# Supplementary material for: Multi-omic and multi-species meta-analyses of nicotine consumption
Source: PubMed Central journal article supplement (PMC7862377; doi:10.1038/s41398-021-01231-y), 2021-02-04
Supplement: 41398_2021_1231_MOESM4_ESM.pdf [file 41398_2021_1231_MOESM4_ESM.pdf]

SMultiXcan Gene Based Associations with Human Cigarettes per Day

| SYMBOL   | GENE                                 | pvalue                      | n              | n_indep   | p_i_best                    | t_i_best    | p_i_worst                   | t_i_worst |             |        |
|----------|--------------------------------------|-----------------------------|----------------|-----------|-----------------------------|-------------|-----------------------------|-----------|-------------|--------|
|          | eigen_max                            | eigen_min                   | eigen_min_kept |           | z_min                       | z_max       | z_mean                      | z_sd      | tmi         | status |
|          | Padj                                 |                             |                |           |                             |             |                             |           |             |        |
| PSMA4    | ENSG00000041357                      | 1.15E-15                    | 9.11E-75       | 7         | 6                           | 1.12E-47    | Brain_Cerebellar_Hemisphere |           |             |        |
|          | 0.208357105                          | Brain_Hippocampus           |                |           | 3.594363174                 |             | 0.061213637                 |           |             |        |
|          | 0.278209238                          | 1.258095819                 | 14.50553561    |           | 8.811804005                 |             | 4.654057564                 |           |             |        |
|          | 6                                    | 0                           | 1.27E-70       |           |                             |             |                             |           |             |        |
| CHRNA3   | ENSG00000080644                      | 1.15E-15                    | 1.53E-34       | 4         | 2                           | 8.29E-28    | Brain_Cerebellum            |           |             |        |
|          | 0.814606663                          | Brain_Caudate_basal_ganglia |                |           | 2.920292675                 |             | 0.006243077                 |           |             |        |
|          | 0.996774342                          | -10.92996246                | -0.234487337   |           | -5.709531813                |             | 4.369693572                 |           |             |        |
|          | 2                                    | 0                           | 1.07E-30       |           |                             |             |                             |           |             |        |
| TMED3    | ENSG00000166557                      | 1.12E-12                    | 2.21E-22       | 2         | 2                           | 5.30E-23    | Brain_Hippocampus           |           |             |        |
|          | 0.202503262                          | Brain_Cortex                |                |           | 1.020835119                 |             | 0.979164881                 |           | 0.979164881 |        |
|          | -1.274452032                         | 9.875898294                 | 4.300723131    |           | 7.884488328                 |             | 2                           | 0         |             |        |
|          | 1.03E-18                             |                             |                |           |                             |             |                             |           |             |        |
| HYKK     | ENSG00000188266                      | 1.13E-13                    | 3.83E-20       | 7         | 7                           | 1.07E-13    | Brain_Hippocampus           |           |             |        |
|          | 0.937099391                          | Brain_Hypothalamus          |                |           | 3.440026804                 |             | 0.145169841                 |           |             |        |
|          | 0.145169841                          | -2.009102164                | 7.431531126    |           | 2.81366038                  |             | 3.251979963                 |           |             | 7      |
|          | 0                                    | 1.34E-16                    |                |           |                             |             |                             |           |             |        |
| ADAMTS7  | ENSG00000136378                      | 1.14E-14                    | 3.77E-19       | 8         | 6                           | 3.93E-15    | Brain_Cortex                |           |             |        |
|          | 0.470423982                          | Brain_Hippocampus           |                |           | 4.84663216                  |             | 0.006777619                 |           | 0.214068576 |        |
|          | -6.164938088                         | 7.857184785                 | 2.055342416    |           | 3.94664666                  | 6           | 0                           | 1.06E-15  |             |        |
| ITPKC    | ENSG00000086544                      | 1.2E-02                     | 9.35E-14       | 5         | 5                           | 5.68E-10    | Brain_Caudate_basal_ganglia |           |             |        |
|          | 0.870271234                          | Brain_Hippocampus           |                |           | 1.834228408                 |             | 0.350912012                 |           |             |        |
|          | 0.350912012                          | -6.198999491                | 3.828273135    |           | -0.401565122                |             | 3.679525496                 |           |             |        |
|          | 5                                    | 0                           | 2.18E-10       |           |                             |             |                             |           |             |        |
| CHRNA5   | ENSG00000169684                      | 1.13E-13                    | 1.86E-12       | 13        | 1                           | 6.39E-13    |                             |           |             |        |
|          | Brain_Caudate_basal_ganglia          |                             | 2.90E-10       |           | Brain_Hippocampus           |             | 12.62357666                 |           |             |        |
|          | 1.59E-06                             | 12.62357666                 | -7.191807679   |           | -6.304004005                |             | -6.940295044                |           |             |        |
|          | 0.255852918                          | 1                           | 0              | 3.71E-09  |                             |             |                             |           |             |        |
| C19orf54 | ENSG00000188493                      | 1.14E-14                    | 2.33E-12       | 9         | 9                           | 6.63E-14    |                             |           |             |        |
|          | Brain_Anterior_cingulate_cortex_BA24 |                             | 0.932413278    |           | Brain_Amygdala              |             |                             |           |             |        |
|          | 2.077687916                          | 0.381808461                 | 0.381808461    |           | -7.494949818                |             | 1.618138038                 |           |             |        |
|          | -1.529294482                         | 3.060723419                 | 9              | 0         | 4.07E-09                    |             |                             |           |             |        |
| LINGO1   | ENSG00000169783                      | 1.12E-12                    | 2.03E-09       | 10        | 8                           | 0.002385685 |                             |           |             |        |
|          | Brain_Caudate_basal_ganglia          |                             | 0.992381569    |           | Brain_Cerebellum            |             | 5.241925125                 |           |             |        |
|          | 0.069455557                          | 0.20358286                  | -3.037475881   |           | 2.709222255                 |             | 0.322175542                 |           |             |        |
|          | 1.598356919                          | 8                           | 0              | 3.16E-06  |                             |             |                             |           |             |        |
| CEACAM21 | ENSG00000007129                      | 1.17E-17                    | 6.16E-09       | 6         | 5                           | 5.72E-08    |                             |           |             |        |
|          | Brain_Spinal_cord_cervical_c-1       |                             | 0.536848875    |           | Brain_Cerebellar_Hemisphere |             |                             |           |             |        |
|          | 3.139853869                          | 0.049666597                 | 0.474001977    |           | -5.427362537                |             | 0.88558747                  |           |             |        |
|          | -1.572432679                         | 2.222787146                 | 5              | 0         | 8.51E-06                    |             |                             |           |             |        |
| CTSH     | ENSG00000103811                      | 1.15E-15                    | 6.69E-09       | 7         | 7                           | 2.61E-08    | Brain_Cortex                |           |             |        |
|          | 0.845266162                          | Brain_Caudate_basal_ganglia |                |           | 2.723100099                 |             | 0.203952269                 |           |             |        |
|          | 0.203952269                          | -2.616055179                | 5.565638246    |           | 1.883934096                 |             | 2.801573693                 |           |             |        |
|          | 7                                    | 0                           | 8.51E-06       |           |                             |             |                             |           |             |        |
| CYP2A7   | ENSG00000198077                      | 1.10E-10                    | 2.90E-08       | 7         | 3                           | 2.66E-10    | Brain_Hippocampus           |           |             |        |
|          | 0.655036491                          | Brain_Substantia_nigra      |                |           | 5.652039461                 |             | 0.028602404                 |           |             |        |
|          | 0.439631432                          | 0.44677643                  | 6.317168215    |           | 3.410717412                 |             | 2.206875713                 |           |             | 3      |
|          | 0                                    | 3.39E-05                    |                |           |                             |             |                             |           |             |        |
| RPS19    | ENSG00000105372                      | 1.26E-06                    | 2.07E-07       | 3         | 3                           | 1.54E-05    |                             |           |             |        |
|          | Brain_Anterior_cingulate_cortex_BA24 |                             | 0.049518114    |           | Brain_Cerebellum            |             |                             |           |             |        |
|          | 1.382301503                          | 0.673482695                 | 0.673482695    |           | -4.322611544                |             | 1.964103299                 |           |             |        |
|          | -1.627566969                         | 3.237846368                 | 3              | 0         | 0.000222426                 |             |                             |           |             |        |
| CRABP1   | ENSG00000166426                      | 1.27E-07                    | 3.36E-07       | 6         | 6                           | 3.34E-09    |                             |           |             |        |
|          | Brain_Frontal_Cortex_BA9             |                             | 0.25615261     |           | Brain_Hypothalamus          |             | 2.972728001                 |           |             |        |
|          | 0.163243275                          | 0.163243275                 | -5.913818856   |           | -1.135531694                |             | -2.535215959                |           |             |        |
|          | 1.887066478                          | 6                           | 0              | 0.0003358 |                             |             |                             |           |             |        |
| RCC1L    | ENSG00000274523                      | 1.24E-04                    | 6.38E-07       | 2         | 2                           | 3.30E-06    | Brain_Cortex                |           |             |        |
|          | 0.000295165                          | Brain_Putamen_basal_ganglia |                |           | 1.228631619                 |             | 0.771368381                 |           |             |        |

|               |                                      |                                       |                                |              |              |                             |              |   |             |
|---------------|--------------------------------------|---------------------------------------|--------------------------------|--------------|--------------|-----------------------------|--------------|---|-------------|
|               | 0.771368381                          | 3.619506502                           | 4.651282184                    | 4.135394343  | 0.729575581  |                             |              |   |             |
|               | 2                                    | 0                                     | 0.000595543                    |              |              |                             |              |   |             |
| SNRPA         | ENSG00000077312.8                    | 4.34E-06                              | 2                              | 2            | 1.57E-06     | Brain_Cerebellum            |              |   |             |
|               | 0.622342244                          | Brain_Cerebellar_Hemisphere           | 1.35210494                     | 0.64789506   | 0.64789506   |                             |              |   |             |
|               | 0.492533502                          | 4.801769434                           | 2.647151468                    | 3.047089949  | 2            | 0                           |              |   |             |
|               | 0.003793986                          |                                       |                                |              |              |                             |              |   |             |
| IDH3A         | ENSG00000166411.13                   | 8.14E-06                              | 4                              | 3            | 8.25E-06     | Brain_Cerebellum            | 0.84397089   |   |             |
|               | Brain_Cerebellar_Hemisphere          | 2.589062982                           | 0.077903822                    | 0.60061939   |              |                             |              |   |             |
|               | -0.438636529                         | 4.458560564                           | 1.195682818                    | 2.214468839  | 3            | 0                           |              |   |             |
|               | 0.006452496                          |                                       |                                |              |              |                             |              |   |             |
| GATSL2        | ENSG00000274070.1                    | 8.30E-06                              | 5                              | 5            | 0.00021917   | Brain_Cortex                |              |   |             |
|               | 0.752416876                          | Brain_Nucleus_accumbens_basal_ganglia | 1.742488794                    |              |              |                             |              |   |             |
|               | 0.187392322                          | 0.187392322                           | -3.69582982                    | 1.94830926   | -1.333669855 |                             |              |   |             |
|               | 2.331839247                          | 5                                     | 0                              | 0.006452496  |              |                             |              |   |             |
| ACSBG1        | ENSG00000103740.9                    | 2.40E-05                              | 1                              | 1            | 2.40E-05     |                             |              |   |             |
|               | Brain_Spinal_cord_cervical_c-1       | 2.40E-05                              | Brain_Spinal_cord_cervical_c-1 | 1            |              |                             |              |   |             |
|               | 1                                    | 1                                     | 4.22354272                     | 4.22354272   | 4.22354272   | NA                          | 1            | 0 | 0.017709054 |
| GTF2I         | ENSG00000263001.5                    | 2.56E-05                              | 12                             | 2            | 2.19E-06     | Brain_Putamen_basal_ganglia |              |   |             |
|               | 0.001254019                          | Brain_Cerebellar_Hemisphere           | 11.14287432                    | 6.44E-05     |              |                             |              |   |             |
|               | 0.390194078                          | 3.226299924                           | 4.735482563                    | 4.346388192  | 0.465681939  |                             |              |   |             |
|               | 2                                    | 0                                     | 0.017939002                    |              |              |                             |              |   |             |
| RASGRF1       | ENSG00000058335.15                   | 2.74E-05                              | 3                              | 3            | 7.20E-05     |                             |              |   |             |
|               | Brain_Cerebellar_Hemisphere          | 0.945765619                           | Brain_Cerebellum               | 1.760444875  |              |                             |              |   |             |
|               | 0.518226103                          | 0.518226103                           | -0.382870327                   | 3.96973357   | 1.172946033  |                             |              |   |             |
|               | 2.42719947                           | 3                                     | 0                              | 0.018249292  |              |                             |              |   |             |
| CTSL          | ENSG00000135047.14                   | 3.37E-05                              | 1                              | 1            | 3.37E-05     |                             |              |   |             |
|               | Brain_Anterior_cingulate_cortex_BA24 | 3.37E-05                              |                                |              |              |                             |              |   |             |
|               | Brain_Anterior_cingulate_cortex_BA24 | 1                                     | 1                              | 1            | 4.146762063  |                             |              |   |             |
|               | 4.146762063                          | 4.146762063                           | NA                             | 1            | 0            | 0.021445034                 |              |   |             |
| DNAJC24       | ENSG00000170946.14                   | 4.08E-05                              | 1                              | 1            | 4.08E-05     | Brain_Cortex                |              |   |             |
|               | 4.08E-05                             | Brain_Cortex                          | 1                              | 1            | 4.102783507  | 4.102783507                 |              |   |             |
|               | 4.102783507                          | NA                                    | 1                              | 0            | 0.024831542  |                             |              |   |             |
| B9D2          | ENSG00000123810.7                    | 4.80E-05                              | 2                              | 2            | 8.22E-06     | Brain_Hypothalamus          |              |   |             |
|               | 0.85974164                           | Brain_Hippocampus                     | 1.044445453                    | 0.955554547  | 0.955554547  |                             |              |   |             |
|               | -4.459415926                         | -0.176703056                          | -2.318059491                   | 3.028335312  | 2            | 0                           |              |   |             |
|               | 0.028006714                          |                                       |                                |              |              |                             |              |   |             |
| GTF2IRD2      | ENSG00000196275.13                   | 6.71E-05                              | 13                             | 1            | 2.75E-05     | Brain_Hypothalamus          |              |   |             |
|               | 0.001031117                          | Brain_Substantia_nigra                | 12.53548127                    | 7.06E-06     |              |                             |              |   |             |
|               | 12.53548127                          | 3.281895824                           | 4.193034437                    | 3.913937219  | 0.269329277  |                             |              |   |             |
|               | 1                                    | 0                                     | 0.037538368                    |              |              |                             |              |   |             |
| ADAR          | ENSG00000160710.15                   | 7.59E-05                              | 4                              | 4            | 0.001301464  | Brain_Cortex                |              |   |             |
|               | 0.366772752                          | Brain_Putamen_basal_ganglia           | 1.742273967                    | 0.589760564  |              |                             |              |   |             |
|               | 0.589760564                          | -3.215656847                          | 1.14277502                     | -1.051156896 | 2.397782959  | 4                           |              |   |             |
|               | 0                                    | 0.040864456                           |                                |              |              |                             |              |   |             |
| CH25H         | ENSG00000138135.6                    | 0.000115643                           | 5                              | 5            | 0.019162215  |                             |              |   |             |
|               | Brain_Hypothalamus                   | 0.95601526                            | Brain_Putamen_basal_ganglia    | 2.688399639  |              |                             |              |   |             |
|               | 0.166313176                          | 0.166313176                           | -2.342360125                   | 1.965669599  | -0.088099616 |                             |              |   |             |
|               | 1.638289326                          | 5                                     | 0                              | 0.059924344  |              |                             |              |   |             |
| SYNDIG1       | ENSG00000101463.5                    | 0.000233803                           | 2                              | 2            | 0.003756721  |                             |              |   |             |
|               | Brain_Cerebellum                     | 0.012157837                           | Brain_Caudate_basal_ganglia    | 1.12278424   | 0.87721576   |                             |              |   |             |
|               | 0.87721576                           | 2.507529694                           | 2.897898562                    | 2.702714128  | 0.276032474  | 2                           |              |   |             |
|               | 0                                    | 0.116826412                           |                                |              |              |                             |              |   |             |
| SRR           | ENSG00000167720.12                   | 0.000244933                           | 13                             | 4            | 7.75E-05     |                             |              |   |             |
|               | Brain_Cerebellar_Hemisphere          | 0.140821926                           | Brain_Substantia_nigra         |              |              |                             |              |   |             |
|               | 9.437325899                          | 5.76E-05                              | 0.728785444                    | -1.472737149 | 3.952057725  |                             |              |   |             |
|               | 3.034190338                          | 1.490600264                           | 4                              | 0            | 0.118167683  |                             |              |   |             |
| TMEM91        | ENSG00000142046.14                   | 0.000265629                           | 3                              | 3            | 0.003246816  |                             |              |   |             |
|               | Brain_Cerebellum                     | 0.013463572                           | Brain_Frontal_Cortex_BA9       | 1.181633527  |              |                             |              |   |             |
|               | 0.807973441                          | 0.807973441                           | 2.471265756                    | 2.943349527  | 2.676910053  |                             |              |   |             |
|               | 0.241842535                          | 3                                     | 0                              | 0.123880421  |              |                             |              |   |             |
| RP11-431D12.1 | ENSG00000253839.1                    | 0.000277351                           | 1                              | 1            | 0.000277351  |                             |              |   |             |
|               | Brain_Cortex                         | 0.000277351                           | Brain_Cortex                   | 1            | 1            | 1                           | -3.635584321 |   |             |

|              |                                       |                   |              |             |             |              |                                        |                  |   |
|--------------|---------------------------------------|-------------------|--------------|-------------|-------------|--------------|----------------------------------------|------------------|---|
|              | -3.635584321                          | -3.635584321      | NA           | 1           | 0           | 0.125174883  |                                        |                  |   |
| PCOLCE       | ENSG00000106333.12                    | 0.000304074       |              | 2           | 2           | 5.72E-05     |                                        |                  |   |
|              | Brain_Spinal_cord_cervical_c-1        | 0.714440854       |              |             |             |              | Brain_Frontal_Cortex_BA9               |                  |   |
|              | 1.101576216                           | 0.898423784       | 0.898423784  |             |             | -4.024254524 |                                        | -0.365898449     |   |
|              | -2.195076486                          | 2.586848389       |              | 2           | 0           | 0.132946685  |                                        |                  |   |
| DCAF7        | ENSG00000136485.14                    | 0.000401388       |              | 3           | 3           | 0.001255442  |                                        |                  |   |
|              | Brain_Hypothalamus                    | 0.511284912       |              |             |             |              | Brain_Cerebellum1.597824243            |                  |   |
|              | 0.283617114                           | 0.283617114       | -0.953139201 |             |             | 3.22597517   | 0.538665899                            |                  |   |
|              | 2.331988829                           | 3                 | 0            | 0.166269998 |             |              |                                        |                  |   |
| C8orf44      | ENSG00000213865.7                     | 0.000404058       |              | 2           | 2           | 0.000160052  |                                        |                  |   |
|              | Brain_Nucleus_accumbens_basal_ganglia | 0.224657188       |              |             |             |              | Brain_Substantia_nigra                 |                  |   |
|              | 1.010730483                           | 0.989269517       | 0.989269517  |             |             | -3.774930626 |                                        | -1.214237123     |   |
|              | -2.494583874                          | 1.81068374        | 2            | 0           | 0.166269998 |              |                                        |                  |   |
| SPATA33      | ENSG00000167523.13                    | 0.000438064       |              | 7           | 6           | 9.67E-06     |                                        |                  |   |
|              | Brain_Hippocampus                     | 0.177661179       |              |             |             |              | Brain_Caudate_basal_ganglia4.757660561 |                  |   |
|              | 0.112663073                           | 0.220440255       | -4.424425869 |             |             | -1.347991304 |                                        | -2.91367749      |   |
|              | 1.036109748                           | 6                 | 0            | 0.173037995 |             |              |                                        |                  |   |
| RP11-560J1.2 | ENSG00000271888.1                     | 0.000445241       |              | 1           | 1           | 0.000445241  |                                        |                  |   |
|              | Brain_Hypothalamus                    | 0.000445241       |              |             |             |              | Brain_Hypothalamus                     | 1                | 1 |
|              | -3.511705511                          | -3.511705511      | -3.511705511 | NA          | 1           | 0            |                                        | 0.173037995      |   |
| PSMC3        | ENSG00000165916.8                     | 0.000551113       |              | 5           | 3           | 6.51E-05     |                                        | Brain_Cerebellum |   |
|              | 0.721444315                           | Brain_Cortex      | 3.529693715  |             |             | 0.001853746  |                                        | 0.466381735      |   |
|              | -3.993536304                          | -0.356529164      | -3.075129558 |             |             | 1.545379895  |                                        | 3                | 0 |
|              | 0.208395282                           |                   |              |             |             |              |                                        |                  |   |
| KCNC2        | ENSG00000166006.12                    | 0.000607862       |              | 1           | 1           | 0.000607862  |                                        |                  |   |
|              | Brain_Hypothalamus                    | 0.000607862       |              |             |             |              | Brain_Hypothalamus                     | 1                | 1 |
|              | -3.428081701                          | -3.428081701      | -3.428081701 | NA          | 1           | 0            |                                        | 0.221406245      |   |
| GOLGA8K      | ENSG00000249931.4                     | 0.00062192        |              | 1           | 1           | 0.00062192   |                                        |                  |   |
|              | Brain_Caudate_basal_ganglia           | 0.00062192        |              |             |             |              | Brain_Caudate_basal_ganglia1           | 1                | 1 |
|              | -3.421870232                          | -3.421870232      | -3.421870232 | NA          | 1           | 0            |                                        | 0.221406245      |   |
| LINC02166    | ENSG00000260259.1                     | 0.000632996       |              | 8           | 7           | 9.24E-06     |                                        |                  |   |
|              | Brain_Nucleus_accumbens_basal_ganglia | 0.535861738       |              |             |             |              | Brain_Hippocampus                      |                  |   |
|              | 4.11449395                            | 0.016610905       | 0.168004228  |             |             | -0.710570216 |                                        | 4.434342133      |   |
|              | 1.789194651                           | 1.754114568       | 7            | 0           | 0.221406245 |              |                                        |                  |   |
| TACO1        | ENSG00000136463.7                     | 0.000664557       |              | 1           | 1           | 0.000664557  |                                        |                  |   |
|              | Brain_Hypothalamus                    | 0.000664557       |              |             |             |              | Brain_Hypothalamus                     | 1                | 1 |
|              | 3.403798673                           | 3.403798673       | 3.403798673  | NA          | 1           | 0            |                                        | 0.226776076      |   |
| NUP93        | ENSG00000102900.12                    | 0.000687166       |              | 5           | 4           | 0.00517363   |                                        |                  |   |
|              | Brain_Anterior_cingulate_cortex_BA24  | 0.51957175        |              |             |             |              | Brain_Spinal_cord_cervical_c-1         |                  |   |
|              | 3.523263818                           | 0.035234664       | 0.184052696  |             |             | -0.64400568  |                                        | 2.796019357      |   |
|              | 1.120994105                           | 1.246096234       | 4            | 0           | 0.228908066 |              |                                        |                  |   |
| SNAPC4       | ENSG00000165684.4                     | 0.000769781       |              | 6           | 4           | 0.002844685  |                                        |                  |   |
|              | Brain_Caudate_basal_ganglia           | 0.925452566       |              |             |             |              | Brain_Frontal_Cortex_BA9               | 4.1905262        |   |
|              | 0.053790225                           | 0.26966215        | -2.984041196 |             |             | 0.093567703  |                                        | -1.295820572     |   |
|              | 1.147456242                           | 4                 | 0            | 0.249500968 |             |              |                                        |                  |   |
| RP11-178C3.2 | ENSG00000267302.5                     | 0.00078465        |              | 2           | 1           | 0.000653505  |                                        |                  |   |
|              | Brain_Cerebellar_Hemisphere           | 0.000976486       |              |             |             |              | Brain_Cerebellum1.993624022            |                  |   |
|              | 0.006375978                           | 1.993624022       | 3.297215385  |             |             | 3.40837728   |                                        | 3.352796333      |   |
|              | 0.07860333                            | 1                 | 0            | 0.249500968 |             |              |                                        |                  |   |
| CKB          | ENSG00000166165.12                    | 0.000859469       |              | 1           | 1           | 0.000859469  |                                        | Brain_Amygdala   |   |
|              | 0.000859469                           | Brain_Amygdala    | 1            | 1           | 1           | -3.332896651 |                                        | -3.332896651     |   |
|              | -3.332896651                          | NA                | 1            | 0           | 0.267218343 |              |                                        |                  |   |
| RPS7         | ENSG00000171863.12                    | 0.000892541       |              | 1           | 1           | 0.000892541  |                                        | Brain_Cerebellum |   |
|              | 0.000892541                           | Brain_Cerebellum1 | 1            | 1           | 1           | 3.322376728  |                                        | 3.322376728      |   |
|              | 3.322376728                           | NA                | 1            | 0           | 0.271468283 |              |                                        |                  |   |
| APH1A        | ENSG00000117362.12                    | 0.000986484       |              | 2           | 2           | 0.000307767  |                                        |                  |   |
|              | Brain_Putamen_basal_ganglia           | 0.002336827       |              |             |             |              | Brain_Cortex                           | 1.933459148      |   |
|              | 0.066540852                           | 0.066540852       | 3.043706933  |             |             | 3.608673283  |                                        | 3.326190108      |   |
|              | 0.399491537                           | 2                 | 0            | 0.293657537 |             |              |                                        |                  |   |
| ACP6         | ENSG00000162836.11                    | 0.001042403       |              | 13          | 2           | 0.00010538   |                                        |                  |   |
|              | Brain_Frontal_Cortex_BA9              | 0.012563203       |              |             |             |              | Brain_Cerebellum11.33347419            |                  |   |
|              | 0.00412239                            | 0.722432278       | -3.877859144 |             |             | -2.495916895 |                                        | -3.2658279       |   |

|                                       |                             |                                |             |                             |             |              |                  |   |   |
|---------------------------------------|-----------------------------|--------------------------------|-------------|-----------------------------|-------------|--------------|------------------|---|---|
| 0.345806222                           | 2                           | 0                              | 0.303838725 |                             |             |              |                  |   |   |
| NUDT1                                 | ENSG00000106268.15          | 0.001095913                    | 1           | 1                           | 0.001095913 |              | Brain_Cerebellum |   |   |
| 0.001095913                           | Brain_Cerebellum1           | 1                              | 1           | -3.264670859                |             | -3.264670859 |                  |   |   |
| -3.264670859                          | NA                          | 1                              | 0           | 0.312916835                 |             |              |                  |   |   |
| PHYHIP                                | ENSG00000168490.13          | 0.001204694                    | 3           | 3                           | 0.005350001 |              |                  |   |   |
| Brain_Hypothalamus                    | 0.386390909                 |                                |             | Brain_Cerebellum1.067665989 |             |              |                  |   |   |
| 0.949178493                           | 0.949178493                 | -2.785167929                   |             | 0.866181004                 |             | -1.51100915  |                  |   |   |
| 2.060484389                           | 3                           | 0                              | 0.325924914 |                             |             |              |                  |   |   |
| RNF180                                | ENSG00000164197.11          | 0.001205967                    | 10          | 6                           | 0.097726967 |              |                  |   |   |
| Brain_Anterior_cingulate_cortex_BA24  | 0.428634776                 |                                |             | Brain_Putamen_basal_ganglia |             |              |                  |   |   |
| 6.919028902                           | 0.030157983                 | 0.250444283                    |             | -1.65597458                 |             | 1.288682493  |                  |   |   |
| 0.276352658                           | 1.175371108                 | 6                              | 0           | 0.325924914                 |             |              |                  |   |   |
| FUBP1                                 | ENSG00000162613.16          | 0.001214182                    | 1           | 1                           | 0.001214182 |              | Brain_Cerebellum |   |   |
| 0.001214182                           | Brain_Cerebellum1           | 1                              | 1           | -3.235527591                |             | -3.235527591 |                  |   |   |
| -3.235527591                          | NA                          | 1                              | 0           | 0.325924914                 |             |              |                  |   |   |
| PRR12                                 | ENSG00000126464.13          | 0.001247894                    | 7           | 4                           | 0.026302631 |              |                  |   |   |
| Brain_Frontal_Cortex_BA9              | 0.43446118                  | Brain_Hypothalamus             |             | 5.703158076                 |             |              |                  |   |   |
| 0.015139554                           | 0.23095158                  | -0.781580449                   |             | 2.221714124                 |             | 1.543343986  |                  |   |   |
| 1.082276294                           | 4                           | 0                              | 0.325924914 |                             |             |              |                  |   |   |
| RP11-324L17.1                         | ENSG00000272551.1           | 0.001257948                    | 3           | 3                           | 0.00716708  |              |                  |   |   |
| Brain_Cortex                          | 0.495792388                 | Brain_Frontal_Cortex_BA9       |             | 1.154293586                 |             |              |                  |   |   |
| 0.840963632                           | 0.840963632                 | -2.607657802                   |             | 2.688979603                 |             | -0.199934406 |                  |   |   |
| 2.680904745                           | 3                           | 0                              | 0.325924914 |                             |             |              |                  |   |   |
| ACACA                                 | ENSG00000278540.4           | 0.001355985                    | 3           | 2                           | 0.000321084 |              | Brain_Amygdala   |   |   |
| 0.006800184                           | Brain_Cortex                | 2.566812994                    |             | 0.058923105                 |             | 0.374263901  |                  |   |   |
| 2.706474348                           | 3.597667303                 | 3.09805245                     | 0.455313272 | 2                           | 0           |              |                  |   |   |
| 0.344938046                           |                             |                                |             |                             |             |              |                  |   |   |
| HIST1H4E                              | ENSG00000276966.2           | 0.001388518                    | 1           | 1                           | 0.001388518 |              |                  |   |   |
| Brain_Spinal_cord_cervical_c-1        | 0.001388518                 | Brain_Spinal_cord_cervical_c-1 |             |                             |             |              |                  |   |   |
| 1                                     | 1                           | 1                              | 3.197027313 | 3.197027313                 |             | 3.197027313  | NA               | 1 | 0 |
| 0.345229743                           |                             |                                |             |                             |             |              |                  |   |   |
| SPDYE5                                | ENSG00000170092.14          | 0.001408346                    | 7           | 6                           | 0.000104781 |              |                  |   |   |
| Brain_Caudate_basal_ganglia           | 0.330017158                 | Brain_Spinal_cord_cervical_c-1 |             |                             |             |              |                  |   |   |
| 3.415112476                           | 0.030622218                 | 0.142950662                    |             | 0.974079317                 |             | 3.879244328  |                  |   |   |
| 2.486753314                           | 1.103727673                 | 6                              | 0           | 0.345229743                 |             |              |                  |   |   |
| TMPRSS6                               | ENSG00000187045.16          | 0.001454904                    | 1           | 1                           | 0.001454904 |              |                  |   |   |
| Brain_Nucleus_accumbens_basal_ganglia | 0.001454904                 |                                |             |                             |             |              |                  |   |   |
| Brain_Nucleus_accumbens_basal_ganglia | 1                           | 1                              | 1           | -3.183531188                |             |              |                  |   |   |
| -3.183531188                          | -3.183531188                | NA                             | 1           | 0                           | 0.345229743 |              |                  |   |   |
| POM121C                               | ENSG00000272391.5           | 0.001455833                    | 5           | 4                           | 6.77E-05    |              |                  |   |   |
| Brain_Spinal_cord_cervical_c-1        | 0.834266141                 | Brain_Substantia_nigra         |             |                             |             |              |                  |   |   |
| 2.798479902                           | 0.079674489                 | 0.145869942                    |             | 0.20923327                  |             | 3.984203681  |                  |   |   |
| 2.381415109                           | 1.578766025                 | 4                              | 0           | 0.345229743                 |             |              |                  |   |   |
| COL20A1                               | ENSG00000101203.16          | 0.001494202                    | 3           | 3                           | 0.000595849 |              |                  |   |   |
| Brain_Nucleus_accumbens_basal_ganglia | 0.859985182                 | Brain_Cerebellum               |             |                             |             |              |                  |   |   |
| 1.078913056                           | 0.910782368                 | 0.910782368                    |             | 0.176393027                 |             | 3.433496737  |                  |   |   |
| 1.882992228                           | 1.63415278                  | 3                              | 0           | 0.348422905                 |             |              |                  |   |   |
| PKD2                                  | ENSG00000118762.7           | 0.001580156                    | 5           | 5                           | 0.003528318 |              |                  |   |   |
| Brain_Caudate_basal_ganglia           | 0.093332527                 | Brain_Cortex                   |             | 1.610893608                 |             |              |                  |   |   |
| 0.477291444                           | 0.477291444                 | -1.730215153                   |             | 2.917515795                 |             | 0.770010224  |                  |   |   |
| 2.280610695                           | 5                           | 0                              | 0.362425692 |                             |             |              |                  |   |   |
| PTPRJ                                 | ENSG00000149177.12          | 0.001697628                    | 7           | 7                           | 0.00034602  |              |                  |   |   |
| Brain_Caudate_basal_ganglia           | 0.947792029                 | Brain_Spinal_cord_cervical_c-1 |             |                             |             |              |                  |   |   |
| 3.559356523                           | 0.146328777                 | 0.146328777                    |             | -1.187770161                |             | 3.578161396  |                  |   |   |
| 1.115647425                           | 1.897056675                 | 7                              | 0           | 0.376767286                 |             |              |                  |   |   |
| CTD-2189E23.1                         | ENSG00000267723.1           | 0.001724351                    | 7           | 7                           | 0.053971691 |              |                  |   |   |
| Brain_Frontal_Cortex_BA9              | 0.864668016                 | Brain_Caudate_basal_ganglia    |             |                             |             |              |                  |   |   |
| 1.895151691                           | 0.112009677                 | 0.112009677                    |             | -1.927063704                |             | 1.891287496  |                  |   |   |
| 0.297292805                           | 1.354917242                 | 7                              | 0           | 0.376767286                 |             |              |                  |   |   |
| NUMBL                                 | ENSG00000105245.9           | 0.00178662                     | 2           | 2                           | 0.001012255 |              | Brain_Cerebellum |   |   |
| 0.001198725                           | Brain_Cerebellar_Hemisphere | 1.683327913                    |             | 0.316672087                 |             |              |                  |   |   |
| 0.316672087                           | -3.287098176                | -3.239183341                   |             | -3.263140759                |             | 0.033880904  |                  |   |   |

|           |                                       |                             |              |             |                                      |                   |   |   |  |
|-----------|---------------------------------------|-----------------------------|--------------|-------------|--------------------------------------|-------------------|---|---|--|
|           | 2                                     | 0                           | 0.376767286  |             |                                      |                   |   |   |  |
| PAPD4     | ENSG00000164329.13                    | 0.001805428                 | 1            | 1           | 0.001805428                          | Brain_Cerebellum  |   |   |  |
|           | 0.001805428                           | Brain_Cerebellum1           | 1            | 1           | -3.120502471                         | -3.120502471      |   |   |  |
|           | -3.120502471                          | NA                          | 1            | 0           | 0.376767286                          |                   |   |   |  |
| RECK      | ENSG00000122707.11                    | 0.001854036                 | 1            | 1           | 0.001854036                          |                   |   |   |  |
|           | Brain_Nucleus_accumbens_basal_ganglia | 0.001854036                 |              |             |                                      |                   |   |   |  |
|           | Brain_Nucleus_accumbens_basal_ganglia | 1                           | 1            | 1           | -3.1126694                           | -3.1126694        |   |   |  |
|           | -3.1126694                            | NA                          | 1            | 0           | 0.376767286                          |                   |   |   |  |
| GDPD3     | ENSG00000102886.14                    | 0.001866245                 | 7            | 6           | 0.001050645                          |                   |   |   |  |
|           | Brain_Caudate_basal_ganglia           | 0.989789699                 |              |             | Brain_Putamen_basal_ganglia          |                   |   |   |  |
|           | 2.296288808                           | 0.058782552                 | 0.422226786  |             | -3.276601566                         | 2.203070283       |   |   |  |
|           | -1.165636433                          | 1.940156                    | 6            | 0           | 0.376767286                          |                   |   |   |  |
| MAMSTR    | ENSG00000176909.11                    | 0.001900827                 | 12           | 9           | 0.015393818                          |                   |   |   |  |
|           | Brain_Frontal_Cortex_BA9              | 0.998731237                 |              |             | Brain_Cerebellar_Hemisphere          |                   |   |   |  |
|           | 5.736474738                           | 0.00071382                  | 0.245012146  |             | -2.422978968                         | 1.903004155       |   |   |  |
|           | 0.398002137                           | 1.154516514                 | 9            | 0           | 0.376767286                          |                   |   |   |  |
| ACE       | ENSG00000159640.15                    | 0.001909736                 | 4            | 3           | 0.000864873                          | Brain_Cortex      |   |   |  |
|           | 0.744149819                           | Brain_Cerebellar_Hemisphere | 3.032963825  |             | 0.057241166                          |                   |   |   |  |
|           | 0.271715713                           | -3.331152201                | -0.32636288  |             | -2.312077125                         | 1.382576542       |   |   |  |
|           | 3                                     | 0                           | 0.376767286  |             |                                      |                   |   |   |  |
| JAK1      | ENSG00000162434.11                    | 0.001917618                 | 5            | 2           | 0.016628775                          | Brain_Cortex      |   |   |  |
|           | 0.986046597                           | Brain_Caudate_basal_ganglia | 4.481754684  |             | 0.00081114                           |                   |   |   |  |
|           | 0.349827929                           | -0.017488888                | 2.394814513  |             | 1.787115672                          | 1.043371796       |   |   |  |
|           | 2                                     | 0                           | 0.376767286  |             |                                      |                   |   |   |  |
| DHRS1     | ENSG00000157379.13                    | 0.001929672                 | 13           | 2           | 0.00111992                           |                   |   |   |  |
|           | Brain_Cerebellar_Hemisphere           | 0.969447285                 |              |             | Brain_Spinal_cord_cervical_c-1       |                   |   |   |  |
|           | 11.49684592                           | 0.001615773                 | 0.687605125  |             | -3.25852761                          | 0.038301512       |   |   |  |
|           | -1.367540584                          | 0.767692396                 | 2            | 0           | 0.376767286                          |                   |   |   |  |
| ATP5SL    | ENSG00000105341.18                    | 0.001957133                 | 10           | 4           | 0.004423574                          |                   |   |   |  |
|           | Brain_Cerebellar_Hemisphere           | 0.926635823                 |              |             | Brain_Anterior_cingulate_cortex_BA24 |                   |   |   |  |
|           | 7.994072424                           | 0.003784908                 | 0.310438506  |             | -1.884268045                         | 2.846262309       |   |   |  |
|           | -0.1008078                            | 1.263074845                 | 4            | 0           | 0.376767286                          |                   |   |   |  |
| GPS1      | ENSG00000169727.12                    | 0.001965836                 | 1            | 1           | 0.001965836                          |                   |   |   |  |
|           | Brain_Caudate_basal_ganglia           | 0.001965836                 |              |             | Brain_Caudate_basal_ganglia          | 1                 | 1 |   |  |
|           | 1                                     | -3.095345736                | -3.095345736 |             | -3.095345736                         | NA                | 1 | 0 |  |
|           | 0.376767286                           |                             |              |             |                                      |                   |   |   |  |
| TMED4     | ENSG00000158604.14                    | 0.002014414                 | 5            | 5           | 0.005249667                          | Brain_Cerebellum  |   |   |  |
|           | 0.956408391                           | Brain_Frontal_Cortex_BA9    | 2.740396971  |             | 0.09739272                           | 0.09739272        |   |   |  |
|           | -2.791300711                          | 0.054661187                 | -1.229988288 |             | 1.075297296                          | 5                 | 0 |   |  |
|           | 0.379851559                           |                             |              |             |                                      |                   |   |   |  |
| PCBP4     | ENSG00000090097.21                    | 0.002036228                 | 2            | 2           | 0.021702246                          |                   |   |   |  |
|           | Brain_Hippocampus                     | 0.027644569                 |              |             | Brain_Hypothalamus                   | 1.183571861       |   |   |  |
|           | 0.816428139                           | 0.816428139                 | -2.295539137 |             | 2.202293701                          | -0.046622718      |   |   |  |
|           | 3.1804481                             | 2                           | 0            | 0.379851559 |                                      |                   |   |   |  |
| KLC1      | ENSG00000126214.21                    | 0.002066009                 | 2            | 2           | 0.00767453                           | Brain_Hippocampus |   |   |  |
|           | 0.955833678                           | Brain_Cerebellar_Hemisphere | 1.663878351  |             | 0.336121649                          |                   |   |   |  |
|           | 0.336121649                           | -2.666063055                | -0.055382574 |             | -1.360722815                         | 1.846029872       |   |   |  |
|           | 2                                     | 0                           | 0.380336017  |             |                                      |                   |   |   |  |
| SLC39A13  | ENSG00000165915.13                    | 0.002096939                 | 5            | 4           | 0.001967985                          |                   |   |   |  |
|           | Brain_Caudate_basal_ganglia           | 0.947755138                 |              |             | Brain_Cerebellum                     | 3.738420061       |   |   |  |
|           | 0.05537963                            | 0.19836213                  | -0.981201081 |             | 3.095021626                          | 0.447322926       |   |   |  |
|           | 1.557032807                           | 4                           | 0            | 0.381016589 |                                      |                   |   |   |  |
| GRK4      | ENSG00000125388.19                    | 0.002138899                 | 9            | 4           | 0.000120346                          |                   |   |   |  |
|           | Brain_Caudate_basal_ganglia           | 0.00995033                  |              |             | Brain_Spinal_cord_cervical_c-1       |                   |   |   |  |
|           | 7.062832378                           | 0.016865136                 | 0.258972922  |             | 2.577550649                          | 3.845419515       |   |   |  |
|           | 3.171672883                           | 0.405567713                 | 4            | 0           | 0.383658234                          |                   |   |   |  |
| FXYD4     | ENSG00000150201.14                    | 0.002166931                 | 5            | 5           | 0.000658982                          | Brain_Cerebellum  |   |   |  |
|           | 0.738510912                           | Brain_Hippocampus           | 3.379380976  |             | 0.14963229                           | 0.14963229        |   |   |  |
|           | 0.333825935                           | 3.406099252                 | 1.323741094  |             | 1.253072523                          | 5                 | 0 |   |  |
|           | 0.383766208                           |                             |              |             |                                      |                   |   |   |  |
| LINC01731 | ENSG00000234283.1                     | 0.002235116                 | 3            | 3           | 0.000155844                          |                   |   |   |  |
|           | Brain_Nucleus_accumbens_basal_ganglia | 0.807616369                 |              |             | Brain_Caudate_basal_ganglia          |                   |   |   |  |

|           |                                       |              |                                      |              |              |
|-----------|---------------------------------------|--------------|--------------------------------------|--------------|--------------|
|           | 1.208199916                           | 0.807115351  | 0.807115351                          | -0.427957354 | 3.781567269  |
|           | 1.199037377                           | 2.261594564  | 3 0                                  | 0.390893865  |              |
| LINC01443 | ENSG00000266554.1                     | 0.002488198  | 1 1                                  | 0.002488198  |              |
|           | Brain_Substantia_nigra                | 0.002488198  | Brain_Substantia_nigra               | 1 1          |              |
|           | 1 -3.024772962                        | -3.024772962 | -3.024772962                         | NA 1 0       |              |
|           | 0.429782503                           |              |                                      |              |              |
| PIH1D1    | ENSG00000104872.10                    | 0.002549675  | 4 4                                  | 0.000313605  |              |
|           | Brain_Cerebellum                      | 0.461381438  | Brain_Spinal_cord_cervical_c-1       | 1.535430082  |              |
|           | 0.425796668                           | 0.425796668  | -3.603794423                         | -0.736574021 | -2.053355147 |
|           | 1.456263888                           | 4 0          | 0.430536868                          |              |              |
| TNK1      | ENSG00000174292.12                    | 0.002554111  | 1 1                                  | 0.002554111  |              |
|           | Brain_Frontal_Cortex_BA9              | 0.002554111  | Brain_Frontal_Cortex_BA9             | 1 1          |              |
|           | 1 -3.016856073                        | -3.016856073 | -3.016856073                         | NA 1 0       |              |
|           | 0.430536868                           |              |                                      |              |              |
| CHRNA2    | ENSG00000120903.12                    | 0.002622489  | 2 2                                  | 0.000609601  |              |
|           | Brain_Cerebellum                      | 0.001983894  | Brain_Cerebellar_Hemisphere          | 1.843544363  |              |
|           | 0.156455637                           | 0.156455637  | 3.092632936                          | 3.427306142  | 3.259969539  |
|           | 0.236649693                           | 2 0          | 0.433188002                          |              |              |
| GET4      | ENSG00000239857.6                     | 0.002631762  | 1 1                                  | 0.002631762  |              |
|           | Brain_Anterior_cingulate_cortex_BA24  | 0.002631762  |                                      |              |              |
|           | Brain_Anterior_cingulate_cortex_BA24  | 1 1          | 1                                    | -3.007765432 |              |
|           | -3.007765432                          | -3.007765432 | NA 1 0                               | 0.433188002  |              |
| LINC01431 | ENSG00000232645.5                     | 0.002903932  | 2 2                                  | 0.097525912  |              |
|           | Brain_Nucleus_accumbens_basal_ganglia | 0.973454561  | Brain_Caudate_basal_ganglia          |              |              |
|           | 1.869884532                           | 0.130115468  | 0.130115468                          | -1.656968164 | 0.033275914  |
|           | -0.811846125                          | 1.195183049  | 2 0                                  | 0.470410394  |              |
| NUP50     | ENSG00000093000.18                    | 0.002925145  | 10 2                                 | 0.001945351  |              |
|           | Brain_Cerebellar_Hemisphere           | 0.24149526   | Brain_Hypothalamus                   | 8.537136913  |              |
|           | 0.000588883                           | 0.586830416  | 1.171257573                          | 3.098451064  | 2.302034741  |
|           | 0.626283963                           | 2 0          | 0.470410394                          |              |              |
| SIRT6     | ENSG00000077463.14                    | 0.003324469  | 12 1                                 | 0.001747422  |              |
|           | Brain_Caudate_basal_ganglia           | 0.011474211  | Brain_Hippocampus                    | 11.33958396  |              |
|           | 2.22E-16                              | 11.33958396  | 2.52791506                           | 3.130107736  | 2.856402116  |
|           | 0.164468381                           | 1 0          | 0.517684403                          |              |              |
| KCNQ3     | ENSG00000184156.16                    | 0.00338213   | 4 4                                  | 0.020887079  |              |
|           | Brain_Spinal_cord_cervical_c-1        | 0.120706453  | Brain_Cerebellum                     | 1.390609527  |              |
|           | 0.610291871                           | 0.610291871  | -1.974273243                         | 2.310019428  | 0.071974872  |
|           | 2.174110665                           | 4 0          | 0.517684403                          |              |              |
| ZNF615    | ENSG00000197619.13                    | 0.003411315  | 4 4                                  | 0.020319088  |              |
|           | Brain_Spinal_cord_cervical_c-1        | 0.645778746  | Brain_Hippocampus                    |              |              |
|           | 2.548699391                           | 0.150085564  | 0.150085564                          | -0.459634285 | 2.32040298   |
|           | 1.152559128                           | 1.179363571  | 4 0                                  | 0.517684403  |              |
| PCAT19    | ENSG00000267107.6                     | 0.003431973  | 8 7                                  | 0.01332687   |              |
|           | Brain_Hippocampus                     | 0.552631939  | Brain_Amygdala                       | 3.137334418  |              |
|           | 0.014368096                           | 0.277616355  | -2.474912834                         | 1.339026693  | -1.084237259 |
|           | 1.181483645                           | 7 0          | 0.517684403                          |              |              |
| RRP12     | ENSG00000052749.13                    | 0.003438263  | 8 3                                  | 0.009865303  |              |
|           | Brain_Substantia_nigra                | 0.032873325  | Brain_Cerebellar_Hemisphere          |              |              |
|           | 6.565804363                           | 0.00024905   | 0.297976425                          | 2.133627007  | 2.580515146  |
|           | 2.323858157                           | 0.160093947  | 3 0                                  | 0.517684403  |              |
| MIPEP     | ENSG00000027001.9                     | 0.003441116  | 12 1                                 | 0.001890441  |              |
|           | Brain_Caudate_basal_ganglia           | 0.047145909  | Brain_Anterior_cingulate_cortex_BA24 |              |              |
|           | 11.26144081                           | 0.000632666  | 11.26144081                          | -3.106925404 | -1.984987078 |
|           | -2.826186141                          | 0.319290779  | 1 0                                  | 0.517684403  |              |
| SMIM17    | ENSG00000268182.5                     | 0.003581724  | 2 2                                  | 0.001090167  |              |
|           | Brain_Cortex                          | 0.279282382  | Brain_Frontal_Cortex_BA9             | 1.095975749  |              |
|           | 0.904024251                           | 0.904024251  | -3.266159804                         | -1.081932817 | -2.17404631  |
|           | 1.544481714                           | 2 0          | 0.529473242                          |              |              |
| PCDHGA3   | ENSG00000254245.2                     | 0.003595165  | 1 1                                  | 0.003595165  |              |
|           | Brain_Cortex                          | 0.003595165  | Brain_Cortex                         | 1 1 1        | 2.911657565  |
|           | 2.911657565                           | 2.911657565  | NA 1 0                               | 0.529473242  |              |
| RAB4B     | ENSG00000167578.17                    | 0.003779345  | 1 1                                  | 0.003779345  | Brain_Cortex |

|               |                                       |                             |                                      |              |              |                  |             |
|---------------|---------------------------------------|-----------------------------|--------------------------------------|--------------|--------------|------------------|-------------|
|               | 0.003779345                           | Brain_Cortex                | 1                                    | 1            | 1            | 2.896014868      | 2.896014868 |
|               | 2.896014868                           | NA                          | 1                                    | 0            | 0.547650358  |                  |             |
| CNTN2         | ENSG00000184144.11                    | 0.003796875                 | 2                                    | 2            | 0.003537795  | Brain_Cerebellum |             |
|               | 0.003883512                           | Brain_Cerebellar_Hemisphere | 1.511184356                          |              | 0.488815644  |                  |             |
|               | 0.488815644                           | 2.88747201                  | 2.916679175                          |              | 2.902075592  | 0.020652585      | 2           |
|               | 0                                     | 0.547650358                 |                                      |              |              |                  |             |
| YIPF1         | ENSG00000058799.14                    | 0.003846568                 | 2                                    | 2            | 0.000856933  | Brain_Cortex     |             |
|               | 0.876871043                           | Brain_Caudate_basal_ganglia | 1.072331134                          |              | 0.927668866  |                  |             |
|               | 0.927668866                           | -3.333718514                | -0.154936925                         |              | -1.744327719 | 2.247738018      |             |
|               | 2                                     | 0                           | 0.549156507                          |              |              |                  |             |
| CEP57L1       | ENSG00000183137.14                    | 0.004049891                 | 1                                    | 1            | 0.004049891  |                  |             |
|               | Brain_Hippocampus                     | 0.004049891                 | Brain_Hippocampus                    | 1            | 1            | 1                |             |
|               | 2.874249366                           | 2.874249366                 | 2.874249366                          | NA           | 1            | 0                | 0.563172833 |
| PDPR          | ENSG00000090857.13                    | 0.004106794                 | 3                                    | 3            | 0.037686116  |                  |             |
|               | Brain_Cerebellar_Hemisphere           | 0.199749163                 | Brain_Cerebellum                     | 2.01682891   |              |                  |             |
|               | 0.246682582                           | 0.246682582                 | -2.078252427                         |              | 1.639527554  | -0.573663802     |             |
|               | 1.957564908                           | 3                           | 0                                    | 0.563172833  |              |                  |             |
| CDK10         | ENSG00000185324.21                    | 0.004117023                 | 12                                   | 8            | 3.76E-05     |                  |             |
|               | Brain_Nucleus_accumbens_basal_ganglia | 0.853298628                 | Brain_Putamen_basal_ganglia          |              |              |                  |             |
|               | 6.400271287                           | 0.008334583                 | 0.236379574                          |              | -1.095599905 | 4.121955977      |             |
|               | 1.277312866                           | 1.459319177                 | 8                                    | 0            | 0.563172833  |                  |             |
| NOF14         | ENSG00000087269.15                    | 0.0041433                   | 2                                    | 2            | 0.001205575  | Brain_Cerebellum |             |
|               | 0.079646525                           | Brain_Cerebellar_Hemisphere | 1.696615643                          |              | 0.303384357  |                  |             |
|               | 0.303384357                           | 1.752740705                 | 3.237557829                          |              | 2.495149267  | 1.049924257      |             |
|               | 2                                     | 0                           | 0.563172833                          |              |              |                  |             |
| RABL6         | ENSG00000196642.18                    | 0.004146008                 | 1                                    | 1            | 0.004146008  | Brain_Cerebellum |             |
|               | 0.004146008                           | Brain_Cerebellum            | 1                                    | 1            | -2.866833687 | -2.866833687     |             |
|               | -2.866833687                          | NA                          | 1                                    | 0            | 0.563172833  |                  |             |
| CACNA1B       | ENSG00000148408.12                    | 0.004207751                 | 1                                    | 1            | 0.004207751  |                  |             |
|               | Brain_Anterior_cingulate_cortex_BA24  | 0.004207751                 |                                      |              |              |                  |             |
|               | Brain_Anterior_cingulate_cortex_BA24  | 1                           | 1                                    | 1            | 2.862151933  |                  |             |
|               | 2.862151933                           | 2.862151933                 | NA                                   | 1            | 0            | 0.563180843      |             |
| F12           | ENSG00000131187.9                     | 0.004226573                 | 2                                    | 2            | 0.003923344  |                  |             |
|               | Brain_Hypothalamus                    | 0.138884318                 | Brain_Anterior_cingulate_cortex_BA24 |              |              |                  |             |
|               | 1.046800872                           | 0.953199128                 | 0.953199128                          |              | 1.479958516  | 2.884260205      |             |
|               | 2.182109361                           | 0.992991247                 | 2                                    | 0            | 0.563180843  |                  |             |
| COA7          | ENSG00000162377.5                     | 0.004354006                 | 13                                   | 4            | 0.000376136  |                  |             |
|               | Brain_Caudate_basal_ganglia           | 0.169410101                 | Brain_Spinal_cord_cervical_c-1       |              |              |                  |             |
|               | 10.04425949                           | 0.001068059                 | 0.491771073                          |              | -3.556284773 | -1.374101734     |             |
|               | -2.875778692                          | 0.6106601                   | 4                                    | 0            | 0.566087256  |                  |             |
| RP11-713D19.1 | ENSG00000273233.1                     | 0.004360209                 | 2                                    | 2            | 0.007273534  |                  |             |
|               | Brain_Spinal_cord_cervical_c-1        | 0.044937906                 | Brain_Hippocampus                    |              |              |                  |             |
|               | 1.034122074                           | 0.965877926                 | 0.965877926                          |              | 2.005235224  | 2.684054089      |             |
|               | 2.344644656                           | 0.479997423                 | 2                                    | 0            | 0.566087256  |                  |             |
| FAM166B       | ENSG00000215187.10                    | 0.004369768                 | 3                                    | 3            | 0.002997216  |                  |             |
|               | Brain_Cerebellum                      | 0.642529876                 | Brain_Cortex                         | 1.420462506  | 0.62575329   |                  |             |
|               | 0.62575329                            | -2.96802328                 | 1.44169379                           | -0.354054988 | 2.315926065  | 3                | 0           |
|               | 0.566087256                           |                             |                                      |              |              |                  |             |
| COL16A1       | ENSG00000084636.17                    | 0.004450692                 | 12                                   | 7            | 0.002061101  |                  |             |
|               | Brain_Putamen_basal_ganglia           | 0.87769451                  | Brain_Substantia_nigra               | 7.12464931   |              |                  |             |
|               | 0.024173561                           | 0.253322653                 | -3.081283773                         |              | 2.082091545  | -0.80268444      |             |
|               | 1.512896503                           | 7                           | 0                                    | 0.568775733  |              |                  |             |
| FRY           | ENSG00000073910.19                    | 0.004471827                 | 2                                    | 2            | 0.001336459  | Brain_Cerebellum |             |
|               | 0.015893364                           | Brain_Cerebellar_Hemisphere | 1.564641088                          |              | 0.435358912  |                  |             |
|               | 0.435358912                           | -3.208033551                | -2.411355137                         |              | -2.809694344 | 0.563336709      |             |
|               | 2                                     | 0                           | 0.568775733                          |              |              |                  |             |
| RP11-490G2.2  | ENSG00000259946.1                     | 0.004563036                 | 1                                    | 1            | 0.004563036  |                  |             |
|               | Brain_Nucleus_accumbens_basal_ganglia | 0.004563036                 |                                      |              |              |                  |             |
|               | Brain_Nucleus_accumbens_basal_ganglia | 1                           | 1                                    | 1            | -2.836364347 |                  |             |
|               | -2.836364347                          | -2.836364347                | NA                                   | 1            | 0            | 0.572012386      |             |
| MANBAL        | ENSG00000101363.12                    | 0.004579043                 | 5                                    | 5            | 0.00214892   |                  |             |
|               | Brain_Putamen_basal_ganglia           | 0.904524312                 | Brain_Cerebellum                     | 2.417558011  |              |                  |             |

|              |                                      |              |                                       |              |                  |
|--------------|--------------------------------------|--------------|---------------------------------------|--------------|------------------|
|              | 0.096676958                          | 0.096676958  | -1.428484703                          | 3.068839509  | 0.269109547      |
|              | 1.690384436                          | 5            | 0                                     | 0.572012386  |                  |
| HIP1         | ENSG00000127946.16                   | 0.004738991  | 1                                     | 1            | 0.004738991      |
|              | Brain_Hippocampus                    | 0.004738991  | Brain_Hippocampus                     | 1            | 1                |
|              | 2.824260077                          | 2.824260077  | 2.824260077                           | NA           | 1                |
|              |                                      |              |                                       | 0            | 0.584417168      |
| SIGMAR1      | ENSG00000147955.16                   | 0.004815005  | 2                                     | 2            | 0.007231363      |
|              | Brain_Cortex                         | 0.069154887  | Brain_Caudate_basal_ganglia           | 1.015558989  |                  |
|              | 0.984441011                          | 0.984441011  | -2.685997483                          | 1.81740654   | -0.434295471     |
|              | 3.184387523                          | 2            | 0                                     | 0.584417168  |                  |
| ZFP90        | ENSG00000184939.15                   | 0.004871145  | 6                                     | 4            | 0.012601727      |
|              | Brain_Caudate_basal_ganglia          | 0.784514762  | Brain_Cortex                          | 4.194264541  |                  |
|              | 0.018733399                          | 0.151481824  | -2.494830603                          | 0.273440321  | -0.999597161     |
|              | 0.898864177                          | 4            | 0                                     | 0.584417168  |                  |
| RASSF4       | ENSG00000107551.20                   | 0.004897632  | 4                                     | 3            | 0.000927753      |
|              | Brain_Anterior_cingulate_cortex_BA24 | 0.363703391  | Brain_Cerebellum                      |              |                  |
|              | 2.814415657                          | 0.080443693  | 0.156866949                           | -3.311566208 | -0.908330959     |
|              | -1.944965788                         | 1.014118937  | 3                                     | 0            | 0.584417168      |
| C2CD5        | ENSG00000111731.12                   | 0.004900775  | 3                                     | 3            | 0.029664727      |
|              | Brain_Caudate_basal_ganglia          | 2.360464497  | 0.092256492                           |              | Brain_Cerebellum |
|              | 0.092256492                          | -2.174538368 | 0.316150413                           | -0.99392536  | 1.250381184      |
|              | 3                                    | 0            | 0.584417168                           |              |                  |
| AC141928.1   | ENSG00000250986.1                    | 0.00492897   | 5                                     | 5            | 0.004952316      |
|              | Brain_Frontal_Cortex_BA9             | 1.248373646  | 0.709270918                           |              | Brain_Cortex     |
|              | 0.709270918                          | -2.810119152 | 2.509015799                           | 0.579728061  | 2.025810666      |
|              | 5                                    | 0            | 0.584417168                           |              |                  |
| WNT5B        | ENSG00000111186.12                   | 0.005305583  | 1                                     | 1            | 0.005305583      |
|              | Brain_Substantia_nigra               | 0.005305583  | Brain_Substantia_nigra                | 1            | 1                |
|              | 1                                    | 2.787869992  | 2.787869992                           | 2.787869992  | NA               |
|              |                                      |              |                                       | 1            | 0                |
|              | 0.607583557                          |              |                                       |              |                  |
| HCN3         | ENSG00000143630.9                    | 0.005347993  | 1                                     | 1            | 0.005347993      |
|              | Brain_Cerebellum                     | 1            | 1                                     | 1            | -2.785289639     |
|              | -2.785289639                         | NA           | 1                                     | 0            | 0.607583557      |
|              | 0.607583557                          |              |                                       |              |                  |
| RP11-384F7.2 | ENSG00000239268.2                    | 0.005365617  | 2                                     | 2            | 0.005480139      |
|              | Brain_Putamen_basal_ganglia          | 0.087599105  | Brain_Nucleus_accumbens_basal_ganglia |              |                  |
|              | 1.018968775                          | 0.981031225  | 0.981031225                           | -2.777366252 | 1.708200722      |
|              | -0.534582765                         | 3.171774825  | 2                                     | 0            | 0.607583557      |
| COMMD7       | ENSG00000149600.11                   | 0.005395069  | 4                                     | 4            | 0.001886073      |
|              | Brain_Cortex                         | 0.264053908  | Brain_Nucleus_accumbens_basal_ganglia |              |                  |
|              | 2.661503862                          | 0.111075423  | 0.111075423                           | 1.11686066   | 3.107609233      |
|              | 2.235149817                          | 0.826755883  | 4                                     | 0            | 0.607583557      |
| C14orf166    | ENSG00000087302.8                    | 0.005413374  | 2                                     | 2            | 0.008444         |
|              | Brain_Cerebellar_Hemisphere          | 0.069387683  | Brain_Cerebellum                      | 1.020804417  |                  |
|              | 0.979195583                          | 0.979195583  | -1.815887162                          | 2.633780735  | 0.408946787      |
|              | 3.146390344                          | 2            | 0                                     | 0.607583557  |                  |
| ZNF852       | ENSG00000178917.15                   | 0.00542258   | 2                                     | 2            | 0.001325395      |
|              | Brain_Substantia_nigra               | 0.740119092  | Brain_Spinal_cord_cervical_c-1        |              |                  |
|              | 1.007921704                          | 0.992078296  | 0.992078296                           | 0.331695642  | 3.210423506      |
|              | 1.771059574                          | 2.035567994  | 2                                     | 0            | 0.607583557      |
| RPS3         | ENSG00000149273.14                   | 0.005519433  | 7                                     | 3            | 0.16215207       |
|              | Brain_Frontal_Cortex_BA9             | 0.69730747   | Brain_Cortex                          | 5.774385788  |                  |
|              | 0.001379627                          | 0.330618026  | -1.397870131                          | 1.37015358   | -0.400713115     |
|              | 0.847049134                          | 3            | 0                                     | 0.607583557  |                  |
| MFSD10       | ENSG00000109736.14                   | 0.005520887  | 2                                     | 2            | 0.001262581      |
|              | Brain_Cerebellum                     | 0.975540892  | Brain_Frontal_Cortex_BA9              | 1.004316735  |                  |
|              | 0.995683265                          | 0.995683265  | 0.030659749                           | 3.224352075  | 1.627505912      |
|              | 2.2582815                            | 2            | 0                                     | 0.607583557  |                  |
| RP11-434H6.7 | ENSG00000273437.1                    | 0.005536914  | 2                                     | 2            | 0.003982509      |
|              | Brain_Cortex                         | 0.015301119  | Brain_Nucleus_accumbens_basal_ganglia | 1.37573313   |                  |
|              | 0.62426687                           | 0.62426687   | 2.425172389                           | 2.879543836  | 2.652358112      |
|              | 0.321289131                          | 2            | 0                                     | 0.607583557  |                  |
| WDPCP        | ENSG00000143951.15                   | 0.00558812   | 7                                     | 6            | 0.008886498      |
|              | Brain_Frontal_Cortex_BA9             | 0.864130617  | Brain_Caudate_basal_ganglia           |              |                  |



|              |                                      |                          |              |                                      |                  |             |  |
|--------------|--------------------------------------|--------------------------|--------------|--------------------------------------|------------------|-------------|--|
|              | 4.136342664                          | 0.058749556              | 0.159792913  | -2.552919149                         | 2.616390047      |             |  |
|              | -0.359963267                         | 1.689288399              | 6 0          | 0.607583557                          |                  |             |  |
| CORO7        | ENSG00000262246.5                    | 0.00560205               | 13 7         | 0.017467677                          | Brain_Cerebellum |             |  |
|              | 0.653241099                          | Brain_Frontal_Cortex_BA9 |              | 8.493441239                          | 0.013374286      |             |  |
|              | 0.287137135                          | -1.748763534             | 2.376712924  | -0.731865734                         | 1.168944864      |             |  |
|              | 7 0                                  | 0.607583557              |              |                                      |                  |             |  |
| DPY19L1      | ENSG00000173852.14                   | 0.005742586              | 8 6          | 0.01137662                           |                  |             |  |
|              | Brain_Frontal_Cortex_BA9             | 0.201901443              |              | Brain_Cortex                         | 4.962145003      |             |  |
|              | 0.007050184                          | 0.20693148               | -2.530912578 | 2.066736583                          | -1.400322921     |             |  |
|              | 1.478811534                          | 6 0                      | 0.612592871  |                                      |                  |             |  |
| DPH3         | ENSG00000154813.9                    | 0.00574956               | 2 2          | 0.001681356                          |                  |             |  |
|              | Brain_Frontal_Cortex_BA9             | 0.924237537              |              | Brain_Hypothalamus                   | 1.179518953      |             |  |
|              | 0.820481047                          | 0.820481047              | -3.141411515 | 0.095097307                          | -1.523157104     |             |  |
|              | 2.288557335                          | 2 0                      | 0.612592871  |                                      |                  |             |  |
| WDR3         | ENSG00000065183.15                   | 0.005796371              | 2 2          | 0.003915349                          |                  |             |  |
|              | Brain_Anterior_cingulate_cortex_BA24 | 0.179300965              |              | Brain_Amygdala                       |                  |             |  |
|              | 1.021942277                          | 0.978057723              | 0.978057723  | -2.884902493                         | 1.342910471      |             |  |
|              | -0.770996011                         | 2.989515217              | 2 0          | 0.612592871                          |                  |             |  |
| TYROBP       | ENSG00000011600.11                   | 0.005823376              | 2 2          | 0.002953241                          |                  |             |  |
|              | Brain_Cerebellar_Hemisphere          | 0.169576004              |              | Brain_Hippocampus                    | 1.05686345       |             |  |
|              | 0.94313655                           | 0.94313655               | -1.373567462 | 2.972563478                          | 0.799498008      |             |  |
|              | 3.073178659                          | 2 0                      | 0.612592871  |                                      |                  |             |  |
| ALDH16A1     | ENSG00000161618.9                    | 0.005927502              | 13 4         | 0.002992889                          |                  |             |  |
|              | Brain_Cerebellum                     | 0.934497224              |              | Brain_Hypothalamus                   | 10.16288951      |             |  |
|              | 0.000178514                          | 0.563282556              | 0.082187989  | 2.968467301                          | 1.75084883       |             |  |
|              | 0.775121913                          | 4 0                      | 0.618893116  |                                      |                  |             |  |
| RNF224       | ENSG00000233198.3                    | 0.006097498              | 2 2          | 0.020869487                          |                  |             |  |
|              | Brain_Cerebellar_Hemisphere          | 0.033967384              |              | Brain_Frontal_Cortex_BA9             |                  |             |  |
|              | 1.035981483                          | 0.964018517              | 0.964018517  | -2.310337305                         | -2.120458668     |             |  |
|              | -2.215397987                         | 0.134264472              | 2 0          | 0.631926639                          |                  |             |  |
| ATP4A        | ENSG00000105675.8                    | 0.006290833              | 2 2          | 0.002952339                          |                  |             |  |
|              | Brain_Cerebellar_Hemisphere          | 0.181841768              |              | Brain_Cortex                         | 1.066325966      |             |  |
|              | 0.933674034                          | 0.933674034              | 1.335105658  | 2.97265732                           | 2.153881489      |             |  |
|              | 1.157923885                          | 2 0                      | 0.63859576   |                                      |                  |             |  |
| STX1B        | ENSG00000099365.10                   | 0.006328997              | 2 2          | 0.001490089                          |                  |             |  |
|              | Brain_Cerebellar_Hemisphere          | 0.008107601              |              | Brain_Cerebellum                     | 1.798291343      |             |  |
|              | 0.201708657                          | 0.201708657              | 2.647555667  | 3.176606852                          | 2.91208126       |             |  |
|              | 0.37409568                           | 2 0                      | 0.63859576   |                                      |                  |             |  |
| GNLY         | ENSG00000115523.16                   | 0.006337043              | 13 3         | 0.004402521                          |                  |             |  |
|              | Brain_Hypothalamus                   | 0.312093964              |              | Brain_Anterior_cingulate_cortex_BA24 |                  |             |  |
|              | 10.8920935                           | 1.79E-06                 | 0.56344247   | 1.010838017                          | 2.847781016      | 2.469165447 |  |
|              | 0.500557773                          | 3 0                      | 0.63859576   |                                      |                  |             |  |
| RP11-7K24.3  | ENSG00000261068.2                    | 0.006384941              | 1 1          | 0.006384941                          |                  |             |  |
|              | Brain_Cerebellar_Hemisphere          | 0.006384941              |              | Brain_Cerebellar_Hemisphere          | 1 1              |             |  |
|              | 1                                    | -2.727328643             | -2.727328643 | -2.727328643                         | NA 1 0           | 0.63859576  |  |
| GTF2H1       | ENSG00000110768.11                   | 0.006416429              | 13 2         | 0.007216946                          |                  |             |  |
|              | Brain_Spinal_cord_cervical_c-1       | 0.522799392              |              | Brain_Cerebellar_Hemisphere          |                  |             |  |
|              | 11.5014293                           | 0.000269585              | 0.729023551  | -2.686664239                         | 0.639036185      |             |  |
|              | -2.110024546                         | 0.858973343              | 2 0          | 0.63859576                           |                  |             |  |
| CCNT2        | ENSG00000082258.12                   | 0.006439994              | 5 4          | 0.000400577                          |                  |             |  |
|              | Brain_Caudate_basal_ganglia          | 0.447938644              |              | Brain_Putamen_basal_ganglia          |                  |             |  |
|              | 3.134769271                          | 0.060258811              | 0.116360498  | -3.539703488                         | -0.758856098     |             |  |
|              | -2.267180979                         | 1.180146686              | 4 0          | 0.63859576                           |                  |             |  |
| PSMC4        | ENSG00000013275.7                    | 0.006534388              | 1 1          | 0.006534388                          |                  |             |  |
|              | Brain_Putamen_basal_ganglia          | 0.006534388              |              | Brain_Putamen_basal_ganglia          | 1 1              |             |  |
|              | 1                                    | -2.719686271             | -2.719686271 | -2.719686271                         | NA 1 0           | 0.63859576  |  |
| MRPS7        | ENSG00000125445.10                   | 0.00653555               | 6 2          | 0.001707626                          | Brain_Cortex     |             |  |
|              | 0.126701273                          | Brain_Frontal_Cortex_BA9 |              | 5.117711049                          | 0.005548743      |             |  |
|              | 0.691742389                          | 1.527240281              | 3.136868636  | 2.07648382                           | 0.561569124      | 2           |  |
|              | 0                                    | 0.63859576               |              |                                      |                  |             |  |
| RP11-11M20.4 | ENSG00000283078.1                    | 0.006572639              | 1 1          | 0.006572639                          |                  |             |  |
|              | Brain_Anterior_cingulate_cortex_BA24 | 0.006572639              |              |                                      |                  |             |  |

|          |                                        |                                        |                                        |              |                                       |                  |
|----------|----------------------------------------|----------------------------------------|----------------------------------------|--------------|---------------------------------------|------------------|
|          | Brain_Anterior_cingulate_cortex_BA24   | 1                                      | 1                                      | 1            | -2.717755497                          |                  |
|          | -2.717755497                           | -2.717755497                           | NA                                     | 1            | 0                                     | 0.63859576       |
| EDN3     | ENSG00000124205.15                     | 0.006669702                            | 1                                      | 1            | 0.006669702                           | Brain_Cerebellum |
|          | 0.006669702                            | Brain_Cerebellum1                      | 1                                      | 1            | 2.712901036                           | 2.712901036      |
|          | 2.712901036                            | NA                                     | 1                                      | 0            | 0.641307231                           |                  |
| TUB      | ENSG00000166402.8                      | 0.006721067                            | 2                                      | 2            | 0.005119727                           |                  |
|          | Brain_Cerebellar_Hemisphere0.783359563 |                                        |                                        |              | Brain_Cerebellum1.540707149           |                  |
|          | 0.459292851                            | -0.459292851                           | -2.799402514                           | -0.274943608 | -1.537173061                          |                  |
|          | 1.785062011                            | 2                                      | 0                                      | 0.641307231  |                                       |                  |
| MAPK3    | ENSG00000102882.11                     | 0.006745752                            | 7                                      | 5            | 0.000911729                           | Brain_Cerebellum |
|          | 0.517518673                            | Brain_Anterior_cingulate_cortex_BA24   | 2.964923041                            |              |                                       |                  |
|          | 0.029361948                            | 0.804540946                            | -3.316437638                           | 1.505843078  | -1.487786613                          |                  |
|          | 1.869158259                            | 5                                      | 0                                      | 0.641307231  |                                       |                  |
| DDB2     | ENSG00000134574.11                     | 0.006783895                            | 3                                      | 2            | 0.002228948                           | Brain_Amygdala   |
|          | 0.072230108                            | Brain_Hypothalamus                     | 2.637867612                            | 0.047525326  |                                       |                  |
|          | 0.314607062                            | 1.797665021                            | 3.057898901                            | 2.612399451  | 0.706610368                           |                  |
|          | 2                                      | 0                                      | 0.641307231                            |              |                                       |                  |
| SLX1A    | ENSG00000132207.17                     | 0.006857971                            | 2                                      | 2            | 0.014606546                           | Brain_Cortex     |
|          | 0.075568918                            | Brain_Cerebellar_Hemisphere1.088264013 | 0.911735987                            |              |                                       |                  |
|          | 0.911735987                            | -2.441990131                           | -1.776995878                           | -2.109493005 | 0.470221946                           |                  |
|          | 2                                      | 0                                      | 0.641479123                            |              |                                       |                  |
| ARHGAP1  | ENSG00000175220.11                     | 0.006907571                            | 3                                      | 3            | 0.002111638                           |                  |
|          | Brain_Amygdala                         | 0.796251319                            | Brain_Cerebellum1.715377661            | 0.477277824  |                                       |                  |
|          | 0.477277824                            | -3.074064446                           | -0.258201605                           | -1.420525012 | 1.470795966                           |                  |
|          | 3                                      | 0                                      | 0.641479123                            |              |                                       |                  |
| CLDN15   | ENSG00000106404.13                     | 0.006959396                            | 13                                     | 2            | 0.024619146                           |                  |
|          | Brain_Substantia_nigra                 | 0.986128331                            | Brain_Cerebellum11.07480564            |              |                                       |                  |
|          | 0.000971885                            | 1.074117908                            | -2.247326851                           | 1.462195162  | 0.265498694                           |                  |
|          | 1.002682587                            | 2                                      | 0                                      | 0.641479123  |                                       |                  |
| PPP1R13B | ENSG00000088808.16                     | 0.006969111                            | 3                                      | 3            | 0.000797905                           |                  |
|          | Brain_Caudate_basal_ganglia0.781119756 |                                        |                                        |              | Brain_Nucleus_accumbens_basal_ganglia |                  |
|          | 1.06547631                             | 0.930708244                            | 0.930708244                            | 0.277860097  | 3.353520655                           |                  |
|          | 1.427529807                            | 1.678370593                            | 3                                      | 0            | 0.641479123                           |                  |
| TMTC1    | ENSG00000133687.15                     | 0.007027024                            | 3                                      | 2            | 0.001783507                           | Brain_Cortex     |
|          | 0.691030011                            | Brain_Cerebellum1.947004553            | 0.052640987                            | 1.00035446   |                                       |                  |
|          | -3.124098593                           | 0.457293845                            | -0.756449033                           | 2.050662922  | 2                                     | 0                |
|          | 0.642582349                            |                                        |                                        |              |                                       |                  |
| DHX40    | ENSG00000108406.9                      | 0.007179791                            | 5                                      | 4            | 0.000389456                           | Brain_Cortex     |
|          | 0.361439758                            | Brain_Hypothalamus                     | 2.71608375                             | 0.062749085  | 0.343977772                           |                  |
|          | 0.912625083                            | 3.547127599                            | 2.381724392                            | 1.154949695  | 4                                     | 0                |
|          | 0.651430507                            |                                        |                                        |              |                                       |                  |
| SLC12A9  | ENSG00000146828.17                     | 0.007216906                            | 6                                      | 6            | 0.006066885                           |                  |
|          | Brain_Cerebellum0.733185555            |                                        | Brain_Caudate_basal_ganglia1.6044652   |              |                                       |                  |
|          | 0.556423216                            | 0.556423216                            | -2.744144344                           | 1.764895653  | -0.74632081                           |                  |
|          | 1.720897547                            | 6                                      | 0                                      | 0.651430507  |                                       |                  |
| NQO2     | ENSG00000124588.19                     | 0.007296929                            | 13                                     | 5            | 0.007170145                           |                  |
|          | Brain_Hippocampus                      | 0.769159047                            | Brain_Cerebellar_Hemisphere8.609755163 |              |                                       |                  |
|          | 0.025687673                            | 0.533457939                            | -2.688836861                           | 1.28740939   | -0.019168276                          |                  |
|          | 1.217021456                            | 5                                      | 0                                      | 0.654431595  |                                       |                  |
| WFIKKN1  | ENSG00000127578.6                      | 0.007524354                            | 13                                     | 1            | 0.0039376                             |                  |
|          | Brain_Anterior_cingulate_cortex_BA24   | 0.051329289                            | Brain_Substantia_nigra                 |              |                                       |                  |
|          | 12.69565893                            | 0.00010806                             | 12.69565893                            | -2.883117945 | -1.948716511                          |                  |
|          | -2.63840153                            | 0.245242311                            | 1                                      | 0            | 0.666736822                           |                  |
| CEP78    | ENSG00000148019.12                     | 0.007529442                            | 1                                      | 1            | 0.007529442                           |                  |
|          | Brain_Frontal_Cortex_BA9               | 0.007529442                            | Brain_Frontal_Cortex_BA9               | 1            | 1                                     |                  |
|          | 1                                      | 2.672473076                            | 2.672473076                            | 2.672473076  | NA                                    | 1                |
|          | 0.666736822                            |                                        |                                        |              | 0                                     |                  |
| ZNF695   | ENSG00000197472.14                     | 0.007711812                            | 1                                      | 1            | 0.007711812                           |                  |
|          | Brain_Cerebellum0.007711812            |                                        | Brain_Cerebellum1                      | 1            | 1                                     | 2.664433485      |
|          | 2.664433485                            | 2.664433485                            | NA                                     | 1            | 0                                     | 0.677925928      |
| DHX34    | ENSG00000134815.18                     | 0.007752709                            | 9                                      | 4            | 0.005505575                           |                  |
|          | Brain_Putamen_basal_ganglia0.642365443 |                                        | Brain_Nucleus_accumbens_basal_ganglia  |              |                                       |                  |

|         |                                       |              |              |              |              |                                       |             |            |   |
|---------|---------------------------------------|--------------|--------------|--------------|--------------|---------------------------------------|-------------|------------|---|
|         | 6.994588242                           | 0.002780585  | 0.284401472  | 0.464394062  | 2.77586097   |                                       |             |            |   |
|         | 1.678490314                           | 0.881218059  | 4            | 0            | 0.677925928  |                                       |             |            |   |
| NRP1    | ENSG00000099250.17                    | 0.007873169  | 1            | 1            | 0.007873169  |                                       |             |            |   |
|         | Brain_Anterior_cingulate_cortex_BA24  | 0.007873169  |              |              |              |                                       |             |            |   |
|         | Brain_Anterior_cingulate_cortex_BA24  | 1            | 1            | 1            | -2.657461061 |                                       |             |            |   |
|         | -2.657461061                          | -2.657461061 | NA           | 1            | 0            | 0.681200722                           |             |            |   |
| GRK1    | ENSG00000185974.6                     | 0.007887536  | 2            | 2            | 0.014608317  |                                       |             |            |   |
|         | Brain_Spinal_cord_cervical_c-1        | 0.026692436  |              |              |              | Brain_Substantia_nigra                |             |            |   |
|         | 1.123485264                           | 0.876514736  | 0.876514736  |              |              | -2.441946354                          | 2.215986361 |            |   |
|         | -0.112979996                          | 3.293655809  | 2            | 0            | 0.681200722  |                                       |             |            |   |
| ATP5G1  | ENSG00000159199.13                    | 0.008015304  | 8            | 6            | 0.001541356  |                                       |             |            |   |
|         | Brain_Hippocampus                     | 0.586070039  |              |              |              | Brain_Hypothalamus                    | 3.040211181 |            |   |
|         | 0.074850253                           | 0.215131796  | -1.979918874 |              |              | 3.166782352                           | 0.487956259 |            |   |
|         | 1.83423152                            | 6            | 0            | 0.681393817  |              |                                       |             |            |   |
| TSPAN5  | ENSG00000168785.7                     | 0.008023397  | 3            | 3            | 0.000635338  |                                       |             |            |   |
|         | Brain_Cerebellar_Hemisphere           | 0.635750741  |              |              |              | Brain_Spinal_cord_cervical_c-1        |             |            |   |
|         | 1.408972843                           | 0.5685158    | 0.5685158    | -0.47364828  |              | 3.41606211                            | 1.350020582 |            |   |
|         | 1.956149307                           | 3            | 0            | 0.681393817  |              |                                       |             |            |   |
| EXOSC6  | ENSG00000223496.2                     | 0.008081804  | 13           | 1            | 0.005325409  |                                       |             |            |   |
|         | Brain_Nucleus_accumbens_basal_ganglia | 0.019424698  |              |              |              | Brain_Cortex                          | 12.8466457  |            |   |
|         | 1.30E-05                              | 12.8466457   | -2.786661401 | -2.337278682 |              | -2.632770497                          |             |            |   |
|         | 0.132037263                           | 1            | 0            | 0.681393817  |              |                                       |             |            |   |
| C1QTNF9 | ENSG00000240654.6                     | 0.008084581  | 6            | 2            | 0.001039685  |                                       |             |            |   |
|         | Brain_Amygdala                        | 0.078117094  |              |              |              | Brain_Frontal_Cortex_BA9              | 5.566426142 |            |   |
|         | 0.002430371                           | 0.254876483  | -3.279561673 | -1.761717179 |              | -2.785179384                          |             |            |   |
|         | 0.606023933                           | 2            | 0            | 0.681393817  |              |                                       |             |            |   |
| SP6     | ENSG00000189120.4                     | 0.008141272  | 4            | 4            | 0.003486431  |                                       |             |            |   |
|         | Brain_Hippocampus                     | 0.480391168  |              |              |              | Brain_Cortex                          | 1.802728002 | 0.42111087 |   |
|         | 0.42111087                            | -1.581890764 | 2.921238238  | -0.125450744 |              | 2.062388794                           |             | 4          |   |
|         | 0                                     | 0.682063089  |              |              |              |                                       |             |            |   |
| MRM2    | ENSG00000122687.17                    | 0.008399207  | 13           | 5            | 0.001075373  |                                       |             |            |   |
|         | Brain_Hypothalamus                    | 0.19379565   |              |              |              | Brain_Spinal_cord_cervical_c-1        | 9.714123298 |            |   |
|         | 5.93E-18                              | 0.358666472  | 1.299432191  | 3.270026809  |              | 2.653073073                           |             |            |   |
|         | 0.577781533                           | 5            | 0            | 0.699483996  |              |                                       |             |            |   |
| CBLC    | ENSG00000142273.10                    | 0.008452055  | 1            | 1            | 0.008452055  |                                       |             |            |   |
|         | Brain_Hippocampus                     | 0.008452055  |              |              |              | Brain_Hippocampus                     | 1           | 1          | 1 |
|         | -2.633456953                          | -2.633456953 | -2.633456953 | NA           | 1            | 0                                     | 0.699720118 |            |   |
| REST    | ENSG00000084093.16                    | 0.008589143  | 1            | 1            | 0.008589143  |                                       |             |            |   |
|         | Brain_Putamen_basal_ganglia           | 0.008589143  |              |              |              | Brain_Putamen_basal_ganglia           | 1           | 1          |   |
|         | 1                                     | -2.627988443 | -2.627988443 | -2.627988443 | NA           | 1                                     | 0           |            |   |
|         | 0.706664942                           |              |              |              |              |                                       |             |            |   |
| RNF5    | ENSG00000204308.7                     | 0.00863696   | 6            | 4            | 0.011434651  |                                       |             |            |   |
|         | Brain_Frontal_Cortex_BA9              | 0.462884385  |              |              |              | Brain_Hypothalamus                    | 3.634004243 |            |   |
|         | 0.048367145                           | 0.487069494  | -2.529127397 | 0.799897998  |              | -1.38891532                           |             |            |   |
|         | 1.294379708                           | 4            | 0            | 0.706664942  |              |                                       |             |            |   |
| TRDN    | ENSG00000186439.12                    | 0.008713527  | 2            | 2            | 0.030384381  |                                       |             |            |   |
|         | Brain_Cerebellar_Hemisphere           | 1.183906982  |              |              |              | Brain_Cortex                          | 0.816093018 |            |   |
|         | 0.816093018                           | -1.754983886 | 2.165043152  | 0.205029633  |              | 2.7718777                             | 2           |            |   |
|         | 0                                     | 0.706789404  |              |              |              |                                       |             |            |   |
| ARID3C  | ENSG00000205143.2                     | 0.008739516  | 8            | 3            | 0.000826295  |                                       |             |            |   |
|         | Brain_Putamen_basal_ganglia           | 0.113180525  |              |              |              | Brain_Nucleus_accumbens_basal_ganglia |             |            |   |
|         | 7.094401249                           | 0.000840029  | 0.250581226  | -3.343832995 |              | -1.584057984                          |             |            |   |
|         | -2.440991548                          | 0.487783727  | 3            | 0            | 0.706789404  |                                       |             |            |   |
| DNAH2   | ENSG00000183914.14                    | 0.00883582   | 2            | 2            | 0.002613207  |                                       |             |            |   |
|         | Brain_Caudate_basal_ganglia           | 0.080790421  |              |              |              | Brain_Cerebellar_Hemisphere           |             |            |   |
|         | 1.386763876                           | 0.613236124  | 0.613236124  | 1.746118164  |              | 3.009915113                           |             |            |   |
|         | 2.378016639                           | 0.893639393  | 2            | 0            | 0.710471056  |                                       |             |            |   |
| VPS9D1  | ENSG00000075399.13                    | 0.00890385   | 12           | 6            | 0.015729527  |                                       |             |            |   |
|         | Brain_Spinal_cord_cervical_c-1        | 0.987046715  |              |              |              | Brain_Cerebellar_Hemisphere           |             |            |   |
|         | 7.537464698                           | 0.006154259  | 0.355635004  | -1.916291281 |              | 2.415131567                           |             |            |   |
|         | -0.353566733                          | 1.313024389  | 6            | 0            | 0.711850118  |                                       |             |            |   |
| BTN2A2  | ENSG00000124508.16                    | 0.009052551  | 12           | 8            | 0.015143897  |                                       |             |            |   |

|               |                                      |                          |                                |                          |              |              |             |   |   |
|---------------|--------------------------------------|--------------------------|--------------------------------|--------------------------|--------------|--------------|-------------|---|---|
|               | Brain_Hippocampus                    | 0.863744831              |                                | Brain_Frontal_Cortex_BA9 | 5.488329761  |              |             |   |   |
|               | 0.034621903                          | 0.253016509              | -2.39660019                    | 2.428919434              | 0.062253297  |              |             |   |   |
|               | 1.368877004                          | 8                        | 0                              | 0.711972999              |              |              |             |   |   |
| NUP88         | ENSG00000108559.11                   | 0.009083442              | 6                              | 3                        | 0.1546061    | Brain_Cortex |             |   |   |
|               | 0.810741603                          | Brain_Amygdala           | 4.661013383                    |                          | 0.025263161  | 0.248862738  |             |   |   |
|               | -0.239469424                         | 1.423448781              | 0.671298162                    |                          | 0.568472612  | 3            | 0           |   |   |
|               | 0.711972999                          |                          |                                |                          |              |              |             |   |   |
| RMND5A        | ENSG00000153561.12                   | 0.009135353              | 1                              | 1                        | 0.009135353  |              |             |   |   |
|               | Brain_Cerebellum                     | 0.009135353              | Brain_Cerebellum1              | 1                        | 1            | 2.606946897  |             |   |   |
|               | 2.606946897                          | 2.606946897              | NA                             | 1                        | 0            | 0.711972999  |             |   |   |
| MRPL41        | ENSG00000182154.7                    | 0.009181968              | 2                              | 2                        | 0.004041854  |              |             |   |   |
|               | Brain_Cerebellar_Hemisphere          | 0.261055538              | Brain_Cerebellum1              | 0.23559652               |              |              |             |   |   |
|               | 0.976440348                          | 0.976440348              | -1.123899795                   |                          | 2.874876623  | 0.875488414  |             |   |   |
|               | 2.827561922                          | 2                        | 0                              | 0.711972999              |              |              |             |   |   |
| CTPS1         | ENSG00000171793.13                   | 0.009287267              | 8                              | 8                        | 0.005075671  |              |             |   |   |
|               | Brain_Putamen_basal_ganglia          | 0.741347531              | Brain_Cortex                   | 3.39975557               |              |              |             |   |   |
|               | 0.177471658                          | 0.177471658              | -0.933558941                   |                          | 2.802191637  | 0.554256885  |             |   |   |
|               | 1.244759695                          | 8                        | 0                              | 0.711972999              |              |              |             |   |   |
| TEX9          | ENSG00000151575.14                   | 0.009328675              | 9                              | 3                        | 0.004978619  |              |             |   |   |
|               | Brain_Anterior_cingulate_cortex_BA24 | 0.481235736              | Brain_Hippocampus              |                          |              |              |             |   |   |
|               | 7.886356173                          | 0.000972502              | 0.316469032                    |                          | -2.808413916 | -0.704316431 |             |   |   |
|               | -1.205302841                         | 0.62404743               | 3                              | 0                        | 0.711972999  |              |             |   |   |
| SLC22A17      | ENSG00000092096.16                   | 0.009423654              | 1                              | 1                        | 0.009423654  |              |             |   |   |
|               | Brain_Spinal_cord_cervical_c-1       | 0.009423654              | Brain_Spinal_cord_cervical_c-1 |                          |              |              |             |   |   |
|               | 1                                    | 1                        | 1                              | 2.596289818              | 2.596289818  | 2.596289818  | NA          | 1 | 0 |
|               | 0.711972999                          |                          |                                |                          |              |              |             |   |   |
| BAIAP3        | ENSG00000007516.13                   | 0.009478869              | 8                              | 7                        | 0.051840528  |              |             |   |   |
|               | Brain_Caudate_basal_ganglia          | 0.647117714              | Brain_Cerebellum               | 2.312030116              |              |              |             |   |   |
|               | 0.043725332                          | 0.466964687              | -1.944455654                   |                          | 1.829258568  | 0.003423574  |             |   |   |
|               | 1.460182067                          | 7                        | 0                              | 0.711972999              |              |              |             |   |   |
| RP11-596C23.6 | ENSG00000282885.1                    | 0.009520934              | 1                              | 1                        | 0.009520934  |              |             |   |   |
|               | Brain_Spinal_cord_cervical_c-1       | 0.009520934              | Brain_Spinal_cord_cervical_c-1 |                          |              |              |             |   |   |
|               | 1                                    | 1                        | 1                              | -2.592759441             | -2.592759441 | -2.592759441 | NA          | 1 | 0 |
|               | 0.711972999                          |                          |                                |                          |              |              |             |   |   |
| RAPSN         | ENSG00000165917.9                    | 0.009567171              | 4                              | 4                        | 0.001057133  | Brain_Cortex |             |   |   |
|               | 0.658823309                          | Brain_Frontal_Cortex_BA9 | 2.125831251                    | 0.438466439              |              |              |             |   |   |
|               | 0.438466439                          | -0.441538344             | 3.274862875                    |                          | 1.187117279  | 1.546855145  |             |   |   |
|               | 4                                    | 0                        | 0.711972999                    |                          |              |              |             |   |   |
| LINC00928     | ENSG00000259218.5                    | 0.00957811               | 1                              | 1                        | 0.00957811   |              |             |   |   |
|               | Brain_Caudate_basal_ganglia          | 0.00957811               | Brain_Caudate_basal_ganglia    | 1                        | 1            | 1            |             |   |   |
|               | 2.590699458                          | 2.590699458              | 2.590699458                    | NA                       | 1            | 0            | 0.711972999 |   |   |
| NUP160        | ENSG00000030066.13                   | 0.009600195              | 1                              | 1                        | 0.009600195  |              |             |   |   |
|               | Brain_Hippocampus                    | 0.009600195              | Brain_Hippocampus              | 1                        | 1            | 1            |             |   |   |
|               | 2.589906707                          | 2.589906707              | 2.589906707                    | NA                       | 1            | 0            | 0.711972999 |   |   |
| ANKEF1        | ENSG00000132623.15                   | 0.009609445              | 1                              | 1                        | 0.009609445  |              |             |   |   |
|               | Brain_Hypothalamus                   | 0.009609445              | Brain_Hypothalamus             | 1                        | 1            | 1            |             |   |   |
|               | 2.58957514                           | 2.58957514               | 2.58957514                     | NA                       | 1            | 0            | 0.711972999 |   |   |
| HGFAC         | ENSG00000109758.8                    | 0.009775378              | 6                              | 5                        | 0.031565046  |              |             |   |   |
|               | Brain_Frontal_Cortex_BA9             | 0.791467264              | Brain_Cerebellum               | 2.610541862              |              |              |             |   |   |
|               | 0.067361596                          | 0.244315881              | -1.567120744                   |                          | 2.149875733  | 0.741499812  |             |   |   |
|               | 1.483480505                          | 5                        | 0                              | 0.711972999              |              |              |             |   |   |
| SPEF2         | ENSG00000152582.13                   | 0.009781378              | 8                              | 2                        | 0.004607755  |              |             |   |   |
|               | Brain_Anterior_cingulate_cortex_BA24 | 0.550656017              | Brain_Amygdala                 |                          |              |              |             |   |   |
|               | 6.648289776                          | 0.008379531              | 0.670421649                    |                          | -2.833248501 | -0.596777387 |             |   |   |
|               | -2.292451463                         | 0.721562152              | 2                              | 0                        | 0.711972999  |              |             |   |   |
| MGMT          | ENSG00000170430.9                    | 0.009814776              | 13                             | 3                        | 0.161515191  |              |             |   |   |
|               | Brain_Hippocampus                    | 0.933566053              | Brain_Substantia_nigra         | 10.49564394              |              |              |             |   |   |
|               | 0.016844828                          | 0.488590056              | -0.966143836                   |                          | 1.399993746  | -0.207278204 |             |   |   |
|               | 0.791096439                          | 3                        | 0                              | 0.711972999              |              |              |             |   |   |
| CALHM2        | ENSG00000138172.10                   | 0.009817352              | 4                              | 4                        | 0.02652566   |              |             |   |   |
|               | Brain_Putamen_basal_ganglia          | 0.197296302              | Brain_Hypothalamus             | 2.730596328              |              |              |             |   |   |
|               | 0.093947361                          | 0.093947361              | -2.21842806                    |                          | 1.289292833  | -1.09919356  |             |   |   |

|               |                                       |             |              |                                       |             |              |    |   |              |
|---------------|---------------------------------------|-------------|--------------|---------------------------------------|-------------|--------------|----|---|--------------|
| 1.64852315    | 4                                     | 0           | 0.711972999  |                                       |             |              |    |   |              |
| EGLN2         | ENSG00000269858.5                     |             | 0.009891429  | 2                                     | 2           | 0.013613772  |    |   |              |
|               | Brain_Frontal_Cortex_BA9              | 0.0202898   |              | Brain_Putamen_basal_ganglia           | 1.24361133  |              |    |   |              |
|               | 0.75638867                            | 0.75638867  | -2.467296124 |                                       |             | -2.320945224 |    |   | -2.394120674 |
|               | 0.103485714                           | 2           | 0            | 0.711972999                           |             |              |    |   |              |
| RP11-440L14.3 | ENSG00000260262.1                     |             | 0.009899546  | 1                                     | 1           | 0.009899546  |    |   |              |
|               | Brain_Cerebellar_Hemisphere           | 0.009899546 |              | Brain_Cerebellar_Hemisphere           | 1           | 1            |    |   |              |
|               | 1                                     | 2.579318523 | 2.579318523  | 2.579318523                           | NA          | 1            | 0  |   |              |
|               | 0.711972999                           |             |              |                                       |             |              |    |   |              |
| LINC01480     | ENSG00000270164.1                     |             | 0.009923146  | 5                                     | 5           | 0.001243429  |    |   |              |
|               | Brain_Putamen_basal_ganglia           | 0.956100849 |              | Brain_Nucleus_accumbens_basal_ganglia |             |              |    |   |              |
|               | 2.486951508                           | 0.183148877 | 0.183148877  |                                       |             | 0.055047214  |    |   | 3.228726151  |
|               | 1.413518202                           | 1.345334412 | 5            | 0                                     | 0.711972999 |              |    |   |              |
| C12orf60      | ENSG00000182993.3                     |             | 0.010217511  | 13                                    | 3           | 0.026762703  |    |   |              |
|               | Brain_Substantia_nigra                | 0.876726807 |              | Brain_Cortex                          | 11.37929529 |              |    |   |              |
|               | 0.00016636                            | 0.417511674 | -2.214961555 |                                       |             | 1.145064011  |    |   | -0.265827552 |
|               | 0.717661813                           | 3           | 0            | 0.727710219                           |             |              |    |   |              |
| EGLN3         | ENSG00000129521.13                    |             | 0.010265574  | 2                                     | 2           | 0.002631289  |    |   |              |
|               | Brain_Nucleus_accumbens_basal_ganglia | 0.816471768 |              | Brain_Cerebellum                      |             |              |    |   |              |
|               | 1.033512707                           | 0.966487293 | 0.966487293  |                                       |             | -3.007820026 |    |   | -0.232085292 |
|               | -1.619952659                          | 1.962740853 | 2            | 0                                     | 0.727710219 |              |    |   |              |
| B3GALNT2      | ENSG00000162885.12                    |             | 0.010385138  | 3                                     | 3           | 0.008614488  |    |   |              |
|               | Brain_Nucleus_accumbens_basal_ganglia | 0.09000425  |              | Brain_Frontal_Cortex_BA9              |             |              |    |   |              |
|               | 1.868031916                           | 0.149644766 | 0.149644766  |                                       |             | 1.695375291  |    |   | 2.626985998  |
|               | 2.190181114                           | 0.468505826 | 3            | 0                                     | 0.727710219 |              |    |   |              |
| SEMA6C        | ENSG00000143434.15                    |             | 0.010397173  | 4                                     | 3           | 0.000957534  |    |   |              |
|               | Brain_Cortex                          | 0.30947798  |              | Brain_Caudate_basal_ganglia           | 2.599861889 |              |    |   |              |
|               | 0.053539327                           | 0.347959672 | 1.016317999  |                                       |             | 3.302715619  |    |   | 2.350664533  |
|               | 0.963053464                           | 3           | 0            | 0.727710219                           |             |              |    |   |              |
| GAS8          | ENSG00000141013.16                    |             | 0.01045903   | 12                                    | 6           | 0.006160085  |    |   |              |
|               | Brain_Cerebellar_Hemisphere           | 0.798509409 |              | Brain_Caudate_basal_ganglia           |             |              |    |   |              |
|               | 6.256898096                           | 0.020935694 | 0.312748074  |                                       |             | -2.739136216 |    |   | -0.255276682 |
|               | -1.560874807                          | 0.747742909 | 6            | 0                                     | 0.727710219 |              |    |   |              |
| GS1-166A23.2  | ENSG00000272361.2                     |             | 0.010570269  | 10                                    | 8           | 0.00312604   |    |   |              |
|               | Brain_Nucleus_accumbens_basal_ganglia | 0.955669522 |              | Brain_Substantia_nigra                |             |              |    |   |              |
|               | 3.829885165                           | 0.010680733 | 0.203014663  |                                       |             | -2.95506423  |    |   | 1.381137847  |
|               | -1.334795836                          | 1.639534919 | 8            | 0                                     | 0.727710219 |              |    |   |              |
| AC144831.1    | ENSG00000261888.1                     |             | 0.010625074  | 2                                     | 2           | 0.008759458  |    |   |              |
|               | Brain_Cortex                          | 0.300828197 |              | Brain_Anterior_cingulate_cortex_BA24  |             |              |    |   |              |
|               | 1.165577982                           | 0.834422018 | 0.834422018  |                                       |             | -2.621302205 |    |   | -1.034658986 |
|               | -1.827980595                          | 1.12192618  | 2            | 0                                     | 0.727710219 |              |    |   |              |
| ZNHIT1        | ENSG00000106400.11                    |             | 0.010665695  | 3                                     | 2           | 0.00195544   |    |   |              |
|               | Brain_Putamen_basal_ganglia           | 0.008902685 |              | Brain_Caudate_basal_ganglia           |             |              |    |   |              |
|               | 2.800256827                           | 0.034307675 | 0.165435498  |                                       |             | -3.096917986 |    |   | -2.615768671 |
|               | -2.882635369                          | 0.24484685  | 2            | 0                                     | 0.727710219 |              |    |   |              |
| RP11-395G23.3 | ENSG00000254615.2                     |             | 0.010714546  | 1                                     | 1           | 0.010714546  |    |   |              |
|               | Brain_Spinal_cord_cervical_c-1        | 0.010714546 |              | Brain_Spinal_cord_cervical_c-1        |             |              |    |   |              |
|               | 1                                     | 1           | 1            | 2.551873355                           | 2.551873355 | 2.551873355  | NA | 1 | 0            |
|               | 0.727710219                           |             |              |                                       |             |              |    |   |              |
| BSDC1         | ENSG00000160058.18                    |             | 0.0107258    | 3                                     | 3           | 0.025066926  |    |   |              |
|               | Brain_Putamen_basal_ganglia           | 0.109552741 |              | Brain_Cerebellar_Hemisphere           |             |              |    |   |              |
|               | 1.503098835                           | 0.504533843 | 0.504533843  |                                       |             | -2.118534365 |    |   | 2.240369782  |
|               | -0.49279042                           | 2.381131961 | 3            | 0                                     | 0.727710219 |              |    |   |              |
| COIL          | ENSG00000121058.4                     |             | 0.01072831   | 1                                     | 1           | 0.01072831   |    |   |              |
|               | Brain_Spinal_cord_cervical_c-1        | 0.01072831  |              | Brain_Spinal_cord_cervical_c-1        |             |              |    |   |              |
|               | 1                                     | 1           | 2.551426027  | 2.551426027                           | 2.551426027 | NA           | 1  | 0 |              |
|               | 0.727710219                           |             |              |                                       |             |              |    |   |              |
| U91328.19     | ENSG00000272462.2                     |             | 0.010766637  | 13                                    | 7           | 0.014352479  |    |   |              |
|               | Brain_Hippocampus                     | 0.970851829 |              | Brain_Cerebellar_Hemisphere           | 8.703457522 |              |    |   |              |
|               | 0.040522496                           | 0.307025745 | -2.448318323 |                                       |             | 1.314182922  |    |   | -0.59776862  |
|               | 1.033219719                           | 7           | 0            | 0.727710219                           |             |              |    |   |              |
| HS3ST2        | ENSG00000122254.6                     |             | 0.010893428  | 1                                     | 1           | 0.010893428  |    |   |              |

|           |                                |                             |                                       |              |              |              |                  |
|-----------|--------------------------------|-----------------------------|---------------------------------------|--------------|--------------|--------------|------------------|
|           | Brain_Amygdala                 | 0.010893428                 | Brain_Amygdala                        | 1            | 1            | 1            | 2.546099027      |
|           | 2.546099027                    | 2.546099027                 | NA                                    | 1            | 0            | 0.732740155  |                  |
| NCBP2-AS2 | ENSG00000270170.1              | 0.011021459                 |                                       | 2            | 2            | 0.030314339  |                  |
|           | Brain_Putamen_basal_ganglia    | 0.218728707                 | Brain_Hippocampus                     |              |              |              | 1.336327505      |
|           | 0.663672495                    | 0.663672495                 | -2.165958752                          |              |              | 1.229915614  | -0.468021569     |
|           | 2.401245792                    | 2                           | 0                                     | 0.737804957  |              |              |                  |
| CNNM4     | ENSG00000158158.11             | 0.011196984                 |                                       | 5            | 3            | 0.061078976  | Brain_Amygdala   |
|           | 0.390310248                    | Brain_Hypothalamus          | 3.535169444                           |              |              | 0.000730441  |                  |
|           | 0.269758165                    | -1.281940695                | 1.872923311                           |              |              | -0.446226731 | 1.305801442      |
|           | 3                              | 0                           | 0.739059879                           |              |              |              |                  |
| WDR49     | ENSG00000174776.10             | 0.011281487                 |                                       | 4            | 4            | 0.000794657  | Brain_Cerebellum |
|           | 0.791870604                    | Brain_Hypothalamus          | 1.712913907                           |              |              | 0.337647966  |                  |
|           | 0.337647966                    | -3.354649305                | -0.263882314                          |              |              | -1.296805894 | 1.447799302      |
|           | 4                              | 0                           | 0.739059879                           |              |              |              |                  |
| UPF3A     | ENSG00000169062.14             | 0.011311236                 |                                       | 7            | 6            | 0.00210032   |                  |
|           | Brain_Putamen_basal_ganglia    | 0.634706929                 | Brain_Substantia_nigra                |              |              |              |                  |
|           | 3.303911477                    | 0.092188861                 | 0.129590698                           |              |              | -0.522988912 | 3.075667425      |
|           | 0.817281082                    | 1.201098042                 | 6                                     | 0            | 0.739059879  |              |                  |
| DRD1      | ENSG00000184845.3              | 0.011388851                 |                                       | 1            | 1            | 0.011388851  |                  |
|           | Brain_Hypothalamus             | 0.011388851                 | Brain_Hypothalamus                    | 1            | 1            | 1            |                  |
|           | -2.530535656                   | -2.530535656                | -2.530535656                          | NA           | 1            | 0            | 0.739059879      |
| SV2A      | ENSG00000159164.9              | 0.011412644                 |                                       | 1            | 1            | 0.011412644  |                  |
|           | Brain_Spinal_cord_cervical_c-1 | 0.011412644                 | Brain_Spinal_cord_cervical_c-1        |              |              |              |                  |
|           | 1                              | 1                           | -2.529803455                          | -2.529803455 | -2.529803455 | NA           | 1                |
|           | 0.739059879                    |                             |                                       |              |              |              | 0                |
| COCH      | ENSG00000100473.15             | 0.011486772                 |                                       | 2            | 2            | 0.00351182   | Brain_Cortex     |
|           | 0.676517286                    | Brain_Caudate_basal_ganglia | 1.076501839                           |              |              | 0.923498161  |                  |
|           | 0.923498161                    | -2.91897715                 | 0.417220289                           |              |              | -1.25087843  | 2.359047833      |
|           | 2                              | 0                           | 0.739059879                           |              |              |              |                  |
| NRG4      | ENSG00000169752.16             | 0.011566944                 |                                       | 12           | 2            | 0.070808017  |                  |
|           | Brain_Hypothalamus             | 0.931713688                 | Brain_Cerebellum                      | 10.72180989  |              |              |                  |
|           | 0.001071701                    | 0.387948793                 | 0.085688948                           |              |              | 1.806706733  | 1.268923772      |
|           | 0.642092752                    | 2                           | 0                                     | 0.739059879  |              |              |                  |
| TMEM63A   | ENSG00000196187.11             | 0.011570634                 |                                       | 6            | 6            | 0.010156908  |                  |
|           | Brain_Frontal_Cortex_BA9       | 0.383746037                 | Brain_Nucleus_accumbens_basal_ganglia |              |              |              |                  |
|           | 3.103650406                    | 0.165202449                 | 0.165202449                           |              |              | -1.950481544 | 2.570441147      |
|           | 1.063773984                    | 1.63697285                  | 6                                     | 0            | 0.739059879  |              |                  |
| MRPL10    | ENSG00000159111.12             | 0.011588159                 |                                       | 8            | 8            | 3.69E-05     | Brain_Cerebellum |
|           | 0.839211581                    | Brain_Frontal_Cortex_BA9    | 1.708747978                           |              |              | 0.345362821  |                  |
|           | 0.345362821                    | -4.126127029                | 1.178766131                           |              |              | -1.073343617 | 1.631134899      |
|           | 8                              | 0                           | 0.739059879                           |              |              |              |                  |
| PXYLP1    | ENSG00000155893.12             | 0.011682195                 |                                       | 2            | 2            | 0.007611904  |                  |
|           | Brain_Cortex                   | 0.796400478                 | Brain_Spinal_cord_cervical_c-1        |              |              | 1.367778853  |                  |
|           | 0.632221147                    | 0.632221147                 | -2.668816421                          |              |              | -0.25800833  | -1.463412375     |
|           | 1.704698749                    | 2                           | 0                                     | 0.739059879  |              |              |                  |
| RNF208    | ENSG00000212864.3              | 0.011775952                 |                                       | 1            | 1            | 0.011775952  |                  |
|           | Brain_Amygdala                 | 0.011775952                 | Brain_Amygdala                        | 1            | 1            | 1            |                  |
|           | -2.518788056                   | -2.518788056                | NA                                    | 1            | 0            | 0.739059879  | -2.518788056     |
| TSHR      | ENSG00000165409.16             | 0.011825252                 |                                       | 3            | 3            | 0.031054605  |                  |
|           | Brain_Caudate_basal_ganglia    | 0.452082017                 | Brain_Putamen_basal_ganglia           |              |              |              |                  |
|           | 1.860702445                    | 0.142973918                 | 0.142973918                           |              |              | 0.751948521  | 2.156372309      |
|           | 1.338022904                    | 0.730455548                 | 3                                     | 0            | 0.739059879  |              |                  |
| TXNDC11   | ENSG00000153066.12             | 0.011916993                 |                                       | 2            | 2            | 0.005124619  |                  |
|           | Brain_Cerebellar_Hemisphere    | 0.316688638                 | Brain_Caudate_basal_ganglia           |              |              |              |                  |
|           | 1.003914522                    | 0.996085478                 | 0.996085478                           |              |              | -1.001285836 | 2.799094199      |
|           | 0.898904181                    | 2.687274494                 | 2                                     | 0            | 0.739059879  |              |                  |
| TRH       | ENSG00000170893.3              | 0.011919646                 |                                       | 2            | 2            | 0.006643294  |                  |
|           | Brain_Cerebellar_Hemisphere    | 0.133059313                 | Brain_Cerebellum                      | 1.105914036  |              |              |                  |
|           | 0.894085964                    | 0.894085964                 | 1.502146366                           |              |              | 2.714215488  | 2.108180927      |
|           | 0.857062295                    | 2                           | 0                                     | 0.739059879  |              |              |                  |
| HSD17B13  | ENSG00000170509.11             | 0.011946121                 |                                       | 13           | 3            | 0.000371842  |                  |
|           | Brain_Cerebellum               | 0.02197183                  | Brain_Nucleus_accumbens_basal_ganglia | 10.86295246  |              |              |                  |

|             |                                       |                  |              |              |                                      |
|-------------|---------------------------------------|------------------|--------------|--------------|--------------------------------------|
|             | 0.001235798                           | 0.468116143      | -3.559302159 | -2.290854497 | -2.891746361                         |
|             | 0.380170968                           | 3                | 0            | 0.739059879  |                                      |
| SESN1       | ENSG00000080546.13                    | 0.011954692      | 1            | 1            | 0.011954692                          |
|             | Brain_Anterior_cingulate_cortex_BA24  | 0.011954692      |              |              |                                      |
|             | Brain_Anterior_cingulate_cortex_BA24  | 1                | 1            | 1            | 2.513478936                          |
|             | 2.513478936                           | 2.513478936      | NA           | 1            | 0.739059879                          |
| EGLN1       | ENSG00000135766.8                     | 0.01199029       | 2            | 2            | 0.052833299                          |
|             | Brain_Nucleus_accumbens_basal_ganglia | 0.477100586      |              |              | Brain_Hippocampus                    |
|             | 1.581496903                           | 0.418503097      | 0.418503097  | -1.936280967 | 0.710973615                          |
|             | -0.612653676                          | 1.871891667      | 2            | 0            | 0.739059879                          |
| CPSF4       | ENSG00000160917.14                    | 0.011991037      | 3            | 2            | 0.003257112                          |
|             | Brain_Anterior_cingulate_cortex_BA24  | 0.016182987      |              |              | Brain_Frontal_Cortex_BA9             |
|             | 2.793418433                           | 0.053822709      | 0.152758858  | -2.942369336 | -2.40476232                          |
|             | -2.706459464                          | 0.274774998      | 2            | 0            | 0.739059879                          |
| TMEM163     | ENSG00000152128.13                    | 0.012224863      | 5            | 5            | 0.000729995                          |
|             | Brain_Putamen_basal_ganglia           | 0.78154018       |              |              | Brain_Frontal_Cortex_BA9             |
|             | 0.117544874                           | 0.117544874      | -0.277312477 | 3.378058737  | 2.397836256                          |
|             | 1.379847416                           | 5                | 0            | 0.750166927  | 1.396714182                          |
| MIER1       | ENSG00000198160.14                    | 0.012286747      | 5            | 5            | 0.092580648                          |
|             | Brain_Cerebellum                      |                  |              |              |                                      |
|             | 0.80617454                            | Brain_Cortex     | 3.135420981  | 0.21770353   | 0.21770353                           |
|             | 1.530789114                           | -0.293197648     | 1.159281931  | 5            | 0                                    |
| TPD52L1     | ENSG00000111907.20                    | 0.012452374      | 6            | 5            | 0.043785743                          |
|             | Brain_Cortex                          | 0.820758611      |              |              | Brain_Anterior_cingulate_cortex_BA24 |
|             | 2.839390443                           | 0.049883009      | 0.139736837  | -1.074189121 | 2.016136127                          |
|             | 0.745133124                           | 1.270074915      | 5            | 0            | 0.75748335                           |
| ZWILCH      | ENSG00000174442.11                    | 0.012577108      | 1            | 1            | 0.012577108                          |
|             | Brain_Frontal_Cortex_BA9              | 0.012577108      |              |              | Brain_Frontal_Cortex_BA9             |
|             | 1                                     | 2.495524474      | 2.495524474  | 2.495524474  | NA                                   |
|             | 0.758660175                           |                  |              |              | 1                                    |
| CDC37L1-AS1 | ENSG00000273061.1                     | 0.012625669      | 2            | 2            | 0.003266892                          |
|             | Brain_Cerebellar_Hemisphere           | 0.766381156      |              |              | Brain_Caudate_basal_ganglia          |
|             | 1.002093236                           | 0.997906764      | 0.997906764  | -0.2971118   | 2.94144084                           |
|             | 2.290002533                           | 2                | 0            | 0.758660175  | 1.32216452                           |
| MTAP        | ENSG00000099810.18                    | 0.012634395      | 6            | 5            | 0.049573366                          |
|             | Brain_Putamen_basal_ganglia           | 0.598099508      |              |              | Brain_Anterior_cingulate_cortex_BA24 |
|             | 3.461791788                           | 0.080976389      | 0.268285223  | -1.963626981 | 1.815246806                          |
|             | -0.414096141                          | 1.610395174      | 5            | 0            | 0.758660175                          |
| NXT1        | ENSG00000132661.3                     | 0.012741446      | 1            | 1            | 0.012741446                          |
|             | Brain_Cerebellar_Hemisphere           | 0.012741446      |              |              | Brain_Cerebellar_Hemisphere          |
|             | 1                                     | -2.490915382     | -2.490915382 | -2.490915382 | NA                                   |
|             | 0.761818686                           |                  |              |              | 1                                    |
| DDAH2       | ENSG00000213722.8                     | 0.012874597      | 6            | 6            | 0.002285106                          |
|             | Brain_Cortex                          |                  |              |              |                                      |
|             | 0.137850124                           | Brain_Cerebellum | 3.210910695  | 0.114985278  | 0.114985278                          |
|             | -3.050434376                          | 1.550009414      | -1.671181647 | 1.668833576  | 6                                    |
|             | 0.762414582                           |                  |              |              | 0                                    |
| KANK4       | ENSG00000132854.18                    | 0.012909179      | 4            | 4            | 0.004586502                          |
|             | Brain_Caudate_basal_ganglia           | 0.523566629      |              |              | Brain_Hypothalamus                   |
|             | 0.496685663                           | 0.496685663      | -1.073930918 | 2.834725922  | 1.754881474                          |
|             | 1.828368886                           | 4                | 0            | 0.762414582  | 0.356946514                          |
| ZNF580      | ENSG00000213015.8                     | 0.012917145      | 2            | 2            | 0.003276666                          |
|             | Brain_Hippocampus                     | 0.939890551      |              |              | Brain_Cerebellum                     |
|             | 0.948371403                           | 0.948371403      | -0.075407426 | 2.940515539  | 1.432554057                          |
|             | 2.13257958                            | 2                | 0            | 0.762414582  |                                      |
| ZNF547      | ENSG00000152433.14                    | 0.012995017      | 3            | 3            | 0.002925453                          |
|             | Brain_Frontal_Cortex_BA9              | 0.559411219      |              |              | Brain_Cerebellum                     |
|             | 0.691209728                           | 0.691209728      | -2.975464384 | 0.58371627   | -1.415997043                         |
|             | 1.819973659                           | 3                | 0            | 0.762414582  |                                      |
| SCAMP1      | ENSG00000085365.17                    | 0.013023879      | 5            | 4            | 0.002108017                          |
|             | Brain_Putamen_basal_ganglia           | 0.942724021      |              |              | Brain_Caudate_basal_ganglia          |
|             | 3.293279658                           | 0.050260806      | 0.280009088  | 0.071846558  | 3.074576485                          |
|             | 1.581504952                           | 1.109700307      | 4            | 0            | 0.762414582                          |
| C2orf50     | ENSG00000150873.11                    | 0.013204444      | 3            | 3            | 0.001189103                          |

|               |                                       |                                       |                                       |              |              |                  |             |
|---------------|---------------------------------------|---------------------------------------|---------------------------------------|--------------|--------------|------------------|-------------|
|               | Brain_Frontal_Cortex_BA9              | 0.64643769                            | Brain_Nucleus_accumbens_basal_ganglia |              |              |                  |             |
|               | 1.67183415                            | 0.416437026                           | 0.416437026                           | -3.24148123  | -0.458716602 |                  |             |
|               | -1.774876712                          | 1.397469099                           | 3                                     | 0            | 0.762468029  |                  |             |
| SCRT2         | ENSG00000215397.3                     | 0.013219896                           | 1                                     | 1            | 0.013219896  |                  |             |
|               | Brain_Nucleus_accumbens_basal_ganglia | 0.013219896                           |                                       |              |              |                  |             |
|               | Brain_Nucleus_accumbens_basal_ganglia | 1                                     | 1                                     | 1            | 2.477789907  |                  |             |
|               | 2.477789907                           | 2.477789907                           | NA                                    | 1            | 0            | 0.762468029      |             |
| LAMP3         | ENSG00000078081.7                     | 0.013233651                           | 1                                     | 1            | 0.013233651  |                  |             |
|               | Brain_Caudate_basal_ganglia           | 0.013233651                           | Brain_Caudate_basal_ganglia           | 1            | 1            |                  |             |
|               | 1                                     | 2.477418825                           | 2.477418825                           | 2.477418825  | NA           | 1                | 0           |
|               | 0.762468029                           |                                       |                                       |              |              |                  |             |
| JARID2        | ENSG0000008083.13                     | 0.013243217                           | 3                                     | 3            | 0.026496578  |                  |             |
|               | Brain_Amygdala                        | 0.991402329                           | Brain_Caudate_basal_ganglia           | 1.801553238  |              |                  |             |
|               | 0.235000439                           | 0.235000439                           | -1.692293074                          | 2.218855192  | 0.179112637  |                  |             |
|               | 1.961000551                           | 3                                     | 0                                     | 0.762468029  |              |                  |             |
| HTR1A         | ENSG00000178394.4                     | 0.013303123                           | 1                                     | 1            | 0.013303123  | Brain_Cortex     |             |
|               | 0.013303123                           | Brain_Cortex                          | 1                                     | 1            | 1            | 2.475549735      | 2.475549735 |
|               | 2.475549735                           | NA                                    | 1                                     | 0            | 0.762468029  |                  |             |
| TSSK3         | ENSG00000162526.6                     | 0.013424894                           | 2                                     | 2            | 0.007273018  |                  |             |
|               | Brain_Frontal_Cortex_BA9              | 0.53045974                            | Brain_Cerebellum                      | 1.200756261  |              |                  |             |
|               | 0.799243739                           | 0.799243739                           | -0.62730437                           | 2.684077791  | 1.028386711  |                  |             |
|               | 2.341500781                           | 2                                     | 0                                     | 0.762468029  |              |                  |             |
| ANKDD1A       | ENSG00000166839.16                    | 0.013470842                           | 5                                     | 3            | 0.002461821  |                  |             |
|               | Brain_Cerebellum                      | 0.111609825                           | Brain_Nucleus_accumbens_basal_ganglia | 3.58902752   |              |                  |             |
|               | 0.029049765                           | 0.236706202                           | 1.590998892                           | 3.027995131  | 2.395873275  |                  |             |
|               | 0.614672404                           | 3                                     | 0                                     | 0.762468029  |              |                  |             |
| NR1H3         | ENSG00000025434.18                    | 0.013500475                           | 6                                     | 5            | 0.001741044  | Brain_Amygdala   |             |
|               | 0.962327624                           | Brain_Nucleus_accumbens_basal_ganglia | 3.01782055                            | 0.074772006  |              |                  |             |
|               | 0.174870339                           | -0.168459321                          | 3.131181634                           | 0.986380162  | 1.236111665  |                  |             |
|               | 5                                     | 0                                     | 0.762468029                           |              |              |                  |             |
| SH2D7         | ENSG00000183476.12                    | 0.013515265                           | 8                                     | 4            | 0.002516159  |                  |             |
|               | Brain_Caudate_basal_ganglia           | 0.804181358                           | Brain_Nucleus_accumbens_basal_ganglia |              |              |                  |             |
|               | 6.071708408                           | 0.046456379                           | 0.217840419                           | -3.021391377 | 0.707664853  |                  |             |
|               | -0.783591108                          | 1.167547527                           | 4                                     | 0            | 0.762468029  |                  |             |
| MTPAP         | ENSG00000107951.14                    | 0.013649378                           | 7                                     | 4            | 0.074572655  |                  |             |
|               | Brain_Hypothalamus                    | 0.595885214                           | Brain_Hippocampus                     | 4.753812163  |              |                  |             |
|               | 0.015374837                           | 0.396726147                           | -1.783083847                          | 1.498451114  | -0.245870834 |                  |             |
|               | 1.161460166                           | 4                                     | 0                                     | 0.766941559  |              |                  |             |
| CHTOP         | ENSG00000160679.12                    | 0.013747487                           | 1                                     | 1            | 0.013747487  | Brain_Cerebellum |             |
|               | 0.013747487                           | Brain_Cerebellum                      | 1                                     | 1            | 1            | 2.463794584      | 2.463794584 |
|               | 2.463794584                           | NA                                    | 1                                     | 0            | 0.769364384  |                  |             |
| MUTYH         | ENSG00000132781.17                    | 0.013892816                           | 5                                     | 4            | 0.048950611  |                  |             |
|               | Brain_Nucleus_accumbens_basal_ganglia | 0.718532353                           |                                       |              |              |                  |             |
|               | Brain_Spinal_cord_cervical_c-1        | 3.051742873                           | 0.066263608                           | 0.351643073  |              |                  |             |
|               | -0.729880983                          | 1.969021601                           | 0.509768097                           | 1.267552774  | 4            | 0                |             |
|               | 0.770767298                           |                                       |                                       |              |              |                  |             |
| FAM131A       | ENSG00000175182.14                    | 0.013909004                           | 2                                     | 2            | 0.008302422  |                  |             |
|               | Brain_Amygdala                        | 0.260808707                           | Brain_Hypothalamus                    | 1.050109337  |              |                  |             |
|               | 0.949890663                           | 0.949890663                           | -2.639517171                          | 1.124481753  | -0.757517709 |                  |             |
|               | 2.661549163                           | 2                                     | 0                                     | 0.770767298  |              |                  |             |
| SNRNP70       | ENSG00000104852.14                    | 0.013937826                           | 3                                     | 3            | 0.001362616  |                  |             |
|               | Brain_Nucleus_accumbens_basal_ganglia | 0.93393351                            | Brain_Cerebellum                      | 1.682033764  |              |                  |             |
|               | 0.443342209                           | 0.443342209                           | -0.082896911                          | 3.202454915  | 1.586165539  |                  |             |
|               | 1.643311566                           | 3                                     | 0                                     | 0.770767298  |              |                  |             |
| NQO1          | ENSG00000181019.12                    | 0.014051215                           | 1                                     | 1            | 0.014051215  |                  |             |
|               | Brain_Nucleus_accumbens_basal_ganglia | 0.014051215                           |                                       |              |              |                  |             |
|               | Brain_Nucleus_accumbens_basal_ganglia | 1                                     | 1                                     | 1            | -2.455951423 |                  |             |
|               | -2.455951423                          | -2.455951423                          | NA                                    | 1            | 0            | 0.771297043      |             |
| CITF22-92A6.1 | ENSG00000273145.1                     | 0.014098681                           | 1                                     | 1            | 0.014098681  |                  |             |
|               | Brain_Cerebellum                      | 0.014098681                           | Brain_Cerebellum                      | 1            | 1            | 1                | 2.454739259 |
|               | 2.454739259                           | 2.454739259                           | NA                                    | 1            | 0            | 0.771297043      |             |
| TNN           | ENSG00000120332.15                    | 0.01411279                            | 3                                     | 2            | 0.003126917  | Brain_Cortex     |             |



|              |                                      |                             |                                |              |                              |
|--------------|--------------------------------------|-----------------------------|--------------------------------|--------------|------------------------------|
|              | 0.215027607                          | Brain_Hippocampus           | 2.285782804                    | 0.026783846  | 0.68743335                   |
|              | 1.23985885                           | 2.954977693                 | 2.331143557                    | 0.948309385  | 2 0                          |
|              | 0.771297043                          |                             |                                |              |                              |
| ZNF850       | ENSG00000267041.5                    | 0.01419335                  | 3                              | 3            | 0.120208558 Brain_Cerebellum |
|              | 0.348814374                          | Brain_Frontal_Cortex_BA9    | 1.652722276                    | 0.420354657  |                              |
|              | 0.420354657                          | -0.936891496                | 1.553898801                    | 0.673713637  | 1.396833588                  |
|              | 3                                    | 0                           | 0.772182682                    |              |                              |
| ANKRD24      | ENSG00000089847.12                   | 0.014267336                 | 5                              | 3            | 0.002487063                  |
|              | Brain_Cerebellum                     | 0.15774728                  | Brain_Spinal_cord_cervical_c-1 | 4.327892991  |                              |
|              | 0.00100621                           | 0.260409678                 | 1.412688687                    | 3.024910953  | 2.491448907                  |
|              | 0.667907203                          | 3                           | 0                              | 0.772182682  |                              |
| MRPS21       | ENSG00000266472.5                    | 0.014295969                 | 8                              | 5            | 0.0526634 Brain_Cortex       |
|              | 0.919344674                          | Brain_Putamen_basal_ganglia | 5.916228837                    | 0.000661204  |                              |
|              | 0.253062503                          | -1.937670788                | 0.550474524                    | -0.719083834 | 0.996986879                  |
|              | 5                                    | 0                           | 0.772182682                    |              |                              |
| BAIAP2       | ENSG00000175866.15                   | 0.014394606                 | 2                              | 2            | 0.004389676                  |
|              | Brain_Cerebellum                     | 0.507062608                 | Brain_Spinal_cord_cervical_c-1 | 1.020369774  |                              |
|              | 0.979630226                          | 0.979630226                 | -0.663418426                   | 2.848710804  | 1.092646189                  |
|              | 2.483450395                          | 2                           | 0                              | 0.772182682  |                              |
| GMEB2        | ENSG00000101216.10                   | 0.01440721                  | 3                              | 2            | 0.012256208 Brain_Cortex     |
|              | 0.973280261                          | Brain_Cerebellum            | 2.38246978                     | 0.04079876   | 0.576731459                  |
|              | -2.504680425                         | 0.033494488                 | -0.907033225                   | 1.390840568  | 2 0                          |
|              | 0.772182682                          |                             |                                |              |                              |
| CEACAM4      | ENSG00000105352.10                   | 0.014668799                 | 2                              | 2            | 0.038005122                  |
|              | Brain_Cortex                         | 0.055959644                 | Brain_Cerebellar_Hemisphere    | 1.057729578  |                              |
|              | 0.942270422                          | 0.942270422                 | 1.911349797                    | 2.074799493  | 1.993074645                  |
|              | 0.115576388                          | 2                           | 0                              | 0.772182682  |                              |
| NAF1         | ENSG00000145414.8                    | 0.014692264                 | 1                              | 1            | 0.014692264 Brain_Cortex     |
|              | 0.014692264                          | Brain_Cortex                | 1                              | 1            | 1                            |
|              | -2.439876987                         | NA                          | 1                              | 0            | 0.772182682                  |
|              |                                      |                             |                                |              |                              |
| SLC22A5      | ENSG00000197375.12                   | 0.014717975                 | 8                              | 6            | 0.008041619                  |
|              | Brain_Cortex                         | 0.778929618                 | Brain_Cerebellar_Hemisphere    | 4.296994051  |                              |
|              | 0.028942889                          | 0.168838213                 | -0.902743864                   | 2.650317389  | 0.664930274                  |
|              | 1.185585251                          | 6                           | 0                              | 0.772182682  |                              |
| ABI1         | ENSG00000136754.16                   | 0.014925398                 | 1                              | 1            | 0.014925398                  |
|              | Brain_Cerebellar_Hemisphere          | 0.014925398                 | Brain_Cerebellar_Hemisphere    | 1            | 1                            |
|              | 1                                    | 2.4341842                   | 2.4341842                      | 2.4341842    | NA                           |
|              |                                      |                             |                                |              | 1 0                          |
|              |                                      |                             |                                |              | 0.772182682                  |
| CNTNAP5      | ENSG00000155052.14                   | 0.014925932                 | 1                              | 1            | 0.014925932                  |
|              | Brain_Anterior_cingulate_cortex_BA24 | 0.014925932                 |                                |              |                              |
|              | Brain_Anterior_cingulate_cortex_BA24 | 1                           | 1                              | 1            | 2.434171239                  |
|              | 2.434171239                          | 2.434171239                 | NA                             | 1            | 0                            |
|              |                                      |                             |                                |              | 0.772182682                  |
| C6orf132     | ENSG00000188112.8                    | 0.014958189                 | 2                              | 2            | 0.006847804                  |
|              | Brain_Cerebellum                     | 0.074634246                 | Brain_Cerebellar_Hemisphere    | 1.857871337  |                              |
|              | 0.142128663                          | 0.142128663                 | -2.704156447                   | -1.78270556  | -2.243431004                 |
|              | 0.65156417                           | 2                           | 0                              | 0.772182682  |                              |
| BIN1         | ENSG00000136717.14                   | 0.015067184                 | 4                              | 4            | 0.001216433                  |
|              | Brain_Cerebellar_Hemisphere          | 0.906695895                 | Brain_Amygdala                 | 1.90297309   | 0.16058411                   |
|              | 0.16058411                           | -3.234998721                | 0.749477519                    | -1.187306509 | 1.826593924                  |
|              | 0                                    | 0.772182682                 |                                |              | 4                            |
| DUSP16       | ENSG00000111266.8                    | 0.015074412                 | 1                              | 1            | 0.015074412                  |
|              | Brain_Anterior_cingulate_cortex_BA24 | 0.015074412                 |                                |              |                              |
|              | Brain_Anterior_cingulate_cortex_BA24 | 1                           | 1                              | 1            | -2.430586383                 |
|              | -2.430586383                         | -2.430586383                | NA                             | 1            | 0                            |
|              |                                      |                             |                                |              | 0.772182682                  |
| RAPGEF5      | ENSG00000136237.18                   | 0.015106691                 | 1                              | 1            | 0.015106691                  |
|              | Brain_Spinal_cord_cervical_c-1       | 0.015106691                 | Brain_Spinal_cord_cervical_c-1 |              |                              |
|              | 1                                    | 1                           | 1                              | 2.429811169  | 2.429811169                  |
|              |                                      |                             |                                |              | 2.429811169                  |
|              |                                      |                             |                                |              | NA                           |
|              |                                      |                             |                                |              | 1 0                          |
|              |                                      |                             |                                |              | 0.772182682                  |
| RP11-33M22.2 | ENSG00000272880.1                    | 0.015168837                 | 1                              | 1            | 0.015168837                  |
|              | Brain_Hypothalamus                   | 0.015168837                 | Brain_Hypothalamus             | 1            | 1 1                          |
|              | -2.428322758                         | -2.428322758                | -2.428322758                   | NA           | 1 0                          |
|              |                                      |                             |                                |              | 0.772182682                  |
| PICK1        | ENSG00000100151.15                   | 0.015334659                 | 7                              | 3            | 0.004541585                  |
|              | Brain_Caudate_basal_ganglia          | 0.71234979                  | Brain_Amygdala                 | 5.760973007  |                              |

|               |                                       |                                       |                                      |              |                                      |
|---------------|---------------------------------------|---------------------------------------|--------------------------------------|--------------|--------------------------------------|
|               | 0.002728024                           | 0.306692126                           | 0.368702091                          | 2.837868741  | 1.824087748                          |
|               | 0.758267121                           | 3                                     | 0                                    | 0.772182682  |                                      |
| TMED6         | ENSG00000157315.4                     | 0.015347621                           | 3                                    | 3            | 0.00451697                           |
|               | Brain_Putamen_basal_ganglia           | 0.417973665                           |                                      |              | Brain_Anterior_cingulate_cortex_BA24 |
|               | 1.591626485                           | 0.411723529                           | 0.411723529                          | -0.990754928 | 2.8396031                            |
|               | 0.346302146                           | 2.161153763                           | 3                                    | 0            | 0.772182682                          |
| C4B           | ENSG00000224389.8                     | 0.015511474                           | 10                                   | 10           | 0.071426442                          |
|               | Brain_Hypothalamus                    | 0.993158931                           |                                      |              | Brain_Cerebellar_Hemisphere          |
|               | 0.142911188                           | 0.142911188                           | -1.802756646                         | 1.788188847  | 3.734034545                          |
|               | 1.10297714                            | 10                                    | 0                                    | 0.772182682  | -0.004987287                         |
| CAPN2         | ENSG00000162909.17                    | 0.015607969                           | 1                                    | 1            | 0.015607969                          |
|               | Brain_Cerebellum                      | 1                                     | 1                                    | 1            | Brain_Cerebellum                     |
|               | 0.015607969                           | Brain_Cerebellum                      | 1                                    | 1            | -2.417955877                         |
|               | -2.417955877                          | NA                                    | 1                                    | 0            | -2.417955877                         |
| SREBF2        | ENSG00000198911.11                    | 0.015698742                           | 1                                    | 1            | 0.015698742                          |
|               | Brain_Hypothalamus                    | 0.015698742                           | Brain_Hypothalamus                   | 1            | 1                                    |
|               | -2.415845016                          | -2.415845016                          | -2.415845016                         | NA           | 1                                    |
|               |                                       |                                       |                                      | 0            | 0.772182682                          |
| GMDS-AS1      | ENSG00000250903.8                     | 0.015711864                           | 1                                    | 1            | 0.015711864                          |
|               | Brain_Nucleus_accumbens_basal_ganglia | 0.015711864                           |                                      |              |                                      |
|               | Brain_Nucleus_accumbens_basal_ganglia | 1                                     | 1                                    | 1            | 2.415540748                          |
|               | 2.415540748                           | 2.415540748                           | NA                                   | 1            | 0                                    |
|               |                                       |                                       |                                      | 0.772182682  |                                      |
| TIPIN         | ENSG00000075131.9                     | 0.015757311                           | 13                                   | 1            | 0.009142197                          |
|               | Brain_Cerebellar_Hemisphere           | 12.5931078                            | 8.94E-05                             |              | Brain_Amygdala                       |
|               | 0.121357418                           | Brain_Cerebellar_Hemisphere           | 12.5931078                           | 8.94E-05     | 12.5931078                           |
|               | 1.549101104                           | 2.606690448                           | 2.372737107                          | 0.316663646  | 1                                    |
|               | 0.772182682                           |                                       |                                      |              | 0                                    |
| CLEC18C       | ENSG00000157335.20                    | 0.015780537                           | 3                                    | 3            | 0.009355337                          |
|               | Brain_Cortex                          | 0.573157179                           | Brain_Cerebellum                     | 1.570990476  | 0.434196869                          |
|               | 0.434196869                           | -2.059062329                          | 2.598788586                          | 0.367711376  | 2.335083859                          |
|               | 3                                     | 0                                     | 0.772182682                          |              |                                      |
| VPS45         | ENSG00000136631.12                    | 0.015946376                           | 2                                    | 2            | 0.018986593                          |
|               | Brain_Frontal_Cortex_BA9              | 0.026075905                           |                                      |              | Brain_Anterior_cingulate_cortex_BA24 |
|               | 1.263608197                           | 0.736391803                           | 0.736391803                          | 2.225079446  | 2.345794106                          |
|               | 2.285436776                           | 0.085358155                           | 2                                    | 0            | 0.772182682                          |
| RP11-1072A3.4 | ENSG00000275263.1                     | 0.016059995                           | 3                                    | 3            | 0.001501998                          |
|               | Brain_Hypothalamus                    | 0.711629959                           | Brain_Cerebellar_Hemisphere          | 1.840269211  |                                      |
|               | 0.169750415                           | 0.169750415                           | -3.174297193                         | 0.369667891  | -1.809823315                         |
|               | 1.907383564                           | 3                                     | 0                                    | 0.772182682  |                                      |
| TPTE2         | ENSG00000132958.17                    | 0.016129025                           | 6                                    | 6            | 0.110327155                          |
|               | Brain_Frontal_Cortex_BA9              | 0.98606892                            | Brain_Anterior_cingulate_cortex_BA24 |              |                                      |
|               | 2.803883331                           | 0.126944823                           | 0.126944823                          | -0.289635387 | 1.596724397                          |
|               | 0.819673266                           | 0.788404501                           | 6                                    | 0            | 0.772182682                          |
| CDK4          | ENSG00000135446.16                    | 0.016129243                           | 2                                    | 2            | 0.021520748                          |
|               | Brain_Hippocampus                     | 0.308546124                           | Brain_Amygdala                       | 1.277337531  |                                      |
|               | 0.722662469                           | 0.722662469                           | -2.298721686                         | 1.018277446  | -0.64022212                          |
|               | 2.345472579                           | 2                                     | 0                                    | 0.772182682  |                                      |
| ATP5J2        | ENSG00000241468.7                     | 0.016130844                           | 1                                    | 1            | 0.016130844                          |
|               | Brain_Putamen_basal_ganglia           | 0.016130844                           | Brain_Putamen_basal_ganglia          | 1            | 1                                    |
|               | 1                                     | 2.405941588                           | 2.405941588                          | 2.405941588  | NA                                   |
|               |                                       |                                       |                                      | 1            | 0                                    |
|               | 0.772182682                           |                                       |                                      |              |                                      |
| TIAL1         | ENSG00000151923.17                    | 0.016269581                           | 4                                    | 4            | 0.010772779                          |
|               | Brain_Cortex                          |                                       |                                      |              | Brain_Cortex                         |
|               | 0.924417707                           | Brain_Nucleus_accumbens_basal_ganglia | 1.318583388                          |              |                                      |
|               | 0.699969101                           | 0.699969101                           | -2.187611154                         | 2.549984237  | -0.030762929                         |
|               | 1.9532716                             | 4                                     | 0                                    | 0.772182682  |                                      |
| GABRB3        | ENSG00000166206.14                    | 0.016316754                           | 1                                    | 1            | 0.016316754                          |
|               | Brain_Cerebellum                      | 0.016316754                           | Brain_Cerebellum                     | 1            | 1                                    |
|               | 2.401752282                           | 2.401752282                           | NA                                   | 1            | 0                                    |
|               |                                       |                                       |                                      | 0.772182682  |                                      |
| ZC3H8         | ENSG00000144161.12                    | 0.016363014                           | 6                                    | 4            | 0.005313122                          |
|               | Brain_Cerebellar_Hemisphere           | 0.675709584                           | Brain_Putamen_basal_ganglia          | 4.56758167   |                                      |
|               | 0.043606791                           | -0.194188643                          | 0.418324904                          | -2.787409923 | 1.848905882                          |
|               | 0.776063695                           | 4                                     | 0                                    | 0.772182682  |                                      |
| LINC00346     | ENSG00000255874.2                     | 0.016399664                           | 8                                    | 7            | 0.016035952                          |
|               | Brain_Substantia_nigra                | 0.552426081                           | Brain_Cortex                         | 2.265372485  |                                      |
|               | 0.038779133                           | -0.540655576                          | -2.228678085                         | 2.408096266  | 0.129262977                          |

|         |                                       |             |    |                                |              |             |              |                                       |                  |
|---------|---------------------------------------|-------------|----|--------------------------------|--------------|-------------|--------------|---------------------------------------|------------------|
|         | 1.541869316                           | 7           | 0  | 0.772182682                    |              |             |              |                                       |                  |
| HSD17B8 | ENSG00000204228.3                     |             |    | 0.016438985                    | 7            | 7           | 0.001722092  |                                       |                  |
|         | Brain_Putamen_basal_ganglia           |             |    | 0.968690259                    |              |             |              | Brain_Nucleus_accumbens_basal_ganglia |                  |
|         | 2.876909955                           | 0.311496332 |    | 0.311496332                    |              |             | -1.542499868 | 3.134394461                           |                  |
|         | 0.46522096                            | 1.512120523 | 7  | 0                              | 0.772182682  |             |              |                                       |                  |
| SMG6    | ENSG00000070366.13                    |             |    | 0.016518418                    | 3            | 3           | 0.002086493  |                                       | Brain_Cerebellum |
|         | 0.807320506                           |             |    | Brain_Spinal_cord_cervical_c-1 |              |             | 1.685213885  | 0.423476965                           |                  |
|         | 0.423476965                           | -3.07763648 |    | -0.2438842                     | -1.786107218 |             | 1.43341324   | 3                                     | 0                |
|         | 0.772182682                           |             |    |                                |              |             |              |                                       |                  |
| STK25   | ENSG00000115694.14                    |             |    | 0.016535688                    | 2            | 2           | 0.045474401  |                                       |                  |
|         | Brain_Cerebellar_Hemisphere           |             |    | 0.131340969                    |              |             |              | Brain_Nucleus_accumbens_basal_ganglia |                  |
|         | 1.240570708                           | 0.759429292 |    | 0.759429292                    |              |             | -2.000239566 | 1.50883494                            |                  |
|         | -0.245702313                          | 2.481290379 | 2  | 0                              | 0.772182682  |             |              |                                       |                  |
| TRIP6   | ENSG00000087077.13                    |             |    | 0.016630738                    | 2            | 2           | 0.005324704  |                                       |                  |
|         | Brain_Cerebellar_Hemisphere           |             |    | 0.646427869                    |              |             |              | Brain_Cerebellum                      | 1.069388031      |
|         | 0.930611969                           | 0.930611969 |    | -2.786704343                   |              |             | 0.458730276  | -1.163987033                          |                  |
|         | 2.294868827                           | 2           | 0  | 0.772182682                    |              |             |              |                                       |                  |
| NRDC    | ENSG00000078618.21                    |             |    | 0.016659587                    | 7            | 6           | 0.003896025  |                                       |                  |
|         | Brain_Frontal_Cortex_BA9              |             |    | 0.545410603                    |              |             |              | Brain_Nucleus_accumbens_basal_ganglia |                  |
|         | 2.693959449                           | 0.004840421 |    | 0.283361812                    |              |             | -2.886459795 | 0.920932252                           |                  |
|         | -1.007363055                          | 1.382243559 | 6  | 0                              | 0.772182682  |             |              |                                       |                  |
| ZNF788  | ENSG00000214189.8                     |             |    | 0.016710081                    | 2            | 2           | 0.004227848  |                                       |                  |
|         | Brain_Cerebellum                      |             |    | 0.044841177                    |              |             |              | Brain_Cerebellar_Hemisphere           | 1.704935319      |
|         | 0.295064681                           | 0.295064681 |    | 2.006141279                    |              |             | 2.860641548  | 2.433391414                           |                  |
|         | 0.604222935                           | 2           | 0  | 0.772182682                    |              |             |              |                                       |                  |
| REPIN1  | ENSG00000214022.11                    |             |    | 0.016750775                    | 4            | 3           | 0.01216752   |                                       | Brain_Cortex     |
|         | 0.987197437                           |             |    | Brain_Amygdala                 | 2.395307016  |             | 0.006194792  | 0.752279302                           |                  |
|         | -2.507248302                          | 1.095702497 |    | -0.934014179                   |              |             | 1.777244469  | 3                                     | 0                |
|         | 0.772182682                           |             |    |                                |              |             |              |                                       |                  |
| TUBG1   | ENSG00000131462.7                     |             |    | 0.016750886                    | 1            | 1           | 0.016750886  |                                       |                  |
|         | Brain_Nucleus_accumbens_basal_ganglia |             |    | 0.016750886                    |              |             |              |                                       |                  |
|         | Brain_Nucleus_accumbens_basal_ganglia | 1           | 1  | 1                              | 2.392130483  |             |              |                                       |                  |
|         | 2.392130483                           | 2.392130483 | NA | 1                              | 0            | 0.772182682 |              |                                       |                  |
| UCKL1   | ENSG00000198276.15                    |             |    | 0.016799211                    | 1            | 1           | 0.016799211  |                                       | Brain_Cerebellum |
|         | 0.016799211                           |             |    | Brain_Cerebellum               | 1            | 1           | -2.391073025 | -2.391073025                          |                  |
|         | -2.391073025                          | NA          | 1  | 0                              | 0.772182682  |             |              |                                       |                  |
| CCSER2  | ENSG00000107771.15                    |             |    | 0.016813318                    | 1            | 1           | 0.016813318  |                                       |                  |
|         | Brain_Hypothalamus                    |             |    | 0.016813318                    |              |             |              | Brain_Hypothalamus                    | 1 1 1            |
|         | 2.390764849                           | 2.390764849 |    | 2.390764849                    | NA           | 1           | 0            | 0.772182682                           |                  |
| CNTD2   | ENSG00000105219.8                     |             |    | 0.016862403                    | 1            | 1           | 0.016862403  |                                       | Brain_Cerebellum |
|         | 0.016862403                           |             |    | Brain_Cerebellum               | 1            | 1           | -2.38969427  | -2.38969427                           |                  |
|         | -2.38969427                           | NA          | 1  | 0                              | 0.772182682  |             |              |                                       |                  |
| CDIPT   | ENSG00000103502.13                    |             |    | 0.016882474                    | 2            | 2           | 0.188101739  |                                       |                  |
|         | Brain_Cerebellar_Hemisphere           |             |    | 0.817802587                    |              |             |              | Brain_Cerebellum                      | 1.847528469      |
|         | 0.152471531                           | 0.152471531 |    | -1.316215453                   |              |             | 0.230372167  | -0.542921643                          |                  |
|         | 1.093602594                           | 2           | 0  | 0.772182682                    |              |             |              |                                       |                  |
| MRPS18C | ENSG00000163319.10                    |             |    | 0.016945474                    | 1            | 1           | 0.016945474  |                                       |                  |
|         | Brain_Cortex                          |             |    | 0.016945474                    |              |             |              | Brain_Cortex                          | 1 1 1            |
|         | 2.387888664                           | 2.387888664 | NA | 1                              | 0            | 0.772182682 |              | 2.387888664                           |                  |
| ABHD14B | ENSG00000114779.19                    |             |    | 0.016951527                    | 1            | 1           | 0.016951527  |                                       |                  |
|         | Brain_Spinal_cord_cervical_c-1        |             |    | 0.016951527                    |              |             |              | Brain_Spinal_cord_cervical_c-1        |                  |
|         | 1                                     | 1           | 1  | -2.387757411                   | -2.387757411 |             | -2.387757411 | NA                                    | 1 0              |
|         | 0.772182682                           |             |    |                                |              |             |              |                                       |                  |
| DLK2    | ENSG00000171462.14                    |             |    | 0.016978032                    | 2            | 2           | 0.004335636  |                                       |                  |
|         | Brain_Anterior_cingulate_cortex_BA24  |             |    | 0.688250248                    |              |             |              | Brain_Substantia_nigra                |                  |
|         | 1.181526089                           | 0.818473911 |    | 0.818473911                    |              |             | 0.401230744  | 2.852649878                           |                  |
|         | 1.626940311                           | 1.733415093 | 2  | 0                              | 0.772182682  |             |              |                                       |                  |
| SPTLC3  | ENSG00000172296.12                    |             |    | 0.017038852                    | 1            | 1           | 0.017038852  |                                       |                  |
|         | Brain_Amygdala                        |             |    | 0.017038852                    |              |             |              | Brain_Amygdala                        | 1 1 1            |
|         | 2.385868301                           | 2.385868301 | NA | 1                              | 0            | 0.772182682 |              | 2.385868301                           |                  |
| EEA1    | ENSG00000102189.16                    |             |    | 0.017063815                    | 2            | 2           | 0.005180062  |                                       |                  |
|         | Brain_Frontal_Cortex_BA9              |             |    | 0.5520579                      |              |             |              | Brain_Amygdala                        | 1.008455425      |

|         |                                      |                             |              |              |                                      |
|---------|--------------------------------------|-----------------------------|--------------|--------------|--------------------------------------|
|         | 0.991544575                          | 0.991544575                 | -2.795617819 | -0.594679242 | -1.695148531                         |
|         | 1.556298592                          | 2                           | 0            | 0.772182682  |                                      |
| TYMS    | ENSG00000176890.15                   | 0.01707194                  | 1            | 1            | 0.01707194                           |
|         | Brain_Anterior_cingulate_cortex_BA24 | 0.01707194                  |              |              |                                      |
|         | Brain_Anterior_cingulate_cortex_BA24 | 1                           | 1            | 1            | 2.385154712                          |
|         | 2.385154712                          | 2.385154712                 | NA           | 1            | 0                                    |
| AQR     | ENSG00000021776.10                   | 0.017084523                 | 1            | 1            | 0.017084523                          |
|         | 0.017084523                          | Brain_Cortex                | 1            | 1            | 1                                    |
|         | -2.384883666                         | NA                          | 1            | 0            | 0.772182682                          |
| TADA2A  | ENSG00000276234.4                    | 0.017139155                 | 10           | 3            | 0.002843756                          |
|         | Brain_Cerebellar_Hemisphere          | 0.474147762                 |              |              | Brain_Spinal_cord_cervical_c-1       |
|         | 7.58666831                           | 0.001788125                 | 0.337896862  | -2.984141129 | -0.715746711                         |
|         | -2.121485142                         | 0.890564621                 | 3            | 0            | 0.772182682                          |
| SIGLEC7 | ENSG00000168995.13                   | 0.017166062                 | 2            | 2            | 0.013560955                          |
|         | Brain_Cortex                         | 0.151664391                 |              |              | Brain_Spinal_cord_cervical_c-1       |
|         | 0.997135921                          | 0.997135921                 | 1.433677237  | 2.468687606  | 1.002864079                          |
|         | 0.73186285                           | 2                           | 0            | 0.772182682  | 1.951182421                          |
| OR2W3   | ENSG00000238243.3                    | 0.017239961                 | 10           | 7            | 0.072149578                          |
|         | 0.759625074                          | Brain_Hypothalamus          | 6.396124416  | 0.037539557  | Brain_Amygdala                       |
|         | 0.258846732                          | -1.79817312                 | 1.345835105  | -0.304931098 | 0.893520268                          |
|         | 7                                    | 0                           | 0.772182682  |              |                                      |
| SEC61A1 | ENSG00000058262.9                    | 0.017375983                 | 4            | 4            | 0.018886117                          |
|         | Brain_Hippocampus                    | 0.747239355                 |              |              | Brain_Amygdala                       |
|         | 0.466691028                          | 0.466691028                 | -1.72409808  | 2.347771241  | 1.492420113                          |
|         | 1.794261671                          | 4                           | 0            | 0.772182682  | -0.022319639                         |
| TRIM73  | ENSG00000178809.11                   | 0.017384592                 | 4            | 4            | 0.006986474                          |
|         | Brain_Hippocampus                    | 0.236919353                 |              |              | Brain_Anterior_cingulate_cortex_BA24 |
|         | 2.186723088                          | 0.178539376                 | 0.178539376  | -1.81748562  | 2.697488297                          |
|         | -0.448450265                         | 2.113245736                 | 4            | 0            | 0.772182682                          |
| KLHL12  | ENSG00000117153.15                   | 0.017447305                 | 8            | 5            | 0.047345957                          |
|         | Brain_Putamen_basal_ganglia          | 0.718661227                 |              |              | Brain_Caudate_basal_ganglia          |
|         | 5.083530689                          | 0.005866198                 | 0.249645925  | -1.983192266 | 0.719043345                          |
|         | -0.449715885                         | 0.959410371                 | 5            | 0            | 0.772182682                          |
| ADGRE5  | ENSG00000123146.19                   | 0.017455472                 | 8            | 8            | 0.007489177                          |
|         | Brain_Spinal_cord_cervical_c-1       | 0.747377322                 |              |              | Brain_Caudate_basal_ganglia          |
|         | 2.210002167                          | 0.17863933                  | 0.17863933   | -2.674271599 | 1.74449848                           |
|         | 1.415201373                          | 8                           | 0            | 0.772182682  | -0.278492077                         |
| EPHA3   | ENSG00000044524.10                   | 0.017492027                 | 3            | 3            | 0.05377633                           |
|         | 0.287160683                          | Brain_Caudate_basal_ganglia | 1.246417818  | 0.662053906  | Brain_Cerebellum                     |
|         | 0.662053906                          | -1.064370961                | 1.92863388   | 0.781118052  | 1.613968532                          |
|         | 0                                    | 0.772182682                 |              |              | 3                                    |
| PNOC    | ENSG00000168081.8                    | 0.017514746                 | 3            | 3            | 0.092943038                          |
|         | Brain_Cerebellar_Hemisphere          | 0.953532292                 |              |              | Brain_Cerebellum                     |
|         | 0.097302957                          | 0.097302957                 | -0.351785134 | 1.680073389  | 1.912400024                          |
|         | 1.074463947                          | 3                           | 0            | 0.772182682  | 0.462186617                          |
| CTSS    | ENSG00000163131.10                   | 0.017541023                 | 5            | 2            | 0.00743514                           |
|         | Brain_Caudate_basal_ganglia          | 0.901786597                 |              |              | Brain_Cortex                         |
|         | 0.019729871                          | 1.281437778                 | -2.676698989 | -0.123404749 | 3.573492011                          |
|         | 1.201245544                          | 2                           | 0            | 0.772182682  | -1.407911524                         |
| FBXO10  | ENSG00000147912.12                   | 0.017550861                 | 2            | 2            | 0.008772024                          |
|         | Brain_Spinal_cord_cervical_c-1       | 0.744547752                 |              |              | Brain_Cerebellar_Hemisphere          |
|         | 1.279738074                          | 0.720261926                 | 0.720261926  | -2.620813496 | 0.32583691                           |
|         | -1.147488293                         | 2.083596484                 | 2            | 0            | 0.772182682                          |
| SP1     | ENSG00000185591.9                    | 0.017773522                 | 5            | 4            | 0.01327751                           |
|         | Brain_Cerebellar_Hemisphere          | 0.969593398                 |              |              | Brain_Cortex                         |
|         | 0.085160832                          | 0.198891655                 | -0.306066986 | 2.476237826  | 3.762790242                          |
|         | 1.238306185                          | 4                           | 0            | 0.777630976  | 1.178764608                          |
| CCDC150 | ENSG00000144395.17                   | 0.017785856                 | 1            | 1            | 0.017785856                          |
|         | Brain_Cerebellar_Hemisphere          | 0.017785856                 |              |              | Brain_Cerebellar_Hemisphere          |
|         | 1                                    | -2.370046336                | -2.370046336 | -2.370046336 | NA                                   |
|         | 0.777630976                          | 1                           | 0            |              |                                      |
| XRCC3   | ENSG00000126215.13                   | 0.018037509                 | 6            | 5            | 0.000176477                          |
|         |                                      |                             |              |              | Brain_Cortex                         |

|               |                             |                             |                                       |               |                             |
|---------------|-----------------------------|-----------------------------|---------------------------------------|---------------|-----------------------------|
|               | 0.850682857                 | Brain_Hippocampus           | 3.24079853                            | 0.053289637   | 0.392198011                 |
|               | 0.188247221                 | 3.750507766                 | 1.608779062                           | 1.324413477   | 5 0                         |
|               | 0.782416753                 |                             |                                       |               |                             |
| LINC02055     | ENSG00000254101.5           | 0.018061029                 | 1 1                                   | 0.018061029   |                             |
|               | Brain_Frontal_Cortex_BA9    | 0.018061029                 | Brain_Frontal_Cortex_BA9              | 1 1           |                             |
|               | 1 -2.364364579              | -2.364364579                | -2.364364579                          | NA 1 0        |                             |
|               | 0.782416753                 |                             |                                       |               |                             |
| LRRC47        | ENSG00000130764.9           | 0.018072688                 | 5 5                                   | 0.007613078   |                             |
|               | Brain_Substantia_nigra      | 0.411263619                 | Brain_Hypothalamus                    | 1.97434032    |                             |
|               | 0.29906764 0.29906764       | -2.66876462                 | 0.821671964                           | -1.434480364  |                             |
|               | 1.420693769                 | 5 0                         | 0.782416753                           |               |                             |
| RPE65         | ENSG00000116745.6           | 0.018119007                 | 1 1                                   | 0.018119007   | Brain_Cortex                |
|               | 0.018119007                 | Brain_Cortex                | 1 1 1                                 | -2.363177132  | -2.363177132                |
|               | -2.363177132                | NA 1 0                      | 0.782416753                           |               |                             |
| NOD1          | ENSG00000106100.10          | 0.01852124                  | 1 1                                   | 0.01852124    | Brain_Caudate_basal_ganglia |
|               | 0.01852124                  | Brain_Caudate_basal_ganglia | 1 1                                   | 1 -2.35502941 |                             |
|               | -2.35502941                 | -2.35502941                 | NA 1 0                                | 0.795131046   |                             |
| EYA2          | ENSG00000064655.18          | 0.018527105                 | 1 1                                   | 0.018527105   | Brain_Cortex                |
|               | 0.018527105                 | Brain_Cortex                | 1 1 1                                 | -2.35491176   | -2.35491176                 |
|               | -2.35491176                 | NA 1 0                      | 0.795131046                           |               |                             |
| TNR           | ENSG00000116147.16          | 0.018602152                 | 2 2                                   | 0.023561284   |                             |
|               | Brain_Hypothalamus          | 0.040409786                 | Brain_Hippocampus                     | 1.171644768   |                             |
|               | 0.828355232                 | 0.828355232                 | 2.049535444                           | 2.264208662   | 2.156872053                 |
|               | 0.151796889                 | 2 0                         | 0.795910409                           |               |                             |
| SMIM15        | ENSG00000188725.7           | 0.018711415                 | 1 1                                   | 0.018711415   |                             |
|               | Brain_Putamen_basal_ganglia | 0.018711415                 | Brain_Putamen_basal_ganglia           | 1 1           |                             |
|               | 1 2.351230975               | 2.351230975                 | 2.351230975                           | NA 1 0        |                             |
|               | 0.796586992                 |                             |                                       |               |                             |
| SETD1A        | ENSG00000099381.17          | 0.018816035                 | 2 1                                   | 0.009090547   |                             |
|               | Brain_Cerebellum            | 0.039500058                 | Brain_Cerebellar_Hemisphere           | 1.973912658   |                             |
|               | 0.026087342                 | 1.973912658                 | 2.058939255                           | 2.608630014   | 2.333784635                 |
|               | 0.388690063                 | 1 0                         | 0.796586992                           |               |                             |
| TARS2         | ENSG00000143374.16          | 0.018893847                 | 5 5                                   | 0.000421289   |                             |
|               | Brain_Frontal_Cortex_BA9    | 0.928577302                 | Brain_Anterior_cingulate_cortex_BA24  |               |                             |
|               | 2.841166785                 | 0.181065846                 | 0.181065846                           | 0.08963496    | 3.526375869                 |
|               | 1.710352588                 | 1.308057248                 | 5 0                                   | 0.796586992   |                             |
| RP11-139I14.2 | ENSG00000237390.1           | 0.018976911                 | 2 2                                   | 0.014036596   |                             |
|               | Brain_Cerebellum            | 0.952214682                 | Brain_Cerebellar_Hemisphere           | 1.507392133   |                             |
|               | 0.492607867                 | 0.492607867                 | -2.456325484                          | -0.059925862  | -1.258125673                |
|               | 1.694510423                 | 2 0                         | 0.796586992                           |               |                             |
| SPEG          | ENSG00000072195.14          | 0.019045228                 | 2 2                                   | 0.007086591   |                             |
|               | Brain_Cerebellar_Hemisphere | 0.073198966                 | Brain_Cerebellum                      | 1.384525235   |                             |
|               | 0.615474765                 | 0.615474765                 | -2.692747528                          | -1.79158813   | -2.242167829                |
|               | 0.637215921                 | 2 0                         | 0.796586992                           |               |                             |
| CNOT6L        | ENSG00000138767.12          | 0.019061446                 | 8 1                                   | 0.011671796   |                             |
|               | Brain_Caudate_basal_ganglia | 0.032538276                 | Brain_Anterior_cingulate_cortex_BA24  |               |                             |
|               | 7.512817956                 | 0.000137865                 | 7.512817956                           | -2.521914833  | -2.137734773                |
|               | -2.272220103                | 0.133857218                 | 1 0                                   | 0.796586992   |                             |
| MLST8         | ENSG00000167965.17          | 0.01909572                  | 13 4                                  | 0.002458884   |                             |
|               | Brain_Substantia_nigra      | 0.299862908                 | Brain_Frontal_Cortex_BA9              |               |                             |
|               | 9.859747981                 | 1.82E-16                    | 0.506473021                           | -1.036727422  | 3.028355754                 |
|               | 2.076386288                 | 1.154335244                 | 4 0                                   | 0.796586992   |                             |
| SMIM8         | ENSG00000111850.10          | 0.019117794                 | 12 4                                  | 0.199947781   |                             |
|               | Brain_Caudate_basal_ganglia | 0.906848748                 | Brain_Nucleus_accumbens_basal_ganglia |               |                             |
|               | 8.498585046                 | 0.026637111                 | 0.304072405                           | -1.141197623  | 1.281700353                 |
|               | -0.252581337                | 0.670419179                 | 4 0                                   | 0.796586992   |                             |
| CATIP         | ENSG00000158428.3           | 0.01920051                  | 3 3                                   | 0.025387789   | Brain_Cerebellum            |
|               | 0.201681477                 | Brain_Hypothalamus          | 1.121320201                           | 0.908145828   |                             |
|               | 0.908145828                 | -1.675850091                | 2.235450485                           | 0.612125336   | 2.03859953 3                |
|               | 0 0.796586992               |                             |                                       |               |                             |
| ZNF180        | ENSG00000167384.10          | 0.019225326                 | 10 4                                  | 0.114451634   |                             |
|               | Brain_Hippocampus           | 0.900250129                 | Brain_Cortex                          | 7.467859045   |                             |

|          |                                       |                    |                                |              |                  |
|----------|---------------------------------------|--------------------|--------------------------------|--------------|------------------|
|          | 0.020308481                           | 0.347232638        | -1.578496317                   | 0.874173878  | 0.291505709      |
|          | 0.705172929                           | 4 0                | 0.796586992                    |              |                  |
| VANGL2   | ENSG00000162738.5                     | 0.019302135        | 2 1                            | 0.016813991  |                  |
|          | Brain_Cerebellar_Hemisphere           | 0.02583321         | Brain_Cerebellum               | 1.949184393  |                  |
|          | 0.050815607                           | 1.949184393        | -2.390750147                   | -2.228709949 | -2.309730048     |
|          | 0.114579723                           | 1 0                | 0.796586992                    |              |                  |
| NHLH2    | ENSG00000177551.5                     | 0.019406446        | 5 5                            | 0.0531348    |                  |
|          | Brain_Anterior_cingulate_cortex_BA24  | 0.633991155        | Brain_Frontal_Cortex_BA9       |              |                  |
|          | 2.968889452                           | 0.102217965        | 0.102217965                    | -1.933823766 | -0.476116819     |
|          | -1.200589547                          | 0.633606931        | 5 0                            | 0.796586992  |                  |
| ATP6V1E2 | ENSG00000250565.6                     | 0.019597318        | 11 11                          | 0.000577368  |                  |
|          | Brain_Putamen_basal_ganglia           | 0.876005836        | Brain_Hypothalamus             | 3.495784836  |                  |
|          | 0.277209049                           | 0.277209049        | -1.317078305                   | 3.442029285  | 0.849788697      |
|          | 1.268111428                           | 11 0               | 0.796586992                    |              |                  |
| MEIS3    | ENSG00000105419.17                    | 0.019606309        | 3 2                            | 0.031151976  |                  |
|          | Brain_Caudate_basal_ganglia           | 0.056979834        | Brain_Frontal_Cortex_BA9       | 1.9537845    |                  |
|          | 0.047319207                           | 0.998896293        | -2.155125998                   | 1.903465483  | -0.753578996     |
|          | 2.302226452                           | 2 0                | 0.796586992                    |              |                  |
| HADHB    | ENSG00000138029.13                    | 0.019699668        | 9 3                            | 0.023487049  | Brain_Cerebellum |
|          | 0.810017622                           | Brain_Cortex       | 7.447358124                    | 0.011269421  | 0.277827433      |
|          | -2.265417864                          | 1.185267869        | 0.396025153                    | 1.09004523 3 | 0                |
|          | 0.796586992                           |                    |                                |              |                  |
| TUBB2A   | ENSG00000137267.5                     | 0.019705702        | 10 8                           | 0.005627769  |                  |
|          | Brain_Cerebellar_Hemisphere           | 0.823283893        | Brain_Cerebellum               | 5.268729917  |                  |
|          | 0.020205414                           | 0.25122535         | -2.768715874                   | 2.281901603  | -0.608386764     |
|          | 1.257744265                           | 8 0                | 0.796586992                    |              |                  |
| BICDL1   | ENSG00000135127.11                    | 0.019803346        | 3 2                            | 0.005838532  |                  |
|          | Brain_Hypothalamus                    | 0.035629336        | Brain_Cerebellum               | 2.795736628  |                  |
|          | 0.048011981                           | 0.156251391        | -2.756714436                   | -2.101132513 | -2.409905833     |
|          | 0.329441841                           | 2 0                | 0.796586992                    |              |                  |
| ECE2     | ENSG00000145194.17                    | 0.0198477          | 13 5                           | 0.050815384  |                  |
|          | Brain_Nucleus_accumbens_basal_ganglia | 0.869429657        | Brain_Cortex                   |              |                  |
|          | 9.957148283                           | 1.83E-17           | 0.339930092                    | -1.867844162 | 1.953035541      |
|          | -1.03845399                           | 1.075939323        | 5 0                            | 0.796586992  |                  |
| LGALS3   | ENSG00000131981.15                    | 0.01985139         | 2 2                            | 0.008811632  |                  |
|          | Brain_Nucleus_accumbens_basal_ganglia | 0.384718813        | Brain_Cerebellar_Hemisphere    |              |                  |
|          | 1.04537969                            | 0.95462031         | 0.95462031                     | -2.619277169 | -0.869234624     |
|          | 1.237466951                           | 2 0                | 0.796586992                    |              |                  |
| SYT15    | ENSG00000204176.13                    | 0.019873641        | 10 10                          | 0.034446795  |                  |
|          | Brain_Nucleus_accumbens_basal_ganglia | 0.974485992        |                                |              |                  |
|          | Brain_Anterior_cingulate_cortex_BA24  | 2.518901919        | 0.118847944                    |              |                  |
|          | 0.118847944                           | -1.751088183       | 2.114802367                    | 0.16350159   | 1.228438809      |
|          | 0                                     | 0.796586992        |                                |              | 10               |
| MDK      | ENSG00000110492.15                    | 0.019917493        | 2 2                            | 0.008201889  |                  |
|          | Brain_Caudate_basal_ganglia           | 0.091531703        | Brain_Substantia_nigra         |              |                  |
|          | 1.831345046                           | 0.168654954        | 0.168654954                    | -2.643643907 | -1.687372737     |
|          | -2.165508322                          | 0.676185829        | 2 0                            | 0.796586992  |                  |
| CHD7     | ENSG00000171316.11                    | 0.020068317        | 2 2                            | 0.04379905   |                  |
|          | Brain_Caudate_basal_ganglia           | 0.120325708        | Brain_Spinal_cord_cervical_c-1 |              |                  |
|          | 1.175484942                           | 0.824515058        | 0.824515058                    | -1.553407935 | 2.016008854      |
|          | 0.231300459                           | 2.523958816        | 2 0                            | 0.796586992  |                  |
| PAPPA2   | ENSG00000116183.10                    | 0.020071957        | 2 2                            | 0.273540954  |                  |
|          | Brain_Cerebellar_Hemisphere           | 0.422384926        | Brain_Cerebellum               | 1.76904533   | 0.23095467       |
|          | 0.23095467                            | -0.802290518       | 1.094944496                    | 0.146326989  | 1.341547744      |
|          | 0                                     | 0.796586992        |                                |              | 2                |
| HSD3B7   | ENSG00000099377.13                    | 0.020092548        | 2 2                            | 0.031348384  |                  |
|          | Brain_Anterior_cingulate_cortex_BA24  | 0.863985919        | Brain_Cortex                   |              |                  |
|          | 1.589620836                           | 0.410379164        | 0.410379164                    | -0.171302494 | 2.152622176      |
|          | 0.990659841                           | 1.643262893        | 2 0                            | 0.796586992  |                  |
| 2-Sep    | ENSG00000168385.17                    | 0.020214532        | 13 1                           | 0.011509403  | Brain_Cerebellum |
|          | 0.08232559                            | Brain_Hypothalamus | 12.49728606                    | 3.14E-05     | 12.49728606      |
|          | 1.737348983                           | 2.526839681        | 2.27531267                     | 0.190977213  | 1 0              |

|               |                                       |                                |                                      |              |                          |             |             |                  |  |
|---------------|---------------------------------------|--------------------------------|--------------------------------------|--------------|--------------------------|-------------|-------------|------------------|--|
|               | 0.796586992                           |                                |                                      |              |                          |             |             |                  |  |
| GOPC          | ENSG00000047932.13                    | 0.020227361                    | 1                                    | 1            | 0.020227361              |             |             |                  |  |
|               | Brain_Frontal_Cortex_BA9              | 0.020227361                    |                                      |              | Brain_Frontal_Cortex_BA9 | 1           | 1           |                  |  |
|               | 1                                     | 2.32210354                     | 2.32210354                           | 2.32210354   | NA                       | 1           | 0           | 0.796586992      |  |
| XAB2          | ENSG00000076924.11                    | 0.020458901                    | 1                                    | 1            | 0.020458901              |             |             |                  |  |
|               | Brain_Anterior_cingulate_cortex_BA24  | 0.020458901                    |                                      |              |                          |             |             |                  |  |
|               | Brain_Anterior_cingulate_cortex_BA24  | 1                              | 1                                    | 1            | 2.317823765              |             |             |                  |  |
|               | 2.317823765                           | 2.317823765                    | NA                                   | 1            | 0                        | 0.796586992 |             |                  |  |
| DCDC2         | ENSG00000146038.11                    | 0.020557029                    | 4                                    | 4            | 0.001248451              |             |             |                  |  |
|               | Brain_Nucleus_accumbens_basal_ganglia | 0.583624386                    |                                      |              | Brain_Cerebellum         |             |             |                  |  |
|               | 2.335258019                           | 0.159347519                    | 0.159347519                          | -3.227573291 | -0.548098332             |             |             |                  |  |
|               | -1.803756231                          | 1.132756385                    | 4                                    | 0            | 0.796586992              |             |             |                  |  |
| LRP4          | ENSG00000134569.9                     | 0.020612317                    | 5                                    | 4            | 0.034965089              |             |             | Brain_Cortex     |  |
|               | 0.816618359                           | Brain_Caudate_basal_ganglia    | 3.470753754                          | 0.008416123  |                          |             |             |                  |  |
|               | 0.139904642                           | 0.231896556                    | 2.108762479                          | 0.648880131  | 0.816764312              |             |             |                  |  |
|               | 4                                     | 0                              | 0.796586992                          |              |                          |             |             |                  |  |
| GPR146        | ENSG00000164849.9                     | 0.020677013                    | 2                                    | 2            | 0.075825271              |             |             |                  |  |
|               | Brain_Cerebellar_Hemisphere           | 0.97028801                     | Brain_Cerebellum                     | 1.761898212  |                          |             |             |                  |  |
|               | 0.238101788                           | 0.238101788                    | -0.037247068                         | 1.775439957  | 0.869096444              |             |             |                  |  |
|               | 1.281763287                           | 2                              | 0                                    | 0.796586992  |                          |             |             |                  |  |
| NUB1          | ENSG00000013374.15                    | 0.020725622                    | 3                                    | 3            | 0.01257965               |             |             |                  |  |
|               | Brain_Spinal_cord_cervical_c-1        | 0.348527075                    |                                      |              |                          |             |             |                  |  |
|               | Brain_Nucleus_accumbens_basal_ganglia | 1.070143671                    | 0.91105757                           | 0.91105757   |                          |             |             |                  |  |
|               | -2.495452767                          | 1.822875055                    | 0.088290799                          | 2.280963052  | 3                        | 0           |             |                  |  |
|               | 0.796586992                           |                                |                                      |              |                          |             |             |                  |  |
| ALDOC         | ENSG00000109107.13                    | 0.020730317                    | 3                                    | 3            | 0.010381858              |             |             | Brain_Amygdala   |  |
|               | 0.776651997                           | Brain_Spinal_cord_cervical_c-1 | 1.776132635                          | 0.216656795  |                          |             |             |                  |  |
|               | 0.216656795                           | -2.56284435                    | -0.283684731                         | -1.235199454 | 1.185220475              |             |             |                  |  |
|               | 3                                     | 0                              | 0.796586992                          |              |                          |             |             |                  |  |
| RP11-557H15.4 | ENSG00000232310.6                     | 0.020733503                    | 3                                    | 3            | 0.001860211              |             |             |                  |  |
|               | Brain_Cortex                          | 0.110091653                    | Brain_Hippocampus                    | 2.402770455  |                          |             |             |                  |  |
|               | 0.168578753                           | 0.168578753                    | 1.59778132                           | 3.111687885  | 2.393537208              |             |             |                  |  |
|               | 0.759931049                           | 3                              | 0                                    | 0.796586992  |                          |             |             |                  |  |
| ETFA          | ENSG00000140374.15                    | 0.020748149                    | 4                                    | 4            | 0.010232659              |             |             | Brain_Cerebellum |  |
|               | 0.608926361                           | Brain_Spinal_cord_cervical_c-1 | 1.580869644                          | 0.313736693  |                          |             |             |                  |  |
|               | 0.313736693                           | -2.567866382                   | 0.826305487                          | -0.876745407 | 1.418423969              |             |             |                  |  |
|               | 4                                     | 0                              | 0.796586992                          |              |                          |             |             |                  |  |
| ADPRM         | ENSG00000170222.11                    | 0.020782814                    | 9                                    | 6            | 0.090393962              |             |             |                  |  |
|               | Brain_Caudate_basal_ganglia           | 0.948248042                    | Brain_Spinal_cord_cervical_c-1       |              |                          |             |             |                  |  |
|               | 6.695314675                           | 0.002167606                    | 0.245832111                          | -1.693323215 | 1.119456838              |             |             |                  |  |
|               | -0.753966701                          | 0.840723582                    | 6                                    | 0            | 0.796586992              |             |             |                  |  |
| POLDIP2       | ENSG00000004142.11                    | 0.020836973                    | 12                                   | 3            | 0.037821347              |             |             |                  |  |
|               | Brain_Spinal_cord_cervical_c-1        | 0.828449949                    | Brain_Hippocampus                    |              |                          |             |             |                  |  |
|               | 9.701283518                           | 0.000223269                    | 0.708597679                          | -2.076785658 | 1.971382049              |             |             |                  |  |
|               | 0.287586184                           | 0.922553621                    | 3                                    | 0            | 0.796586992              |             |             |                  |  |
| FADS1         | ENSG00000149485.18                    | 0.020851501                    | 9                                    | 2            | 0.00453046               |             |             |                  |  |
|               | Brain_Putamen_basal_ganglia           | 0.096410592                    | Brain_Anterior_cingulate_cortex_BA24 |              |                          |             |             |                  |  |
|               | 8.366542694                           | 0.001414017                    | 0.399562137                          | 1.662509838  | 2.838651576              |             |             |                  |  |
|               | 2.421662174                           | 0.329246228                    | 2                                    | 0            | 0.796586992              |             |             |                  |  |
| DACH1         | ENSG00000276644.4                     | 0.020865126                    | 1                                    | 1            | 0.020865126              |             |             | Brain_Amygdala   |  |
|               | 0.020865126                           | Brain_Amygdala                 | 1                                    | 1            | 1                        | 2.310416144 | 2.310416144 |                  |  |
|               | 2.310416144                           | NA                             | 1                                    | 0            | 0.796586992              |             |             |                  |  |
| DLG1          | ENSG00000075711.20                    | 0.021032565                    | 2                                    | 2            | 0.010519611              |             |             |                  |  |
|               | Brain_Cerebellar_Hemisphere           | 0.100505332                    | Brain_Cerebellum                     | 1.85915739   | 0.14084261               |             |             |                  |  |
|               | 0.14084261                            | 1.642408706                    | 2.558264274                          | 2.10033649   | 0.647607683              | 2           | 0           |                  |  |
|               | 0.796586992                           |                                |                                      |              |                          |             |             |                  |  |
| FRAT1         | ENSG00000165879.8                     | 0.021113238                    | 1                                    | 1            | 0.021113238              |             |             |                  |  |
|               | Brain_Hippocampus                     | 0.021113238                    | Brain_Hippocampus                    | 1            | 1                        | 1           |             |                  |  |
|               | 2.305953374                           | 2.305953374                    | 2.305953374                          | NA           | 1                        | 0           | 0.796586992 |                  |  |
| AGO1          | ENSG00000092847.11                    | 0.021160028                    | 1                                    | 1            | 0.021160028              |             |             |                  |  |
|               | Brain_Cerebellar_Hemisphere           | 0.021160028                    | Brain_Cerebellar_Hemisphere          | 1            | 1                        |             |             |                  |  |
|               | 1                                     | 2.305116892                    | 2.305116892                          | 2.305116892  | NA                       | 1           | 0           |                  |  |

0.796586992

LRRC46 ENSG00000141294.9 0.021171423 9 6 0.000784787  
Brain\_Cerebellum 0.99461926 Brain\_Anterior\_cingulate\_cortex\_BA24 4.446489366  
0.009072392 0.271095991 -3.358105512 1.476432681 -0.5044567  
1.694404999 6 0 0.796586992

GREM1 ENSG00000166923.10 0.02120967 10 10 0.000884486 Brain\_Amygdala  
0.949510311 Brain\_Cerebellum 1.600469183 0.567066736 0.567066736  
-3.324905095 2.248645294 -0.364152433 1.525993214 10 0  
0.796586992

CTNNA2 ENSG00000066032.18 0.021252692 3 3 0.025301564  
Brain\_Nucleus\_accumbens\_basal\_ganglia 0.877999666 Brain\_Hypothalamus  
2.325485426 0.173053737 0.173053737 -2.236767133 0.153505483  
-1.146786089 1.208934938 3 0 0.796586992

RP11-196G11.2 ENSG00000260911.2 0.021293183 11 3 0.002621841  
Brain\_Cerebellum 0.146034897 Brain\_Frontal\_Cortex\_BA9 9.262608946  
0.002028025 0.517134744 1.453680535 3.00891314 2.586674925  
0.413919717 3 0 0.796586992

CTC-297N7.9 ENSG00000264016.2 0.021295478 1 1 0.021295478  
Brain\_Caudate\_basal\_ganglia 0.021295478 Brain\_Caudate\_basal\_ganglia 1 1  
1 2.302704447 2.302704447 2.302704447 NA 1 0  
0.796586992

RP11-368I23.4 ENSG00000273177.1 0.021367236 1 1 0.021367236  
Brain\_Nucleus\_accumbens\_basal\_ganglia 0.021367236  
Brain\_Nucleus\_accumbens\_basal\_ganglia 1 1 1 -2.301431806  
-2.301431806 -2.301431806 NA 1 0 0.796586992

EVPL ENSG00000167880.7 0.021378975 4 4 0.038800684  
Brain\_Frontal\_Cortex\_BA9 0.938478365 Brain\_Amygdala 1.899657116  
0.398286531 0.398286531 -0.530067994 2.066294465 0.741375418  
1.181257335 4 0 0.796586992

PPP3CC ENSG00000120910.14 0.021407813 9 2 0.004625484  
Brain\_Hypothalamus 0.102472795 Brain\_Hippocampus 8.241712315  
0.008590497 0.429127166 1.63298194 2.832020825 2.549070965  
0.364499737 2 0 0.796586992

RGR ENSG00000148604.13 0.021604252 12 12 0.021715758  
Brain\_Hypothalamus 0.954594814 Brain\_Hippocampus 1.856166495  
0.37737979 0.37737979 -2.295303133 2.192498034 0.244058809  
1.338740125 12 0 0.79847168

RP3-449M8.6 ENSG00000259005.1 0.02161626 3 3 0.014575035  
Brain\_Hypothalamus 0.139136721 Brain\_Nucleus\_accumbens\_basal\_ganglia  
1.316299274 0.690110153 0.690110153 1.479013447 2.4427697  
1.923570417 0.486194544 3 0 0.79847168

GANAB ENSG00000089597.16 0.021629674 2 1 0.014395795  
Brain\_Hippocampus 0.037559057 Brain\_Cerebellum 1.942297604  
0.057702396 1.942297604 -2.447232485 -2.079634637 -2.263433561  
0.259930931 1 0 0.79847168

REEP6 ENSG00000115255.10 0.021762468 6 3 0.005340501 Brain\_Cerebellum  
0.186554555 Brain\_Cerebellar\_Hemisphere 5.175625471 0.010193666  
0.32161779 -2.785744147 -1.320840491 -2.392182566 0.544991774 3  
0 0.801259702

RFX8 ENSG00000196460.12 0.021998594 1 1 0.021998594  
Brain\_Substantia\_nigra 0.021998594 Brain\_Substantia\_nigra 1 1  
1 -2.29039216 -2.29039216 -2.29039216 NA 1 0  
0.807827619

VCAN ENSG00000038427.15 0.02208176 2 2 0.009668204  
Brain\_Cerebellar\_Hemisphere 0.991837125 Brain\_Cerebellum 1.352867209  
0.647132791 0.647132791 -2.587475599 -0.010230825 -1.298853212  
1.822387257 2 0 0.808337838

GTF2F1 ENSG00000125651.13 0.022226333 1 1 0.022226333  
Brain\_Cortex 0.022226333 Brain\_Cortex 1 1 1 -2.286477605  
-2.286477605 -2.286477605 NA 1 0 0.808337838

MVK ENSG00000110921.13 0.022256828 2 2 0.011164368  
Brain\_Hippocampus 0.258927694 Brain\_Cortex 1.018471546



|          |                                       |                             |                             |              |              |                  |             |  |  |
|----------|---------------------------------------|-----------------------------|-----------------------------|--------------|--------------|------------------|-------------|--|--|
|          | 0.981528454                           | 0.981528454                 | -2.537511559                | 1.128929219  | -0.70429117  |                  |             |  |  |
|          | 2.592565137                           | 2                           | 0                           | 0.808337838  |              |                  |             |  |  |
| EXT1     | ENSG00000182197.10                    | 0.022401872                 | 2                           | 2            | 0.009876997  | Brain_Cortex     |             |  |  |
|          | 0.293077475                           | Brain_Putamen_basal_ganglia | 1.031862808                 | 0.968137192  |              |                  |             |  |  |
|          | 0.968137192                           | -2.580106071                | 1.051394425                 | -0.764355823 | 2.567858627  |                  |             |  |  |
|          | 2                                     | 0                           | 0.808337838                 |              |              |                  |             |  |  |
| CLIP1    | ENSG00000130779.19                    | 0.022412379                 | 1                           | 1            | 0.022412379  |                  |             |  |  |
|          | Brain_Cerebellar_Hemisphere           | 0.022412379                 | Brain_Cerebellar_Hemisphere | 1            | 1            |                  |             |  |  |
|          | 1                                     | -2.283305512                | -2.283305512                | -2.283305512 | NA           | 1                | 0           |  |  |
|          | 0.808337838                           |                             |                             |              |              |                  |             |  |  |
| HIST1H1C | ENSG00000187837.3                     | 0.022414962                 | 4                           | 3            | 0.039744333  |                  |             |  |  |
|          | Brain_Caudate_basal_ganglia           | 0.404793969                 | Brain_Cortex                | 3.650080125  |              |                  |             |  |  |
|          | 0.054065391                           | 0.140880678                 | -2.056396296                | -0.833090007 | -1.481680058 |                  |             |  |  |
|          | 0.609589121                           | 3                           | 0                           | 0.808337838  |              |                  |             |  |  |
| MTX3     | ENSG00000177034.14                    | 0.022471471                 | 1                           | 1            | 0.022471471  |                  |             |  |  |
|          | Brain_Cerebellar_Hemisphere           | 0.022471471                 | Brain_Cerebellar_Hemisphere | 1            | 1            |                  |             |  |  |
|          | 1                                     | 2.282302777                 | 2.282302777                 | 2.282302777  | NA           | 1                | 0           |  |  |
|          | 0.808337838                           |                             |                             |              |              |                  |             |  |  |
| AARS     | ENSG00000090861.15                    | 0.022687922                 | 9                           | 2            | 0.005965022  | Brain_Cortex     |             |  |  |
|          | 0.148884383                           | Brain_Caudate_basal_ganglia | 7.747991389                 | 0.000375741  |              |                  |             |  |  |
|          | 0.732323584                           | 1.443483267                 | 2.749697934                 | 2.521745722  | 0.416071454  |                  |             |  |  |
|          | 2                                     | 0                           | 0.808337838                 |              |              |                  |             |  |  |
| TSHZ3    | ENSG00000121297.6                     | 0.022691476                 | 1                           | 1            | 0.022691476  | Brain_Cerebellum |             |  |  |
|          | 0.022691476                           | Brain_Cerebellum            | 1                           | 1            | -2.278589539 | -2.278589539     |             |  |  |
|          | -2.278589539                          | NA                          | 1                           | 0            | 0.808337838  |                  |             |  |  |
| MDF1C    | ENSG00000135272.10                    | 0.022708312                 | 3                           | 3            | 0.006482909  |                  |             |  |  |
|          | Brain_Spinal_cord_cervical_c-1        | 0.489393529                 | Brain_Hypothalamus          |              |              |                  |             |  |  |
|          | 1.469692772                           | 0.560260016                 | 0.560260016                 | -2.72230088  | -0.691273744 |                  |             |  |  |
|          | -1.636865715                          | 1.022709585                 | 3                           | 0            | 0.808337838  |                  |             |  |  |
| SH2D2A   | ENSG00000027869.11                    | 0.022745059                 | 1                           | 1            | 0.022745059  |                  |             |  |  |
|          | Brain_Hypothalamus                    | 0.022745059                 | Brain_Hypothalamus          | 1            | 1            | 1                |             |  |  |
|          | -2.277689917                          | -2.277689917                | -2.277689917                | NA           | 1            | 0                | 0.808337838 |  |  |
| POU2F2   | ENSG00000028277.21                    | 0.022755123                 | 3                           | 3            | 0.002253385  |                  |             |  |  |
|          | Brain_Hypothalamus                    | 0.958263577                 | Brain_Frontal_Cortex_BA9    | 1.131216877  |              |                  |             |  |  |
|          | 0.91140179                            | 0.91140179                  | 0.052332726                 | 3.054629796  | 1.089111977  |                  |             |  |  |
|          | 1.703045337                           | 3                           | 0                           | 0.808337838  |              |                  |             |  |  |
| VEGFC    | ENSG00000150630.3                     | 0.022787207                 | 2                           | 2            | 0.034666995  |                  |             |  |  |
|          | Brain_Nucleus_accumbens_basal_ganglia | 0.108249011                 | Brain_Cerebellum            |              |              |                  |             |  |  |
|          | 1.071273808                           | 0.928726192                 | 0.928726192                 | -2.112226863 | 1.606113333  |                  |             |  |  |
|          | -0.253056765                          | 2.629263567                 | 2                           | 0            | 0.808337838  |                  |             |  |  |
| MARK3    | ENSG00000075413.17                    | 0.022821346                 | 3                           | 3            | 0.002008755  |                  |             |  |  |
|          | Brain_Hippocampus                     | 0.045192761                 | Brain_Frontal_Cortex_BA9    | 2.449540719  |              |                  |             |  |  |
|          | 0.110525153                           | 0.110525153                 | -3.088934822                | -2.002855868 | -2.604060887 |                  |             |  |  |
|          | 0.55230568                            | 3                           | 0                           | 0.808337838  |              |                  |             |  |  |
| DEPDC4   | ENSG00000166153.16                    | 0.022985688                 | 1                           | 1            | 0.022985688  |                  |             |  |  |
|          | Brain_Amygdala                        | 0.022985688                 | Brain_Amygdala              | 1            | 1            | 1                | 2.273672442 |  |  |
|          | 2.273672442                           | 2.273672442                 | NA                          | 1            | 0            | 0.812102941      |             |  |  |
| SYNRG    | ENSG00000275066.4                     | 0.023332412                 | 6                           | 6            | 0.010438798  |                  |             |  |  |
|          | Brain_Hypothalamus                    | 0.290658234                 | Brain_Cerebellar_Hemisphere | 2.774588119  |              |                  |             |  |  |
|          | 0.221711129                           | 0.221711129                 | -2.397845745                | 2.560944675  | -0.443035008 |                  |             |  |  |
|          | 2.034381584                           | 6                           | 0                           | 0.818790077  |              |                  |             |  |  |
| OSGIN1   | ENSG00000140961.12                    | 0.023368394                 | 1                           | 1            | 0.023368394  |                  |             |  |  |
|          | Brain_Hypothalamus                    | 0.023368394                 | Brain_Hypothalamus          | 1            | 1            | 1                |             |  |  |
|          | -2.267357524                          | -2.267357524                | -2.267357524                | NA           | 1            | 0                | 0.818790077 |  |  |
| DHRS13   | ENSG00000167536.13                    | 0.023391779                 | 3                           | 3            | 0.006771754  |                  |             |  |  |
|          | Brain_Cerebellar_Hemisphere           | 0.996667982                 | Brain_Frontal_Cortex_BA9    |              |              |                  |             |  |  |
|          | 1.509229609                           | 0.567554658                 | 0.567554658                 | -0.004176077 | 2.70786513   |                  |             |  |  |
|          | 1.704727689                           | 1.487404268                 | 3                           | 0            | 0.818790077  |                  |             |  |  |
| TM4SF1   | ENSG00000169908.11                    | 0.023438474                 | 1                           | 1            | 0.023438474  |                  |             |  |  |
|          | Brain_Hippocampus                     | 0.023438474                 | Brain_Hippocampus           | 1            | 1            | 1                |             |  |  |
|          | 2.266210898                           | 2.266210898                 | 2.266210898                 | NA           | 1            | 0                | 0.818790077 |  |  |
| PLEKHG1  | ENSG00000120278.15                    | 0.023518567                 | 2                           | 2            | 0.006519427  |                  |             |  |  |

|              |                                      |                  |                                |                             |              |                  |
|--------------|--------------------------------------|------------------|--------------------------------|-----------------------------|--------------|------------------|
|              | Brain_Spinal_cord_cervical_c-1       | 0.482600668      |                                | Brain_Putamen_basal_ganglia |              |                  |
|              | 1.143566428                          | 0.856433572      | 0.856433572                    | -2.720444226                | -0.702125874 |                  |
|              | -1.71128505                          | 1.427166594      | 2                              | 0                           | 0.818790077  |                  |
| RP11-13A1.1  | ENSG00000246363.2                    | 0.023527019      | 3                              | 3                           | 0.010105278  |                  |
|              | Brain_Cortex                         | 0.747349543      | Brain_Frontal_Cortex_BA9       | 1.53205713                  |              |                  |
|              | 0.510564261                          | 0.510564261      | -0.349690855                   | 2.572205864                 | 0.848217058  |                  |
|              | 1.530340138                          | 3                | 0                              | 0.818790077                 |              |                  |
| SVIP         | ENSG00000198168.8                    | 0.023620332      | 6                              | 6                           | 0.03419396   |                  |
|              | Brain_Putamen_basal_ganglia          | 0.784928457      | Brain_Frontal_Cortex_BA9       |                             |              |                  |
|              | 1.620029873                          | 0.470528856      | 0.470528856                    | -2.117776982                | 1.185990599  |                  |
|              | -0.760545773                         | 1.267710607      | 6                              | 0                           | 0.818790077  |                  |
| GAS6         | ENSG00000183087.14                   | 0.023643141      | 1                              | 1                           | 0.023643141  | Brain_Cerebellum |
|              | 0.023643141                          | Brain_Cerebellum | 1                              | 1                           | -2.262879127 | -2.262879127     |
|              | -2.262879127                         | NA               | 1                              | 0                           | 0.818790077  |                  |
| NLRC5        | ENSG00000140853.15                   | 0.02374205       | 1                              | 1                           | 0.02374205   |                  |
|              | Brain_Spinal_cord_cervical_c-1       | 0.02374205       | Brain_Spinal_cord_cervical_c-1 | 1                           |              |                  |
|              | 1                                    | 1                | 2.261277969                    | 2.261277969                 | 2.261277969  | NA               |
|              | 0.820122065                          |                  |                                |                             |              | 1                |
| C4orf36      | ENSG00000163633.10                   | 0.023829205      | 2                              | 2                           | 0.00897034   |                  |
|              | Brain_Cerebellar_Hemisphere          | 0.653078375      | Brain_Cerebellum               | 1.132602666                 |              |                  |
|              | 0.867397334                          | 0.867397334      | -2.613182441                   | 0.449489785                 | -1.081846328 |                  |
|              | 2.165636299                          | 2                | 0                              | 0.820122065                 |              |                  |
| AJ239322.1   | ENSG00000235615.2                    | 0.023857457      | 9                              | 9                           | 0.054060831  |                  |
|              | Brain_Frontal_Cortex_BA9             | 0.550312741      | Brain_Hippocampus              | 1.869416417                 |              |                  |
|              | 0.280426744                          | 0.280426744      | -1.926348837                   | 1.919705935                 | -0.541737693 |                  |
|              | 1.184774719                          | 0                | 0.820122065                    |                             |              |                  |
| CELF2        | ENSG00000048740.18                   | 0.023974241      | 1                              | 1                           | 0.023974241  | Brain_Cerebellum |
|              | 0.023974241                          | Brain_Cerebellum | 1                              | 1                           | 2.257541794  | 2.257541794      |
|              | 2.257541794                          | NA               | 1                              | 0                           | 0.820276344  |                  |
| RP11-491F9.5 | ENSG00000260769.1                    | 0.02400332       | 4                              | 4                           | 0.008504907  |                  |
|              | Brain_Cerebellar_Hemisphere          | 0.316264086      | Brain_Frontal_Cortex_BA9       |                             |              |                  |
|              | 2.476174998                          | 0.138836678      | 0.138836678                    | -2.631339323                | 1.002164632  |                  |
|              | -1.209424322                         | 1.552484587      | 4                              | 0                           | 0.820276344  |                  |
| ARHGAP11A    | ENSG00000198826.10                   | 0.024037832      | 4                              | 4                           | 0.002092152  |                  |
|              | Brain_Putamen_basal_ganglia          | 0.663825657      | Brain_Hippocampus              | 1.32583984                  |              |                  |
|              | 0.623428262                          | 0.623428262      | -1.282043504                   | 3.076829087                 | 0.404607899  |                  |
|              | 1.916411814                          | 0                | 0.820276344                    |                             |              |                  |
| LINC01089    | ENSG00000212694.8                    | 0.024250127      | 11                             | 3                           | 0.004556566  |                  |
|              | Brain_Spinal_cord_cervical_c-1       | 0.284199809      | Brain_Amygdala                 | 8.614743349                 |              |                  |
|              | 7.38E-05                             | 0.725085825      | 1.070932438                    | 2.836817398                 | 2.353892642  |                  |
|              | 0.466295658                          | 3                | 0                              | 0.823558191                 |              |                  |
| VARS         | ENSG00000204394.12                   | 0.024251731      | 2                              | 2                           | 0.006454915  |                  |
|              | Brain_Anterior_cingulate_cortex_BA24 | 0.880058468      | Brain_Caudate_basal_ganglia    |                             |              |                  |
|              | 1.10680059                           | 0.89319941       | 0.89319941                     | -2.723730552                | -0.150895097 | -1.437312824     |
|              | 1.819269397                          | 2                | 0                              | 0.823558191                 |              |                  |
| CENPT        | ENSG00000102901.12                   | 0.024372064      | 1                              | 1                           | 0.024372064  |                  |
|              | Brain_Cerebellar_Hemisphere          | 0.024372064      | Brain_Cerebellar_Hemisphere    | 1                           | 1            |                  |
|              | 1                                    | -2.251212782     | -2.251212782                   | -2.251212782                | NA           | 1                |
|              | 0.824778382                          |                  |                                |                             |              | 0                |
| DBNL         | ENSG00000136279.20                   | 0.024445187      | 2                              | 2                           | 0.006726546  | Brain_Cerebellum |
|              | 0.045804701                          | Brain_Cortex     | 1.659440216                    | 0.340559784                 | 0.340559784  |                  |
|              | 1.997188582                          | 2.710087513      | 2.353638047                    | 0.504095668                 | 2            | 0                |
|              | 0.824778382                          |                  |                                |                             |              |                  |
| INAFM2       | ENSG00000259330.2                    | 0.02458954       | 3                              | 3                           | 0.012073119  |                  |
|              | Brain_Cerebellar_Hemisphere          | 0.472432123      | Brain_Substantia_nigra         |                             |              |                  |
|              | 1.330377851                          | 0.811866132      | 0.811866132                    | -1.269672131                | 2.509999903  |                  |
|              | 0.652951744                          | 1.890689108      | 3                              | 0                           | 0.824778382  |                  |
| LMBR1L       | ENSG00000139636.15                   | 0.024596073      | 1                              | 1                           | 0.024596073  |                  |
|              | Brain_Cerebellum                     | 0.024596073      | Brain_Cerebellum               | 1                           | 1            | 1                |
|              | 2.24768829                           | 2.24768829       | NA                             | 1                           | 0            | 0.824778382      |
| SYCP2L       | ENSG00000153157.12                   | 0.024628633      | 8                              | 7                           | 0.015562097  |                  |
|              | Brain_Cerebellum                     | 0.896116359      | Brain_Cerebellar_Hemisphere    | 4.33269128                  |              |                  |

|              |                                       |                                       |                                |              |              |                  |              |  |  |
|--------------|---------------------------------------|---------------------------------------|--------------------------------|--------------|--------------|------------------|--------------|--|--|
|              | 0.014579204                           | 0.27074251                            | -2.419026724                   | 1.456550054  | -0.794418742 |                  |              |  |  |
|              | 1.406784747                           | 7                                     | 0                              | 0.824778382  |              |                  |              |  |  |
| AC009014.3   | ENSG00000271824.1                     | 0.024641367                           | 3                              | 2            | 0.022326274  |                  |              |  |  |
|              | Brain_Cerebellum                      | 0.126815292                           | Brain_Spinal_cord_cervical_c-1 | 1.964725686  |              |                  |              |  |  |
|              | 0.050167974                           | 0.985106339                           | 1.526781748                    | 2.284770743  | 1.897702934  |                  |              |  |  |
|              | 0.379252375                           | 2                                     | 0                              | 0.824778382  |              |                  |              |  |  |
| KCNH2        | ENSG0000055118.14                     | 0.024863057                           | 2                              | 1            | 0.021551558  | Brain_Cerebellum |              |  |  |
|              | 0.030105913                           | Brain_Cerebellar_Hemisphere           | 1.982056527                    | 0.017943473  |              |                  |              |  |  |
|              | 1.982056527                           | -2.298179804                          | -2.168694131                   | -2.233436968 | 0.091560198  |                  |              |  |  |
|              | 1                                     | 0                                     | 0.825888482                    |              |              |                  |              |  |  |
| FBXW12       | ENSG00000164049.14                    | 0.02489389                            | 1                              | 1            | 0.02489389   |                  |              |  |  |
|              | Brain_Anterior_cingulate_cortex_BA24  | 0.02489389                            |                                |              |              |                  |              |  |  |
|              | Brain_Anterior_cingulate_cortex_BA24  | 1                                     | 1                              | 1            | -2.243045348 |                  |              |  |  |
|              | -2.243045348                          | -2.243045348                          | NA                             | 1            | 0            | 0.825888482      |              |  |  |
| KCNK4        | ENSG00000182450.12                    | 0.024894702                           | 3                              | 2            | 0.027460889  |                  |              |  |  |
|              | Brain_Nucleus_accumbens_basal_ganglia | 0.420346539                           | Brain_Cortex                   |              |              |                  |              |  |  |
|              | 2.737015196                           | 0.026540035                           | 0.236444769                    | -2.204903182 | -0.805820182 |                  |              |  |  |
|              | -1.68982469                           | 0.769050137                           | 2                              | 0            | 0.825888482  |                  |              |  |  |
| SLC7A8       | ENSG00000092068.19                    | 0.024910653                           | 6                              | 6            | 0.01977773   | Brain_Cortex     |              |  |  |
|              | 0.500234428                           | Brain_Nucleus_accumbens_basal_ganglia | 1.18806365                     | 0.828770914  |              |                  |              |  |  |
|              | 0.828770914                           | -2.330538078                          | 1.708934404                    | -0.348220879 | 1.632551947  |                  |              |  |  |
|              | 6                                     | 0                                     | 0.825888482                    |              |              |                  |              |  |  |
| RP11-133F8.2 | ENSG00000249776.5                     | 0.02502934                            | 1                              | 1            | 0.02502934   |                  |              |  |  |
|              | Brain_Hippocampus                     | 0.02502934                            | Brain_Hippocampus              | 1            | 1            | 1                |              |  |  |
|              | -2.240949601                          | -2.240949601                          | -2.240949601                   | NA           | 1            | 0                | 0.827861685  |  |  |
| SPOCK1       | ENSG00000152377.13                    | 0.025089687                           | 3                              | 3            | 0.004974298  |                  |              |  |  |
|              | Brain_Cerebellar_Hemisphere           | 0.821326097                           | Brain_Spinal_cord_cervical_c-1 |              |              |                  |              |  |  |
|              | 1.20839723                            | 0.798129407                           | 0.798129407                    | -2.808693515 | 0.950896777  |                  |              |  |  |
|              | -0.69454548                           | 1.923120802                           | 3                              | 0            | 0.827900493  |                  |              |  |  |
| DTD2         | ENSG00000129480.12                    | 0.025196375                           | 8                              | 5            | 0.054654159  |                  |              |  |  |
|              | Brain_Hippocampus                     | 0.914047329                           | Brain_Hypothalamus             | 5.083922183  |              |                  |              |  |  |
|              | 0.001793038                           | 0.266921477                           | -1.626623023                   | 1.92161548   | -0.378894869 |                  |              |  |  |
|              | 1.233706021                           | 5                                     | 0                              | 0.829464666  |              |                  |              |  |  |
| DIAPH1       | ENSG00000131504.15                    | 0.025389095                           | 1                              | 1            | 0.025389095  |                  |              |  |  |
|              | Brain_Cerebellum                      | 0.025389095                           | Brain_Cerebellum               | 1            | 1            | 1                | -2.23543057  |  |  |
|              | -2.23543057                           | -2.23543057                           | NA                             | 1            | 0            | 0.830376705      |              |  |  |
| C1R          | ENSG00000159403.15                    | 0.02540829                            | 1                              | 1            | 0.02540829   |                  |              |  |  |
|              | Brain_Nucleus_accumbens_basal_ganglia | 0.02540829                            |                                |              |              |                  |              |  |  |
|              | Brain_Nucleus_accumbens_basal_ganglia | 1                                     | 1                              | 1            | -2.235138012 |                  |              |  |  |
|              | -2.235138012                          | -2.235138012                          | NA                             | 1            | 0            | 0.830376705      |              |  |  |
| SMPD3        | ENSG00000103056.11                    | 0.025424246                           | 5                              | 4            | 0.001555213  | Brain_Cerebellum |              |  |  |
|              | 0.620616451                           | Brain_Putamen_basal_ganglia           | 2.578564251                    | 0.079651924  |              |                  |              |  |  |
|              | 0.390418784                           | -1.100054877                          | 3.16417871                     | 1.562866978  | 1.813652689  | 4                |              |  |  |
|              | 0                                     | 0.830376705                           |                                |              |              |                  |              |  |  |
| SLC22A1      | ENSG00000175003.12                    | 0.025510574                           | 1                              | 1            | 0.025510574  |                  |              |  |  |
|              | Brain_Amygdala                        | 0.025510574                           | Brain_Amygdala                 | 1            | 1            | 1                | -2.233582226 |  |  |
|              | -2.233582226                          | -2.233582226                          | NA                             | 1            | 0            | 0.830376705      |              |  |  |
| FZD7         | ENSG00000155760.2                     | 0.02556226                            | 1                              | 1            | 0.02556226   | Brain_Cerebellum | 0.02556226   |  |  |
|              | Brain_Cerebellum                      | 1                                     | 1                              | 1            | 2.232798127  | 2.232798127      | 2.232798127  |  |  |
|              | NA                                    | 1                                     | 0                              | 0.830376705  |              |                  |              |  |  |
| YPEL3        | ENSG00000090238.11                    | 0.025580184                           | 7                              | 3            | 0.003268969  |                  |              |  |  |
|              | Brain_Caudate_basal_ganglia           | 0.922262088                           | Brain_Cortex                   | 5.786986664  |              |                  |              |  |  |
|              | 0.000748799                           | 0.22540173                            | -2.941244036                   | 0.097584682  | -1.281916885 |                  |              |  |  |
|              | 0.891831827                           | 3                                     | 0                              | 0.830376705  |              |                  |              |  |  |
| SUPT20H      | ENSG00000102710.19                    | 0.025736065                           | 2                              | 2            | 0.011567417  |                  |              |  |  |
|              | Brain_Frontal_Cortex_BA9              | 0.030388547                           | Brain_Caudate_basal_ganglia    |              |              |                  |              |  |  |
|              | 1.531516438                           | 0.468483562                           | 0.468483562                    | -2.525073259 | -2.164988753 |                  |              |  |  |
|              | -2.345031006                          | 0.254618196                           | 2                              | 0            | 0.832371261  |                  |              |  |  |
| ZNF20        | ENSG00000132010.15                    | 0.025800195                           | 7                              | 6            | 0.033160775  |                  |              |  |  |
|              | Brain_Nucleus_accumbens_basal_ganglia | 0.861325078                           | Brain_Putamen_basal_ganglia    |              |              |                  |              |  |  |
|              | 4.182201098                           | 0.026662834                           | 0.144583238                    | -1.478405482 | 2.130131296  |                  |              |  |  |
|              | -0.44999278                           | 1.275346539                           | 6                              | 0            | 0.832371261  |                  |              |  |  |

|               |                                       |                             |              |              |              |                                       |              |   |                          |
|---------------|---------------------------------------|-----------------------------|--------------|--------------|--------------|---------------------------------------|--------------|---|--------------------------|
| CYP11A1       | ENSG00000140459.17                    | 0.025845655                 | 5            | 4            | 0.006817348  |                                       |              |   |                          |
|               | Brain_Cerebellar_Hemisphere           | 0.151185627                 |              |              |              | Brain_Nucleus_accumbens_basal_ganglia |              |   |                          |
|               | 3.112796279                           | 0.035081206                 | 0.276234551  |              | 1.435356176  |                                       | 2.705637217  |   |                          |
|               | 1.839610398                           | 0.503281078                 | 4            | 0            | 0.832371261  |                                       |              |   |                          |
| ST8SIA2       | ENSG00000140557.11                    | 0.025879601                 | 1            | 1            | 0.025879601  |                                       |              |   |                          |
|               | Brain_Frontal_Cortex_BA9              | 0.025879601                 |              |              |              | Brain_Frontal_Cortex_BA9              | 1            | 1 |                          |
|               | 1                                     | -2.228013706                | -2.228013706 | -2.228013706 | NA           | 1                                     | 0            |   |                          |
|               | 0.832371261                           |                             |              |              |              |                                       |              |   |                          |
| ZNF461        | ENSG00000197808.11                    | 0.025958626                 | 3            | 1            | 0.008687485  |                                       |              |   |                          |
|               | Brain_Cortex                          | 0.049123482                 |              |              |              | Brain_Nucleus_accumbens_basal_ganglia |              |   |                          |
|               | 2.921225609                           | 0.025006543                 | 2.921225609  |              | -2.624113438 |                                       | -1.967518358 |   |                          |
|               | -2.197696174                          | 0.369677854                 | 1            | 0            | 0.832998015  |                                       |              |   |                          |
| TIMM23        | ENSG00000265354.3                     | 0.026206793                 | 1            | 1            | 0.026206793  |                                       |              |   |                          |
|               | Brain_Amygdala                        | 0.026206793                 |              |              |              | Brain_Amygdala                        | 1            | 1 | 2.223133588              |
|               | 2.223133588                           | 2.223133588                 | NA           | 1            | 0            | 0.837564451                           |              |   |                          |
| SLC26A9       | ENSG00000174502.18                    | 0.026220658                 | 1            | 1            | 0.026220658  |                                       |              |   |                          |
|               | Brain_Spinal_cord_cervical_c-1        | 0.026220658                 |              |              |              | Brain_Spinal_cord_cervical_c-1        |              |   |                          |
|               | 1                                     | 1                           | 1            | -2.222927957 | -2.222927957 | -2.222927957                          | NA           | 1 | 0                        |
|               | 0.837564451                           |                             |              |              |              |                                       |              |   |                          |
| RP11-539L10.2 | ENSG00000246526.2                     | 0.026447436                 | 1            | 1            | 0.026447436  |                                       |              |   |                          |
|               | Brain_Nucleus_accumbens_basal_ganglia | 0.026447436                 |              |              |              |                                       |              |   |                          |
|               | Brain_Nucleus_accumbens_basal_ganglia | 1                           | 1            | 1            | 2.219577864  |                                       |              |   |                          |
|               | 2.219577864                           | 2.219577864                 | NA           | 1            | 0            | 0.840843063                           |              |   |                          |
| P2RX4         | ENSG00000135124.14                    | 0.026451497                 | 6            | 6            | 0.024591026  |                                       |              |   | Brain_Cortex             |
|               | 0.616697493                           | Brain_Caudate_basal_ganglia | 2.596180751  |              | 0.105850822  |                                       |              |   |                          |
|               | 0.105850822                           | -2.2477674                  | 1.984516887  |              | 0.406994505  |                                       | 1.411045041  |   | 6                        |
|               | 0                                     | 0.840843063                 |              |              |              |                                       |              |   |                          |
| MRPS2         | ENSG00000122140.10                    | 0.026503594                 | 1            | 1            | 0.026503594  |                                       |              |   |                          |
|               | Brain_Hypothalamus                    | 0.026503594                 |              |              |              | Brain_Hypothalamus                    | 1            | 1 | 1                        |
|               | -2.218752099                          | -2.218752099                | -2.218752099 | NA           | 1            | 0                                     | 0.840843063  |   |                          |
| VRK2          | ENSG00000028116.16                    | 0.026662531                 | 2            | 2            | 0.024915964  |                                       |              |   |                          |
|               | Brain_Hippocampus                     | 0.947596772                 |              |              |              | Brain_Substantia_nigra                |              |   | 1.532808724              |
|               | 0.467191276                           | 0.467191276                 | -2.242703145 |              | 0.065724995  |                                       | -1.088489075 |   |                          |
|               | 1.632305192                           | 2                           | 0            | 0.843600462  |              |                                       |              |   |                          |
| CRYGN         | ENSG00000127377.8                     | 0.0267111                   | 1            | 1            | 0.0267111    |                                       |              |   |                          |
|               | Brain_Anterior_cingulate_cortex_BA24  | 0.0267111                   |              |              |              |                                       |              |   |                          |
|               | Brain_Anterior_cingulate_cortex_BA24  | 1                           | 1            | 1            | -2.215713929 |                                       |              |   |                          |
|               | -2.215713929                          | -2.215713929                | NA           | 1            | 0            | 0.843600462                           |              |   |                          |
| CWF19L1       | ENSG00000095485.16                    | 0.02684544                  | 13           | 2            | 0.009989182  |                                       |              |   |                          |
|               | Brain_Substantia_nigra                | 0.419958396                 |              |              |              | Brain_Hippocampus                     |              |   | 11.8387498               |
|               | 0.00010096                            | 0.473212585                 | -2.576203545 |              | -0.806493427 |                                       | -2.187479961 |   |                          |
|               | 0.498671384                           | 2                           | 0            | 0.84436232   |              |                                       |              |   |                          |
| C3            | ENSG00000125730.16                    | 0.026855924                 | 1            | 1            | 0.026855924  |                                       |              |   |                          |
|               | Brain_Anterior_cingulate_cortex_BA24  | 0.026855924                 |              |              |              |                                       |              |   |                          |
|               | Brain_Anterior_cingulate_cortex_BA24  | 1                           | 1            | 1            | -2.213605568 |                                       |              |   |                          |
|               | -2.213605568                          | -2.213605568                | NA           | 1            | 0            | 0.84436232                            |              |   |                          |
| NES           | ENSG00000132688.10                    | 0.027006857                 | 1            | 1            | 0.027006857  |                                       |              |   |                          |
|               | Brain_Cerebellar_Hemisphere           | 0.027006857                 |              |              |              | Brain_Cerebellar_Hemisphere           | 1            | 1 |                          |
|               | 1                                     | -2.21141868                 | -2.21141868  | -2.21141868  | NA           | 1                                     | 0            |   |                          |
|               | 0.846540308                           |                             |              |              |              |                                       |              |   |                          |
| SMAD7         | ENSG00000101665.8                     | 0.02704621                  | 1            | 1            | 0.02704621   |                                       |              |   | Brain_Frontal_Cortex_BA9 |
|               | 0.02704621                            | Brain_Frontal_Cortex_BA9    | 1            | 1            | 1            | 2.210850239                           |              |   |                          |
|               | 2.210850239                           | 2.210850239                 | NA           | 1            | 0            | 0.846540308                           |              |   |                          |
| SRGAP2B       | ENSG00000196369.10                    | 0.027110775                 | 6            | 5            | 0.071160662  |                                       |              |   |                          |
|               | Brain_Anterior_cingulate_cortex_BA24  | 0.791825068                 |              |              |              | Brain_Hypothalamus                    |              |   |                          |
|               | 2.794468502                           | 9.00E-17                    | 0.372026196  |              | -1.804450824 |                                       | 0.496107787  |   |                          |
|               | -0.51283168                           | 0.978570967                 | 5            | 0            | 0.846667093  |                                       |              |   |                          |
| RP11-71E19.1  | ENSG00000250934.1                     | 0.027192364                 | 4            | 3            | 0.0022058    |                                       |              |   |                          |
|               | Brain_Cerebellar_Hemisphere           | 0.91660857                  |              |              |              | Brain_Nucleus_accumbens_basal_ganglia |              |   |                          |
|               | 1.946660889                           | 0.052909204                 | 0.948702731  |              | 0.104706669  |                                       | 3.061025918  |   |                          |
|               | 1.607121921                           | 1.573440992                 | 3            | 0            | 0.847323746  |                                       |              |   |                          |
| DYRK1B        | ENSG00000105204.13                    | 0.027326452                 | 3            | 3            | 0.002889985  |                                       |              |   |                          |

|               |                                       |                                      |                             |             |                             |                    |              |
|---------------|---------------------------------------|--------------------------------------|-----------------------------|-------------|-----------------------------|--------------------|--------------|
|               | Brain_Spinal_cord_cervical_c-1        | 0.861868254                          |                             |             | Brain_Cerebellar_Hemisphere |                    |              |
|               | 1.93256594                            | 0.160048121                          | 0.160048121                 |             | -2.979203831                |                    | -0.173996448 |
|               | -1.140963476                          | 1.592681708                          | 3                           | 0           | 0.84960975                  |                    |              |
| VPS13A        | ENSG00000197969.11                    | 0.027623842                          | 6                           | 6           | 0.117971246                 |                    |              |
|               | Brain_Caudate_basal_ganglia           | 0.86782838                           | Brain_Putamen_basal_ganglia | 2.952471693 |                             |                    |              |
|               | 0.132630559                           | 0.132630559                          | -1.476990117                |             | 1.563345951                 |                    | -0.069715932 |
|               | 1.262938013                           | 6                                    | 0                           | 0.85013142  |                             |                    |              |
| ZMIZ2         | ENSG00000122515.14                    | 0.027721156                          | 8                           | 8           | 0.000495468                 |                    |              |
|               | Brain_Frontal_Cortex_BA9              | 0.706883036                          | Brain_Cerebellar_Hemisphere |             |                             |                    |              |
|               | 3.918282269                           | 0.151939257                          | 0.151939257                 |             | 0.376045546                 |                    | 3.48319471   |
|               | 1.81406429                            | 1.020259286                          | 8                           | 0           | 0.85013142                  |                    |              |
| MRT04         | ENSG00000053372.4                     | 0.027743295                          | 9                           | 3           | 0.090213085                 | Brain_Amygdala     |              |
|               | 0.955005465                           | Brain_Putamen_basal_ganglia          | 7.543944397                 |             | 0.037311835                 |                    |              |
|               | 0.364709301                           | -0.467545001                         | 1.694274756                 |             | 0.835016175                 |                    | 0.734994379  |
|               | 3                                     | 0                                    | 0.85013142                  |             |                             |                    |              |
| PDLIM2        | ENSG00000120913.23                    | 0.027780848                          | 2                           | 2           | 0.037124885                 |                    |              |
|               | Brain_Cortex                          | 0.576493269                          | Brain_Frontal_Cortex_BA9    | 1.776147469 |                             |                    |              |
|               | 0.223852531                           | 0.223852531                          | -2.084388037                |             | -0.558514261                |                    | -1.321451149 |
|               | 1.078955694                           | 2                                    | 0                           | 0.85013142  |                             |                    |              |
| CD84          | ENSG00000066294.14                    | 0.027811835                          | 3                           | 3           | 0.011945996                 |                    |              |
|               | Brain_Nucleus_accumbens_basal_ganglia | 0.210782829                          | Brain_Hippocampus           |             |                             |                    |              |
|               | 1.426504205                           | 0.622647835                          | 0.622647835                 |             | 1.251415764                 |                    | 2.513735581  |
|               | 1.88004688                            | 0.631175106                          | 3                           | 0           | 0.85013142                  |                    |              |
| NCKIPSD       | ENSG00000213672.7                     | 0.027819887                          | 13                          | 2           | 0.011383934                 |                    |              |
|               | Brain_Hippocampus                     | 0.441740908                          | Brain_Hypothalamus          | 12.10131814 |                             |                    |              |
|               | 0.000729582                           | 0.419152673                          | -2.530687146                |             | -0.769256748                |                    | -2.045458709 |
|               | 0.468221296                           | 2                                    | 0                           | 0.85013142  |                             |                    |              |
| IGSF10        | ENSG00000152580.8                     | 0.027891852                          | 1                           | 1           | 0.027891852                 |                    |              |
|               | Brain_Anterior_cingulate_cortex_BA24  | 0.027891852                          |                             |             |                             |                    |              |
|               | Brain_Anterior_cingulate_cortex_BA24  | 1                                    | 1                           | 1           | -2.19880414                 |                    |              |
|               | -2.19880414                           | -2.19880414                          | NA                          | 1           | 0                           | 0.85013142         |              |
| CD46          | ENSG00000117335.19                    | 0.02791812                           | 13                          | 3           | 0.012991432                 | Brain_Hypothalamus |              |
|               | 0.974579983                           | Brain_Anterior_cingulate_cortex_BA24 | 10.91813349                 |             |                             |                    |              |
|               | 0.001402718                           | 0.483255708                          | -0.031864658                |             | 2.484004086                 |                    | 1.501369724  |
|               | 0.665230899                           | 3                                    | 0                           | 0.85013142  |                             |                    |              |
| LINC01106     | ENSG00000175772.10                    | 0.02793681                           | 4                           | 4           | 0.009857816                 |                    |              |
|               | Brain_Caudate_basal_ganglia           | 0.346167669                          | Brain_Hypothalamus          | 2.764850985 |                             |                    |              |
|               | 0.176801333                           | 0.176801333                          | 0.942048774                 |             | 2.580777253                 |                    | 1.789521981  |
|               | 0.694128614                           | 4                                    | 0                           | 0.85013142  |                             |                    |              |
| COLEC12       | ENSG00000158270.11                    | 0.028011024                          | 4                           | 4           | 0.020318518                 |                    |              |
|               | Brain_Cerebellar_Hemisphere           | 0.198990015                          | Brain_Cortex                | 1.465454085 |                             |                    |              |
|               | 0.519616221                           | 0.519616221                          | -2.320413524                |             | 1.78133077                  |                    | -0.374163686 |
|               | 2.211622972                           | 4                                    | 0                           | 0.85013142  |                             |                    |              |
| SLC18A2       | ENSG00000165646.11                    | 0.028147574                          | 1                           | 1           | 0.028147574                 |                    |              |
|               | Brain_Cerebellum                      | 0.028147574                          | Brain_Cerebellum            | 1           | 1                           | 1                  | 2.195223428  |
|               | 2.195223428                           | 2.195223428                          | NA                          | 1           | 0                           | 0.85013142         |              |
| DNMT3B        | ENSG00000088305.18                    | 0.028401216                          | 3                           | 2           | 0.009141053                 |                    |              |
|               | Brain_Anterior_cingulate_cortex_BA24  | 0.080007719                          | Brain_Cerebellar_Hemisphere |             |                             |                    |              |
|               | 2.400534259                           | 0.057021756                          | 0.542443985                 |             | 1.750641283                 |                    | 2.606733287  |
|               | 2.172850538                           | 0.428165368                          | 2                           | 0           | 0.85013142                  |                    |              |
| RP11-307E17.8 | ENSG00000232063.1                     | 0.028445042                          | 6                           | 5           | 0.038955784                 |                    |              |
|               | Brain_Substantia_nigra                | 0.498483402                          | Brain_Putamen_basal_ganglia |             |                             |                    |              |
|               | 3.842558809                           | 0.11431138                           | 0.218472072                 |             | -0.945356428                |                    | 2.064653636  |
|               | 1.002400845                           | 1.054289774                          | 5                           | 0           | 0.85013142                  |                    |              |
| RNF144B       | ENSG00000137393.9                     | 0.028486412                          | 1                           | 1           | 0.028486412                 |                    |              |
|               | Brain_Substantia_nigra                | 0.028486412                          | Brain_Substantia_nigra      | 1           | 1                           |                    |              |
|               | 1                                     | -2.190521849                         | -2.190521849                |             | -2.190521849                | NA                 | 1            |
|               |                                       |                                      |                             |             |                             | 0                  | 0.85013142   |
| DDX25         | ENSG00000109832.13                    | 0.02861955                           | 11                          | 4           | 0.023146189                 |                    |              |
|               | Brain_Anterior_cingulate_cortex_BA24  | 0.946596962                          | Brain_Caudate_basal_ganglia |             |                             |                    |              |
|               | 8.678567601                           | 0.003294141                          | 0.349487527                 |             | -2.27101304                 |                    | 0.754848453  |
|               | -0.537296025                          | 0.754994853                          | 4                           | 0           | 0.85013142                  |                    |              |
| TBC1D14       | ENSG00000132405.18                    | 0.028621991                          | 1                           | 1           | 0.028621991                 |                    |              |

|                |                                       |                                      |              |            |                                |             |   |                          |
|----------------|---------------------------------------|--------------------------------------|--------------|------------|--------------------------------|-------------|---|--------------------------|
|                | Brain_Spinal_cord_cervical_c-1        | 0.028621991                          |              |            | Brain_Spinal_cord_cervical_c-1 |             |   |                          |
|                | 1 1 1                                 | -2.188654089                         | -2.188654089 |            | -2.188654089                   | NA          | 1 | 0                        |
|                | 0.85013142                            |                                      |              |            |                                |             |   |                          |
| SMARCD1        | ENSG00000066117.14                    | 0.028632782                          | 1            | 1          | 0.028632782                    |             |   |                          |
|                | Brain_Cerebellar_Hemisphere           | 0.028632782                          |              |            | Brain_Cerebellar_Hemisphere    | 1           | 1 |                          |
|                | 1 -2.18850576                         | -2.18850576                          | -2.18850576  |            | NA                             | 1           | 0 | 0.85013142               |
| KB-1592A4.15   | ENSG00000197210.7                     | 0.028705476                          | 2            | 2          | 0.008035859                    |             |   |                          |
|                | Brain_Cerebellar_Hemisphere           | 0.133617617                          |              |            | Brain_Cerebellum               | 1.474434386 |   |                          |
|                | 0.525565614                           | 0.525565614                          | -2.650559417 |            | -1.499987591                   |             |   | -2.075273504             |
|                | 0.81357714                            | 2 0                                  | 0.85013142   |            |                                |             |   |                          |
| BCKDHB         | ENSG00000083123.14                    | 0.028740332                          | 4            | 3          | 0.021703913                    |             |   |                          |
|                | Brain_Anterior_cingulate_cortex_BA24  | 0.389573432                          |              |            | Brain_Caudate_basal_ganglia    |             |   |                          |
|                | 2.956922339                           | 0.055501759                          | 0.399887013  |            | 0.860391205                    |             |   | 2.295510024              |
|                | 1.665877102                           | 0.710798229                          | 3 0          | 0.85013142 |                                |             |   |                          |
| RP11-1007O24.2 | ENSG00000261187.1                     | 0.028746229                          | 1            | 1          | 0.028746229                    |             |   |                          |
|                | Brain_Putamen_basal_ganglia           | 0.028746229                          |              |            | Brain_Putamen_basal_ganglia    | 1           | 1 |                          |
|                | 1 2.186949245                         | 2.186949245                          | 2.186949245  |            | NA                             | 1           | 0 | 0.85013142               |
| LINC02102      | ENSG00000248677.1                     | 0.028784791                          | 3            | 3          | 0.002790088                    |             |   |                          |
|                | Brain_Cortex                          | 0.815262446                          |              |            | Brain_Cerebellar_Hemisphere    | 1.314905189 |   |                          |
|                | 0.767958586                           | 0.767958586                          | -2.989965707 |            | -0.233642609                   |             |   | -1.153031096             |
|                | 1.590832305                           | 3 0                                  | 0.85013142   |            |                                |             |   |                          |
| STAU2          | ENSG00000040341.17                    | 0.028801564                          | 2            | 2          | 0.140086517                    |             |   | Brain_Cerebellum         |
|                | 0.686439244                           | Brain_Cerebellar_Hemisphere          | 1.906892919  |            | 0.093107081                    |             |   |                          |
|                | 0.093107081                           | 0.403691972                          | 1.475468923  |            | 0.939580447                    |             |   | 0.75786075 2             |
|                | 0                                     | 0.85013142                           |              |            |                                |             |   |                          |
| TMOD1          | ENSG00000136842.13                    | 0.028817845                          | 2            | 1          | 0.026079954                    |             |   | Brain_Cerebellum         |
|                | 0.033788895                           | Brain_Cerebellar_Hemisphere          | 1.977794841  |            | 0.022205159                    |             |   |                          |
|                | 1.977794841                           | -2.225019133                         | -2.12258199  |            | -2.173800562                   |             |   | 0.072433999              |
|                | 1 0                                   | 0.85013142                           |              |            |                                |             |   |                          |
| RP11-3B7.1     | ENSG00000225399.4                     | 0.028951654                          | 2            | 2          | 0.02071604                     |             |   | Brain_Cortex             |
|                | 0.036547589                           | Brain_Anterior_cingulate_cortex_BA24 | 1.376538411  |            |                                |             |   |                          |
|                | 0.623461589                           | 0.623461589                          | -2.313120052 |            | -2.090782234                   |             |   | -2.201951143             |
|                | 0.157216579                           | 2 0                                  | 0.85013142   |            |                                |             |   |                          |
| CENPO          | ENSG00000138092.10                    | 0.02896348                           | 4            | 4          | 0.02143218                     |             |   | Brain_Frontal_Cortex_BA9 |
|                | 0.975211201                           | Brain_Putamen_basal_ganglia          | 2.33980253   |            | 0.147071724                    |             |   |                          |
|                | 0.147071724                           | -0.793236658                         | 2.300283217  |            | 0.192913877                    |             |   | 1.445532596              |
|                | 4 0                                   | 0.85013142                           |              |            |                                |             |   |                          |
| UNC45A         | ENSG00000140553.17                    | 0.029003072                          | 1            | 1          | 0.029003072                    |             |   |                          |
|                | Brain_Cerebellum                      | 0.029003072                          |              |            | Brain_Cerebellum               | 1           | 1 | 1                        |
|                | -2.183444766                          | -2.183444766                         | NA           | 1          | 0                              |             |   | 0.85013142               |
| ALOX12         | ENSG00000108839.11                    | 0.029086949                          | 1            | 1          | 0.029086949                    |             |   |                          |
|                | Brain_Spinal_cord_cervical_c-1        | 0.029086949                          |              |            | Brain_Spinal_cord_cervical_c-1 |             |   |                          |
|                | 1 1 1                                 | -2.182306101                         | -2.182306101 |            | -2.182306101                   | NA          | 1 | 0                        |
|                | 0.85013142                            |                                      |              |            |                                |             |   |                          |
| AC093323.3     | ENSG00000170846.16                    | 0.029108034                          | 1            | 1          | 0.029108034                    |             |   |                          |
|                | Brain_Putamen_basal_ganglia           | 0.029108034                          |              |            | Brain_Putamen_basal_ganglia    | 1           | 1 |                          |
|                | 1 -2.182020313                        | -2.182020313                         | -2.182020313 |            | NA                             | 1           | 0 | 0.85013142               |
| ORC4           | ENSG00000115947.13                    | 0.029110029                          | 5            | 3          | 0.003599091                    |             |   |                          |
|                | Brain_Frontal_Cortex_BA9              | 0.076070882                          |              |            | Brain_Amygdala                 | 3.457019796 |   |                          |
|                | 0.010930703                           | 0.501963947                          | 1.77395326   |            | 2.911316648                    |             |   | 2.365422133              |
|                | 0.40294771                            | 3 0                                  | 0.85013142   |            |                                |             |   |                          |
| TCP11L1        | ENSG00000176148.15                    | 0.029434447                          | 9            | 5          | 0.003689821                    |             |   |                          |
|                | Brain_Cortex                          | 0.605917605                          |              |            | Brain_Frontal_Cortex_BA9       | 6.340145328 |   |                          |
|                | 0.006564875                           | 0.313385006                          | 0.51590952   |            | 2.903529595                    |             |   | 1.475513049              |
|                | 0.694310279                           | 5 0                                  | 0.85013142   |            |                                |             |   |                          |
| CLASRP         | ENSG00000104859.14                    | 0.029480159                          | 2            | 2          | 0.008999311                    |             |   |                          |
|                | Brain_Substantia_nigra                | 0.710197782                          |              |            | Brain_Spinal_cord_cervical_c-1 |             |   |                          |
|                | 1.039242184                           | 0.960757816                          | 0.960757816  |            | 0.371590475                    |             |   | 2.612080326              |
|                | 1.4918354                             | 1.584265567                          | 2 0          | 0.85013142 |                                |             |   |                          |
| KDM8           | ENSG00000155666.11                    | 0.029486491                          | 6            | 6          | 0.00932503                     |             |   |                          |
|                | Brain_Nucleus_accumbens_basal_ganglia | 0.940864105                          |              |            | Brain_Putamen_basal_ganglia    |             |   |                          |
|                | 1.857965593                           | 0.307961479                          | 0.307961479  |            | -2.23174326                    |             |   | 2.599902323              |

|                |                                       |                             |                                |              |              |                  |              |
|----------------|---------------------------------------|-----------------------------|--------------------------------|--------------|--------------|------------------|--------------|
|                | 0.184021865                           | 1.781315512                 | 6                              | 0            | 0.85013142   |                  |              |
| AC007563.1     | ENSG00000236295.1                     | 0.029564031                 | 1                              | 1            | 0.029564031  |                  |              |
|                | Brain_Cerebellum                      | 0.029564031                 | Brain_Cerebellum               | 1            | 1            | 1                | 2.175882727  |
|                | 2.175882727                           | 2.175882727                 | NA                             | 1            | 0            | 0.85013142       |              |
| RHCG           | ENSG00000140519.12                    | 0.02961758                  | 1                              | 1            | 0.02961758   | Brain_Cerebellum | 0.02961758   |
|                | Brain_Cerebellum                      | 1                           | 1                              | 1            | -2.175167322 | -2.175167322     | -2.175167322 |
|                | NA                                    | 1                           | 0                              | 0.85013142   |              |                  |              |
| RP11-575F12.2  | ENSG00000256001.1                     | 0.029649179                 | 1                              | 1            | 0.029649179  |                  |              |
|                | Brain_Frontal_Cortex_BA9              | 0.029649179                 | Brain_Frontal_Cortex_BA9       | 1            | 1            |                  |              |
|                | 1                                     | 2.174745693                 | 2.174745693                    | 2.174745693  | NA           | 1                | 0            |
|                |                                       |                             |                                |              |              |                  | 0.85013142   |
| RP11-554F20.1  | ENSG00000237461.1                     | 0.029727624                 | 1                              | 1            | 0.029727624  |                  |              |
|                | Brain_Hippocampus                     | 0.029727624                 | Brain_Hippocampus              | 1            | 1            | 1                |              |
|                | -2.173700645                          | -2.173700645                | -2.173700645                   | NA           | 1            | 0                | 0.85013142   |
| XPNPEP3        | ENSG00000196236.12                    | 0.029761548                 | 7                              | 7            | 0.021600229  |                  |              |
|                | Brain_Hippocampus                     | 0.973249446                 | Brain_Spinal_cord_cervical_c-1 |              |              |                  |              |
|                | 2.665607143                           | 0.099912993                 | 0.099912993                    | -2.297325137 | -0.661872592 |                  |              |
|                | -0.902017009                          | 1.153882825                 | 7                              | 0            | 0.85013142   |                  |              |
| RP11-1070N10.4 | ENSG00000258390.1                     | 0.029766926                 | 1                              | 1            | 0.029766926  |                  |              |
|                | Brain_Cerebellum                      | 0.029766926                 | Brain_Cerebellum               | 1            | 1            | 1                | -2.173177958 |
|                | -2.173177958                          | -2.173177958                | NA                             | 1            | 0            | 0.85013142       |              |
| DDX17          | ENSG00000100201.20                    | 0.029802951                 | 3                              | 2            | 0.030305309  |                  |              |
|                | Brain_Cerebellar_Hemisphere           | 0.369895153                 | Brain_Putamen_basal_ganglia    | 2.75599537   |              |                  |              |
|                | 0.054806524                           | 0.189198107                 | 0.896669776                    | 2.166076923  | 1.438188094  |                  |              |
|                | 0.654903888                           | 2                           | 0                              | 0.85013142   |              |                  |              |
| PLEK           | ENSG00000115956.9                     | 0.029864366                 | 5                              | 4            | 0.002197473  |                  |              |
|                | Brain_Nucleus_accumbens_basal_ganglia | 0.583321727                 | Brain_Caudate_basal_ganglia    |              |              |                  |              |
|                | 2.322543602                           | 0.052748967                 | 0.638641482                    | -3.062158196 | 0.950121339  |                  |              |
|                | -1.424996493                          | 1.677719136                 | 4                              | 0            | 0.85013142   |                  |              |
| ADRA2C         | ENSG00000184160.7                     | 0.029889448                 | 3                              | 3            | 0.004297664  |                  |              |
|                | Brain_Spinal_cord_cervical_c-1        | 0.630724612                 | Brain_Cerebellum               | 1.362492035  |              |                  |              |
|                | 0.741578712                           | 0.741578712                 | -2.855444468                   | 0.931018004  | -0.801711222 |                  |              |
|                | 1.913532649                           | 3                           | 0                              | 0.85013142   |              |                  |              |
| TSPAN3         | ENSG00000140391.14                    | 0.029895265                 | 2                              | 2            | 0.0094737    | Brain_Cerebellum |              |
|                | 0.141092261                           | Brain_Cerebellar_Hemisphere | 1.375249328                    | 0.624750672  |              |                  |              |
|                | 0.624750672                           | -2.594469565                | -1.471735708                   | -2.033102636 | 0.793892723  |                  |              |
|                | 2                                     | 0                           | 0.85013142                     |              |              |                  |              |
| RP11-486I11.2  | ENSG00000277369.1                     | 0.030260086                 | 1                              | 1            | 0.030260086  |                  |              |
|                | Brain_Hypothalamus                    | 0.030260086                 | Brain_Hypothalamus             | 1            | 1            | 1                |              |
|                | -2.166669208                          | -2.166669208                | -2.166669208                   | NA           | 1            | 0                | 0.857794409  |
| RP11-791G15.2  | ENSG00000272275.1                     | 0.030287359                 | 2                              | 2            | 0.01003569   |                  |              |
|                | Brain_Frontal_Cortex_BA9              | 0.533323183                 | Brain_Cerebellar_Hemisphere    |              |              |                  |              |
|                | 1.007143373                           | 0.992856627                 | 0.992856627                    | -2.574597157 | 0.622941168  |                  |              |
|                | -0.975827995                          | 2.261001033                 | 2                              | 0            | 0.857794409  |                  |              |
| RP1-56K13.5    | ENSG00000266588.1                     | 0.030416323                 | 1                              | 1            | 0.030416323  |                  |              |
|                | Brain_Frontal_Cortex_BA9              | 0.030416323                 | Brain_Frontal_Cortex_BA9       | 1            | 1            |                  |              |
|                | 1                                     | -2.164626202                | -2.164626202                   | -2.164626202 | NA           | 1                | 0            |
|                | 0.859658408                           |                             |                                |              |              |                  |              |
| KPNA4          | ENSG00000186432.8                     | 0.03056327                  | 1                              | 1            | 0.03056327   |                  |              |
|                | Brain_Anterior_cingulate_cortex_BA24  | 0.03056327                  |                                |              |              |                  |              |
|                | Brain_Anterior_cingulate_cortex_BA24  | 1                           | 1                              | 1            | 2.162712881  |                  |              |
|                | 2.162712881                           | 2.162712881                 | NA                             | 1            | 0            | 0.859658408      |              |
| WDR17          | ENSG00000150627.15                    | 0.030696692                 | 3                              | 3            | 0.031682296  | Brain_Cerebellum |              |
|                | 0.661648575                           | Brain_Cortex                | 1.143770292                    | 0.850885591  | 0.850885591  |                  |              |
|                | -2.148396176                          | 1.855519311                 | 0.048253779                    | 2.030160087  | 3            | 0                |              |
|                | 0.859658408                           |                             |                                |              |              |                  |              |
| SIPA1L2        | ENSG00000116991.10                    | 0.030704204                 | 5                              | 5            | 0.005934992  |                  |              |
|                | Brain_Hippocampus                     | 0.70474618                  | Brain_Putamen_basal_ganglia    | 2.29038624   |              |                  |              |
|                | 0.189788339                           | 0.189788339                 | -0.378921471                   | 2.75135152   | 1.678194391  |                  |              |
|                | 1.243259009                           | 5                           | 0                              | 0.859658408  |              |                  |              |
| CIB2           | ENSG00000136425.12                    | 0.030719213                 | 12                             | 5            | 0.008871133  | Brain_Cerebellum |              |
|                | 0.768143909                           | Brain_Substantia_nigra      | 8.293866285                    | 0.014911646  |              |                  |              |
|                | 0.457192719                           | -2.616980818                | 0.906359667                    | -1.185983527 | 0.975283591  |                  |              |

5 0 0.859658408  
HOXC4 ENSG00000198353.7 0.030721836 1 1 0.030721836  
Brain\_Nucleus\_accumbens\_basal\_ganglia 0.030721836  
Brain\_Nucleus\_accumbens\_basal\_ganglia 1 1 -2.160657118  
-2.160657118 -2.160657118 NA 1 0 0.859658408  
USP2 ENSG00000036672.15 0.031018058 3 3 0.003791154 Brain\_Cortex  
0.941975969 Brain\_Frontal\_Cortex\_BA9 1.156976292 0.801343768  
0.801343768 -0.072786556 2.895035743 1.078285452 1.59196042 3  
0 0.860205619  
GMPPA ENSG00000144591.18 0.031025066 2 2 0.027948965 Brain\_Cerebellum  
0.218725353 Brain\_Spinal\_cord\_cervical\_c-1 1.098800461 0.901199539  
0.901199539 -2.198001978 -1.229924569 -1.713963274 0.684534101  
2 0 0.860205619  
GMPS ENSG00000163655.15 0.031226916 2 2 0.044727237 Brain\_Amygdala  
0.093096604 Brain\_Caudate\_basal\_ganglia 1.012313159 0.987686841  
0.987686841 -2.007210664 1.679284535 -0.163963064 2.606745754  
2 0 0.860205619  
IFRD2 ENSG00000214706.10 0.03131959 1 1 0.03131959 Brain\_Cerebellum 0.03131959  
Brain\_Cerebellum 1 1 1 -2.152988402 -2.152988402 -2.152988402  
NA 1 0 0.860205619  
RP11-313F23.4 ENSG00000255652.3 0.031355026 1 1 0.031355026  
Brain\_Amygdala 0.031355026 Brain\_Amygdala 1 1 1 2.152537741  
2.152537741 2.152537741 NA 1 0 0.860205619  
GDAP1L1 ENSG00000124194.16 0.031384417 1 1 0.031384417  
Brain\_Cerebellum 0.031384417 Brain\_Cerebellum 1 1 1 2.152164297  
2.152164297 2.152164297 NA 1 0 0.860205619  
RPH3A ENSG00000089169.14 0.031384851 1 1 0.031384851  
Brain\_Cerebellar\_Hemisphere 0.031384851 Brain\_Cerebellar\_Hemisphere 1 1  
1 2.152158785 2.152158785 2.152158785 NA 1 0  
0.860205619  
LINC00865 ENSG00000232229.5 0.031455549 13 1 0.012754016  
Brain\_Amygdala 0.497531358 Brain\_Cerebellar\_Hemisphere 12.41287843  
0.000332457 12.41287843 0.678379098 2.490565015 2.090413621  
0.469255646 1 0 0.860205619  
CALN1 ENSG00000183166.10 0.031468709 1 1 0.031468709  
Brain\_Caudate\_basal\_ganglia 0.031468709 Brain\_Caudate\_basal\_ganglia 1 1  
1 2.151094908 2.151094908 2.151094908 NA 1 0  
0.860205619  
RP11-178F10.3 ENSG00000266489.1 0.031509764 7 7 0.034265244  
Brain\_Hypothalamus 0.842348029 Brain\_Amygdala 3.429748501  
0.166473709 0.166473709 -2.116936422 0.976082745 -0.039779053  
1.123643687 7 0 0.860205619  
RGPD8 ENSG00000169629.11 0.031578601 13 4 0.003843936  
Brain\_Putamen\_basal\_ganglia 0.645332371 Brain\_Nucleus\_accumbens\_basal\_ganglia  
9.943036033 0.003448531 0.485221001 -2.890692895 1.55061555  
-1.64002818 1.106782179 4 0 0.860205619  
VSTM2A ENSG00000170419.10 0.031609895 1 1 0.031609895  
Brain\_Cortex 0.031609895 Brain\_Cortex 1 1 1 -2.149309239  
-2.149309239 -2.149309239 NA 1 0 0.860205619  
CAPN15 ENSG00000103326.11 0.031632663 3 3 0.006809099  
Brain\_Cerebellum 0.620980433 Brain\_Putamen\_basal\_ganglia 1.129893075  
0.827949107 0.827949107 -2.706039301 -0.494461298 -1.36961529  
1.175732469 3 0 0.860205619  
ARHGEF39 ENSG00000137135.17 0.031702491 12 4 0.019938171  
Brain\_Nucleus\_accumbens\_basal\_ganglia 0.997788061 Brain\_Cerebellar\_Hemisphere  
8.818393473 0.009453597 0.674926429 -1.263900026 2.327509367  
-0.117088944 0.836772869 4 0 0.860205619  
WDR86 ENSG00000187260.15 0.03174625 3 2 0.009786245  
Brain\_Nucleus\_accumbens\_basal\_ganglia 0.516829425 Brain\_Cerebellum  
1.942925459 0.057099972 0.999974569 -2.583292018 -0.648240479  
-1.886285087 1.075010438 2 0 0.860205619  
Clorf168 ENSG00000187889.12 0.03175677 2 2 0.01128753 Brain\_Cerebellum



|              |                                      |                             |              |              |                                |                  |              |
|--------------|--------------------------------------|-----------------------------|--------------|--------------|--------------------------------|------------------|--------------|
|              | 0.461091257                          | Brain_Substantia_nigra      | 1.017550563  | 0.982449437  |                                |                  |              |
|              | 0.982449437                          | -2.533668987                | -0.737051129 | -1.635360058 | 1.27040067                     | 2                |              |
|              | 0                                    | 0.860205619                 |              |              |                                |                  |              |
| RAD51        | ENSG00000051180.16                   | 0.031818293                 | 2            | 2            | 0.010828992                    |                  |              |
|              | Brain_Substantia_nigra               | 0.420491558                 |              |              | Brain_Caudate_basal_ganglia    |                  |              |
|              | 1.067808595                          | 0.932191405                 | 0.932191405  | -2.548169236 | -0.805568737                   |                  |              |
|              | -1.676868986                         | 1.232204629                 | 2            | 0            | 0.860205619                    |                  |              |
| GALT         | ENSG00000213930.11                   | 0.031848082                 | 3            | 3            | 0.003537195                    |                  |              |
|              | Brain_Putamen_basal_ganglia          | 0.699328409                 |              |              | Brain_Cortex                   | 1.511410916      |              |
|              | 0.48476944                           | 0.48476944                  | -2.916732073 | -0.386227202 | -1.264541467                   |                  |              |
|              | 1.431791594                          | 3                           | 0            | 0.860205619  |                                |                  |              |
| S100A13      | ENSG00000189171.14                   | 0.031974363                 | 12           | 2            | 0.105861476                    |                  |              |
|              | Brain_Substantia_nigra               | 0.629732384                 |              |              | Brain_Spinal_cord_cervical_c-1 |                  |              |
|              | 10.41956981                          | 0.009766195                 | 0.529811032  | -1.617077856 | 0.572073444                    |                  |              |
|              | -1.032547461                         | 0.628257779                 | 2            | 0            | 0.8606068                      |                  |              |
| ZKSCAN5      | ENSG00000196652.11                   | 0.031985958                 | 3            | 2            | 0.009266456                    |                  |              |
|              | Brain_Cortex                         | 0.013137559                 |              |              | Brain_Frontal_Cortex_BA9       | 2.821862568      |              |
|              | 0.032082427                          | 0.146055005                 | -2.602063985 | -2.480018424 | -2.540706652                   |                  |              |
|              | 0.061025532                          | 2                           | 0            | 0.8606068    |                                |                  |              |
| RP1-151F17.2 | ENSG00000272341.1                    | 0.032177093                 | 1            | 1            | 0.032177093                    |                  |              |
|              | Brain_Cortex                         | 0.032177093                 | Brain_Cortex | 1            | 1                              | 1                | 2.142203706  |
|              | 2.142203706                          | 2.142203706                 | NA           | 1            | 0                              | 0.862519717      |              |
| PCDHGB1      | ENSG00000254221.2                    | 0.032262487                 | 1            | 1            | 0.032262487                    |                  |              |
|              | Brain_Cerebellar_Hemisphere          | 0.032262487                 |              |              | Brain_Cerebellar_Hemisphere    | 1                | 1            |
|              | 1                                    | 2.141143257                 | 2.141143257  | 2.141143257  | NA                             | 1                | 0            |
|              | 0.862519717                          |                             |              |              |                                |                  |              |
| CRYGA        | ENSG00000168582.4                    | 0.032293156                 | 8            | 5            | 0.164048415                    |                  |              |
|              | Brain_Hypothalamus                   | 0.727661647                 |              |              | Brain_Frontal_Cortex_BA9       | 5.6889705        |              |
|              | 0.029982096                          | 0.206619211                 | -1.391583972 | 0.452151436  | -0.828352582                   |                  |              |
|              | 0.644721129                          | 5                           | 0            | 0.862519717  |                                |                  |              |
| MCM6         | ENSG00000076003.4                    | 0.032303647                 | 5            | 4            | 0.03732561                     | Brain_Cerebellum |              |
|              | 0.989616508                          | Brain_Caudate_basal_ganglia | 2.925049834  | 0.065837535  |                                |                  |              |
|              | 0.214512078                          | -2.082184611                | 0.761212326  | -0.387312129 | 1.246358911                    |                  |              |
|              | 4                                    | 0                           | 0.862519717  |              |                                |                  |              |
| STPG3        | ENSG00000197768.10                   | 0.032445132                 | 1            | 1            | 0.032445132                    | Brain_Cortex     |              |
|              | 0.032445132                          | Brain_Cortex                | 1            | 1            | 1                              | -2.138883167     | -2.138883167 |
|              | -2.138883167                         | NA                          | 1            | 0            | 0.864647308                    |                  |              |
| ZNF669       | ENSG00000188295.14                   | 0.032639196                 | 9            | 3            | 0.186997152                    |                  |              |
|              | Brain_Anterior_cingulate_cortex_BA24 | 0.740947952                 |              |              | Brain_Caudate_basal_ganglia    |                  |              |
|              | 7.491137584                          | 0.017025456                 | 0.345506727  | -0.763350901 | 1.319514542                    |                  |              |
|              | 0.628107451                          | 0.630611515                 | 3            | 0            | 0.865270611                    |                  |              |
| C20orf203    | ENSG00000198547.8                    | 0.032734222                 | 13           | 4            | 0.002808184                    |                  |              |
|              | Brain_Hippocampus                    | 0.545485578                 |              |              | Brain_Hypothalamus             | 10.25225069      |              |
|              | 1.30E-16                             | 0.397106397                 | -2.987990353 | -0.604538655 | -2.58068792                    |                  |              |
|              | 0.663745306                          | 4                           | 0            | 0.865270611  |                                |                  |              |
| FMN2         | ENSG00000155816.19                   | 0.03274693                  | 2            | 2            | 0.014302055                    |                  |              |
|              | Brain_Frontal_Cortex_BA9             | 0.383788527                 |              |              | Brain_Substantia_nigra         |                  |              |
|              | 1.017971196                          | 0.982028804                 | 0.982028804  | -2.449586012 | -0.870937048                   |                  |              |
|              | -1.66026153                          | 1.116273387                 | 2            | 0            | 0.865270611                    |                  |              |
| MIEF2        | ENSG00000177427.12                   | 0.032803312                 | 1            | 1            | 0.032803312                    |                  |              |
|              | Brain_Putamen_basal_ganglia          | 0.032803312                 |              |              | Brain_Putamen_basal_ganglia    | 1                | 1            |
|              | 1                                    | -2.134482405                | -2.134482405 | -2.134482405 | NA                             | 1                | 0            |
|              | 0.865270611                          |                             |              |              |                                |                  |              |
| LSS          | ENSG00000160285.14                   | 0.032883481                 | 8            | 6            | 0.064618871                    |                  |              |
|              | Brain_Anterior_cingulate_cortex_BA24 | 0.814979888                 |              |              | Brain_Hypothalamus             |                  |              |
|              | 4.592229791                          | 0.108328536                 | 0.182411994  | -0.935542731 | 1.847885757                    |                  |              |
|              | 0.151081276                          | 0.959157576                 | 6            | 0            | 0.865270611                    |                  |              |
| WDR92        | ENSG00000243667.6                    | 0.032996846                 | 8            | 3            | 0.003625872                    |                  |              |
|              | Brain_Hippocampus                    | 0.730455006                 |              |              | Brain_Spinal_cord_cervical_c-1 |                  |              |
|              | 6.080904181                          | 3.60E-05                    | 0.523383579  | 0.344520335  | 2.908999693                    |                  |              |
|              | 2.107052325                          | 0.8066006                   | 3            | 0            | 0.865270611                    |                  |              |
| FLVCR2       | ENSG00000119686.9                    | 0.03317226                  | 2            | 2            | 0.101006949                    |                  |              |

|                |                                       |              |                  |                                |              |             |             |             |
|----------------|---------------------------------------|--------------|------------------|--------------------------------|--------------|-------------|-------------|-------------|
|                | Brain_Hippocampus                     | 0.108532547  |                  | Brain_Spinal_cord_cervical_c-1 |              |             |             |             |
|                | 1.227137527                           | 0.772862473  | 0.772862473      | -1.604823979                   | 1.639991431  |             |             |             |
|                | 0.017583726                           | 2.29443098   | 2                | 0                              | 0.865270611  |             |             |             |
| RASL11A        | ENSG00000122035.6                     | 0.033189736  | 0.033189736      | 1                              | 1            | 0.033189736 |             |             |
|                | Brain_Cerebellum                      | 0.033189736  | Brain_Cerebellum | 1                              | 1            | 1           | 2.129780543 |             |
|                | 2.129780543                           | 2.129780543  | NA               | 1                              | 0            | 0.865270611 |             |             |
| CSNK2A2        | ENSG00000070770.8                     | 0.033205862  | 0.033205862      | 1                              | 1            | 0.033205862 |             |             |
|                | Brain_Spinal_cord_cervical_c-1        | 0.033205862  | 0.033205862      | Brain_Spinal_cord_cervical_c-1 |              |             |             |             |
|                | 1                                     | 1            | -2.12958534      | -2.12958534                    | -2.12958534  | NA          | 1           | 0           |
|                | 0.865270611                           |              |                  |                                |              |             |             |             |
| NOXRED1        | ENSG00000165555.9                     | 0.033267113  | 0.033267113      | 7                              | 5            | 0.082901295 |             |             |
|                | Brain_Frontal_Cortex_BA9              | 0.467288801  | 0.467288801      | Brain_Caudate_basal_ganglia    |              |             |             |             |
|                | 4.651651095                           | 0.002203394  | 0.205600952      | -1.734094623                   | 1.721329663  |             |             |             |
|                | 0.544796364                           | 1.305463336  | 5                | 0                              | 0.865270611  |             |             |             |
| NDUFS4         | ENSG00000164258.11                    | 0.033268707  | 0.033268707      | 1                              | 1            | 0.033268707 |             |             |
|                | Brain_Cerebellar_Hemisphere           | 0.033268707  | 0.033268707      | Brain_Cerebellar_Hemisphere    | 1            | 1           |             |             |
|                | 1                                     | -2.128825423 | -2.128825423     | -2.128825423                   | NA           | 1           | 0           |             |
|                | 0.865270611                           |              |                  |                                |              |             |             |             |
| MIRLET7BHG     | ENSG00000197182.14                    | 0.033316297  | 0.033316297      | 1                              | 1            | 0.033316297 |             |             |
|                | Brain_Cerebellum                      | 0.033316297  | 0.033316297      | Brain_Cerebellum               | 1            | 1           | 1           | 2.128250774 |
|                | 2.128250774                           | 2.128250774  | NA               | 1                              | 0            | 0.865270611 |             |             |
| LMO7           | ENSG00000136153.19                    | 0.033345437  | 0.033345437      | 1                              | 1            | 0.033345437 |             |             |
|                | Brain_Frontal_Cortex_BA9              | 0.033345437  | 0.033345437      | Brain_Frontal_Cortex_BA9       | 1            | 1           |             |             |
|                | 1                                     | -2.127899254 | -2.127899254     | -2.127899254                   | NA           | 1           | 0           |             |
|                | 0.865270611                           |              |                  |                                |              |             |             |             |
| CCL20          | ENSG00000115009.11                    | 0.033435316  | 0.033435316      | 2                              | 2            | 0.056492536 |             |             |
|                | Brain_Spinal_cord_cervical_c-1        | 0.056632306  | 0.056632306      | Brain_Hippocampus              |              |             |             |             |
|                | 1.069825257                           | 0.930174743  | 0.930174743      | -1.907216671                   | -1.906137982 |             |             |             |
|                | -1.906677326                          | 0.000762748  | 2                | 0                              | 0.865270611  |             |             |             |
| GFRA2          | ENSG00000168546.10                    | 0.033443232  | 0.033443232      | 2                              | 2            | 0.034155043 |             |             |
|                | Brain_Frontal_Cortex_BA9              | 0.180378764  | 0.180378764      | Brain_Cerebellar_Hemisphere    |              |             |             |             |
|                | 1.082490065                           | 0.917509935  | 0.917509935      | -2.118236504                   | -1.339589731 |             |             |             |
|                | -1.728913117                          | 0.550586414  | 2                | 0                              | 0.865270611  |             |             |             |
| PELO           | ENSG00000152684.10                    | 0.03349668   | 0.03349668       | 2                              | 2            | 0.041972958 |             |             |
|                | Brain_Nucleus_accumbens_basal_ganglia | 0.077724292  | 0.077724292      | Brain_Hippocampus              |              |             |             |             |
|                | 1.067842628                           | 0.932157372  | 0.932157372      | -2.03378817                    | 1.76404566   |             |             |             |
|                | -0.134871255                          | 2.685474055  | 2                | 0                              | 0.865270611  |             |             |             |
| RAVER2         | ENSG00000162437.14                    | 0.033519882  | 0.033519882      | 2                              | 2            | 0.020225068 |             |             |
|                | Brain_Cerebellar_Hemisphere           | 0.394760873  | 0.394760873      | Brain_Cerebellum               | 1.719960518  |             |             |             |
|                | 0.280039482                           | 0.280039482  | 0.851015266      | 2.322146145                    | 1.586580705  |             |             |             |
|                | 1.040246621                           | 2            | 0                | 0.865270611                    |              |             |             |             |
| ATG14          | ENSG00000126775.8                     | 0.033659457  | 0.033659457      | 12                             | 3            | 0.015229136 |             |             |
|                | Brain_Cerebellar_Hemisphere           | 0.65074035   | 0.65074035       | Brain_Hippocampus              | 10.10763383  |             |             |             |
|                | 0.004556017                           | 0.51323597   | 0.452733922      | 2.42688371                     | 1.190989861  |             |             |             |
|                | 0.529637274                           | 3            | 0                | 0.865643096                    |              |             |             |             |
| RP11-399K21.14 | ENSG00000272692.1                     | 0.033682395  | 0.033682395      | 5                              | 5            | 0.003404808 |             |             |
|                | Brain_Spinal_cord_cervical_c-1        | 0.974211283  | 0.974211283      | Brain_Cerebellar_Hemisphere    |              |             |             |             |
|                | 1.51273017                            | 0.536356428  | 0.536356428      | -0.267510579                   | 2.928610461  |             |             |             |
|                | 1.217897347                           | 1.361647908  | 5                | 0                              | 0.865643096  |             |             |             |
| TBC1D8-AS1     | ENSG00000272902.2                     | 0.033754384  | 0.033754384      | 1                              | 1            | 0.033754384 |             |             |
|                | Brain_Nucleus_accumbens_basal_ganglia | 0.033754384  | 0.033754384      |                                |              |             |             |             |
|                | Brain_Nucleus_accumbens_basal_ganglia | 1            | 1                | 1                              | 2.122993653  |             |             |             |
|                | 2.122993653                           | 2.122993653  | NA               | 1                              | 0            | 0.865643096 |             |             |
| NAMPT          | ENSG00000105835.11                    | 0.033781798  | 0.033781798      | 2                              | 2            | 0.009735751 |             |             |
|                | Brain_Cerebellar_Hemisphere           | 0.111956474  | 0.111956474      | Brain_Cerebellum               | 1.699218911  |             |             |             |
|                | 0.300781089                           | 0.300781089  | 1.58946046       | 2.585076098                    | 2.087268279  |             |             |             |
|                | 0.704006569                           | 2            | 0                | 0.865643096                    |              |             |             |             |
| QPCT           | ENSG00000115828.15                    | 0.033902424  | 0.033902424      | 2                              | 2            | 0.017852437 |             |             |
|                | Brain_Nucleus_accumbens_basal_ganglia | 0.096577932  | 0.096577932      | Brain_Cortex                   |              |             |             |             |
|                | 1.263246213                           | 0.736753787  | 0.736753787      | 1.661675123                    | 2.368664546  |             |             |             |
|                | 2.015169835                           | 0.499917015  | 2                | 0                              | 0.866227595  |             |             |             |
| ARV1           | ENSG00000173409.13                    | 0.033928434  | 0.033928434      | 5                              | 3            | 0.051819666 |             |             |

|           |                                       |                             |              |                                |              |              |   |              |  |
|-----------|---------------------------------------|-----------------------------|--------------|--------------------------------|--------------|--------------|---|--------------|--|
|           | Brain_Cerebellar_Hemisphere           | 0.596867272                 |              | Brain_Cerebellum               | 3.927844772  |              |   |              |  |
|           | 0.031442667                           | 0.252518774                 | -1.944628838 | 0.644443091                    |              | -0.772302037 |   |              |  |
|           | 0.945283544                           | 3                           | 0            | 0.866227595                    |              |              |   |              |  |
| FBF1      | ENSG00000188878.19                    | 0.034104634                 | 13           | 3                              | 0.009806059  |              |   |              |  |
|           | Brain_Nucleus_accumbens_basal_ganglia | 0.61329839                  |              | Brain_Spinal_cord_cervical_c-1 |              |              |   |              |  |
|           | 10.60138035                           | 0.002000073                 | 0.679999731  | -0.713273764                   |              | 2.582594209  |   |              |  |
|           | 1.681224504                           | 0.878351284                 | 3            | 0                              | 0.869140144  |              |   |              |  |
| MAP7      | ENSG00000135525.18                    | 0.034305586                 | 1            | 1                              | 0.034305586  |              |   |              |  |
|           | Brain_Frontal_Cortex_BA9              | 0.034305586                 |              | Brain_Frontal_Cortex_BA9       |              |              | 1 | 1            |  |
|           | 1                                     | 2.116461383                 | 2.116461383  | 2.116461383                    | NA           | 1            | 0 |              |  |
|           | 0.870664744                           |                             |              |                                |              |              |   |              |  |
| MTRF1L    | ENSG00000112031.15                    | 0.034367576                 | 13           | 1                              | 0.022613711  |              |   |              |  |
|           | Brain_Spinal_cord_cervical_c-1        | 0.052755748                 |              |                                |              |              |   |              |  |
|           | Brain_Anterior_cingulate_cortex_BA24  | 12.57520497                 |              | 0.000171977                    |              |              |   |              |  |
|           | 12.57520497                           | 1.93691489                  | 2.279898464  | 2.080175435                    |              | 0.086934673  |   | 1            |  |
|           | 0                                     | 0.870664744                 |              |                                |              |              |   |              |  |
| ESR1      | ENSG00000091831.22                    | 0.034551234                 | 2            | 2                              | 0.017252212  |              |   |              |  |
|           | Brain_Spinal_cord_cervical_c-1        | 0.862619573                 |              | Brain_Caudate_basal_ganglia    |              |              |   |              |  |
|           | 1.45720379                            | 0.54279621                  | 0.54279621   | -2.381288131                   |              | -0.173040526 |   | -1.277164328 |  |
|           | 1.561466856                           | 2                           | 0            | 0.870664744                    |              |              |   |              |  |
| LAMTOR3   | ENSG00000109270.12                    | 0.034658371                 | 11           | 1                              | 0.025440474  |              |   |              |  |
|           | Brain_Substantia_nigra                | 0.11952978                  |              | Brain_Hypothalamus             | 9.99273475   | 0.0034709    |   |              |  |
|           | 9.99273475                            | 1.556750303                 | 2.234647887  | 2.016316779                    |              | 0.199820391  |   | 1            |  |
|           | 0                                     | 0.870664744                 |              |                                |              |              |   |              |  |
| HSPA12A   | ENSG00000165868.13                    | 0.034679543                 | 2            | 2                              | 0.060547191  |              |   |              |  |
|           | Brain_Cerebellum                      | 0.484153796                 |              | Brain_Cerebellar_Hemisphere    | 1.469098658  |              |   |              |  |
|           | 0.530901342                           | 0.530901342                 | -0.699637374 | 1.876787745                    |              | 0.588575186  |   |              |  |
|           | 1.821807673                           | 2                           | 0            | 0.870664744                    |              |              |   |              |  |
| CCDC18    | ENSG00000122483.17                    | 0.034679673                 | 5            | 2                              | 0.030559309  |              |   |              |  |
|           | Brain_Spinal_cord_cervical_c-1        | 0.115938093                 |              | Brain_Cerebellum               | 3.940080535  |              |   |              |  |
|           | 0.007621671                           | 0.972843007                 | -2.162764346 | -1.57205372                    |              | -1.79703089  |   |              |  |
|           | 0.246106156                           | 2                           | 0            | 0.870664744                    |              |              |   |              |  |
| LARS      | ENSG00000133706.17                    | 0.034684413                 | 12           | 2                              | 0.010863938  |              |   |              |  |
|           | Brain_Anterior_cingulate_cortex_BA24  | 0.18801746                  |              | Brain_Frontal_Cortex_BA9       |              |              |   |              |  |
|           | 11.11892716                           | 0.001184122                 | 0.383068751  | -2.547045126                   |              | -1.316466663 |   |              |  |
|           | -2.263843677                          | 0.353251043                 | 2            | 0                              | 0.870664744  |              |   |              |  |
| GSTM4     | ENSG00000168765.16                    | 0.034721205                 | 12           | 4                              | 0.010256884  |              |   |              |  |
|           | Brain_Cerebellum                      |                             |              | Brain_Cerebellar_Hemisphere    | 8.811587113  | 0.019207575  |   |              |  |
|           | 0.975853939                           | Brain_Cerebellar_Hemisphere | 8.811587113  | 0.019207575                    |              |              |   |              |  |
|           | 0.424022553                           | -0.332998764                | 2.567046556  | 0.757628974                    |              | 0.822134425  |   |              |  |
|           | 4                                     | 0                           | 0.870664744  |                                |              |              |   |              |  |
| ZNF396    | ENSG00000186496.10                    | 0.034724532                 | 3            | 3                              | 0.008030062  |              |   |              |  |
|           | Brain_Nucleus_accumbens_basal_ganglia | 0.660043339                 |              | Brain_Putamen_basal_ganglia    |              |              |   |              |  |
|           | 1.704523769                           | 0.485785344                 | 0.485785344  | -2.650803168                   |              | 0.439853331  |   |              |  |
|           | -1.07960515                           | 1.545977727                 | 3            | 0                              | 0.870664744  |              |   |              |  |
| SALL2     | ENSG00000165821.11                    | 0.034787331                 | 1            | 1                              | 0.034787331  |              |   |              |  |
|           | Brain_Cerebellum                      | 1                           | 1            | 1                              | -2.110825294 |              |   |              |  |
|           | 0.034787331                           | Brain_Cerebellum            | 1            | 1                              | -2.110825294 |              |   |              |  |
|           | -2.110825294                          | NA                          | 1            | 0                              | 0.870678982  |              |   |              |  |
| CLDN12    | ENSG00000157224.15                    | 0.034857494                 | 1            | 1                              | 0.034857494  |              |   |              |  |
|           | Brain_Substantia_nigra                | 0.034857494                 |              | Brain_Substantia_nigra         |              |              | 1 | 1            |  |
|           | 1                                     | 2.110010005                 | 2.110010005  | 2.110010005                    | NA           | 1            | 0 |              |  |
|           | 0.870877142                           |                             |              |                                |              |              |   |              |  |
| KB-68A7.1 | ENSG00000274225.1                     | 0.035067403                 | 3            | 3                              | 0.016501579  |              |   |              |  |
|           | Brain_Nucleus_accumbens_basal_ganglia | 0.338384856                 |              | Brain_Cerebellar_Hemisphere    |              |              |   |              |  |
|           | 1.590648283                           | 0.442513065                 | 0.442513065  | -1.330179789                   |              | 2.397628784  |   |              |  |
|           | 0.036695853                           | 2.053107793                 | 3            | 0                              | 0.871659844  |              |   |              |  |
| CPPED1    | ENSG00000103381.11                    | 0.035072755                 | 1            | 1                              | 0.035072755  |              |   |              |  |
|           | Brain_Cortex                          | 0.035072755                 |              | Brain_Cortex                   | 1            | 1            | 1 | 2.107517396  |  |
|           | 2.107517396                           | 2.107517396                 | NA           | 1                              | 0            | 0.871659844  |   |              |  |
| ITGA3     | ENSG00000005884.17                    | 0.035075727                 | 5            | 4                              | 0.065650435  |              |   |              |  |
|           | Brain_Anterior_cingulate_cortex_BA24  | 0.784082327                 |              | Brain_Putamen_basal_ganglia    |              |              |   |              |  |
|           | 3.312678245                           | 0.099536622                 | 0.396652413  | -1.840802987                   |              | 0.830159281  |   |              |  |
|           | -0.528447241                          | 1.074212216                 | 4            | 0                              | 0.871659844  |              |   |              |  |

|           |                                       |                             |                                       |              |                                |                |              |            |  |
|-----------|---------------------------------------|-----------------------------|---------------------------------------|--------------|--------------------------------|----------------|--------------|------------|--|
| CMAS      | ENSG00000111726.12                    | 0.035229309                 | 1                                     | 1            | 0.035229309                    |                |              |            |  |
|           | Brain_Spinal_cord_cervical_c-1        | 0.035229309                 |                                       |              | Brain_Spinal_cord_cervical_c-1 |                |              |            |  |
|           | 1 1 1                                 | 2.105712776                 | 2.105712776                           | 2.105712776  | NA                             | 1              | 0            |            |  |
|           | 0.872247017                           |                             |                                       |              |                                |                |              |            |  |
| CYC1      | ENSG00000179091.4                     | 0.035249653                 | 2                                     | 2            | 0.18459666                     |                |              |            |  |
|           | Brain_Cerebellar_Hemisphere           | 0.2452324                   | Brain_Frontal_Cortex_BA9              | 1.536512354  |                                |                |              |            |  |
|           | 0.463487646                           | 0.463487646                 | -1.162007545                          | 1.32673409   | 0.082363273                    |                |              |            |  |
|           | 1.759806087                           | 2                           | 0                                     | 0.872247017  |                                |                |              |            |  |
| DYNLL2    | ENSG00000264364.2                     | 0.03541551                  | 8                                     | 7            | 0.03036976                     |                |              |            |  |
|           | Brain_Cerebellar_Hemisphere           | 0.90889741                  | Brain_Nucleus_accumbens_basal_ganglia |              |                                |                |              |            |  |
|           | 4.069280114                           | 0.030145768                 | 0.210676837                           | -1.51153059  | 2.165234128                    |                |              |            |  |
|           | 0.026939132                           | 1.110262671                 | 7                                     | 0            | 0.872247017                    |                |              |            |  |
| LINC01123 | ENSG00000204588.5                     | 0.03564733                  | 6                                     | 4            | 0.002458902                    | Brain_Cortex   |              |            |  |
|           | 0.607279111                           | Brain_Hypothalamus          | 4.110856137                           | 0.078603177  |                                |                |              |            |  |
|           | 0.210283474                           | -3.028353583                | 0.51396121                            | -2.13893229  | 1.316690092                    |                | 4            |            |  |
|           | 0                                     | 0.872247017                 |                                       |              |                                |                |              |            |  |
| NUMB      | ENSG00000133961.19                    | 0.035680396                 | 3                                     | 3            | 0.021110186                    |                |              |            |  |
|           | Brain_Hypothalamus                    | 0.192923578                 | Brain_Spinal_cord_cervical_c-1        |              |                                |                |              |            |  |
|           | 1.235141256                           | 0.695290219                 | 0.695290219                           | 1.301978962  | 2.306007994                    |                |              |            |  |
|           | 1.778954194                           | 0.503884384                 | 3                                     | 0            | 0.872247017                    |                |              |            |  |
| DLG5      | ENSG00000151208.16                    | 0.035703437                 | 8                                     | 4            | 0.016704256                    |                |              |            |  |
|           | Brain_Hippocampus                     | 0.523847055                 | Brain_Putamen_basal_ganglia           | 6.034365342  |                                |                |              |            |  |
|           | 0.00803967                            | 0.238727608                 | -2.393153387                          | 1.687684964  | -0.93511195                    |                |              |            |  |
|           | 1.20839403                            | 4                           | 0                                     | 0.872247017  |                                |                |              |            |  |
| UBE2E2    | ENSG00000182247.9                     | 0.035746524                 | 2                                     | 2            | 0.009868301                    |                |              |            |  |
|           | Brain_Anterior_cingulate_cortex_BA24  | 0.98694506                  | Brain_Substantia_nigra                |              |                                |                |              |            |  |
|           | 1.031105484                           | 0.968894516                 | 0.968894516                           | -2.580410242 | -0.016362671                   |                |              |            |  |
|           | -1.298386456                          | 1.813055425                 | 2                                     | 0            | 0.872247017                    |                |              |            |  |
| ACAA2     | ENSG00000167315.17                    | 0.035749453                 | 4                                     | 4            | 0.022116315                    |                |              |            |  |
|           | Brain_Anterior_cingulate_cortex_BA24  | 0.620167459                 | Brain_Cerebellar_Hemisphere           |              |                                |                |              |            |  |
|           | 1.784114628                           | 0.254218293                 | 0.254218293                           | -2.021041719 | 2.288364291                    |                |              |            |  |
|           | -0.259008764                          | 1.82125984                  | 4                                     | 0            | 0.872247017                    |                |              |            |  |
| DYRK1A    | ENSG00000157540.19                    | 0.035781328                 | 1                                     | 1            | 0.035781328                    |                |              |            |  |
|           | Brain_Cerebellum                      | 0.035781328                 | Brain_Cerebellum                      | 1            | 1                              | 1              | -2.099403704 |            |  |
|           | -2.099403704                          | -2.099403704                | NA                                    | 1            | 0                              | 0.872247017    |              |            |  |
| LYG1      | ENSG00000144214.9                     | 0.035785698                 | 4                                     | 2            | 0.038325437                    |                |              |            |  |
|           | Brain_Cerebellar_Hemisphere           | 0.452339451                 | Brain_Hippocampus                     | 3.073234382  |                                |                |              |            |  |
|           | 0.038342621                           | 0.810498819                 | -0.751520529                          | 2.071357103  | 1.250037677                    |                |              |            |  |
|           | 1.340995234                           | 2                           | 0                                     | 0.872247017  |                                |                |              |            |  |
| CCDC82    | ENSG00000149231.11                    | 0.035855881                 | 13                                    | 1            | 0.029952659                    |                |              |            |  |
|           | Brain_Anterior_cingulate_cortex_BA24  | 0.059243116                 |                                       |              |                                |                |              |            |  |
|           | Brain_Nucleus_accumbens_basal_ganglia | 12.82672451                 | 2.86E-06                              | 12.82672451  |                                |                |              |            |  |
|           | -2.170715844                          | -1.886384826                | -2.084272778                          | 0.075439856  | 1                              | 0              |              |            |  |
|           | 0.872247017                           |                             |                                       |              |                                |                |              |            |  |
| ADCYAP1   | ENSG00000141433.12                    | 0.035891087                 | 2                                     | 2            | 0.012268472                    |                |              |            |  |
|           | Brain_Cerebellar_Hemisphere           | 0.602964073                 | Brain_Cerebellum                      | 1.430689079  |                                |                |              |            |  |
|           | 0.569310921                           | 0.569310921                 | 0.520142765                           | 2.50432663   | 1.512234698                    |                |              |            |  |
|           | 1.403029866                           | 2                           | 0                                     | 0.872247017  |                                |                |              |            |  |
| SLC25A34  | ENSG00000162461.7                     | 0.035956834                 | 13                                    | 2            | 0.016108491                    |                |              |            |  |
|           | Brain_Hippocampus                     | 0.885599659                 | Brain_Nucleus_accumbens_basal_ganglia |              |                                |                |              |            |  |
|           | 11.75116111                           | 1.11E-16                    | 0.466489699                           | -2.406448135 | -0.143874389                   |                |              |            |  |
|           | -0.909313316                          | 0.51437312                  | 2                                     | 0            | 0.872247017                    |                |              |            |  |
| EML5      | ENSG00000165521.15                    | 0.035972163                 | 1                                     | 1            | 0.035972163                    | Brain_Cortex   |              |            |  |
|           | 0.035972163                           | Brain_Cortex                | 1                                     | 1            | 1                              | 2.09724195     | 2.09724195   | 2.09724195 |  |
|           | NA                                    | 1                           | 0                                     | 0.872247017  |                                |                |              |            |  |
| DMTN      | ENSG00000158856.17                    | 0.03609814                  | 9                                     | 8            | 0.002109683                    | Brain_Amygdala |              |            |  |
|           | 0.822910205                           | Brain_Cerebellar_Hemisphere | 3.220587392                           | 0.0066622    |                                |                |              |            |  |
|           | 0.442786249                           | -0.223803502                | 3.07434071                            | 1.422364724  | 1.07127223                     | 8              | 0            |            |  |
|           | 0.873227322                           |                             |                                       |              |                                |                |              |            |  |
| LINC00926 | ENSG00000247982.6                     | 0.036155713                 | 9                                     | 9            | 0.01054573                     |                |              |            |  |
|           | Brain_Caudate_basal_ganglia           | 0.915546505                 | Brain_Cerebellar_Hemisphere           |              |                                |                |              |            |  |
|           | 2.834304655                           | 0.157035314                 | 0.157035314                           | -1.158993884 | 2.557401881                    |                |              |            |  |

|              |                                      |              |              |             |                                      |              |              |
|--------------|--------------------------------------|--------------|--------------|-------------|--------------------------------------|--------------|--------------|
|              | 0.445951566                          | 1.147377778  | 9            | 0           | 0.873227322                          |              |              |
| MYPOP        | ENSG00000176182.5                    | 0.036253608  | 1            | 1           | 0.036253608                          | Brain_Cortex |              |
|              | 0.036253608                          | Brain_Cortex | 1            | 1           | -2.094071542                         | -2.094071542 |              |
|              | -2.094071542                         | NA           | 1            | 0           | 0.873227322                          |              |              |
| ZNF501       | ENSG00000186446.11                   | 0.036350843  | 11           | 9           | 0.04705919                           |              |              |
|              | Brain_Caudate_basal_ganglia          | 0.935616915  |              |             | Brain_Frontal_Cortex_BA9             |              |              |
|              | 4.542354563                          | 0.057480992  | 0.243410078  |             | -1.321111181                         | 1.985767105  |              |
|              | 0.248471038                          | 0.899560673  | 9            | 0           | 0.873227322                          |              |              |
| NPIPB2       | ENSG00000234719.8                    | 0.036359322  | 13           | 1           | 0.027491942                          |              |              |
|              | Brain_Anterior_cingulate_cortex_BA24 | 0.062488775  |              |             | Brain_Caudate_basal_ganglia          |              |              |
|              | 12.76723101                          | 4.41E-05     | 12.76723101  |             | 1.862811619                          | 2.204460962  |              |
|              | 2.073512428                          | 0.107936262  | 1            | 0           | 0.873227322                          |              |              |
| ACOT1        | ENSG00000184227.7                    | 0.036414162  | 13           | 9           | 0.000999587                          |              |              |
|              | Brain_Hypothalamus                   | 0.940107466  |              |             | Brain_Caudate_basal_ganglia          | 7.055504149  |              |
|              | 0.009730962                          | 0.284161742  | -0.345520357 |             | 3.290643075                          | 0.874603606  |              |
|              | 0.936467197                          | 9            | 0            | 0.873227322 |                                      |              |              |
| NAPG         | ENSG00000134265.12                   | 0.036459886  | 10           | 4           | 0.024780061                          |              |              |
|              | Brain_Hippocampus                    | 0.698803083  |              |             | Brain_Hypothalamus                   | 7.805567576  |              |
|              | 0.00149957                           | 0.310060818  | -0.506665583 |             | 2.244814227                          | 1.389201757  |              |
|              | 0.892507278                          | 4            | 0            | 0.873227322 |                                      |              |              |
| SELENBP1     | ENSG00000143416.20                   | 0.036521801  | 10           | 7           | 0.017818106                          |              |              |
|              | Brain_Spinal_cord_cervical_c-1       | 0.910818289  |              |             | Brain_Cerebellum                     | 5.731157911  |              |
|              | 9.62E-18                             | 0.32301278   | -0.760420888 |             | 2.369376479                          | 1.191835255  |              |
|              | 1.120085477                          | 7            | 0            | 0.873227322 |                                      |              |              |
| ARL2BP       | ENSG00000102931.7                    | 0.036751019  | 1            | 1           | 0.036751019                          |              |              |
|              | Brain_Cortex                         | 0.036751019  |              |             | Brain_Cortex                         | 1            | 1            |
|              | -2.088519273                         | -2.088519273 | NA           | 1           | 0                                    | 0.873227322  | -2.088519273 |
| GOLT1B       | ENSG00000111711.9                    | 0.036859838  | 3            | 3           | 0.006480823                          |              |              |
|              | Brain_Frontal_Cortex_BA9             | 0.38168676   |              |             | Brain_Cortex                         | 1.502177896  |              |
|              | 0.510801325                          | 0.510801325  | -2.722407209 |             | -0.874792608                         | -1.565170939 |              |
|              | 1.008408241                          | 3            | 0            | 0.873227322 |                                      |              |              |
| CLEC18A      | ENSG00000157322.17                   | 0.036967866  | 13           | 1           | 0.010245282                          |              |              |
|              | Brain_Substantia_nigra               | 0.298924136  |              |             | Brain_Anterior_cingulate_cortex_BA24 |              |              |
|              | 12.48017608                          | 0.000444569  | 12.48017608  |             | -2.567438965                         | -1.038743303 |              |
|              | -2.041904227                         | 0.393226244  | 1            | 0           | 0.873227322                          |              |              |
| RILP         | ENSG00000167705.11                   | 0.037009929  | 2            | 2           | 0.041286236                          |              |              |
|              | Brain_Cerebellar_Hemisphere          | 0.185636608  |              |             | Brain_Cerebellum                     | 1.110438175  |              |
|              | 0.889561825                          | 0.889561825  | -1.323597944 |             | 2.040643894                          | 0.358522975  |              |
|              | 2.378878217                          | 2            | 0            | 0.873227322 |                                      |              |              |
| LONRF2       | ENSG00000170500.12                   | 0.037030765  | 3            | 3           | 0.070833692                          |              |              |
|              | Brain_Cortex                         | 0.177400816  |              |             | Brain_Putamen_basal_ganglia          | 1.142832776  |              |
|              | 0.853347832                          | 0.853347832  | -1.517260645 |             | 1.80654218                           | -0.353173235 |              |
|              | 1.872264043                          | 3            | 0            | 0.873227322 |                                      |              |              |
| CCDC154      | ENSG00000197599.12                   | 0.037080592  | 12           | 1           | 0.023211006                          |              |              |
|              | Brain_Cerebellar_Hemisphere          | 0.090402654  |              |             | Brain_Hypothalamus                   | 10.99447599  |              |
|              | 0.001925917                          | 10.99447599  | -2.269943595 |             | -1.693277523                         | -1.996519273 |              |
|              | 0.169833273                          | 1            | 0            | 0.873227322 |                                      |              |              |
| TRMT61A      | ENSG00000166166.12                   | 0.037342798  | 5            | 5           | 0.006697957                          |              |              |
|              | Brain_Putamen_basal_ganglia          | 0.584969069  |              |             | Brain_Substantia_nigra               |              |              |
|              | 2.179977551                          | 0.231783855  | 0.231783855  |             | -2.711499879                         | 1.250160767  |              |
|              | -1.14410935                          | 1.600602285  | 5            | 0           | 0.873227322                          |              |              |
| UBXN6        | ENSG00000167671.11                   | 0.037367808  | 12           | 4           | 0.023474876                          |              |              |
|              | Brain_Caudate_basal_ganglia          | 0.98211802   |              |             | Brain_Hypothalamus                   | 8.832949312  |              |
|              | 0.005225791                          | 0.399065684  | -0.373389574 |             | 2.265616464                          | 0.656256501  |              |
|              | 0.904416317                          | 4            | 0            | 0.873227322 |                                      |              |              |
| AC008991.1   | ENSG00000267683.1                    | 0.037373778  | 2            | 2           | 0.019020844                          |              |              |
|              | Brain_Spinal_cord_cervical_c-1       | 0.236854903  |              |             | Brain_Hypothalamus                   |              |              |
|              | 1.063383178                          | 0.936616822  | 0.936616822  |             | 1.182884555                          | 2.345122203  |              |
|              | 1.764003379                          | 0.821826122  | 2            | 0           | 0.873227322                          |              |              |
| RP5-875H18.9 | ENSG00000276851.1                    | 0.037418838  | 2            | 2           | 0.017297387                          |              |              |
|              | Brain_Cerebellum                     | 0.131887072  |              |             | Brain_Cortex                         | 1.846059797  | 0.153940203  |
|              | 0.153940203                          | -2.380324733 | -1.506701948 |             | -1.94351334                          | 0.617744596  |              |

|           |                                       |                        |                        |             |                                       |              |   |                  |   |
|-----------|---------------------------------------|------------------------|------------------------|-------------|---------------------------------------|--------------|---|------------------|---|
|           | 2                                     | 0                      | 0.873227322            |             |                                       |              |   |                  |   |
| LINC01266 | ENSG00000224957.5                     | 0.037426467            | 2                      | 2           | 0.123466199                           |              |   |                  |   |
|           | Brain_Cerebellar_Hemisphere           | 0.559877591            |                        |             | Brain_Cerebellum                      | 1.641675809  |   |                  |   |
|           | 0.358324191                           | 0.358324191            | -1.540386383           |             | 0.583023336                           |              |   | -0.478681523     |   |
|           | 1.501477412                           | 2                      | 0                      | 0.873227322 |                                       |              |   |                  |   |
| NEU4      | ENSG00000204099.11                    | 0.03747331             | 4                      | 4           | 0.0026001                             |              |   |                  |   |
|           | Brain_Nucleus_accumbens_basal_ganglia | 0.334873086            |                        |             | Brain_Cerebellum                      |              |   |                  |   |
|           | 1.702924392                           | 0.315947649            | 0.315947649            |             | 0.964344802                           |              |   | 3.011442106      |   |
|           | 1.738256618                           | 0.88643951             | 4                      | 0           | 0.873227322                           |              |   |                  |   |
| SEL1L3    | ENSG00000091490.10                    | 0.037487006            | 7                      | 6           | 0.011780974                           |              |   |                  |   |
|           | Brain_Putamen_basal_ganglia           | 0.853068035            |                        |             | Brain_Cerebellar_Hemisphere           |              |   |                  |   |
|           | 2.432896877                           | 0.043011847            | 0.4026476              |             | -2.518637896                          |              |   | 1.990224379      |   |
|           | 0.076824755                           | 1.509289133            | 6                      | 0           | 0.873227322                           |              |   |                  |   |
| FCN3      | ENSG00000142748.12                    | 0.037496661            | 1                      | 1           | 0.037496661                           |              |   | Brain_Cortex     |   |
|           | 0.037496661                           | Brain_Cortex           | 1                      | 1           | 1                                     | 2.080314875  |   | 2.080314875      |   |
|           | 2.080314875                           | NA                     | 1                      | 0           | 0.873227322                           |              |   |                  |   |
| SEC16A    | ENSG00000148396.18                    | 0.037539891            | 1                      | 1           | 0.037539891                           |              |   |                  |   |
|           | Brain_Cerebellum                      | 0.037539891            | Brain_Cerebellum       | 1           | 1                                     | 1            |   | -2.079843487     |   |
|           | -2.079843487                          | -2.079843487           | NA                     | 1           | 0                                     | 0.873227322  |   |                  |   |
| CCDC9     | ENSG00000105321.12                    | 0.037585072            | 2                      | 2           | 0.010692757                           |              |   | Brain_Cerebellum |   |
|           | 0.452184912                           | Brain_Cortex           | 1.211849619            |             | 0.788150381                           |              |   | 0.788150381      |   |
|           | 0.751777438                           | 2.552582529            | 1.652179984            |             | 1.273361491                           |              |   | 2                | 0 |
|           | 0.873227322                           |                        |                        |             |                                       |              |   |                  |   |
| CLUL1     | ENSG00000079101.16                    | 0.037641218            | 11                     | 11          | 0.020908389                           |              |   |                  |   |
|           | Brain_Cerebellar_Hemisphere           | 0.563308949            |                        |             | Brain_Cerebellum                      | 3.094481489  |   |                  |   |
|           | 0.269186253                           | 0.269186253            | -1.526949804           |             | 2.309634657                           |              |   | 1.215235531      |   |
|           | 1.02078862                            | 11                     | 0                      | 0.873227322 |                                       |              |   |                  |   |
| CFAP46    | ENSG00000171811.13                    | 0.03779472             | 5                      | 5           | 0.001733641                           |              |   |                  |   |
|           | Brain_Cerebellar_Hemisphere           | 0.876038172            |                        |             | Brain_Nucleus_accumbens_basal_ganglia |              |   |                  |   |
|           | 2.335988202                           | 0.09943406             | 0.09943406             |             | -0.602440906                          |              |   | 3.132432838      |   |
|           | 1.599462735                           | 1.819834814            | 5                      | 0           | 0.873227322                           |              |   |                  |   |
| SGCB      | ENSG00000163069.12                    | 0.037846913            | 3                      | 2           | 0.045523001                           |              |   | Brain_Cortex     |   |
|           | 0.146163775                           | Brain_Cerebellum       | 1.970144187            |             | 0.032797131                           |              |   | 0.997058682      |   |
|           | 1.453216059                           | 1.999789476            | 1.774524211            |             | 0.285663792                           |              |   | 2                | 0 |
|           | 0.873227322                           |                        |                        |             |                                       |              |   |                  |   |
| RARG      | ENSG00000172819.16                    | 0.037880573            | 1                      | 1           | 0.037880573                           |              |   | Brain_Amygdala   |   |
|           | 0.037880573                           | Brain_Amygdala         | 1                      | 1           | 1                                     | -2.076144666 |   | -2.076144666     |   |
|           | -2.076144666                          | NA                     | 1                      | 0           | 0.873227322                           |              |   |                  |   |
| BEND4     | ENSG00000188848.15                    | 0.037953661            | 1                      | 1           | 0.037953661                           |              |   |                  |   |
|           | Brain_Hippocampus                     | 0.037953661            | Brain_Hippocampus      | 1           | 1                                     | 1            |   |                  |   |
|           | 2.075354832                           | 2.075354832            | 2.075354832            |             | NA                                    | 1            | 0 | 0.873227322      |   |
| CHDH      | ENSG00000016391.10                    | 0.037972178            | 6                      | 3           | 0.009512838                           |              |   |                  |   |
|           | Brain_Nucleus_accumbens_basal_ganglia | 0.5898562              | Brain_Cerebellum       | 4.000920313 |                                       |              |   |                  |   |
|           | 0.016477735                           | 0.201545254            | -2.593052005           |             | 0.765261237                           |              |   | -1.118724138     |   |
|           | 1.504721424                           | 3                      | 0                      | 0.873227322 |                                       |              |   |                  |   |
| THRAP3    | ENSG00000054118.13                    | 0.037986148            | 3                      | 3           | 0.0109665                             |              |   | Brain_Cerebellum |   |
|           | 0.856653628                           | Brain_Hypothalamus     | 1.133337172            |             | 0.871951171                           |              |   |                  |   |
|           | 0.871951171                           | -1.138357479           | 2.543764495            |             | 0.528680865                           |              |   | 1.865571548      |   |
|           | 3                                     | 0                      | 0.873227322            |             |                                       |              |   |                  |   |
| EI24      | ENSG00000149547.14                    | 0.038229082            | 2                      | 2           | 0.03445059                            |              |   | Brain_Cerebellum |   |
|           | 0.131974768                           | Brain_Substantia_nigra | 1.034663658            |             | 0.965336342                           |              |   |                  |   |
|           | 0.965336342                           | 1.506360061            | 2.114757863            |             | 1.810558962                           |              |   | 0.430202212      |   |
|           | 2                                     | 0                      | 0.873227322            |             |                                       |              |   |                  |   |
| TACC2     | ENSG00000138162.18                    | 0.03823219             | 3                      | 3           | 0.016237099                           |              |   |                  |   |
|           | Brain_Anterior_cingulate_cortex_BA24  | 0.967492916            | Brain_Substantia_nigra |             |                                       |              |   |                  |   |
|           | 1.075123388                           | 0.950686628            | 0.950686628            |             | -0.040752865                          |              |   | 2.403542052      |   |
|           | 1.305250655                           | 1.240832536            | 3                      | 0           | 0.873227322                           |              |   |                  |   |
| NELFA     | ENSG00000185049.14                    | 0.038303793            | 2                      | 2           | 0.014518617                           |              |   |                  |   |
|           | Brain_Spinal_cord_cervical_c-1        | 0.268812277            | Brain_Cerebellum       | 1.15242317  |                                       |              |   |                  |   |
|           | 0.84757683                            | 0.84757683             | 1.10580189             | 2.444169179 | 1.774985535                           |              |   | 0.946368586      |   |
|           | 2                                     | 0                      | 0.873227322            |             |                                       |              |   |                  |   |
| ADAMTSL2  | ENSG00000197859.9                     | 0.038312171            | 4                      | 4           | 0.004581328                           |              |   |                  |   |

|              |                                       |                                      |              |                                      |              |                  |   |
|--------------|---------------------------------------|--------------------------------------|--------------|--------------------------------------|--------------|------------------|---|
|              | Brain_Cerebellar_Hemisphere           | 0.679852529                          |              | Brain_Cortex                         | 1.222391566  |                  |   |
|              | 0.816603563                           | 0.816603563                          | -2.835086527 | 0.412664375                          | -1.101710842 |                  |   |
|              | 1.337611181                           | 4                                    | 0            | 0.873227322                          |              |                  |   |
| SEMA6B       | ENSG00000167680.15                    | 0.038346574                          | 1            | 1                                    | 0.038346574  |                  |   |
|              | Brain_Nucleus_accumbens_basal_ganglia | 0.038346574                          |              |                                      |              |                  |   |
|              | Brain_Nucleus_accumbens_basal_ganglia | 1                                    | 1            | 1                                    | 2.071130799  |                  |   |
|              | 2.071130799                           | 2.071130799                          | NA           | 1                                    | 0            | 0.873227322      |   |
| C5AR1        | ENSG00000197405.7                     | 0.038645535                          | 2            | 2                                    | 0.012711347  | Brain_Cerebellum |   |
|              | 0.033271999                           | Brain_Cerebellar_Hemisphere          | 1.697365818  | 0.302634182                          |              |                  |   |
|              | 0.302634182                           | -2.491755614                         | -2.128785642 | -2.310270628                         | 0.256658528  |                  |   |
|              | 2                                     | 0                                    | 0.873227322  |                                      |              |                  |   |
| LCN15        | ENSG00000177984.6                     | 0.038745318                          | 9            | 2                                    | 0.021554024  | Brain_Cortex     |   |
|              | 0.978513044                           | Brain_Cerebellum                     | 7.951529645  | 0.000463944                          | 0.766054065  |                  |   |
|              | -0.026933161                          | 2.298136448                          | 1.838557501  | 0.737861724                          | 2            | 0                |   |
|              | 0.873227322                           |                                      |              |                                      |              |                  |   |
| AMZ1         | ENSG00000174945.13                    | 0.03876327                           | 9            | 6                                    | 0.004976468  |                  |   |
|              | Brain_Caudate_basal_ganglia           | 0.708507104                          |              | Brain_Putamen_basal_ganglia          |              |                  |   |
|              | 5.617476651                           | 0.043286508                          | 0.213188971  | -2.808553058                         | 0.7573427    |                  |   |
|              | -0.93008161                           | 1.172660444                          | 6            | 0                                    | 0.873227322  |                  |   |
| F5           | ENSG00000198734.10                    | 0.038840582                          | 2            | 2                                    | 0.153300204  |                  |   |
|              | Brain_Frontal_Cortex_BA9              | 0.565699888                          |              | Brain_Cortex                         | 1.933274565  |                  |   |
|              | 0.066725435                           | 0.066725435                          | 0.574395957  | 1.427971008                          | 1.001183482  |                  |   |
|              | 0.603568706                           | 2                                    | 0            | 0.873227322                          |              |                  |   |
| GALR1        | ENSG00000166573.5                     | 0.038843988                          | 1            | 1                                    | 0.038843988  |                  |   |
|              | Brain_Anterior_cingulate_cortex_BA24  | 0.038843988                          |              |                                      |              |                  |   |
|              | Brain_Anterior_cingulate_cortex_BA24  | 1                                    | 1            | 1                                    | -2.065835782 |                  |   |
|              | -2.065835782                          | -2.065835782                         | NA           | 1                                    | 0            | 0.873227322      |   |
| CNTN6        | ENSG00000134115.12                    | 0.038971659                          | 2            | 2                                    | 0.011199322  |                  |   |
|              | Brain_Cerebellar_Hemisphere           | 0.088526333                          |              | Brain_Cerebellum                     | 1.735010635  |                  |   |
|              | 0.264989365                           | 0.264989365                          | -2.536417212 | -1.70322306                          | -2.119820136 |                  |   |
|              | 0.589157235                           | 2                                    | 0            | 0.873227322                          |              |                  |   |
| IMMT         | ENSG00000132305.20                    | 0.039011989                          | 10           | 6                                    | 0.139308473  |                  |   |
|              | Brain_Spinal_cord_cervical_c-1        | 0.91591268                           |              | Brain_Anterior_cingulate_cortex_BA24 |              |                  |   |
|              | 7.255024882                           | 0.004789812                          | 0.306785134  | -1.10350595                          | 1.478371112  |                  |   |
|              | -0.398998014                          | 0.801215318                          | 6            | 0                                    | 0.873227322  |                  |   |
| GNAO1        | ENSG00000087258.14                    | 0.039047081                          | 1            | 1                                    | 0.039047081  |                  |   |
|              | Brain_Putamen_basal_ganglia           | 0.039047081                          |              | Brain_Putamen_basal_ganglia          | 1            | 1                |   |
|              | 1                                     | 2.063690388                          | 2.063690388  | 2.063690388                          | NA           | 1                | 0 |
|              | 0.873227322                           |                                      |              |                                      |              |                  |   |
| CRY2         | ENSG00000121671.11                    | 0.039216157                          | 2            | 2                                    | 0.010991851  |                  |   |
|              | Brain_Cerebellar_Hemisphere           | 0.974823829                          |              | Brain_Hypothalamus                   | 1.053028021  |                  |   |
|              | 0.946971979                           | 0.946971979                          | -2.542957765 | 0.031558889                          | -1.255699438 |                  |   |
|              | 1.820458184                           | 2                                    | 0            | 0.873227322                          |              |                  |   |
| TTI2         | ENSG00000129696.12                    | 0.039229517                          | 1            | 1                                    | 0.039229517  |                  |   |
|              | Brain_Cerebellar_Hemisphere           | 0.039229517                          |              | Brain_Cerebellar_Hemisphere          | 1            | 1                |   |
|              | 1                                     | 2.061771277                          | 2.061771277  | 2.061771277                          | NA           | 1                | 0 |
|              | 0.873227322                           |                                      |              |                                      |              |                  |   |
| CTB-129P6.11 | ENSG00000267114.1                     | 0.039241215                          | 1            | 1                                    | 0.039241215  |                  |   |
|              | Brain_Substantia_nigra                | 0.039241215                          |              | Brain_Substantia_nigra               | 1            | 1                |   |
|              | 1                                     | 2.061648479                          | 2.061648479  | 2.061648479                          | NA           | 1                | 0 |
|              | 0.873227322                           |                                      |              |                                      |              |                  |   |
| SERPINB1     | ENSG00000021355.12                    | 0.039244285                          | 2            | 2                                    | 0.08618573   |                  |   |
|              | Brain_Cerebellar_Hemisphere           | 0.200000464                          |              | Brain_Cerebellum                     | 1.298440837  |                  |   |
|              | 0.701559163                           | 0.701559163                          | -1.715870595 | 1.281550244                          | -0.217160176 |                  |   |
|              | 2.119496601                           | 2                                    | 0            | 0.873227322                          |              |                  |   |
| HAR1B        | ENSG00000231133.6                     | 0.039271042                          | 11           | 11                                   | 0.046838628  | Brain_Cortex     |   |
|              | 0.965332711                           | Brain_Anterior_cingulate_cortex_BA24 | 2.686570287  |                                      |              |                  |   |
|              | 0.252381396                           | 0.252381396                          | -1.98775649  | 1.609446884                          | -0.347292532 |                  |   |
|              | 1.235660954                           | 11                                   | 0            | 0.873227322                          |              |                  |   |
| C17orf97     | ENSG00000187624.8                     | 0.039316698                          | 11           | 8                                    | 0.015657959  |                  |   |
|              | Brain_Nucleus_accumbens_basal_ganglia | 0.693505721                          |              | Brain_Putamen_basal_ganglia          |              |                  |   |
|              | 4.617472564                           | 0.000404722                          | 0.276962078  | -2.416792053                         | 2.265717587  |                  |   |

|                                       |                                       |              |              |             |                                      |             |   |  |                  |
|---------------------------------------|---------------------------------------|--------------|--------------|-------------|--------------------------------------|-------------|---|--|------------------|
| 0.535366686                           | 1.403556297                           | 8            | 0            | 0.873227322 |                                      |             |   |  |                  |
| ELAVL2                                | ENSG00000107105.14                    | 0.039435561  | 2            | 2           | 0.023712288                          |             |   |  |                  |
|                                       | Brain_Putamen_basal_ganglia           | 0.316461855  |              |             | Brain_Cortex                         | 1.069672553 |   |  |                  |
| 0.930327447                           | 0.930327447                           | -2.261759144 |              |             | -1.001755168                         |             |   |  | -1.631757156     |
| 0.890957356                           | 2                                     | 0            | 0.873227322  |             |                                      |             |   |  |                  |
| AC007204.2                            | ENSG00000267268.1                     | 0.039587926  | 7            | 4           | 0.110021648                          |             |   |  |                  |
|                                       | Brain_Hippocampus                     | 0.970013117  |              |             | Brain_Caudate_basal_ganglia          | 5.321061604 |   |  |                  |
| 0.025010202                           | 0.226090063                           | -0.70206103  |              |             | 1.598095844                          |             |   |  | 0.080515953      |
| 0.739203572                           | 4                                     | 0            | 0.873227322  |             |                                      |             |   |  |                  |
| CISD3                                 | ENSG00000277972.1                     | 0.039635938  | 5            | 5           | 0.027215534                          |             |   |  | Brain_Cortex     |
|                                       | Brain_Frontal_Cortex_BA9              | 1.641554519  |              |             | 0.662589256                          |             |   |  |                  |
| 0.662589256                           | -1.787626335                          | 2.208412462  |              |             | 0.035126623                          |             |   |  | 1.558890626      |
| 5                                     | 0                                     | 0.873227322  |              |             |                                      |             |   |  |                  |
| RECQL4                                | ENSG00000160957.12                    | 0.039692998  | 6            | 6           | 0.024231331                          |             |   |  |                  |
|                                       | Brain_Nucleus_accumbens_basal_ganglia | 0.927955773  |              |             | Brain_Cerebellar_Hemisphere          |             |   |  |                  |
| 1.876269891                           | 0.236642978                           | 0.236642978  |              |             | -1.78551689                          |             |   |  | 2.253441411      |
| 0.153776003                           | 1.393096895                           | 6            | 0            | 0.873227322 |                                      |             |   |  |                  |
| SERPINA1                              | ENSG00000197249.13                    | 0.039715134  | 1            | 1           | 0.039715134                          |             |   |  |                  |
|                                       | Brain_Frontal_Cortex_BA9              | 0.039715134  |              |             | Brain_Frontal_Cortex_BA9             | 1           | 1 |  |                  |
| 1                                     | 2.056699561                           | 2.056699561  | 2.056699561  | NA          | 1                                    | 0           |   |  |                  |
| 0.873227322                           |                                       |              |              |             |                                      |             |   |  |                  |
| RNF125                                | ENSG00000101695.8                     | 0.039784396  | 1            | 1           | 0.039784396                          |             |   |  |                  |
|                                       | Brain_Anterior_cingulate_cortex_BA24  | 0.039784396  |              |             |                                      |             |   |  |                  |
| Brain_Anterior_cingulate_cortex_BA24  | 1                                     | 1            | 1            |             | -2.0559805                           |             |   |  | -2.0559805       |
| -2.0559805                            | NA                                    | 1            | 0            | 0.873227322 |                                      |             |   |  |                  |
| RAB5A                                 | ENSG00000144566.10                    | 0.040050043  | 1            | 1           | 0.040050043                          |             |   |  |                  |
|                                       | Brain_Caudate_basal_ganglia           | 0.040050043  |              |             | Brain_Caudate_basal_ganglia          | 1           | 1 |  |                  |
| 1                                     | -2.053232409                          | -2.053232409 | -2.053232409 | NA          | 1                                    | 0           |   |  |                  |
| 0.873227322                           |                                       |              |              |             |                                      |             |   |  |                  |
| CTD-2541J13.1                         | ENSG00000260578.1                     | 0.040069207  | 1            | 1           | 0.040069207                          |             |   |  |                  |
|                                       | Brain_Cerebellar_Hemisphere           | 0.040069207  |              |             | Brain_Cerebellar_Hemisphere          | 1           | 1 |  |                  |
| 1                                     | 2.053034752                           | 2.053034752  | 2.053034752  | NA          | 1                                    | 0           |   |  |                  |
| 0.873227322                           |                                       |              |              |             |                                      |             |   |  |                  |
| PNPLA6                                | ENSG00000032444.15                    | 0.040108103  | 4            | 4           | 0.016157133                          |             |   |  |                  |
|                                       | Brain_Cerebellum                      | 0.913672638  |              |             | Brain_Caudate_basal_ganglia          | 1.927034906 |   |  |                  |
| 0.256869338                           | 0.256869338                           | -2.405346619 |              |             | 0.508444227                          |             |   |  | -0.395600653     |
| 1.350609078                           | 4                                     | 0            | 0.873227322  |             |                                      |             |   |  |                  |
| SPIRE2                                | ENSG00000204991.10                    | 0.040189466  | 12           | 10          | 0.003966479                          |             |   |  |                  |
|                                       | Brain_Hippocampus                     | 0.95280647   |              |             | Brain_Substantia_nigra               | 4.380829909 |   |  |                  |
| 0.020306809                           | 0.227698266                           | -2.307558298 |              |             | 2.880815378                          |             |   |  | 0.62412618       |
| 1.548157058                           | 10                                    | 0            | 0.873227322  |             |                                      |             |   |  |                  |
| ITGAV                                 | ENSG00000138448.11                    | 0.040322056  | 9            | 7           | 0.019007693                          |             |   |  | Brain_Cerebellum |
|                                       | Brain_Spinal_cord_cervical_c-1        | 3.838836545  |              |             | 0.04602563                           |             |   |  |                  |
| 0.967251983                           | -1.234681959                          | 2.34538007   | 0.47680248   | 1.352092391 |                                      |             |   |  | 7                |
| 0.155610543                           |                                       |              |              |             |                                      |             |   |  | 0                |
| 0.873227322                           |                                       |              |              |             |                                      |             |   |  |                  |
| CCER2                                 | ENSG00000262484.1                     | 0.040343879  | 1            | 1           | 0.040343879                          |             |   |  |                  |
|                                       | Brain_Nucleus_accumbens_basal_ganglia | 0.040343879  |              |             |                                      |             |   |  |                  |
| Brain_Nucleus_accumbens_basal_ganglia | 1                                     | 1            | 1            |             | -2.050210651                         |             |   |  |                  |
| -2.050210651                          | -2.050210651                          | NA           | 1            | 0           | 0.873227322                          |             |   |  |                  |
| DHRS4L2                               | ENSG00000187630.15                    | 0.040413375  | 13           | 4           | 0.026487748                          |             |   |  |                  |
|                                       | Brain_Substantia_nigra                | 0.958766128  |              |             | Brain_Cerebellum                     | 10.09232596 |   |  |                  |
| 0.003399687                           | 0.391176832                           | -0.355201428 |              |             | 2.218984955                          |             |   |  | 1.117104028      |
| 0.688129386                           | 4                                     | 0            | 0.873227322  |             |                                      |             |   |  |                  |
| KIF1BP                                | ENSG00000198954.7                     | 0.040417602  | 4            | 4           | 0.225274301                          |             |   |  |                  |
|                                       | Brain_Hypothalamus                    | 0.587238244  |              |             | Brain_Anterior_cingulate_cortex_BA24 |             |   |  |                  |
| 3.325396277                           | 0.169788063                           | 0.169788063  |              |             | -1.212622191                         |             |   |  | 0.542842507      |
| -0.55085311                           | 0.760754492                           | 4            | 0            | 0.873227322 |                                      |             |   |  |                  |
| BMP3                                  | ENSG00000152785.6                     | 0.04042792   | 2            | 2           | 0.255906598                          |             |   |  | Brain_Cerebellum |
|                                       | Brain_Cerebellar_Hemisphere           | 1.674518097  |              |             | 0.325481903                          |             |   |  |                  |
| 0.365420516                           | -1.136119398                          | 0.905084702  |              |             | -0.115517348                         |             |   |  | 1.443349261      |
| 0.325481903                           |                                       |              |              |             |                                      |             |   |  |                  |
| 2                                     | 0                                     | 0.873227322  |              |             |                                      |             |   |  |                  |
| MITF                                  | ENSG00000187098.14                    | 0.04044626   | 2            | 2           | 0.011431417                          |             |   |  | Brain_Cortex     |



|            |                                       |                        |              |              |                                      |                        |              |
|------------|---------------------------------------|------------------------|--------------|--------------|--------------------------------------|------------------------|--------------|
|            | 0.84655879                            | Brain_Substantia_nigra | 1.02263835   | 0.97736165   | 0.97736165                           |                        |              |
|            | 0.193511003                           | 2.529226695            | 1.361368849  | 1.651600405  | 2                                    | 0                      |              |
|            | 0.873227322                           |                        |              |              |                                      |                        |              |
| PDZD2      | ENSG00000133401.15                    | 0.040511419            | 1            | 1            | 0.040511419                          | Brain_Cortex           |              |
|            | 0.040511419                           | Brain_Cortex           | 1            | 1            | 1                                    | -2.048496046           | -2.048496046 |
|            | -2.048496046                          | NA                     | 1            | 0            | 0.873227322                          |                        |              |
| SLA2       | ENSG00000101082.13                    | 0.040513487            | 1            | 1            | 0.040513487                          |                        |              |
|            | Brain_Cerebellar_Hemisphere           | 0.040513487            |              |              | Brain_Cerebellar_Hemisphere          | 1                      | 1            |
|            | 1                                     | -2.048474917           | -2.048474917 | -2.048474917 | NA                                   | 1                      | 0            |
|            | 0.873227322                           |                        |              |              |                                      |                        |              |
| TBC1D10B   | ENSG00000169221.13                    | 0.04052812             | 1            | 1            | 0.04052812                           | Brain_Cortex           |              |
|            | 0.04052812                            | Brain_Cortex           | 1            | 1            | 1                                    | 2.048325455            | 2.048325455  |
|            | 2.048325455                           | NA                     | 1            | 0            | 0.873227322                          |                        |              |
| BHLHE41    | ENSG00000123095.5                     | 0.040619155            | 1            | 1            | 0.040619155                          |                        |              |
|            | Brain_Nucleus_accumbens_basal_ganglia | 0.040619155            |              |              |                                      |                        |              |
|            | Brain_Nucleus_accumbens_basal_ganglia | 1                      | 1            | 1            | -2.047396646                         |                        |              |
|            | -2.047396646                          | -2.047396646           | NA           | 1            | 0                                    | 0.873227322            |              |
| RSPO4      | ENSG00000101282.8                     | 0.040660611            | 6            | 6            | 0.009854383                          |                        |              |
|            | Brain_Frontal_Cortex_BA9              | 0.606669194            |              |              | Brain_Cerebellar_Hemisphere          |                        |              |
|            | 2.917199226                           | 0.112081175            | 0.112081175  | 0.514833757  | 2.580897511                          |                        |              |
|            | 1.490345757                           | 0.69816305             | 6            | 0            | 0.873227322                          |                        |              |
| IL34       | ENSG00000157368.10                    | 0.040687597            | 3            | 2            | 0.055864036                          |                        |              |
|            | Brain_Putamen_basal_ganglia           | 0.888741149            |              |              | Brain_Frontal_Cortex_BA9             |                        |              |
|            | 2.551723509                           | 0.058462256            | 0.389814235  | 0.139897281  | 1.9120948                            |                        |              |
|            | 1.296663593                           | 1.002473832            | 2            | 0            | 0.873227322                          |                        |              |
| ADH1C      | ENSG00000248144.5                     | 0.040708032            | 3            | 3            | 0.009355063                          |                        |              |
|            | Brain_Caudate_basal_ganglia           | 0.685458801            |              |              | Brain_Putamen_basal_ganglia          |                        |              |
|            | 1.380802053                           | 0.702692016            | 0.702692016  | -2.598798643 | 1.500007712                          |                        |              |
|            | -0.501272128                          | 2.051097499            | 3            | 0            | 0.873227322                          |                        |              |
| CLCN7      | ENSG00000103249.17                    | 0.040724618            | 6            | 2            | 0.016662589                          |                        |              |
|            | Brain_Hippocampus                     | 0.059711568            |              |              | Brain_Cerebellar_Hemisphere          | 4.408355168            |              |
|            | 0.025518515                           | 1.283048814            | 1.882917362  | 2.394069547  | 2.090716431                          |                        |              |
|            | 0.234571073                           | 2                      | 0            | 0.873227322  |                                      |                        |              |
| TCF25      | ENSG00000141002.19                    | 0.04074736             | 1            | 1            | 0.04074736                           | Brain_Substantia_nigra |              |
|            | 0.04074736                            | Brain_Substantia_nigra | 1            | 1            | 1                                    | -2.04609159            |              |
|            | -2.04609159                           | -2.04609159            | NA           | 1            | 0                                    | 0.873227322            |              |
| DTWD1      | ENSG00000104047.14                    | 0.040757675            | 3            | 3            | 0.005529858                          |                        |              |
|            | Brain_Nucleus_accumbens_basal_ganglia | 0.669430258            |              |              | Brain_Frontal_Cortex_BA9             |                        |              |
|            | 1.137466383                           | 0.893536242            | 0.893536242  | -2.774429745 | -0.426930077                         |                        |              |
|            | -1.387911012                          | 1.230244076            | 3            | 0            | 0.873227322                          |                        |              |
| C1RL       | ENSG00000139178.10                    | 0.040878061            | 4            | 4            | 0.060736279                          |                        |              |
|            | Brain_Caudate_basal_ganglia           | 0.173510543            |              |              | Brain_Frontal_Cortex_BA9             |                        |              |
|            | 1.305273689                           | 0.729857332            | 0.729857332  | -1.875410445 | 1.72743479                           |                        |              |
|            | -0.84247915                           | 1.729886611            | 4            | 0            | 0.873227322                          |                        |              |
| ARNT2      | ENSG00000172379.20                    | 0.041026753            | 3            | 3            | 0.009981985                          |                        |              |
|            | Brain_Substantia_nigra                | 0.689381146            |              |              | Brain_Cortex                         | 2.034555151            |              |
|            | 0.209668061                           | 0.209668061            | -2.576452733 | 0.487361997  | -0.829595258                         |                        |              |
|            | 1.576499548                           | 3                      | 0            | 0.873227322  |                                      |                        |              |
| TXLNB      | ENSG00000164440.14                    | 0.041062186            | 4            | 4            | 0.002997131                          |                        |              |
|            | Brain_Substantia_nigra                | 0.360401295            |              |              | Brain_Anterior_cingulate_cortex_BA24 |                        |              |
|            | 2.486797642                           | 0.231927241            | 0.231927241  | -0.914600693 | 2.968032003                          |                        |              |
|            | 1.565930048                           | 1.706805021            | 4            | 0            | 0.873227322                          |                        |              |
| NDUFAF7    | ENSG00000003509.15                    | 0.041117376            | 4            | 4            | 0.010429098                          |                        |              |
|            | Brain_Putamen_basal_ganglia           | 0.100227907            |              |              | Brain_Cerebellum                     | 2.998001032            |              |
|            | 0.134274627                           | 0.134274627            | -2.561267629 | -1.643749741 | -2.156263624                         |                        |              |
|            | 0.472357424                           | 4                      | 0            | 0.873227322  |                                      |                        |              |
| PHC2       | ENSG00000134686.18                    | 0.041128827            | 1            | 1            | 0.041128827                          |                        |              |
|            | Brain_Spinal_cord_cervical_c-1        | 0.041128827            |              |              | Brain_Spinal_cord_cervical_c-1       |                        |              |
|            | 1                                     | 1                      | 1            | 2.042228937  | 2.042228937                          | 2.042228937            | NA           |
|            | 0.873227322                           |                        |              |              |                                      |                        | 1            |
| AP006621.5 | ENSG00000255284.1                     | 0.041130499            | 13           | 3            | 0.004108009                          |                        |              |
|            | Brain_Cerebellar_Hemisphere           | 0.226956168            |              |              | Brain_Substantia_nigra               |                        |              |

|               |                                      |                          |                                       |              |                          |
|---------------|--------------------------------------|--------------------------|---------------------------------------|--------------|--------------------------|
|               | 11.14432246                          | 0.000538683              | 0.572899251                           | 1.208236859  | 2.869746611              |
|               | 2.105572368                          | 0.571132514              | 3 0                                   | 0.873227322  |                          |
| LINC00607     | ENSG00000235770.5                    | 0.041221748              | 2 2                                   | 0.013038298  |                          |
|               | Brain_Hypothalamus                   | 0.606878145              | Brain_Caudate_basal_ganglia           | 1.021102037  |                          |
|               | 0.978897963                          | 0.978897963              | -2.482721506                          | -0.514534787 | -1.498628147             |
|               | 1.391718176                          | 2 0                      | 0.873838606                           |              |                          |
| RLF           | ENSG00000117000.8                    | 0.041349835              | 1 1                                   | 0.041349835  | Brain_Cortex             |
|               | 0.041349835                          | Brain_Cortex             | 1 1 1                                 | -2.040004931 | -2.040004931             |
|               | -2.040004931                         | NA 1 0                   | 0.874894752                           |              |                          |
| BLOC1S3       | ENSG00000189114.6                    | 0.041396635              | 4 4                                   | 0.007257796  |                          |
|               | Brain_Cortex                         | 0.388479451              | Brain_Cerebellum                      | 2.706586441  | 0.271709276              |
|               | 0.271709276                          | -2.684778184             | -0.862378167                          | -1.75537715  | 0.752476548              |
|               | 4 0                                  | 0.874894752              |                                       |              |                          |
| ATP5E         | ENSG00000124172.9                    | 0.04149949               | 1 1                                   | 0.04149949   | Brain_Frontal_Cortex_BA9 |
|               | 0.04149949                           | Brain_Frontal_Cortex_BA9 | 1 1 1                                 | -2.038504651 |                          |
|               | -2.038504651                         | -2.038504651 NA 1 0      | 0.875166114                           |              |                          |
| TYK2          | ENSG00000105397.13                   | 0.041534579              | 3 3                                   | 0.182747853  | Brain_Cortex             |
|               | 0.471426358                          | Brain_Cerebellum         | 1.916733738                           | 0.335228843  | 0.335228843              |
|               | -0.720160212                         | 1.332341934              | 0.606849719                           | 1.150894841  | 3 0                      |
|               | 0.875166114                          |                          |                                       |              |                          |
| N4BP3         | ENSG00000145911.5                    | 0.041666225              | 3 3                                   | 0.030238548  |                          |
|               | Brain_Cerebellar_Hemisphere          | 0.107452936              | Brain_Spinal_cord_cervical_c-1        |              |                          |
|               | 1.882462605                          | 0.152345997              | 0.152345997                           | -2.16695156  | 1.609747749              |
|               | -0.82343948                          | 2.111020693              | 3 0                                   | 0.876028842  |                          |
| SSTR1         | ENSG00000139874.5                    | 0.041700751              | 1 1                                   | 0.041700751  | Brain_Cortex             |
|               | 0.041700751                          | Brain_Cortex             | 1 1 1                                 | 2.036494238  | 2.036494238              |
|               | 2.036494238                          | NA 1 0                   | 0.876028842                           |              |                          |
| NTRK1         | ENSG00000198400.11                   | 0.04186069               | 2 2                                   | 0.022258868  | Brain_Cerebellum         |
|               | 0.721508607                          | Brain_Cortex             | 1.287729861                           | 0.712270139  | 0.712270139              |
|               | -0.3564433                           | 2.285921208              | 0.964738954                           | 1.868433862  | 2 0                      |
|               | 0.877113826                          |                          |                                       |              |                          |
| STK33         | ENSG00000130413.15                   | 0.041974819              | 7 5                                   | 0.031015599  |                          |
|               | Brain_Frontal_Cortex_BA9             | 0.833605371              | Brain_Cerebellum                      | 4.502909389  |                          |
|               | 0.054573556                          | 0.222636807              | -2.156872511                          | 0.210079826  | -1.30996547              |
|               | 0.906712301                          | 5 0                      | 0.877113826                           |              |                          |
| RNASEL        | ENSG00000135828.11                   | 0.041991329              | 10 6                                  | 0.003265788  |                          |
|               | Brain_Spinal_cord_cervical_c-1       | 0.421146069              | Brain_Hippocampus                     | 6.42822677   |                          |
|               | 0.001545948                          | 0.311866153              | -2.941545517                          | -0.804434525 | -1.902373217             |
|               | 0.588492959                          | 6 0                      | 0.877113826                           |              |                          |
| NEDD4         | ENSG00000069869.15                   | 0.042230891              | 3 3                                   | 0.038097367  |                          |
|               | Brain_Anterior_cingulate_cortex_BA24 | 0.197635208              |                                       |              |                          |
|               | Brain_Spinal_cord_cervical_c-1       | 1.192800076              | 0.883612799                           | 0.883612799  |                          |
|               | -1.411116798                         | 2.073805622              | 0.650335686                           | 1.827959892  | 3 0                      |
|               | 0.877113826                          |                          |                                       |              |                          |
| KB-1507C5.4   | ENSG00000254281.1                    | 0.042261223              | 2 2                                   | 0.015682837  |                          |
|               | Brain_Hypothalamus                   | 0.184195703              | Brain_Caudate_basal_ganglia           | 1.270804966  |                          |
|               | 0.729195034                          | 0.729195034              | -2.4162141                            | -1.327946737 | -1.872080418             |
|               | 0.769521232                          | 2 0                      | 0.877113826                           |              |                          |
| LYSMD1        | ENSG00000163155.11                   | 0.042437842              | 3 3                                   | 0.164244587  |                          |
|               | Brain_Cortex                         | 0.936722503              | Brain_Nucleus_accumbens_basal_ganglia |              |                          |
|               | 2.663457894                          | 0.124052161              | 0.124052161                           | -0.079389899 | 1.390936819              |
|               | 0.68431642                           | 0.736823769              | 3 0                                   | 0.877113826  |                          |
| RP11-426C22.5 | ENSG00000260517.2                    | 0.042461125              | 2 2                                   | 0.016358242  |                          |
|               | Brain_Spinal_cord_cervical_c-1       | 0.554641782              | Brain_Cerebellar_Hemisphere           |              |                          |
|               | 1.063415813                          | 0.936584187              | 0.936584187                           | -2.400823104 | 0.590818882              |
|               | -0.905002111                         | 2.115410335              | 2 0                                   | 0.877113826  |                          |
| SF3B3         | ENSG00000189091.12                   | 0.042517042              | 5 5                                   | 0.005525021  |                          |
|               | Brain_Frontal_Cortex_BA9             | 0.674985084              | Brain_Cerebellar_Hemisphere           |              |                          |
|               | 2.284361618                          | 0.135960945              | 0.135960945                           | -0.419316165 | 2.774714348              |
|               | 1.06222738                           | 1.177620719              | 5 0                                   | 0.877113826  |                          |
| FRA10AC1      | ENSG00000148690.11                   | 0.0425489                | 13 2                                  | 0.035729542  |                          |
|               | Brain_Substantia_nigra               | 0.72509275               | Brain_Amygdala                        | 11.95185166  |                          |

|               |                                       |                             |              |              |                                      |              |                  |   |
|---------------|---------------------------------------|-----------------------------|--------------|--------------|--------------------------------------|--------------|------------------|---|
|               | 0.001620066                           | 0.43453841                  | -2.099992038 |              | -0.351660682                         |              | -0.659952422     |   |
|               | 0.455445028                           | 2                           | 0            | 0.877113826  |                                      |              |                  |   |
| FADS3         | ENSG00000221968.8                     | 0.042569833                 | 2            | 2            | 0.012022955                          |              | Brain_Cerebellum |   |
|               | 0.040320606                           | Brain_Cerebellar_Hemisphere | 1.833116083  |              | 0.166883917                          |              |                  |   |
|               | 0.166883917                           | 2.050449308                 | 2.511469875  |              | 2.280959591                          |              | 0.325990769      |   |
|               | 2                                     | 0                           | 0.877113826  |              |                                      |              |                  |   |
| RBM24         | ENSG00000112183.14                    | 0.042605749                 | 1            | 1            | 0.042605749                          |              |                  |   |
|               | Brain_Frontal_Cortex_BA9              | 0.042605749                 |              |              | Brain_Frontal_Cortex_BA9             | 1            | 1                |   |
|               | 1                                     | 2.027554383                 | 2.027554383  | 2.027554383  | NA                                   | 1            | 0                |   |
|               | 0.877113826                           |                             |              |              |                                      |              |                  |   |
| ETFDH         | ENSG00000171503.11                    | 0.042625272                 | 13           | 3            | 0.014883662                          |              |                  |   |
|               | Brain_Nucleus_accumbens_basal_ganglia | 0.758318384                 |              |              | Brain_Substantia_nigra               |              |                  |   |
|               | 10.609172                             | 0.002416122                 | 0.438654215  |              | 0.307689797                          |              | 2.435197531      |   |
|               | 1.520522482                           | 0.54271008                  | 3            | 0            | 0.877113826                          |              |                  |   |
| CXCL1         | ENSG00000163739.4                     | 0.042629877                 | 1            | 1            | 0.042629877                          |              | Brain_Cortex     |   |
|               | 0.042629877                           | Brain_Cortex                | 1            | 1            | 1                                    | 2.027318241  | 2.027318241      |   |
|               | 2.027318241                           | NA                          | 1            | 0            | 0.877113826                          |              |                  |   |
| ZBTB1         | ENSG00000126804.13                    | 0.042662949                 | 2            | 2            | 0.012013723                          |              |                  |   |
|               | Brain_Frontal_Cortex_BA9              | 0.944354667                 |              |              | Brain_Cerebellum                     | 1.026804295  |                  |   |
|               | 0.973195705                           | 0.973195705                 | -2.511740984 |              | 0.069797714                          |              | -1.220971635     |   |
|               | 1.825423519                           | 2                           | 0            | 0.877113826  |                                      |              |                  |   |
| PAIP1         | ENSG00000172239.13                    | 0.042760492                 | 2            | 2            | 0.016892318                          |              |                  |   |
|               | Brain_Cerebellar_Hemisphere           | 0.465912705                 |              |              | Brain_Frontal_Cortex_BA9             | 1.01809374   |                  |   |
|               | 0.98190626                            | 0.98190626                  | -2.389043163 | 0.729145434  | -0.829948864                         |              |                  |   |
|               | 2.204892302                           | 2                           | 0            | 0.877113826  |                                      |              |                  |   |
| RP11-805F19.1 | ENSG00000264880.1                     | 0.042818506                 | 5            | 4            | 0.023249098                          |              |                  |   |
|               | Brain_Amygdala                        | 0.065529383                 |              |              | Brain_Hippocampus                    | 3.542401528  | 0.06669702       |   |
|               | 0.172967369                           | -2.269316296                | 2.161011457  |              | -1.179672826                         |              | 1.874562724      |   |
|               | 4                                     | 0                           | 0.877113826  |              |                                      |              |                  |   |
| GPALPP1       | ENSG00000133114.17                    | 0.042822108                 | 3            | 3            | 0.00533564                           |              | Brain_Cortex     |   |
|               | 0.312223144                           | Brain_Cerebellar_Hemisphere | 2.242961271  |              | 0.155480658                          |              |                  |   |
|               | 0.155480658                           | 1.010568197                 | 2.786039336  |              | 2.034054632                          |              | 0.918345977      |   |
|               | 3                                     | 0                           | 0.877113826  |              |                                      |              |                  |   |
| SLC19A2       | ENSG00000117479.12                    | 0.042880842                 | 1            | 1            | 0.042880842                          |              |                  |   |
|               | Brain_Anterior_cingulate_cortex_BA24  | 0.042880842                 |              |              |                                      |              |                  |   |
|               | Brain_Anterior_cingulate_cortex_BA24  | 1                           | 1            | 1            | 2.024868764                          |              |                  |   |
|               | 2.024868764                           | 2.024868764                 | NA           | 1            | 0                                    | 0.877113826  |                  |   |
| SMN1          | ENSG00000172062.16                    | 0.043042083                 | 1            | 1            | 0.043042083                          |              | Brain_Cortex     |   |
|               | 0.043042083                           | Brain_Cortex                | 1            | 1            | 1                                    | 2.023301392  | 2.023301392      |   |
|               | 2.023301392                           | NA                          | 1            | 0            | 0.8791267                            |              |                  |   |
| DCAF4L1       | ENSG00000182308.6                     | 0.043141688                 | 4            | 4            | 0.01297989                           |              |                  |   |
|               | Brain_Anterior_cingulate_cortex_BA24  | 0.437261655                 |              |              | Brain_Cerebellum                     |              |                  |   |
|               | 1.953156322                           | 0.33465302                  | 0.33465302   | -2.48432059  | 1.591552253                          |              |                  |   |
|               | 0.365886898                           | 1.938009472                 | 4            | 0            | 0.879876616                          |              |                  |   |
| MYB           | ENSG00000118513.18                    | 0.043312943                 | 1            | 1            | 0.043312943                          |              | Brain_Cortex     |   |
|               | 0.043312943                           | Brain_Cortex                | 1            | 1            | 1                                    | 2.020679604  | 2.020679604      |   |
|               | 2.020679604                           | NA                          | 1            | 0            | 0.88018129                           |              |                  |   |
| FAM135B       | ENSG00000147724.11                    | 0.043313002                 | 1            | 1            | 0.043313002                          |              |                  |   |
|               | Brain_Spinal_cord_cervical_c-1        | 0.043313002                 |              |              | Brain_Spinal_cord_cervical_c-1       |              |                  |   |
|               | 1                                     | 1                           | 1            | -2.020679028 | -2.020679028                         | -2.020679028 | NA               | 1 |
|               | 0.88018129                            |                             |              |              |                                      |              |                  | 0 |
| SMYD1         | ENSG00000115593.14                    | 0.043363359                 | 1            | 1            | 0.043363359                          |              |                  |   |
|               | Brain_Hippocampus                     | 0.043363359                 |              |              | Brain_Hippocampus                    | 1            | 1                | 1 |
|               | -2.020193129                          | -2.020193129                | -2.020193129 | NA           | 1                                    | 0            | 0.88018129       |   |
| TMEM8A        | ENSG00000129925.10                    | 0.043430826                 | 7            | 5            | 0.010816189                          |              |                  |   |
|               | Brain_Putamen_basal_ganglia           | 0.615317439                 |              |              | Brain_Anterior_cingulate_cortex_BA24 |              |                  |   |
|               | 4.750585299                           | 0.000831779                 | 0.16844866   | -2.548581898 | 2.46237467                           |              |                  |   |
|               | -0.404003038                          | 2.042107348                 | 5            | 0            | 0.88018129                           |              |                  |   |
| RGS5          | ENSG00000143248.12                    | 0.043471179                 | 1            | 1            | 0.043471179                          |              |                  |   |
|               | Brain_Hippocampus                     | 0.043471179                 |              |              | Brain_Hippocampus                    | 1            | 1                | 1 |
|               | 2.019154349                           | 2.019154349                 | 2.019154349  | NA           | 1                                    | 0            | 0.88018129       |   |
| RPL21         | ENSG00000122026.10                    | 0.043553182                 | 2            | 2            | 0.061609275                          |              |                  |   |

|           |                                       |                             |              |             |                             |   |                             |   |
|-----------|---------------------------------------|-----------------------------|--------------|-------------|-----------------------------|---|-----------------------------|---|
|           | Brain_Putamen_basal_ganglia           | 0.093105808                 |              |             | Brain_Frontal_Cortex_BA9    |   |                             |   |
|           | 1.007352906                           | 0.992647094                 | 0.992647094  |             | -1.679237286                |   | 1.869097323                 |   |
|           | 0.094930018                           | 2.509051464                 | 2            | 0           | 0.880567306                 |   |                             |   |
| CHMP4B    | ENSG00000101421.3                     | 0.04388756                  | 3            | 3           | 0.031949433                 |   |                             |   |
|           | Brain_Substantia_nigra                | 0.762245568                 |              |             | Brain_Hypothalamus          |   | 2.109182879                 |   |
|           | 0.265371843                           | 0.265371843                 | -2.1450427   | 0.739083409 |                             |   | -0.569497524                |   |
|           | 1.460478786                           | 3                           | 0            | 0.884436129 |                             |   |                             |   |
| DAB1      | ENSG00000173406.15                    | 0.043943646                 | 2            | 2           | 0.012432876                 |   | Brain_Cerebellum            |   |
|           | 0.052647488                           | Brain_Cerebellar_Hemisphere | 1.764850135  |             | 0.235149865                 |   |                             |   |
|           | 0.235149865                           | -2.499613806                | -1.937801147 |             | -2.218707477                |   | 0.397261541                 |   |
|           | 2                                     | 0                           | 0.884436129  |             |                             |   |                             |   |
| CPSF4L    | ENSG00000187959.9                     | 0.044020132                 | 3            | 3           | 0.018166781                 |   |                             |   |
|           | Brain_Cerebellum                      | 0.567287701                 |              |             | Brain_Substantia_nigra      |   | 1.191869326                 |   |
|           | 0.836328364                           | 0.836328364                 | -0.572050591 |             | 2.362201163                 |   | 1.045537223                 |   |
|           | 1.490092186                           | 3                           | 0            | 0.884436129 |                             |   |                             |   |
| COQ8B     | ENSG00000123815.11                    | 0.04404138                  | 2            | 1           | 0.015338223                 |   | Brain_Cerebellum            |   |
|           | 0.116199473                           | Brain_Cerebellar_Hemisphere | 1.968173554  |             | 0.031826446                 |   |                             |   |
|           | 1.968173554                           | -2.424293049                | -1.570927574 |             | -1.997610311                |   | 0.603420514                 |   |
|           | 1                                     | 0                           | 0.884436129  |             |                             |   |                             |   |
| CXCL16    | ENSG00000161921.14                    | 0.044060609                 | 4            | 3           | 0.14947838                  |   |                             |   |
|           | Brain_Frontal_Cortex_BA9              | 0.832229225                 |              |             | Brain_Putamen_basal_ganglia |   | 3.36421308                  |   |
|           | 0.060807726                           | 0.211742697                 | -0.211843379 |             | 1.441376377                 |   | 0.710309682                 |   |
|           | 0.734012009                           | 3                           | 0            | 0.884436129 |                             |   |                             |   |
| ZMYND11   | ENSG00000015171.19                    | 0.044137596                 | 1            | 1           | 0.044137596                 |   |                             |   |
|           | Brain_Hippocampus                     | 0.044137596                 |              |             | Brain_Hippocampus           |   | 1                           | 1 |
|           | -2.012781735                          | -2.012781735                | -2.012781735 | NA          | 1                           | 0 | 0.884712192                 |   |
| AHNAK2    | ENSG00000185567.6                     | 0.044217954                 | 2            | 2           | 0.01412112                  |   | Brain_Cerebellum            |   |
|           | 0.721449872                           | Brain_Cerebellar_Hemisphere | 1.04318512   |             | 0.95681488                  |   | 0.95681488                  |   |
|           | -0.356521743                          | 2.454167463                 | 1.04882286   |             | 1.987457398                 |   | 2                           | 0 |
|           | 0.885054933                           |                             |              |             |                             |   |                             |   |
| CNMD      | ENSG00000136110.12                    | 0.044297122                 | 5            | 5           | 0.043181558                 |   |                             |   |
|           | Brain_Nucleus_accumbens_basal_ganglia | 0.625994159                 |              |             | Brain_Frontal_Cortex_BA9    |   |                             |   |
|           | 2.027176599                           | 0.337032846                 | 0.337032846  |             | -2.021949611                |   | 1.952430706                 |   |
|           | 0.634153311                           | 1.595533353                 | 5            | 0           | 0.885332493                 |   |                             |   |
| GPR142    | ENSG00000257008.6                     | 0.044358379                 | 2            | 2           | 0.028862199                 |   |                             |   |
|           | Brain_Cerebellar_Hemisphere           | 0.661976667                 |              |             | Brain_Cerebellum            |   | 1.322444248                 |   |
|           | 0.677555752                           | 0.677555752                 | -0.437185717 |             | 2.185363577                 |   | 0.87408893                  |   |
|           | 1.85442239                            | 2                           | 0            | 0.885332493 |                             |   |                             |   |
| STX4      | ENSG00000103496.14                    | 0.044528449                 | 7            | 4           | 0.001329978                 |   |                             |   |
|           | Brain_Nucleus_accumbens_basal_ganglia | 0.455279959                 |              |             | Brain_Cerebellar_Hemisphere |   |                             |   |
|           | 5.033270699                           | 0.00133462                  | 0.237874378  |             | -3.209431256                |   | 2.774101387                 |   |
|           | -1.5130044                            | 2.342278066                 | 4            | 0           | 0.885347965                 |   |                             |   |
| FFAR4     | ENSG00000186188.10                    | 0.044623103                 | 4            | 4           | 0.005158807                 |   | Brain_Cortex                |   |
|           | 0.733040606                           | Brain_Caudate_basal_ganglia | 1.894112213  |             | 0.14052278                  |   | 0.14052278                  |   |
|           | -0.678447664                          | 2.79694653                  | 0.698150217  |             | 1.579080555                 |   | 4                           | 0 |
|           | 0.885347965                           |                             |              |             |                             |   |                             |   |
| STK19     | ENSG00000204344.14                    | 0.044736439                 | 6            | 6           | 0.004500964                 |   | Brain_Cerebellum            |   |
|           | 0.644132223                           | Brain_Cerebellar_Hemisphere | 2.609797698  |             | 0.366273941                 |   |                             |   |
|           | 0.366273941                           | -2.840735432                | 0.667479138  |             | -1.308871527                |   | 1.231937589                 |   |
|           | 6                                     | 0                           | 0.885347965  |             |                             |   |                             |   |
| APOD      | ENSG00000189058.8                     | 0.04475277                  | 1            | 1           | 0.04475277                  |   | Brain_Putamen_basal_ganglia |   |
|           | 0.04475277                            | Brain_Putamen_basal_ganglia | 1            | 1           | 1                           |   | -2.006970821                |   |
|           | -2.006970821                          | -2.006970821                | NA           | 1           | 0                           |   | 0.885347965                 |   |
| LINC00675 | ENSG00000263429.3                     | 0.044771847                 | 1            | 1           | 0.044771847                 |   |                             |   |
|           | Brain_Amygdala                        | 0.044771847                 |              |             | Brain_Amygdala              |   | 1                           | 1 |
|           | -2.006791701                          | -2.006791701                | NA           | 1           | 0                           |   | 0.885347965                 |   |
| TRAP1     | ENSG00000126602.10                    | 0.044872454                 | 7            | 6           | 0.035352237                 |   |                             |   |
|           | Brain_Substantia_nigra                | 0.98039661                  |              |             | Brain_Cerebellum            |   | 1.970299194                 |   |
|           | 0.054250501                           | 0.365862937                 | -2.104300562 |             | 2.073314667                 |   | -0.060405031                |   |
|           | 1.37518706                            | 6                           | 0            | 0.885347965 |                             |   |                             |   |
| MT1G      | ENSG00000125144.13                    | 0.044877712                 | 3            | 3           | 0.024824207                 |   | Brain_Amygdala              |   |
|           | 0.369034228                           | Brain_Cerebellar_Hemisphere | 1.372614994  |             | 0.629047631                 |   |                             |   |

|             |                                       |                                       |                                |              |              |                   |
|-------------|---------------------------------------|---------------------------------------|--------------------------------|--------------|--------------|-------------------|
|             | 0.629047631                           | -0.898283873                          | 2.24412737                     | 0.874520261  | 1.609538128  | 3                 |
|             | 0                                     | 0.885347965                           |                                |              |              |                   |
| EIF2B5      | ENSG00000145191.12                    | 0.044971213                           | 2                              | 2            | 0.019481659  |                   |
|             | Brain_Hypothalamus                    | 0.652201086                           | Brain_Frontal_Cortex_BA9       | 1.510720377  |              |                   |
|             | 0.489279623                           | 0.489279623                           | -2.336183909                   | -0.450706516 | -1.393445212 |                   |
|             | 1.333233851                           | 2                                     | 0                              | 0.885347965  |              |                   |
| KB-1980E6.3 | ENSG00000253633.1                     | 0.045168734                           | 2                              | 2            | 0.022740458  |                   |
|             | Brain_Nucleus_accumbens_basal_ganglia | 0.172572954                           | Brain_Cortex                   |              |              |                   |
|             | 1.838693265                           | 0.161306735                           | 0.161306735                    | 1.363982879  | 2.277767091  |                   |
|             | 1.820874985                           | 0.646143013                           | 2                              | 0            | 0.885347965  |                   |
| PPIL6       | ENSG00000185250.15                    | 0.045211545                           | 8                              | 6            | 0.09202039   | Brain_Hippocampus |
|             | 0.641313797                           | Brain_Amygdala                        | 5.298110464                    | 0.086271763  | 0.209157191  |                   |
|             | -1.502486987                          | 1.684835105                           | -0.734175567                   | 1.024451115  | 6            | 0                 |
|             | 0.885347965                           |                                       |                                |              |              |                   |
| ANXA8L1     | ENSG00000264230.7                     | 0.045255988                           | 3                              | 3            | 0.02180999   |                   |
|             | Brain_Anterior_cingulate_cortex_BA24  | 0.174680739                           | Brain_Frontal_Cortex_BA9       |              |              |                   |
|             | 1.491330343                           | 0.516583968                           | 0.516583968                    | -2.293660804 | 1.764127382  |                   |
|             | -0.628949899                          | 2.124688077                           | 3                              | 0            | 0.885347965  |                   |
| NSUN5       | ENSG00000130305.16                    | 0.045265594                           | 2                              | 2            | 0.057524574  | Brain_Cerebellum  |
|             | 0.178995016                           | Brain_Cerebellar_Hemisphere           | 1.131320069                    | 0.868679931  |              |                   |
|             | 0.868679931                           | -1.343855816                          | 1.899303572                    | 0.277723878  | 2.293259996  |                   |
|             | 2                                     | 0                                     | 0.885347965                    |              |              |                   |
| CCDC93      | ENSG00000125633.10                    | 0.045312727                           | 8                              | 5            | 0.065905565  |                   |
|             | Brain_Nucleus_accumbens_basal_ganglia | 0.358809223                           | Brain_Substantia_nigra         |              |              |                   |
|             | 5.480653342                           | 0.02861948                            | 0.186530902                    | -1.746033329 | 1.839065418  |                   |
|             | 0.832269151                           | 1.377498178                           | 5                              | 0            | 0.885347965  |                   |
| UNC119B     | ENSG00000175970.10                    | 0.045317077                           | 5                              | 5            | 0.017060968  |                   |
|             | Brain_Anterior_cingulate_cortex_BA24  | 0.894082057                           | Brain_Putamen_basal_ganglia    |              |              |                   |
|             | 2.94417735                            | 0.141781507                           | 0.141781507                    | -0.158568273 | 2.385391201  |                   |
|             | 0.925054754                           | 1.120622941                           | 5                              | 0            | 0.885347965  |                   |
| CDIP1       | ENSG00000089486.16                    | 0.045321177                           | 6                              | 4            | 0.106619385  | Brain_Cerebellum  |
|             | 0.625795506                           | Brain_Nucleus_accumbens_basal_ganglia | 3.672717427                    |              |              |                   |
|             | 0.012732413                           | 0.454905153                           | -1.046792919                   | 1.613576188  | 0.361290728  |                   |
|             | 1.235677479                           | 4                                     | 0                              | 0.885347965  |              |                   |
| CRH         | ENSG00000147571.4                     | 0.045371631                           | 1                              | 1            | 0.045371631  |                   |
|             | Brain_Caudate_basal_ganglia           | 0.045371631                           | Brain_Caudate_basal_ganglia    | 1            | 1            |                   |
|             | 1                                     | -2.001192665                          | -2.001192665                   | -2.001192665 | NA           | 1                 |
|             | 0.885347965                           |                                       |                                |              |              |                   |
| TGFA        | ENSG00000163235.15                    | 0.045470536                           | 6                              | 3            | 0.067349049  |                   |
|             | Brain_Caudate_basal_ganglia           | 0.475130454                           | Brain_Cortex                   | 4.551535205  |              |                   |
|             | 0.005384487                           | 0.325003057                           | -1.829337602                   | -0.714156431 | -1.566400591 |                   |
|             | 0.421310592                           | 3                                     | 0                              | 0.885363885  |              |                   |
| RXFP3       | ENSG00000182631.6                     | 0.045514445                           | 1                              | 1            | 0.045514445  |                   |
|             | Brain_Hypothalamus                    | 0.045514445                           | Brain_Hypothalamus             | 1            | 1            | 1                 |
|             | 1.999868692                           | 1.999868692                           | 1.999868692                    | NA           | 1            | 0                 |
|             | 0.885363885                           |                                       |                                |              |              |                   |
| PLAC8L1     | ENSG00000173261.8                     | 0.045614971                           | 2                              | 2            | 0.013012314  |                   |
|             | Brain_Cerebellar_Hemisphere           | 0.042233709                           | Brain_Spinal_cord_cervical_c-1 |              |              |                   |
|             | 1.79668254                            | 0.20331746                            | 0.20331746                     | -2.483432088 | 2.031209877  | -0.226111106      |
|             | 3.192333948                           | 2                                     | 0                              | 0.885363885  |              |                   |
| GRM1        | ENSG00000152822.13                    | 0.045735682                           | 2                              | 2            | 0.023812584  | Brain_Cerebellum  |
|             | 0.357406147                           | Brain_Spinal_cord_cervical_c-1        | 1.048133601                    | 0.951866399  |              |                   |
|             | 0.951866399                           | -0.920318877                          | 2.260139662                    | 0.669910392  | 2.2489238    | 2                 |
|             | 0                                     | 0.885363885                           |                                |              |              |                   |
| TMEM126B    | ENSG00000171204.12                    | 0.045921357                           | 1                              | 1            | 0.045921357  |                   |
|             | Brain_Substantia_nigra                | 0.045921357                           | Brain_Substantia_nigra         | 1            | 1            |                   |
|             | 1                                     | -1.996115455                          | -1.996115455                   | -1.996115455 | NA           | 1                 |
|             | 0.885363885                           |                                       |                                |              |              |                   |
| GNL3        | ENSG00000163938.16                    | 0.045973062                           | 8                              | 3            | 0.003643684  | Brain_Cortex      |
|             | 0.854222918                           | Brain_Anterior_cingulate_cortex_BA24  | 6.290843036                    | 0.0122212    |              |                   |
|             | 0.384343568                           | -0.183733001                          | 2.90746735                     | 1.945857266  | 0.922596367  | 3                 |
|             | 0                                     | 0.885363885                           |                                |              |              |                   |
| RAF1        | ENSG00000132155.11                    | 0.045995576                           | 3                              | 3            | 0.007418343  |                   |

|          |                                       |                             |              |             |                                       |                    |             |
|----------|---------------------------------------|-----------------------------|--------------|-------------|---------------------------------------|--------------------|-------------|
|          | Brain_Frontal_Cortex_BA9              | 0.868081769                 |              |             | Brain_Caudate_basal_ganglia           |                    |             |
|          | 1.222557641                           | 0.793563196                 | 0.793563196  |             | -0.74144421                           | 2.677456748        |             |
|          | 0.700702691                           | 1.771037704                 | 3            | 0           | 0.885363885                           |                    |             |
| CLCA4    | ENSG00000016602.9                     | 0.045998327                 | 3            | 3           | 0.294032224                           |                    |             |
|          | Brain_Caudate_basal_ganglia           | 0.770702953                 |              |             | Brain_Nucleus_accumbens_basal_ganglia |                    |             |
|          | 1.93995144                            | 0.192654169                 | 0.192654169  |             | -1.049317045                          | 0.713900394        |             |
|          | -0.208957392                          | 0.884498949                 | 3            | 0           | 0.885363885                           |                    |             |
| PCDHA12  | ENSG00000251664.3                     | 0.046001829                 |              |             | 2                                     | 0.016321299        |             |
|          | Brain_Frontal_Cortex_BA9              | 0.472672146                 |              |             | Brain_Cerebellar_Hemisphere           |                    |             |
|          | 1.521027692                           | 0.478972308                 | 0.478972308  |             | 0.718138091                           | 2.401650381        |             |
|          | 1.559894236                           | 1.190422957                 | 2            | 0           | 0.885363885                           |                    |             |
| ARID5B   | ENSG00000150347.14                    | 0.046005257                 |              |             | 2                                     | 0.03059038         |             |
|          | Brain_Caudate_basal_ganglia           | 0.604151463                 |              |             | Brain_Anterior_cingulate_cortex_BA24  |                    |             |
|          | 1.297731392                           | 0.702268608                 | 0.702268608  |             | -0.518439784                          | 2.16236075         |             |
|          | 0.821960483                           | 1.895612236                 | 2            | 0           | 0.885363885                           |                    |             |
| SARDH    | ENSG00000123453.17                    | 0.046168735                 | 8            | 7           | 0.003797874                           |                    |             |
|          | Brain_Nucleus_accumbens_basal_ganglia | 0.841521533                 |              |             | Brain_Hippocampus                     |                    |             |
|          | 3.686736998                           | 0.097667936                 | 0.144115663  |             | -2.894479747                          | -0.199947638       |             |
|          | -1.753479759                          | 1.151805105                 | 7            | 0           | 0.887085993                           |                    |             |
| TUBB8    | ENSG00000261456.5                     | 0.04624578                  | 1            | 1           | 0.04624578                            | Brain_Hypothalamus |             |
|          | 0.04624578                            | Brain_Hypothalamus          | 1            | 1           | 1                                     | 1.993143093        | 1.993143093 |
|          | 1.993143093                           | NA                          | 1            | 0           | 0.887085993                           |                    |             |
| TDRD10   | ENSG00000163239.12                    | 0.046284953                 |              |             | 3                                     | 2                  | 0.013103292 |
|          | Brain_Cerebellum                      | 0.125428196                 |              |             | Brain_Cortex                          | 2.727560011        | 0.03358549  |
|          | 0.2388545                             | -2.480949536                | -1.532382003 |             | -2.074546321                          | 0.488639334        | 2           |
|          | 0                                     | 0.887085993                 |              |             |                                       |                    |             |
| SPC24    | ENSG00000161888.11                    | 0.046393163                 | 5            | 4           | 0.134237102                           |                    |             |
|          | Brain_Frontal_Cortex_BA9              | 0.969334848                 |              |             | Brain_Nucleus_accumbens_basal_ganglia |                    |             |
|          | 3.472490668                           | 0.014964362                 | 0.16804996   |             | 0.038442535                           | 1.497600403        |             |
|          | 0.493127326                           | 0.639660232                 | 4            | 0           | 0.887943571                           |                    |             |
| RAB33B   | ENSG00000172007.5                     | 0.04660691                  | 2            | 2           | 0.143155597                           | Brain_Cerebellum   |             |
|          | 0.677800569                           | Brain_Cerebellar_Hemisphere | 1.695845503  |             | 0.304154497                           |                    |             |
|          | 0.304154497                           | -0.415466316                | 1.464140377  |             | 0.524337031                           | 1.329082639        |             |
|          | 2                                     | 0                           | 0.890815963  |             |                                       |                    |             |
| ANAPC7   | ENSG00000196510.12                    | 0.046683118                 |              |             | 5                                     | 4                  | 0.039449333 |
|          | Brain_Frontal_Cortex_BA9              | 0.531251304                 |              |             | Brain_Hippocampus                     | 1.998848945        |             |
|          | 0.009627799                           | 0.131188624                 | -2.059468985 |             | 1.844507558                           | -0.04000813        |             |
|          | 1.764945227                           | 4                           | 0            | 0.891055255 |                                       |                    |             |
| BPI      | ENSG00000101425.12                    | 0.046784433                 | 2            | 2           | 0.02072363                            | Brain_Hypothalamus |             |
|          | 0.448623064                           | Brain_Substantia_nigra      | 1.052378152  |             | 0.947621848                           |                    |             |
|          | 0.947621848                           | -2.312981986                | 0.757712585  |             | -0.777634701                          | 2.171308954        |             |
|          | 2                                     | 0                           | 0.891772489  |             |                                       |                    |             |
| DBP      | ENSG00000105516.10                    | 0.046948811                 | 2            | 2           | 0.023347767                           |                    |             |
|          | Brain_Putamen_basal_ganglia           | 0.323131104                 |              |             | Brain_Cerebellum                      | 1.000285615        |             |
|          | 0.999714385                           | 0.999714385                 | -0.988043991 |             | 2.267695585                           | 0.639825797        |             |
|          | 2.302155532                           | 2                           | 0            | 0.893688179 |                                       |                    |             |
| OLIG2    | ENSG00000205927.4                     | 0.047051935                 | 1            | 1           | 0.047051935                           |                    |             |
|          | Brain_Caudate_basal_ganglia           | 0.047051935                 |              |             | Brain_Caudate_basal_ganglia           | 1                  | 1           |
|          | 1                                     | -1.985832417                | -1.985832417 |             | -1.985832417                          | NA                 | 1           |
|          |                                       |                             |              |             |                                       | 0                  | 0.89443427  |
| GLIS1    | ENSG00000174332.5                     | 0.047168553                 | 4            | 3           | 0.007439767                           |                    |             |
|          | Brain_Cerebellar_Hemisphere           | 0.683241403                 |              |             | Brain_Spinal_cord_cervical_c-1        |                    |             |
|          | 2.797978001                           | 0.002920369                 | 0.19808217   |             | -2.676490503                          | -0.408043957       |             |
|          | -1.890208353                          | 1.065354412                 | 3            | 0           | 0.895434489                           |                    |             |
| PDE1A    | ENSG00000115252.18                    | 0.047271599                 | 9            | 4           | 0.040952571                           |                    |             |
|          | Brain_Hypothalamus                    | 0.951294996                 |              |             | Brain_Substantia_nigra                | 7.25701203         |             |
|          | 0.011337351                           | 0.251111534                 | -0.061080629 |             | 2.044009881                           | 0.798657467        |             |
|          | 0.556729123                           | 4                           | 0            | 0.896174718 |                                       |                    |             |
| EMCN     | ENSG00000164035.9                     | 0.047382789                 | 2            | 2           | 0.014303746                           |                    |             |
|          | Brain_Nucleus_accumbens_basal_ganglia | 0.864307862                 |              |             | Brain_Hypothalamus                    |                    |             |
|          | 1.05829053                            | 0.94170947                  | 0.94170947   |             | -0.170893049                          | 2.449543415        | 1.139325183 |
|          | 1.852928394                           | 2                           | 0            | 0.897067117 |                                       |                    |             |
| SERPINF2 | ENSG00000167711.13                    | 0.047498354                 |              |             | 12                                    | 3                  | 0.098523959 |

|           |                                       |                  |              |                                      |             |              |             |                  |
|-----------|---------------------------------------|------------------|--------------|--------------------------------------|-------------|--------------|-------------|------------------|
|           | Brain_Cortex                          | 0.966662056      |              | Brain_Anterior_cingulate_cortex_BA24 |             |              |             |                  |
|           | 10.05769484                           | 0.001423548      |              | 0.449556834                          |             | -0.495307824 |             | 1.652051962      |
|           | 0.383683116                           | 0.595236266      | 3            | 0                                    |             | 0.89803982   |             |                  |
| MED27     | ENSG00000160563.13                    | 0.047564989      |              | 1                                    | 1           | 0.047564989  |             |                  |
|           | Brain_Substantia_nigra                | 0.047564989      |              | Brain_Substantia_nigra               |             |              | 1           | 1                |
|           | 1                                     | -1.981234438     | -1.981234438 | -1.981234438                         | NA          | 1            | 0           |                  |
|           | 0.898086044                           |                  |              |                                      |             |              |             |                  |
| NBEAL1    | ENSG00000144426.18                    | 0.047745288      |              | 1                                    | 1           | 0.047745288  |             |                  |
|           | Brain_Substantia_nigra                | 0.047745288      |              | Brain_Substantia_nigra               |             |              | 1           | 1                |
|           | 1                                     | 1.979628504      | 1.979628504  | 1.979628504                          | NA          | 1            | 0           |                  |
|           | 0.898625231                           |                  |              |                                      |             |              |             |                  |
| CHMP1A    | ENSG00000131165.14                    | 0.047747001      |              | 5                                    | 5           | 0.047193492  |             |                  |
|           | Brain_Spinal_cord_cervical_c-1        | 0.951465654      |              | Brain_Hippocampus                    |             |              |             |                  |
|           | 2.142657185                           | 0.220035664      | 0.220035664  | -1.984559589                         |             | 0.257477598  |             |                  |
|           | -0.688522971                          | 0.965663432      | 5            | 0                                    |             | 0.898625231  |             |                  |
| ARFGEF1   | ENSG00000066777.8                     | 0.04784635       | 2            | 2                                    |             | 0.03019013   |             |                  |
|           | Brain_Caudate_basal_ganglia           | 0.043245325      |              | Brain_Cerebellum                     |             | 1.447739301  |             |                  |
|           | 0.552260699                           | 0.552260699      | 2.021332809  | 2.167586923                          |             | 2.094459866  |             |                  |
|           | 0.103417276                           | 2                | 0            | 0.898625231                          |             |              |             |                  |
| SSR2      | ENSG00000163479.13                    | 0.047986837      |              | 2                                    | 2           | 0.018953538  |             |                  |
|           | Brain_Putamen_basal_ganglia           | 0.444315613      |              | Brain_Spinal_cord_cervical_c-1       |             |              |             |                  |
|           | 1.00484567                            | 0.99515433       | 0.99515433   | -2.346443531                         | 0.764925996 | -0.790758767 |             |                  |
|           | 2.200070491                           | 2                | 0            | 0.898625231                          |             |              |             |                  |
| GNE       | ENSG00000159921.14                    | 0.048010839      |              | 2                                    | 2           | 0.025205688  |             |                  |
|           | Brain_Substantia_nigra                | 0.321733153      |              | Brain_Cerebellum                     |             | 1.01784075   | 0.98215925  |                  |
|           | 0.98215925                            | -0.990902579     | 2.238235712  | 0.623666566                          | 2.283345583 | 2            |             |                  |
|           | 0                                     | 0.898625231      |              |                                      |             |              |             |                  |
| INAFM1    | ENSG00000257704.3                     | 0.048030735      |              | 2                                    | 2           | 0.066636883  |             |                  |
|           | Brain_Cerebellum                      | 0.254086377      |              | Brain_Cerebellar_Hemisphere          |             | 1.247470834  |             |                  |
|           | 0.752529166                           | 0.752529166      | -1.834115284 | 1.140480008                          |             | -0.346817638 |             |                  |
|           | 2.103356502                           | 2                | 0            | 0.898625231                          |             |              |             |                  |
| WDR43     | ENSG00000163811.11                    | 0.048070852      |              | 2                                    | 1           | 0.024545366  |             |                  |
|           | Brain_Cerebellar_Hemisphere           | 0.095424628      |              | Brain_Cerebellum                     |             | 1.962190841  |             |                  |
|           | 0.037809159                           | 1.962190841      | 1.667451666  | 2.248483657                          |             | 1.957967661  |             |                  |
|           | 0.410851661                           | 1                | 0            | 0.898625231                          |             |              |             |                  |
| DMXL1     | ENSG00000172869.14                    | 0.048107376      |              | 1                                    | 1           | 0.048107376  |             | Brain_Cortex     |
|           | 0.048107376                           | Brain_Cortex     | 1            | 1                                    | 1           | -1.976418694 |             | -1.976418694     |
|           | -1.976418694                          | NA               | 1            | 0                                    | 0.898625231 |              |             |                  |
| LINC01124 | ENSG00000222033.1                     | 0.048297144      |              | 5                                    | 4           | 0.016698235  |             |                  |
|           | Brain_Cortex                          | 0.722685298      |              | Brain_Cerebellum                     |             | 3.355127139  | 0.097962693 |                  |
|           | 0.228461704                           | -2.393285651     | -0.354872251 | -1.073010075                         |             | 0.853834062  |             |                  |
|           | 4                                     | 0                | 0.900875989  |                                      |             |              |             |                  |
| UBAP1L    | ENSG00000246922.8                     | 0.048442744      |              | 2                                    | 2           | 0.041081631  |             |                  |
|           | Brain_Nucleus_accumbens_basal_ganglia | 0.184844635      |              | Brain_Cerebellar_Hemisphere          |             |              |             |                  |
|           | 1.022308809                           | 0.977691191      | 0.977691191  | -2.042705191                         |             | -1.325985094 |             |                  |
|           | -1.684345143                          | 0.506797641      | 2            | 0                                    | 0.900875989 |              |             |                  |
| SLC16A9   | ENSG00000165449.11                    | 0.048443845      |              | 3                                    | 2           | 0.021070353  |             |                  |
|           | Brain_Spinal_cord_cervical_c-1        | 0.43492437       |              | Brain_Cerebellar_Hemisphere          |             |              |             |                  |
|           | 1.967660159                           | 0.032471902      | 0.999867939  | 0.7807928                            | 2.306721455 |              |             |                  |
|           | 1.307330817                           | 0.865913833      | 2            | 0                                    | 0.900875989 |              |             |                  |
| NEMF      | ENSG00000165525.17                    | 0.048595985      |              | 1                                    | 1           | 0.048595985  |             |                  |
|           | Brain_Substantia_nigra                | 0.048595985      |              | Brain_Substantia_nigra               |             |              | 1           | 1                |
|           | 1                                     | -1.972119336     | -1.972119336 | -1.972119336                         | NA          | 1            | 0           |                  |
|           | 0.900875989                           |                  |              |                                      |             |              |             |                  |
| CNPY4     | ENSG00000166997.7                     | 0.048600968      |              | 5                                    | 5           | 0.095817486  |             |                  |
|           | Brain_Anterior_cingulate_cortex_BA24  | 0.9750369        |              |                                      |             |              |             |                  |
|           | Brain_Nucleus_accumbens_basal_ganglia | 1.8783548        | 0.419094394  | 0.419094394                          |             |              |             |                  |
|           | -1.556374704                          | 1.665477717      | 0.327673087  | 1.326245065                          | 5           | 0            |             |                  |
|           | 0.900875989                           |                  |              |                                      |             |              |             |                  |
| SGF29     | ENSG00000176476.8                     | 0.048614207      |              | 1                                    | 1           | 0.048614207  |             | Brain_Cerebellum |
|           | 0.048614207                           | Brain_Cerebellum | 1            | 1                                    | 1           | 1.971959701  |             | 1.971959701      |
|           | 1.971959701                           | NA               | 1            | 0                                    | 0.900875989 |              |             |                  |

|              |                                       |                             |                                       |              |              |                  |              |  |
|--------------|---------------------------------------|-----------------------------|---------------------------------------|--------------|--------------|------------------|--------------|--|
| DSG2         | ENSG00000046604.12                    | 0.048797565                 | 1                                     | 1            | 0.048797565  |                  |              |  |
|              | Brain_Nucleus_accumbens_basal_ganglia | 0.048797565                 |                                       |              |              |                  |              |  |
|              | Brain_Nucleus_accumbens_basal_ganglia | 1                           | 1                                     | 1            | -1.970356168 |                  |              |  |
|              | -1.970356168                          | -1.970356168                | NA                                    | 1            | 0            | 0.901991096      |              |  |
| LYSMD3       | ENSG00000176018.12                    | 0.048803321                 | 1                                     | 1            | 0.048803321  |                  |              |  |
|              | Brain_Nucleus_accumbens_basal_ganglia | 0.048803321                 |                                       |              |              |                  |              |  |
|              | Brain_Nucleus_accumbens_basal_ganglia | 1                           | 1                                     | 1            | 1.970305917  |                  |              |  |
|              | 1.970305917                           | 1.970305917                 | NA                                    | 1            | 0            | 0.901991096      |              |  |
| RP11-343L5.2 | ENSG00000271862.1                     | 0.049096794                 | 1                                     | 1            | 0.049096794  |                  |              |  |
|              | Brain_Cerebellum                      | 0.049096794                 | Brain_Cerebellum                      | 1            | 1            | 1                | -1.967750135 |  |
|              | -1.967750135                          | -1.967750135                | NA                                    | 1            | 0            | 0.906218004      |              |  |
| FAM200B      | ENSG00000237765.6                     | 0.049177857                 | 11                                    | 3            | 0.062196961  |                  |              |  |
|              | Brain_Putamen_basal_ganglia           | 0.891273969                 | Brain_Nucleus_accumbens_basal_ganglia |              |              |                  |              |  |
|              | 8.895214997                           | 0.014768716                 | 0.398525291                           |              | -1.864889024 | 0.13669236       |              |  |
|              | -1.015001634                          | 0.595053506                 | 3                                     | 0            | 0.906518302  |                  |              |  |
| SLC22A8      | ENSG00000149452.15                    | 0.049539894                 | 1                                     | 1            | 0.049539894  |                  |              |  |
|              | Brain_Anterior_cingulate_cortex_BA24  | 0.049539894                 |                                       |              |              |                  |              |  |
|              | Brain_Anterior_cingulate_cortex_BA24  | 1                           | 1                                     | 1            | -1.963915483 |                  |              |  |
|              | -1.963915483                          | -1.963915483                | NA                                    | 1            | 0            | 0.911990338      |              |  |
| MIR646HG     | ENSG00000228340.5                     | 0.049656074                 | 2                                     | 2            | 0.055045637  |                  |              |  |
|              | Brain_Nucleus_accumbens_basal_ganglia | 0.221705296                 | Brain_Caudate_basal_ganglia           |              |              |                  |              |  |
|              | 1.92968588                            | 0.07031412                  | 0.07031412                            | -1.91851583  | -1.222006165 | -1.570260997     |              |  |
|              | 0.492506708                           | 2                           | 0                                     | 0.912927892  |              |                  |              |  |
| GPRIN1       | ENSG00000169258.6                     | 0.049757195                 | 1                                     | 1            | 0.049757195  |                  |              |  |
|              | Brain_Cortex                          | 0.049757195                 | Brain_Cortex                          | 1            | 1            | 1                | 1.962045429  |  |
|              | 1.962045429                           | 1.962045429                 | NA                                    | 1            | 0            | 0.91323095       |              |  |
| PTTG1IP      | ENSG00000183255.11                    | 0.04983381                  | 2                                     | 2            | 0.021807068  | Brain_Cerebellum |              |  |
|              | 0.155506679                           | Brain_Cerebellar_Hemisphere | 1.257583857                           | 0.742416143  |              |                  |              |  |
|              | 0.742416143                           | 1.420347018                 | 2.293711635                           | 1.857029327  | 0.617562043  |                  |              |  |
|              | 2                                     | 0                           | 0.91323095                            |              |              |                  |              |  |
| Clorf229     | ENSG00000221953.5                     | 0.049988244                 | 12                                    | 7            | 0.014213949  |                  |              |  |
|              | Brain_Caudate_basal_ganglia           | 0.98764799                  | Brain_Hypothalamus                    | 7.892698268  |              |                  |              |  |
|              | 0.001083766                           | 0.263839629                 | -2.451810504                          | 1.687007838  | -0.521780272 |                  |              |  |
|              | 1.007936181                           | 7                           | 0                                     | 0.91323095   |              |                  |              |  |
| MYLK4        | ENSG00000145949.9                     | 0.049991466                 | 10                                    | 5            | 0.002945623  |                  |              |  |
|              | Brain_Hippocampus                     | 0.911524687                 | Brain_Anterior_cingulate_cortex_BA24  |              |              |                  |              |  |
|              | 6.730464363                           | 0.002526534                 | 0.281784108                           | -0.37455687  | 2.97335629   |                  |              |  |
|              | 0.59839434                            | 0.938165911                 | 5                                     | 0            | 0.91323095   |                  |              |  |
| SPOCK2       | ENSG00000107742.12                    | 0.050038108                 | 4                                     | 3            | 0.056212303  |                  |              |  |
|              | Brain_Frontal_Cortex_BA9              | 0.33719559                  | Brain_Caudate_basal_ganglia           | 1.979501897  |              |                  |              |  |
|              | 0.023843232                           | 0.947711446                 | -1.909386099                          | 1.787631954  | 0.585331134  |                  |              |  |
|              | 1.698242397                           | 3                           | 0                                     | 0.91323095   |              |                  |              |  |
| RP11-536I6.2 | ENSG00000255021.1                     | 0.050104092                 | 2                                     | 2            | 0.06814299   |                  |              |  |
|              | Brain_Putamen_basal_ganglia           | 0.964544868                 | Brain_Caudate_basal_ganglia           |              |              |                  |              |  |
|              | 1.679984323                           | 0.320015677                 | 0.320015677                           | -1.824060079 | -0.044451053 |                  |              |  |
|              | -0.934255566                          | 1.258373611                 | 2                                     | 0            | 0.91323095   |                  |              |  |
| ANKRD6       | ENSG00000135299.16                    | 0.050129467                 | 2                                     | 2            | 0.014949705  |                  |              |  |
|              | Brain_Nucleus_accumbens_basal_ganglia | 0.701385248                 | Brain_Caudate_basal_ganglia           |              |              |                  |              |  |
|              | 1.257929548                           | 0.742070452                 | 0.742070452                           | -2.43359516  | -0.383451198 |                  |              |  |
|              | -1.408523179                          | 1.449670698                 | 2                                     | 0            | 0.91323095   |                  |              |  |
| SMYD4        | ENSG00000186532.11                    | 0.050208143                 | 13                                    | 2            | 0.014865195  | Brain_Cortex     |              |  |
|              | 0.56765551                            | Brain_Cerebellar_Hemisphere | 11.63768346                           | 0.002690157  |              |                  |              |  |
|              | 0.532601346                           | -2.435646714                | -0.571507748                          | -1.96357772  | 0.462375098  |                  |              |  |
|              | 2                                     | 0                           | 0.913474813                           |              |              |                  |              |  |
| CNN3         | ENSG00000117519.15                    | 0.050317275                 | 5                                     | 5            | 0.232077539  | Brain_Cortex     |              |  |
|              | 0.701634298                           | Brain_Frontal_Cortex_BA9    | 2.624955938                           | 0.087690047  |              |                  |              |  |
|              | 0.087690047                           | -1.195024293                | 1.172383137                           | -0.127627882 | 0.918367498  |                  |              |  |
|              | 5                                     | 0                           | 0.914271422                           |              |              |                  |              |  |
| DECR2        | ENSG00000242612.6                     | 0.050567988                 | 13                                    | 2            | 0.014453384  | Brain_Cortex     |              |  |
|              | 0.136475451                           | Brain_Frontal_Cortex_BA9    | 11.97046972                           | 0.002281669  |              |                  |              |  |
|              | 0.57348175                            | 1.489045259                 | 2.445793286                           | 2.111672623  | 0.297911382  | 2                |              |  |
|              | 0                                     | 0.91489611                  |                                       |              |              |                  |              |  |



CTD-2162K18.3 ENSG00000267353.1 0.050589901 3 3 0.095253417  
Brain\_Caudate\_basal\_ganglia 0.553869421 Brain\_Cerebellum 1.805706852  
0.350843029 0.350843029 -1.416372567 1.668313964 -0.113343494  
1.597071256 3 0 0.91489611

VN1R1 ENSG00000178201.4 0.05081646 9 7 0.017321932  
Brain\_Nucleus\_accumbens\_basal\_ganglia 0.775478145 Brain\_Hypothalamus  
5.066220262 0.038684252 0.200275612 -2.379802229 0.71349936  
-0.451801076 0.924580816 7 0 0.91489611

RP5-944M2.3 ENSG00000214043.7 0.050822208 3 3 0.0724402  
Brain\_Cortex 0.922305812 Brain\_Frontal\_Cortex\_BA9 1.860871545  
0.49898136 0.49898136 -1.097848664 1.796341638 0.265340865 1.45437438  
3 0 0.91489611

TMPO ENSG00000120802.13 0.050983033 1 1 0.050983033  
Brain\_Nucleus\_accumbens\_basal\_ganglia 0.050983033  
Brain\_Nucleus\_accumbens\_basal\_ganglia 1 1 1 1.951622558  
1.951622558 1.951622558 NA 1 0 0.91489611

RND1 ENSG00000172602.9 0.051004219 2 2 0.033832473  
Brain\_Cerebellar\_Hemisphere 0.273341336 Brain\_Caudate\_basal\_ganglia  
1.050250118 0.949749882 0.949749882 -2.122062705 1.095400225  
-0.51333124 2.275089856 2 0 0.91489611

TMEM117 ENSG00000139173.9 0.051012311 1 1 0.051012311  
Brain\_Hippocampus 0.051012311 Brain\_Hippocampus 1 1 1  
1.9513762 1.9513762 1.9513762 NA 1 0 0.91489611

SLC35D3 ENSG00000182747.4 0.051373108 1 1 0.051373108  
Brain\_Substantia\_nigra 0.051373108 Brain\_Substantia\_nigra 1 1  
1 -1.948349914 -1.948349914 -1.948349914 NA 1 0 0.91489611

NTNG2 ENSG00000196358.10 0.051385013 1 1 0.051385013  
Brain\_Spinal\_cord\_cervical\_c-1 0.051385013 Brain\_Spinal\_cord\_cervical\_c-1  
1 1 1 -1.948250362 -1.948250362 -1.948250362 NA 1 0  
0.91489611

RPRD2 ENSG00000163125.15 0.05147799 11 3 0.013864496  
Brain\_Frontal\_Cortex\_BA9 0.970579799 Brain\_Substantia\_nigra  
8.880700168 0.000408903 0.464120423 0.036881114 2.46075512  
1.717502924 0.828494118 3 0 0.91489611

THEMIS2 ENSG00000130775.15 0.051495461 1 1 0.051495461  
Brain\_Cerebellar\_Hemisphere 0.051495461 Brain\_Cerebellar\_Hemisphere 1 1  
1 1.947327687 1.947327687 1.947327687 NA 1 0 0.91489611

NCOA7 ENSG00000111912.19 0.05151695 7 5 0.002928209  
Brain\_Anterior\_cingulate\_cortex\_BA24 0.857286887 Brain\_Cerebellum  
4.262854399 0.071004654 0.246145726 -0.17982891 2.975175617  
1.363675455 1.055617382 5 0 0.91489611

GPT2 ENSG00000166123.13 0.05157863 1 1 0.05157863 Brain\_Cortex 0.05157863  
Brain\_Cortex 1 1 1 -1.946633995 -1.946633995 -1.946633995  
NA 1 0 0.91489611

IL1R2 ENSG00000115590.13 0.051600057 1 1 0.051600057  
Brain\_Frontal\_Cortex\_BA9 0.051600057 Brain\_Frontal\_Cortex\_BA9 1 1  
1 1.946455432 1.946455432 1.946455432 NA 1 0 0.91489611

CRABP2 ENSG00000143320.8 0.051679349 2 2 0.017383418  
Brain\_Cerebellar\_Hemisphere 0.56230209 Brain\_Cerebellum 1.025969372  
0.974030628 0.974030628 -0.579425517 2.378496154 0.899535318  
2.091566472 2 0 0.91489611

SNAPIN ENSG00000143553.10 0.051693438 1 1 0.051693438  
Brain\_Cerebellar\_Hemisphere 0.051693438 Brain\_Cerebellar\_Hemisphere 1 1  
1 1.945677942 1.945677942 1.945677942 NA 1 0 0.91489611

UBAC1 ENSG00000130560.8 0.051709428 2 2 0.030812824  
Brain\_Cerebellar\_Hemisphere 0.693361541 Brain\_Cerebellum 1.31151615 0.68848385  
0.68848385 -2.159481593 0.394297321 -0.882592136 1.805794388 2  
0 0.91489611

SORBS3 ENSG00000120896.13 0.051747346 1 1 0.051747346  
Brain\_Hippocampus 0.051747346 Brain\_Hippocampus 1 1 1  
-1.945229637 -1.945229637 -1.945229637 NA 1 0 0.91489611

SCTR ENSG00000080293.9 0.051853519 1 1 0.051853519

|           |                                       |                          |                             |              |              |             |              |            |
|-----------|---------------------------------------|--------------------------|-----------------------------|--------------|--------------|-------------|--------------|------------|
|           | Brain_Anterior_cingulate_cortex_BA24  | 0.051853519              |                             |              |              |             |              |            |
|           | Brain_Anterior_cingulate_cortex_BA24  | 1                        | 1                           | 1            | 1.944347842  |             |              |            |
|           | 1.944347842                           | 1.944347842              | NA                          | 1            | 0            | 0.91489611  |              |            |
| GLYCTK    | ENSG00000168237.17                    | 0.051937376              | 6                           | 5            | 0.002814629  |             |              |            |
|           | Brain_Cerebellum0.274988327           | Brain_Cortex             | 3.498626192                 |              | 0.111677205  |             |              |            |
|           | 0.347984998                           | 1.091646913              | 2.98728964                  | 1.807823431  | 0.703577822  |             |              | 5          |
|           | 0                                     | 0.91489611               |                             |              |              |             |              |            |
| DUSP13    | ENSG00000079393.20                    | 0.051961549              | 1                           | 1            | 0.051961549  |             |              |            |
|           | Brain_Anterior_cingulate_cortex_BA24  | 0.051961549              |                             |              |              |             |              |            |
|           | Brain_Anterior_cingulate_cortex_BA24  | 1                        | 1                           | 1            | 1.943452167  |             |              |            |
|           | 1.943452167                           | 1.943452167              | NA                          | 1            | 0            | 0.91489611  |              |            |
| SNAI3     | ENSG00000185669.5                     | 0.052140086              | 3                           | 3            | 0.034357059  |             |              |            |
|           | Brain_Nucleus_accumbens_basal_ganglia | 0.290666245              |                             |              |              |             |              |            |
|           | Brain_Anterior_cingulate_cortex_BA24  | 1.057333422              |                             |              | 0.933120505  |             |              |            |
|           | 0.933120505                           | -2.115855974             | -1.056661186                | -1.51841217  | 0.542478392  |             |              |            |
|           | 3                                     | 0                        | 0.91489611                  |              |              |             |              |            |
| ATXN1L    | ENSG00000224470.7                     | 0.052154647              | 1                           | 1            | 0.052154647  |             |              |            |
|           | Brain_Cortex                          | 0.052154647              | Brain_Cortex                | 1            | 1            | 1           | -1.941855077 |            |
|           | -1.941855077                          | -1.941855077             | NA                          | 1            | 0            | 0.91489611  |              |            |
| ATM       | ENSG00000149311.18                    | 0.0522961                | 2                           | 2            | 0.030848468  |             |              |            |
|           | Brain_Spinal_cord_cervical_c-1        | 0.809816711              |                             |              |              |             |              |            |
|           | Brain_Nucleus_accumbens_basal_ganglia | 1.36813434               | 0.63186566                  | 0.63186566   |              |             |              |            |
|           | -2.159021904                          | 0.240662492              | -0.959179706                | 1.696833109  | 2            | 0           |              |            |
|           | 0.91489611                            |                          |                             |              |              |             |              |            |
| KL        | ENSG00000133116.7                     | 0.052310499              | 1                           | 1            | 0.052310499  |             |              |            |
|           | Brain_Putamen_basal_ganglia           | 0.052310499              | Brain_Putamen_basal_ganglia | 1            | 1            |             |              |            |
|           | 1                                     | 1.940569643              | 1.940569643                 | 1.940569643  | NA           | 1           | 0            | 0.91489611 |
| CDC37L1   | ENSG00000106993.11                    | 0.05232551               | 1                           | 1            | 0.05232551   |             |              |            |
|           | Brain_Putamen_basal_ganglia           | 0.05232551               | Brain_Putamen_basal_ganglia | 1            | 1            | 1           |              |            |
|           | 1.940446007                           | 1.940446007              | 1.940446007                 | NA           | 1            | 0           | 0.91489611   |            |
| BPGM      | ENSG00000172331.11                    | 0.052360062              | 1                           | 1            | 0.052360062  |             |              |            |
|           | 0.052360062                           | Brain_Cortex             | 1                           | 1            | 1            | 1.940161535 | 1.940161535  |            |
|           | 1.940161535                           | NA                       | 1                           | 0            | 0.91489611   |             |              |            |
| C20orf197 | ENSG00000176659.7                     | 0.052395038              | 4                           | 1            | 0.045735537  |             |              |            |
|           | Brain_Nucleus_accumbens_basal_ganglia | 0.062048003              | Brain_Cerebellar_Hemisphere |              |              |             |              |            |
|           | 3.975704335                           | 1.73E-05                 | 3.975704335                 | -1.99782591  | -1.865952557 |             |              |            |
|           | -1.933892586                          | 0.068875856              | 1                           | 0            | 0.91489611   |             |              |            |
| ACAA1     | ENSG00000060971.17                    | 0.05239945               | 1                           | 1            | 0.05239945   |             |              |            |
|           | 0.05239945                            | Brain_Frontal_Cortex_BA9 | 1                           | 1            | 1            | 1.939837432 |              |            |
|           | 1.939837432                           | 1.939837432              | NA                          | 1            | 0            | 0.91489611  |              |            |
| SLK       | ENSG00000065613.13                    | 0.052459348              | 2                           | 2            | 0.015238136  |             |              |            |
|           | Brain_Frontal_Cortex_BA9              | 0.964381811              | Brain_Cerebellar_Hemisphere |              |              |             |              |            |
|           | 1.015348268                           | 0.984651732              | 0.984651732                 | -2.426669356 | -0.044655617 |             |              |            |
|           | -1.235662487                          | 1.684338068              | 2                           | 0            | 0.91489611   |             |              |            |
| LINC02175 | ENSG00000262155.1                     | 0.052541831              | 2                           | 1            | 0.053031928  |             |              |            |
|           | Brain_Cerebellar_Hemisphere           | 0.057947859              | Brain_Cerebellum            | 1.95223286   | 0.04776714   |             |              |            |
|           | 1.95223286                            | 1.896092161              | 1.934660849                 | 1.915376505  | 0.027272181  |             |              | 1          |
|           | 0                                     | 0.91489611               |                             |              |              |             |              |            |
| TRIM33    | ENSG00000197323.11                    | 0.052556765              | 1                           | 1            | 0.052556765  |             |              |            |
|           | Brain_Nucleus_accumbens_basal_ganglia | 0.052556765              |                             |              |              |             |              |            |
|           | Brain_Nucleus_accumbens_basal_ganglia | 1                        | 1                           | 1            | -1.938545012 |             |              |            |
|           | -1.938545012                          | -1.938545012             | NA                          | 1            | 0            | 0.91489611  |              |            |
| PLEKH01   | ENSG00000023902.13                    | 0.052637229              | 2                           | 2            | 0.025936677  |             |              |            |
|           | Brain_Anterior_cingulate_cortex_BA24  | 0.065022439              | Brain_Cerebellum            | 1.43993653   |              |             |              |            |
|           | 0.56006347                            | 0.56006347               | 1.845103811                 | 2.227158591  | 2.036131201  |             |              |            |
|           | 0.270153526                           | 2                        | 0                           | 0.91489611   |              |             |              |            |
| NUDT18    | ENSG00000275074.1                     | 0.052644292              | 9                           | 4            | 0.001934723  |             |              |            |
|           | Brain_Hypothalamus                    | 0.90690559               | Brain_Frontal_Cortex_BA9    | 6.561759145  |              |             |              |            |
|           | 0.007093693                           | 0.324013908              | -3.100073949                | -0.116942536 | -2.401575995 |             |              |            |
|           | 0.919293213                           | 4                        | 0                           | 0.91489611   |              |             |              |            |
| PCSK4     | ENSG00000115257.15                    | 0.052728497              | 2                           | 2            | 0.017152072  |             |              |            |
|           | Brain_Cerebellar_Hemisphere           | 0.273273905              | Brain_Cerebellum            | 1.609984011  |              |             |              |            |

|              |                                       |                             |                                |              |                  |
|--------------|---------------------------------------|-----------------------------|--------------------------------|--------------|------------------|
|              | 0.390015989                           | 0.390015989                 | -2.383431598                   | -1.095554221 | -1.739492909     |
|              | 0.910666826                           | 2 0                         | 0.91489611                     |              |                  |
| PCDHB2       | ENSG00000112852.6                     | 0.052749907                 | 6                              | 5            | 0.002179889      |
|              | Brain_Cortex                          | 0.428000967                 | Brain_Cerebellum               | 3.81161473   | 0.100995666      |
|              | 0.267118377                           | -3.064562107                | -0.792617058                   | -1.871106452 | 0.74173846 5     |
|              | 0 0.91489611                          |                             |                                |              |                  |
| PIDD1        | ENSG00000177595.17                    | 0.052792578                 | 7 6                            | 0.004009685  | Brain_Cerebellum |
|              | 0.447184889                           | Brain_Hippocampus           | 4.007722475                    | 0.002484983  |                  |
|              | 0.220444529                           | -1.792437317                | 2.877398831                    | 1.500765814  | 1.622883358      |
|              | 6 0 0.91489611                        |                             |                                |              |                  |
| EWSAT1       | ENSG00000212766.9                     | 0.052958865                 | 1 1                            | 0.052958865  |                  |
|              | Brain_Frontal_Cortex_BA9              | 0.052958865                 | Brain_Frontal_Cortex_BA9       | 1 1          |                  |
|              | 1 1.935256196                         | 1.935256196                 | 1.935256196                    | NA 1 0       | 0.91489611       |
| MTERF1       | ENSG00000127989.13                    | 0.053005951                 | 2 2                            | 0.047256395  |                  |
|              | Brain_Frontal_Cortex_BA9              | 0.114622929                 | Brain_Cerebellar_Hemisphere    |              |                  |
|              | 1.096773062                           | 0.903226938                 | 0.903226938                    | -1.983995022 | -1.577750545     |
|              | -1.780872783                          | 0.287258224                 | 2 0                            | 0.91489611   |                  |
| LILRA6       | ENSG00000244482.10                    | 0.053009702                 | 3 1                            | 0.044598158  |                  |
|              | Brain_Cortex                          | 0.065465022                 | Brain_Caudate_basal_ganglia    | 2.899812675  |                  |
|              | 0.024706867                           | 2.899812675                 | -2.008424907                   | -1.842069245 | -1.902449482     |
|              | 0.092074657                           | 1 0 0.91489611              |                                |              |                  |
| ADH1B        | ENSG00000196616.13                    | 0.053032717                 | 2 2                            | 0.049323541  |                  |
|              | Brain_Caudate_basal_ganglia           | 0.174000381                 | Brain_Hypothalamus             | 1.029230313  |                  |
|              | 0.970769687                           | 0.970769687                 | -1.965784227                   | 1.359461541  | -0.303161343     |
|              | 2.351303832                           | 2 0 0.91489611              |                                |              |                  |
| EMG1         | ENSG00000126749.14                    | 0.053202608                 | 3 3                            | 0.042609535  | Brain_Cortex     |
|              | 0.175047582                           | Brain_Cerebellum            | 1.703433123                    | 0.296778924  | 0.296778924      |
|              | 1.356162149                           | 2.027517319                 | 1.750831166                    | 0.350883753  | 3 0              |
|              | 0.916696663                           |                             |                                |              |                  |
| ZMIZ1        | ENSG00000108175.16                    | 0.053371367                 | 1 1                            | 0.053371367  | Brain_Cerebellum |
|              | 0.053371367                           | Brain_Cerebellum            | 1 1 1                          | -1.931903914 | -1.931903914     |
|              | -1.931903914                          | NA 1 0 0.917505849          |                                |              |                  |
| RAB25        | ENSG00000132698.14                    | 0.05339887                  | 2 2                            | 0.040059377  | Brain_Cerebellum |
|              | 0.147370783                           | Brain_Putamen_basal_ganglia | 1.083251966                    | 0.916748034  |                  |
|              | 0.916748034                           | -1.448881125                | 2.053136126                    | 0.302127501  | 2.476300146      |
|              | 2 0 0.917505849                       |                             |                                |              |                  |
| FRMPD1       | ENSG00000070601.9                     | 0.053513165                 | 1 1                            | 0.053513165  |                  |
|              | Brain_Cerebellum                      | 0.053513165                 | Brain_Cerebellum               | 1 1 1        | 1.930756554      |
|              | 1.930756554                           | 1.930756554                 | NA 1 0                         | 0.917505849  |                  |
| ELSPBP1      | ENSG00000169393.8                     | 0.053568375                 | 1 1                            | 0.053568375  |                  |
|              | Brain_Spinal_cord_cervical_c-1        | 0.053568375                 | Brain_Spinal_cord_cervical_c-1 |              |                  |
|              | 1 1 1                                 | -1.930310515                | -1.930310515                   | -1.930310515 | NA 1 0           |
|              | 0.917505849                           |                             |                                |              |                  |
| UBP1         | ENSG00000153560.11                    | 0.053577463                 | 3 1                            | 0.043503833  | Brain_Cerebellum |
|              | 0.073466527                           | Brain_Cerebellar_Hemisphere | 2.910389945                    | 0.023242223  |                  |
|              | 2.910389945                           | -2.018840188                | -1.789921532                   | -1.900726602 | 0.114634194      |
|              | 1 0 0.917505849                       |                             |                                |              |                  |
| GALM         | ENSG00000143891.16                    | 0.053817493                 | 3 1                            | 0.030780203  |                  |
|              | Brain_Hippocampus                     | 0.082278054                 | Brain_Cortex                   | 2.885685743  |                  |
|              | 0.031235366                           | 2.885685743                 | -2.159902693                   | -1.737618519 | -1.892342905     |
|              | 0.232658229                           | 1 0 0.920240629             |                                |              |                  |
| RP11-403A3.3 | ENSG00000275830.1                     | 0.054025805                 | 2 1                            | 0.053080798  |                  |
|              | Brain_Hypothalamus                    | 0.057727546                 | Brain_Caudate_basal_ganglia    | 1.978017061  |                  |
|              | 0.021982939                           | 1.978017061                 | -1.934263017                   | -1.897761205 | -1.916012111     |
|              | 0.025810678                           | 1 0 0.920240629             |                                |              |                  |
| CWC25        | ENSG00000273559.4                     | 0.054050039                 | 4 3                            | 0.037271436  |                  |
|              | Brain_Spinal_cord_cervical_c-1        | 0.401298147                 | Brain_Substantia_nigra         |              |                  |
|              | 2.090592848                           | 0.035848555                 | 0.848697237                    | -1.593721571 | 2.082778302      |
|              | -0.440050202                          | 1.712282703                 | 3 0 0.920240629                |              |                  |
| GNG7         | ENSG00000176533.12                    | 0.054102111                 | 3 3                            | 0.062123069  |                  |
|              | Brain_Nucleus_accumbens_basal_ganglia | 0.18582163                  | Brain_Cortex                   | 1.062140893  |                  |
|              | 0.935791222                           | 0.935791222                 | -1.865416338                   | 1.323041342  | -0.646552095     |

|                                       |                             |                                       |              |             |              |                   |  |   |  |
|---------------------------------------|-----------------------------|---------------------------------------|--------------|-------------|--------------|-------------------|--|---|--|
| 1.721703034                           | 3                           | 0                                     | 0.920240629  |             |              |                   |  |   |  |
| KCTD5                                 | ENSG00000167977.8           | 0.054156513                           | 2            | 2           | 0.01578531   | Brain_Hippocampus |  |   |  |
| 0.589351789                           | Brain_Putamen_basal_ganglia | 1.194536167                           |              |             | 0.805463833  |                   |  |   |  |
| 0.805463833                           | -2.413841909                | 0.53977561                            | -0.93703315  |             | 2.088522977  |                   |  | 2 |  |
| 0                                     | 0.920240629                 |                                       |              |             |              |                   |  |   |  |
| CD34                                  | ENSG00000174059.16          | 0.0542222                             | 2            | 2           | 0.338557207  | Brain_Cortex      |  |   |  |
| 0.36132912                            | Brain_Caudate_basal_ganglia | 1.700076731                           |              |             | 0.299923269  |                   |  |   |  |
| 0.299923269                           | -0.957019908                | 0.912835394                           | -0.022092257 |             | 1.322187364  |                   |  |   |  |
| 2                                     | 0                           | 0.920240629                           |              |             |              |                   |  |   |  |
| SLC26A6                               | ENSG00000225697.12          | 0.054251961                           | 2            | 2           | 0.039852545  |                   |  |   |  |
| Brain_Hypothalamus                    | 0.265342395                 | Brain_Cerebellum                      | 1.072653751  |             |              |                   |  |   |  |
| 0.927346249                           | 0.927346249                 | -1.113852674                          | 2.055274025  |             | 0.470710676  |                   |  |   |  |
| 2.240910979                           | 2                           | 0                                     | 0.920240629  |             |              |                   |  |   |  |
| C5orf34                               | ENSG00000172244.8           | 0.054284802                           | 5            | 2           | 0.00915779   |                   |  |   |  |
| Brain_Nucleus_accumbens_basal_ganglia | 0.028788082                 | Brain_Caudate_basal_ganglia           |              |             |              |                   |  |   |  |
| 4.583509743                           | 0.020261086                 | 0.224533666                           | -2.606106826 |             | -2.186376361 |                   |  |   |  |
| -2.306953627                          | 0.173708328                 | 2                                     | 0            | 0.920240629 |              |                   |  |   |  |
| RRP1B                                 | ENSG00000160208.12          | 0.054329123                           | 1            | 1           | 0.054329123  | Brain_Cerebellum  |  |   |  |
| 0.054329123                           | Brain_Cerebellum            | 1                                     | 1            | 1           | 1.924203162  | 1.924203162       |  |   |  |
| 1.924203162                           | NA                          | 1                                     | 0            | 0.920240629 |              |                   |  |   |  |
| ZNF112                                | ENSG00000062370.16          | 0.054604702                           | 2            | 2           | 0.019683209  |                   |  |   |  |
| Brain_Cerebellum                      | 0.829370809                 | Brain_Caudate_basal_ganglia           | 1.339524947  |             |              |                   |  |   |  |
| 0.660475053                           | 0.660475053                 | -2.332332444                          | -0.215508598 |             | -1.273920521 |                   |  |   |  |
| 1.496820496                           | 2                           | 0                                     | 0.92196835   |             |              |                   |  |   |  |
| ALDH1B1                               | ENSG00000137124.7           | 0.054630827                           | 3            | 2           | 0.017948293  |                   |  |   |  |
| Brain_Nucleus_accumbens_basal_ganglia | 0.033311294                 | Brain_Caudate_basal_ganglia           |              |             |              |                   |  |   |  |
| 2.648464196                           | 0.005039431                 | 0.346496372                           | -2.366683114 |             | -2.128311151 |                   |  |   |  |
| -2.262520189                          | 0.121993339                 | 2                                     | 0            | 0.92196835  |              |                   |  |   |  |
| DBNDD1                                | ENSG00000003249.13          | 0.054633266                           | 5            | 5           | 0.022613672  |                   |  |   |  |
| Brain_Amygdala                        | 0.561602399                 | Brain_Cortex                          | 1.626186098  |             | 0.376571691  |                   |  |   |  |
| 0.376571691                           | -1.843961121                | 2.27989912                            | -0.271080305 |             | 1.72537812   | 5                 |  | 0 |  |
| 0.92196835                            |                             |                                       |              |             |              |                   |  |   |  |
| TNFSF18                               | ENSG00000120337.8           | 0.054694713                           | 5            | 3           | 0.033803827  |                   |  |   |  |
| Brain_Cerebellum                      | 0.977327068                 | Brain_Cerebellar_Hemisphere           | 3.633874067  |             |              |                   |  |   |  |
| 0.001694963                           | 0.470833337                 | -0.028420132                          | 2.12240399   |             | 1.328240252  |                   |  |   |  |
| 0.995733701                           | 3                           | 0                                     | 0.92196835   |             |              |                   |  |   |  |
| LINC02062                             | ENSG00000248489.1           | 0.054890786                           | 2            | 2           | 0.019428077  |                   |  |   |  |
| Brain_Nucleus_accumbens_basal_ganglia | 0.578520555                 | Brain_Cerebellar_Hemisphere           |              |             |              |                   |  |   |  |
| 1.012591725                           | 0.987408275                 | 0.987408275                           | -0.555547024 |             | 2.337213658  |                   |  |   |  |
| 0.890833317                           | 2.045490694                 | 2                                     | 0            | 0.924128356 |              |                   |  |   |  |
| RP11-472N13.2                         | ENSG00000223834.2           | 0.054986916                           | 1            | 1           | 0.054986916  |                   |  |   |  |
| Brain_Caudate_basal_ganglia           | 0.054986916                 | Brain_Caudate_basal_ganglia           | 1            | 1           |              |                   |  |   |  |
| 1                                     | 1.918979598                 | 1.918979598                           | 1.918979598  |             | NA           | 1                 |  | 0 |  |
| 0.924128356                           |                             |                                       |              |             |              |                   |  |   |  |
| CSF1                                  | ENSG00000184371.13          | 0.055021008                           | 2            | 2           | 0.061308857  |                   |  |   |  |
| Brain_Cerebellar_Hemisphere           | 0.167343383                 | Brain_Amygdala                        | 1.070288153  |             |              |                   |  |   |  |
| 0.929711847                           | 0.929711847                 | 1.380790506                           | 1.871261409  |             | 1.626025958  |                   |  |   |  |
| 0.346815301                           | 2                           | 0                                     | 0.924128356  |             |              |                   |  |   |  |
| RP11-469N6.1                          | ENSG00000251226.1           | 0.05527054                            | 11           | 6           | 0.034703644  |                   |  |   |  |
| Brain_Caudate_basal_ganglia           | 0.718311738                 | Brain_Putamen_basal_ganglia           |              |             |              |                   |  |   |  |
| 6.744659167                           | 0.010751726                 | 0.252995254                           | -0.970865705 |             | 2.111799576  |                   |  |   |  |
| 0.934593737                           | 1.227871095                 | 6                                     | 0            | 0.92441438  |              |                   |  |   |  |
| SLC6A16                               | ENSG00000063127.15          | 0.055273787                           | 2            | 2           | 0.016696263  |                   |  |   |  |
| Brain_Cerebellum                      | 0.090694728                 | Brain_Nucleus_accumbens_basal_ganglia |              |             |              |                   |  |   |  |
| 1.773294871                           | 0.226705129                 | 0.226705129                           | -2.393328976 |             | -1.691744353 |                   |  |   |  |
| -2.042536665                          | 0.496095244                 | 2                                     | 0            | 0.92441438  |              |                   |  |   |  |
| UCHL1                                 | ENSG00000154277.12          | 0.05529625                            | 2            | 2           | 0.016172338  |                   |  |   |  |
| Brain_Cerebellar_Hemisphere           | 0.487475729                 | Brain_Cerebellum                      | 1.319378958  |             |              |                   |  |   |  |
| 0.680621042                           | 0.680621042                 | 0.694329287                           | 2.405002888  |             | 1.549666087  |                   |  |   |  |
| 1.209628904                           | 2                           | 0                                     | 0.92441438   |             |              |                   |  |   |  |
| CEP57                                 | ENSG00000166037.10          | 0.055302325                           | 2            | 2           | 0.021859965  | Brain_Cortex      |  |   |  |
| 0.849354983                           | Brain_Cerebellum            | 1.227241117                           | 0.772758883  |             | 0.772758883  |                   |  |   |  |

|              |                                       |                             |                                       |              |              |                                |
|--------------|---------------------------------------|-----------------------------|---------------------------------------|--------------|--------------|--------------------------------|
|              | -0.189941487                          | 2.292792316                 | 1.051425415                           | 1.755557908  | 2            | 0                              |
|              | 0.92441438                            |                             |                                       |              |              |                                |
| RANBP1       | ENSG00000099901.16                    | 0.055429134                 | 1                                     | 1            | 0.055429134  |                                |
|              | Brain_Amygdala                        | 0.055429134                 | Brain_Amygdala                        | 1            | 1            | 1.915497136                    |
|              | 1.915497136                           | 1.915497136                 | NA                                    | 1            | 0            | 0.925428419                    |
| CKAP2        | ENSG00000136108.14                    | 0.055615936                 | 13                                    | 1            | 0.035493716  |                                |
|              | Brain_Frontal_Cortex_BA9              | 0.163905963                 |                                       |              |              | Brain_Spinal_cord_cervical_c-1 |
|              | 12.33290831                           | 8.73E-05                    | 12.33290831                           |              |              | -2.102680412                   |
|              | -1.86155743                           | 0.189923098                 | 1                                     | 0            | 0.926896684  | -1.392054276                   |
| RP11-390F4.3 | ENSG00000225489.6                     | 0.05570428                  | 3                                     | 3            | 0.051712261  |                                |
|              | Brain_Cerebellar_Hemisphere           | 0.40685787                  | Brain_Hippocampus                     |              |              | 1.507617744                    |
|              | 0.557382803                           | 0.557382803                 | -1.945521362                          | 0.829435766  |              | -0.948704119                   |
|              | 1.543679231                           | 3                           | 0                                     | 0.926896684  |              |                                |
| GTF3C3       | ENSG00000119041.10                    | 0.055715825                 | 1                                     | 1            | 0.055715825  |                                |
|              | Brain_Putamen_basal_ganglia           | 0.055715825                 | Brain_Putamen_basal_ganglia           | 1            | 1            |                                |
|              | 1                                     | 1.913251798                 | 1.913251798                           | 1.913251798  | NA           | 1                              |
|              | 0.926896684                           |                             |                                       |              |              | 0                              |
| IL12RB2      | ENSG00000081985.10                    | 0.055882819                 | 3                                     | 3            | 0.012006363  |                                |
|              | Brain_Cerebellum                      | 0.952396768                 | Brain_Cerebellar_Hemisphere           |              |              | 1.308701284                    |
|              | 0.743871307                           | 0.743871307                 | -0.059697243                          | 2.511957253  |              | 1.210292497                    |
|              | 1.28611982                            | 3                           | 0                                     | 0.928019729  |              |                                |
| DHRS11       | ENSG00000278535.4                     | 0.055946434                 | 12                                    | 1            | 0.039833079  |                                |
|              | Brain_Cerebellum                      | 0.120790322                 | Brain_Nucleus_accumbens_basal_ganglia |              |              |                                |
|              | 11.62016064                           | 4.60E-05                    | 11.62016064                           | 1.551464861  |              | 2.055475717                    |
|              | 1.878836387                           | 0.14327835                  | 1                                     | 0            | 0.928019729  |                                |
| GS1-259H13.2 | ENSG00000244219.6                     | 0.055982321                 | 7                                     | 4            | 0.003210233  |                                |
|              | Brain_Putamen_basal_ganglia           | 0.314956587                 | Brain_Spinal_cord_cervical_c-1        |              |              |                                |
|              | 5.531574638                           | 0.038779534                 | 0.190910834                           | 1.004875949  |              | 2.946855357                    |
|              | 1.944089897                           | 0.630343866                 | 4                                     | 0            | 0.928019729  |                                |
| ZNF646       | ENSG00000167395.10                    | 0.056106954                 | 5                                     | 5            | 0.004236359  |                                |
|              | Brain_Hippocampus                     | 0.278183809                 | Brain_Frontal_Cortex_BA9              |              |              | 2.832395033                    |
|              | 0.125137815                           | 0.125137815                 | 1.084408291                           | 2.860003801  |              | 1.984420865                    |
|              | 0.833511454                           | 5                           | 0                                     | 0.928853939  |              |                                |
| POM121       | ENSG00000196313.11                    | 0.056173185                 | 9                                     | 8            | 0.02085347   |                                |
|              | Brain_Caudate_basal_ganglia           | 0.724180122                 | Brain_Hippocampus                     |              |              | 4.329189743                    |
|              | 0.12118092                            | 0.259814456                 | -0.870677741                          | 2.310626939  |              | 0.655476506                    |
|              | 1.002819081                           | 8                           | 0                                     | 0.928853939  |              |                                |
| METRNL       | ENSG00000176845.12                    | 0.056379223                 | 3                                     | 3            | 0.015070934  |                                |
|              | Brain_Cortex                          | 0.439408046                 | Brain_Substantia_nigra                |              |              | 1.435287038                    |
|              | 0.467039999                           | 0.467039999                 | -2.43067                              | -0.773193207 |              | -1.375826082                   |
|              | 0.916612487                           | 3                           | 0                                     | 0.928853939  |              |                                |
| CUL5         | ENSG00000166266.13                    | 0.05638782                  | 1                                     | 1            | 0.05638782   | Brain_Cerebellar_Hemisphere    |
|              | 0.05638782                            | Brain_Cerebellar_Hemisphere | 1                                     | 1            | 1.908026276  |                                |
|              | 1.908026276                           | 1.908026276                 | NA                                    | 1            | 0            | 0.928853939                    |
| RPS18        | ENSG00000231500.6                     | 0.056439418                 | 10                                    | 4            | 0.115082658  |                                |
|              | Brain_Frontal_Cortex_BA9              | 0.995835812                 | Brain_Putamen_basal_ganglia           |              |              |                                |
|              | 7.784707686                           | 0.027444961                 | 0.376340076                           | -1.500349353 |              | 1.575753346                    |
|              | 0.45679286                            | 0.899854173                 | 4                                     | 0            | 0.928853939  |                                |
| MSL2         | ENSG00000174579.3                     | 0.056490046                 | 1                                     | 1            | 0.056490046  | Brain_Cerebellum               |
|              | 0.056490046                           | Brain_Cerebellum            | 1                                     | 1            | -1.907235906 | -1.907235906                   |
|              | -1.907235906                          | NA                          | 1                                     | 0            | 0.928853939  |                                |
| DYNC1LI1     | ENSG00000144635.8                     | 0.056746258                 | 1                                     | 1            | 0.056746258  |                                |
|              | Brain_Spinal_cord_cervical_c-1        | 0.056746258                 | Brain_Spinal_cord_cervical_c-1        |              |              |                                |
|              | 1                                     | 1                           | 1                                     | 1.905260184  | 1.905260184  | 1.905260184                    |
|              | 0.928853939                           |                             |                                       |              |              | NA                             |
| SAMD14       | ENSG00000167100.14                    | 0.05682789                  | 3                                     | 3            | 0.010598372  |                                |
|              | Brain_Cerebellar_Hemisphere           | 0.694641898                 | Brain_Putamen_basal_ganglia           |              |              |                                |
|              | 1.585970321                           | 0.416414778                 | 0.416414778                           | 0.392563506  |              | 2.555669515                    |
|              | 1.738568567                           | 1.174547391                 | 3                                     | 0            | 0.928853939  |                                |
| COPG2        | ENSG00000158623.14                    | 0.056884191                 | 3                                     | 3            | 0.202033434  |                                |
|              | Brain_Nucleus_accumbens_basal_ganglia | 0.963110588                 | Brain_Cerebellar_Hemisphere           |              |              |                                |
|              | 2.110770585                           | 0.114825004                 | 0.114825004                           | 0.046250505  |              | 1.275779619                    |

|              |                                |                             |              |              |                                       |                             |             |   |   |
|--------------|--------------------------------|-----------------------------|--------------|--------------|---------------------------------------|-----------------------------|-------------|---|---|
|              | 0.811453482                    | 0.667705485                 | 3            | 0            | 0.928853939                           |                             |             |   |   |
| AP001258.4   | ENSG00000245571.6              | 0.05688441                  | 2            | 2            | 0.017667335                           |                             |             |   |   |
|              | Brain_Putamen_basal_ganglia    | 0.151261857                 |              |              | Brain_Hypothalamus                    | 1.485703681                 |             |   |   |
|              | 0.514296319                    | 0.514296319                 | -2.372517325 |              | -1.435088581                          | -1.903802953                |             |   |   |
|              | 0.662862222                    | 2                           | 0            | 0.928853939  |                                       |                             |             |   |   |
| PCDH10       | ENSG00000138650.8              | 0.056909698                 | 2            | 2            | 0.035574735                           |                             |             |   |   |
|              | Brain_Cortex                   | 0.462325266                 |              |              | Brain_Putamen_basal_ganglia           | 1.186371492                 |             |   |   |
|              | 0.813628508                    | 0.813628508                 | -0.735023362 |              | 2.101755089                           | 0.683365863                 |             |   |   |
|              | 2.005905279                    | 2                           | 0            | 0.928853939  |                                       |                             |             |   |   |
| ABHD8        | ENSG00000127220.5              | 0.056924711                 | 1            | 1            | 0.056924711                           |                             |             |   |   |
|              | Brain_Caudate_basal_ganglia    | 0.056924711                 |              |              | Brain_Caudate_basal_ganglia           | 1                           | 1           |   |   |
|              | 1                              | 1.903888468                 | 1.903888468  | 1.903888468  | NA                                    | 1                           | 0           |   |   |
|              | 0.928853939                    |                             |              |              |                                       |                             |             |   |   |
| GAP43        | ENSG00000172020.12             | 0.056989802                 | 1            | 1            | 0.056989802                           |                             |             |   |   |
|              | Brain_Hippocampus              | 0.056989802                 |              |              | Brain_Hippocampus                     | 1                           | 1           | 1 |   |
|              | -1.903389024                   | -1.903389024                | -1.903389024 | NA           | 1                                     | 0                           | 0.928853939 |   |   |
| ST13         | ENSG00000100380.13             | 0.057069898                 | 1            | 1            | 0.057069898                           |                             |             |   |   |
|              | Brain_Substantia_nigra         | 0.057069898                 |              |              | Brain_Substantia_nigra                | 1                           | 1           |   |   |
|              | 1                              | 1.902775098                 | 1.902775098  | 1.902775098  | NA                                    | 1                           | 0           |   |   |
|              | 0.928853939                    |                             |              |              |                                       |                             |             |   |   |
| SHTN1        | ENSG00000187164.19             | 0.05714056                  | 1            | 1            | 0.05714056                            | Brain_Cerebellar_Hemisphere |             |   |   |
|              | 0.05714056                     | Brain_Cerebellar_Hemisphere | 1            | 1            | -1.902234077                          |                             |             |   |   |
|              | -1.902234077                   | -1.902234077                | NA           | 1            | 0                                     | 0.928853939                 |             |   |   |
| LINC01422    | ENSG00000235271.5              | 0.057155156                 | 3            | 3            | 0.023453494                           |                             |             |   |   |
|              | Brain_Caudate_basal_ganglia    | 0.377622885                 |              |              | Brain_Nucleus_accumbens_basal_ganglia |                             |             |   |   |
|              | 2.291163263                    | 0.236208038                 | 0.236208038  | 0.882284669  | 2.265965535                           |                             |             |   |   |
|              | 1.663171871                    | 0.70882379                  | 3            | 0            | 0.928853939                           |                             |             |   |   |
| PDCD4        | ENSG00000150593.17             | 0.057161264                 | 2            | 2            | 0.06258757                            |                             |             |   |   |
|              | Brain_Putamen_basal_ganglia    | 0.209214877                 |              |              | Brain_Hippocampus                     | 1.125890502                 |             |   |   |
|              | 0.874109498                    | 0.874109498                 | -1.255727246 |              | 1.862110116                           | 0.303191435                 |             |   |   |
|              | 2.204643941                    | 2                           | 0            | 0.928853939  |                                       |                             |             |   |   |
| ADAMTS5      | ENSG00000154736.5              | 0.057361729                 | 2            | 2            | 0.016893016                           |                             |             |   |   |
|              | Brain_Cerebellar_Hemisphere    | 0.036492144                 |              |              | Brain_Cerebellum                      | 1.893543864                 |             |   |   |
|              | 0.106456136                    | 0.106456136                 | 2.091400877  |              | 2.389027983                           | 2.24021443                  |             |   |   |
|              | 0.210454145                    | 2                           | 0            | 0.928971634  |                                       |                             |             |   |   |
| AKIRIN1      | ENSG00000174574.15             | 0.057523475                 | 3            | 2            | 0.039396871                           |                             |             |   |   |
|              | Brain_Hypothalamus             | 0.222585621                 |              |              | Brain_Hippocampus                     | 2.785793882                 |             |   |   |
|              | 0.068691243                    | 0.145514875                 | -2.060017466 |              | -1.219681544                          | -1.517064514                |             |   |   |
|              | 0.470924173                    | 2                           | 0            | 0.928971634  |                                       |                             |             |   |   |
| MRPS15       | ENSG00000116898.11             | 0.057601661                 | 4            | 4            | 0.015022323                           |                             |             |   |   |
|              | Brain_Putamen_basal_ganglia    | 0.999475746                 |              |              | Brain_Frontal_Cortex_BA9              |                             |             |   |   |
|              | 1.467842534                    | 0.644735279                 | 0.644735279  | -2.43184044  | 0.000657055                           |                             |             |   |   |
|              | -1.188565268                   | 1.029293237                 | 4            | 0            | 0.928971634                           |                             |             |   |   |
| ARHGEF35     | ENSG00000213214.4              | 0.057626694                 | 5            | 2            | 0.082886126                           |                             |             |   |   |
|              | Brain_Substantia_nigra         | 0.640124582                 |              |              | Brain_Caudate_basal_ganglia           |                             |             |   |   |
|              | 4.708788414                    | 0.00324667                  | 0.177511574  | -1.734180137 | -0.46752462                           |                             |             |   |   |
|              | -1.065014191                   | 0.452769732                 | 2            | 0            | 0.928971634                           |                             |             |   |   |
| RP11-545G3.1 | ENSG00000241449.5              | 0.057638615                 | 3            | 3            | 0.051461657                           |                             |             |   |   |
|              | Brain_Cerebellum               | 0.790978556                 |              |              | Brain_Caudate_basal_ganglia           | 1.149488753                 |             |   |   |
|              | 0.850089305                    | 0.850089305                 | -1.947609909 |              | 0.26504012                            | -1.098068046                |             |   |   |
|              | 1.19237905                     | 3                           | 0            | 0.928971634  |                                       |                             |             |   |   |
| MED19        | ENSG00000156603.15             | 0.057643481                 | 3            | 3            | 0.025539876                           |                             |             |   |   |
|              | Brain_Cerebellar_Hemisphere    | 0.545721371                 |              |              | Brain_Cerebellum                      | 2.539198696                 |             |   |   |
|              | 0.170268046                    | 0.170268046                 | -2.233137542 |              | -0.604183919                          | -1.422551184                |             |   |   |
|              | 0.814504686                    | 3                           | 0            | 0.928971634  |                                       |                             |             |   |   |
| MYH10        | ENSG00000133026.12             | 0.057859174                 | 1            | 1            | 0.057859174                           |                             |             |   |   |
|              | Brain_Hippocampus              | 0.057859174                 |              |              | Brain_Hippocampus                     | 1                           | 1           | 1 |   |
|              | 1.896763384                    | 1.896763384                 | 1.896763384  | NA           | 1                                     | 0                           | 0.928971634 |   |   |
| NGEF         | ENSG00000066248.14             | 0.057869497                 | 1            | 1            | 0.057869497                           |                             |             |   |   |
|              | Brain_Spinal_cord_cervical_c-1 | 0.057869497                 |              |              | Brain_Spinal_cord_cervical_c-1        |                             |             |   |   |
|              | 1                              | 1                           | 1            | -1.896685207 | -1.896685207                          | -1.896685207                | NA          | 1 | 0 |
|              | 0.928971634                    |                             |              |              |                                       |                             |             |   |   |

|           |                                       |                                       |                                |              |              |                   |
|-----------|---------------------------------------|---------------------------------------|--------------------------------|--------------|--------------|-------------------|
| MATN2     | ENSG00000132561.13                    | 0.057955709                           | 2                              | 2            | 0.017049126  | Brain_Cortex      |
|           | 0.085108231                           | Brain_Putamen_basal_ganglia           | 1.700922129                    | 0.299077871  |              |                   |
|           | 0.299077871                           | -2.385646603                          | -1.721786334                   | -2.053716468 | 0.469420098  |                   |
|           | 2                                     | 0                                     | 0.928971634                    |              |              |                   |
| FBXW8     | ENSG00000174989.12                    | 0.057969149                           | 1                              | 1            | 0.057969149  |                   |
|           | Brain_Hypothalamus                    | 0.057969149                           | Brain_Hypothalamus             | 1            | 1            | 1                 |
|           | 1.895931152                           | 1.895931152                           | 1.895931152                    | NA           | 1            | 0                 |
|           | 0.928971634                           |                                       |                                |              |              |                   |
| BGLAP     | ENSG00000242252.1                     | 0.058002261                           | 7                              | 4            | 0.005416007  |                   |
|           | Brain_Caudate_basal_ganglia           | 0.685268402                           | Brain_Substantia_nigra         |              |              |                   |
|           | 5.050264012                           | 5.89E-05                              | 0.290359998                    | -2.781189764 | 0.405284495  |                   |
|           | -1.703886136                          | 1.171570875                           | 4                              | 0            | 0.928971634  |                   |
| NSG1      | ENSG00000168824.14                    | 0.058023684                           | 3                              | 3            | 0.024237336  | Brain_Amygdala    |
|           | 0.380365465                           | Brain_Nucleus_accumbens_basal_ganglia | 1.197864485                    |              |              |                   |
|           | 0.814014524                           | 0.814014524                           | -1.299294403                   | 2.253346085  | 0.025609523  |                   |
|           | 1.940784296                           | 3                                     | 0                              | 0.928971634  |              |                   |
| LINC01060 | ENSG00000249378.5                     | 0.058067512                           | 2                              | 1            | 0.056522682  |                   |
|           | Brain_Substantia_nigra                | 0.060521775                           | Brain_Spinal_cord_cervical_c-1 |              |              |                   |
|           | 1.993231904                           | 0.006768096                           | 1.993231904                    | 1.876973144  | 1.906983824  |                   |
|           | 1.891978484                           | 0.021220756                           | 1                              | 0            | 0.928971634  |                   |
| ATP5J     | ENSG00000154723.12                    | 0.058333158                           | 1                              | 1            | 0.058333158  |                   |
|           | Brain_Frontal_Cortex_BA9              | 0.058333158                           | Brain_Frontal_Cortex_BA9       | 1            | 1            |                   |
|           | 1                                     | -1.893185854                          | -1.893185854                   | -1.893185854 | NA           | 1                 |
|           | 0.928971634                           |                                       |                                |              |              | 0                 |
| LINC01102 | ENSG00000235597.1                     | 0.058378503                           | 1                              | 1            | 0.058378503  |                   |
|           | Brain_Cortex                          | 0.058378503                           | Brain_Cortex                   | 1            | 1            | 1                 |
|           | -1.892844867                          | -1.892844867                          | NA                             | 1            | 0            | 0.928971634       |
| MEPCE     | ENSG00000146834.13                    | 0.058549579                           | 6                              | 3            | 0.009392115  |                   |
|           | Brain_Caudate_basal_ganglia           | 0.814580575                           | Brain_Spinal_cord_cervical_c-1 |              |              |                   |
|           | 4.702078395                           | 0.003183362                           | 0.373134964                    | 0.234520945  | 2.59744139   |                   |
|           | 0.835127849                           | 0.920984137                           | 3                              | 0            | 0.928971634  |                   |
| ABI2      | ENSG00000138443.15                    | 0.058564867                           | 1                              | 1            | 0.058564867  |                   |
|           | Brain_Putamen_basal_ganglia           | 0.058564867                           | Brain_Putamen_basal_ganglia    | 1            | 1            |                   |
|           | 1                                     | 1.891445743                           | 1.891445743                    | 1.891445743  | NA           | 1                 |
|           | 0.928971634                           |                                       |                                |              |              | 0                 |
| OPCML     | ENSG00000183715.13                    | 0.058576003                           | 2                              | 2            | 0.022769982  |                   |
|           | Brain_Caudate_basal_ganglia           | 0.454831254                           | Brain_Cerebellar_Hemisphere    |              |              |                   |
|           | 1.021224605                           | 0.978775395                           | 0.978775395                    | 0.747384906  | 2.277272099  |                   |
|           | 1.512328502                           | 1.081793608                           | 2                              | 0            | 0.928971634  |                   |
| SPRR3     | ENSG00000163209.14                    | 0.058632825                           | 1                              | 1            | 0.058632825  |                   |
|           | Brain_Anterior_cingulate_cortex_BA24  | 0.058632825                           |                                |              |              |                   |
|           | Brain_Anterior_cingulate_cortex_BA24  | 1                                     | 1                              | 1            | -1.890936472 |                   |
|           | -1.890936472                          | -1.890936472                          | NA                             | 1            | 0            | 0.928971634       |
| RFXANK    | ENSG00000064490.13                    | 0.058654625                           | 1                              | 1            | 0.058654625  |                   |
|           | Brain_Nucleus_accumbens_basal_ganglia | 0.058654625                           |                                |              |              |                   |
|           | Brain_Nucleus_accumbens_basal_ganglia | 1                                     | 1                              | 1            | -1.890773208 |                   |
|           | -1.890773208                          | -1.890773208                          | NA                             | 1            | 0            | 0.928971634       |
| NMUR2     | ENSG00000132911.4                     | 0.058703658                           | 2                              | 2            | 0.020501971  |                   |
|           | Brain_Frontal_Cortex_BA9              | 0.105448051                           | Brain_Cortex                   | 1.830736205  |              |                   |
|           | 0.169263795                           | 0.169263795                           | 1.618996338                    | 2.317032324  | 1.968014331  |                   |
|           | 0.493585979                           | 2                                     | 0                              | 0.928971634  |              |                   |
| TEX15     | ENSG00000133863.7                     | 0.058780835                           | 2                              | 2            | 0.091308335  |                   |
|           | Brain_Caudate_basal_ganglia           | 0.211997303                           | Brain_Cortex                   | 1.228493126  |              |                   |
|           | 0.771506874                           | 0.771506874                           | -1.248092177                   | 1.688536256  | 0.22022204   |                   |
|           | 2.076509879                           | 2                                     | 0                              | 0.928971634  |              |                   |
| ADRB3     | ENSG00000188778.5                     | 0.05887007                            | 2                              | 2            | 0.027091589  | Brain_Hippocampus |
|           | 0.354223017                           | Brain_Frontal_Cortex_BA9              | 1.019677808                    | 0.980322192  |              |                   |
|           | 0.980322192                           | 0.926429119                           | 2.210195612                    | 1.568312365  | 0.907759993  |                   |
|           | 2                                     | 0                                     | 0.928971634                    |              |              |                   |
| DPP8      | ENSG00000074603.18                    | 0.058881492                           | 2                              | 2            | 0.017588745  |                   |
|           | Brain_Spinal_cord_cervical_c-1        | 0.935235721                           | Brain_Cerebellum               | 1.035960206  |              |                   |
|           | 0.964039794                           | 0.964039794                           | -2.374163822                   | -0.081259325 | -1.227711574 |                   |
|           | 1.621328319                           | 2                                     | 0                              | 0.928971634  |              |                   |

|               |                                      |                                |                          |              |                                       |                  |
|---------------|--------------------------------------|--------------------------------|--------------------------|--------------|---------------------------------------|------------------|
| RBBP5         | ENSG00000117222.13                   | 0.058882761                    | 6                        | 4            | 0.003331324                           | Brain_Cerebellum |
|               | 0.406001184                          | Brain_Spinal_cord_cervical_c-1 |                          |              | 3.733719889                           | 0.027474165      |
|               | 0.267919351                          | 0.830951225                    | 2.935386549              |              | 2.023150748                           | 0.8104669 4      |
|               | 0                                    | 0.928971634                    |                          |              |                                       |                  |
| TAOK2         | ENSG00000149930.17                   | 0.05900236                     | 2                        | 2            | 0.03079282                            |                  |
|               | Brain_Anterior_cingulate_cortex_BA24 | 0.409875004                    |                          |              | Brain_Frontal_Cortex_BA9              |                  |
|               | 1.079038303                          | 0.920961697                    | 0.920961697              |              | -0.824113617                          | 2.159739781      |
|               | 0.667813082                          | 2.109902972                    | 2                        | 0            | 0.928971634                           |                  |
| HIRA          | ENSG00000100084.14                   | 0.059248198                    | 3                        | 3            | 0.071474881                           | Brain_Cortex     |
|               | 0.443960592                          | Brain_Spinal_cord_cervical_c-1 |                          |              | 1.435414567                           | 0.556873198      |
|               | 0.556873198                          | -0.860587252                   | 1.802448433              |              | 0.058779627                           | 1.510809391      |
|               | 3                                    | 0                              | 0.928971634              |              |                                       |                  |
| ENGASE        | ENSG00000167280.16                   | 0.059427285                    | 7                        | 6            | 0.112505233                           |                  |
|               | Brain_Frontal_Cortex_BA9             | 0.573144887                    |                          |              | Brain_Putamen_basal_ganglia           |                  |
|               | 4.608960154                          | 0.021337473                    | 0.157529117              |              | -1.587032724                          | 1.068888339      |
|               | -0.699937691                         | 0.860914141                    | 6                        | 0            | 0.928971634                           |                  |
| C16orf89      | ENSG00000153446.15                   | 0.059454918                    | 1                        | 1            | 0.059454918                           |                  |
|               | Brain_Cerebellar_Hemisphere          | 0.059454918                    |                          |              | Brain_Cerebellar_Hemisphere1          | 1                |
|               | 1                                    | -1.884814264                   | -1.884814264             | -1.884814264 | NA                                    | 1 0              |
|               | 0.928971634                          |                                |                          |              |                                       |                  |
| C17orf62      | ENSG00000178927.17                   | 0.059629391                    | 10                       | 3            | 0.075129343                           |                  |
|               | Brain_Frontal_Cortex_BA9             | 0.614146339                    |                          |              | Brain_Hippocampus                     | 8.435954867      |
|               | 0.000114251                          | 0.471594692                    | -0.504163711             |              | 1.77967391                            | 1.097265589      |
|               | 0.628648167                          | 3                              | 0                        | 0.928971634  |                                       |                  |
| EXOC3         | ENSG00000180104.15                   | 0.059669979                    | 13                       | 6            | 0.015585455                           |                  |
|               | Brain_Caudate_basal_ganglia          | 0.963621892                    |                          |              | Brain_Putamen_basal_ganglia           |                  |
|               | 8.186669927                          | 0.014664041                    | 0.353395492              |              | -0.584383831                          | 2.418481114      |
|               | 0.465047624                          | 0.899846824                    | 6                        | 0            | 0.928971634                           |                  |
| NPTXR         | ENSG00000221890.3                    | 0.05979547                     | 2                        | 2            | 0.135391413                           | Brain_Cerebellum |
|               | 0.197446655                          | Brain_Caudate_basal_ganglia    | 1.311134771              |              | 0.688865229                           |                  |
|               | 0.688865229                          | -1.288860308                   | 1.493174892              |              | 0.102157292                           | 1.967195956      |
|               | 2                                    | 0                              | 0.928971634              |              |                                       |                  |
| RP11-77K12.10 | ENSG00000273971.1                    | 0.059852831                    | 1                        | 1            | 0.059852831                           |                  |
|               | Brain_Putamen_basal_ganglia          | 0.059852831                    |                          |              | Brain_Putamen_basal_ganglia1          | 1                |
|               | 1                                    | -1.88187617                    | -1.88187617              | -1.88187617  | NA                                    | 1 0              |
|               | 0.928971634                          |                                |                          |              |                                       |                  |
| VPS13B        | ENSG00000132549.18                   | 0.05996898                     | 1                        | 1            | 0.05996898                            |                  |
|               | Brain_Cerebellar_Hemisphere          | 0.05996898                     |                          |              | Brain_Cerebellar_Hemisphere1          | 1 1 1            |
|               | -1.881021603                         | -1.881021603                   | -1.881021603             |              | NA                                    | 1 0 0.928971634  |
| RP11-567C2.1  | ENSG00000257194.2                    | 0.059975998                    | 4                        | 4            | 0.05702996                            |                  |
|               | Brain_Cerebellar_Hemisphere          | 0.435880445                    |                          |              | Brain_Nucleus_accumbens_basal_ganglia |                  |
|               | 2.490283103                          | 0.084358565                    | 0.084358565              |              | -1.119679451                          | 1.903081129      |
|               | 0.328102628                          | 1.501468851                    | 4                        | 0            | 0.928971634                           |                  |
| CEP70         | ENSG00000114107.8                    | 0.060209666                    | 1                        | 1            | 0.060209666                           | Brain_Cortex     |
|               | 0.060209666                          | Brain_Cortex                   | 1                        | 1            | 1                                     | 1.879255121      |
|               | 1.879255121                          | NA                             | 1                        | 0            | 0.928971634                           | 1.879255121      |
| VKORC1        | ENSG00000167397.14                   | 0.060245332                    | 3                        | 3            | 0.030144832                           |                  |
|               | Brain_Cortex                         | 0.71480625                     | Brain_Frontal_Cortex_BA9 |              | 1.961192862                           |                  |
|               | 0.415917561                          | 0.415917561                    | -2.168182124             |              | 0.365408832                           | -1.142826742     |
|               | 1.33403551                           | 3                              | 0                        | 0.928971634  |                                       |                  |
| SEMA5B        | ENSG00000082684.14                   | 0.060322315                    | 6                        | 6            | 0.048088683                           |                  |
|               | Brain_Cortex                         | 0.865955015                    |                          |              | Brain_Frontal_Cortex_BA9              | 2.034878091      |
|               | 0.390203204                          | 0.390203204                    | -1.976583904             |              | 0.714577984                           | -0.457258675     |
|               | 1.142802977                          | 6                              | 0                        | 0.928971634  |                                       |                  |
| RP11-259K5.1  | ENSG00000271653.1                    | 0.060341966                    | 1                        | 1            | 0.060341966                           |                  |
|               | Brain_Hippocampus                    | 0.060341966                    |                          |              | Brain_Hippocampus                     | 1 1 1            |
|               | -1.87828662                          | -1.87828662                    | -1.87828662              |              | NA                                    | 1 0 0.928971634  |
| KATNAL2       | ENSG00000167216.16                   | 0.060347369                    | 3                        | 3            | 0.020435269                           |                  |
|               | Brain_Putamen_basal_ganglia          | 0.885153187                    |                          |              | Brain_Nucleus_accumbens_basal_ganglia |                  |
|               | 1.59470131                           | 0.565999011                    | 0.565999011              |              | -0.144439804                          | 2.318258643      |
|               | 1.197901467                          | 1.246265868                    | 3                        | 0            | 0.928971634                           |                  |
| LIN7B         | ENSG00000104863.11                   | 0.060451594                    | 3                        | 3            | 0.014666965                           | Brain_Cortex     |



|                |                                       |                             |                                       |              |              |                    |             |             |
|----------------|---------------------------------------|-----------------------------|---------------------------------------|--------------|--------------|--------------------|-------------|-------------|
|                | 0.792080244                           | Brain_Cerebellar_Hemisphere | 1.67019507                            | 0.648565171  |              |                    |             |             |
|                | 0.648565171                           | -0.26361027                 | 2.440499536                           | 0.928730401  | 1.380064625  |                    |             |             |
|                | 3                                     | 0                           | 0.928971634                           |              |              |                    |             |             |
| ZNF417         | ENSG00000173480.10                    | 0.060561399                 | 11                                    | 7            | 0.033868459  |                    |             |             |
|                | Brain_Hippocampus                     | 0.97608986                  | Brain_Frontal_Cortex_BA9              | 6.443779275  |              |                    |             |             |
|                | 0.051429114                           | 0.397885511                 | -2.12163431                           | 1.296340427  | -0.550028038 |                    |             |             |
|                | 1.014867958                           | 7                           | 0                                     | 0.928971634  |              |                    |             |             |
| PPM1F          | ENSG00000100034.13                    | 0.060589003                 | 7                                     | 5            | 0.013765227  |                    |             |             |
|                | Brain_Nucleus_accumbens_basal_ganglia | 0.831858019                 | Brain_Cerebellum                      |              |              |                    |             |             |
|                | 3.873063577                           | 0.006683771                 | 0.271942957                           | 0.212319198  | 2.463332319  |                    |             |             |
|                | 1.243740261                           | 0.947833325                 | 5                                     | 0            | 0.928971634  |                    |             |             |
| KCND3          | ENSG00000171385.9                     | 0.060608929                 | 1                                     | 1            | 0.060608929  |                    |             |             |
|                | Brain_Substantia_nigra                | 0.060608929                 | Brain_Substantia_nigra                | 1            | 1            |                    |             |             |
|                | 1                                     | 1.87633766                  | 1.87633766                            | 1.87633766   | NA           | 1                  | 0           | 0.928971634 |
| FOXS1          | ENSG00000179772.7                     | 0.060782688                 | 2                                     | 2            | 0.460002975  | Brain_Cerebellum   |             |             |
|                | 0.747149332                           | Brain_Caudate_basal_ganglia | 1.898632867                           | 0.101367133  |              |                    |             |             |
|                | 0.101367133                           | -0.738841951                | 0.322400465                           | -0.208220743 | 0.750411708  |                    |             |             |
|                | 2                                     | 0                           | 0.928971634                           |              |              |                    |             |             |
| EFCAB13        | ENSG00000178852.15                    | 0.06109238                  | 13                                    | 6            | 0.002471741  |                    |             |             |
|                | Brain_Hypothalamus                    | 0.507144571                 | Brain_Caudate_basal_ganglia           | 8.293727747  |              |                    |             |             |
|                | 0.007847353                           | 0.28763634                  | 0.66329042                            | 3.026779561  | 2.000762221  |                    |             |             |
|                | 0.718369379                           | 6                           | 0                                     | 0.928971634  |              |                    |             |             |
| KCNJ3          | ENSG00000162989.4                     | 0.061095501                 | 7                                     | 4            | 0.072117776  |                    |             |             |
|                | Brain_Frontal_Cortex_BA9              | 0.642937705                 | Brain_Amygdala                        | 5.239643981  |              |                    |             |             |
|                | 0.012616425                           | 0.187860257                 | -0.733588502                          | 1.798373902  | 0.129145042  |                    |             |             |
|                | 0.944354752                           | 4                           | 0                                     | 0.928971634  |              |                    |             |             |
| RBM18          | ENSG00000119446.13                    | 0.061160878                 | 2                                     | 2            | 0.023669161  | Brain_Amygdala     |             |             |
|                | 0.45649753                            | Brain_Caudate_basal_ganglia | 1.026279805                           | 0.973720195  |              |                    |             |             |
|                | 0.973720195                           | -0.744626522                | 2.262457357                           | 0.758915418  | 2.126329403  |                    |             |             |
|                | 2                                     | 0                           | 0.928971634                           |              |              |                    |             |             |
| RAC3           | ENSG00000169750.8                     | 0.061160941                 | 3                                     | 3            | 0.040629587  |                    |             |             |
|                | Brain_Putamen_basal_ganglia           | 0.228820699                 | Brain_Nucleus_accumbens_basal_ganglia |              |              |                    |             |             |
|                | 1.399784104                           | 0.46689659                  | 0.46689659                            | -2.047290325 | 1.289305926  |                    |             |             |
|                | 0.148472616                           | 1.90207151                  | 3                                     | 0            | 0.928971634  |                    |             |             |
| STRA6          | ENSG00000137868.18                    | 0.061337106                 | 2                                     | 2            | 0.019333842  |                    |             |             |
|                | Brain_Hippocampus                     | 0.500267881                 | Brain_Cortex                          | 1.146861096  |              |                    |             |             |
|                | 0.853138904                           | 0.853138904                 | -2.339030758                          | -0.674068317 | -1.506549538 |                    |             |             |
|                | 1.177306233                           | 2                           | 0                                     | 0.928971634  |              |                    |             |             |
| CLIP3          | ENSG00000105270.14                    | 0.061341901                 | 1                                     | 1            | 0.061341901  |                    |             |             |
|                | Brain_Caudate_basal_ganglia           | 0.061341901                 | Brain_Caudate_basal_ganglia           | 1            | 1            |                    |             |             |
|                | 1                                     | 1.87102294                  | 1.87102294                            | 1.87102294   | NA           | 1                  | 0           | 0.928971634 |
| STIP1          | ENSG00000168439.16                    | 0.061362165                 | 4                                     | 4            | 0.012652436  |                    |             |             |
|                | Brain_Nucleus_accumbens_basal_ganglia | 0.856873629                 | Brain_Amygdala                        |              |              |                    |             |             |
|                | 1.446871255                           | 0.604018179                 | 0.604018179                           | 0.18035532   | 2.49340522   |                    |             |             |
|                | 1.450280666                           | 1.051094413                 | 4                                     | 0            | 0.928971634  |                    |             |             |
| NPY1R          | ENSG00000164128.6                     | 0.061410815                 | 1                                     | 1            | 0.061410815  |                    |             |             |
|                | Brain_Hypothalamus                    | 0.061410815                 | Brain_Hypothalamus                    | 1            | 1            | 1                  |             |             |
|                | -1.870525961                          | -1.870525961                | -1.870525961                          | NA           | 1            | 0                  | 0.928971634 |             |
| RP11-1055B8.10 | ENSG00000274833.1                     | 0.061467621                 | 2                                     | 2            | 0.062144232  |                    |             |             |
|                | Brain_Cerebellar_Hemisphere           | 0.472598427                 | Brain_Cerebellum                      | 1.824554508  |              |                    |             |             |
|                | 0.175445492                           | 0.175445492                 | 0.718257666                           | 1.865265263  | 1.291761465  |                    |             |             |
|                | 0.81105685                            | 2                           | 0                                     | 0.928971634  |              |                    |             |             |
| BRD2           | ENSG00000204256.12                    | 0.06150519                  | 7                                     | 5            | 0.046870799  |                    |             |             |
|                | Brain_Anterior_cingulate_cortex_BA24  | 0.871624656                 | Brain_Frontal_Cortex_BA9              |              |              |                    |             |             |
|                | 4.056581207                           | 0.001757917                 | 0.173300044                           | -1.987465832 | 1.293918747  |                    |             |             |
|                | 0.108700931                           | 1.418184582                 | 5                                     | 0            | 0.928971634  |                    |             |             |
| ANKRD31        | ENSG00000145700.9                     | 0.061510284                 | 2                                     | 2            | 0.04630218   | Brain_Cortex       |             |             |
|                | 0.15216121                            | Brain_Hypothalamus          | 1.084820341                           | 0.915179659  | 0.915179659  |                    |             |             |
|                | -1.431939244                          | 1.99262815                  | 0.280344453                           | 2.421534827  | 2            | 0                  |             |             |
|                | 0.928971634                           |                             |                                       |              |              |                    |             |             |
| KCNK7          | ENSG00000173338.12                    | 0.061532303                 | 3                                     | 2            | 0.03589808   | Brain_Hypothalamus |             |             |
|                | 0.589835925                           | Brain_Caudate_basal_ganglia | 2.640683726                           | 0.046761718  |              |                    |             |             |

|               |                                       |                             |                                |              |              |                  |
|---------------|---------------------------------------|-----------------------------|--------------------------------|--------------|--------------|------------------|
|               | 0.312554556                           | -2.098079989                | -0.539073811                   | -1.249155997 | 0.78872229   | 2                |
|               | 0                                     | 0.928971634                 |                                |              |              |                  |
| L3MBTL3       | ENSG00000198945.7                     | 0.061744943                 | 5                              | 5            | 0.012479795  |                  |
|               | Brain_Cortex                          | 0.805273351                 | Brain_Spinal_cord_cervical_c-1 | 2.282602235  |              |                  |
|               | 0.312711608                           | 0.312711608                 | -0.246528234                   | 2.498278955  | 1.511553591  |                  |
|               | 1.208242755                           | 5                           | 0                              | 0.928971634  |              |                  |
| TSPAN4        | ENSG00000214063.10                    | 0.061791547                 | 6                              | 6            | 0.11109676   |                  |
|               | Brain_Nucleus_accumbens_basal_ganglia | 0.930765091                 | Brain_Cerebellum               |              |              |                  |
|               | 2.613530759                           | 0.285128199                 | 0.285128199                    | -1.201729461 | 1.593282817  |                  |
|               | 0.18227495                            | 1.123053694                 | 6                              | 0            | 0.928971634  |                  |
| ENPP4         | ENSG00000001561.6                     | 0.061829339                 | 7                              | 5            | 0.203293273  | Brain_Cerebellum |
|               | 0.988785354                           | Brain_Caudate_basal_ganglia | 5.255912758                    | 0.021520502  |              |                  |
|               | 0.228767392                           | -1.272224759                | 0.429015882                    | -0.287232299 | 0.645060919  |                  |
|               | 5                                     | 0                           | 0.928971634                    |              |              |                  |
| RGS22         | ENSG00000132554.19                    | 0.061849117                 | 1                              | 1            | 0.061849117  |                  |
|               | Brain_Hippocampus                     | 0.061849117                 | Brain_Hippocampus              | 1            | 1            | 1                |
|               | -1.867375874                          | -1.867375874                | -1.867375874                   | NA           | 1            | 0                |
|               | 0.928971634                           |                             |                                |              |              |                  |
| RP11-347I19.7 | ENSG00000274292.1                     | 0.061869973                 | 8                              | 2            | 0.010169088  |                  |
|               | Brain_Cerebellar_Hemisphere           | 0.170251127                 | Brain_Putamen_basal_ganglia    |              |              |                  |
|               | 7.187980498                           | 0.003093209                 | 0.600807401                    | 1.371397336  | 2.570025993  |                  |
|               | 2.202801419                           | 0.363351752                 | 2                              | 0            | 0.928971634  |                  |
| RP6-102O10.1  | ENSG00000227935.1                     | 0.061900345                 | 2                              | 2            | 0.020182254  |                  |
|               | Brain_Cerebellum                      | 0.027719433                 | Brain_Cerebellar_Hemisphere    | 1.856394292  |              |                  |
|               | 0.143605708                           | 0.143605708                 | -2.322942266                   | -2.201234417 | -2.262088342 |                  |
|               | 0.086060446                           | 2                           | 0                              | 0.928971634  |              |                  |
| SAA4          | ENSG00000148965.9                     | 0.061921775                 | 1                              | 1            | 0.061921775  |                  |
|               | Brain_Anterior_cingulate_cortex_BA24  | 0.061921775                 |                                |              |              |                  |
|               | Brain_Anterior_cingulate_cortex_BA24  | 1                           | 1                              | 1            | -1.866855462 |                  |
|               | -1.866855462                          | -1.866855462                | NA                             | 1            | 0            | 0.928971634      |
| SYPL2         | ENSG00000143028.8                     | 0.06201333                  | 3                              | 2            | 0.037749138  | Brain_Cortex     |
|               | 0.205892931                           | Brain_Cerebellum            | 2.818799897                    | 0.030216421  | 0.150983682  |                  |
|               | -2.077568308                          | -1.264939737                | -1.538329711                   | 0.467009546  | 2            | 0                |
|               | 0.928971634                           |                             |                                |              |              |                  |
| LCK           | ENSG00000182866.16                    | 0.062104519                 | 1                              | 1            | 0.062104519  |                  |
|               | Brain_Cerebellar_Hemisphere           | 0.062104519                 | Brain_Cerebellar_Hemisphere    | 1            | 1            |                  |
|               | 1                                     | -1.865548794                | -1.865548794                   | -1.865548794 | NA           | 1                |
|               | 0.928971634                           |                             |                                |              |              |                  |
| RP11-16L9.2   | ENSG00000225172.5                     | 0.062136537                 | 1                              | 1            | 0.062136537  |                  |
|               | Brain_Nucleus_accumbens_basal_ganglia | 0.062136537                 |                                |              |              |                  |
|               | Brain_Nucleus_accumbens_basal_ganglia | 1                           | 1                              | 1            | 1.86532019   | 1.86532019       |
|               | 1.86532019                            | NA                          | 1                              | 0            | 0.928971634  |                  |
| RIMS3         | ENSG00000117016.9                     | 0.062193503                 | 1                              | 1            | 0.062193503  |                  |
|               | Brain_Nucleus_accumbens_basal_ganglia | 0.062193503                 |                                |              |              |                  |
|               | Brain_Nucleus_accumbens_basal_ganglia | 1                           | 1                              | 1            | -1.864913689 |                  |
|               | -1.864913689                          | -1.864913689                | NA                             | 1            | 0            | 0.928971634      |
| SEC23IP       | ENSG00000107651.12                    | 0.062269615                 | 1                              | 1            | 0.062269615  |                  |
|               | Brain_Caudate_basal_ganglia           | 0.062269615                 | Brain_Caudate_basal_ganglia    | 1            | 1            |                  |
|               | 1                                     | -1.864371053                | -1.864371053                   | -1.864371053 | NA           | 1                |
|               | 0.928971634                           |                             |                                |              |              |                  |
| GUCY2D        | ENSG00000132518.6                     | 0.062270005                 | 2                              | 2            | 0.038660763  |                  |
|               | Brain_Caudate_basal_ganglia           | 0.271260873                 | Brain_Putamen_basal_ganglia    |              |              |                  |
|               | 1.014359792                           | 0.985640208                 | 0.985640208                    | -2.067779494 | -1.10016354  |                  |
|               | -1.583971517                          | 0.684207803                 | 2                              | 0            | 0.928971634  |                  |
| LRP12         | ENSG00000147650.11                    | 0.062299786                 | 3                              | 3            | 0.007595366  | Brain_Cerebellum |
|               | 0.073610329                           | Brain_Cerebellar_Hemisphere | 2.562242733                    | 0.190306011  |              |                  |
|               | 0.190306011                           | -2.669546902                | -1.789027857                   | -2.204243057 | 0.442391344  |                  |
|               | 3                                     | 0                           | 0.928971634                    |              |              |                  |
| ARPC4         | ENSG00000241553.12                    | 0.062348133                 | 1                              | 1            | 0.062348133  |                  |
|               | Brain_Cerebellar_Hemisphere           | 0.062348133                 | Brain_Cerebellar_Hemisphere    | 1            | 1            |                  |
|               | 1                                     | 1.863811838                 | 1.863811838                    | 1.863811838  | NA           | 1                |
|               | 0.928971634                           |                             |                                |              |              |                  |
| RP11-486G15.2 | ENSG00000271576.1                     | 0.062432714                 | 2                              | 2            | 0.021892531  |                  |

|               |                                       |                   |                                       |              |              |              |
|---------------|---------------------------------------|-------------------|---------------------------------------|--------------|--------------|--------------|
|               | Brain_Cerebellar_Hemisphere           | 0.5836914         | Brain_Cortex                          | 1.449965456  |              |              |
|               | 0.550034544                           | 0.550034544       | 0.548000733                           | 2.292227293  | 1.420114013  |              |
|               | 1.233354429                           | 2                 | 0                                     | 0.928971634  |              |              |
| LINC00290     | ENSG00000248197.1                     | 0.06252893        | 6                                     | 5            | 0.02813745   | Brain_Cortex |
|               | 0.434382857                           | Brain_Hippocampus | 3.158142634                           | 0.040998346  |              |              |
|               | 0.306914936                           | -0.850186263      | 2.195364654                           | 1.1002467    | 1.060621511  | 5            |
|               | 0                                     | 0.928971634       |                                       |              |              |              |
| COG4          | ENSG00000103051.18                    | 0.06259392        | 8                                     | 7            | 0.003604341  |              |
|               | Brain_Caudate_basal_ganglia           | 0.687449574       | Brain_Cortex                          | 3.204270796  |              |              |
|               | 0.000134377                           | 0.200608461       | -2.910861217                          | 0.879893437  | -1.567892827 |              |
|               | 1.498890868                           | 7                 | 0                                     | 0.928971634  |              |              |
| ALAD          | ENSG00000148218.15                    | 0.062604004       | 7                                     | 7            | 0.011020783  |              |
|               | Brain_Spinal_cord_cervical_c-1        | 0.824088909       | Brain_Cerebellum                      | 1.904313371  |              |              |
|               | 0.302014054                           | 0.302014054       | -1.285391235                          | 2.542039146  | 0.711548972  |              |
|               | 1.249843304                           | 7                 | 0                                     | 0.928971634  |              |              |
| OAZ1          | ENSG00000104904.12                    | 0.062644454       | 2                                     | 2            | 0.022201667  |              |
|               | Brain_Spinal_cord_cervical_c-1        | 0.561782365       | Brain_Cortex                          | 1.009998224  |              |              |
|               | 0.990001776                           | 0.990001776       | -0.580196127                          | 2.286899894  | 0.853351884  |              |
|               | 2.027343039                           | 2                 | 0                                     | 0.928971634  |              |              |
| ATF7IP2       | ENSG00000166669.13                    | 0.06279937        | 4                                     | 4            | 0.030080186  |              |
|               | Brain_Caudate_basal_ganglia           | 0.78544043        | Brain_Nucleus_accumbens_basal_ganglia |              |              |              |
|               | 2.872180519                           | 0.103488506       | 0.103488506                           | -0.462727798 | 2.169032902  |              |
|               | 0.843135525                           | 1.167998504       | 4                                     | 0            | 0.928971634  |              |
| RP11-157J24.2 | ENSG00000272279.1                     | 0.062835043       | 13                                    | 4            | 0.183216407  |              |
|               | Brain_Spinal_cord_cervical_c-1        | 0.937014442       | Brain_Cerebellar_Hemisphere           |              |              |              |
|               | 10.04017144                           | 8.43E-05          | 0.376917998                           | -1.330916744 | 0.806360019  |              |
|               | -0.13628609                           | 0.716443393       | 4                                     | 0            | 0.928971634  |              |
| PCYT1A        | ENSG00000161217.11                    | 0.062990401       | 8                                     | 6            | 0.057199846  |              |
|               | Brain_Frontal_Cortex_BA9              | 0.939546623       | Brain_Cerebellar_Hemisphere           |              |              |              |
|               | 4.131891803                           | 8.08E-05          | 0.172487989                           | -0.426295045 | 1.901780583  |              |
|               | 0.797768569                           | 1.137517068       | 6                                     | 0            | 0.928971634  |              |
| C8orf48       | ENSG00000164743.4                     | 0.06300209        | 1                                     | 1            | 0.06300209   |              |
|               | Brain_Nucleus_accumbens_basal_ganglia | 0.06300209        |                                       |              |              |              |
|               | Brain_Nucleus_accumbens_basal_ganglia | 1                 | 1                                     | 1            | 1.859176743  |              |
|               | 1.859176743                           | 1.859176743       | NA                                    | 1            | 0            | 0.928971634  |
| NDUFS3        | ENSG00000213619.9                     | 0.063010372       | 3                                     | 2            | 0.186477147  |              |
|               | Brain_Cerebellar_Hemisphere           | 0.837329039       | Brain_Cerebellum                      | 2.578011675  |              |              |
|               | 0.066693704                           | 0.355294621       | -0.519946726                          | 1.321072633  | 0.198604922  |              |
|               | 0.984733065                           | 2                 | 0                                     | 0.928971634  |              |              |
| LINC00320     | ENSG00000224924.6                     | 0.063076779       | 12                                    | 2            | 0.035832988  |              |
|               | Brain_Anterior_cingulate_cortex_BA24  | 0.860220646       | Brain_Cerebellum                      |              |              |              |
|               | 10.49825193                           | 0.002214505       | 0.520465185                           | -2.098817539 | -0.176093298 |              |
|               | -1.312125014                          | 0.464007011       | 2                                     | 0            | 0.928971634  |              |
| STRADA        | ENSG00000266173.6                     | 0.063201647       | 5                                     | 5            | 0.018137744  |              |
|               | Brain_Hippocampus                     | 0.868939792       | Brain_Substantia_nigra                | 2.189957073  |              |              |
|               | 0.194565456                           | 0.194565456       | -2.36279409                           | 0.665783538  | -0.553740568 |              |
|               | 1.121753866                           | 5                 | 0                                     | 0.928971634  |              |              |
| IMPACT        | ENSG00000154059.9                     | 0.063232719       | 2                                     | 2            | 0.020582341  |              |
|               | Brain_Hypothalamus                    | 0.140254625       | Brain_Frontal_Cortex_BA9              | 1.485924326  |              |              |
|               | 0.514075674                           | 0.514075674       | -2.315559345                          | -1.474843491 | -1.895201418 |              |
|               | 0.594475881                           | 2                 | 0                                     | 0.928971634  |              |              |
| LINC00294     | ENSG00000280798.1                     | 0.063323245       | 6                                     | 3            | 0.064066076  |              |
|               | Brain_Hippocampus                     | 0.692124884       | Brain_Spinal_cord_cervical_c-1        |              |              |              |
|               | 4.127968873                           | 0.01946189        | 0.674852682                           | -1.671182718 | 1.851719751  |              |
|               | 0.658776669                           | 1.40586402        | 3                                     | 0            | 0.928971634  |              |
| HPX           | ENSG00000110169.10                    | 0.063430093       | 4                                     | 4            | 0.044935845  |              |
|               | Brain_Hypothalamus                    | 0.656843167       | Brain_Cerebellum                      | 1.471383491  |              |              |
|               | 0.611748633                           | 0.611748633       | -2.005254511                          | 1.841126445  | 0.429321763  |              |
|               | 1.725907864                           | 4                 | 0                                     | 0.928971634  |              |              |
| LA16c-325D7.2 | ENSG00000263280.1                     | 0.063507122       | 13                                    | 1            | 0.035611208  |              |
|               | Brain_Cerebellar_Hemisphere           | 0.168638896       | Brain_Cortex                          | 11.9810621   |              |              |
|               | 0.002972111                           | 11.9810621        | 1.376590479                           | 2.101339114  | 1.782504022  |              |

|             |                                       |                             |    |              |    |             |                                      |              |                  |
|-------------|---------------------------------------|-----------------------------|----|--------------|----|-------------|--------------------------------------|--------------|------------------|
| SH3YL1      | 0.239600279                           | 1                           | 0  | 0.928971634  |    |             |                                      |              |                  |
|             | ENSG00000035115.21                    |                             |    | 0.063535429  | 4  | 4           | 0.004702836                          |              |                  |
|             | Brain_Nucleus_accumbens_basal_ganglia | 0.997859785                 |    |              |    |             | Brain_Substantia_nigra               |              |                  |
|             | 2.077516689                           | 0.226284251                 |    | 0.226284251  |    |             | 0.002682365                          | 2.826713629  |                  |
|             | 1.818905625                           | 1.262877808                 |    | 4            | 0  | 0.928971634 |                                      |              |                  |
| ZNF787      | ENSG00000142409.5                     |                             |    | 0.063731409  | 1  | 1           | 0.063731409                          |              |                  |
|             | Brain_Cortex                          | 0.063731409                 |    |              |    |             | Brain_Cortex                         | 1            | 1                |
|             | 1.85405418                            | 1.85405418                  | NA | 1            | 0  | 0.928971634 |                                      |              | 1.85405418       |
| CTB-75G16.3 | ENSG00000275720.1                     |                             |    | 0.063732635  | 10 | 4           | 0.05006158                           |              |                  |
|             | Brain_Cerebellar_Hemisphere           | 0.757993552                 |    |              |    |             | Brain_Caudate_basal_ganglia          |              |                  |
|             | 5.709139444                           | 3.50E-21                    |    | 0.708319163  |    |             | -1.959437434                         | 1.643620234  |                  |
|             | -0.737782583                          | 1.212765824                 |    | 4            | 0  | 0.928971634 |                                      |              |                  |
| TFAP2E      | ENSG00000116819.6                     |                             |    | 0.063744535  | 1  | 1           | 0.063744535                          |              |                  |
|             | Brain_Anterior_cingulate_cortex_BA24  | 0.063744535                 |    |              |    |             |                                      |              |                  |
|             | Brain_Anterior_cingulate_cortex_BA24  | 1                           | 1  | 1            |    |             | -1.853962431                         |              |                  |
|             | -1.853962431                          | -1.853962431                | NA | 1            | 0  | 0.928971634 |                                      |              |                  |
| FLT3LG      | ENSG00000090554.12                    |                             |    | 0.063904776  | 1  | 1           | 0.063904776                          |              |                  |
|             | Brain_Amygdala                        | 0.063904776                 |    |              |    |             | Brain_Amygdala                       | 1            | 1                |
|             | 1.852843619                           | 1.852843619                 | NA | 1            | 0  | 0.928971634 |                                      |              | 1.852843619      |
| GPER1       | ENSG00000164850.14                    |                             |    | 0.063927896  | 2  | 2           | 0.020356553                          |              |                  |
|             | Brain_Cerebellar_Hemisphere           | 0.651303653                 |    |              |    |             | Brain_Anterior_cingulate_cortex_BA24 |              |                  |
|             | 1.334918981                           | 0.665081019                 |    | 0.665081019  |    |             | -2.319710317                         | -0.451951874 |                  |
|             | -1.385831096                          | 1.320704661                 |    | 2            | 0  | 0.928971634 |                                      |              |                  |
| LGALS8      | ENSG00000116977.18                    |                             |    | 0.063956798  | 5  | 4           | 0.006603953                          |              |                  |
|             | Brain_Caudate_basal_ganglia           | 0.82638993                  |    |              |    |             | Brain_Hippocampus                    | 2.718525153  |                  |
|             | 0.080729082                           | 0.347298786                 |    | -2.716182365 |    |             | 0.487163401                          | -0.887023731 |                  |
|             | 1.334667254                           | 4                           | 0  | 0.928971634  |    |             |                                      |              |                  |
| LINC01945   | ENSG00000236485.1                     |                             |    | 0.064094409  | 10 | 10          | 0.018122252                          |              |                  |
|             | Brain_Substantia_nigra                | 0.607478939                 |    |              |    |             | Brain_Cortex                         | 2.333999474  |                  |
|             | 0.376114385                           | 0.376114385                 |    | -2.36311076  |    |             | 1.335791483                          | 0.12844303   |                  |
|             | 1.370293051                           | 10                          | 0  | 0.928971634  |    |             |                                      |              |                  |
| HIST1H2BD   | ENSG00000158373.8                     |                             |    | 0.064098073  | 2  | 2           | 0.025747131                          |              |                  |
|             | Brain_Cortex                          | 0.320981502                 |    |              |    |             | Brain_Hippocampus                    | 1.123610672  |                  |
|             | 0.876389328                           | 0.876389328                 |    | 0.992442938  |    |             | 2.230004698                          | 1.611223818  |                  |
|             | 0.875088313                           | 2                           | 0  | 0.928971634  |    |             |                                      |              |                  |
| MARCKSL1    | ENSG00000175130.6                     |                             |    | 0.064236887  | 2  | 2           | 0.0249619                            |              |                  |
|             | Brain_Putamen_basal_ganglia           | 0.624654348                 |    |              |    |             | Brain_Amygdala                       | 1.084456686  |                  |
|             | 0.915543314                           | 0.915543314                 |    | -2.241991841 |    |             | 0.489264644                          | -0.876363598 |                  |
|             | 1.931289982                           | 2                           | 0  | 0.928971634  |    |             |                                      |              |                  |
| KLRC2       | ENSG00000205809.9                     |                             |    | 0.064420143  | 13 | 1           | 0.034139973                          |              | Brain_Cerebellum |
|             | 0.155722965                           | Brain_Frontal_Cortex_BA9    |    |              |    |             | 12.46430078                          | 0.00129551   |                  |
|             | 12.46430078                           | 1.41960412                  |    | 2.118414572  |    |             | 1.809733626                          | 0.210019571  | 1                |
|             | 0                                     | 0.928971634                 |    |              |    |             |                                      |              |                  |
| TOR2A       | ENSG00000160404.17                    |                             |    | 0.064501056  | 2  | 2           | 0.37038712                           |              | Brain_Cerebellum |
|             | 0.985340975                           | Brain_Cerebellar_Hemisphere |    | 1.92690023   |    |             | 0.07309977                           | 0.07309977   |                  |
|             | -0.895748464                          | -0.018373396                |    | -0.45706093  |    |             | 0.62039786                           | 2            | 0                |
|             | 0.928971634                           |                             |    |              |    |             |                                      |              |                  |
| TBC1D30     | ENSG00000111490.12                    |                             |    | 0.064536144  | 1  | 1           | 0.064536144                          |              |                  |
|             | Brain_Amygdala                        | 0.064536144                 |    |              |    |             | Brain_Amygdala                       | 1            | 1                |
|             | -1.848457797                          | -1.848457797                | NA | 1            | 0  | 0.928971634 |                                      |              | -1.848457797     |
| NUDC        | ENSG00000090273.13                    |                             |    | 0.064605102  | 10 | 4           | 0.025706669                          |              |                  |
|             | Brain_Hypothalamus                    | 0.995337693                 |    |              |    |             | Brain_Putamen_basal_ganglia          | 7.021944036  |                  |
|             | 0.00412324                            | 0.235688958                 |    | -0.231417206 |    |             | 2.230614598                          | 0.546927943  |                  |
|             | 0.711895689                           | 4                           | 0  | 0.928971634  |    |             |                                      |              |                  |
| TIA1        | ENSG00000116001.15                    |                             |    | 0.06468102   | 2  | 2           | 0.035146195                          |              | Brain_Amygdala   |
|             | 0.169778798                           | Brain_Hippocampus           |    | 1.175466076  |    |             | 0.824533924                          |              |                  |
|             | 0.824533924                           | -2.106669996                |    | -1.37291492  |    |             | -1.739792458                         | 0.51884319   | 2                |
|             | 0                                     | 0.928971634                 |    |              |    |             |                                      |              |                  |
| PPIF        | ENSG00000108179.13                    |                             |    | 0.064690569  | 2  | 2           | 0.019417584                          |              |                  |
|             | Brain_Substantia_nigra                | 0.999368468                 |    |              |    |             | Brain_Spinal_cord_cervical_c-1       |              |                  |
|             | 1.048623504                           | 0.951376496                 |    | 0.951376496  |    |             | -2.337415606                         | -0.000791509 |                  |
|             | -1.169103557                          | 1.652242744                 |    | 2            | 0  | 0.928971634 |                                      |              |                  |

|          |                                       |              |              |              |                             |             |              |   |             |
|----------|---------------------------------------|--------------|--------------|--------------|-----------------------------|-------------|--------------|---|-------------|
| AP2A2    | ENSG00000183020.13                    | 0.064789625  | 11           | 6            | 0.008055672                 |             |              |   |             |
|          | Brain_Hypothalamus                    | 0.629817105  |              |              | Brain_Cerebellum            | 7.038686237 |              |   |             |
|          | 0.001430457                           | 0.25822377   | -2.649727476 |              | 2.036265361                 |             | -1.597048834 |   |             |
|          | 1.477856957                           | 6            | 0            | 0.928971634  |                             |             |              |   |             |
| C19orf12 | ENSG00000131943.17                    | 0.064792796  | 2            | 2            | 0.06597937                  |             |              |   |             |
|          | Brain_Cerebellar_Hemisphere           | 0.067192552  |              |              | Brain_Substantia_nigra      |             |              |   |             |
|          | 1.229762911                           | 0.770237089  | 0.770237089  |              | 1.830383911                 |             | 1.8385638    |   |             |
|          | 1.834473855                           | 0.005784055  | 2            | 0            | 0.928971634                 |             |              |   |             |
| SULT1A4  | ENSG00000213648.10                    | 0.064848962  | 2            | 2            | 0.056371545                 |             |              |   |             |
|          | Brain_Spinal_cord_cervical_c-1        | 0.144193497  |              |              | Brain_Hippocampus           |             |              |   |             |
|          | 1.057483115                           | 0.942516885  | 0.942516885  |              | 1.460351493                 |             | 1.908152221  |   |             |
|          | 1.684251857                           | 0.316642931  | 2            | 0            | 0.928971634                 |             |              |   |             |
| CCDC148  | ENSG00000153237.17                    | 0.06485878   | 5            | 5            | 0.005377565                 |             |              |   |             |
|          | Brain_Frontal_Cortex_BA9              | 0.725223044  |              |              | Brain_Hypothalamus          | 2.529881604 |              |   |             |
|          | 0.193132403                           | 0.193132403  | -2.783501294 |              | -0.351486973                |             | -1.319425221 |   |             |
|          | 0.95713863                            | 5            | 0            | 0.928971634  |                             |             |              |   |             |
| MFSD6L   | ENSG00000185156.5                     | 0.064864615  | 1            | 1            | 0.064864615                 |             |              |   |             |
|          | Brain_Caudate_basal_ganglia           | 0.064864615  |              |              | Brain_Caudate_basal_ganglia | 1           | 1            |   |             |
|          | 1                                     | -1.846190049 | -1.846190049 | -1.846190049 | NA                          | 1           | 0            |   |             |
|          | 0.928971634                           |              |              |              |                             |             |              |   |             |
| KCTD17   | ENSG00000100379.17                    | 0.064873524  | 1            | 1            | 0.064873524                 |             |              |   |             |
|          | Brain_Putamen_basal_ganglia           | 0.064873524  |              |              | Brain_Putamen_basal_ganglia | 1           | 1            |   |             |
|          | 1                                     | 1.846128675  | 1.846128675  | 1.846128675  | NA                          | 1           | 0            |   |             |
|          | 0.928971634                           |              |              |              |                             |             |              |   |             |
| DEF8     | ENSG00000140995.16                    | 0.065012541  | 5            | 5            | 0.013771675                 |             |              |   |             |
|          | Brain_Nucleus_accumbens_basal_ganglia | 0.333515664  |              |              | Brain_Putamen_basal_ganglia |             |              |   |             |
|          | 2.88754707                            | 0.145202249  | 0.145202249  |              | -2.4631644                  | 1.914798917 |              |   |             |
|          | -1.178860256                          | 1.825421599  | 5            | 0            | 0.928971634                 |             |              |   |             |
| PDGFRL   | ENSG00000104213.12                    | 0.065106497  | 5            | 5            | 0.003019447                 |             |              |   |             |
|          | Brain_Cortex                          | 0.907324921  |              |              | Brain_Cerebellum            | 1.738589695 | 0.390300991  |   |             |
|          | 0.390300991                           | -2.965751159 | 0.626440428  |              | -0.881974364                |             | 1.632672116  |   |             |
|          | 5                                     | 0            | 0.928971634  |              |                             |             |              |   |             |
| ZBTB41   | ENSG00000177888.7                     | 0.065144227  | 3            | 3            | 0.031603933                 |             |              |   |             |
|          | Brain_Nucleus_accumbens_basal_ganglia | 0.130524448  |              |              | Brain_Hypothalamus          |             |              |   |             |
|          | 1.556444633                           | 0.446963307  | 0.446963307  |              | 1.512037009                 |             | 2.149384499  |   |             |
|          | 1.853881212                           | 0.321190856  | 3            | 0            | 0.928971634                 |             |              |   |             |
| GPR176   | ENSG00000166073.10                    | 0.065240699  | 1            | 1            | 0.065240699                 |             |              |   |             |
|          | Brain_Cerebellum                      | 0.065240699  |              |              | Brain_Cerebellum            | 1           | 1            | 1 | 1.843605187 |
|          | 1.843605187                           | 1.843605187  | NA           | 1            | 0                           | 0.928971634 |              |   |             |
| YJEFN3   | ENSG00000250067.11                    | 0.065244111  | 3            | 3            | 0.009357394                 |             |              |   |             |
|          | Brain_Cerebellar_Hemisphere           | 0.730801383  |              |              | Brain_Cortex                | 1.767547522 |              |   |             |
|          | 0.248548904                           | 0.248548904  | -2.598713132 |              | -0.344059708                |             | -1.476192795 |   |             |
|          | 1.12735745                            | 3            | 0            | 0.928971634  |                             |             |              |   |             |
| RTP4     | ENSG00000136514.2                     | 0.065257207  | 6            | 6            | 0.052621908                 |             |              |   |             |
|          | Brain_Spinal_cord_cervical_c-1        | 0.994137755  |              |              | Brain_Cerebellar_Hemisphere |             |              |   |             |
|          | 2.65993018                            | 0.182085538  | 0.182085538  |              | -1.938010773                |             | 1.308680504  |   |             |
|          | -0.053521679                          | 1.096634968  | 6            | 0            | 0.928971634                 |             |              |   |             |
| CENPX    | ENSG00000169689.14                    | 0.065342222  | 13           | 1            | 0.044783737                 |             |              |   |             |
|          | Brain_Hypothalamus                    | 0.157095404  |              |              | Brain_Frontal_Cortex_BA9    | 12.45558793 |              |   |             |
|          | 0.000204001                           | 12.45558793  | -2.006680093 |              | -1.414908231                |             | -1.803488628 |   |             |
|          | 0.186848007                           | 1            | 0            | 0.928971634  |                             |             |              |   |             |
| TMEM161A | ENSG00000064545.14                    | 0.065419091  | 5            | 4            | 0.011529813                 |             |              |   |             |
|          | Brain_Cortex                          | 0.370625119  |              |              | Brain_Caudate_basal_ganglia | 2.756768889 |              |   |             |
|          | 0.080322743                           | 0.274391281  | -2.526217342 |              | -0.895303033                |             | -1.900105507 |   |             |
|          | 0.614542607                           | 4            | 0            | 0.928971634  |                             |             |              |   |             |
| TMC6     | ENSG00000141524.15                    | 0.065461489  | 4            | 4            | 0.034103097                 |             |              |   |             |
|          | Brain_Hippocampus                     | 0.991463289  |              |              | Brain_Caudate_basal_ganglia | 2.624522345 |              |   |             |
|          | 0.147645775                           | 0.147645775  | -1.183088073 |              | 2.118850581                 |             | 0.451950976  |   |             |
|          | 1.392145942                           | 4            | 0            | 0.928971634  |                             |             |              |   |             |
| SCARA3   | ENSG00000168077.13                    | 0.065548639  | 1            | 1            | 0.065548639                 |             |              |   |             |
|          | Brain_Frontal_Cortex_BA9              | 0.065548639  |              |              | Brain_Frontal_Cortex_BA9    | 1           | 1            |   |             |
|          | 1                                     | -1.841497822 | -1.841497822 | -1.841497822 | NA                          | 1           | 0            |   |             |

0.928971634

B3GNTL1 ENSG00000175711.8 0.06559904 12 8 0.003010386  
Brain\_Putamen\_basal\_ganglia 0.506319525 Brain\_Spinal\_cord\_cervical\_c-1  
7.274949454 0.08447498 0.281800339 -2.966675428 -0.664579437  
-1.970897738 0.711003617 8 0 0.928971634

CLEC4G ENSG00000182566.13 0.065616876 6 6 0.008717647  
Brain\_Nucleus\_accumbens\_basal\_ganglia 0.990742094 Brain\_Cerebellum  
1.884272317 0.173645362 0.173645362 -2.622932766 0.659169465  
-0.878664945 1.355568671 6 0 0.928971634

ACMSD ENSG00000153086.13 0.065698323 1 1 0.065698323  
Brain\_Cerebellar\_Hemisphere 0.065698323 Brain\_Cerebellar\_Hemisphere1 1  
1 1.840476419 1.840476419 1.840476419 NA 1 0  
0.928971634

COPS8 ENSG00000198612.10 0.065760018 1 1 0.065760018  
Brain\_Frontal\_Cortex\_BA9 0.065760018 Brain\_Frontal\_Cortex\_BA9 1 1  
1 1.840055988 1.840055988 1.840055988 NA 1 0  
0.928971634

LINC01976 ENSG00000261514.1 0.065923482 1 1 0.065923482  
Brain\_Frontal\_Cortex\_BA9 0.065923482 Brain\_Frontal\_Cortex\_BA9 1 1  
1 -1.838943598 -1.838943598 -1.838943598 NA 1 0  
0.928971634

PRSS36 ENSG00000178226.10 0.065925162 11 1 0.028904304  
Brain\_Amygdala 0.172947449 Brain\_Hippocampus 10.7381063 0.00033989  
10.7381063 1.36279398 2.184789228 1.817644257 0.227461194 1 0  
0.928971634

CCT6B ENSG00000132141.13 0.06600554 11 5 0.127729072  
Brain\_Putamen\_basal\_ganglia 0.888915022 Brain\_Anterior\_cingulate\_cortex\_BA24  
8.063293904 0.003094608 0.328812397 -1.523118455 1.065099639  
-0.474222676 0.665485225 5 0 0.928971634

YAF2 ENSG00000015153.14 0.066091379 2 2 0.030353973  
Brain\_Caudate\_basal\_ganglia 0.370852857 Brain\_Anterior\_cingulate\_cortex\_BA24  
1.014890007 0.985109993 0.985109993 -2.16544043 0.894876974  
-0.635281728 2.163971189 2 0 0.928971634

LINC00184 ENSG00000224939.1 0.066122905 11 9 0.011105585  
Brain\_Putamen\_basal\_ganglia 0.896581335 Brain\_Hippocampus 4.703515057  
0.02440998 0.176230187 -2.539358854 0.915095706 -0.334230458  
1.08510219 9 0 0.928971634

RXFP4 ENSG00000173080.5 0.066139894 1 1 0.066139894 Brain\_Cerebellum  
0.066139894 Brain\_Cerebellum 1 1 1 1.837474391 1.837474391  
1.837474391 NA 1 0 0.928971634

LINC02082 ENSG00000242268.2 0.066263192 2 2 0.022404675  
Brain\_Nucleus\_accumbens\_basal\_ganglia 0.119360846 Brain\_Caudate\_basal\_ganglia  
1.507434392 0.492565608 0.492565608 -2.283436396 -1.557461956  
-1.920449176 0.51334145 2 0 0.928971634

RHCE ENSG00000188672.17 0.066326025 13 2 0.05211985  
Brain\_Substantia\_nigra 0.978899031 Brain\_Cortex 12.13062655  
0.000738591 0.557223412 -1.942142515 0.026449227 -1.550757335  
0.487945293 2 0 0.928971634

ZC3H13 ENSG00000123200.16 0.066398397 1 1 0.066398397  
Brain\_Cerebellum 0.066398397 Brain\_Cerebellum 1 1 1 -1.835724605  
-1.835724605 -1.835724605 NA 1 0 0.928971634

RSF1 ENSG00000048649.13 0.066463865 1 1 0.066463865  
Brain\_Cerebellar\_Hemisphere 0.066463865 Brain\_Cerebellar\_Hemisphere 1 1  
1 -1.835282346 -1.835282346 -1.835282346 NA 1 0  
0.928971634

SUCLA2 ENSG00000136143.14 0.066484899 6 3 0.007738429  
Brain\_Cerebellar\_Hemisphere 0.090416538 Brain\_Frontal\_Cortex\_BA9  
4.795065141 0.020899419 0.212987374 -2.663274365 -1.693204556  
-2.297666265 0.351911693 3 0 0.928971634

C8orf58 ENSG00000241852.9 0.066518621 8 4 0.066803836  
Brain\_Cerebellum 0.963169776 Brain\_Hypothalamus 6.524162622  
0.004956169 0.233880484 -0.046176245 1.832991495 1.239722492

|              |                                      |              |                                |              |             |                                       |             |              |   |
|--------------|--------------------------------------|--------------|--------------------------------|--------------|-------------|---------------------------------------|-------------|--------------|---|
|              | 0.586599338                          | 4            | 0                              | 0.928971634  |             |                                       |             |              |   |
| CERKL        | ENSG00000188452.13                   |              | 0.066530047                    | 1            | 1           | 0.066530047                           |             |              |   |
|              | Brain_Cerebellar_Hemisphere          |              | 0.066530047                    |              |             | Brain_Cerebellar_Hemisphere1          | 1           |              |   |
|              | 1                                    | -1.834835634 | -1.834835634                   | -1.834835634 | NA          | 1                                     | 0           |              |   |
|              | 0.928971634                          |              |                                |              |             |                                       |             |              |   |
| RGS12        | ENSG00000159788.18                   |              | 0.066709424                    | 6            | 6           | 0.011499206                           |             | Brain_Cortex |   |
|              | 0.788734437                          |              | Brain_Cerebellar_Hemisphere    | 2.746888985  |             | 0.096666363                           |             |              |   |
|              | 0.096666363                          | -2.527150959 | -0.75842761                    | -0.380394585 |             | 1.357612153                           |             |              | 6 |
|              | 0                                    | 0.928971634  |                                |              |             |                                       |             |              |   |
| SLC51A       | ENSG00000163959.9                    |              | 0.06680607                     | 12           | 4           | 0.005920781                           |             |              |   |
|              | Brain_Spinal_cord_cervical_c-1       |              | 0.19803667                     |              |             | Brain_Substantia_nigra                |             |              |   |
|              | 9.870671717                          | 1.59E-05     | 0.347089992                    |              |             | -2.752136633                          |             | -1.287165326 |   |
|              | -2.05218542                          | 0.394495411  |                                | 4            | 0           | 0.928971634                           |             |              |   |
| APOE         | ENSG00000130203.9                    |              | 0.066829707                    | 1            | 1           | 0.066829707                           |             |              |   |
|              | Brain_Spinal_cord_cervical_c-1       |              | 0.066829707                    |              |             | Brain_Spinal_cord_cervical_c-1        |             |              |   |
|              | 1                                    | 1            | -1.832817559                   | -1.832817559 |             | -1.832817559                          | NA          | 1            | 0 |
|              | 0.928971634                          |              |                                |              |             |                                       |             |              |   |
| MIER2        | ENSG00000105556.11                   |              | 0.066832631                    | 2            | 2           | 0.065655462                           |             |              |   |
|              | Brain_Spinal_cord_cervical_c-1       |              | 0.764268825                    |              |             | Brain_Cortex                          |             | 1.708306743  |   |
|              | 0.291693257                          | 0.291693257  | -1.840768694                   |              |             | -0.299879823                          |             | -1.070324259 |   |
|              | 1.08957297                           | 2            | 0                              | 0.928971634  |             |                                       |             |              |   |
| RP11-700H6.1 | ENSG00000247011.2                    |              | 0.06692527                     | 2            | 1           | 0.057872331                           |             |              |   |
|              | Brain_Spinal_cord_cervical_c-1       |              | 0.084534783                    |              |             | Brain_Caudate_basal_ganglia           |             |              |   |
|              | 1.953630204                          | 0.046369796  | 1.953630204                    |              |             | -1.896663751                          |             | -1.724959437 |   |
|              | -1.810811594                         | 0.121413285  |                                | 1            | 0           | 0.928971634                           |             |              |   |
| CYP20A1      | ENSG00000119004.15                   |              | 0.066934601                    | 1            | 1           | 0.066934601                           |             |              |   |
|              | Brain_Frontal_Cortex_BA9             |              | 0.066934601                    |              |             | Brain_Frontal_Cortex_BA9              | 1           | 1            |   |
|              | 1                                    | 1.832112908  | 1.832112908                    | 1.832112908  | NA          | 1                                     | 0           |              |   |
|              | 0.928971634                          |              |                                |              |             |                                       |             |              |   |
| SAMD1        | ENSG00000141858.11                   |              | 0.066940487                    | 2            | 2           | 0.032844525                           |             |              |   |
|              | Brain_Cerebellar_Hemisphere          |              | 0.3136945                      |              |             | Brain_Nucleus_accumbens_basal_ganglia |             |              |   |
|              | 1.039398774                          | 0.960601226  | 0.960601226                    |              |             | 1.00750012                            |             | 2.133978696  |   |
|              | 1.570739408                          | 0.79654064   | 2                              | 0            | 0.928971634 |                                       |             |              |   |
| ZFP91        | ENSG00000186660.14                   |              | 0.066964231                    | 2            | 2           | 0.068224837                           |             |              |   |
|              | Brain_Caudate_basal_ganglia          |              | 0.083521478                    |              |             | Brain_Spinal_cord_cervical_c-1        |             |              |   |
|              | 1.169180941                          | 0.830819059  | 0.830819059                    |              |             | 1.730609266                           |             | 1.823518898  |   |
|              | 1.777064082                          | 0.065697031  |                                | 2            | 0           | 0.928971634                           |             |              |   |
| ABLIM1       | ENSG00000099204.18                   |              | 0.066964424                    | 2            | 2           | 0.092070508                           |             |              |   |
|              | Brain_Substantia_nigra               |              | 0.108670862                    |              |             | Brain_Cerebellum                      | 1.000750203 |              |   |
|              | 0.999249797                          | 0.999249797  | -1.604195974                   |              |             | 1.684575465                           |             | 0.040189745  |   |
|              | 2.325512587                          | 2            | 0                              | 0.928971634  |             |                                       |             |              |   |
| BACH1        | ENSG00000156273.15                   |              | 0.067000978                    | 2            | 2           | 0.033000607                           |             |              |   |
|              | Brain_Anterior_cingulate_cortex_BA24 |              | 0.365541235                    |              |             |                                       |             |              |   |
|              | Brain_Spinal_cord_cervical_c-1       |              | 1.010619021                    |              |             | 0.989380979                           |             | 0.989380979  |   |
|              | -0.904856839                         | 2.132075908  | 0.613609534                    |              |             | 2.14743574                            | 2           | 0            |   |
|              | 0.928971634                          |              |                                |              |             |                                       |             |              |   |
| ARHGEF10     | ENSG00000104728.15                   |              | 0.067118887                    | 7            | 6           | 0.131424863                           |             |              |   |
|              | Brain_Hypothalamus                   |              | 0.948312796                    |              |             | Brain_Caudate_basal_ganglia           | 2.93193654  |              |   |
|              | 0.000125453                          | 0.254442641  | -0.87275149                    |              |             | 1.508506819                           |             | 0.40202576   |   |
|              | 0.884056456                          | 6            | 0                              | 0.928971634  |             |                                       |             |              |   |
| NUDT17       | ENSG00000186364.11                   |              | 0.067127589                    | 3            | 2           | 0.058830573                           |             |              |   |
|              | Brain_Anterior_cingulate_cortex_BA24 |              | 0.174658634                    |              |             | Brain_Hypothalamus                    |             |              |   |
|              | 2.000038479                          | 1.70E-16     | 0.999961521                    |              |             | 1.357385874                           |             | 1.889457345  |   |
|              | 1.540580924                          | 0.302262717  |                                | 2            | 0           | 0.928971634                           |             |              |   |
| ARAP2        | ENSG00000047365.11                   |              | 0.067128177                    | 2            | 2           | 0.1526499                             |             | Brain_Cortex |   |
|              | 0.244619588                          |              | Brain_Spinal_cord_cervical_c-1 | 1.374347278  |             | 0.625652722                           |             |              |   |
|              | 0.625652722                          | -1.430233895 | 1.163517535                    |              |             | -0.13335818                           |             | 1.834059225  |   |
|              | 2                                    | 0            | 0.928971634                    |              |             |                                       |             |              |   |
| PSMA6        | ENSG00000100902.10                   |              | 0.067320923                    | 1            | 1           | 0.067320923                           |             |              |   |
|              | Brain_Cerebellar_Hemisphere          |              | 0.067320923                    |              |             | Brain_Cerebellar_Hemisphere1          | 1           | 1            |   |
|              | 1                                    | 1.829525497  | 1.829525497                    | 1.829525497  | NA          | 1                                     | 0           |              |   |
|              | 0.930718416                          |              |                                |              |             |                                       |             |              |   |

|               |                                       |                                       |              |              |                                |              |             |             |             |
|---------------|---------------------------------------|---------------------------------------|--------------|--------------|--------------------------------|--------------|-------------|-------------|-------------|
| PARK7         | ENSG00000116288.12                    | 0.067527724                           | 4            | 4            | 0.06933594                     |              |             |             |             |
|               | Brain_Putamen_basal_ganglia           | 0.636388444                           |              |              | Brain_Hippocampus              | 1.471117583  |             |             |             |
|               | 0.518495358                           | 0.518495358                           | -1.816224508 |              | 0.758828401                    | -0.770208598 |             |             |             |
|               | 1.173275217                           | 4                                     | 0            | 0.931227594  |                                |              |             |             |             |
| TNFSF4        | ENSG00000117586.10                    | 0.067557794                           | 2            | 2            | 0.035173718                    |              |             |             |             |
|               | Brain_Nucleus_accumbens_basal_ganglia | 0.616666615                           |              |              | Brain_Cerebellum               |              |             |             |             |
|               | 1.214936296                           | 0.785063704                           | 0.785063704  |              | -0.500580179                   | 2.106352803  |             |             |             |
|               | 0.802886312                           | 1.84337999                            | 2            | 0            | 0.931227594                    |              |             |             |             |
| TUBAL3        | ENSG00000178462.11                    | 0.067624796                           | 2            | 2            | 0.530095468                    |              |             |             |             |
|               | Brain_Frontal_Cortex_BA9              | 0.53016973                            |              |              | Brain_Cerebellar_Hemisphere    | 1.85368616   |             |             |             |
|               | 0.14631384                            | 0.14631384                            | -0.62774694  |              | 0.627860289                    | 5.67E-05     | 0.887848386 |             |             |
|               | 2                                     | 0                                     | 0.931227594  |              |                                |              |             |             |             |
| RASL10A       | ENSG00000100276.9                     | 0.067824426                           | 4            | 3            | 0.033732114                    |              |             |             |             |
|               | Brain_Putamen_basal_ganglia           | 0.3124456                             |              |              | Brain_Cerebellum               | 3.60374835   | 0.057937147 |             |             |
|               | 0.122900874                           | -2.123259483                          | -1.01010372  |              | -1.547238124                   | 0.552773559  |             |             |             |
|               | 3                                     | 0                                     | 0.931227594  |              |                                |              |             |             |             |
| RP11-111M22.4 | ENSG00000272301.1                     | 0.067938337                           | 1            | 1            | 0.067938337                    |              |             |             |             |
|               | Brain_Substantia_nigra                | 0.067938337                           |              |              | Brain_Substantia_nigra         | 1            | 1           |             |             |
|               | 1                                     | -1.825415597                          | -1.825415597 |              | -1.825415597                   | NA           | 1           | 0           |             |
|               | 0.931227594                           |                                       |              |              |                                |              |             |             |             |
| SLC25A29      | ENSG00000197119.12                    | 0.067946175                           | 3            | 2            | 0.015356404                    |              |             |             |             |
|               | Brain_Cerebellar_Hemisphere           | 0.211393016                           |              |              | Brain_Cortex                   | 2.304050117  |             |             |             |
|               | 0.033389288                           | 0.662560595                           | -2.423862849 |              | -1.249744171                   | -1.945344263 |             |             |             |
|               | 0.616426761                           | 2                                     | 0            | 0.931227594  |                                |              |             |             |             |
| CENPBD1       | ENSG00000177946.5                     | 0.067960505                           | 4            | 4            | 0.020031282                    |              |             |             |             |
|               | Brain_Cerebellar_Hemisphere           | 0.159273198                           |              |              | Brain_Frontal_Cortex_BA9       |              |             |             |             |
|               | 2.239967721                           | 0.301828315                           | 0.301828315  |              | -2.325761422                   | -1.407520178 |             |             |             |
|               | -1.866242843                          | 0.446437635                           | 4            | 0            | 0.931227594                    |              |             |             |             |
| RP11-111M22.2 | ENSG00000179240.9                     | 0.067974088                           | 1            | 1            | 0.067974088                    |              |             |             |             |
|               | Brain_Cortex                          | 0.067974088                           |              |              | Brain_Cortex                   | 1            | 1           | 1           | 1.825178561 |
|               | 1.825178561                           | 1.825178561                           | NA           | 1            | 0                              | 0.931227594  |             |             |             |
| EVA1B         | ENSG00000142694.6                     | 0.068053402                           | 3            | 3            | 0.022116884                    |              |             |             |             |
|               | Brain_Caudate_basal_ganglia           | 0.942402121                           |              |              | Brain_Cerebellum               | 1.517836781  |             |             |             |
|               | 0.514970837                           | 0.514970837                           | -2.288354515 |              | -0.072251048                   | -1.090907624 |             |             |             |
|               | 1.118817736                           | 3                                     | 0            | 0.931227594  |                                |              |             |             |             |
| GPR27         | ENSG00000170837.2                     | 0.068074846                           | 4            | 4            | 0.018344724                    |              |             |             |             |
|               | Brain_Cortex                          |                                       |              |              | Brain_Cortex                   |              |             |             |             |
|               | 0.697079641                           | Brain_Nucleus_accumbens_basal_ganglia | 1.997304332  |              | 0.46894492                     |              |             |             |             |
|               | 0.46894492                            | -1.235504615                          | 2.358585682  |              | 0.514700192                    | 1.469679409  |             | 4           |             |
|               | 0                                     | 0.931227594                           |              |              |                                |              |             |             |             |
| 11-Mar        | ENSG00000183654.8                     | 0.068089903                           | 1            | 1            | 0.068089903                    |              |             |             |             |
|               | Brain_Hypothalamus                    | 0.068089903                           |              |              | Brain_Hypothalamus             | 1            | 1           | 1           |             |
|               | 1.824411381                           | 1.824411381                           | 1.824411381  |              | NA                             | 1            | 0           | 0.931227594 |             |
| USP42         | ENSG00000106346.11                    | 0.068163809                           | 1            | 1            | 0.068163809                    |              |             |             |             |
|               | Brain_Spinal_cord_cervical_c-1        | 0.068163809                           |              |              | Brain_Spinal_cord_cervical_c-1 |              |             |             |             |
|               | 1                                     | 1                                     | 1            | -1.823922368 | -1.823922368                   | -1.823922368 | NA          | 1           | 0           |
|               | 0.931327987                           |                                       |              |              |                                |              |             |             |             |
| LNPEP         | ENSG00000113441.15                    | 0.068233454                           | 2            | 2            | 0.034503441                    |              |             |             |             |
|               | Brain_Substantia_nigra                | 1.067678124                           |              |              | 0.932321876                    |              |             |             |             |
|               | 0.932321876                           | -0.803458316                          | 2.114138482  |              | 0.655340083                    | 2.063052481  |             |             |             |
|               | 2                                     | 0                                     | 0.93137      |              |                                |              |             |             |             |
| DTX2          | ENSG00000091073.19                    | 0.068371528                           | 4            | 4            | 0.011217559                    |              |             |             |             |
|               | Brain_Putamen_basal_ganglia           | 0.286181039                           |              |              | Brain_Cortex                   | 2.442263347  |             |             |             |
|               | 0.186314251                           | 0.186314251                           | 1.066536829  |              | 2.535847443                    | 1.611504377  |             |             |             |
|               | 0.641293606                           | 4                                     | 0            | 0.932345077  |                                |              |             |             |             |
| IL32          | ENSG00000008517.16                    | 0.068507722                           | 6            | 6            | 0.002667754                    |              |             |             |             |
|               | Brain_Substantia_nigra                | 0.898930697                           |              |              | Brain_Cortex                   | 1.248024128  |             |             |             |
|               | 0.718440164                           | 0.718440164                           | 0.127012257  |              | 3.003634691                    | 1.093149624  |             |             |             |
|               | 1.07543934                            | 6                                     | 0            | 0.933292638  |                                |              |             |             |             |
| LMO2          | ENSG00000135363.11                    | 0.068837315                           | 1            | 1            | 0.068837315                    |              |             |             |             |
|               | Brain_Hippocampus                     | 0.068837315                           |              |              | Brain_Hippocampus              | 1            | 1           | 1           |             |
|               | -1.819486009                          | -1.819486009                          | -1.819486009 |              | NA                             | 1            | 0           | 0.936870505 |             |
| CCDC112       | ENSG00000164221.12                    | 0.068946921                           | 1            | 1            | 0.068946921                    |              |             |             |             |



|              |                                      |              |              |                                       |              |             |                  |
|--------------|--------------------------------------|--------------|--------------|---------------------------------------|--------------|-------------|------------------|
|              | Brain_Cerebellum                     | 0.068946921  |              | Brain_Cerebellum1                     | 1            | 1           | 1.818767417      |
|              |                                      | 1.818767417  |              | NA                                    | 1            | 0           | 0.937289328      |
| RP11-543C4.1 | ENSG00000247970.2                    |              | 0.06901057   | 2                                     | 2            | 0.024199708 |                  |
|              | Brain_Hypothalamus                   | 0.46732449   |              | Brain_Cortex                          | 1.094361532  |             | 0.905638468      |
|              |                                      | 0.905638468  | -0.726839162 | 2.253943726                           | 0.763552282  |             | 2.107731793      |
|              |                                      | 2            | 0            | 0.937289328                           |              |             |                  |
| PPP1CC       | ENSG00000186298.11                   |              | 0.069114266  | 2                                     | 2            | 0.276569305 |                  |
|              | Brain_Putamen_basal_ganglia          | 0.494430709  |              | Brain_Caudate_basal_ganglia           |              |             |                  |
|              |                                      | 1.703767746  | 0.296232254  | 0.296232254                           | -0.683278766 |             | 1.088058451      |
|              |                                      | 0.202389843  | 1.252524557  | 2                                     | 0            | 0.937289328 |                  |
| SLC25A12     | ENSG00000115840.13                   |              | 0.069136058  | 8                                     | 4            | 0.017012211 |                  |
|              | Brain_Hippocampus                    | 0.524526133  |              | Brain_Hypothalamus                    | 6.388198911  |             |                  |
|              |                                      | 0.007560682  | 0.219445034  | -2.386443713                          | -0.636384053 |             | -1.566323168     |
|              |                                      | 0.512998677  | 4            | 0                                     | 0.937289328  |             |                  |
| KLHDC8B      | ENSG00000185909.14                   |              | 0.069287312  | 1                                     | 1            | 0.069287312 |                  |
|              | Brain_Cerebellum                     | 0.069287312  |              | Brain_Cerebellum1                     | 1            | 1           | 1.816541734      |
|              |                                      | 1.816541734  | 1.816541734  | NA                                    | 1            | 0           | 0.937965237      |
| RANBP2       | ENSG00000153201.15                   |              | 0.069320476  | 1                                     | 1            | 0.069320476 |                  |
|              | Brain_Amygdala                       | 0.069320476  |              | Brain_Amygdala                        | 1            | 1           | 1.816325366      |
|              |                                      | 1.816325366  | 1.816325366  | NA                                    | 1            | 0           | 0.937965237      |
| TMC8         | ENSG00000167895.14                   |              | 0.069606539  | 6                                     | 5            | 0.016969656 |                  |
|              | Brain_Anterior_cingulate_cortex_BA24 | 0.969670222  |              | Brain_Amygdala                        |              |             |                  |
|              |                                      | 2.880869477  | 0.058641393  | 0.196057756                           | -0.038021899 |             | 2.387364524      |
|              |                                      | 0.875102873  | 0.947624812  | 5                                     | 0            | 0.937965237 |                  |
| NUDT5        | ENSG00000165609.12                   |              | 0.069759213  | 5                                     | 4            | 0.016824379 | Brain_Cerebellum |
|              |                                      | 0.698319843  |              | Brain_Nucleus_accumbens_basal_ganglia | 3.020190449  |             |                  |
|              |                                      | 0.033555942  | 0.213993095  | -2.390523365                          | -0.387589496 |             | -1.183936593     |
|              |                                      | 0.782879132  | 4            | 0                                     | 0.937965237  |             |                  |
| IQCG         | ENSG00000114473.13                   |              | 0.069985999  | 8                                     | 5            | 0.039782365 |                  |
|              | Brain_Spinal_cord_cervical_c-1       | 0.795137216  |              | Brain_Cortex                          | 5.509720881  |             |                  |
|              |                                      | 0.040708827  | 0.201282871  | -0.496137701                          | 2.056001573  |             | 0.412057021      |
|              |                                      | 0.85624368   | 5            | 0                                     | 0.937965237  |             |                  |
| ASCC1        | ENSG00000138303.17                   |              | 0.069997737  | 1                                     | 1            | 0.069997737 |                  |
|              | Brain_Caudate_basal_ganglia          | 0.069997737  |              | Brain_Caudate_basal_ganglia1          | 1            | 1           |                  |
|              |                                      | 1            | 1.811925315  | 1.811925315                           | 1.811925315  | NA          | 1                |
|              |                                      | 0.937965237  |              |                                       | 0            |             |                  |
| TNFRSF1A     | ENSG00000067182.7                    |              | 0.070008813  | 2                                     | 2            | 0.157776969 |                  |
|              | Brain_Caudate_basal_ganglia          | 0.162601864  |              | Brain_Cerebellum1                     | 1.258177528  |             |                  |
|              |                                      | 0.741822472  | 0.741822472  | -1.412587762                          | 1.396374121  |             | -0.00810682      |
|              |                                      | 1.986235996  | 2            | 0                                     | 0.937965237  |             |                  |
| C9orf142     | ENSG00000148362.10                   |              | 0.070121782  | 4                                     | 4            | 0.004207461 |                  |
|              | Brain_Cortex                         | 0.814471084  |              | Brain_Cerebellum1                     | 1.115511963  |             | 0.883064658      |
|              |                                      | 0.883064658  | -0.694013178 | 2.862173819                           | 0.752239     | 1.509161259 | 4                |
|              |                                      | 0            | 0.937965237  |                                       |              |             |                  |
| KMT5C        | ENSG00000133247.13                   |              | 0.070210487  | 3                                     | 3            | 0.072222718 |                  |
|              | Brain_Cerebellar_Hemisphere          | 0.722258033  |              | Brain_Cerebellum1                     | 1.505577944  |             |                  |
|              |                                      | 0.47376833   | 0.47376833   | -1.615846014                          | 1.797711626  | 0.17910274  | 1.713597313      |
|              |                                      | 3            | 0            | 0.937965237                           |              |             |                  |
| SLC26A2      | ENSG00000155850.7                    |              | 0.070291333  | 2                                     | 2            | 0.045749617 |                  |
|              | Brain_Spinal_cord_cervical_c-1       | 0.77079603   |              | Brain_Frontal_Cortex_BA9              |              |             |                  |
|              |                                      | 1.384867636  | 0.615132364  | 0.615132364                           | -0.291333813 |             | 1.997696099      |
|              |                                      | 0.853181143  | 1.618588573  | 2                                     | 0            | 0.937965237 |                  |
| KDM6B        | ENSG00000132510.10                   |              | 0.070331373  | 1                                     | 1            | 0.070331373 | Brain_Cortex     |
|              |                                      | 0.070331373  | Brain_Cortex | 1                                     | 1            | 1           | -1.809770574     |
|              |                                      | -1.809770574 | NA           | 1                                     | 0            | 0.937965237 | -1.809770574     |
| SCMH1        | ENSG00000010803.16                   |              | 0.070375204  | 2                                     | 2            | 0.042570944 |                  |
|              | Brain_Anterior_cingulate_cortex_BA24 | 0.271358352  |              | Brain_Cerebellum                      |              |             |                  |
|              |                                      | 1.003239923  | 0.996760077  | 0.996760077                           | -2.027895216 |             | -1.099939801     |
|              |                                      | -1.563917508 | 0.656163566  | 2                                     | 0            | 0.937965237 |                  |
| MAP6D1       | ENSG00000180834.7                    |              | 0.070425238  | 9                                     | 5            | 0.010248106 |                  |
|              | Brain_Cerebellum                     | 0.28454033   |              | Brain_Frontal_Cortex_BA9              | 5.782371603  |             |                  |
|              |                                      | 0.019037076  | 0.244793701  | -1.070175477                          | 2.56734343   | 1.858514837 |                  |

|              |                                       |                                       |              |              |                                |                  |             |   |              |
|--------------|---------------------------------------|---------------------------------------|--------------|--------------|--------------------------------|------------------|-------------|---|--------------|
|              | 1.126485322                           | 5                                     | 0            | 0.937965237  |                                |                  |             |   |              |
| DOCK4        | ENSG00000128512.20                    | 0.070440868                           | 2            | 2            | 0.025197964                    |                  |             |   |              |
|              | Brain_Cerebellar_Hemisphere           | 0.026385802                           |              |              | Brain_Cerebellum               | 1.873929383      |             |   |              |
|              | 0.126070617                           | 0.126070617                           | 2.220485904  |              | 2.23835424                     | 2.229420072      |             |   |              |
|              | 0.012634822                           | 2                                     | 0            | 0.937965237  |                                |                  |             |   |              |
| ZNF205       | ENSG00000122386.10                    | 0.070505691                           | 4            | 4            | 0.046163272                    |                  |             |   |              |
|              | Brain_Cerebellum                      | 0.792068868                           |              |              | Brain_Cerebellar_Hemisphere    | 1.741562153      |             |   |              |
|              | 0.407296579                           | 0.407296579                           | -1.993897363 |              | 1.233157549                    | -0.501191613     |             |   |              |
|              | 1.509309314                           | 4                                     | 0            | 0.937965237  |                                |                  |             |   |              |
| YIPF7        | ENSG00000177752.14                    | 0.070518092                           | 9            | 4            | 0.005179572                    |                  |             |   |              |
|              | Brain_Nucleus_accumbens_basal_ganglia | 0.600661049                           |              |              | Brain_Cortex                   | 6.74589441       |             |   |              |
|              | 0.023344191                           | 0.442975191                           | 0.523450127  |              | 2.795648351                    | 1.714118341      |             |   |              |
|              | 0.61602484                            | 4                                     | 0            | 0.937965237  |                                |                  |             |   |              |
| GLTSCR2      | ENSG00000105373.18                    | 0.070628491                           | 1            | 1            | 0.070628491                    |                  |             |   |              |
|              | Brain_Hippocampus                     | 0.070628491                           |              |              | Brain_Hippocampus              | 1                | 1           | 1 |              |
|              | 1.807858723                           | 1.807858723                           | 1.807858723  | NA           | 1                              | 0                | 0.937965237 |   |              |
| PDCD11       | ENSG00000148843.13                    | 0.070721382                           | 4            | 4            | 0.01431507                     | Brain_Cerebellum |             |   |              |
|              | 0.449511984                           | Brain_Cerebellar_Hemisphere           | 2.454385788  |              | 0.26922575                     | 0.26922575       |             |   |              |
|              | 0.756228875                           | 2.44925842                            | 1.390517825  | 0.733356113  | 4                              | 0                |             |   |              |
|              | 0.937965237                           |                                       |              |              |                                |                  |             |   |              |
| FAM189A2     | ENSG00000135063.17                    | 0.070737634                           | 1            | 1            | 0.070737634                    |                  |             |   |              |
|              | Brain_Cerebellar_Hemisphere           | 0.070737634                           |              |              | Brain_Cerebellar_Hemisphere    | 1                | 1           |   |              |
|              | 1                                     | -1.807158084                          | -1.807158084 | -1.807158084 | NA                             | 1                | 0           |   |              |
|              | 0.937965237                           |                                       |              |              |                                |                  |             |   |              |
| PDZD7        | ENSG00000186862.17                    | 0.070833122                           | 7            | 7            | 0.048750863                    |                  |             |   |              |
|              | Brain_Cerebellar_Hemisphere           | 0.543971631                           |              |              | Brain_Hippocampus              | 1.914885635      |             |   |              |
|              | 0.307454041                           | 0.307454041                           | -1.323211063 |              | 1.970764117                    | 0.22334923       |             |   |              |
|              | 1.256217871                           | 7                                     | 0            | 0.937965237  |                                |                  |             |   |              |
| ALOX5        | ENSG00000012779.10                    | 0.070840151                           | 5            | 3            | 0.020977711                    |                  |             |   |              |
|              | Brain_Anterior_cingulate_cortex_BA24  | 0.530058644                           |              |              | Brain_Cerebellum               |                  |             |   |              |
|              | 4.275767183                           | 0.010336568                           | 0.150760655  |              | -2.308385387                   | 1.188656309      |             |   |              |
|              | -0.9313838                            | 1.694689391                           | 3            | 0            | 0.937965237                    |                  |             |   |              |
| SHE          | ENSG00000169291.9                     | 0.070932307                           | 1            | 1            | 0.070932307                    |                  |             |   |              |
|              | Brain_Hippocampus                     | 0.070932307                           |              |              | Brain_Hippocampus              | 1                | 1           | 1 |              |
|              | -1.805910587                          | -1.805910587                          | -1.805910587 | NA           | 1                              | 0                | 0.937965237 |   |              |
| ATP2A2       | ENSG00000174437.16                    | 0.070966789                           | 3            | 3            | 0.062927143                    |                  |             |   |              |
|              | Brain_Cerebellum                      | 0.500694458                           |              |              | Brain_Spinal_cord_cervical_c-1 | 1.548257627      |             |   |              |
|              | 0.406518192                           | 0.406518192                           | -0.67339747  |              | 1.859705925                    | 0.928172782      |             |   |              |
|              | 1.393149489                           | 3                                     | 0            | 0.937965237  |                                |                  |             |   |              |
| LINC01010    | ENSG00000236700.5                     | 0.07099381                            | 2            | 2            | 0.024607478                    | Brain_Amygdala   |             |   |              |
|              | 0.323167491                           | Brain_Caudate_basal_ganglia           | 1.227771223  |              | 0.772228777                    |                  |             |   |              |
|              | 0.772228777                           | 0.987969693                           | 2.247509595  |              | 1.617739644                    | 0.890629206      |             |   |              |
|              | 2                                     | 0                                     | 0.937965237  |              |                                |                  |             |   |              |
| UBR4         | ENSG00000127481.14                    | 0.071068827                           | 2            | 2            | 0.021586101                    | Brain_Cerebellum |             |   |              |
|              | 0.821421943                           | Brain_Nucleus_accumbens_basal_ganglia | 1.056174635  |              |                                |                  |             |   |              |
|              | 0.943825365                           | 0.943825365                           | -2.297573057 |              | 0.225716476                    | -1.035928291     |             |   |              |
|              | 1.784235139                           | 2                                     | 0            | 0.937965237  |                                |                  |             |   |              |
| CGNL1        | ENSG00000128849.10                    | 0.071142038                           | 1            | 1            | 0.071142038                    | Brain_Cerebellum |             |   |              |
|              | 0.071142038                           | Brain_Cerebellum                      | 1            | 1            | 1.804569734                    | 1.804569734      |             |   |              |
|              | 1.804569734                           | NA                                    | 1            | 0            | 0.937965237                    |                  |             |   |              |
| ACP2         | ENSG00000134575.9                     | 0.071142675                           | 4            | 3            | 0.010286339                    | Brain_Cerebellum |             |   |              |
|              | 0.395396734                           | Brain_Putamen_basal_ganglia           | 2.514247703  |              | 0.010946902                    |                  |             |   |              |
|              | 0.305779967                           | -2.566052058                          | -0.849871137 |              | -1.730873709                   | 0.909302519      |             |   |              |
|              | 3                                     | 0                                     | 0.937965237  |              |                                |                  |             |   |              |
| RP11-268P4.5 | ENSG00000250166.2                     | 0.071176028                           | 1            | 1            | 0.071176028                    |                  |             |   |              |
|              | Brain_Frontal_Cortex_BA9              | 0.071176028                           |              |              | Brain_Frontal_Cortex_BA9       | 1                | 1           |   |              |
|              | 1                                     | 1.804352731                           | 1.804352731  | 1.804352731  | NA                             | 1                | 0           |   |              |
|              | 0.937965237                           |                                       |              |              |                                |                  |             |   |              |
| R3HCC1L      | ENSG00000166024.13                    | 0.071227532                           | 1            | 1            | 0.071227532                    |                  |             |   |              |
|              | Brain_Cerebellum                      | 0.071227532                           |              |              | Brain_Cerebellum               | 1                | 1           | 1 | -1.804024083 |
|              | -1.804024083                          | -1.804024083                          | NA           | 1            | 0                              | 0.937965237      |             |   |              |
| POLR3G       | ENSG00000113356.11                    | 0.071232909                           | 3            | 2            | 0.04823922                     |                  |             |   |              |

|               |                                       |                             |              |                                |              |
|---------------|---------------------------------------|-----------------------------|--------------|--------------------------------|--------------|
|               | Brain_Spinal_cord_cervical_c-1        | 0.838994018                 |              | Brain_Cortex                   | 2.352335966  |
|               | 0.054046132                           | 0.593617903                 | -0.203180418 | 1.975254977                    | 1.139824905  |
|               | 1.174572122                           | 2                           | 0            | 0.937965237                    |              |
| PRPF6         | ENSG00000101161.7                     | 0.071266994                 | 3            | 2                              | 0.324725347  |
|               | Brain_Nucleus_accumbens_basal_ganglia | 0.771506459                 |              | Brain_Caudate_basal_ganglia    |              |
|               | 2.788881775                           | 0.034441526                 | 0.176676699  | -0.98479384                    | 0.290404948  |
|               | -0.513937029                          | 0.699958751                 | 2            | 0                              | 0.937965237  |
| RP11-395A13.2 | ENSG00000272667.1                     | 0.071344269                 | 2            | 2                              | 0.024709565  |
|               | Brain_Anterior_cingulate_cortex_BA24  | 0.660126728                 |              | Brain_Cortex                   |              |
|               | 1.020622802                           | 0.979377198                 | 0.979377198  | -0.439738206                   | 2.245913244  |
|               | 0.903087519                           | 1.899042352                 | 2            | 0                              | 0.937965237  |
| CDK18         | ENSG00000117266.15                    | 0.071451822                 | 4            | 4                              | 0.015230848  |
|               | Brain_Hypothalamus                    | 0.352764044                 |              | Brain_Hippocampus              | 1.806137074  |
|               | 0.38203208                            | 0.38203208                  | -2.426842937 | 0.980440894                    | -1.088824346 |
|               | 1.515607322                           | 4                           | 0            | 0.937965237                    |              |
| NOL12         | ENSG00000273899.4                     | 0.071638405                 | 3            | 3                              | 0.067239142  |
|               | Brain_Putamen_basal_ganglia           | 0.598494687                 |              | Brain_Hippocampus              | 2.265598707  |
|               | 0.139067974                           | 0.139067974                 | 0.526566463  | 1.830072211                    | 1.056651405  |
|               | 0.68497523                            | 3                           | 0            | 0.937965237                    |              |
| CDC25A        | ENSG00000164045.11                    | 0.071643411                 | 6            | 2                              | 0.025490065  |
|               | Brain_Spinal_cord_cervical_c-1        | 0.156875822                 |              | Brain_Cerebellum               | 5.52280218   |
|               | 0.008471511                           | 0.273039726                 | -2.23389375  | -1.415657449                   | -1.689420974 |
|               | 0.315375772                           | 2                           | 0            | 0.937965237                    |              |
| RP5-1198O20.4 | ENSG00000230615.6                     | 0.071646171                 | 2            | 2                              | 0.029395292  |
|               | Brain_Putamen_basal_ganglia           | 0.328657171                 |              | Brain_Spinal_cord_cervical_c-1 |              |
|               | 1.117251541                           | 0.882748459                 | 0.882748459  | 0.976822225                    | 2.178144339  |
|               | 1.577483282                           | 0.849463014                 | 2            | 0                              | 0.937965237  |
| CBLB          | ENSG00000114423.18                    | 0.071756871                 | 3            | 3                              | 0.008260307  |
|               | Brain_Nucleus_accumbens_basal_ganglia | 0.898803171                 |              | Brain_Cerebellum               |              |
|               | 1.911266901                           | 0.089172103                 | 0.089172103  | 0.127173383                    | 2.641240469  |
|               | 0.999026555                           | 1.423104031                 | 3            | 0                              | 0.937965237  |
| P2RY2         | ENSG00000175591.11                    | 0.071794222                 | 1            | 1                              | 0.071794222  |
|               | Brain_Cerebellar_Hemisphere           | 0.071794222                 |              | Brain_Cerebellar_Hemisphere    | 1            |
|               | 1                                     | -1.80042078                 | -1.80042078  | -1.80042078                    | NA           |
|               | 0.937965237                           |                             |              | 1                              | 0            |
| HSPA9         | ENSG00000113013.12                    | 0.071919685                 | 2            | 2                              | 0.024407621  |
|               | Brain_Cerebellar_Hemisphere           | 0.487947878                 |              | Brain_Caudate_basal_ganglia    |              |
|               | 1.111200205                           | 0.888799795                 | 0.888799795  | -2.250651471                   | -0.693576432 |
|               | -1.472113952                          | 1.101018319                 | 2            | 0                              | 0.937965237  |
| KIF13A        | ENSG00000137177.19                    | 0.071994776                 | 5            | 5                              | 0.085302837  |
|               | Brain_Nucleus_accumbens_basal_ganglia | 0.988525339                 |              | Brain_Caudate_basal_ganglia    |              |
|               | 1.964041984                           | 0.316029138                 | 0.316029138  | -1.720713435                   | 1.304152571  |
|               | -0.385797951                          | 1.172391165                 | 5            | 0                              | 0.937965237  |
| ZNF442        | ENSG00000198342.9                     | 0.072170147                 | 1            | 1                              | 0.072170147  |
|               | Brain_Substantia_nigra                | 0.072170147                 |              | Brain_Substantia_nigra         | 1            |
|               | 1                                     | 1.798043293                 | 1.798043293  | 1.798043293                    | NA           |
|               | 0.937965237                           |                             |              | 1                              | 0            |
| UBAC2-AS1     | ENSG00000228889.6                     | 0.072229465                 | 1            | 1                              | 0.072229465  |
|               | Brain_Cortex                          | 0.072229465                 |              | Brain_Cortex                   | 1            |
|               | 1.797669074                           | 1.797669074                 | NA           | 1                              | 0            |
|               | 0.937965237                           |                             |              |                                |              |
| RP5-984P4.6   | ENSG00000278041.1                     | 0.0723341                   | 3            | 3                              | 0.025248617  |
|               | Brain_Spinal_cord_cervical_c-1        | 0.3045049                   |              | Brain_Cerebellum               | 1.29563093   |
|               | 0.761245997                           | 0.761245997                 | -2.23757755  | -1.026820701                   | -1.626696967 |
|               | 0.605453432                           | 3                           | 0            | 0.937965237                    |              |
| GID8          | ENSG00000101193.7                     | 0.072356312                 | 1            | 1                              | 0.072356312  |
|               | Brain_Nucleus_accumbens_basal_ganglia | 0.072356312                 |              |                                |              |
|               | Brain_Nucleus_accumbens_basal_ganglia | 1                           | 1            | 1                              | 1.796869675  |
|               | 1.796869675                           | 1.796869675                 | NA           | 1                              | 0            |
|               | 0.937965237                           |                             |              |                                |              |
| TRPV6         | ENSG00000165125.19                    | 0.072365416                 | 3            | 3                              | 0.02465072   |
|               | Brain_Cortex                          |                             |              | Brain_Cortex                   |              |
|               | 0.253053796                           | Brain_Putamen_basal_ganglia | 2.233339242  | 0.213569262                    |              |
|               | 0.213569262                           | -2.246832722                | -1.142963379 | -1.830366143                   | 0.599738855  |
|               | 3                                     | 0                           | 0.937965237  |                                |              |

|              |                                       |                             |             |             |                                      |                  |
|--------------|---------------------------------------|-----------------------------|-------------|-------------|--------------------------------------|------------------|
| FAM81B       | ENSG00000153347.9                     | 0.072485319                 | 2           | 2           | 0.036714225                          |                  |
|              | Brain_Cerebellar_Hemisphere           | 0.112227058                 |             |             | Brain_Cerebellum                     | 1.928059638      |
|              | 0.071940362                           | 0.071940362                 |             |             | 1.588262215                          | 2.088927775      |
|              | 0.354024012                           | 2                           | 0           | 0.937965237 |                                      | 1.838594995      |
| BMPR1A       | ENSG00000107779.13                    | 0.072495466                 | 6           | 5           | 0.008269079                          |                  |
|              | Brain_Caudate_basal_ganglia           | 0.867625289                 |             |             | Brain_Hypothalamus                   | 3.244390261      |
|              | 0.070443423                           | 0.228020451                 |             |             | 0.166675621                          | 2.64088085       |
|              | 1.021127702                           | 5                           | 0           | 0.937965237 |                                      | 1.712583758      |
| TPMT         | ENSG00000137364.4                     | 0.072522809                 | 10          | 7           | 0.015602519                          | Brain_Amygdala   |
|              | 0.693060669                           | Brain_Cerebellum            | 6.485025681 |             | 0.025664457                          | 0.231321237      |
|              | 0.394704923                           | 2.418082952                 |             |             | 1.378771781                          | 0.646334374      |
|              | 0.937965237                           |                             |             |             |                                      | 7                |
|              |                                       |                             |             |             |                                      | 0                |
| SEMA3F       | ENSG00000001617.11                    | 0.072537794                 | 3           | 3           | 0.017904534                          |                  |
|              | Brain_Substantia_nigra                | 0.922858575                 |             |             | Brain_Anterior_cingulate_cortex_BA24 |                  |
|              | 1.891839478                           | 0.348168853                 |             |             | 0.348168853                          | -0.300221655     |
|              | 0.656843761                           | 1.485032729                 | 3           | 0           | 0.937965237                          | 2.367586494      |
| DEFB1        | ENSG00000164825.3                     | 0.072559509                 | 3           | 3           | 0.030539254                          |                  |
|              | Brain_Cerebellar_Hemisphere           | 0.342361605                 |             |             | Brain_Caudate_basal_ganglia          |                  |
|              | 1.926856045                           | 0.076302447                 |             |             | 0.076302447                          | -2.163025042     |
|              | -1.55763247                           | 0.60676244                  | 3           | 0           | 0.937965237                          | -0.949509378     |
| RP5-1017F8.2 | ENSG00000276093.1                     | 0.072699516                 | 13          | 1           | 0.0466267                            |                  |
|              | Brain_Substantia_nigra                | 0.122502278                 |             |             | Brain_Cortex                         | 12.48899588      |
|              | 0.002478483                           | 12.48899588                 |             |             | -1.98967544                          | -1.54435532      |
|              | 0.125016215                           | 1                           | 0           | 0.937965237 |                                      | -1.758038051     |
| CD93         | ENSG00000125810.9                     | 0.07275634                  | 1           | 1           | 0.07275634                           |                  |
|              | Brain_Nucleus_accumbens_basal_ganglia | 0.07275634                  |             |             |                                      |                  |
|              | Brain_Nucleus_accumbens_basal_ganglia | 1                           | 1           | 1           | 1.794356159                          |                  |
|              | 1.794356159                           | 1.794356159                 | NA          | 1           | 0                                    | 0.937965237      |
| ARHGEF40     | ENSG00000165801.9                     | 0.072797632                 | 2           | 2           | 0.023796178                          |                  |
|              | Brain_Nucleus_accumbens_basal_ganglia | 0.493147153                 |             |             | Brain_Hypothalamus                   |                  |
|              | 1.144921452                           | 0.855078548                 |             |             | 0.855078548                          | 0.685311854      |
|              | 1.472858014                           | 1.11375846                  | 2           | 0           | 0.937965237                          | 2.260404173      |
| ERI2         | ENSG00000196678.13                    | 0.073076736                 | 3           | 3           | 0.010438168                          |                  |
|              | Brain_Hippocampus                     | 0.585756124                 |             |             | Brain_Cortex                         | 1.451847445      |
|              | 0.529520314                           | 0.529520314                 |             |             | 0.54499621                           | 2.560965642      |
|              | 1.038892515                           | 3                           | 0           | 0.937965237 |                                      | 1.407763308      |
| ATP6V0A2     | ENSG00000185344.13                    | 0.073097161                 | 4           | 3           | 0.009665476                          |                  |
|              | Brain_Hypothalamus                    | 0.862023835                 |             |             | Brain_Putamen_basal_ganglia          | 2.834686604      |
|              | 0.032202381                           | 0.16882563                  |             |             | -2.587572832                         | 0.583597799      |
|              | 1.512239376                           | 3                           | 0           | 0.937965237 |                                      | -0.334560252     |
| RNF216       | ENSG00000011275.18                    | 0.07313061                  | 2           | 2           | 0.036369771                          |                  |
|              | Brain_Putamen_basal_ganglia           | 0.243442898                 |             |             | Brain_Caudate_basal_ganglia          |                  |
|              | 1.119637564                           | 0.880362436                 |             |             | 0.880362436                          | -2.092769107     |
|              | -1.629596753                          | 0.655024625                 | 2           | 0           | 0.937965237                          | -1.166424399     |
| ADAM12       | ENSG00000148848.14                    | 0.073229948                 | 5           | 5           | 0.074952197                          |                  |
|              | Brain_Frontal_Cortex_BA9              | 0.800845201                 |             |             | Brain_Caudate_basal_ganglia          |                  |
|              | 2.423752905                           | 0.202910093                 |             |             | 0.202910093                          | -1.780756754     |
|              | 0.214450096                           | 1.426718894                 | 5           | 0           | 0.937965237                          | 1.632820547      |
| LINC01700    | ENSG00000232837.1                     | 0.073249186                 | 3           | 3           | 0.037176581                          |                  |
|              | Brain_Caudate_basal_ganglia           | 0.379241456                 |             |             | Brain_Frontal_Cortex_BA9             |                  |
|              | 1.191608307                           | 0.797819706                 |             |             | 0.797819706                          | -2.083819584     |
|              | -1.486119965                          | 0.602314243                 | 3           | 0           | 0.937965237                          | -0.879294797     |
| RP4-565E6.1  | ENSG00000227733.9                     | 0.073260223                 | 11          | 2           | 0.216488628                          |                  |
|              | Brain_Cerebellar_Hemisphere           | 0.939915949                 |             |             | Brain_Cortex                         | 10.08850285      |
|              | 0.000226251                           | 0.5188683                   |             |             | -0.864310853                         | 1.235919124      |
|              | 0.579302142                           | 2                           | 0           | 0.937965237 |                                      | 0.517573338      |
| TAC1         | ENSG00000006128.11                    | 0.07338151                  | 3           | 3           | 0.055463183                          | Brain_Cerebellum |
|              | 0.546458408                           | Brain_Putamen_basal_ganglia | 1.212248599 |             | 0.766079258                          |                  |
|              | 0.766079258                           | 0.603075585                 |             |             | 1.915229963                          | 1.334983717      |
|              | 3                                     | 0                           | 0.937965237 |             |                                      | 0.669095116      |
| TBCA         | ENSG00000171530.13                    | 0.073383154                 | 1           | 1           | 0.073383154                          | Brain_Cerebellum |
|              | 0.073383154                           | Brain_Cerebellum            | 1           | 1           | 1                                    | -1.790440318     |
|              |                                       |                             |             |             |                                      | -1.790440318     |

|               |                                       |                  |              |             |             |                                |              |            |                  |
|---------------|---------------------------------------|------------------|--------------|-------------|-------------|--------------------------------|--------------|------------|------------------|
|               | -1.790440318                          | NA               | 1            | 0           | 0.937965237 |                                |              |            |                  |
| MPND          | ENSG00000008382.15                    |                  | 0.073494922  | 1           | 1           | 0.073494922                    |              |            |                  |
|               | Brain_Caudate_basal_ganglia           | 0.073494922      |              |             |             | Brain_Caudate_basal_ganglia    | 1            | 1          |                  |
|               | 1                                     | 1.789744957      | 1.789744957  | 1.789744957 | NA          | 1                              | 0            |            |                  |
|               | 0.937965237                           |                  |              |             |             |                                |              |            |                  |
| RBM22         | ENSG000000086589.11                   |                  | 0.073547424  | 1           | 1           | 0.073547424                    |              |            | Brain_Cerebellum |
|               | 0.073547424                           | Brain_Cerebellum | 1            | 1           | 1           | 1.78941861                     | 1.78941861   | 1.78941861 |                  |
|               | NA                                    | 1                | 0            | 0.937965237 |             |                                |              |            |                  |
| ATP1B1        | ENSG00000143153.12                    |                  | 0.073619718  | 7           | 3           | 0.024618668                    |              |            |                  |
|               | Brain_Cerebellum                      | 0.541499694      |              |             |             | Brain_Caudate_basal_ganglia    | 5.638173439  |            |                  |
|               | 0.016291098                           | 0.327722563      |              |             |             | -2.24733434                    |              |            |                  |
|               | 0.548221036                           | 3                | 0            | 0.937965237 |             |                                |              |            |                  |
| PSMG1         | ENSG00000183527.11                    |                  | 0.073660449  | 8           | 2           | 0.401368959                    |              |            |                  |
|               | Brain_Frontal_Cortex_BA9              | 0.986520851      |              |             |             | Brain_Caudate_basal_ganglia    |              |            |                  |
|               | 7.449541196                           | 0.00463999       | 0.274812584  |             |             | -0.654969545                   | 0.839178842  |            |                  |
|               | 0.214824104                           | 0.558009002      | 2            | 0           | 0.937965237 |                                |              |            |                  |
| CERS4         | ENSG00000090661.11                    |                  | 0.073809451  | 3           | 3           | 0.016881769                    |              |            |                  |
|               | Brain_Nucleus_accumbens_basal_ganglia | 0.961294528      |              |             |             | Brain_Frontal_Cortex_BA9       |              |            |                  |
|               | 1.087317245                           | 0.949699155      | 0.949699155  |             |             | 0.048529157                    | 2.389272655  |            |                  |
|               | 1.149628927                           | 1.176505781      | 3            | 0           | 0.937965237 |                                |              |            |                  |
| CTD-2532N20.1 | ENSG00000272192.1                     |                  | 0.073835515  | 2           | 2           | 0.073457105                    |              |            |                  |
|               | Brain_Putamen_basal_ganglia           | 0.141769739      |              |             |             | Brain_Frontal_Cortex_BA9       |              |            |                  |
|               | 1.029543182                           | 0.970456818      | 0.970456818  |             |             | -1.789980138                   | 1.469232496  |            |                  |
|               | -0.160373821                          | 2.304611355      | 2            | 0           | 0.937965237 |                                |              |            |                  |
| WDR6          | ENSG00000178252.17                    |                  | 0.073874924  | 11          | 2           | 0.012384326                    |              |            |                  |
|               | Brain_Putamen_basal_ganglia           | 0.130202731      |              |             |             | Brain_Amygdala                 | 10.10740147  |            |                  |
|               | 0.000718718                           | 0.397024313      | 1.513302923  |             |             | 2.500999767                    | 1.9473577    |            |                  |
|               | 0.276453509                           | 2                | 0            | 0.937965237 |             |                                |              |            |                  |
| PKIG          | ENSG00000168734.13                    |                  | 0.07395222   | 2           | 2           | 0.042150996                    |              |            |                  |
|               | Brain_Cerebellar_Hemisphere           | 0.549341827      |              |             |             | Brain_Cerebellum               | 1.672895471  |            |                  |
|               | 0.327104529                           | 0.327104529      | -2.032026271 |             |             | -0.598746675                   | -1.315386473 |            |                  |
|               | 1.013481722                           | 2                | 0            | 0.937965237 |             |                                |              |            |                  |
| TRIM29        | ENSG00000137699.16                    |                  | 0.07397264   | 4           | 4           | 0.004706038                    |              |            |                  |
|               | Brain_Putamen_basal_ganglia           | 0.051199965      |              |             |             | Brain_Cortex                   | 3.040170999  |            |                  |
|               | 0.109002991                           | 0.109002991      | 1.949799968  |             |             | 2.826495691                    | 2.251379792  |            |                  |
|               | 0.393295726                           | 4                | 0            | 0.937965237 |             |                                |              |            |                  |
| BTN3A3        | ENSG00000111801.15                    |                  | 0.073973255  | 4           | 4           | 0.051486155                    |              |            |                  |
|               | Brain_Cerebellar_Hemisphere           | 0.608173746      |              |             |             | Brain_Hippocampus              | 1.953540658  |            |                  |
|               | 0.275036402                           | 0.275036402      | -1.947405371 |             |             | 0.933104146                    | -0.458589977 |            |                  |
|               | 1.397723473                           | 4                | 0            | 0.937965237 |             |                                |              |            |                  |
| ZMYM6         | ENSG00000163867.16                    |                  | 0.074100271  | 1           | 1           | 0.074100271                    |              |            |                  |
|               | Brain_Hypothalamus                    | 0.074100271      |              |             |             | Brain_Hypothalamus             | 1            | 1          | 1                |
|               | -1.785993744                          | -1.785993744     | -1.785993744 |             |             | NA                             | 1            | 0          | 0.937965237      |
| ZBED5         | ENSG00000236287.7                     |                  | 0.074119057  | 1           | 1           | 0.074119057                    |              |            | Brain_Amygdala   |
|               | 0.074119057                           | Brain_Amygdala   | 1            | 1           | 1           | 1.785877732                    | 1.785877732  |            |                  |
|               | 1.785877732                           | NA               | 1            | 0           | 0.937965237 |                                |              |            |                  |
| ZDHHC13       | ENSG00000177054.13                    |                  | 0.07414692   | 2           | 2           | 0.068236883                    |              |            |                  |
|               | Brain_Putamen_basal_ganglia           | 0.091245563      |              |             |             | Brain_Frontal_Cortex_BA9       |              |            |                  |
|               | 1.187947668                           | 0.812052332      | 0.812052332  |             |             | -1.823439295                   | 1.688863649  |            |                  |
|               | -0.067287823                          | 2.483573229      | 2            | 0           | 0.937965237 |                                |              |            |                  |
| CYGB          | ENSG00000161544.9                     |                  | 0.074216575  | 1           | 1           | 0.074216575                    |              |            |                  |
|               | Brain_Hypothalamus                    | 0.074216575      |              |             |             | Brain_Hypothalamus             | 1            | 1          | 1                |
|               | -1.785275904                          | -1.785275904     | -1.785275904 |             |             | NA                             | 1            | 0          | 0.937998289      |
| H2AFV         | ENSG00000105968.18                    |                  | 0.074286141  | 3           | 3           | 0.019236442                    |              |            |                  |
|               | Brain_Caudate_basal_ganglia           | 0.185079507      |              |             |             | Brain_Spinal_cord_cervical_c-1 |              |            |                  |
|               | 2.483582628                           | 0.098465556      | 0.098465556  |             |             | 1.325276359                    | 2.340917019  |            |                  |
|               | 1.871035125                           | 0.512054159      | 3            | 0           | 0.938030147 |                                |              |            |                  |
| CARD14        | ENSG00000141527.16                    |                  | 0.074387297  | 6           | 6           | 0.022437246                    |              |            |                  |
|               | Brain_Nucleus_accumbens_basal_ganglia | 0.79411208       |              |             |             | Brain_Cerebellum               | 1.880888673  |            |                  |
|               | 0.307809664                           | 0.307809664      | -0.379699949 |             |             | 2.282883253                    | 0.615207636  |            |                  |
|               | 0.9912822                             | 6                | 0            | 0.938460481 |             |                                |              |            |                  |
| SS18L2        | ENSG00000008324.11                    |                  | 0.074597671  | 1           | 1           | 0.074597671                    |              |            |                  |

|                |                                       |                                      |                             |              |             |              |                  |
|----------------|---------------------------------------|--------------------------------------|-----------------------------|--------------|-------------|--------------|------------------|
|                | Brain_Cortex                          | 0.074597671                          | Brain_Cortex                | 1            | 1           | 1            | 1.782930173      |
|                | 1.782930173                           | 1.782930173                          | NA                          | 1            | 0           | 0.939695092  |                  |
| LLNLR-268E12.1 | ENSG00000276445.1                     | 0.074619487                          |                             | 5            | 3           | 0.156513008  |                  |
|                | Brain_Frontal_Cortex_BA9              | 0.945460804                          | Brain_Cortex                |              |             | 4.436126007  |                  |
|                | 0.018991556                           | 0.199360958                          | -1.416897122                |              |             | 0.169906631  | -0.366732253     |
|                | 0.623412324                           | 3                                    | 0                           | 0.939695092  |             |              |                  |
| FMN1           | ENSG00000248905.8                     | 0.074767524                          |                             | 5            | 4           | 0.041529417  |                  |
|                | Brain_Putamen_basal_ganglia           | 0.936464691                          | Brain_Cerebellum            |              |             | 3.387628976  |                  |
|                | 0.08074772                            | 0.336281106                          | -2.03820519                 |              |             | 0.079714042  | -1.362553223     |
|                | 0.877775524                           | 4                                    | 0                           | 0.94019081   |             |              |                  |
| WBP1L          | ENSG00000166272.16                    | 0.074793251                          |                             | 2            | 2           | 0.025219738  |                  |
|                | Brain_Nucleus_accumbens_basal_ganglia | 0.462854535                          | Brain_Cortex                |              |             |              |                  |
|                | 1.141783231                           | 0.858216769                          | 0.858216769                 |              |             | 0.734154575  | 2.238020192      |
|                | 1.486087383                           | 1.063393576                          | 2                           | 0            | 0.94019081  |              |                  |
| APH1B          | ENSG00000138613.13                    | 0.074984272                          |                             | 2            | 2           | 0.032850125  | Brain_Cortex     |
|                | 0.3520558                             | Brain_Anterior_cingulate_cortex_BA24 | 1.065723494                 |              |             | 0.934276506  |                  |
|                | 0.934276506                           | -2.133910296                         | 0.930609111                 |              |             | -0.601650593 | 2.166942453      |
|                | 2                                     | 0                                    | 0.940563256                 |              |             |              |                  |
| ANKS4B         | ENSG00000175311.6                     | 0.075079253                          |                             | 1            | 1           | 0.075079253  |                  |
|                | Brain_Cerebellum                      | 0.075079253                          | Brain_Cerebellum            | 1            | 1           | 1            | 1.779979885      |
|                | 1.779979885                           | 1.779979885                          | NA                          | 1            | 0           | 0.940563256  |                  |
| HTATIP2        | ENSG00000109854.13                    | 0.075079598                          |                             | 8            | 8           | 0.069686806  |                  |
|                | Brain_Frontal_Cortex_BA9              | 0.810238689                          | Brain_Caudate_basal_ganglia |              |             | 2.36793881   |                  |
|                | 0.189617236                           | 0.189617236                          | -1.773438801                |              |             | 1.813941023  | 0.0164128        |
|                | 1.227327756                           | 8                                    | 0                           | 0.940563256  |             |              |                  |
| INSIG1         | ENSG00000186480.12                    | 0.075193447                          |                             | 1            | 1           | 0.075193447  |                  |
|                | Brain_Cortex                          | 0.075193447                          | Brain_Cortex                | 1            | 1           | 1            | 1.77928257       |
|                | 1.77928257                            | 1.77928257                           | NA                          | 1            | 0           | 0.940563256  |                  |
| TP53INP1       | ENSG00000164938.13                    | 0.075219765                          |                             | 2            | 2           | 0.023211331  |                  |
|                | Brain_Cerebellum                      | 0.944959664                          | Brain_Hypothalamus          |              |             | 1.095550663  |                  |
|                | 0.904449337                           | 0.904449337                          | -0.069037633                |              |             | 2.269938225  | 1.100450296      |
|                | 1.65390569                            | 2                                    | 0                           | 0.940563256  |             |              |                  |
| FAM102A        | ENSG00000167106.11                    | 0.075254178                          |                             | 1            | 1           | 0.075254178  |                  |
|                | Brain_Cerebellar_Hemisphere           | 0.075254178                          | Brain_Cerebellar_Hemisphere | 1            |             | 1            |                  |
|                | 1                                     | 1.778912074                          | 1.778912074                 | 1.778912074  | NA          | 1            | 0                |
|                | 0.940563256                           |                                      |                             |              |             |              |                  |
| SYN3           | ENSG00000185666.14                    | 0.075293463                          |                             | 5            | 5           | 0.049428024  | Brain_Cerebellum |
|                | 0.947904343                           | Brain_Frontal_Cortex_BA9             | 2.709445112                 |              |             | 0.258786726  |                  |
|                | 0.258786726                           | -0.681238456                         | 1.964880897                 |              |             | 0.474182375  | 1.144690946      |
|                | 5                                     | 0                                    | 0.940563256                 |              |             |              |                  |
| TMPRSS13       | ENSG00000137747.15                    | 0.075399231                          |                             | 1            | 1           | 0.075399231  |                  |
|                | Brain_Cerebellar_Hemisphere           | 0.075399231                          | Brain_Cerebellar_Hemisphere | 1            |             | 1            |                  |
|                | 1                                     | -1.778028152                         | -1.778028152                | -1.778028152 | NA          | 1            | 0                |
|                | 0.941044288                           |                                      |                             |              |             |              |                  |
| LINC00877      | ENSG00000241163.7                     | 0.075639632                          |                             | 4            | 4           | 0.06355378   |                  |
|                | Brain_Putamen_basal_ganglia           | 0.122104193                          | Brain_Cerebellum            |              |             | 1.688604008  |                  |
|                | 0.458600869                           | 0.458600869                          | -1.855297327                |              |             | -1.546001554 | -1.7406397       |
|                | 0.143545122                           | 4                                    | 0                           | 0.941300256  |             |              |                  |
| MAT2A          | ENSG00000168906.12                    | 0.075713497                          |                             | 2            | 2           | 0.028736624  |                  |
|                | Brain_Cerebellar_Hemisphere           | 0.216655223                          | Brain_Cerebellum            |              |             | 1.750683382  |                  |
|                | 0.249316618                           | 0.249316618                          | -2.187080833                |              |             | -1.235471106 | -1.71127597      |
|                | 0.672889691                           | 2                                    | 0                           | 0.941300256  |             |              |                  |
| ZNF574         | ENSG00000105732.12                    | 0.075792068                          |                             | 1            | 1           | 0.075792068  |                  |
|                | Brain_Putamen_basal_ganglia           | 0.075792068                          | Brain_Putamen_basal_ganglia | 1            |             | 1            |                  |
|                | 1                                     | 1.775641243                          | 1.775641243                 | 1.775641243  | NA          | 1            | 0                |
|                | 0.941300256                           |                                      |                             |              |             |              |                  |
| LBR            | ENSG00000143815.14                    | 0.075800268                          |                             | 1            | 1           | 0.075800268  | Brain_Amygdala   |
|                | 0.075800268                           | Brain_Amygdala                       | 1                           | 1            | 1           | 1.775591525  | 1.775591525      |
|                | 1.775591525                           | NA                                   | 1                           | 0            | 0.941300256 |              |                  |
| RNF44          | ENSG00000146083.11                    | 0.075884102                          |                             | 1            | 1           | 0.075884102  | Brain_Cortex     |
|                | 0.075884102                           | Brain_Cortex                         | 1                           | 1            | 1           | 1.775083493  | 1.775083493      |
|                | 1.775083493                           | NA                                   | 1                           | 0            | 0.941300256 |              |                  |

|            |                                       |                             |              |              |                                |                  |
|------------|---------------------------------------|-----------------------------|--------------|--------------|--------------------------------|------------------|
| STBD1      | ENSG00000118804.8                     | 0.076006212                 | 11           | 4            | 0.019522233                    |                  |
|            | Brain_Caudate_basal_ganglia           | 0.772385004                 |              |              | Brain_Cerebellum               | 7.774681927      |
|            | 0.023522874                           | 0.346689601                 | 0.289256623  | 2.335405776  | 1.602171238                    |                  |
|            | 0.713501757                           | 4                           | 0            | 0.941300256  |                                |                  |
| HIVEP2     | ENSG0000010818.9                      | 0.076028276                 | 2            | 2            | 0.027306101                    |                  |
|            | Brain_Nucleus_accumbens_basal_ganglia | 0.049128901                 |              |              | Brain_Putamen_basal_ganglia    |                  |
|            | 1.725969091                           | 0.274030909                 | 0.274030909  | -2.207113925 | -1.967471306                   |                  |
|            | -2.087292615                          | 0.169452921                 | 2            | 0            | 0.941300256                    |                  |
| FAM180B    | ENSG00000196666.4                     | 0.076065803                 | 5            | 3            | 0.312764467                    |                  |
|            | Brain_Cerebellum                      | 0.428167478                 |              |              | Brain_Frontal_Cortex_BA9       | 3.627917913      |
|            | 0.041452073                           | 0.366219533                 | -0.855844567 | 1.009438322  | -0.45325921                    |                  |
|            | 0.81801158                            | 3                           | 0            | 0.941300256  |                                |                  |
| LINC00528  | ENSG00000269220.1                     | 0.076130868                 | 2            | 2            | 0.067871015                    |                  |
|            | Brain_Cerebellar_Hemisphere           | 0.220245714                 |              |              | Brain_Cerebellum               | 1.934389772      |
|            | 0.065610228                           | 0.065610228                 | -1.825862245 | -1.225875011 | -1.525868628                   |                  |
|            | 0.424255042                           | 2                           | 0            | 0.941300256  |                                |                  |
| FAM213B    | ENSG00000157870.14                    | 0.076150801                 | 6            | 6            | 0.014579254                    |                  |
|            | Brain_Frontal_Cortex_BA9              | 0.900662315                 |              |              | Brain_Caudate_basal_ganglia    |                  |
|            | 2.067910874                           | 0.251549141                 | 0.251549141  | -2.361179184 | 2.442665222                    |                  |
|            | -0.391715604                          | 1.625812186                 | 6            | 0            | 0.941300256                    |                  |
| CRB1       | ENSG00000134376.15                    | 0.076159809                 | 4            | 4            | 0.031803219                    | Brain_Cerebellum |
|            | 0.678143326                           | Brain_Cortex                | 2.466579566  | 0.180553546  | 0.180553546                    |                  |
|            | -2.14687519                           | -0.414998056                | -0.960111348 | 0.802573984  | 4                              | 0                |
|            | 0.941300256                           |                             |              |              |                                |                  |
| GRM4       | ENSG00000124493.13                    | 0.076351961                 | 2            | 2            | 0.058663657                    | Brain_Cerebellum |
|            | 0.370847617                           | Brain_Cerebellar_Hemisphere | 1.178740491  | 0.821259509  |                                |                  |
|            | 0.821259509                           | -1.890705583                | 0.894886775  | -0.497909404 | 1.969711246                    |                  |
|            | 2                                     | 0                           | 0.942842265  |              |                                |                  |
| MT1M       | ENSG00000205364.3                     | 0.076450543                 | 1            | 1            | 0.076450543                    | Brain_Cerebellum |
|            | 0.076450543                           | Brain_Cerebellum            | 1            | 1            | 1.771662831                    | 1.771662831      |
|            | 1.771662831                           | NA                          | 1            | 0            | 0.943061045                    |                  |
| PIGH       | ENSG00000100564.8                     | 0.076555013                 | 9            | 6            | 0.027356938                    | Brain_Cortex     |
|            | 0.977725673                           | Brain_Cerebellum            | 5.038283315  | 0.030085914  | 0.31676318                     |                  |
|            | -2.206386665                          | 1.208002767                 | -0.95939773  | 1.086256388  | 6                              | 0                |
|            | 0.943061045                           |                             |              |              |                                |                  |
| TMEM181    | ENSG00000146433.8                     | 0.076571892                 | 6            | 6            | 0.008309212                    |                  |
|            | Brain_Frontal_Cortex_BA9              | 0.898418526                 |              |              | Brain_Cerebellum               | 3.213020304      |
|            | 0.220186109                           | 0.220186109                 | -2.639240046 | -0.127659394 | -1.286847895                   |                  |
|            | 0.857317806                           | 6                           | 0            | 0.943061045  |                                |                  |
| ZFYVE28    | ENSG00000159733.13                    | 0.076780182                 | 3            | 3            | 0.034426356                    |                  |
|            | Brain_Caudate_basal_ganglia           | 0.548749723                 |              |              | Brain_Cerebellum               | 1.844297884      |
|            | 0.414907635                           | 0.414907635                 | -2.115042145 | 0.59963469   | -0.746492146                   |                  |
|            | 1.357477321                           | 3                           | 0            | 0.944228234  |                                |                  |
| KLHL17     | ENSG00000187961.13                    | 0.076967968                 | 1            | 1            | 0.076967968                    |                  |
|            | Brain_Cerebellum                      | 0.076967968                 |              |              | Brain_Cerebellum               | 1                |
|            | -1.768556187                          | -1.768556187                | NA           | 1            | 0                              | 0.944228234      |
| HAX1       | ENSG00000143575.14                    | 0.077155716                 | 4            | 4            | 0.027590204                    |                  |
|            | Brain_Nucleus_accumbens_basal_ganglia | 0.809544419                 |              |              | Brain_Putamen_basal_ganglia    |                  |
|            | 1.604047243                           | 0.460104101                 | 0.460104101  | -2.203064489 | 0.539584261                    |                  |
|            | -0.513909869                          | 1.231154833                 | 4            | 0            | 0.944228234                    |                  |
| LZTS1      | ENSG00000061337.15                    | 0.077239292                 | 1            | 1            | 0.077239292                    |                  |
|            | Brain_Hippocampus                     | 0.077239292                 |              |              | Brain_Hippocampus              | 1                |
|            | -1.766933939                          | -1.766933939                | -1.766933939 | NA           | 1                              | 0                |
|            |                                       |                             |              |              | 0.944228234                    |                  |
| NCBP1      | ENSG00000136937.12                    | 0.077288527                 | 2            | 2            | 0.040506443                    |                  |
|            | Brain_Frontal_Cortex_BA9              | 0.137864106                 |              |              | Brain_Spinal_cord_cervical_c-1 |                  |
|            | 1.272924527                           | 0.727075473                 | 0.727075473  | -1.483792017 | 2.048546882                    |                  |
|            | 0.282377433                           | 2.497740789                 | 2            | 0            | 0.944228234                    |                  |
| VHL        | ENSG00000134086.7                     | 0.077313579                 | 1            | 1            | 0.077313579                    |                  |
|            | Brain_Frontal_Cortex_BA9              | 0.077313579                 |              |              | Brain_Frontal_Cortex_BA9       | 1                |
|            | 1                                     | -1.766490588                | -1.766490588 | -1.766490588 | NA                             | 1                |
|            | 0.944228234                           |                             |              |              | 0                              |                  |
| AP000473.5 | ENSG00000228798.1                     | 0.077360514                 | 1            | 1            | 0.077360514                    |                  |

|              |                                       |                             |                  |                             |              |   |                  |
|--------------|---------------------------------------|-----------------------------|------------------|-----------------------------|--------------|---|------------------|
|              | Brain_Hypothalamus                    | 0.077360514                 |                  | Brain_Hypothalamus          | 1            | 1 | 1                |
|              | 1.766210658                           | 1.766210658                 | 1.766210658      | NA                          | 1            | 0 | 0.944228234      |
| PDIA3        | ENSG00000167004.12                    | 0.077758411                 | 1                | 1                           | 0.077758411  |   |                  |
|              | Brain_Hippocampus                     | 0.077758411                 |                  | Brain_Hippocampus           | 1            | 1 | 1                |
|              | 1.763843025                           | 1.763843025                 | 1.763843025      | NA                          | 1            | 0 | 0.944228234      |
| NDUFB5       | ENSG00000136521.12                    | 0.07785367                  | 2                | 2                           | 0.030994494  |   | Brain_Cerebellum |
|              | 0.042876415                           | Brain_Cerebellar_Hemisphere | 1.723368406      |                             |              |   | 0.276631594      |
|              | 0.276631594                           | -2.157143391                | -2.024911868     |                             | -2.091027629 |   | 0.093501806      |
|              | 2                                     | 0                           | 0.944228234      |                             |              |   |                  |
| BAK1         | ENSG00000030110.12                    | 0.077870614                 | 12               | 2                           | 0.026890097  |   |                  |
|              | Brain_Anterior_cingulate_cortex_BA24  | 0.750166482                 |                  | Brain_Frontal_Cortex_BA9    |              |   |                  |
|              | 10.43298198                           | 1.51E-10                    | 0.648288628      |                             | -2.21310951  |   | -0.318419852     |
|              | -1.795243588                          | 0.528534485                 | 2                | 0                           | 0.944228234  |   |                  |
| AXIN2        | ENSG00000168646.12                    | 0.077874985                 | 1                | 1                           | 0.077874985  |   | Brain_Cerebellum |
|              | 0.077874985                           | Brain_Cerebellum            | 1                | 1                           | 1.763151238  |   | 1.763151238      |
|              | 1.763151238                           | NA                          | 1                | 0                           | 0.944228234  |   |                  |
| SCRN2        | ENSG00000141295.13                    | 0.077896077                 | 13               | 11                          | 0.000323472  |   | Brain_Cerebellum |
|              | 0.876741726                           | Brain_Cortex                | 4.77634321       | 0.018156417                 |              |   | 0.239483059      |
|              | 0.155100959                           | 3.595738626                 | 1.900547056      |                             | 1.066791466  |   | 11               |
|              | 0.944228234                           |                             |                  |                             |              |   | 0                |
| BBS12        | ENSG00000181004.9                     | 0.077926563                 | 3                | 3                           | 0.03450694   |   |                  |
|              | Brain_Caudate_basal_ganglia           | 0.577778687                 |                  | Brain_Cerebellum            | 2.005447433  |   |                  |
|              | 0.194557407                           | 0.194557407                 | -0.754917897     |                             | 2.114097512  |   | 0.267515775      |
|              | 1.602256964                           | 3                           | 0                | 0.944228234                 |              |   |                  |
| UPF1         | ENSG00000005007.12                    | 0.077996561                 | 1                | 1                           | 0.077996561  |   | Brain_Cerebellum |
|              | 0.077996561                           | Brain_Cerebellum            | 1                | 1                           | -1.762430668 |   | -1.762430668     |
|              | -1.762430668                          | NA                          | 1                | 0                           | 0.944228234  |   |                  |
| ZFPM2        | ENSG00000169946.13                    | 0.078069471                 | 2                | 2                           | 0.023922469  |   |                  |
|              | Brain_Hypothalamus                    | 0.94199513                  | Brain_Cerebellum | 1.028576456                 |              |   | 0.971423544      |
|              | 0.971423544                           | 0.072762478                 | 2.258372126      |                             | 1.165567302  |   | 1.545459404      |
|              | 2                                     | 0                           | 0.944228234      |                             |              |   |                  |
| CNTN3        | ENSG00000113805.8                     | 0.078135081                 | 2                | 2                           | 0.023969863  |   |                  |
|              | Brain_Nucleus_accumbens_basal_ganglia | 0.051733508                 |                  | Brain_Caudate_basal_ganglia |              |   |                  |
|              | 1.870968713                           | 0.129031287                 | 0.129031287      |                             | -2.257611944 |   | -1.945344683     |
|              | -2.101478314                          | 0.220806298                 | 2                | 0                           | 0.944228234  |   |                  |
| RP11-542F9.1 | ENSG00000223504.1                     | 0.078208166                 | 2                | 2                           | 0.024007262  |   |                  |
|              | Brain_Hypothalamus                    | 0.847666292                 |                  | Brain_Substantia_nigra      | 1.062327221  |   |                  |
|              | 0.937672779                           | 0.937672779                 | 0.192096914      |                             | 2.25701301   |   | 1.224554962      |
|              | 1.460116174                           | 2                           | 0                | 0.944228234                 |              |   |                  |
| GPR26        | ENSG00000154478.3                     | 0.078341929                 | 2                | 2                           | 0.028313497  |   |                  |
|              | Brain_Caudate_basal_ganglia           | 0.588871229                 |                  | Brain_Cortex                | 1.003246756  |   |                  |
|              | 0.996753244                           | 0.996753244                 | -0.540472488     |                             | 2.1929151    |   | 0.826221306      |
|              | 1.932796899                           | 2                           | 0                | 0.944228234                 |              |   |                  |
| KDM1B        | ENSG00000165097.13                    | 0.078373336                 | 5                | 5                           | 0.006237869  |   |                  |
|              | Brain_Substantia_nigra                | 0.747215066                 |                  | Brain_Cerebellar_Hemisphere |              |   |                  |
|              | 2.487869527                           | 0.400600328                 | 0.400600328      |                             | -2.73500835  |   | -0.322313685     |
|              | -1.255863333                          | 0.994890834                 | 5                | 0                           | 0.944228234  |   |                  |
| PPP4R2       | ENSG00000163605.14                    | 0.078413682                 | 3                | 3                           | 0.011481591  |   |                  |
|              | Brain_Spinal_cord_cervical_c-1        | 0.69041744                  | Brain_Cerebellum | 1.368590922                 |              |   |                  |
|              | 0.704738515                           | 0.704738515                 | -2.527689311     |                             | 0.398288631  |   | -0.977198141     |
|              | 1.470818355                           | 3                           | 0                | 0.944228234                 |              |   |                  |
| TEP1         | ENSG00000129566.12                    | 0.078441808                 | 3                | 3                           | 0.010721848  |   | Brain_Cerebellum |
|              | 0.889233085                           | Brain_Cerebellar_Hemisphere | 1.290813413      |                             | 0.710592677  |   |                  |
|              | 0.710592677                           | 0.139274695                 | 2.551635957      |                             | 1.091113572  |   | 1.284110936      |
|              | 3                                     | 0                           | 0.944228234      |                             |              |   |                  |
| ADGRD1       | ENSG00000111452.12                    | 0.078453343                 | 3                | 3                           | 0.009201996  |   |                  |
|              | Brain_Spinal_cord_cervical_c-1        | 0.928839465                 |                  | Brain_Putamen_basal_ganglia |              |   |                  |
|              | 1.139099198                           | 0.86090381                  | 0.86090381       |                             | -0.129865705 |   | 2.604457018      |
|              | 0.795095414                           | 1.567084347                 | 3                | 0                           | 0.944228234  |   |                  |
| ACSBG2       | ENSG00000130377.13                    | 0.078558645                 | 1                | 1                           | 0.078558645  |   |                  |
|              | Brain_Nucleus_accumbens_basal_ganglia | 0.078558645                 |                  |                             |              |   |                  |
|              | Brain_Nucleus_accumbens_basal_ganglia | 1                           | 1                | 1                           | -1.759111069 |   |                  |



|         |                                       |                                       |                                      |              |              |                             |                  |   |  |
|---------|---------------------------------------|---------------------------------------|--------------------------------------|--------------|--------------|-----------------------------|------------------|---|--|
|         | -1.759111069                          | -1.759111069                          | NA                                   | 1            | 0            | 0.944228234                 |                  |   |  |
| PXMP4   | ENSG00000101417.11                    | 0.078697143                           |                                      | 3            | 3            | 0.009152108                 | Brain_Cerebellum |   |  |
|         | 0.94512531                            | Brain_Nucleus_accumbens_basal_ganglia |                                      | 1.189500543  |              | 0.79664112                  |                  |   |  |
|         | 0.79664112                            | -0.068829532                          | 2.606319373                          |              | 0.906634124  | 1.47732126                  | 3                | 0 |  |
|         | 0.944228234                           |                                       |                                      |              |              |                             |                  |   |  |
| NME4    | ENSG00000103202.12                    | 0.078870486                           |                                      | 9            | 5            | 0.00333977                  |                  |   |  |
|         | Brain_Nucleus_accumbens_basal_ganglia | 0.710168476                           |                                      |              |              | Brain_Putamen_basal_ganglia |                  |   |  |
|         | 5.750266783                           | 0.007064221                           | 0.298679326                          |              | -2.934600886 | -0.37162983                 |                  |   |  |
|         | -1.968509885                          | 0.763122657                           | 5                                    | 0            | 0.944228234  |                             |                  |   |  |
| KCTD10  | ENSG00000110906.12                    | 0.078974586                           |                                      | 2            | 2            | 0.024976445                 |                  |   |  |
|         | Brain_Cerebellum                      | 0.187100339                           | Brain_Cerebellar_Hemisphere          | 1.664308775  |              |                             |                  |   |  |
|         | 0.335691225                           | 0.335691225                           | 1.319205743                          |              | 2.241766848  | 1.780486295                 |                  |   |  |
|         | 0.652349213                           | 2                                     | 0                                    | 0.944228234  |              |                             |                  |   |  |
| SULT1A3 | ENSG00000261052.5                     | 0.07900607                            | 1                                    | 1            | 0.07900607   |                             |                  |   |  |
|         | Brain_Frontal_Cortex_BA9              | 0.07900607                            | Brain_Frontal_Cortex_BA9             | 1            | 1            | 1                           |                  |   |  |
|         | -1.756482422                          | -1.756482422                          | -1.756482422                         | NA           | 1            | 0                           | 0.944228234      |   |  |
| NCOA6   | ENSG00000198646.13                    | 0.079098867                           |                                      | 5            | 2            | 0.053922393                 |                  |   |  |
|         | Brain_Frontal_Cortex_BA9              | 0.790417926                           | Brain_Cortex                         | 4.190937546  |              |                             |                  |   |  |
|         | 0.018510208                           | 0.676980551                           | -1.927459478                         |              | 0.265767953  | -1.343352045                |                  |   |  |
|         | 0.907464418                           | 2                                     | 0                                    | 0.944228234  |              |                             |                  |   |  |
| SEC22B  | ENSG00000265808.3                     | 0.079202187                           |                                      | 1            | 1            | 0.079202187                 |                  |   |  |
|         | Brain_Cerebellar_Hemisphere           | 0.079202187                           | Brain_Cerebellar_Hemisphere          | 1            | 1            |                             |                  |   |  |
|         | 1                                     | -1.755334039                          | -1.755334039                         | -1.755334039 | NA           | 1                           | 0                |   |  |
|         | 0.944228234                           |                                       |                                      |              |              |                             |                  |   |  |
| CSMD1   | ENSG00000183117.18                    | 0.079264845                           |                                      | 7            | 7            | 0.008387284                 |                  |   |  |
|         | Brain_Hippocampus                     | 0.690219966                           | Brain_Anterior_cingulate_cortex_BA24 |              |              |                             |                  |   |  |
|         | 2.328086875                           | 0.307486002                           | 0.307486002                          | -1.887631434 | 2.636068344  |                             |                  |   |  |
|         | -0.720868828                          | 1.566800823                           | 7                                    | 0            | 0.944228234  |                             |                  |   |  |
| HMG2    | ENSG00000198830.10                    | 0.079323706                           |                                      | 1            | 1            | 0.079323706                 |                  |   |  |
|         | Brain_Putamen_basal_ganglia           | 0.079323706                           | Brain_Putamen_basal_ganglia          | 1            | 1            |                             |                  |   |  |
|         | 1                                     | -1.754623636                          | -1.754623636                         | -1.754623636 | NA           | 1                           | 0                |   |  |
|         | 0.944228234                           |                                       |                                      |              |              |                             |                  |   |  |
| MFSD9   | ENSG00000135953.10                    | 0.079330089                           |                                      | 1            | 1            | 0.079330089                 |                  |   |  |
|         | Brain_Cerebellar_Hemisphere           | 0.079330089                           | Brain_Cerebellar_Hemisphere          | 1            | 1            |                             |                  |   |  |
|         | 1                                     | 1.754586344                           | 1.754586344                          | 1.754586344  | NA           | 1                           | 0                |   |  |
|         | 0.944228234                           |                                       |                                      |              |              |                             |                  |   |  |
| TRPM3   | ENSG00000083067.22                    | 0.079477421                           |                                      | 6            | 6            | 0.110687696                 |                  |   |  |
|         | Brain_Caudate_basal_ganglia           | 0.77682841                            | Brain_Cortex                         | 3.309269544  |              |                             |                  |   |  |
|         | 0.149335681                           | 0.149335681                           | -0.788379237                         | 1.59510975   | 0.767661128  |                             |                  |   |  |
|         | 0.885790559                           | 6                                     | 0                                    | 0.944228234  |              |                             |                  |   |  |
| FANCI   | ENSG00000140525.17                    | 0.079610892                           |                                      | 3            | 3            | 0.079895546                 | Brain_Cortex     |   |  |
|         | 0.662173393                           | Brain_Hippocampus                     | 1.247546036                          | 0.759949364  |              |                             |                  |   |  |
|         | 0.759949364                           | -1.430311999                          | 1.751292457                          | 0.252631635  | 1.598787617  |                             |                  |   |  |
|         | 3                                     | 0                                     | 0.944228234                          |              |              |                             |                  |   |  |
| NECTIN3 | ENSG00000177707.10                    | 0.079642582                           |                                      | 5            | 3            | 0.028012012                 |                  |   |  |
|         | Brain_Nucleus_accumbens_basal_ganglia | 0.606434482                           | Brain_Cortex                         | 3.832745     |              |                             |                  |   |  |
|         | 0.04647375                            | 0.15689053                            | 0.51516964                           | 2.197118106  | 1.392557671  | 0.632428142                 |                  |   |  |
|         | 3                                     | 0                                     | 0.944228234                          |              |              |                             |                  |   |  |
| ATP6V1A | ENSG00000114573.9                     | 0.079645102                           |                                      | 2            | 2            | 0.03353509                  | Brain_Cortex     |   |  |
|         | 0.355445053                           | Brain_Spinal_cord_cervical_c-1        | 1.089751593                          | 0.910248407  |              |                             |                  |   |  |
|         | 0.910248407                           | 0.924079256                           | 2.125617877                          | 1.524848567  | 0.849616106  |                             |                  |   |  |
|         | 2                                     | 0                                     | 0.944228234                          |              |              |                             |                  |   |  |
| CYP2A6  | ENSG00000255974.7                     | 0.079690451                           |                                      | 1            | 1            | 0.079690451                 |                  |   |  |
|         | Brain_Caudate_basal_ganglia           | 0.079690451                           | Brain_Caudate_basal_ganglia          | 1            | 1            |                             |                  |   |  |
|         | 1                                     | 1.752484975                           | 1.752484975                          | 1.752484975  | NA           | 1                           | 0                |   |  |
|         | 0.944228234                           |                                       |                                      |              |              |                             |                  |   |  |
| TTC32   | ENSG00000183891.5                     | 0.0797409                             | 13                                   | 2            | 0.058067307  |                             |                  |   |  |
|         | Brain_Putamen_basal_ganglia           | 0.498188779                           | Brain_Cerebellum                     | 12.03749026  |              |                             |                  |   |  |
|         | 4.86E-08                              | 0.417700658                           | -1.895189453                         | -0.67734233  | -0.987181376 |                             |                  |   |  |
|         | 0.338477595                           | 2                                     | 0                                    | 0.944228234  |              |                             |                  |   |  |
| NEK4    | ENSG00000114904.12                    | 0.079752018                           |                                      | 3            | 3            | 0.032145894                 |                  |   |  |
|         | Brain_Cerebellar_Hemisphere           | 0.864544707                           | Brain_Cortex                         | 2.345299897  |              |                             |                  |   |  |

|               |                                       |              |                             |              |                             |
|---------------|---------------------------------------|--------------|-----------------------------|--------------|-----------------------------|
|               | 0.081280903                           | 0.081280903  | -0.17059185                 | 2.142591751  | 1.213119296                 |
|               | 1.221660421                           | 3            | 0                           | 0.944228234  |                             |
| DIDO1         | ENSG00000101191.16                    | 0.07979459   | 9                           | 4            | 0.002368624                 |
|               | Brain_Anterior_cingulate_cortex_BA24  | 0.049770772  |                             |              | Brain_Cerebellum            |
|               | 7.364858714                           | 0.007650992  | 0.296862213                 | 1.961928817  | 3.039638325                 |
|               | 2.436797349                           | 0.354840626  | 4                           | 0            | 0.944228234                 |
| NME5          | ENSG00000112981.4                     | 0.079883602  | 5                           | 5            | 0.012309688                 |
|               | Brain_Nucleus_accumbens_basal_ganglia | 0.490976076  |                             |              | Brain_Caudate_basal_ganglia |
|               | 1.475742789                           | 0.595961817  | 0.595961817                 | -2.503139887 | 0.913655639                 |
|               | -0.787932414                          | 1.526112433  | 5                           | 0            | 0.944228234                 |
| AC005330.2    | ENSG00000267372.2                     | 0.080005497  | 1                           | 1            | 0.080005497                 |
|               | Brain_Hypothalamus                    | 0.080005497  | Brain_Hypothalamus          | 1            | 1                           |
|               | 1.750654178                           | 1.750654178  | 1.750654178                 | NA           | 1                           |
| PDRG1         | ENSG00000088356.5                     | 0.080036456  | 1                           | 1            | 0.080036456                 |
|               | Brain_Caudate_basal_ganglia           | 0.080036456  | Brain_Caudate_basal_ganglia | 1            | 1                           |
|               | 1                                     | -1.750474586 | -1.750474586                | -1.750474586 | NA                          |
|               | 0.944228234                           |              |                             | 1            | 0                           |
| TAT           | ENSG00000198650.10                    | 0.080097134  | 1                           | 1            | 0.080097134                 |
|               | Brain_Nucleus_accumbens_basal_ganglia | 0.080097134  |                             |              |                             |
|               | Brain_Nucleus_accumbens_basal_ganglia | 1            | 1                           | 1            | -1.750122753                |
|               | -1.750122753                          | -1.750122753 | NA                          | 1            | 0                           |
| KMT2D         | ENSG00000167548.14                    | 0.080100603  | 1                           | 1            | 0.080100603                 |
|               | Brain_Cortex                          | 1            | 1                           | 1            | Brain_Cortex                |
|               | 0.080100603                           | Brain_Cortex | 1                           | 1            | 1.75010265                  |
|               | NA                                    | 1            | 0                           | 0.944228234  | 1.75010265                  |
| LILRB1        | ENSG00000104972.15                    | 0.080110941  | 2                           | 2            | 0.156870564                 |
|               | Brain_Caudate_basal_ganglia           | 0.303895961  | Brain_Putamen_basal_ganglia |              |                             |
|               | 1.402206354                           | 0.597793646  | 0.597793646                 | -1.02811452  | 1.415675402                 |
|               | 0.193780441                           | 1.728020425  | 2                           | 0            | 0.944228234                 |
| FAM206A       | ENSG00000119328.11                    | 0.080169661  | 3                           | 3            | 0.086759912                 |
|               | Brain_Frontal_Cortex_BA9              | 0.650119289  | Brain_Hippocampus           |              | 1.261919278                 |
|               | 0.739049018                           | 0.739049018  | -1.383324053                | 1.712742559  | -0.041392657                |
|               | 1.588660162                           | 3            | 0                           | 0.944228234  |                             |
| AC019118.3    | ENSG00000236760.1                     | 0.080190127  | 1                           | 1            | 0.080190127                 |
|               | Brain_Cerebellar_Hemisphere           | 0.080190127  | Brain_Cerebellar_Hemisphere | 1            | 1                           |
|               | 1                                     | 1.749583976  | 1.749583976                 | 1.749583976  | NA                          |
|               | 0.944228234                           |              |                             | 1            | 0                           |
| CCDC192       | ENSG00000230561.4                     | 0.080255897  | 2                           | 2            | 0.064216624                 |
|               | Brain_Putamen_basal_ganglia           | 0.353499886  | Brain_Cortex                |              | 1.175718268                 |
|               | 0.824281732                           | 0.824281732  | 0.927822047                 | 1.850672904  | 1.389247475                 |
|               | 0.652554099                           | 2            | 0                           | 0.944228234  |                             |
| RPS6KA4       | ENSG00000162302.12                    | 0.080313279  | 2                           | 2            | 0.052214485                 |
|               | Brain_Cerebellar_Hemisphere           | 0.11985646   | Brain_Caudate_basal_ganglia |              | 1.236033488                 |
|               | 0.763966512                           | 0.763966512  | -1.94136117                 | 1.555376363  | -0.192992403                |
|               | 2.472566822                           | 2            | 0                           | 0.944228234  |                             |
| ACTR3C        | ENSG00000106526.10                    | 0.080645792  | 9                           | 3            | 0.012118856                 |
|               | Brain_Caudate_basal_ganglia           | 0.350559671  | Brain_Cerebellar_Hemisphere |              |                             |
|               | 7.292559641                           | 0.002426978  | 0.30760778                  | 0.933504263  | 2.508664415                 |
|               | 2.029079344                           | 0.471833088  | 3                           | 0            | 0.944228234                 |
| PPP2R5A       | ENSG00000066027.11                    | 0.08074714   | 2                           | 2            | 0.074752161                 |
|               | Brain_Cerebellar_Hemisphere           | 0.15933945   | Brain_Putamen_basal_ganglia |              | 1.025175306                 |
|               | 0.974824694                           | 0.974824694  | -1.407296625                | 1.781982037  | 0.187342706                 |
|               | 2.255160569                           | 2            | 0                           | 0.944228234  |                             |
| PCDHB11       | ENSG00000197479.6                     | 0.080957596  | 4                           | 4            | 0.004952377                 |
|               | Brain_Substantia_nigra                | 0.327426866  | Brain_Amygdala              |              | 2.453045542                 |
|               | 0.219290727                           | 0.219290727  | -2.810115188                | -0.979309929 | -1.689979098                |
|               | 0.84767458                            | 4            | 0                           | 0.944228234  |                             |
| XBP1          | ENSG00000100219.16                    | 0.080984356  | 3                           | 3            | 0.054823071                 |
|               | Brain_Hippocampus                     | 0.563201607  | Brain_Cerebellar_Hemisphere |              | 1.804130256                 |
|               | 0.318636941                           | 0.318636941  | -1.920275805                | 1.083073374  | -0.471765008                |
|               | 1.504495178                           | 3            | 0                           | 0.944228234  |                             |
| RP11-134K13.4 | ENSG00000271967.1                     | 0.081036331  | 13                          | 7            | 0.081777357                 |
|               | Brain_Substantia_nigra                | 0.949618947  | Brain_Cerebellum            |              | 8.145680915                 |

|               |                                       |            |                             |              |              |                                      |                   |
|---------------|---------------------------------------|------------|-----------------------------|--------------|--------------|--------------------------------------|-------------------|
|               | 0.004411222                           | 0.3406286  | -1.740465249                | 1.432526453  | 0.484615489  |                                      |                   |
|               | 0.99609023                            | 7          | 0                           | 0.944228234  |              |                                      |                   |
| PCDHA3        | ENSG00000255408.3                     |            | 0.081161257                 | 5            | 5            | 0.003358132                          |                   |
|               | Brain_Spinal_cord_cervical_c-1        |            | 0.820864517                 |              |              | Brain_Cortex                         | 2.079561587       |
|               | 0.094965508                           |            | 0.094965508                 | -0.280147679 |              | 2.932898955                          | 0.55147757        |
|               | 1.380042643                           | 5          | 0                           | 0.944228234  |              |                                      |                   |
| CRYGS         | ENSG00000213139.7                     |            | 0.081181325                 | 3            | 3            | 0.060520247                          |                   |
|               | Brain_Nucleus_accumbens_basal_ganglia |            | 0.605118795                 |              |              | Brain_Cerebellum                     |                   |
|               | 1.669543301                           |            | 0.361700648                 | 0.361700648  |              | 0.517053526                          | 1.876984288       |
|               | 1.336190807                           |            | 0.721428703                 | 3            | 0            | 0.944228234                          |                   |
| RP11-195F19.5 | ENSG00000187186.14                    |            | 0.081251965                 | 2            | 2            | 0.031268378                          |                   |
|               | Brain_Substantia_nigra                |            | 0.514570646                 |              |              | Brain_Cerebellum                     | 1.015583948       |
|               | 0.984416052                           |            | 0.984416052                 | -0.651737315 |              | 2.153640471                          | 0.750951578       |
|               | 1.983701656                           | 2          | 0                           | 0.944228234  |              |                                      |                   |
| TSC2          | ENSG00000103197.16                    |            | 0.081269057                 | 7            | 5            | 0.020830517                          |                   |
|               | Brain_Cerebellar_Hemisphere           |            | 0.9175699                   |              |              | Brain_Cortex                         | 3.7580785         |
|               | 0.483379113                           |            | -0.972703445                | 2.31104232   | 1.13946181   | 1.340897217                          | 5                 |
|               | 0.944228234                           |            |                             |              |              |                                      | 0                 |
| MED17         | ENSG00000042429.11                    |            | 0.08129003                  | 7            | 3            | 0.014181322                          | Brain_Hippocampus |
|               | 0.332460609                           |            | Brain_Frontal_Cortex_BA9    |              |              | 5.419693171                          | 0.001289509       |
|               | 0.516399762                           |            | -2.45263738                 | -0.969169534 |              | -1.352429017                         | 0.507546618       |
|               | 3                                     | 0          | 0.944228234                 |              |              |                                      |                   |
| RP11-318C24.2 | ENSG00000227740.1                     |            | 0.081377361                 | 2            | 2            | 0.065886041                          |                   |
|               | Brain_Substantia_nigra                |            | 0.384142744                 |              |              | Brain_Cerebellum                     | 1.844970605       |
|               | 0.155029395                           |            | 0.155029395                 | -1.839198189 |              | -0.870288533                         | -1.354743361      |
|               | 0.685122588                           | 2          | 0                           | 0.944228234  |              |                                      |                   |
| ACSL5         | ENSG00000197142.10                    |            | 0.081408297                 | 3            | 3            | 0.027805941                          | Brain_Cerebellum  |
|               | 0.441178802                           |            | Brain_Cerebellar_Hemisphere |              |              | 1.788073777                          | 0.244575566       |
|               | 0.244575566                           |            | -1.157283902                | 2.200013443  |              | 0.090841797                          | 1.83682102        |
|               | 0                                     |            | 0.944228234                 |              |              |                                      | 3                 |
| TCF7L2        | ENSG00000148737.16                    |            | 0.081432027                 | 2            | 2            | 0.060746989                          |                   |
|               | Brain_Frontal_Cortex_BA9              |            | 0.236682929                 |              |              | Brain_Anterior_cingulate_cortex_BA24 |                   |
|               | 1.021740115                           |            | 0.978259885                 | 0.978259885  |              | 1.183318537                          | 1.875332541       |
|               | 1.529325539                           |            | 0.489327795                 | 2            | 0            | 0.944228234                          |                   |
| ZNF655        | ENSG00000197343.10                    |            | 0.081441245                 | 1            | 1            | 0.081441245                          |                   |
|               | Brain_Caudate_basal_ganglia           |            | 0.081441245                 |              |              | Brain_Caudate_basal_ganglia          | 1                 |
|               | 1                                     |            | -1.742384162                | -1.742384162 |              | -1.742384162                         | NA                |
|               | 0.944228234                           |            |                             |              |              | 1                                    | 0                 |
| FAM71F1       | ENSG00000135248.15                    |            | 0.081444419                 | 7            | 5            | 0.007290212                          |                   |
|               | Brain_Frontal_Cortex_BA9              |            | 0.979393775                 |              |              | Brain_Amygdala                       | 2.75087558        |
|               | 0.075378424                           |            | 0.331146999                 | -0.078981372 |              | 2.683288265                          | 1.062252712       |
|               | 1.091161024                           | 5          | 0                           | 0.944228234  |              |                                      |                   |
| RP11-491F9.6  | ENSG00000259839.1                     |            | 0.081501137                 | 2            | 2            | 0.026121732                          |                   |
|               | Brain_Cerebellar_Hemisphere           |            | 0.086330579                 |              |              | Brain_Cerebellum                     | 1.686881902       |
|               | 0.313118098                           |            | 0.313118098                 | -2.224397209 |              | -1.715079901                         | -1.969738555      |
|               | 0.360141722                           | 2          | 0                           | 0.944228234  |              |                                      |                   |
| SHOC2         | ENSG00000108061.11                    |            | 0.08156057                  | 2            | 2            | 0.026529489                          |                   |
|               | Brain_Spinal_cord_cervical_c-1        |            | 0.789397527                 |              |              | Brain_Amygdala                       | 1.016046593       |
|               | 0.983953407                           |            | 0.983953407                 | -2.218371846 |              | 0.267093039                          | -0.975639403      |
|               | 1.757489075                           | 2          | 0                           | 0.944228234  |              |                                      |                   |
| RGS9          | ENSG00000108370.16                    |            | 0.081632909                 | 2            | 2            | 0.028076864                          |                   |
|               | Brain_Hypothalamus                    |            | 0.295429532                 |              |              | Brain_Cortex                         | 1.287460068       |
|               | 0.712539932                           |            | 0.712539932                 | -2.196210728 |              | -1.046284863                         | -1.621247796      |
|               | 0.813120377                           | 2          | 0                           | 0.944228234  |              |                                      |                   |
| CD2BP2        | ENSG00000169217.8                     |            | 0.081707264                 | 1            | 1            | 0.081707264                          |                   |
|               | Brain_Cortex                          |            | 0.081707264                 |              |              | Brain_Cortex                         | 1                 |
|               | 1.74086489                            | 1.74086489 | NA                          | 1            | 0            | 0.944228234                          |                   |
| NAALADL1      | ENSG00000168060.15                    |            | 0.081732964                 | 1            | 1            | 0.081732964                          |                   |
|               | Brain_Spinal_cord_cervical_c-1        |            | 0.081732964                 |              |              | Brain_Spinal_cord_cervical_c-1       |                   |
|               | 1                                     | 1          | 1                           | -1.740718327 | -1.740718327 | -1.740718327                         | NA                |
|               | 0.944228234                           |            |                             |              |              | 1                                    | 0                 |
| CCDC184       | ENSG00000177875.4                     |            | 0.081746622                 | 4            | 3            | 0.207911895                          |                   |

|                    |                                       |                    |                                |                                       |              |                  |              |   |
|--------------------|---------------------------------------|--------------------|--------------------------------|---------------------------------------|--------------|------------------|--------------|---|
|                    | Brain_Frontal_Cortex_BA9              | 0.989788851        |                                | Brain_Nucleus_accumbens_basal_ganglia |              |                  |              |   |
|                    | 3.401435919                           | 0.061639859        | 0.250183962                    | -1.259327969                          | 0.385005712  |                  |              |   |
|                    | -0.121601254                          | 0.778003216        | 3                              | 0                                     | 0.944228234  |                  |              |   |
| UPK3A              | ENSG00000100373.9                     | 0.081773712        | 7                              | 7                                     | 0.014516733  | Brain_Cerebellum |              |   |
|                    | 0.706607093                           | Brain_Hypothalamus | 2.69840773                     | 0.205880288                           | 0.205880288  |                  |              |   |
|                    | -0.928748341                          | 2.444215986        | 0.918928112                    | 1.108144849                           | 7            | 0                |              |   |
|                    | 0.944228234                           |                    |                                |                                       |              |                  |              |   |
| ABC7-42404400C24.1 | ENSG00000277758.4                     | 0.081842346        | 8                              | 7                                     | 0.006974256  |                  |              |   |
|                    | Brain_Cortex                          | 0.980959004        | Brain_Amygdala                 | 2.281470367                           | 0.006612654  |                  |              |   |
|                    | 0.446198588                           | -2.698071003       | 1.260979354                    | -0.492095864                          | 1.477352192  |                  |              |   |
|                    | 7                                     | 0                  | 0.944228234                    |                                       |              |                  |              |   |
| ALPK3              | ENSG00000136383.6                     | 0.082050522        | 4                              | 3                                     | 0.014873374  | Brain_Cerebellum |              |   |
|                    | 0.654471976                           | Brain_Cortex       | 3.05701828                     | 0.01195639                            | 0.104353686  |                  |              |   |
|                    | 0.447558339                           | 2.435447705        | 1.08893418                     | 0.917274123                           | 3            | 0                |              |   |
|                    | 0.944228234                           |                    |                                |                                       |              |                  |              |   |
| BIN3               | ENSG00000147439.12                    | 0.082143747        | 10                             | 7                                     | 0.068380054  |                  |              |   |
|                    | Brain_Hippocampus                     | 0.712134438        | Brain_Hypothalamus             | 6.091560702                           |              |                  |              |   |
|                    | 0.031470606                           | 0.240803016        | -1.073462793                   | 1.82249406                            | 0.531715609  |                  |              |   |
|                    | 1.027722613                           | 7                  | 0                              | 0.944228234                           |              |                  |              |   |
| HLCS               | ENSG00000159267.14                    | 0.082229758        | 8                              | 5                                     | 0.015914753  |                  |              |   |
|                    | Brain_Hypothalamus                    | 0.802104054        | Brain_Cortex                   | 5.127608603                           |              |                  |              |   |
|                    | 0.015274583                           | 0.256334137        | -2.410864651                   | 0.926771318                           | 0.217039994  |                  |              |   |
|                    | 1.101579361                           | 5                  | 0                              | 0.944228234                           |              |                  |              |   |
| EN1                | ENSG00000163064.6                     | 0.082255172        | 2                              | 2                                     | 0.03926682   | Brain_Cerebellum |              |   |
|                    | 0.442170707                           | Brain_Hippocampus  | 1.045891807                    | 0.954108193                           |              |                  |              |   |
|                    | 0.954108193                           | -2.0613798         | 0.768532808                    | -0.646423496                          | 2.001050395  | 2                |              |   |
|                    | 0                                     | 0.944228234        |                                |                                       |              |                  |              |   |
| MAP2K6             | ENSG00000108984.13                    | 0.082349985        | 1                              | 1                                     | 0.082349985  |                  |              |   |
|                    | Brain_Spinal_cord_cervical_c-1        | 0.082349985        | Brain_Spinal_cord_cervical_c-1 |                                       |              |                  |              |   |
|                    | 1                                     | 1                  | 1                              | 1.737210714                           | 1.737210714  | 1.737210714      | NA           | 1 |
|                    | 0.944228234                           |                    |                                |                                       |              |                  |              | 0 |
| GPANK1             | ENSG00000204438.10                    | 0.082429473        | 2                              | 2                                     | 0.10481142   |                  |              |   |
|                    | Brain_Spinal_cord_cervical_c-1        | 0.207518032        | Brain_Caudate_basal_ganglia    |                                       |              |                  |              |   |
|                    | 1.158278547                           | 0.841721453        | 0.841721453                    | -1.621962302                          | 1.260419607  |                  |              |   |
|                    | -0.180771348                          | 2.038151794        | 2                              | 0                                     | 0.944228234  |                  |              |   |
| RAD21              | ENSG00000164754.14                    | 0.08267652         | 2                              | 2                                     | 0.027401186  | Brain_Cortex     |              |   |
|                    | 0.131540866                           | Brain_Cerebellum   | 1.78174261                     | 0.21825739                            | 0.21825739   | 1.50805338       |              |   |
|                    | 2.205754604                           | 1.856903992        | 0.493349267                    | 2                                     | 0            | 0.944228234      |              |   |
| RP11-158I9.8       | ENSG00000278376.1                     | 0.082708416        | 13                             | 2                                     | 0.016717824  |                  |              |   |
|                    | Brain_Spinal_cord_cervical_c-1        | 0.152234324        | Brain_Amygdala                 | 11.98031136                           |              |                  |              |   |
|                    | 0.001741811                           | 0.44756934         | -2.392855484                   | -1.431683837                          | -1.940571622 |                  |              |   |
|                    | 0.281105313                           | 2                  | 0                              | 0.944228234                           |              |                  |              |   |
| LINC00492          | ENSG00000250958.1                     | 0.082711155        | 1                              | 1                                     | 0.082711155  |                  |              |   |
|                    | Brain_Cerebellum                      | 0.082711155        | Brain_Cerebellum               | 1                                     | 1            | 1                | -1.735167422 |   |
|                    | -1.735167422                          | -1.735167422       | NA                             | 1                                     | 0            | 0.944228234      |              |   |
| RBFOX2             | ENSG00000100320.22                    | 0.08278063         | 1                              | 1                                     | 0.08278063   | Brain_Cerebellum |              |   |
|                    | 0.08278063                            | Brain_Cerebellum   | 1                              | 1                                     | 1.734775204  | 1.734775204      |              |   |
|                    | 1.734775204                           | NA                 | 1                              | 0                                     | 0.944228234  |                  |              |   |
| ALX4               | ENSG00000052850.5                     | 0.082816755        | 1                              | 1                                     | 0.082816755  | Brain_Cortex     |              |   |
|                    | 0.082816755                           | Brain_Cortex       | 1                              | 1                                     | 1            | -1.734571367     | -1.734571367 |   |
|                    | -1.734571367                          | NA                 | 1                              | 0                                     | 0.944228234  |                  |              |   |
| MERTK              | ENSG00000153208.16                    | 0.082841298        | 7                              | 3                                     | 0.139033757  |                  |              |   |
|                    | Brain_Nucleus_accumbens_basal_ganglia | 0.830457405        | Brain_Cortex                   |                                       |              |                  |              |   |
|                    | 6.236069031                           | 0.014924268        | 0.222424632                    | -0.214114966                          | 1.479398816  |                  |              |   |
|                    | 0.763659469                           | 0.532918644        | 3                              | 0                                     | 0.944228234  |                  |              |   |
| HOXD1              | ENSG00000128645.14                    | 0.082874856        | 1                              | 1                                     | 0.082874856  |                  |              |   |
|                    | Brain_Spinal_cord_cervical_c-1        | 0.082874856        | Brain_Spinal_cord_cervical_c-1 |                                       |              |                  |              |   |
|                    | 1                                     | 1                  | 1                              | 1.734243676                           | 1.734243676  | 1.734243676      | NA           | 1 |
|                    | 0.944228234                           |                    |                                |                                       |              |                  |              | 0 |
| OR7D2              | ENSG00000188000.3                     | 0.0828972          | 11                             | 11                                    | 0.062325495  |                  |              |   |
|                    | Brain_Anterior_cingulate_cortex_BA24  | 0.973138651        | Brain_Putamen_basal_ganglia    |                                       |              |                  |              |   |
|                    | 3.383197795                           | 0.112794503        | 0.112794503                    | -1.099615499                          | 1.863973007  |                  |              |   |

|               |                                      |                   |                                       |              |              |                  |              |             |   |
|---------------|--------------------------------------|-------------------|---------------------------------------|--------------|--------------|------------------|--------------|-------------|---|
|               | 0.08348866                           | 0.976634137       | 11                                    | 0            | 0.944228234  |                  |              |             |   |
| BCAN          | ENSG00000132692.18                   | 0.083009784       | 1                                     | 1            | 0.083009784  | Brain_Cerebellum |              |             |   |
|               | 0.083009784                          | Brain_Cerebellum1 | 1                                     | 1            | 1.73348341   | 1.73348341       | 1.73348341   |             |   |
|               | NA                                   | 1                 | 0                                     | 0.944228234  |              |                  |              |             |   |
| FAM212B       | ENSG00000197852.9                    | 0.083015822       | 1                                     | 1            | 0.083015822  |                  |              |             |   |
|               | Brain_Putamen_basal_ganglia          | 0.083015822       | Brain_Putamen_basal_ganglia1          | 1            |              |                  |              |             |   |
|               | 1                                    | 1.73344941        | 1.73344941                            | 1.73344941   | NA           | 1                | 0            | 0.944228234 |   |
| TREX1         | ENSG00000213689.11                   | 0.083084897       | 13                                    | 5            | 0.037594475  |                  |              |             |   |
|               | Brain_Hypothalamus                   | 0.675653452       | Brain_Cortex                          | 8.660615241  |              |                  |              |             |   |
|               | 0.003351634                          | 0.443155702       | -1.603245109                          | 2.079248944  | 1.094284717  |                  |              |             |   |
|               | 1.029915676                          | 5                 | 0                                     | 0.944228234  |              |                  |              |             |   |
| MORF4L1       | ENSG00000185787.14                   | 0.083106268       | 1                                     | 1            | 0.083106268  |                  |              |             |   |
|               | Brain_Cerebellum                     | 0.083106268       | Brain_Cerebellum1                     | 1            | 1            | 1                | -1.732940369 |             |   |
|               | -1.732940369                         | -1.732940369      | NA                                    | 1            | 0            | 0.944228234      |              |             |   |
| CEBPZOS       | ENSG00000218739.9                    | 0.083294553       | 13                                    | 6            | 0.001608011  |                  |              |             |   |
|               | Brain_Hippocampus                    | 0.182609382       | Brain_Caudate_basal_ganglia           | 8.715464419  |              |                  |              |             |   |
|               | 0.008160741                          | 0.464604678       | 1.332763638                           | 3.154449778  | 2.53781253   |                  |              |             |   |
|               | 0.456057913                          | 6                 | 0                                     | 0.944228234  |              |                  |              |             |   |
| GPAA1         | ENSG00000197858.10                   | 0.083305475       | 7                                     | 2            | 0.056984321  |                  |              |             |   |
|               | Brain_Anterior_cingulate_cortex_BA24 | 0.984944548       | Brain_Amygdala                        |              |              |                  |              |             |   |
|               | 6.114352056                          | 0.008527913       | 0.586961112                           | -0.018870331 | 1.903431063  |                  |              |             |   |
|               | 0.487376408                          | 0.662921652       | 2                                     | 0            | 0.944228234  |                  |              |             |   |
| RP11-734I18.1 | ENSG00000251129.1                    | 0.083427798       | 5                                     | 5            | 0.041180859  |                  |              |             |   |
|               | Brain_Spinal_cord_cervical_c-1       | 0.583665836       | Brain_Amygdala                        | 3.12229104   |              |                  |              |             |   |
|               | 0.17550622                           | 0.17550622        | -0.548037964                          | 2.041704436  | 0.885950931  |                  |              |             |   |
|               | 0.968242268                          | 5                 | 0                                     | 0.944228234  |              |                  |              |             |   |
| AQP7          | ENSG00000165269.12                   | 0.083451781       | 10                                    | 10           | 0.002389957  |                  |              |             |   |
|               | Brain_Frontal_Cortex_BA9             | 0.930540712       | Brain_Cerebellum                      | 2.83495106   |              |                  |              |             |   |
|               | 0.130877275                          | 0.130877275       | -3.036936613                          | 0.682979101  | -0.771994194 |                  |              |             |   |
|               | 1.011326673                          | 10                | 0                                     | 0.944228234  |              |                  |              |             |   |
| MAPK8IP2      | ENSG00000008735.13                   | 0.083560561       | 3                                     | 3            | 0.145688133  |                  |              |             |   |
|               | Brain_Cerebellum                     | 0.595090898       | Brain_Cerebellar_Hemisphere           | 1.758791284  |              |                  |              |             |   |
|               | 0.301907776                          | 0.301907776       | -0.531473215                          | 1.454931838  | 0.639417474  |                  |              |             |   |
|               | 1.039793493                          | 3                 | 0                                     | 0.944228234  |              |                  |              |             |   |
| SFT2D1        | ENSG00000198818.9                    | 0.083609873       | 2                                     | 2            | 0.112337787  |                  |              |             |   |
|               | Brain_Cerebellum                     | 0.132192152       | Brain_Anterior_cingulate_cortex_BA24  |              |              |                  |              |             |   |
|               | 1.035426202                          | 0.964573798       | 0.964573798                           | -1.587772524 | -1.505513331 |                  |              |             |   |
|               | -1.546642927                         | 0.058166033       | 2                                     | 0            | 0.944228234  |                  |              |             |   |
| NFXL1         | ENSG00000170448.11                   | 0.083631917       | 11                                    | 8            | 0.06613533   |                  |              |             |   |
|               | Brain_Frontal_Cortex_BA9             | 0.81660875        | Brain_Cerebellum                      | 5.070261896  |              |                  |              |             |   |
|               | 0.005968219                          | 0.275538317       | -1.717227817                          | 1.83750533   | -0.052623999 |                  |              |             |   |
|               | 1.077727235                          | 8                 | 0                                     | 0.944228234  |              |                  |              |             |   |
| RPGRIP1       | ENSG00000092200.12                   | 0.083755599       | 3                                     | 3            | 0.036031354  |                  |              |             |   |
|               | Brain_Cerebellum                     | 0.520296763       | Brain_Cortex                          | 1.14646161   | 0.822386867  |                  |              |             |   |
|               | 0.822386867                          | -2.096573423      | 0.64288802                            | -0.922928912 | 1.411209288  |                  |              |             | 3 |
|               | 0                                    | 0.944228234       |                                       |              |              |                  |              |             |   |
| LINC01856     | ENSG00000237574.1                    | 0.083856536       | 1                                     | 1            | 0.083856536  |                  |              |             |   |
|               | Brain_Anterior_cingulate_cortex_BA24 | 0.083856536       |                                       |              |              |                  |              |             |   |
|               | Brain_Anterior_cingulate_cortex_BA24 | 1                 | 1                                     | 1            | 1.728734992  |                  |              |             |   |
|               | 1.728734992                          | 1.728734992       | NA                                    | 1            | 0            | 0.944228234      |              |             |   |
| ID4           | ENSG00000172201.11                   | 0.083881657       | 3                                     | 3            | 0.014423795  |                  |              |             |   |
|               | Brain_Caudate_basal_ganglia          | 0.904121423       | Brain_Nucleus_accumbens_basal_ganglia |              |              |                  |              |             |   |
|               | 1.272666693                          | 0.720125289       | 0.720125289                           | -2.446532101 | 0.774108519  |                  |              |             |   |
|               | -0.597626741                         | 1.662498114       | 3                                     | 0            | 0.944228234  |                  |              |             |   |
| CCDC126       | ENSG00000169193.11                   | 0.083888868       | 1                                     | 1            | 0.083888868  |                  |              |             |   |
|               | Brain_Spinal_cord_cervical_c-1       | 0.083888868       | Brain_Spinal_cord_cervical_c-1        | 1            |              |                  |              |             |   |
|               | 1                                    | 1                 | -1.728555498                          | -1.728555498 | -1.728555498 | NA               | 1            | 0           |   |
|               | 0.944228234                          |                   |                                       |              |              |                  |              |             |   |
| RP11-419I17.2 | ENSG00000270154.1                    | 0.083895697       | 2                                     | 2            | 0.026177514  |                  |              |             |   |
|               | Brain_Amygdala                       | 0.788256912       | Brain_Cortex                          | 1.071428375  | 0.928571625  |                  |              |             |   |
|               | 0.928571625                          | -2.223568148      | -0.268574793                          | -1.24607147  | 1.382389058  |                  |              |             |   |
|               | 2                                    | 0                 | 0.944228234                           |              |              |                  |              |             |   |

|        |                                       |                             |                                      |              |                                      |                  |              |   |
|--------|---------------------------------------|-----------------------------|--------------------------------------|--------------|--------------------------------------|------------------|--------------|---|
| RBM26  | ENSG00000139746.15                    | 0.083903191                 | 2                                    | 2            | 0.026108694                          |                  |              |   |
|        | Brain_Cerebellar_Hemisphere           | 0.080747014                 |                                      |              | Brain_Cerebellum                     | 1.759932245      |              |   |
|        | 0.240067755                           | 0.240067755                 | -2.224591193                         |              | -1.746368075                         |                  | -1.985479634 |   |
|        | 0.338154809                           | 2                           | 0                                    | 0.944228234  |                                      |                  |              |   |
| VAMP8  | ENSG00000118640.10                    | 0.083972812                 | 1                                    | 1            | 0.083972812                          |                  |              |   |
|        | Brain_Nucleus_accumbens_basal_ganglia | 0.083972812                 |                                      |              |                                      |                  |              |   |
|        | Brain_Nucleus_accumbens_basal_ganglia | 1                           | 1                                    | 1            | -1.728085972                         |                  |              |   |
|        | -1.728085972                          | -1.728085972                | NA                                   | 1            | 0                                    | 0.944228234      |              |   |
| EIF4E2 | ENSG00000135930.13                    | 0.083975676                 | 2                                    | 2            | 0.072778077                          |                  |              |   |
|        | Brain_Caudate_basal_ganglia           | 0.24633083                  |                                      |              | Brain_Cortex                         | 1.085366127      |              |   |
|        | 0.914633873                           | 0.914633873                 | -1.159307588                         |              | 1.794219897                          |                  | 0.317456155  |   |
|        | 2.088459313                           | 2                           | 0                                    | 0.944228234  |                                      |                  |              |   |
| PSMA5  | ENSG00000143106.12                    | 0.083980171                 | 1                                    | 1            | 0.083980171                          |                  |              |   |
|        | Brain_Spinal_cord_cervical_c-1        | 0.083980171                 |                                      |              | Brain_Spinal_cord_cervical_c-1       |                  |              |   |
|        | 1                                     | 1                           | -1.728044922                         | -1.728044922 | -1.728044922                         | NA               | 1            | 0 |
|        | 0.944228234                           |                             |                                      |              |                                      |                  |              |   |
| SNTB2  | ENSG00000168807.16                    | 0.08407488                  | 2                                    | 2            | 0.047376659                          |                  |              |   |
|        | Brain_Cerebellar_Hemisphere           | 0.340555248                 |                                      |              | Brain_Cerebellum                     | 1.791767546      |              |   |
|        | 0.208232454                           | 0.208232454                 | 0.953068732                          |              | 1.982917378                          |                  | 1.467993055  |   |
|        | 0.728212961                           | 2                           | 0                                    | 0.944228234  |                                      |                  |              |   |
| PENK   | ENSG00000181195.10                    | 0.084123314                 | 2                                    | 2            | 0.05710087                           | Brain_Cerebellum |              |   |
|        | 0.54216405                            | Brain_Cerebellar_Hemisphere | 1.732949961                          |              | 0.267050039                          |                  |              |   |
|        | 0.267050039                           | -1.90253789                 | -0.609543799                         |              | -1.256040844                         |                  | 0.914284889  |   |
|        | 2                                     | 0                           | 0.944228234                          |              |                                      |                  |              |   |
| ZNF721 | ENSG00000182903.15                    | 0.084148752                 | 4                                    | 3            | 0.033927043                          |                  |              |   |
|        | Brain_Cerebellum                      | 0.33878167                  | Brain_Anterior_cingulate_cortex_BA24 | 3.514569989  |                                      |                  |              |   |
|        | 0.032850819                           | 0.122012997                 | -2.120937725                         |              | -0.956575283                         |                  | -1.485249744 |   |
|        | 0.511850449                           | 3                           | 0                                    | 0.944228234  |                                      |                  |              |   |
| ARNT   | ENSG00000143437.20                    | 0.084157859                 | 11                                   | 5            | 0.034821143                          |                  |              |   |
|        | Brain_Cerebellar_Hemisphere           | 0.946326489                 |                                      |              | Brain_Anterior_cingulate_cortex_BA24 |                  |              |   |
|        | 8.234466198                           | 0.002914546                 | 0.44543404                           |              | -0.449680577                         |                  | 2.110432222  |   |
|        | 0.004605501                           | 0.719926944                 | 5                                    | 0            | 0.944228234                          |                  |              |   |
| MCOLN1 | ENSG00000090674.15                    | 0.084298858                 | 1                                    | 1            | 0.084298858                          |                  |              |   |
|        | Brain_Anterior_cingulate_cortex_BA24  | 0.084298858                 |                                      |              |                                      |                  |              |   |
|        | Brain_Anterior_cingulate_cortex_BA24  | 1                           | 1                                    | 1            | -1.726269953                         |                  |              |   |
|        | -1.726269953                          | -1.726269953                | NA                                   | 1            | 0                                    | 0.945052344      |              |   |
| SHH    | ENSG00000164690.7                     | 0.084388323                 | 3                                    | 3            | 0.010868028                          | Brain_Amygdala   |              |   |
|        | 0.745418158                           | Brain_Caudate_basal_ganglia | 1.357534484                          |              | 0.624574286                          |                  |              |   |
|        | 0.624574286                           | -2.546913786                | -0.324686758                         |              | -1.104709608                         |                  | 1.250374473  |   |
|        | 3                                     | 0                           | 0.945153761                          |              |                                      |                  |              |   |
| ZNF322 | ENSG00000181315.10                    | 0.084443013                 | 13                                   | 3            | 0.006806277                          |                  |              |   |
|        | Brain_Spinal_cord_cervical_c-1        | 0.158330235                 |                                      |              | Brain_Substantia_nigra               |                  |              |   |
|        | 11.02623981                           | 0.002800557                 | 0.420448483                          |              | -2.706176924                         |                  | -1.410709683 |   |
|        | -2.14868189                           | 0.399421644                 | 3                                    | 0            | 0.945153761                          |                  |              |   |
| OLFML1 | ENSG00000183801.7                     | 0.084544585                 | 1                                    | 1            | 0.084544585                          |                  |              |   |
|        | Brain_Hippocampus                     | 0.084544585                 | Brain_Hippocampus                    | 1            | 1                                    | 1                |              |   |
|        | -1.724905054                          | -1.724905054                | -1.724905054                         | NA           | 1                                    | 0                | 0.945534199  |   |
| KNDC1  | ENSG00000171798.17                    | 0.084668757                 | 3                                    | 3            | 0.02742416                           | Brain_Cerebellum |              |   |
|        | 0.285136065                           | Brain_Caudate_basal_ganglia | 1.464292795                          |              | 0.424925226                          |                  |              |   |
|        | 0.424925226                           | -1.548045784                | 2.205426793                          |              | 0.575411224                          |                  | 1.924773347  |   |
|        | 3                                     | 0                           | 0.945562561                          |              |                                      |                  |              |   |
| MRPL28 | ENSG00000086504.15                    | 0.084682288                 | 7                                    | 7            | 0.020485605                          |                  |              |   |
|        | Brain_Caudate_basal_ganglia           | 0.771578541                 |                                      |              | Brain_Hippocampus                    | 3.931539233      |              |   |
|        | 0.167818085                           | 0.167818085                 | -2.317332886                         |              | 0.290310716                          |                  | -1.326787057 |   |
|        | 1.039320595                           | 7                           | 0                                    | 0.945562561  |                                      |                  |              |   |
| RNF185 | ENSG00000138942.15                    | 0.084966809                 | 4                                    | 3            | 0.053736676                          |                  |              |   |
|        | Brain_Cerebellum                      | 0.931368091                 | Brain_Frontal_Cortex_BA9             | 3.278043998  |                                      |                  |              |   |
|        | 0.047980912                           | 0.185164966                 | -0.086123691                         |              | 1.928953173                          |                  | 1.327435311  |   |
|        | 0.950966239                           | 3                           | 0                                    | 0.946087088  |                                      |                  |              |   |
| STARD5 | ENSG00000172345.13                    | 0.085073026                 | 2                                    | 2            | 0.047609148                          |                  |              |   |
|        | Brain_Cortex                          | 0.387148448                 | Brain_Cerebellum                     | 1.068273293  |                                      | 0.931726707      |              |   |
|        | 0.931726707                           | -1.980840636                | 0.864800225                          |              | -0.558020205                         |                  | 2.01217195   | 2 |

|                |                                       |                          |              |              |                                       |                    |             |   |              |
|----------------|---------------------------------------|--------------------------|--------------|--------------|---------------------------------------|--------------------|-------------|---|--------------|
| 0              | 0.946087088                           |                          |              |              |                                       |                    |             |   |              |
| OAZ2           | ENSG00000180304.14                    | 0.085087363              | 1            | 1            | 0.085087363                           |                    |             |   |              |
|                | Brain_Frontal_Cortex_BA9              | 0.085087363              |              |              | Brain_Frontal_Cortex_BA9              | 1                  | 1           |   |              |
|                | 1                                     | 1.721901499              | 1.721901499  | 1.721901499  | NA                                    | 1                  | 0           |   |              |
|                | 0.946087088                           |                          |              |              |                                       |                    |             |   |              |
| TMEM33         | ENSG00000109133.12                    | 0.085095907              | 1            | 1            | 0.085095907                           |                    |             |   |              |
|                | Brain_Cerebellum                      | 0.085095907              |              |              | Brain_Cerebellum                      | 1                  | 1           | 1 | -1.721854347 |
|                | -1.721854347                          | -1.721854347             | NA           | 1            | 0                                     | 0.946087088        |             |   |              |
| TMEM198        | ENSG00000188760.10                    | 0.08511998               | 1            | 1            | 0.08511998                            |                    |             |   |              |
|                | Brain_Putamen_basal_ganglia           | 0.08511998               |              |              | Brain_Putamen_basal_ganglia           | 1                  | 1           | 1 |              |
|                | -1.721721502                          | -1.721721502             | -1.721721502 | NA           | 1                                     | 0                  | 0.946087088 |   |              |
| NT5C1A         | ENSG00000116981.3                     | 0.085288716              | 1            | 1            | 0.085288716                           |                    |             |   |              |
|                | Brain_Cerebellar_Hemisphere           | 0.085288716              |              |              | Brain_Cerebellar_Hemisphere           | 1                  | 1           |   |              |
|                | 1                                     | 1.720791219              | 1.720791219  | 1.720791219  | NA                                    | 1                  | 0           |   |              |
|                | 0.946087088                           |                          |              |              |                                       |                    |             |   |              |
| EHMT1          | ENSG00000181090.19                    | 0.085391174              | 2            | 2            | 0.06402517                            | Brain_Hypothalamus |             |   |              |
|                | 0.201184635                           | Brain_Frontal_Cortex_BA9 | 1.031138219  | 0.968861781  |                                       |                    |             |   |              |
|                | 0.968861781                           | 1.278183776              | 1.852004547  | 1.565094162  | 0.405752558                           |                    |             |   |              |
|                | 2                                     | 0                        | 0.946087088  |              |                                       |                    |             |   |              |
| ROR1           | ENSG00000185483.11                    | 0.085402559              | 5            | 5            | 0.043220874                           |                    |             |   |              |
|                | Brain_Hippocampus                     | 0.909502653              |              |              | Brain_Cortex                          | 1.334056997        |             |   |              |
|                | 0.649231912                           | 0.649231912              | -2.021569223 | 0.800833176  | -0.320242132                          |                    |             |   |              |
|                | 1.275211781                           | 5                        | 0            | 0.946087088  |                                       |                    |             |   |              |
| CTC-360G5.9    | ENSG00000269486.2                     | 0.085424269              | 13           | 4            | 0.176190759                           |                    |             |   |              |
|                | Brain_Hippocampus                     | 0.905757126              |              |              | Brain_Nucleus_accumbens_basal_ganglia |                    |             |   |              |
|                | 10.09499733                           | 0.00379803               | 0.407083185  | -1.335991577 | 1.352577142                           |                    |             |   |              |
|                | 0.02643534                            | 0.830118614              | 4            | 0            | 0.946087088                           |                    |             |   |              |
| GLIPR1         | ENSG00000139278.9                     | 0.085454937              | 5            | 5            | 0.025360658                           |                    |             |   |              |
|                | Brain_Caudate_basal_ganglia           | 0.680921151              |              |              | Brain_Cortex                          | 3.21686824         |             |   |              |
|                | 0.193545106                           | 0.193545106              | -2.235864355 | 0.411206461  | -1.048017029                          |                    |             |   |              |
|                | 1.053206933                           | 5                        | 0            | 0.946087088  |                                       |                    |             |   |              |
| CCDC187        | ENSG00000260220.6                     | 0.085473096              | 1            | 1            | 0.085473096                           |                    |             |   |              |
|                | Brain_Caudate_basal_ganglia           | 0.085473096              |              |              | Brain_Caudate_basal_ganglia           | 1                  | 1           |   |              |
|                | 1                                     | -1.719776392             | -1.719776392 | -1.719776392 | NA                                    | 1                  | 0           |   |              |
|                | 0.946087088                           |                          |              |              |                                       |                    |             |   |              |
| SLC43A3        | ENSG00000134802.17                    | 0.085880827              | 2            | 2            | 0.036584836                           |                    |             |   |              |
|                | Brain_Cerebellar_Hemisphere           | 0.037414551              |              |              | Brain_Cerebellum                      | 1.772319364        |             |   |              |
|                | 0.227680636                           | 0.227680636              | 2.081211502  | 2.090367099  | 2.085789301                           |                    |             |   |              |
|                | 0.006473984                           | 2                        | 0            | 0.948453588  |                                       |                    |             |   |              |
| RP11-1293J14.1 | ENSG00000271868.1                     | 0.085896208              | 7            | 6            | 0.036538812                           |                    |             |   |              |
|                | Brain_Cerebellar_Hemisphere           | 0.618733468              |              |              | Brain_Nucleus_accumbens_basal_ganglia |                    |             |   |              |
|                | 3.782018733                           | 0.051047472              | 0.170436975  | -0.903836606 | 2.090880114                           |                    |             |   |              |
|                | 0.963220404                           | 1.221767512              | 6            | 0            | 0.948453588                           |                    |             |   |              |
| NRSN1          | ENSG00000152954.11                    | 0.08592797               | 4            | 4            | 0.022407469                           |                    |             |   |              |
|                | Brain_Putamen_basal_ganglia           | 0.979835123              |              |              | Brain_Spinal_cord_cervical_c-1        |                    |             |   |              |
|                | 1.869423251                           | 0.175301897              | 0.175301897  | -2.283388925 | 0.08357648                            |                    |             |   |              |
|                | -0.75641879                           | 1.104120734              | 4            | 0            | 0.948453588                           |                    |             |   |              |
| FAM220A        | ENSG00000178397.12                    | 0.086034728              | 1            | 1            | 0.086034728                           |                    |             |   |              |
|                | Brain_Frontal_Cortex_BA9              | 0.086034728              |              |              | Brain_Frontal_Cortex_BA9              | 1                  | 1           |   |              |
|                | 1                                     | -1.716696021             | -1.716696021 | -1.716696021 | NA                                    | 1                  | 0           |   |              |
|                | 0.948453588                           |                          |              |              |                                       |                    |             |   |              |
| GBGT1          | ENSG00000148288.11                    | 0.086117833              | 5            | 5            | 0.003359403                           |                    |             |   |              |
|                | Brain_Anterior_cingulate_cortex_BA24  | 0.812817615              |              |              |                                       |                    |             |   |              |
|                | Brain_Nucleus_accumbens_basal_ganglia | 1.257840685              |              |              | 0.743528686                           |                    |             |   |              |
|                | 0.743528686                           | -0.864977347             | 2.932781421  | 0.194405126  | 1.553146021                           |                    |             |   |              |
|                | 5                                     | 0                        | 0.948453588  |              |                                       |                    |             |   |              |
| FBXO18         | ENSG00000134452.19                    | 0.086129409              | 1            | 1            | 0.086129409                           |                    |             |   |              |
|                | Brain_Cortex                          | 0.086129409              |              |              | Brain_Cortex                          | 1                  | 1           | 1 | 1.716178326  |
|                | 1.716178326                           | 1.716178326              | NA           | 1            | 0                                     | 0.948453588        |             |   |              |
| C1QB           | ENSG00000173369.15                    | 0.086161426              | 2            | 2            | 0.068897278                           |                    |             |   |              |
|                | Brain_Anterior_cingulate_cortex_BA24  | 0.270111705              |              |              | Brain_Hypothalamus                    |                    |             |   |              |
|                | 1.085273304                           | 0.914726696              | 0.914726696  | 1.102805349  | 1.819092767                           |                    |             |   |              |

|              |                                       |                  |             |             |              |                                       |                |             |
|--------------|---------------------------------------|------------------|-------------|-------------|--------------|---------------------------------------|----------------|-------------|
| 1.460949058  | 0.50649169                            | 2                | 0           | 0.948453588 |              |                                       |                |             |
| MGST2        | ENSG00000085871.8                     | 0.086327937      | 4           | 4           | 0.007334133  |                                       |                |             |
|              | Brain_Nucleus_accumbens_basal_ganglia | 0.580072121      |             |             |              | Brain_Amygdala                        |                |             |
| 1.841904461  | 0.324352956                           | 0.324352956      |             |             | -2.681279034 | 0.553279376                           |                |             |
| -1.299275154 | 1.482582078                           |                  | 4           | 0           | 0.949539443  |                                       |                |             |
| TUBGCP3      | ENSG00000126216.13                    | 0.086600037      | 2           | 2           | 0.031511599  |                                       |                |             |
|              | Brain_Cerebellum                      | 0.733248779      |             |             |              | Brain_Cortex                          | 1.381051135    | 0.618948865 |
| 0.618948865  | -2.150551733                          |                  |             |             | -0.340807134 | -1.245679434                          | 1.279682678    |             |
| 2            | 0                                     | 0.950309951      |             |             |              |                                       |                |             |
| XRCC4        | ENSG00000152422.15                    | 0.086636209      | 4           | 4           | 0.118170473  |                                       |                |             |
|              | Brain_Caudate_basal_ganglia           | 0.862170658      |             |             |              | Brain_Putamen_basal_ganglia           |                |             |
| 2.570666346  | 0.121428431                           | 0.121428431      |             |             | -0.173611673 | 1.562499035                           |                |             |
| 0.978436901  | 0.786652238                           |                  | 4           | 0           | 0.950309951  |                                       |                |             |
| LINC00957    | ENSG00000235314.1                     | 0.086696823      | 10          | 4           | 0.01604256   |                                       |                |             |
|              | Brain_Hippocampus                     | 0.892334359      |             |             |              | Brain_Nucleus_accumbens_basal_ganglia |                |             |
| 8.318130721  | 0.010944358                           | 0.284879723      |             |             | -0.135351006 | 2.40794586                            |                |             |
| 1.915932226  | 0.755278495                           |                  | 4           | 0           | 0.950309951  |                                       |                |             |
| PAFAH1B2     | ENSG00000168092.13                    | 0.086903357      | 3           | 3           | 0.042431026  |                                       |                |             |
|              | Brain_Cortex                          | 0.46069512       |             |             |              | Brain_Cerebellum                      | 1.84597148     | 0.160204694 |
| 0.160204694  | 0.737702719                           | 2.029267749      |             |             | 1.431252594  | 0.651060841                           |                |             |
| 3            | 0                                     | 0.950309951      |             |             |              |                                       |                |             |
| NDRG4        | ENSG00000103034.14                    | 0.086934637      | 3           | 3           | 0.018602137  |                                       |                |             |
|              | Brain_Anterior_cingulate_cortex_BA24  | 0.839780698      |             |             |              | Brain_Cerebellum                      | 1.79678464     |             |
| 0.299501498  | 0.299501498                           | -0.202174        |             |             | 2.35340946   | 0.912231831                           | 1.30875382     |             |
| 3            | 0                                     | 0.950309951      |             |             |              |                                       |                |             |
| IL11RA       | ENSG00000137070.17                    | 0.08695638       | 10          | 10          | 0.004348323  |                                       | Brain_Amygdala |             |
| 0.880121433  |                                       | Brain_Cerebellum | 2.788493496 |             | 0.214984116  | 0.214984116                           |                |             |
| -0.798717587 | 2.851721107                           | 0.802119267      |             |             | 1.190413522  | 10                                    | 0              |             |
| 0.950309951  |                                       |                  |             |             |              |                                       |                |             |
| SPPL2B       | ENSG00000005206.16                    | 0.087008777      | 4           | 4           | 0.016836204  |                                       |                |             |
|              | Brain_Hippocampus                     | 0.880562955      |             |             |              | Brain_Cerebellum                      | 1.500081779    |             |
| 0.548559521  | 0.548559521                           | -2.390265342     |             |             | 1.253585171  | -0.212479661                          |                |             |
| 1.561816729  | 4                                     | 0                | 0.950309951 |             |              |                                       |                |             |
| RGL1         | ENSG00000143344.15                    | 0.087010896      | 2           | 2           | 0.033919364  |                                       |                |             |
|              | Brain_Caudate_basal_ganglia           | 0.811807593      |             |             |              | Brain_Amygdala                        | 1.175618353    |             |
| 0.824381647  | 0.824381647                           | -2.121028974     |             |             | 0.238094767  | -0.941467103                          |                |             |
| 1.668152395  | 2                                     | 0                | 0.950309951 |             |              |                                       |                |             |
| NDST1-AS1    | ENSG00000254333.1                     | 0.087143162      | 11          | 3           | 0.012967519  |                                       |                |             |
|              | Brain_Spinal_cord_cervical_c-1        | 0.187931729      |             |             |              | Brain_Hippocampus                     |                |             |
| 9.150181632  | 0.004251785                           | 0.345465906      |             |             | 1.316722291  | 2.484660078                           |                |             |
| 2.10403351   | 0.381559136                           | 3                | 0           | 0.950309951 |              |                                       |                |             |
| TAS1R3       | ENSG00000169962.4                     | 0.08728398       | 2           | 2           | 0.028815498  |                                       |                |             |
|              | Brain_Cerebellar_Hemisphere           | 0.087072307      |             |             |              | Brain_Cerebellum                      | 1.856791709    |             |
| 0.143208291  | 0.143208291                           | -2.186001466     |             |             | -1.711047705 | -1.948524585                          |                |             |
| 0.335843025  | 2                                     | 0                | 0.950309951 |             |              |                                       |                |             |
| SLC9A3R2     | ENSG00000065054.13                    | 0.087424769      | 1           | 1           | 0.087424769  |                                       |                |             |
|              | Brain_Cerebellar_Hemisphere           | 0.087424769      |             |             |              | Brain_Cerebellar_Hemisphere           | 1              | 1           |
| 1            | 1.709141356                           | 1.709141356      | 1.709141356 | NA          | 1            | 0                                     |                |             |
| 0.950309951  |                                       |                  |             |             |              |                                       |                |             |
| DKFZP434A062 | ENSG00000262075.3                     | 0.087542867      | 1           | 1           | 0.087542867  |                                       |                |             |
|              | Brain_Cortex                          | 0.087542867      |             |             |              | Brain_Cortex                          | 1              | 1           |
| -1.70850399  | -1.70850399                           | NA               | 1           | 0           | 0.950309951  |                                       |                |             |
| NUP50-AS1    | ENSG00000226328.6                     | 0.087567663      | 4           | 3           | 0.045326824  |                                       |                |             |
|              | Brain_Cortex                          | 0.356267667      |             |             |              | Brain_Frontal_Cortex_BA9              | 2.546584584    |             |
| 0.058102879  | 0.420414202                           | -1.462248076     |             |             | 2.00160878   | 0.679684473                           |                |             |
| 1.497494521  | 3                                     | 0                | 0.950309951 |             |              |                                       |                |             |
| FMO1         | ENSG00000010932.16                    | 0.087600296      | 2           | 2           | 0.027331612  |                                       |                |             |
|              | Brain_Hypothalamus                    | 0.27863377       |             |             |              | Brain_Hippocampus                     | 1.496528038    |             |
| 0.503471962  | 0.503471962                           | -2.206748829     |             |             | -1.083393567 | -1.645071198                          |                |             |
| 0.794332124  | 2                                     | 0                | 0.950309951 |             |              |                                       |                |             |
| ZNF484       | ENSG00000127081.13                    | 0.087617231      | 2           | 2           | 0.033644649  |                                       |                |             |
|              | Brain_Cerebellar_Hemisphere           | 0.051027624      |             |             |              | Brain_Cerebellum                      | 1.724779071    |             |



|             |                                      |                                |                             |              |                                      |              |              |                             |   |
|-------------|--------------------------------------|--------------------------------|-----------------------------|--------------|--------------------------------------|--------------|--------------|-----------------------------|---|
|             | 0.275220929                          | 0.275220929                    | -2.124304984                | -1.951247395 | -2.037776189                         |              |              |                             |   |
|             | 0.122370195                          | 2                              | 0                           | 0.950309951  |                                      |              |              |                             |   |
| DDX41       | ENSG00000183258.11                   | 0.087661972                    | 1                           | 1            | 0.087661972                          |              |              |                             |   |
|             | Brain_Frontal_Cortex_BA9             | 0.087661972                    |                             |              | Brain_Frontal_Cortex_BA9             | 1            | 1            |                             |   |
|             | 1                                    | -1.707861889                   | -1.707861889                | -1.707861889 | NA                                   | 1            | 0            |                             |   |
|             | 0.950309951                          |                                |                             |              |                                      |              |              |                             |   |
| RIPK3       | ENSG00000129465.15                   | 0.087668207                    | 2                           | 2            | 0.050769562                          |              |              |                             |   |
|             | Brain_Anterior_cingulate_cortex_BA24 | 0.067555458                    |                             |              | Brain_Frontal_Cortex_BA9             |              |              |                             |   |
|             | 1.473059382                          | 0.526940618                    | 0.526940618                 | 1.827960646  | 1.953422419                          |              |              |                             |   |
|             | 1.890691533                          | 0.08871487                     | 2                           | 0            | 0.950309951                          |              |              |                             |   |
| FXR2        | ENSG00000129245.11                   | 0.087683848                    | 1                           | 1            | 0.087683848                          |              |              | Brain_Amygdala              |   |
|             | 0.087683848                          | Brain_Amygdala                 | 1                           | 1            | 1                                    | -1.707744035 | -1.707744035 | -1.707744035                |   |
|             | -1.707744035                         | NA                             | 1                           | 0            | 0.950309951                          |              |              |                             |   |
| FAM181B     | ENSG00000182103.4                    | 0.08777586                     | 1                           | 1            | 0.08777586                           |              |              |                             |   |
|             | Brain_Caudate_basal_ganglia          | 0.08777586                     | Brain_Caudate_basal_ganglia | 1            | 1                                    | 1            |              |                             |   |
|             | -1.707248575                         | -1.707248575                   | -1.707248575                | NA           | 1                                    | 0            | 0.950309951  |                             |   |
| ZNF668      | ENSG00000167394.12                   | 0.087851043                    | 2                           | 2            | 0.042879754                          |              |              |                             |   |
|             | Brain_Cerebellar_Hemisphere          | 0.081249255                    |                             |              | Brain_Cortex                         | 1.483043853  |              |                             |   |
|             | 0.516956147                          | 0.516956147                    | -2.024879355                | -1.743483153 | -1.884181254                         |              |              |                             |   |
|             | 0.198977163                          | 2                              | 0                           | 0.950309951  |                                      |              |              |                             |   |
| BRI3        | ENSG00000164713.9                    | 0.088013723                    | 1                           | 1            | 0.088013723                          |              |              | Brain_Cerebellum            |   |
|             | 0.088013723                          | Brain_Cerebellum               | 1                           | 1            | 1                                    | -1.705969691 | -1.705969691 | -1.705969691                |   |
|             | -1.705969691                         | NA                             | 1                           | 0            | 0.950309951                          |              |              |                             |   |
| JAZF1       | ENSG00000153814.11                   | 0.088087172                    | 1                           | 1            | 0.088087172                          |              |              |                             |   |
|             | Brain_Spinal_cord_cervical_c-1       | 0.088087172                    |                             |              | Brain_Spinal_cord_cervical_c-1       |              |              |                             |   |
|             | 1                                    | 1                              | 1                           | 1.70557535   | 1.70557535                           | 1.70557535   | NA           | 1                           | 0 |
|             | 0.950309951                          |                                |                             |              |                                      |              |              |                             |   |
| PLEKHH1     | ENSG00000054690.13                   | 0.088272525                    | 2                           | 2            | 0.289939532                          |              |              |                             |   |
|             | Brain_Cerebellum                     | 0.984082541                    |                             |              | Brain_Cerebellar_Hemisphere          | 1.872720261  |              |                             |   |
|             | 0.127279739                          | 0.127279739                    | -1.058254276                | 0.0199509    | -0.519151688                         |              |              |                             |   |
|             | 0.762406192                          | 2                              | 0                           | 0.950309951  |                                      |              |              |                             |   |
| ARL4A       | ENSG00000122644.12                   | 0.0883378                      | 1                           | 1            | 0.0883378                            |              |              | Brain_Cerebellar_Hemisphere |   |
|             | 0.0883378                            | Brain_Cerebellar_Hemisphere    | 1                           | 1            | 1                                    | 1.704231747  |              |                             |   |
|             | 1.704231747                          | 1.704231747                    | NA                          | 1            | 0                                    | 0.950309951  |              |                             |   |
| PPIAL4A     | ENSG00000263353.3                    | 0.088338931                    | 2                           | 2            | 0.028087444                          |              |              |                             |   |
|             | Brain_Cerebellum                     | 0.229295067                    |                             |              | Brain_Cerebellar_Hemisphere          | 1.610371989  |              |                             |   |
|             | 0.389628011                          | 0.389628011                    | -1.202176721                | 2.196062865  | 0.496943072                          |              |              |                             |   |
|             | 2.402918256                          | 2                              | 0                           | 0.950309951  |                                      |              |              |                             |   |
| PRR29-AS1   | ENSG00000264954.1                    | 0.088395317                    | 1                           | 1            | 0.088395317                          |              |              |                             |   |
|             | Brain_Cortex                         | 0.088395317                    | Brain_Cortex                | 1            | 1                                    | 1            | 1.703923836  |                             |   |
|             | 1.703923836                          | 1.703923836                    | NA                          | 1            | 0                                    | 0.950309951  |              |                             |   |
| SEPHS2      | ENSG00000179918.18                   | 0.088469802                    | 2                           | 2            | 0.05713908                           |              |              |                             |   |
|             | Brain_Spinal_cord_cervical_c-1       | 0.225887593                    |                             |              | Brain_Putamen_basal_ganglia          |              |              |                             |   |
|             | 1.05406564                           | 0.94593436                     | 0.94593436                  | -1.211020383 | 1.902245402                          | 0.34561251   |              |                             |   |
|             | 2.201411348                          | 2                              | 0                           | 0.950309951  |                                      |              |              |                             |   |
| CPM         | ENSG00000135678.11                   | 0.088485755                    | 4                           | 4            | 0.06726681                           |              |              | Brain_Cortex                |   |
|             | 0.353788794                          | Brain_Spinal_cord_cervical_c-1 |                             |              | 2.468148059                          | 0.102429572  |              |                             |   |
|             | 0.102429572                          | -0.931226575                   | 1.829887186                 | 0.850344177  | 1.247022492                          |              |              |                             |   |
|             | 4                                    | 0                              | 0.950309951                 |              |                                      |              |              |                             |   |
| RP11-17E3.1 | ENSG00000278532.1                    | 0.088563213                    | 1                           | 1            | 0.088563213                          |              |              |                             |   |
|             | Brain_Substantia_nigra               | 0.088563213                    | Brain_Substantia_nigra      | 1            | 1                                    |              |              |                             |   |
|             | 1                                    | -1.703025948                   | -1.703025948                | -1.703025948 | NA                                   | 1            | 0            |                             |   |
|             | 0.950309951                          |                                |                             |              |                                      |              |              |                             |   |
| MC1R        | ENSG00000258839.3                    | 0.088587992                    | 11                          | 5            | 0.015647103                          |              |              |                             |   |
|             | Brain_Putamen_basal_ganglia          | 0.433020867                    |                             |              | Brain_Anterior_cingulate_cortex_BA24 |              |              |                             |   |
|             | 8.192879312                          | 0.011249257                    | 0.317893258                 | 0.784032795  | 2.417044521                          |              |              |                             |   |
|             | 1.756136101                          | 0.512242804                    | 5                           | 0            | 0.950309951                          |              |              |                             |   |
| AC005498.4  | ENSG00000267224.1                    | 0.088657402                    | 4                           | 4            | 0.056340722                          |              |              |                             |   |
|             | Brain_Cerebellum                     | 0.660332619                    |                             |              | Brain_Frontal_Cortex_BA9             | 2.384323599  |              |                             |   |
|             | 0.100308633                          | 0.100308633                    | -0.439453983                | 1.908390823  | 0.917530139                          |              |              |                             |   |
|             | 1.009582161                          | 4                              | 0                           | 0.950309951  |                                      |              |              |                             |   |
| PVALB       | ENSG00000100362.12                   | 0.088683904                    | 1                           | 1            | 0.088683904                          |              |              | Brain_Cerebellum            |   |
|             | 0.088683904                          | Brain_Cerebellum               | 1                           | 1            | 1                                    | 1.702381349  | 1.702381349  | 1.702381349                 |   |

|              |                                      |                                      |              |              |                                       |              |             |             |                  |
|--------------|--------------------------------------|--------------------------------------|--------------|--------------|---------------------------------------|--------------|-------------|-------------|------------------|
| 1.702381349  | NA                                   | 1                                    | 0            | 0.950309951  |                                       |              |             |             |                  |
| PSEN1        | ENSG00000080815.18                   | 0.088796594                          | 1            | 1            | 0.088796594                           |              |             |             |                  |
|              | Brain_Cerebellar_Hemisphere          | 0.088796594                          |              |              | Brain_Cerebellar_Hemisphere           | 1            | 1           |             |                  |
|              | 1_1.701780122                        | 1.701780122                          | 1.701780122  | NA           | 1                                     | 0            |             |             |                  |
|              | 0.950309951                          |                                      |              |              |                                       |              |             |             |                  |
| PCBP3        | ENSG00000183570.16                   | 0.088903028                          | 6            | 4            | 0.006209366                           |              |             |             |                  |
|              | Brain_Frontal_Cortex_BA9             | 0.082663147                          |              |              | Brain_Cerebellum                      | 4.687873198  |             |             |                  |
|              | 0.034522468                          | 0.185679956                          | -2.73651554  | -1.735438606 | -2.262617119                          |              |             |             |                  |
|              | 0.389736708                          | 4                                    | 0            | 0.950309951  |                                       |              |             |             |                  |
| LINC01451    | ENSG00000279141.3                    | 0.089056533                          | 1            | 1            | 0.089056533                           |              |             |             |                  |
|              | Brain_Cerebellum                     | 0.089056533                          |              |              | Brain_Cerebellum                      | 1            | 1           | 1           | 1.700395632      |
|              | 1.700395632                          | 1.700395632                          | NA           | 1            | 0                                     | 0.950309951  |             |             |                  |
| C1GALT1C1L   | ENSG00000223658.7                    | 0.089064575                          | 1            | 1            | 0.089064575                           |              |             |             |                  |
|              | Brain_Spinal_cord_cervical_c-1       | 0.089064575                          |              |              | Brain_Spinal_cord_cervical_c-1        |              |             |             |                  |
|              | 1_1_1                                | 1.70035285                           | 1.70035285   | 1.70035285   | NA                                    | 1            | 0           | 0.950309951 |                  |
| RP11-758H9.2 | ENSG00000273702.1                    | 0.08910603                           | 2            | 2            | 0.030585417                           |              |             |             |                  |
|              | Brain_Cortex                         | 0.058453872                          |              |              | Brain_Cerebellar_Hemisphere           | 1.753557502  |             |             |                  |
|              | 0.246442498                          | 0.246442498                          | 1.892278587  | 2.162425197  | 2.027351892                           |              |             |             |                  |
|              | 0.1910225                            | 2                                    | 0            | 0.950309951  |                                       |              |             |             |                  |
| DNAJC21      | ENSG00000168724.14                   | 0.089108486                          | 1            | 1            | 0.089108486                           |              |             |             |                  |
|              | Brain_Frontal_Cortex_BA9             | 0.089108486                          |              |              | Brain_Frontal_Cortex_BA9              | 1            | 1           |             |                  |
|              | 1_-1.700119309                       | -1.700119309                         | -1.700119309 | NA           | 1                                     | 0            |             |             |                  |
|              | 0.950309951                          |                                      |              |              |                                       |              |             |             |                  |
| TNFSF14      | ENSG00000125735.10                   | 0.089114833                          | 1            | 1            | 0.089114833                           |              |             |             |                  |
|              | Brain_Substantia_nigra               | 0.089114833                          |              |              | Brain_Substantia_nigra                | 1            | 1           |             |                  |
|              | 1_-1.70008556                        | -1.70008556                          | -1.70008556  | NA           | 1                                     | 0            |             |             |                  |
|              | 0.950309951                          |                                      |              |              |                                       |              |             |             |                  |
| C1orf27      | ENSG00000157181.15                   | 0.089114906                          | 6            | 5            | 0.096335827                           |              |             |             |                  |
|              | Brain_Hypothalamus                   | 0.650430181                          |              |              | Brain_Cerebellar_Hemisphere           | 3.449317712  |             |             |                  |
|              | 0.042582805                          | 0.300114295                          | -1.662883153 | 0.907996876  | -0.39929381                           |              |             |             |                  |
|              | 0.982115665                          | 5                                    | 0            | 0.950309951  |                                       |              |             |             |                  |
| AP5S1        | ENSG00000125843.10                   | 0.089286229                          | 2            | 2            | 0.028684462                           |              |             |             | Brain_Cerebellum |
|              | 0.393237703                          | Brain_Cerebellar_Hemisphere          | 1.475861992  | 0.524138008  |                                       |              |             |             |                  |
|              | 0.524138008                          | 0.853760503                          | 2.187796041  | 1.520778272  | 0.943305575                           |              |             |             |                  |
|              | 2                                    | 0                                    | 0.951411752  |              |                                       |              |             |             |                  |
| KIF9         | ENSG00000088727.12                   | 0.089464069                          | 1            | 1            | 0.089464069                           |              |             |             |                  |
|              | Brain_Hypothalamus                   | 0.089464069                          |              |              | Brain_Hypothalamus                    | 1            | 1           | 1           |                  |
|              | 1.698231546                          | 1.698231546                          | 1.698231546  | NA           | 1                                     | 0            | 0.952099339 |             |                  |
| AC011995.1   | ENSG00000237720.1                    | 0.089486858                          | 4            | 4            | 0.038205488                           |              |             |             |                  |
|              | Brain_Caudate_basal_ganglia          | 0.517519739                          |              |              | Brain_Nucleus_accumbens_basal_ganglia |              |             |             |                  |
|              | 1.409363882                          | 0.59998248                           | 0.59998248   | -2.072643297 | 1.647344                              | -0.580262295 |             |             |                  |
|              | 1.595885526                          | 4                                    | 0            | 0.952099339  |                                       |              |             |             |                  |
| ST8SIA6      | ENSG00000148488.15                   | 0.089594123                          | 1            | 1            | 0.089594123                           |              |             |             |                  |
|              | Brain_Cerebellar_Hemisphere          | 0.089594123                          |              |              | Brain_Cerebellar_Hemisphere           | 1            | 1           |             |                  |
|              | 1_1.697542609                        | 1.697542609                          | 1.697542609  | NA           | 1                                     | 0            |             |             |                  |
|              | 0.952420243                          |                                      |              |              |                                       |              |             |             |                  |
| RAB17        | ENSG00000124839.12                   | 0.089813549                          | 3            | 2            | 0.023881641                           |              |             |             | Brain_Cortex     |
|              | 0.11289235                           | Brain_Anterior_cingulate_cortex_BA24 | 2.592689124  | 0.012607052  |                                       |              |             |             |                  |
|              | 0.394703824                          | 1.585325714                          | 2.259028029  | 1.98614668   | 0.354605572                           | 2            |             |             |                  |
|              | 0                                    | 0.952420243                          |              |              |                                       |              |             |             |                  |
| HLA-DQA1     | ENSG00000196735.11                   | 0.08988419                           | 9            | 7            | 0.007975966                           |              |             |             |                  |
|              | Brain_Anterior_cingulate_cortex_BA24 | 0.847472721                          |              |              | Brain_Cortex                          |              |             |             |                  |
|              | 4.059890872                          | 0.092429676                          | 0.217651193  | -1.29930358  | 2.65308552                            |              |             |             |                  |
|              | 0.046952195                          | 1.140938789                          | 7            | 0            | 0.952420243                           |              |             |             |                  |
| NMB          | ENSG00000197696.9                    | 0.089892054                          | 1            | 1            | 0.089892054                           |              |             |             |                  |
|              | Brain_Caudate_basal_ganglia          | 0.089892054                          |              |              | Brain_Caudate_basal_ganglia           | 1            | 1           |             |                  |
|              | 1_-1.695967401                       | -1.695967401                         | -1.695967401 | NA           | 1                                     | 0            |             |             |                  |
|              | 0.952420243                          |                                      |              |              |                                       |              |             |             |                  |
| GPD1         | ENSG00000167588.12                   | 0.089924308                          | 2            | 2            | 0.039524027                           |              |             |             | Brain_Cerebellum |
|              | 0.172438179                          | Brain_Cerebellar_Hemisphere          | 1.854696251  | 0.145303749  |                                       |              |             |             |                  |
|              | 0.145303749                          | 1.364411217                          | 2.058689139  | 1.711550178  | 0.490928627                           |              |             |             |                  |
|              | 2                                    | 0                                    | 0.952420243  |              |                                       |              |             |             |                  |

|           |                                       |                                       |                             |              |              |                  |
|-----------|---------------------------------------|---------------------------------------|-----------------------------|--------------|--------------|------------------|
| SPAG9     | ENSG00000008294.20                    | 0.089925462                           | 2                           | 1            | 0.071547433  | Brain_Cerebellum |
|           | 0.114727175                           | Brain_Putamen_basal_ganglia           | 1.985522352                 | 0.014477648  |              |                  |
|           | 1.985522352                           | -1.577297117                          | 1.801987111                 | 0.112344997  | 2.389514793  |                  |
|           | 1                                     | 0                                     | 0.952420243                 |              |              |                  |
| AKAP8L    | ENSG00000011243.17                    | 0.090057514                           | 2                           | 2            | 0.0329849    |                  |
|           | Brain_Substantia_nigra                | 0.610019471                           | Brain_Cerebellum            | 1.003605183  |              |                  |
|           | 0.996394817                           | 0.996394817                           | -2.13226704                 | 0.510045663  | -0.811110688 |                  |
|           | 1.86839723                            | 2                                     | 0                           | 0.95259636   |              |                  |
| RNPS1     | ENSG000000205937.11                   | 0.090146052                           | 11                          | 3            | 0.015569622  |                  |
|           | Brain_Hippocampus                     | 0.916936926                           | Brain_Frontal_Cortex_BA9    | 8.435016572  |              |                  |
|           | 0.000323129                           | 0.848873555                           | -2.418850878                | 0.757234388  | 0.10433538   |                  |
|           | 0.900773096                           | 3                                     | 0                           | 0.95259636   |              |                  |
| SHROOM3   | ENSG00000138771.14                    | 0.090194422                           | 4                           | 4            | 0.044759431  |                  |
|           | Brain_Cerebellar_Hemisphere           | 0.74929592                            | Brain_Cerebellum            | 1.726020587  |              |                  |
|           | 0.315631424                           | 0.315631424                           | -2.00690827                 | 1.050648503  | -0.546686001 |                  |
|           | 1.273835805                           | 4                                     | 0                           | 0.95259636   |              |                  |
| ENKUR     | ENSG00000151023.16                    | 0.090214436                           | 2                           | 2            | 0.081491226  | Brain_Amygdala   |
|           | 0.21245362                            | Brain_Putamen_basal_ganglia           | 1.048413489                 | 0.951586511  |              |                  |
|           | 0.951586511                           | 1.246846954                           | 1.74209841                  | 1.494472682  | 0.350195663  | 2                |
|           | 0                                     | 0.95259636                            |                             |              |              |                  |
| THAP3     | ENSG00000041988.15                    | 0.090287921                           | 3                           | 3            | 0.014902212  | Brain_Cerebellum |
|           | 0.315393239                           | Brain_Cortex                          | 2.376057945                 | 0.101018659  | 0.101018659  |                  |
|           | -2.434746837                          | -1.003969657                          | -1.644766494                | 0.726961225  | 3            | 0                |
|           | 0.952653319                           |                                       |                             |              |              |                  |
| HMOX2     | ENSG00000103415.11                    | 0.090445378                           | 2                           | 1            | 0.082283897  | Brain_Cerebellum |
|           | 0.102139479                           | Brain_Nucleus_accumbens_basal_ganglia | 1.983552653                 |              |              |                  |
|           | 0.016447347                           | 1.983552653                           | -1.63456877                 | 1.737585386  | 0.051508308  |                  |
|           | 2.384473071                           | 1                                     | 0                           | 0.953595542  |              |                  |
| REEP2     | ENSG00000132563.15                    | 0.090516819                           | 3                           | 3            | 0.175781806  | Brain_Cerebellum |
|           | 0.289783178                           | Brain_Cortex                          | 1.465197411                 | 0.592114889  | 0.592114889  |                  |
|           | -1.058597386                          | 1.353857621                           | 0.495810542                 | 1.348582076  | 3            | 0                |
|           | 0.953630131                           |                                       |                             |              |              |                  |
| AMPD3     | ENSG00000133805.15                    | 0.090763073                           | 13                          | 8            | 0.057082376  |                  |
|           | Brain_Frontal_Cortex_BA9              | 0.954063394                           | Brain_Cerebellum            | 6.882868544  |              |                  |
|           | 0.058448404                           | 0.268434677                           | -0.740009369                | 1.902679518  | 0.493351588  |                  |
|           | 0.678818347                           | 8                                     | 0                           | 0.955505003  |              |                  |
| AKR1C2    | ENSG00000151632.17                    | 0.090832845                           | 12                          | 1            | 0.016302379  |                  |
|           | Brain_Hypothalamus                    | 0.295772923                           | Brain_Caudate_basal_ganglia | 11.00517619  |              |                  |
|           | 0.00074031                            | 11.00517619                           | 1.045541169                 | 2.402074707  | 1.619291452  |                  |
|           | 0.353298999                           | 1                                     | 0                           | 0.955520549  |              |                  |
| SPACA6    | ENSG00000182310.13                    | 0.091131079                           | 1                           | 1            | 0.091131079  |                  |
|           | Brain_Frontal_Cortex_BA9              | 0.091131079                           | Brain_Frontal_Cortex_BA9    | 1            | 1            |                  |
|           | 1                                     | -1.68946121                           | -1.68946121                 | -1.68946121  | NA           | 1                |
|           | 0.957814531                           |                                       |                             |              | 0            |                  |
| SEMA3B    | ENSG00000012171.19                    | 0.091187832                           | 1                           | 1            | 0.091187832  |                  |
|           | Brain_Nucleus_accumbens_basal_ganglia | 0.091187832                           |                             |              |              |                  |
|           | Brain_Nucleus_accumbens_basal_ganglia | 1                                     | 1                           | 1            | -1.689164908 |                  |
|           | -1.689164908                          | -1.689164908                          | NA                          | 1            | 0            | 0.957814531      |
| C21orf91  | ENSG00000154642.10                    | 0.091259422                           | 2                           | 2            | 0.043391012  |                  |
|           | Brain_Cerebellum                      | 0.055746059                           | Brain_Cerebellar_Hemisphere | 1.620352874  |              |                  |
|           | 0.379647126                           | 0.379647126                           | 1.913015574                 | 2.019926505  | 1.966471039  |                  |
|           | 0.075597444                           | 2                                     | 0                           | 0.957847387  |              |                  |
| PSME4     | ENSG00000068878.14                    | 0.091394192                           | 1                           | 1            | 0.091394192  |                  |
|           | Brain_Substantia_nigra                | 0.091394192                           | Brain_Substantia_nigra      | 1            | 1            |                  |
|           | 1                                     | -1.688088758                          | -1.688088758                | -1.688088758 | NA           | 1                |
|           | 0.958542836                           |                                       |                             |              | 0            |                  |
| HIST1H2BJ | ENSG00000124635.8                     | 0.091575448                           | 1                           | 1            | 0.091575448  |                  |
|           | Brain_Cerebellar_Hemisphere           | 0.091575448                           | Brain_Cerebellar_Hemisphere | 1            | 1            |                  |
|           | 1                                     | -1.687145138                          | -1.687145138                | -1.687145138 | NA           | 1                |
|           | 0.958592126                           |                                       |                             |              | 0            |                  |
| KPNB1     | ENSG00000108424.9                     | 0.091637038                           | 1                           | 1            | 0.091637038  |                  |
|           | Brain_Cerebellar_Hemisphere           | 0.091637038                           | Brain_Cerebellar_Hemisphere | 1            | 1            |                  |

|              |                                       |                                      |              |              |                                |              |             |                  |
|--------------|---------------------------------------|--------------------------------------|--------------|--------------|--------------------------------|--------------|-------------|------------------|
| 1            | 1.68682484                            | 1.68682484                           | 1.68682484   | NA           | 1                              | 0            | 0.958592126 |                  |
| CCDC127      | ENSG00000164366.3                     | 0.091825839                          | 0.091825839  |              | 11                             | 4            | 0.041386339 |                  |
|              | Brain_Hypothalamus                    | 0.898034552                          | 0.898034552  |              | Brain_Frontal_Cortex_BA9       |              | 9.121795342 |                  |
|              | 0.002723471                           | 0.31965708                           | 0.128144587  |              | 2.039638557                    |              | 1.141047525 |                  |
|              | 0.52415788                            | 4                                    | 0            | 0.958592126  |                                |              |             |                  |
| ZNF596       | ENSG00000172748.13                    | 0.091859236                          | 0.091859236  |              | 1                              | 1            | 0.091859236 |                  |
|              | Brain_Cerebellum                      | 0.091859236                          | 0.091859236  |              | Brain_Cerebellum1              | 1            | 1           | -1.685670738     |
|              | -1.685670738                          | -1.685670738                         | NA           | 1            | 0                              | 0.958592126  |             |                  |
| MT1F         | ENSG00000198417.6                     | 0.091996854                          | 0.091996854  |              | 1                              | 1            | 0.091996854 | Brain_Cerebellum |
|              | 0.091996854                           | Brain_Cerebellum1                    | 1            | 1            | 1                              | 1.684957073  |             | 1.684957073      |
|              | 1.684957073                           | NA                                   | 1            | 0            | 0.958592126                    |              |             |                  |
| FTCD         | ENSG00000160282.13                    | 0.092059044                          | 0.092059044  |              | 12                             | 3            | 0.080251072 | Brain_Cerebellum |
|              | 0.670041639                           | Brain_Anterior_cingulate_cortex_BA24 | 8.36707897   | 0.015381579  |                                |              |             |                  |
|              | 0.523622152                           | -1.749231147                         | 0.76737811   | -1.00850732  | 0.692227245                    |              |             | 3                |
|              | 0                                     | 0.958592126                          |              |              |                                |              |             |                  |
| KCNJ12       | ENSG00000184185.9                     | 0.092067481                          | 0.092067481  |              | 4                              | 4            | 0.0689058   |                  |
|              | Brain_Nucleus_accumbens_basal_ganglia | 0.448043731                          | 0.448043731  |              | Brain_Hypothalamus             |              |             |                  |
|              | 1.621910508                           | 0.455555987                          | 0.455555987  |              | -1.273199904                   |              | 1.819036905 |                  |
|              | 0.258029471                           | 1.504342734                          | 4            | 0            | 0.958592126                    |              |             |                  |
| RP11-379F4.7 | ENSG00000272087.1                     | 0.092129116                          | 0.092129116  |              | 1                              | 1            | 0.092129116 |                  |
|              | Brain_Hippocampus                     | 0.092129116                          | 0.092129116  |              | Brain_Hippocampus              | 1            | 1           | 1                |
|              | -1.684271991                          | -1.684271991                         | -1.684271991 | NA           | 1                              | 0            | 0.958592126 |                  |
| RGS16        | ENSG00000143333.6                     | 0.092169526                          | 0.092169526  |              | 2                              | 2            | 0.031150708 |                  |
|              | Brain_Nucleus_accumbens_basal_ganglia | 0.681656733                          | 0.681656733  |              | Brain_Cerebellar_Hemisphere    |              |             |                  |
|              | 1.343546465                           | 0.656453535                          | 0.656453535  |              | -2.155142201                   |              | -0.41020342 |                  |
|              | -1.28267281                           | 1.233858045                          | 2            | 0            | 0.958592126                    |              |             |                  |
| B4GALT5      | ENSG00000158470.5                     | 0.092229716                          | 0.092229716  |              | 3                              | 3            | 0.013617352 |                  |
|              | Brain_Cerebellar_Hemisphere           | 0.698039171                          | 0.698039171  |              | Brain_Spinal_cord_cervical_c-1 |              |             |                  |
|              | 1.813576656                           | 0.174336611                          | 0.174336611  |              | -2.467201988                   |              | 0.387968735 |                  |
|              | -1.367402546                          | 1.53633681                           | 3            | 0            | 0.958592126                    |              |             |                  |
| LINC01151    | ENSG00000253819.1                     | 0.092277051                          | 0.092277051  |              | 1                              | 1            | 0.092277051 |                  |
|              | Brain_Cerebellum                      | 0.092277051                          | 0.092277051  |              | Brain_Cerebellum1              | 1            | 1           | -1.683506659     |
|              | -1.683506659                          | -1.683506659                         | NA           | 1            | 0                              | 0.958592126  |             |                  |
| NALCN        | ENSG00000102452.15                    | 0.092350663                          | 0.092350663  |              | 3                              | 3            | 0.015574307 |                  |
|              | Brain_Cerebellar_Hemisphere           | 0.762226944                          | 0.762226944  |              | Brain_Caudate_basal_ganglia    |              |             |                  |
|              | 1.169342636                           | 0.837110535                          | 0.837110535  |              | 0.302557714                    |              | 2.418741411 |                  |
|              | 1.218861906                           | 1.086218016                          | 3            | 0            | 0.958592126                    |              |             |                  |
| LYAR         | ENSG00000145220.13                    | 0.092514405                          | 0.092514405  |              | 1                              | 1            | 0.092514405 |                  |
|              | Brain_Putamen_basal_ganglia           | 0.092514405                          | 0.092514405  |              | Brain_Putamen_basal_ganglia1   | 1            | 1           |                  |
|              | 1                                     | -1.682280784                         | -1.682280784 | -1.682280784 | NA                             | 1            | 0           |                  |
|              | 0.958592126                           |                                      |              |              |                                |              |             |                  |
| MBD5         | ENSG00000204406.12                    | 0.092540247                          | 0.092540247  |              | 1                              | 1            | 0.092540247 | Brain_Cerebellum |
|              | 0.092540247                           | Brain_Cerebellum1                    | 1            | 1            | 1                              | -1.682147473 |             | -1.682147473     |
|              | -1.682147473                          | NA                                   | 1            | 0            | 0.958592126                    |              |             |                  |
| LINC00472    | ENSG00000233237.6                     | 0.092588611                          | 0.092588611  |              | 1                              | 1            | 0.092588611 |                  |
|              | Brain_Amygdala                        | 0.092588611                          | 0.092588611  |              | Brain_Amygdala                 | 1            | 1           | 1                |
|              | 1.681898051                           | 1.681898051                          | NA           | 1            | 0                              | 0.958592126  |             | 1.681898051      |
|              | 0.717215043                           | 3                                    | 0            | 0.958592126  |                                |              |             |                  |
| GXYLT2       | ENSG00000172986.12                    | 0.092598553                          | 0.092598553  |              | 9                              | 3            | 0.106074025 |                  |
|              | Brain_Hippocampus                     | 0.997644263                          | 0.997644263  |              | Brain_Putamen_basal_ganglia    | 7.450730629  |             |                  |
|              | 0.014613336                           | 0.408852588                          | -1.616093846 | 0.473402767  |                                | -0.200609533 |             |                  |
|              | 0.717215043                           | 3                                    | 0            | 0.958592126  |                                |              |             |                  |
| LINC01504    | ENSG00000225434.2                     | 0.092836042                          | 0.092836042  |              | 2                              | 2            | 0.029605695 |                  |
|              | Brain_Spinal_cord_cervical_c-1        | 0.910796373                          | 0.910796373  |              | Brain_Substantia_nigra         |              |             |                  |
|              | 1.118890947                           | 0.881109053                          | 0.881109053  |              | -0.112034095                   |              | 2.175326    |                  |
|              | 1.031645953                           | 1.617407835                          | 2            | 0            | 0.958592126                    |              |             |                  |
| SMAD4        | ENSG00000141646.13                    | 0.092869953                          | 0.092869953  |              | 2                              | 2            | 0.03843264  |                  |
|              | Brain_Substantia_nigra                | 0.710685419                          | 0.710685419  |              | Brain_Cerebellum1              | 1.147432193  |             |                  |
|              | 0.852567807                           | 0.852567807                          | 0.370935707  |              | 2.070210464                    |              | 1.220573086 |                  |
|              | 1.201568704                           | 2                                    | 0            | 0.958592126  |                                |              |             |                  |
| PSG8-AS1     | ENSG00000225877.1                     | 0.092931349                          | 0.092931349  |              | 2                              | 2            | 0.029344843 |                  |
|              | Brain_Caudate_basal_ganglia           | 0.945348853                          | 0.945348853  |              | Brain_Cerebellar_Hemisphere    |              |             |                  |
|              | 1.000604229                           | 0.999395771                          | 0.999395771  |              | -2.178822689                   |              | 0.068548702 |                  |

|              |                                       |                   |             |              |             |                                       |             |                   |   |
|--------------|---------------------------------------|-------------------|-------------|--------------|-------------|---------------------------------------|-------------|-------------------|---|
|              | -1.055136994                          | 1.58913155        | 2           | 0            | 0.958592126 |                                       |             |                   |   |
| SLC35F4      | ENSG00000151812.14                    | 0.092993468       |             | 3            | 3           | 0.06453311                            |             |                   |   |
|              | Brain_Putamen_basal_ganglia           | 0.18035051        |             |              |             | Brain_Cerebellar_Hemisphere           | 1.614910562 |                   |   |
|              | 0.399849432                           | 0.399849432       |             | 1.339676595  |             | 1.848478789                           |             | 1.517289846       |   |
|              | 0.287069744                           | 3                 | 0           | 0.958592126  |             |                                       |             |                   |   |
| ZNF528       | ENSG00000167555.13                    | 0.093024648       |             | 13           | 1           | 0.0413572                             |             |                   |   |
|              | Brain_Hippocampus                     | 0.416235919       |             |              |             | Brain_Cerebellar_Hemisphere           | 11.97452156 |                   |   |
|              | 0.0004555                             | 11.97452156       |             | -2.039930983 |             | -0.812968848                          |             | -1.608012512      |   |
|              | 0.33493106                            | 1                 | 0           | 0.958592126  |             |                                       |             |                   |   |
| CORO6        | ENSG00000167549.18                    | 0.093253239       |             | 4            | 4           | 0.047200394                           |             | Brain_Cerebellum  |   |
|              | 0.988328796                           | Brain_Cortex      |             | 2.153221447  |             | 0.280863166                           |             | 0.280863166       |   |
|              | -1.984497616                          | 1.149529271       |             | -0.071452634 |             | 1.357100131                           |             | 4                 | 0 |
|              | 0.958592126                           |                   |             |              |             |                                       |             |                   |   |
| ANXA9        | ENSG00000143412.9                     | 0.09336059        | 4           | 4            | 0.105330988 |                                       |             |                   |   |
|              | Brain_Frontal_Cortex_BA9              | 0.369580731       |             |              |             | Brain_Caudate_basal_ganglia           |             |                   |   |
|              | 1.960320119                           | 0.32950995        | 0.32950995  | -1.081563204 |             | 1.61954065                            |             | 0.677493177       |   |
|              | 1.209232417                           | 4                 | 0           | 0.958592126  |             |                                       |             |                   |   |
| TPP1         | ENSG00000166340.15                    | 0.093411958       |             | 1            | 1           | 0.093411958                           |             | Brain_Cerebellum  |   |
|              | 0.093411958                           | Brain_Cerebellum  | 1           | 1            | 1           | 1.677667856                           |             | 1.677667856       |   |
|              | 1.677667856                           | NA                | 1           | 0            | 0.958592126 |                                       |             |                   |   |
| RP11-496H1.2 | ENSG00000273308.1                     | 0.093420632       |             | 2            | 2           | 0.038369781                           |             |                   |   |
|              | Brain_Cortex                          | 0.285561757       |             |              |             | Brain_Cerebellum                      | 1.197142979 | 0.802857021       |   |
|              | 0.802857021                           | 1.067908569       |             | 2.070882472  |             | 1.56939552                            | 0.709209648 |                   | 2 |
|              | 0                                     | 0.958592126       |             |              |             |                                       |             |                   |   |
| AQP11        | ENSG00000178301.3                     | 0.093433133       |             | 6            | 5           | 0.047025565                           |             |                   |   |
|              | Brain_Hypothalamus                    | 0.877636759       |             |              |             | Brain_Anterior_cingulate_cortex_BA24  |             |                   |   |
|              | 3.435267322                           | 0.056032628       |             | 0.247272738  |             | -1.343581417                          |             | 1.986069882       |   |
|              | 0.253940953                           | 1.122308882       |             | 5            | 0           | 0.958592126                           |             |                   |   |
| PRKAR2A      | ENSG00000114302.15                    | 0.093468976       |             | 2            | 2           | 0.104733156                           |             |                   |   |
|              | Brain_Substantia_nigra                | 0.173043316       |             |              |             | Brain_Anterior_cingulate_cortex_BA24  |             |                   |   |
|              | 1.05387396                            | 0.94612604        | 0.94612604  | -1.362489943 |             | 1.62232791                            |             | 0.129918983       |   |
|              | 2.110584944                           | 2                 | 0           | 0.958592126  |             |                                       |             |                   |   |
| HSD11B2      | ENSG00000176387.6                     | 0.093551324       |             | 1            | 1           | 0.093551324                           |             |                   |   |
|              | Brain_Frontal_Cortex_BA9              | 0.093551324       |             |              |             | Brain_Frontal_Cortex_BA9              | 1           | 1                 |   |
|              | 1                                     | 1.676954783       | 1.676954783 | 1.676954783  |             | NA                                    | 1           | 0                 |   |
|              | 0.958592126                           |                   |             |              |             |                                       |             |                   |   |
| CYTH4        | ENSG00000100055.20                    | 0.093693137       |             | 1            | 1           | 0.093693137                           |             |                   |   |
|              | Brain_Spinal_cord_cervical_c-1        | 0.093693137       |             |              |             | Brain_Spinal_cord_cervical_c-1        |             |                   |   |
|              | 1                                     | 1                 | 1           | -1.676230064 |             | -1.676230064                          |             | NA                | 1 |
|              | 0.958592126                           |                   |             |              |             |                                       |             |                   | 0 |
| ARRDC1       | ENSG00000197070.13                    | 0.093708684       |             | 4            | 3           | 0.056644334                           |             |                   |   |
|              | Brain_Hypothalamus                    | 0.982277195       |             |              |             | Brain_Cerebellar_Hemisphere           | 2.885609519 |                   |   |
|              | 0.041492454                           | 0.251738324       |             | -0.022214069 |             | 1.906045256                           |             | 0.764225214       |   |
|              | 0.86949778                            | 3                 | 0           | 0.958592126  |             |                                       |             |                   |   |
| BICDL2       | ENSG00000162069.14                    | 0.093776221       |             | 2            | 2           | 0.041822061                           |             |                   |   |
|              | Brain_Amygdala                        | 0.802342439       |             |              |             | Brain_Frontal_Cortex_BA9              | 1.243457158 |                   |   |
|              | 0.756542842                           | 0.756542842       |             | -0.250316705 |             | 2.035286427                           |             | 0.892484861       |   |
|              | 1.616165473                           | 2                 | 0           | 0.958592126  |             |                                       |             |                   |   |
| CRYBB2       | ENSG00000244752.2                     | 0.093807433       |             | 4            | 3           | 0.16600354                            |             |                   |   |
|              | Brain_Caudate_basal_ganglia           | 0.474350339       |             |              |             | Brain_Nucleus_accumbens_basal_ganglia |             |                   |   |
|              | 2.094284825                           | 0.004832048       |             | 0.478639845  |             | -0.715418735                          |             | 1.385160029       |   |
|              | 0.689160966                           | 0.951419997       |             | 3            | 0           | 0.958592126                           |             |                   |   |
| ANKMY2       | ENSG00000106524.8                     | 0.093811208       |             | 1            | 1           | 0.093811208                           |             |                   |   |
|              | Brain_Cerebellum                      | 0.093811208       |             |              |             | Brain_Cerebellum                      | 1           | 1                 | 1 |
|              | -1.675627351                          | -1.675627351      |             | NA           | 1           | 0                                     |             | 0.958592126       |   |
| HFE          | ENSG00000010704.18                    | 0.093867648       |             | 1            | 1           | 0.093867648                           |             |                   |   |
|              | Brain_Nucleus_accumbens_basal_ganglia | 0.093867648       |             |              |             |                                       |             |                   |   |
|              | Brain_Nucleus_accumbens_basal_ganglia | 1                 | 1           | 1            |             | -1.675339457                          |             |                   |   |
|              | -1.675339457                          | -1.675339457      |             | NA           | 1           | 0                                     |             | 0.958592126       |   |
| PPP2R2A      | ENSG00000221914.9                     | 0.09392554        |             | 1            | 1           | 0.09392554                            |             | Brain_Hippocampus |   |
|              | 0.09392554                            | Brain_Hippocampus | 1           | 1            | 1           | 1.675044301                           |             | 1.675044301       |   |
|              | 1.675044301                           | NA                | 1           | 0            | 0.958592126 |                                       |             |                   |   |

|                                       |                        |                                       |              |              |              |                        |
|---------------------------------------|------------------------|---------------------------------------|--------------|--------------|--------------|------------------------|
| CTD-2547L24.4                         | ENSG00000260810.1      | 0.093948532                           | 2            | 2            | 0.045086256  |                        |
| Brain_Hypothalamus                    | 0.339970896            | Brain_Cerebellar_Hemisphere           | 1.054972807  |              |              |                        |
| 0.945027193                           | 0.945027193            | 0.954222761                           | 2.003848829  | 1.479035795  |              |                        |
| 0.742197711                           | 2                      | 0                                     | 0.958592126  |              |              |                        |
| EPB41L4A-AS2                          | ENSG00000278921.2      | 0.094058511                           | 1            | 1            | 0.094058511  |                        |
| Brain_Nucleus_accumbens_basal_ganglia | 0.094058511            |                                       |              |              |              |                        |
| Brain_Nucleus_accumbens_basal_ganglia | 1                      | 1                                     | -1.674366916 |              |              |                        |
| -1.674366916                          | -1.674366916           | NA                                    | 1            | 0            | 0.958592126  |                        |
| ZNF471                                | ENSG00000196263.7      | 0.094171404                           | 9            | 4            | 0.022534254  |                        |
| Brain_Amygdala                        | 0.196851307            | Brain_Cerebellar_Hemisphere           | 6.561342542  |              |              |                        |
| 0.007020493                           | 0.39609464             | 1.290574372                           | 2.281239915  | 1.743357478  |              |                        |
| 0.329423116                           | 4                      | 0                                     | 0.958592126  |              |              |                        |
| CIDEC                                 | ENSG00000187288.10     | 0.094263884                           | 4            | 4            | 0.023176194  |                        |
| Brain_Hippocampus                     | 0.84204362             | Brain_Caudate_basal_ganglia           | 1.572461187  |              |              |                        |
| 0.452161898                           | 0.452161898            | -0.199280132                          | 2.270517639  | 0.964956474  |              |                        |
| 1.148223554                           | 4                      | 0                                     | 0.958592126  |              |              |                        |
| CSTF2T                                | ENSG00000177613.8      | 0.094315817                           | 2            | 2            | 0.03283565   |                        |
| Brain_Substantia_nigra                | 0.633413968            | Brain_Putamen_basal_ganglia           |              |              |              |                        |
| 1.031579761                           | 0.968420239            | 0.968420239                           | -2.134087123 | 0.476927192  |              |                        |
| -0.828579965                          | 1.846265928            | 2                                     | 0            | 0.958592126  |              |                        |
| RP11-571I18.4                         | ENSG00000272650.1      | 0.094338259                           | 1            | 1            | 0.094338259  |                        |
| Brain_Cortex                          | 0.094338259            | Brain_Cortex                          | 1            | 1            | 1            | 1.672944313            |
| 1.672944313                           | 1.672944313            | NA                                    | 1            | 0            | 0.958592126  |                        |
| RP11-390F4.6                          | ENSG00000236924.1      | 0.094411302                           | 1            | 1            | 0.094411302  |                        |
| Brain_Cortex                          | 0.094411302            | Brain_Cortex                          | 1            | 1            | 1            | 1.672573426            |
| 1.672573426                           | 1.672573426            | NA                                    | 1            | 0            | 0.958592126  |                        |
| DUSP14                                | ENSG00000276023.4      | 0.094493425                           | 4            | 4            | 0.011023358  |                        |
| Brain_Substantia_nigra                | 0.369397782            | Brain_Nucleus_accumbens_basal_ganglia |              |              |              |                        |
| 2.975394245                           | 0.152076618            | 0.152076618                           | -2.541957499 | -0.897601981 |              |                        |
| -1.527769343                          | 0.779063433            | 4                                     | 0            | 0.958592126  |              |                        |
| WIPF2                                 | ENSG00000171475.13     | 0.09452434                            | 1            | 1            | 0.09452434   | Brain_Substantia_nigra |
| 0.09452434                            | Brain_Substantia_nigra | 1                                     | 1            | 1            | -1.671999908 |                        |
| -1.671999908                          | -1.671999908           | NA                                    | 1            | 0            | 0.958592126  |                        |
| PTCD1                                 | ENSG00000106246.17     | 0.094527517                           | 1            | 1            | 0.094527517  |                        |
| Brain_Frontal_Cortex_BA9              | 0.094527517            | Brain_Frontal_Cortex_BA9              | 1            | 1            |              |                        |
| 1                                     | -1.671983798           | -1.671983798                          | -1.671983798 | NA           | 1            | 0                      |
| 0.958592126                           |                        |                                       |              |              |              |                        |
| HES7                                  | ENSG00000179111.8      | 0.094554384                           | 3            | 1            | 0.088484674  | Brain_Cortex           |
| 0.103765758                           | Brain_Cerebellum       | 2.964720439                           | 0.000121098  | 2.964720439  |              |                        |
| 1.626865072                           | 1.703445794            | 1.662125591                           | 0.038648306  | 1            | 0            |                        |
| 0.958592126                           |                        |                                       |              |              |              |                        |
| RP11-284F21.11                        | ENSG00000272971.1      | 0.094671486                           | 1            | 1            | 0.094671486  |                        |
| Brain_Nucleus_accumbens_basal_ganglia | 0.094671486            |                                       |              |              |              |                        |
| Brain_Nucleus_accumbens_basal_ganglia | 1                      | 1                                     | 1            | -1.671254161 |              |                        |
| -1.671254161                          | -1.671254161           | NA                                    | 1            | 0            | 0.958592126  |                        |
| LRRC10B                               | ENSG00000204950.3      | 0.094687608                           | 1            | 1            | 0.094687608  |                        |
| Brain_Cerebellar_Hemisphere           | 0.094687608            | Brain_Cerebellar_Hemisphere           | 1            | 1            |              |                        |
| 1                                     | -1.671172514           | -1.671172514                          | -1.671172514 | NA           | 1            | 0                      |
| 0.958592126                           |                        |                                       |              |              |              |                        |
| AJAP1                                 | ENSG00000196581.10     | 0.09482909                            | 2            | 2            | 0.042733094  |                        |
| Brain_Spinal_cord_cervical_c-1        | 0.522509372            | Brain_Hippocampus                     | 1.06752901   |              |              |                        |
| 0.93247099                            | 0.93247099             | -2.026309349                          | 0.639482074  | -0.693413638 |              |                        |
| 1.884999193                           | 2                      | 0                                     | 0.9593303    |              |              |                        |
| ABCC4                                 | ENSG00000125257.13     | 0.094951186                           | 2            | 2            | 0.050507931  |                        |
| Brain_Putamen_basal_ganglia           | 0.42453148             | Brain_Frontal_Cortex_BA9              | 1.071270864  |              |              |                        |
| 0.928729136                           | 0.928729136            | -0.798584324                          | 1.955637001  | 0.578526338  |              |                        |
| 1.947528576                           | 2                      | 0                                     | 0.959871415  |              |              |                        |
| RP4-621F18.2                          | ENSG00000282057.1      | 0.095035178                           | 1            | 1            | 0.095035178  |                        |
| Brain_Caudate_basal_ganglia           | 0.095035178            | Brain_Caudate_basal_ganglia           | 1            | 1            |              |                        |
| 1                                     | 1.669414923            | 1.669414923                           | 1.669414923  | NA           | 1            | 0                      |
| 0.960026845                           |                        |                                       |              |              |              |                        |
| CFDP1                                 | ENSG00000153774.8      | 0.095120141                           | 6            | 4            | 0.039521501  | Brain_Amygdala         |

|              |                                       |                                       |              |              |                             |                  |             |
|--------------|---------------------------------------|---------------------------------------|--------------|--------------|-----------------------------|------------------|-------------|
|              | 0.955165986                           | Brain_Nucleus_accumbens_basal_ganglia | 3.992414076  |              |                             |                  |             |
|              | 0.009182672                           | 0.148281653                           | -0.056220706 | 2.058715494  | 0.92829023                  |                  |             |
|              | 0.735253953                           | 4                                     | 0            | 0.960191841  |                             |                  |             |
| SOD2         | ENSG00000112096.16                    | 0.09526714                            | 1            | 1            | 0.09526714                  | Brain_Cerebellum | 0.09526714  |
|              | Brain_Cerebellum                      | 1                                     | 1            | -1.668244805 | -1.668244805                | -1.668244805     |             |
|              | NA                                    | 1                                     | 0            | 0.960424307  |                             |                  |             |
| INMT         | ENSG00000241644.2                     | 0.095306682                           | 1            | 1            | 0.095306682                 |                  |             |
|              | Brain_Caudate_basal_ganglia           | 0.095306682                           |              |              | Brain_Caudate_basal_ganglia | 1                | 1           |
|              | 1                                     | -1.668045566                          | -1.668045566 | -1.668045566 | NA                          | 1                | 0           |
|              | 0.960424307                           |                                       |              |              |                             |                  |             |
| OPTN         | ENSG00000123240.16                    | 0.095349107                           | 5            | 5            | 0.031664013                 |                  |             |
|              | Brain_Putamen_basal_ganglia           | 0.625925284                           |              |              | Brain_Cerebellar_Hemisphere |                  |             |
|              | 1.451834601                           | 0.56772549                            | 0.56772549   | -2.148626582 | 1.760004027                 |                  |             |
|              | 0.087380711                           | 1.524484087                           | 5            | 0            | 0.960424307                 |                  |             |
| GALNT10      | ENSG00000164574.15                    | 0.095429276                           | 4            | 4            | 0.040771707                 |                  |             |
|              | Brain_Hypothalamus                    | 0.829919634                           |              |              | Brain_Cerebellum            | 2.201365473      |             |
|              | 0.270856116                           | 0.270856116                           | -2.045844145 | -0.214804642 | -1.257788714                |                  |             |
|              | 0.762185707                           | 4                                     | 0            | 0.960528064  |                             |                  |             |
| FBXO3        | ENSG00000110429.13                    | 0.095701514                           | 1            | 1            | 0.095701514                 |                  |             |
|              | Brain_Putamen_basal_ganglia           | 0.095701514                           |              |              | Brain_Putamen_basal_ganglia | 1                | 1           |
|              | 1                                     | -1.666059751                          | -1.666059751 | -1.666059751 | NA                          | 1                | 0           |
|              | 0.960528064                           |                                       |              |              |                             |                  |             |
| PPIE         | ENSG00000084072.16                    | 0.095740798                           | 13           | 1            | 0.043987767                 |                  |             |
|              | Brain_Nucleus_accumbens_basal_ganglia | 0.148147671                           |              |              | Brain_Cerebellar_Hemisphere |                  |             |
|              | 12.60598054                           | 1.04E-05                              | 12.60598054  | 1.446105293  | 2.014207361                 |                  |             |
|              | 1.641643147                           | 0.137956255                           | 1            | 0            | 0.960528064                 |                  |             |
| PTRH2        | ENSG00000141378.14                    | 0.095787934                           | 1            | 1            | 0.095787934                 | Brain_Cerebellum |             |
|              | 0.095787934                           | Brain_Cerebellum                      | 1            | 1            | 1.665625978                 | 1.665625978      |             |
|              | 1.665625978                           | NA                                    | 1            | 0            | 0.960528064                 |                  |             |
| CAMKMT       | ENSG00000143919.14                    | 0.095799149                           | 1            | 1            | 0.095799149                 |                  |             |
|              | Brain_Hippocampus                     | 0.095799149                           |              |              | Brain_Hippocampus           | 1                | 1           |
|              | -1.665569708                          | -1.665569708                          | -1.665569708 | NA           | 1                           | 0                | 0.960528064 |
| AK2          | ENSG00000004455.16                    | 0.095823647                           | 1            | 1            | 0.095823647                 |                  |             |
|              | Brain_Nucleus_accumbens_basal_ganglia | 0.095823647                           |              |              |                             |                  |             |
|              | Brain_Nucleus_accumbens_basal_ganglia | 1                                     | 1            | 1            | 1.665446813                 |                  |             |
|              | 1.665446813                           | 1.665446813                           | NA           | 1            | 0                           | 0.960528064      |             |
| ZNF549       | ENSG00000121406.8                     | 0.09591864                            | 12           | 8            | 0.015945646                 |                  |             |
|              | Brain_Putamen_basal_ganglia           | 0.998571884                           |              |              | Brain_Caudate_basal_ganglia | 6.09744477       |             |
|              | 3.67E-05                              | 0.265330879                           | -1.477292298 | 2.410157246  | 0.49137155                  |                  |             |
|              | 1.018735706                           | 8                                     | 0            | 0.960528064  |                             |                  |             |
| AAK1         | ENSG00000115977.18                    | 0.095950148                           | 1            | 1            | 0.095950148                 | Brain_Cerebellum |             |
|              | 0.095950148                           | Brain_Cerebellum                      | 1            | 1            | -1.664812606                | -1.664812606     |             |
|              | -1.664812606                          | NA                                    | 1            | 0            | 0.960528064                 |                  |             |
| RP11-238F2.1 | ENSG00000271239.1                     | 0.096030579                           | 2            | 2            | 0.032635217                 |                  |             |
|              | Brain_Spinal_cord_cervical_c-1        | 0.976642878                           |              |              | Brain_Frontal_Cortex_BA9    |                  |             |
|              | 1.174262753                           | 0.825737247                           | 0.825737247  | -2.136542545 | -0.029277993                |                  |             |
|              | -1.082910269                          | 1.490061055                           | 2            | 0            | 0.960528064                 |                  |             |
| AC092835.2   | ENSG00000233757.6                     | 0.096096354                           | 1            | 1            | 0.096096354                 |                  |             |
|              | Brain_Cerebellar_Hemisphere           | 0.096096354                           |              |              | Brain_Cerebellar_Hemisphere | 1                | 1           |
|              | 1                                     | -1.664080446                          | -1.664080446 | -1.664080446 | NA                          | 1                | 0           |
|              | 0.960528064                           |                                       |              |              |                             |                  |             |
| GFM1         | ENSG00000168827.14                    | 0.096114594                           | 8            | 1            | 0.07322472                  |                  |             |
|              | Brain_Spinal_cord_cervical_c-1        | 0.191058049                           |              |              | Brain_Cerebellar_Hemisphere |                  |             |
|              | 7.592010139                           | 0.00876808                            | 7.592010139  | 1.307455527  | 1.791427492                 |                  |             |
|              | 1.621810407                           | 0.18766675                            | 1            | 0            | 0.960528064                 |                  |             |
| BOD1         | ENSG00000145919.10                    | 0.096254204                           | 1            | 1            | 0.096254204                 |                  |             |
|              | Brain_Anterior_cingulate_cortex_BA24  | 0.096254204                           |              |              |                             |                  |             |
|              | Brain_Anterior_cingulate_cortex_BA24  | 1                                     | 1            | 1            | -1.663290977                |                  |             |
|              | -1.663290977                          | -1.663290977                          | NA           | 1            | 0                           | 0.960902993      |             |
| RRAS2        | ENSG00000133818.13                    | 0.096289472                           | 3            | 3            | 0.122566754                 |                  |             |
|              | Brain_Nucleus_accumbens_basal_ganglia | 0.539867642                           |              |              | Brain_Cerebellum            |                  |             |
|              | 1.816856622                           | 0.191297728                           | 0.191297728  | -1.544089081 | 1.464557488                 |                  |             |

|              |                                       |                          |              |              |                             |              |                    |   |
|--------------|---------------------------------------|--------------------------|--------------|--------------|-----------------------------|--------------|--------------------|---|
|              | -0.230848249                          | 1.540300638              | 3            | 0            | 0.960902993                 |              |                    |   |
| RSBN1        | ENSG00000081019.13                    | 0.096605149              | 1            | 1            | 0.096605149                 |              |                    |   |
|              | Brain_Hippocampus                     | 0.096605149              |              |              | Brain_Hippocampus           | 1            | 1                  | 1 |
|              | 1.661539468                           | 1.661539468              | 1.661539468  | NA           | 1                           | 0            | 0.963272587        |   |
| IGFBP5       | ENSG00000115461.4                     | 0.096731339              | 3            | 3            | 0.013922232                 |              |                    |   |
|              | Brain_Cerebellum                      | 0.578408056              |              |              | Brain_Frontal_Cortex_BA9    | 1.564446306  |                    |   |
|              | 0.465446634                           | 0.465446634              | 0.555711555  | 2.459263693  |                             | 1.519147269  |                    |   |
|              | 0.951990298                           | 3                        | 0            | 0.963272587  |                             |              |                    |   |
| ZNF468       | ENSG00000204604.9                     | 0.096860856              | 7            | 7            | 0.028654703                 |              |                    |   |
|              | Brain_Cerebellum                      | 0.597947281              |              |              | Brain_Substantia_nigra      | 2.046656103  |                    |   |
|              | 0.112260711                           | 0.112260711              | -1.606580257 | 2.188204592  |                             | -0.364103616 |                    |   |
|              | 1.347131846                           | 7                        | 0            | 0.963272587  |                             |              |                    |   |
| ZNF225       | ENSG00000256294.7                     | 0.096993132              | 1            | 1            | 0.096993132                 |              |                    |   |
|              | Brain_Hypothalamus                    | 0.096993132              |              |              | Brain_Hypothalamus          | 1            | 1                  | 1 |
|              | 1.659609025                           | 1.659609025              | 1.659609025  | NA           | 1                           | 0            | 0.963272587        |   |
| RP11-255P5.2 | ENSG00000272542.1                     | 0.097096418              | 5            | 5            | 0.099226646                 |              |                    |   |
|              | Brain_Hippocampus                     | 0.906044814              |              |              | Brain_Cerebellum            | 2.562716888  | 0.1457604          |   |
|              | 0.1457604                             | -1.648614451             | 0.399257302  | -0.533019136 | 1.003313365                 |              | 5                  |   |
|              | 0                                     | 0.963272587              |              |              |                             |              |                    |   |
| GJB5         | ENSG00000189280.3                     | 0.097102691              | 1            | 1            | 0.097102691                 |              |                    |   |
|              | Brain_Frontal_Cortex_BA9              | 0.097102691              |              |              | Brain_Frontal_Cortex_BA9    | 1            | 1                  |   |
|              | 1                                     | 1.659065022              | 1.659065022  | 1.659065022  | NA                          | 1            | 0                  |   |
|              | 0.963272587                           |                          |              |              |                             |              |                    |   |
| CRYBG3       | ENSG00000080200.9                     | 0.097154768              | 4            | 4            | 0.092967807                 |              |                    |   |
|              | Brain_Anterior_cingulate_cortex_BA24  | 0.818708838              |              |              | Brain_Frontal_Cortex_BA9    |              |                    |   |
|              | 2.382473062                           | 0.137788126              | 0.137788126  | -1.679946081 |                             | -0.229205963 |                    |   |
|              | -1.083601499                          | 0.685886778              | 4            | 0            | 0.963272587                 |              |                    |   |
| CMTM8        | ENSG00000170293.8                     | 0.097157957              | 1            | 1            | 0.097157957                 |              | Brain_Cerebellum   |   |
|              | 0.097157957                           | Brain_Cerebellum         | 1            | 1            | -1.65879079                 |              | -1.65879079        |   |
|              | -1.65879079                           | NA                       | 1            | 0            | 0.963272587                 |              |                    |   |
| GPRC5C       | ENSG00000170412.16                    | 0.097320531              | 2            | 2            | 0.087872843                 |              |                    |   |
|              | Brain_Cerebellum                      | 0.300824667              |              |              | Brain_Cerebellar_Hemisphere | 1.916316032  |                    |   |
|              | 0.083683968                           | 0.083683968              | 1.03466654   | 1.706726802  |                             | 1.370696671  |                    |   |
|              | 0.475218368                           | 2                        | 0            | 0.963272587  |                             |              |                    |   |
| CLN6         | ENSG00000128973.12                    | 0.097342361              | 3            | 3            | 0.017021507                 |              |                    |   |
|              | Brain_Hippocampus                     | 0.688047853              |              |              | Brain_Cerebellar_Hemisphere | 1.777802309  |                    |   |
|              | 0.335526244                           | 0.335526244              | -2.386242845 | -0.401505686 |                             | -1.22868531  |                    |   |
|              | 1.032791156                           | 3                        | 0            | 0.963272587  |                             |              |                    |   |
| PDE7B        | ENSG00000171408.13                    | 0.09743598               | 1            | 1            | 0.09743598                  |              | Brain_Hypothalamus |   |
|              | 0.09743598                            | Brain_Hypothalamus       | 1            | 1            | 1                           | 1.657413122  | 1.657413122        |   |
|              | 1.657413122                           | NA                       | 1            | 0            | 0.963272587                 |              |                    |   |
| FAM3B        | ENSG00000183844.16                    | 0.097566253              | 4            | 4            | 0.177443815                 |              |                    |   |
|              | Brain_Nucleus_accumbens_basal_ganglia | 0.820554498              |              |              | Brain_Substantia_nigra      |              |                    |   |
|              | 2.072238611                           | 0.156029561              | 0.156029561  | -1.150330088 |                             | 1.348667419  |                    |   |
|              | -0.026124853                          | 1.075706681              | 4            | 0            | 0.963272587                 |              |                    |   |
| DSTYK        | ENSG00000133059.16                    | 0.097629749              | 10           | 5            | 0.034526355                 |              | Brain_Cortex       |   |
|              | 0.660901318                           | Brain_Frontal_Cortex_BA9 | 7.841439955  | 0.009881724  |                             |              |                    |   |
|              | 0.320961422                           | -2.1138702               | 0.438669103  | -1.109704939 | 0.657417207                 |              | 5                  |   |
|              | 0                                     | 0.963272587              |              |              |                             |              |                    |   |
| ZBTB4        | ENSG00000174282.11                    | 0.097658718              | 1            | 1            | 0.097658718                 |              | Brain_Cortex       |   |
|              | 0.097658718                           | Brain_Cortex             | 1            | 1            | 1                           | 1.656311671  | 1.656311671        |   |
|              | 1.656311671                           | NA                       | 1            | 0            | 0.963272587                 |              |                    |   |
| RRP7A        | ENSG00000189306.10                    | 0.09777992               | 12           | 10           | 0.030609119                 |              |                    |   |
|              | Brain_Putamen_basal_ganglia           | 0.965823691              |              |              | Brain_Frontal_Cortex_BA9    |              |                    |   |
|              | 4.529027853                           | 0.012807618              | 0.154392073  | -1.020174557 |                             | 2.162117519  |                    |   |
|              | 0.448902092                           | 0.907259448              | 10           | 0            | 0.963272587                 |              |                    |   |
| LETM2        | ENSG00000165046.12                    | 0.097810459              | 1            | 1            | 0.097810459                 |              | Brain_Cortex       |   |
|              | 0.097810459                           | Brain_Cortex             | 1            | 1            | 1                           | 1.655562453  | 1.655562453        |   |
|              | 1.655562453                           | NA                       | 1            | 0            | 0.963272587                 |              |                    |   |
| RWDD3        | ENSG00000122481.16                    | 0.097924484              | 13           | 2            | 0.106695301                 |              |                    |   |
|              | Brain_Substantia_nigra                | 0.993493681              |              |              | Brain_Amygdala              | 11.54708915  |                    |   |
|              | 0.003370548                           | 0.388833351              | -1.613226531 | 0.335680945  |                             | -0.184885217 |                    |   |



|           |                                       |                                      |                                       |             |                  |                             |
|-----------|---------------------------------------|--------------------------------------|---------------------------------------|-------------|------------------|-----------------------------|
| ARRB2     | ENSG00000141480.17                    | 0.097981345                          | 2                                     | 2           | 0.074485818      | Brain_Cerebellum            |
|           | 0.973018272                           | Brain_Hippocampus                    | 1.548422359                           |             | 0.451577641      |                             |
|           | 0.451577641                           | -0.033823029                         | 1.783617637                           |             | 0.874897304      | 1.285124619                 |
|           | 2                                     | 0                                    | 0.963272587                           |             |                  |                             |
| MMP24-AS1 | ENSG00000126005.16                    | 0.097999168                          | 13                                    | 4           | 0.038876863      |                             |
|           | Brain_Anterior_cingulate_cortex_BA24  | 0.917939468                          |                                       |             | Brain_Cerebellum |                             |
|           | 10.00786652                           | 0.004916761                          | 0.545206908                           |             | -2.065487866     | 0.513439459                 |
|           | -0.091877126                          | 0.692708774                          | 4                                     | 0           | 0.963272587      |                             |
| ZNF567    | ENSG00000189042.13                    | 0.098014659                          | 3                                     | 3           | 0.020456807      |                             |
|           | Brain_Cerebellum                      | 0.175671976                          | Brain_Hypothalamus                    | 2.238687193 |                  |                             |
|           | 0.161510799                           | 0.161510799                          | -2.317862286                          |             | -1.354201891     | -1.697193619                |
|           | 0.53850599                            | 3                                    | 0                                     | 0.963272587 |                  |                             |
| TMEM42    | ENSG00000169964.7                     | 0.098078247                          | 2                                     | 2           | 0.037221726      |                             |
|           | Brain_Hypothalamus                    | 0.981144432                          | Brain_Nucleus_accumbens_basal_ganglia |             |                  |                             |
|           | 1.245127086                           | 0.754872914                          | 0.754872914                           |             | -2.083323722     | 0.023634149                 |
|           | -1.029844786                          | 1.489844198                          | 2                                     | 0           | 0.963272587      |                             |
| OR3A2     | ENSG00000221882.2                     | 0.098102222                          | 7                                     | 4           | 0.005396888      | Brain_Amygdala              |
|           | 0.555483569                           | Brain_Hypothalamus                   | 4.116936289                           |             | 0.002346711      |                             |
|           | 0.340017372                           | -1.656112279                         | 2.782337511                           |             | 0.719709678      | 1.288977855                 |
|           | 4                                     | 0                                    | 0.963272587                           |             |                  |                             |
| DNAJC30   | ENSG00000176410.7                     | 0.098110459                          | 7                                     | 3           | 0.009354101      |                             |
|           | Brain_Nucleus_accumbens_basal_ganglia | 0.256470528                          |                                       |             |                  |                             |
|           | Brain_Anterior_cingulate_cortex_BA24  | 5.571938987                          |                                       |             | 0.0126935        | 0.281277365                 |
|           | 1.134772795                           | 2.598833951                          | 1.998693381                           |             | 0.547426178      | 3                           |
|           | 0.963272587                           |                                      |                                       |             |                  | 0                           |
| SF3A1     | ENSG00000099995.18                    | 0.098210231                          | 1                                     | 1           | 0.098210231      |                             |
|           | Brain_Hypothalamus                    | 0.098210231                          | Brain_Hypothalamus                    | 1           | 1                | 1                           |
|           | -1.653593024                          | -1.653593024                         | -1.653593024                          | NA          | 1                | 0                           |
|           |                                       |                                      |                                       |             |                  | 0.963575976                 |
| EIF3L     | ENSG00000100129.17                    | 0.098436704                          | 1                                     | 1           | 0.098436704      |                             |
|           | Brain_Hippocampus                     | 0.098436704                          | Brain_Hippocampus                     | 1           | 1                | 1                           |
|           | 1.652480173                           | 1.652480173                          | 1.652480173                           | NA          | 1                | 0                           |
|           |                                       |                                      |                                       |             |                  | 0.964541023                 |
| MYBPC3    | ENSG00000134571.10                    | 0.098576238                          | 3                                     | 3           | 0.041078535      |                             |
|           | Brain_Amygdala                        | 0.884100776                          | Brain_Cortex                          | 1.761046797 |                  | 0.391106385                 |
|           | 0.391106385                           | -1.506530501                         | 2.042736446                           |             | 0.130144393      | 1.790648395                 |
|           | 3                                     | 0                                    | 0.964541023                           |             |                  |                             |
| FAM19A2   | ENSG00000198673.10                    | 0.098580662                          | 2                                     | 2           | 0.111788931      |                             |
|           | Brain_Hippocampus                     | 0.193618787                          | Brain_Putamen_basal_ganglia           | 1.091110257 |                  |                             |
|           | 0.908889743                           | 0.908889743                          | -1.590203548                          |             | 1.299948015      | -0.145127767                |
|           | 2.043645769                           | 2                                    | 0                                     | 0.964541023 |                  |                             |
| RRP9      | ENSG00000114767.6                     | 0.098632366                          | 3                                     | 3           | 0.022536205      |                             |
|           | Brain_Hippocampus                     | 0.614413642                          | Brain_Caudate_basal_ganglia           | 1.152643228 |                  |                             |
|           | 0.813470756                           | 0.813470756                          | -0.954178514                          |             | 2.281206932      | 0.610270583                 |
|           | 1.620319227                           | 3                                    | 0                                     | 0.964541023 |                  |                             |
| LINC00116 | ENSG00000175701.10                    | 0.098653292                          | 3                                     | 2           | 0.042840772      |                             |
|           | Brain_Hypothalamus                    | 0.434539735                          | Brain_Caudate_basal_ganglia           | 1.989002181 |                  |                             |
|           | 0.01303525                            | 0.997962569                          | 0.781446834                           |             | 2.025259038      | 1.202002724                 |
|           | 0.713016776                           | 2                                    | 0                                     | 0.964541023 |                  |                             |
| LINC00487 | ENSG00000205837.7                     | 0.09878338                           | 11                                    | 10          | 0.051494473      | Brain_Amygdala              |
|           | 0.767413846                           | Brain_Anterior_cingulate_cortex_BA24 | 3.777913476                           |             |                  |                             |
|           | 0.027530435                           | 0.239269029                          | -1.130201356                          |             | 1.947335937      | 0.409226156                 |
|           | 1.084622223                           | 10                                   | 0                                     | 0.965138458 |                  |                             |
| ELL3      | ENSG00000128886.11                    | 0.09887263                           | 1                                     | 1           | 0.09887263       | Brain_Cerebellar_Hemisphere |
|           | 0.09887263                            | Brain_Cerebellar_Hemisphere          | 1                                     | 1           | 1                | -1.650343843                |
|           | -1.650343843                          | -1.650343843                         | NA                                    | 1           | 0                | 0.965336333                 |
| SNAPC1    | ENSG00000023608.4                     | 0.098995944                          | 2                                     | 2           | 0.068809669      |                             |
|           | Brain_Cerebellar_Hemisphere           | 0.173152971                          | Brain_Putamen_basal_ganglia           |             |                  |                             |
|           | 1.123392509                           | -0.876607491                         | 0.876607491                           |             | -1.819667408     | -1.362142333                |
|           | -1.590904871                          | 0.323519083                          | 2                                     | 0           | 0.965342597      |                             |
| AP3B2     | ENSG00000103723.12                    | 0.099015019                          | 5                                     | 2           | 0.097269698      |                             |
|           | Brain_Substantia_nigra                | 0.957082337                          | Brain_Frontal_Cortex_BA9              |             |                  |                             |
|           | 4.539853919                           | -0.006442103                         | 0.310266616                           |             | -1.658236707     | 0.053815279                 |

|              |                                       |                              |              |              |                                      |                             |   |  |  |
|--------------|---------------------------------------|------------------------------|--------------|--------------|--------------------------------------|-----------------------------|---|--|--|
|              | -0.96051835                           | 0.623460386                  | 2            | 0            | 0.965342597                          |                             |   |  |  |
| SHF          | ENSG00000138606.19                    | 0.099141831                  | 7            | 3            | 0.014136996                          |                             |   |  |  |
|              | Brain_Frontal_Cortex_BA9              | 0.854488399                  |              |              | Brain_Spinal_cord_cervical_c-1       |                             |   |  |  |
|              | 4.7291914                             | 0.010498899                  | 0.239270479  |              | -2.170416312                         | 2.453763407                 |   |  |  |
|              | 0.392506221                           | 1.978917294                  | 3            | 0            | 0.965342597                          |                             |   |  |  |
| ANKRD44      | ENSG00000065413.18                    | 0.099166798                  | 2            | 2            | 0.034740851                          |                             |   |  |  |
|              | Brain_Anterior_cingulate_cortex_BA24  | 0.610395556                  |              |              | Brain_Cerebellum                     |                             |   |  |  |
|              | 1.049728586                           | 0.950271414                  | 0.950271414  |              | -2.111366165                         | -0.509508908                |   |  |  |
|              | -1.310437536                          | 1.132684129                  | 2            | 0            | 0.965342597                          |                             |   |  |  |
| SSTR3        | ENSG00000278195.1                     | 0.099245483                  | 1            | 1            | 0.099245483                          | Brain_Cerebellum            |   |  |  |
|              | 0.099245483                           | Brain_Cerebellum1            | 1            | 1            | 1.648522571                          | 1.648522571                 |   |  |  |
|              | 1.648522571                           | NA                           | 1            | 0            | 0.965342597                          |                             |   |  |  |
| IFNAR2       | ENSG00000159110.19                    | 0.099287256                  | 1            | 1            | 0.099287256                          |                             |   |  |  |
|              | Brain_Caudate_basal_ganglia           | 0.099287256                  |              |              | Brain_Caudate_basal_ganglia1         | 1                           |   |  |  |
|              | 1                                     | -1.648318863                 | -1.648318863 | -1.648318863 | NA                                   | 1                           | 0 |  |  |
|              | 0.965342597                           |                              |              |              |                                      |                             |   |  |  |
| FAM126A      | ENSG00000122591.11                    | 0.09949738                   | 4            | 4            | 0.032214123                          | Brain_Cortex                |   |  |  |
|              | 0.871405553                           | Brain_Cerebellar_Hemisphere1 | 1.923405899  | 0.10438456   | 0.10438456                           |                             |   |  |  |
|              | -2.141743569                          | 0.161873396                  | -0.923337411 | 0.962745774  | 4                                    | 0                           |   |  |  |
|              | 0.966226814                           |                              |              |              |                                      |                             |   |  |  |
| ZNF581       | ENSG00000171425.9                     | 0.099531146                  | 3            | 3            | 0.034092506                          |                             |   |  |  |
|              | Brain_Hippocampus                     | 0.467595038                  |              |              | Brain_Anterior_cingulate_cortex_BA24 |                             |   |  |  |
|              | 1.204696804                           | 0.775126825                  | 0.775126825  |              | -0.748454687                         | 2.118975878                 |   |  |  |
|              | 0.698972943                           | 1.43391199                   | 3            | 0            | 0.966226814                          |                             |   |  |  |
| SHC4         | ENSG00000185634.11                    | 0.099585381                  | 1            | 1            | 0.099585381                          |                             |   |  |  |
|              | Brain_Anterior_cingulate_cortex_BA24  | 0.099585381                  |              |              |                                      |                             |   |  |  |
|              | Brain_Anterior_cingulate_cortex_BA24  | 1                            | 1            | 1            | 1.646867025                          |                             |   |  |  |
|              | 1.646867025                           | 1.646867025                  | NA           | 1            | 0                                    | 0.966226814                 |   |  |  |
| NDUFA7       | ENSG00000267855.5                     | 0.09966541                   | 2            | 2            | 0.046266273                          |                             |   |  |  |
|              | Brain_Spinal_cord_cervical_c-1        | 0.450926447                  |              |              | Brain_Caudate_basal_ganglia          |                             |   |  |  |
|              | 1.023039235                           | 0.976960765                  | 0.976960765  |              | -1.992955926                         | -0.753871398                |   |  |  |
|              | -1.373413662                          | 0.876165072                  | 2            | 0            | 0.96633316                           |                             |   |  |  |
| RP11-134G8.5 | ENSG00000223396.2                     | 0.099796989                  | 1            | 1            | 0.099796989                          |                             |   |  |  |
|              | Brain_Frontal_Cortex_BA9              | 0.099796989                  |              |              | Brain_Frontal_Cortex_BA9             | 1                           | 1 |  |  |
|              | 1                                     | -1.645838619                 | -1.645838619 | -1.645838619 | NA                                   | 1                           | 0 |  |  |
|              | 0.966938832                           |                              |              |              |                                      |                             |   |  |  |
| USE1         | ENSG00000053501.12                    | 0.10012736                   | 5            | 5            | 0.044043                             | Brain_Cerebellar_Hemisphere |   |  |  |
|              | 0.690073223                           | Brain_Caudate_basal_ganglia  | 2.251243772  | 0.22899514   | 0.22899514                           |                             |   |  |  |
|              | -2.013681341                          | 1.089822485                  | -0.460727724 | 1.223024095  | 5                                    | 0                           |   |  |  |
|              | 0.968172935                           |                              |              |              |                                      |                             |   |  |  |
| ADAMTS16     | ENSG00000145536.15                    | 0.100177998                  | 3            | 3            | 0.042127432                          |                             |   |  |  |
|              | Brain_Hypothalamus                    | 0.677930039                  |              |              | Brain_Cerebellar_Hemisphere1         | 1.759524383                 |   |  |  |
|              | 0.271375223                           | 0.271375223                  | 0.415289429  | 2.032259109  | 1.258734073                          |                             |   |  |  |
|              | 0.810749221                           | 3                            | 0            | 0.968172935  |                                      |                             |   |  |  |
| EXO5         | ENSG00000164002.11                    | 0.100272193                  | 10           | 6            | 0.04459324                           |                             |   |  |  |
|              | Brain_Putamen_basal_ganglia           | 0.876760192                  |              |              | Brain_Cortex                         | 6.404877506                 |   |  |  |
|              | 0.023797847                           | 0.31896023                   | -2.008471229 | 0.766643714  | -0.818722607                         |                             |   |  |  |
|              | 0.812430222                           | 6                            | 0            | 0.968172935  |                                      |                             |   |  |  |
| MND1         | ENSG00000121211.7                     | 0.100563603                  | 1            | 1            | 0.100563603                          |                             |   |  |  |
|              | Brain_Cerebellar_Hemisphere           | 0.100563603                  |              |              | Brain_Cerebellar_Hemisphere1         | 1                           | 1 |  |  |
|              | 1                                     | 1.642127407                  | 1.642127407  | 1.642127407  | NA                                   | 1                           | 0 |  |  |
|              | 0.968172935                           |                              |              |              |                                      |                             |   |  |  |
| GFRA4        | ENSG00000125861.14                    | 0.100683127                  | 3            | 3            | 0.013953363                          |                             |   |  |  |
|              | Brain_Nucleus_accumbens_basal_ganglia | 0.539378114                  |              |              | Brain_Frontal_Cortex_BA9             |                             |   |  |  |
|              | 1.568789813                           | 0.550414386                  | 0.550414386  | 0.613753674  | 2.458461782                          |                             |   |  |  |
|              | 1.43157453                            | 0.939956685                  | 3            | 0            | 0.968172935                          |                             |   |  |  |
| MSLNL        | ENSG00000162006.9                     | 0.100715163                  | 6            | 3            | 0.108655001                          |                             |   |  |  |
|              | Brain_Anterior_cingulate_cortex_BA24  | 0.800096416                  |              |              | Brain_Cortex                         |                             |   |  |  |
|              | 4.564155408                           | 0.009466245                  | 0.373426386  | -1.604267955 | 0.253222325                          |                             |   |  |  |
|              | -0.980755064                          | 0.720747025                  | 3            | 0            | 0.968172935                          |                             |   |  |  |
| EPN1         | ENSG00000063245.14                    | 0.100785728                  | 1            | 1            | 0.100785728                          |                             |   |  |  |
|              | Brain_Anterior_cingulate_cortex_BA24  | 0.100785728                  |              |              |                                      |                             |   |  |  |

|               |                                       |                   |              |              |              |                                       |
|---------------|---------------------------------------|-------------------|--------------|--------------|--------------|---------------------------------------|
|               | Brain_Anterior_cingulate_cortex_BA24  | 1                 | 1            | 1.641056304  |              |                                       |
|               | 1.641056304                           | 1.641056304       | NA           | 1            | 0            | 0.968172935                           |
| ATP2B1-AS1    | ENSG00000271614.1                     | 0.100788275       | 3            | 3            | 0.055237472  |                                       |
|               | Brain_Nucleus_accumbens_basal_ganglia | 0.904717727       |              |              |              | Brain_Putamen_basal_ganglia           |
|               | 1.958421202                           | 0.359635966       | 0.359635966  | -1.917003615 | 0.336104378  |                                       |
|               | -0.487065119                          | 1.243080999       | 3            | 0            | 0.968172935  |                                       |
| GOLGA8A       | ENSG00000175265.17                    | 0.100853571       | 6            | 6            | 0.012792592  |                                       |
|               | Brain_Anterior_cingulate_cortex_BA24  | 0.768753661       |              |              |              | Brain_Cerebellar_Hemisphere           |
|               | 1.65823286                            | 0.422428082       | 0.422428082  | -2.489491668 | 1.436401161  |                                       |
|               | -0.787969247                          | 1.367251373       | 6            | 0            | 0.968172935  |                                       |
| PLEKHG3       | ENSG00000126822.16                    | 0.100869316       | 3            | 3            | 0.08880837   |                                       |
|               | Brain_Anterior_cingulate_cortex_BA24  | 0.218006541       |              |              |              | Brain_Putamen_basal_ganglia           |
|               | 1.137439697                           | 0.83638246        | 0.83638246   | -1.393734897 | 1.701717329  |                                       |
|               | 0.513276211                           | 1.668146649       | 3            | 0            | 0.968172935  |                                       |
| ADCY5         | ENSG00000173175.14                    | 0.100937734       | 1            | 1            | 0.100937734  | Brain_Cerebellum                      |
|               | 0.100937734                           | Brain_Cerebellum1 | 1            | 1            | -1.640324403 | -1.640324403                          |
|               | -1.640324403                          | NA                | 1            | 0            | 0.968172935  |                                       |
| ZNF141        | ENSG00000131127.13                    | 0.10107989        | 3            | 3            | 0.081208507  |                                       |
|               | Brain_Substantia_nigra                | 0.352397423       |              |              |              | Brain_Nucleus_accumbens_basal_ganglia |
|               | 1.413876853                           | 0.585006304       | 0.585006304  | -0.929949131 | 1.743716668  |                                       |
|               | 0.584017152                           | 1.371587003       | 3            | 0            | 0.968172935  |                                       |
| RP11-44N21.1  | ENSG00000257556.1                     | 0.101168236       | 2            | 2            | 0.042602778  |                                       |
|               | Brain_Amygdala                        | 0.115646399       |              |              |              | Brain_Frontal_Cortex_BA9              |
|               | 0.521145608                           | 0.521145608       | 1.573312833  | 2.027583464  | 1.800448148  |                                       |
|               | 0.321217844                           | 2                 | 0            | 0.968172935  |              |                                       |
| DNM1          | ENSG00000106976.20                    | 0.101190326       | 1            | 1            | 0.101190326  | Brain_Cortex                          |
|               | 0.101190326                           | Brain_Cortex      | 1            | 1            | 1.639110131  | 1.639110131                           |
|               | 1.639110131                           | NA                | 1            | 0            | 0.968172935  |                                       |
| TBCEL         | ENSG00000154114.12                    | 0.101295302       | 2            | 2            | 0.032507452  |                                       |
|               | Brain_Hippocampus                     | 0.130869711       |              |              |              | Brain_Substantia_nigra                |
|               | 0.324082007                           | 0.324082007       | 1.510681133  | 2.138114496  | 1.824397815  |                                       |
|               | 0.443662385                           | 2                 | 0            | 0.968172935  |              |                                       |
| TIAF1         | ENSG00000221995.5                     | 0.101404539       | 13           | 1            | 0.038274402  |                                       |
|               | Brain_Substantia_nigra                | 0.478276928       |              |              |              | Brain_Hippocampus                     |
|               | 0.000759664                           | 11.96306727       | -2.071903919 | -0.709076625 | -1.560310008 |                                       |
|               | 0.382079972                           | 1                 | 0            | 0.968172935  |              |                                       |
| RP11-325L12.7 | ENSG00000278737.1                     | 0.101407382       | 3            | 3            | 0.012953334  |                                       |
|               | Brain_Anterior_cingulate_cortex_BA24  | 0.595707979       |              |              |              | Brain_Hypothalamus                    |
|               | 1.33004724                            | 0.771330052       | 0.771330052  | -2.485049717 | 0.592695547  |                                       |
|               | -0.807645627                          | 1.557466492       | 3            | 0            | 0.968172935  |                                       |
| ANKRD18A      | ENSG00000180071.19                    | 0.101415249       | 10           | 8            | 0.087388659  |                                       |
|               | Brain_Anterior_cingulate_cortex_BA24  | 0.86019525        |              |              |              | Brain_Hippocampus                     |
|               | 4.164344951                           | 0.07058382        | 0.290884137  | -1.463177652 | 1.709336376  |                                       |
|               | -0.085295195                          | 1.014424388       | 8            | 0            | 0.968172935  |                                       |
| GRPEL1        | ENSG00000109519.12                    | 0.101439007       | 6            | 6            | 0.039845137  |                                       |
|               | Brain_Cerebellum                      | 0.919535073       |              |              |              | Brain_Spinal_cord_cervical_c-1        |
|               | 0.303537049                           | 0.303537049       | -0.473679094 | 2.055350764  | 0.475925299  |                                       |
|               | 0.877215331                           | 6                 | 0            | 0.968172935  |              |                                       |
| TBC1D2B       | ENSG00000167202.11                    | 0.101477125       | 2            | 2            | 0.057490039  |                                       |
|               | Brain_Hypothalamus                    | 0.365067952       |              |              |              | Brain_Nucleus_accumbens_basal_ganglia |
|               | 1.040562561                           | 0.959437439       | 0.959437439  | -1.899566443 | -0.905750453 |                                       |
|               | -1.402658448                          | 0.702734026       | 2            | 0            | 0.968172935  |                                       |
| MPHOSPH10     | ENSG00000124383.8                     | 0.101552399       | 1            | 1            | 0.101552399  |                                       |
|               | Brain_Frontal_Cortex_BA9              | 0.101552399       |              |              |              | Brain_Frontal_Cortex_BA9              |
|               | 1                                     | -1.637373752      | -1.637373752 | -1.637373752 | NA           | 1                                     |
|               | 0.968172935                           |                   |              |              | 0            |                                       |
| AATF          | ENSG00000275700.4                     | 0.101565338       | 5            | 2            | 0.051948336  |                                       |
|               | Brain_Caudate_basal_ganglia           | 0.106789524       |              |              |              | Brain_Spinal_cord_cervical_c-1        |
|               | 4.16970953                            | 0.011297673       | 0.738349231  | 1.612792832  | 1.943561637  |                                       |
|               | 1.765360152                           | 0.125876706       | 2            | 0            | 0.968172935  |                                       |
| LINC01305     | ENSG00000231453.1                     | 0.101667093       | 1            | 1            | 0.101667093  |                                       |
|               | Brain_Caudate_basal_ganglia           | 0.101667093       |              |              |              | Brain_Caudate_basal_ganglia1          |
|               |                                       |                   |              |              |              | 1                                     |

|               |                                       |                                |                          |              |              |                  |
|---------------|---------------------------------------|--------------------------------|--------------------------|--------------|--------------|------------------|
| 1             | 1.636824747                           | 1.636824747                    | 1.636824747              | NA           | 1            | 0                |
|               | 0.968172935                           |                                |                          |              |              |                  |
| FAXDC2        | ENSG00000170271.10                    | 0.101733116                    | 1                        | 1            | 0.101733116  |                  |
|               | Brain_Frontal_Cortex_BA9              | 0.101733116                    | Brain_Frontal_Cortex_BA9 | 1            | 1            |                  |
|               | 1                                     | -1.636508942                   | -1.636508942             | -1.636508942 | NA           | 1                |
|               | 0.968172935                           |                                |                          |              |              | 0                |
| IRX1          | ENSG00000170549.3                     | 0.101733254                    | 1                        | 1            | 0.101733254  |                  |
|               | Brain_Anterior_cingulate_cortex_BA24  | 0.101733254                    |                          |              |              |                  |
|               | Brain_Anterior_cingulate_cortex_BA24  | 1                              | 1                        | 1            | 1.63650828   | 1.63650828       |
|               | 1.63650828                            | NA                             | 1                        | 0            | 0.968172935  |                  |
| MRPL37        | ENSG00000116221.15                    | 0.101891969                    | 7                        | 3            | 0.073823236  |                  |
|               | Brain_Cortex                          | 0.94852265                     | Brain_Frontal_Cortex_BA9 | 6.074027611  |              |                  |
|               | 0.004217638                           | 0.342340548                    | -0.064562115             | 1.787707343  | 1.247465775  |                  |
|               | 0.605700401                           | 3                              | 0                        | 0.968172935  |              |                  |
| POC5          | ENSG00000152359.14                    | 0.101906015                    | 3                        | 2            | 0.054792032  | Brain_Cortex     |
|               | 0.294139936                           | Brain_Cerebellum               | 2.777268029              | 0.056611125  | 0.166120845  |                  |
|               | -1.92052172                           | -1.049082964                   | -1.482169095             | 0.435743248  | 2            | 0                |
|               | 0.968172935                           |                                |                          |              |              |                  |
| SMPDL3A       | ENSG00000172594.12                    | 0.101919948                    | 3                        | 3            | 0.024102713  |                  |
|               | Brain_Cerebellar_Hemisphere           | 0.124356857                    | Brain_Cerebellum         | 1.648230274  |              |                  |
|               | 0.473447007                           | 0.473447007                    | -2.255488028             | -1.536740548 | -1.791723849 |                  |
|               | 0.402295384                           | 3                              | 0                        | 0.968172935  |              |                  |
| RP11-676J12.9 | ENSG00000277491.1                     | 0.101931151                    | 1                        | 1            | 0.101931151  |                  |
|               | Brain_Hypothalamus                    | 0.101931151                    | Brain_Hypothalamus       | 1            | 1            | 1                |
|               | 1.635562658                           | 1.635562658                    | 1.635562658              | NA           | 1            | 0                |
|               |                                       |                                |                          |              | 0.968172935  |                  |
| RBM43         | ENSG00000184898.6                     | 0.102194671                    | 7                        | 4            | 0.010146059  | Brain_Cortex     |
|               | 0.835732342                           | Brain_Spinal_cord_cervical_c-1 | 4.951695048              | 4.70E-06     |              |                  |
|               | 0.227494725                           | -2.570811317                   | -0.20735536              | -1.587550291 | 0.928260624  |                  |
|               | 4                                     | 0                              | 0.969383589              |              |              |                  |
| RFPL3S        | ENSG00000205853.10                    | 0.102292985                    | 12                       | 3            | 0.107735422  |                  |
|               | Brain_Nucleus_accumbens_basal_ganglia | 0.978257186                    | Brain_Substantia_nigra   |              |              |                  |
|               | 10.51561756                           | 0.000522669                    | 0.429019403              | -1.608455651 | 0.118719222  |                  |
|               | -0.674056471                          | 0.564734998                    | 3                        | 0            | 0.969383589  |                  |
| TFIP11        | ENSG00000100109.16                    | 0.102329285                    | 5                        | 3            | 0.021394487  |                  |
|               | Brain_Cerebellar_Hemisphere           | 0.828897415                    | Brain_Frontal_Cortex_BA9 | 3.03365912   |              |                  |
|               | 0.058952584                           | 0.828965804                    | -0.24411417              | 2.300949469  | 1.204101522  |                  |
|               | 1.312467488                           | 3                              | 0                        | 0.969383589  |              |                  |
| C8orf34       | ENSG00000165084.15                    | 0.102429344                    | 2                        | 2            | 0.069209316  |                  |
|               | Brain_Cerebellum                      | 0.169435052                    | Brain_Hippocampus        | 1.146152508  |              |                  |
|               | 0.853847492                           | 0.853847492                    | -1.374021357             | 1.817050923  | 0.221514783  |                  |
|               | 2.256428849                           | 2                              | 0                        | 0.969383589  |              |                  |
| CBX1          | ENSG00000108468.14                    | 0.102728855                    | 5                        | 5            | 0.026317921  |                  |
|               | Brain_Putamen_basal_ganglia           | 0.999258189                    | Brain_Hippocampus        | 3.399664636  |              |                  |
|               | 0.230168059                           | 0.230168059                    | -0.098235213             | 2.221488087  | 0.839729222  |                  |
|               | 1.040051557                           | 5                              | 0                        | 0.969383589  |              |                  |
| TANGO6        | ENSG00000103047.7                     | 0.102748376                    | 1                        | 1            | 0.102748376  |                  |
|               | Brain_Cerebellum                      | 0.102748376                    | Brain_Cerebellum         | 1            | 1            | 1                |
|               | -1.631673069                          | -1.631673069                   | NA                       | 1            | 0            | 0.969383589      |
| PRKD3         | ENSG00000115825.9                     | 0.102762806                    | 9                        | 4            | 0.001600645  |                  |
|               | Brain_Nucleus_accumbens_basal_ganglia | 0.029210223                    | Brain_Hypothalamus       |              |              |                  |
|               | 7.50259792                            | 0.01369812                     | 0.266242755              | 2.180637724  | 3.155789212  |                  |
|               | 2.501200565                           | 0.313633456                    | 4                        | 0            | 0.969383589  |                  |
| IRAK1BP1      | ENSG00000146243.13                    | 0.102772812                    | 13                       | 1            | 0.070790631  |                  |
|               | Brain_Cerebellum                      | 0.201555642                    | Brain_Cortex             | 11.85935101  | 0.000778681  |                  |
|               | 11.85935101                           | 1.277132021                    | 1.806818193              | 1.557720978  | 0.191194264  |                  |
|               | 1                                     | 0                              | 0.969383589              |              |              |                  |
| TTC17         | ENSG00000052841.14                    | 0.102925473                    | 3                        | 3            | 0.025608691  | Brain_Cerebellum |
|               | 0.668702341                           | Brain_Cortex                   | 1.640403283              | 0.367444473  | 0.367444473  |                  |
|               | -0.46536416                           | 2.232094911                    | 0.446267034              | 1.546685566  | 3            | 0                |
|               | 0.969383589                           |                                |                          |              |              |                  |
| FOCAD         | ENSG00000188352.12                    | 0.102949538                    | 5                        | 4            | 0.02359354   | Brain_Cortex     |
|               | 0.56371717                            | Brain_Putamen_basal_ganglia    | 3.830828089              | 0.075875679  |              |                  |

|                |                                       |                                       |                                      |              |               |
|----------------|---------------------------------------|---------------------------------------|--------------------------------------|--------------|---------------|
|                | 0.146269562                           | 0.577329084                           | 2.263684278                          | 1.626379241  | 0.632841082   |
|                | 4                                     | 0                                     | 0.969383589                          |              |               |
| ODF3L1         | ENSG00000182950.2                     | 0.103077088                           | 1                                    | 1            | 0.103077088   |
|                | Brain_Cerebellar_Hemisphere           | 0.103077088                           | Brain_Cerebellar_Hemisphere          | 1            | 1             |
|                | 1                                     | 1.630115503                           | 1.630115503                          | 1.630115503  | NA 1 0        |
|                | 0.969383589                           |                                       |                                      |              |               |
| EMILIN3        | ENSG00000183798.4                     | 0.103252098                           | 9                                    | 7            | 0.035934608   |
|                | Brain_Hypothalamus                    | 0.996070864                           | Brain_Putamen_basal_ganglia          | 6.102409013  |               |
|                | 0.099936524                           | 0.237924767                           | 0.004924462                          | 2.097666597  | 0.935500022   |
|                | 0.700271514                           | 7                                     | 0                                    | 0.969383589  |               |
| WDR24          | ENSG00000127580.15                    | 0.103357689                           | 1                                    | 1            | 0.103357689   |
|                | Brain_Hypothalamus                    | 0.103357689                           | Brain_Hypothalamus                   | 1            | 1 1           |
|                | -1.628789023                          | -1.628789023                          | -1.628789023                         | NA 1         | 0 0.969383589 |
| PTCHD4         | ENSG00000244694.7                     | 0.103363872                           | 2                                    | 2            | 0.089151068   |
|                | Brain_Putamen_basal_ganglia           | 0.373952994                           | Brain_Anterior_cingulate_cortex_BA24 |              |               |
|                | 1.214834215                           | 0.785165785                           | 0.785165785                          | -0.889093199 | 1.699892927   |
|                | 0.405399864                           | 1.830689646                           | 2                                    | 0            | 0.969383589   |
| PAC3IN3        | ENSG00000165912.15                    | 0.10338936                            | 4                                    | 2            | 0.040467089   |
|                | Brain_Nucleus_accumbens_basal_ganglia | 1.976092093                           | Brain_Cerebellum                     |              |               |
|                | 0.621527792                           | Brain_Nucleus_accumbens_basal_ganglia | 1.976092093                          |              |               |
|                | 0.028512385                           | 1.932936522                           | -0.809129935                         | 2.048949136  | 0.671543272   |
|                | 1.533675769                           | 2                                     | 0                                    | 0.969383589  |               |
| SYNGR1         | ENSG00000100321.14                    | 0.103390401                           | 3                                    | 3            | 0.018579734   |
|                | Brain_Cerebellum                      | 0.788227867                           | Brain_Cerebellar_Hemisphere          | 1.759438039  |               |
|                | 0.428014163                           | 0.428014163                           | -0.268612533                         | 2.353857462  | 0.923620798   |
|                | 1.327336208                           | 3                                     | 0                                    | 0.969383589  |               |
| CNTNAP4        | ENSG00000152910.18                    | 0.103415821                           | 7                                    | 6            | 0.118566311   |
|                | Brain_Nucleus_accumbens_basal_ganglia | 0.778102491                           | Brain_Cerebellar_Hemisphere          |              |               |
|                | 3.403205547                           | 0.035027478                           | 0.153686756                          | -1.560819647 | 0.961102833   |
|                | -0.549658125                          | 0.910306288                           | 6                                    | 0            | 0.969383589   |
| RP11-300M24.1  | ENSG00000227455.2                     | 0.103516025                           | 2                                    | 2            | 0.037710219   |
|                | Brain_Nucleus_accumbens_basal_ganglia | 0.735892162                           | Brain_Hippocampus                    |              |               |
|                | 1.061946017                           | 0.938053983                           | 0.938053983                          | 0.33729814   | 2.077990662   |
|                | 1.207644401                           | 1.230855486                           | 2                                    | 0            | 0.969383589   |
| HIST1H2BF      | ENSG00000277224.2                     | 0.103518325                           | 1                                    | 1            | 0.103518325   |
|                | Brain_Hypothalamus                    | 0.103518325                           | Brain_Hypothalamus                   | 1            | 1 1           |
|                | 1.628030943                           | 1.628030943                           | 1.628030943                          | NA 1         | 0 0.969383589 |
| LINC01361      | ENSG00000236268.5                     | 0.103607356                           | 4                                    | 3            | 0.023097116   |
|                | Brain_Frontal_Cortex_BA9              | 0.759170461                           | Brain_Hypothalamus                   | 2.7275319    |               |
|                | 0.070468956                           | 0.215008986                           | -0.306570302                         | 2.271824436  | 1.184123679   |
|                | 1.084716009                           | 3                                     | 0                                    | 0.969383589  |               |
| BMPER          | ENSG00000164619.8                     | 0.103644097                           | 4                                    | 4            | 0.057418843   |
|                | Brain_Cerebellum                      | 2.020788309                           | Brain_Cortex                         |              |               |
|                | 0.984988483                           | Brain_Cerebellum                      | 2.020788309                          | 0.10573877   | 0.10573877    |
|                | -1.900108799                          | -0.018815257                          | -0.841824293                         | 0.804490825  | 4 0           |
|                | 0.969383589                           |                                       |                                      |              |               |
| NAT10          | ENSG00000135372.8                     | 0.103652766                           | 3                                    | 2            | 0.072445196   |
|                | Brain_Frontal_Cortex_BA9              | 0.544038966                           | Brain_Cerebellum                     | 2.728525145  |               |
|                | 0.001798045                           | 0.269676811                           | 0.606716657                          | 1.796310202  | 1.348537618   |
|                | 0.647017416                           | 2                                     | 0                                    | 0.969383589  |               |
| RP11-736N17.11 | ENSG00000283071.1                     | 0.103654813                           | 7                                    | 3            | 0.18950952    |
|                | Brain_Nucleus_accumbens_basal_ganglia | 0.731266968                           | Brain_Cerebellum                     |              |               |
|                | 5.875923475                           | 0.006122645                           | 0.315494323                          | -0.700571337 | 1.312031461   |
|                | 0.688532271                           | 0.727547398                           | 3                                    | 0            | 0.969383589   |
| ZCCHC8         | ENSG00000033030.13                    | 0.10375114                            | 1                                    | 1            | 0.10375114    |
|                | Brain_Amygdala                        | 1                                     | 1                                    | 1            | 1.626933886   |
|                | 1.626933886                           | NA 1                                  | 0                                    | 0.969383589  | 1.626933886   |
| BDKRB1         | ENSG00000100739.10                    | 0.103863712                           | 5                                    | 5            | 0.021759574   |
|                | Brain_Cortex                          | 0.799304676                           | Brain_Cerebellar_Hemisphere          | 1.148874536  |               |
|                | 0.82390708                            | 0.82390708                            | -0.597543119                         | 2.294538719  | 0.713835148   |
|                | 1.180071973                           | 5                                     | 0                                    | 0.969383589  |               |
| 8-Sep          | ENSG00000164402.13                    | 0.103883653                           | 1                                    | 1            | 0.103883653   |
|                | Brain_Cerebellar_Hemisphere           | 0.103883653                           | Brain_Cerebellar_Hemisphere          | 1            | 1             |
|                | 1                                     | -1.626310341                          | -1.626310341                         | -1.626310341 | NA 1 0        |

|               |                                       |                                |              |              |                                       |                  |             |   |   |
|---------------|---------------------------------------|--------------------------------|--------------|--------------|---------------------------------------|------------------|-------------|---|---|
|               | 0.969383589                           |                                |              |              |                                       |                  |             |   |   |
| TCF7L1        | ENSG00000152284.4                     | 0.103929339                    | 2            | 2            | 0.037494518                           |                  |             |   |   |
|               | Brain_Cerebellar_Hemisphere           | 0.053290882                    |              |              | Brain_Cerebellum                      | 1.799844465      |             |   |   |
|               | 0.200155535                           | 0.200155535                    | 1.932556289  |              | 2.08033826                            | 2.006447274      |             |   |   |
|               | 0.104497634                           | 2                              | 0            | 0.969383589  |                                       |                  |             |   |   |
| RP6-7406.6    | ENSG00000272824.1                     | 0.104244339                    | 2            | 2            | 0.098072727                           |                  |             |   |   |
|               | Brain_Nucleus_accumbens_basal_ganglia | 0.156246237                    |              |              | Brain_Cerebellar_Hemisphere           |                  |             |   |   |
|               | 1.050358534                           | 0.949641466                    | 0.949641466  |              | -1.654269695                          | 1.417810024      |             |   |   |
|               | -0.118229836                          | 2.172288402                    | 2            | 0            | 0.971401205                           |                  |             |   |   |
| ZNF853        | ENSG00000236609.3                     | 0.104321396                    | 6            | 6            | 0.010893403                           |                  |             |   |   |
|               | Brain_Caudate_basal_ganglia           | 0.954449019                    |              |              | Brain_Nucleus_accumbens_basal_ganglia |                  |             |   |   |
|               | 1.978747536                           | 0.32624036                     | 0.32624036   | -1.329299839 | 2.546099825                           | 0.81293348       |             |   |   |
|               | 1.351641358                           | 6                              | 0            | 0.971401205  |                                       |                  |             |   |   |
| RP11-517P14.2 | ENSG00000230555.2                     | 0.104353943                    | 9            | 5            | 0.140831608                           |                  |             |   |   |
|               | Brain_Cerebellar_Hemisphere           | 0.950180448                    |              |              | Brain_Anterior_cingulate_cortex_BA24  |                  |             |   |   |
|               | 6.452399229                           | 0.008018277                    | 0.221144173  |              | -1.472701255                          | 1.431046723      |             |   |   |
|               | -0.466193014                          | 0.803033593                    | 5            | 0            | 0.971401205                           |                  |             |   |   |
| ACOT11        | ENSG00000162390.17                    | 0.104493876                    | 4            | 3            | 0.028173977                           |                  |             |   |   |
|               | Brain_Nucleus_accumbens_basal_ganglia | 0.590896803                    |              |              | Brain_Cortex                          |                  |             |   |   |
|               | 2.703665708                           | 0.01903555                     | 0.459194654  |              | 0.537536901                           | 2.194855327      |             |   |   |
|               | 1.369533175                           | 0.690068216                    | 3            | 0            | 0.971501595                           |                  |             |   |   |
| ZNF235        | ENSG00000159917.15                    | 0.104620722                    | 5            | 2            | 0.121073381                           |                  |             |   |   |
|               | Brain_Cerebellar_Hemisphere           | 0.920610167                    |              |              | Brain_Frontal_Cortex_BA9              | 4.35488111       |             |   |   |
|               | 0.020559407                           | 0.496444015                    | -1.550283938 |              | 0.278017049                           | -0.254321313     |             |   |   |
|               | 0.744816001                           | 2                              | 0            | 0.971501595  |                                       |                  |             |   |   |
| RCVRN         | ENSG00000109047.7                     | 0.104675849                    | 13           | 2            | 0.028387634                           |                  |             |   |   |
|               | Brain_Substantia_nigra                | 0.562692245                    |              |              | Brain_Amygdala                        | 11.61050087      |             |   |   |
|               | 0.001379948                           | 0.93124854                     | -2.191887459 |              | -0.578847252                          | -1.424931108     |             |   |   |
|               | 0.380095812                           | 2                              | 0            | 0.971501595  |                                       |                  |             |   |   |
| PPP1R37       | ENSG00000104866.10                    | 0.104760035                    | 6            | 6            | 0.032226365                           |                  |             |   |   |
|               | Brain_Cerebellar_Hemisphere           | 0.953047615                    |              |              | Brain_Cortex                          | 2.199385831      |             |   |   |
|               | 0.269460882                           | 0.269460882                    | 0.058880092  |              | 2.141591539                           | 0.82064672       |             |   |   |
|               | 0.877601935                           | 6                              | 0            | 0.971501595  |                                       |                  |             |   |   |
| EPHB4         | ENSG00000196411.9                     | 0.104800264                    | 2            | 2            | 0.038871555                           |                  |             |   |   |
|               | Brain_Spinal_cord_cervical_c-1        | 0.890372384                    |              |              | Brain_Frontal_Cortex_BA9              |                  |             |   |   |
|               | 1.169405153                           | 0.830594847                    | 0.830594847  |              | -0.137833024                          | 2.065544019      |             |   |   |
|               | 0.963855497                           | 1.558022849                    | 2            | 0            | 0.971501595                           |                  |             |   |   |
| TMEM175       | ENSG00000127419.16                    | 0.104807257                    | 6            | 5            | 0.030199312                           |                  |             |   |   |
|               | Brain_Caudate_basal_ganglia           | 0.989283663                    |              |              | Brain_Putamen_basal_ganglia           |                  |             |   |   |
|               | 3.094768333                           | 0.020229227                    | 0.124198102  |              | -2.167466364                          | 0.349093753      |             |   |   |
|               | -0.525361831                          | 1.057894765                    | 5            | 0            | 0.971501595                           |                  |             |   |   |
| AK4           | ENSG00000162433.14                    | 0.10485079                     | 1            | 1            | 0.10485079                            | Brain_Cerebellum | 0.10485079  |   |   |
|               | Brain_Cerebellum                      | 1                              | 1            | 1.621778468  | 1.621778468                           | 1.621778468      |             |   |   |
|               | NA                                    | 1                              | 0            | 0.971501595  |                                       |                  |             |   |   |
| MCMDC2        | ENSG00000178460.17                    | 0.104934984                    | 1            | 1            | 0.104934984                           |                  |             |   |   |
|               | Brain_Cerebellar_Hemisphere           | 0.104934984                    |              |              | Brain_Cerebellar_Hemisphere           | 1                | 1           |   |   |
|               | 1                                     | 1.621385521                    | 1.621385521  | 1.621385521  | NA                                    | 1                | 0           |   |   |
|               | 0.971638228                           |                                |              |              |                                       |                  |             |   |   |
| KIRREL        | ENSG00000183853.17                    | 0.105236638                    | 1            | 1            | 0.105236638                           |                  |             |   |   |
|               | Brain_Spinal_cord_cervical_c-1        | 0.105236638                    |              |              | Brain_Spinal_cord_cervical_c-1        |                  |             |   |   |
|               | 1                                     | 1                              | 1            | 1.619979697  | 1.619979697                           | 1.619979697      | NA          | 1 | 0 |
|               | 0.972491774                           |                                |              |              |                                       |                  |             |   |   |
| JUN           | ENSG00000177606.6                     | 0.105293331                    | 1            | 1            | 0.105293331                           | Brain_Cortex     |             |   |   |
|               | 0.105293331                           | Brain_Cortex                   | 1            | 1            | 1                                     | 1.619715843      | 1.619715843 |   |   |
|               | 1.619715843                           | NA                             | 1            | 0            | 0.972491774                           |                  |             |   |   |
| JAGN1         | ENSG00000171135.13                    | 0.105480149                    | 3            | 3            | 0.023442604                           | Brain_Cerebellum |             |   |   |
|               | 0.557263346                           | Brain_Spinal_cord_cervical_c-1 |              |              | 1.38819021                            | 0.611670369      |             |   |   |
|               | 0.611670369                           | -0.586911201                   | 2.266143406  |              | 1.101737174                           | 1.497031234      |             |   |   |
|               | 3                                     | 0                              | 0.972491774  |              |                                       |                  |             |   |   |
| NARS          | ENSG00000134440.11                    | 0.105609212                    | 1            | 1            | 0.105609212                           |                  |             |   |   |
|               | Brain_Caudate_basal_ganglia           | 0.105609212                    |              |              | Brain_Caudate_basal_ganglia           | 1                | 1           |   |   |
|               | 1                                     | -1.618247769                   | -1.618247769 | -1.618247769 | NA                                    | 1                | 0           |   |   |

|               |                                       |                  |             |             |                                      |                  |              |              |  |
|---------------|---------------------------------------|------------------|-------------|-------------|--------------------------------------|------------------|--------------|--------------|--|
| 0.972491774   |                                       |                  |             |             |                                      |                  |              |              |  |
| PRSS8         | ENSG00000052344.15                    | 0.105711207      | 1           | 1           | 0.105711207                          | Brain_Cerebellum |              |              |  |
|               | 0.105711207                           | Brain_Cerebellum | 1           | 1           | -1.617774487                         |                  | -1.617774487 |              |  |
|               | -1.617774487                          | NA               | 1           | 0           | 0.972491774                          |                  |              |              |  |
| MPPED2        | ENSG00000066382.16                    | 0.105918965      | 3           | 3           | 0.013522981                          |                  |              |              |  |
|               | Brain_Caudate_basal_ganglia           | 0.977850165      |             |             | Brain_Hippocampus                    |                  | 1.426953946  |              |  |
|               | 0.573452544                           | 0.573452544      |             |             | -2.46969098                          | 0.027764269      |              | -1.203617028 |  |
|               | 1.249089014                           | 3                | 0           | 0.972491774 |                                      |                  |              |              |  |
| FZD9          | ENSG00000188763.4                     | 0.105923818      | 1           | 1           | 0.105923818                          |                  |              |              |  |
|               | Brain_Hippocampus                     | 0.105923818      |             |             | Brain_Hippocampus                    | 1                | 1            | 1            |  |
|               | 1.616789078                           | 1.616789078      | 1.616789078 | NA          | 1                                    | 0                | 0.972491774  |              |  |
| EPS15L1       | ENSG00000127527.13                    | 0.105932688      | 3           | 3           | 0.031451374                          |                  |              |              |  |
|               | Brain_Cerebellar_Hemisphere           | 0.37943649       |             |             | Brain_Anterior_cingulate_cortex_BA24 |                  |              |              |  |
|               | 1.969911075                           | 0.068156242      |             |             | 0.068156242                          | 0.878935055      |              | 2.151314628  |  |
|               | 1.707102104                           | 0.71784626       | 3           | 0           | 0.972491774                          |                  |              |              |  |
| ZMPSTE24      | ENSG00000084073.8                     | 0.105950174      | 2           | 2           | 0.034105181                          |                  |              |              |  |
|               | Brain_Putamen_basal_ganglia           | 0.76138348       |             |             | Brain_Caudate_basal_ganglia          | 1.149022034      |              |              |  |
|               | 0.850977966                           | 0.850977966      |             |             | -2.118825919                         | -0.303664535     |              | -1.211245227 |  |
|               | 1.283512924                           | 2                | 0           | 0.972491774 |                                      |                  |              |              |  |
| RP11-982M15.6 | ENSG00000256050.2                     | 0.105983822      | 3           | 3           | 0.025451875                          |                  |              |              |  |
|               | Brain_Substantia_nigra                | 0.574947284      |             |             | Brain_Putamen_basal_ganglia          |                  |              |              |  |
|               | 1.551970958                           | 0.625891628      |             |             | 0.625891628                          | -0.560780349     |              | 2.234474395  |  |
|               | 0.754008209                           | 1.404972982      | 3           | 0           | 0.972491774                          |                  |              |              |  |
| CELF6         | ENSG00000140488.15                    | 0.106056298      | 1           | 1           | 0.106056298                          | Brain_Amygdala   |              |              |  |
|               | 0.106056298                           | Brain_Amygdala   | 1           | 1           | 1                                    | -1.616175853     |              | -1.616175853 |  |
|               | -1.616175853                          | NA               | 1           | 0           | 0.972491774                          |                  |              |              |  |
| NPIPB12       | ENSG00000169203.16                    | 0.106110108      | 7           | 4           | 0.024422111                          |                  |              |              |  |
|               | Brain_Nucleus_accumbens_basal_ganglia | 0.612479629      |             |             |                                      |                  |              |              |  |
|               | Brain_Anterior_cingulate_cortex_BA24  | 4.587001907      |             |             | 0.017592548                          |                  |              |              |  |
|               | 0.589135864                           | 0.506537133      |             |             | 2.250422922                          | 1.273709843      |              | 0.621375716  |  |
|               | 4                                     | 0                | 0.972491774 |             |                                      |                  |              |              |  |
| CTD-3116E22.7 | ENSG00000267612.1                     | 0.106123173      | 3           | 3           | 0.202405244                          |                  |              |              |  |
|               | Brain_Cerebellar_Hemisphere           | 0.761553423      |             |             | Brain_Caudate_basal_ganglia          |                  |              |              |  |
|               | 2.215137832                           | 0.258469329      |             |             | 0.258469329                          | -1.274728817     |              | 0.3034415    |  |
|               | -0.622130976                          | 0.823736457      | 3           | 0           | 0.972491774                          |                  |              |              |  |
| TANC2         | ENSG00000170921.15                    | 0.106273936      | 2           | 1           | 0.09963433                           |                  |              |              |  |
|               | Brain_Cerebellar_Hemisphere           | 0.114732264      |             |             | Brain_Cerebellum                     | 1.992039045      |              |              |  |
|               | 0.007960955                           | 1.992039045      |             |             | 1.577274991                          | 1.64662898       |              | 1.611951985  |  |
|               | 0.049040676                           | 1                | 0           | 0.972491774 |                                      |                  |              |              |  |
| KCNG1         | ENSG00000026559.13                    | 0.106346812      | 1           | 1           | 0.106346812                          |                  |              |              |  |
|               | Brain_Caudate_basal_ganglia           | 0.106346812      |             |             | Brain_Caudate_basal_ganglia          | 1                | 1            |              |  |
|               | 1                                     | 1.614833244      | 1.614833244 | 1.614833244 | NA                                   | 1                | 0            |              |  |
|               | 0.972491774                           |                  |             |             |                                      |                  |              |              |  |
| SCAMP4        | ENSG00000227500.9                     | 0.106662398      | 2           | 2           | 0.062532957                          |                  |              |              |  |
|               | Brain_Cerebellar_Hemisphere           | 0.353378754      |             |             | Brain_Cerebellum                     | 1.812455235      |              |              |  |
|               | 0.187544765                           | 0.187544765      |             |             | 0.928055553                          | 1.862497791      |              | 1.395276672  |  |
|               | 0.660750443                           | 2                | 0           | 0.972491774 |                                      |                  |              |              |  |
| CRIP1         | ENSG00000119878.5                     | 0.106720724      | 12          | 2           | 0.025112469                          |                  |              |              |  |
|               | Brain_Nucleus_accumbens_basal_ganglia | 0.196132611      |             |             |                                      |                  |              |              |  |
|               | Brain_Anterior_cingulate_cortex_BA24  | 10.85934414      |             |             | 0.003922323                          |                  |              |              |  |
|               | 0.473451832                           | -2.239668241     |             |             | -1.292648634                         | -1.804652368     |              | 0.277835052  |  |
|               | 2                                     | 0                | 0.972491774 |             |                                      |                  |              |              |  |
| AP3S1         | ENSG00000177879.15                    | 0.106726846      | 1           | 1           | 0.106726846                          |                  |              |              |  |
|               | Brain_Frontal_Cortex_BA9              | 0.106726846      |             |             | Brain_Frontal_Cortex_BA9             | 1                | 1            |              |  |
|               | 1                                     | 1.613081298      | 1.613081298 | 1.613081298 | NA                                   | 1                | 0            |              |  |
|               | 0.972491774                           |                  |             |             |                                      |                  |              |              |  |
| LINC00698     | ENSG00000244342.5                     | 0.106779062      | 1           | 1           | 0.106779062                          |                  |              |              |  |
|               | Brain_Putamen_basal_ganglia           | 0.106779062      |             |             | Brain_Putamen_basal_ganglia          | 1                | 1            |              |  |
|               | 1                                     | 1.612840971      | 1.612840971 | 1.612840971 | NA                                   | 1                | 0            |              |  |
|               | 0.972491774                           |                  |             |             |                                      |                  |              |              |  |
| POLE4         | ENSG00000115350.11                    | 0.107007585      | 8           | 7           | 0.005289158                          |                  |              |              |  |
|               | Brain_Hippocampus                     | 0.579590936      |             |             | Brain_Amygdala                       | 3.655636179      |              |              |  |

|               |                                       |                                       |                                |              |              |                  |              |             |   |
|---------------|---------------------------------------|---------------------------------------|--------------------------------|--------------|--------------|------------------|--------------|-------------|---|
|               | 0.110158094                           | 0.263816687                           | -2.788874365                   | 1.299900392  | -0.842983651 |                  |              |             |   |
|               | 1.524749753                           | 7                                     | 0                              | 0.972491774  |              |                  |              |             |   |
| QPRT          | ENSG00000103485.17                    | 0.107077534                           | 12                             | 4            | 0.022763569  |                  |              |             |   |
|               | Brain_Hypothalamus                    | 0.975725387                           | Brain_Amygdala                 | 7.975748941  | 7.95E-17     |                  |              |             |   |
|               | 0.540973223                           | 0.03042841                            | 2.277379566                    | 1.008563637  | 0.777217883  | 4                |              |             |   |
|               | 0                                     | 0.972491774                           |                                |              |              |                  |              |             |   |
| RP5-1177M21.1 | ENSG00000234104.1                     | 0.107204498                           | 6                              | 5            | 0.053083023  |                  |              |             |   |
|               | Brain_Frontal_Cortex_BA9              | 0.946578612                           | Brain_Substantia_nigra         |              |              |                  |              |             |   |
|               | 3.477038126                           | 0.022978281                           | 0.450856685                    | 0.067003883  | 1.93424491   |                  |              |             |   |
|               | 1.324045645                           | 0.735221275                           | 5                              | 0            | 0.972491774  |                  |              |             |   |
| SCAMP5        | ENSG00000198794.11                    | 0.107208645                           | 1                              | 1            | 0.107208645  |                  |              |             |   |
|               | Brain_Putamen_basal_ganglia           | 0.107208645                           | Brain_Putamen_basal_ganglia    | 1            | 1            |                  |              |             |   |
|               | 1                                     | 1.610867318                           | 1.610867318                    | 1.610867318  | NA           | 1                | 0            |             |   |
|               | 0.972491774                           |                                       |                                |              |              |                  |              |             |   |
| RBM47         | ENSG00000163694.14                    | 0.107219709                           | 1                              | 1            | 0.107219709  |                  |              |             |   |
|               | Brain_Cerebellar_Hemisphere           | 0.107219709                           | Brain_Cerebellar_Hemisphere    | 1            | 1            |                  |              |             |   |
|               | 1                                     | 1.61081657                            | 1.61081657                     | 1.61081657   | NA           | 1                | 0            | 0.972491774 |   |
| NPEPL1        | ENSG00000215440.11                    | 0.107239809                           | 10                             | 2            | 0.110364578  |                  |              |             |   |
|               | Brain_Hypothalamus                    | 0.56455316                            | Brain_Putamen_basal_ganglia    | 9.263155628  |              |                  |              |             |   |
|               | 0.001277195                           | 0.353606234                           | 0.576091761                    | 1.596556607  | 1.090877067  |                  |              |             |   |
|               | 0.349663014                           | 2                                     | 0                              | 0.972491774  |              |                  |              |             |   |
| STRADB        | ENSG00000082146.12                    | 0.107296425                           | 1                              | 1            | 0.107296425  |                  |              |             |   |
|               | Brain_Spinal_cord_cervical_c-1        | 0.107296425                           | Brain_Spinal_cord_cervical_c-1 |              |              |                  |              |             |   |
|               | 1                                     | 1                                     | 1                              | -1.610464795 | -1.610464795 | -1.610464795     | NA           | 1           | 0 |
|               | 0.972491774                           |                                       |                                |              |              |                  |              |             |   |
| DNASE1        | ENSG00000213918.10                    | 0.107336048                           | 1                              | 1            | 0.107336048  |                  |              |             |   |
|               | Brain_Cerebellum                      | 0.107336048                           | Brain_Cerebellum               | 1            | 1            | 1                | -1.610283189 |             |   |
|               | -1.610283189                          | -1.610283189                          | NA                             | 1            | 0            | 0.972491774      |              |             |   |
| OPRL1         | ENSG00000125510.15                    | 0.107343687                           | 3                              | 3            | 0.055437345  |                  |              |             |   |
|               | Brain_Cerebellar_Hemisphere           | 0.277563213                           | Brain_Cerebellum               | 1.101516818  |              |                  |              |             |   |
|               | 0.906813423                           | 0.906813423                           | -1.915432695                   | -1.085809658 | -1.447774911 |                  |              |             |   |
|               | 0.424790277                           | 3                                     | 0                              | 0.972491774  |              |                  |              |             |   |
| MRM3          | ENSG00000171861.10                    | 0.107400144                           | 3                              | 3            | 0.091884336  | Brain_Cerebellum |              |             |   |
|               | 0.369958328                           | Brain_Substantia_nigra                | 1.475037466                    | 0.520574516  |              |                  |              |             |   |
|               | 0.520574516                           | -1.68554051                           | 1.562983288                    | 0.257998068  | 1.715820361  |                  |              |             |   |
|               | 3                                     | 0                                     | 0.972491774                    |              |              |                  |              |             |   |
| FKBP8         | ENSG00000105701.15                    | 0.10740439                            | 2                              | 2            | 0.040064569  |                  |              |             |   |
|               | Brain_Cerebellar_Hemisphere           | 0.416315567                           | Brain_Substantia_nigra         |              |              |                  |              |             |   |
|               | 1.156751332                           | 0.843248668                           | 0.843248668                    | 0.81282994   | 2.053082581  |                  |              |             |   |
|               | 1.43295626                            | 0.876991053                           | 2                              | 0            | 0.972491774  |                  |              |             |   |
| CLNS1A        | ENSG00000074201.8                     | 0.107417865                           | 1                              | 1            | 0.107417865  |                  |              |             |   |
|               | Brain_Cerebellar_Hemisphere           | 0.107417865                           | Brain_Cerebellar_Hemisphere    | 1            | 1            |                  |              |             |   |
|               | 1                                     | 1.609908356                           | 1.609908356                    | 1.609908356  | NA           | 1                | 0            |             |   |
|               | 0.972491774                           |                                       |                                |              |              |                  |              |             |   |
| RP11-305L7.3  | ENSG00000237422.1                     | 0.107499697                           | 1                              | 1            | 0.107499697  |                  |              |             |   |
|               | Brain_Cerebellum                      | 0.107499697                           | Brain_Cerebellum               | 1            | 1            | 1                | 1.609533677  |             |   |
|               | 1.609533677                           | 1.609533677                           | NA                             | 1            | 0            | 0.972491774      |              |             |   |
| WLS           | ENSG00000116729.13                    | 0.107542412                           | 2                              | 2            | 0.051754769  |                  |              |             |   |
|               | Brain_Frontal_Cortex_BA9              | 0.717654774                           | Brain_Cerebellum               | 1.225884596  |              |                  |              |             |   |
|               | 0.774115404                           | 0.774115404                           | 0.361594903                    | 1.945167945  | 1.153381424  |                  |              |             |   |
|               | 1.119755236                           | 2                                     | 0                              | 0.972491774  |              |                  |              |             |   |
| WFDC1         | ENSG00000103175.10                    | 0.107567323                           | 3                              | 3            | 0.080261646  | Brain_Cortex     |              |             |   |
|               | 0.861544173                           | Brain_Nucleus_accumbens_basal_ganglia | 1.050873939                    |              |              |                  |              |             |   |
|               | 0.946790944                           | 0.946790944                           | -1.721123                      | 1.749169954  | -0.048787293 |                  |              |             |   |
|               | 1.738553673                           | 3                                     | 0                              | 0.972491774  |              |                  |              |             |   |
| SLC35E2       | ENSG00000215790.6                     | 0.107622769                           | 1                              | 1            | 0.107622769  |                  |              |             |   |
|               | Brain_Cerebellar_Hemisphere           | 0.107622769                           | Brain_Cerebellar_Hemisphere    | 1            | 1            |                  |              |             |   |
|               | 1                                     | -1.608970606                          | -1.608970606                   | -1.608970606 | NA           | 1                | 0            |             |   |
|               | 0.972491774                           |                                       |                                |              |              |                  |              |             |   |
| MN1           | ENSG00000169184.5                     | 0.107674103                           | 2                              | 2            | 0.051273254  |                  |              |             |   |
|               | Brain_Nucleus_accumbens_basal_ganglia | 0.391855612                           | Brain_Cerebellum               |              |              |                  |              |             |   |
|               | 1.023252989                           | 0.976747011                           | 0.976747011                    | -0.856257051 | 1.94918568   |                  |              |             |   |



|               |                                      |              |              |              |                                      |              |   |              |  |
|---------------|--------------------------------------|--------------|--------------|--------------|--------------------------------------|--------------|---|--------------|--|
|               | 0.546464314                          | 1.98374758   | 2            | 0            | 0.972491774                          |              |   |              |  |
| ATXN3         | ENSG00000066427.21                   | 0.107713593  | 2            | 2            | 0.092366756                          |              |   |              |  |
|               | Brain_Anterior_cingulate_cortex_BA24 | 0.215751209  |              |              | Brain_Putamen_basal_ganglia          |              |   |              |  |
|               | 1.021469583                          | 0.978530417  | 0.978530417  |              | -1.683043059                         |              |   | -1.237905214 |  |
|               | -1.460474136                         | 0.314759989  | 2            | 0            | 0.972491774                          |              |   |              |  |
| KIAA1549L     | ENSG00000110427.14                   | 0.107835874  | 1            | 1            | 0.107835874                          |              |   |              |  |
|               | Brain_Cerebellar_Hemisphere          | 0.107835874  |              |              | Brain_Cerebellar_Hemisphere          | 1            | 1 |              |  |
|               | 1                                    | 1.607996826  | 1.607996826  | 1.607996826  | NA                                   | 1            | 0 |              |  |
|               | 0.972491774                          |              |              |              |                                      |              |   |              |  |
| SNCG          | ENSG00000173267.13                   | 0.107839838  | 6            | 6            | 0.015910845                          |              |   |              |  |
|               | Brain_Caudate_basal_ganglia          | 0.921578522  |              |              | Brain_Cortex                         | 3.132588423  |   |              |  |
|               | 0.130030177                          | 0.130030177  |              |              | -1.220609552                         | 2.410954228  |   | 0.408050827  |  |
|               | 1.253585261                          | 6            | 0            | 0.972491774  |                                      |              |   |              |  |
| MTMR3         | ENSG00000100330.15                   | 0.107909249  | 3            | 3            | 0.015381458                          |              |   |              |  |
|               | Brain_Cerebellar_Hemisphere          | 0.065403116  |              |              | Brain_Cerebellum                     | 2.383774425  |   |              |  |
|               | 0.147400437                          | 0.147400437  |              |              | -2.423270752                         | -1.842492685 |   | -2.075336056 |  |
|               | 0.307018404                          | 3            | 0            | 0.972491774  |                                      |              |   |              |  |
| TARBP2        | ENSG00000139546.10                   | 0.107934906  | 1            | 1            | 0.107934906                          |              |   |              |  |
|               | Brain_Cerebellar_Hemisphere          | 0.107934906  |              |              | Brain_Cerebellar_Hemisphere          | 1            | 1 |              |  |
|               | 1                                    | -1.607544817 | -1.607544817 | -1.607544817 | NA                                   | 1            | 0 |              |  |
|               | 0.972491774                          |              |              |              |                                      |              |   |              |  |
| NUP133        | ENSG00000069248.11                   | 0.108152906  | 2            | 2            | 0.115333231                          |              |   |              |  |
|               | Brain_Amygdala                       | 0.280642874  |              |              | Brain_Anterior_cingulate_cortex_BA24 |              |   |              |  |
|               | 1.189746001                          | 0.810253999  | 0.810253999  |              | -1.574667424                         |              |   | -1.078876304 |  |
|               | -1.326771864                         | 0.350577264  | 2            | 0            | 0.972491774                          |              |   |              |  |
| ANKLE1        | ENSG00000160117.14                   | 0.108230712  | 7            | 6            | 0.021923079                          |              |   |              |  |
|               | Brain_Spinal_cord_cervical_c-1       | 0.717960103  |              |              | Brain_Cerebellar_Hemisphere          |              |   |              |  |
|               | 4.112684772                          | 0.1102363    | 0.23930817   | -2.291697943 | 0.468012771                          |              |   |              |  |
|               | -1.034645278                         | 1.135450887  | 6            | 0            | 0.972491774                          |              |   |              |  |
| ARMC2         | ENSG00000118690.12                   | 0.108366983  | 11           | 4            | 0.058502043                          |              |   |              |  |
|               | Brain_Anterior_cingulate_cortex_BA24 | 0.973007829  |              |              | Brain_Cerebellum                     | 8.578213     |   |              |  |
|               | 0.001194276                          | 0.351268636  |              |              | -1.891916978                         | 0.576047896  |   | -0.231614883 |  |
|               | 0.741654573                          | 4            | 0            | 0.972491774  |                                      |              |   |              |  |
| PAPD5         | ENSG00000121274.12                   | 0.108431711  | 1            | 1            | 0.108431711                          |              |   |              |  |
|               | Brain_Hypothalamus                   | 0.108431711  |              |              | Brain_Hypothalamus                   | 1            | 1 | 1            |  |
|               | 1.605282218                          | 1.605282218  | 1.605282218  |              | NA                                   | 1            | 0 | 0.972491774  |  |
| SEZ6L         | ENSG00000100095.18                   | 0.108467272  | 2            | 2            | 0.042445753                          |              |   |              |  |
|               | Brain_Cerebellar_Hemisphere          | 0.129873216  |              |              | Brain_Cerebellum                     | 1.879955946  |   |              |  |
|               | 0.120044054                          | 0.120044054  |              |              | -2.029123109                         | -1.514602038 |   | -1.771862574 |  |
|               | 0.363821338                          | 2            | 0            | 0.972491774  |                                      |              |   |              |  |
| HNRNPC        | ENSG00000092199.17                   | 0.108506376  | 1            | 1            | 0.108506376                          |              |   |              |  |
|               | Brain_Cerebellar_Hemisphere          | 0.108506376  |              |              | Brain_Cerebellar_Hemisphere          | 1            | 1 |              |  |
|               | 1                                    | 1.604942879  | 1.604942879  | 1.604942879  | NA                                   | 1            | 0 |              |  |
|               | 0.972491774                          |              |              |              |                                      |              |   |              |  |
| RP11-429B14.4 | ENSG00000261478.1                    | 0.108542933  | 13           | 8            | 0.001127746                          |              |   |              |  |
|               | Brain_Substantia_nigra               | 0.967923804  |              |              | Brain_Frontal_Cortex_BA9             |              |   |              |  |
|               | 6.122690845                          | 0.004782056  | 0.263016688  |              | -0.577462425                         |              |   | 3.256551126  |  |
|               | 1.314625335                          | 1.466586754  | 8            | 0            | 0.972491774                          |              |   |              |  |
| UAP1          | ENSG00000117143.13                   | 0.108606224  | 1            | 1            | 0.108606224                          |              |   |              |  |
|               | Brain_Putamen_basal_ganglia          | 0.108606224  |              |              | Brain_Putamen_basal_ganglia          | 1            | 1 |              |  |
|               | 1                                    | 1.604489376  | 1.604489376  | 1.604489376  | NA                                   | 1            | 0 |              |  |
|               | 0.972491774                          |              |              |              |                                      |              |   |              |  |
| SCARF1        | ENSG00000074660.15                   | 0.108724276  | 1            | 1            | 0.108724276                          |              |   |              |  |
|               | Brain_Cerebellar_Hemisphere          | 0.108724276  |              |              | Brain_Cerebellar_Hemisphere          | 1            | 1 |              |  |
|               | 1                                    | 1.603953623  | 1.603953623  | 1.603953623  | NA                                   | 1            | 0 |              |  |
|               | 0.972491774                          |              |              |              |                                      |              |   |              |  |
| TRPM7         | ENSG00000092439.13                   | 0.108866628  | 3            | 3            | 0.117445115                          |              |   |              |  |
|               | Brain_Caudate_basal_ganglia          | 0.869433098  |              |              | Brain_Cerebellum                     | 1.76034981   |   |              |  |
|               | 0.316779114                          | 0.316779114  |              |              | -1.014353516                         | 1.56558794   |   | 0.23853768   |  |
|               | 1.291568486                          | 3            | 0            | 0.972491774  |                                      |              |   |              |  |
| RP11-435J9.2  | ENSG00000274340.1                    | 0.108964751  | 1            | 1            | 0.108964751                          |              |   |              |  |
|               | Brain_Anterior_cingulate_cortex_BA24 | 0.108964751  |              |              |                                      |              |   |              |  |

|           |                                       |                             |              |             |              |                                       |
|-----------|---------------------------------------|-----------------------------|--------------|-------------|--------------|---------------------------------------|
|           | Brain_Anterior_cingulate_cortex_BA24  | 1                           | 1            | 1           | -1.602863693 |                                       |
|           | -1.602863693                          | -1.602863693                | NA           | 1           | 0            | 0.972491774                           |
| SSC5D     | ENSG00000179954.15                    | 0.10896618                  | 8            | 8           | 0.00914181   |                                       |
|           | Brain_Nucleus_accumbens_basal_ganglia | 0.739252437                 |              |             |              | Brain_Cerebellum                      |
|           | 1.763660892                           | 0.347273218                 | 0.347273218  |             | -2.606704936 | 1.490132518                           |
|           | -0.385645216                          | 1.294569134                 | 8            | 0           | 0.972491774  |                                       |
| POLR1A    | ENSG00000068654.15                    | 0.109012254                 | 12           | 1           | 0.040794057  |                                       |
|           | Brain_Cortex                          | 0.319172895                 |              |             |              | Brain_Putamen_basal_ganglia           |
|           | 0.001753432                           | 11.11453059                 | -2.045617107 |             | -0.996159003 | -1.543669834                          |
|           | 0.270032585                           | 1                           | 0            | 0.972491774 |              |                                       |
| MRPL24    | ENSG00000143314.12                    | 0.109137932                 | 2            | 2           | 0.035800321  |                                       |
|           | Brain_Nucleus_accumbens_basal_ganglia | 0.822087684                 |              |             |              | Brain_Cerebellum                      |
|           | 1.033830997                           | 0.966169003                 | 0.966169003  |             | 0.224860648  | 2.099188116                           |
|           | 1.162024382                           | 1.325349662                 | 2            | 0           | 0.972491774  |                                       |
| CD79A     | ENSG00000105369.9                     | 0.109191461                 | 1            | 1           | 0.109191461  |                                       |
|           | Brain_Hypothalamus                    | 0.109191461                 |              |             |              | Brain_Hypothalamus                    |
|           | 1.601837892                           | 1.601837892                 | 1.601837892  | NA          | 1            | 0                                     |
| FUT11     | ENSG00000196968.10                    | 0.109229139                 | 6            | 3           | 0.074624629  | Brain_Cortex                          |
|           | 0.964091472                           | Brain_Cerebellum            | 4.041161452  |             | 0.030958086  | 0.72261667                            |
|           | -0.045019869                          | 1.782764608                 | 1.342612457  |             | 0.702006607  | 3                                     |
|           | 0.972491774                           |                             |              |             |              | 0                                     |
| CISD2     | ENSG00000145354.9                     | 0.109246642                 | 3            | 2           | 0.02834222   | Brain_Cerebellum                      |
|           | 0.283518064                           | Brain_Hypothalamus          | 2.570687517  |             | 0.008618605  |                                       |
|           | 0.420693878                           | 1.072449768                 | 2.192516675  |             | 1.7250083    | 0.582511922                           |
|           | 0                                     | 0.972491774                 |              |             |              | 2                                     |
| C7orf25   | ENSG00000136197.12                    | 0.109256235                 | 11           | 2           | 0.221384713  |                                       |
|           | Brain_Anterior_cingulate_cortex_BA24  | 0.729646826                 |              |             |              | Brain_Cortex                          |
|           | 9.549520348                           | 0.011301662                 | 0.619952973  |             | -1.092171026 | 1.222854351                           |
|           | -0.457929806                          | 0.613475198                 | 2            | 0           | 0.972491774  |                                       |
| LMOD3     | ENSG00000163380.15                    | 0.109275496                 | 3            | 3           | 0.127759023  |                                       |
|           | Brain_Spinal_cord_cervical_c-1        | 0.195333733                 |              |             |              | Brain_Cerebellar_Hemisphere           |
|           | 1.10336475                            | 0.884905168                 | 0.884905168  |             | -1.522998729 | 1.518174109                           |
|           | -0.433261826                          | 1.69383499                  | 3            | 0           | 0.972491774  |                                       |
| PRDX2     | ENSG00000167815.11                    | 0.109483508                 | 2            | 2           | 0.036104629  |                                       |
|           | Brain_Hippocampus                     | 0.715155141                 |              |             |              | Brain_Hypothalamus                    |
|           | 0.910623377                           | 0.910623377                 | -2.095747122 |             | -0.364941412 | -1.230344267                          |
|           | 1.223864454                           | 2                           | 0            | 0.972491774 |              |                                       |
| C9orf116  | ENSG00000160345.12                    | 0.109602569                 | 1            | 1           | 0.109602569  |                                       |
|           | Brain_Nucleus_accumbens_basal_ganglia | 0.109602569                 |              |             |              |                                       |
|           | Brain_Nucleus_accumbens_basal_ganglia | 1                           | 1            | 1           | 1.599982033  |                                       |
|           | 1.599982033                           | 1.599982033                 | NA           | 1           | 0            | 0.972491774                           |
| RPS9      | ENSG00000170889.13                    | 0.109721911                 | 13           | 3           | 0.044793739  |                                       |
|           | Brain_Nucleus_accumbens_basal_ganglia | 0.789919356                 |              |             |              | Brain_Hypothalamus                    |
|           | 11.2428909                            | 0.005453429                 | 0.420014278  |             | 0.266415335  | 2.006586224                           |
|           | 1.575022364                           | 0.440585817                 | 3            | 0           | 0.972491774  |                                       |
| CERK      | ENSG00000100422.13                    | 0.109727528                 | 2            | 2           | 0.059353744  | Brain_Cerebellum                      |
|           | 0.706741721                           | Brain_Cerebellar_Hemisphere | 1.274532436  |             | 0.725467564  |                                       |
|           | 0.725467564                           | -1.885563914                | 0.37623564   |             | -0.754664137 | 1.599333802                           |
|           | 0                                     | 0.972491774                 |              |             |              | 2                                     |
| FGD4      | ENSG00000139132.14                    | 0.109893303                 | 2            | 2           | 0.049742857  |                                       |
|           | Brain_Cerebellar_Hemisphere           | 0.468397887                 |              |             |              | Brain_Nucleus_accumbens_basal_ganglia |
|           | 1.013976271                           | 0.986023729                 | 0.986023729  |             | -0.725088258 | 1.962168614                           |
|           | 0.618540178                           | 1.900177557                 | 2            | 0           | 0.972491774  |                                       |
| RAB11FIP3 | ENSG00000090565.15                    | 0.109993493                 | 5            | 5           | 0.012522892  |                                       |
|           | Brain_Putamen_basal_ganglia           | 0.782247063                 |              |             |              | Brain_Cerebellum                      |
|           | 0.631478878                           | 0.631478878                 | -0.326149056 |             | 2.497056725  | 0.502897016                           |
|           | 1.232789152                           | 5                           | 0            | 0.972491774 |              |                                       |
| TOGARAM2  | ENSG00000189350.12                    | 0.110061603                 | 11           | 5           | 0.019436294  |                                       |
|           | Brain_Anterior_cingulate_cortex_BA24  | 0.328877794                 |              |             |              | Brain_Cerebellar_Hemisphere           |
|           | 7.740042869                           | 0.015210613                 | 0.296932683  |             | -2.337055577 | 1.323487547                           |
|           | -1.681192908                          | 1.060060892                 | 5            | 0           | 0.972491774  |                                       |
| LINC02035 | ENSG00000273033.2                     | 0.110089992                 | 6            | 6           | 0.077315115  |                                       |

|               |                                       |              |              |                                |              |
|---------------|---------------------------------------|--------------|--------------|--------------------------------|--------------|
|               | Brain_Anterior_cingulate_cortex_BA24  | 0.749322323  |              | Brain_Cerebellar_Hemisphere    |              |
|               | 1.782916287                           | 0.657667455  | 0.657667455  | -1.766481425                   | 1.21166293   |
|               | -0.698581034                          | 1.078622636  | 6            | 0                              | 0.972491774  |
| RP11-72M17.1  | ENSG00000258561.1                     | 0.110103845  | 1            | 1                              | 0.110103845  |
|               | Brain_Caudate_basal_ganglia           | 0.110103845  |              | Brain_Caudate_basal_ganglia    | 1            |
|               | 1                                     | 1.59772656   | 1.59772656   | NA                             | 1            |
|               | 0.972491774                           |              |              |                                |              |
| RP11-347C12.3 | ENSG00000258130.7                     | 0.11020816   | 1            | 1                              | 0.11020816   |
|               | Brain_Cortex                          | 1            | 1            | 1.597258217                    | 1.597258217  |
|               | 1.597258217                           | NA           | 1            | 0                              | 0.972491774  |
| FAM19A1       | ENSG00000183662.10                    | 0.110254286  | 2            | 2                              | 0.03646525   |
|               | Brain_Putamen_basal_ganglia           | 0.791928122  |              | Brain_Substantia_nigra         |              |
|               | 1.037103335                           | 0.962896665  | 0.962896665  | -2.091701238                   | -0.263807673 |
|               | -1.177754455                          | 1.292515935  | 2            | 0                              | 0.972491774  |
| ZNF30-AS1     | ENSG00000270876.1                     | 0.110300493  | 1            | 1                              | 0.110300493  |
|               | Brain_Anterior_cingulate_cortex_BA24  | 0.110300493  |              |                                |              |
|               | Brain_Anterior_cingulate_cortex_BA24  | 1            | 1            | 1                              | 1.596843966  |
|               | 1.596843966                           | 1.596843966  | NA           | 1                              | 0            |
|               | 0.972491774                           |              |              |                                |              |
| SDC3          | ENSG00000162512.15                    | 0.110540426  | 1            | 1                              | 0.110540426  |
|               | Brain_Cerebellum                      | 1            | 1            | 1                              | -1.595768781 |
|               | -1.595768781                          | NA           | 1            | 0                              | 0.972491774  |
| PHACTR1       | ENSG00000112137.17                    | 0.110676912  | 3            | 3                              | 0.167404102  |
|               | Brain_Substantia_nigra                | 0.335197792  |              | Brain_Hippocampus              | 1.235889842  |
|               | 0.732264227                           | 0.732264227  | -1.380593112 | 1.263581666                    | -0.360236193 |
|               | 1.421632475                           | 3            | 0            | 0.972491774                    |              |
| TINCR         | ENSG00000223573.6                     | 0.110776765  | 2            | 2                              | 0.141473248  |
|               | Brain_Cerebellar_Hemisphere           | 0.613853576  |              | Brain_Cerebellum               | 1.523711122  |
|               | 0.476288878                           | 0.476288878  | -1.470326868 | 0.504580404                    | -0.482873232 |
|               | 1.396470324                           | 2            | 0            | 0.972491774                    |              |
| C19orf18      | ENSG00000177025.3                     | 0.110799843  | 7            | 7                              | 0.100597076  |
|               | Brain_Spinal_cord_cervical_c-1        | 0.877577711  |              | Brain_Cortex                   | 3.281301124  |
|               | 0.146552359                           | 0.146552359  | -0.686960889 | 1.641965875                    | 0.258005149  |
|               | 0.729606872                           | 7            | 0            | 0.972491774                    |              |
| GULP1         | ENSG00000144366.15                    | 0.110810246  | 1            | 1                              | 0.110810246  |
|               | Brain_Nucleus_accumbens_basal_ganglia | 0.110810246  |              |                                |              |
|               | Brain_Nucleus_accumbens_basal_ganglia | 1            | 1            | 1                              | -1.594561864 |
|               | -1.594561864                          | -1.594561864 | NA           | 1                              | 0            |
|               | 0.972491774                           |              |              |                                |              |
| MTHFD2L       | ENSG00000163738.18                    | 0.110877794  | 3            | 3                              | 0.358550226  |
|               | Brain_Cerebellar_Hemisphere           | 0.558357192  |              | Brain_Spinal_cord_cervical_c-1 |              |
|               | 1.865055312                           | 0.267125323  | 0.267125323  | -0.840234711                   | 0.918131117  |
|               | 0.221059927                           | 0.934053872  | 3            | 0                              | 0.972491774  |
| MAN1B1        | ENSG00000177239.14                    | 0.110958533  | 6            | 6                              | 0.008161483  |
|               | Brain_Cerebellum                      | 0.904325284  |              | Brain_Hippocampus              | 1.656644613  |
|               | 0.478610953                           | 0.478610953  | -2.645315315 | 1.487256527                    | -0.316692014 |
|               | 1.383733685                           | 6            | 0            | 0.972491774                    |              |
| ADAT1         | ENSG00000065457.10                    | 0.111084896  | 10           | 5                              | 0.093077759  |
|               | Brain_Caudate_basal_ganglia           | 0.597143649  |              | Brain_Frontal_Cortex_BA9       |              |
|               | 7.141191342                           | 0.024432427  | 0.293816339  | -1.679381283                   | 1.103948727  |
|               | -0.66778446                           | 0.902315456  | 5            | 0                              | 0.972491774  |
| NCS1          | ENSG00000107130.9                     | 0.11108786   | 1            | 1                              | 0.11108786   |
|               | Brain_Cerebellum                      | 1            | 1            | 1.59332251                     | 1.59332251   |
|               | 0.972491774                           |              |              | 1.59332251                     | NA           |
|               |                                       |              |              |                                | 1            |
|               |                                       |              |              |                                | 0            |
| TMA7          | ENSG00000232112.3                     | 0.111173793  | 12           | 1                              | 0.058210244  |
|               | Brain_Hypothalamus                    | 11.56923223  |              | Brain_Amygdala                 |              |
|               | 0.192130859                           | 0.00033248   | 11.56923223  | 0.00033248                     | 11.56923223  |
|               | 1.30430134                            | 1.894111253  | 1.565927405  | 0.182816827                    | 1            |
|               | 0.972491774                           |              |              |                                | 0            |
| RP11-499E18.1 | ENSG00000248161.5                     | 0.111198474  | 4            | 4                              | 0.043329214  |
|               | Brain_Putamen_basal_ganglia           | 0.899891791  |              | Brain_Frontal_Cortex_BA9       |              |
|               | 1.909626146                           | 0.31041156   | 0.31041156   | -1.431744456                   | 2.020522547  |
|               | 1.490138697                           | 4            | 0            | 0.972491774                    | 0.37507569   |
| RP11-352D13.5 | ENSG00000259504.2                     | 0.111247695  | 1            | 1                              | 0.111247695  |
|               | Brain_Cerebellar_Hemisphere           | 0.111247695  |              | Brain_Cerebellar_Hemisphere    | 1            |
|               | 1                                     | 1.592610062  | 1.592610062  | 1.592610062                    | NA           |
|               |                                       |              |              |                                | 1            |
|               |                                       |              |              |                                | 0            |

|            |                                       |                                      |                                      |              |              |                  |              |             |  |
|------------|---------------------------------------|--------------------------------------|--------------------------------------|--------------|--------------|------------------|--------------|-------------|--|
|            | 0.972491774                           |                                      |                                      |              |              |                  |              |             |  |
| TTYH3      | ENSG00000136295.14                    | 0.111340483                          | 1                                    | 1            | 0.111340483  | Brain_Cortex     |              |             |  |
|            | 0.111340483                           | Brain_Cortex                         | 1                                    | 1            | 1            | -1.592196842     | -1.592196842 |             |  |
|            | -1.592196842                          | NA                                   | 1                                    | 0            | 0.972491774  |                  |              |             |  |
| PCNX2      | ENSG00000135749.18                    | 0.111390703                          | 2                                    | 2            | 0.060423239  | Brain_Cerebellum |              |             |  |
|            | 0.274177499                           | Brain_Anterior_cingulate_cortex_BA24 | 1.089398447                          |              |              |                  |              |             |  |
|            | 0.910601553                           | 0.910601553                          | -1.877692534                         | 1.093492775  | -0.392099879 |                  |              |             |  |
|            | 2.100945281                           | 2                                    | 0                                    | 0.972491774  |              |                  |              |             |  |
| BTBD19     | ENSG00000222009.8                     | 0.111440904                          | 1                                    | 1            | 0.111440904  |                  |              |             |  |
|            | Brain_Cortex                          | 0.111440904                          | Brain_Cortex                         | 1            | 1            | 1                | -1.591749933 |             |  |
|            | -1.591749933                          | -1.591749933                         | NA                                   | 1            | 0            | 0.972491774      |              |             |  |
| ATOX1      | ENSG00000177556.11                    | 0.111465633                          | 1                                    | 1            | 0.111465633  |                  |              |             |  |
|            | Brain_Frontal_Cortex_BA9              | 0.111465633                          | Brain_Frontal_Cortex_BA9             | 1            | 1            |                  |              |             |  |
|            | 1                                     | 1.59163993                           | 1.59163993                           | 1.59163993   | NA           | 1                | 0            | 0.972491774 |  |
| EFTUD2     | ENSG00000108883.12                    | 0.111475302                          | 2                                    | 2            | 0.038050191  |                  |              |             |  |
|            | Brain_Cerebellar_Hemisphere           | 0.232077149                          | Brain_Cerebellum                     | 1.679325382  |              |                  |              |             |  |
|            | 0.320674618                           | 0.320674618                          | 1.195025291                          | 2.074313654  | 1.634669473  |                  |              |             |  |
|            | 0.621750764                           | 2                                    | 0                                    | 0.972491774  |              |                  |              |             |  |
| C10orf11   | ENSG00000148655.14                    | 0.111819484                          | 9                                    | 4            | 0.038660338  |                  |              |             |  |
|            | Brain_Hypothalamus                    | 0.794964219                          | Brain_Hippocampus                    | 6.436068908  |              |                  |              |             |  |
|            | 0.019926624                           | 0.503087856                          | -2.067784004                         | 0.259869784  | -0.921645315 |                  |              |             |  |
|            | 0.650998981                           | 4                                    | 0                                    | 0.972491774  |              |                  |              |             |  |
| ERI1       | ENSG00000104626.14                    | 0.111915192                          | 3                                    | 3            | 0.332378245  |                  |              |             |  |
|            | Brain_Putamen_basal_ganglia           | 0.724699225                          | Brain_Cortex                         | 2.199360195  |              |                  |              |             |  |
|            | 0.133294528                           | 0.133294528                          | -0.969334654                         | 0.556579615  | -0.020189879 |                  |              |             |  |
|            | 0.8283122                             | 3                                    | 0                                    | 0.972491774  |              |                  |              |             |  |
| PLD5       | ENSG00000180287.16                    | 0.112020947                          | 3                                    | 3            | 0.105425636  |                  |              |             |  |
|            | Brain_Cerebellar_Hemisphere           | 0.759497841                          | Brain_Cerebellum                     | 1.878700269  |              |                  |              |             |  |
|            | 0.332766015                           | 0.332766015                          | 0.306140278                          | 1.619100527  | 0.963029946  |                  |              |             |  |
|            | 0.656480507                           | 3                                    | 0                                    | 0.972491774  |              |                  |              |             |  |
| CUBN       | ENSG00000107611.14                    | 0.112062278                          | 7                                    | 3            | 0.02310237   |                  |              |             |  |
|            | Brain_Cerebellar_Hemisphere           | 0.731534443                          | Brain_Anterior_cingulate_cortex_BA24 |              |              |                  |              |             |  |
|            | 5.08663028                            | 0.024171995                          | 0.669545443                          | -2.271737492 | -0.343085096 |                  |              |             |  |
|            | -1.262950187                          | 0.743074398                          | 3                                    | 0            | 0.972491774  |                  |              |             |  |
| ATP8A2     | ENSG00000132932.16                    | 0.112114768                          | 4                                    | 4            | 0.012699853  |                  |              |             |  |
|            | Brain_Frontal_Cortex_BA9              | 0.827811649                          | Brain_Spinal_cord_cervical_c-1       |              |              |                  |              |             |  |
|            | 1.099901518                           | 0.836881228                          | 0.836881228                          | -0.936202517 | 2.492076909  |                  |              |             |  |
|            | 0.672991483                           | 1.433684797                          | 4                                    | 0            | 0.972491774  |                  |              |             |  |
| AC104135.2 | ENSG00000236209.1                     | 0.112140491                          | 13                                   | 1            | 0.086381258  |                  |              |             |  |
|            | Brain_Substantia_nigra                | 0.211838935                          | Brain_Amygdala                       | 12.45010393  |              |                  |              |             |  |
|            | 0.000360512                           | 12.45010393                          | 1.248524794                          | 1.714803508  | 1.552199056  |                  |              |             |  |
|            | 0.147180039                           | 1                                    | 0                                    | 0.972491774  |              |                  |              |             |  |
| JMJD7      | ENSG00000243789.10                    | 0.11250551                           | 9                                    | 3            | 0.139535416  |                  |              |             |  |
|            | Brain_Nucleus_accumbens_basal_ganglia | 0.952250132                          | Brain_Cerebellar_Hemisphere          |              |              |                  |              |             |  |
|            | 7.128750054                           | 0.006353422                          | 0.568982977                          | -0.411279793 | 1.477523306  |                  |              |             |  |
|            | 0.45384312                            | 0.737847084                          | 3                                    | 0            | 0.972491774  |                  |              |             |  |
| PIK3CA     | ENSG00000121879.3                     | 0.112545985                          | 2                                    | 2            | 0.077411818  |                  |              |             |  |
|            | Brain_Spinal_cord_cervical_c-1        | 0.241876216                          | Brain_Hippocampus                    |              |              |                  |              |             |  |
|            | 1.029791131                           | 0.970208869                          | 0.970208869                          | -1.765904821 | 1.170310058  |                  |              |             |  |
|            | -0.297797381                          | 2.076217452                          | 2                                    | 0            | 0.972491774  |                  |              |             |  |
| PIGO       | ENSG00000165282.13                    | 0.112565945                          | 7                                    | 5            | 0.018854953  |                  |              |             |  |
|            | Brain_Frontal_Cortex_BA9              | 0.775475892                          | Brain_Cortex                         | 4.361337391  |              |                  |              |             |  |
|            | 0.01827284                            | 0.3795768                            | -2.348386341                         | 0.285219617  | -0.804711831 | 0.91438979       |              |             |  |
|            | 5                                     | 0                                    | 0.972491774                          |              |              |                  |              |             |  |
| RSU1       | ENSG00000148484.17                    | 0.112598621                          | 8                                    | 6            | 0.016815896  | Brain_Cortex     |              |             |  |
|            | 0.937578582                           | Brain_Hippocampus                    | 4.044887932                          | 0.06432202   | 0.26770062   |                  |              |             |  |
|            | -2.390708547                          | 1.144945246                          | -0.086016045                         | 1.013856318  | 6            | 0                |              |             |  |
|            | 0.972491774                           |                                      |                                      |              |              |                  |              |             |  |
| MICAL1     | ENSG00000135596.17                    | 0.112651836                          | 7                                    | 5            | 0.008743527  |                  |              |             |  |
|            | Brain_Cerebellum                      | 0.964765678                          | Brain_Cortex                         | 4.190232724  | 0.042761758  |                  |              |             |  |
|            | 0.219496885                           | -2.621922658                         | 0.044174036                          | -0.691289212 | 0.934867028  |                  |              |             |  |
|            | 5                                     | 0                                    | 0.972491774                          |              |              |                  |              |             |  |

|         |                                       |                                       |                             |              |                                |                   |              |
|---------|---------------------------------------|---------------------------------------|-----------------------------|--------------|--------------------------------|-------------------|--------------|
| MUC1    | ENSG00000185499.16                    | 0.112724326                           | 1                           | 1            | 0.112724326                    |                   |              |
|         | Brain_Nucleus_accumbens_basal_ganglia | 0.112724326                           |                             |              |                                |                   |              |
|         | Brain_Nucleus_accumbens_basal_ganglia | 1                                     | 1                           | 1            | -1.586066055                   |                   |              |
|         | -1.586066055                          | -1.586066055                          | NA                          | 0            | 0.972491774                    |                   |              |
| REXO4   | ENSG00000148300.11                    | 0.112887866                           | 5                           | 2            | 0.03630539                     | Brain_Hippocampus |              |
|         | 0.407447789                           | Brain_Cortex                          | 3.94808266                  | 0.053467661  | 0.794903788                    |                   |              |
|         | 0.828393319                           | 2.093490511                           | 1.189914566                 | 0.512951474  | 2                              | 0                 |              |
|         | 0.972491774                           |                                       |                             |              |                                |                   |              |
| ABAT    | ENSG00000183044.11                    | 0.112937222                           | 4                           | 4            | 0.023686706                    |                   |              |
|         | Brain_Spinal_cord_cervical_c-1        | 0.721149157                           |                             |              |                                |                   |              |
|         | Brain_Anterior_cingulate_cortex_BA24  | 1.347862001                           |                             |              | 0.764575638                    |                   |              |
|         | 0.764575638                           | -0.780891057                          | 2.26217318                  | 0.566201781  | 1.399154192                    |                   | 4            |
|         | 0                                     | 0.972491774                           |                             |              |                                |                   |              |
| RNF215  | ENSG00000099999.14                    | 0.112958664                           | 4                           | 4            | 0.029629325                    |                   |              |
|         | Brain_Putamen_basal_ganglia           | 0.812962146                           |                             |              | Brain_Caudate_basal_ganglia    |                   |              |
|         | 1.678213926                           | 0.445973247                           | 0.445973247                 | -2.175010562 | 1.518996752                    |                   |              |
|         | -0.065488603                          | 1.578458004                           | 4                           | 0            | 0.972491774                    |                   |              |
| LRFN5   | ENSG00000165379.13                    | 0.11302934                            | 4                           | 4            | 0.145516819                    |                   |              |
|         | Brain_Cerebellar_Hemisphere           | 0.821049446                           |                             |              | Brain_Cerebellum               | 1.906688938       |              |
|         | 0.118345951                           | 0.118345951                           | 0.226195402                 | 1.455550868  | 0.67081094                     |                   |              |
|         | 0.557558833                           | 4                                     | 0                           | 0.972491774  |                                |                   |              |
| CRTC3   | ENSG00000140577.15                    | 0.113134072                           | 2                           | 2            | 0.095561826                    | Brain_Cortex      |              |
|         | 0.270499099                           | Brain_Cerebellum                      | 1.090035722                 | 0.909964278  | 0.909964278                    |                   |              |
|         | 1.101913913                           | 1.666761564                           | 1.384337738                 | 0.399407604  | 2                              | 0                 |              |
|         | 0.972491774                           |                                       |                             |              |                                |                   |              |
| FAM170A | ENSG00000164334.15                    | 0.113187685                           | 3                           | 2            | 0.27242379                     |                   |              |
|         | Brain_Spinal_cord_cervical_c-1        | 0.806909529                           |                             |              | Brain_Hippocampus              |                   |              |
|         | 2.629275057                           | 0.052792336                           | 0.317932607                 | -1.097497919 | 0.416026092                    |                   |              |
|         | -0.145685654                          | 0.828747576                           | 2                           | 0            | 0.972491774                    |                   |              |
| NEBL    | ENSG00000078114.18                    | 0.113312851                           | 1                           | 1            | 0.113312851                    | Brain_Amygdala    |              |
|         | 0.113312851                           | Brain_Amygdala                        | 1                           | 1            | 1                              | -1.583476711      | -1.583476711 |
|         | -1.583476711                          | NA                                    | 1                           | 0            | 0.972491774                    |                   |              |
| LRRC25  | ENSG00000175489.9                     | 0.113344572                           | 2                           | 2            | 0.044651162                    |                   |              |
|         | Brain_Nucleus_accumbens_basal_ganglia | 0.12876068                            | Brain_Caudate_basal_ganglia |              |                                |                   |              |
|         | 1.513709722                           | 0.486290278                           | 0.486290278                 | -2.007925941 | -1.519007214                   |                   |              |
|         | -1.763466578                          | 0.345717747                           | 2                           | 0            | 0.972491774                    |                   |              |
| RPS16   | ENSG00000105193.8                     | 0.113395712                           | 3                           | 2            | 0.081022924                    | Brain_Cerebellum  |              |
|         | 0.659396183                           | Brain_Nucleus_accumbens_basal_ganglia | 2.647438225                 |              |                                |                   |              |
|         | 0.029011057                           | 0.323550719                           | -1.744781421                | 0.440746978  | -0.667326534                   |                   |              |
|         | 1.093085871                           | 2                                     | 0                           | 0.972491774  |                                |                   |              |
| SATB1   | ENSG00000182568.16                    | 0.113568762                           | 1                           | 1            | 0.113568762                    | Brain_Cerebellum  |              |
|         | 0.113568762                           | Brain_Cerebellum                      | 1                           | 1            | 1                              | 1.582354077       | 1.582354077  |
|         | 1.582354077                           | NA                                    | 1                           | 0            | 0.972491774                    |                   |              |
| FASTKD5 | ENSG00000215251.3                     | 0.113712377                           | 4                           | 4            | 0.021026891                    |                   |              |
|         | Brain_Spinal_cord_cervical_c-1        | 0.470355891                           |                             |              |                                |                   |              |
|         | Brain_Anterior_cingulate_cortex_BA24  | 2.946276448                           |                             |              | 0.119329266                    |                   |              |
|         | 0.119329266                           | 0.721900115                           | 2.307501284                 | 1.456265262  | 0.650836086                    |                   |              |
|         | 4                                     | 0                                     | 0.972491774                 |              |                                |                   |              |
| PISD    | ENSG00000241878.11                    | 0.113712535                           | 10                          | 6            | 0.084658746                    |                   |              |
|         | Brain_Anterior_cingulate_cortex_BA24  | 0.85131274                            | Brain_Frontal_Cortex_BA9    |              |                                |                   |              |
|         | 6.648210765                           | 0.035608333                           | 0.267595208                 | -1.72427203  | 0.829837729                    |                   |              |
|         | -0.813895682                          | 0.726961728                           | 6                           | 0            | 0.972491774                    |                   |              |
| SEC61A2 | ENSG00000065665.20                    | 0.11387567                            | 9                           | 3            | 0.017112364                    | Brain_Cortex      |              |
|         | 0.460001154                           | Brain_Substantia_nigra                | 7.299923484                 | 0.000462325  |                                |                   |              |
|         | 0.496551374                           | -2.384284578                          | -0.738844949                | -1.61419778  | 0.434824885                    |                   |              |
|         | 3                                     | 0                                     | 0.972491774                 |              |                                |                   |              |
| SLC5A4  | ENSG00000100191.5                     | 0.113882862                           | 8                           | 3            | 0.093866061                    |                   |              |
|         | Brain_Frontal_Cortex_BA9              | 0.924060435                           | Brain_Amygdala              | 6.046627773  |                                |                   |              |
|         | 0.004186035                           | 0.343444865                           | -1.005272625                | 1.675347551  | 0.769800844                    |                   |              |
|         | 0.908901576                           | 3                                     | 0                           | 0.972491774  |                                |                   |              |
| MBD4    | ENSG00000129071.9                     | 0.113948392                           | 1                           | 1            | 0.113948392                    |                   |              |
|         | Brain_Spinal_cord_cervical_c-1        | 0.113948392                           |                             |              | Brain_Spinal_cord_cervical_c-1 |                   |              |

|                                       |                             |                                      |              |              |              |                                |                  |   |
|---------------------------------------|-----------------------------|--------------------------------------|--------------|--------------|--------------|--------------------------------|------------------|---|
| 1                                     | 1                           | 1                                    | -1.580692379 | -1.580692379 | -1.580692379 | NA                             | 1                | 0 |
| 0.972491774                           |                             |                                      |              |              |              |                                |                  |   |
| CDCA8                                 | ENSG00000134690.10          | 0.114094729                          | 2            | 2            | 0.073325266  |                                |                  |   |
| Brain_Nucleus_accumbens_basal_ganglia | 0.246691024                 |                                      |              |              |              | Brain_Substantia_nigra         |                  |   |
| 1.052934621                           | 0.947065379                 | 0.947065379                          |              |              | -1.790800803 | -1.158424062                   |                  |   |
| -1.474612433                          | 0.447157882                 | 2                                    | 0            | 0.972491774  |              |                                |                  |   |
| CCDC173                               | ENSG00000154479.12          | 0.114110947                          | 7            | 2            | 0.022675954  |                                |                  |   |
| Brain_Cerebellar_Hemisphere           | 0.177088988                 |                                      |              |              |              | Brain_Hippocampus              | 6.439644727      |   |
| 1.42E-09                              | 0.241464768                 | 1.349772441                          |              |              | 2.2788505    | 1.858740854                    |                  |   |
| 0.409381257                           | 2                           | 0                                    | 0.972491774  |              |              |                                |                  |   |
| PHRF1                                 | ENSG00000070047.11          | 0.114119489                          | 3            | 3            | 0.150008263  |                                |                  |   |
| Brain_Caudate_basal_ganglia           | 0.334576905                 |                                      |              |              |              | Brain_Cerebellar_Hemisphere    |                  |   |
| 1.942928419                           | 0.315631357                 | 0.315631357                          |              |              | -1.150624589 | 1.439502285                    |                  |   |
| -0.225352743                          | 1.444792985                 | 3                                    | 0            | 0.972491774  |              |                                |                  |   |
| RP11-573G6.6                          | ENSG00000261671.1           | 0.114185256                          | 1            | 1            | 0.114185256  |                                |                  |   |
| Brain_Frontal_Cortex_BA9              | 0.114185256                 |                                      |              |              |              | Brain_Frontal_Cortex_BA9       | 1                | 1 |
| 1                                     | 1.579657793                 | 1.579657793                          | 1.579657793  | NA           | 1            | 0                              |                  |   |
| 0.972491774                           |                             |                                      |              |              |              |                                |                  |   |
| C5orf56                               | ENSG00000197536.11          | 0.114238623                          | 10           | 2            | 0.065752126  |                                |                  |   |
| Brain_Hippocampus                     | 0.95993511                  | Brain_Anterior_cingulate_cortex_BA24 |              |              |              |                                |                  |   |
| 8.777321552                           | 3.55E-05                    | 0.776740431                          |              |              | -0.050235013 | 1.840109751                    |                  |   |
| 0.457562214                           | 0.560461728                 | 2                                    | 0            | 0.972491774  |              |                                |                  |   |
| PIGV                                  | ENSG00000060642.10          | 0.114266995                          | 3            | 3            | 0.07437643   |                                |                  |   |
| Brain_Anterior_cingulate_cortex_BA24  | 0.556124736                 |                                      |              |              |              | Brain_Cerebellar_Hemisphere    |                  |   |
| 1.547984964                           | 0.450356718                 | 0.450356718                          |              |              | -0.588607299 | 1.784290768                    |                  |   |
| 0.763429389                           | 1.220622433                 | 3                                    | 0            | 0.972491774  |              |                                |                  |   |
| LINC01549                             | ENSG00000232560.6           | 0.114288658                          | 1            | 1            | 0.114288658  |                                |                  |   |
| Brain_Frontal_Cortex_BA9              | 0.114288658                 |                                      |              |              |              | Brain_Frontal_Cortex_BA9       | 1                | 1 |
| 1                                     | -1.579206681                | -1.579206681                         | -1.579206681 | NA           | 1            | 0                              |                  |   |
| 0.972491774                           |                             |                                      |              |              |              |                                |                  |   |
| RUSC2                                 | ENSG00000198853.11          | 0.114291017                          | 1            | 1            | 0.114291017  |                                |                  |   |
| Brain_Caudate_basal_ganglia           | 0.114291017                 |                                      |              |              |              | Brain_Caudate_basal_ganglia    | 1                | 1 |
| 1                                     | 1.579196392                 | 1.579196392                          | 1.579196392  | NA           | 1            | 0                              |                  |   |
| 0.972491774                           |                             |                                      |              |              |              |                                |                  |   |
| CABP7                                 | ENSG00000100314.3           | 0.114297022                          | 2            | 2            | 0.298918734  |                                | Brain_Cerebellum |   |
| 0.88753758                            | Brain_Cerebellar_Hemisphere | 1.830887582                          |              |              | 0.169112418  |                                |                  |   |
| 0.169112418                           | -1.038754915                | 0.141420729                          |              |              | -0.448667093 | 0.8345102                      | 2                |   |
| 0                                     | 0.972491774                 |                                      |              |              |              |                                |                  |   |
| ATP5C1                                | ENSG00000165629.19          | 0.114348275                          | 4            | 4            | 0.01565118   |                                |                  |   |
| Brain_Cerebellar_Hemisphere           | 0.400235112                 |                                      |              |              |              | Brain_Frontal_Cortex_BA9       |                  |   |
| 2.082028679                           | 0.085528122                 | 0.085528122                          |              |              | -2.416949705 | -0.841201409                   |                  |   |
| -1.827469117                          | 0.712290925                 | 4                                    | 0            | 0.972491774  |              |                                |                  |   |
| ATG4B                                 | ENSG00000168397.16          | 0.114402931                          | 4            | 4            | 0.035873027  |                                |                  |   |
| Brain_Frontal_Cortex_BA9              | 0.499226245                 |                                      |              |              |              | Brain_Caudate_basal_ganglia    |                  |   |
| 2.566205646                           | 0.092757119                 | 0.092757119                          |              |              | -2.098363722 | 1.399421367                    |                  |   |
| 0.177422265                           | 1.552348103                 | 4                                    | 0            | 0.972491774  |              |                                |                  |   |
| TLDC1                                 | ENSG00000140950.15          | 0.114568505                          | 2            | 2            | 0.113052267  |                                |                  |   |
| Brain_Hypothalamus                    | 0.171751843                 |                                      |              |              |              | Brain_Cerebellar_Hemisphere    | 1.010605914      |   |
| 0.989394086                           | 0.989394086                 | 1.366596411                          |              |              | 1.584621894  | 1.475609152                    |                  |   |
| 0.154167298                           | 2                           | 0                                    | 0.972491774  |              |              |                                |                  |   |
| LINC01301                             | ENSG00000251396.6           | 0.114600232                          | 10           | 3            | 0.005236564  |                                |                  |   |
| Brain_Hypothalamus                    | 0.187875802                 |                                      |              |              |              | Brain_Caudate_basal_ganglia    | 8.808946932      |   |
| 0.003380283                           | 0.332482098                 | 1.316889096                          |              |              | 2.792109477  | 2.105867719                    |                  |   |
| 0.407510765                           | 3                           | 0                                    | 0.972491774  |              |              |                                |                  |   |
| SPHKAP                                | ENSG00000153820.12          | 0.114627533                          | 2            | 2            | 0.186658917  |                                |                  |   |
| Brain_Cerebellum                      | 0.782394341                 |                                      |              |              |              | Brain_Cerebellar_Hemisphere    | 1.850320717      |   |
| 0.149679283                           | 0.149679283                 | 0.276200151                          |              |              | 1.320527632  | 0.798363891                    |                  |   |
| 0.738451044                           | 2                           | 0                                    | 0.972491774  |              |              |                                |                  |   |
| RP11-509J21.4                         | ENSG00000226669.2           | 0.114667581                          | 2            | 2            | 0.041609418  |                                |                  |   |
| Brain_Substantia_nigra                | 0.691725677                 |                                      |              |              |              | Brain_Spinal_cord_cervical_c-1 |                  |   |
| 1.013839814                           | 0.986160186                 | 0.986160186                          |              |              | -0.396514278 | 2.037405552                    |                  |   |
| 0.820445637                           | 1.721041217                 | 2                                    | 0            | 0.972491774  |              |                                |                  |   |

|               |                                       |                                       |                   |              |                                      |                  |
|---------------|---------------------------------------|---------------------------------------|-------------------|--------------|--------------------------------------|------------------|
| SRSF12        | ENSG00000154548.8                     | 0.114811773                           | 4                 | 4            | 0.042120883                          |                  |
|               | Brain_Frontal_Cortex_BA9              | 0.506159                              |                   |              | Brain_Anterior_cingulate_cortex_BA24 |                  |
|               | 1.625102146                           | 0.555173578                           | 0.555173578       | -2.032323832 | 1.310721028                          |                  |
|               | -0.770660593                          | 1.504635488                           | 4                 | 0            | 0.972491774                          |                  |
| BISPR         | ENSG00000282851.1                     | 0.114881097                           | 1                 | 1            | 0.114881097                          |                  |
|               | Brain_Cerebellar_Hemisphere           | 0.114881097                           |                   |              | Brain_Cerebellar_Hemisphere1         | 1                |
|               | 1                                     | 1.576628214                           | 1.576628214       | 1.576628214  | NA                                   | 1 0              |
|               | 0.972491774                           |                                       |                   |              |                                      |                  |
| CANT1         | ENSG00000171302.16                    | 0.114888063                           | 4                 | 4            | 0.057408646                          |                  |
|               | Brain_Frontal_Cortex_BA9              | 0.739698658                           |                   |              | Brain_Caudate_basal_ganglia          |                  |
|               | 1.417595202                           | 0.680877572                           | 0.680877572       | -1.900186529 | 1.427065034                          |                  |
|               | -0.345623077                          | 1.507914913                           | 4                 | 0            | 0.972491774                          |                  |
| PEX6          | ENSG00000124587.13                    | 0.114963372                           | 13                | 1            | 0.069608068                          | Brain_Cerebellum |
|               | 0.221357501                           | Brain_Spinal_cord_cervical_c-1        | 12.60331731       |              | 0.000126956                          |                  |
|               | 12.60331731                           | -1.814452638                          | -1.222926387      | -1.551384242 | 0.146644689                          |                  |
|               | 1                                     | 0                                     | 0.972491774       |              |                                      |                  |
| GUF1          | ENSG00000151806.13                    | 0.114983779                           | 13                | 2            | 0.032976593                          | Brain_Amygdala   |
|               | 0.679459475                           | Brain_Cerebellum                      | 11.37245582       |              | 0.002272008                          | 0.845172566      |
|               | -2.132368159                          | -0.413200837                          | -1.431590787      | 0.445218862  | 2                                    | 0                |
|               | 0.972491774                           |                                       |                   |              |                                      |                  |
| ZAP70         | ENSG00000115085.13                    | 0.114991773                           | 11                | 3            | 0.136716275                          |                  |
|               | Brain_Nucleus_accumbens_basal_ganglia | 0.595420322                           |                   |              | Brain_Putamen_basal_ganglia          |                  |
|               | 9.445155175                           | 0.001129384                           | 0.37332217        | -1.488131281 | 1.408961637                          |                  |
|               | -0.824860479                          | 0.774467034                           | 3                 | 0            | 0.972491774                          |                  |
| CH17-140K24.3 | ENSG00000280336.1                     | 0.115002544                           | 1                 | 1            | 0.115002544                          |                  |
|               | Brain_Cerebellum                      | 0.115002544                           | Brain_Cerebellum1 | 1            | 1                                    | 1.576100934      |
|               | 1.576100934                           | 1.576100934                           | NA                | 1            | 0                                    | 0.972491774      |
| PRDX5         | ENSG00000126432.13                    | 0.115005422                           | 7                 | 7            | 0.047602248                          | Brain_Cerebellum |
|               | 0.539627063                           | Brain_Nucleus_accumbens_basal_ganglia | 2.276259596       |              | 0.26794053                           |                  |
|               | 0.26794053                            | -1.910037994                          | 1.98090215        | 0.577497575  | 1.409327869                          | 7 0              |
|               | 0.972491774                           |                                       |                   |              |                                      |                  |
| AKNA          | ENSG00000106948.16                    | 0.115081203                           | 7                 | 7            | 0.053814531                          |                  |
|               | Brain_Putamen_basal_ganglia           | 0.853686584                           |                   |              | Brain_Hippocampus                    | 2.922845148      |
|               | 0.10067224                            | 0.10067224                            | -1.337370094      | 1.928326472  | 0.389646789                          | 1.11452166       |
|               | 7                                     | 0                                     | 0.972491774       |              |                                      |                  |
| RP11-373D23.3 | ENSG00000270210.1                     | 0.115172735                           | 1                 | 1            | 0.115172735                          |                  |
|               | Brain_Cortex                          | 0.115172735                           | Brain_Cortex      | 1            | 1                                    | 1.575362762      |
|               | 1.575362762                           | 1.575362762                           | NA                | 1            | 0                                    | 0.972491774      |
| EXOSC4        | ENSG00000178896.8                     | 0.115302056                           | 1                 | 1            | 0.115302056                          |                  |
|               | Brain_Nucleus_accumbens_basal_ganglia | 0.115302056                           |                   |              |                                      |                  |
|               | Brain_Nucleus_accumbens_basal_ganglia | 1                                     | 1                 | 1            | 1.574802426                          |                  |
|               | 1.574802426                           | 1.574802426                           | NA                | 1            | 0                                    | 0.972491774      |
| SPRY4         | ENSG00000187678.8                     | 0.115337559                           | 2                 | 2            | 0.05372071                           |                  |
|               | Brain_Cerebellar_Hemisphere           | 0.543837523                           |                   |              | Brain_Spinal_cord_cervical_c-1       |                  |
|               | 1.084894436                           | 0.915105564                           | 0.915105564       | -1.929081781 | 0.607020176                          |                  |
|               | -0.661030802                          | 1.793294891                           | 2                 | 0            | 0.972491774                          |                  |
| C11orf70      | ENSG00000137691.12                    | 0.115374992                           | 2                 | 2            | 0.105937166                          |                  |
|               | Brain_Anterior_cingulate_cortex_BA24  | 0.237417659                           |                   |              | Brain_Substantia_nigra               |                  |
|               | 1.074698893                           | 0.925301107                           | 0.925301107       | 1.181465983  | 1.616727262                          |                  |
|               | 1.399096623                           | 0.307776202                           | 2                 | 0            | 0.972491774                          |                  |
| LINC01291     | ENSG00000204792.2                     | 0.115400926                           | 13                | 1            | 0.085680538                          |                  |
|               | Brain_Hippocampus                     | 0.212804353                           | Brain_Cortex      | 12.53777859  |                                      |                  |
|               | 0.001518658                           | 12.53777859                           | 1.245891169       | 1.718636735  | 1.546551314                          |                  |
|               | 0.128574805                           | 1                                     | 0                 | 0.972491774  |                                      |                  |
| HN1L          | ENSG00000206053.12                    | 0.11547385                            | 3                 | 3            | 0.027147657                          |                  |
|               | Brain_Cerebellar_Hemisphere           | 0.76213588                            | Brain_Cortex      | 1.147013535  |                                      |                  |
|               | 0.797260922                           | 0.797260922                           | 0.302677194       | 2.209388111  | 1.272669087                          |                  |
|               | 0.953790828                           | 3                                     | 0                 | 0.972491774  |                                      |                  |
| LRP5L         | ENSG00000100068.11                    | 0.115640717                           | 5                 | 4            | 0.01294843                           |                  |
|               | Brain_Frontal_Cortex_BA9              | 0.880768895                           |                   |              | Brain_Caudate_basal_ganglia          |                  |
|               | 3.055810775                           | 0.074126795                           | 0.189913198       | -2.485184527 | 0.281567365                          |                  |
|               | -1.308863938                          | 1.279152833                           | 4                 | 0            | 0.972491774                          |                  |

|               |                             |                             |             |             |                             |              |  |  |                  |
|---------------|-----------------------------|-----------------------------|-------------|-------------|-----------------------------|--------------|--|--|------------------|
| KCNS3         | ENSG00000170745.11          | 0.115755699                 | 7           | 6           | 0.147795461                 |              |  |  |                  |
|               | Brain_Hippocampus           | 0.903506648                 |             |             | Brain_Amygdala              | 3.465272259  |  |  |                  |
|               | 0.071455106                 | 0.212183223                 |             |             | -1.447362365                | 0.938491437  |  |  | -0.307271215     |
|               | 0.829072563                 | 6                           | 0           | 0.972491774 |                             |              |  |  |                  |
| TMED8         | ENSG00000100580.7           | 0.115772542                 | 3           | 3           | 0.02932857                  |              |  |  |                  |
|               | Brain_Cerebellar_Hemisphere | 0.081317306                 |             |             | Brain_Cortex                | 2.052485668  |  |  |                  |
|               | 0.28346936                  | 0.28346936                  | 1.743093371 |             | 2.179041712                 | 1.943930616  |  |  |                  |
|               | 0.219985821                 | 3                           | 0           | 0.972491774 |                             |              |  |  |                  |
| TMEM98        | ENSG0000006042.11           | 0.1158587                   | 9           | 5           | 0.040258086                 |              |  |  |                  |
|               | Brain_Hippocampus           | 0.983991712                 |             |             | Brain_Cerebellar_Hemisphere | 5.978678945  |  |  |                  |
|               | 0.019997967                 | 0.249692133                 |             |             | -0.670260807                | 2.051090994  |  |  | 0.483121917      |
|               | 0.732450867                 | 5                           | 0           | 0.972491774 |                             |              |  |  |                  |
| TBX5          | ENSG00000089225.19          | 0.115864168                 | 2           | 2           | 0.077358751                 |              |  |  | Brain_Cerebellum |
|               | 0.609914035                 | Brain_Hippocampus           | 1.30050195  |             | 0.69949805                  | 0.69949805   |  |  |                  |
|               | -1.766221166                | 0.510196171                 |             |             | -0.628012498                | 1.609670136  |  |  | 2 0              |
|               | 0.972491774                 |                             |             |             |                             |              |  |  |                  |
| RP11-398C13.8 | ENSG00000284024.1           | 0.115945149                 | 1           | 1           | 0.115945149                 |              |  |  |                  |
|               | Brain_Frontal_Cortex_BA9    | 0.115945149                 |             |             | Brain_Frontal_Cortex_BA9    | 1            |  |  | 1                |
|               | 1                           | 1.572023293                 |             |             | 1.572023293                 | 1.572023293  |  |  | NA 1 0           |
|               | 0.972491774                 |                             |             |             |                             |              |  |  |                  |
| FAM98B        | ENSG00000171262.11          | 0.116116486                 | 2           | 2           | 0.042819491                 |              |  |  |                  |
|               | Brain_Cerebellar_Hemisphere | 0.88723234                  |             |             | Brain_Cerebellum            | 1.150342272  |  |  |                  |
|               | 0.849657728                 | 0.849657728                 |             |             | -0.141807145                | 2.025466439  |  |  | 0.941829647      |
|               | 1.532493848                 | 2                           | 0           | 0.972491774 |                             |              |  |  |                  |
| TAB1          | ENSG00000100324.13          | 0.116162172                 | 2           | 1           | 0.115327564                 |              |  |  |                  |
|               | Brain_Cerebellar_Hemisphere | 0.118218487                 |             |             | Brain_Cerebellum            | 1.993399508  |  |  |                  |
|               | 0.006600492                 | 1.993399508                 |             |             | 1.562295093                 | 1.574691964  |  |  | 1.568493529      |
|               | 0.008765912                 | 1                           | 0           | 0.972491774 |                             |              |  |  |                  |
| RP11-807H7.2  | ENSG00000248479.1           | 0.116325524                 | 1           | 1           | 0.116325524                 |              |  |  |                  |
|               | Brain_Cortex                | 0.116325524                 |             |             | Brain_Cortex                | 1            |  |  | 1                |
|               | -1.570385196                | -1.570385196                |             |             | NA 1                        | 0            |  |  | 0.972491774      |
| BCHE          | ENSG00000114200.9           | 0.116348898                 | 5           | 4           | 0.07311247                  |              |  |  | Brain_Cerebellum |
|               | 0.8522711                   | Brain_Cortex                | 2.650708062 |             | 0.052328692                 | 0.429759889  |  |  |                  |
|               | -1.561442197                | 1.792127969                 |             |             | 0.149080609                 | 1.221877801  |  |  | 4 0              |
|               | 0.972491774                 |                             |             |             |                             |              |  |  |                  |
| TST           | ENSG00000128311.13          | 0.116510732                 | 7           | 7           | 0.033277656                 |              |  |  | Brain_Cortex     |
|               | 0.843432929                 | Brain_Cerebellar_Hemisphere | 2.568596645 |             | 0.179080785                 |              |  |  |                  |
|               | 0.179080785                 | -0.898832717                |             |             | 2.128717313                 | 0.847695254  |  |  | 1.051276346      |
|               | 7                           | 0                           | 0.972491774 |             |                             |              |  |  |                  |
| RP11-83B20.1  | ENSG00000214650.2           | 0.11652935                  | 1           | 1           | 0.11652935                  |              |  |  | Brain_Cerebellum |
|               | 0.11652935                  | Brain_Cerebellum            | 1           |             | 1                           | -1.569509144 |  |  | -1.569509144     |
|               | -1.569509144                | NA                          | 1           | 0           | 0.972491774                 |              |  |  |                  |
| RPRML         | ENSG00000179673.4           | 0.116529397                 | 1           | 1           | 0.116529397                 |              |  |  | Brain_Cerebellum |
|               | 0.116529397                 | Brain_Cerebellum            | 1           |             | 1                           | -1.569508944 |  |  | -1.569508944     |
|               | -1.569508944                | NA                          | 1           | 0           | 0.972491774                 |              |  |  |                  |
| CRBN          | ENSG00000113851.14          | 0.116622507                 | 2           | 2           | 0.065094917                 |              |  |  |                  |
|               | Brain_Frontal_Cortex_BA9    | 0.139500495                 |             |             | Brain_Hippocampus           | 1.314145732  |  |  |                  |
|               | 0.685854268                 | 0.685854268                 |             |             | -1.8446057                  | -1.477653693 |  |  | -1.661129696     |
|               | 0.259474253                 | 2                           | 0           | 0.972491774 |                             |              |  |  |                  |
| MAP2K1        | ENSG00000169032.9           | 0.116726622                 | 2           | 2           | 0.113608594                 |              |  |  |                  |
|               | Brain_Cerebellar_Hemisphere | 0.82775541                  |             |             | Brain_Hypothalamus          | 1.562263144  |  |  |                  |
|               | 0.437736856                 | 0.437736856                 |             |             | -0.217581231                | 1.582179523  |  |  | 0.682299146      |
|               | 1.272623034                 | 2                           | 0           | 0.972491774 |                             |              |  |  |                  |
| DUSP4         | ENSG00000120875.8           | 0.116799472                 | 1           | 1           | 0.116799472                 |              |  |  |                  |
|               | Brain_Caudate_basal_ganglia | 0.116799472                 |             |             | Brain_Caudate_basal_ganglia | 1            |  |  | 1                |
|               | 1                           | 1.568350004                 |             |             | 1.568350004                 | 1.568350004  |  |  | NA 1 0           |
|               | 0.972491774                 |                             |             |             |                             |              |  |  |                  |
| PIP5K1C       | ENSG00000186111.9           | 0.116805355                 | 2           | 2           | 0.061133486                 |              |  |  |                  |
|               | Brain_Cerebellum            | 0.61409505                  |             |             | Brain_Cerebellar_Hemisphere | 1.195655875  |  |  |                  |
|               | 0.804344125                 | 0.804344125                 |             |             | -1.872528764                | 0.504236705  |  |  | -0.68414603      |
|               | 1.68062698                  | 2                           | 0           | 0.972491774 |                             |              |  |  |                  |
| THUMPD3       | ENSG00000134077.15          | 0.116912372                 | 12          | 5           | 0.04397737                  |              |  |  | Brain_Cerebellum |



|               |                                       |                                |                                      |              |
|---------------|---------------------------------------|--------------------------------|--------------------------------------|--------------|
|               | 0.505906722                           | Brain_Spinal_cord_cervical_c-1 | 8.793044452                          | 0.001225868  |
|               | 0.366792478                           | -0.798199679                   | 2.014306447                          | 1.075492099  |
|               | 5                                     | 0                              | 0.972491774                          | 0.907500384  |
| 12-Sep        | ENSG00000140623.13                    | 0.116961495                    | 13                                   | 5            |
|               | Brain_Caudate_basal_ganglia           | 0.908744732                    | Brain_Anterior_cingulate_cortex_BA24 | 0.009666459  |
|               | 9.642845514                           | 0.007114576                    | 0.480008769                          | -0.114622011 |
|               | 1.046635404                           | 0.646305211                    | 5                                    | 0            |
|               |                                       |                                | 0.972491774                          | 2.587537793  |
| UFD1L         | ENSG00000070010.18                    | 0.117000286                    | 1                                    | 1            |
|               | Brain_Frontal_Cortex_BA9              | 0.117000286                    | Brain_Frontal_Cortex_BA9             | 1            |
|               | 1                                     | 1.56748964                     | 1.56748964                           | 1.56748964   |
|               |                                       | NA                             | 1                                    | 0            |
|               |                                       |                                | 0.972491774                          |              |
| KLRC3         | ENSG00000205810.8                     | 0.117187182                    | 11                                   | 3            |
|               | Brain_Hypothalamus                    | 0.369362215                    | Brain_Frontal_Cortex_BA9             | 9.289399496  |
|               | 0.00140662                            | 0.309835169                    | 0.897668674                          | 2.533708872  |
|               | 0.42446909                            | 3                              | 0                                    | 0.972491774  |
|               |                                       |                                |                                      | 1.704206504  |
| FHDC1         | ENSG00000137460.8                     | 0.117304322                    | 3                                    | 3            |
|               | Brain_Frontal_Cortex_BA9              | 0.103407686                    | Brain_Cerebellar_Hemisphere          |              |
|               | 2.032582636                           | 0.241529992                    | 0.241529992                          | 1.628552975  |
|               | 1.956830501                           | 0.287808959                    | 3                                    | 0            |
|               |                                       |                                | 0.972491774                          | 2.165795557  |
| SLC35A1       | ENSG00000164414.17                    | 0.117355538                    | 6                                    | 6            |
|               | Brain_Anterior_cingulate_cortex_BA24  | 0.851047554                    | Brain_Hypothalamus                   |              |
|               | 3.100797565                           | 0.35320602                     | 0.35320602                           | -2.045273066 |
|               | -1.007949128                          | 0.688788061                    | 6                                    | 0            |
|               |                                       |                                | 0.972491774                          | -0.187781991 |
| CFAP99        | ENSG00000206113.10                    | 0.117367918                    | 3                                    | 3            |
|               | Brain_Cerebellum                      | 0.941725096                    | Brain_Cortex                         | 1.401297054  |
|               | 0.580472172                           | -0.628687429                   | 2.257651516                          | 0.567355301  |
|               | 3                                     | 0                              | 0.972491774                          | 1.505308276  |
| ZNF212        | ENSG00000170260.8                     | 0.117401531                    | 4                                    | 4            |
|               | Brain_Hypothalamus                    | 0.406927409                    | Brain_Putamen_basal_ganglia          | 2.006404918  |
|               | 0.48709839                            | 0.48709839                     | 0.829312836                          | 2.659800607  |
|               | 0.837731882                           | 4                              | 0                                    | 0.972491774  |
|               |                                       |                                |                                      | 1.465025461  |
| HIST1H2AG     | ENSG00000196787.3                     | 0.117526715                    | 2                                    | 2            |
|               | Brain_Hypothalamus                    | 0.376398653                    | Brain_Cerebellar_Hemisphere          | 1.138009514  |
|               | 0.861990486                           | 0.861990486                    | -1.730783375                         | -0.884551354 |
|               | 0.5983764                             | 2                              | 0                                    | 0.972491774  |
|               |                                       |                                |                                      | -1.307667364 |
| ZNF490        | ENSG00000188033.9                     | 0.117629553                    | 1                                    | 1            |
|               | Brain_Cerebellum                      | 0.117629553                    | Brain_Cerebellum                     | 1            |
|               | 1.564801101                           | 1.564801101                    | NA                                   | 1            |
|               |                                       |                                | 0                                    | 0.972491774  |
|               |                                       |                                |                                      | 1.564801101  |
| KIF18B        | ENSG00000186185.13                    | 0.117645175                    | 1                                    | 1            |
|               | Brain_Anterior_cingulate_cortex_BA24  | 0.117645175                    |                                      |              |
|               | Brain_Anterior_cingulate_cortex_BA24  | 1                              | 1                                    | 1            |
|               | 1.564734501                           | 1.564734501                    | NA                                   | 1            |
|               |                                       |                                | 0                                    | 0.972491774  |
| KIAA2013      | ENSG00000116685.15                    | 0.118172281                    | 1                                    | 1            |
|               | Brain_Nucleus_accumbens_basal_ganglia | 0.118172281                    |                                      |              |
|               | Brain_Nucleus_accumbens_basal_ganglia | 1                              | 1                                    | 1            |
|               | 1.562491353                           | 1.562491353                    | NA                                   | 1            |
|               |                                       |                                | 0                                    | 0.972491774  |
| TXNL1         | ENSG00000091164.12                    | 0.118338464                    | 1                                    | 1            |
|               | Brain_Cerebellum                      | 1                              | 1                                    | 1            |
|               | 0.118338464                           | Brain_Cerebellum               | 1                                    | 1            |
|               | 1.561785775                           | NA                             | 1                                    | 0            |
|               |                                       |                                | 0.972491774                          | 1.561785775  |
| COX6B2        | ENSG00000160471.12                    | 0.118395625                    | 3                                    | 3            |
|               | Brain_Cerebellar_Hemisphere           | 0.773453821                    | Brain_Cerebellum                     | 1.173849025  |
|               | 0.832630212                           | 0.832630212                    | -0.287860112                         | 1.697971242  |
|               | 1.12727029                            | 3                              | 0                                    | 0.972491774  |
|               |                                       |                                |                                      | 1.013198804  |
| USP16         | ENSG00000156256.14                    | 0.118517805                    | 2                                    | 1            |
|               | Brain_Cerebellar_Hemisphere           | 1.97967541                     | 0.02032459                           | 1.97967541   |
|               | 0.140813687                           | Brain_Cerebellar_Hemisphere    | 1.97967541                           | 0.02032459   |
|               | 1.47276769                            | 1.633378603                    | 1.553073147                          | 0.113569066  |
|               |                                       |                                |                                      | 1            |
|               |                                       |                                |                                      | 0            |
|               |                                       |                                |                                      | 0.972491774  |
| LINC00161     | ENSG00000226935.6                     | 0.118543477                    | 1                                    | 1            |
|               | Brain_Cerebellum                      | 0.118543477                    | Brain_Cerebellum                     | 1            |
|               | -1.560916402                          | -1.560916402                   | NA                                   | 1            |
|               |                                       |                                | 0                                    | 0.972491774  |
| RP11-188P17.2 | ENSG00000272646.1                     | 0.118767754                    | 1                                    | 1            |
|               | Brain_Amygdala                        | 0.118767754                    | Brain_Amygdala                       | 1            |
|               | -1.559966685                          | -1.559966685                   | NA                                   | 1            |
|               |                                       |                                | 0                                    | 0.972491774  |

|               |                                        |                             |                                      |              |                             |                  |
|---------------|----------------------------------------|-----------------------------|--------------------------------------|--------------|-----------------------------|------------------|
| NOB1          | ENSG00000141101.12                     | 0.118795497                 | 6                                    | 4            | 0.021024087                 | Brain_Cerebellum |
|               | 0.21315722 Brain_Caudate_basal_ganglia | 4.196957782                 |                                      |              | 0.017746257                 |                  |
|               | 0.172330261                            | -2.307551647                | -1.244930713                         |              | -1.768676055                | 0.40101643 4     |
|               | 0                                      | 0.972491774                 |                                      |              |                             |                  |
| SNHG19        | ENSG00000260260.1                      | 0.118797535                 | 1                                    | 1            | 0.118797535                 |                  |
|               | Brain_Nucleus_accumbens_basal_ganglia  | 0.118797535                 |                                      |              |                             |                  |
|               | Brain_Nucleus_accumbens_basal_ganglia  | 1                           | 1                                    | 1            | 1.559840684                 |                  |
|               | 1.559840684                            | 1.559840684                 | NA                                   | 0            | 0.972491774                 |                  |
| C8orf4        | ENSG00000176907.4                      | 0.118930833                 | 2                                    | 2            | 0.101092603                 |                  |
|               | Brain_Spinal_cord_cervical_c-1         | 0.483004108                 |                                      |              | Brain_Hippocampus           | 1.3009868        |
|               | 0.6990132                              | 0.6990132                   | -0.701479044                         | 1.639579621  | 0.469050288                 |                  |
|               | 1.655378458                            | 2                           | 0                                    | 0.972491774  |                             |                  |
| VASH2         | ENSG00000143494.15                     | 0.119013725                 | 2                                    | 2            | 0.091879794                 |                  |
|               | Brain_Nucleus_accumbens_basal_ganglia  | 0.227710387                 |                                      |              | Brain_Cortex                |                  |
|               | 1.009738864                            | 0.990261136                 | 0.990261136                          |              | -1.685564071                | 1.20627782       |
|               | -0.239643125                           | 2.044841011                 | 2                                    | 0            | 0.972491774                 |                  |
| ARHGEF10L     | ENSG00000074964.16                     | 0.119061676                 | 3                                    | 3            | 0.079288989                 |                  |
|               | Brain_Cerebellum                       | 0.94937492                  | Brain_Cerebellar_Hemisphere          | 1.639124297  |                             |                  |
|               | 0.360767661                            | 0.360767661                 | -1.754826502                         | 0.563862847  | -0.375823965                |                  |
|               | 1.220175727                            | 3                           | 0                                    | 0.972491774  |                             |                  |
| MDFI          | ENSG00000112559.13                     | 0.119158404                 | 1                                    | 1            | 0.119158404                 | Brain_Amygdala   |
|               | 0.119158404                            | Brain_Amygdala              | 1                                    | 1            | 1.558315804                 | 1.558315804      |
|               | 1.558315804                            | NA                          | 1                                    | 0            | 0.972491774                 |                  |
| WBP2          | ENSG00000132471.11                     | 0.119331591                 | 4                                    | 4            | 0.017886342                 |                  |
|               | Brain_Frontal_Cortex_BA9               | 0.872368995                 |                                      |              | Brain_Putamen_basal_ganglia |                  |
|               | 1.336296299                            | 0.59063519                  | 0.59063519                           | -2.367962645 | -0.160650098                |                  |
|               | -1.238572729                           | 1.063880234                 | 4                                    | 0            | 0.972491774                 |                  |
| RP11-468E2.10 | ENSG00000276698.1                      | 0.11937373                  | 2                                    | 2            | 0.094661206                 |                  |
|               | Brain_Cerebellum                       | 0.302904324                 | Brain_Frontal_Cortex_BA9             | 1.10220523   | 0.89779477                  |                  |
|               | 0.89779477                             | 1.030225154                 | 1.671306231                          | 1.350765693  | 0.453312777                 | 2                |
|               | 0                                      | 0.972491774                 |                                      |              |                             |                  |
| GPR179        | ENSG00000277399.4                      | 0.119608882                 | 2                                    | 2            | 0.04192825                  | Brain_Cortex     |
|               | 0.091015477                            | Brain_Frontal_Cortex_BA9    | 1.717841408                          | 0.282158592  |                             |                  |
|               | 0.282158592                            | 1.690065225                 | 2.034231594                          | 1.862148409  | 0.243362373                 |                  |
|               | 2                                      | 0                           | 0.972491774                          |              |                             |                  |
| NME1          | ENSG00000239672.7                      | 0.119717723                 | 13                                   | 4            | 0.006552328                 | Brain_Cerebellum |
|               | 0.698357819                            | Brain_Substantia_nigra      | 10.33360498                          | 0.000182721  |                             |                  |
|               | 0.564013621                            | 0.387538188                 | 2.718779441                          | 2.017555409  | 0.626433407                 |                  |
|               | 4                                      | 0                           | 0.972491774                          |              |                             |                  |
| GZF1          | ENSG00000125812.15                     | 0.119719567                 | 3                                    | 3            | 0.043785475                 | Brain_Cerebellum |
|               | 0.850906845                            | Brain_Cerebellar_Hemisphere | 1.260344937                          | 0.777931094  |                             |                  |
|               | 0.777931094                            | -1.227776202                | 2.016138695                          | 0.325441326  | 1.626321461                 |                  |
|               | 3                                      | 0                           | 0.972491774                          |              |                             |                  |
| DPYSL4        | ENSG00000151640.12                     | 0.119890358                 | 5                                    | 3            | 0.081414824                 |                  |
|               | Brain_Cerebellar_Hemisphere            | 0.417238647                 | Brain_Anterior_cingulate_cortex_BA24 |              |                             |                  |
|               | 4.044793524                            | 0.021261092                 | 0.19329042                           | -0.81122121  | 1.742535275                 |                  |
|               | 1.009396214                            | 1.033944741                 | 3                                    | 0            | 0.972491774                 |                  |
| ZBTB46        | ENSG00000130584.10                     | 0.119892141                 | 6                                    | 2            | 0.254105583                 |                  |
|               | Brain_Putamen_basal_ganglia            | 0.789563943                 | Brain_Cortex                         | 5.549050239  |                             |                  |
|               | 0.000342949                            | 0.293068682                 | -1.140433885                         | 0.266876899  | -0.707262469                |                  |
|               | 0.503101443                            | 2                           | 0                                    | 0.972491774  |                             |                  |
| C5AR2         | ENSG00000134830.5                      | 0.119933868                 | 1                                    | 1            | 0.119933868                 | Brain_Cerebellum |
|               | 0.119933868                            | Brain_Cerebellum            | 1                                    | 1            | 1.555051231                 | 1.555051231      |
|               | 1.555051231                            | NA                          | 1                                    | 0            | 0.972491774                 |                  |
| SMARCD3       | ENSG00000082014.16                     | 0.11997801                  | 1                                    | 1            | 0.11997801                  |                  |
|               | Brain_Frontal_Cortex_BA9               | 0.11997801                  | Brain_Frontal_Cortex_BA9             | 1            | 1                           | 1                |
|               | -1.5548659                             | -1.5548659                  | -1.5548659                           | NA           | 1                           | 0                |
|               |                                        |                             |                                      | 0.972491774  |                             |                  |
| JKAMP         | ENSG00000050130.17                     | 0.1200744                   | 1                                    | 1            | 0.1200744                   |                  |
|               | Brain_Nucleus_accumbens_basal_ganglia  | 0.1200744                   |                                      |              |                             |                  |
|               | Brain_Nucleus_accumbens_basal_ganglia  | 1                           | 1                                    | 1            | -1.55446139                 |                  |
|               | -1.55446139                            | -1.55446139                 | NA                                   | 1            | 0                           | 0.972491774      |
| KBTBD3        | ENSG00000182359.14                     | 0.120182014                 | 3                                    | 3            | 0.025799985                 |                  |

|               |                                       |              |                                |                          |              |
|---------------|---------------------------------------|--------------|--------------------------------|--------------------------|--------------|
|               | Brain_Anterior_cingulate_cortex_BA24  | 0.727515549  |                                | Brain_Cortex             |              |
|               | 2.007961645                           | 0.343236526  | 0.343236526                    | 0.3484323                | 2.22920926   |
|               | 1.213186068                           | 0.949469495  | 3                              | 0                        | 0.972491774  |
| GIPC2         | ENSG00000137960.5                     | 0.12026289   | 1                              | 1                        | 0.12026289   |
|               | Brain_Amygdala                        | 1            | 1                              | 1.553671102              | 1.553671102  |
|               | NA                                    | 1            | 0                              | 0.972491774              | 1.553671102  |
| ORMDL3        | ENSG00000172057.9                     | 0.120285926  | 3                              | 3                        | 0.018408821  |
|               | Brain_Caudate_basal_ganglia           | 0.722994147  |                                | Brain_Frontal_Cortex_BA9 |              |
|               | 1.704596293                           | 0.29872961   | 0.29872961                     | -2.357290874             | 0.403108776  |
|               | -0.533240687                          | 1.579861067  | 3                              | 0                        | 0.972491774  |
| RP11-17E13.2  | ENSG00000272864.1                     | 0.120397985  | 13                             | 5                        | 0.006211299  |
|               | Brain_Nucleus_accumbens_basal_ganglia | 0.292107665  |                                | Brain_Substantia_nigra   |              |
|               | 9.411678048                           | 0.008294731  | 0.48055703                     | -2.736413134             | -1.053509232 |
|               | -2.235129181                          | 0.433415501  | 5                              | 0                        | 0.972491774  |
| ALDH6A1       | ENSG00000119711.12                    | 0.120504788  | 5                              | 3                        | 0.032115553  |
|               | Brain_Cerebellum                      | 0.559701093  | Brain_Amygdala                 | 3.220243768              | 0.027364909  |
|               | 0.773653376                           | -2.142969433 | 0.583285543                    | -1.294186038             | 1.16971169   |
|               | 0                                     | 0.972491774  |                                |                          | 3            |
| IL17RE        | ENSG00000163701.18                    | 0.120572221  | 3                              | 3                        | 0.016170089  |
|               | Brain_Anterior_cingulate_cortex_BA24  | 0.924358908  |                                | Brain_Hippocampus        |              |
|               | 1.046015839                           | 0.96057557   | 0.96057557                     | -2.405053701             | 0.152244268  |
|               | -0.71928831                           | 1.460196744  | 3                              | 0                        | 0.972491774  |
| PSMC3IP       | ENSG00000131470.14                    | 0.120626299  | 3                              | 3                        | 0.036836082  |
|               | Brain_Putamen_basal_ganglia           | 0.973276639  | Brain_Hippocampus              | 1.592108457              |              |
|               | 0.563459473                           | 0.563459473  | -0.820614136                   | 2.08757619               | 0.411154341  |
|               | 1.504220798                           | 3            | 0                              | 0.972491774              |              |
| SYNGR4        | ENSG00000105467.8                     | 0.120745222  | 2                              | 2                        | 0.087584486  |
|               | Brain_Hippocampus                     | 0.12792151   | Brain_Hypothalamus             | 1.240907853              |              |
|               | 0.759092147                           | 0.759092147  | 1.522349584                    | 1.70827954               | 1.615314562  |
|               | 0.131472333                           | 2            | 0                              | 0.972491774              |              |
| RP5-1102E8.3  | ENSG00000272855.1                     | 0.120781583  | 1                              | 1                        | 0.120781583  |
|               | Brain_Spinal_cord_cervical_c-1        | 0.120781583  | Brain_Spinal_cord_cervical_c-1 |                          |              |
|               | 1                                     | 1            | 1                              | 1.551501355              | 1.551501355  |
|               | 0.972491774                           | 1.551501355  |                                | NA                       | 1            |
|               |                                       |              |                                |                          | 0            |
| RP11-266K4.13 | ENSG00000276417.1                     | 0.120951902  | 2                              | 2                        | 0.074183212  |
|               | Brain_Nucleus_accumbens_basal_ganglia | 0.311860757  |                                |                          |              |
|               | Brain_Spinal_cord_cervical_c-1        | 1.003859383  | 0.996140617                    | 0.996140617              |              |
|               | -1.011325307                          | 1.785481734  | 0.387078214                    | 1.977641225              | 2            |
|               | 0.972491774                           |              |                                |                          | 0            |
| AC068831.16   | ENSG00000278514.1                     | 0.120994541  | 3                              | 3                        | 0.022229716  |
|               | Brain_Cerebellum                      | 0.710744469  | Brain_Caudate_basal_ganglia    | 1.534122917              |              |
|               | 0.486162521                           | 0.486162521  | -2.28641971                    | 0.370856429              | -1.146392594 |
|               | 1.36821102                            | 3            | 0                              | 0.972491774              |              |
| SAMD15        | ENSG00000100583.4                     | 0.121045994  | 3                              | 2                        | 0.119909354  |
|               | Brain_Hypothalamus                    | 0.656424652  | Brain_Amygdala                 | 2.731928542              |              |
|               | 0.022516757                           | 0.245554701  | -1.555154179                   | -0.444854851             | -1.165832189 |
|               | 0.625050079                           | 2            | 0                              | 0.972491774              |              |
| SNX27         | ENSG00000143376.12                    | 0.121105185  | 11                             | 3                        | 0.055243548  |
|               | Brain_Frontal_Cortex_BA9              | 0.359506391  | Brain_Putamen_basal_ganglia    |                          |              |
|               | 9.990949308                           | 3.95E-05     | 0.340075895                    | 0.916306059              | 1.916955793  |
|               | 1.664951289                           | 0.384006374  | 3                              | 0                        | 0.972491774  |
| RP11-314B1.2  | ENSG00000273301.1                     | 0.121167515  | 2                              | 2                        | 0.048109877  |
|               | Brain_Caudate_basal_ganglia           | 0.56186397   | Brain_Amygdala                 | 1.009529984              |              |
|               | 0.990470016                           | 0.990470016  | 0.580075107                    | 1.976396594              | 1.278235851  |
|               | 0.987348393                           | 2            | 0                              | 0.972491774              |              |
| MRPL54        | ENSG00000183617.4                     | 0.121212471  | 6                              | 5                        | 0.023571222  |
|               | Brain_Spinal_cord_cervical_c-1        | 0.781788685  | Brain_Caudate_basal_ganglia    |                          |              |
|               | 2.560049936                           | 0.00100569   | 0.444771453                    | -0.404002052             | 2.264047035  |
|               | 1.128588669                           | 1.157518548  | 5                              | 0                        | 0.972491774  |
| AATK-AS1      | ENSG00000225180.7                     | 0.121349289  | 1                              | 1                        | 0.121349289  |
|               | Brain_Cortex                          | 0.121349289  | Brain_Cortex                   | 1                        | 1            |
|               | -1.549134926                          | -1.549134926 | NA                             | 1                        | 0            |
|               |                                       |              |                                | 0.972491774              |              |

SCAMP1-AS1 ENSG00000245556.2 0.121361241 5 3 0.221995288  
 Brain\_Cerebellum 0.892950176 Brain\_Cerebellar\_Hemisphere 4.461176658  
 0.047244083 0.166740659 -0.134572133 1.221239671 0.82212795  
 0.543785618 3 0 0.972491774  
 FBXW5 ENSG00000159069.13 0.12138695 2 2 0.05312706 Brain\_Caudate\_basal\_ganglia  
 0.919432279 Brain\_Nucleus\_accumbens\_basal\_ganglia 1.38249433 0.61750567  
 0.61750567 -1.9338867 -0.101148877 -1.017517788 1.295941343 2 0  
 0.972491774  
 RP11-367J11.3 ENSG00000245468.3 0.121428845 7 4 0.059368323  
 Brain\_Cerebellar\_Hemisphere 0.600867141 Brain\_Hypothalamus 5.061383655  
 5.85E-17 0.352614915 -1.88545583 -0.523153926 -0.945933949  
 0.599731199 4 0 0.972491774  
 RP11-688I9.4 ENSG00000254938.1 0.121566194 1 1 0.121566194  
 Brain\_Hippocampus 0.121566194 Brain\_Hippocampus 1 1 1  
 1.548233061 1.548233061 1.548233061 NA 1 0 0.972491774  
 SLC38A2 ENSG00000134294.13 0.121613651 2 2 0.046178706  
 Brain\_Anterior\_cingulate\_cortex\_BA24 0.703324618 Brain\_Caudate\_basal\_ganglia  
 1.053706269 0.946293731 0.946293731 -1.993756189 0.380836439  
 -0.806459875 1.67909055 2 0 0.972491774  
 POLR2J3 ENSG00000168255.19 0.121662059 2 2 0.081079258  
 Brain\_Cortex 0.083355638 Brain\_Spinal\_cord\_cervical\_c-1 1.43400583  
 0.56599417 0.56599417 1.73153921 1.744458007 1.737998609 0.009134969  
 2 0 0.972491774  
 SMYD3 ENSG00000185420.18 0.121740557 2 2 0.097283167 Brain\_Cortex  
 0.142502813 Brain\_Cerebellar\_Hemisphere 1.165203429 0.834796571  
 0.834796571 1.466534195 1.658169956 1.562352075 0.135506946  
 2 0 0.972491774  
 SACS ENSG00000151835.14 0.121783182 3 3 0.020983291  
 Brain\_Hippocampus 0.669580346 Brain\_Cerebellum 1.771636388  
 0.241931468 0.241931468 -2.308284988 0.487571084 -0.464663292  
 1.596913057 3 0 0.972491774  
 CSNK1A1 ENSG00000113712.17 0.121793485 1 1 0.121793485  
 Brain\_Putamen\_basal\_ganglia 0.121793485 Brain\_Putamen\_basal\_ganglia 1 1  
 1 1.547289367 1.547289367 1.547289367 NA 1 0  
 0.972491774  
 ITGBL1 ENSG00000198542.13 0.121860384 2 2 0.041589049  
 Brain\_Cerebellum 0.436950069 Brain\_Cerebellar\_Hemisphere 1.26771411 0.73228589  
 0.73228589 0.777353789 2.037609021 1.407481405 0.891135021 2  
 0 0.972491774  
 TOM1 ENSG00000100284.20 0.121980633 1 1 0.121980633  
 Brain\_Frontal\_Cortex\_BA9 0.121980633 Brain\_Frontal\_Cortex\_BA9 1 1  
 1 -1.546513372 -1.546513372 -1.546513372 NA 1 0  
 0.972491774  
 ZFP64 ENSG00000020256.19 0.122062992 1 1 0.122062992 Brain\_Cortex  
 0.122062992 Brain\_Cortex 1 1 1 1.546172172 1.546172172  
 1.546172172 NA 1 0 0.972491774  
 COG8 ENSG00000213380.14 0.122144954 1 1 0.122144954  
 Brain\_Frontal\_Cortex\_BA9 0.122144954 Brain\_Frontal\_Cortex\_BA9 1 1  
 1 -1.545832798 -1.545832798 -1.545832798 NA 1 0  
 0.972491774  
 SOX7 ENSG00000171056.7 0.122202721 2 2 0.090461617 Brain\_Cerebellum  
 0.387137724 Brain\_Cerebellar\_Hemisphere 1.163254572 0.836745428  
 0.836745428 -0.86481976 1.692967693 0.414073967 1.808628853  
 2 0 0.972491774  
 RP11-206L10.9 ENSG00000237491.8 0.122265938 11 10 0.007115939  
 Brain\_Substantia\_nigra 0.886713064 Brain\_Anterior\_cingulate\_cortex\_BA24  
 2.467739884 0.062939637 0.158309474 -2.002658063 2.691369206  
 0.17849293 1.227225347 10 0 0.972491774  
 PIK3R1 ENSG00000145675.14 0.122294285 3 3 0.12162017  
 Brain\_Caudate\_basal\_ganglia 0.64015985 Brain\_Nucleus\_accumbens\_basal\_ganglia  
 1.45031678 0.548617446 0.548617446 -1.548008831 1.140366206  
 0.01994423 1.398947154 3 0 0.972491774

|               |                                      |              |              |             |              |                                       |             |             |
|---------------|--------------------------------------|--------------|--------------|-------------|--------------|---------------------------------------|-------------|-------------|
| ASPHD1        | ENSG00000174939.10                   | 0.122418521  | 6            | 3           | 0.00334106   |                                       |             |             |
|               | Brain_Hypothalamus                   | 0.667457006  |              |             |              | Brain_Nucleus_accumbens_basal_ganglia |             |             |
|               | 3.920765801                          | 0.003132877  | 0.922202327  |             | -0.44065615  | 2.934480983                           |             |             |
|               | 1.397686383                          | 1.457005834  | 3            | 0           | 0.972491774  |                                       |             |             |
| RUFY3         | ENSG00000018189.12                   | 0.122464054  | 1            | 1           | 0.122464054  |                                       |             |             |
|               | Brain_Hippocampus                    | 0.122464054  |              |             |              | Brain_Hippocampus                     | 1           | 1           |
|               | 1.54451321                           | 1.54451321   | 1.54451321   | NA          | 1            | 0                                     | 0.972491774 |             |
| SCO1          | ENSG00000133028.10                   | 0.122632411  | 10           | 2           | 0.225400805  |                                       |             |             |
|               | Brain_Spinal_cord_cervical_c-1       | 0.977654361  |              |             |              | Brain_Hypothalamus                    |             |             |
|               | 8.704672694                          | 0.000583942  | 0.700137553  |             | -1.21229153  | 0.69980392                            |             |             |
|               | -0.70457583                          | 0.59973416   | 2            | 0           | 0.972491774  |                                       |             |             |
| CYP39A1       | ENSG00000146233.7                    | 0.122719991  | 4            | 4           | 0.033459013  |                                       |             |             |
|               | Brain_Cerebellum                     | 0.586768916  |              |             |              | Brain_Nucleus_accumbens_basal_ganglia |             |             |
|               | 1.255359726                          | 0.791697678  | 0.791697678  |             | -0.543524226 | 2.126531702                           |             |             |
|               | 0.942783574                          | 1.109696926  | 4            | 0           | 0.972491774  |                                       |             |             |
| SPCS2         | ENSG00000118363.11                   | 0.122872225  | 2            | 2           | 0.043987842  |                                       |             |             |
|               | Brain_Spinal_cord_cervical_c-1       | 0.776004296  |              |             |              | Brain_Frontal_Cortex_BA9              |             |             |
|               | 1.041797976                          | 0.958202024  | 0.958202024  |             | -0.284529936 | 2.014206648                           |             |             |
|               | 0.864838356                          | 1.625452226  | 2            | 0           | 0.972491774  |                                       |             |             |
| SLC8A3        | ENSG00000100678.18                   | 0.122910356  | 5            | 2           | 0.031874931  |                                       |             |             |
|               | Brain_Putamen_basal_ganglia          | 0.175275436  |              |             |              | Brain_Cerebellum                      | 4.112324423 |             |
|               | 0.006126488                          | 0.748477335  | -1.824736466 |             | 2.145975525  | 0.560513166                           |             |             |
|               | 1.972420926                          | 2            | 0            | 0.972491774 |              |                                       |             |             |
| CDKN1B        | ENSG00000111276.10                   | 0.12307155   | 1            | 1           | 0.12307155   |                                       |             |             |
|               | Brain_Cerebellar_Hemisphere          | 0.12307155   |              |             |              | Brain_Cerebellar_Hemisphere           | 1           | 1           |
|               | -1.542008408                         | -1.542008408 | -1.542008408 | NA          | 1            | 0                                     | 0.972491774 |             |
| SNX15         | ENSG00000110025.12                   | 0.123088008  | 9            | 4           | 0.026923906  |                                       |             |             |
|               | Brain_Anterior_cingulate_cortex_BA24 | 0.820108442  |              |             |              | Brain_Hippocampus                     |             |             |
|               | 7.354101789                          | 0.02216733   | 0.279106437  |             | -2.212619268 | -0.227405502                          |             |             |
|               | -1.55703067                          | 0.575264082  | 4            | 0           | 0.972491774  |                                       |             |             |
| PTP4A1        | ENSG00000112245.10                   | 0.123224605  | 1            | 1           | 0.123224605  |                                       |             |             |
|               | Brain_Spinal_cord_cervical_c-1       | 0.123224605  |              |             |              | Brain_Spinal_cord_cervical_c-1        |             |             |
|               | 1                                    | 1            | 1            | 1.541378864 | 1.541378864  | 1.541378864                           | NA          | 1           |
|               | 0.972491774                          |              |              |             |              |                                       |             | 0           |
| PACRG         | ENSG00000112530.11                   | 0.123295162  | 9            | 5           | 0.152872197  |                                       |             |             |
|               | Brain_Hypothalamus                   | 0.752058722  |              |             |              | Brain_Frontal_Cortex_BA9              | 6.122323046 |             |
|               | 0.00260151                           | 0.226549783  | -1.060294555 |             | 1.429459537  | -0.205456081                          |             |             |
|               | 0.81475555                           | 5            | 0            | 0.972491774 |              |                                       |             |             |
| RP11-430H10.2 | ENSG00000255267.3                    | 0.123317126  | 2            | 2           | 0.043331849  |                                       |             |             |
|               | Brain_Hypothalamus                   | 0.824831672  |              |             |              | Brain_Hippocampus                     | 1.04954895  | 0.95045105  |
|               | 0.95045105                           | -0.221334907 | 2.020497112  |             | 0.899581102  | 1.585214623                           |             | 2           |
|               | 0                                    | 0.972491774  |              |             |              |                                       |             |             |
| SLC43A2       | ENSG00000167703.14                   | 0.123366188  | 2            | 2           | 0.137778851  |                                       |             |             |
|               | Brain_Hypothalamus                   | 0.4659128    |              |             |              | Brain_Putamen_basal_ganglia           | 1.38450918  | 0.61549082  |
|               | 0.61549082                           | -1.484113356 | 0.729145278  |             | -0.377484039 | 1.565010189                           |             | 2           |
|               | 0                                    | 0.972491774  |              |             |              |                                       |             |             |
| PTPN14        | ENSG00000152104.11                   | 0.123385575  | 3            | 3           | 0.06138096   |                                       |             |             |
|               | Brain_Frontal_Cortex_BA9             | 0.887022431  |              |             |              | Brain_Nucleus_accumbens_basal_ganglia |             |             |
|               | 2.28958473                           | 0.256241771  | 0.256241771  |             | 0.142072891  | 1.870741206                           |             |             |
|               | 1.087271423                          | 0.875608746  | 3            | 0           | 0.972491774  |                                       |             |             |
| CD83          | ENSG00000112149.9                    | 0.123680967  | 3            | 3           | 0.089276359  |                                       |             |             |
|               | Brain_Hippocampus                    | 1.169270932  |              |             |              | Brain_Amygdala                        |             |             |
|               | 0.340588663                          |              |              |             | 0.83728578   | 0.83728578                            |             |             |
|               | -1.69922733                          | -0.953002778 | -1.33212227  |             | 0.373257325  | 3                                     |             | 0           |
|               | 0.972491774                          |              |              |             |              |                                       |             |             |
| RP11-472I20.3 | ENSG00000283217.1                    | 0.123692645  | 1            | 1           | 0.123692645  |                                       |             |             |
|               | Brain_Cortex                         | 0.123692645  |              |             |              | Brain_Cortex                          | 1           | 1           |
|               | 1.539457504                          | 1.539457504  | NA           | 1           | 0            | 0.972491774                           |             | 1           |
|               | 1.539457504                          |              |              |             |              |                                       |             | 1.539457504 |
| INTS6         | ENSG00000102786.14                   | 0.123763353  | 2            | 2           | 0.063059839  |                                       |             |             |
|               | Brain_Caudate_basal_ganglia          | 0.301473274  |              |             |              | Brain_Cerebellar_Hemisphere           |             |             |
|               | 1.100527258                          | 0.899472742  | 0.899472742  |             | 1.033279167  | 1.858769346                           |             |             |
|               | 1.446024256                          | 0.583709703  | 2            | 0           | 0.972491774  |                                       |             |             |
| MDH2          | ENSG00000146701.11                   | 0.123768778  | 2            | 2           | 0.077448839  |                                       |             |             |
|               |                                      |              |              |             |              | Brain_Cerebellum                      |             |             |

|               |                                      |                             |                                       |              |              |                  |
|---------------|--------------------------------------|-----------------------------|---------------------------------------|--------------|--------------|------------------|
|               | 0.281591448                          | Brain_Hypothalamus          | 1.026646451                           | 0.973353549  |              |                  |
|               | 0.973353549                          | -1.765684238                | 1.076751163                           | -0.344466538 | 2.009905348  |                  |
|               | 2                                    | 0                           | 0.972491774                           |              |              |                  |
| ARMC12        | ENSG00000157343.8                    | 0.123919274                 | 1                                     | 1            | 0.123919274  |                  |
|               | Brain_Caudate_basal_ganglia          | 0.123919274                 | Brain_Caudate_basal_ganglia           | 1            | 1            |                  |
|               | 1                                    | -1.538529203                | -1.538529203                          | -1.538529203 | NA           | 1 0              |
|               | 0.972491774                          |                             |                                       |              |              |                  |
| CACNA1C       | ENSG00000151067.21                   | 0.123997847                 | 3                                     | 2            | 0.05296381   | Brain_Cortex     |
|               | 0.287974695                          | Brain_Cerebellar_Hemisphere | 2.09603764                            | 0.037213214  |              |                  |
|               | 0.866749146                          | -1.935215881                | -1.062575075                          | -1.411631942 | 0.461757803  |                  |
|               | 2                                    | 0                           | 0.972491774                           |              |              |                  |
| RP11-395N3.2  | ENSG00000272622.1                    | 0.124052964                 | 1                                     | 1            | 0.124052964  |                  |
|               | Brain_Frontal_Cortex_BA9             | 0.124052964                 | Brain_Frontal_Cortex_BA9              | 1            | 1            |                  |
|               | 1                                    | 1.537982213                 | 1.537982213                           | 1.537982213  | NA           | 1 0              |
|               | 0.972491774                          |                             |                                       |              |              |                  |
| ETFBKMT       | ENSG00000139160.13                   | 0.124084642                 | 2                                     | 2            | 0.171366694  |                  |
|               | Brain_Cerebellar_Hemisphere          | 0.210244289                 | Brain_Frontal_Cortex_BA9              |              |              |                  |
|               | 1.176076609                          | 0.823923391                 | 0.823923391                           | -1.367825533 | 1.252893992  |                  |
|               | -0.05746577                          | 1.853128548                 | 2                                     | 0            | 0.972491774  |                  |
| GAREM2        | ENSG00000157833.12                   | 0.12414204                  | 1                                     | 1            | 0.12414204   |                  |
|               | Brain_Caudate_basal_ganglia          | 0.12414204                  | Brain_Caudate_basal_ganglia           | 1            | 1            | 1                |
|               | 1.537618016                          | 1.537618016                 | 1.537618016                           | NA           | 1            | 0 0.972491774    |
| RP11-571L19.8 | ENSG00000272777.1                    | 0.12414634                  | 8                                     | 6            | 0.065138367  |                  |
|               | Brain_Hippocampus                    | 0.954317882                 | Brain_Cerebellar_Hemisphere           | 5.116709517  |              |                  |
|               | 0.053615838                          | 0.206206155                 | -1.844307308                          | -0.057285361 | -0.979498734 |                  |
|               | 0.639448358                          | 6                           | 0                                     | 0.972491774  |              |                  |
| TRIM46        | ENSG00000163462.17                   | 0.124213552                 | 2                                     | 2            | 0.073083221  |                  |
|               | Brain_Hippocampus                    | 0.290581093                 | Brain_Substantia_nigra                | 1.043761853  |              |                  |
|               | 0.956238147                          | 0.956238147                 | -1.792310631                          | -1.056847717 | -1.424579174 |                  |
|               | 0.520050814                          | 2                           | 0                                     | 0.972491774  |              |                  |
| NAT16         | ENSG00000167011.8                    | 0.124328865                 | 5                                     | 4            | 0.076302649  |                  |
|               | Brain_Caudate_basal_ganglia          | 0.762604751                 | Brain_Cerebellum                      | 3.122144659  |              |                  |
|               | 0.072260543                          | 0.375076199                 | -1.772553945                          | 0.914778606  | -0.233832479 |                  |
|               | 1.141451217                          | 4                           | 0                                     | 0.972491774  |              |                  |
| LINC00882     | ENSG00000242759.6                    | 0.124342679                 | 2                                     | 2            | 0.047644423  |                  |
|               | Brain_Frontal_Cortex_BA9             | 0.931069814                 | Brain_Nucleus_accumbens_basal_ganglia |              |              |                  |
|               | 1.202059978                          | 0.797940022                 | 0.797940022                           | -1.980526285 | 0.08649892   |                  |
|               | -0.947013683                         | 1.46160754                  | 2                                     | 0            | 0.972491774  |                  |
| CD3EAP        | ENSG00000117877.10                   | 0.124503784                 | 7                                     | 5            | 0.020483716  |                  |
|               | Brain_Frontal_Cortex_BA9             | 0.611725766                 | Brain_Cortex                          | 4.564918279  |              |                  |
|               | 0.007800304                          | 0.247356941                 | -1.568706393                          | 2.317367593  | 0.920276244  |                  |
|               | 1.227893771                          | 5                           | 0                                     | 0.972491774  |              |                  |
| GOLGA7        | ENSG00000147533.16                   | 0.124509958                 | 8                                     | 2            | 0.032098164  |                  |
|               | Brain_Substantia_nigra               | 0.197208796                 | Brain_Amygdala                        | 6.864377102  |              |                  |
|               | 0.0136944                            | 0.601474059                 | 1.289544674                           | 2.143186022  | 1.651601891  |                  |
|               | 0.294383629                          | 2                           | 0                                     | 0.972491774  |              |                  |
| IQSEC3        | ENSG00000120645.11                   | 0.124730966                 | 3                                     | 3            | 0.035554892  |                  |
|               | Brain_Cerebellar_Hemisphere          | 0.740562745                 | Brain_Frontal_Cortex_BA9              |              |              |                  |
|               | 1.540851035                          | 0.437337553                 | 0.437337553                           | -0.331108217 | 2.101981554  |                  |
|               | 1.282761797                          | 1.397706418                 | 3                                     | 0            | 0.972491774  |                  |
| MAMDC4        | ENSG00000177943.13                   | 0.124799678                 | 2                                     | 2            | 0.085473096  |                  |
|               | Brain_Cerebellum                     | 0.091655862                 | Brain_Hippocampus                     | 1.394344857  |              |                  |
|               | 0.605655143                          | 0.605655143                 | -1.719776392                          | -1.686726976 | -1.703251684 |                  |
|               | 0.023369466                          | 2                           | 0                                     | 0.972491774  |              |                  |
| PTPN6         | ENSG00000111679.16                   | 0.124822991                 | 1                                     | 1            | 0.124822991  | Brain_Cerebellum |
|               | 0.124822991                          | Brain_Cerebellum            | 1                                     | 1            | 1.534840584  | 1.534840584      |
|               | 1.534840584                          | NA                          | 1                                     | 0            | 0.972491774  |                  |
| ITIH5         | ENSG00000123243.14                   | 0.12493999                  | 1                                     | 1            | 0.12493999   |                  |
|               | Brain_Anterior_cingulate_cortex_BA24 | 0.12493999                  |                                       |              |              |                  |
|               | Brain_Anterior_cingulate_cortex_BA24 | 1                           | 1                                     | 1            | -1.534364565 |                  |
|               | -1.534364565                         | -1.534364565                | NA                                    | 1            | 0.972491774  |                  |
| S100A3        | ENSG00000188015.9                    | 0.124948557                 | 3                                     | 3            | 0.065850278  |                  |

|               |                                       |                   |                                      |                             |              |
|---------------|---------------------------------------|-------------------|--------------------------------------|-----------------------------|--------------|
|               | Brain_Anterior_cingulate_cortex_BA24  | 0.978572428       |                                      | Brain_Cerebellar_Hemisphere |              |
|               | 1.688444206                           | 0.306381109       | 0.306381109                          | 0.026858707                 | 1.839441476  |
|               | 1.045048772                           | 0.926783695       | 3                                    | 0                           | 0.972491774  |
| RP11-284F21.9 | ENSG00000272068.1                     | 0.125034679       | 1                                    | 1                           | 0.125034679  |
|               | Brain_Cerebellum                      | 0.125034679       | 1                                    | 1                           | 1.533979571  |
|               | 1.533979571                           | 1.533979571       | NA                                   | 1                           | 0            |
|               |                                       |                   |                                      |                             | 0.972491774  |
| RP11-704J17.5 | ENSG00000272428.1                     | 0.125072471       | 1                                    | 1                           | 0.125072471  |
|               | Brain_Anterior_cingulate_cortex_BA24  | 0.125072471       |                                      |                             |              |
|               | Brain_Anterior_cingulate_cortex_BA24  | 1                 | 1                                    | 1                           | 1.533825973  |
|               | 1.533825973                           | 1.533825973       | NA                                   | 1                           | 0            |
|               |                                       |                   |                                      |                             | 0.972491774  |
| DALRD3        | ENSG00000178149.16                    | 0.125087896       | 5                                    | 3                           | 0.024960108  |
|               | Brain_Cortex                          | 0.071977879       | Brain_Anterior_cingulate_cortex_BA24 |                             |              |
|               | 3.748776375                           | 0.070458342       | 0.438205239                          | -2.242019558                | -1.799257997 |
|               | -2.016071769                          | 0.184298689       | 3                                    | 0                           | 0.972491774  |
| MFSD4A        | ENSG00000174514.12                    | 0.125093333       | 5                                    | 5                           | 0.058565382  |
|               | Brain_Nucleus_accumbens_basal_ganglia | 0.855555288       | Brain_Cortex                         |                             |              |
|               | 2.582676242                           | 0.12639934        | 0.12639934                           | -1.891441885                | -0.182034962 |
|               | -0.877097391                          | 0.62982875        | 5                                    | 0                           | 0.972491774  |
| MAN2A2        | ENSG00000196547.14                    | 0.125128824       | 2                                    | 2                           | 0.041485252  |
|               | Brain_Anterior_cingulate_cortex_BA24  | 0.958838664       | Brain_Cerebellum                     |                             |              |
|               | 1.011968021                           | 0.988031979       | 0.988031979                          | -0.051610988                | 2.038647185  |
|               | 0.993518099                           | 1.478035728       | 2                                    | 0                           | 0.972491774  |
| ARPIN         | ENSG00000242498.7                     | 0.125177092       | 3                                    | 3                           | 0.082145492  |
|               | Brain_Spinal_cord_cervical_c-1        | 0.53330594        | Brain_Caudate_basal_ganglia          |                             |              |
|               | 1.255747844                           | 0.769182267       | 0.769182267                          | -1.478017395                | 1.738370839  |
|               | 0.294440284                           | 1.633167435       | 3                                    | 0                           | 0.972491774  |
| CRYZ          | ENSG00000116791.13                    | 0.125188865       | 13                                   | 6                           | 0.009118226  |
|               | Brain_Nucleus_accumbens_basal_ganglia | 0.49441365        | Brain_Spinal_cord_cervical_c-1       |                             |              |
|               | 9.177633731                           | 0.02991335        | 0.338788902                          | -2.607589397                | -0.683305768 |
|               | -2.008344972                          | 0.618367936       | 6                                    | 0                           | 0.972491774  |
| FXYD7         | ENSG00000221946.7                     | 0.125305753       | 1                                    | 1                           | 0.125305753  |
|               | Brain_Cerebellum                      | 1                 | 1                                    | 1                           | 1.532878666  |
|               | 1.532878666                           | NA                | 1                                    | 0                           | 0.972491774  |
| FOXO3         | ENSG00000118689.14                    | 0.125378396       | 3                                    | 3                           | 0.097908072  |
|               | Brain_Anterior_cingulate_cortex_BA24  | 1.325731034       | Brain_Cerebellum                     |                             |              |
|               | 0.667287653                           | 0.667287653       | -1.397300478                         | 1.655080983                 | 0.32303882   |
|               | 1.562798498                           | 3                 | 0                                    | 0.972491774                 |              |
| TGOLN2        | ENSG00000152291.13                    | 0.12548401        | 3                                    | 3                           | 0.027181887  |
|               | Brain_Frontal_Cortex_BA9              | 0.992009939       | Brain_Putamen_basal_ganglia          |                             |              |
|               | 1.733092958                           | 0.467500299       | 0.467500299                          | -0.010014224                | 2.208895828  |
|               | 1.038597583                           | 1.114448808       | 3                                    | 0                           | 0.972491774  |
| ANGPT1        | ENSG00000154188.9                     | 0.125642194       | 1                                    | 1                           | 0.125642194  |
|               | Brain_Cerebellar_Hemisphere           | 0.125642194       | Brain_Cerebellar_Hemisphere          | 1                           | 1            |
|               | 1                                     | -1.531514871      | -1.531514871                         | -1.531514871                | NA           |
|               |                                       |                   |                                      |                             | 1            |
|               |                                       |                   |                                      |                             | 0            |
|               |                                       |                   |                                      |                             | 0.972491774  |
| TP73          | ENSG00000078900.14                    | 0.125707514       | 2                                    | 2                           | 0.089852694  |
|               | Brain_Amygdala                        |                   |                                      |                             |              |
|               | 0.344079927                           | Brain_Cerebellum  | 1.103201929                          | 0.896798071                 | 0.896798071  |
|               | 0.946134622                           | 1.696175262       | 1.321154942                          | 0.530358823                 | 2            |
|               |                                       |                   |                                      |                             | 0            |
|               |                                       |                   |                                      |                             | 0.972491774  |
| LIMK2         | ENSG00000182541.17                    | 0.125741262       | 6                                    | 5                           | 0.029125684  |
|               | Brain_Anterior_cingulate_cortex_BA24  | 0.71283255        | Brain_Cortex                         |                             |              |
|               | 0.080804587                           | 0.220067561       | -2.181781211                         | 1.179703729                 | -1.020854296 |
|               | 1.255508453                           | 5                 | 0                                    | 0.972491774                 |              |
| LENEP         | ENSG00000163352.5                     | 0.12579458        | 1                                    | 1                           | 0.12579458   |
|               | Brain_Cerebellum                      | 0.12579458        | Brain_Cerebellum                     | 0.12579458                  | 0.12579458   |
|               | Brain_Cerebellum                      | 1                 | 1                                    | 1                           | -1.530898094 |
|               | NA                                    | 1                 | 0                                    | 0.972491774                 |              |
| ELAVL1        | ENSG00000066044.14                    | 0.125846482       | 1                                    | 1                           | 0.125846482  |
|               | Brain_Cortex                          | 0.125846482       | Brain_Cortex                         | 1                           | 1            |
|               | -1.530688156                          | -1.530688156      | NA                                   | 1                           | 0            |
|               |                                       |                   |                                      |                             | 0.972491774  |
| ENO3          | ENSG00000108515.17                    | 0.125873369       | 9                                    | 9                           | 0.118402458  |
|               | Brain_Amygdala                        |                   |                                      |                             |              |
|               | 0.990775038                           | Brain_Hippocampus | 4.412762196                          | 0.16621892                  | 0.16621892   |
|               | -0.932816941                          | 1.561514275       | 0.15655534                           | 0.830226405                 | 9            |
|               |                                       |                   |                                      |                             | 0            |

0.972491774  
LINC02084 ENSG00000272282.1 0.126024661 2 2 0.045397254  
Brain\_Cerebellum 0.584886154 Brain\_Cerebellar\_Hemisphere 1.08756869 0.91243131  
0.91243131 -0.546261562 2.000954866 0.727346652 1.80115401 2 0  
0.972491774  
EMP1 ENSG00000134531.9 0.126029568 5 5 0.006278036  
Brain\_Hippocampus 0.990858746 Brain\_Putamen\_basal\_ganglia 1.385103973  
0.62943895 0.62943895 -2.732894886 0.501785627 -0.591207311  
1.263591458 5 0 0.972491774  
C5orf42 ENSG00000197603.13 0.126121885 2 2 0.0663001 Brain\_Cerebellum  
0.315769681 Brain\_Cortex 1.070024938 0.929975062 0.929975062  
-1.836389304 1.003188996 -0.416600154 2.007885072 2 0  
0.972491774  
TMUB1 ENSG00000164897.12 0.126155788 1 1 0.126155788  
Brain\_Frontal\_Cortex\_BA9 0.126155788 Brain\_Frontal\_Cortex\_BA9 1 1  
1 -1.529438446 -1.529438446 -1.529438446 NA 1 0  
0.972491774  
AFG3L2 ENSG00000141385.9 0.126293502 1 1 0.126293502  
Brain\_Spinal\_cord\_cervical\_c-1 0.126293502 Brain\_Spinal\_cord\_cervical\_c-1  
1 1 1 -1.528882797 -1.528882797 -1.528882797 NA 1 0  
0.972491774  
CTA-246H3.12 ENSG00000272942.1 0.126301071 4 4 0.045180125  
Brain\_Hippocampus 0.9307341 Brain\_Amygdala 1.995511653 0.494312993  
0.494312993 -2.002973578 0.086921261 -1.224735547 0.966169973  
4 0 0.972491774  
NDST1 ENSG00000070614.14 0.126301637 6 4 0.013059381  
Brain\_Putamen\_basal\_ganglia 0.20690477 Brain\_Cerebellar\_Hemisphere 5.053757289  
0.022747674 0.193943533 1.262122334 2.482145841 1.754253824  
0.452072943 4 0 0.972491774  
ATXN1 ENSG00000124788.17 0.126346552 2 2 0.042524912  
Brain\_Hippocampus 0.886696066 Brain\_Caudate\_basal\_ganglia 1.004949495  
0.995050505 0.995050505 -2.02834635 0.14248609 -0.94293013  
1.535010339 2 0 0.972491774  
C16orf54 ENSG00000185905.3 0.126395488 1 1 0.126395488  
Brain\_Cerebellar\_Hemisphere 0.126395488 Brain\_Cerebellar\_Hemisphere 1 1  
1 1.528471606 1.528471606 1.528471606 NA 1 0  
0.972491774  
BTN3A1 ENSG00000026950.16 0.126451888 7 5 0.070522939  
Brain\_Hippocampus 0.420401327 Brain\_Cortex 4.454830144  
0.005507034 0.18657959 -1.529795061 1.808537157 0.377478159  
1.312230102 5 0 0.972491774  
XYLT1 ENSG00000103489.11 0.126455258 1 1 0.126455258  
Brain\_Cerebellar\_Hemisphere 0.126455258 Brain\_Cerebellar\_Hemisphere 1 1  
1 -1.528230743 -1.528230743 -1.528230743 NA 1 0  
0.972491774  
CTA-384D8.35 ENSG00000272666.1 0.126495446 1 1 0.126495446  
Brain\_Cerebellar\_Hemisphere 0.126495446 Brain\_Cerebellar\_Hemisphere 1 1  
1 1.528068844 1.528068844 1.528068844 NA 1 0  
0.972491774  
NDUFAF8 ENSG00000224877.3 0.126513031 6 5 0.020251859  
Brain\_Cerebellar\_Hemisphere 0.823641646 Brain\_Cerebellum 3.05405942  
0.045156286 0.169220966 -1.48248935 2.321648699 0.864642286  
1.514976961 5 0 0.972491774  
DOK6 ENSG00000206052.10 0.126671717 1 1 0.126671717 Brain\_Amygdala  
0.126671717 Brain\_Amygdala 1 1 1 -1.527359197 -1.527359197  
-1.527359197 NA 1 0 0.972491774  
INTS2 ENSG00000108506.11 0.126748324 1 1 0.126748324  
Brain\_Cerebellar\_Hemisphere 0.126748324 Brain\_Cerebellar\_Hemisphere 1 1  
1 1.527051025 1.527051025 1.527051025 NA 1 0  
0.972491774  
GPN1 ENSG00000198522.13 0.126762599 3 3 0.289906404  
Brain\_Frontal\_Cortex\_BA9 0.821064836 Brain\_Cerebellar\_Hemisphere



|               |                                       |                |                                |              |                             |                |             |            |   |
|---------------|---------------------------------------|----------------|--------------------------------|--------------|-----------------------------|----------------|-------------|------------|---|
|               | 2.494152437                           | 0.12725663     | 0.12725663                     | -1.058326965 | 0.841093026                 |                |             |            |   |
|               | -0.147803184                          | 0.952132215    | 3                              | 0            | 0.972491774                 |                |             |            |   |
| NCOA5         | ENSG00000124160.11                    | 0.126836364    | 1                              | 1            | 0.126836364                 |                |             |            |   |
|               | Brain_Nucleus_accumbens_basal_ganglia | 0.126836364    |                                |              |                             |                |             |            |   |
|               | Brain_Nucleus_accumbens_basal_ganglia | 1              | 1                              | 1            | -1.52669704                 |                |             |            |   |
|               | -1.52669704                           | -1.52669704    | NA                             | 1            | 0.972491774                 |                |             |            |   |
| LIPG          | ENSG00000101670.11                    | 0.126861713    | 1                              | 1            | 0.126861713                 |                |             |            |   |
|               | Brain_Caudate_basal_ganglia           | 0.126861713    |                                |              | Brain_Caudate_basal_ganglia | 1              | 1           |            |   |
|               | 1                                     | -1.526595154   | -1.526595154                   | -1.526595154 | NA                          | 1              | 0           |            |   |
|               | 0.972491774                           |                |                                |              |                             |                |             |            |   |
| EIF3A         | ENSG00000107581.12                    | 0.126981847    | 1                              | 1            | 0.126981847                 | Brain_Amygdala |             |            |   |
|               | 0.126981847                           | Brain_Amygdala | 1                              | 1            | 1                           | 1.52611251     | 1.52611251  | 1.52611251 |   |
|               | NA                                    | 1              | 0                              | 0.972491774  |                             |                |             |            |   |
| COX19         | ENSG00000240230.5                     | 0.127042578    | 1                              | 1            | 0.127042578                 |                |             |            |   |
|               | Brain_Substantia_nigra                | 0.127042578    |                                |              | Brain_Substantia_nigra      | 1              | 1           |            |   |
|               | 1                                     | -1.525868655   | -1.525868655                   | -1.525868655 | NA                          | 1              | 0           |            |   |
|               | 0.972491774                           |                |                                |              |                             |                |             |            |   |
| TMEM8B        | ENSG00000137103.16                    | 0.127107074    | 13                             | 1            | 0.05847603                  |                |             |            |   |
|               | Brain_Anterior_cingulate_cortex_BA24  | 0.363171091    |                                |              | Brain_Caudate_basal_ganglia |                |             |            |   |
|               | 12.4050553                            | 0.000374583    | 12.4050553                     | -1.892112221 | -0.909339226                |                |             |            |   |
|               | -1.488436137                          | 0.258715229    | 1                              | 0            | 0.972491774                 |                |             |            |   |
| MRPS14        | ENSG00000120333.4                     | 0.127181033    | 3                              | 3            | 0.031203733                 |                |             |            |   |
|               | Brain_Caudate_basal_ganglia           | 0.527826088    |                                |              | Brain_Putamen_basal_ganglia |                |             |            |   |
|               | 1.173978191                           | 0.859191943    | 0.859191943                    | 0.631327991  | 2.154464885                 |                |             |            |   |
|               | 1.279790217                           | 0.786362227    | 3                              | 0            | 0.972491774                 |                |             |            |   |
| PSMD2         | ENSG00000175166.16                    | 0.127314722    | 9                              | 5            | 0.207502911                 |                |             |            |   |
|               | Brain_Anterior_cingulate_cortex_BA24  | 0.95852331     | Brain_Putamen_basal_ganglia    |              |                             |                |             |            |   |
|               | 5.856071075                           | 0.056663616    | 0.368836403                    | -0.916915651 | 1.260461547                 |                |             |            |   |
|               | 0.063572279                           | 0.792129243    | 5                              | 0            | 0.972491774                 |                |             |            |   |
| CTD-2062F14.3 | ENSG00000259031.1                     | 0.127462032    | 2                              | 2            | 0.054558956                 |                |             |            |   |
|               | Brain_Cerebellum                      | 0.458110767    | Brain_Putamen_basal_ganglia    | 1.047476454  |                             |                |             |            |   |
|               | 0.952523546                           | 0.952523546    | 0.741961327                    | 1.922372077  | 1.332166702                 |                |             |            |   |
|               | 0.834676447                           | 2              | 0                              | 0.972491774  |                             |                |             |            |   |
| SUMF2         | ENSG00000129103.17                    | 0.127499594    | 10                             | 3            | 0.04261149                  |                |             |            |   |
|               | Brain_Spinal_cord_cervical_c-1        | 0.978206745    | Brain_Cortex                   | 8.266407762  |                             |                |             |            |   |
|               | 0.015368448                           | 0.564379292    | 0.027317191                    | 2.027498188  | 0.432686239                 |                |             |            |   |
|               | 0.605258399                           | 3              | 0                              | 0.972491774  |                             |                |             |            |   |
| APOPT1        | ENSG00000256053.7                     | 0.127589325    | 10                             | 7            | 0.001259522                 |                |             |            |   |
|               | Brain_Hippocampus                     | 0.550731646    | Brain_Spinal_cord_cervical_c-1 |              |                             |                |             |            |   |
|               | 6.044570761                           | 0.036217166    | 0.234297326                    | -3.225046458 | -0.59666413                 |                |             |            |   |
|               | -1.955571926                          | 0.769912983    | 7                              | 0            | 0.972491774                 |                |             |            |   |
| ADRM1         | ENSG00000130706.12                    | 0.127640466    | 1                              | 1            | 0.127640466                 |                |             |            |   |
|               | Brain_Caudate_basal_ganglia           | 0.127640466    | Brain_Caudate_basal_ganglia    | 1            | 1                           |                |             |            |   |
|               | 1                                     | 1.523472781    | 1.523472781                    | 1.523472781  | NA                          | 1              | 0           |            |   |
|               | 0.972491774                           |                |                                |              |                             |                |             |            |   |
| SLC1A3        | ENSG00000079215.13                    | 0.127645088    | 1                              | 1            | 0.127645088                 |                |             |            |   |
|               | Brain_Cerebellum                      | 0.127645088    | Brain_Cerebellum               | 1            | 1                           | 1              | -1.52345429 |            |   |
|               | -1.52345429                           | -1.52345429    | NA                             | 1            | 0                           | 0.972491774    |             |            |   |
| ZMAT3         | ENSG00000172667.10                    | 0.127669971    | 3                              | 3            | 0.160611206                 | Brain_Amygdala |             |            |   |
|               | 0.601283513                           | Brain_Cortex   | 1.321278954                    | 0.680837204  | 0.680837204                 |                |             |            |   |
|               | -1.403018891                          | 1.344863442    | 0.154800065                    | 1.410371389  | 3                           | 0              |             |            |   |
|               | 0.972491774                           |                |                                |              |                             |                |             |            |   |
| SULT1E1       | ENSG00000109193.10                    | 0.127780687    | 1                              | 1            | 0.127780687                 |                |             |            |   |
|               | Brain_Spinal_cord_cervical_c-1        | 0.127780687    | Brain_Spinal_cord_cervical_c-1 |              |                             |                |             |            |   |
|               | 1                                     | 1              | 1                              | 1.522912144  | 1.522912144                 | 1.522912144    | NA          | 1          | 0 |
|               | 0.972491774                           |                |                                |              |                             |                |             |            |   |
| RP11-108E14.1 | ENSG00000253300.1                     | 0.127849948    | 1                              | 1            | 0.127849948                 |                |             |            |   |
|               | Brain_Substantia_nigra                | 0.127849948    | Brain_Substantia_nigra         | 1            | 1                           |                |             |            |   |
|               | 1                                     | 1.522635399    | 1.522635399                    | 1.522635399  | NA                          | 1              | 0           |            |   |
|               | 0.972491774                           |                |                                |              |                             |                |             |            |   |
| PTK2          | ENSG00000169398.19                    | 0.127924831    | 10                             | 9            | 0.001748596                 |                |             |            |   |
|               | Brain_Nucleus_accumbens_basal_ganglia | 0.992426374    | Brain_Putamen_basal_ganglia    |              |                             |                |             |            |   |

|              |                                       |                                       |                                      |              |                              |
|--------------|---------------------------------------|---------------------------------------|--------------------------------------|--------------|------------------------------|
|              | 3.432380103                           | 0.041645396                           | 0.218211038                          | -3.129910469 | 1.413741101                  |
|              | -0.137437918                          | 1.213254079                           | 0                                    | 0.972491774  |                              |
| RP11-21401.2 | ENSG00000266709.1                     | 0.128022541                           | 1                                    | 1            | 0.128022541                  |
|              | Brain_Cerebellar_Hemisphere           | 0.128022541                           | Brain_Cerebellar_Hemisphere          | 1            | 1                            |
|              | 1                                     | -1.521946282                          | -1.521946282                         | -1.521946282 | NA 1 0                       |
|              | 0.972491774                           |                                       |                                      |              |                              |
| WBP11        | ENSG00000084463.7                     | 0.128157411                           | 3                                    | 3            | 0.050354504 Brain_Cerebellum |
|              | 0.960868648                           | Brain_Cortex                          | 2.18150752                           | 0.207685151  | 0.207685151                  |
|              | -1.956940165                          | 0.049063555                           | -0.791853619                         | 1.041550319  | 3 0                          |
|              | 0.972491774                           |                                       |                                      |              |                              |
| DNAAF2       | ENSG00000165506.14                    | 0.128269838                           | 2                                    | 2            | 0.056272296                  |
|              | Brain_Hypothalamus                    | 0.551115467                           | Brain_Cerebellum                     | 1.043943452  |                              |
|              | 0.956056548                           | 0.956056548                           | -1.9089209                           | -0.596089457 | -1.252505179                 |
|              | 0.928312016                           | 2 0                                   | 0.972491774                          |              |                              |
| C10orf105    | ENSG00000214688.5                     | 0.128324818                           | 4                                    | 4            | 0.10167831 Brain_Cerebellum  |
|              | 0.448504357                           | Brain_Nucleus_accumbens_basal_ganglia | 1.703539594                          |              |                              |
|              | 0.383844642                           | 0.383844642                           | -1.322664456                         | 1.636771083  | 0.577102605                  |
|              | 1.316481111                           | 4 0                                   | 0.972491774                          |              |                              |
| GNPDA2       | ENSG00000163281.11                    | 0.128348847                           | 12                                   | 2            | 0.017497806                  |
|              | Brain_Caudate_basal_ganglia           | 0.094071135                           | Brain_Cerebellum                     | 11.01817992  |                              |
|              | 0.002167064                           | 0.378156135                           | 1.674302643                          | 2.376077107  | 1.910480359                  |
|              | 0.196582614                           | 2 0                                   | 0.972491774                          |              |                              |
| TRAM2        | ENSG00000065308.4                     | 0.128399098                           | 1                                    | 1            | 0.128399098                  |
|              | Brain_Caudate_basal_ganglia           | 0.128399098                           | Brain_Caudate_basal_ganglia          | 1            | 1                            |
|              | 1                                     | -1.520445293                          | -1.520445293                         | -1.520445293 | NA 1 0                       |
|              | 0.972491774                           |                                       |                                      |              |                              |
| MIR137HG     | ENSG00000225206.8                     | 0.1284187                             | 6                                    | 4            | 0.038445232                  |
|              | Brain_Hippocampus                     | 0.435551032                           | Brain_Anterior_cingulate_cortex_BA24 |              |                              |
|              | 4.5400746                             | 0.057986541                           | 0.218628067                          | -2.070075955 | -0.779727935                 |
|              | -1.291872532                          | 0.601742201                           | 4 0                                  | 0.972491774  |                              |
| GLTPD2       | ENSG00000182327.7                     | 0.128533282                           | 3                                    | 3            | 0.181432576                  |
|              | Brain_Frontal_Cortex_BA9              | 0.871392989                           | Brain_Caudate_basal_ganglia          |              |                              |
|              | 1.717151178                           | 0.282228425                           | 0.282228425                          | -1.336357117 | 0.404352058                  |
|              | -0.36463147                           | 0.887888159                           | 3 0                                  | 0.972491774  |                              |
| HECW1        | ENSG00000002746.14                    | 0.128740986                           | 1                                    | 1            | 0.128740986                  |
|              | Brain_Nucleus_accumbens_basal_ganglia | 0.128740986                           |                                      |              |                              |
|              | Brain_Nucleus_accumbens_basal_ganglia | 1                                     | 1                                    | 1            | -1.519085461                 |
|              | -1.519085461                          | -1.519085461                          | NA 1                                 | 0            | 0.972491774                  |
| NAGLU        | ENSG00000108784.9                     | 0.128774045                           | 2                                    | 2            | 0.058125675                  |
|              | Brain_Caudate_basal_ganglia           | 0.790422646                           | Brain_Cortex                         | 1.472266534  |                              |
|              | 0.527733466                           | 0.527733466                           | -1.894748908                         | -0.265761825 | -1.080255366                 |
|              | 1.151867813                           | 2 0                                   | 0.972491774                          |              |                              |
| FKTN         | ENSG00000106692.13                    | 0.128780277                           | 3                                    | 3            | 0.129269482 Brain_Cortex     |
|              | 0.624827767                           | Brain_Nucleus_accumbens_basal_ganglia | 1.921169294                          |              |                              |
|              | 0.360978612                           | 0.360978612                           | -0.489019676                         | 1.516988917  | 0.752373122                  |
|              | 1.084668083                           | 3 0                                   | 0.972491774                          |              |                              |
| MDGA1        | ENSG00000112139.14                    | 0.128832922                           | 3                                    | 3            | 0.080343992                  |
|              | Brain_Putamen_basal_ganglia           | 0.618316218                           | Brain_Cortex                         | 1.100879579  |                              |
|              | 0.904212079                           | 0.904212079                           | -1.74869363                          | 1.550641831  | 0.100062107                  |
|              | 1.685322439                           | 3 0                                   | 0.972491774                          |              |                              |
| MAGI3        | ENSG00000081026.18                    | 0.128953201                           | 3                                    | 3            | 0.096287233 Brain_Cerebellum |
|              | 0.992266965                           | Brain_Spinal_cord_cervical_c-1        | 2.203656192                          | 0.077910262  | 0.077910262                  |
|              | 0.077910262                           | -1.663125917                          | -0.009692074                         | -0.851697172 | 0.827140891                  |
|              | 3 0                                   | 0.972491774                           |                                      |              |                              |
| BICD2        | ENSG00000185963.13                    | 0.129030567                           | 7                                    | 1            | 0.081102766                  |
|              | Brain_Hypothalamus                    | 0.371499034                           | Brain_Spinal_cord_cervical_c-1       |              |                              |
|              | 6.659266581                           | 0.000513214                           | 6.659266581                          | -1.744323097 | -0.893668966                 |
|              | -1.475697838                          | 0.300687137                           | 1 0                                  | 0.972491774  |                              |
| GPR19        | ENSG00000183150.7                     | 0.129033838                           | 1                                    | 1            | 0.129033838                  |
|              | Brain_Caudate_basal_ganglia           | 0.129033838                           | Brain_Caudate_basal_ganglia          | 1            | 1                            |
|              | 1                                     | 1.517922893                           | 1.517922893                          | 1.517922893  | NA 1 0                       |
|              | 0.972491774                           |                                       |                                      |              |                              |

|          |                                       |                             |                                       |              |                             |                  |              |  |
|----------|---------------------------------------|-----------------------------|---------------------------------------|--------------|-----------------------------|------------------|--------------|--|
| BRWD1    | ENSG00000185658.13                    | 0.129036773                 | 1                                     | 1            | 0.129036773                 |                  |              |  |
|          | Brain_Caudate_basal_ganglia           | 0.129036773                 |                                       |              | Brain_Caudate_basal_ganglia | 1                | 1            |  |
|          | 1                                     | 1.517911253                 | 1.517911253                           | 1.517911253  | NA                          | 1                | 0            |  |
|          | 0.972491774                           |                             |                                       |              |                             |                  |              |  |
| C7orf34  | ENSG00000165131.6                     | 0.129071445                 | 1                                     | 1            | 0.129071445                 |                  |              |  |
|          | Brain_Caudate_basal_ganglia           | 0.129071445                 |                                       |              | Brain_Caudate_basal_ganglia | 1                | 1            |  |
|          | 1                                     | 1.517773747                 | 1.517773747                           | 1.517773747  | NA                          | 1                | 0            |  |
|          | 0.972491774                           |                             |                                       |              |                             |                  |              |  |
| C3orf35  | ENSG00000198590.11                    | 0.129326981                 | 1                                     | 1            | 0.129326981                 |                  |              |  |
|          | Brain_Frontal_Cortex_BA9              | 0.129326981                 |                                       |              | Brain_Frontal_Cortex_BA9    | 1                | 1            |  |
|          | 1                                     | 1.516761219                 | 1.516761219                           | 1.516761219  | NA                          | 1                | 0            |  |
|          | 0.972491774                           |                             |                                       |              |                             |                  |              |  |
| MEN1     | ENSG00000133895.14                    | 0.129524013                 | 4                                     | 4            | 0.027530664                 |                  |              |  |
|          | Brain_Frontal_Cortex_BA9              | 0.795539286                 |                                       |              | Brain_Cerebellar_Hemisphere |                  |              |  |
|          | 1.706383696                           | 0.478021227                 | 0.478021227                           | -2.203910149 | 1.1615417                   |                  |              |  |
|          | -0.541840165                          | 1.396293734                 | 4                                     | 0            | 0.972491774                 |                  |              |  |
| TUBG2    | ENSG00000037042.8                     | 0.129706385                 | 12                                    | 1            | 0.073447003                 | Brain_Cortex     |              |  |
|          | 0.310887646                           | Brain_Hypothalamus          | 10.76806292                           | 0.001513652  |                             |                  |              |  |
|          | 10.76806292                           | -1.790042976                | -1.013361241                          | -1.432691446 | 0.239297646                 |                  |              |  |
|          | 1                                     | 0                           | 0.972491774                           |              |                             |                  |              |  |
| KIF16B   | ENSG00000089177.18                    | 0.129728595                 | 7                                     | 7            | 0.10285567                  |                  |              |  |
|          | Brain_Nucleus_accumbens_basal_ganglia | 0.951383023                 |                                       |              | Brain_Cerebellar_Hemisphere |                  |              |  |
|          | 3.347877139                           | 0.218594541                 | 0.218594541                           | -0.71952421  | 1.631164233                 |                  |              |  |
|          | 0.587570467                           | 0.888614625                 | 7                                     | 0            | 0.972491774                 |                  |              |  |
| SSC4D    | ENSG00000146700.8                     | 0.129732965                 | 3                                     | 3            | 0.023730103                 |                  |              |  |
|          | Brain_Frontal_Cortex_BA9              | 0.043386568                 |                                       |              | Brain_Caudate_basal_ganglia |                  |              |  |
|          | 2.519802055                           | 0.147447179                 | 0.147447179                           | 2.019969334  | 2.261471062                 |                  |              |  |
|          | 2.160624928                           | 0.125576136                 | 3                                     | 0            | 0.972491774                 |                  |              |  |
| KIAA0391 | ENSG00000100890.15                    | 0.12984675                  | 6                                     | 6            | 0.089553748                 | Brain_Cerebellum |              |  |
|          | 0.95700969                            | Brain_Putamen_basal_ganglia | 2.869406037                           | 0.128414446  |                             |                  |              |  |
|          | 0.128414446                           | -0.749290356                | 1.697756398                           | 0.50586787   | 0.924296415                 | 6                |              |  |
|          | 0                                     | 0.972491774                 |                                       |              |                             |                  |              |  |
| BMP2K    | ENSG00000138756.17                    | 0.130094075                 | 3                                     | 3            | 0.042700447                 | Brain_Amygdala   |              |  |
|          | 0.561500735                           | Brain_Cerebellar_Hemisphere | 1.08872068                            | 0.879746374  |                             |                  |              |  |
|          | 0.879746374                           | -2.026628231                | 0.827623474                           | -0.593206203 | 1.427167518                 |                  |              |  |
|          | 3                                     | 0                           | 0.972491774                           |              |                             |                  |              |  |
| IMPDH2   | ENSG00000178035.11                    | 0.130112906                 | 1                                     | 1            | 0.130112906                 |                  |              |  |
|          | Brain_Cortex                          | 0.130112906                 | Brain_Cortex                          | 1            | 1                           | 1                | -1.513656805 |  |
|          | -1.513656805                          | -1.513656805                | NA                                    | 1            | 0                           | 0.972491774      |              |  |
| UBTF     | ENSG00000108312.14                    | 0.130307971                 | 1                                     | 1            | 0.130307971                 |                  |              |  |
|          | Brain_Nucleus_accumbens_basal_ganglia | 0.130307971                 |                                       |              |                             |                  |              |  |
|          | Brain_Nucleus_accumbens_basal_ganglia | 1                           | 1                                     | 1            | -1.512888551                |                  |              |  |
|          | -1.512888551                          | -1.512888551                | NA                                    | 1            | 0                           | 0.972491774      |              |  |
| CISTR    | ENSG00000260492.2                     | 0.130361764                 | 2                                     | 2            | 0.053150059                 |                  |              |  |
|          | Brain_Hypothalamus                    | 0.124735665                 | Brain_Cortex                          | 1.54214523   | 0.45785477                  |                  |              |  |
|          | 0.45785477                            | 1.535196106                 | 1.933699713                           | 1.73444791   | 0.281784603                 | 2                | 0            |  |
|          | 0.972491774                           |                             |                                       |              |                             |                  |              |  |
| TUBB6    | ENSG00000176014.12                    | 0.130377654                 | 5                                     | 5            | 0.095560684                 |                  |              |  |
|          | Brain_Cerebellar_Hemisphere           | 0.741207361                 | Brain_Hippocampus                     | 1.543850993  |                             |                  |              |  |
|          | 0.520038059                           | 0.520038059                 | -1.201158445                          | 1.666767302  | 0.39160432                  |                  |              |  |
|          | 1.165724765                           | 5                           | 0                                     | 0.972491774  |                             |                  |              |  |
| BEND7    | ENSG00000165626.16                    | 0.130378809                 | 5                                     | 4            | 0.014165233                 |                  |              |  |
|          | Brain_Cerebellar_Hemisphere           | 0.90031975                  | Brain_Nucleus_accumbens_basal_ganglia |              |                             |                  |              |  |
|          | 2.68501381                            | 0.085832662                 | 0.204574147                           | -2.453045716 | -0.125257433                |                  |              |  |
|          | -1.373054555                          | 0.833859401                 | 4                                     | 0            | 0.972491774                 |                  |              |  |
| ZNF398   | ENSG00000197024.8                     | 0.130529491                 | 1                                     | 1            | 0.130529491                 |                  |              |  |
|          | Brain_Cerebellar_Hemisphere           | 0.130529491                 | Brain_Cerebellar_Hemisphere           | 1            | 1                           |                  |              |  |
|          | 1                                     | 1.512017183                 | 1.512017183                           | 1.512017183  | NA                          | 1                | 0            |  |
|          | 0.972491774                           |                             |                                       |              |                             |                  |              |  |
| SPTBN1   | ENSG00000115306.15                    | 0.130560555                 | 12                                    | 10           | 0.124776334                 |                  |              |  |
|          | Brain_Anterior_cingulate_cortex_BA24  | 0.945173445                 | Brain_Cerebellar_Hemisphere           |              |                             |                  |              |  |
|          | 5.754189911                           | 0.031333587                 | 0.221671943                           | -1.535030508 | 0.977020383                 |                  |              |  |

|              |                                      |                             |                                       |              |              |                                |              |   |   |
|--------------|--------------------------------------|-----------------------------|---------------------------------------|--------------|--------------|--------------------------------|--------------|---|---|
|              | -0.497174702                         | 0.799777348                 | 10                                    | 0            | 0.972491774  |                                |              |   |   |
| C22orf23     | ENSG00000128346.10                   | 0.130587137                 | 1                                     | 1            | 0.130587137  |                                |              |   |   |
|              | Brain_Anterior_cingulate_cortex_BA24 | 0.130587137                 |                                       |              |              |                                |              |   |   |
|              | Brain_Anterior_cingulate_cortex_BA24 | 1                           | 1                                     | 1            | -1.511790616 |                                |              |   |   |
|              | -1.511790616                         | -1.511790616                | NA                                    | 1            | 0            | 0.972491774                    |              |   |   |
| SDHB         | ENSG00000117118.9                    | 0.130603698                 | 5                                     | 5            | 0.055385665  |                                |              |   |   |
|              | Brain_Anterior_cingulate_cortex_BA24 | 0.900640175                 |                                       |              |              | Brain_Cerebellar_Hemisphere    |              |   |   |
|              | 2.310076829                          | 0.400438474                 | 0.400438474                           |              | -1.915838426 | 0.124852688                    |              |   |   |
|              | -0.973015052                         | 0.875677201                 | 5                                     | 0            | 0.972491774  |                                |              |   |   |
| RP4-798A10.7 | ENSG00000261135.1                    | 0.130682448                 | 1                                     | 1            | 0.130682448  |                                |              |   |   |
|              | Brain_Spinal_cord_cervical_c-1       | 0.130682448                 |                                       |              |              | Brain_Spinal_cord_cervical_c-1 |              |   |   |
|              | 1                                    | 1                           | 1                                     | -1.511416185 | -1.511416185 | -1.511416185                   | NA           | 1 | 0 |
|              | 0.972491774                          |                             |                                       |              |              |                                |              |   |   |
| SEC11A       | ENSG00000140612.13                   | 0.130703201                 | 1                                     | 1            | 0.130703201  |                                |              |   |   |
|              | Brain_Amygdala                       | 0.130703201                 | Brain_Amygdala                        | 1            | 1            | 1                              | -1.511334687 |   |   |
|              | -1.511334687                         | -1.511334687                | NA                                    | 1            | 0            | 0.972491774                    |              |   |   |
| MISP3        | ENSG00000141854.9                    | 0.130712844                 | 11                                    | 11           | 0.014038891  |                                |              |   |   |
|              | Brain_Substantia_nigra               | 0.944014923                 |                                       |              |              | Brain_Cerebellum2.381594541    |              |   |   |
|              | 0.319332544                          | 0.319332544                 | -2.456266739                          |              | 1.437243018  | -0.520097588                   |              |   |   |
|              | 1.141733086                          | 11                          | 0                                     | 0.972491774  |              |                                |              |   |   |
| JAKMIP1      | ENSG00000152969.17                   | 0.13076622                  | 2                                     | 2            | 0.043877635  |                                |              |   |   |
|              | Brain_Spinal_cord_cervical_c-1       | 0.895141329                 |                                       |              |              | Brain_Cortex                   | 1.022657906  |   |   |
|              | 0.977342094                          | 0.977342094                 | -2.015257888                          |              | -0.131801463 | -1.073529675                   |              |   |   |
|              | 1.33180481                           | 2                           | 0                                     | 0.972491774  |              |                                |              |   |   |
| TMEM216      | ENSG00000187049.9                    | 0.130952918                 | 12                                    | 4            | 0.009744314  |                                |              |   |   |
|              | Brain_Amygdala                       | 0.641604165                 | Brain_Cerebellum                      | 9.003974726  | 0.000662998  |                                |              |   |   |
|              | 0.433566421                          | -2.584772943                | 0.465457082                           |              | -0.957528527 | 0.684151454                    |              |   |   |
|              | 4                                    | 0                           | 0.972491774                           |              |              |                                |              |   |   |
| CCL27        | ENSG00000213927.3                    | 0.13096273                  | 2                                     | 2            | 0.219800539  |                                |              |   |   |
|              | Brain_Cerebellar_Hemisphere          | 0.453400309                 |                                       |              |              | Brain_Cerebellum1.510332739    |              |   |   |
|              | 0.489667261                          | 0.489667261                 | -1.227058673                          |              | 0.749758265  | -0.238650204                   |              |   |   |
|              | 1.397820662                          | 2                           | 0                                     | 0.972491774  |              |                                |              |   |   |
| PNO1         | ENSG00000115946.7                    | 0.130986966                 | 4                                     | 4            | 0.0122925    | Brain_Hypothalamus             |              |   |   |
|              | 0.365426845                          | Brain_Cortex                | 2.588313143                           |              | 0.164436182  | 0.164436182                    |              |   |   |
|              | -2.503634356                         | -0.905072754                | -1.948621308                          |              | 0.745654032  | 4                              | 0            |   |   |
|              | 0.972491774                          |                             |                                       |              |              |                                |              |   |   |
| SYNE3        | ENSG00000176438.12                   | 0.131086283                 | 3                                     | 3            | 0.033991631  | Brain_Cerebellum               |              |   |   |
|              | 0.240643742                          | Brain_Cortex                | 1.567481241                           |              | 0.413667325  | 0.413667325                    |              |   |   |
|              | 1.173379281                          | 2.120170956                 | 1.657519641                           |              | 0.473761494  | 3                              | 0            |   |   |
|              | 0.972491774                          |                             |                                       |              |              |                                |              |   |   |
| RP11-700H6.4 | ENSG00000262006.1                    | 0.131115974                 | 6                                     | 6            | 0.045410754  |                                |              |   |   |
|              | Brain_Caudate_basal_ganglia          | 0.978386226                 | Brain_Nucleus_accumbens_basal_ganglia |              |              |                                |              |   |   |
|              | 2.092328868                          | 0.425802074                 | 0.425802074                           |              | -2.000829619 | 0.445590242                    |              |   |   |
|              | -0.46535413                          | 1.101242392                 | 6                                     | 0            | 0.972491774  |                                |              |   |   |
| UCN2         | ENSG00000145040.3                    | 0.131174335                 | 1                                     | 1            | 0.131174335  | Brain_Cerebellum               |              |   |   |
|              | 0.131174335                          | Brain_Cerebellum            | 1                                     | 1            | 1            | -1.509487158                   | -1.509487158 |   |   |
|              | -1.509487158                         | NA                          | 1                                     | 0            | 0.972491774  |                                |              |   |   |
| IPMK         | ENSG00000151151.5                    | 0.131177198                 | 1                                     | 1            | 0.131177198  |                                |              |   |   |
|              | Brain_Hippocampus                    | 0.131177198                 | Brain_Hippocampus                     | 1            | 1            | 1                              |              |   |   |
|              | 1.509475945                          | 1.509475945                 | 1.509475945                           | NA           | 1            | 0                              | 0.972491774  |   |   |
| TTC25        | ENSG00000204815.9                    | 0.131250879                 | 2                                     | 2            | 0.057866932  |                                |              |   |   |
|              | Brain_Hippocampus                    | 0.579920413                 | Brain_Substantia_nigra                |              |              | 1.066443332                    |              |   |   |
|              | 0.933556668                          | 0.933556668                 | -1.896704632                          |              | 0.553500975  | -0.671601829                   |              |   |   |
|              | 1.732557                             | 2                           | 0                                     | 0.972491774  |              |                                |              |   |   |
| RP4-816N1.8  | ENSG00000283297.1                    | 0.131277716                 | 2                                     | 2            | 0.088489967  |                                |              |   |   |
|              | Brain_Spinal_cord_cervical_c-1       | 0.317434851                 | Brain_Amygdala                        | 1.044541485  |              |                                |              |   |   |
|              | 0.955458515                          | 0.955458515                 | -1.70341749                           |              | 0.999743095  | -0.351837198                   |              |   |   |
|              | 1.91142318                           | 2                           | 0                                     | 0.972491774  |              |                                |              |   |   |
| KPTN         | ENSG00000118162.13                   | 0.131303181                 | 2                                     | 2            | 0.242573056  | Brain_Cerebellum               |              |   |   |
|              | 0.919189522                          | Brain_Cerebellar_Hemisphere | 1.842837302                           |              | 0.157162698  |                                |              |   |   |
|              | 0.157162698                          | -1.168579588                | -0.101454692                          |              | -0.63501714  | 0.75457125                     | 2            |   |   |
|              | 0                                    | 0.972491774                 |                                       |              |              |                                |              |   |   |

|            |                                       |              |              |              |                                |             |             |              |
|------------|---------------------------------------|--------------|--------------|--------------|--------------------------------|-------------|-------------|--------------|
| SFN        | ENSG00000175793.11                    | 0.131460679  | 1            | 1            | 0.131460679                    |             |             |              |
|            | Brain_Putamen_basal_ganglia           | 0.131460679  |              |              | Brain_Putamen_basal_ganglia    | 1           | 1           |              |
|            | 1                                     | 1.508366784  | 1.508366784  | 1.508366784  | NA                             | 1           | 0           |              |
|            | 0.972491774                           |              |              |              |                                |             |             |              |
| FOXD4L1    | ENSG00000184492.6                     | 0.131516496  | 11           | 1            | 0.079963951                    |             |             |              |
|            | Brain_Caudate_basal_ganglia           | 0.302813899  |              |              | Brain_Hippocampus              | 10.42859816 |             |              |
|            | 0.000458548                           | 10.42859816  | 1.030417847  | 1.750895274  | 1.466149889                    |             |             |              |
|            | 0.215540279                           | 1            | 0            | 0.972491774  |                                |             |             |              |
| ZNF277     | ENSG00000198839.9                     | 0.131568471  | 2            | 2            | 0.054690287                    |             |             |              |
|            | Brain_Cerebellum                      | 0.611248482  |              |              | Brain_Frontal_Cortex_BA9       | 1.049486701 |             |              |
|            | 0.950513299                           | 0.950513299  | -0.508292139 | 1.921328656  | 0.706518258                    |             |             |              |
|            | 1.718001339                           | 2            | 0            | 0.972491774  |                                |             |             |              |
| TMEM81     | ENSG00000174529.7                     | 0.131678952  | 8            | 4            | 0.006847224                    |             |             |              |
|            | Brain_Cortex                          | 0.265570437  |              |              | Brain_Caudate_basal_ganglia    | 6.154813741 |             |              |
|            | 0.010316975                           | 0.393783011  | 1.113321357  | 2.704184596  | 2.161079999                    |             |             |              |
|            | 0.50906621                            | 4            | 0            | 0.972491774  |                                |             |             |              |
| ABCB4      | ENSG00000005471.15                    | 0.131696859  | 7            | 7            | 0.056926115                    |             |             |              |
|            | Brain_Putamen_basal_ganglia           | 0.757076218  |              |              | Brain_Caudate_basal_ganglia    |             |             |              |
|            | 2.791744594                           | 0.163128981  | 0.163128981  | -1.903877693 | -0.309322498                   |             |             |              |
|            | -1.105029136                          | 0.584143133  | 7            | 0            | 0.972491774                    |             |             |              |
| RCHY1      | ENSG00000163743.13                    | 0.131706057  | 4            | 4            | 0.055202738                    |             |             |              |
|            | Brain_Hippocampus                     | 0.856131489  |              |              | Brain_Frontal_Cortex_BA9       | 3.131618174 |             |              |
|            | 0.121354861                           | 0.121354861  | -1.917277097 | -0.181300786 | -1.118656133                   |             |             |              |
|            | 0.799494175                           | 4            | 0            | 0.972491774  |                                |             |             |              |
| DAND5      | ENSG00000179284.5                     | 0.131866043  | 1            | 1            | 0.131866043                    |             |             |              |
|            | Brain_Cerebellar_Hemisphere           | 0.131866043  |              |              | Brain_Cerebellar_Hemisphere    | 1           | 1           |              |
|            | 1                                     | -1.506783956 | -1.506783956 | -1.506783956 | NA                             | 1           | 0           |              |
|            | 0.972491774                           |              |              |              |                                |             |             |              |
| MYLK2      | ENSG00000101306.10                    | 0.131964359  | 8            | 7            | 0.064456797                    |             |             |              |
|            | Brain_Substantia_nigra                | 0.853488171  |              |              | Brain_Spinal_cord_cervical_c-1 |             |             |              |
|            | 4.833896876                           | 0.066445329  | 0.172387277  | -1.542470885 | 1.849007033                    |             |             |              |
|            | 0.097644104                           | 0.981753981  | 7            | 0            | 0.972491774                    |             |             |              |
| SH3GL2     | ENSG00000107295.9                     | 0.131997098  | 5            | 5            | 0.060877263                    |             |             |              |
|            | Brain_Frontal_Cortex_BA9              | 0.830975088  |              |              | Brain_Cerebellar_Hemisphere    | 1.94399194  |             |              |
|            | 0.139315378                           | 0.139315378  | -1.578669204 | 1.874385842  | -0.238878824                   |             |             |              |
|            | 1.298728469                           | 5            | 0            | 0.972491774  |                                |             |             |              |
| LINC01800  | ENSG00000234572.1                     | 0.132017504  | 1            | 1            | 0.132017504                    |             |             |              |
|            | Brain_Hypothalamus                    | 0.132017504  |              |              | Brain_Hypothalamus             | 1           | 1           | 1            |
|            | 1.506193515                           | 1.506193515  | 1.506193515  | NA           | 1                              | 0           | 0.972491774 |              |
| SEMA6A-AS2 | ENSG00000249167.1                     | 0.132022508  | 1            | 1            | 0.132022508                    |             |             |              |
|            | Brain_Nucleus_accumbens_basal_ganglia | 0.132022508  |              |              |                                |             |             |              |
|            | Brain_Nucleus_accumbens_basal_ganglia | 1            | 1            | 1            | 1.506174015                    |             |             |              |
|            | 1.506174015                           | 1.506174015  | NA           | 1            | 0                              | 0.972491774 |             |              |
| JADE2      | ENSG00000043143.20                    | 0.132166668  | 1            | 1            | 0.132166668                    |             |             |              |
|            | Brain_Cerebellar_Hemisphere           | 0.132166668  |              |              | Brain_Cerebellar_Hemisphere    | 1           | 1           |              |
|            | 1                                     | 1.505612538  | 1.505612538  | 1.505612538  | NA                             | 1           | 0           |              |
|            | 0.972491774                           |              |              |              |                                |             |             |              |
| CXCL11     | ENSG00000169248.12                    | 0.132338859  | 1            | 1            | 0.132338859                    |             |             |              |
|            | Brain_Cerebellum                      | 0.132338859  |              |              | Brain_Cerebellum               | 1           | 1           | 1            |
|            | -1.504942506                          | -1.504942506 | NA           | 1            | 0                              | 0.972491774 |             | -1.504942506 |
| UNC5D      | ENSG00000156687.10                    | 0.13235331   | 2            | 2            | 0.139444575                    |             |             |              |
|            | Brain_Cortex                          | 0.303201275  |              |              | Brain_Frontal_Cortex_BA9       | 1.206401029 | 0.793598971 |              |
|            | 0.793598971                           | -1.47786254  | 1.029592632  | -0.224134954 | 1.773038556                    |             |             |              |
|            | 2                                     | 0            | 0.972491774  |              |                                |             |             |              |
| FAM3C      | ENSG00000196937.10                    | 0.132402274  | 8            | 3            | 0.088921691                    |             |             |              |
|            | Brain_Caudate_basal_ganglia           | 0.704317184  |              |              | Brain_Hippocampus              | 6.778062547 |             |              |
|            | 0.001612337                           | 0.3765218    | -0.379499219 | 1.701113425  | 0.888404027                    |             |             |              |
|            | 0.583797233                           | 3            | 0            | 0.972491774  |                                |             |             |              |
| IL27RA     | ENSG00000104998.3                     | 0.13251489   | 1            | 1            | 0.13251489                     |             |             |              |
|            | Brain_Cortex                          | 0.13251489   | 1            | 1            | 1                              | -1.50425823 | -1.50425823 |              |
|            | -1.50425823                           | NA           | 1            | 0            | 0.972491774                    |             |             |              |
| AKTIP      | ENSG00000166971.16                    | 0.132711564  | 8            | 4            | 0.140302915                    |             |             |              |

|               |                                       |                             |                             |                                      |              |             |              |                  |
|---------------|---------------------------------------|-----------------------------|-----------------------------|--------------------------------------|--------------|-------------|--------------|------------------|
|               | Brain_Hippocampus                     | 0.886263081                 |                             | Brain_Amygdala                       | 5.345627143  |             |              |                  |
|               | 0.003774816                           | 0.187174714                 |                             | -1.474663941                         | 1.174368566  |             | 0.225205623  |                  |
|               | 0.776227405                           | 4                           | 0                           | 0.972491774                          |              |             |              |                  |
| RP11-665C16.6 | ENSG00000258413.1                     | 0.132723601                 |                             | 3                                    | 2            | 0.082291587 |              |                  |
|               | Brain_Hypothalamus                    | 0.346116607                 |                             | Brain_Frontal_Cortex_BA9             | 2.787486393  |             |              |                  |
|               | 0.064599078                           | 0.147914529                 |                             | -1.737541775                         | -0.942148519 |             | -1.400908576 |                  |
|               | 0.411520152                           | 2                           | 0                           | 0.972491774                          |              |             |              |                  |
| LOR           | ENSG00000203782.5                     | 0.132767597                 |                             | 1                                    | 1            | 0.132767597 |              |                  |
|               | Brain_Spinal_cord_cervical_c-1        | 0.132767597                 |                             | Brain_Spinal_cord_cervical_c-1       |              |             |              |                  |
|               | 1                                     | 1                           | 1                           | 1.503277121                          | 1.503277121  | 1.503277121 | NA           | 1 0              |
|               | 0.972491774                           |                             |                             |                                      |              |             |              |                  |
| MYLK3         | ENSG00000140795.12                    | 0.132833598                 |                             | 1                                    | 1            | 0.132833598 |              |                  |
|               | Brain_Frontal_Cortex_BA9              | 0.132833598                 |                             | Brain_Frontal_Cortex_BA9             | 1            | 1           |              |                  |
|               | 1                                     | 1.503021119                 | 1.503021119                 | 1.503021119                          | NA           | 1           | 0            |                  |
|               | 0.972491774                           |                             |                             |                                      |              |             |              |                  |
| AMT           | ENSG00000145020.15                    | 0.132865606                 |                             | 12                                   | 1            | 0.072170519 |              | Brain_Cerebellum |
|               | 0.273502339                           | Brain_Putamen_basal_ganglia | 11.41133464                 | 0.00104653                           |              |             |              |                  |
|               | 11.41133464                           | -1.798040946                | -1.095032635                | -1.46464599                          | 0.200327815  |             |              |                  |
|               | 1                                     | 0                           | 0.972491774                 |                                      |              |             |              |                  |
| GTF2A1L       | ENSG00000242441.7                     | 0.132999315                 |                             | 12                                   | 11           | 0.010808102 |              |                  |
|               | Brain_Cerebellar_Hemisphere           | 0.938871167                 |                             | Brain_Anterior_cingulate_cortex_BA24 |              |             |              |                  |
|               | 4.05875208                            | 0.000239044                 | 0.153631212                 | -1.590228125                         | 2.548842771  |             |              |                  |
|               | 0.009492103                           | 1.093770887                 | 11                          | 0                                    | 0.972491774  |             |              |                  |
| FMOD          | ENSG00000122176.10                    | 0.133017645                 |                             | 1                                    | 1            | 0.133017645 |              |                  |
|               | Brain_Frontal_Cortex_BA9              | 0.133017645                 |                             | Brain_Frontal_Cortex_BA9             | 1            | 1           |              |                  |
|               | 1                                     | -1.50230776                 | -1.50230776                 | -1.50230776                          | NA           | 1           | 0            |                  |
|               | 0.972491774                           |                             |                             |                                      |              |             |              |                  |
| DNAH17        | ENSG00000187775.16                    | 0.133109148                 |                             | 2                                    | 2            | 0.049953968 |              |                  |
|               | Brain_Spinal_cord_cervical_c-1        | 0.781939232                 |                             |                                      |              |             |              |                  |
|               | Brain_Nucleus_accumbens_basal_ganglia | 1.080533145                 |                             | 0.919466855                          |              |             |              |                  |
|               | 0.919466855                           | -1.960357945                | -0.276792771                | -1.118575358                         | 1.190460351  |             |              |                  |
|               | 2                                     | 0                           | 0.972491774                 |                                      |              |             |              |                  |
| SQSTM1        | ENSG00000161011.19                    | 0.133146609                 |                             | 4                                    | 4            | 0.031195369 |              |                  |
|               | Brain_Frontal_Cortex_BA9              | 0.946491677                 |                             | Brain_Hippocampus                    | 2.53299727   |             |              |                  |
|               | 0.205448842                           | 0.205448842                 | -2.154571654                | 0.721880494                          | -0.264089836 |             |              |                  |
|               | 1.288983719                           | 4                           | 0                           | 0.972491774                          |              |             |              |                  |
| Clorf162      | ENSG00000143110.11                    | 0.133204607                 |                             | 3                                    | 3            | 0.030596101 |              |                  |
|               | Brain_Cortex                          | 0.907227988                 |                             | Brain_Caudate_basal_ganglia          | 1.412284907  |             |              |                  |
|               | 0.65445517                            | 0.65445517                  | -2.162286482                | 0.667330098                          | -0.537164031 |             |              |                  |
|               | 1.460951278                           | 3                           | 0                           | 0.972491774                          |              |             |              |                  |
| SRGAP3        | ENSG00000196220.15                    | 0.133353713                 |                             | 2                                    | 2            | 0.102914718 |              |                  |
|               | Brain_Cortex                          | 0.328501258                 |                             | Brain_Caudate_basal_ganglia          | 1.113808002  |             |              |                  |
|               | 0.886191998                           | 0.886191998                 | -1.630884382                | 0.977137151                          | -0.326873616 |             |              |                  |
|               | 1.844149711                           | 2                           | 0                           | 0.972491774                          |              |             |              |                  |
| EVI5L         | ENSG00000142459.8                     | 0.133379076                 |                             | 3                                    | 2            | 0.056224069 |              | Brain_Amygdala   |
|               | 0.374498412                           | Brain_Cerebellum            | 2.149172826                 | 0.043300651                          | 0.807526522  |             |              |                  |
|               | 0.888078713                           | 1.909294829                 | 1.415701569                 | 0.511457818                          | 2            | 0           |              |                  |
|               | 0.972491774                           |                             |                             |                                      |              |             |              |                  |
| NUDCD2        | ENSG00000170584.10                    | 0.1334279                   |                             | 5                                    | 5            | 0.018174126 |              |                  |
|               | Brain_Frontal_Cortex_BA9              | 0.80510435                  | Brain_Putamen_basal_ganglia | 2.768647278                          |              |             |              |                  |
|               | 0.353072581                           | 0.353072581                 | -2.362051328                | 0.727101503                          | -0.67446265  |             |              |                  |
|               | 1.118653735                           | 5                           | 0                           | 0.972491774                          |              |             |              |                  |
| AC062028.1    | ENSG00000145063.14                    | 0.133438071                 |                             | 5                                    | 5            | 0.243848147 |              |                  |
|               | Brain_Nucleus_accumbens_basal_ganglia | 0.984592326                 |                             |                                      |              |             |              |                  |
|               | Brain_Spinal_cord_cervical_c-1        | 2.14015267                  | 0.416695317                 | 0.416695317                          |              |             |              |                  |
|               | -1.165422172                          | 1.103387499                 | 0.037593333                 | 0.997933378                          | 5            | 0           |              |                  |
|               | 0.972491774                           |                             |                             |                                      |              |             |              |                  |
| ECI2          | ENSG00000198721.12                    | 0.133485094                 |                             | 11                                   | 2            | 0.032080248 |              |                  |
|               | Brain_Frontal_Cortex_BA9              | 0.098490219                 |                             | Brain_Cerebellar_Hemisphere          |              |             |              |                  |
|               | 9.881876065                           | 0.000612426                 | 0.459470784                 | -2.143409284                         | -1.652217508 |             |              |                  |
|               | -1.899695812                          | 0.171420514                 | 2                           | 0                                    | 0.972491774  |             |              |                  |
| PLA2G4B       | ENSG00000243708.10                    | 0.133564052                 |                             | 8                                    | 4            | 0.118131362 |              |                  |

|              |                                       |                             |              |              |                                       |                    |             |             |
|--------------|---------------------------------------|-----------------------------|--------------|--------------|---------------------------------------|--------------------|-------------|-------------|
|              | Brain_Nucleus_accumbens_basal_ganglia | 0.906416176                 |              |              | Brain_Cerebellum                      |                    |             |             |
|              | 6.671247986                           | 0.014250094                 | 0.231575422  | -1.562665206 | 0.171350586                           |                    |             |             |
|              | -0.716317992                          | 0.573878564                 | 0            | 0.972491774  |                                       |                    |             |             |
| NORAD        | ENSG00000260032.1                     | 0.133578767                 | 2            | 2            | 0.10863812                            |                    |             |             |
|              | Brain_Frontal_Cortex_BA9              | 0.257260088                 |              |              | Brain_Cortex                          | 1.044257101        |             |             |
|              | 0.955742899                           | 0.955742899                 | -1.132890862 | 1.604344578  | 0.235726858                           |                    |             |             |
|              | 1.935517741                           | 2                           | 0            | 0.972491774  |                                       |                    |             |             |
| EPM2A        | ENSG00000112425.14                    | 0.133630562                 | 2            | 2            | 0.04861333                            | Brain_Hypothalamus |             |             |
|              | 0.820823298                           | Brain_Putamen_basal_ganglia | 1.072149337  | 0.927850663  |                                       |                    |             |             |
|              | 0.927850663                           | 0.226486191                 | 1.971967384  | 1.099226788  | 1.234241588                           |                    |             |             |
|              | 2                                     | 0                           | 0.972491774  |              |                                       |                    |             |             |
| BARD1        | ENSG00000138376.10                    | 0.133648622                 | 10           | 6            | 0.075778077                           |                    |             |             |
|              | Brain_Cerebellar_Hemisphere           | 0.939583639                 |              |              | Brain_Cortex                          | 6.467045455        |             |             |
|              | 0.019491182                           | 0.292974444                 | -1.168607719 | 1.775726077  | 0.12940029                            |                    |             |             |
|              | 0.914752916                           | 6                           | 0            | 0.972491774  |                                       |                    |             |             |
| KLK7         | ENSG00000169035.11                    | 0.133690243                 | 2            | 2            | 0.048693943                           |                    |             |             |
|              | Brain_Putamen_basal_ganglia           | 0.878749187                 |              |              | Brain_Nucleus_accumbens_basal_ganglia |                    |             |             |
|              | 1.259756815                           | 0.740243185                 | 0.740243185  | -1.971261763 | -0.152555035                          |                    |             |             |
|              | -1.061908399                          | 1.286019861                 | 2            | 0            | 0.972491774                           |                    |             |             |
| SNTA1        | ENSG00000101400.5                     | 0.133762782                 | 1            | 1            | 0.133762782                           |                    |             |             |
|              | Brain_Putamen_basal_ganglia           | 0.133762782                 |              |              | Brain_Putamen_basal_ganglia           | 1                  | 1           |             |
|              | 1                                     | 1.499427431                 | 1.499427431  | 1.499427431  | NA                                    | 1                  | 0           |             |
|              | 0.972491774                           |                             |              |              |                                       |                    |             |             |
| LINC00869    | ENSG00000277147.4                     | 0.134367256                 | 4            | 4            | 0.009122386                           |                    |             |             |
|              | Brain_Frontal_Cortex_BA9              | 0.926661681                 |              |              | Brain_Cortex                          | 1.397945062        |             |             |
|              | 0.618628182                           | 0.618628182                 | -0.092045762 | 2.607433228  | 0.791022516                           |                    |             |             |
|              | 1.232557418                           | 4                           | 0            | 0.972491774  |                                       |                    |             |             |
| PCCB         | ENSG00000114054.13                    | 0.134374196                 | 10           | 3            | 0.038355153                           |                    |             |             |
|              | Brain_Cerebellar_Hemisphere           | 0.478867157                 |              |              | Brain_Caudate_basal_ganglia           |                    |             |             |
|              | 8.588551313                           | 0.010216615                 | 0.389372009  | 0.708125771  | 2.071038984                           |                    |             |             |
|              | 1.356422672                           | 0.477320513                 | 0            | 0.972491774  |                                       |                    |             |             |
| RP11-109D9.4 | ENSG00000261447.1                     | 0.134427092                 | 2            | 2            | 0.090583832                           |                    |             |             |
|              | Brain_Nucleus_accumbens_basal_ganglia | 0.226903278                 |              |              | Brain_Substantia_nigra                |                    |             |             |
|              | 1.082665487                           | 0.917334513                 | 0.917334513  | -1.208374412 | 1.692326006                           |                    |             |             |
|              | 0.241975797                           | 2.051104936                 | 2            | 0            | 0.972491774                           |                    |             |             |
| UCN          | ENSG00000163794.6                     | 0.134504309                 | 1            | 1            | 0.134504309                           |                    |             |             |
|              | Brain_Substantia_nigra                | 0.134504309                 |              |              | Brain_Substantia_nigra                | 1                  | 1           |             |
|              | 1                                     | 1.49657335                  | 1.49657335   | 1.49657335   | NA                                    | 1                  | 0           | 0.972491774 |
| SEMA4D       | ENSG00000187764.11                    | 0.134594734                 | 8            | 7            | 0.025044864                           |                    |             |             |
|              | Brain_Frontal_Cortex_BA9              | 0.710990794                 |              |              | Brain_Amygdala                        | 3.195442349        |             |             |
|              | 0.052516277                           | 0.147426387                 | -2.240710029 | 0.858242484  | -0.632968258                          |                    |             |             |
|              | 1.085050758                           | 7                           | 0            | 0.972491774  |                                       |                    |             |             |
| ZNF69        | ENSG00000198429.9                     | 0.134625432                 | 4            | 4            | 0.038993812                           |                    |             |             |
|              | Brain_Putamen_basal_ganglia           | 0.390687518                 |              |              | Brain_Cerebellar_Hemisphere           |                    |             |             |
|              | 1.442279878                           | 0.585482001                 | 0.585482001  | -2.064252185 | 0.992551927                           |                    |             |             |
|              | -0.913016706                          | 1.367962904                 | 4            | 0            | 0.972491774                           |                    |             |             |
| IGSF11       | ENSG00000144847.12                    | 0.134640747                 | 4            | 4            | 0.027153901                           |                    |             |             |
|              | Brain_Caudate_basal_ganglia           | 0.092100619                 |              |              | Brain_Anterior_cingulate_cortex_BA24  |                    |             |             |
|              | 2.440523614                           | 0.158205712                 | 0.158205712  | 1.684419531  | 2.209298276                           |                    |             |             |
|              | 1.977927348                           | 0.242854144                 | 4            | 0            | 0.972491774                           |                    |             |             |
| AGBL1        | ENSG00000273540.3                     | 0.134911648                 | 1            | 1            | 0.134911648                           | Brain_Cortex       |             |             |
|              | 0.134911648                           | Brain_Cortex                | 1            | 1            | 1                                     | 1.495010705        | 1.495010705 |             |
|              | 1.495010705                           | NA                          | 1            | 0            | 0.972491774                           |                    |             |             |
| POFUT2       | ENSG00000186866.16                    | 0.134948306                 | 1            | 1            | 0.134948306                           |                    |             |             |
|              | Brain_Hypothalamus                    | 0.134948306                 |              |              | Brain_Hypothalamus                    | 1                  | 1           | 1           |
|              | -1.494870259                          | -1.494870259                | -1.494870259 | NA           | 1                                     | 0                  | 0.972491774 |             |
| HHIP         | ENSG00000164161.9                     | 0.134991283                 | 2            | 2            | 0.057921733                           |                    |             |             |
|              | Brain_Putamen_basal_ganglia           | 0.148931269                 |              |              | Brain_Cerebellum                      | 1.461950207        |             |             |
|              | 0.538049793                           | 0.538049793                 | 1.443316732  | 1.896289813  | 1.669803272                           |                    |             |             |
|              | 0.320300338                           | 2                           | 0            | 0.972491774  |                                       |                    |             |             |
| KLHL1        | ENSG00000150361.11                    | 0.135091312                 | 8            | 7            | 0.195466077                           | Brain_Cerebellum   |             |             |
|              | 0.953749651                           | Brain_Cortex                | 4.247397822  | 0.107107209  | 0.18016724                            |                    |             |             |

|               |                                       |                   |                                       |              |                                       |                  |
|---------------|---------------------------------------|-------------------|---------------------------------------|--------------|---------------------------------------|------------------|
|               | -1.294577329                          | 1.012607822       | -0.114841214                          | 0.871892199  | 7                                     | 0                |
|               | 0.972491774                           |                   |                                       |              |                                       |                  |
| PAXIP1-AS1    | ENSG00000273344.1                     | 0.135239815       | 11                                    | 8            | 0.037667051                           |                  |
|               | Brain_Putamen_basal_ganglia           | 0.734288633       |                                       |              | Brain_Frontal_Cortex_BA9              | 5.60729835       |
|               | 0.003313776                           | 0.238491013       | -1.252401194                          | 2.078459567  | 0.486115813                           |                  |
|               | 1.037111647                           | 8                 | 0                                     | 0.972491774  |                                       |                  |
| BTBD9         | ENSG00000183826.16                    | 0.135328058       | 6                                     | 6            | 0.012687373                           |                  |
|               | Brain_Hippocampus                     | 0.889819114       |                                       |              | Brain_Frontal_Cortex_BA9              | 2.255531435      |
|               | 0.203857305                           | 0.203857305       | -2.492426089                          | 0.530726671  | -0.90075264                           |                  |
|               | 1.320961259                           | 6                 | 0                                     | 0.972491774  |                                       |                  |
| SYNC          | ENSG00000162520.14                    | 0.135455603       | 2                                     | 2            | 0.061802621                           |                  |
|               | Brain_Nucleus_accumbens_basal_ganglia | 0.398284568       |                                       |              | Brain_Amygdala                        |                  |
|               | 1.070901562                           | 0.929098438       | 0.929098438                           | -1.86770916  | -0.844688882                          |                  |
|               | -1.356199021                          | 0.723384576       | 2                                     | 0            | 0.972491774                           |                  |
| FAM19A3       | ENSG00000184599.13                    | 0.13554183        | 1                                     | 1            | 0.13554183                            | Brain_Cerebellum |
|               | 0.13554183                            | Brain_Cerebellum1 | 1                                     | 1            | 1.492600357                           | 1.492600357      |
|               | 1.492600357                           | NA                | 1                                     | 0            | 0.972491774                           |                  |
| CENPU         | ENSG00000151725.11                    | 0.135579181       | 7                                     | 5            | 0.042685488                           |                  |
|               | Brain_Nucleus_accumbens_basal_ganglia | 0.830380082       |                                       |              |                                       |                  |
|               | Brain_Anterior_cingulate_cortex_BA24  | 4.525936974       |                                       |              | 0.093613259                           |                  |
|               | 0.266107705                           | -2.02677442       | 0.763701805                           | -0.14562567  | 1.140454185                           |                  |
|               | 5                                     | 0                 | 0.972491774                           |              |                                       |                  |
| LYPD3         | ENSG00000124466.8                     | 0.135609399       | 1                                     | 1            | 0.135609399                           |                  |
|               | Brain_Hippocampus                     | 0.135609399       | Brain_Hippocampus                     | 1            | 1                                     | 1                |
|               | 1.49234243                            | 1.49234243        | 1.49234243                            | NA           | 1                                     | 0                |
|               |                                       |                   |                                       |              | 0.972491774                           |                  |
| RP4-644L1.2   | ENSG00000229771.2                     | 0.135800649       | 2                                     | 2            | 0.355780218                           |                  |
|               | Brain_Caudate_basal_ganglia           | 0.401974165       |                                       |              | Brain_Nucleus_accumbens_basal_ganglia |                  |
|               | 1.611236835                           | 0.388763165       | 0.388763165                           | -0.923435654 | 0.838100673                           |                  |
|               | -0.04266749                           | 1.245594283       | 2                                     | 0            | 0.972491774                           |                  |
| MPG           | ENSG00000103152.11                    | 0.135866257       | 1                                     | 1            | 0.135866257                           |                  |
|               | Brain_Spinal_cord_cervical_c-1        | 0.135866257       |                                       |              | Brain_Spinal_cord_cervical_c-1        |                  |
|               | 1                                     | 1                 | 1                                     | -1.491362847 | -1.491362847                          | -1.491362847     |
|               |                                       |                   |                                       |              | NA                                    | 1                |
|               |                                       |                   |                                       |              |                                       | 0                |
|               |                                       |                   |                                       |              | 0.972491774                           |                  |
| GHITM         | ENSG00000165678.20                    | 0.135925323       | 1                                     | 1            | 0.135925323                           | Brain_Amygdala   |
|               | 0.135925323                           | Brain_Amygdala    | 1                                     | 1            | 1                                     | -1.491137786     |
|               | -1.491137786                          | NA                | 1                                     | 0            | 0.972491774                           |                  |
| IQCC          | ENSG00000160051.11                    | 0.135996259       | 1                                     | 1            | 0.135996259                           | Brain_Cortex     |
|               | 0.135996259                           | Brain_Cortex      | 1                                     | 1            | 1                                     | -1.490867603     |
|               | -1.490867603                          | NA                | 1                                     | 0            | 0.972491774                           |                  |
| ATP6V1E1      | ENSG00000131100.12                    | 0.136125102       | 3                                     | 3            | 0.115985567                           |                  |
|               | Brain_Cortex                          | 0.765891154       | Brain_Cerebellum                      | 1.331616628  | 0.689783387                           |                  |
|               | 0.689783387                           | -1.571849033      | 0.2977537                             | -0.942621966 | 1.074234869                           | 3                |
|               | 0                                     | 0.972491774       |                                       |              |                                       |                  |
| E2F6          | ENSG00000169016.16                    | 0.136177477       | 2                                     | 2            | 0.085972028                           |                  |
|               | Brain_Nucleus_accumbens_basal_ganglia | 0.23110381        |                                       |              |                                       |                  |
|               | Brain_Anterior_cingulate_cortex_BA24  | 1.107096703       |                                       |              | 0.892903297                           |                  |
|               | 0.892903297                           | 1.197520326       | 1.717039099                           | 1.457279712  | 0.367355247                           |                  |
|               | 2                                     | 0                 | 0.972491774                           |              |                                       |                  |
| C19orf47      | ENSG00000160392.13                    | 0.136214352       | 8                                     | 4            | 0.000262977                           |                  |
|               | Brain_Amygdala                        | 0.632401349       | Brain_Nucleus_accumbens_basal_ganglia |              |                                       |                  |
|               | 4.695953524                           | 0.035296455       | 0.449469735                           | 0.478349671  | 3.649279111                           |                  |
|               | 1.738621409                           | 0.936465705       | 4                                     | 0            | 0.972491774                           |                  |
| POLR1B        | ENSG00000125630.15                    | 0.136430336       | 13                                    | 1            | 0.078361761                           |                  |
|               | Brain_Hypothalamus                    | 0.333822567       | Brain_Substantia_nigra                |              | 12.53051409                           |                  |
|               | 4.31E-05                              | 12.53051409       | 0.966442979                           | 1.760271635  | 1.4599862                             |                  |
|               | 0.263057338                           | 1                 | 0                                     | 0.972491774  |                                       |                  |
| CHD4          | ENSG00000111642.14                    | 0.136482129       | 1                                     | 1            | 0.136482129                           | Brain_Cerebellum |
|               | 0.136482129                           | Brain_Cerebellum1 | 1                                     | 1            | 1                                     | -1.489019898     |
|               | -1.489019898                          | NA                | 1                                     | 0            | 0.972491774                           |                  |
| RP11-245D16.4 | ENSG00000278238.1                     | 0.136507014       | 7                                     | 3            | 0.026913328                           |                  |
|               | Brain_Hypothalamus                    | 0.989322333       | Brain_Spinal_cord_cervical_c-1        |              | 4.11326301                            |                  |
|               | 0.031557667                           | 0.662265753       | -2.212772592                          | 0.244124404  | -1.09376167                           |                  |



|               |                                      |                             |              |              |             |   |                                       |                  |            |
|---------------|--------------------------------------|-----------------------------|--------------|--------------|-------------|---|---------------------------------------|------------------|------------|
|               | 1.025094682                          | 3                           | 0            | 0.972491774  |             |   |                                       |                  |            |
| AC093159.1    | ENSG00000228541.1                    |                             |              | 0.136533299  | 2           | 2 | 0.046015376                           |                  |            |
|               | Brain_Substantia_nigra               |                             |              | 0.974007147  |             |   | Brain_Cortex                          | 1.034679331      |            |
|               | 0.965320669                          | 0.965320669                 |              | -1.995252242 |             |   | 0.032582975                           | -0.981334634     |            |
|               | 1.433896033                          | 2                           | 0            | 0.972491774  |             |   |                                       |                  |            |
| RP11-767I20.1 | ENSG00000257259.1                    |                             |              | 0.136541784  | 1           | 1 | 0.136541784                           |                  |            |
|               | Brain_Hippocampus                    |                             |              | 0.136541784  |             |   | Brain_Hippocampus                     | 1                | 1          |
|               | -1.48879339                          | -1.48879339                 |              | -1.48879339  |             |   | NA                                    | 1                | 0          |
|               |                                      |                             |              |              |             |   |                                       | 0.972491774      |            |
| ATAD2B        | ENSG00000119778.14                   |                             |              | 0.136698148  | 2           | 2 | 0.069123131                           |                  |            |
|               | Brain_Cerebellum                     | 0.263237792                 |              |              |             |   | Brain_Cerebellar_Hemisphere           | 1.852219217      |            |
|               | 0.147780783                          | 0.147780783                 |              | -1.81761413  |             |   | -1.118771128                          | -1.468192629     |            |
|               | 0.494156626                          | 2                           | 0            | 0.972491774  |             |   |                                       |                  |            |
| MMP21         | ENSG00000154485.4                    |                             |              | 0.13675507   | 1           | 1 | 0.13675507                            | Brain_Cerebellum | 0.13675507 |
|               | Brain_Cerebellum                     | 1                           | 1            | -1.487984164 |             |   | -1.487984164                          | -1.487984164     |            |
|               | NA                                   | 1                           | 0            | 0.972491774  |             |   |                                       |                  |            |
| TBC1D3B       | ENSG00000274808.5                    |                             |              | 0.136757182  | 1           | 1 | 0.136757182                           |                  |            |
|               | Brain_Cortex                         | 0.136757182                 |              |              |             |   | Brain_Cortex                          | 1                | 1          |
|               | -1.487976156                         | -1.487976156                |              | NA           | 1           | 0 | 0.972491774                           |                  |            |
|               |                                      |                             |              |              |             |   |                                       | -1.487976156     |            |
| BTBD10        | ENSG00000148925.10                   |                             |              | 0.136806528  | 3           | 3 | 0.036648988                           |                  |            |
|               | Brain_Putamen_basal_ganglia          | 0.473183867                 |              |              |             |   | Brain_Cerebellar_Hemisphere           |                  |            |
|               | 1.255982964                          | 0.72963476                  | 0.72963476   | -0.968156338 |             |   | 2.089652934                           |                  |            |
|               | 0.612934976                          | 1.531574267                 | 3            | 0            | 0.972491774 |   |                                       |                  |            |
| P4HA2         | ENSG00000072682.18                   |                             |              | 0.136828292  | 4           | 3 | 0.100902412                           |                  |            |
|               | Brain_Anterior_cingulate_cortex_BA24 | 0.948722307                 |              |              |             |   | Brain_Putamen_basal_ganglia           |                  |            |
|               | 2.530053952                          | 0.01154059                  | 0.501753907  | -1.640494397 |             |   | -0.064311362                          |                  |            |
|               | -1.154720128                         | 0.732309215                 | 3            | 0            | 0.972491774 |   |                                       |                  |            |
| RBFADN        | ENSG00000261126.7                    |                             |              | 0.136829393  | 13          | 1 | 0.098000971                           |                  |            |
|               | Brain_Cortex                         | 0.262641921                 |              |              |             |   | Brain_Anterior_cingulate_cortex_BA24  | 12.2250501       |            |
|               | 0.00186199                           | 12.2250501                  | -1.654623117 | -1.120168603 |             |   | -1.441949728                          |                  |            |
|               | 0.180686267                          | 1                           | 0            | 0.972491774  |             |   |                                       |                  |            |
| FHIT          | ENSG00000189283.9                    |                             |              | 0.136832607  | 2           | 2 | 0.126441897                           |                  |            |
|               | Brain_Frontal_Cortex_BA9             | 0.165595584                 |              |              |             |   | Brain_Cerebellar_Hemisphere           | 1.0707798        |            |
|               | 0.9292202                            | 0.9292202                   | 1.386495729  | 1.528284579  |             |   | 1.457390154                           |                  |            |
|               | 0.100259857                          | 2                           | 0            | 0.972491774  |             |   |                                       |                  |            |
| 8-Mar         | ENSG00000165406.15                   |                             |              | 0.136899468  | 10          | 7 | 0.061413882                           | Brain_Cortex     |            |
|               | 0.832425021                          | Brain_Frontal_Cortex_BA9    |              | 4.250925497  |             |   | 0.028753743                           |                  |            |
|               | 0.170276848                          | -1.870503858                | 1.467066511  | -0.001418305 |             |   | 0.93560062                            | 7                |            |
|               | 0                                    | 0.972491774                 |              |              |             |   |                                       |                  |            |
| ITGB4         | ENSG00000132470.13                   |                             |              | 0.136904897  | 4           | 4 | 0.030878584                           |                  |            |
|               | Brain_Caudate_basal_ganglia          | 0.938096377                 |              |              |             |   | Brain_Nucleus_accumbens_basal_ganglia |                  |            |
|               | 3.178838906                          | 0.128644383                 | 0.128644383  | -2.158633854 |             |   | 0.077662685                           |                  |            |
|               | -1.199746569                         | 0.939752771                 | 4            | 0            | 0.972491774 |   |                                       |                  |            |
| ULK1          | ENSG00000177169.9                    |                             |              | 0.137133234  | 2           | 2 | 0.118256059                           | Brain_Cerebellum |            |
|               | 0.294597991                          | Brain_Cerebellar_Hemisphere |              | 1.116365948  |             |   | 0.883634052                           |                  |            |
|               | 0.883634052                          | -1.048088159                | 1.562135554  | 0.257023698  |             |   | 1.845706888                           |                  |            |
|               | 2                                    | 0                           | 0.972491774  |              |             |   |                                       |                  |            |
| MOK           | ENSG00000080823.22                   |                             |              | 0.137247811  | 2           | 2 | 0.052175788                           | Brain_Cerebellum |            |
|               | 0.694064519                          | Brain_Frontal_Cortex_BA9    |              | 1.028688398  |             |   | 0.971311602                           |                  |            |
|               | 0.971311602                          | -1.941680525                | -0.393345226 | -1.167512875 |             |   | 1.094838389                           |                  |            |
|               | 2                                    | 0                           | 0.972491774  |              |             |   |                                       |                  |            |
| CLIP4         | ENSG00000115295.19                   |                             |              | 0.137297072  | 1           | 1 | 0.137297072                           |                  |            |
|               | Brain_Spinal_cord_cervical_c-1       | 0.137297072                 |              |              |             |   | Brain_Spinal_cord_cervical_c-1        |                  |            |
|               | 1                                    | 1                           | 1            | 1.485932136  |             |   | 1.485932136                           | NA               | 1          |
|               | 0.972491774                          |                             |              |              |             |   |                                       |                  | 0          |
| RP11-584P21.2 | ENSG00000250075.5                    |                             |              | 0.137346784  | 6           | 5 | 0.138650571                           |                  |            |
|               | Brain_Frontal_Cortex_BA9             | 0.877332176                 |              |              |             |   | Brain_Hypothalamus                    | 3.243103683      |            |
|               | 0.067852723                          | 0.219124261                 | -1.128057218 | 1.480834911  |             |   | 0.196909885                           |                  |            |
|               | 0.915091636                          | 5                           | 0            | 0.972491774  |             |   |                                       |                  |            |
| NUP43         | ENSG00000120253.13                   |                             |              | 0.137535563  | 2           | 1 | 0.09577862                            | Brain_Cerebellum |            |
|               | 0.198175356                          | Brain_Cerebellar_Hemisphere |              | 1.976337288  |             |   | 0.023662712                           |                  |            |
|               | 1.976337288                          | -1.665672712                | -1.286767447 | -1.47622008  |             |   | 0.267926482                           |                  |            |
|               | 1                                    | 0                           | 0.972491774  |              |             |   |                                       |                  |            |

|          |                                      |                             |                             |              |              |                  |
|----------|--------------------------------------|-----------------------------|-----------------------------|--------------|--------------|------------------|
| AMZ2     | ENSG00000196704.11                   | 0.137562209                 | 4                           | 4            | 0.028676905  |                  |
|          | Brain_Caudate_basal_ganglia          | 0.48531517                  | Brain_Cerebellum            | 2.831139471  |              |                  |
|          | 0.097726265                          | 0.097726265                 | 0.697779391                 | 2.187899754  | 1.527626073  |                  |
|          | 0.633342681                          | 4                           | 0                           | 0.972491774  |              |                  |
| RNF32    | ENSG00000105982.16                   | 0.137575756                 | 4                           | 4            | 0.018216266  | Brain_Cerebellum |
|          | 0.761874504                          | Brain_Hypothalamus          | 1.22665319                  | 0.774777416  | 0.774777416  |                  |
|          | -1.128322949                         | 2.361192628                 | 0.279944352                 | 1.505527449  | 4            | 0                |
|          | 0.972491774                          |                             |                             |              |              |                  |
| MAN1C1   | ENSG00000117643.14                   | 0.137603491                 | 2                           | 2            | 0.095221743  |                  |
|          | Brain_Amygdala                       | 0.215078013                 | Brain_Cerebellum            | 1.094041618  | 0.905958382  |                  |
|          | 0.905958382                          | -1.668473626                | 1.239722607                 | -0.214375509 | 2.056405277  |                  |
|          | 2                                    | 0                           | 0.972491774                 |              |              |                  |
| GRIN1    | ENSG00000176884.14                   | 0.137662351                 | 1                           | 1            | 0.137662351  |                  |
|          | Brain_Cerebellar_Hemisphere          | 0.137662351                 | Brain_Cerebellar_Hemisphere | 1            | 1            |                  |
|          | 1                                    | -1.484552706                | -1.484552706                | -1.484552706 | NA           | 1                |
|          | 0.972491774                          |                             |                             |              |              | 0                |
| PGPEP1L  | ENSG00000183571.10                   | 0.137674394                 | 10                          | 10           | 0.011279916  |                  |
|          | Brain_Amygdala                       | 0.797395179                 | Brain_Putamen_basal_ganglia | 3.24544519   |              |                  |
|          | 0.168773892                          | 0.168773892                 | -1.853883277                | 2.533905473  | 0.07742878   |                  |
|          | 1.27439857                           | 10                          | 0                           | 0.972491774  |              |                  |
| ADAM15   | ENSG00000143537.13                   | 0.137699272                 | 9                           | 9            | 0.232439873  |                  |
|          | Brain_Amygdala                       | 0.952941244                 | Brain_Hippocampus           | 3.16891491   | 0.11506421   |                  |
|          | 0.11506421                           | -1.194097394                | 1.140331964                 | -0.028940119 | 0.783593277  | 9                |
|          | 0                                    | 0.972491774                 |                             |              |              |                  |
| PTPN22   | ENSG00000134242.15                   | 0.137828994                 | 2                           | 2            | 0.046920192  |                  |
|          | Brain_Cerebellum                     | 0.666209798                 | Brain_Cerebellar_Hemisphere | 1.276778195  |              |                  |
|          | 0.723221805                          | 0.723221805                 | 0.431355642                 | 1.9870199    | 1.209187771  |                  |
|          | 1.100020746                          | 2                           | 0                           | 0.972491774  |              |                  |
| PRSS35   | ENSG00000146250.6                    | 0.137899507                 | 2                           | 2            | 0.05450855   | Brain_Cerebellum |
|          | 0.570306443                          | Brain_Hypothalamus          | 1.027366587                 | 0.972633413  |              |                  |
|          | 0.972633413                          | -0.567600242                | 1.922773113                 | 0.677586436  | 1.760959887  |                  |
|          | 2                                    | 0                           | 0.972491774                 |              |              |                  |
| METTL21B | ENSG00000123427.16                   | 0.137905388                 | 13                          | 2            | 0.032366276  |                  |
|          | Brain_Spinal_cord_cervical_c-1       | 0.969653878                 |                             |              |              |                  |
|          | Brain_Anterior_cingulate_cortex_BA24 | 11.95572878                 |                             | 0.000138939  |              |                  |
|          | 0.685485577                          | 0.038042398                 | 2.13985761                  | 1.54928121   | 0.48506145   | 2                |
|          | 0.972491774                          |                             |                             |              |              | 0                |
| TAF4B    | ENSG00000141384.12                   | 0.13796677                  | 2                           | 2            | 0.076534776  |                  |
|          | Brain_Frontal_Cortex_BA9             | 0.572402524                 | Brain_Putamen_basal_ganglia |              |              |                  |
|          | 1.185082846                          | 0.814917154                 | 0.814917154                 | -1.771155928 | 0.564516721  |                  |
|          | -0.603319604                         | 1.651569969                 | 2                           | 0            | 0.972491774  |                  |
| DUS2     | ENSG00000167264.17                   | 0.138067518                 | 8                           | 5            | 0.00793084   |                  |
|          | Brain_Frontal_Cortex_BA9             | 0.747007955                 | Brain_Cerebellum            | 5.400789844  |              |                  |
|          | 0.012888156                          | 0.216863889                 | -2.655000028                | -0.322587112 | -1.262332775 |                  |
|          | 0.73073225                           | 5                           | 0                           | 0.972491774  |              |                  |
| RBM4B    | ENSG00000173914.11                   | 0.138117698                 | 1                           | 1            | 0.138117698  | Brain_Cerebellum |
|          | 0.138117698                          | Brain_Cerebellum            | 1                           | 1            | -1.482837095 | -1.482837095     |
|          | -1.482837095                         | NA                          | 1                           | 0            | 0.972491774  |                  |
| TBC1D22A | ENSG00000054611.13                   | 0.138173719                 | 6                           | 5            | 0.048274522  |                  |
|          | Brain_Cerebellar_Hemisphere          | 0.691653778                 | Brain_Putamen_basal_ganglia |              |              |                  |
|          | 3.295802389                          | 5.69E-17                    | 0.264574661                 | -1.974943837 | -0.396611762 |                  |
|          | -1.113525175                         | 0.742862289                 | 5                           | 0            | 0.972491774  |                  |
| GMCL1    | ENSG00000087338.4                    | 0.138228984                 | 9                           | 6            | 0.021036529  | Brain_Amygdala   |
|          | 0.999594185                          | Brain_Caudate_basal_ganglia | 4.74888606                  | 0.023491973  | 0.4042315    |                  |
|          | -2.307328225                         | 1.381913041                 | -0.086295421                | 1.088372293  | 6            | 0                |
|          | 0.972491774                          |                             |                             |              |              |                  |
| WDR66    | ENSG00000158023.9                    | 0.138278608                 | 6                           | 6            | 0.016771654  | Brain_Cerebellum |
|          | 0.990942688                          | Brain_Hippocampus           | 2.409868209                 | 0.161497489  |              |                  |
|          | 0.161497489                          | -0.643051401                | 2.391675702                 | 0.926017931  | 1.084795263  |                  |
|          | 6                                    | 0                           | 0.972491774                 |              |              |                  |
| CCL2     | ENSG00000108691.9                    | 0.138341664                 | 1                           | 1            | 0.138341664  |                  |
|          | Brain_Substantia_nigra               | 0.138341664                 | Brain_Substantia_nigra      | 1            | 1            |                  |

|               |                                       |                          |                             |              |                                       |             |                    |
|---------------|---------------------------------------|--------------------------|-----------------------------|--------------|---------------------------------------|-------------|--------------------|
|               | 1                                     | 1.481994853              | 1.481994853                 | 1.481994853  | NA                                    | 1           | 0                  |
|               |                                       | 0.972491774              |                             |              |                                       |             |                    |
| RAD52         | ENSG00000002016.17                    | 0.138362897              | 10                          | 5            | 0.304796715                           |             |                    |
|               | Brain_Nucleus_accumbens_basal_ganglia | 0.677148816              |                             |              | Brain_Putamen_basal_ganglia           |             |                    |
|               | 7.20624735                            | 0.042891731              | 0.301730903                 | -0.983632178 | 1.026201287                           |             |                    |
|               | -0.066545477                          | 0.74417604               | 5                           | 0            | 0.972491774                           |             |                    |
| NRDE2         | ENSG00000119720.17                    | 0.138381012              | 1                           | 1            | 0.138381012                           |             |                    |
|               | Brain_Hypothalamus                    | 0.138381012              |                             |              | Brain_Hypothalamus                    | 1           | 1                  |
|               | 1.481846993                           | 1.481846993              | 1.481846993                 | NA           | 1                                     | 0           | 0.972491774        |
| DOHH          | ENSG00000129932.7                     | 0.138474049              | 5                           | 5            | 0.056050115                           |             | Brain_Cortex       |
|               | 0.944843708                           | Brain_Frontal_Cortex_BA9 | 3.300200842                 | 0.15317676   | 0.15317676                            |             |                    |
|               | -0.06918331                           | 1.910645794              | 0.623857872                 | 0.772865546  | 5                                     | 0           |                    |
|               | 0.972491774                           |                          |                             |              |                                       |             |                    |
| C11orf1       | ENSG00000137720.7                     | 0.138546488              | 5                           | 4            | 0.095206295                           |             |                    |
|               | Brain_Cortex                          | 0.63205827               | Brain_Caudate_basal_ganglia | 3.788026766  |                                       |             |                    |
|               | 0.000925141                           | 0.151632209              | -0.478831832                | 1.668551512  | 0.887012804                           |             |                    |
|               | 0.816206869                           | 4                        | 0                           | 0.972491774  |                                       |             |                    |
| KCNG2         | ENSG00000178342.4                     | 0.138596486              | 1                           | 1            | 0.138596486                           |             | Brain_Cerebellum   |
|               | 0.138596486                           | Brain_Cerebellum1        | 1                           | 1            | -1.481037855                          |             | -1.481037855       |
|               | -1.481037855                          | NA                       | 1                           | 0            | 0.972491774                           |             |                    |
| ATF2          | ENSG00000115966.16                    | 0.138684484              | 2                           | 2            | 0.07073726                            |             | Brain_Hypothalamus |
|               | 0.645343432                           | Brain_Frontal_Cortex_BA9 | 1.194638445                 | 0.805361555  |                                       |             |                    |
|               | 0.805361555                           | -0.460240739             | 1.807160486                 | 0.673459873  | 1.603294782                           |             |                    |
|               | 2                                     | 0                        | 0.972491774                 |              |                                       |             |                    |
| BMPR1B        | ENSG00000138696.10                    | 0.138891802              | 2                           | 2            | 0.173213071                           |             |                    |
|               | Brain_Caudate_basal_ganglia           | 0.654840242              |                             |              | Brain_Spinal_cord_cervical_c-1        |             |                    |
|               | 1.555250449                           | 0.444749551              | 0.444749551                 | -1.361951883 | 0.447048223                           |             |                    |
|               | -0.45745183                           | 1.279156242              | 2                           | 0            | 0.972491774                           |             |                    |
| HMGN1         | ENSG00000205581.10                    | 0.138990075              | 6                           | 6            | 0.126437639                           |             |                    |
|               | Brain_Nucleus_accumbens_basal_ganglia | 0.860390131              |                             |              |                                       |             |                    |
|               | Brain_Anterior_cingulate_cortex_BA24  | 3.591458129              | 0.182438374                 |              |                                       |             |                    |
|               | 0.182438374                           | -1.164600945             | 1.528301738                 | -0.234606367 | 0.998089943                           |             |                    |
|               | 6                                     | 0                        | 0.972491774                 |              |                                       |             |                    |
| CD200         | ENSG00000091972.18                    | 0.13902005               | 2                           | 2            | 0.12611551                            |             |                    |
|               | Brain_Anterior_cingulate_cortex_BA24  | 0.242799896              |                             |              | Brain_Cerebellar_Hemisphere           |             |                    |
|               | 1.063382302                           | 0.936617698              | 0.936617698                 | -1.529601048 | 1.16801703                            |             |                    |
|               | -0.180792009                          | 1.907504036              | 2                           | 0            | 0.972491774                           |             |                    |
| JMJD4         | ENSG00000081692.12                    | 0.139038288              | 1                           | 1            | 0.139038288                           |             |                    |
|               | Brain_Anterior_cingulate_cortex_BA24  | 0.139038288              |                             |              |                                       |             |                    |
|               | Brain_Anterior_cingulate_cortex_BA24  | 1                        | 1                           | 1            | 1.479381849                           |             |                    |
|               | 1.479381849                           | 1.479381849              | NA                          | 1            | 0                                     | 0.972491774 |                    |
| EFS           | ENSG00000100842.12                    | 0.139104215              | 1                           | 1            | 0.139104215                           |             |                    |
|               | Brain_Nucleus_accumbens_basal_ganglia | 0.139104215              |                             |              |                                       |             |                    |
|               | Brain_Nucleus_accumbens_basal_ganglia | 1                        | 1                           | 1            | 1.479135083                           |             |                    |
|               | 1.479135083                           | 1.479135083              | NA                          | 1            | 0                                     | 0.972491774 |                    |
| RP11-70F11.11 | ENSG00000258135.5                     | 0.139180408              | 1                           | 1            | 0.139180408                           |             |                    |
|               | Brain_Cerebellum                      | 0.139180408              | Brain_Cerebellum1           | 1            | 1                                     | 1.478850004 |                    |
|               | 1.478850004                           | 1.478850004              | NA                          | 1            | 0                                     | 0.972491774 |                    |
| CCDC177       | ENSG00000267909.2                     | 0.139192784              | 1                           | 1            | 0.139192784                           |             |                    |
|               | Brain_Frontal_Cortex_BA9              | 0.139192784              | Brain_Frontal_Cortex_BA9    | 1            | 1                                     |             |                    |
|               | 1                                     | 1.478803709              | 1.478803709                 | 1.478803709  | NA                                    | 1           | 0                  |
|               | 0.972491774                           |                          |                             |              |                                       |             |                    |
| CTD-2228A4.1  | ENSG00000271892.1                     | 0.139321106              | 12                          | 2            | 0.039252328                           |             |                    |
|               | Brain_Cerebellar_Hemisphere           | 0.885111132              |                             |              | Brain_Nucleus_accumbens_basal_ganglia |             |                    |
|               | 10.52800788                           | 0.00049185               | 0.817054109                 | -2.061531853 | -0.144493065                          |             |                    |
|               | -0.626422072                          | 0.525660218              | 2                           | 0            | 0.972491774                           |             |                    |
| NRAP          | ENSG00000197893.13                    | 0.139321763              | 3                           | 3            | 0.043992749                           |             |                    |
|               | Brain_Caudate_basal_ganglia           | 0.926608084              |                             |              | Brain_Cortex                          | 1.135918371 |                    |
|               | 0.861405076                           | 0.861405076              | -1.190061855                | 2.014159897  | 0.24399494                            |             |                    |
|               | 1.628338349                           | 3                        | 0                           | 0.972491774  |                                       |             |                    |
| RAB40C        | ENSG00000197562.9                     | 0.139370065              | 5                           | 3            | 0.024144085                           |             |                    |
|               | Brain_Anterior_cingulate_cortex_BA24  | 0.308440366              |                             |              | Brain_Caudate_basal_ganglia           |             |                    |

|               |                             |              |              |              |                                       |             |                  |
|---------------|-----------------------------|--------------|--------------|--------------|---------------------------------------|-------------|------------------|
|               | 3.982924092                 | 0.033410375  | 0.336559455  | -2.254828677 | -1.018500073                          |             |                  |
|               | -1.619695564                | 0.509690087  | 3            | 0            | 0.972491774                           |             |                  |
| WWTR1         | ENSG00000018408.14          | 0.139372568  | 1            | 1            | 0.139372568                           |             |                  |
|               | Brain_Putamen_basal_ganglia | 0.139372568  |              |              | Brain_Putamen_basal_ganglia           | 1           | 1                |
|               | 1                           | -1.47813156  | -1.47813156  | -1.47813156  | NA                                    | 1           | 0                |
|               | 0.972491774                 |              |              |              |                                       |             |                  |
| HDGF          | ENSG00000143321.18          | 0.139389847  | 1            | 1            | 0.139389847                           |             |                  |
|               | Brain_Hippocampus           | 0.139389847  |              |              | Brain_Hippocampus                     | 1           | 1                |
|               | 1.478066997                 | 1.478066997  | 1.478066997  | NA           | 1                                     | 0           | 0.972491774      |
| SMIM5         | ENSG00000204323.5           | 0.139397607  | 1            | 1            | 0.139397607                           |             |                  |
|               | Brain_Cerebellar_Hemisphere | 0.139397607  |              |              | Brain_Cerebellar_Hemisphere           | 1           | 1                |
|               | 1                           | 1.478038003  | 1.478038003  | 1.478038003  | NA                                    | 1           | 0                |
|               | 0.972491774                 |              |              |              |                                       |             |                  |
| ZNF285        | ENSG00000267508.5           | 0.139533161  | 4            | 3            | 0.263253413                           |             |                  |
|               | Brain_Cerebellum            | 0.934956568  |              |              | Brain_Cortex                          | 3.23459286  | 0.0960722        |
|               | 0.187275995                 | -1.118734522 | 0.081610353  | -0.731889823 | 0.563920234                           |             |                  |
|               | 3                           | 0            | 0.972491774  |              |                                       |             |                  |
| PDS5B         | ENSG00000083642.18          | 0.139702807  | 2            | 2            | 0.050179982                           |             | Brain_Cerebellum |
|               | 0.899353495                 | Brain_Cortex | 1.096962553  | 0.903037447  | 0.903037447                           |             |                  |
|               | -1.958426553                | 0.126478086  | -0.915974233 | 1.474250208  | 2                                     | 0           |                  |
|               | 0.972491774                 |              |              |              |                                       |             |                  |
| RP11-58C22.2  | ENSG00000273659.1           | 0.139800804  | 1            | 1            | 0.139800804                           |             |                  |
|               | Brain_Cerebellar_Hemisphere | 0.139800804  |              |              | Brain_Cerebellar_Hemisphere           | 1           | 1                |
|               | 1                           | -1.476533221 | -1.476533221 | -1.476533221 | NA                                    | 1           | 0                |
|               | 0.972491774                 |              |              |              |                                       |             |                  |
| TMEM189       | ENSG00000240849.10          | 0.139980915  | 1            | 1            | 0.139980915                           |             |                  |
|               | Brain_Putamen_basal_ganglia | 0.139980915  |              |              | Brain_Putamen_basal_ganglia           | 1           | 1                |
|               | 1                           | 1.475862101  | 1.475862101  | 1.475862101  | NA                                    | 1           | 0                |
|               | 0.972491774                 |              |              |              |                                       |             |                  |
| RP11-182L21.6 | ENSG00000272447.1           | 0.139981014  | 4            | 4            | 0.129960265                           |             |                  |
|               | Brain_Amygdala              | 0.786629274  |              |              | Brain_Frontal_Cortex_BA9              | 2.036194283 |                  |
|               | 0.287532099                 | 0.287532099  | -1.077267289 | 1.514258596  | -0.010661249                          |             |                  |
|               | 1.167517653                 | 4            | 0            | 0.972491774  |                                       |             |                  |
| CATSPER2      | ENSG00000166762.16          | 0.140037186  | 2            | 2            | 0.124338816                           |             |                  |
|               | Brain_Putamen_basal_ganglia | 0.331215602  |              |              | Brain_Cerebellum                      | 1.930629199 |                  |
|               | 0.069370801                 | 0.069370801  | 0.971668281  | 1.536814195  | 1.254241238                           |             |                  |
|               | 0.399618509                 | 2            | 0            | 0.972491774  |                                       |             |                  |
| IZUMO1        | ENSG00000182264.8           | 0.140153697  | 4            | 4            | 0.016119101                           |             |                  |
|               | Brain_Cerebellar_Hemisphere | 0.938404766  |              |              | Brain_Hippocampus                     | 1.297149188 |                  |
|               | 0.653385667                 | 0.653385667  | -0.653508835 | 2.406207623  | 0.669368966                           |             |                  |
|               | 1.310078985                 | 4            | 0            | 0.972491774  |                                       |             |                  |
| AHSA1         | ENSG00000100591.7           | 0.140175548  | 3            | 1            | 0.13972601                            |             |                  |
|               | Brain_Caudate_basal_ganglia | 0.146910098  |              |              | Brain_Cortex                          | 2.969716506 |                  |
|               | 1.62E-05                    | 2.969716506  | 1.450532447  | 1.47681211   | 1.467644144                           |             |                  |
|               | 0.014831801                 | 1            | 0            | 0.972491774  |                                       |             |                  |
| TECPR1        | ENSG00000205356.9           | 0.140180212  | 3            | 3            | 0.089872934                           |             |                  |
|               | Brain_Cortex                | 0.222962944  |              |              | Brain_Nucleus_accumbens_basal_ganglia |             |                  |
|               | 1.125688872                 | 0.861136654  | 0.861136654  | -1.696068365 | 1.273851949                           |             |                  |
|               | -0.546967867                | 1.594839114  | 3            | 0            | 0.972491774                           |             |                  |
| HCN2          | ENSG00000099822.2           | 0.140249062  | 1            | 1            | 0.140249062                           |             |                  |
|               | Brain_Cerebellar_Hemisphere | 0.140249062  |              |              | Brain_Cerebellar_Hemisphere           | 1           | 1                |
|               | 1                           | 1.474864182  | 1.474864182  | 1.474864182  | NA                                    | 1           | 0                |
|               | 0.972491774                 |              |              |              |                                       |             |                  |
| RRM2B         | ENSG00000048392.11          | 0.140306818  | 3            | 3            | 0.020966739                           |             |                  |
|               | Brain_Cerebellar_Hemisphere | 0.854237899  |              |              | Brain_Spinal_cord_cervical_c-1        |             |                  |
|               | 1.230268392                 | 0.757558917  | 0.757558917  | -2.30858287  | 0.313682016                           |             |                  |
|               | -0.603728983                | 1.477876182  | 3            | 0            | 0.972491774                           |             |                  |
| DLL1          | ENSG00000198719.8           | 0.140393738  | 2            | 2            | 0.196514956                           |             |                  |
|               | Brain_Caudate_basal_ganglia | 0.623962075  |              |              | Brain_Cerebellum                      | 1.573580893 |                  |
|               | 0.426419107                 | 0.426419107  | -0.490242833 | 1.291544439  | 0.400650803                           |             |                  |
|               | 1.259913863                 | 2            | 0            | 0.972491774  |                                       |             |                  |
| TIMP4         | ENSG00000157150.4           | 0.140457985  | 8            | 6            | 0.159054834                           |             |                  |

|               |                                       |                             |              |             |                                       |                  |
|---------------|---------------------------------------|-----------------------------|--------------|-------------|---------------------------------------|------------------|
|               | Brain_Frontal_Cortex_BA9              | 0.987834764                 |              |             | Brain_Anterior_cingulate_cortex_BA24  |                  |
|               | 5.152885602                           | 0.076393505                 | 0.212659989  |             | -0.816842347                          | 1.408257505      |
|               | 0.437400137                           | 0.780086501                 | 6            | 0           | 0.972491774                           |                  |
| TADA1         | ENSG00000152382.5                     | 0.140479052                 | 4            | 4           | 0.032363152                           |                  |
|               | Brain_Caudate_basal_ganglia           | 0.38186723                  |              |             | Brain_Cerebellum                      | 1.447281187      |
|               | 0.67743567                            | -1.200462894                | 2.139896258  |             | 0.735612102                           | 1.401675515      |
|               | 0                                     | 0.972491774                 |              |             |                                       | 4                |
| SETD3         | ENSG00000183576.12                    | 0.140484618                 | 1            | 1           | 0.140484618                           | Brain_Cerebellum |
|               | 0.140484618                           | Brain_Cerebellum            | 1            | 1           | 1.473988758                           | 1.473988758      |
|               | 1.473988758                           | NA                          | 1            | 0           | 0.972491774                           |                  |
| IGSF6         | ENSG00000140749.8                     | 0.140541633                 | 2            | 2           | 0.114269095                           | Brain_Cortex     |
|               | 0.320351437                           | Brain_Caudate_basal_ganglia | 1.122361885  |             | 0.877638115                           |                  |
|               | 0.877638115                           | 0.993735948                 | 1.579292006  |             | 1.286513977                           | 0.414050659      |
|               | 2                                     | 0                           | 0.972491774  |             |                                       |                  |
| MYT1          | ENSG00000196132.11                    | 0.140558956                 | 1            | 1           | 0.140558956                           |                  |
|               | Brain_Nucleus_accumbens_basal_ganglia | 0.140558956                 |              |             |                                       |                  |
|               | Brain_Nucleus_accumbens_basal_ganglia | 1                           | 1            | 1           | 1.473712723                           |                  |
|               | 1.473712723                           | 1.473712723                 | NA           | 1           | 0                                     | 0.972491774      |
| TIGD6         | ENSG00000164296.6                     | 0.140629628                 | 8            | 5           | 0.025769272                           |                  |
|               | Brain_Putamen_basal_ganglia           | 0.936534999                 |              |             | Brain_Nucleus_accumbens_basal_ganglia |                  |
|               | 5.552280076                           | 0.004397677                 | 0.306994332  |             | -0.105960235                          | 2.229671312      |
|               | 0.762016752                           | 0.79011251                  | 5            | 0           | 0.972491774                           |                  |
| DCP1A         | ENSG00000272886.5                     | 0.140692075                 | 1            | 1           | 0.140692075                           |                  |
|               | Brain_Hippocampus                     | 0.140692075                 |              |             | Brain_Hippocampus                     | 1                |
|               | 1.473218697                           | 1.473218697                 | 1.473218697  | NA          | 1                                     | 0                |
|               |                                       |                             |              |             | 0.972491774                           |                  |
| RP11-119J18.1 | ENSG00000250378.2                     | 0.140755153                 | 4            | 4           | 0.08078428                            |                  |
|               | Brain_Cortex                          | 0.538484555                 |              |             | Brain_Nucleus_accumbens_basal_ganglia |                  |
|               | 2.311043983                           | 0.313984869                 | 0.313984869  |             | -0.979516467                          | 1.746153511      |
|               | 0.210531869                           | 1.249865245                 | 4            | 0           | 0.972491774                           |                  |
| SH3BP1        | ENSG00000100092.20                    | 0.140792173                 | 3            | 3           | 0.025430238                           |                  |
|               | Brain_Cerebellar_Hemisphere           | 0.853150359                 |              |             | Brain_Nucleus_accumbens_basal_ganglia |                  |
|               | 1.751232708                           | 0.257861579                 | 0.257861579  |             | -0.18510031                           | 2.234803718      |
|               | 1.098897788                           | 1.216730185                 | 3            | 0           | 0.972491774                           |                  |
| CCDC181       | ENSG00000117477.12                    | 0.140895255                 | 7            | 3           | 0.029739276                           |                  |
|               | Brain_Nucleus_accumbens_basal_ganglia | 0.576717009                 |              |             | Brain_Caudate_basal_ganglia           |                  |
|               | 5.963417248                           | 0.005409802                 | 0.411986139  |             | -2.173545629                          | -0.558186543     |
|               | -0.915706882                          | 0.56205894                  | 3            | 0           | 0.972491774                           |                  |
| RNF139        | ENSG00000170881.4                     | 0.140999376                 | 2            | 2           | 0.048614846                           |                  |
|               | Brain_Cerebellar_Hemisphere           | 0.979840435                 |              |             | Brain_Hypothalamus                    | 1.09933067       |
|               | 0.90066933                            | 0.90066933                  | -1.971954101 |             | -0.025268957                          | -0.998611529     |
|               | 1.376514266                           | 2                           | 0            | 0.972491774 |                                       |                  |
| TUBA1B        | ENSG00000123416.15                    | 0.141009037                 | 5            | 5           | 0.013559758                           |                  |
|               | Brain_Anterior_cingulate_cortex_BA24  | 0.819467421                 |              |             | Brain_Hypothalamus                    |                  |
|               | 2.573270566                           | 0.16503489                  | 0.16503489   |             | -0.228230025                          | 2.468719197      |
|               | 1.445916768                           | 1.037172304                 | 5            | 0           | 0.972491774                           |                  |
| LINC02076     | ENSG00000220161.4                     | 0.141290492                 | 2            | 2           | 0.197916476                           |                  |
|               | Brain_Caudate_basal_ganglia           | 0.569312752                 |              |             | Brain_Putamen_basal_ganglia           |                  |
|               | 1.914360942                           | 0.085639058                 | 0.085639058  |             | 0.569063935                           | 1.287510318      |
|               | 0.928287126                           | 0.508018309                 | 2            | 0           | 0.972491774                           |                  |
| SRRM5         | ENSG00000226763.4                     | 0.141298055                 | 4            | 4           | 0.013094115                           |                  |
|               | Brain_Nucleus_accumbens_basal_ganglia | 0.888975658                 |              |             | Brain_Cortex                          |                  |
|               | 2.076985808                           | 0.249844367                 | 0.249844367  |             | -0.148637437                          | 2.481199279      |
|               | 0.642888963                           | 1.250072019                 | 4            | 0           | 0.972491774                           |                  |
| LANCL1        | ENSG00000115365.11                    | 0.14132077                  | 4            | 4           | 0.286637653                           |                  |
|               | Brain_Anterior_cingulate_cortex_BA24  | 0.792426644                 |              |             | Brain_Cerebellar_Hemisphere           |                  |
|               | 2.45433169                            | 0.110866098                 | 0.110866098  |             | -0.886942009                          | 1.065526692      |
|               | 0.209838769                           | 0.9431837                   | 4            | 0           | 0.972491774                           |                  |
| AUNIP         | ENSG00000127423.10                    | 0.141558588                 | 2            | 2           | 0.052592415                           |                  |
|               | Brain_Frontal_Cortex_BA9              | 0.946512261                 |              |             | Brain_Substantia_nigra                |                  |
|               | 1.164610598                           | 0.835389402                 | 0.835389402  |             | 0.067087229                           | 1.93825258       |
|               | 1.002669904                           | 1.323113708                 | 2            | 0           | 0.972491774                           |                  |
| MSANTD4       | ENSG00000170903.10                    | 0.14179147                  | 2            | 2           | 0.175976585                           | Brain_Cortex     |

|              |                                      |                                       |                             |              |              |                  |             |             |
|--------------|--------------------------------------|---------------------------------------|-----------------------------|--------------|--------------|------------------|-------------|-------------|
|              | 0.335908311                          | Brain_Nucleus_accumbens_basal_ganglia | 1.303345147                 |              |              |                  |             |             |
|              | 0.696654853                          | 0.696654853                           | -1.353247469                | 0.962281317  | -0.195483076 |                  |             |             |
|              | 1.637326107                          | 2                                     | 0                           | 0.972491774  |              |                  |             |             |
| ATPAF2       | ENSG00000171953.15                   | 0.141850216                           | 2                           | 2            | 0.054517086  |                  |             |             |
|              | Brain_Cerebellum                     | 0.119573886                           | Brain_Substantia_nigra      | 1.623620997  |              |                  |             |             |
|              | 0.376379003                          | 0.376379003                           | 1.556564634                 | 1.922705177  | 1.739634905  |                  |             |             |
|              | 0.258900461                          | 2                                     | 0                           | 0.972491774  |              |                  |             |             |
| CDK14        | ENSG00000058091.16                   | 0.141931326                           | 4                           | 4            | 0.025219323  |                  |             |             |
|              | Brain_Caudate_basal_ganglia          | 0.561925877                           | Brain_Cerebellum            | 2.075440597  |              |                  |             |             |
|              | 0.104047372                          | 0.104047372                           | 0.579983304                 | 2.238026555  | 1.12430632   |                  |             |             |
|              | 0.756211994                          | 4                                     | 0                           | 0.972491774  |              |                  |             |             |
| CD47         | ENSG00000196776.14                   | 0.142000304                           | 2                           | 2            | 0.161039586  |                  |             |             |
|              | Brain_Frontal_Cortex_BA9             | 0.162520842                           | Brain_Cerebellum            | 1.002868344  |              |                  |             |             |
|              | 0.997131656                          | 0.997131656                           | -1.401583739                | 1.396643368  | -0.002470186 |                  |             |             |
|              | 1.978645363                          | 2                                     | 0                           | 0.972491774  |              |                  |             |             |
| HERC1        | ENSG00000103657.13                   | 0.142011145                           | 1                           | 1            | 0.142011145  |                  |             |             |
|              | Brain_Caudate_basal_ganglia          | 0.142011145                           | Brain_Caudate_basal_ganglia | 1            | 1            |                  |             |             |
|              | 1                                    | -1.468342748                          | -1.468342748                | -1.468342748 | NA           | 1                | 0           |             |
|              | 0.972491774                          |                                       |                             |              |              |                  |             |             |
| ATP6V0A4     | ENSG00000105929.15                   | 0.142090784                           | 1                           | 1            | 0.142090784  |                  |             |             |
|              | Brain_Hippocampus                    | 0.142090784                           | Brain_Hippocampus           | 1            | 1            | 1                |             |             |
|              | -1.468049476                         | -1.468049476                          | -1.468049476                | NA           | 1            | 0                | 0.972491774 |             |
| C1QC         | ENSG00000159189.11                   | 0.142252905                           | 1                           | 1            | 0.142252905  |                  |             |             |
|              | Brain_Anterior_cingulate_cortex_BA24 | 0.142252905                           |                             |              |              |                  |             |             |
|              | Brain_Anterior_cingulate_cortex_BA24 | 1                                     | 1                           | 1            | 1.467452854  |                  |             |             |
|              | 1.467452854                          | 1.467452854                           | NA                          | 1            | 0            | 0.972491774      |             |             |
| PANK1        | ENSG00000152782.16                   | 0.142283378                           | 1                           | 1            | 0.142283378  |                  |             |             |
|              | Brain_Putamen_basal_ganglia          | 0.142283378                           | Brain_Putamen_basal_ganglia | 1            | 1            |                  |             |             |
|              | 1                                    | 1.46734077                            | 1.46734077                  | 1.46734077   | NA           | 1                | 0           | 0.972491774 |
| MC4R         | ENSG00000166603.4                    | 0.142287883                           | 2                           | 1            | 0.125759472  | Brain_Cerebellum |             |             |
|              | 0.174626274                          | Brain_Cerebellar_Hemisphere           | 1.937630594                 | 0.062369406  |              |                  |             |             |
|              | 1.937630594                          | -1.531040143                          | -1.357487779                | -1.444263961 | 0.122720054  |                  |             |             |
|              | 1                                    | 0                                     | 0.972491774                 |              |              |                  |             |             |
| NUDT7        | ENSG00000140876.11                   | 0.142383903                           | 9                           | 7            | 0.022277809  | Brain_Cortex     |             |             |
|              | 0.999698804                          | Brain_Spinal_cord_cervical_c-1        | 4.722269498                 | 0.063398745  |              |                  |             |             |
|              | 0.308245865                          | 0.000377493                           | 2.285597633                 | 0.933967066  | 0.83539652   | 7                |             |             |
|              | 0                                    | 0.972491774                           |                             |              |              |                  |             |             |
| PEPD         | ENSG00000124299.13                   | 0.142469473                           | 13                          | 3            | 0.023931483  |                  |             |             |
|              | Brain_Putamen_basal_ganglia          | 0.44882581                            | Brain_Cerebellar_Hemisphere | 10.44457408  |              |                  |             |             |
|              | 8.40E-07                             | 0.557383545                           | -2.258227439                | -0.75737403  | -1.64112907  |                  |             |             |
|              | 0.44168                              | 3                                     | 0                           | 0.972491774  |              |                  |             |             |
| EMP2         | ENSG00000213853.9                    | 0.142493661                           | 6                           | 6            | 0.089329828  |                  |             |             |
|              | Brain_Substantia_nigra               | 0.751298104                           | Brain_Cerebellum            | 2.961035645  |              |                  |             |             |
|              | 0.205843966                          | 0.205843966                           | -1.698943509                | 0.748818611  | -0.40952103  |                  |             |             |
|              | 0.977572204                          | 6                                     | 0                           | 0.972491774  |              |                  |             |             |
| GDPGP1       | ENSG00000183208.12                   | 0.142511362                           | 5                           | 5            | 0.059913675  |                  |             |             |
|              | Brain_Putamen_basal_ganglia          | 0.722041051                           | Brain_Cortex                | 2.788509605  |              |                  |             |             |
|              | 0.214124699                          | 0.214124699                           | -1.092832059                | 1.881428337  | 0.079045591  |                  |             |             |
|              | 1.15533135                           | 5                                     | 0                           | 0.972491774  |              |                  |             |             |
| RP11-569D9.5 | ENSG00000283361.1                    | 0.142722537                           | 8                           | 4            | 0.229861199  |                  |             |             |
|              | Brain_Caudate_basal_ganglia          | 0.948830129                           | Brain_Cortex                | 5.768197697  |              |                  |             |             |
|              | 0.052458794                          | 0.235560684                           | -0.772033597                | 1.200716481  | 0.421279112  |                  |             |             |
|              | 0.618461019                          | 4                                     | 0                           | 0.972491774  |              |                  |             |             |
| POU3F3       | ENSG00000198914.3                    | 0.142769839                           | 2                           | 2            | 0.048568185  |                  |             |             |
|              | Brain_Cerebellar_Hemisphere          | 0.068690278                           | Brain_Cerebellum            | 1.93270237   | 0.06729763   |                  |             |             |
|              | 0.06729763                           | 1.820451486                           | 1.972362977                 | 1.896407232  | 0.107417646  | 2                |             |             |
|              | 0                                    | 0.972491774                           |                             |              |              |                  |             |             |
| ZFAND2A      | ENSG00000178381.11                   | 0.142770927                           | 3                           | 3            | 0.074049935  |                  |             |             |
|              | Brain_Cerebellar_Hemisphere          | 0.628161991                           | Brain_Hypothalamus          | 1.347820528  |              |                  |             |             |
|              | 0.657335948                          | 0.657335948                           | -0.724808763                | 1.786304705  | 0.192393487  |                  |             |             |
|              | 1.385595173                          | 3                                     | 0                           | 0.972491774  |              |                  |             |             |
| TNNI3K       | ENSG00000116783.14                   | 0.142851388                           | 13                          | 2            | 0.017846836  |                  |             |             |

|               |                                       |                  |                                      |              |                                |              |                  |   |
|---------------|---------------------------------------|------------------|--------------------------------------|--------------|--------------------------------|--------------|------------------|---|
|               | Brain_Spinal_cord_cervical_c-1        | 0.148024345      |                                      |              | Brain_Cerebellar_Hemisphere    |              |                  |   |
|               | 10.61170571                           | 0.019363045      | 1.199893224                          |              | 1.446545196                    |              | 2.368780614      |   |
|               | 1.783108314                           | 0.270885401      | 2                                    | 0            | 0.972491774                    |              |                  |   |
| PMAIP1        | ENSG00000141682.11                    | 0.143025858      | 1                                    | 1            | 0.143025858                    |              |                  |   |
|               | Brain_Hippocampus                     | 0.143025858      | Brain_Hippocampus                    | 1            | 1                              | 1            |                  |   |
|               | 1.464615472                           | 1.464615472      | 1.464615472                          | NA           | 1                              | 0            | 0.972491774      |   |
| LCNL1         | ENSG00000214402.6                     | 0.14306774       | 7                                    | 7            | 0.002203189                    |              |                  |   |
|               | Brain_Spinal_cord_cervical_c-1        | 0.706496984      |                                      |              | Brain_Hypothalamus             |              | 1.99941381       |   |
|               | 0.120616993                           | 0.120616993      | -3.061380465                         |              | 0.694013178                    |              | -0.796389281     |   |
|               | 1.130399076                           | 7                | 0                                    | 0.972491774  |                                |              |                  |   |
| RP11-770J1.4  | ENSG00000255384.1                     | 0.143108725      | 1                                    | 1            | 0.143108725                    |              |                  |   |
|               | Brain_Hypothalamus                    | 0.143108725      | Brain_Hypothalamus                   | 1            | 1                              | 1            |                  |   |
|               | -1.464311981                          | -1.464311981     | -1.464311981                         | NA           | 1                              | 0            | 0.972491774      |   |
| LINC01600     | ENSG00000164385.8                     | 0.143123667      | 10                                   | 9            | 0.012699832                    |              |                  |   |
|               | Brain_Anterior_cingulate_cortex_BA24  | 0.935296065      |                                      |              |                                |              |                  |   |
|               | Brain_Nucleus_accumbens_basal_ganglia | 4.38489316       | 0.069867172                          |              | 0.198290956                    |              |                  |   |
|               | -1.887652032                          | 2.492077499      | 0.189400405                          | 1.223556336  | 9                              | 0            |                  |   |
|               | 0.972491774                           |                  |                                      |              |                                |              |                  |   |
| SCN2B         | ENSG00000149575.5                     | 0.143201335      | 1                                    | 1            | 0.143201335                    |              |                  |   |
|               | Brain_Spinal_cord_cervical_c-1        | 0.143201335      |                                      |              | Brain_Spinal_cord_cervical_c-1 |              |                  |   |
|               | 1                                     | 1                | 1                                    | 1.463972966  | 1.463972966                    | 1.463972966  | NA               | 1 |
|               | 0.972491774                           |                  |                                      |              |                                |              |                  |   |
| EEF1E1        | ENSG00000124802.11                    | 0.14323376       | 1                                    | 1            | 0.14323376                     |              |                  |   |
|               | Brain_Spinal_cord_cervical_c-1        | 0.14323376       | Brain_Spinal_cord_cervical_c-1       | 1            |                                |              |                  |   |
|               | 1                                     | 1                | -1.463854307                         | -1.463854307 | -1.463854307                   | NA           | 1                | 0 |
|               | 0.972491774                           |                  |                                      |              |                                |              |                  |   |
| NOM1          | ENSG00000146909.7                     | 0.143254615      | 9                                    | 7            | 0.059889028                    |              |                  |   |
|               | Brain_Hippocampus                     | 0.955658601      | Brain_Anterior_cingulate_cortex_BA24 |              |                                |              |                  |   |
|               | 5.370649879                           | 0.010778554      | 0.194263456                          | -1.881609703 | 0.055602339                    |              |                  |   |
|               | -1.075547114                          | 0.573216053      | 7                                    | 0            | 0.972491774                    |              |                  |   |
| LLNLF-187D8.1 | ENSG00000277531.2                     | 0.143385133      | 11                                   | 4            | 0.014396652                    |              |                  |   |
|               | Brain_Caudate_basal_ganglia           | 0.49874634       | Brain_Substantia_nigra               |              | 8.962454686                    |              |                  |   |
|               | 0.00480081                            | 0.356433696      | 0.676463615                          | 2.447211029  | 1.70281941                     |              |                  |   |
|               | 0.653055498                           | 4                | 0                                    | 0.972491774  |                                |              |                  |   |
| KDELR3        | ENSG00000100196.10                    | 0.143462426      | 2                                    | 2            | 0.056501252                    |              |                  |   |
|               | Brain_Substantia_nigra                | 0.337185218      | Brain_Hypothalamus                   |              | 1.251449381                    |              |                  |   |
|               | 0.748550619                           | 0.748550619      | -1.907149338                         | -0.959741724 | -1.433445531                   |              |                  |   |
|               | 0.669918349                           | 2                | 0                                    | 0.972491774  |                                |              |                  |   |
| SSB           | ENSG00000138385.15                    | 0.143482376      | 1                                    | 1            | 0.143482376                    |              |                  |   |
|               | Brain_Hypothalamus                    | 0.143482376      | Brain_Hypothalamus                   | 1            | 1                              | 1            |                  |   |
|               | 1.462945195                           | 1.462945195      | 1.462945195                          | NA           | 1                              | 0            | 0.972491774      |   |
| MATN1         | ENSG00000162510.5                     | 0.143512453      | 1                                    | 1            | 0.143512453                    |              |                  |   |
|               | Brain_Hypothalamus                    | 0.143512453      | Brain_Hypothalamus                   | 1            | 1                              | 1            |                  |   |
|               | -1.462835295                          | -1.462835295     | -1.462835295                         | NA           | 1                              | 0            | 0.972491774      |   |
| RP11-651P23.5 | ENSG00000242791.2                     | 0.143590398      | 1                                    | 1            | 0.143590398                    |              |                  |   |
|               | Brain_Caudate_basal_ganglia           | 0.143590398      | Brain_Caudate_basal_ganglia          | 1            | 1                              |              |                  |   |
|               | 1                                     | -1.462550568     | -1.462550568                         | -1.462550568 | NA                             | 1            | 0                |   |
|               | 0.972491774                           |                  |                                      |              |                                |              |                  |   |
| GNPTG         | ENSG00000090581.9                     | 0.143649635      | 2                                    | 2            | 0.049588117                    |              |                  |   |
|               | Brain_Nucleus_accumbens_basal_ganglia | 0.099102858      | Brain_Putamen_basal_ganglia          |              |                                |              |                  |   |
|               | 1.790167202                           | 0.209832798      | 0.209832798                          | -1.963499895 | -1.649218603                   |              |                  |   |
|               | -1.806359249                          | 0.222230432      | 2                                    | 0            | 0.972491774                    |              |                  |   |
| MVD           | ENSG00000167508.11                    | 0.143672697      | 1                                    | 1            | 0.143672697                    |              |                  |   |
|               | Brain_Frontal_Cortex_BA9              | 0.143672697      | Brain_Frontal_Cortex_BA9             | 1            | 1                              |              |                  |   |
|               | 1                                     | 1.462250065      | 1.462250065                          | 1.462250065  | NA                             | 1            | 0                |   |
|               | 0.972491774                           |                  |                                      |              |                                |              |                  |   |
| PLXND1        | ENSG00000004399.12                    | 0.143681082      | 1                                    | 1            | 0.143681082                    |              |                  |   |
|               | Brain_Spinal_cord_cervical_c-1        | 0.143681082      | Brain_Spinal_cord_cervical_c-1       |              |                                |              |                  |   |
|               | 1                                     | 1                | 1                                    | -1.462219456 | -1.462219456                   | -1.462219456 | NA               | 1 |
|               | 0.972491774                           |                  |                                      |              |                                |              |                  |   |
| DHX37         | ENSG00000150990.7                     | 0.143696378      | 1                                    | 1            | 0.143696378                    |              | Brain_Cerebellum |   |
|               | 0.143696378                           | Brain_Cerebellum | 1                                    | 1            | 1.46216362                     | 1.46216362   | 1.46216362       |   |

|              |                                |                             |                  |              |                                       |                             |             |   |   |
|--------------|--------------------------------|-----------------------------|------------------|--------------|---------------------------------------|-----------------------------|-------------|---|---|
| NA           | 1                              | 0                           | 0.972491774      |              |                                       |                             |             |   |   |
| CD79B        | ENSG00000007312.12             | 0.14375893                  | 1                | 1            | 0.14375893                            | Brain_Cerebellar_Hemisphere |             |   |   |
|              | 0.14375893                     | Brain_Cerebellar_Hemisphere | 1                | 1            | -1.461935338                          |                             |             |   |   |
|              | -1.461935338                   | -1.461935338                | NA               | 1            | 0                                     | 0.972491774                 |             |   |   |
| C17orf102    | ENSG00000197322.3              | 0.143764879                 | 5                | 5            | 0.027227896                           |                             |             |   |   |
|              | Brain_Frontal_Cortex_BA9       | 0.920911672                 |                  |              | Brain_Hypothalamus                    | 2.464666043                 |             |   |   |
|              | 0.158470246                    | 0.158470246                 | -2.208235002     |              | 0.885598527                           | -0.565073593                |             |   |   |
|              | 1.196148121                    | 5                           | 0                | 0.972491774  |                                       |                             |             |   |   |
| PBOV1        | ENSG00000254440.3              | 0.14383525                  | 1                | 1            | 0.14383525                            | Brain_Cerebellar_Hemisphere |             |   |   |
|              | 0.14383525                     | Brain_Cerebellar_Hemisphere | 1                | 1            | -1.461656913                          |                             |             |   |   |
|              | -1.461656913                   | -1.461656913                | NA               | 1            | 0                                     | 0.972491774                 |             |   |   |
| DPP7         | ENSG00000176978.13             | 0.143967928                 | 7                | 7            | 0.021140437                           |                             |             |   |   |
|              | Brain_Spinal_cord_cervical_c-1 | 0.989852193                 |                  |              | Brain_Cortex                          | 1.846692522                 |             |   |   |
|              | 0.298167759                    | 0.298167759                 | -2.305466921     |              | 1.487256527                           | -0.061069538                |             |   |   |
|              | 1.150866468                    | 7                           | 0                | 0.972491774  |                                       |                             |             |   |   |
| RP11-5407.17 | ENSG00000272512.1              | 0.144235948                 | 12               | 4            | 0.041270584                           |                             |             |   |   |
|              | Brain_Substantia_nigra         | 0.449660061                 |                  |              | Brain_Hypothalamus                    | 9.282693409                 |             |   |   |
|              | 1.09E-16                       | 0.414370695                 | 0.755981878      |              | 2.040801275                           | 1.392884494                 |             |   |   |
|              | 0.374032618                    | 4                           | 0                | 0.972491774  |                                       |                             |             |   |   |
| TCTE3        | ENSG00000184786.5              | 0.144237188                 | 2                | 2            | 0.08813909                            |                             |             |   |   |
|              | Brain_Spinal_cord_cervical_c-1 | 0.537363857                 |                  |              | Brain_Amygdala                        | 1.202313279                 |             |   |   |
|              | 0.797686721                    | 0.797686721                 | 0.616804237      |              | 1.705296769                           | 1.161050503                 |             |   |   |
|              | 0.76968045                     | 2                           | 0                | 0.972491774  |                                       |                             |             |   |   |
| BRIP1        | ENSG00000136492.8              | 0.144261659                 | 6                | 3            | 0.090843542                           |                             |             |   |   |
|              | Brain_Caudate_basal_ganglia    | 0.3366547                   |                  |              | Brain_Frontal_Cortex_BA9              | 4.618632062                 |             |   |   |
|              | 0.028530565                    | 0.179995625                 | -1.690964712     |              | 1.513282369                           | -0.90773401                 |             |   |   |
|              | 1.218523041                    | 3                           | 0                | 0.972491774  |                                       |                             |             |   |   |
| VRK1         | ENSG00000100749.7              | 0.144280104                 | 4                | 2            | 0.150126604                           |                             |             |   |   |
|              | Brain_Caudate_basal_ganglia    | 0.597149538                 |                  |              | Brain_Frontal_Cortex_BA9              |                             |             |   |   |
|              | 3.775547114                    | 0.007186753                 | 0.165838099      |              | 0.528504048                           | 1.439084426                 |             |   |   |
|              | 0.847809275                    | 0.405314253                 | 2                | 0            | 0.972491774                           |                             |             |   |   |
| FRS2         | ENSG00000166225.8              | 0.144304135                 | 1                | 1            | 0.144304135                           | Brain_Cerebellum            |             |   |   |
|              | 0.144304135                    | Brain_Cerebellum            | 1                | 1            | -1.459948838                          | -1.459948838                |             |   |   |
|              | -1.459948838                   | NA                          | 1                | 0            | 0.972491774                           |                             |             |   |   |
| TMEM104      | ENSG00000109066.13             | 0.144322724                 | 1                | 1            | 0.144322724                           |                             |             |   |   |
|              | Brain_Cerebellum               | 0.144322724                 | Brain_Cerebellum | 1            | 1                                     | 1                           | -1.45988121 |   |   |
|              | -1.45988121                    | -1.45988121                 | NA               | 1            | 0                                     | 0.972491774                 |             |   |   |
| FZD8         | ENSG00000177283.7              | 0.144382967                 | 1                | 1            | 0.144382967                           |                             |             |   |   |
|              | Brain_Frontal_Cortex_BA9       | 0.144382967                 |                  |              | Brain_Frontal_Cortex_BA9              | 1                           | 1           |   |   |
|              | 1                              | -1.459662086                | -1.459662086     | -1.459662086 | NA                                    | 1                           | 0           |   |   |
|              | 0.972491774                    |                             |                  |              |                                       |                             |             |   |   |
| MAPK6        | ENSG00000069956.11             | 0.144416564                 | 2                | 2            | 0.139573689                           |                             |             |   |   |
|              | Brain_Putamen_basal_ganglia    | 0.162723316                 |                  |              | Brain_Substantia_nigra                |                             |             |   |   |
|              | 1.067636698                    | 0.932363302                 | 0.932363302      |              | -1.477380431                          | -1.395970708                |             |   |   |
|              | -1.436675569                   | 0.057565367                 | 2                | 0            | 0.972491774                           |                             |             |   |   |
| KRT74        | ENSG00000170484.9              | 0.144485519                 | 1                | 1            | 0.144485519                           |                             |             |   |   |
|              | Brain_Spinal_cord_cervical_c-1 | 0.144485519                 |                  |              | Brain_Spinal_cord_cervical_c-1        |                             |             |   |   |
|              | 1                              | 1                           | 1                | 1.459289226  | 1.459289226                           | 1.459289226                 | NA          | 1 | 0 |
|              | 0.972491774                    |                             |                  |              |                                       |                             |             |   |   |
| OR3A3        | ENSG00000159961.1              | 0.144523414                 | 1                | 1            | 0.144523414                           |                             |             |   |   |
|              | Brain_Caudate_basal_ganglia    | 0.144523414                 |                  |              | Brain_Caudate_basal_ganglia           | 1                           | 1           |   |   |
|              | 1                              | 1.459151501                 | 1.459151501      | 1.459151501  | NA                                    | 1                           | 0           |   |   |
|              | 0.972491774                    |                             |                  |              |                                       |                             |             |   |   |
| PROC         | ENSG00000115718.17             | 0.144818342                 | 4                | 3            | 0.213007541                           |                             |             |   |   |
|              | Brain_Putamen_basal_ganglia    | 0.767306317                 |                  |              | Brain_Nucleus_accumbens_basal_ganglia |                             |             |   |   |
|              | 2.953361715                    | 0.031946206                 | 0.331685298      |              | 0.295900176                           | 1.245337977                 |             |   |   |
|              | 0.745247624                    | 0.474474546                 | 3                | 0            | 0.972491774                           |                             |             |   |   |
| FAIM         | ENSG00000158234.12             | 0.144961465                 | 9                | 5            | 0.019453946                           | Brain_Cortex                |             |   |   |
|              | 0.922850339                    | Brain_Amygdala              | 6.382813138      |              | 0.000272631                           | 0.307481507                 |             |   |   |
|              | -2.3367162                     | 0.096843927                 | -1.479352543     |              | 0.816982292                           | 5                           | 0           |   |   |
|              | 0.972491774                    |                             |                  |              |                                       |                             |             |   |   |
| ACTR8        | ENSG00000113812.13             | 0.144988592                 | 13               | 2            | 0.120975912                           |                             |             |   |   |



|              |                                       |              |                  |                                |              |              |    |   |   |
|--------------|---------------------------------------|--------------|------------------|--------------------------------|--------------|--------------|----|---|---|
|              | Brain_Cerebellar_Hemisphere           | 0.913510518  |                  | Brain_Cortex                   | 11.28387354  |              |    |   |   |
|              | 0.003262932                           | 0.515475656  | -1.550690334     | 0.635022064                    | -0.570907132 |              |    |   |   |
|              | 0.570230961                           | 2            | 0                | 0.972491774                    |              |              |    |   |   |
| RP11-451G4.3 | ENSG00000242790.1                     | 0.145027947  |                  | 1                              | 1            | 0.145027947  |    |   |   |
|              | Brain_Putamen_basal_ganglia           | 0.145027947  |                  | Brain_Putamen_basal_ganglia    | 1            | 1            |    |   |   |
|              | 1                                     | 1.457320439  | 1.457320439      | 1.457320439                    | NA           | 1            | 0  |   |   |
|              | 0.972491774                           |              |                  |                                |              |              |    |   |   |
| DIRAS1       | ENSG00000176490.4                     | 0.145109566  |                  | 1                              | 1            | 0.145109566  |    |   |   |
|              | Brain_Frontal_Cortex_BA9              | 0.145109566  |                  | Brain_Frontal_Cortex_BA9       | 1            | 1            |    |   |   |
|              | 1                                     | -1.457024685 | -1.457024685     | -1.457024685                   | NA           | 1            | 0  |   |   |
|              | 0.972491774                           |              |                  |                                |              |              |    |   |   |
| PARP14       | ENSG00000173193.13                    | 0.14518216   | 7                | 6                              | 0.026566712  |              |    |   |   |
|              | Brain_Hippocampus                     | 0.546384847  |                  | Brain_Substantia_nigra         | 4.78583255   |              |    |   |   |
|              | 0.073377348                           | 0.173983482  | -2.217825807     | -0.60318617                    | -1.512656654 |              |    |   |   |
|              | 0.617721716                           | 6            | 0                | 0.972491774                    |              |              |    |   |   |
| RERE         | ENSG00000142599.17                    | 0.145189495  |                  | 6                              | 3            | 0.073833462  |    |   |   |
|              | Brain_Anterior_cingulate_cortex_BA24  | 0.715347801  |                  | Brain_Hippocampus              |              |              |    |   |   |
|              | 5.167431049                           | 0.002927019  | 0.175271399      | -1.787644                      | 0.364683333  |              |    |   |   |
|              | -1.162327983                          | 0.766535138  | 3                | 0                              | 0.972491774  |              |    |   |   |
| MIR3976HG    | ENSG00000261738.6                     | 0.145409505  |                  | 2                              | 1            | 0.099090001  |    |   |   |
|              | Brain_Frontal_Cortex_BA9              | 0.217046618  |                  | Brain_Cortex                   | 1.961481073  |              |    |   |   |
|              | 0.038518927                           | 1.961481073  | -1.649281389     | -1.234419524                   | -1.441850456 |              |    |   |   |
|              | 0.293351638                           | 1            | 0                | 0.972491774                    |              |              |    |   |   |
| LAG3         | ENSG00000089692.8                     | 0.145509741  |                  | 1                              | 1            | 0.145509741  |    |   |   |
|              | Brain_Spinal_cord_cervical_c-1        | 0.145509741  |                  | Brain_Spinal_cord_cervical_c-1 |              |              |    |   |   |
|              | 1                                     | 1            | 1                | -1.455576455                   | -1.455576455 | -1.455576455 | NA | 1 | 0 |
|              | 0.972491774                           |              |                  |                                |              |              |    |   |   |
| RP11-474P2.6 | ENSG00000275481.1                     | 0.145721926  |                  | 1                              | 1            | 0.145721926  |    |   |   |
|              | Brain_Anterior_cingulate_cortex_BA24  | 0.145721926  |                  |                                |              |              |    |   |   |
|              | Brain_Anterior_cingulate_cortex_BA24  | 1            | 1                | 1                              | 1.454809795  |              |    |   |   |
|              | 1.454809795                           | 1.454809795  | NA               | 1                              | 0            | 0.972491774  |    |   |   |
| PITPNC1      | ENSG00000154217.14                    | 0.145814692  |                  | 3                              | 3            | 0.062057175  |    |   |   |
|              | Brain_Hippocampus                     | 0.42509021   | Brain_Cerebellum | 1.567208181                    | 0.562527747  |              |    |   |   |
|              | 0.562527747                           | -0.797621431 | 1.865887014      | 0.803676323                    | 1.411215949  |              |    |   |   |
|              | 3                                     | 0            | 0.972491774      |                                |              |              |    |   |   |
| ADCY7        | ENSG00000121281.12                    | 0.145893592  |                  | 1                              | 1            | 0.145893592  |    |   |   |
|              | Brain_Nucleus_accumbens_basal_ganglia | 0.145893592  |                  |                                |              |              |    |   |   |
|              | Brain_Nucleus_accumbens_basal_ganglia | 1            | 1                | 1                              | -1.454190162 |              |    |   |   |
|              | -1.454190162                          | -1.454190162 | NA               | 1                              | 0            | 0.972491774  |    |   |   |
| CCK          | ENSG00000187094.11                    | 0.145978275  |                  | 1                              | 1            | 0.145978275  |    |   |   |
|              | Brain_Frontal_Cortex_BA9              | 0.145978275  |                  | Brain_Frontal_Cortex_BA9       | 1            | 1            |    |   |   |
|              | 1                                     | 1.453884702  | 1.453884702      | 1.453884702                    | NA           | 1            | 0  |   |   |
|              | 0.972491774                           |              |                  |                                |              |              |    |   |   |
| NEK8         | ENSG00000160602.13                    | 0.146152981  |                  | 1                              | 1            | 0.146152981  |    |   |   |
|              | Brain_Putamen_basal_ganglia           | 0.146152981  |                  | Brain_Putamen_basal_ganglia    | 1            | 1            |    |   |   |
|              | 1                                     | 1.453254949  | 1.453254949      | 1.453254949                    | NA           | 1            | 0  |   |   |
|              | 0.972491774                           |              |                  |                                |              |              |    |   |   |
| LLGL1        | ENSG00000131899.10                    | 0.146201429  |                  | 10                             | 5            | 0.147788356  |    |   |   |
|              | Brain_Spinal_cord_cervical_c-1        | 0.867512323  |                  | Brain_Cortex                   | 6.716181354  |              |    |   |   |
|              | 0.012236027                           | 0.274330703  | -1.345645724     | 1.447387746                    | 0.460988875  |              |    |   |   |
|              | 0.929189447                           | 5            | 0                | 0.972491774                    |              |              |    |   |   |
| CPEB2        | ENSG00000137449.15                    | 0.146302271  |                  | 1                              | 1            | 0.146302271  |    |   |   |
|              | Brain_Amygdala                        | 1            | 1                | 1                              | -1.452717268 |              |    |   |   |
|              | -1.452717268                          | NA           | 1                | 0                              | 0.972491774  |              |    |   |   |
| OGDHL        | ENSG00000197444.9                     | 0.146590891  |                  | 2                              | 2            | 0.051003107  |    |   |   |
|              | Brain_Cerebellar_Hemisphere           | 0.537241323  |                  | Brain_Cerebellum               | 1.400237788  |              |    |   |   |
|              | 0.599762212                           | 0.599762212  | 0.616989998      | 1.951453633                    | 1.284221816  |              |    |   |   |
|              | 0.943608285                           | 2            | 0                | 0.972491774                    |              |              |    |   |   |
| RNPEP        | ENSG00000176393.10                    | 0.146635657  |                  | 1                              | 1            | 0.146635657  |    |   |   |
|              | Brain_Anterior_cingulate_cortex_BA24  | 0.146635657  |                  |                                |              |              |    |   |   |
|              | Brain_Anterior_cingulate_cortex_BA24  | 1            | 1                | 1                              | 1.451518059  |              |    |   |   |
|              | 1.451518059                           | 1.451518059  | NA               | 1                              | 0            | 0.972491774  |    |   |   |

|               |                                      |                  |              |              |              |                                |             |             |                |
|---------------|--------------------------------------|------------------|--------------|--------------|--------------|--------------------------------|-------------|-------------|----------------|
| SLC2A6        | ENSG00000160326.13                   | 0.146746886      | 6            | 3            | 0.048435162  |                                |             |             |                |
|               | Brain_Cerebellar_Hemisphere          | 0.440169144      |              |              |              | Brain_Frontal_Cortex_BA9       |             |             |                |
|               | 5.086209708                          | 0.030525694      | 0.24941155   | -1.973530423 | -0.77190762  |                                |             |             |                |
|               | -1.391758473                         | 0.406599202      | 3            | 0            | 0.972491774  |                                |             |             |                |
| PRR33         | ENSG00000283787.1                    | 0.146819308      | 1            | 1            | 0.146819308  |                                |             |             |                |
|               | Brain_Cerebellar_Hemisphere          | 0.146819308      |              |              |              | Brain_Cerebellar_Hemisphere1   | 1           | 1           |                |
|               | 1                                    | 1.45085835       | 1.45085835   | 1.45085835   | NA           | 1                              | 0           | 0.972491774 |                |
| CLP1          | ENSG00000172409.5                    | 0.146902889      | 2            | 2            | 0.090952991  |                                |             |             |                |
|               | Brain_Spinal_cord_cervical_c-1       | 0.233351026      |              |              |              | Brain_Caudate_basal_ganglia    |             |             |                |
|               | 1.124372876                          | 0.875627124      | 0.875627124  | -1.690391967 | -1.191771062 |                                |             |             |                |
|               | -1.441081515                         | 0.352578224      | 2            | 0            | 0.972491774  |                                |             |             |                |
| GLTSCR1       | ENSG00000063169.10                   | 0.146974788      | 1            | 1            | 0.146974788  |                                |             |             |                |
|               | Brain_Cerebellar_Hemisphere          | 0.146974788      |              |              |              | Brain_Cerebellar_Hemisphere1   | 1           | 1           |                |
|               | 1                                    | 1.450300325      | 1.450300325  | 1.450300325  | NA           | 1                              | 0           | 0.972491774 |                |
| TXNL4A        | ENSG00000141759.14                   | 0.146977078      | 7            | 5            | 0.053207585  |                                |             |             |                |
|               | Brain_Cerebellum                     | 0.693051168      |              |              |              | Brain_Hypothalamus             | 5.031517883 |             |                |
|               | 0.047271449                          | 0.236028752      | -1.933232323 | 0.394717796  | -1.003888787 |                                |             |             |                |
|               | 0.785753289                          | 5                | 0            | 0.972491774  |              |                                |             |             |                |
| RAD51AP2      | ENSG00000214842.5                    | 0.147045294      | 2            | 2            | 0.057494956  |                                |             |             |                |
|               | Brain_Cerebellum                     | 0.956536572      |              |              |              | Brain_Cortex                   | 1.215594619 | 0.784405381 |                |
|               | 0.784405381                          | -1.899529013     | 0.054500297  | -0.922514358 | 1.381707375  |                                |             |             |                |
|               | 2                                    | 0                | 0.972491774  |              |              |                                |             |             |                |
| UTP11         | ENSG00000183520.11                   | 0.147085171      | 1            | 1            | 0.147085171  |                                |             |             |                |
|               | Brain_Spinal_cord_cervical_c-1       | 0.147085171      |              |              |              | Brain_Spinal_cord_cervical_c-1 |             |             |                |
|               | 1                                    | 1                | 1            | -1.449904431 | -1.449904431 | -1.449904431                   | NA          | 1           | 0              |
|               | 0.972491774                          |                  |              |              |              |                                |             |             |                |
| PGM2L1        | ENSG00000165434.7                    | 0.147262408      | 2            | 2            | 0.143235357  |                                |             |             |                |
|               | Brain_Anterior_cingulate_cortex_BA24 | 0.215127439      |              |              |              | Brain_Frontal_Cortex_BA9       |             |             |                |
|               | 1.040088853                          | 0.959911147      | 0.959911147  | -1.463848466 | -1.239589032 |                                |             |             |                |
|               | -1.351718749                         | 0.158575366      | 2            | 0            | 0.972491774  |                                |             |             |                |
| COLGALT2      | ENSG00000198756.10                   | 0.14736122       | 11           | 3            | 0.018510177  |                                |             |             | Brain_Amygdala |
|               | 0.849118906                          | Brain_Cerebellum | 8.47187738   | 0.00113449   | 0.429544295  |                                |             |             |                |
|               | -2.35525142                          | 1.025738398      | -1.538028783 | 1.059382537  | 3            | 0                              |             |             |                |
|               | 0.972491774                          |                  |              |              |              |                                |             |             |                |
| ZNF66         | ENSG00000160229.11                   | 0.147403795      | 2            | 2            | 0.106461416  |                                |             |             |                |
|               | Brain_Cerebellar_Hemisphere          | 0.340526706      |              |              |              | Brain_Cortex                   | 1.091792215 |             |                |
|               | 0.908207785                          | 0.908207785      | 0.953125069  | 1.6143044    | 1.283714734  |                                |             |             |                |
|               | 0.467524389                          | 2                | 0            | 0.972491774  |              |                                |             |             |                |
| RP11-326G21.1 | ENSG00000272755.1                    | 0.147609499      | 5            | 5            | 0.01835282   |                                |             |             |                |
|               | Brain_Anterior_cingulate_cortex_BA24 | 0.797017267      |              |              |              | Brain_Cerebellum               |             |             |                |
|               | 2.161259522                          | 0.123741462      | 0.123741462  | -2.015207957 | 2.358421916  |                                |             |             |                |
|               | 0.199292797                          | 1.920371089      | 5            | 0            | 0.972491774  |                                |             |             |                |
| ZNF534        | ENSG00000198633.10                   | 0.147619028      | 13           | 4            | 0.027994449  |                                |             |             |                |
|               | Brain_Cerebellar_Hemisphere          | 0.893327789      |              |              |              | Brain_Cortex                   | 9.464344845 |             |                |
|               | 0.013600565                          | 0.662446165      | -1.251790061 | 2.197364151  | 1.00635628   |                                |             |             |                |
|               | 1.006136955                          | 4                | 0            | 0.972491774  |              |                                |             |             |                |
| CDC42         | ENSG00000070831.15                   | 0.147771347      | 2            | 2            | 0.103802739  |                                |             |             |                |
|               | Brain_Frontal_Cortex_BA9             | 0.15647293       |              |              |              | Brain_Caudate_basal_ganglia    | 1.22026916  |             |                |
|               | 0.77973084                           | 0.77973084       | 1.417034195  | 1.626691008  | 1.521862602  |                                |             |             |                |
|               | 0.148249755                          | 2                | 0            | 0.972491774  |              |                                |             |             |                |
| RP11-16D22.2  | ENSG00000271850.1                    | 0.147792631      | 2            | 2            | 0.110162893  |                                |             |             |                |
|               | Brain_Spinal_cord_cervical_c-1       | 0.249011951      |              |              |              | Brain_Substantia_nigra         |             |             |                |
|               | 1.015686352                          | 0.984313648      | 0.984313648  | -1.152752585 | 1.597461412  |                                |             |             |                |
|               | 0.222354414                          | 1.944694967      | 2            | 0            | 0.972491774  |                                |             |             |                |
| RP4-761J14.10 | ENSG00000269892.1                    | 0.147830444      | 1            | 1            | 0.147830444  |                                |             |             |                |
|               | Brain_Putamen_basal_ganglia          | 0.147830444      |              |              |              | Brain_Putamen_basal_ganglia1   | 1           | 1           |                |
|               | 1                                    | 1.447237403      | 1.447237403  | 1.447237403  | NA           | 1                              | 0           | 0.972491774 |                |
|               | 0.972491774                          |                  |              |              |              |                                |             |             |                |
| LEPROT        | ENSG00000213625.8                    | 0.147863577      | 9            | 2            | 0.037784128  |                                |             |             |                |
|               | Brain_Anterior_cingulate_cortex_BA24 | 0.24464803       |              |              |              | Brain_Substantia_nigra         |             |             |                |
|               | 7.911184937                          | 0.01175345       | 0.5230723    | -2.077188905 | -1.163447395 |                                |             |             |                |

|               |                                       |                   |                                |              |              |                  |   |  |
|---------------|---------------------------------------|-------------------|--------------------------------|--------------|--------------|------------------|---|--|
|               | -1.793411288                          | 0.25242027        | 2                              | 0            | 0.972491774  |                  |   |  |
| LINC01579     | ENSG00000258754.7                     | 0.147976659       | 1                              | 1            | 0.147976659  |                  |   |  |
|               | Brain_Anterior_cingulate_cortex_BA24  | 0.147976659       |                                |              |              |                  |   |  |
|               | Brain_Anterior_cingulate_cortex_BA24  | 1                 | 1                              | 1            | -1.446715366 |                  |   |  |
|               | -1.446715366                          | -1.446715366      | NA                             | 1            | 0            | 0.972491774      |   |  |
| NDRG3         | ENSG00000101079.20                    | 0.148026795       | 2                              | 2            | 0.075782655  | Brain_Cerebellum |   |  |
|               | 0.307303298                           | Brain_Hippocampus | 1.117995888                    |              | 0.882004112  |                  |   |  |
|               | 0.882004112                           | -1.775698315      | 1.020896878                    |              | -0.377400718 | 1.977491425      |   |  |
|               | 2                                     | 0                 | 0.972491774                    |              |              |                  |   |  |
| RP11-188D8.1  | ENSG00000271427.1                     | 0.148118874       | 1                              | 1            | 0.148118874  |                  |   |  |
|               | Brain_Nucleus_accumbens_basal_ganglia | 0.148118874       |                                |              |              |                  |   |  |
|               | Brain_Nucleus_accumbens_basal_ganglia | 1                 | 1                              | 1            | 1.446207986  |                  |   |  |
|               | 1.446207986                           | 1.446207986       | NA                             | 1            | 0            | 0.972491774      |   |  |
| LONRF1        | ENSG00000154359.12                    | 0.148174112       | 1                              | 1            | 0.148174112  |                  |   |  |
|               | Brain_Cerebellar_Hemisphere           | 0.148174112       | Brain_Cerebellar_Hemisphere    | 1            | 1            |                  |   |  |
|               | 1                                     | 1.446011017       | 1.446011017                    | 1.446011017  | NA           | 1                | 0 |  |
|               | 0.972491774                           |                   |                                |              |              |                  |   |  |
| COX5A         | ENSG00000178741.11                    | 0.148213071       | 2                              | 2            | 0.130241044  |                  |   |  |
|               | Brain_Caudate_basal_ganglia           | 0.254907886       | Brain_Substantia_nigra         |              |              |                  |   |  |
|               | 1.063039949                           | 0.936960051       | 0.936960051                    |              | -1.513152038 | -1.13850928      |   |  |
|               | -1.325830659                          | 0.264912435       | 2                              | 0            | 0.972491774  |                  |   |  |
| QRFP          | ENSG00000188710.2                     | 0.148275748       | 1                              | 1            | 0.148275748  | Brain_Amygdala   |   |  |
|               | 0.148275748                           | Brain_Amygdala    | 1                              | 1            | 1.445648743  | 1.445648743      |   |  |
|               | 1.445648743                           | NA                | 1                              | 0            | 0.972491774  |                  |   |  |
| VGLL4         | ENSG00000144560.14                    | 0.148297861       | 1                              | 1            | 0.148297861  |                  |   |  |
|               | Brain_Nucleus_accumbens_basal_ganglia | 0.148297861       |                                |              |              |                  |   |  |
|               | Brain_Nucleus_accumbens_basal_ganglia | 1                 | 1                              | 1            | -1.445569948 |                  |   |  |
|               | -1.445569948                          | -1.445569948      | NA                             | 1            | 0            | 0.972491774      |   |  |
| RALGAPA2      | ENSG00000188559.13                    | 0.148300036       | 1                              | 1            | 0.148300036  |                  |   |  |
|               | Brain_Anterior_cingulate_cortex_BA24  | 0.148300036       |                                |              |              |                  |   |  |
|               | Brain_Anterior_cingulate_cortex_BA24  | 1                 | 1                              | 1            | -1.445562198 |                  |   |  |
|               | -1.445562198                          | -1.445562198      | NA                             | 1            | 0            | 0.972491774      |   |  |
| ALKBH5        | ENSG00000091542.8                     | 0.14862839        | 8                              | 3            | 0.071068743  |                  |   |  |
|               | Brain_Hippocampus                     | 0.890590499       | Brain_Spinal_cord_cervical_c-1 |              |              |                  |   |  |
|               | 6.701444441                           | 0.000648378       | 0.309056941                    |              | -0.255306271 | 1.805037953      |   |  |
|               | 0.425778559                           | 0.654616206       | 3                              | 0            | 0.972491774  |                  |   |  |
| NDUFAF2       | ENSG00000164182.10                    | 0.148663037       | 3                              | 3            | 0.024558383  |                  |   |  |
|               | Brain_Cortex                          | 0.263138142       | Brain_Caudate_basal_ganglia    | 1.914431339  |              |                  |   |  |
|               | 0.313860736                           | 0.313860736       | -2.24827935                    |              | -1.119004682 | -1.73915152      |   |  |
|               | 0.572764553                           | 3                 | 0                              | 0.972491774  |              |                  |   |  |
| GPR132        | ENSG00000183484.11                    | 0.148708076       | 3                              | 3            | 0.023723192  |                  |   |  |
|               | Brain_Putamen_basal_ganglia           | 0.116123772       | Brain_Substantia_nigra         |              |              |                  |   |  |
|               | 2.394963247                           | 0.126942075       | 0.126942075                    |              | -2.261582801 | -1.571253523     |   |  |
|               | -2.006195349                          | 0.378574244       | 3                              | 0            | 0.972491774  |                  |   |  |
| LINC00663     | ENSG00000266904.5                     | 0.148727813       | 13                             | 11           | 0.045789551  |                  |   |  |
|               | Brain_Anterior_cingulate_cortex_BA24  | 0.865804121       | Brain_Caudate_basal_ganglia    |              |              |                  |   |  |
|               | 5.17361488                            | 1.25E-16          | 0.230647486                    |              | -0.94701312  | 1.997328112      |   |  |
|               | 0.241728166                           | 0.892467424       | 11                             | 0            | 0.972491774  |                  |   |  |
| TMEM237       | ENSG00000155755.18                    | 0.148778757       | 2                              | 2            | 0.279390359  |                  |   |  |
|               | Brain_Putamen_basal_ganglia           | 0.662693495       | Brain_Caudate_basal_ganglia    |              |              |                  |   |  |
|               | 1.687565154                           | 0.312434846       | 0.312434846                    |              | -0.436197426 | 1.081689863      |   |  |
|               | 0.322746218                           | 1.073308395       | 2                              | 0            | 0.972491774  |                  |   |  |
| ZC3H7A        | ENSG00000122299.11                    | 0.148859929       | 1                              | 1            | 0.148859929  |                  |   |  |
|               | Brain_Cerebellar_Hemisphere           | 0.148859929       | Brain_Cerebellar_Hemisphere    | 1            | 1            |                  |   |  |
|               | 1                                     | -1.443570143      | -1.443570143                   | -1.443570143 | NA           | 1                | 0 |  |
|               | 0.972491774                           |                   |                                |              |              |                  |   |  |
| RP11-586D19.2 | ENSG00000251408.1                     | 0.148919634       | 1                              | 1            | 0.148919634  |                  |   |  |
|               | Brain_Nucleus_accumbens_basal_ganglia | 0.148919634       |                                |              |              |                  |   |  |
|               | Brain_Nucleus_accumbens_basal_ganglia | 1                 | 1                              | 1            | 1.443358055  |                  |   |  |
|               | 1.443358055                           | 1.443358055       | NA                             | 1            | 0            | 0.972491774      |   |  |
| RAMP3         | ENSG00000122679.8                     | 0.149088979       | 1                              | 1            | 0.149088979  |                  |   |  |
|               | Brain_Nucleus_accumbens_basal_ganglia | 0.149088979       |                                |              |              |                  |   |  |

|         |                                       |                             |              |             |              |                                      |                  |
|---------|---------------------------------------|-----------------------------|--------------|-------------|--------------|--------------------------------------|------------------|
|         | Brain_Nucleus_accumbens_basal_ganglia | 1                           | 1            | 1           | -1.442756847 |                                      |                  |
|         | -1.442756847                          | -1.442756847                | NA           | 1           | 0            | 0.972491774                          |                  |
| GMFB    | ENSG00000197045.12                    | 0.149162295                 | 2            | 2           | 0.104836497  |                                      |                  |
|         | Brain_Spinal_cord_cervical_c-1        | 0.300218189                 |              |             |              | Brain_Hippocampus                    |                  |
|         | 1.029330375                           | 0.970669625                 | 0.970669625  |             | 1.035965606  | 1.621845201                          |                  |
|         | 1.328905403                           | 0.414279435                 | 2            | 0           | 0.972491774  |                                      |                  |
| PPIP5K2 | ENSG00000145725.19                    | 0.149173096                 | 6            | 5           | 0.104074413  |                                      |                  |
|         | Brain_Spinal_cord_cervical_c-1        | 0.984787419                 |              |             |              | Brain_Hypothalamus                   | 3.61015902       |
|         | 0.055734295                           | 0.195758257                 | -0.174526264 |             | 1.625413823  | 0.678171048                          |                  |
|         | 0.769586982                           | 5                           | 0            | 0.972491774 |              |                                      |                  |
| TTC21B  | ENSG00000123607.14                    | 0.14920517                  | 2            | 2           | 0.082710437  |                                      |                  |
|         | Brain_Cerebellar_Hemisphere           | 0.152700234                 |              |             |              | Brain_Cerebellum                     | 1.341482878      |
|         | 0.658517122                           | 0.658517122                 | -1.735171475 |             | -1.430058484 | -1.58261498                          |                  |
|         | 0.215747465                           | 2                           | 0            | 0.972491774 |              |                                      |                  |
| CPNE1   | ENSG00000214078.12                    | 0.149215174                 | 13           | 1           | 0.11152484   |                                      |                  |
|         | Brain_Cerebellar_Hemisphere           | 0.20573852                  |              |             |              | Brain_Anterior_cingulate_cortex_BA24 |                  |
|         | 12.49621181                           | 9.63E-05                    | 12.49621181  |             | -1.591376633 | -1.26537057                          |                  |
|         | -1.413419334                          | 0.106380866                 | 1            | 0           | 0.972491774  |                                      |                  |
| TCF7    | ENSG00000081059.19                    | 0.149345594                 | 3            | 3           | 0.314975346  |                                      | Brain_Cerebellum |
|         | 0.977975255                           | Brain_Cerebellar_Hemisphere | 1.894482423  |             | 0.095632192  |                                      |                  |
|         | 0.095632192                           | -1.004836997                | 0.810239663  |             | -0.055663301 | 0.910398996                          |                  |
|         | 3                                     | 0                           | 0.972491774  |             |              |                                      |                  |
| RYR1    | ENSG00000196218.12                    | 0.149407692                 | 5            | 3           | 0.048557988  |                                      |                  |
|         | Brain_Nucleus_accumbens_basal_ganglia | 0.51502224                  |              |             |              | Brain_Cortex                         | 4.360812456      |
|         | 0.038644304                           | 0.226514035                 | 0.651037562  |             | 1.972452379  | 1.479630383                          |                  |
|         | 0.544778475                           | 3                           | 0            | 0.972491774 |              |                                      |                  |
| PTPRM   | ENSG00000173482.16                    | 0.149417692                 | 2            | 2           | 0.092638096  |                                      |                  |
|         | Brain_Frontal_Cortex_BA9              | 0.335564918                 |              |             |              | Brain_Cerebellum                     | 1.014211162      |
|         | 0.985788838                           | 0.985788838                 | -0.962965339 |             | 1.681642952  | 0.359338806                          |                  |
|         | 1.870020456                           | 2                           | 0            | 0.972491774 |              |                                      |                  |
| TBCK    | ENSG00000145348.16                    | 0.149437205                 | 2            | 2           | 0.208064266  |                                      |                  |
|         | Brain_Cerebellar_Hemisphere           | 0.752625346                 |              |             |              | Brain_Cerebellum                     | 1.857953744      |
|         | 0.142046256                           | 0.142046256                 | -1.258906057 |             | -0.315179532 | -0.787042795                         |                  |
|         | 0.667315426                           | 2                           | 0            | 0.972491774 |              |                                      |                  |
| SOCS7   | ENSG00000274211.4                     | 0.149557438                 | 1            | 1           | 0.149557438  |                                      |                  |
|         | Brain_Putamen_basal_ganglia           | 0.149557438                 |              |             |              | Brain_Putamen_basal_ganglia          | 1                |
|         | 1                                     | -1.441096445                | -1.441096445 |             | -1.441096445 | NA                                   | 1                |
|         | 0.972491774                           |                             |              |             |              | 0                                    |                  |
| EFNA4   | ENSG00000243364.7                     | 0.1496466                   | 1            | 1           | 0.1496466    | Brain_Cortex                         | 0.1496466        |
|         | Brain_Cortex                          | 1                           | 1            | 1           | 1.440780868  | 1.440780868                          | 1.440780868      |
|         | NA                                    | 1                           | 0            | 0.972491774 |              |                                      |                  |
| TLR6    | ENSG00000174130.12                    | 0.14967149                  | 3            | 2           | 0.048545262  |                                      |                  |
|         | Brain_Putamen_basal_ganglia           | 0.079986283                 |              |             |              | Brain_Cerebellum                     | 2.819819307      |
|         | 0.059047718                           | 0.121132975                 | -1.972563965 |             | -1.750765664 | -1.866457032                         |                  |
|         | 0.111209342                           | 2                           | 0            | 0.972491774 |              |                                      |                  |
| COQ6    | ENSG00000119723.16                    | 0.149687671                 | 7            | 5           | 0.006139939  |                                      |                  |
|         | Brain_Hypothalamus                    | 0.328449204                 |              |             |              | Brain_Cerebellar_Hemisphere          | 5.249033164      |
|         | 0.073446817                           | 0.223354342                 | 0.977242315  |             | 2.740212925  | 1.672708783                          |                  |
|         | 0.577277223                           | 5                           | 0            | 0.972491774 |              |                                      |                  |
| LRRC3   | ENSG00000160233.7                     | 0.149694844                 | 4            | 4           | 0.03173205   |                                      |                  |
|         | Brain_Nucleus_accumbens_basal_ganglia | 0.871997126                 |              |             |              | Brain_Putamen_basal_ganglia          |                  |
|         | 2.008384387                           | 0.348054433                 | 0.348054433  |             | 0.161122238  | 2.147769767                          |                  |
|         | 1.192614846                           | 1.079460844                 | 4            | 0           | 0.972491774  |                                      |                  |
| CBX2    | ENSG00000173894.10                    | 0.149721945                 | 2            | 2           | 0.081522831  |                                      |                  |
|         | Brain_Caudate_basal_ganglia           | 0.262991283                 |              |             |              | Brain_Cortex                         | 1.146315619      |
|         | 0.853684381                           | 0.853684381                 | 1.119348991  |             | 1.741917789  | 1.43063339                           |                  |
|         | 0.440222619                           | 2                           | 0            | 0.972491774 |              |                                      |                  |
| MMS22L  | ENSG00000146263.11                    | 0.149725086                 | 1            | 1           | 0.149725086  |                                      |                  |
|         | Brain_Amygdala                        | 0.149725086                 |              |             |              | Brain_Amygdala                       | 1                |
|         | 1.440503198                           | 1.440503198                 | NA           | 1           | 0            | 0.972491774                          | 1.440503198      |
|         | 1.440503198                           | 1.440503198                 | NA           | 1           | 0            | 0.972491774                          |                  |
| SLC45A4 | ENSG00000022567.9                     | 0.149784027                 | 1            | 1           | 0.149784027  |                                      |                  |
|         | Brain_Cerebellum                      | 0.149784027                 |              |             |              | Brain_Cerebellum                     | 1                |
|         |                                       |                             |              |             |              |                                      | 1                |
|         |                                       |                             |              |             |              |                                      | 1                |
|         |                                       |                             |              |             |              |                                      | 1.440294746      |

|              |                                       |                   |              |              |             |                                       |             |                  |
|--------------|---------------------------------------|-------------------|--------------|--------------|-------------|---------------------------------------|-------------|------------------|
| 1.440294746  | 1.440294746                           | NA                | 1            | 0            | 0.972491774 |                                       |             |                  |
| MAP3K7       | ENSG00000135341.17                    | 0.149853061       |              | 1            | 1           | 0.149853061                           |             |                  |
|              | Brain_Frontal_Cortex_BA9              | 0.149853061       |              |              |             | Brain_Frontal_Cortex_BA9              | 1           | 1                |
| 1            | -1.440050681                          | -1.440050681      |              | -1.440050681 | NA          | 1                                     | 0           |                  |
|              | 0.972491774                           |                   |              |              |             |                                       |             |                  |
| NPIPB9       | ENSG00000196993.8                     | 0.149856171       |              | 10           | 2           | 0.020848054                           |             |                  |
|              | Brain_Frontal_Cortex_BA9              | 0.184512534       |              |              |             | Brain_Nucleus_accumbens_basal_ganglia |             |                  |
|              | 9.037386483                           | 0.000619522       | 0.3239629    | -2.310724921 |             | -1.326988358                          |             |                  |
|              | -1.718511102                          | 0.296035548       | 2            | 0            | 0.972491774 |                                       |             |                  |
| MAPK4        | ENSG00000141639.11                    | 0.149856204       |              | 1            | 1           | 0.149856204                           |             |                  |
|              | Brain_Cerebellar_Hemisphere           | 0.149856204       |              |              |             | Brain_Cerebellar_Hemisphere1          | 1           | 1                |
| 1            | 1.440039572                           | 1.440039572       |              | 1.440039572  | NA          | 1                                     | 0           |                  |
|              | 0.972491774                           |                   |              |              |             |                                       |             |                  |
| RP11-329B9.3 | ENSG00000273403.1                     | 0.149867123       |              | 9            | 7           | 0.065344277                           |             |                  |
|              | Brain_Hypothalamus                    | 0.656122915       |              |              |             | Brain_Anterior_cingulate_cortex_BA24  |             |                  |
|              | 3.910752795                           | 0.046666421       | 0.448891466  | -1.687518429 |             | 1.842895449                           |             |                  |
|              | -0.389745034                          | 1.3230449         | 7            | 0            | 0.972491774 |                                       |             |                  |
| RP5-890E16.5 | ENSG00000278765.1                     | 0.149923271       |              | 4            | 4           | 0.060889211                           |             |                  |
|              | Brain_Hippocampus                     | 0.850704155       |              |              |             | Brain_Cerebellar_Hemisphere2          | 3.97655407  |                  |
|              | 0.28596296                            | 0.28596296        | -1.061776835 | 1.874299103  |             | 0.503365788                           |             |                  |
|              | 1.250051863                           | 4                 | 0            | 0.972491774  |             |                                       |             |                  |
| PDPN         | ENSG00000162493.16                    | 0.149963344       |              | 2            | 2           | 0.059391811                           |             |                  |
|              | Brain_Nucleus_accumbens_basal_ganglia | 0.84073167        |              |              |             | Brain_Frontal_Cortex_BA9              |             |                  |
|              | 1.150536105                           | 0.849463895       | 0.849463895  | -1.885281735 |             | 0.200957675                           |             |                  |
|              | -0.84216203                           | 1.475194034       | 2            | 0            | 0.972491774 |                                       |             |                  |
| SNX9         | ENSG00000130340.15                    | 0.150096013       |              | 1            | 1           | 0.150096013                           |             | Brain_Cerebellum |
|              | 0.150096013                           | Brain_Cerebellum1 | 1            | 1            | 1           | -1.439192419                          |             | -1.439192419     |
|              | -1.439192419                          | NA                | 1            | 0            | 0.972491774 |                                       |             |                  |
| ZNF142       | ENSG00000115568.15                    | 0.150217075       |              | 4            | 3           | 0.173479081                           |             |                  |
|              | Brain_Spinal_cord_cervical_c-1        | 0.841845642       |              |              |             |                                       |             |                  |
|              | Brain_Nucleus_accumbens_basal_ganglia | 2.936651073       |              |              |             | 0.022411063                           |             |                  |
|              | 0.284484521                           | 0.199533242       | 1.361109523  | 0.778267575  |             | 0.630844212                           |             |                  |
|              | 3                                     | 0                 | 0.972491774  |              |             |                                       |             |                  |
| TMEM102      | ENSG00000181284.2                     | 0.150233195       |              | 1            | 1           | 0.150233195                           |             |                  |
|              | Brain_Frontal_Cortex_BA9              | 0.150233195       |              |              |             | Brain_Frontal_Cortex_BA9              | 1           | 1                |
| 1            | -1.43870827                           | -1.43870827       |              | -1.43870827  | NA          | 1                                     | 0           |                  |
|              | 0.972491774                           |                   |              |              |             |                                       |             |                  |
| HS3ST3B1     | ENSG00000125430.8                     | 0.150482949       |              | 2            | 2           | 0.056397987                           |             |                  |
|              | Brain_Frontal_Cortex_BA9              | 0.803638375       |              |              |             | Brain_Cortex                          | 1.070505721 |                  |
|              | 0.929494279                           | 0.929494279       | -0.24864115  | 1.907947621  |             | 0.829653236                           |             |                  |
|              | 1.524938544                           | 2                 | 0            | 0.972491774  |             |                                       |             |                  |
| AK9          | ENSG00000155085.15                    | 0.150490706       |              | 13           | 1           | 0.054798279                           |             |                  |
|              | Brain_Anterior_cingulate_cortex_BA24  | 0.397943016       |              |              |             | Brain_Amygdala                        |             |                  |
|              | 11.89873663                           | 0.009149878       | 11.89873663  | -1.920472221 |             | -0.845300619                          |             |                  |
|              | -1.382742355                          | 0.321677698       | 1            | 0            | 0.972491774 |                                       |             |                  |
| NAGA         | ENSG00000198951.11                    | 0.150595698       |              | 13           | 3           | 0.043147152                           |             |                  |
|              | Brain_Hippocampus                     | 0.757973159       |              |              |             | Brain_Substantia_nigra                | 11.16957949 |                  |
|              | 0.000429491                           | 0.571709814       | -0.308143479 | 2.022282724  |             | 1.28337613                            |             |                  |
|              | 0.577420967                           | 3                 | 0            | 0.972491774  |             |                                       |             |                  |
| C21orf62     | ENSG00000205929.10                    | 0.150656763       |              | 1            | 1           | 0.150656763                           |             |                  |
|              | Brain_Spinal_cord_cervical_c-1        | 0.150656763       |              |              |             | Brain_Spinal_cord_cervical_c-1        |             |                  |
| 1            | 1                                     | 1                 | -1.437215526 | -1.437215526 |             | -1.437215526                          | NA          | 1                |
|              | 0.972491774                           |                   |              |              |             |                                       |             |                  |
| ZNF616       | ENSG00000204611.6                     | 0.150670615       |              | 1            | 1           | 0.150670615                           |             |                  |
|              | Brain_Substantia_nigra                | 0.150670615       |              |              |             | Brain_Substantia_nigra                | 1           | 1                |
| 1            | -1.437166763                          | -1.437166763      |              | -1.437166763 | NA          | 1                                     | 0           |                  |
|              | 0.972491774                           |                   |              |              |             |                                       |             |                  |
| LINC00886    | ENSG00000240875.5                     | 0.150703804       |              | 9            | 8           | 0.021723911                           |             |                  |
|              | Brain_Putamen_basal_ganglia           | 0.830940271       |              |              |             | Brain_Spinal_cord_cervical_c-1        |             |                  |
|              | 4.042561341                           | 0.114296064       | 0.182893619  | -2.295160796 |             | 1.181341146                           |             |                  |
|              | -0.514960496                          | 1.029430957       | 8            | 0            | 0.972491774 |                                       |             |                  |
| TP53TG3D     | ENSG00000205456.11                    | 0.150713253       |              | 1            | 1           | 0.150713253                           |             |                  |

|               |                                       |                                      |             |   |                             |              |   |   |                  |
|---------------|---------------------------------------|--------------------------------------|-------------|---|-----------------------------|--------------|---|---|------------------|
|               | Brain_Nucleus_accumbens_basal_ganglia | 0.150713253                          |             |   |                             |              |   |   |                  |
|               | Brain_Nucleus_accumbens_basal_ganglia | 1                                    | 1           | 1 | -1.437016684                |              |   |   |                  |
|               | -1.437016684                          | -1.437016684                         | NA          | 1 | 0                           | 0.972491774  |   |   |                  |
| CCDC88A       | ENSG00000115355.15                    | 0.150945025                          | 2           | 1 | 0.110303066                 |              |   |   |                  |
|               | Brain_Cerebellum                      | 0.204864643                          |             |   | Brain_Cerebellar_Hemisphere | 1.989212176  |   |   |                  |
|               | 0.010787824                           | 1.989212176                          |             |   | 1.267813266                 | 1.596832424  |   |   | 1.432322845      |
|               | 0.232651677                           | 1                                    | 0           |   | 0.972491774                 |              |   |   |                  |
| SPA17         | ENSG00000064199.6                     | 0.150976522                          | 4           | 4 | 0.011139101                 |              |   |   |                  |
|               | Brain_Frontal_Cortex_BA9              | 0.755933105                          |             |   | Brain_Putamen_basal_ganglia |              |   |   |                  |
|               | 2.677206823                           | 0.107299481                          |             |   | 0.107299481                 | -2.538304514 |   |   | -0.310825734     |
|               | -1.881043371                          | 1.05346344                           | 4           | 0 | 0.972491774                 |              |   |   |                  |
| BCKDHA        | ENSG00000248098.11                    | 0.150988827                          | 2           | 2 | 0.059528727                 |              |   |   |                  |
|               | Brain_Cerebellum                      | 0.593479497                          |             |   | Brain_Cortex                | 1.028527583  |   |   | 0.971472417      |
|               | 0.971472417                           | -1.884268045                         |             |   | 0.533800602                 | -0.675233722 |   |   | 1.709832738      |
|               | 2                                     | 0                                    |             |   | 0.972491774                 |              |   |   |                  |
| GPM6A         | ENSG00000150625.16                    | 0.150988939                          | 1           | 1 | 0.150988939                 |              |   |   |                  |
|               | Brain_Nucleus_accumbens_basal_ganglia | 0.150988939                          |             |   |                             |              |   |   |                  |
|               | Brain_Nucleus_accumbens_basal_ganglia | 1                                    | 1           | 1 | 1.4360471                   | 1.4360471    |   |   |                  |
|               | 1.4360471                             | NA                                   | 1           | 0 | 0.972491774                 |              |   |   |                  |
| RP11-873E20.1 | ENSG00000267397.1                     | 0.15103699                           | 3           | 3 | 0.050842489                 |              |   |   |                  |
|               | Brain_Caudate_basal_ganglia           | 0.765282477                          |             |   | Brain_Frontal_Cortex_BA9    |              |   |   |                  |
|               | 1.683660739                           | 0.569055201                          |             |   | 0.569055201                 | -1.952806827 |   |   | -0.298551237     |
|               | -1.241792753                          | 0.851227101                          |             |   | 3                           | 0            |   |   | 0.972491774      |
| ZBTB14        | ENSG00000198081.10                    | 0.151096177                          | 1           | 1 | 0.151096177                 |              |   |   |                  |
|               | Brain_Amygdala                        | 0.151096177                          |             |   | Brain_Amygdala              | 1            | 1 | 1 | -1.435670313     |
|               | -1.435670313                          | -1.435670313                         | NA          | 1 | 0                           | 0.972491774  |   |   |                  |
| SELL          | ENSG00000188404.8                     | 0.151177501                          | 8           | 3 | 0.177862691                 |              |   |   |                  |
|               | Brain_Anterior_cingulate_cortex_BA24  | 0.75943808                           |             |   |                             |              |   |   |                  |
|               | Brain_Nucleus_accumbens_basal_ganglia | 7.056545898                          |             |   | 0.002665709                 |              |   |   | 0.2688395        |
|               | -1.347365049                          | 0.476093382                          |             |   | -0.490153248                | 0.512908906  |   | 3 | 0                |
|               | 0.972491774                           |                                      |             |   |                             |              |   |   |                  |
| FGF17         | ENSG00000158815.10                    | 0.151334209                          | 2           | 2 | 0.066377595                 |              |   |   | Brain_Cerebellum |
|               | 0.530443493                           | Brain_Cortex                         | 1.005416144 |   | 0.994583856                 |              |   |   | 0.994583856      |
|               | -0.62732916                           | 1.835865205                          |             |   | 0.604268022                 | 1.741741439  |   | 2 | 0                |
|               | 0.972491774                           |                                      |             |   |                             |              |   |   |                  |
| TULP3         | ENSG00000078246.16                    | 0.151352935                          | 10          | 2 | 0.080292983                 |              |   |   | Brain_Amygdala   |
|               | 0.958877807                           | Brain_Cerebellar_Hemisphere          | 8.144139816 |   | 0.001341591                 |              |   |   |                  |
|               | 1.499406458                           | -1.748988638                         |             |   | 0.187477476                 | -1.185146964 |   |   | 0.71627163       |
|               | 0                                     | 0.972491774                          |             |   |                             |              |   |   | 2                |
| ARHGAP24      | ENSG00000138639.17                    | 0.151353421                          | 1           | 1 | 0.151353421                 |              |   |   |                  |
|               | Brain_Substantia_nigra                | 0.151353421                          |             |   | Brain_Substantia_nigra      | 1            | 1 |   |                  |
|               | 1                                     | -1.434767292                         |             |   | -1.434767292                | NA           | 1 | 0 |                  |
|               | 0.972491774                           |                                      |             |   |                             |              |   |   |                  |
| ALPK1         | ENSG00000073331.17                    | 0.1513788                            | 3           | 3 | 0.068718763                 |              |   |   | Brain_Cerebellum |
|               | 0.725581664                           | Brain_Anterior_cingulate_cortex_BA24 | 1.412555218 |   |                             |              |   |   |                  |
|               | 0.645329813                           | 0.645329813                          |             |   | -1.820264316                | 0.817898002  |   |   | -0.217119135     |
|               | 1.40785376                            | 3                                    | 0           |   | 0.972491774                 |              |   |   |                  |
| ZDHHC19       | ENSG00000163958.13                    | 0.151496748                          | 1           | 1 | 0.151496748                 |              |   |   |                  |
|               | Brain_Caudate_basal_ganglia           | 0.151496748                          |             |   | Brain_Caudate_basal_ganglia | 1            | 1 |   |                  |
|               | 1                                     | -1.43426467                          |             |   | -1.43426467                 | NA           | 1 | 0 |                  |
|               | 0.972491774                           |                                      |             |   |                             |              |   |   |                  |
| MUM1          | ENSG00000160953.15                    | 0.151516821                          | 12          | 7 | 0.040284697                 |              |   |   | Brain_Cerebellum |
|               | 0.8683988                             | Brain_Putamen_basal_ganglia          | 7.27149742  |   | 0.000698368                 |              |   |   | 0.288228087      |
|               | -1.866259401                          | 2.050817768                          |             |   | 0.911499559                 | 1.248907756  |   | 7 | 0                |
|               | 0.972491774                           |                                      |             |   |                             |              |   |   |                  |
| NSMCE4A       | ENSG00000107672.14                    | 0.151619299                          | 4           | 4 | 0.389456784                 |              |   |   |                  |
|               | Brain_Cortex                          | 0.974623636                          |             |   | Brain_Frontal_Cortex_BA9    | 2.575632564  |   |   |                  |
|               | 0.216300162                           | 0.216300162                          |             |   | -0.855528251                | 0.860602908  |   |   | 0.133305955      |
|               | 0.756317854                           | 4                                    | 0           |   | 0.972491774                 |              |   |   |                  |
| CRLS1         | ENSG00000088766.11                    | 0.151627062                          | 2           | 2 | 0.124489915                 |              |   |   | Brain_Cerebellum |
|               | 0.438303771                           | Brain_Cerebellar_Hemisphere          | 1.245512649 |   | 0.754487351                 |              |   |   |                  |
|               | 0.754487351                           | -0.775060737                         |             |   | 1.53619764                  | 0.380568452  |   |   | 1.634306471      |
|               |                                       |                                      |             |   |                             |              |   |   | 2                |

|              |                                       |                          |   |             |                             |                                       |              |             |             |
|--------------|---------------------------------------|--------------------------|---|-------------|-----------------------------|---------------------------------------|--------------|-------------|-------------|
| 0            | 0.972491774                           |                          |   |             |                             |                                       |              |             |             |
| EPB41L3      | ENSG00000082397.17                    | 0.15171293               | 1 | 1           | 0.15171293                  | Brain_Cerebellum                      |              |             |             |
|              | 0.15171293 Brain_Cerebellum1          |                          | 1 | 1           | 1.433507246                 | 1.433507246                           |              |             |             |
|              | 1.433507246 NA                        |                          | 1 | 0           | 0.972491774                 |                                       |              |             |             |
| IGSF5        | ENSG00000183067.5                     | 0.151755851              | 5 | 5           | 0.027609255                 |                                       |              |             |             |
|              | Brain_Hippocampus                     | 0.797382419              |   |             |                             | Brain_Nucleus_accumbens_basal_ganglia |              |             |             |
|              | 2.871751679                           | 0.267343255              |   |             | 0.267343255                 | -0.439075054                          | 2.20279423   |             |             |
|              | 0.532878557                           | 1.044887857              |   |             | 5                           | 0                                     | 0.972491774  |             |             |
| APOBEC3B     | ENSG00000179750.15                    | 0.151788257              | 1 | 1           | 0.151788257                 |                                       |              |             |             |
|              | Brain_Cortex                          | 0.151788257              |   |             | Brain_Cortex                | 1                                     | 1            | 1           | 1.433243517 |
|              | 1.433243517                           | 1.433243517              |   |             | NA                          | 1                                     | 0            | 0.972491774 |             |
| RN7SL832P    | ENSG00000243819.4                     | 0.151798827              | 1 | 1           | 0.151798827                 |                                       |              |             |             |
|              | Brain_Nucleus_accumbens_basal_ganglia | 0.151798827              |   |             |                             |                                       |              |             |             |
|              | Brain_Nucleus_accumbens_basal_ganglia | 1                        | 1 | 1           | -1.433206519                |                                       |              |             |             |
|              | -1.433206519                          | -1.433206519             |   |             | NA                          | 1                                     | 0            | 0.972491774 |             |
| CACNG2       | ENSG00000166862.6                     | 0.151859862              | 1 | 1           | 0.151859862                 |                                       |              |             |             |
|              | Brain_Anterior_cingulate_cortex_BA24  | 0.151859862              |   |             |                             |                                       |              |             |             |
|              | Brain_Anterior_cingulate_cortex_BA24  | 1                        | 1 | 1           | 1.432992916                 |                                       |              |             |             |
|              | 1.432992916                           | 1.432992916              |   |             | NA                          | 1                                     | 0            | 0.972491774 |             |
| TMOD4        | ENSG00000163157.14                    | 0.151864255              | 2 | 2           | 0.128372795                 | Brain_Cerebellum                      |              |             |             |
|              | 0.231725411                           | Brain_Frontal_Cortex_BA9 |   |             | 1.007428479                 | 0.992571521                           |              |             |             |
|              | 0.992571521                           | -1.19592607              |   |             | 1.52055003                  | 0.16231198                            | 1.920838672  | 2           | 0           |
|              | 0.972491774                           |                          |   |             |                             |                                       |              |             |             |
| SIRT4        | ENSG00000089163.4                     | 0.151961106              | 3 | 3           | 0.054221596                 |                                       |              |             |             |
|              | Brain_Frontal_Cortex_BA9              | 0.749032384              |   |             | Brain_Cerebellum            | 1.904566965                           |              |             |             |
|              | 0.344822915                           | 0.344822915              |   |             | -1.925062048                | -0.319915505                          | -0.861236576 |             |             |
|              | 0.921347922                           | 3                        | 0 | 0.972491774 |                             |                                       |              |             |             |
| WIPI1        | ENSG00000070540.12                    | 0.152109662              | 4 | 4           | 0.053458303                 |                                       |              |             |             |
|              | Brain_Nucleus_accumbens_basal_ganglia | 0.991523459              |   |             | Brain_Cerebellar_Hemisphere |                                       |              |             |             |
|              | 1.97084289                            | 0.069368653              |   |             | 0.069368653                 | -1.931200166                          | 0.010623969  |             |             |
|              | -1.0620788                            | 0.819729924              |   |             | 4                           | 0                                     | 0.972491774  |             |             |
| CNTLN        | ENSG00000044459.14                    | 0.152174417              | 5 | 4           | 0.028012752                 |                                       |              |             |             |
|              | Brain_Hippocampus                     | 0.725941114              |   |             | Brain_Cortex                | 3.397434516                           |              |             |             |
|              | 0.033886941                           | 0.303453704              |   |             | -2.197107753                | -0.350529821                          | -0.833789267 |             |             |
|              | 0.776205139                           | 4                        | 0 | 0.972491774 |                             |                                       |              |             |             |
| EXOC6B       | ENSG00000144036.15                    | 0.152255183              | 2 | 2           | 0.054535936                 |                                       |              |             |             |
|              | Brain_Frontal_Cortex_BA9              | 0.283838896              |   |             | Brain_Cerebellum            | 1.435176099                           |              |             |             |
|              | 0.564823901                           | 0.564823901              |   |             | -1.922555191                | -1.0717354                            | -1.497145295 |             |             |
|              | 0.601620444                           | 2                        | 0 | 0.972491774 |                             |                                       |              |             |             |
| CASC15       | ENSG00000272168.6                     | 0.152278462              | 6 | 2           | 0.072407768                 |                                       |              |             |             |
|              | Brain_Cortex                          | 0.838479262              |   |             | Brain_Cerebellum            | 5.43512629                            | 0.000460475  |             |             |
|              | 0.426888982                           | -1.796545723             |   |             | -0.203839068                | -0.9475308                            | 0.546898109  |             | 2           |
|              | 0                                     | 0.972491774              |   |             |                             |                                       |              |             |             |
| ELOVL7       | ENSG00000164181.13                    | 0.15230909               | 3 | 3           | 0.048955                    |                                       |              |             |             |
|              | Brain_Cerebellar_Hemisphere           | 0.753353727              |   |             | Brain_Substantia_nigra      |                                       |              |             |             |
|              | 1.626988808                           | 0.487460974              |   |             | 0.487460974                 | -0.314220298                          | 1.968983374  |             |             |
|              | 1.134186584                           | 1.259223078              |   |             | 3                           | 0                                     | 0.972491774  |             |             |
| SERPINF1     | ENSG00000132386.10                    | 0.152315276              | 1 | 1           | 0.152315276                 |                                       |              |             |             |
|              | Brain_Putamen_basal_ganglia           | 0.152315276              |   |             | Brain_Putamen_basal_ganglia | 1                                     | 1            |             |             |
|              | 1                                     | 1.431401162              |   |             | 1.431401162                 | NA                                    | 1            | 0           |             |
|              | 0.972491774                           |                          |   |             |                             |                                       |              |             |             |
| SLC4A2       | ENSG00000164889.13                    | 0.152403762              | 3 | 3           | 0.0422675                   |                                       |              |             |             |
|              | Brain_Cerebellar_Hemisphere           | 0.411595032              |   |             | Brain_Cortex                | 1.065725263                           |              |             |             |
|              | 0.940133018                           | 0.940133018              |   |             | -2.030876743                | -0.821089953                          | -1.239312753 |             |             |
|              | 0.685881734                           | 3                        | 0 | 0.972491774 |                             |                                       |              |             |             |
| RP11-542G1.1 | ENSG00000251185.1                     | 0.152404382              | 5 | 5           | 0.043247932                 |                                       |              |             |             |
|              | Brain_Hypothalamus                    | 0.263054696              |   |             | Brain_Amygdala              | 2.692127918                           |              |             |             |
|              | 0.139436691                           | 0.139436691              |   |             | 1.119200302                 | 2.02130761                            | 1.698109261  |             |             |
|              | 0.409500081                           | 5                        | 0 | 0.972491774 |                             |                                       |              |             |             |
| SPRED2       | ENSG00000198369.9                     | 0.152445805              | 2 | 2           | 0.063103056                 |                                       |              |             |             |
|              | Brain_Substantia_nigra                | 0.951755259              |   |             | Brain_Amygdala              | 1.256107371                           |              |             |             |
|              | 0.743892629                           | 0.743892629              |   |             | 0.060502708                 | 1.858464667                           | 0.959483688  |             |             |

|               |                                       |                                       |                                      |                   |              |              |                    |  |  |
|---------------|---------------------------------------|---------------------------------------|--------------------------------------|-------------------|--------------|--------------|--------------------|--|--|
|               | 1.271351094                           | 2                                     | 0                                    | 0.972491774       |              |              |                    |  |  |
| DMRT2         | ENSG00000173253.15                    |                                       | 0.152474663                          | 1                 | 1            | 0.152474663  |                    |  |  |
|               | Brain_Hippocampus                     |                                       | 0.152474663                          | Brain_Hippocampus | 1            | 1            | 1                  |  |  |
|               | -1.43084493                           | -1.43084493                           | -1.43084493                          | NA                | 1            | 0            | 0.972491774        |  |  |
| DSEL          | ENSG00000171451.13                    |                                       | 0.152484739                          | 2                 | 2            | 0.061625091  |                    |  |  |
|               | Brain_Spinal_cord_cervical_c-1        |                                       | 0.746778881                          |                   |              |              |                    |  |  |
|               | Brain_Anterior_cingulate_cortex_BA24  |                                       | 1.102900887                          |                   |              | 0.897099113  |                    |  |  |
|               | 0.897099113                           | -1.868983636                          | 0.322889563                          | -0.773047036      |              |              | 1.549888402        |  |  |
|               | 2                                     | 0                                     | 0.972491774                          |                   |              |              |                    |  |  |
| RP11-131L23.2 | ENSG00000273264.1                     |                                       | 0.152562451                          | 1                 | 1            | 0.152562451  |                    |  |  |
|               | Brain_Hippocampus                     |                                       | 0.152562451                          | Brain_Hippocampus | 1            | 1            | 1                  |  |  |
|               | 1.430538757                           | 1.430538757                           | 1.430538757                          | NA                | 1            | 0            | 0.972491774        |  |  |
| KCNK1         | ENSG00000135750.14                    |                                       | 0.152582757                          | 3                 | 3            | 0.022801682  |                    |  |  |
|               | Brain_Substantia_nigra                |                                       | 0.969076012                          | Brain_Cortex      | 1.11235599   | 0.87153977   |                    |  |  |
|               | 0.87153977                            | 0.03876718                            | 2.276741242                          | 0.89045511        | 1.210982413  | 3            | 0                  |  |  |
|               | 0.972491774                           |                                       |                                      |                   |              |              |                    |  |  |
| IGSF9         | ENSG00000085552.16                    |                                       | 0.152610131                          | 1                 | 1            | 0.152610131  |                    |  |  |
|               | Brain_Nucleus_accumbens_basal_ganglia |                                       | 0.152610131                          |                   |              |              |                    |  |  |
|               | Brain_Nucleus_accumbens_basal_ganglia | 1                                     | 1                                    | 1                 | -1.430372521 |              |                    |  |  |
|               | -1.430372521                          | -1.430372521                          | NA                                   | 1                 | 0            | 0.972491774  |                    |  |  |
| CUTA          | ENSG00000112514.15                    |                                       | 0.152720549                          | 2                 | 2            | 0.090971218  | Brain_Cerebellum   |  |  |
|               | 0.692935114                           | Brain_Frontal_Cortex_BA9              | 1.30181894                           | 0.69818106        | 0.69818106   |              |                    |  |  |
|               | -0.394875037                          | 1.690296639                           | 0.647710801                          | 1.474439032       | 2            | 0            |                    |  |  |
|               | 0.972491774                           |                                       |                                      |                   |              |              |                    |  |  |
| RP11-575F12.3 | ENSG00000278266.1                     |                                       | 0.15272259                           | 2                 | 2            | 0.053358303  |                    |  |  |
|               | Brain_Caudate_basal_ganglia           | 0.390539465                           | Brain_Amygdala                       | 1.367400731       |              |              |                    |  |  |
|               | 0.632599269                           | 0.632599269                           | 0.858639453                          | 1.932009747       |              | 1.3953246    |                    |  |  |
|               | 0.758987414                           | 2                                     | 0                                    | 0.972491774       |              |              |                    |  |  |
| PEF1          | ENSG00000162517.12                    |                                       | 0.152747811                          | 7                 | 5            | 0.027480679  |                    |  |  |
|               | Brain_Frontal_Cortex_BA9              | 0.52225647                            | Brain_Spinal_cord_cervical_c-1       |                   |              |              |                    |  |  |
|               | 4.425827003                           | 0.006137611                           | 0.2148637                            | -2.204621311      |              | 1.537312692  |                    |  |  |
|               | -1.168392321                          | 1.308863962                           | 5                                    | 0                 | 0.972491774  |              |                    |  |  |
| CIITA         | ENSG00000179583.18                    |                                       | 0.152864719                          | 1                 | 1            | 0.152864719  |                    |  |  |
|               | Brain_Caudate_basal_ganglia           | 0.152864719                           | Brain_Caudate_basal_ganglia          | 1                 | 1            |              |                    |  |  |
|               | 1                                     | 1.429485573                           | 1.429485573                          | 1.429485573       | NA           | 1            | 0                  |  |  |
|               | 0.972491774                           |                                       |                                      |                   |              |              |                    |  |  |
| HSPA13        | ENSG00000155304.5                     |                                       | 0.1529829                            | 2                 | 2            | 0.116859769  | Brain_Amygdala     |  |  |
|               | 0.168541318                           | Brain_Nucleus_accumbens_basal_ganglia | 1.161649461                          |                   |              |              |                    |  |  |
|               | 0.838350539                           | 0.838350539                           | 1.376905982                          | 1.568091546       |              | 1.472498764  |                    |  |  |
|               | 0.135188609                           | 2                                     | 0                                    | 0.972491774       |              |              |                    |  |  |
| ING2          | ENSG00000168556.6                     |                                       | 0.15301448                           | 1                 | 1            | 0.15301448   | Brain_Hypothalamus |  |  |
|               | 0.15301448                            | Brain_Hypothalamus                    | 1                                    | 1                 | 1            | -1.42896435  | -1.42896435        |  |  |
|               | -1.42896435                           | NA                                    | 1                                    | 0                 | 0.972491774  |              |                    |  |  |
| RHBDD1        | ENSG00000144468.16                    |                                       | 0.153122947                          | 6                 | 5            | 0.060619591  |                    |  |  |
|               | Brain_Frontal_Cortex_BA9              | 0.242120958                           | Brain_Anterior_cingulate_cortex_BA24 |                   |              |              |                    |  |  |
|               | 3.42397897                            | 0.025614641                           | 0.236741936                          | -1.876259972      |              | 1.169701887  |                    |  |  |
|               | -1.119772856                          | 1.148452451                           | 5                                    | 0                 | 0.972491774  |              |                    |  |  |
| KCNJ10        | ENSG00000177807.8                     |                                       | 0.153178093                          | 3                 | 3            | 0.107384574  |                    |  |  |
|               | Brain_Cerebellum                      | 0.719971424                           | Brain_Spinal_cord_cervical_c-1       | 1.021541746       |              |              |                    |  |  |
|               | 0.975400352                           | 0.975400352                           | -1.610060844                         | 0.358496984       |              | -0.950946263 |                    |  |  |
|               | 1.134019625                           | 3                                     | 0                                    | 0.972491774       |              |              |                    |  |  |
| RP11-347I19.8 | ENSG00000272849.1                     |                                       | 0.153219748                          | 10                | 3            | 0.009689614  |                    |  |  |
|               | Brain_Cerebellar_Hemisphere           | 0.643799326                           | Brain_Anterior_cingulate_cortex_BA24 |                   |              |              |                    |  |  |
|               | 8.33299523                            | 0.000239568                           | 0.28646648                           | 0.462393268       |              | 2.586713421  |                    |  |  |
|               | 2.005783275                           | 0.599935158                           | 3                                    | 0                 | 0.972491774  |              |                    |  |  |
| WNT6          | ENSG00000115596.3                     |                                       | 0.153256157                          | 1                 | 1            | 0.153256157  |                    |  |  |
|               | Brain_Substantia_nigra                | 0.153256157                           | Brain_Substantia_nigra               | 1                 | 1            |              |                    |  |  |
|               | 1                                     | -1.428124048                          | -1.428124048                         | -1.428124048      | NA           | 1            | 0                  |  |  |
|               | 0.972491774                           |                                       |                                      |                   |              |              |                    |  |  |
| CHD1L         | ENSG00000131778.18                    |                                       | 0.153347045                          | 7                 | 4            | 0.008983612  |                    |  |  |
|               | Brain_Nucleus_accumbens_basal_ganglia | 0.877223349                           | Brain_Cerebellum                     |                   |              |              |                    |  |  |
|               | 4.051020075                           | 0.03017911                            | 0.330556689                          | -0.172901083      |              | 2.61267715   | 1.08821574         |  |  |



|          |                                |                  |              |              |             |                                       |             |                  |   |
|----------|--------------------------------|------------------|--------------|--------------|-------------|---------------------------------------|-------------|------------------|---|
|          | 0.996852685                    | 4                | 0            | 0.972491774  |             |                                       |             |                  |   |
| RPS17    | ENSG00000182774.10             |                  | 0.153372955  | 4            | 3           | 0.026341371                           |             |                  |   |
|          | Brain_Spinal_cord_cervical_c-1 | 0.977011635      |              |              |             | Brain_Frontal_Cortex_BA9              |             |                  |   |
|          | 2.849225723                    | 0.05078984       | 0.177363316  |              |             | -2.221141621                          |             | -0.02881563      |   |
|          | -0.635063427                   | 1.059905859      | 3            | 0            | 0.972491774 |                                       |             |                  |   |
| RWDD2B   | ENSG00000156253.6              |                  | 0.153397941  | 13           | 1           | 0.108675783                           |             |                  |   |
|          | Brain_Substantia_nigra         | 0.1888123        |              |              |             | Brain_Caudate_basal_ganglia           | 12.58793791 |                  |   |
|          | 0.000169558                    | 12.58793791      | -1.604173644 |              |             | -1.314100755                          |             | -1.405700963     |   |
|          | 0.073698402                    | 1                | 0            | 0.972491774  |             |                                       |             |                  |   |
| C22orf34 | ENSG00000188511.12             |                  | 0.153609762  | 8            | 3           | 0.158718213                           |             |                  |   |
|          | Brain_Cerebellar_Hemisphere    | 0.915409758      |              |              |             | Brain_Hypothalamus                    | 6.715826654 |                  |   |
|          | 0.024655935                    | 0.2790929        | -1.409395639 |              |             | 0.448945064                           |             | -0.051932479     |   |
|          | 0.605242515                    | 3                | 0            | 0.972491774  |             |                                       |             |                  |   |
| RASA4    | ENSG00000105808.17             |                  | 0.153616812  | 6            | 6           | 0.028104498                           |             |                  |   |
|          | Brain_Caudate_basal_ganglia    | 0.749190303      |              |              |             | Brain_Cerebellar_Hemisphere           |             |                  |   |
|          | 3.439668002                    | 0.13481766       | 0.13481766   | 0.319707198  |             | 2.195824625                           |             |                  |   |
|          | 1.611519391                    | 0.682661542      | 6            | 0            | 0.972491774 |                                       |             |                  |   |
| TMEM132E | ENSG00000181291.6              |                  | 0.153817895  | 3            | 3           | 0.057678775                           |             |                  |   |
|          | Brain_Frontal_Cortex_BA9       | 0.426306359      |              |              |             | Brain_Cerebellum                      | 1.134492632 |                  |   |
|          | 0.868317649                    | 0.868317649      | -0.795528122 |              |             | 1.898131397                           |             | 0.633394395      |   |
|          | 1.354314611                    | 3                | 0            | 0.972491774  |             |                                       |             |                  |   |
| TIMM22   | ENSG00000177370.4              |                  | 0.153865159  | 10           | 10          | 0.008373145                           |             |                  |   |
|          | Brain_Putamen_basal_ganglia    | 0.997180643      |              |              |             | Brain_Cerebellum                      | 1.994003629 |                  |   |
|          | 0.347068172                    | 0.347068172      | 0.003533547  |              |             | 2.636640787                           |             | 1.004098115      |   |
|          | 0.923823844                    | 10               | 0            | 0.972491774  |             |                                       |             |                  |   |
| PRICKLE2 | ENSG00000163637.12             |                  | 0.153872925  | 2            | 2           | 0.161648343                           |             |                  |   |
|          | Brain_Caudate_basal_ganglia    | 0.222328892      |              |              |             | Brain_Putamen_basal_ganglia           | 1.07950498  |                  |   |
|          | 0.92049502                     | 0.92049502       | -1.220358791 | 1.399549242  |             | 0.089595225                           |             |                  |   |
|          | 1.852554736                    | 2                | 0            | 0.972491774  |             |                                       |             |                  |   |
| S100BPB  | ENSG00000116497.17             |                  | 0.154096078  | 2            | 2           | 0.055411014                           |             |                  |   |
|          | Brain_Frontal_Cortex_BA9       | 0.575104565      |              |              |             | Brain_Nucleus_accumbens_basal_ganglia |             |                  |   |
|          | 1.155520055                    | 0.844479945      | 0.844479945  |              |             | 0.560549677                           |             | 1.915639375      |   |
|          | 1.238094526                    | 0.958193114      | 2            | 0            | 0.972491774 |                                       |             |                  |   |
| GGA1     | ENSG00000100083.18             |                  | 0.154134451  | 2            | 2           | 0.066799336                           |             |                  |   |
|          | Brain_Caudate_basal_ganglia    | 0.533942976      |              |              |             | Brain_Cortex                          | 1.003081284 |                  |   |
|          | 0.996918716                    | 0.996918716      | -1.833021754 |              |             | -0.621998316                          |             | -1.227510035     |   |
|          | 0.856322885                    | 2                | 0            | 0.972491774  |             |                                       |             |                  |   |
| WNT3     | ENSG00000108379.9              |                  | 0.154163321  | 12           | 12          | 0.003049231                           |             |                  |   |
|          | Brain_Frontal_Cortex_BA9       | 0.930590165      |              |              |             | Brain_Substantia_nigra                |             |                  |   |
|          | 2.396709333                    | 0.30213477       | 0.30213477   | -2.962730786 |             | 1.643996477                           |             |                  |   |
|          | -0.60898777                    | 1.188231663      | 12           | 0            | 0.972491774 |                                       |             |                  |   |
| JMJD6    | ENSG00000070495.14             |                  | 0.154202626  | 1            | 1           | 0.154202626                           |             | Brain_Cerebellum |   |
|          | 0.154202626                    | Brain_Cerebellum | 1            | 1            | 1           | -1.424842875                          |             | -1.424842875     |   |
|          | -1.424842875                   | NA               | 1            | 0            | 0.972491774 |                                       |             |                  |   |
| TSC1     | ENSG00000165699.13             |                  | 0.154246017  | 9            | 2           | 0.099436424                           |             |                  |   |
|          | Brain_Substantia_nigra         | 0.394691653      |              |              |             | Brain_Hippocampus                     | 7.708994566 |                  |   |
|          | 1.75E-05                       | 1.000150204      | 0.851139883  |              |             | 1.647591996                           |             | 1.041340432      |   |
|          | 0.254551338                    | 2                | 0            | 0.972491774  |             |                                       |             |                  |   |
| PCDHGA6  | ENSG00000253731.2              |                  | 0.154261064  | 8            | 5           | 0.165674889                           |             |                  |   |
|          | Brain_Cerebellar_Hemisphere    | 0.980381232      |              |              |             | Brain_Hypothalamus                    | 6.192468283 |                  |   |
|          | 0.008355499                    | 0.274989586      | -1.386235879 |              |             | 0.425841291                           |             | -0.774626561     |   |
|          | 0.705997509                    | 5                | 0            | 0.972491774  |             |                                       |             |                  |   |
| RAB3B    | ENSG00000169213.6              |                  | 0.154321076  | 3            | 3           | 0.025140862                           |             |                  |   |
|          | Brain_Caudate_basal_ganglia    | 0.726654179      |              |              |             | Brain_Frontal_Cortex_BA9              |             |                  |   |
|          | 1.905648746                    | 0.10526835       | 0.10526835   | -2.239231421 |             | 0.349579658                           |             |                  |   |
|          | -1.30895152                    | 1.439877822      | 3            | 0            | 0.972491774 |                                       |             |                  |   |
| SELENOW  | ENSG00000178980.14             |                  | 0.154327081  | 3            | 3           | 0.037111588                           |             |                  |   |
|          | Brain_Spinal_cord_cervical_c-1 | 0.664013423      |              |              |             | Brain_Cerebellum                      | 1.555520727 |                  |   |
|          | 0.547024286                    | 0.547024286      | -2.084534365 |              |             | -0.434378755                          |             | -1.296587858     |   |
|          | 0.82758056                     | 3                | 0            | 0.972491774  |             |                                       |             |                  |   |
| MON2     | ENSG00000061987.14             |                  | 0.154392335  | 1            | 1           | 0.154392335                           |             |                  |   |
|          | Brain_Hypothalamus             | 0.154392335      |              |              |             | Brain_Hypothalamus                    | 1           | 1                | 1 |

|                |                                       |              |              |             |                                       |                                      |
|----------------|---------------------------------------|--------------|--------------|-------------|---------------------------------------|--------------------------------------|
| 1.424187042    | 1.424187042                           | 1.424187042  | NA           | 1           | 0                                     | 0.972491774                          |
| ANKRD27        | ENSG00000105186.15                    | 0.154399311  | 10           | 4           | 0.093432427                           |                                      |
|                | Brain_Cerebellar_Hemisphere           | 0.963038485  |              |             |                                       | Brain_Anterior_cingulate_cortex_BA24 |
| 6.387096378    | 0.021257773                           | 0.223358004  |              |             | -1.677563072                          | 0.321083482                          |
| -0.700723515   | 0.792027999                           | 4            | 0            | 0.972491774 |                                       |                                      |
| OTUD3          | ENSG00000169914.5                     | 0.154486856  | 13           | 1           | 0.101703008                           | Brain_Cortex                         |
| 0.402919343    | Brain_Substantia_nigra                |              |              |             | 11.34635091                           | 0.008272082                          |
| 11.34635091    | 0.836418795                           | 1.636652936  |              |             | 1.327168249                           | 0.210345448                          |
| 1              | 0                                     | 0.972491774  |              |             |                                       |                                      |
| MASTL          | ENSG00000120539.14                    | 0.154527068  | 11           | 3           | 0.104189363                           |                                      |
|                | Brain_Substantia_nigra                | 0.98556661   |              |             | Brain_Amygdala                        | 9.307290269                          |
| 0.007588403    | -0.502517423                          | -1.624874219 |              |             | 0.147023018                           | -0.539149401                         |
| 0.513267298    | 3                                     | 0            | 0.972491774  |             |                                       |                                      |
| RP11-1263C18.2 | ENSG00000283183.1                     | 0.154578146  | 4            | 4           | 0.048347396                           |                                      |
|                | Brain_Cortex                          | 0.907747407  |              |             | Brain_Cerebellum                      | 1.474858316                          |
| 0.565356695    | -1.069511669                          | 1.974302153  |              |             | -0.003319552                          | 1.428770904                          |
| 4              | 0                                     | 0.972491774  |              |             |                                       |                                      |
| LEF1           | ENSG00000138795.9                     | 0.154598792  | 1            | 1           | 0.154598792                           |                                      |
|                | Brain_Hypothalamus                    | 0.154598792  |              |             | Brain_Hypothalamus                    | 1 1 1                                |
| 1.423474005    | 1.423474005                           | 1.423474005  | NA           | 1           | 0                                     | 0.972491774                          |
| RP11-783K16.13 | ENSG00000257086.1                     | 0.154638654  | 10           | 2           | 0.048050747                           |                                      |
|                | Brain_Anterior_cingulate_cortex_BA24  | 0.862534254  |              |             | Brain_Cerebellum                      |                                      |
| 8.503586772    | 0.004820919                           | 0.736416935  |              |             | -1.976919355                          | -0.173149072                         |
| -1.481218488   | 0.599629043                           | 2            | 0            | 0.972491774 |                                       |                                      |
| KIAA1324L      | ENSG00000164659.14                    | 0.154652669  | 3            | 3           | 0.037708865                           |                                      |
|                | Brain_Hippocampus                     | 0.954892083  |              |             | Brain_Cerebellum                      | 1.229889922                          |
| 0.844598635    | 0.844598635                           | -2.078005362 |              |             | 0.056564539                           | -1.079401035                         |
| 1.073893966    | 3                                     | 0            | 0.972491774  |             |                                       |                                      |
| SECISBP2L      | ENSG00000138593.8                     | 0.154766886  | 1            | 1           | 0.154766886                           |                                      |
|                | Brain_Putamen_basal_ganglia           | 0.154766886  |              |             | Brain_Putamen_basal_ganglia           | 1 1                                  |
| 1              | 1.422893999                           | 1.422893999  | 1.422893999  | NA          | 1                                     | 0                                    |
| 0.972491774    |                                       |              |              |             |                                       |                                      |
| ANO4           | ENSG00000151572.16                    | 0.154846711  | 2            | 2           | 0.121564361                           |                                      |
|                | Brain_Putamen_basal_ganglia           | 0.26135031   |              |             | Brain_Nucleus_accumbens_basal_ganglia |                                      |
| 1.020261268    | 0.979738732                           | 0.979738732  |              |             | -1.548240679                          | -1.123205304                         |
| -1.335722992   | 0.300545396                           | 2            | 0            | 0.972491774 |                                       |                                      |
| SAFB2          | ENSG00000130254.11                    | 0.154965666  | 1            | 1           | 0.154965666                           |                                      |
|                | Brain_Nucleus_accumbens_basal_ganglia | 0.154965666  |              |             |                                       |                                      |
|                | Brain_Nucleus_accumbens_basal_ganglia | 1            | 1            | 1           | 1.422208727                           |                                      |
| 1.422208727    | 1.422208727                           | NA           | 1            | 0           | 0.972491774                           |                                      |
| LINC01671      | ENSG00000225431.1                     | 0.155007816  | 2            | 1           | 0.149783671                           |                                      |
|                | Brain_Nucleus_accumbens_basal_ganglia | 0.160761757  |              |             | Brain_Putamen_basal_ganglia           |                                      |
| 1.99814845     | 0.00185155                            | 1.99814845   | -1.440296006 |             | -1.402514188                          | -1.421405097                         |
| 0.026715779    | 1                                     | 0            | 0.972491774  |             |                                       |                                      |
| EMILIN1        | ENSG00000138080.13                    | 0.155136306  | 1            | 1           | 0.155136306                           |                                      |
|                | Brain_Amygdala                        | 0.155136306  |              |             | Brain_Amygdala                        | 1 1 1                                |
| 1.421620997    | 1.421620997                           | NA           | 1            | 0           | 0.972491774                           | 1.421620997                          |
| PLEKHF2        | ENSG00000175895.3                     | 0.15534015   | 1            | 1           | 0.15534015                            | Brain_Hippocampus                    |
| 0.15534015     | Brain_Hippocampus                     | 1            | 1            | 1           | -1.420919547                          | -1.420919547                         |
| -1.420919547   | NA                                    | 1            | 0            | 0.972491774 |                                       |                                      |
| KIAA1024       | ENSG00000169330.8                     | 0.155352495  | 3            | 3           | 0.119471114                           |                                      |
|                | Brain_Cerebellar_Hemisphere           | 0.936616531  |              |             | Brain_Cerebellum                      | 1.685646967                          |
| 0.389636671    | -0.389636671                          | -1.556997354 |              |             | 1.152263348                           | -0.108403624                         |
| 1.364371921    | 3                                     | 0            | 0.972491774  |             |                                       |                                      |
| PDZD9          | ENSG00000155714.13                    | 0.15536101   | 2            | 2           | 0.247571867                           |                                      |
|                | Brain_Nucleus_accumbens_basal_ganglia | 0.424669559  |              |             | Brain_Frontal_Cortex_BA9              |                                      |
| 1.481015275    | 0.518984725                           | 0.518984725  |              |             | -1.156267232                          | 0.798346295                          |
| -0.178960468   | 1.38212048                            | 2            | 0            | 0.972491774 |                                       |                                      |
| ANXA3          | ENSG00000138772.12                    | 0.155365338  | 9            | 5           | 0.037452985                           |                                      |
|                | Brain_Caudate_basal_ganglia           | 0.867650382  |              |             | Brain_Hippocampus                     | 6.632464019                          |
| 0.004343408    | 0.221664503                           | -2.080791602 |              |             | -0.166643731                          | -0.755316485                         |
| 0.567831243    | 5                                     | 0            | 0.972491774  |             |                                       |                                      |

PWAR6 ENSG00000257151.1 0.155507443 1 1 0.155507443  
Brain\_Nucleus\_accumbens\_basal\_ganglia 0.155507443  
Brain\_Nucleus\_accumbens\_basal\_ganglia 1 1 1 -1.420344392  
-1.420344392 -1.420344392 NA 1 0 0.972491774  
BATF3 ENSG00000123685.8 0.155515224 6 2 0.076806262  
Brain\_Putamen\_basal\_ganglia 0.938153437 Brain\_Cortex 5.165328707  
0.004129925 0.516852878 0.077590956 1.769525244 1.232898416  
0.602023042 2 0 0.972491774  
MICA ENSG00000204520.12 0.155583387 13 2 0.064166044  
Brain\_Nucleus\_accumbens\_basal\_ganglia 0.377982479 Brain\_Cerebellum  
10.66255347 0.003606476 1.724513045 -1.851024395 -0.881619735  
-1.203824595 0.253730118 2 0 0.972491774  
AC012354.6 ENSG00000225156.2 0.155638534 3 3 0.083269139  
Brain\_Caudate\_basal\_ganglia 0.264662857 Brain\_Nucleus\_accumbens\_basal\_ganglia  
1.204108738 0.778068461 0.778068461 -1.115437805 1.732024846  
0.674454015 1.558599181 3 0 0.972491774  
SUSD5 ENSG00000173705.8 0.155706649 6 6 0.030916562  
Brain\_Putamen\_basal\_ganglia 0.899536711 Brain\_Caudate\_basal\_ganglia  
1.914595063 0.225732658 0.225732658 -1.282117776 2.158144979  
0.202819454 1.283131743 6 0 0.972491774  
CTC-461F20.1 ENSG00000250415.1 0.155732513 2 2 0.062380944  
Brain\_Cerebellar\_Hemisphere 0.619912017 Brain\_Cerebellum 1.00017055 0.99982945  
0.99982945 -0.495975045 1.863578327 0.683801641 1.66845619 2 0  
0.972491774  
AP001505.10 ENSG00000276529.1 0.155816454 12 2 0.119863959  
Brain\_Putamen\_basal\_ganglia 0.732651599 Brain\_Nucleus\_accumbens\_basal\_ganglia  
11.2360993 3.32E-05 0.415105135 0.341600449 1.555344861 0.49756384  
0.336919538 2 0 0.972491774  
HSDL2 ENSG00000119471.14 0.155903141 4 4 0.033613321 Brain\_Amygdala  
0.878298902 Brain\_Cortex 2.635031889 0.139568701 0.139568701  
0.153126014 2.124680035 1.238431733 1.007973137 4 0  
0.972491774  
BTBD6 ENSG00000184887.13 0.155929958 4 3 0.075102658  
Brain\_Frontal\_Cortex\_BA9 0.982161426 Brain\_Cerebellum 2.796886165  
0.085780607 0.201169202 -0.0223592 1.779836893 0.680323629  
0.77795133 3 0 0.972491774  
ECHDC3 ENSG00000134463.14 0.15596912 11 4 0.097214393  
Brain\_Spinal\_cord\_cervical\_c-1 0.970913337 Brain\_Cortex 8.687139612  
0.0080629 0.291283372 -1.65851088 1.521391452 -0.244764023  
0.809883728 4 0 0.972491774  
SOX21-AS1 ENSG00000227640.2 0.156019224 1 1 0.156019224  
Brain\_Nucleus\_accumbens\_basal\_ganglia 0.156019224  
Brain\_Nucleus\_accumbens\_basal\_ganglia 1 1 1 -1.418587804  
-1.418587804 -1.418587804 NA 1 0 0.972491774  
AACS ENSG00000081760.16 0.156069634 7 7 0.030840388  
Brain\_Putamen\_basal\_ganglia 0.869086084 Brain\_Caudate\_basal\_ganglia  
2.969935519 0.20664197 0.20664197 -1.052780488 2.159126068  
0.582660557 0.980144489 7 0 0.972491774  
LINC01607 ENSG00000272138.1 0.156092921 8 8 0.043005242  
Brain\_Caudate\_basal\_ganglia 0.903078913 Brain\_Hypothalamus 1.434204661  
0.575088398 0.575088398 -1.080638379 2.023659079 0.56448543  
0.961508556 8 0 0.972491774  
C7orf61 ENSG00000185955.4 0.156096374 2 2 0.387590005  
Brain\_Cortex 0.39521019 Brain\_Spinal\_cord\_cervical\_c-1 1.604457116  
0.395542884 0.395542884 -0.863996152 0.850206677 -0.006894737  
1.212124444 2 0 0.972491774  
EXOC6 ENSG00000138190.16 0.156122032 2 2 0.117375127  
Brain\_Cerebellar\_Hemisphere 0.622385496 Brain\_Nucleus\_accumbens\_basal\_ganglia  
1.355979475 0.644020525 0.644020525 -1.565886774 -0.492472304  
-1.029179539 0.759018651 2 0 0.972491774  
POLD2 ENSG00000106628.10 0.15612938 7 3 0.098487499  
Brain\_Nucleus\_accumbens\_basal\_ganglia 0.987016902 Brain\_Hippocampus

|               |                                       |                             |                             |              |                       |
|---------------|---------------------------------------|-----------------------------|-----------------------------|--------------|-----------------------|
|               | 5.302232729                           | 0.006966312                 | 0.647228122                 | -0.503269199 | 1.652230854           |
|               | 0.303080742                           | 0.802650405                 | 3 0                         | 0.972491774  |                       |
| TRRAP         | ENSG00000196367.12                    | 0.156206981                 | 1 1                         | 0.156206981  |                       |
|               | Brain_Nucleus_accumbens_basal_ganglia | 0.156206981                 |                             |              |                       |
|               | Brain_Nucleus_accumbens_basal_ganglia | 1 1                         | 1                           | -1.417944459 |                       |
|               | -1.417944459                          | -1.417944459                | NA 1 0                      | 0.972491774  |                       |
| RP5-999L4.2   | ENSG00000275142.1                     | 0.156499829                 | 4 3                         | 0.041824063  |                       |
|               | Brain_Hippocampus                     | 0.133651145                 | Brain_Substantia_nigra      | 2.818405365  |                       |
|               | 0.012204188                           | 0.214843385                 | -2.035266517                | -1.499858171 | -1.733095274          |
|               | 0.261513364                           | 3 0                         | 0.972491774                 |              |                       |
| SIX5          | ENSG00000177045.7                     | 0.156515606                 | 1 1                         | 0.156515606  |                       |
|               | Brain_Nucleus_accumbens_basal_ganglia | 0.156515606                 |                             |              |                       |
|               | Brain_Nucleus_accumbens_basal_ganglia | 1 1                         | 1                           | -1.416888237 |                       |
|               | -1.416888237                          | -1.416888237                | NA 1 0                      | 0.972491774  |                       |
| LPCAT1        | ENSG00000153395.9                     | 0.156579065                 | 2 2                         | 0.059329589  |                       |
|               | Brain_Cerebellar_Hemisphere           | 0.156730357                 | Brain_Cerebellum            | 1.857480573  |                       |
|               | 0.142519427                           | 0.142519427                 | -1.885743051                | -1.416154218 | -1.650948634          |
|               | 0.332049448                           | 2 0                         | 0.972491774                 |              |                       |
| CTD-2315E11.1 | ENSG00000259685.2                     | 0.156630119                 | 7 6                         | 0.005269608  |                       |
|               | Brain_Caudate_basal_ganglia           | 0.660437803                 | Brain_Cerebellar_Hemisphere |              |                       |
|               | 4.210449152                           | 0.094402089                 | 0.215034047                 | -2.790073458 | 0.439308794           |
|               | -1.861576624                          | 1.173611478                 | 6 0                         | 0.972491774  |                       |
| APEX1         | ENSG00000100823.11                    | 0.156731666                 | 2 2                         | 0.153517781  |                       |
|               | Brain_Nucleus_accumbens_basal_ganglia | 0.275858506                 | Brain_Cerebellar_Hemisphere |              |                       |
|               | 1.133700259                           | 0.866299741                 | 0.866299741                 | 1.089670067  | 1.427215526           |
|               | 1.258442797                           | 0.238680683                 | 2 0                         | 0.972491774  |                       |
| XRCC2         | ENSG00000196584.2                     | 0.156818114                 | 13 3                        | 0.158794015  |                       |
|               | Brain_Hippocampus                     | 0.900534785                 | Brain_Amygdala              | 11.06176618  | 2.63E-17              |
|               | 0.395459271                           | -1.119798181                | 1.40913919                  | 0.839312486  | 0.716934733 3         |
|               | 0 0.972491774                         |                             |                             |              |                       |
| GPLD1         | ENSG00000112293.14                    | 0.156823625                 | 2 2                         | 0.17094916   |                       |
|               | Brain_Putamen_basal_ganglia           | 0.307190804                 | Brain_Frontal_Cortex_BA9    |              |                       |
|               | 1.218519403                           | 0.781480597                 | 0.781480597                 | -1.369160342 | 1.021134321           |
|               | -0.17401301                           | 1.690193565                 | 2 0                         | 0.972491774  |                       |
| SRPRB         | ENSG00000144867.11                    | 0.15683411                  | 4 4                         | 0.074812161  |                       |
|               | Brain_Putamen_basal_ganglia           | 0.945121031                 | Brain_Hippocampus           | 1.582589979  |                       |
|               | 0.43441675                            | 0.43441675                  | -1.781614239                | 0.740317384  | -0.629640799          |
|               | 1.172582098                           | 4 0                         | 0.972491774                 |              |                       |
| ZNRF1         | ENSG00000186187.11                    | 0.15683766                  | 1 1                         | 0.15683766   | Brain_Hypothalamus    |
|               | 0.15683766                            | Brain_Hypothalamus          | 1 1 1                       | -1.415787742 | -1.415787742          |
|               | -1.415787742                          | NA 1 0                      | 0.972491774                 |              |                       |
| MTMR6         | ENSG00000139505.11                    | 0.156883988                 | 3 1                         | 0.129466365  |                       |
|               | Brain_Frontal_Cortex_BA9              | 0.214678253                 | Brain_Cerebellum            | 2.957701924  |                       |
|               | 0.009439358                           | 2.957701924                 | -1.516209587                | -1.240803756 | -1.405620707          |
|               | 0.145490913                           | 1 0                         | 0.972491774                 |              |                       |
| IFT43         | ENSG00000119650.12                    | 0.156965988                 | 1 1                         | 0.156965988  | Brain_Cerebellum      |
|               | 0.156965988                           | Brain_Cerebellum            | 1 1 1                       | 1.415349705  | 1.415349705           |
|               | 1.415349705                           | NA 1 0                      | 0.972491774                 |              |                       |
| ETAA1         | ENSG00000143971.7                     | 0.157100388                 | 4 4                         | 0.036416289  | Brain_Cortex          |
|               | 0.810139877                           | Brain_Cerebellar_Hemisphere | 1.589430217                 | 0.444523616  |                       |
|               | 0.444523616                           | -2.092248533                | 1.56978631                  | -0.40267205  | 1.524242167 4         |
|               | 0 0.972491774                         |                             |                             |              |                       |
| PTGER3        | ENSG00000050628.20                    | 0.157176552                 | 3 3                         | 0.100664183  |                       |
|               | Brain_Anterior_cingulate_cortex_BA24  | 0.940139318                 | Brain_Frontal_Cortex_BA9    |              |                       |
|               | 2.164448585                           | 0.301060337                 | 0.301060337                 | -0.532398056 | 1.641642168           |
|               | 0.344716451                           | 1.146208451                 | 3 0                         | 0.972491774  |                       |
| LRTM1         | ENSG00000144771.7                     | 0.157237418                 | 1 1                         | 0.157237418  | Brain_Cortex          |
|               | 0.157237418                           | Brain_Cortex                | 1 1 1                       | -1.4144241   | -1.4144241 -1.4144241 |
|               | NA 1 0                                | 0.972491774                 |                             |              |                       |
| PARP10        | ENSG00000178685.13                    | 0.157301711                 | 2 2                         | 0.054504597  |                       |
|               | Brain_Spinal_cord_cervical_c-1        | 0.956226557                 | Brain_Substantia_nigra      |              |                       |
|               | 1.005278446                           | 0.994721554                 | 0.994721554                 | 0.054889424  | 1.922804581           |

|              |                                       |                             |                                       |              |                          |                  |              |  |
|--------------|---------------------------------------|-----------------------------|---------------------------------------|--------------|--------------------------|------------------|--------------|--|
|              | 0.988847003                           | 1.320815474                 | 2                                     | 0            | 0.972491774              |                  |              |  |
| PFN2         | ENSG00000070087.13                    | 0.15757611                  | 1                                     | 1            | 0.15757611               | Brain_Cerebellum | 0.15757611   |  |
|              | Brain_Cerebellum                      | 1                           | 1                                     | 1.413270822  | 1.413270822              |                  | 1.413270822  |  |
|              | NA                                    | 1                           | 0                                     | 0.972491774  |                          |                  |              |  |
| UBN1         | ENSG00000118900.14                    | 0.15757879                  | 1                                     | 1            | 0.15757879               | Brain_Cerebellum | 0.15757879   |  |
|              | Brain_Cerebellum                      | 1                           | 1                                     | -1.413261704 | -1.413261704             |                  | -1.413261704 |  |
|              | NA                                    | 1                           | 0                                     | 0.972491774  |                          |                  |              |  |
| KAT8         | ENSG00000103510.19                    | 0.15770392                  | 11                                    | 2            | 0.007802196              |                  |              |  |
|              | Brain_Caudate_basal_ganglia           | 0.296742588                 |                                       |              | Brain_Frontal_Cortex_BA9 |                  |              |  |
|              | 9.618986962                           | 0.002869283                 | 0.756016019                           |              | 1.04344425               | 2.660511933      |              |  |
|              | 1.788195844                           | 0.424784441                 | 2                                     | 0            | 0.972491774              |                  |              |  |
| HNRNPAL2     | ENSG00000139675.11                    | 0.157714433                 | 12                                    | 3            | 0.039995847              |                  |              |  |
|              | Brain_Amygdala                        | 0.537970397                 | Brain_Substantia_nigra                | 10.40447491  |                          |                  |              |  |
|              | 0.002325084                           | 0.409499146                 | -2.053791801                          |              | -0.615885038             |                  | -1.091273682 |  |
|              | 0.363609695                           | 3                           | 0                                     | 0.972491774  |                          |                  |              |  |
| BBOF1        | ENSG00000119636.15                    | 0.157771403                 | 9                                     | 4            | 0.187375902              |                  |              |  |
|              | Brain_Cerebellar_Hemisphere           | 0.630526859                 | Brain_Nucleus_accumbens_basal_ganglia |              |                          |                  |              |  |
|              | 6.25760275                            | 0.020035774                 | 0.291937209                           |              | -1.199519464             | 1.318381706      |              |  |
|              | 0.717462942                           | 0.770340163                 | 4                                     | 0            | 0.972491774              |                  |              |  |
| MAPK1        | ENSG00000100030.14                    | 0.157882009                 | 2                                     | 2            | 0.057617359              |                  |              |  |
|              | Brain_Nucleus_accumbens_basal_ganglia | 0.854414252                 | Brain_Hippocampus                     |              |                          |                  |              |  |
|              | 1.05856939                            | 0.94143061                  | 0.94143061                            | 0.183489123  | 1.898597947              | 1.041043535      |              |  |
|              | 1.21276508                            | 2                           | 0                                     | 0.972491774  |                          |                  |              |  |
| LKAAEAR1     | ENSG00000171695.10                    | 0.157885998                 | 4                                     | 4            | 0.036187864              |                  |              |  |
|              | Brain_Nucleus_accumbens_basal_ganglia | 0.5578333                   | Brain_Caudate_basal_ganglia           |              |                          |                  |              |  |
|              | 1.192809462                           | 0.789552104                 | 0.789552104                           |              | -2.094810247             | 1.057477093      |              |  |
|              | -0.161956872                          | 1.494073979                 | 4                                     | 0            | 0.972491774              |                  |              |  |
| SYCE3        | ENSG00000217442.3                     | 0.157918227                 | 12                                    | 3            | 0.025137934              |                  |              |  |
|              | Brain_Putamen_basal_ganglia           | 0.739666347                 | Brain_Amygdala                        | 9.791099082  |                          |                  |              |  |
|              | 1.18E-17                              | 0.356442074                 | 0.332295222                           |              | 2.239276446              | 1.834819956      |              |  |
|              | 0.557624757                           | 3                           | 0                                     | 0.972491774  |                          |                  |              |  |
| CCDC50       | ENSG00000152492.13                    | 0.157962948                 | 3                                     | 3            | 0.087390906              |                  |              |  |
|              | Brain_Hippocampus                     | 0.205546037                 | Brain_Caudate_basal_ganglia           | 1.757120167  |                          |                  |              |  |
|              | 0.246128862                           | 0.246128862                 | -1.413812245                          |              | 1.709324241              |                  | -0.323465321 |  |
|              | 1.761999992                           | 3                           | 0                                     | 0.972491774  |                          |                  |              |  |
| CSNK1E       | ENSG00000213923.11                    | 0.157978159                 | 3                                     | 3            | 0.087383579              |                  |              |  |
|              | Brain_Hippocampus                     | 0.994351347                 | Brain_Nucleus_accumbens_basal_ganglia |              |                          |                  |              |  |
|              | 1.275422042                           | 0.739592684                 | 0.739592684                           |              | -1.360795975             | 1.709363817      |              |  |
|              | 0.118549146                           | 1.538112279                 | 3                                     | 0            | 0.972491774              |                  |              |  |
| HAUS4        | ENSG00000092036.18                    | 0.158031423                 | 13                                    | 1            | 0.117743045              |                  |              |  |
|              | Brain_Hypothalamus                    | 0.237822449                 | Brain_Amygdala                        | 12.3665029   | 0.000789305              |                  |              |  |
|              | 12.3665029                            | -1.564317412                | -1.180447074                          |              | -1.377515108             | 0.105827191      | 1            |  |
|              | 0                                     | 0.972491774                 |                                       |              |                          |                  |              |  |
| RMDN3        | ENSG00000137824.15                    | 0.158039952                 | 10                                    | 3            | 0.027349305              |                  |              |  |
|              | Brain_Substantia_nigra                | 0.835992713                 | Brain_Cerebellum                      | 7.885959685  |                          |                  |              |  |
|              | 0.00161022                            | 0.310186144                 | -0.207021954                          |              | 2.20649578               | 1.780425446      |              |  |
|              | 0.728097619                           | 3                           | 0                                     | 0.972491774  |                          |                  |              |  |
| SCIMP        | ENSG00000161929.14                    | 0.15811572                  | 4                                     | 4            | 0.042535871              |                  |              |  |
|              | Brain_Nucleus_accumbens_basal_ganglia | 0.719898884                 | Brain_Cerebellum                      |              |                          |                  |              |  |
|              | 1.691594018                           | 0.566936308                 | 0.566936308                           |              | -2.028238907             | 1.146954767      |              |  |
|              | -0.152828079                          | 1.397559438                 | 4                                     | 0            | 0.972491774              |                  |              |  |
| LINC01740    | ENSG00000228067.1                     | 0.15835619                  | 4                                     | 2            | 0.048841076              |                  |              |  |
|              | Brain_Putamen_basal_ganglia           | 0.094741246                 | Brain_Amygdala                        | 3.742693875  |                          |                  |              |  |
|              | 0.04721698                            | 0.161635062                 | -1.969976391                          |              | -1.670900941             | -1.85625244      |              |  |
|              | 0.129133432                           | 2                           | 0                                     | 0.972491774  |                          |                  |              |  |
| LITAF        | ENSG00000189067.12                    | 0.158373569                 | 3                                     | 3            | 0.044472752              | Brain_Cerebellum |              |  |
|              | 0.766830321                           | Brain_Cerebellar_Hemisphere | 1.444746197                           |              | 0.635433056              |                  |              |  |
|              | 0.635433056                           | -0.296523503                | 2.009607452                           |              | 0.802537359              | 1.156853271      |              |  |
|              | 3                                     | 0                           | 0.972491774                           |              |                          |                  |              |  |
| RP11-85E16.1 | ENSG00000272984.1                     | 0.158549426                 | 1                                     | 1            | 0.158549426              |                  |              |  |
|              | Brain_Anterior_cingulate_cortex_BA24  | 0.158549426                 |                                       |              |                          |                  |              |  |
|              | Brain_Anterior_cingulate_cortex_BA24  | 1                           | 1                                     | 1            | -1.409967003             |                  |              |  |

|               |                                |                             |                   |              |             |              |                                       |                |
|---------------|--------------------------------|-----------------------------|-------------------|--------------|-------------|--------------|---------------------------------------|----------------|
|               | -1.409967003                   | -1.409967003                | NA                | 1            | 0           | 0.972491774  |                                       |                |
| MVB12A        | ENSG00000141971.12             | 0.158584062                 |                   |              | 6           | 5            | 0.284600716                           |                |
|               | Brain_Putamen_basal_ganglia    | 0.968113099                 |                   |              |             |              | Brain_Caudate_basal_ganglia           |                |
|               | 4.114555035                    | 0.055790615                 | 0.209148684       |              |             |              | -1.070041308                          | 0.963851292    |
|               | -0.245617314                   | 0.689165159                 | 5                 | 0            |             |              | 0.972491774                           |                |
| DHODH         | ENSG00000102967.11             | 0.158622833                 |                   | 12           | 4           | 0.025726358  |                                       | Brain_Amygdala |
|               | 0.600016116                    | Brain_Caudate_basal_ganglia | 9.633607806       |              |             | 0.002984373  |                                       |                |
|               | 0.335127185                    | -2.230317711                | -0.524377337      |              |             |              | -1.418460247                          | 0.548554788    |
|               | 4                              | 0                           | 0.972491774       |              |             |              |                                       |                |
| HGSNAT        | ENSG00000165102.14             | 0.158777963                 |                   |              | 1           | 1            | 0.158777963                           |                |
|               | Brain_Caudate_basal_ganglia    | 0.158777963                 |                   |              |             |              | Brain_Caudate_basal_ganglia           | 1              |
|               | 1                              | 1.409193486                 | 1.409193486       | 1.409193486  | NA          | 1            | 0                                     |                |
|               | 0.972491774                    |                             |                   |              |             |              |                                       |                |
| RP4-737E23.2  | ENSG00000230387.2              | 0.158836203                 |                   |              | 6           | 5            | 0.072304938                           |                |
|               | Brain_Frontal_Cortex_BA9       | 0.857703366                 |                   |              |             |              | Brain_Nucleus_accumbens_basal_ganglia |                |
|               | 2.842137532                    | 0.072165928                 | 0.215286905       |              |             |              | -1.797193298                          | -0.179298447   |
|               | -1.261799069                   | 0.666258762                 | 5                 | 0            |             |              | 0.972491774                           |                |
| AFTPH         | ENSG00000119844.15             | 0.15887089                  | 1                 | 1            | 0.15887089  |              | Brain_Caudate_basal_ganglia           |                |
|               | 0.15887089                     | Brain_Caudate_basal_ganglia | 1                 | 1            | 1           | 1            | 1.408879203                           |                |
|               | 1.408879203                    | 1.408879203                 | NA                | 1            | 0           | 0.972491774  |                                       |                |
| PLCB2         | ENSG00000137841.11             | 0.158878553                 |                   |              | 1           | 1            | 0.158878553                           |                |
|               | Brain_Caudate_basal_ganglia    | 0.158878553                 |                   |              |             |              | Brain_Caudate_basal_ganglia           | 1              |
|               | 1                              | -1.408853292                | -1.408853292      | -1.408853292 | NA          | 1            | 0                                     |                |
|               | 0.972491774                    |                             |                   |              |             |              |                                       |                |
| BORCS8        | ENSG00000254901.7              | 0.15895361                  | 8                 | 4            | 0.082726011 |              |                                       |                |
|               | Brain_Cerebellar_Hemisphere    | 0.683395729                 |                   |              |             |              | Brain_Substantia_nigra                |                |
|               | 6.317686711                    | 0.011812242                 | 0.262154147       |              |             |              | -0.407833757                          | 1.735083533    |
|               | 0.984287427                    | 0.676042775                 | 4                 | 0            |             |              | 0.972491774                           |                |
| SLC24A3       | ENSG00000185052.11             | 0.159021254                 |                   |              | 1           | 1            | 0.159021254                           |                |
|               | Brain_Putamen_basal_ganglia    | 0.159021254                 |                   |              |             |              | Brain_Putamen_basal_ganglia           | 1              |
|               | 1                              | 1.408370958                 | 1.408370958       | 1.408370958  | NA          | 1            | 0                                     |                |
|               | 0.972491774                    |                             |                   |              |             |              |                                       |                |
| ZDBF2         | ENSG00000204186.7              | 0.159239043                 |                   | 4            | 3           | 0.027131897  |                                       |                |
|               | Brain_Putamen_basal_ganglia    | 0.11967874                  | Brain_Hippocampus |              |             | 3.007132454  |                                       |                |
|               | 0.067715926                    | 0.348012216                 | 1.55612345        | 2.209614955  |             | 1.897949597  |                                       |                |
|               | 0.309492442                    | 3                           | 0                 | 0.972491774  |             |              |                                       |                |
| COX7A1        | ENSG00000161281.10             | 0.159474111                 |                   |              | 10          | 8            | 0.018702786                           |                |
|               | Brain_Cerebellar_Hemisphere    | 0.550972219                 |                   |              |             |              | Brain_Frontal_Cortex_BA9              | 5.38012229     |
|               | 0.091105319                    | 0.227750896                 | 0.596303911       |              |             | 2.351402591  |                                       | 1.139627784    |
|               | 0.587011262                    | 8                           | 0                 | 0.972491774  |             |              |                                       |                |
| PRSS48        | ENSG00000189099.11             | 0.159560015                 |                   |              | 1           | 1            | 0.159560015                           |                |
|               | Brain_Putamen_basal_ganglia    | 0.159560015                 |                   |              |             |              | Brain_Putamen_basal_ganglia           | 1              |
|               | 1                              | 1.406552875                 | 1.406552875       | 1.406552875  | NA          | 1            | 0                                     |                |
|               | 0.972491774                    |                             |                   |              |             |              |                                       |                |
| RPUSD2        | ENSG00000166133.17             | 0.159608208                 |                   |              | 1           | 1            | 0.159608208                           |                |
|               | Brain_Cerebellar_Hemisphere    | 0.159608208                 |                   |              |             |              | Brain_Cerebellar_Hemisphere           | 1              |
|               | 1                              | -1.406390474                | -1.406390474      | -1.406390474 | NA          | 1            | 0                                     |                |
|               | 0.972491774                    |                             |                   |              |             |              |                                       |                |
| WHAMM         | ENSG00000156232.7              | 0.159720704                 |                   |              | 4           | 4            | 0.052208823                           | Brain_Cortex   |
|               | 0.842941609                    | Brain_Hippocampus           | 1.595128861       |              |             | 0.461440158  |                                       |                |
|               | 0.461440158                    | -0.19813223                 | 1.94140788        | 1.036179676  |             | 0.955174105  |                                       | 4              |
|               | 0                              | 0.972491774                 |                   |              |             |              |                                       |                |
| ADH5          | ENSG00000197894.10             | 0.159758349                 |                   | 9            | 6           | 0.004539593  |                                       |                |
|               | Brain_Spinal_cord_cervical_c-1 | 0.338829607                 |                   |              |             |              | Brain_Cortex                          | 5.045075156    |
|               | 0.007879834                    | 0.189295101                 | 0.956480351       |              |             | 2.83800883   |                                       | 2.039446711    |
|               | 0.724023053                    | 6                           | 0                 | 0.972491774  |             |              |                                       |                |
| RP5-1125A11.6 | ENSG00000275784.1              | 0.159832621                 |                   |              | 2           | 2            | 0.110660894                           |                |
|               | Brain_Cortex                   | 0.237480338                 | Brain_Cerebellum  | 1.078415112  |             | 0.921584888  |                                       |                |
|               | 0.921584888                    | -1.595229635                | 1.181308132       |              |             | -0.206960752 |                                       | 1.963308683    |
|               | 2                              | 0                           | 0.972491774       |              |             |              |                                       |                |
| ERGIC2        | ENSG00000087502.17             | 0.159970995                 |                   |              | 1           | 1            | 0.159970995                           |                |
|               | Brain_Hypothalamus             | 0.159970995                 |                   |              |             |              | Brain_Hypothalamus                    | 1              |
|               |                                |                             |                   |              |             |              |                                       | 1              |

|               |                                       |                                |                                |              |                                |                  |
|---------------|---------------------------------------|--------------------------------|--------------------------------|--------------|--------------------------------|------------------|
| 1.405169116   | 1.405169116                           | 1.405169116                    | NA                             | 1            | 0                              | 0.972491774      |
| ZNF77         | ENSG00000175691.8                     | 0.160032151                    | 1                              | 1            | 0.160032151                    |                  |
|               | Brain_Substantia_nigra                | 0.160032151                    |                                |              | Brain_Substantia_nigra         | 1 1              |
| 1             | -1.404963436                          | -1.404963436                   | -1.404963436                   | NA           | 1                              | 0                |
|               | 0.972491774                           |                                |                                |              |                                |                  |
| RHBDL1        | ENSG00000103269.13                    | 0.160186836                    | 1                              | 1            | 0.160186836                    |                  |
|               | Brain_Spinal_cord_cervical_c-1        | 0.160186836                    |                                |              | Brain_Spinal_cord_cervical_c-1 |                  |
| 1             | 1                                     | -1.404443464                   | -1.404443464                   | -1.404443464 | NA                             | 1 0              |
|               | 0.972491774                           |                                |                                |              |                                |                  |
| STRN4         | ENSG00000090372.14                    | 0.160310696                    | 4                              | 2            | 0.062926389                    | Brain_Cortex     |
|               | 0.079046982                           | Brain_Spinal_cord_cervical_c-1 |                                |              | 3.596766637                    | 0.049511343      |
|               | 0.263898896                           | -1.859711251                   | -1.75624267                    | -1.801550463 |                                | 0.04290423 2     |
|               | 0                                     | 0.972491774                    |                                |              |                                |                  |
| RP11-13K12.2  | ENSG00000267665.1                     | 0.160390308                    | 5                              | 5            | 0.163404388                    |                  |
|               | Brain_Nucleus_accumbens_basal_ganglia | 0.865752558                    |                                |              |                                |                  |
|               | Brain_Spinal_cord_cervical_c-1        | 1.788270447                    |                                |              | 0.235231041                    | 0.235231041      |
|               | -0.503965515                          | 1.393712671                    | 0.112604228                    | 0.765495328  |                                | 5 0              |
|               | 0.972491774                           |                                |                                |              |                                |                  |
| SNRPA1        | ENSG00000131876.16                    | 0.160458604                    | 1                              | 1            | 0.160458604                    |                  |
|               | Brain_Caudate_basal_ganglia           | 0.160458604                    |                                |              | Brain_Caudate_basal_ganglia    | 1 1              |
| 1             | 1.403530833                           | 1.403530833                    | 1.403530833                    | NA           | 1                              | 0                |
|               | 0.972491774                           |                                |                                |              |                                |                  |
| SPON1         | ENSG00000262655.3                     | 0.160542024                    | 3                              | 3            | 0.50299175                     | Brain_Cerebellum |
|               | 0.615672178                           | Brain_Cerebellar_Hemisphere    | 1.864870016                    |              | 0.143085582                    |                  |
|               | 0.143085582                           | -0.669789873                   | 0.50199338                     | -0.275561337 | 0.673404201                    | 3                |
|               | 0                                     | 0.972491774                    |                                |              |                                |                  |
| EIF3CL        | ENSG00000205609.12                    | 0.160553485                    | 1                              | 1            | 0.160553485                    |                  |
|               | Brain_Amygdala                        | 0.160553485                    | Brain_Amygdala                 | 1 1 1        | 1.403212488                    |                  |
|               | 1.403212488                           | 1.403212488                    | NA                             | 1 0          | 0.972491774                    |                  |
| RP11-108L7.14 | ENSG00000273476.1                     | 0.160553814                    | 1                              | 1            | 0.160553814                    |                  |
|               | Brain_Hypothalamus                    | 0.160553814                    | Brain_Hypothalamus             | 1 1 1        |                                |                  |
|               | 1.403211384                           | 1.403211384                    | 1.403211384                    | NA           | 1 0                            | 0.972491774      |
| CAPZA1        | ENSG00000116489.12                    | 0.160585054                    | 6                              | 5            | 0.058717167                    |                  |
|               | Brain_Nucleus_accumbens_basal_ganglia | 0.883793658                    |                                |              |                                |                  |
|               | Brain_Spinal_cord_cervical_c-1        | 4.184774928                    |                                |              | 0.074724313                    | 0.163522316      |
|               | -1.8903051                            | 0.347587165                    | -0.476055255                   | 0.797343547  | 5                              | 0                |
|               | 0.972491774                           |                                |                                |              |                                |                  |
| ADCY3         | ENSG00000138031.14                    | 0.160593319                    | 6                              | 3            | 0.133568826                    | Brain_Cortex     |
|               | 0.826260719                           | Brain_Spinal_cord_cervical_c-1 |                                |              | 5.117478209                    | 0.060244001      |
|               | 0.197817928                           | -1.500175972                   | 0.502874637                    | -0.643262073 |                                | 0.745762704      |
|               | 3                                     | 0                              | 0.972491774                    |              |                                |                  |
| SLC10A5       | ENSG00000253598.1                     | 0.160627353                    | 2                              | 2            | 0.294104002                    |                  |
|               | Brain_Cerebellar_Hemisphere           | 0.77126232                     | Brain_Cerebellum               | 1.742965861  |                                |                  |
|               | 0.257034139                           | 0.257034139                    | -1.04916105                    | 0.290724124  |                                | -0.379218463     |
|               | 0.947441893                           | 2                              | 0                              | 0.972491774  |                                |                  |
| TRIM63        | ENSG00000158022.6                     | 0.160645875                    | 3                              | 3            | 0.254736877                    |                  |
|               | Brain_Substantia_nigra                | 0.583196713                    | Brain_Cerebellar_Hemisphere    |              |                                |                  |
|               | 2.506732144                           | 0.124717592                    | 0.124717592                    | -1.138919152 |                                | 0.54872132       |
|               | -0.386816057                          | 0.858643519                    | 3                              | 0            | 0.972491774                    |                  |
| PIGM          | ENSG00000143315.6                     | 0.160651578                    | 1                              | 1            | 0.160651578                    |                  |
|               | Brain_Spinal_cord_cervical_c-1        | 0.160651578                    | Brain_Spinal_cord_cervical_c-1 |              |                                |                  |
| 1             | 1                                     | 1                              | -1.402883511                   | -1.402883511 | -1.402883511                   | NA 1 0           |
|               | 0.972491774                           |                                |                                |              |                                |                  |
| UBXN2A        | ENSG00000173960.13                    | 0.160654268                    | 2                              | 2            | 0.057735635                    |                  |
|               | Brain_Cerebellum                      | 0.877031767                    | Brain_Hippocampus              |              | 1.042755464                    |                  |
|               | 0.957244536                           | 0.957244536                    | -0.154733058                   | 1.897699833  |                                | 0.871483387      |
|               | 1.451289216                           | 2                              | 0                              | 0.972491774  |                                |                  |
| PPM1K         | ENSG00000163644.14                    | 0.160657677                    | 3                              | 3            | 0.129398142                    |                  |
|               | Brain_Substantia_nigra                | 0.504064507                    | Brain_Spinal_cord_cervical_c-1 |              |                                |                  |
|               | 1.090129567                           | 0.927471771                    | 0.927471771                    | -1.506986016 |                                | 1.516479532      |
|               | -0.219538239                          | 1.56084825                     | 3                              | 0            | 0.972491774                    |                  |
| BSN-AS2       | ENSG00000226913.1                     | 0.16067837                     | 8                              | 1            | 0.084852143                    | Brain_Cortex     |

|              |                                      |                                       |                                       |              |              |                    |             |  |
|--------------|--------------------------------------|---------------------------------------|---------------------------------------|--------------|--------------|--------------------|-------------|--|
|              | 0.284310597                          | Brain_Nucleus_accumbens_basal_ganglia | 7.503597808                           |              |              |                    |             |  |
|              | 0.006711218                          | 7.503597808                           | 1.070686095                           | 1.723201223  | 1.358809206  |                    |             |  |
|              | 0.244473807                          | 1                                     | 0                                     | 0.972491774  |              |                    |             |  |
| OGFRL1       | ENSG00000119900.7                    | 0.160762659                           | 3                                     | 2            | 0.063235071  |                    |             |  |
|              | Brain_Cerebellum                     | 0.850287548                           | Brain_Nucleus_accumbens_basal_ganglia |              |              |                    |             |  |
|              | 2.221684745                          | 0.002950839                           | 0.775364416                           | -1.857535042 | -0.188751549 |                    |             |  |
|              | -1.283826044                         | 0.948723392                           | 2                                     | 0            | 0.972491774  |                    |             |  |
| FOXD4        | ENSG00000170122.5                    | 0.160831972                           | 5                                     | 5            | 0.268145843  | Brain_Amygdala     |             |  |
|              | 0.876921782                          | Brain_Cerebellar_Hemisphere           | 3.510848069                           | 0.182327472  |              |                    |             |  |
|              | 0.182327472                          | -0.58111148                           | 1.107342577                           | 0.294996859  | 0.772590861  |                    |             |  |
|              | 5                                    | 0                                     | 0.972491774                           |              |              |                    |             |  |
| PCDHGB2      | ENSG00000253910.2                    | 0.160856729                           | 4                                     | 4            | 0.012619248  |                    |             |  |
|              | Brain_Cortex                         | 0.590834224                           | Brain_Cerebellum                      | 2.193569589  | 0.239780895  |                    |             |  |
|              | 0.239780895                          | 0.537627524                           | 2.494337529                           | 1.625978171  | 0.847574696  |                    |             |  |
|              | 4                                    | 0                                     | 0.972491774                           |              |              |                    |             |  |
| C8orf37      | ENSG00000156172.5                    | 0.160952088                           | 2                                     | 2            | 0.103186655  |                    |             |  |
|              | Brain_Caudate_basal_ganglia          | 0.95570105                            | Brain_Nucleus_accumbens_basal_ganglia |              |              |                    |             |  |
|              | 1.54714587                           | 0.45285413                            | 0.45285413                            | -1.62959721  | -0.055549055 | -0.842573132       |             |  |
|              | 1.113020124                          | 2                                     | 0                                     | 0.972491774  |              |                    |             |  |
| MRPL49       | ENSG00000149792.8                    | 0.161011631                           | 2                                     | 2            | 0.067878929  |                    |             |  |
|              | Brain_Frontal_Cortex_BA9             | 0.796702482                           | Brain_Cortex                          | 1.421594146  |              |                    |             |  |
|              | 0.578405854                          | 0.578405854                           | 0.257617035                           | 1.825809716  | 1.041713375  |                    |             |  |
|              | 1.10887968                           | 2                                     | 0                                     | 0.972491774  |              |                    |             |  |
| FGL1         | ENSG00000104760.16                   | 0.161287478                           | 2                                     | 2            | 0.083815483  |                    |             |  |
|              | Brain_Putamen_basal_ganglia          | 0.191031346                           | Brain_Nucleus_accumbens_basal_ganglia |              |              |                    |             |  |
|              | 1.309508823                          | 0.690491177                           | 0.690491177                           | -1.72896431  | -1.307534204 |                    |             |  |
|              | -1.518249257                         | 0.297996086                           | 2                                     | 0            | 0.972491774  |                    |             |  |
| DCBLD1       | ENSG00000164465.18                   | 0.161346489                           | 2                                     | 2            | 0.065153178  |                    |             |  |
|              | Brain_Frontal_Cortex_BA9             | 0.10543963                            | Brain_Cortex                          | 1.680252281  |              |                    |             |  |
|              | 0.319747719                          | 0.319747719                           | -1.844205629                          | -1.619035476 | -1.731620552 |                    |             |  |
|              | 0.159219342                          | 2                                     | 0                                     | 0.972491774  |              |                    |             |  |
| RXRB         | ENSG00000204231.10                   | 0.161385446                           | 3                                     | 3            | 0.342877546  | Brain_Cerebellum   |             |  |
|              | 0.638051171                          | Brain_Caudate_basal_ganglia           | 1.786514869                           | 0.348709716  |              |                    |             |  |
|              | 0.348709716                          | -0.852974326                          | 0.948494944                           | 0.188648649  | 0.933204938  |                    |             |  |
|              | 3                                    | 0                                     | 0.972491774                           |              |              |                    |             |  |
| ZNF133       | ENSG00000125846.15                   | 0.161423313                           | 1                                     | 1            | 0.161423313  |                    |             |  |
|              | Brain_Cerebellum                     | 0.161423313                           | Brain_Cerebellum                      | 1            | 1            | 1                  | 1.400300628 |  |
|              | 1.400300628                          | 1.400300628                           | NA                                    | 1            | 0            | 0.972491774        |             |  |
| DPT          | ENSG00000143196.4                    | 0.16143117                            | 1                                     | 1            | 0.16143117   | Brain_Hypothalamus |             |  |
|              | 0.16143117                           | Brain_Hypothalamus                    | 1                                     | 1            | 1            | 1.400274381        | 1.400274381 |  |
|              | 1.400274381                          | NA                                    | 1                                     | 0            | 0.972491774  |                    |             |  |
| RP11-88E10.4 | ENSG00000277159.1                    | 0.161451605                           | 9                                     | 4            | 0.009664281  |                    |             |  |
|              | Brain_Frontal_Cortex_BA9             | 0.702796726                           | Brain_Anterior_cingulate_cortex_BA24  |              |              |                    |             |  |
|              | 6.911833465                          | 0.002612227                           | 0.307187548                           | 0.381547912  | 2.587615422  |                    |             |  |
|              | 2.03755032                           | 0.697459423                           | 4                                     | 0            | 0.972491774  |                    |             |  |
| CARD9        | ENSG00000187796.13                   | 0.161471939                           | 2                                     | 2            | 0.116299933  | Brain_Cortex       |             |  |
|              | 0.256523815                          | Brain_Anterior_cingulate_cortex_BA24  | 1.031015502                           |              |              |                    |             |  |
|              | 0.968984498                          | 0.968984498                           | 1.134645657                           | 1.570495275  | 1.352570466  |                    |             |  |
|              | 0.308192221                          | 2                                     | 0                                     | 0.972491774  |              |                    |             |  |
| AP001432.14  | ENSG00000242553.1                    | 0.161519037                           | 1                                     | 1            | 0.161519037  |                    |             |  |
|              | Brain_Anterior_cingulate_cortex_BA24 | 0.161519037                           |                                       |              |              |                    |             |  |
|              | Brain_Anterior_cingulate_cortex_BA24 | 1                                     | 1                                     | 1            | -1.399980904 |                    |             |  |
|              | -1.399980904                         | -1.399980904                          | NA                                    | 1            | 0            | 0.972491774        |             |  |
| TSEN54       | ENSG00000182173.12                   | 0.161628875                           | 4                                     | 4            | 0.037851656  |                    |             |  |
|              | Brain_Hypothalamus                   | 0.385121998                           | Brain_Cerebellar_Hemisphere           | 2.583570964  |              |                    |             |  |
|              | 0.189788882                          | 0.189788882                           | -1.069633132                          | 2.076457516  | 0.789331633  |                    |             |  |
|              | 1.336841664                          | 4                                     | 0                                     | 0.972491774  |              |                    |             |  |
| TMEM204      | ENSG00000131634.13                   | 0.161733202                           | 1                                     | 1            | 0.161733202  |                    |             |  |
|              | Brain_Frontal_Cortex_BA9             | 0.161733202                           | Brain_Frontal_Cortex_BA9              | 1            | 1            |                    |             |  |
|              | 1                                    | 1.399266099                           | 1.399266099                           | 1.399266099  | NA           | 1                  | 0           |  |
|              | 0.972491774                          |                                       |                                       |              |              |                    |             |  |
| AQP5         | ENSG00000161798.6                    | 0.161739599                           | 13                                    | 7            | 0.021455571  |                    |             |  |



|               |                                       |              |                                      |                                       |              |             |                  |   |
|---------------|---------------------------------------|--------------|--------------------------------------|---------------------------------------|--------------|-------------|------------------|---|
|               | Brain_Hypothalamus                    | 0.853763305  |                                      | Brain_Spinal_cord_cervical_c-1        |              |             |                  |   |
|               | 7.780472862                           | 0.005652473  | 0.279092918                          | 0.184318879                           |              |             | 2.299870268      |   |
|               | 1.170170537                           | 0.724016625  | 7                                    | 0                                     | 0.972491774  |             |                  |   |
| RP1-149A16.17 | ENSG00000241954.1                     |              | 0.161759303                          | 5                                     | 3            | 0.043617746 |                  |   |
|               | Brain_Nucleus_accumbens_basal_ganglia | 0.881442555  |                                      | Brain_Caudate_basal_ganglia           |              |             |                  |   |
|               | 3.582796492                           | 0.076584617  | 0.450940409                          | -2.017745766                          | 0.149140771  |             |                  |   |
|               | -1.039695408                          | 0.882548335  | 3                                    | 0                                     | 0.972491774  |             |                  |   |
| RP11-238K6.1  | ENSG00000253288.1                     |              | 0.161773257                          | 4                                     | 4            | 0.26899737  |                  |   |
|               | Brain_Anterior_cingulate_cortex_BA24  | 0.658771403  |                                      | Brain_Hippocampus                     |              |             |                  |   |
|               | 1.935252177                           | 0.256954574  | 0.256954574                          | -0.851593259                          | 1.10537445   |             |                  |   |
|               | -0.22910194                           | 0.906083073  | 4                                    | 0                                     | 0.972491774  |             |                  |   |
| GOLGA6L10     | ENSG00000278662.4                     |              | 0.161839115                          | 13                                    | 2            | 0.013543412 |                  |   |
|               | Brain_Caudate_basal_ganglia           | 0.293359908  |                                      | Brain_Putamen_basal_ganglia           |              |             |                  |   |
|               | 11.10774795                           | 0.004280452  | 0.56441519                           | 1.050779423                           | 2.469150832  |             |                  |   |
|               | 1.647164992                           | 0.379398924  | 2                                    | 0                                     | 0.972491774  |             |                  |   |
| CPSF1         | ENSG00000071894.16                    |              | 0.161879401                          | 13                                    | 1            | 0.113908725 | Brain_Amygdala   |   |
|               | 0.234558786                           |              | Brain_Anterior_cingulate_cortex_BA24 | 12.63303091                           |              |             |                  |   |
|               | 0.000872659                           | 12.63303091  | -1.580865802                         | -1.188697345                          | -1.380279156 |             |                  |   |
|               | 0.093594545                           | 1            | 0                                    | 0.972491774                           |              |             |                  |   |
| TMEM8C        | ENSG00000187616.4                     |              | 0.161932454                          | 1                                     | 1            | 0.161932454 |                  |   |
|               | Brain_Caudate_basal_ganglia           | 0.161932454  |                                      | Brain_Caudate_basal_ganglia           | 1            | 1           |                  |   |
|               | 1                                     | -1.398601708 | -1.398601708                         | -1.398601708                          | NA           | 1           | 0                |   |
|               | 0.972491774                           |              |                                      |                                       |              |             |                  |   |
| RABGAP1       | ENSG00000011454.16                    |              | 0.161965048                          | 3                                     | 2            | 0.071144203 |                  |   |
|               | Brain_Frontal_Cortex_BA9              | 0.914383519  |                                      | Brain_Caudate_basal_ganglia           | 2.35409829   |             |                  |   |
|               | 0.029564973                           | 0.616336737  | 0.1075111                            | 1.80455591                            | 0.864794478  |             |                  |   |
|               | 0.863112942                           | 2            | 0                                    | 0.972491774                           |              |             |                  |   |
| COA6          | ENSG00000168275.14                    |              | 0.162011443                          | 8                                     | 5            | 0.051128956 |                  |   |
|               | Brain_Nucleus_accumbens_basal_ganglia | 0.95652885   |                                      | Brain_Frontal_Cortex_BA9              |              |             |                  |   |
|               | 5.702229713                           | 0.018033945  | 0.259365191                          | -1.05960047                           | 1.950395852  |             |                  |   |
|               | 0.108478626                           | 0.915428954  | 5                                    | 0                                     | 0.972491774  |             |                  |   |
| GLT1D1        | ENSG00000151948.11                    |              | 0.162125743                          | 4                                     | 4            | 0.029373109 |                  |   |
|               | Brain_Frontal_Cortex_BA9              | 0.527206351  |                                      | Brain_Caudate_basal_ganglia           |              |             |                  |   |
|               | 1.936011491                           | 0.209989782  | 0.209989782                          | -2.178442496                          | -0.632276294 |             |                  |   |
|               | -1.125327845                          | 0.718527879  | 4                                    | 0                                     | 0.972491774  |             |                  |   |
| CTTN          | ENSG00000085733.15                    |              | 0.162130987                          | 3                                     | 3            | 0.094116193 | Brain_Cerebellum |   |
|               | 0.558457275                           |              | Brain_Cerebellar_Hemisphere          | 2.473014587                           | 0.176953971  |             |                  |   |
|               | 0.176953971                           | 0.585134511  | 1.674073308                          | 1.180757255                           | 0.551631145  |             |                  |   |
|               | 3                                     | 0            | 0.972491774                          |                                       |              |             |                  |   |
| PPP1R21       | ENSG00000162869.15                    |              | 0.162179004                          | 9                                     | 6            | 0.108646726 |                  |   |
|               | Brain_Cerebellar_Hemisphere           | 0.960625998  |                                      | Brain_Nucleus_accumbens_basal_ganglia |              |             |                  |   |
|               | 5.682654896                           | 0.02767101   | 0.208022899                          | -1.604305514                          | 1.452149046  |             |                  |   |
|               | -0.212155549                          | 0.846174088  | 6                                    | 0                                     | 0.972491774  |             |                  |   |
| SLC18B1       | ENSG00000146409.10                    |              | 0.162253124                          | 1                                     | 1            | 0.162253124 |                  |   |
|               | Brain_Caudate_basal_ganglia           | 0.162253124  |                                      | Brain_Caudate_basal_ganglia           | 1            | 1           |                  |   |
|               | 1                                     | 1.397533752  | 1.397533752                          | 1.397533752                           | NA           | 1           | 0                |   |
|               | 0.972491774                           |              |                                      |                                       |              |             |                  |   |
| UBR3          | ENSG00000144357.16                    |              | 0.162305669                          | 1                                     | 1            | 0.162305669 |                  |   |
|               | Brain_Spinal_cord_cervical_c-1        | 0.162305669  |                                      | Brain_Spinal_cord_cervical_c-1        |              |             |                  |   |
|               | 1                                     | 1            | 1                                    | -1.39735891                           | -1.39735891  | -1.39735891 | NA               | 1 |
|               | 0.972491774                           |              |                                      |                                       |              |             |                  |   |
| PRDM4         | ENSG00000110851.11                    |              | 0.162307048                          | 4                                     | 3            | 0.107166861 | Brain_Cerebellum |   |
|               | 0.548970482                           |              | Brain_Frontal_Cortex_BA9             | 2.737638671                           | 0.00274357   |             |                  |   |
|               | 0.213900235                           | -1.611059014 | -0.599303549                         | -1.354486271                          | 0.503486538  |             |                  |   |
|               | 3                                     | 0            | 0.972491774                          |                                       |              |             |                  |   |
| PPWD1         | ENSG00000113593.11                    |              | 0.162354792                          | 13                                    | 2            | 0.067633755 | Brain_Cortex     |   |
|               | 0.645058384                           |              | Brain_Substantia_nigra               | 10.93050483                           | 0.006461624  |             |                  |   |
|               | 1.124464754                           | 0.460637943  | 1.82743923                           | 1.225082482                           | 0.457103949  |             | 2                |   |
|               | 0                                     | 0.972491774  |                                      |                                       |              |             |                  |   |
| TRIM21        | ENSG00000132109.9                     |              | 0.162510653                          | 3                                     | 3            | 0.031548871 |                  |   |
|               | Brain_Nucleus_accumbens_basal_ganglia | 0.815650858  |                                      | Brain_Cerebellum                      |              |             |                  |   |
|               | 1.585385528                           | 0.414744538  | 0.414744538                          | -0.890882205                          | 2.150080204  |             |                  |   |

|                |                                       |              |             |              |                                |             |                  |
|----------------|---------------------------------------|--------------|-------------|--------------|--------------------------------|-------------|------------------|
| 0.342018544    | 1.599990827                           | 3            | 0           | 0.972491774  |                                |             |                  |
| DNPEP          | ENSG00000123992.18                    | 0.162549679  | 6           | 3            | 0.025705134                    |             |                  |
|                | Brain_Nucleus_accumbens_basal_ganglia | 0.366676741  |             |              | Brain_Amygdala                 |             |                  |
| 4.515489027    | 0.048172179                           | 0.266158236  |             | 0.902715815  | 2.230637746                    |             |                  |
| 1.682997533    | 0.46250574                            | 3            | 0           | 0.972491774  |                                |             |                  |
| CENPV          | ENSG00000166582.9                     | 0.162572976  | 13          | 1            | 0.1275609                      |             |                  |
|                | Brain_Anterior_cingulate_cortex_BA24  | 0.214269435  |             |              | Brain_Putamen_basal_ganglia    |             |                  |
| 12.58167177    | 2.29E-06                              | 12.58167177  |             | -1.523791115 | -1.241910909                   |             |                  |
| -1.37457501    | 0.070878642                           | 1            | 0           | 0.972491774  |                                |             |                  |
| TRIM72         | ENSG00000177238.13                    | 0.162669633  | 9           | 4            | 0.015374356                    |             |                  |
|                | Brain_Nucleus_accumbens_basal_ganglia | 0.535283041  |             |              | Brain_Amygdala                 |             |                  |
| 6.223517118    | 0.011065213                           | 0.328593699  |             | -2.423438508 | -0.619961642                   |             |                  |
| -1.839288794   | 0.536135516                           | 4            | 0           | 0.972491774  |                                |             |                  |
| STAMBP         | ENSG00000124356.15                    | 0.162735144  | 1           | 1            | 0.162735144                    |             |                  |
|                | Brain_Putamen_basal_ganglia           | 0.162735144  |             |              | Brain_Putamen_basal_ganglia    | 1           | 1                |
| 1              | 1.395931434                           | 1.395931434  | 1.395931434 | NA           | 1                              | 0           |                  |
| 0.972491774    |                                       |              |             |              |                                |             |                  |
| HBS1L          | ENSG00000112339.14                    | 0.162768481  | 12          | 2            | 0.058741319                    |             |                  |
|                | Brain_Cerebellar_Hemisphere           | 0.987340283  |             |              | Brain_Caudate_basal_ganglia    |             |                  |
| 10.33111396    | 8.58E-06                              | 1.004957338  |             | -1.890124441 | -0.015867268                   |             |                  |
| -0.670254137   | 0.476188404                           | 2            | 0           | 0.972491774  |                                |             |                  |
| KIF26A         | ENSG00000066735.14                    | 0.16280391   | 2           | 2            | 0.060066843                    |             |                  |
|                | Brain_Caudate_basal_ganglia           | 0.698257337  |             |              | Brain_Hippocampus              | 1.042507554 |                  |
| 0.957492446    | 0.957492446                           | -1.880302645 |             | -0.387673949 | -1.133988297                   |             |                  |
| 1.055447873    | 2                                     | 0            | 0.972491774 |              |                                |             |                  |
| RP11-560I19.1  | ENSG00000234418.1                     | 0.162858947  | 2           | 2            | 0.058529108                    |             |                  |
|                | Brain_Cortex                          | 0.244116706  |             |              | Brain_Spinal_cord_cervical_c-1 | 1.513087673 |                  |
| 0.486912327    | 0.486912327                           | -1.89171392  |             | -1.164758638 | -1.528236279                   |             |                  |
| 0.51403501     | 2                                     | 0            | 0.972491774 |              |                                |             |                  |
| PRR29          | ENSG00000224383.7                     | 0.163080065  | 1           | 1            | 0.163080065                    |             |                  |
|                | Brain_Nucleus_accumbens_basal_ganglia | 0.163080065  |             |              |                                |             |                  |
|                | Brain_Nucleus_accumbens_basal_ganglia | 1            | 1           | 1            | 1.394787052                    |             |                  |
| 1.394787052    | 1.394787052                           | NA           | 1           | 0            | 0.972491774                    |             |                  |
| TIMM50         | ENSG00000105197.10                    | 0.163104675  | 1           | 1            | 0.163104675                    |             |                  |
|                | Brain_Substantia_nigra                | 0.163104675  |             |              | Brain_Substantia_nigra         | 1           | 1                |
| 1              | 1.39470547                            | 1.39470547   | 1.39470547  | NA           | 1                              | 0           | 0.972491774      |
| HMGCLL1        | ENSG00000146151.12                    | 0.163127997  | 8           | 4            | 0.016079316                    |             |                  |
|                | Brain_Hypothalamus                    | 0.507665     |             |              | Brain_Cerebellar_Hemisphere    | 6.540175915 |                  |
| 0.028588031    | 0.223915285                           | -2.407110214 |             | -0.66247789  | -1.51171619                    |             |                  |
| 0.567116939    | 4                                     | 0            | 0.972491774 |              |                                |             |                  |
| UBOX5          | ENSG00000185019.16                    | 0.163151309  | 6           | 4            | 0.019492897                    |             |                  |
|                | Brain_Hippocampus                     | 0.340178115  |             |              | Brain_Cortex                   | 4.867309651 | 0.07334389       |
| 0.230948925    | -2.33596823                           | -0.953813382 |             | -1.631216028 | 0.562015318                    |             |                  |
| 4              | 0                                     | 0.972491774  |             |              |                                |             |                  |
| RP11-347C12.10 | ENSG00000260219.2                     | 0.163192646  | 2           | 2            | 0.05713908                     |             |                  |
|                | Brain_Hippocampus                     | 0.831427297  |             |              | Brain_Hypothalamus             | 1.155692469 |                  |
| 0.844307531    | 0.844307531                           | -1.902245402 |             | -0.212871366 | -1.057558384                   |             |                  |
| 1.194567837    | 2                                     | 0            | 0.972491774 |              |                                |             |                  |
| PRKAG2         | ENSG00000106617.13                    | 0.163315298  | 3           | 3            | 0.085419506                    |             |                  |
|                | Brain_Cerebellum                      | 0.579818726  |             |              | Brain_Hippocampus              | 1.098009918 |                  |
| 0.857259247    | 0.857259247                           | -1.720071167 |             | 1.144282985  | -0.376479235                   |             |                  |
| 1.440372577    | 3                                     | 0            | 0.972491774 |              |                                |             |                  |
| CCDC13         | ENSG00000244607.5                     | 0.163325096  | 4           | 4            | 0.254296199                    |             |                  |
|                | Brain_Cortex                          | 0.994310089  |             |              | Brain_Putamen_basal_ganglia    | 1.965207377 |                  |
| 0.108464366    | 0.108464366                           | -1.139976241 |             | 0.968130586  | -0.219833017                   |             |                  |
| 0.922721659    | 4                                     | 0            | 0.972491774 |              |                                |             |                  |
| ACSL6          | ENSG00000164398.12                    | 0.163382899  | 9           | 8            | 0.100272647                    |             | Brain_Cerebellum |
| 0.932831671    | Brain_Cerebellar_Hemisphere           | 3.815519072  |             |              | 0.060116084                    |             |                  |
| 0.199752078    | -1.182278641                          | 1.643533272  |             | 0.092505718  | 0.982809123                    |             |                  |
| 8              | 0                                     | 0.972491774  |             |              |                                |             |                  |
| IQCE           | ENSG00000106012.17                    | 0.16348006   | 4           | 4            | 0.158940427                    |             |                  |
|                | Brain_Cerebellar_Hemisphere           | 0.952857571  |             |              | Brain_Hippocampus              | 1.462657054 |                  |

|           |                                       |                   |              |                                |              |
|-----------|---------------------------------------|-------------------|--------------|--------------------------------|--------------|
|           | 0.539029009                           | 0.539029009       | -1.408644115 | 1.203326499                    | 0.11890738   |
|           | 1.144102195                           | 4                 | 0            | 0.972491774                    |              |
| CYP4B1    | ENSG00000142973.13                    | 0.163622464       | 1            | 1                              | 0.163622464  |
|           | Brain_Caudate_basal_ganglia           | 0.163622464       |              | Brain_Caudate_basal_ganglia    | 1            |
|           | 1                                     | 1.392991159       | 1.392991159  | 1.392991159                    | NA 1 0       |
|           | 0.972491774                           |                   |              |                                |              |
| RANBP3L   | ENSG00000164188.8                     | 0.16365675        | 1            | 1                              | 0.16365675   |
|           | Brain_Nucleus_accumbens_basal_ganglia | 0.16365675        |              |                                |              |
|           | Brain_Nucleus_accumbens_basal_ganglia | 1                 | 1            | 1                              | -1.39287779  |
|           | -1.39287779                           | -1.39287779       | NA           | 1                              | 0            |
|           | 0.972491774                           |                   |              |                                |              |
| RBM23     | ENSG00000100461.17                    | 0.163789932       | 11           | 2                              | 0.043014067  |
|           | Brain_Putamen_basal_ganglia           | 0.192298555       |              | Brain_Spinal_cord_cervical_c-1 |              |
|           | 9.469016086                           | 0.004894277       | 0.79292012   | 1.303809464                    | 2.023573375  |
|           | 1.757361369                           | 0.258875692       | 2            | 0                              | 0.972491774  |
| NFATC2    | ENSG00000101096.19                    | 0.163810566       | 2            | 2                              | 0.058545034  |
|           | Brain_Caudate_basal_ganglia           | 0.421764817       |              | Brain_Putamen_basal_ganglia    |              |
|           | 1.515270185                           | 0.484729815       | 0.484729815  | 0.803363238                    | 1.891594462  |
|           | 1.34747885                            | 0.769495678       | 2            | 0                              | 0.972491774  |
| KRT2      | ENSG00000172867.3                     | 0.163817203       | 2            | 2                              | 0.088715015  |
|           | Brain_Caudate_basal_ganglia           | 0.338332271       |              | Brain_Putamen_basal_ganglia    |              |
|           | 1.064885178                           | 0.935114822       | 0.935114822  | -0.95746566                    | 1.702215304  |
|           | 0.372374822                           | 1.880678445       | 2            | 0                              | 0.972491774  |
| ARPC5L    | ENSG00000136950.13                    | 0.163819103       | 4            | 1                              | 0.120413502  |
|           | Brain_Cerebellum                      | 0.322009204       |              | Brain_Putamen_basal_ganglia    | 3.859323969  |
|           | 0.004392575                           | 3.859323969       | -1.553040323 | -0.990337458                   | -1.364205387 |
|           | 0.253383584                           | 1                 | 0            | 0.972491774                    |              |
| GPBP1     | ENSG00000062194.15                    | 0.163837463       | 1            | 1                              | 0.163837463  |
|           | Brain_Hippocampus                     | 0.163837463       |              | Brain_Hippocampus              | 1 1 1        |
|           | -1.392280535                          | -1.392280535      | -1.392280535 | NA                             | 1 0          |
|           | 0.972491774                           |                   |              |                                |              |
| LINC01132 | ENSG00000227630.2                     | 0.16389963        | 2            | 2                              | 0.127165634  |
|           | Brain_Cerebellar_Hemisphere           | 1.003509803       |              | Brain_Cortex                   |              |
|           | 0.258255575                           | 0.996490197       | -1.130523801 | 1.525374828                    | 0.996490197  |
|           | 0.996490197                           | -1.130523801      | 1.525374828  | 0.197425514                    | 1.878003931  |
|           | 2                                     | 0                 | 0.972491774  |                                |              |
| TUBA3D    | ENSG00000075886.10                    | 0.163922471       | 6            | 5                              | 0.012905508  |
|           | Brain_Hippocampus                     | 0.950879295       |              | Brain_Frontal_Cortex_BA9       | 2.935848662  |
|           | 0.067422962                           | 0.127073991       | -2.48636622  | 0.533194715                    | -0.63548877  |
|           | 1.01960487                            | 5                 | 0            | 0.972491774                    |              |
| SLC9B2    | ENSG00000164038.14                    | 0.163947471       | 1            | 1                              | 0.163947471  |
|           | Brain_Hypothalamus                    | 0.163947471       |              | Brain_Hypothalamus             | 1 1 1        |
|           | 1.391917206                           | 1.391917206       | 1.391917206  | NA                             | 1 0          |
|           | 0.972491774                           |                   |              |                                |              |
| PAX8      | ENSG00000125618.16                    | 0.163996573       | 10           | 2                              | 0.020952042  |
|           | Brain_Nucleus_accumbens_basal_ganglia | 8.955667582       |              | Brain_Amygdala                 |              |
|           | 0.299436962                           | 0.000322046       | 0.308761505  | 1.037641559                    | 2.30884756   |
|           | 0.000322046                           | 0.308761505       | 1.037641559  | 2.30884756                     | 1.796165591  |
|           | 0.369383327                           | 2                 | 0            | 0.972491774                    |              |
| ANKRD17   | ENSG00000132466.18                    | 0.1640123         | 1            | 1                              | 0.1640123    |
|           | Brain_Hippocampus                     | 0.1640123         |              | Brain_Hippocampus              |              |
|           | 0.1640123                             | Brain_Hippocampus | 1            | 1                              | 1            |
|           | -1.391703178                          | NA                | 1            | 0                              | 0.972491774  |
|           | -1.391703178                          | NA                | 1            | 0                              | 0.972491774  |
| IL12B     | ENSG00000113302.4                     | 0.164014605       | 1            | 1                              | 0.164014605  |
|           | Brain_Cerebellum                      | 1                 | 1            | 1                              |              |
|           | 0.164014605                           | Brain_Cerebellum  | 1            | 1                              | 1            |
|           | -1.391695568                          | NA                | 1            | 0                              | 0.972491774  |
|           | -1.391695568                          | NA                | 1            | 0                              | 0.972491774  |
| PLXNA2    | ENSG00000076356.6                     | 0.164173055       | 1            | 1                              | 0.164173055  |
|           | Brain_Substantia_nigra                | 0.164173055       |              | Brain_Substantia_nigra         | 1 1          |
|           | 1                                     | 1.391172727       | 1.391172727  | 1.391172727                    | NA 1 0       |
|           | 0.972491774                           |                   |              |                                |              |
| ATG3      | ENSG00000144848.10                    | 0.16438443        | 1            | 1                              | 0.16438443   |
|           | Brain_Anterior_cingulate_cortex_BA24  | 0.16438443        |              |                                |              |
|           | Brain_Anterior_cingulate_cortex_BA24  | 1                 | 1            | 1                              | -1.390475843 |
|           | -1.390475843                          | -1.390475843      | NA           | 1                              | 0            |
|           | 0.972491774                           |                   |              |                                |              |
| FNDC5     | ENSG00000160097.16                    | 0.164467546       | 2            | 2                              | 0.147161094  |
|           | Brain_Frontal_Cortex_BA9              | 0.468568138       |              | Brain_Cerebellum               | 1.306517534  |
|           | 0.693482466                           | 0.693482466       | -0.724810753 | 1.449632262                    | 0.362410754  |
|           | 1.537563402                           | 2                 | 0            | 0.972491774                    |              |

VSIG8 ENSG00000243284.1 0.164472466 7 6 0.185596893  
 Brain\_Putamen\_basal\_ganglia 0.811543514 Brain\_Frontal\_Cortex\_BA9 2.86622111  
 0.012111241 0.28919421 -1.323717475 1.16617153 -0.414013727  
 0.859704838 6 0 0.972491774  
 ZNF358 ENSG00000198816.6 0.164499548 2 2 0.127620652  
 Brain\_Hypothalamus 0.195957718 Brain\_Amygdala 1.108097051  
 0.891902949 0.891902949 -1.293154241 1.523552037 0.115198898  
 1.99171211 2 0 0.972491774  
 NAA38 ENSG00000183011.13 0.16460205 3 3 0.038819752  
 Brain\_Frontal\_Cortex\_BA9 0.112697322 Brain\_Hypothalamus 2.072913537  
 0.296929245 0.296929245 1.586185122 2.066092439 1.821667122  
 0.240078623 3 0 0.972491774  
 MAFTRR ENSG00000261390.5 0.165067223 13 2 0.032696994  
 Brain\_Cerebellum 0.151250253 Brain\_Frontal\_Cortex\_BA9 12.12358596  
 0.000167693 0.557606028 -2.135784368 -1.43512931 -1.779718718  
 0.18777485 2 0 0.972491774  
 EID3 ENSG00000255150.2 0.165139376 3 3 0.189053759 Brain\_Cerebellum  
 0.644943778 Brain\_Anterior\_cingulate\_cortex\_BA24 1.665630134  
 0.346863223 0.346863223 -1.313383487 0.460797664 -0.62958927  
 0.9544202 3 0 0.972491774  
 ACSL1 ENSG00000151726.13 0.165174326 3 3 0.030674537  
 Brain\_Anterior\_cingulate\_cortex\_BA24 0.755351892 Brain\_Hippocampus  
 1.402488069 0.609077003 0.609077003 -2.161269383 0.510736412  
 -0.446314217 1.488528873 3 0 0.972491774  
 SLC1A4 ENSG00000115902.10 0.165219777 5 5 0.029803984  
 Brain\_Cerebellum 0.794689743 Brain\_Putamen\_basal\_ganglia 2.096463926  
 0.222588687 0.222588687 -2.172685652 0.983065756 -0.649487437  
 1.260182312 5 0 0.972491774  
 AP000255.6 ENSG00000273091.1 0.1652611 2 2 0.059472203  
 Brain\_Caudate\_basal\_ganglia 0.876250124 Brain\_Amygdala 1.034054182  
 0.965945818 0.965945818 0.155724577 1.8846863 1.020205438  
 1.222560559 2 0 0.972491774  
 TUFM ENSG00000178952.10 0.165303447 9 1 0.103166571  
 Brain\_Putamen\_basal\_ganglia 0.582187398 Brain\_Hypothalamus 8.226491105  
 0.009515852 8.226491105 0.550192426 1.62969218 1.321941078  
 0.347128591 1 0 0.972491774  
 RP5-894D12.4 ENSG00000271234.1 0.165414502 2 2 0.08992523  
 Brain\_Nucleus\_accumbens\_basal\_ganglia 0.583755382 Brain\_Hippocampus  
 1.68728956 0.31271044 0.31271044 -1.695792253 -0.547907553 -1.121849903  
 0.811677055 2 0 0.972491774  
 TRMT2A ENSG00000099899.14 0.165472843 3 3 0.06916384 Brain\_Cerebellum  
 0.339154438 Brain\_Nucleus\_accumbens\_basal\_ganglia 1.442063401  
 0.644282743 0.644282743 0.955837304 1.81734803 1.282031131  
 0.467278854 3 0 0.972491774  
 ADAMTS19 ENSG00000145808.9 0.165491289 3 3 0.078225162  
 Brain\_Cortex 0.90641116 Brain\_Amygdala 1.488812713 0.496256422  
 0.496256422 -0.366550538 1.761078238 0.504031396 1.115220784  
 3 0 0.972491774  
 SMUG1 ENSG00000123415.15 0.165572005 1 1 0.165572005  
 Brain\_Nucleus\_accumbens\_basal\_ganglia 0.165572005  
 Brain\_Nucleus\_accumbens\_basal\_ganglia 1 1 1 -1.386573004  
 -1.386573004 -1.386573004 NA 1 0 0.972491774  
 PKP1 ENSG00000081277.12 0.165635671 1 1 0.165635671  
 Brain\_Anterior\_cingulate\_cortex\_BA24 0.165635671  
 Brain\_Anterior\_cingulate\_cortex\_BA24 1 1 1 1.386364367  
 1.386364367 1.386364367 NA 1 0 0.972491774  
 MMP16 ENSG00000156103.15 0.165700363 2 2 0.060248355 Brain\_Cerebellum  
 0.373125046 Brain\_Cerebellar\_Hemisphere 1.583833551 0.416166449  
 0.416166449 0.890634945 1.878971718 1.384803332 0.698859634  
 2 0 0.972491774  
 S100A2 ENSG00000196754.10 0.165714097 2 2 0.177281324  
 Brain\_Cerebellar\_Hemisphere 0.490562476 Brain\_Cerebellum 1.395787635

|            |                             |                             |              |              |                                        |
|------------|-----------------------------|-----------------------------|--------------|--------------|----------------------------------------|
|            | 0.604212365                 | 0.604212365                 | -0.689414477 | 1.349173251  | 0.329879387                            |
|            | 1.441499207                 | 2                           | 0            | 0.972491774  |                                        |
| USP38      | ENSG00000170185.9           | 0.165724994                 | 2            | 2            | 0.069995291                            |
|            | Brain_Hypothalamus          | 0.429150029                 |              |              | Brain_Anterior_cingulate_cortex_BA24   |
|            | 1.130870479                 | 0.869129521                 | 0.869129521  | 0.79064697   | 1.811941147                            |
|            | 1.301294059                 | 0.722164038                 | 2            | 0            | 0.972491774                            |
| CNPY1      | ENSG00000146910.12          | 0.165748967                 | 2            | 2            | 0.105585341                            |
|            | Brain_Hypothalamus          | 0.279060721                 |              |              | Brain_Cerebellum1.059645406            |
|            | 0.940354594                 | 0.940354594                 | -1.61835859  | -1.082431763 | -1.350395177                           |
|            | 0.378957494                 | 2                           | 0            | 0.972491774  |                                        |
| HSDL1      | ENSG00000103160.11          | 0.165773852                 | 4            | 4            | 0.124576198                            |
|            | 0.780596174                 | Brain_Cerebellum2.266262214 |              |              | Brain_Cortex                           |
|            | -1.235914129                | 1.535845824                 | 0.268042914  | 1.143130402  | 0.201160603                            |
|            | 0.972491774                 |                             |              |              | 4                                      |
|            |                             |                             |              |              | 0                                      |
| RASSF2     | ENSG00000101265.15          | 0.166145096                 | 2            | 2            | 0.122098301                            |
|            | Brain_Cerebellar_Hemisphere | 0.561758486                 |              |              | Brain_Cerebellum1.300407657            |
|            | 0.699592343                 | 0.699592343                 | -0.580231542 | 1.546025951  | 0.482897205                            |
|            | 1.503491091                 | 2                           | 0            | 0.972491774  |                                        |
| ADGRV1     | ENSG00000164199.16          | 0.166320732                 | 4            | 4            | 0.057121337                            |
|            | Brain_Cerebellar_Hemisphere | 0.299353031                 |              |              | Brain_Cerebellum2.251306739            |
|            | 0.12259802                  | 0.12259802                  | -1.446746392 | 1.902381198  | 0.640461461                            |
|            | 1.447975076                 | 4                           | 0            | 0.972491774  |                                        |
| CYP17A1    | ENSG00000148795.6           | 0.166392613                 | 2            | 2            | 0.075060083                            |
|            | Brain_Frontal_Cortex_BA9    | 0.097459729                 |              |              | Brain_Cortex                           |
|            | 0.342735487                 | 0.342735487                 | 1.657295587  | 1.780097029  | 1.718696308                            |
|            | 0.086833732                 | 2                           | 0            | 0.972491774  |                                        |
| ERVH48-1   | ENSG00000233056.2           | 0.166566781                 | 5            | 5            | 0.058122074                            |
|            | Brain_Hypothalamus          | 0.894400042                 |              |              | Brain_Frontal_Cortex_BA9               |
|            | 0.131407113                 | 0.131407113                 | -1.033067293 | 1.894776075  | 2.695224038                            |
|            | 1.260411813                 | 5                           | 0            | 0.972491774  | 0.14959003                             |
| SP3        | ENSG00000172845.14          | 0.166602036                 | 1            | 1            | 0.166602036                            |
|            | Brain_Cortex                | 1                           | 1            | 1            | Brain_Cortex                           |
|            | 0.166602036                 | Brain_Cortex                | 1            | 1            | -1.383204937                           |
|            | -1.383204937                | NA                          | 1            | 0            | -1.383204937                           |
|            | 0.972491774                 |                             |              |              |                                        |
| PRR36      | ENSG00000183248.11          | 0.16662749                  | 3            | 3            | 0.062831517                            |
|            | Brain_Caudate_basal_ganglia | 1.824389622                 |              |              | Brain_Cerebellum                       |
|            | 0.314089719                 | Brain_Caudate_basal_ganglia | 1.824389622  | 0.175469656  | 0.175469656                            |
|            | 0.175469656                 | -1.006677623                | 1.860381874  | 0.658071717  | 1.488420316                            |
|            | 3                           | 0                           | 0.972491774  |              |                                        |
| CPT1C      | ENSG00000169169.14          | 0.166659718                 | 9            | 9            | 0.007714256                            |
|            | Brain_Cerebellar_Hemisphere | 0.997715039                 |              |              | Brain_Caudate_basal_ganglia            |
|            | 1.411201249                 | 0.673724177                 | 0.673724177  | -1.246744574 | 2.664326906                            |
|            | 0.086375433                 | 1.19672127                  | 9            | 0            | 0.972491774                            |
| OR1F1      | ENSG00000168124.2           | 0.166718197                 | 1            | 1            | 0.166718197                            |
|            | Brain_Cerebellar_Hemisphere | 0.166718197                 |              |              | Brain_Cerebellar_Hemisphere1           |
|            | 1                           | -1.38282609                 | -1.38282609  | -1.38282609  | NA                                     |
|            | 0.972491774                 |                             |              |              | 1                                      |
|            |                             |                             |              |              | 0                                      |
| AL022344.7 | ENSG00000259869.1           | 0.1667302                   | 5            | 4            | 0.066873081                            |
|            | Brain_Caudate_basal_ganglia | 0.599057976                 |              |              | Brain_Nucleus_accumbens_basal_ganglia  |
|            | 3.516827101                 | 0.025904264                 | 0.199563501  | -1.832526069 | -0.525755674                           |
|            | -1.314738231                | 0.566524767                 | 4            | 0            | 0.972491774                            |
| PBLD       | ENSG00000108187.15          | 0.166738823                 | 12           | 2            | 0.047136841                            |
|            | Brain_Hypothalamus          | 0.867212714                 |              |              | Brain_Cerebellum10.04153719            |
|            | 0.875618052                 | 0.167199962                 | 1.985068593  | 0.850849514  | 0.00181235                             |
|            | 2                           | 0                           | 0.972491774  |              | 0.496752088                            |
| GNB1L      | ENSG00000185838.13          | 0.166786803                 | 9            | 9            | 0.006320892                            |
|            | Brain_Hypothalamus          | 0.958894095                 |              |              | Brain_Anterior_cingulate_cortex_BA24   |
|            | 3.297916735                 | 0.148969788                 | 0.148969788  | -2.730653355 | 0.620345322                            |
|            | -0.653870398                | 1.023487384                 | 9            | 0            | 0.972491774                            |
| RIF1       | ENSG00000080345.17          | 0.166796372                 | 11           | 5            | 0.135765121                            |
|            | Brain_Hypothalamus          | 0.938514623                 |              |              | Brain_Cerebellar_Hemisphere7.718492018 |
|            | 0.008633535                 | 0.266408302                 | -1.491748378 | 1.23093135   | -0.85622677                            |
|            | 0.782933218                 | 5                           | 0            | 0.972491774  |                                        |
| HYPK       | ENSG00000242028.6           | 0.166797062                 | 1            | 1            | 0.166797062                            |

|              |                                       |                  |              |                                |              |              |                  |
|--------------|---------------------------------------|------------------|--------------|--------------------------------|--------------|--------------|------------------|
|              | Brain_Cerebellar_Hemisphere           | 0.166797062      |              | Brain_Cerebellar_Hemisphere    | 1            | 1            |                  |
|              | 1                                     | 1.382568993      | 1.382568993  | 1.382568993                    | NA           | 1            | 0                |
|              |                                       | 0.972491774      |              |                                |              |              |                  |
| LINC01238    | ENSG00000237940.3                     | 0.166798699      | 9            | 9                              | 0.011970414  |              |                  |
|              | Brain_Hypothalamus                    | 0.844824911      |              | Brain_Putamen_basal_ganglia    | 2.552253434  |              |                  |
|              | 0.152963299                           | 0.152963299      | -1.53359984  | 2.51301531                     | 0.452847301  |              |                  |
|              | 1.240667121                           | 9                | 0            | 0.972491774                    |              |              |                  |
| BACE2        | ENSG00000182240.15                    | 0.166836939      | 7            | 7                              | 0.013008531  |              | Brain_Cortex     |
|              | 0.59118536                            | Brain_Cerebellum | 2.071379629  | 0.069637998                    | 0.069637998  |              |                  |
|              | -2.483535652                          | 1.55130262       | 0.227483796  | 1.38054519                     | 7            | 0            | 0.972491774      |
| BRAT1        | ENSG00000106009.15                    | 0.166972119      | 3            | 3                              | 0.024502543  |              |                  |
|              | Brain_Nucleus_accumbens_basal_ganglia | 0.743845523      |              | Brain_Cerebellar_Hemisphere    |              |              |                  |
|              | 1.591608825                           | 0.415682939      | 0.415682939  | -0.326765145                   | 2.24915646   |              |                  |
|              | 1.064645052                           | 1.300364703      | 3            | 0                              | 0.972491774  |              |                  |
| CTD-2376I4.1 | ENSG00000271926.1                     | 0.167026581      | 1            | 1                              | 0.167026581  |              |                  |
|              | Brain_Hippocampus                     | 0.167026581      |              | Brain_Hippocampus              | 1            | 1            | 1                |
|              | -1.381821287                          | -1.381821287     | -1.381821287 | NA                             | 1            | 0            | 0.972491774      |
| CTC-501O10.1 | ENSG00000267440.1                     | 0.167231819      | 1            | 1                              | 0.167231819  |              |                  |
|              | Brain_Cerebellum                      | 0.167231819      |              | Brain_Cerebellum               | 1            | 1            | 1                |
|              | -1.381153336                          | -1.381153336     | NA           | 1                              | 0            | 0.972491774  | -1.381153336     |
| INSR         | ENSG00000171105.13                    | 0.167280604      | 2            | 2                              | 0.060515088  |              | Brain_Cortex     |
|              | 0.901689635                           | Brain_Cerebellum | 1.056590276  | 0.943409724                    | 0.943409724  |              |                  |
|              | 0.123527202                           | 1.877021929      | 1.000274566  | 1.239908012                    | 2            | 0            |                  |
|              |                                       | 0.972491774      |              |                                |              |              |                  |
| LRRC45       | ENSG00000169683.7                     | 0.167298067      | 3            | 3                              | 0.073892957  |              |                  |
|              | Brain_Anterior_cingulate_cortex_BA24  | 0.788117315      |              | Brain_Putamen_basal_ganglia    |              |              |                  |
|              | 1.407275045                           | 0.589968002      | 0.589968002  | -1.787275594                   | 0.499598932  |              |                  |
|              | -0.518810948                          | 1.163762997      | 3            | 0                              | 0.972491774  |              |                  |
| ERICH2       | ENSG00000204334.7                     | 0.167326523      | 3            | 3                              | 0.051385888  |              |                  |
|              | Brain_Amygdala                        | 0.314821999      |              | Brain_Substantia_nigra         | 1.366083843  |              |                  |
|              | 0.630809027                           | 0.630809027      | -1.948243053 | 1.005155458                    | -0.68597631  |              |                  |
|              | 1.522689922                           | 3                | 0            | 0.972491774                    |              |              |                  |
| TPRKB        | ENSG00000144034.14                    | 0.167461288      | 1            | 1                              | 0.167461288  |              |                  |
|              | Brain_Spinal_cord_cervical_c-1        | 0.167461288      |              | Brain_Spinal_cord_cervical_c-1 |              |              |                  |
|              | 1                                     | 1                | 1            | 1.380407255                    | 1.380407255  | NA           | 1                |
|              |                                       | 0.972491774      |              |                                |              |              | 0                |
| C11orf52     | ENSG00000149300.9                     | 0.167486523      | 2            | 2                              | 0.100909316  |              |                  |
|              | Brain_Cerebellar_Hemisphere           | 0.904536491      |              | Brain_Cerebellum               | 1.440904499  |              |                  |
|              | 0.559095501                           | 0.559095501      | -0.119932661 | 1.640461169                    | 0.760264254  |              |                  |
|              | 1.244786415                           | 2                | 0            | 0.972491774                    |              |              |                  |
| LIPE         | ENSG00000079435.9                     | 0.167660545      | 1            | 1                              | 0.167660545  |              |                  |
|              | Brain_Frontal_Cortex_BA9              | 0.167660545      |              | Brain_Frontal_Cortex_BA9       | 1            | 1            |                  |
|              | 1                                     | -1.379760023     | -1.379760023 | -1.379760023                   | NA           | 1            | 0                |
|              |                                       | 0.972491774      |              |                                |              |              |                  |
| CELA2A       | ENSG00000142615.7                     | 0.167660943      | 1            | 1                              | 0.167660943  |              |                  |
|              | Brain_Cortex                          | 0.167660943      |              | Brain_Cortex                   | 1            | 1            | 1                |
|              | -1.379758732                          | -1.379758732     | NA           | 1                              | 0            | 0.972491774  | -1.379758732     |
| FCHO2        | ENSG00000157107.13                    | 0.167830813      | 1            | 1                              | 0.167830813  |              | Brain_Cerebellum |
|              | 0.167830813                           | Brain_Cerebellum | 1            | 1                              | 1            | -1.379207413 | -1.379207413     |
|              | -1.379207413                          | NA               | 1            | 0                              | 0.972491774  |              |                  |
| SLC5A9       | ENSG00000117834.12                    | 0.167897225      | 6            | 4                              | 0.058708647  |              |                  |
|              | Brain_Nucleus_accumbens_basal_ganglia | 0.521982505      |              | Brain_Cortex                   | 4.8258799    |              |                  |
|              | 0.032942828                           | 0.168948336      | -0.640292424 | 1.890368846                    | 1.068664089  |              |                  |
|              | 0.87695086                            | 4                | 0            | 0.972491774                    |              |              |                  |
| RP1-90G24.11 | ENSG00000273325.1                     | 0.16793605       | 3            | 3                              | 0.029442312  |              |                  |
|              | Brain_Cerebellum                      | 0.124115717      |              | Brain_Cerebellar_Hemisphere    | 2.36129769   |              |                  |
|              | 0.188895075                           | 0.188895075      | -2.177513013 | -1.537725617                   | -1.760415766 |              |                  |
|              | 0.361493524                           | 3                | 0            | 0.972491774                    |              |              |                  |
| VEGFA        | ENSG00000112715.21                    | 0.167946814      | 1            | 1                              | 0.167946814  |              |                  |
|              | Brain_Substantia_nigra                | 0.167946814      |              | Brain_Substantia_nigra         | 1            | 1            |                  |
|              | 1                                     | 1.378831169      | 1.378831169  | 1.378831169                    | NA           | 1            | 0                |
|              |                                       | 0.972491774      |              |                                |              |              |                  |

|               |                                       |                             |              |              |              |                                      |                       |
|---------------|---------------------------------------|-----------------------------|--------------|--------------|--------------|--------------------------------------|-----------------------|
| CPA4          | ENSG00000128510.10                    | 0.167964488                 | 3            | 3            | 0.056355523  |                                      |                       |
|               | Brain_Nucleus_accumbens_basal_ganglia | 0.895942369                 |              |              |              | Brain_Caudate_basal_ganglia          |                       |
|               | 1.816686235                           | 0.195838357                 | 0.195838357  |              | -0.664833838 | 1.908276236                          |                       |
|               | 0.370884527                           | 1.357932609                 | 3            | 0            | 0.972491774  |                                      |                       |
| NKX2-3        | ENSG00000119919.10                    | 0.168016148                 | 1            | 1            | 0.168016148  |                                      |                       |
|               | Brain_Nucleus_accumbens_basal_ganglia | 0.168016148                 |              |              |              |                                      |                       |
|               | Brain_Nucleus_accumbens_basal_ganglia | 1                           | 1            | 1            | -1.37860638  |                                      |                       |
|               | -1.37860638                           | -1.37860638                 | NA           | 1            | 0.972491774  |                                      |                       |
| KATNA1        | ENSG00000186625.13                    | 0.168019534                 | 1            | 1            | 0.168019534  |                                      |                       |
|               | Brain_Frontal_Cortex_BA9              | 0.168019534                 |              |              |              | Brain_Frontal_Cortex_BA9             | 1 1                   |
|               | 1                                     | 1.378595406                 | 1.378595406  | 1.378595406  | NA           | 1                                    | 0                     |
|               | 0.972491774                           |                             |              |              |              |                                      |                       |
| GTF2IRD2B     | ENSG00000174428.16                    | 0.168081871                 | 2            | 2            | 0.06986754   |                                      |                       |
|               | Brain_Frontal_Cortex_BA9              | 0.484257163                 |              |              |              | Brain_Cortex                         | 1.09502938 0.90497062 |
|               | 0.90497062                            | -0.699471908                | 1.812768463  |              | 0.556648277  | 1.776422202                          | 2                     |
|               | 0                                     | 0.972491774                 |              |              |              |                                      |                       |
| ST14          | ENSG00000149418.10                    | 0.168093005                 | 3            | 3            | 0.069375787  |                                      |                       |
|               | Brain_Cerebellar_Hemisphere           | 0.848194783                 |              |              |              | Brain_Cerebellum                     | 1.072220297           |
|               | 0.925781252                           | 0.925781252                 | 0.191422259  |              | 1.815964699  | 1.092940322                          |                       |
|               | 0.826849159                           | 3                           | 0            | 0.972491774  |              |                                      |                       |
| RP6-91H8.5    | ENSG00000269945.1                     | 0.168097093                 | 2            | 2            | 0.125784003  |                                      |                       |
|               | Brain_Frontal_Cortex_BA9              | 0.591569758                 |              |              |              | Brain_Cortex                         | 1.331052257           |
|               | 0.668947743                           | 0.668947743                 | -0.536562638 |              | 1.530940888  | 0.497189125                          |                       |
|               | 1.461945763                           | 2                           | 0            | 0.972491774  |              |                                      |                       |
| STMND1        | ENSG00000230873.8                     | 0.168221074                 | 2            | 2            | 0.141605835  |                                      |                       |
|               | Brain_Hypothalamus                    | 0.222238865                 |              |              |              | Brain_Anterior_cingulate_cortex_BA24 |                       |
|               | 1.024369567                           | 0.975630433                 | 0.975630433  |              | -1.469837259 | -1.220596412                         |                       |
|               | -1.345216835                          | 0.176239893                 | 2            | 0            | 0.972491774  |                                      |                       |
| RP11-521O16.1 | ENSG00000260634.1                     | 0.168245359                 | 8            | 5            | 0.067435629  |                                      |                       |
|               | Brain_Substantia_nigra                | 0.611376799                 |              |              |              | Brain_Frontal_Cortex_BA9             |                       |
|               | 5.184227221                           | 0.002683114                 | 0.200212425  |              | -1.828759601 | 1.298137633                          |                       |
|               | -0.346842043                          | 0.935741                    | 5            | 0            | 0.972491774  |                                      |                       |
| STXBP3        | ENSG00000116266.10                    | 0.168354922                 | 2            | 2            | 0.061229589  |                                      |                       |
|               | Brain_Spinal_cord_cervical_c-1        | 0.258543806                 |              |              |              | Brain_Hypothalamus                   |                       |
|               | 1.489900244                           | 0.510099756                 | 0.510099756  |              | 1.12983963   | 1.871833881                          |                       |
|               | 1.500836756                           | 0.524669167                 | 2            | 0            | 0.972491774  |                                      |                       |
| JPH2          | ENSG00000149596.6                     | 0.168586103                 | 1            | 1            | 0.168586103  |                                      |                       |
|               | Brain_Caudate_basal_ganglia           | 0.168586103                 |              |              |              | Brain_Caudate_basal_ganglia          | 1 1                   |
|               | 1                                     | 1.376761158                 | 1.376761158  | 1.376761158  | NA           | 1                                    | 0                     |
|               | 0.972491774                           |                             |              |              |              |                                      |                       |
| SBNO2         | ENSG00000064932.15                    | 0.168591814                 | 2            | 2            | 0.076490905  |                                      | Brain_Cerebellum      |
|               | 0.585590691                           | Brain_Cerebellar_Hemisphere | 1.058563574  |              | 0.941436426  |                                      |                       |
|               | 0.941436426                           | -0.545236762                | 1.771419882  |              | 0.61309156   | 1.638123623                          | 2                     |
|               | 0                                     | 0.972491774                 |              |              |              |                                      |                       |
| CHRNA6        | ENSG00000147434.8                     | 0.168747203                 | 2            | 2            | 0.121052516  |                                      |                       |
|               | Brain_Cerebellum                      | 0.294611129                 |              |              |              | Brain_Cerebellar_Hemisphere          | 1.017104901           |
|               | 0.982895099                           | 0.982895099                 | -1.550370914 |              | 1.048059641  | -0.251155636                         |                       |
|               | 1.837367866                           | 2                           | 0            | 0.972491774  |              |                                      |                       |
| MRNIP         | ENSG00000161010.14                    | 0.168760423                 | 12           | 4            | 0.022905967  |                                      |                       |
|               | Brain_Cerebellar_Hemisphere           | 0.740444594                 |              |              |              | Brain_Putamen_basal_ganglia          |                       |
|               | 8.246775852                           | 0.005165147                 | 0.47480087   |              | -2.274999378 | -0.331264645                         |                       |
|               | -1.092341912                          | 0.718774857                 | 4            | 0            | 0.972491774  |                                      |                       |
| SLFN5         | ENSG00000166750.9                     | 0.16900792                  | 13           | 3            | 0.025547401  |                                      |                       |
|               | Brain_Anterior_cingulate_cortex_BA24  | 0.405613621                 |              |              |              | Brain_Cerebellar_Hemisphere          |                       |
|               | 10.96381695                           | 8.49E-05                    | 0.389332847  |              | 0.831637442  | 2.233023404                          |                       |
|               | 1.651229781                           | 0.36545427                  | 3            | 0            | 0.972491774  |                                      |                       |
| C19orf70      | ENSG00000174917.8                     | 0.169098488                 | 1            | 1            | 0.169098488  |                                      |                       |
|               | Brain_Caudate_basal_ganglia           | 0.169098488                 |              |              |              | Brain_Caudate_basal_ganglia          | 1 1                   |
|               | 1                                     | -1.375106312                | -1.375106312 | -1.375106312 | NA           | 1                                    | 0                     |
|               | 0.972491774                           |                             |              |              |              |                                      |                       |
| NPFFR1        | ENSG00000148734.7                     | 0.169115709                 | 2            | 2            | 0.218426843  |                                      |                       |
|               | Brain_Cerebellum                      | 0.636155486                 |              |              |              | Brain_Cerebellar_Hemisphere          | 1.897101132           |

|               |                                       |                                       |                                       |              |                   |
|---------------|---------------------------------------|---------------------------------------|---------------------------------------|--------------|-------------------|
|               | 0.102898868                           | 0.102898868                           | 0.473080868                           | 1.230722038  | 0.851901453       |
|               | 0.535733209                           | 2 0                                   | 0.972491774                           |              |                   |
| BOC           | ENSG00000144857.14                    | 0.169292257                           | 8 6                                   | 0.012917205  | Brain_Cerebellum  |
|               | 0.981851956                           | Brain_Cortex                          | 3.770121076                           | 0.021913032  | 0.145572445       |
|               | -2.486043833                          | 0.659737818                           | -0.553706627                          | 1.235686164  | 6 0               |
|               | 0.972491774                           |                                       |                                       |              |                   |
| ECM2          | ENSG00000106823.12                    | 0.169325496                           | 4 4                                   | 0.013490934  | Brain_Cortex      |
|               | 0.364460429                           | Brain_Hippocampus                     | 2.736754412                           | 0.212149273  |                   |
|               | 0.212149273                           | -2.470539706                          | -0.906898587                          | -1.597317291 | 0.680745395       |
|               | 4 0                                   | 0.972491774                           |                                       |              |                   |
| GALNS         | ENSG00000141012.12                    | 0.169342926                           | 4 4                                   | 0.038946996  | Brain_Amygdala    |
|               | 0.288502716                           | Brain_Nucleus_accumbens_basal_ganglia | 2.472733478                           |              |                   |
|               | 0.111376517                           | 0.111376517                           | -2.064746458                          | -1.061411977 | -1.475641176      |
|               | 0.421909004                           | 4 0                                   | 0.972491774                           |              |                   |
| C6orf120      | ENSG00000185127.6                     | 0.16945719                            | 3 3                                   | 0.037578752  |                   |
|               | Brain_Putamen_basal_ganglia           | 0.795283856                           | Brain_Frontal_Cortex_BA9              |              |                   |
|               | 1.379025705                           | 0.726602325                           | 0.726602325                           | -0.577468882 | 2.079420129       |
|               | 0.587135563                           | 1.358416541                           | 3 0                                   | 0.972491774  |                   |
| RP11-645C24.5 | ENSG00000260306.1                     | 0.169492822                           | 11 1                                  | 0.084871704  |                   |
|               | Brain_Amygdala                        | 0.337690831                           | Brain_Caudate_basal_ganglia           | 10.01414771  |                   |
|               | 0.010292504                           | 10.01414771                           | -1.723093024                          | -0.958737839 | -1.312133564      |
|               | 0.26062007 1                          | 0 0.972491774                         |                                       |              |                   |
| PEBP4         | ENSG00000134020.7                     | 0.169582413                           | 12 2                                  | 0.185316145  |                   |
|               | Brain_Substantia_nigra                | 0.679904972                           | Brain_Nucleus_accumbens_basal_ganglia |              |                   |
|               | 10.44940912                           | 0.007681541                           | 0.598088622                           | -1.324562968 | 0.748145443       |
|               | -0.742203871                          | 0.57415654 2                          | 0 0.972491774                         |              |                   |
| ENOX1-AS1     | ENSG00000233821.1                     | 0.169675761                           | 3 3                                   | 0.147357469  |                   |
|               | Brain_Spinal_cord_cervical_c-1        | 0.789064316                           |                                       |              |                   |
|               | Brain_Nucleus_accumbens_basal_ganglia | 1.59789336                            | 0.429653833                           | 0.429653833  |                   |
|               | -0.559185649                          | 1.448928794                           | 0.207405766                           | 1.085034991  | 3 0               |
|               | 0.972491774                           |                                       |                                       |              |                   |
| PKN2          | ENSG00000065243.19                    | 0.1697073                             | 2 2                                   | 0.138669803  | Brain_Hippocampus |
|               | 0.29476233                            | Brain_Cerebellar_Hemisphere           | 1.076178938                           | 0.923821062  |                   |
|               | 0.923821062                           | -1.480762762                          | 1.047731501                           | -0.21651563  | 1.787915439       |
|               | 2 0                                   | 0.972491774                           |                                       |              |                   |
| SCT           | ENSG00000070031.3                     | 0.169716366                           | 6 4                                   | 0.057866283  |                   |
|               | Brain_Spinal_cord_cervical_c-1        | 0.771799586                           | Brain_Hippocampus                     | 3.5309627    |                   |
|               | 0.017590316                           | 0.481153371                           | 0.290021766                           | 1.896709549  | 1.283606554       |
|               | 0.534083337                           | 4 0                                   | 0.972491774                           |              |                   |
| LINC01730     | ENSG00000275491.1                     | 0.169779048                           | 10 9                                  | 0.006656262  |                   |
|               | Brain_Hypothalamus                    | 0.915094377                           | Brain_Frontal_Cortex_BA9              | 2.576818978  |                   |
|               | 0.02630227                            | 0.44977505                            | -2.037945018                          | 2.713569401  | 0.819854141       |
|               | 1.221316591                           | 9 0                                   | 0.972491774                           |              |                   |
| WDR59         | ENSG00000103091.14                    | 0.169880167                           | 3 3                                   | 0.042792923  | Brain_Cerebellum  |
|               | 0.478771654                           | Brain_Spinal_cord_cervical_c-1        | 1.880813676                           | 0.146043978  |                   |
|               | 0.146043978                           | -2.025725488                          | 0.708279581                           | -1.044879536 | 1.521856317       |
|               | 3 0                                   | 0.972491774                           |                                       |              |                   |
| RP11-16E12.1  | ENSG00000259448.2                     | 0.16997534                            | 1 1                                   | 0.16997534   |                   |
|               | Brain_Caudate_basal_ganglia           | 0.16997534                            | Brain_Caudate_basal_ganglia           | 1 1 1        |                   |
|               | 1.372283051                           | 1.372283051                           | 1.372283051                           | NA 1 0       | 0.972491774       |
| AGBL2         | ENSG00000165923.15                    | 0.170093422                           | 2 2                                   | 0.122244523  | Brain_Cortex      |
|               | 0.662741761                           | Brain_Cerebellum                      | 1.365067028                           | 0.634932972  | 0.634932972       |
|               | -0.436130897                          | 1.545420757                           | 0.55464493                            | 1.401168612  | 2 0               |
|               | 0.972491774                           |                                       |                                       |              |                   |
| ZNF48         | ENSG00000180035.12                    | 0.170218497                           | 1 1                                   | 0.170218497  |                   |
|               | Brain_Frontal_Cortex_BA9              | 0.170218497                           | Brain_Frontal_Cortex_BA9              | 1 1          |                   |
|               | 1 -1.371502076                        | -1.371502076                          | -1.371502076                          | NA 1 0       |                   |
|               | 0.972491774                           |                                       |                                       |              |                   |
| RP11-159D12.2 | ENSG00000264112.1                     | 0.170307094                           | 1 1                                   | 0.170307094  |                   |
|               | Brain_Spinal_cord_cervical_c-1        | 0.170307094                           | Brain_Spinal_cord_cervical_c-1        |              |                   |
|               | 1 1 1                                 | -1.371217726                          | -1.371217726                          | -1.371217726 | NA 1 0            |
|               | 0.972491774                           |                                       |                                       |              |                   |



|              |                                       |                                |                                      |             |              |                  |
|--------------|---------------------------------------|--------------------------------|--------------------------------------|-------------|--------------|------------------|
| MAP3K3       | ENSG00000198909.7                     | 0.170435647                    | 7                                    | 4           | 0.0792371    | Brain_Cerebellum |
|              | 0.556440756                           | Brain_Hypothalamus             | 5.225407628                          |             | 0.007016563  |                  |
|              | 0.289466242                           | -1.75512985                    | 1.185887317                          |             | -0.772154335 | 0.93229638 4     |
|              | 0                                     | 0.972491774                    |                                      |             |              |                  |
| RAD23B       | ENSG00000119318.12                    | 0.17047684                     | 2                                    | 2           | 0.185889993  | Brain_Amygdala   |
|              | 0.216575194                           | Brain_Cerebellar_Hemisphere    | 1.074052315                          |             | 0.925947685  |                  |
|              | 0.925947685                           | -1.322835787                   | -1.235686293                         |             | -1.27926104  | 0.061623998      |
|              | 2                                     | 0                              | 0.972491774                          |             |              |                  |
| SLC6A6       | ENSG00000131389.16                    | 0.170581064                    | 7                                    | 7           | 0.072438518  |                  |
|              | Brain_Cortex                          | 0.741595507                    | Brain_Cerebellar_Hemisphere          | 1.453388629 |              |                  |
|              | 0.649861607                           | 0.649861607                    | -1.54928932                          |             | 1.796352221  | 0.224189142      |
|              | 1.329353037                           | 7                              | 0                                    | 0.972491774 |              |                  |
| DGKG         | ENSG00000058866.14                    | 0.170591504                    | 2                                    | 2           | 0.104276843  |                  |
|              | Brain_Hippocampus                     | 0.36649298                     | Brain_Cerebellar_Hemisphere          | 1.027245371 |              |                  |
|              | 0.972754629                           | 0.972754629                    | -1.624463879                         |             | -0.903062019 | -1.263762949     |
|              | 0.510108147                           | 2                              | 0                                    | 0.972491774 |              |                  |
| IFNGR1       | ENSG00000027697.13                    | 0.170642751                    | 1                                    | 1           | 0.170642751  |                  |
|              | Brain_Frontal_Cortex_BA9              | 0.170642751                    | Brain_Frontal_Cortex_BA9             | 1           | 1            |                  |
|              | 1                                     | 1.370141451                    | 1.370141451                          | 1.370141451 | NA           | 1 0              |
|              | 0.972491774                           |                                |                                      |             |              |                  |
| RFT1         | ENSG00000163933.9                     | 0.170662245                    | 11                                   | 1           | 0.110873673  |                  |
|              | Brain_Hypothalamus                    | 0.475315793                    | Brain_Anterior_cingulate_cortex_BA24 |             |              |                  |
|              | 10.36553088                           | 0.000741077                    | 10.36553088                          |             | -1.594278491 | -0.713856703     |
|              | -1.322861663                          | 0.252662833                    | 1                                    | 0           | 0.972491774  |                  |
| ANGPTL6      | ENSG00000130812.10                    | 0.171096285                    | 3                                    | 2           | 0.197706564  |                  |
|              | Brain_Hippocampus                     | 0.834591923                    | Brain_Hypothalamus                   | 2.608657289 |              |                  |
|              | 0.053889117                           | 0.337453595                    | -0.208815946                         |             | 1.288113191  | 0.481671644      |
|              | 0.755170974                           | 2                              | 0                                    | 0.972491774 |              |                  |
| TRIM65       | ENSG00000141569.10                    | 0.171216936                    | 13                                   | 2           | 0.020505836  |                  |
|              | Brain_Nucleus_accumbens_basal_ganglia | 0.41523674                     | Brain_Substantia_nigra               |             |              |                  |
|              | 11.08972753                           | 0.00532892                     | 1.141370574                          |             | 0.814712774  | 2.316961366      |
|              | 1.712121833                           | 0.395274367                    | 2                                    | 0           | 0.972491774  |                  |
| PSENE1       | ENSG00000205155.7                     | 0.171225939                    | 1                                    | 1           | 0.171225939  |                  |
|              | Brain_Frontal_Cortex_BA9              | 0.171225939                    | Brain_Frontal_Cortex_BA9             | 1           | 1            |                  |
|              | 1                                     | 1.368275238                    | 1.368275238                          | 1.368275238 | NA           | 1 0              |
|              | 0.972491774                           |                                |                                      |             |              |                  |
| LINC00623    | ENSG00000226067.6                     | 0.171310903                    | 5                                    | 3           | 0.057932792  |                  |
|              | Brain_Spinal_cord_cervical_c-1        | 0.900327875                    | Brain_Cerebellar_Hemisphere          |             |              |                  |
|              | 2.174949477                           | 0.000390344                    | 1.33721551                           |             | -1.896206136 | 0.125247169      |
|              | -1.119148251                          | 0.845234377                    | 3                                    | 0           | 0.972491774  |                  |
| MIMT1        | ENSG00000268654.1                     | 0.171315077                    | 1                                    | 1           | 0.171315077  |                  |
|              | Brain_Hippocampus                     | 0.171315077                    | Brain_Hippocampus                    | 1           | 1            | 1                |
|              | -1.367990414                          | -1.367990414                   | -1.367990414                         |             | NA           | 1 0              |
|              | 0.972491774                           |                                |                                      |             |              |                  |
| PATE2        | ENSG00000196844.8                     | 0.171536368                    | 1                                    | 1           | 0.171536368  |                  |
|              | Brain_Caudate_basal_ganglia           | 0.171536368                    | Brain_Caudate_basal_ganglia          | 1           | 1            |                  |
|              | 1                                     | 1.367283799                    | 1.367283799                          | 1.367283799 | NA           | 1 0              |
|              | 0.972491774                           |                                |                                      |             |              |                  |
| SCRN3        | ENSG00000144306.14                    | 0.171655695                    | 3                                    | 3           | 0.07831716   | Brain_Cortex     |
|              | 0.783201928                           | Brain_Spinal_cord_cervical_c-1 | 1.04506643                           |             | 0.9630365    | 0.9630365        |
|              | -1.288182735                          | 1.760534873                    | 0.249166976                          |             | 1.524524862  | 3 0              |
|              | 0.972491774                           |                                |                                      |             |              |                  |
| PQLC3        | ENSG00000162976.12                    | 0.171663504                    | 3                                    | 3           | 0.046375468  |                  |
|              | Brain_Nucleus_accumbens_basal_ganglia | 0.595736557                    | Brain_Hypothalamus                   |             |              |                  |
|              | 1.116003728                           | 0.883076273                    | 0.883076273                          |             | -1.99195981  | 0.731196995      |
|              | -0.597101432                          | 1.36279801                     | 3                                    | 0           | 0.972491774  |                  |
| MXRA8        | ENSG00000162576.16                    | 0.171670403                    | 4                                    | 4           | 0.020025608  | Brain_Cerebellum |
|              | 0.185672116                           | Brain_Hippocampus              | 3.066980765                          |             | 0.15545494   | 0.15545494       |
|              | 1.323491094                           | 2.325867723                    | 1.872928632                          |             | 0.424958636  | 4 0              |
|              | 0.972491774                           |                                |                                      |             |              |                  |
| RP1-122P22.4 | ENSG00000268628.2                     | 0.171754092                    | 2                                    | 2           | 0.101551363  |                  |
|              | Brain_Cerebellum                      | 0.324702321                    | Brain_Hypothalamus                   | 1.041419238 |              |                  |
|              | 0.958580762                           | 0.958580762                    | 0.984840709                          |             | 1.637378713  | 1.311109711      |

|               |                                       |                             |              |              |              |                                      |                              |            |   |
|---------------|---------------------------------------|-----------------------------|--------------|--------------|--------------|--------------------------------------|------------------------------|------------|---|
|               | 0.461414048                           | 2                           | 0            | 0.972491774  |              |                                      |                              |            |   |
| CLPTM1L       | ENSG00000049656.13                    |                             |              | 0.171781644  | 1            | 1                                    | 0.171781644                  |            |   |
|               | Brain_Cerebellar_Hemisphere           |                             |              | 0.171781644  |              |                                      | Brain_Cerebellar_Hemisphere1 | 1          |   |
|               | 1                                     | -1.366501392                | -1.366501392 | -1.366501392 | NA           | 1                                    | 0                            |            |   |
|               | 0.972491774                           |                             |              |              |              |                                      |                              |            |   |
| BET1          | ENSG00000105829.11                    |                             | 0.171802285  | 1            | 1            | 0.171802285                          | Brain_Cortex                 |            |   |
|               | 0.171802285                           | Brain_Cortex                | 1            | 1            | 1            | 1.366435589                          | 1.366435589                  |            |   |
|               | 1.366435589                           | NA                          | 1            | 0            | 0.972491774  |                                      |                              |            |   |
| LINC01152     | ENSG00000256124.5                     |                             | 0.171862138  | 7            | 2            | 0.087866092                          |                              |            |   |
|               | Brain_Cerebellar_Hemisphere           |                             | 0.696554355  |              |              | Brain_Frontal_Cortex_BA9             |                              |            |   |
|               | 5.837853165                           | -6.32E-05                   | 0.981136397  |              |              | -1.70676311                          | 0.960564332                  |            |   |
|               | 0.217794321                           | 0.871452649                 | 2            | 0            | 0.972491774  |                                      |                              |            |   |
| DAPK3         | ENSG00000167657.13                    |                             | 0.17186246   | 1            | 1            | 0.17186246                           | Brain_Cortex                 | 0.17186246 |   |
|               | Brain_Cortex                          | 1                           | 1            | 1            | 1.366243781  | 1.366243781                          | 1.366243781                  |            |   |
|               | NA                                    | 1                           | 0            | 0.972491774  |              |                                      |                              |            |   |
| DDB1          | ENSG00000167986.13                    |                             | 0.171962839  | 1            | 1            | 0.171962839                          |                              |            |   |
|               | Brain_Spinal_cord_cervical_c-1        |                             | 0.171962839  |              |              | Brain_Spinal_cord_cervical_c-1       |                              |            |   |
|               | 1                                     | 1                           | 1            | 1.365923936  | 1.365923936  | 1.365923936                          | NA                           | 1          | 0 |
|               | 0.972491774                           |                             |              |              |              |                                      |                              |            |   |
| IL20RB        | ENSG00000174564.12                    |                             | 0.171963121  | 3            | 3            | 0.040105919                          |                              |            |   |
|               | Brain_Substantia_nigra                |                             | 0.431772424  |              |              | Brain_Anterior_cingulate_cortex_BA24 |                              |            |   |
|               | 1.714108562                           | 0.31037395                  | 0.31037395   | -2.05265634  | 1.532585446  |                                      |                              |            |   |
|               | -0.435411056                          | 1.818174766                 | 3            | 0            | 0.972491774  |                                      |                              |            |   |
| RP11-403A3.2  | ENSG00000276269.1                     |                             | 0.171972201  | 5            | 4            | 0.025329293                          |                              |            |   |
|               | Brain_Anterior_cingulate_cortex_BA24  |                             | 0.547159526  |              |              | Brain_Caudate_basal_ganglia          |                              |            |   |
|               | 3.833276472                           | 0.021982729                 | 0.146426681  |              |              | -2.236343285                         | -0.602021951                 |            |   |
|               | -1.622875936                          | 0.659260133                 | 4            | 0            | 0.972491774  |                                      |                              |            |   |
| AJ011932.1    | ENSG00000274248.1                     |                             | 0.172017832  | 2            | 2            | 0.063810733                          |                              |            |   |
|               | Brain_Anterior_cingulate_cortex_BA24  |                             | 0.090493137  |              |              | Brain_Hypothalamus                   |                              |            |   |
|               | 1.824331532                           | 0.175668468                 | 0.175668468  |              |              | -1.85349995                          | -1.69280213                  |            |   |
|               | -1.77315104                           | 0.113630518                 | 2            | 0            | 0.972491774  |                                      |                              |            |   |
| GLRB          | ENSG00000109738.10                    |                             | 0.172041725  | 2            | 2            | 0.06228538                           | Brain_Amygdala               |            |   |
|               | 0.801695962                           | Brain_Cerebellar_Hemisphere | 1.02149464   | 0.97850536   | 0.97850536   |                                      |                              |            |   |
|               | -0.251152817                          | 1.864258727                 | 0.806552955  | 1.495821847  | 2            | 0                                    |                              |            |   |
|               | 0.972491774                           |                             |              |              |              |                                      |                              |            |   |
| LINC01785     | ENSG00000268038.1                     |                             | 0.172246426  | 5            | 5            | 0.073512373                          |                              |            |   |
|               | Brain_Putamen_basal_ganglia           |                             | 0.799792365  |              |              | Brain_Anterior_cingulate_cortex_BA24 |                              |            |   |
|               | 2.918908195                           | 0.209608788                 | 0.209608788  |              |              | -1.78963646                          | 0.950966206                  |            |   |
|               | -0.612697073                          | 1.029239749                 | 5            | 0            | 0.972491774  |                                      |                              |            |   |
| RP11-277B15.3 | ENSG00000272205.1                     |                             | 0.17237882   | 1            | 1            | 0.17237882                           |                              |            |   |
|               | Brain_Nucleus_accumbens_basal_ganglia |                             | 0.17237882   |              |              |                                      |                              |            |   |
|               | Brain_Nucleus_accumbens_basal_ganglia | 1                           | 1            | 1            | -1.364599952 |                                      |                              |            |   |
|               | -1.364599952                          | -1.364599952                | NA           | 1            | 0            | 0.972491774                          |                              |            |   |
| MICU3         | ENSG00000155970.11                    |                             | 0.172383958  | 2            | 2            | 0.172751643                          |                              |            |   |
|               | Brain_Frontal_Cortex_BA9              |                             | 0.574510142  |              |              | Brain_Hypothalamus                   | 1.437326457                  |            |   |
|               | 0.562673543                           | 0.562673543                 | -1.36341536  | 0.56142163   | -0.400996865 |                                      |                              |            |   |
|               | 1.361065288                           | 2                           | 0            | 0.972491774  |              |                                      |                              |            |   |
| PDE1B         | ENSG00000123360.11                    |                             | 0.172399785  | 4            | 3            | 0.262039779                          |                              |            |   |
|               | Brain_Cerebellar_Hemisphere           |                             | 0.929350787  |              |              | Brain_Hippocampus                    | 2.870256874                  |            |   |
|               | 0.025597621                           | 0.10295167                  | -1.121583009 |              |              | -0.088661681                         | -0.63428775                  |            |   |
|               | 0.539841512                           | 3                           | 0            | 0.972491774  |              |                                      |                              |            |   |
| ITGB8         | ENSG00000105855.9                     |                             | 0.172504142  | 1            | 1            | 0.172504142                          |                              |            |   |
|               | Brain_Hippocampus                     |                             | 0.172504142  |              |              | Brain_Hippocampus                    | 1                            | 1          | 1 |
|               | 1.364201546                           | 1.364201546                 | 1.364201546  | NA           | 1            | 0                                    | 0.972491774                  |            |   |
| GDNF          | ENSG00000168621.14                    |                             | 0.172594329  | 2            | 2            | 0.09387092                           | Brain_Cerebellum             |            |   |
|               | 0.994600716                           | Brain_Cerebellar_Hemisphere | 1.445315932  | 0.554684068  |              |                                      |                              |            |   |
|               | 0.554684068                           | -0.00676705                 | 1.675322772  | 0.834277861  | 1.18941712   | 2                                    |                              |            |   |
|               | 0                                     | 0.972491774                 |              |              |              |                                      |                              |            |   |
| TM6SF2        | ENSG00000213996.12                    |                             | 0.172649571  | 2            | 1            | 0.154099131                          |                              |            |   |
|               | Brain_Cerebellum                      |                             | 0.207718491  |              |              | Brain_Cerebellar_Hemisphere          | 1.938280811                  |            |   |
|               | 0.061719189                           | 1.938280811                 | 1.259863824  | 1.425200917  | 1.342532371  |                                      |                              |            |   |
|               | 0.11691098                            | 1                           | 0            | 0.972491774  |              |                                      |                              |            |   |

|               |                                       |              |    |    |                                       |             |   |  |              |
|---------------|---------------------------------------|--------------|----|----|---------------------------------------|-------------|---|--|--------------|
| ATP23         | ENSG00000166896.7                     | 0.172703073  | 13 | 1  | 0.042158808                           |             |   |  |              |
|               | Brain_Substantia_nigra                | 0.484840398  |    |    | Brain_Cortex                          | 12.37439694 |   |  |              |
|               | 1.85E-05                              | 12.37439694  |    |    | -2.031949107                          |             |   |  |              |
|               | 0.288632885                           | 1            | 0  |    | -0.698538647                          |             |   |  | -1.333047478 |
| PMFBP1        | ENSG00000118557.15                    | 0.172800097  |    | 2  | 2                                     | 0.066811473 |   |  |              |
|               | Brain_Cortex                          | 0.579989952  |    |    | Brain_Spinal_cord_cervical_c-1        | 1.090386391 |   |  |              |
|               | 0.909613609                           | 0.909613609  |    |    | -1.832940142                          |             |   |  | 0.553399397  |
|               | 1.687396871                           | 2            | 0  |    | 0.972491774                           |             |   |  | -0.639770373 |
| RP11-360I2.1  | ENSG00000272130.1                     | 0.172802032  |    | 11 | 10                                    | 0.055814709 |   |  |              |
|               | Brain_Substantia_nigra                | 0.96440705   |    |    | Brain_Hippocampus                     | 3.15494573  |   |  |              |
|               | 0.084783387                           | 0.186336573  |    |    | -1.912479579                          |             |   |  | 0.708787453  |
|               | 0.811214715                           | 10           | 0  |    | 0.972491774                           |             |   |  | -0.511798284 |
| RPS15A        | ENSG00000134419.15                    | 0.172813599  |    | 2  | 2                                     | 0.078973415 |   |  |              |
|               | Brain_Spinal_cord_cervical_c-1        | 0.526538572  |    |    | Brain_Putamen_basal_ganglia           |             |   |  |              |
|               | 1.010658098                           | 0.989341902  |    |    | 0.989341902                           |             |   |  | -1.756673861 |
|               | -0.561687558                          | 1.689965837  |    |    | 2                                     | 0           |   |  | 0.633298745  |
|               |                                       |              |    |    | 0.972491774                           |             |   |  |              |
| NICN1         | ENSG00000145029.13                    | 0.173030868  |    | 6  | 5                                     | 0.099722034 |   |  |              |
|               | Brain_Frontal_Cortex_BA9              | 0.758471885  |    |    | Brain_Cerebellum                      | 3.907568414 |   |  |              |
|               | 0.078965224                           | 0.199361656  |    |    | -0.936005563                          |             |   |  | 1.646202698  |
|               | 1.012306334                           | 5            | 0  |    | 0.972491774                           |             |   |  | 0.529645428  |
| TWSG1         | ENSG00000128791.11                    | 0.173248174  |    | 10 | 3                                     | 0.186562703 |   |  |              |
|               | Brain_Hippocampus                     | 0.926558043  |    |    | Brain_Hypothalamus                    | 8.568688302 |   |  |              |
|               | 0.004632013                           | 0.307626194  |    |    | -1.32081606                           |             |   |  | 0.400098414  |
|               | 0.606398874                           | 3            | 0  |    | 0.972491774                           |             |   |  | -0.230229078 |
| ATP2C2        | ENSG00000064270.12                    | 0.173318629  |    | 3  | 3                                     | 0.108062329 |   |  |              |
|               | Brain_Nucleus_accumbens_basal_ganglia | 0.362200607  |    |    | Brain_Frontal_Cortex_BA9              |             |   |  |              |
|               | 1.749520401                           | 0.294201806  |    |    | 0.294201806                           |             |   |  | -1.350521591 |
|               | 0.389207331                           | 1.546292769  |    |    | 3                                     | 0           |   |  | 0.972491774  |
| PLEKHG4B      | ENSG00000153404.14                    | 0.173482433  |    | 1  | 1                                     | 0.173482433 |   |  |              |
|               | Brain_Anterior_cingulate_cortex_BA24  | 0.173482433  |    |    |                                       |             |   |  |              |
|               | Brain_Anterior_cingulate_cortex_BA24  | 1            | 1  | 1  |                                       |             |   |  | -1.361098915 |
|               | -1.361098915                          | -1.361098915 |    |    | NA                                    | 1           | 0 |  | 0.972491774  |
| RSBN1L        | ENSG00000187257.15                    | 0.173485076  |    | 3  | 3                                     | 0.101896192 |   |  |              |
|               | Brain_Hypothalamus                    | 0.157327635  |    |    | Brain_Cerebellum                      | 1.901813528 |   |  |              |
|               | 0.098173662                           | 0.098173662  |    |    | -1.514296875                          |             |   |  | 1.635729599  |
|               | 1.790449916                           | 3            | 0  |    | 0.972491774                           |             |   |  | -0.430894665 |
| RP11-953B20.1 | ENSG00000261710.1                     | 0.173515102  |    | 1  | 1                                     | 0.173515102 |   |  |              |
|               | Brain_Caudate_basal_ganglia           | 0.173515102  |    |    | Brain_Caudate_basal_ganglia           | 1           | 1 |  |              |
|               | 1                                     | -1.36099553  |    |    | -1.36099553                           |             |   |  | NA           |
|               | 0.972491774                           |              |    |    |                                       |             |   |  | 1            |
| ITGB1         | ENSG00000150093.18                    | 0.173646385  |    | 1  | 1                                     | 0.173646385 |   |  |              |
|               | Brain_Cerebellar_Hemisphere           | 0.173646385  |    |    | Brain_Cerebellar_Hemisphere           | 1           | 1 |  |              |
|               | 1                                     | 1.360580224  |    |    | 1.360580224                           |             |   |  | NA           |
|               | 0.972491774                           |              |    |    |                                       |             |   |  | 1            |
| DDAH1         | ENSG00000153904.18                    | 0.173712402  |    | 1  | 1                                     | 0.173712402 |   |  |              |
|               | Brain_Cerebellar_Hemisphere           | 0.173712402  |    |    | Brain_Cerebellar_Hemisphere           | 1           | 1 |  |              |
|               | 1                                     | -1.360371469 |    |    | -1.360371469                          |             |   |  | NA           |
|               | 0.972491774                           |              |    |    |                                       |             |   |  | 1            |
| TTL11         | ENSG00000175764.14                    | 0.173802015  |    | 1  | 1                                     | 0.173802015 |   |  |              |
|               | Brain_Cerebellum                      | 0.173802015  |    |    | Brain_Cerebellum                      | 1           | 1 |  |              |
|               | 1.3600882                             | 1.3600882    |    |    | NA                                    | 1           | 0 |  | 1.3600882    |
|               | 0.972491774                           |              |    |    |                                       |             |   |  |              |
| KDM3A         | ENSG00000115548.16                    | 0.173928363  |    | 3  | 3                                     | 0.101727731 |   |  |              |
|               | Brain_Cerebellum                      | 1.740950888  |    |    | Brain_Cortex                          |             |   |  |              |
|               | 0.486543902                           |              |    |    | 0.272321363                           |             |   |  | 0.272321363  |
|               | 0.695816264                           | 1.636534692  |    |    | 1.246880694                           |             |   |  | 3            |
|               | 0.972491774                           |              |    |    | 0.490691131                           |             |   |  | 0            |
| A1BG          | ENSG00000121410.11                    | 0.173953952  |    | 2  | 2                                     | 0.16096179  |   |  |              |
|               | Brain_Amygdala                        |              |    |    | Brain_Nucleus_accumbens_basal_ganglia | 1.1061561   |   |  |              |
|               | 0.167627764                           |              |    |    | 1.401844153                           |             |   |  | 0.8938439    |
|               | 0.8938439                             | 1.379866464  |    |    | 1.390855309                           |             |   |  | 0.015540573  |
|               | 0                                     | 0.972491774  |    |    |                                       |             |   |  | 2            |
| NHLRC4        | ENSG00000257108.1                     | 0.174076969  |    | 2  | 2                                     | 0.074943843 |   |  |              |
|               | Brain_Cerebellum                      | 0.402730629  |    |    | Brain_Cortex                          | 1.153418507 |   |  |              |
|               | 0.846581493                           | 0.836754408  |    |    | 1.780807871                           |             |   |  | 0.846581493  |
|               |                                       |              |    |    | 1.30878114                            |             |   |  | 0.667546606  |
|               |                                       |              |    |    |                                       |             |   |  | 2            |

|               |                                      |                                |              |             |                             |                  |             |   |             |
|---------------|--------------------------------------|--------------------------------|--------------|-------------|-----------------------------|------------------|-------------|---|-------------|
| 0             | 0.972491774                          |                                |              |             |                             |                  |             |   |             |
| MCRS1         | ENSG00000187778.13                   | 0.174117727                    | 1            | 1           | 0.174117727                 |                  |             |   |             |
|               | Brain_Hippocampus                    | 0.174117727                    |              |             | Brain_Hippocampus           | 1                | 1           | 1 |             |
|               | 1.359091087                          | 1.359091087                    | 1.359091087  | NA          | 1                           | 0                | 0.972491774 |   |             |
| ARFRP1        | ENSG00000101246.19                   | 0.174166655                    | 3            | 3           | 0.041649619                 |                  |             |   |             |
|               | Brain_Anterior_cingulate_cortex_BA24 | 0.12425167                     |              |             | Brain_Cortex                | 2.180589095      |             |   |             |
|               | 0.074847054                          | 0.074847054                    | 1.537170059  | 2.03700422  | 1.737953476                 |                  |             |   |             |
|               | 0.264009276                          | 3                              | 0            | 0.972491774 |                             |                  |             |   |             |
| R3HDM4        | ENSG00000198858.9                    | 0.17425893                     | 1            | 1           | 0.17425893                  |                  |             |   |             |
|               | Brain_Substantia_nigra               | 0.17425893                     |              |             | Brain_Substantia_nigra      | 1                | 1           | 1 |             |
|               | 1.358645561                          | 1.358645561                    | 1.358645561  | NA          | 1                           | 0                | 0.972491774 |   |             |
| HPS4          | ENSG00000100099.20                   | 0.174279797                    | 10           | 7           | 0.038122908                 |                  |             |   |             |
|               | Brain_Cerebellar_Hemisphere          | 0.968720732                    |              |             | Brain_Cortex                | 5.726627234      |             |   |             |
|               | 0.038779206                          | 0.332368836                    | -2.073530799 | 1.655369319 | 0.465958724                 |                  |             |   |             |
|               | 1.196053552                          | 7                              | 0            | 0.972491774 |                             |                  |             |   |             |
| CH17-264L24.1 | ENSG00000279278.1                    | 0.174353084                    | 1            | 1           | 0.174353084                 |                  |             |   |             |
|               | Brain_Cerebellum                     | 0.174353084                    |              |             | Brain_Cerebellum            | 1                | 1           | 1 | 1.358348638 |
|               | 1.358348638                          | 1.358348638                    | NA           | 1           | 0                           | 0.972491774      |             |   |             |
| SPINK8        | ENSG00000229453.2                    | 0.174372021                    | 2            | 2           | 0.065585194                 |                  |             |   |             |
|               | Brain_Hypothalamus                   | 0.221198245                    |              |             | Brain_Hippocampus           | 1.515055111      |             |   |             |
|               | 0.484944889                          | 0.484944889                    | 1.223348106  | 1.841248207 | 1.532298157                 |                  |             |   |             |
|               | 0.436921351                          | 2                              | 0            | 0.972491774 |                             |                  |             |   |             |
| FNDC3A        | ENSG00000102531.16                   | 0.174406851                    | 1            | 1           | 0.174406851                 |                  |             |   |             |
|               | Brain_Cerebellum                     | 0.174406851                    |              |             | Brain_Cerebellum            | 1                | 1           | 1 | 1.358179131 |
|               | 1.358179131                          | 1.358179131                    | NA           | 1           | 0                           | 0.972491774      |             |   |             |
| GSTA1         | ENSG00000243955.5                    | 0.174412377                    | 4            | 4           | 0.052789831                 |                  |             |   |             |
|               | Brain_Substantia_nigra               | 0.926251755                    |              |             | Brain_Cortex                | 2.006483465      |             |   |             |
|               | 0.248884039                          | 0.248884039                    | -1.387387184 | 1.936636191 | 0.06453574                  |                  |             |   |             |
|               | 1.379218499                          | 4                              | 0            | 0.972491774 |                             |                  |             |   |             |
| STPG1         | ENSG00000001460.17                   | 0.174431848                    | 10           | 4           | 0.022039602                 |                  |             |   |             |
|               | Brain_Substantia_nigra               | 0.118420404                    |              |             | Brain_Hypothalamus          | 8.416785102      |             |   |             |
|               | 0.000340863                          | 0.288684847                    | 1.561438161  | 2.289684684 | 1.870530304                 |                  |             |   |             |
|               | 0.216213363                          | 4                              | 0            | 0.972491774 |                             |                  |             |   |             |
| CCM2          | ENSG00000136280.15                   | 0.1745049                      | 1            | 1           | 0.1745049                   | Brain_Cerebellum | 0.1745049   |   |             |
|               | Brain_Cerebellum                     | 1                              | 1            | 1.35787012  | 1.35787012                  | 1.35787012       | NA          | 1 | 0           |
|               | 0.972491774                          |                                |              |             |                             |                  |             |   |             |
| ZDHC11B       | ENSG00000206077.10                   | 0.174558567                    | 8            | 6           | 0.065175687                 |                  |             |   |             |
|               | Brain_Hypothalamus                   | 0.811995741                    |              |             | Brain_Cerebellar_Hemisphere | 3.844969078      |             |   |             |
|               | 0.004181262                          | 0.219163436                    | -0.923962444 | 1.844051142 | 0.749143533                 |                  |             |   |             |
|               | 1.035732232                          | 6                              | 0            | 0.972491774 |                             |                  |             |   |             |
| PTPRE         | ENSG00000132334.16                   | 0.174620124                    | 1            | 1           | 0.174620124                 | Brain_Cerebellum |             |   |             |
|               | 0.174620124                          | Brain_Cerebellum               | 1            | 1           | 1                           | 1.357507148      | 1.357507148 |   |             |
|               | 1.357507148                          | NA                             | 1            | 0           | 0.972491774                 |                  |             |   |             |
| ZFP62         | ENSG00000196670.13                   | 0.174641659                    | 5            | 2           | 0.064690273                 |                  |             |   |             |
|               | Brain_Cerebellar_Hemisphere          | 0.280035899                    |              |             | Brain_Frontal_Cortex_BA9    |                  |             |   |             |
|               | 4.597576922                          | 0.006498834                    | 0.262723682  | 1.080238699 | 1.84739252                  |                  |             |   |             |
|               | 1.578256088                          | 0.327988059                    | 2            | 0           | 0.972491774                 |                  |             |   |             |
| ANKRD34A      | ENSG00000272031.2                    | 0.174658634                    | 2            | 1           | 0.174658634                 |                  |             |   |             |
|               | Brain_Frontal_Cortex_BA9             | 0.174658634                    |              |             | Brain_Frontal_Cortex_BA9    | 2                |             |   |             |
|               | 3.35E-17                             | 2                              | 1.357385874  | 1.357385874 | 1.357385874                 | 0                | 1           | 0 |             |
|               | 0.972491774                          |                                |              |             |                             |                  |             |   |             |
| NUCB1         | ENSG00000104805.15                   | 0.174730392                    | 2            | 2           | 0.155627404                 | Brain_Cerebellum |             |   |             |
|               | 0.943488603                          | Brain_Cerebellar_Hemisphere    | 1.678094418  | 0.321905582 |                             |                  |             |   |             |
|               | 0.321905582                          | 0.070885853                    | 1.419932258  | 0.745409055 | 0.953919861                 |                  |             |   |             |
|               | 2                                    | 0                              | 0.972491774  |             |                             |                  |             |   |             |
| MYO9B         | ENSG00000099331.13                   | 0.174733594                    | 4            | 4           | 0.046558182                 | Brain_Cortex     |             |   |             |
|               | 0.451716986                          | Brain_Spinal_cord_cervical_c-1 | 1.665766418  | 0.35844087  |                             |                  |             |   |             |
|               | 0.35844087                           | -0.756265067                   | 1.990297421  | 0.844516089 | 1.180810095                 | 4                |             |   |             |
|               | 0                                    | 0.972491774                    |              |             |                             |                  |             |   |             |
| METTL16       | ENSG00000127804.12                   | 0.174795645                    | 10           | 4           | 0.030603649                 |                  |             |   |             |
|               | Brain_Hippocampus                    | 0.990482777                    |              |             | Brain_Caudate_basal_ganglia | 7.554390912      |             |   |             |
|               | 0.0001561                            | 0.401246516                    | -2.162188502 | 0.011928354 | -0.580526815                |                  |             |   |             |

|               |                                       |              |                                      |                                       |             |                                       |             |                  |   |
|---------------|---------------------------------------|--------------|--------------------------------------|---------------------------------------|-------------|---------------------------------------|-------------|------------------|---|
|               | 0.652280325                           | 4            | 0                                    | 0.972491774                           |             |                                       |             |                  |   |
| GSTZ1         | ENSG00000100577.18                    |              | 0.174890944                          | 12                                    | 2           | 0.060000418                           |             |                  |   |
|               | Brain_Substantia_nigra                |              | 0.355792605                          |                                       |             | Brain_Amygdala                        | 10.72897032 |                  |   |
|               | 0.002729854                           | 0.641735746  |                                      | 0.923411876                           |             | 1.880790533                           |             | 1.349139284      |   |
|               | 0.230511748                           | 2            | 0                                    | 0.972491774                           |             |                                       |             |                  |   |
| WDR62         | ENSG00000075702.16                    |              | 0.174935218                          | 4                                     | 4           | 0.016554959                           |             | Brain_Cerebellum |   |
|               | 0.995578266                           |              | Brain_Frontal_Cortex_BA9             |                                       | 1.921912209 |                                       | 0.458290074 |                  |   |
|               | 0.458290074                           | -2.396445418 |                                      | 0.020702065                           |             | -0.669700866                          |             | 1.161127053      |   |
|               | 4                                     | 0            | 0.972491774                          |                                       |             |                                       |             |                  |   |
| BBS1          | ENSG00000174483.19                    |              | 0.175043008                          | 4                                     | 3           | 0.280218979                           |             |                  |   |
|               | Brain_Nucleus_accumbens_basal_ganglia |              | 0.569733628                          |                                       |             | Brain_Putamen_basal_ganglia           |             |                  |   |
|               | 2.847668944                           | 0.046653347  |                                      | 0.220571714                           |             | -0.806686535                          |             | 1.079827553      |   |
|               | 0.369234645                           | 0.816136542  |                                      | 3                                     | 0           | 0.972491774                           |             |                  |   |
| BSG           | ENSG00000172270.18                    |              | 0.175066207                          | 5                                     | 5           | 0.025297873                           |             |                  |   |
|               | Brain_Frontal_Cortex_BA9              |              | 0.825957353                          |                                       |             | Brain_Nucleus_accumbens_basal_ganglia |             |                  |   |
|               | 1.589898012                           | 0.438259772  |                                      | 0.438259772                           |             | -2.236823569                          |             | 1.417304594      |   |
|               | 0.083661706                           | 1.45275526   | 5                                    | 0                                     | 0.972491774 |                                       |             |                  |   |
| RP11-439E19.7 | ENSG00000235021.1                     |              | 0.175082933                          | 5                                     | 5           | 0.076174902                           |             |                  |   |
|               | Brain_Frontal_Cortex_BA9              |              | 0.76784046                           |                                       |             | Brain_Putamen_basal_ganglia           | 1.364636499 |                  |   |
|               | 0.764088002                           | 0.764088002  |                                      | -1.773324801                          |             | 0.295200841                           |             | -0.995181873     |   |
|               | 0.780920252                           | 5            | 0                                    | 0.972491774                           |             |                                       |             |                  |   |
| TEX40         | ENSG00000219435.5                     |              | 0.175204813                          | 11                                    | 3           | 0.02299041                            |             | Brain_Amygdala   |   |
|               | 0.059588132                           |              | Brain_Anterior_cingulate_cortex_BA24 |                                       | 9.753490221 |                                       |             |                  |   |
|               | 0.002084812                           | 0.329811176  |                                      | 1.883828832                           |             | 2.273593973                           |             | 2.087259004      |   |
|               | 0.13770637                            | 3            | 0                                    | 0.972491774                           |             |                                       |             |                  |   |
| DENND1B       | ENSG00000213047.12                    |              | 0.175305448                          | 1                                     | 1           | 0.175305448                           |             |                  |   |
|               | Brain_Cerebellum                      | 0.175305448  |                                      | Brain_Cerebellum1                     | 1           | 1                                     |             | -1.355351958     |   |
|               | -1.355351958                          | -1.355351958 | NA                                   | 1                                     | 0           | 0.972491774                           |             |                  |   |
| NGB           | ENSG00000165553.4                     |              | 0.175332387                          | 3                                     | 3           | 0.121332572                           |             | Brain_Cerebellum |   |
|               | 0.54075778                            |              | Brain_Cerebellar_Hemisphere          | 1.139396079                           |             | 0.864260814                           |             |                  |   |
|               | 0.864260814                           | -1.35288142  |                                      | 1.549204484                           |             | -0.13844814                           |             | 1.50780571       | 3 |
|               | 0                                     | 0.972491774  |                                      |                                       |             |                                       |             |                  |   |
| RP11-59H7.4   | ENSG00000277144.1                     |              | 0.175334853                          | 3                                     | 3           | 0.027590162                           |             |                  |   |
|               | Brain_Hippocampus                     | 0.983873589  |                                      | Brain_Hypothalamus                    | 1.383688656 |                                       |             |                  |   |
|               | 0.660219936                           | 0.660219936  |                                      | -0.020212835                          |             | 2.203065081                           |             | 0.934994872      |   |
|               | 1.144182407                           | 3            | 0                                    | 0.972491774                           |             |                                       |             |                  |   |
| ENTPD4        | ENSG00000197217.12                    |              | 0.175371746                          | 6                                     | 6           | 0.011804511                           |             |                  |   |
|               | Brain_Cerebellar_Hemisphere           | 0.946953549  |                                      | Brain_Frontal_Cortex_BA9              |             |                                       |             |                  |   |
|               | 3.256212512                           | 0.216380368  |                                      | 0.216380368                           |             | -2.51793498                           |             | 0.06653292       |   |
|               | -1.195297857                          | 0.865641709  |                                      | 6                                     | 0           | 0.972491774                           |             |                  |   |
| GDPD4         | ENSG00000178795.9                     |              | 0.175454374                          | 1                                     | 1           | 0.175454374                           |             |                  |   |
|               | Brain_Spinal_cord_cervical_c-1        | 0.175454374  |                                      | Brain_Spinal_cord_cervical_c-1        |             |                                       |             |                  |   |
|               | 1                                     | 1            | 1                                    | -1.354884453                          |             | -1.354884453                          | NA          | 1                | 0 |
|               | 0.972491774                           |              |                                      |                                       |             |                                       |             |                  |   |
| NLRP12        | ENSG00000142405.21                    |              | 0.175586889                          | 1                                     | 1           | 0.175586889                           |             |                  |   |
|               | Brain_Hippocampus                     | 0.175586889  |                                      | Brain_Hippocampus                     | 1           | 1                                     | 1           |                  |   |
|               | -1.354468712                          | -1.354468712 |                                      | -1.354468712                          | NA          | 1                                     | 0           | 0.972491774      |   |
| AGK           | ENSG00000006530.15                    |              | 0.175701002                          | 1                                     | 1           | 0.175701002                           |             |                  |   |
|               | Brain_Spinal_cord_cervical_c-1        | 0.175701002  |                                      | Brain_Spinal_cord_cervical_c-1        |             |                                       |             |                  |   |
|               | 1                                     | 1            | 1                                    | 1.354110892                           |             | 1.354110892                           | NA          | 1                | 0 |
|               | 0.972491774                           |              |                                      |                                       |             |                                       |             |                  |   |
| BDKRB2        | ENSG00000168398.6                     |              | 0.175751482                          | 5                                     | 5           | 0.126785909                           |             |                  |   |
|               | Brain_Frontal_Cortex_BA9              | 0.469423468  |                                      | Brain_Putamen_basal_ganglia           | 1.68173422  |                                       |             |                  |   |
|               | 0.332024354                           | 0.332024354  |                                      | -0.964127584                          |             | 1.526899883                           |             | 0.772901972      |   |
|               | 1.015393798                           | 5            | 0                                    | 0.972491774                           |             |                                       |             |                  |   |
| APLP1         | ENSG00000105290.11                    |              | 0.175815827                          | 1                                     | 1           | 0.175815827                           |             |                  |   |
|               | Brain_Putamen_basal_ganglia           | 0.175815827  |                                      | Brain_Putamen_basal_ganglia           | 1           | 1                                     |             |                  |   |
|               | 1                                     | -1.353751014 |                                      | -1.353751014                          | NA          | 1                                     | 0           |                  |   |
|               | 0.972491774                           |              |                                      |                                       |             |                                       |             |                  |   |
| RP11-285E23.2 | ENSG00000274560.1                     |              | 0.175818271                          | 3                                     | 3           | 0.126693555                           |             |                  |   |
|               | Brain_Cerebellar_Hemisphere           | 0.659050567  |                                      | Brain_Nucleus_accumbens_basal_ganglia |             |                                       |             |                  |   |
|               | 1.318285314                           | 0.662527403  |                                      | 0.662527403                           |             | -0.441224377                          |             | 1.527271331      |   |

|               |                                       |                             |              |              |             |             |                                |             |
|---------------|---------------------------------------|-----------------------------|--------------|--------------|-------------|-------------|--------------------------------|-------------|
|               | 0.699894345                           | 1.021062802                 | 3            | 0            | 0.972491774 |             |                                |             |
| LINC01160     | ENSG00000231346.5                     | 0.175821285                 |              |              | 1           | 1           | 0.175821285                    |             |
|               | Brain_Cerebellar_Hemisphere           | 0.175821285                 |              |              |             |             | Brain_Cerebellar_Hemisphere    | 1           |
|               | 1                                     | -1.353733911                | -1.353733911 | -1.353733911 | NA          | 1           | 0                              |             |
|               | 0.972491774                           |                             |              |              |             |             |                                |             |
| POLR3H        | ENSG00000100413.16                    | 0.175826088                 |              |              | 12          | 2           | 0.05209402                     |             |
|               | Brain_Nucleus_accumbens_basal_ganglia | 0.506512165                 |              |              |             |             | Brain_Hippocampus              |             |
|               | 10.36947985                           | 0.006205491                 | 0.79315834   | -1.942355982 |             |             | -0.664278366                   |             |
|               | -1.092303299                          | 0.395263284                 | 2            | 0            | 0.972491774 |             |                                |             |
| PPM1A         | ENSG00000100614.17                    | 0.175921184                 |              |              | 8           | 2           | 0.098576228                    |             |
|               | Brain_Anterior_cingulate_cortex_BA24  | 0.665858307                 |              |              |             |             | Brain_Cerebellum               |             |
|               | 6.965474984                           | 2.21E-05                    | 0.528037598  | 0.431839173  |             |             | 1.651795592                    |             |
|               | 0.981133904                           | 0.522456887                 | 2            | 0            | 0.972491774 |             |                                |             |
| SLC25A20      | ENSG00000178537.9                     | 0.175957007                 |              |              | 1           | 1           | 0.175957007                    |             |
|               | Brain_Cerebellum                      | 0.175957007                 |              |              |             |             | Brain_Cerebellum               | 1           |
|               | 1.353308774                           | 1.353308774                 | NA           | 1            | 0           | 0.972491774 |                                | 1.353308774 |
| FAM166A       | ENSG00000188163.7                     | 0.176019369                 |              |              | 3           | 3           | 0.038627384                    |             |
|               | Brain_Hippocampus                     | 0.967811828                 |              |              |             |             | Brain_Spinal_cord_cervical_c-1 |             |
|               | 1.147897873                           | 0.879014937                 | 0.879014937  | -0.733009449 |             |             | 2.068134428                    |             |
|               | 0.458492606                           | 1.446627942                 | 3            | 0            | 0.972491774 |             |                                |             |
| GGA3          | ENSG00000125447.16                    | 0.17606125                  | 2            | 2            | 0.063321251 |             | Brain_Cerebellum               |             |
|               | 0.352028688                           | Brain_Cerebellar_Hemisphere | 1.571946936  | 0.428053064  |             |             |                                |             |
|               | 0.428053064                           | -1.856929033                | -0.930661505 | -1.393795269 |             |             | 0.65497005                     | 2           |
|               | 0                                     | 0.972491774                 |              |              |             |             |                                |             |
| STMN3         | ENSG00000197457.9                     | 0.176064039                 |              |              | 6           | 6           | 0.103681907                    |             |
|               | Brain_Cerebellar_Hemisphere           | 0.993377548                 |              |              |             |             | Brain_Cerebellum               | 3.559983871 |
|               | 0.184535428                           | 0.184535428                 | -1.627259915 | 0.958169941  |             |             | -0.296126425                   |             |
|               | 0.892298629                           | 6                           | 0            | 0.972491774  |             |             |                                |             |
| RND3          | ENSG00000115963.13                    | 0.176220387                 |              |              | 2           | 2           | 0.145931042                    |             |
|               | Brain_Nucleus_accumbens_basal_ganglia | 0.310331604                 |              |              |             |             | Brain_Caudate_basal_ganglia    |             |
|               | 1.099655226                           | 0.900344774                 | 0.900344774  | -1.014526472 |             |             | 1.454055057                    |             |
|               | 0.219764292                           | 1.745550739                 | 2            | 0            | 0.972491774 |             |                                |             |
| RP1-40E16.9   | ENSG00000230269.6                     | 0.176235574                 |              |              | 2           | 2           | 0.1452227                      |             |
|               | Brain_Nucleus_accumbens_basal_ganglia | 0.221102236                 |              |              |             |             | Brain_Cortex                   | 1.04306211  |
|               | 0.95693789                            | 0.95693789                  | -1.456614946 | -1.223602448 |             |             | -1.340108697                   |             |
|               | 0.164764718                           | 2                           | 0            | 0.972491774  |             |             |                                |             |
| FAM92B        | ENSG00000153789.12                    | 0.176253546                 |              |              | 2           | 2           | 0.316078692                    |             |
|               | Brain_Cerebellum                      | 0.675901157                 |              |              |             |             | Brain_Cerebellar_Hemisphere    | 1.700682053 |
|               | 0.299317947                           | 0.299317947                 | -1.002548631 | 0.418062861  |             |             | -0.292242885                   |             |
|               | 1.004524019                           | 2                           | 0            | 0.972491774  |             |             |                                |             |
| SDHAF1        | ENSG00000205138.3                     | 0.176267473                 |              |              | 1           | 1           | 0.176267473                    |             |
|               | Brain_Putamen_basal_ganglia           | 0.176267473                 |              |              |             |             | Brain_Putamen_basal_ganglia    | 1           |
|               | 1                                     | -1.352337189                | -1.352337189 | -1.352337189 | NA          | 1           | 0                              |             |
|               | 0.972491774                           |                             |              |              |             |             |                                |             |
| MB21D1        | ENSG00000164430.15                    | 0.176272119                 |              |              | 1           | 1           | 0.176272119                    |             |
|               | Brain_Substantia_nigra                | 0.176272119                 |              |              |             |             | Brain_Substantia_nigra         | 1           |
|               | 1                                     | -1.352322657                | -1.352322657 | -1.352322657 | NA          | 1           | 0                              |             |
|               | 0.972491774                           |                             |              |              |             |             |                                |             |
| RP11-522N14.2 | ENSG00000256596.1                     | 0.176316267                 |              |              | 1           | 1           | 0.176316267                    |             |
|               | Brain_Hypothalamus                    | 0.176316267                 |              |              |             |             | Brain_Hypothalamus             | 1           |
|               | -1.352184605                          | -1.352184605                | -1.352184605 | NA           | 1           | 0           | 0.972491774                    |             |
| C10orf82      | ENSG00000165863.16                    | 0.176325977                 |              |              | 3           | 3           | 0.080867492                    |             |
|               | Brain_Caudate_basal_ganglia           | 0.804759593                 |              |              |             |             | Brain_Cortex                   | 1.101927456 |
|               | 0.887341179                           | 0.887341179                 | -1.745674712 | 1.255206753  |             |             | -0.245886672                   |             |
|               | 1.500441158                           | 3                           | 0            | 0.972491774  |             |             |                                |             |
| RP11-96L14.7  | ENSG00000236782.6                     | 0.176446251                 |              |              | 2           | 2           | 0.134714568                    |             |
|               | Brain_Cerebellum                      | 0.869703688                 |              |              |             |             | Brain_Cerebellar_Hemisphere    | 1.522904496 |
|               | 0.477095504                           | 0.477095504                 | -0.164034877 | 1.495766293  |             |             | 0.665865708                    |             |
|               | 1.173656662                           | 2                           | 0            | 0.972491774  |             |             |                                |             |
| CFTR          | ENSG00000001626.14                    | 0.176448753                 |              |              | 5           | 5           | 0.067741612                    |             |
|               | Brain_Hippocampus                     | 0.611117681                 |              |              |             |             | Brain_Frontal_Cortex_BA9       | 2.007979237 |
|               | 0.362751752                           | 0.362751752                 | -1.826721779 | 1.319537239  |             |             | -0.425136242                   |             |

|                                       |                             |                                |              |              |              |                  |              |   |  |
|---------------------------------------|-----------------------------|--------------------------------|--------------|--------------|--------------|------------------|--------------|---|--|
| 1.351021401                           | 5                           | 0                              | 0.972491774  |              |              |                  |              |   |  |
| FBLN7                                 | ENSG00000144152.12          | 0.17646944                     | 5            | 5            | 0.01913208   | Brain_Cortex     |              |   |  |
| 0.909262751                           | Brain_Cerebellum            | 1.984810076                    |              |              | 0.240687789  |                  | 0.240687789  |   |  |
| -2.3429474                            | 0.113968516                 | -0.920600585                   |              |              | 0.952093918  | 5                | 0            |   |  |
| 0.972491774                           |                             |                                |              |              |              |                  |              |   |  |
| PAPD7                                 | ENSG00000112941.13          | 0.176481782                    | 3            | 3            | 0.051110242  | Brain_Cerebellum |              |   |  |
| 0.920704067                           | Brain_Cerebellar_Hemisphere | 2.119209386                    |              |              | 0.203370083  |                  |              |   |  |
| 0.203370083                           | -1.950553007                | -0.099546881                   |              |              | -1.098611361 |                  | 0.934232179  |   |  |
| 3                                     | 0                           | 0.972491774                    |              |              |              |                  |              |   |  |
| C12orf43                              | ENSG00000157895.11          | 0.17661117                     | 11           | 4            | 0.15211279   |                  |              |   |  |
| Brain_Putamen_basal_ganglia           | 0.961362612                 | Brain_Cerebellum               | 8.078236294  |              |              |                  |              |   |  |
| 4.12E-05                              | 0.309917492                 | -1.432108439                   |              |              | 1.199563044  |                  | -0.482309029 |   |  |
| 0.943243604                           | 4                           | 0                              | 0.972530552  |              |              |                  |              |   |  |
| SPPL3                                 | ENSG00000157837.15          | 0.176743135                    | 9            | 4            | 0.016929209  |                  |              |   |  |
| Brain_Hypothalamus                    | 0.23669979                  | Brain_Cerebellar_Hemisphere    | 7.313203716  |              |              |                  |              |   |  |
| 0.018639202                           | 0.263480288                 | -2.3882416                     | -1.183275977 |              | -1.592940997 |                  |              |   |  |
| 0.428218954                           | 4                           | 0                              | 0.972530552  |              |              |                  |              |   |  |
| RP11-131L12.4                         | ENSG00000275409.1           | 0.176777384                    | 10           | 5            | 0.367321983  |                  |              |   |  |
| Brain_Putamen_basal_ganglia           | 0.763322811                 | Brain_Cerebellum               | 7.266898388  |              |              |                  |              |   |  |
| 0.020716448                           | 0.349198809                 | -0.901501036                   | 0.866438091  |              | -0.377109771 |                  |              |   |  |
| 0.587893983                           | 5                           | 0                              | 0.972530552  |              |              |                  |              |   |  |
| EIF4A3                                | ENSG00000141543.9           | 0.176826978                    | 1            | 1            | 0.176826978  |                  |              |   |  |
| Brain_Spinal_cord_cervical_c-1        | 0.176826978                 | Brain_Spinal_cord_cervical_c-1 |              |              |              |                  |              |   |  |
| 1                                     | 1                           | 1                              | 1.350589464  | 1.350589464  | 1.350589464  | NA               | 1            | 0 |  |
| 0.972530552                           |                             |                                |              |              |              |                  |              |   |  |
| NPIP13                                | ENSG00000198064.13          | 0.176889956                    | 1            | 1            | 0.176889956  |                  |              |   |  |
| Brain_Hippocampus                     | 0.176889956                 | Brain_Hippocampus              | 1            | 1            | 1            |                  |              |   |  |
| 1.350392997                           | 1.350392997                 | 1.350392997                    | NA           | 1            | 0            | 0.972530552      |              |   |  |
| EPS8L2                                | ENSG00000177106.14          | 0.177019982                    | 5            | 4            | 0.227658187  |                  |              |   |  |
| Brain_Nucleus_accumbens_basal_ganglia | 0.824091211                 | Brain_Cerebellar_Hemisphere    |              |              |              |                  |              |   |  |
| 2.912827357                           | 0.062316799                 | 0.152050596                    | -1.035319363 |              | 1.206413256  |                  |              |   |  |
| 0.455448004                           | 0.923145613                 | 4                              | 0            | 0.972530552  |              |                  |              |   |  |
| ID3                                   | ENSG00000117318.8           | 0.177043266                    | 1            | 1            | 0.177043266  |                  |              |   |  |
| Brain_Nucleus_accumbens_basal_ganglia | 0.177043266                 |                                |              |              |              |                  |              |   |  |
| Brain_Nucleus_accumbens_basal_ganglia | 1                           | 1                              | 1            | -1.349914948 |              |                  |              |   |  |
| -1.349914948                          | -1.349914948                | NA                             | 1            | 0            | 0.972530552  |                  |              |   |  |
| TMEM218                               | ENSG00000150433.9           | 0.177102498                    | 5            | 4            | 0.142109231  |                  |              |   |  |
| Brain_Putamen_basal_ganglia           | 0.926234273                 | Brain_Frontal_Cortex_BA9       |              |              |              |                  |              |   |  |
| 2.154578741                           | 0.046913754                 | 0.79805857                     | -1.332231509 |              | 1.467981563  |                  |              |   |  |
| 0.192192001                           | 1.181054558                 | 4                              | 0            | 0.972530552  |              |                  |              |   |  |
| MMAB                                  | ENSG00000139428.11          | 0.17711442                     | 7            | 3            | 0.136672158  |                  |              |   |  |
| Brain_Nucleus_accumbens_basal_ganglia | 0.852259329                 | Brain_Cerebellar_Hemisphere    |              |              |              |                  |              |   |  |
| 5.513234248                           | 0.022781443                 | 0.492723867                    | -1.488298623 |              | 0.477216043  |                  |              |   |  |
| -0.399614752                          | 0.652351636                 | 3                              | 0            | 0.972530552  |              |                  |              |   |  |
| BLOC1S2                               | ENSG00000196072.11          | 0.177270387                    | 12           | 2            | 0.03425703   |                  |              |   |  |
| Brain_Hypothalamus                    | 0.198414139                 | Brain_Cerebellum               | 10.95669682  |              |              |                  |              |   |  |
| 0.001700931                           | 0.408734561                 | -2.117033205                   | -1.286082877 |              | -1.682604234 |                  |              |   |  |
| 0.239810858                           | 2                           | 0                              | 0.973005094  |              |              |                  |              |   |  |
| RHOF                                  | ENSG00000139725.7           | 0.17741456                     | 4            | 3            | 0.018020414  |                  |              |   |  |
| Brain_Cerebellar_Hemisphere           | 0.661294811                 | Brain_Cortex                   | 2.135032982  |              |              |                  |              |   |  |
| 0.030023071                           | 0.861384036                 | 0.438126189                    | 2.365198402  |              | 1.329682629  |                  |              |   |  |
| 1.007165822                           | 3                           | 0                              | 0.973414554  |              |              |                  |              |   |  |
| BLNK                                  | ENSG00000095585.16          | 0.177573406                    | 1            | 1            | 0.177573406  | Brain_Amygdala   |              |   |  |
| 0.177573406                           | Brain_Amygdala              | 1                              | 1            | 1            | -1.34826425  | -1.34826425      |              |   |  |
| -1.34826425                           | NA                          | 1                              | 0            | 0.973741196  |              |                  |              |   |  |
| CDKL2                                 | ENSG00000138769.10          | 0.177613289                    | 5            | 3            | 0.058048302  | Brain_Cortex     |              |   |  |
| 0.602562025                           | Brain_Frontal_Cortex_BA9    | 3.999405128                    | 0.03195613   |              |              |                  |              |   |  |
| 0.392788042                           | -1.895332975                | -0.520719734                   | -0.900455166 |              | 0.577538919  |                  |              |   |  |
| 3                                     | 0                           | 0.973741196                    |              |              |              |                  |              |   |  |
| RANBP6                                | ENSG00000137040.9           | 0.177927973                    | 2            | 2            | 0.111457578  |                  |              |   |  |
| Brain_Amygdala                        | 0.389687072                 | Brain_Frontal_Cortex_BA9       | 1.060848283  |              |              |                  |              |   |  |
| 0.939151717                           | 0.939151717                 | 0.860184999                    | 1.591675758  |              | 1.225930379  |                  |              |   |  |

|               |                                       |                        |              |                                      |             |                             |             |              |  |
|---------------|---------------------------------------|------------------------|--------------|--------------------------------------|-------------|-----------------------------|-------------|--------------|--|
|               | 0.517242076                           | 2                      | 0            | 0.9738951                            |             |                             |             |              |  |
| CRCT1         | ENSG00000169509.5                     |                        | 0.178191181  | 1                                    | 1           | 0.178191181                 |             |              |  |
|               | Brain_Cerebellar_Hemisphere           | 0.178191181            |              |                                      |             | Brain_Cerebellar_Hemisphere | 1           | 1            |  |
|               | 1                                     | 1.346345305            | 1.346345305  | 1.346345305                          | NA          | 1                           | 0           | 0.9738951    |  |
| RP11-297M9.1  | ENSG00000260362.1                     |                        | 0.178196325  | 1                                    | 1           | 0.178196325                 |             |              |  |
|               | Brain_Cortex                          | 0.178196325            |              | Brain_Cortex                         | 1           | 1                           | 1           | -1.346329348 |  |
|               | -1.346329348                          | -1.346329348           | NA           | 1                                    | 0           | 0.9738951                   |             |              |  |
| CTD-2325M2.1  | ENSG00000267939.1                     |                        | 0.178227836  | 11                                   | 6           | 0.017705038                 |             |              |  |
|               | Brain_Hypothalamus                    | 0.517197826            |              | Brain_Spinal_cord_cervical_c-1       |             |                             |             |              |  |
|               | 8.323342703                           | 0.030500341            | 0.340655892  | 0.647670905                          |             | 2.37172969                  |             |              |  |
|               | 1.30482314                            | 0.524840727            | 6            | 0                                    | 0.9738951   |                             |             |              |  |
| LINC01068     | ENSG00000227676.3                     |                        | 0.178249823  | 2                                    | 1           | 0.158248536                 |             |              |  |
|               | Brain_Cerebellar_Hemisphere           | 0.201453173            |              | Brain_Cerebellum                     | 1.994183614 |                             |             |              |  |
|               | 0.005816386                           | 1.994183614            | 1.277422365  | 1.410986698                          |             | 1.344204531                 |             |              |  |
|               | 0.094444245                           | 1                      | 0            | 0.9738951                            |             |                             |             |              |  |
| KPRP          | ENSG00000203786.6                     |                        | 0.178284418  | 1                                    | 1           | 0.178284418                 |             |              |  |
|               | Brain_Putamen_basal_ganglia           | 0.178284418            |              | Brain_Putamen_basal_ganglia          | 1           | 1                           |             |              |  |
|               | 1                                     | -1.346056122           | -1.346056122 | -1.346056122                         | NA          | 1                           | 0           | 0.9738951    |  |
| RBBP8NL       | ENSG00000130701.3                     |                        | 0.178398835  | 3                                    | 1           | 0.119342862                 |             |              |  |
|               | Brain_Frontal_Cortex_BA9              | 0.234700021            |              | Brain_Anterior_cingulate_cortex_BA24 |             |                             |             |              |  |
|               | 2.891752941                           | 0.025945762            | 2.891752941  | -1.557537763                         |             | -1.188338637                |             |              |  |
|               | -1.322338858                          | 0.204347446            | 1            | 0                                    | 0.9738951   |                             |             |              |  |
| SETD1B        | ENSG00000139718.10                    |                        | 0.178531402  | 1                                    | 1           | 0.178531402                 |             |              |  |
|               | Brain_Anterior_cingulate_cortex_BA24  | 0.178531402            |              |                                      |             |                             |             |              |  |
|               | Brain_Anterior_cingulate_cortex_BA24  | 1                      | 1            | 1                                    | 1.345290619 |                             |             |              |  |
|               | 1.345290619                           | 1.345290619            | NA           | 1                                    | 0           | 0.9738951                   |             |              |  |
| CTC-543D15.8  | ENSG00000278611.1                     |                        | 0.178614539  | 13                                   | 2           | 0.029046866                 |             |              |  |
|               | Brain_Hippocampus                     | 0.195547243            |              | Brain_Substantia_nigra               | 10.9578459  |                             |             |              |  |
|               | 0.001481638                           | 0.810310956            | 1.294342208  | 2.182849887                          |             | 1.696534705                 |             |              |  |
|               | 0.269460359                           | 2                      | 0            | 0.9738951                            |             |                             |             |              |  |
| MYO6          | ENSG00000196586.13                    |                        | 0.178627371  | 5                                    | 3           | 0.127925014                 |             |              |  |
|               | Brain_Nucleus_accumbens_basal_ganglia | 0.957926838            |              |                                      |             |                             |             |              |  |
|               | Brain_Anterior_cingulate_cortex_BA24  | 2.959345682            |              | 0.023817305                          |             |                             |             |              |  |
|               | 0.131737053                           | -0.05275535            | 1.522335592  | 0.747014183                          |             | 0.57314951                  | 3           |              |  |
|               | 0                                     | 0.9738951              |              |                                      |             |                             |             |              |  |
| RP11-817O13.8 | ENSG00000260274.1                     |                        | 0.178668278  | 2                                    | 2           | 0.070832259                 |             |              |  |
|               | Brain_Cortex                          | 0.285395321            |              | Brain_Cerebellum                     | 1.372933819 |                             | 0.627066181 |              |  |
|               | 0.627066181                           | 1.068277576            | 1.806551361  | 1.437414469                          |             | 0.5220384                   | 2           |              |  |
|               | 0                                     | 0.9738951              |              |                                      |             |                             |             |              |  |
| GOLGA8B       | ENSG00000215252.11                    |                        | 0.178860508  | 2                                    | 2           | 0.365145716                 |             |              |  |
|               | Brain_Spinal_cord_cervical_c-1        | 0.813699526            |              | Brain_Caudate_basal_ganglia          |             |                             |             |              |  |
|               | 1.803719007                           | 0.196280993            | 0.196280993  | -0.235656115                         |             | 0.905603575                 |             |              |  |
|               | 0.33497373                            | 0.806992466            | 2            | 0                                    | 0.9738951   |                             |             |              |  |
| SUGCT         | ENSG00000175600.15                    |                        | 0.178889241  | 3                                    | 3           | 0.037331052                 |             |              |  |
|               | 0.58426971                            | Brain_Hypothalamus     | 1.03229135   | 0.968340783                          |             | 0.968340783                 |             |              |  |
|               | -0.547158696                          | 2.082125016            | 0.706890429  | 1.318824342                          |             | 3                           | 0           |              |  |
|               | 0.9738951                             |                        |              |                                      |             |                             |             |              |  |
| TOMM34        | ENSG00000025772.7                     |                        | 0.179027351  | 3                                    | 3           | 0.031410006                 |             |              |  |
|               | Brain_Nucleus_accumbens_basal_ganglia | 0.937746219            |              |                                      |             |                             |             |              |  |
|               | Brain_Anterior_cingulate_cortex_BA24  | 1.183451056            |              | 0.817496088                          |             |                             |             |              |  |
|               | 0.817496088                           | 0.078102877            | 2.151839399  | 0.787246873                          |             | 1.182076721                 |             |              |  |
|               | 3                                     | 0                      | 0.9738951    |                                      |             |                             |             |              |  |
| CHRM5         | ENSG00000184984.9                     |                        | 0.179123992  | 12                                   | 6           | 0.03304743                  |             |              |  |
|               | 0.746336485                           | Brain_Substantia_nigra | 7.662689623  | 0.007839532                          |             |                             |             |              |  |
|               | 0.287827329                           | -2.131506593           | -0.32347375  | -1.112261175                         |             | 0.516481728                 |             |              |  |
|               | 6                                     | 0                      | 0.9738951    |                                      |             |                             |             |              |  |
| SEC11C        | ENSG00000166562.8                     |                        | 0.179323203  | 1                                    | 1           | 0.179323203                 |             |              |  |
|               | Brain_Cerebellar_Hemisphere           | 0.179323203            |              | Brain_Cerebellar_Hemisphere          | 1           | 1                           |             |              |  |
|               | 1                                     | 1.342841806            | 1.342841806  | 1.342841806                          | NA          | 1                           | 0           | 0.9738951    |  |
| KANK3         | ENSG00000186994.11                    |                        | 0.179378681  | 2                                    | 1           | 0.147696768                 |             |              |  |
|               | Brain_Cerebellar_Hemisphere           | 0.224469987            |              | Brain_Cerebellum                     | 1.966036678 |                             |             |              |  |
|               | 0.033963322                           | 1.966036678            | 1.21472764   | 1.447715017                          |             | 1.331221328                 |             |              |  |



|               |                                      |                          |                                |              |              |                    |              |  |  |
|---------------|--------------------------------------|--------------------------|--------------------------------|--------------|--------------|--------------------|--------------|--|--|
|               | 0.164746955                          | 1                        | 0                              | 0.9738951    |              |                    |              |  |  |
| DACT2         | ENSG00000164488.11                   | 0.179390292              | 1                              | 1            | 0.179390292  | Brain_Cortex       |              |  |  |
|               | 0.179390292                          | Brain_Cortex             | 1                              | 1            | 1.342634691  | 1.342634691        |              |  |  |
|               | 1.342634691                          | NA                       | 1                              | 0            | 0.9738951    |                    |              |  |  |
| TMEM179B      | ENSG00000185475.10                   | 0.17946801               | 4                              | 4            | 0.03142269   | Brain_Amygdala     |              |  |  |
|               | 0.840800389                          | Brain_Frontal_Cortex_BA9 | 2.079633286                    | 0.293285155  |              |                    |              |  |  |
|               | 0.293285155                          | -0.490772041             | 2.151678428                    | 0.542665723  | 1.188552525  |                    |              |  |  |
|               | 4                                    | 0                        | 0.9738951                      |              |              |                    |              |  |  |
| CPA5          | ENSG00000158525.15                   | 0.17950551               | 1                              | 1            | 0.17950551   | Brain_Hypothalamus |              |  |  |
|               | 0.17950551                           | Brain_Hypothalamus       | 1                              | 1            | 1.342279124  | 1.342279124        |              |  |  |
|               | 1.342279124                          | NA                       | 1                              | 0            | 0.9738951    |                    |              |  |  |
| CTNNA1        | ENSG00000044115.20                   | 0.179551088              | 1                              | 1            | 0.179551088  |                    |              |  |  |
|               | Brain_Anterior_cingulate_cortex_BA24 | 0.179551088              |                                |              |              |                    |              |  |  |
|               | Brain_Anterior_cingulate_cortex_BA24 | 1                        | 1                              | 1            | 1.342138514  |                    |              |  |  |
|               | 1.342138514                          | 1.342138514              | NA                             | 1            | 0            | 0.9738951          |              |  |  |
| SLC35G2       | ENSG00000168917.8                    | 0.179626107              | 4                              | 3            | 0.218496731  |                    |              |  |  |
|               | Brain_Cerebellum                     | 0.54167229               | Brain_Substantia_nigra         | 2.276726183  |              |                    |              |  |  |
|               | 0.058178723                          | 0.217872315              | -1.230535261                   | 1.112072805  | -0.089043476 |                    |              |  |  |
|               | 1.127054718                          | 3                        | 0                              | 0.9738951    |              |                    |              |  |  |
| ISYNA1        | ENSG00000105655.18                   | 0.179640191              | 1                              | 1            | 0.179640191  |                    |              |  |  |
|               | Brain_Amygdala                       | 0.179640191              | Brain_Amygdala                 | 1            | 1            | 1                  | -1.341863708 |  |  |
|               | -1.341863708                         | -1.341863708             | NA                             | 1            | 0            | 0.9738951          |              |  |  |
| PFKP          | ENSG00000067057.16                   | 0.179664654              | 3                              | 3            | 0.050674778  |                    |              |  |  |
|               | Brain_Anterior_cingulate_cortex_BA24 | 0.503943659              | Brain_Caudate_basal_ganglia    |              |              |                    |              |  |  |
|               | 1.317240362                          | 0.797646304              | 0.797646304                    | -1.954223612 | -0.668297577 |                    |              |  |  |
|               | -1.304170601                         | 0.643080279              | 3                              | 0            | 0.9738951    |                    |              |  |  |
| RP11-489018.1 | ENSG00000253988.1                    | 0.179735284              | 2                              | 2            | 0.132283001  |                    |              |  |  |
|               | Brain_Amygdala                       | 0.378380032              | Brain_Cortex                   | 1.126699285  | 0.873300715  |                    |              |  |  |
|               | 0.873300715                          | 0.880885065              | 1.505159786                    | 1.193022425  | 0.441428889  |                    |              |  |  |
|               | 2                                    | 0                        | 0.9738951                      |              |              |                    |              |  |  |
| DPEP1         | ENSG00000015413.9                    | 0.17979881               | 2                              | 2            | 0.069260454  | Brain_Cortex       |              |  |  |
|               | 0.515068925                          | Brain_Hypothalamus       | 1.161425799                    | 0.838574201  |              |                    |              |  |  |
|               | 0.838574201                          | -1.81671702              | -0.650965242                   | -1.233841131 | 0.824310988  |                    |              |  |  |
|               | 2                                    | 0                        | 0.9738951                      |              |              |                    |              |  |  |
| RP11-332H14.2 | ENSG00000272994.1                    | 0.179826707              | 2                              | 1            | 0.179375145  |                    |              |  |  |
|               | Brain_Cerebellum                     | 0.18027943               | Brain_Cerebellar_Hemisphere    | 1.999998549  | 1.45E-06     |                    |              |  |  |
|               | 1.999998549                          | -1.342681445             | -1.339895167                   | -1.341288306 | 0.001970196  |                    |              |  |  |
|               | 1                                    | 0                        | 0.9738951                      |              |              |                    |              |  |  |
| C1orf54       | ENSG00000118292.8                    | 0.180016148              | 1                              | 1            | 0.180016148  |                    |              |  |  |
|               | Brain_Hypothalamus                   | 0.180016148              | Brain_Hypothalamus             | 1            | 1            | 1                  |              |  |  |
|               | 1.340705315                          | 1.340705315              | 1.340705315                    | NA           | 1            | 0                  | 0.9738951    |  |  |
| NOP10         | ENSG00000182117.5                    | 0.180041225              | 1                              | 1            | 0.180041225  |                    |              |  |  |
|               | Brain_Anterior_cingulate_cortex_BA24 | 0.180041225              |                                |              |              |                    |              |  |  |
|               | Brain_Anterior_cingulate_cortex_BA24 | 1                        | 1                              | 1            | 1.340628112  |                    |              |  |  |
|               | 1.340628112                          | 1.340628112              | NA                             | 1            | 0            | 0.9738951          |              |  |  |
| C12orf54      | ENSG00000177627.9                    | 0.180169812              | 6                              | 6            | 0.043902812  |                    |              |  |  |
|               | Brain_Caudate_basal_ganglia          | 0.925829045              | Brain_Spinal_cord_cervical_c-1 |              |              |                    |              |  |  |
|               | 3.471176469                          | 0.234323548              | 0.234323548                    | -0.093093798 | 2.015017534  |                    |              |  |  |
|               | 1.2419279                            | 0.820115675              | 6                              | 0            | 0.9738951    |                    |              |  |  |
| UTP4          | ENSG00000141076.17                   | 0.180225549              | 13                             | 2            | 0.02546921   |                    |              |  |  |
|               | Brain_Anterior_cingulate_cortex_BA24 | 0.493694805              | Brain_Amygdala                 |              |              |                    |              |  |  |
|               | 11.59341508                          | 9.75E-05                 | 0.551414387                    | 0.684444055  | 2.234210743  |                    |              |  |  |
|               | 1.701781808                          | 0.356906861              | 2                              | 0            | 0.9738951    |                    |              |  |  |
| DIS3L         | ENSG00000166938.12                   | 0.180238364              | 12                             | 6            | 0.00856136   |                    |              |  |  |
|               | Brain_Spinal_cord_cervical_c-1       | 0.613152323              | Brain_Frontal_Cortex_BA9       |              |              |                    |              |  |  |
|               | 8.071723019                          | 0.028102573              | 0.269558511                    | -2.629090389 | -0.505578864 |                    |              |  |  |
|               | -1.854891215                         | 0.718604304              | 6                              | 0            | 0.9738951    |                    |              |  |  |
| MTCH1         | ENSG00000137409.19                   | 0.180275003              | 4                              | 4            | 0.027510818  |                    |              |  |  |
|               | Brain_Spinal_cord_cervical_c-1       | 0.771452885              | Brain_Putamen_basal_ganglia    |              |              |                    |              |  |  |
|               | 1.680217618                          | 0.297928399              | 0.297928399                    | 0.290474985  | 2.204192376  |                    |              |  |  |
|               | 1.219626694                          | 0.803859237              | 4                              | 0            | 0.9738951    |                    |              |  |  |
| MMP19         | ENSG00000123342.15                   | 0.180275269              | 1                              | 1            | 0.180275269  |                    |              |  |  |

|              |                                       |                             |              |                                      |              |              |                  |
|--------------|---------------------------------------|-----------------------------|--------------|--------------------------------------|--------------|--------------|------------------|
|              | Brain_Hypothalamus                    | 0.180275269                 |              | Brain_Hypothalamus                   | 1            | 1            | 1                |
|              | 1.339907962                           | 1.339907962                 | 1.339907962  | NA                                   | 1            | 0            | 0.9738951        |
| RP11-282I1.1 | ENSG00000230131.5                     | 0.18028233                  | 2            | 2                                    | 0.079711292  |              |                  |
|              | Brain_Hippocampus                     | 0.298109649                 |              | Brain_Amygdala                       | 1.7986016    | 0.2013984    |                  |
|              | 0.2013984                             | 1.040495725                 | 1.752363682  | 1.396429703                          | 0.50336666   | 2            | 0                |
|              | 0.9738951                             |                             |              |                                      |              |              |                  |
| TADA2B       | ENSG00000173011.11                    | 0.180331638                 | 1            | 1                                    | 0.180331638  |              |                  |
|              | Brain_Hippocampus                     | 0.180331638                 |              | Brain_Hippocampus                    | 1            | 1            | 1                |
|              | -1.33973462                           | -1.33973462                 | -1.33973462  | NA                                   | 1            | 0            | 0.9738951        |
| PMS1         | ENSG00000064933.17                    | 0.180418624                 | 1            | 1                                    | 0.180418624  |              | Brain_Cerebellum |
|              | 0.180418624                           | Brain_Cerebellum1           | 1            | 1                                    | 1.339467204  |              | 1.339467204      |
|              | 1.339467204                           | NA                          | 1            | 0                                    | 0.9738951    |              |                  |
| FGF2         | ENSG00000138685.13                    | 0.180660136                 | 1            | 1                                    | 0.180660136  |              | Brain_Cortex     |
|              | 0.180660136                           | Brain_Cortex                | 1            | 1                                    | 1            | -1.338725241 | -1.338725241     |
|              | -1.338725241                          | NA                          | 1            | 0                                    | 0.9738951    |              |                  |
| ZNF589       | ENSG00000164048.13                    | 0.180715461                 | 13           | 2                                    | 0.085742979  |              |                  |
|              | Brain_Nucleus_accumbens_basal_ganglia | 0.946894417                 |              | Brain_Hippocampus                    |              |              |                  |
|              | 11.61839315                           | 1.60E-06                    | 0.776262799  | -1.718294134                         | 0.066607196  |              |                  |
|              | -1.421701511                          | 0.464779762                 | 2            | 0                                    | 0.9738951    |              |                  |
| ZNF23        | ENSG00000167377.17                    | 0.180739497                 | 5            | 5                                    | 0.067022476  |              |                  |
|              | Brain_Caudate_basal_ganglia           | 0.838872835                 |              | Brain_Anterior_cingulate_cortex_BA24 |              |              |                  |
|              | 3.072941892                           | 0.147893409                 | 0.147893409  | -1.831523279                         | 0.203335468  |              |                  |
|              | -0.941019325                          | 0.863832102                 | 5            | 0                                    | 0.9738951    |              |                  |
| CALML5       | ENSG00000178372.7                     | 0.18078007                  | 2            | 2                                    | 0.113914688  |              |                  |
|              | Brain_Hippocampus                     | 0.319748937                 |              | Brain_Frontal_Cortex_BA9             | 1.022176196  |              |                  |
|              | 0.977823804                           | 0.977823804                 | -1.58083973  | 0.994973944                          | -0.292932893 |              |                  |
|              | 1.821375316                           | 2                           | 0            | 0.9738951                            |              |              |                  |
| OXT          | ENSG00000101405.3                     | 0.180827023                 | 1            | 1                                    | 0.180827023  |              |                  |
|              | Brain_Spinal_cord_cervical_c-1        | 0.180827023                 |              | Brain_Spinal_cord_cervical_c-1       |              |              |                  |
|              | 1                                     | 1                           | 1            | -1.338212967                         | -1.338212967 | -1.338212967 | NA               |
|              | 0.9738951                             |                             |              |                                      |              |              | 1                |
|              |                                       |                             |              |                                      |              |              | 0                |
| TNPO2        | ENSG00000105576.15                    | 0.180832329                 | 5            | 5                                    | 0.022631619  |              |                  |
|              | Brain_Substantia_nigra                | 0.798182583                 |              | Brain_Hypothalamus                   | 1.939404958  |              |                  |
|              | 0.135696106                           | 0.135696106                 | -0.672431327 | 2.279596692                          | 0.692894348  |              |                  |
|              | 1.233788742                           | 5                           | 0            | 0.9738951                            |              |              |                  |
| PRR5         | ENSG00000186654.20                    | 0.180972515                 | 2            | 2                                    | 0.064821447  |              |                  |
|              | Brain_Caudate_basal_ganglia           | 0.864388289                 |              | Brain_Putamen_basal_ganglia          | 1.04029923   |              |                  |
|              | 0.95970077                            | 0.95970077                  | -1.846487543 | -0.170790767                         | -1.008639155 |              |                  |
|              | 1.184896553                           | 2                           | 0            | 0.9738951                            |              |              |                  |
| SLC13A4      | ENSG00000164707.15                    | 0.180983691                 | 1            | 1                                    | 0.180983691  |              |                  |
|              | Brain_Cortex                          | 0.180983691                 |              | Brain_Cortex                         | 1            | 1            | 1                |
|              | 1.337732381                           | 1.337732381                 | NA           | 1                                    | 0            | 0.9738951    |                  |
| OR2T33       | ENSG00000177212.3                     | 0.181129788                 | 1            | 1                                    | 0.181129788  |              |                  |
|              | Brain_Caudate_basal_ganglia           | 0.181129788                 |              | Brain_Caudate_basal_ganglia          | 1            | 1            |                  |
|              | 1                                     | -1.337284502                | -1.337284502 | -1.337284502                         | NA           | 1            | 0                |
|              |                                       |                             |              |                                      |              |              | 0.9738951        |
| TTC1         | ENSG00000113312.10                    | 0.181144364                 | 2            | 2                                    | 0.17671289   |              | Brain_Cortex     |
|              | 0.364311318                           | Brain_Cerebellum            | 1.236030121  | 0.763969879                          | 0.763969879  |              |                  |
|              | -0.907180568                          | 1.350945505                 | 0.221882469  | 1.596736259                          | 2            | 0            |                  |
|              | 0.9738951                             |                             |              |                                      |              |              |                  |
| APOA1        | ENSG00000118137.9                     | 0.181166457                 | 1            | 1                                    | 0.181166457  |              |                  |
|              | Brain_Anterior_cingulate_cortex_BA24  | 0.181166457                 |              |                                      |              |              |                  |
|              | Brain_Anterior_cingulate_cortex_BA24  | 1                           | 1            | 1                                    | 1.337172131  |              |                  |
|              | 1.337172131                           | 1.337172131                 | NA           | 1                                    | 0            | 0.9738951    |                  |
| GSTM2        | ENSG00000213366.12                    | 0.181175165                 | 8            | 7                                    | 0.057941527  |              |                  |
|              | Brain_Putamen_basal_ganglia           | 0.82282494                  |              | Brain_Cortex                         | 3.776951933  |              |                  |
|              | 0.104526425                           | 0.215852534                 | -1.896140058 | 0.899800734                          | 0.028698511  |              |                  |
|              | 0.90171023                            | 7                           | 0            | 0.9738951                            |              |              |                  |
| RP6-7406.2   | ENSG00000215859.8                     | 0.181196356                 | 4            | 4                                    | 0.03289925   |              | Brain_Cerebellum |
|              | 0.889720484                           | Brain_Cerebellar_Hemisphere | 1.552662596  | 0.554377872                          |              |              |                  |
|              | 0.554377872                           | -0.898184573                | 2.133310659  | 0.389350281                          | 1.265479698  |              |                  |
|              | 4                                     | 0                           | 0.9738951    |                                      |              |              |                  |
| RP11-546B8.6 | ENSG00000275038.1                     | 0.181315405                 | 1            | 1                                    | 0.181315405  |              |                  |

|                 |                                       |                                      |                                       |              |              |               |
|-----------------|---------------------------------------|--------------------------------------|---------------------------------------|--------------|--------------|---------------|
|                 | Brain_Cerebellum                      | 0.181315405                          | Brain_Cerebellum1                     | 1            | 1            | 1.336715854   |
|                 |                                       | 1.336715854                          | NA                                    | 1            | 0            | 0.9738951     |
| KCNJ5           | ENSG00000120457.11                    | 0.181330819                          |                                       | 1            | 1            | 0.181330819   |
|                 | Brain_Putamen_basal_ganglia           | 0.181330819                          | Brain_Putamen_basal_ganglia1          | 1            | 1            |               |
|                 |                                       | 1.336668652                          | 1.336668652                           | 1.336668652  | NA           | 1 0 0.9738951 |
| AP006621.6      | ENSG00000255142.1                     | 0.181333768                          |                                       | 8            | 5            | 0.004194312   |
|                 | Brain_Cerebellar_Hemisphere           | 0.114185191                          | Brain_Cortex                          | 5.68491321   | 0.0115943    |               |
|                 |                                       | 0.237597491                          | 1.57965808                            | 2.863165672  | 2.119473559  | 0.509344416 5 |
|                 |                                       | 0.9738951                            |                                       |              |              |               |
| ARRDC4          | ENSG00000140450.8                     | 0.181405874                          |                                       | 1            | 1            | 0.181405874   |
|                 | Brain_Hippocampus                     | 0.181405874                          | Brain_Hippocampus                     | 1            | 1            | 1             |
|                 |                                       | 1.336438853                          | 1.336438853                           | 1.336438853  | NA           | 1 0 0.9738951 |
| XXyac-YX155B6.5 | ENSG00000232265.7                     | 0.18149889                           |                                       | 2            | 2            | 0.135230061   |
|                 | Brain_Cerebellar_Hemisphere           | 0.431784858                          | Brain_Frontal_Cortex_BA9              |              |              |               |
|                 |                                       | 1.876535348                          | 0.123464652                           | 0.123464652  | 0.786141049  | 1.493791741   |
|                 |                                       | 1.139966395                          | 0.500384603                           | 2            | 0            | 0.9738951     |
| NME7            | ENSG00000143156.13                    | 0.181558163                          |                                       | 9            | 5            | 0.018274988   |
|                 | Brain_Putamen_basal_ganglia           | 0.790779659                          | Brain_Cerebellar_Hemisphere           |              |              |               |
|                 |                                       | 5.691017814                          | 0.000972966                           | 0.307403854  | -2.359998921 | -0.26529832   |
|                 |                                       | -1.53347232                          | 0.655281373                           | 5            | 0            | 0.9738951     |
| SEC22C          | ENSG00000093183.13                    | 0.181834872                          |                                       | 12           | 4            | 0.030079481   |
|                 | Brain_Putamen_basal_ganglia           | 0.818960397                          | Brain_Cerebellar_Hemisphere           |              |              |               |
|                 |                                       | 9.177895886                          | 1.03E-09                              | 0.309726896  | -2.169042187 | -0.228882301  |
|                 |                                       | -1.6199216                           | 0.732206104                           | 4            | 0            | 0.9738951     |
| NBPF14          | ENSG00000270629.5                     | 0.1819174                            |                                       | 4            | 4            | 0.142118573   |
|                 | Brain_Frontal_Cortex_BA9              | 0.788786187                          | Brain_Substantia_nigra                |              |              |               |
|                 |                                       | 1.275797904                          | 0.674201781                           | 0.674201781  | -1.336892982 | 1.467947173   |
|                 |                                       | -0.232116181                         | 1.214507368                           | 4            | 0            | 0.9738951     |
| NDUFS2          | ENSG00000158864.12                    | 0.181939713                          |                                       | 11           | 7            | 0.050426318   |
|                 | Brain_Hypothalamus                    | 0.781746799                          | Brain_Nucleus_accumbens_basal_ganglia |              |              |               |
|                 |                                       | 6.314711866                          | 0.002390627                           | 0.287242508  | -1.73063801  | 1.956329784   |
|                 |                                       | -0.369605033                         | 1.260436479                           | 7            | 0            | 0.9738951     |
| MALRD1          | ENSG00000204740.10                    | 0.181946449                          |                                       | 8            | 4            | 0.111774464   |
|                 | Brain_Nucleus_accumbens_basal_ganglia | 0.89148742                           | Brain_Putamen_basal_ganglia           |              |              |               |
|                 |                                       | 6.262629124                          | 0.013664221                           | 0.269312355  | 0.136422332  | 1.590267751   |
|                 |                                       | 0.765247455                          | 0.575135323                           | 4            | 0            | 0.9738951     |
| EIF2B1          | ENSG00000111361.12                    | 0.181998625                          |                                       | 1            | 1            | 0.181998625   |
|                 | Brain_Cortex                          | 0.181998625                          | Brain_Cortex                          | 1            | 1            | 1             |
|                 |                                       | -1.334626485                         | -1.334626485                          | NA           | 1            | 0 0.9738951   |
| NACC1           | ENSG00000160877.5                     | 0.18204092                           |                                       | 1            | 1            | 0.18204092    |
|                 | Brain_Putamen_basal_ganglia1          | 1                                    | 1                                     | 1            | 1            | -1.334497333  |
|                 |                                       | -1.334497333                         | -1.334497333                          | NA           | 1            | 0 0.9738951   |
| PRKAG1          | ENSG00000181929.11                    | 0.182061023                          |                                       | 1            | 1            | 0.182061023   |
|                 | Brain_Anterior_cingulate_cortex_BA24  | 0.182061023                          |                                       |              |              |               |
|                 |                                       | Brain_Anterior_cingulate_cortex_BA24 | 1                                     | 1            | 1            | -1.334435955  |
|                 |                                       | -1.334435955                         | -1.334435955                          | NA           | 1            | 0 0.9738951   |
| BTBD17          | ENSG00000204347.3                     | 0.182096318                          |                                       | 2            | 2            | 0.078172583   |
|                 | Brain_Cerebellum                      | 0.561286944                          | Brain_Cerebellar_Hemisphere           | 1.016858742  |              |               |
|                 |                                       | 0.983141258                          | 0.983141258                           | -1.761389017 | 0.580931022  | -0.590228998  |
|                 |                                       | 1.656270383                          | 2                                     | 0            | 0.9738951    |               |
| MIR4458HG       | ENSG00000247516.6                     | 0.182366489                          |                                       | 2            | 2            | 0.065116102   |
|                 | Brain_Cerebellar_Hemisphere           | 0.599125684                          | Brain_Cerebellum                      | 1.304592222  |              |               |
|                 |                                       | 0.695407778                          | 0.695407778                           | -1.844460196 | -0.525658239 | -1.185059217  |
|                 |                                       | 0.932533807                          | 2                                     | 0            | 0.973897072  |               |
| PLD4            | ENSG00000166428.12                    | 0.182377482                          |                                       | 2            | 2            | 0.068687131   |
|                 | Brain_Putamen_basal_ganglia           | 0.913455722                          | Brain_Cerebellum                      | 1.103509391  |              |               |
|                 |                                       | 0.896490609                          | 0.896490609                           | -1.820472168 | 0.108680736  | -0.855895716  |
|                 |                                       | 1.3641171                            | 2                                     | 0            | 0.973897072  |               |
| INTS11          | ENSG00000127054.20                    | 0.182525477                          |                                       | 7            | 5            | 0.009198098   |
|                 | Brain_Putamen_basal_ganglia           | 0.36704756                           | Brain_Anterior_cingulate_cortex_BA24  |              |              |               |
|                 |                                       | 4.990371084                          | 0.009520725                           | 0.284337848  | -2.604602213 | -0.902017523  |
|                 |                                       | -1.869476693                         | 0.666609219                           | 5            | 0            | 0.973897072   |

|              |                                       |                                        |              |              |                                       |                  |
|--------------|---------------------------------------|----------------------------------------|--------------|--------------|---------------------------------------|------------------|
| NAT1         | ENSG00000171428.13                    | 0.182579044                            | 2            | 2            | 0.159178136                           | Brain_Cerebellum |
|              | 0.616110338                           | Brain_Cerebellar_Hemisphere1.414087233 |              |              | 0.585912767                           |                  |
|              | 0.585912767                           | -1.40784107                            | 0.501370585  |              | -0.453235243                          | 1.350016508      |
|              | 2                                     | 0                                      | 0.973897072  |              |                                       |                  |
| IL7          | ENSG00000104432.13                    | 0.182702073                            | 4            | 3            | 0.037337825                           | Brain_Cerebellum |
|              | 0.154798893                           | Brain_Cortex                           | 3.641195117  |              | 0.011267012                           | 0.154561793      |
|              | -2.082050855                          | -1.422783612                           | -1.766363335 |              | 0.274912634                           | 3                |
|              | 0.973897072                           |                                        |              |              |                                       | 0                |
| COX20        | ENSG00000203667.9                     | 0.182749498                            | 2            | 2            | 0.067056793                           |                  |
|              | Brain_Spinal_cord_cervical_c-1        | 0.874462256                            |              |              | Brain_Cerebellum1.030334341           |                  |
|              | 0.969665659                           | 0.969665659                            | -0.157993075 |              | 1.831293191                           | 0.836650058      |
|              | 1.406637808                           | 2                                      | 0            | 0.973897072  |                                       |                  |
| SIX1         | ENSG00000126778.8                     | 0.182769722                            | 1            | 1            | 0.182769722                           |                  |
|              | Brain_Caudate_basal_ganglia           | 0.182769722                            |              |              | Brain_Caudate_basal_ganglia1          | 1                |
|              | 1                                     | 1.332275357                            | 1.332275357  | 1.332275357  | NA                                    | 1                |
|              | 0.973897072                           |                                        |              |              |                                       | 0                |
| C14orf159    | ENSG00000133943.20                    | 0.18282564                             | 1            | 1            | 0.18282564                            | Brain_Cerebellum |
|              | 0.18282564                            | Brain_Cerebellum1                      | 1            | 1            | 1.332105145                           | 1.332105145      |
|              | 1.332105145                           | NA                                     | 1            | 0            | 0.973897072                           |                  |
| SEZ6L2       | ENSG00000174938.14                    | 0.183000231                            | 2            | 1            | 0.158602779                           |                  |
|              | Brain_Cerebellar_Hemisphere           | 0.221413743                            |              |              | Brain_Cerebellum1.954327099           |                  |
|              | 0.045672901                           | 1.954327099                            | -1.409786346 |              | -1.222777508                          | -1.316281927     |
|              | 0.132235218                           | 1                                      | 0            | 0.973897072  |                                       |                  |
| LINC02067    | ENSG00000240567.1                     | 0.183052381                            | 1            | 1            | 0.183052381                           |                  |
|              | Brain_Cerebellar_Hemisphere           | 0.183052381                            |              |              | Brain_Cerebellar_Hemisphere1          | 1                |
|              | 1                                     | -1.331415352                           | -1.331415352 | -1.331415352 | NA                                    | 1                |
|              | 0.973897072                           |                                        |              |              |                                       | 0                |
| RP11-25O3.1  | ENSG00000266335.1                     | 0.183110594                            | 2            | 2            | 0.070798901                           |                  |
|              | Brain_Nucleus_accumbens_basal_ganglia | 0.684406914                            |              |              | Brain_Frontal_Cortex_BA9              |                  |
|              | 1.024754697                           | 0.975245303                            | 0.975245303  |              | -1.806765176                          | -0.406456907     |
|              | -1.106611042                          | 0.990167473                            | 2            | 0            | 0.973897072                           |                  |
| CHPF2        | ENSG00000033100.16                    | 0.183160146                            | 3            | 3            | 0.092905155                           |                  |
|              | Brain_Nucleus_accumbens_basal_ganglia | 0.591490289                            |              |              | Brain_Cortex                          |                  |
|              | 2.325059038                           | 0.197938587                            | 0.197938587  |              | -1.680268149                          | -0.536677662     |
|              | -1.058697398                          | 0.57825825                             | 3            | 0            | 0.973897072                           |                  |
| SLC2A3       | ENSG00000059804.15                    | 0.183203173                            | 1            | 1            | 0.183203173                           |                  |
|              | Brain_Cerebellum                      | 0.183203173                            |              |              | Brain_Cerebellum1                     | 1                |
|              | 1.33095696                            | 1.33095696                             | NA           | 1            | 0                                     | 0.973897072      |
| NCKAP5L      | ENSG00000167566.16                    | 0.183252932                            | 1            | 1            | 0.183252932                           |                  |
|              | Brain_Putamen_basal_ganglia           | 0.183252932                            |              |              | Brain_Putamen_basal_ganglia1          | 1                |
|              | 1                                     | -1.330805759                           | -1.330805759 | -1.330805759 | NA                                    | 1                |
|              | 0.973897072                           |                                        |              |              |                                       | 0                |
| RHD          | ENSG00000187010.19                    | 0.183279638                            | 13           | 4            | 0.073215607                           |                  |
|              | Brain_Caudate_basal_ganglia           | 0.833523763                            |              |              | Brain_Amygdala                        | 9.887914048      |
|              | 0.011983401                           | 0.4698271                              | -0.642717996 |              | 1.791484329                           | 1.272224184      |
|              | 0.716093518                           | 4                                      | 0            | 0.973897072  |                                       |                  |
| RP11-51G5.1  | ENSG00000230852.1                     | 0.183312053                            | 1            | 1            | 0.183312053                           |                  |
|              | Brain_Hypothalamus                    | 0.183312053                            |              |              | Brain_Hypothalamus                    | 1                |
|              | -1.330626152                          | -1.330626152                           | -1.330626152 | NA           | 1                                     | 0                |
|              |                                       |                                        |              |              |                                       | 0.973897072      |
| RP4-668E10.4 | ENSG00000278254.4                     | 0.183365242                            | 3            | 3            | 0.038927928                           |                  |
|              | Brain_Caudate_basal_ganglia           | 0.273793064                            |              |              | Brain_Nucleus_accumbens_basal_ganglia |                  |
|              | 2.378347915                           | 0.122456896                            | 0.122456896  |              | 1.094369251                           | 2.064947919      |
|              | 1.598375414                           | 0.486370946                            | 3            | 0            | 0.973897072                           |                  |
| OCEL1        | ENSG00000099330.8                     | 0.183401309                            | 12           | 4            | 0.024977751                           |                  |
|              | Brain_Putamen_basal_ganglia           | 0.539573209                            |              |              | Brain_Anterior_cingulate_cortex_BA24  |                  |
|              | 9.674742261                           | 0.009398621                            | 0.422305235  |              | -2.241746651                          | -0.61345851      |
|              | -1.412213414                          | 0.409772312                            | 4            | 0            | 0.973897072                           |                  |
| C10orf142    | ENSG00000277288.3                     | 0.183419254                            | 7            | 3            | 0.107006802                           |                  |
|              | Brain_Putamen_basal_ganglia           | 0.886772563                            |              |              | Brain_Anterior_cingulate_cortex_BA24  |                  |
|              | 5.564067438                           | 0.032508438                            | 0.330233846  |              | -1.611793873                          | -0.142389237     |
|              | -0.98939773                           | 0.576071199                            | 3            | 0            | 0.973897072                           |                  |
| C7orf57      | ENSG00000164746.13                    | 0.183617823                            | 1            | 1            | 0.183617823                           |                  |

|               |                                       |                             |                             |              |                             |              |                   |  |
|---------------|---------------------------------------|-----------------------------|-----------------------------|--------------|-----------------------------|--------------|-------------------|--|
|               | Brain_Nucleus_accumbens_basal_ganglia | 0.183617823                 |                             |              |                             |              |                   |  |
|               | Brain_Nucleus_accumbens_basal_ganglia | 1                           | 1                           | 1            | -1.329697911                |              |                   |  |
|               | -1.329697911                          | -1.329697911                | NA                          | 1            | 0                           | 0.974222538  |                   |  |
| PBX4          | ENSG00000105717.13                    | 0.183619815                 | 1                           | 1            | 0.183619815                 |              | Brain_Cerebellum  |  |
|               | 0.183619815                           | Brain_Cerebellum            | 1                           | 1            | 1.329691868                 |              | 1.329691868       |  |
|               | 1.329691868                           | NA                          | 1                           | 0            | 0.974222538                 |              |                   |  |
| ETNK1         | ENSG00000139163.15                    | 0.183876793                 | 1                           | 1            | 0.183876793                 |              | Brain_Amygdala    |  |
|               | 0.183876793                           | Brain_Amygdala              | 1                           | 1            | 1                           | -1.328912641 | -1.328912641      |  |
|               | -1.328912641                          | NA                          | 1                           | 0            | 0.974933956                 |              |                   |  |
| TMEM177       | ENSG00000144120.12                    | 0.183893268                 | 6                           | 3            | 0.129778449                 |              |                   |  |
|               | Brain_Amygdala                        | 0.988603987                 |                             |              | Brain_Putamen_basal_ganglia | 4.400391779  |                   |  |
|               | 0.005157264                           | 0.462310024                 |                             |              | 0.01428327                  | 1.514976129  | 1.014216346       |  |
|               | 0.535921941                           | 3                           | 0                           | 0.974933956  |                             |              |                   |  |
| RP11-446H18.6 | ENSG00000272597.1                     | 0.184151826                 | 2                           | 2            | 0.104190005                 |              |                   |  |
|               | Brain_Amygdala                        | 0.306400763                 |                             |              | Brain_Cerebellar_Hemisphere | 1.101437859  |                   |  |
|               | 0.898562141                           | 0.898562141                 |                             |              | 1.022803499                 | 1.624871204  | 1.323837351       |  |
|               | 0.425726157                           | 2                           | 0                           | 0.975276323  |                             |              |                   |  |
| NT5DC3        | ENSG00000111696.11                    | 0.184177707                 | 6                           | 6            | 0.05916232                  |              | Brain_Cortex      |  |
|               | 0.780755591                           | Brain_Amygdala              | 2.112046654                 |              | 0.366133037                 |              | 0.366133037       |  |
|               | -1.530001082                          | 1.886985173                 | 0.201881667                 |              | 1.375252299                 | 6            | 0                 |  |
|               | 0.975276323                           |                             |                             |              |                             |              |                   |  |
| LINC00165     | ENSG00000261706.1                     | 0.184453833                 | 4                           | 4            | 0.091159929                 |              |                   |  |
|               | Brain_Caudate_basal_ganglia           | 0.622782465                 |                             |              | Brain_Substantia_nigra      |              |                   |  |
|               | 1.974945653                           | 0.398131857                 | 0.398131857                 |              | -0.813168803                | 1.68931057   |                   |  |
|               | 0.512853573                           | 1.02825063                  | 4                           | 0            | 0.975276323                 |              |                   |  |
| RP11-734K23.9 | ENSG00000277701.4                     | 0.184562845                 | 1                           | 1            | 0.184562845                 |              |                   |  |
|               | Brain_Nucleus_accumbens_basal_ganglia | 0.184562845                 |                             |              |                             |              |                   |  |
|               | Brain_Nucleus_accumbens_basal_ganglia | 1                           | 1                           | 1            | 1.326836283                 |              |                   |  |
|               | 1.326836283                           | 1.326836283                 | NA                          | 1            | 0                           | 0.975276323  |                   |  |
| MAP1B         | ENSG00000131711.14                    | 0.184598795                 | 10                          | 5            | 0.027560675                 |              |                   |  |
|               | Brain_Hypothalamus                    | 0.820510751                 |                             |              | Brain_Frontal_Cortex_BA9    | 6.547097454  |                   |  |
|               | 0.023971899                           | 0.407248865                 | -0.232792093                |              | 2.203483701                 | 0.776233542  |                   |  |
|               | 0.692444276                           | 5                           | 0                           | 0.975276323  |                             |              |                   |  |
| DDTL          | ENSG00000099974.7                     | 0.184614098                 | 4                           | 4            | 0.292395426                 |              | Brain_Cerebellum  |  |
|               | 0.962281982                           | Brain_Putamen_basal_ganglia | 2.148424572                 |              | 0.123603292                 |              |                   |  |
|               | 0.123603292                           | -1.052881238                | 0.047290145                 |              | -0.589098327                | 0.467317362  |                   |  |
|               | 4                                     | 0                           | 0.975276323                 |              |                             |              |                   |  |
| TC2N          | ENSG00000165929.12                    | 0.18477102                  | 12                          | 2            | 0.13328204                  |              |                   |  |
|               | Brain_Nucleus_accumbens_basal_ganglia | 0.853632937                 |                             |              | Brain_Putamen_basal_ganglia |              |                   |  |
|               | 10.52768891                           | 0.001136415                 | 0.497014873                 |              | 0.184485072                 | 1.501284313  |                   |  |
|               | 0.995967197                           | 0.391473821                 | 2                           | 0            | 0.975276323                 |              |                   |  |
| RHOA          | ENSG00000067560.10                    | 0.184775973                 | 3                           | 3            | 0.05232267                  |              | Brain_Hippocampus |  |
|               | 0.650373887                           | Brain_Caudate_basal_ganglia | 1.504996587                 |              | 0.533774631                 |              |                   |  |
|               | 0.533774631                           | 0.453242841                 | 1.940469395                 |              | 1.24719339                  | 0.748707038  | 3                 |  |
|               | 0                                     | 0.975276323                 |                             |              |                             |              |                   |  |
| PCDHB9        | ENSG00000177839.6                     | 0.18514416                  | 1                           | 1            | 0.18514416                  |              |                   |  |
|               | Brain_Cerebellar_Hemisphere           | 0.18514416                  | Brain_Cerebellar_Hemisphere | 1            | 1                           | 1            |                   |  |
|               | 1.325081383                           | 1.325081383                 | 1.325081383                 | NA           | 1                           | 0            | 0.975276323       |  |
| KDEL2         | ENSG00000136240.9                     | 0.185166558                 | 3                           | 3            | 0.352787034                 |              |                   |  |
|               | Brain_Cerebellar_Hemisphere           | 0.840407646                 |                             |              | Brain_Cerebellum            | 1.861232058  |                   |  |
|               | 0.140788878                           | 0.140788878                 | -0.929196939                |              | 0.201372079                 | -0.449317518 |                   |  |
|               | 0.584318974                           | 3                           | 0                           | 0.975276323  |                             |              |                   |  |
| RP11-303E16.7 | ENSG00000245059.2                     | 0.185211515                 | 1                           | 1            | 0.185211515                 |              |                   |  |
|               | Brain_Putamen_basal_ganglia           | 0.185211515                 | Brain_Putamen_basal_ganglia | 1            | 1                           |              |                   |  |
|               | 1                                     | -1.324878313                | -1.324878313                | -1.324878313 | NA                          | 1            | 0                 |  |
|               | 0.975276323                           |                             |                             |              |                             |              |                   |  |
| IFITM3        | ENSG00000142089.15                    | 0.185211764                 | 5                           | 3            | 0.155320235                 |              |                   |  |
|               | Brain_Hypothalamus                    | 0.281481796                 | Brain_Amygdala              | 3.000907921  |                             | 1.04E-16     |                   |  |
|               | 0.96404637                            | -1.420988044                | 1.076996574                 |              | -0.843777814                | 1.075205498  | 3                 |  |
|               | 0                                     | 0.975276323                 |                             |              |                             |              |                   |  |
| GLIS3         | ENSG00000107249.21                    | 0.185345006                 | 1                           | 1            | 0.185345006                 |              |                   |  |
|               | Brain_Putamen_basal_ganglia           | 0.185345006                 | Brain_Putamen_basal_ganglia | 1            | 1                           |              |                   |  |

|           |                                       |                                       |              |              |                                       |              |                  |              |
|-----------|---------------------------------------|---------------------------------------|--------------|--------------|---------------------------------------|--------------|------------------|--------------|
|           | 1                                     | 1.324476008                           | 1.324476008  | 1.324476008  | NA                                    | 1            | 0                |              |
|           |                                       | 0.975276323                           |              |              |                                       |              |                  |              |
| LDB3      | ENSG00000122367.19                    | 0.185362407                           | 4            | 4            | 0.056942543                           |              |                  |              |
|           | Brain_Cerebellar_Hemisphere           | 0.263009559                           |              |              | Brain_Nucleus_accumbens_basal_ganglia |              |                  |              |
|           | 2.451478392                           | 0.137826331                           | 0.137826331  | -1.903751598 | 1.738377167                           |              |                  |              |
|           | 0.574152464                           | 1.671651076                           | 4            | 0            | 0.975276323                           |              |                  |              |
| TTF2      | ENSG00000116830.11                    | 0.185364873                           | 13           | 2            | 0.054893693                           |              | Brain_Cerebellum |              |
|           | 0.119146413                           | Brain_Spinal_cord_cervical_c-1        | 12.07897888  | 2.91E-05     |                                       |              |                  |              |
|           | 0.453604648                           | -1.919716703                          | -1.558366415 | -1.714507125 | 0.110505142                           |              |                  |              |
|           | 2                                     | 0                                     | 0.975276323  |              |                                       |              |                  |              |
| AP001     | 628.7                                 | ENSG00000233754.2                     | 0.185496945  | 1            | 1                                     | 0.185496945  |                  |              |
|           | Brain_Cerebellar_Hemisphere           | 0.185496945                           |              |              | Brain_Cerebellar_Hemisphere1          | 1            | 1                |              |
|           | 1                                     | 1.324018366                           | 1.324018366  | 1.324018366  | NA                                    | 1            | 0                |              |
|           |                                       | 0.975276323                           |              |              |                                       |              |                  |              |
| RP11-266A | 24.1                                  | ENSG00000255418.5                     | 0.185596161  | 2            | 2                                     | 0.43506426   |                  |              |
|           | Brain_Cerebellar_Hemisphere           | 0.556903158                           |              |              | Brain_Cerebellum1.721308554           |              |                  |              |
|           | 0.278691446                           | 0.278691446                           | -0.780555012 | 0.587447562  | -0.096553725                          |              |                  |              |
|           | 0.967323897                           | 2                                     | 0            | 0.975276323  |                                       |              |                  |              |
| Clorf56   | ENSG00000143443.9                     | 0.1857074                             | 1            | 1            | 0.1857074                             |              |                  |              |
|           | Brain_Spinal_cord_cervical_c-1        | 0.1857074                             |              |              | Brain_Spinal_cord_cervical_c-1        | 1            | 1                |              |
|           | 1                                     | 1                                     | 1.323384931  | 1.323384931  | 1.323384931                           | NA           | 1                | 0            |
|           |                                       | 0.975276323                           |              |              |                                       |              |                  |              |
| CIPC      | ENSG00000198894.7                     | 0.185816563                           | 1            | 1            | 0.185816563                           |              | Brain_Amygdala   |              |
|           | 0.185816563                           | Brain_Amygdala                        | 1            | 1            | 1                                     | -1.323056579 | -1.323056579     |              |
|           | -1.323056579                          | NA                                    | 1            | 0            | 0.975276323                           |              |                  |              |
| CSPG5     | ENSG00000114646.9                     | 0.186109709                           | 1            | 1            | 0.186109709                           |              |                  |              |
|           | Brain_Frontal_Cortex_BA9              | 0.186109709                           |              |              | Brain_Frontal_Cortex_BA9              | 1            | 1                |              |
|           | 1                                     | -1.322175525                          | -1.322175525 | -1.322175525 | NA                                    | 1            | 0                |              |
|           |                                       | 0.975276323                           |              |              |                                       |              |                  |              |
| MAPKBP1   | ENSG00000137802.13                    | 0.186114218                           | 6            | 4            | 0.117261275                           |              |                  |              |
|           | Brain_Caudate_basal_ganglia           | 0.992927442                           |              |              | Brain_Nucleus_accumbens_basal_ganglia |              |                  |              |
|           | 4.344735893                           | 0.04166316                            | 0.180051225  | -1.566373192 | 1.247462258                           |              |                  |              |
|           | -0.217092246                          | 1.02976993                            | 4            | 0            | 0.975276323                           |              |                  |              |
| NDFIP1    | ENSG00000131507.10                    | 0.186204536                           | 1            | 1            | 0.186204536                           |              |                  |              |
|           | Brain_Cerebellum                      | 0.186204536                           |              |              | Brain_Cerebellum1                     | 1            | 1                | -1.321890743 |
|           | -1.321890743                          | -1.321890743                          | NA           | 1            | 0                                     | 0.975276323  |                  |              |
| AMDHD1    | ENSG00000139344.7                     | 0.18635719                            | 8            | 6            | 0.099399237                           |              |                  |              |
|           | Brain_Hippocampus                     | 0.853012342                           |              |              | Brain_Caudate_basal_ganglia           | 5.29629018   |                  |              |
|           | 0.010805701                           | 0.193165532                           | -1.647773119 | 0.812829637  | -0.840285513                          |              |                  |              |
|           | 0.827631269                           | 6                                     | 0            | 0.975276323  |                                       |              |                  |              |
| CEMIP     | ENSG00000103888.16                    | 0.186363613                           | 3            | 3            | 0.037694101                           |              |                  |              |
|           | Brain_Cerebellar_Hemisphere           | 0.986523385                           |              |              | Brain_Cerebellum1.095819644           |              |                  |              |
|           | 0.940743239                           | 0.940743239                           | -0.016891236 | 2.078165686  | 0.893708652                           |              |                  |              |
|           | 1.07404105                            | 3                                     | 0            | 0.975276323  |                                       |              |                  |              |
| ClQA      | ENSG00000173372.16                    | 0.186391722                           | 2            | 2            | 0.11220583                            |              | Brain_Cortex     |              |
|           | 0.391927229                           | Brain_Nucleus_accumbens_basal_ganglia | 1.03657955   | 0.96342045   |                                       |              |                  |              |
|           | 0.96342045                            | -0.856127555                          | 1.588356136  | 0.36611429   | 1.728510994                           | 2            | 0                |              |
|           |                                       | 0.975276323                           |              |              |                                       |              |                  |              |
| CRIP1     | ENSG00000213145.9                     | 0.186424677                           | 2            | 2            | 0.100017399                           |              |                  |              |
|           | Brain_Frontal_Cortex_BA9              | 0.544142764                           |              |              | Brain_Cortex                          | 1.119450674  |                  |              |
|           | 0.880549326                           | 0.880549326                           | -1.644769284 | -0.606560284 | -1.125664784                          |              |                  |              |
|           | 0.734124624                           | 2                                     | 0            | 0.975276323  |                                       |              |                  |              |
| CRISPLD1  | ENSG00000121005.8                     | 0.186447217                           | 3            | 3            | 0.18797595                            |              | Brain_Amygdala   |              |
|           | 0.618165304                           | Brain_Cortex                          | 1.905999519  | 0.131495976  | 0.131495976                           |              |                  |              |
|           | -1.041362047                          | 1.316590426                           | 0.257893549  | 1.197241137  | 3                                     | 0            |                  |              |
|           |                                       | 0.975276323                           |              |              |                                       |              |                  |              |
| MTHFS     | ENSG00000103248.18                    | 0.186461984                           | 7            | 7            | 0.062540224                           |              |                  |              |
|           | Brain_Nucleus_accumbens_basal_ganglia | 0.399864979                           |              |              | Brain_Frontal_Cortex_BA9              |              |                  |              |
|           | 2.5505842                             | 0.086846903                           | 0.086846903  | -1.831865628 | 1.862446189                           |              |                  |              |
|           | -0.575482214                          | 1.372324329                           | 7            | 0            | 0.975276323                           |              |                  |              |
| LINC01411 | ENSG00000249306.5                     | 0.186553532                           | 2            | 2            | 0.246039182                           |              |                  |              |
|           | Brain_Cerebellar_Hemisphere           | 0.968036116                           |              |              | Brain_Cerebellum1.760102818           |              |                  |              |

|           |                                       |                        |                                       |              |                  |                  |   |
|-----------|---------------------------------------|------------------------|---------------------------------------|--------------|------------------|------------------|---|
|           | 0.239897182                           | 0.239897182            | -1.160023639                          | 0.040071509  | -0.559976065     |                  |   |
|           | 0.848595417                           | 2                      | 0                                     | 0.975276323  |                  |                  |   |
| HID1      | ENSG00000167861.15                    | 0.186641403            | 1                                     | 1            | 0.186641403      |                  |   |
|           | Brain_Anterior_cingulate_cortex_BA24  | 0.186641403            |                                       |              |                  |                  |   |
|           | Brain_Anterior_cingulate_cortex_BA24  | 1                      | 1                                     | 1            | 1.320580128      |                  |   |
|           | 1.320580128                           | 1.320580128            | NA                                    | 1            | 0                | 0.975276323      |   |
| MTPN      | ENSG00000105887.10                    | 0.186652764            | 2                                     | 2            | 0.123604397      |                  |   |
|           | Brain_Spinal_cord_cervical_c-1        | 0.490676044            |                                       |              | Brain_Cerebellum | 1.185994749      |   |
|           | 0.814005251                           | 0.814005251            | 0.689233969                           | 1.539819339  | 1.114526654      |                  |   |
|           | 0.601454684                           | 2                      | 0                                     | 0.975276323  |                  |                  |   |
| LINC00638 | ENSG00000258701.1                     | 0.186689518            | 9                                     | 4            | 0.042706492      |                  |   |
|           | Brain_Caudate_basal_ganglia           | 0.878098963            | Brain_Hypothalamus                    | 6.522108656  |                  |                  |   |
|           | 0.002817444                           | 0.284458864            | -1.07786689                           | 2.026569171  | 0.790819984      |                  |   |
|           | 0.857805888                           | 4                      | 0                                     | 0.975276323  |                  |                  |   |
| PYCR2     | ENSG00000143811.18                    | 0.186698983            | 3                                     | 3            | 0.105441212      | Brain_Cerebellum |   |
|           | 0.295819393                           | Brain_Cortex           | 1.164307112                           | 0.888343591  | 0.888343591      |                  |   |
|           | -1.349492669                          | 1.619028126            | -0.258635039                          | 1.633195071  | 3                | 0                |   |
|           | 0.975276323                           |                        |                                       |              |                  |                  |   |
| CD2       | ENSG00000116824.4                     | 0.186831995            | 1                                     | 1            | 0.186831995      |                  |   |
|           | Brain_Substantia_nigra                | 0.186831995            | Brain_Substantia_nigra                | 1            | 1                |                  |   |
|           | 1                                     | 1.320009054            | 1.320009054                           | 1.320009054  | NA               | 1                | 0 |
|           | 0.975276323                           |                        |                                       |              |                  |                  |   |
| ACP5      | ENSG00000102575.10                    | 0.186860104            | 4                                     | 3            | 0.033931589      |                  |   |
|           | Brain_Hypothalamus                    | 0.096967934            | Brain_Cerebellum                      | 3.540945875  | 0.04947553       |                  |   |
|           | 0.139026801                           | -2.120883723           | -1.659734211                          | -1.882837661 | 0.20549638       | 3                |   |
|           | 0                                     | 0.975276323            |                                       |              |                  |                  |   |
| RPP25L    | ENSG00000164967.9                     | 0.187054894            | 6                                     | 6            | 0.295991307      |                  |   |
|           | Brain_Cerebellum                      | 0.897484205            | Brain_Cortex                          | 3.776086298  | 0.21634124       |                  |   |
|           | 0.21634124                            | -1.023370385           | 1.045068509                           | -0.066809227 | 0.728978372      | 6                |   |
|           | 0                                     | 0.975276323            |                                       |              |                  |                  |   |
| PITPNM3   | ENSG00000091622.15                    | 0.187119542            | 6                                     | 6            | 0.032933258      |                  |   |
|           | Brain_Putamen_basal_ganglia           | 0.740369903            | Brain_Cerebellar_Hemisphere           |              |                  |                  |   |
|           | 1.800924915                           | 0.30347401             | 0.30347401                            | -2.13289601  | 1.550736673      |                  |   |
|           | 0.394477759                           | 1.332284155            | 6                                     | 0            | 0.975276323      |                  |   |
| BTNL2     | ENSG00000204290.10                    | 0.187183522            | 5                                     | 5            | 0.006896939      |                  |   |
|           | Brain_Hippocampus                     | 0.788871057            | Brain_Cerebellar_Hemisphere           | 2.406916966  |                  |                  |   |
|           | 0.13343824                            | 0.13343824             | -2.701779965                          | -0.267776894 | -1.414744839     |                  |   |
|           | 0.884633858                           | 5                      | 0                                     | 0.975276323  |                  |                  |   |
| CELF1     | ENSG00000149187.17                    | 0.187192724            | 1                                     | 1            | 0.187192724      |                  |   |
|           | Brain_Frontal_Cortex_BA9              | 0.187192724            | Brain_Frontal_Cortex_BA9              | 1            | 1                |                  |   |
|           | 1                                     | 1.318929377            | 1.318929377                           | 1.318929377  | NA               | 1                | 0 |
|           | 0.975276323                           |                        |                                       |              |                  |                  |   |
| ABRACL    | ENSG00000146386.7                     | 0.187235636            | 4                                     | 4            | 0.025254303      |                  |   |
|           | Brain_Caudate_basal_ganglia           | 0.658031331            | Brain_Spinal_cord_cervical_c-1        |              |                  |                  |   |
|           | 2.632521667                           | 0.197497638            | 0.197497638                           | 0.442632835  | 2.237490442      |                  |   |
|           | 1.136059178                           | 0.826632543            | 4                                     | 0            | 0.975276323      |                  |   |
| HRASLS    | ENSG00000127252.5                     | 0.187295462            | 3                                     | 3            | 0.083616207      |                  |   |
|           | Brain_Nucleus_accumbens_basal_ganglia | 0.195765684            | Brain_Cortex                          |              |                  |                  |   |
|           | 1.681973726                           | 0.302893976            | 0.302893976                           | -1.293709787 | 1.730078745      |                  |   |
|           | 0.628072118                           | 1.670283779            | 3                                     | 0            | 0.975276323      |                  |   |
| NT5C2     | ENSG00000076685.18                    | 0.187359609            | 4                                     | 4            | 0.01528108       | Brain_Cerebellum |   |
|           | 0.554762852                           | Brain_Substantia_nigra | 2.502774018                           | 0.264885668  |                  |                  |   |
|           | 0.264885668                           | -2.425648077           | -0.590638217                          | -1.625801912 | 0.765408933      |                  |   |
|           | 4                                     | 0                      | 0.975276323                           |              |                  |                  |   |
| DYNC1I2   | ENSG00000077380.15                    | 0.187375125            | 4                                     | 4            | 0.090033457      |                  |   |
|           | Brain_Cerebellar_Hemisphere           | 0.466825358            | Brain_Cerebellum                      | 2.08769732   |                  |                  |   |
|           | 0.124040789                           | 0.124040789            | 0.727654094                           | 1.695221251  | 1.229049101      |                  |   |
|           | 0.440127279                           | 4                      | 0                                     | 0.975276323  |                  |                  |   |
| STRAP     | ENSG00000023734.10                    | 0.187418148            | 2                                     | 2            | 0.172294523      |                  |   |
|           | Brain_Cerebellar_Hemisphere           | 0.226416538            | Brain_Nucleus_accumbens_basal_ganglia |              |                  |                  |   |
|           | 1.006836036                           | 0.993163964            | 0.993163964                           | 1.209641367  | 1.364868058      |                  |   |
|           | 1.287254712                           | 0.109761846            | 2                                     | 0            | 0.975276323      |                  |   |

|              |                                       |                          |              |              |                                       |             |             |                  |
|--------------|---------------------------------------|--------------------------|--------------|--------------|---------------------------------------|-------------|-------------|------------------|
| VPS37D       | ENSG00000176428.5                     | 0.187662605              | 2            | 2            | 0.075206202                           |             |             |                  |
|              | Brain_Putamen_basal_ganglia           | 0.494964325              |              |              | Brain_Amygdala                        | 1.147279467 |             |                  |
|              | 0.852720533                           | 0.852720533              | 0.682434376  | 1.779204736  | 1.230819556                           |             |             |                  |
|              | 0.775533759                           | 2                        | 0            | 0.975276323  |                                       |             |             |                  |
| ZNF746       | ENSG00000181220.15                    | 0.187668642              | 3            | 3            | 0.034181547                           |             |             |                  |
|              | Brain_Cortex                          | 0.850017766              |              |              | Brain_Caudate_basal_ganglia           | 1.375924428 |             |                  |
|              | 0.63187135                            | 0.63187135               | -2.117923498 | 0.658459074  | -0.423456222                          |             |             |                  |
|              | 1.486098918                           | 3                        | 0            | 0.975276323  |                                       |             |             |                  |
| SNTG1        | ENSG00000147481.14                    | 0.187735915              | 2            | 2            | 0.352670185                           |             |             |                  |
|              | Brain_Cerebellar_Hemisphere           | 0.930169002              |              |              | Brain_Cerebellum                      | 1.88462892  | 0.11537108  |                  |
|              | 0.11537108                            | 0.087632209              | 0.929422475  | 0.508527342  | 0.595235605                           | 2           |             |                  |
|              | 0                                     | 0.975276323              |              |              |                                       |             |             |                  |
| C14orf180    | ENSG00000184601.10                    | 0.187923009              | 7            | 7            | 0.028384107                           |             |             |                  |
|              | Brain_Hypothalamus                    | 0.821759486              |              |              | Brain_Nucleus_accumbens_basal_ganglia |             |             |                  |
|              | 2.15008257                            | 0.139481939              | 0.139481939  | -2.191936288 | 0.514349818                           |             |             |                  |
|              | -1.001295386                          | 1.139696011              | 7            | 0            | 0.975276323                           |             |             |                  |
| UBE2J1       | ENSG00000198833.6                     | 0.187946998              | 2            | 2            | 0.073105814                           |             |             |                  |
|              | Brain_Cerebellar_Hemisphere           | 0.194459979              |              |              | Brain_Cerebellum                      | 1.55590194  | 0.44409806  |                  |
|              | 0.44409806                            | -1.79216953              | -1.297497749 | -1.54483364  | 0.349785771                           | 2           |             |                  |
|              | 0                                     | 0.975276323              |              |              |                                       |             |             |                  |
| IGFBPL1      | ENSG00000137142.4                     | 0.188013366              | 7            | 7            | 0.027925043                           |             |             |                  |
|              | Brain_Nucleus_accumbens_basal_ganglia | 0.890036717              |              |              | Brain_Putamen_basal_ganglia           |             |             |                  |
|              | 2.095889868                           | 0.36436656               | 0.36436656   | -1.575601159 | 2.198337793                           |             |             |                  |
|              | 0.188563467                           | 1.177955226              | 7            | 0            | 0.975276323                           |             |             |                  |
| RP1-90K10.4  | ENSG00000232598.2                     | 0.188021937              | 1            | 1            | 0.188021937                           |             |             |                  |
|              | Brain_Spinal_cord_cervical_c-1        | 0.188021937              |              |              | Brain_Spinal_cord_cervical_c-1        |             |             |                  |
|              | 1                                     | 1                        | 1            | 1.316453317  | 1.316453317                           | NA          | 1           | 0                |
|              | 0.975276323                           |                          |              |              |                                       |             |             |                  |
| WDR64        | ENSG00000162843.17                    | 0.188027729              | 2            | 2            | 0.105309751                           |             |             | Brain_Cortex     |
|              | 0.36943307                            | Brain_Frontal_Cortex_BA9 | 1.839027464  | 0.160972536  |                                       |             |             |                  |
|              | 0.160972536                           | 0.897535818              | 1.619639446  | 1.258587632  | 0.510604372                           |             |             |                  |
|              | 2                                     | 0                        | 0.975276323  |              |                                       |             |             |                  |
| RNF170       | ENSG00000120925.15                    | 0.188070401              | 4            | 4            | 0.05164262                            |             |             |                  |
|              | Brain_Spinal_cord_cervical_c-1        | 0.880484835              |              |              | Brain_Cerebellum                      | 1.401024277 |             |                  |
|              | 0.585732301                           | 0.585732301              | -0.277303904 | 1.946100908  | 0.667342636                           |             |             |                  |
|              | 1.069277573                           | 4                        | 0            | 0.975276323  |                                       |             |             |                  |
| RP11-44N11.2 | ENSG00000272384.1                     | 0.188098545              | 2            | 2            | 0.126674613                           |             |             |                  |
|              | Brain_Caudate_basal_ganglia           | 0.266046165              |              |              | Brain_Cerebellar_Hemisphere           |             |             |                  |
|              | 1.072321225                           | 0.927678775              | 0.927678775  | -1.112213964 | 1.527347545                           |             |             |                  |
|              | 0.207566791                           | 1.866451842              | 2            | 0            | 0.975276323                           |             |             |                  |
| PLCH1        | ENSG00000114805.16                    | 0.188099683              | 6            | 6            | 0.038712148                           |             |             |                  |
|              | Brain_Nucleus_accumbens_basal_ganglia | 0.758053389              |              |              | Brain_Amygdala                        |             |             |                  |
|              | 1.487836945                           | 0.55825791               | 0.55825791   | -1.463611023 | 2.067233595                           |             |             |                  |
|              | -0.109875878                          | 1.370115992              | 6            | 0            | 0.975276323                           |             |             |                  |
| HBM          | ENSG00000206177.6                     | 0.188269516              | 1            | 1            | 0.188269516                           |             |             |                  |
|              | Brain_Hippocampus                     | 0.188269516              |              |              | Brain_Hippocampus                     | 1           | 1           | 1                |
|              | 1.315715602                           | 1.315715602              | 1.315715602  | NA           | 1                                     | 0           | 0.975276323 |                  |
| BMP8B        | ENSG00000116985.11                    | 0.188654574              | 4            | 4            | 0.202496028                           |             |             | Brain_Cerebellum |
|              | 0.71154448                            | Brain_Frontal_Cortex_BA9 | 1.831938605  | 0.333141824  |                                       |             |             |                  |
|              | 0.333141824                           | -0.905746351             | 1.274472456  | 0.298181006  | 0.900381321                           |             |             |                  |
|              | 4                                     | 0                        | 0.975276323  |              |                                       |             |             |                  |
| TAMM41       | ENSG00000144559.10                    | 0.188718592              | 13           | 3            | 0.11843513                            |             |             |                  |
|              | Brain_Nucleus_accumbens_basal_ganglia | 0.939637936              |              |              | Brain_Hippocampus                     |             |             |                  |
|              | 10.43543567                           | 0.006172024              | 0.502791359  | -1.561375707 | 0.638376888                           |             |             |                  |
|              | -0.062954552                          | 0.585884461              | 3            | 0            | 0.975276323                           |             |             |                  |
| GNB3         | ENSG00000111664.10                    | 0.188736701              | 13           | 5            | 0.061914124                           |             |             |                  |
|              | Brain_Spinal_cord_cervical_c-1        | 0.875614189              |              |              | Brain_Hippocampus                     |             |             |                  |
|              | 9.365287545                           | 4.93E-17                 | 0.537263734  | -1.866910237 | 0.156531376                           |             |             |                  |
|              | -1.015654974                          | 0.536122098              | 5            | 0            | 0.975276323                           |             |             |                  |
| AKR7A2       | ENSG00000053371.12                    | 0.188943941              | 1            | 1            | 0.188943941                           |             |             |                  |
|              | Brain_Cerebellar_Hemisphere           | 0.188943941              |              |              | Brain_Cerebellar_Hemisphere           | 1           | 1           | 1                |
|              | 1                                     | -1.313709625             | -1.313709625 | -1.313709625 | NA                                    | 1           | 0           |                  |



0.975276323

FKBP15 ENSG00000119321.8 0.189006359 4 4 0.111442809  
Brain\_Frontal\_Cortex\_BA9 0.891200879 Brain\_Nucleus\_accumbens\_basal\_ganglia  
2.223176587 0.329125256 0.329125256 -1.591741458 1.067433643  
-0.325486595 1.107353145 4 0 0.975276323

FAM163B ENSG00000196990.8 0.189017258 2 2 0.119752574  
Brain\_Cerebellar\_Hemisphere 0.174564618 Brain\_Cerebellum 1.284414833  
0.715585167 0.715585167 -1.555812967 -1.357681977 -1.456747472  
0.140099767 2 0 0.975276323

GBAS ENSG00000146729.9 0.189026747 8 2 0.159212104 Brain\_Cortex  
0.907748199 Brain\_Cerebellar\_Hemisphere 6.28123398 0.00400854 1.314812645  
-1.407726391 0.708773617 -0.654023811 0.764222105 2 0  
0.975276323

NSMCE3 ENSG00000185115.5 0.189227462 1 1 0.189227462  
Brain\_Hypothalamus 0.189227462 Brain\_Hypothalamus 1 1 1  
-1.312867909 -1.312867909 -1.312867909 NA 1 0 0.975276323

FSTL5 ENSG00000168843.13 0.189257011 4 4 0.063939719  
Brain\_Anterior\_cingulate\_cortex\_BA24 0.765230372 Brain\_Hippocampus  
1.270490851 0.7691825 0.7691825 -1.357081267 1.852599952  
-0.122998682 1.387687508 4 0 0.975276323

SMPD2 ENSG00000135587.8 0.189275153 9 3 0.097330367  
Brain\_Anterior\_cingulate\_cortex\_BA24 0.718236243 Brain\_Cortex  
7.163140082 0.005042656 0.449233623 -1.417526143 1.65793609  
0.593220599 0.843012685 3 0 0.975276323

VTI1B ENSG00000100568.10 0.189279434 3 3 0.208695033 Brain\_Cortex  
0.919610691 Brain\_Cerebellum 2.143406337 0.136209689 0.136209689  
0.100924126 1.257161855 0.759129503 0.594527518 3 0  
0.975276323

TIGD2 ENSG00000180346.3 0.189305273 1 1 0.189305273  
Brain\_Nucleus\_accumbens\_basal\_ganglia 0.189305273  
Brain\_Nucleus\_accumbens\_basal\_ganglia 1 1 1 1.312637068  
1.312637068 1.312637068 NA 1 0 0.975276323

MIR7-3HG ENSG00000176840.11 0.189328189 11 5 0.018968441  
Brain\_Cerebellar\_Hemisphere 0.899729835 Brain\_Substantia\_nigra  
8.054805819 1.34E-09 0.287489166 -0.659534305 2.346150601  
1.573369745 0.958912808 5 0 0.975276323

CCT6A ENSG00000146731.10 0.189373889 2 2 0.09693879 Brain\_Hypothalamus  
0.303666572 Brain\_Cortex 1.170366992 0.829633008 0.829633008  
-1.659879034 -1.028602353 -1.344240693 0.446380022 2 0  
0.975276323

PDCD6 ENSG00000249915.7 0.189401605 3 2 0.189005147 Brain\_Cerebellum  
0.851666 Brain\_Nucleus\_accumbens\_basal\_ganglia 2.700316827 0.070337301  
0.229345872 0.186993155 1.313527839 0.796260384 0.568874386  
2 0 0.975276323

CDC23 ENSG00000094880.10 0.189435589 2 2 0.19788957 Brain\_Cerebellum  
0.284829332 Brain\_Cortex 1.159939559 0.840060441 0.840060441  
-1.287587566 1.069533522 -0.109027022 1.666736306 2 0  
0.975276323

STRN3 ENSG00000196792.11 0.189562514 4 4 0.319362674 Brain\_Cerebellum  
0.940790957 Brain\_Caudate\_basal\_ganglia 2.533930464 0.130817606  
0.130817606 -0.995768428 0.53410146 -0.36406427 0.730101212 4  
0 0.975276323

VILL ENSG00000136059.14 0.18975867 12 1 0.096419034  
Brain\_Anterior\_cingulate\_cortex\_BA24 0.780347623 Brain\_Cerebellum  
11.20456165 7.13E-05 11.20456165 0.278866051 1.662467702  
1.253850777 0.381148277 1 0 0.975276323

BAX ENSG00000087088.19 0.189849025 1 1 0.189849025  
Brain\_Anterior\_cingulate\_cortex\_BA24 0.189849025  
Brain\_Anterior\_cingulate\_cortex\_BA24 1 1 1 -1.311025865  
-1.311025865 -1.311025865 NA 1 0 0.975276323

COMP ENSG00000105664.10 0.189881359 3 2 0.0563875 Brain\_Cerebellum  
0.561857588 Brain\_Amygdala 1.971723232 0.029745872 0.998530896

|               |                                      |                             |                                       |                                       |              |                  |
|---------------|--------------------------------------|-----------------------------|---------------------------------------|---------------------------------------|--------------|------------------|
|               | -1.908028755                         | 0.580084571                 | -0.939687685                          | 1.332566788                           | 2            | 0                |
|               | 0.975276323                          |                             |                                       |                                       |              |                  |
| CEP85L        | ENSG00000111860.13                   | 0.190080395                 | 3                                     | 3                                     | 0.171279847  |                  |
|               | Brain_Cerebellar_Hemisphere          | 0.551150294                 |                                       | Brain_Cerebellum                      | 1.927079905  |                  |
|               | 0.101353827                          | 0.101353827                 | 0.596037323                           | 1.368102972                           | 0.974202365  |                  |
|               | 0.386273281                          | 3                           | 0                                     | 0.975276323                           |              |                  |
| MGAT2         | ENSG00000168282.5                    | 0.190085625                 | 1                                     | 1                                     | 0.190085625  | Brain_Cortex     |
|               | 0.190085625                          | Brain_Cortex                | 1                                     | 1                                     | 1            | -1.310325854     |
|               | -1.310325854                         | NA                          | 1                                     | 0                                     | 0.975276323  | -1.310325854     |
| STIM1         | ENSG00000167323.11                   | 0.190102376                 | 2                                     | 2                                     | 0.484656711  | Brain_Cerebellum |
|               | 0.701916291                          | Brain_Cerebellar_Hemisphere | 1.822381039                           | 0.177618961                           |              |                  |
|               | 0.177618961                          | -0.382734959                | 0.698832507                           | 0.158048774                           | 0.764783689  |                  |
|               | 2                                    | 0                           | 0.975276323                           |                                       |              |                  |
| DFFA          | ENSG00000160049.11                   | 0.190138303                 | 1                                     | 1                                     | 0.190138303  | Brain_Cerebellum |
|               | 0.190138303                          | Brain_Cerebellum            | 1                                     | 1                                     | 1            | -1.310170087     |
|               | -1.310170087                         | NA                          | 1                                     | 0                                     | 0.975276323  | -1.310170087     |
| WDR78         | ENSG00000152763.16                   | 0.19023732                  | 2                                     | 2                                     | 0.163862308  |                  |
|               | Brain_Caudate_basal_ganglia          | 0.257778057                 |                                       | Brain_Nucleus_accumbens_basal_ganglia |              |                  |
|               | 1.030770072                          | 0.969229928                 | 0.969229928                           | -1.392198463                          | -1.131658449 |                  |
|               | -1.261928456                         | 0.18422961                  | 2                                     | 0                                     | 0.975276323  |                  |
| NANS          | ENSG00000095380.10                   | 0.19028966                  | 2                                     | 2                                     | 0.102857112  |                  |
|               | Brain_Anterior_cingulate_cortex_BA24 | 0.512299571                 |                                       | Brain_Cerebellar_Hemisphere           |              |                  |
|               | 1.093315606                          | 0.906684394                 | 0.906684394                           | 0.655261241                           | 1.631157396  |                  |
|               | 1.143209318                          | 0.690062789                 | 2                                     | 0                                     | 0.975276323  |                  |
| L3MBTL1       | ENSG00000185513.14                   | 0.190310826                 | 2                                     | 2                                     | 0.07521896   | Brain_Cerebellum |
|               | 0.272732709                          | Brain_Cerebellar_Hemisphere | 1.41668112                            | 0.58331888                            | 0.58331888   |                  |
|               | -1.779126896                         | -1.096791129                | -1.437959012                          | 0.482484248                           | 2            | 0                |
|               | 0.975276323                          |                             |                                       |                                       |              |                  |
| AHCTF1        | ENSG00000153207.14                   | 0.190338396                 | 3                                     | 3                                     | 0.091129424  |                  |
|               | Brain_Caudate_basal_ganglia          | 0.62390589                  | Brain_Amygdala                        | 1.123387715                           |              |                  |
|               | 0.922785403                          | 0.922785403                 | -1.689469857                          | 0.490322242                           | -0.799408771 |                  |
|               | 1.143536374                          | 3                           | 0                                     | 0.975276323                           |              |                  |
| ZNF579        | ENSG00000218891.4                    | 0.190404676                 | 1                                     | 1                                     | 0.190404676  |                  |
|               | Brain_Spinal_cord_cervical_c-1       | 0.190404676                 |                                       | Brain_Spinal_cord_cervical_c-1        |              |                  |
|               | 1                                    | 1                           | 1                                     | 1.309382914                           | 1.309382914  | NA               |
|               | 0.975276323                          |                             |                                       |                                       | 1            | 0                |
| ZNF18         | ENSG00000154957.13                   | 0.190465867                 | 2                                     | 1                                     | 0.164968275  |                  |
|               | Brain_Caudate_basal_ganglia          | 0.227394455                 |                                       | Brain_Putamen_basal_ganglia           |              |                  |
|               | 1.965393847                          | 0.034606153                 | 1.965393847                           | 1.207097869                           | 1.388554454  |                  |
|               | 1.297826161                          | 0.128309182                 | 1                                     | 0                                     | 0.975276323  |                  |
| SLC35A3       | ENSG00000117620.14                   | 0.190564489                 | 2                                     | 1                                     | 0.184890609  |                  |
|               | Brain_Cortex                         | 0.205865019                 |                                       | Brain_Cerebellar_Hemisphere           | 1.95902037   | 0.04097963       |
|               | 1.95902037                           | -1.325846314                | -1.265017599                          | -1.295431956                          | 0.043012397  | 1                |
|               | 0                                    | 0.975276323                 |                                       |                                       |              |                  |
| RERG          | ENSG00000134533.6                    | 0.190587632                 | 1                                     | 1                                     | 0.190587632  | Brain_Cerebellum |
|               | 0.190587632                          | Brain_Cerebellum            | 1                                     | 1                                     | 1            | -1.308842722     |
|               | -1.308842722                         | NA                          | 1                                     | 0                                     | 0.975276323  | -1.308842722     |
| ERICH4        | ENSG00000204978.2                    | 0.190680513                 | 1                                     | 1                                     | 0.190680513  |                  |
|               | Brain_Cerebellum                     | 0.190680513                 |                                       | Brain_Cerebellum                      | 1            | 1                |
|               | -1.308568631                         | -1.308568631                | NA                                    | 1                                     | 0            | 0.975276323      |
| FAM26F        | ENSG00000188820.12                   | 0.190702504                 | 9                                     | 6                                     | 0.197152013  |                  |
|               | Brain_Cortex                         | 0.97247575                  | Brain_Nucleus_accumbens_basal_ganglia | 5.74646336                            |              |                  |
|               | 0.041189578                          | 0.258955095                 | -1.289708138                          | 1.164996977                           | -0.00360919  |                  |
|               | 0.893452895                          | 6                           | 0                                     | 0.975276323                           |              |                  |
| RP11-480A16.1 | ENSG00000260261.1                    | 0.190745208                 | 6                                     | 6                                     | 0.073338649  |                  |
|               | Brain_Cortex                         | 0.815417391                 |                                       | Brain_Cerebellum                      | 2.168446221  | 0.208613878      |
|               | 0.208613878                          | -1.790717442                | 1.263097453                           | 0.108230554                           | 1.133601829  |                  |
|               | 6                                    | 0                           | 0.975276323                           |                                       |              |                  |
| MEIS1         | ENSG00000143995.19                   | 0.190759784                 | 4                                     | 3                                     | 0.096407185  | Brain_Cortex     |
|               | 0.788807087                          | Brain_Amygdala              | 1.984655814                           | 0.048600833                           | 0.934469164  |                  |
|               | 0.267859996                          | 1.662526848                 | 1.200620086                           | 0.631330206                           | 3            | 0                |
|               | 0.975276323                          |                             |                                       |                                       |              |                  |

|               |                                       |                             |                                |              |              |                    |             |            |   |
|---------------|---------------------------------------|-----------------------------|--------------------------------|--------------|--------------|--------------------|-------------|------------|---|
| TNFRSF17      | ENSG00000048462.10                    | 0.190775243                 | 5                              | 5            | 0.028929593  |                    |             |            |   |
|               | Brain_Nucleus_accumbens_basal_ganglia | 0.495641429                 |                                |              |              | Brain_Cerebellum   |             |            |   |
|               | 2.675556917                           | 0.105337121                 | 0.105337121                    |              | -1.245990879 | 2.184444606        |             |            |   |
|               | 1.080927429                           | 1.423951346                 | 5                              | 0            | 0.975276323  |                    |             |            |   |
| ARHGEF37      | ENSG00000183111.11                    | 0.190802379                 | 3                              | 3            | 0.423326731  |                    |             |            |   |
|               | Brain_Nucleus_accumbens_basal_ganglia | 0.918958797                 |                                |              |              |                    |             |            |   |
|               | Brain_Anterior_cingulate_cortex_BA24  | 2.644466772                 |                                |              | 0.111118313  |                    |             |            |   |
|               | 0.111118313                           | -0.306441231                | 0.800663063                    |              | 0.198655731  | 0.559878285        |             |            |   |
|               | 3                                     | 0                           | 0.975276323                    |              |              |                    |             |            |   |
| SEMA3C        | ENSG00000075223.13                    | 0.190835765                 | 4                              | 4            | 0.048169596  |                    |             |            |   |
|               | Brain_Nucleus_accumbens_basal_ganglia | 0.552635012                 |                                |              |              | Brain_Amygdala     |             |            |   |
|               | 1.775091151                           | 0.538668286                 | 0.538668286                    |              | -1.975869178 | 0.593816261        |             |            |   |
|               | -1.179555414                          | 1.211271337                 | 4                              | 0            | 0.975276323  |                    |             |            |   |
| FER1L5        | ENSG00000249715.10                    | 0.190916649                 | 1                              | 1            | 0.190916649  |                    |             |            |   |
|               | Brain_Nucleus_accumbens_basal_ganglia | 0.190916649                 |                                |              |              |                    |             |            |   |
|               | Brain_Nucleus_accumbens_basal_ganglia | 1                           | 1                              | 1            | 1.307872234  |                    |             |            |   |
|               | 1.307872234                           | 1.307872234                 | NA                             | 1            | 0            | 0.975276323        |             |            |   |
| Clorf109      | ENSG00000116922.14                    | 0.190932644                 | 5                              | 3            | 0.031348028  |                    |             |            |   |
|               | Brain_Cortex                          | 0.179071026                 | Brain_Amygdala                 | 4.484746479  | 0.009821323  |                    |             |            |   |
|               | 0.153078659                           | -2.152626712                | -1.343620844                   |              | -1.812230492 | 0.317855803        |             |            |   |
|               | 3                                     | 0                           | 0.975276323                    |              |              |                    |             |            |   |
| STK17B        | ENSG00000081320.10                    | 0.1909885                   | 1                              | 1            | 0.1909885    | Brain_Hypothalamus |             |            |   |
|               | 0.1909885                             | Brain_Hypothalamus          | 1                              | 1            | 1            | 1.30766046         | 1.30766046  | 1.30766046 |   |
|               | NA                                    | 1                           | 0                              | 0.975276323  |              |                    |             |            |   |
| GPR153        | ENSG00000158292.6                     | 0.19113734                  | 3                              | 2            | 0.161951039  |                    |             |            |   |
|               | Brain_Putamen_basal_ganglia           | 0.209079721                 | Brain_Cortex                   | 1.98595211   |              |                    |             |            |   |
|               | 0.020323145                           | 0.993724745                 | 1.256099987                    |              | 1.398539769  | 1.338283202        |             |            |   |
|               | 0.073707912                           | 2                           | 0                              | 0.975276323  |              |                    |             |            |   |
| SLC35B3       | ENSG00000124786.9                     | 0.191200654                 | 3                              | 3            | 0.096693114  |                    |             |            |   |
|               | Brain_Cerebellum                      | 0.938929259                 | Brain_Cerebellar_Hemisphere    | 1.866213044  |              |                    |             |            |   |
|               | 0.51714689                            | 0.51714689                  | -0.586928479                   | 1.661101246  | 0.332519018  |                    |             |            |   |
|               | 1.178538431                           | 3                           | 0                              | 0.975276323  |              |                    |             |            |   |
| SMAD5         | ENSG00000113658.16                    | 0.191305478                 | 1                              | 1            | 0.191305478  |                    |             |            |   |
|               | Brain_Spinal_cord_cervical_c-1        | 0.191305478                 | Brain_Spinal_cord_cervical_c-1 |              |              |                    |             |            |   |
|               | 1                                     | 1                           | 1                              | -1.306726905 | -1.306726905 | -1.306726905       | NA          | 1          | 0 |
|               | 0.975276323                           |                             |                                |              |              |                    |             |            |   |
| PDE4DIP       | ENSG00000178104.19                    | 0.191337936                 | 5                              | 5            | 0.09222856   |                    |             |            |   |
|               | Brain_Anterior_cingulate_cortex_BA24  | 0.410881952                 |                                |              |              |                    |             |            |   |
|               | Brain_Nucleus_accumbens_basal_ganglia | 1.896006679                 |                                |              | 0.162898564  |                    |             |            |   |
|               | 0.162898564                           | -1.683757417                | 1.156918435                    |              | -0.416861436 | 1.30911001         | 5           |            |   |
|               | 0                                     | 0.975276323                 |                                |              |              |                    |             |            |   |
| TGS1          | ENSG00000137574.10                    | 0.191384757                 | 2                              | 2            | 0.069494006  |                    |             |            |   |
|               | Brain_Nucleus_accumbens_basal_ganglia | 0.887850766                 | Brain_Hippocampus              |              |              |                    |             |            |   |
|               | 1.017332919                           | 0.982667081                 | 0.982667081                    |              | -1.815194623 | -0.141024275       |             |            |   |
|               | -0.978109449                          | 1.183817206                 | 2                              | 0            | 0.975276323  |                    |             |            |   |
| SIGLEC10      | ENSG00000142512.14                    | 0.191388097                 | 6                              | 5            | 0.029517854  |                    |             |            |   |
|               | Brain_Cortex                          | 0.677957774                 | Brain_Substantia_nigra         | 2.399251307  |              |                    |             |            |   |
|               | 0.002338775                           | 0.741274854                 | -0.415251538                   | 2.176500536  | 1.065957852  |                    |             |            |   |
|               | 1.012156464                           | 5                           | 0                              | 0.975276323  |              |                    |             |            |   |
| DLC1          | ENSG00000164741.14                    | 0.191447451                 | 1                              | 1            | 0.191447451  |                    |             |            |   |
|               | Brain_Nucleus_accumbens_basal_ganglia | 0.191447451                 |                                |              |              |                    |             |            |   |
|               | Brain_Nucleus_accumbens_basal_ganglia | 1                           | 1                              | 1            | 1.306309137  |                    |             |            |   |
|               | 1.306309137                           | 1.306309137                 | NA                             | 1            | 0            | 0.975276323        |             |            |   |
| RP11-326C3.13 | ENSG00000270030.1                     | 0.191534367                 | 4                              | 4            | 0.10227563   |                    |             |            |   |
|               | Brain_Putamen_basal_ganglia           | 0.780707097                 | Brain_Amygdala                 | 1.314636055  |              |                    |             |            |   |
|               | 0.725516336                           | 0.725516336                 | -0.278397684                   | 1.633920091  | 0.987091884  |                    |             |            |   |
|               | 0.862308614                           | 4                           | 0                              | 0.975276323  |              |                    |             |            |   |
| CELSR3        | ENSG00000008300.16                    | 0.191587381                 | 1                              | 1            | 0.191587381  |                    |             |            |   |
|               | Brain_Amygdala                        | 0.191587381                 | Brain_Amygdala                 | 1            | 1            | 1                  | 1.305897605 |            |   |
|               | 1.305897605                           | 1.305897605                 | NA                             | 1            | 0            | 0.975276323        |             |            |   |
| SLC25A35      | ENSG00000125434.10                    | 0.19169886                  | 2                              | 2            | 0.167563126  | Brain_Cerebellum   |             |            |   |
|               | 0.815702972                           | Brain_Cerebellar_Hemisphere | 1.548018998                    |              | 0.451981002  |                    |             |            |   |

|               |                                       |                  |                  |                                      |              |
|---------------|---------------------------------------|------------------|------------------|--------------------------------------|--------------|
|               | 0.451981002                           | -0.233075252     | 1.380076389      | 0.573500569                          | 1.140670464  |
|               | 2                                     | 0                | 0.975276323      |                                      |              |
| STAC          | ENSG00000144681.10                    | 0.191717393      | 3                | 3                                    | 0.032009679  |
|               | Brain_Putamen_basal_ganglia           | 0.981904367      |                  | Brain_Cerebellum                     | 1.622025242  |
|               | 0.421667727                           | 0.421667727      | -2.144289729     | -0.022681458                         | -0.740813017 |
|               | 1.215557031                           | 3                | 0                | 0.975276323                          |              |
| ATAD3C        | ENSG00000215915.9                     | 0.191726996      | 13               | 4                                    | 0.010084451  |
|               | Brain_Cerebellum                      | 0.984951971      |                  | Brain_Anterior_cingulate_cortex_BA24 |              |
|               | 9.889987337                           | 0.004769962      | 0.370825083      | 0.018861026                          | 2.572920024  |
|               | 1.357817344                           | 0.570740903      | 4                | 0                                    | 0.975276323  |
| CACNG5        | ENSG00000075429.8                     | 0.191927336      | 1                | 1                                    | 0.191927336  |
|               | Brain_Cerebellum                      | 0.191927336      | Brain_Cerebellum | 1                                    | 1            |
|               | 1.304898724                           | 1.304898724      | NA               | 1                                    | 0            |
|               |                                       |                  |                  |                                      | 0.975276323  |
| ONECUT2       | ENSG00000119547.5                     | 0.192128397      | 2                | 2                                    | 0.069698007  |
|               | Brain_Frontal_Cortex_BA9              | 0.700910423      |                  | Brain_Cortex                         | 1.262402711  |
|               | 0.737597289                           | 0.737597289      | -1.813868284     | -0.38409178                          | -1.098980032 |
|               | 1.011004661                           | 2                | 0                | 0.975276323                          |              |
| MED28         | ENSG00000118579.12                    | 0.192144377      | 10               | 4                                    | 0.062307145  |
|               | Brain_Anterior_cingulate_cortex_BA24  | 0.999675486      |                  | Brain_Caudate_basal_ganglia          |              |
|               | 7.636998262                           | 0.00774045       | 0.292325662      | -1.864103683                         | 0.709591587  |
|               | -0.1939048                            | 0.718971217      | 4                | 0                                    | 0.975276323  |
| PTPRC         | ENSG00000081237.18                    | 0.192156317      | 3                | 3                                    | 0.040480518  |
|               | Brain_Anterior_cingulate_cortex_BA24  | 0.77920158       |                  | Brain_Frontal_Cortex_BA9             |              |
|               | 1.384318145                           | 0.609018777      | 0.609018777      | -0.36635426                          | 2.048811838  |
|               | 0.654272414                           | 1.250245927      | 3                | 0                                    | 0.975276323  |
| DOPEY2        | ENSG00000142197.12                    | 0.192194163      | 4                | 4                                    | 0.086313898  |
|               | Brain_Frontal_Cortex_BA9              | 0.838498323      |                  | Brain_Cortex                         | 2.075839563  |
|               | 0.206896982                           | 0.206896982      | -1.715170905     | 1.086003975                          | 0.022808198  |
|               | 1.214843686                           | 4                | 0                | 0.975276323                          |              |
| RP11-1055B8.3 | ENSG00000262223.6                     | 0.192207206      | 10               | 1                                    | 0.117603656  |
|               | Brain_Putamen_basal_ganglia           | 0.387659965      |                  | Brain_Hippocampus                    | 9.403819158  |
|               | 8.60E-17                              | 9.403819158      | -1.564911524     | -0.863868805                         | -1.262825675 |
|               | 0.231563104                           | 1                | 0                | 0.975276323                          |              |
| SPATC1L       | ENSG00000160284.14                    | 0.19226166       | 13               | 4                                    | 0.048855664  |
|               | Brain_Putamen_basal_ganglia           | 0.566015759      |                  | Brain_Anterior_cingulate_cortex_BA24 |              |
|               | 10.14017545                           | 0.005324886      | 0.369772         | -1.969849127                         | -0.573929131 |
|               | -1.249775969                          | 0.479842481      | 4                | 0                                    | 0.975276323  |
| MRPL38        | ENSG00000204316.12                    | 0.192539872      | 3                | 3                                    | 0.038976969  |
|               | Brain_Cerebellum                      | 0.198864602      |                  | Brain_Cerebellar_Hemisphere          | 1.823124409  |
|               | 0.504912834                           | 0.504912834      | -2.064429956     | -1.284793078                         | -1.61221979  |
|               | 0.404520207                           | 3                | 0                | 0.975276323                          |              |
| RP11-250B2.5  | ENSG00000260645.1                     | 0.192557734      | 6                | 4                                    | 0.061740567  |
|               | Brain_Hippocampus                     | 0.896922048      |                  | Brain_Putamen_basal_ganglia          | 4.306822641  |
|               | 0.051656553                           | 0.289839681      | -1.868154298     | 0.542098653                          | -0.402920466 |
|               | 0.798932959                           | 4                | 0                | 0.975276323                          |              |
| HAVCR2        | ENSG00000135077.8                     | 0.192704209      | 1                | 1                                    | 0.192704209  |
|               | Brain_Nucleus_accumbens_basal_ganglia | 0.192704209      |                  |                                      |              |
|               | Brain_Nucleus_accumbens_basal_ganglia | 1                | 1                | 1                                    | -1.302620929 |
|               | -1.302620929                          | -1.302620929     | NA               | 1                                    | 0            |
|               |                                       |                  |                  |                                      | 0.975276323  |
| GOLGA1        | ENSG00000136935.13                    | 0.192830691      | 1                | 1                                    | 0.192830691  |
|               | Brain_Cerebellum                      | 0.192830691      |                  | Brain_Cerebellum                     | 1            |
|               | -1.302250723                          | -1.302250723     | NA               | 1                                    | 0            |
|               |                                       |                  |                  |                                      | 0.975276323  |
| LSM11         | ENSG00000155858.5                     | 0.192910132      | 1                | 1                                    | 0.192910132  |
|               | Brain_Spinal_cord_cervical_c-1        | 0.192910132      |                  | Brain_Spinal_cord_cervical_c-1       |              |
|               | 1                                     | 1                | 1                | 1.302018294                          | 1.302018294  |
|               |                                       |                  |                  |                                      | 1.302018294  |
|               |                                       |                  |                  |                                      | NA           |
|               |                                       |                  |                  |                                      | 1            |
|               |                                       |                  |                  |                                      | 0            |
|               |                                       |                  |                  |                                      | 0.975276323  |
| ITGB3         | ENSG00000259207.7                     | 0.192968195      | 2                | 2                                    | 0.086707172  |
|               | Brain_Substantia_nigra                | 0.101501939      |                  | Brain_Anterior_cingulate_cortex_BA24 |              |
|               | 1.711083284                           | 0.288916716      | 0.288916716      | 1.637615447                          | 1.713029176  |
|               | 1.675322312                           | 0.053325559      | 2                | 0                                    | 0.975276323  |
| CHID1         | ENSG00000177830.17                    | 0.192996083      | 1                | 1                                    | 0.192996083  |
|               | Brain_Cerebellum                      | 0.192996083      |                  | Brain_Cerebellum                     |              |
|               | 0.192996083                           | Brain_Cerebellum | 1                | 1                                    | 1            |
|               |                                       |                  |                  |                                      | -1.301766896 |
|               |                                       |                  |                  |                                      | -1.301766896 |

|              |                                       |                                      |                                       |                  |             |              |             |                   |  |
|--------------|---------------------------------------|--------------------------------------|---------------------------------------|------------------|-------------|--------------|-------------|-------------------|--|
|              | -1.301766896                          | NA                                   | 1                                     | 0                | 0.975276323 |              |             |                   |  |
| FBXO45       | ENSG00000174013.7                     |                                      |                                       | 0.193024191      | 1           | 1            | 0.193024191 |                   |  |
|              | Brain_Cerebellum                      | 0.193024191                          |                                       | Brain_Cerebellum | 1           | 1            | 1           | -1.301684702      |  |
|              | -1.301684702                          | -1.301684702                         | NA                                    | 1                | 0           | 0.975276323  |             |                   |  |
| SLC7A2       | ENSG00000003989.17                    |                                      |                                       | 0.1930274        | 1           | 1            | 0.1930274   | Brain_Hippocampus |  |
|              | 0.1930274                             | Brain_Hippocampus                    |                                       | 1                | 1           | 1            | 1.301675321 | 1.301675321       |  |
|              | 1.301675321                           | NA                                   | 1                                     | 0                | 0.975276323 |              |             |                   |  |
| CDK11B       | ENSG00000248333.8                     |                                      |                                       | 0.193158505      | 3           | 3            | 0.041325382 |                   |  |
|              | Brain_Cerebellar_Hemisphere           | 0.87209276                           | Brain_Substantia_nigra                |                  |             |              |             | 1.48637822        |  |
|              | 0.542716744                           | 0.542716744                          | 0.161000813                           |                  |             | 2.040250499  |             | 1.200806736       |  |
|              | 0.955512214                           | 3                                    | 0                                     | 0.975276323      |             |              |             |                   |  |
| NUDT21       | ENSG00000167005.13                    |                                      |                                       | 0.193160665      | 1           | 1            | 0.193160665 |                   |  |
|              | Brain_Hypothalamus                    | 0.193160665                          | Brain_Hypothalamus                    |                  | 1           | 1            | 1           |                   |  |
|              | -1.301285744                          | -1.301285744                         | -1.301285744                          | NA               | 1           | 0            | 0.975276323 |                   |  |
| BBS9         | ENSG00000122507.20                    |                                      |                                       | 0.193244755      | 10          | 4            | 0.288804444 |                   |  |
|              | Brain_Anterior_cingulate_cortex_BA24  | 0.996036652                          | Brain_Putamen_basal_ganglia           |                  |             |              |             |                   |  |
|              | 7.986736541                           | 1.15E-16                             | 0.320900718                           |                  |             | -1.023940652 | 1.06074799  | 0.22398386        |  |
|              | 0.574353608                           | 4                                    | 0                                     | 0.975276323      |             |              |             |                   |  |
| RRP1         | ENSG00000160214.12                    |                                      |                                       | 0.193257438      | 3           | 3            | 0.056960597 | Brain_Cortex      |  |
|              | 0.495125865                           | Brain_Anterior_cingulate_cortex_BA24 | 1.455029559                           |                  |             |              |             |                   |  |
|              | 0.545854742                           | 0.545854742                          | -0.917357853                          |                  |             | 1.903613054  |             | 0.101358783       |  |
|              | 1.565221274                           | 3                                    | 0                                     | 0.975276323      |             |              |             |                   |  |
| ERLIN1       | ENSG00000107566.13                    |                                      |                                       | 0.193394195      | 2           | 2            | 0.070146684 |                   |  |
|              | Brain_Cerebellar_Hemisphere           | 0.34471354                           | Brain_Hippocampus                     |                  |             |              | 1.482883539 |                   |  |
|              | 0.517116461                           | 0.517116461                          | -1.810962323                          |                  |             | -0.944892933 |             | -1.377927628      |  |
|              | 0.612403538                           | 2                                    | 0                                     | 0.975276323      |             |              |             |                   |  |
| BRD9         | ENSG00000028310.17                    |                                      |                                       | 0.193493225      | 4           | 2            | 0.080855714 | Brain_Cerebellum  |  |
|              | 0.601692072                           | Brain_Anterior_cingulate_cortex_BA24 | 3.467935208                           |                  |             |              |             |                   |  |
|              | 0.045364521                           | 0.382657598                          | -1.745742458                          |                  |             | -0.521968775 |             | -1.295541614      |  |
|              | 0.538764257                           | 2                                    | 0                                     | 0.975276323      |             |              |             |                   |  |
| KCNA1        | ENSG00000111262.5                     |                                      |                                       | 0.193526815      | 2           | 2            | 0.150880876 | Brain_Amygdala    |  |
|              | 0.281994721                           | Brain_Spinal_cord_cervical_c-1       | 1.0202406                             | 0.9797594        | 0.9797594   |              |             |                   |  |
|              | -1.436426996                          | 1.075849163                          | -0.180288916                          |                  |             | 1.776447508  | 2           | 0                 |  |
|              | 0.975276323                           |                                      |                                       |                  |             |              |             |                   |  |
| LSM2         | ENSG00000204392.10                    |                                      |                                       | 0.193538529      | 1           | 1            | 0.193538529 |                   |  |
|              | Brain_Hippocampus                     | 0.193538529                          | Brain_Hippocampus                     |                  | 1           | 1            | 1           |                   |  |
|              | -1.300182201                          | -1.300182201                         | -1.300182201                          | NA               | 1           | 0            | 0.975276323 |                   |  |
| RP11-399E6.1 | ENSG00000235358.1                     |                                      |                                       | 0.193653822      | 4           | 2            | 0.036304707 |                   |  |
|              | Brain_Cerebellar_Hemisphere           | 0.163641963                          | Brain_Putamen_basal_ganglia           |                  |             |              |             |                   |  |
|              | 3.645872736                           | 0.036148554                          | 0.257058589                           |                  |             | -2.093498177 |             | -1.39292668       |  |
|              | -1.673926757                          | 0.303475171                          | 2                                     | 0                | 0.975276323 |              |             |                   |  |
| PPAN         | ENSG00000130810.19                    |                                      |                                       | 0.193694052      | 1           | 1            | 0.193694052 |                   |  |
|              | Brain_Frontal_Cortex_BA9              | 0.193694052                          | Brain_Frontal_Cortex_BA9              |                  | 1           | 1            |             |                   |  |
|              | 1                                     | 1.299728461                          | 1.299728461                           | 1.299728461      | NA          | 1            | 0           |                   |  |
|              | 0.975276323                           |                                      |                                       |                  |             |              |             |                   |  |
| SCN3B        | ENSG00000166257.8                     |                                      |                                       | 0.193757852      | 1           | 1            | 0.193757852 |                   |  |
|              | Brain_Cerebellar_Hemisphere           | 0.193757852                          | Brain_Cerebellar_Hemisphere           |                  | 1           | 1            |             |                   |  |
|              | 1                                     | 1.299542402                          | 1.299542402                           | 1.299542402      | NA          | 1            | 0           |                   |  |
|              | 0.975276323                           |                                      |                                       |                  |             |              |             |                   |  |
| CCDC174      | ENSG00000154781.15                    |                                      |                                       | 0.193855345      | 13          | 1            | 0.132748521 |                   |  |
|              | Brain_Nucleus_accumbens_basal_ganglia | 0.323098458                          | Brain_Hypothalamus                    |                  |             |              |             |                   |  |
|              | 12.42651931                           | 0.001020078                          | 12.42651931                           |                  |             | 0.988110654  |             | 1.503351132       |  |
|              | 1.267684082                           | 0.196073483                          | 1                                     | 0                | 0.975276323 |              |             |                   |  |
| CLIP2        | ENSG00000106665.15                    |                                      |                                       | 0.193908362      | 1           | 1            | 0.193908362 | Brain_Cerebellum  |  |
|              | 0.193908362                           | Brain_Cerebellum                     | 1                                     | 1                | 1           | 1.299103646  |             | 1.299103646       |  |
|              | 1.299103646                           | NA                                   | 1                                     | 0                | 0.975276323 |              |             |                   |  |
| NUDT15       | ENSG00000136159.3                     |                                      |                                       | 0.19395256       | 3           | 2            | 0.107665303 |                   |  |
|              | Brain_Spinal_cord_cervical_c-1        | 0.364475656                          | Brain_Cerebellum                      |                  |             |              | 1.987026917 |                   |  |
|              | 0.035873195                           | 0.977099888                          | -1.608776126                          |                  |             | 1.087193717  |             | 0.128429129       |  |
|              | 1.507163147                           | 2                                    | 0                                     | 0.975276323      |             |              |             |                   |  |
| STK32C       | ENSG00000165752.16                    |                                      |                                       | 0.194147652      | 4           | 4            | 0.015658137 |                   |  |
|              | Brain_Putamen_basal_ganglia           | 0.614323252                          | Brain_Nucleus_accumbens_basal_ganglia |                  |             |              |             |                   |  |

|               |                                       |                             |                             |              |                        |
|---------------|---------------------------------------|-----------------------------|-----------------------------|--------------|------------------------|
|               | 2.415635217                           | 0.245460288                 | 0.245460288                 | 0.503911951  | 2.416787931            |
|               | 1.169665707                           | 0.850213849                 | 4 0                         | 0.975276323  |                        |
| BCDIN3D       | ENSG00000186666.5                     | 0.194267551                 | 1 1                         | 0.194267551  |                        |
|               | Brain_Cerebellum                      | 0.194267551                 | Brain_Cerebellum            | 1 1          | 1.298057576            |
|               | 1.298057576                           | 1.298057576                 | NA 1                        | 0            | 0.975276323            |
| LRRC41        | ENSG00000132128.16                    | 0.194310472                 | 1 1                         | 0.194310472  |                        |
|               | Brain_Putamen_basal_ganglia           | 0.194310472                 | Brain_Putamen_basal_ganglia | 1 1          | 1                      |
|               | 1                                     | 1.297932673                 | 1.297932673                 | 1.297932673  | NA 1 0                 |
|               | 0.975276323                           |                             |                             |              |                        |
| ATG16L2       | ENSG00000168010.10                    | 0.19438282                  | 1 1                         | 0.19438282   | Brain_Cortex           |
|               | 0.19438282                            | Brain_Cortex                | 1 1                         | 1.297722177  | 1.297722177            |
|               | 1.297722177                           | NA 1                        | 0                           | 0.975276323  |                        |
| RP11-863P13.6 | ENSG00000260166.1                     | 0.194568085                 | 1 1                         | 0.194568085  |                        |
|               | Brain_Amygdala                        | 0.194568085                 | Brain_Amygdala              | 1 1 1        | -1.297183418           |
|               | -1.297183418                          | -1.297183418                | NA 1                        | 0            | 0.975276323            |
| PNPLA2        | ENSG00000177666.16                    | 0.194598387                 | 7 7                         | 0.009309263  |                        |
|               | Brain_Nucleus_accumbens_basal_ganglia | 0.960811101                 | Brain_Cerebellar_Hemisphere |              |                        |
|               | 3.116976967                           | 0.172258292                 | 0.172258292                 | -2.600483023 | 1.109023124            |
|               | -0.905929284                          | 1.330099286                 | 7 0                         | 0.975276323  |                        |
| HAPLN4        | ENSG00000187664.8                     | 0.1948024                   | 4 3                         | 0.074550897  |                        |
|               | Brain_Caudate_basal_ganglia           | 0.94855291                  | Brain_Cerebellum            | 2.661947708  |                        |
|               | 0.049739238                           | 0.40089682                  | -0.06452411                 | 1.78321755   | 0.83270782 0.799262671 |
|               | 3                                     | 0                           | 0.975276323                 |              |                        |
| CLDN11        | ENSG00000013297.10                    | 0.194844174                 | 1 1                         | 0.194844174  |                        |
|               | Brain_Cerebellar_Hemisphere           | 0.194844174                 | Brain_Cerebellar_Hemisphere | 1 1          |                        |
|               | 1                                     | -1.296381235                | -1.296381235                | -1.296381235 | NA 1 0                 |
|               | 0.975276323                           |                             |                             |              |                        |
| ACYP2         | ENSG00000170634.12                    | 0.194922416                 | 4 3                         | 0.035548111  | Brain_Cortex           |
|               | 0.631975784                           | Brain_Caudate_basal_ganglia | 2.788687333                 | 0.043895535  |                        |
|               | 0.254647683                           | 0.478947772                 | 2.102058967                 | 1.299587837  | 0.720999951            |
|               | 3                                     | 0                           | 0.975276323                 |              |                        |
| RP11-693J15.6 | ENSG00000277738.1                     | 0.195079404                 | 1 1                         | 0.195079404  |                        |
|               | Brain_Cerebellum                      | 0.195079404                 | Brain_Cerebellum            | 1 1 1        | 1.295698427            |
|               | 1.295698427                           | 1.295698427                 | NA 1                        | 0            | 0.975276323            |
| CEP131        | ENSG00000141577.13                    | 0.195186245                 | 4 4                         | 0.043340832  |                        |
|               | Brain_Cerebellar_Hemisphere           | 0.775528973                 | Brain_Caudate_basal_ganglia | 1.4714581    |                        |
|               | 0.559768767                           | 0.559768767                 | -2.020410437                | 0.733312738  | -0.47380447            |
|               | 1.141265882                           | 4                           | 0                           | 0.975276323  |                        |
| TAGAP         | ENSG00000164691.16                    | 0.195197675                 | 1 1                         | 0.195197675  |                        |
|               | Brain_Cerebellar_Hemisphere           | 0.195197675                 | Brain_Cerebellar_Hemisphere | 1 1          |                        |
|               | 1                                     | 1.295355345                 | 1.295355345                 | 1.295355345  | NA 1 0                 |
|               | 0.975276323                           |                             |                             |              |                        |
| FBXL8         | ENSG00000135722.8                     | 0.195212871                 | 1 1                         | 0.195212871  | Brain_Cerebellum       |
|               | 0.195212871                           | Brain_Cerebellum            | 1 1                         | 1.295311275  | 1.295311275            |
|               | 1.295311275                           | NA 1                        | 0                           | 0.975276323  |                        |
| SOX18         | ENSG00000203883.6                     | 0.195213379                 | 2 2                         | 0.070721992  |                        |
|               | Brain_Frontal_Cortex_BA9              | 0.946184928                 | Brain_Hippocampus           | 1.018660701  |                        |
|               | 0.981339299                           | 0.981339299                 | -1.807258442                | -0.06749841  | -0.937378426           |
|               | 1.230196117                           | 2                           | 0                           | 0.975276323  |                        |
| PEX5L         | ENSG00000114757.18                    | 0.195249034                 | 3 3                         | 0.083928778  |                        |
|               | Brain_Caudate_basal_ganglia           | 0.172541538                 | Brain_Putamen_basal_ganglia |              |                        |
|               | 1.617407491                           | 0.511920963                 | 0.511920963                 | -1.728331673 | -1.364082703           |
|               | -1.53525265                           | 0.183110169                 | 3 0                         | 0.975276323  |                        |
| C6orf48       | ENSG00000204387.12                    | 0.195273423                 | 3 3                         | 0.070468244  |                        |
|               | Brain_Caudate_basal_ganglia           | 0.579145331                 | Brain_Cerebellum            | 1.350401802  |                        |
|               | 0.698372269                           | 0.698372269                 | -1.808889034                | 0.554633558  | -0.884691092           |
|               | 1.263161274                           | 3                           | 0                           | 0.975276323  |                        |
| KCNH4         | ENSG00000089558.8                     | 0.1953142                   | 1 1                         | 0.1953142    | Brain_Substantia_nigra |
|               | 0.1953142                             | Brain_Substantia_nigra      | 1 1                         | 1 1          | 1.29501748 1.29501748  |
|               | 1.29501748                            | NA 1                        | 0                           | 0.975276323  |                        |
| GMPPB         | ENSG00000173540.12                    | 0.195331697                 | 13 1                        | 0.123131488  | Brain_Amygdala         |
|               | 0.399617724                           | Brain_Caudate_basal_ganglia | 12.09189657                 | 0.000203054  |                        |

|               |                                       |              |              |              |                                |
|---------------|---------------------------------------|--------------|--------------|--------------|--------------------------------|
|               | 12.09189657                           | 0.842304159  | 1.541761801  | 1.247732268  | 0.186131943                    |
|               | 1                                     | 0            | 0.975276323  |              |                                |
| TBX15         | ENSG00000092607.13                    | 0.195405295  | 1            | 1            | 0.195405295                    |
|               | Brain_Nucleus_accumbens_basal_ganglia | 0.195405295  |              |              |                                |
|               | Brain_Nucleus_accumbens_basal_ganglia | 1            | 1            | 1            | 1.294753449                    |
|               | 1.294753449                           | 1.294753449  | NA           | 1            | 0.975276323                    |
| DLEU1         | ENSG00000176124.11                    | 0.195468616  | 1            | 1            | 0.195468616                    |
|               | Brain_Putamen_basal_ganglia           | 0.195468616  |              |              | Brain_Putamen_basal_ganglia    |
|               | 1                                     | -1.294569973 | -1.294569973 | -1.294569973 | NA                             |
|               | 1                                     | 0            |              |              | 0                              |
|               | 0.975276323                           |              |              |              |                                |
| RP11-192H23.4 | ENSG00000258472.8                     | 0.195474845  | 5            | 4            | 0.045176846                    |
|               | Brain_Hypothalamus                    | 0.825025324  |              |              | Brain_Cortex                   |
|               | 0.089804944                           | 0.256004066  | 0.221086189  | 2.00300412   | 0.889702042                    |
|               | 0.777045256                           | 4            | 0            | 0.975276323  |                                |
| TOMM6         | ENSG00000214736.7                     | 0.195582517  | 1            | 1            | 0.195582517                    |
|               | Brain_Spinal_cord_cervical_c-1        | 0.195582517  |              |              | Brain_Spinal_cord_cervical_c-1 |
|               | 1                                     | 1            | 1            | 1.294240049  | 1.294240049                    |
|               | 1                                     | 1.294240049  | 1.294240049  | 1.294240049  | NA                             |
|               | 1                                     | 0            |              |              | 0                              |
|               | 0.975276323                           |              |              |              |                                |
| POLE3         | ENSG00000148229.12                    | 0.195628146  | 2            | 2            | 0.110001053                    |
|               | Brain_Putamen_basal_ganglia           | 0.452934854  |              |              | Brain_Cerebellum               |
|               | 0.943638376                           | 0.943638376  | 0.750531176  | 1.598188407  | 1.174359792                    |
|               | 0.599384176                           | 2            | 0            | 0.975276323  |                                |
| PPM1M         | ENSG00000164088.17                    | 0.195703077  | 12           | 3            | 0.037562053                    |
|               | Brain_Substantia_nigra                | 8.513668325  |              |              | Brain_Cerebellum               |
|               | 0.953488971                           | 0.012460817  |              |              |                                |
|               | 0.383703517                           | -0.910324873 | 2.079602003  | 0.457913058  | 0.962866412                    |
|               | 3                                     | 0            | 0.975276323  |              |                                |
| UBE3B         | ENSG00000151148.13                    | 0.195750124  | 3            | 3            | 0.058183811                    |
|               | Brain_Cerebellum                      | 2.581879154  |              |              | Brain_Cortex                   |
|               | 0.543386913                           | 0.098400958  | 0.098400958  | 0.098400958  | 0.098400958                    |
|               | 0.607699322                           | 1.894310477  | 1.364725187  | 0.672784495  | 3                              |
|               | 0.975276323                           |              |              |              | 0                              |
| LTA           | ENSG00000226979.8                     | 0.195893894  | 4            | 4            | 0.098047289                    |
|               | Brain_Cerebellar_Hemisphere           | 0.810976229  |              |              | Brain_Cortex                   |
|               | 0.295633549                           | 0.295633549  | -0.239166821 | 1.654394965  | 0.818596332                    |
|               | 0.824064797                           | 4            | 0            | 0.975276323  |                                |
| SELENOT       | ENSG00000198843.12                    | 0.196029892  | 1            | 1            | 0.196029892                    |
|               | Brain_Frontal_Cortex_BA9              | 0.196029892  |              |              | Brain_Frontal_Cortex_BA9       |
|               | 1                                     | 1.29294555   | 1.29294555   | 1.29294555   | NA                             |
|               | 1                                     | 0            | 0.975276323  |              |                                |
| PRPF31        | ENSG00000105618.13                    | 0.196034565  | 2            | 2            | 0.208298558                    |
|               | Brain_Cortex                          | 0.479964814  |              |              | Brain_Cerebellum               |
|               | 0.612821161                           | -0.706359157 | 1.258257744  | 0.275949294  | 0.612821161                    |
|               | 2                                     | 0            | 0.975276323  |              | 1.389193933                    |
| L3MBTL2       | ENSG00000100395.14                    | 0.196062885  | 10           | 4            | 0.12055827                     |
|               | Brain_Frontal_Cortex_BA9              | 7.625632673  |              |              | Brain_Amygdala                 |
|               | 0.293827075                           | -0.858561712 | 1.552434601  | 0.683315799  | 0.002583853                    |
|               | 4                                     | 0            | 0.975276323  |              | 0.766501676                    |
| ANO9          | ENSG00000185101.12                    | 0.196107496  | 1            | 1            | 0.196107496                    |
|               | Brain_Putamen_basal_ganglia           | 0.196107496  |              |              | Brain_Putamen_basal_ganglia    |
|               | 1                                     | 1.29272122   | 1.29272122   | 1.29272122   | NA                             |
|               | 1                                     | 0            | 0.975276323  |              |                                |
| GPN3          | ENSG00000111231.8                     | 0.196240304  | 1            | 1            | 0.196240304                    |
|               | Brain_Spinal_cord_cervical_c-1        | 0.196240304  |              |              | Brain_Spinal_cord_cervical_c-1 |
|               | 1                                     | 1            | 1            | 1.292337463  | 1.292337463                    |
|               | 1                                     | 1.292337463  | 1.292337463  | 1.292337463  | NA                             |
|               | 1                                     | 0            |              |              | 0                              |
|               | 0.975276323                           |              |              |              |                                |
| BRF1          | ENSG00000185024.16                    | 0.196335373  | 1            | 1            | 0.196335373                    |
|               | Brain_Putamen_basal_ganglia           | 0.196335373  |              |              | Brain_Putamen_basal_ganglia    |
|               | 1                                     | -1.292062869 | -1.292062869 | -1.292062869 | NA                             |
|               | 1                                     | 0            |              |              | 0                              |
|               | 0.975276323                           |              |              |              |                                |
| SBSPON        | ENSG00000164764.10                    | 0.196380406  | 3            | 3            | 0.084362561                    |
|               | Brain_Hippocampus                     | 0.487622891  |              |              | Brain_Hypothalamus             |
|               | 0.689290365                           | 0.689290365  | -1.725915803 | 0.96358568   | -0.485474905                   |
|               | 1.356833146                           | 3            | 0            | 0.975276323  |                                |
| SLC46A3       | ENSG00000139508.14                    | 0.196399152  | 7            | 4            | 0.242060757                    |
|               | Brain_Substantia_nigra                | 0.912366549  |              |              | Brain_Cerebellum               |
|               |                                       |              |              |              | 5.562286758                    |

|             |                                       |                                      |              |                                       |              |              |                             |            |  |
|-------------|---------------------------------------|--------------------------------------|--------------|---------------------------------------|--------------|--------------|-----------------------------|------------|--|
|             | 0.0136991                             | 0.274543412                          | -0.8383331   | 1.169851443                           | 0.219162559  |              |                             |            |  |
|             | 0.659711684                           | 4                                    | 0            | 0.975276323                           |              |              |                             |            |  |
| C2orf80     | ENSG00000188674.10                    |                                      | 0.196465132  | 7                                     | 7            | 0.139531613  |                             |            |  |
|             | Brain_Hippocampus                     | 0.971534497                          |              | Brain_Cortex                          | 4.113503079  |              |                             |            |  |
|             | 0.175719874                           | 0.175719874                          | -1.477537502 |                                       | 0.497455471  | -0.454195873 |                             |            |  |
|             | 0.805572559                           | 7                                    | 0            | 0.975276323                           |              |              |                             |            |  |
| FLI1        | ENSG00000151702.16                    |                                      | 0.196483862  | 1                                     | 1            | 0.196483862  |                             |            |  |
|             | Brain_Putamen_basal_ganglia           | 0.196483862                          |              | Brain_Putamen_basal_ganglia           | 1            | 1            |                             |            |  |
|             | 1                                     | -1.291634177                         | -1.291634177 | -1.291634177                          | NA           | 1            | 0                           |            |  |
|             | 0.975276323                           |                                      |              |                                       |              |              |                             |            |  |
| TMEM263     | ENSG00000151135.9                     |                                      | 0.196526736  | 1                                     | 1            | 0.196526736  |                             |            |  |
|             | Brain_Spinal_cord_cervical_c-1        | 0.196526736                          |              | Brain_Spinal_cord_cervical_c-1        |              |              |                             |            |  |
|             | 1                                     | 1                                    | 1.291510445  | 1.291510445                           | 1.291510445  | NA           | 1                           | 0          |  |
|             | 0.975276323                           |                                      |              |                                       |              |              |                             |            |  |
| PLB1        | ENSG00000163803.12                    |                                      | 0.196645266  | 4                                     | 4            | 0.168236366  |                             |            |  |
|             | Brain_Hippocampus                     | 0.929568954                          |              | Brain_Putamen_basal_ganglia           | 1.368245126  |              |                             |            |  |
|             | 0.637054002                           | 0.637054002                          | -1.175201161 |                                       | 1.377892872  | 0.381399784  |                             |            |  |
|             | 1.187388717                           | 4                                    | 0            | 0.975276323                           |              |              |                             |            |  |
| HPCA        | ENSG00000121905.9                     |                                      | 0.19665436   | 1                                     | 1            | 0.19665436   | Brain_Cortex                | 0.19665436 |  |
|             | Brain_Cortex                          | 1                                    | 1            | 1                                     | 1.291142238  | 1.291142238  | 1.291142238                 |            |  |
|             | NA                                    | 1                                    | 0            | 0.975276323                           |              |              |                             |            |  |
| RP11-30K9.6 | ENSG00000245975.2                     |                                      | 0.196670436  | 10                                    | 9            | 0.009309072  |                             |            |  |
|             | Brain_Spinal_cord_cervical_c-1        | 0.601522885                          |              | Brain_Caudate_basal_ganglia           |              |              |                             |            |  |
|             | 4.981739347                           | 0.092402653                          | 0.183093011  |                                       | -2.600490045 | -0.52221178  |                             |            |  |
|             | -1.771332182                          | 0.719132926                          | 9            | 0                                     | 0.975276323  |              |                             |            |  |
| KHDRBS2     | ENSG00000112232.8                     |                                      | 0.196770298  | 3                                     | 3            | 0.031875892  |                             |            |  |
|             | Brain_Frontal_Cortex_BA9              | 0.698169306                          |              | Brain_Cerebellar_Hemisphere           |              |              |                             |            |  |
|             | 1.916584644                           | 0.181229077                          | 0.181229077  |                                       | -2.145963487 | -0.387792892 |                             |            |  |
|             | -1.338879541                          | 0.887887124                          | 3            | 0                                     | 0.975276323  |              |                             |            |  |
| COQ3        | ENSG00000132423.11                    |                                      | 0.196841575  | 3                                     | 3            | 0.074171124  |                             |            |  |
|             | Brain_Nucleus_accumbens_basal_ganglia | 0.692398554                          |              | Brain_Putamen_basal_ganglia           |              |              |                             |            |  |
|             | 1.692968262                           | 0.425069077                          | 0.425069077  |                                       | -1.785556326 | -0.395602145 |                             |            |  |
|             | -1.067701387                          | 0.696105842                          | 3            | 0                                     | 0.975276323  |              |                             |            |  |
| ACTG2       | ENSG00000163017.13                    |                                      | 0.19688945   | 1                                     | 1            | 0.19688945   | Brain_Cerebellar_Hemisphere |            |  |
|             | 0.19688945                            | Brain_Cerebellar_Hemisphere          | 1            | 1                                     | 1            | -1.290464444 |                             |            |  |
|             | -1.290464444                          | -1.290464444                         | NA           | 1                                     | 0            | 0.975276323  |                             |            |  |
| HELZ2       | ENSG00000130589.16                    |                                      | 0.196941941  | 1                                     | 1            | 0.196941941  | Brain_Cerebellum            |            |  |
|             | 0.196941941                           | Brain_Cerebellum                     | 1            | 1                                     | 1            | 1.290313185  | 1.290313185                 |            |  |
|             | 1.290313185                           | NA                                   | 1            | 0                                     | 0.975276323  |              |                             |            |  |
| DOCK5       | ENSG00000147459.17                    |                                      | 0.196975514  | 1                                     | 1            | 0.196975514  |                             |            |  |
|             | Brain_Anterior_cingulate_cortex_BA24  | 0.196975514                          |              |                                       |              |              |                             |            |  |
|             | Brain_Anterior_cingulate_cortex_BA24  | 1                                    | 1            | 1                                     | -1.290216455 |              |                             |            |  |
|             | -1.290216455                          | -1.290216455                         | NA           | 1                                     | 0            | 0.975276323  |                             |            |  |
| PLPP7       | ENSG00000160539.4                     |                                      | 0.197012171  | 1                                     | 1            | 0.197012171  |                             |            |  |
|             | Brain_Putamen_basal_ganglia           | 0.197012171                          |              | Brain_Putamen_basal_ganglia           | 1            | 1            |                             |            |  |
|             | 1                                     | 1.290110855                          | 1.290110855  | 1.290110855                           | NA           | 1            | 0                           |            |  |
|             | 0.975276323                           |                                      |              |                                       |              |              |                             |            |  |
| SIX3-AS1    | ENSG00000236502.1                     |                                      | 0.197034419  | 4                                     | 2            | 0.141709644  |                             |            |  |
|             | Brain_Frontal_Cortex_BA9              | 0.419120099                          |              | Brain_Nucleus_accumbens_basal_ganglia |              |              |                             |            |  |
|             | 2.955216038                           | 0.006847787                          | 0.995044072  |                                       | -1.469454169 | -0.807948727 |                             |            |  |
|             | -1.079922214                          | 0.287235886                          | 2            | 0                                     | 0.975276323  |              |                             |            |  |
| ALOX12B     | ENSG00000179477.9                     |                                      | 0.197062838  | 1                                     | 1            | 0.197062838  |                             |            |  |
|             | Brain_Putamen_basal_ganglia           | 0.197062838                          |              | Brain_Putamen_basal_ganglia           | 1            | 1            |                             |            |  |
|             | 1                                     | -1.289964921                         | -1.289964921 | -1.289964921                          | NA           | 1            | 0                           |            |  |
|             | 0.975276323                           |                                      |              |                                       |              |              |                             |            |  |
| DSC1        | ENSG00000134765.9                     |                                      | 0.197396939  | 3                                     | 3            | 0.040930492  | Brain_Cortex                |            |  |
|             | 0.563278582                           | Brain_Anterior_cingulate_cortex_BA24 | 1.688480307  |                                       |              |              |                             |            |  |
|             | 0.298166275                           | 0.298166275                          | -0.577978578 |                                       | 2.04423343   | 0.813400829  |                             |            |  |
|             | 1.318457588                           | 3                                    | 0            | 0.976584361                           |              |              |                             |            |  |
| PLPPR3      | ENSG00000129951.18                    |                                      | 0.197561124  | 3                                     | 3            | 0.085865632  |                             |            |  |
|             | Brain_Cerebellum                      | 0.6690569                            | Brain_Cortex | 1.162395168                           | 0.81235428   | 0.81235428   |                             |            |  |
|             | 0.427442717                           | 1.717621743                          | 1.020088029  | 0.6514535                             | 3            | 0            |                             |            |  |



0.976995006  
UGP2 ENSG00000169764.15 0.197619603 2 2 0.148378355  
Brain\_Nucleus\_accumbens\_basal\_ganglia 0.316637404 Brain\_Cortex  
1.049489276 0.950510724 0.950510724 -1.001391847 1.445283199  
0.221945676 1.730060516 2 0 0.976995006  
ST8SIA5 ENSG00000101638.13 0.197733576 2 1 0.18462316 Brain\_Cerebellum  
0.222994094 Brain\_Cerebellar\_Hemisphere 1.952442704 0.047557296  
1.952442704 -1.326654011 -1.218605149 -1.27262958 0.076402083  
1 0 0.977086887  
LINC00237 ENSG00000225127.2 0.197903119 1 1 0.197903119  
Brain\_Cortex 0.197903119 Brain\_Cortex 1 1 1 1.287548666  
1.287548666 1.287548666 NA 1 0 0.977086887  
YWHAZ ENSG00000164924.17 0.197968036 9 2 0.038067004  
Brain\_Spinal\_cord\_cervical\_c-1 0.375218892  
Brain\_Anterior\_cingulate\_cortex\_BA24 7.621813724 0.018490906  
0.671534872 -2.074132528 -0.886740011 -1.6284672 0.346146934 2  
0 0.977086887  
BAZ1A ENSG00000198604.10 0.197975065 1 1 0.197975065  
Brain\_Cerebellar\_Hemisphere 0.197975065 Brain\_Cerebellar\_Hemisphere 1 1  
1 1.287342131 1.287342131 1.287342131 NA 1 0  
0.977086887  
PPFIA2 ENSG00000139220.16 0.198042089 5 5 0.061474106  
Brain\_Substantia\_nigra 0.990104195 Brain\_Caudate\_basal\_ganglia  
3.167932444 0.227007101 0.227007101 -0.20905962 1.87006994  
0.758825433 0.861446109 5 0 0.977086887  
ZEB1 ENSG00000148516.21 0.198115385 1 1 0.198115385  
Brain\_Putamen\_basal\_ganglia 0.198115385 Brain\_Putamen\_basal\_ganglia 1 1  
1 -1.286939475 -1.286939475 -1.286939475 NA 1 0  
0.977086887  
APOBR ENSG00000184730.10 0.198174884 1 1 0.198174884 Brain\_Cerebellum  
0.198174884 Brain\_Cerebellum 1 1 1 1.286768802 1.286768802  
1.286768802 NA 1 0 0.977086887  
ACADM ENSG00000117054.13 0.198259538 3 2 0.057894596  
Brain\_Nucleus\_accumbens\_basal\_ganglia 0.987092141 Brain\_Cerebellum 1.92061011  
0.051034553 1.028355337 -1.896495187 -0.016178308 -0.720178511  
1.025285341 2 0 0.977086887  
MPDU1 ENSG00000129255.15 0.198266719 1 1 0.198266719  
Brain\_Cerebellar\_Hemisphere 0.198266719 Brain\_Cerebellar\_Hemisphere 1 1  
1 -1.286505446 -1.286505446 -1.286505446 NA 1 0  
0.977086887  
CXCR1 ENSG00000163464.7 0.198432559 1 1 0.198432559  
Brain\_Substantia\_nigra 0.198432559 Brain\_Substantia\_nigra 1 1  
1 -1.286030094 -1.286030094 -1.286030094 NA 1 0  
0.977559837  
ARFGAP3 ENSG00000242247.10 0.198604801 11 5 0.089429639  
Brain\_Nucleus\_accumbens\_basal\_ganglia 0.726665052 Brain\_Hypothalamus  
8.348229066 0.010178435 0.338773024 -1.698414069 -0.349565173  
-0.848758976 0.500271123 5 0 0.977766913  
RP11-44M6.1 ENSG00000225807.1 0.198614364 1 1 0.198614364  
Brain\_Nucleus\_accumbens\_basal\_ganglia 0.198614364  
Brain\_Nucleus\_accumbens\_basal\_ganglia 1 1 1 -1.285509315  
-1.285509315 -1.285509315 NA 1 0 0.977766913  
TYW3 ENSG00000162623.15 0.198856248 10 6 0.006441526 Brain\_Cerebellum  
0.652302844 Brain\_Putamen\_basal\_ganglia 6.339964159 0.042709835  
0.255876201 -2.724416265 -0.450565351 -1.570759869 0.780292805  
6 0 0.978208199  
C3orf18 ENSG00000088543.14 0.198888482 2 2 0.107371661  
Brain\_Cortex 0.637953957 Brain\_Nucleus\_accumbens\_basal\_ganglia  
1.663342253 0.336657747 0.336657747 -1.610120005 -0.470561429  
-1.040340717 0.805789596 2 0 0.978208199  
RP11-713P17.3 ENSG00000204241.7 0.198913754 10 10 0.030269159  
Brain\_Frontal\_Cortex\_BA9 0.96430127 Brain\_Cerebellar\_Hemisphere 2.787475564

|           |                                       |                                       |                    |              |                                       |             |             |                  |
|-----------|---------------------------------------|---------------------------------------|--------------------|--------------|---------------------------------------|-------------|-------------|------------------|
|           | 0.127312385                           | 0.127312385                           | -1.129521234       | 2.166550321  | 0.128647395                           |             |             |                  |
|           | 1.198801929                           | 10                                    | 0                  | 0.978208199  |                                       |             |             |                  |
| ACACB     | ENSG00000076555.15                    | 0.198994954                           | 1                  | 1            | 0.198994954                           |             |             |                  |
|           | Brain_Cerebellar_Hemisphere           | 0.198994954                           |                    |              | Brain_Cerebellar_Hemisphere           | 1           | 1           |                  |
|           | 1                                     | -1.284420243                          | -1.284420243       | -1.284420243 | NA                                    | 1           | 0           |                  |
|           | 0.978263667                           |                                       |                    |              |                                       |             |             |                  |
| MAN1A2    | ENSG00000198162.12                    | 0.199109528                           | 2                  | 2            | 0.140331782                           |             |             |                  |
|           | Brain_Putamen_basal_ganglia           | 0.196471864                           |                    |              | Brain_Cerebellum                      | 1.192987089 |             |                  |
|           | 0.807012911                           | 0.807012911                           | 1.291668809        | 1.474556631  | 1.38311272                            |             |             |                  |
|           | 0.129321219                           | 2                                     | 0                  | 0.978435021  |                                       |             |             |                  |
| SUSD6     | ENSG00000100647.7                     | 0.199303902                           | 1                  | 1            | 0.199303902                           |             |             |                  |
|           | Brain_Caudate_basal_ganglia           | 0.199303902                           |                    |              | Brain_Caudate_basal_ganglia           | 1           | 1           |                  |
|           | 1                                     | 1.283537295                           | 1.283537295        | 1.283537295  | NA                                    | 1           | 0           |                  |
|           | 0.978435021                           |                                       |                    |              |                                       |             |             |                  |
| MSTO1     | ENSG00000125459.14                    | 0.199624871                           | 2                  | 1            | 0.185172532                           |             |             | Brain_Cerebellum |
|           | 0.218011848                           | Brain_Cerebellar_Hemisphere           | 1.986901092        | 0.013098908  |                                       |             |             |                  |
|           | 1.986901092                           | -1.324995837                          | -1.231831997       | -1.278413917 | 0.065876783                           |             |             |                  |
|           | 1                                     | 0                                     | 0.978435021        |              |                                       |             |             |                  |
| NCLN      | ENSG00000125912.10                    | 0.199703865                           | 12                 | 5            | 0.051617222                           |             |             |                  |
|           | Brain_Frontal_Cortex_BA9              | 0.957086365                           |                    |              | Brain_Cerebellar_Hemisphere           |             |             |                  |
|           | 8.577484622                           | 0.006262787                           | 0.33467304         | -0.919912641 | 1.946312428                           |             |             |                  |
|           | 0.020402962                           | 0.74990941                            | 5                  | 0            | 0.978435021                           |             |             |                  |
| LINC02193 | ENSG00000260923.6                     | 0.199709516                           | 1                  | 1            | 0.199709516                           |             |             |                  |
|           | Brain_Cortex                          | 0.199709516                           | Brain_Cortex       | 1            | 1                                     | 1           | 1.282379603 |                  |
|           | 1.282379603                           | 1.282379603                           | NA                 | 1            | 0                                     | 0.978435021 |             |                  |
| ZNF251    | ENSG00000198169.8                     | 0.199712873                           | 8                  | 4            | 0.128637184                           |             |             |                  |
|           | Brain_Nucleus_accumbens_basal_ganglia | 0.977514478                           |                    |              | Brain_Hypothalamus                    |             |             |                  |
|           | 5.649186276                           | 0.002567504                           | 0.53871088         | -0.30253809  | 1.519498028                           |             |             |                  |
|           | 0.252047263                           | 0.764889364                           | 4                  | 0            | 0.978435021                           |             |             |                  |
| KRT17     | ENSG00000128422.15                    | 0.199719166                           | 3                  | 3            | 0.045982255                           |             |             | Brain_Cerebellum |
|           | 0.827979134                           | Brain_Caudate_basal_ganglia           | 1.232865293        | 0.7733085    | 0.7733085                             |             |             |                  |
|           | 0.217294126                           | 1.995556162                           | 1.011441159        | 0.904223335  | 3                                     | 0           |             |                  |
|           | 0.978435021                           |                                       |                    |              |                                       |             |             |                  |
| ASB13     | ENSG00000196372.12                    | 0.199750521                           | 6                  | 6            | 0.067344976                           |             |             |                  |
|           | Brain_Cerebellar_Hemisphere           | 0.847420734                           |                    |              | Brain_Nucleus_accumbens_basal_ganglia |             |             |                  |
|           | 1.416872617                           | 0.611293726                           | 0.611293726        | -1.829364806 | 1.652013815                           |             |             |                  |
|           | -0.112457444                          | 1.268030502                           | 6                  | 0            | 0.978435021                           |             |             |                  |
| ERC1      | ENSG00000082805.19                    | 0.199863317                           | 2                  | 2            | 0.159991649                           |             |             |                  |
|           | Brain_Anterior_cingulate_cortex_BA24  | 0.225599036                           |                    |              | Brain_Caudate_basal_ganglia           |             |             |                  |
|           | 1.069953867                           | 0.930046133                           | 0.930046133        | 1.211773653  | 1.405099648                           |             |             |                  |
|           | 1.308436651                           | 0.136702122                           | 2                  | 0            | 0.978435021                           |             |             |                  |
| PWP2      | ENSG00000241945.7                     | 0.199866637                           | 13                 | 1            | 0.101059797                           |             |             |                  |
|           | Brain_Spinal_cord_cervical_c-1        | 0.515494026                           |                    |              | Brain_Caudate_basal_ganglia           |             |             |                  |
|           | 12.51995628                           | 0.001176948                           | 12.51995628        | 0.650306861  | 1.639737313                           |             |             |                  |
|           | 1.256079782                           | 0.240976976                           | 1                  | 0            | 0.978435021                           |             |             |                  |
| DEFA3     | ENSG00000239839.6                     | 0.199920356                           | 1                  | 1            | 0.199920356                           |             |             |                  |
|           | Brain_Hypothalamus                    | 0.199920356                           | Brain_Hypothalamus | 1            | 1                                     | 1           |             |                  |
|           | -1.281778505                          | -1.281778505                          | -1.281778505       | NA           | 1                                     | 0           | 0.978435021 |                  |
| SF3A3     | ENSG00000183431.11                    | 0.200015628                           | 4                  | 2            | 0.0938151                             |             |             |                  |
|           | Brain_Putamen_basal_ganglia           | 0.354845258                           |                    |              | Brain_Cerebellar_Hemisphere           |             |             |                  |
|           | 2.997877084                           | 0.003402129                           | 0.987859651        | -1.675607495 | 0.925231968                           |             |             |                  |
|           | -0.976344371                          | 1.268971445                           | 2                  | 0            | 0.978435021                           |             |             |                  |
| SIRT5     | ENSG00000124523.15                    | 0.200047002                           | 8                  | 4            | 0.01708108                            |             |             |                  |
|           | Brain_Putamen_basal_ganglia           | 0.481884406                           |                    |              | Brain_Cerebellum                      | 6.251162327 |             |                  |
|           | 0.00303376                            | 0.288359733                           | -2.384957811       | -0.703274971 | -1.271000961                          |             |             |                  |
|           | 0.507430733                           | 4                                     | 0                  | 0.978435021  |                                       |             |             |                  |
| ISCA1     | ENSG00000135070.14                    | 0.200048054                           | 3                  | 3            | 0.145238861                           |             |             |                  |
|           | Brain_Anterior_cingulate_cortex_BA24  | 0.298716946                           |                    |              | Brain_Substantia_nigra                |             |             |                  |
|           | 1.09345867                            | 0.900969314                           | 0.900969314        | 1.039188783  | 1.456556435                           |             |             |                  |
|           | 1.260999775                           | 0.20991881                            | 3                  | 0            | 0.978435021                           |             |             |                  |
| LINC01011 | ENSG00000244041.7                     | 0.200197547                           | 9                  | 6            | 0.0282091                             |             |             | Brain_Cerebellum |
|           | 0.786637984                           | Brain_Nucleus_accumbens_basal_ganglia | 4.941037226        |              |                                       |             |             |                  |

|              |                                       |                                |                                |              |              |                  |             |             |
|--------------|---------------------------------------|--------------------------------|--------------------------------|--------------|--------------|------------------|-------------|-------------|
|              | 0.039270521                           | 0.438156426                    | -2.194366116                   | -0.27067893  | -1.484097848 |                  |             |             |
|              | 0.588452477                           | 6                              | 0                              | 0.978435021  |              |                  |             |             |
| DRD4         | ENSG00000069696.6                     | 0.200268408                    | 9                              | 6            | 0.011167538  |                  |             |             |
|              | Brain_Hippocampus                     | 0.75606781                     | Brain_Putamen_basal_ganglia    | 4.863923107  |              |                  |             |             |
|              | 0.078524775                           | 0.175652173                    | 0.310648555                    | 2.537412182  | 1.346812017  |                  |             |             |
|              | 0.659934994                           | 6                              | 0                              | 0.978435021  |              |                  |             |             |
| LRR34        | ENSG00000171757.15                    | 0.200302167                    | 3                              | 3            | 0.11170483   |                  |             |             |
|              | Brain_Cerebellar_Hemisphere           | 0.886038636                    | Brain_Cerebellum               | 1.395827803  |              |                  |             |             |
|              | 0.7504027                             | 0.7504027                      | -1.590576885                   | 1.111142639  | -0.207584253 |                  |             |             |
|              | 1.352005792                           | 3                              | 0                              | 0.978435021  |              |                  |             |             |
| RP11-25902.1 | ENSG00000248994.1                     | 0.200350482                    | 2                              | 2            | 0.143842922  |                  |             |             |
|              | Brain_Cortex                          | 0.394412092                    | Brain_Amygdala                 | 1.122651077  | 0.877348923  |                  |             |             |
|              | 0.877348923                           | -1.461628932                   | 0.851643313                    | -0.30499281  | 1.635730491  |                  |             |             |
|              | 2                                     | 0                              | 0.978435021                    |              |              |                  |             |             |
| ATP2B1       | ENSG00000070961.15                    | 0.20036703                     | 3                              | 3            | 0.083724473  | Brain_Cerebellum |             |             |
|              | 0.968983101                           | Brain_Spinal_cord_cervical_c-1 | 1.897319208                    | 0.2076576    |              |                  |             |             |
|              | 0.2076576                             | -0.854392354                   | 1.729473011                    | 0.278732314  | 1.320889856  | 3                |             |             |
|              | 0                                     | 0.978435021                    |                                |              |              |                  |             |             |
| FNDC3B       | ENSG00000075420.12                    | 0.200450904                    | 2                              | 2            | 0.082101052  |                  |             |             |
|              | Brain_Caudate_basal_ganglia           | 0.610799537                    | Brain_Cerebellum               | 1.041197683  |              |                  |             |             |
|              | 0.958802317                           | 0.958802317                    | -1.738623261                   | -0.508932501 | -1.123777881 |                  |             |             |
|              | 0.869522675                           | 2                              | 0                              | 0.978435021  |              |                  |             |             |
| ZNF32        | ENSG00000169740.13                    | 0.200542566                    | 2                              | 2            | 0.073053568  | Brain_Cortex     |             |             |
|              | 0.951880181                           | Brain_Hypothalamus             | 1.022289966                    | 0.977710034  |              |                  |             |             |
|              | 0.977710034                           | -1.792495886                   | 0.060345855                    | -0.866075015 | 1.31015696   | 2                |             |             |
|              | 0                                     | 0.978435021                    |                                |              |              |                  |             |             |
| RP11-88E10.5 | ENSG00000274922.1                     | 0.200585829                    | 1                              | 1            | 0.200585829  |                  |             |             |
|              | Brain_Putamen_basal_ganglia           | 0.200585829                    | Brain_Putamen_basal_ganglia    | 1            | 1            |                  |             |             |
|              | 1                                     | 1.279884303                    | 1.279884303                    | 1.279884303  | NA           | 1                | 0           |             |
|              | 0.978435021                           |                                |                                |              |              |                  |             |             |
| PGM2         | ENSG00000169299.13                    | 0.200684624                    | 11                             | 2            | 0.026992724  | Brain_Cortex     |             |             |
|              | 0.336979296                           | Brain_Hypothalamus             | 9.700876024                    | 0.005878884  |              |                  |             |             |
|              | 0.651261725                           | -2.211623014                   | -0.960150856                   | -1.655649777 | 0.348457901  |                  |             |             |
|              | 2                                     | 0                              | 0.978435021                    |              |              |                  |             |             |
| RNF4         | ENSG00000063978.15                    | 0.200756047                    | 5                              | 5            | 0.028440165  |                  |             |             |
|              | Brain_Putamen_basal_ganglia           | 0.728715109                    | Brain_Amygdala                 | 1.629076311  |              |                  |             |             |
|              | 0.419006717                           | 0.419006717                    | -0.831012591                   | 2.191160707  | 0.936523325  |                  |             |             |
|              | 1.189030854                           | 5                              | 0                              | 0.978435021  |              |                  |             |             |
| RP11-354K4.2 | ENSG00000271945.1                     | 0.200843036                    | 1                              | 1            | 0.200843036  |                  |             |             |
|              | Brain_Hypothalamus                    | 0.200843036                    | Brain_Hypothalamus             | 1            | 1            | 1                |             |             |
|              | 1.279153417                           | 1.279153417                    | 1.279153417                    | NA           | 1            | 0                | 0.978435021 |             |
| PPIH         | ENSG00000171960.10                    | 0.200882891                    | 1                              | 1            | 0.200882891  |                  |             |             |
|              | Brain_Hypothalamus                    | 0.200882891                    | Brain_Hypothalamus             | 1            | 1            | 1                |             |             |
|              | -1.279040227                          | -1.279040227                   | -1.279040227                   | NA           | 1            | 0                | 0.978435021 |             |
| MPV17        | ENSG00000115204.14                    | 0.201007202                    | 1                              | 1            | 0.201007202  |                  |             |             |
|              | Brain_Spinal_cord_cervical_c-1        | 0.201007202                    | Brain_Spinal_cord_cervical_c-1 |              |              |                  |             |             |
|              | 1                                     | 1                              | 1                              | -1.278687277 | -1.278687277 | -1.278687277     | NA          | 1           |
|              | 0.978435021                           |                                |                                |              |              |                  |             | 0           |
| RP11-56F10.3 | ENSG00000254396.1                     | 0.201052301                    | 1                              | 1            | 0.201052301  |                  |             |             |
|              | Brain_Cerebellar_Hemisphere           | 0.201052301                    | Brain_Cerebellar_Hemisphere    | 1            | 1            |                  |             |             |
|              | 1                                     | 1.27855927                     | 1.27855927                     | 1.27855927   | NA           | 1                | 0           | 0.978435021 |
| H2AFY        | ENSG00000113648.16                    | 0.201101178                    | 1                              | 1            | 0.201101178  |                  |             |             |
|              | Brain_Nucleus_accumbens_basal_ganglia | 0.201101178                    |                                |              |              |                  |             |             |
|              | Brain_Nucleus_accumbens_basal_ganglia | 1                              | 1                              | 1            | 1.278420561  |                  |             |             |
|              | 1.278420561                           | 1.278420561                    | NA                             | 1            | 0            | 0.978435021      |             |             |
| ZNF414       | ENSG00000133250.13                    | 0.201127805                    | 3                              | 3            | 0.104982236  |                  |             |             |
|              | Brain_Cerebellum                      | 0.62329697                     | Brain_Cortex                   | 2.223681069  | 0.262981301  |                  |             |             |
|              | 0.262981301                           | -1.621165098                   | -0.491183072                   | -1.141714965 | 0.584094659  |                  |             |             |
|              | 3                                     | 0                              | 0.978435021                    |              |              |                  |             |             |
| GIPR         | ENSG00000010310.8                     | 0.201353438                    | 1                              | 1            | 0.201353438  |                  |             |             |
|              | Brain_Hippocampus                     | 0.201353438                    | Brain_Hippocampus              | 1            | 1            | 1                |             |             |
|              | -1.277705068                          | -1.277705068                   | -1.277705068                   | NA           | 1            | 0                | 0.978731946 |             |

|               |                                       |                                       |                                |              |                                      |             |   |                  |              |
|---------------|---------------------------------------|---------------------------------------|--------------------------------|--------------|--------------------------------------|-------------|---|------------------|--------------|
| VSNL1         | ENSG00000163032.11                    | 0.201427574                           | 1                              | 1            | 0.201427574                          |             |   |                  |              |
|               | Brain_Frontal_Cortex_BA9              | 0.201427574                           |                                |              | Brain_Frontal_Cortex_BA9             | 1           | 1 |                  |              |
|               | 1                                     | 1.277494916                           | 1.277494916                    | 1.277494916  | NA                                   | 1           | 0 |                  |              |
|               | 0.978731946                           |                                       |                                |              |                                      |             |   |                  |              |
| ATP2C1        | ENSG0000017260.19                     | 0.201462089                           | 4                              | 3            | 0.152981045                          |             |   |                  |              |
|               | Brain_Nucleus_accumbens_basal_ganglia | 0.803975068                           |                                |              | Brain_Frontal_Cortex_BA9             |             |   |                  |              |
|               | 2.544157539                           | 0.069480072                           | 0.392444549                    | -0.248205943 | 1.429080682                          |             |   |                  |              |
|               | 0.680008024                           | 0.801598369                           | 3                              | 0            | 0.978731946                          |             |   |                  |              |
| TPSB2         | ENSG00000197253.13                    | 0.201672492                           | 12                             | 3            | 0.135513745                          |             |   |                  |              |
|               | Brain_Spinal_cord_cervical_c-1        | 0.970288583                           |                                |              | Brain_Substantia_nigra               |             |   |                  |              |
|               | 9.631990819                           | 0.003611193                           | 0.673891639                    | -0.682423125 | 1.492707594                          |             |   |                  |              |
|               | -0.173727973                          | 0.618579213                           | 3                              | 0            | 0.978731946                          |             |   |                  |              |
| DIRC2         | ENSG00000138463.8                     | 0.201728198                           | 2                              | 2            | 0.073726193                          |             |   | Brain_Cerebellum |              |
|               | 0.896503286                           | Brain_Nucleus_accumbens_basal_ganglia | 1.039122588                    |              |                                      |             |   |                  |              |
|               | 0.960877412                           | 0.960877412                           | -1.78830885                    | -0.130079807 | -0.959194328                         |             |   |                  |              |
|               | 1.172545001                           | 2                                     | 0                              | 0.978731946  |                                      |             |   |                  |              |
| RBM17         | ENSG00000134453.15                    | 0.201738672                           | 2                              | 2            | 0.076183469                          |             |   |                  |              |
|               | Brain_Putamen_basal_ganglia           | 0.799707318                           |                                |              | Brain_Frontal_Cortex_BA9             |             |   |                  |              |
|               | 1.272692942                           | 0.727307058                           | 0.727307058                    | 0.253725907  | 1.773273073                          |             |   |                  |              |
|               | 1.01349949                            | 1.074482106                           | 2                              | 0            | 0.978731946                          |             |   |                  |              |
| C6orf58       | ENSG00000184530.8                     | 0.201750169                           | 1                              | 1            | 0.201750169                          |             |   |                  |              |
|               | Brain_Frontal_Cortex_BA9              | 0.201750169                           |                                |              | Brain_Frontal_Cortex_BA9             | 1           | 1 |                  |              |
|               | 1                                     | -1.276581125                          | -1.276581125                   | -1.276581125 | NA                                   | 1           | 0 |                  |              |
|               | 0.978731946                           |                                       |                                |              |                                      |             |   |                  |              |
| HYLS1         | ENSG00000198331.10                    | 0.201771586                           | 2                              | 2            | 0.145030634                          |             |   |                  |              |
|               | Brain_Substantia_nigra                | 0.317348831                           |                                |              | Brain_Anterior_cingulate_cortex_BA24 |             |   |                  |              |
|               | 1.025903804                           | 0.974096196                           | 0.974096196                    | -0.999920814 | 1.457310701                          |             |   |                  |              |
|               | 0.228694944                           | 1.737525067                           | 2                              | 0            | 0.978731946                          |             |   |                  |              |
| RP11-234B24.2 | ENSG00000255474.1                     | 0.201818431                           | 3                              | 3            | 0.100733041                          |             |   |                  |              |
|               | Brain_Cerebellum                      | 0.750700591                           |                                |              | Brain_Cerebellar_Hemisphere          | 1.161106234 |   |                  |              |
|               | 0.872514212                           | 0.872514212                           | -1.266998208                   | 1.641310194  | 0.018865424                          |             |   |                  |              |
|               | 1.483081113                           | 3                                     | 0                              | 0.978731946  |                                      |             |   |                  |              |
| THOC5         | ENSG00000100296.13                    | 0.202095176                           | 2                              | 2            | 0.305017894                          |             |   |                  |              |
|               | Brain_Caudate_basal_ganglia           | 0.939884891                           |                                |              | Brain_Cortex                         | 1.794233923 |   |                  |              |
|               | 0.205766077                           | 0.205766077                           | -1.025732069                   | 0.07541454   | -0.475158765                         |             |   |                  |              |
|               | 0.778628234                           | 2                                     | 0                              | 0.979476941  |                                      |             |   |                  |              |
| KIF12         | ENSG00000136883.13                    | 0.20217207                            | 7                              | 4            | 0.015514908                          |             |   |                  |              |
|               | Brain_Caudate_basal_ganglia           | 0.646187159                           |                                |              | Brain_Putamen_basal_ganglia          |             |   |                  |              |
|               | 4.680746848                           | 0.003384181                           | 0.517328919                    | -1.313048895 | 2.420131207                          |             |   |                  |              |
|               | 0.832932562                           | 1.612701094                           | 4                              | 0            | 0.979476941                          |             |   |                  |              |
| CTC-304I17.6  | ENSG00000279668.2                     | 0.202182075                           | 4                              | 3            | 0.092730423                          |             |   |                  |              |
|               | Brain_Amygdala                        | 0.675384825                           |                                |              | Brain_Cerebellar_Hemisphere          | 2.060167408 |   |                  |              |
|               | 0.018799049                           | 0.907482463                           | -1.681167303                   | 0.441355059  | -0.507602898                         |             |   |                  |              |
|               | 1.099759803                           | 3                                     | 0                              | 0.979476941  |                                      |             |   |                  |              |
| LRRN2         | ENSG00000170382.11                    | 0.202407918                           | 2                              | 2            | 0.197291507                          |             |   |                  |              |
|               | Brain_Caudate_basal_ganglia           | 0.204115466                           |                                |              | Brain_Putamen_basal_ganglia          |             |   |                  |              |
|               | 1.025058666                           | 0.974941334                           | 0.974941334                    | -1.289306629 | 1.269913437                          |             |   |                  |              |
|               | -0.009696596                          | 1.809641864                           | 2                              | 0            | 0.979511814                          |             |   |                  |              |
| LINC02043     | ENSG00000232233.1                     | 0.202517917                           | 1                              | 1            | 0.202517917                          |             |   |                  |              |
|               | Brain_Cerebellum                      | 0.202517917                           |                                |              | Brain_Cerebellum                     | 1           | 1 | 1                | -1.274410658 |
|               | -1.274410658                          | -1.274410658                          | NA                             | 1            | 0                                    | 0.979511814 |   |                  |              |
| NDUFAF5       | ENSG00000101247.17                    | 0.202529624                           | 4                              | 4            | 0.103707188                          |             |   |                  |              |
|               | Brain_Cortex                          | 0.70177093                            | Brain_Spinal_cord_cervical_c-1 | 2.120431552  |                                      |             |   |                  |              |
|               | 0.272092867                           | 0.272092867                           | -0.382930993                   | 1.627140844  | 0.795247562                          |             |   |                  |              |
|               | 0.879107399                           | 4                                     | 0                              | 0.979511814  |                                      |             |   |                  |              |
| CECR2         | ENSG00000099954.18                    | 0.202544128                           | 3                              | 2            | 0.073214309                          |             |   | Brain_Cerebellum |              |
|               | 0.912929756                           | Brain_Caudate_basal_ganglia           | 1.978107327                    | 0.021859553  |                                      |             |   |                  |              |
|               | 1.00003312                            | -0.109343864                          | 1.791492424                    | 1.146089403  | 1.087380948                          |             |   | 2                |              |
|               | 0                                     | 0.979511814                           |                                |              |                                      |             |   |                  |              |
| EPHA5         | ENSG00000145242.13                    | 0.202556904                           | 3                              | 3            | 0.123421672                          |             |   |                  |              |
|               | Brain_Nucleus_accumbens_basal_ganglia | 0.669337383                           |                                |              | Brain_Cerebellar_Hemisphere          |             |   |                  |              |
|               | 2.006442444                           | 0.082110544                           | 0.082110544                    | -1.540569189 | 0.830236272                          |             |   |                  |              |

|          |                                      |                                      |                                |              |              |                   |              |  |
|----------|--------------------------------------|--------------------------------------|--------------------------------|--------------|--------------|-------------------|--------------|--|
|          | -0.094425109                         | 1.268517949                          | 3                              | 0            | 0.979511814  |                   |              |  |
| CYB5R4   | ENSG00000065615.13                   | 0.202609334                          | 1                              | 1            | 0.202609334  |                   |              |  |
|          | Brain_Cerebellum                     | 0.202609334                          | Brain_Cerebellum               | 1            | 1            | 1                 | -1.274152618 |  |
|          | -1.274152618                         | -1.274152618                         | NA                             | 1            | 0            | 0.979511814       |              |  |
| CD300C   | ENSG00000167850.3                    | 0.202806538                          | 1                              | 1            | 0.202806538  |                   |              |  |
|          | Brain_Frontal_Cortex_BA9             | 0.202806538                          | Brain_Frontal_Cortex_BA9       | 1            | 1            | 1                 | 1            |  |
|          | 1                                    | 1.273596262                          | 1.273596262                    | 1.273596262  | NA           | 1                 | 0            |  |
|          | 0.979708282                          |                                      |                                |              |              |                   |              |  |
| NOD2     | ENSG00000167207.11                   | 0.203006593                          | 1                              | 1            | 0.203006593  | Brain_Cerebellum  |              |  |
|          | 0.203006593                          | Brain_Cerebellum                     | 1                              | 1            | -1.273032265 | -1.273032265      |              |  |
|          | -1.273032265                         | NA                                   | 1                              | 0            | 0.979708282  |                   |              |  |
| NEUROD2  | ENSG00000171532.4                    | 0.203072082                          | 1                              | 1            | 0.203072082  |                   |              |  |
|          | Brain_Hypothalamus                   | 0.203072082                          | Brain_Hypothalamus             | 1            | 1            | 1                 |              |  |
|          | -1.272847726                         | -1.272847726                         | -1.272847726                   | NA           | 1            | 0                 | 0.979708282  |  |
| RNF8     | ENSG00000112130.16                   | 0.203082325                          | 8                              | 8            | 0.098613882  |                   |              |  |
|          | Brain_Hypothalamus                   | 0.936971464                          | Brain_Cerebellum               | 2.439385083  |              |                   |              |  |
|          | 0.260969558                          | 0.260969558                          | -1.198018312                   | 1.65161097   | -0.391377756 |                   |              |  |
|          | 0.988459197                          | 8                                    | 0                              | 0.979708282  |              |                   |              |  |
| ACAP2    | ENSG00000114331.13                   | 0.203125597                          | 11                             | 6            | 0.071868064  | Brain_Amygdala    |              |  |
|          | 0.857835596                          | Brain_Anterior_cingulate_cortex_BA24 | 6.838293435                    | 0.012766     |              |                   |              |  |
|          | 0.291507207                          | -1.799952972                         | 0.955275116                    | 0.191566057  | 0.752833015  |                   |              |  |
|          | 6                                    | 0                                    | 0.979708282                    |              |              |                   |              |  |
| RNF187   | ENSG00000168159.11                   | 0.203158321                          | 1                              | 1            | 0.203158321  |                   |              |  |
|          | Brain_Cerebellum                     | 0.203158321                          | Brain_Cerebellum               | 1            | 1            | 1                 | 1.272604781  |  |
|          | 1.272604781                          | 1.272604781                          | NA                             | 1            | 0            | 0.979708282       |              |  |
| DUOXA1   | ENSG00000140254.12                   | 0.203266954                          | 4                              | 4            | 0.01895869   |                   |              |  |
|          | Brain_Hippocampus                    | 0.96844073                           | Brain_Substantia_nigra         | 1.670483975  |              |                   |              |  |
|          | 0.36066569                           | 0.36066569                           | 0.039563999                    | 2.346342236  | 1.03498969   | 1.156322217       |              |  |
|          | 4                                    | 0                                    | 0.979708282                    |              |              |                   |              |  |
| MRPL45   | ENSG00000278845.4                    | 0.203428271                          | 6                              | 5            | 0.186725297  |                   |              |  |
|          | Brain_Hypothalamus                   | 0.939914418                          | Brain_Frontal_Cortex_BA9       | 2.880193058  |              |                   |              |  |
|          | 0.043882929                          | 0.28625541                           | -0.527523743                   | 1.320328701  | 0.192114083  |                   |              |  |
|          | 0.799417939                          | 5                                    | 0                              | 0.979708282  |              |                   |              |  |
| NADK     | ENSG00000008130.15                   | 0.203581188                          | 8                              | 8            | 0.034923763  |                   |              |  |
|          | Brain_Caudate_basal_ganglia          | 0.990858719                          | Brain_Cerebellum               | 2.021759294  |              |                   |              |  |
|          | 0.209694109                          | 0.209694109                          | -2.109241247                   | 0.011457148  | -0.854602387 |                   |              |  |
|          | 0.825075869                          | 8                                    | 0                              | 0.979708282  |              |                   |              |  |
| ADRA2B   | ENSG00000274286.1                    | 0.203647116                          | 3                              | 2            | 0.111082845  |                   |              |  |
|          | Brain_Cerebellum                     | 0.982762136                          | Brain_Spinal_cord_cervical_c-1 | 2.308667459  |              |                   |              |  |
|          | 0.001292637                          | 0.690039904                          | -1.593344876                   | 0.02160614   | -1.047709967 |                   |              |  |
|          | 0.926119967                          | 2                                    | 0                              | 0.979708282  |              |                   |              |  |
| DHDDS    | ENSG00000117682.16                   | 0.20368681                           | 5                              | 5            | 0.171727043  | Brain_Hippocampus |              |  |
|          | 0.781133603                          | Brain_Cerebellum                     | 1.945148393                    | 0.129291464  | 0.129291464  |                   |              |  |
|          | -0.755719267                         | 1.366675494                          | 0.136461803                    | 0.841188598  | 5            | 0                 |              |  |
|          | 0.979708282                          |                                      |                                |              |              |                   |              |  |
| IFNE     | ENSG00000184995.7                    | 0.203792261                          | 3                              | 3            | 0.035307767  |                   |              |  |
|          | Brain_Anterior_cingulate_cortex_BA24 | 0.680832485                          | Brain_Cerebellum               |              |              |                   |              |  |
|          | 1.905894079                          | 0.094218128                          | 0.094218128                    | -0.431584863 | 2.104810953  |                   |              |  |
|          | 0.420632899                          | 1.458576148                          | 3                              | 0            | 0.979708282  |                   |              |  |
| C12orf76 | ENSG00000174456.13                   | 0.203824004                          | 2                              | 2            | 0.358150559  |                   |              |  |
|          | Brain_Cerebellar_Hemisphere          | 0.549102374                          | Brain_Hippocampus              | 1.634200047  |              |                   |              |  |
|          | 0.365799953                          | 0.365799953                          | -0.918894879                   | 0.59910574   | -0.159894569 |                   |              |  |
|          | 1.073388531                          | 2                                    | 0                              | 0.979708282  |              |                   |              |  |
| PRKAR1B  | ENSG00000188191.14                   | 0.203836475                          | 2                              | 2            | 0.094069025  |                   |              |  |
|          | Brain_Cerebellum                     | 0.805994173                          | Brain_Putamen_basal_ganglia    | 1.211962426  |              |                   |              |  |
|          | 0.788037574                          | 0.788037574                          | 0.24559705                     | 1.674313387  | 0.959955218  |                   |              |  |
|          | 1.010255011                          | 2                                    | 0                              | 0.979708282  |              |                   |              |  |
| CCDC102A | ENSG00000135736.5                    | 0.203992027                          | 1                              | 1            | 0.203992027  |                   |              |  |
|          | Brain_Substantia_nigra               | 0.203992027                          | Brain_Substantia_nigra         | 1            | 1            |                   |              |  |
|          | 1                                    | 1.270260013                          | 1.270260013                    | 1.270260013  | NA           | 1                 | 0            |  |
|          | 0.979708282                          |                                      |                                |              |              |                   |              |  |
| ARHGAP27 | ENSG00000159314.11                   | 0.204089089                          | 6                              | 5            | 0.086320344  |                   |              |  |

|              |                                       |                             |              |                                      |              |              |             |                  |
|--------------|---------------------------------------|-----------------------------|--------------|--------------------------------------|--------------|--------------|-------------|------------------|
|              | Brain_Cortex                          | 0.968492812                 |              | Brain_Caudate_basal_ganglia          | 2.894595362  |              |             |                  |
|              | 0.069623054                           | 0.141851224                 |              | -1.715135732                         | 0.81395936   | -0.473373919 |             |                  |
|              | 0.853163082                           | 5                           | 0            | 0.979708282                          |              |              |             |                  |
| FAM151A      | ENSG00000162391.11                    | 0.204135955                 | 2            | 2                                    | 0.173478706  |              |             |                  |
|              | Brain_Substantia_nigra                | 0.817457177                 |              | Brain_Anterior_cingulate_cortex_BA24 |              |              |             |                  |
|              | 1.541488752                           | 0.458511248                 | 0.458511248  | -0.230816739                         | 1.361110709  |              |             |                  |
|              | 0.565146985                           | 1.125662694                 | 2            | 0                                    | 0.979708282  |              |             |                  |
| LARGE2       | ENSG00000165905.17                    | 0.204172399                 | 1            | 1                                    | 0.204172399  |              |             |                  |
|              | Brain_Cortex                          | 0.204172399                 |              | Brain_Cortex                         | 1            | 1            | 1           | 1.269753642      |
|              | 1.269753642                           | 1.269753642                 | NA           | 1                                    | 0            | 0.979708282  |             |                  |
| MKX          | ENSG00000150051.13                    | 0.204279765                 | 3            | 3                                    | 0.084215187  |              |             |                  |
|              | Brain_Nucleus_accumbens_basal_ganglia | 0.948645384                 |              | Brain_Cerebellum                     |              |              |             |                  |
|              | 1.162611208                           | 0.816865141                 | 0.816865141  | -0.06440797                          | 1.726735445  |              |             |                  |
|              | 0.987293436                           | 0.935509557                 | 3            | 0                                    | 0.979708282  |              |             |                  |
| C21orf33     | ENSG00000160221.16                    | 0.204311203                 | 13           | 1                                    | 0.118538737  |              |             |                  |
|              | Brain_Substantia_nigra                | 0.365363201                 |              | Brain_Cerebellar_Hemisphere          |              |              |             |                  |
|              | 12.63346301                           | 0.000298515                 | 12.63346301  | 0.905192903                          | 1.560936488  |              |             |                  |
|              | 1.250375726                           | 0.187681218                 | 1            | 0                                    | 0.979708282  |              |             |                  |
| RP11-253E3.3 | ENSG00000250899.3                     | 0.2043941                   | 1            | 1                                    | 0.2043941    |              |             |                  |
|              | Brain_Hippocampus                     | 0.2043941                   |              | Brain_Hippocampus                    | 1            | 1            | 1           |                  |
|              | 1.269131689                           | 1.269131689                 | 1.269131689  | NA                                   | 1            | 0            | 0.979708282 |                  |
| CTD-2587M2.1 | ENSG00000249476.1                     | 0.204413884                 | 11           | 5                                    | 0.022067144  |              |             |                  |
|              | Brain_Spinal_cord_cervical_c-1        | 0.976345616                 |              | Brain_Frontal_Cortex_BA9             |              |              |             |                  |
|              | 7.582333372                           | 0.008628105                 | 0.379930026  | -0.039136603                         | 2.289210175  |              |             |                  |
|              | 1.2855947                             | 0.750885635                 | 5            | 0                                    | 0.979708282  |              |             |                  |
| RRS1         | ENSG00000179041.3                     | 0.204461908                 | 2            | 2                                    | 0.084542724  |              |             |                  |
|              | Brain_Spinal_cord_cervical_c-1        | 0.618093514                 |              | Brain_Putamen_basal_ganglia          |              |              |             |                  |
|              | 1.030262696                           | 0.969737304                 | 0.969737304  | 0.498554148                          | 1.724915376  |              |             |                  |
|              | 1.111734762                           | 0.86716834                  | 2            | 0                                    | 0.979708282  |              |             |                  |
| KIAA1257     | ENSG00000114656.10                    | 0.204534454                 | 2            | 2                                    | 0.075751923  |              |             |                  |
|              | Brain_Cortex                          | 0.966219005                 |              | Brain_Substantia_nigra               | 1.103588857  |              |             |                  |
|              | 0.896411143                           | 0.896411143                 | 0.042350855  | 1.775884702                          | 0.909117779  |              |             |                  |
|              | 1.225793539                           | 2                           | 0            | 0.979708282                          |              |              |             |                  |
| PHLDA2       | ENSG00000181649.5                     | 0.20456243                  | 1            | 1                                    | 0.20456243   |              |             |                  |
|              | Brain_Frontal_Cortex_BA9              | 0.20456243                  |              | Brain_Frontal_Cortex_BA9             | 1            | 1            | 1           |                  |
|              | -1.268659788                          | -1.268659788                | -1.268659788 | NA                                   | 1            | 0            | 0.979708282 |                  |
| PTK2B        | ENSG00000120899.17                    | 0.204580726                 | 2            | 2                                    | 0.092751682  |              |             | Brain_Cerebellum |
|              | 0.753201612                           | Brain_Putamen_basal_ganglia | 1.159220745  | 0.840779255                          |              |              |             |                  |
|              | 0.840779255                           | -0.314420601                | 1.681057831  | 0.683318615                          | 1.411016331  |              |             |                  |
|              | 2                                     | 0                           | 0.979708282  |                                      |              |              |             |                  |
| TRAPPC2L     | ENSG00000167515.10                    | 0.204736112                 | 4            | 4                                    | 0.076895149  |              |             |                  |
|              | Brain_Cerebellum                      | 0.591283357                 |              | Brain_Cerebellar_Hemisphere          | 2.692437342  |              |             |                  |
|              | 0.114213368                           | 0.114213368                 | -0.536977209 | 1.768992361                          | 1.075516656  |              |             |                  |
|              | 1.080781966                           | 4                           | 0            | 0.979708282                          |              |              |             |                  |
| ACPT         | ENSG00000142513.5                     | 0.204979002                 | 3            | 3                                    | 0.120385384  |              |             |                  |
|              | Brain_Hippocampus                     | 0.557853166                 |              | Brain_Cerebellar_Hemisphere          | 1.483423153  |              |             |                  |
|              | 0.505118174                           | 0.505118174                 | 0.586033258  | 1.553158034                          | 1.178118537  |              |             |                  |
|              | 0.518810405                           | 3                           | 0            | 0.979708282                          |              |              |             |                  |
| SLC38A6      | ENSG00000139974.15                    | 0.205034261                 | 1            | 1                                    | 0.205034261  |              |             |                  |
|              | Brain_Cortex                          | 0.205034261                 |              | Brain_Cortex                         | 1            | 1            | 1           | -1.267338553     |
|              | -1.267338553                          | -1.267338553                | NA           | 1                                    | 0            | 0.979708282  |             |                  |
| DNAL1        | ENSG00000119661.14                    | 0.205080301                 | 5            | 4                                    | 0.169964533  |              |             |                  |
|              | Brain_Hippocampus                     | 0.963393654                 |              | Brain_Frontal_Cortex_BA9             | 3.743324897  |              |             |                  |
|              | 0.039284345                           | 0.208513143                 | -1.372317781 | 0.045895358                          | -0.609748187 |              |             |                  |
|              | 0.630014946                           | 4                           | 0            | 0.979708282                          |              |              |             |                  |
| NUP54        | ENSG00000138750.14                    | 0.205122201                 | 13           | 4                                    | 0.048662071  |              |             |                  |
|              | Brain_Frontal_Cortex_BA9              | 0.807869649                 |              | Brain_Cerebellar_Hemisphere          |              |              |             |                  |
|              | 10.03048119                           | 0.001611634                 | 0.548538248  | -0.709381099                         | 1.971540624  |              |             |                  |
|              | 0.627150764                           | 0.722396017                 | 4            | 0                                    | 0.979708282  |              |             |                  |
| PHF2         | ENSG00000197724.10                    | 0.205159594                 | 1            | 1                                    | 0.205159594  |              |             | Brain_Cerebellum |
|              | 0.205159594                           | Brain_Cerebellum            | 1            | 1                                    | 1.266987963  | 1.266987963  |             |                  |
|              | 1.266987963                           | NA                          | 1            | 0                                    | 0.979708282  |              |             |                  |

|               |                                       |                                      |                                      |              |              |                  |
|---------------|---------------------------------------|--------------------------------------|--------------------------------------|--------------|--------------|------------------|
| BCCIP         | ENSG00000107949.16                    | 0.205179302                          | 1                                    | 1            | 0.205179302  | Brain_Cerebellum |
|               | 0.205179302                           | Brain_Cerebellum                     | 1                                    | 1            | 1.266932849  | 1.266932849      |
|               | 1.266932849                           | NA                                   | 1                                    | 0            | 0.979708282  |                  |
| TBC1D4        | ENSG00000136111.12                    | 0.205197616                          | 9                                    | 5            | 0.028351185  |                  |
|               | Brain_Hypothalamus                    | 0.904372344                          | Brain_Putamen_basal_ganglia          | 6.077618004  |              |                  |
|               | 0.044976596                           | 0.24960495                           | 0.120139877                          | 2.192392395  | 0.716387649  |                  |
|               | 0.62960865                            | 5                                    | 0                                    | 0.979708282  |              |                  |
| TNFAIP6       | ENSG00000123610.4                     | 0.205199929                          | 7                                    | 5            | 0.013392368  |                  |
|               | Brain_Nucleus_accumbens_basal_ganglia | 0.251167794                          | Brain_Putamen_basal_ganglia          |              |              |                  |
|               | 4.956498574                           | 0.03283248                           | 0.173794728                          | -2.473161302 | -1.147517526 |                  |
|               | -1.793879845                          | 0.455218035                          | 5                                    | 0            | 0.979708282  |                  |
| HIC1          | ENSG00000177374.12                    | 0.205243531                          | 1                                    | 1            | 0.205243531  |                  |
|               | Brain_Hypothalamus                    | 0.205243531                          | Brain_Hypothalamus                   | 1            | 1            | 1                |
|               | -1.266753256                          | -1.266753256                         | -1.266753256                         | NA           | 1            | 0                |
|               |                                       |                                      |                                      |              | 0.979708282  |                  |
| PPIL1         | ENSG00000137168.7                     | 0.205244731                          | 1                                    | 1            | 0.205244731  |                  |
|               | Brain_Anterior_cingulate_cortex_BA24  | 0.205244731                          |                                      |              |              |                  |
|               | Brain_Anterior_cingulate_cortex_BA24  | 1                                    | 1                                    | 1            | 1.266749901  |                  |
|               | 1.266749901                           | 1.266749901                          | NA                                   | 1            | 0            | 0.979708282      |
| CS            | ENSG00000062485.18                    | 0.205424185                          | 1                                    | 1            | 0.205424185  |                  |
|               | Brain_Spinal_cord_cervical_c-1        | 0.205424185                          | Brain_Spinal_cord_cervical_c-1       |              |              |                  |
|               | 1                                     | 1                                    | 1                                    | -1.266248343 | -1.266248343 | -1.266248343     |
|               |                                       |                                      |                                      |              | NA           | 1                |
|               |                                       |                                      |                                      |              |              | 0                |
|               |                                       |                                      |                                      |              |              | 0.979708282      |
| INTS8         | ENSG00000164941.13                    | 0.205521895                          | 5                                    | 4            | 0.046186894  |                  |
|               | Brain_Cerebellar_Hemisphere           | 0.976394234                          | Brain_Anterior_cingulate_cortex_BA24 |              |              |                  |
|               | 2.301964868                           | 0.021294939                          | 0.738325838                          | 0.029589757  | 1.993681304  |                  |
|               | 1.260749204                           | 0.868920564                          | 4                                    | 0            | 0.979708282  |                  |
| SFXN5         | ENSG00000144040.12                    | 0.205550613                          | 6                                    | 4            | 0.036445143  | Brain_Cerebellum |
|               | 0.510114782                           | Brain_Anterior_cingulate_cortex_BA24 | 4.554038333                          |              |              |                  |
|               | 0.022243339                           | 0.202215405                          | 0.658658976                          | 2.09192592   | 1.440967728  |                  |
|               | 0.595882726                           | 4                                    | 0                                    | 0.979708282  |              |                  |
| LINC00667     | ENSG00000263753.6                     | 0.205729433                          | 12                                   | 7            | 0.015257178  |                  |
|               | Brain_Amygdala                        | 0.936500453                          | Brain_Anterior_cingulate_cortex_BA24 |              |              |                  |
|               | 6.741825229                           | 0.024411152                          | 0.274148896                          | -2.426216203 | -0.079669079 |                  |
|               | -0.89962192                           | 0.612197771                          | 7                                    | 0            | 0.979708282  |                  |
| PSMF1         | ENSG00000125818.17                    | 0.205789877                          | 10                                   | 3            | 0.079014217  |                  |
|               | Brain_Caudate_basal_ganglia           | 0.872203079                          | Brain_Anterior_cingulate_cortex_BA24 |              |              |                  |
|               | 8.261989488                           | 0.000569405                          | 0.622754678                          | 0.160860747  | 1.756434672  |                  |
|               | 1.359561906                           | 0.456822979                          | 3                                    | 0            | 0.979708282  |                  |
| RP11-70P17.1  | ENSG00000225643.1                     | 0.20581839                           | 1                                    | 1            | 0.20581839   |                  |
|               | Brain_Hippocampus                     | 0.20581839                           | Brain_Hippocampus                    | 1            | 1            | 1                |
|               | 1.265147691                           | 1.265147691                          | 1.265147691                          | NA           | 1            | 0                |
|               |                                       |                                      |                                      |              | 0.979708282  |                  |
| ZNF692        | ENSG00000171163.15                    | 0.205870763                          | 1                                    | 1            | 0.205870763  |                  |
|               | Brain_Cerebellum                      | 0.205870763                          | Brain_Cerebellum                     | 1            | 1            | 1.265001577      |
|               | 1.265001577                           | 1.265001577                          | NA                                   | 1            | 0            | 0.979708282      |
| RP11-732A21.3 | ENSG00000277459.1                     | 0.205887347                          | 1                                    | 1            | 0.205887347  |                  |
|               | Brain_Amygdala                        | 0.205887347                          | Brain_Amygdala                       | 1            | 1            | 1.264955313      |
|               | 1.264955313                           | 1.264955313                          | NA                                   | 1            | 0            | 0.979708282      |
| PAH           | ENSG00000171759.9                     | 0.205918515                          | 8                                    | 8            | 0.126158156  |                  |
|               | Brain_Hypothalamus                    | 0.708684794                          | Brain_Frontal_Cortex_BA9             | 2.81809963   |              |                  |
|               | 0.196442098                           | 0.196442098                          | -1.4755987                           | 1.529428888  | 0.08865564   |                  |
|               | 1.107209248                           | 8                                    | 0                                    | 0.979708282  |              |                  |
| CYP7B1        | ENSG00000172817.3                     | 0.205941109                          | 2                                    | 2            | 0.081521214  |                  |
|               | Brain_Cerebellar_Hemisphere           | 0.722546456                          | Brain_Cerebellum                     | 1.000036865  |              |                  |
|               | 0.999963135                           | 0.999963135                          | -1.741927028                         | -0.355057579 | -1.048492303 |                  |
|               | 0.980664792                           | 2                                    | 0                                    | 0.979708282  |              |                  |
| RGS7BP        | ENSG00000186479.4                     | 0.206196972                          | 1                                    | 1            | 0.206196972  |                  |
|               | Brain_Cerebellum                      | 0.206196972                          | Brain_Cerebellum                     | 1            | 1            | 1.264092099      |
|               | 1.264092099                           | 1.264092099                          | NA                                   | 1            | 0            | 0.980246923      |
| ASPRV1        | ENSG00000244617.2                     | 0.206320433                          | 4                                    | 4            | 0.031591798  |                  |
|               | Brain_Nucleus_accumbens_basal_ganglia | 0.98932207                           | Brain_Putamen_basal_ganglia          |              |              |                  |
|               | 1.915964736                           | 0.199194651                          | 0.199194651                          | -2.149537735 | -0.0133832   |                  |
|               | -1.429698095                          | 0.988912527                          | 4                                    | 0            | 0.980246923  |                  |

|              |                                      |                             |              |             |                                      |                  |
|--------------|--------------------------------------|-----------------------------|--------------|-------------|--------------------------------------|------------------|
| C9orf72      | ENSG00000147894.14                   | 0.206359321                 | 12           | 9           | 0.052312818                          |                  |
|              | Brain_Cortex                         | 0.999457707                 |              |             | Brain_Cerebellar_Hemisphere          | 5.752224033      |
|              | 0.071863426                          | 0.261512476                 |              |             | -1.94055054                          | 0.620778567      |
|              | 0.733923287                          | 9                           | 0            | 0.980246923 |                                      | -0.515061941     |
| HCRTR1       | ENSG00000121764.11                   | 0.206386097                 | 1            | 1           | 0.206386097                          |                  |
|              | Brain_Cerebellum                     | 0.206386097                 |              |             | Brain_Cerebellum1                    | 1                |
|              | -1.263565294                         | -1.263565294                |              |             | NA                                   | 1                |
|              |                                      |                             | 0            | 0.980246923 |                                      |                  |
| LPCAT3       | ENSG00000111684.10                   | 0.206420377                 | 2            | 2           | 0.216553276                          |                  |
|              | Brain_Cerebellum                     | 0.535383327                 |              |             | Brain_Cerebellar_Hemisphere          | 1.915961227      |
|              | 0.084038773                          | 0.084038773                 |              |             | 0.619809328                          | 1.235745239      |
|              | 0.435532459                          | 2                           | 0            | 0.980246923 |                                      | 0.927777283      |
| RP5-998H6.2  | ENSG00000229957.1                    | 0.206767983                 | 1            | 1           | 0.206767983                          |                  |
|              | Brain_Cerebellar_Hemisphere          | 0.206767983                 |              |             | Brain_Cerebellar_Hemisphere1         | 1                |
|              | 1                                    | 1.262502623                 | 1.262502623  | 1.262502623 | NA                                   | 1                |
|              |                                      |                             |              |             |                                      | 0                |
|              |                                      |                             |              |             |                                      | 0.980246923      |
| BMP4         | ENSG00000125378.15                   | 0.206769416                 | 2            | 2           | 0.191898627                          | Brain_Cerebellum |
|              | 0.509061617                          | Brain_Cerebellar_Hemisphere | 1.356075543  |             | 0.643924457                          |                  |
|              | 0.643924457                          | -1.304983029                | 0.660299553  |             | -0.322341738                         | 1.389664641      |
|              | 2                                    | 0                           | 0.980246923  |             |                                      |                  |
| PKN3         | ENSG00000160447.6                    | 0.206820178                 | 2            | 2           | 0.092054561                          |                  |
|              | Brain_Frontal_Cortex_BA9             | 0.747555725                 |              |             | Brain_Cerebellar_Hemisphere          |                  |
|              | 1.138236871                          | 0.861763129                 | 0.861763129  |             | -0.321864003                         | 1.684658068      |
|              | 0.681397033                          | 1.418825363                 | 2            | 0           | 0.980246923                          |                  |
| CPTP         | ENSG00000224051.6                    | 0.206899668                 | 3            | 3           | 0.081070332                          | Brain_Cerebellum |
|              | 0.732865993                          | Brain_Hypothalamus          | 1.381089399  |             | 0.530478214                          |                  |
|              | 0.530478214                          | -1.744509237                | 0.466670981  |             | -0.539717957                         | 1.118861969      |
|              | 3                                    | 0                           | 0.980246923  |             |                                      |                  |
| CHCHD5       | ENSG00000125611.15                   | 0.206933447                 | 7            | 6           | 0.006301567                          |                  |
|              | Brain_Cerebellar_Hemisphere          | 0.515685808                 |              |             | Brain_Hippocampus                    | 5.207766179      |
|              | 0.060034023                          | 0.178468302                 | -2.731662449 |             | -0.650009929                         | -1.600262298     |
|              | 0.62928061                           | 6                           | 0            | 0.980246923 |                                      |                  |
| POGLUT1      | ENSG00000163389.10                   | 0.206962766                 | 10           | 2           | 0.083180405                          |                  |
|              | Brain_Cortex                         | 0.320289557                 |              |             | Brain_Cerebellar_Hemisphere          | 9.069014237      |
|              | 0.003146101                          | 0.374551919                 | 0.993863027  |             | 1.732523453                          | 1.271202422      |
|              | 0.205790179                          | 2                           | 0            | 0.980246923 |                                      |                  |
| SELENOP      | ENSG00000250722.5                    | 0.207037069                 | 1            | 1           | 0.207037069                          |                  |
|              | Brain_Caudate_basal_ganglia          | 0.207037069                 |              |             | Brain_Caudate_basal_ganglia1         | 1                |
|              | 1                                    | 1.261754696                 | 1.261754696  | 1.261754696 | NA                                   | 1                |
|              |                                      |                             |              |             |                                      | 0                |
|              |                                      |                             |              |             |                                      | 0.980246923      |
| PPP2R2B      | ENSG00000156475.18                   | 0.207043489                 | 4            | 4           | 0.091969385                          |                  |
|              | Brain_Frontal_Cortex_BA9             | 0.741014431                 |              |             | Brain_Putamen_basal_ganglia          |                  |
|              | 2.113115848                          | 0.174716211                 | 0.174716211  |             | -1.022772641                         | 1.685099452      |
|              | 0.546214775                          | 1.186363526                 | 4            | 0           | 0.980246923                          |                  |
| ZNF860       | ENSG00000197385.5                    | 0.207052875                 | 3            | 3           | 0.13162694                           |                  |
|              | Brain_Anterior_cingulate_cortex_BA24 | 0.63247309                  |              |             | Brain_Cerebellum                     | 1.28998035       |
|              | 0.728809618                          | 0.728809618                 | -0.927394537 |             | 1.507717126                          | 0.034024576      |
|              | 1.295862747                          | 3                           | 0            | 0.980246923 |                                      |                  |
| PLAC9        | ENSG00000189129.13                   | 0.207116643                 | 10           | 7           | 0.196237773                          |                  |
|              | Brain_Hippocampus                    | 0.964271904                 |              |             | Brain_Anterior_cingulate_cortex_BA24 |                  |
|              | 5.920945201                          | 0.044468447                 | 0.214206449  |             | -1.037952593                         | 1.292344773      |
|              | 0.109045247                          | 0.857975286                 | 7            | 0           | 0.980246923                          |                  |
| VPS33A       | ENSG00000139719.9                    | 0.207176478                 | 4            | 4           | 0.160373055                          |                  |
|              | Brain_Cerebellar_Hemisphere          | 0.787801342                 |              |             | Brain_Cerebellum                     | 3.292878577      |
|              | 0.124541831                          | 0.124541831                 | 0.269166781  |             | 1.403817991                          | 0.808721184      |
|              | 0.46750526                           | 4                           | 0            | 0.980246923 |                                      |                  |
| NSUN3        | ENSG00000178694.9                    | 0.207361532                 | 1            | 1           | 0.207361532                          |                  |
|              | Brain_Substantia_nigra               | 0.207361532                 |              |             | Brain_Substantia_nigra               | 1                |
|              | 1                                    | 1.260853783                 | 1.260853783  | 1.260853783 | NA                                   | 1                |
|              |                                      |                             |              |             |                                      | 0                |
|              |                                      |                             |              |             |                                      | 0.980246923      |
| RP11-121C2.2 | ENSG00000259959.1                    | 0.20738364                  | 9            | 4           | 0.100522382                          |                  |
|              | Brain_Amygdala                       | 0.579556048                 |              |             | Brain_Cerebellar_Hemisphere          | 6.719427516      |
|              | 0.015653779                          | 0.282920615                 | -1.642326384 |             | -0.554033312                         | -1.246218598     |



|               |                                       |                                       |             |                                      |              |                  |                  |   |  |
|---------------|---------------------------------------|---------------------------------------|-------------|--------------------------------------|--------------|------------------|------------------|---|--|
|               | 0.351254924                           | 4                                     | 0           | 0.980246923                          |              |                  |                  |   |  |
| LINC00299     | ENSG00000236790.5                     |                                       |             | 0.207418905                          | 8            | 5                | 0.143373162      |   |  |
|               | Brain_Nucleus_accumbens_basal_ganglia |                                       |             | 0.951966427                          |              |                  | Brain_Amygdala   |   |  |
|               | 5.521729978                           | 0.084650276                           |             | 0.32247827                           | -1.463344409 |                  | 0.905820116      |   |  |
|               | -0.124540022                          | 0.870707135                           |             | 5                                    | 0            | 0.980246923      |                  |   |  |
| EFR3A         | ENSG00000132294.14                    | 0.207607559                           |             | 7                                    | 5            | 0.004393494      | Brain_Amygdala   |   |  |
|               | 0.843233083                           | Brain_Hypothalamus                    |             | 3.850200006                          |              | 0.045298315      | 0.18125706       |   |  |
|               | 0.197759694                           | 2.848434188                           |             | 1.694185343                          |              | 1.010391498      | 5                | 0 |  |
|               | 0.980246923                           |                                       |             |                                      |              |                  |                  |   |  |
| AHI1          | ENSG00000135541.20                    | 0.207656902                           |             | 11                                   | 8            | 0.107022759      | Brain_Cortex     |   |  |
|               | 0.86246318                            | Brain_Nucleus_accumbens_basal_ganglia |             | 5.036337581                          |              | 0.042805032      |                  |   |  |
|               | 0.315000482                           | -1.611720571                          |             | 1.56452678                           | 0.188369031  | 0.969426764      |                  | 8 |  |
|               | 0                                     | 0.980246923                           |             |                                      |              |                  |                  |   |  |
| HOMER2        | ENSG00000103942.12                    | 0.207748554                           |             | 4                                    | 4            | 0.07925963       |                  |   |  |
|               | Brain_Spinal_cord_cervical_c-1        |                                       |             | 0.585641587                          |              | Brain_Cerebellum | 1.92729797       |   |  |
|               | 0.10747872                            | 0.10747872                            |             | -0.990291834                         |              | 1.754998114      | 0.557652646      |   |  |
|               | 1.149167501                           | 4                                     | 0           | 0.980246923                          |              |                  |                  |   |  |
| ZNF566        | ENSG00000186017.14                    | 0.207819339                           |             | 2                                    | 2            | 0.121300885      |                  |   |  |
|               | Brain_Cerebellum                      | 0.727884234                           |             | Brain_Cerebellar_Hemisphere          |              | 1.647966791      |                  |   |  |
|               | 0.352033209                           | 0.352033209                           |             | -1.549336353                         |              | -0.347941346     | -0.94863885      |   |  |
|               | 0.849514557                           | 2                                     | 0           | 0.980246923                          |              |                  |                  |   |  |
| SPTB          | ENSG00000070182.19                    | 0.207826119                           |             | 1                                    | 1            | 0.207826119      |                  |   |  |
|               | Brain_Cerebellar_Hemisphere           | 0.207826119                           |             | Brain_Cerebellar_Hemisphere          |              | 1                | 1                |   |  |
|               | 1                                     | -1.259565579                          |             | -1.259565579                         |              | NA               | 1                | 0 |  |
|               | 0.980246923                           |                                       |             |                                      |              |                  |                  |   |  |
| HAUS6         | ENSG00000147874.10                    | 0.207936993                           |             | 2                                    | 2            | 0.104086404      |                  |   |  |
|               | Brain_Frontal_Cortex_BA9              | 0.422392441                           |             | Brain_Cerebellum                     |              | 1.059652863      |                  |   |  |
|               | 0.940347137                           | 0.940347137                           |             | -1.625357509                         |              | 0.802277523      | -0.411539993     |   |  |
|               | 1.716597193                           | 2                                     | 0           | 0.980246923                          |              |                  |                  |   |  |
| LINC01170     | ENSG00000253807.5                     | 0.207941584                           |             | 2                                    | 2            | 0.206710052      |                  |   |  |
|               | Brain_Caudate_basal_ganglia           | 0.251195746                           |             | Brain_Putamen_basal_ganglia          |              |                  |                  |   |  |
|               | 1.073525857                           | 0.926474143                           |             | 0.926474143                          |              | -1.147449857     | 1.262663736      |   |  |
|               | 0.057606939                           | 1.704207665                           |             | 2                                    | 0            | 0.980246923      |                  |   |  |
| FAM208A       | ENSG00000163946.13                    | 0.208038924                           |             | 4                                    | 4            | 0.178444459      |                  |   |  |
|               | Brain_Spinal_cord_cervical_c-1        | 0.865742567                           |             |                                      |              |                  |                  |   |  |
|               | Brain_Nucleus_accumbens_basal_ganglia | 2.298900518                           |             | 0.280298075                          |              |                  |                  |   |  |
|               | 0.280298075                           | -0.451024622                          |             | 1.345560001                          |              | 0.315134645      | 0.749240275      |   |  |
|               | 4                                     | 0                                     | 0.980246923 |                                      |              |                  |                  |   |  |
| RIC8A         | ENSG00000177963.14                    | 0.20811585                            | 10          | 5                                    |              | 0.158688324      |                  |   |  |
|               | Brain_Putamen_basal_ganglia           | 0.954102165                           |             | Brain_Anterior_cingulate_cortex_BA24 |              |                  |                  |   |  |
|               | 6.987915569                           | 6.94E-18                              |             | 0.379766904                          |              | -0.767562368     | 1.409496785      |   |  |
|               | -0.186382945                          | 0.713613013                           |             | 5                                    | 0            | 0.980246923      |                  |   |  |
| ACY1          | ENSG00000243989.8                     | 0.208137118                           |             | 1                                    | 1            | 0.208137118      | Brain_Cerebellum |   |  |
|               | 0.208137118                           | Brain_Cerebellum                      |             | 1                                    | 1            | -1.25870441      | -1.25870441      |   |  |
|               | -1.25870441                           | NA                                    | 1           | 0                                    | 0.980246923  |                  |                  |   |  |
| RP11-367F23.1 | ENSG00000228216.1                     | 0.208204046                           |             | 1                                    | 1            | 0.208204046      |                  |   |  |
|               | Brain_Frontal_Cortex_BA9              | 0.208204046                           |             | Brain_Frontal_Cortex_BA9             |              | 1                | 1                |   |  |
|               | 1                                     | 1.258519205                           |             | 1.258519205                          |              | NA               | 1                | 0 |  |
|               | 0.980246923                           |                                       |             |                                      |              |                  |                  |   |  |
| PFKM          | ENSG00000152556.15                    | 0.208226278                           |             | 3                                    | 3            | 0.368886665      |                  |   |  |
|               | Brain_Cerebellar_Hemisphere           | 0.874887484                           |             | Brain_Cerebellum                     |              | 2.595144332      |                  |   |  |
|               | 0.101567764                           | 0.101567764                           |             | -0.898560766                         |              | 0.330284227      | -0.24191         |   |  |
|               | 0.618760604                           | 3                                     | 0           | 0.980246923                          |              |                  |                  |   |  |
| PKP2          | ENSG00000057294.14                    | 0.208539869                           |             | 1                                    | 1            | 0.208539869      |                  |   |  |
|               | Brain_Caudate_basal_ganglia           | 0.208539869                           |             | Brain_Caudate_basal_ganglia          |              | 1                | 1                |   |  |
|               | 1                                     | 1.257590559                           |             | 1.257590559                          |              | NA               | 1                | 0 |  |
|               | 0.980935746                           |                                       |             |                                      |              |                  |                  |   |  |
| ADAMTS4       | ENSG00000158859.9                     | 0.208544329                           |             | 3                                    | 3            | 0.174669064      |                  |   |  |
|               | Brain_Substantia_nigra                | 0.623252521                           |             | Brain_Frontal_Cortex_BA9             |              |                  |                  |   |  |
|               | 1.569665542                           | 0.56786734                            |             | 0.56786734                           |              | -0.491245925     | 1.357353033      |   |  |
|               | 0.735710158                           | 1.062606506                           |             | 3                                    | 0            | 0.980935746      |                  |   |  |
| COX6B1        | ENSG00000126267.8                     | 0.208582935                           |             | 7                                    | 5            | 0.065266217      |                  |   |  |

|             |                                       |                             |                             |              |              |                  |
|-------------|---------------------------------------|-----------------------------|-----------------------------|--------------|--------------|------------------|
|             | Brain_Anterior_cingulate_cortex_BA24  | 0.956403344                 |                             |              | Brain_Cortex |                  |
|             | 4.505548007                           | 0.000676875                 | 0.175086283                 | -1.843430249 | 0.355833866  |                  |
|             | -0.635608478                          | 0.805895172                 | 5                           | 0            | 0.980935746  |                  |
| P3H3        | ENSG00000110811.19                    | 0.208848041                 | 2                           | 2            | 0.077620722  | Brain_Cerebellum |
|             | 0.930774967                           | Brain_Caudate_basal_ganglia | 1.027335109                 | 0.972664891  |              |                  |
|             | 0.972664891                           | -1.764661207                | 0.086869848                 | -0.838895679 | 1.309230164  |                  |
|             | 2                                     | 0                           | 0.981194841                 |              |              |                  |
| GS1-279B7.2 | ENSG00000273004.1                     | 0.209000123                 | 1                           | 1            | 0.209000123  |                  |
|             | Brain_Anterior_cingulate_cortex_BA24  | 0.209000123                 |                             |              |              |                  |
|             | Brain_Anterior_cingulate_cortex_BA24  | 1                           | 1                           | 1            | 1.256319586  |                  |
|             | 1.256319586                           | 1.256319586                 | NA                          | 1            | 0            | 0.981194841      |
| VIPR2       | ENSG00000106018.13                    | 0.209029134                 | 3                           | 3            | 0.125745269  |                  |
|             | Brain_Frontal_Cortex_BA9              | 0.715832439                 | Brain_Cortex                | 1.682915313  |              |                  |
|             | 0.309539799                           | 0.309539799                 | -1.531097617                | 1.350910066  | -0.181407264 |                  |
|             | 1.449657384                           | 3                           | 0                           | 0.981194841  |              |                  |
| STARD3NL    | ENSG0000010270.13                     | 0.209039499                 | 5                           | 3            | 0.079832843  |                  |
|             | Brain_Cortex                          | 0.522172715                 | Brain_Putamen_basal_ganglia | 4.310096753  |              |                  |
|             | 0.001673833                           | 0.232466253                 | 0.639999822                 | 1.751656778  | 1.115850594  |                  |
|             | 0.481408292                           | 3                           | 0                           | 0.981194841  |              |                  |
| LARP1       | ENSG00000155506.16                    | 0.209073609                 | 3                           | 3            | 0.050575931  |                  |
|             | Brain_Nucleus_accumbens_basal_ganglia | 0.773660928                 | Brain_Hippocampus           |              |              |                  |
|             | 1.214846915                           | 0.803969668                 | 0.803969668                 | -1.95506049  | 0.338177277  |                  |
|             | -0.44309788                           | 1.309642309                 | 3                           | 0            | 0.981194841  |                  |
| RECQL5      | ENSG00000108469.14                    | 0.209132072                 | 4                           | 4            | 0.106281898  |                  |
|             | Brain_Cerebellum                      | 0.831417239                 | Brain_Caudate_basal_ganglia | 2.307166987  |              |                  |
|             | 0.3272425                             | 0.3272425                   | -0.212884261                | 1.615132993  | 0.817310577  |                  |
|             | 0.786512094                           | 4                           | 0                           | 0.981194841  |              |                  |
| RP1-79C4.4  | ENSG00000271811.1                     | 0.209144906                 | 11                          | 9            | 0.012006269  |                  |
|             | Brain_Cerebellum                      | 0.942897944                 | Brain_Amygdala              | 4.476877462  | 0.024455701  |                  |
|             | 0.179016883                           | -2.51196003                 | 0.859522502                 | -0.495124012 | 1.016930367  |                  |
|             | 9                                     | 0                           | 0.981194841                 |              |              |                  |
| NSMAF       | ENSG00000035681.7                     | 0.209292908                 | 3                           | 3            | 0.135494882  | Brain_Cerebellum |
|             | 0.728650897                           | Brain_Caudate_basal_ganglia | 1.464038636                 | 0.73911982   | 0.73911982   |                  |
|             | -1.492779628                          | 1.059511186                 | -0.260063046                | 1.278360391  | 3            | 0                |
|             | 0.981194841                           |                             |                             |              |              |                  |
| BNIPL       | ENSG00000163141.18                    | 0.209326556                 | 2                           | 2            | 0.079041288  |                  |
|             | Brain_Caudate_basal_ganglia           | 0.940861704                 | Brain_Cerebellum            | 1.159097428  |              |                  |
|             | 0.840902572                           | 0.840902572                 | 0.074186856                 | 1.756276028  | 0.915231442  |                  |
|             | 1.18941666                            | 2                           | 0                           | 0.981194841  |              |                  |
| NDUFA11     | ENSG00000174886.12                    | 0.209527278                 | 2                           | 1            | 0.143566727  |                  |
|             | Brain_Cerebellum                      | 0.311580935                 | Brain_Cerebellar_Hemisphere | 1.944314813  |              |                  |
|             | 0.055685187                           | 1.944314813                 | 1.011910319                 | 1.462637021  | 1.23727367   |                  |
|             | 0.318711907                           | 1                           | 0                           | 0.981194841  |              |                  |
| ATP6V1F     | ENSG00000128524.4                     | 0.209609209                 | 1                           | 1            | 0.209609209  |                  |
|             | Brain_Caudate_basal_ganglia           | 0.209609209                 | Brain_Caudate_basal_ganglia | 1            | 1            |                  |
|             | 1                                     | -1.254640734                | -1.254640734                | -1.254640734 | NA           | 1                |
|             | 0.981194841                           |                             |                             |              | 0            |                  |
| CDT1        | ENSG00000167513.8                     | 0.209731542                 | 1                           | 1            | 0.209731542  |                  |
|             | Brain_Anterior_cingulate_cortex_BA24  | 0.209731542                 |                             |              |              |                  |
|             | Brain_Anterior_cingulate_cortex_BA24  | 1                           | 1                           | 1            | 1.25430397   | 1.25430397       |
|             | 1.25430397                            | NA                          | 1                           | 0            | 0.981194841  |                  |
| STK4-AS1    | ENSG00000227477.1                     | 0.209757658                 | 2                           | 2            | 0.079668808  |                  |
|             | Brain_Hypothalamus                    | 0.624382557                 | Brain_Frontal_Cortex_BA9    | 1.398661247  |              |                  |
|             | 0.601338753                           | 0.601338753                 | -1.752610963                | -0.489648632 | -1.121129798 |                  |
|             | 0.893049229                           | 2                           | 0                           | 0.981194841  |              |                  |
| DFNA5       | ENSG00000105928.13                    | 0.209781529                 | 12                          | 3            | 0.050379223  | Brain_Cortex     |
|             | 0.331615285                           | Brain_Cerebellum            | 9.556682919                 | 0.000556216  | 0.787622173  |                  |
|             | -1.956729977                          | 0.97086545                  | -1.246164872                | 0.738157564  | 3            | 0                |
|             | 0.981194841                           |                             |                             |              |              |                  |
| RANGAP1     | ENSG00000100401.19                    | 0.209975123                 | 2                           | 1            | 0.194958389  |                  |
|             | Brain_Cerebellum                      | 0.241365695                 | Brain_Cerebellar_Hemisphere | 1.937262892  |              |                  |
|             | 0.062737108                           | 1.937262892                 | -1.296049623                | -1.171580067 | -1.233814845 |                  |

|          |                                      |                             |                                      |                                       |                          |             |                             |                             |  |
|----------|--------------------------------------|-----------------------------|--------------------------------------|---------------------------------------|--------------------------|-------------|-----------------------------|-----------------------------|--|
|          | 0.088013267                          | 1                           | 0                                    | 0.981194841                           |                          |             |                             |                             |  |
| KIAA0825 | ENSG00000185261.14                   |                             |                                      | 0.210007552                           | 2                        | 2           | 0.403004036                 |                             |  |
|          | Brain_Cerebellar_Hemisphere          |                             |                                      | 0.853569532                           |                          |             | Brain_Cerebellum            | 1.925504609                 |  |
|          | 0.074495391                          | 0.074495391                 |                                      | 0.184565902                           |                          |             | 0.836268205                 | 0.510417054                 |  |
|          | 0.460823117                          | 2                           | 0                                    | 0.981194841                           |                          |             |                             |                             |  |
| SLC16A14 | ENSG00000163053.10                   |                             |                                      | 0.210149675                           | 1                        | 1           | 0.210149675                 |                             |  |
|          | Brain_Cerebellum                     | 0.210149675                 |                                      | Brain_Cerebellum                      | 1                        | 1           | 1                           | 1.253153977                 |  |
|          | 1.253153977                          | 1.253153977                 |                                      | NA                                    | 1                        | 0           | 0.981194841                 |                             |  |
| PLXNB2   | ENSG00000196576.14                   |                             |                                      | 0.210175098                           | 1                        | 1           | 0.210175098                 |                             |  |
|          | Brain_Cerebellum                     | 0.210175098                 |                                      | Brain_Cerebellum                      | 1                        | 1           | 1                           | 1.25308411                  |  |
|          | 1.25308411                           | 1.25308411                  | NA                                   | 1                                     | 0                        | 0.981194841 |                             |                             |  |
| JRKL     | ENSG00000183340.6                    |                             |                                      | 0.210182014                           | 1                        | 1           | 0.210182014                 |                             |  |
|          | Brain_Caudate_basal_ganglia          | 0.210182014                 |                                      | Brain_Caudate_basal_ganglia           | 1                        | 1           |                             | 1                           |  |
|          | 1                                    | -1.253065106                | -1.253065106                         | -1.253065106                          | NA                       | 1           | 0                           |                             |  |
|          | 0.981194841                          |                             |                                      |                                       |                          |             |                             |                             |  |
| CBFA2T3  | ENSG00000129993.14                   |                             |                                      | 0.210265665                           | 1                        | 1           | 0.210265665                 |                             |  |
|          | Brain_Putamen_basal_ganglia          | 0.210265665                 |                                      | Brain_Putamen_basal_ganglia           | 1                        | 1           |                             | 1                           |  |
|          | 1                                    | -1.252835265                | -1.252835265                         | -1.252835265                          | NA                       | 1           | 0                           |                             |  |
|          | 0.981194841                          |                             |                                      |                                       |                          |             |                             |                             |  |
| CPLX1    | ENSG00000168993.14                   |                             |                                      | 0.210283137                           | 3                        | 3           | 0.141996995                 | Brain_Cortex                |  |
|          | 0.236792699                          | Brain_Cerebellar_Hemisphere |                                      | 1.800699495                           |                          |             | 0.206228798                 |                             |  |
|          | 0.206228798                          | -1.468394866                | 1.427418866                          | 0.380688501                           |                          |             | 1.60600811                  | 3                           |  |
|          | 0                                    | 0.981194841                 |                                      |                                       |                          |             |                             |                             |  |
| PABPC1   | ENSG00000070756.15                   |                             |                                      | 0.210458733                           | 6                        | 6           | 0.078246223                 |                             |  |
|          | Brain_Spinal_cord_cervical_c-1       |                             |                                      | 0.907450572                           |                          |             |                             |                             |  |
|          | Brain_Anterior_cingulate_cortex_BA24 |                             |                                      | 1.781396926                           |                          |             | 0.514668441                 |                             |  |
|          | 0.514668441                          | -1.463101942                | 1.760953799                          | 0.365838558                           |                          |             | 1.152958552                 |                             |  |
|          | 6                                    | 0                           | 0.981194841                          |                                       |                          |             |                             |                             |  |
| MRPL36   | ENSG00000171421.12                   |                             |                                      | 0.210498747                           | 6                        | 1           | 0.151024854                 |                             |  |
|          | Brain_Cerebellum                     | 0.371507233                 |                                      | Brain_Cortex                          |                          |             | 5.732907242                 | 7.79E-05                    |  |
|          | 5.732907242                          | 0.893653649                 | 1.435920886                          | 1.219835468                           |                          |             | 0.250959736                 |                             |  |
|          | 1                                    | 0                           | 0.981194841                          |                                       |                          |             |                             |                             |  |
| BRAP     | ENSG00000089234.15                   |                             |                                      | 0.21059505                            | 1                        | 1           | 0.21059505                  | Brain_Caudate_basal_ganglia |  |
|          | 0.21059505                           | Brain_Caudate_basal_ganglia |                                      | 1                                     | 1                        | 1           | 1.251930884                 |                             |  |
|          | 1.251930884                          | 1.251930884                 | NA                                   | 1                                     | 0                        | 0.981194841 |                             |                             |  |
| PLCG1    | ENSG00000124181.14                   |                             |                                      | 0.210609219                           | 2                        | 2           | 0.098572996                 |                             |  |
|          | Brain_Hippocampus                    |                             |                                      | 0.308908772                           |                          |             | Brain_Cerebellar_Hemisphere | 1.251480007                 |  |
|          | 0.748519993                          | 0.748519993                 | -1.651811441                         | -1.017514429                          |                          |             | -1.334662935                |                             |  |
|          | 0.448515719                          | 2                           | 0                                    | 0.981194841                           |                          |             |                             |                             |  |
| NOTCH2   | ENSG00000134250.19                   |                             |                                      | 0.210699655                           | 2                        | 2           | 0.100022242                 |                             |  |
|          | Brain_Hippocampus                    |                             |                                      | 0.39675952                            | Brain_Frontal_Cortex_BA9 |             | 1.129455253                 |                             |  |
|          | 0.870544747                          | 0.870544747                 | 0.847422766                          | 1.644745808                           |                          |             | 1.246084287                 |                             |  |
|          | 0.56379253                           | 2                           | 0                                    | 0.981194841                           |                          |             |                             |                             |  |
| WSCD2    | ENSG00000075035.9                    |                             |                                      | 0.210747864                           | 4                        | 4           | 0.071156659                 |                             |  |
|          | Brain_Putamen_basal_ganglia          | 0.716762757                 |                                      | Brain_Nucleus_accumbens_basal_ganglia |                          |             |                             |                             |  |
|          | 1.8004567                            | 0.436722644                 | 0.436722644                          | -1.804476377                          |                          |             | 0.709970056                 |                             |  |
|          | -0.233303713                         | 1.147278751                 | 4                                    | 0                                     | 0.981194841              |             |                             |                             |  |
| ALG9     | ENSG00000086848.14                   |                             |                                      | 0.210765078                           | 3                        | 3           | 0.04729291                  |                             |  |
|          | Brain_Cerebellar_Hemisphere          | 0.885143349                 |                                      | Brain_Cerebellum                      | 1.23186885               |             |                             |                             |  |
|          | 0.827146519                          | 0.827146519                 | -0.144452264                         | 1.98366758                            | 0.846548945              |             |                             |                             |  |
|          | 1.071557858                          | 3                           | 0                                    | 0.981194841                           |                          |             |                             |                             |  |
| VKORC1L1 | ENSG00000196715.5                    |                             |                                      | 0.210840272                           | 3                        | 3           | 0.123573054                 |                             |  |
|          | Brain_Spinal_cord_cervical_c-1       | 0.78304691                  | Brain_Anterior_cingulate_cortex_BA24 |                                       |                          |             |                             |                             |  |
|          | 1.744107958                          | 0.358227074                 | 0.358227074                          | -1.539947897                          |                          |             | 0.275350579                 |                             |  |
|          | -0.707959322                         | 0.917060928                 | 3                                    | 0                                     | 0.981194841              |             |                             |                             |  |
| KIAA1586 | ENSG00000168116.13                   |                             |                                      | 0.210971254                           | 8                        | 2           | 0.093525286                 |                             |  |
|          | Brain_Caudate_basal_ganglia          | 0.378926177                 | Brain_Cortex                         | 7.222567751                           |                          |             |                             |                             |  |
|          | 0.013284251                          | 0.253543361                 | 0.879876572                          | 1.677087945                           |                          |             | 1.356540407                 |                             |  |
|          | 0.275282229                          | 2                           | 0                                    | 0.981194841                           |                          |             |                             |                             |  |
| LRRC71   | ENSG00000160838.13                   |                             |                                      | 0.210997678                           | 2                        | 2           | 0.12351085                  |                             |  |
|          | Brain_Hypothalamus                   | 0.470801173                 | Brain_Frontal_Cortex_BA9             | 1.087965485                           |                          |             |                             |                             |  |
|          | 0.912034515                          | 0.912034515                 | -1.54020312                          | -0.721176103                          |                          |             | -1.130689612                |                             |  |

|               |                             |                             |              |                                       |             |              |             |                  |  |
|---------------|-----------------------------|-----------------------------|--------------|---------------------------------------|-------------|--------------|-------------|------------------|--|
|               | 0.579139558                 | 2                           | 0            | 0.981194841                           |             |              |             |                  |  |
| RP11-589P10.5 | ENSG00000262089.1           |                             |              | 0.211092688                           | 1           | 1            | 0.211092688 |                  |  |
|               | Brain_Cerebellum            | 0.211092688                 |              | Brain_Cerebellum                      | 1           | 1            | 1           | -1.250566475     |  |
|               | -1.250566475                | -1.250566475                | NA           | 1                                     | 0           | 0.981194841  |             |                  |  |
| VLDLR         | ENSG00000147852.15          | 0.211142364                 |              | 1                                     | 1           | 0.211142364  |             | Brain_Cortex     |  |
|               | 0.211142364                 | Brain_Cortex                | 1            | 1                                     | 1           | -1.250430404 |             | -1.250430404     |  |
|               | -1.250430404                | NA                          | 1            | 0                                     | 0.981194841 |              |             |                  |  |
| DNAJB9        | ENSG00000128590.4           | 0.211154095                 |              | 1                                     | 1           | 0.211154095  |             |                  |  |
|               | Brain_Hypothalamus          | 0.211154095                 |              | Brain_Hypothalamus                    | 1           | 1            | 1           |                  |  |
|               | -1.250398273                | -1.250398273                | -1.250398273 | NA                                    | 1           | 0            | 0.981194841 |                  |  |
| SOD3          | ENSG00000109610.5           | 0.211324006                 |              | 3                                     | 3           | 0.035254437  |             | Brain_Cortex     |  |
|               | 0.977513123                 | Brain_Cerebellum            | 1.16173421   | 0.836197868                           |             | 0.836197868  |             |                  |  |
|               | 0.028186853                 | 2.105423768                 | 0.916595774  | 1.070708651                           |             | 3            | 0           |                  |  |
|               | 0.981194841                 |                             |              |                                       |             |              |             |                  |  |
| TMEM165       | ENSG00000134851.12          | 0.211327165                 |              | 2                                     | 2           | 0.091485791  |             |                  |  |
|               | Brain_Putamen_basal_ganglia | 0.855310941                 |              | Brain_Cerebellar_Hemisphere           |             |              |             |                  |  |
|               | 1.387004909                 | 0.612995091                 | 0.612995091  | -1.687611704                          |             | -0.182346332 |             |                  |  |
|               | -0.934979018                | 1.064383352                 | 2            | 0                                     | 0.981194841 |              |             |                  |  |
| NBPF9         | ENSG00000269713.7           | 0.211332193                 |              | 9                                     | 8           | 0.01987136   |             |                  |  |
|               | Brain_Putamen_basal_ganglia | 0.762422339                 |              | Brain_Nucleus_accumbens_basal_ganglia |             |              |             |                  |  |
|               | 2.775388676                 | 0.006682182                 | 0.122864544  | -1.599187247                          |             | 2.328767998  |             |                  |  |
|               | 0.023537564                 | 1.566218574                 | 8            | 0                                     | 0.981194841 |              |             |                  |  |
| HEATR1        | ENSG00000119285.10          | 0.211358074                 |              | 2                                     | 2           | 0.1161779    |             | Brain_Cerebellum |  |
|               | 0.302722128                 | Brain_Cerebellar_Hemisphere | 1.889123922  | 0.110876078                           |             |              |             |                  |  |
|               | 0.110876078                 | 1.030613445                 | 1.571020445  | 1.300816945                           |             | 0.382125454  |             |                  |  |
|               | 2                           | 0                           | 0.981194841  |                                       |             |              |             |                  |  |
| AXDND1        | ENSG00000162779.21          | 0.211373115                 |              | 3                                     | 2           | 0.469790731  |             |                  |  |
|               | Brain_Caudate_basal_ganglia | 0.9306913                   |              | Brain_Nucleus_accumbens_basal_ganglia |             |              |             |                  |  |
|               | 2.845097359                 | 0.001567441                 | 0.1533352    | -0.722819588                          |             | 0.137352472  |             |                  |  |
|               | -0.166164004                | 0.482735486                 | 2            | 0                                     | 0.981194841 |              |             |                  |  |
| GPAM          | ENSG00000119927.13          | 0.211469139                 |              | 5                                     | 5           | 0.010358555  |             |                  |  |
|               | Brain_Cerebellar_Hemisphere | 0.207436884                 |              | Brain_Hypothalamus                    |             | 3.20783365   |             |                  |  |
|               | 0.164152425                 | 0.164152425                 | 1.260644707  | 2.563624484                           |             | 1.796400262  |             |                  |  |
|               | 0.550566926                 | 5                           | 0            | 0.981298973                           |             |              |             |                  |  |
| CFI           | ENSG00000205403.12          | 0.211633491                 |              | 1                                     | 1           | 0.211633491  |             |                  |  |
|               | Brain_Hippocampus           | 0.211633491                 |              | Brain_Hippocampus                     | 1           | 1            | 1           |                  |  |
|               | 1.249086354                 | 1.249086354                 | 1.249086354  | NA                                    | 1           | 0            | 0.981298973 |                  |  |
| ELN           | ENSG00000049540.16          | 0.211657999                 |              | 2                                     | 2           | 0.078263216  |             | Brain_Cortex     |  |
|               | 0.818458773                 | Brain_Cerebellar_Hemisphere | 1.09050915   | 0.90949085                            |             | 0.90949085   |             |                  |  |
|               | 0.229527727                 | 1.760853415                 | 0.995190571  | 1.082810778                           |             | 2            | 0           |                  |  |
|               | 0.981298973                 |                             |              |                                       |             |              |             |                  |  |
| IGSF9B        | ENSG00000080854.14          | 0.21176315                  | 2            | 2                                     | 0.122458777 |              |             |                  |  |
|               | Brain_Frontal_Cortex_BA9    | 0.424284705                 |              | Brain_Cerebellum                      | 1.031402324 |              |             |                  |  |
|               | 0.968597676                 | 0.968597676                 | 0.799009842  | 1.544535007                           |             | 1.171772425  |             |                  |  |
|               | 0.5271659                   | 2                           | 0            | 0.981298973                           |             |              |             |                  |  |
| LINGO4        | ENSG00000213171.2           | 0.211832814                 |              | 5                                     | 5           | 0.016249802  |             |                  |  |
|               | Brain_Caudate_basal_ganglia | 0.899230326                 |              | Brain_Hypothalamus                    | 2.428297005 |              |             |                  |  |
|               | 0.107152716                 | 0.107152716                 | -0.126633696 | 2.403256111                           |             | 1.064810174  |             |                  |  |
|               | 0.997650764                 | 5                           | 0            | 0.981298973                           |             |              |             |                  |  |
| ZNF385B       | ENSG00000144331.18          | 0.211840611                 |              | 1                                     | 1           | 0.211840611  |             |                  |  |
|               | Brain_Frontal_Cortex_BA9    | 0.211840611                 |              | Brain_Frontal_Cortex_BA9              | 1           | 1            |             |                  |  |
|               | 1                           | 1.248520212                 | 1.248520212  | 1.248520212                           | NA          | 1            | 0           |                  |  |
|               | 0.981298973                 |                             |              |                                       |             |              |             |                  |  |
| RP11-428O18.6 | ENSG00000275294.4           | 0.211886513                 |              | 1                                     | 1           | 0.211886513  |             |                  |  |
|               | Brain_Frontal_Cortex_BA9    | 0.211886513                 |              | Brain_Frontal_Cortex_BA9              | 1           | 1            |             |                  |  |
|               | 1                           | 1.248394799                 | 1.248394799  | 1.248394799                           | NA          | 1            | 0           |                  |  |
|               | 0.981298973                 |                             |              |                                       |             |              |             |                  |  |
| NUPR1         | ENSG00000176046.8           | 0.211991289                 |              | 2                                     | 1           | 0.153485939  |             | Brain_Cerebellum |  |
|               | 0.303195968                 | Brain_Cerebellar_Hemisphere | 1.937540583  | 0.062459417                           |             |              |             |                  |  |
|               | 1.937540583                 | 1.029603933                 | 1.427326038  | 1.228464985                           |             | 0.281231997  |             |                  |  |
|               | 1                           | 0                           | 0.981459338  |                                       |             |              |             |                  |  |
| FAHD1         | ENSG00000180185.11          | 0.212132761                 |              | 13                                    | 1           | 0.149985379  |             |                  |  |

|           |                                |                                |                                |              |              |                  |             |  |
|-----------|--------------------------------|--------------------------------|--------------------------------|--------------|--------------|------------------|-------------|--|
|           | Brain_Substantia_nigra         | 0.248722                       | Brain_Cerebellum               | 12.75898708  |              |                  |             |  |
|           | 0.000293433                    | 12.75898708                    | 1.15345909                     | 1.439583117  |              |                  | 1.236640028 |  |
|           | 0.072591767                    | 1 0                            | 0.981527124                    |              |              |                  |             |  |
| LINC01055 | ENSG00000235366.2              | 0.212151275                    | 2                              | 2            | 0.105819151  |                  |             |  |
|           | Brain_Caudate_basal_ganglia    | 0.559647541                    | Brain_Amygdala                 | 1.069026049  |              |                  |             |  |
|           | 0.930973951                    | 0.930973951                    | -0.583365109                   | 1.61727399   | 0.516954441  |                  |             |  |
|           | 1.55608683                     | 2 0                            | 0.981527124                    |              |              |                  |             |  |
| OCM       | ENSG00000122543.10             | 0.212275633                    | 2                              | 2            | 0.078308557  | Brain_Cerebellum |             |  |
|           | 0.980062501                    | Brain_Cortex                   | 1.019193773                    | 0.980806227  | 0.980806227  |                  |             |  |
|           | -0.02499055                    | 1.760585666                    | 0.867797558                    | 1.262593051  | 2            | 0                |             |  |
|           | 0.981527124                    |                                |                                |              |              |                  |             |  |
| CMTR2     | ENSG00000180917.17             | 0.212331025                    | 2                              | 2            | 0.315116866  |                  |             |  |
|           | Brain_Substantia_nigra         | 0.729875085                    | Brain_Amygdala                 | 1.917185992  |              |                  |             |  |
|           | 0.082814008                    | 0.082814008                    | 0.345291701                    | 1.004543186  | 0.674917444  |                  |             |  |
|           | 0.466161196                    | 2 0                            | 0.981527124                    |              |              |                  |             |  |
| LINC00506 | ENSG00000281392.1              | 0.212356701                    | 4                              | 4            | 0.045730503  |                  |             |  |
|           | Brain_Amygdala                 | 0.921874386                    | Brain_Frontal_Cortex_BA9       | 1.324357808  |              |                  |             |  |
|           | 0.698110868                    | 0.698110868                    | -0.668111411                   | 1.99787233   | 0.426598701  |                  |             |  |
|           | 1.146717889                    | 4 0                            | 0.981527124                    |              |              |                  |             |  |
| PHLPP2    | ENSG00000040199.18             | 0.212442757                    | 5                              | 3            | 0.166832728  |                  |             |  |
|           | Brain_Spinal_cord_cervical_c-1 | 0.957403161                    | Brain_Hippocampus              | 3.75093883   |              |                  |             |  |
|           | 0.075800011                    | 0.235102975                    | -1.382452754                   | 0.311981486  | -0.566771625 |                  |             |  |
|           | 0.75619126                     | 3 0                            | 0.981600599                    |              |              |                  |             |  |
| RCN2      | ENSG00000117906.13             | 0.212836575                    | 6                              | 5            | 0.035368066  |                  |             |  |
|           | Brain_Hippocampus              | 0.982438835                    | Brain_Putamen_basal_ganglia    | 3.566391547  |              |                  |             |  |
|           | 0.115009064                    | 0.158637425                    | -2.104119017                   | 0.803597093  | -0.356585    |                  |             |  |
|           | 1.026369057                    | 5 0                            | 0.983095584                    |              |              |                  |             |  |
| EVC2      | ENSG00000173040.12             | 0.212908537                    | 2                              | 2            | 0.08027183   | Brain_Cortex     |             |  |
|           | 0.84616775                     | Brain_Spinal_cord_cervical_c-1 | 1.004889003                    | 0.995110997  |              |                  |             |  |
|           | 0.995110997                    | -1.749111022                   | 0.194010385                    | -0.777550319 | 1.373994324  |                  |             |  |
|           | 2 0                            | 0.983103412                    |                                |              |              |                  |             |  |
| LRRC4     | ENSG00000128594.7              | 0.213132266                    | 1                              | 1            | 0.213132266  |                  |             |  |
|           | Brain_Hypothalamus             | 0.213132266                    | Brain_Hypothalamus             | 1 1 1        |              |                  |             |  |
|           | -1.244998597                   | -1.244998597                   | -1.244998597                   | NA 1 0       | 0.983811789  |                  |             |  |
| LRGUK     | ENSG00000155530.2              | 0.213712692                    | 6                              | 6            | 0.155922043  |                  |             |  |
|           | Brain_Substantia_nigra         | 0.501578603                    | Brain_Cortex                   | 1.896936435  |              |                  |             |  |
|           | 0.455620604                    | 0.455620604                    | -1.156670381                   | 1.418921022  | 0.560724912  |                  |             |  |
|           | 1.157053783                    | 6 0                            | 0.985417674                    |              |              |                  |             |  |
| TUBA1C    | ENSG00000167553.15             | 0.213763094                    | 12                             | 3            | 0.016570134  |                  |             |  |
|           | Brain_Frontal_Cortex_BA9       | 0.156315479                    | Brain_Cortex                   | 10.41495394  |              |                  |             |  |
|           | 0.00843878                     | 0.358794761                    | -2.396109609                   | -1.417572961 | -1.878387803 |                  |             |  |
|           | 0.37694708                     | 3 0                            | 0.985417674                    |              |              |                  |             |  |
| PCDHA5    | ENSG00000204965.8              | 0.213827434                    | 2                              | 2            | 0.214041898  |                  |             |  |
|           | Brain_Cerebellar_Hemisphere    | 0.236020363                    | Brain_Putamen_basal_ganglia    |              |              |                  |             |  |
|           | 1.044480542                    | 0.955519458                    | 0.955519458                    | -1.184992625 | 1.242527779  |                  |             |  |
|           | 0.028767577                    | 1.716516139                    | 2 0                            | 0.985417674  |              |                  |             |  |
| ATP13A1   | ENSG00000105726.16             | 0.213832427                    | 2                              | 2            | 0.103697567  |                  |             |  |
|           | Brain_Cortex                   | 0.20772586                     | Brain_Cerebellar_Hemisphere    | 1.402113466  |              |                  |             |  |
|           | 0.597886534                    | 0.597886534                    | 1.259843401                    | 1.627186156  | 1.443514778  |                  |             |  |
|           | 0.259750553                    | 2 0                            | 0.985417674                    |              |              |                  |             |  |
| LINC02208 | ENSG00000250891.1              | 0.213901006                    | 1                              | 1            | 0.213901006  |                  |             |  |
|           | Brain_Frontal_Cortex_BA9       | 0.213901006                    | Brain_Frontal_Cortex_BA9       | 1 1          |              |                  |             |  |
|           | 1                              | -1.242909984                   | -1.242909984                   | -1.242909984 | NA 1 0       |                  |             |  |
|           | 0.985417674                    |                                |                                |              |              |                  |             |  |
| SHISA2    | ENSG00000180730.4              | 0.213902757                    | 3                              | 3            | 0.050174296  |                  |             |  |
|           | Brain_Substantia_nigra         | 0.814034605                    | Brain_Spinal_cord_cervical_c-1 |              |              |                  |             |  |
|           | 1.074240686                    | 0.908551306                    | 0.908551306                    | -0.71322242  | 1.958475046  |                  |             |  |
|           | 0.336676091                    | 1.424708541                    | 3 0                            | 0.985417674  |              |                  |             |  |
| ACADSB    | ENSG00000196177.12             | 0.214025301                    | 2                              | 2            | 0.228517715  |                  |             |  |
|           | Brain_Cerebellum               | 0.429573092                    | Brain_Cerebellar_Hemisphere    | 1.341504526  |              |                  |             |  |
|           | 0.658495474                    | 0.658495474                    | -1.204185952                   | 0.789922394  | -0.207131779 |                  |             |  |
|           | 1.410047534                    | 2 0                            | 0.985518871                    |              |              |                  |             |  |

|                |                                       |              |              |   |                                |              |             |    |            |
|----------------|---------------------------------------|--------------|--------------|---|--------------------------------|--------------|-------------|----|------------|
| FN3KRP         | ENSG00000141560.14                    | 0.214085225  | 13           | 4 | 0.010735554                    |              |             |    |            |
|                | Brain_Cerebellum                      | 0.559016593  |              |   | Brain_Hippocampus              | 9.772883303  |             |    |            |
|                | 0.003828333                           | 0.337260211  |              |   | 0.584302824                    | 2.551190781  | 1.18294889  |    |            |
|                | 0.493080387                           | 4            | 0            |   | 0.985518871                    |              |             |    |            |
| RP11-10C24.3   | ENSG00000271643.1                     | 0.214136042  | 6            | 3 | 0.18782913                     |              |             |    |            |
|                | Brain_Caudate_basal_ganglia           | 0.863554834  |              |   | Brain_Putamen_basal_ganglia    |              |             |    |            |
|                | 5.261062405                           | 0.019892378  |              |   | 0.231266221                    | 0.171850791  | 1.317028325 |    |            |
|                | 0.556423428                           | 0.532178206  | 3            | 0 | 0.985518871                    |              |             |    |            |
| TMEM11         | ENSG00000178307.9                     | 0.214207331  | 1            | 1 | 0.214207331                    |              |             |    |            |
|                | Brain_Caudate_basal_ganglia           | 0.214207331  |              |   | Brain_Caudate_basal_ganglia    | 1            | 1           |    |            |
|                | 1                                     | -1.24207923  | -1.24207923  |   | -1.24207923                    | NA           | 1           | 0  |            |
|                | 0.985522778                           |              |              |   |                                |              |             |    |            |
| TMEM199        | ENSG00000244045.12                    | 0.214399135  | 7            | 3 | 0.349552728                    |              |             |    |            |
|                | Brain_Amygdala                        | 0.981096624  |              |   | Brain_Caudate_basal_ganglia    | 5.764132027  |             |    |            |
|                | 0.00372374                            | 0.45951216   | -0.935457205 |   | 0.905490533                    | 0.325236887  |             |    |            |
|                | 0.632665663                           | 3            | 0            |   | 0.985711621                    |              |             |    |            |
| LYPLAL1        | ENSG00000143353.11                    | 0.214422794  | 2            | 2 | 0.089066163                    |              |             |    |            |
|                | Brain_Anterior_cingulate_cortex_BA24  | 0.106824152  |              |   | Brain_Hypothalamus             |              |             |    |            |
|                | 1.792823223                           | 0.207176777  | 0.207176777  |   | -1.700344403                   | -1.61263352  |             |    |            |
|                | -1.656488961                          | 0.06202096   | 2            | 0 | 0.985711621                    |              |             |    |            |
| RP3-449M8.9    | ENSG00000270000.1                     | 0.214550271  | 3            | 3 | 0.057966069                    |              |             |    |            |
|                | Brain_Putamen_basal_ganglia           | 0.771188153  |              |   | Brain_Substantia_nigra         |              |             |    |            |
|                | 1.295532047                           | 0.74821992   | 0.74821992   |   | 0.290821093                    | 1.895954444  |             |    |            |
|                | 1.073753172                           | 0.803286886  | 3            | 0 | 0.985711621                    |              |             |    |            |
| RBP7           | ENSG00000162444.11                    | 0.214590729  | 1            | 1 | 0.214590729                    |              |             |    |            |
|                | Brain_Spinal_cord_cervical_c-1        | 0.214590729  |              |   | Brain_Spinal_cord_cervical_c-1 |              |             |    |            |
|                | 1                                     | 1            | 1            |   | 1.241040659                    | 1.241040659  | 1.241040659 | NA | 1          |
|                | 0.985711621                           |              |              |   |                                |              |             |    |            |
| TTC39B         | ENSG00000155158.20                    | 0.214600643  | 1            | 1 | 0.214600643                    |              |             |    |            |
|                | Brain_Nucleus_accumbens_basal_ganglia | 0.214600643  |              |   |                                |              |             |    |            |
|                | Brain_Nucleus_accumbens_basal_ganglia | 1            | 1            | 1 | -1.241013821                   |              |             |    |            |
|                | -1.241013821                          | -1.241013821 | NA           | 1 | 0                              | 0.985711621  |             |    |            |
| MAP3K1         | ENSG00000095015.5                     | 0.214710762  | 2            | 2 | 0.092750224                    |              |             |    |            |
|                | Brain_Nucleus_accumbens_basal_ganglia | 0.633905301  |              |   | Brain_Cerebellar_Hemisphere    |              |             |    |            |
|                | 1.014665775                           | 0.985334225  | 0.985334225  |   | -0.476237338                   | 1.681065337  |             |    |            |
|                | 0.602413999                           | 1.525443351  | 2            | 0 | 0.985893753                    |              |             |    |            |
| NDUFA9         | ENSG00000139180.10                    | 0.214935476  | 4            | 3 | 0.037763781                    |              |             |    |            |
|                | Brain_Frontal_Cortex_BA9              | 0.901292242  |              |   | Brain_Amygdala                 | 2.15256132   |             |    |            |
|                | 0.004416908                           | 0.770279944  | 0.12402909   |   | 2.077409485                    | 1.239014009  |             |    |            |
|                | 0.990360145                           | 3            | 0            |   | 0.986019991                    |              |             |    |            |
| UGCG           | ENSG00000148154.9                     | 0.214943931  | 2            | 2 | 0.122998425                    |              |             |    |            |
|                | Brain_Caudate_basal_ganglia           | 0.949402795  |              |   | Brain_Cerebellar_Hemisphere    |              |             |    |            |
|                | 1.443643575                           | 0.556356425  | 0.556356425  |   | -0.063456754                   | 1.542309403  |             |    |            |
|                | 0.739426325                           | 1.135448139  | 2            | 0 | 0.986019991                    |              |             |    |            |
| PPP1R14B       | ENSG00000173457.10                    | 0.21494968   | 5            | 4 | 0.105521921                    |              |             |    |            |
|                | Brain_Hypothalamus                    | 0.906655966  |              |   | Brain_Cerebellum               | 3.787322335  |             |    |            |
|                | 0.083363426                           | 0.186177715  | -1.618653109 |   | -0.117257547                   | -0.85357094  |             |    |            |
|                | 0.560617371                           | 4            | 0            |   | 0.986019991                    |              |             |    |            |
| HEMK1          | ENSG00000114735.9                     | 0.215109193  | 6            | 5 | 0.012923563                    |              |             |    |            |
|                | Brain_Nucleus_accumbens_basal_ganglia | 0.420500088  |              |   | Brain_Cerebellum               |              |             |    |            |
|                | 3.665236432                           | 0.097787834  | 0.287413797  |   | 0.805553949                    | 2.485868721  |             |    |            |
|                | 1.721202268                           | 0.648192167  | 5            | 0 | 0.98622433                     |              |             |    |            |
| HECTD4         | ENSG00000173064.12                    | 0.215199073  | 2            | 2 | 0.137887425                    |              |             |    |            |
|                | Brain_Cortex                          | 0.638385627  |              |   | Brain_Cerebellum               | 1.285998235  | 0.714001765 |    |            |
|                | 0.714001765                           | -0.469957157 | 1.483704148  |   | 0.506873496                    | 1.381447157  |             |    |            |
|                | 2                                     | 0            | 0.98622433   |   |                                |              |             |    |            |
| CDKN1A         | ENSG00000124762.13                    | 0.215249263  | 1            | 1 | 0.215249263                    |              |             |    |            |
|                | Brain_Frontal_Cortex_BA9              | 0.215249263  |              |   | Brain_Frontal_Cortex_BA9       | 1            | 1           |    |            |
|                | 1                                     | -1.239259902 | -1.239259902 |   | -1.239259902                   | NA           | 1           | 0  | 0.98622433 |
| RP11-370I10.12 | ENSG00000269514.1                     | 0.215276185  | 3            | 3 | 0.088338572                    |              |             |    |            |
|                | Brain_Amygdala                        | 0.665489563  |              |   | Brain_Cerebellar_Hemisphere    | 1.764532918  |             |    |            |
|                | 0.282158191                           | 0.282158191  | -1.704227616 |   | 1.013778871                    | -0.086034067 |             |    |            |

|              |                                      |                                |             |              |             |   |                              |                  |   |
|--------------|--------------------------------------|--------------------------------|-------------|--------------|-------------|---|------------------------------|------------------|---|
|              | 1.431233265                          | 3                              | 0           | 0.98622433   |             |   |                              |                  |   |
| HAGH         | ENSG00000063854.12                   |                                |             | 0.215387605  | 13          | 4 | 0.077979855                  |                  |   |
|              | Brain_Frontal_Cortex_BA9             |                                |             | 0.994670689  |             |   | Brain_Putamen_basal_ganglia  |                  |   |
|              | 9.254067979                          | 0.001399945                    |             | 0.628306443  |             |   | -1.762529628                 | 0.66334518       |   |
|              | -0.362387044                         | 0.73121876                     | 4           | 0            | 0.986382004 |   |                              |                  |   |
| TAS2R50      | ENSG00000212126.3                    |                                |             | 0.215451605  | 1           | 1 | 0.215451605                  |                  |   |
|              | Brain_Cerebellar_Hemisphere          |                                |             | 0.215451605  |             |   | Brain_Cerebellar_Hemisphere1 | 1                | 1 |
|              | 1_1.238713534                        | 1.238713534                    |             | 1.238713534  |             |   | NA                           | 1                | 0 |
|              | 0.986382004                          |                                |             |              |             |   |                              |                  |   |
| ABLIM3       | ENSG00000173210.19                   |                                |             | 0.215557306  | 10          | 2 | 0.045632229                  |                  |   |
|              | Brain_Frontal_Cortex_BA9             |                                |             | 0.232877881  |             |   | Brain_Caudate_basal_ganglia  |                  |   |
|              | 8.865740133                          | 0.001095927                    |             | 0.464361273  |             |   | -1.998779384                 | -1.192978275     |   |
|              | -1.628022519                         | 0.253484617                    | 2           | 0            | 0.986543104 |   |                              |                  |   |
| DCD          | ENSG00000161634.11                   |                                |             | 0.215664122  | 2           | 2 | 0.088755707                  |                  |   |
|              | Brain_Anterior_cingulate_cortex_BA24 |                                |             | 0.44197765   |             |   | Brain_Frontal_Cortex_BA9     |                  |   |
|              | 1.214230797                          | 0.785769203                    |             | 0.785769203  |             |   | -0.768857938                 | 1.701998194      |   |
|              | 0.466570128                          | 1.747159126                    | 2           | 0            | 0.986709198 |   |                              |                  |   |
| RP11-482M8.1 | ENSG00000260750.5                    |                                |             | 0.215780529  | 3           | 3 | 0.059136139                  |                  |   |
|              | Brain_Anterior_cingulate_cortex_BA24 |                                |             | 0.582357812  |             |   | Brain_Substantia_nigra       |                  |   |
|              | 1.088496577                          | 0.901705608                    |             | 0.901705608  |             |   | -1.887179855                 | 0.931974991      |   |
|              | -0.135086969                         | 1.529332874                    | 3           | 0            | 0.98671628  |   |                              |                  |   |
| GCN1         | ENSG00000089154.10                   |                                |             | 0.215818743  | 4           | 3 | 0.398060107                  | Brain_Cerebellum |   |
|              | 0.772857601                          | Brain_Cortex                   |             | 3.517330481  |             |   | 0.047583304                  | 0.139335663      |   |
|              | -0.569079656                         | 0.845090868                    |             | -0.093471998 |             |   | 0.636894437                  | 3                | 0 |
|              | 0.98671628                           |                                |             |              |             |   |                              |                  |   |
| GAS2L1       | ENSG00000185340.15                   |                                |             | 0.215888368  | 10          | 6 | 0.115831032                  |                  |   |
|              | Brain_Hypothalamus                   |                                |             | 0.836641337  |             |   | Brain_Caudate_basal_ganglia  | 5.956094179      |   |
|              | 0.020815826                          | 0.237348464                    |             | -1.034664331 |             |   | 1.572515565                  | 0.125602062      |   |
|              | 0.744995088                          | 6                              | 0           | 0.98671628   |             |   |                              |                  |   |
| TOP3A        | ENSG00000177302.14                   |                                |             | 0.21594777   | 10          | 2 | 0.390967003                  |                  |   |
|              | Brain_Spinal_cord_cervical_c-1       |                                |             | 0.920381915  |             |   | Brain_Hippocampus            |                  |   |
|              | 8.877849169                          | 0.002176524                    |             | 0.551799708  |             |   | -0.857865018                 | 0.856892271      |   |
|              | 0.16443341                           | 0.466683791                    | 2           | 0            | 0.98671628  |   |                              |                  |   |
| RHOBTB1      | ENSG00000072422.16                   |                                |             | 0.216189567  | 4           | 3 | 0.133574722                  |                  |   |
|              | Brain_Hippocampus                    |                                |             | 0.951992098  |             |   | Brain_Frontal_Cortex_BA9     | 2.974494922      |   |
|              | 0.020539764                          | 0.271180425                    |             | -1.500153202 |             |   | 0.060205333                  | -0.897507653     |   |
|              | 0.696670925                          | 3                              | 0           | 0.987147804  |             |   |                              |                  |   |
| KLK6         | ENSG00000167755.14                   |                                |             | 0.216265361  | 1           | 1 | 0.216265361                  |                  |   |
|              | Brain_Substantia_nigra               |                                |             | 0.216265361  |             |   | Brain_Substantia_nigra       | 1                | 1 |
|              | 1_1.236519932                        | 1.236519932                    |             | 1.236519932  |             |   | NA                           | 1                | 0 |
|              | 0.987147804                          |                                |             |              |             |   |                              |                  |   |
| IL17RC       | ENSG00000163702.18                   |                                |             | 0.216312688  | 7           | 4 | 0.020104016                  |                  |   |
|              | Brain_Cortex                         |                                |             | 0.179606     |             |   | Brain_Putamen_basal_ganglia  | 5.434768047      |   |
|              | 0.013666832                          | 0.27391043                     |             | -2.324400928 |             |   | 2.152574121                  | -0.762599596     |   |
|              | 1.96248175                           | 4                              | 0           | 0.987147804  |             |   |                              |                  |   |
| SSBP2        | ENSG00000145687.16                   |                                |             | 0.216493057  | 2           | 2 | 0.099117924                  |                  |   |
|              | Brain_Cerebellar_Hemisphere          |                                |             | 0.653638043  |             |   | Brain_Cerebellum             | 1.564296339      |   |
|              | 0.435703661                          | 0.435703661                    |             | 0.448713918  |             |   | 1.649145044                  | 1.048929481      |   |
|              | 0.848832989                          | 2                              | 0           | 0.987147804  |             |   |                              |                  |   |
| PFDN6        | ENSG00000204220.11                   |                                |             | 0.216696645  | 2           | 2 | 0.138751374                  | Brain_Cortex     |   |
|              | 0.340034324                          | Brain_Spinal_cord_cervical_c-1 |             | 1.015678757  |             |   | 0.984321243                  |                  |   |
|              | 0.984321243                          | -1.480456829                   |             | -0.954097436 |             |   | -1.217277132                 | 0.372192296      |   |
|              | 2                                    | 0                              | 0.987147804 |              |             |   |                              |                  |   |
| GBX2         | ENSG00000168505.6                    |                                |             | 0.216813289  | 3           | 2 | 0.104279329                  |                  |   |
|              | Brain_Caudate_basal_ganglia          |                                |             | 0.970687521  |             |   | Brain_Putamen_basal_ganglia  | 2.33561958       |   |
|              | 0.049872114                          | 0.614508306                    |             | -1.624452224 |             |   | 0.036746012                  | -0.963017563     |   |
|              | 0.880763723                          | 2                              | 0           | 0.987147804  |             |   |                              |                  |   |
| MS4A8        | ENSG00000166959.7                    |                                |             | 0.216824479  | 1           | 1 | 0.216824479                  | Brain_Amygdala   |   |
|              | 0.216824479                          | Brain_Amygdala                 | 1           | 1            | 1           |   | -1.235016189                 | -1.235016189     |   |
|              | -1.235016189                         | NA                             | 1           | 0            | 0.987147804 |   |                              |                  |   |
| EZH1         | ENSG00000108799.12                   |                                |             | 0.216957142  | 3           | 2 | 0.263424669                  | Brain_Cortex     |   |
|              | 0.689078554                          | Brain_Caudate_basal_ganglia    |             | 2.462438126  |             |   | 0.006650082                  |                  |   |

|           |                                       |                                |                  |              |                                       |                             |              |
|-----------|---------------------------------------|--------------------------------|------------------|--------------|---------------------------------------|-----------------------------|--------------|
|           | 0.530911792                           | -1.118333303                   | 0.463436436      | -0.084930338 | 0.895513236                           |                             |              |
|           | 2                                     | 0                              | 0.987147804      |              |                                       |                             |              |
| HAPLN1    | ENSG00000145681.10                    | 0.217034133                    | 1                | 1            | 0.217034133                           |                             |              |
|           | Brain_Nucleus_accumbens_basal_ganglia | 0.217034133                    |                  |              |                                       |                             |              |
|           | Brain_Nucleus_accumbens_basal_ganglia | 1                              | 1                | -1.234453045 |                                       |                             |              |
|           | -1.234453045                          | -1.234453045                   | NA               | 1            | 0                                     | 0.987147804                 |              |
| KIAA1671  | ENSG00000197077.13                    | 0.217086185                    | 4                | 3            | 0.43267707                            | Brain_Cortex                |              |
|           | 0.935313883                           | Brain_Putamen_basal_ganglia    | 3.689889365      |              | 0.012111081                           |                             |              |
|           | 0.144731405                           | -0.328549353                   | 0.784618858      |              | 0.150501994                           | 0.479975462                 |              |
|           | 3                                     | 0                              | 0.987147804      |              |                                       |                             |              |
| RDH12     | ENSG00000139988.9                     | 0.217106673                    | 1                | 1            | 0.217106673                           |                             |              |
|           | Brain_Substantia_nigra                | 0.217106673                    |                  |              | Brain_Substantia_nigra                | 1                           | 1            |
|           | 1                                     | 1.234258291                    | 1.234258291      | 1.234258291  | NA                                    | 1                           | 0            |
|           | 0.987147804                           |                                |                  |              |                                       |                             |              |
| WFDC2     | ENSG00000101443.17                    | 0.217126857                    | 6                | 6            | 0.043457503                           | Brain_Cortex                |              |
|           | 0.802378828                           | Brain_Cerebellum               | 2.86427875       | 0.132896261  | 0.132896261                           |                             |              |
|           | -2.01928599                           | 0.323397561                    | -0.902037622     |              | 0.832139689                           | 6                           | 0            |
|           | 0.987147804                           |                                |                  |              |                                       |                             |              |
| ZNF571    | ENSG00000180479.13                    | 0.217162658                    | 3                | 3            | 0.039179501                           |                             |              |
|           | Brain_Nucleus_accumbens_basal_ganglia | 0.796551032                    |                  |              | Brain_Frontal_Cortex_BA9              |                             |              |
|           | 1.386695096                           | 0.599369031                    | 0.599369031      | -0.297710232 | 2.062296657                           |                             |              |
|           | 0.502257722                           | 1.351180614                    | 3                | 0            | 0.987147804                           |                             |              |
| LINC01532 | ENSG00000267014.5                     | 0.217310311                    | 7                | 5            | 0.094610944                           |                             |              |
|           | Brain_Nucleus_accumbens_basal_ganglia | 0.98867557                     |                  |              | Brain_Hypothalamus                    |                             |              |
|           | 4.708444433                           | 0.02326193                     | 0.278680457      | -1.671560884 | 0.729994807                           |                             |              |
|           | -0.153099308                          | 0.793320824                    | 5                | 0            | 0.987147804                           |                             |              |
| LMBRD2    | ENSG00000164187.6                     | 0.217418164                    | 2                | 2            | 0.096684                              | Brain_Cortex                |              |
|           | 0.552241707                           | Brain_Spinal_cord_cervical_c-1 | 1.032444926      |              | 0.967555074                           |                             |              |
|           | 0.967555074                           | -1.661146636                   | -0.59440434      | -1.127775488 | 0.754300711                           |                             |              |
|           | 2                                     | 0                              | 0.987147804      |              |                                       |                             |              |
| BDH2      | ENSG00000164039.14                    | 0.217455943                    | 10               | 9            | 0.011252102                           |                             |              |
|           | Brain_Substantia_nigra                | 0.797617091                    |                  |              | Brain_Putamen_basal_ganglia           |                             |              |
|           | 4.312368428                           | 0.102622644                    | 0.199630923      | -2.534770493 | 0.417919992                           |                             |              |
|           | -0.803605301                          | 0.861168629                    | 9                | 0            | 0.987147804                           |                             |              |
| GPCPD1    | ENSG00000125772.12                    | 0.217551667                    | 2                | 2            | 0.090784135                           |                             |              |
|           | Brain_Anterior_cingulate_cortex_BA24  | 0.933592412                    |                  |              | Brain_Cerebellum                      | 1.29562234                  |              |
|           | 0.70437766                            | 0.70437766                     | -1.691275824     | -0.083325893 | -0.887300859                          | 1.1369923                   |              |
|           | 2                                     | 0                              | 0.987147804      |              |                                       |                             |              |
| ACOT7     | ENSG00000097021.19                    | 0.217562883                    | 1                | 1            | 0.217562883                           | Brain_Cerebellum            |              |
|           | 0.217562883                           | Brain_Cerebellum               | 1                | 1            | 1.233034526                           | 1.233034526                 |              |
|           | 1.233034526                           | NA                             | 1                | 0            | 0.987147804                           |                             |              |
| RASSF7    | ENSG00000099849.14                    | 0.217761867                    | 1                | 1            | 0.217761867                           |                             |              |
|           | Brain_Cerebellum                      | 0.217761867                    | Brain_Cerebellum | 1            | 1                                     | 1                           | -1.232501337 |
|           | -1.232501337                          | -1.232501337                   | NA               | 1            | 0                                     | 0.987147804                 |              |
| MKRN1     | ENSG00000133606.10                    | 0.217771482                    | 2                | 2            | 0.161349735                           |                             |              |
|           | Brain_Frontal_Cortex_BA9              | 0.268229635                    |                  |              | Brain_Nucleus_accumbens_basal_ganglia |                             |              |
|           | 1.046881863                           | 0.953118137                    | 0.953118137      | 1.107148718  | 1.400546478                           |                             |              |
|           | 1.253847598                           | 0.207463546                    | 2                | 0            | 0.987147804                           |                             |              |
| SLC12A2   | ENSG00000064651.13                    | 0.21806908                     | 3                | 3            | 0.049899737                           |                             |              |
|           | Brain_Spinal_cord_cervical_c-1        | 0.739817599                    |                  |              | Brain_Cerebellar_Hemisphere           |                             |              |
|           | 1.702005687                           | 0.346720882                    | 0.346720882      | -1.960822463 | -0.332094902                          |                             |              |
|           | -0.901510621                          | 0.918252158                    | 3                | 0            | 0.987147804                           |                             |              |
| ACVR1     | ENSG00000115170.13                    | 0.2180927                      | 1                | 1            | 0.2180927                             | Brain_Cerebellar_Hemisphere |              |
|           | 0.2180927                             | Brain_Cerebellar_Hemisphere    | 1                | 1            | 1                                     | 1.23161563                  | 1.23161563   |
|           | 1.23161563                            | NA                             | 1                | 0            | 0.987147804                           |                             |              |
| HEBP2     | ENSG00000051620.10                    | 0.218150345                    | 4                | 2            | 0.530961518                           |                             |              |
|           | Brain_Hypothalamus                    | 0.785271937                    |                  |              | Brain_Cerebellar_Hemisphere           | 3.685893837                 |              |
|           | 0.075740327                           | 0.144036307                    | -0.626538919     |              | 0.272455327                           | -0.329702882                |              |
|           | 0.412062257                           | 2                              | 0                | 0.987147804  |                                       |                             |              |
| GEMIN2    | ENSG00000092208.16                    | 0.218163513                    | 1                | 1            | 0.218163513                           |                             |              |
|           | Brain_Frontal_Cortex_BA9              | 0.218163513                    |                  |              | Brain_Frontal_Cortex_BA9              | 1                           | 1            |
|           | 1                                     | 1.231426172                    | 1.231426172      | 1.231426172  | NA                                    | 1                           | 0            |



0.987147804  
SMPDL3B ENSG00000130768.14 0.218189069 4 1 0.187734732  
Brain\_Cerebellar\_Hemisphere 0.29024482 Brain\_Cerebellum 3.951291255  
0.000972841 3.951291255 -1.317310008 -1.057584702 -1.224115577  
0.121049743 1 0 0.987147804  
LRTOMT ENSG00000184154.13 0.218194455 1 1 0.218194455  
Brain\_Hippocampus 0.218194455 Brain\_Hippocampus 1 1 1  
1.231343404 1.231343404 1.231343404 NA 1 0 0.987147804  
RP11-448A19.1 ENSG00000273329.1 0.218432402 7 4 0.01274595  
Brain\_Spinal\_cord\_cervical\_c-1 0.617804985 Brain\_Cerebellar\_Hemisphere  
4.639909353 0.028799712 0.503788654 -2.490789809 0.49896366  
-1.532598716 0.990718678 4 0 0.987147804  
NCALD ENSG00000104490.17 0.218553284 3 3 0.075444836  
Brain\_Nucleus\_accumbens\_basal\_ganglia 0.646173499 Brain\_Cerebellum  
1.104788396 0.882705821 0.882705821 -1.777750532 1.121491173  
-0.065724959 1.519200227 3 0 0.987147804  
RP11-360K13.1 ENSG00000254587.1 0.218681066 1 1 0.218681066  
Brain\_Cortex 0.218681066 Brain\_Cortex 1 1 1 -1.230042833  
-1.230042833 -1.230042833 NA 1 0 0.987147804  
NOS2 ENSG00000007171.16 0.218703285 12 5 0.057366904  
Brain\_Hypothalamus 0.386325371 Brain\_Putamen\_basal\_ganglia 8.230790907  
0.001208197 0.522376468 -1.900504814 1.117163062 -1.073404065  
0.754828887 5 0 0.987147804  
RP13-516M14.1 ENSG00000260563.3 0.218738201 7 2 0.093298157  
Brain\_Cortex 0.572904313 Brain\_Putamen\_basal\_ganglia 5.851082569  
0.000410449 0.99525624 0.563779341 1.678250756 1.442871526  
0.397509511 2 0 0.987147804  
DNAJC5G ENSG00000163793.12 0.218746078 1 1 0.218746078  
Brain\_Cortex 0.218746078 Brain\_Cortex 1 1 1 1.229869232  
1.229869232 1.229869232 NA 1 0 0.987147804  
ALDOA ENSG00000149925.17 0.21876987 1 1 0.21876987 Brain\_Cerebellum 0.21876987  
Brain\_Cerebellum 1 1 1 -1.229805708 -1.229805708 -1.229805708  
NA 1 0 0.987147804  
FCGRT ENSG00000104870.12 0.218886538 7 7 0.015036003  
Brain\_Hippocampus 0.979896317 Brain\_Cerebellar\_Hemisphere 3.475833487  
0.119912498 0.119912498 -2.431510724 -0.025198897 -1.602332534  
0.823975621 7 0 0.987147804  
SERINC5 ENSG00000164300.16 0.218911365 12 11 0.030549662  
Brain\_Caudate\_basal\_ganglia 0.824442841 Brain\_Cerebellar\_Hemisphere  
2.947707893 0.010045377 0.283720764 -2.162889732 1.40807695  
-0.359692185 1.21002858 11 0 0.987147804  
C16orf74 ENSG00000154102.10 0.219005326 4 4 0.114615163  
Brain\_Nucleus\_accumbens\_basal\_ganglia 0.899275473  
Brain\_Spinal\_cord\_cervical\_c-1 2.770791297 0.094786621 0.094786621  
0.126576657 1.57778434 0.827468556 0.593295705 4 0  
0.987147804  
PLA2G2A ENSG00000188257.10 0.219051808 1 1 0.219051808  
Brain\_Spinal\_cord\_cervical\_c-1 0.219051808 Brain\_Spinal\_cord\_cervical\_c-1  
1 1 1 1.229053339 1.229053339 1.229053339 NA 1 0  
0.987147804  
SNRPG ENSG00000143977.13 0.219111955 1 1 0.219111955 Brain\_Cortex  
0.219111955 Brain\_Cortex 1 1 1 -1.228892922 -1.228892922  
-1.228892922 NA 1 0 0.987147804  
LGALS9 ENSG00000168961.16 0.219133752 3 3 0.069808422  
Brain\_Cortex 0.666814095 Brain\_Putamen\_basal\_ganglia 1.719700446  
0.330885649 0.330885649 -0.430524573 1.813151734 1.04757947  
1.280350341 3 0 0.987147804  
RP11-285F16.1 ENSG00000273030.1 0.219149805 1 1 0.219149805  
Brain\_Hypothalamus 0.219149805 Brain\_Hypothalamus 1 1 1  
1.228791991 1.228791991 1.228791991 NA 1 0 0.987147804  
CACNA2D4 ENSG00000151062.14 0.21917192 2 2 0.099237783  
Brain\_Putamen\_basal\_ganglia 0.18621227 Brain\_Caudate\_basal\_ganglia 1.928694407

|               |                                       |              |              |                                       |              |
|---------------|---------------------------------------|--------------|--------------|---------------------------------------|--------------|
|               | 0.071305593                           | 0.071305593  | 1.321867519  | 1.648560126                           | 1.485213822  |
|               | 0.231006558                           | 2 0          | 0.987147804  |                                       |              |
| SLC1A2        | ENSG00000110436.11                    | 0.219186915  | 1            | 1                                     | 0.219186915  |
|               | Brain_Cerebellar_Hemisphere           | 0.219186915  |              | Brain_Cerebellar_Hemisphere           | 1            |
|               | 1 1.228693044                         | 1.228693044  | 1.228693044  | NA                                    | 1 0          |
|               | 0.987147804                           |              |              |                                       |              |
| MGAT3         | ENSG00000128268.11                    | 0.219482041  | 5            | 3                                     | 0.065518849  |
|               | Brain_Nucleus_accumbens_basal_ganglia | 0.433964644  |              | Brain_Hypothalamus                    |              |
|               | 4.126125479                           | 0.005439261  | 0.284548955  | 0.782425345                           | 1.841701335  |
|               | 1.445650151                           | 0.432695004  | 3 0          | 0.987147804                           |              |
| GRHPR         | ENSG00000137106.17                    | 0.219577589  | 8            | 7                                     | 0.130444052  |
|               | Brain_Nucleus_accumbens_basal_ganglia | 0.788238728  |              | Brain_Cerebellar_Hemisphere           |              |
|               | 2.846250279                           | 0.061483463  | 0.129350916  | -1.512353128                          | 1.08172124   |
|               | -0.315002863                          | 0.909885218  | 7 0          | 0.987147804                           |              |
| WDHD1         | ENSG00000198554.11                    | 0.219755709  | 2            | 2                                     | 0.110869745  |
|               | Brain_Frontal_Cortex_BA9              | 0.114958812  |              | Brain_Nucleus_accumbens_basal_ganglia |              |
|               | 1.658846976                           | 0.341153024  | 0.341153024  | -1.594296036                          | -1.576290753 |
|               | -1.585293395                          | 0.012731658  | 2 0          | 0.987147804                           |              |
| RP5-1085F17.3 | ENSG00000260257.2                     | 0.219868713  | 4            | 4                                     | 0.040216199  |
|               | Brain_Hypothalamus                    | 0.390399755  |              | Brain_Caudate_basal_ganglia           | 2.475591948  |
|               | 0.218074707                           | 0.218074707  | 0.858892632  | 2.051521385                           | 1.339365491  |
|               | 0.506210634                           | 4 0          | 0.987147804  |                                       |              |
| LINC00940     | ENSG00000235049.1                     | 0.219967081  | 8            | 8                                     | 0.01892352   |
|               | Brain_Caudate_basal_ganglia           | 0.987461673  |              | Brain_Cortex                          | 1.879361398  |
|               | 0.162479315                           | 0.162479315  | -2.347034155 | 0.180303913                           | -0.719707387 |
|               | 0.896234091                           | 8 0          | 0.987147804  |                                       |              |
| OPN1SW        | ENSG00000128617.2                     | 0.22002358   | 3            | 3                                     | 0.038743051  |
|               | Brain_Putamen_basal_ganglia           | 1.46382015   |              | Brain_Amygdala                        |              |
|               | 0.765885329                           | 0.297761332  | 2.066905588  | 1.029246114                           | 0.923458205  |
|               | 0.703742949                           | 3 0          | 0.987147804  |                                       |              |
| SLC12A7       | ENSG00000113504.20                    | 0.220137645  | 1            | 1                                     | 0.220137645  |
|               | Brain_Cerebellum                      | 0.220137645  |              | Brain_Cerebellum                      | 1 1 1        |
|               | -1.226162195                          | -1.226162195 | NA           | 1 0                                   | 0.987147804  |
| TXN           | ENSG00000136810.12                    | 0.220220514  | 9            | 4                                     | 0.290269947  |
|               | Brain_Spinal_cord_cervical_c-1        | 0.811953098  |              | Brain_Hypothalamus                    |              |
|               | 6.957679893                           | 0.022437083  | 0.241409862  | -1.057529612                          | 0.622681132  |
|               | -0.410899919                          | 0.481534224  | 4 0          | 0.987147804                           |              |
| EME1          | ENSG00000154920.14                    | 0.220227225  | 5            | 3                                     | 0.052482522  |
|               | Brain_Substantia_nigra                | 0.685284915  |              | Brain_Spinal_cord_cervical_c-1        |              |
|               | 2.989795642                           | 0.00060841   | 0.911227846  | -0.747763547                          | 1.939154547  |
|               | 0.058567073                           | 1.153226512  | 3 0          | 0.987147804                           |              |
| SIK2          | ENSG00000170145.4                     | 0.22023841   | 2            | 2                                     | 0.109531831  |
|               | Brain_Spinal_cord_cervical_c-1        | 0.572033498  |              | Brain_Cerebellar_Hemisphere           |              |
|               | 1.071970053                           | 0.928029947  | 0.928029947  | 0.565059201                           | 1.600300975  |
|               | 1.082680088                           | 0.732026478  | 2 0          | 0.987147804                           |              |
| INTS4         | ENSG00000149262.16                    | 0.220252167  | 4            | 3                                     | 0.033032175  |
|               | Brain_Hypothalamus                    | 0.87604214   |              | Brain_Cerebellum                      | 2.431349516  |
|               | 0.615061839                           | 0.155988431  | 2.131691997  | 1.30697603                            | 0.944975187  |
|               | 0                                     | 0.987147804  |              |                                       | 3            |
| RP4-669L17.10 | ENSG00000237094.11                    | 0.220389633  | 1            | 1                                     | 0.220389633  |
|               | Brain_Hippocampus                     | 0.220389633  |              | Brain_Hippocampus                     | 1 1 1        |
|               | -1.225492716                          | -1.225492716 | -1.225492716 | NA                                    | 1 0          |
| ACTB          | ENSG00000075624.13                    | 0.220411096  | 1            | 1                                     | 0.220411096  |
|               | Brain_Putamen_basal_ganglia           | 0.220411096  |              | Brain_Putamen_basal_ganglia           | 1 1          |
|               | 1 1.225435719                         | 1.225435719  | 1.225435719  | NA                                    | 1 0          |
|               | 0.987147804                           |              |              |                                       |              |
| LYPD6         | ENSG00000187123.14                    | 0.220574561  | 5            | 5                                     | 0.056882477  |
|               | Brain_Substantia_nigra                | 1.670569549  |              | Brain_Cerebellum                      |              |
|               | 0.999872435                           | -0.557456359 | 1.904212784  | 0.364366642                           |              |
|               | 0.364366642                           |              | 0.790321519  | 1.02681405                            | 5            |
|               | 0                                     | 0.987147804  |              |                                       |              |
| FAM189B       | ENSG00000160767.20                    | 0.220579505  | 1            | 1                                     | 0.220579505  |
|               | Brain_Cortex                          | 0.220579505  |              | Brain_Cortex                          | 1 1 1        |
|               |                                       |              |              |                                       | -1.22498863  |

|          |                                       |                                       |              |              |                                      |                  |              |
|----------|---------------------------------------|---------------------------------------|--------------|--------------|--------------------------------------|------------------|--------------|
|          | -1.22498863                           | -1.22498863                           | NA           | 1            | 0                                    | 0.987147804      |              |
| UBL4B    | ENSG00000186150.4                     | 0.22066876                            | 1            | 1            | 0.22066876                           | Brain_Cortex     | 0.22066876   |
|          | Brain_Cortex                          | 1                                     | 1            | 1            | -1.224751776                         | -1.224751776     | -1.224751776 |
|          | NA                                    | 1                                     | 0            | 0.987147804  |                                      |                  |              |
| SLC22A14 | ENSG00000144671.10                    | 0.220724446                           | 3            | 3            | 0.041069168                          |                  |              |
|          | Brain_Cortex                          | 0.721338296                           |              |              | Brain_Cerebellum                     | 1.295934973      | 0.702567007  |
|          | 0.702567007                           | -2.042831026                          | 0.440774112  |              | -0.652909225                         |                  | 1.268026632  |
|          | 3                                     | 0                                     | 0.987147804  |              |                                      |                  |              |
| AMPD2    | ENSG00000116337.15                    | 0.220727321                           | 3            | 3            | 0.035837806                          |                  |              |
|          | Brain_Cerebellar_Hemisphere           | 0.960015553                           |              |              | Brain_Spinal_cord_cervical_c-1       |                  |              |
|          | 1.397203431                           | 0.60101593                            | 0.60101593   | 0.050134066  | 2.098762906                          |                  |              |
|          | 0.980179495                           | 1.037246335                           | 3            | 0            | 0.987147804                          |                  |              |
| FAIM2    | ENSG00000135472.8                     | 0.22089877                            | 3            | 3            | 0.133876118                          |                  |              |
|          | Brain_Cerebellar_Hemisphere           | 0.564298199                           |              |              | Brain_Frontal_Cortex_BA9             |                  |              |
|          | 1.721560054                           | 0.29174257                            | 0.29174257   | 0.576469027  | 1.498990417                          |                  |              |
|          | 1.135129463                           | 0.491143112                           | 3            | 0            | 0.987147804                          |                  |              |
| ZNF175   | ENSG00000105497.7                     | 0.221046574                           | 7            | 6            | 0.016037677                          |                  |              |
|          | Brain_Cerebellar_Hemisphere           | 0.624953445                           |              |              | Brain_Substantia_nigra               |                  |              |
|          | 4.778035732                           | 0.122014606                           | 0.164714046  |              | -2.408057003                         |                  | 0.488842163  |
|          | -1.352777231                          | 0.904616426                           | 6            | 0            | 0.987147804                          |                  |              |
| PARP2    | ENSG00000129484.13                    | 0.221147676                           | 8            | 3            | 0.062329333                          |                  |              |
|          | Brain_Nucleus_accumbens_basal_ganglia | 0.99563097                            |              |              | Brain_Spinal_cord_cervical_c-1       |                  |              |
|          | 6.44161565                            | 0.009995123                           | 0.35761013   | -0.941711251 | 1.863945678                          |                  |              |
|          | -0.019156005                          | 0.818974648                           | 3            | 0            | 0.987147804                          |                  |              |
| NACA     | ENSG00000196531.10                    | 0.221149379                           | 3            | 3            | 0.075034372                          |                  |              |
|          | Brain_Caudate_basal_ganglia           | 0.475502465                           |              |              | Brain_Cortex                         | 1.140902629      |              |
|          | 0.844883419                           | 0.844883419                           | -1.780254182 |              | -0.713554882                         |                  | -1.143702179 |
|          | 0.562506913                           | 3                                     | 0            | 0.987147804  |                                      |                  |              |
| IRF8     | ENSG00000140968.10                    | 0.221257495                           | 1            | 1            | 0.221257495                          | Brain_Cerebellum |              |
|          | 0.221257495                           | Brain_Cerebellum                      | 1            | 1            | 1.223191184                          | 1.223191184      |              |
|          | 1.223191184                           | NA                                    | 1            | 0            | 0.987147804                          |                  |              |
| NEK3     | ENSG00000136098.16                    | 0.221329769                           | 3            | 2            | 0.09470982                           |                  |              |
|          | Brain_Anterior_cingulate_cortex_BA24  | 0.144295695                           |              |              | Brain_Putamen_basal_ganglia          |                  |              |
|          | 2.609638883                           | 0.071461411                           | 0.318899707  |              | 1.459979547                          |                  | 1.671060036  |
|          | 1.586456474                           | 0.111596493                           | 2            | 0            | 0.987147804                          |                  |              |
| TREM2    | ENSG00000095970.16                    | 0.221349972                           | 1            | 1            | 0.221349972                          |                  |              |
|          | Brain_Hypothalamus                    | 0.221349972                           |              |              | Brain_Hypothalamus                   | 1                | 1            |
|          | -1.22294632                           | -1.22294632                           | -1.22294632  | NA           | 1                                    | 0                | 0.987147804  |
| DUSP28   | ENSG00000188542.9                     | 0.221518889                           | 2            | 2            | 0.098878806                          |                  |              |
|          | Brain_Hypothalamus                    | 0.643467158                           |              |              | Brain_Cerebellar_Hemisphere          | 1.046038706      |              |
|          | 0.953961294                           | 0.953961294                           | -0.4628566   | 1.650313628  | 0.593728514                          |                  |              |
|          | 1.494236998                           | 2                                     | 0            | 0.987147804  |                                      |                  |              |
| CYP24A1  | ENSG00000019186.9                     | 0.221529574                           | 5            | 3            | 0.098804384                          |                  |              |
|          | Brain_Amygdala                        | 0.968156887                           |              |              | Brain_Anterior_cingulate_cortex_BA24 |                  |              |
|          | 3.792139676                           | 1.10E-18                              | 0.163452057  |              | -1.650677796                         |                  | 0.063040614  |
|          | -0.482769575                          | 0.779792614                           | 3            | 0            | 0.987147804                          |                  |              |
| GINM1    | ENSG00000055211.12                    | 0.221532651                           | 8            | 6            | 0.069357133                          |                  |              |
|          | Brain_Frontal_Cortex_BA9              | 0.915601873                           |              |              | Brain_Cortex                         | 5.710329917      |              |
|          | 0.006444174                           | 0.235814494                           | -0.105975396 |              | 1.816086311                          |                  | 1.218020608  |
|          | 0.713312979                           | 6                                     | 0            | 0.987147804  |                                      |                  |              |
| ZPR1     | ENSG00000109917.10                    | 0.221550062                           | 8            | 4            | 0.068646655                          |                  |              |
|          | Brain_Anterior_cingulate_cortex_BA24  | 0.844314485                           |              |              | Brain_Caudate_basal_ganglia          |                  |              |
|          | 6.050953334                           | 0.007415431                           | 0.362235479  |              | -1.820738246                         |                  | 0.196377782  |
|          | -1.122322717                          | 0.68121068                            | 4            | 0            | 0.987147804                          |                  |              |
| PPM1L    | ENSG00000163590.13                    | 0.221695434                           | 2            | 2            | 0.185731462                          |                  |              |
|          | Brain_Cerebellar_Hemisphere           | 0.818950957                           |              |              | Brain_Cerebellum                     | 1.74201542       | 0.25798458   |
|          | 0.25798458                            | 0.228894446                           | 1.323312544  |              | 0.776103495                          | 0.773870458      | 2            |
|          | 0                                     | 0.987147804                           |              |              |                                      |                  |              |
| LIN37    | ENSG00000267796.7                     | 0.221847583                           | 2            | 2            | 0.181901232                          | Brain_Cerebellum |              |
|          | 0.254550662                           | Brain_Nucleus_accumbens_basal_ganglia | 1.02309487   | 0.97690513   |                                      |                  |              |
|          | 0.97690513                            | 1.139365686                           | 1.33492397   | 1.237144828  | 0.138280589                          | 2                | 0            |
|          | 0.987147804                           |                                       |              |              |                                      |                  |              |

|          |                                       |                                       |                                       |             |              |                  |            |   |   |
|----------|---------------------------------------|---------------------------------------|---------------------------------------|-------------|--------------|------------------|------------|---|---|
| ALG1     | ENSG00000033011.11                    | 0.22185762                            | 2                                     | 2           | 0.108780946  | Brain_Cerebellum |            |   |   |
|          | 0.517780386                           | Brain_Cerebellar_Hemisphere           | 1.010111578                           |             | 0.989888422  |                  |            |   |   |
|          | 0.989888422                           | -1.6036966                            | -0.646770656                          |             | -1.125233628 | 0.676648824      |            |   | 2 |
|          | 0                                     | 0.987147804                           |                                       |             |              |                  |            |   |   |
| MYO15B   | ENSG00000266714.6                     | 0.221866013                           | 8                                     | 8           | 0.037287078  |                  |            |   |   |
|          | Brain_Cerebellum                      | 0.577406871                           | Brain_Hypothalamus                    | 2.6350294   | 0.088514893  |                  |            |   |   |
|          | 0.088514893                           | -1.094939828                          | 2.082606807                           |             | 0.577928478  | 1.06797357       |            |   | 8 |
|          | 0                                     | 0.987147804                           |                                       |             |              |                  |            |   |   |
| RBM8A    | ENSG00000265241.6                     | 0.22189923                            | 6                                     | 1           | 0.21408736   | Brain_Cerebellum | 0.23793172 |   |   |
|          | Brain_Hypothalamus                    | 5.968702191                           | 6.56E-18                              | 5.968702191 | 1.180172234  |                  |            |   |   |
|          | 1.242404488                           | 1.218250718                           | 0.021136701                           | 1           | 0            | 0.987147804      |            |   |   |
| DHX57    | ENSG00000163214.20                    | 0.221986006                           | 2                                     | 2           | 0.090598223  | Brain_Cerebellum |            |   |   |
|          | 0.647990877                           | Brain_Nucleus_accumbens_basal_ganglia | 1.043774402                           |             |              |                  |            |   |   |
|          | 0.956225598                           | 0.956225598                           | -1.692250493                          |             | 0.456555073  | -0.61784771      |            |   |   |
|          | 1.519434987                           | 2                                     | 0                                     | 0.987147804 |              |                  |            |   |   |
| PAGR1    | ENSG00000280789.1                     | 0.222022835                           | 1                                     | 1           | 0.222022835  | Brain_Cerebellum |            |   |   |
|          | 0.222022835                           | Brain_Cerebellum                      | 1                                     | 1           | -1.221166898 | -1.221166898     |            |   |   |
|          | -1.221166898                          | NA                                    | 1                                     | 0           | 0.987147804  |                  |            |   |   |
| DYNC2LI1 | ENSG00000138036.18                    | 0.22210417                            | 4                                     | 2           | 0.260850805  |                  |            |   |   |
|          | Brain_Hypothalamus                    | 0.983422702                           | Brain_Caudate_basal_ganglia           | 3.627677591 |              |                  |            |   |   |
|          | 0.017742018                           | 0.246594434                           | -1.124382471                          |             | -0.020778056 | -0.513769119     |            |   |   |
|          | 0.530510466                           | 2                                     | 0                                     | 0.987147804 |              |                  |            |   |   |
| MYO10    | ENSG00000145555.14                    | 0.222112192                           | 1                                     | 1           | 0.222112192  |                  |            |   |   |
|          | Brain_Anterior_cingulate_cortex_BA24  | 0.222112192                           |                                       |             |              |                  |            |   |   |
|          | Brain_Anterior_cingulate_cortex_BA24  | 1                                     | 1                                     | 1           | 1.220930877  |                  |            |   |   |
|          | 1.220930877                           | 1.220930877                           | NA                                    | 1           | 0            | 0.987147804      |            |   |   |
| ZNF384   | ENSG00000126746.17                    | 0.222223464                           | 2                                     | 2           | 0.210691098  |                  |            |   |   |
|          | Brain_Cerebellum                      | 0.222561316                           | Brain_Hypothalamus                    | 1.015399171 |              |                  |            |   |   |
|          | 0.984600829                           | 0.984600829                           | -1.25166736                           |             | -1.219745634 | -1.235706497     |            |   |   |
|          | 0.022572069                           | 2                                     | 0                                     | 0.987147804 |              |                  |            |   |   |
| DISP2    | ENSG00000140323.5                     | 0.222382081                           | 11                                    | 4           | 0.034575439  |                  |            |   |   |
|          | Brain_Frontal_Cortex_BA9              | 0.314549719                           | Brain_Nucleus_accumbens_basal_ganglia |             |              |                  |            |   |   |
|          | 8.443061139                           | 0.016477784                           | 0.401049719                           | 1.005721165 | 2.113296023  |                  |            |   |   |
|          | 1.624458629                           | 0.330607606                           | 4                                     | 0           | 0.987147804  |                  |            |   |   |
| COPE     | ENSG00000105669.13                    | 0.222399234                           | 11                                    | 5           | 0.054402933  |                  |            |   |   |
|          | Brain_Putamen_basal_ganglia           | 0.89826874                            | Brain_Hypothalamus                    | 7.868489735 |              |                  |            |   |   |
|          | 0.002896048                           | 0.299278543                           | -1.923614415                          |             | 0.267928258  | -1.12019152      |            |   |   |
|          | 0.742771953                           | 5                                     | 0                                     | 0.987147804 |              |                  |            |   |   |
| FETUB    | ENSG00000090512.11                    | 0.222503289                           | 1                                     | 1           | 0.222503289  |                  |            |   |   |
|          | Brain_Spinal_cord_cervical_c-1        | 0.222503289                           | Brain_Spinal_cord_cervical_c-1        |             |              |                  |            |   |   |
|          | 1                                     | 1                                     | 1                                     | 1.219898672 | 1.219898672  | 1.219898672      | NA         | 1 | 0 |
|          | 0.987147804                           |                                       |                                       |             |              |                  |            |   |   |
| R3HCC1   | ENSG00000104679.10                    | 0.22261536                            | 1                                     | 1           | 0.22261536   |                  |            |   |   |
|          | Brain_Spinal_cord_cervical_c-1        | 0.22261536                            | Brain_Spinal_cord_cervical_c-1        | 1           |              |                  |            |   |   |
|          | 1                                     | 1                                     | 1.219603128                           | 1.219603128 | 1.219603128  | NA               | 1          | 0 |   |
|          | 0.987147804                           |                                       |                                       |             |              |                  |            |   |   |
| RRAS     | ENSG00000126458.3                     | 0.222937447                           | 1                                     | 1           | 0.222937447  |                  |            |   |   |
|          | Brain_Spinal_cord_cervical_c-1        | 0.222937447                           | Brain_Spinal_cord_cervical_c-1        |             |              |                  |            |   |   |
|          | 1                                     | 1                                     | 1                                     | 1.218754338 | 1.218754338  | 1.218754338      | NA         | 1 | 0 |
|          | 0.987147804                           |                                       |                                       |             |              |                  |            |   |   |
| NPIP3    | ENSG00000169246.16                    | 0.222990787                           | 4                                     | 4           | 0.639428143  |                  |            |   |   |
|          | Brain_Amygdala                        | 0.843123107                           | Brain_Cortex                          | 2.340428475 | 0.087109053  |                  |            |   |   |
|          | 0.087109053                           | -0.388288726                          | 0.468498501                           |             | -0.017593236 | 0.420168927      |            |   |   |
|          | 4                                     | 0                                     | 0.987147804                           |             |              |                  |            |   |   |
| GRK7     | ENSG00000114124.2                     | 0.223129801                           | 6                                     | 4           | 0.080453675  |                  |            |   |   |
|          | Brain_Spinal_cord_cervical_c-1        | 0.817947416                           |                                       |             |              |                  |            |   |   |
|          | Brain_Nucleus_accumbens_basal_ganglia | 4.400468402                           | 0.023964301                           |             |              |                  |            |   |   |
|          | 0.386890778                           | -0.230185774                          | 1.748059791                           |             | 0.996168364  | 0.758804612      |            |   |   |
|          | 4                                     | 0                                     | 0.987147804                           |             |              |                  |            |   |   |
| AGGF1    | ENSG00000164252.12                    | 0.223173216                           | 3                                     | 3           | 0.156944722  |                  |            |   |   |
|          | Brain_Caudate_basal_ganglia           | 0.285522154                           | Brain_Nucleus_accumbens_basal_ganglia |             |              |                  |            |   |   |
|          | 1.20485807                            | 0.808099211                           | 0.808099211                           |             | 1.06799636   | 1.415422278      |            |   |   |

|            |                                      |                                       |              |              |                                       |                  |    |
|------------|--------------------------------------|---------------------------------------|--------------|--------------|---------------------------------------|------------------|----|
|            | 1.289055676                          | 0.192096915                           | 3            | 0            | 0.987147804                           |                  |    |
| RFC4       | ENSG00000163918.10                   | 0.223196298                           | 9            | 3            | 0.129649358                           |                  |    |
|            | Brain_Anterior_cingulate_cortex_BA24 | 0.920761133                           |              |              | Brain_Substantia_nigra                |                  |    |
|            | 7.236141999                          | 9.72E-19                              | 0.573723098  |              | -1.515486061                          | 0.364462428      |    |
|            | -0.212021988                         | 0.619379925                           | 3            | 0            | 0.987147804                           |                  |    |
| ARSB       | ENSG00000113273.15                   | 0.223212223                           | 11           | 6            | 0.238876863                           |                  |    |
|            | Brain_Anterior_cingulate_cortex_BA24 | 0.997375449                           |              |              | Brain_Putamen_basal_ganglia           |                  |    |
|            | 7.707231181                          | 0.027415973                           | 0.288282422  |              | -1.177798711                          | 0.853076986      |    |
|            | -0.284329316                         | 0.578838333                           | 6            | 0            | 0.987147804                           |                  |    |
| UNG        | ENSG00000076248.10                   | 0.223230661                           | 2            | 2            | 0.182420028                           |                  |    |
|            | Brain_Substantia_nigra               | 0.237219781                           |              |              | Brain_Nucleus_accumbens_basal_ganglia |                  |    |
|            | 1.059076682                          | 0.940923318                           | 0.940923318  |              | -1.181964515                          | 1.333340684      |    |
|            | 0.075688085                          | 1.778589363                           | 2            | 0            | 0.987147804                           |                  |    |
| NXP4       | ENSG00000182379.9                    | 0.223232011                           | 2            | 2            | 0.145549356                           |                  |    |
|            | Brain_Cerebellar_Hemisphere          | 0.472299038                           |              |              | Brain_Cerebellum                      | 1.144253076      |    |
|            | 0.855746924                          | 0.855746924                           | -1.455433253 |              | 0.718743399                           | -0.368344927     |    |
|            | 1.537375054                          | 2                                     | 0            | 0.987147804  |                                       |                  |    |
| AKR1E2     | ENSG00000165568.17                   | 0.223248375                           | 7            | 7            | 0.019365375                           |                  |    |
|            | Brain_Spinal_cord_cervical_c-1       | 0.587644586                           |              |              | Brain_Cortex                          | 1.749773117      |    |
|            | 0.46566274                           | 0.46566274                            | -1.392323825 |              | 2.338421856                           | 0.700782148      |    |
|            | 1.107721185                          | 7                                     | 0            | 0.987147804  |                                       |                  |    |
| SPICE1     | ENSG00000163611.11                   | 0.22325768                            | 1            | 1            | 0.22325768                            | Brain_Cerebellum |    |
|            | 0.22325768                           | Brain_Cerebellum                      | 1            | 1            | -1.217911305                          | -1.217911305     |    |
|            | -1.217911305                         | NA                                    | 1            | 0            | 0.987147804                           |                  |    |
| THSD7B     | ENSG00000144229.11                   | 0.223278774                           | 3            | 3            | 0.063345786                           |                  |    |
|            | Brain_Caudate_basal_ganglia          | 0.902300371                           |              |              | Brain_Cerebellum                      | 1.597847556      |    |
|            | 0.543000383                          | 0.543000383                           | -1.856756634 |              | 0.122755933                           | -0.841547521     |    |
|            | 0.990737624                          | 3                                     | 0            | 0.987147804  |                                       |                  |    |
| IFITM1     | ENSG00000185885.15                   | 0.223326028                           | 4            | 4            | 0.175799871                           |                  |    |
|            | Brain_Hippocampus                    | 0.274099357                           |              |              | Brain_Spinal_cord_cervical_c-1        |                  |    |
|            | 1.144605873                          | 0.794043659                           | 0.794043659  |              | 1.093670864                           | 1.353801012      |    |
|            | 1.219057124                          | 0.136273466                           | 4            | 0            | 0.987147804                           |                  |    |
| SPRTN      | ENSG00000010072.15                   | 0.223413406                           | 1            | 1            | 0.223413406                           | Brain_Amygdala   |    |
|            | 0.223413406                          | Brain_Amygdala                        | 1            | 1            | 1.217501659                           | 1.217501659      |    |
|            | 1.217501659                          | NA                                    | 1            | 0            | 0.987147804                           |                  |    |
| VAV2       | ENSG00000160293.16                   | 0.22364266                            | 2            | 2            | 0.084600199                           |                  |    |
|            | Brain_Spinal_cord_cervical_c-1       | 0.862349881                           |              |              | Brain_Cerebellum                      | 1.016163485      |    |
|            | 0.983836515                          | 0.983836515                           | -1.724596585 |              | -0.173383644                          | -0.948990115     |    |
|            | 1.09687319                           | 2                                     | 0            | 0.987147804  |                                       |                  |    |
| AC133633.2 | ENSG00000253444.1                    | 0.223909558                           | 6            | 6            | 0.097244896                           |                  |    |
|            | Brain_Hypothalamus                   | 0.595223337                           |              |              | Brain_Frontal_Cortex_BA9              | 1.773859133      |    |
|            | 0.44947651                           | 0.44947651                            | -1.658359651 |              | 0.531282057                           | -0.904580989     |    |
|            | 0.846718226                          | 6                                     | 0            | 0.987147804  |                                       |                  |    |
| TSPAN2     | ENSG00000134198.9                    | 0.223921716                           | 2            | 2            | 0.084131599                           |                  |    |
|            | Brain_Cerebellum                     | 0.426749064                           |              |              | Brain_Cerebellar_Hemisphere           | 1.509209832      |    |
|            | 0.490790168                          | 0.490790168                           | 0.794766977  |              | 1.727200843                           | 1.26098391       |    |
|            | 0.65933031                           | 2                                     | 0            | 0.987147804  |                                       |                  |    |
| RTEL1      | ENSG00000258366.7                    | 0.223939883                           | 1            | 1            | 0.223939883                           | Brain_Cortex     |    |
|            | 0.223939883                          | Brain_Cortex                          | 1            | 1            | -1.21611824                           | -1.21611824      |    |
|            | -1.21611824                          | NA                                    | 1            | 0            | 0.987147804                           |                  |    |
| FAM222A    | ENSG00000139438.5                    | 0.224012841                           | 2            | 2            | 0.103196863                           |                  |    |
|            | Brain_Cortex                         | 0.674446587                           |              |              | Brain_Cerebellar_Hemisphere           | 1.096632607      |    |
|            | 0.903367393                          | 0.903367393                           | 0.420053205  |              | 1.629548941                           | 1.024801073      |    |
|            | 0.855242637                          | 2                                     | 0            | 0.987147804  |                                       |                  |    |
| OSTM1      | ENSG00000081087.14                   | 0.224061782                           | 6            | 2            | 0.0695276                             | Brain_Cortex     |    |
|            | 0.241756774                          | Brain_Nucleus_accumbens_basal_ganglia | 5.461149134  |              |                                       |                  |    |
|            | 0.000196206                          | 0.229348349                           | -1.814975988 |              | -1.17060702                           | -1.439761773     |    |
|            | 0.293765727                          | 2                                     | 0            | 0.987147804  |                                       |                  |    |
| PRDM16     | ENSG00000142611.16                   | 0.224066838                           | 1            | 1            | 0.224066838                           |                  |    |
|            | Brain_Spinal_cord_cervical_c-1       | 0.224066838                           |              |              | Brain_Spinal_cord_cervical_c-1        |                  |    |
|            | 1                                    | 1                                     | 1            | -1.215784991 | -1.215784991                          | -1.215784991     | NA |
|            | 0.987147804                          |                                       |              |              |                                       |                  | 1  |

|         |                                       |                             |              |              |              |                                      |             |
|---------|---------------------------------------|-----------------------------|--------------|--------------|--------------|--------------------------------------|-------------|
| NBPF26  | ENSG00000273136.6                     | 0.224188435                 | 7            | 7            | 0.003891824  |                                      |             |
|         | Brain_Nucleus_accumbens_basal_ganglia | 0.783396523                 |              |              |              | Brain_Caudate_basal_ganglia          |             |
|         | 2.099918864                           | 0.074044475                 | 0.074044475  | -2.886799302 | 0.343560606  |                                      |             |
|         | -0.982362861                          | 1.056031513                 | 7            | 0            | 0.987147804  |                                      |             |
| CNIH4   | ENSG00000143771.11                    | 0.224261155                 | 5            | 5            | 0.014599402  |                                      |             |
|         | Brain_Hypothalamus                    | 0.407248429                 |              |              |              | Brain_Cerebellar_Hemisphere          | 2.375244291 |
|         | 0.354432505                           | 0.354432505                 | 0.828745508  | 2.442166738  | 1.499083995  |                                      |             |
|         | 0.589098779                           | 5                           | 0            | 0.987147804  |              |                                      |             |
| MAGOHB  | ENSG00000111196.9                     | 0.224296652                 | 1            | 1            | 0.224296652  |                                      |             |
|         | Brain_Frontal_Cortex_BA9              | 0.224296652                 |              |              |              | Brain_Frontal_Cortex_BA9             | 1 1         |
|         | 1 1.215182084                         | 1.215182084                 | 1.215182084  | NA           | 1 0          |                                      |             |
|         | 0.987147804                           |                             |              |              |              |                                      |             |
| STAT6   | ENSG00000166888.11                    | 0.224313474                 | 4            | 3            | 0.075117486  |                                      |             |
|         | Brain_Frontal_Cortex_BA9              | 0.264764229                 |              |              |              | Brain_Cerebellum                     | 2.621198465 |
|         | 0.046576509                           | 0.292855402                 | -1.473445506 | 1.779746322  | 0.666943858  |                                      |             |
|         | 1.455581596                           | 3                           | 0            | 0.987147804  |              |                                      |             |
| ABHD14A | ENSG00000248487.8                     | 0.224327723                 | 4            | 4            | 0.212654693  |                                      |             |
|         | Brain_Frontal_Cortex_BA9              | 0.834535031                 |              |              |              | Brain_Hippocampus                    | 1.754603511 |
|         | 0.280718923                           | 0.280718923                 | -0.671060879 | 1.246298868  | 0.138579251  |                                      |             |
|         | 0.821221412                           | 4                           | 0            | 0.987147804  |              |                                      |             |
| TRIM38  | ENSG00000112343.10                    | 0.224390119                 | 1            | 1            | 0.224390119  |                                      |             |
|         | Brain_Substantia_nigra                | 0.224390119                 |              |              |              | Brain_Substantia_nigra               | 1 1         |
|         | 1 1.214937003                         | 1.214937003                 | 1.214937003  | NA           | 1 0          |                                      |             |
|         | 0.987147804                           |                             |              |              |              |                                      |             |
| ADRA1D  | ENSG00000171873.7                     | 0.224519841                 | 3            | 3            | 0.180679846  |                                      |             |
|         | Brain_Frontal_Cortex_BA9              | 0.321136439                 |              |              |              | Brain_Cerebellum                     | 1.062213601 |
|         | 0.937647272                           | 0.937647272                 | -1.338664722 | 1.176391363  | 0.276617291  |                                      |             |
|         | 1.40190602                            | 3                           | 0            | 0.987147804  |              |                                      |             |
| MT1A    | ENSG00000205362.11                    | 0.224640124                 | 2            | 2            | 0.201216546  | Brain_Amygdala                       |             |
|         | 0.255933317                           | Brain_Cerebellum            | 1.021021854  | 0.978978146  | 0.978978146  |                                      |             |
|         | -1.278093258                          | 1.136055548                 | -0.071018855 | 1.707060992  | 2            | 0                                    |             |
|         | 0.987147804                           |                             |              |              |              |                                      |             |
| HPS5    | ENSG00000110756.17                    | 0.224671676                 | 4            | 3            | 0.089056345  |                                      |             |
|         | Brain_Cerebellar_Hemisphere           | 0.544893404                 |              |              |              | Brain_Cortex                         | 2.393547643 |
|         | 0.060187688                           | 0.503261183                 | -1.571000928 | 1.700396631  | 0.607455584  |                                      |             |
|         | 1.540881004                           | 3                           | 0            | 0.987147804  |              |                                      |             |
| ESPN    | ENSG00000187017.15                    | 0.224694135                 | 1            | 1            | 0.224694135  |                                      |             |
|         | Brain_Hypothalamus                    | 0.224694135                 |              |              |              | Brain_Hypothalamus                   | 1 1 1       |
|         | -1.214140347                          | -1.214140347                | -1.214140347 | NA           | 1 0          | 0.987147804                          |             |
| ARMC10  | ENSG00000170632.13                    | 0.224722892                 | 9            | 4            | 0.141945851  |                                      |             |
|         | Brain_Hippocampus                     | 0.578294122                 |              |              |              | Brain_Cortex                         | 6.620343611 |
|         | 0.023763209                           | 0.347822465                 | -1.468583285 | 1.367051585  | 0.641114143  |                                      |             |
|         | 0.831670736                           | 4                           | 0            | 0.987147804  |              |                                      |             |
| XRCC5   | ENSG00000079246.15                    | 0.224851462                 | 11           | 4            | 0.129755765  | Brain_Cortex                         |             |
|         | 0.924954172                           | Brain_Cerebellum            | 8.232822902  | 0.000546548  | 0.317294896  |                                      |             |
|         | -1.515065708                          | 0.997361085                 | 0.303627647  | 0.679790275  | 4            | 0                                    |             |
|         | 0.987147804                           |                             |              |              |              |                                      |             |
| COX4I2  | ENSG00000131055.4                     | 0.224874193                 | 3            | 2            | 0.315233574  |                                      |             |
|         | Brain_Caudate_basal_ganglia           | 0.491471099                 |              |              |              | Brain_Anterior_cingulate_cortex_BA24 |             |
|         | 2.358893888                           | 0.045579214                 | 0.595526898  | -0.687970912 | 1.004300955  |                                      |             |
|         | 0.415328855                           | 0.95621427                  | 2            | 0            | 0.987147804  |                                      |             |
| GALNT13 | ENSG00000144278.14                    | 0.224989294                 | 3            | 2            | 0.164548185  |                                      |             |
|         | Brain_Nucleus_accumbens_basal_ganglia | 0.66606952                  |              |              |              | Brain_Cerebellum                     | 2.184337408 |
|         | 0.005989159                           | 0.809673433                 | -1.38993642  | -0.431548604 | -0.791933411 |                                      |             |
|         | 0.52151089                            | 2                           | 0            | 0.987147804  |              |                                      |             |
| GJC1    | ENSG00000182963.9                     | 0.22503019                  | 2            | 1            | 0.220198171  | Brain_Cerebellum                     |             |
|         | 0.236689638                           | Brain_Cerebellar_Hemisphere | 1.971717154  | 0.028282846  |              |                                      |             |
|         | 1.971717154                           | -1.226001339                | -1.183301602 | -1.20465147  | 0.030193274  |                                      |             |
|         | 1                                     | 0                           | 0.987147804  |              |              |                                      |             |
| CENPQ   | ENSG00000031691.6                     | 0.225079382                 | 13           | 4            | 0.038512235  | Brain_Amygdala                       |             |
|         | 0.904984278                           | Brain_Substantia_nigra      | 10.15036897  | 0.014099284  |              |                                      |             |
|         | 0.350857741                           | -2.069360871                | -0.119367412 | -0.609690985 | 0.604968993  |                                      |             |

|           |                                |                             |              |              |                                      |              |             |   |                  |
|-----------|--------------------------------|-----------------------------|--------------|--------------|--------------------------------------|--------------|-------------|---|------------------|
| 4         | 0                              | 0.987147804                 |              |              |                                      |              |             |   |                  |
| CAPN8     | ENSG00000203697.11             | 0.225079769                 | 11           | 5            | 0.040745489                          |              |             |   |                  |
|           | Brain_Substantia_nigra         | 0.917212737                 |              |              | Brain_Hypothalamus                   | 8.354310408  |             |   |                  |
|           | 0.010094317                    | 0.426311818                 |              |              | 0.103945327                          | 2.046110616  |             |   | 1.36970316       |
|           | 0.563626209                    | 5                           | 0            | 0.987147804  |                                      |              |             |   |                  |
| LINC01569 | ENSG00000262468.5              | 0.22514249                  | 3            | 3            | 0.133588818                          |              |             |   | Brain_Cortex     |
|           | 0.619866984                    | Brain_Putamen_basal_ganglia | 1.805715776  |              | 0.495975092                          |              |             |   |                  |
|           | 0.495975092                    | -1.500098775                | 0.496038874  |              | -0.76105018                          |              |             |   | 1.094264966      |
|           | 3                              | 0                           | 0.987147804  |              |                                      |              |             |   |                  |
| TGM1      | ENSG00000092295.11             | 0.225313469                 | 10           | 6            | 0.050428343                          |              |             |   |                  |
|           | Brain_Hypothalamus             | 0.959897184                 |              |              | Brain_Cerebellum                     | 6.55751735   | 0.026461755 |   |                  |
|           | 0.258921371                    | -0.593294209                | 1.956312578  |              | 0.42404291                           | 0.782030618  |             |   | 6                |
|           | 0                              | 0.987147804                 |              |              |                                      |              |             |   |                  |
| LYN       | ENSG00000254087.7              | 0.225328849                 | 4            | 4            | 0.089781977                          |              |             |   | Brain_Cerebellum |
|           | 0.955813418                    | Brain_Hippocampus           | 1.831723326  |              | 0.21847241                           | 0.21847241   |             |   |                  |
|           | -1.696548902                   | 1.668306418                 | -0.201118873 |              | 1.436944224                          | 4            | 0           |   |                  |
|           | 0.987147804                    |                             |              |              |                                      |              |             |   |                  |
| CMYA5     | ENSG00000164309.14             | 0.225340366                 | 1            | 1            | 0.225340366                          |              |             |   | Brain_Amygdala   |
|           | 0.225340366                    | Brain_Amygdala              | 1            | 1            | 1                                    | 1.212449491  |             |   | 1.212449491      |
|           | 1.212449491                    | NA                          | 1            | 0            | 0.987147804                          |              |             |   |                  |
| DPF2      | ENSG00000133884.9              | 0.225403813                 | 4            | 4            | 0.07883651                           |              |             |   | Brain_Cerebellum |
|           | 0.935466714                    | Brain_Cortex                | 2.25589108   | 0.414964725  | 0.414964725                          |              |             |   |                  |
|           | -1.757477168                   | 0.151915988                 | -0.636331903 |              | 0.863369469                          | 4            | 0           |   |                  |
|           | 0.987147804                    |                             |              |              |                                      |              |             |   |                  |
| MSX1      | ENSG00000163132.6              | 0.225491392                 | 1            | 1            | 0.225491392                          |              |             |   | Brain_Cerebellum |
|           | 0.225491392                    | Brain_Cerebellum            | 1            | 1            | 1                                    | 1.212054832  |             |   | 1.212054832      |
|           | 1.212054832                    | NA                          | 1            | 0            | 0.987147804                          |              |             |   |                  |
| LYZL4     | ENSG00000157093.8              | 0.225530834                 | 2            | 2            | 0.204150509                          |              |             |   |                  |
|           | Brain_Frontal_Cortex_BA9       | 0.349599652                 |              |              | Brain_Anterior_cingulate_cortex_BA24 |              |             |   |                  |
|           | 1.170396223                    | 0.829603777                 | 0.829603777  |              | -1.269815077                         | 0.935366118  |             |   |                  |
|           | -0.16722448                    | 1.559298577                 | 2            | 0            | 0.987147804                          |              |             |   |                  |
| ARHGAP28  | ENSG00000088756.12             | 0.225534513                 | 7            | 5            | 0.010961906                          |              |             |   |                  |
|           | Brain_Spinal_cord_cervical_c-1 | 0.604613287                 |              |              | Brain_Hippocampus                    |              |             |   |                  |
|           | 4.515771145                    | 0.03929875                  | 0.152120608  |              | 0.517777832                          | 2.54391086   |             |   |                  |
|           | 1.862838118                    | 0.722033946                 | 5            | 0            | 0.987147804                          |              |             |   |                  |
| CACNB2    | ENSG00000165995.18             | 0.225682268                 | 5            | 5            | 0.024135648                          |              |             |   |                  |
|           | Brain_Putamen_basal_ganglia    | 0.625564219                 |              |              | Brain_Caudate_basal_ganglia          |              |             |   |                  |
|           | 2.038058541                    | 0.124026674                 | 0.124026674  |              | -0.848087361                         | 2.254963056  |             |   |                  |
|           | 0.382632009                    | 1.280531627                 | 5            | 0            | 0.987147804                          |              |             |   |                  |
| TSNAXIP1  | ENSG00000102904.14             | 0.225707224                 | 4            | 2            | 0.069982563                          |              |             |   |                  |
|           | Brain_Cerebellum               | 0.458466298                 |              |              | Brain_Cortex                         | 3.472653485  | 0.01012452  |   |                  |
|           | 0.465696358                    | -1.812023513                | -0.741374671 |              | -1.409556296                         | 0.463630937  |             |   |                  |
|           | 2                              | 0                           | 0.987147804  |              |                                      |              |             |   |                  |
| GRIN2C    | ENSG00000161509.13             | 0.225772433                 | 1            | 1            | 0.225772433                          |              |             |   |                  |
|           | Brain_Cerebellum               | 0.225772433                 |              |              | Brain_Cerebellum                     | 1            | 1           | 1 | -1.211320922     |
|           | -1.211320922                   | -1.211320922                | NA           | 1            | 0                                    | 0.987147804  |             |   |                  |
| TMEM95    | ENSG00000182896.12             | 0.225799945                 | 1            | 1            | 0.225799945                          |              |             |   |                  |
|           | Brain_Spinal_cord_cervical_c-1 | 0.225799945                 |              |              | Brain_Spinal_cord_cervical_c-1       |              |             |   |                  |
|           | 1                              | 1                           | 1            | -1.211249113 | -1.211249113                         | -1.211249113 | NA          | 1 | 0                |
|           | 0.987147804                    |                             |              |              |                                      |              |             |   |                  |
| RIT1      | ENSG00000143622.10             | 0.225910632                 | 2            | 2            | 0.327417648                          |              |             |   | Brain_Cerebellum |
|           | 0.770620568                    | Brain_Cerebellar_Hemisphere | 1.715374655  |              | 0.284625345                          |              |             |   |                  |
|           | 0.284625345                    | -0.291563262                | 0.979328591  |              | 0.343882665                          | 0.898656247  |             |   |                  |
|           | 2                              | 0                           | 0.987147804  |              |                                      |              |             |   |                  |
| ENDOV     | ENSG00000173818.16             | 0.225966264                 | 1            | 1            | 0.225966264                          |              |             |   | Brain_Cerebellum |
|           | 0.225966264                    | Brain_Cerebellum            | 1            | 1            | 1                                    | -1.210815132 |             |   | -1.210815132     |
|           | -1.210815132                   | NA                          | 1            | 0            | 0.987147804                          |              |             |   |                  |
| HPSE2     | ENSG00000172987.12             | 0.226096977                 | 3            | 3            | 0.039705607                          |              |             |   |                  |
|           | Brain_Hippocampus              | 0.427565352                 |              |              | Brain_Anterior_cingulate_cortex_BA24 |              |             |   |                  |
|           | 1.897693071                    | 0.287429709                 | 0.287429709  |              | -2.05679856                          | -0.793364733 |             |   |                  |
|           | -1.49651714                    | 0.64371993                  | 3            | 0            | 0.987147804                          |              |             |   |                  |
| CNOT1     | ENSG00000125107.17             | 0.226105632                 | 2            | 2            | 0.085149184                          |              |             |   | Brain_Cerebellum |

|               |                                       |                             |                                      |              |              |              |                  |
|---------------|---------------------------------------|-----------------------------|--------------------------------------|--------------|--------------|--------------|------------------|
|               | 0.911186313                           | Brain_Caudate_basal_ganglia | 1.007478589                          | 0.992521411  |              |              |                  |
|               | 0.992521411                           | 0.111542314                 | 1.721560388                          | 0.916551351  | 1.138454698  |              |                  |
|               | 2                                     | 0                           | 0.987147804                          |              |              |              |                  |
| RP11-364L4.3  | ENSG00000250969.1                     |                             | 0.226137113                          | 1            | 1            | 0.226137113  |                  |
|               | Brain_Amygdala                        | 0.226137113                 | Brain_Amygdala                       | 1            | 1            | 1            | 1.210369571      |
|               | 1.210369571                           | 1.210369571                 | NA                                   | 1            | 0            | 0.987147804  |                  |
| RP3-395P12.2  | ENSG00000226375.1                     |                             | 0.226430508                          | 3            | 3            | 0.038951031  |                  |
|               | Brain_Anterior_cingulate_cortex_BA24  | 0.240421675                 | Brain_Cerebellum                     |              |              |              |                  |
|               | 2.142510287                           | 0.181336355                 | 0.181336355                          | -2.064703846 | -1.17393347  |              |                  |
|               | -1.679301476                          | 0.457342083                 | 3                                    | 0            | 0.987147804  |              |                  |
| LINC00271     | ENSG00000231028.8                     |                             | 0.226533129                          | 3            | 3            | 0.103161746  |                  |
|               | Brain_Frontal_Cortex_BA9              | 0.579011629                 | Brain_Anterior_cingulate_cortex_BA24 |              |              |              |                  |
|               | 1.819818246                           | 0.422008762                 | 0.422008762                          | 0.554829     | 1.629714999  |              |                  |
|               | 1.241702088                           | 0.596517419                 | 3                                    | 0            | 0.987147804  |              |                  |
| FDFT1         | ENSG00000079459.12                    |                             | 0.226547959                          | 2            | 2            | 0.106100965  | Brain_Cerebellum |
|               | 0.783632328                           | Brain_Cerebellar_Hemisphere | 1.193466182                          | 0.806533818  |              |              |                  |
|               | 0.806533818                           | -1.615969233                | 0.274588597                          | -0.670690318 | 1.336826262  |              |                  |
|               | 2                                     | 0                           | 0.987147804                          |              |              |              |                  |
| ZC3H14        | ENSG00000100722.18                    |                             | 0.226581571                          | 2            | 2            | 0.12660844   | Brain_Cortex     |
|               | 0.574815477                           | Brain_Frontal_Cortex_BA9    | 1.148889189                          | 0.851110811  |              |              |                  |
|               | 0.851110811                           | -1.527613855                | 0.560973684                          | -0.483320086 | 1.476854412  |              |                  |
|               | 2                                     | 0                           | 0.987147804                          |              |              |              |                  |
| LPXN          | ENSG00000110031.12                    |                             | 0.226689009                          | 1            | 1            | 0.226689009  | Brain_Cerebellum |
|               | 0.226689009                           | Brain_Cerebellum1           | 1                                    | 1            | -1.208931902 | -1.208931902 |                  |
|               | -1.208931902                          | NA                          | 1                                    | 0            | 0.987147804  |              |                  |
| POR           | ENSG00000127948.15                    |                             | 0.226883119                          | 3            | 3            | 0.05456471   |                  |
|               | Brain_Caudate_basal_ganglia           | 0.391551287                 | Brain_Cerebellar_Hemisphere          |              |              |              |                  |
|               | 2.263672063                           | 0.14273954                  | 0.14273954                           | 0.856807488  | 1.922326322  |              |                  |
|               | 1.412298472                           | 0.534212288                 | 3                                    | 0            | 0.987147804  |              |                  |
| NMRAL1        | ENSG00000153406.13                    |                             | 0.226922807                          | 13           | 2            | 0.051307147  |                  |
|               | Brain_Cortex                          | 0.233319821                 | Brain_Anterior_cingulate_cortex_BA24 |              |              |              |                  |
|               | 11.34682166                           | 0.007585048                 | 0.678851687                          | 1.191850626  | 1.948901853  |              |                  |
|               | 1.583078501                           | 0.220919777                 | 2                                    | 0            | 0.987147804  |              |                  |
| RP11-234K24.6 | ENSG00000278035.1                     |                             | 0.227120062                          | 1            | 1            | 0.227120062  |                  |
|               | Brain_Nucleus_accumbens_basal_ganglia | 0.227120062                 |                                      |              |              |              |                  |
|               | Brain_Nucleus_accumbens_basal_ganglia | 1                           | 1                                    | 1            | -1.20781076  |              |                  |
|               | -1.20781076                           | -1.20781076                 | NA                                   | 1            | 0            | 0.987147804  |                  |
| TESMIN        | ENSG00000132749.10                    |                             | 0.227121149                          | 7            | 5            | 0.021131387  |                  |
|               | Brain_Nucleus_accumbens_basal_ganglia | 0.765294974                 | Brain_Cerebellum                     |              |              |              |                  |
|               | 4.401569502                           | 0.089826503                 | 0.359175404                          | -0.29853486  | 2.305628725  |              |                  |
|               | 1.110183573                           | 0.862421927                 | 5                                    | 0            | 0.987147804  |              |                  |
| ZBED9         | ENSG00000232040.2                     |                             | 0.227340627                          | 1            | 1            | 0.227340627  |                  |
|               | Brain_Hippocampus                     | 0.227340627                 | Brain_Hippocampus                    | 1            | 1            | 1            |                  |
|               | -1.20723767                           | -1.20723767                 | -1.20723767                          | NA           | 1            | 0            | 0.987147804      |
| LINC00334     | ENSG00000182586.8                     |                             | 0.227426933                          | 4            | 3            | 0.198245049  |                  |
|               | Brain_Putamen_basal_ganglia           | 0.895101922                 | Brain_Caudate_basal_ganglia          |              |              |              |                  |
|               | 2.484983418                           | 0.020291619                 | 0.227752307                          | 0.131851284  | 1.286567582  |              |                  |
|               | 0.976029723                           | 0.563197458                 | 3                                    | 0            | 0.987147804  |              |                  |
| MIER3         | ENSG00000155545.19                    |                             | 0.227478348                          | 1            | 1            | 0.227478348  |                  |
|               | Brain_Nucleus_accumbens_basal_ganglia | 0.227478348                 |                                      |              |              |              |                  |
|               | Brain_Nucleus_accumbens_basal_ganglia | 1                           | 1                                    | 1            | -1.206880035 |              |                  |
|               | -1.206880035                          | -1.206880035                | NA                                   | 1            | 0            | 0.987147804  |                  |
| FBXO17        | ENSG00000269190.5                     |                             | 0.227497275                          | 8            | 2            | 0.0575599    |                  |
|               | Brain_Frontal_Cortex_BA9              | 0.275146668                 | Brain_Caudate_basal_ganglia          |              |              |              |                  |
|               | 7.005697532                           | 0.007566922                 | 0.566419335                          | -1.899034805 | -1.091286882 |              |                  |
|               | -1.543350357                          | 0.236782776                 | 2                                    | 0            | 0.987147804  |              |                  |
| ESRRB         | ENSG00000119715.14                    |                             | 0.227568864                          | 6            | 5            | 0.224462839  |                  |
|               | Brain_Caudate_basal_ganglia           | 0.917660053                 | Brain_Cortex                         | 3.812136972  |              |              |                  |
|               | 0.112579208                           | 0.220350719                 | -1.214746376                         | 1.099836677  | -0.064415397 |              |                  |
|               | 0.775484067                           | 5                           | 0                                    | 0.987147804  |              |              |                  |
| KLFL16        | ENSG00000129911.8                     |                             | 0.227610759                          | 1            | 1            | 0.227610759  | Brain_Cortex     |
|               | 0.227610759                           | Brain_Cortex                | 1                                    | 1            | 1            | -1.206536331 | -1.206536331     |



|               |                                       |                                |              |              |              |   |                                |   |                  |
|---------------|---------------------------------------|--------------------------------|--------------|--------------|--------------|---|--------------------------------|---|------------------|
|               | -1.206536331                          | NA                             | 1            | 0            | 0.987147804  |   |                                |   |                  |
| AC073283.4    | ENSG00000234690.6                     |                                |              | 0.227613498  | 4            | 4 | 0.041685059                    |   |                  |
|               | Brain_Nucleus_accumbens_basal_ganglia |                                |              | 0.899812047  |              |   |                                |   |                  |
|               | Brain_Anterior_cingulate_cortex_BA24  |                                |              | 1.22921      | 0.806347715  |   | 0.806347715                    |   |                  |
|               | -0.220458056                          | 2.036650689                    |              | 0.723378007  | 1.090417245  |   | 4                              | 0 |                  |
|               | 0.987147804                           |                                |              |              |              |   |                                |   |                  |
| SLC35D1       | ENSG00000116704.7                     |                                |              | 0.227721053  | 2            | 2 | 0.112377438                    |   |                  |
|               | Brain_Putamen_basal_ganglia           |                                |              | 0.377557055  |              |   | Brain_Caudate_basal_ganglia    |   |                  |
|               | 1.142843257                           | 0.857156743                    |              | 0.857156743  |              |   | 0.882406438                    |   | 1.587597263      |
|               | 1.23500185                            | 0.498645214                    | 2            | 0            | 0.987147804  |   |                                |   |                  |
| RP11-114F10.2 | ENSG00000257890.1                     |                                |              | 0.227779988  | 3            | 2 | 0.067819296                    |   |                  |
|               | Brain_Cerebellar_Hemisphere           |                                |              | 0.157713064  |              |   | Brain_Cerebellum               |   | 2.6025263        |
|               | 0.042217604                           | 0.355256097                    |              | -1.826205611 |              |   | -1.412805013                   |   | -1.59283422      |
|               | 0.211799564                           | 2                              | 0            | 0.987147804  |              |   |                                |   |                  |
| POLM          | ENSG00000122678.16                    |                                |              | 0.227796944  | 12           | 7 | 0.069781055                    |   |                  |
|               | Brain_Substantia_nigra                |                                |              | 0.997419091  |              |   | Brain_Cerebellar_Hemisphere    |   |                  |
|               | 8.074269359                           | 0.011141792                    |              | 0.294914409  |              |   | -1.813329244                   |   | 0.696357341      |
|               | -1.128166327                          | 0.790285127                    | 7            | 0            | 0.987147804  |   |                                |   |                  |
| PEX7          | ENSG00000112357.12                    |                                |              | 0.227876604  | 8            | 5 | 0.008106358                    |   | Brain_Cortex     |
|               | 0.60682455                            | Brain_Spinal_cord_cervical_c-1 |              | 5.658694227  |              |   | 0.001168467                    |   |                  |
|               | 0.254441331                           | -2.647607527                   |              | 0.514611468  |              |   | -1.441960958                   |   | 0.955725892      |
|               | 5                                     | 0                              | 0.987147804  |              |              |   |                                |   |                  |
| OR5K2         | ENSG00000231861.2                     |                                |              | 0.227922588  | 6            | 1 | 0.184465675                    |   |                  |
|               | Brain_Caudate_basal_ganglia           |                                |              | 0.345250926  |              |   | Brain_Frontal_Cortex_BA9       |   |                  |
|               | 5.906196757                           | 3.11E-10                       | 5.906196757  |              |              |   | -1.327130025                   |   | -0.943840961     |
|               | -1.195310211                          | 0.130481567                    | 1            | 0            | 0.987147804  |   |                                |   |                  |
| SLC16A8       | ENSG00000100156.10                    |                                |              | 0.228026214  | 4            | 4 | 0.024229991                    |   |                  |
|               | Brain_Spinal_cord_cervical_c-1        |                                |              | 0.100116064  |              |   | Brain_Amygdala                 |   | 3.265637266      |
|               | 0.135262596                           | 0.135262596                    |              | 1.644291208  |              |   | 2.253462692                    |   | 1.912459097      |
|               | 0.313066288                           | 4                              | 0            | 0.987147804  |              |   |                                |   |                  |
| ZNF419        | ENSG00000105136.20                    |                                |              | 0.228117277  | 12           | 3 | 0.049407235                    |   |                  |
|               | Brain_Spinal_cord_cervical_c-1        |                                |              | 0.312700035  |              |   |                                |   |                  |
|               | Brain_Anterior_cingulate_cortex_BA24  |                                |              | 9.396472209  |              |   | 0.005143258                    |   |                  |
|               | 0.543359132                           | 1.00957274                     | 1.965060509  |              | 1.588075637  |   | 0.24082675                     | 3 | 0                |
|               | 0.987147804                           |                                |              |              |              |   |                                |   |                  |
| DNAJC5        | ENSG00000101152.10                    |                                |              | 0.22825327   | 2            | 2 | 0.087803046                    |   |                  |
|               | Brain_Hippocampus                     |                                |              | 0.804010653  |              |   | Brain_Putamen_basal_ganglia    |   | 1.02767122       |
|               | 0.97232878                            | 0.97232878                     | -0.24815995  |              | 1.707102266  |   | 0.729471158                    |   |                  |
|               | 1.382579171                           | 2                              | 0            | 0.987147804  |              |   |                                |   |                  |
| RAB38         | ENSG00000123892.11                    |                                |              | 0.228421964  | 3            | 3 | 0.158330986                    |   |                  |
|               | Brain_Nucleus_accumbens_basal_ganglia |                                |              | 0.684066564  |              |   | Brain_Caudate_basal_ganglia    |   |                  |
|               | 1.589639651                           | 0.443881327                    |              | 0.443881327  |              |   | -0.489257969                   |   | 1.410707136      |
|               | 0.17150964                            | 1.073965876                    | 3            | 0            | 0.987147804  |   |                                |   |                  |
| RSRC2         | ENSG00000111011.17                    |                                |              | 0.228462831  | 1            | 1 | 0.228462831                    |   |                  |
|               | Brain_Substantia_nigra                |                                |              | 0.228462831  |              |   | Brain_Substantia_nigra         |   | 1                |
|               | 1                                     | -1.204327995                   | -1.204327995 |              | -1.204327995 |   | NA                             | 1 | 0                |
|               | 0.987147804                           |                                |              |              |              |   |                                |   |                  |
| CEP120        | ENSG00000168944.15                    |                                |              | 0.228463266  | 2            | 2 | 0.095692134                    |   |                  |
|               | Brain_Hypothalamus                    |                                |              | 0.630848091  |              |   | Brain_Spinal_cord_cervical_c-1 |   |                  |
|               | 1.036177881                           | 0.963822119                    |              | 0.963822119  |              |   | 0.480533496                    |   | 1.666106851      |
|               | 1.073320173                           | 0.838326959                    | 2            | 0            | 0.987147804  |   |                                |   |                  |
| BORA          | ENSG00000136122.15                    |                                |              | 0.228464425  | 1            | 1 | 0.228464425                    |   | Brain_Cerebellum |
|               | 0.228464425                           | Brain_Cerebellum               |              | 1            | 1            | 1 | -1.204323867                   |   | -1.204323867     |
|               | -1.204323867                          | NA                             | 1            | 0            | 0.987147804  |   |                                |   |                  |
| G3BP1         | ENSG00000145907.14                    |                                |              | 0.228597166  | 4            | 4 | 0.193605788                    |   |                  |
|               | Brain_Putamen_basal_ganglia           |                                |              | 0.668501472  |              |   | Brain_Cerebellum               |   | 2.536113989      |
|               | 0.2957912                             | 0.2957912                      | -0.428205556 |              | 1.299985942  |   | 0.633326317                    |   | 0.74761501       |
|               | 4                                     | 0                              | 0.987147804  |              |              |   |                                |   |                  |
| ZNF211        | ENSG00000121417.13                    |                                |              | 0.228805336  | 4            | 3 | 0.450923807                    |   |                  |
|               | Brain_Putamen_basal_ganglia           |                                |              | 0.649934154  |              |   | Brain_Frontal_Cortex_BA9       |   |                  |
|               | 3.160198634                           | 0.075773746                    |              | 0.188554479  |              |   | -0.512817768                   |   | 0.753875793      |
|               | 0.313070137                           | 0.564476844                    | 3            | 0            | 0.987147804  |   |                                |   |                  |

|               |                                      |                        |                                       |              |              |                  |              |  |
|---------------|--------------------------------------|------------------------|---------------------------------------|--------------|--------------|------------------|--------------|--|
| HEPACAM2      | ENSG00000188175.9                    | 0.228999942            | 1                                     | 1            | 0.228999942  |                  |              |  |
|               | Brain_Cerebellum                     | 0.228999942            | Brain_Cerebellum                      | 1            | 1            | 1.202938962      |              |  |
|               | 1.202938962                          | 1.202938962            | NA                                    | 1            | 0            | 0.987147804      |              |  |
| CDCP2         | ENSG00000157211.11                   | 0.229004882            | 1                                     | 1            | 0.229004882  | Brain_Cortex     |              |  |
|               | 0.229004882                          | Brain_Cortex           | 1                                     | 1            | 1            | -1.202926196     | -1.202926196 |  |
|               | -1.202926196                         | NA                     | 1                                     | 0            | 0.987147804  |                  |              |  |
| COLQ          | ENSG00000206561.12                   | 0.229095276            | 2                                     | 1            | 0.172349961  |                  |              |  |
|               | Brain_Cerebellar_Hemisphere          | 0.302711708            | Brain_Cerebellum                      | 1.983309282  |              |                  |              |  |
|               | 0.016690718                          | 1.983309282            | -1.364691726                          | -1.030635658 | -1.197663692 |                  |              |  |
|               | 0.236213311                          | 1                      | 0                                     | 0.987147804  |              |                  |              |  |
| SMIM20        | ENSG00000250317.8                    | 0.229136768            | 1                                     | 1            | 0.229136768  |                  |              |  |
|               | Brain_Cerebellum                     | 0.229136768            | Brain_Cerebellum                      | 1            | 1            | 1                | -1.202585484 |  |
|               | -1.202585484                         | -1.202585484           | NA                                    | 1            | 0            | 0.987147804      |              |  |
| RPS6KA5       | ENSG00000100784.10                   | 0.229229001            | 2                                     | 2            | 0.086331846  |                  |              |  |
|               | Brain_Frontal_Cortex_BA9             | 0.652131577            | Brain_Spinal_cord_cervical_c-1        |              |              |                  |              |  |
|               | 1.300532954                          | 0.699467046            | 0.699467046                           | 0.450802947  | 1.715072986  |                  |              |  |
|               | 1.082937967                          | 0.893973918            | 2                                     | 0            | 0.987147804  |                  |              |  |
| RP11-307C19.1 | ENSG00000259362.2                    | 0.229323567            | 13                                    | 6            | 0.036723444  |                  |              |  |
|               | Brain_Cerebellum                     | 0.786470542            | Brain_Hypothalamus                    | 8.599751556  |              |                  |              |  |
|               | 0.008104205                          | 0.386859964            | -0.270896624                          | 2.088825393  | 1.502680821  |                  |              |  |
|               | 0.587020911                          | 6                      | 0                                     | 0.987147804  |              |                  |              |  |
| RPL27         | ENSG00000131469.12                   | 0.229338672            | 1                                     | 1            | 0.229338672  |                  |              |  |
|               | Brain_Anterior_cingulate_cortex_BA24 | 0.229338672            |                                       |              |              |                  |              |  |
|               | Brain_Anterior_cingulate_cortex_BA24 | 1                      | 1                                     | 1            | 1.202064157  |                  |              |  |
|               | 1.202064157                          | 1.202064157            | NA                                    | 1            | 0            | 0.987147804      |              |  |
| MAP1LC3A      | ENSG00000101460.12                   | 0.229640339            | 11                                    | 4            | 0.026437678  |                  |              |  |
|               | Brain_Amygdala                       | 0.625524485            | Brain_Frontal_Cortex_BA9              | 8.451147739  |              |                  |              |  |
|               | 0.002689021                          | 0.316636231            | 0.488035798                           | 2.219721503  | 1.356060124  |                  |              |  |
|               | 0.525297578                          | 4                      | 0                                     | 0.987147804  |              |                  |              |  |
| PCDHB5        | ENSG00000113209.8                    | 0.229655353            | 2                                     | 2            | 0.135190983  |                  |              |  |
|               | Brain_Cerebellum                     | 0.17780945             | Brain_Caudate_basal_ganglia           | 1.380135954  |              |                  |              |  |
|               | 0.619864046                          | 0.619864046            | -1.493941222                          | -1.34753046  | -1.420735841 |                  |              |  |
|               | 0.103528043                          | 2                      | 0                                     | 0.987147804  |              |                  |              |  |
| TRIP13        | ENSG00000071539.13                   | 0.22977588             | 1                                     | 1            | 0.22977588   |                  |              |  |
|               | Brain_Cerebellar_Hemisphere          | 0.22977588             | Brain_Cerebellar_Hemisphere           | 1            | 1            | 1                |              |  |
|               | -1.200936383                         | -1.200936383           | -1.200936383                          | NA           | 1            | 0                | 0.987147804  |  |
| FEN1          | ENSG00000168496.3                    | 0.229776581            | 1                                     | 1            | 0.229776581  |                  |              |  |
|               | Brain_Cerebellar_Hemisphere          | 0.229776581            | Brain_Cerebellar_Hemisphere           | 1            | 1            |                  |              |  |
|               | 1                                    | -1.200934576           | -1.200934576                          | -1.200934576 | NA           | 1                | 0            |  |
|               | 0.987147804                          |                        |                                       |              |              |                  |              |  |
| CALML6        | ENSG00000169885.9                    | 0.22991216             | 4                                     | 3            | 0.087039126  |                  |              |  |
|               | Brain_Hypothalamus                   | 0.619124404            | Brain_Caudate_basal_ganglia           | 1.95139833   |              |                  |              |  |
|               | 0.050171905                          | 0.980984713            | -1.71122749                           | 0.954075952  | -0.535079161 |                  |              |  |
|               | 1.114382918                          | 3                      | 0                                     | 0.987147804  |              |                  |              |  |
| BOLA2B        | ENSG00000169627.7                    | 0.229974637            | 1                                     | 1            | 0.229974637  |                  |              |  |
|               | Brain_Hypothalamus                   | 0.229974637            | Brain_Hypothalamus                    | 1            | 1            | 1                |              |  |
|               | -1.200424194                         | -1.200424194           | -1.200424194                          | NA           | 1            | 0                | 0.987147804  |  |
| CENPE         | ENSG00000138778.11                   | 0.230105021            | 4                                     | 4            | 0.045872586  | Brain_Cerebellum |              |  |
|               | 0.955598962                          | Brain_Substantia_nigra | 2.403731675                           | 0.3059495    | 0.3059495    |                  |              |  |
|               | -1.996563824                         | -0.055677202           | -1.043434785                          | 0.813478493  | 4            | 0                |              |  |
|               | 0.987147804                          |                        |                                       |              |              |                  |              |  |
| GRWD1         | ENSG00000105447.12                   | 0.230123862            | 7                                     | 4            | 0.041458961  |                  |              |  |
|               | Brain_Frontal_Cortex_BA9             | 0.891654196            | Brain_Nucleus_accumbens_basal_ganglia |              |              |                  |              |  |
|               | 5.52082403                           | 0.001830674            | 0.254487602                           | -2.038910493 | -0.136211358 |                  |              |  |
|               | -1.037391775                         | 0.599075164            | 4                                     | 0            | 0.987147804  |                  |              |  |
| KIAA1549      | ENSG00000122778.9                    | 0.230291271            | 1                                     | 1            | 0.230291271  |                  |              |  |
|               | Brain_Frontal_Cortex_BA9             | 0.230291271            | Brain_Frontal_Cortex_BA9              | 1            | 1            |                  |              |  |
|               | 1                                    | -1.199608893           | -1.199608893                          | -1.199608893 | NA           | 1                | 0            |  |
|               | 0.987147804                          |                        |                                       |              |              |                  |              |  |
| ARL6IP5       | ENSG00000144746.6                    | 0.230294308            | 8                                     | 8            | 0.03425039   |                  |              |  |
|               | Brain_Caudate_basal_ganglia          | 0.968842248            | Brain_Putamen_basal_ganglia           |              |              |                  |              |  |
|               | 1.684045296                          | 0.497391516            | 0.497391516                           | -2.117111448 | 1.64750099   |                  |              |  |

|               |                                       |                          |              |              |              |                                       |             |
|---------------|---------------------------------------|--------------------------|--------------|--------------|--------------|---------------------------------------|-------------|
|               | -0.174444231                          | 1.166005105              | 8            | 0            | 0.987147804  |                                       |             |
| STAT5A        | ENSG00000126561.16                    | 0.230549457              | 1            | 1            | 0.230549457  |                                       |             |
|               | Brain_Anterior_cingulate_cortex_BA24  | 0.230549457              |              |              |              |                                       |             |
|               | Brain_Anterior_cingulate_cortex_BA24  | 1                        | 1            | 1            | -1.19894468  |                                       |             |
|               | -1.19894468                           | -1.19894468              | NA           | 1            | 0            | 0.987147804                           |             |
| RAP1GDS1      | ENSG00000138698.14                    | 0.230560385              | 1            | 1            | 0.230560385  |                                       |             |
|               | Brain_Cerebellar_Hemisphere           | 0.230560385              |              |              |              | Brain_Cerebellar_Hemisphere1          | 1           |
|               | 1                                     | 1.198916577              | 1.198916577  | 1.198916577  | NA           | 1                                     | 0           |
|               | 0.987147804                           |                          |              |              |              |                                       |             |
| CUL4A         | ENSG00000139842.14                    | 0.230563057              | 1            | 1            | 0.230563057  | Brain_Cerebellum                      |             |
|               | 0.230563057                           | Brain_Cerebellum1        | 1            | 1            | 1.198909707  | 1.198909707                           |             |
|               | 1.198909707                           | NA                       | 1            | 0            | 0.987147804  |                                       |             |
| FAM69A        | ENSG00000154511.11                    | 0.230605578              | 4            | 4            | 0.217115242  |                                       |             |
|               | Brain_Cerebellar_Hemisphere           | 0.908479214              |              |              |              | Brain_Cerebellum2.220341744           |             |
|               | 0.099001018                           | 0.099001018              | -1.234235287 | 1.050718911  | 0.078576663  |                                       |             |
|               | 0.959592156                           | 4                        | 0            | 0.987147804  |              |                                       |             |
| CST3          | ENSG00000101439.8                     | 0.230763302              | 3            | 3            | 0.086655657  |                                       |             |
|               | Brain_Nucleus_accumbens_basal_ganglia | 0.513585662              |              |              |              | Brain_Cerebellum                      |             |
|               | 1.392514367                           | 0.609932541              | 0.609932541  | 0.653264675  | 1.713309276  |                                       |             |
|               | 1.180596024                           | 0.530042794              | 3            | 0            | 0.987147804  |                                       |             |
| METTL4        | ENSG00000101574.14                    | 0.23088279               | 10           | 4            | 0.227213426  | Brain_Amygdala                        |             |
|               | 0.884394138                           | Brain_Frontal_Cortex_BA9 | 7.644239905  | 0.015470839  |              |                                       |             |
|               | 0.292113348                           | -0.997446576             | 1.207568125  | 0.115954991  | 0.74547015   | 4                                     |             |
|               | 0                                     | 0.987147804              |              |              |              |                                       |             |
| MFSD1         | ENSG00000118855.18                    | 0.230882873              | 5            | 5            | 0.1191967    |                                       |             |
|               | Brain_Anterior_cingulate_cortex_BA24  | 0.309562429              |              |              |              | Brain_Frontal_Cortex_BA9              |             |
|               | 1.794616325                           | 0.431785928              | 0.431785928  | -1.136020314 | 1.558154198  |                                       |             |
|               | -0.156673807                          | 1.331940643              | 5            | 0            | 0.987147804  |                                       |             |
| GPX4          | ENSG00000167468.16                    | 0.231021052              | 8            | 5            | 0.047313411  |                                       |             |
|               | Brain_Putamen_basal_ganglia           | 0.71915938               |              |              |              | Brain_Nucleus_accumbens_basal_ganglia |             |
|               | 4.169323704                           | 0.019901015              | 0.404706693  | -1.507483462 | 1.983483831  |                                       |             |
|               | 0.009608482                           | 1.131960903              | 5            | 0            | 0.987147804  |                                       |             |
| SFRP5         | ENSG00000120057.4                     | 0.231134324              | 2            | 2            | 0.087826924  | Brain_Cerebellum                      |             |
|               | 0.401022305                           | Brain_Frontal_Cortex_BA9 | 1.553231036  | 0.446768964  |              |                                       |             |
|               | 0.446768964                           | -1.706973791             | -0.839796841 | -1.273385316 | 0.613186702  |                                       |             |
|               | 2                                     | 0                        | 0.987147804  |              |              |                                       |             |
| HEBP1         | ENSG00000013583.8                     | 0.231248771              | 5            | 5            | 0.034208907  |                                       |             |
|               | Brain_Substantia_nigra                | 0.748185144              |              |              |              | Brain_Hypothalamus                    | 1.811153981 |
|               | 0.201125757                           | 0.201125757              | -2.117600607 | -0.321033315 | -1.134342972 |                                       |             |
|               | 0.680259129                           | 5                        | 0            | 0.987147804  |              |                                       |             |
| TSGA10IP      | ENSG00000175513.9                     | 0.231333705              | 1            | 1            | 0.231333705  |                                       |             |
|               | Brain_Caudate_basal_ganglia           | 0.231333705              |              |              |              | Brain_Caudate_basal_ganglia1          | 1           |
|               | 1                                     | 1.196930346              | 1.196930346  | 1.196930346  | NA           | 1                                     | 0           |
|               | 0.987147804                           |                          |              |              |              |                                       |             |
| EXOC8         | ENSG00000116903.7                     | 0.231446895              | 4            | 4            | 0.064646165  | Brain_Cortex                          |             |
|               | 0.767572299                           | Brain_Hippocampus        | 2.119935094  | 0.265448184  |              |                                       |             |
|               | 0.265448184                           | -0.406435231             | 1.847697164  | 0.840375848  | 1.077220991  |                                       |             |
|               | 4                                     | 0                        | 0.987147804  |              |              |                                       |             |
| FAXC          | ENSG00000146267.11                    | 0.231467873              | 1            | 1            | 0.231467873  |                                       |             |
|               | Brain_Hippocampus                     | 0.231467873              |              |              |              | Brain_Hippocampus                     | 1 1 1       |
|               | -1.196586223                          | -1.196586223             | -1.196586223 | NA           | 1            | 0                                     | 0.987147804 |
| RP11-63G10.4  | ENSG00000283445.1                     | 0.231514029              | 1            | 1            | 0.231514029  |                                       |             |
|               | Brain_Frontal_Cortex_BA9              | 0.231514029              |              |              |              | Brain_Frontal_Cortex_BA9              | 1 1         |
|               | 1                                     | 1.196467873              | 1.196467873  | 1.196467873  | NA           | 1                                     | 0           |
|               | 0.987147804                           |                          |              |              |              |                                       |             |
| CENPS         | ENSG00000175279.21                    | 0.231555368              | 4            | 4            | 0.040825652  |                                       |             |
|               | Brain_Nucleus_accumbens_basal_ganglia | 0.363884484              |              |              |              | Brain_Frontal_Cortex_BA9              |             |
|               | 2.140020449                           | 0.153012605              | 0.153012605  | 0.907988147  | 2.04529633   |                                       |             |
|               | 1.487833903                           | 0.574284795              | 4            | 0            | 0.987147804  |                                       |             |
| RP11-371M22.1 | ENSG00000251628.1                     | 0.231619656              | 1            | 1            | 0.231619656  |                                       |             |
|               | Brain_Frontal_Cortex_BA9              | 0.231619656              |              |              |              | Brain_Frontal_Cortex_BA9              | 1 1         |
|               | 1                                     | -1.19619709              | -1.19619709  | -1.19619709  | NA           | 1                                     | 0           |

0.987147804  
CENPK ENSG00000123219.12 0.231622365 7 4 0.14848048  
Brain\_Anterior\_cingulate\_cortex\_BA24 0.404256985 Brain\_Cerebellum  
5.400482175 4.06E-17 0.189472664 -1.444919566 1.41518977  
0.735283269 0.97920467 4 0 0.987147804  
ALLC ENSG00000151360.9 0.231704109 12 11 0.081801132  
Brain\_Putamen\_basal\_ganglia 0.895852313 Brain\_Amygdala 4.766750811  
0.073692936 0.180748444 -1.740329755 0.538538414 -0.781332508  
0.88827711 11 0 0.987147804  
SCRT1 ENSG00000261678.2 0.231705004 1 1 0.231705004  
Brain\_Cerebellar\_Hemisphere 0.231705004 Brain\_Cerebellar\_Hemisphere1 1  
1 -1.195978361 -1.195978361 -1.195978361 NA 1 0  
0.987147804  
DEFA4 ENSG00000164821.4 0.231826766 1 1 0.231826766 Brain\_Amygdala  
0.231826766 Brain\_Amygdala 1 1 1 -1.195666405 -1.195666405  
-1.195666405 NA 1 0 0.987147804  
SNAP47 ENSG00000143740.14 0.231937225 11 6 0.260282487  
Brain\_Hypothalamus 0.908083902 Brain\_Caudate\_basal\_ganglia 7.760558327  
0.013794481 0.272937687 -1.125723704 0.522265633 -0.506998336  
0.569090287 6 0 0.987147804  
PHLDB2 ENSG00000144824.20 0.231939803 2 2 0.103141831  
Brain\_Cerebellum 0.717506647 Brain\_Caudate\_basal\_ganglia 1.093249366  
0.906750634 0.906750634 -1.629809188 0.361793103 -0.634008043  
1.408275485 2 0 0.987147804  
AUTS2 ENSG00000158321.15 0.232192763 2 2 0.135577185  
Brain\_Frontal\_Cortex\_BA9 0.317740293 Brain\_Caudate\_basal\_ganglia  
1.115417083 0.884582917 0.884582917 -1.492465386 -0.999112302  
-1.245788844 0.348853312 2 0 0.987147804  
MRPS36 ENSG00000134056.11 0.232267081 1 1 0.232267081  
Brain\_Cerebellar\_Hemisphere 0.232267081 Brain\_Cerebellar\_Hemisphere1 1  
1 -1.19453929 -1.19453929 -1.19453929 NA 1 0  
0.987147804  
EEF2KMT ENSG00000118894.14 0.232293227 1 1 0.232293227  
Brain\_Cerebellum 0.232293227 Brain\_Cerebellum1 1 1 1 -1.194472409  
-1.194472409 -1.194472409 NA 1 0 0.987147804  
TNIP2 ENSG00000168884.14 0.232450562 2 2 0.100776727 Brain\_Cortex  
0.557035536 Brain\_Nucleus\_accumbens\_basal\_ganglia 1.590976673  
0.409023327 0.409023327 -1.641099672 -0.587250418 -1.114175045  
0.745183954 2 0 0.987147804  
CTD-219904.6 ENSG00000272417.1 0.232609853 1 1 0.232609853  
Brain\_Spinal\_cord\_cervical\_c-1 0.232609853 Brain\_Spinal\_cord\_cervical\_c-1  
1 1 1 1.193662915 1.193662915 1.193662915 NA 1 0  
0.987147804  
FAM53A ENSG00000174137.12 0.232613236 4 4 0.096501601  
Brain\_Putamen\_basal\_ganglia 0.535216286 Brain\_Cerebellar\_Hemisphere 1.44101648  
0.435445464 0.435445464 -1.662055727 0.620063037 -0.916329453  
1.048570282 4 0 0.987147804  
SLC22A3 ENSG00000146477.5 0.232657169 9 4 0.122142971  
Brain\_Spinal\_cord\_cervical\_c-1 0.901194671  
Brain\_Anterior\_cingulate\_cortex\_BA24 6.914284072 0.016976751 0.35953405  
-1.545841008 1.063442541 0.439767267 0.831067167 4 0  
0.987147804  
VCPKMT ENSG00000100483.13 0.232686977 8 5 0.080536728  
Brain\_Putamen\_basal\_ganglia 0.854514094 Brain\_Hypothalamus 5.599136334  
0.044779149 0.226376933 -1.747580306 -0.183361867 -1.363130339  
0.491202306 5 0 0.987147804  
PPP1R12C ENSG00000125503.12 0.232716569 2 2 0.158624611  
Brain\_Cerebellum 0.334814067 Brain\_Hippocampus 1.000592157  
0.999407843 0.999407843 -1.409712438 -0.964462568 -1.187087503  
0.314839203 2 0 0.987147804  
TMEM132B ENSG00000139364.10 0.232778492 3 3 0.148789377  
Brain\_Putamen\_basal\_ganglia 0.753260737 Brain\_Cerebellum 1.728777056

|               |                                       |                                |                             |              |              |                  |             |  |  |
|---------------|---------------------------------------|--------------------------------|-----------------------------|--------------|--------------|------------------|-------------|--|--|
|               | 0.271159111                           | 0.271159111                    | -1.443820845                | 1.209743334  | 0.026755078  |                  |             |  |  |
|               | 1.349955819                           | 3                              | 0                           | 0.987147804  |              |                  |             |  |  |
| MEF2B         | ENSG00000213999.15                    | 0.23283307                     | 2                           | 2            | 0.110757651  | Brain_Cerebellum |             |  |  |
|               | 0.245894876                           | Brain_Cerebellar_Hemisphere    | 1.896739547                 |              | 0.103260453  |                  |             |  |  |
|               | 0.103260453                           | -1.594796944                   | -1.160378158                | -1.377587551 | 0.30718047   | 2                |             |  |  |
|               | 0                                     | 0.987147804                    |                             |              |              |                  |             |  |  |
| KITLG         | ENSG0000049130.14                     | 0.232909325                    | 1                           | 1            | 0.232909325  | Brain_Cerebellum |             |  |  |
|               | 0.232909325                           | Brain_Cerebellum               | 1                           | 1            | -1.192897995 | -1.192897995     |             |  |  |
|               | -1.192897995                          | NA                             | 1                           | 0            | 0.987147804  |                  |             |  |  |
| CTD-2006K23.1 | ENSG00000261222.2                     | 0.232920678                    | 2                           | 2            | 0.342154796  |                  |             |  |  |
|               | Brain_Cerebellar_Hemisphere           | 0.916859525                    | Brain_Cerebellum            | 1.863349303  |              |                  |             |  |  |
|               | 0.136650697                           | 0.136650697                    | 0.10439042                  | 0.949916276  | 0.527153348  |                  |             |  |  |
|               | 0.597877066                           | 2                              | 0                           | 0.987147804  |              |                  |             |  |  |
| EGR2          | ENSG00000122877.15                    | 0.233091859                    | 1                           | 1            | 0.233091859  |                  |             |  |  |
|               | Brain_Caudate_basal_ganglia           | 0.233091859                    | Brain_Caudate_basal_ganglia | 1            | 1            |                  |             |  |  |
|               | 1                                     | 1.192432103                    | 1.192432103                 | 1.192432103  | NA           | 1                | 0           |  |  |
|               | 0.987147804                           |                                |                             |              |              |                  |             |  |  |
| LRRC14        | ENSG00000160959.7                     | 0.23317174                     | 1                           | 1            | 0.23317174   |                  |             |  |  |
|               | Brain_Caudate_basal_ganglia           | 0.23317174                     | Brain_Caudate_basal_ganglia | 1            | 1            | 1                |             |  |  |
|               | 1.1922283                             | 1.1922283                      | 1.1922283                   | NA           | 1            | 0                | 0.987147804 |  |  |
| NCF1          | ENSG00000158517.13                    | 0.233221055                    | 2                           | 2            | 0.088951726  |                  |             |  |  |
|               | Brain_Nucleus_accumbens_basal_ganglia | 0.910141312                    | Brain_Amygdala              |              |              |                  |             |  |  |
|               | 1.013160116                           | 0.986839884                    | 0.986839884                 | -1.700953467 | 0.112860299  |                  |             |  |  |
|               | -0.794046584                          | 1.282560013                    | 2                           | 0            | 0.987147804  |                  |             |  |  |
| SNX16         | ENSG00000104497.13                    | 0.233221515                    | 13                          | 4            | 0.018601568  | Brain_Cerebellum |             |  |  |
|               | 0.908608093                           | Brain_Substantia_nigra         | 9.786116685                 | 0.004748135  |              |                  |             |  |  |
|               | 0.470243435                           | -0.114794393                   | 2.353420831                 | 1.432593091  | 0.671884437  |                  |             |  |  |
|               | 4                                     | 0                              | 0.987147804                 |              |              |                  |             |  |  |
| EEF2          | ENSG00000167658.15                    | 0.233330921                    | 2                           | 2            | 0.097690761  |                  |             |  |  |
|               | Brain_Cerebellar_Hemisphere           | 0.654009123                    | Brain_Amygdala              | 1.023389974  |              |                  |             |  |  |
|               | 0.976610026                           | 0.976610026                    | -1.656153383                | -0.44819964  | -1.052176511 |                  |             |  |  |
|               | 0.854152284                           | 2                              | 0                           | 0.987147804  |              |                  |             |  |  |
| TMEM110       | ENSG00000213533.11                    | 0.233345787                    | 3                           | 3            | 0.09935326   |                  |             |  |  |
|               | Brain_Hippocampus                     | 0.184996611                    | Brain_Caudate_basal_ganglia | 1.653889487  |              |                  |             |  |  |
|               | 0.397821179                           | 0.397821179                    | -1.647997131                | -1.325526425 | -1.491252071 |                  |             |  |  |
|               | 0.161422821                           | 3                              | 0                           | 0.987147804  |              |                  |             |  |  |
| TMEM59        | ENSG00000116209.11                    | 0.233346408                    | 1                           | 1            | 0.233346408  |                  |             |  |  |
|               | Brain_Cortex                          | 0.233346408                    | Brain_Cortex                | 1            | 1            | 1                | 1.191782835 |  |  |
|               | 1.191782835                           | 1.191782835                    | NA                          | 1            | 0            | 0.987147804      |             |  |  |
| STT3A         | ENSG00000134910.12                    | 0.233351418                    | 1                           | 1            | 0.233351418  |                  |             |  |  |
|               | Brain_Hypothalamus                    | 0.233351418                    | Brain_Hypothalamus          | 1            | 1            | 1                |             |  |  |
|               | -1.19177006                           | -1.19177006                    | -1.19177006                 | NA           | 1            | 0                | 0.987147804 |  |  |
| AF127936.5    | ENSG00000226751.2                     | 0.233387617                    | 2                           | 2            | 0.089431298  |                  |             |  |  |
|               | Brain_Frontal_Cortex_BA9              | 0.787189097                    | Brain_Hippocampus           | 1.065075137  |              |                  |             |  |  |
|               | 0.934924863                           | 0.934924863                    | -1.698405272                | -0.269962509 | -0.984183891 |                  |             |  |  |
|               | 1.010061564                           | 2                              | 0                           | 0.987147804  |              |                  |             |  |  |
| UFSP2         | ENSG00000109775.10                    | 0.233421228                    | 13                          | 1            | 0.177410045  | Brain_Cerebellum |             |  |  |
|               | 0.347040055                           | Brain_Hypothalamus             | 12.45201661                 | 1.02E-16     | 12.45201661  |                  |             |  |  |
|               | -1.348772517                          | -0.94034611                    | -1.168314382                | 0.09819025   | 1            | 0                |             |  |  |
|               | 0.987147804                           |                                |                             |              |              |                  |             |  |  |
| GALNT2        | ENSG00000143641.9                     | 0.233668962                    | 4                           | 4            | 0.051594851  |                  |             |  |  |
|               | Brain_Putamen_basal_ganglia           | 0.650673633                    | Brain_Cerebellar_Hemisphere |              |              |                  |             |  |  |
|               | 1.760768942                           | 0.209562742                    | 0.209562742                 | 0.452826565  | 1.946498811  |                  |             |  |  |
|               | 1.286952401                           | 0.742026733                    | 4                           | 0            | 0.987147804  |                  |             |  |  |
| KCTD6         | ENSG00000168301.12                    | 0.233720764                    | 3                           | 3            | 0.098815416  |                  |             |  |  |
|               | Brain_Cerebellar_Hemisphere           | 0.43237615                     | Brain_Cortex                | 1.038478913  |              |                  |             |  |  |
|               | 0.968493578                           | 0.968493578                    | -0.95261062                 | 1.650623798  | 0.494381743  |                  |             |  |  |
|               | 1.32574853                            | 3                              | 0                           | 0.987147804  |              |                  |             |  |  |
| AC109826.1    | ENSG00000226791.6                     | 0.233790344                    | 3                           | 3            | 0.09544643   | Brain_Cortex     |             |  |  |
|               | 0.678216682                           | Brain_Spinal_cord_cervical_c-1 | 1.206604891                 | 0.799273111  |              |                  |             |  |  |
|               | 0.799273111                           | -1.66734195                    | 0.785131456                 | -0.155770881 | 1.322083036  |                  |             |  |  |
|               | 3                                     | 0                              | 0.987147804                 |              |              |                  |             |  |  |

|               |                                       |                             |              |             |                                |             |            |   |              |
|---------------|---------------------------------------|-----------------------------|--------------|-------------|--------------------------------|-------------|------------|---|--------------|
| RP11-190P13.2 | ENSG00000242880.1                     | 0.233852623                 | 1            | 1           | 0.233852623                    |             |            |   |              |
|               | Brain_Spinal_cord_cervical_c-1        | 0.233852623                 |              |             | Brain_Spinal_cord_cervical_c-1 |             |            |   |              |
|               | 1 1 1 1.190493144                     | 1.190493144                 |              |             | 1.190493144                    | NA          | 1          | 0 |              |
|               | 0.987147804                           |                             |              |             |                                |             |            |   |              |
| CPEB2-AS1     | ENSG00000247624.6                     | 0.234009968                 | 2            | 2           | 0.094751891                    |             |            |   |              |
|               | Brain_Cerebellum                      | 0.704721337                 |              |             | Brain_Caudate_basal_ganglia    | 1.02563461  | 0.97436539 |   |              |
|               | 0.97436539 -0.378954925               | 1.670847058                 |              |             | 0.645946067                    | 1.449428882 | 2          |   |              |
|               | 0 0.987147804                         |                             |              |             |                                |             |            |   |              |
| BID           | ENSG0000015475.18                     | 0.234059251                 | 5            | 2           | 0.287734994                    |             |            |   | Brain_Cortex |
|               | 0.619843409                           | Brain_Caudate_basal_ganglia | 4.343929802  |             | 0.013954409                    |             |            |   |              |
|               | 0.543416183 -1.063103552              | 0.49607229                  | -0.660093556 |             | 0.657809449                    |             | 2          |   |              |
|               | 0 0.987147804                         |                             |              |             |                                |             |            |   |              |
| DZANK1        | ENSG00000089091.16                    | 0.23409765                  | 5            | 5           | 0.059294878                    |             |            |   |              |
|               | Brain_Frontal_Cortex_BA9              | 0.674909515                 |              |             | Brain_Cerebellum               | 3.063288295 |            |   |              |
|               | 0.12276426 0.12276426 -1.886000566    | -0.419419583                |              |             | -1.095492661                   | 0.52837391  |            |   |              |
|               | 5 0 0.987147804                       |                             |              |             |                                |             |            |   |              |
| CCDC69        | ENSG00000198624.12                    | 0.234207848                 | 2            | 2           | 0.160916766                    |             |            |   |              |
|               | Brain_Hypothalamus                    | 0.392044798                 |              |             | Brain_Cerebellum               | 1.078018157 |            |   |              |
|               | 0.921981843 0.921981843               | 0.855914998                 |              |             | 1.401994913                    | 1.128954956 |            |   |              |
|               | 0.386136811 2 0 0.987147804           |                             |              |             |                                |             |            |   |              |
| MAFF          | ENSG00000185022.11                    | 0.234288866                 | 1            | 1           | 0.234288866                    |             |            |   |              |
|               | Brain_Caudate_basal_ganglia           | 0.234288866                 |              |             | Brain_Caudate_basal_ganglia    | 1           | 1          |   |              |
|               | 1 1.189383309 1.189383309             | 1.189383309                 | 1.189383309  | NA          | 1                              | 0           |            |   |              |
|               | 0.987147804                           |                             |              |             |                                |             |            |   |              |
| DESI1         | ENSG00000100418.7                     | 0.234333818                 | 3            | 3           | 0.115741608                    |             |            |   | Brain_Cortex |
|               | 0.78993242                            | Brain_Putamen_basal_ganglia | 1.495286781  |             | 0.496414247                    |             |            |   |              |
|               | 0.496414247 -0.266398371              | 1.572901585                 |              |             | 0.688565132                    | 0.921681733 |            |   |              |
|               | 3 0 0.987147804                       |                             |              |             |                                |             |            |   |              |
| ZNF266        | ENSG00000174652.17                    | 0.234335984                 | 13           | 1           | 0.201353251                    |             |            |   |              |
|               | Brain_Substantia_nigra                | 0.375286989                 |              |             | Brain_Spinal_cord_cervical_c-1 |             |            |   |              |
|               | 12.79494339 2.86E-05 12.79494339      | -1.277705597                |              |             | -0.886613564                   |             |            |   |              |
|               | -1.179164524 0.098880238 1 0          | 0.987147804                 |              |             |                                |             |            |   |              |
| CENPL         | ENSG00000120334.15                    | 0.234364929                 | 1            | 1           | 0.234364929                    |             |            |   |              |
|               | Brain_Frontal_Cortex_BA9              | 0.234364929                 |              |             | Brain_Frontal_Cortex_BA9       | 1           | 1          |   |              |
|               | 1 1.18918995 1.18918995 1.18918995    | NA                          | 1            | 0           | 0.987147804                    |             |            |   |              |
| TYW1B         | ENSG00000277149.4                     | 0.234406696                 | 13           | 1           | 0.058362561                    |             |            |   |              |
|               | Brain_Spinal_cord_cervical_c-1        | 0.370777025                 |              |             | Brain_Amygdala                 | 12.52034533 |            |   |              |
|               | 0.000338584 12.52034533               | 0.895018825                 |              |             | 1.892964726                    | 1.167539391 |            |   |              |
|               | 0.302184625 1 0 0.987147804           |                             |              |             |                                |             |            |   |              |
| ZHX2          | ENSG00000178764.7                     | 0.234429041                 | 1            | 1           | 0.234429041                    |             |            |   |              |
|               | Brain_Caudate_basal_ganglia           | 0.234429041                 |              |             | Brain_Caudate_basal_ganglia    | 1           | 1          |   |              |
|               | 1 1.189027004 1.189027004             | 1.189027004                 | 1.189027004  | NA          | 1                              | 0           |            |   |              |
|               | 0.987147804                           |                             |              |             |                                |             |            |   |              |
| TMED9         | ENSG00000184840.11                    | 0.23451457                  | 4            | 2           | 0.118133134                    |             |            |   |              |
|               | Brain_Cerebellar_Hemisphere           | 0.555564384                 |              |             | Brain_Putamen_basal_ganglia    | 3.70856114  |            |   |              |
|               | 0.017783952 0.242919569               | 0.589442633                 |              |             | 1.562657678                    | 0.995941352 |            |   |              |
|               | 0.444055476 2 0 0.987147804           |                             |              |             |                                |             |            |   |              |
| FAM219B       | ENSG00000178761.14                    | 0.234553113                 | 1            | 1           | 0.234553113                    |             |            |   |              |
|               | Brain_Hypothalamus                    | 0.234553113                 |              |             | Brain_Hypothalamus             | 1           | 1          | 1 |              |
|               | 1.188711755 1.188711755               | 1.188711755                 | NA           | 1           | 0                              | 0.987147804 |            |   |              |
| NDST2         | ENSG00000166507.17                    | 0.234556222                 | 1            | 1           | 0.234556222                    |             |            |   |              |
|               | Brain_Nucleus_accumbens_basal_ganglia | 0.234556222                 |              |             |                                |             |            |   |              |
|               | Brain_Nucleus_accumbens_basal_ganglia | 1                           | 1            | 1           | 1.188703858                    |             |            |   |              |
|               | 1.188703858 1.188703858               | NA                          | 1            | 0           | 0.987147804                    |             |            |   |              |
| KIAA0922      | ENSG00000121210.15                    | 0.234603816                 | 1            | 1           | 0.234603816                    |             |            |   |              |
|               | Brain_Caudate_basal_ganglia           | 0.234603816                 |              |             | Brain_Caudate_basal_ganglia    | 1           | 1          |   |              |
|               | 1 -1.188582961 -1.188582961           | -1.188582961                | -1.188582961 | NA          | 1                              | 0           |            |   |              |
|               | 0.987147804                           |                             |              |             |                                |             |            |   |              |
| GALNT15       | ENSG00000131386.17                    | 0.23461869                  | 2            | 2           | 0.197976582                    |             |            |   |              |
|               | Brain_Frontal_Cortex_BA9              | 0.347975772                 |              |             | Brain_Spinal_cord_cervical_c-1 |             |            |   |              |
|               | 1.129491817 0.870508183               | 0.870508183                 |              |             | 0.938522865                    | 1.287337778 |            |   |              |
|               | 1.112930321 0.24664939                | 2                           | 0            | 0.987147804 |                                |             |            |   |              |

|                |                                       |                             |                                      |             |              |                    |
|----------------|---------------------------------------|-----------------------------|--------------------------------------|-------------|--------------|--------------------|
| POLR1D         | ENSG00000186184.16                    | 0.234619443                 | 11                                   | 8           | 0.01817217   | Brain_Cortex       |
|                | 0.797656828                           | Brain_Cerebellum            | 4.859504134                          |             | 0.066341983  | 0.177807091        |
|                | -0.362248397                          | 2.362091218                 | 1.066099586                          |             | 1.014939257  | 8 0                |
|                | 0.987147804                           |                             |                                      |             |              |                    |
| ERN1           | ENSG00000178607.15                    | 0.234638695                 | 4                                    | 3           | 0.13245472   |                    |
|                | Brain_Nucleus_accumbens_basal_ganglia | 0.739752879                 |                                      |             |              | Brain_Hypothalamus |
|                | 1.977816133                           | 0.036151748                 | 0.976596285                          |             | -1.504492044 | -0.332180617       |
|                | -1.10519484                           | 0.526988499                 | 3 0                                  |             | 0.987147804  |                    |
| LINC02010      | ENSG00000242671.1                     | 0.234698116                 | 1                                    | 1           | 0.234698116  |                    |
|                | Brain_Cerebellum                      | 0.234698116                 | Brain_Cerebellum                     | 1 1         | 1            | -1.188343475       |
|                | -1.188343475                          | -1.188343475                | NA 1                                 | 0           | 0.987147804  |                    |
| RP11-354P17.15 | ENSG00000261696.1                     | 0.234769675                 | 1                                    | 1           | 0.234769675  |                    |
|                | Brain_Frontal_Cortex_BA9              | 0.234769675                 | Brain_Frontal_Cortex_BA9             | 1 1         | 1            | 1                  |
|                | 1 1.188161787                         | 1.188161787                 | 1.188161787                          | NA 1        | 0            |                    |
|                | 0.987147804                           |                             |                                      |             |              |                    |
| SDC1           | ENSG00000115884.10                    | 0.234852178                 | 2                                    | 2           | 0.158704797  | Brain_Cerebellum   |
|                | 0.289507815                           | Brain_Putamen_basal_ganglia | 1.076256696                          |             | 0.923743304  |                    |
|                | 0.923743304                           | -1.409441035                | 1.059201956                          |             | -0.17511954  | 1.745594199        |
|                | 2 0                                   | 0.987147804                 |                                      |             |              |                    |
| PRPF19         | ENSG00000110107.8                     | 0.234870052                 | 1                                    | 1           | 0.234870052  |                    |
|                | Brain_Cerebellum                      | 0.234870052                 | Brain_Cerebellum                     | 1 1         | 1            | 1.187906999        |
|                | 1.187906999                           | 1.187906999                 | NA 1                                 | 0           | 0.987147804  |                    |
| ITIH2          | ENSG00000151655.18                    | 0.234879364                 | 4                                    | 4           | 0.055283395  |                    |
|                | Brain_Caudate_basal_ganglia           | 0.498218193                 | Brain_Cerebellum                     | 1.82148446  |              |                    |
|                | 0.197659824                           | 0.197659824                 | -1.051169289                         |             | 1.916642264  | 0.221178244        |
|                | 1.357287411                           | 4 0                         | 0.987147804                          |             |              |                    |
| DGCR6          | ENSG00000183628.12                    | 0.234950775                 | 4                                    | 4           | 0.057734936  |                    |
|                | Brain_Nucleus_accumbens_basal_ganglia | 0.897758711                 | Brain_Caudate_basal_ganglia          |             |              |                    |
|                | 1.944508877                           | 0.266925431                 | 0.266925431                          |             | -1.897705129 | -0.12849316        |
|                | -1.408820765                          | 0.854761877                 | 4 0                                  |             | 0.987147804  |                    |
| KIF22          | ENSG00000079616.12                    | 0.235079606                 | 1                                    | 1           | 0.235079606  |                    |
|                | Brain_Hypothalamus                    | 0.235079606                 | Brain_Hypothalamus                   | 1 1         | 1            | 1                  |
|                | 1.187375331                           | 1.187375331                 | 1.187375331                          | NA 1        | 0            | 0.987147804        |
| MMS19          | ENSG00000155229.20                    | 0.235149966                 | 2                                    | 2           | 0.112161245  | Brain_Cerebellum   |
|                | 0.635769228                           | Brain_Substantia_nigra      | 1.084209346                          |             | 0.915790654  |                    |
|                | 0.915790654                           | -1.588553447                | -0.47362236                          |             | -1.031087903 | 0.788375332        |
|                | 2 0                                   | 0.987147804                 |                                      |             |              |                    |
| KCNJ9          | ENSG00000162728.4                     | 0.235235635                 | 3                                    | 3           | 0.133964093  |                    |
|                | Brain_Putamen_basal_ganglia           | 0.223240915                 | Brain_Spinal_cord_cervical_c-1       |             |              |                    |
|                | 1.502412398                           | 0.491933067                 | 0.491933067                          |             | -1.217955418 | 1.498651393        |
|                | 0.535935211                           | 1.521333591                 | 3 0                                  |             | 0.987147804  |                    |
| DUSP8          | ENSG00000184545.10                    | 0.235278061                 | 1                                    | 1           | 0.235278061  |                    |
|                | Brain_Frontal_Cortex_BA9              | 0.235278061                 | Brain_Frontal_Cortex_BA9             | 1 1         | 1            | 1                  |
|                | 1 -1.186872133                        | -1.186872133                | -1.186872133                         | NA 1        | 0            |                    |
|                | 0.987147804                           |                             |                                      |             |              |                    |
| C12orf71       | ENSG00000214700.5                     | 0.23531222                  | 1                                    | 1           | 0.23531222   | Brain_Hypothalamus |
|                | 0.23531222                            | Brain_Hypothalamus          | 1 1                                  | 1           | 1.186785551  | 1.186785551        |
|                | 1.186785551                           | NA 1                        | 0                                    |             | 0.987147804  |                    |
| GNMT           | ENSG00000124713.5                     | 0.235352616                 | 12                                   | 1           | 0.16687529   |                    |
|                | Brain_Cerebellar_Hemisphere           | 0.310275426                 | Brain_Putamen_basal_ganglia          |             |              |                    |
|                | 11.59661449                           | 0.000166649                 | 11.59661449                          |             | 1.014644274  | 1.382314061        |
|                | 1.166816738                           | 0.112301196                 | 1 0                                  |             | 0.987147804  |                    |
| SETD6          | ENSG00000103037.11                    | 0.235370516                 | 3                                    | 3           | 0.057525688  |                    |
|                | Brain_Cerebellar_Hemisphere           | 0.401040815                 | Brain_Anterior_cingulate_cortex_BA24 |             |              |                    |
|                | 1.824025943                           | 0.17754882                  | 0.17754882                           |             | -0.839763833 | 1.899295091        |
|                | 0.878070256                           | 1.496515716                 | 3 0                                  |             | 0.987147804  |                    |
| PCDHGA1        | ENSG00000204956.5                     | 0.23538649                  | 3                                    | 3           | 0.072443954  |                    |
|                | Brain_Cerebellar_Hemisphere           | 0.53428444                  | Brain_Caudate_basal_ganglia          | 1.745476363 |              |                    |
|                | 0.254902411                           | 0.254902411                 | -1.034302504                         |             | 1.796318016  | 0.04684547         |
|                | 1.529083527                           | 3 0                         | 0.987147804                          |             |              |                    |
| ABRA           | ENSG00000174429.3                     | 0.235397647                 | 1                                    | 1           | 0.235397647  |                    |
|                | Brain_Frontal_Cortex_BA9              | 0.235397647                 | Brain_Frontal_Cortex_BA9             | 1 1         | 1            | 1                  |

|                                |                                      |                                      |              |             |              |                          |   |
|--------------------------------|--------------------------------------|--------------------------------------|--------------|-------------|--------------|--------------------------|---|
| 1                              | -1.186569057                         | -1.186569057                         | -1.186569057 | NA          | 1            | 0                        |   |
| 0.987147804                    |                                      |                                      |              |             |              |                          |   |
| OLFM1                          | ENSG00000130558.19                   | 0.235444479                          | 2            | 2           | 0.089246182  |                          |   |
| Brain_Putamen_basal_ganglia    | 0.76310269                           | Brain_Substantia_nigra               |              |             | 1.137651889  |                          |   |
| 0.862348111                    | 0.862348111                          | -0.301408924                         |              |             | 1.699387571  | 0.698989323              |   |
| 1.414776769                    | 2                                    | 0                                    | 0.987147804  |             |              |                          |   |
| RPS6KA2                        | ENSG00000071242.11                   | 0.235481797                          | 1            | 1           | 0.235481797  |                          |   |
| Brain_Cerebellar_Hemisphere    | 0.235481797                          | Brain_Cerebellar_Hemisphere          | 1            | 1           |              |                          |   |
| 1                              | -1.186355856                         | -1.186355856                         | -1.186355856 | NA          | 1            | 0                        |   |
| 0.987147804                    |                                      |                                      |              |             |              |                          |   |
| QRFPR                          | ENSG00000186867.10                   | 0.235677484                          | 1            | 1           | 0.235677484  |                          |   |
| Brain_Cerebellar_Hemisphere    | 0.235677484                          | Brain_Cerebellar_Hemisphere          | 1            | 1           |              |                          |   |
| 1                              | -1.185860273                         | -1.185860273                         | -1.185860273 | NA          | 1            | 0                        |   |
| 0.987147804                    |                                      |                                      |              |             |              |                          |   |
| IARS                           | ENSG00000196305.17                   | 0.235739909                          | 2            | 2           | 0.323197898  |                          |   |
| Brain_Cerebellar_Hemisphere    | 0.728102888                          | Brain_Cerebellum                     |              |             | 1.677784203  |                          |   |
| 0.322215797                    | 0.322215797                          | -0.347650217                         |              |             | 0.987907611  | 0.320128697              |   |
| 0.944381997                    | 2                                    | 0                                    | 0.987147804  |             |              |                          |   |
| THUMPD2                        | ENSG00000138050.14                   | 0.235850007                          | 3            | 3           | 0.153126815  |                          |   |
| Brain_Cerebellar_Hemisphere    | 0.547092965                          | Brain_Cortex                         |              |             | 1.798604535  |                          |   |
| 0.208622751                    | 0.208622751                          | -1.428573639                         |              |             | 1.377388313  | 0.183645541              |   |
| 1.449033298                    | 3                                    | 0                                    | 0.987147804  |             |              |                          |   |
| TAPBP                          | ENSG00000231925.11                   | 0.235851501                          | 6            | 5           | 0.05417687   | Brain_Hypothalamus       |   |
| 0.978856426                    | Brain_Anterior_cingulate_cortex_BA24 | 2.878980225                          |              |             |              |                          |   |
| 0.021485946                    | 0.420879871                          | -0.395267722                         |              |             | 1.925419727  | 0.565452675              |   |
| 0.806464797                    | 5                                    | 0                                    | 0.987147804  |             |              |                          |   |
| RP11-521C20.2                  | ENSG00000259584.1                    | 0.235868153                          | 5            | 3           | 0.093924597  |                          |   |
| Brain_Cerebellum               | 0.333560307                          | Brain_Anterior_cingulate_cortex_BA24 |              |             |              |                          |   |
| 3.451855617                    | 0.025608267                          | 0.403681898                          |              |             | 0.966967447  | 1.675049107              |   |
| 1.19462256                     | 0.286885082                          | 3                                    | 0            | 0.987147804 |              |                          |   |
| CSE1L                          | ENSG00000124207.16                   | 0.235949953                          | 1            | 1           | 0.235949953  | Brain_Cortex             |   |
| 0.235949953                    | Brain_Cortex                         | 1                                    | 1            | 1           | -1.185170723 | -1.185170723             |   |
| -1.185170723                   | NA                                   | 1                                    | 0            | 0.987147804 |              |                          |   |
| RP11-572O17.1                  | ENSG00000270195.1                    | 0.235958182                          | 2            | 2           | 0.179535898  |                          |   |
| Brain_Cerebellum               | 0.886098666                          | Brain_Putamen_basal_ganglia          |              |             | 1.544657997  |                          |   |
| 0.455342003                    | 0.455342003                          | -1.342185374                         |              |             | 0.1432425    | -0.599471437             |   |
| 1.050356123                    | 2                                    | 0                                    | 0.987147804  |             |              |                          |   |
| FAM228A                        | ENSG00000186453.12                   | 0.235967796                          | 7            | 6           | 0.276358588  |                          |   |
| Brain_Substantia_nigra         | 0.816330008                          | Brain_Putamen_basal_ganglia          |              |             |              |                          |   |
| 4.479645229                    | 0.127660906                          | 0.164388479                          |              |             | -0.926254054 | 1.08853592               |   |
| 0.327415349                    | 0.774370632                          | 6                                    | 0            | 0.987147804 |              |                          |   |
| RAET1G                         | ENSG00000203722.7                    | 0.236016035                          | 11           | 1           | 0.139172063  |                          |   |
| Brain_Cerebellum               | 0.370807139                          | Brain_Cortex                         |              |             | 10.42702206  | 0.00319541               |   |
| 10.42702206                    | -1.478881222                         | -0.894962491                         |              |             | -1.152534133 | 0.171399056              |   |
| 1                              | 0                                    | 0.987147804                          |              |             |              |                          |   |
| KBTBD8                         | ENSG00000163376.11                   | 0.236367124                          | 1            | 1           | 0.236367124  |                          |   |
| Brain_Substantia_nigra         | 0.236367124                          | Brain_Substantia_nigra               |              |             |              | 1                        | 1 |
| 1                              | -1.184116059                         | -1.184116059                         | -1.184116059 | NA          | 1            | 0                        |   |
| 0.987147804                    |                                      |                                      |              |             |              |                          |   |
| HIBADH                         | ENSG00000106049.8                    | 0.236454416                          | 3            | 3           | 0.21723293   |                          |   |
| Brain_Caudate_basal_ganglia    | 0.922163235                          | Brain_Hippocampus                    |              |             | 1.783242358  |                          |   |
| 0.375449548                    | 0.375449548                          | -1.233919427                         |              |             | 1.060041794  | -0.025389488             |   |
| 1.151924251                    | 3                                    | 0                                    | 0.987147804  |             |              |                          |   |
| ADD1                           | ENSG00000087274.16                   | 0.23653785                           | 1            | 1           | 0.23653785   | Brain_Frontal_Cortex_BA9 |   |
| 0.23653785                     | Brain_Frontal_Cortex_BA9             | 1                                    | 1            | 1           | -1.183684821 |                          |   |
| -1.183684821                   | -1.183684821                         | NA                                   | 1            | 0           | 0.987147804  |                          |   |
| GNA12                          | ENSG00000146535.13                   | 0.236701838                          | 5            | 4           | 0.091934212  |                          |   |
| Brain_Hypothalamus             | 0.952851491                          | Brain_Putamen_basal_ganglia          |              |             | 3.368380382  |                          |   |
| 0.102190475                    | 0.14719142                           | -1.68528182                          |              |             | -0.059126325 | -0.984227762             |   |
| 0.637675817                    | 4                                    | 0                                    | 0.987147804  |             |              |                          |   |
| ATF6B                          | ENSG00000213676.10                   | 0.236871056                          | 9            | 9           | 0.051951651  |                          |   |
| Brain_Spinal_cord_cervical_c-1 | 0.504841509                          | Brain_Hippocampus                    |              |             |              |                          |   |



|             |                                       |              |              |                                       |              |
|-------------|---------------------------------------|--------------|--------------|---------------------------------------|--------------|
|             | 1.987563202                           | 0.395822121  | 0.395822121  | -1.943534173                          | 0.951814024  |
|             | -0.661969303                          | 1.166845033  | 9 0          | 0.987147804                           |              |
| ZNF276      | ENSG00000158805.11                    | 0.236889351  | 6 5          | 0.061528248                           |              |
|             | Brain_Nucleus_accumbens_basal_ganglia | 0.787097284  |              | Brain_Cerebellum                      |              |
|             | 4.308747353                           | 0.096312347  | 0.167234967  | -1.869680151                          | 0.386888588  |
|             | -0.911443567                          | 0.832435707  | 5 0          | 0.987147804                           |              |
| GNG8        | ENSG00000167414.4                     | 0.236896973  | 1 1          | 0.236896973                           |              |
|             | Brain_Nucleus_accumbens_basal_ganglia | 0.236896973  |              |                                       |              |
|             | Brain_Nucleus_accumbens_basal_ganglia | 1 1          | 1 1          | 1.182778425                           |              |
|             | 1.182778425                           | 1.182778425  | NA 1         | 0.987147804                           |              |
| ZNF507      | ENSG00000168813.16                    | 0.236929433  | 6 6          | 0.065867508                           |              |
|             | Brain_Frontal_Cortex_BA9              | 0.966098363  |              | Brain_Hippocampus                     | 2.859668187  |
|             | 0.141326956                           | 0.141326956  | -0.988448273 | 1.839324255                           | -0.006002752 |
|             | 1.049365718                           | 6 0          | 0.987147804  |                                       |              |
| PDLIM4      | ENSG00000131435.12                    | 0.236976592  | 4 3          | 0.206267378                           |              |
|             | Brain_Cortex                          | 0.891910923  |              | Brain_Frontal_Cortex_BA9              | 3.489033248  |
|             | 0.085039094                           | 0.166466498  | -0.135886608 | 1.263895943                           | 0.568796365  |
|             | 0.573630222                           | 3 0          | 0.987147804  |                                       |              |
| ZGRF1       | ENSG00000138658.15                    | 0.237178099  | 13 5         | 0.047180694                           |              |
|             | Brain_Spinal_cord_cervical_c-1        | 0.964973514  |              | Brain_Hippocampus                     |              |
|             | 8.794103636                           | 0.003603806  | 0.456653816  | 0.0439133                             | 1.984674531  |
|             | 1.110572822                           | 0.544022028  | 5 0          | 0.987147804                           |              |
| NEGR1       | ENSG00000172260.14                    | 0.237213604  | 5 5          | 0.047003093                           |              |
|             | Brain_Putamen_basal_ganglia           | 0.964093532  |              | Brain_Nucleus_accumbens_basal_ganglia |              |
|             | 1.647254598                           | 0.392911668  | 0.392911668  | -0.261759971                          | 1.986272336  |
|             | 0.908459813                           | 0.995059667  | 5 0          | 0.987147804                           |              |
| PHLDB3      | ENSG00000176531.10                    | 0.237256065  | 10 1         | 0.173545751                           |              |
|             | Brain_Spinal_cord_cervical_c-1        | 0.398220396  |              | Brain_Hypothalamus                    |              |
|             | 9.217841656                           | 0.001552066  | 9.217841656  | 0.844803794                           | 1.360898553  |
|             | 1.132898103                           | 0.159281237  | 1 0          | 0.987147804                           |              |
| CMTM3       | ENSG00000140931.19                    | 0.237413104  | 3 3          | 0.074181999                           |              |
|             | Brain_Spinal_cord_cervical_c-1        | 0.666680662  |              | Brain_Hippocampus                     |              |
|             | 1.322823765                           | 0.802998845  | 0.802998845  | -1.785489217                          | 0.430708053  |
|             | -0.602049094                          | 1.115756069  | 3 0          | 0.987147804                           |              |
| PAAF1       | ENSG00000175575.12                    | 0.237510258  | 12 3         | 0.088458041                           |              |
|             | Brain_Nucleus_accumbens_basal_ganglia | 0.976644832  |              | Brain_Cerebellum                      | 9.43914757   |
|             | 0.004677707                           | 0.524647105  | -1.703588233 | 0.543970517                           | -0.534855991 |
|             | 0.569758428                           | 3 0          | 0.987147804  |                                       |              |
| MAGEF1      | ENSG00000177383.4                     | 0.237604009  | 1 1          | 0.237604009                           |              |
|             | Brain_Frontal_Cortex_BA9              | 0.237604009  |              | Brain_Frontal_Cortex_BA9              | 1 1          |
|             | 1 -1.180996764                        | -1.180996764 | -1.180996764 | NA 1 0                                |              |
|             | 0.987147804                           |              |              |                                       |              |
| LINC00987   | ENSG00000237248.4                     | 0.237697766  | 3 3          | 0.040173083                           |              |
|             | Brain_Putamen_basal_ganglia           | 0.66897293   |              | Brain_Caudate_basal_ganglia           | 1.66600622   |
|             | 0.535678401                           | 0.535678401  | 0.427558027  | 2.051964801                           | 1.069242635  |
|             | 0.864236255                           | 3 0          | 0.987147804  |                                       |              |
| CTA-228A9.3 | ENSG00000272720.1                     | 0.237792119  | 6 4          | 0.019346881                           |              |
|             | Brain_Caudate_basal_ganglia           | 0.95391294   |              | Brain_Hypothalamus                    | 3.930288295  |
|             | 0.029352713                           | 0.188434213  | -0.057793721 | 2.338778859                           | 1.409375695  |
|             | 1.074799843                           | 4 0          | 0.987147804  |                                       |              |
| NBEAL2      | ENSG00000160796.16                    | 0.237792576  | 6 4          | 0.098056613                           |              |
|             | Brain_Anterior_cingulate_cortex_BA24  | 0.997589299  |              | Brain_Cerebellar_Hemisphere           |              |
|             | 4.379227102                           | 0.029197115  | 0.151326194  | -0.631573505                          | 1.654349047  |
|             | 0.46131437                            | 0.885583287  | 4 0          | 0.987147804                           |              |
| FGF12       | ENSG00000114279.13                    | 0.237812829  | 1 1          | 0.237812829                           | Brain_Cortex |
|             | 0.237812829                           | Brain_Cortex | 1 1 1        | -1.180471273                          | -1.180471273 |
|             | -1.180471273                          | NA 1 0       | 0.987147804  |                                       |              |
| LINC01914   | ENSG00000234362.5                     | 0.23793191   | 1 1          | 0.23793191                            |              |
|             | Brain_Spinal_cord_cervical_c-1        | 0.23793191   |              | Brain_Spinal_cord_cervical_c-1        | 1 1          |
|             | 1 1 1.180171757                       | 1.180171757  | 1.180171757  | NA 1 0                                |              |
|             | 0.987147804                           |              |              |                                       |              |
| ABHD12      | ENSG00000100997.18                    | 0.23804275   | 12 2         | 0.112022367                           |              |

|               |                                       |              |                             |                                      |              |             |              |
|---------------|---------------------------------------|--------------|-----------------------------|--------------------------------------|--------------|-------------|--------------|
|               | Brain_Substantia_nigra                | 0.792563293  |                             | Brain_Anterior_cingulate_cortex_BA24 |              |             |              |
|               | 10.10266244                           | 0.008517663  | 0.903170287                 | -0.262983505                         | 1.589168452  |             |              |
|               | 0.999958563                           | 0.479050292  | 2                           | 0                                    | 0.987147804  |             |              |
| MEIOB         | ENSG00000162039.14                    | 0.23806839   | 7                           | 5                                    | 0.099561017  |             |              |
|               | Brain_Nucleus_accumbens_basal_ganglia | 0.924455956  |                             |                                      |              |             |              |
|               | Brain_Spinal_cord_cervical_c-1        | 5.118291963  |                             | 0.018424994                          | 0.182016653  |             |              |
|               | -1.646985543                          | 0.174282309  | -0.728517427                | 0.617076755                          | 5            | 0           |              |
|               | 0.987147804                           |              |                             |                                      |              |             |              |
| CFD           | ENSG00000197766.7                     | 0.238165807  | 8                           | 8                                    | 0.007716038  |             |              |
|               | Brain_Hypothalamus                    | 0.976747587  |                             | Brain_Putamen_basal_ganglia          | 2.022181798  |             |              |
|               | 0.266978438                           | 0.266978438  | -2.664249186                | 1.166396634                          | -0.142429841 |             |              |
|               | 1.171613857                           | 8            | 0                           | 0.987147804                          |              |             |              |
| RP11-298J23.8 | ENSG00000269387.1                     | 0.238217884  |                             | 1                                    | 1            | 0.238217884 |              |
|               | Brain_Cortex                          | 0.238217884  | Brain_Cortex                | 1                                    | 1            | 1           | -1.179452893 |
|               | -1.179452893                          | -1.179452893 | NA                          | 1                                    | 0            | 0.987147804 |              |
| SLC19A3       | ENSG00000135917.13                    | 0.23822348   | 3                           | 3                                    | 0.060720593  |             |              |
|               | Brain_Substantia_nigra                | 0.414724392  |                             | Brain_Cortex                         | 1.400043243  |             |              |
|               | 0.61194241                            | 0.61194241   | 0.815607966                 | 1.875524564                          | 1.306400317  |             |              |
|               | 0.534282428                           | 3            | 0                           | 0.987147804                          |              |             |              |
| TTL11-IT1     | ENSG00000237548.1                     | 0.238463354  |                             | 1                                    | 1            | 0.238463354 |              |
|               | Brain_Cerebellum                      | 0.238463354  | Brain_Cerebellum            | 1                                    | 1            | 1           | 1.178836331  |
|               | 1.178836331                           | 1.178836331  | NA                          | 1                                    | 0            | 0.987147804 |              |
| FHL3          | ENSG00000183386.9                     | 0.238517877  | 5                           | 5                                    | 0.059562506  |             |              |
|               | Brain_Hypothalamus                    | 0.713378457  |                             | Brain_Cortex                         | 2.206197678  |             |              |
|               | 0.388711357                           | 0.388711357  | -1.884018254                | -0.367322521                         | -1.136442551 |             |              |
|               | 0.657490727                           | 5            | 0                           | 0.987147804                          |              |             |              |
| RHOBTB2       | ENSG00000008853.16                    | 0.238618987  | 2                           | 2                                    | 0.307685599  |             |              |
|               | Brain_Cerebellum                      | 0.941525768  | Brain_Cerebellar_Hemisphere | 1.823416082                          |              |             |              |
|               | 0.176583918                           | 0.176583918  | 0.073352307                 | 1.020090379                          | 0.546721343  |             |              |
|               | 0.66944491                            | 2            | 0                           | 0.987147804                          |              |             |              |
| RP11-401N18.1 | ENSG00000271148.1                     | 0.238624101  |                             | 3                                    | 3            | 0.115485409 |              |
|               | Brain_Cerebellar_Hemisphere           | 0.392333567  | Brain_Cerebellum            | 1.828344775                          |              |             |              |
|               | 0.194250743                           | 0.194250743  | -1.204015625                | 1.574008826                          | 0.408462098  |             |              |
|               | 1.441931152                           | 3            | 0                           | 0.987147804                          |              |             |              |
| MYO7A         | ENSG00000137474.19                    | 0.238654299  | 2                           | 2                                    | 0.104913233  |             |              |
|               | Brain_Substantia_nigra                | 0.601869306  | Brain_Hypothalamus          | 1.022059023                          |              |             |              |
|               | 0.977940977                           | 0.977940977  | -0.521714243                | 1.621487015                          | 0.549886386  |             |              |
|               | 1.515472143                           | 2            | 0                           | 0.987147804                          |              |             |              |
| RASSF5        | ENSG00000266094.7                     | 0.238658334  |                             | 1                                    | 1            | 0.238658334 |              |
|               | Brain_Nucleus_accumbens_basal_ganglia | 0.238658334  |                             |                                      |              |             |              |
|               | Brain_Nucleus_accumbens_basal_ganglia | 1            | 1                           | 1                                    | -1.17834691  |             |              |
|               | -1.17834691                           | -1.17834691  | NA                          | 1                                    | 0            | 0.987147804 |              |
| TM2D3         | ENSG00000184277.12                    | 0.238726598  | 10                          | 3                                    | 0.06924133   |             |              |
|               | Brain_Substantia_nigra                | 0.835801204  | Brain_Putamen_basal_ganglia | 8.29568985                           |              |             |              |
|               | 0.002369803                           | 0.306400828  | 0.207267181                 | 1.816841865                          | 1.127423728  |             |              |
|               | 0.434721875                           | 3            | 0                           | 0.987147804                          |              |             |              |
| LRFN2         | ENSG00000156564.8                     | 0.238760984  | 2                           | 2                                    | 0.6818361    |             |              |
|               | Brain_Cerebellar_Hemisphere           | 0.771854745  | Brain_Cerebellum            | 1.914382681                          |              |             |              |
|               | 0.085617319                           | 0.085617319  | -0.289949665                | 0.409958896                          | 0.060004615  |             |              |
|               | 0.49491009                            | 2            | 0                           | 0.987147804                          |              |             |              |
| GALC          | ENSG00000054983.16                    | 0.23888233   | 5                           | 5                                    | 0.035185238  |             |              |
|               | Brain_Nucleus_accumbens_basal_ganglia | 0.996566146  | Brain_Cerebellum            |                                      |              |             |              |
|               | 2.014054854                           | 0.112127047  | 0.112127047                 | -2.106220098                         | 0.835537999  |             |              |
|               | -0.165173171                          | 1.191501365  | 5                           | 0                                    | 0.987147804  |             |              |
| LTBP4         | ENSG00000090006.17                    | 0.23933714   | 3                           | 3                                    | 0.057415706  |             |              |
|               | Brain_Putamen_basal_ganglia           | 0.190737649  | Brain_Cerebellum            | 2.117054605                          |              |             |              |
|               | 0.167694991                           | 0.167694991  | -1.900132714                | -1.308400069                         | -1.608505536 |             |              |
|               | 0.295957415                           | 3            | 0                           | 0.987147804                          |              |             |              |
| ZNF493        | ENSG00000196268.11                    | 0.239352647  |                             | 9                                    | 5            | 0.105230127 |              |
|               | Brain_Hippocampus                     | 0.841690931  | Brain_Cortex                | 6.11750647                           | 0.045916976  |             |              |
|               | 0.265408381                           | -1.620010009 | 0.608216341                 | -0.573217469                         | 0.669382453  |             |              |
|               | 5                                     | 0            | 0.987147804                 |                                      |              |             |              |

|          |                                       |                          |                                |              |                          |              |             |              |
|----------|---------------------------------------|--------------------------|--------------------------------|--------------|--------------------------|--------------|-------------|--------------|
| C15orf65 | ENSG00000261652.2                     | 0.239352965              | 2                              | 2            | 0.272854867              |              |             |              |
|          | Brain_Cerebellar_Hemisphere           | 0.742861361              |                                |              | Brain_Cerebellum         | 1.872612455  |             |              |
|          | 0.127387545                           | 0.127387545              |                                |              | -1.09651179              | -0.328066529 |             | -0.712289159 |
|          | 0.543372855                           | 2                        | 0                              | 0.987147804  |                          |              |             |              |
| VPS39    | ENSG00000166887.15                    | 0.239423865              | 2                              | 2            | 0.4532212                |              |             |              |
|          | Brain_Nucleus_accumbens_basal_ganglia | 0.609704732              |                                |              | Brain_Frontal_Cortex_BA9 |              |             |              |
|          | 1.720481027                           | 0.279518973              | 0.279518973                    |              | -0.750055632             | 0.510494979  |             |              |
|          | -0.119780327                          | 0.891343885              | 2                              | 0            | 0.987147804              |              |             |              |
| ALDH3A2  | ENSG00000072210.18                    | 0.239434101              | 2                              | 1            | 0.163436673              |              |             |              |
|          | Brain_Substantia_nigra                | 0.349090502              |                                |              | Brain_Cerebellum         | 1.961351202  |             |              |
|          | 0.038648798                           | 1.961351202              |                                |              | -1.39360581              | -0.936354878 |             | -1.164980344 |
|          | 0.323325235                           | 1                        | 0                              | 0.987147804  |                          |              |             |              |
| ZNF257   | ENSG00000197134.11                    | 0.239463276              | 13                             | 4            | 0.126704481              |              |             |              |
|          | Brain_Putamen_basal_ganglia           | 0.714712046              |                                |              | Brain_Hippocampus        | 10.67404495  |             |              |
|          | 0.005331465                           | 0.423525845              |                                |              | -1.527227377             | 0.365535053  |             | -0.995783874 |
|          | 0.509035201                           | 4                        | 0                              | 0.987147804  |                          |              |             |              |
| PRSS23   | ENSG00000150687.11                    | 0.2395195                | 4                              | 4            | 0.122217469              |              |             | Brain_Cortex |
|          | 0.841997636                           | Brain_Hippocampus        | 3.223792433                    |              | 0.148022349              |              |             |              |
|          | 0.148022349                           | 0.199338921              | 1.545532687                    |              | 0.653478272              | 0.605112782  |             |              |
|          | 4                                     | 0                        | 0.987147804                    |              |                          |              |             |              |
| SPIRE1   | ENSG00000134278.15                    | 0.239655601              | 1                              | 1            | 0.239655601              |              |             |              |
|          | Brain_Nucleus_accumbens_basal_ganglia | 0.239655601              |                                |              |                          |              |             |              |
|          | Brain_Nucleus_accumbens_basal_ganglia | 1                        | 1                              | 1            | -1.17584805              |              |             |              |
|          | -1.17584805                           | -1.17584805              | NA                             | 1            | 0                        | 0.987147804  |             |              |
| PCDHGA4  | ENSG00000262576.2                     | 0.239759784              | 1                              | 1            | 0.239759784              |              |             |              |
|          | Brain_Cortex                          | 0.239759784              | Brain_Cortex                   | 1            | 1                        | 1            | 1.175587422 |              |
|          | 1.175587422                           | 1.175587422              | NA                             | 1            | 0                        | 0.987147804  |             |              |
| C11orf68 | ENSG00000175573.6                     | 0.239768745              | 1                              | 1            | 0.239768745              |              |             |              |
|          | Brain_Substantia_nigra                | 0.239768745              | Brain_Substantia_nigra         | 1            | 1                        |              |             |              |
|          | 1                                     | -1.175565009             | -1.175565009                   | -1.175565009 | NA                       | 1            | 0           |              |
|          | 0.987147804                           |                          |                                |              |                          |              |             |              |
| AGAP9    | ENSG00000204172.12                    | 0.239816354              | 11                             | 8            | 0.066335644              |              |             |              |
|          | Brain_Nucleus_accumbens_basal_ganglia | 0.923606972              |                                |              | Brain_Cerebellum         |              |             |              |
|          | 4.054783475                           | 0.006373013              | 0.416609071                    |              | -1.460000693             | 1.836148858  |             |              |
|          | 0.209358013                           | 1.164265624              | 8                              | 0            | 0.987147804              |              |             |              |
| RALGPS2  | ENSG00000116191.17                    | 0.239847514              | 2                              | 2            | 0.097924438              |              |             |              |
|          | Brain_Frontal_Cortex_BA9              | 0.739613211              | Brain_Substantia_nigra         |              |                          |              |             |              |
|          | 1.390655128                           | 0.609344872              | 0.609344872                    |              | 0.3323656                | 1.655000295  |             |              |
|          | 0.993682948                           | 0.935243962              | 2                              | 0            | 0.987147804              |              |             |              |
| PRPSAP1  | ENSG00000161542.16                    | 0.239850556              | 11                             | 9            | 0.079245229              |              |             |              |
|          | Brain_Nucleus_accumbens_basal_ganglia | 0.999448542              | Brain_Substantia_nigra         |              |                          |              |             |              |
|          | 4.905900458                           | 0.045666683              | 0.19391009                     | -1.755082313 | 1.509897351              |              |             |              |
|          | 0.067874858                           | 0.891178355              | 9                              | 0            | 0.987147804              |              |             |              |
| ELOVL5   | ENSG00000012660.13                    | 0.239941131              | 5                              | 3            | 0.47464745               |              |             | Brain_Cortex |
|          | 0.992449782                           | Brain_Frontal_Cortex_BA9 | 4.228755166                    |              | 0.04354467               |              |             |              |
|          | 0.142471858                           | -0.714937846             | 0.457038667                    |              | -0.198175844             | 0.493233037  |             |              |
|          | 3                                     | 0                        | 0.987147804                    |              |                          |              |             |              |
| EMB      | ENSG00000170571.11                    | 0.24007078               | 2                              | 2            | 0.134623702              |              |             |              |
|          | Brain_Putamen_basal_ganglia           | 0.936691899              | Brain_Hippocampus              |              | 1.422185183              |              |             |              |
|          | 0.577814817                           | 0.577814817              | -1.496114951                   |              | 0.079428376              | -0.708343287 |             |              |
|          | 1.114077371                           | 2                        | 0                              | 0.987147804  |                          |              |             |              |
| EIF4G3   | ENSG00000075151.20                    | 0.240083595              | 2                              | 2            | 0.092487031              |              |             |              |
|          | Brain_Cerebellum                      | 0.791944396              | Brain_Spinal_cord_cervical_c-1 |              | 1.066864185              |              |             |              |
|          | 0.933135815                           | 0.933135815              | -1.682422037                   |              | -0.263786554             | -0.973104295 |             |              |
|          | 1.00312677                            | 2                        | 0                              | 0.987147804  |                          |              |             |              |
| DCDC1    | ENSG00000170959.14                    | 0.240125864              | 2                              | 2            | 0.093518221              |              |             |              |
|          | Brain_Nucleus_accumbens_basal_ganglia | 0.977233337              | Brain_Substantia_nigra         |              |                          |              |             |              |
|          | 1.102259888                           | 0.897740112              | 0.897740112                    |              | -1.67712408              | -0.028537654 |             |              |
|          | -0.852830867                          | 1.165726641              | 2                              | 0            | 0.987147804              |              |             |              |
| PTGDR    | ENSG00000168229.3                     | 0.240257751              | 1                              | 1            | 0.240257751              |              |             |              |
|          | Brain_Hippocampus                     | 0.240257751              | Brain_Hippocampus              | 1            | 1                        | 1            |             |              |
|          | 1.174342788                           | 1.174342788              | 1.174342788                    | NA           | 1                        | 0            | 0.987147804 |              |

HAND2 ENSG00000164107.8 0.240308173 2 2 0.180217385 Brain\_Cerebellum  
0.530148539 Brain\_Cerebellar\_Hemisphere 1.859886753 0.140113247  
0.140113247 -1.340086006 -0.627779284 -0.983932645 0.503676913  
2 0 0.987147804

PIBF1 ENSG00000083535.15 0.24035296 10 4 0.125277223  
Brain\_Caudate\_basal\_ganglia 0.747135022 Brain\_Anterior\_cingulate\_cortex\_BA24  
7.606584592 0.013031558 0.390018931 -1.532994447 0.929513241  
-0.828786318 0.73076852 4 0 0.987147804

AF064858.6 ENSG00000205622.9 0.240377381 1 1 0.240377381  
Brain\_Cortex 0.240377381 Brain\_Cortex 1 1 1 -1.174044054  
-1.174044054 -1.174044054 NA 1 0 0.987147804

RP11-744I24.3 ENSG00000261797.1 0.24081923 1 1 0.24081923  
Brain\_Caudate\_basal\_ganglia 0.24081923 Brain\_Caudate\_basal\_ganglia 1 1 1  
-1.172941588 -1.172941588 -1.172941588 NA 1 0 0.987147804

CD300LG ENSG00000161649.12 0.240902811 1 1 0.240902811  
Brain\_Hippocampus 0.240902811 Brain\_Hippocampus 1 1 1  
-1.172733206 -1.172733206 -1.172733206 NA 1 0 0.987147804

MICALL2 ENSG00000164877.18 0.241080823 3 3 0.04558935  
Brain\_Substantia\_nigra 0.787454878 Brain\_Cerebellum 1.050268114  
0.954010613 0.954010613 -1.999175671 -0.269617055 -0.862358661  
0.984813071 3 0 0.987147804

PCDH1 ENSG00000156453.13 0.241098594 1 1 0.241098594  
Brain\_Anterior\_cingulate\_cortex\_BA24 0.241098594  
Brain\_Anterior\_cingulate\_cortex\_BA24 1 1 1 -1.172245281  
-1.172245281 -1.172245281 NA 1 0 0.987147804

GNG12 ENSG00000172380.5 0.241104877 1 1 0.241104877 Brain\_Cortex  
0.241104877 Brain\_Cortex 1 1 1 -1.172229626 -1.172229626  
-1.172229626 NA 1 0 0.987147804

ARHGEF3 ENSG00000163947.11 0.241133475 2 2 0.100927056  
Brain\_Cortex 0.700181772 Brain\_Putamen\_basal\_ganglia 1.00446208 0.99553792  
0.99553792 -1.640375791 -0.385075104 -1.012725448 0.887631628 2  
0 0.987147804

CDKN1C ENSG00000129757.12 0.241135372 2 2 0.092944496  
Brain\_Spinal\_cord\_cervical\_c-1 0.765311606 Brain\_Frontal\_Cortex\_BA9  
1.263184219 0.736815781 0.736815781 -1.680065893 -0.298513065  
-0.989289479 0.976905374 2 0 0.987147804

ZNF662 ENSG00000182983.14 0.241149765 1 1 0.241149765  
Brain\_Cerebellum 0.241149765 Brain\_Cerebellum 1 1 1 1.1721178  
1.1721178 1.1721178 NA 1 0 0.987147804

RP11-1060G2.2 ENSG00000271382.1 0.241180741 1 1 0.241180741  
Brain\_Nucleus\_accumbens\_basal\_ganglia 0.241180741  
Brain\_Nucleus\_accumbens\_basal\_ganglia 1 1 1 -1.172040637  
-1.172040637 -1.172040637 NA 1 0 0.987147804

AP4B1 ENSG00000134262.12 0.24122396 3 3 0.11004355 Brain\_Cerebellum  
0.898029689 Brain\_Cortex 1.375912317 0.639538669 0.639538669  
-1.014728268 1.597997427 0.151706143 1.328654881 3 0  
0.987147804

PIP4K2B ENSG00000276293.4 0.241246991 2 2 0.109498993  
Brain\_Frontal\_Cortex\_BA9 0.727505545 Brain\_Cerebellar\_Hemisphere  
1.112242407 0.887757593 0.887757593 0.348445622 1.600449085  
0.974447354 0.885300139 2 0 0.987147804

C2orf71 ENSG00000179270.6 0.241275818 10 2 0.110901878  
Brain\_Anterior\_cingulate\_cortex\_BA24 0.749668231 Brain\_Amygdala  
8.633595393 0.000958983 0.710803508 0.31907686 1.594152522  
1.172485555 0.426559611 2 0 0.987147804

COL5A2 ENSG00000204262.11 0.2413436 1 1 0.2413436 Brain\_Cerebellum  
0.2413436 Brain\_Cerebellum 1 1 1 1.171635075 1.171635075  
1.171635075 NA 1 0 0.987147804

GNG10 ENSG00000242616.3 0.241481778 13 1 0.062872704 Brain\_Amygdala  
0.810670694 Brain\_Substantia\_nigra 11.98569333 0.003657292  
11.98569333 -1.860090633 -0.239560881 -1.122008084 0.408474382  
1 0 0.987147804

|               |                                       |              |              |             |                                       |              |             |              |
|---------------|---------------------------------------|--------------|--------------|-------------|---------------------------------------|--------------|-------------|--------------|
| RIC3          | ENSG00000166405.14                    | 0.241519361  | 5            | 2           | 0.047578799                           |              |             |              |
|               | Brain_Nucleus_accumbens_basal_ganglia | 0.21288958   |              |             | Brain_Cortex                          | 4.243067872  |             |              |
|               | 0.000217828                           | 0.682174856  | -1.981111253 |             | -1.245659087                          | -1.480031805 |             |              |
|               | 0.288395291                           | 2            | 0            | 0.987147804 |                                       |              |             |              |
| ADAP2         | ENSG00000184060.10                    | 0.241622579  | 1            | 1           | 0.241622579                           |              |             |              |
|               | Brain_Spinal_cord_cervical_c-1        | 0.241622579  |              |             | Brain_Spinal_cord_cervical_c-1        |              |             |              |
|               | 1                                     | 1            | 1.170940787  | 1.170940787 | 1.170940787                           | NA           | 1           | 0            |
|               | 0.987147804                           |              |              |             |                                       |              |             |              |
| METTL2B       | ENSG00000165055.15                    | 0.241650295  | 13           | 7           | 0.146430372                           |              |             |              |
|               | Brain_Putamen_basal_ganglia           | 0.838836394  |              |             | Brain_Cortex                          | 8.067050214  |             |              |
|               | 0.011764042                           | 0.275832572  | -0.926798851 |             | 1.452256233                           | 0.614893757  |             |              |
|               | 0.742323188                           | 7            | 0            | 0.987147804 |                                       |              |             |              |
| RP11-112J3.16 | ENSG00000227388.2                     | 0.241770168  | 5            | 4           | 0.154733707                           |              |             |              |
|               | Brain_Putamen_basal_ganglia           | 0.885745064  |              |             | Brain_Anterior_cingulate_cortex_BA24  |              |             |              |
|               | 3.021168888                           | 0.012076638  | 0.338988862  |             | -1.423008447                          | 0.608690687  |             |              |
|               | -0.453781995                          | 0.78173715   | 4            | 0           | 0.987147804                           |              |             |              |
| DKFZp779M0652 | ENSG00000205106.4                     | 0.241802323  | 13           | 9           | 0.043584482                           |              |             |              |
|               | Brain_Hippocampus                     | 0.899360703  |              |             | Brain_Substantia_nigra                | 7.170369485  |             |              |
|               | 0.088655794                           | 0.327224182  | -0.351667424 |             | 2.018065096                           | 0.755079216  |             |              |
|               | 0.752961147                           | 9            | 0            | 0.987147804 |                                       |              |             |              |
| MECOM         | ENSG00000085276.17                    | 0.241839421  | 2            | 2           | 0.169611001                           |              |             |              |
|               | Brain_Putamen_basal_ganglia           | 1.000748982  |              |             | Brain_Cortex                          | 0.999251018  |             |              |
|               | 0.999251018                           | 0.974975402  | 1.373454809  |             | 1.174215106                           | 0.281767491  |             |              |
|               | 2                                     | 0            | 0.987147804  |             |                                       |              |             |              |
| ERCC5         | ENSG00000134899.18                    | 0.24185063   | 2            | 2           | 0.0945673                             |              |             |              |
|               | Brain_Putamen_basal_ganglia           | 1.059378     |              |             | Brain_Amygdala                        | 0.940622     | 0.940622    |              |
|               | -1.671782088                          | -0.110159323 | -0.890970706 |             | 1.104234047                           | 2            | 0           |              |
|               | 0.987147804                           |              |              |             |                                       |              |             |              |
| HIVEP3        | ENSG00000127124.14                    | 0.241853518  | 2            | 1           | 0.218458298                           |              |             |              |
|               | Brain_Cerebellum                      | 0.281958421  |              |             | Brain_Cerebellar_Hemisphere           | 1.942043201  |             |              |
|               | 0.057956799                           | 1.942043201  | 1.075930319  |             | 1.230637969                           | 1.153284144  |             |              |
|               | 0.109394829                           | 1            | 0            | 0.987147804 |                                       |              |             |              |
| SOX21         | ENSG00000125285.5                     | 0.241882851  | 2            | 2           | 0.107835161                           |              |             |              |
|               | Brain_Frontal_Cortex_BA9              | 0.777616501  |              |             | Brain_Cerebellar_Hemisphere           |              |             |              |
|               | 1.134296161                           | 0.865703839  | 0.865703839  |             | -1.608000083                          | 0.282426495  |             |              |
|               | -0.662786794                          | 1.336733453  | 2            | 0           | 0.987147804                           |              |             |              |
| GPR55         | ENSG00000135898.9                     | 0.241913075  | 6            | 6           | 0.036151302                           |              |             |              |
|               | Brain_Frontal_Cortex_BA9              | 0.847979931  |              |             | Brain_Nucleus_accumbens_basal_ganglia |              |             |              |
|               | 2.436621847                           | 0.112264718  | 0.112264718  |             | -0.525529265                          | 2.09522155   |             |              |
|               | 0.814940307                           | 0.956680551  | 6            | 0           | 0.987147804                           |              |             |              |
| TMEM249       | ENSG00000261587.2                     | 0.241922792  | 5            | 5           | 0.034169714                           |              |             |              |
|               | Brain_Cerebellum                      | 0.49829457   |              |             | Brain_Caudate_basal_ganglia           | 1.614666736  |             |              |
|               | 0.372305811                           | 0.372305811  | -0.677175564 |             | 2.118063224                           | 1.021588554  |             |              |
|               | 1.027432326                           | 5            | 0            | 0.987147804 |                                       |              |             |              |
| LA16c-OS12.2  | ENSG00000268836.1                     | 0.241993785  | 10           | 10          | 0.017064086                           |              |             |              |
|               | Brain_Hippocampus                     | 0.48648503   |              |             | Brain_Cerebellum                      | 3.575188988  | 0.148498475 |              |
|               | 0.148498475                           | -0.983423638 | 2.385323981  |             | 1.097024491                           | 0.916373102  |             |              |
|               | 10                                    | 0            | 0.987147804  |             |                                       |              |             |              |
| MBLAC2        | ENSG00000176055.9                     | 0.24216699   | 1            | 1           | 0.24216699                            |              |             |              |
|               | Brain_Substantia_nigra                | 0.24216699   |              |             | Brain_Substantia_nigra                | 1            | 1           | 1            |
|               | 1.169587551                           | 1.169587551  | 1.169587551  |             | NA                                    | 1            | 0           | 0.987147804  |
| RP11-335L23.5 | ENSG00000272784.1                     | 0.242186854  | 1            | 1           | 0.242186854                           |              |             |              |
|               | Brain_Anterior_cingulate_cortex_BA24  | 0.242186854  |              |             |                                       |              |             |              |
|               | Brain_Anterior_cingulate_cortex_BA24  | 1            | 1            | 1           | -1.169538216                          |              |             |              |
|               | -1.169538216                          | -1.169538216 | NA           | 1           | 0                                     | 0.987147804  |             |              |
| ARID3B        | ENSG00000179361.17                    | 0.242208625  | 1            | 1           | 0.242208625                           |              |             |              |
|               | Brain_Cerebellum                      | 0.242208625  |              |             | Brain_Cerebellum                      | 1            | 1           | 1            |
|               | -1.169484147                          | -1.169484147 | NA           | 1           | 0                                     | 0.987147804  |             | -1.169484147 |
| ZNF701        | ENSG00000167562.12                    | 0.242275135  | 3            | 2           | 0.234777124                           |              |             |              |
|               | Brain_Cerebellar_Hemisphere           | 0.260427564  |              |             | Brain_Caudate_basal_ganglia           |              |             |              |
|               | 2.006132213                           | 1.99E-08     | 0.993867767  |             | -1.12538113                           | 1.188142878  |             |              |
|               | 0.416946206                           | 1.335694654  | 2            | 0           | 0.987147804                           |              |             |              |

|               |                                       |                  |             |   |              |                                        |             |    |              |
|---------------|---------------------------------------|------------------|-------------|---|--------------|----------------------------------------|-------------|----|--------------|
| RAPGEF4       | ENSG00000091428.17                    | 0.242306273      | 2           | 2 | 0.099121612  |                                        |             |    |              |
|               | Brain_Spinal_cord_cervical_c-1        | 0.721096832      |             |   |              | Brain_Cerebellum1.010417686            |             |    |              |
|               | 0.989582314                           | 0.989582314      |             |   | -1.649127037 | 0.356993286                            |             |    | -0.646066875 |
|               | 1.418541285                           | 2                | 0           |   | 0.987147804  |                                        |             |    |              |
| LINC01621     | ENSG00000235357.1                     | 0.242440334      | 1           | 1 | 0.242440334  |                                        |             |    |              |
|               | Brain_Cerebellum0.242440334           |                  |             |   |              | Brain_Cerebellum1                      | 1           | 1  | -1.168908908 |
|               | -1.168908908                          | -1.168908908     |             |   | NA           | 1                                      | 0           |    | 0.987147804  |
| FTCDNL1       | ENSG00000226124.6                     | 0.242479952      | 13          | 1 | 0.144062879  |                                        |             |    |              |
|               | Brain_Anterior_cingulate_cortex_BA24  | 0.393612601      |             |   |              | Brain_Hypothalamus                     |             |    |              |
|               | 12.02923438                           | 0.003264557      |             |   | 12.02923438  | 0.85308422                             |             |    | 1.460827163  |
|               | 1.122453886                           | 0.171986186      | 1           | 0 |              | 0.987147804                            |             |    |              |
| CAMK2A        | ENSG00000070808.15                    | 0.242539838      | 3           | 3 | 0.059244627  |                                        |             |    |              |
|               | Brain_Caudate_basal_ganglia           | 0.606378312      |             |   |              | Brain_Nucleus_accumbens_basal_ganglia  |             |    |              |
|               | 1.188913214                           | 0.772910214      |             |   | 0.772910214  | -1.886373604                           |             |    | 0.901668047  |
|               | -0.499985196                          | 1.394083506      | 3           | 0 |              | 0.987147804                            |             |    |              |
| MICAL1        | ENSG00000100139.13                    | 0.242593741      | 3           | 2 | 0.101032637  |                                        |             |    |              |
|               | Brain_Cerebellum0.297326374           |                  |             |   |              | Brain_Anterior_cingulate_cortex_BA24   |             |    |              |
|               | 2.665469335                           | 0.04578911       | 0.288741556 |   |              | -1.639867899                           |             |    | -1.042184013 |
|               | -1.428313624                          | 0.33490882       | 2           | 0 |              | 0.987147804                            |             |    |              |
| PDE1C         | ENSG00000154678.16                    | 0.242599149      | 2           | 2 | 0.092535106  |                                        |             |    |              |
|               | Brain_Hippocampus                     | 0.963174378      |             |   |              | Brain_Anterior_cingulate_cortex_BA24   |             |    |              |
|               | 1.059841758                           | 0.940158242      |             |   | 0.940158242  | -0.046170471                           |             |    | 1.682173992  |
|               | 0.81800176                            | 1.22212409       | 2           | 0 |              | 0.987147804                            |             |    |              |
| MYBPC2        | ENSG00000086967.9                     | 0.242599801      | 2           | 2 | 0.159335031  |                                        |             |    |              |
|               | Brain_Cortex                          | 0.564187125      |             |   |              | Brain_Frontal_Cortex_BA9               | 1.228806588 |    |              |
|               | 0.771193412                           | 0.771193412      |             |   | -0.57663341  | 1.407311532                            |             |    | 0.415339061  |
|               | 1.402860922                           | 2                | 0           |   | 0.987147804  |                                        |             |    |              |
| SLC24A4       | ENSG00000140090.17                    | 0.242616349      | 2           | 1 | 0.230734994  |                                        |             |    |              |
|               | Brain_Cerebellum0.26750412            |                  |             |   |              | Brain_Cerebellar_Hemisphere1.949575169 |             |    |              |
|               | 0.050424831                           | 1.949575169      |             |   | 1.108828624  | 1.198467691                            |             |    | 1.153648158  |
|               | 0.063384392                           | 1                | 0           |   | 0.987147804  |                                        |             |    |              |
| PCDHA9        | ENSG00000204961.6                     | 0.242754196      | 7           | 4 | 0.104397152  |                                        |             |    |              |
|               | Brain_Spinal_cord_cervical_c-1        | 0.969117997      |             |   |              |                                        |             |    |              |
|               | Brain_Anterior_cingulate_cortex_BA24  | 5.113056191      |             |   |              | 0.047453069                            |             |    | 0.17256053   |
|               | -1.6239                               | 0.191243436      |             |   | -0.422686801 | 0.659632308                            |             | 4  | 0            |
|               | 0.987147804                           |                  |             |   |              |                                        |             |    |              |
| PIGC          | ENSG00000135845.9                     | 0.242781131      | 7           | 7 | 0.071626702  |                                        |             |    |              |
|               | Brain_Nucleus_accumbens_basal_ganglia | 0.808736729      |             |   |              | Brain_Amygdala                         |             |    |              |
|               | 2.259427533                           | 0.485987427      |             |   | 0.485987427  | -1.788523393                           |             |    | 1.801483526  |
|               | 0.521070735                           | 1.146520539      | 7           | 0 |              | 0.987147804                            |             |    |              |
| GPATCH2L      | ENSG00000089916.17                    | 0.242898033      | 4           | 4 | 0.16470052   | Brain_Cerebellum                       |             |    |              |
|               | 0.776640412                           | Brain_Cortex     | 2.696920732 |   |              | 0.261986326                            |             |    | 0.261986326  |
|               | -0.290620522                          | 1.389434977      |             |   | 0.362532618  | 0.810966707                            |             | 4  | 0            |
|               | 0.987147804                           |                  |             |   |              |                                        |             |    |              |
| RP11-388K12.2 | ENSG00000254089.1                     | 0.242982493      | 1           | 1 | 0.242982493  |                                        |             |    |              |
|               | Brain_Spinal_cord_cervical_c-1        | 0.242982493      |             |   |              | Brain_Spinal_cord_cervical_c-1         |             |    |              |
|               | 1                                     | 1                | 1           |   | 1.167564459  | 1.167564459                            |             | NA | 1            |
|               | 0.987147804                           |                  |             |   |              |                                        |             |    | 0            |
| RPP30         | ENSG00000148688.13                    | 0.243047767      | 1           | 1 | 0.243047767  | Brain_Cortex                           |             |    |              |
|               | 0.243047767                           | Brain_Cortex     | 1           | 1 | 1            | -1.167402736                           |             |    | -1.167402736 |
|               | -1.167402736                          | NA               | 1           | 0 |              | 0.987147804                            |             |    |              |
| EIF3G         | ENSG00000130811.11                    | 0.243086904      | 1           | 1 | 0.243086904  |                                        |             |    |              |
|               | Brain_Spinal_cord_cervical_c-1        | 0.243086904      |             |   |              | Brain_Spinal_cord_cervical_c-1         |             |    |              |
|               | 1                                     | 1                | 1           |   | 1.167305784  | 1.167305784                            |             | NA | 1            |
|               | 0.987147804                           |                  |             |   |              |                                        |             |    | 0            |
| RBM34         | ENSG00000188739.14                    | 0.243289442      | 1           | 1 | 0.243289442  |                                        |             |    |              |
|               | Brain_Hypothalamus                    | 0.243289442      |             |   |              | Brain_Hypothalamus                     | 1           | 1  | 1            |
|               | 1.16680422                            | 1.16680422       | 1.16680422  |   | NA           | 1                                      | 0           |    | 0.987147804  |
| CYTH3         | ENSG00000008256.15                    | 0.243319675      | 2           | 2 | 0.1804682    | Brain_Hypothalamus                     |             |    |              |
|               | 0.284556642                           | Brain_Cerebellum | 1.040783287 |   |              | 0.959216713                            |             |    | 0.959216713  |
|               | -1.33931484                           | -1.070139232     |             |   | -1.204727036 | 0.190335898                            |             | 2  | 0            |
|               | 0.987147804                           |                  |             |   |              |                                        |             |    |              |

|                |                             |                                       |    |              |             |                                       |             |                  |
|----------------|-----------------------------|---------------------------------------|----|--------------|-------------|---------------------------------------|-------------|------------------|
| MYOM1          | ENSG00000101605.12          | 0.24337049                            | 7  | 7            | 0.071975588 |                                       |             |                  |
|                | Brain_Putamen_basal_ganglia | 0.938062973                           |    |              |             | Brain_Caudate_basal_ganglia           |             |                  |
|                | 2.036777831                 | 0.310502144                           |    | 0.310502144  |             | -1.799272489                          |             | 1.304342783      |
|                | 0.353247164                 | 1.049042375                           | 7  | 0            | 0.987147804 |                                       |             |                  |
| RIOK2          | ENSG00000058729.10          | 0.24338048                            | 8  | 5            | 0.011116479 |                                       |             | Brain_Cerebellum |
|                | 0.410964365                 | Brain_Nucleus_accumbens_basal_ganglia |    |              |             | 5.727998572                           |             |                  |
|                | 0.016255596                 | 0.301467067                           |    | 0.82219774   | 2.53901583  | 1.920227811                           |             |                  |
|                | 0.536039408                 | 5                                     | 0  | 0.987147804  |             |                                       |             |                  |
| DDX39B         | ENSG00000198563.13          | 0.243461485                           | 2  | 2            | 0.113558093 |                                       |             |                  |
|                | Brain_Cortex                | 0.433729005                           |    |              |             | Brain_Cerebellum                      | 1.139851574 | 0.860148426      |
|                | 0.860148426                 | -1.582400841                          |    | -0.782826498 |             | -1.182613669                          |             | 0.56538444       |
|                | 0                           | 0.987147804                           |    |              |             |                                       |             |                  |
| RP4-633019_A.1 | ENSG00000223695.1           | 0.243464986                           | 1  | 1            | 0.243464986 |                                       |             |                  |
|                | Brain_Cerebellum            | 0.243464986                           |    |              |             | Brain_Cerebellum                      | 1           | 1                |
|                | 1.166369744                 | 1.166369744                           | NA | 1            | 0           | 0.987147804                           |             | 1.166369744      |
| POC1B          | ENSG00000139323.13          | 0.243466728                           | 2  | 2            | 0.093675235 |                                       |             |                  |
|                | Brain_Hypothalamus          | 0.233776669                           |    |              |             | Brain_Cerebellum                      | 1.654128164 |                  |
|                | 0.345871836                 | 0.345871836                           |    | 1.190686528  |             | 1.676321507                           |             | 1.433504017      |
|                | 0.343395787                 | 2                                     | 0  | 0.987147804  |             |                                       |             |                  |
| ZC3H18         | ENSG00000158545.15          | 0.243477107                           | 1  | 1            | 0.243477107 |                                       |             |                  |
|                | Brain_Cortex                | 0.243477107                           |    |              |             | Brain_Cortex                          | 1           | 1                |
|                | -1.166339753                | -1.166339753                          | NA | 1            | 0           | 0.987147804                           |             | -1.166339753     |
| SLC25A23       | ENSG00000125648.14          | 0.243522209                           | 6  | 6            | 0.027432906 |                                       |             |                  |
|                | Brain_Cortex                | 0.730622703                           |    |              |             | Brain_Spinal_cord_cervical_c-1        | 1.857322786 |                  |
|                | 0.218479263                 | 0.218479263                           |    | -2.205302048 |             | 0.690381662                           |             | -0.324431161     |
|                | 1.180706722                 | 6                                     | 0  | 0.987147804  |             |                                       |             |                  |
| USP1           | ENSG00000162607.12          | 0.243732951                           | 1  | 1            | 0.243732951 |                                       |             |                  |
|                | Brain_Putamen_basal_ganglia | 0.243732951                           |    |              |             | Brain_Putamen_basal_ganglia           | 1           | 1                |
|                | 1                           | -1.165706947                          |    | -1.165706947 |             | -1.165706947                          | NA          | 1                |
|                | 0.987147804                 |                                       |    |              |             |                                       |             | 0                |
| FOPNL          | ENSG00000133393.12          | 0.243803148                           | 2  | 2            | 0.094196465 |                                       |             |                  |
|                | Brain_Caudate_basal_ganglia | 0.110880707                           |    |              |             | Brain_Cortex                          | 1.91761888  | 0.08238112       |
|                | 0.08238112                  | -1.673664953                          |    | -1.594247073 |             | -1.633956013                          |             | 0.056156921      |
|                | 0                           | 0.987147804                           |    |              |             |                                       |             | 2                |
| FAT1           | ENSG00000083857.13          | 0.24395051                            | 2  | 2            | 0.248989142 |                                       |             |                  |
|                | Brain_Putamen_basal_ganglia | 0.261119962                           |    |              |             | Brain_Hippocampus                     | 1.081467594 |                  |
|                | 0.918532406                 | 0.918532406                           |    | -1.152808142 |             | 1.123747965                           |             | -0.014530089     |
|                | 1.609768261                 | 2                                     | 0  | 0.987147804  |             |                                       |             |                  |
| U91328.22      | ENSG00000272810.1           | 0.243995596                           | 1  | 1            | 0.243995596 |                                       |             |                  |
|                | Brain_Putamen_basal_ganglia | 0.243995596                           |    |              |             | Brain_Putamen_basal_ganglia           | 1           | 1                |
|                | 1                           | -1.165057803                          |    | -1.165057803 |             | -1.165057803                          | NA          | 1                |
|                | 0.987147804                 |                                       |    |              |             |                                       |             | 0                |
| FAM20B         | ENSG00000116199.11          | 0.244030284                           | 10 | 2            | 0.093395185 |                                       |             |                  |
|                | Brain_Cerebellum            | 0.205127958                           |    |              |             | Brain_Putamen_basal_ganglia           | 8.459642595 |                  |
|                | 0.003212948                 | 0.774693865                           |    | 1.267076444  |             | 1.677753734                           |             | 1.471596801      |
|                | 0.147913648                 | 2                                     | 0  | 0.987147804  |             |                                       |             |                  |
| GOLIM4         | ENSG00000173905.8           | 0.244095137                           | 4  | 4            | 0.324210604 |                                       |             |                  |
|                | Brain_Frontal_Cortex_BA9    | 0.478689794                           |    |              |             | Brain_Nucleus_accumbens_basal_ganglia |             |                  |
|                | 1.929913974                 | 0.503314506                           |    | 0.503314506  |             | -0.985842098                          |             | 0.982879494      |
|                | -0.038115669                | 1.027940406                           | 4  | 0            | 0.987147804 |                                       |             |                  |
| FGF5           | ENSG00000138675.16          | 0.244146909                           | 2  | 2            | 0.095682841 |                                       |             |                  |
|                | Brain_Cerebellar_Hemisphere | 0.929984463                           |    |              |             | Brain_Cerebellum                      | 1.176516812 |                  |
|                | 0.823483188                 | 0.823483188                           |    | -1.666153518 |             | -0.087864385                          |             | -0.877008952     |
|                | 1.116018948                 | 2                                     | 0  | 0.987147804  |             |                                       |             |                  |
| C20orf27       | ENSG00000101220.17          | 0.244163766                           | 2  | 2            | 0.122282436 |                                       |             |                  |
|                | Brain_Putamen_basal_ganglia | 0.590976456                           |    |              |             | Brain_Nucleus_accumbens_basal_ganglia |             |                  |
|                | 1.076312224                 | 0.923687776                           |    | 0.923687776  |             | -1.545263931                          |             | -0.537421558     |
|                | -1.041342744                | 0.712652176                           | 2  | 0            | 0.987147804 |                                       |             |                  |
| LINC00706      | ENSG00000281186.1           | 0.244188931                           | 5  | 5            | 0.104269928 |                                       |             |                  |
|                | Brain_Caudate_basal_ganglia | 0.605751435                           |    |              |             | Brain_Substantia_nigra                |             |                  |
|                | 2.708683117                 | 0.150898367                           |    | 0.150898367  |             | -0.82769745                           |             | 1.624496307      |
|                | 0.601784829                 | 0.910585769                           | 5  | 0            | 0.987147804 |                                       |             |                  |

|               |                                       |                                |              |              |                                       |                  |              |
|---------------|---------------------------------------|--------------------------------|--------------|--------------|---------------------------------------|------------------|--------------|
| SLC39A7       | ENSG00000112473.17                    | 0.244189651                    | 1            | 1            | 0.244189651                           |                  |              |
|               | Brain_Cerebellar_Hemisphere           | 0.244189651                    |              |              | Brain_Cerebellar_Hemisphere           | 1                | 1            |
|               | 1                                     | -1.1645785                     | -1.1645785   | -1.1645785   | NA                                    | 1                | 0            |
| NELFCD        | ENSG00000101158.13                    | 0.24423921                     | 12           | 4            | 0.081345959                           |                  |              |
|               | Brain_Nucleus_accumbens_basal_ganglia | 0.901735869                    |              |              | Brain_Substantia_nigra                |                  |              |
|               | 10.02883523                           | 0.010088116                    | 0.351613919  |              | -1.742929337                          | 0.289141415      |              |
|               | -0.655184046                          | 0.621062497                    | 4            | 0            | 0.987147804                           |                  |              |
| ZNF2          | ENSG00000275111.4                     | 0.244278892                    | 1            | 1            | 0.244278892                           | Brain_Cerebellum |              |
|               | 0.244278892                           | Brain_Cerebellum               | 1            | 1            | -1.164358171                          | -1.164358171     |              |
|               | -1.164358171                          | NA                             | 1            | 0            | 0.987147804                           |                  |              |
| CAST          | ENSG00000153113.23                    | 0.244287418                    | 13           | 2            | 0.091900807                           |                  |              |
|               | Brain_Substantia_nigra                | 0.662898025                    |              |              | Brain_Cerebellum                      | 11.17259534      |              |
|               | 0.00146659                            | 0.991528336                    | -0.593817529 |              | 1.685455067                           | 0.988648254      |              |
|               | 0.562163375                           | 2                              | 0            | 0.987147804  |                                       |                  |              |
| PINK1         | ENSG00000158828.7                     | 0.244301077                    | 2            | 2            | 0.129053164                           |                  |              |
|               | Brain_Substantia_nigra                | 0.386677324                    |              |              | Brain_Nucleus_accumbens_basal_ganglia |                  |              |
|               | 1.099958442                           | 0.900041558                    | 0.900041558  |              | 0.865658756                           | 1.517846244      |              |
|               | 1.1917525                             | 0.461166196                    | 2            | 0            | 0.987147804                           |                  |              |
| SLC25A10      | ENSG00000183048.11                    | 0.244337113                    | 1            | 1            | 0.244337113                           |                  |              |
|               | Brain_Spinal_cord_cervical_c-1        | 0.244337113                    |              |              | Brain_Spinal_cord_cervical_c-1        |                  |              |
|               | 1                                     | 1                              | 1            | -1.164214457 | -1.164214457                          | -1.164214457     | NA           |
|               | 0.987147804                           |                                |              |              |                                       |                  | 1            |
|               |                                       |                                |              |              |                                       |                  | 0            |
| UBAC2         | ENSG00000134882.15                    | 0.244405689                    | 1            | 1            | 0.244405689                           |                  |              |
|               | Brain_Caudate_basal_ganglia           | 0.244405689                    |              |              | Brain_Caudate_basal_ganglia           | 1                | 1            |
|               | 1                                     | 1.164045215                    | 1.164045215  | 1.164045215  | NA                                    | 1                | 0            |
|               | 0.987147804                           |                                |              |              |                                       |                  |              |
| SAMD11        | ENSG00000187634.11                    | 0.244661359                    | 4            | 4            | 0.06737967                            |                  |              |
|               | Brain_Putamen_basal_ganglia           | 0.321034049                    |              |              | Brain_Cerebellum                      | 1.473395268      |              |
|               | 0.517405094                           | 0.517405094                    | -1.258755656 |              | 1.829133108                           | 0.150763181      |              |
|               | 1.513786764                           | 4                              | 0            | 0.98789526   |                                       |                  |              |
| NCL           | ENSG00000115053.15                    | 0.244820619                    | 4            | 3            | 0.076000597                           | Brain_Cerebellum |              |
|               | 0.539422847                           | Brain_Spinal_cord_cervical_c-1 | 3.044924464  |              | 5.10E-17                              |                  |              |
|               | 0.316613916                           | -1.7743783                     | -0.613685992 |              | -1.220120088                          | 0.641418559      | 3            |
|               | 0                                     | 0.988253109                    |              |              |                                       |                  |              |
| OLR1          | ENSG00000173391.8                     | 0.245015483                    | 1            | 1            | 0.245015483                           | Brain_Cortex     |              |
|               | 0.245015483                           | Brain_Cortex                   | 1            | 1            | -1.162541734                          | -1.162541734     |              |
|               | -1.162541734                          | NA                             | 1            | 0            | 0.988377671                           |                  |              |
| DDX51         | ENSG00000185163.9                     | 0.245141538                    | 12           | 3            | 0.138049741                           |                  |              |
|               | Brain_Putamen_basal_ganglia           | 0.85225564                     |              |              | Brain_Cerebellar_Hemisphere           | 9.63236303       |              |
|               | 0.004906646                           | 0.658909426                    | -1.483092858 |              | 0.702081301                           | -0.492793416     |              |
|               | 0.568599996                           | 3                              | 0            | 0.988377671  |                                       |                  |              |
| CTD-2541M15.3 | ENSG00000271743.1                     | 0.245155973                    | 12           | 11           | 0.027552134                           |                  |              |
|               | Brain_Hippocampus                     | 0.981443418                    |              |              | Brain_Substantia_nigra                | 4.872346192      |              |
|               | 0.072145499                           | 0.225997768                    | -1.720291022 |              | 2.20360502                            | -0.049437206     |              |
|               | 1.058901494                           | 11                             | 0            | 0.988377671  |                                       |                  |              |
| ZMAT2         | ENSG00000146007.10                    | 0.245222269                    | 9            | 5            | 0.183025721                           |                  |              |
|               | Brain_Frontal_Cortex_BA9              | 0.91215299                     |              |              | Brain_Cortex                          | 6.839086386      |              |
|               | 0.047381212                           | 0.228946112                    | -1.331496424 |              | 0.664099297                           | -0.066801146     |              |
|               | 0.730077349                           | 5                              | 0            | 0.988377671  |                                       |                  |              |
| IKBIP         | ENSG00000166130.14                    | 0.245428279                    | 11           | 5            | 0.112684754                           |                  |              |
|               | Brain_Cerebellar_Hemisphere           | 0.890130592                    |              |              | Brain_Nucleus_accumbens_basal_ganglia |                  |              |
|               | 8.679669372                           | 0.009194293                    | 0.313956616  |              | -1.586240541                          | 0.384184358      |              |
|               | -0.849590225                          | 0.680683005                    | 5            | 0            | 0.988377671                           |                  |              |
| HRH2          | ENSG00000113749.7                     | 0.24577601                     | 1            | 1            | 0.24577601                            | Brain_Cerebellum | 0.24577601   |
|               | Brain_Cerebellum                      | 1                              | 1            | 1            | -1.160670286                          | -1.160670286     | -1.160670286 |
|               | NA                                    | 1                              | 0            | 0.988377671  |                                       |                  |              |
| FAM196A       | ENSG00000188916.8                     | 0.245790759                    | 3            | 3            | 0.068695904                           |                  |              |
|               | Brain_Cortex                          | 0.485201621                    |              |              | Brain_Caudate_basal_ganglia           | 2.174068516      |              |
|               | 0.091248948                           | 0.091248948                    | -1.82041451  |              | -0.697960942                          | -1.161051025     |              |
|               | 0.58640254                            | 3                              | 0            | 0.988377671  |                                       |                  |              |
| SLC2A14       | ENSG00000173262.11                    | 0.246025152                    | 8            | 4            | 0.097325612                           |                  |              |
|               | Brain_Putamen_basal_ganglia           | 0.602203939                    |              |              | Brain_Hypothalamus                    | 6.623091885      |              |



|           |                                       |                                |              |                                       |              |
|-----------|---------------------------------------|--------------------------------|--------------|---------------------------------------|--------------|
|           | 0.006841998                           | 0.249298852                    | -0.52123376  | 1.657959644                           | 0.9953542    |
|           | 0.657940356                           | 4                              | 0            | 0.988377671                           |              |
| ISCU      | ENSG00000136003.15                    | 0.246123853                    | 3            | 3                                     | 0.084178733  |
|           | Brain_Cerebellar_Hemisphere           | 0.477767369                    |              | Brain_Amygdala                        | 1.334217264  |
|           | 0.674590148                           | 0.674590148                    | -0.709898035 | 1.726938365                           | 0.716231448  |
|           | 1.270423095                           | 3                              | 0            | 0.988377671                           |              |
| PIK3CB    | ENSG00000051382.8                     | 0.246139277                    | 2            | 2                                     | 0.103477975  |
|           | Brain_Cerebellar_Hemisphere           | 0.634556189                    |              | Brain_Hypothalamus                    | 1.052329841  |
|           | 0.947670159                           | 0.947670159                    | -1.628221277 | -0.475323813                          | -1.051772545 |
|           | 0.815221615                           | 2                              | 0            | 0.988377671                           |              |
| ROPN1     | ENSG00000065371.17                    | 0.246163128                    | 1            | 1                                     | 0.246163128  |
|           | Brain_Nucleus_accumbens_basal_ganglia | 0.246163128                    |              |                                       |              |
|           | Brain_Nucleus_accumbens_basal_ganglia | 1                              | 1            | 1                                     | 1.159719256  |
|           | 1.159719256                           | 1.159719256                    | NA           | 1                                     | 0            |
| NELFE     | ENSG00000204356.13                    | 0.246175337                    | 2            | 2                                     | 0.115545079  |
|           | Brain_Hypothalamus                    | 0.956852087                    |              | Brain_Nucleus_accumbens_basal_ganglia |              |
|           | 1.310839404                           | 0.689160596                    | 0.689160596  | -0.054104275                          | 1.573750771  |
|           | 0.759823248                           | 1.151067342                    | 2            | 0                                     | 0.988377671  |
| LINC01511 | ENSG00000250584.2                     | 0.246177503                    | 3            | 3                                     | 0.070160938  |
|           | Brain_Frontal_Cortex_BA9              | 0.743643627                    |              | Brain_Caudate_basal_ganglia           |              |
|           | 1.056104159                           | 0.956048011                    | 0.956048011  | -0.327032073                          | 1.810870255  |
|           | 0.778525601                           | 1.070829912                    | 3            | 0                                     | 0.988377671  |
| CX3CL1    | ENSG00000006210.6                     | 0.246245477                    | 2            | 2                                     | 0.113280079  |
|           | Brain_Frontal_Cortex_BA9              | 0.606495303                    |              | Brain_Cerebellar_Hemisphere           |              |
|           | 1.017662244                           | 0.982337756                    | 0.982337756  | -1.583620619                          | 0.515082598  |
|           | -0.534269011                          | 1.484007276                    | 2            | 0                                     | 0.988377671  |
| RWDD2A    | ENSG00000013392.7                     | 0.246267126                    | 2            | 2                                     | 0.239561248  |
|           | Brain_Cortex                          | 0.383315458                    |              | Brain_Cerebellum                      | 1.241727861  |
|           | 0.758272139                           | -1.176084158                   | 0.871803732  | -0.152140213                          | 1.448075414  |
|           | 2                                     | 0                              | 0.988377671  |                                       |              |
| ZNF587B   | ENSG00000269343.6                     | 0.246339863                    | 5            | 5                                     | 0.1127417    |
|           | Brain_Cerebellum                      |                                |              |                                       |              |
|           | 0.876259628                           | Brain_Cerebellar_Hemisphere    | 2.084066067  | 0.226101446                           |              |
|           | 0.226101446                           | 0.155712521                    | 1.585989462  | 0.884171854                           | 0.588293554  |
|           | 5                                     | 0                              | 0.988377671  |                                       |              |
| AKIRIN2   | ENSG00000135334.8                     | 0.246348216                    | 4            | 4                                     | 0.078582584  |
|           | Brain_Cortex                          | 0.64773165                     |              | Brain_Anterior_cingulate_cortex_BA24  | 2.824899218  |
|           | 0.290439788                           | 0.290439788                    | 0.456915684  | 1.758970122                           | 1.140204202  |
|           | 0.647103363                           | 4                              | 0            | 0.988377671                           |              |
| FDX1      | ENSG00000137714.2                     | 0.246363617                    | 4            | 4                                     | 0.045073704  |
|           | Brain_Spinal_cord_cervical_c-1        | 0.501711917                    |              | Brain_Frontal_Cortex_BA9              |              |
|           | 1.51663635                            | 0.445301874                    | 0.445301874  | -1.245734909                          | 2.003965988  |
|           | 0.671485088                           | 1.389579219                    | 4            | 0                                     | 0.988377671  |
| AGFG2     | ENSG00000106351.12                    | 0.246390388                    | 1            | 1                                     | 0.246390388  |
|           | Brain_Cerebellum                      | 1                              | 1            | 1                                     | 1.159161434  |
|           | 0.246390388                           | Brain_Cerebellum               | 1            | 1                                     | 1.159161434  |
|           | 1.159161434                           | NA                             | 1            | 0                                     | 0.988377671  |
| ANKRD34B  | ENSG00000189127.7                     | 0.246413789                    | 2            | 2                                     | 0.106443209  |
|           | Brain_Spinal_cord_cervical_c-1        | 0.706287522                    |              | Brain_Cortex                          | 1.040048807  |
|           | 0.959951193                           | 0.959951193                    | -1.614388386 | 0.376846715                           | -0.618770835 |
|           | 1.408015843                           | 2                              | 0            | 0.988377671                           |              |
| P4HA3     | ENSG00000149380.11                    | 0.246415106                    | 5            | 5                                     | 0.041701557  |
|           | Brain_Cerebellum                      |                                |              |                                       |              |
|           | 0.331749313                           | Brain_Spinal_cord_cervical_c-1 | 2.52836783   | 0.313447942                           |              |
|           | 0.313447942                           | 0.970596373                    | 2.036486202  | 1.557736362                           | 0.475706857  |
|           | 5                                     | 0                              | 0.988377671  |                                       |              |
| RFC5      | ENSG00000111445.13                    | 0.246517219                    | 1            | 1                                     | 0.246517219  |
|           | Brain_Cerebellar_Hemisphere           | 0.246517219                    |              | Brain_Cerebellar_Hemisphere           | 1            |
|           | 1                                     | 1.158850278                    | 1.158850278  | 1.158850278                           | NA           |
|           | 0.988377671                           |                                |              | 1                                     | 0            |
| C7orf73   | ENSG00000243317.7                     | 0.246540275                    | 13           | 3                                     | 0.045099646  |
|           | Brain_Hippocampus                     | 0.372873582                    |              | Brain_Cerebellum                      | 10.35046882  |
|           | 0.008680776                           | 0.495770901                    | 0.891103623  | 2.003723891                           | 1.398630528  |
|           | 0.321448256                           | 3                              | 0            | 0.988377671                           |              |
| CKMT1A    | ENSG00000223572.9                     | 0.246635315                    | 8            | 2                                     | 0.150243692  |

|               |                                       |                                      |                                |                                |              |                  |                |              |            |
|---------------|---------------------------------------|--------------------------------------|--------------------------------|--------------------------------|--------------|------------------|----------------|--------------|------------|
|               | Brain_Cerebellum                      | 0.738573792                          |                                | Brain_Amygdala                 | 6.59054399   | 0.025742428      |                |              |            |
|               |                                       | 0.913678313                          | 0.333742612                    |                                | 1.438671239  | 0.756937209      | 0.34013709     | 2            |            |
|               |                                       | 0                                    | 0.988377671                    |                                |              |                  |                |              |            |
| FBXO41        | ENSG00000163013.11                    | 0.246646191                          |                                |                                | 2            | 2                | 0.114257858    |              |            |
|               | Brain_Hippocampus                     | 0.343870965                          |                                | Brain_Cerebellum               | 1.261673976  |                  |                |              |            |
|               |                                       | 0.738326024                          | 0.738326024                    |                                | -1.579341019 | -0.946544443     | -1.262942731   |              |            |
|               |                                       | 0.44745475                           | 2                              | 0                              | 0.988377671  |                  |                |              |            |
| LEFTY2        | ENSG00000143768.12                    | 0.24688982                           | 7                              | 6                              | 0.109090505  |                  |                |              |            |
|               | Brain_Caudate_basal_ganglia           | 0.83728464                           |                                | Brain_Cortex                   | 4.030114701  |                  |                |              |            |
|               |                                       | 0.059854605                          | 0.202095321                    |                                | -1.602294485 | 1.011143405      | -0.659275493   |              |            |
|               |                                       | 0.936836559                          | 6                              | 0                              | 0.988377671  |                  |                |              |            |
| DERL1         | ENSG00000136986.9                     | 0.24689248                           | 1                              | 1                              | 0.24689248   | Brain_Cerebellum | 0.24689248     |              |            |
|               | Brain_Cerebellum                      | 1                                    | 1                              | 1                              | -1.157930304 | -1.157930304     | -1.157930304   |              |            |
|               | NA                                    | 1                                    | 0                              | 0.988377671                    |              |                  |                |              |            |
| ZNF518B       | ENSG00000178163.7                     | 0.246998529                          |                                | 1                              | 1            | 0.246998529      |                |              |            |
|               | Brain_Putamen_basal_ganglia           | 0.246998529                          |                                | Brain_Putamen_basal_ganglia    | 1            | 1                |                |              |            |
|               |                                       | 1                                    | -1.157670494                   | -1.157670494                   | -1.157670494 | NA               | 1              | 0            |            |
|               |                                       | 0.988377671                          |                                |                                |              |                  |                |              |            |
| LINC01140     | ENSG00000267272.5                     | 0.247098539                          |                                | 8                              | 6            | 0.225252607      |                |              |            |
|               | Brain_Nucleus_accumbens_basal_ganglia | 0.821233907                          |                                | Brain_Putamen_basal_ganglia    |              |                  |                |              |            |
|               |                                       | 4.334172421                          | 0.007963444                    | 0.19719469                     | -1.212678908 | 0.824527389      |                |              |            |
|               |                                       | -0.578440839                         | 0.66283539                     | 6                              | 0            | 0.988377671      |                |              |            |
| UFSP1         | ENSG00000176125.4                     | 0.247217399                          |                                | 4                              | 4            | 0.249429346      | Brain_Amygdala |              |            |
|               |                                       | 0.906237178                          | Brain_Spinal_cord_cervical_c-1 | 2.148543662                    |              | 0.301280747      |                |              |            |
|               |                                       | 0.301280747                          | -1.151736555                   | 0.902136671                    | 0.090678165  | 0.888047962      |                |              |            |
|               |                                       | 4                                    | 0                              | 0.988377671                    |              |                  |                |              |            |
| PLCD1         | ENSG00000187091.13                    | 0.247222595                          |                                | 3                              | 3            | 0.23859167       |                |              |            |
|               | Brain_Putamen_basal_ganglia           | 0.439404872                          |                                | Brain_Spinal_cord_cervical_c-1 |              |                  |                |              |            |
|               |                                       | 1.517251254                          | 0.437567737                    | 0.437567737                    | -1.178514212 | 0.800897312      |                |              |            |
|               |                                       | 0.131860557                          | 1.134902344                    | 3                              | 0            | 0.988377671      |                |              |            |
| RBM44         | ENSG00000177483.11                    | 0.247243629                          |                                | 8                              | 5            | 0.160014943      |                |              |            |
|               | Brain_Hypothalamus                    | 0.658345299                          |                                | Brain_Putamen_basal_ganglia    | 5.213331769  |                  |                |              |            |
|               |                                       | 0.001837329                          | 0.364271107                    | -0.581818531                   | 1.405021307  | 0.617449189      |                |              |            |
|               |                                       | 0.780614729                          | 5                              | 0                              | 0.988377671  |                  |                |              |            |
| CTD-3025N20.3 | ENSG00000272010.1                     | 0.247244595                          |                                | 11                             | 1            | 0.134014635      |                |              |            |
|               | Brain_Cerebellar_Hemisphere           | 0.445826756                          |                                | Brain_Amygdala                 | 10.30726122  |                  |                |              |            |
|               |                                       | 0.000873833                          | 10.30726122                    | 0.762390865                    | 1.498456699  | 1.121652157      |                |              |            |
|               |                                       | 0.221973188                          | 1                              | 0                              | 0.988377671  |                  |                |              |            |
| RB1           | ENSG00000139687.13                    | 0.247280854                          |                                | 1                              | 1            | 0.247280854      | Brain_Cortex   |              |            |
|               |                                       | 0.247280854                          | Brain_Cortex                   | 1                              | 1            | 1                | -1.156979211   | -1.156979211 |            |
|               |                                       | -1.156979211                         | NA                             | 1                              | 0            | 0.988377671      |                |              |            |
| MTMR11        | ENSG00000014914.20                    | 0.24732401                           | 2                              | 2                              | 0.180488853  |                  |                |              |            |
|               | Brain_Frontal_Cortex_BA9              | 0.263096525                          |                                | Brain_Cerebellar_Hemisphere    |              |                  |                |              |            |
|               |                                       | 1.091899219                          | 0.908100781                    | 0.908100781                    | -1.11910224  | 1.339251372      |                |              |            |
|               |                                       | 0.110074566                          | 1.73831851                     | 2                              | 0            | 0.988377671      |                |              |            |
| SUGT1         | ENSG00000165416.14                    | 0.247592818                          |                                | 3                              | 3            | 0.073389552      |                |              |            |
|               | Brain_Nucleus_accumbens_basal_ganglia | 0.898143991                          |                                | Brain_Substantia_nigra         |              |                  |                |              |            |
|               |                                       | 1.038777485                          | 0.94698752                     | 0.94698752                     | -1.790400489 | -0.128006296     |                |              |            |
|               |                                       | -0.937293893                         | 0.832062914                    | 3                              | 0            | 0.98846115       |                |              |            |
| SLC39A8       | ENSG00000138821.12                    | 0.247613058                          |                                | 1                              | 1            | 0.247613058      |                |              |            |
|               | Brain_Frontal_Cortex_BA9              | 0.247613058                          |                                | Brain_Frontal_Cortex_BA9       | 1            | 1                |                |              |            |
|               |                                       | 1                                    | -1.156166504                   | -1.156166504                   | -1.156166504 | NA               | 1              | 0            | 0.98846115 |
| LINC01358     | ENSG00000237352.3                     | 0.247636656                          |                                | 5                              | 4            | 0.067069666      |                |              |            |
|               | Brain_Spinal_cord_cervical_c-1        | 0.941771288                          |                                | Brain_Cerebellar_Hemisphere    |              |                  |                |              |            |
|               |                                       | 2.043820384                          | 0.004073624                    | 0.623961318                    | -1.831206907 | 0.807932266      |                |              |            |
|               |                                       | -0.091316521                         | 1.018064157                    | 4                              | 0            | 0.98846115       |                |              |            |
| EYA1          | ENSG00000104313.17                    | 0.247652079                          |                                | 1                              | 1            | 0.247652079      |                |              |            |
|               | Brain_Anterior_cingulate_cortex_BA24  | 0.247652079                          |                                |                                |              |                  |                |              |            |
|               |                                       | Brain_Anterior_cingulate_cortex_BA24 | 1                              | 1                              | 1            | 1.156071092      |                |              |            |
|               |                                       | 1.156071092                          | 1.156071092                    | NA                             | 1            | 0                | 0.98846115     |              |            |
| GPR37L1       | ENSG00000170075.8                     | 0.247732935                          |                                | 1                              | 1            | 0.247732935      |                |              |            |
|               | Brain_Putamen_basal_ganglia           | 0.247732935                          |                                | Brain_Putamen_basal_ganglia    | 1            | 1                |                |              |            |

|         |                                      |                                       |                                |              |                                       |              |                    |
|---------|--------------------------------------|---------------------------------------|--------------------------------|--------------|---------------------------------------|--------------|--------------------|
| 1       | -1.155873424                         | -1.155873424                          | -1.155873424                   | NA           | 1                                     | 0            | 0.98846115         |
| SLITRK3 | ENSG00000121871.3                    | 0.247768798                           | 1                              | 1            | 0.247768798                           |              |                    |
|         | Brain_Substantia_nigra               | 0.247768798                           |                                |              | Brain_Substantia_nigra                | 1            | 1                  |
| 1       | 1.155785763                          | 1.155785763                           | 1.155785763                    | NA           | 1                                     | 0            | 0.98846115         |
| RIOX2   | ENSG00000170854.17                   | 0.247867107                           | 2                              | 2            | 0.398308963                           |              | Brain_Cortex       |
|         | 0.522491923                          | Brain_Frontal_Cortex_BA9              | 1.60334372                     | 0.39665628   | 0.39665628                            |              |                    |
|         | -0.639508904                         | 0.844645202                           | 0.102568149                    | 1.049455433  | 2                                     | 0            |                    |
|         | 0.988571465                          |                                       |                                |              |                                       |              |                    |
| TTC7A   | ENSG00000068724.15                   | 0.24804572                            | 3                              | 3            | 0.083675844                           |              |                    |
|         | Brain_Caudate_basal_ganglia          | 0.982949897                           |                                |              | Brain_Cerebellar_Hemisphere           | 1.16494698   |                    |
|         | 0.84729401                           | 0.84729401                            | -1.207311174                   | 1.729745008  | 0.181268199                           |              |                    |
|         | 1.475042422                          | 3                                     | 0                              | 0.988929228  |                                       |              |                    |
| KLRK1   | ENSG00000213809.8                    | 0.24829104                            | 6                              | 4            | 0.039681826                           |              | Brain_Hypothalamus |
|         | 0.439266218                          | Brain_Nucleus_accumbens_basal_ganglia | 4.449165036                    | 0.00441364   |                                       |              |                    |
|         | 0.157822758                          | 0.773432912                           | 2.057045738                    | 1.269333045  | 0.447817858                           |              |                    |
|         | 4                                    | 0                                     | 0.988929228                    |              |                                       |              |                    |
| SP140   | ENSG00000079263.18                   | 0.248329348                           | 1                              | 1            | 0.248329348                           |              |                    |
|         | Brain_Caudate_basal_ganglia          | 0.248329348                           |                                |              | Brain_Caudate_basal_ganglia           | 1            | 1                  |
|         | 1                                    | 1.154416759                           | 1.154416759                    | 1.154416759  | NA                                    | 1            | 0                  |
|         | 0.988929228                          |                                       |                                |              |                                       |              |                    |
| PROZ    | ENSG00000126231.13                   | 0.248346298                           | 2                              | 1            | 0.228745725                           |              | Brain_Cerebellum   |
|         | 0.273898275                          | Brain_Cerebellar_Hemisphere           | 1.980943702                    | 0.019056298  |                                       |              |                    |
|         | 1.980943702                          | 1.094129296                           | 1.203596108                    | 1.148862702  | 0.077404725                           |              |                    |
|         | 1                                    | 0                                     | 0.988929228                    |              |                                       |              |                    |
| CTSK    | ENSG00000143387.12                   | 0.248475242                           | 4                              | 2            | 0.307628058                           |              |                    |
|         | Brain_Caudate_basal_ganglia          | 0.943396096                           |                                |              | Brain_Cerebellar_Hemisphere           |              |                    |
|         | 3.743011431                          | 0.007837064                           | 0.222214913                    | -1.020211725 | -0.071002086                          |              |                    |
|         | -0.355187843                         | 0.446033902                           | 2                              | 0            | 0.988929228                           |              |                    |
| HPCAL4  | ENSG00000116983.12                   | 0.248476768                           | 4                              | 4            | 0.086131369                           |              |                    |
|         | Brain_Caudate_basal_ganglia          | 0.587152636                           |                                |              | Brain_Nucleus_accumbens_basal_ganglia |              |                    |
|         | 2.513826141                          | 0.152081527                           | 0.152081527                    | -0.805419535 | 1.716167611                           |              |                    |
|         | 0.683288541                          | 1.104260953                           | 4                              | 0            | 0.988929228                           |              |                    |
| SS18L1  | ENSG00000184402.14                   | 0.24858476                            | 1                              | 1            | 0.24858476                            |              |                    |
|         | Brain_Spinal_cord_cervical_c-1       | 0.24858476                            | Brain_Spinal_cord_cervical_c-1 | 1            |                                       |              |                    |
|         | 1                                    | 1                                     | -1.153793693                   | -1.153793693 | -1.153793693                          | NA           | 1                  |
|         | 0.988929228                          |                                       |                                |              |                                       |              |                    |
| PAQR7   | ENSG00000182749.5                    | 0.248639054                           | 1                              | 1            | 0.248639054                           |              | Brain_Cerebellum   |
|         | 0.248639054                          | Brain_Cerebellum                      | 1                              | 1            | 1                                     | -1.153661305 | -1.153661305       |
|         | -1.153661305                         | NA                                    | 1                              | 0            | 0.988929228                           |              |                    |
| PSMD14  | ENSG00000115233.11                   | 0.248649267                           | 1                              | 1            | 0.248649267                           |              |                    |
|         | Brain_Frontal_Cortex_BA9             | 0.248649267                           | Brain_Frontal_Cortex_BA9       | 1            | 1                                     |              |                    |
|         | 1                                    | -1.153636404                          | -1.153636404                   | -1.153636404 | NA                                    | 1            | 0                  |
|         | 0.988929228                          |                                       |                                |              |                                       |              |                    |
| TBPL1   | ENSG00000028839.9                    | 0.248732689                           | 3                              | 3            | 0.111910151                           |              | Brain_Cerebellum   |
|         | 0.606832629                          | Brain_Cerebellar_Hemisphere           | 1.165715315                    | 0.874808653  |                                       |              |                    |
|         | 0.874808653                          | -1.589665824                          | 0.514599909                    | -0.71273914  | 1.095022916                           |              |                    |
|         | 3                                    | 0                                     | 0.988929228                    |              |                                       |              |                    |
| TXLNA   | ENSG00000084652.15                   | 0.248756636                           | 4                              | 3            | 0.096698059                           |              | Brain_Cortex       |
|         | 0.426750727                          | Brain_Cerebellum                      | 3.292546962                    | 0.008193868  | 0.223961247                           |              |                    |
|         | -1.661076622                         | -0.794764118                          | -1.201206756                   | 0.387808894  | 3                                     | 0            |                    |
|         | 0.988929228                          |                                       |                                |              |                                       |              |                    |
| GAD1    | ENSG00000128683.13                   | 0.248805009                           | 1                              | 1            | 0.248805009                           |              |                    |
|         | Brain_Anterior_cingulate_cortex_BA24 | 0.248805009                           |                                |              |                                       |              |                    |
|         | Brain_Anterior_cingulate_cortex_BA24 | 1                                     | 1                              | 1            | -1.153256768                          |              |                    |
|         | -1.153256768                         | -1.153256768                          | NA                             | 1            | 0                                     | 0.988929228  |                    |
| SLC12A8 | ENSG00000221955.10                   | 0.249031841                           | 7                              | 5            | 0.01689016                            |              |                    |
|         | Brain_Hippocampus                    | 0.668396055                           | Brain_Caudate_basal_ganglia    | 3.751273188  |                                       |              |                    |
|         | 0.08644981                           | 0.129894922                           | -2.389090102                   | 0.531424312  | -0.952472282                          |              |                    |
|         | 1.07702454                           | 5                                     | 0                              | 0.989089975  |                                       |              |                    |
| UBLCP1  | ENSG00000164332.7                    | 0.249040337                           | 1                              | 1            | 0.249040337                           |              |                    |
|         | Brain_Cerebellum                     | 0.249040337                           | Brain_Cerebellum               | 1            | 1                                     | 1            | 1.15268345         |
|         | 1.15268345                           | 1.15268345                            | NA                             | 1            | 0                                     | 0.989089975  |                    |

DRD5 ENSG00000169676.5 0.24908243 4 4 0.269358916  
 Brain\_Frontal\_Cortex\_BA9 0.947355891 Brain\_Hippocampus 2.908335382  
 0.131565959 0.131565959 -0.066027551 1.104540106 0.624145522  
 0.578429688 4 0 0.989089975  
 SCP2 ENSG00000116171.17 0.2491326 3 2 0.120662096 Brain\_Cerebellum  
 0.332098164 Brain\_Cortex 2.159985298 0.047340175 0.792674527  
 0.969896342 1.552000535 1.266451266 0.291208115 2 0  
 0.989089975  
 SNX29 ENSG00000048471.13 0.249357741 3 3 0.096419741  
 Brain\_Putamen\_basal\_ganglia 0.717286627 Brain\_Hippocampus 1.894138425  
 0.300476134 0.300476134 -1.662464175 0.362087523 -0.708827072  
 1.017358296 3 0 0.989089975  
 RP11-493L12.4 ENSG00000258181.1 0.249391481 5 4 0.261731508  
 Brain\_Nucleus\_accumbens\_basal\_ganglia 0.803966765 Brain\_Hypothalamus  
 3.785514354 0.011521163 0.252796844 -0.577109168 1.122307994  
 0.071995207 0.713010977 4 0 0.989089975  
 GPATCH1 ENSG00000076650.6 0.249532771 4 3 0.093408616  
 Brain\_Putamen\_basal\_ganglia 0.894034018 Brain\_Cerebellum 2.326191936  
 0.040905316 0.65161209 -0.751833492 1.677684963 0.320872417  
 1.006008362 3 0 0.989089975  
 MRPS6 ENSG00000243927.5 0.249582864 1 1 0.249582864  
 Brain\_Anterior\_cingulate\_cortex\_BA24 0.249582864  
 Brain\_Anterior\_cingulate\_cortex\_BA24 1 1 1 -1.151363157  
 -1.151363157 -1.151363157 NA 1 0 0.989089975  
 MED22 ENSG00000148297.15 0.249599569 2 2 0.129648264 Brain\_Amygdala  
 0.565582031 Brain\_Putamen\_basal\_ganglia 1.076261036 0.923738964  
 0.923738964 -1.515490382 0.574570171 -0.470460105 1.47789599 2  
 0 0.989089975  
 CERS5 ENSG00000139624.12 0.24968481 13 4 0.028370369  
 Brain\_Anterior\_cingulate\_cortex\_BA24 0.311819336  
 Brain\_Spinal\_cord\_cervical\_c-1 10.43624188 0.008665677 0.433026495  
 1.011411882 2.192126571 1.591155203 0.313270621 4 0  
 0.989089975  
 GGT7 ENSG00000131067.16 0.249706752 3 3 0.076154089  
 Brain\_Nucleus\_accumbens\_basal\_ganglia 0.847176611 Brain\_Amygdala  
 1.629119649 0.494974027 0.494974027 -1.773450488 0.192722105  
 -0.734339186 0.987863892 3 0 0.989089975  
 MFSD13A ENSG00000138111.14 0.249737652 12 3 0.169810285  
 Brain\_Anterior\_cingulate\_cortex\_BA24 0.964658032 Brain\_Frontal\_Cortex\_BA9  
 10.33273428 0.004248982 0.398920144 -1.372813653 0.08297396  
 -0.517619421 0.472276626 3 0 0.989089975  
 LYPD1 ENSG00000150551.10 0.249764483 4 4 0.092498478  
 Brain\_Cerebellar\_Hemisphere 0.882307133 Brain\_Cortex 1.494201739  
 0.655130463 0.655130463 -0.924448245 1.682362969 0.241806216  
 1.095549924 4 0 0.989089975  
 BCL2 ENSG00000171791.12 0.250016027 2 2 0.105012682 Brain\_Amygdala  
 0.810802986 Brain\_Caudate\_basal\_ganglia 1.08614835 0.91385165 0.91385165  
 -1.621023113 0.239390255 -0.690816429 1.315510908 2 0  
 0.989147565  
 ZFR2 ENSG00000105278.10 0.250025245 3 3 0.066841985  
 Brain\_Putamen\_basal\_ganglia 0.635386045 Brain\_Amygdala 1.262857485  
 0.779427366 0.779427366 -1.832735032 0.570309034 -0.578861892  
 1.204938634 3 0 0.989147565  
 CYP4F26P ENSG00000226562.3 0.250028699 8 5 0.098626244  
 Brain\_Hypothalamus 0.935283308 Brain\_Anterior\_cingulate\_cortex\_BA24  
 5.988356574 0.038416453 0.202025136 -0.702109008 1.65155037  
 0.090093185 0.755714479 5 0 0.989147565  
 LETMD1 ENSG00000050426.15 0.250061821 10 5 0.173677861  
 Brain\_Amygdala 0.995331342 Brain\_Hypothalamus 7.40909364 0.002104129  
 0.259256337 -1.360480685 0.722297348 -0.459499346 0.589407819  
 5 0 0.989147565  
 PPP1R3D ENSG00000132825.6 0.250160111 1 1 0.250160111

|              |                                       |              |                          |                                       |              |              |                 |
|--------------|---------------------------------------|--------------|--------------------------|---------------------------------------|--------------|--------------|-----------------|
|              | Brain_Putamen_basal_ganglia           | 0.250160111  |                          | Brain_Putamen_basal_ganglia           | 1            | 1            |                 |
|              |                                       | -1.149960571 | -1.149960571             |                                       | -1.149960571 | NA           | 1 0             |
|              |                                       | 0.989256676  |                          |                                       |              |              |                 |
| CTNND1       | ENSG00000198561.13                    | 0.250257833  |                          |                                       | 1            | 1            | 0.250257833     |
|              | Brain_Nucleus_accumbens_basal_ganglia | 0.250257833  |                          |                                       |              |              |                 |
|              | Brain_Nucleus_accumbens_basal_ganglia | 1            | 1                        |                                       | -1.149723352 |              |                 |
|              |                                       | -1.149723352 | -1.149723352             | NA                                    | 1            | 0            | 0.989275155     |
| RBM19        | ENSG00000122965.10                    | 0.250340024  | 8                        |                                       | 5            |              | 0.019465954     |
|              | Brain_Cerebellar_Hemisphere           | 0.129699385  |                          | Brain_Nucleus_accumbens_basal_ganglia |              |              |                 |
|              |                                       | 6.096048634  | 0.019150583              |                                       | 0.229996929  | -2.336485478 | -1.515288399    |
|              |                                       | -1.953698556 | 0.303480707              | 5                                     | 0            |              | 0.989275155     |
| GRAMD4       | ENSG00000075240.16                    | 0.250483982  |                          |                                       | 1            | 1            | 0.250483982     |
|              | Brain_Cerebellum                      | 0.250483982  |                          | Brain_Cerebellum                      | 1            | 1            | 1.149174626     |
|              |                                       | 1.149174626  | 1.149174626              | NA                                    | 1            | 0            | 0.989275155     |
| SERGEF       | ENSG00000129158.10                    | 0.250592958  |                          |                                       | 2            | 2            | 0.192050436     |
|              | Brain_Nucleus_accumbens_basal_ganglia | 0.963366066  |                          | Brain_Caudate_basal_ganglia           |              |              |                 |
|              |                                       | 1.642014247  | 0.357985753              |                                       | 0.357985753  | 0.045929971  | 1.304537341     |
|              |                                       | 0.675233656  | 0.889969806              | 2                                     | 0            |              | 0.989275155     |
| CTA-150C2.13 | ENSG00000235209.1                     | 0.250616294  |                          |                                       | 13           | 2            | 0.091501918     |
|              | Brain_Hippocampus                     | 0.90945668   |                          | Brain_Putamen_basal_ganglia           | 11.25123735  |              |                 |
|              |                                       | 0.000572835  | 0.726401992              |                                       | -1.687527751 | -0.113723882 | -0.843768136    |
|              |                                       | 0.334307375  | 2                        | 0                                     |              |              | 0.989275155     |
| SEC14L1      | ENSG00000129657.14                    | 0.250620828  |                          |                                       | 2            | 1            | 0.245805051     |
|              | Brain_Nucleus_accumbens_basal_ganglia | 0.255570746  |                          | Brain_Cortex                          |              |              |                 |
|              |                                       | 1.999714089  | 0.000285911              |                                       | 1.999714089  | 1.136922354  | 1.160598906     |
|              |                                       | 1.14876063   | 0.01674185               | 1                                     | 0            |              | 0.989275155     |
| C5orf67      | ENSG00000225940.5                     | 0.250663855  |                          |                                       | 1            | 1            | 0.250663855     |
|              | Brain_Nucleus_accumbens_basal_ganglia | 0.250663855  |                          |                                       |              |              |                 |
|              | Brain_Nucleus_accumbens_basal_ganglia | 1            | 1                        | 1                                     |              | 1.148738428  |                 |
|              |                                       | 1.148738428  | 1.148738428              | NA                                    | 1            | 0            | 0.989275155     |
| HVCN1        | ENSG00000122986.13                    | 0.250730448  |                          |                                       | 1            | 1            | 0.250730448     |
|              | Brain_Nucleus_accumbens_basal_ganglia | 0.250730448  |                          |                                       |              |              |                 |
|              | Brain_Nucleus_accumbens_basal_ganglia | 1            | 1                        | 1                                     |              | -1.148576994 |                 |
|              |                                       | -1.148576994 | -1.148576994             | NA                                    | 1            | 0            | 0.989275155     |
| TMEM57       | ENSG00000204178.9                     | 0.250812456  |                          |                                       | 3            | 2            | 0.07722363      |
|              | Brain_Frontal_Cortex_BA9              | 2.252154929  |                          | Brain_Cerebellum                      |              |              |                 |
|              |                                       | 0.610072365  | Brain_Frontal_Cortex_BA9 |                                       | 0.021509442  |              |                 |
|              |                                       | 0.726335629  | -1.76702746              |                                       | -0.509970163 | -1.264707109 | 0.665457636     |
|              |                                       | 2            | 0                        |                                       |              |              | 0.989319727     |
| TCTE1        | ENSG00000146221.9                     | 0.250957074  |                          |                                       | 5            | 3            | 0.116296518     |
|              | Brain_Frontal_Cortex_BA9              | 0.918214204  |                          | Brain_Cortex                          |              |              | 3.452568617     |
|              |                                       | 0.040711973  | 0.574181254              |                                       | -0.584983593 | 1.570509964  | 0.257092143     |
|              |                                       | 0.805103922  | 3                        | 0                                     |              |              | 0.989573785     |
| LINC01679    | ENSG00000237989.1                     | 0.251053989  |                          |                                       | 1            | 1            | 0.251053989     |
|              | Brain_Hypothalamus                    | 0.251053989  |                          | Brain_Hypothalamus                    | 1            | 1            | 1               |
|              |                                       | 1.147793095  | 1.147793095              |                                       | 1.147793095  | NA           | 1 0 0.989573785 |
| ABHD11       | ENSG00000106077.18                    | 0.251216438  |                          |                                       | 10           | 4            | 0.029495476     |
|              | Brain_Putamen_basal_ganglia           | 0.88241889   |                          | Brain_Caudate_basal_ganglia           |              |              | 7.437259748     |
|              |                                       | 0.000797276  | 0.419325636              |                                       | -0.216106989 | 2.176800222  | 0.774590817     |
|              |                                       | 0.643178659  | 4                        | 0                                     |              |              | 0.989573785     |
| ZNF37A       | ENSG00000075407.18                    | 0.251243209  |                          |                                       | 3            | 3            | 0.253390539     |
|              | Brain_Amygdala                        | 0.636381181  |                          | Brain_Nucleus_accumbens_basal_ganglia |              |              |                 |
|              |                                       | 2.256861557  | 0.349242251              |                                       | 0.349242251  | -1.142152733 | 0.546230051     |
|              |                                       | -0.356229071 | 0.850202618              | 3                                     | 0            |              | 0.989573785     |
| STXBP6       | ENSG00000168952.15                    | 0.251297075  |                          |                                       | 6            | 6            | 0.210393493     |
|              | Brain_Substantia_nigra                | 0.830490697  |                          | Brain_Nucleus_accumbens_basal_ganglia |              |              |                 |
|              |                                       | 2.417558607  | 0.147117645              |                                       | 0.147117645  | -1.226323267 | 1.25248417      |
|              |                                       | 0.201265691  | 0.938121078              | 6                                     | 0            |              | 0.989573785     |
| DHX30        | ENSG00000132153.14                    | 0.251307247  |                          |                                       | 2            | 2            | 0.105220621     |
|              | Brain_Anterior_cingulate_cortex_BA24  | 0.873280685  |                          | Brain_Amygdala                        |              |              |                 |
|              |                                       | 1.315696036  | 0.684303964              |                                       | 0.684303964  | -1.620054262 | -0.159492731    |
|              |                                       | -0.889773497 | 1.032772963              | 2                                     | 0            |              | 0.989573785     |
| RP11-687F6.5 | ENSG00000274776.1                     | 0.251458524  |                          |                                       | 3            | 2            | 0.101970781     |

|          |                                      |                                       |              |                  |                                      |             |                  |            |  |
|----------|--------------------------------------|---------------------------------------|--------------|------------------|--------------------------------------|-------------|------------------|------------|--|
|          | Brain_Cortex                         | 0.204330465                           |              | Brain_Cerebellum | 2.80538096                           | 0.074581628 |                  |            |  |
|          | 0.120037412                          | -1.635373469                          |              | -1.269310158     | -1.48869321                          | 0.193558412 |                  |            |  |
|          | 2                                    | 0                                     | 0.989573785  |                  |                                      |             |                  |            |  |
| BBOX1    | ENSG00000129151.8                    | 0.251462561                           | 4            | 4                | 0.070245092                          |             | Brain_Cortex     |            |  |
|          | 0.8314721                            | Brain_Putamen_basal_ganglia           | 2.329418897  |                  | 0.256975211                          |             |                  |            |  |
|          | 0.256975211                          | -1.810327001                          | 0.601496519  |                  | -0.313756789                         | 1.057935865 |                  |            |  |
|          | 4                                    | 0                                     | 0.989573785  |                  |                                      |             |                  |            |  |
| HYAL3    | ENSG00000186792.16                   | 0.251560685                           | 10           | 9                | 0.014818761                          |             |                  |            |  |
|          | Brain_Anterior_cingulate_cortex_BA24 | 0.585767371                           |              |                  | Brain_Cortex                         |             |                  |            |  |
|          | 3.067365861                          | 0.095460634                           | 0.186334573  |                  | -2.436778307                         | 0.949120015 |                  |            |  |
|          | -1.181953049                         | 1.029174616                           | 9            | 0                | 0.989573785                          |             |                  |            |  |
| EIF4EBP1 | ENSG00000187840.4                    | 0.251640053                           | 1            | 1                | 0.251640053                          |             |                  |            |  |
|          | Brain_Spinal_cord_cervical_c-1       | 0.251640053                           |              |                  | Brain_Spinal_cord_cervical_c-1       |             |                  |            |  |
|          | 1                                    | 1                                     | -1.146374925 | -1.146374925     | -1.146374925                         | NA          | 1                | 0          |  |
|          | 0.989573785                          |                                       |              |                  |                                      |             |                  |            |  |
| MPIG6B   | ENSG00000204420.8                    | 0.251654887                           | 3            | 3                | 0.08039602                           |             | Brain_Cerebellum |            |  |
|          | 0.713846131                          | Brain_Nucleus_accumbens_basal_ganglia | 1.39002313   |                  | 0.612424969                          |             |                  |            |  |
|          | 0.612424969                          | -1.748392881                          | 0.900260177  |                  | -0.160479053                         | 1.40081246  | 3                |            |  |
|          | 0                                    | 0.989573785                           |              |                  |                                      |             |                  |            |  |
| DEK      | ENSG00000124795.14                   | 0.251768309                           | 1            | 1                | 0.251768309                          |             |                  |            |  |
|          | Brain_Putamen_basal_ganglia          | 0.251768309                           |              |                  | Brain_Putamen_basal_ganglia          | 1           | 1                |            |  |
|          | 1                                    | 1.146064878                           | 1.146064878  | 1.146064878      | NA                                   | 1           | 0                |            |  |
|          | 0.989590105                          |                                       |              |                  |                                      |             |                  |            |  |
| ZNF678   | ENSG00000181450.17                   | 0.251800498                           | 3            | 3                | 0.082366281                          |             |                  |            |  |
|          | Brain_Spinal_cord_cervical_c-1       | 0.822544984                           |              |                  | Brain_Cortex                         | 1.276249668 |                  |            |  |
|          | 0.76119342                           | 0.76119342                            | -0.830813006 | 1.737118363      | 0.37685941                           | 1.290747794 |                  |            |  |
|          | 3                                    | 0                                     | 0.989590105  |                  |                                      |             |                  |            |  |
| YPEL4    | ENSG00000166793.10                   | 0.251881808                           | 1            | 1                | 0.251881808                          |             |                  |            |  |
|          | Brain_Frontal_Cortex_BA9             | 0.251881808                           |              |                  | Brain_Frontal_Cortex_BA9             | 1           | 1                |            |  |
|          | 1                                    | -1.145790594                          | -1.145790594 | -1.145790594     | NA                                   | 1           | 0                | 0.98963167 |  |
| CHSY1    | ENSG00000131873.5                    | 0.252010222                           | 1            | 1                | 0.252010222                          |             |                  |            |  |
|          | Brain_Hypothalamus                   | 0.252010222                           |              |                  | Brain_Hypothalamus                   | 1           | 1                | 1          |  |
|          | 1.145480371                          | 1.145480371                           | 1.145480371  | NA               | 1                                    | 0           | 0.989788891      |            |  |
| TNFAIP2  | ENSG00000185215.8                    | 0.252087754                           | 1            | 1                | 0.252087754                          |             |                  |            |  |
|          | Brain_Frontal_Cortex_BA9             | 0.252087754                           |              |                  | Brain_Frontal_Cortex_BA9             | 1           | 1                |            |  |
|          | 1                                    | -1.145293122                          | -1.145293122 | -1.145293122     | NA                                   | 1           | 0                |            |  |
|          | 0.989788891                          |                                       |              |                  |                                      |             |                  |            |  |
| PFKFB2   | ENSG00000123836.14                   | 0.252196216                           | 1            | 1                | 0.252196216                          |             |                  |            |  |
|          | Brain_Anterior_cingulate_cortex_BA24 | 0.252196216                           |              |                  |                                      |             |                  |            |  |
|          | Brain_Anterior_cingulate_cortex_BA24 | 1                                     | 1            | 1                | 1.145031243                          |             |                  |            |  |
|          | 1.145031243                          | 1.145031243                           | NA           | 1                | 0                                    | 0.989788891 |                  |            |  |
| PRAG1    | ENSG00000275342.4                    | 0.252204803                           | 3            | 3                | 0.280685546                          |             |                  |            |  |
|          | Brain_Putamen_basal_ganglia          | 0.454956605                           |              |                  | Brain_Cortex                         | 1.463095025 |                  |            |  |
|          | 0.597737092                          | 0.597737092                           | -1.001931545 | 1.078780598      | 0.274675418                          |             |                  |            |  |
|          | 1.117937479                          | 3                                     | 0            | 0.989788891      |                                      |             |                  |            |  |
| STK16    | ENSG00000115661.13                   | 0.252292771                           | 4            | 2                | 0.109532388                          |             |                  |            |  |
|          | Brain_Frontal_Cortex_BA9             | 0.607509109                           |              |                  | Brain_Cortex                         | 3.331500204 |                  |            |  |
|          | 0.010127499                          | 0.582362753                           | 0.513632276  | 1.600298463      | 0.818189887                          |             |                  |            |  |
|          | 0.522366512                          | 2                                     | 0            | 0.989856467      |                                      |             |                  |            |  |
| DGKQ     | ENSG00000145214.13                   | 0.252522981                           | 8            | 7                | 0.013844863                          |             |                  |            |  |
|          | Brain_Frontal_Cortex_BA9             | 0.834805523                           |              |                  | Brain_Anterior_cingulate_cortex_BA24 |             |                  |            |  |
|          | 3.13580671                           | 0.082240643                           | 0.134786208  | -0.714141314     | 2.461263544                          |             |                  |            |  |
|          | 0.737208377                          | 1.064290263                           | 7            | 0                | 0.989943081                          |             |                  |            |  |
| SIAH2    | ENSG00000181788.3                    | 0.252638602                           | 1            | 1                | 0.252638602                          |             |                  |            |  |
|          | Brain_Substantia_nigra               | 0.252638602                           |              |                  | Brain_Substantia_nigra               | 1           | 1                |            |  |
|          | 1                                    | 1.143963916                           | 1.143963916  | 1.143963916      | NA                                   | 1           | 0                |            |  |
|          | 0.989943081                          |                                       |              |                  |                                      |             |                  |            |  |
| LSM5     | ENSG00000106355.9                    | 0.252721967                           | 3            | 3                | 0.290242968                          |             |                  |            |  |
|          | Brain_Cerebellar_Hemisphere          | 0.865292371                           |              |                  | Brain_Frontal_Cortex_BA9             |             |                  |            |  |
|          | 2.474630159                          | 0.20473858                            | 0.20473858   | -0.169641135     | 1.057588763                          |             |                  |            |  |
|          | 0.501439779                          | 0.621635196                           | 3            | 0                | 0.989943081                          |             |                  |            |  |
| DDX1     | ENSG00000079785.14                   | 0.252790022                           | 5            | 5                | 0.078169246                          |             |                  |            |  |

|           |                                       |                             |              |                             |              |             |                  |              |
|-----------|---------------------------------------|-----------------------------|--------------|-----------------------------|--------------|-------------|------------------|--------------|
|           | Brain_Hippocampus                     | 0.989241776                 |              | Brain_Cerebellum            | 1.214634725  |             |                  |              |
|           | 0.849789423                           | 0.849789423                 | -1.761408743 |                             | 0.449458569  |             |                  | -0.731404152 |
|           | 0.923702936                           | 5                           | 0            | 0.989943081                 |              |             |                  |              |
| NEIL1     | ENSG00000140398.13                    | 0.252800667                 | 2            | 2                           | 0.107991623  |             |                  |              |
|           | Brain_Nucleus_accumbens_basal_ganglia | 0.169801725                 |              | Brain_Caudate_basal_ganglia |              |             |                  |              |
|           | 1.664074768                           | 0.335925232                 | 0.335925232  |                             | -1.607286096 |             |                  | -1.372841182 |
|           | -1.490063639                          | 0.165777589                 | 2            | 0                           | 0.989943081  |             |                  |              |
| TMIGD3    | ENSG00000121933.18                    | 0.252809207                 | 2            | 2                           | 0.125980768  |             |                  |              |
|           | Brain_Hippocampus                     | 0.190103642                 |              | Brain_Caudate_basal_ganglia | 1.492632757  |             |                  |              |
|           | 0.507367243                           | 0.507367243                 | -1.530145297 |                             | -1.310272574 |             |                  | -1.420208936 |
|           | 0.155473493                           | 2                           | 0            | 0.989943081                 |              |             |                  |              |
| ZGLP1     | ENSG00000220201.7                     | 0.252810137                 | 4            | 4                           | 0.151794964  |             | Brain_Cerebellum |              |
|           | 0.909937583                           | Brain_Cerebellar_Hemisphere | 1.713004961  |                             | 0.305219188  |             |                  |              |
|           | 0.305219188                           | -1.43322004                 | 0.359809862  |                             | -0.288433927 |             | 0.796036418      |              |
|           | 4                                     | 0                           | 0.989943081  |                             |              |             |                  |              |
| LINC01694 | ENSG00000233922.2                     | 0.252884994                 | 2            | 2                           | 0.110286017  |             |                  |              |
|           | Brain_Cerebellar_Hemisphere           | 0.418277704                 |              | Brain_Cerebellum            | 1.705186531  |             |                  |              |
|           | 0.294813469                           | 0.294813469                 | -1.596908895 |                             | -0.809412866 |             |                  | -1.203160881 |
|           | 0.556843783                           | 2                           | 0            | 0.989959136                 |              |             |                  |              |
| CD55      | ENSG00000196352.14                    | 0.252981287                 | 5            | 5                           | 0.190671364  |             |                  |              |
|           | Brain_Cerebellar_Hemisphere           | 0.906178177                 |              | Brain_Hippocampus           | 2.849365008  |             |                  |              |
|           | 0.223120664                           | 0.223120664                 | -1.308595623 |                             | 0.250027698  |             |                  | -0.462558121 |
|           | 0.645030839                           | 5                           | 0            | 0.990059072                 |              |             |                  |              |
| USH1C     | ENSG00000006611.15                    | 0.253102165                 | 2            | 2                           | 0.185384688  |             |                  |              |
|           | Brain_Cerebellar_Hemisphere           | 0.389259523                 |              | Brain_Caudate_basal_ganglia | 1.09901927   |             |                  |              |
|           | 0.90098073                            | 0.90098073                  | -0.860960999 | 1.324356458                 | 0.231697729  |             |                  |              |
|           | 1.545252793                           | 2                           | 0            | 0.990255142                 |              |             |                  |              |
| CASD1     | ENSG00000127995.16                    | 0.253208726                 | 9            | 9                           | 0.153156441  |             |                  |              |
|           | Brain_Frontal_Cortex_BA9              | 0.886508908                 |              | Brain_Cerebellum            | 2.631717953  |             |                  |              |
|           | 0.204336174                           | 0.204336174                 | -1.413543019 |                             | 1.428470635  |             |                  | 0.188863644  |
|           | 0.947525736                           | 9                           | 0            | 0.990395103                 |              |             |                  |              |
| UBA2      | ENSG00000126261.12                    | 0.253327371                 | 1            | 1                           | 0.253327371  |             | Brain_Amygdala   |              |
|           | 0.253327371                           | Brain_Amygdala              | 1            | 1                           | 1            | 1.142304742 |                  | 1.142304742  |
|           | 1.142304742                           | NA                          | 1            | 0                           | 0.990582238  |             |                  |              |
| CD48      | ENSG00000117091.9                     | 0.253444756                 | 1            | 1                           | 0.253444756  |             |                  |              |
|           | Brain_Hypothalamus                    | 0.253444756                 |              | Brain_Hypothalamus          | 1            | 1           | 1                |              |
|           | -1.142022287                          | -1.142022287                | -1.142022287 | NA                          | 1            | 0           |                  | 0.990645409  |
| GDF5      | ENSG00000125965.8                     | 0.253694567                 | 3            | 3                           | 0.274247023  |             |                  |              |
|           | Brain_Putamen_basal_ganglia           | 0.941816046                 |              | Brain_Frontal_Cortex_BA9    | 2.12300591   |             |                  |              |
|           | 0.18262087                            | 0.18262087                  | -0.163180804 | 1.093334358                 | 0.334380359  |             |                  |              |
|           | 0.667796563                           | 3                           | 0            | 0.990645409                 |              |             |                  |              |
| VEZT      | ENSG00000028203.17                    | 0.253791636                 | 5            | 5                           | 0.035290451  |             |                  |              |
|           | Brain_Cerebellar_Hemisphere           | 0.84646576                  |              | Brain_Caudate_basal_ganglia | 2.015989189  |             |                  |              |
|           | 0.491717787                           | 0.491717787                 | 0.193629803  |                             | 2.10500984   |             |                  | 1.340028642  |
|           | 0.710143834                           | 5                           | 0            | 0.990645409                 |              |             |                  |              |
| BCAS4     | ENSG00000124243.17                    | 0.253797513                 | 2            | 2                           | 0.117993363  |             | Brain_Cortex     |              |
|           | 0.548609252                           | Brain_Frontal_Cortex_BA9    | 1.034319857  |                             | 0.965680143  |             |                  |              |
|           | 0.965680143                           | 0.599845432                 | 1.563251877  |                             | 1.081548654  |             |                  | 0.68123123 2 |
|           | 0                                     | 0.990645409                 |              |                             |              |             |                  |              |
| ELOB      | ENSG00000103363.14                    | 0.253848737                 | 1            | 1                           | 0.253848737  |             |                  |              |
|           | Brain_Putamen_basal_ganglia           | 0.253848737                 |              | Brain_Putamen_basal_ganglia | 1            | 1           |                  |              |
|           | 1                                     | -1.141050912                | -1.141050912 | -1.141050912                | NA           | 1           | 0                |              |
|           | 0.990645409                           |                             |              |                             |              |             |                  |              |
| SIGLEC14  | ENSG00000254415.3                     | 0.253928987                 | 12           | 2                           | 0.088567863  |             |                  |              |
|           | Brain_Hippocampus                     | 0.513862741                 |              | Brain_Substantia_nigra      | 10.40825034  |             |                  |              |
|           | 0.006633439                           | 0.472320601                 | 0.652834869  |                             | 1.703001099  |             |                  | 1.262622033  |
|           | 0.333250516                           | 2                           | 0            | 0.990645409                 |              |             |                  |              |
| FAM182B   | ENSG00000175170.14                    | 0.253988569                 | 13           | 3                           | 0.037657501  |             |                  |              |
|           | Brain_Anterior_cingulate_cortex_BA24  | 0.540503097                 |              | Brain_Cortex                |              |             |                  |              |
|           | 10.61119493                           | 0.013170163                 | 0.558770025  |                             | 0.612052388  |             |                  | 2.078563364  |
|           | 1.412978216                           | 0.404328695                 | 3            | 0                           | 0.990645409  |             |                  |              |
| INPP5F    | ENSG00000198825.12                    | 0.2541471                   | 1            | 1                           | 0.2541471    |             | Brain_Cerebellum |              |

|               |                                       |                   |              |                                       |              |             |
|---------------|---------------------------------------|-------------------|--------------|---------------------------------------|--------------|-------------|
|               | 0.2541471                             | Brain_Cerebellum1 | 1            | 1                                     | 1.140334187  | 1.140334187 |
|               | 1.140334187                           | NA                | 1            | 0                                     | 0.990645409  |             |
| FAM95C        | ENSG00000273036.2                     |                   | 0.254202872  | 6                                     | 4            | 0.206319278 |
|               | Brain_Cerebellar_Hemisphere           | 0.976752729       |              | Brain_Amygdala                        | 4.099814682  |             |
|               | 0.032991651                           | 0.270976701       | -1.263751379 | 0.824329352                           | -0.287638009 |             |
|               | 0.704256669                           | 4                 | 0            | 0.990645409                           |              |             |
| DNASE2B       | ENSG00000137976.7                     |                   | 0.25421295   | 1                                     | 1            | 0.25421295  |
|               | Brain_Anterior_cingulate_cortex_BA24  | 0.25421295        |              |                                       |              |             |
|               | Brain_Anterior_cingulate_cortex_BA24  | 1                 | 1            | 1                                     | -1.140176082 |             |
|               | -1.140176082                          | -1.140176082      | NA           | 1                                     | 0            | 0.990645409 |
| SLC52A1       | ENSG00000132517.14                    |                   | 0.254362841  | 1                                     | 1            | 0.254362841 |
|               | Brain_Hippocampus                     | 0.254362841       |              | Brain_Hippocampus                     | 1            | 1           |
|               | -1.139816301                          | -1.139816301      | -1.139816301 | NA                                    | 1            | 0           |
|               |                                       |                   |              |                                       |              | 0.990645409 |
| CCDC136       | ENSG00000128596.16                    |                   | 0.254368792  | 2                                     | 2            | 0.162761696 |
|               | Brain_Cerebellar_Hemisphere           | 0.585276321       |              | Brain_Cerebellum1                     | 2.28762128   |             |
|               | 0.771237872                           | 0.771237872       | -1.395843274 | 0.545693965                           | -0.425074654 |             |
|               | 1.372874148                           | 2                 | 0            | 0.990645409                           |              |             |
| C2orf81       | ENSG00000284308.1                     |                   | 0.25441693   | 1                                     | 1            | 0.25441693  |
|               | Brain_Anterior_cingulate_cortex_BA24  | 0.25441693        |              |                                       |              |             |
|               | Brain_Anterior_cingulate_cortex_BA24  | 1                 | 1            | 1                                     | 1.139686508  |             |
|               | 1.139686508                           | 1.139686508       | NA           | 1                                     | 0            | 0.990645409 |
| AP000230.1    | ENSG00000273492.5                     |                   | 0.254545761  | 13                                    | 7            | 0.014822474 |
|               | Brain_Amygdala                        | 0.867451955       |              | Brain_Substantia_nigra                | 7.888113462  |             |
|               | 0.024681788                           | 0.337352956       | -0.166895905 | 2.436687719                           | 1.283073013  |             |
|               | 0.723199669                           | 7                 | 0            | 0.990645409                           |              |             |
| CTD-2186M15.3 | ENSG00000272086.1                     |                   | 0.254556026  | 1                                     | 1            | 0.254556026 |
|               | Brain_Cerebellum                      | 0.254556026       |              | Brain_Cerebellum1                     | 1            | 1           |
|               | 1.139352819                           | 1.139352819       | NA           | 1                                     | 0            | 0.990645409 |
| HOXB3         | ENSG00000120093.11                    |                   | 0.254561702  | 2                                     | 2            | 0.110023935 |
|               | Brain_Cerebellar_Hemisphere           | 1.855102692       |              | Brain_Cerebellum                      | 0.144897308  |             |
|               | 0.144897308                           | 1.588041169       | 1.598085568  | 1.593063368                           | 0.007102463  |             |
|               | 2                                     | 0                 | 0.990645409  |                                       |              |             |
| PTGIR         | ENSG00000160013.8                     |                   | 0.254613657  | 1                                     | 1            | 0.254613657 |
|               | Brain_Hypothalamus                    | 0.254613657       |              | Brain_Hypothalamus                    | 1            | 1           |
|               | 1.139214602                           | 1.139214602       | 1.139214602  | NA                                    | 1            | 0           |
|               |                                       |                   |              |                                       |              | 0.990645409 |
| LINC00500     | ENSG00000249381.1                     |                   | 0.254618032  | 11                                    | 11           | 0.009307395 |
|               | Brain_Nucleus_accumbens_basal_ganglia | 0.891613502       |              | Brain_Amygdala                        |              |             |
|               | 2.334892576                           | 0.442615363       | 0.442615363  | -2.600551851                          | 0.310999857  |             |
|               | -0.746242105                          | 1.03168238        | 11           | 0                                     | 0.990645409  |             |
| RNF130        | ENSG00000113269.13                    |                   | 0.254833297  | 1                                     | 1            | 0.254833297 |
|               | Brain_Cerebellum                      | 0.254833297       |              | Brain_Cerebellum1                     | 1            | 1           |
|               | -1.13868803                           | -1.13868803       | NA           | 1                                     | 0            | 0.991040625 |
| PIGQ          | ENSG00000007541.16                    |                   | 0.255021117  | 9                                     | 1            | 0.016889853 |
|               | Brain_Hippocampus                     | 0.545128795       |              | Brain_Hypothalamus                    | 8.640766364  |             |
|               | 0.001392783                           | 8.640766364       | 0.605075556  | 2.389096762                           | 1.12637081   |             |
|               | 0.528682451                           | 1                 | 0            | 0.991040625                           |              |             |
| RFC1          | ENSG00000035928.15                    |                   | 0.255110855  | 2                                     | 2            | 0.216954946 |
|               | Brain_Cerebellar_Hemisphere           | 1.859997822       |              | Brain_Cerebellum                      | 0.140002178  |             |
|               | 0.140002178                           | 0.501012646       | 1.2346657    | 0.867839173                           | 0.518771049  | 2           |
|               | 0                                     | 0.991040625       |              |                                       |              |             |
| KRT7          | ENSG00000135480.15                    |                   | 0.255118598  | 2                                     | 2            | 0.103983662 |
|               | Brain_Hippocampus                     | 0.813609501       |              | Brain_Spinal_cord_cervical_c-1        |              |             |
|               | 1.038031583                           | 0.961968417       | 0.961968417  | -0.235772123                          | 1.625840164  |             |
|               | 0.69503402                            | 1.316358672       | 2            | 0                                     | 0.991040625  |             |
| GUCA1B        | ENSG00000112599.8                     |                   | 0.255177304  | 12                                    | 3            | 0.418252995 |
|               | Brain_Substantia_nigra                | 0.959264291       |              | Brain_Nucleus_accumbens_basal_ganglia |              |             |
|               | 10.17524954                           | 0.000704885       | 0.342828431  | -0.809455838                          | 0.737736151  |             |
|               | 0.10855973                            | 0.458510221       | 3            | 0                                     | 0.991040625  |             |
| CDKL3         | ENSG00000006837.11                    |                   | 0.255282077  | 1                                     | 1            | 0.255282077 |
|               | Brain_Anterior_cingulate_cortex_BA24  | 0.255282077       |              |                                       |              |             |
|               | Brain_Anterior_cingulate_cortex_BA24  | 1                 | 1            | 1                                     | 1.137613092  |             |
|               | 1.137613092                           | 1.137613092       | NA           | 1                                     | 0            | 0.991040625 |



|               |                                       |                    |                                |              |              |                    |
|---------------|---------------------------------------|--------------------|--------------------------------|--------------|--------------|--------------------|
| DDX18         | ENSG00000088205.12                    | 0.255284973        | 2                              | 2            | 0.100699579  | Brain_Cerebellum   |
|               | 0.231221754                           | Brain_Hypothalamus | 1.640160857                    |              | 0.359839143  |                    |
|               | 0.359839143                           | -1.641471498       | 1.197217594                    |              | -0.222126952 | 2.007256306        |
|               | 2                                     | 0                  | 0.991040625                    |              |              |                    |
| GPRIN3        | ENSG00000185477.4                     | 0.255373739        | 3                              | 2            | 0.187774435  |                    |
|               | Brain_Cortex                          | 0.264837906        | Brain_Cerebellum               | 2.013221821  |              | 0.002229292        |
|               | 0.984548887                           | -1.115029207       | 1.317191523                    |              | 0.503349386  | 1.401564697        |
|               | 2                                     | 0                  | 0.991040625                    |              |              |                    |
| CTB-61M7.2    | ENSG00000268734.1                     | 0.25542945         | 2                              | 2            | 0.16751764   | Brain_Hypothalamus |
|               | 0.418629508                           | Brain_Amygdala     | 1.070297858                    |              | 0.929702142  | 0.929702142        |
|               | -1.38022415                           | 0.808801197        | -0.285711477                   |              | 1.547874667  | 2                  |
|               | 0.991040625                           |                    |                                |              |              | 0                  |
| HPD           | ENSG00000158104.11                    | 0.255655304        | 1                              | 1            | 0.255655304  |                    |
|               | Brain_Nucleus_accumbens_basal_ganglia | 0.255655304        |                                |              |              |                    |
|               | Brain_Nucleus_accumbens_basal_ganglia | 1                  | 1                              | 1            | 1.136720125  |                    |
|               | 1.136720125                           | 1.136720125        | NA                             | 1            | 0            | 0.991040625        |
| RP1-223B1.1   | ENSG00000228793.1                     | 0.255663306        | 13                             | 6            | 0.036787061  |                    |
|               | Brain_Anterior_cingulate_cortex_BA24  | 0.7197972          | Brain_Substantia_nigra         |              |              |                    |
|               | 9.032404228                           | 0.016459367        | 0.329141657                    |              | -2.088119449 | 0.358729845        |
|               | -0.824438864                          | 0.599639197        | 6                              | 0            | 0.991040625  |                    |
| RDH13         | ENSG00000160439.15                    | 0.255703304        | 5                              | 4            | 0.05806547   |                    |
|               | Brain_Spinal_cord_cervical_c-1        | 0.975850929        | Brain_Putamen_basal_ganglia    |              |              |                    |
|               | 2.949889902                           | 0.026802608        | 0.231246066                    |              | 0.030270995  | 1.895203321        |
|               | 1.327060391                           | 0.779806383        | 4                              | 0            | 0.991040625  |                    |
| RP11-365P13.5 | ENSG00000277767.1                     | 0.255726043        | 13                             | 4            | 0.028049061  |                    |
|               | Brain_Hypothalamus                    | 0.209706267        | Brain_Amygdala                 | 10.74215667  |              |                    |
|               | 0.000957131                           | 0.386825293        | 1.254373536                    |              | 2.196599517  | 1.926200035        |
|               | 0.272832404                           | 4                  | 0                              | 0.991040625  |              |                    |
| RP11-282A11.4 | ENSG00000277863.1                     | 0.255748966        | 9                              | 9            | 0.041530847  |                    |
|               | Brain_Hypothalamus                    | 0.922771822        | Brain_Amygdala                 | 2.479395084  |              |                    |
|               | 0.278760681                           | 0.278760681        | -1.206839497                   |              | 2.038190878  | 0.581668576        |
|               | 1.035985487                           | 9                  | 0                              | 0.991040625  |              |                    |
| CROT          | ENSG00000005469.11                    | 0.255782124        | 3                              | 3            | 0.126648005  |                    |
|               | Brain_Spinal_cord_cervical_c-1        | 0.363398388        | Brain_Substantia_nigra         |              |              |                    |
|               | 1.114401841                           | 0.886894965        | 0.886894965                    |              | -1.527454615 | -0.908908572       |
|               | -1.178838917                          | 0.316691238        | 3                              | 0            | 0.991040625  |                    |
| CTA-929C8.8   | ENSG00000230051.1                     | 0.255977905        | 6                              | 6            | 0.028820655  |                    |
|               | Brain_Putamen_basal_ganglia           | 0.791327337        | Brain_Cortex                   | 2.158696071  |              |                    |
|               | 0.354968371                           | 0.354968371        | -2.185930987                   |              | -0.264587388 | -1.101570424       |
|               | 0.654596476                           | 6                  | 0                              | 0.991226735  |              |                    |
| RP1-193H18.2  | ENSG00000267194.1                     | 0.255978546        | 1                              | 1            | 0.255978546  |                    |
|               | Brain_Frontal_Cortex_BA9              | 0.255978546        | Brain_Frontal_Cortex_BA9       | 1            | 1            |                    |
|               | 1                                     | -1.135947479       | -1.135947479                   | -1.135947479 | NA           | 1                  |
|               | 0.991226735                           |                    |                                |              |              | 0                  |
| DNAJC4        | ENSG00000110011.13                    | 0.2560427          | 3                              | 3            | 0.12464399   |                    |
|               | Brain_Nucleus_accumbens_basal_ganglia | 0.820764111        | Brain_Hippocampus              |              |              |                    |
|               | 1.23324823                            | 0.82141564         | 0.82141564                     | -1.476940317 | 1.535569539  | -0.055977692       |
|               | 1.513482157                           | 3                  | 0                              | 0.991226735  |              |                    |
| SLC39A9       | ENSG00000029364.11                    | 0.256154486        | 1                              | 1            | 0.256154486  |                    |
|               | Brain_Cerebellar_Hemisphere           | 0.256154486        | Brain_Cerebellar_Hemisphere    | 1            | 1            |                    |
|               | 1                                     | -1.135527213       | -1.135527213                   | -1.135527213 | NA           | 1                  |
|               | 0.991382948                           |                    |                                |              |              | 0                  |
| TTC39C        | ENSG00000168234.12                    | 0.256274568        | 2                              | 2            | 0.331469675  |                    |
|               | Brain_Cerebellar_Hemisphere           | 0.871437328        | Brain_Cerebellum               | 1.746863994  |              |                    |
|               | 0.253136006                           | 0.253136006        | -0.161833048                   |              | 0.97115786   | 0.404662406        |
|               | 0.801145554                           | 2                  | 0                              | 0.991382948  |              |                    |
| CGA           | ENSG00000135346.8                     | 0.256295627        | 1                              | 1            | 0.256295627  |                    |
|               | Brain_Spinal_cord_cervical_c-1        | 0.256295627        | Brain_Spinal_cord_cervical_c-1 |              |              |                    |
|               | 1                                     | 1                  | 1                              | 1.135190217  | 1.135190217  | 1.135190217        |
|               | 0.991382948                           |                    |                                |              |              | NA                 |
|               |                                       |                    |                                |              |              | 1                  |
|               |                                       |                    |                                |              |              | 0                  |
| RP11-433A10.3 | ENSG00000272774.1                     | 0.256415343        | 1                              | 1            | 0.256415343  |                    |
|               | Brain_Hypothalamus                    | 0.256415343        | Brain_Hypothalamus             | 1            | 1            | 1                  |

|              |                                       |                             |              |                                       |              |                  |             |
|--------------|---------------------------------------|-----------------------------|--------------|---------------------------------------|--------------|------------------|-------------|
|              | 1.134904478                           | 1.134904478                 | 1.134904478  | NA                                    | 1            | 0                | 0.991571882 |
| FAM13C       | ENSG00000148541.12                    | 0.256552796                 | 1            | 1                                     | 0.256552796  |                  |             |
|              | Brain_Putamen_basal_ganglia           | 0.256552796                 |              | Brain_Putamen_basal_ganglia           | 1            | 1                |             |
|              | 1                                     | -1.134576518                | -1.134576518 | -1.134576518                          | NA           | 1                | 0.99177351  |
| RP11-51B23.3 | ENSG00000254847.1                     | 0.256656214                 | 5            | 5                                     | 0.103322077  |                  |             |
|              | Brain_Cerebellar_Hemisphere           | 0.916018908                 |              | Brain_Caudate_basal_ganglia           |              |                  |             |
|              | 1.681204351                           | 0.393728476                 | 0.393728476  | -1.469001515                          | 1.628957215  |                  |             |
|              | 0.56824402                            | 1.331531977                 | 5            | 0                                     | 0.99177351   |                  |             |
| HOMER3       | ENSG00000051128.18                    | 0.256680143                 | 5            | 5                                     | 0.05402307   | Brain_Cortex     |             |
|              | 0.631837097                           | Brain_Frontal_Cortex_BA9    | 1.265003951  | 0.763593213                           |              |                  |             |
|              | 0.763593213                           | -1.926651545                | 1.143968111  | -0.630888163                          | 1.124962532  |                  |             |
|              | 5                                     | 0                           | 0.99177351   |                                       |              |                  |             |
| TNNI2        | ENSG00000130598.15                    | 0.256849298                 | 2            | 2                                     | 0.18970348   |                  |             |
|              | Brain_Caudate_basal_ganglia           | 0.342715454                 |              | Brain_Frontal_Cortex_BA9              |              |                  |             |
|              | 1.037952118                           | 0.962047882                 | 0.962047882  | 0.948813541                           | 1.3114568    |                  |             |
|              | 1.13013517                            | 0.256427507                 | 2            | 0                                     | 0.992153101  |                  |             |
| PNPLA7       | ENSG00000130653.15                    | 0.257176709                 | 9            | 8                                     | 0.012186875  |                  |             |
|              | Brain_Hippocampus                     | 0.782551869                 |              | Brain_Nucleus_accumbens_basal_ganglia |              |                  |             |
|              | 2.583999373                           | 0.034867195                 | 0.103487437  | -2.506686493                          | 1.568183899  |                  |             |
|              | -0.300782779                          | 1.392938462                 | 8            | 0                                     | 0.992493858  |                  |             |
| TCEA3        | ENSG00000204219.9                     | 0.257550347                 | 13           | 2                                     | 0.035218979  |                  |             |
|              | Brain_Nucleus_accumbens_basal_ganglia | 0.504678789                 |              | Brain_Cerebellum                      |              |                  |             |
|              | 11.81644306                           | 0.000589567                 | 0.580797268  | -2.105831647                          | -0.667146142 |                  |             |
|              | -1.3723942                            | 0.312018095                 | 2            | 0                                     | 0.992493858  |                  |             |
| NF2          | ENSG00000186575.17                    | 0.257651185                 | 1            | 1                                     | 0.257651185  |                  |             |
|              | Brain_Spinal_cord_cervical_c-1        | 0.257651185                 |              | Brain_Spinal_cord_cervical_c-1        |              |                  |             |
|              | 1                                     | 1                           | 1            | 1.131960159                           | 1.131960159  | NA               | 1           |
|              | 0.992493858                           |                             |              |                                       |              |                  | 0           |
| ADPRHL2      | ENSG00000116863.10                    | 0.257682809                 | 3            | 3                                     | 0.072303872  |                  |             |
|              | Brain_Hippocampus                     | 0.844390656                 |              | Brain_Cortex                          | 1.106914622  |                  |             |
|              | 0.877854119                           | 0.877854119                 | 0.196280458  | 1.797200019                           | 1.017580512  |                  |             |
|              | 0.801273244                           | 3                           | 0            | 0.992493858                           |              |                  |             |
| NHLH1        | ENSG00000171786.5                     | 0.257736824                 | 2            | 2                                     | 0.100806878  | Brain_Cerebellum |             |
|              | 0.215536142                           | Brain_Cerebellar_Hemisphere | 1.694450667  | 0.305549333                           |              |                  |             |
|              | 0.305549333                           | -1.640954414                | -1.238485373 | -1.439719893                          | 0.284588588  |                  |             |
|              | 2                                     | 0                           | 0.992493858  |                                       |              |                  |             |
| PIK3R4       | ENSG00000196455.7                     | 0.257780186                 | 6            | 3                                     | 0.065810922  |                  |             |
|              | Brain_Cortex                          | 0.480180253                 |              | Brain_Spinal_cord_cervical_c-1        | 4.880432889  |                  |             |
|              | 0.003486776                           | 0.5368537                   | -1.839709337 | -0.706012679                          | -1.501916658 |                  |             |
|              | 0.404005329                           | 3                           | 0            | 0.992493858                           |              |                  |             |
| NEMP2        | ENSG00000189362.11                    | 0.257807104                 | 1            | 1                                     | 0.257807104  | Brain_Cerebellum |             |
|              | 0.257807104                           | Brain_Cerebellum            | 1            | 1                                     | 1.131589387  | 1.131589387      |             |
|              | 1.131589387                           | NA                          | 1            | 0                                     | 0.992493858  |                  |             |
| ITGA6        | ENSG00000091409.14                    | 0.257947601                 | 3            | 3                                     | 0.04567341   | Brain_Cortex     |             |
|              | 0.816504321                           | Brain_Caudate_basal_ganglia | 1.276791931  | 0.638153195                           |              |                  |             |
|              | 0.638153195                           | -0.389553814                | 1.998399095  | 0.613629554                           | 1.238864714  |                  |             |
|              | 3                                     | 0                           | 0.992493858  |                                       |              |                  |             |
| NPEPPS       | ENSG00000141279.15                    | 0.257980184                 | 5            | 4                                     | 0.056531574  |                  |             |
|              | Brain_Nucleus_accumbens_basal_ganglia | 0.986976179                 |              | Brain_Cerebellum                      |              |                  |             |
|              | 3.212878817                           | 0.062342628                 | 0.192168121  | -1.906915164                          | 0.928611159  |                  |             |
|              | -0.656764579                          | 1.128776451                 | 4            | 0                                     | 0.992493858  |                  |             |
| ZC3H4        | ENSG00000130749.9                     | 0.258098138                 | 1            | 1                                     | 0.258098138  |                  |             |
|              | Brain_Nucleus_accumbens_basal_ganglia | 0.258098138                 |              |                                       |              |                  |             |
|              | Brain_Nucleus_accumbens_basal_ganglia | 1                           | 1            | 1                                     | -1.130897731 |                  |             |
|              | -1.130897731                          | -1.130897731                | NA           | 1                                     | 0.992493858  |                  |             |
| RBM48        | ENSG00000127993.15                    | 0.258162392                 | 8            | 5                                     | 0.066938285  |                  |             |
|              | Brain_Anterior_cingulate_cortex_BA24  | 0.839156566                 |              | Brain_Cortex                          |              |                  |             |
|              | 5.675670771                           | 0.00843137                  | 0.252683886  | -1.832088177                          | -0.202972449 |                  |             |
|              | -1.22395268                           | 0.670793359                 | 5            | 0                                     | 0.992493858  |                  |             |
| ACR          | ENSG00000100312.10                    | 0.258180132                 | 1            | 1                                     | 0.258180132  | Brain_Amygdala   |             |
|              | 0.258180132                           | Brain_Amygdala              | 1            | 1                                     | 1.130702968  | 1.130702968      |             |
|              | 1.130702968                           | NA                          | 1            | 0                                     | 0.992493858  |                  |             |

RAI14 ENSG00000039560.13 0.258219405 5 5 0.054776178  
Brain\_Putamen\_basal\_ganglia 0.658061457 Brain\_Amygdala 1.253624701  
0.626192469 0.626192469 -1.920647378 0.812610806 -0.365392628  
1.160059621 5 0 0.992493858

SPPL2C ENSG00000185294.6 0.258250808 4 3 0.170197839  
Brain\_Cerebellum 0.523314444 Brain\_Cerebellar\_Hemisphere 2.823170558  
0.086500668 0.191972663 -1.371568391 1.329723731 -0.390027487  
1.186405194 3 0 0.992493858

SUSD4 ENSG00000143502.14 0.25841516 5 4 0.031922782 Brain\_Cerebellum  
0.547117682 Brain\_Putamen\_basal\_ganglia 3.123558505 0.082064587  
0.121375736 0.602084816 2.145376181 1.334260239 0.59327793 4  
0 0.992493858

BCAT2 ENSG00000105552.14 0.258424544 3 3 0.059652134  
Brain\_Frontal\_Cortex\_BA9 0.798829123 Brain\_Cerebellum 1.55390644  
0.550855142 0.550855142 -0.255612623 1.88335604 0.627535382  
1.117121486 3 0 0.992493858

RP4-535B20.1 ENSG00000231485.1 0.258492911 1 1 0.258492911  
Brain\_Cortex 0.258492911 Brain\_Cortex 1 1 1 -1.129960401  
-1.129960401 -1.129960401 NA 1 0 0.992493858

USP6NL ENSG00000148429.14 0.258610273 4 4 0.084559972  
Brain\_Nucleus\_accumbens\_basal\_ganglia 0.530664293  
Brain\_Spinal\_cord\_cervical\_c-1 1.887310954 0.408651443 0.408651443  
-1.72481969 -0.626992283 -1.326792618 0.49404095 4 0  
0.992493858

RAB37 ENSG00000172794.19 0.258671978 5 4 0.16865654  
Brain\_Caudate\_basal\_ganglia 0.717305606 Brain\_Frontal\_Cortex\_BA9  
2.162646337 0.012478244 0.443015293 0.362062125 1.376533446  
0.93122544 0.459701168 4 0 0.992493858

SNRPE ENSG00000182004.12 0.258675923 8 2 0.294976945 Brain\_Amygdala  
0.974999127 Brain\_Frontal\_Cortex\_BA9 7.170809183 6.21E-05  
0.479578429 -1.047265931 0.380640198 0.006011585 0.447160087  
2 0 0.992493858

NKX1-2 ENSG00000229544.8 0.258717464 1 1 0.258717464  
Brain\_Cerebellum 0.258717464 Brain\_Cerebellum 1 1 1 1.129427674  
1.129427674 1.129427674 NA 1 0 0.992493858

DENND3 ENSG00000105339.10 0.258739486 2 2 0.188650679  
Brain\_Anterior\_cingulate\_cortex\_BA24 0.404276521 Brain\_Cortex  
1.112239241 0.887760759 0.887760759 -0.83400792 1.314581238  
0.240286659 1.519281964 2 0 0.992493858

SPHK1 ENSG00000176170.13 0.258800306 1 1 0.258800306 Brain\_Cortex  
0.258800306 Brain\_Cortex 1 1 1 -1.129231221 -1.129231221  
-1.129231221 NA 1 0 0.992493858

ROBO2 ENSG00000185008.17 0.258807662 2 2 0.179019709 Brain\_Cerebellum  
0.746028123 Brain\_Cerebellar\_Hemisphere 1.40393719 0.59606281 0.59606281  
-1.343779475 0.323881008 -0.509949233 1.179214037 2 0  
0.992493858

ASIC4 ENSG00000072182.12 0.258860848 1 1 0.258860848 Brain\_Cerebellum  
0.258860848 Brain\_Cerebellum 1 1 1 1.129087679 1.129087679  
1.129087679 NA 1 0 0.992493858

TLR10 ENSG00000174123.10 0.259028891 1 1 0.259028891  
Brain\_Substantia\_nigra 0.259028891 Brain\_Substantia\_nigra 1 1  
1 1.12868938 1.12868938 1.12868938 NA 1 0 0.992493858

KLHL7 ENSG00000122550.17 0.259253642 2 2 0.133394164  
Brain\_Caudate\_basal\_ganglia 0.33969131 Brain\_Amygdala 1.199472977  
0.800527023 0.800527023 0.954775361 1.50085077 1.227813066  
0.386133624 2 0 0.992493858

HEY2 ENSG00000135547.8 0.25932316 3 3 0.080464998  
Brain\_Anterior\_cingulate\_cortex\_BA24 0.24587521 Brain\_Spinal\_cord\_cervical\_c-1  
2.012679493 0.475565948 0.475565948 -1.747994395 -1.160426483  
-1.546584224 0.334526174 3 0 0.992493858

TPH1 ENSG00000129167.9 0.259355863 3 3 0.107662781  
Brain\_Frontal\_Cortex\_BA9 0.875940364 Brain\_Cerebellum 1.392453386

|               |                                      |                             |                             |              |              |
|---------------|--------------------------------------|-----------------------------|-----------------------------|--------------|--------------|
|               | 0.596926311                          | 0.596926311                 | -1.608787657                | 0.882241161  | -0.190142982 |
|               | 1.281104372                          | 3                           | 0                           | 0.992493858  |              |
| FXVD5         | ENSG00000089327.14                   | 0.259493261                 | 1                           | 1            | 0.259493261  |
|               | 0.259493261                          | Brain_Cortex                | 1                           | 1            | 1            |
|               | -1.127589646                         | NA                          | 1                           | 0            | 0.992493858  |
| STAG1         | ENSG00000118007.12                   | 0.259663015                 | 1                           | 1            | 0.259663015  |
|               | Brain_Substantia_nigra               | 0.259663015                 | Brain_Substantia_nigra      | 1            | 1            |
|               | 1                                    | -1.127187971                | -1.127187971                | -1.127187971 | NA           |
|               | 0.992493858                          |                             |                             | 1            | 0            |
| RP11-124N19.4 | ENSG00000283075.1                    | 0.259675968                 | 2                           | 2            | 0.128433186  |
|               | Brain_Cerebellar_Hemisphere          | 0.274846741                 | Brain_Cerebellum            | 1.897945232  |              |
|               | 0.102054768                          | 0.102054768                 | 1.091968968                 | 1.520309587  | 1.306139278  |
|               | 0.302882557                          | 2                           | 0                           | 0.992493858  |              |
| PIGF          | ENSG00000151665.12                   | 0.259765512                 | 5                           | 5            | 0.126224698  |
|               | Brain_Spinal_cord_cervical_c-1       | 0.937692359                 | Brain_Cortex                | 2.77775844   |              |
|               | 0.143826359                          | 0.143826359                 | -0.084903178                | 1.529160348  | 0.666129328  |
|               | 0.692371969                          | 5                           | 0                           | 0.992493858  |              |
| RP11-411K7.1  | ENSG00000236740.6                    | 0.25985539                  | 1                           | 1            | 0.25985539   |
|               | Brain_Frontal_Cortex_BA9             | 0.25985539                  | Brain_Frontal_Cortex_BA9    | 1            | 1            |
|               | 1.126732989                          | 1.126732989                 | 1.126732989                 | NA           | 1            |
|               | 0.992493858                          |                             |                             | 0            |              |
| GLCE          | ENSG00000138604.9                    | 0.25990434                  | 2                           | 2            | 0.484202989  |
|               | Brain_Amygdala                       | 1.815330601                 | Brain_Hypothalamus          | 0.184669399  | 0.184669399  |
|               | -0.289490852                         | 0.699558625                 | 0.205033886                 | 0.699363592  | 2            |
|               | 0.992493858                          |                             |                             |              | 0            |
| OSER1-AS1     | ENSG00000223891.5                    | 0.260089529                 | 3                           | 3            | 0.056507949  |
|               | Brain_Cortex                         | 0.786604965                 | Brain_Putamen_basal_ganglia | 1.773035352  |              |
|               | 0.410885295                          | 0.410885295                 | -1.907097606                | -0.270721857 | -1.116328512 |
|               | 0.819564986                          | 3                           | 0                           | 0.992493858  |              |
| AF146191.4    | ENSG00000245685.6                    | 0.260091904                 | 13                          | 5            | 0.060157776  |
|               | Brain_Anterior_cingulate_cortex_BA24 | 0.948306665                 | Brain_Caudate_basal_ganglia | 0.466545791  |              |
|               | 10.07495021                          | 9.51E-06                    | 0.363529942                 | -1.879635471 | 0.466545791  |
|               | -0.304572924                         | 0.601575278                 | 5                           | 0            | 0.992493858  |
| NEFL          | ENSG00000277586.2                    | 0.260112706                 | 2                           | 1            | 0.184344839  |
|               | Brain_Cerebellar_Hemisphere          | 0.36501105                  | Brain_Cerebellum            | 1.966581167  |              |
|               | 0.033418833                          | 1.966581167                 | 0.905857939                 | 1.327495465  | 1.116676702  |
|               | 0.298142754                          | 1                           | 0                           | 0.992493858  |              |
| PHF21B        | ENSG00000056487.15                   | 0.26012253                  | 1                           | 1            | 0.26012253   |
|               | Brain_Cortex                         | 1                           | 1                           | 1            | 1.126101568  |
|               | 1.126101568                          | NA                          | 1                           | 0            | 0.992493858  |
| GRIN3B        | ENSG00000116032.5                    | 0.26017408                  | 6                           | 4            | 0.267352206  |
|               | Brain_Cerebellum                     | 4.306345191                 | Brain_Cortex                | 0.22860767   |              |
|               | -1.109180772                         | 1.066044955                 | 0.067342415                 | 0.776255233  | 4            |
|               | 0.992493858                          |                             |                             |              | 0            |
| ACAT1         | ENSG00000075239.13                   | 0.260305423                 | 10                          | 9            | 0.06314791   |
|               | Brain_Anterior_cingulate_cortex_BA24 | 0.780357857                 | Brain_Cerebellum            | 2.76293395   |              |
|               | 0.091631182                          | 0.284889507                 | -1.833444002                | 1.858148633  | -0.255685411 |
|               | 1.230747467                          | 9                           | 0                           | 0.992493858  |              |
| SPATA21       | ENSG00000187144.11                   | 0.260311417                 | 2                           | 2            | 0.147284654  |
|               | Brain_Cerebellar_Hemisphere          | 0.576314584                 | Brain_Cerebellum            | 1.741617521  |              |
|               | 0.258382479                          | 0.258382479                 | -1.449189555                | -0.558776029 | -1.003982792 |
|               | 0.629617442                          | 2                           | 0                           | 0.992493858  |              |
| AC159540.1    | ENSG00000230606.10                   | 0.260354946                 | 11                          | 4            | 0.134843128  |
|               | Brain_Cerebellar_Hemisphere          | 0.987511468                 | Brain_Putamen_basal_ganglia | 0.124573793  |              |
|               | 9.058572571                          | 0.006087637                 | 0.41024154                  | -1.495273311 | 0.124573793  |
|               | -0.667177452                         | 0.512913292                 | 4                           | 0            | 0.992493858  |
| HRH3          | ENSG00000101180.15                   | 0.260355405                 | 2                           | 2            | 0.18879815   |
|               | Brain_Cerebellum                     | 1.425364931                 | Brain_Cerebellum            | 0.574635069  |              |
|               | 0.741553709                          | Brain_Cerebellar_Hemisphere | 1.425364931                 | 0.574635069  |              |
|               | 0.574635069                          | -1.314142811                | 0.329796531                 | -0.49217314  | 1.162440657  |
|               | 2                                    | 0                           | 0.992493858                 |              |              |
| HS3ST5        | ENSG00000249853.7                    | 0.260362174                 | 1                           | 1            | 0.260362174  |
|               | Brain_Cerebellar_Hemisphere          | 0.260362174                 | Brain_Cerebellar_Hemisphere | 1            | 1            |
|               | 1                                    | -1.125535521                | -1.125535521                | -1.125535521 | NA           |
|               |                                      |                             |                             | 1            | 0            |

0.992493858  
TSFM ENSG00000123297.17 0.260637923 10 3 0.065080731  
Brain\_Caudate\_basal\_ganglia 0.844977886 Brain\_Amygdala 8.027760833  
0.006529596 0.57079867 -1.84470316 -0.195530214 -1.329902792  
0.565714742 3 0 0.992493858  
ZNF239 ENSG00000196793.13 0.26073803 6 3 0.046688027  
Brain\_Nucleus\_accumbens\_basal\_ganglia 0.186211393 Brain\_Cerebellar\_Hemisphere  
5.198403509 0.014680022 0.228111439 -1.989119385 -1.321870152  
-1.654169328 0.274231077 3 0 0.992493858  
HIF3A ENSG00000124440.15 0.260846998 1 1 0.260846998  
Brain\_Caudate\_basal\_ganglia 0.260846998 Brain\_Caudate\_basal\_ganglia 1 1  
1 1.124391448 1.124391448 1.124391448 NA 1 0  
0.992493858  
DZIP1 ENSG00000134874.17 0.261031153 1 1 0.261031153  
Brain\_Caudate\_basal\_ganglia 0.261031153 Brain\_Caudate\_basal\_ganglia 1 1  
1 -1.123957271 -1.123957271 -1.123957271 NA 1 0  
0.992493858  
POLL ENSG00000166169.16 0.261074379 2 2 0.145798381  
Brain\_Cerebellar\_Hemisphere 0.249080121 Brain\_Cortex 1.296612258  
0.703387742 0.703387742 -1.152586564 1.454533759 0.150973597  
1.84351246 2 0 0.992493858  
ASH1L ENSG00000116539.12 0.261215906 1 1 0.261215906  
Brain\_Caudate\_basal\_ganglia 0.261215906 Brain\_Caudate\_basal\_ganglia 1 1  
1 1.123521898 1.123521898 1.123521898 NA 1 0  
0.992493858  
GLB1L3 ENSG00000166105.15 0.261218594 4 4 0.034656057  
Brain\_Cerebellar\_Hemisphere 0.520431598 Brain\_Amygdala 2.114703598  
0.103859925 0.103859925 -2.112354474 1.03175507 -0.589209731  
1.65662091 4 0 0.992493858  
WIPF1 ENSG00000115935.17 0.261226178 12 9 0.027948001  
Brain\_Putamen\_basal\_ganglia 0.924998072 Brain\_Spinal\_cord\_cervical\_c-1  
6.448860504 0.016756952 0.226147034 -1.20893468 2.1980155  
0.352276806 0.977926323 9 0 0.992493858  
KLK10 ENSG00000129451.11 0.261463831 9 9 0.03285255 Brain\_Cortex  
0.979912867 Brain\_Cerebellar\_Hemisphere 1.51133712 0.560289554  
0.560289554 -2.133880667 1.725433668 0.052608963 1.106288817  
9 0 0.992493858  
ANXA11 ENSG00000122359.17 0.261503812 12 3 0.04067752  
Brain\_Cerebellar\_Hemisphere 0.62169206 Brain\_Cerebellum 9.563347167  
0.000641183 0.527330154 -2.046802098 -0.493453681 -0.942029824  
0.492557915 3 0 0.992493858  
ZBTB25 ENSG00000089775.11 0.261534942 2 2 0.108314575  
Brain\_Cerebellar\_Hemisphere 0.329461423 Brain\_Cerebellum 1.741798414  
0.258201586 0.258201586 -1.605814952 -0.975199272 -1.290507112  
0.445912623 2 0 0.992493858  
RP11-1275H24.2 ENSG00000272953.1 0.261537419 1 1 0.261537419  
Brain\_Frontal\_Cortex\_BA9 0.261537419 Brain\_Frontal\_Cortex\_BA9 1 1  
1 1.122764752 1.122764752 1.122764752 NA 1 0  
0.992493858  
HDHD3 ENSG00000119431.9 0.261552807 5 5 0.063328739  
Brain\_Cerebellar\_Hemisphere 0.756836691 Brain\_Amygdala 2.278549679  
0.305601394 0.305601394 -0.332033629 1.856876411 0.704789486  
1.080045756 5 0 0.992493858  
CYP46A1 ENSG00000036530.8 0.261649623 2 1 0.219243301  
Brain\_Cerebellar\_Hemisphere 0.312132744 Brain\_Cerebellum 1.989854147  
0.010145853 1.989854147 1.01075701 1.228542726 1.119649868  
0.153997757 1 0 0.992493858  
GCAT ENSG00000100116.16 0.261690612 4 4 0.108422197 Brain\_Amygdala  
0.980974386 Brain\_Hypothalamus 2.81353615 0.114334694 0.114334694  
-1.605325469 0.058127326 -0.644881954 0.823212461 4 0  
0.992493858  
LINC01337 ENSG00000251221.1 0.261735336 1 1 0.261735336

|               |                                       |              |                                |              |              |                  |
|---------------|---------------------------------------|--------------|--------------------------------|--------------|--------------|------------------|
|               | Brain_Cerebellum                      | 0.261735336  | Brain_Cerebellum1              | 1            | 1            | -1.122298989     |
|               |                                       | -1.122298989 | NA                             | 1            | 0            | 0.992493858      |
| EFHD1         | ENSG00000115468.11                    | 0.26174964   | 5                              | 4            | 0.058373014  |                  |
|               | Brain_Cerebellar_Hemisphere           | 0.83076614   | Brain_Cortex                   | 2.711289885  |              |                  |
|               |                                       | 0.017282334  | 0.384003926                    | -0.706254981 | 1.892886131  | 0.786494493      |
|               |                                       | 1.185539608  | 4                              | 0            | 0.992493858  |                  |
| UNC5C         | ENSG00000182168.14                    | 0.261785323  | 2                              | 2            | 0.207563991  |                  |
|               | Brain_Cerebellar_Hemisphere           | 0.329030855  | Brain_Caudate_basal_ganglia    |              |              |                  |
|               |                                       | 1.053543736  | 0.946456264                    | 0.946456264  | -0.976067825 | 1.26029215       |
|               |                                       | 0.142112163  | 1.581345304                    | 2            | 0            | 0.992493858      |
| SPARCL1       | ENSG00000152583.12                    | 0.261948879  | 6                              | 4            | 0.11224241   |                  |
|               | Brain_Anterior_cingulate_cortex_BA24  | 0.936548153  | Brain_Cortex                   |              |              |                  |
|               |                                       | 4.054514712  | 0.058288053                    | 0.371729854  | -1.588194299 | 1.166889907      |
|               |                                       | -0.077817431 | 0.882927457                    | 4            | 0            | 0.992493858      |
| CTC-529P8.1   | ENSG00000250072.5                     | 0.262102236  | 1                              | 1            | 0.262102236  |                  |
|               | Brain_Spinal_cord_cervical_c-1        | 0.262102236  | Brain_Spinal_cord_cervical_c-1 |              |              |                  |
|               |                                       | 1            | 1                              | 1            | -1.121436197 | -1.121436197     |
|               |                                       | 0.992493858  | -1.121436197                   | -1.121436197 | -1.121436197 | NA               |
|               |                                       |              |                                |              |              | 1                |
|               |                                       |              |                                |              |              | 0                |
| SH2D5         | ENSG00000189410.11                    | 0.262159815  | 1                              | 1            | 0.262159815  |                  |
|               | Brain_Cerebellar_Hemisphere           | 0.262159815  | Brain_Cerebellar_Hemisphere1   | 1            | 1            |                  |
|               |                                       | 1            | -1.121300872                   | -1.121300872 | -1.121300872 | NA               |
|               |                                       |              |                                |              |              | 1                |
|               |                                       |              |                                |              |              | 0                |
|               |                                       |              |                                |              |              | 0.992493858      |
| CTD-2544H17.1 | ENSG00000249621.1                     | 0.26228804   | 1                              | 1            | 0.26228804   |                  |
|               | Brain_Hypothalamus                    | 0.26228804   | Brain_Hypothalamus             | 1            | 1            | 1                |
|               |                                       | -1.120999582 | -1.120999582                   | -1.120999582 | NA           | 1                |
|               |                                       |              |                                |              |              | 0                |
|               |                                       |              |                                |              |              | 0.992493858      |
| COL15A1       | ENSG00000204291.10                    | 0.262332564  | 3                              | 3            | 0.151227313  |                  |
|               | Brain_Frontal_Cortex_BA9              | 0.730456127  | Brain_Cerebellar_Hemisphere    |              |              |                  |
|               |                                       | 1.092517079  | 0.927244443                    | 0.927244443  | -1.323099825 | 1.435209831      |
|               |                                       | -0.077469613 | 1.398411423                    | 3            | 0            | 0.992493858      |
| CUL9          | ENSG00000112659.13                    | 0.262483359  | 4                              | 4            | 0.050566828  |                  |
|               | Brain_Frontal_Cortex_BA9              | 0.216498917  | Brain_Cortex                   | 2.328507733  |              |                  |
|               |                                       | 0.228720015  | 0.228720015                    | -1.955137629 | -1.235891446 | -1.668583926     |
|               |                                       | 0.314664173  | 4                              | 0            | 0.992493858  |                  |
| TP53I3        | ENSG00000115129.13                    | 0.262484856  | 9                              | 3            | 0.147159066  |                  |
|               | Brain_Substantia_nigra                | 0.783598367  | Brain_Cerebellum               | 8.079919737  |              |                  |
|               |                                       | 4.54E-05     | 0.310695402                    | 0.274632797  | 1.449639532  | 0.476969516      |
|               |                                       | 0.368807832  | 3                              | 0            | 0.992493858  |                  |
| HINFP         | ENSG00000172273.12                    | 0.262653214  | 1                              | 1            | 0.262653214  | Brain_Cortex     |
|               |                                       | 0.262653214  | Brain_Cortex                   | 1            | 1            | 1                |
|               |                                       | -1.120142096 | NA                             | 1            | 0            | 0.992493858      |
|               |                                       |              |                                |              |              | -1.120142096     |
|               |                                       |              |                                |              |              | -1.120142096     |
| KLHL26        | ENSG00000167487.11                    | 0.262865224  | 2                              | 1            | 0.241783331  |                  |
|               | Brain_Cerebellum                      | 0.295943944  | Brain_Cerebellar_Hemisphere    | 1.958106038  |              |                  |
|               |                                       | 0.041893962  | 1.958106038                    | -1.170540985 | -1.045171001 | -1.107855993     |
|               |                                       | 0.088649965  | 1                              | 0            | 0.992493858  |                  |
| PRAME         | ENSG00000185686.17                    | 0.262986769  | 2                              | 2            | 0.597597453  |                  |
|               | Brain_Substantia_nigra                | 0.740382078  | Brain_Hypothalamus             | 1.861282483  |              |                  |
|               |                                       | 0.138717517  | 0.138717517                    | -0.52785864  | 0.331347417  | -0.098255611     |
|               |                                       | 0.60755043   | 2                              | 0            | 0.992493858  |                  |
| NOTUM         | ENSG00000185269.11                    | 0.262997025  | 2                              | 2            | 0.106611614  |                  |
|               | Brain_Cerebellar_Hemisphere           | 0.781508412  | Brain_Hypothalamus             | 1.010905577  |              |                  |
|               |                                       | 0.989094423  | 0.989094423                    | -0.277353853 | 1.613611993  | 0.66812907       |
|               |                                       | 1.337114773  | 2                              | 0            | 0.992493858  |                  |
| LA16c-360A4.1 | ENSG00000275438.1                     | 0.263179167  | 4                              | 2            | 0.132984001  |                  |
|               | Brain_Nucleus_accumbens_basal_ganglia | 0.74860528   | Brain_Frontal_Cortex_BA9       |              |              |                  |
|               |                                       | 3.538814203  | 0.018210279                    | 0.358821232  | 0.320478957  | 1.502438106      |
|               |                                       | 0.824713366  | 0.528653167                    | 2            | 0            | 0.992493858      |
| UIMC1         | ENSG00000087206.16                    | 0.263513294  | 4                              | 4            | 0.137082671  |                  |
|               | Brain_Putamen_basal_ganglia           | 0.838244389  | Brain_Cerebellum               | 2.152110987  |              |                  |
|               |                                       | 0.280558049  | 0.280558049                    | -1.486743112 | -0.204139626 | -0.977968352     |
|               |                                       | 0.566401854  | 4                              | 0            | 0.992493858  |                  |
| EPRS          | ENSG00000136628.17                    | 0.263524896  | 1                              | 1            | 0.263524896  | Brain_Cerebellum |
|               |                                       | 0.263524896  | Brain_Cerebellum1              | 1            | 1            | 1                |
|               |                                       |              |                                |              |              | -1.118098573     |
|               |                                       |              |                                |              |              | -1.118098573     |

|              |                                       |              |                             |              |                                       |             |    |   |             |  |  |
|--------------|---------------------------------------|--------------|-----------------------------|--------------|---------------------------------------|-------------|----|---|-------------|--|--|
|              | -1.118098573                          | NA           | 1                           | 0            | 0.992493858                           |             |    |   |             |  |  |
| AIM2         | ENSG00000163568.14                    | 0.263541847  | 1                           | 1            | 0.263541847                           |             |    |   |             |  |  |
|              | Brain_Putamen_basal_ganglia           | 0.263541847  |                             |              | Brain_Putamen_basal_ganglia           | 1           | 1  |   |             |  |  |
|              | 1                                     | 1.118058879  | 1.118058879                 | 1.118058879  | NA                                    | 1           | 0  |   |             |  |  |
|              | 0.992493858                           |              |                             |              |                                       |             |    |   |             |  |  |
| OR11H4       | ENSG00000176198.2                     | 0.263616686  | 1                           | 1            | 0.263616686                           |             |    |   |             |  |  |
|              | Brain_Cerebellar_Hemisphere           | 0.263616686  |                             |              | Brain_Cerebellar_Hemisphere           | 1           | 1  |   |             |  |  |
|              | 1                                     | 1.117883657  | 1.117883657                 | 1.117883657  | NA                                    | 1           | 0  |   |             |  |  |
|              | 0.992493858                           |              |                             |              |                                       |             |    |   |             |  |  |
| GSTO2        | ENSG00000065621.14                    | 0.263716139  | 13                          | 2            | 0.068934916                           |             |    |   |             |  |  |
|              | Brain_Caudate_basal_ganglia           | 0.308468845  |                             |              | Brain_Hippocampus                     | 11.82377401 |    |   |             |  |  |
|              | 0.000194505                           | 0.630798732  | 1.018440118                 | 1.81884608   | 1.551030809                           |             |    |   |             |  |  |
|              | 0.207283868                           | 2            | 0                           | 0.992493858  |                                       |             |    |   |             |  |  |
| STON1        | ENSG00000243244.5                     | 0.26372562   | 10                          | 4            | 0.231952515                           |             |    |   |             |  |  |
|              | Brain_Caudate_basal_ganglia           | 0.996012434  |                             |              | Brain_Anterior_cingulate_cortex_BA24  |             |    |   |             |  |  |
|              | 7.437247113                           | 0.053034565  | 0.324940155                 | -0.795251578 | 1.19534436                            |             |    |   |             |  |  |
|              | 0.461162199                           | 0.615450805  | 4                           | 0            | 0.992493858                           |             |    |   |             |  |  |
| CD63         | ENSG00000135404.11                    | 0.263932977  | 1                           | 1            | 0.263932977                           |             |    |   |             |  |  |
|              | Brain_Substantia_nigra                | 0.263932977  |                             |              | Brain_Substantia_nigra                | 1           | 1  |   |             |  |  |
|              | 1                                     | 1.117143493  | 1.117143493                 | 1.117143493  | NA                                    | 1           | 0  |   |             |  |  |
|              | 0.992493858                           |              |                             |              |                                       |             |    |   |             |  |  |
| PPID         | ENSG00000171497.4                     | 0.264157217  | 4                           | 4            | 0.14935245                            |             |    |   |             |  |  |
|              | Brain_Cerebellar_Hemisphere           | 0.950270148  |                             |              | Brain_Cerebellum                      | 1.898477305 |    |   |             |  |  |
|              | 0.309751685                           | 0.309751685  | -1.176714457                | 1.441822513  | 0.05656017                            |             |    |   |             |  |  |
|              | 1.074686168                           | 4            | 0                           | 0.992493858  |                                       |             |    |   |             |  |  |
| ZNF439       | ENSG00000171291.8                     | 0.264196789  | 1                           | 1            | 0.264196789                           |             |    |   |             |  |  |
|              | Brain_Cortex                          | 0.264196789  |                             |              | Brain_Cortex                          | 1           | 1  | 1 | 1.116526604 |  |  |
|              | 1.116526604                           | 1.116526604  | NA                          | 1            | 0                                     | 0.992493858 |    |   |             |  |  |
| OSBP         | ENSG00000110048.11                    | 0.264245327  | 1                           | 1            | 0.264245327                           |             |    |   |             |  |  |
|              | Brain_Frontal_Cortex_BA9              | 0.264245327  |                             |              | Brain_Frontal_Cortex_BA9              | 1           | 1  |   |             |  |  |
|              | 1                                     | -1.116413151 | -1.116413151                | -1.116413151 | NA                                    | 1           | 0  |   |             |  |  |
|              | 0.992493858                           |              |                             |              |                                       |             |    |   |             |  |  |
| ZDHHC23      | ENSG00000184307.14                    | 0.264348196  | 1                           | 1            | 0.264348196                           |             |    |   |             |  |  |
|              | Brain_Spinal_cord_cervical_c-1        | 0.264348196  |                             |              | Brain_Spinal_cord_cervical_c-1        |             |    |   |             |  |  |
|              | 1                                     | 1            | 1                           | -1.11617275  | -1.11617275                           | -1.11617275 | NA | 1 | 0           |  |  |
|              | 0.992493858                           |              |                             |              |                                       |             |    |   |             |  |  |
| P2RY11       | ENSG00000244165.1                     | 0.264418324  | 5                           | 3            | 0.094920169                           |             |    |   |             |  |  |
|              | Brain_Cortex                          | 0.86841313   | Brain_Cerebellar_Hemisphere | 3.6347244    | 0.009005008                           |             |    |   |             |  |  |
|              | 0.320488271                           | -1.669995931 | 1.115530739                 | 0.07835644   | 1.041012044                           | 3           |    |   |             |  |  |
|              | 0                                     | 0.992493858  |                             |              |                                       |             |    |   |             |  |  |
| MRPS27       | ENSG00000113048.16                    | 0.264501688  | 9                           | 7            | 0.149232172                           |             |    |   |             |  |  |
|              | Brain_Nucleus_accumbens_basal_ganglia | 0.926987554  |                             |              | Brain_Hippocampus                     |             |    |   |             |  |  |
|              | 5.573041493                           | 0.018655594  | 0.208823513                 | -1.071384661 | 1.442248892                           |             |    |   |             |  |  |
|              | -0.031893561                          | 0.750060646  | 7                           | 0            | 0.992493858                           |             |    |   |             |  |  |
| NAT2         | ENSG00000156006.4                     | 0.264528762  | 1                           | 1            | 0.264528762                           |             |    |   |             |  |  |
|              | Brain_Cerebellar_Hemisphere           | 0.264528762  |                             |              | Brain_Cerebellar_Hemisphere           | 1           | 1  |   |             |  |  |
|              | 1                                     | 1.115750933  | 1.115750933                 | 1.115750933  | NA                                    | 1           | 0  |   |             |  |  |
|              | 0.992493858                           |              |                             |              |                                       |             |    |   |             |  |  |
| RP11-290F5.1 | ENSG00000249096.6                     | 0.264603482  | 4                           | 4            | 0.082004403                           |             |    |   |             |  |  |
|              | Brain_Spinal_cord_cervical_c-1        | 0.626093522  |                             |              |                                       |             |    |   |             |  |  |
|              | Brain_Nucleus_accumbens_basal_ganglia | 1.210392853  |                             |              | 0.769810675                           |             |    |   |             |  |  |
|              | 0.769810675                           | -0.926413402 | 1.739172624                 | -0.114874105 | 1.24951134                            | 4           |    |   |             |  |  |
|              | 0                                     | 0.992493858  |                             |              |                                       |             |    |   |             |  |  |
| ATP1B2       | ENSG00000129244.8                     | 0.264661216  | 1                           | 1            | 0.264661216                           |             |    |   |             |  |  |
|              | Brain_Caudate_basal_ganglia           | 0.264661216  |                             |              | Brain_Caudate_basal_ganglia           | 1           | 1  |   |             |  |  |
|              | 1                                     | 1.115441637  | 1.115441637                 | 1.115441637  | NA                                    | 1           | 0  |   |             |  |  |
|              | 0.992493858                           |              |                             |              |                                       |             |    |   |             |  |  |
| KISS1        | ENSG00000170498.8                     | 0.26474143   | 3                           | 3            | 0.054795875                           |             |    |   |             |  |  |
|              | Brain_Putamen_basal_ganglia           | 0.825498313  |                             |              | Brain_Nucleus_accumbens_basal_ganglia |             |    |   |             |  |  |
|              | 1.208263016                           | 0.789222607  | 0.789222607                 | 0.220478759  | 1.920491272                           |             |    |   |             |  |  |
|              | 1.002680791                           | 0.858080925  | 3                           | 0            | 0.992493858                           |             |    |   |             |  |  |
| TMEM215      | ENSG00000188133.5                     | 0.264783092  | 6                           | 1            | 0.218769839                           |             |    |   |             |  |  |

|             |                                       |              |              |              |                                       |              |              |                  |
|-------------|---------------------------------------|--------------|--------------|--------------|---------------------------------------|--------------|--------------|------------------|
|             | Brain_Caudate_basal_ganglia           | 0.351396728  |              |              | Brain_Cortex                          | 5.908035413  |              |                  |
|             |                                       | 3.22E-05     | 5.908035413  | -1.22980579  |                                       | -0.931883515 | -1.107065783 |                  |
|             |                                       | 0.098430145  | 1            | 0            |                                       | 0.992493858  |              |                  |
| CKMT1B      | ENSG00000237289.9                     | 0.264787053  |              |              | 1                                     | 1            | 0.264787053  |                  |
|             | Brain_Cerebellum                      | 0.264787053  |              |              | Brain_Cerebellum                      | 1            | 1            | 1.115147888      |
|             |                                       | 1.115147888  | 1.115147888  | NA           | 1                                     | 0            | 0.992493858  |                  |
| ZSCAN2      | ENSG00000182318.5                     | 0.264792719  |              |              | 2                                     | 2            | 0.196014804  |                  |
|             | Brain_Cerebellar_Hemisphere           | 0.576908492  |              |              | Brain_Anterior_cingulate_cortex_BA24  |              |              |                  |
|             |                                       | 1.300832464  | -0.699167536 | 0.699167536  |                                       | -1.292989173 | 0.55790612   |                  |
|             |                                       | -0.367541526 | 1.308780613  | 2            | 0                                     | 0.992493858  |              |                  |
| RP3-460G2.2 | ENSG00000234147.1                     | 0.264824072  |              |              | 7                                     | 3            | 0.113856553  |                  |
|             | Brain_Cerebellar_Hemisphere           | 0.692737056  |              |              | Brain_Hippocampus                     |              | 5.663950133  |                  |
|             |                                       | 0.015708747  | -0.288963026 | -1.581093969 |                                       | 0.525158705  | -0.885087416 |                  |
|             |                                       | 0.721684688  | 3            | 0            | 0.992493858                           |              |              |                  |
| LINC01356   | ENSG00000215866.7                     | 0.26485077   | 6            | 5            | 0.165798682                           |              |              |                  |
|             | Brain_Nucleus_accumbens_basal_ganglia | 0.964317755  |              |              |                                       |              |              |                  |
|             | Brain_Anterior_cingulate_cortex_BA24  | 4.05297237   | 9.90E-05     | 0.142747715  |                                       |              |              |                  |
|             |                                       | -0.938063359 | 1.385830452  | 0.189404182  | 0.738386822                           | 5            | 0            |                  |
|             |                                       | 0.992493858  |              |              |                                       |              |              |                  |
| CCDC170     | ENSG00000120262.9                     | 0.265003738  |              |              | 10                                    | 8            | 0.166684418  |                  |
|             | Brain_Spinal_cord_cervical_c-1        | 0.940040876  |              |              | Brain_Frontal_Cortex_BA9              |              |              |                  |
|             |                                       | 5.189181143  | 0.102899934  | 0.30652708   | -1.382936238                          | 0.739767897  |              |                  |
|             |                                       | -0.479044402 | 0.755956033  | 8            | 0                                     | 0.992493858  |              |                  |
| ERCC4       | ENSG00000175595.14                    | 0.26519757   | 3            | 3            | 0.194727739                           |              |              |                  |
|             | Brain_Spinal_cord_cervical_c-1        | 0.71866656   |              |              | Brain_Putamen_basal_ganglia           |              |              |                  |
|             |                                       | 1.340023491  | 0.65776692   | 0.65776692   | -1.296719436                          | 0.920611588  |              |                  |
|             |                                       | -0.005288791 | 1.152973764  | 3            | 0                                     | 0.992493858  |              |                  |
| PURG        | ENSG00000172733.11                    | 0.265331665  |              |              | 1                                     | 1            | 0.265331665  |                  |
|             | Brain_Substantia_nigra                | 0.265331665  |              |              | Brain_Substantia_nigra                | 1            | 1            |                  |
|             |                                       | 1            | -1.113877682 | -1.113877682 | -1.113877682                          | NA           | 1            | 0                |
|             |                                       | 0.992493858  |              |              |                                       |              |              |                  |
| CLCN2       | ENSG00000114859.15                    | 0.265356051  |              |              | 4                                     | 4            | 0.048781627  | Brain_Cerebellum |
|             |                                       | 0.839242131  |              |              | Brain_Nucleus_accumbens_basal_ganglia | 2.843123298  |              |                  |
|             |                                       | 0.225283316  | 0.225283316  | 0.202862979  |                                       | 1.970495357  | 0.956455836  |                  |
|             |                                       | 0.772018305  | 4            | 0            | 0.992493858                           |              |              |                  |
| SLC38A7     | ENSG00000103042.8                     | 0.265394717  |              |              | 2                                     | 2            | 0.606600077  |                  |
|             | Brain_Cerebellar_Hemisphere           | 0.778856635  |              |              | Brain_Cerebellum                      | 1.880006388  |              |                  |
|             |                                       | 0.119993612  | 0.119993612  | -0.280809346 |                                       | 0.514932661  | 0.117061657  |                  |
|             |                                       | 0.562674569  | 2            | 0            | 0.992493858                           |              |              |                  |
| LINC00235   | ENSG00000277142.1                     | 0.265456169  |              |              | 2                                     | 2            | 0.149300995  |                  |
|             | Brain_Cortex                          | 0.761659136  |              |              | Brain_Cerebellum                      | 1.291854574  | 0.708145426  |                  |
|             |                                       | 0.708145426  | -0.30330277  | 1.442004887  |                                       | 0.569351058  | 1.234118879  |                  |
|             |                                       | 2            | 0            | 0.992493858  |                                       |              |              |                  |
| COBLL1      | ENSG00000082438.15                    | 0.265495498  |              |              | 5                                     | 5            | 0.018636067  |                  |
|             | Brain_Caudate_basal_ganglia           | 0.631631911  |              |              | Brain_Cerebellum                      | 1.7252435    |              |                  |
|             |                                       | 0.353128546  | 0.353128546  | -2.352731874 |                                       | -0.479431188 | -1.139593548 |                  |
|             |                                       | 0.749856842  | 5            | 0            | 0.992493858                           |              |              |                  |
| C5orf58     | ENSG00000234511.8                     | 0.265535964  |              |              | 2                                     | 2            | 0.127872972  |                  |
|             | Brain_Anterior_cingulate_cortex_BA24  | 0.568860283  |              |              | Brain_Cortex                          |              |              |                  |
|             |                                       | 1.005305058  | 0.994694942  | 0.994694942  |                                       | -1.52254343  | -0.56973082  |                  |
|             |                                       | -1.046137125 | 0.673740258  | 2            | 0                                     | 0.992493858  |              |                  |
| PLXNC1      | ENSG00000136040.8                     | 0.265542035  |              |              | 2                                     | 2            | 0.138120294  |                  |
|             | Brain_Putamen_basal_ganglia           | 0.545299298  |              |              | Brain_Cerebellum                      | 1.045636857  |              |                  |
|             |                                       | 0.954363143  | 0.954363143  | 0.604818954  |                                       | 1.482827325  | 1.043823139  |                  |
|             |                                       | 0.620845673  | 2            | 0            | 0.992493858                           |              |              |                  |
| PEX11G      | ENSG00000104883.7                     | 0.265596219  |              |              | 10                                    | 6            | 0.016894555  |                  |
|             | Brain_Substantia_nigra                | 0.955748201  |              |              | Brain_Cerebellar_Hemisphere           |              |              |                  |
|             |                                       | 6.251965216  | 4.17E-18     | 0.468785191  |                                       | -2.3889945   | 0.055489869  |                  |
|             |                                       | -1.249123987 | 0.849123756  | 6            | 0                                     | 0.992493858  |              |                  |
| UBE2Z       | ENSG00000159202.17                    | 0.265703961  |              |              | 3                                     | 3            | 0.06043182   |                  |
|             | Brain_Spinal_cord_cervical_c-1        | 0.878560752  |              |              | Brain_Cerebellar_Hemisphere           |              |              |                  |
|             |                                       | 1.526433937  | 0.472562593  | 0.472562593  |                                       | -0.152793972 | 1.877629848  |                  |



|               |                                       |                             |                                       |              |              |                |              |  |  |
|---------------|---------------------------------------|-----------------------------|---------------------------------------|--------------|--------------|----------------|--------------|--|--|
|               | 1.073621087                           | 1.079108675                 | 3                                     | 0            | 0.992493858  |                |              |  |  |
| ANKRD33       | ENSG00000167612.12                    | 0.265770857                 | 1                                     | 1            | 0.265770857  |                |              |  |  |
|               | Brain_Cortex                          | 0.265770857                 | Brain_Cortex                          | 1            | 1            | 1              | -1.112854656 |  |  |
|               | -1.112854656                          | -1.112854656                | NA                                    | 1            | 0            | 0.992493858    |              |  |  |
| S100A1        | ENSG00000160678.11                    | 0.265857511                 | 4                                     | 3            | 0.137195582  |                |              |  |  |
|               | Brain_Cortex                          | 0.873949143                 | Brain_Substantia_nigra                | 2.463959503  |              |                |              |  |  |
|               | 0.041133046                           | 0.502859837                 | -1.486315903                          | 0.256171822  | -0.59841288  |                |              |  |  |
|               | 0.933741618                           | 3                           | 0                                     | 0.992493858  |              |                |              |  |  |
| SPOCD1        | ENSG00000134668.12                    | 0.265920107                 | 3                                     | 2            | 0.105401625  |                |              |  |  |
|               | Brain_Putamen_basal_ganglia           | 0.120777982                 | Brain_Caudate_basal_ganglia           |              |              |                |              |  |  |
|               | 2.837720082                           | 0.002126566                 | 0.160153352                           | -1.619212149 | -1.551516395 |                |              |  |  |
|               | -1.582296123                          | 0.034262507                 | 2                                     | 0            | 0.992493858  |                |              |  |  |
| SUCLG1        | ENSG00000163541.11                    | 0.265946182                 | 4                                     | 2            | 0.155806259  |                |              |  |  |
|               | Brain_Frontal_Cortex_BA9              | 0.588676157                 | Brain_Cortex                          | 3.662751954  |              |                |              |  |  |
|               | 0.060660311                           | 0.187421103                 | -1.419318233                          | -0.540755444 | -0.929953931 |                |              |  |  |
|               | 0.405537578                           | 2                           | 0                                     | 0.992493858  |              |                |              |  |  |
| CEBPZ         | ENSG00000115816.14                    | 0.266017328                 | 7                                     | 6            | 0.009474281  |                |              |  |  |
|               | Brain_Hypothalamus                    | 0.283249562                 | Brain_Nucleus_accumbens_basal_ganglia |              |              |                |              |  |  |
|               | 4.924327739                           | 0.065085029                 | 0.166016678                           | 1.073048041  | 2.594448497  |                |              |  |  |
|               | 1.842464552                           | 0.604144788                 | 6                                     | 0            | 0.992493858  |                |              |  |  |
| ITGA5         | ENSG00000161638.10                    | 0.26616514                  | 2                                     | 2            | 0.579743625  |                |              |  |  |
|               | Brain_Anterior_cingulate_cortex_BA24  | 0.617699803                 | Brain_Cerebellum                      | 1.79056039   |              |                |              |  |  |
|               | 0.20943961                            | 0.20943961                  | -0.499112967                          | 0.553759243  | 0.027323138  |                |              |  |  |
|               | 0.744493079                           | 2                           | 0                                     | 0.992493858  |              |                |              |  |  |
| LY6E          | ENSG00000160932.10                    | 0.26630056                  | 3                                     | 3            | 0.228728136  | Brain_Amygdala |              |  |  |
|               | 0.385318017                           | Brain_Putamen_basal_ganglia | 1.239866653                           | 0.769525848  |              |                |              |  |  |
|               | 0.769525848                           | -1.203641594                | 1.006529848                           | 0.22367589   | 1.238028423  | 3              |              |  |  |
|               | 0                                     | 0.992493858                 |                                       |              |              |                |              |  |  |
| CCNE1         | ENSG00000105173.13                    | 0.266464906                 | 1                                     | 1            | 0.266464906  |                |              |  |  |
|               | Brain_Frontal_Cortex_BA9              | 0.266464906                 | Brain_Frontal_Cortex_BA9              | 1            | 1            |                |              |  |  |
|               | 1                                     | 1.111240352                 | 1.111240352                           | 1.111240352  | NA           | 1              | 0            |  |  |
|               | 0.992493858                           |                             |                                       |              |              |                |              |  |  |
| TM2D1         | ENSG00000162604.12                    | 0.266581291                 | 5                                     | 5            | 0.13245527   |                |              |  |  |
|               | Brain_Nucleus_accumbens_basal_ganglia | 0.719381654                 | Brain_Putamen_basal_ganglia           |              |              |                |              |  |  |
|               | 1.337544136                           | 0.709390008                 | 0.709390008                           | -1.504489908 | 0.540749438  |                |              |  |  |
|               | -0.446965675                          | 0.95442252                  | 5                                     | 0            | 0.992493858  |                |              |  |  |
| VWA5B2        | ENSG00000145198.14                    | 0.266680508                 | 9                                     | 2            | 0.191070878  |                |              |  |  |
|               | Brain_Amygdala                        | 0.910900828                 | Brain_Substantia_nigra                | 8.041589     |              |                |              |  |  |
|               | 0.002126497                           | 0.392152682                 | -1.307417735                          | 0.111902356  | -0.448182724 |                |              |  |  |
|               | 0.395255513                           | 2                           | 0                                     | 0.992493858  |              |                |              |  |  |
| RP11-80H5.9   | ENSG00000235100.3                     | 0.266727703                 | 6                                     | 5            | 0.119481551  |                |              |  |  |
|               | Brain_Cortex                          | 0.573474361                 | Brain_Caudate_basal_ganglia           | 4.054136001  |              |                |              |  |  |
|               | 0.022731782                           | 0.149813818                 | -1.556953394                          | -0.562942027 | -0.887102661 |                |              |  |  |
|               | 0.456398916                           | 5                           | 0                                     | 0.992493858  |              |                |              |  |  |
| GPX2          | ENSG00000176153.11                    | 0.266871956                 | 1                                     | 1            | 0.266871956  |                |              |  |  |
|               | Brain_Cerebellar_Hemisphere           | 0.266871956                 | Brain_Cerebellar_Hemisphere           | 1            | 1            |                |              |  |  |
|               | 1                                     | -1.110294932                | -1.110294932                          | -1.110294932 | NA           | 1              | 0            |  |  |
|               | 0.992493858                           |                             |                                       |              |              |                |              |  |  |
| RP11-676J15.1 | ENSG00000263958.1                     | 0.266982875                 | 6                                     | 2            | 0.085474743  |                |              |  |  |
|               | Brain_Putamen_basal_ganglia           | 0.579338387                 | Brain_Anterior_cingulate_cortex_BA24  |              |              |                |              |  |  |
|               | 5.268453143                           | 0.039698041                 | 0.281785971                           | -1.71976733  | -0.554351389 |                |              |  |  |
|               | -0.989780427                          | 0.415577948                 | 2                                     | 0            | 0.992493858  |                |              |  |  |
| LGALS1        | ENSG00000100097.11                    | 0.267063654                 | 2                                     | 2            | 0.399161414  |                |              |  |  |
|               | Brain_Caudate_basal_ganglia           | 0.50816818                  | Brain_Anterior_cingulate_cortex_BA24  |              |              |                |              |  |  |
|               | 1.569502388                           | 0.430497612                 | 0.430497612                           | -0.661692706 | 0.843119858  |                |              |  |  |
|               | 0.090713576                           | 1.064063168                 | 2                                     | 0            | 0.992493858  |                |              |  |  |
| CHST12        | ENSG00000136213.9                     | 0.267091324                 | 3                                     | 3            | 0.24644867   |                |              |  |  |
|               | Brain_Frontal_Cortex_BA9              | 0.763172596                 | Brain_Cortex                          | 2.228358952  |              |                |              |  |  |
|               | 0.299271025                           | 0.299271025                 | -0.30131724                           | 1.159018437  | 0.549719052  |                |              |  |  |
|               | 0.759587139                           | 3                           | 0                                     | 0.992493858  |              |                |              |  |  |
| TMEM221       | ENSG00000188051.6                     | 0.267117033                 | 1                                     | 1            | 0.267117033  |                |              |  |  |
|               | Brain_Cerebellar_Hemisphere           | 0.267117033                 | Brain_Cerebellar_Hemisphere           | 1            | 1            |                |              |  |  |

|          |                                      |                                       |                                       |             |              |             |                  |
|----------|--------------------------------------|---------------------------------------|---------------------------------------|-------------|--------------|-------------|------------------|
|          | 1                                    | 1.109726192                           | 1.109726192                           | 1.109726192 | NA           | 1           | 0                |
|          |                                      | 0.992493858                           |                                       |             |              |             |                  |
| BNIP1    | ENSG00000113734.17                   | 0.26713404                            | 12                                    | 4           | 0.123917379  |             | Brain_Cerebellum |
|          | 0.949978339                          | Brain_Caudate_basal_ganglia           | 9.875273551                           |             | 0.000617367  |             |                  |
|          | 0.382949386                          | -1.538536957                          | 0.062733979                           |             | -0.390349594 |             | 0.430872269      |
|          | 4                                    | 0                                     | 0.992493858                           |             |              |             |                  |
| RUNDC3B  | ENSG00000105784.15                   | 0.267178582                           | 3                                     | 3           | 0.191858715  |             |                  |
|          | Brain_Cerebellum                     | 0.967791447                           | Brain_Cerebellar_Hemisphere           | 1.512435597 |              |             |                  |
|          | 0.493922399                          | 0.493922399                           | -1.305100246                          |             | 0.040378405  |             | -0.834039848     |
|          | 0.75802465                           | 3                                     | 0                                     | 0.992493858 |              |             |                  |
| TEAD2    | ENSG00000074219.13                   | 0.267207364                           | 9                                     | 3           | 0.086248576  |             | Brain_Cerebellum |
|          | 0.755420501                          | Brain_Putamen_basal_ganglia           | 7.706869696                           |             | 0.00194651   |             |                  |
|          | 0.346251382                          | 0.311500055                           | 1.715527402                           |             | 0.899039136  |             | 0.406259281      |
|          | 3                                    | 0                                     | 0.992493858                           |             |              |             |                  |
| ZNF558   | ENSG00000167785.8                    | 0.267313188                           | 1                                     | 1           | 0.267313188  |             |                  |
|          | Brain_Cortex                         | 0.267313188                           | Brain_Cortex                          | 1           | 1            | 1           | -1.109271241     |
|          | -1.109271241                         | -1.109271241                          | NA                                    | 1           | 0            | 0.992493858 |                  |
| AK3      | ENSG00000147853.16                   | 0.267421113                           | 4                                     | 4           | 0.031397019  |             | Brain_Cortex     |
|          | 0.674100825                          | Brain_Cerebellum                      | 2.380179853                           |             | 0.166119542  |             | 0.166119542      |
|          | -2.15200426                          | 0.995929947                           | -0.470923274                          |             | 1.44118056   | 4           | 0                |
|          | 0.992493858                          |                                       |                                       |             |              |             |                  |
| CUX1     | ENSG00000257923.9                    | 0.267523094                           | 2                                     | 2           | 0.202550181  |             | Brain_Cerebellum |
|          | 0.622730634                          | Brain_Cerebellar_Hemisphere           | 1.35297778                            |             | 0.64702222   | 0.64702222  |                  |
|          | -1.274319578                         | 0.491984029                           | -0.391167775                          |             | 1.248965258  | 2           | 0                |
|          | 0.992493858                          |                                       |                                       |             |              |             |                  |
| C12orf65 | ENSG00000130921.7                    | 0.267592667                           | 3                                     | 3           | 0.06387413   |             |                  |
|          | Brain_Caudate_basal_ganglia          | 0.643416593                           | Brain_Nucleus_accumbens_basal_ganglia |             |              |             |                  |
|          | 1.634775211                          | 0.465979306                           | 0.465979306                           |             | -1.853057412 |             | -0.46292714      |
|          | -1.298516407                         | 0.736448666                           | 3                                     | 0           | 0.992493858  |             |                  |
| TAF1C    | ENSG00000103168.16                   | 0.26761079                            | 13                                    | 3           | 0.187144168  |             |                  |
|          | Brain_Caudate_basal_ganglia          | 0.965635671                           | Brain_Hypothalamus                    | 10.69018686 |              |             |                  |
|          | 0.00272083                           | 0.577234457                           | -0.807955882                          |             | 1.319074618  |             | -0.135570649     |
|          | 0.509312356                          | 3                                     | 0                                     | 0.992493858 |              |             |                  |
| FBXO9    | ENSG00000112146.16                   | 0.267612377                           | 1                                     | 1           | 0.267612377  |             |                  |
|          | Brain_Cerebellar_Hemisphere          | 0.267612377                           | Brain_Cerebellar_Hemisphere           | 1           | 1            |             |                  |
|          | 1                                    | -1.108577759                          | -1.108577759                          |             | -1.108577759 | NA          | 1                |
|          | 0.992493858                          |                                       |                                       |             |              |             | 0                |
| CEP72    | ENSG00000112877.7                    | 0.267803997                           | 3                                     | 3           | 0.253396589  |             | Brain_Cortex     |
|          | 0.614498152                          | Brain_Nucleus_accumbens_basal_ganglia | 1.920159809                           |             |              |             |                  |
|          | 0.123813624                          | 0.123813624                           | 0.503663086                           |             | 1.142138177  |             | 0.926162062      |
|          | 0.365925374                          | 3                                     | 0                                     | 0.992493858 |              |             |                  |
| GALK1    | ENSG00000108479.11                   | 0.267814029                           | 1                                     | 1           | 0.267814029  |             | Brain_Cerebellum |
|          | 0.267814029                          | Brain_Cerebellum                      | 1                                     | 1           | 1.108110657  |             | 1.108110657      |
|          | 1.108110657                          | NA                                    | 1                                     | 0           | 0.992493858  |             |                  |
| MFAP3    | ENSG00000037749.11                   | 0.267859524                           | 1                                     | 1           | 0.267859524  |             |                  |
|          | Brain_Hypothalamus                   | 0.267859524                           | Brain_Hypothalamus                    | 1           | 1            | 1           |                  |
|          | -1.108005307                         | -1.108005307                          | -1.108005307                          |             | NA           | 1           | 0                |
|          | 0.992493858                          |                                       |                                       |             |              |             |                  |
| KLHDC3   | ENSG00000124702.17                   | 0.267982878                           | 1                                     | 1           | 0.267982878  |             |                  |
|          | Brain_Caudate_basal_ganglia          | 0.267982878                           | Brain_Caudate_basal_ganglia           | 1           | 1            |             |                  |
|          | 1                                    | -1.107719725                          | -1.107719725                          |             | -1.107719725 | NA          | 1                |
|          | 0.992493858                          |                                       |                                       |             |              |             | 0                |
| TMEM80   | ENSG00000177042.14                   | 0.267999738                           | 13                                    | 1           | 0.120753913  |             |                  |
|          | Brain_Anterior_cingulate_cortex_BA24 | 0.453174048                           | Brain_Substantia_nigra                |             |              |             |                  |
|          | 12.3788854                           | 0.001107417                           | 12.3788854                            |             | 0.750133927  |             | 1.551616917      |
|          | 1.081105717                          | 0.194805644                           | 1                                     | 0           | 0.992493858  |             |                  |
| LYSMD2   | ENSG00000140280.13                   | 0.268028944                           | 2                                     | 2           | 0.173273984  |             |                  |
|          | Brain_Anterior_cingulate_cortex_BA24 | 0.386872866                           | Brain_Frontal_Cortex_BA9              |             |              |             |                  |
|          | 1.01263016                           | 0.98736984                            | 0.98736984                            |             | -1.361758907 |             | -0.865302342     |
|          | 0.351047803                          | 2                                     | 0                                     | 0.992493858 |              |             | -1.113530624     |
| OSCP1    | ENSG00000116885.18                   | 0.268029135                           | 10                                    | 3           | 0.067491969  |             | Brain_Amygdala   |
|          | 0.80636937                           | Brain_Hypothalamus                    | 8.26482952                            |             | 2.78E-17     | 0.550900781 |                  |
|          | -0.245112442                         | 1.828383812                           | 0.613134201                           |             | 0.512086617  | 3           | 0                |

|              |                                       |                   |    |   |                                |              |                  |
|--------------|---------------------------------------|-------------------|----|---|--------------------------------|--------------|------------------|
|              | 0.992493858                           |                   |    |   |                                |              |                  |
| DIP2C        | ENSG00000151240.16                    | 0.268060492       | 3  | 2 | 0.112112574                    |              |                  |
|              | Brain_Putamen_basal_ganglia           | 0.56208457        |    |   | Brain_Cerebellar_Hemisphere    | 2.055007622  |                  |
|              | 0.064057499                           | 0.880934879       |    |   | 0.579747998                    | 1.588768913  | 1.011962507      |
|              | 0.519818155                           | 2                 | 0  |   | 0.992493858                    |              |                  |
| RP11-5407.18 | ENSG00000273443.1                     | 0.268094817       | 3  | 3 | 0.079758389                    |              |                  |
|              | Brain_Cortex                          | 0.558593576       |    |   | Brain_Frontal_Cortex_BA9       | 1.083802805  |                  |
|              | 0.920538497                           | 0.920538497       |    |   | -0.585582474                   | 1.752089676  | 0.193858468      |
|              | 1.34946785                            | 3                 | 0  |   | 0.992493858                    |              |                  |
| ADGRA1       | ENSG00000197177.15                    | 0.268151429       | 4  | 4 | 0.045529518                    |              |                  |
|              | Brain_Cerebellum                      | 0.599804008       |    |   | Brain_Spinal_cord_cervical_c-1 | 1.555431609  |                  |
|              | 0.60057363                            | 0.60057363        |    |   | -0.636820386                   | 1.999729153  | 0.621384327      |
|              | 1.079014083                           | 4                 | 0  |   | 0.992493858                    |              |                  |
| CHURC1       | ENSG00000258289.8                     | 0.268246515       | 11 | 1 | 0.207139143                    |              |                  |
|              | Brain_Cortex                          | 0.387592377       |    |   | Brain_Hippocampus              | 10.58281843  |                  |
|              | 0.002013018                           | 10.58281843       |    |   | -1.261471164                   | -0.863991833 | -1.087144199     |
|              | 0.106772025                           | 1                 | 0  |   | 0.992493858                    |              |                  |
| PLCD3        | ENSG00000161714.11                    | 0.268300357       | 2  | 2 | 0.142360489                    |              | Brain_Cortex     |
|              | 0.427226602                           | Brain_Hippocampus |    |   | 1.070580608                    | 0.929419392  |                  |
|              | 0.929419392                           | 0.793946458       |    |   | 1.467057225                    | 1.130501842  | 0.475961188      |
|              | 2                                     | 0                 |    |   | 0.992493858                    |              |                  |
| DMKN         | ENSG00000161249.20                    | 0.268399091       | 2  | 2 | 0.266875394                    |              |                  |
|              | Brain_Nucleus_accumbens_basal_ganglia | 0.803750084       |    |   | Brain_Caudate_basal_ganglia    |              |                  |
|              | 1.825234077                           | 0.174765923       |    |   | 0.174765923                    | -1.110286951 | -0.248496751     |
|              | -0.679391851                          | 0.609377695       |    |   | 2                              | 0            | 0.992493858      |
| BCAM         | ENSG00000187244.10                    | 0.268459702       | 2  | 2 | 0.18179046                     |              |                  |
|              | Brain_Cerebellar_Hemisphere           | 0.441667865       |    |   | Brain_Frontal_Cortex_BA9       | 1.10901249   |                  |
|              | 0.89098751                            | 0.89098751        |    |   | -0.76937982                    | 1.335262461  | 0.282941321      |
|              | 1.488206829                           | 2                 | 0  |   | 0.992493858                    |              |                  |
| IFIT1        | ENSG00000185745.9                     | 0.268669691       | 7  | 2 | 0.39720397                     |              |                  |
|              | Brain_Spinal_cord_cervical_c-1        | 0.947111234       |    |   | Brain_Hypothalamus             |              |                  |
|              | 6.325630349                           | 0.00275048        |    |   | 0.466246704                    | -0.709143384 | 0.846625368      |
|              | -0.16930393                           | 0.500069931       |    |   | 2                              | 0            | 0.992493858      |
| PLEKHA6      | ENSG00000143850.13                    | 0.268956761       | 5  | 4 | 0.058180903                    |              |                  |
|              | Brain_Cerebellum                      | 0.704137612       |    |   | Brain_Spinal_cord_cervical_c-1 | 3.135157489  |                  |
|              | 0.034852684                           | 0.149325921       |    |   | 0.379741095                    | 1.894332401  | 1.374064337      |
|              | 0.590332872                           | 4                 | 0  |   | 0.992493858                    |              |                  |
| AZIN2        | ENSG00000142920.16                    | 0.268985243       | 1  | 1 | 0.268985243                    |              | Brain_Cerebellum |
|              | 0.268985243                           | Brain_Cerebellum  |    |   | 1                              | 1            | -1.10540245      |
|              | -1.10540245                           | NA                |    |   | 1                              | 0            | 0.992493858      |
| CCDC71       | ENSG00000177352.9                     | 0.269002512       | 9  | 3 | 0.034769357                    |              |                  |
|              | Brain_Cerebellar_Hemisphere           | 0.115072087       |    |   | Brain_Frontal_Cortex_BA9       |              |                  |
|              | 7.588426405                           | 0.012511757       |    |   | 0.366277277                    | 1.5757992    | 2.111034384      |
|              | 1.800041699                           | 0.189154403       |    |   | 3                              | 0            | 0.992493858      |
| EIF4E        | ENSG00000151247.12                    | 0.269087093       | 4  | 3 | 0.195357743                    |              |                  |
|              | Brain_Frontal_Cortex_BA9              | 0.804482681       |    |   | Brain_Cerebellar_Hemisphere    |              |                  |
|              | 2.788895977                           | 0.021866399       |    |   | 0.272183558                    | -0.374839507 | 1.294891264      |
|              | 0.489557477                           | 0.717624771       |    |   | 3                              | 0            | 0.992493858      |
| VIP          | ENSG00000146469.12                    | 0.269131299       | 2  | 2 | 0.105815368                    |              |                  |
|              | Brain_Cerebellar_Hemisphere           | 0.223657419       |    |   | Brain_Cerebellum               | 1.710012203  |                  |
|              | 0.289987797                           | 0.289987797       |    |   | -1.617291526                   | -1.216860178 | -1.417075852     |
|              | 0.283147722                           | 2                 | 0  |   | 0.992493858                    |              |                  |
| DOK7         | ENSG00000175920.16                    | 0.269216104       | 6  | 6 | 0.126856166                    |              |                  |
|              | Brain_Hippocampus                     | 0.832840766       |    |   | Brain_Cerebellar_Hemisphere    | 1.837916403  |                  |
|              | 0.286201093                           | 0.286201093       |    |   | -1.417769309                   | 1.526617446  | 0.195348428      |
|              | 1.141581882                           | 6                 | 0  |   | 0.992493858                    |              |                  |
| MINDY2       | ENSG00000128923.10                    | 0.269309756       | 1  | 1 | 0.269309756                    |              |                  |
|              | Brain_Cortex                          | 0.269309756       |    |   | Brain_Cortex                   | 1            | 1                |
|              | 1.104653509                           | 1.104653509       |    |   | NA                             | 1            | 0                |
|              |                                       |                   |    |   | 0.992493858                    |              |                  |
| TAF1D        | ENSG00000166012.16                    | 0.269417576       | 1  | 1 | 0.269417576                    |              | Brain_Cerebellum |
|              | 0.269417576                           | Brain_Cerebellum  |    |   | 1                              | 1            | 1.104404808      |
|              | 1.104404808                           | NA                |    |   | 1                              | 0            | 0.992493858      |

|               |                                      |                          |                             |              |             |                   |              |    |
|---------------|--------------------------------------|--------------------------|-----------------------------|--------------|-------------|-------------------|--------------|----|
| WBSCR17       | ENSG00000185274.11                   | 0.269672114              | 1                           | 1            | 0.269672114 |                   |              |    |
|               | Brain_Cerebellum                     | 0.269672114              | Brain_Cerebellum            | 1            | 1           | -1.103817956      |              |    |
|               | -1.103817956                         | -1.103817956             | NA                          | 1            | 0           | 0.992493858       |              |    |
| CTD-2620I22.3 | ENSG00000267943.1                    | 0.26976923               | 1                           | 1            | 0.26976923  | Brain_Cerebellum  |              |    |
|               | 0.26976923                           | Brain_Cerebellum         | 1                           | 1            | 1.10359415  | 1.10359415        | 1.10359415   | NA |
|               | 1                                    | 0                        | 0.992493858                 |              |             |                   |              |    |
| RRBP1         | ENSG00000125844.15                   | 0.269784407              | 3                           | 3            | 0.113070807 |                   |              |    |
|               | Brain_Putamen_basal_ganglia          | 0.548134052              | Brain_Cerebellar_Hemisphere |              |             |                   |              |    |
|               | 1.402585461                          | 0.600772697              | 0.600772697                 | -1.584540349 | 1.261133218 |                   |              |    |
|               | -0.30798856                          | 1.445220541              | 3                           | 0            | 0.992493858 |                   |              |    |
| CLCN6         | ENSG00000011021.21                   | 0.269892025              | 4                           | 3            | 0.207401275 | Brain_Cerebellum  |              |    |
|               | 0.88328444                           | Brain_Hippocampus        | 2.538809058                 | 0.080593688  | 0.217257177 |                   |              |    |
|               | -1.260743502                         | -0.146806897             | -0.896143623                | 0.515996577  | 3           | 0                 |              |    |
|               | 0.992493858                          |                          |                             |              |             |                   |              |    |
| ITIH4         | ENSG00000055955.15                   | 0.269929643              | 13                          | 2            | 0.04519631  | Brain_Hippocampus |              |    |
|               | 0.660748193                          | Brain_Frontal_Cortex_BA9 | 11.92728446                 | 0.000843018  |             |                   |              |    |
|               | 0.481559416                          | -2.002822819             | -0.438880409                | -1.412714112 | 0.353201647 |                   |              |    |
|               | 2                                    | 0                        | 0.992493858                 |              |             |                   |              |    |
| CDS2          | ENSG00000101290.13                   | 0.270069544              | 13                          | 10           | 0.157477878 | Brain_Amygdala    |              |    |
|               | 0.873330468                          | Brain_Cerebellum         | 4.748278117                 | 0.00350426   | 0.219618449 |                   |              |    |
|               | -1.413605117                         | 1.154375655              | -0.173074777                | 0.942167751  | 10          | 0                 |              |    |
|               | 0.992493858                          |                          |                             |              |             |                   |              |    |
| CLOCK         | ENSG00000134852.14                   | 0.270131945              | 1                           | 1            | 0.270131945 |                   |              |    |
|               | Brain_Hypothalamus                   | 0.270131945              | Brain_Hypothalamus          | 1            | 1           | 1                 |              |    |
|               | -1.102758753                         | -1.102758753             | -1.102758753                | NA           | 1           | 0                 | 0.992493858  |    |
| IGF1          | ENSG00000017427.15                   | 0.270136311              | 1                           | 1            | 0.270136311 |                   |              |    |
|               | Brain_Cerebellar_Hemisphere          | 0.270136311              | Brain_Cerebellar_Hemisphere | 1            | 1           |                   |              |    |
|               | 1                                    | 1.102748702              | 1.102748702                 | 1.102748702  | NA          | 1                 | 0            |    |
|               | 0.992493858                          |                          |                             |              |             |                   |              |    |
| RP5-1021I20.2 | ENSG00000258586.1                    | 0.270145997              | 10                          | 3            | 0.195731018 |                   |              |    |
|               | Brain_Spinal_cord_cervical_c-1       | 0.938207207              |                             |              |             |                   |              |    |
|               | Brain_Anterior_cingulate_cortex_BA24 | 9.199210923              | 0.002260483                 | 0.30686335   |             |                   |              |    |
|               | 0.077523361                          | 1.293810114              | 0.846050466                 | 0.467272053  | 3           | 0                 |              |    |
|               | 0.992493858                          |                          |                             |              |             |                   |              |    |
| KARS          | ENSG00000065427.14                   | 0.270237605              | 1                           | 1            | 0.270237605 |                   |              |    |
|               | Brain_Cerebellar_Hemisphere          | 0.270237605              | Brain_Cerebellar_Hemisphere | 1            | 1           |                   |              |    |
|               | 1                                    | -1.102515542             | -1.102515542                | -1.102515542 | NA          | 1                 | 0            |    |
|               | 0.992493858                          |                          |                             |              |             |                   |              |    |
| RP5-1065P14.2 | ENSG00000236975.1                    | 0.270289023              | 2                           | 2            | 0.154749945 |                   |              |    |
|               | Brain_Hippocampus                    | 0.39952343               | Brain_Putamen_basal_ganglia | 1.052200944  |             |                   |              |    |
|               | 0.947799056                          | 0.947799056              | -0.842472672                | 1.422952432  | 0.29023988  |                   |              |    |
|               | 1.601897454                          | 2                        | 0                           | 0.992493858  |             |                   |              |    |
| HSPA4         | ENSG00000170606.14                   | 0.270414251              | 6                           | 1            | 0.238391711 |                   |              |    |
|               | Brain_Cerebellar_Hemisphere          | 0.365729799              | Brain_Putamen_basal_ganglia |              |             |                   |              |    |
|               | 5.861733516                          | 0.000806856              | 5.861733516                 | -1.179016236 | -0.90450101 |                   |              |    |
|               | -1.088451816                         | 0.096176706              | 1                           | 0            | 0.992493858 |                   |              |    |
| SMAD6         | ENSG00000137834.14                   | 0.270453715              | 1                           | 1            | 0.270453715 | Brain_Cortex      |              |    |
|               | 0.270453715                          | Brain_Cortex             | 1                           | 1            | 1           | 1.102018302       | 1.102018302  |    |
|               | 1.102018302                          | NA                       | 1                           | 0            | 0.992493858 |                   |              |    |
| KDM5A         | ENSG00000073614.12                   | 0.270523727              | 1                           | 1            | 0.270523727 |                   |              |    |
|               | Brain_Frontal_Cortex_BA9             | 0.270523727              | Brain_Frontal_Cortex_BA9    | 1            | 1           |                   |              |    |
|               | 1                                    | -1.101857271             | -1.101857271                | -1.101857271 | NA          | 1                 | 0            |    |
|               | 0.992493858                          |                          |                             |              |             |                   |              |    |
| DOPEY1        | ENSG00000083097.14                   | 0.270583456              | 1                           | 1            | 0.270583456 |                   |              |    |
|               | Brain_Anterior_cingulate_cortex_BA24 | 0.270583456              |                             |              |             |                   |              |    |
|               | Brain_Anterior_cingulate_cortex_BA24 | 1                        | 1                           | 1            | 1.101719916 |                   |              |    |
|               | 1.101719916                          | 1.101719916              | NA                          | 1            | 0           | 0.992493858       |              |    |
| BLOC1S4       | ENSG00000186222.4                    | 0.270761028              | 1                           | 1            | 0.270761028 |                   |              |    |
|               | Brain_Cortex                         | 0.270761028              | Brain_Cortex                | 1            | 1           | 1                 | -1.101311684 |    |
|               | -1.101311684                         | -1.101311684             | NA                          | 1            | 0           | 0.992493858       |              |    |
| KCNC4         | ENSG00000116396.14                   | 0.270778895              | 3                           | 3            | 0.101326471 |                   |              |    |
|               | Brain_Cerebellar_Hemisphere          | 0.859519596              | Brain_Cortex                | 1.464369934  |             |                   |              |    |

|                |                                       |                             |                             |             |                                      |                  |
|----------------|---------------------------------------|-----------------------------|-----------------------------|-------------|--------------------------------------|------------------|
|                | 0.535521955                           | 0.535521955                 | -1.638456646                | 0.907392494 | -0.302683295                         |                  |
|                | 1.27757069                            | 3                           | 0                           | 0.992493858 |                                      |                  |
| RBM11          | ENSG00000185272.13                    | 0.270942008                 | 2                           | 2           | 0.313004359                          | Brain_Cerebellum |
|                | 0.43546779                            | Brain_Putamen_basal_ganglia | 1.382922141                 |             | 0.617077859                          |                  |
|                | 0.617077859                           | -0.779869334                | 1.008938023                 |             | 0.114534344                          | 1.264877812      |
|                | 2                                     | 0                           | 0.992493858                 |             |                                      |                  |
| MYT1L          | ENSG00000186487.17                    | 0.271107769                 | 1                           | 1           | 0.271107769                          | Brain_Cerebellum |
|                | 0.271107769                           | Brain_Cerebellum            | 1                           | 1           | 1.100515065                          | 1.100515065      |
|                | 1.100515065                           | NA                          | 1                           | 0           | 0.992493858                          |                  |
| RP11-798G7.6   | ENSG00000267198.1                     | 0.2712393                   | 4                           | 4           | 0.133757513                          |                  |
|                | Brain_Cerebellar_Hemisphere           | 0.542139636                 |                             |             | Brain_Cerebellum                     | 1.296378129      |
|                | 0.726671517                           | -0.726671517                | -0.818257987                |             | 1.499447753                          | 0.391478214      |
|                | 1.279244719                           | 4                           | 0                           | 0.992493858 |                                      |                  |
| ARHGFE25       | ENSG00000240771.6                     | 0.271295609                 | 2                           | 2           | 0.148528166                          |                  |
|                | Brain_Amygdala                        | 0.484936205                 |                             |             | Brain_Caudate_basal_ganglia          | 1.016519564      |
|                | 0.983480436                           | 0.983480436                 | 0.698385399                 |             | 1.444749836                          | 1.071567618      |
|                | 0.527759355                           | 2                           | 0                           | 0.992493858 |                                      |                  |
| NDUFAF3        | ENSG00000178057.14                    | 0.271416918                 | 2                           | 2           | 0.106751825                          |                  |
|                | Brain_Nucleus_accumbens_basal_ganglia | 0.584782501                 |                             |             | Brain_Amygdala                       | 1.38502776       |
|                | 0.61497224                            | 0.61497224                  | -1.61296632                 |             | -0.546412381                         | -1.07968935      |
|                | 0.754167523                           | 2                           | 0                           | 0.992493858 |                                      |                  |
| KLHDC4         | ENSG00000104731.13                    | 0.271561234                 | 10                          | 10          | 0.043691662                          |                  |
|                | Brain_Putamen_basal_ganglia           | 0.907944736                 |                             |             | Brain_Frontal_Cortex_BA9             |                  |
|                | 2.041876382                           | -0.317974434                | 0.317974434                 |             | -2.017036904                         | 1.842358688      |
|                | -0.275818705                          | 1.048048785                 | 10                          | 0           | 0.992493858                          |                  |
| KHNYN          | ENSG00000100441.9                     | 0.271568226                 | 8                           | 8           | 0.10522812                           | Brain_Cortex     |
|                | 0.734776455                           | Brain_Hippocampus           | 2.776393006                 |             | 0.140883035                          |                  |
|                | 0.140883035                           | -1.620019351                | 1.539861767                 |             | -0.217284494                         | 0.9930888        |
|                | 0                                     | 0.992493858                 |                             |             |                                      | 8                |
| AP001056.1     | ENSG00000237604.1                     | 0.27157628                  | 3                           | 3           | 0.133476276                          |                  |
|                | Brain_Substantia_nigra                | 0.535082516                 |                             |             | Brain_Spinal_cord_cervical_c-1       |                  |
|                | 1.293022125                           | 0.674058842                 | 0.674058842                 |             | -0.620266242                         | 1.500533447      |
|                | 0.733707963                           | 1.176012561                 | 3                           | 0           | 0.992493858                          |                  |
| ZHX1           | ENSG00000165156.14                    | 0.271602231                 | 1                           | 1           | 0.271602231                          | Brain_Cortex     |
|                | 0.271602231                           | Brain_Cortex                | 1                           | 1           | 1                                    | -1.099380273     |
|                | -1.099380273                          | NA                          | 1                           | 0           | 0.992493858                          |                  |
| CD53           | ENSG00000143119.12                    | 0.271689622                 | 3                           | 3           | 0.425065479                          | Brain_Cortex     |
|                | 0.997873137                           | Brain_Frontal_Cortex_BA9    | 1.921040279                 |             | 0.095261657                          |                  |
|                | 0.095261657                           | -0.562276091                | 0.797664036                 |             | 0.079351192                          | 0.683205528      |
|                | 3                                     | 0                           | 0.992493858                 |             |                                      |                  |
| RP11-1029J19.4 | ENSG00000258919.1                     | 0.271766932                 | 1                           | 1           | 0.271766932                          |                  |
|                | Brain_Amygdala                        | 0.271766932                 | Brain_Amygdala              | 1           | 1                                    | 1                |
|                | 1.099002599                           | 1.099002599                 | NA                          | 1           | 0                                    | 0.992493858      |
| SAMD4A         | ENSG0000020577.13                     | 0.27181675                  | 1                           | 1           | 0.27181675                           |                  |
|                | Brain_Cerebellar_Hemisphere           | 0.27181675                  | Brain_Cerebellar_Hemisphere | 1           | 1                                    | 1                |
|                | 1.098888393                           | 1.098888393                 | 1.098888393                 |             | NA                                   | 1                |
|                |                                       |                             |                             | 0           | 0.992493858                          |                  |
| LINC00421      | ENSG00000236834.1                     | 0.271829852                 | 4                           | 4           | 0.271189255                          |                  |
|                | Brain_Hippocampus                     | 0.809827012                 |                             |             | Brain_Anterior_cingulate_cortex_BA24 |                  |
|                | 2.937868719                           | 0.152764747                 | 0.152764747                 |             | -0.240649203                         | 1.100327957      |
|                | 0.475294692                           | 0.577630116                 | 4                           | 0           | 0.992493858                          |                  |
| TMEM167B       | ENSG00000215717.5                     | 0.272151149                 | 2                           | 2           | 0.119652699                          |                  |
|                | Brain_Cerebellum                      | 0.681168557                 | Brain_Cortex                | 1.00930206  | 0.99069794                           | 0.99069794       |
|                | -0.410869051                          | 1.556232992                 | 0.572681971                 |             | 1.390951194                          | 2                |
|                | 0.992493858                           |                             |                             |             | 0                                    |                  |
| MXD3           | ENSG00000213347.10                    | 0.272362181                 | 13                          | 7           | 0.094582525                          |                  |
|                | Brain_Frontal_Cortex_BA9              | 0.901160041                 |                             |             | Brain_Putamen_basal_ganglia          |                  |
|                | 7.801498004                           | 0.029702963                 | 0.302075736                 |             | -1.671704913                         | 0.907315591      |
|                | -0.224715738                          | 0.7759832                   | 7                           | 0           | 0.992493858                          |                  |
| CXCL3          | ENSG00000163734.4                     | 0.272404388                 | 1                           | 1           | 0.272404388                          |                  |
|                | Brain_Substantia_nigra                | 0.272404388                 |                             |             | Brain_Substantia_nigra               | 1                |
|                | 1                                     | -1.097542329                | -1.097542329                |             | -1.097542329                         | NA               |
|                | 0.992493858                           |                             |                             |             | 1                                    | 0                |

|          |                                       |                  |              |             |                                       |             |                |             |  |
|----------|---------------------------------------|------------------|--------------|-------------|---------------------------------------|-------------|----------------|-------------|--|
| ACADL    | ENSG00000115361.7                     | 0.272558078      | 2            | 2           | 0.150843075                           |             |                |             |  |
|          | Brain_Cerebellar_Hemisphere           | 0.258647749      |              |             | Brain_Frontal_Cortex_BA9              |             |                |             |  |
|          | 1.300132643                           | 0.699867357      | 0.699867357  |             | -1.436559935                          |             | 1.129593031    |             |  |
|          | -0.153483452                          | 1.814544164      | 2            | 0           | 0.992493858                           |             |                |             |  |
| CCNI2    | ENSG00000205089.7                     | 0.272584173      | 1            | 1           | 0.272584173                           |             | Brain_Amygdala |             |  |
|          | 0.272584173                           | Brain_Amygdala   | 1            | 1           | 1.097130902                           |             | 1.097130902    |             |  |
|          | 1.097130902                           | NA               | 1            | 0           | 0.992493858                           |             |                |             |  |
| DMGDH    | ENSG00000132837.14                    | 0.272612018      | 4            | 4           | 0.195118112                           |             |                |             |  |
|          | Brain_Caudate_basal_ganglia           | 0.744380193      |              |             | Brain_Putamen_basal_ganglia           |             |                |             |  |
|          | 2.792080128                           | 0.112788274      | 0.112788274  |             | 0.326058371                           |             | 1.295586125    |             |  |
|          | 0.754469185                           | 0.407523224      | 4            | 0           | 0.992493858                           |             |                |             |  |
| ANKHD1   | ENSG00000131503.20                    | 0.272752198      | 1            | 1           | 0.272752198                           |             |                |             |  |
|          | Brain_Frontal_Cortex_BA9              | 0.272752198      |              |             | Brain_Frontal_Cortex_BA9              | 1           | 1              |             |  |
|          | 1                                     | 1.096746558      | 1.096746558  | 1.096746558 | NA                                    | 1           | 0              |             |  |
|          | 0.992493858                           |                  |              |             |                                       |             |                |             |  |
| SRXN1    | ENSG00000271303.1                     | 0.272789827      | 2            | 2           | 0.130142002                           |             |                |             |  |
|          | Brain_Caudate_basal_ganglia           | 0.507218931      |              |             | Brain_Nucleus_accumbens_basal_ganglia |             |                |             |  |
|          | 1.072878202                           | 0.927121798      | 0.927121798  |             | -1.513542153                          |             | -0.663174298   |             |  |
|          | -1.088358225                          | 0.601300877      | 2            | 0           | 0.992493858                           |             |                |             |  |
| PIF1     | ENSG00000140451.12                    | 0.272836052      | 11           | 1           | 0.155116777                           |             |                |             |  |
|          | Brain_Cerebellar_Hemisphere           | 0.447611932      |              |             | Brain_Cortex                          | 10.53547138 |                |             |  |
|          | 0.000823964                           | 10.53547138      | -1.421688234 |             | -0.75940231                           |             | -1.072646359   |             |  |
|          | 0.184312106                           | 1                | 0            | 0.992493858 |                                       |             |                |             |  |
| RNU12    | ENSG00000270022.3                     | 0.272890564      | 2            | 2           | 0.126579976                           |             |                |             |  |
|          | Brain_Cerebellar_Hemisphere           | 0.687615367      |              |             | Brain_Cerebellum                      | 1.071883434 |                |             |  |
|          | 0.928116566                           | 0.928116566      | -1.527728438 |             | -0.402093295                          |             | -0.964910867   |             |  |
|          | 0.795944243                           | 2                | 0            | 0.992493858 |                                       |             |                |             |  |
| IP6K2    | ENSG00000068745.14                    | 0.272966632      | 11           | 8           | 0.029962706                           |             | Brain_Amygdala |             |  |
|          | 0.8660229                             | Brain_Cerebellum | 6.026243918  |             | 0.037221316                           |             | 0.262798414    |             |  |
|          | -2.170583034                          | 1.167488669      | -0.573833492 |             | 1.103889324                           |             | 8              | 0           |  |
|          | 0.992493858                           |                  |              |             |                                       |             |                |             |  |
| SPATA25  | ENSG00000149634.4                     | 0.272976323      | 1            | 1           | 0.272976323                           |             |                |             |  |
|          | Brain_Hippocampus                     | 0.272976323      |              |             | Brain_Hippocampus                     | 1           | 1              | 1           |  |
|          | 1.096234139                           | 1.096234139      | 1.096234139  |             | NA                                    | 1           | 0              | 0.992493858 |  |
| FCN2     | ENSG00000160339.15                    | 0.273005045      | 1            | 1           | 0.273005045                           |             |                |             |  |
|          | Brain_Anterior_cingulate_cortex_BA24  | 0.273005045      |              |             |                                       |             |                |             |  |
|          | Brain_Anterior_cingulate_cortex_BA24  | 1                | 1            | 1           | 1.096168494                           |             |                |             |  |
|          | 1.096168494                           | 1.096168494      | NA           | 1           | 0                                     | 0.992493858 |                |             |  |
| HLA-DRA  | ENSG00000204287.13                    | 0.273096166      | 4            | 3           | 0.114430838                           |             |                |             |  |
|          | Brain_Caudate_basal_ganglia           | 0.966230327      |              |             | Brain_Frontal_Cortex_BA9              |             |                |             |  |
|          | 3.007110417                           | 0.063427206      | 0.314268285  |             | -1.578586916                          |             | 0.042336652    |             |  |
|          | -0.660553695                          | 0.682635279      | 3            | 0           | 0.992493858                           |             |                |             |  |
| KIAA0319 | ENSG00000137261.13                    | 0.273131408      | 3            | 3           | 0.058575713                           |             |                |             |  |
|          | Brain_Cortex                          | 0.616409477      |              |             | Brain_Nucleus_accumbens_basal_ganglia |             |                |             |  |
|          | 1.496276102                           | 0.518608887      | 0.518608887  |             | 0.500945503                           |             | 1.891364431    |             |  |
|          | 1.018278141                           | 0.760418763      | 3            | 0           | 0.992493858                           |             |                |             |  |
| MLXIPL   | ENSG00000009950.15                    | 0.273206118      | 4            | 4           | 0.111587366                           |             |                |             |  |
|          | Brain_Nucleus_accumbens_basal_ganglia | 0.8259291        |              |             | Brain_Cerebellum                      | 1.267119692 |                |             |  |
|          | 0.791798175                           | 0.791798175      | -1.586282227 |             | 1.591098697                           |             | -0.159679775   |             |  |
|          | 1.313228657                           | 4                | 0            | 0.992493858 |                                       |             |                |             |  |
| DOCK2    | ENSG00000134516.15                    | 0.273264331      | 2            | 2           | 0.113100338                           |             |                |             |  |
|          | Brain_Spinal_cord_cervical_c-1        | 0.822805115      |              |             | Brain_Hypothalamus                    |             |                |             |  |
|          | 1.041725235                           | 0.958274765      | 0.958274765  |             | -1.584410484                          |             | -0.223938555   |             |  |
|          | -0.904174519                          | 0.961998927      | 2            | 0           | 0.992493858                           |             |                |             |  |
| KIAA1109 | ENSG00000138688.15                    | 0.273327066      | 5            | 4           | 0.063578513                           |             |                |             |  |
|          | Brain_Nucleus_accumbens_basal_ganglia | 0.424287933      |              |             | Brain_Caudate_basal_ganglia           |             |                |             |  |
|          | 3.896449065                           | 0.055276469      | 0.185196385  |             | -1.855124059                          |             | -0.799004276   |             |  |
|          | -1.275933514                          | 0.437170369      | 4            | 0           | 0.992493858                           |             |                |             |  |
| CCDC190  | ENSG00000185860.13                    | 0.273380862      | 9            | 4           | 0.053279103                           |             |                |             |  |
|          | Brain_Nucleus_accumbens_basal_ganglia | 0.919441297      |              |             | Brain_Substantia_nigra                |             |                |             |  |
|          | 6.599655664                           | 0.010005537      | 0.302259467  |             | -1.932651833                          |             | -0.101137516   |             |  |
|          | -1.404420718                          | 0.569455675      | 4            | 0           | 0.992493858                           |             |                |             |  |

|              |                                      |                                       |                                       |              |              |                  |
|--------------|--------------------------------------|---------------------------------------|---------------------------------------|--------------|--------------|------------------|
| RABAC1       | ENSG00000105404.10                   | 0.273497736                           | 3                                     | 2            | 0.59081022   | Brain_Cortex     |
|              | 0.792674108                          | Brain_Nucleus_accumbens_basal_ganglia |                                       |              | 2.777775825  |                  |
|              | 0.020932874                          | 0.201291301                           | -0.452787194                          | 0.537662288  | -0.059321547 |                  |
|              | 0.525654148                          | 2                                     | 0                                     | 0.992493858  |              |                  |
| SLC14A1      | ENSG00000141469.16                   | 0.273635814                           | 4                                     | 4            | 0.133384441  |                  |
|              | Brain_Cerebellum                     | 0.573218931                           | Brain_Nucleus_accumbens_basal_ganglia |              |              |                  |
|              | 1.952350282                          | 0.454322238                           | 0.454322238                           | -1.500888355 | 0.92683626   |                  |
|              | -0.196436354                         | 1.136560576                           | 4                                     | 0            | 0.992493858  |                  |
| YARS         | ENSG00000134684.10                   | 0.273649469                           | 1                                     | 1            | 0.273649469  | Brain_Cortex     |
|              | 0.273649469                          | Brain_Cortex                          | 1                                     | 1            | 1.094696851  | 1.094696851      |
|              | 1.094696851                          | NA                                    | 1                                     | 0            | 0.992493858  |                  |
| AAMDC        | ENSG00000087884.14                   | 0.273687903                           | 4                                     | 4            | 0.03203148   | Brain_Amygdala   |
|              | 0.800578423                          | Brain_Hypothalamus                    | 1.8306117                             | 0.405384365  | 0.405384365  |                  |
|              | -2.144017558                         | -0.252598586                          | -1.298650413                          | 0.826478891  | 4            | 0                |
|              | 0.992493858                          |                                       |                                       |              |              |                  |
| UHRF2        | ENSG00000147854.16                   | 0.2737733                             | 1                                     | 1            | 0.2737733    | Brain_Cerebellum |
|              | Brain_Cerebellum                     | 1                                     | 1                                     | 1.094414333  | 1.094414333  | 1.094414333      |
|              | NA                                   | 1                                     | 0                                     | 0.992493858  |              |                  |
| AP1M2        | ENSG00000129354.11                   | 0.273808158                           | 2                                     | 2            | 0.154299178  |                  |
|              | Brain_Frontal_Cortex_BA9             | 0.915439968                           | Brain_Cortex                          | 1.406126322  |              |                  |
|              | 0.593873678                          | 0.593873678                           | -1.424509012                          | 0.106179459  | -0.659164776 |                  |
|              | 1.082360198                          | 2                                     | 0                                     | 0.992493858  |              |                  |
| ZFAT         | ENSG00000066827.15                   | 0.273850941                           | 2                                     | 2            | 0.107517079  | Brain_Cortex     |
|              | 0.33524783                           | Brain_Frontal_Cortex_BA9              | 1.598557415                           | 0.401442585  |              |                  |
|              | 0.401442585                          | -1.609454121                          | -0.963597362                          | -1.286525741 | 0.456689693  |                  |
|              | 2                                    | 0                                     | 0.992493858                           |              |              |                  |
| RASGRP3      | ENSG00000152689.17                   | 0.273880653                           | 7                                     | 6            | 0.25298885   | Brain_Cortex     |
|              | 0.743823268                          | Brain_Spinal_cord_cervical_c-1        |                                       | 4.426303465  | 0.069002335  |                  |
|              | 0.219714061                          | -1.143119811                          | 0.751798204                           | -0.393223525 | 0.748676823  |                  |
|              | 6                                    | 0                                     | 0.992493858                           |              |              |                  |
| TFAP2B       | ENSG00000008196.12                   | 0.274103643                           | 1                                     | 1            | 0.274103643  |                  |
|              | Brain_Cerebellum                     | 0.274103643                           | Brain_Cerebellum                      | 1            | 1            | -1.093661095     |
|              | -1.093661095                         | -1.093661095                          | NA                                    | 1            | 0            | 0.992493858      |
| LINC01197    | ENSG00000248441.6                    | 0.274186056                           | 5                                     | 5            | 0.085695228  |                  |
|              | Brain_Frontal_Cortex_BA9             | 0.417705468                           | Brain_Cortex                          | 1.804319655  |              |                  |
|              | 0.210211533                          | 0.210211533                           | -1.19443411                           | 1.718556116  | -0.134890946 |                  |
|              | 1.322752986                          | 5                                     | 0                                     | 0.992493858  |              |                  |
| C21orf59     | ENSG00000159079.18                   | 0.274249961                           | 2                                     | 2            | 0.117791689  |                  |
|              | Brain_Frontal_Cortex_BA9             | 0.205434779                           | Brain_Caudate_basal_ganglia           |              |              |                  |
|              | 1.621470799                          | 0.378529201                           | 0.378529201                           | -1.564110208 | -1.266218742 |                  |
|              | -1.415164475                         | 0.210641076                           | 2                                     | 0            | 0.992493858  |                  |
| RP11-475B2.1 | ENSG00000261672.1                    | 0.274312194                           | 2                                     | 2            | 0.223282707  |                  |
|              | Brain_Cerebellum                     | 0.479059583                           | Brain_Cerebellar_Hemisphere           | 1.919771976  |              |                  |
|              | 0.080228024                          | 0.080228024                           | -1.217845454                          | -0.707815913 | -0.962830684 |                  |
|              | 0.360645347                          | 2                                     | 0                                     | 0.992493858  |              |                  |
| ZNF17        | ENSG00000186272.12                   | 0.274340987                           | 11                                    | 2            | 0.022142048  |                  |
|              | Brain_Anterior_cingulate_cortex_BA24 | 0.345086864                           | Brain_Cortex                          |              |              |                  |
|              | 9.353176115                          | 0.001418119                           | 0.60345954                            | 0.944162013  | 2.287922264  |                  |
|              | 1.457751149                          | 0.369268923                           | 2                                     | 0            | 0.992493858  |                  |
| CD72         | ENSG00000137101.12                   | 0.27434236                            | 5                                     | 5            | 0.037242624  |                  |
|              | Brain_Frontal_Cortex_BA9             | 0.989139227                           | Brain_Cerebellum                      | 2.559286141  |              |                  |
|              | 0.168870321                          | 0.168870321                           | -0.013612381                          | 2.083094353  | 0.980845741  |                  |
|              | 0.866657786                          | 5                                     | 0                                     | 0.992493858  |              |                  |
| GOLM1        | ENSG00000135052.16                   | 0.274432551                           | 4                                     | 4            | 0.038998834  |                  |
|              | Brain_Hippocampus                    | 0.848024429                           | Brain_Cerebellum                      | 1.812325249  |              |                  |
|              | 0.230231123                          | 0.230231123                           | 0.191639717                           | 2.064199192  | 1.289892961  |                  |
|              | 0.912223856                          | 4                                     | 0                                     | 0.992493858  |              |                  |
| GATS         | ENSG00000239521.7                    | 0.274447263                           | 6                                     | 5            | 0.108044779  | Brain_Amygdala   |
|              | 0.806729923                          | Brain_Cortex                          | 3.3584374                             | 0.091206709  | 0.208918141  |                  |
|              | -0.821487441                         | 1.607043713                           | 0.617067412                           | 0.867996543  | 5            | 0                |
|              | 0.992493858                          |                                       |                                       |              |              |                  |
| C5orf22      | ENSG00000082213.17                   | 0.274655747                           | 1                                     | 1            | 0.274655747  |                  |

|                                       |                                      |                                       |              |              |              |                  |
|---------------------------------------|--------------------------------------|---------------------------------------|--------------|--------------|--------------|------------------|
| Brain_Cerebellar_Hemisphere           | 0.274655747                          | Brain_Cerebellar_Hemisphere           | 1            | 1            |              |                  |
| 1                                     | -1.092403587                         | -1.092403587                          | -1.092403587 | NA           | 1            | 0                |
|                                       | 0.992493858                          |                                       |              |              |              |                  |
| SRGAP1                                | ENSG00000196935.8                    | 0.274704152                           | 2            | 2            | 0.192374814  |                  |
| Brain_Spinal_cord_cervical_c-1        | 0.376678901                          |                                       |              |              |              |                  |
| Brain_Anterior_cingulate_cortex_BA24  | 1.042757296                          |                                       |              |              | 0.957242704  |                  |
| 0.957242704                           | 0.884032071                          | 1.303585889                           | 1.09380898   | 0.29666935   | 2            | 0                |
|                                       | 0.992493858                          |                                       |              |              |              |                  |
| ZRANB3                                | ENSG00000121988.17                   | 0.274825056                           | 3            | 3            | 0.153461673  |                  |
| Brain_Hippocampus                     | 0.39416765                           | Brain_Frontal_Cortex_BA9              | 1.865243753  |              |              |                  |
| 0.134230845                           | 0.134230845                          | -1.427410266                          | 1.013838257  | -0.421885229 |              |                  |
| 1.276215741                           | 3                                    | 0                                     | 0.992493858  |              |              |                  |
| C20orf96                              | ENSG00000196476.11                   | 0.274857542                           | 2            | 2            | 0.34488901   | Brain_Cerebellum |
| 0.531977882                           | Brain_Cerebellar_Hemisphere          | 1.516845675                           | 0.483154325  |              |              |                  |
| 0.483154325                           | -0.944549322                         | 0.624989603                           | -0.159779859 | 1.109831617  |              |                  |
| 2                                     | 0                                    | 0.992493858                           |              |              |              |                  |
| LATS1                                 | ENSG00000131023.12                   | 0.275059396                           | 4            | 3            | 0.070996272  |                  |
| Brain_Spinal_cord_cervical_c-1        | 0.107692945                          | Brain_Cerebellum                      | 3.491386269  |              |              |                  |
| 0.026746529                           | 0.150192633                          | -1.8055013                            | -1.608649768 | -1.730379126 |              |                  |
| 0.086708845                           | 3                                    | 0                                     | 0.992493858  |              |              |                  |
| TLL2                                  | ENSG00000095587.8                    | 0.275089294                           | 3            | 3            | 0.185916015  |                  |
| Brain_Frontal_Cortex_BA9              | 0.690467696                          | Brain_Cerebellar_Hemisphere           |              |              |              |                  |
| 1.119056897                           | 0.874214691                          | 0.874214691                           | 0.398220446  | 1.322757558  |              |                  |
| 1.007512737                           | 0.527769034                          | 3                                     | 0            | 0.992493858  |              |                  |
| PQLC1                                 | ENSG00000122490.18                   | 0.275159225                           | 8            | 8            | 0.093999068  | Brain_Cortex     |
| 0.972868355                           | Brain_Spinal_cord_cervical_c-1       | 3.730809873                           | 0.176965878  |              |              |                  |
| 0.176965878                           | -0.207920839                         | 1.674669635                           | 0.487965919  | 0.696328851  |              |                  |
| 8                                     | 0                                    | 0.992493858                           |              |              |              |                  |
| CEP89                                 | ENSG00000121289.17                   | 0.27519849                            | 12           | 5            | 0.133817416  |                  |
| Brain_Cerebellar_Hemisphere           | 0.961548573                          | Brain_Hypothalamus                    | 8.21279069   |              |              |                  |
| 0.004441615                           | 0.333670498                          | -1.072672853                          | 1.49921673   | 0.319326437  |              |                  |
| 0.782084443                           | 5                                    | 0                                     | 0.992493858  |              |              |                  |
| USP53                                 | ENSG00000145390.11                   | 0.275245878                           | 3            | 3            | 0.054782375  | Brain_Cortex     |
| 0.597140577                           | Brain_Anterior_cingulate_cortex_BA24 | 2.091566292                           |              |              |              |                  |
| 0.279234415                           | 0.279234415                          | -1.920598254                          | -0.528516962 | -1.120301536 |              |                  |
| 0.719083143                           | 3                                    | 0                                     | 0.992493858  |              |              |                  |
| RP11-47I22.2                          | ENSG00000250548.6                    | 0.275252342                           | 2            | 2            | 0.384376973  |                  |
| Brain_Cerebellar_Hemisphere           | 0.958939033                          | Brain_Cerebellum                      | 1.822887401  |              |              |                  |
| 0.177112599                           | 0.177112599                          | -0.869859898                          | 0.051485027  | -0.409187435 |              |                  |
| 0.651489244                           | 2                                    | 0                                     | 0.992493858  |              |              |                  |
| GSAP                                  | ENSG00000186088.15                   | 0.275448424                           | 11           | 7            | 0.06323694   |                  |
| Brain_Putamen_basal_ganglia           | 0.999243274                          | Brain_Nucleus_accumbens_basal_ganglia |              |              |              |                  |
| 7.248147228                           | 0.024524172                          | 0.272176651                           | -1.857521888 | 0.260072722  |              |                  |
| -0.701923736                          | 0.682928637                          | 7                                     | 0            | 0.992493858  |              |                  |
| PCGF3                                 | ENSG00000185619.18                   | 0.275460099                           | 12           | 3            | 0.034482614  |                  |
| Brain_Anterior_cingulate_cortex_BA24  | 0.770192606                          |                                       |              |              |              |                  |
| Brain_Nucleus_accumbens_basal_ganglia | 9.876754029                          | 0.011098661                           |              |              |              |                  |
| 0.647390412                           | 0.292122968                          | 2.114382466                           | 1.276846906  | 0.50243476   | 3            |                  |
| 0                                     | 0.992493858                          |                                       |              |              |              |                  |
| TSPAN33                               | ENSG00000158457.5                    | 0.27550311                            | 2            | 2            | 0.146668929  | Brain_Cerebellum |
| 0.674018465                           | Brain_Cerebellar_Hemisphere          | 1.649601101                           | 0.350398899  |              |              |                  |
| 0.350398899                           | -1.451398494                         | -0.420639336                          | -0.936018915 | 0.72885679   | 2            |                  |
| 0                                     | 0.992493858                          |                                       |              |              |              |                  |
| SURF4                                 | ENSG00000148248.13                   | 0.275544777                           | 1            | 1            | 0.275544777  | Brain_Amygdala   |
| 0.275544777                           | Brain_Amygdala                       | 1                                     | 1            | 1            | -1.090382297 | -1.090382297     |
| -1.090382297                          | NA                                   | 1                                     | 0            | 0.992493858  |              |                  |
| CSMD3                                 | ENSG00000164796.17                   | 0.275587505                           | 4            | 4            | 0.028956338  |                  |
| Brain_Caudate_basal_ganglia           | 0.84103017                           | Brain_Spinal_cord_cervical_c-1        |              |              |              |                  |
| 1.819235431                           | 0.387198342                          | 0.387198342                           | -2.184080439 | -0.200575943 |              |                  |
| -0.974626531                          | 0.847949613                          | 4                                     | 0            | 0.992493858  |              |                  |
| ABHD3                                 | ENSG00000158201.9                    | 0.275589168                           | 1            | 1            | 0.275589168  |                  |
| Brain_Spinal_cord_cervical_c-1        | 0.275589168                          | Brain_Spinal_cord_cervical_c-1        |              |              |              |                  |



|                                       |                    |                             |              |              |              |                  |   |   |
|---------------------------------------|--------------------|-----------------------------|--------------|--------------|--------------|------------------|---|---|
| 1                                     | 1                  | 1                           | -1.090281487 | -1.090281487 | -1.090281487 | NA               | 1 | 0 |
| 0.992493858                           |                    |                             |              |              |              |                  |   |   |
| WDR45B                                | ENSG00000141580.15 | 0.275599492                 | 6            | 5            | 0.035045509  |                  |   |   |
| Brain_Hippocampus                     | 0.421369656        | Brain_Putamen_basal_ganglia | 3.962281535  |              |              |                  |   |   |
| 0.115634124                           | 0.200326617        | -2.107832172                | -0.804047304 | -1.721051064 |              |                  |   |   |
| 0.462221939                           | 5                  | 0                           | 0.992493858  |              |              |                  |   |   |
| SELENON                               | ENSG00000162430.16 | 0.275693564                 | 3            | 3            | 0.066838175  |                  |   |   |
| Brain_Cerebellar_Hemisphere           | 0.684747227        | Brain_Amygdala              | 1.341002378  |              |              |                  |   |   |
| 0.782028642                           | -0.782028642       | 0.405993703                 | 1.83276064   | 0.927235948  |              |                  |   |   |
| 0.787191668                           | 3                  | 0                           | 0.992493858  |              |              |                  |   |   |
| CCKBR                                 | ENSG00000110148.9  | 0.275706289                 | 3            | 3            | 0.107113854  |                  |   |   |
| Brain_Frontal_Cortex_BA9              | 0.595363647        | Brain_Hippocampus           | 1.067259184  |              |              |                  |   |   |
| 0.923544864                           | 0.923544864        | -1.611302282                | -0.531079561 | -1.050425404 |              |                  |   |   |
| 0.541307585                           | 3                  | 0                           | 0.992493858  |              |              |                  |   |   |
| OSBPL3                                | ENSG00000070882.12 | 0.275750599                 | 3            | 3            | 0.057162101  |                  |   |   |
| Brain_Cortex                          | 0.866730804        | Brain_Caudate_basal_ganglia | 1.26659578   |              |              |                  |   |   |
| 0.673556049                           | 0.673556049        | -1.902069255                | -0.16781248  | -0.976913243 |              |                  |   |   |
| 0.872933706                           | 3                  | 0                           | 0.992493858  |              |              |                  |   |   |
| RP11-326C3.15                         | ENSG00000270972.1  | 0.275858876                 | 8            | 8            | 0.024588523  |                  |   |   |
| Brain_Putamen_basal_ganglia           | 0.866811186        | Brain_Amygdala              | 1.733383458  |              |              |                  |   |   |
| 0.297426553                           | 0.297426553        | -1.717509944                | 2.247806637  | -0.329604658 |              |                  |   |   |
| 1.23774101                            | 8                  | 0                           | 0.992493858  |              |              |                  |   |   |
| TULP4                                 | ENSG00000130338.12 | 0.275869505                 | 3            | 2            | 0.103717872  | Brain_Cerebellum |   |   |
| 0.424499934                           | Brain_Hypothalamus | 2.227384993                 | 0.030398001  |              |              |                  |   |   |
| 0.742217006                           | -0.798638712       | 1.627090531                 | 0.789316442  | 1.375906724  |              |                  |   |   |
| 2                                     | 0                  | 0.992493858                 |              |              |              |                  |   |   |
| TMEM141                               | ENSG00000244187.7  | 0.275903096                 | 3            | 3            | 0.079875933  |                  |   |   |
| Brain_Nucleus_accumbens_basal_ganglia | 0.760783782        | Brain_Substantia_nigra      |              |              |              |                  |   |   |
| 1.464439766                           | 0.536582085        | 0.536582085                 | -1.751406392 | 0.304451704  |              |                  |   |   |
| -1.005090303                          | 1.137785438        | 3                           | 0            | 0.992493858  |              |                  |   |   |
| ARHGDIB                               | ENSG00000111348.8  | 0.275912619                 | 3            | 3            | 0.108960799  |                  |   |   |
| Brain_Substantia_nigra                | 0.740729375        | Brain_Cortex                | 1.208015539  |              |              |                  |   |   |
| 0.845653397                           | 0.845653397        | -0.330887618                | 1.602881592  | 0.769947847  |              |                  |   |   |
| 0.994331101                           | 3                  | 0                           | 0.992493858  |              |              |                  |   |   |
| TRIO                                  | ENSG00000038382.18 | 0.27593977                  | 3            | 3            | 0.052357144  |                  |   |   |
| Brain_Frontal_Cortex_BA9              | 0.944149878        | Brain_Substantia_nigra      |              |              |              |                  |   |   |
| 1.103734425                           | 0.940334872        | 0.940334872                 | 0.070055007  | 1.940185551  |              |                  |   |   |
| 0.726177371                           | 1.05250867         | 3                           | 0            | 0.992493858  |              |                  |   |   |
| BRK1                                  | ENSG00000254999.3  | 0.275984579                 | 1            | 1            | 0.275984579  |                  |   |   |
| Brain_Caudate_basal_ganglia           | 0.275984579        | Brain_Caudate_basal_ganglia | 1            | 1            |              |                  |   |   |
| 1                                     | 1.089384012        | 1.089384012                 | 1.089384012  | NA           | 1            | 0                |   |   |
| 0.992493858                           |                    |                             |              |              |              |                  |   |   |
| TMEM214                               | ENSG00000119777.18 | 0.276131457                 | 1            | 1            | 0.276131457  |                  |   |   |
| Brain_Nucleus_accumbens_basal_ganglia | 0.276131457        |                             |              |              |              |                  |   |   |
| Brain_Nucleus_accumbens_basal_ganglia | 1                  | 1                           | 1            | -1.089050862 |              |                  |   |   |
| -1.089050862                          | -1.089050862       | NA                          | 1            | 0            | 0.992493858  |                  |   |   |
| IMPAD1                                | ENSG00000104331.8  | 0.276271592                 | 3            | 3            | 0.058185123  |                  |   |   |
| Brain_Cerebellum                      | 0.975477116        | Brain_Cerebellar_Hemisphere | 1.211989677  |              |              |                  |   |   |
| 0.731671091                           | 0.731671091        | -1.894300587                | 0.568809537  | -0.452076922 |              |                  |   |   |
| 1.284473297                           | 3                  | 0                           | 0.992493858  |              |              |                  |   |   |
| ZDHHC21                               | ENSG00000175893.11 | 0.276272433                 | 5            | 4            | 0.025463143  |                  |   |   |
| Brain_Cerebellum                      | 0.731863562        | Brain_Hypothalamus          | 3.623943383  |              |              |                  |   |   |
| 0.028351882                           | 0.132679926        | -2.234303                   | -0.342647634 | -1.615388743 |              |                  |   |   |
| 0.732950638                           | 4                  | 0                           | 0.992493858  |              |              |                  |   |   |
| RTN4RL2                               | ENSG00000186907.7  | 0.276476596                 | 2            | 2            | 0.121793792  |                  |   |   |
| Brain_Cerebellar_Hemisphere           | 0.365092886        | Brain_Cerebellum            | 1.76162578   | 0.23837422   |              |                  |   |   |
| 0.23837422                            | 0.905703356        | 1.54728809                  | 1.226495723  | 0.453668916  | 2            | 0                |   |   |
| 0.992493858                           |                    |                             |              |              |              |                  |   |   |
| NPPA                                  | ENSG00000175206.10 | 0.276520428                 | 1            | 1            | 0.276520428  | Brain_Amygdala   |   |   |
| 0.276520428                           | Brain_Amygdala     | 1                           | 1            | 1            | -1.08816918  | -1.08816918      |   |   |
| -1.08816918                           | NA                 | 1                           | 0            | 0.992493858  |              |                  |   |   |
| CORO2B                                | ENSG00000103647.12 | 0.276587819                 | 1            | 1            | 0.276587819  |                  |   |   |

|              |                                       |              |              |             |                             |              |             |             |
|--------------|---------------------------------------|--------------|--------------|-------------|-----------------------------|--------------|-------------|-------------|
|              | Brain_Caudate_basal_ganglia           | 0.276587819  |              |             | Brain_Caudate_basal_ganglia | 1            | 1           |             |
| 1            | 1.08801651                            | 1.08801651   | 1.08801651   | NA          | 1                           | 0            | 0.992493858 |             |
| VSIG2        | ENSG00000019102.11                    | 0.276588797  | 3            | 3           | 0.089932301                 |              |             |             |
|              | Brain_Nucleus_accumbens_basal_ganglia | 0.835167591  |              |             | Brain_Frontal_Cortex_BA9    |              |             |             |
| 1.022389272  | 0.967535657                           | 0.967535657  |              |             | -1.695754931                | 0.960145837  |             |             |
| -0.314562567 | 1.331148507                           | 3            | 0            | 0.992493858 |                             |              |             |             |
| NET1         | ENSG00000173848.18                    | 0.276643135  | 2            | 1           | 0.272067422                 |              |             |             |
|              | Brain_Cerebellar_Hemisphere           | 0.296355406  |              |             | Brain_Cerebellum            | 1.939452799  |             |             |
| 0.060547201  | 1.939452799                           | 1.044280988  |              |             | 1.098313952                 | 1.07129747   |             |             |
| 0.038207075  | 1                                     | 0            | 0.992493858  |             |                             |              |             |             |
| CERCAM       | ENSG00000167123.18                    | 0.276650577  | 4            | 3           | 0.159517918                 |              |             |             |
|              | Brain_Cerebellum                      | 0.683595435  |              |             | Brain_Cortex                | 2.410925602  | 0.000220547 |             |
| 0.322572668  | -1.146751068                          | 1.406694767  |              |             | 0.31210326                  | 1.29347128   | 3           | 0           |
| 0.992493858  |                                       |              |              |             |                             |              |             |             |
| C9orf43      | ENSG00000157653.11                    | 0.276733898  | 2            | 2           | 0.23258194                  |              |             |             |
|              | Brain_Spinal_cord_cervical_c-1        | 0.301394001  |              |             | Brain_Hypothalamus          |              |             |             |
| 1.030018323  | 0.969981677                           | 0.969981677  |              |             | -1.033448625                | 1.193734245  |             |             |
| 0.08014281   | 1.57485611                            | 2            | 0            | 0.992493858 |                             |              |             |             |
| STXBP5       | ENSG00000164506.14                    | 0.276892236  | 1            | 1           | 0.276892236                 |              |             |             |
|              | Brain_Cortex                          | 0.276892236  |              |             | Brain_Cortex                | 1            | 1           | -1.08732719 |
| -1.08732719  | -1.08732719                           | NA           | 1            | 0           | 0.992493858                 |              |             |             |
| LINC01224    | ENSG00000269416.5                     | 0.276929014  | 12           | 1           | 0.209819469                 |              |             |             |
|              | Brain_Hippocampus                     | 0.559705489  |              |             | Brain_Substantia_nigra      | 11.44166425  |             |             |
| 0.001885692  | 11.44166425                           | -1.254062004 |              |             | -0.583279012                | -1.058508471 |             |             |
| 0.182527822  | 1                                     | 0            | 0.992493858  |             |                             |              |             |             |
| CLEC4M       | ENSG00000104938.16                    | 0.276933988  | 5            | 5           | 0.022950241                 |              |             |             |
|              | Brain_Cerebellar_Hemisphere           | 0.916967262  |              |             | Brain_Cerebellum            | 1.282984443  |             |             |
| 0.662827682  | 0.662827682                           | -2.274261964 |              |             | 0.402465761                 | -0.738333434 |             |             |
| 1.016198044  | 5                                     | 0            | 0.992493858  |             |                             |              |             |             |
| UPP2         | ENSG00000007001.12                    | 0.276953143  | 3            | 3           | 0.096631278                 |              |             |             |
|              | Brain_Putamen_basal_ganglia           | 0.982193072  |              |             | Brain_Hypothalamus          | 1.416866172  |             |             |
| 0.571419721  | 0.571419721                           | 0.022319527  |              |             | 1.661409267                 | 1.051783173  |             |             |
| 0.896577643  | 3                                     | 0            | 0.992493858  |             |                             |              |             |             |
| HSD17B1      | ENSG00000108786.10                    | 0.27701154   | 8            | 3           | 0.051271282                 |              |             |             |
|              | Brain_Substantia_nigra                | 0.320999821  |              |             | Brain_Amygdala              | 6.704396861  |             |             |
| 0.000626012  | 0.426608663                           | -1.949202203 |              |             | -0.992405368                | -1.240897117 |             |             |
| 0.329968122  | 3                                     | 0            | 0.992493858  |             |                             |              |             |             |
| RUBCN        | ENSG00000145016.15                    | 0.277210474  | 1            | 1           | 0.277210474                 |              |             |             |
|              | Brain_Cerebellum                      | 1            | 1            | 1           | -1.086607128                | -1.086607128 |             |             |
| 0.277210474  | NA                                    | 1            | 0            | 0.992493858 |                             |              |             |             |
| -1.086607128 |                                       |              |              |             |                             |              |             |             |
| RTP1         | ENSG00000175077.5                     | 0.27725899   | 2            | 2           | 0.120690698                 |              |             |             |
|              | Brain_Putamen_basal_ganglia           | 1.144352564  |              |             | Brain_Cortex                | 0.855647436  |             |             |
| 0.866265879  | Brain_Putamen_basal_ganglia           | 1.144352564  |              |             | 0.855647436                 |              |             |             |
| 0.855647436  | -1.551881009                          | 0.16840347   | -0.69173877  |             | 1.21642482                  | 2            | 0           |             |
| 0.992493858  |                                       |              |              |             |                             |              |             |             |
| ZNF473       | ENSG00000142528.15                    | 0.277305295  | 2            | 2           | 0.123098096                 |              |             |             |
|              | Brain_Nucleus_accumbens_basal_ganglia | 0.713059485  |              |             | Brain_Cortex                |              |             |             |
| 1.042313385  | 0.957686615                           | 0.957686615  |              |             | 0.367750227                 | 1.541899177  |             |             |
| 0.954824702  | 0.830248684                           | 2            | 0            | 0.992493858 |                             |              |             |             |
| COPB2        | ENSG00000184432.9                     | 0.277413154  | 3            | 3           | 0.098206655                 |              |             |             |
|              | Brain_Hippocampus                     | 0.513681202  |              |             | Brain_Cerebellum            | 1.04538949   | 0.951306996 |             |
| 0.951306996  | -1.653610614                          | 0.790613367  |              |             | -0.069960263                | 1.373203436  |             |             |
| 3            | 0                                     | 0.992493858  |              |             |                             |              |             |             |
| GPR62        | ENSG00000180929.5                     | 0.27742019   | 2            | 2           | 0.197291113                 |              |             |             |
|              | Brain_Caudate_basal_ganglia           | 0.38786518   |              |             | Brain_Substantia_nigra      | 1.065367063  |             |             |
| 0.934632937  | 0.934632937                           | -0.863495341 |              |             | 1.289307765                 | 0.212906212  |             |             |
| 1.522261675  | 2                                     | 0            | 0.992493858  |             |                             |              |             |             |
| VAV3         | ENSG00000134215.15                    | 0.277505513  | 4            | 4           | 0.024297669                 |              |             |             |
|              | Brain_Nucleus_accumbens_basal_ganglia | 0.878038511  |              |             | Brain_Cortex                |              |             |             |
| 2.058238962  | 0.1836516                             | 0.1836516    | -2.252389491 |             | -0.153456222                |              |             |             |
| -1.137323028 | 1.033424807                           | 4            | 0            | 0.992493858 |                             |              |             |             |
| G2E3         | ENSG00000092140.14                    | 0.277591593  | 1            | 1           | 0.277591593                 |              |             |             |
|              | Brain_Cortex                          | 1            | 1            | 1           | 1.085745525                 | 1.085745525  |             |             |
| 0.277591593  |                                       |              |              |             |                             |              |             |             |

|              |                                       |                    |   |             |                                |   |             |              |              |
|--------------|---------------------------------------|--------------------|---|-------------|--------------------------------|---|-------------|--------------|--------------|
|              | 1.085745525                           | NA                 | 1 | 0           | 0.992493858                    |   |             |              |              |
| RP11-352G9.1 | ENSG00000273009.1                     |                    |   |             | 0.277642203                    | 3 | 3           | 0.080561979  |              |
|              | Brain_Cerebellum                      | 0.227717446        |   |             | Brain_Cerebellar_Hemisphere    |   |             | 2.161829638  |              |
|              | 0.136329833                           | 0.136329833        |   |             | 1.206259506                    |   |             | 1.747434606  | 1.545430644  |
|              | 0.295514379                           | 3                  | 0 | 0.992493858 |                                |   |             |              |              |
| RPL34-AS1    | ENSG00000234492.4                     |                    |   |             | 0.277669731                    | 2 | 2           | 0.172449682  |              |
|              | Brain_Cerebellum                      | 0.425834507        |   |             | Brain_Cerebellar_Hemisphere    |   |             | 1.877730133  |              |
|              | 0.122269867                           | 0.122269867        |   |             | -1.364374649                   |   |             | -0.796339888 | -1.080357268 |
|              | 0.401661232                           | 2                  | 0 | 0.992493858 |                                |   |             |              |              |
| CGB2         | ENSG00000104818.14                    |                    |   |             | 0.277762535                    | 3 | 3           | 0.062910306  |              |
|              | Brain_Nucleus_accumbens_basal_ganglia | 0.731463185        |   |             | Brain_Caudate_basal_ganglia    |   |             |              |              |
|              | 1.142458214                           | 0.826772648        |   |             | 0.826772648                    |   |             | -0.665141742 | 1.859824882  |
|              | 0.512620987                           | 1.270982629        |   |             | 3                              | 0 | 0.992493858 |              |              |
| CTB-3204.4   | ENSG00000276631.1                     |                    |   |             | 0.277800326                    | 1 | 1           | 0.277800326  |              |
|              | Brain_Substantia_nigra                | 0.277800326        |   |             | Brain_Substantia_nigra         |   |             | 1            | 1            |
|              | 1                                     | -1.085273981       |   |             | -1.085273981                   |   |             | NA           | 1            |
|              | 0.992493858                           |                    |   |             |                                |   |             | 0            |              |
| AC138969.4   | ENSG00000183889.12                    |                    |   |             | 0.277804065                    | 1 | 1           | 0.277804065  |              |
|              | Brain_Hippocampus                     | 0.277804065        |   |             | Brain_Hippocampus              |   |             | 1            | 1            |
|              | -1.085265536                          | -1.085265536       |   |             | -1.085265536                   |   |             | NA           | 1            |
|              |                                       |                    |   |             |                                |   |             | 0            | 0.992493858  |
| LINC01990    | ENSG00000273125.1                     |                    |   |             | 0.277892281                    | 4 | 4           | 0.102772349  |              |
|              | Brain_Nucleus_accumbens_basal_ganglia | 0.809022875        |   |             | Brain_Caudate_basal_ganglia    |   |             |              |              |
|              | 1.276689136                           | 0.760105647        |   |             | 0.760105647                    |   |             | -0.241686779 | 1.631559341  |
|              | 0.831735027                           | 0.842956939        |   |             | 4                              | 0 | 0.992493858 |              |              |
| DLEU7        | ENSG00000186047.9                     |                    |   |             | 0.27800486                     | 4 | 4           | 0.127556703  | Brain_Cortex |
|              | 0.850520231                           | Brain_Hypothalamus |   |             | 1.897483795                    |   |             | 0.266309647  |              |
|              | 0.266309647                           | -1.523807911       |   |             | -0.18845469                    |   |             | -0.906823014 | 0.705823336  |
|              | 4                                     | 0                  |   |             | 0.992493858                    |   |             |              |              |
| POLR2L       | ENSG00000177700.5                     |                    |   |             | 0.278086369                    | 2 | 1           | 0.208561749  |              |
|              | Brain_Nucleus_accumbens_basal_ganglia | 0.378726468        |   |             | Brain_Hippocampus              |   |             |              |              |
|              | 1.94237179                            | 0.05762821         |   |             | 1.94237179                     |   |             | 0.880245244  | 1.257530093  |
|              | 0.266780675                           | 1                  | 0 | 0.992493858 |                                |   |             |              | 1.068887669  |
| LINC01703    | ENSG00000225518.2                     |                    |   |             | 0.278214771                    | 1 | 1           | 0.278214771  |              |
|              | Brain_Cerebellar_Hemisphere           | 0.278214771        |   |             | Brain_Cerebellar_Hemisphere    |   |             | 1            | 1            |
|              | 1                                     | -1.084338433       |   |             | -1.084338433                   |   |             | NA           | 1            |
|              | 0.992493858                           |                    |   |             |                                |   |             | 0            |              |
| SERPINI2     | ENSG00000114204.14                    |                    |   |             | 0.278453019                    | 5 | 4           | 0.250730098  |              |
|              | Brain_Cerebellum                      | 0.894074281        |   |             | Brain_Caudate_basal_ganglia    |   |             | 3.085542308  |              |
|              | 0.060231275                           | 0.171230414        |   |             | -0.443208867                   |   |             | 1.148577843  | 0.445450978  |
|              | 0.65109065                            | 4                  | 0 | 0.992493858 |                                |   |             |              |              |
| RHOU         | ENSG00000116574.5                     |                    |   |             | 0.278459401                    | 1 | 1           | 0.278459401  |              |
|              | Brain_Putamen_basal_ganglia           | 0.278459401        |   |             | Brain_Putamen_basal_ganglia    |   |             | 1            | 1            |
|              | 1                                     | 1.08378666         |   |             | 1.08378666                     |   |             | NA           | 1            |
|              |                                       |                    |   |             |                                |   |             | 0            | 0.992493858  |
| SAP30BP      | ENSG00000161526.14                    |                    |   |             | 0.278459878                    | 1 | 1           | 0.278459878  |              |
|              | Brain_Hippocampus                     | 0.278459878        |   |             | Brain_Hippocampus              |   |             | 1            | 1            |
|              | 1.083785585                           | 1.083785585        |   |             | 1.083785585                    |   |             | NA           | 1            |
|              |                                       |                    |   |             |                                |   |             | 0            | 0.992493858  |
| SERTAD4      | ENSG00000082497.11                    |                    |   |             | 0.278485258                    | 1 | 1           | 0.278485258  |              |
|              | Brain_Spinal_cord_cervical_c-1        | 0.278485258        |   |             | Brain_Spinal_cord_cervical_c-1 |   |             |              |              |
|              | 1                                     | 1                  |   |             | 1.083728358                    |   |             | 1.083728358  | NA           |
|              |                                       |                    |   |             |                                |   |             | 1            | 0            |
|              | 0.992493858                           |                    |   |             |                                |   |             |              |              |
| SH3BGRL3     | ENSG00000142669.14                    |                    |   |             | 0.278597063                    | 1 | 1           | 0.278597063  |              |
|              | Brain_Cerebellum                      | 0.278597063        |   |             | Brain_Cerebellum               |   |             | 1            | 1            |
|              | -1.083476305                          | -1.083476305       |   |             | NA                             | 1 | 0           | 0.992493858  |              |
|              |                                       |                    |   |             |                                |   |             |              |              |
| PTPMT1       | ENSG00000110536.13                    |                    |   |             | 0.278600406                    | 2 | 2           | 0.216951877  |              |
|              | Brain_Nucleus_accumbens_basal_ganglia | 0.345736536        |   |             | Brain_Caudate_basal_ganglia    |   |             |              |              |
|              | 1.057561199                           | 0.942438801        |   |             | 0.942438801                    |   |             | -1.234673943 | 0.94289124   |
|              | -0.145891351                          | 1.539771108        |   |             | 2                              | 0 | 0.992493858 |              |              |
| C17orf80     | ENSG00000141219.15                    |                    |   |             | 0.278602981                    | 2 | 2           | 0.11336142   |              |
|              | Brain_Hypothalamus                    | 0.164459463        |   |             | Brain_Cerebellar_Hemisphere    |   |             | 1.792654475  |              |
|              | 0.207345525                           | 0.207345525        |   |             | 1.390228627                    |   |             | 1.583263494  | 1.48674606   |
|              | 0.136496264                           | 2                  | 0 | 0.992493858 |                                |   |             |              |              |
| PLCB3        | ENSG00000149782.11                    |                    |   |             | 0.278694567                    | 1 | 1           | 0.278694567  |              |

|              |                                       |                          |                  |                                |              |              |
|--------------|---------------------------------------|--------------------------|------------------|--------------------------------|--------------|--------------|
|              | Brain_Frontal_Cortex_BA9              | 0.278694567              |                  | Brain_Frontal_Cortex_BA9       | 1            | 1            |
|              | 1                                     | -1.083256547             | -1.083256547     | -1.083256547                   | NA           | 1 0          |
|              | 0.992493858                           |                          |                  |                                |              |              |
| RNF31        | ENSG00000092098.16                    | 0.278954829              | 2                | 2                              | 0.278506384  |              |
|              | Brain_Nucleus_accumbens_basal_ganglia | 0.384686457              |                  | Brain_Cerebellar_Hemisphere    |              |              |
|              | 1.247707892                           | 0.752292108              | 0.752292108      | -0.869293794                   | 1.083680726  |              |
|              | 0.107193466                           | 1.380961527              | 2                | 0                              | 0.992493858  |              |
| GMEB1        | ENSG00000162419.12                    | 0.279007903              | 1                | 1                              | 0.279007903  |              |
|              | Brain_Spinal_cord_cervical_c-1        | 0.279007903              |                  | Brain_Spinal_cord_cervical_c-1 |              |              |
|              | 1                                     | 1                        | 1.082550694      | 1.082550694                    | 1.082550694  | NA 1 0       |
|              | 0.992493858                           |                          |                  |                                |              |              |
| THAP8        | ENSG00000161277.10                    | 0.279025408              | 3                | 3                              | 0.181238419  |              |
|              | Brain_Hippocampus                     | 0.958299936              |                  | Brain_Substantia_nigra         | 2.435947284  |              |
|              | 0.165547609                           | 0.165547609              | -1.336951652     | 0.145555142                    | -0.379703138 |              |
|              | 0.830312152                           | 3                        | 0                | 0.992493858                    |              |              |
| THNSL2       | ENSG00000144115.16                    | 0.279097963              | 13               | 1                              | 0.211852687  |              |
|              | Brain_Cerebellar_Hemisphere           | 0.433877854              |                  | Brain_Putamen_basal_ganglia    |              |              |
|              | 12.68227632                           | 0.000556669              | 12.68227632      | 0.782573082                    | 1.248487215  |              |
|              | 1.068348686                           | 0.150174829              | 1                | 0                              | 0.992493858  |              |
| YWHAE        | ENSG00000108953.16                    | 0.279181977              | 2                | 2                              | 0.142794109  | Brain_Cortex |
|              | 0.282229989                           | Brain_Frontal_Cortex_BA9 | 1.323233989      | 0.676766011                    |              |              |
|              | 0.676766011                           | -1.465464949             | -1.075323343     | -1.270394146                   | 0.275871775  |              |
|              | 2                                     | 0                        | 0.992493858      |                                |              |              |
| MANSC1       | ENSG00000111261.13                    | 0.279252891              | 1                | 1                              | 0.279252891  |              |
|              | Brain_Amygdala                        | 0.279252891              | Brain_Amygdala   | 1                              | 1            | 1.081999183  |
|              | 1.081999183                           | 1.081999183              | NA               | 1                              | 0            | 0.992493858  |
| INPP5B       | ENSG00000204084.12                    | 0.279412824              | 12               | 5                              | 0.022690416  |              |
|              | Brain_Putamen_basal_ganglia           | 0.745802787              |                  | Brain_Cerebellum               | 8.669328572  |              |
|              | 0.000667026                           | 0.333540489              | -2.278607362     | -0.324178647                   | -1.158535864 |              |
|              | 0.600646548                           | 5                        | 0                | 0.992493858                    |              |              |
| ZNF343       | ENSG00000088876.11                    | 0.279436143              | 1                | 1                              | 0.279436143  |              |
|              | Brain_Cerebellar_Hemisphere           | 0.279436143              |                  | Brain_Cerebellar_Hemisphere    | 1            | 1            |
|              | 1                                     | -1.081586866             | -1.081586866     | -1.081586866                   | NA           | 1 0          |
|              | 0.992493858                           |                          |                  |                                |              |              |
| RP11-245J9.5 | ENSG00000271843.1                     | 0.279438                 | 2                | 2                              | 0.183914641  |              |
|              | Brain_Cortex                          | 0.376924363              | Brain_Cerebellum | 1.001503647                    | 0.998496353  |              |
|              | 0.998496353                           | -1.328797942             | -0.883577437     | -1.106187689                   | 0.314818438  |              |
|              | 2                                     | 0                        | 0.992493858      |                                |              |              |
| RP11-433J8.1 | ENSG00000258702.1                     | 0.279621225              | 9                | 9                              | 0.024181392  |              |
|              | Brain_Hippocampus                     | 0.931227138              | Brain_Amygdala   | 2.439230851                    |              |              |
|              | 0.233217206                           | 0.233217206              | -2.254234941     | 1.356353045                    | -0.555338121 |              |
|              | 1.03147776                            | 9                        | 0                | 0.992493858                    |              |              |
| TTL10        | ENSG00000162571.13                    | 0.279679746              | 1                | 1                              | 0.279679746  |              |
|              | Brain_Putamen_basal_ganglia           | 0.279679746              |                  | Brain_Putamen_basal_ganglia    | 1            | 1            |
|              | 1                                     | -1.081039044             | -1.081039044     | -1.081039044                   | NA           | 1 0          |
|              | 0.992493858                           |                          |                  |                                |              |              |
| GRB7         | ENSG00000141738.13                    | 0.27968691               | 2                | 2                              | 0.139828932  |              |
|              | Brain_Spinal_cord_cervical_c-1        | 0.427096946              |                  | Brain_Hypothalamus             |              |              |
|              | 1.130345905                           | 0.869654095              | 0.869654095      | -0.794169184                   | 1.476428367  |              |
|              | 0.341129592                           | 1.605554925              | 2                | 0                              | 0.992493858  |              |
| NCAPG        | ENSG00000109805.9                     | 0.279830548              | 1                | 1                              | 0.279830548  |              |
|              | Brain_Nucleus_accumbens_basal_ganglia | 0.279830548              |                  |                                |              |              |
|              | Brain_Nucleus_accumbens_basal_ganglia | 1                        | 1                | 1                              | 1.08070008   | 1.08070008   |
|              | 1.08070008                            | NA                       | 1                | 0                              | 0.992493858  |              |
| CHML         | ENSG00000203668.2                     | 0.279873467              | 3                | 3                              | 0.062025379  |              |
|              | Brain_Nucleus_accumbens_basal_ganglia | 0.741774746              |                  | Brain_Cortex                   |              |              |
|              | 1.343999004                           | 0.648852198              | 0.648852198      | -0.329504033                   | 1.866114279  |              |
|              | 0.890326713                           | 1.117968134              | 3                | 0                              | 0.992493858  |              |
| DNAJC6       | ENSG00000116675.15                    | 0.280026593              | 3                | 3                              | 0.132678391  |              |
|              | Brain_Caudate_basal_ganglia           | 0.796342304              |                  | Brain_Cortex                   | 1.298085312  |              |
|              | 0.770098611                           | 0.770098611              | -1.503623289     | 1.117328442                    | -0.042737046 |              |
|              | 1.336120069                           | 3                        | 0                | 0.992493858                    |              |              |

|               |                                       |                             |                                       |              |                  |                  |
|---------------|---------------------------------------|-----------------------------|---------------------------------------|--------------|------------------|------------------|
| WWC2          | ENSG00000151718.15                    | 0.280139614                 | 1                                     | 1            | 0.280139614      | Brain_Cortex     |
|               | 0.280139614                           | Brain_Cortex                | 1                                     | 1            | -1.080005762     | -1.080005762     |
|               | -1.080005762                          | NA                          | 1                                     | 0            | 0.992493858      |                  |
| TMCO3         | ENSG00000150403.17                    | 0.280238101                 | 11                                    | 4            | 0.131061923      |                  |
|               | Brain_Frontal_Cortex_BA9              | 0.805233085                 |                                       |              | Brain_Cerebellum | 8.617246083      |
|               | 0.009033336                           | 0.376540646                 |                                       |              | -0.433681307     | 1.509927508      |
|               | 0.581072104                           | 4                           | 0                                     | 0.992493858  |                  | 0.915160415      |
| SAT2          | ENSG00000141504.11                    | 0.280275613                 | 8                                     | 2            | 0.44761733       | Brain_Cortex     |
|               | 0.738791669                           | Brain_Putamen_basal_ganglia | 7.37892256                            | 0.002003255  |                  |                  |
|               | 0.327734312                           | -0.333453918                | 0.759393285                           |              | 0.520955734      | 0.360631746      |
|               | 2                                     | 0                           | 0.992493858                           |              |                  |                  |
| SCN4A         | ENSG00000007314.12                    | 0.280283044                 | 1                                     | 1            | 0.280283044      |                  |
|               | Brain_Anterior_cingulate_cortex_BA24  | 0.280283044                 |                                       |              |                  |                  |
|               | Brain_Anterior_cingulate_cortex_BA24  | 1                           | 1                                     | 1            | 1.079683725      |                  |
|               | 1.079683725                           | 1.079683725                 | NA                                    | 1            | 0                | 0.992493858      |
| TICAM2        | ENSG00000243414.5                     | 0.280365083                 | 2                                     | 2            | 0.155887029      |                  |
|               | Brain_Caudate_basal_ganglia           | 0.31925771                  | Brain_Nucleus_accumbens_basal_ganglia |              |                  |                  |
|               | 1.912112788                           | 0.087887212                 | 0.087887212                           |              | -1.419041116     | -0.995984431     |
|               | -1.207512773                          | 0.299146251                 | 2                                     | 0            | 0.992493858      |                  |
| SOCS1         | ENSG00000185338.4                     | 0.280370935                 | 1                                     | 1            | 0.280370935      |                  |
|               | Brain_Caudate_basal_ganglia           | 0.280370935                 | Brain_Caudate_basal_ganglia           | 1            | 1                |                  |
|               | 1                                     | -1.079486441                | -1.079486441                          | -1.079486441 | NA               | 1                |
|               | 0.992493858                           |                             |                                       |              | 0                |                  |
| OR51E2        | ENSG00000167332.7                     | 0.28041652                  | 2                                     | 2            | 0.113417526      | Brain_Cortex     |
|               | 0.190870167                           | Brain_Frontal_Cortex_BA9    | 1.88326149                            | 0.11673851   | 0.11673851       |                  |
|               | -1.58301728                           | -1.308009265                | -1.445513273                          |              | 0.194460033      | 2                |
|               | 0.992493858                           |                             |                                       |              | 0                |                  |
| ZNF880        | ENSG00000221923.8                     | 0.280483709                 | 13                                    | 1            | 0.191997094      |                  |
|               | Brain_Cerebellum                      | 0.508266196                 | Brain_Cortex                          | 12.6264254   | 8.69E-06         | 12.6264254       |
|               | 0.661539805                           | 1.304693916                 | 1.061810577                           |              | 0.225481007      | 1                |
|               | 0.992493858                           |                             |                                       |              | 0                |                  |
| KANK1         | ENSG00000107104.18                    | 0.280527805                 | 3                                     | 3            | 0.145631127      |                  |
|               | Brain_Caudate_basal_ganglia           | 0.906593295                 | Brain_Cerebellum                      | 1.888447789  |                  |                  |
|               | 0.115104107                           | 0.115104107                 | -0.117336636                          |              | 1.455137762      | 0.628579837      |
|               | 0.789332766                           | 3                           | 0                                     | 0.992493858  |                  |                  |
| PAIP2B        | ENSG00000124374.8                     | 0.280707326                 | 3                                     | 3            | 0.089055729      |                  |
|               | Brain_Caudate_basal_ganglia           | 0.98114205                  | Brain_Putamen_basal_ganglia           | 2.151382629  |                  |                  |
|               | 0.222717824                           | 0.222717824                 | -1.700399909                          |              | -0.023637136     | -0.601932227     |
|               | 0.95174471                            | 3                           | 0                                     | 0.992493858  |                  |                  |
| UBL7          | ENSG00000138629.15                    | 0.280710457                 | 1                                     | 1            | 0.280710457      | Brain_Cerebellum |
|               | 0.280710457                           | Brain_Cerebellum            | 1                                     | 1            | 1.078724732      | 1.078724732      |
|               | 1.078724732                           | NA                          | 1                                     | 0            | 0.992493858      |                  |
| MSRB3         | ENSG00000174099.10                    | 0.280783896                 | 3                                     | 3            | 0.158690513      | Brain_Amygdala   |
|               | 0.5076848                             | Brain_Caudate_basal_ganglia | 1.064486902                           |              | 0.932093621      |                  |
|               | 0.932093621                           | -1.237466601                | 1.409489374                           |              | -0.163474737     | 1.392237035      |
|               | 3                                     | 0                           | 0.992493858                           |              |                  |                  |
| LRRIQ3        | ENSG00000162620.15                    | 0.280802814                 | 11                                    | 1            | 0.164105791      |                  |
|               | Brain_Anterior_cingulate_cortex_BA24  | 0.579820119                 |                                       |              |                  |                  |
|               | Brain_Nucleus_accumbens_basal_ganglia | 10.68069527                 |                                       |              | 0.001120855      |                  |
|               | 10.68069527                           | 0.553647489                 | 1.391394632                           |              | 1.062081588      | 0.269127502      |
|               | 1                                     | 0                           | 0.992493858                           |              |                  |                  |
| KPNA5         | ENSG00000196911.10                    | 0.280933584                 | 2                                     | 1            | 0.240843814      | Brain_Cerebellum |
|               | 0.34069779                            | Brain_Cerebellar_Hemisphere | 1.943311271                           |              | 0.056688729      |                  |
|               | 1.943311271                           | -1.172880292                | -0.95278742                           |              | -1.062833856     | 0.155629162      |
|               | 1                                     | 0                           | 0.992493858                           |              |                  |                  |
| GPR63         | ENSG00000112218.8                     | 0.28098523                  | 2                                     | 2            | 0.245929407      | Brain_Cortex     |
|               | 0.267811653                           | Brain_Cerebellar_Hemisphere | 1.013917041                           |              | 0.986082959      |                  |
|               | 0.986082959                           | -1.108116159                | 1.16029331                            | 0.026088575  | 1.604007718      | 2                |
|               | 0                                     | 0.992493858                 |                                       |              |                  |                  |
| ZNF559-ZNF177 | ENSG00000270011.6                     | 0.281072433                 | 2                                     | 2            | 0.111953305      |                  |
|               | Brain_Putamen_basal_ganglia           | 0.824404121                 | Brain_Cerebellar_Hemisphere           |              |                  |                  |
|               | 1.071264545                           | 0.928735455                 | 0.928735455                           |              | -0.221884084     | 1.589474506      |

|              |                             |                             |              |             |              |    |              |                                |             |
|--------------|-----------------------------|-----------------------------|--------------|-------------|--------------|----|--------------|--------------------------------|-------------|
|              | 0.683795211                 | 1.280823942                 | 2            | 0           | 0.992493858  |    |              |                                |             |
| POMZP3       | ENSG00000146707.14          | 0.281102186                 |              |             | 13           | 2  | 0.083655195  |                                |             |
|              | Brain_Frontal_Cortex_BA9    | 0.726404404                 |              |             |              |    |              | Brain_Spinal_cord_cervical_c-1 |             |
|              | 11.88606221                 | 0.000954102                 | 0.560434934  |             | 0.349912449  |    | 1.72986054   |                                |             |
|              | 1.226055161                 | 0.348669269                 | 2            | 0           | 0.992493858  |    |              |                                |             |
| KCNAB1       | ENSG00000169282.17          | 0.281155838                 |              |             | 3            | 3  | 0.067868258  |                                |             |
|              | Brain_Cerebellar_Hemisphere | 0.827281257                 |              |             |              |    |              | Brain_Spinal_cord_cervical_c-1 |             |
|              | 1.915756282                 | 0.128601497                 | 0.128601497  |             | 0.218189768  |    | 1.825880543  |                                |             |
|              | 1.286803022                 | 0.925458522                 | 3            | 0           | 0.992493858  |    |              |                                |             |
| CEP128       | ENSG00000100629.16          | 0.281195838                 |              |             | 4            | 4  | 0.199145604  |                                |             |
|              | Brain_Hypothalamus          | 0.996322116                 |              |             |              |    |              | Brain_Cerebellar_Hemisphere    | 2.153540794 |
|              | 0.362894844                 | 0.362894844                 | 0.004609561  |             | 1.283989573  |    | 0.873411592  |                                |             |
|              | 0.585953622                 | 4                           | 0            | 0.992493858 |              |    |              |                                |             |
| TNKS1BP1     | ENSG00000149115.13          | 0.281197878                 |              |             | 1            | 1  | 0.281197878  |                                |             |
|              | Brain_Frontal_Cortex_BA9    | 0.281197878                 |              |             |              |    |              | Brain_Frontal_Cortex_BA9       | 1 1         |
|              | 1                           | 1.077632308                 | 1.077632308  |             | 1.077632308  | NA | 1            | 0                              |             |
|              | 0.992493858                 |                             |              |             |              |    |              |                                |             |
| RP11-212P7.2 | ENSG00000273270.1           | 0.281206693                 |              |             | 13           | 2  | 0.083421978  |                                |             |
|              | Brain_Cerebellar_Hemisphere | 0.941401351                 |              |             |              |    |              | Brain_Putamen_basal_ganglia    |             |
|              | 11.25384355                 | 4.29E-05                    | 0.651392758  |             | -1.731167029 |    | -0.073508662 |                                |             |
|              | -0.811218863                | 0.433684247                 | 2            | 0           | 0.992493858  |    |              |                                |             |
| AMIGO1       | ENSG00000181754.6           | 0.281310892                 |              |             | 10           | 8  | 0.20753219   | Brain_Cerebellum               |             |
|              | 0.988207344                 | Brain_Putamen_basal_ganglia | 5.488130499  |             | 0.017887575  |    |              |                                |             |
|              | 0.220247996                 | -1.260380341                | 1.151051443  |             | 0.262100544  |    | 0.776709793  |                                |             |
|              | 8                           | 0                           | 0.992493858  |             |              |    |              |                                |             |
| CCT3         | ENSG00000163468.14          | 0.281332976                 | 2            |             | 1            |    | 0.282558074  |                                |             |
|              | Brain_Cerebellar_Hemisphere | 0.284435569                 |              |             |              |    |              | Brain_Cerebellum               | 1.982105798 |
|              | 0.017894202                 | 1.982105798                 | 1.070408291  |             | 1.074590575  |    | 1.072499433  |                                |             |
|              | 0.002957321                 | 1                           | 0            | 0.992493858 |              |    |              |                                |             |
| ABCG8        | ENSG00000143921.6           | 0.281339973                 | 3            |             | 3            |    | 0.157707731  |                                |             |
|              | Brain_Frontal_Cortex_BA9    | 0.919003838                 |              |             |              |    |              | Brain_Spinal_cord_cervical_c-1 |             |
|              | 1.551272761                 | 0.364225337                 | 0.364225337  |             | 0.101688616  |    | 1.412823144  |                                |             |
|              | 0.704983237                 | 0.661789789                 | 3            | 0           | 0.992493858  |    |              |                                |             |
| CRLF1        | ENSG00000006016.10          | 0.28136087                  | 6            | 6           | 0.085626858  |    |              | Brain_Amygdala                 |             |
|              | 0.469773272                 | Brain_Hypothalamus          | 2.192966616  |             | 0.184732999  |    |              |                                |             |
|              | 0.184732999                 | -1.718931431                | 1.282357483  |             | -0.069355675 |    | 1.287082518  |                                |             |
|              | 6                           | 0                           | 0.992493858  |             |              |    |              |                                |             |
| PDCD7        | ENSG00000090470.14          | 0.281383338                 | 3            | 3           | 0.072603525  |    |              |                                |             |
|              | Brain_Caudate_basal_ganglia | 0.63910624                  |              |             |              |    |              | Brain_Cerebellar_Hemisphere    | 1.255845872 |
|              | 0.67213796                  | 0.67213796                  | -1.795315012 |             | 0.873607839  |    | -0.463551988 |                                | 1.33446961  |
|              | 3                           | 0                           | 0.992493858  |             |              |    |              |                                |             |
| ULBP1        | ENSG00000111981.4           | 0.281412073                 | 4            | 4           | 0.067997105  |    |              |                                |             |
|              | Brain_Cerebellar_Hemisphere | 0.82376363                  |              |             |              |    |              | Brain_Cortex                   | 1.911146647 |
|              | 0.112623914                 | 0.112623914                 | -1.825026009 |             | -0.222706901 |    | -0.860020557 |                                |             |
|              | 0.743345377                 | 4                           | 0            | 0.992493858 |              |    |              |                                |             |
| TIGD3        | ENSG00000173825.6           | 0.28141391                  | 2            | 2           | 0.284027408  |    |              | Brain_Cerebellum               |             |
|              | 0.650369127                 | Brain_Hippocampus           | 1.517782967  |             | 0.482217033  |    |              |                                |             |
|              | 0.482217033                 | -1.07131591                 | 0.453249452  |             | -0.309033229 |    | 1.078030506  |                                |             |
|              | 2                           | 0                           | 0.992493858  |             |              |    |              |                                |             |
| ATP2B4       | ENSG00000058668.14          | 0.281491144                 | 2            | 2           | 0.428773419  |    |              |                                |             |
|              | Brain_Cerebellum            | 0.710642154                 |              |             |              |    |              | Brain_Cerebellar_Hemisphere    | 1.728099482 |
|              | 0.271900518                 | 0.271900518                 | -0.791292337 |             | 0.370993794  |    | -0.210149271 |                                |             |
|              | 0.821860405                 | 2                           | 0            | 0.992493858 |              |    |              |                                |             |
| ENPEP        | ENSG00000138792.9           | 0.281532011                 | 1            | 1           | 0.281532011  |    |              |                                |             |
|              | Brain_Frontal_Cortex_BA9    | 0.281532011                 |              |             |              |    |              | Brain_Frontal_Cortex_BA9       | 1 1         |
|              | 1                           | -1.076884182                | -1.076884182 |             | -1.076884182 | NA | 1            | 0                              |             |
|              | 0.992493858                 |                             |              |             |              |    |              |                                |             |
| ACSS2        | ENSG00000131069.19          | 0.281542936                 | 6            | 4           | 0.151210467  |    |              |                                |             |
|              | Brain_Cerebellar_Hemisphere | 0.969903048                 |              |             |              |    |              | Brain_Hippocampus              | 4.455476035 |
|              | 0.058320566                 | 0.294198784                 | -0.512173822 |             | 1.435268968  |    | 0.71100151   |                                |             |
|              | 0.774032657                 | 4                           | 0            | 0.992493858 |              |    |              |                                |             |
| RBPMS        | ENSG00000157110.15          | 0.28163273                  | 1            | 1           | 0.28163273   |    |              | Brain_Cerebellum               | 0.28163273  |

|              |                                       |              |              |              |             |                                       |              |   |              |
|--------------|---------------------------------------|--------------|--------------|--------------|-------------|---------------------------------------|--------------|---|--------------|
|              | Brain_Cerebellum1                     | 1            | 1            | 1.076658788  | 1.076658788 | 1.076658788                           |              |   |              |
|              | NA_1                                  | 0            | 0.992493858  |              |             |                                       |              |   |              |
| SGSH         | ENSG00000181523.12                    | 0.28176912   | 5            | 4            | 0.029296507 |                                       |              |   |              |
|              | Brain_Nucleus_accumbens_basal_ganglia | 0.751118604  |              |              |             | Brain_Cerebellum                      |              |   |              |
|              | 2.443215341                           | 0.078991219  | 0.540031178  |              |             | -0.950639374                          | 2.179473559  |   |              |
|              | 0.726259542                           | 1.178596337  | 4            | 0            | 0.992493858 |                                       |              |   |              |
| MAP2K4       | ENSG00000065559.14                    | 0.281836754  | 1            | 1            | 0.281836754 |                                       |              |   |              |
|              | Brain_Caudate_basal_ganglia           | 0.281836754  |              |              |             | Brain_Caudate_basal_ganglia1          | 1            |   | 1            |
|              | 1                                     | -1.076202384 | -1.076202384 | -1.076202384 | NA          | 1                                     | 0            |   |              |
|              | 0.992493858                           |              |              |              |             |                                       |              |   |              |
| TBC1D22B     | ENSG00000065491.8                     | 0.282019108  | 1            | 1            | 0.282019108 |                                       |              |   |              |
|              | Brain_Cerebellar_Hemisphere           | 0.282019108  |              |              |             | Brain_Cerebellar_Hemisphere1          | 1            |   | 1            |
|              | 1                                     | 1.075794645  | 1.075794645  | 1.075794645  | NA          | 1                                     | 0            |   |              |
|              | 0.992493858                           |              |              |              |             |                                       |              |   |              |
| CETN3        | ENSG00000153140.8                     | 0.282035082  | 3            | 3            | 0.070415403 |                                       |              |   |              |
|              | Brain_Putamen_basal_ganglia           | 0.968884528  |              |              |             | Brain_Hippocampus                     | 1.325862632  |   |              |
|              | 0.668452712                           | 0.668452712  | -0.102939293 |              |             | 1.809229201                           | 0.555760852  |   |              |
|              | 1.086005985                           | 3            | 0            | 0.992493858  |             |                                       |              |   |              |
| SLC6A13      | ENSG0000010379.15                     | 0.282039176  | 1            | 1            | 0.282039176 |                                       |              |   |              |
|              | Brain_Cerebellum                      | 0.282039176  |              |              |             | Brain_Cerebellum1                     | 1            | 1 | -1.075749785 |
|              | -1.075749785                          | -1.075749785 | NA           | 1            | 0           | 0.992493858                           |              |   |              |
| LINC01119    | ENSG00000239332.5                     | 0.282200004  | 6            | 5            | 0.101405566 |                                       |              |   |              |
|              | Brain_Cortex                          | 0.718840698  |              |              |             | Brain_Putamen_basal_ganglia           | 3.007398938  |   |              |
|              | 0.06654925                            | 0.273845965  | -1.638077319 |              |             | 1.261625067                           | -0.380327279 |   |              |
|              | 1.039065146                           | 5            | 0            | 0.992493858  |             |                                       |              |   |              |
| CWC15        | ENSG00000150316.11                    | 0.282203206  | 5            | 3            | 0.058008937 |                                       |              |   |              |
|              | Brain_Nucleus_accumbens_basal_ganglia | 0.29092887   |              |              |             | Brain_Cerebellum                      | 4.364718609  |   |              |
|              | 0.033544119                           | 0.160401064  | -1.89563038  |              |             | -1.056086123                          | -1.487900801 |   |              |
|              | 0.333131941                           | 3            | 0            | 0.992493858  |             |                                       |              |   |              |
| ENO2         | ENSG00000111674.8                     | 0.282249762  | 1            | 1            | 0.282249762 |                                       |              |   |              |
|              | Brain_Hippocampus                     | 0.282249762  |              |              |             | Brain_Hippocampus                     | 1            | 1 | 1            |
|              | 1.075279165                           | 1.075279165  | 1.075279165  | NA           | 1           | 0                                     | 0.992493858  |   |              |
| AHCYL2       | ENSG00000158467.16                    | 0.282291663  | 1            | 1            | 0.282291663 |                                       |              |   |              |
|              | Brain_Cerebellar_Hemisphere           | 0.282291663  |              |              |             | Brain_Cerebellar_Hemisphere1          | 1            |   | 1            |
|              | 1                                     | 1.075185552  | 1.075185552  | 1.075185552  | NA          | 1                                     | 0            |   |              |
|              | 0.992493858                           |              |              |              |             |                                       |              |   |              |
| SLC23A2      | ENSG00000089057.14                    | 0.282385929  | 1            | 1            | 0.282385929 |                                       |              |   |              |
|              | Brain_Cerebellar_Hemisphere           | 0.282385929  |              |              |             | Brain_Cerebellar_Hemisphere1          | 1            |   | 1            |
|              | 1                                     | 1.074974982  | 1.074974982  | 1.074974982  | NA          | 1                                     | 0            |   |              |
|              | 0.992493858                           |              |              |              |             |                                       |              |   |              |
| CTA-390C10.9 | ENSG00000272798.1                     | 0.282407213  | 2            | 2            | 0.143731314 |                                       |              |   |              |
|              | Brain_Cerebellum                      | 0.70517297   |              |              |             | Brain_Cerebellar_Hemisphere           | 1.163309347  |   |              |
|              | 0.836690653                           | 0.836690653  | -1.462036114 |              |             | 0.378346817                           | -0.541844648 |   |              |
|              | 1.301347251                           | 2            | 0            | 0.992493858  |             |                                       |              |   |              |
| LINC02036    | ENSG00000225742.5                     | 0.28244684   | 3            | 3            | 0.056772126 |                                       |              |   |              |
|              | Brain_Caudate_basal_ganglia           | 0.804243483  |              |              |             | Brain_Nucleus_accumbens_basal_ganglia |              |   |              |
|              | 1.091431218                           | 0.940705361  | 0.940705361  |              |             | -0.491065425                          | 1.905061126  |   |              |
|              | 0.553951576                           | 1.227039159  | 3            | 0            | 0.992493858 |                                       |              |   |              |
| SGCD         | ENSG00000170624.13                    | 0.282473814  | 3            | 3            | 0.155932114 |                                       |              |   |              |
|              | Brain_Caudate_basal_ganglia           | 0.353069804  |              |              |             | Brain_Spinal_cord_cervical_c-1        |              |   |              |
|              | 1.587521848                           | 0.365276185  | 0.365276185  |              |             | -1.41888648                           | -0.928651345 |   |              |
|              | -1.105224773                          | 0.272355501  | 3            | 0            | 0.992493858 |                                       |              |   |              |
| CASC18       | ENSG00000257859.1                     | 0.282499084  | 2            | 2            | 0.112299917 |                                       |              |   |              |
|              | Brain_Cortex                          | 0.973994831  |              |              |             | Brain_Nucleus_accumbens_basal_ganglia |              |   |              |
|              | 1.030633769                           | 0.969366231  | 0.969366231  |              |             | -1.587939959                          | -0.032598419 |   |              |
|              | -0.810269189                          | 1.09979255   | 2            | 0            | 0.992493858 |                                       |              |   |              |
| RAD9B        | ENSG00000151164.18                    | 0.282499121  | 3            | 3            | 0.066459234 |                                       |              |   |              |
|              | Brain_Spinal_cord_cervical_c-1        | 0.466038748  |              |              |             | Brain_Frontal_Cortex_BA9              |              |   |              |
|              | 1.413245016                           | 0.612491531  | 0.612491531  |              |             | -1.835313618                          | -0.728939374 |   |              |
|              | -1.188008833                          | 0.576706507  | 3            | 0            | 0.992493858 |                                       |              |   |              |
| Clorf74      | ENSG00000162757.4                     | 0.282536512  | 1            | 1            | 0.282536512 |                                       |              |   |              |
|              | Brain_Cerebellar_Hemisphere           | 0.282536512  |              |              |             | Brain_Cerebellar_Hemisphere1          | 1            |   | 1            |

|                                       |                                      |                                       |              |              |              |                             |
|---------------------------------------|--------------------------------------|---------------------------------------|--------------|--------------|--------------|-----------------------------|
| 1                                     | -1.074638714                         | -1.074638714                          | -1.074638714 | NA           | 1            | 0                           |
| 0.992493858                           |                                      |                                       |              |              |              |                             |
| SPTBN4                                | ENSG00000160460.15                   | 0.282564064                           | 6            | 3            | 0.009750068  |                             |
| Brain_Cerebellum                      | 0.860053251                          | Brain_Cortex                          | 4.120293791  |              | 0.026763284  |                             |
| 0.421562299                           | -0.230438294                         | 2.584569407                           | 0.634926589  |              | 1.037825278  |                             |
| 3                                     | 0                                    | 0.992493858                           |              |              |              |                             |
| ACSF3                                 | ENSG00000176715.15                   | 0.282680566                           | 11           | 3            | 0.107642119  |                             |
| Brain_Spinal_cord_cervical_c-1        | 0.848296601                          | Brain_Cortex                          | 8.695087222  |              |              |                             |
| 0.003780684                           | 0.404282035                          | -1.608882123                          | 0.196497185  |              | -0.582375512 |                             |
| 0.532529989                           | 3                                    | 0                                     | 0.992493858  |              |              |                             |
| ME3                                   | ENSG00000151376.16                   | 0.282688389                           | 6            | 6            | 0.127195135  |                             |
| Brain_Spinal_cord_cervical_c-1        | 0.988312425                          | Brain_Hippocampus                     |              |              |              |                             |
| 2.376750238                           | 0.255678299                          | 0.255678299                           | -1.52525649  |              | 0.830382256  |                             |
| -0.186021484                          | 0.89825006                           | 6                                     | 0            | 0.992493858  |              |                             |
| SLC40A1                               | ENSG00000138449.10                   | 0.282720006                           | 6            | 5            | 0.185127086  |                             |
| Brain_Hypothalamus                    | 0.794419701                          | Brain_Hippocampus                     | 2.500857555  |              |              |                             |
| 0.010960424                           | 0.66437099                           | -1.32513287                           | 1.203501917  |              | 0.397931304  |                             |
| 0.895544164                           | 5                                    | 0                                     | 0.992493858  |              |              |                             |
| LINC00493                             | ENSG00000232388.4                    | 0.282731026                           | 11           | 4            | 0.229648424  |                             |
| Brain_Amygdala                        | 0.952653125                          | Brain_Nucleus_accumbens_basal_ganglia |              |              |              |                             |
| 7.884735182                           | 0.036004077                          | 0.32935744                            | -1.201264995 |              | 0.775024031  |                             |
| -0.242916705                          | 0.656709594                          | 4                                     | 0            | 0.992493858  |              |                             |
| ELMOD1                                | ENSG00000110675.12                   | 0.282762797                           | 1            | 1            | 0.282762797  |                             |
| Brain_Amygdala                        | 0.282762797                          | Brain_Amygdala                        | 1            | 1            | 1            | -1.074133622                |
| -1.074133622                          | -1.074133622                         | NA                                    | 1            | 0            | 0.992493858  |                             |
| LINC01534                             | ENSG00000225975.6                    | 0.282799624                           | 2            | 2            | 0.219789192  |                             |
| Brain_Cerebellar_Hemisphere           | 0.284605275                          | Brain_Caudate_basal_ganglia           |              |              |              |                             |
| 1.049870757                           | 0.950129243                          | 0.950129243                           | -1.070031178 |              | 1.227088867  |                             |
| 0.078528844                           | 1.624309161                          | 2                                     | 0            | 0.992493858  |              |                             |
| PNMA2                                 | ENSG00000240694.8                    | 0.282859125                           | 2            | 2            | 0.12040201   | Brain_Cerebellum            |
| 0.279335693                           | Brain_Cerebellar_Hemisphere          | 1.509933592                           |              |              | 0.490066408  |                             |
| 0.490066408                           | -1.553088428                         | -1.081812855                          | -1.317450642 |              | 0.333242154  |                             |
| 2                                     | 0                                    | 0.992493858                           |              |              |              |                             |
| HMOX1                                 | ENSG00000100292.16                   | 0.28288649                            | 1            | 1            | 0.28288649   | Brain_Cortex                |
| Brain_Cortex                          | 1                                    | 1                                     | 1            | -1.073857644 | -1.073857644 | -1.073857644                |
| NA                                    | 1                                    | 0                                     | 0.992493858  |              |              |                             |
| BTNL3                                 | ENSG00000168903.8                    | 0.282894147                           | 7            | 2            | 0.402513235  | Brain_Cortex                |
| 0.912028448                           | Brain_Anterior_cingulate_cortex_BA24 | 6.255182211                           |              |              |              |                             |
| 0.014681509                           | 0.415221513                          | -0.837141146                          | 0.354715612  |              | -0.087231607 |                             |
| 0.457542832                           | 2                                    | 0                                     | 0.992493858  |              |              |                             |
| FNBP1L                                | ENSG00000137942.16                   | 0.282896325                           | 1            | 1            | 0.282896325  |                             |
| Brain_Cerebellum                      | 0.282896325                          | Brain_Cerebellum                      | 1            | 1            | 1            | -1.073835702                |
| -1.073835702                          | -1.073835702                         | NA                                    | 1            | 0            | 0.992493858  |                             |
| RRAGC                                 | ENSG00000116954.7                    | 0.282903888                           | 1            | 1            | 0.282903888  |                             |
| Brain_Hippocampus                     | 0.282903888                          | Brain_Hippocampus                     | 1            | 1            | 1            |                             |
| -1.073818831                          | -1.073818831                         | -1.073818831                          | NA           | 1            | 0            | 0.992493858                 |
| ZNF783                                | ENSG00000204946.9                    | 0.282953304                           | 2            | 2            | 0.216447026  |                             |
| Brain_Cerebellar_Hemisphere           | 0.77576857                           | Brain_Putamen_basal_ganglia           | 1.478818757  |              |              |                             |
| 0.521181243                           | 0.521181243                          | -1.236031039                          | 0.284837592  |              | -0.475596723 |                             |
| 1.075416522                           | 2                                    | 0                                     | 0.992493858  |              |              |                             |
| DPH7                                  | ENSG00000148399.12                   | 0.282960708                           | 2            | 2            | 0.17245652   | Brain_Cortex                |
| 0.652486656                           | Brain_Cerebellum                     | 1.248254429                           | 0.751745571  |              | 0.751745571  |                             |
| -1.364352914                          | 0.450310379                          | -0.457021267                          | 1.28316072   | 2            | 0            |                             |
| 0.992493858                           |                                      |                                       |              |              |              |                             |
| PGS1                                  | ENSG00000087157.18                   | 0.28301569                            | 6            | 5            | 0.11260685   | Brain_Caudate_basal_ganglia |
| 0.974260816                           | Brain_Anterior_cingulate_cortex_BA24 | 3.792194221                           |              |              |              |                             |
| 0.116120989                           | 0.185214718                          | -1.586584193                          | 0.424577437  |              | -0.502482748 |                             |
| 0.708446153                           | 5                                    | 0                                     | 0.992493858  |              |              |                             |
| APLNR                                 | ENSG00000134817.10                   | 0.283088631                           | 1            | 1            | 0.283088631  |                             |
| Brain_Nucleus_accumbens_basal_ganglia | 0.283088631                          |                                       |              |              |              |                             |
| Brain_Nucleus_accumbens_basal_ganglia | 1                                    | 1                                     | 1            | -1.073406808 |              |                             |
| -1.073406808                          | -1.073406808                         | NA                                    | 1            | 0            | 0.992493858  |                             |



|               |                                       |                             |              |              |              |                                       |             |            |
|---------------|---------------------------------------|-----------------------------|--------------|--------------|--------------|---------------------------------------|-------------|------------|
| AC006946.17   | ENSG00000273442.1                     | 0.283162731                 | 4            | 2            | 0.206892245  |                                       |             |            |
|               | Brain_Spinal_cord_cervical_c-1        | 0.303042509                 |              |              |              | Brain_Cortex                          | 2.925448886 |            |
|               | 0.004091549                           | 0.998128533                 | -1.262157147 |              |              | 1.172028518                           | 0.520005382 |            |
|               | 1.189667567                           | 2                           | 0            | 0.992493858  |              |                                       |             |            |
| ARHGDIG       | ENSG00000242173.8                     | 0.283185881                 | 1            | 1            | 0.283185881  |                                       |             |            |
|               | Brain_Spinal_cord_cervical_c-1        | 0.283185881                 |              |              |              | Brain_Spinal_cord_cervical_c-1        |             |            |
|               | 1                                     | 1                           | -1.07318999  | -1.07318999  |              | -1.07318999                           | NA          | 1 0        |
|               | 0.992493858                           |                             |              |              |              |                                       |             |            |
| TRIM50        | ENSG00000146755.10                    | 0.28324693                  | 2            | 2            | 0.117395196  | Brain_Cerebellum                      |             |            |
|               | 0.18920208                            | Brain_Cerebellar_Hemisphere | 1.909371393  |              | 0.090628607  |                                       |             |            |
|               | 0.090628607                           | 1.312943224                 | 1.56580107   | 1.439372147  | 0.178797498  |                                       |             | 2          |
|               | 0                                     | 0.992493858                 |              |              |              |                                       |             |            |
| RP11-571M6.18 | ENSG00000269903.1                     | 0.283252439                 | 1            | 1            | 0.283252439  |                                       |             |            |
|               | Brain_Anterior_cingulate_cortex_BA24  | 0.283252439                 |              |              |              |                                       |             |            |
|               | Brain_Anterior_cingulate_cortex_BA24  | 1                           | 1            | 1            | 1.073041629  |                                       |             |            |
|               | 1.073041629                           | 1.073041629                 | NA           | 1            | 0            | 0.992493858                           |             |            |
| C9orf78       | ENSG00000136819.15                    | 0.283477431                 | 1            | 1            | 0.283477431  |                                       |             |            |
|               | Brain_Frontal_Cortex_BA9              | 0.283477431                 |              |              |              | Brain_Frontal_Cortex_BA9              | 1           | 1          |
|               | 1                                     | 1.072540282                 | 1.072540282  | 1.072540282  | NA           | 1                                     | 0           |            |
|               | 0.992493858                           |                             |              |              |              |                                       |             |            |
| RBP3          | ENSG00000265203.1                     | 0.283506633                 | 4            | 4            | 0.155145734  |                                       |             |            |
|               | Brain_Caudate_basal_ganglia           | 0.985688104                 |              |              |              | Brain_Cortex                          | 1.63241724  | 0.35621978 |
|               | 0.35621978                            | -1.185924696                | 1.42158854   | 0.083462754  | 1.066657417  |                                       | 4           | 0          |
|               | 0.992493858                           |                             |              |              |              |                                       |             |            |
| C3orf67       | ENSG00000163689.19                    | 0.283534825                 | 1            | 1            | 0.283534825  |                                       |             |            |
|               | Brain_Frontal_Cortex_BA9              | 0.283534825                 |              |              |              | Brain_Frontal_Cortex_BA9              | 1           | 1          |
|               | 1                                     | -1.072412435                | -1.072412435 | -1.072412435 | NA           | 1                                     | 0           |            |
|               | 0.992493858                           |                             |              |              |              |                                       |             |            |
| RP11-442O1.3  | ENSG00000275088.1                     | 0.283550007                 | 2            | 2            | 0.11260379   |                                       |             |            |
|               | Brain_Cerebellar_Hemisphere           | 0.906346807                 |              |              |              | Brain_Cerebellum                      | 1.037202617 |            |
|               | 0.962797383                           | 0.962797383                 | -1.586597695 | -0.117647701 | -0.852122698 |                                       |             |            |
|               | 1.038704502                           | 2                           | 0            | 0.992493858  |              |                                       |             |            |
| FAH           | ENSG00000103876.11                    | 0.283564516                 | 7            | 6            | 0.098036261  |                                       |             |            |
|               | Brain_Frontal_Cortex_BA9              | 0.972523758                 |              |              |              | Brain_Cerebellar_Hemisphere           |             |            |
|               | 2.957975732                           | 0.033746336                 | 0.188615986  | -1.654449278 | 0.611165723  |                                       |             |            |
|               | -0.279533765                          | 0.740116749                 | 6            | 0            | 0.992493858  |                                       |             |            |
| ZMYND15       | ENSG00000141497.13                    | 0.283643262                 | 2            | 2            | 0.118990883  |                                       |             |            |
|               | Brain_Hippocampus                     | 0.810756457                 |              |              |              | Brain_Cerebellar_Hemisphere           | 1.334454785 |            |
|               | 0.665545215                           | 0.665545215                 | 0.239450266  | 1.559023225  | 0.899236745  |                                       |             |            |
|               | 0.933078988                           | 2                           | 0            | 0.992493858  |              |                                       |             |            |
| FGL2          | ENSG00000127951.6                     | 0.283682077                 | 5            | 3            | 0.130078354  |                                       |             |            |
|               | Brain_Nucleus_accumbens_basal_ganglia | 0.763012481                 |              |              |              |                                       |             |            |
|               | Brain_Spinal_cord_cervical_c-1        | 3.915750491                 |              |              | 0.046204882  |                                       | 0.250347817 |            |
|               | 0.30152724                            | 1.51379298                  | 1.009922933  | 0.515930099  | 3            | 0                                     | 0.992493858 |            |
| RNF175        | ENSG00000145428.14                    | 0.283727567                 | 5            | 3            | 0.143531654  |                                       |             |            |
|               | Brain_Putamen_basal_ganglia           | 0.702927675                 |              |              |              | Brain_Cortex                          | 3.924912409 |            |
|               | 0.031506341                           | 0.198186725                 | -1.462765145 | 0.435885826  | -0.635371775 |                                       |             |            |
|               | 0.721699018                           | 3                           | 0            | 0.992493858  |              |                                       |             |            |
| HMGXB3        | ENSG00000113716.12                    | 0.283752086                 | 7            | 4            | 0.050949197  |                                       |             |            |
|               | Brain_Spinal_cord_cervical_c-1        | 0.991317013                 |              |              |              | Brain_Cerebellum                      | 5.32703838  |            |
|               | 0.017415129                           | 0.272281274                 | 0.010882725  | 1.951907425  | 0.667806991  |                                       |             |            |
|               | 0.684601142                           | 4                           | 0            | 0.992493858  |              |                                       |             |            |
| SYT6          | ENSG00000134207.14                    | 0.283856884                 | 2            | 2            | 0.118903418  |                                       |             |            |
|               | Brain_Putamen_basal_ganglia           | 0.469399368                 |              |              |              | Brain_Caudate_basal_ganglia           |             |            |
|               | 1.282640026                           | 0.717359974                 | 0.717359974  | -1.55939289  | -0.723456666 |                                       |             |            |
|               | -1.141424778                          | 0.591096172                 | 2            | 0            | 0.992612265  |                                       |             |            |
| RP11-1084I9.1 | ENSG00000206187.3                     | 0.2839484                   | 7            | 4            | 0.090809438  |                                       |             |            |
|               | Brain_Amygdala                        | 0.703104767                 |              |              |              | Brain_Nucleus_accumbens_basal_ganglia |             |            |
|               | 5.312510593                           | 0.00302842                  | 0.18061676   | -1.691143294 | 1.370884139  |                                       |             |            |
|               | 0.486356321                           | 1.012624087                 | 4            | 0            | 0.992684172  |                                       |             |            |
| CARD18        | ENSG00000255501.1                     | 0.284233765                 | 1            | 1            | 0.284233765  |                                       |             |            |
|               | Brain_Nucleus_accumbens_basal_ganglia | 0.284233765                 |              |              |              |                                       |             |            |

|         |                                       |                        |                                      |              |              |                   |
|---------|---------------------------------------|------------------------|--------------------------------------|--------------|--------------|-------------------|
|         | Brain_Nucleus_accumbens_basal_ganglia | 1                      | 1                                    | 1            | -1.070856929 |                   |
|         | -1.070856929                          | -1.070856929           | NA                                   | 1            | 0            | 0.993193183       |
| TES     | ENSG00000135269.17                    | 0.284235974            | 3                                    | 3            | 0.243259389  | Brain_Amygdala    |
|         | 0.850094835                           | Brain_Cortex           | 1.60636651                           | 0.485619983  | 0.485619983  |                   |
|         | -1.137629188                          | 1.166878625            | 0.072748954                          | 1.156643569  | 3            | 0                 |
|         | 0.993193183                           |                        |                                      |              |              |                   |
| AC005   | 537.2                                 | ENSG00000232006.8      | 0.284465379                          | 5            | 5            | 0.131713296       |
|         | Brain_Cerebellum                      | 0.822783305            | Brain_Anterior_cingulate_cortex_BA24 |              |              |                   |
|         | 2.425235919                           | 0.119730791            | 0.119730791                          | -1.420165338 | 1.507379947  |                   |
|         | 0.303452579                           | 1.088034152            | 5                                    | 0            | 0.993501203  |                   |
| CBX6    | ENSG00000183741.11                    | 0.284565476            | 2                                    | 2            | 0.114454089  | Brain_Cortex      |
|         | 0.962001222                           | Brain_Substantia_nigra | 1.123360595                          | 0.876639405  |              |                   |
|         | 0.876639405                           | -1.57848562            | 0.047642422                          | -0.765421599 | 1.149846166  |                   |
|         | 2                                     | 0                      | 0.993501203                          |              |              |                   |
| WARS2   | ENSG00000116874.11                    | 0.284677701            | 13                                   | 1            | 0.13462302   | Brain_Hippocampus |
|         | 0.455145916                           | Brain_Substantia_nigra | 12.35480834                          | 0.000777965  |              |                   |
|         | 12.35480834                           | -1.496117569           | -0.746863573                         | -1.043895722 | 0.248601417  |                   |
|         | 1                                     | 0                      | 0.993501203                          |              |              |                   |
| ENKD1   | ENSG00000124074.11                    | 0.284687886            | 2                                    | 2            | 0.11364435   |                   |
|         | Brain_Cerebellar_Hemisphere           | 0.132522937            | Brain_Cerebellum                     | 1.927241249  |              |                   |
|         | 0.072758751                           | 0.072758751            | -1.58202287                          | -1.504226963 | -1.543124917 |                   |
|         | 0.055010013                           | 2                      | 0                                    | 0.993501203  |              |                   |
| MGME1   | ENSG00000125871.13                    | 0.284690727            | 6                                    | 5            | 0.339403169  |                   |
|         | Brain_Caudate_basal_ganglia           | 0.965546663            | Brain_Hypothalamus                   | 4.39414212   |              |                   |
|         | 0.070567124                           | 0.180107112            | -0.769405908                         | 0.955345175  | 0.291500611  |                   |
|         | 0.601739302                           | 5                      | 0                                    | 0.993501203  |              |                   |
| 1-Sep   | ENSG00000180096.11                    | 0.284750184            | 9                                    | 4            | 0.094728935  |                   |
|         | Brain_Frontal_Cortex_BA9              | 0.607535861            | Brain_Putamen_basal_ganglia          |              |              |                   |
|         | 7.360298074                           | 0.005079379            | 0.309665587                          | -1.67096326  | 0.689116348  |                   |
|         | -0.813911439                          | 0.663245506            | 4                                    | 0            | 0.993501203  |                   |
| CDKL1   | ENSG00000100490.9                     | 0.284981416            | 4                                    | 3            | 0.152819816  |                   |
|         | Brain_Frontal_Cortex_BA9              | 0.901854904            | Brain_Cortex                         | 2.486439365  |              |                   |
|         | 0.034162928                           | 0.479115353            | -1.429641925                         | 0.700178867  | -0.171298535 |                   |
|         | 0.905547111                           | 3                      | 0                                    | 0.993575862  |              |                   |
| CFAP53  | ENSG00000172361.5                     | 0.285141233            | 3                                    | 3            | 0.192188483  |                   |
|         | Brain_Cerebellar_Hemisphere           | 0.799768134            | Brain_Putamen_basal_ganglia          |              |              |                   |
|         | 1.502966855                           | 0.496328773            | 0.496328773                          | 0.253647192  | 1.304132285  |                   |
|         | 0.83097325                            | 0.532933213            | 3                                    | 0            | 0.993575862  |                   |
| NR3C2   | ENSG00000151623.14                    | 0.285177638            | 1                                    | 1            | 0.285177638  |                   |
|         | Brain_Cerebellar_Hemisphere           | 0.285177638            | Brain_Cerebellar_Hemisphere          | 1            | 1            |                   |
|         | 1                                     | 1.068760421            | 1.068760421                          | 1.068760421  | NA           | 1                 |
|         | 0.993575862                           |                        |                                      |              | 0            |                   |
| SLC31A1 | ENSG00000136868.10                    | 0.285219651            | 5                                    | 5            | 0.071613245  |                   |
|         | Brain_Cortex                          | 0.671491167            | Brain_Putamen_basal_ganglia          | 1.219275356  |              |                   |
|         | 0.865376806                           | 0.865376806            | -1.055226723                         | 1.801568985  | 0.587817172  |                   |
|         | 1.046098988                           | 5                      | 0                                    | 0.993575862  |              |                   |
| USP40   | ENSG00000085982.13                    | 0.285230991            | 9                                    | 6            | 0.04967455   |                   |
|         | Brain_Nucleus_accumbens_basal_ganglia | 0.91990776             | Brain_Cerebellar_Hemisphere          |              |              |                   |
|         | 5.442731518                           | 0.059639664            | 0.195207938                          | -0.894653157 | 1.962755855  |                   |
|         | 0.618294123                           | 0.796093837            | 6                                    | 0            | 0.993575862  |                   |
| CCDC146 | ENSG00000135205.14                    | 0.2853026              | 2                                    | 2            | 0.193908579  |                   |
|         | Brain_Putamen_basal_ganglia           | 0.361847429            | Brain_Cerebellum                     | 1.004550988  |              |                   |
|         | 0.995449012                           | 0.995449012            | -1.299103014                         | -0.911850487 | -1.10547675  |                   |
|         | 0.273828888                           | 2                      | 0                                    | 0.993575862  |              |                   |
| STK11   | ENSG00000118046.14                    | 0.285338923            | 1                                    | 1            | 0.285338923  |                   |
|         | Brain_Cerebellar_Hemisphere           | 0.285338923            | Brain_Cerebellar_Hemisphere          | 1            | 1            |                   |
|         | 1                                     | -1.068402648           | -1.068402648                         | -1.068402648 | NA           | 1                 |
|         | 0.993575862                           |                        |                                      |              | 0            |                   |
| TMEM56  | ENSG00000152078.9                     | 0.285395572            | 1                                    | 1            | 0.285395572  |                   |
|         | Brain_Amygdala                        | 0.285395572            | Brain_Amygdala                       | 1            | 1            | 1                 |
|         | -1.068277019                          | -1.068277019           | NA                                   | 1            | 0            | 0.993575862       |
| LURAP1  | ENSG00000171357.5                     | 0.285510798            | 1                                    | 1            | 0.285510798  |                   |

|              |                                |                             |              |                                       |              |              |                  |
|--------------|--------------------------------|-----------------------------|--------------|---------------------------------------|--------------|--------------|------------------|
|              | Brain_Hypothalamus             | 0.285510798                 |              | Brain_Hypothalamus                    | 1            | 1            | 1                |
|              | -1.068021535                   | -1.068021535                | -1.068021535 | NA                                    | 1            | 0            | 0.993575862      |
| LECT2        | ENSG00000145826.8              | 0.285636644                 | 1            | 1                                     | 0.285636644  |              |                  |
|              | Brain_Caudate_basal_ganglia    | 0.285636644                 |              | Brain_Caudate_basal_ganglia           | 1            | 1            |                  |
|              | 1                              | -1.067742583                | -1.067742583 | -1.067742583                          | NA           | 1            | 0                |
|              | 0.993575862                    |                             |              |                                       |              |              |                  |
| DCLRE1C      | ENSG00000152457.17             | 0.285737676                 | 5            | 4                                     | 0.265631365  |              |                  |
|              | Brain_Caudate_basal_ganglia    | 0.821377261                 |              | Brain_Frontal_Cortex_BA9              |              |              |                  |
|              | 3.842152857                    | 0.0356048                   | 0.244965814  | -0.225773921                          | 1.113179455  |              |                  |
|              | 0.823368286                    | 0.587308571                 | 4            | 0                                     | 0.993575862  |              |                  |
| SLC2A12      | ENSG00000146411.5              | 0.285759424                 | 4            | 4                                     | 0.328567719  |              |                  |
|              | Brain_Cortex                   | 0.981315212                 |              | Brain_Amygdala                        | 2.027898335  | 0.135081618  |                  |
|              | 0.135081618                    | -0.977002895                | 0.864389111  | -0.218797651                          | 0.828073018  |              |                  |
|              | 4                              | 0                           | 0.993575862  |                                       |              |              |                  |
| UQCC1        | ENSG00000101019.21             | 0.285774801                 | 6            | 4                                     | 0.351423716  |              | Brain_Cortex     |
|              | 0.915974782                    | Brain_Putamen_basal_ganglia | 4.873906357  | 0.006378338                           |              |              |                  |
|              | 0.216456067                    | -0.715873979                | 0.9318313    | -0.104718193                          | 0.611393481  | 4            |                  |
|              | 0                              | 0.993575862                 |              |                                       |              |              |                  |
| PPARG        | ENSG00000132170.19             | 0.285784158                 | 4            | 3                                     | 0.056145962  |              |                  |
|              | Brain_Spinal_cord_cervical_c-1 | 0.902337955                 |              | Brain_Hypothalamus                    | 2.00099068   |              |                  |
|              | 0.00332815                     | 0.940417056                 | -1.909900991 | 0.122708472                           | -0.619124314 |              |                  |
|              | 0.88827753                     | 3                           | 0            | 0.993575862                           |              |              |                  |
| AGO3         | ENSG00000126070.19             | 0.285854975                 | 2            | 2                                     | 0.245664627  |              |                  |
|              | Brain_Putamen_basal_ganglia    | 0.28566058                  |              | Brain_Hippocampus                     | 1.006726692  |              |                  |
|              | 0.993273308                    | 0.993273308                 | -1.160944116 | 1.067689537                           | -0.04662729  |              |                  |
|              | 1.575881968                    | 2                           | 0            | 0.993575862                           |              |              |                  |
| RP11-602.2   | ENSG00000278090.1              | 0.285907828                 | 7            | 7                                     | 0.057074554  |              |                  |
|              | Brain_Cerebellar_Hemisphere    | 0.873983002                 |              | Brain_Frontal_Cortex_BA9              |              |              |                  |
|              | 2.524396946                    | 0.188001383                 | 0.188001383  | -1.90273943                           | 1.507365946  |              |                  |
|              | -0.241393693                   | 1.088728616                 | 7            | 0                                     | 0.993575862  |              |                  |
| CTNS         | ENSG00000040531.14             | 0.28603658                  | 12           | 3                                     | 0.105860205  |              |                  |
|              | Brain_Spinal_cord_cervical_c-1 | 0.924101541                 |              | Brain_Hippocampus                     |              |              |                  |
|              | 10.46436311                    | 6.85E-17                    | 0.398910259  | -0.389970584                          | 1.617083746  |              |                  |
|              | 0.516610896                    | 0.484329293                 | 3            | 0                                     | 0.99365189   |              |                  |
| RP11-480D4.1 | ENSG00000245729.2              | 0.286112723                 | 2            | 2                                     | 0.152020687  |              |                  |
|              | Brain_Spinal_cord_cervical_c-1 | 0.472143098                 |              | Brain_Substantia_nigra                |              |              |                  |
|              | 1.033435781                    | 0.966564219                 | 0.966564219  | 0.718996465                           | 1.432430387  |              |                  |
|              | 1.075713426                    | 0.504473964                 | 2            | 0                                     | 0.99365189   |              |                  |
| ORM1         | ENSG00000229314.5              | 0.286142768                 | 1            | 1                                     | 0.286142768  |              |                  |
|              | Brain_Cerebellar_Hemisphere    | 0.286142768                 |              | Brain_Cerebellar_Hemisphere           | 1            | 1            |                  |
|              | 1                              | -1.066621544                | -1.066621544 | -1.066621544                          | NA           | 1            | 0                |
|              | 0.99365189                     |                             |              |                                       |              |              |                  |
| RP5-115904.1 | ENSG00000272894.5              | 0.286330138                 | 13           | 5                                     | 0.062264052  |              |                  |
|              | Brain_Substantia_nigra         | 0.962028468                 |              | Brain_Nucleus_accumbens_basal_ganglia |              |              |                  |
|              | 9.263713124                    | 0.002085678                 | 0.316062244  | -0.047608236                          | 1.864410697  |              |                  |
|              | 1.026465125                    | 0.512079792                 | 5            | 0                                     | 0.994055822  |              |                  |
| ZNF292       | ENSG00000188994.12             | 0.286519784                 | 3            | 3                                     | 0.23393469   |              |                  |
|              | Brain_Substantia_nigra         | 0.528752513                 |              | Brain_Cerebellar_Hemisphere           |              |              |                  |
|              | 1.933274629                    | 0.374872043                 | 0.374872043  | -1.190284247                          | 0.763651566  |              |                  |
|              | 0.067759594                    | 1.091548136                 | 3            | 0                                     | 0.994213519  |              |                  |
| RNF41        | ENSG00000181852.17             | 0.286608454                 | 1            | 1                                     | 0.286608454  |              | Brain_Cerebellum |
|              | 0.286608454                    | Brain_Cerebellum            | 1            | 1                                     | 1            | -1.065591255 | -1.065591255     |
|              | -1.065591255                   | NA                          | 1            | 0                                     | 0.994213519  |              |                  |
| ARFIP1       | ENSG00000164144.15             | 0.286628145                 | 12           | 3                                     | 0.353676106  |              |                  |
|              | Brain_Hypothalamus             | 0.981795869                 |              | Brain_Spinal_cord_cervical_c-1        |              |              |                  |
|              | 9.555517327                    | 0.002760463                 | 0.608093431  | -0.864630388                          | 0.927482437  |              |                  |
|              | -0.091867743                   | 0.546213536                 | 3            | 0                                     | 0.994213519  |              |                  |
| GHRL         | ENSG00000157017.15             | 0.286683875                 | 3            | 2                                     | 0.115889984  |              | Brain_Cortex     |
|              | 0.221057875                    | Brain_Cerebellum            | 2.755154566  | 0.021788254                           | 0.22305718   |              |                  |
|              | 1.223719994                    | 1.572261214                 | 1.451232671  | 0.197165917                           | 2            | 0            |                  |
|              | 0.994213519                    |                             |              |                                       |              |              |                  |
| ZNF57        | ENSG00000171970.12             | 0.286747305                 | 2            | 2                                     | 0.276725089  |              |                  |
|              | Brain_Cerebellar_Hemisphere    | 0.991329876                 |              | Brain_Cerebellum                      | 1.730274438  |              |                  |

|           |                                       |                                       |                                      |              |                  |
|-----------|---------------------------------------|---------------------------------------|--------------------------------------|--------------|------------------|
|           | 0.269725562                           | 0.269725562                           | 0.010866603                          | 1.087705613  | 0.549286108      |
|           | 0.761440166                           | 2                                     | 0                                    | 0.994213519  |                  |
| EBI3      | ENSG00000105246.5                     | 0.286801927                           | 2                                    | 2            | 0.117616093      |
|           | Brain_Caudate_basal_ganglia           | 0.812429727                           |                                      |              | Brain_Cerebellum |
|           | 1.009980113                           |                                       |                                      |              |                  |
|           | 0.990019887                           | 0.990019887                           | -0.237292697                         | 1.564858492  | 0.663782897      |
|           | 1.274313326                           | 2                                     | 0                                    | 0.994213519  |                  |
| FNDC10    | ENSG00000228594.3                     | 0.28722162                            | 1                                    | 1            | 0.28722162       |
|           | Brain_Putamen_basal_ganglia           | 0.28722162                            | Brain_Putamen_basal_ganglia          | 1            | 1                |
|           | 1.064236403                           | 1.064236403                           | 1.064236403                          | NA           | 1                |
|           |                                       |                                       |                                      | 0            | 0.994554841      |
| HEPACAM   | ENSG00000165478.6                     | 0.287312565                           | 1                                    | 1            | 0.287312565      |
|           | Brain_Putamen_basal_ganglia           | 0.287312565                           | Brain_Putamen_basal_ganglia          | 1            | 1                |
|           | 1                                     | -1.064035618                          | -1.064035618                         | -1.064035618 | NA               |
|           |                                       |                                       |                                      | 1            | 0                |
|           | 0.994554841                           |                                       |                                      |              |                  |
| MST1      | ENSG00000173531.15                    | 0.287353936                           | 7                                    | 3            | 0.33910618       |
|           | Brain_Cortex                          |                                       |                                      |              |                  |
|           | 0.583026312                           | Brain_Cerebellum                      | 6.011050435                          | 0.010906764  | 0.267482359      |
|           | -0.796377677                          | 0.955932812                           | 0.507356576                          | 0.593216266  | 3                |
|           |                                       |                                       |                                      |              | 0                |
|           | 0.994554841                           |                                       |                                      |              |                  |
| LRP6      | ENSG00000070018.8                     | 0.287397479                           | 3                                    | 3            | 0.117598532      |
|           | Brain_Cerebellum                      |                                       |                                      |              |                  |
|           | 0.303394632                           | Brain_Cerebellar_Hemisphere           | 1.432454568                          | 0.583790592  |                  |
|           | 0.583790592                           | -1.564933375                          | 1.181509985                          | -0.470868128 | 1.455858071      |
|           | 3                                     | 0                                     | 0.994554841                          |              |                  |
| LINC01299 | ENSG00000254081.1                     | 0.287407574                           | 11                                   | 2            | 0.178364616      |
|           | Brain_Cerebellum                      | 0.991201535                           | Brain_Anterior_cingulate_cortex_BA24 |              |                  |
|           | 9.687214005                           | 0.01143485                            | 0.395932627                          | -0.056194784 | 1.34580747       |
|           | 0.714849606                           | 0.491229121                           | 2                                    | 0            | 0.994554841      |
| FREM1     | ENSG00000164946.19                    | 0.287410301                           | 10                                   | 9            | 0.088257921      |
|           | Brain_Cerebellum                      |                                       |                                      |              |                  |
|           | 0.993457084                           | Brain_Nucleus_accumbens_basal_ganglia | 4.359832632                          |              |                  |
|           | 0.074824508                           | 0.156079632                           | -0.787550845                         | 1.704659643  | 0.038891726      |
|           | 0.726016701                           | 9                                     | 0                                    | 0.994554841  |                  |
| TMEM64    | ENSG00000180694.13                    | 0.287450111                           | 1                                    | 1            | 0.287450111      |
|           | Brain_Hypothalamus                    | 0.287450111                           | Brain_Hypothalamus                   | 1            | 1                |
|           | 1.063732028                           | 1.063732028                           | 1.063732028                          | NA           | 1                |
|           |                                       |                                       |                                      | 0            | 0.994554841      |
| SEN3      | ENSG00000161956.12                    | 0.287469071                           | 2                                    | 2            | 0.115195394      |
|           | Brain_Nucleus_accumbens_basal_ganglia | 0.985578339                           | Brain_Hypothalamus                   |              |                  |
|           | 1.080273634                           | 0.919726366                           | 0.919726366                          | -1.575264548 | -0.018075856     |
|           | -0.796670202                          | 1.101098684                           | 2                                    | 0            | 0.994554841      |
| LINC01562 | ENSG00000203356.2                     | 0.287574666                           | 2                                    | 2            | 0.114391483      |
|           | Brain_Cerebellum                      | 0.848742688                           | Brain_Substantia_nigra               | 1.125964017  |                  |
|           | 0.874035983                           | 0.874035983                           | -1.578758405                         | -0.19072291  | -0.884740658     |
|           | 0.98148931                            | 2                                     | 0                                    | 0.994674202  |                  |
| SRGAP2    | ENSG00000266028.7                     | 0.287715909                           | 1                                    | 1            | 0.287715909      |
|           | Brain_Substantia_nigra                | 0.287715909                           | Brain_Substantia_nigra               | 1            | 1                |
|           | 1                                     | -1.063145642                          | -1.063145642                         | -1.063145642 | NA               |
|           |                                       |                                       |                                      | 1            | 0                |
|           | 0.994725712                           |                                       |                                      |              |                  |
| SRFBP1    | ENSG00000151304.5                     | 0.287885777                           | 2                                    | 2            | 0.115743315      |
|           | Brain_Putamen_basal_ganglia           | 0.654731783                           | Brain_Cerebellum                     | 1.204652709  |                  |
|           | 0.795347291                           | 0.795347291                           | -1.572894216                         | -0.447198447 | -1.010046331     |
|           | 0.795987112                           | 2                                     | 0                                    | 0.994725712  |                  |
| GYPA      | ENSG00000170180.19                    | 0.287895132                           | 1                                    | 1            | 0.287895132      |
|           | Brain_Frontal_Cortex_BA9              | 0.287895132                           | Brain_Frontal_Cortex_BA9             | 1            | 1                |
|           | 1                                     | -1.062750459                          | -1.062750459                         | -1.062750459 | NA               |
|           |                                       |                                       |                                      | 1            | 0                |
|           | 0.994725712                           |                                       |                                      |              |                  |
| FBLIM1    | ENSG00000162458.12                    | 0.287916441                           | 1                                    | 1            | 0.287916441      |
|           | Brain_Caudate_basal_ganglia           | 0.287916441                           | Brain_Caudate_basal_ganglia          | 1            | 1                |
|           | 1                                     | 1.062703483                           | 1.062703483                          | 1.062703483  | NA               |
|           |                                       |                                       |                                      | 1            | 0                |
|           | 0.994725712                           |                                       |                                      |              |                  |
| MRPS11    | ENSG00000181991.15                    | 0.287945046                           | 1                                    | 1            | 0.287945046      |
|           | Brain_Nucleus_accumbens_basal_ganglia | 0.287945046                           |                                      |              |                  |
|           | Brain_Nucleus_accumbens_basal_ganglia | 1                                     | 1                                    | 1            | -1.062640429     |
|           | -1.062640429                          | -1.062640429                          | NA                                   | 1            | 0                |
|           |                                       |                                       |                                      | 0.994725712  |                  |
| NUP85     | ENSG00000125450.10                    | 0.288071663                           | 13                                   | 2            | 0.067618314      |
|           | Brain_Hippocampus                     | 0.430613688                           | Brain_Substantia_nigra               | 11.81805067  |                  |

|               |                                       |              |              |                                       |              |   |             |            |  |
|---------------|---------------------------------------|--------------|--------------|---------------------------------------|--------------|---|-------------|------------|--|
|               | 0.000215623                           | 0.434848719  | -1.827542024 | -0.788141936                          | -1.457087588 |   |             |            |  |
|               | 0.358544325                           | 2            | 0            | 0.994917463                           |              |   |             |            |  |
| TDO2          | ENSG00000151790.8                     | 0.288146267  | 3            | 3                                     | 0.452312911  |   |             |            |  |
|               | Brain_Frontal_Cortex_BA9              | 0.982325355  |              | Brain_Cortex                          | 2.016714565  |   |             |            |  |
|               | 0.076183302                           | 0.076183302  | 0.022153694  | 0.751564646                           | 0.323656849  |   |             |            |  |
|               | 0.380780362                           | 3            | 0            | 0.994929521                           |              |   |             |            |  |
| DNAJC25       | ENSG00000059769.19                    | 0.288481185  | 3            | 3                                     | 0.054101079  |   |             |            |  |
|               | Brain_Cerebellum                      | 0.935137372  |              | Brain_Anterior_cingulate_cortex_BA24  |              |   |             |            |  |
|               | 1.182959385                           | 0.794656084  | 0.794656084  | -1.926026388                          | 0.194907222  |   |             |            |  |
|               | -0.604167387                          | 1.153068725  | 3            | 0                                     | 0.995840183  |   |             |            |  |
| LINC01771     | ENSG00000225675.2                     | 0.288795993  | 1            | 1                                     | 0.288795993  |   |             |            |  |
|               | Brain_Putamen_basal_ganglia           | 0.288795993  |              | Brain_Putamen_basal_ganglia           | 1            | 1 |             |            |  |
|               | 1                                     | 1.060766581  | 1.060766581  | 1.060766581                           | NA           | 1 | 0           |            |  |
|               | 0.996489356                           |              |              |                                       |              |   |             |            |  |
| PIK3C2B       | ENSG00000133056.13                    | 0.288875862  | 1            | 1                                     | 0.288875862  |   |             |            |  |
|               | Brain_Frontal_Cortex_BA9              | 0.288875862  |              | Brain_Frontal_Cortex_BA9              | 1            | 1 |             |            |  |
|               | 1                                     | -1.060590896 | -1.060590896 | -1.060590896                          | NA           | 1 | 0           |            |  |
|               | 0.996489356                           |              |              |                                       |              |   |             |            |  |
| CCHCR1        | ENSG00000204536.13                    | 0.288889506  | 6            | 5                                     | 0.271793922  |   |             |            |  |
|               | Brain_Putamen_basal_ganglia           | 0.963018228  |              | Brain_Cerebellar_Hemisphere           |              |   |             |            |  |
|               | 4.251036094                           | 0.09536014   | 0.153692604  | -0.88971875                           | 1.098940724  |   |             |            |  |
|               | 0.151584437                           | 0.647193692  | 5            | 0                                     | 0.996489356  |   |             |            |  |
| OCIAD2        | ENSG00000145247.11                    | 0.288954136  | 4            | 3                                     | 0.084330685  |   |             |            |  |
|               | Brain_Putamen_basal_ganglia           | 0.997686873  |              | Brain_Cerebellum                      | 2.419378407  |   |             |            |  |
|               | 0.071884599                           | 0.466049784  | 0.002899079  | 1.726092991                           | 0.640352616  |   |             |            |  |
|               | 0.749886869                           | 3            | 0            | 0.996489356                           |              |   |             |            |  |
| PSMB1         | ENSG00000008018.8                     | 0.289092931  | 3            | 3                                     | 0.24459742   |   |             |            |  |
|               | Brain_Frontal_Cortex_BA9              | 0.668896504  |              | Brain_Cerebellum                      | 2.530474303  |   |             |            |  |
|               | 0.095080575                           | 0.095080575  | -1.163572207 | -0.427662982                          | -0.854072344 |   |             |            |  |
|               | 0.381630017                           | 3            | 0            | 0.996722327                           |              |   |             |            |  |
| SIAH1         | ENSG00000196470.11                    | 0.289269995  | 1            | 1                                     | 0.289269995  |   |             |            |  |
|               | Brain_Cerebellar_Hemisphere           | 0.289269995  |              | Brain_Cerebellar_Hemisphere           | 1            | 1 |             |            |  |
|               | 1                                     | -1.059724409 | -1.059724409 | -1.059724409                          | NA           | 1 | 0           | 0.99708709 |  |
| SFI1          | ENSG00000198089.15                    | 0.28941212   | 11           | 8                                     | 0.018440902  |   |             |            |  |
|               | Brain_Spinal_cord_cervical_c-1        | 0.952846598  |              |                                       |              |   |             |            |  |
|               | Brain_Nucleus_accumbens_basal_ganglia | 5.403533894  |              | 0.057455239                           |              |   |             |            |  |
|               | 0.206438145                           | -2.356644294 | 0.360440474  | -0.803856384                          | 0.834207629  |   |             |            |  |
|               | 8                                     | 0            | 0.997148584  |                                       |              |   |             |            |  |
| TCEA2         | ENSG00000171703.16                    | 0.289528764  | 5            | 5                                     | 0.046759678  |   |             |            |  |
|               | Brain_Hippocampus                     | 0.569333316  |              | Brain_Cerebellar_Hemisphere           | 1.298012545  |   |             |            |  |
|               | 0.609476934                           | 0.609476934  | -1.988470501 | 0.980301323                           | -0.11410284  |   |             |            |  |
|               | 1.262842484                           | 5            | 0            | 0.997148584                           |              |   |             |            |  |
| TACR2         | ENSG00000075073.14                    | 0.289530735  | 3            | 3                                     | 0.1079016    |   |             |            |  |
|               | Brain_Caudate_basal_ganglia           | 0.908174256  |              | Brain_Nucleus_accumbens_basal_ganglia |              |   |             |            |  |
|               | 1.052416211                           | 0.931031792  | 0.931031792  | -1.607696798                          | 0.115341739  |   |             |            |  |
|               | -0.840267065                          | 0.876797566  | 3            | 0                                     | 0.997148584  |   |             |            |  |
| RP11-452F19.3 | ENSG00000228106.5                     | 0.289598673  | 7            | 4                                     | 0.212828155  |   |             |            |  |
|               | Brain_Cerebellar_Hemisphere           | 0.775099703  |              | Brain_Cortex                          | 4.701169317  |   |             |            |  |
|               | 0.021736346                           | 0.305561018  | -0.419658131 | 1.245826345                           | 0.24338095   |   |             |            |  |
|               | 0.670912051                           | 4            | 0            | 0.997148584                           |              |   |             |            |  |
| RP11-20D14.6  | ENSG00000249790.2                     | 0.289644925  | 2            | 2                                     | 0.141714322  |   |             |            |  |
|               | Brain_Cerebellum                      | 0.556561194  |              | Brain_Putamen_basal_ganglia           | 1.015834279  |   |             |            |  |
|               | 0.984165721                           | 0.984165721  | -0.587956943 | 1.469436912                           | 0.440739985  |   |             |            |  |
|               | 1.454797146                           | 2            | 0            | 0.997148584                           |              |   |             |            |  |
| RP11-45M22.5  | ENSG00000266498.1                     | 0.289956229  | 1            | 1                                     | 0.289956229  |   |             |            |  |
|               | Brain_Hippocampus                     | 0.289956229  |              | Brain_Hippocampus                     | 1            | 1 | 1           |            |  |
|               | 1.058217645                           | 1.058217645  | 1.058217645  | NA                                    | 1            | 0 | 0.997148584 |            |  |
| BIRC7         | ENSG00000101197.12                    | 0.289982615  | 7            | 6                                     | 0.0586197    |   |             |            |  |
|               | Brain_Caudate_basal_ganglia           | 3.179016371  |              | 0.034859358                           |              |   |             |            |  |
|               | 0.873849558                           | -1.891034791 | 0.525906739  | -0.506719546                          | 0.892746195  |   |             |            |  |
|               | 0.358087519                           | 6            | 0            | 0.997148584                           |              |   |             |            |  |
| MAP3K7CL      | ENSG00000156265.15                    | 0.290042084  | 4            | 4                                     | 0.359304258  |   |             |            |  |

|               |                                       |                             |                                |                             |              |              |                  |
|---------------|---------------------------------------|-----------------------------|--------------------------------|-----------------------------|--------------|--------------|------------------|
|               | Brain_Hippocampus                     | 0.712226638                 |                                | Brain_Hypothalamus          | 2.488368852  |              |                  |
|               | 0.159697619                           | 0.159697619                 | -0.897125482                   | 0.916691622                 | 0.114587388  |              |                  |
|               | 0.890879591                           | 4                           | 0                              | 0.997148584                 |              |              |                  |
| GPR137B       | ENSG00000077585.13                    | 0.290055718                 |                                | 6                           | 6            | 0.044253962  |                  |
|               | Brain_Putamen_basal_ganglia           | 0.637526761                 |                                | Brain_Cerebellar_Hemisphere |              |              |                  |
|               | 2.852475053                           | 0.195561739                 | 0.195561739                    | -2.011677329                | 0.853352212  |              |                  |
|               | -0.885179513                          | 1.045576436                 | 6                              | 0                           | 0.997148584  |              |                  |
| ZNF460        | ENSG00000197714.8                     | 0.290101009                 |                                | 1                           | 1            | 0.290101009  |                  |
|               | Brain_Amygdala                        | 0.290101009                 | Brain_Amygdala                 | 1                           | 1            | 1            | 1.057900057      |
|               | 1.057900057                           | 1.057900057                 | NA                             | 1                           | 0            | 0.997148584  |                  |
| CRP           | ENSG00000132693.12                    | 0.290277254                 |                                | 1                           | 1            | 0.290277254  | Brain_Cortex     |
|               | 0.290277254                           | Brain_Cortex                | 1                              | 1                           | 1            | -1.057513595 | -1.057513595     |
|               | -1.057513595                          | NA                          | 1                              | 0                           | 0.997148584  |              |                  |
| TUBGCP5       | ENSG00000275835.4                     | 0.290312896                 |                                | 4                           | 4            | 0.081285128  |                  |
|               | Brain_Nucleus_accumbens_basal_ganglia | 0.921566923                 | Brain_Frontal_Cortex_BA9       |                             |              |              |                  |
|               | 1.960381073                           | 0.244132581                 | 0.244132581                    | -0.098460139                | 1.743277646  |              |                  |
|               | 0.780875548                           | 0.768347228                 | 4                              | 0                           | 0.997148584  |              |                  |
| NT5C          | ENSG00000125458.6                     | 0.290365179                 |                                | 3                           | 3            | 0.079983789  |                  |
|               | Brain_Putamen_basal_ganglia           | 0.640326972                 | Brain_Cerebellum               | 1.462582872                 |              |              |                  |
|               | 0.624978396                           | 0.624978396                 | -1.75078014                    | 0.467241686                 | -0.842910702 |              |                  |
|               | 1.162445218                           | 3                           | 0                              | 0.997148584                 |              |              |                  |
| SZT2          | ENSG00000198198.15                    | 0.290391736                 |                                | 4                           | 4            | 0.111223901  | Brain_Cortex     |
|               | 0.990599444                           | Brain_Cerebellar_Hemisphere | 1.482727569                    | 0.540771368                 |              |              |                  |
|               | 0.540771368                           | -1.304497741                | 1.592716071                    | -0.107404742                | 1.254963351  |              |                  |
|               | 4                                     | 0                           | 0.997148584                    |                             |              |              |                  |
| GRAMD1B       | ENSG00000023171.16                    | 0.290407244                 |                                | 4                           | 4            | 0.048478548  |                  |
|               | Brain_Cerebellum                      | 0.999738692                 | Brain_Amygdala                 | 1.701912325                 | 0.502525595  |              |                  |
|               | 0.502525595                           | -0.000327501                | 1.97314936                     | 0.584773896                 | 0.929695103  |              | 4                |
|               | 0                                     | 0.997148584                 |                                |                             |              |              |                  |
| NDFIP2        | ENSG00000102471.13                    | 0.290428167                 |                                | 1                           | 1            | 0.290428167  |                  |
|               | Brain_Amygdala                        | 0.290428167                 | Brain_Amygdala                 | 1                           | 1            | 1            | -1.057182803     |
|               | -1.057182803                          | -1.057182803                | NA                             | 1                           | 0            | 0.997148584  |                  |
| UGGT2         | ENSG00000102595.19                    | 0.290575616                 |                                | 2                           | 2            | 0.130621388  |                  |
|               | Brain_Cerebellar_Hemisphere           | 0.22428293                  | Brain_Spinal_cord_cervical_c-1 |                             |              |              |                  |
|               | 1.568821665                           | 0.431178335                 | 0.431178335                    | 1.215218072                 | 1.511656037  |              |                  |
|               | 1.363437055                           | 0.209613295                 | 2                              | 0                           | 0.997306517  |              |                  |
| RP11-160H22.5 | ENSG00000227373.5                     | 0.29070929                  |                                | 5                           | 5            | 0.064141236  |                  |
|               | Brain_Cortex                          | 0.547520691                 | Brain_Spinal_cord_cervical_c-1 | 2.847490156                 |              |              |                  |
|               | 0.195286321                           | 0.195286321                 | -1.851196871                   | -0.601479456                | -1.225719604 |              |                  |
|               | 0.519740322                           | 5                           | 0                              | 0.997306517                 |              |              |                  |
| RP11-1055B8.9 | ENSG00000275966.1                     | 0.29077415                  |                                | 1                           | 1            | 0.29077415   |                  |
|               | Brain_Nucleus_accumbens_basal_ganglia | 0.29077415                  |                                |                             |              |              |                  |
|               | Brain_Nucleus_accumbens_basal_ganglia | 1                           | 1                              | 1                           | -1.056424867 |              |                  |
|               | -1.056424867                          | -1.056424867                | NA                             | 1                           | 0            | 0.997306517  |                  |
| PALM2         | ENSG00000243444.7                     | 0.290783671                 |                                | 1                           | 1            | 0.290783671  |                  |
|               | Brain_Hypothalamus                    | 0.290783671                 | Brain_Hypothalamus             | 1                           | 1            | 1            |                  |
|               | -1.056404019                          | -1.056404019                | -1.056404019                   | NA                          | 1            | 0            | 0.997306517      |
| ZNF391        | ENSG00000124613.8                     | 0.290841749                 |                                | 13                          | 2            | 0.239702486  |                  |
|               | Brain_Anterior_cingulate_cortex_BA24  | 0.99766832                  | Brain_Spinal_cord_cervical_c-1 |                             |              |              |                  |
|               | 11.90924496                           | 0.003439555                 | 0.471308523                    | -1.175730751                | 0.017586029  |              |                  |
|               | -0.352983281                          | 0.355252605                 | 2                              | 0                           | 0.997306517  |              |                  |
| ZNF618        | ENSG00000157657.14                    | 0.290901858                 |                                | 2                           | 2            | 0.13135706   |                  |
|               | Brain_Cerebellar_Hemisphere           | 0.230964538                 | Brain_Cerebellum               | 1.912863795                 |              |              |                  |
|               | 0.087136205                           | 0.087136205                 | 1.197877942                    | 1.508771994                 | 1.353324968  |              |                  |
|               | 0.219835292                           | 2                           | 0                              | 0.997306517                 |              |              |                  |
| ASNS          | ENSG00000070669.16                    | 0.291020956                 |                                | 3                           | 3            | 0.155933775  | Brain_Cerebellum |
|               | 0.817402288                           | Brain_Frontal_Cortex_BA9    | 1.775831973                    | 0.348632664                 |              |              |                  |
|               | 0.348632664                           | -0.376743559                | 1.418880786                    | 0.270416613                 | 0.997269258  |              |                  |
|               | 3                                     | 0                           | 0.997319833                    |                             |              |              |                  |
| LRRC20        | ENSG00000172731.13                    | 0.291118611                 |                                | 2                           | 2            | 0.144955801  |                  |
|               | Brain_Putamen_basal_ganglia           | 0.763871379                 | Brain_Frontal_Cortex_BA9       | 1.18877392                  |              |              |                  |
|               | 0.81122608                            | 0.81122608                  | -1.457581975                   | 0.300400898                 | -0.578590539 | 1.24308161   |                  |

2 0 0.997319833  
 ESD ENSG00000139684.13 0.291299695 3 2 0.118014771 Brain\_Cortex  
 0.994539864 Brain\_Anterior\_cingulate\_cortex\_BA24 2.005437444  
 0.005442725 0.989119831 -1.563160831 0.067436093 -0.496293806  
 0.924430531 2 0 0.997319833  
 CTD-2201E18.5 ENSG00000271788.1 0.291508978 1 1 0.291508978  
 Brain\_Caudate\_basal\_ganglia 0.291508978 Brain\_Caudate\_basal\_ganglia 1 1  
 1 1.054817109 1.054817109 1.054817109 NA 1 0  
 0.997319833  
 HCRT ENSG00000161610.1 0.29154907 1 1 0.29154907  
 Brain\_Nucleus\_accumbens\_basal\_ganglia 0.29154907  
 Brain\_Nucleus\_accumbens\_basal\_ganglia 1 1 1 1.05472947 1.05472947  
 1.05472947 NA 1 0 0.997319833  
 GPSM3 ENSG00000213654.9 0.291593205 1 1 0.291593205 Brain\_Cerebellum  
 0.291593205 Brain\_Cerebellum 1 1 1 1.054633 1.054633 1.054633  
 NA 1 0 0.997319833  
 PREP ENSG00000085377.13 0.291668434 1 1 0.291668434 Brain\_Amygdala  
 0.291668434 Brain\_Amygdala 1 1 1 -1.05446859 -1.05446859  
 -1.05446859 NA 1 0 0.997319833  
 PRMT6 ENSG00000198890.7 0.291901038 7 6 0.00976791 Brain\_Hippocampus  
 0.889812876 Brain\_Spinal\_cord\_cervical\_c-1 3.197721886 0.001495747  
 0.333670692 -2.58393889 -0.138540991 -1.478413174 1.039738616  
 6 0 0.997319833  
 RP11-431K24.1 ENSG00000238290.1 0.292061511 11 2 0.063381027  
 Brain\_Nucleus\_accumbens\_basal\_ganglia 0.818789218 Brain\_Cerebellum  
 9.474483829 5.06E-05 0.997571468 0.229102542 1.856509099  
 1.375653105 0.474561231 2 0 0.997319833  
 ZNF195 ENSG00000005801.16 0.292070156 11 2 0.110867352  
 Brain\_Anterior\_cingulate\_cortex\_BA24 0.23342381 Brain\_Hypothalamus  
 10.05065344 0.001280164 0.395113129 1.191585508 1.594306727  
 1.381820927 0.133578942 2 0 0.997319833  
 CTD-2540B15.9 ENSG00000267130.1 0.292317228 1 1 0.292317228  
 Brain\_Nucleus\_accumbens\_basal\_ganglia 0.292317228  
 Brain\_Nucleus\_accumbens\_basal\_ganglia 1 1 1 1.053051852  
 1.053051852 1.053051852 NA 1 0 0.997319833  
 EDEM3 ENSG00000116406.18 0.292325918 5 5 0.078862439  
 Brain\_Nucleus\_accumbens\_basal\_ganglia 0.668067609 Brain\_Cortex  
 3.231375908 0.109237712 0.109237712 -1.75732494 0.428801607  
 -0.889125866 0.799798245 5 0 0.997319833  
 OR2L3 ENSG00000198128.3 0.292488298 3 2 0.288479619 Brain\_Cerebellum  
 0.745883356 Brain\_Cerebellar\_Hemisphere 2.401860339 0.03242993  
 0.565709732 -1.061462825 0.406756798 -0.110211268 0.824844729  
 2 0 0.997319833  
 NUTM2G ENSG00000188152.12 0.292513927 2 2 0.135767826  
 Brain\_Hippocampus 0.145553812 Brain\_Cerebellar\_Hemisphere 1.768528089  
 0.231471911 0.231471911 -1.491738065 -1.455417149 -1.473577607  
 0.025682766 2 0 0.997319833  
 ZMYM5 ENSG00000132950.18 0.292536523 1 1 0.292536523 Brain\_Cortex  
 0.292536523 Brain\_Cortex 1 1 1 1.052573466 1.052573466  
 1.052573466 NA 1 0 0.997319833  
 ARL15 ENSG00000185305.10 0.292594839 4 3 0.179777741  
 Brain\_Nucleus\_accumbens\_basal\_ganglia 0.787351375 Brain\_Putamen\_basal\_ganglia  
 2.651502845 0.06307438 0.206249417 -1.341439684 0.914850937  
 -0.223714442 1.008903758 3 0 0.997319833  
 RASSF9 ENSG00000198774.4 0.292644707 2 2 0.120582173  
 Brain\_Cerebellum 0.894452984 Brain\_Substantia\_nigra 1.05523222 0.94476778  
 0.94476778 0.132671752 1.552334643 0.842503197 1.003853257 2  
 0 0.997319833  
 TMEM106B ENSG00000106460.18 0.292648963 2 2 0.117720523  
 Brain\_Cerebellum 0.179994612 Brain\_Cortex 1.886836937 0.113163063  
 0.113163063 1.340771624 1.564413371 1.452592497 0.158138596 2  
 0 0.997319833

|                |                                       |                    |              |              |                                |             |              |                  |
|----------------|---------------------------------------|--------------------|--------------|--------------|--------------------------------|-------------|--------------|------------------|
| REV1           | ENSG00000135945.9                     | 0.292693142        | 1            | 1            | 0.292693142                    |             |              |                  |
|                | Brain_Hypothalamus                    | 0.292693142        |              |              | Brain_Hypothalamus             | 1           | 1            | 1                |
|                | -1.052231955                          | -1.052231955       | -1.052231955 | NA           | 1                              | 0           | 0.997319833  |                  |
| SYTL2          | ENSG00000137501.17                    | 0.292697603        | 1            | 1            | 0.292697603                    |             |              |                  |
|                | Brain_Putamen_basal_ganglia           | 0.292697603        |              |              | Brain_Putamen_basal_ganglia    | 1           | 1            | 1                |
|                | 1.052222229                           | 1.052222229        | 1.052222229  | NA           | 1                              | 0           | 0.997319833  |                  |
| ABHD2          | ENSG00000140526.17                    | 0.292774783        | 2            | 2            | 0.18516964                     |             |              |                  |
|                | Brain_Nucleus_accumbens_basal_ganglia | 0.393802155        |              |              | Brain_Cerebellar_Hemisphere    |             |              |                  |
|                | 1.011700183                           | 0.988299817        | 0.988299817  | -1.325004556 |                                |             | -0.852742431 |                  |
|                | -1.088873493                          | 0.333939751        | 2            | 0            | 0.997319833                    |             |              |                  |
| ITGB3BP        | ENSG00000142856.16                    | 0.292835293        | 13           | 1            | 0.223814522                    |             |              |                  |
|                | Brain_Cerebellar_Hemisphere           | 0.488782989        |              |              | Brain_Cerebellum               | 12.81599335 |              |                  |
|                | 0.000100788                           | 12.81599335        | -1.21644744  | -0.692245788 |                                |             | -1.044650124 |                  |
|                | 0.134024222                           | 1                  | 0            | 0.997319833  |                                |             |              |                  |
| LINC00326      | ENSG00000231023.6                     | 0.292978014        | 4            | 2            | 0.248313229                    |             |              |                  |
|                | Brain_Spinal_cord_cervical_c-1        | 0.555068416        |              |              |                                |             |              |                  |
|                | Brain_Anterior_cingulate_cortex_BA24  | 2.985819673        |              |              | 0.000656614                    |             |              |                  |
|                | 0.928629927                           | 0.590182332        | 1.154456095  | 0.869943202  |                                |             | 0.269089436  |                  |
|                | 2                                     | 0                  | 0.997319833  |              |                                |             |              |                  |
| ASXL3          | ENSG00000141431.10                    | 0.292982014        | 1            | 1            | 0.292982014                    |             |              | Brain_Cerebellum |
|                | 0.292982014                           | Brain_Cerebellum   | 1            | 1            | 1.051602382                    |             | 1.051602382  |                  |
|                | 1.051602382                           | NA                 | 1            | 0            | 0.997319833                    |             |              |                  |
| ANKRD65        | ENSG00000235098.8                     | 0.293169473        | 13           | 7            | 0.00593631                     |             |              | Brain_Cortex     |
|                | 0.935021099                           | Brain_Hypothalamus | 8.136996408  | 0.007160242  |                                |             |              |                  |
|                | 0.424296288                           | 0.081529206        | 2.75127876   | 1.66047555   | 0.827189159                    |             | 7            | 0                |
|                | 0.997319833                           |                    |              |              |                                |             |              |                  |
| TMEM59L        | ENSG00000105696.8                     | 0.293233939        | 4            | 4            | 0.103529415                    |             |              |                  |
|                | Brain_Nucleus_accumbens_basal_ganglia | 0.705952227        |              |              | Brain_Caudate_basal_ganglia    |             |              |                  |
|                | 1.361868361                           | 0.698812124        | 0.698812124  | -1.627978639 |                                |             | 0.377297908  |                  |
|                | -0.76937651                           | 0.848476979        | 4            | 0            | 0.997319833                    |             |              |                  |
| NME9           | ENSG00000181322.13                    | 0.293289792        | 7            | 7            | 0.011572645                    |             |              |                  |
|                | Brain_Caudate_basal_ganglia           | 0.832954017        |              |              | Brain_Spinal_cord_cervical_c-1 |             |              |                  |
|                | 3.966230288                           | 0.143939665        | 0.143939665  | -2.524914479 |                                |             | 0.210914465  |                  |
|                | -1.317553759                          | 0.972008647        | 7            | 0            | 0.997319833                    |             |              |                  |
| ALG11          | ENSG00000253710.2                     | 0.293325692        | 1            | 1            | 0.293325692                    |             |              | Brain_Cerebellum |
|                | 0.293325692                           | Brain_Cerebellum   | 1            | 1            | -1.05085391                    |             | -1.05085391  |                  |
|                | -1.05085391                           | NA                 | 1            | 0            | 0.997319833                    |             |              |                  |
| KLKB1          | ENSG00000164344.15                    | 0.293359888        | 11           | 3            | 0.052358979                    |             |              |                  |
|                | Brain_Substantia_nigra                | 0.295319559        |              |              | Brain_Hippocampus              |             | 8.840742547  |                  |
|                | 0.007538113                           | 0.511521747        | 1.046523158  | 1.940170449  |                                |             | 1.404314524  |                  |
|                | 0.33524881                            | 3                  | 0            | 0.997319833  |                                |             |              |                  |
| CTD-2561B21.10 | ENSG00000262098.1                     | 0.293418497        | 2            | 2            | 0.295116234                    |             |              |                  |
|                | Brain_Putamen_basal_ganglia           | 0.314971744        |              |              | Brain_Caudate_basal_ganglia    |             |              |                  |
|                | 1.141370613                           | 0.858629387        | 0.858629387  | -1.046963887 |                                |             | 1.004844476  |                  |
|                | -0.021059706                          | 1.450847608        | 2            | 0            | 0.997319833                    |             |              |                  |
| PANX2          | ENSG00000073150.13                    | 0.293611118        | 1            | 1            | 0.293611118                    |             |              |                  |
|                | Brain_Frontal_Cortex_BA9              | 0.293611118        |              |              | Brain_Frontal_Cortex_BA9       | 1           | 1            |                  |
|                | 1                                     | -1.050232746       | -1.050232746 | -1.050232746 | NA                             | 1           | 0            |                  |
|                | 0.997319833                           |                    |              |              |                                |             |              |                  |
| RP11-424M24.5  | ENSG00000262890.1                     | 0.293631951        | 1            | 1            | 0.293631951                    |             |              |                  |
|                | Brain_Amygdala                        | 0.293631951        |              |              | Brain_Amygdala                 | 1           | 1            | 1                |
|                | 1.050187422                           | 1.050187422        | NA           | 1            | 0                              | 0.997319833 |              | 1.050187422      |
| SLC25A30       | ENSG00000174032.16                    | 0.293638856        | 3            | 3            | 0.20483275                     |             |              |                  |
|                | Brain_Caudate_basal_ganglia           | 0.474207674        |              |              | Brain_Hippocampus              |             | 1.137033692  |                  |
|                | 0.881389302                           | 0.881389302        | -1.26790256  | 1.239233709  |                                |             | -0.248106185 |                  |
|                | 1.31733852                            | 3                  | 0            | 0.997319833  |                                |             |              |                  |
| RAPGEF1        | ENSG00000107263.18                    | 0.293693094        | 2            | 2            | 0.571238257                    |             |              |                  |
|                | Brain_Cerebellum                      | 0.890106949        |              |              | Brain_Cerebellar_Hemisphere    | 1.896721932 |              |                  |
|                | 0.103278068                           | 0.103278068        | -0.138168881 | 0.566228796  |                                |             | 0.214029958  |                  |
|                | 0.498084374                           | 2                  | 0            | 0.997319833  |                                |             |              |                  |
| PREX1          | ENSG00000124126.13                    | 0.293736274        | 3            | 3            | 0.098391204                    |             |              |                  |



|            |                                       |                                |                                      |              |                  |                |             |             |
|------------|---------------------------------------|--------------------------------|--------------------------------------|--------------|------------------|----------------|-------------|-------------|
|            | Brain_Nucleus_accumbens_basal_ganglia | 0.456481625                    |                                      |              | Brain_Cerebellum |                |             |             |
|            | 1.914116599                           | 0.088921031                    | 0.088921031                          | -0.962039544 | 1.652703587      |                |             |             |
|            | -0.01799626                           | 1.450945461                    | 3                                    | 0            | 0.997319833      |                |             |             |
| C19orf67   | ENSG00000188032.9                     | 0.293797403                    | 1                                    | 1            | 0.293797403      |                |             |             |
|            | Brain_Hypothalamus                    | 0.293797403                    | Brain_Hypothalamus                   | 1            | 1                | 1              |             |             |
|            | -1.049827556                          | -1.049827556                   | -1.049827556                         | NA           | 1                | 0              | 0.997319833 |             |
| TECRL      | ENSG00000205678.7                     | 0.293803828                    | 1                                    | 1            | 0.293803828      |                |             |             |
|            | Brain_Hypothalamus                    | 0.293803828                    | Brain_Hypothalamus                   | 1            | 1                | 1              |             |             |
|            | -1.049813585                          | -1.049813585                   | -1.049813585                         | NA           | 1                | 0              | 0.997319833 |             |
| ACTR3B     | ENSG00000133627.17                    | 0.293822822                    | 1                                    | 1            | 0.293822822      |                |             |             |
|            | Brain_Caudate_basal_ganglia           | 0.293822822                    | Brain_Caudate_basal_ganglia          | 1            | 1                | 1              |             |             |
|            | 1                                     | 1.049772281                    | 1.049772281                          | 1.049772281  | NA               | 1              | 0           | 0.997319833 |
| AC005224.2 | ENSG00000231595.1                     | 0.293893927                    | 1                                    | 1            | 0.293893927      |                |             |             |
|            | Brain_Spinal_cord_cervical_c-1        | 0.293893927                    | Brain_Spinal_cord_cervical_c-1       | 1            | 1                | 1              |             |             |
|            | 1                                     | 1                              | 1.049617676                          | 1.049617676  | 1.049617676      | NA             | 1           | 0           |
|            | 0.997319833                           |                                |                                      |              |                  |                |             |             |
| GNS        | ENSG00000135677.10                    | 0.293903958                    | 1                                    | 1            | 0.293903958      |                |             |             |
|            | Brain_Spinal_cord_cervical_c-1        | 0.293903958                    | Brain_Spinal_cord_cervical_c-1       | 1            | 1                | 1              |             |             |
|            | 1                                     | 1                              | 1.049595867                          | 1.049595867  | 1.049595867      | NA             | 1           | 0           |
|            | 0.997319833                           |                                |                                      |              |                  |                |             |             |
| SIRPB1     | ENSG00000101307.15                    | 0.294054784                    | 13                                   | 2            | 0.48364558       |                |             |             |
|            | Brain_Substantia_nigra                | 0.971342617                    | Brain_Hippocampus                    | 12.43188409  |                  |                |             |             |
|            | 4.31E-05                              | 0.474496595                    | -0.177818243                         | 0.700451186  | 0.104619101      |                |             |             |
|            | 0.313078225                           | 2                              | 0                                    | 0.997319833  |                  |                |             |             |
| LIG4       | ENSG00000174405.13                    | 0.294102966                    | 4                                    | 3            | 0.090214228      |                |             |             |
|            | Brain_Hippocampus                     | 0.55021813                     | Brain_Cerebellum                     | 3.248956806  | 0.073824647      |                |             |             |
|            | 0.123922125                           | 0.597433295                    | 1.694268738                          | 1.032720091  | 0.470669051      |                |             |             |
|            | 3                                     | 0                              | 0.997319833                          |              |                  |                |             |             |
| ZNF814     | ENSG00000204514.9                     | 0.294152996                    | 10                                   | 3            | 0.033881731      |                |             |             |
|            | Brain_Spinal_cord_cervical_c-1        | 0.959511612                    |                                      |              |                  |                |             |             |
|            | Brain_Anterior_cingulate_cortex_BA24  | 8.363561561                    |                                      |              | 0.013844396      |                |             |             |
|            | 0.333784459                           | 0.050766467                    | 2.121476406                          | 1.248611259  | 0.677730351      |                |             |             |
|            | 3                                     | 0                              | 0.997319833                          |              |                  |                |             |             |
| CCDC88B    | ENSG00000168071.21                    | 0.294156509                    | 7                                    | 3            | 0.188251008      |                |             |             |
|            | Brain_Frontal_Cortex_BA9              | 0.89529206                     | Brain_Putamen_basal_ganglia          | 5.803259489  |                  |                |             |             |
|            | 0.00370512                            | 0.3710505                      | -1.315770725                         | 0.504448183  | -0.610574285     |                |             |             |
|            | 0.624859643                           | 3                              | 0                                    | 0.997319833  |                  |                |             |             |
| DVL1       | ENSG00000107404.19                    | 0.294183069                    | 1                                    | 1            | 0.294183069      |                |             |             |
|            | Brain_Spinal_cord_cervical_c-1        | 0.294183069                    | Brain_Spinal_cord_cervical_c-1       | 1            | 1                | 1              |             |             |
|            | 1                                     | 1                              | 1.048989244                          | 1.048989244  | 1.048989244      | NA             | 1           | 0           |
|            | 0.997319833                           |                                |                                      |              |                  |                |             |             |
| C19orf35   | ENSG00000188305.5                     | 0.294354992                    | 1                                    | 1            | 0.294354992      |                |             |             |
|            | Brain_Hypothalamus                    | 0.294354992                    | Brain_Hypothalamus                   | 1            | 1                | 1              |             |             |
|            | -1.048615776                          | -1.048615776                   | -1.048615776                         | NA           | 1                | 0              | 0.997319833 |             |
| SMC6       | ENSG00000163029.15                    | 0.294358374                    | 3                                    | 3            | 0.06799178       | Brain_Amygdala |             |             |
|            | 0.624081321                           | Brain_Cerebellum               | 1.881948115                          | 0.118835888  | 0.118835888      |                |             |             |
|            | 0.490074303                           | 1.825061298                    | 0.969126502                          | 0.743019473  | 3                | 0              |             |             |
|            | 0.997319833                           |                                |                                      |              |                  |                |             |             |
| C1orf194   | ENSG00000179902.12                    | 0.29444545                     | 9                                    | 3            | 0.042737388      |                |             |             |
|            | Brain_Caudate_basal_ganglia           | 0.705197535                    | Brain_Anterior_cingulate_cortex_BA24 |              |                  |                |             |             |
|            | 7.254225782                           | 0.017998848                    | 0.315984454                          | 0.378313746  | 2.026267421      |                |             |             |
|            | 1.363165201                           | 0.484121964                    | 3                                    | 0            | 0.997319833      |                |             |             |
| RCE1       | ENSG00000173653.7                     | 0.294477686                    | 1                                    | 1            | 0.294477686      |                |             |             |
|            | Brain_Cerebellar_Hemisphere           | 0.294477686                    | Brain_Cerebellar_Hemisphere          | 1            | 1                |                |             |             |
|            | 1                                     | 1.048349337                    | 1.048349337                          | 1.048349337  | NA               | 1              | 0           | 0.997319833 |
|            | 0.997319833                           |                                |                                      |              |                  |                |             |             |
| RAC1       | ENSG00000136238.17                    | 0.294575996                    | 10                                   | 7            | 0.038053568      | Brain_Cortex   |             |             |
|            | 0.951764906                           | Brain_Spinal_cord_cervical_c-1 | 6.149873384                          | 0.03118222   |                  |                |             |             |
|            | 0.319588028                           | 0.060490596                    | 2.074277267                          | 1.227125653  | 0.670628979      |                |             |             |
|            | 7                                     | 0                              | 0.997319833                          |              |                  |                |             |             |
| USP45      | ENSG00000123552.17                    | 0.29495143                     | 2                                    | 2            | 0.317016719      |                |             |             |

|               |                                       |                  |                                       |                                       |              |                  |              |
|---------------|---------------------------------------|------------------|---------------------------------------|---------------------------------------|--------------|------------------|--------------|
|               | Brain_Caudate_basal_ganglia           | 0.684222686      |                                       | Brain_Nucleus_accumbens_basal_ganglia |              |                  |              |
|               | 1.57497671                            | 0.42502329       | 0.42502329                            | -1.000607259                          | 0.406707698  |                  | -0.296949781 |
|               | 0.995121949                           | 2                | 0                                     | 0.997319833                           |              |                  |              |
| TLR9          | ENSG00000239732.3                     | 0.294991074      | 3                                     | 3                                     | 0.082701891  |                  |              |
|               | Brain_Cerebellar_Hemisphere           | 0.45389703       | Brain_Amygdala                        | 2.101577507                           |              |                  |              |
|               | 0.130769769                           | 0.130769769      | 0.748933928                           | 1.735219743                           |              |                  | 1.186066154  |
|               | 0.502594784                           | 3                | 0                                     | 0.997319833                           |              |                  |              |
| GBA           | ENSG00000177628.15                    | 0.294999008      | 2                                     | 2                                     | 0.161909363  |                  |              |
|               | Brain_Nucleus_accumbens_basal_ganglia | 0.584682488      | Brain_Cerebellum                      |                                       |              |                  |              |
|               | 1.104551273                           | 0.895448727      | 0.895448727                           | -0.546557916                          |              |                  | 1.398678672  |
|               | 0.426060378                           | 1.375489983      | 2                                     | 0                                     | 0.997319833  |                  |              |
| COLEC11       | ENSG00000118004.17                    | 0.295237229      | 13                                    | 13                                    | 0.061947991  |                  |              |
|               | Brain_Amygdala                        | 0.979216575      | Brain_Nucleus_accumbens_basal_ganglia |                                       |              |                  |              |
|               | 2.952990297                           | 0.163676754      | 0.163676754                           | -1.733238908                          |              |                  | 1.866667812  |
|               | 0.071167465                           | 1.006317149      | 13                                    | 0                                     | 0.997319833  |                  |              |
| RP11-357P18.2 | ENSG00000274245.1                     | 0.295245993      | 1                                     | 1                                     | 0.295245993  |                  |              |
|               | Brain_Hypothalamus                    | 0.295245993      | Brain_Hypothalamus                    | 1                                     | 1            | 1                |              |
|               | -1.046682596                          | -1.046682596     | -1.046682596                          | NA                                    | 1            | 0                | 0.997319833  |
| C6orf89       | ENSG00000198663.16                    | 0.295254302      | 6                                     | 5                                     | 0.181952408  |                  |              |
|               | Brain_Hippocampus                     | 0.502427133      | Brain_Putamen_basal_ganglia           | 3.082285946                           |              |                  |              |
|               | 0.002085501                           | 0.138721842      | -1.334767638                          | 1.122393187                           |              |                  | -0.352940847 |
|               | 0.997928103                           | 5                | 0                                     | 0.997319833                           |              |                  |              |
| CTBP1         | ENSG00000159692.15                    | 0.295373241      | 3                                     | 3                                     | 0.069448799  |                  |              |
|               | Brain_Spinal_cord_cervical_c-1        | 0.758682353      | Brain_Cerebellum                      | 1.273161241                           |              |                  |              |
|               | 0.725719788                           | 0.725719788      | -0.500620187                          | 1.815488976                           |              |                  | 0.540693447  |
|               | 1.175574651                           | 3                | 0                                     | 0.997319833                           |              |                  |              |
| EPB41L4A-AS1  | ENSG00000224032.6                     | 0.295380466      | 1                                     | 1                                     | 0.295380466  |                  |              |
|               | Brain_Cortex                          | 0.295380466      | Brain_Cortex                          | 1                                     | 1            | 1                | -1.046391174 |
|               | -1.046391174                          | -1.046391174     | NA                                    | 1                                     | 0            | 0.997319833      |              |
| CYMP-AS1      | ENSG00000235407.1                     | 0.29540574       | 1                                     | 1                                     | 0.29540574   | Brain_Cerebellum |              |
|               | 0.29540574                            | Brain_Cerebellum | 1                                     | 1                                     | -1.046336411 | -1.046336411     |              |
|               | -1.046336411                          | NA               | 1                                     | 0                                     | 0.997319833  |                  |              |
| GRAMD2        | ENSG00000175318.11                    | 0.29551396       | 4                                     | 4                                     | 0.042136705  | Brain_Cortex     |              |
|               | 0.787781891                           | Brain_Cerebellum | 1.36568505                            | 0.636824563                           | 0.636824563  |                  |              |
|               | -0.269192058                          | 2.032167472      | 0.789177811                           | 0.988728026                           |              | 4                | 0            |
|               | 0.997319833                           |                  |                                       |                                       |              |                  |              |
| PSMG4         | ENSG00000180822.11                    | 0.295616827      | 10                                    | 1                                     | 0.211176897  |                  |              |
|               | Brain_Cerebellar_Hemisphere           | 0.479733215      | Brain_Hippocampus                     | 9.483297277                           |              |                  |              |
|               | 0.001611009                           | 9.483297277      | -1.250335826                          | -0.706731718                          |              |                  | -1.01612507  |
|               | 0.142419256                           | 1                | 0                                     | 0.997319833                           |              |                  |              |
| ZBTB24        | ENSG00000112365.4                     | 0.295717321      | 2                                     | 2                                     | 0.142277966  |                  |              |
|               | Brain_Hippocampus                     | 0.482392671      | Brain_Nucleus_accumbens_basal_ganglia |                                       |              |                  |              |
|               | 1.118379025                           | 0.881620975      | 0.881620975                           | -1.467360675                          |              |                  | -0.702459467 |
|               | -1.084910071                          | 0.540866831      | 2                                     | 0                                     | 0.997319833  |                  |              |
| PSMD13        | ENSG00000185627.17                    | 0.295728968      | 13                                    | 2                                     | 0.123515261  |                  |              |
|               | Brain_Substantia_nigra                | 0.980361586      | Brain_Hippocampus                     | 11.55674                              |              |                  |              |
|               | 1.48E-16                              | 0.879803923      | -1.540185017                          | 0.111006328                           |              |                  | -0.442942891 |
|               | 0.412487407                           | 2                | 0                                     | 0.997319833                           |              |                  |              |
| GUCA1A        | ENSG00000048545.13                    | 0.295754875      | 4                                     | 4                                     | 0.293505365  |                  |              |
|               | Brain_Hypothalamus                    | 0.933345289      | Brain_Cerebellum                      | 2.457383149                           |              |                  |              |
|               | 0.216369172                           | 0.216369172      | -1.050462844                          | 0.083636697                           |              |                  | -0.67088727  |
|               | 0.528646021                           | 4                | 0                                     | 0.997319833                           |              |                  |              |
| FAM129A       | ENSG00000135842.16                    | 0.295763256      | 1                                     | 1                                     | 0.295763256  |                  |              |
|               | Brain_Putamen_basal_ganglia           | 0.295763256      | Brain_Putamen_basal_ganglia           | 1                                     | 1            |                  |              |
|               | 1                                     | 1.045562098      | 1.045562098                           | 1.045562098                           | NA           | 1                | 0            |
|               | 0.997319833                           |                  |                                       |                                       |              |                  |              |
| HIST1H4C      | ENSG00000197061.4                     | 0.295847259      | 1                                     | 1                                     | 0.295847259  |                  |              |
|               | Brain_Anterior_cingulate_cortex_BA24  | 0.295847259      |                                       |                                       |              |                  |              |
|               | Brain_Anterior_cingulate_cortex_BA24  | 1                | 1                                     | 1                                     | 1.045380255  |                  |              |
|               | 1.045380255                           | 1.045380255      | NA                                    | 1                                     | 0            | 0.997319833      |              |
| CYBA          | ENSG00000051523.10                    | 0.295866229      | 4                                     | 4                                     | 0.249990394  |                  |              |
|               | Brain_Putamen_basal_ganglia           | 0.418088887      | Brain_Nucleus_accumbens_basal_ganglia |                                       |              |                  |              |

|              |                                      |                    |                                       |              |              |                   |    |           |   |
|--------------|--------------------------------------|--------------------|---------------------------------------|--------------|--------------|-------------------|----|-----------|---|
|              | 1.28074755                           | 0.780614486        | 0.780614486                           | -1.150372714 | 1.059428573  |                   |    |           |   |
|              | 0.430100659                          | 1.059039578        | 4                                     | 0            | 0.997319833  |                   |    |           |   |
| CTC-498J12.1 | ENSG00000250237.1                    | 0.295893323        | 1                                     | 1            | 0.295893323  |                   |    |           |   |
|              | Brain_Substantia_nigra               | 0.295893323        | Brain_Substantia_nigra                | 1            | 1            |                   |    |           |   |
|              | 1                                    | 1.045280554        | 1.045280554                           | 1.045280554  | NA           | 1                 | 0  |           |   |
|              | 0.997319833                          |                    |                                       |              |              |                   |    |           |   |
| MSH4         | ENSG00000057468.6                    | 0.295943546        | 13                                    | 3            | 0.075236944  |                   |    |           |   |
|              | Brain_Hippocampus                    | 0.958862654        | Brain_Substantia_nigra                | 10.33447738  |              |                   |    |           |   |
|              | 0.0157946                            | 0.759259124        | -1.779017189                          | -0.051580881 | -1.241380613 |                   |    |           |   |
|              | 0.47290589                           | 3                  | 0                                     | 0.997319833  |              |                   |    |           |   |
| SULT2B1      | ENSG00000088002.11                   | 0.295974837        | 6                                     | 6            | 0.080724134  |                   |    |           |   |
|              | Brain_Anterior_cingulate_cortex_BA24 | 0.988671786        | Brain_Amygdala                        | 2.8172652    |              |                   |    |           |   |
|              | 0.152542342                          | 0.152542342        | -0.351286356                          | 1.746499847  | 0.479880922  |                   |    |           |   |
|              | 0.863075186                          | 6                  | 0                                     | 0.997319833  |              |                   |    |           |   |
| CTD-3088G3.8 | ENSG00000188897.8                    | 0.296012742        | 6                                     | 6            | 0.012898681  |                   |    |           |   |
|              | Brain_Cerebellum                     | 0.80144556         | Brain_Nucleus_accumbens_basal_ganglia | 2.385947426  |              |                   |    |           |   |
|              | 0.165908625                          | 0.165908625        | -0.776965365                          | 2.486554497  | 0.375292021  |                   |    |           |   |
|              | 1.155815914                          | 6                  | 0                                     | 0.997319833  |              |                   |    |           |   |
| POLR2F       | ENSG00000100142.14                   | 0.296146847        | 2                                     | 2            | 0.182902274  |                   |    |           |   |
|              | Brain_Hypothalamus                   | 0.559293585        | Brain_Cerebellum                      | 1.163342431  |              |                   |    |           |   |
|              | 0.836657569                          | 0.836657569        | -0.583891095                          | 1.331871937  | 0.373990421  |                   |    |           |   |
|              | 1.354649031                          | 2                  | 0                                     | 0.997319833  |              |                   |    |           |   |
| LGI4         | ENSG00000153902.13                   | 0.296160726        | 1                                     | 1            | 0.296160726  |                   |    |           |   |
|              | Brain_Spinal_cord_cervical_c-1       | 0.296160726        | Brain_Spinal_cord_cervical_c-1        |              |              |                   |    |           |   |
|              | 1                                    | 1                  | 1                                     | 1.044701988  | 1.044701988  | 1.044701988       | NA | 1         | 0 |
|              | 0.997319833                          |                    |                                       |              |              |                   |    |           |   |
| AEBP2        | ENSG00000139154.14                   | 0.296207961        | 1                                     | 1            | 0.296207961  |                   |    |           |   |
|              | Brain_Anterior_cingulate_cortex_BA24 | 0.296207961        |                                       |              |              |                   |    |           |   |
|              | Brain_Anterior_cingulate_cortex_BA24 | 1                  | 1                                     | 1            | -1.044599824 |                   |    |           |   |
|              | -1.044599824                         | -1.044599824       | NA                                    | 1            | 0            | 0.997319833       |    |           |   |
| NME2         | ENSG00000243678.11                   | 0.296251964        | 12                                    | 4            | 0.021720781  |                   |    |           |   |
|              | Brain_Putamen_basal_ganglia          | 0.190952648        | Brain_Substantia_nigra                |              |              |                   |    |           |   |
|              | 9.871776829                          | 0.000210281        | 0.350128172                           | -2.295215444 | -1.307766122 |                   |    |           |   |
|              | -1.84974915                          | 0.234293695        | 4                                     | 0            | 0.997319833  |                   |    |           |   |
| AC069513.4   | ENSG00000229178.1                    | 0.296519246        | 13                                    | 1            | 0.180822178  |                   |    |           |   |
|              | Brain_Hypothalamus                   | 0.533949196        | Brain_Cerebellar_Hemisphere           | 12.41687914  |              |                   |    |           |   |
|              | 0.001303049                          | 12.41687914        | -1.338227836                          | -0.621988855 | -1.01725618  |                   |    |           |   |
|              | 0.23525862                           | 1                  | 0                                     | 0.9973828    |              |                   |    |           |   |
| SKIV2L       | ENSG00000204351.11                   | 0.296701889        | 12                                    | 4            | 0.02060559   |                   |    |           |   |
|              | Brain_Cerebellar_Hemisphere          | 0.354034607        | Brain_Spinal_cord_cervical_c-1        |              |              |                   |    |           |   |
|              | 9.657162964                          | 0.001871761        | 0.423632569                           | -2.315134176 | -0.926791869 |                   |    |           |   |
|              | -1.828523049                         | 0.470782807        | 4                                     | 0            | 0.9973828    |                   |    |           |   |
| PPP2R1A      | ENSG00000105568.17                   | 0.296710339        | 1                                     | 1            | 0.296710339  |                   |    |           |   |
|              | Brain_Anterior_cingulate_cortex_BA24 | 0.296710339        |                                       |              |              |                   |    |           |   |
|              | Brain_Anterior_cingulate_cortex_BA24 | 1                  | 1                                     | 1            | -1.043513916 |                   |    |           |   |
|              | -1.043513916                         | -1.043513916       | NA                                    | 1            | 0            | 0.9973828         |    |           |   |
| RAP1B        | ENSG00000127314.17                   | 0.296770685        | 2                                     | 2            | 0.162399641  |                   |    |           |   |
|              | Brain_Substantia_nigra               | 0.423109719        | Brain_Hypothalamus                    | 1.080164673  |              |                   |    |           |   |
|              | 0.919835327                          | 0.919835327        | -1.397046325                          | 0.801037876  | -0.298004224 |                   |    |           |   |
|              | 1.554280244                          | 2                  | 0                                     | 0.9973828    |              |                   |    |           |   |
| ZNF524       | ENSG00000171443.6                    | 0.296792661        | 1                                     | 1            | 0.296792661  |                   |    |           |   |
|              | Brain_Cerebellar_Hemisphere          | 0.296792661        | Brain_Cerebellar_Hemisphere           | 1            | 1            |                   |    |           |   |
|              | 1                                    | 1.043336092        | 1.043336092                           | 1.043336092  | NA           | 1                 | 0  | 0.9973828 |   |
| LRRC8D       | ENSG00000171492.14                   | 0.296895063        | 2                                     | 2            | 0.245943928  |                   |    |           |   |
|              | Brain_Cortex                         | 0.341137872        | Brain_Caudate_basal_ganglia           | 1.073861028  |              |                   |    |           |   |
|              | 0.926138972                          | 0.926138972        | -1.160257634                          | -0.951919377 | -1.056088505 |                   |    |           |   |
|              | 0.147317394                          | 2                  | 0                                     | 0.9973828    |              |                   |    |           |   |
| ARMC1        | ENSG00000104442.9                    | 0.29690579         | 13                                    | 2            | 0.160658721  | Brain_Hippocampus |    |           |   |
|              | 0.85865017                           | Brain_Hypothalamus | 11.76085747                           | 0.004070798  | 0.467752493  |                   |    |           |   |
|              | -1.402859564                         | 0.178092707        | -0.995583932                          | 0.415778577  | 2            | 0                 |    |           |   |
|              | 0.9973828                            |                    |                                       |              |              |                   |    |           |   |
| ATP5S        | ENSG00000125375.14                   | 0.296910032        | 4                                     | 4            | 0.349163703  |                   |    |           |   |

|               |                                       |                          |                  |                             |              |                |
|---------------|---------------------------------------|--------------------------|------------------|-----------------------------|--------------|----------------|
|               | Brain_Caudate_basal_ganglia           | 0.998441058              |                  | Brain_Frontal_Cortex_BA9    |              |                |
|               | 3.143229955                           | 0.12141028               | 0.12141028       | -0.936212666                | 0.751112479  |                |
|               | -0.123575355                          | 0.700948266              | 4                | 0                           | 0.9973828    |                |
| PPIC          | ENSG00000168938.5                     | 0.296912255              | 2                | 2                           | 0.284648647  | Brain_Amygdala |
|               | 0.290249529                           | Brain_Frontal_Cortex_BA9 |                  | 1.068113465                 | 0.931886535  |                |
|               | 0.931886535                           | 1.057574377              | 1.069934823      | 1.0637546                   | 0.008740155  | 2              |
|               | 0                                     | 0.9973828                |                  |                             |              |                |
| LINC02033     | ENSG00000279727.1                     | 0.297334726              | 1                | 1                           | 0.297334726  |                |
|               | Brain_Cerebellum                      | 0.297334726              | Brain_Cerebellum | 1                           | 1            | -1.042165995   |
|               | -1.042165995                          | -1.042165995             | NA               | 1                           | 0            | 0.997539919    |
| CTD-2145A24.5 | ENSG00000265478.2                     | 0.297488696              | 4                | 4                           | 0.244934124  |                |
|               | Brain_Nucleus_accumbens_basal_ganglia | 0.496260343              |                  | Brain_Hypothalamus          |              |                |
|               | 2.084425054                           | 0.445551768              | 0.445551768      | -1.162742177                | 0.977622688  |                |
|               | -0.039095273                          | 1.043612812              | 4                | 0                           | 0.997539919  |                |
| GNG4          | ENSG00000168243.10                    | 0.297652746              | 2                | 2                           | 0.24695895   |                |
|               | Brain_Spinal_cord_cervical_c-1        | 0.341240516              |                  | Brain_Cortex                | 1.074435541  |                |
|               | 0.925564459                           | 0.925564459              | -0.951717019     | 1.157767449                 | 0.103025215  |                |
|               | 1.491630773                           | 2                        | 0                | 0.997539919                 |              |                |
| SEL1L2        | ENSG00000101251.11                    | 0.29777374               | 2                | 2                           | 0.198034621  |                |
|               | Brain_Nucleus_accumbens_basal_ganglia | 0.808076625              |                  | Brain_Caudate_basal_ganglia |              |                |
|               | 1.684450472                           | 0.315549528              | 0.315549528      | -1.287171205                | -0.242908056 |                |
|               | -0.76503963                           | 0.738405554              | 2                | 0                           | 0.997539919  |                |
| PRELID3B      | ENSG00000101166.15                    | 0.297827948              | 3                | 3                           | 0.170934476  |                |
|               | Brain_Hippocampus                     | 0.955267563              |                  | Brain_Substantia_nigra      | 2.201070626  |                |
|               | 0.127036495                           | 0.127036495              | -1.369207328     | -0.056093198                | -0.753772036 |                |
|               | 0.660409101                           | 3                        | 0                | 0.997539919                 |              |                |
| ATAD5         | ENSG00000176208.8                     | 0.297863803              | 4                | 2                           | 0.165780865  |                |
|               | Brain_Nucleus_accumbens_basal_ganglia | 0.532433302              |                  | Brain_Hippocampus           |              |                |
|               | 3.71775102                            | 0.016196219              | 0.171283965      | -1.385888788                | -0.62429586  |                |
|               | -0.963511706                          | 0.328887061              | 2                | 0                           | 0.997539919  |                |
| RP11-418H16.1 | ENSG00000281920.1                     | 0.29788626               | 7                | 7                           | 0.081332736  |                |
|               | Brain_Cerebellar_Hemisphere           | 0.951312357              |                  | Brain_Frontal_Cortex_BA9    |              |                |
|               | 3.830698839                           | 0.204387105              | 0.204387105      | -1.74300503                 | 1.373812409  |                |
|               | -0.14773858                           | 0.937703522              | 7                | 0                           | 0.997539919  |                |
| PSMD4         | ENSG00000159352.15                    | 0.29792418               | 8                | 6                           | 0.078644419  |                |
|               | Brain_Nucleus_accumbens_basal_ganglia | 0.921712288              |                  | Brain_Cerebellum            |              |                |
|               | 5.515714681                           | 0.116025701              | 0.19567784       | 0.098277067                 | 1.7586062    |                |
|               | 0.891621365                           | 0.645051061              | 6                | 0                           | 0.997539919  |                |
| CPNE2         | ENSG00000140848.16                    | 0.297930024              | 4                | 4                           | 0.103710057  |                |
|               | Brain_Cerebellar_Hemisphere           | 0.973672819              |                  | Brain_Putamen_basal_ganglia |              |                |
|               | 1.892290823                           | 0.164566949              | 0.164566949      | -1.627127332                | 0.033002218  |                |
|               | -0.623870121                          | 0.711060123              | 4                | 0                           | 0.997539919  |                |
| USP54         | ENSG00000166348.18                    | 0.297932758              | 1                | 1                           | 0.297932758  | Brain_Amygdala |
|               | 0.297932758                           | Brain_Amygdala           | 1                | 1                           | 1            | -1.040876741   |
|               | -1.040876741                          | NA                       | 1                | 0                           | 0.997539919  | -1.040876741   |
| COA4          | ENSG00000181924.6                     | 0.297967634              | 1                | 1                           | 0.297967634  |                |
|               | Brain_Putamen_basal_ganglia           | 0.297967634              |                  | Brain_Putamen_basal_ganglia | 1            | 1              |
|               | 1                                     | 1.040801608              | 1.040801608      | 1.040801608                 | NA           | 1              |
|               | 0.997539919                           |                          |                  |                             | 0            |                |
| RASAL2-AS1    | ENSG00000224687.1                     | 0.298101576              | 2                | 2                           | 0.126456735  |                |
|               | Brain_Nucleus_accumbens_basal_ganglia | 0.884598172              |                  | Brain_Cortex                |              |                |
|               | 1.278392403                           | 0.721607597              | 0.721607597      | -1.528224794                | -0.145142742 |                |
|               | -0.836683768                          | 0.977986698              | 2                | 0                           | 0.997539919  |                |
| AF067845.1    | ENSG00000260721.1                     | 0.29811535               | 2                | 2                           | 0.142422193  | Brain_Cortex   |
|               | 0.547275633                           | Brain_Frontal_Cortex_BA9 |                  | 1.057326802                 | 0.942673198  |                |
|               | 0.942673198                           | -1.466830417             | -0.601847531     | -1.034338974                | 0.611635264  |                |
|               | 2                                     | 0                        | 0.997539919      |                             |              |                |
| GOLGB1        | ENSG00000173230.15                    | 0.298156864              | 1                | 1                           | 0.298156864  |                |
|               | Brain_Caudate_basal_ganglia           | 0.298156864              |                  | Brain_Caudate_basal_ganglia | 1            | 1              |
|               | 1                                     | -1.040394052             | -1.040394052     | -1.040394052                | NA           | 1              |
|               | 0.997539919                           |                          |                  |                             | 0            |                |
| NAV2          | ENSG00000166833.19                    | 0.298223177              | 1                | 1                           | 0.298223177  |                |

|              |                                       |                        |              |    |              |              |                                       |              |
|--------------|---------------------------------------|------------------------|--------------|----|--------------|--------------|---------------------------------------|--------------|
|              | Brain_Anterior_cingulate_cortex_BA24  | 0.298223177            |              |    |              |              |                                       |              |
|              | Brain_Anterior_cingulate_cortex_BA24  | 1                      | 1            | 1  | -1.040251271 |              |                                       |              |
|              | -1.040251271                          | -1.040251271           | NA           | 1  | 0            | 0.997539919  |                                       |              |
| C20orf202    | ENSG00000215595.1                     | 0.298311066            |              | 2  | 2            | 0.153869406  |                                       |              |
|              | Brain_Amygdala                        | 0.757775144            |              |    |              |              | Brain_Caudate_basal_ganglia           | 1.209610279  |
|              | 0.790389721                           | 0.790389721            |              |    |              | -1.425996315 | 0.30840373                            | -0.558796292 |
|              | 1.226406033                           | 2                      | 0            |    |              | 0.997539919  |                                       |              |
| RP3-393E18.2 | ENSG00000237927.1                     | 0.298659932            |              | 2  | 2            | 0.133554722  |                                       |              |
|              | Brain_Frontal_Cortex_BA9              | 0.626105588            |              |    |              |              | Brain_Putamen_basal_ganglia           |              |
|              | 1.053399127                           | 0.946600873            | 0.946600873  |    |              | 0.487215549  | 1.500230434                           |              |
|              | 0.993722991                           | 0.716309695            | 2            | 0  |              | 0.997539919  |                                       |              |
| CYB561       | ENSG00000008283.15                    | 0.298679216            |              | 11 | 4            | 0.06019354   | Brain_Amygdala                        |              |
|              | 0.183341493                           | Brain_Cerebellum       | 8.674602296  |    |              | 0.001652429  | 0.432786588                           |              |
|              | -1.879373294                          | -1.330536729           | -1.600131806 |    |              | 0.152600399  | 4                                     | 0            |
|              | 0.997539919                           |                        |              |    |              |              |                                       |              |
| GNAT1        | ENSG00000114349.9                     | 0.298706122            |              | 1  | 1            | 0.298706122  |                                       |              |
|              | Brain_Hippocampus                     | 0.298706122            |              |    |              |              | Brain_Hippocampus                     | 1 1 1        |
|              | 1.039212062                           | 1.039212062            | 1.039212062  |    |              | NA           | 1                                     | 0            |
| WDR20        | ENSG00000140153.17                    | 0.2988101              | 1            | 1  | 0.2988101    |              | Brain_Cortex                          | 0.2988101    |
|              | Brain_Cortex                          | 1                      | 1            | 1  | -1.038988468 | -1.038988468 | -1.038988468                          |              |
|              | NA                                    | 1                      | 0            |    |              | 0.997539919  |                                       |              |
| NMBR         | ENSG00000135577.4                     | 0.298863659            |              | 1  | 1            | 0.298863659  |                                       |              |
|              | Brain_Substantia_nigra                | 0.298863659            |              |    |              |              | Brain_Substantia_nigra                | 1 1          |
|              | 1                                     | -1.038873315           | -1.038873315 |    |              | -1.038873315 | NA                                    | 1 0          |
|              | 0.997539919                           |                        |              |    |              |              |                                       |              |
| DNAJB14      | ENSG00000164031.16                    | 0.298929308            |              | 7  | 6            | 0.047211581  |                                       |              |
|              | Brain_Substantia_nigra                | 0.993228678            |              |    |              |              | Brain_Caudate_basal_ganglia           |              |
|              | 3.825127672                           | 0.050160697            | 0.252161948  |    |              | -1.494203127 | 1.984397176                           |              |
|              | -0.192378223                          | 1.169411145            | 6            | 0  |              | 0.997539919  |                                       |              |
| PCGF1        | ENSG00000115289.13                    | 0.299113737            |              | 1  | 1            | 0.299113737  | Brain_Cortex                          |              |
|              | 0.299113737                           | Brain_Cortex           | 1            | 1  | 1            | 1.038335823  | 1.038335823                           |              |
|              | 1.038335823                           | NA                     | 1            | 0  |              | 0.997539919  |                                       |              |
| TXNL4B       | ENSG00000140830.8                     | 0.299200076            |              | 9  | 6            | 0.13004414   |                                       |              |
|              | Brain_Caudate_basal_ganglia           | 0.992989646            |              |    |              |              | Brain_Frontal_Cortex_BA9              |              |
|              | 4.805500075                           | 0.062799395            | 0.223182828  |    |              | -1.416500242 | 1.51392785                            |              |
|              | -0.171758355                          | 0.895711377            | 6            | 0  |              | 0.997539919  |                                       |              |
| OSTM1-AS1    | ENSG00000225174.1                     | 0.299215091            |              | 2  | 2            | 0.167686212  |                                       |              |
|              | Brain_Anterior_cingulate_cortex_BA24  | 0.41451668             |              |    |              |              | Brain_Caudate_basal_ganglia           |              |
|              | 1.075444322                           | 0.924555678            | 0.924555678  |    |              | -1.379676694 | -0.815971074                          |              |
|              | -1.097823884                          | 0.398600066            | 2            | 0  |              | 0.997539919  |                                       |              |
| RTN2         | ENSG00000125744.11                    | 0.299246122            |              | 1  | 1            | 0.299246122  | Brain_Cerebellum                      |              |
|              | 0.299246122                           | Brain_Cerebellum       | 1            | 1  | 1            | -1.038051409 | -1.038051409                          |              |
|              | -1.038051409                          | NA                     | 1            | 0  |              | 0.997539919  |                                       |              |
| IVL          | ENSG00000163207.6                     | 0.29927968             | 2            | 2  | 0.183869813  |              | Brain_Cerebellum                      |              |
|              | 0.530648265                           | Brain_Substantia_nigra | 1.128303044  |    |              | 0.871696956  |                                       |              |
|              | 0.871696956                           | -1.328933794           | 0.627016736  |    |              | -0.350958529 | 1.383065884                           |              |
|              | 2                                     | 0                      | 0.997539919  |    |              |              |                                       |              |
| SH3BGR       | ENSG00000185437.13                    | 0.299420492            |              | 7  | 5            | 0.062558671  |                                       |              |
|              | Brain_Hippocampus                     | 0.492842983            |              |    |              |              | Brain_Frontal_Cortex_BA9              | 4.2099157    |
|              | 0.040275294                           | 0.196528529            | -0.750936087 |    |              | 1.862315222  | 1.059662146                           |              |
|              | 0.906821521                           | 5                      | 0            |    |              | 0.997539919  |                                       |              |
| MASP1        | ENSG00000127241.16                    | 0.299702588            |              | 3  | 3            | 0.05833498   |                                       |              |
|              | Brain_Caudate_basal_ganglia           | 0.788243325            |              |    |              |              | Brain_Nucleus_accumbens_basal_ganglia |              |
|              | 1.472275676                           | 0.66669627             | 0.66669627   |    |              | 0.268592447  | 1.893172149                           |              |
|              | 0.893502542                           | 0.874727569            | 3            | 0  |              | 0.997539919  |                                       |              |
| TBCD         | ENSG00000141556.20                    | 0.299759481            |              | 6  | 5            | 0.090949824  |                                       |              |
|              | Brain_Hypothalamus                    | 0.977794752            |              |    |              |              | Brain_Cerebellar_Hemisphere           | 3.20894874   |
|              | 0.049924639                           | 0.164015234            | -1.690408531 |    |              | 0.268142477  | -0.432097698                          |              |
|              | 0.70409062                            | 5                      | 0            |    |              | 0.997539919  |                                       |              |
| RP1-232L24.3 | ENSG00000231533.1                     | 0.299779752            |              | 6  | 6            | 0.061339481  |                                       |              |
|              | Brain_Nucleus_accumbens_basal_ganglia | 0.949206381            |              |    |              |              | Brain_Frontal_Cortex_BA9              |              |
|              | 3.467921593                           | 0.17260317             | 0.17260317   |    |              | -1.6631984   | 1.871040406                           | 0.285846887  |

|              |                                       |                                |                    |                             |              |              |             |                   |            |
|--------------|---------------------------------------|--------------------------------|--------------------|-----------------------------|--------------|--------------|-------------|-------------------|------------|
|              | 1.219867479                           | 6                              | 0                  | 0.997539919                 |              |              |             |                   |            |
| AKR7A3       | ENSG00000162482.4                     |                                |                    | 0.299808855                 | 3            | 3            | 0.062800689 |                   |            |
|              | Brain_Substantia_nigra                |                                |                    | 0.907174616                 |              | Brain_Cortex | 1.351091087 |                   |            |
|              | 0.758454513                           | 0.758454513                    |                    | -0.116603056                |              | 1.860599971  | 0.784735219 |                   |            |
|              | 1.000088782                           | 3                              | 0                  | 0.997539919                 |              |              |             |                   |            |
| SLC25A40     | ENSG00000075303.12                    |                                |                    | 0.299871515                 | 1            | 1            | 0.299871515 |                   |            |
|              | Brain_Cerebellum                      | 0.299871515                    |                    | Brain_Cerebellum1           | 1            | 1            | 1.03670896  |                   |            |
|              | 1.03670896                            | 1.03670896                     | NA                 | 1                           | 0            | 0.997539919  |             |                   |            |
| RP11-432J3.4 | ENSG00000279797.1                     |                                |                    | 0.299881572                 | 1            | 1            | 0.299881572 |                   |            |
|              | Brain_Nucleus_accumbens_basal_ganglia |                                |                    | 0.299881572                 |              |              |             |                   |            |
|              | Brain_Nucleus_accumbens_basal_ganglia | 1                              | 1                  | 1                           | 1            | 1.036687388  |             |                   |            |
|              | 1.036687388                           | 1.036687388                    | NA                 | 1                           | 0            | 0.997539919  |             |                   |            |
| TRAF3        | ENSG00000131323.14                    |                                |                    | 0.299903878                 | 4            | 4            | 0.146165179 | Brain_Cerebellum  |            |
|              | 0.571102928                           | Brain_Hypothalamus             |                    | 1.993291657                 |              | 0.205004418  |             |                   |            |
|              | 0.205004418                           | -0.842038026                   |                    | 1.453211                    | 0.633325244  | 1.060693187  |             | 4                 |            |
|              | 0                                     | 0.997539919                    |                    |                             |              |              |             |                   |            |
| GPR12        | ENSG00000132975.7                     |                                |                    | 0.299935092                 | 3            | 3            | 0.161129108 |                   |            |
|              | Brain_Putamen_basal_ganglia           | 0.763039274                    |                    | Brain_Cerebellum1           | 1.847676581  |              |             |                   |            |
|              | 0.2822032                             | 0.2822032                      | -1.401284186       | 0.301492098                 |              | -0.578400319 |             |                   |            |
|              | 0.852818416                           | 3                              | 0                  | 0.997539919                 |              |              |             |                   |            |
| FIG4         | ENSG00000112367.10                    |                                |                    | 0.299984443                 | 1            | 1            | 0.299984443 |                   |            |
|              | Brain_Putamen_basal_ganglia           | 0.299984443                    |                    | Brain_Putamen_basal_ganglia | 1            | 1            |             |                   |            |
|              | 1                                     | -1.036466752                   | -1.036466752       | -1.036466752                | NA           | 1            | 0           |                   |            |
|              | 0.997539919                           |                                |                    |                             |              |              |             |                   |            |
| MLKL         | ENSG00000168404.12                    |                                |                    | 0.300013267                 | 4            | 4            | 0.101163936 |                   |            |
|              | Brain_Spinal_cord_cervical_c-1        | 0.764258003                    |                    | Brain_Cortex                | 1.532262281  |              |             |                   |            |
|              | 0.463385679                           | 0.463385679                    | -1.63923688        | -0.299894011                |              | -0.941511536 |             |                   |            |
|              | 0.597846685                           | 4                              | 0                  | 0.997539919                 |              |              |             |                   |            |
| TSTD1        | ENSG00000215845.10                    |                                |                    | 0.300122816                 | 11           | 8            | 0.009885702 |                   |            |
|              | Brain_Frontal_Cortex_BA9              | 0.95058371                     | Brain_Hypothalamus | 5.312486123                 |              |              |             |                   |            |
|              | 0.019751221                           | 0.187760829                    | -2.579801861       | -0.061973783                |              | -1.028425458 |             |                   |            |
|              | 0.676903065                           | 8                              | 0                  | 0.997539919                 |              |              |             |                   |            |
| FLT4         | ENSG00000037280.15                    |                                |                    | 0.300146537                 | 4            | 3            | 0.226347262 |                   |            |
|              | Brain_Caudate_basal_ganglia           | 0.458884598                    |                    | Brain_Putamen_basal_ganglia |              |              |             |                   |            |
|              | 2.041874568                           | 0.057904123                    | 0.844505599        | -0.954018295                | 1.209821845  |              |             |                   |            |
|              | 0.112856969                           | 1.117759912                    | 3                  | 0                           | 0.997539919  |              |             |                   |            |
| RUVBL2       | ENSG00000183207.13                    |                                |                    | 0.300164901                 | 12           | 3            | 0.066699916 |                   |            |
|              | Brain_Cerebellum                      | 0.736151426                    |                    | Brain_Hippocampus           | 9.838358788  |              |             |                   |            |
|              | 0.001565852                           | 0.502285489                    | 0.3369542          | 1.833690725                 | 1.454442951  |              |             |                   |            |
|              | 0.451786934                           | 3                              | 0                  | 0.997539919                 |              |              |             |                   |            |
| DTX4         | ENSG00000110042.7                     |                                |                    | 0.30017075                  | 6            | 5            | 0.132906465 |                   |            |
|              | Brain_Caudate_basal_ganglia           | 0.844077732                    |                    | Brain_Frontal_Cortex_BA9    | 3.43917375   |              |             |                   |            |
|              | 0.114092734                           | 0.238054721                    | -1.5027386         | 1.035380747                 | -0.391652873 |              |             |                   |            |
|              | 0.829036987                           | 5                              | 0                  | 0.997539919                 |              |              |             |                   |            |
| RPN1         | ENSG00000163902.11                    |                                |                    | 0.300309055                 | 4            | 4            | 0.18518508  | Brain_Hippocampus |            |
|              | 0.962110057                           | Brain_Spinal_cord_cervical_c-1 |                    | 2.045062681                 | 0.394814761  |              |             |                   |            |
|              | 0.394814761                           | -0.475916688                   | 1.324958006        | 0.519560407                 | 0.919143407  |              |             |                   |            |
|              | 4                                     | 0                              | 0.997539919        |                             |              |              |             |                   |            |
| KRT72        | ENSG00000170486.10                    |                                |                    | 0.30034072                  | 1            | 1            | 0.30034072  | Brain_Cerebellum  | 0.30034072 |
|              | Brain_Cerebellum                      | 1                              | 1                  | -1.035703005                | -1.035703005 | -1.035703005 |             |                   |            |
|              | NA                                    | 1                              | 0                  | 0.997539919                 |              |              |             |                   |            |
| GPR37        | ENSG00000170775.2                     |                                |                    | 0.300502547                 | 1            | 1            | 0.300502547 | Brain_Cortex      |            |
|              | 0.300502547                           | Brain_Cortex                   | 1                  | 1                           | 1            | 1.035356299  | 1.035356299 |                   |            |
|              | 1.035356299                           | NA                             | 1                  | 0                           | 0.997539919  |              |             |                   |            |
| RCAN1        | ENSG00000159200.17                    |                                |                    | 0.300503348                 | 4            | 4            | 0.083910926 |                   |            |
|              | Brain_Putamen_basal_ganglia           | 0.389832941                    |                    | Brain_Hippocampus           | 1.976496139  |              |             |                   |            |
|              | 0.285561245                           | 0.285561245                    | -1.728431309       | 1.447888131                 | -0.021358627 |              |             |                   |            |
|              | 1.520370499                           | 4                              | 0                  | 0.997539919                 |              |              |             |                   |            |
| MPP7         | ENSG00000150054.18                    |                                |                    | 0.300646018                 | 3            | 3            | 0.160251895 | Brain_Cortex      |            |
|              | 0.928794467                           | Brain_Cerebellar_Hemisphere    | 1.772511307        | 0.343695437                 |              |              |             |                   |            |
|              | 0.343695437                           | -0.089361692                   | 1.404224881        | 0.73975797                  | 0.760284887  |              |             | 3                 |            |
|              | 0                                     | 0.997539919                    |                    |                             |              |              |             |                   |            |

|          |                                       |                             |                                       |              |              |                  |
|----------|---------------------------------------|-----------------------------|---------------------------------------|--------------|--------------|------------------|
| SMCO3    | ENSG00000179256.2                     | 0.300770237                 | 2                                     | 2            | 0.269325549  | Brain_Cerebellum |
|          | 0.276876411                           | Brain_Caudate_basal_ganglia | 1.000116576                           | 0.999883424  |              |                  |
|          | 0.999883424                           | -1.104617074                | -1.087363011                          | -1.095990043 | 0.012200465  |                  |
|          | 2                                     | 0                           | 0.997539919                           |              |              |                  |
| LCN10    | ENSG00000187922.13                    | 0.300936729                 | 2                                     | 2            | 0.127798051  | Brain_Cerebellum |
|          | 0.346721231                           | Brain_Cerebellar_Hemisphere | 1.74404316                            | 0.25595684   | 0.25595684   |                  |
|          | 0.940968053                           | 1.522842752                 | 1.231905402                           | 0.411447546  | 2            | 0                |
|          | 0.997539919                           |                             |                                       |              |              |                  |
| GIN1     | ENSG00000145723.16                    | 0.301102266                 | 1                                     | 1            | 0.301102266  | Brain_Cerebellum |
|          | 0.301102266                           | Brain_Cerebellum            | 1                                     | 1            | -1.034072511 | -1.034072511     |
|          | -1.034072511                          | NA                          | 1                                     | 0            | 0.997539919  |                  |
| TMEM2    | ENSG00000135048.13                    | 0.301179386                 | 1                                     | 1            | 0.301179386  |                  |
|          | Brain_Caudate_basal_ganglia           | 0.301179386                 | Brain_Caudate_basal_ganglia           | 1            | 1            |                  |
|          | 1                                     | 1.033907549                 | 1.033907549                           | 1.033907549  | NA           | 1                |
|          | 0.997539919                           |                             |                                       |              |              |                  |
| SPG21    | ENSG00000090487.10                    | 0.301391382                 | 13                                    | 2            | 0.181317136  |                  |
|          | Brain_Spinal_cord_cervical_c-1        | 0.509408416                 | Brain_Amygdala                        | 10.86303468  |              |                  |
|          | 0.000344981                           | 1.1405768                   | -1.246823546                          | 1.336710552  | 0.901210184  |                  |
|          | 0.668618787                           | 2                           | 0                                     | 0.997539919  |              |                  |
| DUSP2    | ENSG00000158050.4                     | 0.301397804                 | 2                                     | 2            | 0.143714323  |                  |
|          | Brain_Cerebellar_Hemisphere           | 0.794613044                 | Brain_Putamen_basal_ganglia           |              |              |                  |
|          | 1.166439639                           | 0.833560361                 | 0.833560361                           | -1.462098122 | -0.260325059 |                  |
|          | -0.861211591                          | 0.849781882                 | 2                                     | 0            | 0.997539919  |                  |
| OSBPL6   | ENSG00000079156.16                    | 0.301455801                 | 4                                     | 4            | 0.073734339  |                  |
|          | Brain_Putamen_basal_ganglia           | 0.560834714                 | Brain_Nucleus_accumbens_basal_ganglia |              |              |                  |
|          | 1.467681536                           | 0.586805536                 | 0.586805536                           | -1.788258335 | 0.758248728  |                  |
|          | -0.592432957                          | 1.04593003                  | 4                                     | 0            | 0.997539919  |                  |
| DEPTOR   | ENSG00000155792.9                     | 0.301496643                 | 3                                     | 3            | 0.309272835  |                  |
|          | Brain_Cerebellum                      | 0.873507469                 | Brain_Cerebellar_Hemisphere           | 2.135852635  |              |                  |
|          | 0.32967834                            | 0.32967834                  | -1.01674903                           | -0.159204868 | -0.66795746  |                  |
|          | 0.450595322                           | 3                           | 0                                     | 0.997539919  |              |                  |
| FAM126B  | ENSG00000155744.9                     | 0.301539083                 | 2                                     | 2            | 0.122425491  |                  |
|          | Brain_Nucleus_accumbens_basal_ganglia | 0.659818911                 | Brain_Cerebellar_Hemisphere           |              |              |                  |
|          | 1.216598178                           | 0.783401822                 | 0.783401822                           | 0.440163199  | 1.544672535  |                  |
|          | 0.992417867                           | 0.781006041                 | 2                                     | 0            | 0.997539919  |                  |
| SYT7     | ENSG00000011347.9                     | 0.30164242                  | 2                                     | 2            | 0.181747174  | Brain_Cerebellum |
|          | 0.604765288                           | Brain_Cerebellar_Hemisphere | 1.765233496                           | 0.234766504  |              |                  |
|          | 0.234766504                           | -1.335394774                | -0.517560012                          | -0.926477393 | 0.578296506  |                  |
|          | 2                                     | 0                           | 0.997539919                           |              |              |                  |
| EDC4     | ENSG00000038358.14                    | 0.301722104                 | 1                                     | 1            | 0.301722104  |                  |
|          | Brain_Spinal_cord_cervical_c-1        | 0.301722104                 | Brain_Spinal_cord_cervical_c-1        |              |              |                  |
|          | 1                                     | 1                           | 1                                     | -1.032747445 | -1.032747445 | NA               |
|          | 0.997539919                           |                             |                                       |              |              |                  |
| UBAP1    | ENSG00000165006.13                    | 0.301806751                 | 4                                     | 4            | 0.263876106  |                  |
|          | Brain_Spinal_cord_cervical_c-1        | 0.42042983                  | Brain_Nucleus_accumbens_basal_ganglia |              |              |                  |
|          | 2.573347496                           | 0.221292249                 | 0.221292249                           | -1.117276534 | 0.973778929  |                  |
|          | 0.385956267                           | 1.0045095                   | 4                                     | 0            | 0.997539919  |                  |
| BCL2A1   | ENSG00000140379.7                     | 0.301904905                 | 2                                     | 2            | 0.121730616  |                  |
|          | Brain_Nucleus_accumbens_basal_ganglia | 0.89235847                  | Brain_Caudate_basal_ganglia           |              |              |                  |
|          | 1.099885724                           | 0.900114276                 | 0.900114276                           | -1.547550255 | -0.13532051  |                  |
|          | -0.841435383                          | 0.99859723                  | 2                                     | 0            | 0.997539919  |                  |
| C16orf71 | ENSG00000166246.13                    | 0.301949782                 | 1                                     | 1            | 0.301949782  |                  |
|          | Brain_Putamen_basal_ganglia           | 0.301949782                 | Brain_Putamen_basal_ganglia           | 1            | 1            |                  |
|          | 1                                     | 1.032261179                 | 1.032261179                           | 1.032261179  | NA           | 1                |
|          | 0.997539919                           |                             |                                       |              |              |                  |
| GTF3C5   | ENSG00000148308.17                    | 0.301950216                 | 3                                     | 3            | 0.098488195  |                  |
|          | Brain_Cerebellum                      | 0.665364644                 | Brain_Nucleus_accumbens_basal_ganglia |              |              |                  |
|          | 1.871185628                           | 0.276202378                 | 0.276202378                           | -1.652227439 | -0.432518452 |                  |
|          | -0.866047736                          | 0.682051495                 | 3                                     | 0            | 0.997539919  |                  |
| TNFRSF6B | ENSG00000243509.4                     | 0.302015023                 | 1                                     | 1            | 0.302015023  |                  |
|          | Brain_Cerebellum                      | 0.302015023                 | Brain_Cerebellum                      | 1            | 1            | 1                |
|          | -1.032121884                          | -1.032121884                | NA                                    | 1            | 0            | 0.997539919      |

|              |                                      |                             |                             |              |              |                             |              |            |
|--------------|--------------------------------------|-----------------------------|-----------------------------|--------------|--------------|-----------------------------|--------------|------------|
| RP11-384P7.7 | ENSG00000260947.1                    | 0.30202136                  | 13                          | 1            | 0.188635134  |                             |              |            |
|              | Brain_Substantia_nigra               | 0.539679972                 |                             |              |              | Brain_Caudate_basal_ganglia |              |            |
|              | 12.07818056                          | 0.000486183                 | 12.07818056                 |              | -1.314627467 |                             | -0.613297007 |            |
|              | -0.994941019                         | 0.199321515                 | 1                           | 0            | 0.997539919  |                             |              |            |
| LSM10        | ENSG00000181817.5                    | 0.30203367                  | 5                           | 5            | 0.107534368  | Brain_Cerebellum            |              |            |
|              | 0.868933756                          | Brain_Caudate_basal_ganglia | 1.276915522                 |              | 0.78276065   | 0.78276065                  |              |            |
|              | -1.574357238                         | 1.609375                    | 0.363442685                 | 1.231325444  | 5            | 0                           |              |            |
|              | 0.997539919                          |                             |                             |              |              |                             |              |            |
| TMEM26       | ENSG00000196932.11                   | 0.302056732                 | 7                           | 3            | 0.072037728  |                             |              |            |
|              | Brain_Hippocampus                    | 0.60764883                  | Brain_Frontal_Cortex_BA9    | 5.478605181  |              |                             |              |            |
|              | 0.010691398                          | 0.255912072                 | 0.51343248                  | 1.798879602  | 1.201583283  |                             |              |            |
|              | 0.403698168                          | 3                           | 0                           | 0.997539919  |              |                             |              |            |
| SPATA24      | ENSG00000170469.10                   | 0.302111211                 | 1                           | 1            | 0.302111211  |                             |              |            |
|              | Brain_Hippocampus                    | 0.302111211                 | Brain_Hippocampus           | 1            | 1            | 1                           |              |            |
|              | -1.031916552                         | -1.031916552                | -1.031916552                | NA           | 1            | 0                           | 0.997539919  |            |
| RP11-275H4.1 | ENSG00000241231.1                    | 0.30253831                  | 7                           | 7            | 0.051380702  |                             |              |            |
|              | Brain_Anterior_cingulate_cortex_BA24 | 0.859631973                 | Brain_Amygdala              | 1.49551576   |              |                             |              |            |
|              | 0.633584611                          | 0.633584611                 | -1.948286414                | 1.218824148  | -0.512759205 |                             |              |            |
|              | 1.02769574                           | 7                           | 0                           | 0.997539919  |              |                             |              |            |
| SULT1A1      | ENSG00000196502.11                   | 0.302618563                 | 12                          | 4            | 0.05711455   |                             |              |            |
|              | Brain_Cerebellar_Hemisphere          | 0.333158143                 | Brain_Frontal_Cortex_BA9    |              |              |                             |              |            |
|              | 9.739133678                          | 0.001721961                 | 0.418202418                 | -1.902433153 | -0.967772215 |                             |              |            |
|              | -1.271638531                         | 0.29486149                  | 4                           | 0            | 0.997539919  |                             |              |            |
| LRP1         | ENSG00000123384.13                   | 0.302664403                 | 1                           | 1            | 0.302664403  |                             |              |            |
|              | Brain_Hippocampus                    | 0.302664403                 | Brain_Hippocampus           | 1            | 1            | 1                           |              |            |
|              | 1.030736501                          | 1.030736501                 | 1.030736501                 | NA           | 1            | 0                           | 0.997539919  |            |
| 6-Mar        | ENSG00000145495.15                   | 0.302690647                 | 1                           | 1            | 0.302690647  |                             |              |            |
|              | Brain_Cerebellar_Hemisphere          | 0.302690647                 | Brain_Cerebellar_Hemisphere | 1            | 1            |                             |              |            |
|              | 1                                    | -1.030680555                | -1.030680555                | -1.030680555 | NA           | 1                           | 0            |            |
|              | 0.997539919                          |                             |                             |              |              |                             |              |            |
| PRUNE2       | ENSG00000106772.17                   | 0.302749217                 | 2                           | 2            | 0.200889932  |                             |              |            |
|              | Brain_Cerebellar_Hemisphere          | 0.382599995                 | Brain_Cerebellum            | 1.930789588  |              |                             |              |            |
|              | 0.069210412                          | 0.069210412                 | 0.873115741                 | 1.279020232  | 1.076067986  |                             |              |            |
|              | 0.287017818                          | 2                           | 0                           | 0.997539919  |              |                             |              |            |
| MACROD2      | ENSG00000172264.16                   | 0.302793366                 | 1                           | 1            | 0.302793366  |                             |              |            |
|              | Brain_Cerebellum                     | 0.302793366                 | Brain_Cerebellum            | 1            | 1            | 1                           | 1.030461606  |            |
|              | 1.030461606                          | 1.030461606                 | NA                          | 1            | 0            | 0.997539919                 |              |            |
| SKA3         | ENSG00000165480.15                   | 0.302857612                 | 2                           | 2            | 0.126295191  |                             |              |            |
|              | Brain_Caudate_basal_ganglia          | 0.736138812                 | Brain_Hippocampus           | 1.07232638   |              |                             |              |            |
|              | 0.92767362                           | 0.92767362                  | -1.528875982                | -0.336970933 | -0.932923458 |                             |              |            |
|              | 0.842804143                          | 2                           | 0                           | 0.997539919  |              |                             |              |            |
| DLGAP1       | ENSG00000170579.16                   | 0.303086622                 | 1                           | 1            | 0.303086622  |                             |              |            |
|              | Brain_Putamen_basal_ganglia          | 0.303086622                 | Brain_Putamen_basal_ganglia | 1            | 1            |                             |              |            |
|              | 1                                    | 1.029836801                 | 1.029836801                 | 1.029836801  | NA           | 1                           | 0            |            |
|              | 0.997539919                          |                             |                             |              |              |                             |              |            |
| TOR1AIP2     | ENSG00000169905.12                   | 0.303104622                 | 1                           | 1            | 0.303104622  |                             |              |            |
|              | Brain_Anterior_cingulate_cortex_BA24 | 0.303104622                 |                             |              |              |                             |              |            |
|              | Brain_Anterior_cingulate_cortex_BA24 | 1                           | 1                           | 1            | -1.029798463 |                             |              |            |
|              | -1.029798463                         | -1.029798463                | NA                          | 1            | 0            | 0.997539919                 |              |            |
| C5orf49      | ENSG00000215217.6                    | 0.303120745                 | 2                           | 2            | 0.254592908  |                             |              |            |
|              | Brain_Caudate_basal_ganglia          | 0.272449826                 | Brain_Putamen_basal_ganglia |              |              |                             |              |            |
|              | 1.048229051                          | 0.951770949                 | 0.951770949                 | -1.139264362 | -1.097438329 |                             |              |            |
|              | -1.118351346                         | 0.029575472                 | 2                           | 0            | 0.997539919  |                             |              |            |
| CRNKL1       | ENSG00000101343.14                   | 0.303248663                 | 1                           | 1            | 0.303248663  |                             |              |            |
|              | Brain_Cerebellar_Hemisphere          | 0.303248663                 | Brain_Cerebellar_Hemisphere | 1            | 1            |                             |              |            |
|              | 1                                    | -1.029491732                | -1.029491732                | -1.029491732 | NA           | 1                           | 0            |            |
|              | 0.997539919                          |                             |                             |              |              |                             |              |            |
| LRR1         | ENSG00000165501.16                   | 0.303361728                 | 1                           | 1            | 0.303361728  | Brain_Cortex                |              |            |
|              | 0.303361728                          | Brain_Cortex                | 1                           | 1            | 1            | 1.02925103                  | 1.02925103   | 1.02925103 |
|              | NA                                   | 1                           | 0                           | 0.997539919  |              |                             |              |            |
| NPAP1        | ENSG00000185823.3                    | 0.303470457                 | 4                           | 4            | 0.367321792  |                             |              |            |
|              | Brain_Spinal_cord_cervical_c-1       | 0.725388082                 | Brain_Hippocampus           |              |              |                             |              |            |



|               |                                       |                             |                                |              |             |                             |              |                  |  |
|---------------|---------------------------------------|-----------------------------|--------------------------------|--------------|-------------|-----------------------------|--------------|------------------|--|
|               | 2.477478318                           | 0.29783164                  | 0.29783164                     | -0.568017889 | 0.901501397 |                             |              |                  |  |
|               | 0.150242934                           | 0.719097534                 | 4                              | 0            | 0.997539919 |                             |              |                  |  |
| PARD6A        | ENSG00000102981.9                     | 0.303493577                 |                                | 1            | 1           | 0.303493577                 |              |                  |  |
|               | Brain_Nucleus_accumbens_basal_ganglia | 0.303493577                 |                                |              |             |                             |              |                  |  |
|               | Brain_Nucleus_accumbens_basal_ganglia | 1                           | 1                              | 1            | 1.028970417 |                             |              |                  |  |
|               | 1.028970417                           | 1.028970417                 | NA                             | 1            | 0           | 0.997539919                 |              |                  |  |
| AC009404.2    | ENSG00000236255.1                     | 0.303541916                 |                                | 10           | 6           | 0.095539009                 |              |                  |  |
|               | Brain_Anterior_cingulate_cortex_BA24  | 0.970384381                 |                                |              |             | Brain_Putamen_basal_ganglia |              |                  |  |
|               | 6.668775896                           | 0.016779898                 | 0.268574644                    |              |             | -1.666876276                | 0.037126201  |                  |  |
|               | -0.820428282                          | 0.510965194                 | 6                              | 0            | 0.997539919 |                             |              |                  |  |
| APBB1         | ENSG00000166313.18                    | 0.303552622                 |                                | 1            | 1           | 0.303552622                 |              | Brain_Cerebellum |  |
|               | 0.303552622                           | Brain_Cerebellum1           | 1                              | 1            | 1           | -1.028844777                |              | -1.028844777     |  |
|               | -1.028844777                          | NA                          | 1                              | 0            | 0.997539919 |                             |              |                  |  |
| KCNH1         | ENSG00000143473.12                    | 0.303705151                 |                                | 2            | 2           | 0.162961168                 |              |                  |  |
|               | Brain_Putamen_basal_ganglia           | 0.40568225                  | Brain_Spinal_cord_cervical_c-1 |              |             |                             |              |                  |  |
|               | 1.126025251                           | 0.873974749                 | 0.873974749                    |              |             | 0.831515899                 | 1.395181322  |                  |  |
|               | 1.113348611                           | 0.398571643                 | 2                              | 0            | 0.997539919 |                             |              |                  |  |
| HELB          | ENSG00000127311.9                     | 0.303715913                 |                                | 12           | 3           | 0.121767151                 |              |                  |  |
|               | Brain_Nucleus_accumbens_basal_ganglia | 0.964930871                 |                                |              |             |                             |              |                  |  |
|               | Brain_Spinal_cord_cervical_c-1        | 10.3692722                  | 0.00126799                     | 0.467816451  |             |                             |              |                  |  |
|               | -1.547398631                          | -0.043966797                | -0.693122464                   | 0.414476599  | 3           | 0                           |              |                  |  |
|               | 0.997539919                           |                             |                                |              |             |                             |              |                  |  |
| TUBD1         | ENSG00000108423.14                    | 0.303780017                 |                                | 3            | 3           | 0.093809623                 |              |                  |  |
|               | Brain_Nucleus_accumbens_basal_ganglia | 0.741861795                 | Brain_Caudate_basal_ganglia    |              |             |                             |              |                  |  |
|               | 1.345943871                           | 0.801397355                 | 0.801397355                    |              |             | -1.675635438                | -0.329388849 |                  |  |
|               | -1.054122163                          | 0.679032953                 | 3                              | 0            | 0.997539919 |                             |              |                  |  |
| PSMD7         | ENSG00000103035.10                    | 0.303831176                 |                                | 1            | 1           | 0.303831176                 |              |                  |  |
|               | Brain_Nucleus_accumbens_basal_ganglia | 0.303831176                 |                                |              |             |                             |              |                  |  |
|               | Brain_Nucleus_accumbens_basal_ganglia | 1                           | 1                              | 1            | 1.02825227  | 1.02825227                  |              |                  |  |
|               | 1.02825227                            | NA                          | 1                              | 0            | 0.997539919 |                             |              |                  |  |
| INPP5A        | ENSG00000068383.18                    | 0.30387239                  | 3                              | 3            | 0.09687205  |                             |              |                  |  |
|               | Brain_Caudate_basal_ganglia           | 0.425819899                 | Brain_Spinal_cord_cervical_c-1 |              |             |                             |              |                  |  |
|               | 1.676651332                           | 0.320245218                 | 0.320245218                    |              |             | -1.660210814                | 0.796365028  |                  |  |
|               | -0.573173519                          | 1.252416239                 | 3                              | 0            | 0.997539919 |                             |              |                  |  |
| RP11-862G15.2 | ENSG00000258499.1                     | 0.303992892                 |                                | 2            | 2           | 0.212591515                 |              |                  |  |
|               | Brain_Cerebellum                      | 0.330878997                 | Brain_Cerebellar_Hemisphere    | 1.051097684  |             |                             |              |                  |  |
|               | 0.948902316                           | 0.948902316                 | -1.24647104                    | -0.972344893 |             | -1.109407966                |              |                  |  |
|               | 0.193836458                           | 2                           | 0                              | 0.997539919  |             |                             |              |                  |  |
| SCFD2         | ENSG00000184178.15                    | 0.304086439                 |                                | 1            | 1           | 0.304086439                 |              |                  |  |
|               | Brain_Hippocampus                     | 0.304086439                 | Brain_Hippocampus              | 1            | 1           | 1                           |              |                  |  |
|               | -1.027709624                          | -1.027709624                | -1.027709624                   | NA           | 1           | 0                           | 0.997539919  |                  |  |
| LSMEM1        | ENSG00000181016.9                     | 0.304109062                 |                                | 10           | 2           | 0.434000536                 |              |                  |  |
|               | Brain_Hippocampus                     | 0.988086227                 | Brain_Frontal_Cortex_BA9       | 8.896033659  |             |                             |              |                  |  |
|               | 0.00244208                            | 0.419910437                 | -0.782364252                   | 0.532768317  |             | 0.000480484                 |              |                  |  |
|               | 0.448786152                           | 2                           | 0                              | 0.997539919  |             |                             |              |                  |  |
| ACADS         | ENSG00000122971.8                     | 0.304188035                 |                                | 12           | 3           | 0.31862645                  |              |                  |  |
|               | Brain_Spinal_cord_cervical_c-1        | 0.95928824                  | Brain_Caudate_basal_ganglia    |              |             |                             |              |                  |  |
|               | 10.20887142                           | 0.014568831                 | 0.391006586                    | -0.765880959 |             | 0.997284469                 |              |                  |  |
|               | 0.263228611                           | 0.489624056                 | 3                              | 0            | 0.997539919 |                             |              |                  |  |
| INCENP        | ENSG00000149503.12                    | 0.304311976                 |                                | 1            | 1           | 0.304311976                 |              |                  |  |
|               | Brain_Putamen_basal_ganglia           | 0.304311976                 | Brain_Putamen_basal_ganglia    | 1            | 1           |                             |              |                  |  |
|               | 1                                     | -1.027230421                | -1.027230421                   | -1.027230421 | NA          | 1                           | 0            |                  |  |
|               | 0.997539919                           |                             |                                |              |             |                             |              |                  |  |
| IRF3          | ENSG00000126456.15                    | 0.30436206                  | 5                              | 4            | 0.08664625  | Brain_Cerebellum            |              |                  |  |
|               | 0.436196702                           | Brain_Cerebellar_Hemisphere | 3.847752166                    |              |             | 0.033221708                 |              |                  |  |
|               | 0.155057765                           | 0.778631696                 | 1.713360438                    | 1.285051023  |             | 0.46595969                  | 4            |                  |  |
|               | 0                                     | 0.997539919                 |                                |              |             |                             |              |                  |  |
| MCEE          | ENSG00000124370.10                    | 0.304391264                 |                                | 1            | 1           | 0.304391264                 |              | Brain_Cerebellum |  |
|               | 0.304391264                           | Brain_Cerebellum            | 1                              | 1            | 1           | 1.027062014                 | 1.027062014  |                  |  |
|               | 1.027062014                           | NA                          | 1                              | 0            | 0.997539919 |                             |              |                  |  |
| ZNF91         | ENSG00000167232.13                    | 0.304414064                 |                                | 4            | 4           | 0.095566687                 |              | Brain_Cortex     |  |
|               | 0.756707378                           | Brain_Amygdala              | 2.14482159                     | 0.398962054  |             | 0.398962054                 |              |                  |  |

|              |                                       |                   |                                |               |              |                             |
|--------------|---------------------------------------|-------------------|--------------------------------|---------------|--------------|-----------------------------|
|              | -1.666737127                          | -0.30980746       | -1.009875044                   | 0.554527342   | 4            | 0                           |
|              | 0.997539919                           |                   |                                |               |              |                             |
| PAX6         | ENSG00000007372.21                    | 0.30453225        | 1                              | 1             | 0.30453225   | Brain_Cerebellum 0.30453225 |
|              | Brain_Cerebellum1                     | 1                 | 1                              | 1.02676263    | 1.02676263   | 1.02676263 NA 1 0           |
|              | 0.997539919                           |                   |                                |               |              |                             |
| PRSS54       | ENSG00000103023.11                    | 0.304643164       | 3                              | 3             | 0.371861469  |                             |
|              | Brain_Frontal_Cortex_BA9              | 0.8876097         | Brain_Cortex                   | 2.19394066    | 0.083234405  |                             |
|              | 0.083234405                           | -0.892991978      | 0.341784985                    | -0.230845475  | 0.622236594  |                             |
|              | 3                                     | 0                 | 0.997539919                    |               |              |                             |
| CTD-2501M5.1 | ENSG00000253507.5                     | 0.304787873       | 8                              | 4             | 0.145464504  |                             |
|              | Brain_Hypothalamus                    | 0.82018867        | Brain_Cerebellum               | 5.883143787   | 0.002852093  |                             |
|              | 0.338397418                           | -1.029631531      | 1.455740015                    | -0.185763433  | 0.763906568  |                             |
|              | 4                                     | 0                 | 0.997539919                    |               |              |                             |
| RICTOR       | ENSG00000164327.12                    | 0.304882048       | 1                              | 1             | 0.304882048  |                             |
|              | Brain_Frontal_Cortex_BA9              | 0.304882048       | Brain_Frontal_Cortex_BA9       | 1             | 1            |                             |
|              | 1                                     | 1.02602023        | 1.02602023                     | 1.02602023 NA | 1            | 0                           |
|              | 0.997539919                           |                   |                                |               |              |                             |
| RP11-173M1.4 | ENSG00000266313.1                     | 0.30492369        | 1                              | 1             | 0.30492369   |                             |
|              | Brain_Anterior_cingulate_cortex_BA24  | 0.30492369        |                                |               |              |                             |
|              | Brain_Anterior_cingulate_cortex_BA24  | 1                 | 1                              | 1             | 1.025931889  |                             |
|              | 1.025931889                           | 1.025931889       | NA                             | 1             | 0            | 0.997539919                 |
| PRODH2       | ENSG00000250799.9                     | 0.305108662       | 2                              | 2             | 0.127254992  |                             |
|              | Brain_Cerebellum                      | 0.825500124       | Brain_Cerebellar_Hemisphere    | 1.000164364   |              |                             |
|              | 0.999835636                           | 0.999835636       | 0.220476434                    | 1.525016459   | 0.872746446  |                             |
|              | 0.922449098                           | 2                 | 0                              | 0.997539919   |              |                             |
| IRGC         | ENSG00000124449.6                     | 0.305130786       | 1                              | 1             | 0.305130786  | Brain_Cerebellum            |
|              | 0.305130786                           | Brain_Cerebellum1 | 1                              | 1             | 1.025492662  | 1.025492662                 |
|              | 1.025492662                           | NA                | 1                              | 0             | 0.997539919  |                             |
| ADAM23       | ENSG00000114948.12                    | 0.305190946       | 2                              | 2             | 0.153871938  |                             |
|              | Brain_Cerebellum                      | 0.294280103       | Brain_Hypothalamus             | 1.352743866   |              |                             |
|              | 0.647256134                           | 0.647256134       | -1.425987542                   | -1.048778439  | -1.23738299  |                             |
|              | 0.266727115                           | 2                 | 0                              | 0.997539919   |              |                             |
| AC108868.6   | ENSG00000232001.1                     | 0.305232298       | 2                              | 2             | 0.124952996  |                             |
|              | Brain_Substantia_nigra                | 0.474921562       | Brain_Caudate_basal_ganglia    |               |              |                             |
|              | 1.541692863                           | 0.458307137       | 0.458307137                    | 0.714494328   | 1.534311671  |                             |
|              | 1.124402999                           | 0.579698403       | 2                              | 0             | 0.997539919  |                             |
| RP11-83N9.5  | ENSG00000260193.1                     | 0.30528886        | 1                              | 1             | 0.30528886   |                             |
|              | Brain_Hypothalamus                    | 0.30528886        | Brain_Hypothalamus             | 1             | 1            | 1                           |
|              | -1.025157537                          | -1.025157537      | -1.025157537                   | NA            | 1            | 0                           |
|              | 0.997539919                           |                   |                                |               |              |                             |
| MYH7B        | ENSG00000078814.15                    | 0.305301479       | 3                              | 3             | 0.091157352  |                             |
|              | Brain_Nucleus_accumbens_basal_ganglia | 0.460854324       | Brain_Cerebellar_Hemisphere    |               |              |                             |
|              | 1.937662078                           | 0.086640781       | 0.086640781                    | -1.689324023  | 0.923913966  |                             |
|              | -0.009323082                          | 1.457907895       | 3                              | 0             | 0.997539919  |                             |
| SNX4         | ENSG00000114520.10                    | 0.305446856       | 1                              | 1             | 0.305446856  |                             |
|              | Brain_Caudate_basal_ganglia           | 0.305446856       | Brain_Caudate_basal_ganglia    | 1             | 1            |                             |
|              | 1                                     | 1.024822695       | 1.024822695                    | 1.024822695   | NA           | 1                           |
|              | 0.997539919                           |                   |                                |               |              |                             |
| SVEP1        | ENSG00000165124.17                    | 0.305464291       | 4                              | 4             | 0.030260987  |                             |
|              | Brain_Cerebellar_Hemisphere           | 0.927346888       | Brain_Spinal_cord_cervical_c-1 |               |              |                             |
|              | 2.02624063                            | 0.369148131       | 0.369148131                    | -2.166657397  | 0.091183371  |                             |
|              | -1.005435206                          | 0.957220919       | 4                              | 0             | 0.997539919  |                             |
| MTERF2       | ENSG00000120832.9                     | 0.305477771       | 1                              | 1             | 0.305477771  |                             |
|              | Brain_Hypothalamus                    | 0.305477771       | Brain_Hypothalamus             | 1             | 1            | 1                           |
|              | 1.024757189                           | 1.024757189       | 1.024757189                    | NA            | 1            | 0                           |
|              | 0.997539919                           |                   |                                |               |              |                             |
| FUT7         | ENSG00000180549.7                     | 0.305532055       | 2                              | 2             | 0.213411421  |                             |
|              | Brain_Nucleus_accumbens_basal_ganglia | 0.32140368        | Brain_Cortex                   | 1.069461912   |              |                             |
|              | 0.930538088                           | 0.930538088       | 0.991577479                    | 1.244239525   | 1.117908502  |                             |
|              | 0.178659045                           | 2                 | 0                              | 0.997539919   |              |                             |
| CMTM5        | ENSG00000166091.19                    | 0.305614036       | 1                              | 1             | 0.305614036  | Brain_Cerebellum            |
|              | 0.305614036                           | Brain_Cerebellum1 | 1                              | 1             | -1.024468512 | -1.024468512                |
|              | -1.024468512                          | NA                | 1                              | 0             | 0.997539919  |                             |
| CISD1        | ENSG00000122873.11                    | 0.305761881       | 1                              | 1             | 0.305761881  | Brain_Cerebellum            |
|              | 0.305761881                           | Brain_Cerebellum1 | 1                              | 1             | 1.0241554    | 1.0241554                   |
|              |                                       |                   |                                |               | 1.0241554    | 1.0241554                   |

|               |                                |                                      |              |              |                                |                |    |   |   |
|---------------|--------------------------------|--------------------------------------|--------------|--------------|--------------------------------|----------------|----|---|---|
| NA            | 1                              | 0                                    | 0.997539919  |              |                                |                |    |   |   |
| NFATC1        | ENSG00000131196.17             | 0.305811353                          | 3            | 3            | 0.121093481                    |                |    |   |   |
|               | Brain_Hippocampus              | 0.591636341                          |              |              | Brain_Caudate_basal_ganglia    | 1.114729878    |    |   |   |
|               | 0.895021563                    | 0.895021563                          | -1.550200161 |              | 1.084452556                    | -0.334071292   |    |   |   |
|               | 1.32893624                     | 3                                    | 0            | 0.997539919  |                                |                |    |   |   |
| NFRKB         | ENSG00000170322.14             | 0.305874199                          | 11           | 2            | 0.153258378                    |                |    |   |   |
|               | Brain_Hypothalamus             | 0.857569408                          |              |              | Brain_Frontal_Cortex_BA9       | 9.323677553    |    |   |   |
|               | 0.000890941                    | 1.024214868                          | 0.179469062  |              | 1.42811633                     | 0.861712963    |    |   |   |
|               | 0.39701773                     | 2                                    | 0            | 0.997539919  |                                |                |    |   |   |
| RNH1          | ENSG00000023191.16             | 0.305889997                          | 8            | 5            | 0.243130772                    | Brain_Cortex   |    |   |   |
|               | 0.97060736                     | Brain_Anterior_cingulate_cortex_BA24 | 4.938387739  |              | 0.004489364                    |                |    |   |   |
|               | 0.280510846                    | -0.762772896                         | 1.167197124  |              | -0.159091306                   | 0.66322025     | 5  |   |   |
|               | 0                              | 0.997539919                          |              |              |                                |                |    |   |   |
| VWA5B1        | ENSG00000158816.15             | 0.305964401                          | 3            | 3            | 0.058722848                    |                |    |   |   |
|               | Brain_Hypothalamus             | 0.993748699                          |              |              | Brain_Spinal_cord_cervical_c-1 |                |    |   |   |
|               | 1.105891858                    | 0.894142732                          | 0.894142732  |              | -1.890262602                   | 0.077816578    |    |   |   |
|               | -0.606760316                   | 1.112370277                          | 3            | 0            | 0.997539919                    |                |    |   |   |
| SIGLEC1       | ENSG00000088827.12             | 0.306035796                          | 2            | 2            | 0.123877678                    |                |    |   |   |
|               | Brain_Cerebellar_Hemisphere    | 0.980877296                          |              |              | Brain_Hippocampus              | 1.000896463    |    |   |   |
|               | 0.999103537                    | 0.999103537                          | -1.538699487 |              | 0.02396905                     | -0.757365218   |    |   |   |
|               | 1.10497352                     | 2                                    | 0            | 0.997539919  |                                |                |    |   |   |
| AANAT         | ENSG00000129673.9              | 0.306300842                          | 8            | 5            | 0.057841212                    |                |    |   |   |
|               | Brain_Frontal_Cortex_BA9       | 0.594020524                          |              |              | Brain_Spinal_cord_cervical_c-1 |                |    |   |   |
|               | 5.777351512                    | 0.011894849                          | 0.230743643  |              | -1.896899434                   | -0.533018862   |    |   |   |
|               | -1.140938914                   | 0.480914551                          | 5            | 0            | 0.997539919                    |                |    |   |   |
| MRPL46        | ENSG00000259494.1              | 0.306331795                          | 1            | 1            | 0.306331795                    |                |    |   |   |
|               | Brain_Substantia_nigra         | 0.306331795                          |              |              | Brain_Substantia_nigra         | 1              | 1  |   |   |
|               | 1                              | -1.022949348                         | -1.022949348 |              | -1.022949348                   | NA             | 1  | 0 |   |
|               | 0.997539919                    |                                      |              |              |                                |                |    |   |   |
| AVPR1A        | ENSG00000166148.3              | 0.3063859                            | 2            | 2            | 0.206277459                    |                |    |   |   |
|               | Brain_Cerebellar_Hemisphere    | 0.308261332                          |              |              | Brain_Caudate_basal_ganglia    |                |    |   |   |
|               | 1.117351583                    | 0.882648417                          | 0.882648417  |              | 1.018877068                    | 1.263867861    |    |   |   |
|               | 1.141372465                    | 0.173234651                          | 2            | 0            | 0.997539919                    |                |    |   |   |
| SMARCAL1      | ENSG00000138375.12             | 0.306419472                          | 3            | 3            | 0.057604073                    |                |    |   |   |
|               | Brain_Cortex                   | 0.980665334                          |              |              | Brain_Spinal_cord_cervical_c-1 | 1.189504669    |    |   |   |
|               | 0.813485551                    | 0.813485551                          | -0.024234783 |              | 1.898698925                    | 0.747768076    |    |   |   |
|               | 1.015927324                    | 3                                    | 0            | 0.997539919  |                                |                |    |   |   |
| GDA           | ENSG00000119125.16             | 0.306422633                          | 1            | 1            | 0.306422633                    |                |    |   |   |
|               | Brain_Caudate_basal_ganglia    | 0.306422633                          |              |              | Brain_Caudate_basal_ganglia    | 1              | 1  |   |   |
|               | 1                              | -1.022757254                         | -1.022757254 |              | -1.022757254                   | NA             | 1  | 0 |   |
|               | 0.997539919                    |                                      |              |              |                                |                |    |   |   |
| RP11-46107.1  | ENSG00000246379.6              | 0.306440139                          | 5            | 4            | 0.120788681                    |                |    |   |   |
|               | Brain_Substantia_nigra         | 0.702316011                          |              |              | Brain_Cortex                   | 3.555201408    |    |   |   |
|               | 0.04169419                     | 0.343989906                          | -1.551471712 |              | 0.723276523                    | -0.457868814   |    |   |   |
|               | 0.814404685                    | 4                                    | 0            | 0.997539919  |                                |                |    |   |   |
| CCDC114       | ENSG00000105479.15             | 0.306443234                          | 10           | 4            | 0.021247545                    |                |    |   |   |
|               | Brain_Hypothalamus             | 0.715697192                          |              |              | Brain_Caudate_basal_ganglia    | 7.028704652    |    |   |   |
|               | 0.009256375                    | 0.662833585                          | 0.364215368  |              | 2.303556618                    | 1.365544288    |    |   |   |
|               | 0.610239345                    | 4                                    | 0            | 0.997539919  |                                |                |    |   |   |
| ZNF334        | ENSG00000198185.11             | 0.306474323                          | 7            | 3            | 0.061435925                    |                |    |   |   |
|               | Brain_Cerebellar_Hemisphere    | 0.952484305                          |              |              | Brain_Substantia_nigra         |                |    |   |   |
|               | 5.440193081                    | 0.002748318                          | 0.379533027  |              | -1.870344998                   | -0.059587336   |    |   |   |
|               | -1.059274869                   | 0.543090632                          | 3            | 0            | 0.997539919                    |                |    |   |   |
| NADSYN1       | ENSG00000172890.11             | 0.306542008                          | 8            | 5            | 0.12703568                     | Brain_Amygdala |    |   |   |
|               | 0.698454802                    | Brain_Spinal_cord_cervical_c-1       | 5.512776358  |              | 0.001472847                    |                |    |   |   |
|               | 0.272976076                    | -1.525896349                         | 1.1165098    |              | 0.220233635                    | 0.81694275     | 5  | 0 |   |
|               | 0.997539919                    |                                      |              |              |                                |                |    |   |   |
| STEAP4        | ENSG00000127954.12             | 0.306571335                          | 1            | 1            | 0.306571335                    |                |    |   |   |
|               | Brain_Spinal_cord_cervical_c-1 | 0.306571335                          |              |              | Brain_Spinal_cord_cervical_c-1 |                |    |   |   |
|               | 1                              | 1                                    | 1            | -1.022442878 | -1.022442878                   | -1.022442878   | NA | 1 | 0 |
|               | 0.997539919                    |                                      |              |              |                                |                |    |   |   |
| RP13-977J11.9 | ENSG00000276693.1              | 0.306578486                          | 1            | 1            | 0.306578486                    |                |    |   |   |

|                     |                                       |              |                                       |              |              |                             |
|---------------------|---------------------------------------|--------------|---------------------------------------|--------------|--------------|-----------------------------|
|                     | Brain_Cerebellum                      | 0.306578486  | Brain_Cerebellum1                     | 1            | 1            | 1.022427763                 |
|                     |                                       | 1.022427763  |                                       | 1            | 0            | 0.997539919                 |
| CCS                 | ENSG00000173992.8                     | 0.306623138  | NA                                    | 6            | 6            | 0.069532485                 |
|                     | Brain_Nucleus_accumbens_basal_ganglia | 0.720096391  |                                       |              |              | Brain_Putamen_basal_ganglia |
|                     |                                       | 2.834916202  |                                       | 0.239884756  | -0.609908847 | 1.814944202                 |
|                     |                                       | 0.5679816    | 0.815158062                           | 6            | 0            | 0.997539919                 |
| CBS                 | ENSG00000160200.17                    | 0.306643378  |                                       | 13           | 1            | 0.168811989                 |
|                     | Brain_Substantia_nigra                | 0.697303588  |                                       |              |              | Brain_Amygdala              |
|                     |                                       | 0.005478743  | 11.86861627                           | 0.388962904  | 1.376031153  | 11.86861627                 |
|                     |                                       | 0.297520429  | 1                                     | 0            | 0.997539919  | 0.972144845                 |
| OPALIN              | ENSG00000197430.10                    | 0.306651545  |                                       | 1            | 1            | 0.306651545                 |
|                     | Brain_Cortex                          | 0.306651545  | Brain_Cortex                          | 1            | 1            | 1.022273345                 |
|                     |                                       | 1.022273345  | NA                                    | 1            | 0            | 0.997539919                 |
| FAM83E              | ENSG00000105523.3                     | 0.306654347  |                                       | 5            | 4            | 0.098330401                 |
|                     | Brain_Anterior_cingulate_cortex_BA24  | 0.586247447  |                                       |              |              | Brain_Cerebellum            |
|                     |                                       | 2.069206331  | 0.063553543                           | 0.848889557  | -0.981506419 | 1.653002272                 |
|                     |                                       | 0.627468827  | 1.001052634                           | 4            | 0            | 0.997539919                 |
| TAP2                | ENSG00000204267.13                    | 0.306680179  |                                       | 10           | 9            | 0.105254468                 |
|                     | Brain_Frontal_Cortex_BA9              | 0.8565615    | Brain_Anterior_cingulate_cortex_BA24  |              |              |                             |
|                     |                                       | 5.556317822  | 0.160158856                           | 0.193719291  | -1.619896702 | 1.284043996                 |
|                     |                                       | -0.609926549 | 0.850004615                           | 9            | 0            | 0.997539919                 |
| PRKAR2B             | ENSG00000005249.12                    | 0.306698626  |                                       | 3            | 3            | 0.162786176                 |
|                     | Brain_Cerebellum                      | 0.956722833  | Brain_Spinal_cord_cervical_c-1        |              |              | 2.084266631                 |
|                     |                                       | 0.349344996  | 0.349344996                           | 0.054266508  | 1.395762002  | 0.77081924                  |
|                     |                                       | 0.675423445  | 3                                     | 0            | 0.997539919  |                             |
| PIGP                | ENSG00000185808.13                    | 0.306934177  |                                       | 7            | 5            | 0.182305754                 |
|                     | Brain_Hypothalamus                    | 0.949108086  | Brain_Nucleus_accumbens_basal_ganglia |              |              |                             |
|                     |                                       | 4.55002802   | 0.01846582                            | 0.192896286  | -0.906195958 | 1.333689145                 |
|                     |                                       | -0.259907206 | 0.784345467                           | 5            | 0            | 0.997539919                 |
| TRPM5               | ENSG00000070985.13                    | 0.306985489  |                                       | 1            | 1            | 0.306985489                 |
|                     | Brain_Caudate_basal_ganglia           | 0.306985489  | Brain_Caudate_basal_ganglia1          |              |              | 1                           |
|                     |                                       | 1            | -1.021567833                          | -1.021567833 | -1.021567833 | NA                          |
|                     |                                       | 0.997539919  |                                       | 1            | 0            |                             |
| CD4                 | ENSG00000010610.9                     | 0.307091373  |                                       | 4            | 4            | 0.229869197                 |
|                     | Brain_Putamen_basal_ganglia           | 0.739751183  | Brain_Nucleus_accumbens_basal_ganglia |              |              |                             |
|                     |                                       | 1.733864803  | 0.469311482                           | 0.469311482  | -1.200695868 | 0.98734785                  |
|                     |                                       | -0.223843101 | 0.903481776                           | 4            | 0            | 0.997539919                 |
| SSTR4               | ENSG00000132671.5                     | 0.30715031   |                                       | 4            | 4            | 0.044733506                 |
|                     | Brain_Nucleus_accumbens_basal_ganglia | 0.517256648  | Brain_Cerebellar_Hemisphere           |              |              |                             |
|                     |                                       | 2.255769336  | 0.096367694                           | 0.096367694  | -2.007151761 | -0.647579982                |
|                     |                                       | -1.095474192 | 0.624361082                           | 4            | 0            | 0.997539919                 |
| XXbac-BPGBPG55C20.3 | ENSG00000271761.1                     | 0.307178014  |                                       | 4            | 4            | 0.205118855                 |
|                     | Brain_Cortex                          | 0.452130347  | Brain_Nucleus_accumbens_basal_ganglia |              |              |                             |
|                     |                                       | 2.243222361  | 0.227395268                           | 0.227395268  | -1.11919899  | 1.267101904                 |
|                     |                                       | 0.015463974  | 1.172547747                           | 4            | 0            | 0.997539919                 |
| PPIAL4C             | ENSG00000263464.2                     | 0.30724298   |                                       | 1            | 1            | 0.30724298                  |
|                     | Brain_Cerebellum1                     | 1            | 1                                     | 1            | -1.021024185 | -1.021024185                |
|                     |                                       | -1.021024185 | NA                                    | 1            | 0            | 0.997539919                 |
| LRRC32              | ENSG00000137507.11                    | 0.307244536  |                                       | 1            | 1            | 0.307244536                 |
|                     | Brain_Putamen_basal_ganglia           | 0.307244536  | Brain_Putamen_basal_ganglia1          |              |              | 1                           |
|                     |                                       | 1            | -1.021020902                          | -1.021020902 | -1.021020902 | NA                          |
|                     |                                       | 0.997539919  |                                       | 1            | 0            |                             |
| TTC37               | ENSG00000198677.10                    | 0.307332663  |                                       | 9            | 3            | 0.066998947                 |
|                     | Brain_Substantia_nigra                | 0.52727231   | Brain_Anterior_cingulate_cortex_BA24  |              |              |                             |
|                     |                                       | 7.387953947  | 0.002524596                           | 0.383858434  | 0.632175339  | 1.831681094                 |
|                     |                                       | 1.485865399  | 0.391557135                           | 3            | 0            | 0.997539919                 |
| CAPN10              | ENSG00000142330.19                    | 0.307337378  |                                       | 5            | 3            | 0.518242847                 |
|                     | Brain_Nucleus_accumbens_basal_ganglia | 0.806272037  | Brain_Putamen_basal_ganglia           |              |              |                             |
|                     |                                       | 4.32041627   | 0.037729214                           | 0.254043929  | -0.646056375 | 0.412166363                 |
|                     |                                       | -0.213815193 | 0.501460265                           | 3            | 0            | 0.997539919                 |
| LINC01864           | ENSG00000267522.1                     | 0.307340129  |                                       | 2            | 2            | 0.148814033                 |
|                     | Brain_Nucleus_accumbens_basal_ganglia | 0.602494147  | Brain_Hypothalamus                    |              |              |                             |

|               |                                |                                      |              |              |                                      |              |                  |
|---------------|--------------------------------|--------------------------------------|--------------|--------------|--------------------------------------|--------------|------------------|
|               | 1.002638515                    | 0.997361485                          | 0.997361485  | 0.520817161  | 1.443733221                          |              |                  |
|               | 0.982275191                    | 0.652600205                          | 2            | 0            | 0.997539919                          |              |                  |
| NDNF          | ENSG00000173376.13             | 0.307368636                          | 1            | 1            | 0.307368636                          |              |                  |
|               | Brain_Substantia_nigra         | 0.307368636                          |              |              | Brain_Substantia_nigra               | 1            | 1                |
|               | 1                              | 1.020758995                          | 1.020758995  | 1.020758995  | NA                                   | 1            | 0                |
|               | 0.997539919                    |                                      |              |              |                                      |              |                  |
| CYP4A22       | ENSG00000162365.11             | 0.307637166                          | 7            | 4            | 0.105466359                          |              |                  |
|               | Brain_Hippocampus              | 0.998657225                          |              |              | Brain_Cortex                         | 5.19838747   | 0.018369577      |
|               | 0.267331354                    | -1.618911255                         | -0.001682919 | -0.952533646 | 0.648556811                          |              |                  |
|               | 4                              | 0                                    | 0.998179868  |              |                                      |              |                  |
| UBQLN4        | ENSG00000160803.7              | 0.307823281                          | 4            | 4            | 0.177936293                          |              |                  |
|               | Brain_Hypothalamus             | 0.742728804                          |              |              | Brain_Anterior_cingulate_cortex_BA24 |              |                  |
|               | 1.30687461                     | 0.641879421                          | 0.641879421  | -1.314168243 | 1.347136444                          |              |                  |
|               | -0.111303496                   | 1.190283348                          | 4            | 0            | 0.998207054                          |              |                  |
| DIRAS2        | ENSG00000165023.6              | 0.307882801                          | 1            | 1            | 0.307882801                          |              |                  |
|               | Brain_Spinal_cord_cervical_c-1 | 0.307882801                          |              |              | Brain_Spinal_cord_cervical_c-1       |              |                  |
|               | 1                              | 1                                    | 1            | -1.019674622 | -1.019674622                         | NA           | 1                |
|               | 0.998207054                    |                                      |              |              |                                      |              | 0                |
| TPST2         | ENSG00000128294.15             | 0.307923122                          | 3            | 3            | 0.128423803                          |              | Brain_Cortex     |
|               | 0.665085899                    | Brain_Anterior_cingulate_cortex_BA24 | 1.311516831  |              |                                      |              |                  |
|               | 0.662861789                    | 0.662861789                          | -0.808442075 | 1.520346938  | 0.093000923                          |              |                  |
|               | 1.250297986                    | 3                                    | 0            | 0.998207054  |                                      |              |                  |
| RP11-838N2.5  | ENSG00000266578.1              | 0.308101475                          | 1            | 1            | 0.308101475                          |              |                  |
|               | Brain_Hypothalamus             | 0.308101475                          |              |              | Brain_Hypothalamus                   | 1            | 1                |
|               | 1.019213803                    | 1.019213803                          | 1.019213803  | NA           | 1                                    | 0            | 0.998207054      |
| SNX6          | ENSG00000129515.18             | 0.308184301                          | 1            | 1            | 0.308184301                          |              | Brain_Amygdala   |
|               | 0.308184301                    | Brain_Amygdala                       | 1            | 1            | 1                                    | -1.019039318 | -1.019039318     |
|               | -1.019039318                   | NA                                   | 1            | 0            | 0.998207054                          |              |                  |
| CNGB3         | ENSG00000170289.12             | 0.308255602                          | 1            | 1            | 0.308255602                          |              | Brain_Cortex     |
|               | 0.308255602                    | Brain_Cortex                         | 1            | 1            | 1                                    | -1.018889135 | -1.018889135     |
|               | -1.018889135                   | NA                                   | 1            | 0            | 0.998207054                          |              |                  |
| MTMR4         | ENSG00000108389.9              | 0.30854063                           | 1            | 1            | 0.30854063                           |              | Brain_Cerebellum |
|               | Brain_Cerebellum               | 1                                    | 1            | 1            | -1.01828901                          | -1.01828901  | -1.01828901      |
|               | NA                             | 1                                    | 0            | 0.998207054  |                                      |              |                  |
| CTD-2054N24.2 | ENSG00000259363.5              | 0.308692569                          | 13           | 9            | 0.005406037                          |              |                  |
|               | Brain_Frontal_Cortex_BA9       | 0.972500407                          |              |              | Brain_Hippocampus                    | 7.199054234  |                  |
|               | 0.022017273                    | 0.275939269                          | -2.78178784  | 1.735435317  | 0.358330915                          |              |                  |
|               | 1.061663429                    | 9                                    | 0            | 0.998207054  |                                      |              |                  |
| KDM7A         | ENSG00000006459.10             | 0.308735956                          | 8            | 2            | 0.138812821                          |              |                  |
|               | Brain_Frontal_Cortex_BA9       | 0.672630395                          |              |              | Brain_Spinal_cord_cervical_c-1       |              |                  |
|               | 7.39068625                     | 0.000203802                          | 0.329359535  | -1.480226461 | -0.422540706                         |              |                  |
|               | -0.791354407                   | 0.359671121                          | 2            | 0            | 0.998207054                          |              |                  |
| ANAPC5        | ENSG00000089053.12             | 0.30880248                           | 4            | 4            | 0.10750238                           |              | Brain_Cortex     |
|               | 0.770566278                    | Brain_Cerebellum                     | 1.18573892   | 0.792287319  | 0.792287319                          |              |                  |
|               | -0.536691476                   | 1.609521396                          | 0.454596337  | 1.034855632  | 4                                    | 0            |                  |
|               | 0.998207054                    |                                      |              |              |                                      |              |                  |
| WDR41         | ENSG00000164253.13             | 0.308935054                          | 11           | 4            | 0.070331489                          |              |                  |
|               | Brain_Frontal_Cortex_BA9       | 0.606034131                          |              |              | Brain_Substantia_nigra               |              |                  |
|               | 8.057234931                    | 0.007905571                          | 0.366461161  | -1.809769824 | -0.515742694                         |              |                  |
|               | -1.212608278                   | 0.441237059                          | 4            | 0            | 0.998207054                          |              |                  |
| NFATC3        | ENSG00000072736.18             | 0.30900516                           | 8            | 7            | 0.025439636                          |              | Brain_Cerebellum |
|               | 0.876039382                    | Brain_Caudate_basal_ganglia          | 3.851207656  | 0.038407971  |                                      |              |                  |
|               | 0.216400508                    | 0.15599193                           | 2.234660648  | 1.304102605  | 0.822701118                          |              | 7                |
|               | 0                              | 0.998207054                          |              |              |                                      |              |                  |
| H6PD          | ENSG00000049239.12             | 0.309132805                          | 8            | 8            | 0.010815327                          |              |                  |
|               | Brain_Spinal_cord_cervical_c-1 | 0.899601683                          |              |              | Brain_Hippocampus                    |              |                  |
|               | 2.252464464                    | 0.14891827                           | 0.14891827   | -0.972527408 | 2.548609688                          |              |                  |
|               | 0.423355597                    | 1.029662559                          | 8            | 0            | 0.998207054                          |              |                  |
| EFCC1         | ENSG00000114654.7              | 0.309233802                          | 2            | 2            | 0.125504623                          |              |                  |
|               | Brain_Cerebellar_Hemisphere    | 0.16773342                           |              |              | Brain_Cerebellum                     | 1.898025214  |                  |
|               | 0.101974786                    | 0.101974786                          | 1.379523455  | 1.532072183  | 1.455797819                          |              |                  |
|               | 0.10786824                     | 2                                    | 0            | 0.998207054  |                                      |              |                  |

|               |                                       |              |              |              |                                |              |             |              |              |
|---------------|---------------------------------------|--------------|--------------|--------------|--------------------------------|--------------|-------------|--------------|--------------|
| RASIP1        | ENSG00000105538.9                     | 0.309287199  | 2            | 2            | 0.154975165                    |              |             |              |              |
|               | Brain_Cerebellar_Hemisphere           | 0.195048569  |              |              | Brain_Cerebellum               | 1.586872805  |             |              |              |
|               | 0.413127195                           | 0.413127195  |              |              | 1.422175997                    |              |             | 1.358981947  |              |
|               | 0.089369883                           | 2            | 0            | 0.998207054  |                                |              |             |              |              |
| MFSD12        | ENSG00000161091.12                    | 0.309409986  | 6            | 4            | 0.116383057                    |              |             |              |              |
|               | Brain_Spinal_cord_cervical_c-1        | 0.88320967   |              |              | Brain_Hippocampus              | 3.580885337  |             |              |              |
|               | 0.010700375                           | 0.521135224  |              |              | -0.295849031                   | 1.570137799  |             | 0.507396528  |              |
|               | 0.675329534                           | 4            | 0            | 0.998207054  |                                |              |             |              |              |
| TAS1R1        | ENSG00000173662.20                    | 0.309438263  | 1            | 1            | 0.309438263                    |              |             |              |              |
|               | Brain_Cerebellar_Hemisphere           | 0.309438263  |              |              | Brain_Cerebellar_Hemisphere    | 1            | 1           |              |              |
|               | 1                                     | 1.016401435  | 1.016401435  | 1.016401435  | NA                             | 1            | 0           |              |              |
|               | 0.998207054                           |              |              |              |                                |              |             |              |              |
| MIAT          | ENSG00000225783.6                     | 0.309554242  | 4            | 4            | 0.04487002                     |              |             |              |              |
|               | Brain_Caudate_basal_ganglia           | 0.678487958  |              |              | Brain_Cerebellar_Hemisphere    |              |             |              |              |
|               | 1.489335806                           | 0.55957612   | 0.55957612   | -0.414527327 | 2.005870936                    |              |             |              |              |
|               | 0.705817473                           | 0.994825792  | 4            | 0            | 0.998207054                    |              |             |              |              |
| C7orf72       | ENSG00000164500.6                     | 0.309577652  | 1            | 1            | 0.309577652                    |              |             |              |              |
|               | Brain_Substantia_nigra                | 0.309577652  |              |              | Brain_Substantia_nigra         | 1            | 1           |              |              |
|               | 1                                     | 1.016108647  | 1.016108647  | 1.016108647  | NA                             | 1            | 0           |              |              |
|               | 0.998207054                           |              |              |              |                                |              |             |              |              |
| ZRANB2        | ENSG00000132485.13                    | 0.309778184  | 1            | 1            | 0.309778184                    |              |             |              |              |
|               | Brain_Amygdala                        | 0.309778184  |              |              | Brain_Amygdala                 | 1            | 1           | 1            | -1.015687581 |
|               | -1.015687581                          | -1.015687581 | NA           | 1            | 0                              | 0.998207054  |             |              |              |
| TMEM136       | ENSG00000181264.8                     | 0.309931923  | 4            | 4            | 0.370121804                    |              |             |              |              |
|               | Brain_Hippocampus                     | 0.877362311  |              |              | Brain_Amygdala                 | 2.559593125  |             |              |              |
|               | 0.144177875                           | 0.144177875  | -0.89624523  |              | 0.232054248                    |              |             | -0.284251613 |              |
|               | 0.563031275                           | 4            | 0            | 0.998207054  |                                |              |             |              |              |
| GIN52         | ENSG00000131153.8                     | 0.309992922  | 1            | 1            | 0.309992922                    |              |             |              |              |
|               | Brain_Spinal_cord_cervical_c-1        | 0.309992922  |              |              | Brain_Spinal_cord_cervical_c-1 |              |             |              |              |
|               | 1                                     | 1            | 1            | -1.015236885 | -1.015236885                   | -1.015236885 | NA          | 1            | 0            |
|               | 0.998207054                           |              |              |              |                                |              |             |              |              |
| TMEM143       | ENSG00000161558.10                    | 0.310023589  | 3            | 3            | 0.17937873                     |              |             |              |              |
|               | Brain_Nucleus_accumbens_basal_ganglia | 0.812377138  |              |              | Brain_Substantia_nigra         |              |             |              |              |
|               | 1.878322692                           | 0.171979608  | 0.171979608  | 0.237360491  | 1.342670381                    |              |             |              |              |
|               | 0.842399573                           | 0.560053374  | 3            | 0            | 0.998207054                    |              |             |              |              |
| C2orf91       | ENSG00000205086.6                     | 0.310026032  | 1            | 1            | 0.310026032                    |              |             |              |              |
|               | Brain_Spinal_cord_cervical_c-1        | 0.310026032  |              |              | Brain_Spinal_cord_cervical_c-1 |              |             |              |              |
|               | 1                                     | 1            | 1            | 1.015167411  | 1.015167411                    | 1.015167411  | NA          | 1            | 0            |
|               | 0.998207054                           |              |              |              |                                |              |             |              |              |
| RP11-568N6.1  | ENSG00000260101.1                     | 0.310074845  | 1            | 1            | 0.310074845                    |              |             |              |              |
|               | Brain_Hypothalamus                    | 0.310074845  |              |              | Brain_Hypothalamus             | 1            | 1           | 1            |              |
|               | -1.015064997                          | -1.015064997 | -1.015064997 | NA           | 1                              | 0            | 0.998207054 |              |              |
| RP11-408A13.4 | ENSG00000272871.1                     | 0.310104555  | 11           | 7            | 0.035827481                    |              |             |              |              |
|               | Brain_Spinal_cord_cervical_c-1        | 0.903362009  |              |              | Brain_Frontal_Cortex_BA9       |              |             |              |              |
|               | 5.759293861                           | 0.019490928  | 0.413054132  | -2.098879988 | 0.158018827                    |              |             |              |              |
|               | -1.167969172                          | 0.82598524   | 7            | 0            | 0.998207054                    |              |             |              |              |
| LILRB4        | ENSG00000186818.12                    | 0.31018261   | 1            | 1            | 0.31018261                     |              |             |              |              |
|               | Brain_Nucleus_accumbens_basal_ganglia | 0.31018261   |              |              |                                |              |             |              |              |
|               | Brain_Nucleus_accumbens_basal_ganglia | 1            | 1            | 1            | -1.014838937                   |              |             |              |              |
|               | -1.014838937                          | -1.014838937 | NA           | 1            | 0                              | 0.998207054  |             |              |              |
| RUNX1T1       | ENSG00000079102.16                    | 0.310209445  | 1            | 1            | 0.310209445                    |              |             |              |              |
|               | Brain_Hypothalamus                    | 0.310209445  |              |              | Brain_Hypothalamus             | 1            | 1           | 1            |              |
|               | -1.014782651                          | -1.014782651 | -1.014782651 | NA           | 1                              | 0            | 0.998207054 |              |              |
| TNNT3         | ENSG00000130595.17                    | 0.310215549  | 2            | 2            | 0.137167357                    |              |             |              |              |
|               | Brain_Spinal_cord_cervical_c-1        | 0.6977126    |              |              | Brain_Frontal_Cortex_BA9       |              |             |              |              |
|               | 1.017359189                           | 0.982640811  | 0.982640811  | -1.486422672 | -0.388410062                   |              |             |              |              |
|               | -0.937416367                          | 0.776412163  | 2            | 0            | 0.998207054                    |              |             |              |              |
| TNFRSF10C     | ENSG00000173535.13                    | 0.310252914  | 12           | 5            | 0.018096991                    |              |             |              |              |
|               | Brain_Hypothalamus                    | 0.711043544  |              |              | Brain_Substantia_nigra         | 9.10422794   |             |              |              |
|               | 0.016542909                           | 0.326204531  | -2.363627641 | -0.37045494  | -1.70546978                    |              |             |              |              |
|               | 0.500571381                           | 5            | 0            | 0.998207054  |                                |              |             |              |              |
| OSBPL5        | ENSG00000021762.19                    | 0.310312076  | 3            | 3            | 0.112571096                    |              |             |              |              |

|              |                                      |              |                             |                                |              |              |             |    |                  |
|--------------|--------------------------------------|--------------|-----------------------------|--------------------------------|--------------|--------------|-------------|----|------------------|
|              | Brain_Cerebellum                     | 0.735534082  |                             | Brain_Frontal_Cortex_BA9       | 1.190044182  |              |             |    |                  |
|              |                                      | 0.810045463  | 0.810045463                 |                                | -1.586741971 | -0.337773234 |             |    | -0.985624301     |
|              |                                      | 0.625794483  | 3                           | 0                              | 0.998207054  |              |             |    |                  |
| LRIT2        | ENSG00000204033                      | 3.9          | 0.310357857                 | 7                              | 3            | 0.047974365  |             |    |                  |
|              | Brain_Caudate_basal_ganglia          | 0.40003537   |                             | Brain_Amygdala                 | 5.548824687  |              |             |    |                  |
|              |                                      | 0.012164994  | 0.373304575                 |                                | 0.841558066  | 1.977595431  |             |    | 1.360375422      |
|              |                                      | 0.414342637  | 3                           | 0                              | 0.998207054  |              |             |    |                  |
| RP11-407N8.6 | ENSG00000274156                      | 1.1          | 0.310676074                 | 1                              | 1            | 0.310676074  |             |    |                  |
|              | Brain_Caudate_basal_ganglia          | 0.310676074  |                             | Brain_Caudate_basal_ganglia    | 1            | 1            |             |    |                  |
|              |                                      | 1.013804446  | 1.013804446                 | 1.013804446                    | NA           | 1            | 0           |    |                  |
|              |                                      | 0.998207054  |                             |                                |              |              |             |    |                  |
| TCFL5        | ENSG00000101190                      | 12           | 0.310699507                 | 13                             | 2            | 0.050321537  |             |    | Brain_Cortex     |
|              |                                      | 0.33079356   | Brain_Putamen_basal_ganglia | 11.29268264                    |              | 0.012298391  |             |    |                  |
|              |                                      | 0.459413274  | 0.972516701                 | 1.957220607                    |              | 1.354091631  |             |    | 0.274163021      |
|              |                                      | 2            | 0                           | 0.998207054                    |              |              |             |    |                  |
| RP11-30P6.6  | ENSG00000234155                      | 1.1          | 0.310775478                 | 5                              | 4            | 0.489631022  |             |    |                  |
|              | Brain_Anterior_cingulate_cortex_BA24 | 0.816632938  |                             | Brain_Cortex                   |              |              |             |    |                  |
|              |                                      | 4.100656872  | 0.071230869                 | 0.143091639                    |              | -0.690895806 |             |    | 0.6774696        |
|              |                                      | -0.073895118 | 0.533211939                 | 4                              | 0            | 0.998207054  |             |    |                  |
| SATB2        | ENSG00000119042                      | 16           | 0.310793215                 | 1                              | 1            | 0.310793215  |             |    |                  |
|              | Brain_Spinal_cord_cervical_c-1       | 0.310793215  |                             | Brain_Spinal_cord_cervical_c-1 |              |              |             |    |                  |
|              |                                      | 1            | 1                           | 1                              | 1.013559031  | 1.013559031  | 1.013559031 | NA | 1                |
|              |                                      | 0.998207054  |                             |                                |              |              |             |    | 0                |
| OSER1        | ENSG00000132823                      | 10           | 0.311314045                 | 1                              | 1            | 0.311314045  |             |    | Brain_Cerebellum |
|              |                                      | 0.311314045  | Brain_Cerebellum            | 1                              | 1            | -1.012468616 |             |    | -1.012468616     |
|              |                                      | -1.012468616 | NA                          | 1                              | 0            | 0.998207054  |             |    |                  |
| TFAP4        | ENSG00000090447                      | 11           | 0.311564834                 | 1                              | 1            | 0.311564834  |             |    |                  |
|              | Brain_Spinal_cord_cervical_c-1       | 0.311564834  |                             | Brain_Spinal_cord_cervical_c-1 |              |              |             |    |                  |
|              |                                      | 1            | 1                           | 1                              | 1.01194399   | 1.01194399   | 1.01194399  | NA | 1                |
|              |                                      | 0.998207054  |                             |                                |              |              |             |    | 0                |
| TRMT12       | ENSG00000183665                      | 5            | 0.311592855                 | 1                              | 1            | 0.311592855  |             |    |                  |
|              | Brain_Cerebellum                     | 0.311592855  |                             | Brain_Cerebellum               | 1            | 1            | 1           |    | 1.011885392      |
|              |                                      | 1.011885392  | 1.011885392                 | NA                             | 1            | 0            | 0.998207054 |    |                  |
| NPAT         | ENSG00000149308                      | 16           | 0.311637714                 | 1                              | 1            | 0.311637714  |             |    | Brain_Cerebellum |
|              |                                      | 0.311637714  | Brain_Cerebellum            | 1                              | 1            | 1.011791586  |             |    | 1.011791586      |
|              |                                      | 1.011791586  | NA                          | 1                              | 0            | 0.998207054  |             |    |                  |
| AC079779.5   | ENSG00000235779                      | 7            | 0.311828005                 | 1                              | 1            | 0.311828005  |             |    |                  |
|              | Brain_Cerebellum                     | 0.311828005  |                             | Brain_Cerebellum               | 1            | 1            | 1           |    | -1.011393763     |
|              |                                      | -1.011393763 | -1.011393763                | NA                             | 1            | 0            | 0.998207054 |    |                  |
| OVOS2        | ENSG00000177359                      | 17           | 0.311832466                 | 4                              | 4            | 0.058980457  |             |    | Brain_Cortex     |
|              |                                      | 0.402807656  | Brain_Frontal_Cortex_BA9    | 3.203501509                    |              | 0.124762907  |             |    |                  |
|              |                                      | 0.124762907  | 0.83661741                  | 1.888338982                    |              | 1.312083667  |             |    | 0.454690504      |
|              |                                      | 0            | 0.998207054                 |                                |              |              |             |    | 4                |
| SNRPD1       | ENSG00000167088                      | 10           | 0.311852832                 | 5                              | 3            | 0.155113767  |             |    |                  |
|              | Brain_Cerebellar_Hemisphere          | 0.537720971  |                             | Brain_Caudate_basal_ganglia    |              |              |             |    |                  |
|              |                                      | 3.113938066  | 0.00177754                  | 0.59215831                     | -0.616262975 | 1.421698598  |             |    |                  |
|              |                                      | 0.799961976  | 0.850986971                 | 3                              | 0            | 0.998207054  |             |    |                  |
| DECR1        | ENSG00000104325                      | 6            | 0.3119046                   | 2                              | 2            | 0.144834706  |             |    | Brain_Cortex     |
|              |                                      | 0.386784673  | Brain_Hypothalamus          | 1.29763836                     | 0.70236164   | 0.70236164   |             |    |                  |
|              |                                      | 0.865463078  | 1.458021178                 | 1.161742128                    |              | 0.419001851  |             |    | 2                |
|              |                                      | 0.998207054  |                             |                                |              |              |             |    | 0                |
| GATM         | ENSG00000171766                      | 15           | 0.312003869                 | 2                              | 2            | 0.276630936  |             |    |                  |
|              | Brain_Hippocampus                    | 0.375359654  |                             | Brain_Hypothalamus             | 1.156932842  |              |             |    |                  |
|              |                                      | 0.843067158  | 0.843067158                 | -0.88647865                    |              | 1.087918844  |             |    | 0.100720097      |
|              |                                      | 1.396109857  | 2                           | 0                              | 0.998207054  |              |             |    |                  |
| L3MBTL4      | ENSG00000154655                      | 15           | 0.312011753                 | 1                              | 1            | 0.312011753  |             |    |                  |
|              | Brain_Substantia_nigra               | 0.312011753  |                             | Brain_Substantia_nigra         | 1            | 1            |             |    |                  |
|              |                                      | 1            | 1.011009772                 | 1.011009772                    | 1.011009772  | NA           | 1           | 0  |                  |
|              |                                      | 0.998207054  |                             |                                |              |              |             |    |                  |
| AC073133.1   | ENSG00000233878                      | 1.1          | 0.312107324                 | 9                              | 8            | 0.043784287  |             |    |                  |
|              | Brain_Putamen_basal_ganglia          | 0.973007416  |                             | Brain_Substantia_nigra         |              |              |             |    |                  |
|              |                                      | 3.904585847  | 0.043356124                 | 0.205432032                    |              | -2.01615006  |             |    | 0.787880063      |
|              |                                      | -0.636168285 | 0.90686588                  | 8                              | 0            | 0.998207054  |             |    |                  |

|           |                                      |                                      |              |              |                                      |             |            |                  |
|-----------|--------------------------------------|--------------------------------------|--------------|--------------|--------------------------------------|-------------|------------|------------------|
| GPATCH2   | ENSG00000092978.10                   | 0.312225437                          | 1            | 1            | 0.312225437                          |             |            |                  |
|           | Brain_Putamen_basal_ganglia          | 0.312225437                          |              |              | Brain_Putamen_basal_ganglia          | 1           | 1          |                  |
|           | 1.010563407                          | 1.010563407                          | 1.010563407  | NA           | 1                                    | 0           |            |                  |
|           | 0.998207054                          |                                      |              |              |                                      |             |            |                  |
| CACNA2D2  | ENSG00000007402.11                   | 0.312294446                          | 1            | 1            | 0.312294446                          |             |            |                  |
|           | Brain_Cerebellum                     | 0.312294446                          |              |              | Brain_Cerebellum                     | 1           | 1          | 1.010419298      |
|           | 1.010419298                          | 1.010419298                          | NA           | 1            | 0                                    | 0.998207054 |            |                  |
| ASAP3     | ENSG00000088280.18                   | 0.312326493                          | 4            | 3            | 0.149026252                          |             |            |                  |
|           | Brain_Cerebellar_Hemisphere          | 0.699157801                          |              |              | Brain_Cortex                         | 3.355361365 |            |                  |
|           | 0.063640757                          | 0.216354517                          | -1.442979479 | -0.386457596 | -1.045550042                         |             |            |                  |
|           | 0.490816558                          | 3                                    | 0            | 0.998207054  |                                      |             |            |                  |
| CASP8AP2  | ENSG00000118412.12                   | 0.312454194                          | 1            | 1            | 0.312454194                          |             |            |                  |
|           | Brain_Cerebellum                     | 0.312454194                          |              |              | Brain_Cerebellum                     | 1           | 1          | -1.01008578      |
|           | -1.01008578                          | -1.01008578                          | NA           | 1            | 0                                    | 0.998207054 |            |                  |
| RIIAD1    | ENSG00000178796.12                   | 0.312576669                          | 8            | 8            | 0.007177446                          |             |            |                  |
|           | Brain_Substantia_nigra               | 0.693678657                          |              |              | Brain_Putamen_basal_ganglia          | 3.9389762   |            |                  |
|           | 0.155772885                          | 0.155772885                          | 0.393867783  | 2.688497079  | 0.917440793                          |             |            |                  |
|           | 0.74375282                           | 8                                    | 0            | 0.998207054  |                                      |             |            |                  |
| SCUBE2    | ENSG00000175356.12                   | 0.312710347                          | 8            | 8            | 0.0809235                            |             |            |                  |
|           | Brain_Caudate_basal_ganglia          | 0.806912506                          |              |              | Brain_Spinal_cord_cervical_c-1       |             |            |                  |
|           | 2.925716505                          | 0.193391688                          | 0.193391688  | -1.745352663 | 0.787834272                          |             |            |                  |
|           | -0.210867177                         | 0.816376284                          | 8            | 0            | 0.998207054                          |             |            |                  |
| ETV3L     | ENSG00000253831.1                    | 0.312940678                          | 1            | 1            | 0.312940678                          |             |            | Brain_Amygdala   |
|           | 0.312940678                          | Brain_Amygdala                       | 1            | 1            | 1                                    | 1.009070806 |            | 1.009070806      |
|           | 1.009070806                          | NA                                   | 1            | 0            | 0.998207054                          |             |            |                  |
| NRG1      | ENSG00000157168.18                   | 0.312996105                          | 3            | 3            | 0.169167137                          |             |            | Brain_Cerebellum |
|           | 0.629540249                          | Brain_Caudate_basal_ganglia          | 1.136037521  | 0.872616243  |                                      |             |            |                  |
|           | 0.872616243                          | -1.374884881                         | 0.482374054  | -0.649127575 | 0.992886715                          |             |            |                  |
|           | 3                                    | 0                                    | 0.998207054  |              |                                      |             |            |                  |
| LXN       | ENSG00000079257.7                    | 0.312999832                          | 10           | 3            | 0.065712067                          |             |            |                  |
|           | Brain_Cerebellar_Hemisphere          | 0.438309715                          |              |              | Brain_Anterior_cingulate_cortex_BA24 |             |            |                  |
|           | 8.22888571                           | 0.009244197                          | 0.441250188  | -1.84038273  | -0.775050676                         |             |            |                  |
|           | -1.531297715                         | 0.31974444                           | 3            | 0            | 0.998207054                          |             |            |                  |
| LINC00540 | ENSG00000276476.2                    | 0.313068834                          | 1            | 1            | 0.313068834                          |             |            |                  |
|           | Brain_Spinal_cord_cervical_c-1       | 0.313068834                          |              |              | Brain_Spinal_cord_cervical_c-1       |             |            |                  |
|           | 1                                    | 1                                    | 1            | 1.008803601  | 1.008803601                          | 1.008803601 | NA         | 1                |
|           | 0.998207054                          |                                      |              |              |                                      |             |            | 0                |
| NSMCE1    | ENSG00000169189.16                   | 0.313077961                          | 2            | 2            | 0.140602032                          |             |            |                  |
|           | Brain_Hypothalamus                   | 0.671816212                          |              |              | Brain_Spinal_cord_cervical_c-1       |             |            |                  |
|           | 1.023656532                          | 0.976343468                          | 0.976343468  | -1.473552823 | -0.423656681                         |             |            |                  |
|           | -0.948604752                         | 0.742388682                          | 2            | 0            | 0.998207054                          |             |            |                  |
| GABRG3    | ENSG00000182256.12                   | 0.313203776                          | 2            | 2            | 0.129634503                          |             |            |                  |
|           | Brain_Amygdala                       | 0.869105484                          |              |              | Brain_Cerebellar_Hemisphere          | 1.00456266  | 0.99543734 |                  |
|           | 0.99543734                           | 0.164794816                          | 1.515544765  | 0.840169791  | 0.955124448                          |             |            | 2                |
|           | 0                                    | 0.998207054                          |              |              |                                      |             |            |                  |
| FGFR4     | ENSG00000160867.14                   | 0.313229453                          | 10           | 6            | 0.055461212                          |             |            |                  |
|           | Brain_Hippocampus                    | 0.761461202                          |              |              | Brain_Cerebellar_Hemisphere          | 6.439786483 |            |                  |
|           | 0.023451393                          | 0.279322873                          | -1.915245427 | 1.167629191  | -0.700137079                         |             |            |                  |
|           | 0.807745774                          | 6                                    | 0            | 0.998207054  |                                      |             |            |                  |
| NXNL1     | ENSG00000171773.2                    | 0.313329751                          | 2            | 2            | 0.218633403                          |             |            |                  |
|           | Brain_Anterior_cingulate_cortex_BA24 | 0.36538997                           |              |              | Brain_Caudate_basal_ganglia          |             |            |                  |
|           | 1.005238849                          | 0.994761151                          | 0.994761151  | -1.230170129 | -0.905142367                         |             |            |                  |
|           | -1.067656248                         | 0.229829335                          | 2            | 0            | 0.998207054                          |             |            |                  |
| PVRIG     | ENSG00000213413.2                    | 0.313381167                          | 13           | 2            | 0.066375522                          |             |            | Brain_Cortex     |
|           | 0.85733496                           | Brain_Anterior_cingulate_cortex_BA24 | 11.36649061  | 0.000604804  |                                      |             |            |                  |
|           | 0.612413216                          | 0.179767677                          | 1.835879217  | 1.108982167  | 0.422531849                          |             |            |                  |
|           | 2                                    | 0                                    | 0.998207054  |              |                                      |             |            |                  |
| SLC39A4   | ENSG00000147804.9                    | 0.313383398                          | 5            | 2            | 0.27012328                           |             |            | Brain_Cortex     |
|           | 0.863013567                          | Brain_Cerebellum                     | 4.241747503  | 0.004726335  | 0.613940338                          |             |            |                  |
|           | -1.102778701                         | 0.333844255                          | -0.178056717 | 0.575219242  | 2                                    | 0           |            |                  |
|           | 0.998207054                          |                                      |              |              |                                      |             |            |                  |
| SLC2A9    | ENSG00000109667.11                   | 0.313810098                          | 2            | 2            | 0.185935923                          |             |            |                  |



|           |                                       |                             |                                       |             |                             |                  |
|-----------|---------------------------------------|-----------------------------|---------------------------------------|-------------|-----------------------------|------------------|
|           | Brain_Spinal_cord_cervical_c-1        | 0.838832662                 |                                       |             | Brain_Caudate_basal_ganglia |                  |
|           | 1.606818889                           | 0.393181111                 | 0.393181111                           |             | 0.20338687                  | 1.322697719      |
|           | 0.763042294                           | 0.791472292                 | 2                                     | 0           | 0.998207054                 |                  |
| AARS2     | ENSG00000124608.4                     | 0.313844712                 | 5                                     | 5           | 0.049190441                 | Brain_Amygdala   |
|           | 0.568420579                           | Brain_Cerebellum            | 1.636964457                           |             | 0.366554978                 | 0.366554978      |
|           | -0.583299813                          | 1.96693729                  | 0.687069109                           |             | 0.904694679                 | 5                |
|           | 0.998207054                           |                             |                                       |             |                             | 0                |
| ASIC3     | ENSG00000213199.7                     | 0.313869893                 | 1                                     | 1           | 0.313869893                 | Brain_Amygdala   |
|           | 0.313869893                           | Brain_Amygdala              | 1                                     | 1           | 1                           | -1.007135023     |
|           | -1.007135023                          | NA                          | 1                                     | 0           | 0.998207054                 | -1.007135023     |
| TSPAN31   | ENSG00000135452.9                     | 0.313923844                 | 3                                     | 3           | 0.166991048                 |                  |
|           | Brain_Cerebellar_Hemisphere           | 0.36260786                  | Brain_Hypothalamus                    | 1.631690643 |                             |                  |
|           | 0.403564083                           | 0.403564083                 | -1.381936994                          |             | 0.91040709                  | -0.605342456     |
|           | 1.312811085                           | 3                           | 0                                     | 0.998207054 |                             |                  |
| VEPH1     | ENSG00000197415.11                    | 0.31394143                  | 2                                     | 2           | 0.140227508                 | Brain_Cerebellum |
|           | 0.736212836                           | Brain_Cerebellar_Hemisphere | 1.45554374                            | 0.54445626  | 0.54445626                  | 0.54445626       |
|           | 0.336872739                           | 1.474944339                 | 0.905908539                           |             | 0.804738146                 | 2                |
|           | 0.998207054                           |                             |                                       |             |                             | 0                |
| BTBD3     | ENSG00000132640.14                    | 0.314295572                 | 3                                     | 3           | 0.162872975                 |                  |
|           | Brain_Putamen_basal_ganglia           | 0.48874129                  | Brain_Anterior_cingulate_cortex_BA24  |             |                             |                  |
|           | 1.281636686                           | 0.732971232                 | 0.732971232                           |             | -1.395473916                | -0.6923122       |
|           | -1.069094888                          | 0.354280252                 | 3                                     | 0           | 0.998207054                 |                  |
| PIP4K2C   | ENSG00000166908.17                    | 0.314326865                 | 2                                     | 2           | 0.154665101                 |                  |
|           | Brain_Nucleus_accumbens_basal_ganglia | 0.67602401                  | Brain_Amygdala                        | 1.08281187  |                             |                  |
|           | 0.91718813                            | 0.91718813                  | -1.42324515                           |             | 0.417894834                 | -0.502675158     |
|           | 1.301882567                           | 2                           | 0                                     | 0.998207054 |                             |                  |
| PYGO1     | ENSG00000171016.11                    | 0.314585873                 | 3                                     | 3           | 0.347274466                 |                  |
|           | Brain_Cerebellar_Hemisphere           | 0.864970803                 | Brain_Nucleus_accumbens_basal_ganglia |             |                             |                  |
|           | 2.389141693                           | 0.224975244                 | 0.224975244                           |             | -0.939889067                | 0.669571339      |
|           | -0.033422571                          | 0.823797014                 | 3                                     | 0           | 0.998207054                 |                  |
| C9orf135  | ENSG00000204711.8                     | 0.314673525                 | 1                                     | 1           | 0.314673525                 |                  |
|           | Brain_Nucleus_accumbens_basal_ganglia | 0.314673525                 |                                       |             |                             |                  |
|           | Brain_Nucleus_accumbens_basal_ganglia | 1                           | 1                                     | 1           | -1.005463897                |                  |
|           | -1.005463897                          | -1.005463897                | NA                                    | 1           | 0                           | 0.998207054      |
| LINC00967 | ENSG00000253138.5                     | 0.314886642                 | 1                                     | 1           | 0.314886642                 |                  |
|           | Brain_Putamen_basal_ganglia           | 0.314886642                 | Brain_Putamen_basal_ganglia           | 1           | 1                           |                  |
|           | 1                                     | 1.0050212                   | 1.0050212                             | 1.0050212   | NA                          | 1                |
|           | 0.998207054                           |                             |                                       |             |                             |                  |
| MAP3K21   | ENSG00000143674.10                    | 0.314931241                 | 10                                    | 2           | 0.114473716                 |                  |
|           | Brain_Amygdala                        | 0.313655011                 | Brain_Putamen_basal_ganglia           | 9.174906272 |                             |                  |
|           | 0.000662852                           | 0.333709855                 | -1.578400129                          |             | -1.007582338                | -1.436957645     |
|           | 0.189462228                           | 2                           | 0                                     | 0.998207054 |                             |                  |
| MGLL      | ENSG00000074416.13                    | 0.314991696                 | 2                                     | 2           | 0.13293918                  |                  |
|           | Brain_Spinal_cord_cervical_c-1        | 0.861611196                 | Brain_Cerebellum                      | 1.036481777 |                             |                  |
|           | 0.963518223                           | 0.963518223                 | 0.174323546                           |             | 1.502611794                 | 0.83846767       |
|           | 0.939241628                           | 2                           | 0                                     | 0.998207054 |                             |                  |
| UCP2      | ENSG00000175567.8                     | 0.315060544                 | 9                                     | 8           | 0.008936766                 |                  |
|           | Brain_Spinal_cord_cervical_c-1        | 0.808857346                 | Brain_Cortex                          | 4.589183255 |                             |                  |
|           | 0.054714298                           | 0.198821964                 | -2.614463692                          |             | 0.550641342                 | -0.752496029     |
|           | 1.010460181                           | 8                           | 0                                     | 0.998207054 |                             |                  |
| DHX8      | ENSG00000067596.10                    | 0.315117728                 | 5                                     | 4           | 0.155529724                 |                  |
|           | Brain_Spinal_cord_cervical_c-1        | 0.759962313                 | Brain_Cerebellum                      | 2.460449223 |                             |                  |
|           | 1.71E-09                              | 0.252798763                 | -1.420267825                          |             | 0.464769509                 | -0.075335933     |
|           | 0.820089781                           | 4                           | 0                                     | 0.998207054 |                             |                  |
| ZNF763    | ENSG00000197054.11                    | 0.315195887                 | 4                                     | 1           | 0.25224877                  | Brain_Cerebellum |
|           | 0.353452504                           | Brain_Hippocampus           | 3.901683803                           |             | 0.001176412                 |                  |
|           | 3.901683803                           | -1.144904379                | -0.927913379                          |             | -0.992071599                | 0.102480787      |
|           | 1                                     | 0                           | 0.998207054                           |             |                             |                  |
| FAM114A1  | ENSG00000197712.11                    | 0.315257203                 | 5                                     | 5           | 0.175982819                 |                  |
|           | Brain_Spinal_cord_cervical_c-1        | 0.811653693                 | Brain_Caudate_basal_ganglia           |             |                             |                  |
|           | 2.80509961                            | 0.094962516                 | 0.094962516                           |             | -0.238293202                | 1.353227949      |
|           | 0.761238385                           | 0.638822324                 | 5                                     | 0           | 0.998207054                 |                  |
| RFWD3     | ENSG00000168411.13                    | 0.315331629                 | 11                                    | 4           | 0.116425798                 |                  |

|               |                                       |                                |              |              |                                       |                             |             |   |   |
|---------------|---------------------------------------|--------------------------------|--------------|--------------|---------------------------------------|-----------------------------|-------------|---|---|
|               | Brain_Cerebellar_Hemisphere           | 0.696101834                    |              |              | Brain_Nucleus_accumbens_basal_ganglia |                             |             |   |   |
|               | 7.853015175                           | 0.010963603                    | 0.29520145   | -1.569954065 | -0.390587951                          |                             |             |   |   |
|               | -0.940655965                          | 0.397286708                    | 4            | 0            | 0.998207054                           |                             |             |   |   |
| HRNR          | ENSG00000197915.5                     | 0.315379658                    | 6            | 3            | 0.098080696                           | Brain_Cortex                |             |   |   |
|               | 0.691804067                           | Brain_Spinal_cord_cervical_c-1 | 4.92651603   | 0.055276317  |                                       |                             |             |   |   |
|               | 0.282713269                           | 0.396407998                    | 1.65423046   | 0.969759267  | 0.499350631                           |                             |             | 3 |   |
|               | 0                                     | 0.998207054                    |              |              |                                       |                             |             |   |   |
| FKBP5         | ENSG00000096060.14                    | 0.315461577                    | 2            | 2            | 0.177967985                           |                             |             |   |   |
|               | Brain_Substantia_nigra                | 0.525819923                    |              |              | Brain_Cerebellar_Hemisphere           |                             |             |   |   |
|               | 1.049606758                           | 0.950393242                    | 0.950393242  | -1.347038031 | 0.634399827                           |                             |             |   |   |
|               | -0.356319102                          | 1.401088146                    | 2            | 0            | 0.998207054                           |                             |             |   |   |
| LRRC58        | ENSG00000163428.3                     | 0.315480099                    | 2            | 2            | 0.128838355                           |                             |             |   |   |
|               | Brain_Caudate_basal_ganglia           | 0.984944875                    |              |              | Brain_Hippocampus                     | 1.007036639                 |             |   |   |
|               | 0.992963361                           | 0.992963361                    | 0.01886992   | 1.518698696  | 0.768784308                           |                             |             |   |   |
|               | 1.060539098                           | 2                              | 0            | 0.998207054  |                                       |                             |             |   |   |
| CNTF          | ENSG00000242689.2                     | 0.315504891                    | 2            | 2            | 0.214040219                           |                             |             |   |   |
|               | Brain_Hippocampus                     | 0.303346093                    |              |              | Brain_Cortex                          | 1.131341615                 |             |   |   |
|               | 0.868658385                           | 0.868658385                    | -1.242532332 | -1.029284312 | -1.135908322                          |                             |             |   |   |
|               | 0.150789122                           | 2                              | 0            | 0.998207054  |                                       |                             |             |   |   |
| PIANP         | ENSG00000139200.13                    | 0.315701334                    | 1            | 1            | 0.315701334                           |                             |             |   |   |
|               | Brain_Spinal_cord_cervical_c-1        | 0.315701334                    |              |              | Brain_Spinal_cord_cervical_c-1        |                             |             |   |   |
|               | 1                                     | 1                              | 1            | -1.003330689 | -1.003330689                          | -1.003330689                | NA          | 1 | 0 |
|               | 0.998207054                           |                                |              |              |                                       |                             |             |   |   |
| RNF114        | ENSG00000124226.10                    | 0.315734897                    | 6            | 3            | 0.141654038                           |                             |             |   |   |
|               | Brain_Cortex                          | 0.863417545                    |              |              | Brain_Hypothalamus                    | 5.260175584                 |             |   |   |
|               | 0.010237104                           | 0.219996098                    | -1.469659348 | -0.172025419 | -0.496089071                          |                             |             |   |   |
|               | 0.487303515                           | 3                              | 0            | 0.998207054  |                                       |                             |             |   |   |
| SCNM1         | ENSG00000163156.11                    | 0.315791467                    | 2            | 2            | 0.139919484                           |                             |             |   |   |
|               | Brain_Frontal_Cortex_BA9              | 0.96641574                     |              |              | Brain_Amygdala                        | 1.261119249                 |             |   |   |
|               | 0.738880751                           | 0.738880751                    | -1.476090929 | -0.042104064 | -0.759097497                          |                             |             |   |   |
|               | 1.013981836                           | 2                              | 0            | 0.998207054  |                                       |                             |             |   |   |
| MARVELD1      | ENSG00000155254.12                    | 0.315874241                    | 1            | 1            | 0.315874241                           |                             |             |   |   |
|               | Brain_Caudate_basal_ganglia           | 0.315874241                    |              |              | Brain_Caudate_basal_ganglia           | 1                           | 1           |   |   |
|               | 1                                     | -1.002972269                   | -1.002972269 | -1.002972269 | NA                                    | 1                           | 0           |   |   |
|               | 0.998207054                           |                                |              |              |                                       |                             |             |   |   |
| CADPS2        | ENSG00000081803.15                    | 0.316126095                    | 2            | 2            | 0.173263407                           |                             |             |   |   |
|               | Brain_Nucleus_accumbens_basal_ganglia | 0.561796567                    |              |              | Brain_Frontal_Cortex_BA9              |                             |             |   |   |
|               | 1.06484316                            | 0.93515684                     | 0.93515684   | -1.361792411 | -0.580175065                          | -0.970983738                |             |   |   |
|               | 0.552686925                           | 2                              | 0            | 0.998207054  |                                       |                             |             |   |   |
| BLVRB         | ENSG00000090013.9                     | 0.316179314                    | 1            | 1            | 0.316179314                           |                             |             |   |   |
|               | Brain_Hypothalamus                    | 0.316179314                    |              |              | Brain_Hypothalamus                    | 1                           | 1           | 1 |   |
|               | 1.002340198                           | 1.002340198                    | 1.002340198  | NA           | 1                                     | 0                           | 0.998207054 |   |   |
| LA16c-380H5.5 | ENSG00000272079.2                     | 0.316218897                    | 13           | 2            | 0.054083491                           |                             |             |   |   |
|               | Brain_Amygdala                        | 0.413569899                    |              |              | Brain_Cerebellum                      | 11.39555707                 | 2.67E-05    |   |   |
|               | 1.007211028                           | -0.817627536                   | 1.926167272  | 1.124158339  | 0.629358852                           |                             |             |   |   |
|               | 2                                     | 0                              | 0.998207054  |              |                                       |                             |             |   |   |
| CAMK2G        | ENSG00000148660.20                    | 0.316303471                    | 2            | 2            | 0.129767933                           |                             |             |   |   |
|               | Brain_Nucleus_accumbens_basal_ganglia | 0.638222504                    |              |              |                                       |                             |             |   |   |
|               | Brain_Anterior_cingulate_cortex_BA24  | 1.257650068                    |              |              | 0.742349932                           |                             |             |   |   |
|               | 0.742349932                           | -1.515017654                   | -0.470185484 | -0.992601569 | 0.738807913                           |                             |             |   |   |
|               | 2                                     | 0                              | 0.998207054  |              |                                       |                             |             |   |   |
| CPNE4         | ENSG00000196353.11                    | 0.3163219                      | 1            | 1            | 0.3163219                             | Brain_Caudate_basal_ganglia |             |   |   |
|               | 0.3163219                             | Brain_Caudate_basal_ganglia    | 1            | 1            | 1                                     | 1.002044916                 |             |   |   |
|               | 1.002044916                           | 1.002044916                    | NA           | 1            | 0                                     | 0.998207054                 |             |   |   |
| C16orf59      | ENSG00000162062.14                    | 0.316349297                    | 1            | 1            | 0.316349297                           |                             |             |   |   |
|               | Brain_Hippocampus                     | 0.316349297                    |              |              | Brain_Hippocampus                     | 1                           | 1           | 1 |   |
|               | -1.00198819                           | -1.00198819                    | -1.00198819  | NA           | 1                                     | 0                           | 0.998207054 |   |   |
| MSRB1         | ENSG00000198736.11                    | 0.316422547                    | 1            | 1            | 0.316422547                           |                             |             |   |   |
|               | Brain_Hypothalamus                    | 0.316422547                    |              |              | Brain_Hypothalamus                    | 1                           | 1           | 1 |   |
|               | 1.001836538                           | 1.001836538                    | 1.001836538  | NA           | 1                                     | 0                           | 0.998207054 |   |   |
| SYNE2         | ENSG00000054654.16                    | 0.316652834                    | 5            | 4            | 0.089890388                           |                             |             |   |   |
|               | Brain_Hippocampus                     | 0.958108904                    |              |              | Brain_Cortex                          | 2.594211252                 |             |   |   |

|               |                                       |                             |              |              |                                      |
|---------------|---------------------------------------|-----------------------------|--------------|--------------|--------------------------------------|
|               | 0.064711999                           | 0.357220386                 | -0.930470822 | 1.695976195  | 0.48195728                           |
|               | 0.98371944                            | 0                           | 0.998207054  |              |                                      |
| MFAP2         | ENSG00000117122.13                    | 0.316661207                 | 3            | 3            | 0.117481828                          |
|               | Brain_Spinal_cord_cervical_c-1        | 0.867094452                 |              |              | Brain_Hippocampus 1.23887308         |
|               | 0.760579278                           | 0.760579278                 | -1.565431239 | -0.16735027  | -0.883056791                         |
|               | 0.699636241                           | 3                           | 0            | 0.998207054  |                                      |
| TMEM220       | ENSG00000187824.8                     | 0.316689905                 | 13           | 2            | 0.188241938                          |
|               | Brain_Substantia_nigra                | 0.951468411                 |              |              | Brain_Amygdala 11.96566272           |
|               | 0.001222938                           | 0.435341643                 | 0.060862881  | 1.315797741  | 1.008809535                          |
|               | 0.297299756                           | 2                           | 0            | 0.998207054  |                                      |
| VDAC2         | ENSG00000165637.13                    | 0.316705061                 | 1            | 1            | 0.316705061                          |
|               | Brain_Caudate_basal_ganglia           | 0.316705061                 |              |              | Brain_Caudate_basal_ganglia 1        |
|               | 1                                     | -1.001251858                | -1.001251858 | -1.001251858 | NA 1 0                               |
|               | 0.998207054                           |                             |              |              |                                      |
| GTSF1         | ENSG00000170627.10                    | 0.316754419                 | 5            | 3            | 0.462958686                          |
|               | Brain_Caudate_basal_ganglia           | 0.979079437                 |              |              | Brain_Spinal_cord_cervical_c-1       |
|               | 4.242981027                           | 0.000635426                 | 0.197456373  | -0.129067909 | 0.733983677                          |
|               | 0.243436676                           | 0.440220498                 | 3            | 0            | 0.998207054                          |
| ACY3          | ENSG00000132744.7                     | 0.316784987                 | 8            | 5            | 0.232416521                          |
|               | 0.906948507                           | Brain_Cortex                | 6.066145637  | 0.009845877  | Brain_Amygdala 0.237025943           |
|               | -0.380072688                          | 1.194157099                 | 0.240007118  | 0.500401985  | 5 0                                  |
|               | 0.998207054                           |                             |              |              |                                      |
| RP11-403A21.1 | ENSG00000265752.2                     | 0.316785709                 | 5            | 5            | 0.103428936                          |
|               | Brain_Hypothalamus                    | 0.929780226                 |              |              | Brain_Spinal_cord_cervical_c-1       |
|               | 2.046016158                           | 0.520405207                 | 0.520405207  | -1.628452676 | 0.150539216                          |
|               | -0.595907384                          | 0.814279469                 | 5            | 0            | 0.998207054                          |
| NOTCH4        | ENSG00000204301.6                     | 0.316849039                 | 10           | 9            | 0.148834173                          |
|               | Brain_Cortex                          | 0.993799862                 |              |              | Brain_Anterior_cingulate_cortex_BA24 |
|               | 4.629434704                           | 0.068804583                 | 0.180452119  | -1.443661654 | 1.07153279                           |
|               | -0.232995232                          | 0.741383622                 | 9            | 0            | 0.998207054                          |
| AGPS          | ENSG00000018510.13                    | 0.316874661                 | 5            | 4            | 0.054289803                          |
|               | 0.418963095                           | Brain_Putamen_basal_ganglia | 2.829804577  | 0.065671815  | Brain_Cerebellum                     |
|               | 0.363252966                           | -0.808221479                | 1.924517067  | 1.126778736  | 1.099229682                          |
|               | 4                                     | 0                           | 0.998207054  |              |                                      |
| C11orf58      | ENSG00000110696.9                     | 0.31688354                  | 1            | 1            | 0.31688354                           |
|               | 0.31688354                            | Brain_Amygdala              | 1            | 1            | Brain_Amygdala                       |
|               | 1.000882662                           | NA                          | 1            | 0            | 1.000882662 1.000882662              |
|               | 0.998207054                           |                             |              |              |                                      |
| PRPF40A       | ENSG00000196504.15                    | 0.316923323                 | 1            | 1            | 0.316923323                          |
|               | Brain_Nucleus_accumbens_basal_ganglia | 0.316923323                 |              |              |                                      |
|               | Brain_Nucleus_accumbens_basal_ganglia | 1                           | 1            | 1            | 1.000800385                          |
|               | 1.000800385                           | 1.000800385                 | NA           | 1            | 0.998207054                          |
| TMCC2         | ENSG00000133069.15                    | 0.316938065                 | 6            | 2            | 0.080290453                          |
|               | Brain_Putamen_basal_ganglia           | 0.556119993                 |              |              | Brain_Cerebellar_Hemisphere          |
|               | 5.276560127                           | 0.029914728                 | 0.455681215  | 0.588614368  | 1.749003277                          |
|               | 1.25151094                            | 0.396656751                 | 2            | 0            | 0.998207054                          |
| HDAC7         | ENSG00000061273.17                    | 0.316961517                 | 2            | 2            | 0.132651737                          |
|               | 0.402282813                           | Brain_Cerebellar_Hemisphere | 1.442660203  | 0.557339797  | Brain_Cerebellum                     |
|               | 0.557339797                           | 0.837551195                 | 1.503726757  | 1.170638976  | 0.471057258                          |
|               | 2                                     | 0                           | 0.998207054  |              |                                      |
| LOXL4         | ENSG00000138131.3                     | 0.316991479                 | 2            | 2            | 0.137391317                          |
|               | Brain_Caudate_basal_ganglia           | 0.763464465                 |              |              | Brain_Putamen_basal_ganglia          |
|               | 1.000294224                           | 0.999705776                 | 0.999705776  | 0.30093447   | 1.485575964                          |
|               | 0.893255217                           | 0.837668034                 | 2            | 0            | 0.998207054                          |
| MZF1          | ENSG00000099326.8                     | 0.316997646                 | 1            | 1            | 0.316997646                          |
|               | 0.316997646                           | Brain_Amygdala              | 1            | 1            | Brain_Amygdala                       |
|               | -1.000646695                          | NA                          | 1            | 0            | -1.000646695 -1.000646695            |
|               | 0.998207054                           |                             |              |              |                                      |
| SEC23B        | ENSG00000101310.14                    | 0.317161609                 | 12           | 2            | 0.095656816                          |
|               | Brain_Nucleus_accumbens_basal_ganglia | 0.515407443                 |              |              | Brain_Hypothalamus                   |
|               | 10.98226993                           | 0.000913754                 | 0.397823896  | 0.650440934  | 1.666284231                          |
|               | 1.314826761                           | 0.256066701                 | 2            | 0            | 0.998207054                          |
| JAM3          | ENSG00000166086.12                    | 0.317287109                 | 1            | 1            | 0.317287109                          |
|               | Brain_Spinal_cord_cervical_c-1        | 0.317287109                 |              |              | Brain_Spinal_cord_cervical_c-1       |

|               |                                       |                                |                                |              |              |                    |             |             |   |
|---------------|---------------------------------------|--------------------------------|--------------------------------|--------------|--------------|--------------------|-------------|-------------|---|
|               | 1                                     | 1                              | 1                              | 1.000048352  | 1.000048352  | 1.000048352        | NA          | 1           | 0 |
|               | 0.998207054                           |                                |                                |              |              |                    |             |             |   |
| SMDT1         | ENSG00000183172.8                     | 0.317540735                    | 13                             | 2            | 0.156388191  |                    |             |             |   |
|               | Brain_Substantia_nigra                | 0.596677504                    | Brain_Cortex                   |              | 11.71385913  |                    |             |             |   |
|               | 0.000452119                           | 0.790132638                    | 0.529184448                    | 1.417324105  | 0.922317699  |                    |             |             |   |
|               | 0.324479177                           | 2                              | 0                              | 0.998207054  |              |                    |             |             |   |
| TMEM159       | ENSG00000011638.10                    | 0.317550467                    | 7                              | 7            | 0.195003068  |                    |             |             |   |
|               | Brain_Cerebellar_Hemisphere           | 0.99541091                     | Brain_Frontal_Cortex_BA9       |              | 2.596462114  |                    |             |             |   |
|               | 0.132416254                           | 0.132416254                    | -0.780864463                   | 1.295919941  | 0.259811665  |                    |             |             |   |
|               | 0.671121245                           | 7                              | 0                              | 0.998207054  |              |                    |             |             |   |
| RP11-148L24.1 | ENSG00000248174.5                     | 0.317740707                    | 11                             | 4            | 0.074763246  |                    |             |             |   |
|               | Brain_Nucleus_accumbens_basal_ganglia | 0.429322588                    | Brain_Cerebellum               |              | 8.17251272   |                    |             |             |   |
|               | 2.01E-16                              | 0.443221726                    | -1.21079221                    | 1.78191407   | 1.244919603  |                    |             |             |   |
|               | 0.873097885                           | 4                              | 0                              | 0.998207054  |              |                    |             |             |   |
| ZDHHC12       | ENSG00000160446.18                    | 0.317763638                    | 1                              | 1            | 0.317763638  |                    |             |             |   |
|               | Brain_Cerebellum                      | 0.317763638                    | Brain_Cerebellum               |              | 1            | 1                  | 1           | 0.999064105 |   |
|               | 0.999064105                           | 0.999064105                    | NA                             | 1            | 0            | 0.998207054        |             |             |   |
| SAE1          | ENSG00000142230.11                    | 0.317805552                    | 2                              | 2            | 0.192570796  |                    |             |             |   |
|               | Brain_Caudate_basal_ganglia           | 0.588295163                    | Brain_Hypothalamus             |              | 1.16803616   |                    |             |             |   |
|               | 0.83196384                            | 0.83196384                     | -1.303011615                   | 0.541308209  | -0.380851703 |                    |             |             |   |
|               | 1.304131054                           | 2                              | 0                              | 0.998207054  |              |                    |             |             |   |
| LIMD1         | ENSG00000144791.9                     | 0.317826539                    | 11                             | 5            | 0.02439832   | Brain_Hypothalamus |             |             |   |
|               | 0.743594105                           | Brain_Spinal_cord_cervical_c-1 |                                | 7.776745107  | 2.50E-16     |                    |             |             |   |
|               | 0.297311606                           | 0.32709755                     | 2.25079822                     | 1.712887081  | 0.626198004  | 5                  | 0           |             |   |
|               | 0.998207054                           |                                |                                |              |              |                    |             |             |   |
| TMEM88B       | ENSG00000205116.3                     | 0.317855686                    | 1                              | 1            | 0.317855686  |                    |             |             |   |
|               | Brain_Hippocampus                     | 0.317855686                    | Brain_Hippocampus              |              | 1            | 1                  | 1           |             |   |
|               | 0.998874096                           | 0.998874096                    | 0.998874096                    | NA           | 1            | 0                  | 0.998207054 |             |   |
| NLRC3         | ENSG00000167984.17                    | 0.317959256                    | 11                             | 11           | 0.024494874  | Brain_Cerebellum   |             |             |   |
|               | 0.973057707                           | Brain_Cerebellar_Hemisphere    |                                | 1.922214508  | 0.245549648  |                    |             |             |   |
|               | 0.245549648                           | -2.249277066                   | 1.513978379                    | 0.138718165  | 1.042788618  |                    |             |             |   |
|               | 11                                    | 0                              | 0.998207054                    |              |              |                    |             |             |   |
| RP11-430H10.1 | ENSG00000254427.1                     | 0.317969266                    | 13                             | 2            | 0.145777165  |                    |             |             |   |
|               | Brain_Cerebellar_Hemisphere           | 0.835608861                    | Brain_Spinal_cord_cervical_c-1 |              |              |                    |             |             |   |
|               | 11.32754037                           | 0.001682361                    | 1.090036451                    | 0.207513486  | 1.454610348  |                    |             |             |   |
|               | 0.710306087                           | 0.347192776                    | 2                              | 0            | 0.998207054  |                    |             |             |   |
| PARP15        | ENSG00000173200.12                    | 0.31801411                     | 2                              | 2            | 0.233060364  | Brain_Cortex       |             |             |   |
|               | 0.649738075                           | Brain_Spinal_cord_cervical_c-1 |                                | 1.351200937  | 0.648799063  |                    |             |             |   |
|               | 0.648799063                           | -0.454126091                   | 1.19251247                     | 0.36919319   | 1.164349293  | 2                  | 0           |             |   |
|               | 0.998207054                           |                                |                                |              |              |                    |             |             |   |
| RP11-297N6.4  | ENSG00000255046.1                     | 0.31802262                     | 3                              | 3            | 0.06269053   |                    |             |             |   |
|               | Brain_Nucleus_accumbens_basal_ganglia | 0.838803938                    | Brain_Frontal_Cortex_BA9       |              |              |                    |             |             |   |
|               | 1.694210714                           | 0.382831926                    | 0.382831926                    | -1.861380023 | -0.203423622 |                    |             |             |   |
|               | -1.009438451                          | 0.829931808                    | 3                              | 0            | 0.998207054  |                    |             |             |   |
| KCNMA1        | ENSG00000156113.22                    | 0.318083643                    | 4                              | 4            | 0.140467565  |                    |             |             |   |
|               | Brain_Caudate_basal_ganglia           | 0.747359918                    | Brain_Putamen_basal_ganglia    |              |              |                    |             |             |   |
|               | 2.285619224                           | 0.220548929                    | 0.220548929                    | -1.474052098 | 0.818980251  |                    |             |             |   |
|               | -0.150123604                          | 0.999845914                    | 4                              | 0            | 0.998207054  |                    |             |             |   |
| FAM174B       | ENSG00000185442.12                    | 0.318228475                    | 1                              | 1            | 0.318228475  |                    |             |             |   |
|               | Brain_Cerebellar_Hemisphere           | 0.318228475                    | Brain_Cerebellar_Hemisphere    |              | 1            | 1                  |             |             |   |
|               | 1                                     | 0.99810494                     | 0.99810494                     | 0.99810494   | NA           | 1                  | 0           | 0.998207054 |   |
| RPIA          | ENSG00000153574.8                     | 0.318245353                    | 4                              | 1            | 0.301767351  |                    |             |             |   |
|               | Brain_Nucleus_accumbens_basal_ganglia | 0.367020548                    |                                |              |              |                    |             |             |   |
|               | Brain_Anterior_cingulate_cortex_BA24  | 3.910874632                    | 0.007513144                    |              |              |                    |             |             |   |
|               | 3.910874632                           | 0.902068374                    | 1.032650789                    | 0.987067049  | 0.059111768  |                    |             |             |   |
|               | 1                                     | 0                              | 0.998207054                    |              |              |                    |             |             |   |
| LRSAM1        | ENSG00000148356.13                    | 0.318280311                    | 3                              | 3            | 0.145573693  |                    |             |             |   |
|               | Brain_Cerebellar_Hemisphere           | 0.877955606                    | Brain_Cerebellum               |              | 1.659862767  |                    |             |             |   |
|               | 0.340527091                           | 0.340527091                    | -1.455345295                   | -0.153561359 | -0.691880454 |                    |             |             |   |
|               | 0.679469138                           | 3                              | 0                              | 0.998207054  |              |                    |             |             |   |
| ARHGEF7       | ENSG00000102606.17                    | 0.318332128                    | 11                             | 5            | 0.104899086  |                    |             |             |   |
|               | Brain_Frontal_Cortex_BA9              | 0.500298779                    | Brain_Hippocampus              |              | 7.477874177  |                    |             |             |   |

|              |                                       |                          |              |              |                                       |
|--------------|---------------------------------------|--------------------------|--------------|--------------|---------------------------------------|
|              | 0.002274311                           | 0.481363424              | -1.260576198 | 1.621553031  | 0.883468617                           |
|              | 0.766969967                           | 5                        | 0            | 0.998207054  |                                       |
| CDK7         | ENSG00000134058.11                    | 0.318476504              | 3            | 3            | 0.229683752                           |
|              | Brain_Spinal_cord_cervical_c-1        | 0.756287117              |              |              | Brain_Caudate_basal_ganglia           |
|              | 1.88958337                            | 0.247936352              | 0.247936352  | -1.201173899 | 0.310360121                           |
|              | -0.57050378                           | 0.786213374              | 3            | 0            | 0.998207054                           |
| SLC25A18     | ENSG00000182902.13                    | 0.318532246              | 3            | 3            | 0.158893239                           |
|              | Brain_Nucleus_accumbens_basal_ganglia | 0.94396798               |              |              | Brain_Caudate_basal_ganglia           |
|              | 1.415493687                           | 0.598684121              | 0.598684121  | -1.408803638 | 0.070283544                           |
|              | -0.785116629                          | 0.766285172              | 3            | 0            | 0.998207054                           |
| RP4-781K5.4  | ENSG00000228044.2                     | 0.318549184              | 2            | 2            | 0.253262997                           |
|              | Brain_Substantia_nigra                | 0.666482367              |              |              | Brain_Spinal_cord_cervical_c-1        |
|              | 1.843422307                           | 0.156577693              | 0.156577693  | 0.430980751  | 1.142459679                           |
|              | 0.786720215                           | 0.503091574              | 2            | 0            | 0.998207054                           |
| LINC01886    | ENSG00000224568.1                     | 0.318613308              | 1            | 1            | 0.318613308                           |
|              | Brain_Anterior_cingulate_cortex_BA24  | 0.318613308              |              |              |                                       |
|              | Brain_Anterior_cingulate_cortex_BA24  | 1                        | 1            | 1            | 0.997311553                           |
|              | 0.997311553                           | 0.997311553              | NA           | 1            | 0                                     |
|              |                                       |                          |              |              | 0.998207054                           |
| CAMTA2       | ENSG00000108509.20                    | 0.318742763              | 3            | 3            | 0.103871444                           |
|              | Brain_Putamen_basal_ganglia           | 0.809725389              |              |              | Brain_Cerebellar_Hemisphere           |
|              | 1.315539474                           | 0.630299422              | 0.630299422  | -1.626367764 | -0.240780312                          |
|              | -1.057062546                          | 0.725059571              | 3            | 0            | 0.998207054                           |
| C1QTNF8      | ENSG00000184471.7                     | 0.31884787               | 1            | 1            | 0.31884787                            |
|              | Brain_Anterior_cingulate_cortex_BA24  | 0.31884787               |              |              |                                       |
|              | Brain_Anterior_cingulate_cortex_BA24  | 1                        | 1            | 1            | -0.996828278                          |
|              | -0.996828278                          | -0.996828278             | NA           | 1            | 0                                     |
|              |                                       |                          |              |              | 0.998207054                           |
| RP11-61A14.4 | ENSG00000246777.1                     | 0.318923991              | 2            | 2            | 0.140807004                           |
|              | Brain_Cortex                          | 0.746842557              |              |              | Brain_Hypothalamus                    |
|              | 0.57144197                            | 0.322805487              | 1.472792468  | 0.897798977  | 1.42855803                            |
|              | 0                                     | 0.998207054              |              |              | 0.57144197                            |
|              |                                       |                          |              |              | 0.813163592                           |
|              |                                       |                          |              |              | 2                                     |
| SLC33A1      | ENSG00000169359.13                    | 0.318933589              | 5            | 5            | 0.025546508                           |
|              | Brain_Frontal_Cortex_BA9              | 0.840337144              |              |              | Brain_Cerebellar_Hemisphere           |
|              | 2.439563841                           | 0.181265554              | 0.181265554  | -0.201462251 | 2.233036953                           |
|              | 1.092207172                           | 1.057171478              | 5            | 0            | 0.998207054                           |
| CASC1        | ENSG00000118307.18                    | 0.319024396              | 1            | 1            | 0.319024396                           |
|              | 0.319024396                           | Brain_Cerebellum         | 1            | 1            | Brain_Cerebellum                      |
|              | 0.996464729                           | NA                       | 1            | 0            | 0.996464729                           |
|              |                                       |                          |              |              | 0.998207054                           |
| IFT140       | ENSG00000187535.13                    | 0.319075536              | 7            | 4            | 0.480188938                           |
|              | Brain_Cerebellum                      | 0.972262933              |              |              | Brain_Cerebellar_Hemisphere           |
|              | 0.03497073                            | 0.252802921              | -0.65899307  | 0.705998713  | 4.985389409                           |
|              | 0.474825045                           | 4                        | 0            | 0.998207054  | 0.290449175                           |
| FABP3        | ENSG00000121769.7                     | 0.319161235              | 4            | 3            | 0.148933595                           |
|              | Brain_Cerebellar_Hemisphere           | 0.889614629              |              |              | Brain_Putamen_basal_ganglia           |
|              | 3.436768369                           | 0.020796394              | 0.150295827  | -1.443308471 | -0.138791857                          |
|              | -0.739972916                          | 0.6368891                | 3            | 0            | 0.998207054                           |
| ANKRD16      | ENSG00000134461.15                    | 0.319213338              | 1            | 1            | 0.319213338                           |
|              | Brain_Cerebellum                      | 0.319213338              |              |              | Brain_Cerebellum                      |
|              | 0.996075758                           | 0.996075758              | NA           | 1            | 1                                     |
|              |                                       |                          |              |              | 0.996075758                           |
| PPP4C        | ENSG00000149923.13                    | 0.31949363               | 1            | 1            | 0.31949363                            |
|              | Brain_Frontal_Cortex_BA9              | 0.995499002              |              |              | Brain_Frontal_Cortex_BA9              |
|              | 0.31949363                            | Brain_Frontal_Cortex_BA9 | 1            | 1            | 1                                     |
|              | 0.995499002                           | 0.995499002              | NA           | 1            | 0.995499002                           |
|              |                                       |                          |              |              | 0.998207054                           |
| LINC00443    | ENSG00000230156.2                     | 0.319495014              | 10           | 9            | 0.154878481                           |
|              | Brain_Putamen_basal_ganglia           | 0.991073478              |              |              | Brain_Nucleus_accumbens_basal_ganglia |
|              | 4.617993332                           | 0.065778071              | 0.232704415  | -1.212668849 | 1.422509206                           |
|              | 0.010455551                           | 0.872303929              | 9            | 0            | 0.998207054                           |
| DDX5         | ENSG00000108654.13                    | 0.319570922              | 3            | 3            | 0.073883472                           |
|              | Brain_Spinal_cord_cervical_c-1        | 0.641604406              |              |              | Brain_Cerebellar_Hemisphere           |
|              | 1.418032544                           | 0.58048748               | 0.58048748   | -0.477783991 | 1.787334308                           |
|              | 0.281364524                           | 1.304222655              | 3            | 0            | 0.998207054                           |
| HERC6        | ENSG00000138642.14                    | 0.319622749              | 1            | 1            | 0.319622749                           |
|              | Brain_Nucleus_accumbens_basal_ganglia | 0.319622749              |              |              |                                       |
|              | Brain_Nucleus_accumbens_basal_ganglia | 1                        | 1            | 1            | 0.995233425                           |

|               |                                       |                   |                                       |                                       |             |              |                  |  |
|---------------|---------------------------------------|-------------------|---------------------------------------|---------------------------------------|-------------|--------------|------------------|--|
|               | 0.995233425                           | 0.995233425       | NA                                    | 1                                     | 0           | 0.998207054  |                  |  |
| PAF1          | ENSG00000006712.14                    | 0.319731653       |                                       | 1                                     | 1           | 0.319731653  |                  |  |
|               | Brain_Hippocampus                     | 0.319731653       |                                       | Brain_Hippocampus                     | 1           | 1            | 1                |  |
|               | -0.995009482                          | -0.995009482      | -0.995009482                          | NA                                    | 1           | 0            | 0.998207054      |  |
| DHCR7         | ENSG00000172893.15                    | 0.319918777       |                                       | 1                                     | 1           | 0.319918777  | Brain_Cerebellum |  |
|               | 0.319918777                           | Brain_Cerebellum1 |                                       | 1                                     | 1           | -0.994624809 | -0.994624809     |  |
|               | -0.994624809                          | NA                | 1                                     | 0                                     | 0.998207054 |              |                  |  |
| RP11-738E22.3 | ENSG00000269949.1                     | 0.319931699       |                                       | 11                                    | 2           | 0.068351176  |                  |  |
|               | Brain_Putamen_basal_ganglia           | 0.935166572       |                                       | Brain_Spinal_cord_cervical_c-1        |             |              |                  |  |
|               | 9.181140518                           | 0.001457831       | 0.899833401                           | -0.081346277                          |             | 1.822684586  |                  |  |
|               | 1.230691166                           | 0.482823437       | 2                                     | 0                                     | 0.998207054 |              |                  |  |
| FAM171B       | ENSG00000144369.12                    | 0.320027643       |                                       | 3                                     | 3           | 0.171751716  |                  |  |
|               | Brain_Putamen_basal_ganglia           | 0.399818757       |                                       | Brain_Spinal_cord_cervical_c-1        |             |              |                  |  |
|               | 1.997336485                           | 0.180905367       | 0.180905367                           | -1.366596814                          |             | -0.841944969 |                  |  |
|               | -1.158314454                          | 0.278526497       | 3                                     | 0                                     | 0.998207054 |              |                  |  |
| NME6          | ENSG00000172113.8                     | 0.320151515       |                                       | 7                                     | 3           | 0.083224557  |                  |  |
|               | Brain_Cerebellar_Hemisphere           | 0.198446236       |                                       | Brain_Frontal_Cortex_BA9              |             |              |                  |  |
|               | 5.790792561                           | 0.003908394       | 0.366620717                           | 1.285990906                           |             | 1.732275306  |                  |  |
|               | 1.443228102                           | 0.168848808       | 3                                     | 0                                     | 0.998207054 |              |                  |  |
| NKAIN2        | ENSG00000188580.14                    | 0.320168824       |                                       | 4                                     | 3           | 0.108689529  |                  |  |
|               | Brain_Substantia_nigra                | 0.552475776       |                                       | Brain_Frontal_Cortex_BA9              |             |              |                  |  |
|               | 2.175743856                           | 0.043548266       | 0.663660076                           | -1.604111264                          |             | 1.097586214  |                  |  |
|               | -0.007113216                          | 1.326652662       | 3                                     | 0                                     | 0.998207054 |              |                  |  |
| B4GALNT1      | ENSG00000135454.13                    | 0.320195088       |                                       | 3                                     | 3           | 0.133349824  |                  |  |
|               | Brain_Cortex                          | 0.586988125       | Brain_Cerebellar_Hemisphere           | 1.2368044                             |             |              |                  |  |
|               | 0.696047894                           | 0.696047894       | -1.095794157                          | 1.501022183                           |             | 0.316144603  |                  |  |
|               | 1.313214133                           | 3                 | 0                                     | 0.998207054                           |             |              |                  |  |
| F11           | ENSG00000088926.13                    | 0.320249674       |                                       | 6                                     | 3           | 0.05352275   |                  |  |
|               | Brain_Caudate_basal_ganglia           | 0.198506607       |                                       | Brain_Nucleus_accumbens_basal_ganglia |             |              |                  |  |
|               | 5.005227939                           | 0.040769408       | 0.19308669                            | -1.930679096                          |             | -1.285817943 |                  |  |
|               | -1.62982073                           | 0.311942708       | 3                                     | 0                                     | 0.998207054 |              |                  |  |
| PSCA          | ENSG00000167653.4                     | 0.320253071       |                                       | 10                                    | 3           | 0.225731036  |                  |  |
|               | Brain_Cerebellar_Hemisphere           | 0.984715863       |                                       | Brain_Hypothalamus                    |             | 8.163132053  |                  |  |
|               | 0.013603217                           | 0.528453296       | -1.211428986                          | 0.203953895                           |             | -0.490792465 |                  |  |
|               | 0.498120041                           | 3                 | 0                                     | 0.998207054                           |             |              |                  |  |
| SETBP1        | ENSG00000152217.16                    | 0.320311063       |                                       | 1                                     | 1           | 0.320311063  |                  |  |
|               | Brain_Hypothalamus                    | 0.320311063       |                                       | Brain_Hypothalamus                    | 1           | 1            | 1                |  |
|               | -0.993818859                          | -0.993818859      | -0.993818859                          | NA                                    | 1           | 0            | 0.998207054      |  |
| ITPRIPL1      | ENSG00000198885.9                     | 0.320335464       |                                       | 7                                     | 4           | 0.09460369   | Brain_Cortex     |  |
|               | 0.992694337                           | Brain_Cerebellum  | 4.340284967                           | 0.008766134                           |             | 0.265819903  |                  |  |
|               | -0.299552002                          | 1.67159764        | 0.634996469                           | 0.805506486                           |             | 4            | 0                |  |
|               | 0.998207054                           |                   |                                       |                                       |             |              |                  |  |
| ZBTB34        | ENSG00000177125.5                     | 0.320381583       |                                       | 1                                     | 1           | 0.320381583  |                  |  |
|               | Brain_Amygdala                        | 0.320381583       | Brain_Amygdala                        | 1                                     | 1           | 1            | -0.993674045     |  |
|               | -0.993674045                          | -0.993674045      | NA                                    | 1                                     | 0           | 0.998207054  |                  |  |
| LIN52         | ENSG00000205659.10                    | 0.320396638       |                                       | 7                                     | 4           | 0.307717277  |                  |  |
|               | Brain_Frontal_Cortex_BA9              | 0.963437498       |                                       | Brain_Hypothalamus                    |             | 4.999594012  |                  |  |
|               | 0.000568794                           | 0.176603389       | -0.292730559                          | 1.020023582                           |             | 0.515595192  |                  |  |
|               | 0.540571729                           | 4                 | 0                                     | 0.998207054                           |             |              |                  |  |
| CYP11B1       | ENSG00000160882.11                    | 0.320498903       |                                       | 1                                     | 1           | 0.320498903  |                  |  |
|               | Brain_Nucleus_accumbens_basal_ganglia | 0.320498903       |                                       |                                       |             |              |                  |  |
|               | Brain_Nucleus_accumbens_basal_ganglia | 1                 | 1                                     | 1                                     |             | -0.993433171 |                  |  |
|               | -0.993433171                          | -0.993433171      | NA                                    | 1                                     | 0           | 0.998207054  |                  |  |
| RP1-111D6.5   | ENSG00000283608.1                     | 0.320727311       |                                       | 8                                     | 2           | 0.061637994  |                  |  |
|               | Brain_Anterior_cingulate_cortex_BA24  | 0.342472843       |                                       |                                       |             |              |                  |  |
|               | Brain_Nucleus_accumbens_basal_ganglia | 6.901030285       |                                       | 0.000595527                           |             |              |                  |  |
|               | 0.497553623                           | 0.949290581       | 1.868890903                           | 1.398682521                           |             | 0.332568624  |                  |  |
|               | 2                                     | 0                 | 0.998207054                           |                                       |             |              |                  |  |
| CCDC102B      | ENSG00000150636.17                    | 0.320823402       |                                       | 2                                     | 2           | 0.373685013  |                  |  |
|               | Brain_Hypothalamus                    | 0.392217552       | Brain_Nucleus_accumbens_basal_ganglia |                                       |             |              |                  |  |
|               | 1.330112212                           | 0.669887788       | 0.669887788                           | -0.855602744                          |             | 0.889591982  |                  |  |
|               | 0.016994619                           | 1.234039026       | 2                                     | 0                                     | 0.998207054 |              |                  |  |

|               |                                       |                             |              |              |                                       |              |   |
|---------------|---------------------------------------|-----------------------------|--------------|--------------|---------------------------------------|--------------|---|
| TIMM23B       | ENSG00000204152.10                    | 0.320838357                 | 12           | 1            | 0.154842963                           |              |   |
|               | Brain_Cerebellum                      | 0.475613644                 |              |              | Brain_Caudate_basal_ganglia           | 11.00249809  |   |
|               | 0.000322541                           | 11.00249809                 | 0.713375154  | 1.422631654  |                                       | 0.958102751  |   |
|               | 0.196956645                           | 1                           | 0            | 0.998207054  |                                       |              |   |
| CUEDC2        | ENSG00000107874.10                    | 0.320842287                 | 4            | 3            | 0.407138932                           |              |   |
|               | Brain_Cerebellar_Hemisphere           | 0.916413929                 |              |              | Brain_Putamen_basal_ganglia           | 3.5841886    |   |
|               | 0.009825822                           | 0.131081335                 | -0.828938989 | 0.384097526  |                                       | -0.001280165 |   |
|               | 0.565021915                           | 3                           | 0            | 0.998207054  |                                       |              |   |
| CACNB3        | ENSG00000167535.7                     | 0.321003991                 | 6            | 3            | 0.075907258                           |              |   |
|               | Brain_Hypothalamus                    | 0.609300521                 |              |              | Brain_Nucleus_accumbens_basal_ganglia |              |   |
|               | 4.458681293                           | 0.033501155                 | 0.275077692  | 0.511072172  |                                       | 1.774943252  |   |
|               | 0.819154229                           | 0.482048309                 | 3            | 0            | 0.998207054                           |              |   |
| PCAT18        | ENSG00000265369.3                     | 0.321030842                 | 3            | 3            | 0.196042766                           |              |   |
|               | Brain_Putamen_basal_ganglia           | 0.959611482                 |              |              | Brain_Caudate_basal_ganglia           |              |   |
|               | 2.041639695                           | 0.270781736                 | 0.270781736  | -0.163863973 |                                       | 1.292908331  |   |
|               | 0.393228499                           | 0.786492823                 | 3            | 0            | 0.998207054                           |              |   |
| CEP41         | ENSG00000106477.18                    | 0.321209508                 | 6            | 6            | 0.096860772                           |              |   |
|               | Brain_Nucleus_accumbens_basal_ganglia | 0.693094424                 |              |              | Brain_Cerebellum                      |              |   |
|               | 1.952323448                           | 0.200030111                 | 0.200030111  | -0.508572555 |                                       | 1.660266898  |   |
|               | 0.850345499                           | 0.799433708                 | 6            | 0            | 0.998207054                           |              |   |
| HNRNPAB       | ENSG00000197451.11                    | 0.321256353                 | 2            | 2            | 0.136899219                           |              |   |
|               | Brain_Hippocampus                     | 0.795060948                 |              |              | Brain_Putamen_basal_ganglia           | 1.01194594   |   |
|               | 0.98805406                            | 0.98805406                  | -1.487437802 | 0.259744392  |                                       | -0.613846705 |   |
|               | 1.235444377                           | 2                           | 0            | 0.998207054  |                                       |              |   |
| MED21         | ENSG00000152944.8                     | 0.32125682                  | 2            | 2            | 0.132340095                           |              |   |
|               | Brain_Cerebellar_Hemisphere           | 0.691807242                 |              |              | Brain_Frontal_Cortex_BA9              |              |   |
|               | 1.313058555                           | 0.686941445                 | 0.686941445  | 0.396403694  |                                       | 1.504937699  |   |
|               | 0.950670697                           | 0.783851913                 | 2            | 0            | 0.998207054                           |              |   |
| FASTKD3       | ENSG00000124279.11                    | 0.321276828                 | 2            | 2            | 0.141344797                           |              |   |
|               | Brain_Cerebellum                      | 0.857371968                 |              |              | Brain_Putamen_basal_ganglia           | 1.332567831  |   |
|               | 0.667432169                           | 0.667432169                 | 0.179720539  | 1.470801538  |                                       | 0.825261038  |   |
|               | 0.912932129                           | 2                           | 0            | 0.998207054  |                                       |              |   |
| CYP2D6        | ENSG00000100197.20                    | 0.321279704                 | 13           | 2            | 0.125440512                           |              |   |
|               | Brain_Substantia_nigra                | 0.430663587                 |              |              | Brain_Cerebellar_Hemisphere           |              |   |
|               | 12.30722078                           | 0.000224855                 | 0.483102817  | -1.532332067 |                                       | -0.788056622 |   |
|               | -1.243621244                          | 0.21458282                  | 2            | 0            | 0.998207054                           |              |   |
| TRAF5         | ENSG00000082512.14                    | 0.321342493                 | 1            | 1            | 0.321342493                           |              |   |
|               | Brain_Putamen_basal_ganglia           | 0.321342493                 |              |              | Brain_Putamen_basal_ganglia           | 1            | 1 |
|               | 1                                     | 0.991702864                 | 0.991702864  | 0.991702864  | NA                                    | 1            | 0 |
|               | 0.998207054                           |                             |              |              |                                       |              |   |
| RP13-870H17.3 | ENSG00000254872.3                     | 0.321386792                 | 7            | 7            | 0.097992099                           |              |   |
|               | Brain_Hypothalamus                    | 0.965897906                 |              |              | Brain_Nucleus_accumbens_basal_ganglia |              |   |
|               | 2.335229119                           | 0.159091964                 | 0.159091964  | -1.654666831 |                                       | 1.509148466  |   |
|               | 0.424693698                           | 1.235608501                 | 7            | 0            | 0.998207054                           |              |   |
| SAMD4B        | ENSG00000179134.15                    | 0.321398377                 | 2            | 2            | 0.179699702                           |              |   |
|               | Brain_Caudate_basal_ganglia           | 0.606585706                 |              |              | Brain_Hippocampus                     | 1.123287495  |   |
|               | 0.876712505                           | 0.876712505                 | -0.514953225 | 1.341680225  |                                       | 0.4133635    |   |
|               | 1.312838103                           | 2                           | 0            | 0.998207054  |                                       |              |   |
| P4HTM         | ENSG00000178467.17                    | 0.321538459                 | 12           | 4            | 0.024722774                           |              |   |
|               | Brain_Anterior_cingulate_cortex_BA24  | 0.493292035                 |              |              | Brain_Caudate_basal_ganglia           |              |   |
|               | 9.033607968                           | 0.010769883                 | 0.390089231  | -2.245707122 |                                       | -0.685082227 |   |
|               | -1.633570741                          | 0.435853405                 | 4            | 0            | 0.998207054                           |              |   |
| CRIP3         | ENSG00000146215.13                    | 0.321545742                 | 1            | 1            | 0.321545742                           |              |   |
|               | Brain_Putamen_basal_ganglia           | 0.321545742                 |              |              | Brain_Putamen_basal_ganglia           | 1            | 1 |
|               | 1                                     | 0.991286421                 | 0.991286421  | 0.991286421  | NA                                    | 1            | 0 |
|               | 0.998207054                           |                             |              |              |                                       |              |   |
| RUFY1         | ENSG00000176783.14                    | 0.32159526                  | 4            | 3            | 0.263873134                           |              |   |
|               | Brain_Hippocampus                     |                             |              |              |                                       |              |   |
|               | 0.971891481                           | Brain_Caudate_basal_ganglia | 2.609011574  | 0.002865464  |                                       |              |   |
|               | 0.401719786                           | -1.117283487                | 0.347526352  | -0.447883744 |                                       | 0.749492629  |   |
|               | 3                                     | 0                           | 0.998207054  |              |                                       |              |   |
| PRR19         | ENSG00000188368.9                     | 0.321636087                 | 1            | 1            | 0.321636087                           |              |   |
|               | Brain_Cerebellum                      |                             |              |              |                                       |              |   |
|               | 0.321636087                           | Brain_Cerebellum            | 1            | 1            | 0.991101365                           | 0.991101365  |   |

|               |                                       |                  |                                |              |              |              |                             |             |   |
|---------------|---------------------------------------|------------------|--------------------------------|--------------|--------------|--------------|-----------------------------|-------------|---|
| 0.991101365   | NA                                    | 1                | 0                              | 0.998207054  |              |              |                             |             |   |
| FLVCR1        | ENSG00000162769.12                    |                  | 0.321748124                    | 12           | 4            | 0.144712666  |                             |             |   |
|               | Brain_Frontal_Cortex_BA9              |                  | 0.983596118                    |              |              |              | Brain_Substantia_nigra      |             |   |
|               | 9.033040542                           | 0.01980622       | 0.388146144                    |              |              | -1.45846409  | 1.081204217                 |             |   |
|               | -0.156979951                          | 0.670619411      | 4                              | 0            | 0.998207054  |              |                             |             |   |
| RP11-462G22.2 | ENSG00000272566.1                     |                  | 0.321904445                    | 1            | 1            | 0.321904445  |                             |             |   |
|               | Brain_Putamen_basal_ganglia           | 0.321904445      |                                |              |              |              | Brain_Putamen_basal_ganglia | 1           | 1 |
|               | 1                                     | -0.990551879     | -0.990551879                   | -0.990551879 | NA           | 1            | 0                           |             |   |
|               | 0.998207054                           |                  |                                |              |              |              |                             |             |   |
| ELP5          | ENSG00000170291.14                    |                  | 0.321914314                    | 5            | 5            | 0.088260052  |                             |             |   |
|               | Brain_Putamen_basal_ganglia           | 0.773990557      |                                |              |              |              | Brain_Cortex                | 3.279939215 |   |
|               | 0.129282805                           | 0.129282805      | -1.704648224                   |              |              | 0.287159028  | -0.727843602                |             |   |
|               | 0.716061424                           | 5                | 0                              | 0.998207054  |              |              |                             |             |   |
| DENND1C       | ENSG00000205744.9                     |                  | 0.321935632                    | 2            | 2            | 0.165259293  |                             |             |   |
|               | Brain_Caudate_basal_ganglia           | 0.54481337       | Brain_Frontal_Cortex_BA9       |              |              | 1.015382312  |                             |             |   |
|               | 0.984617688                           | 0.984617688      | 0.605550366                    |              |              | 1.387598649  | 0.996574507                 |             |   |
|               | 0.552991644                           | 2                | 0                              | 0.998207054  |              |              |                             |             |   |
| FEZFB1        | ENSG00000128610.11                    |                  | 0.321986564                    | 2            | 2            | 0.232563841  | Brain_Cortex                |             |   |
|               | 0.248202965                           | Brain_Cerebellum | 1.21726745                     | 0.78273255   | 0.78273255   | -1.193780501 |                             |             |   |
|               | -1.154725228                          | -1.174252864     | 0.027616249                    | 2            | 0            | 0.998207054  |                             |             |   |
| ESRRA         | ENSG00000173153.13                    |                  | 0.322014361                    | 1            | 1            | 0.322014361  | Brain_Amygdala              |             |   |
|               | 0.322014361                           | Brain_Amygdala   | 1                              | 1            | 1            | 0.990326903  | 0.990326903                 |             |   |
|               | 0.990326903                           | NA               | 1                              | 0            | 0.998207054  |              |                             |             |   |
| MYO19         | ENSG00000278259.4                     |                  | 0.322182927                    | 7            | 5            | 0.067842265  |                             |             |   |
|               | Brain_Hippocampus                     | 0.535415984      | Brain_Spinal_cord_cervical_c-1 |              |              |              |                             |             |   |
|               | 5.333028083                           | 0.000494811      | 0.195584903                    | 0.61975973   | 1.826053094  |              |                             |             |   |
|               | 1.169989169                           | 0.416023677      | 5                              | 0            | 0.998207054  |              |                             |             |   |
| PCLAF         | ENSG00000166803.11                    |                  | 0.322188225                    | 1            | 1            | 0.322188225  | Brain_Amygdala              |             |   |
|               | 0.322188225                           | Brain_Amygdala   | 1                              | 1            | 1            | 0.989971141  | 0.989971141                 |             |   |
|               | 0.989971141                           | NA               | 1                              | 0            | 0.998207054  |              |                             |             |   |
| CADPS         | ENSG00000163618.17                    |                  | 0.322201861                    | 1            | 1            | 0.322201861  |                             |             |   |
|               | Brain_Spinal_cord_cervical_c-1        | 0.322201861      | Brain_Spinal_cord_cervical_c-1 |              |              |              |                             |             |   |
|               | 1                                     | 1                | 1                              | -0.989943244 | -0.989943244 | -0.989943244 | NA                          | 1           | 0 |
|               | 0.998207054                           |                  |                                |              |              |              |                             |             |   |
| TSPYL6        | ENSG00000178021.10                    |                  | 0.322315248                    | 4            | 4            | 0.246503749  |                             |             |   |
|               | Brain_Frontal_Cortex_BA9              | 0.966084757      | Brain_Putamen_basal_ganglia    |              |              |              |                             |             |   |
|               | 3.289647757                           | 0.153912843      | 0.153912843                    | -0.388377033 | 1.15888332   |              |                             |             |   |
|               | 0.274613741                           | 0.652041482      | 4                              | 0            | 0.998207054  |              |                             |             |   |
| RP11-141B14.1 | ENSG00000270019.1                     |                  | 0.322480394                    | 1            | 1            | 0.322480394  |                             |             |   |
|               | Brain_Cortex                          | 0.322480394      | Brain_Cortex                   | 1            | 1            | 1            | 0.989373584                 |             |   |
|               | 0.989373584                           | 0.989373584      | NA                             | 1            | 0            | 0.998207054  |                             |             |   |
| CDK5R2        | ENSG00000171450.5                     |                  | 0.322517123                    | 1            | 1            | 0.322517123  |                             |             |   |
|               | Brain_Anterior_cingulate_cortex_BA24  | 0.322517123      |                                |              |              |              |                             |             |   |
|               | Brain_Anterior_cingulate_cortex_BA24  | 1                | 1                              | 1            | -0.98929849  |              |                             |             |   |
|               | -0.98929849                           | -0.98929849      | NA                             | 1            | 0            | 0.998207054  |                             |             |   |
| RP5-968J1.1   | ENSG00000230839.1                     |                  | 0.322621094                    | 8            | 7            | 0.132068635  |                             |             |   |
|               | Brain_Putamen_basal_ganglia           | 0.799090724      | Brain_Caudate_basal_ganglia    |              |              |              |                             |             |   |
|               | 2.070121285                           | 0.002057015      | 0.694919561                    | -1.505994309 | 1.269155203  |              |                             |             |   |
|               | -0.067041043                          | 1.115442317      | 7                              | 0            | 0.998207054  |              |                             |             |   |
| ERCC1         | ENSG00000012061.15                    |                  | 0.322673234                    | 2            | 2            | 0.481217692  |                             |             |   |
|               | Brain_Caudate_basal_ganglia           | 0.86701678       | Brain_Cortex                   | 1.82594542   | 0.17405458   |              |                             |             |   |
|               | 0.17405458                            | -0.167448991     | 0.704345412                    | 0.268448211  | 0.616451734  |              |                             |             | 2 |
|               | 0                                     | 0.998207054      |                                |              |              |              |                             |             |   |
| HCG9          | ENSG00000204625.10                    |                  | 0.322711716                    | 1            | 1            | 0.322711716  |                             |             |   |
|               | Brain_Nucleus_accumbens_basal_ganglia | 0.322711716      |                                |              |              |              |                             |             |   |
|               | Brain_Nucleus_accumbens_basal_ganglia | 1                | 1                              | 1            | 0.988900725  |              |                             |             |   |
|               | 0.988900725                           | 0.988900725      | NA                             | 1            | 0            | 0.998207054  |                             |             |   |
| SLC22A9       | ENSG00000149742.9                     |                  | 0.322770169                    | 3            | 3            | 0.21542051   | Brain_Cortex                |             |   |
|               | 0.920663452                           | Brain_Amygdala   | 2.513421711                    | 0.131748654  | 0.131748654  |              |                             |             |   |
|               | -0.099598038                          | 1.238797474      | 0.423541757                    | 0.715419053  | 3            | 0            |                             |             |   |
|               | 0.998207054                           |                  |                                |              |              |              |                             |             |   |
| FBXO46        | ENSG00000177051.5                     |                  | 0.322770801                    | 2            | 2            | 0.13266972   |                             |             |   |



|               |                                      |                  |              |                                       |              |              |                  |   |
|---------------|--------------------------------------|------------------|--------------|---------------------------------------|--------------|--------------|------------------|---|
|               | Brain_Substantia_nigra               | 0.88547946       | Brain_Cortex | 1.078994116                           |              |              |                  |   |
|               | 0.921005884                          | 0.921005884      | -1.503656947 | 0.144026607                           | -0.67981517  |              |                  |   |
|               | 1.165088214                          | 2                | 0            | 0.998207054                           |              |              |                  |   |
| BTRC          | ENSG00000166167.17                   | 0.322813786      | 2            | 2                                     | 0.246386909  |              |                  |   |
|               | Brain_Frontal_Cortex_BA9             | 0.594969369      |              | Brain_Cortex                          | 1.323370223  |              |                  |   |
|               | 0.676629777                          | 0.676629777      | -0.531648642 | 1.159169972                           | 0.313760665  |              |                  |   |
|               | 1.195589307                          | 2                | 0            | 0.998207054                           |              |              |                  |   |
| CLEC18B       | ENSG00000140839.11                   | 0.322998017      | 3            | 3                                     | 0.12516157   |              |                  |   |
|               | Brain_Spinal_cord_cervical_c-1       | 0.29870793       |              | Brain_Cerebellar_Hemisphere           |              |              |                  |   |
|               | 2.090620343                          | 0.138348452      | 0.138348452  | 1.039208172                           | 1.533464002  |              |                  |   |
|               | 1.298015552                          | 0.247954504      | 3            | 0                                     | 0.998207054  |              |                  |   |
| EFL1          | ENSG00000140598.13                   | 0.323125228      | 3            | 3                                     | 0.141214245  |              |                  |   |
|               | Brain_Spinal_cord_cervical_c-1       | 0.583718231      |              | Brain_Caudate_basal_ganglia           |              |              |                  |   |
|               | 1.311904253                          | 0.773912683      | 0.773912683  | -1.471284308                          | 0.547961656  |              |                  |   |
|               | -0.683799445                         | 1.080451109      | 3            | 0                                     | 0.998207054  |              |                  |   |
| RP11-474D1.3  | ENSG00000214039.8                    | 0.323142739      | 2            | 2                                     | 0.151804235  |              |                  |   |
|               | Brain_Putamen_basal_ganglia          | 0.581219015      |              | Brain_Cerebellum                      | 1.069498917  |              |                  |   |
|               | 0.930501083                          | 0.930501083      | 0.551604993  | 1.433187589                           | 0.992396291  |              |                  |   |
|               | 0.623373032                          | 2                | 0            | 0.998207054                           |              |              |                  |   |
| METTL18       | ENSG00000171806.11                   | 0.323298646      | 13           | 1                                     | 0.152479379  |              |                  |   |
|               | Brain_Substantia_nigra               | 0.517625633      |              | Brain_Amygdala                        | 12.6418991   | 9.86E-05     |                  |   |
|               | 12.6418991                           | 0.64700975       | 1.430828478  | 0.973672064                           | 0.198329486  | 1            | 0                |   |
|               | 0.998207054                          |                  |              |                                       |              |              |                  |   |
| SYCE1L        | ENSG00000205078.5                    | 0.323331904      | 12           | 1                                     | 0.237867182  |              |                  |   |
|               | Brain_Cortex                         | 0.383670342      |              | Brain_Nucleus_accumbens_basal_ganglia |              |              |                  |   |
|               | 11.80400713                          | 0.000286013      | 11.80400713  | 0.871153507                           | 1.180334549  |              |                  |   |
|               | 0.979620728                          | 0.087571967      | 1            | 0                                     | 0.998207054  |              |                  |   |
| PIM3          | ENSG00000198355.4                    | 0.323366438      | 1            | 1                                     | 0.323366438  |              | Brain_Cerebellum |   |
|               | 0.323366438                          | Brain_Cerebellum | 1            | 1                                     | 0.987563564  | 0.987563564  |                  |   |
|               | 0.987563564                          | NA               | 1            | 0                                     | 0.998207054  |              |                  |   |
| GNA11         | ENSG00000088256.8                    | 0.323371031      | 1            | 1                                     | 0.323371031  |              |                  |   |
|               | Brain_Spinal_cord_cervical_c-1       | 0.323371031      |              | Brain_Spinal_cord_cervical_c-1        |              |              |                  |   |
|               | 1                                    | 1                | 1            | -0.98755419                           | -0.98755419  | -0.98755419  | NA               | 1 |
|               | 0.998207054                          |                  |              |                                       |              |              |                  | 0 |
| PPP1R8        | ENSG00000117751.17                   | 0.32340824       | 1            | 1                                     | 0.32340824   |              | Brain_Cortex     |   |
|               | 0.32340824                           | Brain_Cortex     | 1            | 1                                     | 1            | -0.987478252 | -0.987478252     |   |
|               | -0.987478252                         | NA               | 1            | 0                                     | 0.998207054  |              |                  |   |
| RP11-826N14.4 | ENSG00000251623.1                    | 0.323455861      | 7            | 5                                     | 0.112507797  |              |                  |   |
|               | Brain_Cerebellum                     | 0.978765828      |              | Brain_Anterior_cingulate_cortex_BA24  |              |              |                  |   |
|               | 5.137669022                          | 0.043389381      | 0.182118385  | -0.639078054                          | 1.587021405  |              |                  |   |
|               | 0.126013688                          | 0.731491974      | 5            | 0                                     | 0.998207054  |              |                  |   |
| MRPL34        | ENSG00000130312.6                    | 0.323548027      | 13           | 1                                     | 0.16577109   |              |                  |   |
|               | Brain_Anterior_cingulate_cortex_BA24 | 0.599089737      |              | Brain_Cerebellar_Hemisphere           |              |              |                  |   |
|               | 12.51261842                          | 3.75E-05         | 12.51261842  | 0.525709968                           | 1.385920796  |              |                  |   |
|               | 0.970713146                          | 0.213691066      | 1            | 0                                     | 0.998207054  |              |                  |   |
| SWAP70        | ENSG00000133789.14                   | 0.323631187      | 2            | 2                                     | 0.198641988  |              |                  |   |
|               | Brain_Cerebellum                     | 0.448683777      |              | Brain_Caudate_basal_ganglia           | 1.015135204  |              |                  |   |
|               | 0.984864796                          | 0.984864796      | -0.757611193 | 1.285430216                           | 0.263909512  |              |                  |   |
|               | 1.444648434                          | 2                | 0            | 0.998207054                           |              |              |                  |   |
| TP53          | ENSG00000141510.16                   | 0.323853043      | 1            | 1                                     | 0.323853043  |              |                  |   |
|               | Brain_Putamen_basal_ganglia          | 0.323853043      |              | Brain_Putamen_basal_ganglia           | 1            | 1            |                  |   |
|               | 1                                    | -0.986570897     | -0.986570897 | -0.986570897                          | NA           | 1            | 0                |   |
|               | 0.998207054                          |                  |              |                                       |              |              |                  |   |
| RAB15         | ENSG00000139998.14                   | 0.323924375      | 5            | 4                                     | 0.066339527  |              |                  |   |
|               | Brain_Hippocampus                    | 0.838342011      |              | Brain_Substantia_nigra                | 3.209132633  |              |                  |   |
|               | 0.072732486                          | 0.225423981      | -1.836122596 | -0.204014701                          | -1.046270379 |              |                  |   |
|               | 0.579692687                          | 4                | 0            | 0.998207054                           |              |              |                  |   |
| TLL1          | ENSG00000038295.7                    | 0.323989198      | 2            | 2                                     | 0.133631022  |              |                  |   |
|               | Brain_Hypothalamus                   | 0.884258388      |              | Brain_Cerebellum                      | 1.05348541   | 0.94651459   |                  |   |
|               | 0.94651459                           | 0.145573121      | 1.499935845  | 0.822754483                           | 0.957679066  | 2            |                  |   |
|               | 0                                    | 0.998207054      |              |                                       |              |              |                  |   |
| CNKSR3        | ENSG00000153721.18                   | 0.32399897       | 3            | 3                                     | 0.071638098  |              | Brain_Cerebellum |   |

|            |                                       |                                |                                       |              |
|------------|---------------------------------------|--------------------------------|---------------------------------------|--------------|
|            | 0.917989761                           | Brain_Spinal_cord_cervical_c-1 | 1.049427588                           | 0.933178972  |
|            | 0.933178972                           | -0.102966245                   | 1.801411164                           | 0.686983202  |
|            | 3                                     | 0                              | 0.998207054                           | 0.992788024  |
| LINC00265  | ENSG00000188185.11                    | 0.324091657                    | 4                                     | 4            |
|            | Brain_Nucleus_accumbens_basal_ganglia | 0.754803397                    | Brain_Putamen_basal_ganglia           | 0.201807618  |
|            | 2.174083845                           | 0.209072648                    | 0.209072648                           | -1.276418504 |
|            | 0.259772252                           | 1.088648658                    | 4                                     | 0            |
|            | 0.998207054                           |                                |                                       |              |
| RBAK       | ENSG00000146587.17                    | 0.324115753                    | 11                                    | 6            |
|            | Brain_Caudate_basal_ganglia           | 0.811951631                    | Brain_Cerebellum                      | 8.163680625  |
|            | 0.00955286                            | 0.287827839                    | -0.237909056                          | 1.810477889  |
|            | 0.596547446                           | 6                              | 0                                     | 0.998207054  |
| ZBED3      | ENSG00000132846.5                     | 0.324139442                    | 1                                     | 1            |
|            | Brain_Amygdala                        | 1                              | 1                                     | 1            |
|            | 0.324139442                           | Brain_Amygdala                 | 1                                     | 1            |
|            | -0.985987101                          | NA                             | 1                                     | 0            |
|            | 0.998207054                           |                                |                                       |              |
| ENPP5      | ENSG00000112796.9                     | 0.324147543                    | 13                                    | 1            |
|            | Brain_Spinal_cord_cervical_c-1        | 0.720311383                    | Brain_Cortex                          | 12.06796587  |
|            | 0.005029295                           | 12.06796587                    | -0.358042668                          | 1.420521383  |
|            | 0.486482574                           | 1                              | 0                                     | 0.998207054  |
| AC114730.2 | ENSG00000235151.1                     | 0.324288023                    | 1                                     | 1            |
|            | Brain_Cerebellum                      | 0.324288023                    | Brain_Cerebellum                      | 1            |
|            | -0.985684368                          | -0.985684368                   | NA                                    | 1            |
|            | 0.998207054                           |                                |                                       |              |
| DTX1       | ENSG00000135144.7                     | 0.324391684                    | 2                                     | 2            |
|            | Brain_Cerebellar_Hemisphere           | 0.489272783                    | Brain_Cortex                          | 1.056646421  |
|            | 0.943353579                           | 0.943353579                    | 0.691465931                           | 1.368752189  |
|            | 0.478913705                           | 2                              | 0                                     | 0.998207054  |
| CDA        | ENSG00000158825.5                     | 0.324401554                    | 8                                     | 3            |
|            | Brain_Frontal_Cortex_BA9              | 0.28433918                     | Brain_Cortex                          | 6.826256919  |
|            | 0.320634981                           | 1.070622549                    | 2.040183778                           | 1.555771641  |
|            | 3                                     | 0                              | 0.998207054                           | 0.308591159  |
| CDCA7      | ENSG00000144354.13                    | 0.324457299                    | 2                                     | 2            |
|            | Brain_Cortex                          | 1.167930109                    | Brain_Cerebellum                      | 0.832069891  |
|            | 0.357280743                           | Brain_Cortex                   | 1.167930109                           | 0.832069891  |
|            | -1.013394488                          | 0.920558949                    | -0.04641777                           | 1.36751159   |
|            | 0.998207054                           |                                |                                       | 2            |
| RNFT1      | ENSG00000189050.15                    | 0.324815484                    | 1                                     | 1            |
|            | Brain_Cortex                          | 1                              | 1                                     | 1            |
|            | 0.324815484                           | Brain_Cortex                   | 1                                     | 1            |
|            | NA                                    | 1                              | 0                                     | 0.998207054  |
| ALDH18A1   | ENSG00000059573.8                     | 0.324865563                    | 3                                     | 2            |
|            | Brain_Cerebellar_Hemisphere           | 0.766508799                    | Brain_Nucleus_accumbens_basal_ganglia | 0.264810372  |
|            | 2.387701379                           | 0.018987959                    | 0.593310662                           | -0.296944608 |
|            | 0.613799982                           | 0.790063629                    | 2                                     | 0            |
|            | 0.998207054                           |                                |                                       |              |
| CHN2       | ENSG00000106069.21                    | 0.324879256                    | 2                                     | 2            |
|            | Brain_Cerebellar_Hemisphere           | 0.345416353                    | Brain_Nucleus_accumbens_basal_ganglia | 0.274722026  |
|            | 1.074219767                           | 0.925780233                    | 0.925780233                           | -1.092252743 |
|            | -1.017885039                          | 0.105171816                    | 2                                     | 0            |
|            | 0.998207054                           |                                |                                       |              |
| BSND       | ENSG00000162399.6                     | 0.324889469                    | 5                                     | 2            |
|            | Brain_Caudate_basal_ganglia           | 0.403290206                    | Brain_Nucleus_accumbens_basal_ganglia | 0.16644341   |
|            | 4.655952334                           | 0.003036614                    | 0.196647883                           | 0.835759516  |
|            | 1.1981726                             | 0.22672908                     | 2                                     | 0            |
|            | 0.998207054                           |                                |                                       |              |
| ADRA1B     | ENSG00000170214.3                     | 0.324896376                    | 1                                     | 1            |
|            | Brain_Caudate_basal_ganglia           | 0.324896376                    | Brain_Caudate_basal_ganglia           | 1            |
|            | 1                                     | 0.984445784                    | 0.984445784                           | 0.984445784  |
|            | 0.998207054                           |                                |                                       | NA           |
|            |                                       |                                |                                       | 1            |
|            |                                       |                                |                                       | 0            |
| ABI3       | ENSG00000108798.8                     | 0.325022272                    | 1                                     | 1            |
|            | Brain_Cortex                          | 1                              | 1                                     | 1            |
|            | 0.325022272                           | Brain_Cortex                   | 1                                     | 1            |
|            | 0.984189654                           | NA                             | 1                                     | 0            |
|            | 0.998207054                           |                                |                                       |              |
| TTL3       | ENSG00000214021.15                    | 0.325123322                    | 8                                     | 3            |
|            | Brain_Spinal_cord_cervical_c-1        | 0.595431293                    | Brain_Cortex                          | 6.721220744  |
|            | 0.004055825                           | 0.266356841                    | 0.530981941                           | 1.770857921  |
|            | 0.432461675                           | 3                              | 0                                     | 0.998207054  |
| TRAPPC1    | ENSG00000170043.11                    | 0.32513679                     | 1                                     | 1            |
|            | Brain_Caudate_basal_ganglia           | 0.32513679                     | Brain_Caudate_basal_ganglia           | 1            |
|            | -0.983956727                          | -0.983956727                   | -0.983956727                          | NA           |
|            |                                       |                                |                                       | 1            |
|            |                                       |                                |                                       | 0            |
|            |                                       |                                |                                       | 0.998207054  |

|               |                                       |                             |              |              |              |                                       |             |                  |
|---------------|---------------------------------------|-----------------------------|--------------|--------------|--------------|---------------------------------------|-------------|------------------|
| PPP1R2        | ENSG00000184203.7                     | 0.325221458                 | 1            | 1            | 0.325221458  |                                       |             |                  |
|               | Brain_Spinal_cord_cervical_c-1        | 0.325221458                 |              |              |              | Brain_Spinal_cord_cervical_c-1        |             |                  |
|               | 1 1 1                                 | -0.983784549                | -0.983784549 | -0.983784549 | NA           | 1                                     | 0           |                  |
|               | 0.998207054                           |                             |              |              |              |                                       |             |                  |
| IQCA1         | ENSG00000132321.16                    | 0.325233187                 | 4            | 4            | 0.204523901  |                                       |             |                  |
|               | Brain_Nucleus_accumbens_basal_ganglia | 0.841133177                 |              |              |              | Brain_Cerebellar_Hemisphere           |             |                  |
|               | 2.097312698                           | 0.252488624                 | 0.252488624  | -1.268767776 | 1.070225978  |                                       |             |                  |
|               | -0.213166781                          | 0.969432727                 | 4            | 0            | 0.998207054  |                                       |             |                  |
| CR2           | ENSG00000117322.17                    | 0.325300687                 | 1            | 1            | 0.325300687  |                                       |             |                  |
|               | Brain_Hypothalamus                    | 0.325300687                 |              |              |              | Brain_Hypothalamus                    | 1           | 1                |
|               | -0.983623457                          | -0.983623457                | -0.983623457 | NA           | 1            | 0                                     | 0.998207054 |                  |
| NFKB1B        | ENSG00000104825.16                    | 0.325391747                 | 6            | 4            | 0.187067112  |                                       |             |                  |
|               | Brain_Putamen_basal_ganglia           | 0.951785914                 |              |              |              | Brain_Cerebellum                      | 4.026507823 |                  |
|               | 0.047217302                           | 0.259309059                 | -1.319305164 | -0.060464218 | -0.587131281 |                                       |             |                  |
|               | 0.566779811                           | 4                           | 0            | 0.998207054  |              |                                       |             |                  |
| A3GALT2       | ENSG00000184389.9                     | 0.32541259                  | 2            | 1            | 0.205372907  |                                       |             | Brain_Cerebellum |
|               | 0.496175025                           | Brain_Cerebellar_Hemisphere | 1.959773113  | 0.040226887  |              |                                       |             |                  |
|               | 1.959773113                           | -1.266391627                | -0.680520375 | -0.973456001 | 0.414273535  |                                       |             |                  |
|               | 1                                     | 0                           | 0.998207054  |              |              |                                       |             |                  |
| FANCA         | ENSG00000187741.14                    | 0.325415706                 | 6            | 6            | 0.041410502  |                                       |             |                  |
|               | Brain_Hippocampus                     | 0.943551733                 |              |              |              | Brain_Frontal_Cortex_BA9              | 2.069348186 |                  |
|               | 0.383349175                           | 0.383349175                 | -1.01738037  | 2.039396191  | 0.760925027  |                                       |             |                  |
|               | 1.202920841                           | 6                           | 0            | 0.998207054  |              |                                       |             |                  |
| DTNBPI        | ENSG00000047579.19                    | 0.325503401                 | 5            | 5            | 0.055174538  |                                       |             |                  |
|               | Brain_Nucleus_accumbens_basal_ganglia | 0.930546343                 |              |              |              | Brain_Hippocampus                     |             |                  |
|               | 3.057177168                           | 0.163687091                 | 0.163687091  | -0.087157473 | 1.917499236  |                                       |             |                  |
|               | 0.914025603                           | 0.831418266                 | 5            | 0            | 0.998207054  |                                       |             |                  |
| HELLS         | ENSG00000119969.14                    | 0.325579917                 | 3            | 1            | 0.283834801  |                                       |             | Brain_Cerebellum |
|               | 0.380032227                           | Brain_Cerebellar_Hemisphere | 2.905777048  | 0.025099605  |              |                                       |             |                  |
|               | 2.905777048                           | -1.071744515                | -0.877836918 | -0.967556101 | 0.097760207  |                                       |             |                  |
|               | 1                                     | 0                           | 0.998207054  |              |              |                                       |             |                  |
| ARF1          | ENSG00000143761.15                    | 0.325684529                 | 1            | 1            | 0.325684529  |                                       |             |                  |
|               | Brain_Caudate_basal_ganglia           | 0.325684529                 |              |              |              | Brain_Caudate_basal_ganglia           | 1           | 1                |
|               | 1                                     | -0.982843379                | -0.982843379 | -0.982843379 | NA           | 1                                     | 0           |                  |
|               | 0.998207054                           |                             |              |              |              |                                       |             |                  |
| NBL1          | ENSG00000158747.13                    | 0.325902838                 | 7            | 7            | 0.1258078    |                                       |             | Brain_Cerebellum |
|               | 0.905013687                           | Brain_Frontal_Cortex_BA9    | 3.66314681   | 0.149059598  |              |                                       |             |                  |
|               | 0.149059598                           | -0.795941136                | 1.530844615  | 0.57774943   | 0.786511447  |                                       |             | 7                |
|               | 0                                     | 0.998207054                 |              |              |              |                                       |             |                  |
| GEMIN6        | ENSG00000152147.10                    | 0.325910106                 | 1            | 1            | 0.325910106  |                                       |             |                  |
|               | Brain_Spinal_cord_cervical_c-1        | 0.325910106                 |              |              |              | Brain_Spinal_cord_cervical_c-1        |             |                  |
|               | 1                                     | 1                           | 1            | 0.982385218  | 0.982385218  | 0.982385218                           | NA          | 1                |
|               | 0.998207054                           |                             |              |              |              |                                       |             | 0                |
| RP11-321G12.1 | ENSG00000259459.5                     | 0.326016167                 | 8            | 6            | 0.06630504   |                                       |             |                  |
|               | Brain_Nucleus_accumbens_basal_ganglia | 0.996884094                 |              |              |              | Brain_Substantia_nigra                |             |                  |
|               | 5.27170801                            | 0.048239308                 | 0.229819342  | -0.003905219 | 1.836355879  |                                       |             |                  |
|               | 1.223377941                           | 0.683216146                 | 6            | 0            | 0.998207054  |                                       |             |                  |
| MECR          | ENSG00000116353.15                    | 0.326036632                 | 7            | 4            | 0.059534492  |                                       |             |                  |
|               | Brain_Substantia_nigra                | 0.900701232                 |              |              |              | Brain_Nucleus_accumbens_basal_ganglia |             |                  |
|               | 4.499626627                           | 0.040620934                 | 0.413828822  | -0.3545511   | 1.884225412  |                                       |             |                  |
|               | 0.490311563                           | 0.708848936                 | 4            | 0            | 0.998207054  |                                       |             |                  |
| C2CD4D        | ENSG00000225556.1                     | 0.326172607                 | 2            | 2            | 0.280472625  |                                       |             |                  |
|               | Brain_Cerebellar_Hemisphere           | 0.387594867                 |              |              |              | Brain_Amygdala                        | 1.149696556 |                  |
|               | 0.850303444                           | 0.850303444                 | -1.079258236 | 0.863987301  | -0.107635468 |                                       |             |                  |
|               | 1.374082097                           | 2                           | 0            | 0.998207054  |              |                                       |             |                  |
| DCC           | ENSG00000187323.11                    | 0.326418572                 | 1            | 1            | 0.326418572  |                                       |             |                  |
|               | Brain_Cerebellar_Hemisphere           | 0.326418572                 |              |              |              | Brain_Cerebellar_Hemisphere           | 1           | 1                |
|               | 1                                     | -0.981353249                | -0.981353249 | -0.981353249 | NA           | 1                                     | 0           |                  |
|               | 0.998207054                           |                             |              |              |              |                                       |             |                  |
| NDUFS5        | ENSG00000168653.10                    | 0.326529533                 | 10           | 3            | 0.250758153  |                                       |             |                  |
|               | Brain_Anterior_cingulate_cortex_BA24  | 0.951348804                 |              |              |              | Brain_Cerebellar_Hemisphere           |             |                  |
|               | 8.426549026                           | 0.001969027                 | 0.464280844  | -1.14850984  | 0.279762857  |                                       |             |                  |

|             |                                       |                          |              |              |                                |              |    |   |                  |
|-------------|---------------------------------------|--------------------------|--------------|--------------|--------------------------------|--------------|----|---|------------------|
|             | -0.542040284                          | 0.521979424              | 3            | 0            | 0.998207054                    |              |    |   |                  |
| ANKS1B      | ENSG00000185046.18                    | 0.32653272               | 2            | 2            | 0.235001662                    |              |    |   |                  |
|             | Brain_Caudate_basal_ganglia           | 0.612377731              |              |              | Brain_Hippocampus              | 1.303484154  |    |   |                  |
|             | 0.696515846                           | 0.696515846              |              |              | -0.50668233                    | 1.187573048  |    |   | 0.340445359      |
|             | 1.198019467                           | 2                        | 0            |              | 0.998207054                    |              |    |   |                  |
| HAVCR1      | ENSG00000113249.12                    | 0.326559256              | 1            | 1            | 0.326559256                    |              |    |   |                  |
|             | Brain_Frontal_Cortex_BA9              | 0.326559256              |              |              | Brain_Frontal_Cortex_BA9       | 1            | 1  |   |                  |
|             | 1                                     | 0.981067905              | 0.981067905  | 0.981067905  | NA                             | 1            | 0  |   |                  |
|             | 0.998207054                           |                          |              |              |                                |              |    |   |                  |
| GZMK        | ENSG00000113088.5                     | 0.326691078              | 1            | 1            | 0.326691078                    |              |    |   |                  |
|             | Brain_Hippocampus                     | 0.326691078              |              |              | Brain_Hippocampus              | 1            | 1  | 1 |                  |
|             | -0.98080061                           | -0.98080061              | -0.98080061  | NA           | 1                              | 0            |    |   | 0.998207054      |
| WTH3DI      | ENSG00000233087.7                     | 0.326775325              | 5            | 4            | 0.088908311                    |              |    |   |                  |
|             | Brain_Amygdala                        | 0.961515713              |              |              | Brain_Caudate_basal_ganglia    | 2.752664067  |    |   |                  |
|             | 0.088542701                           | 0.290284488              |              |              | -1.701184696                   | -0.048251618 |    |   | -0.764488518     |
|             | 0.62812265                            | 4                        | 0            |              | 0.998207054                    |              |    |   |                  |
| CLRN3       | ENSG00000180745.4                     | 0.326832959              | 3            | 3            | 0.143020101                    |              |    |   | Brain_Cortex     |
|             | 0.442813813                           | Brain_Frontal_Cortex_BA9 | 1.797091427  |              | 0.209541472                    |              |    |   |                  |
|             | 0.209541472                           | 0.767450333              | 1.464636564  |              | 1.071989558                    |              |    |   | 0.35684646       |
|             | 0                                     | 0.998207054              |              |              |                                |              |    |   |                  |
| PTGIS       | ENSG00000124212.5                     | 0.326898574              | 1            | 1            | 0.326898574                    |              |    |   | Brain_Cortex     |
|             | 0.326898574                           | Brain_Cortex             | 1            | 1            | 1                              | -0.980380009 |    |   | -0.980380009     |
|             | -0.980380009                          | NA                       | 1            | 0            | 0.998207054                    |              |    |   |                  |
| RP1-35C21.2 | ENSG00000227579.5                     | 0.326919202              | 3            | 3            | 0.096471102                    |              |    |   |                  |
|             | Brain_Anterior_cingulate_cortex_BA24  | 0.703125159              |              |              | Brain_Amygdala                 |              |    |   |                  |
|             | 1.128545852                           | 0.884839585              | 0.884839585  |              | -1.662207873                   |              |    |   | 0.955121899      |
|             | -0.362730404                          | 1.308761632              | 3            | 0            | 0.998207054                    |              |    |   |                  |
| MFNG        | ENSG00000100060.17                    | 0.326964558              | 1            | 1            | 0.326964558                    |              |    |   |                  |
|             | Brain_Nucleus_accumbens_basal_ganglia | 0.326964558              |              |              |                                |              |    |   |                  |
|             | Brain_Nucleus_accumbens_basal_ganglia | 1                        | 1            | 1            | -0.980246295                   |              |    |   |                  |
|             | -0.980246295                          | -0.980246295             | NA           | 1            | 0                              | 0.998207054  |    |   |                  |
| CDH4        | ENSG00000179242.15                    | 0.326965448              | 1            | 1            | 0.326965448                    |              |    |   | Brain_Cerebellum |
|             | 0.326965448                           | Brain_Cerebellum         | 1            | 1            | 1                              | -0.98024449  |    |   | -0.98024449      |
|             | -0.98024449                           | NA                       | 1            | 0            | 0.998207054                    |              |    |   |                  |
| RSPH1       | ENSG00000160188.9                     | 0.326991105              | 6            | 3            | 0.136477738                    |              |    |   |                  |
|             | Brain_Frontal_Cortex_BA9              | 0.852061529              |              |              | Brain_Cortex                   | 4.731014113  |    |   |                  |
|             | 0.050340526                           | 0.184722329              | -1.489036575 |              | 0.533233532                    |              |    |   | -0.009330568     |
|             | 0.771081989                           | 3                        | 0            |              | 0.998207054                    |              |    |   |                  |
| C15orf39    | ENSG00000167173.18                    | 0.327019729              | 1            | 1            | 0.327019729                    |              |    |   |                  |
|             | Brain_Frontal_Cortex_BA9              | 0.327019729              |              |              | Brain_Frontal_Cortex_BA9       | 1            | 1  |   |                  |
|             | 1                                     | -0.980134504             | -0.980134504 | -0.980134504 | NA                             | 1            | 0  |   |                  |
|             | 0.998207054                           |                          |              |              |                                |              |    |   |                  |
| NFIB        | ENSG00000147862.15                    | 0.327026875              | 1            | 1            | 0.327026875                    |              |    |   |                  |
|             | Brain_Spinal_cord_cervical_c-1        | 0.327026875              |              |              | Brain_Spinal_cord_cervical_c-1 |              |    |   |                  |
|             | 1                                     | 1                        | 1            | 0.980120026  | 0.980120026                    | 0.980120026  | NA | 1 | 0                |
|             | 0.998207054                           |                          |              |              |                                |              |    |   |                  |
| LAMC2       | ENSG00000058085.14                    | 0.327195041              | 10           | 10           | 0.053672484                    |              |    |   |                  |
|             | Brain_Hypothalamus                    | 0.913702184              |              |              | Brain_Caudate_basal_ganglia    | 2.018545242  |    |   |                  |
|             | 0.366653633                           | 0.366653633              | -1.929470463 |              | 1.223581337                    |              |    |   | -0.528750258     |
|             | 0.961625978                           | 10                       | 0            |              | 0.998207054                    |              |    |   |                  |
| ZDHHC3      | ENSG00000163812.13                    | 0.32729874               | 3            | 2            | 0.171926099                    |              |    |   |                  |
|             | Brain_Putamen_basal_ganglia           | 0.622397649              |              |              | Brain_Hippocampus              | 2.706705833  |    |   |                  |
|             | 0.032638834                           | 0.260655333              | -1.366040988 |              | -0.492455109                   |              |    |   | -0.913317633     |
|             | 0.437663577                           | 2                        | 0            |              | 0.998207054                    |              |    |   |                  |
| TANC1       | ENSG00000115183.14                    | 0.327387629              | 3            | 3            | 0.158386624                    |              |    |   |                  |
|             | Brain_Cerebellar_Hemisphere           | 0.245326429              |              |              | Brain_Spinal_cord_cervical_c-1 |              |    |   |                  |
|             | 1.920565245                           | 0.07853208               | 0.07853208   | 1.161776088  | 1.410518546                    |              |    |   |                  |
|             | 1.310567102                           | 0.131366587              | 3            | 0            | 0.998207054                    |              |    |   |                  |
| SAMD9L      | ENSG00000177409.11                    | 0.327422181              | 10           | 3            | 0.310964611                    |              |    |   |                  |
|             | Brain_Anterior_cingulate_cortex_BA24  | 0.847314076              |              |              | Brain_Cerebellum               |              |    |   |                  |
|             | 8.228136504                           | 0.021876926              | 0.289773349  |              | -1.013200062                   |              |    |   | 0.498139313      |
|             | -0.443303939                          | 0.425924191              | 3            | 0            | 0.998207054                    |              |    |   |                  |

SLN ENSG00000170290.3 0.327460491 6 3 0.24608719  
Brain\_Nucleus\_accumbens\_basal\_ganglia 0.968641223 Brain\_Frontal\_Cortex\_BA9  
4.768450691 0.014824049 0.186453631 -1.159905729 -0.039312523  
-0.563625868 0.410288076 3 0 0.998207054  
OSBP2 ENSG00000184792.15 0.327545903 4 2 0.114406819 Brain\_Cerebellum  
0.493362015 Brain\_Hypothalamus 3.018435671 0.023435523  
0.873124715 -1.578691572 -0.684971326 -1.245312175 0.402711366  
2 0 0.998207054  
MRGPRF ENSG00000172935.8 0.327728603 4 4 0.173082914  
Brain\_Cortex 0.692919482 Brain\_Cerebellum 1.85847885 0.201883964  
0.201883964 -1.362364396 0.394896217 -0.656620124 0.768069331  
4 0 0.998207054  
FSIP1 ENSG00000150667.6 0.327737713 1 1 0.327737713  
Brain\_Caudate\_basal\_ganglia 0.327737713 Brain\_Caudate\_basal\_ganglia 1 1  
1 -0.978680818 -0.978680818 -0.978680818 NA 1 0  
0.998207054  
SUMO2 ENSG00000188612.11 0.32796348 1 1 0.32796348 Brain\_Cerebellum 0.32796348  
Brain\_Cerebellum 1 1 1 0.978224139 0.978224139 0.978224139  
NA 1 0 0.998207054  
CDC42BPA ENSG00000143776.18 0.328203794 3 3 0.447179179  
Brain\_Cerebellar\_Hemisphere 0.725780734 Brain\_Putamen\_basal\_ganglia  
1.752086814 0.261110132 0.261110132 -0.550562699 0.760126156  
-0.047060038 0.706147354 3 0 0.998207054  
KIAA1755 ENSG00000149633.11 0.328364223 2 2 0.19016656  
Brain\_Frontal\_Cortex\_BA9 0.39607266 Brain\_Putamen\_basal\_ganglia 1.105202309  
0.894797691 0.894797691 0.848656137 1.310086544 1.079371341  
0.32628057 2 0 0.998207054  
NISCH ENSG00000010322.15 0.328643467 2 2 0.17821729  
Brain\_Caudate\_basal\_ganglia 0.595097213 Brain\_Nucleus\_accumbens\_basal\_ganglia  
1.081095118 0.918904882 0.918904882 -0.5314641 1.346264314  
0.407400107 1.327754495 2 0 0.998207054  
SLC50A1 ENSG00000169241.17 0.32875864 1 1 0.32875864 Brain\_Cerebellum  
0.32875864 Brain\_Cerebellum 1 1 1 -0.976617323 -0.976617323  
-0.976617323 NA 1 0 0.998207054  
TRIM27 ENSG00000204713.10 0.328781671 1 1 0.328781671  
Brain\_Nucleus\_accumbens\_basal\_ganglia 0.328781671  
Brain\_Nucleus\_accumbens\_basal\_ganglia 1 1 1 -0.976570821  
-0.976570821 -0.976570821 NA 1 0 0.998207054  
TTC23 ENSG00000103852.12 0.328797447 13 7 0.013337575  
Brain\_Anterior\_cingulate\_cortex\_BA24 0.692153569 Brain\_Cerebellar\_Hemisphere  
8.226470502 0.001892429 0.363384624 -2.47462605 0.458596727  
-1.017253303 0.674128055 7 0 0.998207054  
TBX3 ENSG00000135111.15 0.328835878 1 1 0.328835878  
Brain\_Putamen\_basal\_ganglia 0.328835878 Brain\_Putamen\_basal\_ganglia 1 1  
1 -0.976461379 -0.976461379 -0.976461379 NA 1 0  
0.998207054  
SPATA5 ENSG00000145375.7 0.328854381 2 2 0.209731599  
Brain\_Caudate\_basal\_ganglia 0.398433981 Brain\_Cerebellum 1.030250585  
0.969749415 0.969749415 0.844421377 1.254303813 1.049362595  
0.28983065 2 0 0.998207054  
DKKL1 ENSG00000104901.6 0.328993055 1 1 0.328993055  
Brain\_Nucleus\_accumbens\_basal\_ganglia 0.328993055  
Brain\_Nucleus\_accumbens\_basal\_ganglia 1 1 1 0.97614411 0.97614411  
0.97614411 NA 1 0 0.998207054  
EFCAB5 ENSG00000176927.15 0.32900835 9 5 0.193834674  
Brain\_Anterior\_cingulate\_cortex\_BA24 0.983757765 Brain\_Frontal\_Cortex\_BA9  
6.974673658 0.000411037 0.246226448 -1.299318424 0.725772276  
-0.314995473 0.556176081 5 0 0.998207054  
DDX6 ENSG00000110367.11 0.329420362 5 4 0.035556441 Brain\_Amygdala  
0.780376259 Brain\_Substantia\_nigra 3.279242935 0.083589306  
0.224609391 0.278828737 2.101963863 1.482996996 0.721854113  
4 0 0.998207054

|          |                                      |                             |              |              |              |                                       |                  |
|----------|--------------------------------------|-----------------------------|--------------|--------------|--------------|---------------------------------------|------------------|
| TWIST2   | ENSG00000233608.3                    | 0.329463399                 | 2            | 2            | 0.193840011  |                                       |                  |
|          | Brain_Spinal_cord_cervical_c-1       | 0.786485642                 |              |              |              | Brain_Putamen_basal_ganglia           |                  |
|          | 1.63998399                           | 0.36001601                  | 0.36001601   | 0.270876991  | 1.299302866  | 0.785089929                           |                  |
|          | 0.72720691                           | 2                           | 0            | 0.998207054  |              |                                       |                  |
| C5orf38  | ENSG00000186493.11                   | 0.329514518                 | 1            | 1            | 0.329514518  |                                       |                  |
|          | Brain_Cortex                         | 0.329514518                 |              |              |              | Brain_Cortex                          |                  |
|          | -0.975092219                         | -0.975092219                | NA           | 1            | 0            | 0.998207054                           | -0.975092219     |
| MARCKS   | ENSG00000277443.2                    | 0.329527748                 | 1            | 1            | 0.329527748  |                                       |                  |
|          | Brain_Substantia_nigra               | 0.329527748                 |              |              |              | Brain_Substantia_nigra                | 1                |
|          | 1                                    | -0.975065546                | -0.975065546 | -0.975065546 | NA           | 1                                     | 0                |
|          | 0.998207054                          |                             |              |              |              |                                       |                  |
| MYADML2  | ENSG00000185105.5                    | 0.329579203                 | 11           | 10           | 0.091487257  |                                       |                  |
|          | Brain_Hippocampus                    | 0.794470749                 |              |              |              | Brain_Amygdala                        | 2.358402458      |
|          | 0.274490704                          | -0.662162573                | 1.68760407   | 0.346499798  | 0.887760147  | 0.05932234                            | 10               |
|          | 0                                    | 0.998207054                 |              |              |              |                                       |                  |
| SOS2     | ENSG00000100485.11                   | 0.329793136                 | 3            | 1            | 0.286044814  |                                       | Brain_Cerebellum |
|          | 0.37829001                           | Brain_Cerebellar_Hemisphere | 2.987921876  | 0.00136423   | 2.987921876  |                                       |                  |
|          | -1.066838402                         | -0.881051382                | -0.972640262 | 0.09292099   | 1            | 0                                     |                  |
|          | 0.998207054                          |                             |              |              |              |                                       |                  |
| VMAC     | ENSG00000187650.3                    | 0.329886419                 | 1            | 1            | 0.329886419  |                                       | Brain_Cortex     |
|          | 0.329886419                          | Brain_Cortex                | 1            | 1            | 1            | 0.974342682                           | 0.974342682      |
|          | 0.974342682                          | NA                          | 1            | 0            | 0.998207054  |                                       |                  |
| CTU1     | ENSG00000142544.6                    | 0.329899008                 | 3            | 3            | 0.166798207  |                                       | Brain_Cerebellum |
|          | 0.978218225                          | Brain_Cerebellar_Hemisphere | 1.060023128  | 0.945916511  |              |                                       |                  |
|          | 0.945916511                          | -1.167876961                | 1.38256526   | 0.080663699  | 1.276058157  | 3                                     |                  |
|          | 0                                    | 0.998207054                 |              |              |              |                                       |                  |
| HLTF     | ENSG00000071794.15                   | 0.329943311                 | 11           | 4            | 0.034099968  |                                       |                  |
|          | Brain_Caudate_basal_ganglia          | 0.461930297                 |              |              |              | Brain_Hypothalamus                    | 8.54966622       |
|          | 0.011695469                          | 0.382982039                 | 0.73567206   | 2.118887586  | 1.58725991   |                                       |                  |
|          | 0.432606329                          | 4                           | 0            | 0.998207054  |              |                                       |                  |
| CALML4   | ENSG00000129007.14                   | 0.329958923                 | 1            | 1            | 0.329958923  |                                       |                  |
|          | Brain_Cerebellum                     | 0.329958923                 |              |              |              | Brain_Cerebellum                      | 1                |
|          | -0.974196619                         | -0.974196619                | NA           | 1            | 0            | 0.998207054                           | -0.974196619     |
| HERC3    | ENSG00000138641.15                   | 0.330176444                 | 2            | 2            | 0.174315696  |                                       |                  |
|          | Brain_Substantia_nigra               | 0.419004601                 |              |              |              | Brain_Nucleus_accumbens_basal_ganglia |                  |
|          | 1.151829459                          | 0.848170541                 | 0.848170541  | -1.35846653  | -0.808149368 |                                       |                  |
|          | -1.083307949                         | 0.389132997                 | 2            | 0            | 0.998207054  |                                       |                  |
| CATSPERG | ENSG00000099338.22                   | 0.330239076                 | 2            | 2            | 0.461735418  |                                       |                  |
|          | Brain_Anterior_cingulate_cortex_BA24 | 0.584795526                 |              |              |              |                                       |                  |
|          | Brain_Spinal_cord_cervical_c-1       | 1.627065809                 |              |              | 0.372934191  | 0.372934191                           |                  |
|          | -0.735992244                         | 0.546393429                 | -0.094799407 | 0.906783605  | 2            | 0                                     |                  |
|          | 0.998207054                          |                             |              |              |              |                                       |                  |
| SCN4B    | ENSG00000177098.8                    | 0.330243219                 | 5            | 5            | 0.051471782  |                                       |                  |
|          | Brain_Frontal_Cortex_BA9             | 0.776009939                 |              |              |              | Brain_Cerebellar_Hemisphere           |                  |
|          | 2.085739648                          | 0.301657052                 | 0.301657052  | -1.947525368 | 0.326454498  |                                       |                  |
|          | -0.657658011                         | 1.096554759                 | 5            | 0            | 0.998207054  |                                       |                  |
| KREMEN2  | ENSG00000131650.13                   | 0.330376884                 | 1            | 1            | 0.330376884  |                                       |                  |
|          | Brain_Cortex                         | 0.330376884                 |              |              |              | Brain_Cortex                          | 1                |
|          | -0.973355025                         | -0.973355025                | NA           | 1            | 0            | 0.998207054                           | -0.973355025     |
| WDSUB1   | ENSG00000196151.10                   | 0.330417642                 | 13           | 3            | 0.043808032  |                                       |                  |
|          | Brain_Putamen_basal_ganglia          | 0.455292386                 |              |              |              | Brain_Substantia_nigra                |                  |
|          | 10.78603702                          | 0.01380394                  | 0.365169142  | -2.015922963 | -0.746620972 |                                       |                  |
|          | -1.542652683                         | 0.34761188                  | 3            | 0            | 0.998207054  |                                       |                  |
| COX5B    | ENSG00000135940.6                    | 0.330546625                 | 2            | 2            | 0.252054374  |                                       |                  |
|          | Brain_Caudate_basal_ganglia          | 0.87669457                  |              |              |              | Brain_Putamen_basal_ganglia           | 1.554580839      |
|          | 0.445419161                          | 0.445419161                 | -0.155160776 | 1.145373735  | 0.49510648   |                                       |                  |
|          | 0.919616772                          | 2                           | 0            | 0.998207054  |              |                                       |                  |
| DYDC2    | ENSG00000133665.12                   | 0.330596683                 | 4            | 2            | 0.100300064  |                                       |                  |
|          | Brain_Putamen_basal_ganglia          | 0.753200417                 |              |              |              | Brain_Cortex                          | 3.179219358      |
|          | 0.002514627                          | 0.790090791                 | -0.314422174 | 1.643400658  | 0.988284275  |                                       |                  |
|          | 0.885888839                          | 2                           | 0            | 0.998207054  |              |                                       |                  |
| ARL3     | ENSG00000138175.8                    | 0.330639572                 | 6            | 6            | 0.148426213  |                                       |                  |

|              |                                       |                          |                                       |              |              |                          |              |  |
|--------------|---------------------------------------|--------------------------|---------------------------------------|--------------|--------------|--------------------------|--------------|--|
|              | Brain_Cerebellar_Hemisphere           | 0.950634859              |                                       | Brain_Cortex | 2.206643159  |                          |              |  |
|              | 0.094856215                           | -0.094856215             | -0.612567827                          | 1.445112769  |              | 0.502655373              |              |  |
|              | 0.749183348                           | 6                        | 0                                     | 0.998207054  |              |                          |              |  |
| ZNF813       | ENSG00000198346.10                    | 0.330647147              | 1                                     | 1            | 0.330647147  |                          |              |  |
|              | Brain_Cortex                          | 0.330647147              | Brain_Cortex                          | 1            | 1            | 1                        | -0.972811195 |  |
|              | -0.972811195                          | -0.972811195             | NA                                    | 1            | 0            | 0.998207054              |              |  |
| BCL6         | ENSG00000113916.17                    | 0.330651547              | 1                                     | 1            | 0.330651547  | Brain_Amygdala           |              |  |
|              | 0.330651547                           | Brain_Amygdala           | 1                                     | 1            | 1            | -0.972802344             | -0.972802344 |  |
|              | -0.972802344                          | NA                       | 1                                     | 0            | 0.998207054  |                          |              |  |
| GLO1         | ENSG00000124767.6                     | 0.330673293              | 10                                    | 3            | 0.319543766  |                          |              |  |
|              | Brain_Hippocampus                     | 0.988925909              | Brain_Caudate_basal_ganglia           | 8.498860184  |              |                          |              |  |
|              | 0.012478464                           | 0.372550173              | -0.995395871                          | 0.37413612   | 0.071484122  |                          |              |  |
|              | 0.398931794                           | 3                        | 0                                     | 0.998207054  |              |                          |              |  |
| XPOT         | ENSG00000184575.11                    | 0.330735271              | 1                                     | 1            | 0.330735271  |                          |              |  |
|              | Brain_Hippocampus                     | 0.330735271              | Brain_Hippocampus                     | 1            | 1            | 1                        |              |  |
|              | -0.972633934                          | -0.972633934             | -0.972633934                          | NA           | 1            | 0                        | 0.998207054  |  |
| YIPF5        | ENSG00000145817.16                    | 0.330743912              | 1                                     | 1            | 0.330743912  |                          |              |  |
|              | Brain_Nucleus_accumbens_basal_ganglia | 0.330743912              |                                       |              |              |                          |              |  |
|              | Brain_Nucleus_accumbens_basal_ganglia | 1                        | 1                                     | 1            | -0.972616555 |                          |              |  |
|              | -0.972616555                          | -0.972616555             | NA                                    | 1            | 0            | 0.998207054              |              |  |
| TNFRSF14     | ENSG00000157873.17                    | 0.330778389              | 5                                     | 4            | 0.093061992  |                          |              |  |
|              | Brain_Amygdala                        | 0.886854638              | Brain_Caudate_basal_ganglia           | 3.311586828  |              |                          |              |  |
|              | 0.068820783                           | 0.190602629              | 0.142285325                           | 1.679462242  | 0.818558745  |                          |              |  |
|              | 0.61501236                            | 4                        | 0                                     | 0.998207054  |              |                          |              |  |
| CFAP157      | ENSG00000160401.14                    | 0.330898861              | 3                                     | 3            | 0.424964114  |                          |              |  |
|              | Brain_Cerebellar_Hemisphere           | 0.482789563              | Brain_Putamen_basal_ganglia           |              |              |                          |              |  |
|              | 1.560385487                           | 0.488988173              | 0.488988173                           | -0.797838676 | 0.784906749  |                          |              |  |
|              | -0.238251637                          | 0.887380733              | 3                                     | 0            | 0.998207054  |                          |              |  |
| RP11-108M9.6 | ENSG00000272426.1                     | 0.330921183              | 4                                     | 4            | 0.071387856  |                          |              |  |
|              | Brain_Hippocampus                     | 0.340351891              | Brain_Cortex                          | 1.919006667  |              |                          |              |  |
|              | 0.238105283                           | 0.238105283              | 0.953470193                           | 1.803002284  | 1.423762332  |                          |              |  |
|              | 0.375334749                           | 4                        | 0                                     | 0.998207054  |              |                          |              |  |
| TRIM26       | ENSG00000234127.8                     | 0.330924744              | 7                                     | 6            | 0.23284772   |                          |              |  |
|              | Brain_Cerebellar_Hemisphere           | 0.895418142              | Brain_Frontal_Cortex_BA9              |              |              |                          |              |  |
|              | 3.844384587                           | 0.095459948              | 0.337778629                           | -0.95503315  | 1.19305529   |                          |              |  |
|              | 0.264411761                           | 0.840147317              | 6                                     | 0            | 0.998207054  |                          |              |  |
| CRLF3        | ENSG00000176390.11                    | 0.330953604              | 11                                    | 4            | 0.29466578   |                          |              |  |
|              | Brain_Spinal_cord_cervical_c-1        | 0.954225026              |                                       |              |              |                          |              |  |
|              | Brain_Nucleus_accumbens_basal_ganglia | 7.588266132              | 0.014072277                           |              |              |                          |              |  |
|              | 0.358358652                           | -0.925004268             | 1.047941024                           | 0.307086792  | 0.54513015   | 4                        |              |  |
|              | 0                                     | 0.998207054              |                                       |              |              |                          |              |  |
| POLR2H       | ENSG00000163882.9                     | 0.33099727               | 1                                     | 1            | 0.33099727   |                          |              |  |
|              | Brain_Caudate_basal_ganglia           | 0.33099727               | Brain_Caudate_basal_ganglia           | 1            | 1            | 1                        |              |  |
|              | 0.972107101                           | 0.972107101              | 0.972107101                           | NA           | 1            | 0                        | 0.998207054  |  |
| FGD6         | ENSG00000180263.13                    | 0.33105803               | 1                                     | 1            | 0.33105803   | Brain_Frontal_Cortex_BA9 |              |  |
|              | 0.33105803                            | Brain_Frontal_Cortex_BA9 | 1                                     | 1            | 1            | -0.971984962             |              |  |
|              | -0.971984962                          | -0.971984962             | NA                                    | 1            | 0            | 0.998207054              |              |  |
| CNTRL        | ENSG00000119397.16                    | 0.331072502              | 3                                     | 3            | 0.101031894  |                          |              |  |
|              | Brain_Spinal_cord_cervical_c-1        | 0.971646493              |                                       |              |              |                          |              |  |
|              | Brain_Nucleus_accumbens_basal_ganglia | 1.675545046              | 0.392238438                           |              |              |                          |              |  |
|              | 0.392238438                           | -0.035543334             | 1.639871471                           | 0.63338697   | 0.887249018  | 3                        |              |  |
|              | 0                                     | 0.998207054              |                                       |              |              |                          |              |  |
| PPIL2        | ENSG00000100023.18                    | 0.331302494              | 9                                     | 8            | 0.205219724  |                          |              |  |
|              | Brain_Frontal_Cortex_BA9              | 0.997786095              | Brain_Spinal_cord_cervical_c-1        |              |              |                          |              |  |
|              | 3.997130105                           | 0.073206871              | 0.264948892                           | -0.87571376  | 1.266819818  |                          |              |  |
|              | 0.184539346                           | 0.815872614              | 8                                     | 0            | 0.998207054  |                          |              |  |
| GRAP2        | ENSG00000100351.16                    | 0.331339227              | 1                                     | 1            | 0.331339227  | Brain_Amygdala           |              |  |
|              | 0.331339227                           | Brain_Amygdala           | 1                                     | 1            | 1            | 0.971419892              | 0.971419892  |  |
|              | 0.971419892                           | NA                       | 1                                     | 0            | 0.998207054  |                          |              |  |
| TEX26        | ENSG00000175664.9                     | 0.331386775              | 7                                     | 4            | 0.184597957  |                          |              |  |
|              | Brain_Hippocampus                     | 0.987891099              | Brain_Nucleus_accumbens_basal_ganglia |              |              |                          |              |  |
|              | 5.339701887                           | 0.026639726              | 0.237993478                           | -0.290825118 | 1.326730169  |                          |              |  |

|              |                                       |              |                                      |              |                        |                             |              |  |
|--------------|---------------------------------------|--------------|--------------------------------------|--------------|------------------------|-----------------------------|--------------|--|
| 0.270398728  | 0.556639037                           | 4            | 0                                    | 0.998207054  |                        |                             |              |  |
| CREBBP       | ENSG00000005339.14                    | 0.331403586  | 1                                    | 1            | 0.331403586            |                             |              |  |
|              | Brain_Substantia_nigra                | 0.331403586  |                                      |              | Brain_Substantia_nigra | 1                           | 1            |  |
| 1            | 0.971290606                           | 0.971290606  | 0.971290606                          | NA           | 1                      | 0                           |              |  |
| 0.998207054  |                                       |              |                                      |              |                        |                             |              |  |
| VPS13C       | ENSG00000129003.15                    | 0.331477597  | 1                                    | 1            | 0.331477597            |                             |              |  |
|              | Brain_Cerebellum                      | 0.331477597  | Brain_Cerebellum                     | 1            | 1                      | 1                           | -0.971141949 |  |
| -0.971141949 | -0.971141949                          | NA           | 1                                    | 0            | 0.998207054            |                             |              |  |
| SEMA6A       | ENSG00000092421.16                    | 0.3314872    | 1                                    | 1            | 0.3314872              | Brain_Cerebellum            |              |  |
| 0.3314872    | Brain_Cerebellum                      | 1            | 1                                    | 0.971122662  | 0.971122662            |                             |              |  |
| 0.971122662  | NA                                    | 1            | 0                                    | 0.998207054  |                        |                             |              |  |
| TJP2         | ENSG00000119139.17                    | 0.3314911    | 1                                    | 1            | 0.3314911              | Brain_Caudate_basal_ganglia |              |  |
| 0.3314911    | Brain_Caudate_basal_ganglia           | 1            | 1                                    | 1            | 0.97111483             | 0.97111483                  |              |  |
| 0.97111483   | NA                                    | 1            | 0                                    | 0.998207054  |                        |                             |              |  |
| APLP2        | ENSG00000084234.16                    | 0.331693333  | 1                                    | 1            | 0.331693333            |                             |              |  |
|              | Brain_Caudate_basal_ganglia           | 0.331693333  | Brain_Caudate_basal_ganglia          | 1            | 1                      |                             |              |  |
| 1            | 0.970708751                           | 0.970708751  | 0.970708751                          | NA           | 1                      | 0                           |              |  |
| 0.998207054  |                                       |              |                                      |              |                        |                             |              |  |
| PRMT7        | ENSG00000132600.16                    | 0.331881887  | 12                                   | 5            | 0.013946936            | Brain_Cortex                |              |  |
| 0.725905094  | Brain_Amygdala                        | 7.565589007  |                                      |              | 0.006068463            | 0.370871098                 |              |  |
| -2.458627208 | -0.350577826                          | -1.522358876 |                                      |              | 0.819803819            | 5                           | 0            |  |
| 0.998207054  |                                       |              |                                      |              |                        |                             |              |  |
| TOMM5        | ENSG00000175768.12                    | 0.33193266   | 1                                    | 1            | 0.33193266             |                             |              |  |
|              | Brain_Anterior_cingulate_cortex_BA24  | 0.33193266   |                                      |              |                        |                             |              |  |
|              | Brain_Anterior_cingulate_cortex_BA24  | 1            | 1                                    | 1            | -0.970228394           |                             |              |  |
| -0.970228394 | -0.970228394                          | NA           | 1                                    | 0            | 0.998207054            |                             |              |  |
| NKIRAS1      | ENSG00000197885.10                    | 0.331939866  | 5                                    | 5            | 0.034858888            |                             |              |  |
|              | Brain_Hypothalamus                    | 0.884016139  | Brain_Anterior_cingulate_cortex_BA24 |              |                        |                             |              |  |
| 2.521314785  | 0.326610165                           | 0.326610165  | -2.109993826                         | -0.145879976 |                        |                             |              |  |
| -1.034998708 | 0.72560815                            | 5            | 0                                    | 0.998207054  |                        |                             |              |  |
| ERI3         | ENSG00000117419.14                    | 0.331941096  | 2                                    | 2            | 0.162935985            |                             |              |  |
|              | Brain_Caudate_basal_ganglia           | 0.60256765   | Brain_Spinal_cord_cervical_c-1       |              |                        |                             |              |  |
| 1.008583017  | 0.991416983                           | 0.991416983  | -1.39526486                          | 0.52071166   |                        |                             |              |  |
| -0.4372766   | 1.35479999                            | 2            | 0                                    | 0.998207054  |                        |                             |              |  |
| EPHB1        | ENSG00000154928.16                    | 0.331968614  | 5                                    | 5            | 0.076886533            |                             |              |  |
|              | Brain_Hypothalamus                    | 0.996414388  | Brain_Putamen_basal_ganglia          | 1.38854056   |                        |                             |              |  |
| 0.584100478  | 0.584100478                           | -1.372519338 | 1.769043996                          | -0.064985652 |                        |                             |              |  |
| 1.17927253   | 5                                     | 0            | 0.998207054                          |              |                        |                             |              |  |
| BMP7         | ENSG00000101144.12                    | 0.332008097  | 4                                    | 4            | 0.05415294             |                             |              |  |
|              | Brain_Substantia_nigra                | 0.902175215  | Brain_Putamen_basal_ganglia          |              |                        |                             |              |  |
| 1.519448103  | 0.494204647                           | 0.494204647  | -1.925611195                         | 0.706386209  |                        |                             |              |  |
| -0.459243602 | 1.144119942                           | 4            | 0                                    | 0.998207054  |                        |                             |              |  |
| BBS5         | ENSG00000163093.11                    | 0.332017005  | 2                                    | 2            | 0.139420406            | Brain_Cerebellum            |              |  |
| 0.385113776  | Brain_Cerebellar_Hemisphere           | 1.503338777  | 0.496661223                          |              |                        |                             |              |  |
| 0.496661223  | 0.868512604                           | 1.477952824  | 1.173232714                          | 0.430939312  |                        |                             |              |  |
| 2            | 0                                     | 0.998207054  |                                      |              |                        |                             |              |  |
| RP11-68606.2 | ENSG00000273456.1                     | 0.332195908  | 8                                    | 2            | 0.126901374            |                             |              |  |
|              | Brain_Nucleus_accumbens_basal_ganglia | 0.986758411  |                                      |              |                        |                             |              |  |
|              | Brain_Spinal_cord_cervical_c-1        | 7.20516994   | 0.004002599                          | 0.274499988  |                        |                             |              |  |
| 0.016596633  | 1.526435773                           | 0.756990564  | 0.424895013                          | 2            | 0                      |                             |              |  |
| 0.998207054  |                                       |              |                                      |              |                        |                             |              |  |
| GALK2        | ENSG00000156958.14                    | 0.332200274  | 8                                    | 4            | 0.087836513            | Brain_Cortex                |              |  |
| 0.826727132  | Brain_Anterior_cingulate_cortex_BA24  | 6.429862712  |                                      |              |                        |                             |              |  |
| 0.001149641  | 0.218892735                           | -0.218901045 | 1.706922204                          | 1.102929967  |                        |                             |              |  |
| 0.63357543   | 4                                     | 0            | 0.998207054                          |              |                        |                             |              |  |
| H3F3A        | ENSG00000163041.9                     | 0.332302043  | 13                                   | 4            | 0.132307314            | Brain_Cortex                |              |  |
| 0.76694882   | Brain_Cerebellum                      | 10.39282636  | 0.002920286                          | 0.415939006  |                        |                             |              |  |
| -1.505065203 | 0.474225855                           | -0.45066023  | 0.534872149                          | 4            | 0                      |                             |              |  |
| 0.998207054  |                                       |              |                                      |              |                        |                             |              |  |
| LYRM1        | ENSG00000102897.9                     | 0.332314814  | 1                                    | 1            | 0.332314814            |                             |              |  |
|              | Brain_Cerebellar_Hemisphere           | 0.332314814  | Brain_Cerebellar_Hemisphere          | 1            | 1                      |                             |              |  |
| 1            | -0.969461834                          | -0.969461834 | -0.969461834                         | NA           | 1                      | 0                           |              |  |



0.998207054  
ISOC1 ENSG00000066583.11 0.332367981 1 1 0.332367981  
Brain\_Caudate\_basal\_ganglia 0.332367981 Brain\_Caudate\_basal\_ganglia 1 1  
1 0.969355232 0.969355232 0.969355232 NA 1 0  
0.998207054  
KLC3 ENSG00000104892.16 0.332593785 6 2 0.153993998  
Brain\_Frontal\_Cortex\_BA9 0.322779029 Brain\_Cortex 5.402282914  
0.010870571 0.348467433 -1.425564816 -0.988763167 -1.179591888  
0.201707102 2 0 0.998207054  
ERBB4 ENSG00000178568.14 0.33264315 2 2 0.192570729  
Brain\_Cerebellar\_Hemisphere 0.490073095 Brain\_Cerebellum 1.83189639 0.16810361  
0.16810361 -1.303011813 -0.69019257 -0.996602191 0.433328642 2  
0 0.998207054  
TTC12 ENSG00000149292.16 0.332665005 13 2 0.128517329  
Brain\_Frontal\_Cortex\_BA9 0.832034856 Brain\_Amygdala 11.00459718  
0.007141539 0.717338417 0.212092519 1.519974722 0.968514221  
0.363633017 2 0 0.998207054  
PTGES3L ENSG00000267060.5 0.332718538 3 3 0.417501086  
Brain\_Cortex 0.591777234 Brain\_Cerebellar\_Hemisphere 2.271802768  
0.288570892 0.288570892 -0.810764219 0.536262369 -0.313304541  
0.739327251 3 0 0.998207054  
IFNAR1 ENSG00000142166.12 0.332746814 2 2 0.138102211  
Brain\_Cerebellum 0.456663288 Brain\_Cerebellar\_Hemisphere 1.526073809  
0.473926191 0.473926191 -1.482895373 -0.744352434 -1.113623903  
0.522228721 2 0 0.998207054  
SHISA3 ENSG00000178343.4 0.332883706 6 6 0.0634147  
Brain\_Hippocampus 0.936278595 Brain\_Frontal\_Cortex\_BA9 2.562328415  
0.316581903 0.316581903 -0.517961429 1.856272691 0.386690758  
0.858295491 6 0 0.998207054  
RP11-138E2.1 ENSG00000270755.1 0.33296216 1 1 0.33296216 Brain\_Cerebellum  
0.33296216 Brain\_Cerebellum 1 1 1 0.968164623 0.968164623  
0.968164623 NA 1 0 0.998207054  
ZNF282 ENSG00000170265.11 0.333070377 1 1 0.333070377  
Brain\_Amygdala 0.333070377 Brain\_Amygdala 1 1 1 0.967947926  
0.967947926 0.967947926 NA 1 0 0.998207054  
TP53RK ENSG00000172315.5 0.333097087 1 1 0.333097087  
Brain\_Amygdala 0.333097087 Brain\_Amygdala 1 1 1 0.967894449  
0.967894449 0.967894449 NA 1 0 0.998207054  
MAN2B1 ENSG00000104774.12 0.333191257 4 3 0.172276578  
Brain\_Cerebellum 0.536037606 Brain\_Spinal\_cord\_cervical\_c-1 2.059685677  
0.011006719 0.448258457 -1.364925146 1.208410868 -0.210598292  
1.320483846 3 0 0.998207054  
ZCCHC7 ENSG00000147905.17 0.333193051 1 1 0.333193051  
Brain\_Hippocampus 0.333193051 Brain\_Hippocampus 1 1 1  
-0.967702337 -0.967702337 -0.967702337 NA 1 0 0.998207054  
TMEM120B ENSG00000188735.12 0.333219834 2 2 0.139819138  
Brain\_Cerebellum 0.854343323 Brain\_Cerebellar\_Hemisphere 1.213014435  
0.786985565 0.786985565 -1.476464875 -0.18357953 -0.830022203  
0.914207995 2 0 0.998207054  
CFAP44 ENSG00000206530.10 0.333280634 3 3 0.087440801  
Brain\_Cerebellar\_Hemisphere 0.636750379 Brain\_Frontal\_Cortex\_BA9  
1.594743233 0.402075337 0.402075337 -0.472247164 1.709054791  
0.791590365 1.13114999 3 0 0.998207054  
DYNLL1 ENSG00000088986.10 0.333546734 6 4 0.04107307  
Brain\_Frontal\_Cortex\_BA9 0.759899676 Brain\_Caudate\_basal\_ganglia 3.57928161  
0.078577602 0.495148828 -2.042791628 -0.305612534 -0.81684808  
0.620427799 4 0 0.998207054  
SERPINB9P1 ENSG00000230438.6 0.333630012 13 8 0.06425588  
Brain\_Spinal\_cord\_cervical\_c-1 0.921467993  
Brain\_Anterior\_cingulate\_cortex\_BA24 7.221989968 0.008223991  
0.278754174 -1.850400268 1.126619842 -0.420673493 0.76298062 8  
0 0.998207054

|           |                                      |                                |              |              |                                       |                |             |             |   |
|-----------|--------------------------------------|--------------------------------|--------------|--------------|---------------------------------------|----------------|-------------|-------------|---|
| PPT1      | ENSG00000131238.16                   | 0.333654793                    | 2            | 1            | 0.337960589                           | Brain_Amygdala |             |             |   |
|           | 0.338780447                          | Brain_Spinal_cord_cervical_c-1 |              |              | 1.96134498                            | 0.03865502     | 1.96134498  |             |   |
|           | 0.956577704                          | 0.958202634                    | 0.957390169  |              | 0.001149                              | 1              | 0           |             |   |
|           | 0.998207054                          |                                |              |              |                                       |                |             |             |   |
| G0S2      | ENSG00000123689.5                    | 0.333744237                    | 3            | 3            | 0.092617455                           | Brain_Cortex   |             |             |   |
|           | 0.862708393                          | Brain_Cerebellar_Hemisphere    |              |              | 1.168896723                           | 0.808546059    |             |             |   |
|           | 0.808546059                          | -0.5377973                     | 1.681749344  |              | 0.323674838                           | 1.19019211     | 3           | 0           |   |
|           | 0.998207054                          |                                |              |              |                                       |                |             |             |   |
| LRPPRC    | ENSG00000138095.18                   | 0.333833914                    | 13           | 2            | 0.131951877                           |                |             |             |   |
|           | Brain_Substantia_nigra               | 0.383767158                    |              |              | Brain_Amygdala                        | 11.49589719    |             |             |   |
|           | 0.000257643                          | 0.800008015                    | 0.870976183  |              | 1.506449286                           | 1.118272511    |             |             |   |
|           | 0.2208377                            | 2                              | 0            | 0.998207054  |                                       |                |             |             |   |
| FLYWCH2   | ENSG00000162076.12                   | 0.33386018                     | 2            | 2            | 0.156912374                           |                |             |             |   |
|           | Brain_Anterior_cingulate_cortex_BA24 | 0.875934507                    |              |              | Brain_Cerebellum                      |                |             |             |   |
|           | 1.393617596                          | 0.606382404                    | 0.606382404  |              | -1.41553268                           | -0.156124982   |             |             |   |
|           | -0.785828831                         | 0.890535724                    | 2            | 0            | 0.998207054                           |                |             |             |   |
| MDM2      | ENSG00000135679.22                   | 0.333888602                    | 1            | 1            | 0.333888602                           |                |             |             |   |
|           | Brain_Spinal_cord_cervical_c-1       | 0.333888602                    |              |              | Brain_Spinal_cord_cervical_c-1        |                |             |             |   |
|           | 1                                    | 1                              | 1            | -0.966310963 | -0.966310963                          | -0.966310963   | NA          | 1           | 0 |
|           | 0.998207054                          |                                |              |              |                                       |                |             |             |   |
| BHLHA15   | ENSG00000180535.3                    | 0.333960199                    | 10           | 2            | 0.092108525                           |                |             |             |   |
|           | Brain_Hypothalamus                   | 0.527257158                    |              |              | Brain_Nucleus_accumbens_basal_ganglia |                |             |             |   |
|           | 8.759547116                          | 0.008060384                    | 0.562687392  |              | -1.684378595                          | -0.632198529   |             |             |   |
|           | -1.191379557                         | 0.306010547                    | 2            | 0            | 0.998207054                           |                |             |             |   |
| ZNF784    | ENSG00000179922.5                    | 0.334217905                    | 2            | 2            | 0.259421215                           |                |             |             |   |
|           | Brain_Cortex                         | 0.352001143                    |              |              | Brain_Cerebellar_Hemisphere           | 1.025000058    |             |             |   |
|           | 0.974999942                          | 0.974999942                    | -1.127760178 |              | 0.930714741                           | -0.098522719   |             |             |   |
|           | 1.455561574                          | 2                              | 0            | 0.998207054  |                                       |                |             |             |   |
| LINC01833 | ENSG00000259439.2                    | 0.334263548                    | 2            | 2            | 0.141476498                           |                |             |             |   |
|           | Brain_Putamen_basal_ganglia          | 0.34894976                     |              |              | Brain_Cerebellum                      | 1.718696871    |             |             |   |
|           | 0.281303129                          | 0.281303129                    | 0.936628358  |              | 1.470314861                           | 1.203471609    |             |             |   |
|           | 0.377373346                          | 2                              | 0            | 0.998207054  |                                       |                |             |             |   |
| SLC35B4   | ENSG00000205060.10                   | 0.334325993                    | 3            | 3            | 0.104139813                           |                |             |             |   |
|           | Brain_Spinal_cord_cervical_c-1       | 0.66989963                     |              |              | Brain_Cerebellum                      | 2.332132874    |             |             |   |
|           | 0.253760675                          | 0.253760675                    | -0.491574168 |              | 1.625106759                           | 0.235748942    |             |             |   |
|           | 1.203661913                          | 3                              | 0            | 0.998207054  |                                       |                |             |             |   |
| ZNF107    | ENSG00000196247.11                   | 0.334548647                    | 10           | 3            | 0.088585617                           |                |             |             |   |
|           | Brain_Spinal_cord_cervical_c-1       | 0.889965676                    |              |              | Brain_Substantia_nigra                |                |             |             |   |
|           | 6.998440131                          | 0.010332937                    | 0.669412382  |              | -1.702906233                          | 0.13834764     |             |             |   |
|           | -0.960086772                         | 0.543784192                    | 3            | 0            | 0.998207054                           |                |             |             |   |
| THBS4     | ENSG00000113296.14                   | 0.334565703                    | 1            | 1            | 0.334565703                           |                |             |             |   |
|           | Brain_Putamen_basal_ganglia          | 0.334565703                    |              |              | Brain_Putamen_basal_ganglia           | 1              | 1           |             |   |
|           | 1                                    | -0.964958292                   | -0.964958292 |              | -0.964958292                          | NA             | 1           | 0           |   |
|           | 0.998207054                          |                                |              |              |                                       |                |             |             |   |
| KCNS2     | ENSG00000156486.7                    | 0.334647068                    | 3            | 3            | 0.184176348                           |                |             |             |   |
|           | Brain_Putamen_basal_ganglia          | 0.908774442                    |              |              | Brain_Amygdala                        | 1.234779932    |             |             |   |
|           | 0.665796164                          | 0.665796164                    | -0.947898003 |              | 1.328005324                           | 0.164897284    |             |             |   |
|           | 1.138785545                          | 3                              | 0            | 0.998207054  |                                       |                |             |             |   |
| PDE4D     | ENSG00000113448.18                   | 0.334718762                    | 1            | 1            | 0.334718762                           |                |             |             |   |
|           | Brain_Spinal_cord_cervical_c-1       | 0.334718762                    |              |              | Brain_Spinal_cord_cervical_c-1        |                |             |             |   |
|           | 1                                    | 1                              | 1            | 0.964652763  | 0.964652763                           | 0.964652763    | NA          | 1           | 0 |
|           | 0.998207054                          |                                |              |              |                                       |                |             |             |   |
| TBC1D12   | ENSG00000108239.8                    | 0.33481242                     | 1            | 1            | 0.33481242                            |                |             |             |   |
|           | Brain_Frontal_Cortex_BA9             | 0.33481242                     |              |              | Brain_Frontal_Cortex_BA9              | 1              | 1           | 1           |   |
|           | -0.964465854                         | -0.964465854                   | -0.964465854 |              | NA                                    | 1              | 0           | 0.998207054 |   |
| PIWIL4    | ENSG00000134627.11                   | 0.334856506                    | 2            | 2            | 0.145221158                           |                |             |             |   |
|           | Brain_Caudate_basal_ganglia          | 0.558227031                    |              |              | Brain_Hypothalamus                    | 1.229821223    |             |             |   |
|           | 0.770178777                          | 0.770178777                    | 0.585476994  |              | 1.456620527                           | 1.021048761    |             |             |   |
|           | 0.615991499                          | 2                              | 0            | 0.998207054  |                                       |                |             |             |   |
| SETX      | ENSG00000107290.13                   | 0.334964727                    | 1            | 1            | 0.334964727                           |                |             |             |   |
|           | Brain_Hippocampus                    | 0.334964727                    |              |              | Brain_Hippocampus                     | 1              | 1           | 1           |   |
|           | 0.96416197                           | 0.96416197                     | 0.96416197   | NA           | 1                                     | 0              | 0.998207054 |             |   |

|          |                                       |                             |              |              |                                |             |                        |
|----------|---------------------------------------|-----------------------------|--------------|--------------|--------------------------------|-------------|------------------------|
| TTC30A   | ENSG00000197557.6                     | 0.334975328                 | 6            | 6            | 0.062609471                    |             |                        |
|          | Brain_Cerebellum                      | 0.968638078                 |              |              | Brain_Frontal_Cortex_BA9       | 3.544285956 |                        |
|          | 0.127491932                           | 0.127491932                 |              |              | -0.471941126                   | 1.861954731 | 0.535708534            |
|          | 0.940551778                           | 6                           | 0            | 0.998207054  |                                |             |                        |
| LLPH     | ENSG00000139233.6                     | 0.335090266                 | 1            | 1            | 0.335090266                    |             |                        |
|          | Brain_Putamen_basal_ganglia           | 0.335090266                 |              |              | Brain_Putamen_basal_ganglia    | 1           | 1                      |
|          | 1                                     | 0.963911563                 | 0.963911563  | 0.963911563  | NA                             | 1           | 0                      |
|          | 0.998207054                           |                             |              |              |                                |             |                        |
| ERBB2    | ENSG00000141736.13                    | 0.335107235                 | 2            | 2            | 0.140882606                    |             |                        |
|          | Brain_Frontal_Cortex_BA9              | 0.915001734                 |              |              | Brain_Hypothalamus             | 1.163162559 |                        |
|          | 0.836837441                           | 0.836837441                 |              |              | 0.106731825                    | 1.472512234 | 0.78962203             |
|          | 0.965752589                           | 2                           | 0            | 0.998207054  |                                |             |                        |
| CYP26A1  | ENSG00000095596.11                    | 0.335141733                 | 1            | 1            | 0.335141733                    |             |                        |
|          | Brain_Frontal_Cortex_BA9              | 0.335141733                 |              |              | Brain_Frontal_Cortex_BA9       | 1           | 1                      |
|          | 1                                     | -0.963808922                | -0.963808922 | -0.963808922 | NA                             | 1           | 0                      |
|          | 0.998207054                           |                             |              |              |                                |             |                        |
| POU6F1   | ENSG00000184271.16                    | 0.335159271                 | 3            | 3            | 0.37085131                     |             |                        |
|          | Brain_Cerebellar_Hemisphere           | 0.977306181                 |              |              | Brain_Cerebellum               | 1.927308234 |                        |
|          | 0.134111719                           | 0.134111719                 |              |              | -0.894879868                   | 0.02844632  | -0.350904248           |
|          | 0.483175815                           | 3                           | 0            | 0.998207054  |                                |             |                        |
| CLDN18   | ENSG00000066405.12                    | 0.335178863                 | 1            | 1            | 0.335178863                    |             |                        |
|          | Brain_Hippocampus                     | 0.335178863                 |              |              | Brain_Hippocampus              | 1           | 1                      |
|          | -0.963734878                          | -0.963734878                |              |              | -0.963734878                   | NA          | 1                      |
|          | 0.998207054                           |                             |              |              |                                |             |                        |
| ALG6     | ENSG00000088035.15                    | 0.335247414                 | 7            | 5            | 0.086638507                    |             | Brain_Cortex           |
|          | 0.384756237                           | Brain_Cerebellum            | 4.626288788  |              | 0.041374177                    |             | 0.233630291            |
|          | -1.336315724                          | 1.713402555                 | 0.914829141  |              | 1.038342222                    |             | 5                      |
|          | 0.998207054                           |                             |              |              |                                |             | 0                      |
| FGF1     | ENSG00000113578.17                    | 0.335347142                 | 2            | 2            | 0.540604551                    |             |                        |
|          | Brain_Putamen_basal_ganglia           | 0.624190908                 |              |              | Brain_Spinal_cord_cervical_c-1 |             |                        |
|          | 1.721668135                           | 0.278331865                 | 0.278331865  |              | 0.489919438                    |             | 0.611899049            |
|          | 0.550909243                           | 0.08625261                  | 2            | 0            | 0.998207054                    |             |                        |
| UROD     | ENSG00000126088.13                    | 0.335364781                 | 5            | 4            | 0.04371649                     |             | Brain_Hippocampus      |
|          | 0.993158499                           | Brain_Cerebellar_Hemisphere | 2.960802049  |              | 0.03506407                     |             |                        |
|          | 0.159189607                           | 0.008574654                 | 2.016799031  |              | 0.568124976                    |             | 0.829454615            |
|          | 4                                     | 0                           | 0.998207054  |              |                                |             |                        |
| CDV3     | ENSG00000091527.15                    | 0.33539036                  | 1            | 1            | 0.33539036                     |             | Brain_Substantia_nigra |
|          | 0.33539036                            | Brain_Substantia_nigra      | 1            | 1            | 1                              |             | -0.963313222           |
|          | -0.963313222                          | -0.963313222                | NA           | 1            | 0                              |             | 0.998207054            |
| TAL1     | ENSG00000162367.11                    | 0.335482106                 | 3            | 3            | 0.068876475                    |             | Brain_Cortex           |
|          | 0.95752206                            | Brain_Amygdala              | 1.545894061  |              | 0.491273506                    |             | 0.491273506            |
|          | 0.053263376                           | 1.819229167                 | 0.852341118  |              | 0.894862569                    |             | 3                      |
|          | 0.998207054                           |                             |              |              |                                |             | 0                      |
| SLC4A9   | ENSG00000113073.14                    | 0.335563591                 | 1            | 1            | 0.335563591                    |             |                        |
|          | Brain_Anterior_cingulate_cortex_BA24  | 0.335563591                 |              |              |                                |             |                        |
|          | Brain_Anterior_cingulate_cortex_BA24  | 1                           | 1            | 1            |                                |             | -0.962967983           |
|          | -0.962967983                          | -0.962967983                | NA           | 1            | 0                              |             | 0.998207054            |
| HSD17B4  | ENSG00000133835.14                    | 0.33563627                  | 4            | 4            | 0.129505381                    |             |                        |
|          | Brain_Spinal_cord_cervical_c-1        | 0.831653711                 |              |              |                                |             |                        |
|          | Brain_Nucleus_accumbens_basal_ganglia | 1.935851763                 |              |              | 0.222275792                    |             |                        |
|          | 0.222275792                           | -1.516055254                | -0.212581104 |              | -0.835707116                   |             | 0.589577726            |
|          | 4                                     | 0                           | 0.998207054  |              |                                |             |                        |
| FAM160A2 | ENSG00000051009.10                    | 0.335658935                 | 2            | 2            | 0.197008169                    |             |                        |
|          | Brain_Caudate_basal_ganglia           | 0.872530684                 |              |              | Brain_Cortex                   | 1.389822038 |                        |
|          | 0.610177962                           | 0.610177962                 |              |              | -0.160444822                   |             | 1.290122385            |
|          | 1.025705909                           | 2                           | 0            | 0.998207054  |                                |             | 0.564838782            |
| UTF1     | ENSG00000171794.3                     | 0.335667303                 | 2            | 2            | 0.160579714                    |             | Brain_Cerebellum       |
|          | 0.645396398                           | Brain_Cerebellar_Hemisphere | 1.002127767  |              | 0.997872233                    |             |                        |
|          | 0.997872233                           | -0.460166941                | 1.403124507  |              | 0.471478783                    |             | 1.317546018            |
|          | 2                                     | 0                           | 0.998207054  |              |                                |             |                        |
| MUC4     | ENSG00000145113.21                    | 0.335735214                 | 9            | 4            | 0.159176379                    |             |                        |
|          | Brain_Anterior_cingulate_cortex_BA24  | 0.859979134                 |              |              | Brain_Putamen_basal_ganglia    |             |                        |
|          | 6.38064972                            | 0.04127152                  | 0.397363255  |              | -1.407847003                   |             | 0.958238312            |

|               |                                       |                                       |              |              |                                |                   |             |   |   |
|---------------|---------------------------------------|---------------------------------------|--------------|--------------|--------------------------------|-------------------|-------------|---|---|
|               | -0.157193075                          | 0.788749374                           | 4            | 0            | 0.998207054                    |                   |             |   |   |
| DNAI1         | ENSG00000122735.15                    | 0.335793632                           | 2            | 2            | 0.224433683                    |                   |             |   |   |
|               | Brain_Cerebellar_Hemisphere           | 0.594856356                           |              |              | Brain_Amygdala                 | 1.234880242       |             |   |   |
|               | 0.765119758                           | 0.765119758                           | -0.531811791 |              | 1.214822801                    | 0.341505505       |             |   |   |
|               | 1.235057164                           | 2                                     | 0            | 0.998207054  |                                |                   |             |   |   |
| ARSG          | ENSG00000141337.12                    | 0.335938974                           | 1            | 1            | 0.335938974                    |                   |             |   |   |
|               | Brain_Cerebellar_Hemisphere           | 0.335938974                           |              |              | Brain_Cerebellar_Hemisphere    | 1                 | 1           |   |   |
|               | 1                                     | -0.96222026                           | -0.96222026  | -0.96222026  | NA                             | 1                 | 0           |   |   |
|               | 0.998207054                           |                                       |              |              |                                |                   |             |   |   |
| 9-Sep         | ENSG00000184640.17                    | 0.336000673                           | 3            | 2            | 0.077898639                    |                   |             |   |   |
|               | Brain_Cerebellar_Hemisphere           | 0.87461366                            |              |              | Brain_Spinal_cord_cervical_c-1 |                   |             |   |   |
|               | 1.947853649                           | 0.051240971                           | 1.00090538   | -0.157800937 | 1.763010975                    |                   |             |   |   |
|               | 0.91208937                            | 0.978948451                           | 2            | 0            | 0.998207054                    |                   |             |   |   |
| IFITM10       | ENSG00000244242.1                     | 0.336055062                           | 1            | 1            | 0.336055062                    |                   |             |   |   |
|               | Brain_Putamen_basal_ganglia           | 0.336055062                           |              |              | Brain_Putamen_basal_ganglia    | 1                 | 1           |   |   |
|               | 1                                     | 0.961989135                           | 0.961989135  | 0.961989135  | NA                             | 1                 | 0           |   |   |
|               | 0.998207054                           |                                       |              |              |                                |                   |             |   |   |
| RP11-493E12.1 | ENSG00000271889.1                     | 0.336094403                           | 3            | 3            | 0.20704678                     |                   |             |   |   |
|               | Brain_Cerebellum                      | 0.892125056                           |              |              | Brain_Cortex                   | 2.19945705        | 0.316903475 |   |   |
|               | 0.316903475                           | -0.135615747                          | 1.261727718  |              | 0.436077231                    | 0.732470479       |             |   |   |
|               | 3                                     | 0                                     | 0.998207054  |              |                                |                   |             |   |   |
| EXD2          | ENSG00000081177.18                    | 0.336135572                           | 1            | 1            | 0.336135572                    |                   |             |   |   |
|               | Brain_Frontal_Cortex_BA9              | 0.336135572                           |              |              | Brain_Frontal_Cortex_BA9       | 1                 | 1           |   |   |
|               | 1                                     | -0.961828872                          | -0.961828872 | -0.961828872 | NA                             | 1                 | 0           |   |   |
|               | 0.998207054                           |                                       |              |              |                                |                   |             |   |   |
| NTPCR         | ENSG00000135778.11                    | 0.336142904                           | 13           | 3            | 0.029215894                    |                   |             |   |   |
|               | Brain_Frontal_Cortex_BA9              | 0.204093677                           |              |              | Brain_Substantia_nigra         |                   |             |   |   |
|               | 10.74203876                           | 0.009091655                           | 0.51030809   | 1.269974603  | 2.180561118                    |                   |             |   |   |
|               | 1.540111832                           | 0.254035507                           | 3            | 0            | 0.998207054                    |                   |             |   |   |
| SLC26A1       | ENSG00000145217.13                    | 0.336274877                           | 11           | 4            | 0.053311444                    |                   |             |   |   |
|               | Brain_Hypothalamus                    | 0.938234331                           |              |              | Brain_Caudate_basal_ganglia    | 7.775595782       |             |   |   |
|               | 5.74E-18                              | 0.693556808                           | -1.932389538 | 0.788483756  | -0.07733162                    |                   |             |   |   |
|               | 0.679428732                           | 4                                     | 0            | 0.998207054  |                                |                   |             |   |   |
| NTSR2         | ENSG00000169006.6                     | 0.33627955                            | 7            | 3            | 0.29186839                     | Brain_Hippocampus |             |   |   |
|               | 0.823555216                           | Brain_Nucleus_accumbens_basal_ganglia | 5.729290047  |              |                                |                   |             |   |   |
|               | 0.015288383                           | 0.302315138                           | -0.985067496 | 1.054031731  | 0.284441595                    |                   |             |   |   |
|               | 0.639682256                           | 3                                     | 0            | 0.998207054  |                                |                   |             |   |   |
| USP36         | ENSG00000055483.19                    | 0.336551762                           | 11           | 2            | 0.129130358                    | Brain_Cortex      |             |   |   |
|               | 0.865991546                           | Brain_Hypothalamus                    | 9.813868103  | 5.38E-07     | 0.980968989                    |                   |             |   |   |
|               | -1.517540178                          | 0.168752215                           | -1.262816235 | 0.485268052  | 2                              | 0                 |             |   |   |
|               | 0.998207054                           |                                       |              |              |                                |                   |             |   |   |
| FMC1          | ENSG00000164898.12                    | 0.336634956                           | 3            | 3            | 0.282548499                    |                   |             |   |   |
|               | Brain_Anterior_cingulate_cortex_BA24  | 0.513864236                           |              |              | Brain_Putamen_basal_ganglia    |                   |             |   |   |
|               | 1.481768582                           | 0.584923592                           | 0.584923592  | -1.074611952 | 0.764556856                    |                   |             |   |   |
|               | -0.320962549                          | 0.963451478                           | 3            | 0            | 0.998207054                    |                   |             |   |   |
| SFXN2         | ENSG00000156398.12                    | 0.336738039                           | 4            | 4            | 0.034557392                    | Brain_Cortex      |             |   |   |
|               | 0.500809023                           | Brain_Spinal_cord_cervical_c-1        | 2.618924951  | 0.100900953  |                                |                   |             |   |   |
|               | 0.100900953                           | 0.673217353                           | 2.11350705   | 1.589798181  | 0.633486634                    | 4                 |             |   |   |
|               | 0                                     | 0.998207054                           |              |              |                                |                   |             |   |   |
| CCDC47        | ENSG00000108588.13                    | 0.336867651                           | 1            | 1            | 0.336867651                    |                   |             |   |   |
|               | Brain_Spinal_cord_cervical_c-1        | 0.336867651                           |              |              | Brain_Spinal_cord_cervical_c-1 |                   |             |   |   |
|               | 1                                     | 1                                     | 1            | -0.960372742 | -0.960372742                   | -0.960372742      | NA          | 1 | 0 |
|               | 0.998207054                           |                                       |              |              |                                |                   |             |   |   |
| ZNF446        | ENSG00000083838.15                    | 0.336885955                           | 1            | 1            | 0.336885955                    |                   |             |   |   |
|               | Brain_Anterior_cingulate_cortex_BA24  | 0.336885955                           |              |              |                                |                   |             |   |   |
|               | Brain_Anterior_cingulate_cortex_BA24  | 1                                     | 1            | 1            | 0.960336363                    |                   |             |   |   |
|               | 0.960336363                           | 0.960336363                           | NA           | 1            | 0                              | 0.998207054       |             |   |   |
| GRASP         | ENSG00000161835.10                    | 0.336920509                           | 1            | 1            | 0.336920509                    |                   |             |   |   |
|               | Brain_Nucleus_accumbens_basal_ganglia | 0.336920509                           |              |              |                                |                   |             |   |   |
|               | Brain_Nucleus_accumbens_basal_ganglia | 1                                     | 1            | 1            | 0.960267686                    |                   |             |   |   |
|               | 0.960267686                           | 0.960267686                           | NA           | 1            | 0                              | 0.998207054       |             |   |   |
| DAW1          | ENSG00000123977.9                     | 0.336973192                           | 4            | 4            | 0.066000629                    |                   |             |   |   |

|               |                                       |                                       |                                       |                             |              |                  |             |
|---------------|---------------------------------------|---------------------------------------|---------------------------------------|-----------------------------|--------------|------------------|-------------|
|               | Brain_Frontal_Cortex_BA9              | 0.245004929                           |                                       | Brain_Putamen_basal_ganglia |              |                  |             |
|               | 2.690911482                           | 0.151329915                           | 0.151329915                           | -1.838419397                | 1.162567733  |                  |             |
|               | -1.005606824                          | 1.452971399                           | 4                                     | 0                           | 0.998207054  |                  |             |
| ELMSAN1       | ENSG00000156030.13                    | 0.336975307                           | 5                                     | 2                           | 0.081936013  |                  |             |
|               | Brain_Frontal_Cortex_BA9              | 0.35916179                            | Brain_Putamen_basal_ganglia           | 4.255027229                 |              |                  |             |
|               | 0.018215226                           | 0.554899883                           | -1.739561679                          | -0.916963456                | -1.325322751 |                  |             |
|               | 0.306431116                           | 2                                     | 0                                     | 0.998207054                 |              |                  |             |
| ATP7B         | ENSG00000123191.14                    | 0.336984295                           | 2                                     | 2                           | 0.268054293  | Brain_Cerebellum |             |
|               | 0.519914788                           | Brain_Cerebellar_Hemisphere           | 1.266628759                           | 0.733371241                 |              |                  |             |
|               | 0.733371241                           | -1.107554429                          | 0.643476762                           | -0.232038833                | 1.23816603   | 2                |             |
|               | 0                                     | 0.998207054                           |                                       |                             |              |                  |             |
| UTRN          | ENSG00000152818.18                    | 0.337105591                           | 3                                     | 3                           | 0.13030622   |                  |             |
|               | Brain_Putamen_basal_ganglia           | 0.802355544                           | Brain_Caudate_basal_ganglia           |                             |              |                  |             |
|               | 1.515946482                           | 0.661927948                           | 0.661927948                           | -1.51289544                 | 0.625444501  |                  |             |
|               | -0.379250232                          | 1.074986323                           | 3                                     | 0                           | 0.998207054  |                  |             |
| CHL1          | ENSG00000134121.9                     | 0.337113944                           | 4                                     | 4                           | 0.213297799  |                  |             |
|               | Brain_Frontal_Cortex_BA9              | 0.68614147                            | Brain_Substantia_nigra                | 1.980137958                 |              |                  |             |
|               | 0.105620893                           | 0.105620893                           | -1.244548396                          | 0.404096892                 | -0.575903443 |                  |             |
|               | 0.732476412                           | 4                                     | 0                                     | 0.998207054                 |              |                  |             |
| RP11-359E10.1 | ENSG00000270607.1                     | 0.337123173                           | 2                                     | 2                           | 0.302890119  |                  |             |
|               | Brain_Cerebellar_Hemisphere           | 0.332788245                           | Brain_Caudate_basal_ganglia           |                             |              |                  |             |
|               | 1.080683217                           | 0.919316783                           | 0.919316783                           | -1.030255423                | 0.968512969  |                  |             |
|               | -0.030871227                          | 1.413342684                           | 2                                     | 0                           | 0.998207054  |                  |             |
| PARD3         | ENSG00000148498.15                    | 0.337343317                           | 1                                     | 1                           | 0.337343317  |                  |             |
|               | Brain_Spinal_cord_cervical_c-1        | 0.337343317                           | Brain_Spinal_cord_cervical_c-1        |                             |              |                  |             |
|               | 1                                     | 1                                     | 1                                     | -0.959427718                | -0.959427718 | NA               | 1           |
|               | 0.998207054                           |                                       |                                       |                             |              |                  | 0           |
| TRAF4         | ENSG00000076604.14                    | 0.337487629                           | 5                                     | 2                           | 0.134888415  |                  |             |
|               | Brain_Putamen_basal_ganglia           | 0.479832362                           | Brain_Nucleus_accumbens_basal_ganglia |                             |              |                  |             |
|               | 4.599160781                           | 0.008468591                           | 0.292040189                           | -1.495099736                | -0.706572213 |                  |             |
|               | -1.138010564                          | 0.348360775                           | 2                                     | 0                           | 0.998207054  |                  |             |
| C14orf178     | ENSG00000197734.8                     | 0.33773993                            | 2                                     | 2                           | 0.211929736  |                  |             |
|               | Brain_Nucleus_accumbens_basal_ganglia | 0.462053303                           | Brain_Caudate_basal_ganglia           |                             |              |                  |             |
|               | 1.883243631                           | 0.116756369                           | 0.116756369                           | -1.248276723                | -0.735470003 |                  |             |
|               | -0.991873363                          | 0.362609109                           | 2                                     | 0                           | 0.998207054  |                  |             |
| AC114877.3    | ENSG00000234165.1                     | 0.337818641                           | 1                                     | 1                           | 0.337818641  |                  |             |
|               | Brain_Cerebellum                      | 0.337818641                           | Brain_Cerebellum                      | 1                           | 1            | 1                | 0.958484228 |
|               | 0.958484228                           | 0.958484228                           | NA                                    | 1                           | 0            | 0.998207054      |             |
| EIF4B         | ENSG00000063046.17                    | 0.337869158                           | 7                                     | 6                           | 0.06590608   |                  |             |
|               | Brain_Frontal_Cortex_BA9              | 0.926155719                           | Brain_Hippocampus                     | 4.556567418                 |              |                  |             |
|               | 0.070248978                           | 0.229112146                           | -0.092682602                          | 1.839061913                 | 0.664660779  |                  |             |
|               | 0.627851525                           | 6                                     | 0                                     | 0.998207054                 |              |                  |             |
| CFB           | ENSG00000243649.8                     | 0.337941018                           | 1                                     | 1                           | 0.337941018  |                  |             |
|               | Brain_Putamen_basal_ganglia           | 0.337941018                           | Brain_Putamen_basal_ganglia           | 1                           | 1            |                  |             |
|               | 1                                     | 0.958241454                           | 0.958241454                           | 0.958241454                 | NA           | 1                | 0           |
|               | 0.998207054                           |                                       |                                       |                             |              |                  |             |
| N4BP2L2       | ENSG00000244754.8                     | 0.338012499                           | 2                                     | 2                           | 0.143332779  |                  |             |
|               | Brain_Caudate_basal_ganglia           | 0.75117626                            | Brain_Frontal_Cortex_BA9              | 1.323937555                 |              |                  |             |
|               | 0.676062445                           | 0.676062445                           | -1.463492079                          | -0.317088752                | -0.890290415 |                  |             |
|               | 0.810629567                           | 2                                     | 0                                     | 0.998207054                 |              |                  |             |
| HAS3          | ENSG00000103044.10                    | 0.338015672                           | 4                                     | 4                           | 0.071197255  | Brain_Amygdala   |             |
|               | 0.996416599                           | Brain_Nucleus_accumbens_basal_ganglia | 2.136049008                           |                             |              |                  |             |
|               | 0.278523277                           | 0.278523277                           | -0.949644821                          | 1.804217259                 | 0.081185239  |                  |             |
|               | 1.211976853                           | 4                                     | 0                                     | 0.998207054                 |              |                  |             |
| ABCA7         | ENSG00000064687.12                    | 0.338045967                           | 8                                     | 6                           | 0.025770856  |                  |             |
|               | Brain_Frontal_Cortex_BA9              | 0.960379248                           | Brain_Putamen_basal_ganglia           |                             |              |                  |             |
|               | 4.576017464                           | 0.003195433                           | 0.269095298                           | -2.229647471                | 0.187677387  |                  |             |
|               | -0.595174595                          | 0.849290013                           | 6                                     | 0                           | 0.998207054  |                  |             |
| RP11-98O2.1   | ENSG00000250501.2                     | 0.338156509                           | 1                                     | 1                           | 0.338156509  |                  |             |
|               | Brain_Nucleus_accumbens_basal_ganglia | 0.338156509                           |                                       |                             |              |                  |             |
|               | Brain_Nucleus_accumbens_basal_ganglia | 1                                     | 1                                     | 1                           | 0.957814097  |                  |             |
|               | 0.957814097                           | 0.957814097                           | NA                                    | 1                           | 0            | 0.998207054      |             |

|               |                                       |                                |              |             |                                      |                  |
|---------------|---------------------------------------|--------------------------------|--------------|-------------|--------------------------------------|------------------|
| LINC00950     | ENSG00000281205.1                     | 0.338244016                    | 10           | 3           | 0.095665761                          |                  |
|               | Brain_Anterior_cingulate_cortex_BA24  | 0.9114974                      |              |             | Brain_Frontal_Cortex_BA9             |                  |
|               | 8.026559021                           | 0.006224138                    | 0.423019909  |             | -1.666239303                         | 0.724064356      |
|               | -0.484273016                          | 0.667522502                    | 3            | 0           | 0.998207054                          |                  |
| DRICH1        | ENSG00000189269.12                    | 0.338264045                    | 12           | 1           | 0.148036285                          |                  |
|               | Brain_Anterior_cingulate_cortex_BA24  | 0.574105911                    |              |             | Brain_Putamen_basal_ganglia          |                  |
|               | 11.23464348                           | 0.001793339                    | 11.23464348  |             | 0.562014836                          | 1.446502594      |
|               | 0.925473031                           | 0.225763672                    | 1            | 0           | 0.998207054                          |                  |
| MYRFL         | ENSG00000166268.10                    | 0.338303586                    | 13           | 1           | 0.2426095                            | Brain_Amygdala   |
|               | 0.547686966                           | Brain_Spinal_cord_cervical_c-1 |              |             | 12.47097451                          | 0.002736953      |
|               | 12.47097451                           | 0.601229759                    | 1.168489183  |             | 0.936884315                          | 0.162678597      |
|               | 1                                     | 0                              | 0.998207054  |             |                                      |                  |
| FAM178B       | ENSG00000168754.14                    | 0.338324263                    | 7            | 7           | 0.270826295                          |                  |
|               | Brain_Frontal_Cortex_BA9              | 0.662277919                    |              |             | Brain_Cortex                         | 2.668641201      |
|               | 0.110382276                           | 0.110382276                    | -1.101161682 |             | 1.011129718                          | 0.179671056      |
|               | 0.833601141                           | 7                              | 0            | 0.998207054 |                                      |                  |
| MAPK12        | ENSG00000188130.13                    | 0.338387137                    | 13           | 2           | 0.104196004                          |                  |
|               | Brain_Cerebellar_Hemisphere           | 0.535441154                    |              |             | Brain_Amygdala                       | 11.72936142      |
|               | 4.46E-05                              | 0.431352093                    | -1.624843058 |             | -0.619721506                         | -1.253119095     |
|               | 0.282009709                           | 2                              | 0            | 0.998207054 |                                      |                  |
| RP11-321M21.4 | ENSG00000276993.1                     | 0.33842501                     | 2            | 2           | 0.245571164                          |                  |
|               | Brain_Cortex                          | 0.550998813                    |              |             | Brain_Frontal_Cortex_BA9             | 1.242427905      |
|               | 0.757572095                           | 0.757572095                    | -1.161173954 |             | 0.596264096                          | -0.282454929     |
|               | 1.242696363                           | 2                              | 0            | 0.998207054 |                                      |                  |
| PEBP1         | ENSG00000089220.4                     | 0.338484936                    | 11           | 8           | 0.077950645                          |                  |
|               | Brain_Frontal_Cortex_BA9              | 0.953570876                    |              |             | Brain_Anterior_cingulate_cortex_BA24 |                  |
|               | 6.236043332                           | 0.006947812                    | 0.216680883  |             | -0.181994215                         | 1.762702701      |
|               | 0.574661219                           | 0.614745957                    | 8            | 0           | 0.998207054                          |                  |
| DYDC1         | ENSG00000170788.13                    | 0.338558109                    | 1            | 1           | 0.338558109                          |                  |
|               | Brain_Nucleus_accumbens_basal_ganglia | 0.338558109                    |              |             |                                      |                  |
|               | Brain_Nucleus_accumbens_basal_ganglia | 1                              | 1            | 1           | 0.95701812                           | 0.95701812       |
|               | 0.95701812                            | NA                             | 1            | 0           | 0.998207054                          |                  |
| RP11-795F19.5 | ENSG00000267127.7                     | 0.338660893                    | 10           | 2           | 0.27666982                           |                  |
|               | Brain_Cerebellum                      | 0.991780544                    |              |             | Brain_Cortex                         | 8.435098619      |
|               | 0.776531427                           | -1.087830777                   | 0.202710029  |             | -0.393036698                         | 0.004851767      |
|               | 2                                     | 0                              | 0.998207054  |             | 0.472629208                          |                  |
| RP11-718O11.1 | ENSG00000259200.1                     | 0.338667284                    | 2            | 2           | 0.285473291                          |                  |
|               | Brain_Putamen_basal_ganglia           | 0.405798104                    |              |             | Brain_Caudate_basal_ganglia          |                  |
|               | 1.157554828                           | 0.842445172                    | 0.842445172  |             | -0.831310749                         | 1.06810469       |
|               | 0.118396971                           | 1.343089537                    | 2            | 0           | 0.998207054                          |                  |
| EEPDP1        | ENSG00000122547.10                    | 0.338781419                    | 2            | 2           | 0.232257159                          | Brain_Cerebellum |
|               | 0.504077843                           | Brain_Caudate_basal_ganglia    | 1.15148737   | 0.84851263  | 0.84851263                           |                  |
|               | 0.668087339                           | 1.194564671                    | 0.931326005  |             | 0.372275691                          | 2                |
|               | 0.998207054                           |                                |              |             | 0                                    |                  |
| SDC4          | ENSG00000124145.6                     | 0.338866834                    | 2            | 2           | 0.152765612                          | Brain_Cerebellum |
|               | 0.263800261                           | Brain_Cerebellar_Hemisphere    | 1.891316462  |             | 0.108683538                          |                  |
|               | 0.108683538                           | 1.117453991                    | 1.429830711  |             | 1.273642351                          | 0.220883697      |
|               | 2                                     | 0                              | 0.998207054  |             |                                      |                  |
| APC2          | ENSG00000115266.11                    | 0.338907498                    | 11           | 1           | 0.283686962                          | Brain_Cortex     |
|               | 0.609764879                           | Brain_Putamen_basal_ganglia    | 10.8039522   | 7.38E-17    | 10.8039522                           |                  |
|               | -1.07207363                           | -0.510409106                   | -0.946354328 |             | 0.159594177                          | 1                |
|               | 0.998207054                           |                                |              |             | 0                                    |                  |
| SPATA13       | ENSG00000182957.15                    | 0.338928298                    | 1            | 1           | 0.338928298                          |                  |
|               | Brain_Nucleus_accumbens_basal_ganglia | 0.338928298                    |              |             |                                      |                  |
|               | Brain_Nucleus_accumbens_basal_ganglia | 1                              | 1            | 1           | 0.956284937                          |                  |
|               | 0.956284937                           | 0.956284937                    | NA           | 1           | 0                                    | 0.998207054      |
| RP1-111D6.3   | ENSG00000228408.6                     | 0.339004071                    | 13           | 3           | 0.028579544                          |                  |
|               | Brain_Putamen_basal_ganglia           | 0.367037171                    |              |             | Brain_Frontal_Cortex_BA9             |                  |
|               | 11.00560796                           | 0.0036198                      | 0.528351395  |             | 0.902037079                          | 2.189238031      |
|               | 1.528735539                           | 0.311142985                    | 3            | 0           | 0.998207054                          |                  |
| EHD3          | ENSG00000013016.15                    | 0.339134969                    | 1            | 1           | 0.339134969                          | Brain_Cortex     |
|               | 0.339134969                           | Brain_Cortex                   | 1            | 1           | 1                                    | 0.955875835      |
|               |                                       |                                |              |             | 0.955875835                          | 0.955875835      |

|               |                                |    |                  |   |              |                                       |             |              |                  |
|---------------|--------------------------------|----|------------------|---|--------------|---------------------------------------|-------------|--------------|------------------|
|               | 0.955875835                    | NA | 1                | 0 | 0.998207054  |                                       |             |              |                  |
| ZNF84         | ENSG00000198040.10             |    | 0.3392663        | 3 | 3            | 0.242780685                           |             |              |                  |
|               | Brain_Cerebellar_Hemisphere    |    | 0.826749783      |   |              | Brain_Spinal_cord_cervical_c-1        |             |              |                  |
|               | 1.437644927                    |    | 0.650342622      |   | 0.650342622  | -1.017157447                          |             | 1.168064656  |                  |
|               | 0.123259726                    |    | 1.095744124      |   | 3            | 0                                     | 0.998207054 |              |                  |
| ZNF304        | ENSG00000131845.14             |    | 0.339299018      |   | 13           | 2                                     | 0.150783792 |              |                  |
|               | Brain_Amygdala                 |    | 0.664841568      |   |              | Brain_Spinal_cord_cervical_c-1        |             | 11.5680097   |                  |
|               | 0.000232879                    |    | 0.556173378      |   | 0.433238423  | 1.436768471                           |             | 0.914136408  |                  |
|               | 0.265296048                    |    | 2                | 0 | 0.998207054  |                                       |             |              |                  |
| RP11-72304.9  | ENSG00000261159.1              |    | 0.339570039      |   | 12           | 1                                     | 0.186334289 |              |                  |
|               | Brain_Putamen_basal_ganglia    |    | 0.699497113      |   |              | Brain_Frontal_Cortex_BA9              |             |              |                  |
|               | 10.97042178                    |    | 0.003903775      |   | 10.97042178  | -1.32150124                           |             | -0.385999401 |                  |
|               | -0.908485914                   |    | 0.242661244      |   | 1            | 0                                     | 0.998207054 |              |                  |
| RP11-707A18.1 | ENSG00000250125.1              |    | 0.339765889      |   | 5            | 4                                     | 0.046909897 |              |                  |
|               | Brain_Frontal_Cortex_BA9       |    | 0.737498585      |   |              | Brain_Hippocampus                     |             | 3.242078995  |                  |
|               | 0.068750256                    |    | 0.238735888      |   | -1.987112812 | -0.335167701                          |             | -1.437044174 |                  |
|               | 0.644217101                    |    | 4                | 0 | 0.998207054  |                                       |             |              |                  |
| MTX1          | ENSG00000173171.14             |    | 0.339940312      |   | 1            | 1                                     | 0.339940312 |              | Brain_Cerebellum |
|               | 0.339940312                    |    | Brain_Cerebellum |   | 1            | 1                                     | 0.954283195 |              | 0.954283195      |
|               | 0.954283195                    |    | NA               | 1 | 0            | 0.998207054                           |             |              |                  |
| ROPN1B        | ENSG00000114547.9              |    | 0.339954938      |   | 11           | 2                                     | 0.086966049 |              |                  |
|               | Brain_Spinal_cord_cervical_c-1 |    | 0.40423903       |   |              | Brain_Substantia_nigra                |             |              |                  |
|               | 10.13925033                    |    | 0.001717693      |   | 0.437164953  | 0.834074453                           |             | 1.71162364   |                  |
|               | 1.195273757                    |    | 0.267311244      |   | 2            | 0                                     | 0.998207054 |              |                  |
| LRRC57        | ENSG00000180979.9              |    | 0.340037742      |   | 3            | 2                                     | 0.248684683 |              |                  |
|               | Brain_Hypothalamus             |    | 0.79517687       |   |              | Brain_Caudate_basal_ganglia           |             | 2.697801636  |                  |
|               | 0.028934643                    |    | 0.27326372       |   | 0.259594123  | 1.15355006                            |             | 0.612580146  |                  |
|               | 0.475702388                    |    | 2                | 0 | 0.998207054  |                                       |             |              |                  |
| DPM2          | ENSG00000136908.17             |    | 0.340113447      |   | 11           | 2                                     | 0.28894211  |              |                  |
|               | Brain_Frontal_Cortex_BA9       |    | 0.86241482       |   |              | Brain_Cerebellum                      |             | 10.12663654  |                  |
|               | 0.001943264                    |    | 0.338247421      |   | 0.173301023  | 1.060445197                           |             | 0.702491277  |                  |
|               | 0.323421477                    |    | 2                | 0 | 0.998207054  |                                       |             |              |                  |
| SLC4A3        | ENSG00000114923.16             |    | 0.340240303      |   | 1            | 1                                     | 0.340240303 |              |                  |
|               | Brain_Frontal_Cortex_BA9       |    | 0.340240303      |   |              | Brain_Frontal_Cortex_BA9              |             | 1            | 1                |
|               | 1                              |    | -0.953690555     |   | -0.953690555 | -0.953690555                          |             | NA           | 1                |
|               | 0.998207054                    |    |                  |   |              |                                       |             | 0            |                  |
| GOLGA8N       | ENSG00000232653.8              |    | 0.340431167      |   | 13           | 12                                    | 0.057000972 |              |                  |
|               | Brain_Cerebellum               |    | 0.896392825      |   |              | Brain_Nucleus_accumbens_basal_ganglia |             |              |                  |
|               | 3.592437032                    |    | 0.060503928      |   | 0.299167008  | -1.903303363                          |             | 1.518731534  |                  |
|               | -0.361952617                   |    | 1.003633099      |   | 12           | 0                                     | 0.998207054 |              |                  |
| CWF19L2       | ENSG00000152404.15             |    | 0.340492334      |   | 5            | 3                                     | 0.271492221 |              |                  |
|               | Brain_Frontal_Cortex_BA9       |    | 0.504533719      |   |              | Brain_Anterior_cingulate_cortex_BA24  |             |              |                  |
|               | 3.592518226                    |    | 0.00018823       |   | 0.602823402  | -0.882039979                          |             | 1.099632625  |                  |
|               | 0.531020362                    |    | 0.817797712      |   | 3            | 0                                     | 0.998207054 |              |                  |
| BCAR1         | ENSG00000050820.16             |    | 0.340571971      |   | 5            | 5                                     | 0.192609326 |              |                  |
|               | Brain_Putamen_basal_ganglia    |    | 0.841875169      |   |              | Brain_Hippocampus                     |             | 2.420852017  |                  |
|               | 0.307999268                    |    | 0.307999268      |   | -0.538762724 | 1.302898765                           |             | 0.498664335  |                  |
|               | 0.827455968                    |    | 5                | 0 | 0.998207054  |                                       |             |              |                  |
| TIRAP         | ENSG00000150455.13             |    | 0.340636948      |   | 6            | 6                                     | 0.034930572 |              |                  |
|               | Brain_Caudate_basal_ganglia    |    | 0.71373282       |   |              | Brain_Hypothalamus                    |             | 3.106811808  |                  |
|               | 0.201909689                    |    | 0.201909689      |   | -2.109162331 | 0.366847439                           |             | -0.780679677 |                  |
|               | 0.839821178                    |    | 6                | 0 | 0.998207054  |                                       |             |              |                  |
| RP11-20E24.1  | ENSG00000257526.2              |    | 0.340755207      |   | 1            | 1                                     | 0.340755207 |              |                  |
|               | Brain_Hypothalamus             |    | 0.340755207      |   |              | Brain_Hypothalamus                    |             | 1            | 1                |
|               | 0.952674125                    |    | 0.952674125      |   | 0.952674125  | NA                                    |             | 1            | 0                |
|               |                                |    |                  |   |              |                                       |             | 0.998207054  |                  |
| SYNPO         | ENSG00000171992.12             |    | 0.340827948      |   | 1            | 1                                     | 0.340827948 |              |                  |
|               | Brain_Substantia_nigra         |    | 0.340827948      |   |              | Brain_Substantia_nigra                |             | 1            | 1                |
|               | 1                              |    | -0.952530612     |   | -0.952530612 | -0.952530612                          |             | NA           | 1                |
|               | 0.998207054                    |    |                  |   |              |                                       |             | 0            |                  |
| RAD1          | ENSG00000113456.18             |    | 0.34090823       |   | 3            | 3                                     | 0.149370278 |              |                  |
|               | Brain_Putamen_basal_ganglia    |    | 0.725431411      |   |              | Brain_Frontal_Cortex_BA9              |             |              |                  |
|               | 1.228980563                    |    | 0.773782189      |   | 0.773782189  | -1.441759335                          |             | -0.351209196 |                  |

|              |                                |                             |              |              |                                |                  |             |             |   |
|--------------|--------------------------------|-----------------------------|--------------|--------------|--------------------------------|------------------|-------------|-------------|---|
|              | -0.975329293                   | 0.562116105                 | 3            | 0            | 0.998207054                    |                  |             |             |   |
| TSHZ1        | ENSG00000179981.9              | 0.340962341                 | 1            | 1            | 0.340962341                    |                  |             |             |   |
|              | Brain_Cerebellar_Hemisphere    | 0.340962341                 |              |              | Brain_Cerebellar_Hemisphere    | 1                | 1           |             |   |
|              | 1                              | -0.952265518                | -0.952265518 | -0.952265518 | NA                             | 1                | 0           |             |   |
|              | 0.998207054                    |                             |              |              |                                |                  |             |             |   |
| ITIH3        | ENSG00000162267.12             | 0.341063272                 | 1            | 1            | 0.341063272                    |                  |             |             |   |
|              | Brain_Caudate_basal_ganglia    | 0.341063272                 |              |              | Brain_Caudate_basal_ganglia    | 1                | 1           |             |   |
|              | 1                              | -0.952066471                | -0.952066471 | -0.952066471 | NA                             | 1                | 0           |             |   |
|              | 0.998207054                    |                             |              |              |                                |                  |             |             |   |
| RP11-598F7.6 | ENSG00000256540.1              | 0.341272411                 | 4            | 4            | 0.131570757                    |                  |             |             |   |
|              | Brain_Cerebellum               | 0.428630454                 |              |              | Brain_Cortex                   | 1.654168842      | 0.527289242 |             |   |
|              | 0.527289242                    | -1.507936588                | -0.791537411 | -1.278997161 | 0.333048061                    |                  |             |             |   |
|              | 4                              | 0                           | 0.998207054  |              |                                |                  |             |             |   |
| ZSCAN18      | ENSG00000121413.12             | 0.341398219                 | 10           | 8            | 0.032241088                    |                  |             |             |   |
|              | Brain_Cerebellar_Hemisphere    | 0.775312457                 |              |              | Brain_Hippocampus              | 4.986709823      |             |             |   |
|              | 0.051441241                    | 0.199860909                 | -2.141408774 | 1.013850057  | -0.747800107                   |                  |             |             |   |
|              | 0.993507948                    | 8                           | 0            | 0.998207054  |                                |                  |             |             |   |
| ZNF233       | ENSG00000159915.12             | 0.341448638                 | 5            | 4            | 0.208288553                    |                  |             |             |   |
|              | Brain_Hippocampus              | 0.839836025                 |              |              | Brain_Cerebellum               | 3.123370654      |             |             |   |
|              | 0.084885242                    | 0.129629578                 | 0.202103227  | 1.258285417  | 0.730519742                    |                  |             |             |   |
|              | 0.414985054                    | 4                           | 0            | 0.998207054  |                                |                  |             |             |   |
| INTS14       | ENSG00000138614.14             | 0.341616893                 | 1            | 1            | 0.341616893                    |                  |             |             |   |
|              | Brain_Hypothalamus             | 0.341616893                 |              |              | Brain_Hypothalamus             | 1                | 1           | 1           |   |
|              | 0.950975342                    | 0.950975342                 | 0.950975342  | NA           | 1                              | 0                | 0.998207054 |             |   |
| CENPN        | ENSG00000166451.13             | 0.341726925                 | 2            | 2            | 0.143096156                    |                  |             |             |   |
|              | Brain_Hippocampus              | 0.462252076                 |              |              | Brain_Putamen_basal_ganglia    | 1.534380651      |             |             |   |
|              | 0.465619349                    | 0.465619349                 | 0.735143547  | 1.464358006  | 1.099750777                    |                  |             |             |   |
|              | 0.515632489                    | 2                           | 0            | 0.998207054  |                                |                  |             |             |   |
| LRAT         | ENSG00000121207.11             | 0.341734415                 | 1            | 1            | 0.341734415                    |                  |             |             |   |
|              | Brain_Spinal_cord_cervical_c-1 | 0.341734415                 |              |              | Brain_Spinal_cord_cervical_c-1 |                  |             |             |   |
|              | 1                              | 1                           | 1            | 0.950743864  | 0.950743864                    | 0.950743864      | NA          | 1           | 0 |
|              | 0.998207054                    |                             |              |              |                                |                  |             |             |   |
| SEMA3G       | ENSG00000010319.6              | 0.341762408                 | 3            | 3            | 0.16007187                     | Brain_Cerebellum |             |             |   |
|              | 0.309947726                    | Brain_Putamen_basal_ganglia | 1.268391008  | 0.668626195  |                                |                  |             |             |   |
|              | 0.668626195                    | 1.015331726                 | 1.404829886  | 1.147484397  | 0.222894898                    |                  |             |             |   |
|              | 3                              | 0                           | 0.998207054  |              |                                |                  |             |             |   |
| STX7         | ENSG00000079950.13             | 0.341844384                 | 1            | 1            | 0.341844384                    |                  |             |             |   |
|              | Brain_Frontal_Cortex_BA9       | 0.341844384                 |              |              | Brain_Frontal_Cortex_BA9       | 1                | 1           |             |   |
|              | 1                              | 0.95052731                  | 0.95052731   | 0.95052731   | NA                             | 1                | 0           | 0.998207054 |   |
| DR1          | ENSG00000117505.12             | 0.342094033                 | 3            | 2            | 0.163619647                    | Brain_Cortex     |             |             |   |
|              | 0.536318468                    | Brain_Substantia_nigra      |              |              | 2.508550499                    | 0.069865111      |             |             |   |
|              | 0.42158439                     | 0.618389727                 | 1.393000477  | 1.122097975  | 0.436639828                    |                  |             |             | 2 |
|              | 0                              | 0.998207054                 |              |              |                                |                  |             |             |   |
| MTSS1        | ENSG00000170873.18             | 0.342109255                 | 1            | 1            | 0.342109255                    |                  |             |             |   |
|              | Brain_Hippocampus              | 0.342109255                 |              |              | Brain_Hippocampus              | 1                | 1           | 1           |   |
|              | -0.950005899                   | -0.950005899                | -0.950005899 | NA           | 1                              | 0                | 0.998207054 |             |   |
| LAMA5        | ENSG00000130702.15             | 0.342236502                 | 3            | 3            | 0.133505051                    |                  |             |             |   |
|              | Brain_Frontal_Cortex_BA9       | 0.704963659                 |              |              | Brain_Amygdala                 | 1.101030165      |             |             |   |
|              | 0.876745448                    | 0.876745448                 | -1.500422283 | 0.37862863   | -0.728834093                   |                  |             |             |   |
|              | 0.983522678                    | 3                           | 0            | 0.998207054  |                                |                  |             |             |   |
| STX3         | ENSG00000166900.15             | 0.342338905                 | 3            | 3            | 0.073258131                    |                  |             |             |   |
|              | Brain_Hypothalamus             | 0.246732703                 |              |              | Brain_Caudate_basal_ganglia    | 2.596747085      |             |             |   |
|              | 0.175832734                    | 0.175832734                 | 1.158321886  | 1.791219172  | 1.437677931                    |                  |             |             |   |
|              | 0.322904515                    | 3                           | 0            | 0.998207054  |                                |                  |             |             |   |
| TLE2         | ENSG00000065717.14             | 0.342379984                 | 1            | 1            | 0.342379984                    | Brain_Cortex     |             |             |   |
|              | 0.342379984                    | Brain_Cortex                | 1            | 1            | 1                              | 0.949473223      | 0.949473223 |             |   |
|              | 0.949473223                    | NA                          | 1            | 0            | 0.998207054                    |                  |             |             |   |
| TXN2         | ENSG00000100348.9              | 0.342412034                 | 10           | 4            | 0.176474938                    |                  |             |             |   |
|              | Brain_Putamen_basal_ganglia    | 0.938241514                 |              |              | Brain_Hippocampus              | 7.525963904      |             |             |   |
|              | 0.022556144                    | 0.252421313                 | -1.351688647 | 0.569603756  | 0.126170761                    |                  |             |             |   |
|              | 0.57478989                     | 4                           | 0            | 0.998207054  |                                |                  |             |             |   |
| BRD3         | ENSG00000169925.16             | 0.342424011                 | 4            | 4            | 0.119747092                    | Brain_Cortex     |             |             |   |



|               |                                       |                          |                                       |              |              |                |              |
|---------------|---------------------------------------|--------------------------|---------------------------------------|--------------|--------------|----------------|--------------|
|               | 0.555825183                           | Brain_Hippocampus        | 3.219575983                           | 0.172135389  |              |                |              |
|               | 0.172135389                           | 0.589053801              | 1.555836013                           | 1.157769978  | 0.45073455   | 4              |              |
|               | 0                                     | 0.998207054              |                                       |              |              |                |              |
| FSBP          | ENSG00000265817.2                     | 0.342446717              | 1                                     | 1            | 0.342446717  |                |              |
|               | Brain_Hippocampus                     | 0.342446717              | Brain_Hippocampus                     | 1            | 1            | 1              |              |
|               | 0.949341964                           | 0.949341964              | 0.949341964                           | NA           | 1            | 0              | 0.998207054  |
| RP11-359I18.5 | ENSG00000272360.1                     | 0.342491545              | 1                                     | 1            | 0.342491545  |                |              |
|               | Brain_Putamen_basal_ganglia           | 0.342491545              | Brain_Putamen_basal_ganglia           | 1            | 1            | 1              |              |
|               | 1                                     | -0.949253799             | -0.949253799                          | -0.949253799 | NA           | 1              | 0            |
|               | 0.998207054                           |                          |                                       |              |              |                |              |
| RELN          | ENSG00000189056.13                    | 0.342515119              | 5                                     | 5            | 0.057968524  |                |              |
|               | Brain_Putamen_basal_ganglia           | 0.945016122              | Brain_Cerebellum                      | 1.518965872  |              |                |              |
|               | 0.612610602                           | 0.612610602              | -0.068966705                          | 1.895935875  | 0.93097554   |                |              |
|               | 0.723297201                           | 5                        | 0                                     | 0.998207054  |              |                |              |
| ERMAP         | ENSG00000164010.13                    | 0.342521203              | 12                                    | 8            | 0.182624258  | Brain_Amygdala |              |
|               | 0.483499538                           | Brain_Frontal_Cortex_BA9 | 7.784227159                           | 0.001438823  |              |                |              |
|               | 0.324393668                           | -1.332718322             | 0.897748739                           | -0.682475095 | 0.716732221  |                |              |
|               | 8                                     | 0                        | 0.998207054                           |              |              |                |              |
| CCDC51        | ENSG00000164051.13                    | 0.342526062              | 1                                     | 1            | 0.342526062  |                |              |
|               | Brain_Cerebellar_Hemisphere           | 0.342526062              | Brain_Cerebellar_Hemisphere           | 1            | 1            | 1              |              |
|               | 1                                     | -0.949185919             | -0.949185919                          | -0.949185919 | NA           | 1              | 0            |
|               | 0.998207054                           |                          |                                       |              |              |                |              |
| TRIM14        | ENSG00000106785.14                    | 0.3425748                | 4                                     | 4            | 0.053511052  |                |              |
|               | Brain_Nucleus_accumbens_basal_ganglia | 0.585210999              | Brain_Cerebellum                      |              |              |                |              |
|               | 2.614695861                           | 0.131321283              | 0.131321283                           | -1.930773638 | 0.54578898   |                |              |
|               | -0.992804364                          | 1.078175418              | 4                                     | 0            | 0.998207054  |                |              |
| KNSTRN        | ENSG00000128944.13                    | 0.342650595              | 13                                    | 1            | 0.293279919  |                |              |
|               | Brain_Hippocampus                     | 0.456182431              | Brain_Cerebellum                      | 12.56795978  |              |                |              |
|               | 0.000269521                           | 12.56795978              | -1.050953561                          | -0.745147708 | -0.932286299 |                |              |
|               | 0.108666892                           | 1                        | 0                                     | 0.998207054  |              |                |              |
| MTFMT         | ENSG00000103707.9                     | 0.342767388              | 1                                     | 1            | 0.342767388  |                |              |
|               | Brain_Cerebellar_Hemisphere           | 0.342767388              | Brain_Cerebellar_Hemisphere           | 1            | 1            | 1              |              |
|               | 1                                     | -0.948711451             | -0.948711451                          | -0.948711451 | NA           | 1              | 0            |
|               | 0.998207054                           |                          |                                       |              |              |                |              |
| SLC22A18      | ENSG00000110628.13                    | 0.342781371              | 8                                     | 5            | 0.140918054  |                |              |
|               | Brain_Hypothalamus                    | 0.842324729              | Brain_Putamen_basal_ganglia           | 5.244092163  |              |                |              |
|               | 0.004039073                           | 0.287201471              | -1.472380877                          | 1.4161126    | 0.403421007  |                |              |
|               | 0.954852603                           | 5                        | 0                                     | 0.998207054  |              |                |              |
| TTL9          | ENSG00000131044.16                    | 0.34289527               | 3                                     | 3            | 0.219435128  |                |              |
|               | Brain_Nucleus_accumbens_basal_ganglia | 0.488201715              | Brain_Hippocampus                     |              |              |                |              |
|               | 1.143675953                           | 0.912724705              | 0.912724705                           | -1.228031542 | 1.097846206  |                |              |
|               | 0.18766217                            | 1.2426109                | 3                                     | 0            | 0.998207054  |                |              |
| SPATA3        | ENSG00000173699.15                    | 0.342932694              | 4                                     | 4            | 0.095137638  |                |              |
|               | Brain_Substantia_nigra                | 0.950667621              | Brain_Hypothalamus                    | 1.231465205  |              |                |              |
|               | 0.789712436                           | 0.789712436              | -1.668897788                          | -0.061868414 | -0.905501194 |                |              |
|               | 0.849738679                           | 4                        | 0                                     | 0.998207054  |              |                |              |
| LRRC29        | ENSG00000125122.15                    | 0.342970199              | 1                                     | 1            | 0.342970199  |                |              |
|               | Brain_Amygdala                        | 0.342970199              | Brain_Amygdala                        | 1            | 1            | 1              | -0.948312873 |
|               | -0.948312873                          | -0.948312873             | NA                                    | 1            | 0            | 0.998207054    |              |
| CELF3         | ENSG00000159409.14                    | 0.342973973              | 1                                     | 1            | 0.342973973  |                |              |
|               | Brain_Spinal_cord_cervical_c-1        | 0.342973973              | Brain_Spinal_cord_cervical_c-1        |              |              |                |              |
|               | 1                                     | 1                        | 1                                     | 0.948305457  | 0.948305457  | 0.948305457    | NA           |
|               | 0.998207054                           |                          |                                       |              |              |                |              |
| PCDHB3        | ENSG00000113205.5                     | 0.342986093              | 4                                     | 3            | 0.160113618  |                |              |
|               | Brain_Cortex                          | 0.233073589              | Brain_Nucleus_accumbens_basal_ganglia | 2.25939802   |              |                |              |
|               | 0.008653113                           | 0.509778501              | -1.404689539                          | -1.192478722 | -1.253151762 |                |              |
|               | 0.101282815                           | 3                        | 0                                     | 0.998207054  |              |                |              |
| IL6R          | ENSG00000160712.12                    | 0.343007639              | 2                                     | 2            | 0.157734448  |                |              |
|               | Brain_Cerebellar_Hemisphere           | 0.436032701              | Brain_Cerebellum                      | 1.294479771  |              |                |              |
|               | 0.705520229                           | 0.705520229              | -0.778910055                          | 1.41273231   | 0.316911128  |                |              |
|               | 1.549725178                           | 2                        | 0                                     | 0.998207054  |              |                |              |
| ADAMTS8       | ENSG00000134917.9                     | 0.343181663              | 5                                     | 5            | 0.359756143  |                |              |

|              |                                       |                             |                             |              |                             |              |                  |  |
|--------------|---------------------------------------|-----------------------------|-----------------------------|--------------|-----------------------------|--------------|------------------|--|
|              | Brain_Caudate_basal_ganglia           | 0.747323302                 |                             |              | Brain_Putamen_basal_ganglia |              |                  |  |
|              | 2.380669862                           | 0.220528425                 | 0.220528425                 |              | -0.915829852                | 0.821908176  |                  |  |
|              | -0.114100213                          | 0.782326432                 | 5                           | 0            | 0.998207054                 |              |                  |  |
| FAHD2B       | ENSG00000144199.11                    | 0.343270539                 |                             |              | 8                           | 4            | 0.082266149      |  |
|              | Brain_Cerebellar_Hemisphere           | 0.991239351                 |                             |              | Brain_Frontal_Cortex_BA9    |              |                  |  |
|              | 5.761319998                           | 0.008180378                 | 0.236145449                 |              | -0.227438243                | 1.737686047  |                  |  |
|              | 0.797316044                           | 0.683070276                 | 4                           | 0            | 0.998207054                 |              |                  |  |
| IL16         | ENSG00000172349.17                    | 0.343312205                 | 1                           | 1            | 0.343312205                 |              | Brain_Cerebellum |  |
|              | 0.343312205                           | Brain_Cerebellum1           | 1                           | 1            | -0.947641081                | -0.947641081 |                  |  |
|              | -0.947641081                          | NA                          | 1                           | 0            | 0.998207054                 |              |                  |  |
| PGR          | ENSG00000082175.14                    | 0.343315851                 | 1                           | 1            | 0.343315851                 |              | Brain_Cortex     |  |
|              | 0.343315851                           | Brain_Cortex                | 1                           | 1            | -0.947633921                | -0.947633921 |                  |  |
|              | -0.947633921                          | NA                          | 1                           | 0            | 0.998207054                 |              |                  |  |
| SIL1         | ENSG00000120725.12                    | 0.343321952                 | 9                           | 9            | 0.092677383                 |              |                  |  |
|              | Brain_Nucleus_accumbens_basal_ganglia | 0.983209381                 |                             |              |                             |              |                  |  |
|              | Brain_Spinal_cord_cervical_c-1        | 2.921539563                 |                             |              | 0.215056009                 | 0.215056009  |                  |  |
|              | -1.681440507                          | 0.86323947                  | -0.02426927                 |              | 0.867666418                 | 9            | 0                |  |
|              | 0.998207054                           |                             |                             |              |                             |              |                  |  |
| STEAP2       | ENSG00000157214.13                    | 0.343327357                 | 12                          | 2            | 0.253190477                 |              |                  |  |
|              | Brain_Cerebellum                      | 0.96993869                  | Brain_Hypothalamus          | 10.39210803  | 8.29E-05                    |              |                  |  |
|              | 1.114469067                           | -1.142634254                | 0.354435729                 |              | -0.318423913                | 0.480810172  |                  |  |
|              | 2                                     | 0                           | 0.998207054                 |              |                             |              |                  |  |
| ABHD5        | ENSG00000011198.7                     | 0.343441711                 | 1                           | 1            | 0.343441711                 |              |                  |  |
|              | Brain_Hippocampus                     | 0.343441711                 | Brain_Hippocampus           | 1            | 1                           | 1            |                  |  |
|              | -0.947386809                          | -0.947386809                | -0.947386809                | NA           | 1                           | 0            | 0.998207054      |  |
| LINC01080    | ENSG00000281721.1                     | 0.343557091                 | 12                          | 11           | 0.122757109                 |              |                  |  |
|              | Brain_Hypothalamus                    | 0.905204606                 | Brain_Substantia_nigra      | 2.405067546  |                             |              |                  |  |
|              | 0.000879868                           | 0.133245132                 | -1.541282415                | 1.543303687  | -0.35068663                 |              |                  |  |
|              | 1.066051603                           | 11                          | 0                           | 0.998207054  |                             |              |                  |  |
| RAD50        | ENSG00000113522.13                    | 0.343581319                 | 2                           | 2            | 0.193070573                 |              | Brain_Cerebellum |  |
|              | 0.896045027                           | Brain_Cerebellar_Hemisphere | 1.532918314                 | 0.467081686  |                             |              |                  |  |
|              | 0.467081686                           | -1.301549089                | -0.130659051                | -0.71610407  | 0.827944286                 |              |                  |  |
|              | 2                                     | 0                           | 0.998207054                 |              |                             |              |                  |  |
| LINC00856    | ENSG00000230417.11                    | 0.343631818                 | 1                           | 1            | 0.343631818                 |              |                  |  |
|              | Brain_Cerebellum                      | 0.343631818                 | Brain_Cerebellum1           | 1            | 1                           | -0.94701366  |                  |  |
|              | -0.94701366                           | -0.94701366                 | NA                          | 1            | 0                           | 0.998207054  |                  |  |
| NAAA         | ENSG00000138744.14                    | 0.343710454                 | 13                          | 4            | 0.223271145                 |              |                  |  |
|              | Brain_Frontal_Cortex_BA9              | 0.967140737                 | Brain_Cerebellar_Hemisphere |              |                             |              |                  |  |
|              | 10.09745853                           | 0.010809988                 | 0.362556987                 | -0.739043821 | 1.217875876                 |              |                  |  |
|              | 0.177029199                           | 0.607861084                 | 4                           | 0            | 0.998207054                 |              |                  |  |
| FBXO34       | ENSG00000178974.9                     | 0.343784522                 | 3                           | 3            | 0.102019181                 |              |                  |  |
|              | Brain_Cerebellum                      | 0.903124374                 | Brain_Putamen_basal_ganglia | 1.949038058  |                             |              |                  |  |
|              | 0.289835473                           | 0.289835473                 | 0.121715454                 | 1.63514249   | 0.827125832                 |              |                  |  |
|              | 0.761912977                           | 3                           | 0                           | 0.998207054  |                             |              |                  |  |
| FBXL6        | ENSG00000182325.10                    | 0.343897126                 | 2                           | 2            | 0.166998213                 |              | Brain_Cerebellum |  |
|              | 0.278143898                           | Brain_Cortex                | 1.484394667                 | 0.515605333  | 0.515605333                 |              |                  |  |
|              | -1.084498351                          | 1.381913662                 | 0.148707656                 | 1.744016659  | 2                           | 0            |                  |  |
|              | 0.998207054                           |                             |                             |              |                             |              |                  |  |
| RP11-268F1.3 | ENSG00000236164.1                     | 0.344101207                 | 2                           | 2            | 0.21277234                  |              |                  |  |
|              | Brain_Hypothalamus                    | 0.5031159                   | Brain_Amygdala              | 1.072818686  | 0.927181314                 |              |                  |  |
|              | 0.927181314                           | -1.245978359                | 0.669595161                 | -0.288191599 | 1.354515025                 |              |                  |  |
|              | 2                                     | 0                           | 0.998207054                 |              |                             |              |                  |  |
| MTMR10       | ENSG00000166912.16                    | 0.344114303                 | 4                           | 4            | 0.240970425                 |              |                  |  |
|              | Brain_Cerebellum                      | 0.701966011                 | Brain_Amygdala              | 1.989792666  | 0.081384671                 |              |                  |  |
|              | 0.081384671                           | -1.172564668                | 0.38266791                  | -0.718324573 | 0.736582978                 | 4            |                  |  |
|              | 0                                     | 0.998207054                 |                             |              |                             |              |                  |  |
| SERPINB6     | ENSG00000124570.17                    | 0.344229732                 | 3                           | 3            | 0.08346029                  |              | Brain_Cerebellum |  |
|              | 0.772819253                           | Brain_Caudate_basal_ganglia | 1.821605183                 | 0.179177943  |                             |              |                  |  |
|              | 0.179177943                           | -1.7309522                  | -0.288689168                | -1.050233936 | 0.724520777                 | 3            |                  |  |
|              | 0                                     | 0.998207054                 |                             |              |                             |              |                  |  |
| PTPRN        | ENSG00000054356.13                    | 0.34425747                  | 4                           | 4            | 0.056220537                 |              |                  |  |
|              | Brain_Caudate_basal_ganglia           | 0.666848545                 | Brain_Cortex                | 1.866617611  |                             |              |                  |  |

|                |                                       |                                       |              |              |                                |              |              |   |  |
|----------------|---------------------------------------|---------------------------------------|--------------|--------------|--------------------------------|--------------|--------------|---|--|
|                | 0.136562944                           | 0.136562944                           | -1.909322226 | 0.61994814   | -0.68448382                    |              |              |   |  |
|                | 1.399031879                           | 4                                     | 0            | 0.998207054  |                                |              |              |   |  |
| CPB1           | ENSG00000153002.11                    | 0.344378206                           | 2            | 2            | 0.251633363                    |              |              |   |  |
|                | Brain_Substantia_nigra                | 0.385070553                           |              |              | Brain_Hippocampus              | 1.030802447  |              |   |  |
|                | 0.969197553                           | 0.969197553                           | -0.868591596 |              | 1.146391102                    | 0.138899753  |              |   |  |
|                | 1.42480793                            | 2                                     | 0            | 0.998207054  |                                |              |              |   |  |
| RYR2           | ENSG00000198626.15                    | 0.344529207                           | 1            | 1            | 0.344529207                    |              |              |   |  |
|                | Brain_Nucleus_accumbens_basal_ganglia | 0.344529207                           |              |              |                                |              |              |   |  |
|                | Brain_Nucleus_accumbens_basal_ganglia | 1                                     | 1            | 1            | -0.94525402                    |              |              |   |  |
|                | -0.94525402                           | -0.94525402                           | NA           | 1            | 0                              | 0.998207054  |              |   |  |
| SCRN1          | ENSG00000136193.16                    | 0.344534153                           | 2            | 2            | 0.172417373                    |              |              |   |  |
|                | Brain_Hypothalamus                    | 0.613752761                           |              |              | Brain_Spinal_cord_cervical_c-1 |              |              |   |  |
|                | 1.010417065                           | 0.989582935                           | 0.989582935  | -0.504723916 | 1.364477365                    |              |              |   |  |
|                | 0.429876725                           | 1.321724901                           | 2            | 0            | 0.998207054                    |              |              |   |  |
| TRIM74         | ENSG00000155428.12                    | 0.344535147                           | 2            | 2            | 0.144478606                    |              |              |   |  |
|                | Brain_Anterior_cingulate_cortex_BA24  | 0.846019521                           |              |              |                                |              |              |   |  |
|                | Brain_Nucleus_accumbens_basal_ganglia | 1.106512295                           |              |              | 0.893487705                    |              |              |   |  |
|                | 0.893487705                           | 0.194199695                           | 1.459314355  | 0.826757025  | 0.894571155                    |              |              |   |  |
|                | 2                                     | 0                                     | 0.998207054  |              |                                |              |              |   |  |
| GCNT1          | ENSG00000187210.12                    | 0.344573354                           | 1            | 1            | 0.344573354                    |              |              |   |  |
|                | Brain_Hypothalamus                    | 0.344573354                           |              |              | Brain_Hypothalamus             | 1            | 1            | 1 |  |
|                | -0.945167529                          | -0.945167529                          | -0.945167529 | NA           | 1                              | 0            | 0.998207054  |   |  |
| SERTAD2        | ENSG00000179833.4                     | 0.344592817                           | 1            | 1            | 0.344592817                    |              |              |   |  |
|                | Brain_Hypothalamus                    | 0.344592817                           |              |              | Brain_Hypothalamus             | 1            | 1            | 1 |  |
|                | 0.9451294                             | 0.9451294                             | 0.9451294    | NA           | 1                              | 0            | 0.998207054  |   |  |
| ENOSF1         | ENSG00000132199.18                    | 0.344828189                           | 10           | 5            | 0.087110056                    |              |              |   |  |
|                | Brain_Nucleus_accumbens_basal_ganglia | 0.681258767                           |              |              | Brain_Cortex                   |              |              |   |  |
|                | 5.974173877                           | 0.030474067                           | 0.292226967  | -1.710843236 | -0.410746035                   |              |              |   |  |
|                | -0.946122067                          | 0.529957734                           | 5            | 0            | 0.998207054                    |              |              |   |  |
| PSMB8          | ENSG00000204264.8                     | 0.344879767                           | 1            | 1            | 0.344879767                    |              |              |   |  |
|                | 0.344879767                           | Brain_Cortex                          | 1            | 1            | 1                              | -0.944567419 | -0.944567419 |   |  |
|                | -0.944567419                          | NA                                    | 1            | 0            | 0.998207054                    |              |              |   |  |
| IMPA1          | ENSG00000133731.9                     | 0.344948459                           | 7            | 1            | 0.307648233                    |              |              |   |  |
|                | Brain_Putamen_basal_ganglia           | 0.431146688                           |              |              | Brain_Cortex                   | 6.707896411  |              |   |  |
|                | 0.0001264                             | 6.707896411                           | 0.787230941  | 1.020169177  | 0.924062425                    |              |              |   |  |
|                | 0.085724912                           | 1                                     | 0            | 0.998207054  |                                |              |              |   |  |
| CRTAC1         | ENSG00000095713.13                    | 0.344999208                           | 2            | 2            | 0.241136819                    |              |              |   |  |
|                | Brain_Cortex                          | 0.330143893                           |              |              | Brain_Cerebellum               | 1.092967407  | 0.907032593  |   |  |
|                | 0.907032593                           | -1.17215005                           | -0.973824084 | -1.072987067 | 0.140237636                    |              |              |   |  |
|                | 2                                     | 0                                     | 0.998207054  |              |                                |              |              |   |  |
| RP11-1263C18.1 | ENSG00000273238.1                     | 0.345401646                           | 1            | 1            | 0.345401646                    |              |              |   |  |
|                | Brain_Nucleus_accumbens_basal_ganglia | 0.345401646                           |              |              |                                |              |              |   |  |
|                | Brain_Nucleus_accumbens_basal_ganglia | 1                                     | 1            | 1            | 0.943546102                    |              |              |   |  |
|                | 0.943546102                           | 0.943546102                           | NA           | 1            | 0                              | 0.998207054  |              |   |  |
| KRT86          | ENSG00000170442.11                    | 0.345420196                           | 1            | 1            | 0.345420196                    |              |              |   |  |
|                | Brain_Cerebellar_Hemisphere           | 0.345420196                           |              |              | Brain_Cerebellar_Hemisphere    | 1            | 1            |   |  |
|                | 1                                     | -0.943509817                          | -0.943509817 | -0.943509817 | NA                             | 1            | 0            |   |  |
|                | 0.998207054                           |                                       |              |              |                                |              |              |   |  |
| PLA2G5         | ENSG00000127472.10                    | 0.345431605                           | 10           | 5            | 0.097707727                    |              |              |   |  |
|                | Brain_Amygdala                        | 0.795396117                           |              |              | Brain_Frontal_Cortex_BA9       | 6.160370652  |              |   |  |
|                | 0.012455085                           | 0.280588028                           | -1.656069592 | 0.365041311  | -0.91080075                    |              |              |   |  |
|                | 0.619919037                           | 5                                     | 0            | 0.998207054  |                                |              |              |   |  |
| TTC9C          | ENSG00000162222.13                    | 0.345619622                           | 6            | 2            | 0.273322949                    |              |              |   |  |
|                | 0.781042486                           | Brain_Nucleus_accumbens_basal_ganglia | 5.593730009  | 0.01567004   |                                |              |              |   |  |
|                | 0.200624442                           | -1.095442212                          | -0.277960754 | -0.815167235 | 0.29723003                     | 2            |              |   |  |
|                | 0                                     | 0.998207054                           |              |              |                                |              |              |   |  |
| CCDC116        | ENSG00000161180.10                    | 0.345656415                           | 7            | 3            | 0.359866334                    |              |              |   |  |
|                | Brain_Cerebellum                      | 0.563417011                           |              |              | Brain_Hippocampus              | 6.09826382   | 0.001989349  |   |  |
|                | 0.267160192                           | -0.577773556                          | 0.915619816  | 0.608582362  | 0.530291902                    |              |              |   |  |
|                | 3                                     | 0                                     | 0.998207054  |              |                                |              |              |   |  |
| CTNND2         | ENSG00000169862.18                    | 0.345831102                           | 1            | 1            | 0.345831102                    |              |              |   |  |
|                | Brain_Spinal_cord_cervical_c-1        | 0.345831102                           |              |              | Brain_Spinal_cord_cervical_c-1 |              |              |   |  |

|                                       |                                       |                                       |              |              |              |                  |   |   |
|---------------------------------------|---------------------------------------|---------------------------------------|--------------|--------------|--------------|------------------|---|---|
| 1                                     | 1                                     | 1                                     | -0.942706395 | -0.942706395 | -0.942706395 | NA               | 1 | 0 |
| 0.998207054                           |                                       |                                       |              |              |              |                  |   |   |
| UBASH3B                               | ENSG00000154127.9                     | 0.346277183                           | 2            | 2            | 0.183040959  |                  |   |   |
| Brain_Hypothalamus                    | 0.715885555                           | Brain_Cortex                          | 1.163884254  |              |              |                  |   |   |
| 0.836115746                           | 0.836115746                           | -0.363963112                          | 1.331450083  | 0.483743486  |              |                  |   |   |
| 1.198838167                           | 2                                     | 0                                     | 0.998207054  |              |              |                  |   |   |
| TNFRSF25                              | ENSG00000215788.9                     | 0.346292586                           | 4            | 4            | 0.093261802  |                  |   |   |
| Brain_Putamen_basal_ganglia           | 0.873132531                           | Brain_Cortex                          | 1.905431899  |              |              |                  |   |   |
| 0.379952373                           | 0.379952373                           | 0.159680793                           | 1.67843709   | 1.098330244  |              |                  |   |   |
| 0.691966374                           | 4                                     | 0                                     | 0.998207054  |              |              |                  |   |   |
| TTC31                                 | ENSG00000115282.19                    | 0.346355974                           | 1            | 1            | 0.346355974  |                  |   |   |
| Brain_Nucleus_accumbens_basal_ganglia | 0.346355974                           |                                       |              |              |              |                  |   |   |
| Brain_Nucleus_accumbens_basal_ganglia | 1                                     | 1                                     | 1            | 0.941681023  |              |                  |   |   |
| 0.941681023                           | 0.941681023                           | NA                                    | 1            | 0            | 0.998207054  |                  |   |   |
| RP11-197K6.1                          | ENSG00000223812.5                     | 0.346381008                           | 3            | 3            | 0.076008099  |                  |   |   |
| Brain_Nucleus_accumbens_basal_ganglia | 0.65598686                            | Brain_Cortex                          | 2.171138658  |              |              |                  |   |   |
| 0.239149217                           | 0.239149217                           | -1.774332919                          | -0.445460693 | -0.973126381 |              |                  |   |   |
| 0.705403285                           | 3                                     | 0                                     | 0.998207054  |              |              |                  |   |   |
| RNF166                                | ENSG00000158717.10                    | 0.34649692                            | 8            | 6            | 0.01504048   |                  |   |   |
| Brain_Anterior_cingulate_cortex_BA24  | 0.790111174                           |                                       |              |              |              |                  |   |   |
| Brain_Spinal_cord_cervical_c-1        | 4.566626385                           | 0.013569799                           | 0.233777552  |              |              |                  |   |   |
| -2.431402874                          | 0.266166251                           | -0.987072787                          | 0.783322809  | 6            | 0            |                  |   |   |
| 0.998207054                           |                                       |                                       |              |              |              |                  |   |   |
| RUBCNL                                | ENSG00000102445.18                    | 0.346562901                           | 1            | 1            | 0.346562901  |                  |   |   |
| Brain_Hypothalamus                    | 0.346562901                           | Brain_Hypothalamus                    | 1            | 1            | 1            |                  |   |   |
| -0.94127705                           | -0.94127705                           | -0.94127705                           | NA           | 1            | 0            | 0.998207054      |   |   |
| LAMC1                                 | ENSG00000135862.5                     | 0.346564338                           | 4            | 3            | 0.138514578  | Brain_Cerebellum |   |   |
| 0.477547257                           | Brain_Nucleus_accumbens_basal_ganglia | 2.0031241                             | 0.019178332  |              |              |                  |   |   |
| 0.889861255                           | -1.481345319                          | 0.710253004                           | -0.807219786 | 1.025904032  |              |                  |   |   |
| 3                                     | 0                                     | 0.998207054                           |              |              |              |                  |   |   |
| RP11-369E15.3                         | ENSG00000254092.1                     | 0.346594316                           | 1            | 1            | 0.346594316  |                  |   |   |
| Brain_Amygdala                        | 0.346594316                           | Brain_Amygdala                        | 1            | 1            | 1            | -0.941215732     |   |   |
| -0.941215732                          | -0.941215732                          | NA                                    | 1            | 0            | 0.998207054  |                  |   |   |
| ZNF138                                | ENSG00000197008.9                     | 0.346620051                           | 11           | 6            | 0.013707238  |                  |   |   |
| Brain_Caudate_basal_ganglia           | 0.641950731                           | Brain_Cerebellum                      | 8.053476687  |              |              |                  |   |   |
| 0.004741046                           | 0.285012158                           | -2.464845405                          | -0.464973085 | -1.583344972 |              |                  |   |   |
| 0.57018015                            | 6                                     | 0                                     | 0.998207054  |              |              |                  |   |   |
| SELENOO                               | ENSG00000073169.13                    | 0.346628026                           | 3            | 3            | 0.130937308  |                  |   |   |
| Brain_Cerebellar_Hemisphere           | 0.765502542                           | Brain_Substantia_nigra                |              |              |              |                  |   |   |
| 1.957733266                           | 0.11783968                            | 0.11783968                            | -0.298262868 | 1.510416002  |              |                  |   |   |
| 0.871306542                           | 1.014332605                           | 3                                     | 0            | 0.998207054  |              |                  |   |   |
| RMDN1                                 | ENSG00000176623.11                    | 0.346832858                           | 13           | 1            | 0.226724117  | Brain_Amygdala   |   |   |
| 0.529774049                           | Brain_Substantia_nigra                | 12.31859638                           | 0.001054355  |              |              |                  |   |   |
| 12.31859638                           | -1.20884053                           | -0.62835097                           | -0.914860336 | 0.177011999  |              |                  |   |   |
| 1                                     | 0                                     | 0.998207054                           |              |              |              |                  |   |   |
| AC005498.3                            | ENSG00000267421.6                     | 0.347179627                           | 2            | 2            | 0.203293956  |                  |   |   |
| Brain_Putamen_basal_ganglia           | 0.41027959                            | Brain_Cerebellum                      | 1.095458661  |              |              |                  |   |   |
| 0.904541339                           | 0.904541339                           | -0.823401711                          | 1.272222836  | 0.224410562  |              |                  |   |   |
| 1.481830328                           | 2                                     | 0                                     | 0.998207054  |              |              |                  |   |   |
| RPL8                                  | ENSG00000161016.17                    | 0.347243636                           | 6            | 2            | 0.41713712   |                  |   |   |
| Brain_Frontal_Cortex_BA9              | 0.987355758                           | Brain_Nucleus_accumbens_basal_ganglia |              |              |              |                  |   |   |
| 5.64869207                            | 0.001721909                           | 0.201472757                           | 0.01584787   | 0.811398048  |              |                  |   |   |
| 0.234352222                           | 0.290793812                           | 2                                     | 0            | 0.998207054  |              |                  |   |   |
| LINC01176                             | ENSG00000281404.1                     | 0.3474356                             | 13           | 13           | 0.009187377  |                  |   |   |
| Brain_Nucleus_accumbens_basal_ganglia | 0.895192378                           | Brain_Amygdala                        |              |              |              |                  |   |   |
| 1.585100596                           | 0.495350308                           | 0.495350308                           | -2.605001821 | 1.299569136  |              |                  |   |   |
| -0.473667139                          | 1.08794395                            | 13                                    | 0            | 0.998207054  |              |                  |   |   |
| TMEM63B                               | ENSG00000137216.18                    | 0.347448566                           | 4            | 4            | 0.038862389  |                  |   |   |
| Brain_Cerebellum                      | 0.923362047                           | Brain_Spinal_cord_cervical_c-1        | 1.826443478  |              |              |                  |   |   |
| 0.287522898                           | 0.287522898                           | -0.096199602                          | 2.065641016  | 1.018428267  |              |                  |   |   |
| 1.029602544                           | 4                                     | 0                                     | 0.998207054  |              |              |                  |   |   |
| ECSIT                                 | ENSG00000130159.13                    | 0.347551812                           | 1            | 1            | 0.347551812  |                  |   |   |

|              |                                       |                                       |              |                                      |              |              |                  |
|--------------|---------------------------------------|---------------------------------------|--------------|--------------------------------------|--------------|--------------|------------------|
|              | Brain_Hippocampus                     | 0.347551812                           |              | Brain_Hippocampus                    | 1            | 1            | 1                |
|              | 0.939348565                           | 0.939348565                           | 0.939348565  | NA                                   | 1            | 0            | 0.998207054      |
| PGPEP1       | ENSG00000130517.13                    | 0.347559032                           | 11           | 11                                   | 0.032041869  |              |                  |
|              | Brain_Cerebellum                      | 0.827054973                           |              | Brain_Substantia_nigra               | 2.508399996  |              |                  |
|              | 0.172564628                           | 0.172564628                           | -1.468693654 | 2.143887918                          |              | 0.178117554  |                  |
|              | 1.117836622                           | 11                                    | 0            | 0.998207054                          |              |              |                  |
| MAJIN        | ENSG00000168070.11                    | 0.347569596                           | 1            | 1                                    | 0.347569596  |              | Brain_Cerebellum |
|              | 0.347569596                           | Brain_Cerebellum1                     | 1            | 1                                    | -0.939313916 |              | -0.939313916     |
|              | -0.939313916                          | NA                                    | 1            | 0                                    | 0.998207054  |              |                  |
| SCAI         | ENSG00000173611.17                    | 0.347617098                           | 4            | 4                                    | 0.089254927  |              |                  |
|              | Brain_Hippocampus                     | 0.863385212                           |              | Brain_Spinal_cord_cervical_c-1       |              |              |                  |
|              | 1.959884663                           | 0.302823969                           | 0.302823969  | -0.748042302                         |              | 1.699341133  |                  |
|              | 0.649706792                           | 1.149702324                           | 4            | 0                                    | 0.998207054  |              |                  |
| ADCY2        | ENSG00000078295.16                    | 0.347802871                           | 1            | 1                                    | 0.347802871  |              |                  |
|              | Brain_Nucleus_accumbens_basal_ganglia | 0.347802871                           |              |                                      |              |              |                  |
|              | Brain_Nucleus_accumbens_basal_ganglia | 1                                     | 1            | 1                                    | 0.938859528  |              |                  |
|              | 0.938859528                           | 0.938859528                           | NA           | 1                                    | 0            | 0.998207054  |                  |
| MAPRE1       | ENSG00000101367.8                     | 0.347819837                           | 1            | 1                                    | 0.347819837  |              |                  |
|              | Brain_Spinal_cord_cervical_c-1        | 0.347819837                           |              | Brain_Spinal_cord_cervical_c-1       |              |              |                  |
|              | 1                                     | 1                                     | 1            | 0.938826488                          | 0.938826488  | 0.938826488  | NA               |
|              | 0.998207054                           |                                       |              |                                      |              |              | 1                |
|              |                                       |                                       |              |                                      |              |              | 0                |
| MCPH1        | ENSG00000147316.12                    | 0.347855383                           | 6            | 5                                    | 0.37973361   |              | Brain_Cortex     |
|              | 0.891489261                           | Brain_Nucleus_accumbens_basal_ganglia | 4.087868851  |                                      |              |              |                  |
|              | 0.109170555                           | 0.185008401                           | -0.878387233 | 0.543266004                          |              | -0.207561327 |                  |
|              | 0.592834989                           | 5                                     | 0            | 0.998207054                          |              |              |                  |
| H2AFY2       | ENSG00000099284.13                    | 0.347878573                           | 1            | 1                                    | 0.347878573  |              |                  |
|              | Brain_Hippocampus                     | 0.347878573                           |              | Brain_Hippocampus                    | 1            | 1            | 1                |
|              | -0.938712113                          | -0.938712113                          | -0.938712113 | NA                                   | 1            | 0            | 0.998207054      |
| PCDHB16      | ENSG00000272674.3                     | 0.347928647                           | 3            | 3                                    | 0.183813771  |              |                  |
|              | Brain_Cerebellum                      | 0.984995757                           |              | Brain_Hippocampus                    | 2.356908349  |              |                  |
|              | 0.274006991                           | 0.274006991                           | 0.018806138  | 1.329103666                          |              | 0.797711168  |                  |
|              | 0.689323395                           | 3                                     | 0            | 0.998207054                          |              |              |                  |
| PRDM11       | ENSG00000019485.13                    | 0.347996415                           | 4            | 4                                    | 0.059169723  |              |                  |
|              | Brain_Putamen_basal_ganglia           | 0.796964114                           |              | Brain_Anterior_cingulate_cortex_BA24 |              |              |                  |
|              | 1.8208391                             | 0.587810445                           | 0.587810445  | -1.886930134                         |              | 0.565162996  |                  |
|              | -0.335088687                          | 1.091340264                           | 4            | 0                                    | 0.998207054  |              |                  |
| ZNF559       | ENSG00000188321.13                    | 0.348032862                           | 13           | 9                                    | 0.038650159  |              |                  |
|              | Brain_Cerebellar_Hemisphere           | 0.892912914                           |              | Brain_Substantia_nigra               |              |              |                  |
|              | 5.740926632                           | 0.039878561                           | 0.210848625  | -1.153114102                         |              | 2.067892218  |                  |
|              | 0.852152764                           | 0.882508352                           | 9            | 0                                    | 0.998207054  |              |                  |
| DDX42        | ENSG00000198231.12                    | 0.3481936                             | 13           | 1                                    | 0.218445082  |              |                  |
|              | Brain_Caudate_basal_ganglia           | 0.996220201                           |              | Brain_Hypothalamus                   | 12.50955572  |              |                  |
|              | 0.000115856                           | 12.50955572                           | -0.004737293 | 1.230673289                          |              | 0.914285383  |                  |
|              | 0.296038621                           | 1                                     | 0            | 0.998207054                          |              |              |                  |
| WRNIP1       | ENSG00000124535.15                    | 0.348403253                           | 1            | 1                                    | 0.348403253  |              |                  |
|              | Brain_Cerebellum                      | 0.348403253                           |              | Brain_Cerebellum1                    | 1            | 1            | -0.937690956     |
|              | -0.937690956                          | -0.937690956                          | NA           | 1                                    | 0            | 0.998207054  |                  |
| RP11-563N4.1 | ENSG00000272716.1                     | 0.348482284                           | 2            | 2                                    | 0.157595982  |              |                  |
|              | Brain_Caudate_basal_ganglia           | 0.46729281                            |              | Brain_Hippocampus                    | 1.288427617  |              |                  |
|              | 0.711572383                           | 0.711572383                           | -0.726890871 | 1.413203214                          |              | 0.343156171  |                  |
|              | 1.51327504                            | 2                                     | 0            | 0.998207054                          |              |              |                  |
| SPRN         | ENSG00000203772.7                     | 0.34849092                            | 2            | 2                                    | 0.153798523  |              |                  |
|              | Brain_Cerebellar_Hemisphere           | 0.499791286                           |              | Brain_Anterior_cingulate_cortex_BA24 |              |              |                  |
|              | 1.622531055                           | 0.377468945                           | 0.377468945  | -1.42624192                          |              | -0.674818184 |                  |
|              | -1.050530052                          | 0.531336819                           | 2            | 0                                    | 0.998207054  |              |                  |
| SSFA2        | ENSG00000138434.16                    | 0.348552021                           | 2            | 2                                    | 0.219615765  |              | Brain_Amygdala   |
|              | 0.354159457                           | Brain_Nucleus_accumbens_basal_ganglia | 1.128465428  |                                      |              |              |                  |
|              | 0.871534572                           | 0.871534572                           | 0.926551479  | 1.227550469                          |              | 1.077050974  |                  |
|              | 0.212838427                           | 2                                     | 0            | 0.998207054                          |              |              |                  |
| MEI4         | ENSG00000269964.2                     | 0.348580539                           | 1            | 1                                    | 0.348580539  |              | Brain_Cortex     |
|              | 0.348580539                           | Brain_Cortex                          | 1            | 1                                    | 1            | -0.937346134 | -0.937346134     |
|              | -0.937346134                          | NA                                    | 1            | 0                                    | 0.998207054  |              |                  |

|              |                                      |                          |                          |              |             |                                      |              |   |
|--------------|--------------------------------------|--------------------------|--------------------------|--------------|-------------|--------------------------------------|--------------|---|
| TSPAN9       | ENSG00000011105.12                   | 0.348580611              | 4                        | 4            | 0.107442193 |                                      |              |   |
|              | Brain_Cerebellar_Hemisphere          | 0.733003776              |                          |              |             | Brain_Caudate_basal_ganglia          |              |   |
|              | 1.940948659                          | 0.072638942              | 0.072638942              |              |             | -1.609796944                         | 1.30841758   |   |
|              | -0.347583309                         | 1.412051088              | 4                        | 0            | 0.998207054 |                                      |              |   |
| LGSN         | ENSG00000146166.16                   | 0.348703539              | 2                        | 2            | 0.158858016 |                                      |              |   |
|              | Brain_Spinal_cord_cervical_c-1       | 0.325698429              |                          |              |             | Brain_Substantia_nigra               |              |   |
|              | 1.83425762                           | 0.16574238               | 0.16574238               | -1.408922734 |             | -0.98281514                          | -1.195868937 |   |
|              | 0.301303569                          | 2                        | 0                        | 0.998207054  |             |                                      |              |   |
| STARD3       | ENSG00000131748.15                   | 0.348762567              | 1                        | 1            | 0.348762567 |                                      |              |   |
|              | Brain_Substantia_nigra               | 0.348762567              |                          |              |             | Brain_Substantia_nigra               | 1            | 1 |
|              | 1                                    | 0.936992206              | 0.936992206              | 0.936992206  | NA          | 1                                    | 0            |   |
|              | 0.998207054                          |                          |                          |              |             |                                      |              |   |
| WWP2         | ENSG00000198373.12                   | 0.349011622              | 4                        | 3            | 0.073479237 |                                      |              |   |
|              | Brain_Spinal_cord_cervical_c-1       | 0.241377882              |                          |              |             | Brain_Cerebellum                     | 3.463109366  |   |
|              | 0.018311511                          | 0.203673987              | 1.171549727              |              |             | 1.789842486                          | 1.542947954  |   |
|              | 0.262656695                          | 3                        | 0                        | 0.998207054  |             |                                      |              |   |
| MTUS2        | ENSG00000132938.19                   | 0.349026012              | 1                        | 1            | 0.349026012 | Brain_Amygdala                       |              |   |
|              | 0.349026012                          | Brain_Amygdala           | 1                        | 1            | 1           | -0.936480181                         | -0.936480181 |   |
|              | -0.936480181                         | NA                       | 1                        | 0            | 0.998207054 |                                      |              |   |
| RASL12       | ENSG00000103710.10                   | 0.349081894              | 3                        | 3            | 0.138550971 |                                      |              |   |
|              | Brain_Anterior_cingulate_cortex_BA24 | 0.965721023              |                          |              |             | Brain_Caudate_basal_ganglia          |              |   |
|              | 1.906306271                          | 0.093781028              | 0.093781028              |              |             | -1.48120869                          | 0.042975552  |   |
|              | -0.779472383                         | 0.769228752              | 3                        | 0            | 0.998207054 |                                      |              |   |
| XIRP2        | ENSG00000163092.19                   | 0.349083401              | 1                        | 1            | 0.349083401 | Brain_Cortex                         |              |   |
|              | 0.349083401                          | Brain_Cortex             | 1                        | 1            | 1           | 0.936368675                          | 0.936368675  |   |
|              | 0.936368675                          | NA                       | 1                        | 0            | 0.998207054 |                                      |              |   |
| DOCK10       | ENSG00000135905.18                   | 0.349276746              | 1                        | 1            | 0.349276746 |                                      |              |   |
|              | Brain_Cerebellum                     | 0.349276746              | Brain_Cerebellum         | 1            | 1           | 1                                    | -0.935993089 |   |
|              | -0.935993089                         | -0.935993089             | NA                       | 1            | 0           | 0.998207054                          |              |   |
| KLHL32       | ENSG00000186231.16                   | 0.349310836              | 2                        | 1            | 0.32408167  |                                      |              |   |
|              | Brain_Cerebellar_Hemisphere          | 0.379475086              |                          |              |             | Brain_Cerebellum                     | 1.985314275  |   |
|              | 0.014685725                          | 1.985314275              | 0.878863879              |              |             | 0.986104838                          | 0.932484359  |   |
|              | 0.075830809                          | 1                        | 0                        | 0.998207054  |             |                                      |              |   |
| SLC39A2      | ENSG00000165794.9                    | 0.349362773              | 3                        | 2            | 0.397015671 |                                      |              |   |
|              | Brain_Cortex                         | 0.985106522              | Brain_Frontal_Cortex_BA9 | 2.740518988  |             |                                      |              |   |
|              | 0.083043644                          | 0.176437367              | -0.846963134             | -0.018667291 |             | -0.378448831                         |              |   |
|              | 0.424718273                          | 2                        | 0                        | 0.998207054  |             |                                      |              |   |
| TEKT4        | ENSG00000163060.7                    | 0.349451572              | 2                        | 2            | 0.163825448 |                                      |              |   |
|              | Brain_Frontal_Cortex_BA9             | 0.493453314              |                          |              |             | Brain_Anterior_cingulate_cortex_BA24 |              |   |
|              | 1.699780144                          | 0.300219856              | 0.300219856              |              |             | 0.684826654                          | 1.392320231  |   |
|              | 1.038573443                          | 0.500273506              | 2                        | 0            | 0.998207054 |                                      |              |   |
| SGK2         | ENSG00000101049.14                   | 0.349518835              | 4                        | 4            | 0.072766008 | Brain_Cortex                         |              |   |
|              | 0.616639018                          | Brain_Frontal_Cortex_BA9 | 1.305141363              | 0.66730237   | 0.66730237  | 0.66730237                           | 0.66730237   |   |
|              | 0.500619384                          | 1.794295549              | 0.979385003              | 0.569266385  |             | 4                                    | 0            |   |
|              | 0.998207054                          |                          |                          |              |             |                                      |              |   |
| DBR1         | ENSG00000138231.12                   | 0.349525937              | 1                        | 1            | 0.349525937 |                                      |              |   |
|              | Brain_Hippocampus                    | 0.349525937              | Brain_Hippocampus        | 1            | 1           | 1                                    |              |   |
|              | 0.935509213                          | 0.935509213              | 0.935509213              | NA           | 1           | 0                                    | 0.998207054  |   |
| ARPP19       | ENSG00000128989.10                   | 0.349558453              | 3                        | 3            | 0.104320149 |                                      |              |   |
|              | Brain_Substantia_nigra               | 0.594491163              |                          |              |             | Brain_Cerebellar_Hemisphere          | 1.27176453   |   |
|              | 0.758112682                          | 0.758112682              | -1.624260848             |              |             | 0.53233909                           | -0.644923408 |   |
|              | 1.091838619                          | 3                        | 0                        | 0.998207054  |             |                                      |              |   |
| RP11-329B9.4 | ENSG00000272970.1                    | 0.34966696               | 9                        | 8            | 0.077280878 |                                      |              |   |
|              | Brain_Frontal_Cortex_BA9             | 0.744240865              | Brain_Cortex             | 4.691649074  |             |                                      |              |   |
|              | 0.103101581                          | 0.232671336              | -1.766685709             |              |             | 0.506445069                          | -0.465830509 |   |
|              | 0.781212012                          | 8                        | 0                        | 0.998207054  |             |                                      |              |   |
| EAF1         | ENSG00000144597.13                   | 0.349679762              | 3                        | 3            | 0.166123345 |                                      |              |   |
|              | Brain_Cerebellar_Hemisphere          | 0.354955485              | Brain_Frontal_Cortex_BA9 |              |             |                                      |              |   |
|              | 1.896567427                          | 0.103423557              | 0.103423557              |              |             | -1.38476824                          | 0.925020037  |   |
|              | -0.464581695                         | 1.224354293              | 3                        | 0            | 0.998207054 |                                      |              |   |
| LINC00906    | ENSG00000267339.5                    | 0.349916993              | 3                        | 3            | 0.181457133 |                                      |              |   |
|              | Brain_Cortex                         | 0.898904452              | Brain_Cerebellum         | 1.911897002  |             | 0.398230826                          |              |   |

|               |                                      |                             |                                       |              |              |                  |
|---------------|--------------------------------------|-----------------------------|---------------------------------------|--------------|--------------|------------------|
|               | 0.398230826                          | 0.127045417                 | 1.336281952                           | 0.83179083   | 0.628998875  | 3                |
|               | 0                                    | 0.998207054                 |                                       |              |              |                  |
| 2-Mar         | ENSG00000099785.10                   | 0.349945184                 | 13                                    | 1            | 0.209798897  | Brain_Cortex     |
|               | 0.82116987                           | Brain_Substantia_nigra      | 12.11476243                           |              | 0.000163584  |                  |
|               | 12.11476243                          | 0.226040565                 | 1.254118611                           | 0.895431018  | 0.253454835  |                  |
|               | 1                                    | 0                           | 0.998207054                           |              |              |                  |
| RPLP2         | ENSG00000177600.8                    | 0.349950591                 | 1                                     | 1            | 0.349950591  |                  |
|               | Brain_Hippocampus                    | 0.349950591                 | Brain_Hippocampus                     | 1            | 1            | 1                |
|               | -0.934685133                         | -0.934685133                | -0.934685133                          | NA           | 1            | 0                |
|               | 0.998207054                          |                             |                                       |              |              |                  |
| M6PR          | ENSG00000003056.7                    | 0.35005218                  | 4                                     | 4            | 0.263143051  | Brain_Cerebellum |
|               | 0.548138699                          | Brain_Cortex                | 2.075034918                           | 0.286230223  | 0.286230223  |                  |
|               | -1.118993174                         | 0.864500246                 | -0.081861857                          | 0.963841891  | 4            | 0                |
|               | 0.998207054                          |                             |                                       |              |              |                  |
| KLRC4         | ENSG00000183542.5                    | 0.350065365                 | 8                                     | 3            | 0.04847563   | Brain_Amygdala   |
|               | 0.459677191                          | Brain_Substantia_nigra      | 6.950549006                           | 0.008334998  |              |                  |
|               | 0.248247313                          | 0.739378505                 | 1.973174983                           | 1.462172728  | 0.382882784  |                  |
|               | 3                                    | 0                           | 0.998207054                           |              |              |                  |
| CAMK1         | ENSG00000134072.10                   | 0.350186305                 | 1                                     | 1            | 0.350186305  |                  |
|               | Brain_Hippocampus                    | 0.350186305                 | Brain_Hippocampus                     | 1            | 1            | 1                |
|               | -0.934227981                         | -0.934227981                | -0.934227981                          | NA           | 1            | 0                |
|               | 0.998207054                          |                             |                                       |              |              |                  |
| PEX3          | ENSG00000034693.14                   | 0.350227782                 | 1                                     | 1            | 0.350227782  |                  |
|               | Brain_Caudate_basal_ganglia          | 0.350227782                 | Brain_Caudate_basal_ganglia           | 1            | 1            |                  |
|               | 1                                    | 0.934147559                 | 0.934147559                           | 0.934147559  | NA           | 1                |
|               | 0.998207054                          |                             |                                       |              |              |                  |
| P3H4          | ENSG00000141696.12                   | 0.35022927                  | 2                                     | 2            | 0.147589785  |                  |
|               | Brain_Putamen_basal_ganglia          | 0.786992768                 | Brain_Cortex                          | 1.161579154  |              |                  |
|               | 0.838420846                          | 0.838420846                 | -1.448097499                          | -0.270217711 | -0.859157605 |                  |
|               | 0.832886786                          | 2                           | 0                                     | 0.998207054  |              |                  |
| KIAA0040      | ENSG00000235750.9                    | 0.350304127                 | 3                                     | 3            | 0.122653053  |                  |
|               | Brain_Frontal_Cortex_BA9             | 0.393089164                 | Brain_Cerebellum                      | 1.869683855  |              |                  |
|               | 0.186244921                          | 0.186244921                 | 0.854028562                           | 1.543732897  | 1.099955282  |                  |
|               | 0.385073694                          | 3                           | 0                                     | 0.998207054  |              |                  |
| CDC42EP5      | ENSG00000167617.2                    | 0.350470357                 | 1                                     | 1            | 0.350470357  |                  |
|               | Brain_Frontal_Cortex_BA9             | 0.350470357                 | Brain_Frontal_Cortex_BA9              | 1            | 1            |                  |
|               | 1                                    | -0.933677341                | -0.933677341                          | -0.933677341 | NA           | 1                |
|               | 0.998207054                          |                             |                                       |              |              |                  |
| RP11-157E21.1 | ENSG00000253593.2                    | 0.350586762                 | 2                                     | 1            | 0.340878182  |                  |
|               | Brain_Caudate_basal_ganglia          | 0.361195641                 | Brain_Nucleus_accumbens_basal_ganglia |              |              |                  |
|               | 1.997038242                          | 0.002961758                 | 1.997038242                           | -0.952431516 | -0.913089179 |                  |
|               | -0.932760347                         | 0.027819234                 | 1                                     | 0            | 0.998207054  |                  |
| LINC01551     | ENSG00000186960.10                   | 0.350596232                 | 2                                     | 2            | 0.168982636  |                  |
|               | Brain_Anterior_cingulate_cortex_BA24 | 0.816195408                 | Brain_Cortex                          |              |              |                  |
|               | 1.155612754                          | 0.844387246                 | 0.844387246                           | -0.232441129 | 1.37548015   |                  |
|               | 0.571519511                          | 1.136972039                 | 2                                     | 0            | 0.998207054  |                  |
| EIF3H         | ENSG00000147677.10                   | 0.350680573                 | 2                                     | 2            | 0.154596227  | Brain_Cerebellum |
|               | 0.322164915                          | Brain_Cortex                | 1.53961904                            | 0.46038096   | 0.46038096   | -1.42348286      |
|               | -0.990018831                         | -1.206750846                | 0.306505354                           | 2            | 0            | 0.998207054      |
| POLG          | ENSG00000140521.12                   | 0.350714704                 | 3                                     | 3            | 0.131445896  | Brain_Cerebellum |
|               | 0.329286943                          | Brain_Caudate_basal_ganglia | 1.921251385                           | 0.078690162  |              |                  |
|               | 0.078690162                          | 0.97555115                  | 1.508424581                           | 1.32412815   | 0.302042385  | 3                |
|               | 0.998207054                          |                             |                                       |              |              | 0                |
| ASAH1         | ENSG00000104763.18                   | 0.350781911                 | 3                                     | 3            | 0.101662579  |                  |
|               | Brain_Cerebellar_Hemisphere          | 0.660814076                 | Brain_Putamen_basal_ganglia           |              |              |                  |
|               | 2.453393017                          | 0.151426957                 | 0.151426957                           | 0.43878949   | 1.636846345  |                  |
|               | 1.100094447                          | 0.608662595                 | 3                                     | 0            | 0.998207054  |                  |
| MRPL30        | ENSG00000185414.19                   | 0.350814723                 | 6                                     | 2            | 0.16759006   |                  |
|               | Brain_Caudate_basal_ganglia          | 0.45363391                  | Brain_Cerebellar_Hemisphere           | 5.671289504  |              |                  |
|               | 0.004459767                          | 0.216905181                 | 0.749370527                           | 1.379988909  | 1.014855283  |                  |
|               | 0.210043219                          | 2                           | 0                                     | 0.998207054  |              |                  |
| AC012360.4    | ENSG00000235319.1                    | 0.350888792                 | 5                                     | 5            | 0.198961967  |                  |
|               | Brain_Cortex                         | 0.825405104                 | Brain_Nucleus_accumbens_basal_ganglia |              |              |                  |
|               | 2.628923989                          | 0.24830434                  | 0.24830434                            | -1.284514574 | 0.220598456  |                  |

|              |                                      |                                      |              |              |                                |                   |              |
|--------------|--------------------------------------|--------------------------------------|--------------|--------------|--------------------------------|-------------------|--------------|
|              | -0.63050631                          | 0.585096835                          | 5            | 0            | 0.998207054                    |                   |              |
| FAM215A      | ENSG00000267496.4                    | 0.351087933                          | 2            | 2            | 0.332819026                    |                   |              |
|              | Brain_Cortex                         | 0.566973863                          |              |              | Brain_Frontal_Cortex_BA9       | 1.417465187       |              |
|              | 0.582534813                          | 0.582534813                          |              |              | -0.968451308                   | 0.572513913       | -0.197968697 |
|              | 1.089626957                          | 2                                    | 0            | 0.998207054  |                                |                   |              |
| ARHGAP19     | ENSG00000213390.10                   | 0.351166517                          | 4            | 4            | 0.095634719                    |                   |              |
|              | Brain_Anterior_cingulate_cortex_BA24 | 0.820684628                          |              |              | Brain_Cerebellum               |                   |              |
|              | 1.796102909                          | 0.375908387                          | 0.375908387  |              | -1.666395234                   | 0.226664508       |              |
|              | -0.741598864                         | 0.792260445                          | 4            | 0            | 0.998207054                    |                   |              |
| RGS17        | ENSG00000091844.7                    | 0.351190519                          | 2            | 2            | 0.156343538                    | Brain_Cerebellum  |              |
|              | 0.281942677                          | Brain_Cerebellar_Hemisphere          | 1.86235437   | 0.13764563   | 0.13764563                     |                   |              |
|              | -1.41747692                          | -1.075965521                         | -1.246721221 | 0.241485026  | 2                              | 0                 |              |
|              | 0.998207054                          |                                      |              |              |                                |                   |              |
| RFPL2        | ENSG00000128253.13                   | 0.351236565                          | 2            | 2            | 0.172308236                    |                   |              |
|              | Brain_Cerebellar_Hemisphere          | 0.174977284                          |              |              | Brain_Cerebellum               | 1.76946167        | 0.23053833   |
|              | 0.23053833                           | -1.364824438                         | -1.356383174 | -1.360603806 | 0.005968875                    | 2                 |              |
|              | 0                                    | 0.998207054                          |              |              |                                |                   |              |
| MAPT         | ENSG00000186868.15                   | 0.351277751                          | 2            | 2            | 0.151490701                    |                   |              |
|              | Brain_Caudate_basal_ganglia          | 0.955237674                          |              |              | Brain_Cerebellum               | 1.168046768       |              |
|              | 0.831953232                          | 0.831953232                          | -1.434285871 | 0.056130717  | -0.689077577                   |                   |              |
|              | 1.053883676                          | 2                                    | 0            | 0.998207054  |                                |                   |              |
| GOLGA4       | ENSG00000144674.16                   | 0.351437313                          | 3            | 3            | 0.205740831                    |                   |              |
|              | Brain_Anterior_cingulate_cortex_BA24 | 0.890430079                          |              |              | Brain_Cortex                   |                   |              |
|              | 1.133700264                          | 0.868990462                          | 0.868990462  | -1.265364121 | 1.239544006                    |                   |              |
|              | 0.037313303                          | 1.255471361                          | 3            | 0            | 0.998207054                    |                   |              |
| EDRF1        | ENSG00000107938.17                   | 0.351473076                          | 1            | 1            | 0.351473076                    |                   |              |
|              | Brain_Spinal_cord_cervical_c-1       | 0.351473076                          |              |              | Brain_Spinal_cord_cervical_c-1 |                   |              |
|              | 1                                    | 1                                    | 1            | 0.931735809  | 0.931735809                    | NA                | 1            |
|              | 0.998207054                          |                                      |              |              |                                |                   |              |
| PLPP3        | ENSG00000162407.8                    | 0.351559476                          | 3            | 3            | 0.158823589                    | Brain_Cerebellum  |              |
|              | 0.62622757                           | Brain_Anterior_cingulate_cortex_BA24 | 1.091731148  | 0.92959601   |                                |                   |              |
|              | 0.92959601                           | -1.409039162                         | -0.487043407 | -1.003093801 | 0.470756181                    | 3                 |              |
|              | 0                                    | 0.998207054                          |              |              |                                |                   |              |
| TMEM185B     | ENSG00000226479.3                    | 0.351711718                          | 4            | 4            | 0.164912293                    |                   |              |
|              | Brain_Cortex                         | 0.960096831                          |              |              | Brain_Putamen_basal_ganglia    | 2.436190359       |              |
|              | 0.252323959                          | 0.252323959                          | -1.388738464 | 0.050032072  | -0.741231288                   |                   |              |
|              | 0.624215743                          | 4                                    | 0            | 0.998207054  |                                |                   |              |
| ANKRA2       | ENSG00000164331.9                    | 0.351714689                          | 3            | 3            | 0.464837947                    |                   |              |
|              | Brain_Cerebellar_Hemisphere          | 0.543584359                          |              |              | Brain_Frontal_Cortex_BA9       |                   |              |
|              | 1.884397921                          | 0.311592308                          | 0.311592308  | -0.630454478 | 0.730903747                    |                   |              |
|              | -0.168984145                         | 0.779411009                          | 3            | 0            | 0.998207054                    |                   |              |
| GAD2         | ENSG00000136750.11                   | 0.351723597                          | 1            | 1            | 0.351723597                    | Brain_Cerebellum  |              |
|              | 0.351723597                          | Brain_Cerebellum                     | 1            | 1            | -0.93125128                    | -0.93125128       |              |
|              | -0.93125128                          | NA                                   | 1            | 0            | 0.998207054                    |                   |              |
| ARL9         | ENSG00000196503.3                    | 0.351774141                          | 3            | 3            | 0.194734943                    |                   |              |
|              | Brain_Anterior_cingulate_cortex_BA24 | 0.956761131                          |              |              | Brain_Cortex                   |                   |              |
|              | 1.710135232                          | 0.435897344                          | 0.435897344  | -1.296698508 | 0.992721401                    |                   |              |
|              | -0.119398515                         | 1.146100873                          | 3            | 0            | 0.998207054                    |                   |              |
| RP11-367H1.1 | ENSG00000273113.1                    | 0.351819068                          | 2            | 2            | 0.149053747                    |                   |              |
|              | Brain_Cerebellar_Hemisphere          | 0.858912232                          |              |              | Brain_Spinal_cord_cervical_c-1 |                   |              |
|              | 1.06382705                           | 0.93617295                           | 0.93617295   | -0.17775902  | 1.442881885                    | 0.632561432       |              |
|              | 1.145966174                          | 2                                    | 0            | 0.998207054  |                                |                   |              |
| APOBEC3F     | ENSG00000128394.16                   | 0.351860521                          | 1            | 1            | 0.351860521                    |                   |              |
|              | Brain_Cerebellar_Hemisphere          | 0.351860521                          |              |              | Brain_Cerebellar_Hemisphere    | 1                 | 1            |
|              | 1                                    | 0.93098655                           | 0.93098655   | 0.93098655   | NA                             | 1                 | 0            |
|              | 0.998207054                          |                                      |              |              |                                |                   |              |
| MYBBP1A      | ENSG00000132382.14                   | 0.35189668                           | 1            | 1            | 0.35189668                     | Brain_Hippocampus |              |
|              | 0.35189668                           | Brain_Hippocampus                    | 1            | 1            | 1                              | 0.930916652       | 0.930916652  |
|              | 0.930916652                          | NA                                   | 1            | 0            | 0.998207054                    |                   |              |
| MYNN         | ENSG00000085274.15                   | 0.35195915                           | 2            | 2            | 0.180099599                    |                   |              |
|              | Brain_Frontal_Cortex_BA9             | 0.700550936                          |              |              | Brain_Cerebellum               | 1.113403578       |              |
|              | 0.886596422                          | 0.886596422                          | -0.384576867 | 1.340448432  | 0.477935783                    |                   |              |
|              | 1.219777086                          | 2                                    | 0            | 0.998207054  |                                |                   |              |



|            |                                       |                  |                             |              |                                      |                       |
|------------|---------------------------------------|------------------|-----------------------------|--------------|--------------------------------------|-----------------------|
| DENND4C    | ENSG00000137145.20                    | 0.351966404      | 1                           | 1            | 0.351966404                          |                       |
|            | Brain_Spinal_cord_cervical_c-1        | 0.351966404      |                             |              | Brain_Spinal_cord_cervical_c-1       |                       |
|            | 1 1 1                                 | -0.930781882     | -0.930781882                | -0.930781882 | NA 1 0                               |                       |
|            | 0.998207054                           |                  |                             |              |                                      |                       |
| XKR4       | ENSG00000206579.8                     | 0.352001198      | 1                           | 1            | 0.352001198                          | Brain_Cerebellum      |
|            | 0.352001198                           | Brain_Cerebellum | 1                           | 1            | -0.930714633                         | -0.930714633          |
|            | -0.930714633                          | NA 1             | 0                           | 0.998207054  |                                      |                       |
| ARL17A     | ENSG00000185829.17                    | 0.352078252      | 11                          | 3            | 0.10838315                           |                       |
|            | Brain_Nucleus_accumbens_basal_ganglia | 0.889625337      |                             |              | Brain_Caudate_basal_ganglia          |                       |
|            | 8.984230898                           | 0.00785473       | 0.45268475                  | -1.605503014 | -0.138778306                         |                       |
|            | -0.901838303                          | 0.441359454      | 3                           | 0            | 0.998207054                          |                       |
| LEMD2      | ENSG00000161904.11                    | 0.352104174      | 9                           | 2            | 0.108726308                          |                       |
|            | Brain_Frontal_Cortex_BA9              | 0.949439607      |                             |              | Brain_Cerebellar_Hemisphere          |                       |
|            | 7.731805273                           | 0.00316427       | 0.827447658                 | -1.603944403 | -0.063410524                         |                       |
|            | -0.99185417                           | 0.448834839      | 2                           | 0            | 0.998207054                          |                       |
| CUL3       | ENSG00000036257.12                    | 0.352248787      | 3                           | 2            | 0.216609131                          |                       |
|            | Brain_Hippocampus                     | 0.529048197      |                             |              | Brain_Cortex                         | 1.9521384 0.054336925 |
|            | 0.993524674                           | -1.235595037     | -0.629459619                | -0.947892316 | 0.304233931                          |                       |
|            | 2 0                                   | 0.998207054      |                             |              |                                      |                       |
| HAUS8      | ENSG00000131351.14                    | 0.35234317       | 3                           | 2            | 0.148598515                          |                       |
|            | Brain_Caudate_basal_ganglia           | 0.185823904      |                             |              | Brain_Cerebellum                     | 2.892433765           |
|            | 0.001702658                           | 0.105863577      | 1.323034503                 | 1.444499518  | 1.3639712                            |                       |
|            | 0.069742812                           | 2 0              | 0.998207054                 |              |                                      |                       |
| ANGPT4     | ENSG00000101280.7                     | 0.35239414       | 2                           | 2            | 0.150688555                          |                       |
|            | Brain_Caudate_basal_ganglia           | 0.989286299      |                             |              | Brain_Anterior_cingulate_cortex_BA24 |                       |
|            | 1.090464272                           | 0.909535728      | 0.909535728                 | -1.437103614 | 0.013428037                          |                       |
|            | -0.711837788                          | 1.025680767      | 2                           | 0            | 0.998207054                          |                       |
| ZNF226     | ENSG00000167380.16                    | 0.352461479      | 1                           | 1            | 0.352461479                          |                       |
|            | Brain_Cerebellum                      | 0.352461479      | Brain_Cerebellum            | 1 1 1        | -0.929825426                         |                       |
|            | -0.929825426                          | -0.929825426     | NA 1                        | 0            | 0.998207054                          |                       |
| AP000462.3 | ENSG00000256972.1                     | 0.352491853      | 2                           | 2            | 0.150046661                          |                       |
|            | Brain_Cerebellum                      | 0.270067915      |                             |              | Brain_Cerebellar_Hemisphere          | 1.708936152           |
|            | 0.291063848                           | 0.291063848      | 1.10290617                  | 1.439366674  | 1.271136422                          |                       |
|            | 0.237913504                           | 2 0              | 0.998207054                 |              |                                      |                       |
| KRT1       | ENSG00000167768.4                     | 0.352613533      | 3                           | 3            | 0.248725601                          |                       |
|            | Brain_Caudate_basal_ganglia           | 0.401751396      |                             |              | Brain_Anterior_cingulate_cortex_BA24 |                       |
|            | 1.042461179                           | 0.957277129      | 0.957277129                 | -1.15031176  | 1.153450312                          |                       |
|            | -0.278452956                          | 1.249826897      | 3                           | 0            | 0.998207054                          |                       |
| MSH5       | ENSG00000204410.14                    | 0.352671954      | 2                           | 2            | 0.14901033                           |                       |
|            | Brain_Putamen_basal_ganglia           | 0.770460132      |                             |              | Brain_Cerebellar_Hemisphere          |                       |
|            | 1.171047064                           | 0.828952936      | 0.828952936                 | -1.443036    | -0.291773076                         |                       |
|            | -0.867404538                          | 0.814065821      | 2                           | 0            | 0.998207054                          |                       |
| FAM221B    | ENSG00000204930.9                     | 0.352674379      | 1                           | 1            | 0.352674379                          |                       |
|            | Brain_Cerebellar_Hemisphere           | 0.352674379      | Brain_Cerebellar_Hemisphere | 1 1          |                                      |                       |
|            | 1 0.929414379                         | 0.929414379      | 0.929414379                 | NA 1 0       |                                      |                       |
|            | 0.998207054                           |                  |                             |              |                                      |                       |
| PLA2G15    | ENSG00000103066.12                    | 0.352715607      | 2                           | 2            | 0.185898254                          |                       |
|            | Brain_Hippocampus                     | 0.45756373       | Brain_Frontal_Cortex_BA9    | 1.128051719  |                                      |                       |
|            | 0.871948281                           | 0.871948281      | -1.322810951                | -0.742864483 | -1.032837717                         |                       |
|            | 0.41008408                            | 2 0              | 0.998207054                 |              |                                      |                       |
| LURAP1L    | ENSG00000153714.5                     | 0.352758691      | 10                          | 2            | 0.184466422                          |                       |
|            | Brain_Cerebellar_Hemisphere           | 0.999307337      |                             |              | Brain_Substantia_nigra               |                       |
|            | 8.708334408                           | 0.000492904      | 0.991578827                 | 0.000868125  | 1.327127767                          |                       |
|            | 0.603298575                           | 0.356116327      | 2                           | 0            | 0.998207054                          |                       |
| YTHDF3-AS1 | ENSG00000270673.1                     | 0.352758922      | 2                           | 2            | 0.375908988                          |                       |
|            | Brain_Putamen_basal_ganglia           | 0.724734784      |                             |              | Brain_Cerebellum                     | 1.61631187 0.38368813 |
|            | 0.38368813                            | -0.88545925      | 0.352137983                 | -0.266660633 | 0.875113397                          | 2                     |
|            | 0                                     | 0.998207054      |                             |              |                                      |                       |
| NOMO2      | ENSG00000185164.14                    | 0.352902737      | 1                           | 1            | 0.352902737                          | Brain_Cerebellum      |
|            | 0.352902737                           | Brain_Cerebellum | 1 1 1                       | -0.928973659 | -0.928973659                         |                       |
|            | -0.928973659                          | NA 1             | 0                           | 0.998207054  |                                      |                       |
| REM2       | ENSG00000139890.9                     | 0.352914497      | 2                           | 2            | 0.158595274                          |                       |

|           |                                       |                                      |                             |                                      |              |              |                             |
|-----------|---------------------------------------|--------------------------------------|-----------------------------|--------------------------------------|--------------|--------------|-----------------------------|
|           | Brain_Caudate_basal_ganglia           | 0.840290636                          |                             | Brain_Cerebellum                     | 1.075618371  |              |                             |
|           | 0.924381629                           | 0.924381629                          | 0.201521735                 | 1.409811756                          | 0.805666746  |              |                             |
|           | 0.854390068                           | 2                                    | 0                           | 0.998207054                          |              |              |                             |
| RCAN2     | ENSG00000172348                       | 14                                   | 0.35294271                  | 1                                    | 1            | 0.35294271   | Brain_Cerebellum 0.35294271 |
|           | Brain_Cerebellum                      | 1                                    | 1                           | -0.928896533                         | -0.928896533 | -0.928896533 |                             |
|           | NA                                    | 1                                    | 0                           | 0.998207054                          |              |              |                             |
| MTRNR2L12 | ENSG00000269028                       | 3                                    | 0.353086155                 | 1                                    | 1            | 0.353086155  |                             |
|           | Brain_Anterior_cingulate_cortex_BA24  | 0.353086155                          |                             |                                      |              |              |                             |
|           | Brain_Anterior_cingulate_cortex_BA24  | 1                                    | 1                           | 1                                    | -0.928619803 |              |                             |
|           | -0.928619803                          | -0.928619803                         | NA                          | 1                                    | 0            | 0.998207054  |                             |
| PADI4     | ENSG00000159339                       | 13                                   | 0.353148321                 | 5                                    | 2            | 0.203832108  |                             |
|           | Brain_Caudate_basal_ganglia           | 0.708620639                          |                             | Brain_Anterior_cingulate_cortex_BA24 |              |              |                             |
|           | 3.888592065                           | 0.002542688                          | 0.993470348                 | 0.373709255                          | 1.270709238  |              |                             |
|           | 0.853122301                           | 0.329948834                          | 2                           | 0                                    | 0.998207054  |              |                             |
| EPHB3     | ENSG00000182580                       | 2                                    | 0.353198436                 | 1                                    | 1            | 0.353198436  | Brain_Cerebellum            |
|           | 0.353198436                           | Brain_Cerebellum                     | 1                           | 1                                    | 1            | 0.928403244  | 0.928403244                 |
|           | 0.928403244                           | NA                                   | 1                           | 0                                    | 0.998207054  |              |                             |
| BET1L     | ENSG00000177951                       | 17                                   | 0.353324161                 | 6                                    | 5            | 0.054915758  |                             |
|           | Brain_Spinal_cord_cervical_c-1        | 0.766181212                          |                             |                                      |              |              |                             |
|           | Brain_Anterior_cingulate_cortex_BA24  | 3.029645112                          |                             | 0.033471289                          |              |              |                             |
|           | 0.152806764                           | -1.879045268                         | 1.919542141                 | -0.299309435                         | 1.364144615  |              |                             |
|           | 5                                     | 0                                    | 0.998207054                 |                                      |              |              |                             |
| HEATR5A   | ENSG00000129493                       | 14                                   | 0.353341767                 | 5                                    | 4            | 0.201212262  |                             |
|           | Brain_Spinal_cord_cervical_c-1        | 0.935216743                          |                             |                                      |              |              |                             |
|           | Brain_Nucleus_accumbens_basal_ganglia | 3.593483376                          |                             | 0.058250528                          |              |              |                             |
|           | 0.252725137                           | -1.278105409                         | 0.386443842                 | -0.198972228                         | 0.698261813  |              |                             |
|           | 4                                     | 0                                    | 0.998207054                 |                                      |              |              |                             |
| B4GALT3   | ENSG00000158850                       | 14                                   | 0.353380812                 | 1                                    | 1            | 0.353380812  |                             |
|           | Brain_Cerebellum                      | 0.353380812                          | Brain_Cerebellum            | 1                                    | 1            | 1            | -0.928051586                |
|           | -0.928051586                          | -0.928051586                         | NA                          | 1                                    | 0            | 0.998207054  |                             |
| GPC1      | ENSG00000063660                       | 8                                    | 0.353467709                 | 4                                    | 4            | 0.141936272  |                             |
|           | Brain_Cerebellar_Hemisphere           | 0.647036416                          | Brain_Putamen_basal_ganglia |                                      |              |              |                             |
|           | 1.921000578                           | 0.134520586                          | 0.134520586                 | -0.457883118                         | 1.468618583  |              |                             |
|           | 0.884856876                           | 0.911582531                          | 4                           | 0                                    | 0.998207054  |              |                             |
| 4-Mar     | ENSG00000144583                       | 4                                    | 0.353473959                 | 1                                    | 1            | 0.353473959  | Brain_Cerebellum            |
|           | 0.353473959                           | Brain_Cerebellum                     | 1                           | 1                                    | 1            | -0.927872021 | -0.927872021                |
|           | -0.927872021                          | NA                                   | 1                           | 0                                    | 0.998207054  |              |                             |
| NHP2      | ENSG00000145912                       | 8                                    | 0.353589322                 | 2                                    | 2            | 0.26461721   | Brain_Amygdala              |
|           | 0.354883731                           | Brain_Anterior_cingulate_cortex_BA24 | 1.010338862                 |                                      |              |              |                             |
|           | 0.989661138                           | 0.989661138                          | -1.115544384                | 0.925157993                          | -0.095193196 |              |                             |
|           | 1.442994489                           | 2                                    | 0                           | 0.998207054                          |              |              |                             |
| ITGA9     | ENSG00000144668                       | 11                                   | 0.353614918                 | 3                                    | 3            | 0.123437523  | Brain_Cerebellum            |
|           | 0.568068283                           | Brain_Cerebellar_Hemisphere          | 2.227444438                 | 0.227707611                          |              |              |                             |
|           | 0.227707611                           | -1.450838565                         | 1.540504105                 | 0.220188094                          | 1.526198287  |              |                             |
|           | 3                                     | 0                                    | 0.998207054                 |                                      |              |              |                             |
| DLX1      | ENSG00000144355                       | 14                                   | 0.353663995                 | 1                                    | 1            | 0.353663995  |                             |
|           | Brain_Caudate_basal_ganglia           | 0.353663995                          | Brain_Caudate_basal_ganglia | 1                                    | 1            |              |                             |
|           | 1                                     | -0.927505775                         | -0.927505775                | -0.927505775                         | NA           | 1            | 0                           |
|           | 0.998207054                           |                                      |                             |                                      |              |              |                             |
| SRP68     | ENSG00000167881                       | 14                                   | 0.353770658                 | 1                                    | 1            | 0.353770658  |                             |
|           | Brain_Cerebellar_Hemisphere           | 0.353770658                          | Brain_Cerebellar_Hemisphere | 1                                    | 1            |              |                             |
|           | 1                                     | -0.927300263                         | -0.927300263                | -0.927300263                         | NA           | 1            | 0                           |
|           | 0.998207054                           |                                      |                             |                                      |              |              |                             |
| LIX1      | ENSG00000145721                       | 11                                   | 0.35386954                  | 2                                    | 2            | 0.163994174  | Brain_Cortex                |
|           | 0.683203743                           | Brain_Anterior_cingulate_cortex_BA24 | 1.0238323                   | 0.9761677                            |              |              |                             |
|           | 0.9761677                             | -1.391763012                         | -0.408095255                | -0.899929134                         | 0.695558142  |              | 2                           |
|           | 0                                     | 0.998207054                          |                             |                                      |              |              |                             |
| NKTR      | ENSG00000114857                       | 17                                   | 0.353896373                 | 8                                    | 4            | 0.251136935  |                             |
|           | Brain_Frontal_Cortex_BA9              | 0.98789641                           | Brain_Cerebellar_Hemisphere | 6.51517425                           |              |              |                             |
|           | 1.39E-05                              | 0.219391805                          | -1.035597805                | 1.147592239                          | 0.398631733  |              |                             |
|           | 0.770800779                           | 4                                    | 0                           | 0.998207054                          |              |              |                             |
| EIF5A     | ENSG00000132507                       | 17                                   | 0.354067884                 | 12                                   | 4            | 0.026502666  |                             |

|               |                                       |                             |              |                                       |             |              |                    |
|---------------|---------------------------------------|-----------------------------|--------------|---------------------------------------|-------------|--------------|--------------------|
|               | Brain_Caudate_basal_ganglia           | 0.483474105                 |              | Brain_Cerebellar_Hemisphere           |             |              |                    |
|               | 9.806084707                           | 0.003507555                 | 0.366619058  | 0.700725874                           |             | 2.218765746  |                    |
|               | 1.631197071                           | 0.421000531                 | 4            | 0                                     | 0.998207054 |              |                    |
| BZW1          | ENSG00000082153.17                    | 0.354146997                 | 1            | 1                                     | 0.354146997 |              |                    |
|               | Brain_Cerebellar_Hemisphere           | 0.354146997                 |              | Brain_Cerebellar_Hemisphere           | 1           | 1            |                    |
|               | 1                                     | 0.926575468                 | 0.926575468  | 0.926575468                           | NA          | 1            | 0                  |
|               | 0.998207054                           |                             |              |                                       |             |              |                    |
| RP11-299L17.3 | ENSG00000258675.1                     | 0.354165853                 | 1            | 1                                     | 0.354165853 |              |                    |
|               | Brain_Hypothalamus                    | 0.354165853                 |              | Brain_Hypothalamus                    | 1           | 1            | 1                  |
|               | 0.926539165                           | 0.926539165                 | 0.926539165  | NA                                    | 1           | 0            | 0.998207054        |
| TMEM43        | ENSG00000170876.7                     | 0.354236635                 | 1            | 1                                     | 0.354236635 |              |                    |
|               | Brain_Cerebellar_Hemisphere           | 0.354236635                 |              | Brain_Cerebellar_Hemisphere           | 1           | 1            |                    |
|               | 1                                     | -0.926402905                | -0.926402905 | -0.926402905                          | NA          | 1            | 0                  |
|               | 0.998207054                           |                             |              |                                       |             |              |                    |
| BHLHE40       | ENSG00000134107.4                     | 0.354253587                 | 1            | 1                                     | 0.354253587 |              |                    |
|               | Brain_Substantia_nigra                | 0.354253587                 |              | Brain_Substantia_nigra                | 1           | 1            |                    |
|               | 1                                     | -0.926370273                | -0.926370273 | -0.926370273                          | NA          | 1            | 0                  |
|               | 0.998207054                           |                             |              |                                       |             |              |                    |
| SYCP3         | ENSG00000139351.14                    | 0.354257922                 | 2            | 2                                     | 0.647378748 |              | Brain_Cerebellum   |
|               | 0.849615533                           | Brain_Cerebellar_Hemisphere | 1.898221469  | 0.101778531                           |             |              |                    |
|               | 0.101778531                           | -0.457406701                | 0.189609001  | -0.13389885                           | 0.457509191 |              |                    |
|               | 2                                     | 0                           | 0.998207054  |                                       |             |              |                    |
| ZBED6         | ENSG00000257315.2                     | 0.354267169                 | 1            | 1                                     | 0.354267169 |              |                    |
|               | Brain_Hippocampus                     | 0.354267169                 |              | Brain_Hippocampus                     | 1           | 1            | 1                  |
|               | -0.926344129                          | -0.926344129                | -0.926344129 | NA                                    | 1           | 0            | 0.998207054        |
| RP11-325E5.1  | ENSG00000259656.1                     | 0.354308258                 | 1            | 1                                     | 0.354308258 |              |                    |
|               | Brain_Caudate_basal_ganglia           | 0.354308258                 |              | Brain_Caudate_basal_ganglia           | 1           | 1            |                    |
|               | 1                                     | -0.926265042                | -0.926265042 | -0.926265042                          | NA          | 1            | 0                  |
|               | 0.998207054                           |                             |              |                                       |             |              |                    |
| SMC2-AS1      | ENSG00000270332.1                     | 0.354345416                 | 2            | 2                                     | 0.208412818 |              |                    |
|               | Brain_Nucleus_accumbens_basal_ganglia | 0.443672305                 |              | Brain_Cerebellum                      |             |              |                    |
|               | 1.051774953                           | 0.948225047                 | 0.948225047  | 0.766006718                           | 1.257941764 |              |                    |
|               | 1.011974241                           | 0.347850607                 | 2            | 0                                     | 0.998207054 |              |                    |
| HIPK1         | ENSG00000163349.21                    | 0.354421946                 | 1            | 1                                     | 0.354421946 |              | Brain_Cortex       |
|               | 0.354421946                           | Brain_Cortex                | 1            | 1                                     | 1           | 0.926046249  | 0.926046249        |
|               | 0.926046249                           | NA                          | 1            | 0                                     | 0.998207054 |              |                    |
| RP11-619A14.3 | ENSG00000255362.1                     | 0.354460325                 | 3            | 3                                     | 0.211439596 |              |                    |
|               | Brain_Nucleus_accumbens_basal_ganglia | 0.33562502                  |              | Brain_Caudate_basal_ganglia           |             |              |                    |
|               | 1.555551229                           | 0.457176587                 | 0.457176587  | 0.962845586                           | 1.249616709 |              |                    |
|               | 1.082220719                           | 0.149294746                 | 3            | 0                                     | 0.998207054 |              |                    |
| GRIN2B        | ENSG00000273079.5                     | 0.354592787                 | 1            | 1                                     | 0.354592787 |              |                    |
|               | Brain_Putamen_basal_ganglia           | 0.354592787                 |              | Brain_Putamen_basal_ganglia           | 1           | 1            |                    |
|               | 1                                     | -0.925717547                | -0.925717547 | -0.925717547                          | NA          | 1            | 0                  |
|               | 0.998207054                           |                             |              |                                       |             |              |                    |
| AC000403.4    | ENSG00000278727.1                     | 0.354776311                 | 1            | 1                                     | 0.354776311 |              |                    |
|               | Brain_Cerebellum                      | 0.354776311                 |              | Brain_Cerebellum                      | 1           | 1            | 1                  |
|               | 0.925364553                           | 0.925364553                 | NA           | 1                                     | 0           | 0.998207054  |                    |
| ARHGAP12      | ENSG00000165322.17                    | 0.354780909                 | 3            | 3                                     | 0.233041044 |              |                    |
|               | Brain_Cerebellar_Hemisphere           | 0.647883197                 |              | Brain_Anterior_cingulate_cortex_BA24  |             |              |                    |
|               | 2.067662576                           | 0.226407399                 | 0.226407399  | -0.729969721                          | 1.192561774 |              |                    |
|               | 0.306432305                           | 0.970035163                 | 3            | 0                                     | 0.998207054 |              |                    |
| GPR162        | ENSG00000250510.7                     | 0.354862793                 | 2            | 2                                     | 0.150605876 |              |                    |
|               | Brain_Spinal_cord_cervical_c-1        | 0.726506065                 |              | Brain_Cerebellum                      | 1.190685519 |              |                    |
|               | 0.809314481                           | 0.809314481                 | 0.349776996  | 1.437394694                           | 0.893585845 |              |                    |
|               | 0.76906185                            | 2                           | 0            | 0.998207054                           |             |              |                    |
| SENP5         | ENSG00000119231.10                    | 0.354876463                 | 5            | 3                                     | 0.242135761 |              |                    |
|               | Brain_Caudate_basal_ganglia           | 0.934636499                 |              | Brain_Nucleus_accumbens_basal_ganglia |             |              |                    |
|               | 3.785012166                           | 0.00844193                  | 0.368923948  | -1.169665119                          | 0.23995369  |              |                    |
|               | -0.342284022                          | 0.716224642                 | 3            | 0                                     | 0.998207054 |              |                    |
| ZNF90         | ENSG00000213988.10                    | 0.35494682                  | 1            | 1                                     | 0.35494682  |              | Brain_Hypothalamus |
|               | 0.35494682                            | Brain_Hypothalamus          | 1            | 1                                     | 1           | -0.925036696 | -0.925036696       |
|               | -0.925036696                          | NA                          | 1            | 0                                     | 0.998207054 |              |                    |

|               |                                |              |             |             |                                |              |                   |
|---------------|--------------------------------|--------------|-------------|-------------|--------------------------------|--------------|-------------------|
| EOGT          | ENSG00000163378.13             | 0.354964268  | 4           | 4           | 0.373000531                    |              |                   |
|               | Brain_Spinal_cord_cervical_c-1 | 0.715833802  |             |             | Brain_Caudate_basal_ganglia    |              |                   |
|               | 2.416172201                    | 0.202370218  |             |             | -0.575433914                   | 0.890866991  |                   |
|               | 0.09289401                     | 0.682963627  | 4           | 0           | 0.998207054                    |              |                   |
| IKZF1         | ENSG00000185811.16             | 0.354978432  | 2           | 2           | 0.177407681                    |              |                   |
|               | Brain_Caudate_basal_ganglia    | 0.632468125  |             |             | Brain_Hypothalamus             | 1.017682807  |                   |
|               | 0.982317193                    | 0.982317193  |             |             | -1.348779874                   | -0.478255836 | -0.913517855      |
|               | 0.615553451                    | 2            | 0           | 0.998207054 |                                |              |                   |
| NDC1          | ENSG00000058804.11             | 0.355045207  | 1           | 1           | 0.355045207                    |              |                   |
|               | Brain_Caudate_basal_ganglia    | 0.355045207  |             |             | Brain_Caudate_basal_ganglia    | 1            | 1                 |
|               | 1                              | 0.92484756   | 0.92484756  | 0.92484756  | NA                             | 1            | 0                 |
|               |                                |              |             |             | 0.998207054                    |              |                   |
| ZKSCAN1       | ENSG00000106261.16             | 0.355196845  | 2           | 2           | 0.175089149                    |              |                   |
|               | Brain_Caudate_basal_ganglia    | 0.996448249  |             |             | Brain_Amygdala                 | 1.337207321  |                   |
|               | 0.662792679                    | 0.662792679  |             |             | -1.35603149                    | -0.004451474 | -0.680241482      |
|               | 0.955711394                    | 2            | 0           | 0.998207054 |                                |              |                   |
| LRRC27        | ENSG00000148814.17             | 0.355198734  | 10          | 2           | 0.299575436                    |              |                   |
|               | Brain_Caudate_basal_ganglia    | 0.924466198  |             |             | Brain_Cerebellar_Hemisphere    |              |                   |
|               | 8.969649881                    | 0.002134272  |             |             | 0.575068426                    | -0.094809428 | 1.03734428        |
|               | 0.675439662                    | 0.346637567  | 2           | 0           | 0.998207054                    |              |                   |
| PMP2          | ENSG00000147588.6              | 0.3552278    | 2           | 2           | 0.166148161                    |              |                   |
|               | Brain_Frontal_Cortex_BA9       | 0.430584731  |             |             | Brain_Caudate_basal_ganglia    |              |                   |
|               | 1.300076869                    | 0.699923131  |             |             | 0.699923131                    | -1.384687113 | -0.788191447      |
|               | -1.08643928                    | 0.42178613   | 2           | 0           | 0.998207054                    |              |                   |
| B4GALNT4      | ENSG00000182272.11             | 0.355287504  | 6           | 6           | 0.041579811                    |              |                   |
|               | Brain_Putamen_basal_ganglia    | 0.648483151  |             |             | Brain_Cortex                   | 3.760707314  |                   |
|               | 0.165588541                    | 0.165588541  |             |             | 0.455870434                    | 2.037701331  | 0.945772613       |
|               | 0.565912823                    | 6            | 0           | 0.998207054 |                                |              |                   |
| CCSER1        | ENSG00000184305.14             | 0.355305275  | 3           | 3           | 0.19117298                     |              |                   |
|               | Brain_Cerebellar_Hemisphere    | 0.962046945  |             |             | Brain_Spinal_cord_cervical_c-1 |              |                   |
|               | 1.077231588                    | 0.944063672  |             |             | 0.944063672                    | -1.307116996 | 1.305035047       |
|               | 0.015167701                    | 1.306377716  | 3           | 0           | 0.998207054                    |              |                   |
| C2orf40       | ENSG00000119147.9              | 0.355424593  | 9           | 5           | 0.027901444                    |              |                   |
|               | Brain_Hippocampus              | 0.279634346  |             |             | Brain_Cortex                   | 6.875516309  | 3.23E-18          |
|               | 0.349399493                    | -2.198669324 |             |             | -1.081141116                   | -1.793841074 | 0.300787282       |
|               | 5                              | 0            | 0.998207054 |             |                                |              |                   |
| RP11-430G17.3 | ENSG00000271200.1              | 0.355436364  | 1           | 1           | 0.355436364                    |              |                   |
|               | Brain_Cerebellum               | 0.355436364  |             |             | Brain_Cerebellum               | 1            | 1                 |
|               | -0.924095946                   | -0.924095946 | NA          | 1           | 0                              | 0.998207054  |                   |
| CPEB1         | ENSG00000214575.9              | 0.355507783  | 3           | 3           | 0.416471627                    |              | Brain_Cerebellum  |
|               | Brain_Hippocampus              | 1.881085138  |             |             | 0.338706471                    |              |                   |
|               | 0.710260007                    | -0.682810717 |             |             | 0.812557814                    | -0.080586606 | 0.78899159        |
|               | 0.338706471                    |              |             |             |                                |              | 3                 |
|               | 0                              | 0.998207054  |             |             |                                |              |                   |
| LINC01544     | ENSG00000260440.2              | 0.355511887  | 2           | 2           | 0.199542311                    |              |                   |
|               | Brain_Cerebellar_Hemisphere    | 0.493447687  |             |             | Brain_Cerebellum               | 1.027239577  |                   |
|               | 0.972760423                    | 0.972760423  |             |             | 0.684835569                    | 1.282856628  | 0.983846098       |
|               | 0.422864746                    | 2            | 0           | 0.998207054 |                                |              |                   |
| SLFN12        | ENSG00000172123.12             | 0.355529658  | 2           | 2           | 0.205955562                    |              |                   |
|               | Brain_Caudate_basal_ganglia    | 0.302374114  |             |             | Brain_Cerebellum               | 1.298923156  |                   |
|               | 0.701076844                    | 0.701076844  |             |             | 1.031355557                    | 1.264765053  | 1.148060305       |
|               | 0.165045438                    | 2            | 0           | 0.998207054 |                                |              |                   |
| ZNF600        | ENSG00000189190.9              | 0.355792446  | 6           | 6           | 0.055448683                    |              |                   |
|               | Brain_Cerebellum               | 0.67641353   |             |             | Brain_Cerebellar_Hemisphere    | 2.111674921  |                   |
|               | 0.385789326                    | 0.385789326  |             |             | -1.915343721                   | -0.417362158 | -1.074080402      |
|               | 0.572289952                    | 6            | 0           | 0.998207054 |                                |              |                   |
| NPR1          | ENSG00000169418.9              | 0.355876103  | 2           | 2           | 0.181272906                    |              | Brain_Cerebellum  |
|               | Brain_Frontal_Cortex_BA9       | 1.061234644  |             |             | 0.938765356                    |              |                   |
|               | 0.655937083                    | -0.445529587 |             |             | 1.336846013                    | 0.445658213  | 1.260329873       |
|               | 0.938765356                    |              |             |             |                                |              |                   |
|               | 2                              | 0            | 0.998207054 |             |                                |              |                   |
| NGFR          | ENSG00000064300.8              | 0.355940508  | 5           | 4           | 0.07828156                     |              | Brain_Hippocampus |
|               | Brain_Cerebellum               | 3.433042342  |             |             | 0.080733733                    |              | 0.240313387       |
|               | 0.942478238                    |              |             |             |                                |              |                   |
|               | 0.0721554                      | 1.760745073  |             |             | 0.794191066                    | 0.611303904  | 4                 |
|               | 0.998207054                    |              |             |             |                                |              | 0                 |

|               |                                       |                             |                                       |              |                   |                  |
|---------------|---------------------------------------|-----------------------------|---------------------------------------|--------------|-------------------|------------------|
| KIRREL3       | ENSG00000149571.11                    | 0.35610293                  | 2                                     | 2            | 0.310610168       |                  |
|               | Brain_Spinal_cord_cervical_c-1        | 0.352485432                 |                                       |              | Brain_Hippocampus |                  |
|               | 1.083798485                           | 0.916201515                 | 0.916201515                           |              | -0.929779172      | 1.013942546      |
|               | 0.042081687                           | 1.374418807                 | 2                                     | 0            | 0.998207054       |                  |
| ZNF644        | ENSG00000122482.20                    | 0.356133202                 | 1                                     | 1            | 0.356133202       |                  |
|               | Brain_Anterior_cingulate_cortex_BA24  | 0.356133202                 |                                       |              |                   |                  |
|               | Brain_Anterior_cingulate_cortex_BA24  | 1                           | 1                                     | 1            | -0.922758251      |                  |
|               | -0.922758251                          | -0.922758251                | NA                                    | 1            | 0                 | 0.998207054      |
| NPM1          | ENSG00000181163.13                    | 0.356172894                 | 2                                     | 2            | 0.243150657       | Brain_Cerebellum |
|               | 0.375837244                           | Brain_Putamen_basal_ganglia | 1.041286738                           |              | 0.958713262       |                  |
|               | 0.958713262                           | -1.167147875                | -0.885592334                          |              | -1.026370105      | 0.199089832      |
|               | 2                                     | 0                           | 0.998207054                           |              |                   |                  |
| CCNB2         | ENSG00000157456.7                     | 0.356208748                 | 3                                     | 3            | 0.094844514       |                  |
|               | Brain_Spinal_cord_cervical_c-1        | 0.861724676                 |                                       |              | Brain_Cortex      | 1.144890915      |
|               | 0.852229137                           | 0.852229137                 | -0.174179143                          |              | 1.670378431       | 0.633278979      |
|               | 0.943477354                           | 3                           | 0                                     | 0.998207054  |                   |                  |
| TPGS2         | ENSG00000134779.14                    | 0.356216115                 | 10                                    | 4            | 0.03569221        | Brain_Cerebellum |
|               | 0.947446729                           | Brain_Cortex                | 7.230997967                           |              | 0.011797007       | 0.261300341      |
|               | -2.100416597                          | 0.570936041                 | -0.374862039                          |              | 0.763194807       | 4                |
|               | 0.998207054                           |                             |                                       |              |                   | 0                |
| CTD-3220F14.1 | ENSG00000267605.5                     | 0.356272788                 | 6                                     | 6            | 0.068962772       |                  |
|               | Brain_Hippocampus                     | 0.982146418                 | Brain_Hypothalamus                    | 3.038211961  |                   |                  |
|               | 0.171371887                           | 0.171371887                 | -1.331081593                          |              | 1.818663575       | 0.178457285      |
|               | 1.042718971                           | 6                           | 0                                     | 0.998207054  |                   |                  |
| GTPBP10       | ENSG00000105793.15                    | 0.356411558                 | 8                                     | 6            | 0.292764632       |                  |
|               | Brain_Nucleus_accumbens_basal_ganglia | 0.618447556                 | Brain_Frontal_Cortex_BA9              |              |                   |                  |
|               | 4.878796494                           | 0.064358037                 | 0.212444633                           |              | -1.009162418      | 1.052076111      |
|               | 0.612996124                           | 0.684128876                 | 6                                     | 0            | 0.998207054       |                  |
| SENP2         | ENSG00000163904.12                    | 0.356457431                 | 2                                     | 2            | 0.207522066       | Brain_Cerebellum |
|               | 0.354447496                           | Brain_Substantia_nigra      | 1.199131934                           |              | 0.800868066       |                  |
|               | 0.800868066                           | 0.925997083                 | 1.260408418                           |              | 1.093202751       | 0.236464523      |
|               | 2                                     | 0                           | 0.998207054                           |              |                   |                  |
| P2RX7         | ENSG00000089041.16                    | 0.356491715                 | 7                                     | 4            | 0.29244121        |                  |
|               | Brain_Cerebellar_Hemisphere           | 0.862301405                 | Brain_Caudate_basal_ganglia           |              |                   |                  |
|               | 5.246842351                           | 0.026001958                 | 0.345917968                           |              | -0.622431138      | 1.052781359      |
|               | 0.287980786                           | 0.632474785                 | 4                                     | 0            | 0.998207054       |                  |
| SPG7          | ENSG00000197912.14                    | 0.3566184                   | 2                                     | 2            | 0.155095149       |                  |
|               | Brain_Caudate_basal_ganglia           | 0.983570541                 | Brain_Amygdala                        | 1.154788103  |                   |                  |
|               | 0.845211897                           | 0.845211897                 | 0.020592728                           |              | 1.421762708       | 0.721177718      |
|               | 0.990776794                           | 2                           | 0                                     | 0.998207054  |                   |                  |
| PCNP          | ENSG00000081154.11                    | 0.356674858                 | 1                                     | 1            | 0.356674858       |                  |
|               | Brain_Caudate_basal_ganglia           | 0.356674858                 | Brain_Caudate_basal_ganglia           | 1            | 1                 |                  |
|               | 1                                     | -0.921719593                | -0.921719593                          | -0.921719593 | NA                | 1                |
|               | 0.998207054                           |                             |                                       |              |                   | 0                |
| RP3-340N1.2   | ENSG00000227066.1                     | 0.356773605                 | 9                                     | 2            | 0.133701917       |                  |
|               | Brain_Substantia_nigra                | 0.897182983                 | Brain_Caudate_basal_ganglia           |              |                   |                  |
|               | 7.776508289                           | 7.32E-06                    | 0.586007391                           |              | 0.129220744       | 1.499662236      |
|               | 0.395990053                           | 0.4522163                   | 2                                     | 0            | 0.998207054       |                  |
| POLR3K        | ENSG00000161980.5                     | 0.357041732                 | 3                                     | 3            | 0.152893516       |                  |
|               | Brain_Cerebellar_Hemisphere           | 0.712508257                 | Brain_Cerebellum                      | 1.060717884  |                   |                  |
|               | 0.945455541                           | 0.945455541                 | -0.94127373                           |              | 1.429385319       | 0.285533704      |
|               | 1.187504666                           | 3                           | 0                                     | 0.998207054  |                   |                  |
| CDPF1         | ENSG00000205643.10                    | 0.357150936                 | 1                                     | 1            | 0.357150936       |                  |
|               | Brain_Putamen_basal_ganglia           | 0.357150936                 | Brain_Putamen_basal_ganglia           | 1            | 1                 |                  |
|               | 1                                     | -0.920807505                | -0.920807505                          | -0.920807505 | NA                | 1                |
|               | 0.998207054                           |                             |                                       |              |                   | 0                |
| ATP6AP1L      | ENSG00000205464.11                    | 0.357164095                 | 13                                    | 2            | 0.332367697       |                  |
|               | Brain_Hypothalamus                    | 0.973458384                 | Brain_Nucleus_accumbens_basal_ganglia |              |                   |                  |
|               | 11.82185184                           | 0.002722757                 | 0.479623671                           |              | -0.9693558        | 0.226410705      |
|               | -0.081093053                          | 0.306694085                 | 2                                     | 0            | 0.998207054       |                  |
| CARD19        | ENSG00000165233.17                    | 0.357164938                 | 12                                    | 6            | 0.178658301       |                  |
|               | Brain_Anterior_cingulate_cortex_BA24  | 0.966986539                 | Brain_Cerebellum                      |              |                   |                  |

|               |                                       |              |                                      |              |                         |
|---------------|---------------------------------------|--------------|--------------------------------------|--------------|-------------------------|
|               | 8.327637284                           | 0.009218269  | 0.295544017                          | -1.344897615 | 1.078843881             |
|               | -0.295589836                          | 0.673674918  | 6 0                                  | 0.998207054  |                         |
| CIQTNF1       | ENSG00000173918.14                    | 0.357236068  | 1 1                                  | 0.357236068  |                         |
|               | Brain_Putamen_basal_ganglia           | 0.357236068  | Brain_Putamen_basal_ganglia          | 1            | 1                       |
|               | 1 0.920644488                         | 0.920644488  | 0.920644488                          | NA 1         | 0                       |
|               | 0.998207054                           |              |                                      |              |                         |
| NAE1          | ENSG00000159593.14                    | 0.35757963   | 1 1                                  | 0.35757963   | Brain_Cortex 0.35757963 |
|               | Brain_Cortex                          | 1 1 1        | -0.919986853                         | -0.919986853 | -0.919986853            |
|               | NA 1                                  | 0            | 0.998207054                          |              |                         |
| TMEM51        | ENSG00000171729.13                    | 0.357584543  | 5 5                                  | 0.038643042  |                         |
|               | Brain_Amygdala                        | 0.944468076  | Brain_Cerebellum                     | 1.770688472  | 0.145680689             |
|               | 0.145680689                           | -0.283345924 | 2.067967897                          | 0.515407792  | 0.971780754             |
|               | 5 0                                   | 0.998207054  |                                      |              |                         |
| TMED5         | ENSG00000117500.12                    | 0.357595007  | 6 4                                  | 0.088225312  |                         |
|               | Brain_Spinal_cord_cervical_c-1        | 0.907557874  | Brain_Cerebellum                     | 4.734390437  |                         |
|               | 0.027000817                           | 0.247356422  | -1.704834408                         | -0.11611945  | -1.125924116            |
|               | 0.534595267                           | 4 0          | 0.998207054                          |              |                         |
| UBE4B         | ENSG00000130939.18                    | 0.357645454  | 1 1                                  | 0.357645454  |                         |
|               | Brain_Cerebellar_Hemisphere           | 0.357645454  | Brain_Cerebellar_Hemisphere          | 1            | 1                       |
|               | 1 0.9198609                           | 0.9198609    | 0.9198609                            | NA 1         | 0                       |
|               | 0.998207054                           |              |                                      |              |                         |
| UBR5          | ENSG00000104517.12                    | 0.357654043  | 2 2                                  | 0.306448903  |                         |
|               | Brain_Cerebellar_Hemisphere           | 0.312814619  | Brain_Anterior_cingulate_cortex_BA24 |              |                         |
|               | 1.004034185                           | 0.995965815  | 0.995965815                          | -1.02270171  | 1.00933371              |
|               | -0.006684                             | 1.436866025  | 2 0                                  | 0.998207054  |                         |
| SCNN1A        | ENSG00000111319.12                    | 0.357657077  | 1 1                                  | 0.357657077  |                         |
|               | Brain_Cerebellum                      | 0.357657077  | Brain_Cerebellum                     | 1 1 1        | 0.91983866              |
|               | 0.91983866                            | 0.91983866   | NA 1                                 | 0            | 0.998207054             |
| COLCA2        | ENSG00000214290.8                     | 0.357670825  | 5 4                                  | 0.049790772  |                         |
|               | Brain_Spinal_cord_cervical_c-1        | 0.764592075  | Brain_Frontal_Cortex_BA9             |              |                         |
|               | 2.861420938                           | 0.068679035  | 0.340155097                          | 0.299456085  | 1.961757089             |
|               | 1.115500275                           | 0.600841967  | 4 0                                  | 0.998207054  |                         |
| MIS12         | ENSG00000167842.15                    | 0.357679639  | 11 7                                 | 0.113695312  |                         |
|               | Brain_Spinal_cord_cervical_c-1        | 0.924515811  | Brain_Hypothalamus                   |              |                         |
|               | 6.346608969                           | 0.035910728  | 0.236444841                          | -1.581799661 | 0.993957805             |
|               | -0.327085275                          | 0.838025646  | 7 0                                  | 0.998207054  |                         |
| PGAP3         | ENSG00000161395.13                    | 0.357707633  | 6 4                                  | 0.36272934   |                         |
|               | Brain_Spinal_cord_cervical_c-1        | 0.950111361  |                                      |              |                         |
|               | Brain_Nucleus_accumbens_basal_ganglia | 4.463171715  | 0.029268684                          |              |                         |
|               | 0.223852183                           | -0.910176682 | 0.526008667                          | -0.249187894 | 0.528995081             |
|               | 4 0                                   | 0.998207054  |                                      |              |                         |
| MORN3         | ENSG00000139714.12                    | 0.357724729  | 6 6                                  | 0.048628308  |                         |
|               | Brain_Spinal_cord_cervical_c-1        | 0.991658669  | Brain_Cortex                         | 3.572181509  |                         |
|               | 0.192831034                           | 0.192831034  | -1.220320443                         | 1.971836203  | -0.338345446            |
|               | 1.211533821                           | 6 0          | 0.998207054                          |              |                         |
| ZNF764        | ENSG00000169951.9                     | 0.357742122  | 1 1                                  | 0.357742122  |                         |
|               | Brain_Frontal_Cortex_BA9              | 0.357742122  | Brain_Frontal_Cortex_BA9             | 1            | 1                       |
|               | 1 -0.919675953                        | -0.919675953 | -0.919675953                         | NA 1         | 0                       |
|               | 0.998207054                           |              |                                      |              |                         |
| ATP2A1        | ENSG00000196296.13                    | 0.357832697  | 1 1                                  | 0.357832697  |                         |
|               | Brain_Hypothalamus                    | 0.357832697  | Brain_Hypothalamus                   | 1 1 1        |                         |
|               | 0.919502694                           | 0.919502694  | 0.919502694                          | NA 1         | 0                       |
|               | 0.998207054                           |              |                                      |              |                         |
| SCPEP1        | ENSG00000121064.12                    | 0.357900831  | 2 2                                  | 0.228304412  |                         |
|               | Brain_Cerebellum                      | 0.501178209  | Brain_Substantia_nigra               | 1.084266951  |                         |
|               | 0.915733049                           | 0.915733049  | -1.204738128                         | 0.672637075  | -0.266050526            |
|               | 1.327504737                           | 2 0          | 0.998207054                          |              |                         |
| RP11-429J17.7 | ENSG00000254973.1                     | 0.35801597   | 4 2                                  | 0.486356744  |                         |
|               | Brain_Nucleus_accumbens_basal_ganglia | 0.939306767  | Brain_Cerebellar_Hemisphere          |              |                         |
|               | 3.521497114                           | 0.009997773  | 0.44029575                           | -0.696115111 | 0.542148197             |
|               | -0.213284296                          | 0.574602141  | 2 0                                  | 0.998207054  |                         |
| ZNF436        | ENSG00000125945.14                    | 0.358108549  | 3 3                                  | 0.102313329  |                         |
|               | Brain_Putamen_basal_ganglia           | 0.773549859  | Brain_Cortex                         | 1.160350683  |                         |
|               | 0.837793015                           | 0.837793015  | -0.939510745                         | 1.6337406    | 0.135498399             |

|               |                                |                             |                                |             |             |   |                                       |              |                |
|---------------|--------------------------------|-----------------------------|--------------------------------|-------------|-------------|---|---------------------------------------|--------------|----------------|
|               | 1.337815491                    | 3                           | 0                              | 0.998207054 |             |   |                                       |              |                |
| DIP2B         | ENSG00000066084.12             |                             | 0.35812939                     | 3           | 3           |   | 0.138237585                           |              |                |
|               | Brain_Putamen_basal_ganglia    |                             | 0.416736175                    |             |             |   | Brain_Nucleus_accumbens_basal_ganglia |              |                |
|               | 2.23146879                     | 0.133388209                 | 0.133388209                    |             |             |   | 0.81209665                            | 1.48238612   | 1.125508687    |
|               | 0.337252019                    | 3                           | 0                              | 0.998207054 |             |   |                                       |              |                |
| CSRNP2        | ENSG00000110925.6              |                             | 0.35813388                     | 2           | 1           |   | 0.27248734                            |              |                |
|               | Brain_Cerebellar_Hemisphere    |                             | 0.474510754                    |             |             |   | Brain_Cerebellum                      | 1.945224667  |                |
|               | 0.054775333                    | 1.945224667                 | 0.715159074                    |             |             |   | 1.097352476                           | 0.906255775  |                |
|               | 0.270251546                    | 1                           | 0                              | 0.998207054 |             |   |                                       |              |                |
| LANCL2        | ENSG00000132434.9              |                             | 0.358195069                    |             | 3           | 3 | 0.159825228                           |              |                |
|               | Brain_Caudate_basal_ganglia    |                             | 0.622741312                    |             |             |   | Brain_Cortex                          | 1.528009516  |                |
|               | 0.681254908                    | 0.681254908                 | -1.405659603                   |             |             |   | 0.54700252                            | -0.450208669 |                |
|               | 0.977000655                    | 3                           | 0                              | 0.998207054 |             |   |                                       |              |                |
| LCOR          | ENSG00000196233.12             |                             | 0.358239209                    | 2           | 2           |   | 0.318400586                           |              | Brain_Amygdala |
|               | 0.363904187                    | Brain_Hypothalamus          | 1.11399981                     |             |             |   | 0.88600019                            | 0.88600019   |                |
|               | -0.907950855                   | 0.997750031                 | 0.044899588                    |             |             |   | 1.34753402                            | 2            | 0              |
|               | 0.998207054                    |                             |                                |             |             |   |                                       |              |                |
| FARP2         | ENSG00000006607.13             |                             | 0.358281921                    | 10          | 4           |   | 0.230467242                           |              | Brain_Amygdala |
|               | 0.796801353                    | Brain_Cerebellar_Hemisphere | 6.984585523                    |             |             |   | 0.006794043                           |              |                |
|               | 0.26193264                     | -1.19915613                 | 0.827123029                    |             |             |   | -0.17674793                           | 0.664042231  | 4              |
|               | 0                              | 0.998207054                 |                                |             |             |   |                                       |              |                |
| FLVCR1-AS1    | ENSG00000198468.7              |                             | 0.358304341                    | 13          | 1           |   | 0.251435676                           |              |                |
|               | Brain_Amygdala                 | 0.51051328                  | Brain_Spinal_cord_cervical_c-1 | 12.33299561 |             |   |                                       |              |                |
|               | 3.61E-05                       | 12.33299561                 | 0.658038675                    |             |             |   | 1.146869219                           | 0.893891788  |                |
|               | 0.153474035                    | 1                           | 0                              | 0.998207054 |             |   |                                       |              |                |
| NUDT19        | ENSG00000213965.3              |                             | 0.358345278                    | 2           | 2           |   | 0.175161713                           |              |                |
|               | Brain_Substantia_nigra         |                             | 0.806198312                    |             |             |   | Brain_Hippocampus                     | 1.156303493  |                |
|               | 0.843696507                    | 0.843696507                 | -0.245333375                   |             |             |   | 1.355803452                           | 0.555235039  |                |
|               | 1.132174708                    | 2                           | 0                              | 0.998207054 |             |   |                                       |              |                |
| PLA2G6        | ENSG00000184381.18             |                             | 0.358549008                    | 6           | 6           |   | 0.15863103                            |              |                |
|               | Brain_Spinal_cord_cervical_c-1 | 0.81539187                  | Brain_Hippocampus              | 2.952148131 |             |   |                                       |              |                |
|               | 0.19923203                     | 0.19923203                  | -1.223040211                   |             |             |   | 1.409690708                           | -0.124128874 |                |
|               | 0.994713749                    | 6                           | 0                              | 0.998207054 |             |   |                                       |              |                |
| NR2C2         | ENSG00000177463.15             |                             | 0.358684185                    | 2           | 2           |   | 0.285036858                           |              |                |
|               | Brain_Spinal_cord_cervical_c-1 | 0.356901474                 | Brain_Cortex                   | 1.02904433  |             |   |                                       |              |                |
|               | 0.97095567                     | 0.97095567                  | -0.921285339                   |             |             |   | 1.06907282                            | 0.07389374   | 1.407395751    |
|               | 0                              | 0.998207054                 |                                |             |             |   |                                       |              | 2              |
| ASB3          | ENSG00000115239.21             |                             | 0.358793239                    | 1           | 1           |   | 0.358793239                           |              |                |
|               | Brain_Caudate_basal_ganglia    | 0.358793239                 | Brain_Caudate_basal_ganglia    | 1           | 1           |   |                                       |              |                |
|               | 1                              | 0.917666982                 | 0.917666982                    | 0.917666982 | NA          | 1 | 0                                     |              |                |
|               | 0.998207054                    |                             |                                |             |             |   |                                       |              |                |
| ELAVL4        | ENSG00000162374.16             |                             | 0.358826929                    | 1           | 1           |   | 0.358826929                           |              |                |
|               | Brain_Cerebellum               | 0.358826929                 | Brain_Cerebellum               | 1           | 1           | 1 | -0.917602652                          |              |                |
|               | -0.917602652                   | -0.917602652                | NA                             | 1           | 0           |   | 0.998207054                           |              |                |
| PERP          | ENSG00000112378.11             |                             | 0.358905037                    | 9           | 5           |   | 0.025641659                           |              |                |
|               | Brain_Hypothalamus             | 0.282409266                 | Brain_Cortex                   | 6.62025591  | 0.067348827 |   |                                       |              |                |
|               | 0.310423133                    | -2.231596266                | -1.07492286                    |             |             |   | -1.612856985                          | 0.38331732   | 5              |
|               | 0                              | 0.998207054                 |                                |             |             |   |                                       |              |                |
| CHMP4C        | ENSG00000164695.4              |                             | 0.359048488                    | 5           | 3           |   | 0.315360057                           |              |                |
|               | Brain_Caudate_basal_ganglia    | 0.921764186                 | Brain_Putamen_basal_ganglia    |             |             |   |                                       |              |                |
|               | 4.439568814                    | 0.012109091                 | 0.193341877                    |             |             |   | 0.098211708                           | 1.0040385    |                |
|               | 0.714721691                    | 0.387033717                 | 3                              | 0           |             |   | 0.998207054                           |              |                |
| MOB3B         | ENSG00000120162.9              |                             | 0.359090346                    | 4           | 3           |   | 0.162146006                           |              |                |
|               | Brain_Cerebellar_Hemisphere    | 0.428091967                 | Brain_Substantia_nigra         |             |             |   |                                       |              |                |
|               | 1.992858184                    | 0.005891183                 | 0.90531802                     |             |             |   | -1.397890319                          | 0.93015986   |                |
|               | -0.258140891                   | 1.293958942                 | 3                              | 0           |             |   | 0.998207054                           |              |                |
| CTD-2012J19.3 | ENSG00000271119.1              |                             | 0.359155633                    | 6           | 6           |   | 0.109312118                           |              |                |
|               | Brain_Hypothalamus             | 0.659911989                 | Brain_Putamen_basal_ganglia    | 1.994664098 |             |   |                                       |              |                |
|               | 0.310365944                    | 0.310365944                 | -0.83733587                    |             |             |   | 1.601292643                           | 0.457938585  |                |
|               | 0.95316453                     | 6                           | 0                              | 0.998207054 |             |   |                                       |              |                |
| MAGEL2        | ENSG00000254585.2              |                             | 0.359208918                    | 1           | 1           |   | 0.359208918                           |              |                |
|               | Brain_Putamen_basal_ganglia    | 0.359208918                 | Brain_Putamen_basal_ganglia    | 1           | 1           |   |                                       |              |                |

|                |                                       |                             |              |              |                                       |                             |              |
|----------------|---------------------------------------|-----------------------------|--------------|--------------|---------------------------------------|-----------------------------|--------------|
| 1              | -0.916873526                          | -0.916873526                | -0.916873526 | NA           | 1                                     | 0                           |              |
| 0.998207054    |                                       |                             |              |              |                                       |                             |              |
| PROSC          | ENSG00000147471.11                    | 0.359262571                 | 1            | 1            | 0.359262571                           |                             |              |
|                | Brain_Nucleus_accumbens_basal_ganglia | 0.359262571                 |              |              |                                       |                             |              |
|                | Brain_Nucleus_accumbens_basal_ganglia | 1                           | 1            | 1            | -0.916771154                          |                             |              |
|                | -0.916771154                          | -0.916771154                | NA           | 1            | 0                                     | 0.998207054                 |              |
| SLC17A6        | ENSG00000091664.7                     | 0.359331139                 | 2            | 2            | 0.160735238                           |                             |              |
|                | Brain_Cortex                          | 0.735752685                 |              |              | Brain_Hypothalamus                    | 1.039458256                 |              |
|                | 0.960541744                           | 0.960541744                 |              |              | 0.337483186                           | 1.402603062                 | 0.870043124  |
|                | 0.753153487                           | 2                           | 0            |              | 0.998207054                           |                             |              |
| SCAMP2         | ENSG00000140497.16                    | 0.359378058                 | 3            | 3            | 0.148901843                           |                             |              |
|                | Brain_Cerebellum                      | 0.795900249                 |              |              | Brain_Nucleus_accumbens_basal_ganglia |                             |              |
|                | 1.519128323                           | 0.403125139                 |              |              | 0.403125139                           | -1.443421246                | 0.502376101  |
|                | -0.227462866                          | 1.060078248                 | 3            | 0            | 0.998207054                           |                             |              |
| LINC00648      | ENSG00000259129.5                     | 0.359387519                 | 10           | 4            | 0.163017365                           |                             |              |
|                | Brain_Hippocampus                     | 0.645673536                 |              |              | Brain_Anterior_cingulate_cortex_BA24  |                             |              |
|                | 7.683892777                           | 0.016660827                 |              |              | 0.392120567                           | -1.394994943                | 0.459780842  |
|                | -0.935166532                          | 0.537206793                 | 4            | 0            | 0.998207054                           |                             |              |
| MIPOL1         | ENSG00000151338.18                    | 0.359400111                 | 1            | 1            | 0.359400111                           |                             |              |
|                | Brain_Caudate_basal_ganglia           | 0.359400111                 |              |              | Brain_Caudate_basal_ganglia           | 1                           | 1            |
|                | 1                                     | -0.916508768                | -0.916508768 | -0.916508768 | NA                                    | 1                           | 0            |
|                | 0.998207054                           |                             |              |              |                                       |                             |              |
| RP11-575H3.1   | ENSG00000261600.1                     | 0.359427162                 | 3            | 3            | 0.145544608                           |                             |              |
|                | Brain_Cortex                          | 0.705762098                 |              |              | Brain_Cerebellar_Hemisphere           | 1.324282894                 |              |
|                | 0.637228504                           | 0.637228504                 |              |              | -1.455450416                          | 1.356135058                 | -0.158956383 |
|                | 1.418482231                           | 3                           | 0            |              | 0.998207054                           |                             |              |
| C4orf3         | ENSG00000164096.12                    | 0.35946639                  | 1            | 1            | 0.35946639                            | Brain_Cerebellum            |              |
|                | 0.35946639                            | Brain_Cerebellum            | 1            | 1            | 0.916382349                           | 0.916382349                 |              |
|                | 0.916382349                           | NA                          | 1            | 0            | 0.998207054                           |                             |              |
| RP3-486I3.7    | ENSG00000237021.2                     | 0.359471699                 | 2            | 2            | 0.230105115                           |                             |              |
|                | Brain_Cerebellar_Hemisphere           | 0.537741939                 |              |              | Brain_Cortex                          | 1.129715265                 |              |
|                | 0.870284735                           | 0.870284735                 |              |              | -0.616231201                          | 1.20008813                  | 0.291928465  |
|                | 1.284331715                           | 2                           | 0            |              | 0.998207054                           |                             |              |
| QRSL1          | ENSG00000130348.11                    | 0.359592096                 | 13           | 2            | 0.429113538                           | Brain_Amygdala              |              |
|                | 0.984154871                           | Brain_Cerebellum            | 11.49284484  |              | 4.36E-05                              | 0.456992382                 |              |
|                | -0.720340644                          | 0.790709488                 | 0.070267311  |              | 0.356231303                           | 2                           | 0            |
|                | 0.998207054                           |                             |              |              |                                       |                             |              |
| PPP2R2D        | ENSG00000175470.18                    | 0.359602059                 | 3            | 2            | 0.275702558                           |                             |              |
|                | Brain_Nucleus_accumbens_basal_ganglia | 0.413903499                 |              |              | Brain_Cerebellar_Hemisphere           |                             |              |
|                | 1.994122389                           | 0.010919383                 |              |              | 0.994958228                           | -0.91832973                 | 1.090024032  |
|                | -0.215116441                          | 1.131418781                 | 2            | 0            | 0.998207054                           |                             |              |
| BYSL           | ENSG00000112578.9                     | 0.35964237                  | 1            | 1            | 0.35964237                            | Brain_Cerebellar_Hemisphere |              |
|                | 0.35964237                            | Brain_Cerebellar_Hemisphere | 1            | 1            | -0.916046759                          |                             |              |
|                | -0.916046759                          | -0.916046759                | NA           | 1            | 0                                     | 0.998207054                 |              |
| SNN            | ENSG00000184602.5                     | 0.359767012                 | 1            | 1            | 0.359767012                           | Brain_Cortex                |              |
|                | 0.359767012                           | Brain_Cortex                | 1            | 1            | 1                                     | 0.915809134                 | 0.915809134  |
|                | 0.915809134                           | NA                          | 1            | 0            | 0.998207054                           |                             |              |
| C1QL2          | ENSG00000144119.3                     | 0.359779048                 | 4            | 4            | 0.16630285                            |                             |              |
|                | Brain_Putamen_basal_ganglia           | 0.801326644                 |              |              | Brain_Cortex                          | 2.016575623                 |              |
|                | 0.17318912                            | 0.17318912                  | -1.384181621 |              | 0.977446692                           | -0.357570405                |              |
|                | 1.161798798                           | 4                           | 0            |              | 0.998207054                           |                             |              |
| RP11-1348G14.4 | ENSG00000251417.2                     | 0.359796526                 | 12           | 4            | 0.044179351                           |                             |              |
|                | Brain_Cerebellum                      | 0.650841166                 |              |              | Brain_Caudate_basal_ganglia           | 9.589297621                 |              |
|                | 0.000750398                           | 0.380745047                 |              |              | -2.012385165                          | 0.591431023                 | -1.097943834 |
|                | 0.667136511                           | 4                           | 0            |              | 0.998207054                           |                             |              |
| MPP3           | ENSG00000161647.18                    | 0.359856975                 | 2            | 2            | 0.197101464                           |                             |              |
|                | Brain_Frontal_Cortex_BA9              | 0.57119165                  |              |              | Brain_Cerebellar_Hemisphere           | 1.038752161                 |              |
|                | 0.961247839                           | 0.961247839                 |              |              | -1.289853686                          | 0.566297368                 | -0.361778159 |
|                | 1.312496997                           | 2                           | 0            |              | 0.998207054                           |                             |              |
| NARF           | ENSG00000141562.17                    | 0.360053369                 | 8            | 2            | 0.118327134                           |                             |              |
|                | Brain_Anterior_cingulate_cortex_BA24  | 0.404162408                 |              |              | Brain_Frontal_Cortex_BA9              |                             |              |
|                | 7.091322956                           | 0.001015721                 |              |              | 0.566117133                           | 0.834210442                 | 1.561833857  |



|           |                                       |                             |                                      |              |                                      |                    |
|-----------|---------------------------------------|-----------------------------|--------------------------------------|--------------|--------------------------------------|--------------------|
|           | 1.267142458                           | 0.276965865                 | 2                                    | 0            | 0.998207054                          |                    |
| PTPA      | ENSG00000119383.19                    | 0.360074563                 | 7                                    | 7            | 0.024085875                          |                    |
|           | Brain_Frontal_Cortex_BA9              | 0.974087265                 |                                      |              | Brain_Cerebellum                     | 2.15394589         |
|           | 0.235092613                           | 0.235092613                 |                                      | -0.644203602 | 2.255756654                          | 0.303316289        |
|           | 1.014404428                           | 7                           | 0                                    | 0.998207054  |                                      |                    |
| CDCA3     | ENSG00000111665.11                    | 0.360185388                 | 12                                   | 3            | 0.13666506                           | Brain_Hypothalamus |
|           | 0.73412505                            | Brain_Hippocampus           | 9.666130518                          |              | 0.002198182                          | 0.632573698        |
|           | -1.488325551                          | 0.339643454                 |                                      | -0.823990108 | 0.45385703                           | 3                  |
|           | 0.998207054                           |                             |                                      |              | 0                                    |                    |
| TTI1      | ENSG00000101407.12                    | 0.360236291                 | 4                                    | 4            | 0.047754978                          |                    |
|           | Brain_Hypothalamus                    | 0.96546878                  | Brain_Amygdala                       | 2.182135099  |                                      | 0.364334875        |
|           | 0.364334875                           | -1.979542334                |                                      | -0.043291985 | -0.664418499                         | 0.890228875        |
|           | 4                                     | 0                           | 0.998207054                          |              |                                      |                    |
| TFPI      | ENSG00000003436.15                    | 0.360321484                 | 1                                    | 1            | 0.360321484                          |                    |
|           | Brain_Anterior_cingulate_cortex_BA24  | 0.360321484                 |                                      |              |                                      |                    |
|           | Brain_Anterior_cingulate_cortex_BA24  | 1                           | 1                                    | 1            | -0.914752675                         |                    |
|           | -0.914752675                          | -0.914752675                | NA                                   | 1            | 0                                    | 0.998207054        |
| LINC01772 | ENSG00000226029.1                     | 0.360327189                 | 8                                    | 5            | 0.033211696                          |                    |
|           | Brain_Caudate_basal_ganglia           | 0.774131737                 |                                      |              | Brain_Anterior_cingulate_cortex_BA24 |                    |
|           | 5.173471941                           | 0.000169016                 | 0.18494384                           | -2.129514744 | 0.286974641                          |                    |
|           | -1.530558106                          | 0.756053476                 | 5                                    | 0            | 0.998207054                          |                    |
| MYH1      | ENSG00000109061.9                     | 0.360489388                 | 2                                    | 2            | 0.295478633                          |                    |
|           | Brain_Substantia_nigra                | 0.32499359                  | Brain_Cerebellar_Hemisphere          | 1.01111993   |                                      |                    |
|           | 0.98888007                            | 0.98888007                  | -1.046178489                         | -0.984248001 | -1.015213245                         |                    |
|           | 0.043791468                           | 2                           | 0                                    | 0.998207054  |                                      |                    |
| SNHG15    | ENSG00000232956.8                     | 0.360498997                 | 7                                    | 6            | 0.150174699                          |                    |
|           | Brain_Caudate_basal_ganglia           | 0.881357747                 |                                      |              | Brain_Cerebellum                     | 4.079745129        |
|           | 0.093293274                           | 0.146332923                 |                                      | -0.624078204 | 1.438914675                          | 0.677839825        |
|           | 0.768307149                           | 6                           | 0                                    | 0.998207054  |                                      |                    |
| CALHM3    | ENSG00000183128.7                     | 0.360555992                 | 2                                    | 2            | 0.236681336                          |                    |
|           | Brain_Cerebellum                      | 0.398550114                 | Brain_Anterior_cingulate_cortex_BA24 |              |                                      |                    |
|           | 1.037867892                           | 0.962132108                 | 0.962132108                          | -1.183322558 | 0.844213497                          |                    |
|           | -0.169554531                          | 1.433684494                 | 2                                    | 0            | 0.998207054                          |                    |
| SNX20     | ENSG00000167208.14                    | 0.360603994                 | 1                                    | 1            | 0.360603994                          | Brain_Cerebellum   |
|           | 0.360603994                           | Brain_Cerebellum            | 1                                    | 1            | -0.91421479                          | -0.91421479        |
|           | -0.91421479                           | NA                          | 1                                    | 0            | 0.998207054                          |                    |
| TFRC      | ENSG00000072274.12                    | 0.360680825                 | 2                                    | 2            | 0.178377577                          |                    |
|           | Brain_Cerebellar_Hemisphere           | 0.620170249                 | Brain_Substantia_nigra               |              |                                      |                    |
|           | 1.013154301                           | 0.986845699                 | 0.986845699                          | -1.345767292 | -0.495609075                         |                    |
|           | -0.920688183                          | 0.60115264                  | 2                                    | 0            | 0.998207054                          |                    |
| CARD6     | ENSG00000132357.13                    | 0.360726082                 | 2                                    | 2            | 0.30059004                           |                    |
|           | Brain_Spinal_cord_cervical_c-1        | 0.857835282                 | Brain_Cerebellar_Hemisphere          |              |                                      |                    |
|           | 1.592491424                           | 0.407508576                 | 0.407508576                          | -1.0351689   | 0.179130439                          |                    |
|           | -0.428019231                          | 0.858639297                 | 2                                    | 0            | 0.998207054                          |                    |
| GSK3B     | ENSG00000082701.14                    | 0.360787326                 | 1                                    | 1            | 0.360787326                          |                    |
|           | Brain_Nucleus_accumbens_basal_ganglia | 0.360787326                 |                                      |              |                                      |                    |
|           | Brain_Nucleus_accumbens_basal_ganglia | 1                           | 1                                    | 1            | -0.913865876                         |                    |
|           | -0.913865876                          | -0.913865876                | NA                                   | 1            | 0                                    | 0.998207054        |
| RHBDL2    | ENSG00000158315.10                    | 0.360809382                 | 1                                    | 1            | 0.360809382                          |                    |
|           | Brain_Nucleus_accumbens_basal_ganglia | 0.360809382                 |                                      |              |                                      |                    |
|           | Brain_Nucleus_accumbens_basal_ganglia | 1                           | 1                                    | 1            | -0.913823907                         |                    |
|           | -0.913823907                          | -0.913823907                | NA                                   | 1            | 0                                    | 0.998207054        |
| ZFYVE16   | ENSG00000039319.16                    | 0.360910137                 | 2                                    | 2            | 0.204991338                          |                    |
|           | Brain_Anterior_cingulate_cortex_BA24  | 0.722221623                 | Brain_Cortex                         |              |                                      |                    |
|           | 1.224716073                           | 0.775283927                 | 0.775283927                          | -0.355491217 | 1.267458655                          |                    |
|           | 0.455983719                           | 1.14759886                  | 2                                    | 0            | 0.998207054                          |                    |
| ADCY6     | ENSG00000174233.11                    | 0.36106523                  | 3                                    | 3            | 0.200921481                          | Brain_Cortex       |
|           | 0.481350794                           | Brain_Cerebellar_Hemisphere | 1.218148772                          |              | 0.765364914                          |                    |
|           | 0.765364914                           | -1.278930641                | 0.704131646                          | -0.562744006 | 1.100262607                          |                    |
|           | 3                                     | 0                           | 0.998207054                          |              |                                      |                    |
| BAP1      | ENSG00000163930.9                     | 0.361078664                 | 2                                    | 2            | 0.159119825                          |                    |
|           | Brain_Hippocampus                     | 0.270884083                 | Brain_Cortex                         | 1.865266059  |                                      |                    |

|               |                                       |                                       |                                       |              |              |                  |
|---------------|---------------------------------------|---------------------------------------|---------------------------------------|--------------|--------------|------------------|
|               | 0.134733941                           | 0.134733941                           | 1.101028891                           | 1.408037978  | 1.254533435  |                  |
|               | 0.217088207                           | 2                                     | 0                                     | 0.998207054  |              |                  |
| ARL1          | ENSG00000120805.13                    | 0.361096013                           | 6                                     | 5            | 0.131587963  | Brain_Cerebellum |
|               | 0.935859507                           | Brain_Hippocampus                     | 3.083242688                           | 0.096508797  |              |                  |
|               | 0.341124421                           | -1.127823525                          | 1.507869373                           | -0.013878262 | 0.909365564  |                  |
|               | 5                                     | 0                                     | 0.998207054                           |              |              |                  |
| RC3H1         | ENSG00000135870.11                    | 0.361097952                           | 2                                     | 2            | 0.333947688  | Brain_Cerebellum |
|               | 0.857258872                           | Brain_Nucleus_accumbens_basal_ganglia | 1.815481732                           |              |              |                  |
|               | 0.184518268                           | 0.184518268                           | 0.179864594                           | 0.966192855  | 0.573028724  |                  |
|               | 0.556018045                           | 2                                     | 0                                     | 0.998207054  |              |                  |
| IDH3B         | ENSG00000101365.20                    | 0.361177587                           | 6                                     | 5            | 0.29755078   |                  |
|               | Brain_Cerebellar_Hemisphere           | 0.860822212                           | Brain_Cortex                          | 3.666503553  |              |                  |
|               | 0.096430086                           | -0.150696722                          | -1.041700018                          | -0.79470998  | -0.264003523 |                  |
|               | 0.805944062                           | 5                                     | 0                                     | 0.998207054  |              |                  |
| PAK1          | ENSG00000149269.9                     | 0.361349061                           | 3                                     | 3            | 0.078849161  |                  |
|               | Brain_Cerebellar_Hemisphere           | 0.971246722                           | Brain_Cortex                          | 1.67816174   |              |                  |
|               | 0.350983294                           | -0.350983294                          | -0.110730602                          | 1.75740289   | 0.56090566   | 1.03879255       |
|               | 3                                     | 0                                     | 0.998207054                           |              |              |                  |
| CBLN2         | ENSG00000141668.9                     | 0.361373367                           | 1                                     | 1            | 0.361373367  | Brain_Cerebellum |
|               | 0.361373367                           | Brain_Cerebellum1                     | 1                                     | 1            | -0.912751281 | -0.912751281     |
|               | -0.912751281                          | NA                                    | 1                                     | 0            | 0.998207054  |                  |
| LINC00621     | ENSG00000262619.1                     | 0.361589353                           | 1                                     | 1            | 0.361589353  |                  |
|               | Brain_Nucleus_accumbens_basal_ganglia | 0.361589353                           |                                       |              |              |                  |
|               | Brain_Nucleus_accumbens_basal_ganglia | 1                                     | 1                                     | 1            | -0.91234078  |                  |
|               | -0.91234078                           | -0.91234078                           | NA                                    | 1            | 0            | 0.998207054      |
| NSL1          | ENSG00000117697.14                    | 0.361610399                           | 3                                     | 3            | 0.15516591   |                  |
|               | Brain_Cerebellar_Hemisphere           | 0.687785808                           | Brain_Nucleus_accumbens_basal_ganglia |              |              |                  |
|               | 1.423061005                           | 0.592281046                           | 0.592281046                           | -1.092302831 | 1.421519082  |                  |
|               | 0.243692652                           | 1.264352894                           | 3                                     | 0            | 0.998207054  |                  |
| RP11-822E23.7 | ENSG00000265265.1                     | 0.361662371                           | 1                                     | 1            | 0.361662371  |                  |
|               | Brain_Cerebellar_Hemisphere           | 0.361662371                           | Brain_Cerebellar_Hemisphere1          | 1            | 1            |                  |
|               | 1                                     | -0.912202039                          | -0.912202039                          | -0.912202039 | NA           | 1                |
|               | 0.998207054                           |                                       |                                       |              | 0            |                  |
| SEC61G        | ENSG00000132432.13                    | 0.361901918                           | 7                                     | 4            | 0.187496047  |                  |
|               | Brain_Nucleus_accumbens_basal_ganglia | 0.740120383                           | Brain_Putamen_basal_ganglia           |              |              |                  |
|               | 5.525254838                           | 0.044230743                           | 0.243406402                           | -0.459425427 | 1.318022705  |                  |
|               | 0.479082344                           | 0.525908819                           | 4                                     | 0            | 0.998207054  |                  |
| MR1           | ENSG00000153029.14                    | 0.362084772                           | 2                                     | 2            | 0.232728125  | Brain_Cerebellum |
|               | 0.377299829                           | Brain_Nucleus_accumbens_basal_ganglia | 1.089223784                           |              |              |                  |
|               | 0.910776216                           | 0.910776216                           | 0.882882371                           | 1.193360737  | 1.038121554  |                  |
|               | 0.219541358                           | 2                                     | 0                                     | 0.998207054  |              |                  |
| CLK4          | ENSG00000113240.12                    | 0.36210808                            | 1                                     | 1            | 0.36210808   | Brain_Cerebellum |
|               | Brain_Cerebellum1                     | 1                                     | 1                                     | 0.911355523  | 0.911355523  | 0.911355523      |
|               | NA                                    | 1                                     | 0                                     | 0.998207054  |              |                  |
| ANKS3         | ENSG00000168096.14                    | 0.362144839                           | 1                                     | 1            | 0.362144839  |                  |
|               | Brain_Spinal_cord_cervical_c-1        | 0.362144839                           | Brain_Spinal_cord_cervical_c-1        |              |              |                  |
|               | 1                                     | 1                                     | 1                                     | 0.911285738  | 0.911285738  | 0.911285738      |
|               | 0.998207054                           |                                       |                                       |              | NA           | 1                |
|               |                                       |                                       |                                       |              |              | 0                |
| PCNX1         | ENSG00000100731.15                    | 0.36217782                            | 7                                     | 3            | 0.071675859  |                  |
|               | Brain_Spinal_cord_cervical_c-1        | 0.819191122                           | Brain_Substantia_nigra                |              |              |                  |
|               | 5.588947275                           | 0.013885531                           | 0.379706291                           | 0.228585466  | 1.801171463  |                  |
|               | 1.211204289                           | 0.5440302                             | 3                                     | 0            | 0.998207054  |                  |
| CAPG          | ENSG00000042493.15                    | 0.362213646                           | 11                                    | 8            | 0.006940325  |                  |
|               | Brain_Cerebellar_Hemisphere           | 0.903058938                           | Brain_Spinal_cord_cervical_c-1        |              |              |                  |
|               | 6.282117998                           | 0.050857146                           | 0.250395384                           | 0.121798075  | 2.699694144  |                  |
|               | 1.573622779                           | 0.747412638                           | 8                                     | 0            | 0.998207054  |                  |
| AC007383.3    | ENSG00000227946.1                     | 0.362217176                           | 2                                     | 2            | 0.172841887  |                  |
|               | Brain_Nucleus_accumbens_basal_ganglia | 0.816467264                           | Brain_Hypothalamus                    |              |              |                  |
|               | 1.132107505                           | 0.867892495                           | 0.867892495                           | -1.36312891  | 0.232091091  |                  |
|               | -0.565518909                          | 1.12799088                            | 2                                     | 0            | 0.998207054  |                  |
| PGM3          | ENSG00000013375.15                    | 0.362220424                           | 3                                     | 3            | 0.129062098  |                  |
|               | Brain_Anterior_cingulate_cortex_BA24  | 0.668214503                           | Brain_Frontal_Cortex_BA9              |              |              |                  |

|            |                                       |                             |                                       |              |                             |
|------------|---------------------------------------|-----------------------------|---------------------------------------|--------------|-----------------------------|
|            | 1.049372287                           | 0.933697158                 | 0.933697158                           | -1.517810813 | 0.882086901                 |
|            | -0.354774565                          | 1.201650898                 | 3 0                                   | 0.998207054  |                             |
| CXXC1      | ENSG00000154832.14                    | 0.362278569                 | 1 1                                   | 0.362278569  |                             |
|            | Brain_Hypothalamus                    | 0.362278569                 | Brain_Hypothalamus                    | 1 1 1        |                             |
|            | -0.911031894                          | -0.911031894                | -0.911031894                          | NA 1 0       | 0.998207054                 |
| SBK1       | ENSG00000188322.4                     | 0.362453268                 | 1 1                                   | 0.362453268  |                             |
|            | Brain_Nucleus_accumbens_basal_ganglia | 0.362453268                 |                                       |              |                             |
|            | Brain_Nucleus_accumbens_basal_ganglia | 1 1                         | 1                                     | -0.910700373 |                             |
|            | -0.910700373                          | -0.910700373                | NA 1                                  | 0            | 0.998207054                 |
| ILKAP      | ENSG00000132323.8                     | 0.36259571                  | 1 1                                   | 0.36259571   | Brain_Putamen_basal_ganglia |
|            | 0.36259571                            | Brain_Putamen_basal_ganglia | 1 1                                   | 1            | -0.910430138                |
|            | -0.910430138                          | -0.910430138                | NA 1                                  | 0            | 0.998207054                 |
| ATP6V1G2   | ENSG00000213760.10                    | 0.362658749                 | 4 4                                   | 0.175586212  |                             |
|            | Brain_Caudate_basal_ganglia           | 0.629962328                 | Brain_Nucleus_accumbens_basal_ganglia |              |                             |
|            | 1.967249372                           | 0.415403115                 | 0.415403115                           | -0.740438883 | 1.354470836                 |
|            | 0.178837161                           | 0.970742587                 | 4 0                                   | 0.998207054  |                             |
| ASCL5      | ENSG00000232237.3                     | 0.362740862                 | 1 1                                   | 0.362740862  | Brain_Cerebellum            |
|            | 0.362740862                           | Brain_Cerebellum            | 1 1                                   | 1            | -0.91015483                 |
|            | -0.91015483                           | NA 1                        | 0                                     | 0.998207054  | -0.91015483                 |
| ZBTB43     | ENSG00000169155.9                     | 0.362900545                 | 1 1                                   | 0.362900545  |                             |
|            | Brain_Cortex                          | 0.362900545                 | Brain_Cortex                          | 1 1 1        | 0.909852041                 |
|            | 0.909852041                           | 0.909852041                 | NA 1                                  | 0            | 0.998207054                 |
| SLC43A1    | ENSG00000149150.8                     | 0.36290329                  | 7 4                                   | 0.176604074  |                             |
|            | Brain_Nucleus_accumbens_basal_ganglia | 0.886988337                 | Brain_Hypothalamus                    |              |                             |
|            | 5.545871065                           | 0.004373842                 | 0.212299326                           | -0.390264489 | 1.351285253                 |
|            | 0.735637136                           | 0.660998491                 | 4 0                                   | 0.998207054  |                             |
| GNGT2      | ENSG00000167083.6                     | 0.362957638                 | 2 2                                   | 0.159738583  |                             |
|            | Brain_Frontal_Cortex_BA9              | 0.936462587                 | Brain_Putamen_basal_ganglia           |              |                             |
|            | 1.101893832                           | 0.898106168                 | 0.898106168                           | -0.079716688 | 1.405951313                 |
|            | 0.663117313                           | 1.050525918                 | 2 0                                   | 0.998207054  |                             |
| LINC01715  | ENSG00000229388.1                     | 0.363060647                 | 1 1                                   | 0.363060647  |                             |
|            | Brain_Spinal_cord_cervical_c-1        | 0.363060647                 | Brain_Spinal_cord_cervical_c-1        |              |                             |
|            | 1 1 1                                 | -0.909548541                | -0.909548541                          | -0.909548541 | NA 1 0                      |
|            | 0.998207054                           |                             |                                       |              |                             |
| MYO16      | ENSG00000041515.15                    | 0.363143075                 | 1 1                                   | 0.363143075  |                             |
|            | Brain_Putamen_basal_ganglia           | 0.363143075                 | Brain_Putamen_basal_ganglia           | 1 1          |                             |
|            | 1 0.909392319                         | 0.909392319                 | 0.909392319                           | NA 1 0       |                             |
|            | 0.998207054                           |                             |                                       |              |                             |
| NPIPB8     | ENSG00000255524.7                     | 0.363144778                 | 1 1                                   | 0.363144778  |                             |
|            | Brain_Cerebellum                      | 0.363144778                 | Brain_Cerebellum                      | 1 1 1        | -0.909389091                |
|            | -0.909389091                          | -0.909389091                | NA 1                                  | 0            | 0.998207054                 |
| CYBRD1     | ENSG00000071967.11                    | 0.363199509                 | 13 3                                  | 0.195330409  |                             |
|            | Brain_Caudate_basal_ganglia           | 0.969768259                 | Brain_Amygdala                        | 11.1010979   |                             |
|            | 0.013787815                           | 0.398091555                 | -1.294970491                          | 0.453970559  | -0.498555456                |
|            | 0.498868617                           | 3 0                         | 0.998207054                           |              |                             |
| TLR1       | ENSG00000174125.7                     | 0.363239634                 | 1 1                                   | 0.363239634  |                             |
|            | Brain_Caudate_basal_ganglia           | 0.363239634                 | Brain_Caudate_basal_ganglia           | 1 1          |                             |
|            | 1 -0.909209342                        | -0.909209342                | -0.909209342                          | NA 1 0       |                             |
|            | 0.998207054                           |                             |                                       |              |                             |
| AC058791.1 | ENSG00000226380.9                     | 0.363251145                 | 7 2                                   | 0.188099779  |                             |
|            | Brain_Cerebellar_Hemisphere           | 0.69458131                  | Brain_Cerebellum                      | 6.298820388  |                             |
|            | 0.007326403                           | 0.314214562                 | 0.392645525                           | 1.316221293  | 0.954740001                 |
|            | 0.313092551                           | 2 0                         | 0.998207054                           |              |                             |
| TXNDC17    | ENSG00000129235.10                    | 0.363254647                 | 1 1                                   | 0.363254647  |                             |
|            | Brain_Substantia_nigra                | 0.363254647                 | Brain_Substantia_nigra                | 1 1          |                             |
|            | 1 0.909180895                         | 0.909180895                 | 0.909180895                           | NA 1 0       |                             |
|            | 0.998207054                           |                             |                                       |              |                             |
| THOC3      | ENSG00000051596.9                     | 0.363395324                 | 11 11                                 | 0.022084518  |                             |
|            | Brain_Putamen_basal_ganglia           | 0.930870876                 | Brain_Spinal_cord_cervical_c-1        |              |                             |
|            | 2.343104247                           | 0.220551715                 | 0.220551715                           | -1.238364577 | 2.288911104                 |
|            | 0.082039998                           | 1.152504658                 | 11 0                                  | 0.998207054  |                             |
| NOC4L      | ENSG00000184967.6                     | 0.363528224                 | 4 4                                   | 0.159515142  |                             |

|               |                                       |                                |                   |              |                                |              |                             |   |
|---------------|---------------------------------------|--------------------------------|-------------------|--------------|--------------------------------|--------------|-----------------------------|---|
|               | Brain_Cerebellar_Hemisphere           | 0.977353505                    |                   |              | Brain_Caudate_basal_ganglia    |              |                             |   |
|               | 2.276243071                           | 0.408150374                    | 0.408150374       |              | -1.406704125                   | 1.206056467  |                             |   |
|               | 0.067292589                           | 1.097108731                    | 4                 | 0            | 0.998207054                    |              |                             |   |
| ALDH1L1       | ENSG00000144908                       | 0.13                           | 0.36371373        | 3            | 2                              | 0.171298383  | Brain_Cerebellum            |   |
|               | 0.46014325                            | Brain_Spinal_cord_cervical_c-1 |                   |              | 1.97706323                     | 0.045326713  |                             |   |
|               | 0.977610057                           | 0.738610988                    | 1.368043748       |              | 1.093811814                    | 0.322433514  |                             |   |
|               | 2                                     | 0                              | 0.998207054       |              |                                |              |                             |   |
| TLE6          | ENSG00000104953                       | 0.19                           | 0.363725027       | 1            | 1                              | 0.363725027  | Brain_Cerebellum            |   |
|               | 0.363725027                           | Brain_Cerebellum               | 1                 | 1            | 1                              | -0.908289994 | -0.908289994                |   |
|               | -0.908289994                          | NA                             | 1                 | 0            | 0.998207054                    |              |                             |   |
| MTUS1         | ENSG00000129422                       | 0.14                           | 0.363751438       | 10           | 6                              | 0.021655784  |                             |   |
|               | Brain_Caudate_basal_ganglia           | 0.699759432                    |                   |              | Brain_Hippocampus              | 6.649721465  |                             |   |
|               | 0.016315015                           | 0.22486267                     | -2.29635164       |              | 0.60209098                     | -1.247904005 | 0.93333285                  |   |
|               | 6                                     | 0                              | 0.998207054       |              |                                |              |                             |   |
| CC2D1B        | ENSG00000154222                       | 0.14                           | 0.36376032        | 6            | 6                              | 0.071213293  | Brain_Cerebellum            |   |
|               | 0.897122457                           | Brain_Cerebellar_Hemisphere    | 2.105513204       |              | 0.32725665                     | 0.32725665   |                             |   |
|               | -1.804114921                          | 0.863824504                    | -0.23029541       |              | 1.135932074                    | 6            | 0                           |   |
|               | 0.998207054                           |                                |                   |              |                                |              |                             |   |
| TELO2         | ENSG00000100726                       | 0.14                           | 0.363776026       | 11           | 9                              | 0.163365446  |                             |   |
|               | Brain_Hippocampus                     | 0.962646297                    |                   |              | Brain_Frontal_Cortex_BA9       | 3.509570413  |                             |   |
|               | 0.049162622                           | 0.425995209                    | -0.730042702      |              | 1.393841591                    | 0.24299714   |                             |   |
|               | 0.704838819                           | 9                              | 0                 | 0.998207054  |                                |              |                             |   |
| PRRX2         | ENSG00000167157                       | 0.10                           | 0.363880688       | 1            | 1                              | 0.363880688  |                             |   |
|               | Brain_Anterior_cingulate_cortex_BA24  | 0.363880688                    |                   |              |                                |              |                             |   |
|               | Brain_Anterior_cingulate_cortex_BA24  | 1                              | 1                 | 1            | 0.907995332                    |              |                             |   |
|               | 0.907995332                           | 0.907995332                    | NA                | 1            | 0                              | 0.998207054  |                             |   |
| SSH2          | ENSG00000141298                       | 0.17                           | 0.364113852       | 1            | 1                              | 0.364113852  | Brain_Cerebellum            |   |
|               | 0.364113852                           | Brain_Cerebellum               | 1                 | 1            | 1                              | -0.907554104 | -0.907554104                |   |
|               | -0.907554104                          | NA                             | 1                 | 0            | 0.998207054                    |              |                             |   |
| ZNF44         | ENSG00000197857                       | 0.13                           | 0.364115845       | 6            | 4                              | 0.116511512  |                             |   |
|               | Brain_Caudate_basal_ganglia           | 0.53892928                     | Brain_Hippocampus | 3.7381468    |                                |              |                             |   |
|               | 0.001954315                           | 0.212347402                    | -0.627412556      |              | 1.569585767                    | 0.460381297  |                             |   |
|               | 0.893211278                           | 4                              | 0                 | 0.998207054  |                                |              |                             |   |
| MCUB          | ENSG00000005059                       | 0.15                           | 0.36414946        | 1            | 1                              | 0.36414946   | Brain_Caudate_basal_ganglia |   |
|               | 0.36414946                            | Brain_Caudate_basal_ganglia    | 1                 | 1            | 1                              | 0.907486737  |                             |   |
|               | 0.907486737                           | 0.907486737                    | NA                | 1            | 0                              | 0.998207054  |                             |   |
| ABCA1         | ENSG00000165029                       | 0.15                           | 0.364280619       | 1            | 1                              | 0.364280619  |                             |   |
|               | Brain_Spinal_cord_cervical_c-1        | 0.364280619                    |                   |              | Brain_Spinal_cord_cervical_c-1 |              |                             |   |
|               | 1                                     | 1                              | 1                 | 0.907238631  | 0.907238631                    | 0.907238631  | NA                          | 1 |
|               | 0.998207054                           |                                |                   |              |                                |              |                             | 0 |
| PCDHGC4       | ENSG00000242419                       | 0.5                            | 0.364290942       | 1            | 1                              | 0.364290942  |                             |   |
|               | Brain_Cerebellar_Hemisphere           | 0.364290942                    |                   |              | Brain_Cerebellar_Hemisphere    | 1            | 1                           |   |
|               | 1                                     | -0.907219106                   | -0.907219106      | -0.907219106 | NA                             | 1            | 0                           |   |
|               | 0.998207054                           |                                |                   |              |                                |              |                             |   |
| COL11A2       | ENSG00000204248                       | 0.10                           | 0.364317593       | 7            | 6                              | 0.180498908  |                             |   |
|               | Brain_Nucleus_accumbens_basal_ganglia | 0.901583199                    |                   |              | Brain_Putamen_basal_ganglia    |              |                             |   |
|               | 3.208707474                           | 0.089199032                    | 0.165692477       |              | -0.611299142                   | 1.339220477  |                             |   |
|               | 0.275827497                           | 0.653332904                    | 6                 | 0            | 0.998207054                    |              |                             |   |
| RP11-521D12.1 | ENSG00000240687                       | 0.1                            | 0.364321312       | 1            | 1                              | 0.364321312  |                             |   |
|               | Brain_Substantia_nigra                | 0.364321312                    |                   |              | Brain_Substantia_nigra         | 1            | 1                           |   |
|               | 1                                     | -0.907161667                   | -0.907161667      | -0.907161667 | NA                             | 1            | 0                           |   |
|               | 0.998207054                           |                                |                   |              |                                |              |                             |   |
| ZNF638        | ENSG00000075292                       | 0.18                           | 0.364524728       | 1            | 1                              | 0.364524728  |                             |   |
|               | Brain_Frontal_Cortex_BA9              | 0.364524728                    |                   |              | Brain_Frontal_Cortex_BA9       | 1            | 1                           |   |
|               | 1                                     | 0.906777013                    | 0.906777013       | 0.906777013  | NA                             | 1            | 0                           |   |
|               | 0.998207054                           |                                |                   |              |                                |              |                             |   |
| PMEPA1        | ENSG00000124225                       | 0.15                           | 0.364548355       | 1            | 1                              | 0.364548355  |                             |   |
|               | Brain_Putamen_basal_ganglia           | 0.364548355                    |                   |              | Brain_Putamen_basal_ganglia    | 1            | 1                           |   |
|               | 1                                     | 0.906732344                    | 0.906732344       | 0.906732344  | NA                             | 1            | 0                           |   |
|               | 0.998207054                           |                                |                   |              |                                |              |                             |   |
| TH            | ENSG00000180176                       | 0.14                           | 0.364631196       | 1            | 1                              | 0.364631196  |                             |   |
|               | Brain_Hippocampus                     | 0.364631196                    |                   |              | Brain_Hippocampus              | 1            | 1                           | 1 |

|             |                                       |                   |              |              |                              |                             |              |
|-------------|---------------------------------------|-------------------|--------------|--------------|------------------------------|-----------------------------|--------------|
|             | -0.906575739                          | -0.906575739      | -0.906575739 | NA           | 1                            | 0                           | 0.998207054  |
| PCDHGA9     | ENSG00000261934.2                     | 0.364634859       | 2            | 2            | 0.15962619                   |                             |              |
|             | Brain_Nucleus_accumbens_basal_ganglia | 0.392213816       |              |              |                              | Brain_Caudate_basal_ganglia |              |
|             | 1.484025587                           | 0.515974413       | 0.515974413  |              | -1.406329885                 | -0.855609496                |              |
|             | -1.130969691                          | 0.389418122       | 2            | 0            | 0.998207054                  |                             |              |
| DRAP1       | ENSG00000175550.7                     | 0.364646378       | 1            | 1            | 0.364646378                  | Brain_Cerebellum            |              |
|             | 0.364646378                           | Brain_Cerebellum1 | 1            | 1            | 0.906547042                  | 0.906547042                 |              |
|             | 0.906547042                           | NA                | 1            | 0            | 0.998207054                  |                             |              |
| FRZB        | ENSG00000162998.4                     | 0.364780178       | 2            | 2            | 0.178332747                  |                             |              |
|             | Brain_Caudate_basal_ganglia           | 0.531118933       |              |              | Brain_Cortex                 | 1.131480287                 |              |
|             | 0.868519713                           | 0.868519713       | 0.626298862  |              | 1.345906269                  | 0.986102565                 |              |
|             | 0.508839277                           | 2                 | 0            | 0.998207054  |                              |                             |              |
| FOLR2       | ENSG00000165457.13                    | 0.364871892       | 1            | 1            | 0.364871892                  |                             |              |
|             | Brain_Putamen_basal_ganglia           | 0.364871892       |              |              | Brain_Putamen_basal_ganglia1 | 1                           | 1            |
|             | 1                                     | -0.906120847      | -0.906120847 | -0.906120847 | NA                           | 1                           | 0            |
|             | 0.998207054                           |                   |              |              |                              |                             |              |
| TRAPPC2B    | ENSG00000256060.2                     | 0.364961135       | 2            | 2            | 0.156946529                  |                             |              |
|             | Brain_Hippocampus                     | 0.923533501       |              |              | Brain_Amygdala               | 1.011253987                 |              |
|             | 0.988746013                           | 0.988746013       | -0.095983721 |              | 1.415416109                  | 0.659716194                 |              |
|             | 1.068721069                           | 2                 | 0            | 0.998207054  |                              |                             |              |
| ZNF365      | ENSG00000138311.15                    | 0.364967873       | 4            | 3            | 0.075376247                  |                             |              |
|             | Brain_Putamen_basal_ganglia           | 0.962100392       |              |              | Brain_Amygdala               | 2.565327721                 |              |
|             | 0.025076613                           | 0.396815881       | -1.778168123 |              | -0.047517991                 | -1.037212225                |              |
|             | 0.725423921                           | 3                 | 0            | 0.998207054  |                              |                             |              |
| R3HDM2      | ENSG00000179912.20                    | 0.365010949       | 1            | 1            | 0.365010949                  |                             |              |
|             | Brain_Cerebellum                      | 0.365010949       |              |              | Brain_Cerebellum1            | 1                           | 1            |
|             | 0.905858129                           | 0.905858129       | NA           | 1            | 0                            | 0.998207054                 |              |
| LGI3        | ENSG00000168481.8                     | 0.365072643       | 1            | 1            | 0.365072643                  |                             |              |
|             | Brain_Hippocampus                     | 0.365072643       |              |              | Brain_Hippocampus            | 1                           | 1            |
|             | 0.905741591                           | 0.905741591       | 0.905741591  | NA           | 1                            | 0                           | 0.998207054  |
| CTA-223H9.9 | ENSG00000273424.1                     | 0.3650818         | 1            | 1            | 0.3650818                    |                             |              |
|             | Brain_Caudate_basal_ganglia           | 0.3650818         |              |              | Brain_Caudate_basal_ganglia1 | 1                           | 1            |
|             | 0.905724294                           | 0.905724294       | 0.905724294  | NA           | 1                            | 0                           | 0.998207054  |
| CYP2R1      | ENSG00000186104.10                    | 0.365115592       | 1            | 1            | 0.365115592                  |                             |              |
|             | Brain_Cortex                          | 0.365115592       |              |              | Brain_Cortex                 | 1                           | 1            |
|             | -0.905660469                          | -0.905660469      | NA           | 1            | 0                            | 0.998207054                 | -0.905660469 |
| SERPINI1    | ENSG00000163536.12                    | 0.365182324       | 6            | 5            | 0.110802656                  |                             |              |
|             | Brain_Spinal_cord_cervical_c-1        | 0.563654951       |              |              | Brain_Cerebellum             | 2.516671377                 |              |
|             | 0.078703902                           | 0.330213389       | 0.577421207  |              | 1.594595783                  | 1.110944396                 |              |
|             | 0.357019313                           | 5                 | 0            | 0.998207054  |                              |                             |              |
| CNNM3       | ENSG00000168763.15                    | 0.365261588       | 1            | 1            | 0.365261588                  |                             |              |
|             | Brain_Substantia_nigra                | 0.365261588       |              |              | Brain_Substantia_nigra       | 1                           | 1            |
|             | 1                                     | 0.905384757       | 0.905384757  | 0.905384757  | NA                           | 1                           | 0            |
|             | 0.998207054                           |                   |              |              |                              |                             |              |
| PPP1R32     | ENSG00000162148.10                    | 0.365263881       | 2            | 2            | 0.157401872                  |                             |              |
|             | Brain_Cerebellum                      | 0.984496288       |              |              | Brain_Caudate_basal_ganglia  | 1.073390001                 |              |
|             | 0.926609999                           | 0.926609999       | -1.413863882 |              | 0.019432245                  | -0.697215819                |              |
|             | 1.013493411                           | 2                 | 0            | 0.998207054  |                              |                             |              |
| FAM120AOS   | ENSG00000188938.15                    | 0.365267569       | 4            | 4            | 0.115734044                  |                             |              |
|             | Brain_Hypothalamus                    | 0.833667451       |              |              | Brain_Cortex                 | 1.173858697                 |              |
|             | 0.745934645                           | 0.745934645       | -1.572934248 |              | 1.271501781                  | -0.14420826                 |              |
|             | 1.195459319                           | 4                 | 0            | 0.998207054  |                              |                             |              |
| RNF7        | ENSG00000114125.13                    | 0.365317466       | 8            | 7            | 0.10950966                   |                             |              |
|             | Brain_Frontal_Cortex_BA9              | 0.914659518       |              |              | Brain_Hippocampus            | 5.036014434                 |              |
|             | 0.078076983                           | 0.226127985       | 0.107163189  |              | 1.600400969                  | 0.731179889                 |              |
|             | 0.586285029                           | 7                 | 0            | 0.998207054  |                              |                             |              |
| ARHGEF1     | ENSG00000076928.17                    | 0.365425117       | 1            | 1            | 0.365425117                  |                             |              |
|             | Brain_Cortex                          | 0.365425117       |              |              | Brain_Cortex                 | 1                           | 1            |
|             | -0.905076016                          | -0.905076016      | NA           | 1            | 0                            | 0.998207054                 | -0.905076016 |
| CHST13      | ENSG00000180767.9                     | 0.365474618       | 7            | 4            | 0.064343532                  |                             |              |
|             | Brain_Nucleus_accumbens_basal_ganglia | 0.79080256        |              |              | Brain_Caudate_basal_ganglia  |                             |              |
|             | 4.951219224                           | 0.044012921       | 0.378996089  |              | -1.849792017                 | -0.26526859                 |              |

|           |                                       |              |   |   |             |              |              |                                       |                    |
|-----------|---------------------------------------|--------------|---|---|-------------|--------------|--------------|---------------------------------------|--------------------|
| HIGD1A    | ENSG00000181061.13                    | 0.65362008   | 4 | 0 | 0.998207054 |              |              |                                       |                    |
|           | Brain_Amygdala                        | 11.06212284  |   |   |             | 0.12860969   | Brain_Cortex |                                       |                    |
|           |                                       | 0.705905685  |   |   |             | 0.000292822  | 0.548670648  |                                       |                    |
|           |                                       | -1.519607348 |   |   |             | -0.377360543 | -1.200127038 | 0.333472039                           | 2 0                |
|           |                                       | 0.998207054  |   |   |             |              |              |                                       |                    |
| ZNF843    | ENSG00000176723.9                     | 0.365561239  |   |   |             | 2            | 2            | 0.514262059                           |                    |
|           | Brain_Cerebellar_Hemisphere           | 0.882526027  |   |   |             |              |              | Brain_Cerebellum                      | 1.835340035        |
|           |                                       | 0.164659965  |   |   |             | -0.147767794 |              | -0.65221566                           | 0.252223933        |
|           |                                       | 0.565673725  |   |   |             | 2            | 0            | 0.998207054                           |                    |
| SYT5      | ENSG00000129990.14                    | 0.365658578  |   |   |             | 4            | 4            | 0.054452706                           | Brain_Cortex       |
|           | Brain_Substantia_nigra                | 1.074731721  |   |   |             |              |              | 0.883007277                           |                    |
|           |                                       | 0.883007277  |   |   |             | -1.923217773 | 0.355753683  | -0.521366919                          | 1.077513028        |
|           |                                       | 4            |   |   |             | 0            | 0.998207054  |                                       |                    |
| SPAG7     | ENSG00000091640.7                     | 0.365759304  |   |   |             | 10           | 1            | 0.150258904                           |                    |
|           | Brain_Cerebellar_Hemisphere           | 0.559238077  |   |   |             |              |              | Brain_Nucleus_accumbens_basal_ganglia |                    |
|           |                                       | 9.624312298  |   |   |             | 9.624312298  |              | -1.438617574                          | -0.583973595       |
|           |                                       | -0.889261227 |   |   |             | 0.240376615  | 1            | 0                                     | 0.998207054        |
| HYAL2     | ENSG00000068001.13                    | 0.365965946  |   |   |             | 2            | 2            | 0.256704036                           | Brain_Cortex       |
|           | Brain_Frontal_Cortex_BA9              | 1.117705416  |   |   |             |              |              | 0.882294584                           |                    |
|           |                                       | 0.882294584  |   |   |             | -1.134215805 | -0.978461332 | -1.056338569                          | 0.110135044        |
|           |                                       | 2            |   |   |             | 0            | 0.998207054  |                                       |                    |
| GRB2      | ENSG00000177885.13                    | 0.365994882  |   |   |             | 2            | 2            | 0.175917031                           | Brain_Cerebellum   |
|           | Brain_Amygdala                        | 1.142838463  |   |   |             |              |              | 0.857161537                           | 0.857161537        |
|           |                                       | 0.611469144  |   |   |             | 1.353433972  | 0.982451558  | 0.524648361                           | 2 0                |
|           |                                       | 0.998207054  |   |   |             |              |              |                                       |                    |
| TEKT5     | ENSG00000153060.7                     | 0.366293246  |   |   |             | 7            | 7            | 0.031053944                           |                    |
|           | Brain_Hypothalamus                    | 0.771352984  |   |   |             |              |              | Brain_Caudate_basal_ganglia           | 1.570145826        |
|           |                                       | 0.490268671  |   |   |             | 0.490268671  |              | -2.156380783                          | 0.410577783        |
|           |                                       | 0.829154532  |   |   |             | 7            | 0            | 0.998207054                           | -0.883509236       |
| VPS36     | ENSG00000136100.12                    | 0.366392612  |   |   |             | 4            | 4            | 0.039951656                           |                    |
|           | Brain_Nucleus_accumbens_basal_ganglia | 0.419728143  |   |   |             |              |              | Brain_Substantia_nigra                |                    |
|           |                                       | 2.571267867  |   |   |             | 0.261613037  | 0.261613037  | 0.806892981                           | 2.054248403        |
|           |                                       | 1.335238169  |   |   |             | 0.552450728  | 4            | 0                                     | 0.998207054        |
| LINC01909 | ENSG00000266258.1                     | 0.366468945  |   |   |             | 2            | 2            | 0.15699419                            |                    |
|           | Brain_Cerebellar_Hemisphere           | 0.944853464  |   |   |             |              |              | Brain_Frontal_Cortex_BA9              |                    |
|           |                                       | 1.000225496  |   |   |             | 0.999774504  | 0.999774504  | -1.415253476                          | 0.069171053        |
|           |                                       | -0.673041212 |   |   |             | 1.049646651  | 2            | 0                                     | 0.998207054        |
| MRAS      | ENSG00000158186.12                    | 0.366484294  |   |   |             | 1            | 1            | 0.366484294                           |                    |
|           | Brain_Hypothalamus                    | 0.366484294  |   |   |             |              |              | Brain_Hypothalamus                    | 1 1 1              |
|           |                                       | 0.903078386  |   |   |             | 0.903078386  | 0.903078386  | NA                                    | 1 0 0.998207054    |
| ZNF623    | ENSG00000183309.11                    | 0.366500154  |   |   |             | 7            | 7            | 0.170696046                           |                    |
|           | Brain_Putamen_basal_ganglia           | 0.966741659  |   |   |             |              |              | Brain_Cortex                          | 3.076648464        |
|           |                                       | 0.114589473  |   |   |             | 0.114589473  |              | -1.304694316                          | 1.369970708        |
|           |                                       | 0.966153975  |   |   |             | 7            | 0            | 0.998207054                           | 0.116811823        |
| FSD1      | ENSG00000105255.10                    | 0.366639803  |   |   |             | 6            | 6            | 0.03336098                            | Brain_Hypothalamus |
|           | Brain_Substantia_nigra                | 1.288528903  |   |   |             |              |              | 0.724721498                           |                    |
|           |                                       | 0.724721498  |   |   |             | -0.299435329 | 2.127711876  | 0.474638929                           | 0.939248801        |
|           |                                       | 6            |   |   |             | 0            | 0.998207054  |                                       |                    |
| ANXA5     | ENSG00000164111.14                    | 0.366670698  |   |   |             | 13           | 2            | 0.093996128                           |                    |
|           | Brain_Nucleus_accumbens_basal_ganglia | 0.568879494  |   |   |             |              |              | Brain_Spinal_cord_cervical_c-1        | 11.71571255        |
|           |                                       | 0.5697025    |   |   |             | 1.674684613  | 1.335253838  | 0.000985317                           | 0.619588776        |
|           |                                       | 0.998207054  |   |   |             |              |              | 0.287925512                           | 2 0                |
| SCARA5    | ENSG00000168079.16                    | 0.366872576  |   |   |             | 2            | 2            | 0.197489147                           |                    |
|           | Brain_Hippocampus                     | 0.607692191  |   |   |             |              |              | Brain_Anterior_cingulate_cortex_BA24  |                    |
|           |                                       | 1.056450572  |   |   |             | 0.943549428  | 0.943549428  | -1.288738114                          | -0.51337048        |
|           |                                       | -0.901054297 |   |   |             | 0.548267712  | 2            | 0                                     | 0.998207054        |
| ZNF717    | ENSG00000227124.8                     | 0.366884527  |   |   |             | 9            | 9            | 0.105728236                           |                    |
|           | Brain_Spinal_cord_cervical_c-1        | 0.793328545  |   |   |             |              |              | Brain_Cerebellar_Hemisphere           |                    |
|           |                                       | 2.340169848  |   |   |             | 0.248582197  | 0.248582197  | -0.869566671                          | 1.617695502        |
|           |                                       | 0.084979498  |   |   |             | 0.842549996  | 9            | 0                                     | 0.998207054        |
| TMEM245   | ENSG00000106771.12                    | 0.366963825  |   |   |             | 9            | 4            | 0.076784777                           |                    |

|               |                                       |                             |              |                             |              |                                       |                             |   |  |
|---------------|---------------------------------------|-----------------------------|--------------|-----------------------------|--------------|---------------------------------------|-----------------------------|---|--|
|               | Brain_Cortex                          | 0.913906924                 |              | Brain_Putamen_basal_ganglia | 6.474323771  |                                       |                             |   |  |
|               | 0.015712476                           | 0.3156351                   | -0.192258944 | 1.769654123                 | 0.946996037  |                                       |                             |   |  |
|               | 0.709872396                           | 4                           | 0            | 0.998207054                 |              |                                       |                             |   |  |
| GUCY1B3       | ENSG00000061918.12                    | 0.366974056                 |              | 1                           | 1            | 0.366974056                           |                             |   |  |
|               | Brain_Anterior_cingulate_cortex_BA24  | 0.366974056                 |              |                             |              |                                       |                             |   |  |
|               | Brain_Anterior_cingulate_cortex_BA24  | 1                           | 1            | 1                           | -0.902155904 |                                       |                             |   |  |
|               | -0.902155904                          | -0.902155904                | NA           | 1                           | 0            | 0.998207054                           |                             |   |  |
| BTBD1         | ENSG00000064726.9                     | 0.367150265                 |              | 9                           | 7            | 0.029887053                           |                             |   |  |
|               | Brain_Spinal_cord_cervical_c-1        | 0.979680818                 |              |                             |              | Brain_Caudate_basal_ganglia           |                             |   |  |
|               | 5.565548216                           | 0.082454975                 | 0.195614482  |                             |              | -0.588399935                          | 2.171584031                 |   |  |
|               | 0.533511174                           | 0.781194462                 | 7            | 0                           | 0.998207054  |                                       |                             |   |  |
| BCL2L2-PABPN1 | ENSG00000258643.5                     | 0.367186691                 |              | 1                           | 1            | 0.367186691                           |                             |   |  |
|               | Brain_Substantia_nigra                | 0.367186691                 |              |                             |              | Brain_Substantia_nigra                | 1                           | 1 |  |
|               | 1                                     | 0.901755636                 | 0.901755636  | 0.901755636                 | NA           | 1                                     | 0                           |   |  |
|               | 0.998207054                           |                             |              |                             |              |                                       |                             |   |  |
| MYH9          | ENSG00000100345.20                    | 0.367237438                 |              | 1                           | 1            | 0.367237438                           |                             |   |  |
|               | Brain_Nucleus_accumbens_basal_ganglia | 0.367237438                 |              |                             |              |                                       |                             |   |  |
|               | Brain_Nucleus_accumbens_basal_ganglia | 1                           | 1            | 1                           | -0.901660132 |                                       |                             |   |  |
|               | -0.901660132                          | -0.901660132                | NA           | 1                           | 0            | 0.998207054                           |                             |   |  |
| KCNQ2         | ENSG00000075043.18                    | 0.367471304                 |              | 4                           | 4            | 0.079210215                           | Brain_Cerebellum            |   |  |
|               | 0.373962083                           | Brain_Hippocampus           | 2.325869057  |                             |              | 0.26469516                            | 0.26469516                  |   |  |
|               | -1.755287083                          | 0.889076285                 | -0.678552151 | 1.116487591                 | 4            | 0                                     |                             |   |  |
|               | 0.998207054                           |                             |              |                             |              |                                       |                             |   |  |
| DST           | ENSG00000151914.19                    | 0.367537677                 |              | 2                           | 2            | 0.306655781                           | Brain_Cerebellum            |   |  |
|               | 0.322504236                           | Brain_Caudate_basal_ganglia | 1.010960444  |                             |              | 0.989039556                           |                             |   |  |
|               | 0.989039556                           | -0.989324838                | 1.022264393  |                             |              | 0.016469778                           | 1.422408386                 |   |  |
|               | 2                                     | 0                           | 0.998207054  |                             |              |                                       |                             |   |  |
| LSM12         | ENSG00000161654.9                     | 0.367662166                 |              | 1                           | 1            | 0.367662166                           | Brain_Amygdala              |   |  |
|               | 0.367662166                           | Brain_Amygdala              | 1            | 1                           | 1            | -0.90086112                           | -0.90086112                 |   |  |
|               | -0.90086112                           | NA                          | 1            | 0                           | 0.998207054  |                                       |                             |   |  |
| CHRNE         | ENSG00000108556.7                     | 0.367763649                 |              | 13                          | 1            | 0.113617498                           |                             |   |  |
|               | Brain_Hypothalamus                    | 0.781634488                 |              |                             |              | Brain_Nucleus_accumbens_basal_ganglia |                             |   |  |
|               | 11.49465933                           | 0.00970351                  | 11.49465933  |                             |              | 0.277189648                           | 1.582140506                 |   |  |
|               | 0.851956525                           | 0.367054801                 | 1            | 0                           | 0.998207054  |                                       |                             |   |  |
| AP1M1         | ENSG00000072958.8                     | 0.367801886                 |              | 9                           | 4            | 0.144668327                           |                             |   |  |
|               | Brain_Putamen_basal_ganglia           | 0.945869251                 |              |                             |              | Brain_Cerebellar_Hemisphere           |                             |   |  |
|               | 7.627489073                           | 3.79E-17                    | 0.302720387  |                             |              | -0.06789496                           | 1.45862508                  |   |  |
|               | 0.338292584                           | 0.43244914                  | 4            | 0                           | 0.998207054  |                                       |                             |   |  |
| VASN          | ENSG00000168140.4                     | 0.367845999                 |              | 3                           | 3            | 0.251630627                           | Brain_Cerebellum            |   |  |
|               | 0.467666481                           | Brain_Caudate_basal_ganglia | 1.2358559    |                             |              | 0.742245969                           |                             |   |  |
|               | 0.742245969                           | -1.146397716                | 0.93446603   |                             |              | -0.312737586                          | 1.100346374                 | 3 |  |
|               | 0                                     | 0.998207054                 |              |                             |              |                                       |                             |   |  |
| B4GALT6       | ENSG00000118276.11                    | 0.367933149                 |              | 1                           | 1            | 0.367933149                           |                             |   |  |
|               | Brain_Substantia_nigra                | 0.367933149                 |              |                             |              | Brain_Substantia_nigra                | 1                           | 1 |  |
|               | 1                                     | 0.900351639                 | 0.900351639  | 0.900351639                 | NA           | 1                                     | 0                           |   |  |
|               | 0.998207054                           |                             |              |                             |              |                                       |                             |   |  |
| ECHDC1        | ENSG00000093144.18                    | 0.368018185                 |              | 2                           | 2            | 0.157556692                           |                             |   |  |
|               | Brain_Anterior_cingulate_cortex_BA24  | 0.418263432                 |              |                             |              |                                       |                             |   |  |
|               | Brain_Nucleus_accumbens_basal_ganglia | 1.596302136                 |              |                             |              | 0.403697864                           |                             |   |  |
|               | 0.403697864                           | -1.41333689                 | -0.809437687 |                             |              | -1.111387289                          | 0.427021221                 |   |  |
|               | 2                                     | 0                           | 0.998207054  |                             |              |                                       |                             |   |  |
| RP11-37B2.1   | ENSG00000251136.8                     | 0.368064834                 |              | 2                           | 2            | 0.204876589                           |                             |   |  |
|               | Brain_Cerebellar_Hemisphere           | 0.507419001                 |              |                             |              | Brain_Cerebellum                      | 1.811403354                 |   |  |
|               | 0.188596646                           | 0.188596646                 | -1.267779825 |                             |              | -0.662861906                          | -0.965320866                |   |  |
|               | 0.427741563                           | 2                           | 0            | 0.998207054                 |              |                                       |                             |   |  |
| LAMP1         | ENSG00000185896.10                    | 0.36814198                  |              | 1                           | 1            | 0.36814198                            | Brain_Putamen_basal_ganglia |   |  |
|               | 0.36814198                            | Brain_Putamen_basal_ganglia | 1            | 1                           | 1            | -0.899959169                          |                             |   |  |
|               | -0.899959169                          | -0.899959169                | NA           | 1                           | 0            | 0.998207054                           |                             |   |  |
| BEST1         | ENSG00000167995.15                    | 0.368304292                 |              | 5                           | 2            | 0.120438645                           |                             |   |  |
|               | Brain_Caudate_basal_ganglia           | 0.364352055                 |              |                             |              | Brain_Cortex                          | 4.370685974                 |   |  |
|               | 0.009043363                           | 0.545074522                 | 0.907103523  |                             |              | 1.552935082                           | 1.21788772                  |   |  |
|               | 0.248163639                           | 2                           | 0            | 0.998207054                 |              |                                       |                             |   |  |

|         |                             |                                |                    |             |                                       |                    |
|---------|-----------------------------|--------------------------------|--------------------|-------------|---------------------------------------|--------------------|
| CCNJL   | ENSG00000135083.14          | 0.368487954                    | 2                  | 2           | 0.188394801                           | Brain_Cortex       |
|         | 0.651859377                 | Brain_Spinal_cord_cervical_c-1 |                    |             | 1.049037364                           | 0.950962636        |
|         | 0.950962636                 | -0.451180619                   | 1.315342558        |             | 0.432080969                           | 1.249120518        |
|         | 2                           | 0                              | 0.998207054        |             |                                       |                    |
| MRS2    | ENSG00000124532.14          | 0.36849908                     | 12                 | 3           | 0.424149481                           |                    |
|         | Brain_Putamen_basal_ganglia | 0.948008032                    |                    |             | Brain_Cortex                          | 9.652840728        |
|         | 0.007434547                 | 0.479272945                    | -0.799243073       |             | 0.683354016                           | -0.25084467        |
|         | 0.533123251                 | 3                              | 0                  | 0.998207054 |                                       |                    |
| SIM2    | ENSG00000159263.15          | 0.368504835                    | 3                  | 2           | 0.373172757                           |                    |
|         | Brain_Hippocampus           | 0.480768881                    |                    |             | Brain_Cerebellar_Hemisphere           | 2.142056937        |
|         | 0.062976473                 | 0.79496659                     | 0.705066455        |             | 0.890546043                           | 0.776934093        |
|         | 0.099536978                 | 2                              | 0                  | 0.998207054 |                                       |                    |
| TMEM65  | ENSG00000164983.7           | 0.368510471                    | 3                  | 3           | 0.090923682                           |                    |
|         | Brain_Hypothalamus          | 0.770258355                    |                    |             | Brain_Cortex                          | 1.62429132         |
|         | 0.506771995                 | -0.292036973                   | 1.690545285        |             | 0.567580781                           | 1.017188152        |
|         | 3                           | 0                              | 0.998207054        |             |                                       |                    |
| SPATA45 | ENSG00000185523.6           | 0.368579459                    | 6                  | 6           | 0.072515987                           |                    |
|         | Brain_Cortex                | 0.80108662                     | Brain_Hypothalamus |             | 3.043430194                           | 0.225256785        |
|         | 0.225256785                 | -0.251941062                   | 1.795865018        |             | 0.881383288                           | 0.765618963        |
|         | 6                           | 0                              | 0.998207054        |             |                                       |                    |
| ST7     | ENSG00000004866.20          | 0.368659035                    | 3                  | 3           | 0.118528789                           |                    |
|         | Brain_Cerebellar_Hemisphere | 0.476302363                    |                    |             | Brain_Caudate_basal_ganglia           |                    |
|         | 1.537783155                 | 0.673311522                    | 0.673311522        |             | -0.712262303                          | 1.560978648        |
|         | 0.705945018                 | 1.236842577                    | 3                  | 0           | 0.998207054                           |                    |
| TDRKH   | ENSG00000182134.15          | 0.368689348                    | 5                  | 4           | 0.238750993                           |                    |
|         | Brain_Hippocampus           | 0.874601812                    |                    |             | Brain_Putamen_basal_ganglia           | 3.767400054        |
|         | 0.070318541                 | 0.149062839                    | -0.157815973       |             | 1.178114423                           | 0.477971698        |
|         | 0.516678898                 | 4                              | 0                  | 0.998207054 |                                       |                    |
| LIPT1   | ENSG00000144182.16          | 0.36872392                     | 11                 | 1           | 0.199464965                           | Brain_Hypothalamus |
|         | 0.650400986                 | Brain_Cerebellar_Hemisphere    | 10.1467848         | 0.002121974 |                                       | 10.1467848         |
|         | 0.453205203                 | 1.283077388                    | 0.858826762        |             | 0.249125159                           | 1                  |
|         | 0.998207054                 |                                |                    |             |                                       | 0                  |
| MGARP   | ENSG00000137463.4           | 0.368733967                    | 3                  | 2           | 0.128846048                           | Brain_Cerebellum   |
|         | 0.577450021                 | Brain_Amygdala                 | 1.951690115        |             | 0.048009879                           | 1.000300007        |
|         | 0.557113301                 | 1.518668149                    | 1.039773441        |             | 0.480788483                           | 2                  |
|         | 0.998207054                 |                                |                    |             |                                       | 0                  |
| CEP104  | ENSG00000116198.12          | 0.368738083                    | 5                  | 3           | 0.138582181                           |                    |
|         | Brain_Cerebellum            | 0.987411087                    |                    |             | Brain_Nucleus_accumbens_basal_ganglia |                    |
|         | 3.865486971                 | 0.026656597                    | 0.289334685        |             | -0.175687698                          | 1.481091545        |
|         | 0.368291233                 | 0.657018532                    | 3                  | 0           | 0.998207054                           |                    |
| FOXP1   | ENSG00000114861.18          | 0.368752793                    | 1                  | 1           | 0.368752793                           |                    |
|         | Brain_Caudate_basal_ganglia | 0.368752793                    |                    |             | Brain_Caudate_basal_ganglia           | 1                  |
|         | 1                           | 0.898812028                    | 0.898812028        | 0.898812028 | NA                                    | 1                  |
|         | 0.998207054                 |                                |                    |             |                                       | 0                  |
| DAAM2   | ENSG00000146122.16          | 0.368780995                    | 1                  | 1           | 0.368780995                           |                    |
|         | Brain_Putamen_basal_ganglia | 0.368780995                    |                    |             | Brain_Putamen_basal_ganglia           | 1                  |
|         | 1                           | -0.89875909                    | -0.89875909        | -0.89875909 | NA                                    | 1                  |
|         | 0.998207054                 |                                |                    |             |                                       | 0                  |
| KCNN3   | ENSG00000143603.18          | 0.368940068                    | 9                  | 4           | 0.168049324                           | Brain_Cerebellum   |
|         | 0.901019048                 | Brain_Hypothalamus             | 6.027138323        |             | 0.050336294                           |                    |
|         | 0.201106176                 | -0.751524251                   | 1.378498846        |             | 0.227746118                           | 0.718334341        |
|         | 4                           | 0                              | 0.998207054        |             |                                       |                    |
| SCN7A   | ENSG00000136546.13          | 0.368968618                    | 6                  | 5           | 0.118194473                           |                    |
|         | Brain_Substantia_nigra      | 0.959508973                    |                    |             | Brain_Hypothalamus                    | 3.591311182        |
|         | 0.099867955                 | 0.195458441                    | -0.604952322       |             | 1.562397087                           | 0.576046244        |
|         | 0.91841666                  | 5                              | 0                  | 0.998207054 |                                       |                    |
| SEC24D  | ENSG00000150961.14          | 0.369047229                    | 1                  | 1           | 0.369047229                           |                    |
|         | Brain_Cerebellum            | 0.369047229                    |                    |             | Brain_Cerebellum                      | 1                  |
|         | 0.898259481                 | 0.898259481                    | NA                 | 1           | 0                                     | 0.998207054        |
| POLH    | ENSG00000170734.11          | 0.36905593                     | 1                  | 1           | 0.36905593                            | Brain_Cerebellum   |
|         | Brain_Cerebellum            | 1                              | 1                  | 1           | 0.898243157                           | 0.898243157        |
|         | NA                          | 1                              | 0                  | 0.998207054 |                                       | 0.898243157        |



|          |                                       |                             |                                      |             |                  |                               |
|----------|---------------------------------------|-----------------------------|--------------------------------------|-------------|------------------|-------------------------------|
| TRIM3    | ENSG00000110171.19                    | 0.369089837                 | 1                                    | 1           | 0.369089837      | Brain_Cortex                  |
|          | 0.369089837                           | Brain_Cortex                | 1                                    | 1           | 0.898179544      | 0.898179544                   |
|          | 0.898179544                           | NA                          | 1                                    | 0           | 0.998207054      |                               |
| CRTC2    | ENSG00000160741.16                    | 0.36927321                  | 3                                    | 3           | 0.228433847      | Brain_Hippocampus             |
|          | 0.926059317                           | Brain_Cerebellum            | 1.599445142                          |             | 0.406917791      | 0.406917791                   |
|          | -1.204403015                          | 0.092803945                 | -0.687256944                         |             | 0.687407904      | 3 0                           |
|          | 0.998207054                           |                             |                                      |             |                  |                               |
| ITGB5    | ENSG00000082781.11                    | 0.369318162                 | 4                                    | 4           | 0.07904821       |                               |
|          | Brain_Anterior_cingulate_cortex_BA24  | 0.944821235                 |                                      |             | Brain_Cerebellum |                               |
|          | 1.464056612                           | 0.556852604                 | 0.556852604                          |             | -0.862594411     | 1.756235474                   |
|          | 0.287340466                           | 1.096744463                 | 4                                    | 0           | 0.998207054      |                               |
| AGL      | ENSG00000162688.16                    | 0.369488                    | 7                                    | 4           | 0.046369628      |                               |
|          | Brain_Putamen_basal_ganglia           | 0.544102928                 |                                      |             | Brain_Cerebellum | 5.461062807                   |
|          | 0.047654589                           | 0.197776491                 | -0.606620296                         |             | 1.992013033      | 1.348819622                   |
|          | 0.887452363                           | 4                           | 0                                    | 0.998207054 |                  |                               |
| TRIM59   | ENSG00000213186.7                     | 0.369591396                 | 1                                    | 1           | 0.369591396      |                               |
|          | Brain_Cortex                          | 0.369591396                 | Brain_Cortex                         | 1           | 1                | 1 -0.897239005                |
|          | -0.897239005                          | -0.897239005                | NA                                   | 1           | 0                | 0.998207054                   |
| ZCWPW1   | ENSG00000078487.17                    | 0.369607671                 | 13                                   | 3           | 0.379916195      |                               |
|          | Brain_Cerebellum                      | 0.904492004                 | Brain_Frontal_Cortex_BA9             | 11.31029699 |                  |                               |
|          | 0.000749125                           | 0.447630989                 | -0.87805072                          |             | 0.857821504      | -0.281011912                  |
|          | 0.390264995                           | 3                           | 0                                    | 0.998207054 |                  |                               |
| DBF4B    | ENSG00000161692.17                    | 0.369709666                 | 13                                   | 3           | 0.042931748      |                               |
|          | Brain_Frontal_Cortex_BA9              | 0.45552201                  | Brain_Putamen_basal_ganglia          | 11.49283556 |                  |                               |
|          | 0.001341471                           | 0.395569618                 | 0.746240726                          |             | 2.024373389      | 1.491005855                   |
|          | 0.367053634                           | 3                           | 0                                    | 0.998207054 |                  |                               |
| SPAG6    | ENSG00000077327.15                    | 0.369775958                 | 1                                    | 1           | 0.369775958      |                               |
|          | Brain_Nucleus_accumbens_basal_ganglia | 0.369775958                 |                                      |             |                  |                               |
|          | Brain_Nucleus_accumbens_basal_ganglia | 1                           | 1                                    | 1           | -0.896893108     |                               |
|          | -0.896893108                          | -0.896893108                | NA                                   | 1           | 0                | 0.998207054                   |
| QRICH1   | ENSG00000198218.10                    | 0.369805606                 | 7                                    | 2           | 0.046212474      |                               |
|          | Brain_Hippocampus                     | 0.419660612                 | Brain_Caudate_basal_ganglia          | 6.057882266 |                  |                               |
|          | 0.002131355                           | 0.627761027                 | 0.807010191                          |             | 1.993447432      | 1.307639994                   |
|          | 0.388264976                           | 2                           | 0                                    | 0.998207054 |                  |                               |
| OSGIN2   | ENSG00000164823.9                     | 0.370063232                 | 8                                    | 6           | 0.074010663      |                               |
|          | Brain_Amygdala                        | 0.618367496                 | Brain_Frontal_Cortex_BA9             | 5.381418552 |                  |                               |
|          | 0.059768269                           | 0.205871732                 | -1.492681281                         |             | 1.786547442      | 0.665935393                   |
|          | 0.971482957                           | 6                           | 0                                    | 0.998207054 |                  |                               |
| F7       | ENSG00000057593.13                    | 0.370120038                 | 9                                    | 7           | 0.034237082      |                               |
|          | Brain_Cerebellar_Hemisphere           | 0.939442794                 | Brain_Cortex                         | 5.723202776 |                  |                               |
|          | 0.041630854                           | 0.202169492                 | -2.117268324                         |             | 1.131785942      | 0.317774114                   |
|          | 0.983064765                           | 7                           | 0                                    | 0.998207054 |                  |                               |
| C16orf95 | ENSG00000260456.6                     | 0.370137669                 | 1                                    | 1           | 0.370137669      |                               |
|          | Brain_Cortex                          | 0.370137669                 | Brain_Cortex                         | 1           | 1                | 1 -0.896215519                |
|          | -0.896215519                          | -0.896215519                | NA                                   | 1           | 0                | 0.998207054                   |
| IQCH-AS1 | ENSG00000259673.5                     | 0.370225211                 | 1                                    | 1           | 0.370225211      |                               |
|          | Brain_Cerebellum                      | 0.370225211                 | Brain_Cerebellum                     | 1           | 1                | 1 0.896051588                 |
|          | 0.896051588                           | 0.896051588                 | NA                                   | 1           | 0                | 0.998207054                   |
| QDPR     | ENSG00000151552.11                    | 0.37025221                  | 5                                    | 3           | 0.268832311      | Brain_Cerebellum              |
|          | 0.852690293                           | Brain_Putamen_basal_ganglia | 3.794513116                          |             | 0.022711537      |                               |
|          | 0.450990274                           | -0.493117791                | 1.105755615                          |             | -0.052914142     | 0.657411072                   |
|          | 3                                     | 0                           | 0.998207054                          |             |                  |                               |
| KRT15    | ENSG00000171346.15                    | 0.370364472                 | 1                                    | 1           | 0.370364472      |                               |
|          | Brain_Spinal_cord_cervical_c-1        | 0.370364472                 | Brain_Spinal_cord_cervical_c-1       |             |                  |                               |
|          | 1                                     | 1                           | 1                                    | 0.89579086  | 0.89579086       | 0.89579086 NA 1 0 0.998207054 |
| APBB3    | ENSG00000113108.19                    | 0.370401642                 | 1                                    | 1           | 0.370401642      |                               |
|          | Brain_Nucleus_accumbens_basal_ganglia | 0.370401642                 |                                      |             |                  |                               |
|          | Brain_Nucleus_accumbens_basal_ganglia | 1                           | 1                                    | 1           | -0.89572128      |                               |
|          | -0.89572128                           | -0.89572128                 | NA                                   | 1           | 0                | 0.998207054                   |
| HSPA6    | ENSG00000173110.7                     | 0.370601036                 | 2                                    | 2           | 0.188029558      |                               |
|          | Brain_Cerebellar_Hemisphere           | 0.570758782                 | Brain_Anterior_cingulate_cortex_BA24 |             |                  |                               |
|          | 1.049595281                           | 0.950404719                 | 0.950404719                          |             | -0.566934354     | 1.316430598                   |

|                |                                |                                      |                                       |              |              |                   |              |
|----------------|--------------------------------|--------------------------------------|---------------------------------------|--------------|--------------|-------------------|--------------|
|                | 0.374748122                    | 1.331740129                          | 2                                     | 0            | 0.998207054  |                   |              |
| TMEM18         | ENSG00000151353.14             | 0.370691102                          | 1                                     | 1            | 0.370691102  |                   |              |
|                | Brain_Cerebellum               | 0.370691102                          | Brain_Cerebellum                      | 1            | 1            | 0.895179573       |              |
|                | 0.895179573                    | 0.895179573                          | NA                                    | 1            | 0            | 0.998207054       |              |
| EPHA10         | ENSG00000183317.16             | 0.370950549                          | 5                                     | 5            | 0.041240174  |                   |              |
|                | Brain_Frontal_Cortex_BA9       | 0.874807793                          | Brain_Cerebellar_Hemisphere           |              |              |                   |              |
|                | 2.195186821                    | 0.138362756                          | 0.138362756                           | -2.041107191 | 0.390409708  |                   |              |
|                | -0.815166584                   | 0.974219504                          | 5                                     | 0            | 0.998207054  |                   |              |
| LL22NC03-2H8.5 | ENSG00000274422.1              | 0.370975866                          | 4                                     | 3            | 0.07637528   |                   |              |
|                | Brain_Cortex                   | 0.989348053                          | Brain_Frontal_Cortex_BA9              | 2.339477     |              |                   |              |
|                | 0.025702573                    | 0.621294214                          | -1.772116141                          | -0.013350632 | -1.095396178 |                   |              |
|                | 0.834726037                    | 3                                    | 0                                     | 0.998207054  |              |                   |              |
| CACNA1D        | ENSG00000157388.15             | 0.37098961                           | 1                                     | 1            | 0.37098961   |                   |              |
|                | Brain_Cerebellar_Hemisphere    | 0.37098961                           | Brain_Cerebellar_Hemisphere           | 1            | 1            | 1                 |              |
|                | -0.894621209                   | -0.894621209                         | -0.894621209                          | NA           | 1            | 0                 | 0.998207054  |
| SNX17          | ENSG00000115234.10             | 0.371052843                          | 3                                     | 3            | 0.136071104  |                   |              |
|                | Brain_Spinal_cord_cervical_c-1 | 0.847902202                          | Brain_Putamen_basal_ganglia           |              |              |                   |              |
|                | 1.830967975                    | 0.222572558                          | 0.222572558                           | -0.689042462 | 1.490582642  |                   |              |
|                | 0.203248144                    | 1.142250478                          | 3                                     | 0            | 0.998207054  |                   |              |
| PLOD2          | ENSG00000152952.11             | 0.371311436                          | 7                                     | 2            | 0.15894809   | Brain_Hippocampus |              |
|                | 0.680728419                    | Brain_Anterior_cingulate_cortex_BA24 | 5.812757977                           |              |              |                   |              |
|                | 0.007185679                    | 0.921428051                          | 0.411469339                           | 1.408618214  | 0.901919639  |                   |              |
|                | 0.361329024                    | 2                                    | 0                                     | 0.998207054  |              |                   |              |
| TEN1           | ENSG00000257949.6              | 0.371342897                          | 13                                    | 1            | 0.201615052  |                   |              |
|                | Brain_Frontal_Cortex_BA9       | 0.970926624                          | Brain_Hippocampus                     | 12.31680364  |              |                   |              |
|                | 0.000786613                    | 12.31680364                          | -1.276963732                          | 0.03644614   | -0.873424824 |                   |              |
|                | 0.331123639                    | 1                                    | 0                                     | 0.998207054  |              |                   |              |
| NELFB          | ENSG00000188986.6              | 0.371444727                          | 5                                     | 5            | 0.038712847  | Brain_Cortex      |              |
|                | 0.859204315                    | Brain_Hypothalamus                   | 1.339372089                           | 0.764521565  |              |                   |              |
|                | 0.764521565                    | -2.067226171                         | 0.414930671                           | -0.572401565 | 0.989847609  |                   |              |
|                | 5                              | 0                                    | 0.998207054                           |              |              |                   |              |
| ZNF765         | ENSG00000196417.12             | 0.37148076                           | 5                                     | 5            | 0.134767034  | Brain_Cortex      |              |
|                | 0.826485503                    | Brain_Hypothalamus                   | 2.711106084                           | 0.217286106  |              |                   |              |
|                | 0.217286106                    | -1.495565059                         | 0.952448375                           | 0.147959656  | 1.034470596  |                   |              |
|                | 5                              | 0                                    | 0.998207054                           |              |              |                   |              |
| RP11-161M6.2   | ENSG00000260807.6              | 0.371494439                          | 10                                    | 4            | 0.177325184  |                   |              |
|                | Brain_Putamen_basal_ganglia    | 0.95477268                           | Brain_Nucleus_accumbens_basal_ganglia |              |              |                   |              |
|                | 7.33891234                     | 0.002552725                          | 0.343674643                           | -0.25008097  | 1.349036682  |                   |              |
|                | 0.536811515                    | 0.511516321                          | 4                                     | 0            | 0.998207054  |                   |              |
| KHDC3L         | ENSG00000203908.3              | 0.371707531                          | 7                                     | 3            | 0.132579888  |                   |              |
|                | Brain_Putamen_basal_ganglia    | 0.888968041                          | Brain_Amygdala                        | 5.823743082  |              |                   |              |
|                | 0.003205846                    | 0.213385671                          | -1.504005744                          | 0.254310667  | -0.476199273 |                   |              |
|                | 0.576198485                    | 3                                    | 0                                     | 0.998207054  |              |                   |              |
| SPATS1         | ENSG00000249481.6              | 0.371725255                          | 1                                     | 1            | 0.371725255  |                   |              |
|                | Brain_Cortex                   | 0.371725255                          | Brain_Cortex                          | 1            | 1            | 1                 | -0.893246363 |
|                | -0.893246363                   | -0.893246363                         | NA                                    | 1            | 0            | 0.998207054       |              |
| CCL3L3         | ENSG00000276085.1              | 0.371730896                          | 8                                     | 6            | 0.059455587  |                   |              |
|                | Brain_Cerebellar_Hemisphere    | 0.822613688                          | Brain_Cerebellum                      | 5.613586069  |              |                   |              |
|                | 0.037500193                    | 0.199410458                          | -0.365342868                          | 1.884809313  | 0.518163978  |                   |              |
|                | 0.747154357                    | 6                                    | 0                                     | 0.998207054  |              |                   |              |
| PNPT1          | ENSG00000138035.14             | 0.371818302                          | 3                                     | 3            | 0.51770329   |                   |              |
|                | Brain_Spinal_cord_cervical_c-1 | 0.722906651                          | Brain_Cerebellum                      | 1.895533788  |              |                   |              |
|                | 0.276916365                    | 0.276916365                          | -0.609312572                          | 0.646889766  | 0.130718002  |                   |              |
|                | 0.657339831                    | 3                                    | 0                                     | 0.998207054  |              |                   |              |
| C2orf88        | ENSG00000187699.10             | 0.371918154                          | 2                                     | 2            | 0.171838618  |                   |              |
|                | Brain_Amygdala                 | 0.584149729                          | Brain_Caudate_basal_ganglia           | 1.159508119  |              |                   |              |
|                | 0.840491881                    | 0.840491881                          | -1.366319771                          | -0.54733336  | -0.956826565 |                   |              |
|                | 0.579110845                    | 2                                    | 0                                     | 0.998207054  |              |                   |              |
| THEG           | ENSG00000105549.10             | 0.371979657                          | 1                                     | 1            | 0.371979657  | Brain_Cortex      |              |
|                | 0.371979657                    | Brain_Cortex                         | 1                                     | 1            | 1            | -0.892771304      | -0.892771304 |
|                | -0.892771304                   | NA                                   | 1                                     | 0            | 0.998207054  |                   |              |
| CYP27A1        | ENSG00000135929.8              | 0.371996465                          | 1                                     | 1            | 0.371996465  |                   |              |

|         |                                |                                       |              |                                       |             |             |                  |            |
|---------|--------------------------------|---------------------------------------|--------------|---------------------------------------|-------------|-------------|------------------|------------|
|         | Brain_Hypothalamus             | 0.371996465                           |              | Brain_Hypothalamus                    | 1           | 1           | 1                |            |
|         | 0.892739924                    | 0.892739924                           | 0.892739924  | NA                                    | 1           | 0           | 0.998207054      |            |
| DBF4    | ENSG00000006634.7              | 0.372077498                           | 2            | 2                                     | 0.252427545 |             |                  |            |
|         | Brain_Putamen_basal_ganglia    | 0.469705319                           |              | Brain_Hypothalamus                    |             |             | 1.079887834      |            |
|         | 0.920112166                    | 0.920112166                           | -0.722958601 | 1.144472962                           |             |             | 0.210757181      |            |
|         | 1.320473522                    | 2                                     | 0            | 0.998207054                           |             |             |                  |            |
| UBE3D   | ENSG00000118420.16             | 0.372083754                           | 3            | 2                                     | 0.158095527 |             | Brain_Cortex     |            |
|         | 0.437018858                    | Brain_Putamen_basal_ganglia           | 2.53440623   | 0.037125981                           |             |             |                  |            |
|         | 0.428467789                    | -1.4115058                            | -0.777237168 | -1.028145199                          | 0.337241659 |             | 2                |            |
|         | 0                              | 0.998207054                           |              |                                       |             |             |                  |            |
| TRDMT1  | ENSG00000107614.21             | 0.372175871                           | 5            | 5                                     | 0.026207421 |             |                  |            |
|         | Brain_Hypothalamus             | 0.933225709                           |              | Brain_Cerebellum                      | 3.156293722 |             |                  |            |
|         | 0.107248261                    | 0.107248261                           | -0.316706594 | 2.223124278                           |             |             | 0.964301439      |            |
|         | 1.106450799                    | 5                                     | 0            | 0.998207054                           |             |             |                  |            |
| PLAGL2  | ENSG00000126003.6              | 0.372253782                           | 2            | 2                                     | 0.193808719 |             |                  |            |
|         | Brain_Cortex                   | 0.463621767                           |              | Brain_Putamen_basal_ganglia           | 1.156136222 |             |                  |            |
|         | 0.843863778                    | 0.843863778                           | -1.299394088 | -0.732896157                          |             |             | -1.016145123     |            |
|         | 0.400574529                    | 2                                     | 0            | 0.998207054                           |             |             |                  |            |
| CNTN4   | ENSG00000144619.14             | 0.372260484                           | 2            | 2                                     | 0.208052188 |             | Brain_Amygdala   |            |
|         | 0.452851763                    | Brain_Cerebellum                      | 1.10192069   | 0.89807931                            | 0.89807931  | 0.750669201 |                  |            |
|         | 1.258939491                    | 1.004804346                           | 0.359401368  | 2                                     | 0           | 0.998207054 |                  |            |
| ZNF254  | ENSG00000213096.10             | 0.37232968                            | 5            | 5                                     | 0.091965972 |             | Brain_Cortex     |            |
|         | 0.725045155                    | Brain_Hypothalamus                    | 1.817430083  | 0.255066786                           |             |             |                  |            |
|         | 0.255066786                    | -1.21213637                           | 1.685117147  | -0.019588664                          |             |             | 1.223052886      |            |
|         | 5                              | 0                                     | 0.998207054  |                                       |             |             |                  |            |
| ECSCR   | ENSG00000249751.3              | 0.372380388                           | 1            | 1                                     | 0.372380388 |             |                  |            |
|         | Brain_Hypothalamus             | 0.372380388                           |              | Brain_Hypothalamus                    | 1           | 1           | 1                |            |
|         | 0.892023404                    | 0.892023404                           | 0.892023404  | NA                                    | 1           | 0           | 0.998207054      |            |
| FAM210A | ENSG00000177150.12             | 0.372448389                           | 1            | 1                                     | 0.372448389 |             |                  |            |
|         | Brain_Cerebellum               | 0.372448389                           |              | Brain_Cerebellum                      | 1           | 1           | 1                | 0.89189654 |
|         | 0.89189654                     | 0.89189654                            | NA           | 1                                     | 0           | 0.998207054 |                  |            |
| FGFR1   | ENSG00000077782.19             | 0.372505287                           | 1            | 1                                     | 0.372505287 |             | Brain_Cerebellum |            |
|         | 0.372505287                    | Brain_Cerebellum                      | 1            | 1                                     | 0.891790401 |             | 0.891790401      |            |
|         | 0.891790401                    | NA                                    | 1            | 0                                     | 0.998207054 |             |                  |            |
| E2F1    | ENSG00000101412.12             | 0.372523529                           | 8            | 4                                     | 0.07268067  |             |                  |            |
|         | Brain_Caudate_basal_ganglia    | 0.575995526                           |              | Brain_Nucleus_accumbens_basal_ganglia |             |             |                  |            |
|         | 5.663375007                    | 0.011010278                           | 0.194046489  | 0.559243535                           |             |             | 1.794830752      |            |
|         | 1.422052911                    | 0.416411888                           | 4            | 0                                     | 0.998207054 |             |                  |            |
| TPM4    | ENSG00000167460.14             | 0.372552133                           | 2            | 2                                     | 0.235852922 |             |                  |            |
|         | Brain_Hippocampus              | 0.426830315                           |              | Brain_Cerebellar_Hemisphere           | 1.034066804 |             |                  |            |
|         | 0.965933196                    | 0.965933196                           | 0.794627332  | 1.185416219                           |             |             | 0.990021775      |            |
|         | 0.276329472                    | 2                                     | 0            | 0.998207054                           |             |             |                  |            |
| ANKRD42 | ENSG00000137494.13             | 0.372624047                           | 9            | 5                                     | 0.071154485 |             |                  |            |
|         | Brain_Cerebellar_Hemisphere    | 0.431562463                           |              | Brain_Hippocampus                     | 6.508925858 |             |                  |            |
|         | 0.006338908                    | 0.276741522                           | -1.804490255 | -0.786520757                          |             |             | -1.319552833     |            |
|         | 0.345307441                    | 5                                     | 0            | 0.998207054                           |             |             |                  |            |
| SLC48A1 | ENSG00000211584.13             | 0.372669417                           | 3            | 3                                     | 0.094497622 |             |                  |            |
|         | Brain_Cerebellum               | 0.732675938                           |              | Brain_Cortex                          | 1.63687817  | 0.363119011 |                  |            |
|         | 0.363119011                    | 0.341568112                           | 1.672135419  | 1.154757238                           |             |             | 0.712902816      |            |
|         | 3                              | 0                                     | 0.998207054  |                                       |             |             |                  |            |
| PECR    | ENSG00000115425.13             | 0.372920725                           | 3            | 3                                     | 0.141664638 |             | Brain_Cortex     |            |
|         | 0.525076163                    | Brain_Nucleus_accumbens_basal_ganglia | 1.436794901  |                                       |             |             |                  |            |
|         | 0.659096122                    | 0.659096122                           | -1.46962023  | -0.635540191                          |             |             | -1.084198982     |            |
|         | 0.420620515                    | 3                                     | 0            | 0.998207054                           |             |             |                  |            |
| CKM     | ENSG00000104879.4              | 0.372981612                           | 1            | 1                                     | 0.372981612 |             |                  |            |
|         | Brain_Spinal_cord_cervical_c-1 | 0.372981612                           |              | Brain_Spinal_cord_cervical_c-1        |             |             |                  |            |
|         | 1                              | 1                                     | 1            | 0.890902252                           | 0.890902252 | 0.890902252 | NA               | 1          |
|         | 0.998207054                    |                                       |              |                                       |             |             |                  | 0          |
| PGGT1B  | ENSG00000164219.9              | 0.373000687                           | 4            | 4                                     | 0.162527619 |             |                  |            |
|         | Brain_Hippocampus              | 0.767288464                           |              | Brain_Frontal_Cortex_BA9              | 2.92495955  |             |                  |            |
|         | 0.124182849                    | 0.124182849                           | -1.396620843 | 0.295923552                           |             |             | -0.511525307     |            |
|         | 0.694359093                    | 4                                     | 0            | 0.998207054                           |             |             |                  |            |

|               |                                       |                             |              |              |                                       |             |                  |
|---------------|---------------------------------------|-----------------------------|--------------|--------------|---------------------------------------|-------------|------------------|
| CALHM1        | ENSG00000185933.6                     | 0.373346576                 | 1            | 1            | 0.373346576                           |             |                  |
|               | Brain_Frontal_Cortex_BA9              | 0.373346576                 |              |              | Brain_Frontal_Cortex_BA9              | 1           | 1                |
|               | 1                                     | -0.89022222                 | -0.89022222  | -0.89022222  | NA                                    | 1           | 0                |
|               | 0.998207054                           |                             |              |              |                                       |             |                  |
| CHRN2         | ENSG00000160716.5                     | 0.373429945                 | 6            | 5            | 0.280605726                           |             |                  |
|               | Brain_Cerebellar_Hemisphere           | 0.976149051                 |              |              | Brain_Cerebellum                      | 3.032222569 |                  |
|               | 0.064525916                           | 0.204989424                 | -1.078959626 | 0.892898207  | -0.056455556                          |             |                  |
|               | 0.757529834                           | 5                           | 0            | 0.998207054  |                                       |             |                  |
| AC004221.2    | ENSG00000267778.1                     | 0.373527903                 | 1            | 1            | 0.373527903                           |             |                  |
|               | Brain_Hypothalamus                    | 0.373527903                 |              |              | Brain_Hypothalamus                    | 1           | 1                |
|               | -0.889884508                          | -0.889884508                | -0.889884508 | NA           | 1                                     | 0           | 0.998207054      |
| CTNBL1        | ENSG00000132792.18                    | 0.373564902                 | 1            | 1            | 0.373564902                           |             |                  |
|               | Brain_Cerebellum                      | 0.373564902                 |              |              | Brain_Cerebellum                      | 1           | 1                |
|               | -0.889815613                          | -0.889815613                | NA           | 1            | 0                                     | 0.998207054 | -0.889815613     |
| FAM111A       | ENSG00000166801.15                    | 0.373618996                 | 1            | 1            | 0.373618996                           |             |                  |
|               | Brain_Amygdala                        | 0.373618996                 |              |              | Brain_Amygdala                        | 1           | 1                |
|               | -0.889714892                          | -0.889714892                | NA           | 1            | 0                                     | 0.998207054 | -0.889714892     |
| FBXO16        | ENSG00000214050.7                     | 0.373635321                 | 1            | 1            | 0.373635321                           |             |                  |
|               | Brain_Cerebellum                      | 0.373635321                 |              |              | Brain_Cerebellum                      | 1           | 1                |
|               | -0.889684497                          | -0.889684497                | NA           | 1            | 0                                     | 0.998207054 | -0.889684497     |
| TRAK2         | ENSG00000115993.12                    | 0.373651618                 | 1            | 1            | 0.373651618                           |             | Brain_Cerebellum |
|               | 0.373651618                           | Brain_Cerebellum            | 1            | 1            | 0.889654155                           | 0.889654155 |                  |
|               | 0.889654155                           | NA                          | 1            | 0            | 0.998207054                           |             |                  |
| PPHLN1        | ENSG00000134283.17                    | 0.373807797                 | 2            | 2            | 0.562900676                           |             |                  |
|               | Brain_Cerebellum                      | 0.85891459                  |              |              | Brain_Cerebellar_Hemisphere           | 1.851406226 |                  |
|               | 0.148593774                           | 0.148593774                 | -0.177756018 | 0.578538405  | 0.200391193                           |             |                  |
|               | 0.534780915                           | 2                           | 0            | 0.998207054  |                                       |             |                  |
| C4orf19       | ENSG00000154274.14                    | 0.373857027                 | 2            | 2            | 0.19255045                            |             | Brain_Cerebellum |
|               | 0.822638195                           | Brain_Cerebellar_Hemisphere | 1.513940951  | 0.486059049  |                                       |             |                  |
|               | 0.486059049                           | 0.224153076                 | 1.303071215  | 0.763612145  | 0.762910333                           |             |                  |
|               | 2                                     | 0                           | 0.998207054  |              |                                       |             |                  |
| UPK3B         | ENSG00000243566.6                     | 0.373884756                 | 13           | 2            | 0.138834367                           |             |                  |
|               | Brain_Substantia_nigra                | 0.401216683                 |              |              | Brain_Cerebellar_Hemisphere           |             |                  |
|               | 11.55215114                           | 0.003017286                 | 0.435554239  | -1.480145702 | -0.839450272                          |             |                  |
|               | -1.07874019                           | 0.229314458                 | 2            | 0            | 0.998207054                           |             |                  |
| PIP5K1A       | ENSG00000143398.19                    | 0.373917526                 | 7            | 7            | 0.091853102                           |             |                  |
|               | Brain_Substantia_nigra                | 0.781751112                 |              |              | Brain_Nucleus_accumbens_basal_ganglia |             |                  |
|               | 2.262673211                           | 0.344348492                 | 0.344348492  | -1.437132197 | 1.685702567                           |             |                  |
|               | -0.095720973                          | 1.058791547                 | 7            | 0            | 0.998207054                           |             |                  |
| CTD-3051D23.1 | ENSG00000258811.1                     | 0.37404678                  | 3            | 3            | 0.143076138                           |             |                  |
|               | Brain_Putamen_basal_ganglia           | 0.297160137                 |              |              | Brain_Hypothalamus                    | 1.99567458  |                  |
|               | 0.06819306                            | 0.06819306                  | -1.166796207 | 1.464431312  | -0.248302534                          |             |                  |
|               | 1.484571539                           | 3                           | 0            | 0.998207054  |                                       |             |                  |
| NRG3          | ENSG00000185737.12                    | 0.374114299                 | 2            | 2            | 0.253119572                           |             |                  |
|               | Brain_Nucleus_accumbens_basal_ganglia | 0.356988397                 |              |              | Brain_Substantia_nigra                |             |                  |
|               | 1.098371835                           | 0.901628165                 | 0.901628165  | 0.921118817  | 1.142804978                           |             |                  |
|               | 1.031961897                           | 0.156755788                 | 2            | 0            | 0.998207054                           |             |                  |
| FAM218A       | ENSG00000250486.3                     | 0.374185692                 | 11           | 4            | 0.101921532                           |             |                  |
|               | Brain_Anterior_cingulate_cortex_BA24  | 0.416882362                 |              |              | Brain_Cerebellum                      |             |                  |
|               | 8.467463369                           | 0.026472353                 | 0.299164025  | -1.635608588 | -0.81184189                           |             |                  |
|               | -1.221595988                          | 0.269600552                 | 4            | 0            | 0.998207054                           |             |                  |
| P3H2          | ENSG00000090530.9                     | 0.374379453                 | 1            | 1            | 0.374379453                           |             | Brain_Cerebellum |
|               | 0.374379453                           | Brain_Cerebellum            | 1            | 1            | 0.888299901                           | 0.888299901 |                  |
|               | 0.888299901                           | NA                          | 1            | 0            | 0.998207054                           |             |                  |
| KCNQ5         | ENSG00000185760.15                    | 0.374404599                 | 2            | 2            | 0.25783046                            |             |                  |
|               | Brain_Anterior_cingulate_cortex_BA24  | 0.407153718                 |              |              | Brain_Cerebellar_Hemisphere           |             |                  |
|               | 1.001403484                           | 0.998596516                 | 0.998596516  | -1.13153386  | -0.828912859                          |             |                  |
|               | -0.98022336                           | 0.213985362                 | 2            | 0            | 0.998207054                           |             |                  |
| CRTC1         | ENSG00000105662.15                    | 0.374416302                 | 2            | 1            | 0.357719711                           |             | Brain_Cerebellum |
|               | 0.406390896                           | Brain_Cerebellar_Hemisphere | 1.940815094  | 0.059184906  |                                       |             |                  |
|               | 1.940815094                           | -0.919718829                | -0.830261597 | -0.874990213 | 0.063255815                           |             |                  |
|               | 1                                     | 0                           | 0.998207054  |              |                                       |             |                  |

|               |                                       |                  |              |              |              |                                       |
|---------------|---------------------------------------|------------------|--------------|--------------|--------------|---------------------------------------|
| RP11-236B18.5 | ENSG00000273124.1                     | 0.374418251      | 1            | 1            | 0.374418251  |                                       |
|               | Brain_Anterior_cingulate_cortex_BA24  | 0.374418251      |              |              |              |                                       |
|               | Brain_Anterior_cingulate_cortex_BA24  | 1                | 1            | 0.888227757  |              |                                       |
|               | 0.888227757                           | 0.888227757      | NA           | 1            | 0            | 0.998207054                           |
| RP5-832C2.5   | ENSG00000215014.4                     | 0.374435148      | 2            | 2            | 0.206767494  |                                       |
|               | Brain_Nucleus_accumbens_basal_ganglia | 0.453585056      |              |              |              | Brain_Putamen_basal_ganglia           |
|               | 1.11450107                            | 0.88549893       | 0.88549893   | -1.262503982 | -0.749451607 | -1.005977795                          |
|               | 0.362782813                           | 2                | 0            | 0.998207054  |              |                                       |
| RP11-222K16.1 | ENSG00000271943.1                     | 0.37448499       | 5            | 5            | 0.102067193  |                                       |
|               | Brain_Cortex                          | 0.971968562      |              |              |              | Brain_Hypothalamus                    |
|               | 0.490321356                           | 0.490321356      | -1.063452783 | 1.634913446  |              | 0.346309108                           |
|               | 0.980951399                           | 5                | 0            | 0.998207054  |              |                                       |
| RCBTB1        | ENSG00000136144.11                    | 0.37466923       | 10           | 5            | 0.056773849  | Brain_Amygdala                        |
|               | 0.828702292                           |                  |              |              |              | Brain_Nucleus_accumbens_basal_ganglia |
|               | 0.037960654                           | 0.277842599      | -1.905047869 | 0.822723875  |              | -0.703015176                          |
|               | 0.736656615                           | 5                | 0            | 0.998207054  |              |                                       |
| C5            | ENSG00000106804.7                     | 0.374763431      | 3            | 3            | 0.291730053  |                                       |
|               | Brain_Caudate_basal_ganglia           | 0.881211586      |              |              |              | Brain_Cerebellum                      |
|               | 0.141617618                           | 0.141617618      | -1.054333944 | -0.149433492 |              | -0.574664402                          |
|               | 0.454899858                           | 3                | 0            | 0.998207054  |              |                                       |
| HRASLS2       | ENSG00000133328.3                     | 0.374842877      | 3            | 3            | 0.176104525  |                                       |
|               | Brain_Cortex                          | 0.807751635      |              |              |              | Brain_Hippocampus                     |
|               | 0.817363214                           | 0.817363214      | 0.243327587  | 1.352846966  |              | 0.829428578                           |
|               | 0.557409315                           | 3                | 0            | 0.998207054  |              |                                       |
| ASIC1         | ENSG00000110881.11                    | 0.374846569      | 2            | 2            | 0.198639467  | Brain_Cortex                          |
|               | 0.467626987                           |                  |              |              |              | Brain_Frontal_Cortex_BA9              |
|               | 0.184318449                           | -1.285437435     | -0.72634551  | -1.005891473 |              | 0.184318449                           |
|               | 2                                     | 0                | 0.998207054  |              |              |                                       |
| POP5          | ENSG00000167272.10                    | 0.374894305      | 10           | 7            | 0.078829727  |                                       |
|               | Brain_Cerebellar_Hemisphere           | 0.953135639      |              |              |              | Brain_Hippocampus                     |
|               | 0.042751287                           | 0.220949757      | -0.548879661 | 1.757517     |              | 0.451772888                           |
|               | 0.684703814                           | 7                | 0            | 0.998207054  |              |                                       |
| SRD5A2        | ENSG00000277893.1                     | 0.37503128       | 1            | 1            | 0.37503128   | Brain_Cerebellum                      |
|               | 0.37503128                            | Brain_Cerebellum | 1            | 1            | -0.887088454 | -0.887088454                          |
|               | -0.887088454                          | NA               | 1            | 0            | 0.998207054  |                                       |
| AC092171.4    | ENSG00000230733.2                     | 0.375056723      | 2            | 2            | 0.163509761  |                                       |
|               | Brain_Caudate_basal_ganglia           | 0.887525744      |              |              |              | Brain_Hypothalamus                    |
|               | 0.999717582                           | 0.999717582      | -1.393363953 | 0.141435711  |              | -0.625964121                          |
|               | 1.08526725                            | 2                | 0            | 0.998207054  |              |                                       |
| SPCS1         | ENSG00000114902.13                    | 0.375061879      | 4            | 4            | 0.071676094  |                                       |
|               | Brain_Frontal_Cortex_BA9              | 0.627230998      |              |              |              | Brain_Cortex                          |
|               | 0.31111223                            | 0.31111223       | -1.80116997  | 1.139685223  |              | -0.603259274                          |
|               | 1.281380479                           | 4                | 0            | 0.998207054  |              |                                       |
| MPZL3         | ENSG00000160588.9                     | 0.375145231      | 1            | 1            | 0.375145231  |                                       |
|               | Brain_Hypothalamus                    | 0.375145231      |              |              |              | Brain_Hypothalamus                    |
|               | -0.886876805                          | -0.886876805     | -0.886876805 | NA           | 1            | 0                                     |
|               |                                       |                  |              |              | 0.998207054  |                                       |
| DNLZ          | ENSG00000213221.4                     | 0.375150914      | 13           | 3            | 0.283466017  |                                       |
|               | Brain_Spinal_cord_cervical_c-1        | 0.948367517      |              |              |              |                                       |
|               | Brain_Nucleus_accumbens_basal_ganglia | 10.40914806      |              |              | 0.021651273  |                                       |
|               | 0.546379427                           | -0.984096566     | 1.07256571   | -0.165015078 |              | 0.529432004                           |
|               | 0                                     | 0.998207054      |              |              |              | 3                                     |
| CDK13         | ENSG00000065883.14                    | 0.37519722       | 2            | 2            | 0.184932594  | Brain_Hippocampus                     |
|               | 0.747940381                           |                  |              |              |              | Brain_Putamen_basal_ganglia           |
|               | 0.904050299                           | -0.321356319     | 1.325719595  | 0.502181638  |              | 0.904050299                           |
|               | 2                                     | 0                | 0.998207054  |              |              | 1.164658548                           |
| RAB2A         | ENSG00000104388.14                    | 0.375225119      | 2            | 2            | 0.172644468  |                                       |
|               | Brain_Cerebellar_Hemisphere           | 0.776079305      |              |              |              | Brain_Spinal_cord_cervical_c-1        |
|               | 1.023975652                           | 0.976024348      | 0.976024348  | -1.363755696 |              | -0.284432045                          |
|               | -0.82409387                           | 0.763197073      | 2            | 0            | 0.998207054  |                                       |
| POT1          | ENSG00000128513.14                    | 0.375355046      | 3            | 3            | 0.2430407    | Brain_Cortex                          |
|               | 0.725270532                           |                  |              |              |              | Brain_Hippocampus                     |
|               | 0.506822518                           | -0.351423664     | 1.167420244  | 0.590565955  |              | 0.822626623                           |

|               |                                      |                             |                                |              |              |                  |              |            |
|---------------|--------------------------------------|-----------------------------|--------------------------------|--------------|--------------|------------------|--------------|------------|
| 3             | 0                                    | 0.998207054                 |                                |              |              |                  |              |            |
| PLXNA1        | ENSG00000114554.11                   | 0.375498109                 | 2                              | 2            | 0.347596635  |                  |              |            |
|               | Brain_Cerebellum                     | 0.64746896                  | Brain_Cerebellar_Hemisphere    | 1.919955253  |              |                  |              |            |
|               | 0.080044747                          | 0.080044747                 | -0.939261237                   | -0.457281174 | -0.698271205 |                  |              |            |
|               | 0.340811371                          | 2                           | 0                              | 0.998207054  |              |                  |              |            |
| CTD-3162L10.1 | ENSG00000267053.6                    | 0.375595968                 | 4                              | 2            | 0.437116368  |                  |              |            |
|               | Brain_Cortex                         | 0.883569483                 | Brain_Hypothalamus             | 3.603815607  |              |                  |              |            |
|               | 0.026260609                          | 0.297355241                 | -0.777071873                   | 0.2944517    | -0.226996055 |                  |              |            |
|               | 0.441087832                          | 2                           | 0                              | 0.998207054  |              |                  |              |            |
| APP           | ENSG00000142192.20                   | 0.375650496                 | 1                              | 1            | 0.375650496  |                  |              |            |
|               | Brain_Cerebellar_Hemisphere          | 0.375650496                 | Brain_Cerebellar_Hemisphere    | 1            | 1            |                  |              |            |
|               | 1                                    | 0.885938819                 | 0.885938819                    | 0.885938819  | NA           | 1                | 0            |            |
|               | 0.998207054                          |                             |                                |              |              |                  |              |            |
| LINC00205     | ENSG00000223768.1                    | 0.375654184                 | 13                             | 3            | 0.21477515   | Brain_Cerebellum |              |            |
|               | 0.970753163                          | Brain_Amygdala              | 10.87606263                    | 0.000801602  | 0.563631865  |                  |              |            |
|               | -1.240541564                         | 0.46159295                  | -0.715408951                   | 0.509236212  | 3            | 0                |              |            |
|               | 0.998207054                          |                             |                                |              |              |                  |              |            |
| RFX1          | ENSG00000132005.8                    | 0.375670184                 | 1                              | 1            | 0.375670184  |                  |              |            |
|               | Brain_Hippocampus                    | 0.375670184                 | Brain_Hippocampus              | 1            | 1            | 1                |              |            |
|               | -0.885902287                         | -0.885902287                | -0.885902287                   | NA           | 1            | 0                | 0.998207054  |            |
| 7-Mar         | ENSG00000136536.14                   | 0.375720144                 | 1                              | 1            | 0.375720144  | Brain_Amygdala   |              |            |
|               | 0.375720144                          | Brain_Amygdala              | 1                              | 1            | 1            | 0.885809585      | 0.885809585  |            |
|               | 0.885809585                          | NA                          | 1                              | 0            | 0.998207054  |                  |              |            |
| RPL9          | ENSG00000163682.15                   | 0.375907456                 | 13                             | 1            | 0.32231109   |                  |              |            |
|               | Brain_Anterior_cingulate_cortex_BA24 | 0.440687401                 | Brain_Hypothalamus             |              |              |                  |              |            |
|               | 12.83560606                          | 4.55E-05                    | 12.83560606                    | -0.989719809 | -0.771032951 |                  |              |            |
|               | -0.880104099                         | 0.052665594                 | 1                              | 0            | 0.998207054  |                  |              |            |
| PSMD3         | ENSG00000108344.14                   | 0.375937941                 | 1                              | 1            | 0.375937941  | Brain_Cerebellum |              |            |
|               | 0.375937941                          | Brain_Cerebellum            | 1                              | 1            | 1            | -0.885405548     | -0.885405548 |            |
|               | -0.885405548                         | NA                          | 1                              | 0            | 0.998207054  |                  |              |            |
| RTTN          | ENSG00000176225.13                   | 0.37597893                  | 2                              | 2            | 0.211393044  |                  |              |            |
|               | Brain_Substantia_nigra               | 0.490622211                 | Brain_Cerebellum               | 1.049555791  |              |                  |              |            |
|               | 0.950444209                          | 0.950444209                 | -1.249744094                   | 0.68931953   | -0.280212282 |                  |              |            |
|               | 1.371125037                          | 2                           | 0                              | 0.998207054  |              |                  |              |            |
| AC008060.8    | ENSG00000236544.1                    | 0.376018053                 | 2                              | 2            | 0.170066843  |                  |              |            |
|               | Brain_Cerebellum                     | 0.875341954                 | Brain_Cerebellar_Hemisphere    | 1.083088311  |              |                  |              |            |
|               | 0.916911689                          | 0.916911689                 | -1.371989061                   | 0.156876788  | -0.607556137 |                  |              |            |
|               | 1.081071409                          | 2                           | 0                              | 0.998207054  |              |                  |              |            |
| RP9           | ENSG00000164610.8                    | 0.376030728                 | 10                             | 1            | 0.218295067  | Brain_Amygdala   |              |            |
|               | 0.860878649                          | Brain_Caudate_basal_ganglia | 9.160560664                    | 0.003493031  |              |                  |              |            |
|               | 9.160560664                          | 0.175255789                 | 1.231074325                    | 0.84899713   | 0.277924862  | 1                |              |            |
|               | 0                                    | 0.998207054                 |                                |              |              |                  |              |            |
| TICAM1        | ENSG00000127666.9                    | 0.376104769                 | 2                              | 1            | 0.375578287  |                  |              |            |
|               | Brain_Caudate_basal_ganglia          | 0.376658915                 | Brain_Cortex                   | 1.999886098  |              |                  |              |            |
|               | 0.000113902                          | 1.999886098                 | 0.884069095                    | 0.886072823  | 0.885070959  |                  |              |            |
|               | 0.00141685                           | 1                           | 0                              | 0.998207054  |              |                  |              |            |
| KIF1B         | ENSG00000054523.17                   | 0.376118563                 | 2                              | 2            | 0.445729838  |                  |              |            |
|               | Brain_Hippocampus                    | 0.959262334                 | Brain_Spinal_cord_cervical_c-1 |              |              |                  |              |            |
|               | 1.857611649                          | 0.142388351                 | 0.142388351                    | 0.051079296  | 0.762553312  |                  |              |            |
|               | 0.406816304                          | 0.503088101                 | 2                              | 0            | 0.998207054  |                  |              |            |
| PDE5A         | ENSG00000138735.15                   | 0.376127082                 | 1                              | 1            | 0.376127082  | Brain_Cortex     |              |            |
|               | 0.376127082                          | Brain_Cortex                | 1                              | 1            | 1            | 0.88505479       | 0.88505479   | 0.88505479 |
|               | NA                                   | 1                           | 0                              | 0.998207054  |              |                  |              |            |
| DGCR6L        | ENSG00000128185.9                    | 0.376233581                 | 3                              | 3            | 0.151972652  |                  |              |            |
|               | Brain_Cerebellum                     | 0.562626418                 | Brain_Cerebellar_Hemisphere    | 1.249262677  |              |                  |              |            |
|               | 0.766909176                          | 0.766909176                 | -1.432598356                   | 0.627352328  | -0.075433742 |                  |              |            |
|               | 1.175588221                          | 3                           | 0                              | 0.998207054  |              |                  |              |            |
| SPDYE6        | ENSG00000260097.2                    | 0.376271902                 | 2                              | 2            | 0.162259053  |                  |              |            |
|               | Brain_Cortex                         | 0.666449998                 | Brain_Cerebellar_Hemisphere    | 1.337326104  |              |                  |              |            |
|               | 0.662673896                          | 0.662673896                 | 0.431025268                    | 1.397514023  | 0.914269645  |                  |              |            |
|               | 0.683410753                          | 2                           | 0                              | 0.998207054  |              |                  |              |            |
| RNF38         | ENSG00000137075.17                   | 0.376339473                 | 1                              | 1            | 0.376339473  |                  |              |            |

|           |                                      |                             |              |                                       |              |                             |
|-----------|--------------------------------------|-----------------------------|--------------|---------------------------------------|--------------|-----------------------------|
|           | Brain_Frontal_Cortex_BA9             | 0.376339473                 |              | Brain_Frontal_Cortex_BA9              | 1            | 1                           |
|           | 1                                    | -0.884661043                | -0.884661043 | -0.884661043                          | NA           | 1 0                         |
|           | 0.998207054                          |                             |              |                                       |              |                             |
| STX6      | ENSG00000135823.13                   | 0.376374069                 | 11           | 4                                     | 0.14339777   |                             |
|           | Brain_Frontal_Cortex_BA9             | 0.998960237                 |              | Brain_Cerebellar_Hemisphere           | 7.87236183   |                             |
|           | 0.005356496                          | 0.555493751                 |              | -0.910618697                          | 1.463254436  | 0.249804766                 |
|           | 0.565543828                          | 4                           | 0            | 0.998207054                           |              |                             |
| CXCL14    | ENSG00000145824.12                   | 0.376398816                 | 2            | 2                                     | 0.224637765  |                             |
|           | Brain_Cerebellum                     | 0.254188152                 |              | Brain_Hippocampus                     | 1.421869348  |                             |
|           | 0.578130652                          | 0.578130652                 |              | -1.214288004                          | -1.140235618 | -1.177261811                |
|           | 0.052362945                          | 2                           | 0            | 0.998207054                           |              |                             |
| RNF112    | ENSG00000128482.15                   | 0.376418527                 | 3            | 3                                     | 0.225807423  |                             |
|           | Brain_Caudate_basal_ganglia          | 0.729684122                 |              | Brain_Cerebellum                      | 1.75439822   |                             |
|           | 0.417488584                          | 0.417488584                 |              | -0.977011383                          | 1.211229597  | -0.037109179                |
|           | 1.126254627                          | 3                           | 0            | 0.998207054                           |              |                             |
| CRNDE     | ENSG00000245694.9                    | 0.376474376                 | 7            | 2                                     | 0.629064736  |                             |
|           | Brain_Anterior_cingulate_cortex_BA24 | 0.878266974                 |              | Brain_Putamen_basal_ganglia           |              |                             |
|           | 6.507877729                          | 0.020851138                 |              | 0.26766814                            | -0.461383594 | 0.483043661                 |
|           | -0.189210523                         | 0.317178468                 | 2            | 0                                     | 0.998207054  |                             |
| ZSCAN12   | ENSG00000158691.14                   | 0.376758008                 | 1            | 1                                     | 0.376758008  |                             |
|           | Brain_Cerebellum                     | 0.376758008                 |              | Brain_Cerebellum                      | 1 1 1        | -0.883885533                |
|           | -0.883885533                         | -0.883885533                | NA           | 1                                     | 0            | 0.998207054                 |
| ERCC8     | ENSG00000049167.13                   | 0.376784557                 | 1            | 1                                     | 0.376784557  |                             |
|           | Brain_Putamen_basal_ganglia          | 0.376784557                 |              | Brain_Putamen_basal_ganglia           | 1            | 1                           |
|           | 1                                    | 0.883836358                 |              | 0.883836358                           | NA           | 1 0                         |
|           | 0.998207054                          |                             |              |                                       |              |                             |
| BUB1      | ENSG00000169679.14                   | 0.376865977                 | 2            | 2                                     | 0.169588428  |                             |
|           | Brain_Caudate_basal_ganglia          | 0.592818541                 |              | Brain_Frontal_Cortex_BA9              |              |                             |
|           | 1.207539903                          | 0.792460097                 |              | 0.792460097                           | 0.534756075  | 1.373527468                 |
|           | 0.954141771                          | 0.59310094                  | 2            | 0                                     | 0.998207054  |                             |
| IL10RB    | ENSG00000243646.9                    | 0.377039499                 | 13           | 5                                     | 0.341786246  |                             |
|           | Brain_Caudate_basal_ganglia          | 0.827371173                 |              | Brain_Nucleus_accumbens_basal_ganglia |              |                             |
|           | 10.0394323                           | 0.004810005                 |              | 0.377437831                           | -0.448761182 | 0.950641791                 |
|           | 0.375176561                          | 0.536774651                 | 5            | 0                                     | 0.998207054  |                             |
| PHLDA3    | ENSG00000174307.6                    | 0.377046214                 | 7            | 6                                     | 0.046746523  |                             |
|           | Brain_Putamen_basal_ganglia          | 0.791500682                 |              | Brain_Hypothalamus                    | 2.283355606  |                             |
|           | 0.008854142                          | 0.696951939                 |              | -1.988589572                          | -0.2643624   | -1.121658799                |
|           | 0.752025528                          | 6                           | 0            | 0.998207054                           |              |                             |
| RAB3C     | ENSG00000152932.7                    | 0.37705296                  | 1            | 1                                     | 0.37705296   | Brain_Caudate_basal_ganglia |
|           | 0.37705296                           | Brain_Caudate_basal_ganglia | 1            | 1                                     | -0.88333933  |                             |
|           | -0.88333933                          | -0.88333933                 | NA           | 1                                     | 0            | 0.998207054                 |
| TYW1      | ENSG00000198874.12                   | 0.377133979                 | 12           | 1                                     | 0.104660191  | Brain_Cerebellum            |
|           | 0.866046372                          | Brain_Hypothalamus          | 11.20778812  |                                       | 0.001627914  |                             |
|           | 11.20778812                          | -1.622668955                |              | -0.168682516                          | -0.854807108 | 0.329058312                 |
|           | 1                                    | 0                           | 0.998207054  |                                       |              |                             |
| COL24A1   | ENSG00000171502.14                   | 0.377149352                 | 4            | 3                                     | 0.416763899  |                             |
|           | Brain_Cortex                         | 0.80097741                  |              | Brain_Caudate_basal_ganglia           | 3.277071556  |                             |
|           | 0.061128675                          | 0.223260105                 |              | -0.812048333                          | 0.481990699  | 0.058613834                 |
|           | 0.58854442                           | 3                           | 0            | 0.998207054                           |              |                             |
| PTGR2     | ENSG00000140043.11                   | 0.377378428                 | 13           | 3                                     | 0.140072036  |                             |
|           | Brain_Cerebellar_Hemisphere          | 0.92490818                  |              | Brain_Frontal_Cortex_BA9              | 9.330705287  |                             |
|           | 0.003870274                          | 0.573574731                 |              | -1.475522826                          | 1.358175785  | 0.453299654                 |
|           | 0.876916751                          | 3                           | 0            | 0.998207054                           |              |                             |
| MAP3K14   | ENSG00000006062.14                   | 0.377400058                 | 2            | 2                                     | 0.287517369  |                             |
|           | Brain_Cerebellar_Hemisphere          | 0.295854739                 |              | Brain_Cerebellum                      | 1.141183159  |                             |
|           | 0.858816841                          | 0.858816841                 |              | 1.045364065                           | 1.063583612  | 1.054473839                 |
|           | 0.012883166                          | 2                           | 0            | 0.998207054                           |              |                             |
| PVT1      | ENSG00000249859.9                    | 0.377405722                 | 2            | 2                                     | 0.231569633  |                             |
|           | Brain_Caudate_basal_ganglia          | 0.674088732                 |              | Brain_Nucleus_accumbens_basal_ganglia |              |                             |
|           | 1.233296854                          | 0.766703146                 |              | 0.766703146                           | -1.196325315 | 0.420543125                 |
|           | -0.387891095                         | 1.143298638                 | 2            | 0                                     | 0.998207054  |                             |
| LINC00645 | ENSG00000258548.5                    | 0.377433829                 | 2            | 2                                     | 0.175821754  |                             |

|               |                                       |                             |              |                                       |                    |             |
|---------------|---------------------------------------|-----------------------------|--------------|---------------------------------------|--------------------|-------------|
|               | Brain_Putamen_basal_ganglia           | 0.756220617                 |              | Brain_Hypothalamus                    | 1.022340961        |             |
|               | 0.977659039                           | 0.977659039                 | -1.353732443 | -0.31044758                           | -0.832090012       |             |
|               | 0.737713802                           | 2                           | 0            | 0.998207054                           |                    |             |
| POLR2E        | ENSG00000099817.11                    | 0.377433854                 |              | 9                                     | 7                  | 0.132147179 |
|               | Brain_Frontal_Cortex_BA9              | 0.786042486                 |              | Brain_Putamen_basal_ganglia           | 3.02125202         |             |
|               | 0.025787305                           | 0.35292812                  | -1.427938665 | 1.505688415                           | -0.369435361       |             |
|               | 1.105776599                           | 7                           | 0            | 0.998207054                           |                    |             |
| FLCN          | ENSG00000154803.12                    | 0.377457976                 | 10           | 7                                     | 0.154582789        |             |
|               | Brain_Frontal_Cortex_BA9              | 0.940897475                 |              | Brain_Nucleus_accumbens_basal_ganglia |                    |             |
|               | 5.783749875                           | 0.012982705                 | 0.329552136  | -1.42352925                           | 1.129069604        |             |
|               | -0.277265104                          | 0.834444916                 | 7            | 0                                     | 0.998207054        |             |
| NXNL2         | ENSG00000130045.15                    | 0.377483581                 | 1            | 1                                     | 0.377483581        |             |
|               | Brain_Substantia_nigra                | 0.377483581                 |              | Brain_Substantia_nigra                | 1                  |             |
|               | 1                                     | -0.882542363                | -0.882542363 | -0.882542363                          | NA                 |             |
|               | 0.998207054                           |                             |              | 1                                     | 0                  |             |
| MOB3A         | ENSG00000172081.13                    | 0.377496644                 | 2            | 2                                     | 0.280455609        |             |
|               | 0.390918512                           | Brain_Caudate_basal_ganglia | 1.024951969  | 0.975048031                           | Brain_Cerebellum   |             |
|               | 0.975048031                           | -1.079296419                | 0.857952826  | -0.110671796                          | 1.369842078        |             |
|               | 2                                     | 0                           | 0.998207054  |                                       |                    |             |
| FALEC         | ENSG00000228126.1                     | 0.377567864                 | 2            | 2                                     | 0.21347323         |             |
|               | 0.398991685                           | Brain_Frontal_Cortex_BA9    | 1.177462745  | 0.822537255                           | Brain_Hypothalamus |             |
|               | 0.822537255                           | -1.244071552                | -0.843423407 | -1.04374748                           | 0.28330102         |             |
|               | 0                                     | 0.998207054                 |              |                                       | 2                  |             |
| RPS25         | ENSG00000118181.10                    | 0.377569461                 | 9            | 2                                     | 0.213790632        |             |
|               | Brain_Nucleus_accumbens_basal_ganglia | 0.688057067                 |              |                                       |                    |             |
|               | Brain_Spinal_cord_cervical_c-1        | 8.316053832                 |              | 7.17E-06                              | 0.461754678        |             |
|               | -1.243209529                          | -0.401493169                | -0.703635935 | 0.273540404                           | 2                  |             |
|               | 0.998207054                           |                             |              |                                       | 0                  |             |
| CLDN16        | ENSG00000113946.3                     | 0.377616058                 | 3            | 3                                     | 0.153344979        |             |
|               | Brain_Amygdala                        | 0.743157374                 |              | Brain_Frontal_Cortex_BA9              | 1.214271069        |             |
|               | 0.786250163                           | 0.786250163                 | -0.998984601 | 1.427815468                           | 0.033718607        |             |
|               | 1.253113592                           | 3                           | 0            | 0.998207054                           |                    |             |
| COG7          | ENSG00000168434.12                    | 0.377649736                 | 2            | 2                                     | 0.162863996        |             |
|               | Brain_Caudate_basal_ganglia           | 0.964766478                 |              | Brain_Cerebellum                      | 1.023007596        |             |
|               | 0.976992404                           | 0.976992404                 | -1.395503712 | -0.044173032                          | -0.719838372       |             |
|               | 0.955535088                           | 2                           | 0            | 0.998207054                           |                    |             |
| MLF2          | ENSG00000089693.10                    | 0.377681057                 | 1            | 1                                     | 0.377681057        |             |
|               | 0.377681057                           | Brain_Cerebellum            | 1            | 1                                     | 0.882177075        |             |
|               | 0.882177075                           | NA                          | 1            | 0                                     | 0.998207054        |             |
| CTD-2017D11.1 | ENSG00000268362.5                     | 0.377697981                 |              | 11                                    | 2                  | 0.113907198 |
|               | Brain_Hippocampus                     | 0.517190943                 |              | Brain_Cerebellum                      | 9.701963863        |             |
|               | 0.003947373                           | 0.81348959                  | 0.647681545  | 1.580872478                           | 1.287705168        |             |
|               | 0.276402465                           | 2                           | 0            | 0.998207054                           |                    |             |
| MAF           | ENSG00000178573.6                     | 0.377752784                 | 1            | 1                                     | 0.377752784        |             |
|               | Brain_Caudate_basal_ganglia           | 0.377752784                 |              | Brain_Caudate_basal_ganglia           | 1                  |             |
|               | 1                                     | -0.882044425                | -0.882044425 | -0.882044425                          | NA                 |             |
|               | 0.998207054                           |                             |              | 1                                     | 0                  |             |
| CTC-591M7.1   | ENSG00000283213.1                     | 0.377885491                 | 2            | 2                                     | 0.206047012        |             |
|               | Brain_Cortex                          | 0.85698241                  |              | Brain_Frontal_Cortex_BA9              | 1.535991262        |             |
|               | 0.464008738                           | 0.464008738                 | -1.264510059 | -0.180216749                          | -0.722363404       |             |
|               | 0.766711153                           | 2                           | 0            | 0.998207054                           |                    |             |
| PHF7          | ENSG00000010318.20                    | 0.378013033                 | 1            | 1                                     | 0.378013033        |             |
|               | Brain_Putamen_basal_ganglia           | 0.378013033                 |              | Brain_Putamen_basal_ganglia           | 1                  |             |
|               | 1                                     | 0.881563256                 | 0.881563256  | 0.881563256                           | NA                 |             |
|               | 0.998207054                           |                             |              | 1                                     | 0                  |             |
| EXTL3         | ENSG00000012232.8                     | 0.37803009                  | 1            | 1                                     | 0.37803009         |             |
|               | 0.37803009                            | Brain_Substantia_nigra      | 1            | 1                                     | 1                  |             |
|               | -0.881531725                          | -0.881531725                | NA           | 1                                     | 0                  |             |
|               | 0.998207054                           |                             |              |                                       |                    |             |
| LIPC          | ENSG00000166035.10                    | 0.378222756                 | 2            | 2                                     | 0.206320801        |             |
|               | Brain_Putamen_basal_ganglia           | 0.566921559                 |              | Brain_Caudate_basal_ganglia           |                    |             |
|               | 1.013322992                           | 0.986677008                 | 0.986677008  | 0.572591142                           | 1.263747134        |             |
|               | 0.918169138                           | 0.488721089                 | 2            | 0                                     | 0.998207054        |             |



|              |                                       |                                       |                  |              |              |                                |                             |              |
|--------------|---------------------------------------|---------------------------------------|------------------|--------------|--------------|--------------------------------|-----------------------------|--------------|
| PKD2L1       | ENSG00000107593.16                    | 0.378380227                           | 6                | 6            | 0.097204483  |                                |                             |              |
|              | Brain_Hypothalamus                    | 0.747763536                           |                  |              |              | Brain_Caudate_basal_ganglia    | 2.400099162                 |              |
|              | 0.098147029                           | 0.098147029                           | -1.658560021     |              | 1.140293291  |                                | -0.591301404                |              |
|              | 0.964141316                           | 6                                     | 0                | 0.998207054  |              |                                |                             |              |
| TWIST1       | ENSG00000122691.12                    | 0.378458999                           | 1                | 1            | 0.378458999  |                                |                             |              |
|              | Brain_Hippocampus                     | 0.378458999                           |                  |              |              | Brain_Hippocampus              | 1                           | 1            |
|              | 0.880739192                           | 0.880739192                           | 0.880739192      |              | NA           | 1                              | 0                           | 0.998207054  |
| EEF1A2       | ENSG00000101210.10                    | 0.378560994                           | 1                | 1            | 0.378560994  |                                |                             |              |
|              | Brain_Nucleus_accumbens_basal_ganglia | 0.378560994                           |                  |              |              |                                |                             |              |
|              | Brain_Nucleus_accumbens_basal_ganglia | 1                                     | 1                | 1            | -0.880550808 |                                |                             |              |
|              | -0.880550808                          | -0.880550808                          | NA               | 1            | 0            | 0.998207054                    |                             |              |
| BANF1        | ENSG00000175334.7                     | 0.378695668                           | 1                | 1            | 0.378695668  |                                | Brain_Cortex                |              |
|              | 0.378695668                           | Brain_Cortex                          | 1                | 1            | 1            | -0.880302114                   |                             | -0.880302114 |
|              | -0.880302114                          | NA                                    | 1                | 0            | 0.998207054  |                                |                             |              |
| RBCK1        | ENSG00000125826.20                    | 0.378830539                           | 1                | 1            | 0.378830539  |                                | Brain_Cerebellum            |              |
|              | 0.378830539                           | Brain_Cerebellum                      | 1                | 1            | 1            | -0.880053111                   |                             | -0.880053111 |
|              | -0.880053111                          | NA                                    | 1                | 0            | 0.998207054  |                                |                             |              |
| CA5A         | ENSG00000174990.4                     | 0.378861115                           | 9                | 5            | 0.034083446  |                                | Brain_Cerebellum            |              |
|              | 0.885893367                           | Brain_Nucleus_accumbens_basal_ganglia | 5.448255124      |              |              |                                |                             |              |
|              | 0.014734801                           | 0.310058395                           | -0.143502462     |              | 2.11908308   | 0.671510399                    |                             |              |
|              | 0.640135599                           | 5                                     | 0                | 0.998207054  |              |                                |                             |              |
| TPT1         | ENSG00000133112.16                    | 0.37887289                            | 1                | 1            | 0.37887289   |                                | Brain_Putamen_basal_ganglia |              |
|              | 0.37887289                            | Brain_Putamen_basal_ganglia           | 1                | 1            | 1            | -0.879974932                   |                             |              |
|              | -0.879974932                          | -0.879974932                          | NA               | 1            | 0            | 0.998207054                    |                             |              |
| CPA1         | ENSG00000091704.9                     | 0.378943765                           | 1                | 1            | 0.378943765  |                                |                             |              |
|              | Brain_Hippocampus                     | 0.378943765                           |                  |              |              | Brain_Hippocampus              | 1                           | 1            |
|              | -0.879844111                          | -0.879844111                          | -0.879844111     |              | NA           | 1                              | 0                           | 0.998207054  |
| RP4-794H19.1 | ENSG00000232453.6                     | 0.378979645                           | 1                | 1            | 0.378979645  |                                |                             |              |
|              | Brain_Anterior_cingulate_cortex_BA24  | 0.378979645                           |                  |              |              |                                |                             |              |
|              | Brain_Anterior_cingulate_cortex_BA24  | 1                                     | 1                | 1            | 0.879777888  |                                |                             |              |
|              | 0.879777888                           | 0.879777888                           | NA               | 1            | 0            | 0.998207054                    |                             |              |
| CMTM1        | ENSG00000089505.17                    | 0.379005832                           | 1                | 1            | 0.379005832  |                                |                             |              |
|              | Brain_Anterior_cingulate_cortex_BA24  | 0.379005832                           |                  |              |              |                                |                             |              |
|              | Brain_Anterior_cingulate_cortex_BA24  | 1                                     | 1                | 1            | 0.879729561  |                                |                             |              |
|              | 0.879729561                           | 0.879729561                           | NA               | 1            | 0            | 0.998207054                    |                             |              |
| RD3          | ENSG00000198570.5                     | 0.379053373                           | 1                | 1            | 0.379053373  |                                |                             |              |
|              | Brain_Nucleus_accumbens_basal_ganglia | 0.379053373                           |                  |              |              |                                |                             |              |
|              | Brain_Nucleus_accumbens_basal_ganglia | 1                                     | 1                | 1            | 0.879641825  |                                |                             |              |
|              | 0.879641825                           | 0.879641825                           | NA               | 1            | 0            | 0.998207054                    |                             |              |
| MADD         | ENSG00000110514.19                    | 0.379315011                           | 6                | 5            | 0.219173555  |                                | Brain_Cerebellum            |              |
|              | 0.99603966                            | Brain_Cortex                          | 3.626202225      |              | 0.029083884  | 0.150642218                    |                             |              |
|              | -1.228728666                          | -0.00496357                           | -0.571986318     |              | 0.400044051  | 5                              | 0                           |              |
|              | 0.998207054                           |                                       |                  |              |              |                                |                             |              |
| LINC01588    | ENSG00000214900.9                     | 0.379379017                           | 1                | 1            | 0.379379017  |                                |                             |              |
|              | Brain_Nucleus_accumbens_basal_ganglia | 0.379379017                           |                  |              |              |                                |                             |              |
|              | Brain_Nucleus_accumbens_basal_ganglia | 1                                     | 1                | 1            | 0.879041052  |                                |                             |              |
|              | 0.879041052                           | 0.879041052                           | NA               | 1            | 0            | 0.998207054                    |                             |              |
| CCNL1        | ENSG00000163660.11                    | 0.379380396                           | 1                | 1            | 0.379380396  |                                |                             |              |
|              | Brain_Nucleus_accumbens_basal_ganglia | 0.379380396                           |                  |              |              |                                |                             |              |
|              | Brain_Nucleus_accumbens_basal_ganglia | 1                                     | 1                | 1            | 0.879038509  |                                |                             |              |
|              | 0.879038509                           | 0.879038509                           | NA               | 1            | 0            | 0.998207054                    |                             |              |
| CCDC90B      | ENSG00000137500.9                     | 0.379413114                           | 11               | 3            | 0.097750341  |                                |                             |              |
|              | Brain_Frontal_Cortex_BA9              | 0.63763725                            | Brain_Cerebellum | 9.059443409  |              |                                |                             |              |
|              | 0.006950409                           | 0.435019593                           | 0.47100488       | 1.655859176  |              | 1.240869181                    |                             |              |
|              | 0.290205501                           | 3                                     | 0                | 0.998207054  |              |                                |                             |              |
| IMMP1L       | ENSG00000148950.9                     | 0.379439057                           | 1                | 1            | 0.379439057  |                                |                             |              |
|              | Brain_Spinal_cord_cervical_c-1        | 0.379439057                           |                  |              |              | Brain_Spinal_cord_cervical_c-1 |                             |              |
|              | 1                                     | 1                                     | 1                | -0.878930321 |              | -0.878930321                   | NA                          | 1            |
|              | 0.998207054                           |                                       |                  |              |              |                                |                             | 0            |
| INTS10       | ENSG00000104613.11                    | 0.379575885                           | 7                | 4            | 0.094728295  |                                |                             |              |
|              | Brain_Spinal_cord_cervical_c-1        | 0.980750818                           |                  |              |              | Brain_Cortex                   | 5.188619417                 |              |
|              | 0.029264277                           | 0.198904766                           | -1.670966502     |              | 0.139462819  |                                | -0.482191593                |              |

|              |                                       |             |   |                                       |    |   |                                      |    |                  |
|--------------|---------------------------------------|-------------|---|---------------------------------------|----|---|--------------------------------------|----|------------------|
|              | 0.659821098                           | 4           | 0 | 0.998207054                           |    |   |                                      |    |                  |
| LINC01829    | ENSG00000236780.5                     |             |   | 0.379601465                           | 4  | 3 | 0.081396184                          |    |                  |
|              | Brain_Nucleus_accumbens_basal_ganglia |             |   | 0.325236762                           |    |   |                                      |    |                  |
|              | Brain_Anterior_cingulate_cortex_BA24  |             |   | 3.05281745                            |    |   | 0.097830753                          |    | 0.39102274       |
|              | 0.98375343                            | 1.742641915 |   | 1.399399755                           |    |   | 0.331646052                          | 3  | 0                |
|              | 0.998207054                           |             |   |                                       |    |   |                                      |    |                  |
| LPGAT1       | ENSG00000123684.12                    |             |   | 0.379607435                           | 1  | 1 | 0.379607435                          |    |                  |
|              | Brain_Cerebellar_Hemisphere           |             |   | 0.379607435                           |    |   | Brain_Cerebellar_Hemisphere1         |    | 1                |
|              | 1                                     | -0.87861984 |   | -0.87861984                           |    |   | -0.87861984                          | NA | 1                |
|              | 0.998207054                           |             |   |                                       |    |   |                                      |    | 0                |
| ILF3         | ENSG00000129351.17                    |             |   | 0.379681142                           | 1  | 1 | 0.379681142                          |    |                  |
|              | Brain_Caudate_basal_ganglia           |             |   | 0.379681142                           |    |   | Brain_Caudate_basal_ganglia1         |    | 1                |
|              | 1                                     | 0.878483953 |   | 0.878483953                           |    |   | 0.878483953                          | NA | 1                |
|              | 0.998207054                           |             |   |                                       |    |   |                                      |    | 0                |
| ACTR3        | ENSG00000115091.11                    |             |   | 0.379685126                           | 2  | 2 | 0.167415964                          |    | Brain_Cerebellum |
|              | 0.653044551                           |             |   | Brain_Hippocampus                     |    |   | 1.200897725                          |    | 0.799102275      |
|              | 0.799102275                           |             |   | -1.380554557                          |    |   | -0.449536685                         |    | -0.915045621     |
|              | 2                                     | 0           |   | 0.998207054                           |    |   |                                      |    | 0.658329051      |
| FXYD6        | ENSG00000137726.16                    |             |   | 0.379766737                           | 2  | 2 | 0.221107677                          |    |                  |
|              | Brain_Substantia_nigra                |             |   | 0.536447975                           |    |   | Brain_Cerebellar_Hemisphere          |    |                  |
|              | 1.036057027                           |             |   | 0.963942973                           |    |   | 0.963942973                          |    | -0.618193226     |
|              | 0.302697403                           |             |   | 1.302336017                           | 2  | 0 | 0.998207054                          |    | 1.223588032      |
| LDHC         | ENSG00000166796.11                    |             |   | 0.379824387                           | 13 | 1 | 0.266405469                          |    | Brain_Cerebellum |
|              | 0.565766971                           |             |   | Brain_Frontal_Cortex_BA9              |    |   | 12.6208127                           |    | 0.001205439      |
|              | 0.574296805                           |             |   | 1.111378485                           |    |   | 0.865139597                          |    | 0.142070285      |
|              | 0.998207054                           |             |   |                                       |    |   |                                      |    | 1                |
|              |                                       |             |   |                                       |    |   |                                      |    | 0                |
| SLC1A6       | ENSG00000105143.12                    |             |   | 0.379936795                           | 8  | 4 | 0.134797221                          |    |                  |
|              | Brain_Hypothalamus                    |             |   | 0.938481912                           |    |   | Brain_Cortex                         |    | 5.905212513      |
|              | 0.303107432                           |             |   | 0.077178039                           |    |   | 1.495449305                          |    | 0.645130114      |
|              | 4                                     | 0           |   | 0.998207054                           |    |   |                                      |    | 0.476461662      |
| RP5-1092A3.5 | ENSG00000271398.1                     |             |   | 0.379978251                           | 1  | 1 | 0.379978251                          |    |                  |
|              | Brain_Cerebellar_Hemisphere           |             |   | 0.379978251                           |    |   | Brain_Cerebellar_Hemisphere1         |    | 1                |
|              | 1                                     | 0.877936369 |   | 0.877936369                           |    |   | 0.877936369                          | NA | 1                |
|              | 0.998207054                           |             |   |                                       |    |   |                                      |    | 0                |
| KB-208E9.1   | ENSG00000272733.1                     |             |   | 0.38006924                            | 12 | 1 | 0.294057999                          |    |                  |
|              | Brain_Cerebellar_Hemisphere           |             |   | 0.638899492                           |    |   | Brain_Frontal_Cortex_BA9             |    |                  |
|              | 11.13460297                           |             |   | 0.009559437                           |    |   | 11.13460297                          |    | 0.469238048      |
|              | 0.844310111                           |             |   | 0.177143569                           | 1  | 0 | 0.998207054                          |    | 1.049261024      |
| URM1         | ENSG00000167118.10                    |             |   | 0.380126329                           | 1  | 1 | 0.380126329                          |    |                  |
|              | Brain_Frontal_Cortex_BA9              |             |   | 0.380126329                           |    |   | Brain_Frontal_Cortex_BA9             |    | 1                |
|              | 1                                     | 0.877663553 |   | 0.877663553                           |    |   | 0.877663553                          | NA | 1                |
|              | 0.998207054                           |             |   |                                       |    |   |                                      |    | 0                |
| COX6A1       | ENSG00000111775.2                     |             |   | 0.380273223                           | 7  | 3 | 0.111934133                          |    |                  |
|              | Brain_Spinal_cord_cervical_c-1        |             |   | 0.5974544                             |    |   | Brain_Anterior_cingulate_cortex_BA24 |    |                  |
|              | 5.436321906                           |             |   | 0.001096572                           |    |   | 0.690672229                          |    | 0.528064744      |
|              | 0.815887589                           |             |   | 0.365982582                           | 3  | 0 | 0.998207054                          |    | 1.589559498      |
| C10orf62     | ENSG00000203942.4                     |             |   | 0.380295641                           | 2  | 2 | 0.293211875                          |    |                  |
|              | Brain_Hypothalamus                    |             |   | 0.382702872                           |    |   | Brain_Cerebellar_Hemisphere1         |    | 1.035101574      |
|              | 0.964898426                           |             |   | 0.964898426                           |    |   | -1.051101718                         |    | 0.872926994      |
|              | 1.360493749                           |             |   | 2                                     | 0  |   | 0.998207054                          |    | -0.089087362     |
| SNUPN        | ENSG00000169371.13                    |             |   | 0.380339279                           | 12 | 2 | 0.113730453                          |    |                  |
|              | Brain_Anterior_cingulate_cortex_BA24  |             |   | 0.67921752                            |    |   | Brain_Cerebellum10                   |    | 7.3839775        |
|              | 1.13E-16                              |             |   | 0.446475923                           |    |   | -1.581645797                         |    | -0.41353113      |
|              | 0.276880937                           |             |   | 2                                     | 0  |   | 0.998207054                          |    | -1.092959302     |
| CYHR1        | ENSG00000187954.12                    |             |   | 0.380626953                           | 6  | 5 | 0.128859516                          |    | Brain_Cerebellum |
|              | 0.977279889                           |             |   | Brain_Nucleus_accumbens_basal_ganglia |    |   | 2.084558263                          |    |                  |
|              | 0.015235343                           |             |   | 0.705376382                           |    |   | -1.51861467                          |    | 0.877781858      |
|              | 0.987100471                           |             |   | 5                                     | 0  |   | 0.998207054                          |    | -0.498637157     |
| FBXO28       | ENSG00000143756.11                    |             |   | 0.380662994                           | 1  | 1 | 0.380662994                          |    |                  |
|              | Brain_Nucleus_accumbens_basal_ganglia |             |   | 0.380662994                           |    |   |                                      |    |                  |
|              | Brain_Nucleus_accumbens_basal_ganglia |             |   | 1                                     | 1  | 1 | 0.87667536                           |    | 0.87667536       |
|              | 0.87667536                            | NA          |   | 1                                     | 0  |   | 0.998207054                          |    |                  |

|               |                                |                             |                                |              |              |                  |
|---------------|--------------------------------|-----------------------------|--------------------------------|--------------|--------------|------------------|
| WDR12         | ENSG00000138442.9              | 0.380737888                 | 3                              | 2            | 0.164227377  | Brain_Amygdala   |
|               | 0.202395867                    | Brain_Putamen_basal_ganglia | 2.886597782                    |              | 0.006785698  |                  |
|               | 0.10661652                     | 1.2747553                   | 1.390993568                    | 1.347426114  | 0.063348937  | 2 0              |
|               | 0.998207054                    |                             |                                |              |              |                  |
| RP11-436K8.1  | ENSG00000231252.2              | 0.380960917                 | 1                              | 1            | 0.380960917  |                  |
|               | Brain_Cortex                   | 0.380960917                 | Brain_Cortex                   | 1 1 1        | 0.876127145  |                  |
|               | 0.876127145                    | 0.876127145                 | NA 1 0                         |              | 0.998207054  |                  |
| PLAC8         | ENSG00000145287.10             | 0.380965012                 | 10                             | 4            | 0.085943322  |                  |
|               | Brain_Substantia_nigra         | 0.602510469                 | Brain_Amygdala                 | 8.288348233  |              |                  |
|               | 0.007287163                    | 0.289382512                 | 0.520793733                    | 1.717196241  | 1.035836315  |                  |
|               | 0.379622217                    | 4 0                         | 0.998207054                    |              |              |                  |
| FLYWCH1       | ENSG00000059122.16             | 0.380985932                 | 13                             | 4            | 0.058852053  |                  |
|               | Brain_Cortex                   | 0.957975027                 | Brain_Cerebellum               | 9.298838289  | 0.004590549  |                  |
|               | 0.529401467                    | -1.889296929                | 0.754278392                    | 0.154330336  | 0.734949017  |                  |
|               | 4 0                            | 0.998207054                 |                                |              |              |                  |
| TBC1D15       | ENSG00000121749.15             | 0.381023952                 | 1                              | 1            | 0.381023952  |                  |
|               | Brain_Cortex                   | 0.381023952                 | Brain_Cortex                   | 1 1 1        | -0.876011187 |                  |
|               | -0.876011187                   | -0.876011187                | NA 1 0                         |              | 0.998207054  |                  |
| PKN1          | ENSG00000123143.12             | 0.381302771                 | 2                              | 1            | 0.263437976  |                  |
|               | Brain_Cerebellar_Hemisphere    | 0.541193425                 | Brain_Cerebellum               | 1.950768336  |              |                  |
|               | 0.049231664                    | 1.950768336                 | 0.611009297                    | 1.118302134  | 0.864655716  |                  |
|               | 0.358710205                    | 1 0                         | 0.998207054                    |              |              |                  |
| RP11-180M15.6 | ENSG00000275963.1              | 0.381323883                 | 2                              | 2            | 0.194037141  |                  |
|               | Brain_Cerebellar_Hemisphere    | 0.355864586                 | Brain_Cerebellum               | 1.35751141   | 0.64248859   |                  |
|               | 0.64248859                     | 0.923273709                 | 1.298728439                    | 1.111001074  | 0.265486586  | 2                |
|               | 0                              | 0.998207054                 |                                |              |              |                  |
| CCDC92        | ENSG00000119242.8              | 0.38140213                  | 1                              | 1            | 0.38140213   |                  |
|               | Brain_Caudate_basal_ganglia    | 0.38140213                  | Brain_Caudate_basal_ganglia    | 1 1 1        |              |                  |
|               | 0.875315743                    | 0.875315743                 | 0.875315743                    | NA 1 0       | 0.998207054  |                  |
| HSPB7         | ENSG00000173641.17             | 0.381409736                 | 2                              | 2            | 0.28940775   |                  |
|               | Brain_Cerebellar_Hemisphere    | 0.735406576                 | Brain_Cerebellum               | 1.812643437  |              |                  |
|               | 0.187356563                    | 0.187356563                 | 0.337942425                    | 1.059421746  | 0.698682086  |                  |
|               | 0.51016292                     | 2 0                         | 0.998207054                    |              |              |                  |
| ACAD8         | ENSG00000151498.11             | 0.381428531                 | 5                              | 5            | 0.032096379  |                  |
|               | Brain_Spinal_cord_cervical_c-1 | 0.835981997                 | Brain_Substantia_nigra         |              |              |                  |
|               | 1.375910906                    | 0.600746181                 | 0.600746181                    | -2.143208265 | 0.664114804  |                  |
|               | -0.224271163                   | 1.139567973                 | 5 0                            | 0.998207054  |              |                  |
| ABCA10        | ENSG00000154263.17             | 0.381463008                 | 5                              | 5            | 0.060598767  |                  |
|               | Brain_Cerebellum               | 0.959975167                 | Brain_Hippocampus              | 2.997477196  |              |                  |
|               | 0.128918294                    | 0.128918294                 | -1.876411719                   | 0.050184746  | -0.496385004 |                  |
|               | 0.790245315                    | 5 0                         | 0.998207054                    |              |              |                  |
| GORAB         | ENSG00000120370.12             | 0.381463531                 | 11                             | 5            | 0.226295359  | Brain_Cerebellum |
|               | Brain_Hippocampus              | 7.8568559                   | 0.008819248                    | 0.280719063  |              |                  |
|               | -0.141549418                   | 1.20995709                  | 0.649544301                    | 0.469556172  | 5 0          |                  |
|               | 0.998207054                    |                             |                                |              |              |                  |
| ANKRD61       | ENSG00000157999.5              | 0.381474172                 | 1                              | 1            | 0.381474172  |                  |
|               | Brain_Hypothalamus             | 0.381474172                 | Brain_Hypothalamus             | 1 1 1        |              |                  |
|               | 0.875183312                    | 0.875183312                 | 0.875183312                    | NA 1 0       | 0.998207054  |                  |
| THAP4         | ENSG00000176946.11             | 0.381591036                 | 4                              | 4            | 0.184182534  |                  |
|               | Brain_Cerebellar_Hemisphere    | 0.965841984                 | Brain_Putamen_basal_ganglia    |              |              |                  |
|               | 2.476784155                    | 0.357941025                 | 0.357941025                    | -0.583002768 | 1.327986598  |                  |
|               | 0.241491408                    | 0.796605796                 | 4 0                            | 0.998207054  |              |                  |
| ZNF532        | ENSG00000074657.13             | 0.381591219                 | 2                              | 2            | 0.223623558  |                  |
|               | Brain_Hypothalamus             | 0.621917183                 | Brain_Cerebellum               | 1.138193895  |              |                  |
|               | 0.861806105                    | 0.861806105                 | 0.493135026                    | 1.216949165  | 0.855042095  |                  |
|               | 0.511813886                    | 2 0                         | 0.998207054                    |              |              |                  |
| ADCK1         | ENSG00000063761.15             | 0.381756183                 | 9                              | 9            | 0.095358046  |                  |
|               | Brain_Hippocampus              | 0.810260498                 | Brain_Cortex                   | 3.080745851  |              |                  |
|               | 0.160683202                    | 0.160683202                 | -1.074130868                   | 1.667786858  | -0.189388882 |                  |
|               | 0.884274253                    | 9 0                         | 0.998207054                    |              |              |                  |
| ADA           | ENSG00000196839.12             | 0.381927316                 | 6                              | 6            | 0.0845789    |                  |
|               | Brain_Putamen_basal_ganglia    | 0.735454031                 | Brain_Spinal_cord_cervical_c-1 |              |              |                  |

|               |                                       |                                      |                                       |              |                  |                  |             |
|---------------|---------------------------------------|--------------------------------------|---------------------------------------|--------------|------------------|------------------|-------------|
|               | 2.298680491                           | 0.139150819                          | 0.139150819                           | -1.724714702 | 1.41234786       |                  |             |
|               | -0.274174093                          | 1.137708178                          | 6                                     | 0            | 0.998207054      |                  |             |
| ENY2          | ENSG00000120533.12                    | 0.38203916                           | 2                                     | 2            | 0.284429329      |                  |             |
|               | Brain_Nucleus_accumbens_basal_ganglia | 0.427077444                          |                                       |              | Brain_Cerebellum |                  |             |
|               | 1.079783391                           | 0.920216609                          | 0.920216609                           | -0.794202687 | 1.070422159      |                  |             |
|               | 0.138109736                           | 1.318488873                          | 2                                     | 0            | 0.998207054      |                  |             |
| PRRC1         | ENSG00000164244.20                    | 0.382048392                          | 1                                     | 1            | 0.382048392      | Brain_Cerebellum |             |
|               | 0.382048392                           | Brain_Cerebellum1                    | 1                                     | 1            | 0.874128292      | 0.874128292      |             |
|               | 0.874128292                           | NA                                   | 1                                     | 0            | 0.998207054      |                  |             |
| GLB1L2        | ENSG00000149328.14                    | 0.382063326                          | 1                                     | 1            | 0.382063326      |                  |             |
|               | Brain_Hippocampus                     | 0.382063326                          | Brain_Hippocampus                     | 1            | 1                | 1                |             |
|               | -0.874100866                          | -0.874100866                         | -0.874100866                          | NA           | 1                | 0                | 0.998207054 |
| NEK9          | ENSG00000119638.12                    | 0.382089481                          | 1                                     | 1            | 0.382089481      |                  |             |
|               | Brain_Hypothalamus                    | 0.382089481                          | Brain_Hypothalamus                    | 1            | 1                | 1                |             |
|               | -0.874052835                          | -0.874052835                         | -0.874052835                          | NA           | 1                | 0                | 0.998207054 |
| RP11-77K12.9  | ENSG00000274220.1                     | 0.382162767                          | 1                                     | 1            | 0.382162767      |                  |             |
|               | Brain_Caudate_basal_ganglia           | 0.382162767                          | Brain_Caudate_basal_ganglia           | 1            | 1                |                  |             |
|               | 1                                     | 0.873918265                          | 0.873918265                           | 0.873918265  | NA               | 1                | 0           |
|               | 0.998207054                           |                                      |                                       |              |                  |                  |             |
| HCAR1         | ENSG00000196917.5                     | 0.382318423                          | 1                                     | 1            | 0.382318423      | Brain_Cortex     |             |
|               | 0.382318423                           | Brain_Cortex                         | 1                                     | 1            | 1                | 0.873632497      | 0.873632497 |
|               | 0.873632497                           | NA                                   | 1                                     | 0            | 0.998207054      |                  |             |
| DHX36         | ENSG00000174953.13                    | 0.382323                             | 5                                     | 3            | 0.146475927      |                  |             |
|               | Brain_Caudate_basal_ganglia           | 0.975800026                          | Brain_Cortex                          | 4.234520641  |                  |                  |             |
|               | 0.025445357                           | 0.218913222                          | -1.452092355                          | -0.030334822 | -0.546703894     |                  |             |
|               | 0.538185106                           | 3                                    | 0                                     | 0.998207054  |                  |                  |             |
| DGCR8         | ENSG00000128191.15                    | 0.382349755                          | 2                                     | 2            | 0.231016719      | Brain_Cerebellum |             |
|               | 0.717565954                           | Brain_Anterior_cingulate_cortex_BA24 | 1.261146699                           |              |                  |                  |             |
|               | 0.738853301                           | 0.738853301                          | 0.361713746                           | 1.197743937  | 0.779728842      |                  |             |
|               | 0.591162617                           | 2                                    | 0                                     | 0.998207054  |                  |                  |             |
| RPL36AL       | ENSG00000165502.6                     | 0.382359998                          | 13                                    | 1            | 0.27250544       |                  |             |
|               | Brain_Caudate_basal_ganglia           | 0.719841427                          | Brain_Frontal_Cortex_BA9              |              |                  |                  |             |
|               | 12.43868366                           | 0.000183173                          | 12.43868366                           | -1.097311056 | -0.358670731     |                  |             |
|               | -0.851258014                          | 0.204871247                          | 1                                     | 0            | 0.998207054      |                  |             |
| BLOC1S5       | ENSG00000188428.19                    | 0.382369783                          | 1                                     | 1            | 0.382369783      |                  |             |
|               | Brain_Nucleus_accumbens_basal_ganglia | 0.382369783                          |                                       |              |                  |                  |             |
|               | Brain_Nucleus_accumbens_basal_ganglia | 1                                    | 1                                     | 1            | 0.87353822       | 0.87353822       |             |
|               | 0.87353822                            | NA                                   | 1                                     | 0            | 0.998207054      |                  |             |
| CTD-2130F23.1 | ENSG00000248533.1                     | 0.382450267                          | 2                                     | 2            | 0.165636382      |                  |             |
|               | Brain_Cerebellum                      | 0.767187355                          | Brain_Cerebellar_Hemisphere           | 1.225992093  |                  |                  |             |
|               | 0.774007907                           | 0.774007907                          | 0.296055949                           | 1.386362038  | 0.841208993      |                  |             |
|               | 0.770962829                           | 2                                    | 0                                     | 0.998207054  |                  |                  |             |
| HAP1          | ENSG00000173805.15                    | 0.382533462                          | 6                                     | 3            | 0.106522853      |                  |             |
|               | Brain_Putamen_basal_ganglia           | 0.362272802                          | Brain_Cerebellum                      | 4.376150769  |                  |                  |             |
|               | 0.002577945                           | 0.360470049                          | -1.614021086                          | 0.91104284   | -1.096397785     |                  |             |
|               | 0.988117616                           | 3                                    | 0                                     | 0.998207054  |                  |                  |             |
| PCDH17        | ENSG00000118946.11                    | 0.382689428                          | 1                                     | 1            | 0.382689428      |                  |             |
|               | Brain_Substantia_nigra                | 0.382689428                          | Brain_Substantia_nigra                | 1            | 1                |                  |             |
|               | 1                                     | 0.872951658                          | 0.872951658                           | 0.872951658  | NA               | 1                | 0           |
|               | 0.998207054                           |                                      |                                       |              |                  |                  |             |
| GREB1         | ENSG00000196208.13                    | 0.382960078                          | 11                                    | 6            | 0.113500217      |                  |             |
|               | Brain_Hippocampus                     | 0.983652272                          | Brain_Nucleus_accumbens_basal_ganglia |              |                  |                  |             |
|               | 5.850752804                           | 0.00822963                           | 0.295210772                           | -0.918666328 | 1.582654574      |                  |             |
|               | 0.065696602                           | 0.833249987                          | 6                                     | 0            | 0.998207054      |                  |             |
| HAS1          | ENSG00000105509.10                    | 0.383047715                          | 5                                     | 5            | 0.055426722      |                  |             |
|               | Brain_Cerebellar_Hemisphere           | 0.993544316                          | Brain_Cortex                          | 1.702365256  |                  |                  |             |
|               | 0.494083522                           | 0.494083522                          | -1.915516069                          | -0.008091088 | -1.077772917     |                  |             |
|               | 0.695971019                           | 5                                    | 0                                     | 0.998207054  |                  |                  |             |
| CTD-3116E22.8 | ENSG00000277587.1                     | 0.383203248                          | 12                                    | 2            | 0.317348519      |                  |             |
|               | Brain_Nucleus_accumbens_basal_ganglia | 0.985413896                          | Brain_Cortex                          |              |                  |                  |             |
|               | 10.94158866                           | 0.000146978                          | 0.477527324                           | -0.124897168 | 0.999921459      |                  |             |
|               | 0.379171102                           | 0.352494253                          | 2                                     | 0            | 0.998207054      |                  |             |

|              |                                       |              |              |             |              |                                |             |             |
|--------------|---------------------------------------|--------------|--------------|-------------|--------------|--------------------------------|-------------|-------------|
| MAP4K5       | ENSG00000012983.11                    | 0.383237768  | 2            | 2           | 0.407299666  |                                |             |             |
|              | Brain_Cortex                          | 0.499165442  |              |             |              | Brain_Putamen_basal_ganglia    | 1.40745697  | 0.59254303  |
|              | 0.59254303                            | -0.828654983 | 0.675803452  |             | -0.076425765 | 1.063812762                    |             | 2           |
|              | 0.998207054                           |              |              |             |              |                                |             |             |
| FAM131B      | ENSG00000159784.17                    | 0.383242248  | 1            | 1           | 0.383242248  |                                |             |             |
|              | Brain_Putamen_basal_ganglia           | 0.383242248  |              |             |              | Brain_Putamen_basal_ganglia    | 1           | 1           |
|              | 1                                     | -0.871937916 | -0.871937916 |             | -0.871937916 | NA                             | 1           | 0           |
|              | 0.998207054                           |              |              |             |              |                                |             |             |
| TBX6         | ENSG00000149922.10                    | 0.383380566  | 13           | 4           | 0.091474986  |                                |             |             |
|              | Brain_Spinal_cord_cervical_c-1        | 0.837243003  |              |             |              | Brain_Hippocampus              |             |             |
|              | 10.02415763                           | 0.009905712  | 0.392157481  |             | -1.687667959 | 0.205421271                    |             |             |
|              | -0.89173308                           | 0.557862168  | 4            | 0           | 0.998207054  |                                |             |             |
| RP11-563J2.3 | ENSG00000212743.2                     | 0.38351163   | 1            | 1           | 0.38351163   |                                |             |             |
|              | Brain_Spinal_cord_cervical_c-1        | 0.38351163   |              |             |              | Brain_Spinal_cord_cervical_c-1 | 1           | 1           |
|              | 1                                     | 0.871444256  | 0.871444256  |             | 0.871444256  | NA                             | 1           | 0           |
|              | 0.998207054                           |              |              |             |              |                                |             |             |
| LIFR         | ENSG00000113594.9                     | 0.383647061  | 3            | 3           | 0.103761787  |                                |             |             |
|              | Brain_Putamen_basal_ganglia           | 0.970750897  |              |             |              | Brain_Cerebellum               | 1.316689058 |             |
|              | 0.672130483                           | 0.672130483  | -1.626883763 |             | -0.036666528 | -0.729640059                   |             |             |
|              | 0.814550453                           | 3            | 0            | 0.998207054 |              |                                |             |             |
| CDHR2        | ENSG00000074276.10                    | 0.383768386  | 3            | 2           | 0.187824653  |                                |             |             |
|              | Brain_Caudate_basal_ganglia           | 0.368755141  |              |             |              | Brain_Cortex                   | 2.133005282 |             |
|              | 0.039942729                           | 0.827051989  | -1.317041683 |             | -0.898807619 | -1.145918012                   |             |             |
|              | 0.219226867                           | 2            | 0            | 0.998207054 |              |                                |             |             |
| POLR2I       | ENSG00000105258.8                     | 0.38387434   | 10           | 6           | 0.048596289  |                                |             |             |
|              | Brain_Nucleus_accumbens_basal_ganglia | 0.667904372  |              |             |              | Brain_Cortex                   |             |             |
|              | 6.646734947                           | 0.00191434   | 0.365067971  |             | -1.972116673 | 0.486468463                    |             |             |
|              | -1.411848497                          | 0.805020619  | 6            | 0           | 0.998207054  |                                |             |             |
| C4orf45      | ENSG00000164123.6                     | 0.383874682  | 1            | 1           | 0.383874682  |                                |             |             |
|              | Brain_Hippocampus                     | 0.383874682  |              |             |              | Brain_Hippocampus              | 1           | 1           |
|              | 0.870779277                           | 0.870779277  | 0.870779277  |             | NA           | 1                              | 0           | 0.998207054 |
| SYVN1        | ENSG00000162298.18                    | 0.383888812  | 2            | 2           | 0.170066779  |                                |             |             |
|              | Brain_Cerebellar_Hemisphere           | 0.895746181  |              |             |              | Brain_Amygdala                 | 1.035705391 |             |
|              | 0.964294609                           | 0.964294609  | -0.131036819 |             | 1.371989267  | 0.620476224                    |             |             |
|              | 1.062799938                           | 2            | 0            | 0.998207054 |              |                                |             |             |
| ATP5G2       | ENSG00000135390.17                    | 0.383917116  | 13           | 1           | 0.219395218  |                                |             |             |
|              | Brain_Spinal_cord_cervical_c-1        | 0.954400078  |              |             |              | Brain_Amygdala                 | 12.29671525 |             |
|              | 5.41E-05                              | 12.29671525  | -1.228137868 |             | 0.057182175  | -0.841999835                   |             |             |
|              | 0.329862896                           | 1            | 0            | 0.998207054 |              |                                |             |             |
| DEUP1        | ENSG00000165325.13                    | 0.383958428  | 2            | 2           | 0.323664143  |                                |             |             |
|              | Brain_Spinal_cord_cervical_c-1        | 0.772966305  |              |             |              |                                |             |             |
|              | Brain_Nucleus_accumbens_basal_ganglia | 1.834176663  |              |             |              | 0.165823337                    |             |             |
|              | 0.165823337                           | 0.288497029  | 0.986956136  |             | 0.637726582  | 0.493885171                    |             |             |
|              | 2                                     | 0            | 0.998207054  |             |              |                                |             |             |
| ZNF700       | ENSG00000196757.7                     | 0.383959182  | 1            | 1           | 0.383959182  |                                |             |             |
|              | Brain_Cerebellar_Hemisphere           | 0.383959182  |              |             |              | Brain_Cerebellar_Hemisphere    | 1           | 1           |
|              | 1                                     | 0.87062456   | 0.87062456   | 0.87062456  | NA           | 1                              | 0           | 0.998207054 |
| AFF4         | ENSG00000072364.12                    | 0.384077859  | 3            | 2           | 0.292069463  |                                |             |             |
|              | Brain_Hippocampus                     | 0.923527203  |              |             |              | Brain_Cerebellar_Hemisphere    | 2.612950213 |             |
|              | 0.08134523                            | 0.305704556  | -1.053592634 |             | -0.095991651 | -0.595193711                   |             |             |
|              | 0.480102679                           | 2            | 0            | 0.998207054 |              |                                |             |             |
| ARGLU1       | ENSG00000134884.13                    | 0.384131298  | 1            | 1           | 0.384131298  |                                |             |             |
|              | Brain_Putamen_basal_ganglia           | 0.384131298  |              |             |              | Brain_Putamen_basal_ganglia    | 1           | 1           |
|              | 1                                     | 0.870309484  | 0.870309484  | 0.870309484 | NA           | 1                              | 0           |             |
|              | 0.998207054                           |              |              |             |              |                                |             |             |
| TNNI3        | ENSG00000129991.12                    | 0.38428281   | 4            | 4           | 0.258046331  |                                |             |             |
|              | Brain_Anterior_cingulate_cortex_BA24  | 0.828629338  |              |             |              | Brain_Amygdala                 |             |             |
|              | 2.108457898                           | 0.271729177  | 0.271729177  |             | -0.216459825 | 1.131020813                    |             |             |
|              | 0.644542483                           | 0.602982436  | 4            | 0           | 0.998207054  |                                |             |             |
| NXN          | ENSG00000167693.16                    | 0.384337397  | 4            | 4           | 0.104963289  |                                |             |             |
|              | Brain_Putamen_basal_ganglia           | 0.983037134  |              |             |              | Brain_Cerebellum               | 1.732960852 |             |
|              | 0.351054712                           | 0.351054712  | -1.621253473 |             | 0.021261401  | -0.80567285                    |             |             |

|               |                                       |                                       |   |              |    |                                       |              |                  |
|---------------|---------------------------------------|---------------------------------------|---|--------------|----|---------------------------------------|--------------|------------------|
|               | 0.728480769                           | 4                                     | 0 | 0.998207054  |    |                                       |              |                  |
| FAM209B       | ENSG00000213714.1                     |                                       |   | 0.384407793  | 4  | 4                                     | 0.065737507  |                  |
|               | Brain_Substantia_nigra                |                                       |   | 0.879022031  |    | Brain_Hippocampus                     | 1.060614015  |                  |
|               | 0.953211459                           | 0.953211459                           |   | -1.840209358 |    | 0.817328197                           | -0.12457619  |                  |
|               | 1.176738994                           | 4                                     | 0 | 0.998207054  |    |                                       |              |                  |
| TCERG1L       | ENSG00000176769.9                     |                                       |   | 0.384535742  | 5  | 5                                     | 0.200028723  |                  |
|               | Brain_Nucleus_accumbens_basal_ganglia |                                       |   | 0.975172669  |    | Brain_Putamen_basal_ganglia           |              |                  |
|               | 1.980023909                           | 0.074509999                           |   | 0.074509999  |    | -1.281469738                          | 1.247532901  |                  |
|               | 0.078969157                           | 0.981087826                           |   | 5            | 0  | 0.998207054                           |              |                  |
| RSPRY1        | ENSG00000159579.13                    |                                       |   | 0.384536985  | 3  | 3                                     | 0.180685265  |                  |
|               | Brain_Caudate_basal_ganglia           |                                       |   | 0.382561948  |    | Brain_Frontal_Cortex_BA9              |              |                  |
|               | 1.432304628                           | 0.618975721                           |   | 0.618975721  |    | -1.338648084                          | 0.873185553  |                  |
|               | -0.447906142                          | 1.167027289                           |   | 3            | 0  | 0.998207054                           |              |                  |
| SLC9A3R1      | ENSG00000109062.11                    |                                       |   | 0.384575938  | 2  | 1                                     | 0.296982782  |                  |
|               | Brain_Cerebellar_Hemisphere           |                                       |   | 0.488006955  |    | Brain_Cerebellum                      | 1.994060634  |                  |
|               | 0.005939366                           | 1.994060634                           |   | 0.693482259  |    | 1.042925536                           | 0.868203898  |                  |
|               | 0.247093711                           | 1                                     | 0 | 0.998207054  |    |                                       |              |                  |
| ERICH5        | ENSG00000177459.10                    |                                       |   | 0.384594935  | 2  | 2                                     | 0.197783928  |                  |
|               | Brain_Substantia_nigra                |                                       |   | 0.48545577   |    | Brain_Cerebellar_Hemisphere           | 1.156277317  |                  |
|               | 0.843722683                           | 0.843722683                           |   | -0.69755462  |    | 1.287890944                           | 0.295168162  |                  |
|               | 1.403922022                           | 2                                     | 0 | 0.998207054  |    |                                       |              |                  |
| ULK3          | ENSG00000140474.12                    |                                       |   | 0.384599558  | 2  | 2                                     | 0.223124793  |                  |
|               | Brain_Caudate_basal_ganglia           |                                       |   | 0.267794761  |    | Brain_Putamen_basal_ganglia           |              |                  |
|               | 1.423828416                           | 0.576171584                           |   | 0.576171584  |    | 1.10815528                            | 1.218261032  |                  |
|               | 1.163208156                           | 0.077856524                           |   | 2            | 0  | 0.998207054                           |              |                  |
| HLA-F         | ENSG00000204642.13                    |                                       |   | 0.384660255  | 4  | 3                                     | 0.233876584  | Brain_Cerebellum |
|               | 0.967043396                           | Brain_Nucleus_accumbens_basal_ganglia |   | 2.073528301  |    |                                       |              |                  |
|               | 0.057497067                           | 0.255664629                           |   | -1.190432148 |    | 0.523713044                           | -0.442402605 |                  |
|               | 0.860124587                           | 3                                     | 0 | 0.998207054  |    |                                       |              |                  |
| RP11-118K6.3  | ENSG00000273001.1                     |                                       |   | 0.384665191  | 2  | 2                                     | 0.283196571  |                  |
|               | Brain_Amygdala                        |                                       |   | 0.287595939  |    | Brain_Nucleus_accumbens_basal_ganglia |              |                  |
|               | 1.194574576                           | 0.805425424                           |   | 0.805425424  |    | -1.063410267                          | 1.073166159  |                  |
|               | 0.004877946                           | 1.510787679                           |   | 2            | 0  | 0.998207054                           |              |                  |
| NSMCE2        | ENSG00000156831.7                     |                                       |   | 0.385014139  | 1  | 1                                     | 0.385014139  |                  |
|               | Brain_Cortex                          |                                       |   | 0.385014139  |    | Brain_Cortex                          | 1            | 1                |
|               | -0.868694703                          | -0.868694703                          |   | NA           | 1  | 0                                     | 0.998207054  | -0.868694703     |
| FOXRED1       | ENSG00000110074.10                    |                                       |   | 0.385138266  | 13 | 2                                     | 0.243016081  |                  |
|               | Brain_Spinal_cord_cervical_c-1        |                                       |   | 0.608968983  |    | Brain_Hypothalamus                    |              |                  |
|               | 10.98568681                           | 9.79E-06                              |   | 1.019800571  |    | -1.111725622                          | 1.167481237  |                  |
|               | 0.625222874                           | 0.553901805                           |   | 2            | 0  | 0.998207054                           |              |                  |
| ZIK1          | ENSG00000171649.11                    |                                       |   | 0.3853612    | 4  | 3                                     | 0.419118026  | Brain_Amygdala   |
|               | 0.95286542                            | Brain_Cerebellum                      |   | 3.362536698  |    | 0.072525135                           | 0.215894539  |                  |
|               | -0.766432653                          | 0.807952328                           |   | 0.077934979  |    | 0.665297434                           | 3            | 0                |
|               | 0.998207054                           |                                       |   |              |    |                                       |              |                  |
| LA16c-380H5.6 | ENSG00000274367.1                     |                                       |   | 0.385381543  | 4  | 4                                     | 0.141912104  |                  |
|               | Brain_Hypothalamus                    |                                       |   | 0.808352685  |    | Brain_Cerebellar_Hemisphere           | 2.407912979  |                  |
|               | 0.183407382                           | 0.183407382                           |   | 0.242551722  |    | 1.468707642                           | 0.958013293  |                  |
|               | 0.5576382                             | 4                                     | 0 | 0.998207054  |    |                                       |              |                  |
| PRCD          | ENSG00000214140.10                    |                                       |   | 0.385492194  | 4  | 4                                     | 0.066382825  |                  |
|               | Brain_Anterior_cingulate_cortex_BA24  |                                       |   | 0.844499407  |    | Brain_Cortex                          |              |                  |
|               | 1.783083691                           | 0.443372184                           |   | 0.443372184  |    | -0.701924786                          | 1.835829854  |                  |
|               | 0.264263764                           | 1.110048673                           |   | 4            | 0  | 0.998207054                           |              |                  |
| RANBP17       | ENSG00000204764.13                    |                                       |   | 0.385537665  | 6  | 2                                     | 0.144352649  |                  |
|               | Brain_Cerebellum                      |                                       |   | 0.748395301  |    | Brain_Cortex                          | 5.398730216  | 0.02974315       |
|               | 0.251038676                           | 0.320756007                           |   | 1.459772354  |    | 0.746455055                           | 0.411352601  |                  |
|               | 2                                     | 0                                     |   | 0.998207054  |    |                                       |              |                  |
| ZNF229        | ENSG00000278318.4                     |                                       |   | 0.38554418   | 6  | 6                                     | 0.066043062  |                  |
|               | Brain_Cerebellar_Hemisphere           |                                       |   | 0.917926669  |    | Brain_Nucleus_accumbens_basal_ganglia |              |                  |
|               | 3.481897727                           | 0.218652494                           |   | 0.218652494  |    | -1.838131286                          | -0.10304574  |                  |
|               | -0.844595093                          | 0.603133735                           |   | 6            | 0  | 0.998207054                           |              |                  |
| EXOSC8        | ENSG00000120699.12                    |                                       |   | 0.385609386  | 4  | 3                                     | 0.106881618  |                  |
|               | Brain_Putamen_basal_ganglia           |                                       |   | 0.522903636  |    | Brain_Cerebellar_Hemisphere           | 3.26164126   |                  |

|              |                                       |              |              |              |                                       |
|--------------|---------------------------------------|--------------|--------------|--------------|---------------------------------------|
| 0.07003354   | 0.23411909                            | -1.612369224 | -0.638875947 | -1.236723662 | 0.44195627                            |
| 3            | 0                                     | 0.998207054  |              |              |                                       |
| ZDHHC20      | ENSG00000180776.15                    | 0.385631064  | 3            | 3            | 0.46962116                            |
|              | Brain_Putamen_basal_ganglia           | 0.737831614  |              |              | Brain_Cerebellum                      |
| 0.301895372  | 0.301895372                           | -0.723095588 |              | 0.62785226   | 0.079827634                           |
| 0.710629997  | 3                                     | 0            | 0.998207054  |              |                                       |
| PHYKPL       | ENSG00000175309.14                    | 0.38568959   | 1            | 1            | 0.38568959                            |
|              | Brain_Cerebellar_Hemisphere           | 0.38568959   |              |              | Brain_Cerebellar_Hemisphere           |
| 0.867460785  | 0.867460785                           | 0.867460785  | NA           | 1            | 0                                     |
| 0.998207054  |                                       |              |              |              |                                       |
| DPYSL3       | ENSG00000113657.12                    | 0.385967301  | 2            | 2            | 0.173906852                           |
|              | Brain_Nucleus_accumbens_basal_ganglia | 0.696532335  |              |              | Brain_Cerebellum                      |
| 0.88460346   | 0.88460346                            | 0.390005696  | 1.359756944  | 0.87488132   | 0.685717683                           |
| 2            | 0                                     | 0.998207054  |              |              |                                       |
| SRC          | ENSG00000197122.11                    | 0.386160155  | 1            | 1            | 0.386160155                           |
|              | Brain_Cerebellar_Hemisphere           | 0.386160155  |              |              | Brain_Cerebellar_Hemisphere           |
| 1            | 0.866601932                           | 0.866601932  | 0.866601932  | NA           | 1                                     |
| 0.998207054  |                                       |              |              |              |                                       |
| AC012074.2   | ENSG00000235072.2                     | 0.38631067   | 3            | 3            | 0.085154988                           |
|              | Brain_Hypothalamus                    | 0.974061144  |              |              | Brain_Nucleus_accumbens_basal_ganglia |
| 1.442784442  | 0.502300132                           | 0.502300132  | -0.032515264 | 1.721528376  |                                       |
| 0.7195682    | 0.903324997                           | 3            | 0            | 0.998207054  |                                       |
| SEMA6D       | ENSG00000137872.16                    | 0.386376278  | 2            | 2            | 0.168223466                           |
|              | Brain_Anterior_cingulate_cortex_BA24  | 0.958104258  |              |              | Brain_Cerebellum                      |
| 1.002821149  | 0.997178851                           | 0.997178851  | 0.052532679  | 1.377934648  |                                       |
| 0.715233663  | 0.937200721                           | 2            | 0            | 0.998207054  |                                       |
| C6orf141     | ENSG00000197261.11                    | 0.386431612  | 5            | 5            | 0.108564462                           |
|              | Brain_Cortex                          | 0.952862188  |              |              | Brain_Nucleus_accumbens_basal_ganglia |
| 2.502927847  | 0.196341446                           | 0.196341446  | -0.516725615 | 1.604679017  |                                       |
| 0.483491825  | 0.81253699                            | 5            | 0            | 0.998207054  |                                       |
| LARP6        | ENSG00000166173.10                    | 0.386432628  | 5            | 2            | 0.393187578                           |
|              | Brain_Cerebellar_Hemisphere           | 0.984693476  |              |              | Brain_Cerebellum                      |
| 0.007821087  | 0.457118263                           | -0.529847138 | 0.853850953  | 0.004719872  |                                       |
| 0.516168962  | 2                                     | 0            | 0.998207054  |              |                                       |
| EPB42        | ENSG00000166947.11                    | 0.38643341   | 2            | 2            | 0.171081308                           |
|              | Brain_Caudate_basal_ganglia           | 0.81286492   |              |              | Brain_Nucleus_accumbens_basal_ganglia |
| 1.05053572   | 0.94946428                            | 0.94946428   | 0.236731727  | 1.368737616  | 0.802734671                           |
| 0.80044904   | 2                                     | 0            | 0.998207054  |              |                                       |
| SLC5A11      | ENSG00000158865.12                    | 0.38649476   | 6            | 3            | 0.254326692                           |
|              | Brain_Nucleus_accumbens_basal_ganglia | 0.925402637  |              |              | Brain_Substantia_nigra                |
| 4.607920136  | 0.000656064                           | 0.529109021  | -1.139903056 | 0.287299521  |                                       |
| -0.113017923 | 0.561549987                           | 3            | 0            | 0.998207054  |                                       |
| ATP1B3       | ENSG00000069849.10                    | 0.386521798  | 2            | 2            | 0.175701235                           |
|              | Brain_Cerebellum                      | 0.961504246  |              |              | Brain_Anterior_cingulate_cortex_BA24  |
| 1.222718184  | 0.777281816                           | 0.777281816  | -1.354110162 | -0.048266006 |                                       |
| -0.701188084 | 0.923371258                           | 2            | 0            | 0.998207054  |                                       |
| ATP9A        | ENSG00000054793.13                    | 0.386598021  | 3            | 3            | 0.131203576                           |
|              | Brain_Anterior_cingulate_cortex_BA24  | 0.565430797  |              |              | Brain_Putamen_basal_ganglia           |
| 1.372049029  | 0.632502467                           | 0.632502467  | -0.725281779 | 1.509372658  |                                       |
| 0.452961542  | 1.122297833                           | 3            | 0            | 0.998207054  |                                       |
| MAP3K13      | ENSG00000073803.13                    | 0.386742346  | 1            | 1            | 0.386742346                           |
|              | Brain_Cortex                          | 0.386742346  |              |              | Brain_Cortex                          |
| 0.865540229  | 0.865540229                           | NA           | 1            | 0            | 0.998207054                           |
| CFAP61       | ENSG00000089101.17                    | 0.38686775   | 3            | 3            | 0.190196448                           |
|              | Brain_Anterior_cingulate_cortex_BA24  | 0.568905304  |              |              | Brain_Cortex                          |
| 0.11936365   | 0.11936365                            | 0.569664454  | 1.30999819   | 0.868036108  | 2.7019902                             |
| 3            | 0                                     | 0.998207054  |              |              | 0.390496054                           |
| LINC01876    | ENSG00000226383.6                     | 0.386904393  | 1            | 1            | 0.386904393                           |
|              | Brain_Spinal_cord_cervical_c-1        | 0.386904393  |              |              | Brain_Spinal_cord_cervical_c-1        |
| 1            | 1                                     | 1            | 0.865244887  | 0.865244887  | 0.865244887                           |
| 0.998207054  |                                       |              |              |              | NA                                    |
| ABCC12       | ENSG00000140798.15                    | 0.38698396   | 1            | 1            | 0.38698396                            |
|              | Brain_Amygdala                        | 1            | 1            | 1            | Brain_Amygdala                        |
| 0.38698396   | Brain_Amygdala                        | 1            | 1            | 1            | -0.8650999                            |
|              |                                       |              |              |              | -0.8650999                            |
|              |                                       |              |              |              | -0.8650999                            |
|              |                                       |              |              |              | NA                                    |

|               |                                       |                             |                             |             |              |                          |              |            |   |
|---------------|---------------------------------------|-----------------------------|-----------------------------|-------------|--------------|--------------------------|--------------|------------|---|
| 1             | 0                                     | 0.998207054                 |                             |             |              |                          |              |            |   |
| EFCAB7        | ENSG00000203965.12                    | 0.38726946                  | 10                          | 5           | 0.184673586  |                          |              |            |   |
|               | Brain_Nucleus_accumbens_basal_ganglia | 0.906885882                 |                             |             |              | Brain_Hippocampus        |              |            |   |
|               | 7.072087102                           | 0.043018908                 | 0.277765933                 |             | -0.910169237 | 1.326501658              |              |            |   |
|               | 0.205984451                           | 0.723245093                 | 5                           | 0           | 0.998207054  |                          |              |            |   |
| AC131097.4    | ENSG00000216921.7                     | 0.387283335                 | 4                           | 4           | 0.287928551  |                          |              |            |   |
|               | Brain_Nucleus_accumbens_basal_ganglia | 0.919696157                 |                             |             |              | Brain_Cortex             |              |            |   |
|               | 2.593683738                           | 0.145255426                 | 0.145255426                 |             | -1.062676787 | 1.055614752              |              |            |   |
|               | 0.187599013                           | 0.92090048                  | 4                           | 0           | 0.998207054  |                          |              |            |   |
| TMEM176A      | ENSG00000002933.7                     | 0.387335545                 | 13                          | 4           | 0.405334558  |                          |              |            |   |
|               | Brain_Caudate_basal_ganglia           | 0.92183785                  | Brain_Cortex                | 10.42374548 |              |                          |              |            |   |
|               | 0.007930469                           | 0.384041885                 | -0.832131794                |             | 0.71707859   | -0.267677601             |              |            |   |
|               | 0.437124965                           | 4                           | 0                           | 0.998207054 |              |                          |              |            |   |
| TMEM156       | ENSG00000121895.7                     | 0.387348342                 | 1                           | 1           | 0.387348342  |                          |              |            |   |
|               | Brain_Cortex                          | 0.387348342                 | Brain_Cortex                | 1           | 1            | 1                        | 0.86443615   |            |   |
|               | 0.86443615                            | 0.86443615                  | NA                          | 1           | 0            | 0.998207054              |              |            |   |
| SYT16         | ENSG00000139973.16                    | 0.38744856                  | 2                           | 2           | 0.220115499  | Brain_Cerebellum         |              |            |   |
|               | 0.510275641                           | Brain_Substantia_nigra      | 1.026049492                 |             | 0.973950508  |                          |              |            |   |
|               | 0.973950508                           | 0.658408553                 | 1.226221058                 |             | 0.942314806  | 0.401504073              |              |            |   |
|               | 2                                     | 0                           | 0.998207054                 |             |              |                          |              |            |   |
| FAM229A       | ENSG00000225828.1                     | 0.387472378                 | 1                           | 1           | 0.387472378  |                          |              |            |   |
|               | Brain_Anterior_cingulate_cortex_BA24  | 0.387472378                 |                             |             |              |                          |              |            |   |
|               | Brain_Anterior_cingulate_cortex_BA24  | 1                           | 1                           | 1           | -0.864210294 |                          |              |            |   |
|               | -0.864210294                          | -0.864210294                | NA                          | 1           | 0            | 0.998207054              |              |            |   |
| NMRK1         | ENSG00000106733.20                    | 0.387516223                 | 13                          | 1           | 0.193797346  | Brain_Cerebellum         |              |            |   |
|               | 0.632089419                           | Brain_Hippocampus           | 12.37693151                 |             | 0.000243913  |                          |              |            |   |
|               | 12.37693151                           | 0.47878805                  | 1.299427248                 |             | 0.843789251  | 0.226231215              |              |            | 1 |
|               | 0                                     | 0.998207054                 |                             |             |              |                          |              |            |   |
| STRC          | ENSG00000242866.9                     | 0.387562385                 | 9                           | 3           | 0.110767076  |                          |              |            |   |
|               | Brain_Caudate_basal_ganglia           | 0.60144203                  | Brain_Amygdala              | 7.178922678 |              |                          |              |            |   |
|               | 0.008348012                           | 0.48293952                  | -1.594754809                |             | -0.522327923 | -1.026152898             |              |            |   |
|               | 0.384330865                           | 3                           | 0                           | 0.998207054 |              |                          |              |            |   |
| PROSER1       | ENSG00000120685.19                    | 0.387637742                 | 1                           | 1           | 0.387637742  |                          |              |            |   |
|               | Brain_Caudate_basal_ganglia           | 0.387637742                 | Brain_Caudate_basal_ganglia | 1           | 1            |                          |              |            |   |
|               | 1                                     | 0.863909255                 | 0.863909255                 | 0.863909255 | NA           | 1                        | 0            |            |   |
|               | 0.998207054                           |                             |                             |             |              |                          |              |            |   |
| TFPT          | ENSG00000105619.13                    | 0.387656434                 | 3                           | 2           | 0.13797329   | Brain_Cortex             |              |            |   |
|               | 0.925524524                           | Brain_Putamen_basal_ganglia | 1.971256332                 |             | 0.030179545  |                          |              |            |   |
|               | 0.998564123                           | -1.483380708                | -0.093477122                |             | -0.937937101 | 0.741630695              |              |            |   |
|               | 2                                     | 0                           | 0.998207054                 |             |              |                          |              |            |   |
| PSMD8         | ENSG00000099341.11                    | 0.387663723                 | 1                           | 1           | 0.387663723  | Brain_Cerebellum         |              |            |   |
|               | 0.387663723                           | Brain_Cerebellum            | 1                           | 1           | -0.863861964 | -0.863861964             |              |            |   |
|               | -0.863861964                          | NA                          | 1                           | 0           | 0.998207054  |                          |              |            |   |
| RP11-269G24.6 | ENSG00000265971.1                     | 0.387674395                 | 2                           | 2           | 0.171506183  |                          |              |            |   |
|               | Brain_Hippocampus                     | 0.833941341                 | Brain_Caudate_basal_ganglia | 1.265795193 |              |                          |              |            |   |
|               | 0.734204807                           | 0.734204807                 | -1.367380142                |             | -0.209649374 | -0.788514758             |              |            |   |
|               | 0.818639277                           | 2                           | 0                           | 0.998207054 |              |                          |              |            |   |
| LAIR2         | ENSG00000167618.9                     | 0.38789908                  | 1                           | 1           | 0.38789908   | Brain_Frontal_Cortex_BA9 |              |            |   |
|               | 0.38789908                            | Brain_Frontal_Cortex_BA9    | 1                           | 1           | 1            | -0.863433658             |              |            |   |
|               | -0.863433658                          | -0.863433658                | NA                          | 1           | 0            | 0.998207054              |              |            |   |
| SLC25A33      | ENSG00000171612.6                     | 0.387999002                 | 1                           | 1           | 0.387999002  |                          |              |            |   |
|               | Brain_Cortex                          | 0.387999002                 | Brain_Cortex                | 1           | 1            | 1                        | -0.863251866 |            |   |
|               | -0.863251866                          | -0.863251866                | NA                          | 1           | 0            | 0.998207054              |              |            |   |
| VAMP5         | ENSG00000168899.4                     | 0.388052138                 | 1                           | 1           | 0.388052138  |                          |              |            |   |
|               | Brain_Hypothalamus                    | 0.388052138                 | Brain_Hypothalamus          | 1           | 1            | 1                        |              |            |   |
|               | -0.863155207                          | -0.863155207                | -0.863155207                | NA          | 1            | 0                        | 0.998207054  |            |   |
| CCDC153       | ENSG00000248712.7                     | 0.388373673                 | 7                           | 5           | 0.138799148  |                          |              |            |   |
|               | Brain_Caudate_basal_ganglia           | 0.675529904                 | Brain_Hippocampus           | 4.622729684 |              |                          |              |            |   |
|               | 0.011818659                           | 0.185426449                 | 0.418570703                 |             | 1.480277714  | 0.97488451               |              |            |   |
|               | 0.416729426                           | 5                           | 0                           | 0.998207054 |              |                          |              |            |   |
| PTPN3         | ENSG00000070159.13                    | 0.388459668                 | 1                           | 1           | 0.388459668  | Brain_Cerebellum         |              |            |   |
|               | 0.388459668                           | Brain_Cerebellum            | 1                           | 1           | 1            | 0.86241413               | 0.86241413   | 0.86241413 |   |



|               |                                       |                             |             |                             |              |             |                  |              |
|---------------|---------------------------------------|-----------------------------|-------------|-----------------------------|--------------|-------------|------------------|--------------|
| NA            | 1                                     | 0                           | 0.998207054 |                             |              |             |                  |              |
| GLYATL2       | ENSG00000156689.6                     | 0.388562141                 | 5           | 4                           | 0.146571715  |             |                  |              |
|               | Brain_Anterior_cingulate_cortex_BA24  | 0.6356097                   |             | Brain_Cortex                | 2.960663116  |             |                  |              |
|               | 0.060394435                           | 0.401340522                 |             | -0.720905869                | 1.451747903  |             | 0.613137129      |              |
|               | 0.822474503                           | 4                           | 0           | 0.998207054                 |              |             |                  |              |
| CBLN3         | ENSG00000139899.10                    | 0.388629664                 | 10          | 7                           | 0.028320807  |             |                  |              |
|               | Brain_Anterior_cingulate_cortex_BA24  | 0.911281474                 |             | Brain_Putamen_basal_ganglia |              |             |                  |              |
|               | 5.342144732                           | 0.032291002                 |             | 0.33396997                  | -2.192813663 |             | -0.111422304     |              |
|               | -1.315486377                          | 0.713872706                 | 7           | 0                           | 0.998207054  |             |                  |              |
| SOX15         | ENSG00000129194.7                     | 0.388691514                 | 4           | 3                           | 0.120823457  |             |                  |              |
|               | Brain_Nucleus_accumbens_basal_ganglia | 0.842818429                 |             | Brain_Caudate_basal_ganglia |              |             |                  |              |
|               | 3.070215551                           | 7.66E-05                    |             | 0.219977996                 | 0.198289676  |             | 1.551326508      |              |
|               | 0.670897401                           | 0.638077569                 | 3           | 0                           | 0.998207054  |             |                  |              |
| CEP295NL      | ENSG00000178404.9                     | 0.388793651                 | 1           | 1                           | 0.388793651  |             |                  |              |
|               | Brain_Caudate_basal_ganglia           | 0.388793651                 |             | Brain_Caudate_basal_ganglia | 1            | 1           |                  |              |
|               | 1                                     | 0.861807147                 | 0.861807147 | 0.861807147                 | NA           | 1           | 0                |              |
|               | 0.998207054                           |                             |             |                             |              |             |                  |              |
| RNF182        | ENSG00000180537.12                    | 0.388857769                 | 3           | 3                           | 0.2882582    |             |                  |              |
|               | Brain_Caudate_basal_ganglia           | 0.857233523                 |             | Brain_Hippocampus           | 1.927734879  |             |                  |              |
|               | 0.076946513                           | 0.076946513                 |             | -1.061950408                | 0.179896882  |             | -0.444676863     |              |
|               | 0.62095583                            | 3                           | 0           | 0.998207054                 |              |             |                  |              |
| ARRDC3        | ENSG00000113369.8                     | 0.388929507                 | 2           | 2                           | 0.180732542  |             |                  |              |
|               | Brain_Frontal_Cortex_BA9              | 0.74576528                  |             | Brain_Hypothalamus          | 1.009409329  |             |                  |              |
|               | 0.990590671                           | 0.990590671                 |             | 0.324228191                 | 1.338502942  |             | 0.831365567      |              |
|               | 0.717200555                           | 2                           | 0           | 0.998207054                 |              |             |                  |              |
| ALDH4A1       | ENSG00000159423.16                    | 0.388946981                 | 8           | 4                           | 0.050971493  |             |                  |              |
|               | Brain_Putamen_basal_ganglia           | 0.476776741                 |             | Brain_Hypothalamus          | 6.553561885  |             |                  |              |
|               | 9.92E-09                              | 0.219050343                 |             | -1.951719695                | -0.711496303 |             | -1.367792723     |              |
|               | 0.462345102                           | 4                           | 0           | 0.998207054                 |              |             |                  |              |
| LATS2         | ENSG00000150457.8                     | 0.389035101                 | 2           | 2                           | 0.169412361  |             | Brain_Cerebellum |              |
|               | 0.235288281                           | Brain_Cerebellar_Hemisphere | 1.861517524 |                             | 0.138482476  |             |                  |              |
|               | 0.138482476                           | -1.374094453                |             | -1.186846227                | -1.28047034  |             | 0.132404491      |              |
|               | 2                                     | 0                           | 0.998207054 |                             |              |             |                  |              |
| TMX4          | ENSG00000125827.8                     | 0.389132562                 | 7           | 5                           | 0.078339112  |             |                  |              |
|               | Brain_Frontal_Cortex_BA9              | 0.856830145                 |             | Brain_Cerebellar_Hemisphere |              |             |                  |              |
|               | 4.446985559                           | 0.036611187                 |             | 0.264313342                 | -1.760405296 |             | 0.180410713      |              |
|               | -0.95043613                           | 0.708223268                 | 5           | 0                           | 0.998207054  |             |                  |              |
| SKP2          | ENSG00000145604.15                    | 0.38920104                  | 1           | 1                           | 0.38920104   |             | Brain_Cerebellum | 0.38920104   |
|               | Brain_Cerebellum                      | 1                           | 1           | -0.861067187                | -0.861067187 |             | -0.861067187     |              |
|               | NA                                    | 1                           | 0           | 0.998207054                 |              |             |                  |              |
| PPP2R2C       | ENSG00000074211.13                    | 0.389214404                 | 3           | 3                           | 0.190594026  |             |                  |              |
|               | Brain_Hypothalamus                    | 0.769835112                 |             | Brain_Frontal_Cortex_BA9    | 1.121996626  |             |                  |              |
|               | 0.863849335                           | 0.863849335                 |             | -0.958129838                | 1.30882385   |             | 0.019367809      |              |
|               | 1.165228855                           | 3                           | 0           | 0.998207054                 |              |             |                  |              |
| RP5-1121E10.2 | ENSG00000238358.2                     | 0.389260141                 | 1           | 1                           | 0.389260141  |             |                  |              |
|               | Brain_Cerebellum                      | 0.389260141                 |             | Brain_Cerebellum            | 1            | 1           | 1                | -0.860959879 |
|               | -0.860959879                          | -0.860959879                | NA          | 1                           | 0            | 0.998207054 |                  |              |
| JMY           | ENSG00000152409.8                     | 0.389272315                 | 3           | 3                           | 0.123595381  |             |                  |              |
|               | Brain_Nucleus_accumbens_basal_ganglia | 0.690954669                 |             | Brain_Cerebellum            |              |             |                  |              |
|               | 2.361012718                           | 0.280736453                 |             | 0.280736453                 | -0.397559839 |             | 1.539856318      |              |
|               | 0.708240291                           | 0.997385599                 | 3           | 0                           | 0.998207054  |             |                  |              |
| COG6          | ENSG00000133103.16                    | 0.389344622                 | 9           | 2                           | 0.475478059  |             |                  |              |
|               | Brain_Putamen_basal_ganglia           | 0.894513291                 |             | Brain_Substantia_nigra      |              |             |                  |              |
|               | 7.899731849                           | 0.004912953                 |             | 0.731636881                 | -0.520499734 |             | 0.713594339      |              |
|               | 0.237560913                           | 0.447467629                 | 2           | 0                           | 0.998207054  |             |                  |              |
| CPSF7         | ENSG00000149532.15                    | 0.389368449                 | 2           | 2                           | 0.170010975  |             | Brain_Cortex     |              |
|               | 0.97451857                            | Brain_Cerebellum            | 1.020511213 |                             | 0.979488787  |             | 0.979488787      |              |
|               | 0.031941667                           | 1.372168546                 |             | 0.702055107                 | 0.947683514  |             | 2                | 0            |
|               | 0.998207054                           |                             |             |                             |              |             |                  |              |
| RP11-480D4.2  | ENSG00000249159.6                     | 0.389402518                 | 3           | 3                           | 0.230520273  |             |                  |              |
|               | Brain_Putamen_basal_ganglia           | 0.692942309                 |             | Brain_Substantia_nigra      |              |             |                  |              |
|               | 1.155705035                           | 0.839826505                 |             | 0.839826505                 | 0.394865287  |             | 1.199019732      |              |

|              |                                       |                                      |                                |              |              |                          |           |
|--------------|---------------------------------------|--------------------------------------|--------------------------------|--------------|--------------|--------------------------|-----------|
|              | 0.876948526                           | 0.425286939                          | 3                              | 0            | 0.998207054  |                          |           |
| KCNC1        | ENSG00000129159.7                     | 0.38946924                           | 1                              | 1            | 0.38946924   | Brain_Frontal_Cortex_BA9 |           |
|              | 0.38946924                            | Brain_Frontal_Cortex_BA9             | 1                              | 1            | 1            | 0.8605803                | 0.8605803 |
|              | 0.8605803                             | NA                                   | 1                              | 0            | 0.998207054  |                          |           |
| GJB3         | ENSG00000188910.7                     | 0.389478112                          | 2                              | 2            | 0.171972148  |                          |           |
|              | Brain_Cerebellar_Hemisphere           | 0.88764564                           | Brain_Spinal_cord_cervical_c-1 |              |              |                          |           |
|              | 1.000689159                           | 0.999310841                          | 0.999310841                    | -0.141283935 | 1.365894282  |                          |           |
|              | 0.612305174                           | 1.065735938                          | 2                              | 0            | 0.998207054  |                          |           |
| MPDZ         | ENSG00000107186.16                    | 0.389524673                          | 1                              | 1            | 0.389524673  |                          |           |
|              | Brain_Cerebellar_Hemisphere           | 0.389524673                          | Brain_Cerebellar_Hemisphere    | 1            | 1            |                          |           |
|              | 1                                     | 0.860479693                          | 0.860479693                    | 0.860479693  | NA           | 1                        | 0         |
|              | 0.998207054                           |                                      |                                |              |              |                          |           |
| PWWP2B       | ENSG00000171813.13                    | 0.389574617                          | 2                              | 2            | 0.337209218  |                          |           |
|              | Brain_Amygdala                        | 0.345583278                          | Brain_Substantia_nigra         | 1.039667135  |              |                          |           |
|              | 0.960332865                           | 0.960332865                          | -0.95969405                    | -0.94319088  | -0.951442465 |                          |           |
|              | 0.011669504                           | 2                                    | 0                              | 0.998207054  |              |                          |           |
| KIAA1841     | ENSG00000162929.13                    | 0.389619924                          | 2                              | 2            | 0.389107077  |                          |           |
|              | Brain_Nucleus_accumbens_basal_ganglia | 0.785943197                          | Brain_Cerebellum               |              |              |                          |           |
|              | 1.639349572                           | 0.360650428                          | 0.360650428                    | -0.271582317 | 0.861237815  |                          |           |
|              | 0.294827749                           | 0.801024797                          | 2                              | 0            | 0.998207054  |                          |           |
| SEC22A       | ENSG00000121542.11                    | 0.389628124                          | 3                              | 3            | 0.271742506  |                          |           |
|              | Brain_Anterior_cingulate_cortex_BA24  | 0.632725111                          |                                |              |              |                          |           |
|              | Brain_Nucleus_accumbens_basal_ganglia | 1.497788131                          | 0.59224239                     | 0.59224239   |              |                          |           |
|              | -1.099058601                          | 0.477894761                          | -0.507541639                   | 0.859112838  | 3            | 0                        |           |
|              | 0.998207054                           |                                      |                                |              |              |                          |           |
| SPATA7       | ENSG00000042317.16                    | 0.389655984                          | 13                             | 2            | 0.059427999  |                          |           |
|              | Brain_Caudate_basal_ganglia           | 0.451526278                          | Brain_Cerebellum               | 11.59646553  |              |                          |           |
|              | 0.006803119                           | 0.46535328                           | 0.752872927                    | 1.885013616  | 1.210525871  |                          |           |
|              | 0.33002482                            | 2                                    | 0                              | 0.998207054  |              |                          |           |
| PPP6C        | ENSG00000119414.11                    | 0.38972898                           | 6                              | 3            | 0.097683344  | Brain_Cortex             |           |
|              | 0.665798674                           | Brain_Anterior_cingulate_cortex_BA24 | 4.594756275                    |              |              |                          |           |
|              | 0.065689377                           | 0.399583234                          | -0.431921217                   | 1.656190018  | 0.812573064  |                          |           |
|              | 0.687016033                           | 3                                    | 0                              | 0.998207054  |              |                          |           |
| BCL10        | ENSG00000142867.12                    | 0.390092816                          | 3                              | 3            | 0.169848359  |                          |           |
|              | Brain_Putamen_basal_ganglia           | 0.852976537                          | Brain_Cerebellar_Hemisphere    |              |              |                          |           |
|              | 1.261995638                           | 0.729130995                          | 0.729130995                    | -1.372691223 | -0.185321931 |                          |           |
|              | -0.856474623                          | 0.608658651                          | 3                              | 0            | 0.998207054  |                          |           |
| RP11-266K4.9 | ENSG00000215241.3                     | 0.390323877                          | 5                              | 5            | 0.129760439  |                          |           |
|              | Brain_Nucleus_accumbens_basal_ganglia | 0.612040062                          | Brain_Cerebellum               |              |              |                          |           |
|              | 2.222740663                           | 0.263548087                          | 0.263548087                    | -1.040077122 | 1.51504725   |                          |           |
|              | 0.278869987                           | 1.041877569                          | 5                              | 0            | 0.998207054  |                          |           |
| SKI          | ENSG00000157933.9                     | 0.390364653                          | 2                              | 2            | 0.30907336   |                          |           |
|              | Brain_Substantia_nigra                | 0.360722165                          | Brain_Cerebellum               | 1.00606117   | 0.99393883   |                          |           |
|              | 0.99393883                            | -1.017168328                         | 0.913989878                    | -0.051589225 | 1.365535063  | 2                        |           |
|              | 0                                     | 0.998207054                          |                                |              |              |                          |           |
| WDR7         | ENSG00000091157.13                    | 0.390413047                          | 7                              | 6            | 0.069551894  |                          |           |
|              | Brain_Cerebellar_Hemisphere           | 0.967934736                          | Brain_Spinal_cord_cervical_c-1 |              |              |                          |           |
|              | 4.773815511                           | 0.049742989                          | 0.234902653                    | -0.139652985 | 1.814817932  |                          |           |
|              | 0.726905961                           | 0.68951607                           | 6                              | 0            | 0.998207054  |                          |           |
| IRS1         | ENSG00000169047.5                     | 0.390453014                          | 4                              | 4            | 0.080222099  |                          |           |
|              | Brain_Cerebellar_Hemisphere           | 0.866538821                          | Brain_Substantia_nigra         |              |              |                          |           |
|              | 1.402427452                           | 0.717306181                          | 0.717306181                    | -0.895548284 | 1.749398852  |                          |           |
|              | 0.258538005                           | 1.117233449                          | 4                              | 0            | 0.998207054  |                          |           |
| EPHA7        | ENSG00000135333.13                    | 0.390480931                          | 1                              | 1            | 0.390480931  |                          |           |
|              | Brain_Nucleus_accumbens_basal_ganglia | 0.390480931                          |                                |              |              |                          |           |
|              | Brain_Nucleus_accumbens_basal_ganglia | 1                                    | 1                              | 1            | -0.858745519 |                          |           |
|              | -0.858745519                          | -0.858745519                         | NA                             | 1            | 0            | 0.998207054              |           |
| MANEA        | ENSG00000172469.15                    | 0.390508367                          | 5                              | 4            | 0.030607041  | Brain_Cerebellum         |           |
|              | 0.990017228                           | Brain_Anterior_cingulate_cortex_BA24 | 3.070410117                    | 0.09251168   |              |                          |           |
|              | 0.294548941                           | 0.012511876                          | 2.162144482                    | 1.358328759  | 0.816881042  |                          |           |
|              | 4                                     | 0                                    | 0.998207054                    |              |              |                          |           |
| CBR4         | ENSG00000145439.11                    | 0.390527975                          | 4                              | 4            | 0.184733413  |                          |           |

|               |                                       |                  |              |                                       |              |             |   |              |  |
|---------------|---------------------------------------|------------------|--------------|---------------------------------------|--------------|-------------|---|--------------|--|
|               | Brain_Hippocampus                     | 0.736084787      |              | Brain_Putamen_basal_ganglia           | 2.785778328  |             |   |              |  |
|               | 0.224880874                           | 0.224880874      | 0.3370426    | 1.326320943                           | 0.886415374  |             |   |              |  |
|               | 0.480239053                           | 4                | 0            | 0.998207054                           |              |             |   |              |  |
| MEOX2         | ENSG00000106511.5                     | 0.390733232      | 4            | 4                                     | 0.143465632  |             |   |              |  |
|               | Brain_Anterior_cingulate_cortex_BA24  | 0.846887783      |              |                                       |              |             |   |              |  |
|               | Brain_Nucleus_accumbens_basal_ganglia | 1.218722058      |              | 0.78125139                            | 0.78125139   |             |   |              |  |
|               | -1.463006383                          | -0.193090895     | -0.857903002 | 0.663317732                           | 4            | 0           |   |              |  |
|               | 0.998207054                           |                  |              |                                       |              |             |   |              |  |
| NDE1          | ENSG00000072864.14                    | 0.390757242      | 13           | 5                                     | 0.102825481  |             |   |              |  |
|               | Brain_Substantia_nigra                | 0.901453587      |              | Brain_Nucleus_accumbens_basal_ganglia |              |             |   |              |  |
|               | 8.990084934                           | 0.00057101       | 0.428593406  | -0.722243905                          | 1.631307361  |             |   |              |  |
|               | -0.126563625                          | 0.634395889      | 5            | 0                                     | 0.998207054  |             |   |              |  |
| RP11-388C12.1 | ENSG00000263063.1                     | 0.390794277      | 13           | 4                                     | 0.052714289  |             |   |              |  |
|               | Brain_Cortex                          | 0.940668237      |              | Brain_Putamen_basal_ganglia           | 10.18178847  |             |   |              |  |
|               | 0.000137379                           | 0.344229924      | -0.549421381 | 1.937254108                           | 0.750538543  |             |   |              |  |
|               | 0.619688929                           | 4                | 0            | 0.998207054                           |              |             |   |              |  |
| RP11-329B9.5  | ENSG00000272922.1                     | 0.390931853      | 4            | 4                                     | 0.11821698   |             |   |              |  |
|               | Brain_Frontal_Cortex_BA9              | 0.747961917      |              | Brain_Cerebellar_Hemisphere           |              |             |   |              |  |
|               | 1.763832773                           | 0.440102088      | 0.440102088  | -1.562301495                          | 1.170880295  |             |   |              |  |
|               | -0.325132124                          | 1.131023028      | 4            | 0                                     | 0.998207054  |             |   |              |  |
| TFCP2         | ENSG00000135457.9                     | 0.391025954      | 1            | 1                                     | 0.391025954  |             |   |              |  |
|               | Brain_Cerebellar_Hemisphere           | 0.391025954      |              | Brain_Cerebellar_Hemisphere           | 1            | 1           |   |              |  |
|               | 1                                     | -0.857758274     | -0.857758274 | -0.857758274                          | NA           | 1           | 0 |              |  |
|               | 0.998207054                           |                  |              |                                       |              |             |   |              |  |
| RSPO1         | ENSG00000169218.13                    | 0.391035771      | 1            | 1                                     | 0.391035771  |             |   |              |  |
|               | Brain_Frontal_Cortex_BA9              | 0.391035771      |              | Brain_Frontal_Cortex_BA9              | 1            | 1           |   |              |  |
|               | 1                                     | -0.8577405       | -0.8577405   | -0.8577405                            | NA           | 1           | 0 | 0.998207054  |  |
| SMIM7         | ENSG00000214046.8                     | 0.391038551      | 7            | 4                                     | 0.102662093  |             |   |              |  |
|               | Brain_Putamen_basal_ganglia           | 0.630778717      |              | Brain_Cortex                          | 5.172076249  |             |   |              |  |
|               | 0.022561252                           | 0.210119151      | 0.480631086  | 1.632082572                           | 1.114568974  |             |   |              |  |
|               | 0.473893802                           | 4                | 0            | 0.998207054                           |              |             |   |              |  |
| TMEM14C       | ENSG00000111843.13                    | 0.391237953      | 1            | 1                                     | 0.391237953  |             |   |              |  |
|               | Brain_Cerebellum                      | 0.391237953      |              | Brain_Cerebellum                      | 1            | 1           | 1 | 0.857374489  |  |
|               | 0.857374489                           | 0.857374489      | NA           | 1                                     | 0            | 0.998207054 |   |              |  |
| EME2          | ENSG00000197774.12                    | 0.391249241      | 7            | 5                                     | 0.468194262  |             |   |              |  |
|               | Brain_Nucleus_accumbens_basal_ganglia | 0.650985574      |              | Brain_Putamen_basal_ganglia           |              |             |   |              |  |
|               | 4.168345478                           | 0.006371815      | 0.439047779  | -0.725420237                          | 0.705079861  |             |   |              |  |
|               | 0.087831933                           | 0.641251272      | 5            | 0                                     | 0.998207054  |             |   |              |  |
| GLIS2-AS1     | ENSG00000262686.1                     | 0.39133654       | 2            | 2                                     | 0.297344286  |             |   | Brain_Cortex |  |
|               | 0.375868102                           | Brain_Cerebellum | 1.003312965  | 0.996687035                           | 0.996687035  |             |   |              |  |
|               | -1.042145371                          | -0.885535091     | -0.963840231 | 0.110740191                           | 2            | 0           |   |              |  |
|               | 0.998207054                           |                  |              |                                       |              |             |   |              |  |
| MYO1B         | ENSG00000128641.18                    | 0.391342355      | 1            | 1                                     | 0.391342355  |             |   |              |  |
|               | Brain_Nucleus_accumbens_basal_ganglia | 0.391342355      |              |                                       |              |             |   |              |  |
|               | Brain_Nucleus_accumbens_basal_ganglia | 1                | 1            | 1                                     | -0.857185536 |             |   |              |  |
|               | -0.857185536                          | -0.857185536     | NA           | 1                                     | 0            | 0.998207054 |   |              |  |
| PDIA4         | ENSG00000155660.10                    | 0.391422217      | 3            | 3                                     | 0.138998929  |             |   |              |  |
|               | Brain_Hippocampus                     | 0.853824153      |              | Brain_Cortex                          | 1.723146967  |             |   |              |  |
|               | 0.293071798                           | 0.293071798      | 0.18424131   | 1.479529214                           | 0.771616192  |             |   |              |  |
|               | 0.656002874                           | 3                | 0            | 0.998207054                           |              |             |   |              |  |
| NUDT16        | ENSG00000198585.11                    | 0.391533298      | 1            | 1                                     | 0.391533298  |             |   |              |  |
|               | Brain_Cerebellar_Hemisphere           | 0.391533298      |              | Brain_Cerebellar_Hemisphere           | 1            | 1           |   |              |  |
|               | 1                                     | -0.856840033     | -0.856840033 | -0.856840033                          | NA           | 1           | 0 |              |  |
|               | 0.998207054                           |                  |              |                                       |              |             |   |              |  |
| LINC02156     | ENSG00000257906.1                     | 0.39155503       | 3            | 3                                     | 0.130401312  |             |   |              |  |
|               | Brain_Caudate_basal_ganglia           | 0.837462292      |              | Brain_Spinal_cord_cervical_c-1        |              |             |   |              |  |
|               | 2.209081047                           | 0.214296974      | 0.214296974  | -1.512521247                          | -0.20514058  |             |   |              |  |
|               | -1.05101338                           | 0.733562099      | 3            | 0                                     | 0.998207054  |             |   |              |  |
| FLG           | ENSG00000143631.10                    | 0.391622748      | 10           | 2                                     | 0.325239912  |             |   |              |  |
|               | Brain_Anterior_cingulate_cortex_BA24  | 0.952656059      |              | Brain_Frontal_Cortex_BA9              |              |             |   |              |  |
|               | 8.494360757                           | 0.000967095      | 0.854058232  | -0.666161833                          | 0.983747025  |             |   |              |  |
|               | 0.259403233                           | 0.494892897      | 2            | 0                                     | 0.998207054  |             |   |              |  |

|           |                                       |                             |              |             |                                       |             |              |                  |
|-----------|---------------------------------------|-----------------------------|--------------|-------------|---------------------------------------|-------------|--------------|------------------|
| SHCBP1    | ENSG00000171241.8                     | 0.391826269                 | 2            | 1           | 0.386790316                           |             |              |                  |
|           | Brain_Frontal_Cortex_BA9              | 0.396997279                 |              |             | Brain_Cortex                          | 1.999599916 |              |                  |
|           | 0.000400084                           | 1.999599916                 |              |             | -0.846996129                          |             | -0.85622446  |                  |
|           | 0.013050831                           | 1                           | 0            | 0.998207054 |                                       |             |              |                  |
| PRTFDC1   | ENSG00000099256.18                    | 0.391889851                 | 5            | 4           | 0.110381296                           |             |              |                  |
|           | Brain_Caudate_basal_ganglia           | 0.879946521                 |              |             | Brain_Nucleus_accumbens_basal_ganglia |             |              |                  |
|           | 2.566410815                           | 0.056812506                 | 0.397008235  |             | -1.596481667                          |             | 0.187111351  |                  |
|           | -0.506595027                          | 0.733480223                 | 4            | 0           | 0.998207054                           |             |              |                  |
| SBK3      | ENSG00000231274.5                     | 0.391914925                 | 2            | 2           | 0.175301842                           |             |              | Brain_Cerebellum |
|           | 0.297191351                           | Brain_Cerebellar_Hemisphere | 1.844538929  |             | 0.155461071                           |             |              |                  |
|           | 0.155461071                           | -1.355363282                | -1.042475343 |             | -1.198919312                          |             | 0.221245183  |                  |
|           | 2                                     | 0                           | 0.998207054  |             |                                       |             |              |                  |
| THAP5     | ENSG00000177683.13                    | 0.391947201                 | 12           | 2           | 0.070831596                           |             |              |                  |
|           | Brain_Anterior_cingulate_cortex_BA24  | 0.501921671                 |              |             | Brain_Cerebellum                      |             |              |                  |
|           | 10.71865313                           | 0.005097378                 | 0.504831252  |             | 0.671469204                           |             | 1.806555613  |                  |
|           | 1.26772175                            | 0.332252371                 | 2            | 0           | 0.998207054                           |             |              |                  |
| CCDC84    | ENSG00000186166.8                     | 0.391996907                 | 2            | 2           | 0.593137386                           |             |              |                  |
|           | Brain_Hippocampus                     | 0.884572848                 |              |             | Brain_Nucleus_accumbens_basal_ganglia |             |              |                  |
|           | 1.874037385                           | 0.125962615                 | 0.125962615  |             | -0.145174818                          |             | 0.534295093  |                  |
|           | 0.194560138                           | 0.480457782                 | 2            | 0           | 0.998207054                           |             |              |                  |
| HIST1H2AE | ENSG00000277075.2                     | 0.392013738                 | 1            | 1           | 0.392013738                           |             |              |                  |
|           | Brain_Spinal_cord_cervical_c-1        | 0.392013738                 |              |             | Brain_Spinal_cord_cervical_c-1        |             |              |                  |
|           | 1                                     | 1                           | 1            | 0.855971149 | 0.855971149                           |             | 0.855971149  | NA 1 0           |
|           | 0.998207054                           |                             |              |             |                                       |             |              |                  |
| RBFOX1    | ENSG00000078328.19                    | 0.392080508                 | 1            | 1           | 0.392080508                           |             |              |                  |
|           | Brain_Cerebellar_Hemisphere           | 0.392080508                 |              |             | Brain_Cerebellar_Hemisphere           | 1           | 1            |                  |
|           | 1                                     | 0.855850446                 | 0.855850446  |             | 0.855850446                           | NA          | 1            | 0                |
|           | 0.998207054                           |                             |              |             |                                       |             |              |                  |
| C2        | ENSG00000166278.14                    | 0.392089563                 | 2            | 2           | 0.215473628                           |             |              |                  |
|           | Brain_Cerebellar_Hemisphere           | 0.355048557                 |              |             | Brain_Nucleus_accumbens_basal_ganglia |             |              |                  |
|           | 1.298511456                           | 0.701488544                 | 0.701488544  |             | 0.924841121                           |             | 1.238654089  |                  |
|           | 1.081747605                           | 0.221899277                 | 2            | 0           | 0.998207054                           |             |              |                  |
| RNF146    | ENSG00000118518.15                    | 0.392135538                 | 2            | 2           | 0.219981066                           |             |              |                  |
|           | Brain_Putamen_basal_ganglia           | 0.660757122                 |              |             | Brain_Frontal_Cortex_BA9              |             |              |                  |
|           | 1.132292623                           | 0.867707377                 | 0.867707377  |             | -1.22657847                           |             | -0.438868086 |                  |
|           | -0.832723278                          | 0.556995354                 | 2            | 0           | 0.998207054                           |             |              |                  |
| UNC13B    | ENSG00000198722.14                    | 0.39216921                  | 1            | 1           | 0.39216921                            |             |              | Brain_Cerebellum |
|           | 0.39216921                            | Brain_Cerebellum            | 1            | 1           | 0.855690114                           |             | 0.855690114  |                  |
|           | 0.855690114                           | NA                          | 1            | 0           | 0.998207054                           |             |              |                  |
| VASH1     | ENSG00000071246.10                    | 0.392218324                 | 3            | 3           | 0.144864289                           |             |              | Brain_Cerebellum |
|           | 0.993790889                           | Brain_Cerebellar_Hemisphere | 1.372319311  |             | 0.644684489                           |             |              |                  |
|           | 0.644684489                           | -1.457913856                | 0.351913385  |             | -0.371260839                          |             | 0.958100353  |                  |
|           | 3                                     | 0                           | 0.998207054  |             |                                       |             |              |                  |
| STIM2     | ENSG00000109689.15                    | 0.392337627                 | 1            | 1           | 0.392337627                           |             |              | Brain_Cerebellum |
|           | 0.392337627                           | Brain_Cerebellum            | 1            | 1           | 1                                     |             | -0.855385755 | -0.855385755     |
|           | -0.855385755                          | NA                          | 1            | 0           | 0.998207054                           |             |              |                  |
| TESK2     | ENSG00000070759.16                    | 0.392397315                 | 8            | 7           | 0.401357485                           |             |              |                  |
|           | Brain_Spinal_cord_cervical_c-1        | 0.806207878                 |              |             | Brain_Putamen_basal_ganglia           |             |              |                  |
|           | 4.072458135                           | 0.082030021                 | 0.206956957  |             | -0.740854065                          |             | 0.839199291  |                  |
|           | -0.058551891                          | 0.61412523                  | 7            | 0           | 0.998207054                           |             |              |                  |
| HIST1H4K  | ENSG00000273542.1                     | 0.392464878                 | 2            | 2           | 0.315420223                           |             |              |                  |
|           | Brain_Anterior_cingulate_cortex_BA24  | 0.734901023                 |              |             |                                       |             |              |                  |
|           | Brain_Nucleus_accumbens_basal_ganglia | 1.83971758                  | 0.16028242   |             | 0.16028242                            |             |              |                  |
|           | 0.338613351                           | 1.003913678                 | 0.671263515  |             | 0.470438373                           |             | 2            | 0                |
|           | 0.998207054                           |                             |              |             |                                       |             |              |                  |
| TM7SF3    | ENSG00000064115.10                    | 0.392523576                 | 10           | 7           | 0.141603931                           |             |              |                  |
|           | Brain_Cerebellum                      | 0.916289696                 |              |             | Brain_Cerebellar_Hemisphere           | 5.779024014 |              |                  |
|           | 0.035642046                           | 0.216143768                 | -1.295690855 |             | 1.469844289                           |             | 0.201841224  |                  |
|           | 0.745842822                           | 7                           | 0            | 0.998207054 |                                       |             |              |                  |
| PAXBP1    | ENSG00000159086.14                    | 0.392530039                 | 1            | 1           | 0.392530039                           |             |              |                  |
|           | Brain_Hippocampus                     | 0.392530039                 |              |             | Brain_Hippocampus                     | 1           | 1            | 1                |
|           | 0.855038129                           | 0.855038129                 | 0.855038129  |             | NA                                    | 1           | 0            | 0.998207054      |

|           |                                       |                             |              |                                       |              |                             |              |
|-----------|---------------------------------------|-----------------------------|--------------|---------------------------------------|--------------|-----------------------------|--------------|
| RETN      | ENSG00000104918.7                     | 0.39253314                  | 1            | 1                                     | 0.39253314   | Brain_Caudate_basal_ganglia |              |
|           | 0.39253314                            | Brain_Caudate_basal_ganglia | 1            | 1                                     | 0.85503253   | 0.85503253                  |              |
|           | 0.85503253                            | NA                          | 1            | 0                                     | 0.998207054  |                             |              |
| TOMM20    | ENSG00000173726.10                    | 0.392665883                 |              | 1                                     | 1            | 0.392665883                 |              |
|           | Brain_Putamen_basal_ganglia           | 0.392665883                 |              | Brain_Putamen_basal_ganglia           | 1            | 1                           |              |
|           | 1                                     | 0.854792768                 | 0.854792768  | 0.854792768                           | NA           | 1                           | 0            |
|           | 0.998207054                           |                             |              |                                       |              |                             |              |
| ZNF839    | ENSG00000022976.15                    | 0.392689592                 | 3            | 2                                     | 0.380240513  |                             |              |
|           | Brain_Cerebellum                      | 0.799003189                 |              | Brain_Cerebellar_Hemisphere           | 2.706234023  |                             |              |
|           | 0.041730385                           | 0.252035592                 |              | -0.877453228                          | 0.271380283  |                             | -0.28690344  |
|           | 0.575096021                           | 2                           | 0            | 0.998207054                           |              |                             |              |
| CTDNEP1   | ENSG00000175826.11                    | 0.392707158                 | 5            | 4                                     | 0.103852693  |                             |              |
|           | Brain_Putamen_basal_ganglia           | 0.757459826                 |              | Brain_Cerebellum                      | 4.002571158  |                             |              |
|           | 0.025136894                           | 0.156119672                 |              | 0.308818197                           | 1.626455969  |                             | 0.846420199  |
|           | 0.483971462                           | 4                           | 0            | 0.998207054                           |              |                             |              |
| ZNF329    | ENSG00000181894.14                    | 0.392711358                 | 5            | 4                                     | 0.247125049  |                             |              |
|           | Brain_Cerebellar_Hemisphere           | 0.69672325                  |              | Brain_Caudate_basal_ganglia           | 2.804027944  |                             |              |
|           | 0.090092404                           | 0.381365454                 |              | -1.157360638                          | 0.443269293  |                             | -0.523359688 |
|           | 0.640028098                           | 4                           | 0            | 0.998207054                           |              |                             |              |
| LAMA1     | ENSG00000101680.14                    | 0.392834805                 | 2            | 2                                     | 0.172911838  |                             |              |
|           | Brain_Putamen_basal_ganglia           | 0.973788612                 |              | Brain_Cortex                          | 1.053489319  |                             |              |
|           | 0.946510681                           | 0.946510681                 |              | -1.36290695                           | 0.032857014  |                             | -0.665024968 |
|           | 0.986954164                           | 2                           | 0            | 0.998207054                           |              |                             |              |
| CAPS2     | ENSG00000180881.19                    | 0.392842404                 | 4            | 4                                     | 0.222098901  |                             |              |
|           | Brain_Caudate_basal_ganglia           | 0.702027826                 |              | Brain_Anterior_cingulate_cortex_BA24  |              |                             |              |
|           | 1.943882245                           | 0.113960774                 |              | 0.113960774                           | -1.092313929 |                             | 1.220965979  |
|           | -0.00657536                           | 1.019649088                 | 4            | 0                                     | 0.998207054  |                             |              |
| LINC01902 | ENSG00000283503.1                     | 0.392848161                 | 1            | 1                                     | 0.392848161  |                             |              |
|           | Brain_Caudate_basal_ganglia           | 0.392848161                 |              | Brain_Caudate_basal_ganglia           | 1            | 1                           |              |
|           | 1                                     | -0.854463615                | -0.854463615 | -0.854463615                          | NA           | 1                           | 0            |
|           | 0.998207054                           |                             |              |                                       |              |                             |              |
| PQLC2L    | ENSG00000174899.10                    | 0.392899079                 | 5            | 5                                     | 0.089645593  |                             |              |
|           | Brain_Frontal_Cortex_BA9              | 0.922602463                 |              | Brain_Caudate_basal_ganglia           |              |                             |              |
|           | 2.675781328                           | 0.134651074                 |              | 0.134651074                           | -1.074019361 |                             | 1.697270179  |
|           | 0.18216587                            | 1.040508215                 | 5            | 0                                     | 0.998207054  |                             |              |
| RPUSD4    | ENSG00000165526.8                     | 0.392923051                 | 5            | 5                                     | 0.084016025  |                             |              |
|           | Brain_Caudate_basal_ganglia           | 0.9823954                   |              | Brain_Nucleus_accumbens_basal_ganglia |              |                             |              |
|           | 1.945912963                           | 0.09004889                  | 0.09004889   | 0.022065885                           | 1.727844954  |                             |              |
|           | 1.119316102                           | 0.683006018                 | 5            | 0                                     | 0.998207054  |                             |              |
| DAPK2     | ENSG00000035664.11                    | 0.392947226                 | 2            | 1                                     | 0.276002232  | Brain_Cortex                |              |
|           | 0.551909289                           | Brain_Frontal_Cortex_BA9    | 1.9434594    | 0.0565406                             | 1.9434594    |                             |              |
|           | -1.089343965                          | -0.594901538                | -0.842122751 | 0.349623593                           | 1            | 0                           |              |
|           | 0.998207054                           |                             |              |                                       |              |                             |              |
| BTN2A1    | ENSG00000112763.15                    | 0.393079791                 | 5            | 5                                     | 0.196157088  |                             |              |
|           | Brain_Nucleus_accumbens_basal_ganglia | 0.905734177                 |              | Brain_Frontal_Cortex_BA9              |              |                             |              |
|           | 3.355880645                           | 0.164407385                 | 0.164407385  | -0.185803971                          | 1.292577898  |                             |              |
|           | 0.623394772                           | 0.66684234                  | 5            | 0                                     | 0.998207054  |                             |              |
| SCN1B     | ENSG00000105711.11                    | 0.393147434                 | 1            | 1                                     | 0.393147434  | Brain_Cerebellum            |              |
|           | 0.393147434                           | Brain_Cerebellum            | 1            | 1                                     | 1            | -0.853923398                | -0.853923398 |
|           | -0.853923398                          | NA                          | 1            | 0                                     | 0.998207054  |                             |              |
| FZD4      | ENSG00000174804.3                     | 0.393153323                 | 1            | 1                                     | 0.393153323  |                             |              |
|           | Brain_Nucleus_accumbens_basal_ganglia | 0.393153323                 |              |                                       |              |                             |              |
|           | Brain_Nucleus_accumbens_basal_ganglia | 1                           | 1            | 1                                     | 0.85391277   | 0.85391277                  |              |
|           | 0.85391277                            | NA                          | 1            | 0                                     | 0.998207054  |                             |              |
| OPN4      | ENSG00000122375.11                    | 0.393164695                 | 8            | 2                                     | 0.154456513  | Brain_Amygdala              |              |
|           | 0.641221906                           | Brain_Hippocampus           | 7.08551696   | 0.005467893                           | 0.523340433  |                             |              |
|           | 0.465991051                           | 1.423965315                 | 1.146839945  | 0.315662033                           | 2            | 0                           |              |
|           | 0.998207054                           |                             |              |                                       |              |                             |              |
| NAGPA-AS1 | ENSG00000267072.2                     | 0.393253824                 | 6            | 6                                     | 0.099583756  |                             |              |
|           | Brain_Putamen_basal_ganglia           | 0.831075472                 |              | Brain_Substantia_nigra                |              |                             |              |
|           | 1.659113298                           | 0.587876229                 | 0.587876229  | -1.64687493                           | 1.001158218  |                             |              |
|           | -0.481612719                          | 0.952143182                 | 6            | 0                                     | 0.998207054  |                             |              |

|              |                                       |                          |              |              |                                       |              |             |                |
|--------------|---------------------------------------|--------------------------|--------------|--------------|---------------------------------------|--------------|-------------|----------------|
| RHOG         | ENSG00000177105.9                     | 0.393273658              | 1            | 1            | 0.393273658                           |              |             |                |
|              | Brain_Putamen_basal_ganglia           | 0.393273658              |              |              | Brain_Putamen_basal_ganglia           | 1            | 1           |                |
|              | 1                                     | 0.853695627              | 0.853695627  | 0.853695627  | NA                                    | 1            | 0           |                |
|              | 0.998207054                           |                          |              |              |                                       |              |             |                |
| DNAJC9       | ENSG00000213551.4                     | 0.393317004              | 1            | 1            | 0.393317004                           |              |             |                |
|              | Brain_Cortex                          | 0.393317004              |              |              | Brain_Cortex                          | 1            | 1           | 0.853617419    |
|              | 0.853617419                           | 0.853617419              | NA           | 1            | 0                                     | 0.998207054  |             |                |
| DQX1         | ENSG00000144045.13                    | 0.393533011              | 1            | 1            | 0.393533011                           |              |             | Brain_Amygdala |
|              | 0.393533011                           | Brain_Amygdala           | 1            | 1            | 1                                     | -0.853227762 |             | -0.853227762   |
|              | -0.853227762                          | NA                       | 1            | 0            | 0.998207054                           |              |             |                |
| CDC42EP4     | ENSG00000179604.9                     | 0.393537066              | 2            | 2            | 0.252489228                           |              |             |                |
|              | Brain_Substantia_nigra                | 0.468690645              |              |              | Brain_Anterior_cingulate_cortex_BA24  |              |             |                |
|              | 1.018096108                           | -0.981903892             | 0.981903892  | -0.724611104 | 1.144324158                           |              |             |                |
|              | 0.209856527                           | 1.321536798              | 2            | 0            | 0.998207054                           |              |             |                |
| FMNL3        | ENSG00000161791.13                    | 0.393596505              | 1            | 1            | 0.393596505                           |              |             |                |
|              | Brain_Cerebellar_Hemisphere           | 0.393596505              |              |              | Brain_Cerebellar_Hemisphere           | 1            | 1           |                |
|              | 1                                     | 0.853113249              | 0.853113249  | 0.853113249  | NA                                    | 1            | 0           |                |
|              | 0.998207054                           |                          |              |              |                                       |              |             |                |
| SOBP         | ENSG00000112320.11                    | 0.393624344              | 1            | 1            | 0.393624344                           |              |             |                |
|              | Brain_Putamen_basal_ganglia           | 0.393624344              |              |              | Brain_Putamen_basal_ganglia           | 1            | 1           |                |
|              | 1                                     | 0.853063044              | 0.853063044  | 0.853063044  | NA                                    | 1            | 0           |                |
|              | 0.998207054                           |                          |              |              |                                       |              |             |                |
| C15orf40     | ENSG00000169609.13                    | 0.393653493              | 13           | 2            | 0.131781979                           |              |             |                |
|              | Brain_Cerebellar_Hemisphere           | 0.554341543              |              |              | Brain_Nucleus_accumbens_basal_ganglia |              |             |                |
|              | 11.96671902                           | 0.005377997              | 0.461532786  | 0.59126699   | 1.507111894                           |              |             |                |
|              | 1.063319748                           | 0.273035248              | 2            | 0            | 0.998207054                           |              |             |                |
| C19orf81     | ENSG00000235034.6                     | 0.393819687              | 1            | 1            | 0.393819687                           |              |             |                |
|              | Brain_Hypothalamus                    | 0.393819687              |              |              | Brain_Hypothalamus                    | 1            | 1           | 1              |
|              | 0.852710824                           | 0.852710824              | 0.852710824  | NA           | 1                                     | 0            | 0.998207054 |                |
| TOX4         | ENSG00000092203.13                    | 0.393955389              | 11           | 3            | 0.090334053                           |              |             |                |
|              | Brain_Hypothalamus                    | 0.829170978              |              |              | Brain_Cortex                          | 9.106409837  |             |                |
|              | 0.001947893                           | 0.634420328              | -1.693638209 | -0.215764941 | -0.758510551                          |              |             |                |
|              | 0.460766436                           | 3                        | 0            | 0.998207054  |                                       |              |             |                |
| RP11-167B3.3 | ENSG00000277987.1                     | 0.393956849              | 2            | 2            | 0.261583471                           |              |             |                |
|              | Brain_Caudate_basal_ganglia           | 0.988135262              |              |              | Brain_Putamen_basal_ganglia           |              |             |                |
|              | 1.559766781                           | 0.440233219              | 0.440233219  | -0.014870792 | 1.122656355                           |              |             |                |
|              | 0.553892782                           | 0.804353159              | 2            | 0            | 0.998207054                           |              |             |                |
| PAWR         | ENSG00000177425.10                    | 0.394071109              | 2            | 2            | 0.172712964                           |              |             |                |
|              | Brain_Caudate_basal_ganglia           | 0.977803959              |              |              | Brain_Cerebellum                      | 1.061885658  |             |                |
|              | 0.938114342                           | 0.938114342              | 0.027822201  | 1.363538168  | 0.695680185                           |              |             |                |
|              | 0.944493818                           | 2                        | 0            | 0.998207054  |                                       |              |             |                |
| RPL10A       | ENSG00000198755.10                    | 0.394207716              | 8            | 2            | 0.289031962                           |              |             |                |
|              | Brain_Hippocampus                     | 0.93572883               |              |              | Brain_Nucleus_accumbens_basal_ganglia |              |             |                |
|              | 7.342509595                           | 0.000148519              | 0.250447635  | 0.080639276  | 1.060247621                           |              |             |                |
|              | 0.637827507                           | 0.383058745              | 2            | 0            | 0.998207054                           |              |             |                |
| SLCO5A1      | ENSG00000137571.10                    | 0.394212598              | 2            | 2            | 0.24338467                            |              |             | Brain_Cortex   |
|              | 0.861701952                           | Brain_Frontal_Cortex_BA9 | 1.405269631  | 0.594730369  |                                       |              |             |                |
|              | 0.594730369                           | -1.166568502             | 0.17420806   | -0.496180221 | 0.948072199                           |              |             | 2              |
|              | 0                                     | 0.998207054              |              |              |                                       |              |             |                |
| ZNF883       | ENSG00000228623.5                     | 0.394214798              | 4            | 4            | 0.070686985                           |              |             |                |
|              | Brain_Nucleus_accumbens_basal_ganglia | 0.875957164              |              |              |                                       |              |             |                |
|              | Brain_Spinal_cord_cervical_c-1        | 2.225702012              | 0.432589322  | 0.432589322  |                                       |              |             |                |
|              | -1.807483112                          | -0.156096237             | -0.688467067 | 0.762969448  | 4                                     | 0            |             |                |
|              | 0.998207054                           |                          |              |              |                                       |              |             |                |
| RASD2        | ENSG00000100302.6                     | 0.394251382              | 4            | 4            | 0.075908509                           |              |             |                |
|              | Brain_Frontal_Cortex_BA9              | 0.941093559              |              |              | Brain_Amygdala                        | 1.404246119  |             |                |
|              | 0.66531213                            | 0.66531213               | 0.073895472  | 1.774935673  | 0.86626949                            | 0.697689724  |             |                |
|              | 4                                     | 0                        | 0.998207054  |              |                                       |              |             |                |
| PKM          | ENSG00000067225.17                    | 0.394375851              | 1            | 1            | 0.394375851                           |              |             |                |
|              | Brain_Spinal_cord_cervical_c-1        | 0.394375851              |              |              | Brain_Spinal_cord_cervical_c-1        |              |             |                |
|              | 1                                     | 1                        | 1            | 0.851708591  | 0.851708591                           | 0.851708591  | NA          | 1              |
|              | 0.998207054                           |                          |              |              |                                       |              |             | 0              |

|           |                                       |                    |                                |             |                                |                    |             |
|-----------|---------------------------------------|--------------------|--------------------------------|-------------|--------------------------------|--------------------|-------------|
| ADAM11    | ENSG00000073670.13                    | 0.394394976        | 3                              | 3           | 0.16654338                     |                    |             |
|           | Brain_Hypothalamus                    | 0.670986922        |                                |             | Brain_Cerebellar_Hemisphere    | 1.588342898        |             |
|           | 0.392973447                           | 0.392973447        | 0.424793904                    |             | 1.383396315                    | 0.970854082        |             |
|           | 0.493051647                           | 3                  | 0                              | 0.998207054 |                                |                    |             |
| OR2A7     | ENSG00000243896.3                     | 0.394399956        | 3                              | 3           | 0.239042864                    |                    |             |
|           | Brain_Substantia_nigra                | 0.955903043        |                                |             | Brain_Spinal_cord_cervical_c-1 |                    |             |
|           | 1.688869969                           | 0.327263812        | 0.327263812                    |             | -1.177382519                   | 0.871726273        |             |
|           | -0.120317251                          | 1.026100668        | 3                              | 0           | 0.998207054                    |                    |             |
| SAR1A     | ENSG00000079332.14                    | 0.39443778         | 12                             | 5           | 0.202363462                    | Brain_Cortex       |             |
|           | 0.934815028                           | Brain_Cerebellum   | 9.550172093                    |             | 0.00291124                     | 0.349363871        |             |
|           | -0.174277521                          | 1.27484683         | 0.883137204                    |             | 0.470650227                    | 5                  | 0           |
|           | 0.998207054                           |                    |                                |             |                                |                    |             |
| RSG1      | ENSG00000132881.11                    | 0.394512438        | 7                              | 4           | 0.15225027                     |                    |             |
|           | Brain_Nucleus_accumbens_basal_ganglia | 0.917418659        |                                |             | Brain_Frontal_Cortex_BA9       |                    |             |
|           | 4.890021835                           | 0.035007701        | 0.197288526                    |             | -1.431628145                   | 0.80103969         |             |
|           | -0.12015267                           | 0.710419732        | 4                              | 0           | 0.998207054                    |                    |             |
| SLC25A48  | ENSG00000145832.12                    | 0.394514647        | 2                              | 2           | 0.204783006                    |                    |             |
|           | Brain_Nucleus_accumbens_basal_ganglia | 0.251071408        |                                |             | Brain_Cerebellar_Hemisphere    |                    |             |
|           | 1.583449621                           | 0.416550379        | 0.416550379                    |             | -1.26804185                    | -1.14775091        |             |
|           | -1.20789638                           | 0.085058539        | 2                              | 0           | 0.998207054                    |                    |             |
| ADPRHL1   | ENSG00000153531.13                    | 0.394620064        | 4                              | 4           | 0.121970047                    |                    |             |
|           | Brain_Cerebellar_Hemisphere           | 0.661552406        |                                |             | Brain_Hypothalamus             | 1.833868595        |             |
|           | 0.412411736                           | 0.412411736        | -0.437770847                   |             | 1.546557242                    | 0.580801909        |             |
|           | 0.820131283                           | 4                  | 0                              | 0.998207054 |                                |                    |             |
| UMPS      | ENSG00000114491.13                    | 0.394663768        | 8                              | 7           | 0.026453822                    |                    |             |
|           | Brain_Caudate_basal_ganglia           | 0.939676822        |                                |             | Brain_Putamen_basal_ganglia    |                    |             |
|           | 3.555451494                           | 0.048921298        | 0.298603501                    |             | -2.219483888                   | 0.075676061        |             |
|           | -0.824709337                          | 0.708685473        | 7                              | 0           | 0.998207054                    |                    |             |
| SCAMP3    | ENSG00000116521.10                    | 0.394692299        | 1                              | 1           | 0.394692299                    |                    |             |
|           | Brain_Cerebellar_Hemisphere           | 0.394692299        |                                |             | Brain_Cerebellar_Hemisphere    | 1                  | 1           |
|           | 1                                     | 0.85113872         | 0.85113872                     | 0.85113872  | NA                             | 1                  | 0           |
|           |                                       |                    |                                |             | 0.998207054                    |                    |             |
| LINC02073 | ENSG00000267452.1                     | 0.394693755        | 4                              | 3           | 0.281468529                    |                    |             |
|           | Brain_Nucleus_accumbens_basal_ganglia | 0.892753379        |                                |             | Brain_Frontal_Cortex_BA9       |                    |             |
|           | 3.006419184                           | 0.033965455        | 0.112532231                    |             | -0.134821029                   | 1.077026272        |             |
|           | 0.491208646                           | 0.496925434        | 3                              | 0           | 0.998207054                    |                    |             |
| STK32B    | ENSG00000152953.12                    | 0.39478107         | 1                              | 1           | 0.39478107                     |                    |             |
|           | Brain_Anterior_cingulate_cortex_BA24  | 0.39478107         |                                |             |                                |                    |             |
|           | Brain_Anterior_cingulate_cortex_BA24  | 1                  | 1                              | 1           | -0.850978908                   |                    |             |
|           | -0.850978908                          | -0.850978908       | NA                             | 1           | 0                              | 0.998207054        |             |
| TMC7      | ENSG00000170537.12                    | 0.39485854         | 1                              | 1           | 0.39485854                     | Brain_Hypothalamus |             |
|           | 0.39485854                            | Brain_Hypothalamus | 1                              | 1           | 1                              | 0.850839458        | 0.850839458 |
|           | 0.850839458                           | NA                 | 1                              | 0           | 0.998207054                    |                    |             |
| ZNF124    | ENSG00000196418.12                    | 0.394878528        | 13                             | 7           | 0.190897635                    |                    |             |
|           | Brain_Amygdala                        | 0.96321967         | Brain_Spinal_cord_cervical_c-1 |             | 7.37372665                     |                    |             |
|           | 0.000591663                           | 0.445554284        | -1.307928285                   |             | 0.8196239                      | -0.39131795        |             |
|           | 0.634679083                           | 7                  | 0                              | 0.998207054 |                                |                    |             |
| LINC00958 | ENSG00000251381.7                     | 0.394928908        | 2                              | 2           | 0.327595382                    |                    |             |
|           | Brain_Cerebellum                      | 0.469018779        |                                |             | Brain_Cortex                   | 1.208074219        | 0.791925781 |
|           | 0.791925781                           | -0.978968829       | 0.724076486                    |             | -0.127446171                   | 1.204234891        |             |
|           | 2                                     | 0                  | 0.998207054                    |             |                                |                    |             |
| SEC31B    | ENSG00000075826.16                    | 0.395169251        | 10                             | 1           | 0.192655918                    |                    |             |
|           | Brain_Caudate_basal_ganglia           | 0.831166205        |                                |             | Brain_Putamen_basal_ganglia    |                    |             |
|           | 9.492029693                           | 0.000455183        | 9.492029693                    |             | 0.213206107                    | 1.302762322        |             |
|           | 0.824025412                           | 0.334564635        | 1                              | 0           | 0.998207054                    |                    |             |
| IGDCC3    | ENSG00000174498.13                    | 0.39519494         | 3                              | 3           | 0.240808581                    | Brain_Cerebellum   |             |
|           | 0.770975851                           | Brain_Amygdala     | 1.80517923                     |             | 0.264055936                    | 0.264055936        |             |
|           | -0.291098677                          | 1.172968144        | 0.472189684                    |             | 0.734032377                    | 3                  | 0           |
|           | 0.998207054                           |                    |                                |             |                                |                    |             |
| ADAM9     | ENSG00000168615.11                    | 0.395302385        | 2                              | 2           | 0.27364534                     |                    |             |
|           | Brain_Caudate_basal_ganglia           | 0.308928625        |                                |             | Brain_Cortex                   | 1.204154914        |             |
|           | 0.795845086                           | 0.795845086        | -1.094706271                   |             | -1.017472675                   | -1.056089473       |             |
|           | 0.054612399                           | 2                  | 0                              | 0.998207054 |                                |                    |             |

|           |                                |                             |              |              |              |                                       |             |
|-----------|--------------------------------|-----------------------------|--------------|--------------|--------------|---------------------------------------|-------------|
| SPTLC1    | ENSG00000090054.13             | 0.395380842                 | 6            | 4            | 0.107434991  |                                       |             |
|           | Brain_Hypothalamus             | 0.861018899                 |              |              |              | Brain_Nucleus_accumbens_basal_ganglia |             |
|           | 4.162713498                    | 0.011488164                 | 0.228549785  | -1.609829923 | -0.175077294 |                                       |             |
|           | -0.882512659                   | 0.515709371                 | 4            | 0            | 0.998207054  |                                       |             |
| ZNF154    | ENSG00000179909.15             | 0.395483948                 | 2            | 2            | 0.261722125  |                                       |             |
|           | Brain_Frontal_Cortex_BA9       | 0.41614473                  |              |              |              | Brain_Putamen_basal_ganglia           | 1.03730774  |
|           | 0.96269226                     | 0.96269226                  | 0.813127902  | 1.122330071  | 0.967728986  |                                       | 0.21863895  |
|           | 2                              | 0                           | 0.998207054  |              |              |                                       |             |
| PRB2      | ENSG00000121335.11             | 0.395518467                 | 9            | 8            | 0.056121689  | Brain_Amygdala                        |             |
|           | 0.976434343                    | Brain_Hippocampus           | 3.65345125   | 0.107655147  |              | 0.139948439                           |             |
|           | -1.296422907                   | 1.91008951                  | 0.436099052  | 1.012441681  | 8            | 0                                     |             |
|           | 0.998207054                    |                             |              |              |              |                                       |             |
| BNIP3     | ENSG00000176171.11             | 0.395573449                 | 1            | 1            | 0.395573449  | Brain_Cerebellum                      |             |
|           | 0.395573449                    | Brain_Cerebellum1           | 1            | 1            | -0.849553365 | -0.849553365                          |             |
|           | -0.849553365                   | NA                          | 1            | 0            | 0.998207054  |                                       |             |
| SNHG8     | ENSG00000269893.6              | 0.395633847                 | 9            | 5            | 0.070107496  |                                       |             |
|           | Brain_Spinal_cord_cervical_c-1 | 0.982450718                 |              |              |              | Brain_Cerebellar_Hemisphere           |             |
|           | 6.121620173                    | 0.022735521                 | 0.277897922  | -1.811215527 | 0.047035916  |                                       |             |
|           | -0.95051157                    | 0.68422624                  | 5            | 0            | 0.998207054  |                                       |             |
| HIST1H2AC | ENSG00000180573.9              | 0.395637993                 | 1            | 1            | 0.395637993  |                                       |             |
|           | Brain_Hypothalamus             | 0.395637993                 |              |              |              | Brain_Hypothalamus                    | 1 1 1       |
|           | 0.849437322                    | 0.849437322                 | 0.849437322  | NA           | 1            | 0                                     | 0.998207054 |
| GCX       | ENSG00000115486.11             | 0.395695198                 | 12           | 2            | 0.222066458  | Brain_Amygdala                        |             |
|           | 0.943373591                    | Brain_Putamen_basal_ganglia | 11.21413852  | 0.000337163  |              |                                       |             |
|           | 0.510714515                    | 0.071030362                 | 1.221051667  | 0.937175143  | 0.31231719   | 2                                     |             |
|           | 0                              | 0.998207054                 |              |              |              |                                       |             |
| CLK3      | ENSG00000179335.18             | 0.395715202                 | 1            | 1            | 0.395715202  |                                       |             |
|           | Brain_Cerebellar_Hemisphere    | 0.395715202                 |              |              |              | Brain_Cerebellar_Hemisphere           | 1 1         |
|           | 1                              | 0.849298523                 | 0.849298523  | 0.849298523  | NA           | 1                                     | 0           |
|           | 0.998207054                    |                             |              |              |              |                                       |             |
| VSTM4     | ENSG00000165633.12             | 0.395777129                 | 3            | 2            | 0.20527607   | Brain_Hypothalamus                    |             |
|           | 0.279446912                    | Brain_Cortex                | 2.423276293  | 0.080294857  | 0.496428849  |                                       |             |
|           | 1.081562642                    | 1.266662288                 | 1.183955301  | 0.094106929  | 2            | 0                                     |             |
|           | 0.998207054                    |                             |              |              |              |                                       |             |
| TRIM55    | ENSG00000147573.16             | 0.39586766                  | 5            | 5            | 0.049437126  |                                       |             |
|           | Brain_Cerebellar_Hemisphere    | 0.870806608                 |              |              |              | Brain_Frontal_Cortex_BA9              |             |
|           | 1.909794475                    | 0.201161266                 | 0.201161266  | -1.964802282 | 0.994406841  |                                       |             |
|           | -0.410031743                   | 1.269972734                 | 5            | 0            | 0.998207054  |                                       |             |
| THAP10    | ENSG00000129028.8              | 0.395941647                 | 2            | 2            | 0.30887164   | Brain_Cerebellum                      |             |
|           | 0.347324204                    | Brain_Caudate_basal_ganglia | 1.035591531  | 0.964408469  |              |                                       |             |
|           | 0.964408469                    | -1.017592528                | -0.939792115 | -0.978692321 | 0.0550132    | 2                                     |             |
|           | 0                              | 0.998207054                 |              |              |              |                                       |             |
| ERC2      | ENSG00000187672.12             | 0.395980956                 | 4            | 3            | 0.089605087  | Brain_Amygdala                        |             |
|           | 0.861287495                    | Brain_Caudate_basal_ganglia | 1.977157482  | 0.039510105  |              |                                       |             |
|           | 0.980942132                    | -0.364420957                | 1.697484564  | 0.304561867  | 0.958748729  |                                       |             |
|           | 3                              | 0                           | 0.998207054  |              |              |                                       |             |
| LSMEM2    | ENSG00000179564.3              | 0.396003649                 | 1            | 1            | 0.396003649  |                                       |             |
|           | Brain_Amygdala                 | 0.396003649                 |              |              |              | Brain_Amygdala                        | 1 1 1       |
|           | 0.848780129                    | 0.848780129                 | NA           | 1            | 0            | 0.998207054                           | 0.848780129 |
| FLJ12825  | ENSG00000248265.1              | 0.396113126                 | 10           | 10           | 0.119373832  |                                       |             |
|           | Brain_Frontal_Cortex_BA9       | 0.967461236                 |              |              |              | Brain_Cerebellar_Hemisphere           |             |
|           | 2.352835469                    | 0.186028181                 | 0.186028181  | -0.089529356 | 1.557407224  |                                       |             |
|           | 0.745562778                    | 0.644458022                 | 10           | 0            | 0.998207054  |                                       |             |
| SAP18     | ENSG00000150459.12             | 0.396127789                 | 2            | 2            | 0.340005252  |                                       |             |
|           | Brain_Putamen_basal_ganglia    | 0.342686826                 |              |              |              | Brain_Nucleus_accumbens_basal_ganglia |             |
|           | 1.022284645                    | 0.977715355                 | 0.977715355  | -0.954154876 | 0.94886982   |                                       |             |
|           | -0.002642528                   | 1.345641667                 | 2            | 0            | 0.998207054  |                                       |             |
| LINC01007 | ENSG00000233123.1              | 0.39625182                  | 1            | 1            | 0.39625182   |                                       |             |
|           | Brain_Frontal_Cortex_BA9       | 0.39625182                  |              |              |              | Brain_Frontal_Cortex_BA9              | 1 1 1       |
|           | -0.848334301                   | -0.848334301                | -0.848334301 | NA           | 1            | 0                                     | 0.998207054 |
| CACNG8    | ENSG00000142408.4              | 0.396295419                 | 1            | 1            | 0.396295419  |                                       |             |
|           | Brain_Cortex                   | 0.396295419                 |              |              |              | Brain_Cortex                          | 1 1 1       |
|           |                                |                             |              |              |              |                                       | 0.848255994 |



|               |                                      |                        |              |              |              |             |                                       |                   |             |
|---------------|--------------------------------------|------------------------|--------------|--------------|--------------|-------------|---------------------------------------|-------------------|-------------|
|               | 0.848255994                          | 0.848255994            | NA           | 1            | 0            | 0.998207054 |                                       |                   |             |
| TBC1D5        | ENSG00000131374.14                   | 0.396326654            |              |              | 1            | 1           | 0.396326654                           |                   |             |
|               | Brain_Frontal_Cortex_BA9             | 0.396326654            |              |              |              |             | Brain_Frontal_Cortex_BA9              | 1                 | 1           |
|               | 1                                    | -0.848199899           | -0.848199899 | -0.848199899 | NA           | 1           | 0                                     |                   |             |
|               | 0.998207054                          |                        |              |              |              |             |                                       |                   |             |
| SLC2A5        | ENSG00000142583.17                   | 0.396339784            |              |              | 3            | 3           | 0.290639078                           |                   |             |
|               | Brain_Cerebellum                     | 0.421790341            |              |              |              |             | Brain_Caudate_basal_ganglia           | 1.098707124       |             |
|               | 0.86563301                           | 0.86563301             | -0.803319066 |              | 1.056720693  |             | 0.384772075                           |                   |             |
|               | 1.031862057                          | 3                      | 0            |              | 0.998207054  |             |                                       |                   |             |
| SIDT1         | ENSG00000072858.10                   | 0.39636487             | 7            | 7            |              |             | 0.108585213                           |                   |             |
|               | Brain_Anterior_cingulate_cortex_BA24 | 0.847018552            |              |              |              |             | Brain_Cerebellar_Hemisphere           |                   |             |
|               | 2.50712683                           | 0.249783652            | 0.249783652  |              |              |             | -1.604584778                          | 0.537589115       |             |
|               | -0.428557424                         | 0.768368785            | 7            | 0            |              |             | 0.998207054                           |                   |             |
| TRAF3IP1      | ENSG00000204104.11                   | 0.396400641            |              |              | 3            | 3           | 0.376375036                           |                   |             |
|               | Brain_Frontal_Cortex_BA9             | 0.585241439            |              |              |              |             | Brain_Nucleus_accumbens_basal_ganglia |                   |             |
|               | 1.773255321                          | 0.456239323            | 0.456239323  |              |              |             | -0.545744703                          | 0.884595127       |             |
|               | 0.346511952                          | 0.7781691              | 3            | 0            |              |             | 0.998207054                           |                   |             |
| CTD-3051D23.3 | ENSG00000259067.1                    | 0.396439632            |              |              | 1            | 1           | 0.396439632                           |                   |             |
|               | Brain_Cerebellum                     | 0.396439632            |              |              |              |             | Brain_Cerebellum                      | 1                 | 1           |
|               | 0.847997017                          | 0.847997017            | NA           | 1            | 0            |             | 0.998207054                           |                   | 0.847997017 |
| SH3D19        | ENSG00000109686.17                   | 0.396532645            |              |              | 3            | 2           | 0.245890934                           |                   |             |
|               | Brain_Caudate_basal_ganglia          | 0.931745942            |              |              |              |             | Brain_Cerebellum                      | 2.209230544       |             |
|               | 0.012748978                          | 0.778020477            | -1.160387843 |              |              |             | -0.085648374                          | -0.528890372      |             |
|               | 0.561557053                          | 2                      | 0            |              | 0.998207054  |             |                                       |                   |             |
| RP11-62901.2  | ENSG00000261220.2                    | 0.396619054            |              |              | 1            | 1           | 0.396619054                           |                   |             |
|               | Brain_Putamen_basal_ganglia          | 0.396619054            |              |              |              |             | Brain_Putamen_basal_ganglia           | 1                 | 1           |
|               | 1                                    | 0.84767489             | 0.84767489   | 0.84767489   | NA           | 1           | 0                                     | 0.998207054       |             |
| ROM1          | ENSG00000149489.8                    | 0.396767235            |              |              | 1            | 1           | 0.396767235                           |                   |             |
|               | Brain_Spinal_cord_cervical_c-1       | 0.396767235            |              |              |              |             | Brain_Spinal_cord_cervical_c-1        |                   |             |
|               | 1                                    | 1                      | 1            | -0.847408919 | -0.847408919 |             | -0.847408919                          | NA                | 1           |
|               | 0.998207054                          |                        |              |              |              |             |                                       |                   | 0           |
| QSER1         | ENSG00000060749.14                   | 0.396806152            |              |              | 6            | 5           | 0.13489369                            | Brain_Hippocampus |             |
|               | 0.992399729                          |                        |              |              |              |             | Brain_Caudate_basal_ganglia           | 4.16161894        | 0.130686924 |
|               | 0.194881875                          | -0.323613914           | 1.495079522  |              |              |             | 0.402745                              | 0.739924918       | 5           |
|               | 0                                    | 0.998207054            |              |              |              |             |                                       |                   |             |
| DRD2          | ENSG00000149295.13                   | 0.396864822            |              |              | 3            | 3           | 0.237621942                           |                   |             |
|               | Brain_Frontal_Cortex_BA9             | 0.969164495            |              |              |              |             | Brain_Cerebellar_Hemisphere           |                   |             |
|               | 1.553432806                          | 0.542240423            | 0.542240423  |              |              |             | -1.180951622                          | 0.702087652       |             |
|               | -0.172506723                         | 0.948628589            | 3            | 0            |              |             | 0.998207054                           |                   |             |
| HAGHL         | ENSG00000103253.17                   | 0.396871199            |              |              | 2            | 2           | 0.174164543                           |                   |             |
|               | Brain_Cerebellar_Hemisphere          | 0.897549               |              |              |              |             | Brain_Cerebellum                      | 1.065747615       |             |
|               | 0.934252385                          | 0.934252385            | -0.128758177 |              |              |             | 1.358943343                           | 0.615092583       |             |
|               | 1.051963833                          | 2                      | 0            |              | 0.998207054  |             |                                       |                   |             |
| SPR           | ENSG00000116096.5                    | 0.397072037            |              |              | 1            | 1           | 0.397072037                           | Brain_Cortex      |             |
|               | 0.397072037                          | Brain_Cortex           | 1            | 1            | 1            |             | -0.846862015                          | -0.846862015      |             |
|               | -0.846862015                         | NA                     | 1            | 0            |              |             | 0.998207054                           |                   |             |
| VAMP2         | ENSG00000220205.8                    | 0.397193409            |              |              | 9            | 2           | 0.148478411                           | Brain_Cerebellum  |             |
|               | 0.397631702                          | Brain_Substantia_nigra |              |              |              |             | 8.399059196                           | 0.000130936       |             |
|               | 0.306980976                          | 0.845858471            | 1.444926931  |              |              |             | 1.186686322                           | 0.164397368       |             |
|               | 2                                    | 0                      | 0.998207054  |              |              |             |                                       |                   |             |
| KCNA2         | ENSG00000177301.14                   | 0.397345525            |              |              | 2            | 2           | 0.217633893                           | Brain_Cerebellum  |             |
|               | 0.501699575                          | Brain_Hippocampus      |              |              |              |             | 1.083425104                           | 0.916574896       |             |
|               | 0.916574896                          | -1.232844212           | -0.671817989 |              |              |             | -0.9523311                            | 0.396705447       | 2           |
|               | 0                                    | 0.998207054            |              |              |              |             |                                       |                   |             |
| EYA3          | ENSG00000158161.15                   | 0.397393137            |              |              | 12           | 3           | 0.165092593                           |                   |             |
|               | Brain_Hypothalamus                   | 0.872880197            |              |              |              |             | Brain_Spinal_cord_cervical_c-1        |                   |             |
|               | 9.872518505                          | 0.002038667            | 0.513611061  |              |              |             | -1.388145997                          | 0.380832153       |             |
|               | -0.393760503                         | 0.434486472            | 3            | 0            |              |             | 0.998207054                           |                   |             |
| PLXNB1        | ENSG00000164050.12                   | 0.39743938             |              |              | 1            | 1           | 0.39743938                            |                   |             |
|               | Brain_Spinal_cord_cervical_c-1       | 0.39743938             |              |              |              |             | Brain_Spinal_cord_cervical_c-1        | 1                 |             |
|               | 1                                    | 1                      | -0.846203231 | -0.846203231 |              |             | -0.846203231                          | NA                | 1           |
|               | 0.998207054                          |                        |              |              |              |             |                                       |                   | 0           |

|               |                                       |                                |              |              |                                |                |   |   |
|---------------|---------------------------------------|--------------------------------|--------------|--------------|--------------------------------|----------------|---|---|
| CTDSPL        | ENSG00000144677.14                    | 0.397475917                    | 1            | 1            | 0.397475917                    |                |   |   |
|               | Brain_Cerebellar_Hemisphere           | 0.397475917                    |              |              | Brain_Cerebellar_Hemisphere    | 1              | 1 |   |
|               | 1                                     | 0.846137726                    | 0.846137726  | 0.846137726  | NA                             | 1              | 0 |   |
|               | 0.998207054                           |                                |              |              |                                |                |   |   |
| RPL28         | ENSG00000108107.14                    | 0.397493659                    | 10           | 10           | 0.032576919                    |                |   |   |
|               | Brain_Hypothalamus                    | 0.954651359                    |              |              | Brain_Putamen_basal_ganglia    | 2.423136114    |   |   |
|               | 0.458292245                           | 0.458292245                    | -2.137259154 | 0.48676656   | -0.96094812                    |                |   |   |
|               | 0.813415996                           | 10                             | 0            | 0.998207054  |                                |                |   |   |
| TCF12         | ENSG00000140262.17                    | 0.39759418                     | 1            | 1            | 0.39759418                     |                |   |   |
|               | Brain_Spinal_cord_cervical_c-1        | 0.39759418                     |              |              | Brain_Spinal_cord_cervical_c-1 | 1              | 1 |   |
|               | 1                                     | -0.845925727                   | -0.845925727 | -0.845925727 | NA                             | 1              | 0 |   |
|               | 0.998207054                           |                                |              |              |                                |                |   |   |
| ADAMTSL4      | ENSG00000143382.14                    | 0.397677506                    | 3            | 3            | 0.135947222                    |                |   |   |
|               | Brain_Cerebellum                      | 0.867007624                    |              |              | Brain_Cerebellar_Hemisphere    | 1.621819492    |   |   |
|               | 0.420501264                           | 0.420501264                    | -0.176856391 | 1.491054366  | 0.493886201                    |                |   |   |
|               | 0.88056619                            | 3                              | 0            | 0.998207054  |                                |                |   |   |
| PRRT2         | ENSG00000167371.17                    | 0.39769691                     | 3            | 3            | 0.175292476                    | Brain_Amygdala |   |   |
|               | 0.435230201                           | Brain_Cerebellar_Hemisphere    | 1.894950219  | 0.106088274  |                                |                |   |   |
|               | 0.106088274                           | -1.032386846                   | 1.355392694  | -0.152422384 | 1.31187655                     | 3              |   |   |
|               | 0                                     | 0.998207054                    |              |              |                                |                |   |   |
| CD40          | ENSG00000101017.13                    | 0.397798133                    | 5            | 5            | 0.064714394                    |                |   |   |
|               | Brain_Frontal_Cortex_BA9              | 0.967652375                    |              |              | Brain_Amygdala                 | 3.224189809    |   |   |
|               | 0.285552352                           | 0.285552352                    | -1.847225991 | -0.040552849 | -1.054156652                   |                |   |   |
|               | 0.712482309                           | 5                              | 0            | 0.998207054  |                                |                |   |   |
| SIAE          | ENSG00000110013.12                    | 0.39781906                     | 2            | 2            | 0.212470733                    |                |   |   |
|               | Brain_Caudate_basal_ganglia           | 0.494563594                    |              |              | Brain_Cerebellum               | 1.119784433    |   |   |
|               | 0.880215567                           | 0.880215567                    | 0.683068445  | 1.246800292  | 0.964934369                    |                |   |   |
|               | 0.398618612                           | 2                              | 0            | 0.998207054  |                                |                |   |   |
| LINC01497     | ENSG00000237560.5                     | 0.398039832                    | 6            | 5            | 0.035767539                    |                |   |   |
|               | Brain_Amygdala                        | 0.780790099                    |              |              | Brain_Substantia_nigra         | 2.834891495    |   |   |
|               | 0.090292197                           | 0.155727633                    | -0.278289547 | 2.099560288  | 1.066436138                    |                |   |   |
|               | 0.84013251                            | 5                              | 0            | 0.998207054  |                                |                |   |   |
| CACNG7        | ENSG00000105605.7                     | 0.398108716                    | 1            | 1            | 0.398108716                    |                |   |   |
|               | Brain_Caudate_basal_ganglia           | 0.398108716                    |              |              | Brain_Caudate_basal_ganglia    | 1              | 1 |   |
|               | 1                                     | 0.845003803                    | 0.845003803  | 0.845003803  | NA                             | 1              | 0 |   |
|               | 0.998207054                           |                                |              |              |                                |                |   |   |
| RP11-398E10.1 | ENSG00000258998.1                     | 0.398132662                    | 1            | 1            | 0.398132662                    |                |   |   |
|               | Brain_Substantia_nigra                | 0.398132662                    |              |              | Brain_Substantia_nigra         | 1              | 1 |   |
|               | 1                                     | -0.844960914                   | -0.844960914 | -0.844960914 | NA                             | 1              | 0 |   |
|               | 0.998207054                           |                                |              |              |                                |                |   |   |
| RAD18         | ENSG00000070950.9                     | 0.398153488                    | 5            | 5            | 0.173340267                    |                |   |   |
|               | Brain_Nucleus_accumbens_basal_ganglia | 0.870846011                    |              |              | Brain_Hippocampus              |                |   |   |
|               | 2.356407523                           | 0.333388857                    | 0.333388857  | -1.361548977 | 0.511517195                    |                |   |   |
|               | -0.346186506                          | 0.881824595                    | 5            | 0            | 0.998207054                    |                |   |   |
| LINC01736     | ENSG00000228058.1                     | 0.398156062                    | 2            | 2            | 0.175799464                    |                |   |   |
|               | Brain_Substantia_nigra                | 0.725796168                    |              |              | Brain_Amygdala                 | 1.190107926    |   |   |
|               | 0.809892074                           | 0.809892074                    | -1.353802287 | 0.350723001  | -0.501539643                   |                |   |   |
|               | 1.20528139                            | 2                              | 0            | 0.998207054  |                                |                |   |   |
| CD164         | ENSG00000135535.15                    | 0.39824576                     | 4            | 4            | 0.246016393                    | Brain_Cortex   |   |   |
|               | 0.795131553                           | Brain_Spinal_cord_cervical_c-1 | 2.106897665  | 0.1695038    |                                |                |   |   |
|               | 0.1695038                             | -0.789986286                   | 1.160079616  | -0.144795425 | 0.899814522                    | 4              |   |   |
|               | 0                                     | 0.998207054                    |              |              |                                |                |   |   |
| PODNL1        | ENSG00000132000.11                    | 0.398266813                    | 1            | 1            | 0.398266813                    |                |   |   |
|               | Brain_Cerebellum                      | 0.398266813                    |              |              | Brain_Cerebellum               | 1              | 1 | 1 |
|               | 0.844720676                           | 0.844720676                    | NA           | 1            | 0                              | 0.998207054    |   |   |
| SBDS          | ENSG00000126524.9                     | 0.398297853                    | 1            | 1            | 0.398297853                    |                |   |   |
|               | Brain_Caudate_basal_ganglia           | 0.398297853                    |              |              | Brain_Caudate_basal_ganglia    | 1              | 1 |   |
|               | 1                                     | -0.844665095                   | -0.844665095 | -0.844665095 | NA                             | 1              | 0 |   |
|               | 0.998207054                           |                                |              |              |                                |                |   |   |
| MKRN3         | ENSG00000179455.7                     | 0.398314794                    | 1            | 1            | 0.398314794                    |                |   |   |
|               | Brain_Frontal_Cortex_BA9              | 0.398314794                    |              |              | Brain_Frontal_Cortex_BA9       | 1              | 1 |   |
|               | 1                                     | -0.844634762                   | -0.844634762 | -0.844634762 | NA                             | 1              | 0 |   |

|              |                                       |                                      |              |              |                                |              |              |                  |  |
|--------------|---------------------------------------|--------------------------------------|--------------|--------------|--------------------------------|--------------|--------------|------------------|--|
| 0.998207054  |                                       |                                      |              |              |                                |              |              |                  |  |
| TNNT2        | ENSG00000118194.18                    | 0.398346156                          | 1            | 1            | 0.398346156                    |              |              |                  |  |
|              | Brain_Spinal_cord_cervical_c-1        | 0.398346156                          |              |              | Brain_Spinal_cord_cervical_c-1 |              |              |                  |  |
|              | 1 1 1                                 | 0.84457861                           | 0.84457861   | 0.84457861   | NA                             | 1            | 0            | 0.998207054      |  |
| AC093609.1   | ENSG00000230587.1                     | 0.398482573                          | 1            | 1            | 0.398482573                    |              |              |                  |  |
|              | Brain_Putamen_basal_ganglia           | 0.398482573                          |              |              | Brain_Putamen_basal_ganglia    | 1            | 1            |                  |  |
|              | 1                                     | -0.844334392                         | -0.844334392 | -0.844334392 | NA                             | 1            | 0            |                  |  |
| 0.998207054  |                                       |                                      |              |              |                                |              |              |                  |  |
| FCGBP        | ENSG00000275395.4                     | 0.398538003                          | 11           | 5            | 0.083672845                    |              |              | Brain_Cerebellum |  |
|              | 0.790560183                           | Brain_Anterior_cingulate_cortex_BA24 | 7.713219532  |              |                                |              |              |                  |  |
|              | 0.000756008                           | 0.296910052                          | -0.75203462  | 1.729761784  | 0.662334279                    |              |              |                  |  |
|              | 0.747382483                           | 5                                    | 0            | 0.998207054  |                                |              |              |                  |  |
| RSRC1        | ENSG00000174891.12                    | 0.398640644                          | 11           | 5            | 0.242957629                    |              |              |                  |  |
|              | Brain_Substantia_nigra                | 0.974276419                          |              |              | Brain_Hypothalamus             | 8.034814468  |              |                  |  |
|              | 0.046758631                           | 0.279692312                          | -1.01658977  | 1.167626072  | 0.223588459                    |              |              |                  |  |
|              | 0.591980094                           | 5                                    | 0            | 0.998207054  |                                |              |              |                  |  |
| ZNF260       | ENSG00000254004.6                     | 0.398678065                          | 8            | 5            | 0.036309009                    |              |              |                  |  |
|              | Brain_Anterior_cingulate_cortex_BA24  | 0.953462495                          |              |              | Brain_Substantia_nigra         |              |              |                  |  |
|              | 5.774215662                           | 0.012185694                          | 0.197658573  | -2.093449936 | 0.058359222                    |              |              |                  |  |
|              | -0.971868402                          | 0.654875219                          | 5            | 0            | 0.998207054                    |              |              |                  |  |
| AC024704.2   | ENSG00000244063.1                     | 0.398739207                          | 2            | 2            | 0.213338333                    |              |              |                  |  |
|              | Brain_Hypothalamus                    | 0.601744104                          |              |              | Brain_Cortex                   | 1.01351845   | 0.98648155   |                  |  |
|              | 0.98648155                            | -1.244438194                         | 0.521894046  | -0.361272074 | 1.248985505                    |              | 2            |                  |  |
|              | 0                                     | 0.998207054                          |              |              |                                |              |              |                  |  |
| ZP3          | ENSG00000188372.14                    | 0.398787577                          | 13           | 3            | 0.069657984                    |              |              |                  |  |
|              | Brain_Frontal_Cortex_BA9              | 0.502644835                          |              |              | Brain_Substantia_nigra         |              |              |                  |  |
|              | 11.21350641                           | 0.006461946                          | 0.393441494  | 0.670334099  | 1.814128247                    |              |              |                  |  |
|              | 1.408951326                           | 0.313895596                          | 3            | 0            | 0.998207054                    |              |              |                  |  |
| PRDM8        | ENSG00000152784.15                    | 0.398805352                          | 3            | 3            | 0.277671461                    |              |              |                  |  |
|              | Brain_Frontal_Cortex_BA9              | 0.660057264                          |              |              | Brain_Cerebellum               | 2.448761222  |              |                  |  |
|              | 0.12084552                            | 0.12084552                           | -1.085565069 | -0.439834105 | -0.845466041                   |              |              |                  |  |
|              | 0.353260495                           | 3                                    | 0            | 0.998207054  |                                |              |              |                  |  |
| SART3        | ENSG00000075856.11                    | 0.398893786                          | 1            | 1            | 0.398893786                    |              |              |                  |  |
|              | Brain_Caudate_basal_ganglia           | 0.398893786                          |              |              | Brain_Caudate_basal_ganglia    | 1            | 1            |                  |  |
|              | 1                                     | -0.84359853                          | -0.84359853  | -0.84359853  | NA                             | 1            | 0            |                  |  |
| 0.998207054  |                                       |                                      |              |              |                                |              |              |                  |  |
| SPNS1        | ENSG00000169682.17                    | 0.398903887                          | 2            | 2            | 0.175292476                    |              |              |                  |  |
|              | Brain_Nucleus_accumbens_basal_ganglia | 0.908205814                          |              |              | Brain_Putamen_basal_ganglia    |              |              |                  |  |
|              | 1.06201456                            | 0.93798544                           | 0.93798544   | -0.115301924 | 1.355392694                    | 0.620045385  |              |                  |  |
|              | 1.039938137                           | 2                                    | 0            | 0.998207054  |                                |              |              |                  |  |
| RHEBL1       | ENSG00000167550.10                    | 0.399285969                          | 6            | 3            | 0.09411248                     |              |              |                  |  |
|              | Brain_Frontal_Cortex_BA9              | 0.170037457                          |              |              | Brain_Putamen_basal_ganglia    |              |              |                  |  |
|              | 5.124820799                           | 7.09E-07                             | 0.316644232  | -1.6740922   | -1.372083464                   |              |              |                  |  |
|              | -1.567701831                          | 0.138623603                          | 3            | 0            | 0.998207054                    |              |              |                  |  |
| THSD1        | ENSG00000136114.15                    | 0.399340559                          | 1            | 1            | 0.399340559                    |              |              | Brain_Amygdala   |  |
|              | 0.399340559                           | Brain_Amygdala                       | 1            | 1            | 1                              | -0.842799552 | -0.842799552 |                  |  |
|              | -0.842799552                          | NA                                   | 1            | 0            | 0.998207054                    |              |              |                  |  |
| GHET1        | ENSG00000281189.1                     | 0.399349697                          | 1            | 1            | 0.399349697                    |              |              | Brain_Cerebellum |  |
|              | 0.399349697                           | Brain_Cerebellum                     | 1            | 1            | 1                              | 0.842783215  | 0.842783215  |                  |  |
|              | 0.842783215                           | NA                                   | 1            | 0            | 0.998207054                    |              |              |                  |  |
| RP11-84A19.2 | ENSG00000203620.2                     | 0.399378645                          | 1            | 1            | 0.399378645                    |              |              |                  |  |
|              | Brain_Spinal_cord_cervical_c-1        | 0.399378645                          |              |              | Brain_Spinal_cord_cervical_c-1 |              |              |                  |  |
|              | 1                                     | 1                                    | 1            | 0.842731466  | 0.842731466                    | NA           | 1            | 0                |  |
| 0.998207054  |                                       |                                      |              |              |                                |              |              |                  |  |
| ZNF667       | ENSG00000198046.11                    | 0.399477608                          | 8            | 7            | 0.026200928                    |              |              |                  |  |
|              | Brain_Cerebellum                      | 0.606836654                          |              |              | Brain_Putamen_basal_ganglia    | 3.57417636   |              |                  |  |
|              | 0.059714025                           | 0.210287379                          | -2.223220608 | 0.51459415   | -1.35592646                    |              |              |                  |  |
|              | 0.912252319                           | 7                                    | 0            | 0.998207054  |                                |              |              |                  |  |
| ZNF253       | ENSG00000256771.3                     | 0.399491982                          | 5            | 3            | 0.209435603                    |              |              |                  |  |
|              | Brain_Frontal_Cortex_BA9              | 0.980606322                          |              |              | Brain_Cerebellar_Hemisphere    |              |              |                  |  |
|              | 4.207522879                           | 0.038099521                          | 0.28930125   | 0.024308764  | 1.255118892                    |              |              |                  |  |
|              | 0.494878272                           | 0.478721981                          | 3            | 0            | 0.998207054                    |              |              |                  |  |

|           |                                       |                             |              |                                       |              |                  |             |              |   |
|-----------|---------------------------------------|-----------------------------|--------------|---------------------------------------|--------------|------------------|-------------|--------------|---|
| NFE2L1    | ENSG00000082641.15                    | 0.399558535                 | 1            | 1                                     | 0.399558535  |                  |             |              |   |
|           | Brain_Cortex                          | 0.399558535                 |              | Brain_Cortex                          | 1            | 1                | 1           | -0.842409932 |   |
|           | -0.842409932                          | -0.842409932                | NA           | 1                                     | 0            | 0.998207054      |             |              |   |
| TRPC1     | ENSG00000144935.14                    | 0.399684697                 | 1            | 1                                     | 0.399684697  |                  |             |              |   |
|           | Brain_Frontal_Cortex_BA9              | 0.399684697                 |              | Brain_Frontal_Cortex_BA9              | 1            | 1                |             |              |   |
|           | 1                                     | -0.842184485                | -0.842184485 | -0.842184485                          | NA           | 1                | 0           |              |   |
|           | 0.998207054                           |                             |              |                                       |              |                  |             |              |   |
| VPS33B    | ENSG00000184056.14                    | 0.39969858                  | 4            | 4                                     | 0.40549687   | Brain_Cerebellum |             |              |   |
|           | 0.850936134                           | Brain_Cerebellar_Hemisphere | 2.258432166  |                                       | 0.210263425  |                  |             |              |   |
|           | 0.210263425                           | -0.831844238                | 0.80031642   | 0.104662787                           | 0.759636983  |                  |             |              | 4 |
|           | 0                                     | 0.998207054                 |              |                                       |              |                  |             |              |   |
| DGKD      | ENSG00000077044.10                    | 0.399709705                 | 1            | 1                                     | 0.399709705  |                  |             |              |   |
|           | Brain_Cerebellar_Hemisphere           | 0.399709705                 |              | Brain_Cerebellar_Hemisphere           | 1            | 1                |             |              |   |
|           | 1                                     | 0.842139801                 | 0.842139801  | 0.842139801                           | NA           | 1                | 0           |              |   |
|           | 0.998207054                           |                             |              |                                       |              |                  |             |              |   |
| FKBPL     | ENSG00000204315.3                     | 0.399896048                 | 1            | 1                                     | 0.399896048  |                  |             |              |   |
|           | Brain_Spinal_cord_cervical_c-1        | 0.399896048                 |              | Brain_Spinal_cord_cervical_c-1        |              |                  |             |              |   |
|           | 1                                     | 1                           | 1            | -0.841806901                          | -0.841806901 | -0.841806901     | NA          | 1            | 0 |
|           | 0.998207054                           |                             |              |                                       |              |                  |             |              |   |
| GPX1      | ENSG00000233276.3                     | 0.399985814                 | 11           | 3                                     | 0.099922735  |                  |             |              |   |
|           | Brain_Caudate_basal_ganglia           | 0.905437144                 |              | Brain_Hippocampus                     |              | 8.579233833      |             |              |   |
|           | 0.000374802                           | 0.774414887                 | 0.118795791  | 1.645228322                           | 1.145286411  |                  |             |              |   |
|           | 0.478745275                           | 3                           | 0            | 0.998207054                           |              |                  |             |              |   |
| GIPC1     | ENSG00000123159.15                    | 0.400029051                 | 1            | 1                                     | 0.400029051  |                  |             |              |   |
|           | Brain_Caudate_basal_ganglia           | 0.400029051                 |              | Brain_Caudate_basal_ganglia           | 1            | 1                |             |              |   |
|           | 1                                     | 0.841569352                 | 0.841569352  | 0.841569352                           | NA           | 1                | 0           |              |   |
|           | 0.998207054                           |                             |              |                                       |              |                  |             |              |   |
| C11orf54  | ENSG00000182919.14                    | 0.40020164                  | 12           | 1                                     | 0.113163455  | Brain_Amygdala   |             |              |   |
|           | 0.524012601                           | Brain_Putamen_basal_ganglia | 11.41843664  | 2.30E-09                              |              |                  |             |              |   |
|           | 11.41843664                           | -1.584133007                | -0.637172327 | -0.827507641                          | 0.247401854  |                  |             |              |   |
|           | 1                                     | 0                           | 0.998207054  |                                       |              |                  |             |              |   |
| RAB30-AS1 | ENSG00000246067.7                     | 0.400210563                 | 13           | 8                                     | 0.126226589  |                  |             |              |   |
|           | Brain_Hippocampus                     | 0.979764834                 |              | Brain_Frontal_Cortex_BA9              |              | 7.800828319      |             |              |   |
|           | 0.085472275                           | 0.32205684                  | -0.516843609 | 1.529152716                           | 0.407371215  |                  |             |              |   |
|           | 0.670367199                           | 8                           | 0            | 0.998207054                           |              |                  |             |              |   |
| GCSAML    | ENSG00000169224.12                    | 0.40024832                  | 2            | 2                                     | 0.422605993  |                  |             |              |   |
|           | Brain_Frontal_Cortex_BA9              | 0.659322309                 |              | Brain_Hypothalamus                    |              | 1.568538601      |             |              |   |
|           | 0.431461399                           | 0.431461399                 | -0.801908321 | 0.440849012                           | -0.180529654 |                  |             |              |   |
|           | 0.878762137                           | 2                           | 0            | 0.998207054                           |              |                  |             |              |   |
| KLB       | ENSG00000134962.6                     | 0.400319143                 | 10           | 2                                     | 0.338053983  |                  |             |              |   |
|           | Brain_Putamen_basal_ganglia           | 0.668238284                 |              | Brain_Spinal_cord_cervical_c-1        |              |                  |             |              |   |
|           | 8.394897211                           | 0.002344606                 | 0.945501289  | -0.958017404                          | 0.865260258  |                  |             |              |   |
|           | 0.520398629                           | 0.536608753                 | 2            | 0                                     | 0.998207054  |                  |             |              |   |
| PDE8B     | ENSG00000113231.13                    | 0.400360472                 | 6            | 6                                     | 0.137963803  | Brain_Cerebellum |             |              |   |
|           | 0.89411233                            | Brain_Cerebellar_Hemisphere | 2.745320563  | 0.199976808                           |              |                  |             |              |   |
|           | 0.199976808                           | -0.733028288                | 1.483416438  | 0.52423386                            | 0.811196598  |                  |             |              | 6 |
|           | 0                                     | 0.998207054                 |              |                                       |              |                  |             |              |   |
| DDT       | ENSG00000099977.13                    | 0.400375539                 | 11           | 3                                     | 0.256247137  |                  |             |              |   |
|           | Brain_Hippocampus                     | 0.982292707                 |              | Brain_Nucleus_accumbens_basal_ganglia |              |                  |             |              |   |
|           | 8.601919902                           | 0.00161795                  | 0.62231396   | -1.135305982                          | 0.731345534  |                  |             |              |   |
|           | -0.640971621                          | 0.564801847                 | 3            | 0                                     | 0.998207054  |                  |             |              |   |
| DNAAF5    | ENSG00000164818.15                    | 0.400428667                 | 9            | 6                                     | 0.258453909  |                  |             |              |   |
|           | Brain_Substantia_nigra                | 0.680813992                 |              | Brain_Cerebellum                      |              | 5.602183872      |             |              |   |
|           | 0.02636191                            | 0.291313472                 | -1.130052961 | 0.887019316                           | 0.351664513  |                  |             |              |   |
|           | 0.710738892                           | 6                           | 0            | 0.998207054                           |              |                  |             |              |   |
| ZBTB48    | ENSG00000204859.12                    | 0.400480112                 | 1            | 1                                     | 0.400480112  |                  |             |              |   |
|           | Brain_Nucleus_accumbens_basal_ganglia | 0.400480112                 |              |                                       |              |                  |             |              |   |
|           | Brain_Nucleus_accumbens_basal_ganglia | 1                           | 1            | 1                                     | -0.840764084 |                  |             |              |   |
|           | -0.840764084                          | -0.840764084                | NA           | 1                                     | 0            | 0.998207054      |             |              |   |
| GMFG      | ENSG00000130755.12                    | 0.400528529                 | 1            | 1                                     | 0.400528529  | Brain_Cortex     |             |              |   |
|           | 0.400528529                           | Brain_Cortex                | 1            | 1                                     | 1            | 0.840677677      | 0.840677677 |              |   |
|           | 0.840677677                           | NA                          | 1            | 0                                     | 0.998207054  |                  |             |              |   |

|               |                                       |                  |              |              |                                       |                  |
|---------------|---------------------------------------|------------------|--------------|--------------|---------------------------------------|------------------|
| ZNF354B       | ENSG00000178338.10                    | 0.400697945      | 2            | 2            | 0.178342293                           |                  |
|               | Brain_Nucleus_accumbens_basal_ganglia | 0.879926697      |              |              | Brain_Putamen_basal_ganglia           |                  |
|               | 1.013368407                           | 0.986631593      | 0.986631593  | 0.151062141  | 1.345876671                           |                  |
|               | 0.748469406                           | 0.844861457      | 2            | 0            | 0.998207054                           |                  |
| CYP2E1        | ENSG00000130649.9                     | 0.40082811       | 3            | 3            | 0.094448526                           |                  |
|               | Brain_Frontal_Cortex_BA9              | 0.862296609      |              |              | Brain_Spinal_cord_cervical_c-1        |                  |
|               | 1.746333356                           | 0.268814698      | 0.268814698  | 0.173451422  | 1.672384501                           |                  |
|               | 1.106275874                           | 0.813978173      | 3            | 0            | 0.998207054                           |                  |
| ALMS1         | ENSG00000116127.17                    | 0.400875257      | 4            | 3            | 0.091761307                           |                  |
|               | Brain_Frontal_Cortex_BA9              | 0.967525705      |              |              | Brain_Nucleus_accumbens_basal_ganglia |                  |
|               | 2.003629072                           | 0.044204274      | 0.943769126  | -1.686179106 | 0.254787773                           |                  |
|               | -0.432648926                          | 0.8711251        | 3            | 0            | 0.998207054                           |                  |
| RAD51C        | ENSG00000108384.14                    | 0.400886109      | 11           | 2            | 0.429907312                           |                  |
|               | Brain_Caudate_basal_ganglia           | 0.997590253      |              |              | Brain_Cerebellum                      | 10.35054273      |
|               | 0.001873874                           | 0.372992508      | -0.789350272 | 0.213620565  | -0.039359127                          |                  |
|               | 0.291248192                           | 2                | 0            | 0.998207054  |                                       |                  |
| ZNF333        | ENSG00000160961.11                    | 0.400992342      | 5            | 5            | 0.077191407                           |                  |
|               | Brain_Amygdala                        | 0.802540221      |              |              | Brain_Cerebellum                      | 1.217755416      |
|               | 0.765132607                           | -1.19384861      | 1.767219908  | -0.157601741 | 1.130102279                           |                  |
|               | 5                                     | 0                | 0.998207054  |              |                                       |                  |
| GIPC3         | ENSG00000179855.5                     | 0.40101171       | 4            | 4            | 0.143379733                           |                  |
|               | Brain_Spinal_cord_cervical_c-1        | 0.77428694       |              |              | Brain_Anterior_cingulate_cortex_BA24  |                  |
|               | 1.093507858                           | 0.918220792      | 0.918220792  | -1.292694211 | 1.463320381                           |                  |
|               | 0.260971743                           | 1.149803923      | 4            | 0            | 0.998207054                           |                  |
| CCDC89        | ENSG00000179071.4                     | 0.401176766      | 2            | 2            | 0.240255975                           |                  |
|               | Brain_Cerebellum                      | 0.928377906      |              |              | Brain_Cerebellar_Hemisphere           | 1.551704087      |
|               | 0.448295913                           | 0.448295913      | 0.089885874  | 1.174347225  | 0.63211655                            |                  |
|               | 0.766829975                           | 2                | 0            | 0.998207054  |                                       |                  |
| HIC2          | ENSG00000169635.9                     | 0.401213159      | 1            | 1            | 0.401213159                           | Brain_Cerebellum |
|               | 0.401213159                           | Brain_Cerebellum | 1            | 1            | 0.839456555                           | 0.839456555      |
|               | 0.839456555                           | NA               | 1            | 0            | 0.998207054                           |                  |
| RP11-819C21.1 | ENSG00000261098.1                     | 0.401303574      | 9            | 5            | 0.23487323                            |                  |
|               | Brain_Cortex                          | 0.738841536      |              |              | Brain_Putamen_basal_ganglia           | 5.82607876       |
|               | 0.016510121                           | 0.385104633      | -1.187898932 | 0.546047533  | -0.496485279                          |                  |
|               | 0.587643121                           | 5                | 0            | 0.998207054  |                                       |                  |
| LINC00652     | ENSG00000179935.9                     | 0.40151444       | 2            | 2            | 0.249483952                           | Brain_Amygdala   |
|               | 0.504866774                           | Brain_Cortex     | 1.033886003  | 0.966113997  | 0.966113997                           |                  |
|               | -1.151603721                          | -0.666851843     | -0.909227782 | 0.34277134   | 2                                     | 0                |
|               | 0.998207054                           |                  |              |              |                                       |                  |
| NPC1          | ENSG00000141458.12                    | 0.401739721      | 11           | 6            | 0.030110651                           |                  |
|               | Brain_Frontal_Cortex_BA9              | 0.968883105      |              |              | Brain_Anterior_cingulate_cortex_BA24  |                  |
|               | 6.967664198                           | 0.008272759      | 0.277809273  | -2.168631767 | -0.039009136                          |                  |
|               | -1.034392815                          | 0.655033458      | 6            | 0            | 0.998207054                           |                  |
| ANKRD10       | ENSG00000088448.14                    | 0.401756452      | 5            | 4            | 0.111574127                           |                  |
|               | Brain_Cortex                          | 0.874064497      |              |              | Brain_Cerebellar_Hemisphere           | 2.7059863        |
|               | 0.017226558                           | 0.391561974      | -1.591157536 | 0.664014948  | -0.343027911                          |                  |
|               | 0.925014102                           | 4                | 0            | 0.998207054  |                                       |                  |
| RP11-445H22.3 | ENSG00000283440.1                     | 0.401765802      | 10           | 7            | 0.283269552                           |                  |
|               | Brain_Cerebellar_Hemisphere           | 0.931229718      |              |              | Brain_Nucleus_accumbens_basal_ganglia |                  |
|               | 5.84856789                            | 0.071418747      | 0.235025869  | -1.073003487 | 1.015544445                           |                  |
|               | 0.013068565                           | 0.624175398      | 7            | 0            | 0.998207054                           |                  |
| C11orf42      | ENSG00000180878.2                     | 0.401989601      | 1            | 1            | 0.401989601                           |                  |
|               | Brain_Amygdala                        | 0.401989601      |              |              | Brain_Amygdala                        | 1                |
|               | 0.838073186                           | 0.838073186      | NA           | 1            | 0                                     | 0.998207054      |
| SLC26A5       | ENSG00000170615.14                    | 0.402116867      | 3            | 3            | 0.091709567                           |                  |
|               | Brain_Spinal_cord_cervical_c-1        | 0.880361861      |              |              | Brain_Cerebellum                      | 1.182004732      |
|               | 0.828460543                           | 0.828460543      | -0.160415122 | 1.686447875  | 0.558847754                           |                  |
|               | 0.988827696                           | 3                | 0            | 0.998207054  |                                       |                  |
| STEAP3        | ENSG00000115107.19                    | 0.402320588      | 5            | 5            | 0.083943833                           |                  |
|               | Brain_Caudate_basal_ganglia           | 0.918042265      |              |              | Brain_Nucleus_accumbens_basal_ganglia |                  |
|               | 1.750822429                           | 0.300225499      | 0.300225499  | -0.102900092 | 1.728247656                           |                  |
|               | 0.883040373                           | 0.6775918        | 5            | 0            | 0.998207054                           |                  |

LINC00937 ENSG00000226091.7 0.402427544 13 4 0.070422501  
Brain\_Cortex 0.446234998 Brain\_Substantia\_nigra 9.535329755  
0.003671297 0.457902983 -1.238602616 1.809183494 0.999237236  
0.737564601 4 0 0.998207054

MMRN1 ENSG00000138722.9 0.402457042 12 5 0.062757738  
Brain\_Cerebellar\_Hemisphere 0.993714847 Brain\_Cerebellum 8.854143733  
1.50E-18 0.311908447 -0.063192218 1.860903977 0.637218064  
0.588425854 5 0 0.998207054

LINC00282 ENSG00000281106.2 0.402481708 6 5 0.051222659  
Brain\_Cortex 0.768516435 Brain\_Caudate\_basal\_ganglia 2.999903344  
0.076075179 0.144662304 -0.315234678 1.949609674 1.173087171  
0.952081104 5 0 0.998207054

JAK2 ENSG00000096968.13 0.402499498 1 1 0.402499498  
Brain\_Frontal\_Cortex\_BA9 0.402499498 Brain\_Frontal\_Cortex\_BA9 1 1  
1 0.837165587 0.837165587 0.837165587 NA 1 0  
0.998207054

ABCA6 ENSG00000154262.12 0.402513569 13 6 0.15381622  
Brain\_Cerebellar\_Hemisphere 0.866192854 Brain\_Amygdala 8.571818758  
0.00144043 0.327944202 -0.963041693 1.426180592 0.455024332  
0.66525495 6 0 0.998207054

LRRN4CL ENSG00000177363.4 0.402684065 1 1 0.402684065  
Brain\_Hypothalamus 0.402684065 Brain\_Hypothalamus 1 1 1  
-0.836837235 -0.836837235 -0.836837235 NA 1 0 0.998207054

RP11-281O15.8 ENSG00000272431.1 0.402900873 1 1 0.402900873  
Brain\_Putamen\_basal\_ganglia 0.402900873 Brain\_Putamen\_basal\_ganglia 1 1  
1 -0.836451637 -0.836451637 -0.836451637 NA 1 0  
0.998207054

TRMT10A ENSG00000145331.13 0.40296574 1 1 0.40296574 Brain\_Hypothalamus  
0.40296574 Brain\_Hypothalamus 1 1 1 -0.836336296 -0.836336296  
-0.836336296 NA 1 0 0.998207054

APOL4 ENSG00000100336.17 0.403117367 10 9 0.044395315  
Brain\_Nucleus\_accumbens\_basal\_ganglia 0.716269128 Brain\_Amygdala  
4.527162772 4.53E-17 0.196364516 -2.010339065 1.861820698  
-0.847190064 1.048275942 9 0 0.998207054

TMEM236 ENSG00000148483.8 0.403170599 2 2 0.19250598 Brain\_Cerebellum  
0.760487048 Brain\_Spinal\_cord\_cervical\_c-1 1.030063457 0.969936543  
0.969936543 0.30484127 1.303201495 0.804021382 0.705947285 2  
0 0.998207054

DCST1 ENSG00000163357.10 0.403208756 2 2 0.236262296 Brain\_Cerebellum  
0.240327525 Brain\_Cerebellar\_Hemisphere 1.531182198 0.468817802  
0.468817802 1.174168539 1.184380955 1.179274747 0.007221269  
2 0 0.998207054

STAP2 ENSG00000178078.11 0.403414428 13 9 0.165828726  
Brain\_Hypothalamus 0.936925337 Brain\_Cerebellum 6.376417441  
0.001803168 0.408551078 -0.995440437 1.385732087 0.096847456  
0.769416335 9 0 0.998207054

WFDC13 ENSG00000168634.4 0.403558459 1 1 0.403558459  
Brain\_Frontal\_Cortex\_BA9 0.403558459 Brain\_Frontal\_Cortex\_BA9 1 1  
1 -0.835282872 -0.835282872 -0.835282872 NA 1 0  
0.998207054

LCN1 ENSG00000160349.9 0.403591906 4 4 0.05537688  
Brain\_Frontal\_Cortex\_BA9 0.649038041 Brain\_Anterior\_cingulate\_cortex\_BA24  
1.777955483 0.402078089 0.402078089 -0.455098967 1.91590743  
0.749046057 0.980217112 4 0 0.998207054

C4orf47 ENSG00000205129.8 0.403667931 2 2 0.237638845  
Brain\_Cerebellum 0.274345623 Brain\_Cerebellar\_Hemisphere 1.430427342  
0.569572658 0.569572658 1.093109734 1.180909077 1.137009406  
0.06208351 2 0 0.998207054

PDYN ENSG00000101327.8 0.403738893 1 1 0.403738893  
Brain\_Anterior\_cingulate\_cortex\_BA24 0.403738893  
Brain\_Anterior\_cingulate\_cortex\_BA24 1 1 1 -0.834962376  
-0.834962376 -0.834962376 NA 1 0 0.998207054

|               |                                      |                             |                                       |              |                          |              |   |                  |
|---------------|--------------------------------------|-----------------------------|---------------------------------------|--------------|--------------------------|--------------|---|------------------|
| TNFRSF10D     | ENSG00000173530.5                    | 0.403753798                 | 1                                     | 1            | 0.403753798              |              |   |                  |
|               | Brain_Frontal_Cortex_BA9             | 0.403753798                 |                                       |              | Brain_Frontal_Cortex_BA9 | 1            | 1 |                  |
|               | 1                                    | 0.834935903                 | 0.834935903                           | 0.834935903  | NA                       | 1            | 0 |                  |
|               | 0.998207054                          |                             |                                       |              |                          |              |   |                  |
| UBE2QL1       | ENSG00000215218.3                    | 0.404181287                 | 1                                     | 1            | 0.404181287              |              |   |                  |
|               | Brain_Cerebellum                     | 0.404181287                 |                                       |              | Brain_Cerebellum         | 1            | 1 | 0.834176935      |
|               | 0.834176935                          | 0.834176935                 | NA                                    | 1            | 0                        | 0.998207054  |   |                  |
| NEK11         | ENSG00000114670.13                   | 0.404205082                 | 1                                     | 1            | 0.404205082              |              |   | Brain_Cortex     |
|               | 0.404205082                          | Brain_Cortex                | 1                                     | 1            | 1                        | -0.834134703 |   | -0.834134703     |
|               | -0.834134703                         | NA                          | 1                                     | 0            | 0.998207054              |              |   |                  |
| JAKMIP3       | ENSG00000188385.11                   | 0.40431459                  | 13                                    | 3            | 0.133279147              |              |   | Brain_Cerebellum |
|               | 0.732926982                          | Brain_Caudate_basal_ganglia | 10.50913665                           |              | 0.012372616              |              |   |                  |
|               | 0.473837936                          | 0.341234594                 | 1.501295504                           |              | 1.02167891               | 0.386719243  |   | 3                |
|               | 0                                    | 0.998207054                 |                                       |              |                          |              |   |                  |
| ACTN1         | ENSG00000072110.13                   | 0.404346669                 | 1                                     | 1            | 0.404346669              |              |   | Brain_Cerebellum |
|               | 0.404346669                          | Brain_Cerebellum            | 1                                     | 1            | 1                        | 0.833883442  |   | 0.833883442      |
|               | 0.833883442                          | NA                          | 1                                     | 0            | 0.998207054              |              |   |                  |
| TBC1D10C      | ENSG00000175463.11                   | 0.404381884                 | 3                                     | 2            | 0.331998531              |              |   |                  |
|               | Brain_Caudate_basal_ganglia          | 0.92297701                  | Brain_Nucleus_accumbens_basal_ganglia |              |                          |              |   |                  |
|               | 2.611249606                          | 0.048070961                 | 0.340679434                           |              | -0.096684424             |              |   | 0.970096225      |
|               | 0.408486293                          | 0.535625127                 | 2                                     | 0            | 0.998207054              |              |   |                  |
| LINC01668     | ENSG00000283051.1                    | 0.404470179                 | 7                                     | 7            | 0.21589861               |              |   |                  |
|               | Brain_Putamen_basal_ganglia          | 0.983082575                 | Brain_Frontal_Cortex_BA9              |              |                          |              |   |                  |
|               | 1.724952742                          | 0.254728002                 | 0.254728002                           |              | -0.821606423             |              |   | 1.237507828      |
|               | 0.058770574                          | 0.776613737                 | 7                                     | 0            | 0.998207054              |              |   |                  |
| RP11-108M9.4  | ENSG00000238142.1                    | 0.404473911                 | 12                                    | 9            | 0.03319682               |              |   |                  |
|               | Brain_Putamen_basal_ganglia          | 0.805257538                 | Brain_Cerebellum                      | 6.611522844  |                          |              |   |                  |
|               | 0.070237141                          | 0.246568697                 | -0.634320549                          |              | 2.129694785              |              |   | 1.378651363      |
|               | 0.907849987                          | 9                           | 0                                     | 0.998207054  |                          |              |   |                  |
| NAXE          | ENSG00000163382.11                   | 0.404479564                 | 13                                    | 2            | 0.116495293              |              |   |                  |
|               | Brain_Anterior_cingulate_cortex_BA24 | 0.687687295                 | Brain_Cerebellar_Hemisphere           |              |                          |              |   |                  |
|               | 11.74692291                          | 0.001324538                 | 0.398574353                           |              | -1.569655439             |              |   | -0.401995559     |
|               | -0.851583778                         | 0.367255242                 | 2                                     | 0            | 0.998207054              |              |   |                  |
| RP11-12D24.10 | ENSG00000272866.1                    | 0.404489804                 | 1                                     | 1            | 0.404489804              |              |   |                  |
|               | Brain_Substantia_nigra               | 0.404489804                 | Brain_Substantia_nigra                | 1            | 1                        |              |   |                  |
|               | 1                                    | 0.833629486                 | 0.833629486                           | 0.833629486  | NA                       | 1            | 0 |                  |
|               | 0.998207054                          |                             |                                       |              |                          |              |   |                  |
| DCST2         | ENSG00000163354.14                   | 0.404537613                 | 12                                    | 5            | 0.045488174              |              |   |                  |
|               | Brain_Spinal_cord_cervical_c-1       | 0.512158082                 | Brain_Frontal_Cortex_BA9              |              |                          |              |   |                  |
|               | 9.132831944                          | 0.004983826                 | 0.390820069                           |              | 0.655481052              |              |   | 2.000111978      |
|               | 1.350299538                          | 0.336482103                 | 5                                     | 0            | 0.998207054              |              |   |                  |
| PTPRH         | ENSG00000080031.9                    | 0.404593716                 | 7                                     | 2            | 0.233378586              |              |   |                  |
|               | Brain_Frontal_Cortex_BA9             | 0.658158519                 | Brain_Cerebellum                      | 5.752276585  |                          |              |   |                  |
|               | 6.47E-17                             | 0.99897412                  | -1.191700796                          |              | 0.791106224              |              |   | 0.386934272      |
|               | 0.706802907                          | 2                           | 0                                     | 0.998207054  |                          |              |   |                  |
| IFT122        | ENSG00000163913.11                   | 0.404702845                 | 12                                    | 2            | 0.138223448              |              |   |                  |
|               | Brain_Anterior_cingulate_cortex_BA24 | 0.880538194                 | Brain_Cerebellum                      |              |                          |              |   |                  |
|               | 10.64324579                          | 0.004434686                 | 0.593514153                           |              | -1.482439283             |              |   | 0.273777094      |
|               | -0.792758728                         | 0.488580562                 | 2                                     | 0            | 0.998207054              |              |   |                  |
| STMN4         | ENSG00000015592.16                   | 0.404930803                 | 9                                     | 6            | 0.056891254              |              |   |                  |
|               | Brain_Hypothalamus                   | 0.650961333                 | Brain_Caudate_basal_ganglia           | 4.791239646  |                          |              |   |                  |
|               | 0.000647603                          | 0.212239405                 | -1.904145374                          |              | 0.980106568              |              |   | -1.033360288     |
|               | 0.901637393                          | 6                           | 0                                     | 0.998207054  |                          |              |   |                  |
| EHBP1         | ENSG00000115504.14                   | 0.404941358                 | 1                                     | 1            | 0.404941358              |              |   |                  |
|               | Brain_Hypothalamus                   | 0.404941358                 | Brain_Hypothalamus                    | 1            | 1                        | 1            |   |                  |
|               | -0.832828678                         | -0.832828678                | -0.832828678                          | NA           | 1                        | 0            |   | 0.998207054      |
| SF1           | ENSG00000168066.20                   | 0.405097324                 | 1                                     | 1            | 0.405097324              |              |   |                  |
|               | Brain_Caudate_basal_ganglia          | 0.405097324                 | Brain_Caudate_basal_ganglia           | 1            | 1                        |              |   |                  |
|               | 1                                    | -0.832552204                | -0.832552204                          | -0.832552204 | NA                       | 1            | 0 |                  |
|               | 0.998207054                          |                             |                                       |              |                          |              |   |                  |
| SDS           | ENSG00000135094.10                   | 0.405114203                 | 2                                     | 2            | 0.207498817              |              |   |                  |
|               | Brain_Frontal_Cortex_BA9             | 0.653025087                 | Brain_Nucleus_accumbens_basal_ganglia |              |                          |              |   |                  |

|           |                                       |                                       |              |                              |                  |
|-----------|---------------------------------------|---------------------------------------|--------------|------------------------------|------------------|
|           | 1.014044203                           | 0.985955797                           | 0.985955797  | 0.449563673                  | 1.260472903      |
|           | 0.855018288                           | 0.573399416                           | 2 0          | 0.998207054                  |                  |
| GALNT3    | ENSG00000115339.13                    | 0.405144633                           | 9 8          | 0.008289912                  |                  |
|           | Brain_Frontal_Cortex_BA9              | 0.733158929                           |              | Brain_Putamen_basal_ganglia  |                  |
|           | 4.086072984                           | 0.028923733                           | 0.162593212  | -0.34092648                  | 2.64002822       |
|           | 1.309673738                           | 0.842386016                           | 8 0          | 0.998207054                  |                  |
| CTDSP2    | ENSG00000175215.10                    | 0.40524329                            | 1 1          | 0.40524329                   | Brain_Cerebellum |
|           | 0.40524329                            | Brain_Cerebellum1                     | 1 1          | 0.832293516                  | 0.832293516      |
|           | 0.832293516                           | NA 1 0                                |              | 0.998207054                  |                  |
| NINL      | ENSG00000101004.14                    | 0.405465921                           | 8 4          | 0.106444937                  |                  |
|           | Brain_Nucleus_accumbens_basal_ganglia | 0.9362855                             |              | Brain_Putamen_basal_ganglia  |                  |
|           | 6.109283155                           | 0.005435289                           | 0.273786383  | -0.079939341                 | 1.614380417      |
|           | 0.988545167                           | 0.613959745                           | 4 0          | 0.998207054                  |                  |
| SMG9      | ENSG00000105771.13                    | 0.405529504                           | 1 1          | 0.405529504                  |                  |
|           | Brain_Cerebellar_Hemisphere           | 0.405529504                           |              | Brain_Cerebellar_Hemisphere1 | 1                |
|           | 1 0.831786432                         | 0.831786432                           | 0.831786432  | NA 1 0                       |                  |
|           | 0.998207054                           |                                       |              |                              |                  |
| OSBPL7    | ENSG00000006025.11                    | 0.405699897                           | 2 2          | 0.255214574                  |                  |
|           | Brain_Nucleus_accumbens_basal_ganglia | 0.516672574                           |              | Brain_Cerebellum             |                  |
|           | 1.056552017                           | 0.943447983                           | 0.943447983  | -1.137774695                 | 0.648483044      |
|           | -0.244645825                          | 1.26307496                            | 2 0          | 0.998207054                  |                  |
| LINC00921 | ENSG00000281005.1                     | 0.405764726                           | 10 4         | 0.062505385                  |                  |
|           | Brain_Putamen_basal_ganglia           | 0.533975492                           |              | Brain_Frontal_Cortex_BA9     |                  |
|           | 7.731250512                           | 1.77E-05                              | 0.420622851  | -1.862693611                 | -0.621948865     |
|           | -1.489278633                          | 0.377089957                           | 4 0          | 0.998207054                  |                  |
| BABAM1    | ENSG00000105393.15                    | 0.405833055                           | 1 1          | 0.405833055                  |                  |
|           | Brain_Anterior_cingulate_cortex_BA24  | 0.405833055                           |              |                              |                  |
|           | Brain_Anterior_cingulate_cortex_BA24  | 1 1                                   | 1            | 0.831248865                  |                  |
|           | 0.831248865                           | 0.831248865                           | NA 1 0       | 0.998207054                  |                  |
| EYA4      | ENSG00000112319.17                    | 0.405843622                           | 4 4          | 0.175845602                  |                  |
|           | Brain_Spinal_cord_cervical_c-1        | 0.727037633                           |              | Brain_Cortex                 | 2.217073021      |
|           | 0.278435126                           | 0.278435126                           | -1.353657722 | 0.349068834                  | -0.5581641       |
|           | 0.729486323                           | 4 0                                   |              | 0.998207054                  |                  |
| RAB36     | ENSG00000100228.12                    | 0.405850159                           | 10 2         | 0.179310846                  | Brain_Cortex     |
|           | 0.990633645                           | Brain_Cerebellar_Hemisphere           | 8.369605551  | 0.001819907                  |                  |
|           | 0.937188063                           | -0.641950433                          | 1.342879961  | 0.230734909                  | 0.583407442      |
|           | 2 0                                   | 0.998207054                           |              |                              |                  |
| C11orf96  | ENSG00000187479.5                     | 0.405995127                           | 1 1          | 0.405995127                  |                  |
|           | Brain_Cortex                          | 0.405995127                           | Brain_Cortex | 1 1 1                        | -0.830961946     |
|           | -0.830961946                          | -0.830961946                          | NA 1 0       | 0.998207054                  |                  |
| GRK3      | ENSG00000100077.14                    | 0.406078379                           | 4 4          | 0.182889167                  |                  |
|           | Brain_Caudate_basal_ganglia           | 0.548668105                           |              | Brain_Hippocampus            | 1.896349401      |
|           | 0.140393704                           | 0.140393704                           | -1.33191182  | 0.599757135                  | -0.58685315      |
|           | 0.8387658                             | 4 0                                   |              | 0.998207054                  |                  |
| SDK1      | ENSG00000146555.18                    | 0.406359293                           | 2 2          | 0.259478845                  | Brain_Cerebellum |
|           | 0.567578527                           | Brain_Hypothalamus                    | 1.132679591  | 0.867320409                  |                  |
|           | 0.867320409                           | 0.571621352                           | 1.127623767  | 0.849622559                  | 0.393153078      |
|           | 2 0                                   | 0.998207054                           |              |                              |                  |
| HSD17B14  | ENSG00000087076.8                     | 0.406435641                           | 5 3          | 0.09221383                   | Brain_Cerebellum |
|           | 0.935113979                           | Brain_Nucleus_accumbens_basal_ganglia | 3.09826042   | 0.013915485                  |                  |
|           | 0.578131486                           | -1.68383361                           | -0.081412411 | -0.619435072                 | 0.657050156      |
|           | 3 0                                   | 0.998207054                           |              |                              |                  |
| TSPYL1    | ENSG00000189241.6                     | 0.406514601                           | 3 2          | 0.460869514                  |                  |
|           | Brain_Cerebellum                      | 0.926217886                           | Brain_Cortex | 2.789131708                  | 0.084257193      |
|           | 0.1266111                             | -0.737415826                          | -0.092604353 | -0.400141188                 | 0.323432701      |
|           | 0                                     | 0.998207054                           |              |                              | 2                |
| DLL4      | ENSG00000128917.6                     | 0.406529964                           | 1 1          | 0.406529964                  |                  |
|           | Brain_Substantia_nigra                | 0.406529964                           |              | Brain_Substantia_nigra       | 1 1              |
|           | 1 -0.8300156                          | -0.8300156                            | -0.8300156   | NA 1 0                       | 0.998207054      |
| TACR3     | ENSG00000169836.4                     | 0.406530018                           | 2 2          | 0.293113526                  |                  |
|           | Brain_Spinal_cord_cervical_c-1        | 0.331812128                           |              | Brain_Cortex                 | 1.137722088      |
|           | 0.862277912                           | 0.862277912                           | -1.051315902 | -0.970470288                 | -1.010893095     |



|         |                                       |                  |             |              |    |             |                                |             |                   |
|---------|---------------------------------------|------------------|-------------|--------------|----|-------------|--------------------------------|-------------|-------------------|
|         | 0.057166482                           | 2                | 0           | 0.998207054  |    |             |                                |             |                   |
| CNOT11  | ENSG00000158435.7                     |                  |             | 0.406566668  | 2  | 2           | 0.179720892                    |             |                   |
|         | Brain_Anterior_cingulate_cortex_BA24  |                  |             | 0.935376346  |    |             | Brain_Hypothalamus             |             |                   |
|         | 1.067259529                           | 0.932740471      |             | 0.932740471  |    |             | -1.341614901                   |             | -0.081082496      |
|         | -0.711348698                          | 0.891331012      |             | 2            | 0  | 0.998207054 |                                |             |                   |
| CCDC107 | ENSG00000159884.11                    |                  |             | 0.406569861  | 1  | 1           | 0.406569861                    |             |                   |
|         | Brain_Cortex                          |                  |             | 0.406569861  |    |             | Brain_Cortex                   | 1           | 1                 |
|         | 0.829945035                           | 0.829945035      |             | NA           | 1  | 0           | 0.998207054                    |             | 0.829945035       |
| CD109   | ENSG00000156535.13                    |                  |             | 0.406840372  | 1  | 1           | 0.406840372                    |             |                   |
|         | Brain_Nucleus_accumbens_basal_ganglia |                  |             | 0.406840372  |    |             |                                |             |                   |
|         | Brain_Nucleus_accumbens_basal_ganglia | 1                |             | 1            | 1  |             | 0.829466701                    |             |                   |
|         | 0.829466701                           | 0.829466701      |             | NA           | 1  | 0           | 0.998207054                    |             |                   |
| NBPF11  | ENSG00000263956.6                     |                  |             | 0.406878057  | 10 | 4           | 0.18183748                     |             |                   |
|         | Brain_Cerebellar_Hemisphere           |                  |             | 0.975814639  |    |             | Brain_Putamen_basal_ganglia    | 7.02304961  |                   |
|         | 7.43E-07                              | 0.272621913      |             | -1.335118762 |    |             | 0.89944913                     |             | 0.456619448       |
|         | 0.699381631                           | 4                | 0           | 0.998207054  |    |             |                                |             |                   |
| CLEC12B | ENSG00000256660.5                     |                  |             | 0.4069064    | 2  | 2           | 0.225652015                    |             |                   |
|         | Brain_Spinal_cord_cervical_c-1        |                  |             | 0.525293072  |    |             | Brain_Putamen_basal_ganglia    |             |                   |
|         | 1.050542074                           | 0.949457926      |             | 0.949457926  |    |             | -1.211635301                   |             | -0.635207531      |
|         | -0.923421416                          | 0.407595985      |             | 2            | 0  | 0.998207054 |                                |             |                   |
| PIGBOS1 | ENSG00000225973.3                     |                  |             | 0.406914944  | 9  | 4           | 0.075741447                    |             |                   |
|         | Brain_Anterior_cingulate_cortex_BA24  |                  |             | 0.980134766  |    |             | Brain_Hypothalamus             |             |                   |
|         | 6.637751811                           | 0.000731491      |             | 0.355236717  |    |             | -0.50660726                    |             | 1.775948252       |
|         | 0.093856919                           | 0.663409006      |             | 4            | 0  | 0.998207054 |                                |             |                   |
| GPR45   | ENSG00000135973.2                     |                  |             | 0.406929372  | 1  | 1           | 0.406929372                    |             |                   |
|         | Brain_Cerebellar_Hemisphere           |                  |             | 0.406929372  |    |             | Brain_Cerebellar_Hemisphere    | 1           | 1                 |
|         | 1                                     | 0.829309367      |             | 0.829309367  |    |             | NA                             | 1           | 0                 |
|         | 0.998207054                           |                  |             |              |    |             |                                |             |                   |
| DCAF1   | ENSG00000145041.15                    |                  |             | 0.406932601  | 1  | 1           | 0.406932601                    |             |                   |
|         | Brain_Hippocampus                     |                  |             | 0.406932601  |    |             | Brain_Hippocampus              | 1           | 1                 |
|         | -0.829303659                          | -0.829303659     |             | -0.829303659 |    |             | NA                             | 1           | 0                 |
|         |                                       |                  |             |              |    |             |                                |             | 0.998207054       |
| CD320   | ENSG00000167775.10                    |                  |             | 0.406938936  | 1  | 1           | 0.406938936                    |             |                   |
|         | Brain_Cerebellar_Hemisphere           |                  |             | 0.406938936  |    |             | Brain_Cerebellar_Hemisphere    | 1           | 1                 |
|         | 1                                     | -0.82929246      |             | -0.82929246  |    |             | NA                             | 1           | 0                 |
|         | 0.998207054                           |                  |             |              |    |             |                                |             |                   |
| FAM120B | ENSG00000112584.13                    |                  |             | 0.407225943  | 8  | 5           | 0.04942707                     |             | Brain_Cortex      |
|         | 0.775278191                           | Brain_Cerebellum | 4.5726752   | 0.031404799  |    |             | 0.190756767                    |             |                   |
|         | -0.285477695                          | 1.964889143      |             | 1.159273777  |    |             | 0.79204214                     | 5           | 0                 |
|         | 0.998207054                           |                  |             |              |    |             |                                |             |                   |
| ICK     | ENSG00000112144.15                    |                  |             | 0.407336984  | 5  | 4           | 0.053590965                    |             |                   |
|         | Brain_Hippocampus                     |                  |             | 0.307716871  |    |             | Brain_Amygdala                 | 3.554268852 |                   |
|         | 0.036397434                           | 0.135316564      |             | -1.930128118 |    |             | -1.020024437                   |             | -1.439115827      |
|         | 0.43561697                            | 4                | 0           | 0.998207054  |    |             |                                |             |                   |
| DNM3    | ENSG00000197959.13                    |                  |             | 0.407382141  | 3  | 2           | 0.196462119                    |             |                   |
|         | Brain_Substantia_nigra                |                  |             | 0.503711175  |    |             | Brain_Cerebellar_Hemisphere    |             |                   |
|         | 2.104140844                           | 0.013118165      |             | 0.882740991  |    |             | -0.67823321                    |             | 1.291696936       |
|         | -0.018399392                          | 1.134586795      |             | 2            | 0  | 0.998207054 |                                |             |                   |
| CYP27C1 | ENSG00000186684.12                    |                  |             | 0.407510535  | 1  | 1           | 0.407510535                    |             |                   |
|         | Brain_Cortex                          |                  |             | 0.407510535  |    |             | Brain_Cortex                   | 1           | 1                 |
|         | -0.828282494                          | -0.828282494     |             | NA           | 1  | 0           | 0.998207054                    |             | -0.828282494      |
| NDUFA12 | ENSG00000184752.12                    |                  |             | 0.407530356  | 2  | 2           | 0.208241248                    |             |                   |
|         | Brain_Substantia_nigra                |                  |             | 0.680936251  |    |             | Brain_Spinal_cord_cervical_c-1 |             |                   |
|         | 1.038576885                           | 0.961423115      |             | 0.961423115  |    |             | -1.258416277                   |             | -0.411185866      |
|         | -0.834801072                          | 0.599082369      |             | 2            | 0  | 0.998207054 |                                |             |                   |
| LDAH    | ENSG00000118961.14                    |                  |             | 0.407741957  | 13 | 4           | 0.30175357                     |             | Brain_Hippocampus |
|         | 0.937079463                           | Brain_Cerebellum | 9.876618544 |              |    |             | 0.007845376                    |             | 0.474648061       |
|         | -0.976560969                          | 1.032680226      |             | -0.297877102 |    |             | 0.533227309                    |             | 4                 |
|         | 0.998207054                           |                  |             |              |    |             |                                |             | 0                 |
| EXOSC5  | ENSG00000077348.8                     |                  |             | 0.407749761  | 6  | 5           | 0.140136168                    |             |                   |
|         | Brain_Substantia_nigra                |                  |             | 0.763911695  |    |             | Brain_Cerebellum               | 3.097557714 |                   |
|         | 0.006642593                           | 0.155155245      |             | -0.596033584 |    |             | 1.475284142                    |             | 0.577318707       |
|         | 0.728355827                           | 5                | 0           | 0.998207054  |    |             |                                |             |                   |

|               |                                       |                             |                                      |              |              |                  |
|---------------|---------------------------------------|-----------------------------|--------------------------------------|--------------|--------------|------------------|
| TMOD2         | ENSG00000128872.9                     | 0.407863313                 | 3                                    | 3            | 0.208352302  | Brain_Cerebellum |
|               | 0.607020311                           | Brain_Putamen_basal_ganglia | 1.214104669                          | 0.77561254   | 0.77561254   |                  |
|               | -0.514331401                          | 1.258109101                 | 0.509571326                          | 0.917744914  | 3            | 0                |
|               | 0.998207054                           |                             |                                      |              |              |                  |
| C17orf53      | ENSG00000125319.14                    | 0.407915245                 | 1                                    | 1            | 0.407915245  |                  |
|               | Brain_Cerebellum                      | 0.407915245                 | Brain_Cerebellum                     | 1            | 1            | 0.827567915      |
|               | 0.827567915                           | 0.827567915                 | NA                                   | 1            | 0            | 0.998207054      |
| SLX1B         | ENSG00000181625.17                    | 0.407957799                 | 3                                    | 3            | 0.206964424  |                  |
|               | Brain_Cerebellar_Hemisphere           | 0.558286681                 | Brain_Cortex                         | 1.24453609   |              |                  |
|               | 0.792115226                           | 0.792115226                 | -1.261956544                         | 0.688878628  |              | -0.386155392     |
|               | 0.990560331                           | 3                           | 0                                    | 0.998207054  |              |                  |
| MMP17         | ENSG00000198598.6                     | 0.408079264                 | 1                                    | 1            | 0.408079264  | Brain_Cerebellum |
|               | 0.408079264                           | Brain_Cerebellum            | 1                                    | 1            | -0.827278435 | -0.827278435     |
|               | -0.827278435                          | NA                          | 1                                    | 0            | 0.998207054  |                  |
| ORMDL1        | ENSG00000128699.13                    | 0.408114086                 | 13                                   | 1            | 0.222158937  |                  |
|               | Brain_Putamen_basal_ganglia           | 0.700112693                 | Brain_Anterior_cingulate_cortex_BA24 |              |              |                  |
|               | 12.0608239                            | 0.001607455                 | 12.0608239                           | 0.385168347  | 1.220807437  |                  |
|               | 0.796473968                           | 0.209841256                 | 1                                    | 0            | 0.998207054  |                  |
| RP11-105C19.2 | ENSG00000260973.1                     | 0.40812187                  | 1                                    | 1            | 0.40812187   |                  |
|               | Brain_Cerebellar_Hemisphere           | 0.40812187                  | Brain_Cerebellar_Hemisphere          | 1            | 1            | 1                |
|               | 0.82720325                            | 0.82720325                  | 0.82720325                           | NA           | 1            | 0                |
|               | 0.998207054                           |                             |                                      |              |              |                  |
| ZNF131        | ENSG00000172262.11                    | 0.408131743                 | 1                                    | 1            | 0.408131743  |                  |
|               | Brain_Cerebellum                      | 0.408131743                 | Brain_Cerebellum                     | 1            | 1            | 0.827185828      |
|               | 0.827185828                           | 0.827185828                 | NA                                   | 1            | 0            | 0.998207054      |
| PDLIM3        | ENSG00000154553.13                    | 0.408306909                 | 2                                    | 2            | 0.214396332  |                  |
|               | Brain_Hypothalamus                    | 0.623979762                 | Brain_Cortex                         | 1.007853171  |              |                  |
|               | 0.992146829                           | 0.992146829                 | -1.241567085                         | 0.490217835  |              | -0.375674625     |
|               | 1.22455686                            | 2                           | 0                                    | 0.998207054  |              |                  |
| SYT10         | ENSG00000110975.8                     | 0.408372221                 | 3                                    | 3            | 0.099321082  |                  |
|               | Brain_Frontal_Cortex_BA9              | 0.417884617                 | Brain_Cortex                         | 1.798159749  |              |                  |
|               | 0.248410632                           | 0.248410632                 | 0.810096672                          | 1.648153958  |              | 1.103681387      |
|               | 0.472010106                           | 3                           | 0                                    | 0.998207054  |              |                  |
| PCDHA7        | ENSG00000204963.5                     | 0.408510796                 | 8                                    | 6            | 0.331190723  |                  |
|               | Brain_Cerebellar_Hemisphere           | 0.811407829                 | Brain_Putamen_basal_ganglia          | 5.23931369   |              |                  |
|               | 0.091377721                           | 0.273490742                 | -0.959909464                         | 0.971718274  |              | 0.101232707      |
|               | 0.675678852                           | 6                           | 0                                    | 0.998207054  |              |                  |
| RASA4B        | ENSG00000170667.14                    | 0.408664203                 | 3                                    | 3            | 0.483030513  |                  |
|               | Brain_Cortex                          | 0.70652879                  | Brain_Spinal_cord_cervical_c-1       | 2.027653312  |              |                  |
|               | 0.342747359                           | 0.342747359                 | -0.64397615                          | 0.70143672   |              | -0.106353843     |
|               | 0.712233889                           | 3                           | 0                                    | 0.998207054  |              |                  |
| LRRC73        | ENSG00000204052.4                     | 0.408924209                 | 4                                    | 4            | 0.116741245  |                  |
|               | Brain_Cortex                          | 0.968178747                 | Brain_Caudate_basal_ganglia          | 1.860849454  |              |                  |
|               | 0.284729375                           | 0.284729375                 | -0.039892604                         | 1.56859969   |              | 0.673700334      |
|               | 0.66909889                            | 4                           | 0                                    | 0.998207054  |              |                  |
| LSM7          | ENSG00000130332.14                    | 0.409003204                 | 13                                   | 3            | 0.181175261  |                  |
|               | Brain_Hypothalamus                    | 0.86908877                  | Brain_Spinal_cord_cervical_c-1       | 10.73841379  |              |                  |
|               | 1.23E-16                              | 0.422586628                 | -1.337145153                         | -0.164816051 |              | -0.349201994     |
|               | 0.3151055                             | 3                           | 0                                    | 0.998207054  |              |                  |
| ERFE          | ENSG00000178752.15                    | 0.409041241                 | 2                                    | 1            | 0.313387169  |                  |
|               | Brain_Cerebellar_Hemisphere           | 0.531127667                 | Brain_Cerebellum                     | 1.959656432  |              |                  |
|               | 0.040343568                           | 1.959656432                 | -1.008140184                         | -0.626285543 |              | -0.817212864     |
|               | 0.270012006                           | 1                           | 0                                    | 0.998207054  |              |                  |
| FBXW10        | ENSG00000171931.12                    | 0.409115779                 | 5                                    | 5            | 0.10883395   |                  |
|               | Brain_Nucleus_accumbens_basal_ganglia | 0.969061625                 | Brain_Cerebellum                     |              |              |                  |
|               | 1.941466917                           | 0.179656199                 | 0.179656199                          | -1.603456301 |              | 0.35454022       |
|               | -0.30032541                           | 0.753523541                 | 5                                    | 0            | 0.998207054  |                  |
| CSMD2         | ENSG00000121904.17                    | 0.409169314                 | 7                                    | 4            | 0.127746646  | Brain_Cerebellum |
|               | 0.998675467                           | Brain_Substantia_nigra      | 3.933030066                          | 4.19E-07     |              |                  |
|               | 0.684574349                           | -1.091036849                | 1.523048203                          | -0.203245123 |              | 1.097335901      |
|               | 4                                     | 0                           | 0.998207054                          |              |              |                  |
| RP11-480D4.6  | ENSG00000272049.1                     | 0.4093027                   | 7                                    | 7            | 0.086116634  |                  |
|               | Brain_Caudate_basal_ganglia           | 0.979515014                 | Brain_Cerebellum                     | 1.425544639  |              |                  |

|           |                                       |              |                                       |             |                             |              |                                      |                  |
|-----------|---------------------------------------|--------------|---------------------------------------|-------------|-----------------------------|--------------|--------------------------------------|------------------|
|           | 0.53537284                            | 0.53537284   | -1.71624815                           |             | 1.62573369                  | -0.107235695 |                                      | 1.054822594      |
|           | 7                                     | 0            | 0.998207054                           |             |                             |              |                                      |                  |
| TSPYL5    | ENSG00000180543.4                     |              | 0.409326773                           |             | 4                           | 4            | 0.134917956                          |                  |
|           | Brain_Cerebellar_Hemisphere           | 0.346451315  |                                       |             |                             |              | Brain_Anterior_cingulate_cortex_BA24 |                  |
|           | 2.191291829                           | 0.128257166  | 0.128257166                           |             |                             | -1.494986535 | 0.941494875                          |                  |
|           | -0.783864676                          | 1.159459866  | 4                                     | 0           |                             | 0.998207054  |                                      |                  |
| FGFRL1    | ENSG00000127418.14                    |              | 0.409337469                           |             | 3                           | 3            | 0.195168689                          |                  |
|           | Brain_Cerebellum                      | 0.876200085  |                                       |             |                             |              | Brain_Anterior_cingulate_cortex_BA24 |                  |
|           | 1.639573257                           | 0.60005809   | 0.60005809                            |             | -1.295439415                | 0.429769134  |                                      |                  |
|           | -0.236627408                          | 0.927134595  | 3                                     | 0           |                             | 0.998207054  |                                      |                  |
| LINC00900 | ENSG00000246100.3                     |              | 0.409374139                           |             | 9                           | 5            | 0.057064596                          |                  |
|           | Brain_Substantia_nigra                | 0.574464796  |                                       |             |                             |              | Brain_Anterior_cingulate_cortex_BA24 |                  |
|           | 6.441095145                           | 1.05E-19     | 0.348864461                           |             | 0.561488165                 | 1.902815717  |                                      |                  |
|           | 1.276791788                           | 0.408521257  | 5                                     | 0           |                             | 0.998207054  |                                      |                  |
| GPX7      | ENSG00000116157.5                     |              | 0.409399235                           |             | 2                           | 2            | 0.491672382                          |                  |
|           | Brain_Cerebellar_Hemisphere           | 0.711086176  |                                       |             |                             |              | Brain_Spinal_cord_cervical_c-1       |                  |
|           | 1.6812806                             | 0.3187194    | 0.3187194                             |             | -0.687651319                | 0.370397715  | -0.158626802                         |                  |
|           | 0.748153647                           | 2            | 0                                     |             | 0.998207054                 |              |                                      |                  |
| TEX101    | ENSG00000131126.18                    |              | 0.409441816                           |             | 4                           | 4            | 0.051625551                          |                  |
|           | Brain_Cerebellum                      | 0.807394032  |                                       |             |                             |              | Brain_Cerebellar_Hemisphere          | 1.146738355      |
|           | 0.865599488                           | 0.865599488  | -0.348756939                          |             | 1.946243048                 | 0.528253056  |                                      |                  |
|           | 0.987684558                           | 4            | 0                                     |             | 0.998207054                 |              |                                      |                  |
| BCAS3     | ENSG00000141376.22                    |              | 0.409479013                           |             | 1                           | 1            | 0.409479013                          |                  |
|           | Brain_Spinal_cord_cervical_c-1        | 0.409479013  |                                       |             |                             |              | Brain_Spinal_cord_cervical_c-1       |                  |
|           | 1                                     | 1            | 1                                     | 0.824810803 | 0.824810803                 | 0.824810803  | NA                                   | 1                |
|           | 0.998207054                           |              |                                       |             |                             |              |                                      | 0                |
| ELOVL1    | ENSG00000066322.14                    |              | 0.409496385                           |             | 1                           | 1            | 0.409496385                          |                  |
|           | Brain_Cerebellum                      | 0.409496385  |                                       |             | 1                           | 1            | 1                                    | -0.824780208     |
|           | -0.824780208                          | -0.824780208 | NA                                    | 1           | 0                           | 0.998207054  |                                      |                  |
| EEF1G     | ENSG00000254772.9                     |              | 0.409642344                           |             | 2                           | 2            | 0.720414898                          | Brain_Cortex     |
|           | 0.730763232                           |              | Brain_Nucleus_accumbens_basal_ganglia | 1.861945385 |                             |              |                                      |                  |
|           | 0.138054615                           | 0.138054615  | -0.357904346                          |             | 0.344110439                 | -0.006896954 |                                      |                  |
|           | 0.496399415                           | 2            | 0                                     |             | 0.998207054                 |              |                                      |                  |
| EBAG9     | ENSG00000147654.14                    |              | 0.409653644                           |             | 4                           | 4            | 0.192859419                          |                  |
|           | Brain_Hypothalamus                    | 0.533885669  |                                       |             |                             |              | Brain_Spinal_cord_cervical_c-1       |                  |
|           | 1.872522945                           | 0.170275233  | 0.170275233                           |             | -1.077869079                | 1.302166661  |                                      |                  |
|           | 0.427411157                           | 1.042261877  | 4                                     | 0           |                             | 0.998207054  |                                      |                  |
| PCCA      | ENSG00000175198.15                    |              | 0.409709767                           |             | 1                           | 1            | 0.409709767                          |                  |
|           | Brain_Nucleus_accumbens_basal_ganglia | 0.409709767  |                                       |             |                             |              |                                      |                  |
|           | Brain_Nucleus_accumbens_basal_ganglia | 1            | 1                                     | 1           | -0.824404486                |              |                                      |                  |
|           | -0.824404486                          | -0.824404486 | NA                                    | 1           | 0                           | 0.998207054  |                                      |                  |
| LINC00499 | ENSG00000251372.5                     |              | 0.409717135                           |             | 13                          | 12           | 0.048198375                          |                  |
|           | Brain_Amygdala                        | 0.919770547  |                                       |             | Brain_Putamen_basal_ganglia | 2.858988205  |                                      |                  |
|           | 0.05316579                            | 0.25760344   | -1.975615207                          |             | 1.43692811                  | -0.32807627  | 0.901771435                          |                  |
|           | 12                                    | 0            | 0.998207054                           |             |                             |              |                                      |                  |
| EIF3B     | ENSG00000106263.17                    |              | 0.409726026                           |             | 4                           | 4            | 0.201028156                          |                  |
|           | Brain_Hypothalamus                    | 0.76840386   |                                       |             |                             |              | Brain_Cortex                         | 2.691057296      |
|           | 0.113956544                           | -1.278627799 | 0.452520252                           |             | -0.189691583                | 0.798611974  |                                      |                  |
|           | 4                                     | 0            | 0.998207054                           |             |                             |              |                                      |                  |
| NPY4R     | ENSG00000204174.7                     |              | 0.409999579                           |             | 1                           | 1            | 0.409999579                          | Brain_Cerebellum |
|           | 0.409999579                           |              | Brain_Cerebellum                      | 1           | 1                           | 1            | 0.823894371                          | 0.823894371      |
|           | 0.823894371                           | NA           | 1                                     | 0           |                             | 0.998207054  |                                      |                  |
| CBWD2     | ENSG00000136682.14                    |              | 0.410046819                           |             | 8                           | 3            | 0.095071948                          |                  |
|           | Brain_Cerebellar_Hemisphere           | 0.298579394  |                                       |             |                             |              | Brain_Frontal_Cortex_BA9             |                  |
|           | 6.805470857                           | 0.000272253  | 0.323594099                           |             | 1.039484649                 | 1.669229286  |                                      |                  |
|           | 1.440254817                           | 0.19454514   | 3                                     | 0           |                             | 0.998207054  |                                      |                  |
| BSPRY     | ENSG00000119411.10                    |              | 0.410073792                           |             | 3                           | 2            | 0.292907048                          |                  |
|           | Brain_Frontal_Cortex_BA9              | 0.75720241   |                                       |             |                             |              | Brain_Anterior_cingulate_cortex_BA24 |                  |
|           | 2.766800563                           | 0.009991724  | 0.223207713                           |             | -1.051765724                | -0.309156595 |                                      |                  |
|           | -0.75859774                           | 0.395200019  | 2                                     | 0           |                             | 0.998207054  |                                      |                  |
| DHRS4     | ENSG00000157326.18                    |              | 0.410149259                           |             | 5                           | 5            | 0.09578144                           | Brain_Cortex     |
|           | 0.498962318                           |              | Brain_Cerebellum                      | 1.777900227 |                             | 0.538310401  | 0.538310401                          |                  |

|               |                                      |                             |              |              |                                      |                                       |              |
|---------------|--------------------------------------|-----------------------------|--------------|--------------|--------------------------------------|---------------------------------------|--------------|
|               | -0.915702522                         | 1.66565856                  | 0.391062003  |              | 1.127874931                          | 5                                     | 0            |
|               | 0.998207054                          |                             |              |              |                                      |                                       |              |
| LAT           | ENSG00000213658.11                   | 0.410188374                 | 3            | 2            | 0.182731608                          |                                       |              |
|               | Brain_Putamen_basal_ganglia          | 0.313446916                 |              |              | Brain_Frontal_Cortex_BA9             |                                       |              |
|               | 2.730073747                          | 7.55E-08                    | 0.269926177  |              | 1.008015719                          | 1.332391397                           |              |
|               | 1.116144118                          | 0.187275637                 | 2            | 0            | 0.998207054                          |                                       |              |
| RP11-285A1.1  | ENSG00000260988.1                    | 0.410261368                 |              | 2            | 2                                    | 0.349078672                           |              |
|               | Brain_Putamen_basal_ganglia          | 0.371851335                 |              |              |                                      | Brain_Nucleus_accumbens_basal_ganglia |              |
|               | 1.060472331                          | 0.939527669                 | 0.939527669  |              | -0.8930109                           | 0.936377861                           |              |
|               | 0.021683481                          | 1.293573199                 | 2            | 0            | 0.998207054                          |                                       |              |
| CTLA4         | ENSG00000163599.14                   | 0.41026857                  | 1            | 1            | 0.41026857                           | Brain_Cerebellum                      | 0.41026857   |
|               | Brain_Cerebellum                     | 1                           | 1            |              | -0.823421096                         | -0.823421096                          | -0.823421096 |
|               | NA                                   | 1                           | 0            |              | 0.998207054                          |                                       |              |
| SIGLEC9       | ENSG00000129450.8                    | 0.41027093                  | 1            | 1            | 0.41027093                           | Brain_Cerebellum                      |              |
|               | 0.41027093                           | Brain_Cerebellum            | 1            | 1            | 0.823416946                          | 0.823416946                           |              |
|               | 0.823416946                          | NA                          | 1            | 0            | 0.998207054                          |                                       |              |
| PDIA5         | ENSG00000065485.19                   | 0.410312033                 | 1            | 1            | 0.410312033                          | Brain_Cortex                          |              |
|               | 0.410312033                          | Brain_Cortex                | 1            | 1            | 1                                    | 0.823344644                           | 0.823344644  |
|               | 0.823344644                          | NA                          | 1            | 0            | 0.998207054                          |                                       |              |
| PDXP          | ENSG00000241360.1                    | 0.410340946                 | 2            | 2            | 0.181961179                          |                                       |              |
|               | Brain_Hippocampus                    | 0.945748181                 |              |              | Brain_Spinal_cord_cervical_c-1       |                                       |              |
|               | 1.050379882                          | 0.949620118                 | 0.949620118  |              | -0.06804705                          | 1.334740848                           |              |
|               | 0.633346899                          | 0.991920836                 | 2            | 0            | 0.998207054                          |                                       |              |
| MCM2          | ENSG00000073111.13                   | 0.410609855                 | 2            | 2            | 0.241898971                          |                                       |              |
|               | Brain_Anterior_cingulate_cortex_BA24 | 0.552189431                 |              |              | Brain_Hippocampus                    |                                       |              |
|               | 1.039227936                          | 0.960772064                 | 0.960772064  |              | -0.594482519                         | 1.170253495                           |              |
|               | 0.287885488                          | 1.247856802                 | 2            | 0            | 0.998207054                          |                                       |              |
| SIRT3         | ENSG00000142082.14                   | 0.410676929                 | 10           | 5            | 0.048533198                          |                                       |              |
|               | Brain_Substantia_nigra               | 0.473131695                 |              |              | Brain_Anterior_cingulate_cortex_BA24 |                                       |              |
|               | 7.100330893                          | 0.00523817                  | 0.303516071  |              | 0.717392907                          | 1.972669772                           |              |
|               | 1.355303923                          | 0.408584488                 | 5            | 0            | 0.998207054                          |                                       |              |
| RP11-255C15.3 | ENSG00000260743.1                    | 0.410738228                 |              | 2            | 2                                    | 0.430405585                           |              |
|               | Brain_Cerebellar_Hemisphere          | 0.696151295                 |              |              | Brain_Cerebellum                     | 1.59825253                            | 0.40174747   |
|               | 0.40174747                           | -0.7884978                  | 0.390521047  |              | -0.198988377                         | 0.833692222                           | 2            |
|               | 0.998207054                          |                             |              |              |                                      |                                       | 0            |
| KYAT3         | ENSG00000137944.17                   | 0.41076702                  | 12           | 1            | 0.30195243                           |                                       |              |
|               | Brain_Anterior_cingulate_cortex_BA24 | 0.598346906                 |              |              | Brain_Putamen_basal_ganglia          |                                       |              |
|               | 11.12916745                          | 0.002718457                 | 11.12916745  |              | 0.526779233                          | 1.032255524                           |              |
|               | 0.791467134                          | 0.145995535                 | 1            | 0            | 0.998207054                          |                                       |              |
| PBX1          | ENSG00000185630.18                   | 0.410781509                 | 1            | 1            | 0.410781509                          |                                       |              |
|               | Brain_Putamen_basal_ganglia          | 0.410781509                 |              |              | Brain_Putamen_basal_ganglia          | 1                                     | 1            |
|               | 1                                    | 0.82251912                  | 0.82251912   | 0.82251912   | NA                                   | 1                                     | 0            |
|               | 0.998207054                          |                             |              |              |                                      |                                       |              |
| TMTC3         | ENSG00000139324.11                   | 0.410864165                 | 3            | 2            | 0.146014141                          | Brain_Cerebellum                      |              |
|               | 0.821105238                          | Brain_Caudate_basal_ganglia | 1.96618631   | 0.03385199   | 0.9999617                            |                                       |              |
|               | -0.226123667                         | 1.453755369                 | 0.791036809  |              | 0.894270763                          | 2                                     | 0            |
|               | 0.998207054                          |                             |              |              |                                      |                                       |              |
| TMEM17        | ENSG00000186889.9                    | 0.411012971                 | 8            | 5            | 0.029338925                          |                                       |              |
|               | Brain_Cerebellum                     | 0.779073104                 |              |              | Brain_Spinal_cord_cervical_c-1       | 4.58748739                            |              |
|               | 0.033788257                          | 0.577685763                 | -2.178902325 |              | 0.280527143                          | -1.173161736                          |              |
|               | 0.911804116                          | 5                           | 0            |              | 0.998207054                          |                                       |              |
| KSR2          | ENSG00000171435.13                   | 0.411093226                 | 1            | 1            | 0.411093226                          |                                       |              |
|               | Brain_Caudate_basal_ganglia          | 0.411093226                 |              |              | Brain_Caudate_basal_ganglia          | 1                                     | 1            |
|               | 1                                    | -0.821971309                | -0.821971309 | -0.821971309 | NA                                   | 1                                     | 0            |
|               | 0.998207054                          |                             |              |              |                                      |                                       |              |
| LPAR2         | ENSG00000064547.13                   | 0.411102725                 | 3            | 3            | 0.105194291                          |                                       |              |
|               | Brain_Spinal_cord_cervical_c-1       | 0.527480228                 |              |              | Brain_Amygdala                       | 1.914447786                           |              |
|               | 0.096511054                          | 0.096511054                 | -1.620176856 |              | 1.516621855                          | -0.245137383                          |              |
|               | 1.603758296                          | 3                           | 0            |              | 0.998207054                          |                                       |              |
| CACNA1G       | ENSG00000006283.17                   | 0.411176251                 | 2            | 2            | 0.280900637                          |                                       |              |
|               | Brain_Hippocampus                    | 0.436549293                 |              |              | Brain_Frontal_Cortex_BA9             | 1.005571299                           |              |
|               | 0.994428701                          | 0.994428701                 | 0.778033451  |              | 1.078298341                          | 0.928165896                           |              |
|               | 0.21231934                           | 2                           | 0            |              | 0.998207054                          |                                       |              |

|          |                                       |                             |                             |              |              |                                       |              |  |
|----------|---------------------------------------|-----------------------------|-----------------------------|--------------|--------------|---------------------------------------|--------------|--|
| EBNA1BP2 | ENSG00000117395.12                    | 0.411177121                 | 3                           | 3            | 0.140716054  |                                       |              |  |
|          | Brain_Substantia_nigra                | 0.918296792                 |                             |              |              | Brain_Nucleus_accumbens_basal_ganglia |              |  |
|          | 1.744186775                           | 0.44007608                  | 0.44007608                  | -0.469711194 | 1.473129748  |                                       |              |  |
|          | 0.300279718                           | 1.032172143                 | 3                           | 0            | 0.998207054  |                                       |              |  |
| PIP5KL1  | ENSG00000167103.11                    | 0.411286351                 | 4                           | 3            | 0.330151102  |                                       |              |  |
|          | Brain_Caudate_basal_ganglia           | 0.749541804                 |                             |              |              | Brain_Spinal_cord_cervical_c-1        |              |  |
|          | 2.817623767                           | 0.070215987                 | 0.200491773                 | -0.971465753 | 0.973809568  |                                       |              |  |
|          | 0.230850684                           | 0.845178639                 | 3                           | 0            | 0.998207054  |                                       |              |  |
| PEX5     | ENSG00000139197.10                    | 0.411343538                 | 11                          | 2            | 0.562878765  |                                       |              |  |
|          | Brain_Nucleus_accumbens_basal_ganglia | 0.997512458                 |                             |              |              | Brain_Caudate_basal_ganglia           |              |  |
|          | 10.25960716                           | 0.000917717                 | 0.342409233                 | -0.278166582 | 0.57857087   |                                       |              |  |
|          | 0.150143572                           | 0.267566396                 | 2                           | 0            | 0.998207054  |                                       |              |  |
| PTPN12   | ENSG00000127947.15                    | 0.411421403                 | 9                           | 6            | 0.373764815  |                                       |              |  |
|          | Brain_Frontal_Cortex_BA9              | 0.882370114                 |                             |              |              | Brain_Caudate_basal_ganglia           |              |  |
|          | 5.880216274                           | 0.029512641                 | 0.213414414                 | -0.642144309 | 0.889443427  |                                       |              |  |
|          | 0.179224038                           | 0.604437689                 | 6                           | 0            | 0.998207054  |                                       |              |  |
| B3GAT2   | ENSG00000112309.10                    | 0.41145428                  | 1                           | 1            | 0.41145428   |                                       |              |  |
|          | Brain_Putamen_basal_ganglia           | 0.41145428                  | Brain_Putamen_basal_ganglia | 1            | 1            | 1                                     |              |  |
|          | 0.821337101                           | 0.821337101                 | 0.821337101                 | NA           | 1            | 0                                     | 0.998207054  |  |
| ZDHHC18  | ENSG00000204160.11                    | 0.411469843                 | 1                           | 1            | 0.411469843  |                                       |              |  |
|          | Brain_Cortex                          | 0.411469843                 | Brain_Cortex                | 1            | 1            | 1                                     | -0.821309772 |  |
|          | -0.821309772                          | -0.821309772                | NA                          | 1            | 0            | 0.998207054                           |              |  |
| CXADR    | ENSG00000154639.18                    | 0.41149316                  | 2                           | 2            | 0.182655389  | Brain_Cerebellum                      |              |  |
|          | 0.256424233                           | Brain_Cerebellar_Hemisphere | 1.849097393                 | 0.150902607  |              |                                       |              |  |
|          | 0.150902607                           | 1.134883264                 | 1.332623501                 | 1.233753383  | 0.139823463  |                                       |              |  |
|          | 2                                     | 0                           | 0.998207054                 |              |              |                                       |              |  |
| LIPJ     | ENSG00000204022.9                     | 0.411507435                 | 2                           | 2            | 0.184440883  |                                       |              |  |
|          | Brain_Anterior_cingulate_cortex_BA24  | 0.873674263                 |                             |              |              | Brain_Cerebellar_Hemisphere           |              |  |
|          | 1.02947158                            | 0.97052842                  | 0.97052842                  | 0.158993159  | 1.327204987  | 0.743099073                           |              |  |
|          | 0.826050505                           | 2                           | 0                           | 0.998207054  |              |                                       |              |  |
| TAPBP1   | ENSG00000139192.11                    | 0.411599646                 | 13                          | 2            | 0.336353441  |                                       |              |  |
|          | Brain_Hippocampus                     | 0.984190444                 | Brain_Hypothalamus          | 11.91532855  |              |                                       |              |  |
|          | 3.71E-05                              | 0.447843768                 | -0.961395311                | 0.037134102  | -0.216879972 |                                       |              |  |
|          | 0.298460402                           | 2                           | 0                           | 0.998207054  |              |                                       |              |  |
| TKT      | ENSG00000163931.15                    | 0.411692324                 | 8                           | 3            | 0.131034349  |                                       |              |  |
|          | Brain_Frontal_Cortex_BA9              | 0.720257674                 |                             |              |              | Brain_Spinal_cord_cervical_c-1        |              |  |
|          | 6.827876589                           | 0.005000454                 | 0.35133746                  | -1.510035568 | -0.358114439 |                                       |              |  |
|          | -0.752727887                          | 0.36663209                  | 3                           | 0            | 0.998207054  |                                       |              |  |
| MED7     | ENSG00000155868.7                     | 0.411704491                 | 2                           | 2            | 0.247637688  |                                       |              |  |
|          | Brain_Hippocampus                     | 0.305647678                 | Brain_Hypothalamus          | 1.349537916  |              |                                       |              |  |
|          | 0.650462084                           | 0.650462084                 | -1.156106278                | -1.024397255 | -1.090251766 |                                       |              |  |
|          | 0.093132343                           | 2                           | 0                           | 0.998207054  |              |                                       |              |  |
| IQCD     | ENSG00000166578.9                     | 0.411818076                 | 1                           | 1            | 0.411818076  |                                       |              |  |
|          | Brain_Hypothalamus                    | 0.411818076                 | Brain_Hypothalamus          | 1            | 1            | 1                                     |              |  |
|          | 0.82069841                            | 0.82069841                  | 0.82069841                  | NA           | 1            | 0                                     | 0.998207054  |  |
| IGSF8    | ENSG00000162729.13                    | 0.4118753                   | 4                           | 3            | 0.076844101  |                                       |              |  |
|          | Brain_Cerebellar_Hemisphere           | 0.770771275                 | Brain_Caudate_basal_ganglia |              |              |                                       |              |  |
|          | 1.981222648                           | 0.022160653                 | 0.89962281                  | -1.769298333 | 0.291366183  |                                       |              |  |
|          | -0.841180058                          | 0.955450944                 | 3                           | 0            | 0.998207054  |                                       |              |  |
| MSH6     | ENSG00000116062.14                    | 0.411998902                 | 3                           | 3            | 0.198181197  |                                       |              |  |
|          | Brain_Nucleus_accumbens_basal_ganglia | 0.987112177                 | Brain_Cerebellar_Hemisphere |              |              |                                       |              |  |
|          | 1.74358813                            | 0.469035838                 | 0.469035838                 | -0.727114268 | 1.286750695  |                                       |              |  |
|          | 0.191929873                           | 1.018374245                 | 3                           | 0            | 0.998207054  |                                       |              |  |
| CDC16    | ENSG00000130177.14                    | 0.412018559                 | 5                           | 4            | 0.215241828  | Brain_Cerebellum                      |              |  |
|          | 0.874249927                           | Brain_Putamen_basal_ganglia | 3.758069756                 | 0.065509377  |              |                                       |              |  |
|          | 0.166301061                           | -1.239279986                | 0.324276512                 | -0.515830963 | 0.7165995    | 4                                     |              |  |
|          | 0                                     | 0.998207054                 |                             |              |              |                                       |              |  |
| C3orf58  | ENSG00000181744.8                     | 0.412088871                 | 1                           | 1            | 0.412088871  |                                       |              |  |
|          | Brain_Hypothalamus                    | 0.412088871                 | Brain_Hypothalamus          | 1            | 1            | 1                                     |              |  |
|          | -0.820223214                          | -0.820223214                | -0.820223214                | NA           | 1            | 0                                     | 0.998207054  |  |
| SLC26A3  | ENSG00000091138.12                    | 0.412127074                 | 1                           | 1            | 0.412127074  |                                       |              |  |
|          | Brain_Cerebellar_Hemisphere           | 0.412127074                 | Brain_Cerebellar_Hemisphere | 1            | 1            |                                       |              |  |

|           |                                       |                                |              |             |                             |                  |
|-----------|---------------------------------------|--------------------------------|--------------|-------------|-----------------------------|------------------|
| 1         | 0.820156188                           | 0.820156188                    | 0.820156188  | NA          | 1                           | 0                |
|           | 0.998207054                           |                                |              |             |                             |                  |
| MCFD2     | ENSG00000180398.11                    | 0.412469159                    | 13           | 1           | 0.287108838                 |                  |
|           | Brain_Nucleus_accumbens_basal_ganglia | 0.650665822                    |              |             |                             |                  |
|           | Brain_Anterior_cingulate_cortex_BA24  | 12.17347533                    |              |             | 0.000263705                 |                  |
|           | 12.17347533                           | -1.06448546                    | -0.452837412 |             | -0.792485842                | 0.165548348      |
| 1         | 0                                     | 0.998207054                    |              |             |                             |                  |
| PPFIA4    | ENSG00000143847.15                    | 0.412812486                    | 4            | 4           | 0.103730901                 |                  |
|           | Brain_Frontal_Cortex_BA9              | 0.653000329                    |              |             | Brain_Cerebellar_Hemisphere |                  |
|           | 1.859787776                           | 0.153924045                    | 0.153924045  |             | -1.627029176                | -0.449598002     |
|           | -0.947769893                          | 0.498396421                    | 4            | 0           | 0.998207054                 |                  |
| LINC01354 | ENSG00000231768.1                     | 0.412843335                    | 5            | 4           | 0.077286167                 |                  |
|           | Brain_Cerebellum                      | 0.845891121                    |              |             | Brain_Putamen_basal_ganglia | 2.768184937      |
|           | 0.073830313                           | 0.199629427                    | -1.766654145 |             | -0.194363687                | -0.787848544     |
|           | 0.624013072                           | 4                              | 0            | 0.998207054 |                             |                  |
| FPGT      | ENSG00000254685.6                     | 0.412889073                    | 5            | 4           | 0.180787637                 |                  |
|           | Brain_Spinal_cord_cervical_c-1        | 0.923574461                    |              |             | Brain_Cortex                | 3.110949877      |
|           | 0.091451905                           | 0.141555378                    | -1.048045424 |             | 1.338333835                 | 0.132244821      |
|           | 0.885781732                           | 4                              | 0            | 0.998207054 |                             |                  |
| EXOC2     | ENSG00000112685.13                    | 0.412910054                    | 3            | 3           | 0.101452937                 | Brain_Cerebellum |
|           | 0.969830189                           | Brain_Spinal_cord_cervical_c-1 | 1.394737808  |             | 0.761721174                 | 0.761721174      |
|           | 0.761721174                           | -0.037821266                   | 1.637850244  |             | 0.711608336                 | 0.851713389      |
| 3         | 0                                     | 0.998207054                    |              |             |                             |                  |
| AMBRA1    | ENSG00000110497.14                    | 0.412981432                    | 1            | 1           | 0.412981432                 |                  |
|           | Brain_Hypothalamus                    | 0.412981432                    |              |             | Brain_Hypothalamus          | 1 1 1            |
|           | 0.818658234                           | 0.818658234                    | 0.818658234  | NA          | 1                           | 0                |
|           | 0.998207054                           |                                |              |             |                             |                  |
| ANKRD36B  | ENSG00000196912.12                    | 0.412987513                    | 11           | 5           | 0.141890888                 |                  |
|           | Brain_Substantia_nigra                | 0.863401025                    |              |             | Brain_Frontal_Cortex_BA9    |                  |
|           | 7.220345004                           | 6.73E-05                       | 0.269082122  |             | -0.645198464                | 1.468785834      |
|           | -0.015719762                          | 0.780222068                    | 5            | 0           | 0.998207054                 |                  |
| PLPP5     | ENSG00000147535.16                    | 0.413075667                    | 6            | 1           | 0.271125556                 |                  |
|           | Brain_Hypothalamus                    | 0.782722164                    |              |             | Brain_Cerebellar_Hemisphere | 5.670790894      |
|           | 0.005336881                           | 5.670790894                    | -1.100474221 |             | -0.275773337                | -0.795337887     |
|           | 0.315532138                           | 1                              | 0            | 0.998207054 |                             |                  |
| PTGFRN    | ENSG00000134247.9                     | 0.413094936                    | 2            | 2           | 0.212311525                 |                  |
|           | Brain_Cerebellum                      | 0.481903799                    |              |             | Brain_Frontal_Cortex_BA9    | 1.201793818      |
|           | 0.798206182                           | 0.798206182                    | -1.247234504 |             | -0.703243846                | -0.975239175     |
|           | 0.384659483                           | 2                              | 0            | 0.998207054 |                             |                  |
| STARD9    | ENSG00000159433.11                    | 0.413216684                    | 1            | 1           | 0.413216684                 |                  |
|           | Brain_Cerebellar_Hemisphere           | 0.413216684                    |              |             | Brain_Cerebellar_Hemisphere | 1 1              |
|           | 1                                     | 0.818246086                    | 0.818246086  | 0.818246086 | NA                          | 1                |
|           | 0.998207054                           |                                |              |             |                             |                  |
| ERVV-1    | ENSG00000269526.1                     | 0.413424279                    | 1            | 1           | 0.413424279                 |                  |
|           | Brain_Cerebellar_Hemisphere           | 0.413424279                    |              |             | Brain_Cerebellar_Hemisphere | 1 1              |
|           | 1                                     | 0.817882508                    | 0.817882508  | 0.817882508 | NA                          | 1                |
|           | 0.998207054                           |                                |              |             |                             |                  |
| DCP2      | ENSG00000172795.15                    | 0.413522809                    | 4            | 3           | 0.602524157                 | Brain_Cerebellum |
|           | 0.902351046                           | Brain_Putamen_basal_ganglia    | 3.224590292  |             | 0.044471515                 |                  |
|           | 0.237139943                           | -0.520774086                   | 0.518076159  |             | -0.080079031                | 0.49087822 3     |
|           | 0                                     | 0.998207054                    |              |             |                             |                  |
| RPL29     | ENSG00000162244.10                    | 0.413602227                    | 6            | 5           | 0.148561594                 |                  |
|           | Brain_Anterior_cingulate_cortex_BA24  | 0.93639021                     |              |             | Brain_Cerebellar_Hemisphere |                  |
|           | 3.824235389                           | 0.061181276                    | 0.194676858  |             | -1.444630882                | 0.734678207      |
|           | 0.150741703                           | 0.816079327                    | 5            | 0           | 0.998207054                 |                  |
| CABLES2   | ENSG00000149679.11                    | 0.413645523                    | 5            | 4           | 0.128649214                 |                  |
|           | Brain_Hippocampus                     | 0.944421107                    |              |             | Brain_Hypothalamus          | 2.587036621      |
|           | 0.057284116                           | 0.58255538                     | -1.519450199 |             | 0.320534868                 | -0.707545002     |
|           | 0.824446566                           | 4                              | 0            | 0.998207054 |                             |                  |
| COQ8A     | ENSG00000163050.16                    | 0.413751884                    | 3            | 3           | 0.14905012                  | Brain_Cortex     |
|           | 0.681970093                           | Brain_Cerebellum               | 1.848879929  |             | 0.154679177                 | 0.154679177      |
|           | -1.442894759                          | 0.64935637                     | -0.127920714 | 1.145083933 | 3                           | 0                |
|           | 0.998207054                           |                                |              |             |                             |                  |

|               |                                       |                   |              |             |                                       |             |              |                |
|---------------|---------------------------------------|-------------------|--------------|-------------|---------------------------------------|-------------|--------------|----------------|
| TDP1          | ENSG00000042088.13                    | 0.413804548       | 2            | 2           | 0.475280674                           |             |              |                |
|               | Brain_Cerebellar_Hemisphere           | 0.788553454       |              |             | Brain_Cerebellum                      | 1.717460045 |              |                |
|               | 0.282539955                           | 0.282539955       | -0.713913491 |             | 0.268189503                           |             | -0.222861994 |                |
|               | 0.694451687                           | 2                 | 0            | 0.998207054 |                                       |             |              |                |
| NEK2          | ENSG00000117650.12                    | 0.413886106       | 1            | 1           | 0.413886106                           |             |              |                |
|               | Brain_Hypothalamus                    | 0.413886106       |              |             | Brain_Hypothalamus                    | 1           | 1            | 1              |
|               | -0.81707406                           | -0.81707406       | -0.81707406  |             | NA                                    | 1           | 0            | 0.998207054    |
| C17orf100     | ENSG00000256806.5                     | 0.413933068       | 7            | 3           | 0.114763201                           |             |              |                |
|               | Brain_Cerebellar_Hemisphere           | 0.616422665       |              |             | Brain_Frontal_Cortex_BA9              |             |              |                |
|               | 5.474689798                           | 0.021174086       | 0.311592777  |             | -1.577140498                          |             | -0.500926765 |                |
|               | -1.15474573                           | 0.445124372       | 3            | 0           | 0.998207054                           |             |              |                |
| TICRR         | ENSG00000140534.13                    | 0.414009952       | 2            | 2           | 0.299003955                           |             |              |                |
|               | Brain_Substantia_nigra                | 0.304486052       |              |             | Brain_Spinal_cord_cervical_c-1        |             |              |                |
|               | 1.209431084                           | 0.790568916       | 0.790568916  |             | 1.026860721                           |             | 1.038571739  |                |
|               | 1.03271623                            | 0.00828094        | 2            | 0           | 0.998207054                           |             |              |                |
| ARSK          | ENSG00000164291.16                    | 0.414081192       | 1            | 1           | 0.414081192                           |             |              |                |
|               | Brain_Nucleus_accumbens_basal_ganglia | 0.414081192       |              |             |                                       |             |              |                |
|               | Brain_Nucleus_accumbens_basal_ganglia | 1                 | 1            | 1           | 0.816732714                           |             |              |                |
|               | 0.816732714                           | 0.816732714       | NA           | 1           | 0                                     | 0.998207054 |              |                |
| CDHR1         | ENSG00000148600.14                    | 0.414238346       | 12           | 4           | 0.095903073                           |             |              |                |
|               | Brain_Cerebellar_Hemisphere           | 0.965841709       |              |             | Brain_Anterior_cingulate_cortex_BA24  |             |              |                |
|               | 9.289537037                           | 0.004536712       | 0.320431641  |             | 0.042824155                           |             | 1.665048535  |                |
|               | 1.054263977                           | 0.479049932       | 4            | 0           | 0.998207054                           |             |              |                |
| ZNF516        | ENSG00000101493.10                    | 0.41434461        | 3            | 3           | 0.196670723                           |             |              | Brain_Cortex   |
|               | 0.709075629                           | Brain_Cerebellum  | 1.068939586  |             | 0.886669884                           |             | 0.886669884  |                |
|               | -1.291095042                          | -0.373097837      | -0.921104988 |             | 0.484197566                           |             | 3            | 0              |
|               | 0.998207054                           |                   |              |             |                                       |             |              |                |
| PCDHB14       | ENSG00000120327.6                     | 0.414364072       | 3            | 3           | 0.101083371                           |             |              |                |
|               | Brain_Hippocampus                     | 0.478516495       |              |             | Brain_Cerebellar_Hemisphere           | 1.967884036 |              |                |
|               | 0.158365022                           | 0.158365022       | 0.708690606  |             | 1.639623995                           |             | 1.03104623   |                |
|               | 0.527353372                           | 3                 | 0            | 0.998207054 |                                       |             |              |                |
| CRIM1         | ENSG00000150938.9                     | 0.414364924       | 2            | 2           | 0.190666926                           |             |              |                |
|               | Brain_Cerebellar_Hemisphere           | 0.328159761       |              |             | Brain_Cerebellum                      | 1.839628895 |              |                |
|               | 0.160371105                           | 0.160371105       | 0.977827271  |             | 1.308608718                           |             | 1.143217995  |                |
|               | 0.233897805                           | 2                 | 0            | 0.998207054 |                                       |             |              |                |
| SEC31A        | ENSG00000138674.16                    | 0.414369516       | 1            | 1           | 0.414369516                           |             |              |                |
|               | Brain_Cortex                          | 0.414369516       |              |             | Brain_Cortex                          | 1           | 1            | 1              |
|               | 0.816228401                           | 0.816228401       | NA           | 1           | 0                                     | 0.998207054 |              | 0.816228401    |
| RP11-396O20.2 | ENSG00000254645.1                     | 0.414427297       | 1            | 1           | 0.414427297                           |             |              |                |
|               | Brain_Amygdala                        | 0.414427297       |              |             | Brain_Amygdala                        | 1           | 1            | 1              |
|               | 0.816127359                           | 0.816127359       | NA           | 1           | 0                                     | 0.998207054 |              | 0.816127359    |
| RBAKDN        | ENSG00000273313.1                     | 0.414494313       | 4            | 2           | 0.759410567                           |             |              |                |
|               | Brain_Hypothalamus                    | 0.830917496       |              |             | Brain_Nucleus_accumbens_basal_ganglia |             |              |                |
|               | 3.841881891                           | 0.002692458       | 0.133159733  |             | -0.304673919                          |             | 0.306254911  |                |
|               | -0.1158472                            | 0.283874022       | 2            | 0           | 0.998207054                           |             |              |                |
| ZGPAT         | ENSG00000197114.11                    | 0.414794168       | 2            | 2           | 0.285538074                           |             |              |                |
|               | Brain_Cerebellar_Hemisphere           | 0.911256742       |              |             | Brain_Cerebellum                      | 1.523520958 |              |                |
|               | 0.476479042                           | 0.476479042       | -0.111453495 |             | 1.067961067                           |             | 0.478253786  |                |
|               | 0.833972034                           | 2                 | 0            | 0.998207054 |                                       |             |              |                |
| EPM2AIP1      | ENSG00000178567.7                     | 0.4148415         | 2            | 2           | 0.191482953                           |             |              |                |
|               | Brain_Putamen_basal_ganglia           | 0.602812332       |              |             | Brain_Amygdala                        | 1.225795177 |              |                |
|               | 0.774204823                           | 0.774204823       | 0.520360506  |             | 1.306204707                           |             | 0.913282606  |                |
|               | 0.555675764                           | 2                 | 0            | 0.998207054 |                                       |             |              |                |
| RPS14         | ENSG00000164587.11                    | 0.414915675       | 4            | 2           | 0.191810652                           |             |              | Brain_Amygdala |
|               | 0.478449054                           | Brain_Hippocampus | 3.2278841    |             | 1.51E-07                              |             | 0.729479864  |                |
|               | -1.305241425                          | -0.708799265      | -0.915751812 |             | 0.281536572                           |             | 2            | 0              |
|               | 0.998207054                           |                   |              |             |                                       |             |              |                |
| OR13A1        | ENSG00000256574.6                     | 0.414959317       | 5            | 4           | 0.127810287                           |             |              |                |
|               | Brain_Hippocampus                     | 0.86842351        |              |             | Brain_Amygdala                        | 2.985744354 |              | 0.021497149    |
|               | 0.27431127                            | -1.522793859      | 1.504670108  |             | 0.230900548                           |             | 1.273717585  | 4              |
|               | 0                                     | 0.998207054       |              |             |                                       |             |              |                |
| LINC01574     | ENSG00000248859.2                     | 0.415031295       | 3            | 3           | 0.126747272                           |             |              |                |

|              |                                       |                             |                                       |                          |              |              |              |
|--------------|---------------------------------------|-----------------------------|---------------------------------------|--------------------------|--------------|--------------|--------------|
|              | Brain_Frontal_Cortex_BA9              | 0.783145989                 |                                       | Brain_Substantia_nigra   |              |              |              |
|              | 1.175389933                           | 0.777324161                 | 0.777324161                           | -0.275221606             | 1.527055256  |              |              |
|              | 0.718209435                           | 0.915207216                 | 3                                     | 0                        | 0.998207054  |              |              |
| TSPAN19      | ENSG00000231738.10                    | 0.415226788                 | 2                                     | 2                        | 0.320001152  |              |              |
|              | Brain_Cerebellum                      | 0.634927183                 |                                       | Brain_Frontal_Cortex_BA9 | 1.348906279  |              |              |
|              | 0.651093721                           | 0.651093721                 | 0.474803297                           | 0.994455516              | 0.734629407  |              |              |
|              | 0.367449608                           | 2                           | 0                                     | 0.998207054              |              |              |              |
| RPS6         | ENSG00000137154.12                    | 0.415288595                 | 3                                     | 3                        | 0.148992626  | Brain_Cortex |              |
|              | 0.728655639                           | Brain_Cerebellar_Hemisphere | 1.741455288                           | 0.40065205               | 0.40065205   |              |              |
|              | -1.443098854                          | 0.491212369                 | -0.201657367                          | 1.077538029              | 3            | 0            |              |
|              | 0.998207054                           |                             |                                       |                          |              |              |              |
| ALKBH4       | ENSG00000160993.3                     | 0.415385456                 | 1                                     | 1                        | 0.415385456  |              |              |
|              | Brain_Cerebellum                      | 0.415385456                 | Brain_Cerebellum                      | 1                        | 1            | 1            | -0.814453054 |
|              | -0.814453054                          | -0.814453054                | NA                                    | 1                        | 0            | 0.998207054  |              |
| PARPBP       | ENSG00000185480.11                    | 0.415431616                 | 1                                     | 1                        | 0.415431616  |              |              |
|              | Brain_Nucleus_accumbens_basal_ganglia | 0.415431616                 |                                       |                          |              |              |              |
|              | Brain_Nucleus_accumbens_basal_ganglia | 1                           | 1                                     | 1                        | 0.81437245   | 0.81437245   |              |
|              | 0.81437245                            | NA                          | 1                                     | 0                        | 0.998207054  |              |              |
| CHTF18       | ENSG00000127586.16                    | 0.415458549                 | 4                                     | 4                        | 0.130564948  |              |              |
|              | Brain_Amygdala                        | 0.924830841                 | Brain_Nucleus_accumbens_basal_ganglia |                          |              |              |              |
|              | 2.383772516                           | 0.374691914                 | 0.374691914                           | -1.511877819             | 0.825238476  |              |              |
|              | -0.158145868                          | 0.982798559                 | 4                                     | 0                        | 0.998207054  |              |              |
| SMARCA4      | ENSG00000127616.17                    | 0.415587369                 | 2                                     | 2                        | 0.395067054  |              |              |
|              | Brain_Caudate_basal_ganglia           | 0.521636441                 | Brain_Frontal_Cortex_BA9              |                          |              |              |              |
|              | 1.360927862                           | 0.639072138                 | 0.639072138                           | -0.850464204             | 0.640824919  |              |              |
|              | -0.104819642                          | 1.054500652                 | 2                                     | 0                        | 0.998207054  |              |              |
| RP11-108M9.3 | ENSG00000228549.3                     | 0.415604572                 | 7                                     | 7                        | 0.052580285  |              |              |
|              | Brain_Hippocampus                     | 0.891913863                 | Brain_Hypothalamus                    | 1.92798719               | 0.28912425   |              |              |
|              | 0.28912425                            | -0.932702618                | 1.938352061                           | 0.365135782              | 0.989343039  | 7            |              |
|              | 0                                     | 0.998207054                 |                                       |                          |              |              |              |
| PRSS51       | ENSG00000253649.3                     | 0.415624399                 | 6                                     | 6                        | 0.09113531   |              |              |
|              | Brain_Frontal_Cortex_BA9              | 0.958301568                 | Brain_Hypothalamus                    | 1.704826975              |              |              |              |
|              | 0.389389662                           | 0.389389662                 | -1.391990418                          | 1.68943912               | 0.021993072  |              |              |
|              | 1.022018899                           | 6                           | 0                                     | 0.998207054              |              |              |              |
| PERM1        | ENSG00000187642.9                     | 0.415699587                 | 3                                     | 3                        | 0.098373505  |              |              |
|              | Brain_Anterior_cingulate_cortex_BA24  | 0.731934347                 | Brain_Cortex                          |                          |              |              |              |
|              | 1.797254748                           | 0.266272823                 | 0.266272823                           | 0.342553556              | 1.652790515  |              |              |
|              | 1.141065446                           | 0.700617751                 | 3                                     | 0                        | 0.998207054  |              |              |
| LINC01352    | ENSG00000238078.1                     | 0.41578734                  | 11                                    | 9                        | 0.049889861  |              |              |
|              | Brain_Hypothalamus                    | 0.892150921                 | Brain_Caudate_basal_ganglia           | 4.688364131              |              |              |              |
|              | 1.71E-07                              | 0.271383441                 | -0.778259276                          | 1.960907101              | 0.7676221    |              |              |
|              | 0.868504901                           | 9                           | 0                                     | 0.998207054              |              |              |              |
| RP11-256L6.5 | ENSG00000283422.1                     | 0.415860962                 | 1                                     | 1                        | 0.415860962  |              |              |
|              | Brain_Cerebellar_Hemisphere           | 0.415860962                 | Brain_Cerebellar_Hemisphere           | 1                        | 1            |              |              |
|              | 1                                     | -0.813622992                | -0.813622992                          | -0.813622992             | NA           | 1            | 0            |
|              | 0.998207054                           |                             |                                       |                          |              |              |              |
| CATSPER1     | ENSG00000175294.5                     | 0.415886795                 | 1                                     | 1                        | 0.415886795  |              |              |
|              | Brain_Anterior_cingulate_cortex_BA24  | 0.415886795                 |                                       |                          |              |              |              |
|              | Brain_Anterior_cingulate_cortex_BA24  | 1                           | 1                                     | 1                        | 0.813577914  |              |              |
|              | 0.813577914                           | 0.813577914                 | NA                                    | 1                        | 0            | 0.998207054  |              |
| CTSC         | ENSG00000109861.15                    | 0.415894294                 | 4                                     | 4                        | 0.099671155  |              |              |
|              | Brain_Nucleus_accumbens_basal_ganglia | 0.945441304                 | Brain_Cortex                          |                          |              |              |              |
|              | 2.813128371                           | 0.143386685                 | 0.143386685                           | 0.068432559              | 1.646449957  |              |              |
|              | 0.727640927                           | 0.677288184                 | 4                                     | 0                        | 0.998207054  |              |              |
| RCOR3        | ENSG00000117625.13                    | 0.415918188                 | 1                                     | 1                        | 0.415918188  |              |              |
|              | Brain_Caudate_basal_ganglia           | 0.415918188                 | Brain_Caudate_basal_ganglia           | 1                        | 1            |              |              |
|              | 1                                     | 0.813523135                 | 0.813523135                           | 0.813523135              | NA           | 1            | 0            |
|              | 0.998207054                           |                             |                                       |                          |              |              |              |
| KCTD21       | ENSG00000188997.7                     | 0.416045259                 | 13                                    | 3                        | 0.189341289  |              |              |
|              | Brain_Spinal_cord_cervical_c-1        | 0.999274842                 | Brain_Cerebellum                      | 11.34784888              |              |              |              |
|              | 0.000270102                           | 0.651741282                 | -1.312530242                          | 0.035874143              | -0.392924502 |              |              |
|              | 0.362123751                           | 3                           | 0                                     | 0.998207054              |              |              |              |



|               |                                       |                             |                                       |             |                             |                  |             |
|---------------|---------------------------------------|-----------------------------|---------------------------------------|-------------|-----------------------------|------------------|-------------|
| DNER          | ENSG00000187957.7                     | 0.416232185                 | 3                                     | 3           | 0.091988206                 |                  |             |
|               | Brain_Hypothalamus                    | 0.938140634                 |                                       |             | Brain_Putamen_basal_ganglia | 1.07667606       |             |
|               | 0.948988147                           | 0.948988147                 | 0.077607051                           |             | 1.685001897                 | 0.627273181      |             |
|               | 0.9162561                             | 3                           | 0                                     | 0.998207054 |                             |                  |             |
| N4BP2         | ENSG00000078177.13                    | 0.41625505                  | 1                                     | 1           | 0.41625505                  | Brain_Cerebellum | 0.41625505  |
|               | Brain_Cerebellum                      | 1                           | 1                                     | 0.812935483 | 0.812935483                 | 0.812935483      |             |
|               | NA                                    | 1                           | 0                                     | 0.998207054 |                             |                  |             |
| FBXO31        | ENSG00000103264.17                    | 0.416444555                 | 2                                     | 2           | 0.186618387                 |                  |             |
|               | Brain_Cerebellum                      | 0.27247475                  | Brain_Cerebellar_Hemisphere           | 1.864721418 |                             |                  |             |
|               | 0.135278582                           | 0.135278582                 | -1.320649118                          |             | -1.097381287                | -1.209015203     |             |
|               | 0.157874197                           | 2                           | 0                                     | 0.998207054 |                             |                  |             |
| CLDN9         | ENSG00000213937.3                     | 0.416674457                 | 9                                     | 2           | 0.167017222                 |                  |             |
|               | Brain_Anterior_cingulate_cortex_BA24  | 0.658046062                 |                                       |             |                             |                  |             |
|               | Brain_Nucleus_accumbens_basal_ganglia | 7.943205384                 |                                       |             | 0.00465445                  | 0.401261347      |             |
|               | 0.442612472                           | 1.381851761                 | 1.144954533                           |             | 0.279168692                 | 2                | 0           |
|               | 0.998207054                           |                             |                                       |             |                             |                  |             |
| AC099552.3    | ENSG00000228521.2                     | 0.41681203                  | 4                                     | 4           | 0.053988914                 |                  |             |
|               | Brain_Spinal_cord_cervical_c-1        | 0.442730922                 |                                       |             | Brain_Caudate_basal_ganglia |                  |             |
|               | 2.570640478                           | 0.198316486                 | 0.198316486                           |             | -1.926925507                | 0.876320377      |             |
|               | -0.804676651                          | 1.216770083                 | 4                                     | 0           | 0.998207054                 |                  |             |
| CRAMP1        | ENSG00000007545.15                    | 0.416833817                 | 3                                     | 3           | 0.119467424                 |                  |             |
|               | Brain_Cortex                          | 0.912152627                 | Brain_Cerebellum                      | 1.886826163 |                             | 0.136310062      |             |
|               | 0.136310062                           | -1.557012894                | 0.110323744                           |             | -0.561549698                | 0.879508734      |             |
|               | 3                                     | 0                           | 0.998207054                           |             |                             |                  |             |
| RP11-266K4.14 | ENSG00000275367.1                     | 0.416843923                 | 2                                     | 2           | 0.193092051                 |                  |             |
|               | Brain_Cerebellar_Hemisphere           | 0.463718112                 | Brain_Cerebellum                      | 1.395687337 |                             |                  |             |
|               | 0.604312663                           | 0.604312663                 | -1.3014863                            |             | -0.732738214                | -1.017112257     |             |
|               | 0.402165628                           | 2                           | 0                                     | 0.998207054 |                             |                  |             |
| FAM208B       | ENSG00000108021.19                    | 0.417070361                 | 2                                     | 2           | 0.327824802                 |                  |             |
|               | Brain_Cerebellum                      | 0.378008244                 | Brain_Putamen_basal_ganglia           | 1.008254376 |                             |                  |             |
|               | 0.991745624                           | 0.991745624                 | -0.978504631                          |             | -0.881572108                | -0.930038369     |             |
|               | 0.068541644                           | 2                           | 0                                     | 0.998207054 |                             |                  |             |
| WASHC3        | ENSG00000120860.10                    | 0.417139105                 | 10                                    | 4           | 0.275830752                 |                  |             |
|               | Brain_Putamen_basal_ganglia           | 0.951933824                 | Brain_Nucleus_accumbens_basal_ganglia |             |                             |                  |             |
|               | 7.1149613                             | 0.033635418                 | 0.376920169                           |             | -1.089733052                | 0.374078321      |             |
|               | -0.38717975                           | 0.50798691                  | 4                                     | 0           | 0.998207054                 |                  |             |
| SLC13A3       | ENSG00000158296.13                    | 0.417247783                 | 10                                    | 3           | 0.169157951                 |                  |             |
|               | Brain_Hippocampus                     | 0.980180344                 | Brain_Caudate_basal_ganglia           | 8.325878638 |                             |                  |             |
|               | 0.000543714                           | 0.398786227                 | -0.661196173                          |             | 1.374914506                 | -0.089410704     |             |
|               | 0.571247325                           | 3                           | 0                                     | 0.998207054 |                             |                  |             |
| TSEN34        | ENSG00000170892.10                    | 0.417274841                 | 1                                     | 1           | 0.417274841                 |                  |             |
|               | Brain_Hypothalamus                    | 0.417274841                 | Brain_Hypothalamus                    | 1           | 1                           | 1                |             |
|               | -0.811158176                          | -0.811158176                | -0.811158176                          |             | NA                          | 1                | 0           |
|               | 0.998207054                           |                             |                                       |             |                             |                  |             |
| CSNK1G3       | ENSG00000151292.17                    | 0.417397244                 | 2                                     | 2           | 0.21536638                  | Brain_Cerebellum |             |
|               | 0.909138718                           | Brain_Cerebellar_Hemisphere | 1.428296401                           |             | 0.571703599                 |                  |             |
|               | 0.571703599                           | 0.114124984                 | 1.238943616                           |             | 0.6765343                   | 0.795366883      | 2           |
|               | 0                                     | 0.998207054                 |                                       |             |                             |                  |             |
| GALNT8        | ENSG00000130035.6                     | 0.417625381                 | 1                                     | 1           | 0.417625381                 |                  |             |
|               | Brain_Cerebellar_Hemisphere           | 0.417625381                 | Brain_Cerebellar_Hemisphere           | 1           | 1                           |                  |             |
|               | 1                                     | 0.810547841                 | 0.810547841                           |             | 0.810547841                 | NA               | 1           |
|               | 0.998207054                           |                             |                                       |             |                             |                  |             |
| SYT14         | ENSG00000143469.18                    | 0.417854892                 | 4                                     | 4           | 0.184037091                 |                  |             |
|               | Brain_Spinal_cord_cervical_c-1        | 0.717908907                 | Brain_Amygdala                        | 2.943149319 |                             |                  |             |
|               | 0.165807104                           | 0.165807104                 | -1.328426981                          |             | 0.361254897                 | -0.555708883     |             |
|               | 0.702239595                           | 4                           | 0                                     | 0.998207054 |                             |                  |             |
| APBA3         | ENSG00000011132.11                    | 0.417856889                 | 1                                     | 1           | 0.417856889                 | Brain_Cerebellum |             |
|               | 0.417856889                           | Brain_Cerebellum            | 1                                     | 1           | 1                           | 0.810144922      | 0.810144922 |
|               | 0.810144922                           | NA                          | 1                                     | 0           | 0.998207054                 |                  |             |
| PDIK1L        | ENSG00000175087.9                     | 0.417979327                 | 5                                     | 4           | 0.360336637                 |                  |             |
|               | Brain_Cerebellum                      | 0.531087461                 | Brain_Anterior_cingulate_cortex_BA24  |             |                             |                  |             |
|               | 3.644428095                           | 0.007097674                 | 0.163323339                           |             | -0.872122063                | 0.914723819      |             |
|               | 0.465614878                           | 0.756266012                 | 4                                     | 0           | 0.998207054                 |                  |             |

|               |                                       |                                       |                                       |              |              |                   |            |            |   |
|---------------|---------------------------------------|---------------------------------------|---------------------------------------|--------------|--------------|-------------------|------------|------------|---|
| ZNF470        | ENSG00000197016.11                    | 0.417988093                           | 12                                    | 6            | 0.064048073  |                   |            |            |   |
|               | Brain_Cortex                          | 0.9559218                             | Brain_Amygdala                        | 8.832972035  | 0.001967614  |                   |            |            |   |
|               | 0.352839744                           | -1.851845077                          | -0.055271961                          | -0.916707404 | 0.59323327   | 6                 |            |            |   |
|               | 0                                     | 0.998207054                           |                                       |              |              |                   |            |            |   |
| RP11-471B22.3 | ENSG00000275198.1                     | 0.418002105                           | 6                                     | 4            | 0.131484134  |                   |            |            |   |
|               | Brain_Cerebellar_Hemisphere           | 0.765482159                           | Brain_Nucleus_accumbens_basal_ganglia |              |              |                   |            |            |   |
|               | 4.539178346                           | 0.061810762                           | 0.255458279                           | -0.298289576 | 1.508275098  |                   |            |            |   |
|               | 0.705488114                           | 0.601438694                           | 4                                     | 0            | 0.998207054  |                   |            |            |   |
| ZNF227        | ENSG00000131115.15                    | 0.418002209                           | 2                                     | 2            | 0.217242924  |                   |            |            |   |
|               | Brain_Spinal_cord_cervical_c-1        | 0.684891376                           | Brain_Cerebellar_Hemisphere           |              |              |                   |            |            |   |
|               | 1.052492849                           | 0.947507151                           | 0.947507151                           | -1.23389261  | 0.405797526  |                   |            |            |   |
|               | -0.414047542                          | 1.159436014                           | 2                                     | 0            | 0.998207054  |                   |            |            |   |
| RP3-395M20.9  | ENSG00000228037.1                     | 0.418012682                           | 4                                     | 3            | 0.115904506  |                   |            |            |   |
|               | Brain_Nucleus_accumbens_basal_ganglia | 0.725439676                           | Brain_Substantia_nigra                |              |              |                   |            |            |   |
|               | 1.999528573                           | 0.02278048                            | 0.973518877                           | -1.572198575 | 0.677153625  |                   |            |            |   |
|               | -0.012853413                          | 1.048095906                           | 3                                     | 0            | 0.998207054  |                   |            |            |   |
| KCMF1         | ENSG00000176407.17                    | 0.418135587                           | 1                                     | 1            | 0.418135587  |                   |            |            |   |
|               | Brain_Substantia_nigra                | 0.418135587                           | Brain_Substantia_nigra                | 1            | 1            |                   |            |            |   |
|               | 1                                     | -0.809660047                          | -0.809660047                          | -0.809660047 | NA           | 1                 | 0          |            |   |
|               | 0.998207054                           |                                       |                                       |              |              |                   |            |            |   |
| CCDC59        | ENSG00000133773.11                    | 0.418278078                           | 1                                     | 1            | 0.418278078  |                   |            |            |   |
|               | Brain_Substantia_nigra                | 0.418278078                           | Brain_Substantia_nigra                | 1            | 1            |                   |            |            |   |
|               | 1                                     | 0.809412216                           | 0.809412216                           | 0.809412216  | NA           | 1                 | 0          |            |   |
|               | 0.998207054                           |                                       |                                       |              |              |                   |            |            |   |
| QSOX2         | ENSG00000165661.16                    | 0.418396582                           | 5                                     | 4            | 0.143606852  |                   |            |            |   |
|               | Brain_Frontal_Cortex_BA9              | 0.929245376                           | Brain_Cerebellum                      | 3.0767891    |              |                   |            |            |   |
|               | 0.060769023                           | 0.504437163                           | -0.088794315                          | 1.462490477  | 0.676272449  |                   |            |            |   |
|               | 0.618821923                           | 4                                     | 0                                     | 0.998207054  |              |                   |            |            |   |
| PTK6          | ENSG00000101213.6                     | 0.418408109                           | 7                                     | 6            | 0.16428421   |                   |            |            |   |
|               | Brain_Putamen_basal_ganglia           | 0.822137175                           | Brain_Spinal_cord_cervical_c-1        |              |              |                   |            |            |   |
|               | 2.574185531                           | 0.080075214                           | 0.518526017                           | -1.265847315 | 1.390806176  |                   |            |            |   |
|               | -0.173367322                          | 1.044960391                           | 6                                     | 0            | 0.998207054  |                   |            |            |   |
| TTC13         | ENSG00000143643.12                    | 0.418488506                           | 2                                     | 2            | 0.240251353  | Brain_Cerebellum  |            |            |   |
|               | 0.364710007                           | Brain_Nucleus_accumbens_basal_ganglia | 1.279136113                           |              |              |                   |            |            |   |
|               | 0.720863887                           | 0.720863887                           | -1.174358769                          | 0.906426774  | -0.133965998 |                   |            |            |   |
|               | 1.471337568                           | 2                                     | 0                                     | 0.998207054  |              |                   |            |            |   |
| CCZ1          | ENSG00000122674.11                    | 0.41851243                            | 13                                    | 6            | 0.052454221  |                   |            |            |   |
|               | Brain_Nucleus_accumbens_basal_ganglia | 0.926343967                           | Brain_Cerebellar_Hemisphere           |              |              |                   |            |            |   |
|               | 9.362345296                           | 0.041730069                           | 0.35155454                            | -1.939387094 | 0.153430891  |                   |            |            |   |
|               | -0.622853784                          | 0.555663228                           | 6                                     | 0            | 0.998207054  |                   |            |            |   |
| YBX3          | ENSG00000060138.12                    | 0.418548092                           | 1                                     | 1            | 0.418548092  |                   |            |            |   |
|               | Brain_Spinal_cord_cervical_c-1        | 0.418548092                           | Brain_Spinal_cord_cervical_c-1        |              |              |                   |            |            |   |
|               | 1                                     | 1                                     | 1                                     | -0.808942725 | -0.808942725 | -0.808942725      | NA         | 1          | 0 |
|               | 0.998207054                           |                                       |                                       |              |              |                   |            |            |   |
| HCG11         | ENSG00000228223.2                     | 0.418558788                           | 1                                     | 1            | 0.418558788  | Brain_Cerebellum  |            |            |   |
|               | 0.418558788                           | Brain_Cerebellum                      | 1                                     | 1            | 0.80892413   | 0.80892413        | 0.80892413 | 0.80892413 |   |
|               | NA                                    | 1                                     | 0                                     | 0.998207054  |              |                   |            |            |   |
| RP11-320M2.1  | ENSG00000257135.5                     | 0.418562305                           | 1                                     | 1            | 0.418562305  |                   |            |            |   |
|               | Brain_Caudate_basal_ganglia           | 0.418562305                           | Brain_Caudate_basal_ganglia           | 1            | 1            |                   |            |            |   |
|               | 1                                     | -0.808918016                          | -0.808918016                          | -0.808918016 | NA           | 1                 | 0          |            |   |
|               | 0.998207054                           |                                       |                                       |              |              |                   |            |            |   |
| ACCS          | ENSG00000110455.13                    | 0.4186554                             | 13                                    | 5            | 0.03548542   | Brain_Hippocampus |            |            |   |
|               | 0.517627027                           | Brain_Substantia_nigra                | 9.830309633                           | 0.032634601  |              |                   |            |            |   |
|               | 0.367168753                           | -2.102775261                          | -0.647007596                          | -1.49818217  | 0.395535485  |                   |            |            |   |
|               | 5                                     | 0                                     | 0.998207054                           |              |              |                   |            |            |   |
| BORCS7        | ENSG00000166275.15                    | 0.418731461                           | 13                                    | 3            | 0.042980252  |                   |            |            |   |
|               | Brain_Caudate_basal_ganglia           | 0.367116892                           | Brain_Substantia_nigra                | 10.5013104   |              |                   |            |            |   |
|               | 0.00764522                            | 0.433385302                           | -2.023901849                          | -0.901887011 | -1.486681641 |                   |            |            |   |
|               | 0.336758611                           | 3                                     | 0                                     | 0.998207054  |              |                   |            |            |   |
| MADCAM1       | ENSG00000099866.14                    | 0.418736709                           | 8                                     | 5            | 0.392143535  |                   |            |            |   |
|               | Brain_Spinal_cord_cervical_c-1        | 0.87396157                            | Brain_Cortex                          | 4.746023044  |              |                   |            |            |   |
|               | 0.035729848                           | 0.306302386                           | -0.799235733                          | 0.85573652   | 0.087422971  |                   |            |            |   |

|               |                                       |                             |              |              |                                      |              |             |   |  |
|---------------|---------------------------------------|-----------------------------|--------------|--------------|--------------------------------------|--------------|-------------|---|--|
| 0.594976591   | 5                                     | 0                           | 0.998207054  |              |                                      |              |             |   |  |
| SDCCAG3       | ENSG00000165689.16                    | 0.418774201                 | 1            | 1            | 0.418774201                          |              |             |   |  |
|               | Brain_Spinal_cord_cervical_c-1        | 0.418774201                 |              |              | Brain_Spinal_cord_cervical_c-1       |              |             |   |  |
|               | 1                                     | 1                           | -0.808549712 | -0.808549712 | -0.808549712                         | NA           | 1           | 0 |  |
|               | 0.998207054                           |                             |              |              |                                      |              |             |   |  |
| HLX           | ENSG00000136630.12                    | 0.418891185                 | 2            | 2            | 0.268181645                          |              |             |   |  |
|               | Brain_Cerebellar_Hemisphere           | 0.734325841                 |              |              | Brain_Cerebellum                     | 1.309378571  |             |   |  |
|               | 0.690621429                           | 0.690621429                 | -0.33937687  |              | 1.107259741                          | 0.383941435  |             |   |  |
|               | 1.022926558                           | 2                           | 0            | 0.998207054  |                                      |              |             |   |  |
| FAM47E        | ENSG00000189157.13                    | 0.419044688                 | 13           | 2            | 0.080047134                          |              |             |   |  |
|               | Brain_Frontal_Cortex_BA9              | 0.457827883                 |              |              | Brain_Cortex                         | 11.98856914  |             |   |  |
|               | 0.000719261                           | 0.527181088                 | -1.750412654 |              | -0.742428293                         | -1.261402042 |             |   |  |
|               | 0.270495104                           | 2                           | 0            | 0.998207054  |                                      |              |             |   |  |
| SMARCD2       | ENSG00000108604.15                    | 0.419058457                 | 1            | 1            | 0.419058457                          |              |             |   |  |
|               | Brain_Nucleus_accumbens_basal_ganglia | 0.419058457                 |              |              |                                      |              |             |   |  |
|               | Brain_Nucleus_accumbens_basal_ganglia | 1                           | 1            | 1            | -0.808055805                         |              |             |   |  |
|               | -0.808055805                          | -0.808055805                | NA           | 1            | 0                                    | 0.998207054  |             |   |  |
| RP11-670E13.6 | ENSG00000274213.1                     | 0.419065493                 | 1            | 1            | 0.419065493                          |              |             |   |  |
|               | Brain_Hippocampus                     | 0.419065493                 |              |              | Brain_Hippocampus                    | 1            | 1           | 1 |  |
|               | -0.808043584                          | -0.808043584                | -0.808043584 | NA           | 1                                    | 0            | 0.998207054 |   |  |
| TINAG         | ENSG00000137251.15                    | 0.419195337                 | 1            | 1            | 0.419195337                          |              |             |   |  |
|               | Brain_Frontal_Cortex_BA9              | 0.419195337                 |              |              | Brain_Frontal_Cortex_BA9             | 1            | 1           |   |  |
|               | 1                                     | -0.807818042                | -0.807818042 | -0.807818042 | NA                                   | 1            | 0           |   |  |
|               | 0.998207054                           |                             |              |              |                                      |              |             |   |  |
| PCDH20        | ENSG00000280165.1                     | 0.419209633                 | 2            | 2            | 0.237097968                          |              |             |   |  |
|               | Brain_Substantia_nigra                | 0.494433674                 |              |              | Brain_Putamen_basal_ganglia          |              |             |   |  |
|               | 1.085830524                           | 0.914169476                 | 0.914169476  | -1.182271556 | 0.683274073                          |              |             |   |  |
|               | -0.249498742                          | 1.319139965                 | 2            | 0            | 0.998207054                          |              |             |   |  |
| HIST1H3H      | ENSG00000278828.1                     | 0.419284815                 | 1            | 1            | 0.419284815                          |              |             |   |  |
|               | Brain_Cerebellar_Hemisphere           | 0.419284815                 |              |              | Brain_Cerebellar_Hemisphere          | 1            | 1           |   |  |
|               | 1                                     | 0.807662643                 | 0.807662643  | 0.807662643  | NA                                   | 1            | 0           |   |  |
|               | 0.998207054                           |                             |              |              |                                      |              |             |   |  |
| DDR2          | ENSG00000162733.16                    | 0.419324457                 | 1            | 1            | 0.419324457                          |              |             |   |  |
|               | Brain_Amygdala                        | 1                           | 1            | 1            | 0.8075938                            | 0.8075938    | 0.8075938   |   |  |
|               | NA                                    | 1                           | 0            | 0.998207054  |                                      |              |             |   |  |
| CTB-58E17.1   | ENSG00000277969.1                     | 0.419472314                 | 2            | 2            | 0.290953131                          |              |             |   |  |
|               | Brain_Cerebellum                      | 0.414979536                 |              |              | Brain_Anterior_cingulate_cortex_BA24 |              |             |   |  |
|               | 1.025136729                           | 0.974863271                 | 0.974863271  | -1.056033015 | -0.815162087                         |              |             |   |  |
|               | -0.935597551                          | 0.170321467                 | 2            | 0            | 0.998207054                          |              |             |   |  |
| ENTPD3        | ENSG00000168032.8                     | 0.419474732                 | 5            | 3            | 0.208381607                          |              |             |   |  |
|               | Brain_Nucleus_accumbens_basal_ganglia | 0.832953336                 |              |              | Brain_Caudate_basal_ganglia          |              |             |   |  |
|               | 4.423364922                           | 0.01283269                  | 0.227196201  | 0.210915338  | 1.258028065                          |              |             |   |  |
|               | 0.827603032                           | 0.381117278                 | 3            | 0            | 0.998207054                          |              |             |   |  |
| PUS10         | ENSG00000162927.13                    | 0.419486641                 | 2            | 2            | 0.189121185                          |              |             |   |  |
|               | Brain_Nucleus_accumbens_basal_ganglia | 0.870146605                 |              |              | Brain_Cerebellum                     |              |             |   |  |
|               | 1.037732764                           | 0.962267236                 | 0.962267236  | -0.163472269 | 1.313183314                          |              |             |   |  |
|               | 0.574855522                           | 1.044153176                 | 2            | 0            | 0.998207054                          |              |             |   |  |
| FKRP          | ENSG00000181027.10                    | 0.419524188                 | 10           | 5            | 0.311683443                          |              |             |   |  |
|               | Brain_Cerebellum                      | 6.951891387                 |              |              | Brain_Amygdala                       |              |             |   |  |
|               | 0.988714093                           | Brain_Cerebellum            | 6.951891387  | 0.006602788  | 0.260624574                          |              |             |   |  |
|               | -0.947951513                          | 1.011695969                 | 0.152902395  | 0.682809315  | 5                                    | 0            |             |   |  |
|               | 0.998207054                           |                             |              |              |                                      |              |             |   |  |
| MED20         | ENSG00000124641.15                    | 0.419533349                 | 5            | 4            | 0.249972778                          |              |             |   |  |
|               | Brain_Cerebellar_Hemisphere           | 3.465726141                 |              |              | Brain_Cortex                         |              |             |   |  |
|               | 0.997734291                           | Brain_Cerebellar_Hemisphere | 3.465726141  | 0.066773126  |                                      |              |             |   |  |
|               | 0.138275621                           | -1.150415503                | 0.159919033  | -0.175777545 | 0.552214055                          |              |             |   |  |
|               | 4                                     | 0                           | 0.998207054  |              |                                      |              |             |   |  |
| ZNF775        | ENSG00000196456.11                    | 0.419546408                 | 1            | 1            | 0.419546408                          |              |             |   |  |
|               | Brain_Spinal_cord_cervical_c-1        | 0.419546408                 |              |              | Brain_Spinal_cord_cervical_c-1       |              |             |   |  |
|               | 1                                     | 1                           | 0.807208433  | 0.807208433  | 0.807208433                          | NA           | 1           | 0 |  |
|               | 0.998207054                           |                             |              |              |                                      |              |             |   |  |
| CYB5R2        | ENSG00000166394.14                    | 0.419764152                 | 1            | 1            | 0.419764152                          |              |             |   |  |
|               | Brain_Putamen_basal_ganglia           | 0.419764152                 |              |              | Brain_Putamen_basal_ganglia          | 1            | 1           |   |  |
|               | 1                                     | 0.806830487                 | 0.806830487  | 0.806830487  | NA                                   | 1            | 0           |   |  |

0.998207054

SPAG1 ENSG00000104450.12 0.419862655 3 2 0.363710335  
Brain\_Nucleus\_accumbens\_basal\_ganglia 0.676289638 Brain\_Cerebellum  
2.130475043 0.019090978 0.850433979 -0.822169826 0.908317812  
-0.110461195 0.905188393 2 0 0.998207054

TRIM2 ENSG00000109654.14 0.420089691 3 3 0.123965635  
Brain\_Hypothalamus 0.77024643 Brain\_Putamen\_basal\_ganglia 1.758283002  
0.243418009 0.243418009 -1.538339464 -0.29205257 -0.806693695  
0.650865591 3 0 0.998207054

IL21R ENSG00000103522.15 0.420313498 7 4 0.068906653  
Brain\_Substantia\_nigra 0.742517099 Brain\_Cerebellum 4.738820074  
0.040726043 -0.283094391 -1.819031315 -0.328521886 -0.738534469  
0.508582954 4 0 0.998207054

ESYT3 ENSG00000158220.13 0.420380368 4 4 0.072678821  
Brain\_Cerebellar\_Hemisphere 0.759997831 Brain\_Hippocampus 2.131657653  
0.233298397 -0.233298397 -1.79484235 0.367415274 -0.649450733  
0.914816344 4 0 0.998207054

UGGT1 ENSG00000136731.12 0.420391593 2 2 0.257517726  
Brain\_Hippocampus 0.488577159 Brain\_Spinal\_cord\_cervical\_c-1 1.01860101  
0.98139899 0.98139899 0.692573638 1.132277643 0.912425641  
0.310917684 2 0 0.998207054

AP000350.5 ENSG00000273295.1 0.42039608 13 1 0.305618112  
Brain\_Hippocampus 0.683567576 Brain\_Cerebellar\_Hemisphere 12.04380331  
0.00080472 12.04380331 -1.024459878 -0.407599712 -0.775508198  
0.226213097 1 0 0.998207054

ZNF428 ENSG00000131116.11 0.420399211 2 2 0.283828996  
Brain\_Substantia\_nigra 0.431737667 Brain\_Nucleus\_accumbens\_basal\_ganglia  
1.020430333 0.979569667 0.979569667 -0.786221612 1.071757436  
0.142767912 1.313789584 2 0 0.998207054

SLC5A5 ENSG00000105641.3 0.420401619 3 3 0.166874695  
Brain\_Nucleus\_accumbens\_basal\_ganglia 0.831326893 Brain\_Cerebellum  
1.171325794 0.823916648 0.823916648 -0.213000089 1.382315999  
0.695735702 0.820532238 3 0 0.998207054

LRRK2 ENSG00000188906.14 0.42084069 4 4 0.177872462  
Brain\_Frontal\_Cortex\_BA9 0.963907605 Brain\_Hippocampus 2.257584821  
0.158102232 0.158102232 -1.347334698 0.045250547 -0.812896194  
0.609313527 4 0 0.998207054

RPS6KA1 ENSG00000117676.13 0.420904544 3 3 0.130005709  
Brain\_Cerebellar\_Hemisphere 0.642301177 Brain\_Frontal\_Cortex\_BA9  
1.133233517 0.864057022 0.864057022 -1.514079375 -0.46448378  
-0.882498381 0.556435694 3 0 0.998207054

APTR ENSG00000214293.8 0.420973545 13 3 0.236041131  
Brain\_Anterior\_cingulate\_cortex\_BA24 0.979822195 Brain\_Cerebellum  
11.23541805 0.007522336 0.488687417 0.025291825 1.184940101  
0.614221295 0.378586408 3 0 0.998207054

NDUFAF6 ENSG00000156170.12 0.421083523 8 4 0.039693193  
Brain\_Hypothalamus 0.373700163 Brain\_Nucleus\_accumbens\_basal\_ganglia  
6.082507134 0.038786107 0.414494706 -2.056927575 -0.889563778  
-1.51048574 0.453640216 4 0 0.998207054

RCOR2 ENSG00000167771.5 0.421098153 1 1 0.421098153  
Brain\_Anterior\_cingulate\_cortex\_BA24 0.421098153  
Brain\_Anterior\_cingulate\_cortex\_BA24 1 1 1 0.804517524  
0.804517524 0.804517524 NA 1 0 0.998207054

OSGEP1 ENSG00000128694.11 0.421121723 1 1 0.421121723  
Brain\_Caudate\_basal\_ganglia 0.421121723 Brain\_Caudate\_basal\_ganglia 1 1  
1 -0.804476695 -0.804476695 -0.804476695 NA 1 0  
0.998207054

ADM2 ENSG00000128165.8 0.421192207 1 1 0.421192207 Brain\_Cerebellum  
0.421192207 Brain\_Cerebellum 1 1 1 -0.80435461 -0.80435461  
-0.80435461 NA 1 0 0.998207054

LCN6 ENSG00000267206.5 0.421259179 1 1 0.421259179  
Brain\_Cerebellar\_Hemisphere 0.421259179 Brain\_Cerebellar\_Hemisphere 1 1

|               |                                       |                                      |                             |              |                             |             |                  |   |  |
|---------------|---------------------------------------|--------------------------------------|-----------------------------|--------------|-----------------------------|-------------|------------------|---|--|
| 1             | 0.80423862                            | 0.80423862                           | 0.80423862                  | NA           | 1                           | 0           | 0.998207054      |   |  |
| RP11-180M15.3 | ENSG00000257004.1                     |                                      | 0.421315457                 |              | 1                           | 1           | 0.421315457      |   |  |
|               | Brain_Cerebellar_Hemisphere           | 0.421315457                          |                             |              | Brain_Cerebellar_Hemisphere | 1           |                  | 1 |  |
| 1             | -0.804141158                          | -0.804141158                         | -0.804141158                | NA           | 1                           | 0           |                  |   |  |
|               | 0.998207054                           |                                      |                             |              |                             |             |                  |   |  |
| TCAF1         | ENSG00000198420.9                     |                                      | 0.42137743                  | 2            | 2                           | 0.20981623  | Brain_Cerebellum |   |  |
|               | 0.388248516                           | Brain_Hippocampus                    |                             | 1.399496414  |                             | 0.600503586 |                  |   |  |
|               | 0.600503586                           | 0.862798041                          | 1.254070917                 |              | 1.058434479                 | 0.276671704 |                  |   |  |
| 2             | 0                                     | 0.998207054                          |                             |              |                             |             |                  |   |  |
| EPDR1         | ENSG00000086289.11                    |                                      | 0.421468816                 | 3            | 2                           | 0.181703338 |                  |   |  |
|               | Brain_Caudate_basal_ganglia           | 0.216863324                          |                             |              | Brain_Putamen_basal_ganglia | 2.85760104  |                  |   |  |
|               | 0.035511316                           | 0.106887644                          | 1.234911821                 |              | 1.335528793                 | 1.279626926 |                  |   |  |
|               | 0.051232817                           | 2                                    | 0                           | 0.998207054  |                             |             |                  |   |  |
| MYZAP         | ENSG00000263155.5                     |                                      | 0.421530008                 | 5            | 4                           | 0.134310524 | Brain_Cerebellum |   |  |
|               | 0.710073922                           | Brain_Hippocampus                    |                             | 2.456825624  |                             | 0.036243859 |                  |   |  |
|               | 0.342532271                           | -0.995650048                         | 1.497318038                 |              | 0.096791147                 | 1.080988088 |                  |   |  |
| 4             | 0                                     | 0.998207054                          |                             |              |                             |             |                  |   |  |
| COPB1         | ENSG00000129083.12                    |                                      | 0.421570204                 | 1            | 1                           | 0.421570204 | Brain_Cerebellum |   |  |
|               | 0.421570204                           | Brain_Cerebellum                     | 1                           | 1            | 1                           | 0.803700086 | 0.803700086      |   |  |
|               | 0.803700086                           | NA                                   | 1                           | 0            | 0.998207054                 |             |                  |   |  |
| LCA5L         | ENSG00000157578.13                    |                                      | 0.421583965                 | 13           | 2                           | 0.089285077 |                  |   |  |
|               | Brain_Spinal_cord_cervical_c-1        | 0.749178509                          |                             |              | Brain_Substantia_nigra      |             |                  |   |  |
|               | 11.64931078                           | 0.000927889                          | 0.708364918                 |              | 0.319722754                 | 1.699181044 |                  |   |  |
|               | 1.159159689                           | 0.383341707                          | 2                           | 0            | 0.998207054                 |             |                  |   |  |
| ZC3H12D       | ENSG00000178199.13                    |                                      | 0.421749354                 | 4            | 4                           | 0.162469939 |                  |   |  |
|               | Brain_Amygdala                        | 0.926781968                          | Brain_Cortex                | 1.19475783   | 0.79422186                  | 0.79422186  |                  |   |  |
|               | -1.396812578                          | 1.259160161                          | 0.146358805                 | 1.133980543  | 4                           | 0           |                  |   |  |
|               | 0.998207054                           |                                      |                             |              |                             |             |                  |   |  |
| FMO5          | ENSG00000131781.12                    |                                      | 0.421857582                 | 5            | 4                           | 0.097195222 |                  |   |  |
|               | Brain_Spinal_cord_cervical_c-1        | 0.55320833                           | Brain_Caudate_basal_ganglia | 3.53857186   |                             |             |                  |   |  |
|               | 0.062368511                           | 0.13336017                           | -1.658605948                | -0.59295939  | -1.106157284                |             |                  |   |  |
|               | 0.392727729                           | 4                                    | 0                           | 0.998207054  |                             |             |                  |   |  |
| HLA-E         | ENSG00000204592.8                     |                                      | 0.421871854                 | 1            | 1                           | 0.421871854 |                  |   |  |
|               | Brain_Anterior_cingulate_cortex_BA24  | 0.421871854                          |                             |              |                             |             |                  |   |  |
|               | Brain_Anterior_cingulate_cortex_BA24  | 1                                    | 1                           | 1            | 0.80317801                  | 0.80317801  |                  |   |  |
|               | 0.80317801                            | NA                                   | 1                           | 0            | 0.998207054                 |             |                  |   |  |
| PTPRD-AS2     | ENSG00000226717.2                     |                                      | 0.421973082                 | 1            | 1                           | 0.421973082 |                  |   |  |
|               | Brain_Nucleus_accumbens_basal_ganglia | 0.421973082                          |                             |              |                             |             |                  |   |  |
|               | Brain_Nucleus_accumbens_basal_ganglia | 1                                    | 1                           | 1            | -0.803002859                |             |                  |   |  |
|               | -0.803002859                          | -0.803002859                         | NA                          | 1            | 0                           | 0.998207054 |                  |   |  |
| ZNF585B       | ENSG00000245680.9                     |                                      | 0.422015612                 | 7            | 4                           | 0.331980864 |                  |   |  |
|               | Brain_Nucleus_accumbens_basal_ganglia | 0.99359273                           | Brain_Cerebellum            | 5.377373357  |                             |             |                  |   |  |
|               | 0.046564548                           | 0.356953849                          | -0.845379358                | 0.970131672  | 0.217369008                 |             |                  |   |  |
|               | 0.588807026                           | 4                                    | 0                           | 0.998207054  |                             |             |                  |   |  |
| RAMP1         | ENSG00000132329.10                    |                                      | 0.422071652                 | 2            | 2                           | 0.193064283 |                  |   |  |
|               | Brain_Putamen_basal_ganglia           | 0.682813513                          | Brain_Cerebellum            | 1.180726497  |                             |             |                  |   |  |
|               | 0.819273503                           | 0.819273503                          | -1.301567478                | -0.408626864 | -0.855097171                |             |                  |   |  |
|               | 0.631404363                           | 2                                    | 0                           | 0.998207054  |                             |             |                  |   |  |
| HOXB2         | ENSG00000173917.10                    |                                      | 0.422101665                 | 5            | 5                           | 0.085972512 | Brain_Cerebellum |   |  |
|               | 0.774441948                           | Brain_Anterior_cingulate_cortex_BA24 | 2.959828401                 | 0.23763183   |                             |             |                  |   |  |
|               | 0.23763183                            | -0.397148585                         | 1.717036449                 | 0.952659298  | 0.957279025                 | 5           |                  |   |  |
| 0             | 0.998207054                           |                                      |                             |              |                             |             |                  |   |  |
| MFSD2A        | ENSG00000168389.17                    |                                      | 0.422208156                 | 1            | 1                           | 0.422208156 |                  |   |  |
|               | Brain_Cortex                          | 0.422208156                          | Brain_Cortex                | 1            | 1                           | 1           | 0.802596217      |   |  |
|               | 0.802596217                           | 0.802596217                          | NA                          | 1            | 0                           | 0.998207054 |                  |   |  |
| ZNF749        | ENSG00000186230.6                     |                                      | 0.422214551                 | 13           | 5                           | 0.244426206 |                  |   |  |
|               | Brain_Nucleus_accumbens_basal_ganglia | 0.77432776                           |                             |              |                             |             |                  |   |  |
|               | Brain_Anterior_cingulate_cortex_BA24  | 9.374965907                          |                             | 5.67E-05     | 0.363162389                 |             |                  |   |  |
|               | -0.702785003                          | 1.163994586                          | 0.627535939                 | 0.580144953  | 5                           | 0           |                  |   |  |
|               | 0.998207054                           |                                      |                             |              |                             |             |                  |   |  |
| EEF2K         | ENSG00000103319.11                    |                                      | 0.422253773                 | 2            | 2                           | 0.233742081 |                  |   |  |
|               | Brain_Anterior_cingulate_cortex_BA24  | 0.832857243                          | Brain_Cortex                |              |                             |             |                  |   |  |

|               |                                       |                                      |              |              |                                        |
|---------------|---------------------------------------|--------------------------------------|--------------|--------------|----------------------------------------|
|               | 1.270288156                           | 0.729711844                          | 0.729711844  | -0.211038483 | 1.190774605                            |
|               | 0.489868061                           | 0.99123154 2                         | 0            | 0.998207054  |                                        |
| SIPA1L3       | ENSG00000105738.10                    | 0.422271419                          | 5            | 5            | 0.150174963                            |
|               | Brain_Spinal_cord_cervical_c-1        | 0.899034795                          |              |              | Brain_Cerebellum1.649638167            |
|               | 0.454258824                           | 0.454258824                          | -0.720565071 | 1.438913745  | 0.271429451                            |
|               | 0.91299197 5                          | 0                                    | 0.998207054  |              |                                        |
| CCNF          | ENSG00000162063.12                    | 0.42229684 1                         | 1            | 0.42229684   |                                        |
|               | Brain_Nucleus_accumbens_basal_ganglia | 0.42229684                           |              |              |                                        |
|               | Brain_Nucleus_accumbens_basal_ganglia | 1                                    | 1            | 1            | -0.80244284                            |
|               | -0.80244284                           | -0.80244284                          | NA           | 1            | 0.998207054                            |
| MUS81         | ENSG00000172732.11                    | 0.42230259 1                         | 1            | 0.42230259   |                                        |
|               | Brain_Nucleus_accumbens_basal_ganglia | 0.42230259                           |              |              |                                        |
|               | Brain_Nucleus_accumbens_basal_ganglia | 1                                    | 1            | 1            | 0.802432897                            |
|               | 0.802432897                           | 0.802432897                          | NA           | 1            | 0.998207054                            |
| LAMA3         | ENSG00000053747.15                    | 0.422445043                          | 1            | 1            | 0.422445043                            |
|               | Brain_Putamen_basal_ganglia           | 0.422445043                          |              |              | Brain_Putamen_basal_ganglia1 1         |
|               | 1                                     | 0.802186571                          | 0.802186571  | 0.802186571  | NA 1 0                                 |
|               | 0.998207054                           |                                      |              |              |                                        |
| FAM177A1      | ENSG00000151327.12                    | 0.42261958 9                         | 7            | 0.04896533   | Brain_Cerebellum                       |
|               | 0.839573248                           | Brain_Anterior_cingulate_cortex_BA24 | 4.265503196  |              |                                        |
|               | 0.118357622                           | 0.282762041                          | -0.202439376 | 1.968893429  | 1.060446438                            |
|               | 0.620971289                           | 7                                    | 0            | 0.998207054  |                                        |
| PSMC5         | ENSG00000087191.12                    | 0.422650875                          | 11           | 5            | 0.253426178                            |
|               | Brain_Frontal_Cortex_BA9              | 0.978140866                          |              |              | Brain_Putamen_basal_ganglia            |
|               | 7.290379106                           | 0.002694047                          | 0.426280947  | -1.030783073 | 1.142066985                            |
|               | 0.019920025                           | 0.68699788 5                         | 0            | 0.998207054  |                                        |
| RP11-405M12.3 | ENSG00000278607.1                     | 0.422698673                          | 1            | 1            | 0.422698673                            |
|               | Brain_Spinal_cord_cervical_c-1        | 0.422698673                          |              |              | Brain_Spinal_cord_cervical_c-1         |
|               | 1                                     | 1                                    | 1            | 0.801748122  | 0.801748122                            |
|               | 0.998207054                           | 0.801748122                          | 0.801748122  | 0.801748122  | NA 1 0                                 |
| CTH           | ENSG00000116761.11                    | 0.422752646                          | 1            | 1            | 0.422752646                            |
|               | Brain_Hippocampus                     | 0.422752646                          |              |              | Brain_Hippocampus 1 1 1                |
|               | 0.801654839                           | 0.801654839                          | 0.801654839  | NA 1 0       | 0.998207054                            |
| MCCC2         | ENSG00000131844.15                    | 0.422753929                          | 3            | 2            | 0.407660205                            |
|               | Brain_Caudate_basal_ganglia           | 0.911565646                          |              |              | Brain_Cerebellar_Hemisphere            |
|               | 2.620185656                           | 0.043776247                          | 0.336038097  | -0.828018178 | 0.202346985                            |
|               | -0.245578377                          | 0.528189069                          | 2            | 0            | 0.998207054                            |
| MGST3         | ENSG00000143198.12                    | 0.422978991                          | 7            | 6            | 0.122741686                            |
|               | Brain_Spinal_cord_cervical_c-1        | 0.973798179                          |              |              | Brain_Cerebellar_Hemisphere            |
|               | 3.435081536                           | 0.040493092                          | 0.171078529  | -1.543367289 | 0.189814137                            |
|               | -0.552483613                          | 0.638039468                          | 6            | 0            | 0.998207054                            |
| AS3MT         | ENSG00000214435.7                     | 0.42308192 13                        | 3            | 0.069036007  | Brain_Hippocampus                      |
|               | 0.270587647                           | Brain_Cerebellar_Hemisphere          | 11.35286888  | 0.006408375  |                                        |
|               | 0.391189054                           | -1.818184052                         | -1.101710278 | -1.477294387 | 0.262832771                            |
|               | 3                                     | 0                                    | 0.998207054  |              |                                        |
| LILRB3        | ENSG00000204577.11                    | 0.423142488                          | 3            | 3            | 0.431826615                            |
|               | Brain_Cerebellum                      | 0.960765645                          |              |              | Brain_Cerebellar_Hemisphere1.847925795 |
|               | 0.152419407                           | 0.152419407                          | -0.786069767 | 0.049192805  | -0.483845237                           |
|               | 0.463003292                           | 3                                    | 0            | 0.998207054  |                                        |
| UGT3A2        | ENSG00000168671.9                     | 0.423155317                          | 1            | 1            | 0.423155317                            |
|               | Brain_Substantia_nigra                | 0.423155317                          |              |              | Brain_Substantia_nigra 1 1             |
|               | 1                                     | -0.800959111                         | -0.800959111 | -0.800959111 | NA 1 0                                 |
|               | 0.998207054                           |                                      |              |              |                                        |
| CCDC106       | ENSG00000173581.7                     | 0.423173542                          | 2            | 2            | 0.224094811                            |
|               | Brain_Caudate_basal_ganglia           | 0.670965013                          |              |              | Brain_Amygdala 1.054592268             |
|               | 0.945407732                           | 0.945407732                          | -1.21571158  | 0.424823956  | -0.395443812                           |
|               | 1.160033802                           | 2                                    | 0            | 0.998207054  |                                        |
| ZNF30         | ENSG00000168661.14                    | 0.423305935                          | 6            | 5            | 0.093645463                            |
|               | Brain_Cerebellar_Hemisphere           | 0.994191027                          |              |              | Brain_Hippocampus 2.646325253          |
|               | 0.018867928                           | 0.363603088                          | -0.007280532 | 1.676473602  | 0.67774337                             |
|               | 0.704616916                           | 5                                    | 0            | 0.998207054  |                                        |
| FAM3D         | ENSG00000198643.6                     | 0.423601114                          | 2            | 2            | 0.292453525                            |
|               |                                       |                                      |              |              | Brain_Amygdala                         |

|               |                                       |                             |                                       |              |              |                  |              |
|---------------|---------------------------------------|-----------------------------|---------------------------------------|--------------|--------------|------------------|--------------|
|               | 0.379960083                           | Brain_Hippocampus           | 1.09571457                            | 0.90428543   | 0.90428543   |                  |              |
|               | -1.052754496                          | -0.877969846                | -0.965362171                          | 0.123591411  | 2            | 0                |              |
|               | 0.998207054                           |                             |                                       |              |              |                  |              |
| MAGI2         | ENSG00000187391.19                    | 0.423724091                 | 6                                     | 5            | 0.068436559  | Brain_Cerebellum |              |
|               | 0.791274964                           | Brain_Caudate_basal_ganglia | 2.879145953                           | 0.017563495  |              |                  |              |
|               | 0.249781658                           | 0.264655367                 | 1.822121452                           | 0.775337378  | 0.576337354  |                  |              |
|               | 5                                     | 0                           | 0.998207054                           |              |              |                  |              |
| CARMIL1       | ENSG00000079691.17                    | 0.42373243                  | 4                                     | 4            | 0.228762489  |                  |              |
|               | Brain_Putamen_basal_ganglia           | 0.916833169                 | Brain_Anterior_cingulate_cortex_BA24  |              |              |                  |              |
|               | 1.431229927                           | 0.708649888                 | 0.708649888                           | -1.203552756 | 1.055904554  |                  |              |
|               | 0.146908003                           | 1.031689984                 | 4                                     | 0            | 0.998207054  |                  |              |
| RAB11B        | ENSG00000185236.11                    | 0.423746068                 | 1                                     | 1            | 0.423746068  |                  |              |
|               | Brain_Frontal_Cortex_BA9              | 0.423746068                 | Brain_Frontal_Cortex_BA9              | 1            | 1            |                  |              |
|               | 1                                     | 0.799939125                 | 0.799939125                           | 0.799939125  | NA           | 1                | 0            |
|               | 0.998207054                           |                             |                                       |              |              |                  |              |
| CTD-2270P14.5 | ENSG00000276791.1                     | 0.423754494                 | 10                                    | 10           | 0.096979663  |                  |              |
|               | Brain_Nucleus_accumbens_basal_ganglia | 0.958664774                 | Brain_Putamen_basal_ganglia           |              |              |                  |              |
|               | 1.707160976                           | 0.375204321                 | 0.375204321                           | -1.659675938 | 1.461046915  |                  |              |
|               | -0.235544975                          | 0.959157901                 | 10                                    | 0            | 0.998207054  |                  |              |
| SUGP2         | ENSG00000064607.16                    | 0.423767622                 | 2                                     | 2            | 0.205307237  |                  |              |
|               | Brain_Hippocampus                     | 0.315995203                 | Brain_Cerebellum                      | 1.574517812  |              |                  |              |
|               | 0.425482188                           | 0.425482188                 | -1.266575165                          | -1.002721604 | -1.134648384 |                  |              |
|               | 0.186572642                           | 2                           | 0                                     | 0.998207054  |              |                  |              |
| INTS13        | ENSG00000064102.14                    | 0.423820847                 | 3                                     | 2            | 0.256241215  |                  |              |
|               | Brain_Spinal_cord_cervical_c-1        | 0.471389575                 | Brain_Frontal_Cortex_BA9              |              |              |                  |              |
|               | 1.97925872                            | 0.021806919                 | 0.998934362                           | 0.720219961  | 1.13532012   |                  |              |
|               | 0.954179554                           | 0.212530992                 | 2                                     | 0            | 0.998207054  |                  |              |
| ABCF3         | ENSG00000161204.11                    | 0.423889512                 | 5                                     | 4            | 0.068475972  |                  |              |
|               | Brain_Caudate_basal_ganglia           | 0.792383644                 | Brain_Amygdala                        | 3.200740859  |              |                  |              |
|               | 0.090135153                           | 0.273968269                 | -1.821861709                          | 0.263216591  | -1.081136391 |                  |              |
|               | 0.834169833                           | 4                           | 0                                     | 0.998207054  |              |                  |              |
| EFNB2         | ENSG00000125266.6                     | 0.423978871                 | 1                                     | 1            | 0.423978871  | Brain_Amygdala   |              |
|               | 0.423978871                           | Brain_Amygdala              | 1                                     | 1            | 1            | -0.799537398     | -0.799537398 |
|               | -0.799537398                          | NA                          | 1                                     | 0            | 0.998207054  |                  |              |
| BBS4          | ENSG00000140463.13                    | 0.424075582                 | 5                                     | 5            | 0.112056749  | Brain_Cortex     |              |
|               | 0.807545141                           | Brain_Putamen_basal_ganglia | 2.354712338                           | 0.163778488  |              |                  |              |
|               | 0.163778488                           | -0.867872501                | 1.589016138                           | 0.591965285  | 1.084036197  |                  |              |
|               | 5                                     | 0                           | 0.998207054                           |              |              |                  |              |
| FAM8A1        | ENSG00000137414.5                     | 0.424292673                 | 3                                     | 3            | 0.189164121  |                  |              |
|               | Brain_Caudate_basal_ganglia           | 0.74547007                  | Brain_Hippocampus                     | 1.286011586  |              |                  |              |
|               | 0.736573279                           | 0.736573279                 | -1.313055874                          | 0.324618175  | -0.657306697 |                  |              |
|               | 0.866191093                           | 3                           | 0                                     | 0.998207054  |              |                  |              |
| C5orf47       | ENSG00000185056.9                     | 0.424345136                 | 3                                     | 3            | 0.138405004  |                  |              |
|               | Brain_Cortex                          | 0.912256789                 | Brain_Nucleus_accumbens_basal_ganglia |              |              |                  |              |
|               | 1.419120057                           | 0.568339977                 | 0.568339977                           | -1.481756851 | 0.182512639  |                  |              |
|               | -0.396350604                          | 0.940684642                 | 3                                     | 0            | 0.998207054  |                  |              |
| NTS           | ENSG00000133636.10                    | 0.424360132                 | 1                                     | 1            | 0.424360132  | Brain_Cerebellum |              |
|               | 0.424360132                           | Brain_Cerebellum            | 1                                     | 1            | 1            | -0.798879767     | -0.798879767 |
|               | -0.798879767                          | NA                          | 1                                     | 0            | 0.998207054  |                  |              |
| CDAN1         | ENSG00000140326.12                    | 0.424365912                 | 4                                     | 2            | 0.266509293  |                  |              |
|               | Brain_Anterior_cingulate_cortex_BA24  | 0.718167762                 | Brain_Cerebellum                      |              |              |                  |              |
|               | 3.586329659                           | 0.013968145                 | 0.334850771                           | -1.111137211 | -0.360908616 |                  |              |
|               | -0.567522503                          | 0.363541914                 | 2                                     | 0            | 0.998207054  |                  |              |
| CDR2          | ENSG00000140743.7                     | 0.424402671                 | 2                                     | 2            | 0.193460633  |                  |              |
|               | Brain_Caudate_basal_ganglia           | 0.770766807                 | Brain_Nucleus_accumbens_basal_ganglia |              |              |                  |              |
|               | 1.334171513                           | 0.665828487                 | 0.665828487                           | 0.291372026  | 1.300409566  |                  |              |
|               | 0.795890796                           | 0.713497287                 | 2                                     | 0            | 0.998207054  |                  |              |
| NT5C3A        | ENSG00000122643.18                    | 0.424449728                 | 2                                     | 2            | 0.563717857  |                  |              |
|               | Brain_Cerebellum                      | 0.919499787                 | Brain_Cerebellar_Hemisphere           | 1.92887754   | 0.07112246   |                  |              |
|               | 0.07112246                            | 0.101063834                 | 0.577328068                           | 0.339195951  | 0.336769669  | 2                |              |
|               | 0                                     | 0.998207054                 |                                       |              |              |                  |              |
| HIP1R         | ENSG00000130787.13                    | 0.424562002                 | 1                                     | 1            | 0.424562002  | Brain_Cerebellum |              |

|               |                                       |                   |                                       |             |              |                |
|---------------|---------------------------------------|-------------------|---------------------------------------|-------------|--------------|----------------|
|               | 0.424562002                           | Brain_Cerebellum1 | 1                                     | 1           | 0.798531706  | 0.798531706    |
|               | 0.798531706                           | NA                | 1                                     | 0           | 0.998207054  |                |
| ACOT4         | ENSG00000177465.4                     | 0.424573004       | 10                                    | 6           | 0.207263929  |                |
|               | Brain_Hypothalamus                    | 0.903550778       | Brain_Nucleus_accumbens_basal_ganglia |             |              |                |
|               | 6.241693881                           | 0.034097521       | 0.246072442                           |             | -0.646987826 | 1.261124682    |
|               | 0.563449965                           | 0.608500877       | 6                                     | 0           | 0.998207054  |                |
| ITGB6         | ENSG00000115221.10                    | 0.424605305       | 3                                     | 1           | 0.386423208  |                |
|               | Brain_Hypothalamus                    | 0.49704125        | Brain_Spinal_cord_cervical_c-1        |             |              |                |
|               | 0.000286262                           | 2.988680718       | 0.679152484                           |             | 0.866122098  | 0.796848212    |
|               | 0.102459334                           | 1                 | 0                                     | 0.998207054 |              |                |
| DPY30         | ENSG00000162961.13                    | 0.424618269       | 1                                     | 1           | 0.424618269  |                |
|               | Brain_Cerebellar_Hemisphere           | 0.424618269       | Brain_Cerebellar_Hemisphere1          |             |              |                |
|               | 1                                     | 0.798434707       | 0.798434707                           | 0.798434707 | NA           | 1              |
|               | 0.998207054                           |                   |                                       |             | 0            |                |
| FARP1         | ENSG00000152767.16                    | 0.424879112       | 3                                     | 3           | 0.187142093  |                |
|               | Brain_Nucleus_accumbens_basal_ganglia | 0.752611624       | Brain_Hypothalamus                    |             |              |                |
|               | 1.137808352                           | 0.880053997       | 0.880053997                           |             | 0.315197605  | 1.319080826    |
|               | 0.866558991                           | 0.509187905       | 3                                     | 0           | 0.998207054  |                |
| FDXACB1       | ENSG00000255561.6                     | 0.424902502       | 1                                     | 1           | 0.424902502  |                |
|               | Brain_Amygdala                        | 0.424902502       | Brain_Amygdala                        |             |              |                |
|               | 0.797944839                           | 0.797944839       | NA                                    | 1           | 0            | 0.998207054    |
| LINC00599     | ENSG00000253230.8                     | 0.424973251       | 1                                     | 1           | 0.424973251  |                |
|               | Brain_Frontal_Cortex_BA9              | 0.424973251       | Brain_Frontal_Cortex_BA9              |             |              |                |
|               | 1                                     | 0.797822933       | 0.797822933                           | 0.797822933 | NA           | 1              |
|               | 0.998207054                           |                   |                                       |             | 0            |                |
| PDHB          | ENSG00000168291.12                    | 0.425138867       | 12                                    | 5           | 0.15036958   | Brain_Amygdala |
|               | 0.94924102                            | Brain_Cortex      | 8.639366035                           |             | 0.004513724  | 0.329318536    |
|               | -1.438227269                          | 0.797202115       | -0.261515677                          |             | 0.563216175  | 5              |
|               | 0.998207054                           |                   |                                       |             | 0            |                |
| RP11-490M8.1  | ENSG00000260025.1                     | 0.425390708       | 4                                     | 4           | 0.205074001  |                |
|               | Brain_Cortex                          | 0.397681439       | Brain_Cerebellum1                     |             |              |                |
|               | 0.207578545                           | -1.267227373      | 1.264184242                           |             | -0.035821204 | 1.276249434    |
|               | 4                                     | 0                 | 0.998207054                           |             |              |                |
| MICU1         | ENSG00000107745.17                    | 0.425473536       | 3                                     | 3           | 0.098504243  |                |
|               | Brain_Putamen_basal_ganglia           | 0.976258305       | Brain_Cortex                          |             |              |                |
|               | 0.429189043                           | 0.429189043       | -1.65214869                           |             | 0.118415426  | -0.501324357   |
|               | 0.997628399                           | 3                 | 0                                     | 0.998207054 |              |                |
| LMBR1         | ENSG00000105983.20                    | 0.425586956       | 1                                     | 1           | 0.425586956  |                |
|               | Brain_Cerebellar_Hemisphere           | 0.425586956       | Brain_Cerebellar_Hemisphere1          |             |              |                |
|               | 1                                     | -0.79676598       | -0.79676598                           | -0.79676598 | NA           | 1              |
|               | 0.998207054                           |                   |                                       |             | 0            |                |
| CTD-2292M16.8 | ENSG00000258768.2                     | 0.425840353       | 3                                     | 3           | 0.130944696  |                |
|               | Brain_Hippocampus                     | 0.870019686       | Brain_Caudate_basal_ganglia           |             |              |                |
|               | 0.46714534                            | 0.46714534        | -0.411649806                          |             | 1.510387032  | 0.311701248    |
|               | 1.045472969                           | 3                 | 0                                     | 0.998207054 |              |                |
| PFDN2         | ENSG00000143256.4                     | 0.426165287       | 1                                     | 1           | 0.426165287  |                |
|               | Brain_Caudate_basal_ganglia           | 0.426165287       | Brain_Caudate_basal_ganglia           |             |              |                |
|               | 1                                     | 0.795770766       | 0.795770766                           | 0.795770766 | NA           | 1              |
|               | 0.998207054                           |                   |                                       |             | 0            |                |
| RP11-140I16.3 | ENSG00000272343.1                     | 0.426268157       | 1                                     | 1           | 0.426268157  |                |
|               | Brain_Hypothalamus                    | 0.426268157       | Brain_Hypothalamus                    |             |              |                |
|               | -0.795593825                          | -0.795593825      | -0.795593825                          | NA          | 1            | 0              |
|               | 0.998207054                           |                   |                                       |             |              |                |
| DOCK7         | ENSG00000116641.17                    | 0.426284892       | 1                                     | 1           | 0.426284892  |                |
|               | Brain_Anterior_cingulate_cortex_BA24  | 0.426284892       |                                       |             |              |                |
|               | Brain_Anterior_cingulate_cortex_BA24  | 1                 | 1                                     | 1           | -0.795565042 |                |
|               | -0.795565042                          | -0.795565042      | NA                                    | 1           | 0            | 0.998207054    |
| C19orf84      | ENSG00000262874.1                     | 0.426419716       | 9                                     | 6           | 0.034577465  |                |
|               | Brain_Hippocampus                     | 0.844210996       | Brain_Frontal_Cortex_BA9              |             |              |                |
|               | 0.001268705                           | 0.23935443        | -2.113272336                          |             | -0.196510013 | -1.345824832   |
|               | 0.552868879                           | 6                 | 0                                     | 0.998207054 |              |                |
| STRIP2        | ENSG00000128578.9                     | 0.426531972       | 1                                     | 1           | 0.426531972  |                |
|               | Brain_Cerebellar_Hemisphere           | 0.426531972       | Brain_Cerebellar_Hemisphere1          |             |              |                |
|               |                                       |                   |                                       |             |              | 1              |



|              |                                       |                                       |              |              |                                       |              |                    |
|--------------|---------------------------------------|---------------------------------------|--------------|--------------|---------------------------------------|--------------|--------------------|
| 1            | 0.795140166                           | 0.795140166                           | 0.795140166  | NA           | 1                                     | 0            |                    |
|              | 0.998207054                           |                                       |              |              |                                       |              |                    |
| BCL7C        | ENSG00000099385.11                    | 0.426591564                           | 2            | 2            | 0.191908499                           |              |                    |
|              | Brain_Cerebellar_Hemisphere           | 0.495007682                           |              |              | Brain_Nucleus_accumbens_basal_ganglia |              |                    |
|              | 1.542756869                           | 0.457243131                           | 0.457243131  |              | 0.682365789                           | 1.304954037  |                    |
|              | 0.993659913                           | 0.440236372                           | 2            | 0            | 0.998207054                           |              |                    |
| UGT2B17      | ENSG00000197888.2                     | 0.426729818                           | 2            | 2            | 0.201824642                           |              |                    |
|              | Brain_Spinal_cord_cervical_c-1        | 0.616894748                           |              |              | Brain_Substantia_nigra                |              |                    |
|              | 1.567520285                           | 0.432479715                           | 0.432479715  |              | 0.500256118                           | 1.276370323  |                    |
|              | 0.888313221                           | 0.548795617                           | 2            | 0            | 0.998207054                           |              |                    |
| RNF111       | ENSG00000157450.15                    | 0.426832056                           | 2            | 2            | 0.238192568                           |              |                    |
|              | Brain_Cerebellar_Hemisphere           | 0.460428443                           |              |              | Brain_Cerebellum                      | 1.158635782  |                    |
|              | 0.841364218                           | 0.841364218                           | -1.179516506 |              | -0.738141541                          | -0.958829024 |                    |
|              | 0.312099231                           | 2                                     | 0            | 0.998207054  |                                       |              |                    |
| ASXL1        | ENSG00000171456.16                    | 0.426845534                           | 1            | 1            | 0.426845534                           |              |                    |
|              | Brain_Anterior_cingulate_cortex_BA24  | 0.426845534                           |              |              |                                       |              |                    |
|              | Brain_Anterior_cingulate_cortex_BA24  | 1                                     | 1            | 1            | 0.794601177                           |              |                    |
|              | 0.794601177                           | 0.794601177                           | NA           | 1            | 0                                     | 0.998207054  |                    |
| RP11-527D7.1 | ENSG00000225554.1                     | 0.42693863                            | 10           | 6            | 0.029792814                           |              |                    |
|              | Brain_Spinal_cord_cervical_c-1        | 0.789560365                           |              |              | Brain_Hippocampus                     | 5.90751458   |                    |
|              | 0.021361646                           | 0.231928625                           | 0.266881546  |              | 2.172833988                           | 0.963374117  |                    |
|              | 0.579534063                           | 6                                     | 0            | 0.998207054  |                                       |              |                    |
| ZNF514       | ENSG00000144026.11                    | 0.427010355                           | 13           | 6            | 0.093505704                           |              |                    |
|              | Brain_Hippocampus                     | 0.992954885                           |              |              | Brain_Frontal_Cortex_BA9              | 7.884906365  |                    |
|              | 0.011699668                           | 0.368436345                           | -1.677188109 |              | 0.048596024                           | -0.807114334 |                    |
|              | 0.543150014                           | 6                                     | 0            | 0.998207054  |                                       |              |                    |
| DCAF10       | ENSG00000122741.15                    | 0.427054573                           | 4            | 3            | 0.391265709                           |              |                    |
|              | Brain_Anterior_cingulate_cortex_BA24  | 0.880069389                           |              |              | Brain_Putamen_basal_ganglia           |              |                    |
|              | 3.516166541                           | 0.001123556                           | 0.143128445  |              | 0.150881253                           | 0.857324252  |                    |
|              | 0.644909032                           | 0.335107659                           | 3            | 0            | 0.998207054                           |              |                    |
| OSR2         | ENSG00000164920.9                     | 0.427190308                           | 1            | 1            | 0.427190308                           |              |                    |
|              | Brain_Spinal_cord_cervical_c-1        | 0.427190308                           |              |              | Brain_Spinal_cord_cervical_c-1        |              |                    |
|              | 1                                     | 1                                     | 1            | -0.794008801 | -0.794008801                          | -0.794008801 | NA 1 0             |
|              | 0.998207054                           |                                       |              |              |                                       |              |                    |
| MYL3         | ENSG00000160808.9                     | 0.427190547                           | 2            | 2            | 0.249753293                           |              | Brain_Amygdala     |
|              | 0.633896574                           | Brain_Nucleus_accumbens_basal_ganglia | 1.115661709  |              |                                       |              |                    |
|              | 0.884338291                           | 0.884338291                           | -1.150948817 |              | 0.47624959                            | -0.337349613 |                    |
|              | 1.150603028                           | 2                                     | 0            | 0.998207054  |                                       |              |                    |
| OXGR1        | ENSG00000165621.8                     | 0.427202306                           | 9            | 8            | 0.038063769                           |              |                    |
|              | Brain_Hypothalamus                    | 0.888232658                           |              |              | Brain_Cortex                          | 4.091713999  |                    |
|              | 0.052261829                           | 0.164004204                           | -0.746930511 |              | 2.074167373                           | 1.243302547  |                    |
|              | 0.959097376                           | 8                                     | 0            | 0.998207054  |                                       |              |                    |
| AP000797.4   | ENSG00000257067.5                     | 0.427341373                           | 3            | 3            | 0.096567267                           |              |                    |
|              | Brain_Nucleus_accumbens_basal_ganglia | 0.817864146                           |              |              | Brain_Cerebellar_Hemisphere           |              |                    |
|              | 1.755076055                           | 0.305740947                           | 0.305740947  |              | 0.23029294                            | 1.661728286  |                    |
|              | 0.758642251                           | 0.785857809                           | 3            | 0            | 0.998207054                           |              |                    |
| ING5         | ENSG00000168395.15                    | 0.427357892                           | 4            | 4            | 0.237599673                           |              | Brain_Cerebellum   |
|              | 0.858818567                           | Brain_Frontal_Cortex_BA9              | 1.987791199  |              | 0.26289851                            | 0.26289851   |                    |
|              | -1.18100768                           | 1.150698632                           | 0.085500717  |              | 0.959008188                           | 4            | 0                  |
|              | 0.998207054                           |                                       |              |              |                                       |              |                    |
| GPR35        | ENSG00000178623.11                    | 0.427366377                           | 5            | 5            | 0.044699314                           |              |                    |
|              | Brain_Hypothalamus                    | 0.946919684                           |              |              | Brain_Nucleus_accumbens_basal_ganglia |              |                    |
|              | 1.648132202                           | 0.522850602                           | 0.522850602  |              | -2.007473086                          | 0.066575458  |                    |
|              | -0.698412517                          | 0.822243424                           | 5            | 0            | 0.998207054                           |              |                    |
| TOGARAM1     | ENSG00000198718.12                    | 0.427393275                           | 1            | 1            | 0.427393275                           |              |                    |
|              | Brain_Anterior_cingulate_cortex_BA24  | 0.427393275                           |              |              |                                       |              |                    |
|              | Brain_Anterior_cingulate_cortex_BA24  | 1                                     | 1            | 1            | -0.793660202                          |              |                    |
|              | -0.793660202                          | -0.793660202                          | NA           | 1            | 0                                     | 0.998207054  |                    |
| CTBP2        | ENSG00000175029.16                    | 0.427540218                           | 2            | 2            | 0.22217973                            |              | Brain_Hypothalamus |
|              | 0.585108469                           | Brain_Cerebellum                      | 1.073576716  |              | 0.926423284                           | 0.926423284  |                    |
|              | 0.545938127                           | 1.220752536                           | 0.883345331  |              | 0.477165845                           | 2            | 0                  |
|              | 0.998207054                           |                                       |              |              |                                       |              |                    |

|           |                                       |              |                                       |              |              |             |    |   |   |
|-----------|---------------------------------------|--------------|---------------------------------------|--------------|--------------|-------------|----|---|---|
| C4orf22   | ENSG00000197826.11                    | 0.427565846  | 1                                     | 1            | 0.427565846  |             |    |   |   |
|           | Brain_Cerebellum                      | 0.427565846  | Brain_Cerebellum                      | 1            | 1            | 0.793363885 |    |   |   |
|           | 0.793363885                           | 0.793363885  | NA                                    | 1            | 0            | 0.998207054 |    |   |   |
| SCARB1    | ENSG00000073060.15                    | 0.427663045  | 1                                     | 1            | 0.427663045  |             |    |   |   |
|           | Brain_Caudate_basal_ganglia           | 0.427663045  | Brain_Caudate_basal_ganglia           | 1            | 1            |             |    |   |   |
|           | 1                                     | 0.793197017  | 0.793197017                           | 0.793197017  | NA           | 1           | 0  |   |   |
|           | 0.998207054                           |              |                                       |              |              |             |    |   |   |
| RPRD1B    | ENSG00000101413.11                    | 0.427887879  | 6                                     | 6            | 0.125944994  |             |    |   |   |
|           | Brain_Hypothalamus                    | 0.697659878  | Brain_Cerebellar_Hemisphere           | 2.836394886  |              |             |    |   |   |
|           | 0.100954693                           | 0.100954693  | -1.126059637                          | 1.530289872  | -0.026151698 |             |    |   |   |
|           | 1.175268416                           | 6            | 0                                     | 0.998207054  |              |             |    |   |   |
| ROBO3     | ENSG00000154134.14                    | 0.427889113  | 1                                     | 1            | 0.427889113  |             |    |   |   |
|           | Brain_Spinal_cord_cervical_c-1        | 0.427889113  | Brain_Spinal_cord_cervical_c-1        |              |              |             |    |   |   |
|           | 1                                     | 1            | 1                                     | 0.792808999  | 0.792808999  | 0.792808999 | NA | 1 | 0 |
|           | 0.998207054                           |              |                                       |              |              |             |    |   |   |
| FKBP1B    | ENSG00000119782.13                    | 0.427908282  | 1                                     | 1            | 0.427908282  |             |    |   |   |
|           | Brain_Caudate_basal_ganglia           | 0.427908282  | Brain_Caudate_basal_ganglia           | 1            | 1            |             |    |   |   |
|           | 1                                     | 0.792776102  | 0.792776102                           | 0.792776102  | NA           | 1           | 0  |   |   |
|           | 0.998207054                           |              |                                       |              |              |             |    |   |   |
| VGLL2     | ENSG00000170162.13                    | 0.427922172  | 1                                     | 1            | 0.427922172  |             |    |   |   |
|           | Brain_Spinal_cord_cervical_c-1        | 0.427922172  | Brain_Spinal_cord_cervical_c-1        |              |              |             |    |   |   |
|           | 1                                     | 1            | 1                                     | 0.792752267  | 0.792752267  | 0.792752267 | NA | 1 | 0 |
|           | 0.998207054                           |              |                                       |              |              |             |    |   |   |
| NUTM2D    | ENSG00000214562.14                    | 0.427996164  | 10                                    | 9            | 0.152939342  |             |    |   |   |
|           | Brain_Putamen_basal_ganglia           | 0.975124635  | Brain_Nucleus_accumbens_basal_ganglia |              |              |             |    |   |   |
|           | 3.173516808                           | 0.087364848  | 0.270970075                           | -1.429225808 | 1.38242363   |             |    |   |   |
|           | -0.008786736                          | 0.930178461  | 9                                     | 0            | 0.998207054  |             |    |   |   |
| PRB1      | ENSG00000251655.6                     | 0.42813076   | 2                                     | 2            | 0.192726374  |             |    |   |   |
|           | Brain_Nucleus_accumbens_basal_ganglia | 0.680179993  | Brain_Caudate_basal_ganglia           |              |              |             |    |   |   |
|           | 1.317195006                           | 0.682804994  | 0.682804994                           | -1.302556039 | -0.412217525 |             |    |   |   |
|           | -0.857386782                          | 0.629564401  | 2                                     | 0            | 0.998207054  |             |    |   |   |
| CAPN11    | ENSG00000137225.12                    | 0.428142761  | 3                                     | 3            | 0.172956505  |             |    |   |   |
|           | Brain_Frontal_Cortex_BA9              | 0.64610517   | Brain_Cortex                          | 1.122614178  |              |             |    |   |   |
|           | 0.917261469                           | 0.917261469  | -1.362765252                          | 0.45917964   | -0.574816522 |             |    |   |   |
|           | 0.93556149                            | 3            | 0                                     | 0.998207054  |              |             |    |   |   |
| TRMT112   | ENSG00000173113.6                     | 0.42817296   | 7                                     | 5            | 0.148290298  |             |    |   |   |
|           | Brain_Putamen_basal_ganglia           | 4.572647588  | Brain_Cortex                          | 0.003933855  |              |             |    |   |   |
|           | 0.708479188                           | 0.201732699  | -0.373899366                          | 1.445596895  | 0.750054735  | 0.580918523 |    |   |   |
|           | 5                                     | 0            | 0.998207054                           |              |              |             |    |   |   |
| ERICD     | ENSG00000280303.2                     | 0.428188748  | 1                                     | 1            | 0.428188748  |             |    |   |   |
|           | Brain_Frontal_Cortex_BA9              | 0.428188748  | Brain_Frontal_Cortex_BA9              | 1            | 1            |             |    |   |   |
|           | 1                                     | -0.792294894 | -0.792294894                          | -0.792294894 | NA           | 1           | 0  |   |   |
|           | 0.998207054                           |              |                                       |              |              |             |    |   |   |
| GSDMD     | ENSG00000104518.10                    | 0.428220218  | 11                                    | 3            | 0.157229892  |             |    |   |   |
|           | Brain_Anterior_cingulate_cortex_BA24  | 0.601872206  | Brain_Frontal_Cortex_BA9              |              |              |             |    |   |   |
|           | 8.818398985                           | 0.002894012  | 0.534629625                           | 0.521710079  | 1.414449748  |             |    |   |   |
|           | 1.073471863                           | 0.297083429  | 3                                     | 0            | 0.998207054  |             |    |   |   |
| DEPDC7    | ENSG00000121690.10                    | 0.428249148  | 2                                     | 2            | 0.196982574  |             |    |   |   |
|           | Brain_Caudate_basal_ganglia           | 0.8373977    | Brain_Cerebellar_Hemisphere           | 1.021545774  |              |             |    |   |   |
|           | 0.978454226                           | 0.978454226  | -0.205223256                          | 1.290196117  | 0.54248643   |             |    |   |   |
|           | 1.057421179                           | 2            | 0                                     | 0.998207054  |              |             |    |   |   |
| LINC01470 | ENSG00000249484.8                     | 0.428300295  | 2                                     | 2            | 0.196108004  |             |    |   |   |
|           | Brain_Putamen_basal_ganglia           | 0.231683518  | Brain_Caudate_basal_ganglia           |              |              |             |    |   |   |
|           | 1.863935746                           | 0.136064254  | 0.136064254                           | 1.19603342   | 1.292719753  |             |    |   |   |
|           | 1.244376586                           | 0.068367562  | 2                                     | 0            | 0.998207054  |             |    |   |   |
| TRABD     | ENSG00000170638.9                     | 0.428319707  | 3                                     | 3            | 0.097243694  |             |    |   |   |
|           | Brain_Hypothalamus                    | 1.179295578  | Brain_Cerebellum                      |              |              |             |    |   |   |
|           | 0.915123595                           | 0.821059831  | 0.106578223                           | 1.658365607  | 0.715645654  | 0.827951705 |    |   |   |
|           | 0.821059831                           | 0.106578223  | 1.658365607                           | 0.715645654  | 0.827951705  |             |    |   |   |
|           | 3                                     | 0            | 0.998207054                           |              |              |             |    |   |   |
| TRIP12    | ENSG00000153827.13                    | 0.428325468  | 2                                     | 2            | 0.192919604  |             |    |   |   |
|           | Brain_Cortex                          | 0.970263438  | Brain_Putamen_basal_ganglia           | 1.010385994  |              |             |    |   |   |
|           | 0.989614006                           | 0.989614006  | -1.301990585                          | -0.037277885 | -0.669634235 |             |    |   |   |

|          |                                       |             |                             |                                       |              |             |              |              |                  |              |
|----------|---------------------------------------|-------------|-----------------------------|---------------------------------------|--------------|-------------|--------------|--------------|------------------|--------------|
| DDO      | 0.894286926                           | 2           | 0                           | 0.998207054                           |              |             |              |              |                  |              |
|          | ENSG00000203797.9                     |             |                             | 0.428378468                           | 11           | 6           | 0.388172148  |              | Brain_Cerebellum |              |
|          | 0.973727234                           |             | Brain_Substantia_nigra      |                                       |              |             | 6.966582313  | 0.002519269  |                  |              |
|          | 0.267783729                           |             | -0.581100134                |                                       |              |             | 0.862936923  | 0.181502818  |                  | 0.436649732  |
|          | 6                                     | 0           | 0.998207054                 |                                       |              |             |              |              |                  |              |
| FAM134B  | ENSG00000154153.13                    |             |                             | 0.428411096                           | 2            | 2           | 0.210505635  |              |                  |              |
|          | Brain_Cerebellum                      | 0.765135459 |                             | Brain_Cerebellar_Hemisphere           | 1.046163649  |             |              |              |                  |              |
|          | 0.953836351                           |             | 0.953836351                 |                                       |              |             | 0.298743899  | 1.252176285  |                  | 0.775460092  |
|          | 0.674178505                           | 2           | 0                           | 0.998207054                           |              |             |              |              |                  |              |
| FAM192A  | ENSG00000172775.16                    |             |                             | 0.428451239                           | 2            | 2           | 0.309331654  |              |                  |              |
|          | Brain_Spinal_cord_cervical_c-1        | 0.390303941 |                             | Brain_Cerebellar_Hemisphere           |              |             |              |              |                  |              |
|          | 1.045751343                           |             | 0.954248657                 |                                       |              |             | 0.954248657  | -1.016625426 |                  | 0.859066295  |
|          | -0.078779565                          | 1.326314335 |                             | 2                                     | 0            | 0.998207054 |              |              |                  |              |
| PCDHA1   | ENSG00000204970.9                     |             |                             | 0.428463911                           | 3            | 2           | 0.19457714   |              |                  |              |
|          | Brain_Substantia_nigra                | 0.965912477 |                             | Brain_Cerebellum                      | 1.988024917  |             |              |              |                  |              |
|          | 0.016102645                           |             | 0.995872438                 |                                       |              |             | -1.297157094 | -0.042735378 |                  | -0.541469891 |
|          | 0.665516321                           | 2           | 0                           | 0.998207054                           |              |             |              |              |                  |              |
| ELOVL4   | ENSG00000118402.5                     |             |                             | 0.428525457                           | 1            | 1           | 0.428525457  |              |                  |              |
|          | Brain_Cerebellar_Hemisphere           | 0.428525457 |                             | Brain_Cerebellar_Hemisphere           | 1            | 1           |              |              |                  |              |
|          | 1                                     | 0.79171743  | 0.79171743                  | 0.79171743                            | NA           | 1           | 0            | 0.998207054  |                  |              |
| EBPL     | ENSG00000123179.13                    |             |                             | 0.428557219                           | 13           | 3           | 0.069523521  |              |                  |              |
|          | Brain_Spinal_cord_cervical_c-1        | 0.839601136 |                             | Brain_Putamen_basal_ganglia           |              |             |              |              |                  |              |
|          | 10.59558064                           |             | 0.013043589                 |                                       |              |             | 0.475541174  | 0.2024037    | 1.815002529      |              |
|          | 0.951078389                           |             | 0.541833565                 |                                       | 3            | 0           | 0.998207054  |              |                  |              |
| PIAS2    | ENSG00000078043.15                    |             |                             | 0.428589475                           | 9            | 5           | 0.060061557  |              |                  |              |
|          | Brain_Hippocampus                     | 0.490726921 |                             | Brain_Hypothalamus                    | 6.466938062  |             |              |              |                  |              |
|          | 0.011840362                           |             | 0.258748715                 |                                       | -1.880341455 |             | -0.689153109 |              |                  | -1.267006241 |
|          | 0.361257597                           | 5           | 0                           | 0.998207054                           |              |             |              |              |                  |              |
| AASDH    | ENSG00000157426.13                    |             |                             | 0.428739554                           | 2            | 2           | 0.204793431  |              | Brain_Cerebellum |              |
|          | 0.386557083                           |             | Brain_Cerebellar_Hemisphere | 1.816388528                           |              |             | 0.183611472  |              |                  |              |
|          | 0.183611472                           |             | 0.865877973                 |                                       | 1.268012656  |             | 1.066945315  |              |                  | 0.284352161  |
|          | 2                                     | 0           | 0.998207054                 |                                       |              |             |              |              |                  |              |
| CCDC163  | ENSG00000280670.2                     |             |                             | 0.428827416                           | 11           | 2           | 0.16846056   |              |                  |              |
|          | Brain_Caudate_basal_ganglia           | 0.25104049  |                             | Brain_Amygdala                        | 10.32952752  |             |              |              |                  | 0.00077682   |
|          | 0.427723562                           |             | 1.147825787                 |                                       | 1.3771672    |             | 1.234982978  |              | 0.075684428      | 2            |
|          | 0                                     |             | 0.998207054                 |                                       |              |             |              |              |                  |              |
| FBXO21   | ENSG00000135108.14                    |             |                             | 0.428874221                           | 3            | 3           | 0.318233287  |              |                  |              |
|          | Brain_Putamen_basal_ganglia           | 0.928977909 |                             | Brain_Nucleus_accumbens_basal_ganglia |              |             |              |              |                  |              |
|          | 2.638489771                           |             | 0.089635876                 |                                       | 0.089635876  |             | -0.998095015 |              |                  | -0.089130865 |
|          | -0.530136521                          |             | 0.45508109                  | 3                                     | 0            | 0.998207054 |              |              |                  |              |
| TMEM259  | ENSG00000182087.12                    |             |                             | 0.428891714                           | 9            | 8           | 0.208285744  |              |                  |              |
|          | Brain_Nucleus_accumbens_basal_ganglia | 0.95741915  |                             | Brain_Cortex                          | 2.890171365  |             |              |              |                  |              |
|          | 0.062429874                           |             | 0.12007793                  |                                       | -1.258293188 |             | 1.236836008  |              |                  | -0.158548093 |
|          | 0.939566998                           | 8           | 0                           | 0.998207054                           |              |             |              |              |                  |              |
| ZBED4    | ENSG00000100426.6                     |             |                             | 0.428923225                           | 3            | 2           | 0.235489153  |              |                  |              |
|          | Brain_Cerebellar_Hemisphere           | 0.401053922 |                             | Brain_Cerebellum                      | 1.945777056  |             |              |              |                  |              |
|          | 0.057432963                           |             | 0.996789981                 |                                       | -1.186337222 |             | 0.84671774   |              |                  | -0.393119981 |
|          | 1.087626089                           | 2           | 0                           | 0.998207054                           |              |             |              |              |                  |              |
| AGFG1    | ENSG00000173744.17                    |             |                             | 0.429000105                           | 3            | 3           | 0.195068229  |              |                  |              |
|          | Brain_Cerebellar_Hemisphere           | 0.368804728 |                             | Brain_Putamen_basal_ganglia           | 1.86309668   |             |              |              |                  |              |
|          | 0.143939489                           |             | 0.143939489                 |                                       | -0.898714543 |             | 1.295730849  |              |                  | 0.433031307  |
|          | 1.170000416                           | 3           | 0                           | 0.998207054                           |              |             |              |              |                  |              |
| RNF123   | ENSG00000164068.15                    |             |                             | 0.429021142                           | 10           | 4           | 0.269619307  |              |                  |              |
|          | Brain_Putamen_basal_ganglia           | 0.980126607 |                             | Brain_Cortex                          | 8.34597223   |             |              |              |                  |              |
|          | 0.001832492                           |             | 0.280450766                 |                                       | -1.103939675 |             | 0.603066659  |              |                  | 0.011349083  |
|          | 0.499941747                           | 4           | 0                           | 0.998207054                           |              |             |              |              |                  |              |
| PLA2G7   | ENSG00000146070.16                    |             |                             | 0.429052337                           | 5            | 5           | 0.067680987  |              |                  |              |
|          | Brain_Cortex                          | 0.774785582 |                             | Brain_Cerebellar_Hemisphere           | 2.286595     |             |              |              |                  |              |
|          | 0.280891491                           |             | 0.280891491                 |                                       | -1.827124938 |             | 0.584332848  |              |                  | -0.210725995 |
|          | 0.990898946                           | 5           | 0                           | 0.998207054                           |              |             |              |              |                  |              |
| GLIPR1L2 | ENSG00000180481.10                    |             |                             | 0.42909066                            | 13           | 1           | 0.326614251  |              | Brain_Cerebellum |              |
|          | 0.54812942                            |             | Brain_Cerebellar_Hemisphere | 12.9023734                            | 3.46E-05     |             | 12.9023734   |              |                  |              |

|              |                                       |                    |              |              |                                       |                    |
|--------------|---------------------------------------|--------------------|--------------|--------------|---------------------------------------|--------------------|
|              | -0.980956383                          | -0.600565503       | -0.787919787 | 0.099051032  | 1                                     | 0                  |
|              | 0.998207054                           |                    |              |              |                                       |                    |
| MYO1D        | ENSG00000176658.16                    | 0.429143294        | 2            | 2            | 0.196996662                           |                    |
|              | Brain_Caudate_basal_ganglia           | 0.818941414        |              |              | Brain_Cerebellum                      | 1.049214946        |
|              | 0.950785054                           | 0.950785054        | -0.228906725 | 1.290155533  |                                       | 0.530624404        |
|              | 1.074139224                           | 2                  | 0            | 0.998207054  |                                       |                    |
| CCDC40       | ENSG00000141519.14                    | 0.429276483        | 11           | 3            | 0.049007464                           |                    |
|              | Brain_Caudate_basal_ganglia           | 0.489426932        |              |              | Brain_Amygdala                        | 9.274522239        |
|              | 2.18E-08                              | 0.416825445        | -1.968526728 | -0.691220582 |                                       | -1.444477397       |
|              | 0.311244034                           | 3                  | 0            | 0.998207054  |                                       |                    |
| TRAF7        | ENSG00000131653.12                    | 0.429424397        | 2            | 2            | 0.210281472                           |                    |
|              | Brain_Hypothalamus                    | 0.835478689        |              |              | Brain_Hippocampus                     | 1.110341148        |
|              | 0.889658852                           | 0.889658852        | -0.207680187 | 1.252791839  |                                       | 0.522555826        |
|              | 1.032709674                           | 2                  | 0            | 0.998207054  |                                       |                    |
| C14orf37     | ENSG00000139971.15                    | 0.429446752        | 4            | 4            | 0.103034933                           |                    |
|              | Brain_Anterior_cingulate_cortex_BA24  | 0.852712741        |              |              | Brain_Hippocampus                     |                    |
|              | 2.014277672                           | 0.496519809        | 0.496519809  | 0.185658287  |                                       | 1.63031503         |
|              | 1.014520304                           | 0.625599058        | 4            | 0            | 0.998207054                           |                    |
| FUT2         | ENSG00000176920.11                    | 0.429706104        | 4            | 3            | 0.302450993                           |                    |
|              | Brain_Nucleus_accumbens_basal_ganglia | 0.997735955        |              |              | Brain_Caudate_basal_ganglia           |                    |
|              | 3.262603101                           | 0.004617895        | 0.125521875  | -0.002837563 |                                       | 1.03119157         |
|              | 0.508294562                           | 0.4679761          | 3            | 0            | 0.998207054                           |                    |
| TP53I11      | ENSG00000175274.18                    | 0.429748379        | 1            | 1            | 0.429748379                           |                    |
|              | Brain_Cerebellar_Hemisphere           | 0.429748379        |              |              | Brain_Cerebellar_Hemisphere           | 1                  |
|              | 1                                     | -0.789622304       | -0.789622304 | -0.789622304 | NA                                    | 1                  |
|              | 0.998207054                           |                    |              |              |                                       | 0                  |
| KAT14        | ENSG00000149474.13                    | 0.429948063        | 4            | 4            | 0.339266978                           |                    |
|              | Brain_Caudate_basal_ganglia           | 0.849235226        |              |              | Brain_Cerebellum                      | 2.98383597         |
|              | 0.139511038                           | 0.139511038        | -0.955614609 | 0.788804284  |                                       | -0.282136386       |
|              | 0.784978397                           | 4                  | 0            | 0.998207054  |                                       |                    |
| FAM216A      | ENSG00000204856.11                    | 0.43013574         | 1            | 1            | 0.43013574                            | Brain_Hypothalamus |
|              | 0.43013574                            | Brain_Hypothalamus | 1            | 1            | 1                                     | -0.788959393       |
|              | -0.788959393                          | NA                 | 1            | 0            | 0.998207054                           | -0.788959393       |
| IAH1         | ENSG00000134330.18                    | 0.430202442        | 5            | 3            | 0.09401435                            |                    |
|              | Brain_Frontal_Cortex_BA9              | 0.894983571        |              |              | Brain_Nucleus_accumbens_basal_ganglia |                    |
|              | 3.266749111                           | 0.012235245        | 0.781028055  | 0.132000912  |                                       | 1.674591798        |
|              | 1.040612548                           | 0.711386444        | 3            | 0            | 0.998207054                           |                    |
| FAM13A       | ENSG00000138640.14                    | 0.430226381        | 2            | 2            | 0.195340007                           |                    |
|              | Brain_Amygdala                        | 0.975895559        |              |              | Brain_Cerebellar_Hemisphere           | 1.100209981        |
|              | 0.899790019                           | 0.899790019        | -1.294942672 | -0.030215033 |                                       | -0.662578852       |
|              | 0.89429749                            | 2                  | 0            | 0.998207054  |                                       |                    |
| NEDD9        | ENSG00000111859.16                    | 0.430252714        | 4            | 4            | 0.098747252                           | Brain_Cortex       |
|              | 0.821785285                           | Brain_Hypothalamus | 1.793778419  | 0.473563674  |                                       |                    |
|              | 0.473563674                           | -1.650957505       | 0.369293106  | -0.486041578 |                                       | 0.958459186        |
|              | 4                                     | 0                  | 0.998207054  |              |                                       |                    |
| DNAJC15      | ENSG00000120675.5                     | 0.430300317        | 13           | 1            | 0.35339782                            |                    |
|              | Brain_Frontal_Cortex_BA9              | 0.486461263        |              |              | Brain_Cortex                          | 12.90758228        |
|              | 6.83E-05                              | 12.90758228        | 0.695948212  | 0.928018795  |                                       | 0.785851138        |
|              | 0.075150943                           | 1                  | 0            | 0.998207054  |                                       |                    |
| PRH2         | ENSG00000134551.12                    | 0.430343607        | 2            | 2            | 0.612705782                           |                    |
|              | Brain_Hippocampus                     | 0.72646772         |              |              | Brain_Spinal_cord_cervical_c-1        | 1.78183434         |
|              | 0.21816566                            | 0.21816566         | -0.349828086 | 0.50621492   | 0.078193417                           | 0.605313815        |
|              | 2                                     | 0                  | 0.998207054  |              |                                       |                    |
| SFMBT1       | ENSG00000163935.13                    | 0.430378537        | 3            | 3            | 0.176349311                           |                    |
|              | Brain_Cerebellar_Hemisphere           | 0.654480757        |              |              | Brain_Cerebellum                      | 1.885505204        |
|              | 0.277746466                           | 0.277746466        | -0.447546174 | 1.352081294  |                                       | 0.687536358        |
|              | 0.987784884                           | 3                  | 0            | 0.998207054  |                                       |                    |
| RP11-305L7.7 | ENSG00000273381.1                     | 0.430479331        | 3            | 3            | 0.332876381                           |                    |
|              | Brain_Hippocampus                     | 0.450208053        |              |              | Brain_Cortex                          | 1.311275168        |
|              | 0.688424606                           | 0.688424606        | -0.866097939 | 0.968336422  |                                       | 0.285768899        |
|              | 1.003229157                           | 3                  | 0            | 0.998207054  |                                       |                    |
| ASNSD1       | ENSG00000138381.9                     | 0.430483672        | 13           | 1            | 0.330395856                           |                    |

|              |                                       |                |              |                        |                                       |                |
|--------------|---------------------------------------|----------------|--------------|------------------------|---------------------------------------|----------------|
|              | Brain_Hippocampus                     | 0.854402684    |              | Brain_Substantia_nigra | 12.21471578                           |                |
|              | 0.000648955                           | 12.21471578    |              | -0.97331684            | -0.183503868                          | -0.761186444   |
|              | 0.201165077                           | 1              | 0            | 0.998207054            |                                       |                |
| RBL2         | ENSG00000103479.15                    | 0.430781981    | 13           | 1                      | 0.178901572                           |                |
|              | Brain_Caudate_basal_ganglia           | 0.797657922    |              |                        | Brain_Substantia_nigra                |                |
|              | 12.18645447                           | 1.82E-05       | 12.18645447  |                        | -0.259559131                          | 1.344144787    |
|              | 0.749516682                           | 0.413085651    | 1            | 0                      | 0.998207054                           |                |
| LRP1B        | ENSG00000168702.17                    | 0.430850974    | 6            | 6                      | 0.110318701                           |                |
|              | Brain_Putamen_basal_ganglia           | 0.743501155    |              |                        | Brain_Substantia_nigra                |                |
|              | 2.603885484                           | 0.191748641    | 0.191748641  |                        | -1.596762309                          | 0.48474829     |
|              | -0.840857761                          | 0.811295104    | 6            | 0                      | 0.998207054                           |                |
| LRRC28       | ENSG00000168904.14                    | 0.43089525     | 1            | 1                      | 0.43089525                            | Brain_Cortex   |
|              | 0.43089525                            | Brain_Cortex   | 1            | 1                      | 1                                     | -0.787660614   |
|              | -0.787660614                          | NA             | 1            | 0                      | 0.998207054                           | -0.787660614   |
| RP11-823E8.3 | ENSG00000274021.1                     | 0.43110394     | 2            | 2                      | 0.211055847                           |                |
|              | Brain_Substantia_nigra                | 0.768123821    |              |                        | Brain_Cortex                          | 1.039457344    |
|              | 0.960542656                           | 0.960542656    | -1.250667407 |                        | 0.294829905                           | -0.477918751   |
|              | 1.092831629                           | 2              | 0            | 0.998207054            |                                       |                |
| ZNF177       | ENSG00000188629.11                    | 0.431211201    | 11           | 11                     | 0.192422598                           |                |
|              | Brain_Amygdala                        | 0.678576273    |              |                        | Brain_Nucleus_accumbens_basal_ganglia |                |
|              | 2.114146913                           | 0.27427101     | 0.27427101   |                        | -1.303445832                          | 1.216664756    |
|              | -0.518776215                          | 0.964188104    | 11           | 0                      | 0.998207054                           |                |
| RP11-548P2.2 | ENSG00000272564.1                     | 0.431221801    | 7            | 2                      | 0.468806859                           |                |
|              | Brain_Caudate_basal_ganglia           | 0.982716508    |              |                        | Brain_Spinal_cord_cervical_c-1        |                |
|              | 6.425094953                           | 0.000164028    | 0.29455195   |                        | -0.724421737                          | 0.244079017    |
|              | -0.196766658                          | 0.396527732    | 2            | 0                      | 0.998207054                           |                |
| AC093802.1   | ENSG00000220256.3                     | 0.431340161    | 1            | 1                      | 0.431340161                           |                |
|              | Brain_Anterior_cingulate_cortex_BA24  | 0.431340161    |              |                        |                                       |                |
|              | Brain_Anterior_cingulate_cortex_BA24  | 1              | 1            | 1                      | -0.786900422                          |                |
|              | -0.786900422                          | -0.786900422   | NA           | 1                      | 0                                     | 0.998207054    |
| IL12A        | ENSG00000168811.6                     | 0.431386149    | 4            | 4                      | 0.082215435                           |                |
|              | Brain_Nucleus_accumbens_basal_ganglia | 0.937740422    |              |                        | Brain_Amygdala                        |                |
|              | 1.523984096                           | 0.533058614    | 0.533058614  |                        | -0.205402332                          | 1.737973777    |
|              | 0.506063719                           | 0.85935733     | 4            | 0                      | 0.998207054                           |                |
| ALG10B       | ENSG00000175548.8                     | 0.431396136    | 4            | 4                      | 0.129002561                           |                |
|              | Brain_Caudate_basal_ganglia           | 0.798272934    |              |                        | Brain_Spinal_cord_cervical_c-1        |                |
|              | 2.865409624                           | 0.145313838    | 0.145313838  |                        | -0.344627952                          | 1.518046959    |
|              | 0.45244222                            | 0.777758586    | 4            | 0                      | 0.998207054                           |                |
| EMX2         | ENSG00000170370.11                    | 0.431437113    | 1            | 1                      | 0.431437113                           | Brain_Amygdala |
|              | 0.431437113                           | Brain_Amygdala | 1            | 1                      | 1                                     | 0.786734826    |
|              | 0.786734826                           | NA             | 1            | 0                      | 0.998207054                           | 0.786734826    |
| CD300A       | ENSG00000167851.13                    | 0.431440424    | 5            | 5                      | 0.323133828                           |                |
|              | Brain_Cerebellar_Hemisphere           | 0.963591443    |              |                        | Brain_Caudate_basal_ganglia           |                |
|              | 2.953063836                           | 0.137748252    | 0.137748252  |                        | -0.86007162                           | 0.988038429    |
|              | -0.067784737                          | 0.676642086    | 5            | 0                      | 0.998207054                           |                |
| PSMA3        | ENSG00000100567.12                    | 0.431476806    | 3            | 3                      | 0.111288892                           |                |
|              | Brain_Anterior_cingulate_cortex_BA24  | 0.905875727    |              |                        | Brain_Putamen_basal_ganglia           |                |
|              | 1.213938844                           | 0.795860358    | 0.795860358  |                        | -0.118242234                          | 1.592426562    |
|              | 0.551972029                           | 0.913457894    | 3            | 0                      | 0.998207054                           |                |
| GATAD2A      | ENSG00000167491.17                    | 0.431655763    | 3            | 3                      | 0.122875978                           |                |
|              | Brain_Frontal_Cortex_BA9              | 0.258616139    |              |                        | Brain_Caudate_basal_ganglia           |                |
|              | 2.144068735                           | 0.20859178     | 0.20859178   |                        | -1.542813728                          | -1.129668016   |
|              | -1.388439071                          | 0.225491243    | 3            | 0                      | 0.998207054                           |                |
| PSPC1        | ENSG00000121390.18                    | 0.431929309    | 1            | 1                      | 0.431929309                           |                |
|              | Brain_Nucleus_accumbens_basal_ganglia | 0.431929309    |              |                        |                                       |                |
|              | Brain_Nucleus_accumbens_basal_ganglia | 1              | 1            | 1                      | -0.78589448                           |                |
|              | -0.78589448                           | -0.78589448    | NA           | 1                      | 0                                     | 0.998207054    |
| TNFRSF18     | ENSG00000186891.13                    | 0.432091962    | 6            | 4                      | 0.066558141                           |                |
|              | Brain_Hippocampus                     | 0.457652852    |              |                        | Brain_Cerebellum                      | 3.73905268     |
|              | 0.207432192                           | 0.742717302    | 1.834646114  |                        | 1.24571482                            | 0.446006425    |
|              | 0                                     | 0.998207054    |              |                        |                                       | 4              |
| POPDC3       | ENSG00000132429.9                     | 0.432178209    | 4            | 3                      | 0.298616497                           |                |

|           |                                       |                                |              |                                      |                       |
|-----------|---------------------------------------|--------------------------------|--------------|--------------------------------------|-----------------------|
|           | Brain_Caudate_basal_ganglia           | 0.915823663                    |              | Brain_Hypothalamus                   | 3.215554187           |
|           | 0.105293787                           | 0.225828323                    | -1.039404833 | 0.105695862                          | -0.334824462          |
|           | 0.491992844                           | 3                              | 0            | 0.998207054                          |                       |
| RHBDD2    | ENSG00000005486.16                    | 0.432191321                    | 2            | 2                                    | 0.293372189           |
|           | Brain_Cerebellum                      | 0.385515443                    |              | Brain_Anterior_cingulate_cortex_BA24 |                       |
|           | 1.109345902                           | 0.890654098                    | 0.890654098  | -1.05075269                          | -0.86777879           |
|           | -0.95926574                           | 0.129382086                    | 2            | 0                                    | 0.998207054           |
| GLB1L     | ENSG00000163521.15                    | 0.432218852                    | 1            | 1                                    | 0.432218852           |
|           | Brain_Hypothalamus                    | 0.432218852                    |              | Brain_Hypothalamus                   | 1 1 1                 |
|           | -0.785400391                          | -0.785400391                   | -0.785400391 | NA                                   | 1 0 0.998207054       |
| DGCR9     | ENSG00000273032.1                     | 0.432304185                    | 11           | 6                                    | 0.065048858           |
|           | Brain_Hippocampus                     | 0.652772709                    |              | Brain_Hypothalamus                   | 6.799067107           |
|           | 0.006019813                           | 0.291132249                    | -0.506197038 | 1.844922195                          | 0.862381099           |
|           | 0.648638735                           | 6                              | 0            | 0.998207054                          |                       |
| PTPRN2    | ENSG00000155093.17                    | 0.432419541                    | 8            | 7                                    | 0.036042765           |
|           | Brain_Nucleus_accumbens_basal_ganglia | 0.988190234                    |              | Brain_Amygdala                       |                       |
|           | 3.872733812                           | 0.070958875                    | 0.369924817  | -2.09644465                          | 0.014801888           |
|           | -0.888507077                          | 0.636883336                    | 7            | 0                                    | 0.998207054           |
| LINC01954 | ENSG00000271952.1                     | 0.432446133                    | 10           | 5                                    | 0.11244833            |
|           | Brain_Hippocampus                     | 0.800090162                    |              | Brain_Cerebellar_Hemisphere          | 6.588977412           |
|           | 0.001574039                           | 0.276275875                    | 0.253230418  | 1.587284033                          | 0.699459296           |
|           | 0.385523096                           | 5                              | 0            | 0.998207054                          |                       |
| EVL       | ENSG00000196405.12                    | 0.432472419                    | 1            | 1                                    | 0.432472419           |
|           | Brain_Anterior_cingulate_cortex_BA24  | 0.432472419                    |              |                                      |                       |
|           | Brain_Anterior_cingulate_cortex_BA24  | 1                              | 1            | 1                                    | 0.78496785 0.78496785 |
|           | 0.78496785                            | NA                             | 1            | 0                                    | 0.998207054           |
| AMY2B     | ENSG00000240038.6                     | 0.432475154                    | 7            | 5                                    | 0.39589998            |
|           | Brain_Putamen_basal_ganglia           | 0.984991592                    |              | Brain_Frontal_Cortex_BA9             |                       |
|           | 4.947231214                           | 0.035768379                    | 0.260719311  | -0.514685319                         | 0.848966416           |
|           | 0.335422594                           | 0.485512711                    | 5            | 0                                    | 0.998207054           |
| PM20D2    | ENSG00000146281.5                     | 0.43247956                     | 5            | 5                                    | 0.144018319           |
|           | Brain_Spinal_cord_cervical_c-1        | 2.198238771                    |              | Brain_Cerebellum                     |                       |
|           | 0.763388645                           | 0.18412412                     | -1.287152344 | 1.460989515                          | 0.18412412            |
|           | 0.18412412                            | 0.998207054                    | 1.460989515  | 0.621192263                          | 1.167004944 5         |
|           | 0                                     | 0.998207054                    |              |                                      |                       |
| GTF3C1    | ENSG00000077235.17                    | 0.432774825                    | 3            | 3                                    | 0.105508798           |
|           | Brain_Spinal_cord_cervical_c-1        | 0.861572691                    |              | Brain_Hypothalamus                   | 1.23629416            |
|           | 0.801286508                           | 0.801286508                    | -0.174372543 | 1.618714072                          | 0.644359838           |
|           | 0.906616525                           | 3                              | 0            | 0.998207054                          |                       |
| COL27A1   | ENSG00000196739.14                    | 0.432786241                    | 1            | 1                                    | 0.432786241           |
|           | Brain_Hypothalamus                    | 0.432786241                    |              | Brain_Hypothalamus                   | 1 1 1                 |
|           | 0.784432729                           | 0.784432729                    | 0.784432729  | NA                                   | 1 0 0.998207054       |
| PLXNA4    | ENSG00000221866.9                     | 0.432803626                    | 1            | 1                                    | 0.432803626           |
|           | Brain_Caudate_basal_ganglia           | 0.432803626                    |              | Brain_Caudate_basal_ganglia          | 1 1                   |
|           | 1                                     | -0.78440309                    | -0.78440309  | -0.78440309                          | NA 1 0                |
|           | 0.998207054                           |                                |              |                                      |                       |
| NEK10     | ENSG00000163491.16                    | 0.432854361                    | 2            | 2                                    | 0.460080254           |
|           | Brain_Frontal_Cortex_BA9              | 0.949605734                    |              | Brain_Cortex                         | 1.847966506           |
|           | 0.152033494                           | 0.152033494                    | -0.738714705 | -0.063201897                         | -0.400958301          |
|           | 0.477659687                           | 2                              | 0            | 0.998207054                          |                       |
| MYO1A     | ENSG00000166866.12                    | 0.433011204                    | 1            | 1                                    | 0.433011204           |
|           | Brain_Spinal_cord_cervical_c-1        | 0.433011204                    |              | Brain_Spinal_cord_cervical_c-1       |                       |
|           | 1                                     | 1                              | 1            | 0.784049264                          | 0.784049264           |
|           | 0.998207054                           |                                |              | 0.784049264                          | NA 1 0                |
| LINC02078 | ENSG00000267719.1                     | 0.433043608                    | 1            | 1                                    | 0.433043608           |
|           | Brain_Cerebellar_Hemisphere           | 0.433043608                    |              | Brain_Cerebellar_Hemisphere          | 1 1                   |
|           | 1                                     | 0.78399404                     | 0.78399404   | 0.78399404                           | NA 1 0 0.998207054    |
| LINC01783 | ENSG00000233421.4                     | 0.433074574                    | 1            | 1                                    | 0.433074574           |
|           | Brain_Frontal_Cortex_BA9              | 0.433074574                    |              | Brain_Frontal_Cortex_BA9             | 1 1                   |
|           | 1                                     | 0.783941266                    | 0.783941266  | 0.783941266                          | NA 1 0                |
|           | 0.998207054                           |                                |              |                                      |                       |
| PTBP2     | ENSG00000117569.18                    | 0.433155001                    | 5            | 5                                    | 0.116128428           |
|           | Brain_Cerebellum                      |                                |              | Brain_Cerebellum                     |                       |
|           | 0.639799841                           | Brain_Spinal_cord_cervical_c-1 | 2.651796418  |                                      | 0.143400566           |

|              |                                       |              |                                       |              |              |
|--------------|---------------------------------------|--------------|---------------------------------------|--------------|--------------|
|              | 0.143400566                           | -1.57123347  | 0.467978674                           | -0.779164461 | 0.762301501  |
|              | 5                                     | 0            | 0.998207054                           |              |              |
| FCHO1        | ENSG00000130475.14                    | 0.433202826  | 3                                     | 3            | 0.159372544  |
|              | Brain_Cerebellar_Hemisphere           | 0.92338418   | Brain_Cerebellum                      | 1.962862969  |              |
|              | 0.368286909                           | 0.368286909  | -0.096171733                          | 1.407184979  | 0.545009586  |
|              | 0.775660452                           | 3            | 0                                     | 0.998207054  |              |
| PI15         | ENSG00000137558.7                     | 0.433220105  | 3                                     | 3            | 0.184396372  |
|              | Brain_Cerebellar_Hemisphere           | 0.636768192  | Brain_Nucleus_accumbens_basal_ganglia |              |              |
|              | 1.450472913                           | 0.597357657  | 0.597357657                           | -0.472222205 | 1.327339593  |
|              | 0.532037368                           | 0.917797933  | 3                                     | 0            | 0.998207054  |
| SYNGR2       | ENSG00000108639.7                     | 0.433285812  | 2                                     | 2            | 0.298468837  |
|              | Brain_Caudate_basal_ganglia           | 0.464408717  | Brain_Spinal_cord_cervical_c-1        |              |              |
|              | 1.035700437                           | 0.964299563  | 0.964299563                           | -1.039722515 | 0.731606603  |
|              | -0.154057956                          | 1.252518831  | 2                                     | 0            | 0.998207054  |
| FAM109B      | ENSG00000177096.8                     | 0.433427026  | 4                                     | 4            | 0.158519853  |
|              | Brain_Frontal_Cortex_BA9              | 0.997131012  | Brain_Hypothalamus                    | 2.435617296  |              |
|              | 0.104065516                           | 0.104065516  | 0.003595751                           | 1.410067161  | 0.922173961  |
|              | 0.626966116                           | 4            | 0                                     | 0.998207054  |              |
| NHSL1        | ENSG00000135540.11                    | 0.433509028  | 4                                     | 3            | 0.174401661  |
|              | Brain_Caudate_basal_ganglia           | 1.957916208  | Brain_Amygdala                        | 0.048765662  |              |
|              | 0.939311127                           | -0.873694923 | 1.358195491                           | -0.116692566 | 1.042135787  |
|              | 3                                     | 0            | 0.998207054                           |              |              |
| TMEM155      | ENSG00000164112.12                    | 0.433617896  | 3                                     | 3            | 0.28236633   |
|              | Brain_Cerebellar_Hemisphere           | 1.869411359  | Brain_Cerebellum                      | 0.267146707  |              |
|              | 0.267146707                           | -1.075018758 | 0.606638243                           | -0.128347591 | 0.860581534  |
|              | 3                                     | 0            | 0.998207054                           |              |              |
| RP11-70D24.4 | ENSG00000275040.1                     | 0.433628253  | 2                                     | 2            | 0.20865709   |
|              | Brain_Cerebellar_Hemisphere           | 0.85395259   | Brain_Cerebellum                      | 1.368722841  |              |
|              | 0.631277159                           | 0.631277159  | -1.257266667                          | -0.184077585 | -0.720672126 |
|              | 0.758859277                           | 2            | 0                                     | 0.998207054  |              |
| PGGHG        | ENSG00000142102.15                    | 0.433656088  | 13                                    | 4            | 0.329535601  |
|              | Brain_Hippocampus                     | 0.975206704  | Brain_Anterior_cingulate_cortex_BA24  |              |              |
|              | 10.63560776                           | 0.0001358    | 0.420162559                           | -0.849545194 | 0.975049712  |
|              | -0.170808667                          | 0.471670717  | 4                                     | 0            | 0.998207054  |
| PDE11A       | ENSG00000128655.16                    | 0.433672583  | 3                                     | 3            | 0.126268114  |
|              | Brain_Hypothalamus                    | 0.632829371  | Brain_Anterior_cingulate_cortex_BA24  |              |              |
|              | 2.255311796                           | 0.300021351  | 0.300021351                           | 0.477748289  | 1.528985196  |
|              | 0.975146624                           | 0.527886242  | 3                                     | 0            | 0.998207054  |
| PRODH        | ENSG00000100033.16                    | 0.433676993  | 8                                     | 8            | 0.01882825   |
|              | Brain_Frontal_Cortex_BA9              | 0.940873257  | Brain_Amygdala                        | 3.89563024   |              |
|              | 0.153150729                           | 0.153150729  | -2.348914101                          | -0.074172337 | -1.302778854 |
|              | 0.745766081                           | 8            | 0                                     | 0.998207054  |              |
| SLC15A2      | ENSG00000163406.10                    | 0.43371561   | 7                                     | 5            | 0.118876708  |
|              | Brain_Nucleus_accumbens_basal_ganglia | 0.79612075   | Brain_Hypothalamus                    |              |              |
|              | 4.404170395                           | 0.036683914  | 0.163609998                           | -0.845266359 | 1.55950582   |
|              | 0.681696023                           | 0.846319425  | 5                                     | 0            | 0.998207054  |
| SLC25A41     | ENSG00000181240.13                    | 0.433741621  | 9                                     | 7            | 0.28954429   |
|              | Brain_Cerebellar_Hemisphere           | 0.947634836  | Brain_Caudate_basal_ganglia           |              |              |
|              | 3.956840305                           | 1.14E-16     | 0.273046133                           | -0.258952705 | 1.05912185   |
|              | 0.393412561                           | 0.397815469  | 7                                     | 0            | 0.998207054  |
| APCDD1       | ENSG00000154856.12                    | 0.43405942   | 4                                     | 4            | 0.080199929  |
|              | Brain_Nucleus_accumbens_basal_ganglia | 0.633061232  |                                       |              |              |
|              | Brain_Spinal_cord_cervical_c-1        | 2.131175166  | 0.285723008                           | 0.285723008  |              |
|              | -1.749527212                          | 0.477422589  | -0.84697944                           | 1.04507394   | 4            |
|              | 0.998207054                           |              |                                       |              | 0            |
| ASPG         | ENSG00000166183.15                    | 0.434062381  | 5                                     | 4            | 0.100906325  |
|              | Brain_Putamen_basal_ganglia           | 3.309750833  | Brain_Cortex                          | 0.047767379  |              |
|              | 0.171523444                           | 0.223368411  | 1.640475566                           | 1.028595052  | 0.559427591  |
|              | 4                                     | 0            | 0.998207054                           |              |              |
| PRKCD        | ENSG00000163932.13                    | 0.434073124  | 6                                     | 6            | 0.231336415  |
|              | Brain_Frontal_Cortex_BA9              | 0.657533453  | Brain_Anterior_cingulate_cortex_BA24  |              |              |
|              | 2.555536169                           | 0.101349276  | 0.101349276                           | -1.196923394 | 1.000723874  |

|         |                                       |                             |              |             |              |                                       |             |   |              |
|---------|---------------------------------------|-----------------------------|--------------|-------------|--------------|---------------------------------------|-------------|---|--------------|
|         | -0.563697308                          | 0.815957238                 | 6            | 0           | 0.998207054  |                                       |             |   |              |
| GOT2    | ENSG00000125166.12                    | 0.434124818                 | 2            | 2           | 0.20430939   |                                       |             |   |              |
|         | Brain_Caudate_basal_ganglia           | 0.609615208                 |              |             |              | Brain_Nucleus_accumbens_basal_ganglia |             |   |              |
|         | 1.217817652                           | 0.782182348                 | 0.782182348  |             | 0.5106228    | 1.269369273                           |             |   |              |
|         | 0.889996036                           | 0.536514776                 | 2            | 0           | 0.998207054  |                                       |             |   |              |
| PNKP    | ENSG00000039650.11                    | 0.434142196                 | 8            | 3           | 0.058641707  |                                       |             |   |              |
|         | Brain_Anterior_cingulate_cortex_BA24  | 0.685213101                 |              |             |              | Brain_Caudate_basal_ganglia           |             |   |              |
|         | 6.839458686                           | 0.042916109                 | 0.228085125  |             | -1.890869949 | -0.405359739                          |             |   |              |
|         | -1.023141051                          | 0.446249725                 | 3            | 0           | 0.998207054  |                                       |             |   |              |
| RIN2    | ENSG00000132669.12                    | 0.434151158                 | 1            | 1           | 0.434151158  |                                       |             |   |              |
|         | Brain_Hippocampus                     | 0.434151158                 |              |             |              | Brain_Hippocampus                     | 1           | 1 | 1            |
|         | 0.78210791                            | 0.78210791                  | 0.78210791   | NA          | 1            | 0                                     | 0.998207054 |   |              |
| PREPL   | ENSG00000138078.15                    | 0.434151885                 | 2            | 2           | 0.614308685  |                                       |             |   |              |
|         | 0.926800375                           | Brain_Cerebellar_Hemisphere | 1.890695248  |             | 0.109304752  |                                       |             |   |              |
|         | 0.109304752                           | -0.50393268                 | 0.091871199  |             | -0.206030741 | 0.421296963                           |             |   |              |
|         | 2                                     | 0                           | 0.998207054  |             |              |                                       |             |   |              |
| MCM8    | ENSG00000125885.13                    | 0.434179413                 | 13           | 3           | 0.157444965  |                                       |             |   |              |
|         | Brain_Nucleus_accumbens_basal_ganglia | 0.85355537                  |              |             |              | Brain_Putamen_basal_ganglia           |             |   |              |
|         | 10.70989831                           | 0.007270279                 | 0.369247194  |             | -1.413717161 | -0.184583957                          |             |   |              |
|         | -0.802442301                          | 0.327131703                 | 3            | 0           | 0.998207054  |                                       |             |   |              |
| KMT2B   | ENSG00000272333.5                     | 0.434252147                 | 2            | 2           | 0.196495161  |                                       |             |   |              |
|         | Brain_Anterior_cingulate_cortex_BA24  | 0.54475798                  |              |             |              | Brain_Spinal_cord_cervical_c-1        |             |   |              |
|         | 1.465458185                           | 0.534541815                 | 0.534541815  |             | -1.291601568 | -0.605633759                          |             |   |              |
|         | -0.948617663                          | 0.485052489                 | 2            | 0           | 0.998207054  |                                       |             |   |              |
| ZNF570  | ENSG00000171827.10                    | 0.434281715                 | 1            | 1           | 0.434281715  |                                       |             |   |              |
|         | Brain_Substantia_nigra                | 0.434281715                 |              |             |              | Brain_Substantia_nigra                | 1           | 1 |              |
|         | 1                                     | -0.781885759                | -0.781885759 |             | -0.781885759 | NA                                    | 1           | 0 |              |
|         | 0.998207054                           |                             |              |             |              |                                       |             |   |              |
| F2R     | ENSG00000181104.6                     | 0.43430024                  | 2            | 2           | 0.279024953  |                                       |             |   |              |
|         | Brain_Nucleus_accumbens_basal_ganglia | 0.740121572                 |              |             |              | Brain_Putamen_basal_ganglia           |             |   |              |
|         | 1.74238137                            | 0.25761863                  | 0.25761863   |             | -1.082512299 | -0.331692357                          |             |   | -0.707102328 |
|         | 0.530909872                           | 2                           | 0            | 0.998207054 |              |                                       |             |   |              |
| DDX20   | ENSG00000064703.11                    | 0.434351826                 | 2            | 2           | 0.20455534   |                                       |             |   |              |
|         | Brain_Cerebellar_Hemisphere           | 0.273178884                 |              |             |              | Brain_Cerebellum                      | 1.734638712 |   |              |
|         | 0.265361288                           | 0.265361288                 | 1.095771271  |             | 1.268679658  | 1.182225465                           |             |   |              |
|         | 0.122264693                           | 2                           | 0            | 0.998207054 |              |                                       |             |   |              |
| ZNF341  | ENSG00000131061.13                    | 0.434371832                 | 1            | 1           | 0.434371832  |                                       |             |   |              |
|         | Brain_Nucleus_accumbens_basal_ganglia | 0.434371832                 |              |             |              |                                       |             |   |              |
|         | Brain_Nucleus_accumbens_basal_ganglia | 1                           | 1            | 1           | 0.781732441  |                                       |             |   |              |
|         | 0.781732441                           | 0.781732441                 | NA           | 1           | 0            | 0.998207054                           |             |   |              |
| ZKSCAN4 | ENSG00000187626.8                     | 0.434466921                 | 1            | 1           | 0.434466921  |                                       |             |   |              |
|         | Brain_Cortex                          | 0.434466921                 |              |             |              | Brain_Cortex                          | 1           | 1 | 1            |
|         | -0.781570685                          | -0.781570685                | NA           | 1           | 0            | 0.998207054                           |             |   | -0.781570685 |
| CREB3L3 | ENSG00000060566.13                    | 0.434552623                 | 1            | 1           | 0.434552623  |                                       |             |   |              |
|         | Brain_Amygdala                        | 0.434552623                 |              |             |              | Brain_Amygdala                        | 1           | 1 | 1            |
|         | 0.781424914                           | 0.781424914                 | NA           | 1           | 0            | 0.998207054                           |             |   | 0.781424914  |
| AGPAT5  | ENSG00000155189.11                    | 0.43456863                  | 2            | 2           | 0.196835033  |                                       |             |   |              |
|         | Brain_Spinal_cord_cervical_c-1        | 0.967616609                 |              |             |              | Brain_Caudate_basal_ganglia           |             |   |              |
|         | 1.005764329                           | 0.994235671                 | 0.994235671  |             | -1.290621281 | -0.040597711                          |             |   |              |
|         | -0.665609496                          | 0.883900143                 | 2            | 0           | 0.998207054  |                                       |             |   |              |
| SLC15A5 | ENSG00000188991.3                     | 0.43471421                  | 3            | 3           | 0.255948117  |                                       |             |   |              |
|         | Brain_Anterior_cingulate_cortex_BA24  | 0.746771828                 |              |             |              | Brain_Hypothalamus                    |             |   |              |
|         | 1.617376817                           | 0.439568451                 | 0.439568451  |             | -1.136020184 | 0.322898875                           |             |   |              |
|         | -0.583579798                          | 0.791276524                 | 3            | 0           | 0.998207054  |                                       |             |   |              |
| DNPH1   | ENSG00000112667.12                    | 0.434739149                 | 8            | 5           | 0.063242041  |                                       |             |   |              |
|         | 0.866650089                           | Brain_Caudate_basal_ganglia | 5.042279744  |             | 0.030078444  |                                       |             |   |              |
|         | 0.258208956                           | -0.632430289                | 1.857485999  |             | 0.206386054  | 0.872638601                           |             |   |              |
|         | 5                                     | 0                           | 0.998207054  |             |              |                                       |             |   |              |
| MED10   | ENSG00000133398.3                     | 0.434743687                 | 8            | 2           | 0.226117091  |                                       |             |   |              |
|         | Brain_Nucleus_accumbens_basal_ganglia | 0.537293812                 |              |             |              | Brain_Caudate_basal_ganglia           |             |   |              |
|         | 7.416920826                           | 3.22E-05                    | 0.257226347  |             | -1.210421774 | -0.616910422                          |             |   |              |
|         | -1.054560619                          | 0.215036546                 | 2            | 0           | 0.998207054  |                                       |             |   |              |



|            |                                       |                             |              |              |              |                                       |              |
|------------|---------------------------------------|-----------------------------|--------------|--------------|--------------|---------------------------------------|--------------|
| PEX16      | ENSG00000121680.15                    | 0.4347967                   | 1            | 1            | 0.4347967    |                                       |              |
|            | Brain_Anterior_cingulate_cortex_BA24  | 0.4347967                   |              |              |              |                                       |              |
|            | Brain_Anterior_cingulate_cortex_BA24  | 1                           | 1            | 1            | 0.781009853  |                                       |              |
|            | 0.781009853                           | 0.781009853                 | NA           | 1            | 0            | 0.998207054                           |              |
| SYT9       | ENSG00000170743.16                    | 0.434880935                 | 2            | 2            | 0.303772817  |                                       |              |
|            | Brain_Cerebellar_Hemisphere           | 0.505655538                 |              |              |              | Brain_Putamen_basal_ganglia           |              |
|            | 1.106542085                           | 0.893457915                 | 0.893457915  |              |              | -0.665617626                          | 1.028376375  |
|            | 0.181379374                           | 1.197834645                 | 2            | 0            | 0.998207054  |                                       |              |
| LINC01376  | ENSG00000236204.5                     | 0.434992169                 | 1            | 1            | 0.434992169  |                                       |              |
|            | Brain_Frontal_Cortex_BA9              | 0.434992169                 |              |              |              | Brain_Frontal_Cortex_BA9              | 1 1          |
|            | 1                                     | -0.780677547                | -0.780677547 | -0.780677547 | NA           | 1                                     | 0            |
|            | 0.998207054                           |                             |              |              |              |                                       |              |
| EFHC1      | ENSG00000096093.15                    | 0.435000092                 | 2            | 1            | 0.426208392  | Brain_Cortex                          |              |
|            | 0.454435144                           | Brain_Putamen_basal_ganglia | 1.955189477  | 0.044810523  |              |                                       |              |
|            | 1.955189477                           | 0.74804147                  | 0.79569662   | 0.771869045  | 0.03369728   | 1                                     | 0            |
|            | 0.998207054                           |                             |              |              |              |                                       |              |
| FAM71F2    | ENSG00000205085.10                    | 0.435005447                 | 6            | 4            | 0.118464293  |                                       |              |
|            | Brain_Nucleus_accumbens_basal_ganglia | 0.804529793                 |              |              |              | Brain_Frontal_Cortex_BA9              |              |
|            | 3.951830802                           | 0.019353873                 | 0.215011831  | -0.608313703 | 1.561252049  |                                       |              |
|            | 0.775505718                           | 0.95525422                  | 4            | 0            | 0.998207054  |                                       |              |
| BNIP2      | ENSG00000140299.11                    | 0.435056632                 | 2            | 2            | 0.263386899  | Brain_Cerebellum                      |              |
|            | 0.501991524                           | Brain_Cerebellar_Hemisphere | 1.876803341  | 0.123196659  |              |                                       |              |
|            | 0.123196659                           | 0.671359523                 | 1.118421775  | 0.894890649  | 0.31612075   | 2                                     |              |
|            | 0                                     | 0.998207054                 |              |              |              |                                       |              |
| PYDC1      | ENSG00000169900.7                     | 0.435078575                 | 3            | 3            | 0.149122271  | Brain_Cortex                          |              |
|            | 0.855776594                           | Brain_Frontal_Cortex_BA9    | 1.568364718  | 0.440100792  |              |                                       |              |
|            | 0.440100792                           | -0.450961292                | 1.442638716  | 0.391143465  | 0.964009093  |                                       |              |
|            | 3                                     | 0                           | 0.998207054  |              |              |                                       |              |
| ETNK2      | ENSG00000143845.14                    | 0.435215051                 | 1            | 1            | 0.435215051  |                                       |              |
|            | Brain_Substantia_nigra                | 0.435215051                 |              |              |              | Brain_Substantia_nigra                | 1 1          |
|            | 1                                     | -0.780298745                | -0.780298745 | -0.780298745 | NA           | 1                                     | 0            |
|            | 0.998207054                           |                             |              |              |              |                                       |              |
| FAM110D    | ENSG00000197245.5                     | 0.435223984                 | 11           | 3            | 0.13463237   |                                       |              |
|            | Brain_Substantia_nigra                | 0.524360798                 |              |              |              | Brain_Cerebellum                      | 8.699154211  |
|            | 0.008130369                           | 0.456113798                 | 0.636637799  | 1.496081686  | 1.200766371  |                                       |              |
|            | 0.250401884                           | 3                           | 0            | 0.998207054  |              |                                       |              |
| PDGFC      | ENSG00000145431.10                    | 0.435252937                 | 3            | 3            | 0.219112864  | Brain_Cerebellum                      |              |
|            | 0.665491139                           | Brain_Caudate_basal_ganglia | 1.127301044  | 0.852183077  |              |                                       |              |
|            | 0.852183077                           | -1.228890498                | 0.805668907  | -0.285188656 | 1.025231241  |                                       |              |
|            | 3                                     | 0                           | 0.998207054  |              |              |                                       |              |
| AC078842.3 | ENSG00000228031.2                     | 0.435392343                 | 1            | 1            | 0.435392343  |                                       |              |
|            | Brain_Putamen_basal_ganglia           | 0.435392343                 |              |              |              | Brain_Putamen_basal_ganglia           | 1 1          |
|            | 1                                     | 0.779997507                 | 0.779997507  | 0.779997507  | NA           | 1                                     | 0            |
|            | 0.998207054                           |                             |              |              |              |                                       |              |
| CEP162     | ENSG00000135315.11                    | 0.435408241                 | 3            | 3            | 0.500606874  |                                       |              |
|            | Brain_Cortex                          | 0.751926205                 |              |              |              | Brain_Nucleus_accumbens_basal_ganglia | 2.45909282   |
|            | 0.189427485                           | 0.189427485                 | -0.673535183 | 0.31610053   | -0.294158608 |                                       |              |
|            | 0.533689778                           | 3                           | 0            | 0.998207054  |              |                                       |              |
| IL17RA     | ENSG00000177663.13                    | 0.435619095                 | 11           | 5            | 0.078408349  |                                       |              |
|            | Brain_Frontal_Cortex_BA9              | 0.935055448                 |              |              |              | Brain_Spinal_cord_cervical_c-1        |              |
|            | 5.718670805                           | 0.008616351                 | 0.826129527  | -1.759996803 | 0.843830049  |                                       |              |
|            | -0.720150676                          | 0.839349355                 | 5            | 0            | 0.998207054  |                                       |              |
| GLMP       | ENSG00000198715.11                    | 0.435763598                 | 2            | 2            | 0.200820416  |                                       |              |
|            | Brain_Putamen_basal_ganglia           | 0.308088587                 |              |              |              | Brain_Nucleus_accumbens_basal_ganglia |              |
|            | 1.859778471                           | 0.140221529                 | 0.140221529  | 1.019240956  | 1.279217668  |                                       |              |
|            | 1.149229312                           | 0.183831295                 | 2            | 0            | 0.998207054  |                                       |              |
| MICB       | ENSG00000204516.9                     | 0.435778031                 | 11           | 5            | 0.109998928  |                                       |              |
|            | Brain_Hippocampus                     | 0.995176545                 |              |              |              | Brain_Substantia_nigra                | 7.645821294  |
|            | 0.006758951                           | 0.508695992                 | -1.598197958 | 0.006045341  | -0.93049193  |                                       |              |
|            | 0.599986235                           | 5                           | 0            | 0.998207054  |              |                                       |              |
| LINC01905  | ENSG00000267057.5                     | 0.43584084                  | 1            | 1            | 0.43584084   | Brain_Hippocampus                     |              |
|            | 0.43584084                            | Brain_Hippocampus           | 1            | 1            | 1            | -0.779235775                          | -0.779235775 |

|               |                                       |                             |                             |              |              |                  |             |  |  |
|---------------|---------------------------------------|-----------------------------|-----------------------------|--------------|--------------|------------------|-------------|--|--|
|               | -0.779235775                          | NA                          | 1                           | 0            | 0.998207054  |                  |             |  |  |
| XPO5          | ENSG00000124571.17                    | 0.435876977                 | 1                           | 1            | 0.435876977  | Brain_Cerebellum |             |  |  |
|               | 0.435876977                           | Brain_Cerebellum1           | 1                           | 1            | -0.779174419 | -0.779174419     |             |  |  |
|               | -0.779174419                          | NA                          | 1                           | 0            | 0.998207054  |                  |             |  |  |
| LINC01923     | ENSG00000236653.2                     | 0.435936411                 | 1                           | 1            | 0.435936411  |                  |             |  |  |
|               | Brain_Cortex                          | 0.435936411                 | Brain_Cortex                | 1            | 1            | 1                | 0.779073514 |  |  |
|               | 0.779073514                           | 0.779073514                 | NA                          | 1            | 0            | 0.998207054      |             |  |  |
| EIF2B3        | ENSG00000070785.16                    | 0.4360153                   | 5                           | 4            | 0.151020058  | Brain_Amygdala   |             |  |  |
|               | 0.904787854                           | Brain_Frontal_Cortex_BA9    | 3.184236667                 | 0.011094036  |              |                  |             |  |  |
|               | 0.283779705                           | -1.435937742                | 0.988197475                 |              | -0.003465915 | 0.880485557      |             |  |  |
|               | 4                                     | 0                           | 0.998207054                 |              |              |                  |             |  |  |
| USP8          | ENSG00000138592.13                    | 0.436074684                 | 1                           | 1            | 0.436074684  | Brain_Cerebellum |             |  |  |
|               | 0.436074684                           | Brain_Cerebellum1           | 1                           | 1            | -0.778838791 | -0.778838791     |             |  |  |
|               | -0.778838791                          | NA                          | 1                           | 0            | 0.998207054  |                  |             |  |  |
| AMH           | ENSG00000104899.7                     | 0.436136482                 | 11                          | 9            | 0.129108388  |                  |             |  |  |
|               | Brain_Hippocampus                     | 0.929835617                 | Brain_Cortex                | 3.959392303  | 4.99E-17     |                  |             |  |  |
|               | 0.449178851                           | -1.517627271                | 1.300812483                 | 0.41082554   | 0.939501911  | 9                |             |  |  |
|               | 0                                     | 0.998207054                 |                             |              |              |                  |             |  |  |
| NEDD8         | ENSG00000129559.12                    | 0.436436894                 | 3                           | 3            | 0.176182524  | Brain_Cerebellum |             |  |  |
|               | 0.913061239                           | Brain_Hippocampus           | 1.325539675                 | 0.648431343  |              |                  |             |  |  |
|               | 0.648431343                           | 0.109178089                 | 1.352602906                 | 0.929217291  | 0.710300549  |                  |             |  |  |
|               | 3                                     | 0                           | 0.998207054                 |              |              |                  |             |  |  |
| RASSF1        | ENSG00000068028.17                    | 0.436525994                 | 3                           | 2            | 0.156715929  |                  |             |  |  |
|               | Brain_Cerebellar_Hemisphere           | 0.955344287                 | Brain_Hippocampus           | 2.016563072  |              |                  |             |  |  |
|               | 0.036477118                           | 0.94695981                  | -1.41620351                 | -0.055996887 | -0.861255649 |                  |             |  |  |
|               | 0.713815224                           | 2                           | 0                           | 0.998207054  |              |                  |             |  |  |
| MAN2C1        | ENSG00000140400.16                    | 0.436841751                 | 13                          | 4            | 0.235579949  |                  |             |  |  |
|               | Brain_Hypothalamus                    | 0.963212835                 | Brain_Cerebellar_Hemisphere | 10.63606304  |              |                  |             |  |  |
|               | 0.009160314                           | 0.429161951                 | -0.667414254                | 1.186107247  | 0.329465052  |                  |             |  |  |
|               | 0.522940825                           | 4                           | 0                           | 0.998207054  |              |                  |             |  |  |
| MAL2          | ENSG00000147676.13                    | 0.436891579                 | 4                           | 3            | 0.260661381  | Brain_Cortex     |             |  |  |
|               | 0.91571107                            | Brain_Cerebellar_Hemisphere | 1.989600057                 | 0.010891294  |              |                  |             |  |  |
|               | 0.923561268                           | -1.124829289                | 1.111875744                 | -0.077518239 | 0.917471632  |                  |             |  |  |
|               | 3                                     | 0                           | 0.998207054                 |              |              |                  |             |  |  |
| RP11-344N10.5 | ENSG00000272630.1                     | 0.436990503                 | 4                           | 4            | 0.425811234  |                  |             |  |  |
|               | Brain_Cerebellum                      | 0.886776897                 | Brain_Hippocampus           | 2.62192748   | 0.100743065  |                  |             |  |  |
|               | 0.100743065                           | -0.297325326                | 0.79637994                  | 0.143893605  | 0.485796178  | 4                |             |  |  |
|               | 0                                     | 0.998207054                 |                             |              |              |                  |             |  |  |
| TRIM5         | ENSG00000132256.18                    | 0.437059379                 | 1                           | 1            | 0.437059379  |                  |             |  |  |
|               | Brain_Putamen_basal_ganglia           | 0.437059379                 | Brain_Putamen_basal_ganglia | 1            | 1            |                  |             |  |  |
|               | 1                                     | 0.777168474                 | 0.777168474                 | 0.777168474  | NA           | 1                | 0           |  |  |
|               | 0.998207054                           |                             |                             |              |              |                  |             |  |  |
| SCGB3A1       | ENSG00000161055.3                     | 0.437091082                 | 5                           | 3            | 0.203636487  |                  |             |  |  |
|               | Brain_Putamen_basal_ganglia           | 0.926918867                 | Brain_Frontal_Cortex_BA9    |              |              |                  |             |  |  |
|               | 3.317253302                           | 0.055014694                 | 0.50311288                  | -0.60277846  | 1.271259103  |                  |             |  |  |
|               | 0.205809878                           | 0.740417555                 | 3                           | 0            | 0.998207054  |                  |             |  |  |
| CARD8         | ENSG00000105483.17                    | 0.437092637                 | 9                           | 7            | 0.113783876  |                  |             |  |  |
|               | Brain_Spinal_cord_cervical_c-1        | 0.961390285                 | Brain_Cerebellar_Hemisphere |              |              |                  |             |  |  |
|               | 4.132161535                           | 0.066269924                 | 0.177704692                 | -0.657195732 | 1.581411954  |                  |             |  |  |
|               | 0.616298412                           | 0.662465322                 | 7                           | 0            | 0.998207054  |                  |             |  |  |
| BCL2L11       | ENSG00000153094.22                    | 0.437165128                 | 6                           | 6            | 0.061848787  |                  |             |  |  |
|               | Brain_Nucleus_accumbens_basal_ganglia | 0.989638524                 |                             |              |              |                  |             |  |  |
|               | Brain_Anterior_cingulate_cortex_BA24  | 2.074776914                 | 0.21885919                  | 0.21885919   |              |                  |             |  |  |
|               | -1.867378234                          | 0.012986549                 | -0.860466607                | 0.761128296  | 6            | 0                |             |  |  |
|               | 0.998207054                           |                             |                             |              |              |                  |             |  |  |
| PLAGL1        | ENSG00000118495.18                    | 0.437209485                 | 3                           | 3            | 0.269701727  |                  |             |  |  |
|               | Brain_Cerebellum                      | 0.586637198                 | Brain_Cerebellar_Hemisphere | 1.036100832  |              |                  |             |  |  |
|               | 0.959307671                           | 0.959307671                 | -1.103749706                | 1.092870904  | 0.177612265  |                  |             |  |  |
|               | 1.143157585                           | 3                           | 0                           | 0.998207054  |              |                  |             |  |  |
| UCHL3         | ENSG00000118939.17                    | 0.437231086                 | 10                          | 2            | 0.184735928  | Brain_Cerebellum |             |  |  |
|               | 0.687329726                           | Brain_Amygdala              | 8.359379443                 | 0.00502972   | 0.952426482  |                  |             |  |  |
|               | 0.402481465                           | 1.326313345                 | 0.81971516                  | 0.302305038  | 2            | 0                |             |  |  |

0.998207054  
CCDC171 ENSG00000164989.16 0.437271641 12 2 0.179538018  
Brain\_Putamen\_basal\_ganglia 0.570006506 Brain\_Amygdala 10.65606044  
0.007543226 0.382404088 -1.342178834 -0.568041916 -0.994351828  
0.26377304 2 0 0.998207054  
RP11-473L15.3 ENSG00000249203.1 0.437314381 2 2 0.272287867  
Brain\_Hippocampus 0.805600441 Brain\_Anterior\_cingulate\_cortex\_BA24  
1.348046666 0.651953334 0.651953334 -1.097809076 0.246105661  
-0.425851707 0.950291224 2 0 0.998207054  
ELP2 ENSG00000134759.13 0.437361519 3 2 0.217492231  
Brain\_Hypothalamus 0.69138532 Brain\_Cerebellar\_Hemisphere1.970128764  
0.045007045 0.98486419 -1.233223927 -0.396975781 -0.727020197  
0.445086304 2 0 0.998207054  
ENTPD6 ENSG00000197586.12 0.437444809 4 3 0.22380921  
Brain\_Cerebellar\_Hemisphere 0.385448835 Brain\_Cortex 2.854464776  
0.030139803 0.129476569 -1.21646139 -0.867900445 -1.064137668  
0.147733325 3 0 0.998207054  
MTRF1 ENSG00000120662.15 0.437563455 3 3 0.14094759  
Brain\_Cerebellar\_Hemisphere 0.713015125 Brain\_Cortex 2.274697641  
0.178054465 0.178054465 0.367809714 1.472271448 0.931913739  
0.55261365 3 0 0.998207054  
RP4-568F9.6 ENSG00000230010.1 0.437621795 1 1 0.437621795  
Brain\_Cerebellum 0.437621795 Brain\_Cerebellum1 1 1 1 0.776215434  
0.776215434 0.776215434 NA 1 0 0.998207054  
NKAIN1 ENSG00000084628.9 0.437624499 11 1 0.20217752  
Brain\_Substantia\_nigra 0.842743645 Brain\_Hypothalamus 10.36397014  
1.88E-05 10.36397014 -1.275372239 0.198385266 -0.756036509  
0.426727344 1 0 0.998207054  
GRID2 ENSG00000152208.12 0.437679873 4 2 0.133876379  
Brain\_Substantia\_nigra 0.395899098 Brain\_Hippocampus 3.586174602  
0.028120841 0.279207041 -1.498989411 -0.848968002 -1.111448121  
0.288019771 2 0 0.998207054  
LPIN3 ENSG00000132793.11 0.437734337 8 5 0.098905898  
Brain\_Nucleus\_accumbens\_basal\_ganglia 0.932010781 Brain\_Cortex  
5.273443896 0.028094196 0.249005739 -1.650181117 0.394078852  
-0.254644904 0.683408383 5 0 0.998207054  
TMEM133 ENSG00000170647.3 0.437802158 1 1 0.437802158  
Brain\_Cerebellum 0.437802158 Brain\_Cerebellum1 1 1 1 -0.775909948  
-0.775909948 -0.775909948 NA 1 0 0.998207054  
CTD-3222D19.12 ENSG00000269399.2 0.437822235 2 2 0.327439205  
Brain\_Nucleus\_accumbens\_basal\_ganglia 0.361392377 Brain\_Frontal\_Cortex\_BA9  
1.085100094 0.914899906 0.914899906 -0.97928495 -0.912715144  
-0.946000047 0.047071961 2 0 0.998207054  
UBXN10 ENSG00000162543.5 0.438066508 2 2 0.212747472  
Brain\_Hypothalamus 0.746161969 Brain\_Caudate\_basal\_ganglia 1.008382572  
0.991617428 0.991617428 -1.246046098 -0.323704228 -0.784875163  
0.65219419 2 0 0.998207054  
B3GNT2 ENSG00000170340.10 0.43810539 1 1 0.43810539  
Brain\_Caudate\_basal\_ganglia 0.43810539 Brain\_Caudate\_basal\_ganglia 1 1 1  
0.775396522 0.775396522 0.775396522 NA 1 0 0.998207054  
HTRA2 ENSG00000115317.11 0.438121987 1 1 0.438121987  
Brain\_Nucleus\_accumbens\_basal\_ganglia 0.438121987  
Brain\_Nucleus\_accumbens\_basal\_ganglia 1 1 1 0.775368426  
0.775368426 0.775368426 NA 1 0 0.998207054  
MTMR7 ENSG00000003987.13 0.438183531 2 2 0.232676364  
Brain\_Hippocampus 0.510225864 Brain\_Cerebellar\_Hemisphere 1.158616612  
0.841383388 0.841383388 -0.658486041 1.19349297 0.267503465  
1.309546917 2 0 0.998207054  
FAM35A ENSG00000122376.11 0.438300222 10 3 0.147796127  
Brain\_Cerebellum 0.958543165 Brain\_Frontal\_Cortex\_BA9 7.677302889  
0.00054943 0.704125829 -1.447359983 -0.051981838 -0.617717982  
0.462274727 3 0 0.998207054

|            |                                       |                             |                             |             |                                       |                  |                    |
|------------|---------------------------------------|-----------------------------|-----------------------------|-------------|---------------------------------------|------------------|--------------------|
| ATP10D     | ENSG00000145246.13                    | 0.438301231                 | 2                           | 2           | 0.326162356                           |                  |                    |
|            | Brain_Anterior_cingulate_cortex_BA24  | 0.98238515                  |                             |             | Brain_Cortex                          | 1.657720108      |                    |
|            | 0.342279892                           | 0.342279892                 |                             |             | -0.022078735                          |                  | -0.501975931       |
|            | 0.678677124                           | 2                           | 0                           | 0.998207054 |                                       |                  |                    |
| GNA15      | ENSG00000060558.3                     | 0.438393964                 | 6                           | 5           | 0.163097715                           | Brain_Cortex     |                    |
|            | 0.996533942                           | Brain_Hippocampus           | 2.014222248                 |             | 1.26E-17                              | 0.834620043      |                    |
|            | -1.394728541                          | 1.083858101                 |                             |             | -0.51513469                           | 0.994925174      | 5 0                |
|            | 0.998207054                           |                             |                             |             |                                       |                  |                    |
| ATRIP      | ENSG00000164053.19                    | 0.438400758                 | 4                           | 4           | 0.102904715                           |                  |                    |
|            | Brain_Putamen_basal_ganglia           | 0.739961114                 |                             |             | Brain_Nucleus_accumbens_basal_ganglia |                  |                    |
|            | 1.647547681                           | 0.414601032                 | 0.414601032                 |             | -1.270031907                          | 1.630931782      |                    |
|            | 0.106148788                           | 1.223997486                 | 4                           | 0           | 0.998207054                           |                  |                    |
| MIR210HG   | ENSG00000247095.2                     | 0.438421009                 | 1                           | 1           | 0.438421009                           |                  |                    |
|            | Brain_Nucleus_accumbens_basal_ganglia | 0.438421009                 |                             |             |                                       |                  |                    |
|            | Brain_Nucleus_accumbens_basal_ganglia | 1                           | 1                           | 1           | 0.774862337                           |                  |                    |
|            | 0.774862337                           | 0.774862337                 | NA                          | 1           | 0                                     | 0.998207054      |                    |
| AF186192.1 | ENSG00000254533.1                     | 0.438570584                 | 2                           | 2           | 0.199315754                           |                  |                    |
|            | Brain_Spinal_cord_cervical_c-1        | 0.744701597                 |                             |             | Brain_Hippocampus                     |                  |                    |
|            | 1.228689502                           | 0.771310498                 | 0.771310498                 |             | 0.325633588                           | 1.283503444      |                    |
|            | 0.804568516                           | 0.67731627                  | 2                           | 0           | 0.998207054                           |                  |                    |
| TLN2       | ENSG00000171914.16                    | 0.438575327                 | 1                           | 1           | 0.438575327                           | Brain_Cerebellum |                    |
|            | 0.438575327                           | Brain_Cerebellum1           | 1                           | 1           | 0.774601235                           | 0.774601235      |                    |
|            | 0.774601235                           | NA                          | 1                           | 0           | 0.998207054                           |                  |                    |
| YBX2       | ENSG00000006047.12                    | 0.438741548                 | 3                           | 3           | 0.195086334                           | Brain_Amygdala   |                    |
|            | 0.892280616                           | Brain_Cerebellar_Hemisphere | 1.021176549                 |             | 0.985043945                           |                  |                    |
|            | 0.985043945                           | -1.295678319                | 1.021861828                 |             | -0.046132503                          | 1.169388212      |                    |
|            | 3                                     | 0                           | 0.998207054                 |             |                                       |                  |                    |
| TCF19      | ENSG00000137310.11                    | 0.438824603                 | 12                          | 2           | 0.126135093                           | Brain_Amygdala   |                    |
|            | 0.779157795                           | Brain_Cerebellum10.55103612 |                             |             | 0.01351822                            | 0.715875283      |                    |
|            | 0.280416741                           | 1.529521986                 | 0.625864158                 |             | 0.364415397                           | 2                | 0                  |
|            | 0.998207054                           |                             |                             |             |                                       |                  |                    |
| PBX3       | ENSG00000167081.16                    | 0.438927369                 | 3                           | 3           | 0.104521595                           |                  |                    |
|            | Brain_Frontal_Cortex_BA9              | 0.515632026                 |                             |             | Brain_Cortex                          | 1.963508604      |                    |
|            | 0.346930633                           | 0.346930633                 | 0.650093193                 |             | 1.623317293                           | 1.041559465      |                    |
|            | 0.513760104                           | 3                           | 0                           | 0.998207054 |                                       |                  |                    |
| GATA2      | ENSG00000179348.11                    | 0.439071078                 | 2                           | 2           | 0.249033896                           |                  |                    |
|            | Brain_Cerebellar_Hemisphere           | 0.654033432                 |                             |             | Brain_Frontal_Cortex_BA9              |                  |                    |
|            | 1.097672572                           | 0.902327428                 | 0.902327428                 |             | -1.152699136                          | 0.448165954      |                    |
|            | -0.352266591                          | 1.131982561                 | 2                           | 0           | 0.998207054                           |                  |                    |
| MFSD14C    | ENSG00000196312.12                    | 0.439107307                 | 9                           | 2           | 0.111431894                           |                  |                    |
|            | Brain_Hippocampus                     | 0.765442291                 |                             |             | Brain_Cortex                          | 7.517133005      |                    |
|            | 0.002623723                           | 0.696426242                 | 0.298341818                 |             | 1.591790017                           | 1.157690992      |                    |
|            | 0.44852273                            | 2                           | 0                           | 0.998207054 |                                       |                  |                    |
| CES3       | ENSG00000172828.12                    | 0.43911563                  | 2                           | 1           | 0.424414232                           |                  |                    |
|            | Brain_Cerebellar_Hemisphere           | 0.456396545                 |                             |             | Brain_Cerebellum1.99020204            | 0.00979796       |                    |
|            | 1.99020204                            | 0.744793533                 | 0.798786479                 |             | 0.771790006                           | 0.038178778      | 1                  |
|            | 0                                     | 0.998207054                 |                             |             |                                       |                  |                    |
| LAMB3      | ENSG00000196878.14                    | 0.439149238                 | 3                           | 2           | 0.166691061                           |                  |                    |
|            | Brain_Nucleus_accumbens_basal_ganglia | 0.397679477                 |                             |             | Brain_Caudate_basal_ganglia           |                  |                    |
|            | 2.550341241                           | 0.054947855                 | 0.394710903                 |             | -1.382914575                          | -0.845772845     |                    |
|            | -1.119887692                          | 0.268742473                 | 2                           | 0           | 0.998207054                           |                  |                    |
| URAD       | ENSG00000183463.5                     | 0.439286837                 | 2                           | 2           | 0.703431067                           | Brain_Cerebellum |                    |
|            | 0.82112166                            | Brain_Cerebellar_Hemisphere | 1.88766661                  |             | 0.11233339                            | 0.11233339       |                    |
|            | -0.380692995                          | 0.226102551                 | -0.077295222                |             | 0.429069246                           | 2                | 0                  |
|            | 0.998207054                           |                             |                             |             |                                       |                  |                    |
| AC005301.9 | ENSG00000283633.1                     | 0.439328822                 | 1                           | 1           | 0.439328822                           |                  |                    |
|            | Brain_Spinal_cord_cervical_c-1        | 0.439328822                 |                             |             | Brain_Spinal_cord_cervical_c-1        |                  |                    |
|            | 1                                     | 1                           | 1                           | -0.7733271  | -0.7733271                            | -0.7733271       | NA 1 0 0.998207054 |
| C4orf46    | ENSG00000205208.4                     | 0.43937966                  | 1                           | 1           | 0.43937966                            |                  |                    |
|            | Brain_Caudate_basal_ganglia           | 0.43937966                  | Brain_Caudate_basal_ganglia | 1           | 1                                     | 1                |                    |
|            | -0.773241178                          | -0.773241178                | -0.773241178                |             | NA                                    | 1                | 0 0.998207054      |
| TMEM35B    | ENSG00000243749.1                     | 0.439392959                 | 1                           | 1           | 0.439392959                           |                  |                    |

|               |                                       |                                       |                             |                             |              |             |                  |
|---------------|---------------------------------------|---------------------------------------|-----------------------------|-----------------------------|--------------|-------------|------------------|
|               | Brain_Hippocampus                     | 0.439392959                           |                             | Brain_Hippocampus           | 1            | 1           | 1                |
|               | 0.773218703                           | 0.773218703                           | 0.773218703                 | NA                          | 1            | 0           | 0.998207054      |
| INTS1         | ENSG00000164880.15                    | 0.439462273                           | 13                          | 1                           | 0.319807304  |             |                  |
|               | Brain_Hypothalamus                    | 0.673064366                           |                             | Brain_Frontal_Cortex_BA9    |              |             | 12.15598126      |
|               | 0.000199083                           | 12.15598126                           | -0.994853946                | -0.421946092                |              |             | -0.747737308     |
|               | 0.175054373                           | 1                                     | 0                           | 0.998207054                 |              |             |                  |
| RP11-351J23.1 | ENSG00000203688.4                     | 0.439465046                           | 4                           | 4                           | 0.114690528  |             |                  |
|               | Brain_Nucleus_accumbens_basal_ganglia | 0.680669693                           |                             | Brain_Putamen_basal_ganglia |              |             |                  |
|               | 1.20767225                            | 0.779804807                           | 0.779804807                 | -0.999455452                | 1.57745648   | 0.08571182  |                  |
|               | 1.161248185                           | 4                                     | 0                           | 0.998207054                 |              |             |                  |
| NKD1          | ENSG00000140807.6                     | 0.439549891                           | 2                           | 2                           | 0.214813777  |             | Brain_Cerebellum |
|               | 0.378290212                           | Brain_Cerebellar_Hemisphere           | 1.848660935                 | 0.151339065                 |              |             |                  |
|               | 0.151339065                           | -1.240437071                          | -0.881051009                | -1.06074404                 | 0.254124321  |             |                  |
|               | 2                                     | 0                                     | 0.998207054                 |                             |              |             |                  |
| C19orf33      | ENSG00000167644.11                    | 0.439578824                           | 7                           | 3                           | 0.482504252  |             |                  |
|               | Brain_Substantia_nigra                | 0.900691604                           |                             | Brain_Caudate_basal_ganglia |              |             |                  |
|               | 5.691593868                           | 0.018136132                           | 0.263900699                 | -0.702280499                | 0.441441836  |             |                  |
|               | -0.150424914                          | 0.420036093                           | 3                           | 0                           | 0.998207054  |             |                  |
| RP11-535M15.1 | ENSG00000224848.1                     | 0.439669818                           | 12                          | 1                           | 0.337467835  |             |                  |
|               | Brain_Frontal_Cortex_BA9              | 0.77346207                            | Brain_Amygdala              | 11.67399745                 | 3.48E-06     |             |                  |
|               | 11.67399745                           | -0.959180474                          | -0.287849336                | -0.761599692                | 0.166624408  |             |                  |
|               | 1                                     | 0                                     | 0.998207054                 |                             |              |             |                  |
| DHRS3         | ENSG00000162496.8                     | 0.439681554                           | 1                           | 1                           | 0.439681554  |             |                  |
|               | Brain_Caudate_basal_ganglia           | 0.439681554                           |                             | Brain_Caudate_basal_ganglia | 1            | 1           |                  |
|               | 1                                     | 0.772731071                           | 0.772731071                 | 0.772731071                 | NA           | 1           | 0                |
|               | 0.998207054                           |                                       |                             |                             |              |             |                  |
| ADAL          | ENSG00000168803.14                    | 0.439802281                           | 13                          | 1                           | 0.273081389  |             |                  |
|               | Brain_Putamen_basal_ganglia           | 0.634993459                           |                             | Brain_Cerebellar_Hemisphere |              |             |                  |
|               | 12.51688451                           | 0.000234867                           | 12.51688451                 | -1.095994026                | -0.474710323 |             |                  |
|               | -0.757725778                          | 0.203360244                           | 1                           | 0                           | 0.998207054  |             |                  |
| DDX54         | ENSG00000123064.12                    | 0.439834404                           | 1                           | 1                           | 0.439834404  |             |                  |
|               | Brain_Caudate_basal_ganglia           | 0.439834404                           |                             | Brain_Caudate_basal_ganglia | 1            | 1           |                  |
|               | 1                                     | 0.77247288                            | 0.77247288                  | 0.77247288                  | NA           | 1           | 0                |
|               | 0.998207054                           |                                       |                             |                             |              |             |                  |
| RP11-121A8.1  | ENSG00000272908.1                     | 0.439848456                           | 1                           | 1                           | 0.439848456  |             |                  |
|               | Brain_Anterior_cingulate_cortex_BA24  | 0.439848456                           |                             |                             |              |             |                  |
|               | Brain_Anterior_cingulate_cortex_BA24  | 1                                     | 1                           | 1                           | -0.772449146 |             |                  |
|               | -0.772449146                          | -0.772449146                          | NA                          | 1                           | 0            | 0.998207054 |                  |
| ATG7          | ENSG00000197548.12                    | 0.439906712                           | 3                           | 2                           | 0.191410427  |             | Brain_Cerebellum |
|               | 0.919760606                           | Brain_Hypothalamus                    | 2.041546285                 | 0.035418017                 |              |             |                  |
|               | 0.923035698                           | -0.100735278                          | 1.306418063                 | 0.80648419                  | 0.787039578  | 2           |                  |
|               | 0                                     | 0.998207054                           |                             |                             |              |             |                  |
| NFKB1         | ENSG00000109320.11                    | 0.439922106                           | 1                           | 1                           | 0.439922106  |             |                  |
|               | Brain_Frontal_Cortex_BA9              | 0.439922106                           |                             | Brain_Frontal_Cortex_BA9    | 1            | 1           |                  |
|               | 1                                     | -0.772324758                          | -0.772324758                | -0.772324758                | NA           | 1           | 0                |
|               | 0.998207054                           |                                       |                             |                             |              |             |                  |
| TMEM116       | ENSG00000198270.12                    | 0.44001348                            | 4                           | 4                           | 0.117112008  |             |                  |
|               | Brain_Spinal_cord_cervical_c-1        | 0.844008778                           |                             | Brain_Frontal_Cortex_BA9    |              |             |                  |
|               | 2.296864526                           | 0.086611937                           | 0.086611937                 | -1.56701148                 | 0.196768404  |             |                  |
|               | -0.49366394                           | 0.757660148                           | 4                           | 0                           | 0.998207054  |             |                  |
| ANKRD36C      | ENSG00000174501.14                    | 0.440016796                           | 3                           | 3                           | 0.200697061  |             |                  |
|               | Brain_Spinal_cord_cervical_c-1        | 0.78361342                            | Brain_Putamen_basal_ganglia | 1.147368                    |              |             |                  |
|               | 0.756816556                           | 0.756816556                           | 0.274613206                 | 1.279568138                 | 0.885680372  |             |                  |
|               | 0.536524718                           | 3                                     | 0                           | 0.998207054                 |              |             |                  |
| SIN3B         | ENSG00000127511.9                     | 0.440036579                           | 2                           | 2                           | 0.254480333  |             | Brain_Cortex     |
|               | 0.276190015                           | Brain_Frontal_Cortex_BA9              | 1.514805322                 | 0.485194678                 |              |             |                  |
|               | 0.485194678                           | 1.088918074                           | 1.13953439                  | 1.114226232                 | 0.03579114   | 2           | 0                |
|               | 0.998207054                           |                                       |                             |                             |              |             |                  |
| MTR           | ENSG00000116984.12                    | 0.440045331                           | 4                           | 4                           | 0.094694616  |             | Brain_Cortex     |
|               | 0.673394358                           | Brain_Nucleus_accumbens_basal_ganglia | 2.349012922                 |                             |              |             |                  |
|               | 0.291402579                           | 0.291402579                           | 0.421494047                 | 1.671137024                 | 1.067139179  |             |                  |
|               | 0.619752778                           | 4                                     | 0                           | 0.998207054                 |              |             |                  |
| MRPL1         | ENSG00000169288.17                    | 0.440110502                           | 1                           | 1                           | 0.440110502  |             | Brain_Amygdala   |

|               |                                       |                                |                                |              |                             |                             |
|---------------|---------------------------------------|--------------------------------|--------------------------------|--------------|-----------------------------|-----------------------------|
|               | 0.440110502                           | Brain_Amygdala                 | 1                              | 1            | -0.772006628                | -0.772006628                |
|               | -0.772006628                          | NA                             | 1                              | 0            | 0.998207054                 |                             |
| UACA          | ENSG00000137831.14                    | 0.440125572                    | 2                              | 2            | 0.200533096                 |                             |
|               | Brain_Putamen_basal_ganglia           | 0.469758387                    |                                |              | Brain_Caudate_basal_ganglia |                             |
|               | 1.598450051                           | 0.401549949                    | 0.401549949                    |              | 0.722872228                 | 1.280034235                 |
|               | 1.001453232                           | 0.393973034                    | 2                              | 0            | 0.998207054                 |                             |
| LINC01719     | ENSG00000233396.7                     | 0.440418192                    | 9                              | 5            | 0.174658634                 |                             |
|               | Brain_Amygdala                        | 0.99037029                     | Brain_Cortex                   | 5.781932739  | 1.07E-16                    |                             |
|               | 0.363664855                           | 0.012069345                    | 1.357385874                    |              | 1.055168622                 | 0.408316615                 |
|               | 5                                     | 0                              | 0.998207054                    |              |                             |                             |
| SCN8A         | ENSG00000196876.15                    | 0.44043225                     | 1                              | 1            | 0.44043225                  | Brain_Caudate_basal_ganglia |
|               | 0.44043225                            | Brain_Caudate_basal_ganglia    | 1                              | 1            | -0.771463499                |                             |
|               | -0.771463499                          | -0.771463499                   | NA                             | 1            | 0                           | 0.998207054                 |
| ARHGFEF26     | ENSG00000114790.12                    | 0.440490953                    | 1                              | 1            | 0.440490953                 |                             |
|               | Brain_Amygdala                        | 0.440490953                    | Brain_Amygdala                 | 1            | 1                           | 1                           |
|               | 0.771364429                           | 0.771364429                    | NA                             | 1            | 0                           | 0.771364429                 |
|               | 0.998207054                           |                                |                                |              |                             |                             |
| COX15         | ENSG00000014919.12                    | 0.440563018                    | 4                              | 4            | 0.117719171                 |                             |
|               | Brain_Cerebellar_Hemisphere           | 0.755107096                    | Brain_Cortex                   | 2.455159458  |                             |                             |
|               | 0.102077907                           | 0.102077907                    | -1.564419131                   |              | -0.311912403                | -0.987230076                |
|               | 0.521865837                           | 4                              | 0                              | 0.998207054  |                             |                             |
| RANGRF        | ENSG00000108961.13                    | 0.440641309                    | 1                              | 1            | 0.440641309                 |                             |
|               | Brain_Hypothalamus                    | 0.440641309                    | Brain_Hypothalamus             | 1            | 1                           | 1                           |
|               | 0.771110717                           | 0.771110717                    | 0.771110717                    | NA           | 1                           | 0                           |
|               | 0.998207054                           |                                |                                |              |                             |                             |
| HPGDS         | ENSG00000163106.10                    | 0.440828045                    | 4                              | 4            | 0.0862179                   |                             |
|               | Brain_Substantia_nigra                | 0.679843156                    | Brain_Caudate_basal_ganglia    |              |                             |                             |
|               | 1.313372695                           | 0.5964128                      | 0.5964128                      | -1.715694892 | 0.422386795                 |                             |
|               | -0.46308383                           | 1.061248463                    | 4                              | 0            | 0.998207054                 |                             |
| CHODL         | ENSG00000154645.13                    | 0.440841885                    | 1                              | 1            | 0.440841885                 |                             |
|               | Brain_Nucleus_accumbens_basal_ganglia | 0.440841885                    |                                |              |                             |                             |
|               | Brain_Nucleus_accumbens_basal_ganglia | 1                              | 1                              | 1            | -0.770772339                |                             |
|               | -0.770772339                          | -0.770772339                   | NA                             | 1            | 0                           | 0.998207054                 |
| GYG1          | ENSG00000163754.17                    | 0.440959724                    | 1                              | 1            | 0.440959724                 |                             |
|               | Brain_Caudate_basal_ganglia           | 0.440959724                    | Brain_Caudate_basal_ganglia    | 1            | 1                           |                             |
|               | 1                                     | -0.770573583                   | -0.770573583                   | -0.770573583 | NA                          | 1                           |
|               | 0                                     |                                |                                |              |                             |                             |
|               | 0.998207054                           |                                |                                |              |                             |                             |
| NLRP1         | ENSG00000091592.15                    | 0.440965697                    | 4                              | 3            | 0.098288508                 | Brain_Cortex                |
|               | 0.405352803                           | Brain_Spinal_cord_cervical_c-1 | 2.987316853                    |              | 0.000924586                 |                             |
|               | 0.180228112                           | 0.832099467                    | 1.653208151                    |              | 1.363392973                 | 0.374842329                 |
|               | 3                                     | 0                              | 0.998207054                    |              |                             |                             |
| RP11-474021.5 | ENSG00000272482.1                     | 0.441074177                    | 1                              | 1            | 0.441074177                 |                             |
|               | Brain_Substantia_nigra                | 0.441074177                    | Brain_Substantia_nigra         | 1            | 1                           |                             |
|               | 1                                     | 0.770380568                    | 0.770380568                    | 0.770380568  | NA                          | 1                           |
|               | 0                                     |                                |                                |              |                             |                             |
|               | 0.998207054                           |                                |                                |              |                             |                             |
| PPDPF         | ENSG00000125534.9                     | 0.441098008                    | 1                              | 1            | 0.441098008                 | Brain_Cortex                |
|               | 0.441098008                           | Brain_Cortex                   | 1                              | 1            | 1                           | 0.770340382                 |
|               | 0.770340382                           | NA                             | 1                              | 0            | 0.998207054                 | 0.770340382                 |
| ANGPTL4       | ENSG00000167772.11                    | 0.44110258                     | 1                              | 1            | 0.44110258                  |                             |
|               | Brain_Spinal_cord_cervical_c-1        | 0.44110258                     | Brain_Spinal_cord_cervical_c-1 | 1            | 1                           |                             |
|               | 1                                     | 1                              | -0.770332673                   | -0.770332673 | -0.770332673                | NA                          |
|               | 1                                     | 0                              |                                |              |                             |                             |
|               | 0.998207054                           |                                |                                |              |                             |                             |
| SYTL1         | ENSG00000142765.17                    | 0.441113627                    | 2                              | 2            | 0.241234306                 |                             |
|               | Brain_Cerebellar_Hemisphere           | 0.437860194                    | Brain_Cerebellum               | 1.23636473   | 0.76363527                  |                             |
|               | 0.76363527                            | 0.775811667                    | 1.171907226                    |              | 0.973859446                 | 0.280081856                 |
|               | 0                                     | 0.998207054                    |                                |              |                             | 2                           |
| F13A1         | ENSG00000124491.15                    | 0.441171712                    | 2                              | 2            | 0.237563722                 |                             |
|               | Brain_Hypothalamus                    | 0.704950763                    | Brain_Spinal_cord_cervical_c-1 |              |                             |                             |
|               | 1.093782108                           | 0.906217892                    | 0.906217892                    |              | -0.378645994                | 1.181098182                 |
|               | 0.401226094                           | 1.102905684                    | 2                              | 0            | 0.998207054                 |                             |
| LLGL2         | ENSG00000073350.13                    | 0.441379107                    | 1                              | 1            | 0.441379107                 | Brain_Cerebellum            |
|               | 0.441379107                           | Brain_Cerebellum               | 1                              | 1            | 1                           | -0.769866467                |
|               | -0.769866467                          | NA                             | 1                              | 0            | 0.998207054                 | -0.769866467                |
| STAT4         | ENSG00000138378.17                    | 0.441495231                    | 1                              | 1            | 0.441495231                 |                             |

|                |                                       |              |                                       |                             |             |              |                  |
|----------------|---------------------------------------|--------------|---------------------------------------|-----------------------------|-------------|--------------|------------------|
|                | Brain_Putamen_basal_ganglia           | 0.441495231  |                                       | Brain_Putamen_basal_ganglia | 1           | 1            |                  |
|                | 1                                     | -0.76967074  | -0.76967074                           | -0.76967074                 | NA          | 1            | 0                |
|                | 0.998207054                           |              |                                       |                             |             |              |                  |
| JPH1           | ENSG00000104369.4                     | 0.441572853  | 5                                     | 2                           | 0.120968316 |              |                  |
|                | Brain_Substantia_nigra                | 0.5802846    |                                       | Brain_Cerebellar_Hemisphere | 3.870307161 |              |                  |
|                | 0.008564151                           | 0.999992818  |                                       | -1.550722016                | 0.552969055 |              | -0.792155571     |
|                | 0.815049159                           | 2            | 0                                     | 0.998207054                 |             |              |                  |
| RP11-675F6.3   | ENSG00000253361.1                     | 0.441631811  | 3                                     | 2                           | 0.315953106 |              |                  |
|                | Brain_Cerebellum                      | 0.852836735  |                                       | Brain_Cortex                | 2.712034507 |              | 0.044546493      |
|                | 0.243419                              | 0.185500186  | 1.002808833                           | 0.542792953                 |             | 0.41822528   | 2 0              |
|                | 0.998207054                           |              |                                       |                             |             |              |                  |
| FGF18          | ENSG00000156427.7                     | 0.441780447  | 1                                     | 1                           | 0.441780447 |              |                  |
|                | Brain_Caudate_basal_ganglia           | 0.441780447  |                                       | Brain_Caudate_basal_ganglia | 1           | 1            |                  |
|                | 1                                     | -0.769190133 | -0.769190133                          | -0.769190133                | NA          | 1            | 0                |
|                | 0.998207054                           |              |                                       |                             |             |              |                  |
| RP11-249C24.12 | ENSG00000275691.1                     | 0.441882926  | 1                                     | 1                           | 0.441882926 |              |                  |
|                | Brain_Nucleus_accumbens_basal_ganglia | 0.441882926  |                                       |                             |             |              |                  |
|                | Brain_Nucleus_accumbens_basal_ganglia | 1            | 1                                     | 1                           | 0.769017492 |              |                  |
|                | 0.769017492                           | 0.769017492  | NA                                    | 1                           | 0           | 0.998207054  |                  |
| KRT33B         | ENSG00000131738.10                    | 0.441981453  | 1                                     | 1                           | 0.441981453 |              |                  |
|                | Brain_Hippocampus                     | 0.441981453  |                                       | Brain_Hippocampus           | 1           | 1            | 1                |
|                | 0.768851532                           | 0.768851532  | 0.768851532                           | NA                          | 1           | 0            | 0.998207054      |
| WBSCR27        | ENSG00000165171.10                    | 0.441990822  | 13                                    | 1                           | 0.225270994 |              |                  |
|                | Brain_Cortex                          | 0.715375494  |                                       | Brain_Substantia_nigra      | 12.62293824 |              |                  |
|                | 0.00035262                            | 12.62293824  | -1.212630835                          | -0.364646239                |             | -0.757075162 |                  |
|                | 0.218844515                           | 1            | 0                                     | 0.998207054                 |             |              |                  |
| RP11-120K24.3  | ENSG00000267868.1                     | 0.442004572  | 6                                     | 6                           | 0.161162027 |              |                  |
|                | Brain_Anterior_cingulate_cortex_BA24  | 0.997569292  |                                       | Brain_Frontal_Cortex_BA9    |             |              |                  |
|                | 2.479322418                           | 0.257161888  | 0.257161888                           | -1.401174066                |             | 0.476538332  |                  |
|                | -0.37882194                           | 0.671785223  | 6                                     | 0                           | 0.998207054 |              |                  |
| AADAT          | ENSG00000109576.13                    | 0.442013266  | 8                                     | 6                           | 0.212881406 |              |                  |
|                | Brain_Anterior_cingulate_cortex_BA24  | 0.982226472  |                                       | Brain_Putamen_basal_ganglia |             |              |                  |
|                | 4.956235535                           | 0.032665545  | 0.211912723                           | -1.245681343                |             | 0.821294222  |                  |
|                | -0.060103932                          | 0.729665453  | 6                                     | 0                           | 0.998207054 |              |                  |
| IPO7           | ENSG00000205339.9                     | 0.442014196  | 1                                     | 1                           | 0.442014196 |              |                  |
|                | Brain_Nucleus_accumbens_basal_ganglia | 0.442014196  |                                       |                             |             |              |                  |
|                | Brain_Nucleus_accumbens_basal_ganglia | 1            | 1                                     | 1                           | 0.768796384 |              |                  |
|                | 0.768796384                           | 0.768796384  | NA                                    | 1                           | 0           | 0.998207054  |                  |
| TSLP           | ENSG00000145777.14                    | 0.442075883  | 12                                    | 2                           | 0.309213244 |              | Brain_Cortex     |
|                | 0.959177027                           |              | Brain_Nucleus_accumbens_basal_ganglia | 10.87561498                 |             |              |                  |
|                | 0.003015814                           | 0.444842675  | -0.26812692                           | 1.016874273                 |             | 0.235545659  |                  |
|                | 0.298076713                           | 2            | 0                                     | 0.998207054                 |             |              |                  |
| RBBP4          | ENSG00000162521.18                    | 0.442140856  | 1                                     | 1                           | 0.442140856 |              | Brain_Cortex     |
|                | 0.442140856                           |              | Brain_Cortex                          | 1                           | 1           | 1            |                  |
|                | -0.768583076                          | NA           | 1                                     | 0                           | 0.998207054 |              | -0.768583076     |
| PRSS37         | ENSG00000165076.13                    | 0.442211591  | 5                                     | 2                           | 0.602010952 |              |                  |
|                | Brain_Nucleus_accumbens_basal_ganglia | 0.958540033  |                                       | Brain_Cerebellar_Hemisphere |             |              |                  |
|                | 4.681553269                           | 0.001639686  | 0.202763452                           | -0.521510846                |             | 0.422500725  |                  |
|                | 0.037591182                           | 0.344145741  | 2                                     | 0                           | 0.998207054 |              |                  |
| KCNAB3         | ENSG00000170049.9                     | 0.44221957   | 6                                     | 2                           | 0.090518457 |              |                  |
|                | Brain_Frontal_Cortex_BA9              | 0.346734005  |                                       | Brain_Cerebellum            | 5.406361462 |              |                  |
|                | 0.021683129                           | 0.270521977  | -1.692669169                          | -0.940943127                |             | -1.192671651 |                  |
|                | 0.280689919                           | 2            | 0                                     | 0.998207054                 |             |              |                  |
| NPIPB6         | ENSG00000198156.10                    | 0.442284032  | 4                                     | 4                           | 0.090268123 |              |                  |
|                | Brain_Nucleus_accumbens_basal_ganglia | 0.877619911  |                                       | Brain_Cerebellum            |             |              |                  |
|                | 1.727814854                           | 0.39578263   | 0.39578263                            | 0.153987095                 |             | 1.693985054  |                  |
|                | 0.979954038                           | 0.63243056   | 4                                     | 0                           | 0.998207054 |              |                  |
| ZBTB38         | ENSG00000177311.11                    | 0.442372832  | 1                                     | 1                           | 0.442372832 |              |                  |
|                | Brain_Cerebellum                      | 0.442372832  |                                       | Brain_Cerebellum            | 1           | 1            | 1                |
|                | 0.768192494                           | 0.768192494  | NA                                    | 1                           | 0           | 0.998207054  |                  |
| DDR1           | ENSG00000204580.13                    | 0.442469146  | 1                                     | 1                           | 0.442469146 |              | Brain_Cerebellum |
|                | 0.442469146                           |              | Brain_Cerebellum                      | 1                           | 1           | 1            |                  |
|                |                                       |              |                                       | 0.768030364                 |             | 0.768030364  |                  |

|                                       |                          |                                       |              |              |              |                  |   |   |  |
|---------------------------------------|--------------------------|---------------------------------------|--------------|--------------|--------------|------------------|---|---|--|
| 0.768030364                           | NA                       | 1                                     | 0            | 0.998207054  |              |                  |   |   |  |
| TRPV1                                 | ENSG00000196689.11       | 0.442586728                           | 1            | 1            | 0.442586728  | Brain_Cerebellum |   |   |  |
| 0.442586728                           | Brain_Cerebellum1        | 1                                     | 1            | -0.767832459 | -0.767832459 |                  |   |   |  |
| -0.767832459                          | NA                       | 1                                     | 0            | 0.998207054  |              |                  |   |   |  |
| LINC02199                             | ENSG00000250198.1        | 0.442638886                           | 2            | 2            | 0.323538581  |                  |   |   |  |
| Brain_Substantia_nigra                | 0.360672319              | Brain_Nucleus_accumbens_basal_ganglia |              |              |              |                  |   |   |  |
| 1.110922684                           | 0.889077316              | 0.889077316                           | 0.914084743  | 0.987212284  |              |                  |   |   |  |
| 0.950648513                           | 0.05170898               | 2                                     | 0            | 0.998207054  |              |                  |   |   |  |
| ANGPTL1                               | ENSG00000116194.12       | 0.442698712                           | 1            | 1            | 0.442698712  |                  |   |   |  |
| Brain_Cortex                          | 0.442698712              | Brain_Cortex                          | 1            | 1            | 1            | -0.767644005     |   |   |  |
| -0.767644005                          | -0.767644005             | NA                                    | 1            | 0            | 0.998207054  |                  |   |   |  |
| KPNA2                                 | ENSG00000182481.8        | 0.442852177                           | 3            | 3            | 0.254916406  |                  |   |   |  |
| Brain_Caudate_basal_ganglia           | 0.795364082              | Brain_Amygdala                        | 2.15974691   |              |              |                  |   |   |  |
| 0.165953901                           | 0.165953901              | -1.138488864                          | 0.265017776  | -0.377607514 |              |                  |   |   |  |
| 0.709186925                           | 3                        | 0                                     | 0.998207054  |              |              |                  |   |   |  |
| AC017074.2                            | ENSG00000227359.1        | 0.442912718                           | 1            | 1            | 0.442912718  |                  |   |   |  |
| Brain_Cerebellum                      | 0.442912718              | Brain_Cerebellum1                     | 1            | 1            | 1            | -0.767283934     |   |   |  |
| -0.767283934                          | -0.767283934             | NA                                    | 1            | 0            | 0.998207054  |                  |   |   |  |
| HS6ST3                                | ENSG00000185352.8        | 0.443159096                           | 2            | 2            | 0.258807745  |                  |   |   |  |
| Brain_Nucleus_accumbens_basal_ganglia | 0.926576222              | Brain_Caudate_basal_ganglia           |              |              |              |                  |   |   |  |
| 1.528107183                           | 0.471892817              | 0.471892817                           | 0.092153324  | 1.129213583  |              |                  |   |   |  |
| 0.610683453                           | 0.733312342              | 2                                     | 0            | 0.998207054  |              |                  |   |   |  |
| FEM1C                                 | ENSG00000145780.7        | 0.443168702                           | 1            | 1            | 0.443168702  | Brain_Cerebellum |   |   |  |
| 0.443168702                           | Brain_Cerebellum1        | 1                                     | 1            | -0.766853367 | -0.766853367 |                  |   |   |  |
| -0.766853367                          | NA                       | 1                                     | 0            | 0.998207054  |              |                  |   |   |  |
| C20orf194                             | ENSG00000088854.12       | 0.443177193                           | 4            | 3            | 0.559156585  |                  |   |   |  |
| Brain_Hippocampus                     | 0.914294059              | Brain_Cortex                          | 3.416517267  |              |              |                  |   |   |  |
| 0.029447349                           | 0.190037311              | -0.584094722                          | 0.340888272  | -0.172883828 |              |                  |   |   |  |
| 0.468502055                           | 3                        | 0                                     | 0.998207054  |              |              |                  |   |   |  |
| ADAMTS10                              | ENSG00000142303.13       | 0.44322945                            | 1            | 1            | 0.44322945   |                  |   |   |  |
| Brain_Cerebellar_Hemisphere           | 0.44322945               | Brain_Cerebellar_Hemisphere1          | 1            | 1            |              |                  |   |   |  |
| 0.76675121                            | 0.76675121               | 0.76675121                            | NA           | 1            | 0            | 0.998207054      |   |   |  |
| FBXL4                                 | ENSG00000112234.8        | 0.443471031                           | 1            | 1            | 0.443471031  |                  |   |   |  |
| Brain_Spinal_cord_cervical_c-1        | 0.443471031              | Brain_Spinal_cord_cervical_c-1        |              |              |              |                  |   |   |  |
| 1                                     | 1                        | 1                                     | -0.76634503  | -0.76634503  | -0.76634503  | NA               | 1 | 0 |  |
| 0.998207054                           |                          |                                       |              |              |              |                  |   |   |  |
| ZNF208                                | ENSG00000160321.14       | 0.443494154                           | 10           | 4            | 0.04137289   | Brain_Amygdala   |   |   |  |
| 0.561930082                           | Brain_Cerebellum         | 8.105726131                           | 0.013158309  | 0.289572824  |              |                  |   |   |  |
| -2.039773506                          | -0.579977068             | -1.209794954                          | 0.442465256  | 4            | 0            |                  |   |   |  |
| 0.998207054                           |                          |                                       |              |              |              |                  |   |   |  |
| MT1E                                  | ENSG00000169715.14       | 0.443561985                           | 8            | 7            | 0.133813273  | Brain_Cortex     |   |   |  |
| 0.945330438                           | Brain_Frontal_Cortex_BA9 | 3.012144884                           | 0.03706576   | 0.18517776   |              |                  |   |   |  |
| -1.499232705                          | 0.704862454              | -0.431355552                          | 0.714238886  | 7            | 0            |                  |   |   |  |
| 0.998207054                           |                          |                                       |              |              |              |                  |   |   |  |
| CHAC2                                 | ENSG00000143942.4        | 0.443594112                           | 1            | 1            | 0.443594112  |                  |   |   |  |
| Brain_Cerebellar_Hemisphere           | 0.443594112              | Brain_Cerebellar_Hemisphere1          | 1            | 1            |              |                  |   |   |  |
| 1                                     | -0.766138139             | -0.766138139                          | -0.766138139 | NA           | 1            | 0                |   |   |  |
| 0.998207054                           |                          |                                       |              |              |              |                  |   |   |  |
| DFFB                                  | ENSG00000169598.15       | 0.443694335                           | 10           | 3            | 0.146864853  |                  |   |   |  |
| Brain_Frontal_Cortex_BA9              | 0.542662596              | Brain_Anterior_cingulate_cortex_BA24  |              |              |              |                  |   |   |  |
| 7.721562916                           | 0.002728874              | 0.655460726                           | -0.750269666 | 1.45069484   |              |                  |   |   |  |
| 0.778631166                           | 0.579130496              | 3                                     | 0            | 0.998207054  |              |                  |   |   |  |
| ITGA4                                 | ENSG00000115232.13       | 0.443787878                           | 1            | 1            | 0.443787878  |                  |   |   |  |
| Brain_Substantia_nigra                | 0.443787878              | Brain_Substantia_nigra                | 1            | 1            |              |                  |   |   |  |
| 1                                     | 0.765812496              | 0.765812496                           | 0.765812496  | NA           | 1            | 0                |   |   |  |
| 0.998207054                           |                          |                                       |              |              |              |                  |   |   |  |
| C11orf74                              | ENSG00000166352.15       | 0.443808                              | 2            | 2            | 0.212690352  | Brain_Cortex     |   |   |  |
| 0.305226729                           | Brain_Hypothalamus       | 1.661603147                           | 0.338396853  |              |              |                  |   |   |  |
| 0.338396853                           | 1.025289246              | 1.246201709                           | 1.135745477  | 0.1562087    | 2            |                  |   |   |  |
| 0                                     | 0.998207054              |                                       |              |              |              |                  |   |   |  |
| TBC1D9B                               | ENSG00000197226.12       | 0.44402658                            | 11           | 11           | 0.163679946  |                  |   |   |  |
| Brain_Nucleus_accumbens_basal_ganglia | 0.911902193              | Brain_Caudate_basal_ganglia           |              |              |              |                  |   |   |  |



|         |                                       |              |             |              |                                |              |              |   |             |
|---------|---------------------------------------|--------------|-------------|--------------|--------------------------------|--------------|--------------|---|-------------|
|         | 3.615215769                           | 0.28533291   | 0.28533291  | -1.292467734 | 1.3928011                      | -0.111672792 |              |   |             |
|         | 0.914596368                           | 11           | 0           | 0.998207054  |                                |              |              |   |             |
| PYURF   | ENSG00000145337.4                     | 0.444057276  | 3           | 3            | 0.144631645                    |              |              |   |             |
|         | Brain_Spinal_cord_cervical_c-1        | 0.60622396   |             |              | Brain_Hypothalamus             | 1.149094415  |              |   |             |
|         | 0.848028009                           | 0.848028009  |             |              | -0.515470956                   | 1.458758294  | 0.547758159  |   |             |
|         | 0.995879274                           | 3            | 0           | 0.998207054  |                                |              |              |   |             |
| UBE2W   | ENSG00000104343.19                    | 0.444149582  | 5           | 3            | 0.106355986                    |              |              |   |             |
|         | Brain_Caudate_basal_ganglia           | 0.254628267  |             |              | Brain_Cerebellum               | 4.42176694   |              |   |             |
|         | 0.021825619                           | 0.197088229  |             |              | 1.139179566                    | 1.614790893  | 1.361389807  |   |             |
|         | 0.188171003                           | 3            | 0           | 0.998207054  |                                |              |              |   |             |
| MRPS22  | ENSG00000175110.11                    | 0.444157371  | 4           | 3            | 0.324215368                    |              |              |   |             |
|         | Brain_Putamen_basal_ganglia           | 0.893475874  |             |              | Brain_Cortex                   | 3.095347506  |              |   |             |
|         | 0.018967237                           | 0.231910288  |             |              | -0.449901371                   | 0.985832392  | 0.282384845  |   |             |
|         | 0.601267598                           | 3            | 0           | 0.998207054  |                                |              |              |   |             |
| ID2     | ENSG00000115738.9                     | 0.444189785  | 1           | 1            | 0.444189785                    |              |              |   |             |
|         | Brain_Spinal_cord_cervical_c-1        | 0.444189785  |             |              | Brain_Spinal_cord_cervical_c-1 |              |              |   |             |
|         | 1                                     | 1            | 1           | 0.76513731   | 0.76513731                     | 0.76513731   | NA           | 1 | 0           |
|         | 0.998207054                           |              |             |              |                                |              |              |   |             |
| PRR34   | ENSG00000182257.6                     | 0.444237867  | 3           | 3            | 0.130236462                    |              |              |   |             |
|         | Brain_Hypothalamus                    | 0.991448009  |             |              | Brain_Cerebellar_Hemisphere    | 1.202345515  |              |   |             |
|         | 0.81816444                            | 0.81816444   |             |              | -1.513170082                   | -0.010718537 | -0.629987544 |   |             |
|         | 0.785224761                           | 3            | 0           | 0.998207054  |                                |              |              |   |             |
| MROH7   | ENSG00000184313.19                    | 0.444241906  | 9           | 8            | 0.119520287                    |              |              |   |             |
|         | Brain_Cerebellum                      |              |             |              | Brain_Frontal_Cortex_BA9       | 2.624538814  | 0.008119607  |   |             |
|         | 0.833842582                           | -1.556790275 |             |              | 0.898201286                    | -0.334059149 | 0.892797811  | 8 |             |
|         | 0.38714613                            | 0            | 0.998207054 |              |                                |              |              |   |             |
| MRPS18A | ENSG00000096080.11                    | 0.444279284  | 1           | 1            | 0.444279284                    |              |              |   |             |
|         | Brain_Amygdala                        | 0.444279284  |             |              | Brain_Amygdala                 | 1            | 1            | 1 | 0.764987003 |
|         | 0.764987003                           | 0.764987003  | NA          | 1            | 0                              | 0.998207054  |              |   |             |
| MIS18A  | ENSG00000159055.3                     | 0.444353953  | 1           | 1            | 0.444353953                    |              |              |   |             |
|         | Brain_Hypothalamus                    | 0.444353953  |             |              | Brain_Hypothalamus             | 1            | 1            | 1 |             |
|         | -0.764861615                          | -0.764861615 |             |              | -0.764861615                   | NA           | 1            | 0 | 0.998207054 |
| CALM2   | ENSG00000143933.16                    | 0.444367958  | 1           | 1            | 0.444367958                    |              |              |   |             |
|         | Brain_Cerebellum                      | 1            | 1           | 1            | 0.764838099                    | 0.764838099  |              |   |             |
|         | 0.444367958                           | NA           | 1           | 0            | 0.998207054                    |              |              |   |             |
| XCL2    | ENSG00000143185.3                     | 0.444538255  | 1           | 1            | 0.444538255                    |              |              |   |             |
|         | Brain_Spinal_cord_cervical_c-1        | 0.444538255  |             |              | Brain_Spinal_cord_cervical_c-1 |              |              |   |             |
|         | 1                                     | 1            | 1           | -0.764552178 | -0.764552178                   | -0.764552178 | NA           | 1 | 0           |
|         | 0.998207054                           |              |             |              |                                |              |              |   |             |
| CHD8    | ENSG00000100888.12                    | 0.444588683  | 1           | 1            | 0.444588683                    |              |              |   |             |
|         | Brain_Cerebellar_Hemisphere           | 0.444588683  |             |              | Brain_Cerebellar_Hemisphere    | 1            | 1            |   |             |
|         | 1                                     | -0.764467524 |             |              | -0.764467524                   | -0.764467524 | NA           | 1 | 0           |
|         | 0.998207054                           |              |             |              |                                |              |              |   |             |
| SLC18A1 | ENSG00000036565.14                    | 0.444647342  | 2           | 2            | 0.625773364                    |              |              |   |             |
|         | Brain_Spinal_cord_cervical_c-1        | 0.782853472  |             |              | Brain_Substantia_nigra         |              |              |   |             |
|         | 1.818906864                           | 0.181093136  |             |              | 0.181093136                    | -0.487684455 | 0.275602392  |   |             |
|         | -0.106041031                          | 0.539725306  | 2           | 0            | 0.998207054                    |              |              |   |             |
| FAM66B  | ENSG00000215374.5                     | 0.444721343  | 1           | 1            | 0.444721343                    |              |              |   |             |
|         | Brain_Spinal_cord_cervical_c-1        | 0.444721343  |             |              | Brain_Spinal_cord_cervical_c-1 |              |              |   |             |
|         | 1                                     | 1            | 1           | -0.764244852 | -0.764244852                   | -0.764244852 | NA           | 1 | 0           |
|         | 0.998207054                           |              |             |              |                                |              |              |   |             |
| COX6C   | ENSG00000164919.10                    | 0.444740172  | 3           | 3            | 0.57407948                     |              |              |   |             |
|         | Brain_Nucleus_accumbens_basal_ganglia | 0.850928365  |             |              | Brain_Cortex                   |              |              |   |             |
|         | 1.940718981                           | 0.142542776  |             |              | 0.142542776                    | -0.243306224 | 0.56205363   |   |             |
|         | 0.043604458                           | 0.449842947  | 3           | 0            | 0.998207054                    |              |              |   |             |
| FAM168A | ENSG00000054965.10                    | 0.444822964  | 1           | 1            | 0.444822964                    |              |              |   |             |
|         | Brain_Caudate_basal_ganglia           | 0.444822964  |             |              | Brain_Caudate_basal_ganglia    | 1            | 1            |   |             |
|         | 1                                     | -0.764074304 |             |              | -0.764074304                   | -0.764074304 | NA           | 1 | 0           |
|         | 0.998207054                           |              |             |              |                                |              |              |   |             |
| SLC37A1 | ENSG00000160190.13                    | 0.444841634  | 3           | 3            | 0.191460506                    |              |              |   |             |
|         | Brain_Anterior_cingulate_cortex_BA24  | 0.885659735  |             |              | Brain_Frontal_Cortex_BA9       |              |              |   |             |
|         | 1.275301834                           | 0.723677638  |             |              | 0.723677638                    | -0.862976795 | 1.306270733  |   |             |
|         | 0.099831875                           | 1.104954959  | 3           | 0            | 0.998207054                    |              |              |   |             |

|               |                                       |                                       |                                |              |                                       |                  |
|---------------|---------------------------------------|---------------------------------------|--------------------------------|--------------|---------------------------------------|------------------|
| RAB13         | ENSG00000143545.8                     | 0.444882313                           | 2                              | 2            | 0.206939646                           | Brain_Cortex     |
|               | 0.97075025                            | Brain_Nucleus_accumbens_basal_ganglia | 1.158053311                    |              | 0.841946689                           |                  |
|               | 0.841946689                           | -1.262025402                          | -0.03666734                    | -0.649346371 | 0.866458995                           |                  |
|               | 2                                     | 0                                     | 0.998207054                    |              |                                       |                  |
| RCCD1         | ENSG00000166965.12                    | 0.444895927                           | 12                             | 1            | 0.150523968                           |                  |
|               | Brain_Substantia_nigra                | 0.588358851                           |                                |              | Brain_Cerebellar_Hemisphere           |                  |
|               | 11.49644532                           | 2.07E-05                              | 11.49644532                    | 0.541215796  | 1.437683179                           |                  |
|               | 0.75659648                            | 0.233501752                           | 1                              | 0            | 0.998207054                           |                  |
| SP110         | ENSG00000135899.17                    | 0.444968837                           | 9                              | 2            | 0.340576137                           |                  |
|               | Brain_Caudate_basal_ganglia           | 0.910678597                           |                                |              | Brain_Hippocampus                     | 8.134050109      |
|               | 0.000151205                           | 0.642573174                           | -0.953027501                   | 0.411839313  | -0.446812533                          |                  |
|               | 0.438219113                           | 2                                     | 0                              | 0.998207054  |                                       |                  |
| LINC01220     | ENSG00000259687.1                     | 0.445044784                           | 1                              | 1            | 0.445044784                           |                  |
|               | Brain_Hypothalamus                    | 0.445044784                           | Brain_Hypothalamus             | 1            | 1                                     | 1                |
|               | -0.763702109                          | -0.763702109                          | -0.763702109                   | NA           | 1                                     | 0                |
|               |                                       |                                       |                                |              | 0.998207054                           |                  |
| GSKIP         | ENSG00000100744.14                    | 0.445058321                           | 8                              | 5            | 0.041753432                           | Brain_Cerebellum |
|               | 0.860897726                           | Brain_Frontal_Cortex_BA9              | 4.398162048                    | 0.024045369  |                                       |                  |
|               | 0.275046771                           | -2.035969356                          | 1.117802633                    | -0.358132935 | 1.070258412                           |                  |
|               | 5                                     | 0                                     | 0.998207054                    |              |                                       |                  |
| COPS9         | ENSG00000172428.10                    | 0.445126159                           | 2                              | 2            | 0.20424317                            |                  |
|               | Brain_Nucleus_accumbens_basal_ganglia | 0.340575734                           |                                |              | Brain_Caudate_basal_ganglia           |                  |
|               | 1.703777284                           | 0.296222716                           | 0.296222716                    | 0.953028297  | 1.269555049                           |                  |
|               | 1.111291673                           | 0.223818213                           | 2                              | 0            | 0.998207054                           |                  |
| LRPAP1        | ENSG00000163956.10                    | 0.445165942                           | 11                             | 4            | 0.164187762                           |                  |
|               | Brain_Cerebellum                      | 0.968811968                           | Brain_Spinal_cord_cervical_c-1 | 8.59455418   |                                       |                  |
|               | 0.009574214                           | 0.416365993                           | 0.039098361                    | 1.39112422   | 0.72941883                            |                  |
|               | 0.472837919                           | 4                                     | 0                              | 0.998207054  |                                       |                  |
| TDRD5         | ENSG00000162782.15                    | 0.445201284                           | 10                             | 4            | 0.124852601                           |                  |
|               | Brain_Substantia_nigra                | 0.933764476                           |                                |              | Brain_Nucleus_accumbens_basal_ganglia |                  |
|               | 7.697845052                           | 0.002760436                           | 0.305470215                    | -1.53472008  | -0.083109495                          |                  |
|               | -1.033434113                          | 0.402946152                           | 4                              | 0            | 0.998207054                           |                  |
| RP11-675F6.4  | ENSG00000254100.1                     | 0.445234971                           | 3                              | 3            | 0.358656308                           |                  |
|               | Brain_Cerebellum                      | 0.757535688                           | Brain_Cerebellar_Hemisphere    | 2.248849874  |                                       |                  |
|               | 0.170890863                           | 0.170890863                           | -0.556944045                   | 0.917928484  | 0.223234305                           |                  |
|               | 0.74114297                            | 3                                     | 0                              | 0.998207054  |                                       |                  |
| SFTA1P        | ENSG00000225383.7                     | 0.445347691                           | 9                              | 6            | 0.06860485                            |                  |
|               | Brain_Spinal_cord_cervical_c-1        | 0.901110667                           |                                |              | Brain_Putamen_basal_ganglia           |                  |
|               | 6.070693162                           | 0.024821923                           | 0.30951692                     | -0.124258422 | 1.821013203                           |                  |
|               | 0.915972025                           | 0.605825496                           | 6                              | 0            | 0.998207054                           |                  |
| C5orf64-AS1   | ENSG00000251575.2                     | 0.445430387                           | 8                              | 8            | 0.063243094                           |                  |
|               | Brain_Caudate_basal_ganglia           | 0.913947669                           |                                |              | Brain_Hippocampus                     | 1.757288498      |
|               | 0.350579815                           | 0.350579815                           | -1.857478596                   | 1.004403472  | -0.355768037                          |                  |
|               | 0.863872692                           | 8                                     | 0                              | 0.998207054  |                                       |                  |
| TTC22         | ENSG00000006555.10                    | 0.445497136                           | 2                              | 2            | 0.32656628                            |                  |
|               | Brain_Caudate_basal_ganglia           | 0.454562027                           |                                |              | Brain_Spinal_cord_cervical_c-1        |                  |
|               | 1.060932168                           | 0.939067832                           | 0.939067832                    | -0.747831122 | 0.98105366                            |                  |
|               | 0.116611269                           | 1.222506154                           | 2                              | 0            | 0.998207054                           |                  |
| RP11-191L17.1 | ENSG00000272663.1                     | 0.445550711                           | 4                              | 4            | 0.230222963                           |                  |
|               | Brain_Cortex                          | 0.920709693                           |                                |              | Brain_Caudate_basal_ganglia           | 2.513281199      |
|               | 0.093396553                           | 0.093396553                           | -1.199784711                   | 0.143428602  | -0.495917536                          |                  |
|               | 0.624883101                           | 4                                     | 0                              | 0.998207054  |                                       |                  |
| ANKRD30B      | ENSG00000180777.13                    | 0.44578662                            | 8                              | 7            | 0.114785362                           | Brain_Amygdala   |
|               | 0.925091617                           | Brain_Nucleus_accumbens_basal_ganglia | 3.726963017                    |              |                                       |                  |
|               | 0.070057888                           | 0.198587294                           | 0.094022081                    | 1.577044169  | 0.633789662                           |                  |
|               | 0.467421904                           | 7                                     | 0                              | 0.998207054  |                                       |                  |
| PCDH18        | ENSG00000189184.11                    | 0.445792158                           | 2                              | 2            | 0.32516783                            | Brain_Amygdala   |
|               | 0.423323669                           | Brain_Putamen_basal_ganglia           | 1.004226855                    | 0.995773145  |                                       |                  |
|               | 0.995773145                           | -0.800668352                          | 0.983893602                    | 0.091612625  | 1.261875859                           |                  |
|               | 2                                     | 0                                     | 0.998207054                    |              |                                       |                  |
| IGFBP7        | ENSG00000163453.11                    | 0.445881823                           | 7                              | 5            | 0.080521308                           |                  |
|               | Brain_Putamen_basal_ganglia           | 0.956713837                           |                                |              | Brain_Nucleus_accumbens_basal_ganglia |                  |
|               | 4.283786213                           | 0.071053229                           | 0.327171124                    | -0.098836576 | 1.747669299                           |                  |

|           |                                      |                                      |                                       |              |              |                  |
|-----------|--------------------------------------|--------------------------------------|---------------------------------------|--------------|--------------|------------------|
|           | 0.680079458                          | 0.721615325                          | 5                                     | 0            | 0.998207054  |                  |
| ATL3      | ENSG00000184743.12                   | 0.445925815                          | 3                                     | 3            | 0.179109815  |                  |
|           | Brain_Caudate_basal_ganglia          | 0.51997312                           | Brain_Nucleus_accumbens_basal_ganglia |              |              |                  |
|           | 1.296970308                          | 0.688349192                          | 0.688349192                           | -1.343500961 | 0.669266937  |                  |
|           | -0.010282394                         | 1.154673657                          | 3                                     | 0            | 0.998207054  |                  |
| NAP1L5    | ENSG00000177432.6                    | 0.44600656                           | 6                                     | 4            | 0.259469423  |                  |
|           | Brain_Caudate_basal_ganglia          | 0.679300401                          | Brain_Nucleus_accumbens_basal_ganglia |              |              |                  |
|           | 3.741153985                          | 0.050884305                          | 0.246867757                           | -1.127646067 | 0.974737778  |                  |
|           | 0.144149717                          | 0.842238601                          | 4                                     | 0            | 0.998207054  |                  |
| KCTD18    | ENSG00000155729.12                   | 0.446129355                          | 1                                     | 1            | 0.446129355  |                  |
|           | Brain_Cerebellar_Hemisphere          | 0.446129355                          | Brain_Cerebellar_Hemisphere           | 1            | 1            |                  |
|           | 1                                    | -0.761883808                         | -0.761883808                          | -0.761883808 | NA           | 1                |
|           | 0.998207054                          |                                      |                                       |              |              | 0                |
| FCRL6     | ENSG00000181036.13                   | 0.446159101                          | 2                                     | 2            | 0.293783442  |                  |
|           | Brain_Caudate_basal_ganglia          | 0.519030384                          | Brain_Cerebellar_Hemisphere           |              |              |                  |
|           | 1.065836578                          | 0.934163422                          | 0.934163422                           | 0.644840761  | 1.049857918  |                  |
|           | 0.84734934                           | 0.286390378                          | 2                                     | 0            | 0.998207054  |                  |
| NPIPA2    | ENSG00000254852.8                    | 0.446182126                          | 3                                     | 3            | 0.193636768  |                  |
|           | Brain_Cerebellar_Hemisphere          | 0.657755163                          | Brain_Caudate_basal_ganglia           |              |              |                  |
|           | 1.187120541                          | 0.828796211                          | 0.828796211                           | 0.443014616  | 1.299895558  |                  |
|           | 0.883110567                          | 0.428915828                          | 3                                     | 0            | 0.998207054  |                  |
| HS3ST1    | ENSG00000002587.9                    | 0.446257558                          | 1                                     | 1            | 0.446257558  |                  |
|           | Brain_Cerebellum                     | 0.446257558                          | Brain_Cerebellum                      | 1            | 1            | 1                |
|           | 0.761669039                          | 0.761669039                          | NA                                    | 1            | 0            | 0.761669039      |
|           |                                      |                                      |                                       |              | 0.998207054  |                  |
| LINC00440 | ENSG00000234660.1                    | 0.4462772                            | 1                                     | 1            | 0.4462772    |                  |
|           | Brain_Anterior_cingulate_cortex_BA24 | 0.4462772                            |                                       |              |              |                  |
|           | Brain_Anterior_cingulate_cortex_BA24 | 1                                    | 1                                     | 1            | 0.761636139  |                  |
|           | 0.761636139                          | 0.761636139                          | NA                                    | 1            | 0            | 0.998207054      |
| GCLC      | ENSG00000001084.10                   | 0.446348508                          | 6                                     | 6            | 0.164756937  |                  |
|           | Brain_Frontal_Cortex_BA9             | 0.947896054                          | Brain_Hippocampus                     |              | 3.167222674  |                  |
|           | 0.266527147                          | 0.266527147                          | -1.088003082                          | 1.389249359  | 0.188863993  |                  |
|           | 0.796573407                          | 6                                    | 0                                     | 0.998207054  |              |                  |
| LINC02032 | ENSG00000241131.1                    | 0.446350688                          | 2                                     | 1            | 0.394431362  |                  |
|           | Brain_Cerebellum                     | 0.511482202                          | Brain_Cerebellar_Hemisphere           | 1.961095251  |              |                  |
|           | 0.038904749                          | 1.961095251                          | -0.851608605                          | -0.656531507 | -0.754070056 |                  |
|           | 0.137940339                          | 1                                    | 0                                     | 0.998207054  |              |                  |
| FAAP24    | ENSG00000131944.9                    | 0.44646211                           | 5                                     | 4            | 0.433328274  |                  |
|           | Brain_Hypothalamus                   | 0.944550983                          | Brain_Frontal_Cortex_BA9              |              | 4.078260471  |                  |
|           | 0.064443299                          | 0.150005607                          | -0.783508994                          | 0.494489957  | 0.063881695  |                  |
|           | 0.519699122                          | 4                                    | 0                                     | 0.998207054  |              |                  |
| CAMKK2    | ENSG00000110931.18                   | 0.446465476                          | 3                                     | 3            | 0.133069773  |                  |
|           | Brain_Cortex                         | 0.973441277                          | Brain_Nucleus_accumbens_basal_ganglia |              |              |                  |
|           | 1.577117626                          | 0.434398507                          | 0.434398507                           | -1.502105857 | -0.033292573 |                  |
|           | -0.967920526                         | 0.812169217                          | 3                                     | 0            | 0.998207054  |                  |
| ZNF552    | ENSG00000178935.5                    | 0.446474777                          | 5                                     | 3            | 0.141603877  |                  |
|           | Brain_Caudate_basal_ganglia          | 0.487749053                          | Brain_Hypothalamus                    |              | 4.157698623  |                  |
|           | 0.044701812                          | 0.259673944                          | -1.469844487                          | -0.693893416 | -0.978849795 |                  |
|           | 0.322248813                          | 3                                    | 0                                     | 0.998207054  |              |                  |
| WISP3     | ENSG00000112761.20                   | 0.446722741                          | 2                                     | 2            | 0.205324386  | Brain_Cerebellum |
|           | 0.995827382                          | Brain_Anterior_cingulate_cortex_BA24 | 1.064302915                           |              |              |                  |
|           | 0.935697085                          | 0.935697085                          | -0.005229624                          | 1.266527232  | 0.630648804  |                  |
|           | 0.899267897                          | 2                                    | 0                                     | 0.998207054  |              |                  |
| LRRC39    | ENSG00000122477.12                   | 0.44679356                           | 8                                     | 4            | 0.123336178  |                  |
|           | Brain_Putamen_basal_ganglia          | 0.812708791                          | Brain_Amygdala                        | 6.232629849  |              |                  |
|           | 0.014256672                          | 0.217317487                          | 0.236932971                           | 1.540920327  | 1.048729047  |                  |
|           | 0.394081433                          | 4                                    | 0                                     | 0.998207054  |              |                  |
| ZNRF3     | ENSG00000183579.15                   | 0.446804689                          | 3                                     | 3            | 0.282195628  | Brain_Amygdala   |
|           | 0.548857717                          | Brain_Cerebellum                     | 1.160408106                           | 0.849666223  | 0.849666223  |                  |
|           | -1.075400119                         | -0.599472689                         | -0.869161488                          | 0.244225659  | 3            | 0                |
|           | 0.998207054                          |                                      |                                       |              |              |                  |
| SRSF6     | ENSG00000124193.14                   | 0.446862279                          | 3                                     | 3            | 0.346108157  |                  |
|           | Brain_Cerebellar_Hemisphere          | 0.87501317                           | Brain_Caudate_basal_ganglia           | 1.549141171  |              |                  |

|              |                                      |              |              |              |                                       |             |          |   |              |
|--------------|--------------------------------------|--------------|--------------|--------------|---------------------------------------|-------------|----------|---|--------------|
|              | 0.587333701                          | 0.587333701  | -0.942165026 | 0.85899987   | 0.024709606                           |             |          |   |              |
|              | 0.907872627                          | 3            | 0            | 0.998207054  |                                       |             |          |   |              |
| PAK4         | ENSG00000130669.17                   | 0.446958272  | 11           | 8            | 0.128666498                           |             |          |   |              |
|              | Brain_Anterior_cingulate_cortex_BA24 | 0.891438988  |              |              | Brain_Hippocampus                     |             |          |   |              |
|              | 5.7505651                            | 0.02103768   | 0.232226409  | -1.519381491 | 0.825242281                           |             |          |   |              |
|              | -0.184830815                         | 0.797927163  | 8            | 0            | 0.998207054                           |             |          |   |              |
| VAMP3        | ENSG00000049245.12                   | 0.447006178  | 6            | 4            | 0.055695401                           |             |          |   |              |
|              | Brain_Putamen_basal_ganglia          | 0.357259617  |              |              | Brain_Cerebellar_Hemisphere           | 4.49925708  |          |   |              |
|              | 0.044205213                          | 0.185213255  | -1.913411443 | -0.920599398 | -1.439371197                          |             |          |   |              |
|              | 0.335467525                          | 4            | 0            | 0.998207054  |                                       |             |          |   |              |
| VPS8         | ENSG00000156931.15                   | 0.447016604  | 11           | 3            | 0.187410323                           |             |          |   |              |
|              | Brain_Frontal_Cortex_BA9             | 0.939106322  |              |              | Brain_Putamen_basal_ganglia           |             |          |   |              |
|              | 9.435602693                          | 0.007702327  | 0.35411653   | -0.076393146 | 1.318278838                           |             |          |   |              |
|              | 0.451419619                          | 0.368370321  | 3            | 0            | 0.998207054                           |             |          |   |              |
| LINC02137    | ENSG00000260186.5                    | 0.447277065  | 5            | 3            | 0.293169058                           |             |          |   |              |
|              | Brain_Cerebellum                     | 0.435003467  |              |              | Brain_Putamen_basal_ganglia           | 2.991488062 |          |   |              |
|              | 0.00354746                           | 0.913309489  | -1.051194959 | 0.894330797  | 0.107707367                           |             |          |   |              |
|              | 1.000567809                          | 3            | 0            | 0.998207054  |                                       |             |          |   |              |
| MRPL20       | ENSG00000242485.5                    | 0.447348543  | 11           | 2            | 0.136081899                           |             |          |   |              |
|              | Brain_Hypothalamus                   | 0.450418753  |              |              | Brain_Hippocampus                     | 9.99719844  | 8.56E-05 |   |              |
|              | 0.457743062                          | -1.490541553 | -0.754717084 | -1.141580608 | 0.210325362                           |             |          |   |              |
|              | 2                                    | 0            | 0.998207054  |              |                                       |             |          |   |              |
| PIGU         | ENSG00000101464.10                   | 0.447349507  | 4            | 4            | 0.136784077                           |             |          |   |              |
|              | Brain_Caudate_basal_ganglia          | 0.527665209  |              |              | Brain_Cortex                          | 1.805542394 |          |   |              |
|              | 0.317235252                          | 0.317235252  | -0.781967987 | 1.487874184  | 0.256373188                           |             |          |   |              |
|              | 1.135183853                          | 4            | 0            | 0.998207054  |                                       |             |          |   |              |
| GSTM5        | ENSG00000134201.10                   | 0.447413849  | 13           | 5            | 0.144867422                           |             |          |   |              |
|              | Brain_Cerebellar_Hemisphere          | 9.950215276  |              |              | Brain_Cortex                          | 0.003054471 |          |   |              |
|              | 0.400041813                          | -1.109527538 | 1.457902489  | 0.76876035   | 0.722752254                           |             |          |   | 5            |
|              | 0                                    | 0.998207054  |              |              |                                       |             |          |   |              |
| GLE1         | ENSG00000119392.14                   | 0.447513555  | 1            | 1            | 0.447513555                           |             |          |   |              |
|              | Brain_Spinal_cord_cervical_c-1       | 0.447513555  |              |              | Brain_Spinal_cord_cervical_c-1        |             |          |   |              |
|              | 1                                    | 1            | 1            | 0.759566826  | 0.759566826                           | 0.759566826 | NA       | 1 | 0            |
|              | 0.998207054                          |              |              |              |                                       |             |          |   |              |
| TNFAIP8      | ENSG00000145779.7                    | 0.447548263  | 2            | 2            | 0.206118993                           |             |          |   |              |
|              | Brain_Cerebellar_Hemisphere          | 0.298466956  |              |              | Brain_Cerebellum                      | 1.861443288 |          |   |              |
|              | 0.138556712                          | 0.138556712  | 1.039726563  | 1.264309411  | 1.152017987                           |             |          |   |              |
|              | 0.158804055                          | 2            | 0            | 0.998207054  |                                       |             |          |   |              |
| RP11-449D8.5 | ENSG00000266573.5                    | 0.447673782  | 1            | 1            | 0.447673782                           |             |          |   |              |
|              | Brain_Cortex                         | 0.447673782  |              |              | Brain_Cortex                          | 1           | 1        | 1 | -0.759298889 |
|              | -0.759298889                         | -0.759298889 | NA           | 1            | 0                                     | 0.998207054 |          |   |              |
| ZNF503       | ENSG00000165655.16                   | 0.447906195  | 3            | 3            | 0.131962322                           |             |          |   |              |
|              | Brain_Amygdala                       | 0.824970493  |              |              | Brain_Cerebellar_Hemisphere           | 1.834092132 |          |   |              |
|              | 0.175531447                          | 0.175531447  | -0.22115661  | 1.506408568  | 0.503858547                           |             |          |   |              |
|              | 0.896598886                          | 3            | 0            | 0.998207054  |                                       |             |          |   |              |
| ACOX2        | ENSG00000168306.12                   | 0.44797686   | 3            | 3            | 0.140163649                           |             |          |   |              |
|              | Brain_Caudate_basal_ganglia          | 0.901255839  |              |              | Brain_Nucleus_accumbens_basal_ganglia |             |          |   |              |
|              | 1.225924538                          | 0.738159679  | 0.738159679  | -0.124075067 | 1.475181891                           |             |          |   |              |
|              | 0.602280345                          | 0.809637284  | 3            | 0            | 0.998207054                           |             |          |   |              |
| C16orf45     | ENSG00000166780.10                   | 0.447986377  | 1            | 1            | 0.447986377                           |             |          |   |              |
|              | Brain_Amygdala                       | 0.447986377  |              |              | Brain_Amygdala                        | 1           | 1        | 1 | 0.758776314  |
|              | 0.758776314                          | 0.758776314  | NA           | 1            | 0                                     | 0.998207054 |          |   |              |
| MCCC1        | ENSG00000078070.12                   | 0.447997007  | 8            | 6            | 0.269069797                           |             |          |   |              |
|              | Brain_Caudate_basal_ganglia          | 0.989107892  |              |              | Brain_Nucleus_accumbens_basal_ganglia |             |          |   |              |
|              | 5.596593415                          | 0.067444691  | 0.202595311  | -0.892625244 | 1.105207247                           |             |          |   |              |
|              | -0.030573964                         | 0.594445026  | 6            | 0            | 0.998207054                           |             |          |   |              |
| TTYH1        | ENSG00000167614.13                   | 0.448041641  | 1            | 1            | 0.448041641                           |             |          |   |              |
|              | Brain_Putamen_basal_ganglia          | 0.448041641  |              |              | Brain_Putamen_basal_ganglia           | 1           |          |   | 1            |
|              | 1                                    | 0.758683948  | 0.758683948  | 0.758683948  | NA                                    | 1           |          |   | 0            |
|              | 0.998207054                          |              |              |              |                                       |             |          |   |              |
| PARP3        | ENSG00000041880.14                   | 0.448181056  | 1            | 1            | 0.448181056                           |             |          |   |              |
|              | Brain_Frontal_Cortex_BA9             | 0.448181056  |              |              | Brain_Frontal_Cortex_BA9              | 1           |          |   | 1            |

|             |   |                                       |              |              |              |                                       |             |
|-------------|---|---------------------------------------|--------------|--------------|--------------|---------------------------------------|-------------|
|             | 1 | 0.758450967                           | 0.758450967  | 0.758450967  | NA           | 1                                     | 0           |
|             |   | 0.998207054                           |              |              |              |                                       |             |
| FBXO15      |   | ENSG00000141665.11                    | 0.448183465  | 3            | 3            | 0.279792268                           |             |
|             |   | Brain_Nucleus_accumbens_basal_ganglia | 0.975628389  |              |              | Brain_Caudate_basal_ganglia           |             |
|             |   | 2.035048283                           | 0.369764046  | 0.369764046  | -1.08078611  | 0.342047405                           |             |
|             |   | -0.25642958                           | 0.737821103  | 3            | 0            | 0.998207054                           |             |
| TMEM50A     |   | ENSG00000183726.10                    | 0.448271248  | 6            | 5            | 0.086704907                           |             |
|             |   | Brain_Cerebellum                      | 0.262791622  |              |              | Brain_Nucleus_accumbens_basal_ganglia |             |
|             |   | 4.064242715                           | 0.025987618  | 0.150311847  | -1.713041489 | -1.119817308                          |             |
|             |   | -1.389822634                          | 0.257382258  | 5            | 0            | 0.998207054                           |             |
| CDKN2D      |   | ENSG00000129355.6                     | 0.448342117  | 3            | 2            | 0.172738044                           |             |
|             |   | Brain_Caudate_basal_ganglia           | 0.29724762   |              |              | Brain_Cerebellum                      | 2.59198172  |
|             |   | 0.354032001                           | -1.363458534 | -1.042353925 | -1.176750143 | 0.053986279                           | 0.166821656 |
|             |   | 2                                     | 0            | 0.998207054  |              |                                       |             |
| LINC02119   |   | ENSG00000248461.1                     | 0.448348263  | 1            | 1            | 0.448348263                           |             |
|             |   | Brain_Nucleus_accumbens_basal_ganglia | 0.448348263  |              |              |                                       |             |
|             |   | Brain_Nucleus_accumbens_basal_ganglia | 1            | 1            | 1            | -0.758171597                          |             |
|             |   | -0.758171597                          | -0.758171597 | NA           | 1            | 0                                     | 0.998207054 |
| MYOM3       |   | ENSG00000142661.18                    | 0.448488052  | 2            | 2            | 0.532247345                           |             |
|             |   | Brain_Cerebellar_Hemisphere           | 0.858279643  |              |              | Brain_Cerebellum                      | 1.930768988 |
|             |   | 0.069231012                           | 0.069231012  | -0.624579093 | -0.178564536 | -0.401571815                          |             |
|             |   | 0.315379918                           | 2            | 0            | 0.998207054  |                                       |             |
| CA14        |   | ENSG00000118298.10                    | 0.448644141  | 5            | 2            | 0.158659126                           |             |
|             |   | Brain_Frontal_Cortex_BA9              | 0.395982604  |              |              | Brain_Nucleus_accumbens_basal_ganglia |             |
|             |   | 4.545962578                           | 0.035520563  | 0.262788203  | 0.848817943  | 1.409595605                           |             |
|             |   | 1.193575029                           | 0.227470249  | 2            | 0            | 0.998207054                           |             |
| KB-1471A8.1 |   | ENSG00000245330.4                     | 0.448701641  | 2            | 2            | 0.222853137                           |             |
|             |   | Brain_Hypothalamus                    | 0.376593184  |              |              | Brain_Nucleus_accumbens_basal_ganglia |             |
|             |   | 1.8657342                             | 0.1342658    | 0.1342658    | 0.884190875  | 1.218976435                           | 1.051583655 |
|             |   | 0.23672914                            | 2            | 0            | 0.998207054  |                                       |             |
| SDHAF4      |   | ENSG00000154079.5                     | 0.448715741  | 9            | 5            | 0.060670345                           |             |
|             |   | Brain_Hypothalamus                    | 0.842710615  |              |              | Brain_Nucleus_accumbens_basal_ganglia |             |
|             |   | 6.201445258                           | 0.024372857  | 0.308243874  | 0.198427485  | 1.875890301                           |             |
|             |   | 1.265426133                           | 0.529138936  | 5            | 0            | 0.998207054                           |             |
| SH2D6       |   | ENSG00000152292.16                    | 0.448759199  | 10           | 8            | 0.062139284                           |             |
|             |   | Brain_Cerebellar_Hemisphere           | 0.482494782  |              |              | Brain_Nucleus_accumbens_basal_ganglia |             |
|             |   | 4.401886961                           | 0.058719448  | 0.150177819  | -1.865300581 | 0.823899664                           |             |
|             |   | -1.083893087                          | 0.746234755  | 8            | 0            | 0.998207054                           |             |
| SF3B2       |   | ENSG00000087365.15                    | 0.448799171  | 8            | 1            | 0.305425504                           |             |
|             |   | Brain_Frontal_Cortex_BA9              | 0.751821766  |              |              | Brain_Hippocampus                     | 7.701692294 |
|             |   | 0.000198249                           | 7.701692294  | 0.316238133  | 1.02486794   | 0.741370766                           |             |
|             |   | 0.231274177                           | 1            | 0            | 0.998207054  |                                       |             |
| MRPL14      |   | ENSG00000180992.6                     | 0.448840771  | 10           | 4            | 0.179145042                           |             |
|             |   | Brain_Caudate_basal_ganglia           | 0.985830778  |              |              | Brain_Nucleus_accumbens_basal_ganglia |             |
|             |   | 7.796953901                           | 3.80E-05     | 0.282765031  | -1.343392106 | 0.231555254                           |             |
|             |   | -0.381178839                          | 0.537530572  | 4            | 0            | 0.998207054                           |             |
| OSBPL10     |   | ENSG00000144645.13                    | 0.448973667  | 3            | 3            | 0.181941314                           |             |
|             |   | Brain_Cerebellar_Hemisphere           | 0.371810951  |              |              | Brain_Spinal_cord_cervical_c-1        |             |
|             |   | 1.620751631                           | 0.37971409   | 0.37971409   | -1.334801524 | 0.893086314                           |             |
|             |   | -0.507149499                          | 1.219327766  | 3            | 0            | 0.998207054                           |             |
| DRG2        |   | ENSG00000108591.9                     | 0.449075148  | 6            | 3            | 0.112631202                           |             |
|             |   | Brain_Putamen_basal_ganglia           | 0.315465779  |              |              | Brain_Cerebellar_Hemisphere           |             |
|             |   | 4.938154291                           | 0.002672023  | 0.325143442  | 1.003819176  | 1.58647675                            |             |
|             |   | 1.362492292                           | 0.221076915  | 3            | 0            | 0.998207054                           |             |
| NMD3        |   | ENSG00000169251.12                    | 0.449112847  | 4            | 4            | 0.092183621                           |             |
|             |   | Brain_Hypothalamus                    | 0.922603584  |              |              | Brain_Nucleus_accumbens_basal_ganglia |             |
|             |   | 2.003016546                           | 0.321475654  | 0.321475654  | -0.19706723  | 1.6839899                             |             |
|             |   | 0.538546493                           | 0.877173871  | 4            | 0            | 0.998207054                           |             |
| SNF8        |   | ENSG00000159210.9                     | 0.449167715  | 12           | 2            | 0.127050028                           |             |
|             |   | Brain_Hippocampus                     | 0.614142143  |              |              | Brain_Frontal_Cortex_BA9              | 10.60332795 |
|             |   | 0.007890014                           | 0.409140339  | 0.504169682  | 1.525838749  | 1.132748251                           |             |
|             |   | 0.300737147                           | 2            | 0            | 0.998207054  |                                       |             |

|            |                                       |                             |              |   |                                |                        |
|------------|---------------------------------------|-----------------------------|--------------|---|--------------------------------|------------------------|
| SIRPA      | ENSG00000198053.11                    | 0.449171138                 | 2            | 2 | 0.562412739                    | Brain_Cortex           |
|            | 0.94937487 Brain_Cerebellum           | 1.910887782                 |              |   | 0.089112218                    | 0.089112218            |
|            | 0.063491824                           | 0.5792615                   | 0.321376662  |   | 0.364704236                    | 2 0                    |
|            | 0.998207054                           |                             |              |   |                                |                        |
| RABGAP1L   | ENSG00000152061.23                    | 0.449258334                 | 5            | 5 | 0.112631244                    |                        |
|            | Brain_Cerebellar_Hemisphere           | 0.971411122                 |              |   | Brain_Cerebellum               | 1.601152477            |
|            | 0.477984618                           | 0.477984618                 | -0.89153615  |   | 1.586476564                    | 0.337266816            |
|            | 1.059780851                           | 5 0                         | 0.998207054  |   |                                |                        |
| ACOX1      | ENSG00000161533.11                    | 0.449506972                 | 4            | 4 | 0.102340569                    |                        |
|            | Brain_Putamen_basal_ganglia           | 0.807983153                 |              |   | Brain_Cerebellar_Hemisphere    |                        |
|            | 1.302628477                           | 0.606272502                 | 0.606272502  |   | -1.633610941                   | 0.514750719            |
|            | -0.508345731                          | 0.896280948                 | 4 0          |   | 0.998207054                    |                        |
| RMND5B     | ENSG00000145916.18                    | 0.449629763                 | 1            | 1 | 0.449629763                    |                        |
|            | Brain_Putamen_basal_ganglia           | 0.449629763                 |              |   | Brain_Putamen_basal_ganglia    | 1 1                    |
|            | 1 0.756032412                         | 0.756032412                 | 0.756032412  |   | NA 1 0                         |                        |
|            | 0.998207054                           |                             |              |   |                                |                        |
| CCNL2      | ENSG00000221978.11                    | 0.44975887                  | 1            | 1 | 0.44975887                     | Brain_Substantia_nigra |
|            | 0.44975887 Brain_Substantia_nigra     |                             | 1            | 1 | 1 0.755817088                  |                        |
|            | 0.755817088                           | 0.755817088                 | NA 1         |   | 0.998207054                    |                        |
| PTGFR      | ENSG00000122420.9                     | 0.44986503                  | 1            | 1 | 0.44986503                     |                        |
|            | Brain_Spinal_cord_cervical_c-1        | 0.44986503                  |              |   | Brain_Spinal_cord_cervical_c-1 | 1                      |
|            | 1 1 0.755640061                       | 0.755640061                 |              |   | 0.755640061                    | NA 1 0                 |
|            | 0.998207054                           |                             |              |   |                                |                        |
| STK17A     | ENSG00000164543.5                     | 0.449884303                 | 3            | 3 | 0.172808328                    |                        |
|            | Brain_Cortex                          | 0.562076071                 |              |   | Brain_Cerebellum               | 1.850840196            |
|            | 0.12203107                            | 0.579760599                 | 1.363235418  |   | 0.959359742                    | 0.392301173            |
|            | 0 0.998207054                         |                             |              |   |                                | 3                      |
| TRIM35     | ENSG00000104228.12                    | 0.449943804                 | 11           | 8 | 0.041786231                    |                        |
|            | Brain_Substantia_nigra                | 0.958572262                 |              |   | Brain_Frontal_Cortex_BA9       |                        |
|            | 4.599101339                           | 0.034099502                 | 0.206426044  |   | -2.035642856                   | 1.298094277            |
|            | -0.437064828                          | 0.897957289                 | 8 0          |   | 0.998207054                    |                        |
| COL7A1     | ENSG00000114270.17                    | 0.450028782                 | 2            | 2 | 0.206481325                    |                        |
|            | Brain_Putamen_basal_ganglia           | 0.894694978                 |              |   | Brain_Cortex                   | 1.129100635            |
|            | 0.870899365                           | 0.870899365                 | 0.132365782  |   | 1.263300171                    | 0.697832976            |
|            | 0.799691375                           | 2 0                         | 0.998207054  |   |                                |                        |
| LMO3       | ENSG00000048540.14                    | 0.450066262                 | 1            | 1 | 0.450066262                    |                        |
|            | Brain_Nucleus_accumbens_basal_ganglia | 0.450066262                 |              |   |                                |                        |
|            | Brain_Nucleus_accumbens_basal_ganglia | 1 1                         | 1            |   | -0.755304562                   |                        |
|            | -0.755304562                          | -0.755304562                | NA 1         |   | 0.998207054                    |                        |
| SRRT       | ENSG00000087087.18                    | 0.450094899                 | 1            | 1 | 0.450094899                    | Brain_Cerebellum       |
|            | 0.450094899                           | Brain_Cerebellum            | 1 1          |   | -0.755256824                   | -0.755256824           |
|            | -0.755256824                          | NA 1                        | 0            |   | 0.998207054                    |                        |
| RNF168     | ENSG00000163961.4                     | 0.450110622                 | 3            | 3 | 0.20902366                     |                        |
|            | Brain_Cerebellar_Hemisphere           | 0.593472942                 |              |   | Brain_Hypothalamus             | 1.059752066            |
|            | 0.924929194                           | 0.924929194                 | 0.533810076  |   | 1.256254646                    | 0.888679586            |
|            | 0.361389834                           | 3 0                         | 0.998207054  |   |                                |                        |
| SLC35C1    | ENSG00000181830.8                     | 0.450130373                 | 1            | 1 | 0.450130373                    |                        |
|            | Brain_Hippocampus                     | 0.450130373                 |              |   | Brain_Hippocampus              | 1 1 1                  |
|            | -0.755197692                          | -0.755197692                | -0.755197692 |   | NA 1 0                         | 0.998207054            |
| ARL6IP6    | ENSG00000177917.10                    | 0.450174247                 | 7            | 6 | 0.017989075                    |                        |
|            | Brain_Frontal_Cortex_BA9              | 0.932853112                 |              |   | Brain_Hypothalamus             | 2.572958707            |
|            | 0.074923121                           | 0.478438918                 | -0.38263566  |   | 2.365842925                    | 0.882062266            |
|            | 0.953866001                           | 6 0                         | 0.998207054  |   |                                |                        |
| AC005618.6 | ENSG00000272070.1                     | 0.450187072                 | 2            | 2 | 0.263804982                    |                        |
|            | Brain_Cerebellum                      | 0.514862549                 |              |   | Brain_Frontal_Cortex_BA9       | 1.056126651            |
|            | 0.943873349                           | 0.943873349                 | 0.65128497   |   | 1.117442943                    | 0.884363957            |
|            | 0.329623464                           | 2 0                         | 0.998207054  |   |                                |                        |
| GGCT       | ENSG00000006625.17                    | 0.450258066                 | 9            | 6 | 0.204510077                    | Brain_Cortex           |
|            | 0.942119243                           | Brain_Caudate_basal_ganglia | 4.907608242  |   | 0.021386281                    |                        |
|            | 0.398290059                           | -0.764187452                | 1.268806527  |   | 0.3839862                      | 0.62681326 6 0         |
|            | 0.998207054                           |                             |              |   |                                |                        |
| AGO4       | ENSG00000134698.10                    | 0.450351135                 | 2            | 2 | 0.293658892                    |                        |

|               |                                       |              |                                       |              |              |             |              |  |
|---------------|---------------------------------------|--------------|---------------------------------------|--------------|--------------|-------------|--------------|--|
|               | Brain_Anterior_cingulate_cortex_BA24  | 0.46338749   | Brain_Cerebellum                      | 1.030172222  |              |             |              |  |
|               | 0.969827778                           | 0.969827778  | 0.733280296                           | 1.050128815  | 0.891704555  |             |              |  |
|               | 0.224045736                           | 2            | 0                                     | 0.998207054  |              |             |              |  |
| SIRPB2        | ENSG00000196209.12                    | 0.450355913  | 8                                     | 8            | 0.090509883  |             |              |  |
|               | Brain_Amygdala                        | 0.952171311  | Brain_Nucleus_accumbens_basal_ganglia |              |              |             |              |  |
|               | 2.720612673                           | 0.144446746  | 0.144446746                           | -1.585578289 | 1.692714189  |             |              |  |
|               | -0.644068141                          | 1.093814463  | 8                                     | 0            | 0.998207054  |             |              |  |
| TP53AIP1      | ENSG00000120471.15                    | 0.450393381  | 1                                     | 1            | 0.450393381  |             |              |  |
|               | Brain_Cortex                          | 0.450393381  | Brain_Cortex                          | 1            | 1            | 1           | 0.754759363  |  |
|               | 0.754759363                           | 0.754759363  | NA                                    | 1            | 0            | 0.998207054 |              |  |
| MAP1LC3B      | ENSG00000140941.12                    | 0.450568977  | 3                                     | 3            | 0.288467206  |             |              |  |
|               | Brain_Anterior_cingulate_cortex_BA24  | 0.784296034  | Brain_Cerebellum                      |              |              |             |              |  |
|               | 1.785860854                           | 0.217023696  | 0.217023696                           | -1.061490152 | 0.273724909  |             |              |  |
|               | -0.441572479                          | 0.672698136  | 3                                     | 0            | 0.998207054  |             |              |  |
| SRSF9         | ENSG00000111786.8                     | 0.450572419  | 1                                     | 1            | 0.450572419  |             |              |  |
|               | Brain_Nucleus_accumbens_basal_ganglia | 0.450572419  |                                       |              |              |             |              |  |
|               | Brain_Nucleus_accumbens_basal_ganglia | 1            | 1                                     | 1            | -0.754461059 |             |              |  |
|               | -0.754461059                          | -0.754461059 | NA                                    | 1            | 0            | 0.998207054 |              |  |
| CAMK1G        | ENSG00000008118.9                     | 0.450602491  | 1                                     | 1            | 0.450602491  |             |              |  |
|               | Brain_Cerebellum                      | 0.450602491  | Brain_Cerebellum                      | 1            | 1            | 1           | -0.754410962 |  |
|               | -0.754410962                          | -0.754410962 | NA                                    | 1            | 0            | 0.998207054 |              |  |
| ITFG2         | ENSG00000111203.11                    | 0.450755129  | 1                                     | 1            | 0.450755129  |             |              |  |
|               | Brain_Nucleus_accumbens_basal_ganglia | 0.450755129  |                                       |              |              |             |              |  |
|               | Brain_Nucleus_accumbens_basal_ganglia | 1            | 1                                     | 1            | -0.754156709 |             |              |  |
|               | -0.754156709                          | -0.754156709 | NA                                    | 1            | 0            | 0.998207054 |              |  |
| HEATR4        | ENSG00000187105.8                     | 0.450938462  | 3                                     | 3            | 0.163441591  |             |              |  |
|               | Brain_Substantia_nigra                | 0.822291865  | Brain_Anterior_cingulate_cortex_BA24  |              |              |             |              |  |
|               | 1.336774727                           | 0.661654986  | 0.661654986                           | -1.393589533 | 0.224598201  |             |              |  |
|               | -0.508000104                          | 0.819870477  | 3                                     | 0            | 0.998207054  |             |              |  |
| ZNF132        | ENSG00000131849.11                    | 0.450994532  | 3                                     | 2            | 0.299818946  |             |              |  |
|               | Brain_Cerebellar_Hemisphere           | 0.395995049  | Brain_Spinal_cord_cervical_c-1        |              |              |             |              |  |
|               | 1.993094292                           | 0.033518555  | 0.973387153                           | -1.03682173  | -0.848795583 |             |              |  |
|               | -0.961184396                          | 0.099254529  | 2                                     | 0            | 0.998207054  |             |              |  |
| GOLGA80       | ENSG00000206127.10                    | 0.451105954  | 6                                     | 6            | 0.184159576  |             |              |  |
|               | Brain_Anterior_cingulate_cortex_BA24  | 0.937187453  | Brain_Caudate_basal_ganglia           |              |              |             |              |  |
|               | 1.813739305                           | 0.32446887   | 0.32446887                            | -1.328056097 | 1.327447882  |             |              |  |
|               | -0.32756818                           | 1.167905189  | 6                                     | 0            | 0.998207054  |             |              |  |
| EMC7          | ENSG00000134153.9                     | 0.451144328  | 1                                     | 1            | 0.451144328  |             |              |  |
|               | Brain_Hippocampus                     | 0.451144328  | Brain_Hippocampus                     | 1            | 1            | 1           |              |  |
|               | -0.753508629                          | -0.753508629 | -0.753508629                          | NA           | 1            | 0           | 0.998207054  |  |
| LENG8         | ENSG00000167615.16                    | 0.451163935  | 2                                     | 2            | 0.422002938  |             |              |  |
|               | Brain_Cerebellar_Hemisphere           | 1.702444201  | Brain_Cerebellum                      |              |              |             |              |  |
|               | 0.897645794                           | 0.297555799  | -0.802951205                          | 0.128635855  | -0.337157675 | 0.658731527 |              |  |
|               | 0.297555799                           | -0.802951205 | 0.128635855                           | -0.337157675 | 0.658731527  |             |              |  |
|               | 2                                     | 0            | 0.998207054                           |              |              |             |              |  |
| ARHGAP31      | ENSG00000031081.10                    | 0.451179081  | 2                                     | 2            | 0.259713043  |             |              |  |
|               | Brain_Hippocampus                     | 0.630727135  | Brain_Cerebellum                      | 1.07514985   | 0.92485015   |             |              |  |
|               | 0.92485015                            | 0.480703652  | 1.127069629                           | 0.803886641  | 0.457049766  | 2           |              |  |
|               | 0                                     | 0.998207054  |                                       |              |              |             |              |  |
| ZNF512B       | ENSG00000196700.8                     | 0.451218724  | 3                                     | 3            | 0.184954832  |             |              |  |
|               | Brain_Hypothalamus                    | 0.849654965  | Brain_Caudate_basal_ganglia           | 1.334323813  |              |             |              |  |
|               | 0.665239645                           | 0.665239645  | -1.325652488                          | 0.189558685  | -0.652433846 |             |              |  |
|               | 0.77157611                            | 3            | 0                                     | 0.998207054  |              |             |              |  |
| MYH3          | ENSG00000109063.14                    | 0.451239943  | 8                                     | 7            | 0.129833189  |             |              |  |
|               | Brain_Caudate_basal_ganglia           | 0.967261856  | Brain_Nucleus_accumbens_basal_ganglia |              |              |             |              |  |
|               | 4.866458433                           | 0.10108743   | 0.172682703                           | -1.514760017 | 0.390580412  |             |              |  |
|               | -0.582517418                          | 0.596639894  | 7                                     | 0            | 0.998207054  |             |              |  |
| LRRC37A3      | ENSG00000176809.10                    | 0.451312597  | 7                                     | 7            | 0.062369956  |             |              |  |
|               | Brain_Caudate_basal_ganglia           | 0.92620682   | Brain_Hypothalamus                    | 2.095814098  |              |             |              |  |
|               | 0.45510627                            | 0.45510627   | -1.863656515                          | 0.470170686  | -0.811638795 |             |              |  |
|               | 0.955480916                           | 7            | 0                                     | 0.998207054  |              |             |              |  |
| RP11-497E19.1 | ENSG00000205562.2                     | 0.4513981    | 1                                     | 1            | 0.4513981    |             |              |  |
|               | Brain_Frontal_Cortex_BA9              | 0.4513981    | Brain_Frontal_Cortex_BA9              | 1            | 1            | 1           |              |  |

|              |                                       |                             |              |              |                                      |             |                  |
|--------------|---------------------------------------|-----------------------------|--------------|--------------|--------------------------------------|-------------|------------------|
| NFS1         | 0.753086227                           | 0.753086227                 | 0.753086227  | NA           | 1                                    | 0           | 0.998207054      |
|              | ENSG00000244005.12                    | 0.451442258                 | 3            | 3            | 0.116946823                          |             |                  |
|              | Brain_Substantia_nigra                | 0.736078103                 |              |              | Brain_Cerebellar_Hemisphere          |             |                  |
|              | 1.647675385                           | 0.436152753                 | 0.436152753  | 0.337051467  | 1.567718583                          |             |                  |
|              | 1.044793069                           | 0.635809034                 | 3            | 0            | 0.998207054                          |             |                  |
| PRDM5        | ENSG00000138738.10                    | 0.451456563                 | 1            | 1            | 0.451456563                          |             |                  |
|              | Brain_Frontal_Cortex_BA9              | 0.451456563                 |              |              | Brain_Frontal_Cortex_BA9             | 1           | 1                |
|              | 1                                     | 0.752988936                 | 0.752988936  | 0.752988936  | NA                                   | 1           | 0                |
|              | 0.998207054                           |                             |              |              |                                      |             |                  |
| THAP9        | ENSG00000168152.12                    | 0.451492075                 | 2            | 2            | 0.210693861                          |             |                  |
|              | Brain_Anterior_cingulate_cortex_BA24  | 0.713056925                 |              |              | Brain_Putamen_basal_ganglia          |             |                  |
|              | 1.172553476                           | 0.827446524                 | 0.827446524  | -0.36775366  | 1.251659782                          |             |                  |
|              | 0.441953061                           | 1.145098227                 | 2            | 0            | 0.998207054                          |             |                  |
| RP11-43F13.4 | ENSG00000272347.1                     | 0.451496304                 | 3            | 3            | 0.201358859                          |             |                  |
|              | Brain_Frontal_Cortex_BA9              | 0.951184905                 |              |              | Brain_Anterior_cingulate_cortex_BA24 |             |                  |
|              | 2.303019592                           | 0.078401637                 | 0.078401637  | -0.061218866 | 1.277689698                          |             |                  |
|              | 0.731613488                           | 0.70273429                  | 3            | 0            | 0.998207054                          |             |                  |
| TCAIM        | ENSG00000179152.19                    | 0.451614971                 | 3            | 3            | 0.142711939                          |             |                  |
|              | Brain_Hippocampus                     | 0.694832594                 |              |              | Brain_Cortex                         | 1.080298027 |                  |
|              | 0.918471976                           | 0.918471976                 | -1.465766394 | 0.490868846  | -0.194197392                         |             |                  |
|              | 1.102313243                           | 3                           | 0            | 0.998207054  |                                      |             |                  |
| SGCA         | ENSG00000108823.15                    | 0.451639753                 | 13           | 5            | 0.104616124                          |             |                  |
|              | Brain_Substantia_nigra                | 0.998148436                 |              |              | Brain_Spinal_cord_cervical_c-1       |             |                  |
|              | 9.267312272                           | 0.006096051                 | 0.321346889  | -1.091480914 | 1.622875023                          |             |                  |
|              | 0.162900742                           | 0.618033166                 | 5            | 0            | 0.998207054                          |             |                  |
| Clorf141     | ENSG00000203963.11                    | 0.451671634                 | 3            | 3            | 0.11816654                           |             |                  |
|              | Brain_Frontal_Cortex_BA9              | 0.852212142                 |              |              | Brain_Hypothalamus                   | 1.67778755  |                  |
|              | 0.333444977                           | 0.333444977                 | -0.18629664  | 1.562515741  | 0.733198076                          |             |                  |
|              | 0.877886731                           | 3                           | 0            | 0.998207054  |                                      |             |                  |
| AMMECR1L     | ENSG00000144233.9                     | 0.451996943                 | 1            | 1            | 0.451996943                          |             |                  |
|              | Brain_Substantia_nigra                | 0.451996943                 |              |              | Brain_Substantia_nigra               | 1           | 1                |
|              | 1                                     | 0.75208999                  | 0.75208999   | 0.75208999   | NA                                   | 1           | 0                |
|              | 0.998207054                           |                             |              |              |                                      |             |                  |
| RP5-828H9.1  | ENSG00000230563.2                     | 0.452045862                 | 12           | 12           | 0.027644478                          |             |                  |
|              | Brain_Cerebellum                      | 0.959605415                 |              |              | Brain_Cerebellar_Hemisphere          | 1.646910375 |                  |
|              | 0.452135522                           | 0.452135522                 | -2.20229499  | 0.52485692   | -0.518610746                         |             |                  |
|              | 0.812157249                           | 12                          | 0            | 0.998207054  |                                      |             |                  |
| NFIA         | ENSG00000162599.15                    | 0.452066129                 | 1            | 1            | 0.452066129                          |             | Brain_Cerebellum |
|              | 0.452066129                           | Brain_Cerebellum            | 1            | 1            | 0.75197494                           | 0.75197494  | 0.75197494       |
|              | NA                                    | 1                           | 0            | 0.998207054  |                                      |             |                  |
| ZBTB20-AS4   | ENSG00000242767.1                     | 0.452110864                 | 2            | 2            | 0.285319457                          |             |                  |
|              | Brain_Cortex                          | 0.473281712                 |              |              | Brain_Hypothalamus                   | 1.046787134 |                  |
|              | 0.953212866                           | 0.953212866                 | -1.068445821 | -0.717149733 | -0.892797777                         |             |                  |
|              | 0.248403846                           | 2                           | 0            | 0.998207054  |                                      |             |                  |
| HPF1         | ENSG00000056050.6                     | 0.452117083                 | 1            | 1            | 0.452117083                          |             |                  |
|              | Brain_Nucleus_accumbens_basal_ganglia | 0.452117083                 |              |              |                                      |             |                  |
|              | Brain_Nucleus_accumbens_basal_ganglia | 1                           | 1            | 1            | -0.751890215                         |             |                  |
|              | -0.751890215                          | -0.751890215                | NA           | 1            | 0                                    | 0.998207054 |                  |
| FASTKD1      | ENSG00000138399.17                    | 0.45217775                  | 12           | 3            | 0.297167934                          |             |                  |
|              | Brain_Substantia_nigra                | 0.966610333                 |              |              | Brain_Hippocampus                    | 9.898615156 |                  |
|              | 0.005487703                           | 0.37639245                  | -1.042525879 | 0.773220499  | -0.000301978                         |             |                  |
|              | 0.485433769                           | 3                           | 0            | 0.998207054  |                                      |             |                  |
| ZSCAN21      | ENSG00000166529.14                    | 0.452182666                 | 11           | 4            | 0.118988738                          |             |                  |
|              | Brain_Hypothalamus                    | 0.79690377                  |              |              | Brain_Substantia_nigra               | 8.735617053 |                  |
|              | 0.003349617                           | 0.429773991                 | -1.559032288 | -0.257356254 | -0.919293639                         |             |                  |
|              | 0.425494488                           | 4                           | 0            | 0.998207054  |                                      |             |                  |
| FAM227B      | ENSG00000166262.15                    | 0.452257992                 | 5            | 4            | 0.416165835                          |             |                  |
|              | Brain_Spinal_cord_cervical_c-1        | 0.975420892                 |              |              | Brain_Frontal_Cortex_BA9             |             |                  |
|              | 3.768072904                           | 0.057476895                 | 0.202575042  | -0.81309109  | 0.673740296                          |             |                  |
|              | 0.102199823                           | 0.567884174                 | 4            | 0            | 0.998207054                          |             |                  |
| BIRC5        | ENSG00000089685.14                    | 0.452483935                 | 3            | 3            | 0.194276319                          |             | Brain_Cerebellum |
|              | 0.815560293                           | Brain_Cerebellar_Hemisphere | 1.165175656  | 0.857402842  |                                      |             |                  |
|              | 0.857402842                           | -1.298032058                | 1.068130136  | -0.154386975 | 1.185051256                          |             |                  |



|             |                                |                                       |                                |              |              |                  |             |             |   |
|-------------|--------------------------------|---------------------------------------|--------------------------------|--------------|--------------|------------------|-------------|-------------|---|
| 3           | 0                              | 0.998207054                           |                                |              |              |                  |             |             |   |
| KRTAP5-4    | ENSG00000241598.5              | 0.452498536                           | 2                              | 2            | 0.21780199   | Brain_Cerebellum |             |             |   |
|             | 0.873993061                    | Brain_Cerebellar_Hemisphere           | 1.3273609                      | 0.6726391    | 0.6726391    |                  |             |             |   |
|             | -1.23239387                    | -0.158588537                          | -0.695491203                   | 0.759295033  | 2            | 0                |             |             |   |
|             | 0.998207054                    |                                       |                                |              |              |                  |             |             |   |
| IFT27       | ENSG00000100360.14             | 0.452571026                           | 12                             | 4            | 0.258494562  | Brain_Cerebellum |             |             |   |
|             | 0.943083648                    | Brain_Amygdala                        | 8.945225597                    | 0.005243144  | 0.549031816  |                  |             |             |   |
|             | -1.06617466                    | 1.129956483                           | 0.1950605                      | 0.573007275  | 4            | 0                |             |             |   |
|             | 0.998207054                    |                                       |                                |              |              |                  |             |             |   |
| THSD4       | ENSG00000187720.14             | 0.452592722                           | 2                              | 2            | 0.413775728  |                  |             |             |   |
|             | Brain_Caudate_basal_ganglia    | 0.662692242                           | Brain_Cerebellum               | 1.488800721  |              |                  |             |             |   |
|             | 0.511199279                    | 0.511199279                           | 0.436199154                    | 0.817267233  | 0.626733194  |                  |             |             |   |
|             | 0.269455823                    | 2                                     | 0                              | 0.998207054  |              |                  |             |             |   |
| C2CD2L      | ENSG00000172375.12             | 0.452611624                           | 1                              | 1            | 0.452611624  |                  |             |             |   |
|             | Brain_Caudate_basal_ganglia    | 0.452611624                           | Brain_Caudate_basal_ganglia    | 1            | 1            |                  |             |             |   |
|             | 1                              | 0.75106818                            | 0.75106818                     | 0.75106818   | NA           | 1                | 0           | 0.998207054 |   |
| LINC01444   | ENSG00000264301.1              | 0.452781932                           | 1                              | 1            | 0.452781932  |                  |             |             |   |
|             | Brain_Cortex                   | 0.452781932                           | Brain_Cortex                   | 1            | 1            | 1                | 0.750785209 |             |   |
|             | 0.750785209                    | 0.750785209                           | NA                             | 1            | 0            | 0.998207054      |             |             |   |
| PCDH8       | ENSG00000136099.13             | 0.452793793                           | 3                              | 3            | 0.115170467  |                  |             |             |   |
|             | Brain_Caudate_basal_ganglia    | 0.708296766                           | Brain_Cerebellar_Hemisphere    |              |              |                  |             |             |   |
|             | 1.730978039                    | 0.26940498                            | 0.26940498                     | -0.374144563 | 1.575372591  |                  |             |             |   |
|             | 0.753291538                    | 1.009992853                           | 3                              | 0            | 0.998207054  |                  |             |             |   |
| RIPPLY2     | ENSG00000203877.8              | 0.452929855                           | 2                              | 2            | 0.231875762  |                  |             |             |   |
|             | Brain_Putamen_basal_ganglia    | 0.693203141                           | Brain_Amygdala                 | 1.000978693  |              |                  |             |             |   |
|             | 0.999021307                    | 0.999021307                           | -1.195540912                   | 0.394511903  | -0.400514505 |                  |             |             |   |
|             | 1.124337128                    | 2                                     | 0                              | 0.998207054  |              |                  |             |             |   |
| PRRC2B      | ENSG00000130723.18             | 0.453122838                           | 1                              | 1            | 0.453122838  |                  |             |             |   |
|             | Brain_Amygdala                 | 0.453122838                           | Brain_Amygdala                 | 1            | 1            | 1                | 0.750218966 |             |   |
|             | 0.750218966                    | 0.750218966                           | NA                             | 1            | 0            | 0.998207054      |             |             |   |
| CD180       | ENSG00000134061.5              | 0.453128475                           | 1                              | 1            | 0.453128475  |                  |             |             |   |
|             | Brain_Caudate_basal_ganglia    | 0.453128475                           | Brain_Caudate_basal_ganglia    | 1            | 1            |                  |             |             |   |
|             | 1                              | -0.750209605                          | -0.750209605                   | -0.750209605 | NA           | 1                | 0           |             |   |
|             | 0.998207054                    |                                       |                                |              |              |                  |             |             |   |
| WNT8A       | ENSG00000061492.11             | 0.453163048                           | 2                              | 2            | 0.4001935    | Brain_Cerebellum |             |             |   |
|             | 0.677330171                    | Brain_Cerebellar_Hemisphere           | 1.480599029                    | 0.519400971  |              |                  |             |             |   |
|             | 0.519400971                    | -0.4161091                            | 0.841275701                    | 0.2125833    | 0.889105319  | 2                | 0           |             |   |
|             | 0.998207054                    |                                       |                                |              |              |                  |             |             |   |
| WASF1       | ENSG00000112290.12             | 0.453225116                           | 1                              | 1            | 0.453225116  |                  |             |             |   |
|             | Brain_Spinal_cord_cervical_c-1 | 0.453225116                           | Brain_Spinal_cord_cervical_c-1 |              |              |                  |             |             |   |
|             | 1                              | 1                                     | 1                              | -0.75004913  | -0.75004913  | -0.75004913      | NA          | 1           | 0 |
|             | 0.998207054                    |                                       |                                |              |              |                  |             |             |   |
| CTB-133G6.1 | ENSG00000263264.1              | 0.453232314                           | 1                              | 1            | 0.453232314  |                  |             |             |   |
|             | Brain_Substantia_nigra         | 0.453232314                           | Brain_Substantia_nigra         | 1            | 1            |                  |             |             |   |
|             | 1                              | 0.750037178                           | 0.750037178                    | 0.750037178  | NA           | 1                | 0           |             |   |
|             | 0.998207054                    |                                       |                                |              |              |                  |             |             |   |
| PCSK6       | ENSG00000140479.16             | 0.45331652                            | 2                              | 2            | 0.282830481  | Brain_Cerebellum |             |             |   |
|             | 0.536094133                    | Brain_Hippocampus                     | 1.033336966                    | 0.966663034  |              |                  |             |             |   |
|             | 0.966663034                    | -0.618730167                          | 1.073982597                    | 0.227626215  | 1.196928674  |                  |             |             |   |
|             | 2                              | 0                                     | 0.998207054                    |              |              |                  |             |             |   |
| ANKK1       | ENSG00000170209.4              | 0.453671349                           | 7                              | 4            | 0.131968855  | Brain_Cortex     |             |             |   |
|             | 0.601962362                    | Brain_Nucleus_accumbens_basal_ganglia | 4.226170665                    |              |              |                  |             |             |   |
|             | 0.013858553                    | 0.632543899                           | -1.506383104                   | -0.521580616 | -1.122378122 |                  |             |             |   |
|             | 0.391682948                    | 4                                     | 0                              | 0.998207054  |              |                  |             |             |   |
| CD24        | ENSG00000272398.5              | 0.45368555                            | 3                              | 3            | 0.119441993  |                  |             |             |   |
|             | Brain_Cerebellar_Hemisphere    | 0.830135329                           | Brain_Hypothalamus             | 1.453698591  |              |                  |             |             |   |
|             | 0.524816386                    | 0.524816386                           | 0.214528007                    | 1.557120018  | 0.937144769  |                  |             |             |   |
|             | 0.67715566                     | 3                                     | 0                              | 0.998207054  |              |                  |             |             |   |
| EPHA8       | ENSG00000070886.11             | 0.453686669                           | 4                              | 3            | 0.38456162   | Brain_Cerebellum |             |             |   |
|             | 0.836041446                    | Brain_Cortex                          | 2.990193597                    | 0.049419243  | 0.218596873  |                  |             |             |   |
|             | -0.478379044                   | 0.86952211                            | 0.105857669                    | 0.588830278  | 3            | 0                |             |             |   |
|             | 0.998207054                    |                                       |                                |              |              |                  |             |             |   |

|          |                                       |                          |              |                                       |              |                  |
|----------|---------------------------------------|--------------------------|--------------|---------------------------------------|--------------|------------------|
| PYGM     | ENSG00000068976.13                    | 0.453711319              | 4            | 3                                     | 0.321964381  | Brain_Cerebellum |
|          | 0.882904846                           | Brain_Hippocampus        | 3.531908374  | 0.004228422                           |              |                  |
|          | 0.185089759                           | -0.147287819             | 0.990429195  | 0.433292281                           | 0.464769023  |                  |
|          | 3                                     | 0                        | 0.998207054  |                                       |              |                  |
| AP4M1    | ENSG00000221838.9                     | 0.453723034              | 6            | 5                                     | 0.091893842  |                  |
|          | Brain_Nucleus_accumbens_basal_ganglia | 0.738913591              |              | Brain_Frontal_Cortex_BA9              |              |                  |
|          | 2.867541811                           | 0.015715782              | 0.139641896  | -1.459765847                          | 1.685491197  |                  |
|          | 0.033576838                           | 1.286318679              | 5            | 0                                     | 0.998207054  |                  |
| GRAMD1C  | ENSG00000178075.19                    | 0.453737114              | 2            | 2                                     | 0.304606479  |                  |
|          | Brain_Cerebellar_Hemisphere           | 0.533175191              |              | Brain_Cerebellum                      | 1.09651996   | 0.90348004       |
|          | 0.90348004                            | -0.623166382             | 1.026605042  | 0.20171933                            | 1.166564561  | 2                |
|          | 0.998207054                           |                          |              |                                       |              | 0                |
| BNC2     | ENSG00000173068.17                    | 0.453746369              | 1            | 1                                     | 0.453746369  |                  |
|          | Brain_Hypothalamus                    | 0.453746369              |              | Brain_Hypothalamus                    | 1            | 1                |
|          | -0.749183905                          | -0.749183905             | -0.749183905 | NA                                    | 1            | 0                |
|          |                                       |                          |              |                                       |              | 0.998207054      |
| CHST1    | ENSG00000175264.7                     | 0.453779038              | 4            | 4                                     | 0.143792292  |                  |
|          | Brain_Frontal_Cortex_BA9              | 0.904087755              |              | Brain_Nucleus_accumbens_basal_ganglia |              |                  |
|          | 1.51068019                            | 0.51531674               | 0.51531674   | -1.138269749                          | 1.461813616  | -0.021757909     |
|          | 1.084639384                           | 4                        | 0            | 0.998207054                           |              |                  |
| NECTIN1  | ENSG00000110400.10                    | 0.453803934              | 2            | 2                                     | 0.260079883  |                  |
|          | Brain_Hippocampus                     | 0.712237892              |              | Brain_Cerebellum                      | 1.161803236  |                  |
|          | 0.838196764                           | 0.838196764              | 0.368852202  | 1.126202342                           | 0.747527272  |                  |
|          | 0.535527419                           | 2                        | 0            | 0.998207054                           |              |                  |
| ASAH2    | ENSG00000188611.14                    | 0.453870716              | 13           | 2                                     | 0.184880479  |                  |
|          | Brain_Putamen_basal_ganglia           | 0.573833411              |              | Brain_Substantia_nigra                |              |                  |
|          | 11.99823807                           | 9.87E-05                 | 0.539844507  | -1.325876891                          | -0.56241484  |                  |
|          | -1.163746699                          | 0.193355096              | 2            | 0                                     | 0.998207054  |                  |
| MRI1     | ENSG00000037757.13                    | 0.454023204              | 12           | 2                                     | 0.21874932   |                  |
|          | Brain_Nucleus_accumbens_basal_ganglia | 0.76416889               |              | Brain_Caudate_basal_ganglia           |              |                  |
|          | 10.15439512                           | 1.17E-17                 | 0.442076919  | -1.229860575                          | -0.300010836 |                  |
|          | -0.647851759                          | 0.281078556              | 2            | 0                                     | 0.998207054  |                  |
| ANAPC13  | ENSG00000129055.12                    | 0.454091036              | 9            | 5                                     | 0.136568156  |                  |
|          | Brain_Frontal_Cortex_BA9              | 0.948532759              |              | Brain_Cerebellum                      | 5.938809194  |                  |
|          | 0.00716193                            | 0.385638805              | -1.488693278 | 0.324282112                           | -0.352661959 |                  |
|          | 0.498809393                           | 5                        | 0            | 0.998207054                           |              |                  |
| PPA2     | ENSG00000138777.19                    | 0.454154404              | 12           | 3                                     | 0.072722266  |                  |
|          | Brain_Anterior_cingulate_cortex_BA24  | 0.550049486              |              | Brain_Cerebellar_Hemisphere           |              |                  |
|          | 10.57978948                           | 0.00335991               | 0.380328028  | -1.794569814                          | -0.597685974 |                  |
|          | -1.243971254                          | 0.273212197              | 3            | 0                                     | 0.998207054  |                  |
| WDFY2    | ENSG00000139668.8                     | 0.454433408              | 6            | 3                                     | 0.537877213  |                  |
|          | Brain_Hypothalamus                    | 0.981222524              |              | Brain_Cerebellum                      | 4.770318604  |                  |
|          | 0.001210863                           | 0.1902836                | -0.616026223 | 0.352871503                           | -0.086860845 |                  |
|          | 0.411626653                           | 3                        | 0            | 0.998207054                           |              |                  |
| PTPRU    | ENSG00000060656.19                    | 0.454460366              | 5            | 5                                     | 0.106613661  |                  |
|          | Brain_Spinal_cord_cervical_c-1        | 0.868859526              |              | Brain_Cortex                          | 1.77084052   |                  |
|          | 0.412774775                           | 0.412774775              | -1.280010585 | 1.613602562                           | 0.059948245  |                  |
|          | 1.105573094                           | 5                        | 0            | 0.998207054                           |              |                  |
| RPS6KB2  | ENSG00000175634.14                    | 0.454490185              | 2            | 2                                     | 0.219455579  |                  |
|          | Brain_Frontal_Cortex_BA9              | 0.677838115              |              | Brain_Nucleus_accumbens_basal_ganglia |              |                  |
|          | 1.521161143                           | 0.478838857              | 0.478838857  | 0.415415018                           | 1.22797706   |                  |
|          | 0.821696039                           | 0.57456813               | 2            | 0                                     | 0.998207054  |                  |
| CENPC    | ENSG00000145241.10                    | 0.45449256               | 8            | 5                                     | 0.136999539  | Brain_Cerebellum |
|          | 0.830854984                           | Brain_Hypothalamus       | 4.720967134  | 0.021835375                           |              |                  |
|          | 0.250167998                           | -1.487057825             | -0.213605149 | -0.776660581                          | 0.519494568  |                  |
|          | 5                                     | 0                        | 0.998207054  |                                       |              |                  |
| TCTEX1D2 | ENSG00000213123.10                    | 0.45456716               | 5            | 4                                     | 0.154405604  | Brain_Cerebellum |
|          | 0.616494885                           | Brain_Frontal_Cortex_BA9 | 3.54738716   | 0.090398124                           |              |                  |
|          | 0.240913635                           | 0.500824153              | 1.424141192  | 0.859755425                           | 0.425923309  |                  |
|          | 4                                     | 0                        | 0.998207054  |                                       |              |                  |
| DNAH7    | ENSG00000118997.13                    | 0.454610682              | 9            | 2                                     | 0.164641024  |                  |
|          | Brain_Frontal_Cortex_BA9              | 0.837516859              |              | Brain_Amygdala                        | 7.390892169  |                  |
|          | 0.001355508                           | 0.809699679              | -1.38963078  | 0.205507783                           | -0.705593744 |                  |

|                |                                       |                             |              |              |   |   |                                |                  |   |
|----------------|---------------------------------------|-----------------------------|--------------|--------------|---|---|--------------------------------|------------------|---|
|                | 0.48738859                            | 2                           | 0            | 0.998207054  |   |   |                                |                  |   |
| GATSL3         | ENSG00000239282.7                     |                             |              | 0.454613372  | 5 | 4 | 0.304574946                    |                  |   |
|                | Brain_Caudate_basal_ganglia           | 0.954867796                 |              |              |   |   | Brain_Cerebellar_Hemisphere    |                  |   |
|                | 3.253704554                           | 0.10613711                  | 0.292162282  |              |   |   | -1.026671984                   | 0.301384855      |   |
|                | -0.174842328                          | 0.569159164                 | 4            | 0            |   |   | 0.998207054                    |                  |   |
| AC073133.2     | ENSG00000228569.1                     |                             |              | 0.454705959  | 2 | 2 | 0.321357049                    |                  |   |
|                | Brain_Nucleus_accumbens_basal_ganglia | 0.482872413                 |              |              |   |   | Brain_Hippocampus              |                  |   |
|                | 1.067065512                           | 0.932934488                 | 0.932934488  |              |   |   | -0.701690156                   | 0.991673034      |   |
|                | 0.144991439                           | 1.197388595                 | 2            | 0            |   |   | 0.998207054                    |                  |   |
| LOX            | ENSG00000113083.13                    |                             |              | 0.454751409  | 1 | 1 | 0.454751409                    |                  |   |
|                | Brain_Spinal_cord_cervical_c-1        | 0.454751409                 |              |              |   |   | Brain_Spinal_cord_cervical_c-1 |                  |   |
|                | 1                                     | 1                           | -0.747517225 | -0.747517225 |   |   | -0.747517225                   | NA               | 1 |
|                | 0.998207054                           |                             |              |              |   |   |                                |                  | 0 |
| ANGEL1         | ENSG00000013523.9                     |                             |              | 0.454805262  | 6 | 6 | 0.048347137                    |                  |   |
|                | Brain_Frontal_Cortex_BA9              | 0.922147924                 |              |              |   |   | Brain_Substantia_nigra         |                  |   |
|                | 3.216836755                           | 0.107324779                 | 0.107324779  |              |   |   | -0.097728449                   | 1.974304436      |   |
|                | 0.871319594                           | 0.795433323                 | 6            | 0            |   |   | 0.998207054                    |                  |   |
| SPX            | ENSG00000134548.9                     |                             |              | 0.454912842  | 7 | 5 | 0.445763531                    |                  |   |
|                | Brain_Caudate_basal_ganglia           | 0.789961865                 |              |              |   |   | Brain_Putamen_basal_ganglia    |                  |   |
|                | 4.090817426                           | 0.044581089                 | 0.222957706  |              |   |   | -0.762496837                   | 0.582398132      |   |
|                | -0.207962614                          | 0.569313192                 | 5            | 0            |   |   | 0.998207054                    |                  |   |
| TMEM178A       | ENSG00000152154.10                    |                             |              | 0.455115514  | 2 | 2 | 0.21548564                     | Brain_Cerebellum |   |
|                | 0.796451808                           | Brain_Caudate_basal_ganglia | 1.046502164  |              |   |   | 0.953497836                    |                  |   |
|                | 0.953497836                           | -1.238621668                | 0.257941821  |              |   |   | -0.490339924                   | 1.058230191      |   |
|                | 2                                     | 0                           | 0.998207054  |              |   |   |                                |                  |   |
| GAS2           | ENSG00000148935.10                    |                             |              | 0.455121103  | 4 | 4 | 0.112665721                    |                  |   |
|                | Brain_Putamen_basal_ganglia           | 0.887619289                 |              |              |   |   | Brain_Caudate_basal_ganglia    |                  |   |
|                | 2.290169772                           | 0.192478861                 | 0.192478861  |              |   |   | -0.141317293                   | 1.586324485      |   |
|                | 1.02034046                            | 0.789514355                 | 4            | 0            |   |   | 0.998207054                    |                  |   |
| PYCR1          | ENSG00000183010.16                    |                             |              | 0.455307783  | 3 | 3 | 0.127872629                    |                  |   |
|                | Brain_Substantia_nigra                | 0.658920396                 |              |              |   |   | Brain_Cerebellar_Hemisphere    | 1.22689914       |   |
|                | 0.787300527                           | 0.787300527                 | -1.5225448   |              |   |   | -0.441404208                   | -0.886120164     |   |
|                | 0.565491298                           | 3                           | 0            | 0.998207054  |   |   |                                |                  |   |
| TFB1M          | ENSG00000029639.10                    |                             |              | 0.455356288  | 4 | 3 | 0.425102358                    |                  |   |
|                | Brain_Hypothalamus                    | 0.924126382                 |              |              |   |   | Brain_Frontal_Cortex_BA9       | 3.312794381      |   |
|                | 0.103633394                           | 0.140521415                 | -0.797600505 |              |   |   | 0.463682437                    | -0.170514782     |   |
|                | 0.518940354                           | 3                           | 0            | 0.998207054  |   |   |                                |                  |   |
| RP11-416I2.1   | ENSG00000260328.1                     |                             |              | 0.455384622  | 4 | 4 | 0.061361981                    |                  |   |
|                | Brain_Putamen_basal_ganglia           | 0.935503412                 |              |              |   |   | Brain_Cerebellum               | 1.933597561      |   |
|                | 0.305604165                           | 0.305604165                 | -1.870878085 |              |   |   | 0.080922718                    | -0.608010028     |   |
|                | 0.868388219                           | 4                           | 0            | 0.998207054  |   |   |                                |                  |   |
| MMP3           | ENSG00000149968.11                    |                             |              | 0.455498619  | 3 | 3 | 0.171288557                    |                  |   |
|                | Brain_Cerebellar_Hemisphere           | 0.642610714                 |              |              |   |   | Brain_Spinal_cord_cervical_c-1 |                  |   |
|                | 1.123600438                           | 0.842425973                 | 0.842425973  |              |   |   | -0.843343106                   | 1.36807514       |   |
|                | 0.020226782                           | 1.182576379                 | 3            | 0            |   |   | 0.998207054                    |                  |   |
| PPIA           | ENSG00000196262.13                    |                             |              | 0.455627712  | 2 | 2 | 0.280745469                    |                  |   |
|                | Brain_Hypothalamus                    | 0.438527791                 |              |              |   |   | Brain_Cortex                   | 1.130604385      |   |
|                | 0.869395615                           | 0.869395615                 | 0.77468166   | 1.078646218  |   |   | 0.926663939                    |                  |   |
|                | 0.2149354                             | 2                           | 0            | 0.998207054  |   |   |                                |                  |   |
| RP11-147L13.13 | ENSG00000277476.1                     |                             |              | 0.455712814  | 1 | 1 | 0.455712814                    |                  |   |
|                | Brain_Putamen_basal_ganglia           | 0.455712814                 |              |              |   |   | Brain_Putamen_basal_ganglia    | 1                | 1 |
|                | 1                                     | 0.745924847                 | 0.745924847  | 0.745924847  |   |   | NA                             | 1                | 0 |
|                | 0.998207054                           |                             |              |              |   |   |                                |                  |   |
| ANG            | ENSG00000214274.9                     |                             |              | 0.455847549  | 1 | 1 | 0.455847549                    |                  |   |
|                | Brain_Hypothalamus                    | 0.455847549                 |              |              |   |   | Brain_Hypothalamus             | 1                | 1 |
|                | -0.745701838                          | -0.745701838                | -0.745701838 |              |   |   | NA                             | 1                | 0 |
|                | 0.998207054                           |                             |              |              |   |   |                                |                  |   |
| C22orf39       | ENSG00000242259.8                     |                             |              | 0.455900814  | 4 | 4 | 0.11526733                     |                  |   |
|                | Brain_Substantia_nigra                | 0.845357792                 |              |              |   |   | Brain_Amygdala                 | 2.066330012      |   |
|                | 0.140524407                           | 0.140524407                 | 0.195044907  |              |   |   | 1.574952841                    | 0.957574536      |   |
|                | 0.570849204                           | 4                           | 0            | 0.998207054  |   |   |                                |                  |   |
| SRM            | ENSG00000116649.9                     |                             |              | 0.455930969  | 1 | 1 | 0.455930969                    |                  |   |
|                | Brain_Hippocampus                     | 0.455930969                 |              |              |   |   | Brain_Hippocampus              | 1                | 1 |
|                |                                       |                             |              |              |   |   |                                | 1                |   |

|               |                                       |                             |                                      |              |              |             |             |              |  |
|---------------|---------------------------------------|-----------------------------|--------------------------------------|--------------|--------------|-------------|-------------|--------------|--|
|               | 0.74556378                            | 0.74556378                  | 0.74556378                           | NA           | 1            | 0           | 0.998207054 |              |  |
| FZD6          | ENSG00000164930.11                    | 0.455944073                 | 7                                    | 6            | 0.036909168  |             |             | Brain_Cortex |  |
|               | 0.490551689                           | Brain_Putamen_basal_ganglia | 3.622828791                          |              | 0.079152094  |             |             |              |  |
|               | 0.167976394                           | 0.689431622                 | 2.086767368                          |              | 1.148698327  |             |             | 0.495545219  |  |
|               | 6                                     | 0                           | 0.998207054                          |              |              |             |             |              |  |
| RNF212        | ENSG00000178222.12                    | 0.455994678                 | 10                                   | 6            | 0.03195237   |             |             |              |  |
|               | Brain_Hypothalamus                    | 0.561921862                 | Brain_Cerebellar_Hemisphere          | 6.287071085  |              |             |             |              |  |
|               | 0.006040245                           | 0.214364897                 | -2.145005962                         |              | -0.579989257 |             |             | -1.406912272 |  |
|               | 0.403552892                           | 6                           | 0                                    | 0.998207054  |              |             |             |              |  |
| BTG4          | ENSG00000137707.13                    | 0.456054874                 | 1                                    | 1            | 0.456054874  |             |             |              |  |
|               | Brain_Hypothalamus                    | 0.456054874                 | Brain_Hypothalamus                   | 1            | 1            | 1           |             |              |  |
|               | -0.74535875                           | -0.74535875                 | -0.74535875                          | NA           | 1            | 0           |             | 0.998207054  |  |
| CTD-2534I21.8 | ENSG00000267334.1                     | 0.45606238                  | 1                                    | 1            | 0.45606238   |             |             |              |  |
|               | Brain_Substantia_nigra                | 0.45606238                  | Brain_Substantia_nigra               | 1            | 1            | 1           |             |              |  |
|               | -0.74534633                           | -0.74534633                 | -0.74534633                          | NA           | 1            | 0           |             | 0.998207054  |  |
| SSR3          | ENSG00000114850.6                     | 0.45608017                  | 2                                    | 2            | 0.276244475  |             |             |              |  |
|               | Brain_Caudate_basal_ganglia           | 0.84849128                  | Brain_Hippocampus                    | 1.356718611  |              |             |             |              |  |
|               | 0.643281389                           | 0.643281389                 | -0.191043797                         |              | 1.088794597  |             |             | 0.4488754    |  |
|               | 0.904982407                           | 2                           | 0                                    | 0.998207054  |              |             |             |              |  |
| PECAM1        | ENSG00000261371.5                     | 0.456116731                 | 1                                    | 1            | 0.456116731  |             |             |              |  |
|               | Brain_Nucleus_accumbens_basal_ganglia | 0.456116731                 |                                      |              |              |             |             |              |  |
|               | Brain_Nucleus_accumbens_basal_ganglia | 1                           | 1                                    | 1            | 0.745256403  |             |             |              |  |
|               | 0.745256403                           | 0.745256403                 | NA                                   | 1            | 0            | 0.998207054 |             |              |  |
| RRAD          | ENSG00000166592.11                    | 0.456125283                 | 1                                    | 1            | 0.456125283  |             |             |              |  |
|               | Brain_Caudate_basal_ganglia           | 0.456125283                 | Brain_Caudate_basal_ganglia          | 1            | 1            |             |             |              |  |
|               | 1                                     | -0.745242254                | -0.745242254                         | -0.745242254 | NA           | 1           | 0           |              |  |
|               | 0.998207054                           |                             |                                      |              |              |             |             |              |  |
| PPARGC1B      | ENSG00000155846.16                    | 0.456231345                 | 1                                    | 1            | 0.456231345  |             |             |              |  |
|               | Brain_Cortex                          | 0.456231345                 | Brain_Cortex                         | 1            | 1            | 1           |             | -0.74506679  |  |
|               | -0.74506679                           | -0.74506679                 | NA                                   | 1            | 0            | 0.998207054 |             |              |  |
| S100A16       | ENSG00000188643.10                    | 0.456442305                 | 4                                    | 3            | 0.210122724  |             |             |              |  |
|               | Brain_Cerebellar_Hemisphere           | 0.77820421                  | Brain_Anterior_cingulate_cortex_BA24 |              |              |             |             |              |  |
|               | 3.316942498                           | 0.019324472                 | 0.252056159                          |              | 0.281660024  |             |             | 1.253228051  |  |
|               | 0.744577872                           | 0.511013873                 | 3                                    | 0            | 0.998207054  |             |             |              |  |
| IKBKE         | ENSG00000263528.7                     | 0.456443108                 | 5                                    | 5            | 0.280245058  |             |             |              |  |
|               | Brain_Caudate_basal_ganglia           | 0.942600919                 | Brain_Anterior_cingulate_cortex_BA24 |              |              |             |             |              |  |
|               | 2.282243057                           | 0.145502036                 | 0.145502036                          |              | -1.079769001 |             |             | -0.072001243 |  |
|               | -0.618842637                          | 0.466285373                 | 5                                    | 0            | 0.998207054  |             |             |              |  |
| ANK3          | ENSG00000151150.21                    | 0.456466359                 | 1                                    | 1            | 0.456466359  |             |             |              |  |
|               | Brain_Hypothalamus                    | 0.456466359                 | Brain_Hypothalamus                   | 1            | 1            | 1           |             |              |  |
|               | -0.744678071                          | -0.744678071                | -0.744678071                         | NA           | 1            | 0           |             | 0.998207054  |  |
| AC106869.2    | ENSG00000226087.1                     | 0.456469165                 | 1                                    | 1            | 0.456469165  |             |             |              |  |
|               | Brain_Cortex                          | 0.456469165                 | Brain_Cortex                         | 1            | 1            | 1           |             | -0.74467343  |  |
|               | -0.74467343                           | -0.74467343                 | NA                                   | 1            | 0            | 0.998207054 |             |              |  |
| ZNF519        | ENSG00000175322.11                    | 0.456469673                 | 12                                   | 3            | 0.130740626  |             |             |              |  |
|               | Brain_Anterior_cingulate_cortex_BA24  | 0.539928776                 | Brain_Frontal_Cortex_BA9             |              |              |             |             |              |  |
|               | 10.43191513                           | 8.83E-18                    | 0.405506641                          |              | -1.511187738 |             |             | -0.612920698 |  |
|               | -1.151579656                          | 0.252147629                 | 3                                    | 0            | 0.998207054  |             |             |              |  |
| SUPT4H1       | ENSG00000213246.6                     | 0.456499876                 | 9                                    | 5            | 0.061873291  |             |             |              |  |
|               | Brain_Hypothalamus                    | 0.88529599                  | Brain_Spinal_cord_cervical_c-1       | 6.103800068  |              |             |             |              |  |
|               | 0.004986775                           | 0.483179499                 | -0.635389171                         |              | 1.867202673  |             |             | -0.119816731 |  |
|               | 0.819870737                           | 5                           | 0                                    | 0.998207054  |              |             |             |              |  |
| TMED7         | ENSG00000134970.13                    | 0.45657667                  | 1                                    | 1            | 0.45657667   |             |             |              |  |
|               | Brain_Anterior_cingulate_cortex_BA24  | 0.45657667                  |                                      |              |              |             |             |              |  |
|               | Brain_Anterior_cingulate_cortex_BA24  | 1                           | 1                                    | 1            | 0.744495654  |             |             |              |  |
|               | 0.744495654                           | 0.744495654                 | NA                                   | 1            | 0            | 0.998207054 |             |              |  |
| NFATC2IP      | ENSG00000176953.12                    | 0.456582585                 | 2                                    | 2            | 0.229537446  |             |             |              |  |
|               | Brain_Cortex                          | 0.529048806                 | Brain_Caudate_basal_ganglia          | 1.239015831  |              |             |             |              |  |
|               | 0.760984169                           | 0.760984169                 | 0.629458688                          |              | 1.201551231  |             |             | 0.91550496   |  |
|               | 0.404530516                           | 2                           | 0                                    | 0.998207054  |              |             |             |              |  |
| SULT1A2       | ENSG00000197165.10                    | 0.456676281                 | 13                                   | 3            | 0.141969453  |             |             |              |  |
|               | Brain_Cortex                          | 0.777563258                 | Brain_Cerebellar_Hemisphere          | 11.29694198  |              |             |             |              |  |

|            |                                       |                             |              |                                       |              |             |                  |              |
|------------|---------------------------------------|-----------------------------|--------------|---------------------------------------|--------------|-------------|------------------|--------------|
|            | 0.001919424                           | 0.490175558                 | 0.282495941  | 1.468496327                           | 1.066877131  |             |                  |              |
|            | 0.351817887                           | 3                           | 0            | 0.998207054                           |              |             |                  |              |
| BMPR1B-AS1 | ENSG00000249599.1                     | 0.456698326                 | 1            | 1                                     | 0.456698326  |             |                  |              |
|            | Brain_Caudate_basal_ganglia           | 0.456698326                 |              | Brain_Caudate_basal_ganglia           | 1            | 1           |                  |              |
|            | 1                                     | 0.744294504                 | 0.744294504  | 0.744294504                           | NA           | 1           | 0                |              |
|            | 0.998207054                           |                             |              |                                       |              |             |                  |              |
| FOS        | ENSG00000170345.9                     | 0.456833264                 | 1            | 1                                     | 0.456833264  |             |                  |              |
|            | Brain_Substantia_nigra                | 0.456833264                 |              | Brain_Substantia_nigra                | 1            | 1           |                  |              |
|            | 1                                     | -0.744071428                | -0.744071428 | -0.744071428                          | NA           | 1           | 0                |              |
|            | 0.998207054                           |                             |              |                                       |              |             |                  |              |
| SLC29A2    | ENSG00000174669.11                    | 0.456917664                 | 1            | 1                                     | 0.456917664  |             |                  |              |
|            | Brain_Nucleus_accumbens_basal_ganglia | 0.456917664                 |              |                                       |              |             |                  |              |
|            | Brain_Nucleus_accumbens_basal_ganglia | 1                           | 1            | 1                                     | 0.743931919  |             |                  |              |
|            | 0.743931919                           | 0.743931919                 | NA           | 1                                     | 0            | 0.998207054 |                  |              |
| ARHGEF33   | ENSG00000214694.10                    | 0.456977555                 | 3            | 3                                     | 0.126412969  |             |                  |              |
|            | Brain_Caudate_basal_ganglia           | 0.879253367                 |              | Brain_Hippocampus                     | 1.04637076   |             |                  |              |
|            | 0.955938298                           | 0.955938298                 | -1.528401151 | 0.513608733                           | -0.388902731 |             |                  |              |
|            | 1.041428444                           | 3                           | 0            | 0.998207054                           |              |             |                  |              |
| GSTM1      | ENSG00000134184.12                    | 0.457022433                 | 13           | 12                                    | 0.041039997  |             | Brain_Cerebellum |              |
|            | 0.765284572                           | Brain_Putamen_basal_ganglia | 5.027312003  | 0.109699377                           |              |             |                  |              |
|            | 0.17129474                            | -0.448826683                | 2.043125693  | 0.782537003                           | 0.670703868  |             | 12               |              |
|            | 0                                     | 0.998207054                 |              |                                       |              |             |                  |              |
| IRF7       | ENSG00000185507.19                    | 0.457241992                 | 3            | 3                                     | 0.188093529  |             | Brain_Cerebellum |              |
|            | 0.284082628                           | Brain_Cerebellar_Hemisphere | 1.929627517  | 0.22424807                            | 0.22424807   |             |                  |              |
|            | -1.31623992                           | -1.071193067                | -1.162227837 | 0.134114117                           | 3            | 0           |                  |              |
|            | 0.998207054                           |                             |              |                                       |              |             |                  |              |
| SLC04A1    | ENSG00000101187.15                    | 0.457300802                 | 2            | 2                                     | 0.257234229  |             |                  |              |
|            | Brain_Amygdala                        | 0.597685351                 |              | Brain_Cerebellum                      | 1.002289111  | 0.997710889 |                  |              |
|            | 0.997710889                           | -1.132952433                | -0.527732012 | -0.830342222                          | 0.427955464  |             |                  |              |
|            | 2                                     | 0                           | 0.998207054  |                                       |              |             |                  |              |
| FAM71E2    | ENSG00000180043.11                    | 0.457392314                 | 1            | 1                                     | 0.457392314  |             |                  |              |
|            | Brain_Cerebellum                      | 0.457392314                 |              | Brain_Cerebellum                      | 1            | 1           | 1                | -0.743147616 |
|            | -0.743147616                          | -0.743147616                | NA           | 1                                     | 0            | 0.998207054 |                  |              |
| MYO5C      | ENSG00000128833.12                    | 0.457413983                 | 2            | 2                                     | 0.263272043  |             |                  |              |
|            | Brain_Cerebellar_Hemisphere           | 0.467244115                 |              | Brain_Hippocampus                     | 1.155961627  |             |                  |              |
|            | 0.844038373                           | 0.844038373                 | -1.118690866 | -0.726970357                          | -0.922830611 |             |                  |              |
|            | 0.276988228                           | 2                           | 0            | 0.998207054                           |              |             |                  |              |
| C1orf52    | ENSG00000162642.13                    | 0.457421046                 | 3            | 3                                     | 0.171882805  |             |                  |              |
|            | Brain_Cerebellar_Hemisphere           | 0.595814587                 |              | Brain_Caudate_basal_ganglia           |              |             |                  |              |
|            | 1.884151084                           | 0.185098029                 | 0.185098029  | -1.366178942                          | 0.530428908  |             |                  |              |
|            | -0.51268647                           | 0.962417773                 | 3            | 0                                     | 0.998207054  |             |                  |              |
| FAM60A     | ENSG00000139146.13                    | 0.457510731                 | 2            | 2                                     | 0.26868458   |             | Brain_Cerebellum |              |
|            | 0.525831778                           | Brain_Cerebellar_Hemisphere | 1.046583621  | 0.953416379                           |              |             |                  |              |
|            | 0.953416379                           | -1.1060969                  | 0.634381657  | -0.235857622                          | 1.23070419   | 2           | 0                |              |
|            | 0.998207054                           |                             |              |                                       |              |             |                  |              |
| PAK5       | ENSG00000101349.16                    | 0.457548298                 | 2            | 2                                     | 0.215014074  |             | Brain_Cerebellum |              |
|            | 0.340887823                           | Brain_Cerebellar_Hemisphere | 1.839375324  | 0.160624676                           |              |             |                  |              |
|            | 0.160624676                           | -1.23989543                 | -0.952412499 | -1.096153964                          | 0.20328113   | 2           |                  |              |
|            | 0                                     | 0.998207054                 |              |                                       |              |             |                  |              |
| EEFSEC     | ENSG00000132394.10                    | 0.457593839                 | 7            | 3                                     | 0.4832329    |             |                  |              |
|            | Brain_Anterior_cingulate_cortex_BA24  | 0.940854569                 |              | Brain_Cortex                          |              |             |                  |              |
|            | 6.066265796                           | 0.007753024                 | 0.234246777  | -0.701112355                          | 0.483750051  |             |                  |              |
|            | -0.081642643                          | 0.471153769                 | 3            | 0                                     | 0.998207054  |             |                  |              |
| TNS3       | ENSG00000136205.16                    | 0.457673407                 | 5            | 4                                     | 0.184261158  |             |                  |              |
|            | Brain_Hypothalamus                    | 0.971295301                 |              | Brain_Putamen_basal_ganglia           | 2.55561185   |             |                  |              |
|            | 0.047807883                           | 0.511214839                 | -1.327748642 | 1.027402199                           | -0.072711106 |             |                  |              |
|            | 0.88686843                            | 4                           | 0            | 0.998207054                           |              |             |                  |              |
| TECR       | ENSG00000099797.13                    | 0.45770314                  | 4            | 2                                     | 0.267082983  |             |                  |              |
|            | Brain_Putamen_basal_ganglia           | 0.756006039                 |              | Brain_Nucleus_accumbens_basal_ganglia |              |             |                  |              |
|            | 3.153578811                           | 0.088262724                 | 0.657655294  | -0.631401405                          | 1.109805188  |             |                  |              |
|            | 0.351382052                           | 0.733246944                 | 2            | 0                                     | 0.998207054  |             |                  |              |
| ADCY8      | ENSG00000155897.9                     | 0.457715243                 | 2            | 2                                     | 0.211327269  |             | Brain_Amygdala   |              |

|               |                                       |              |              |                                       |              |             |              |
|---------------|---------------------------------------|--------------|--------------|---------------------------------------|--------------|-------------|--------------|
|               | 0.99931417                            | Brain_Cortex | 1.020562043  | 0.979437957                           | 0.979437957  |             |              |
|               | -1.249924116                          |              | -0.000859561 | -0.625391838                          | 0.883222017  | 2           | 0            |
|               | 0.998207054                           |              |              |                                       |              |             |              |
| LINC00941     | ENSG00000235884.3                     |              | 0.457740687  | 3                                     | 3            | 0.107359751 |              |
|               | Brain_Putamen_basal_ganglia           | 0.956511272  |              | Brain_Cortex                          | 1.217377007  |             |              |
|               | 0.84602638                            | 0.84602638   | 0.054532053  | 1.610174572                           | 0.617266153  |             | 0.86243456   |
|               | 3                                     | 0            | 0.998207054  |                                       |              |             |              |
| AK7           | ENSG00000140057.8                     |              | 0.457767594  | 2                                     | 2            | 0.211898566 |              |
|               | Brain_Frontal_Cortex_BA9              | 0.950955047  |              | Brain_Putamen_basal_ganglia           |              |             |              |
|               | 1.102008496                           | 0.897991504  | 0.897991504  | -1.248361871                          | 0.061507493  |             |              |
|               | -0.593427189                          | 0.92621751   | 2            | 0                                     | 0.998207054  |             |              |
| CTD-3234P18.6 | ENSG00000276071.1                     |              | 0.457808856  | 2                                     | 2            | 0.321087371 |              |
|               | Brain_Cerebellum                      | 0.664350359  |              | Brain_Nucleus_accumbens_basal_ganglia |              |             |              |
|               | 1.294892101                           | 0.705107899  | 0.705107899  | -0.992225838                          | 0.433914735  |             |              |
|               | -0.279155551                          | 1.00843367   | 2            | 0                                     | 0.998207054  |             |              |
| GPR20         | ENSG00000204882.3                     |              | 0.457816942  | 2                                     | 2            | 0.225409187 |              |
|               | Brain_Substantia_nigra                | 0.732948925  |              | Brain_Anterior_cingulate_cortex_BA24  |              |             |              |
|               | 1.030048275                           | 0.969951725  | 0.969951725  | -1.212269626                          | -0.341205444 |             |              |
|               | -0.776737535                          | 0.615935391  | 2            | 0                                     | 0.998207054  |             |              |
| HADH          | ENSG00000138796.16                    |              | 0.457913418  | 1                                     | 1            | 0.457913418 |              |
|               | Brain_Cerebellar_Hemisphere           | 0.457913418  |              | Brain_Cerebellar_Hemisphere           | 1            | 1           |              |
|               | 1                                     | -0.74228708  | -0.74228708  | -0.74228708                           | NA           | 1           | 0            |
|               | 0.998207054                           |              |              |                                       |              |             |              |
| IGLL1         | ENSG00000128322.6                     |              | 0.45796597   | 2                                     | 2            | 0.228017113 |              |
|               | Brain_Cerebellar_Hemisphere           | 0.350374975  |              | Brain_Cerebellum                      | 1.545406409  |             |              |
|               | 0.454593591                           | 0.454593591  | 0.933862209  | 1.20548244                            | 1.069672325  |             |              |
|               | 0.192064507                           | 2            | 0            | 0.998207054                           |              |             |              |
| SELENOS       | ENSG00000131871.14                    |              | 0.458123177  | 1                                     | 1            | 0.458123177 |              |
|               | Brain_Caudate_basal_ganglia           | 0.458123177  |              | Brain_Caudate_basal_ganglia           | 1            | 1           |              |
|               | 1                                     | -0.741940845 | -0.741940845 | -0.741940845                          | NA           | 1           | 0            |
|               | 0.998207054                           |              |              |                                       |              |             |              |
| ECH1          | ENSG00000104823.8                     |              | 0.458168723  | 7                                     | 6            | 0.089840563 |              |
|               | Brain_Nucleus_accumbens_basal_ganglia | 0.954667303  |              | Brain_Hippocampus                     |              |             |              |
|               | 4.332431265                           | 0.142273706  | 0.222354936  | -0.608232505                          | 1.696239339  |             |              |
|               | 0.589797876                           | 0.717949436  | 6            | 0                                     | 0.998207054  |             |              |
| LINC01977     | ENSG00000262772.1                     |              | 0.458240728  | 1                                     | 1            | 0.458240728 |              |
|               | Brain_Amygdala                        | 0.458240728  |              | Brain_Amygdala                        | 1            | 1           | 1            |
|               | -0.741746851                          | -0.741746851 | NA           | 1                                     | 0            | 0.998207054 | -0.741746851 |
| ZNF697        | ENSG00000143067.4                     |              | 0.458368459  | 8                                     | 8            | 0.18711097  |              |
|               | Brain_Cerebellar_Hemisphere           | 0.789601453  |              | Brain_Amygdala                        | 2.92831883   |             |              |
|               | 0.106240079                           | 0.106240079  | -1.230684218 | 1.319173934                           | 0.180396377  |             |              |
|               | 0.924658977                           | 8            | 0            | 0.998207054                           |              |             |              |
| RP11-143M1.3  | ENSG00000227917.2                     |              | 0.458376664  | 1                                     | 1            | 0.458376664 |              |
|               | Brain_Putamen_basal_ganglia           | 0.458376664  |              | Brain_Putamen_basal_ganglia           | 1            | 1           |              |
|               | 1                                     | -0.741522551 | -0.741522551 | -0.741522551                          | NA           | 1           | 0            |
|               | 0.998207054                           |              |              |                                       |              |             |              |
| C1GALT1       | ENSG00000106392.10                    |              | 0.458405352  | 13                                    | 2            | 0.172015067 |              |
|               | Brain_Frontal_Cortex_BA9              | 0.725215059  |              | Brain_Putamen_basal_ganglia           |              |             |              |
|               | 11.62833155                           | 0.001678234  | 0.73194239   | -1.365757573                          | -0.351497619 |             |              |
|               | -0.899472868                          | 0.260922555  | 2            | 0                                     | 0.998207054  |             |              |
| RP11-212I21.2 | ENSG00000260135.6                     |              | 0.45843236   | 1                                     | 1            | 0.45843236  |              |
|               | Brain_Spinal_cord_cervical_c-1        | 0.45843236   |              | Brain_Spinal_cord_cervical_c-1        | 1            | 1           |              |
|               | 1                                     | 1            | 0.74143066   | 0.74143066                            | 0.74143066   | NA          | 1            |
|               | 0.998207054                           |              |              |                                       |              |             |              |
| WNT10B        | ENSG00000169884.13                    |              | 0.458454365  | 4                                     | 4            | 0.251066062 |              |
|               | Brain_Anterior_cingulate_cortex_BA24  | 0.87218283   |              | Brain_Frontal_Cortex_BA9              |              |             |              |
|               | 2.887823602                           | 0.106966293  | 0.106966293  | -1.147763856                          | 0.428377422  |             |              |
|               | -0.288112521                          | 0.650332905  | 4            | 0                                     | 0.998207054  |             |              |
| RP11-48B3.3   | ENSG00000254162.1                     |              | 0.458578706  | 1                                     | 1            | 0.458578706 |              |
|               | Brain_Cerebellum                      | 0.458578706  |              | Brain_Cerebellum                      | 1            | 1           | 1            |
|               | 0.74118924                            | 0.74118924   | NA           | 1                                     | 0            | 0.998207054 | 0.74118924   |
|               | 0.998207054                           |              |              |                                       |              |             |              |
| TMC1          | ENSG00000165091.15                    |              | 0.458836915  | 3                                     | 3            | 0.128698449 |              |
|               | Brain_Hippocampus                     |              |              | Brain_Cortex                          |              |             |              |
|               | 0.884604057                           |              | 1.330205474  | 0.475473735                           |              |             |              |

|              |                                       |                             |                             |              |                              |                  |   |
|--------------|---------------------------------------|-----------------------------|-----------------------------|--------------|------------------------------|------------------|---|
|              | 0.475473735                           | -1.519254494                | 0.440646849                 | -0.311157452 | 1.056624634                  |                  |   |
|              | 3                                     | 0                           | 0.998207054                 |              |                              |                  |   |
| TRIAPI1      | ENSG00000170855.3                     | 0.458873233                 | 1                           | 1            | 0.458873233                  |                  |   |
|              | Brain_Substantia_nigra                | 0.458873233                 |                             |              | Brain_Substantia_nigra       | 1                | 1 |
|              | 1                                     | 0.740703507                 | 0.740703507                 | 0.740703507  | NA                           | 1                | 0 |
|              | 0.998207054                           |                             |                             |              |                              |                  |   |
| RP11-589B3.6 | ENSG00000226676.1                     | 0.45914576                  | 5                           | 5            | 0.050363416                  |                  |   |
|              | Brain_Frontal_Cortex_BA9              | 0.902296684                 |                             |              | Brain_Cerebellum1.379554568  |                  |   |
|              | 0.695560044                           | 0.695560044                 | -0.459761092                | 1.956864374  | 0.574374006                  |                  |   |
|              | 0.963215412                           | 5                           | 0                           | 0.998207054  |                              |                  |   |
| ENG          | ENSG00000106991.13                    | 0.459189456                 | 1                           | 1            | 0.459189456                  |                  |   |
|              | Brain_Nucleus_accumbens_basal_ganglia | 0.459189456                 |                             |              |                              |                  |   |
|              | Brain_Nucleus_accumbens_basal_ganglia | 1                           | 1                           | 1            | -0.740182185                 |                  |   |
|              | -0.740182185                          | -0.740182185                | NA                          | 1            | 0                            | 0.998207054      |   |
| DLST         | ENSG00000119689.14                    | 0.459293993                 | 2                           | 2            | 0.221065113                  |                  |   |
|              | Brain_Caudate_basal_ganglia           | 0.610542037                 |                             |              | Brain_Cerebellum1.22322533   | 0.77677467       |   |
|              | 0.77677467                            | -0.509299888                | 1.223700812                 | 0.357200462  | 1.225416547                  | 2                |   |
|              | 0                                     | 0.998207054                 |                             |              |                              |                  |   |
| LCN8         | ENSG00000204001.9                     | 0.459446682                 | 5                           | 1            | 0.437461706                  | Brain_Cerebellum |   |
|              | 0.495156605                           | Brain_Frontal_Cortex_BA9    | 4.976728064                 | 0.000325738  |                              |                  |   |
|              | 4.976728064                           | 0.682130233                 | 0.77648664                  | 0.738019176  | 0.047944589                  | 1                |   |
|              | 0                                     | 0.998207054                 |                             |              |                              |                  |   |
| EGFR         | ENSG00000146648.17                    | 0.459452115                 | 5                           | 5            | 0.23204009                   |                  |   |
|              | Brain_Caudate_basal_ganglia           | 0.524826372                 |                             |              | Brain_Cortex                 | 3.00654255       |   |
|              | 0.181784251                           | 0.181784251                 | -1.195120151                | 1.149823284  | 0.450077627                  |                  |   |
|              | 0.941669635                           | 0                           | 0.998207054                 |              |                              |                  |   |
| NECAB2       | ENSG00000103154.9                     | 0.459496514                 | 4                           | 4            | 0.130858379                  |                  |   |
|              | Brain_Caudate_basal_ganglia           | 0.896865953                 |                             |              | Brain_Putamen_basal_ganglia  |                  |   |
|              | 1.515800141                           | 0.487838648                 | 0.487838648                 | -1.510725593 | 0.403242005                  |                  |   |
|              | -0.493318081                          | 0.822635813                 | 4                           | 0            | 0.998207054                  |                  |   |
| XKR6         | ENSG00000171044.10                    | 0.459602504                 | 1                           | 1            | 0.459602504                  |                  |   |
|              | Brain_Anterior_cingulate_cortex_BA24  | 0.459602504                 |                             |              |                              |                  |   |
|              | Brain_Anterior_cingulate_cortex_BA24  | 1                           | 1                           | 1            | -0.739501541                 |                  |   |
|              | -0.739501541                          | -0.739501541                | NA                          | 1            | 0                            | 0.998207054      |   |
| NPR2         | ENSG00000159899.14                    | 0.459625765                 | 1                           | 1            | 0.459625765                  | Brain_Cerebellum |   |
|              | 0.459625765                           | Brain_Cerebellum1           | 1                           | 1            | 0.739463221                  | 0.739463221      |   |
|              | 0.739463221                           | NA                          | 1                           | 0            | 0.998207054                  |                  |   |
| KCNMB4       | ENSG00000135643.4                     | 0.459778312                 | 7                           | 5            | 0.121917592                  |                  |   |
|              | Brain_Caudate_basal_ganglia           | 0.936983108                 |                             |              | Brain_Hypothalamus           | 3.798126952      |   |
|              | 0.07829936                            | 0.206912252                 | -1.546774661                | 0.923094869  | -0.494913693                 |                  |   |
|              | 1.034886276                           | 5                           | 0                           | 0.998207054  |                              |                  |   |
| ANKRD13D     | ENSG00000172932.14                    | 0.459932365                 | 1                           | 1            | 0.459932365                  |                  |   |
|              | Brain_Cerebellar_Hemisphere           | 0.459932365                 |                             |              | Brain_Cerebellar_Hemisphere1 | 1                | 1 |
|              | 1                                     | 0.738958224                 | 0.738958224                 | 0.738958224  | NA                           | 1                | 0 |
|              | 0.998207054                           |                             |                             |              |                              |                  |   |
| ACTR2        | ENSG00000138071.13                    | 0.459940178                 | 4                           | 4            | 0.442554678                  |                  |   |
|              | Brain_Nucleus_accumbens_basal_ganglia | 0.854833281                 |                             |              | Brain_Caudate_basal_ganglia  |                  |   |
|              | 3.259877019                           | 0.16743304                  | 0.16743304                  | -0.7678864   | 0.338732958                  | -0.180169805     |   |
|              | 0.526988148                           | 4                           | 0                           | 0.998207054  |                              |                  |   |
| CEP152       | ENSG00000103995.13                    | 0.46003784                  | 3                           | 2            | 0.24221131                   | Brain_Cortex     |   |
|              | 0.692948881                           | Brain_Cerebellar_Hemisphere | 1.940416289                 | 0.059157558  |                              |                  |   |
|              | 1.000426153                           | -1.169477478                | -0.394856383                | -0.676078585 | 0.428688315                  |                  |   |
|              | 2                                     | 0                           | 0.998207054                 |              |                              |                  |   |
| SNRPN        | ENSG00000128739.21                    | 0.460078595                 | 2                           | 2            | 0.212740772                  | Brain_Cortex     |   |
|              | 0.980983399                           | Brain_Caudate_basal_ganglia | 1.014084093                 | 0.985915907  |                              |                  |   |
|              | 0.985915907                           | -1.24606435                 | -0.023836032                | -0.634950191 | 0.864245932                  |                  |   |
|              | 2                                     | 0                           | 0.998207054                 |              |                              |                  |   |
| RFESD        | ENSG00000175449.13                    | 0.460164778                 | 2                           | 2            | 0.245557824                  |                  |   |
|              | Brain_Caudate_basal_ganglia           | 0.72196739                  | Brain_Cerebellar_Hemisphere | 1.613535921  |                              |                  |   |
|              | 0.386464079                           | 0.386464079                 | -0.355830656                | 1.161206765  | 0.402688055                  |                  |   |
|              | 1.072707448                           | 2                           | 0                           | 0.998207054  |                              |                  |   |
| HIGD2A       | ENSG00000146066.2                     | 0.46036684                  | 1                           | 1            | 0.46036684                   |                  |   |

|             |                                       |                                      |                                       |              |                             |              |                |
|-------------|---------------------------------------|--------------------------------------|---------------------------------------|--------------|-----------------------------|--------------|----------------|
|             | Brain_Frontal_Cortex_BA9              | 0.46036684                           | Brain_Frontal_Cortex_BA9              | 1            | 1                           | 1            |                |
|             | 0.738242929                           | 0.738242929                          | 0.738242929                           | NA           | 1                           | 0            | 0.998207054    |
| ZADH2       | ENSG00000180011.6                     | 0.460465447                          | 2                                     | 1            | 0.383618555                 |              | Brain_Cortex   |
|             | 0.557519908                           | Brain_Spinal_cord_cervical_c-1       |                                       |              | 1.950495426                 |              | 0.049504574    |
|             | 1.950495426                           | -0.871248369                         | -0.586529255                          |              | -0.728888812                |              | 0.201326817    |
|             | 1                                     | 0                                    | 0.998207054                           |              |                             |              |                |
| CTC-534A2.2 | ENSG00000253251.2                     | 0.460519312                          | 3                                     | 3            | 0.166845591                 |              |                |
|             | Brain_Cerebellum                      | 0.77356276                           | Brain_Nucleus_accumbens_basal_ganglia | 1.757867846  |                             |              |                |
|             | 0.24774644                            | 0.24774644                           | -1.382410837                          |              | -0.287717805                |              | -0.780582908   |
|             | 0.555421355                           | 3                                    | 0                                     | 0.998207054  |                             |              |                |
| GTF3C4      | ENSG00000125484.11                    | 0.46059517                           | 2                                     | 2            | 0.227203817                 |              |                |
|             | Brain_Nucleus_accumbens_basal_ganglia | 0.799413444                          |                                       |              | Brain_Cerebellum            |              |                |
|             | 1.040799948                           | 0.959200052                          | 0.959200052                           |              | -0.25410629                 |              | 1.207593094    |
|             | 0.476743402                           | 1.033577547                          | 2                                     | 0            | 0.998207054                 |              |                |
| CARF        | ENSG00000138380.17                    | 0.460598896                          | 3                                     | 3            | 0.132533709                 |              |                |
|             | Brain_Spinal_cord_cervical_c-1        | 0.678471047                          |                                       |              | Brain_Cerebellum            | 2.258600846  |                |
|             | 0.250627509                           | 0.250627509                          | 0.414550424                           |              | 1.504185114                 |              | 0.821535207    |
|             | 0.594827189                           | 3                                    | 0                                     | 0.998207054  |                             |              |                |
| SYNE4       | ENSG00000181392.14                    | 0.460672207                          | 1                                     | 1            | 0.460672207                 |              |                |
|             | Brain_Caudate_basal_ganglia           | 0.460672207                          |                                       |              | Brain_Caudate_basal_ganglia | 1            | 1              |
|             | 1                                     | 0.737740417                          | 0.737740417                           | 0.737740417  | NA                          | 1            | 0              |
|             | 0.998207054                           |                                      |                                       |              |                             |              |                |
| EMC6        | ENSG00000127774.6                     | 0.460761647                          | 1                                     | 1            | 0.460761647                 |              |                |
|             | Brain_Cerebellar_Hemisphere           | 0.460761647                          |                                       |              | Brain_Cerebellar_Hemisphere | 1            | 1              |
|             | 1                                     | 0.737593268                          | 0.737593268                           | 0.737593268  | NA                          | 1            | 0              |
|             | 0.998207054                           |                                      |                                       |              |                             |              |                |
| CISH        | ENSG00000114737.15                    | 0.460789206                          | 1                                     | 1            | 0.460789206                 |              | Brain_Amygdala |
|             | 0.460789206                           | Brain_Amygdala                       | 1                                     | 1            | 1                           | -0.737547932 | -0.737547932   |
|             | -0.737547932                          | NA                                   | 1                                     | 0            | 0.998207054                 |              |                |
| ILDR2       | ENSG00000143195.12                    | 0.460820514                          | 1                                     | 1            | 0.460820514                 |              |                |
|             | Brain_Frontal_Cortex_BA9              | 0.460820514                          |                                       |              | Brain_Frontal_Cortex_BA9    | 1            | 1              |
|             | 1                                     | -0.737496429                         | -0.737496429                          | -0.737496429 | NA                          | 1            | 0              |
|             | 0.998207054                           |                                      |                                       |              |                             |              |                |
| ANTXR2      | ENSG00000163297.16                    | 0.460860695                          | 2                                     | 2            | 0.255895904                 |              |                |
|             | Brain_Frontal_Cortex_BA9              | 0.56283845                           | Brain_Anterior_cingulate_cortex_BA24  |              |                             |              |                |
|             | 1.062674686                           | 0.937325314                          | 0.937325314                           |              | 0.578630603                 |              | 1.136144954    |
|             | 0.857387779                           | 0.394222178                          | 2                                     | 0            | 0.998207054                 |              |                |
| GNRH1       | ENSG00000147437.9                     | 0.460876244                          | 1                                     | 1            | 0.460876244                 |              |                |
|             | Brain_Anterior_cingulate_cortex_BA24  | 0.460876244                          |                                       |              |                             |              |                |
|             | Brain_Anterior_cingulate_cortex_BA24  | 1                                    | 1                                     | 1            | -0.737404756                |              |                |
|             | -0.737404756                          | -0.737404756                         | NA                                    | 1            | 0                           | 0.998207054  |                |
| DCLK2       | ENSG00000170390.15                    | 0.460893701                          | 5                                     | 4            | 0.111914762                 |              |                |
|             | Brain_Nucleus_accumbens_basal_ganglia | 0.576145783                          |                                       |              | Brain_Cortex                |              |                |
|             | 3.257435902                           | 0.09972231                           | 0.298567297                           |              | -1.589645381                |              | 0.559340601    |
|             | -0.853089198                          | 0.882196111                          | 4                                     | 0            | 0.998207054                 |              |                |
| RIT2        | ENSG00000152214.12                    | 0.460907066                          | 3                                     | 3            | 0.170746016                 |              |                |
|             | Brain_Caudate_basal_ganglia           | 0.985763289                          |                                       |              | Brain_Substantia_nigra      |              |                |
|             | 1.718784342                           | 0.34436888                           | 0.34436888                            | 0.017844018  | 1.369810651                 |              |                |
|             | 0.527395968                           | 0.734882061                          | 3                                     | 0            | 0.998207054                 |              |                |
| PDZD8       | ENSG00000165650.11                    | 0.460977027                          | 13                                    | 3            | 0.068113932                 |              | Brain_Cortex   |
|             | 0.325585765                           | Brain_Anterior_cingulate_cortex_BA24 | 10.8865449                            |              | 0.003440412                 |              |                |
|             | 0.476758878                           | 0.983044037                          | 1.824252338                           |              | 1.384806117                 |              | 0.24994627     |
|             | 0                                     | 0.998207054                          |                                       |              |                             |              | 3              |
| MUC5B       | ENSG00000117983.17                    | 0.461074771                          | 2                                     | 2            | 0.234302179                 |              | Brain_Cortex   |
|             | 0.351503598                           | Brain_Frontal_Cortex_BA9             | 1.910525919                           |              | 0.089474081                 |              |                |
|             | 0.089474081                           | -1.189349463                         | -0.931676765                          |              | -1.060513114                |              | 0.182202112    |
|             | 2                                     | 0                                    | 0.998207054                           |              |                             |              |                |
| USP31       | ENSG00000103404.14                    | 0.461221866                          | 5                                     | 4            | 0.120289054                 |              |                |
|             | Brain_Frontal_Cortex_BA9              | 0.892555705                          |                                       |              | Brain_Substantia_nigra      |              |                |
|             | 2.119273151                           | 0.041089184                          | 0.609566138                           |              | -0.746080034                |              | 1.553561478    |
|             | 0.47599319                            | 0.966078023                          | 4                                     | 0            | 0.998207054                 |              |                |
| GATB        | ENSG00000059691.11                    | 0.461277862                          | 6                                     | 3            | 0.167102539                 |              |                |



|         |                                       |                  |              |                                |              |              |  |                  |
|---------|---------------------------------------|------------------|--------------|--------------------------------|--------------|--------------|--|------------------|
|         | Brain_Hippocampus                     | 0.803881175      |              | Brain_Frontal_Cortex_BA9       | 4.599620391  |              |  |                  |
|         | 0.010192483                           | 0.465741965      |              | 0.248327304                    | 1.381574009  |              |  | 1.004356049      |
|         | 0.395699347                           | 3                | 0            | 0.998207054                    |              |              |  |                  |
| ZNF324  | ENSG00000083812.11                    | 0.461447341      |              | 6                              | 6            | 0.093865312  |  |                  |
|         | Brain_Cerebellar_Hemisphere           | 0.909085732      |              | Brain_Cerebellum               | 2.402999637  |              |  |                  |
|         | 0.393727715                           | 0.393727715      |              | -0.274359538                   | 1.675351372  |              |  | 0.570372656      |
|         | 0.771398315                           | 6                | 0            | 0.998207054                    |              |              |  |                  |
| TRIM47  | ENSG00000132481.6                     | 0.462003357      |              | 6                              | 5            | 0.054038321  |  |                  |
|         | Brain_Cerebellum                      | 0.575698608      |              | Brain_Putamen_basal_ganglia    | 3.406241588  |              |  |                  |
|         | 0.02610169                            | 0.197378138      |              | -1.92652927                    | -0.559678707 |              |  | -1.275890797     |
|         | 0.512935491                           | 5                | 0            | 0.998207054                    |              |              |  |                  |
| SFRP1   | ENSG00000104332.11                    | 0.462014868      |              | 4                              | 4            | 0.107801554  |  | Brain_Amygdala   |
|         | 0.893377629                           | Brain_Cerebellum | 1.899751854  |                                | 0.098431956  |              |  | 0.098431956      |
|         | -0.574687708                          | 1.60815355       | 0.552943282  |                                | 0.966422093  | 4            |  | 0                |
|         | 0.998207054                           |                  |              |                                |              |              |  |                  |
| TREH    | ENSG00000118094.11                    | 0.462118844      |              | 1                              | 1            | 0.462118844  |  |                  |
|         | Brain_Cerebellar_Hemisphere           | 0.462118844      |              | Brain_Cerebellar_Hemisphere    | 1            | 1            |  |                  |
|         | 1                                     | -0.735362351     | -0.735362351 | -0.735362351                   | NA           | 1            |  | 0                |
|         | 0.998207054                           |                  |              |                                |              |              |  |                  |
| MPP2    | ENSG00000108852.14                    | 0.462139956      |              | 7                              | 6            | 0.093068935  |  |                  |
|         | Brain_Frontal_Cortex_BA9              | 0.919848361      |              | Brain_Cerebellar_Hemisphere    |              |              |  |                  |
|         | 2.917099832                           | 0.073535017      |              | 0.286293823                    | -1.679426589 |              |  | 0.131879023      |
|         | -0.845436786                          | 0.750545439      |              | 6                              | 0            | 0.998207054  |  |                  |
| PHKB    | ENSG00000102893.15                    | 0.462239866      |              | 1                              | 1            | 0.462239866  |  | Brain_Cerebellum |
|         | 0.462239866                           | Brain_Cerebellum | 1            | 1                              | 1            | -0.735163598 |  | -0.735163598     |
|         | -0.735163598                          | NA               | 1            | 0                              | 0.998207054  |              |  |                  |
| LCE1A   | ENSG00000186844.5                     | 0.462296101      |              | 1                              | 1            | 0.462296101  |  |                  |
|         | Brain_Spinal_cord_cervical_c-1        | 0.462296101      |              | Brain_Spinal_cord_cervical_c-1 |              |              |  |                  |
|         | 1                                     | 1                | 1            | 0.735071253                    | 0.735071253  |              |  | 0.735071253      |
|         | 0.998207054                           |                  |              |                                |              |              |  | NA               |
|         |                                       |                  |              |                                |              |              |  | 1                |
|         |                                       |                  |              |                                |              |              |  | 0                |
| DENND5B | ENSG00000170456.15                    | 0.462305018      |              | 2                              | 2            | 0.32971708   |  |                  |
|         | Brain_Nucleus_accumbens_basal_ganglia | 0.388601335      |              | Brain_Frontal_Cortex_BA9       |              |              |  |                  |
|         | 1.098273486                           | 0.901726514      |              | 0.901726514                    | 0.862156624  |              |  | 0.974683903      |
|         | 0.918420264                           | 0.079568802      |              | 2                              | 0            | 0.998207054  |  |                  |
| CHMP7   | ENSG00000147457.13                    | 0.462307404      |              | 3                              | 3            | 0.332419245  |  |                  |
|         | Brain_Cerebellar_Hemisphere           | 0.874090583      |              | Brain_Cerebellum               | 1.869782316  |              |  |                  |
|         | 0.155136128                           | 0.155136128      |              | -0.969252455                   | 0.299110555  |              |  | -0.276202222     |
|         | 0.642326057                           | 3                | 0            | 0.998207054                    |              |              |  |                  |
| SF3B1   | ENSG00000115524.15                    | 0.46233296       |              | 4                              | 3            | 0.131229262  |  |                  |
|         | Brain_Caudate_basal_ganglia           | 0.625414663      |              | Brain_Cortex                   | 3.380364636  |              |  |                  |
|         | 0.063350364                           | 0.130485592      |              | -1.509272098                   | -0.488190853 |              |  | -0.984288314     |
|         | 0.439560359                           | 3                | 0            | 0.998207054                    |              |              |  |                  |
| WIPI2   | ENSG00000157954.14                    | 0.462467103      |              | 2                              | 2            | 0.244421871  |  |                  |
|         | Brain_Putamen_basal_ganglia           | 0.662359387      |              | Brain_Cortex                   | 1.00318178   | 0.99681822   |  |                  |
|         | 0.99681822                            | -1.164005282     |              | 0.436658008                    | -0.363673637 |              |  | 1.131839867      |
|         | 0                                     | 0.998207054      |              |                                |              |              |  | 2                |
| LEPR    | ENSG00000116678.19                    | 0.462547656      |              | 4                              | 4            | 0.099589059  |  | Brain_Cerebellum |
|         | 0.982050358                           | Brain_Cortex     | 2.654461175  |                                | 0.233019134  |              |  | 0.233019134      |
|         | -0.022498439                          | 1.646849133      |              | 0.963440773                    | 0.742950167  |              |  | 4                |
|         | 0.998207054                           |                  |              |                                |              |              |  | 0                |
| UBE2N   | ENSG00000177889.9                     | 0.462578552      |              | 2                              | 2            | 0.278066753  |  |                  |
|         | Brain_Frontal_Cortex_BA9              | 0.41280672       |              | Brain_Cerebellar_Hemisphere    | 1.210218516  |              |  |                  |
|         | 0.789781484                           | 0.789781484      |              | -1.084672452                   | -0.818964409 |              |  | -0.95181843      |
|         | 0.187883959                           | 2                | 0            | 0.998207054                    |              |              |  |                  |
| NAT6    | ENSG00000243477.5                     | 0.462645618      |              | 7                              | 7            | 0.095689857  |  |                  |
|         | Brain_Frontal_Cortex_BA9              | 0.954456575      |              | Brain_Hypothalamus             | 1.706566217  |              |  |                  |
|         | 0.427272302                           | 0.427272302      |              | -1.597655654                   | 1.666118285  |              |  | -0.066268512     |
|         | 1.065643266                           | 7                | 0            | 0.998207054                    |              |              |  |                  |
| PDDC1   | ENSG00000177225.16                    | 0.462724095      |              | 2                              | 2            | 0.214948185  |  |                  |
|         | Brain_Frontal_Cortex_BA9              | 0.965468193      |              | Brain_Spinal_cord_cervical_c-1 |              |              |  |                  |
|         | 1.012561221                           | 0.987438779      |              | 0.987438779                    | 0.043292722  |              |  | 1.240073566      |
|         | 0.641683144                           | 0.84625185       | 2            | 0                              | 0.998207054  |              |  |                  |

PPP1R1B ENSG00000131771.13 0.463013686 1 1 0.463013686  
 Brain\_Cerebellar\_Hemisphere 0.463013686 Brain\_Cerebellar\_Hemisphere 1 1  
 1 -0.733893438 -0.733893438 -0.733893438 NA 1 0  
 0.998207054  
 G6PC3 ENSG00000141349.8 0.463039771 6 3 0.117597073  
 Brain\_Caudate\_basal\_ganglia 0.63721194 Brain\_Cerebellar\_Hemisphere 4.667267872  
 0.004316314 0.405043791 0.471600542 1.564939598 0.935856316  
 0.490423871 3 0 0.998207054  
 LARP4B ENSG00000107929.14 0.463051592 1 1 0.463051592  
 Brain\_Cerebellar\_Hemisphere 0.463051592 Brain\_Cerebellar\_Hemisphere 1 1  
 1 0.73383125 0.73383125 0.73383125 NA 1 0 0.998207054  
 LRFN1 ENSG00000128011.4 0.463058802 2 2 0.228797448 Brain\_Cerebellum  
 0.991707339 Brain\_Putamen\_basal\_ganglia 1.235611395 0.764388605  
 0.764388605 0.010393496 1.203462362 0.606927929 0.843627085  
 2 0 0.998207054  
 CCDC167 ENSG00000198937.8 0.46309153 13 3 0.066096354  
 Brain\_Putamen\_basal\_ganglia 0.68930772 Brain\_Cortex 11.05868414  
 0.000970279 0.545606679 -1.837769659 -0.39979472 -1.316305197  
 0.333234244 3 0 0.998207054  
 TNS2 ENSG00000111077.17 0.463194249 12 7 0.06540244 Brain\_Cerebellum  
 0.993153681 Brain\_Amygdala 5.679855582 0.000967508 0.290226905  
 -0.782068237 1.84249731 0.483619501 0.881801676 7 0  
 0.998207054  
 RP3-395M20.12 ENSG00000272449.1 0.46319941 2 2 0.217172329  
 Brain\_Cerebellum 0.840884052 Brain\_Spinal\_cord\_cervical\_c-1 1.059611894  
 0.940388106 0.940388106 -1.234082056 0.2007628 -0.516659628  
 1.014588527 2 0 0.998207054  
 CIB4 ENSG00000157884.10 0.463275458 1 1 0.463275458 Brain\_Cerebellum  
 0.463275458 Brain\_Cerebellum 1 1 1 -0.733464031 -0.733464031  
 -0.733464031 NA 1 0 0.998207054  
 AC007879.4 ENSG00000225916.1 0.463328794 2 2 0.217860207  
 Brain\_Hippocampus 0.872620291 Brain\_Caudate\_basal\_ganglia 1.014710872  
 0.985289128 0.985289128 -1.23223796 0.160331062 -0.535953449  
 0.984694999 2 0 0.998207054  
 CHRNA4 ENSG00000101204.16 0.463332233 7 7 0.049026039  
 Brain\_Nucleus\_accumbens\_basal\_ganglia 0.812679866 Brain\_Cerebellar\_Hemisphere  
 2.193000678 0.450048225 0.450048225 -1.968365148 1.751992119  
 -0.453756605 1.128020218 7 0 0.998207054  
 CYB5D2 ENSG00000167740.9 0.463335297 1 1 0.463335297  
 Brain\_Spinal\_cord\_cervical\_c-1 0.463335297 Brain\_Spinal\_cord\_cervical\_c-1  
 1 1 1 0.73336589 0.73336589 0.73336589 NA 1 0 0.998207054  
 CD59 ENSG00000085063.14 0.46353922 9 6 0.213597697  
 Brain\_Putamen\_basal\_ganglia 0.77616814 Brain\_Substantia\_nigra 4.675349336  
 1.12E-06 0.481227649 -0.876344858 1.243733406 0.041240465  
 0.679740372 6 0 0.998207054  
 ARHGAP8 ENSG00000241484.9 0.463653077 1 1 0.463653077  
 Brain\_Hypothalamus 0.463653077 Brain\_Hypothalamus 1 1 1  
 -0.732844827 -0.732844827 -0.732844827 NA 1 0 0.998207054  
 NSA2 ENSG00000164346.9 0.463690531 13 1 0.358465358  
 Brain\_Substantia\_nigra 0.532270462 Brain\_Cortex 12.91233147  
 7.42E-06 12.91233147 0.624543881 0.918293254 0.730606083  
 0.070994463 1 0 0.998207054  
 HPR ENSG00000261701.6 0.463763229 13 7 0.258679184  
 Brain\_Hippocampus 0.95936811 Brain\_Anterior\_cingulate\_cortex\_BA24  
 7.591525452 0.021878735 0.281679588 -1.129518466 0.820848855  
 -0.491284376 0.580440197 7 0 0.998207054  
 RP4-614C10.2 ENSG00000283196.1 0.463788504 3 2 0.217081391  
 Brain\_Anterior\_cingulate\_cortex\_BA24 0.942330195 Brain\_Frontal\_Cortex\_BA9  
 2.001629923 3.25E-06 0.99836683 -0.085801575 1.234326161  
 0.358727719 0.75832036 2 0 0.998207054  
 ZNF155 ENSG00000204920.10 0.464064941 6 6 0.105030734  
 Brain\_Nucleus\_accumbens\_basal\_ganglia 0.828579215 Brain\_Cortex

|           |                                      |                             |                                      |              |              |                  |             |             |   |
|-----------|--------------------------------------|-----------------------------|--------------------------------------|--------------|--------------|------------------|-------------|-------------|---|
|           | 2.431104336                          | 0.344923622                 | 0.344923622                          | -1.620938942 | 0.376258651  |                  |             |             |   |
|           | -0.464494874                         | 0.653413453                 | 6                                    | 0            | 0.998207054  |                  |             |             |   |
| RHOBTB3   | ENSG00000164292.12                   | 0.464168676                 | 1                                    | 1            | 0.464168676  |                  |             |             |   |
|           | Brain_Caudate_basal_ganglia          | 0.464168676                 | Brain_Caudate_basal_ganglia          | 1            | 1            |                  |             |             |   |
|           | 1                                    | 0.731999822                 | 0.731999822                          | 0.731999822  | NA           | 1                | 0           |             |   |
|           | 0.998207054                          |                             |                                      |              |              |                  |             |             |   |
| TEX30     | ENSG00000151287.16                   | 0.464174068                 | 1                                    | 1            | 0.464174068  | Brain_Cerebellum |             |             |   |
|           | 0.464174068                          | Brain_Cerebellum            | 1                                    | 1            | -0.731990989 | -0.731990989     |             |             |   |
|           | -0.731990989                         | NA                          | 1                                    | 0            | 0.998207054  |                  |             |             |   |
| KLHL36    | ENSG00000135686.12                   | 0.464213019                 | 11                                   | 6            | 0.086527576  |                  |             |             |   |
|           | Brain_Cortex                         | 0.561263197                 | Brain_Hippocampus                    | 6.677751024  |              |                  |             |             |   |
|           | 0.011352881                          | 0.313640662                 | -0.872146368                         | 1.714006261  | 0.64863763   |                  |             |             |   |
|           | 0.776040588                          | 6                           | 0                                    | 0.998207054  |              |                  |             |             |   |
| SRI       | ENSG00000075142.13                   | 0.464224826                 | 1                                    | 1            | 0.464224826  |                  |             |             |   |
|           | Brain_Spinal_cord_cervical_c-1       | 0.464224826                 | Brain_Spinal_cord_cervical_c-1       |              |              |                  |             |             |   |
|           | 1                                    | 1                           | 1                                    | 0.731907831  | 0.731907831  | 0.731907831      | NA          | 1           | 0 |
|           | 0.998207054                          |                             |                                      |              |              |                  |             |             |   |
| GNPAT     | ENSG00000116906.11                   | 0.464383364                 | 6                                    | 3            | 0.298440519  |                  |             |             |   |
|           | Brain_Hippocampus                    | 0.912655329                 | Brain_Spinal_cord_cervical_c-1       | 5.09296971   |              |                  |             |             |   |
|           | 0.010542383                          | 0.253806848                 | -0.109689877                         | 1.039783452  | 0.405698542  |                  |             |             |   |
|           | 0.369396983                          | 3                           | 0                                    | 0.998207054  |              |                  |             |             |   |
| KDM4D     | ENSG00000186280.6                    | 0.464412266                 | 1                                    | 1            | 0.464412266  |                  |             |             |   |
|           | Brain_Hypothalamus                   | 0.464412266                 | Brain_Hypothalamus                   | 1            | 1            | 1                |             |             |   |
|           | -0.73160079                          | -0.73160079                 | -0.73160079                          | NA           | 1            | 0                | 0.998207054 |             |   |
| PPP1R16B  | ENSG00000101445.9                    | 0.464482077                 | 2                                    | 2            | 0.289056558  |                  |             |             |   |
|           | Brain_Cerebellum                     | 0.477439374                 | Brain_Anterior_cingulate_cortex_BA24 |              |              |                  |             |             |   |
|           | 1.067776671                          | 0.932223329                 | 0.932223329                          | -1.060193543 | -0.710427017 |                  |             |             |   |
|           | -0.88531028                          | 0.247322282                 | 2                                    | 0            | 0.998207054  |                  |             |             |   |
| KLF9      | ENSG00000119138.4                    | 0.464525381                 | 1                                    | 1            | 0.464525381  | Brain_Cerebellum |             |             |   |
|           | 0.464525381                          | Brain_Cerebellum            | 1                                    | 1            | -0.731415532 | -0.731415532     |             |             |   |
|           | -0.731415532                         | NA                          | 1                                    | 0            | 0.998207054  |                  |             |             |   |
| FHAD1     | ENSG00000142621.19                   | 0.464774833                 | 1                                    | 1            | 0.464774833  |                  |             |             |   |
|           | Brain_Spinal_cord_cervical_c-1       | 0.464774833                 | Brain_Spinal_cord_cervical_c-1       |              |              |                  |             |             |   |
|           | 1                                    | 1                           | 1                                    | -0.731007072 | -0.731007072 | -0.731007072     | NA          | 1           | 0 |
|           | 0.998207054                          |                             |                                      |              |              |                  |             |             |   |
| LEKR1     | ENSG00000197980.12                   | 0.464853801                 | 6                                    | 5            | 0.152934768  |                  |             |             |   |
|           | Brain_Cerebellar_Hemisphere          | 0.833810323                 | Brain_Cortex                         | 4.355752809  |              |                  |             |             |   |
|           | 0.102387889                          | 0.145283045                 | -0.209817233                         | 1.429241727  | 0.806526187  |                  |             |             |   |
|           | 0.556654566                          | 5                           | 0                                    | 0.998207054  |              |                  |             |             |   |
| POLR2J    | ENSG00000005075.15                   | 0.464950614                 | 2                                    | 2            | 0.632993192  |                  |             |             |   |
|           | Brain_Hippocampus                    | 0.708451178                 | Brain_Anterior_cingulate_cortex_BA24 |              |              |                  |             |             |   |
|           | 1.762863569                          | 0.237136431                 | 0.237136431                          | -0.373937013 | 0.47751816   |                  |             |             |   |
|           | 0.051790574                          | 0.602069727                 | 2                                    | 0            | 0.998207054  |                  |             |             |   |
| C14orf2   | ENSG00000156411.9                    | 0.465051851                 | 3                                    | 3            | 0.161354535  |                  |             |             |   |
|           | Brain_Amygdala                       | 0.614272766                 | Brain_Cerebellum                     | 1.698895257  | 0.243963368  |                  |             |             |   |
|           | 0.243963368                          | -0.509238507                | 1.40053044                           | 0.129102713  | 1.101091845  | 3                |             |             |   |
|           | 0                                    | 0.998207054                 |                                      |              |              |                  |             |             |   |
| PIGG      | ENSG00000174227.15                   | 0.465196941                 | 5                                    | 4            | 0.097114063  |                  |             |             |   |
|           | Brain_Anterior_cingulate_cortex_BA24 | 0.556771419                 | Brain_Hippocampus                    |              |              |                  |             |             |   |
|           | 3.394385668                          | 0.048226522                 | 0.275506533                          | 0.587643779  | 1.65900858   |                  |             |             |   |
|           | 1.16573164                           | 0.423377465                 | 4                                    | 0            | 0.998207054  |                  |             |             |   |
| LCMT1-AS1 | ENSG00000260448.5                    | 0.465217242                 | 1                                    | 1            | 0.465217242  |                  |             |             |   |
|           | Brain_Putamen_basal_ganglia          | 0.465217242                 | Brain_Putamen_basal_ganglia          | 1            | 1            |                  |             |             |   |
|           | 1                                    | 0.73028296                  | 0.73028296                           | 0.73028296   | NA           | 1                | 0           | 0.998207054 |   |
| C2orf72   | ENSG00000204128.5                    | 0.46561862                  | 3                                    | 3            | 0.214460489  | Brain_Cerebellum |             |             |   |
|           | 0.774668605                          | Brain_Hippocampus           | 1.171114126                          | 0.834290213  |              |                  |             |             |   |
|           | 0.834290213                          | -0.945020883                | 1.241393311                          | 0.19421533   | 1.096110303  | 3                |             |             |   |
|           | 0                                    | 0.998207054                 |                                      |              |              |                  |             |             |   |
| CAP2      | ENSG00000112186.11                   | 0.465686792                 | 2                                    | 2            | 0.269815663  | Brain_Cerebellum |             |             |   |
|           | 0.530137524                          | Brain_Cerebellar_Hemisphere | 1.064769437                          | 0.935230563  |              |                  |             |             |   |
|           | 0.935230563                          | 0.627796096                 | 1.103487163                          | 0.86564163   | 0.336364379  | 2                |             |             |   |
|           | 0                                    | 0.998207054                 |                                      |              |              |                  |             |             |   |

|            |                                      |                             |                             |              |              |                                       |    |              |   |
|------------|--------------------------------------|-----------------------------|-----------------------------|--------------|--------------|---------------------------------------|----|--------------|---|
| TFB2M      | ENSG00000162851.7                    | 0.465708199                 | 2                           | 2            | 0.227379622  |                                       |    |              |   |
|            | Brain_Caudate_basal_ganglia          | 0.756561961                 |                             |              |              | Brain_Spinal_cord_cervical_c-1        |    |              |   |
|            | 1.03587946                           | 0.96412054                  | 0.96412054                  | -1.207136391 | -0.309998679 |                                       |    | -0.758567535 |   |
|            | 0.63437216                           | 2                           | 0                           | 0.998207054  |              |                                       |    |              |   |
| STK39      | ENSG00000198648.10                   | 0.465713129                 | 3                           | 3            | 0.200170686  |                                       |    |              |   |
|            | Brain_Putamen_basal_ganglia          | 0.789604332                 |                             |              |              | Brain_Spinal_cord_cervical_c-1        |    |              |   |
|            | 2.037388771                          | 0.219359304                 | 0.219359304                 |              | -0.266824445 |                                       |    | 1.281065428  |   |
|            | 0.485914377                          | 0.774816018                 | 3                           | 0            | 0.998207054  |                                       |    |              |   |
| RALY       | ENSG00000125970.11                   | 0.46571748                  | 1                           | 1            | 0.46571748   | Brain_Hippocampus                     |    |              |   |
|            | 0.46571748                           | Brain_Hippocampus           | 1                           | 1            | 1            | 0.729464656                           |    | 0.729464656  |   |
|            | 0.729464656                          | NA                          | 1                           | 0            | 0.998207054  |                                       |    |              |   |
| RP11-326A  | 19.4                                 | ENSG00000260123.1           | 0.465821602                 | 1            | 1            | 0.465821602                           |    |              |   |
|            | Brain_Spinal_cord_cervical_c-1       | 0.465821602                 |                             |              |              | Brain_Spinal_cord_cervical_c-1        |    |              |   |
|            | 1                                    | 1                           | 1                           | -0.729294391 | -0.729294391 | -0.729294391                          | NA | 1            | 0 |
|            | 0.998207054                          |                             |                             |              |              |                                       |    |              |   |
| RP11-574K  | 11.29                                | ENSG00000272140.2           | 0.465873894                 | 3            | 3            | 0.219694065                           |    |              |   |
|            | Brain_Cerebellar_Hemisphere          | 0.709525393                 |                             |              |              | Brain_Substantia_nigra                |    |              |   |
|            | 1.637424497                          | 0.268367115                 | 0.268367115                 |              | -0.372493577 |                                       |    | 1.227342029  |   |
|            | 0.430454145                          | 0.799935018                 | 3                           | 0            | 0.998207054  |                                       |    |              |   |
| LINC00504  | ENSG00000248360.7                    | 0.466087233                 | 2                           | 2            | 0.21672028   | Brain_Cerebellum                      |    |              |   |
|            | 0.710179201                          | Brain_Cerebellar_Hemisphere | 1.322614055                 |              | 0.677385945  |                                       |    |              |   |
|            | 0.677385945                          | 0.371615427                 | 1.23529622                  | 0.803455823  | 0.610714545  |                                       |    | 2            |   |
|            | 0                                    | 0.998207054                 |                             |              |              |                                       |    |              |   |
| POLR2D     | ENSG00000144231.10                   | 0.46626094                  | 11                          | 2            | 0.422655351  |                                       |    |              |   |
|            | Brain_Anterior_cingulate_cortex_BA24 | 0.99593502                  | Brain_Cortex                |              | 9.837189829  |                                       |    |              |   |
|            | 0.000945764                          | 0.471822102                 | -0.801823002                | 0.1050594    | -0.205635806 |                                       |    |              |   |
|            | 0.286341145                          | 2                           | 0                           | 0.998207054  |              |                                       |    |              |   |
| ANGPTL7    | ENSG00000171819.4                    | 0.466524859                 | 1                           | 1            | 0.466524859  |                                       |    |              |   |
|            | Brain_Substantia_nigra               | 0.466524859                 | Brain_Substantia_nigra      |              | 1            | 1                                     |    |              |   |
|            | 1                                    | 0.728144952                 | 0.728144952                 | 0.728144952  | NA           | 1                                     | 0  |              |   |
|            | 0.998207054                          |                             |                             |              |              |                                       |    |              |   |
| LUC7L      | ENSG00000007392.16                   | 0.466555218                 | 2                           | 2            | 0.25170747   |                                       |    |              |   |
|            | Brain_Caudate_basal_ganglia          | 0.998790419                 |                             |              |              | Brain_Nucleus_accumbens_basal_ganglia |    |              |   |
|            | 1.370819472                          | 0.629180528                 | 0.629180528                 |              | -1.146211937 |                                       |    | 0.001515985  |   |
|            | -0.572347976                         | 0.811566197                 | 2                           | 0            | 0.998207054  |                                       |    |              |   |
| RP11-506M  | 13.3                                 | ENSG00000244733.5           | 0.466697483                 | 8            | 8            | 0.103551957                           |    |              |   |
|            | Brain_Hippocampus                    | 0.937432302                 | Brain_Putamen_basal_ganglia |              | 1.679567747  |                                       |    |              |   |
|            | 0.510334386                          | 0.510334386                 | -1.627872341                | 0.426874181  | -0.443885571 |                                       |    |              |   |
|            | 0.815114307                          | 8                           | 0                           | 0.998207054  |              |                                       |    |              |   |
| Clorf101   | ENSG00000179397.17                   | 0.466848624                 | 1                           | 1            | 0.466848624  |                                       |    |              |   |
|            | Brain_Cerebellum                     | 0.466848624                 | Brain_Cerebellum            |              | 1            | 1                                     | 1  | 0.727616097  |   |
|            | 0.727616097                          | 0.727616097                 | NA                          | 1            | 0            | 0.998207054                           |    |              |   |
| CD7        | ENSG00000173762.7                    | 0.466915332                 | 1                           | 1            | 0.466915332  |                                       |    |              |   |
|            | Brain_Frontal_Cortex_BA9             | 0.466915332                 | Brain_Frontal_Cortex_BA9    |              | 1            | 1                                     |    |              |   |
|            | 1                                    | 0.727507157                 | 0.727507157                 | 0.727507157  | NA           | 1                                     | 0  |              |   |
|            | 0.998207054                          |                             |                             |              |              |                                       |    |              |   |
| CDH3       | ENSG00000062038.13                   | 0.467033748                 | 6                           | 3            | 0.274286664  |                                       |    |              |   |
|            | Brain_Caudate_basal_ganglia          | 0.976953168                 | Brain_Putamen_basal_ganglia |              |              |                                       |    |              |   |
|            | 4.344157646                          | 0.087180189                 | 0.517542652                 |              | -1.093244044 |                                       |    | 0.494640306  |   |
|            | -0.246647113                         | 0.642441637                 | 3                           | 0            | 0.998207054  |                                       |    |              |   |
| LA16c-312E | 8.5                                  | ENSG00000284395.1           | 0.467093484                 | 5            | 5            | 0.077830388                           |    |              |   |
|            | Brain_Cerebellar_Hemisphere          | 0.645035093                 | Brain_Hypothalamus          |              | 1.49328293   |                                       |    |              |   |
|            | 0.607468152                          | 0.607468152                 | -1.763415792                | 0.737939314  | -0.349413715 |                                       |    |              |   |
|            | 0.994384096                          | 5                           | 0                           | 0.998207054  |              |                                       |    |              |   |
| PYCRL      | ENSG00000104524.13                   | 0.467163881                 | 10                          | 6            | 0.287390623  |                                       |    |              |   |
|            | Brain_Hypothalamus                   | 0.912047958                 | Brain_Caudate_basal_ganglia |              | 6.32607503   |                                       |    |              |   |
|            | 0.028562834                          | 0.24047067                  | -0.719759216                | 1.063863317  | 0.384781665  |                                       |    |              |   |
|            | 0.55565281                           | 6                           | 0                           | 0.998207054  |              |                                       |    |              |   |
| ARHGAP32   | ENSG00000134909.18                   | 0.467175168                 | 2                           | 2            | 0.326537254  |                                       |    |              |   |
|            | Brain_Cortex                         | 0.463219737                 | Brain_Cerebellum            |              | 1.014651854  |                                       |    | 0.985348146  |   |
|            | 0.985348146                          | 0.733555424                 | 0.981112526                 | 0.857333975  | 0.175049305  |                                       |    |              |   |
|            | 2                                    | 0                           | 0.998207054                 |              |              |                                       |    |              |   |

|               |                                       |                          |                                       |              |              |             |             |  |
|---------------|---------------------------------------|--------------------------|---------------------------------------|--------------|--------------|-------------|-------------|--|
| RP11-587P21.2 | ENSG00000257893.2                     | 0.467197922              | 1                                     | 1            | 0.467197922  |             |             |  |
|               | Brain_Cerebellum                      | 0.467197922              | Brain_Cerebellum                      | 1            | 1            | 0.727045764 |             |  |
|               | 0.727045764                           | 0.727045764              | NA                                    | 1            | 0            | 0.998207054 |             |  |
| EPHA4         | ENSG00000116106.11                    | 0.467268487              | 3                                     | 3            | 0.231042371  |             |             |  |
|               | Brain_Cerebellar_Hemisphere           | 0.777138152              | Brain_Putamen_basal_ganglia           |              |              |             |             |  |
|               | 1.348819052                           | 0.626422571              | 0.626422571                           | -1.197678068 | 0.893369871  |             |             |  |
|               | -0.195786221                          | 1.048251715              | 3                                     | 0            | 0.998207054  |             |             |  |
| HDLBP         | ENSG00000115677.16                    | 0.467294056              | 11                                    | 3            | 0.268008258  |             |             |  |
|               | Brain_Hippocampus                     | 0.886315719              | Brain_Cerebellum                      | 8.855416023  |              |             |             |  |
|               | 0.001619801                           | 0.432785933              | -0.388304015                          | 1.107660978  | 0.625587632  |             |             |  |
|               | 0.51879979                            | 3                        | 0                                     | 0.998207054  |              |             |             |  |
| SSH3          | ENSG00000172830.12                    | 0.467489467              | 6                                     | 2            | 0.51628918   |             |             |  |
|               | Brain_Frontal_Cortex_BA9              | 0.995634083              | Brain_Hypothalamus                    | 5.428742896  |              |             |             |  |
|               | 0.014730546                           | 0.25846069               | -0.649076114                          | 0.196963303  | -0.285686194 |             |             |  |
|               | 0.31628631                            | 2                        | 0                                     | 0.998207054  |              |             |             |  |
| ATG2B         | ENSG00000066739.11                    | 0.467519511              | 1                                     | 1            | 0.467519511  |             |             |  |
|               | Brain_Substantia_nigra                | 0.467519511              | Brain_Substantia_nigra                | 1            | 1            |             |             |  |
|               | 1                                     | -0.726520881             | -0.726520881                          | -0.726520881 | NA           | 1           | 0           |  |
|               | 0.998207054                           |                          |                                       |              |              |             |             |  |
| AC004471.10   | ENSG00000272682.1                     | 0.467599995              | 2                                     | 2            | 0.246752773  |             |             |  |
|               | Brain_Cerebellum                      | 0.550465555              | Brain_Cerebellar_Hemisphere           | 1.754849155  |              |             |             |  |
|               | 0.245150845                           | 0.245150845              | -1.15827269                           | -0.597062647 | -0.877667669 |             |             |  |
|               | 0.396835427                           | 2                        | 0                                     | 0.998207054  |              |             |             |  |
| AC010731.4    | ENSG00000235118.7                     | 0.467651701              | 1                                     | 1            | 0.467651701  |             |             |  |
|               | Brain_Putamen_basal_ganglia           | 0.467651701              | Brain_Putamen_basal_ganglia           | 1            | 1            |             |             |  |
|               | 1                                     | 0.726305186              | 0.726305186                           | 0.726305186  | NA           | 1           | 0           |  |
|               | 0.998207054                           |                          |                                       |              |              |             |             |  |
| RP11-213G21.2 | ENSG00000251635.1                     | 0.467699208              | 1                                     | 1            | 0.467699208  |             |             |  |
|               | Brain_Hippocampus                     | 0.467699208              | Brain_Hippocampus                     | 1            | 1            | 1           |             |  |
|               | -0.726227676                          | -0.726227676             | -0.726227676                          | NA           | 1            | 0           | 0.998207054 |  |
| KBTBD11       | ENSG00000176595.3                     | 0.467817482              | 3                                     | 3            | 0.124307401  |             |             |  |
|               | Brain_Nucleus_accumbens_basal_ganglia | 0.988979306              | Brain_Cerebellum                      |              |              |             |             |  |
|               | 2.019696172                           | 0.067463808              | 0.067463808                           | -1.536942458 | 0.134667904  |             |             |  |
|               | -0.462820574                          | 0.932177479              | 3                                     | 0            | 0.998207054  |             |             |  |
| AC083843.1    | ENSG00000259820.1                     | 0.467823496              | 10                                    | 7            | 0.084903803  |             |             |  |
|               | Brain_Cerebellum                      | 0.981296741              | Brain_Anterior_cingulate_cortex_BA24  |              |              |             |             |  |
|               | 5.867538683                           | 0.013156371              | 0.217447697                           | -1.381701853 | 1.72291552   |             |             |  |
|               | 0.533768552                           | 0.966245569              | 7                                     | 0            | 0.998207054  |             |             |  |
| PTPN18        | ENSG00000072135.12                    | 0.46791322               | 3                                     | 2            | 0.147302186  |             |             |  |
|               | Brain_Cerebellum                      |                          |                                       |              |              |             |             |  |
|               | 0.411697494                           | Brain_Substantia_nigra   | 2.434947397                           | 0.037764487  |              |             |             |  |
|               | 0.527288116                           | 0.820910071              | 1.44912676                            | 1.084094645  | 0.326257173  |             | 2           |  |
|               | 0                                     | 0.998207054              |                                       |              |              |             |             |  |
| EHMT2         | ENSG00000204371.11                    | 0.468011444              | 3                                     | 3            | 0.163203684  |             |             |  |
|               | Brain_Putamen_basal_ganglia           | 0.774358365              | Brain_Cerebellar_Hemisphere           |              |              |             |             |  |
|               | 1.141886975                           | 0.868744717              | 0.868744717                           | -0.614622659 | 1.394377351  |             |             |  |
|               | 0.35547779                            | 1.006265496              | 3                                     | 0            | 0.998207054  |             |             |  |
| DGCR14        | ENSG00000100056.11                    | 0.468068264              | 2                                     | 2            | 0.498508871  |             |             |  |
|               | Brain_Hippocampus                     | 0.591871261              | Brain_Cerebellar_Hemisphere           | 1.513381522  |              |             |             |  |
|               | 0.486618478                           | 0.486618478              | -0.676837802                          | -0.536126306 | -0.606482054 |             |             |  |
|               | 0.099498053                           | 2                        | 0                                     | 0.998207054  |              |             |             |  |
| GOLGA8H       | ENSG00000261794.1                     | 0.468162078              | 8                                     | 8            | 0.10029145   |             |             |  |
|               | Brain_Caudate_basal_ganglia           | 0.982313428              | Brain_Nucleus_accumbens_basal_ganglia |              |              |             |             |  |
|               | 2.437224395                           | 0.453149219              | 0.453149219                           | -0.725327084 | 1.643442321  |             |             |  |
|               | 0.282180382                           | 0.875548828              | 8                                     | 0            | 0.998207054  |             |             |  |
| LINC00571     | ENSG00000223685.5                     | 0.4682126                | 6                                     | 6            | 0.248963451  |             |             |  |
|               | Brain_Amygdala                        |                          |                                       |              |              |             |             |  |
|               | 0.90485029                            | Brain_Frontal_Cortex_BA9 | 3.350808794                           | 0.177981339  |              |             |             |  |
|               | 0.177981339                           | -1.152870721             | 0.721372564                           | -0.464721367 | 0.745348917  |             |             |  |
|               | 6                                     | 0                        | 0.998207054                           |              |              |             |             |  |
| CTD-2509G16.2 | ENSG00000255002.1                     | 0.46822152               | 2                                     | 2            | 0.408106302  |             |             |  |
|               | Brain_Nucleus_accumbens_basal_ganglia | 0.565388977              | Brain_Putamen_basal_ganglia           |              |              |             |             |  |
|               | 1.342041232                           | 0.657958768              | 0.657958768                           | -0.574855575 | 0.827230721  |             |             |  |
|               | 0.126187573                           | 0.991424728              | 2                                     | 0            | 0.998207054  |             |             |  |

|               |                                       |                                       |              |             |              |                             |              |   |              |
|---------------|---------------------------------------|---------------------------------------|--------------|-------------|--------------|-----------------------------|--------------|---|--------------|
| EFCAB11       | ENSG00000140025.15                    | 0.46824688                            | 9            | 1           | 0.315477663  |                             |              |   |              |
|               | Brain_Putamen_basal_ganglia           | 0.896517854                           |              |             |              | Brain_Hypothalamus          | 8.226967256  |   |              |
|               | 0.004235053                           | 8.226967256                           | 0.130061393  |             |              | 1.003794528                 | 0.693722142  |   |              |
|               | 0.278403232                           | 1                                     | 0            | 0.998207054 |              |                             |              |   |              |
| NOC2L         | ENSG00000188976.10                    | 0.468251923                           | 4            | 4           | 0.110483303  |                             |              |   |              |
|               | Brain_Hypothalamus                    | 0.941213005                           |              |             |              | Brain_Cerebellar_Hemisphere | 2.593430489  |   |              |
|               | 0.096244505                           | 0.096244505                           | -1.596024592 |             |              | 0.07374536                  | -0.738043174 |   |              |
|               | 0.68938309                            | 4                                     | 0            | 0.998207054 |              |                             |              |   |              |
| HPGD          | ENSG00000164120.13                    | 0.468323254                           | 2            | 2           | 0.293959856  |                             |              |   |              |
|               | Brain_Hypothalamus                    | 0.508512036                           |              |             |              | Brain_Cortex                | 1.015638589  |   |              |
|               | 0.984361411                           | 0.984361411                           | -0.661156373 |             |              | 1.049474346                 | 0.194158987  |   |              |
|               | 1.209598582                           | 2                                     | 0            | 0.998207054 |              |                             |              |   |              |
| PLA2G2C       | ENSG00000187980.6                     | 0.468334178                           | 1            | 1           | 0.468334178  |                             |              |   |              |
|               | Brain_Cerebellum                      | 0.468334178                           |              |             |              | Brain_Cerebellum            | 1            | 1 | -0.725192118 |
|               | -0.725192118                          | -0.725192118                          | NA           | 1           | 0            | 0.998207054                 |              |   |              |
| RASGRP4       | ENSG00000171777.15                    | 0.468521974                           | 3            | 3           | 0.246827166  |                             |              |   |              |
|               | Brain_Hippocampus                     | 0.596344421                           |              |             |              | Brain_Cortex                | 1.189405129  |   |              |
|               | 0.893687967                           | 0.893687967                           | -0.828727274 |             |              | 1.158090353                 | 0.286342596  |   |              |
|               | 1.015512338                           | 3                                     | 0            | 0.998207054 |              |                             |              |   |              |
| SYNDIG1L      | ENSG00000183379.8                     | 0.468540196                           | 4            | 4           | 0.216634833  |                             |              |   |              |
|               | Brain_Cortex                          | 0.983412172                           |              |             |              | Brain_Putamen_basal_ganglia | 1.363607644  |   |              |
|               | 0.770575909                           | 0.770575909                           | -1.235525928 |             |              | 0.020791258                 | -0.815468434 |   |              |
|               | 0.586704755                           | 4                                     | 0            | 0.998207054 |              |                             |              |   |              |
| FCGR3B        | ENSG00000162747.9                     | 0.468585859                           | 1            | 1           | 0.468585859  |                             |              |   |              |
|               | Brain_Amygdala                        | 0.468585859                           |              |             |              | Brain_Amygdala              | 1            | 1 | 0.724781871  |
|               | 0.724781871                           | 0.724781871                           | NA           | 1           | 0            | 0.998207054                 |              |   |              |
| CCDC155       | ENSG00000161609.9                     | 0.468680609                           | 2            | 1           | 0.432639512  |                             |              |   |              |
|               | Brain_Cerebellar_Hemisphere           | 0.51100667                            |              |             |              | Brain_Cerebellum            | 1.979899709  |   |              |
|               | 0.020100291                           | 1.979899709                           | 0.657271016  |             |              | 0.784682899                 | 0.720976957  |   |              |
|               | 0.090093807                           | 1                                     | 0            | 0.998207054 |              |                             |              |   |              |
| KB-1460A1.1   | ENSG00000253395.1                     | 0.468681998                           | 1            | 1           | 0.468681998  |                             |              |   |              |
|               | Brain_Anterior_cingulate_cortex_BA24  | 0.468681998                           |              |             |              |                             |              |   |              |
|               | Brain_Anterior_cingulate_cortex_BA24  | 1                                     | 1            | 1           | -0.724625195 |                             |              |   |              |
|               | -0.724625195                          | -0.724625195                          | NA           | 1           | 0            | 0.998207054                 |              |   |              |
| PQLC2         | ENSG00000040487.12                    | 0.4687181                             | 4            | 3           | 0.121028295  |                             |              |   |              |
|               | Brain_Nucleus_accumbens_basal_ganglia | 2.892324137                           |              |             |              | Brain_Hypothalamus          |              |   |              |
|               | 0.651462049                           | Brain_Nucleus_accumbens_basal_ganglia | 2.892324137  |             |              |                             |              |   |              |
|               | 0.048500051                           | 0.271626489                           | -1.550471891 |             |              | -0.451732018                | -0.756536864 |   |              |
|               | 0.530223577                           | 3                                     | 0            | 0.998207054 |              |                             |              |   |              |
| ZNF217        | ENSG00000171940.13                    | 0.468824252                           | 1            | 1           | 0.468824252  |                             |              |   |              |
|               | Brain_Cerebellum                      | 0.468824252                           |              |             |              | Brain_Cerebellum            | 1            | 1 | -0.724393397 |
|               | -0.724393397                          | -0.724393397                          | NA           | 1           | 0            | 0.998207054                 |              |   |              |
| ELMO2         | ENSG00000062598.17                    | 0.468848577                           | 1            | 1           | 0.468848577  |                             |              |   |              |
|               | Brain_Cortex                          | 1                                     | 1            | 1           | 0.724353765  |                             |              |   |              |
|               | 0.468848577                           | Brain_Cortex                          | 1            | 1           | 1            | 0.724353765                 | 0.724353765  |   |              |
|               | 0.724353765                           | NA                                    | 1            | 0           | 0.998207054  |                             |              |   |              |
| NIN           | ENSG00000100503.23                    | 0.468938449                           | 2            | 2           | 0.346725822  |                             |              |   |              |
|               | Brain_Frontal_Cortex_BA9              | 1.018753373                           |              |             |              | Brain_Cerebellum            |              |   |              |
|               | 0.417535137                           | Brain_Frontal_Cortex_BA9              | 1.018753373  |             |              | 0.981246627                 |              |   |              |
|               | 0.981246627                           | -0.940959095                          | -0.810704938 |             |              | -0.875832016                | 0.092103598  |   |              |
|               | 2                                     | 0                                     | 0.998207054  |             |              |                             |              |   |              |
| TP63          | ENSG00000073282.12                    | 0.469067342                           | 1            | 1           | 0.469067342  |                             |              |   |              |
|               | Brain_Frontal_Cortex_BA9              | 0.469067342                           |              |             |              | Brain_Frontal_Cortex_BA9    | 1            | 1 |              |
|               | 1                                     | -0.723997382                          | -0.723997382 |             |              | -0.723997382                | NA           | 1 | 0            |
|               | 0.998207054                           |                                       |              |             |              |                             |              |   |              |
| UCHL5         | ENSG00000116750.13                    | 0.469081381                           | 1            | 1           | 0.469081381  |                             |              |   |              |
|               | Brain_Hippocampus                     | 0.469081381                           |              |             |              | Brain_Hippocampus           | 1            | 1 | 1            |
|               | 0.723974515                           | 0.723974515                           | 0.723974515  |             |              | NA                          | 1            | 0 | 0.998207054  |
| RP11-196G11.6 | ENSG00000232748.3                     | 0.469085286                           | 1            | 1           | 0.469085286  |                             |              |   |              |
|               | Brain_Hypothalamus                    | 0.469085286                           |              |             |              | Brain_Hypothalamus          | 1            | 1 | 1            |
|               | -0.723968155                          | -0.723968155                          | -0.723968155 |             |              | NA                          | 1            | 0 | 0.998207054  |
| PPP1R1A       | ENSG00000135447.16                    | 0.469218657                           | 2            | 2           | 0.231856303  |                             |              |   |              |
|               | Brain_Spinal_cord_cervical_c-1        | 0.705655438                           |              |             |              | Brain_Hypothalamus          |              |   |              |
|               | 1.074256911                           | 0.925743089                           | 0.925743089  |             |              | -0.377697348                | 1.195590751  |   |              |
|               | 0.408946701                           | 1.112482683                           | 2            | 0           | 0.998207054  |                             |              |   |              |

|               |                                       |                             |              |              |                                |                       |
|---------------|---------------------------------------|-----------------------------|--------------|--------------|--------------------------------|-----------------------|
| PEX2          | ENSG00000164751.14                    | 0.469376234                 | 2            | 2            | 0.250144224                    | Brain_Cerebellum      |
|               | 0.339998082                           | Brain_Cerebellar_Hemisphere | 1.501644204  |              | 0.498355796                    |                       |
|               | 0.498355796                           | 0.954169043                 | 1.149999143  |              | 1.052084093                    | 0.138472792           |
|               | 2                                     | 0                           | 0.998207054  |              |                                |                       |
| CTD-2132N18.2 | ENSG00000267221.2                     | 0.469396392                 | 1            | 1            | 0.469396392                    |                       |
|               | Brain_Spinal_cord_cervical_c-1        | 0.469396392                 |              |              | Brain_Spinal_cord_cervical_c-1 |                       |
|               | 1                                     | 1                           | 0.723461511  | 0.723461511  | 0.723461511                    | NA 1 0                |
|               | 0.998207054                           |                             |              |              |                                |                       |
| ARL14EP       | ENSG00000152219.4                     | 0.469407139                 | 10           | 6            | 0.012921928                    |                       |
|               | Brain_Cerebellar_Hemisphere           | 0.885730253                 |              |              | Brain_Hypothalamus             | 6.77664298            |
|               | 1.29E-06                              | 0.238959366                 | -2.485913753 |              | -0.143709014                   | -1.614462509          |
|               | 0.711722689                           | 6                           | 0            | 0.998207054  |                                |                       |
| MAPRE2        | ENSG00000166974.12                    | 0.469594097                 | 5            | 4            | 0.162551764                    |                       |
|               | Brain_Cerebellar_Hemisphere           | 0.742386392                 |              |              | Brain_Spinal_cord_cervical_c-1 |                       |
|               | 2.035456689                           | 0.023157212                 | 0.631971193  |              | 0.328694791                    | 1.396540598           |
|               | 0.938661673                           | 0.414024225                 | 4            | 0            | 0.998207054                    |                       |
| DEFA5         | ENSG00000164816.7                     | 0.469657048                 | 2            | 2            | 0.380274099                    |                       |
|               | Brain_Hypothalamus                    | 0.427788368                 |              |              | Brain_Hippocampus              | 1.07500224 0.92499776 |
|               | 0.92499776                            | -0.87739137                 | 0.7929819    | -0.042204735 | 1.181132266                    | 2 0                   |
|               | 0.998207054                           |                             |              |              |                                |                       |
| ADAMTS13      | ENSG00000160323.18                    | 0.469690536                 | 13           | 7            | 0.135487896                    |                       |
|               | Brain_Hippocampus                     | 0.914193537                 |              |              | Brain_Cerebellum               | 7.919252833           |
|               | 0.003570341                           | 0.316191985                 | -1.492806308 |              | 0.450537424                    | -0.415061908          |
|               | 0.609524664                           | 7                           | 0            | 0.998207054  |                                |                       |
| APOEC3D       | ENSG00000243811.8                     | 0.469702522                 | 1            | 1            | 0.469702522                    |                       |
|               | Brain_Amygdala                        | 0.469702522                 |              |              | Brain_Amygdala                 | 1 1 1 -0.722963153    |
|               | -0.722963153                          | -0.722963153                | NA           | 1            | 0                              | 0.998207054           |
| RALA          | ENSG00000006451.7                     | 0.469820841                 | 2            | 2            | 0.248431339                    |                       |
|               | Brain_Nucleus_accumbens_basal_ganglia | 0.583872522                 |              |              | Brain_Putamen_basal_ganglia    |                       |
|               | 1.110550636                           | 0.889449364                 | 0.889449364  |              | -1.154167903                   | -0.547736971          |
|               | -0.850952437                          | 0.428811424                 | 2            | 0            | 0.998207054                    |                       |
| TMEM53        | ENSG00000126106.13                    | 0.46983692                  | 3            | 3            | 0.121574774                    | Brain_Cerebellum      |
|               | 0.906599282                           | Brain_Cortex                | 1.478815217  |              | 0.494901648                    | 0.494901648           |
|               | -0.136778562                          | 1.548197412                 | 0.431363257  |              | 0.967255638                    | 3 0                   |
|               | 0.998207054                           |                             |              |              |                                |                       |
| NAIP          | ENSG00000249437.7                     | 0.46986779                  | 2            | 2            | 0.251035208                    | Brain_Hippocampus     |
|               | 0.876728001                           | Brain_Cerebellum            | 1.236782886  |              | 0.763217114                    | 0.763217114           |
|               | -0.155118369                          | 1.14783858                  | 0.496360105  |              | 0.921329694                    | 2 0                   |
|               | 0.998207054                           |                             |              |              |                                |                       |
| RAB22A        | ENSG00000124209.3                     | 0.46988655                  | 1            | 1            | 0.46988655                     |                       |
|               | Brain_Putamen_basal_ganglia           | 0.46988655                  |              |              | Brain_Putamen_basal_ganglia    | 1 1 1                 |
|               | -0.722663655                          | -0.722663655                | -0.722663655 |              | NA                             | 1 0 0.998207054       |
| FAM83H-AS1    | ENSG00000203499.11                    | 0.470095998                 | 8            | 7            | 0.03632383                     |                       |
|               | Brain_Anterior_cingulate_cortex_BA24  | 0.812618355                 |              |              | Brain_Cerebellum               | 2.41221715            |
|               | 0.055225818                           | 0.358404282                 | -0.639764158 |              | 2.093283773                    | 0.680344427           |
|               | 1.061380041                           | 7                           | 0            | 0.998207054  |                                |                       |
| C9orf62       | ENSG00000178243.4                     | 0.470229814                 | 1            | 1            | 0.470229814                    |                       |
|               | Brain_Frontal_Cortex_BA9              | 0.470229814                 |              |              | Brain_Frontal_Cortex_BA9       | 1 1                   |
|               | 1                                     | 0.722105179                 | 0.722105179  | 0.722105179  | NA                             | 1 0                   |
|               | 0.998207054                           |                             |              |              |                                |                       |
| LDHAL6A       | ENSG00000166800.9                     | 0.470230182                 | 12           | 4            | 0.036859815                    |                       |
|               | Brain_Cerebellum                      | 0.753114239                 |              |              | Brain_Substantia_nigra         | 9.084643122           |
|               | 0.016657369                           | 0.499139885                 | -0.314535657 |              | 2.087313395                    | 1.231749338           |
|               | 0.730906061                           | 4                           | 0            | 0.998207054  |                                |                       |
| PKMYT1        | ENSG00000127564.16                    | 0.470315314                 | 5            | 2            | 0.180443645                    |                       |
|               | Brain_Frontal_Cortex_BA9              | 0.373678821                 |              |              | Brain_Cerebellar_Hemisphere    |                       |
|               | 4.626753828                           | 0.005864456                 | 0.247125094  |              | 0.88960351                     | 1.339390303           |
|               | 1.099667211                           | 0.180937435                 | 2            | 0            | 0.998207054                    |                       |
| EQTN          | ENSG00000120160.10                    | 0.470331907                 | 1            | 1            | 0.470331907                    |                       |
|               | Brain_Caudate_basal_ganglia           | 0.470331907                 |              |              | Brain_Caudate_basal_ganglia    | 1 1                   |
|               | 1                                     | 0.721939122                 | 0.721939122  | 0.721939122  | NA                             | 1 0                   |
|               | 0.998207054                           |                             |              |              |                                |                       |

|               |                                       |                             |              |              |              |                                       |             |             |
|---------------|---------------------------------------|-----------------------------|--------------|--------------|--------------|---------------------------------------|-------------|-------------|
| CYP21A2       | ENSG00000231852.6                     | 0.470370989                 | 8            | 8            | 0.063168021  |                                       |             |             |
|               | Brain_Cerebellar_Hemisphere           | 0.927347145                 |              |              |              | Brain_Nucleus_accumbens_basal_ganglia |             |             |
|               | 3.209394223                           | 0.204847754                 | 0.204847754  | 0.091183047  | 1.858006994  |                                       |             |             |
|               | 1.029523467                           | 0.563459444                 | 8            | 0            | 0.998207054  |                                       |             |             |
| ZNF667-AS1    | ENSG00000166770.10                    | 0.470374279                 | 12           | 6            | 0.113332708  |                                       |             |             |
|               | Brain_Hypothalamus                    | 0.936229083                 |              |              |              | Brain_Cerebellum                      | 7.98993837  | 0.010683274 |
|               | 0.290014392                           | -1.284515851                | 1.583389529  | 0.708778839  | 0.791591804  |                                       |             |             |
|               | 6                                     | 0                           | 0.998207054  |              |              |                                       |             |             |
| OVGP1         | ENSG00000085465.12                    | 0.470423711                 | 6            | 4            | 0.129779478  |                                       |             |             |
|               | Brain_Nucleus_accumbens_basal_ganglia | 0.537829658                 |              |              |              | Brain_Putamen_basal_ganglia           |             |             |
|               | 5.013528416                           | 0.039790143                 | 0.180574151  | 0.616098279  | 1.514972066  |                                       |             |             |
|               | 1.087228195                           | 0.313428693                 | 4            | 0            | 0.998207054  |                                       |             |             |
| ESRP2         | ENSG00000103067.13                    | 0.470425127                 | 1            | 1            | 0.470425127  |                                       |             |             |
|               | Brain_Hippocampus                     | 0.470425127                 |              |              |              | Brain_Hippocampus                     | 1           | 1           |
|               | 0.721787514                           | 0.721787514                 | 0.721787514  | NA           | 1            | 0                                     | 0.998207054 |             |
| CLDN3         | ENSG00000165215.6                     | 0.470462878                 | 3            | 3            | 0.156901797  |                                       |             |             |
|               | Brain_Putamen_basal_ganglia           | 0.691758749                 |              |              |              | Brain_Cerebellum                      | 1.24433964  |             |
|               | 0.756177696                           | 0.756177696                 | -0.715784442 | 1.415568783  | 0.365417927  |                                       |             |             |
|               | 1.066015849                           | 3                           | 0            | 0.998207054  |              |                                       |             |             |
| RP11-445N20.3 | ENSG00000273293.1                     | 0.470470376                 | 2            | 2            | 0.358295812  |                                       |             |             |
|               | Brain_Hippocampus                     | 0.397051006                 |              |              |              | Brain_Caudate_basal_ganglia           | 1.035304304 |             |
|               | 0.964695696                           | 0.964695696                 | 0.846899742  | 0.918617239  | 0.882758491  |                                       |             |             |
|               | 0.050711928                           | 2                           | 0            | 0.998207054  |              |                                       |             |             |
| ITPR2         | ENSG00000123104.11                    | 0.47050716                  | 3            | 3            | 0.392401334  |                                       |             |             |
|               | Brain_Hippocampus                     |                             |              |              |              | Brain_Hippocampus                     |             |             |
|               | 0.922340138                           | Brain_Cerebellar_Hemisphere | 2.077204054  | 0.080027443  |              |                                       |             |             |
|               | 0.080027443                           | -0.552115587                | 0.855270646  | 0.068556221  | 0.71823507   | 3                                     |             |             |
|               | 0                                     | 0.998207054                 |              |              |              |                                       |             |             |
| USP37         | ENSG00000135913.10                    | 0.47083772                  | 2            | 1            | 0.455646233  |                                       |             |             |
|               | Brain_Cerebellar_Hemisphere           | 0.489316094                 |              |              |              | Brain_Cerebellum                      | 1.986705777 |             |
|               | 0.013294223                           | 1.986705777                 | -0.746035065 | -0.691396992 | -0.718716028 |                                       |             |             |
|               | 0.038634952                           | 1                           | 0            | 0.998207054  |              |                                       |             |             |
| FLJ36000      | ENSG00000276399.1                     | 0.471025944                 | 2            | 1            | 0.343960315  |                                       |             |             |
|               | Brain_Cerebellar_Hemisphere           | 0.633755456                 |              |              |              | Brain_Cerebellum                      | 1.948163876 |             |
|               | 0.051836124                           | 1.948163876                 | 0.476447703  | 0.946369188  | 0.711408446  |                                       |             |             |
|               | 0.332284668                           | 1                           | 0            | 0.998207054  |              |                                       |             |             |
| C15orf41      | ENSG00000186073.11                    | 0.471084906                 | 2            | 2            | 0.344929379  |                                       |             |             |
|               | Brain_Anterior_cingulate_cortex_BA24  | 0.400944094                 |              |              |              | Brain_Cerebellum                      |             |             |
|               | 1.061644108                           | 0.938355892                 | 0.938355892  | 0.839936317  | 0.944470286  |                                       |             |             |
|               | 0.892203302                           | 0.073916678                 | 2            | 0            | 0.998207054  |                                       |             |             |
| NAXD          | ENSG00000213995.11                    | 0.471085546                 | 7            | 2            | 0.419618052  |                                       |             |             |
|               | Brain_Frontal_Cortex_BA9              | 0.994419954                 |              |              |              | Brain_Cerebellar_Hemisphere           |             |             |
|               | 6.016575844                           | 0.008295833                 | 0.477168261  | -0.807084066 | 0.242588683  |                                       |             |             |
|               | -0.302851472                          | 0.389449074                 | 2            | 0            | 0.998207054  |                                       |             |             |
| SLC9A9        | ENSG00000181804.14                    | 0.471155347                 | 1            | 1            | 0.471155347  |                                       |             |             |
|               | Brain_Anterior_cingulate_cortex_BA24  | 0.471155347                 |              |              |              |                                       |             |             |
|               | Brain_Anterior_cingulate_cortex_BA24  | 1                           | 1            | 1            | -0.720600498 |                                       |             |             |
|               | -0.720600498                          | -0.720600498                | NA           | 1            | 0            | 0.998207054                           |             |             |
| CFAP161       | ENSG00000156206.13                    | 0.471246083                 | 1            | 1            | 0.471246083  |                                       |             |             |
|               | Brain_Cerebellar_Hemisphere           | 0.471246083                 |              |              |              | Brain_Cerebellar_Hemisphere           | 1           | 1           |
|               | 1                                     | -0.720453073                | -0.720453073 | -0.720453073 | NA           | 1                                     | 0           |             |
|               | 0.998207054                           |                             |              |              |              |                                       |             |             |
| LBHD1         | ENSG00000162194.12                    | 0.471259039                 | 7            | 2            | 0.664455207  |                                       |             |             |
|               | Brain_Cerebellar_Hemisphere           | 0.961933536                 |              |              |              | Brain_Nucleus_accumbens_basal_ganglia |             |             |
|               | 6.415963989                           | 0.000525868                 | 0.29967305   | -0.414911541 | 0.43377036   |                                       |             |             |
|               | 0.099100502                           | 0.346403032                 | 2            | 0            | 0.998207054  |                                       |             |             |
| RRM1          | ENSG00000167325.14                    | 0.4713855                   | 13           | 7            | 0.022654996  |                                       |             |             |
|               | Brain_Frontal_Cortex_BA9              | 0.857265732                 |              |              |              | Brain_Nucleus_accumbens_basal_ganglia |             |             |
|               | 8.689464436                           | 0.007125138                 | 0.347562543  | -2.27920308  | -0.179855855 |                                       |             |             |
|               | -1.296744476                          | 0.556024975                 | 7            | 0            | 0.998207054  |                                       |             |             |
| LINC01749     | ENSG00000272259.5                     | 0.471646358                 | 3            | 2            | 0.571609025  |                                       |             |             |
|               | Brain_Cerebellar_Hemisphere           | 0.668356351                 |              |              |              | Brain_Cerebellum                      | 2.484142476 |             |
|               | 0.049701004                           | 0.46615652                  | -0.565683396 | 0.552496807  | -0.147197166 |                                       |             |             |



|               |                                      |                                      |    |              |              |             |                                        |   |                  |
|---------------|--------------------------------------|--------------------------------------|----|--------------|--------------|-------------|----------------------------------------|---|------------------|
|               | 0.609827916                          | 2                                    | 0  | 0.998207054  |              |             |                                        |   |                  |
| PSTPIP1       | ENSG00000140368.12                   |                                      |    | 0.472059036  | 4            | 4           | 0.09862928                             |   |                  |
|               | Brain_Frontal_Cortex_BA9             |                                      |    | 0.751445129  |              |             | Brain_Caudate_basal_ganglia            |   |                  |
|               | 1.583938854                          | 0.312589113                          |    | 0.312589113  |              |             | -1.651535492                           |   | -0.31673442      |
|               | -0.737230138                         | 0.627019515                          |    | 4            | 0            | 0.998207054 |                                        |   |                  |
| ZNF846        | ENSG00000196605.7                    |                                      |    | 0.472133151  | 1            | 1           | 0.472133151                            |   |                  |
|               | Brain_Anterior_cingulate_cortex_BA24 |                                      |    | 0.472133151  |              |             |                                        |   |                  |
|               | Brain_Anterior_cingulate_cortex_BA24 | 1                                    | 1  | 1            |              |             | -0.719012609                           |   |                  |
|               | -0.719012609                         | -0.719012609                         | NA | 1            | 0            | 0.998207054 |                                        |   |                  |
| DNAJA1        | ENSG00000086061.15                   |                                      |    | 0.472542872  | 3            | 2           | 0.42835974                             |   |                  |
|               | Brain_Anterior_cingulate_cortex_BA24 |                                      |    | 0.994112159  |              |             | Brain_Frontal_Cortex_BA9               |   |                  |
|               | 2.244861476                          | 0.032402537                          |    | 0.722735988  |              |             | -0.792001605                           |   | 0.727746709      |
|               | -0.018958505                         | 0.760216415                          |    | 2            | 0            | 0.998207054 |                                        |   |                  |
| FKBP9         | ENSG00000122642.10                   |                                      |    | 0.472697575  | 3            | 2           | 0.301751133                            |   |                  |
|               | Brain_Cerebellar_Hemisphere          |                                      |    | 0.512936041  |              |             | Brain_Cerebellum2.054936263            |   |                  |
|               | 0.052968667                          | 0.89209507                           |    | -1.032685433 |              |             | 0.661658984                            |   | -0.341766429     |
|               | 0.889351417                          | 2                                    | 0  | 0.998207054  |              |             |                                        |   |                  |
| WNT7B         | ENSG00000188064.9                    |                                      |    | 0.472749823  | 2            | 2           | 0.228507127                            |   |                  |
|               | Brain_Cerebellar_Hemisphere          |                                      |    | 0.286575704  |              |             | Brain_Cerebellum1.768159594            |   |                  |
|               | 0.231840406                          | 0.231840406                          |    | 1.065663676  |              |             | 1.204213351                            |   | 1.134938513      |
|               | 0.097969415                          | 2                                    | 0  | 0.998207054  |              |             |                                        |   |                  |
| TMEM61        | ENSG00000143001.4                    |                                      |    | 0.472844929  | 3            | 2           | 0.275067508                            |   |                  |
|               | Brain_Cerebellum                     |                                      |    | 0.452919948  |              |             | Brain_Cerebellar_Hemisphere1.937522233 |   |                  |
|               | 0.064058419                          | 0.998419349                          |    | -0.832001788 |              |             | 1.091466857                            |   | 0.336673668      |
|               | 1.026356082                          | 2                                    | 0  | 0.998207054  |              |             |                                        |   |                  |
| RP11-219B17.3 | ENSG00000273958.1                    |                                      |    | 0.473071114  | 2            | 2           | 0.324256638                            |   |                  |
|               | Brain_Amygdala                       |                                      |    | 0.510490869  |              |             | Brain_Putamen_basal_ganglia1.066073469 |   |                  |
|               | 0.933926531                          | 0.933926531                          |    | -0.985748307 |              |             | 0.658073553                            |   | -0.163837377     |
|               | 1.162357584                          | 2                                    | 0  | 0.998207054  |              |             |                                        |   |                  |
| SMIM18        | ENSG00000253457.2                    |                                      |    | 0.473157618  | 1            | 1           | 0.473157618                            |   |                  |
|               | Brain_Hypothalamus                   |                                      |    | 0.473157618  |              |             | Brain_Hypothalamus                     | 1 | 1                |
|               | -0.717350883                         | -0.717350883                         |    | -0.717350883 | NA           | 1           | 0                                      |   | 0.998207054      |
| KLK14         | ENSG00000129437.9                    |                                      |    | 0.47318012   | 3            | 3           | 0.167625159                            |   | Brain_Cerebellum |
|               | 0.59900196                           | Brain_Hippocampus                    |    | 1.16798853   | 0.894180432  |             | 0.894180432                            |   |                  |
|               | -1.379874923                         | -0.525836287                         |    | -0.900920413 | 0.436391213  |             | 3                                      |   | 0                |
|               | 0.998207054                          |                                      |    |              |              |             |                                        |   |                  |
| FEM1A         | ENSG00000141965.4                    |                                      |    | 0.47321723   | 4            | 4           | 0.188321887                            |   | Brain_Cerebellum |
|               | 0.440138428                          | Brain_Anterior_cingulate_cortex_BA24 |    | 1.478611445  |              |             |                                        |   |                  |
|               | 0.533139458                          | 0.533139458                          |    | -0.830351212 | 1.315559642  |             | 0.627793449                            |   |                  |
|               | 1.002020301                          | 4                                    | 0  | 0.998207054  |              |             |                                        |   |                  |
| WDR25         | ENSG00000176473.13                   |                                      |    | 0.473229051  | 5            | 5           | 0.131091698                            |   | Brain_Cerebellum |
|               | 0.72272755                           | Brain_Amygdala                       |    | 2.941928695  | 0.213698111  |             | 0.213698111                            |   |                  |
|               | 0.354815855                          | 1.509810839                          |    | 0.906258869  | 0.515369541  |             | 5                                      |   | 0                |
|               | 0.998207054                          |                                      |    |              |              |             |                                        |   |                  |
| CCDC65        | ENSG00000139537.10                   |                                      |    | 0.473265534  | 7            | 1           | 0.398354244                            |   |                  |
|               | Brain_Frontal_Cortex_BA9             |                                      |    | 0.578280202  |              |             | Brain_Nucleus_accumbens_basal_ganglia  |   |                  |
|               | 6.834796184                          | 0.001741123                          |    | 6.834796184  |              |             | -0.844564129                           |   | -0.555898561     |
|               | -0.708939787                         | 0.092423669                          |    | 1            | 0            | 0.998207054 |                                        |   |                  |
| ZNF418        | ENSG00000196724.12                   |                                      |    | 0.47327703   | 10           | 10          | 0.070408675                            |   | Brain_Cerebellum |
|               | 0.9699192                            | Brain_Anterior_cingulate_cortex_BA24 |    | 3.709067448  |              |             | 0.130467399                            |   |                  |
|               | 0.130467399                          | -0.657460645                         |    | 1.809272528  | 0.460483331  |             | 0.678289935                            |   |                  |
|               | 10                                   | 0                                    |    | 0.998207054  |              |             |                                        |   |                  |
| ITLN1         | ENSG00000179914.4                    |                                      |    | 0.473325191  | 2            | 2           | 0.254520224                            |   |                  |
|               | Brain_Anterior_cingulate_cortex_BA24 |                                      |    | 0.642464971  |              |             | Brain_Frontal_Cortex_BA9               |   |                  |
|               | 1.01735246                           | 0.98264754                           |    | 0.98264754   | -0.464255125 |             | 1.139438697                            |   | 0.337591786      |
|               | 1.133982776                          | 2                                    | 0  | 0.998207054  |              |             |                                        |   |                  |
| LDLRAD4       | ENSG00000168675.18                   |                                      |    | 0.473344417  | 1            | 1           | 0.473344417                            |   |                  |
|               | Brain_Hippocampus                    |                                      |    | 0.473344417  |              |             | Brain_Hippocampus                      | 1 | 1                |
|               | -0.717048102                         | -0.717048102                         |    | -0.717048102 | NA           | 1           | 0                                      |   | 0.998207054      |
| TLE4          | ENSG00000106829.18                   |                                      |    | 0.473378663  | 1            | 1           | 0.473378663                            |   | Brain_Cerebellum |
|               | 0.473378663                          | Brain_Cerebellum1                    |    | 1            | 1            |             | 0.7169926                              |   | 0.7169926        |
|               | NA                                   | 1                                    | 0  | 0.998207054  |              |             |                                        |   |                  |

|             |                                      |                             |              |              |              |                                |             |   |
|-------------|--------------------------------------|-----------------------------|--------------|--------------|--------------|--------------------------------|-------------|---|
| NT5DC2      | ENSG00000168268.10                   | 0.473408333                 | 1            | 1            | 0.473408333  |                                |             |   |
|             | Brain_Caudate_basal_ganglia          | 0.473408333                 |              |              |              | Brain_Caudate_basal_ganglia    | 1           | 1 |
|             | 1                                    | -0.716944516                | -0.716944516 | -0.716944516 | NA           | 1                              | 0           |   |
|             | 0.998207054                          |                             |              |              |              |                                |             |   |
| LIMA1       | ENSG00000050405.13                   | 0.47349858                  | 1            | 1            | 0.47349858   |                                |             |   |
|             | Brain_Spinal_cord_cervical_c-1       | 0.47349858                  |              |              |              | Brain_Spinal_cord_cervical_c-1 | 1           | 1 |
|             | 1                                    | 0.716798269                 | 0.716798269  | 0.716798269  | NA           | 1                              | 0           |   |
|             | 0.998207054                          |                             |              |              |              |                                |             |   |
| NR1H2       | ENSG00000131408.13                   | 0.473656721                 | 1            | 1            | 0.473656721  |                                |             |   |
|             | Brain_Hippocampus                    | 0.473656721                 |              |              |              | Brain_Hippocampus              | 1           | 1 |
|             | 0.716542037                          | 0.716542037                 | 0.716542037  | NA           | 1            | 0                              | 0.998207054 |   |
| PUM3        | ENSG00000080608.9                    | 0.473747328                 | 3            | 3            | 0.226812335  |                                |             |   |
|             | Brain_Putamen_basal_ganglia          | 0.540220616                 |              |              |              | Brain_Caudate_basal_ganglia    |             |   |
|             | 1.534635065                          | 0.485029074                 | 0.485029074  | -1.208610984 | -0.61247941  |                                |             |   |
|             | -0.97965935                          | 0.321206338                 | 3            | 0            | 0.998207054  |                                |             |   |
| RP11-61K9.3 | ENSG00000275964.1                    | 0.473842045                 | 1            | 1            | 0.473842045  |                                |             |   |
|             | Brain_Amygdala                       | 0.473842045                 |              |              |              | Brain_Amygdala                 | 1           | 1 |
|             | 0.71624182                           | 0.71624182                  | NA           | 1            | 0            | 0.998207054                    |             |   |
|             | 0.998207054                          |                             |              |              |              |                                |             |   |
| SYK         | ENSG00000165025.14                   | 0.473855522                 | 1            | 1            | 0.473855522  | Brain_Cortex                   |             |   |
|             | 0.473855522                          | Brain_Cortex                | 1            | 1            | 1            | 0.716219989                    | 0.716219989 |   |
|             | 0.716219989                          | NA                          | 1            | 0            | 0.998207054  |                                |             |   |
| IL12RB1     | ENSG00000096996.15                   | 0.473947886                 | 4            | 4            | 0.157575939  |                                |             |   |
|             | Brain_Cortex                         | 0.919823559                 |              |              |              | Brain_Frontal_Cortex_BA9       | 1.527216519 |   |
|             | 0.562755932                          | 0.562755932                 | -1.413271402 | 0.100655977  | -0.802490638 |                                |             |   |
|             | 0.676437566                          | 4                           | 0            | 0.998207054  |              |                                |             |   |
| MIATNB      | ENSG00000244625.5                    | 0.474005306                 | 5            | 5            | 0.15257831   | Brain_Cerebellum               |             |   |
|             | 0.593274668                          | Brain_Cerebellar_Hemisphere | 2.294370101  | 0.284672468  |              |                                |             |   |
|             | 0.284672468                          | 0.534096649                 | 1.430483457  | 1.13926396   | 0.388271531  |                                | 5           |   |
|             | 0                                    | 0.998207054                 |              |              |              |                                |             |   |
| TMPRSS4-AS1 | ENSG00000255274.9                    | 0.474068591                 | 10           | 4            | 0.097595424  |                                |             |   |
|             | Brain_Spinal_cord_cervical_c-1       | 0.802210313                 |              |              |              |                                |             |   |
|             | Brain_Anterior_cingulate_cortex_BA24 | 8.115369856                 | 0.000841739  |              |              |                                |             |   |
|             | 0.300021201                          | 0.250487574                 | 1.65662446   | 0.99326713   | 0.413304606  | 4                              | 0           |   |
|             | 0.998207054                          |                             |              |              |              |                                |             |   |
| MCM7        | ENSG00000166508.17                   | 0.474244242                 | 2            | 2            | 0.500409221  | Brain_Cerebellum               |             |   |
|             | 0.611089363                          | Brain_Cerebellar_Hemisphere | 1.528702387  | 0.471297613  |              |                                |             |   |
|             | 0.471297613                          | -0.673846008                | 0.508519078  | -0.082663465 | 0.83605837   | 2                              |             |   |
|             | 0                                    | 0.998207054                 |              |              |              |                                |             |   |
| OSMR-AS1    | ENSG00000249740.2                    | 0.474393252                 | 1            | 1            | 0.474393252  |                                |             |   |
|             | Brain_Putamen_basal_ganglia          | 0.474393252                 |              |              |              | Brain_Putamen_basal_ganglia    | 1           | 1 |
|             | 1                                    | 0.715349269                 | 0.715349269  | 0.715349269  | NA           | 1                              | 0           |   |
|             | 0.998207054                          |                             |              |              |              |                                |             |   |
| ANP32B      | ENSG00000136938.8                    | 0.474446838                 | 1            | 1            | 0.474446838  |                                |             |   |
|             | Brain_Hippocampus                    | 0.474446838                 |              |              |              | Brain_Hippocampus              | 1           | 1 |
|             | 0.715262529                          | 0.715262529                 | 0.715262529  | NA           | 1            | 0                              | 0.998207054 |   |
| SHISA9      | ENSG00000237515.8                    | 0.474447947                 | 1            | 1            | 0.474447947  |                                |             |   |
|             | Brain_Cortex                         | 0.474447947                 |              |              |              | Brain_Cortex                   | 1           | 1 |
|             | 0.715260733                          | 0.715260733                 | NA           | 1            | 0            | 0.998207054                    |             |   |
|             | 0.998207054                          |                             |              |              |              |                                |             |   |
| RHOQ        | ENSG00000119729.11                   | 0.474489416                 | 1            | 1            | 0.474489416  |                                |             |   |
|             | Brain_Caudate_basal_ganglia          | 0.474489416                 |              |              |              | Brain_Caudate_basal_ganglia    | 1           | 1 |
|             | 1                                    | -0.715193611                | -0.715193611 | -0.715193611 | NA           | 1                              | 0           |   |
|             | 0.998207054                          |                             |              |              |              |                                |             |   |
| PRELID3A    | ENSG00000141391.13                   | 0.474495443                 | 6            | 4            | 0.321246764  |                                |             |   |
|             | Brain_Hippocampus                    | 0.899674374                 |              |              |              | Brain_Spinal_cord_cervical_c-1 |             |   |
|             | 4.478060204                          | 0.024452268                 | 0.177271159  | -0.991899069 | 0.726310975  |                                |             |   |
|             | -0.20449999                          | 0.618863994                 | 4            | 0            | 0.998207054  |                                |             |   |
| SH3RF1      | ENSG00000154447.14                   | 0.474496363                 | 3            | 2            | 0.250091503  |                                |             |   |
|             | Brain_Spinal_cord_cervical_c-1       | 0.429335771                 |              |              |              | Brain_Substantia_nigra         |             |   |
|             | 2.793168584                          | 0.055702159                 | 0.151129257  | -1.150127157 | -0.790328801 |                                |             |   |
|             | -1.016110229                         | 0.196670427                 | 2            | 0            | 0.998207054  |                                |             |   |
| GBP4        | ENSG00000162654.8                    | 0.474669653                 | 1            | 1            | 0.474669653  |                                |             |   |
|             | Brain_Cerebellar_Hemisphere          | 0.474669653                 |              |              |              | Brain_Cerebellar_Hemisphere    | 1           | 1 |

|            |                                       |              |                                      |              |              |             |
|------------|---------------------------------------|--------------|--------------------------------------|--------------|--------------|-------------|
| 1          | -0.714901916                          | -0.714901916 | -0.714901916                         | NA           | 1            | 0           |
| AKR1C1     | ENSG00000187134.13                    | 0.474819178  | 13                                   | 3            | 0.075439469  |             |
|            | Brain_Spinal_cord_cervical_c-1        | 0.96011207   | Brain_Frontal_Cortex_BA9             |              |              |             |
|            | 10.61587202                           | 0.001348494  | 0.362413968                          | -1.777783197 | -0.050012948 |             |
|            | -1.200558296                          | 0.403497474  | 3                                    | 0            | 0.998207054  |             |
| AC007405.6 | ENSG00000239467.5                     | 0.474825948  | 9                                    | 9            | 0.033825231  |             |
|            | Brain_Anterior_cingulate_cortex_BA24  | 0.936085466  |                                      |              |              |             |
|            | Brain_Nucleus_accumbens_basal_ganglia | 3.738645162  | 0.129431772                          |              |              |             |
|            | 0.129431772                           | -2.122148957 | -0.080190852                         | -1.078044352 | 0.660839722  |             |
|            | 9                                     | 0            | 0.998207054                          |              |              |             |
| ZNF888     | ENSG00000213793.5                     | 0.474866042  | 3                                    | 3            | 0.117773073  |             |
|            | Brain_Cerebellar_Hemisphere           | 0.944491752  | Brain_Caudate_basal_ganglia          |              |              |             |
|            | 1.107232173                           | 0.898650198  | 0.898650198                          | -1.564189499 | 0.088369056  |             |
|            | -0.468731653                          | 0.948740613  | 3                                    | 0            | 0.998207054  |             |
| ATRAID     | ENSG00000138085.16                    | 0.475016599  | 7                                    | 2            | 0.209397598  |             |
|            | Brain_Cortex                          | 0.994484663  | Brain_Anterior_cingulate_cortex_BA24 |              |              |             |
|            | 5.817451117                           | 0.003272095  | 0.803343057                          | -1.255223607 | 0.006912505  |             |
|            | -0.901992653                          | 0.427872403  | 2                                    | 0            | 0.998207054  |             |
| PLS1       | ENSG00000120756.12                    | 0.475167424  | 2                                    | 2            | 0.26852702   |             |
|            | Brain_Anterior_cingulate_cortex_BA24  | 0.744463416  | Brain_Putamen_basal_ganglia          |              |              |             |
|            | 1.163469522                           | 0.836530478  | 0.836530478                          | -1.106461036 | 0.325948373  |             |
|            | -0.390256332                          | 1.012866407  | 2                                    | 0            | 0.998207054  |             |
| AJUBA      | ENSG00000129474.15                    | 0.475236886  | 1                                    | 1            | 0.475236886  |             |
|            | Brain_Caudate_basal_ganglia           | 0.475236886  | Brain_Caudate_basal_ganglia          | 1            | 1            |             |
|            | 1                                     | -0.713984303 | -0.713984303                         | -0.713984303 | NA           | 1           |
|            | 0.998207054                           |              |                                      |              |              | 0           |
| CIDEA      | ENSG00000176194.17                    | 0.47528071   | 4                                    | 4            | 0.367535297  |             |
|            | Brain_Caudate_basal_ganglia           | 0.995171605  | Brain_Anterior_cingulate_cortex_BA24 |              |              |             |
|            | 1.778480519                           | 0.362764783  | 0.362764783                          | -0.715928204 | 0.901099728  |             |
|            | 0.100431498                           | 0.66677783   | 4                                    | 0            | 0.998207054  |             |
| ETV7       | ENSG00000010030.13                    | 0.475294356  | 4                                    | 4            | 0.282263114  |             |
|            | Brain_Caudate_basal_ganglia           | 0.676549602  | Brain_Substantia_nigra               |              |              |             |
|            | 1.751482957                           | 0.341297251  | 0.341297251                          | -0.417176104 | 1.075249332  |             |
|            | 0.595334204                           | 0.691722969  | 4                                    | 0            | 0.998207054  |             |
| AC108488.4 | ENSG00000242282.6                     | 0.475301109  | 1                                    | 1            | 0.475301109  |             |
|            | Brain_Nucleus_accumbens_basal_ganglia | 0.475301109  |                                      |              |              |             |
|            | Brain_Nucleus_accumbens_basal_ganglia | 1            | 1                                    | 1            | -0.713880446 |             |
|            | -0.713880446                          | -0.713880446 | NA                                   | 1            | 0            | 0.998207054 |
| ACAD9      | ENSG00000177646.18                    | 0.475424164  | 10                                   | 10           | 0.179587742  |             |
|            | Brain_Cerebellar_Hemisphere           | 0.848281527  | Brain_Anterior_cingulate_cortex_BA24 |              |              |             |
|            | 2.092388099                           | 0.14782681   | 0.14782681                           | -1.294468971 | 1.342025457  |             |
|            | 0.371060292                           | 0.925213093  | 10                                   | 0            | 0.998207054  |             |
| ZNF287     | ENSG00000141040.14                    | 0.475567458  | 1                                    | 1            | 0.475567458  |             |
|            | Brain_Caudate_basal_ganglia           | 0.475567458  | Brain_Caudate_basal_ganglia          | 1            | 1            |             |
|            | 1                                     | -0.713449813 | -0.713449813                         | -0.713449813 | NA           | 1           |
|            | 0.998207054                           |              |                                      |              |              | 0           |
| KCNF1      | ENSG00000162975.4                     | 0.475604974  | 1                                    | 1            | 0.475604974  |             |
|            | Brain_Frontal_Cortex_BA9              | 0.475604974  | Brain_Frontal_Cortex_BA9             | 1            | 1            |             |
|            | 1                                     | 0.713389168  | 0.713389168                          | 0.713389168  | NA           | 1           |
|            | 0.998207054                           |              |                                      |              |              | 0           |
| MILR1      | ENSG00000271605.5                     | 0.475660582  | 3                                    | 3            | 0.144419269  |             |
|            | Brain_Spinal_cord_cervical_c-1        | 0.759113094  | Brain_Cerebellum                     | 2.31623929   |              |             |
|            | 0.179572262                           | 0.179572262  | 0.306645661                          | 1.459530076  | 0.755519501  |             |
|            | 0.617338386                           | 3            | 0                                    | 0.998207054  |              |             |
| C1QBP      | ENSG00000108561.8                     | 0.475831126  | 2                                    | 2            | 0.222950907  |             |
|            | Brain_Frontal_Cortex_BA9              | 0.775117246  | Brain_Amygdala                       | 1.24271945   | 0.75728055   |             |
|            | 0.75728055                            | -1.218718887 | -0.285687805                         | -0.752203346 | 0.659752605  | 2           |
|            | 0                                     | 0.998207054  |                                      |              |              |             |
| SPRED1     | ENSG00000166068.12                    | 0.475848471  | 2                                    | 2            | 0.295447534  |             |
|            | Brain_Hippocampus                     | 0.462903023  | Brain_Frontal_Cortex_BA9             | 1.107684636  |              |             |
|            | 0.892315364                           | 0.892315364  | 0.73407501                           | 1.046245862  | 0.890160436  |             |

|               |                                       |                                       |              |              |                                |             |                  |   |   |
|---------------|---------------------------------------|---------------------------------------|--------------|--------------|--------------------------------|-------------|------------------|---|---|
|               | 0.220738126                           | 2                                     | 0            | 0.998207054  |                                |             |                  |   |   |
| SHQ1          | ENSG00000144736.13                    | 0.475898759                           | 2            | 2            | 0.324094593                    |             |                  |   |   |
|               | Brain_Frontal_Cortex_BA9              | 0.615088105                           |              |              | Brain_Cerebellum1.201375599    |             |                  |   |   |
|               | 0.798624401                           | 0.798624401                           |              | 0.502823877  | 0.986078501                    |             | 0.744451189      |   |   |
|               | 0.341712622                           | 2                                     | 0            | 0.998207054  |                                |             |                  |   |   |
| SPTLC2        | ENSG00000100596.6                     | 0.476015944                           | 1            | 1            | 0.476015944                    |             |                  |   |   |
|               | Brain_Cerebellum0.476015944           | Brain_Cerebellum1                     | 1            | 1            | -0.712724999                   |             |                  |   |   |
|               | -0.712724999                          | -0.712724999                          | NA           | 1            | 0.998207054                    |             |                  |   |   |
| TUBGCP4       | ENSG00000137822.12                    | 0.476053059                           | 3            | 3            | 0.143717397                    |             |                  |   |   |
|               | Brain_Anterior_cingulate_cortex_BA24  | 0.85032951                            |              |              | Brain_Hypothalamus             |             |                  |   |   |
|               | 1.909976322                           | 0.510963523                           |              | 0.510963523  | 0.188698012                    |             | 1.462086905      |   |   |
|               | 0.707395666                           | 0.668692416                           | 3            | 0            | 0.998207054                    |             |                  |   |   |
| SULF2         | ENSG00000196562.14                    | 0.476098589                           | 1            | 1            | 0.476098589                    |             |                  |   |   |
|               | Brain_Hypothalamus                    | 0.476098589                           |              |              | Brain_Hypothalamus             | 1           | 1                | 1 |   |
|               | 0.712591474                           | 0.712591474                           | 0.712591474  | NA           | 1                              | 0           | 0.998207054      |   |   |
| HSPA14        | ENSG00000187522.14                    | 0.476195647                           | 1            | 1            | 0.476195647                    |             |                  |   |   |
|               | Brain_Nucleus_accumbens_basal_ganglia | 0.476195647                           |              |              |                                |             |                  |   |   |
|               | Brain_Nucleus_accumbens_basal_ganglia | 1                                     | 1            | 1            | 0.712434679                    |             |                  |   |   |
|               | 0.712434679                           | 0.712434679                           | NA           | 1            | 0.998207054                    |             |                  |   |   |
| NT5DC1        | ENSG00000178425.13                    | 0.476212066                           | 3            | 3            | 0.211919928                    |             |                  |   |   |
|               | Brain_Spinal_cord_cervical_c-1        | 0.972230785                           |              |              | Brain_Caudate_basal_ganglia    |             |                  |   |   |
|               | 1.844113113                           | 0.466408749                           | 0.466408749  |              | -0.034810578                   |             | 1.248303514      |   |   |
|               | 0.627477001                           | 0.642561054                           | 3            | 0            | 0.998207054                    |             |                  |   |   |
| CASQ1         | ENSG00000143318.12                    | 0.476344316                           | 3            | 3            | 0.286959494                    |             |                  |   |   |
|               | Brain_Anterior_cingulate_cortex_BA24  | 0.865537006                           |              |              | Brain_Frontal_Cortex_BA9       |             |                  |   |   |
|               | 2.269915412                           | 0.175053461                           | 0.175053461  |              | -0.466315968                   |             | 1.064815357      |   |   |
|               | 0.143056431                           | 0.81196046                            | 3            | 0            | 0.998207054                    |             |                  |   |   |
| CBR3          | ENSG00000159231.5                     | 0.476362683                           | 8            | 4            | 0.374752663                    |             | Brain_Cerebellum |   |   |
|               | 0.91206978                            | Brain_Nucleus_accumbens_basal_ganglia | 6.283334141  |              | 0.001938362                    |             |                  |   |   |
|               | 0.235163425                           | -0.734612727                          | 0.887606115  |              | 0.272399591                    |             | 0.492760445      |   |   |
|               | 4                                     | 0                                     | 0.998207054  |              |                                |             |                  |   |   |
| RP11-539L10.3 | ENSG00000251580.1                     | 0.476513607                           | 12           | 4            | 0.074603267                    |             |                  |   |   |
|               | Brain_Caudate_basal_ganglia           | 0.961210622                           |              |              | Brain_Cortex                   | 8.72015604  |                  |   |   |
|               | 0.017858125                           | 0.516762569                           | 0.048634442  |              | 1.782895802                    |             | 0.847813674      |   |   |
|               | 0.569095625                           | 4                                     | 0            | 0.998207054  |                                |             |                  |   |   |
| KCTD3         | ENSG00000136636.12                    | 0.476526488                           | 1            | 1            | 0.476526488                    |             |                  |   |   |
|               | Brain_Substantia_nigra                | 0.476526488                           |              |              | Brain_Substantia_nigra         | 1           | 1                |   |   |
|               | 1                                     | -0.711900346                          | -0.711900346 | -0.711900346 | NA                             | 1           | 0                |   |   |
|               | 0.998207054                           |                                       |              |              |                                |             |                  |   |   |
| MAK16         | ENSG00000198042.10                    | 0.476581828                           | 2            | 2            | 0.412631357                    |             |                  |   |   |
|               | Brain_Substantia_nigra                | 0.430613771                           |              |              | Brain_Caudate_basal_ganglia    |             |                  |   |   |
|               | 1.128163504                           | 0.871836496                           | 0.871836496  |              | -0.819271801                   |             | 0.788141794      |   |   |
|               | -0.015565003                          | 1.136613053                           | 2            | 0            | 0.998207054                    |             |                  |   |   |
| SLC41A1       | ENSG00000133065.10                    | 0.476582247                           | 5            | 4            | 0.096758156                    |             |                  |   |   |
|               | Brain_Spinal_cord_cervical_c-1        | 0.783366407                           |              |              | Brain_Cerebellum3.577403339    |             |                  |   |   |
|               | 0.001172959                           | 0.120498689                           | -1.66077743  |              | -0.2749347                     |             | -0.676554719     |   |   |
|               | 0.576962808                           | 4                                     | 0            | 0.998207054  |                                |             |                  |   |   |
| LAMTOR4       | ENSG00000188186.10                    | 0.476603251                           | 4            | 4            | 0.141441443                    |             |                  |   |   |
|               | Brain_Cerebellar_Hemisphere           | 0.956778051                           |              |              | Brain_Cortex                   | 2.439403284 |                  |   |   |
|               | 0.11789936                            | 0.11789936                            | -1.470444366 | 0.626587082  | -0.545988047                   |             |                  |   |   |
|               | 1.050300596                           | 4                                     | 0            | 0.998207054  |                                |             |                  |   |   |
| ZNF649        | ENSG00000198093.10                    | 0.47660376                            | 11           | 7            | 0.392722851                    |             |                  |   |   |
|               | Brain_Hippocampus                     | 0.985826353                           |              |              | Brain_Spinal_cord_cervical_c-1 |             |                  |   |   |
|               | 7.140740856                           | 0.042645103                           | 0.288765384  |              | -0.854689886                   |             | 0.713891214      |   |   |
|               | -0.017579255                          | 0.527115249                           | 7            | 0            | 0.998207054                    |             |                  |   |   |
| HACD1         | ENSG00000165996.13                    | 0.47670537                            | 3            | 3            | 0.39400655                     |             |                  |   |   |
|               | Brain_Spinal_cord_cervical_c-1        | 0.794655576                           |              |              | Brain_Hippocampus              |             |                  |   |   |
|               | 2.218528753                           | 0.326167936                           | 0.326167936  |              | -0.852373993                   |             | 0.449123378      |   |   |
|               | -0.047660233                          | 0.703270634                           | 3            | 0            | 0.998207054                    |             |                  |   |   |
| SMPD4         | ENSG00000136699.19                    | 0.476839853                           | 1            | 1            | 0.476839853                    |             |                  |   |   |
|               | Brain_Spinal_cord_cervical_c-1        | 0.476839853                           |              |              | Brain_Spinal_cord_cervical_c-1 |             |                  |   |   |
|               | 1                                     | 1                                     | 1            | 0.711394425  | 0.711394425                    | 0.711394425 | NA               | 1 | 0 |

0.998207054  
MPST ENSG00000128309.16 0.476954496 3 3 0.197333928  
Brain\_Caudate\_basal\_ganglia0.95986418 Brain\_Spinal\_cord\_cervical\_c-1  
1.472532748 0.526300631 0.526300631 -1.28918457 0.808305829  
-0.177067588 1.054473538 3 0 0.998207054  
RP11-1000B6.3 ENSG00000261064.1 0.477115459 5 5 0.045154472  
Brain\_Frontal\_Cortex\_BA9 0.925049948 Brain\_Putamen\_basal\_ganglia  
1.129895786 0.787885032 0.787885032 -0.62596744 2.003212616  
0.398333284 0.972113765 5 0 0.998207054  
FTSJ3 ENSG00000108592.16 0.477220562 13 1 0.222178579  
Brain\_Hippocampus 0.840970055 Brain\_Substantia\_nigra 12.41012936  
0.002679057 12.41012936 -1.220755573 -0.200652818 -0.692553942  
0.23775067 1 0 0.998207054  
PLEKHG5 ENSG00000171680.21 0.477304128 5 5 0.116570403  
Brain\_Anterior\_cingulate\_cortex\_BA24 0.770095008 Brain\_Cortex  
1.856188244 0.444518096 0.444518096 0.292250623 1.569332844  
1.012554138 0.476720826 5 0 0.998207054  
C18orf8 ENSG00000141452.9 0.477308721 8 3 0.115099237  
Brain\_Cerebellum0.361003175 Brain\_Spinal\_cord\_cervical\_c-1 6.92339771  
0.001673748 0.338871643 -1.575681439 -0.91345522 -1.385494977  
0.209102437 3 0 0.998207054  
GPD1L ENSG00000152642.10 0.477346592 8 6 0.304894142  
Brain\_Frontal\_Cortex\_BA9 0.972375593 Brain\_Cerebellum3.732438014  
0.017015729 0.387288521 -1.025994573 0.886770725 -0.14537625  
0.639548276 6 0 0.998207054  
MROH8 ENSG00000101353.14 0.47736606 7 4 0.06646297 Brain\_Cortex  
0.596343067 Brain\_Caudate\_basal\_ganglia3.752205302 0.00845525  
0.302698812 -1.835288393 -0.529666661 -1.206060883 0.411671297  
4 0 0.998207054  
SLC25A1 ENSG00000100075.9 0.477411989 3 3 0.175626239  
Brain\_Spinal\_cord\_cervical\_c-1 0.97693533 Brain\_Cerebellum1.216499607  
0.784621593 0.784621593 -0.820019274 1.354345302 0.168471575  
1.100538653 3 0 0.998207054  
UBE2S ENSG00000108106.13 0.477416368 1 1 0.477416368  
Brain\_Substantia\_nigra 0.477416368 Brain\_Substantia\_nigra 1 1  
1 -0.710464128 -0.710464128 -0.710464128 NA 1 0  
0.998207054  
ATP6V0E2 ENSG00000171130.17 0.477434914 13 9 0.073068811  
Brain\_Putamen\_basal\_ganglia0.917742118 Brain\_Hippocampus 5.132684537  
0.00417984 0.243336279 -1.792400651 1.762728569 0.29388595  
0.813915221 9 0 0.998207054  
NPDC1 ENSG00000107281.9 0.477478011 1 1 0.477478011  
Brain\_Putamen\_basal\_ganglia0.477478011 Brain\_Putamen\_basal\_ganglia1 1  
1 0.710364695 0.710364695 0.710364695 NA 1 0  
0.998207054  
RP3-454B23.1 ENSG00000255775.1 0.477529595 1 1 0.477529595  
Brain\_Hippocampus 0.477529595 Brain\_Hippocampus 1 1 1  
-0.710281491 -0.710281491 -0.710281491 NA 1 0 0.998207054  
CFAP74 ENSG00000142609.17 0.477602417 4 3 0.156163081  
Brain\_Anterior\_cingulate\_cortex\_BA24 0.559596826 Brain\_Amygdala  
1.993657255 0.008900831 0.443213245 0.583440462 1.418094827  
0.900046891 0.363302803 3 0 0.998207054  
SBNO1 ENSG00000139697.13 0.477629166 2 2 0.22773798  
Brain\_Spinal\_cord\_cervical\_c-1 0.93451885 Brain\_Hippocampus 1.057158589  
0.942841411 0.942841411 -0.082160793 1.206206236 0.562022721  
0.911013063 2 0 0.998207054  
TMEM74B ENSG00000125895.5 0.477647 3 3 0.164260016  
Brain\_Caudate\_basal\_ganglia0.934588301 Brain\_Nucleus\_accumbens\_basal\_ganglia  
1.084026648 0.916025091 0.916025091 -1.390885944 -0.082073456  
-0.698563607 0.657693258 3 0 0.998207054  
LIAS ENSG00000121897.14 0.477682645 3 3 0.292640999  
Brain\_Anterior\_cingulate\_cortex\_BA24 0.539470751 Brain\_Cerebellum

|              |                                       |                                       |                                       |                  |                       |
|--------------|---------------------------------------|---------------------------------------|---------------------------------------|------------------|-----------------------|
|              | 1.931142026                           | 0.092031178                           | 0.092031178                           | 0.613613514      | 1.05234564            |
|              | 0.814405931                           | 0.22171245 3                          | 0                                     | 0.998207054      |                       |
| SHISA6       | ENSG00000188803.14                    | 0.47768335 3                          | 3                                     | 0.250312379      |                       |
|              | Brain_Anterior_cingulate_cortex_BA24  | 0.681200621                           |                                       | Brain_Cerebellum |                       |
|              | 1.141003552                           | 0.82858168 0.82858168                 | -1.014229351                          | 1.149590969      |                       |
|              | 0.182062315                           | 1.099899532                           | 3 0                                   | 0.998207054      |                       |
| SLC26A7      | ENSG00000147606.8                     | 0.477791706                           | 1                                     | 1                | 0.477791706           |
|              | Brain_Cortex                          | 0.477791706                           | Brain_Cortex                          | 1                | 1 1 0.709858793       |
|              | 0.709858793                           | 0.709858793                           | NA 1 0                                | 0.998207054      |                       |
| NID2         | ENSG00000087303.17                    | 0.478030919                           | 2 2                                   | 0.227128888      |                       |
|              | Brain_Spinal_cord_cervical_c-1        | 0.672604045                           |                                       | Brain_Cerebellum | 1.447566016           |
|              | 0.552433984                           | 0.552433984                           | -0.422576815                          | 1.20778782       | 0.392605502           |
|              | 1.152841889                           | 2 0                                   | 0.998207054                           |                  |                       |
| TTC27        | ENSG00000018699.11                    | 0.478238711                           | 11 6                                  | 0.241878223      |                       |
|              | Brain_Cerebellar_Hemisphere           | 0.94974899                            | Brain_Frontal_Cortex_BA9              | 6.987685381      |                       |
|              | 0.057797612                           | 0.293484394                           | -1.170305067                          | 0.752639127      | -0.339433442          |
|              | 0.559842726                           | 6 0                                   | 0.998207054                           |                  |                       |
| PALD1        | ENSG00000107719.8                     | 0.478285271                           | 4 4                                   | 0.091609557      | Brain_Amygdala        |
|              | 0.98196607                            | Brain_Nucleus_accumbens_basal_ganglia | 1.183392941                           | 0.871059294      |                       |
|              | 0.871059294                           | -1.686967731                          | -0.022604105                          | -0.631162109     | 0.747686478           |
|              | 4 0                                   | 0.998207054                           |                                       |                  |                       |
| CNGA3        | ENSG00000144191.11                    | 0.478394516                           | 1 1                                   | 0.478394516      | Brain_Cerebellum      |
|              | 0.478394516                           | Brain_Cerebellum                      | 1 1 1                                 | 0.70888714       | 0.70888714 0.70888714 |
|              | NA 1 0                                | 0.998207054                           |                                       |                  |                       |
| ACTN2        | ENSG00000077522.12                    | 0.478416843                           | 3 3                                   | 0.225038479      |                       |
|              | Brain_Spinal_cord_cervical_c-1        | 0.648445872                           |                                       |                  |                       |
|              | Brain_Nucleus_accumbens_basal_ganglia | 1.059617821                           |                                       | 0.924411066      |                       |
|              | 0.924411066                           | -0.813025672                          | 1.213238944                           | 0.285378515      | 1.023841273           |
|              | 3 0                                   | 0.998207054                           |                                       |                  |                       |
| RP11-48G14.1 | ENSG00000261823.1                     | 0.478497794                           | 1 1                                   | 0.478497794      |                       |
|              | Brain_Anterior_cingulate_cortex_BA24  | 0.478497794                           |                                       |                  |                       |
|              | Brain_Anterior_cingulate_cortex_BA24  | 1 1 1                                 | -0.708720736                          |                  |                       |
|              | -0.708720736                          | -0.708720736                          | NA 1 0                                | 0.998207054      |                       |
| RPAIN        | ENSG00000129197.14                    | 0.478504799                           | 1 1                                   | 0.478504799      |                       |
|              | Brain_Anterior_cingulate_cortex_BA24  | 0.478504799                           |                                       |                  |                       |
|              | Brain_Anterior_cingulate_cortex_BA24  | 1 1 1                                 | -0.70870945                           |                  |                       |
|              | -0.70870945                           | -0.70870945                           | NA 1 0                                | 0.998207054      |                       |
| AC019186.1   | ENSG00000234584.1                     | 0.478565915                           | 2 2                                   | 0.251981129      |                       |
|              | Brain_Hippocampus                     | 0.655759002                           | Brain_Cortex                          | 1.038438231      |                       |
|              | 0.961561769                           | 0.961561769                           | 0.44577608                            | 1.145550645      | 0.795663362           |
|              | 0.494815341                           | 2 0                                   | 0.998207054                           |                  |                       |
| KLF11        | ENSG00000172059.10                    | 0.478772331                           | 2 2                                   | 0.235532095      | Brain_Cerebellum      |
|              | 0.840002111                           | Brain_Cerebellar_Hemisphere           | 1.371178136                           | 0.628821864      |                       |
|              | 0.628821864                           | -1.186228446                          | -0.201890778                          | -0.694059612     | 0.69603184 2          |
|              | 0                                     | 0.998207054                           |                                       |                  |                       |
| TTC24        | ENSG00000187862.11                    | 0.478830477                           | 1 1                                   | 0.478830477      |                       |
|              | Brain_Nucleus_accumbens_basal_ganglia | 0.478830477                           |                                       |                  |                       |
|              | Brain_Nucleus_accumbens_basal_ganglia | 1 1 1                                 | 0.708184844                           |                  |                       |
|              | 0.708184844                           | 0.708184844                           | NA 1 0                                | 0.998207054      |                       |
| LINC00519    | ENSG00000258955.1                     | 0.478909694                           | 1 1                                   | 0.478909694      |                       |
|              | Brain_Hypothalamus                    | 0.478909694                           | Brain_Hypothalamus                    | 1 1 1            |                       |
|              | -0.70805727                           | -0.70805727                           | -0.70805727                           | NA 1 0           | 0.998207054           |
| ZNF586       | ENSG00000083828.15                    | 0.478912077                           | 9 6                                   | 0.097320543      |                       |
|              | Brain_Substantia_nigra                | 0.683553974                           | Brain_Nucleus_accumbens_basal_ganglia |                  |                       |
|              | 5.309924794                           | 0.030474235                           | 0.255145877                           | -0.9695021       | 1.657984759           |
|              | -0.319511581                          | 0.890161737                           | 6 0                                   | 0.998207054      |                       |
| CACNG1       | ENSG00000108878.4                     | 0.47897278                            | 1 1                                   | 0.47897278       |                       |
|              | Brain_Spinal_cord_cervical_c-1        | 0.47897278                            | Brain_Spinal_cord_cervical_c-1        | 1                |                       |
|              | 1 1                                   | 0.707955681                           | 0.707955681                           | 0.707955681      | NA 1 0                |
|              | 0.998207054                           |                                       |                                       |                  |                       |
| ATR          | ENSG00000175054.14                    | 0.478992171                           | 2 2                                   | 0.481989923      |                       |
|              | Brain_Cerebellar_Hemisphere           | 0.646384338                           | Brain_Caudate_basal_ganglia           |                  |                       |

|              |                                       |                             |                                |              |                             |                             |              |
|--------------|---------------------------------------|-----------------------------|--------------------------------|--------------|-----------------------------|-----------------------------|--------------|
|              | 1.535347899                           | 0.464652101                 | 0.464652101                    | -0.458790889 | 0.703105631                 |                             |              |
|              | 0.122157371                           | 0.821584908                 | 2                              | 0            | 0.998207054                 |                             |              |
| EPX          | ENSG00000121053.5                     | 0.478996078                 | 4                              | 4            | 0.195177631                 |                             |              |
|              | Brain_Substantia_nigra                | 0.801680576                 |                                |              | Brain_Cerebellar_Hemisphere |                             |              |
|              | 2.017872209                           | 0.305428232                 | 0.305428232                    | -1.295413478 | 0.567931617                 |                             |              |
|              | -0.354710394                          | 0.764682259                 | 4                              | 0            | 0.998207054                 |                             |              |
| LINC01993    | ENSG00000204277.1                     | 0.479009546                 | 1                              | 1            | 0.479009546                 |                             |              |
|              | Brain_Nucleus_accumbens_basal_ganglia | 0.479009546                 |                                |              |                             |                             |              |
|              | Brain_Nucleus_accumbens_basal_ganglia | 1                           | 1                              | 1            | 0.707896479                 |                             |              |
|              | 0.707896479                           | 0.707896479                 | NA                             | 1            | 0                           | 0.998207054                 |              |
| GJD2         | ENSG00000159248.4                     | 0.479042741                 | 1                              | 1            | 0.479042741                 | Brain_Cerebellum            |              |
|              | 0.479042741                           | Brain_Cerebellum            | 1                              | 1            | 0.70784303                  | 0.70784303                  | 0.70784303   |
|              | NA                                    | 1                           | 0                              | 0.998207054  |                             |                             |              |
| EBF2         | ENSG00000221818.8                     | 0.47915996                  | 1                              | 1            | 0.47915996                  | Brain_Putamen_basal_ganglia |              |
|              | 0.47915996                            | Brain_Putamen_basal_ganglia | 1                              | 1            | 1                           | 0.707654306                 |              |
|              | 0.707654306                           | 0.707654306                 | NA                             | 1            | 0                           | 0.998207054                 |              |
| ENSA         | ENSG00000143420.18                    | 0.479383214                 | 1                              | 1            | 0.479383214                 |                             |              |
|              | Brain_Caudate_basal_ganglia           | 0.479383214                 |                                |              | Brain_Caudate_basal_ganglia | 1                           | 1            |
|              | 1                                     | 0.707294932                 | 0.707294932                    | 0.707294932  | NA                          | 1                           | 0            |
|              | 0.998207054                           |                             |                                |              |                             |                             |              |
| CA11         | ENSG00000063180.8                     | 0.479457389                 | 1                              | 1            | 0.479457389                 | Brain_Cerebellum            |              |
|              | 0.479457389                           | Brain_Cerebellum            | 1                              | 1            | 1                           | 0.707175552                 | 0.707175552  |
|              | 0.707175552                           | NA                          | 1                              | 0            | 0.998207054                 |                             |              |
| RHOT1        | ENSG00000126858.16                    | 0.479629423                 | 2                              | 2            | 0.412308183                 |                             |              |
|              | Brain_Cerebellar_Hemisphere           | 0.882660176                 |                                |              | Brain_Caudate_basal_ganglia | 1.64879003                  |              |
|              | 0.35120997                            | 0.35120997                  | -0.14759782                    | 0.819838495  | 0.336120338                 |                             |              |
|              | 0.684080778                           | 2                           | 0                              | 0.998207054  |                             |                             |              |
| AC009120.11  | ENSG00000275236.1                     | 0.479649044                 | 1                              | 1            | 0.479649044                 |                             |              |
|              | Brain_Cortex                          | 0.479649044                 | Brain_Cortex                   | 1            | 1                           | 1                           | -0.706867143 |
|              | -0.706867143                          | -0.706867143                | NA                             | 1            | 0                           | 0.998207054                 |              |
| RP5-115904.2 | ENSG00000272732.1                     | 0.479692257                 | 6                              | 4            | 0.354659789                 |                             |              |
|              | Brain_Nucleus_accumbens_basal_ganglia | 0.81331617                  | Brain_Putamen_basal_ganglia    |              |                             |                             |              |
|              | 4.493886841                           | 0.023054829                 | 0.22992418                     | -0.236150137 | 0.925588659                 |                             |              |
|              | 0.493195942                           | 0.422058988                 | 4                              | 0            | 0.998207054                 |                             |              |
| OCIAD1       | ENSG00000109180.14                    | 0.479720121                 | 7                              | 5            | 0.05837688                  |                             |              |
|              | Brain_Hypothalamus                    | 0.956431506                 | Brain_Cerebellum               | 4.033744485  |                             |                             |              |
|              | 0.089607982                           | 0.194891595                 | -1.892857068                   | -0.054632173 | -0.673540453                |                             |              |
|              | 0.630785396                           | 5                           | 0                              | 0.998207054  |                             |                             |              |
| TMEM39B      | ENSG00000121775.17                    | 0.479720545                 | 1                              | 1            | 0.479720545                 |                             |              |
|              | Brain_Cerebellum                      | 0.479720545                 | Brain_Cerebellum               | 1            | 1                           | 1                           | -0.706752101 |
|              | -0.706752101                          | -0.706752101                | NA                             | 1            | 0                           | 0.998207054                 |              |
| ACO2         | ENSG00000100412.15                    | 0.479772033                 | 1                              | 1            | 0.479772033                 | Brain_Cerebellum            |              |
|              | 0.479772033                           | Brain_Cerebellum            | 1                              | 1            | -0.706669266                | -0.706669266                |              |
|              | -0.706669266                          | NA                          | 1                              | 0            | 0.998207054                 |                             |              |
| ODF2         | ENSG00000136811.16                    | 0.47988924                  | 8                              | 5            | 0.130745159                 |                             |              |
|              | Brain_Caudate_basal_ganglia           | 0.763319115                 | Brain_Substantia_nigra         |              |                             |                             |              |
|              | 4.450967683                           | 0.024034402                 | 0.299813289                    | -1.511169942 | 1.011822623                 |                             |              |
|              | -0.342035712                          | 0.840485916                 | 5                              | 0            | 0.998207054                 |                             |              |
| ATIC         | ENSG00000138363.14                    | 0.479978527                 | 13                             | 2            | 0.24249807                  |                             |              |
|              | Brain_Putamen_basal_ganglia           | 0.797515153                 | Brain_Hippocampus              | 10.6683932   |                             |                             |              |
|              | 0.00358462                            | 1.055880014                 | -1.168765633                   | 0.329235865  | -0.55722257                 |                             |              |
|              | 0.492251249                           | 2                           | 0                              | 0.998207054  |                             |                             |              |
| WDR77        | ENSG00000116455.13                    | 0.480158298                 | 2                              | 2            | 0.331243428                 | Brain_Cortex                |              |
|              | 0.478615226                           | Brain_Hypothalamus          | 1.015174972                    | 0.984825028  |                             |                             |              |
|              | 0.984825028                           | 0.708531552                 | 0.971612366                    | 0.840071959  | 0.186026228                 |                             |              |
|              | 2                                     | 0                           | 0.998207054                    |              |                             |                             |              |
| FUZ          | ENSG00000010361.13                    | 0.480339905                 | 4                              | 4            | 0.481224747                 | Brain_Cortex                |              |
|              | 0.935602433                           | Brain_Cerebellum            | 2.28902123                     | 0.115924492  | 0.115924492                 |                             |              |
|              | -0.151070687                          | 0.70433408                  | 0.227564974                    | 0.412293641  | 4                           | 0                           |              |
|              | 0.998207054                           |                             |                                |              |                             |                             |              |
| ZNHIT3       | ENSG00000273611.4                     | 0.480494733                 | 1                              | 1            | 0.480494733                 |                             |              |
|              | Brain_Spinal_cord_cervical_c-1        | 0.480494733                 | Brain_Spinal_cord_cervical_c-1 |              |                             |                             |              |

|               |                                       |                             |                             |              |                                      |                  |             |   |   |
|---------------|---------------------------------------|-----------------------------|-----------------------------|--------------|--------------------------------------|------------------|-------------|---|---|
|               | 1                                     | 1                           | 1                           | 0.705507071  | 0.705507071                          | 0.705507071      | NA          | 1 | 0 |
|               | 0.998207054                           |                             |                             |              |                                      |                  |             |   |   |
| HTR1B         | ENSG00000135312.6                     | 0.480523489                 | 3                           | 3            | 0.166106641                          |                  |             |   |   |
|               | Brain_Anterior_cingulate_cortex_BA24  | 0.566066818                 |                             |              | Brain_Amygdala                       |                  |             |   |   |
|               | 1.711480827                           | 0.269360516                 | 0.269360516                 | 0.573853683  | 1.384822852                          |                  |             |   |   |
|               | 0.96855069                            | 0.405914848                 | 3                           | 0            | 0.998207054                          |                  |             |   |   |
| CD274         | ENSG00000120217.13                    | 0.480549581                 | 5                           | 3            | 0.210662395                          |                  |             |   |   |
|               | Brain_Caudate_basal_ganglia           | 0.971219217                 |                             |              | Brain_Cortex                         | 3.739184955      |             |   |   |
|               | 0.004667479                           | 0.439694672                 | -0.065978717                | 1.251746104  | 0.259672051                          |                  |             |   |   |
|               | 0.561000002                           | 3                           | 0                           | 0.998207054  |                                      |                  |             |   |   |
| CCDC8         | ENSG00000169515.5                     | 0.480590846                 | 11                          | 2            | 0.0928072                            | Brain_Cerebellum |             |   |   |
|               | 0.979312585                           | Brain_Frontal_Cortex_BA9    | 9.39498945                  | 5.86E-05     | 0.813272996                          |                  |             |   |   |
|               | -0.025930735                          | 1.68077205                  | 0.882213951                 | 0.542672891  | 2                                    | 0                |             |   |   |
|               | 0.998207054                           |                             |                             |              |                                      |                  |             |   |   |
| CLVS2         | ENSG00000146352.12                    | 0.480628593                 | 4                           | 3            | 0.166688967                          |                  |             |   |   |
|               | Brain_Caudate_basal_ganglia           | 0.673764551                 |                             |              | Brain_Anterior_cingulate_cortex_BA24 |                  |             |   |   |
|               | 2.568244892                           | 0.054752201                 | 0.396679323                 | -0.723493604 | 1.382921404                          |                  |             |   |   |
|               | 0.520393357                           | 0.918735768                 | 3                           | 0            | 0.998207054                          |                  |             |   |   |
| NXPE3         | ENSG00000144815.15                    | 0.480710283                 | 1                           | 1            | 0.480710283                          | Brain_Cortex     |             |   |   |
|               | 0.480710283                           | Brain_Cortex                | 1                           | 1            | 1                                    | 0.705160624      | 0.705160624 |   |   |
|               | 0.705160624                           | NA                          | 1                           | 0            | 0.998207054                          |                  |             |   |   |
| SRGAP3-AS4    | ENSG00000235830.1                     | 0.480735041                 | 1                           | 1            | 0.480735041                          |                  |             |   |   |
|               | Brain_Hippocampus                     | 0.480735041                 | Brain_Hippocampus           | 1            | 1                                    | 1                |             |   |   |
|               | 0.705120837                           | 0.705120837                 | 0.705120837                 | NA           | 1                                    | 0                | 0.998207054 |   |   |
| RASGRP1       | ENSG00000172575.11                    | 0.480763275                 | 1                           | 1            | 0.480763275                          |                  |             |   |   |
|               | Brain_Caudate_basal_ganglia           | 0.480763275                 | Brain_Caudate_basal_ganglia | 1            | 1                                    |                  |             |   |   |
|               | 1                                     | -0.705075464                | -0.705075464                | -0.705075464 | NA                                   | 1                | 0           |   |   |
|               | 0.998207054                           |                             |                             |              |                                      |                  |             |   |   |
| AP001372.2    | ENSG00000254837.2                     | 0.480791403                 | 1                           | 1            | 0.480791403                          |                  |             |   |   |
|               | Brain_Hypothalamus                    | 0.480791403                 | Brain_Hypothalamus          | 1            | 1                                    | 1                |             |   |   |
|               | -0.705030262                          | -0.705030262                | -0.705030262                | NA           | 1                                    | 0                | 0.998207054 |   |   |
| MDGA2         | ENSG00000139915.18                    | 0.480807519                 | 4                           | 4            | 0.199771676                          |                  |             |   |   |
|               | Brain_Cerebellar_Hemisphere           | 0.65597315                  | Brain_Caudate_basal_ganglia | 1.49798024   |                                      |                  |             |   |   |
|               | 0.635734738                           | 0.635734738                 | -1.28220234                 | 1.122448949  | -0.375604936                         |                  |             |   |   |
|               | 1.055622138                           | 4                           | 0                           | 0.998207054  |                                      |                  |             |   |   |
| ZNF582-AS1    | ENSG00000267454.5                     | 0.480975461                 | 12                          | 9            | 0.085671035                          |                  |             |   |   |
|               | Brain_Anterior_cingulate_cortex_BA24  | 0.844195784                 |                             |              |                                      |                  |             |   |   |
|               | Brain_Nucleus_accumbens_basal_ganglia | 4.833328857                 |                             |              | 0.005766133                          |                  |             |   |   |
|               | 0.573668855                           | -1.449452684                | 1.718688898                 | -0.291201299 | 0.957284832                          |                  |             |   |   |
|               | 9                                     | 0                           | 0.998207054                 |              |                                      |                  |             |   |   |
| SORBS2        | ENSG00000154556.17                    | 0.481000468                 | 1                           | 1            | 0.481000468                          |                  |             |   |   |
|               | Brain_Frontal_Cortex_BA9              | 0.481000468                 | Brain_Frontal_Cortex_BA9    | 1            | 1                                    |                  |             |   |   |
|               | 1                                     | -0.70469435                 | -0.70469435                 | -0.70469435  | NA                                   | 1                | 0           |   |   |
|               | 0.998207054                           |                             |                             |              |                                      |                  |             |   |   |
| EIF2B4        | ENSG00000115211.15                    | 0.481125812                 | 2                           | 2            | 0.261210531                          |                  |             |   |   |
|               | Brain_Spinal_cord_cervical_c-1        | 0.58485716                  | Brain_Hypothalamus          | 1.088855622  |                                      |                  |             |   |   |
|               | 0.911144378                           | 0.911144378                 | -1.12353456                 | 0.546303748  | -0.288615406                         |                  |             |   |   |
|               | 1.180753991                           | 2                           | 0                           | 0.998207054  |                                      |                  |             |   |   |
| MPP4          | ENSG00000082126.17                    | 0.481245992                 | 4                           | 4            | 0.197799872                          |                  |             |   |   |
|               | Brain_Hypothalamus                    | 0.715812955                 | Brain_Caudate_basal_ganglia | 1.455985032  |                                      |                  |             |   |   |
|               | 0.544160971                           | 0.544160971                 | -1.28784515                 | 0.47405994   | -0.269990578                         |                  |             |   |   |
|               | 0.840919628                           | 4                           | 0                           | 0.998207054  |                                      |                  |             |   |   |
| TEX29         | ENSG00000153495.10                    | 0.48130193                  | 7                           | 7            | 0.197001382                          | Brain_Cerebellum |             |   |   |
|               | 0.710117672                           | Brain_Putamen_basal_ganglia | 2.331474081                 | 0.329257193  |                                      |                  |             |   |   |
|               | 0.329257193                           | -0.959656122                | 1.290141935                 | 0.0606669    | 0.813987889                          |                  |             |   | 7 |
|               | 0.998207054                           |                             |                             |              |                                      |                  |             |   |   |
| RP11-126K15.1 | ENSG00000265380.1                     | 0.481313942                 | 1                           | 1            | 0.481313942                          |                  |             |   |   |
|               | Brain_Nucleus_accumbens_basal_ganglia | 0.481313942                 |                             |              |                                      |                  |             |   |   |
|               | Brain_Nucleus_accumbens_basal_ganglia | 1                           | 1                           | 1            | 0.704190828                          |                  |             |   |   |
|               | 0.704190828                           | 0.704190828                 | NA                          | 1            | 0                                    | 0.998207054      |             |   |   |
| FAM171A2      | ENSG00000161682.14                    | 0.481363879                 | 2                           | 2            | 0.233285404                          |                  |             |   |   |
|               | Brain_Frontal_Cortex_BA9              | 0.751993744                 | Brain_Substantia_nigra      |              |                                      |                  |             |   |   |



|               |                             |                             |                                |              |              |                  |             |             |  |
|---------------|-----------------------------|-----------------------------|--------------------------------|--------------|--------------|------------------|-------------|-------------|--|
|               | 1.094888942                 | 0.905111058                 | 0.905111058                    | -1.191938389 | 0.316011547  |                  |             |             |  |
|               | -0.437963421                | 1.066281625                 | 2                              | 0            | 0.998207054  |                  |             |             |  |
| CAPN9         | ENSG00000135773.12          | 0.481452342                 | 12                             | 6            | 0.06705067   | Brain_Cortex     |             |             |  |
|               | 0.972859522                 | Brain_Cerebellar_Hemisphere | 7.093633808                    |              | 0.002396023  |                  |             |             |  |
|               | 0.293962999                 | -1.831334239                | -0.034022108                   | -1.247246767 | 0.538341119  |                  |             |             |  |
|               | 6                           | 0                           | 0.998207054                    |              |              |                  |             |             |  |
| MYO5A         | ENSG00000197535.14          | 0.481470164                 | 7                              | 3            | 0.132597066  | Brain_Cortex     |             |             |  |
|               | 0.486590906                 | Brain_Putamen_basal_ganglia | 5.845751899                    |              | 0.012262853  |                  |             |             |  |
|               | 0.375982318                 | -1.503939031                | -0.69574122                    | -1.250550275 | 0.270630214  |                  |             |             |  |
|               | 3                           | 0                           | 0.998207054                    |              |              |                  |             |             |  |
| RP11-554D14.7 | ENSG00000257141.1           | 0.481504391                 | 1                              | 1            | 0.481504391  |                  |             |             |  |
|               | Brain_Hypothalamus          | 0.481504391                 | Brain_Hypothalamus             | 1            | 1            | 1                |             |             |  |
|               | 0.703885005                 | 0.703885005                 | 0.703885005                    | NA           | 1            | 0                | 0.998207054 |             |  |
| RP11-153F10.2 | ENSG00000282860.1           | 0.481607894                 | 6                              | 4            | 0.259443691  |                  |             |             |  |
|               | Brain_Cortex                | 0.976281305                 | Brain_Spinal_cord_cervical_c-1 | 4.257788414  |              |                  |             |             |  |
|               | 0.023471779                 | 0.314342993                 | -1.127706975                   | 0.193529531  | -0.361470793 |                  |             |             |  |
|               | 0.475889886                 | 4                           | 0                              | 0.998207054  |              |                  |             |             |  |
| STARD10       | ENSG00000214530.8           | 0.481639841                 | 13                             | 3            | 0.160060185  |                  |             |             |  |
|               | Brain_Hypothalamus          | 0.961051529                 | Brain_Cerebellum               | 10.72026354  |              |                  |             |             |  |
|               | 0.004026873                 | 0.417031663                 | -1.404869174                   | 0.19671434   | -0.886698341 |                  |             |             |  |
|               | 0.467881656                 | 3                           | 0                              | 0.998207054  |              |                  |             |             |  |
| RNMT          | ENSG00000101654.17          | 0.481676287                 | 3                              | 3            | 0.575907319  |                  |             |             |  |
|               | Brain_Cerebellar_Hemisphere | 0.945152008                 | Brain_Cerebellum               | 2.181380568  |              |                  |             |             |  |
|               | 0.127128863                 | 0.127128863                 | -0.264252505                   | 0.559372802  | 0.075441435  |                  |             |             |  |
|               | 0.430340549                 | 3                           | 0                              | 0.998207054  |              |                  |             |             |  |
| FAF1          | ENSG00000185104.19          | 0.481768684                 | 1                              | 1            | 0.481768684  |                  |             |             |  |
|               | Brain_Frontal_Cortex_BA9    | 0.481768684                 | Brain_Frontal_Cortex_BA9       | 1            | 1            |                  |             |             |  |
|               | 1                           | 0.70346071                  | 0.70346071                     | 0.70346071   | NA           | 1                | 0           | 0.998207054 |  |
| LETM1         | ENSG00000168924.14          | 0.481884618                 | 1                              | 1            | 0.481884618  | Brain_Cerebellum |             |             |  |
|               | 0.481884618                 | Brain_Cerebellum            | 1                              | 1            | 0.703274629  | 0.703274629      |             |             |  |
|               | 0.703274629                 | NA                          | 1                              | 0            | 0.998207054  |                  |             |             |  |
| GNB2          | ENSG00000172354.9           | 0.481912928                 | 2                              | 2            | 0.263386223  | Brain_Cerebellum |             |             |  |
|               | 0.788423506                 | Brain_Cerebellar_Hemisphere | 1.574581225                    |              | 0.425418775  |                  |             |             |  |
|               | 0.425418775                 | 0.268358337                 | 1.118423359                    | 0.693390848  | 0.601086742  |                  |             |             |  |
|               | 2                           | 0                           | 0.998207054                    |              |              |                  |             |             |  |
| RP11-722E23.2 | ENSG00000272338.2           | 0.481927065                 | 4                              | 4            | 0.113015452  |                  |             |             |  |
|               | Brain_Cerebellar_Hemisphere | 0.530387233                 | Brain_Cerebellum               | 3.171261258  |              |                  |             |             |  |
|               | 0.176289096                 | 0.176289096                 | -1.584783854                   | -0.627415007 | -0.914937342 |                  |             |             |  |
|               | 0.449762351                 | 4                           | 0                              | 0.998207054  |              |                  |             |             |  |
| OTULIN        | ENSG00000154124.4           | 0.482080987                 | 1                              | 1            | 0.482080987  |                  |             |             |  |
|               | Brain_Hippocampus           | 0.482080987                 | Brain_Hippocampus              | 1            | 1            | 1                |             |             |  |
|               | 0.702959503                 | 0.702959503                 | 0.702959503                    | NA           | 1            | 0                | 0.998207054 |             |  |
| GUCY1A2       | ENSG00000152402.10          | 0.482151995                 | 3                              | 3            | 0.374730181  |                  |             |             |  |
|               | Brain_Cerebellar_Hemisphere | 0.650199458                 | Brain_Spinal_cord_cervical_c-1 |              |              |                  |             |             |  |
|               | 1.542338538                 | 0.489745146                 | 0.489745146                    | -0.540857891 | 0.887647896  |                  |             |             |  |
|               | -0.035565037                | 0.800718484                 | 3                              | 0            | 0.998207054  |                  |             |             |  |
| LAMA4         | ENSG00000112769.18          | 0.482198758                 | 1                              | 1            | 0.482198758  |                  |             |             |  |
|               | Brain_Frontal_Cortex_BA9    | 0.482198758                 | Brain_Frontal_Cortex_BA9       | 1            | 1            |                  |             |             |  |
|               | 1                           | 0.702770543                 | 0.702770543                    | 0.702770543  | NA           | 1                | 0           |             |  |
|               | 0.998207054                 |                             |                                |              |              |                  |             |             |  |
| ANKDD1B       | ENSG00000189045.13          | 0.4823345                   | 1                              | 1            | 0.4823345    | Brain_Cerebellum |             |             |  |
|               | 0.4823345                   | Brain_Cerebellum            | 1                              | 1            | 0.702552778  | 0.702552778      |             |             |  |
|               | 0.702552778                 | NA                          | 1                              | 0            | 0.998207054  |                  |             |             |  |
| SLC20A1       | ENSG00000144136.10          | 0.482424779                 | 1                              | 1            | 0.482424779  |                  |             |             |  |
|               | Brain_Cerebellar_Hemisphere | 0.482424779                 | Brain_Cerebellar_Hemisphere    | 1            | 1            |                  |             |             |  |
|               | 1                           | -0.702407966                | -0.702407966                   | -0.702407966 | NA           | 1                | 0           |             |  |
|               | 0.998207054                 |                             |                                |              |              |                  |             |             |  |
| LINC00581     | ENSG00000280989.1           | 0.482450202                 | 1                              | 1            | 0.482450202  |                  |             |             |  |
|               | Brain_Putamen_basal_ganglia | 0.482450202                 | Brain_Putamen_basal_ganglia    | 1            | 1            |                  |             |             |  |
|               | 1                           | -0.702367189                | -0.702367189                   | -0.702367189 | NA           | 1                | 0           |             |  |
|               | 0.998207054                 |                             |                                |              |              |                  |             |             |  |
| C3orf33       | ENSG00000174928.15          | 0.482512015                 | 2                              | 2            | 0.233208898  |                  |             |             |  |

|              |                                       |              |              |                             |             |                             |             |                  |             |
|--------------|---------------------------------------|--------------|--------------|-----------------------------|-------------|-----------------------------|-------------|------------------|-------------|
|              | Brain_Cerebellar_Hemisphere           | 0.843438952  |              | Brain_Cerebellum            | 1.317263493 |                             |             |                  |             |
|              |                                       | 0.682736507  | -0.682736507 |                             |             | -1.192133513                |             | -0.197496587     | -0.69481505 |
|              |                                       | 0.703314515  | 2            | 0                           | 0.998207054 |                             |             |                  |             |
| SLAMF6       | ENSG00000162739.13                    | 0.482555738  |              | 2                           | 2           | 0.314314077                 |             |                  |             |
|              | Brain_Nucleus_accumbens_basal_ganglia | 0.553763421  |              |                             |             | Brain_Cortex                |             |                  |             |
|              |                                       | 1.072633117  | 0.927366883  | 0.927366883                 |             | -1.006211009                |             | 0.592130176      |             |
|              |                                       | -0.207040417 | 1.130197891  | 2                           | 0           | 0.998207054                 |             |                  |             |
| SLC7A5       | ENSG00000103257.8                     | 0.482603276  |              | 1                           | 1           | 0.482603276                 |             |                  |             |
|              | Brain_Anterior_cingulate_cortex_BA24  | 0.482603276  |              |                             |             |                             |             |                  |             |
|              | Brain_Anterior_cingulate_cortex_BA24  | 1            | 1            | 1                           |             | -0.702121691                |             |                  |             |
|              |                                       | -0.702121691 | -0.702121691 | NA                          | 1           | 0                           | 0.998207054 |                  |             |
| SPTAN1       | ENSG00000197694.15                    | 0.482695098  |              | 1                           | 1           | 0.482695098                 |             |                  |             |
|              | Brain_Frontal_Cortex_BA9              | 0.482695098  |              |                             |             | Brain_Frontal_Cortex_BA9    | 1           | 1                |             |
|              |                                       | 1            | -0.70197445  | -0.70197445                 | -0.70197445 | NA                          | 1           | 0                |             |
|              |                                       | 0.998207054  |              |                             |             |                             |             |                  |             |
| SPATA41      | ENSG00000189419.6                     | 0.483029706  |              | 3                           | 3           | 0.146880567                 |             |                  |             |
|              | Brain_Substantia_nigra                | 0.925858744  |              |                             |             | Brain_Cerebellum            | 1.791262359 |                  |             |
|              |                                       | 0.225030411  | 0.225030411  | 0.093056414                 |             | 1.450638434                 |             | 0.832304002      |             |
|              |                                       | 0.686820376  | 3            | 0                           | 0.998207054 |                             |             |                  |             |
| CMTR1        | ENSG00000137200.12                    | 0.483079686  |              | 2                           | 2           | 0.230526295                 |             | Brain_Cerebellum |             |
|              |                                       | 0.852254725  |              | Brain_Caudate_basal_ganglia | 1.044997661 | 0.955002339                 |             |                  |             |
|              |                                       | 0.955002339  | -1.199004244 | -0.186242336                |             | -0.69262329                 |             | 0.716130813      |             |
|              |                                       | 2            | 0            | 0.998207054                 |             |                             |             |                  |             |
| C9orf64      | ENSG00000165118.14                    | 0.483092733  |              | 2                           | 2           | 0.23106403                  |             |                  |             |
|              | Brain_Nucleus_accumbens_basal_ganglia | 0.957887604  |              |                             |             | Brain_Cerebellar_Hemisphere |             |                  |             |
|              |                                       | 1.07596644   | 0.92403356   | 0.92403356                  | 0.052804591 | 1.197622457                 |             | 0.625213524      |             |
|              |                                       | 0.809508476  | 2            | 0                           | 0.998207054 |                             |             |                  |             |
| EPB41L4B     | ENSG00000095203.14                    | 0.48309986   | 2            | 2                           | 0.261411279 |                             |             | Brain_Cerebellum |             |
|              |                                       | 0.664919987  |              | Brain_Putamen_basal_ganglia | 1.006307415 | 0.993692585                 |             |                  |             |
|              |                                       | 0.993692585  | -0.433130471 | 1.123061727                 |             | 0.344965628                 |             | 1.100394056      |             |
|              |                                       | 2            | 0            | 0.998207054                 |             |                             |             |                  |             |
| CCL21        | ENSG00000137077.7                     | 0.483164924  |              | 1                           | 1           | 0.483164924                 |             | Brain_Cerebellum |             |
|              |                                       | 0.483164924  |              | Brain_Cerebellum            | 1           | 1                           | 1           | 0.701221292      | 0.701221292 |
|              |                                       | 0.701221292  | NA           | 1                           | 0           | 0.998207054                 |             |                  |             |
| SPON2        | ENSG00000159674.11                    | 0.483428722  |              | 7                           | 7           | 0.315808519                 |             | Brain_Cerebellum |             |
|              |                                       | 0.965084714  |              | Brain_Cortex                | 3.129380348 | 0.116016384                 |             | 0.116016384      |             |
|              |                                       | -0.653962295 | 1.003108491  | 0.314407728                 |             | 0.726959853                 |             | 7                | 0           |
|              |                                       | 0.998207054  |              |                             |             |                             |             |                  |             |
| HIST1H4H     | ENSG00000158406.4                     | 0.483442825  |              | 1                           | 1           | 0.483442825                 |             |                  |             |
|              | Brain_Hypothalamus                    | 0.483442825  |              |                             |             | Brain_Hypothalamus          | 1           | 1                | 1           |
|              |                                       | 0.70077599   | 0.70077599   | 0.70077599                  | NA          | 1                           | 0           | 0.998207054      |             |
| NUTM2B       | ENSG00000188199.10                    | 0.48346008   | 13           | 13                          | 0.066253388 |                             |             | Brain_Amygdala   |             |
|              |                                       | 0.907485936  |              | Brain_Frontal_Cortex_BA9    | 3.101100654 | 0.134935035                 |             |                  |             |
|              |                                       | 0.134935035  | -1.836705467 | 1.797463769                 |             | -0.481378286                |             | 0.89444063       | 13          |
|              |                                       | 0            | 0.998207054  |                             |             |                             |             |                  |             |
| N6AMT1       | ENSG00000156239.11                    | 0.483461817  |              | 10                          | 5           | 0.191811091                 |             |                  |             |
|              | Brain_Substantia_nigra                | 0.976097556  |              |                             |             | Brain_Cortex                | 7.304340522 |                  |             |
|              |                                       | 0.004204428  | 0.260523553  | -0.394587331                |             | 1.305240137                 |             | 0.207282766      |             |
|              |                                       | 0.611500663  | 5            | 0                           | 0.998207054 |                             |             |                  |             |
| RP4-555D20.3 | ENSG00000271192.1                     | 0.483486695  |              | 1                           | 1           | 0.483486695                 |             |                  |             |
|              | Brain_Anterior_cingulate_cortex_BA24  | 0.483486695  |              |                             |             |                             |             |                  |             |
|              | Brain_Anterior_cingulate_cortex_BA24  | 1            | 1            | 1                           |             | 0.700705706                 |             |                  |             |
|              |                                       | 0.700705706  | 0.700705706  | NA                          | 1           | 0                           | 0.998207054 |                  |             |
| LIG1         | ENSG00000105486.13                    | 0.483589959  |              | 9                           | 4           | 0.143517165                 |             |                  |             |
|              | Brain_Nucleus_accumbens_basal_ganglia | 0.743121148  |              |                             |             | Brain_Cerebellum            |             |                  |             |
|              |                                       | 6.526798003  | 0.028143712  | 0.303568838                 |             | 0.327722952                 |             | 1.462818079      |             |
|              |                                       | 0.962039277  | 0.449990342  | 4                           | 0           | 0.998207054                 |             |                  |             |
| P2RX2        | ENSG00000187848.12                    | 0.483716831  |              | 5                           | 4           | 0.444174277                 |             | Brain_Cortex     |             |
|              |                                       | 0.93324513   |              | Brain_Frontal_Cortex_BA9    | 3.984107673 | 0.037299763                 |             |                  |             |
|              |                                       | 0.168754876  | -0.444310945 | 0.765163356                 |             | 0.206684324                 |             | 0.507111782      |             |
|              |                                       | 4            | 0            | 0.998207054                 |             |                             |             |                  |             |
| SOS1         | ENSG00000115904.12                    | 0.483787835  |              | 2                           | 2           | 0.238938238                 |             |                  |             |

|                |                                       |                                       |                        |                                       |              |                  |             |   |
|----------------|---------------------------------------|---------------------------------------|------------------------|---------------------------------------|--------------|------------------|-------------|---|
|                | Brain_Hypothalamus                    | 0.811399288                           |                        | Brain_Cerebellum                      | 1.014459617  |                  |             |   |
|                | 0.985540383                           | 0.985540383                           | -0.238621247           |                                       | 1.17764481   | 0.469511781      |             |   |
|                | 1.001451333                           | 2                                     | 0                      | 0.998207054                           |              |                  |             |   |
| PODN           | ENSG00000174348.13                    | 0.483797016                           | 4                      | 4                                     | 0.345612795  |                  |             |   |
|                | Brain_Caudate_basal_ganglia           | 0.890287889                           |                        | Brain_Cerebellar_Hemisphere           |              |                  |             |   |
|                | 2.211195222                           | 0.240231769                           | 0.240231769            |                                       | -0.943133162 | 0.141150544      |             |   |
|                | -0.327409779                          | 0.552707627                           | 4                      | 0                                     | 0.998207054  |                  |             |   |
| CABYR          | ENSG00000154040.20                    | 0.483928983                           | 9                      | 7                                     | 0.190144504  |                  |             |   |
|                | Brain_Nucleus_accumbens_basal_ganglia | 0.637584534                           |                        | Brain_Putamen_basal_ganglia           |              |                  |             |   |
|                | 3.957913185                           | 0.021471327                           | 0.451795583            |                                       | -1.310151751 | 0.672325061      |             |   |
|                | -0.726878243                          | 0.574944268                           | 7                      | 0                                     | 0.998207054  |                  |             |   |
| CTD-2192J16.11 | ENSG00000230310.1                     | 0.483933756                           | 5                      | 5                                     | 0.061347881  |                  |             |   |
|                | Brain_Nucleus_accumbens_basal_ganglia | 0.627842524                           |                        | Brain_Hypothalamus                    |              |                  |             |   |
|                | 2.064271459                           | 0.374467486                           | 0.374467486            |                                       | 0.484765746  | 1.870979799      |             |   |
|                | 1.083365403                           | 0.592850076                           | 5                      | 0                                     | 0.998207054  |                  |             |   |
| GUCA1C         | ENSG00000138472.10                    | 0.483967761                           | 2                      | 2                                     | 0.24709384   | Brain_Cortex     |             |   |
|                | 0.544619098                           | Brain_Frontal_Cortex_BA9              | 1.723016711            |                                       | 0.276983289  |                  |             |   |
|                | 0.276983289                           | -1.15743706                           | -0.605842871           |                                       | -0.881639966 | 0.390035991      |             |   |
|                | 2                                     | 0                                     | 0.998207054            |                                       |              |                  |             |   |
| FEZ1           | ENSG00000149557.12                    | 0.484163904                           | 3                      | 3                                     | 0.214782956  | Brain_Cortex     |             |   |
|                | 0.563768366                           | Brain_Cerebellum                      | 1.942035851            |                                       | 0.086663675  | 0.086663675      |             |   |
|                | -1.240520449                          | -0.577253284                          | -0.903503224           |                                       | 0.331764651  | 3                | 0           |   |
|                | 0.998207054                           |                                       |                        |                                       |              |                  |             |   |
| RP11-118B22.4  | ENSG00000256427.1                     | 0.484203487                           | 13                     | 6                                     | 0.250833654  |                  |             |   |
|                | Brain_Cerebellar_Hemisphere           | 0.987493816                           |                        | Brain_Putamen_basal_ganglia           |              |                  |             |   |
|                | 8.808488708                           | 0.005604174                           | 0.356086226            |                                       | -1.148326863 | 0.968333123      |             |   |
|                | 0.063900652                           | 0.625265094                           | 6                      | 0                                     | 0.998207054  |                  |             |   |
| CEP170B        | ENSG00000099814.15                    | 0.484346149                           | 3                      | 3                                     | 0.126002587  |                  |             |   |
|                | Brain_Hypothalamus                    | 0.96823154                            | Brain_Substantia_nigra | 1.273650477                           |              |                  |             |   |
|                | 0.786290779                           | 0.786290779                           | -0.161165437           |                                       | 1.530057134  | 0.469572694      |             |   |
|                | 0.923888448                           | 3                                     | 0                      | 0.998207054                           |              |                  |             |   |
| MCOLN2         | ENSG00000153898.12                    | 0.484356241                           | 9                      | 2                                     | 0.22087287   |                  |             |   |
|                | Brain_Hypothalamus                    | 0.906691113                           |                        | Brain_Nucleus_accumbens_basal_ganglia |              |                  |             |   |
|                | 7.894245118                           | 0.012620978                           | 0.585039291            |                                       | -0.233489055 | 1.224210392      |             |   |
|                | 0.292496358                           | 0.432136497                           | 2                      | 0                                     | 0.998207054  |                  |             |   |
| TNK2           | ENSG00000061938.16                    | 0.484410906                           | 3                      | 3                                     | 0.129917042  | Brain_Cerebellum |             |   |
|                | 0.939785919                           | Brain_Nucleus_accumbens_basal_ganglia | 1.265783108            |                                       |              |                  |             |   |
|                | 0.738751591                           | 0.738751591                           | -1.514429106           |                                       | -0.075538937 | -0.777988793     |             |   |
|                | 0.720047042                           | 3                                     | 0                      | 0.998207054                           |              |                  |             |   |
| SH3RF3         | ENSG00000172985.10                    | 0.484506216                           | 1                      | 1                                     | 0.484506216  |                  |             |   |
|                | Brain_Cerebellum                      | 0.484506216                           | Brain_Cerebellum       | 1                                     | 1            | 1                |             |   |
|                | -0.699073312                          | -0.699073312                          | NA                     | 1                                     | 0            | 0.998207054      |             |   |
| MDM4           | ENSG00000198625.12                    | 0.484570013                           | 1                      | 1                                     | 0.484570013  | Brain_Cortex     |             |   |
|                | 0.484570013                           | Brain_Cortex                          | 1                      | 1                                     | 1            | 0.698971226      | 0.698971226 |   |
|                | 0.698971226                           | NA                                    | 1                      | 0                                     | 0.998207054  |                  |             |   |
| CLEC19A        | ENSG00000261210.7                     | 0.484593099                           | 5                      | 3                                     | 0.170903512  |                  |             |   |
|                | Brain_Substantia_nigra                | 0.808596231                           |                        | Brain_Spinal_cord_cervical_c-1        |              |                  |             |   |
|                | 3.297330017                           | 0.025284546                           | 0.658130423            |                                       | -1.36930642  | -0.242237381     |             |   |
|                | -0.585424065                          | 0.476317207                           | 3                      | 0                                     | 0.998207054  |                  |             |   |
| PPP2R5E        | ENSG00000154001.13                    | 0.484778695                           | 1                      | 1                                     | 0.484778695  |                  |             |   |
|                | Brain_Putamen_basal_ganglia           | 0.484778695                           |                        | Brain_Putamen_basal_ganglia           | 1            | 1                |             |   |
|                | 1                                     | -0.698637351                          | -0.698637351           |                                       | -0.698637351 | NA               | 1           | 0 |
|                | 0.998207054                           |                                       |                        |                                       |              |                  |             |   |
| OPN5           | ENSG00000124818.15                    | 0.484822405                           | 1                      | 1                                     | 0.484822405  |                  |             |   |
|                | Brain_Frontal_Cortex_BA9              | 0.484822405                           |                        | Brain_Frontal_Cortex_BA9              | 1            | 1                |             |   |
|                | 1                                     | 0.698567428                           | 0.698567428            |                                       | 0.698567428  | NA               | 1           | 0 |
|                | 0.998207054                           |                                       |                        |                                       |              |                  |             |   |
| ASB4           | ENSG00000005981.12                    | 0.484909271                           | 4                      | 4                                     | 0.366632538  |                  |             |   |
|                | Brain_Hypothalamus                    | 0.665301494                           |                        | Brain_Caudate_basal_ganglia           | 2.296988488  |                  |             |   |
|                | 0.215970315                           | 0.215970315                           | -0.902799083           |                                       | 0.845782061  | 0.226956742      |             |   |
|                | 0.773472987                           | 4                                     | 0                      | 0.998207054                           |              |                  |             |   |
| PHF20          | ENSG00000025293.16                    | 0.484944673                           | 1                      | 1                                     | 0.484944673  |                  |             |   |

|              |                                       |                        |                                       |                             |             |              |             |
|--------------|---------------------------------------|------------------------|---------------------------------------|-----------------------------|-------------|--------------|-------------|
|              | Brain_Cerebellar_Hemisphere           | 0.484944673            |                                       | Brain_Cerebellar_Hemisphere | 1           | 1            |             |
|              | 1                                     | 0.698371855            | 0.698371855                           | 0.698371855                 | NA          | 1            | 0           |
|              |                                       | 0.998207054            |                                       |                             |             |              |             |
| RALBP1       | ENSG00000017797.12                    | 0.485011892            |                                       | 1                           | 1           | 0.485011892  |             |
|              | Brain_Cerebellum                      | 0.485011892            | Brain_Cerebellum                      | 1                           | 1           | 0.698264346  |             |
|              | 0.698264346                           | 0.698264346            | NA                                    | 1                           | 0           | 0.998207054  |             |
| CFAP221      | ENSG00000163075.12                    | 0.485088489            |                                       | 4                           | 4           | 0.183272938  |             |
|              | Brain_Cerebellar_Hemisphere           | 0.734950565            | Brain_Frontal_Cortex_BA9              |                             |             |              |             |
|              | 1.242855521                           | 0.813695399            | 0.813695399                           | -0.409169199                |             | 1.330744977  |             |
|              | 0.600103797                           | 0.798474223            | 4                                     | 0                           | 0.998207054 |              |             |
| RAD54L2      | ENSG00000164080.13                    | 0.485093984            |                                       | 4                           | 3           | 0.170840707  |             |
|              | Brain_Caudate_basal_ganglia           | 0.972717833            | Brain_Hippocampus                     |                             |             | 2.279971056  |             |
|              | 0.027776283                           | 0.680012082            | -0.034199792                          | 1.369507453                 |             | 0.75512919   |             |
|              | 0.582189984                           | 3                      | 0                                     | 0.998207054                 |             |              |             |
| WSCD1        | ENSG00000179314.13                    | 0.485261813            |                                       | 2                           | 2           | 0.430256469  |             |
|              | Brain_Cerebellar_Hemisphere           | 0.925781119            | Brain_Cerebellum                      | 1.803389047                 |             |              |             |
|              | 0.196610953                           | 0.196610953            | -0.788752855                          | -0.093154125                |             | -0.44095349  |             |
|              | 0.491862579                           | 2                      | 0                                     | 0.998207054                 |             |              |             |
| DNAJC16      | ENSG00000116138.12                    | 0.485343992            |                                       | 5                           | 5           | 0.203775277  |             |
|              | Brain_Nucleus_accumbens_basal_ganglia | 0.934727846            | Brain_Cerebellar_Hemisphere           |                             |             |              |             |
|              | 3.383325574                           | 0.118567646            | 0.118567646                           | -1.270868943                |             | 0.089428588  |             |
|              | -0.542762724                          | 0.590170267            | 5                                     | 0                           | 0.998207054 |              |             |
| SPDYE3       | ENSG00000214300.7                     | 0.485376948            |                                       | 2                           | 2           | 0.259228424  |             |
|              | Brain_Nucleus_accumbens_basal_ganglia | 0.59457717             | Brain_Cerebellar_Hemisphere           |                             |             |              |             |
|              | 1.105345344                           | 0.894654656            | 0.894654656                           | 0.532214892                 |             | 1.128216674  |             |
|              | 0.830215783                           | 0.421436902            | 2                                     | 0                           | 0.998207054 |              |             |
| EXD1         | ENSG00000178997.11                    | 0.48549764             | 1                                     | 1                           | 0.48549764  | Brain_Cortex | 0.48549764  |
|              | Brain_Cortex                          | 1                      | 1                                     | 1                           | -0.69748769 | -0.69748769  | -0.69748769 |
|              | NA                                    | 1                      | 0                                     | 0.998207054                 |             |              |             |
| RP11-444D3.1 | ENSG00000255864.5                     | 0.48565584             | 2                                     | 2                           | 0.230149914 |              |             |
|              | Brain_Caudate_basal_ganglia           | 0.910193805            | Brain_Hippocampus                     |                             |             | 1.037667556  |             |
|              | 0.962332444                           | 0.962332444            | -1.199972775                          | -0.112794089                |             | -0.656383432 |             |
|              | 0.768751421                           | 2                      | 0                                     | 0.998207054                 |             |              |             |
| FGA          | ENSG00000171560.14                    | 0.485904327            | 2                                     | 2                           | 0.246576423 |              |             |
|              | Brain_Anterior_cingulate_cortex_BA24  | 0.817230585            | Brain_Hippocampus                     |                             |             |              |             |
|              | 1.073922033                           | 0.926077967            | 0.926077967                           | -1.158705071                |             | 0.231108405  |             |
|              | -0.463798333                          | 0.982746534            | 2                                     | 0                           | 0.998207054 |              |             |
| OSTN         | ENSG00000188729.6                     | 0.485940151            | 4                                     | 4                           | 0.384946926 |              |             |
|              | Brain_Nucleus_accumbens_basal_ganglia | 0.801556501            | Brain_Putamen_basal_ganglia           |                             |             |              |             |
|              | 1.762511414                           | 0.240416813            | 0.240416813                           | -0.868817561                |             | 0.25133321   |             |
|              | -0.52421434                           | 0.529954313            | 4                                     | 0                           | 0.998207054 |              |             |
| TSPAN10      | ENSG00000182612.10                    | 0.486062886            |                                       | 5                           | 3           | 0.153165147  |             |
|              | Brain_Frontal_Cortex_BA9              | 0.503985911            | Brain_Nucleus_accumbens_basal_ganglia |                             |             |              |             |
|              | 4.296179219                           | 0.044585025            | 0.165694907                           | 0.668231374                 |             | 1.428440367  |             |
|              | 1.169636414                           | 0.309455514            | 3                                     | 0                           | 0.998207054 |              |             |
| COX14        | ENSG00000178449.8                     | 0.486089788            | 7                                     | 5                           | 0.112938802 | Brain_Cortex |             |
|              | 0.857560053                           | Brain_Substantia_nigra | 5.071371286                           | 0.057491757                 |             |              |             |
|              | 0.222292416                           | -1.585121192           | -0.179480977                          | -0.766778523                |             | 0.544430657  |             |
|              | 5                                     | 0                      | 0.998207054                           |                             |             |              |             |
| KCTD13       | ENSG00000174943.9                     | 0.48609726             | 2                                     | 2                           | 0.231210833 |              |             |
|              | Brain_Frontal_Cortex_BA9              | 0.790217132            | Brain_Cortex                          | 1.299046758                 |             |              |             |
|              | 0.700953242                           | 0.700953242            | -1.197245622                          | -0.266028666                |             | -0.731637144 |             |
|              | 0.658469825                           | 2                      | 0                                     | 0.998207054                 |             |              |             |
| FUT3         | ENSG00000171124.12                    | 0.486120023            | 2                                     | 2                           | 0.303585233 |              |             |
|              | Brain_Cerebellar_Hemisphere           | 0.603649822            | Brain_Spinal_cord_cervical_c-1        |                             |             |              |             |
|              | 1.095146306                           | 0.904853694            | 0.904853694                           | -1.028775391                |             | 0.519159066  |             |
|              | -0.254808163                          | 1.094554951            | 2                                     | 0                           | 0.998207054 |              |             |
| ADGRL2       | ENSG00000117114.19                    | 0.486134748            |                                       | 2                           | 2           | 0.231523722  |             |
|              | Brain_Hippocampus                     | 0.863580474            | Brain_Cerebellum                      | 1.055833497                 |             |              |             |
|              | 0.944166503                           | 0.944166503            | -1.196443019                          | -0.171818178                |             | -0.684130599 |             |
|              | 0.724519173                           | 2                      | 0                                     | 0.998207054                 |             |              |             |
| CRKL         | ENSG00000099942.12                    | 0.486190774            |                                       | 1                           | 1           | 0.486190774  |             |

|               |                                       |                                       |              |                                       |              |                  |
|---------------|---------------------------------------|---------------------------------------|--------------|---------------------------------------|--------------|------------------|
|               | Brain_Caudate_basal_ganglia           | 0.486190774                           |              | Brain_Caudate_basal_ganglia           | 1            | 1                |
| 1             | 0.696380177                           | 0.696380177                           | 0.696380177  | NA                                    | 1            | 0                |
|               | 0.998207054                           |                                       |              |                                       |              |                  |
| CASS4         | ENSG00000087589.16                    | 0.486266167                           | 2            | 2                                     | 0.231129433  |                  |
|               | Brain_Cerebellar_Hemisphere           | 0.987755718                           |              | Brain_Cortex                          | 1.062201987  |                  |
|               | 0.937798013                           | 0.937798013                           | -0.015346534 | 1.197454548                           | 0.591054007  |                  |
|               | 0.857579869                           | 2                                     | 0            | 0.998207054                           |              |                  |
| VSTM2B        | ENSG00000187135.7                     | 0.486328581                           | 2            | 2                                     | 0.229894158  |                  |
|               | Brain_Cerebellum                      | 0.263179353                           |              | Brain_Cerebellar_Hemisphere           | 1.927249996  |                  |
|               | 0.072750004                           | 0.072750004                           | -1.200631547 | -1.118908086                          | -1.159769816 |                  |
|               | 0.057787214                           | 2                                     | 0            | 0.998207054                           |              |                  |
| COPA          | ENSG00000122218.14                    | 0.486421939                           | 12           | 4                                     | 0.079090845  | Brain_Cortex     |
|               | 0.548183591                           | Brain_Substantia_nigra                |              | 9.620482043                           | 0.00140203   |                  |
|               | 0.410609624                           | -1.755985729                          | -0.600484194 | -0.98897553                           | 0.344488484  |                  |
|               | 4                                     | 0                                     | 0.998207054  |                                       |              |                  |
| WDR73         | ENSG00000177082.12                    | 0.486500015                           | 7            | 6                                     | 0.067082841  |                  |
|               | Brain_Nucleus_accumbens_basal_ganglia | 0.957332005                           |              | Brain_Cerebellum                      |              |                  |
|               | 3.272114029                           | 0.019817424                           | 0.362569632  | -1.83111861                           | 0.682456944  |                  |
|               | -0.642532518                          | 0.893814039                           | 6            | 0                                     | 0.998207054  |                  |
| KLHL33        | ENSG00000185271.7                     | 0.486518537                           | 2            | 2                                     | 0.238905144  |                  |
|               | Brain_Nucleus_accumbens_basal_ganglia | 0.680093393                           |              | Brain_Caudate_basal_ganglia           |              |                  |
|               | 1.155343568                           | 0.844656432                           | 0.844656432  | 0.41233569                            | 1.177727791  |                  |
|               | 0.79503174                            | 0.541213945                           | 2            | 0                                     | 0.998207054  |                  |
| SLC25A30-AS1  | ENSG00000251015.1                     | 0.486678145                           | 2            | 2                                     | 0.242325745  |                  |
|               | Brain_Cerebellar_Hemisphere           | 0.462725237                           |              | Brain_Caudate_basal_ganglia           |              |                  |
|               | 1.774552949                           | 0.225447051                           | 0.225447051  | -1.169193336                          | -0.734366765 |                  |
|               | -0.951780051                          | 0.307468817                           | 2            | 0                                     | 0.998207054  |                  |
| PGD           | ENSG00000142657.20                    | 0.48678761                            | 2            | 2                                     | 0.446697274  | Brain_Amygdala   |
|               | 0.500807454                           | Brain_Nucleus_accumbens_basal_ganglia |              | 1.28427467                            | 0.71572533   |                  |
|               | 0.71572533                            | -0.673219819                          | 0.760932687  | 0.043856434                           | 1.014098962  | 2                |
|               | 0                                     | 0.998207054                           |              |                                       |              |                  |
| EFCAB12       | ENSG00000172771.11                    | 0.486799056                           | 3            | 3                                     | 0.21774545   | Brain_Cerebellum |
|               | 0.914234177                           | Brain_Cerebellar_Hemisphere           |              | 1.300759203                           | 0.68048735   | 0.68048735       |
|               | -0.10769936                           | 1.232545315                           | 0.723277736  | 0.725731843                           | 3            | 0                |
|               | 0.998207054                           |                                       |              |                                       |              |                  |
| RP11-107N15.1 | ENSG00000273209.1                     | 0.48688019                            | 3            | 3                                     | 0.253450913  |                  |
|               | Brain_Cerebellar_Hemisphere           | 0.623999135                           |              | Brain_Cerebellum                      | 1.617976703  |                  |
|               | 0.584291727                           | 0.584291727                           | -0.590504107 | 1.142007475                           | 0.347231274  |                  |
|               | 0.875058336                           | 3                                     | 0            | 0.998207054                           |              |                  |
| CCDC62        | ENSG00000130783.13                    | 0.487103856                           | 2            | 2                                     | 0.382800398  |                  |
|               | Brain_Amygdala                        | 0.440121348                           |              | Brain_Hippocampus                     | 1.05661556   | 0.94338444       |
|               | 0.94338444                            | -0.771988316                          | 0.872748092  | 0.050379888                           | 1.163004267  | 2                |
|               | 0                                     | 0.998207054                           |              |                                       |              |                  |
| SMIM13        | ENSG00000224531.5                     | 0.487148118                           | 2            | 2                                     | 0.384059568  |                  |
|               | Brain_Cerebellar_Hemisphere           | 0.405673052                           |              | Brain_Hippocampus                     | 1.007473868  |                  |
|               | 0.992526132                           | 0.992526132                           | -0.870440781 | -0.831532189                          | -0.850986485 |                  |
|               | 0.027512529                           | 2                                     | 0            | 0.998207054                           |              |                  |
| ABCA8         | ENSG00000141338.13                    | 0.48719356                            | 3            | 3                                     | 0.196400204  |                  |
|               | Brain_Spinal_cord_cervical_c-1        | 0.424006737                           |              | Brain_Putamen_basal_ganglia           |              |                  |
|               | 2.480174337                           | 0.090028148                           | 0.090028148  | 0.79948932                            | 1.291875671  |                  |
|               | 1.108396673                           | 0.26909159                            | 3            | 0                                     | 0.998207054  |                  |
| MROH6         | ENSG00000204839.8                     | 0.487225663                           | 7            | 4                                     | 0.398496668  |                  |
|               | Brain_Putamen_basal_ganglia           | 0.881375866                           |              | Brain_Cortex                          | 5.590292752  |                  |
|               | 0.001502513                           | 0.251482441                           | -0.844309161 | 0.815719078                           | 0.017939822  |                  |
|               | 0.568961848                           | 4                                     | 0            | 0.998207054                           |              |                  |
| FECH          | ENSG00000066926.10                    | 0.487239033                           | 5            | 5                                     | 0.129595636  |                  |
|               | Brain_Frontal_Cortex_BA9              | 0.74503807                            |              | Brain_Nucleus_accumbens_basal_ganglia |              |                  |
|               | 1.666875                              | 0.35902106                            | 0.35902106   | -0.623870755                          | 1.515698388  | 0.570398855      |
|               | 0.791009643                           | 5                                     | 0            | 0.998207054                           |              |                  |
| PPP3CB        | ENSG00000107758.15                    | 0.487243676                           | 1            | 1                                     | 0.487243676  |                  |
|               | Brain_Caudate_basal_ganglia           | 0.487243676                           |              | Brain_Caudate_basal_ganglia           | 1            | 1                |
|               | 1                                     | -0.694699445                          | -0.694699445 | -0.694699445                          | NA           | 1                |
|               |                                       |                                       |              |                                       | 0            |                  |

0.998207054  
PCDHA2 ENSG00000204969.6 0.48742349 5 5 0.2863169  
Brain\_Frontal\_Cortex\_BA9 0.993972522 Brain\_Putamen\_basal\_ganglia  
3.311225633 0.115447144 0.115447144 -0.129361492 1.06623616  
0.14742045 0.516423774 5 0 0.998207054  
PRRT4 ENSG00000224940.8 0.487501418 1 1 0.487501418  
Brain\_Putamen\_basal\_ganglia 0.487501418 Brain\_Putamen\_basal\_ganglia 1 1  
1 -0.694288313 -0.694288313 -0.694288313 NA 1 0  
0.998207054  
TEKT2 ENSG00000092850.11 0.48750333 1 1 0.48750333  
Brain\_Anterior\_cingulate\_cortex\_BA24 0.48750333  
Brain\_Anterior\_cingulate\_cortex\_BA24 1 1 1 0.694285265  
0.694285265 0.694285265 NA 1 0 0.998207054  
RSL24D1 ENSG00000137876.9 0.487541478 2 2 0.288523947  
Brain\_Amygdala 0.520393071 Brain\_Cerebellum 1.08256172 0.91743828 0.91743828  
0.642739616 1.061365241 0.852052428 0.296013018 2 0  
0.998207054  
MLX ENSG00000108788.11 0.487669927 1 1 0.487669927  
Brain\_Nucleus\_accumbens\_basal\_ganglia 0.487669927  
Brain\_Nucleus\_accumbens\_basal\_ganglia 1 1 1 -0.694019585  
-0.694019585 -0.694019585 NA 1 0 0.998207054  
C11orf49 ENSG00000149179.13 0.487781562 1 1 0.487781562  
Brain\_Cerebellum 0.487781562 Brain\_Cerebellum 1 1 1 0.693841582  
0.693841582 0.693841582 NA 1 0 0.998207054  
CTC-444N24.8 ENSG00000268713.1 0.48779695 1 1 0.48779695  
Brain\_Putamen\_basal\_ganglia 0.48779695 Brain\_Putamen\_basal\_ganglia 1 1 1  
-0.693817048 -0.693817048 -0.693817048 NA 1 0 0.998207054  
SCO2 ENSG00000130489.14 0.488069787 3 3 0.144841988  
Brain\_Substantia\_nigra 0.955229621 Brain\_Hippocampus 1.327455533  
0.68289661 0.68289661 -0.056140826 1.457994759 0.488729724  
0.841566784 3 0 0.998207054  
ZRSR1 ENSG00000212643.2 0.488298035 1 1 0.488298035 Brain\_Cerebellum  
0.488298035 Brain\_Cerebellum 1 1 1 0.693018351 0.693018351  
0.693018351 NA 1 0 0.998207054  
IGFALS ENSG00000099769.5 0.488386704 3 2 0.251642212  
Brain\_Cerebellum 0.330143005 Brain\_Frontal\_Cortex\_BA9 2.335445169  
0.04049918 0.624055651 0.973825871 1.146369707 1.04664351  
0.089363844 2 0 0.998207054  
UTP23 ENSG00000147679.11 0.48848317 6 2 0.216784549  
Brain\_Frontal\_Cortex\_BA9 0.907731649 Brain\_Cortex 4.777871253  
1.10E-05 1.006285974 0.115900185 1.235123489 0.635361914  
0.428639095 2 0 0.998207054  
RIC1 ENSG00000107036.11 0.48850037 2 2 0.231519742 Brain\_Cerebellum  
0.277972289 Brain\_Cerebellar\_Hemisphere 1.893036572 0.106963428  
0.106963428 -1.196453225 -1.084885684 -1.140669454 0.078890165  
2 0 0.998207054  
CHST5 ENSG00000135702.14 0.488530703 4 4 0.073441935  
Brain\_Cerebellar\_Hemisphere 0.259381524 Brain\_Cerebellum 3.223113817  
0.15323999 0.15323999 -1.790074504 -1.127854142 -1.410006141  
0.277451176 4 0 0.998207054  
FBL ENSG00000105202.8 0.488792559 1 1 0.488792559 Brain\_Cerebellum  
0.488792559 Brain\_Cerebellum 1 1 1 0.692230546 0.692230546  
0.692230546 NA 1 0 0.998207054  
SSTR5 ENSG00000162009.8 0.488807357 1 1 0.488807357  
Brain\_Hypothalamus 0.488807357 Brain\_Hypothalamus 1 1 1  
0.692206979 0.692206979 0.692206979 NA 1 0 0.998207054  
LARS2 ENSG00000011376.9 0.488820459 13 4 0.017614637  
Brain\_Anterior\_cingulate\_cortex\_BA24 0.942831856  
Brain\_Spinal\_cord\_cervical\_c-1 10.55686658 0.00111007 0.46329186  
0.071711057 2.373620653 1.427923726 0.796218432 4 0  
0.998207054  
ITCH ENSG00000078747.14 0.488875927 1 1 0.488875927 Brain\_Cortex

|              |                                       |                                       |              |                                       |              |                    |
|--------------|---------------------------------------|---------------------------------------|--------------|---------------------------------------|--------------|--------------------|
|              | 0.488875927                           | Brain_Cortex                          | 1            | 1                                     | -0.692097778 | -0.692097778       |
|              | -0.692097778                          | NA                                    | 1            | 0                                     | 0.998207054  |                    |
| MTHFD1       | ENSG00000100714.15                    | 0.488915315                           | 3            | 3                                     | 0.181285869  |                    |
|              | Brain_Cerebellar_Hemisphere           | 0.877462049                           |              | Brain_Hypothalamus                    | 1.126360048  |                    |
|              | 0.843544549                           | 0.843544549                           | -1.336806311 | 0.154187309                           | -0.695244832 |                    |
|              | 0.766924476                           | 3                                     | 0            | 0.998207054                           |              |                    |
| UBTD2        | ENSG00000168246.5                     | 0.488959008                           | 1            | 1                                     | 0.488959008  |                    |
|              | Brain_Nucleus_accumbens_basal_ganglia | 0.488959008                           |              |                                       |              |                    |
|              | Brain_Nucleus_accumbens_basal_ganglia | 1                                     | 1            | 1                                     | -0.691965479 |                    |
|              | -0.691965479                          | -0.691965479                          | NA           | 1                                     | 0            | 0.998207054        |
| HNRNPDL      | ENSG00000152795.17                    | 0.489104176                           | 1            | 1                                     | 0.489104176  |                    |
|              | Brain_Nucleus_accumbens_basal_ganglia | 0.489104176                           |              |                                       |              |                    |
|              | Brain_Nucleus_accumbens_basal_ganglia | 1                                     | 1            | 1                                     | -0.691734343 |                    |
|              | -0.691734343                          | -0.691734343                          | NA           | 1                                     | 0            | 0.998207054        |
| LRRC37B      | ENSG00000185158.12                    | 0.489186635                           | 5            | 4                                     | 0.283209647  |                    |
|              | Brain_Nucleus_accumbens_basal_ganglia | 0.982595994                           |              | Brain_Amygdala                        |              |                    |
|              | 3.456528493                           | 0.010231558                           | 0.117483382  | -1.07313701                           | -0.021814416 |                    |
|              | -0.435195419                          | 0.450817222                           | 4            | 0                                     | 0.998207054  |                    |
| NAGPA        | ENSG00000103174.11                    | 0.489235462                           | 6            | 6                                     | 0.120921937  |                    |
|              | Brain_Anterior_cingulate_cortex_BA24  | 0.646813268                           |              | Brain_Putamen_basal_ganglia           |              |                    |
|              | 1.717322117                           | 0.299024264                           | 0.299024264  | -1.550915492                          | 1.324773566  |                    |
|              | -0.042510816                          | 1.022474794                           | 6            | 0                                     | 0.998207054  |                    |
| IL15RA       | ENSG00000134470.20                    | 0.489244809                           | 1            | 1                                     | 0.489244809  |                    |
|              | Brain_Nucleus_accumbens_basal_ganglia | 0.489244809                           |              |                                       |              |                    |
|              | Brain_Nucleus_accumbens_basal_ganglia | 1                                     | 1            | 1                                     | -0.691510461 |                    |
|              | -0.691510461                          | -0.691510461                          | NA           | 1                                     | 0            | 0.998207054        |
| DGKH         | ENSG00000102780.16                    | 0.489260598                           | 2            | 1                                     | 0.485219929  |                    |
|              | Brain_Cerebellar_Hemisphere           | 0.498078092                           |              | Brain_Cerebellum                      | 1.978302659  |                    |
|              | 0.021697341                           | 1.978302659                           | 0.677516835  | 0.697931667                           | 0.687724251  |                    |
|              | 0.014435466                           | 1                                     | 0            | 0.998207054                           |              |                    |
| LINC02021    | ENSG00000249846.6                     | 0.489281157                           | 11           | 4                                     | 0.192429293  |                    |
|              | Brain_Spinal_cord_cervical_c-1        | 0.989674368                           |              | Brain_Cerebellar_Hemisphere           |              |                    |
|              | 8.287052312                           | 0.006534983                           | 0.276565206  | -1.30342621                           | 0.86425561   |                    |
|              | -0.616402559                          | 0.630054854                           | 4            | 0                                     | 0.998207054  |                    |
| RP11-428J1.5 | ENSG00000272142.1                     | 0.489313591                           | 1            | 1                                     | 0.489313591  |                    |
|              | Brain_Hypothalamus                    | 0.489313591                           |              | Brain_Hypothalamus                    | 1            | 1                  |
|              | 0.691400975                           | 0.691400975                           | 0.691400975  | NA                                    | 1            | 0                  |
|              |                                       |                                       |              |                                       | 0.998207054  |                    |
| GK5          | ENSG00000175066.15                    | 0.489354333                           | 1            | 1                                     | 0.489354333  |                    |
|              | Brain_Nucleus_accumbens_basal_ganglia | 0.489354333                           |              |                                       |              |                    |
|              | Brain_Nucleus_accumbens_basal_ganglia | 1                                     | 1            | 1                                     | 0.691336128  |                    |
|              | 0.691336128                           | 0.691336128                           | NA           | 1                                     | 0            | 0.998207054        |
| C19orf71     | ENSG00000183397.5                     | 0.489433181                           | 8            | 5                                     | 0.368677455  |                    |
|              | Brain_Caudate_basal_ganglia           | 0.923095565                           |              | Brain_Nucleus_accumbens_basal_ganglia |              |                    |
|              | 5.069531881                           | 0.032817439                           | 0.23309969   | -0.675857374                          | 0.898953452  |                    |
|              | 0.166948949                           | 0.54566461                            | 5            | 0                                     | 0.998207054  |                    |
| RP11-10L7.1  | ENSG00000246375.2                     | 0.489449586                           | 13           | 1                                     | 0.349000619  |                    |
|              | Brain_Hypothalamus                    | 0.687478848                           |              | Brain_Substantia_nigra                | 12.68608361  |                    |
|              | 3.31E-05                              | 12.68608361                           | 0.402278809  | 0.936529524                           | 0.682739773  |                    |
|              | 0.197263758                           | 1                                     | 0            | 0.998207054                           |              |                    |
| CSRP2        | ENSG00000175183.9                     | 0.4894609                             | 10           | 7                                     | 0.041972157  | Brain_Hypothalamus |
|              | 0.982403054                           | Brain_Frontal_Cortex_BA9              | 5.289140869  | 0.005477261                           |              |                    |
|              | 0.197850022                           | 0.02205629                            | 2.033796107  | 0.824184366                           | 0.631189457  | 7                  |
|              | 0                                     | 0.998207054                           |              |                                       |              |                    |
| PANK2        | ENSG00000125779.21                    | 0.489468872                           | 1            | 1                                     | 0.489468872  |                    |
|              | Brain_Hypothalamus                    | 0.489468872                           |              | Brain_Hypothalamus                    | 1            | 1                  |
|              | 0.691153835                           | 0.691153835                           | 0.691153835  | NA                                    | 1            | 0                  |
|              |                                       |                                       |              |                                       | 0.998207054  |                    |
| PLEKHB1      | ENSG00000021300.13                    | 0.489508477                           | 5            | 5                                     | 0.048029816  |                    |
|              | Brain_Putamen_basal_ganglia           | 0.399590151                           |              | Brain_Cerebellar_Hemisphere           |              |                    |
|              | 3.214183005                           | 0.169381014                           | 0.169381014  | -1.97710453                           | -0.842353431 |                    |
|              | -1.131562877                          | 0.488990483                           | 5            | 0                                     | 0.998207054  |                    |
| PCNT         | ENSG00000160299.16                    | 0.4895417                             | 6            | 4                                     | 0.343526064  | Brain_Hypothalamus |
|              | 0.940827558                           | Brain_Nucleus_accumbens_basal_ganglia | 4.633877161  |                                       |              |                    |

|          |                                       |                             |             |                                       |              |
|----------|---------------------------------------|-----------------------------|-------------|---------------------------------------|--------------|
|          | 0.034328594                           | 0.176375979                 | -0.94722122 | 0.941778084                           | 0.007124788  |
|          | 0.614729229                           | 4                           | 0           | 0.998207054                           |              |
| TTC9     | ENSG00000133985.2                     | 0.489612373                 | 1           | 1                                     | 0.489612373  |
|          | Brain_Cerebellar_Hemisphere           | 0.489612373                 |             | Brain_Cerebellar_Hemisphere           | 1            |
|          | 1                                     | 0.69092548                  | 0.69092548  | 0.69092548                            | NA           |
|          |                                       |                             |             | 1                                     | 0            |
|          |                                       |                             |             | 0.998207054                           |              |
| HSPE1    | ENSG00000115541.10                    | 0.489645324                 | 1           | 1                                     | 0.489645324  |
|          | Brain_Anterior_cingulate_cortex_BA24  | 0.489645324                 |             |                                       |              |
|          | Brain_Anterior_cingulate_cortex_BA24  | 1                           | 1           | 1                                     | -0.690873049 |
|          | -0.690873049                          | -0.690873049                | NA          | 1                                     | 0            |
|          |                                       |                             |             | 0.998207054                           |              |
| SNRNP200 | ENSG00000144028.14                    | 0.489725062                 | 1           | 1                                     | 0.489725062  |
|          | Brain_Caudate_basal_ganglia           | 0.489725062                 |             | Brain_Caudate_basal_ganglia           | 1            |
|          | 1                                     | 0.690746181                 | 0.690746181 | 0.690746181                           | NA           |
|          |                                       |                             |             | 1                                     | 0            |
|          |                                       |                             |             | 0.998207054                           |              |
| C15orf57 | ENSG00000128891.15                    | 0.489756364                 | 13          | 2                                     | 0.280400131  |
|          | Brain_Nucleus_accumbens_basal_ganglia | 0.986090875                 |             | Brain_Cerebellar_Hemisphere           |              |
|          | 11.55230891                           | 0.000953425                 | 0.693482078 | -1.048131027                          | 1.079420917  |
|          | -0.196735875                          | 0.537962814                 | 2           | 0                                     | 0.998207054  |
| SCLT1    | ENSG00000151466.11                    | 0.489823137                 | 2           | 2                                     | 0.569226608  |
|          | Brain_Cerebellum                      |                             |             |                                       |              |
|          | 0.801491674                           | Brain_Cerebellar_Hemisphere | 1.759281274 | 0.240718726                           |              |
|          | 0.240718726                           | -0.569190882                | 0.251417067 | -0.158886908                          | 0.580257445  |
|          | 2                                     | 0                           | 0.998207054 |                                       |              |
| DPP3     | ENSG00000254986.7                     | 0.489835844                 | 3           | 3                                     | 0.19831176   |
|          | Brain_Spinal_cord_cervical_c-1        | 0.467970786                 |             | Brain_Caudate_basal_ganglia           |              |
|          | 1.762036354                           | 0.342999223                 | 0.342999223 | 0.72578467                            | 1.286376315  |
|          | 1.058112672                           | 0.294427905                 | 3           | 0                                     | 0.998207054  |
| TJP3     | ENSG00000105289.14                    | 0.489848958                 | 2           | 2                                     | 0.353911235  |
|          | Brain_Putamen_basal_ganglia           | 0.467445999                 |             | Brain_Nucleus_accumbens_basal_ganglia |              |
|          | 1.028759126                           | 0.971240874                 | 0.971240874 | -0.726640847                          | 0.927029468  |
|          | 0.10019431                            | 1.169321493                 | 2           | 0                                     | 0.998207054  |
| SOX9     | ENSG00000125398.5                     | 0.489870571                 | 1           | 1                                     | 0.489870571  |
|          | Brain_Putamen_basal_ganglia           | 0.489870571                 |             | Brain_Putamen_basal_ganglia           | 1            |
|          | 1                                     | 0.690514696                 | 0.690514696 | 0.690514696                           | NA           |
|          |                                       |                             |             | 1                                     | 0            |
|          |                                       |                             |             | 0.998207054                           |              |
| KIF2C    | ENSG00000142945.12                    | 0.489961088                 | 3           | 3                                     | 0.380888439  |
|          | Brain_Anterior_cingulate_cortex_BA24  | 0.755238335                 |             | Brain_Hypothalamus                    |              |
|          | 1.887670687                           | 0.238101332                 | 0.238101332 | -0.620597625                          | 0.876260489  |
|          | 0.189134196                           | 0.755923369                 | 3           | 0                                     | 0.998207054  |
| RPL13    | ENSG00000167526.13                    | 0.489977621                 | 8           | 4                                     | 0.260022315  |
|          | Brain_Amygdala                        |                             |             |                                       |              |
|          | 0.62858495                            | Brain_Caudate_basal_ganglia | 5.489652752 | 0.006060814                           |              |
|          | 0.428373463                           | -1.049783772                | 1.126338388 | -0.512433979                          | 0.692221177  |
|          | 4                                     | 0                           | 0.998207054 |                                       |              |
| LRRC42   | ENSG00000116212.14                    | 0.490043635                 | 1           | 1                                     | 0.490043635  |
|          | Brain_Spinal_cord_cervical_c-1        | 0.490043635                 |             | Brain_Spinal_cord_cervical_c-1        |              |
|          | 1                                     | 1                           | 1           | -0.690239423                          | -0.690239423 |
|          |                                       |                             |             | -0.690239423                          | NA           |
|          |                                       |                             |             | 1                                     | 0            |
|          |                                       |                             |             | 0.998207054                           |              |
| LPIN1    | ENSG00000134324.11                    | 0.490099366                 | 12          | 10                                    | 0.081559575  |
|          | Brain_Amygdala                        |                             |             |                                       |              |
|          | 0.96173702                            | Brain_Putamen_basal_ganglia | 4.179212904 | 0.004192097                           |              |
|          | 0.264017994                           | -1.741707867                | 1.272773504 | -0.264358801                          | 0.866190941  |
|          | 10                                    | 0                           | 0.998207054 |                                       |              |
| ETFRF1   | ENSG00000205707.10                    | 0.490106622                 | 2           | 2                                     | 0.267822912  |
|          | Brain_Cerebellum                      | 0.576545211                 |             | Brain_Nucleus_accumbens_basal_ganglia |              |
|          | 1.104178933                           | 0.895821067                 | 0.895821067 | -1.108090086                          | 0.558438174  |
|          | -0.274825956                          | 1.178413434                 | 2           | 0                                     | 0.998207054  |
| TEX14    | ENSG00000121101.15                    | 0.490134937                 | 13          | 7                                     | 0.13265593   |
|          | Brain_Cortex                          |                             |             |                                       |              |
|          | 0.923587069                           | Brain_Cerebellum            | 8.340635217 | 0.034667537                           | 0.35241706   |
|          | -1.503710478                          | 1.146105878                 | 0.457367924 | 0.69124718                            | 7            |
|          |                                       |                             |             | 0                                     |              |
|          |                                       |                             |             | 0.998207054                           |              |
| PPP1R17  | ENSG00000106341.10                    | 0.490135216                 | 2           | 2                                     | 0.298302705  |
|          | Brain_Nucleus_accumbens_basal_ganglia | 0.625625358                 |             | Brain_Caudate_basal_ganglia           |              |
|          | 1.092704107                           | 0.907295893                 | 0.907295893 | -0.487893388                          | 1.040080064  |
|          | 0.276093338                           | 1.08044039                  | 2           | 0                                     | 0.998207054  |
| TMEM244  | ENSG00000203756.7                     | 0.49015142                  | 5           | 4                                     | 0.096928891  |
|          | Brain_Cortex                          |                             |             |                                       |              |



|                |                                      |                                |                          |              |                                |              |              |   |
|----------------|--------------------------------------|--------------------------------|--------------------------|--------------|--------------------------------|--------------|--------------|---|
|                | 0.973391772                          | Brain_Spinal_cord_cervical_c-1 | 2.88006556               | 0.030249982  |                                |              |              |   |
|                | 0.360639712                          | -1.659928235                   | -0.033354652             | -0.96361266  | 0.724157354                    |              |              |   |
|                | 4                                    | 0                              | 0.998207054              |              |                                |              |              |   |
| LINC01842      | ENSG00000267147.2                    | 0.490244581                    | 2                        | 2            | 0.232537193                    |              |              |   |
|                | Brain_Putamen_basal_ganglia          | 0.970929948                    |                          |              | Brain_Spinal_cord_cervical_c-1 |              |              |   |
|                | 1.013212932                          | 0.986787068                    | 0.986787068              | -0.036441971 | 1.19384861                     |              |              |   |
|                | 0.578703319                          | 0.869946813                    | 2                        | 0            | 0.998207054                    |              |              |   |
| SEMA7A         | ENSG00000138623.9                    | 0.490249053                    | 1                        | 1            | 0.490249053                    |              |              |   |
|                | Brain_Cerebellum                     | 0.490249053                    | Brain_Cerebellum         | 1            | 1                              | 1            | 0.689912756  |   |
|                | 0.689912756                          | 0.689912756                    | NA                       | 1            | 0                              | 0.998207054  |              |   |
| LINC01748      | ENSG00000226476.3                    | 0.490356524                    | 4                        | 3            | 0.22063153                     |              |              |   |
|                | Brain_Putamen_basal_ganglia          | 0.915787428                    |                          |              | Brain_Spinal_cord_cervical_c-1 |              |              |   |
|                | 2.742023273                          | 0.066502892                    | 0.211313269              | -1.224850564 | 0.105741531                    |              |              |   |
|                | -0.523274591                         | 0.55266736                     | 3                        | 0            | 0.998207054                    |              |              |   |
| C2orf15        | ENSG00000273045.5                    | 0.490500327                    | 1                        | 1            | 0.490500327                    |              |              |   |
|                | Brain_Spinal_cord_cervical_c-1       | 0.490500327                    |                          |              | Brain_Spinal_cord_cervical_c-1 |              |              |   |
|                | 1                                    | 1                              | 1                        | -0.689513268 | -0.689513268                   | -0.689513268 | NA           | 1 |
|                | 0.998207054                          |                                |                          |              |                                |              |              | 0 |
| RP11-304L19.13 | ENSG00000260778.5                    | 0.490502412                    | 12                       | 3            | 0.272829508                    |              |              |   |
|                | Brain_Substantia_nigra               | 0.853782114                    |                          |              | Brain_Putamen_basal_ganglia    |              |              |   |
|                | 9.419355448                          | 0.007299483                    | 0.48843035               | -1.09656977  | -0.184294901                   |              |              |   |
|                | -0.634333828                         | 0.359013495                    | 3                        | 0            | 0.998207054                    |              |              |   |
| SLC22A18AS     | ENSG00000254827.5                    | 0.490517157                    | 2                        | 2            | 0.258006986                    |              |              |   |
|                | Brain_Frontal_Cortex_BA9             | 0.403560981                    |                          |              | Brain_Cortex                   | 1.435177894  |              |   |
|                | 0.564822106                          | 0.564822106                    | 0.835278392              | 1.131114301  | 0.983196346                    |              |              |   |
|                | 0.209187577                          | 2                              | 0                        | 0.998207054  |                                |              |              |   |
| NBPF3          | ENSG00000142794.18                   | 0.490602731                    | 13                       | 1            | 0.312243951                    |              |              |   |
|                | Brain_Anterior_cingulate_cortex_BA24 | 0.617144046                    |                          |              | Brain_Cortex                   |              |              |   |
|                | 12.82675093                          | 0.000150849                    | 12.82675093              | -1.010524744 | -0.499902054                   |              |              |   |
|                | -0.684840356                         | 0.139834767                    | 1                        | 0            | 0.998207054                    |              |              |   |
| ACTR10         | ENSG00000131966.13                   | 0.490640321                    | 4                        | 4            | 0.192004914                    |              |              |   |
|                | Brain_Hypothalamus                   | 0.68273117                     | Brain_Frontal_Cortex_BA9 | 1.941276074  |                                |              |              |   |
|                | 0.29789237                           | 0.29789237                     | -0.903168752             | 1.304670961  | 0.238540959                    |              |              |   |
|                | 1.061701753                          | 4                              | 0                        | 0.998207054  |                                |              |              |   |
| CDCA5          | ENSG00000146670.9                    | 0.490689562                    | 1                        | 1            | 0.490689562                    |              |              |   |
|                | Brain_Putamen_basal_ganglia          | 0.490689562                    |                          |              | Brain_Putamen_basal_ganglia    | 1            | 1            |   |
|                | 1                                    | -0.689212484                   | -0.689212484             | -0.689212484 | NA                             | 1            | 0            |   |
|                | 0.998207054                          |                                |                          |              |                                |              |              |   |
| ZNF273         | ENSG00000198039.11                   | 0.490767607                    | 13                       | 8            | 0.131494652                    |              |              |   |
|                | Brain_Putamen_basal_ganglia          | 0.91447461                     | Brain_Hippocampus        | 6.495123977  |                                |              |              |   |
|                | 0.023723909                          | 0.219660404                    | -0.919968531             | 1.508233985  | 0.42284677                     |              |              |   |
|                | 0.694295541                          | 8                              | 0                        | 0.998207054  |                                |              |              |   |
| LINC01915      | ENSG00000265485.5                    | 0.490778452                    | 2                        | 1            | 0.465723838                    |              |              |   |
|                | Brain_Cerebellum                     | 0.521459924                    |                          |              | Brain_Cerebellar_Hemisphere    | 1.978026463  |              |   |
|                | 0.021973537                          | 1.978026463                    | -0.729454259             | -0.641096599 | -0.685275429                   |              |              |   |
|                | 0.0624783                            | 1                              | 0                        | 0.998207054  |                                |              |              |   |
| SRSF4          | ENSG00000116350.16                   | 0.490804367                    | 2                        | 2            | 0.274207959                    |              |              |   |
|                | Brain_Cerebellar_Hemisphere          | 0.66899703                     | Brain_Cortex             | 1.045106071  |                                |              |              |   |
|                | 0.954893929                          | 0.954893929                    | 0.427524932              | 1.093423366  | 0.760474149                    |              |              |   |
|                | 0.470861298                          | 2                              | 0                        | 0.998207054  |                                |              |              |   |
| GPRC5D         | ENSG00000111291.8                    | 0.49082912                     | 1                        | 1            | 0.49082912                     |              |              |   |
|                | Brain_Substantia_nigra               | 0.49082912                     | Brain_Substantia_nigra   | 1            | 1                              | 1            |              |   |
|                | 0.688990701                          | 0.688990701                    | 0.688990701              | NA           | 1                              | 0            | 0.998207054  |   |
| CHRD           | ENSG00000090539.15                   | 0.490838021                    | 2                        | 2            | 0.256280956                    |              |              |   |
|                | Brain_Cerebellar_Hemisphere          | 1.788206566                    |                          |              | Brain_Cerebellum               |              |              |   |
|                | 0.503459574                          | 0.669056285                    | 1.135225241              | 0.902140763  | 0.32963123                     | 2            |              |   |
|                | 0.211793434                          | 0                              | 0.998207054              |              |                                |              |              |   |
| AC008088.4     | ENSG00000260907.1                    | 0.490892746                    | 1                        | 1            | 0.490892746                    |              |              |   |
|                | Brain_Cerebellum                     | 0.490892746                    | Brain_Cerebellum         | 1            | 1                              | 1            | -0.688889597 |   |
|                | -0.688889597                         | -0.688889597                   | NA                       | 1            | 0                              | 0.998207054  |              |   |
| CNTNAP2        | ENSG00000174469.19                   | 0.490893469                    | 4                        | 4            | 0.157456471                    |              |              |   |
|                | Brain_Cerebellum                     | 0.819531089                    |                          |              | Brain_Caudate_basal_ganglia    | 1.646518778  |              |   |

|               |                                       |              |              |              |                                     |
|---------------|---------------------------------------|--------------|--------------|--------------|-------------------------------------|
|               | 0.354100342                           | 0.354100342  | -1.413677987 | 0.228148124  | -0.669704837                        |
|               | 0.68774038                            | 4 0          | 0.998207054  |              |                                     |
| PRELID2       | ENSG00000186314.11                    | 0.490924333  | 1            | 1            | 0.490924333                         |
|               | Brain_Spinal_cord_cervical_c-1        | 0.490924333  |              |              | Brain_Spinal_cord_cervical_c-1      |
|               | 1 1 1                                 | -0.688839408 | -0.688839408 | -0.688839408 | NA 1 0                              |
|               | 0.998207054                           |              |              |              |                                     |
| SPINT1        | ENSG00000166145.14                    | 0.490927259  | 1            | 1            | 0.490927259                         |
|               | Brain_Hypothalamus                    | 0.490927259  |              |              | Brain_Hypothalamus 1 1 1            |
|               | 0.688834759                           | 0.688834759  | 0.688834759  | NA 1 0       | 0.998207054                         |
| TIMMDC1       | ENSG00000113845.9                     | 0.491008135  | 1            | 1            | 0.491008135                         |
|               | Brain_Nucleus_accumbens_basal_ganglia | 0.491008135  |              |              |                                     |
|               | Brain_Nucleus_accumbens_basal_ganglia | 1 1 1        |              |              | -0.688706261                        |
|               | -0.688706261                          | -0.688706261 | NA 1 0       |              | 0.998207054                         |
| LSINCT5       | ENSG00000281560.1                     | 0.491042775  | 1            | 1            | 0.491042775                         |
|               | Brain_Cerebellum                      | 0.491042775  |              |              | Brain_Cerebellum 1 1 1              |
|               | 0.688651228                           | 0.688651228  | NA 1 0       |              | 0.688651228                         |
| SLC23A1       | ENSG00000170482.16                    | 0.491287396  | 2            | 2            | 0.249210915                         |
|               | Brain_Hippocampus                     | 0.710950594  |              |              | Brain_Cortex 1.056334152            |
|               | 0.943665848                           | 0.943665848  | -1.152268116 | -0.370579714 | -0.761423915                        |
|               | 0.55273717                            | 2 0          | 0.998207054  |              |                                     |
| RP11-326I11.4 | ENSG00000271538.5                     | 0.491337805  | 12           | 1            | 0.292050654                         |
|               | Brain_Nucleus_accumbens_basal_ganglia | 0.934090693  |              |              | Brain_Putamen_basal_ganglia         |
|               | 11.27116526                           | 6.93E-17     | 11.27116526  | -1.053633699 | -0.082699235                        |
|               | -0.665061658                          | 0.257554542  | 1 0          |              | 0.998207054                         |
| SHISA5        | ENSG00000164054.15                    | 0.491406027  | 2            | 2            | 0.235481813                         |
|               | Brain_Frontal_Cortex_BA9              | 0.411515573  |              |              | Brain_Cerebellum 1.614912162        |
|               | 0.385087838                           | 0.385087838  | 0.821229471  | 1.186355814  | 1.003792642                         |
|               | 0.258183314                           | 2 0          | 0.998207054  |              |                                     |
| DUOX1         | ENSG00000137857.17                    | 0.491544567  | 9            | 6            | 0.038806367                         |
|               | Brain_Substantia_nigra                | 0.939458533  |              |              | Brain_Amygdala 5.520533032          |
|               | 0.018140707                           | 0.216234403  | -1.749215114 | 2.066234243  | 0.77053663                          |
|               | 1.494415088                           | 6 0          | 0.998207054  |              |                                     |
| MYL12A        | ENSG00000101608.12                    | 0.491568154  | 1            | 1            | 0.491568154                         |
|               | Brain_Cerebellum                      | 0.491568154  |              |              | Brain_Cerebellum 1 1 1              |
|               | -0.687816803                          | -0.687816803 | NA 1 0       |              | 0.998207054                         |
| CENPF         | ENSG00000117724.12                    | 0.491611099  | 2            | 2            | 0.328976393                         |
|               | Brain_Hypothalamus                    | 0.427124057  |              |              | Brain_Cortex 1.118201374            |
|               | 0.881798626                           | 0.881798626  | -0.976177739 | 0.794122609  | -0.091027565                        |
|               | 1.25179138                            | 2 0          | 0.998207054  |              |                                     |
| FAM118A       | ENSG00000100376.11                    | 0.492011162  | 13           | 1            | 0.317302302                         |
|               | Brain_Amygdala                        | 0.652167468  |              |              | Brain_Cerebellum 12.76477676        |
|               | 12.76477676                           | 0.450753154  | 1.000016956  | 0.680859711  | 0.000254112                         |
|               | 1 0                                   | 0.998207054  |              |              | 0.154717895                         |
| GCC1          | ENSG00000179562.2                     | 0.492056487  | 1            | 1            | 0.492056487                         |
|               | Brain_Cerebellum                      | 0.492056487  |              |              | Brain_Cerebellum 1 1 1              |
|               | -0.687041643                          | NA 1 0       |              |              | -0.687041643                        |
| PSIP1         | ENSG00000164985.14                    | 0.492210522  | 2            | 2            | 0.239501388                         |
|               | Brain_Putamen_basal_ganglia           | 0.895245239  |              |              | Brain_Frontal_Cortex_BA9            |
|               | 1.263543986                           | 0.736456014  | 0.736456014  | -1.176233984 | -0.131670097                        |
|               | -0.65395204                           | 0.738618208  | 2 0          |              | 0.998207054                         |
| DNAJC8        | ENSG00000126698.10                    | 0.4922716    | 4            | 2            | 0.245817384                         |
|               | Brain_Spinal_cord_cervical_c-1        | 0.581300768  |              |              | Brain_Caudate_basal_ganglia         |
|               | 3.306418809                           | 0.027988918  | 0.622882996  | -1.160568592 | -0.551485698                        |
|               | -0.814933337                          | 0.28776812   | 2 0          |              | 0.998207054                         |
| HHAT          | ENSG00000054392.12                    | 0.492389338  | 5            | 5            | 0.178128795                         |
|               | Brain_Caudate_basal_ganglia           | 0.868671956  |              |              | Brain_Frontal_Cortex_BA9 2.40449513 |
|               | 0.184444681                           | 0.184444681  | -0.284413384 | 1.346538866  | 0.440461224                         |
|               | 0.79684367                            | 5 0          | 0.998207054  |              |                                     |
| RUNX3         | ENSG00000020633.18                    | 0.492453942  | 1            | 1            | 0.492453942                         |
|               | Brain_Substantia_nigra                | 0.492453942  |              |              | Brain_Substantia_nigra 1 1          |
|               | 1 0.686411044                         | 0.686411044  | 0.686411044  | NA 1 0       |                                     |
|               | 0.998207054                           |              |              |              |                                     |

|           |                                      |                             |                                      |              |                                       |                  |              |
|-----------|--------------------------------------|-----------------------------|--------------------------------------|--------------|---------------------------------------|------------------|--------------|
| PCP4      | ENSG00000183036.10                   | 0.49248013                  | 1                                    | 1            | 0.49248013                            | Brain_Cortex     | 0.49248013   |
|           | Brain_Cortex                         | 1                           | 1                                    | 1            | -0.686369504                          | -0.686369504     | -0.686369504 |
|           | NA                                   | 1                           | 0                                    | 0.998207054  |                                       |                  |              |
| CRACR2A   | ENSG00000130038.9                    | 0.492622946                 | 1                                    | 1            | 0.492622946                           |                  |              |
|           | Brain_Spinal_cord_cervical_c-1       | 0.492622946                 |                                      |              | Brain_Spinal_cord_cervical_c-1        |                  |              |
|           | 1                                    | 1                           | 1                                    | -0.686142987 | -0.686142987                          | -0.686142987     | NA 1 0       |
|           | 0.998207054                          |                             |                                      |              |                                       |                  |              |
| LINC00437 | ENSG00000236354.1                    | 0.492650209                 | 7                                    | 5            | 0.317635522                           |                  |              |
|           | Brain_Cortex                         | 0.960173802                 |                                      |              | Brain_Nucleus_accumbens_basal_ganglia |                  |              |
|           | 5.139566374                          | 0.008428592                 |                                      |              | 0.253568441                           | -0.628549493     | 0.999328627  |
|           | 0.063493802                          | 0.574648885                 | 5                                    | 0            | 0.998207054                           |                  |              |
| TMC5      | ENSG00000103534.16                   | 0.492667244                 | 2                                    | 2            | 0.403469203                           |                  |              |
|           | Brain_Cerebellar_Hemisphere          | 0.748428886                 |                                      |              | Brain_Cortex                          | 1.4964698        | 0.5035302    |
|           | 0.5035302                            | -0.835441445                | 0.320711692                          |              | -0.257364877                          | 0.817523724      | 2            |
|           | 0                                    | 0.998207054                 |                                      |              |                                       |                  |              |
| CELF5     | ENSG00000161082.12                   | 0.492955702                 | 1                                    | 1            | 0.492955702                           |                  |              |
|           | Brain_Cerebellar_Hemisphere          | 0.492955702                 |                                      |              | Brain_Cerebellar_Hemisphere           | 1                | 1            |
|           | 1                                    | 0.685615345                 | 0.685615345                          | 0.685615345  | NA                                    | 1                | 0            |
|           | 0.998207054                          |                             |                                      |              |                                       |                  |              |
| APOBEC3G  | ENSG00000239713.8                    | 0.493115964                 | 12                                   | 9            | 0.09048961                            |                  |              |
|           | Brain_Hypothalamus                   | 0.94312356                  | Brain_Anterior_cingulate_cortex_BA24 |              |                                       |                  |              |
|           | 5.836495889                          | 0.00769134                  | 0.206486932                          |              | -1.549510792                          | 1.692820656      |              |
|           | 0.357535813                          | 1.014486809                 | 9                                    | 0            | 0.998207054                           |                  |              |
| NAMA      | ENSG00000271086.5                    | 0.493219665                 | 2                                    | 2            | 0.401100013                           | Brain_Cerebellum |              |
|           | 0.885097382                          | Brain_Cerebellar_Hemisphere | 1.616907731                          |              | 0.383092269                           |                  |              |
|           | 0.383092269                          | -0.144510479                | 0.839658279                          |              | 0.3475739                             | 0.695912403      | 2            |
|           | 0                                    | 0.998207054                 |                                      |              |                                       |                  |              |
| ACTL6B    | ENSG00000077080.9                    | 0.493231053                 | 2                                    | 2            | 0.364551923                           |                  |              |
|           | Brain_Spinal_cord_cervical_c-1       | 0.462191241                 |                                      |              | Brain_Hypothalamus                    |                  |              |
|           | 1.036688733                          | 0.963311267                 | 0.963311267                          |              | -0.906725598                          | -0.735243451     |              |
|           | -0.820984525                         | 0.121256189                 | 2                                    | 0            | 0.998207054                           |                  |              |
| MSANTD1   | ENSG00000188981.10                   | 0.493293855                 | 4                                    | 4            | 0.084204934                           |                  |              |
|           | Brain_Anterior_cingulate_cortex_BA24 | 0.908027814                 | Brain_Cerebellum                     |              |                                       |                  |              |
|           | 1.819670724                          | 0.185416193                 | 0.185416193                          |              | -0.136314086                          | 1.726792509      |              |
|           | 0.475857927                          | 0.873989347                 | 4                                    | 0            | 0.998207054                           |                  |              |
| GPHN      | ENSG00000171723.15                   | 0.493434268                 | 1                                    | 1            | 0.493434268                           |                  |              |
|           | Brain_Cerebellar_Hemisphere          | 0.493434268                 |                                      |              | Brain_Cerebellar_Hemisphere           | 1                | 1            |
|           | 1                                    | -0.684856833                | -0.684856833                         | -0.684856833 | NA                                    | 1                | 0            |
|           | 0.998207054                          |                             |                                      |              |                                       |                  |              |
| ODF1      | ENSG00000155087.3                    | 0.49350936                  | 4                                    | 3            | 0.309349758                           |                  |              |
|           | Brain_Frontal_Cortex_BA9             | 0.984189553                 | Brain_Cortex                         |              | 3.136801654                           |                  |              |
|           | 0.029433965                          | 0.153963254                 | -0.019816753                         |              | 1.016587384                           | 0.520670963      |              |
|           | 0.459468797                          | 3                           | 0                                    | 0.998207054  |                                       |                  |              |
| NSF       | ENSG00000073969.18                   | 0.493566574                 | 3                                    | 3            | 0.342225791                           |                  |              |
|           | Brain_Cerebellar_Hemisphere          | 0.923857916                 | Brain_Putamen_basal_ganglia          |              | 1.50984215                            |                  |              |
|           | 0.499528551                          | 0.499528551                 | -0.949776576                         |              | 0.600958315                           | -0.084414334     |              |
|           | 0.790880437                          | 3                           | 0                                    | 0.998207054  |                                       |                  |              |
| FGF14-AS2 | ENSG00000272143.1                    | 0.493643217                 | 12                                   | 5            | 0.120536939                           |                  |              |
|           | Brain_Putamen_basal_ganglia          | 0.951012572                 | Brain_Amygdala                       |              | 8.681929906                           |                  |              |
|           | 0.00034377                           | 0.419375063                 | -0.078517567                         |              | 1.552523816                           | 0.979988171      |              |
|           | 0.504335946                          | 5                           | 0                                    | 0.998207054  |                                       |                  |              |
| TECPR2    | ENSG00000196663.15                   | 0.493992783                 | 2                                    | 2            | 0.458918571                           |                  |              |
|           | Brain_Cerebellum                     | 0.694833627                 | Brain_Cerebellar_Hemisphere          |              | 1.531852029                           |                  |              |
|           | 0.468147971                          | 0.468147971                 | -0.74062875                          |              | 0.392303974                           | -0.174162388     |              |
|           | 0.801104412                          | 2                           | 0                                    | 0.998207054  |                                       |                  |              |
| GGT2      | ENSG00000133475.16                   | 0.49402172                  | 2                                    | 2            | 0.236983448                           |                  |              |
|           | Brain_Caudate_basal_ganglia          | 0.884894022                 | Brain_Cerebellum                     |              | 1.030204259                           |                  |              |
|           | 0.969795741                          | 0.969795741                 | 0.144768033                          |              | 1.182560315                           | 0.663664174      |              |
|           | 0.73382996                           | 2                           | 0                                    | 0.998207054  |                                       |                  |              |
| APOLD1    | ENSG00000178878.12                   | 0.494097738                 | 1                                    | 1            | 0.494097738                           |                  |              |
|           | Brain_Spinal_cord_cervical_c-1       | 0.494097738                 |                                      |              | Brain_Spinal_cord_cervical_c-1        |                  |              |
|           | 1                                    | 1                           | 1                                    | 0.683805903  | 0.683805903                           | 0.683805903      | NA 1 0       |

0.998207054  
WDR75 ENSG00000115368.9 0.494098344 8 2 0.442641365  
Brain\_Putamen\_basal\_ganglia 0.938917955 Brain\_Hippocampus 7.012193475  
0.004448608 0.731951913 -0.767740509 0.693337102 0.212463582  
0.465414015 2 0 0.998207054  
LGALS7 ENSG00000205076.4 0.494206573 1 1 0.494206573  
Brain\_Hypothalamus 0.494206573 Brain\_Hypothalamus 1 1 1  
0.683633583 0.683633583 0.683633583 NA 1 0 0.998207054  
LAMA2 ENSG00000196569.11 0.494307939 4 4 0.112213543  
Brain\_Putamen\_basal\_ganglia 0.8147483 Brain\_Caudate\_basal\_ganglia 2.3493532  
0.149801326 0.149801326 -0.234304877 1.588322011 0.761767628  
0.900236148 4 0 0.998207054  
VPS51 ENSG00000149823.8 0.494339035 1 1 0.494339035  
Brain\_Nucleus\_accumbens\_basal\_ganglia 0.494339035  
Brain\_Nucleus\_accumbens\_basal\_ganglia 1 1 1 0.68342388 0.68342388  
0.68342388 NA 1 0 0.998207054  
TEX261 ENSG00000144043.11 0.494551394 8 5 0.091386149  
Brain\_Cerebellar\_Hemisphere 0.996544196 Brain\_Nucleus\_accumbens\_basal\_ganglia  
5.768177951 0.001934404 0.197748014 -1.688130665 0.482423041  
-0.059714375 0.721086326 5 0 0.998207054  
METTL15 ENSG00000169519.20 0.494680917 8 4 0.068081119  
Brain\_Anterior\_cingulate\_cortex\_BA24 0.843270018 Brain\_Hypothalamus  
5.790163776 0.028598261 0.372870635 -1.824469525 0.197712489  
-0.980880153 0.603791994 4 0 0.998207054  
ZFP3 ENSG00000180787.5 0.49469666 1 1 0.49469666 Brain\_Cerebellar\_Hemisphere  
0.49469666 Brain\_Cerebellar\_Hemisphere 1 1 1 -0.682857866  
-0.682857866 -0.682857866 NA 1 0 0.998207054  
CTD-2240J17.4 ENSG00000275995.1 0.494729117 1 1 0.494729117  
Brain\_Frontal\_Cortex\_BA9 0.494729117 Brain\_Frontal\_Cortex\_BA9 1 1  
1 0.682806507 0.682806507 0.682806507 NA 1 0  
0.998207054  
ARID3A ENSG00000116017.10 0.49473139 5 5 0.229946019  
Brain\_Hippocampus 0.558095872 Brain\_Cerebellar\_Hemisphere 1.256234753  
0.730889245 0.730889245 -1.200497921 1.058698297 0.476769239  
0.956928399 5 0 0.998207054  
RP11-203M5.8 ENSG00000258908.1 0.494778224 1 1 0.494778224  
Brain\_Substantia\_nigra 0.494778224 Brain\_Substantia\_nigra 1 1  
1 -0.682728805 -0.682728805 -0.682728805 NA 1 0  
0.998207054  
SCIN ENSG00000006747.14 0.494844174 4 4 0.222389939  
Brain\_Nucleus\_accumbens\_basal\_ganglia 0.933709237 Brain\_Frontal\_Cortex\_BA9  
1.930779558 0.113135583 0.113135583 0.083178967 1.2201977  
0.656425165 0.483869577 4 0 0.998207054  
RP1-60019.2 ENSG00000229654.1 0.494958083 12 6 0.215478576  
Brain\_Hippocampus 0.907236832 Brain\_Cerebellum 8.42272021 0.01049511  
0.322627054 -1.221446362 1.238640732 -0.10938137 0.61369532 6  
0 0.998207054  
NOSTRIN ENSG00000163072.15 0.494967009 4 4 0.106700413  
Brain\_Substantia\_nigra 0.690083181 Brain\_Cortex 1.859534337  
0.259022828 0.259022828 -1.613202995 -0.398742185 -0.994363051  
0.508864709 4 0 0.998207054  
BIVM ENSG00000134897.13 0.495017601 10 7 0.124152156  
Brain\_Anterior\_cingulate\_cortex\_BA24 0.990902038 Brain\_Cortex  
5.971148532 0.015971428 0.299789413 -1.537576669 0.521849478  
-0.22193498 0.753754274 7 0 0.998207054  
DPY19L2 ENSG00000177990.11 0.495036345 10 4 0.173854852  
Brain\_Amygdala 0.957932061 Brain\_Anterior\_cingulate\_cortex\_BA24  
7.890652201 0.000974734 0.404762107 -0.563501672 1.359921231  
-0.035863068 0.527870386 4 0 0.998207054  
TMEM5 ENSG00000118600.11 0.495063289 5 5 0.387120669  
Brain\_Substantia\_nigra 0.979333133 Brain\_Anterior\_cingulate\_cortex\_BA24  
2.845267511 0.289639705 0.289639705 -0.842079206 0.864850829

|                   |                                       |                                      |                                       |              |              |                |             |  |
|-------------------|---------------------------------------|--------------------------------------|---------------------------------------|--------------|--------------|----------------|-------------|--|
|                   | -0.111584752                          | 0.623348771                          | 5                                     | 0            | 0.998207054  |                |             |  |
| RAPGEF2           | ENSG00000109756.8                     | 0.495069338                          | 1                                     | 1            | 0.495069338  |                |             |  |
|                   | Brain_Hippocampus                     | 0.495069338                          | Brain_Hippocampus                     | 1            | 1            | 1              |             |  |
|                   | 0.682268262                           | 0.682268262                          | 0.682268262                           | NA           | 1            | 0              | 0.998207054 |  |
| ABCC2             | ENSG00000023839.10                    | 0.495101905                          | 2                                     | 2            | 0.236880728  |                |             |  |
|                   | Brain_Spinal_cord_cervical_c-1        | 0.400577083                          | Brain_Cerebellum                      | 1.657682649  |              |                |             |  |
|                   | 0.342317351                           | 0.342317351                          | 0.840591034                           | 1.182819405  | 1.01170522   |                |             |  |
|                   | 0.241992002                           | 2                                    | 0                                     | 0.998207054  |              |                |             |  |
| GNRHR             | ENSG00000109163.6                     | 0.495120137                          | 5                                     | 3            | 0.219329117  |                |             |  |
|                   | Brain_Hypothalamus                    | 0.967842756                          | Brain_Cerebellum                      | 4.276389144  |              |                |             |  |
|                   | 0.006735212                           | 0.185847894                          | -0.040314045                          | 1.228314001  | 0.410028535  |                |             |  |
|                   | 0.531229463                           | 3                                    | 0                                     | 0.998207054  |              |                |             |  |
| TONSL             | ENSG00000160949.16                    | 0.495128781                          | 5                                     | 5            | 0.073384412  | Brain_Cortex   |             |  |
|                   | 0.740371119                           | Brain_Cerebellum                     | 2.27097943                            | 0.117310921  | 0.117310921  |                |             |  |
|                   | -1.790432482                          | 0.641051889                          | -0.197576774                          | 1.028553865  | 5            | 0              |             |  |
|                   | 0.998207054                           |                                      |                                       |              |              |                |             |  |
| KIAA1324          | ENSG00000116299.16                    | 0.495164395                          | 1                                     | 1            | 0.495164395  |                |             |  |
|                   | Brain_Nucleus_accumbens_basal_ganglia | 0.495164395                          |                                       |              |              |                |             |  |
|                   | Brain_Nucleus_accumbens_basal_ganglia | 1                                    | 1                                     | 1            | 0.682117912  |                |             |  |
|                   | 0.682117912                           | 0.682117912                          | NA                                    | 1            | 0            | 0.998207054    |             |  |
| NIPSNAP3A         | ENSG00000136783.9                     | 0.495197439                          | 13                                    | 4            | 0.432566765  |                |             |  |
|                   | Brain_Nucleus_accumbens_basal_ganglia | 0.997941064                          | Brain_Cerebellum                      |              |              |                |             |  |
|                   | 9.844221812                           | 0.000874351                          | 0.398431495                           | -0.78480695  | 0.731819544  |                |             |  |
|                   | -0.00932738                           | 0.44643455                           | 4                                     | 0            | 0.998207054  |                |             |  |
| LL22NC03-N95F10.1 | ENSG00000282012.1                     | 0.495237794                          | 1                                     | 1            | 0.495237794  |                |             |  |
|                   | Brain_Hypothalamus                    | 0.495237794                          | Brain_Hypothalamus                    | 1            | 1            | 1              |             |  |
|                   | -0.682001829                          | -0.682001829                         | -0.682001829                          | NA           | 1            | 0              | 0.998207054 |  |
| HPYR1             | ENSG00000253521.1                     | 0.495244487                          | 1                                     | 1            | 0.495244487  | Brain_Cortex   |             |  |
|                   | 0.495244487                           | Brain_Cortex                         | 1                                     | 1            | 1            | 0.681991244    | 0.681991244 |  |
|                   | 0.681991244                           | NA                                   | 1                                     | 0            | 0.998207054  |                |             |  |
| GNPTAB            | ENSG00000111670.14                    | 0.495327526                          | 3                                     | 3            | 0.274400359  |                |             |  |
|                   | Brain_Nucleus_accumbens_basal_ganglia | 0.529823248                          |                                       |              |              |                |             |  |
|                   | Brain_Spinal_cord_cervical_c-1        | 1.369308276                          | 0.587002622                           | 0.587002622  |              |                |             |  |
|                   | -1.09298506                           | 1.041607649                          | -0.226551088                          | 1.122567859  | 3            | 0              |             |  |
|                   | 0.998207054                           |                                      |                                       |              |              |                |             |  |
| KLHL22            | ENSG00000099910.16                    | 0.495372775                          | 2                                     | 2            | 0.235928854  |                |             |  |
|                   | Brain_Cerebellar_Hemisphere           | 0.898278138                          | Brain_Cortex                          | 1.098165566  |              |                |             |  |
|                   | 0.901834434                           | 0.901834434                          | 0.127836786                           | 1.1852241    | 0.656530443  |                |             |  |
|                   | 0.74768574                            | 2                                    | 0                                     | 0.998207054  |              |                |             |  |
| Clorf131          | ENSG00000143633.12                    | 0.495419226                          | 1                                     | 1            | 0.495419226  |                |             |  |
|                   | Brain_Cerebellum                      | 0.495419226                          | Brain_Cerebellum                      | 1            | 1            | 1              | 0.681714928 |  |
|                   | 0.681714928                           | 0.681714928                          | NA                                    | 1            | 0            | 0.998207054    |             |  |
| FAM138B           | ENSG00000226516.7                     | 0.495420152                          | 7                                     | 6            | 0.112524126  |                |             |  |
|                   | Brain_Caudate_basal_ganglia           | 0.636662861                          | Brain_Nucleus_accumbens_basal_ganglia |              |              |                |             |  |
|                   | 4.598360273                           | 0.103103931                          | 0.176368828                           | -1.58694931  | 0.486619659  |                |             |  |
|                   | -0.659653214                          | 0.664509335                          | 6                                     | 0            | 0.998207054  |                |             |  |
| NOG               | ENSG00000183691.4                     | 0.495474519                          | 2                                     | 2            | 0.23915135   |                |             |  |
|                   | Brain_Caudate_basal_ganglia           | 0.901820357                          | Brain_Spinal_cord_cervical_c-1        |              |              |                |             |  |
|                   | 1.011949805                           | 0.988050195                          | 0.988050195                           | -1.177110638 | -0.123362113 |                |             |  |
|                   | -0.650236375                          | 0.745112728                          | 2                                     | 0            | 0.998207054  |                |             |  |
| GABPB2            | ENSG00000143458.11                    | 0.49557828                           | 4                                     | 4            | 0.104758241  |                |             |  |
|                   | Brain_Hippocampus                     | 0.913634184                          | Brain_Cerebellar_Hemisphere           | 1.734174135  |              |                |             |  |
|                   | 0.474863388                           | 0.474863388                          | -0.108455745                          | 1.622210703  | 0.723701474  |                |             |  |
|                   | 0.711002208                           | 4                                    | 0                                     | 0.998207054  |              |                |             |  |
| GFRA1             | ENSG00000151892.14                    | 0.495827162                          | 7                                     | 4            | 0.08865285   | Brain_Amygdala |             |  |
|                   | 0.909590401                           | Brain_Anterior_cingulate_cortex_BA24 | 4.37534464                            | 0.000177205  |              |                |             |  |
|                   | 0.716806267                           | -1.70254714                          | 0.119216082                           | -0.775761951 | 0.606353171  |                |             |  |
|                   | 4                                     | 0                                    | 0.998207054                           |              |              |                |             |  |
| RP11-90P13.1      | ENSG00000261795.1                     | 0.495965366                          | 2                                     | 2            | 0.270754575  |                |             |  |
|                   | Brain_Caudate_basal_ganglia           | 0.649513982                          | Brain_Putamen_basal_ganglia           |              |              |                |             |  |
|                   | 1.017340068                           | 0.982659932                          | 0.982659932                           | -1.101326516 | -0.454437478 |                |             |  |
|                   | -0.777881997                          | 0.457419625                          | 2                                     | 0            | 0.998207054  |                |             |  |

|              |                                       |                                      |                             |              |              |                  |              |  |
|--------------|---------------------------------------|--------------------------------------|-----------------------------|--------------|--------------|------------------|--------------|--|
| TNFSF11      | ENSG00000120659.14                    | 0.495980019                          | 1                           | 1            | 0.495980019  |                  |              |  |
|              | Brain_Hypothalamus                    | 0.495980019                          | Brain_Hypothalamus          | 1            | 1            | 1                |              |  |
|              | 0.680828492                           | 0.680828492                          | 0.680828492                 | NA           | 1            | 0                | 0.998207054  |  |
| Clorf204     | ENSG00000188004.9                     | 0.495986374                          | 10                          | 8            | 0.248336925  |                  |              |  |
|              | Brain_Anterior_cingulate_cortex_BA24  | 0.840644719                          | Brain_Frontal_Cortex_BA9    |              |              |                  |              |  |
|              | 4.574495551                           | 0.029029444                          | 0.221873144                 | -1.102456447 | 1.154398268  |                  |              |  |
|              | -0.146366264                          | 0.762775193                          | 8                           | 0            | 0.998207054  |                  |              |  |
| ZNF485       | ENSG00000198298.12                    | 0.496062571                          | 1                           | 1            | 0.496062571  |                  |              |  |
|              | Brain_Substantia_nigra                | 0.496062571                          | Brain_Substantia_nigra      | 1            | 1            |                  |              |  |
|              | 1                                     | -0.68069805                          | -0.68069805                 | -0.68069805  | NA           | 1                | 0            |  |
|              | 0.998207054                           |                                      |                             |              |              |                  |              |  |
| PHC1         | ENSG00000111752.10                    | 0.496097397                          | 3                           | 3            | 0.348132303  |                  |              |  |
|              | Brain_Cerebellar_Hemisphere           | 0.931502202                          | Brain_Cerebellum            | 2.24152072   |              |                  |              |  |
|              | 0.179274519                           | 0.179274519                          | -0.938218169                | -0.085954984 | -0.485581275 |                  |              |  |
|              | 0.428597395                           | 3                                    | 0                           | 0.998207054  |              |                  |              |  |
| FST          | ENSG00000134363.11                    | 0.496218123                          | 1                           | 1            | 0.496218123  |                  |              |  |
|              | Brain_Caudate_basal_ganglia           | 0.496218123                          | Brain_Caudate_basal_ganglia | 1            | 1            |                  |              |  |
|              | 1                                     | 0.680452287                          | 0.680452287                 | 0.680452287  | NA           | 1                | 0            |  |
|              | 0.998207054                           |                                      |                             |              |              |                  |              |  |
| RTKN2        | ENSG00000182010.10                    | 0.496241541                          | 1                           | 1            | 0.496241541  | Brain_Cortex     |              |  |
|              | 0.496241541                           | Brain_Cortex                         | 1                           | 1            | 1            | 0.680415292      | 0.680415292  |  |
|              | 0.680415292                           | NA                                   | 1                           | 0            | 0.998207054  |                  |              |  |
| SKAP2        | ENSG00000005020.12                    | 0.496248702                          | 4                           | 3            | 0.110073311  | Brain_Cerebellum |              |  |
|              | 0.75857428                            | Brain_Cortex                         | 2.967183858                 | 0.084299422  | 0.383307341  |                  |              |  |
|              | 0.30735355                            | 1.597863716                          | 1.045713515                 | 0.5406851    | 3            | 0                | 0.998207054  |  |
| RPS2         | ENSG00000140988.15                    | 0.496332446                          | 1                           | 1            | 0.496332446  |                  |              |  |
|              | Brain_Hippocampus                     | 0.496332446                          | Brain_Hippocampus           | 1            | 1            | 1                |              |  |
|              | -0.68027169                           | -0.68027169                          | -0.68027169                 | NA           | 1            | 0                | 0.998207054  |  |
| VPS13D       | ENSG00000048707.13                    | 0.496391882                          | 1                           | 1            | 0.496391882  |                  |              |  |
|              | Brain_Cortex                          | 0.496391882                          | Brain_Cortex                | 1            | 1            | 1                | -0.680177809 |  |
|              | -0.680177809                          | -0.680177809                         | NA                          | 1            | 0            | 0.998207054      |              |  |
| RP11-568A7.4 | ENSG00000280707.2                     | 0.496527841                          | 1                           | 1            | 0.496527841  |                  |              |  |
|              | Brain_Caudate_basal_ganglia           | 0.496527841                          | Brain_Caudate_basal_ganglia | 1            | 1            |                  |              |  |
|              | 1                                     | -0.679963075                         | -0.679963075                | -0.679963075 | NA           | 1                | 0            |  |
|              | 0.998207054                           |                                      |                             |              |              |                  |              |  |
| PEAK1        | ENSG00000173517.10                    | 0.496528687                          | 13                          | 4            | 0.048398722  | Brain_Cortex     |              |  |
|              | 0.432690804                           | Brain_Anterior_cingulate_cortex_BA24 | 9.97286326                  | 0.011091118  |              |                  |              |  |
|              | 0.417194352                           | 0.784595441                          | 1.973850695                 | 1.329668737  | 0.357170197  |                  |              |  |
|              | 4                                     | 0                                    | 0.998207054                 |              |              |                  |              |  |
| RP11-11N7.4  | ENSG00000273175.1                     | 0.496642526                          | 1                           | 1            | 0.496642526  |                  |              |  |
|              | Brain_Hypothalamus                    | 0.496642526                          | Brain_Hypothalamus          | 1            | 1            | 1                |              |  |
|              | -0.679781968                          | -0.679781968                         | -0.679781968                | NA           | 1            | 0                | 0.998207054  |  |
| NCAM2        | ENSG00000154654.14                    | 0.496653413                          | 2                           | 2            | 0.238530595  |                  |              |  |
|              | Brain_Hypothalamus                    | 0.962106404                          | Brain_Cortex                | 1.0464045    | 0.9535955    |                  |              |  |
|              | 0.9535955                             | -1.178667517                         | -0.047510447                | -0.613088982 | 0.799848835  | 2                |              |  |
|              | 0                                     | 0.998207054                          |                             |              |              |                  |              |  |
| PARD6G       | ENSG00000178184.15                    | 0.49667102                           | 1                           | 1            | 0.49667102   |                  |              |  |
|              | Brain_Cerebellar_Hemisphere           | 0.49667102                           | Brain_Cerebellar_Hemisphere | 1            | 1            | 1                |              |  |
|              | -0.679736975                          | -0.679736975                         | -0.679736975                | NA           | 1            | 0                | 0.998207054  |  |
| ETF1         | ENSG00000120705.12                    | 0.496755946                          | 1                           | 1            | 0.496755946  |                  |              |  |
|              | Brain_Nucleus_accumbens_basal_ganglia | 0.496755946                          |                             |              |              |                  |              |  |
|              | Brain_Nucleus_accumbens_basal_ganglia | 1                                    | 1                           | 1            | 0.67960288   | 0.67960288       |              |  |
|              | 0.67960288                            | NA                                   | 1                           | 0            | 0.998207054  |                  |              |  |
| RP1-93H18.1  | ENSG00000240050.5                     | 0.496877599                          | 3                           | 3            | 0.124225247  |                  |              |  |
|              | Brain_Anterior_cingulate_cortex_BA24  | 0.882024107                          |                             |              |              |                  |              |  |
|              | Brain_Spinal_cord_cervical_c-1        | 1.4957862                            | 0.551666761                 | 0.551666761  |              |                  |              |  |
|              | 0.148403793                           | 1.537277999                          | 0.74795601                  | 0.713619167  | 3            | 0                |              |  |
|              | 0.998207054                           |                                      |                             |              |              |                  |              |  |
| KCTD1        | ENSG00000134504.12                    | 0.496907549                          | 3                           | 3            | 0.222293376  |                  |              |  |
|              | Brain_Caudate_basal_ganglia           | 0.778726715                          | Brain_Cerebellum            | 1.136529899  |              |                  |              |  |
|              | 0.87907303                            | 0.87907303                           | -1.220452524                | 0.736716338  | -0.067585819 |                  |              |  |
|              | 1.024085163                           | 3                                    | 0                           | 0.998207054  |              |                  |              |  |

SCYL3 ENSG00000000457.13 0.496994699 10 6 0.256065345  
 Brain\_Nucleus\_accumbens\_basal\_ganglia 0.964806015 Brain\_Cerebellum  
 6.225463377 0.004532388 0.275830924 -0.886483522 1.135740118  
 0.472844376 0.712648736 6 0 0.998207054  
 CASQ2 ENSG00000118729.11 0.497129623 2 2 0.241012593  
 Brain\_Nucleus\_accumbens\_basal\_ganglia 0.914758456 Brain\_Cerebellum  
 1.217938721 0.782061279 0.782061279 -1.172459576 -0.107038475  
 -0.639749025 0.753366485 2 0 0.998207054  
 AJ003147.8 ENSG00000262521.1 0.497167412 2 2 0.280266484  
 Brain\_Cerebellum 0.745519137 Brain\_Cerebellar\_Hemisphere 1.64237402 0.35762598  
 0.35762598 -1.0797209 -0.324553352 -0.702137126 0.533984094 2 0  
 0.998207054  
 GLI1 ENSG00000111087.9 0.497393156 1 1 0.497393156  
 Brain\_Nucleus\_accumbens\_basal\_ganglia 0.497393156  
 Brain\_Nucleus\_accumbens\_basal\_ganglia 1 1 1 -0.678597139  
 -0.678597139 -0.678597139 NA 1 0 0.998207054  
 DUSP22 ENSG00000112679.14 0.497412503 1 1 0.497412503  
 Brain\_Putamen\_basal\_ganglia 0.497412503 Brain\_Putamen\_basal\_ganglia 1 1  
 1 0.678566613 0.678566613 0.678566613 NA 1 0  
 0.998207054  
 ZNF578 ENSG00000258405.9 0.497427253 1 1 0.497427253  
 Brain\_Hypothalamus 0.497427253 Brain\_Hypothalamus 1 1 1  
 0.678543341 0.678543341 0.678543341 NA 1 0 0.998207054  
 IER2 ENSG00000160888.6 0.497458373 2 2 0.24426173  
 Brain\_Frontal\_Cortex\_BA9 0.834293393 Brain\_Hypothalamus 1.00649593  
 0.99350407 0.99350407 0.20919836 1.164400537 0.686799449 0.675429937  
 2 0 0.998207054  
 PART1 ENSG00000152931.7 0.497686981 5 4 0.106221591  
 Brain\_Anterior\_cingulate\_cortex\_BA24 0.441604249 Brain\_Caudate\_basal\_ganglia  
 2.911447828 0.046331028 0.415500458 -1.615411594 -0.769487016  
 -1.099001599 0.329893433 4 0 0.998207054  
 CYTH1 ENSG00000108669.16 0.497714756 2 2 0.274743629  
 Brain\_Nucleus\_accumbens\_basal\_ganglia 0.489921699 Brain\_Cerebellar\_Hemisphere  
 1.231257453 0.768742547 0.768742547 -1.09220358 -0.690433368  
 -0.891318474 0.284094441 2 0 0.998207054  
 RP11-1055B8.4 ENSG00000262877.4 0.497747801 13 7 0.091581622  
 Brain\_Cerebellum 0.988933976 Brain\_Putamen\_basal\_ganglia 8.045859233  
 0.014602774 0.360441579 -0.024966911 1.687113018 0.879233162  
 0.568792922 7 0 0.998207054  
 TVP23B ENSG00000171928.13 0.497777092 13 4 0.201058047  
 Brain\_Nucleus\_accumbens\_basal\_ganglia 0.98102508 Brain\_Amygdala 10.74447588  
 0.0007883 0.395874402 -0.495527211 1.278542962 0.094178675  
 0.424178529 4 0 0.998207054  
 AC005013.5 ENSG00000228421.2 0.497870097 10 3 0.239091221  
 Brain\_Nucleus\_accumbens\_basal\_ganglia 0.848830706 Brain\_Hypothalamus  
 8.43047376 0.005450738 0.399148717 -1.177261319 0.452215381  
 -0.284332466 0.517275702 3 0 0.998207054  
 LRRC40 ENSG00000066557.5 0.497949448 3 3 0.220903634  
 Brain\_Spinal\_cord\_cervical\_c-1 0.690737097 Brain\_Hippocampus  
 1.126664489 0.898911078 0.898911078 -0.71655818 1.224128823  
 0.301808537 0.973902048 3 0 0.998207054  
 ATP11A ENSG00000068650.18 0.49796111 1 1 0.49796111  
 Brain\_Spinal\_cord\_cervical\_c-1 0.49796111 Brain\_Spinal\_cord\_cervical\_c-1 1 1  
 1 1 0.677701288 0.677701288 0.677701288 NA 1 0  
 0.998207054  
 NMT2 ENSG00000152465.17 0.498028208 6 6 0.15827535  
 Brain\_Frontal\_Cortex\_BA9 0.95818295 Brain\_Caudate\_basal\_ganglia 2.425695301  
 0.106706363 0.106706363 -0.743777829 1.410895767 0.441050619  
 0.76010661 6 0 0.998207054  
 ANKRD66 ENSG00000230062.5 0.498116439 2 2 0.238008268  
 Brain\_Amygdala 0.789765611 Brain\_Anterior\_cingulate\_cortex\_BA24 1.25756444  
 0.74243556 0.74243556 -0.266614993 1.179979754 0.45668238 1.022896955

|             |                                      |                             |                             |              |                             |              |              |                  |  |  |
|-------------|--------------------------------------|-----------------------------|-----------------------------|--------------|-----------------------------|--------------|--------------|------------------|--|--|
| AGT         | 2                                    | 0                           | 0.998207054                 |              |                             |              |              |                  |  |  |
|             | ENSG00000135744.7                    | 0.498335206                 | 9                           | 8            | 0.02721936                  |              |              |                  |  |  |
|             | Brain_Putamen_basal_ganglia          | 0.899575861                 |                             |              | Brain_Frontal_Cortex_BA9    |              |              |                  |  |  |
|             | 3.409862819                          | 0.023350083                 | 0.246510379                 |              | -2.208357531                | 0.888020428  |              |                  |  |  |
|             | -0.365293736                         | 1.125759896                 | 8                           | 0            | 0.998207054                 |              |              |                  |  |  |
| CCDC134     | ENSG00000100147.13                   | 0.498394622                 | 1                           | 1            | 0.498394622                 |              |              |                  |  |  |
|             | Brain_Cerebellum                     | 0.498394622                 |                             |              | Brain_Cerebellum            | 1            | 1            | 0.677017861      |  |  |
|             | 0.677017861                          | 0.677017861                 | NA                          | 1            | 0                           | 0.998207054  |              |                  |  |  |
| SMARCA5     | ENSG00000153147.5                    | 0.498520309                 | 1                           | 1            | 0.498520309                 |              |              |                  |  |  |
|             | Brain_Frontal_Cortex_BA9             | 0.498520309                 |                             |              | Brain_Frontal_Cortex_BA9    | 1            | 1            |                  |  |  |
|             | 1                                    | 0.676819776                 | 0.676819776                 | 0.676819776  | NA                          | 1            | 0            |                  |  |  |
|             | 0.998207054                          |                             |                             |              |                             |              |              |                  |  |  |
| LIPA        | ENSG00000107798.17                   | 0.498592079                 | 3                           | 3            | 0.126372842                 |              |              | Brain_Cortex     |  |  |
|             | 0.577965705                          | Brain_Cerebellar_Hemisphere | 1.927639894                 | 0.478205424  |                             |              |              |                  |  |  |
|             | 0.478205424                          | 0.556358643                 | 1.528562887                 | 0.900471237  | 0.54477367                  | 3            |              |                  |  |  |
|             | 0                                    | 0.998207054                 |                             |              |                             |              |              |                  |  |  |
| PAM         | ENSG00000145730.20                   | 0.498655322                 | 5                           | 5            | 0.101093536                 |              |              |                  |  |  |
|             | Brain_Cerebellar_Hemisphere          | 0.730790233                 |                             |              | Brain_Putamen_basal_ganglia |              |              |                  |  |  |
|             | 3.180268496                          | 0.219501909                 | 0.219501909                 | -1.639575138 | 0.344074536                 |              |              |                  |  |  |
|             | -0.757574639                         | 0.727291445                 | 5                           | 0            | 0.998207054                 |              |              |                  |  |  |
| RTCB        | ENSG00000100220.11                   | 0.498738379                 | 1                           | 1            | 0.498738379                 |              |              |                  |  |  |
|             | Brain_Putamen_basal_ganglia          | 0.498738379                 |                             |              | Brain_Putamen_basal_ganglia | 1            | 1            |                  |  |  |
|             | 1                                    | 0.676476157                 | 0.676476157                 | 0.676476157  | NA                          | 1            | 0            |                  |  |  |
|             | 0.998207054                          |                             |                             |              |                             |              |              |                  |  |  |
| ATG12       | ENSG00000145782.12                   | 0.498829161                 | 8                           | 4            | 0.315823684                 |              |              |                  |  |  |
|             | Brain_Hippocampus                    | 0.94444475                  | Brain_Caudate_basal_ganglia | 5.691427759  |                             |              |              |                  |  |  |
|             | 5.05E-17                             | 0.212309231                 | -0.502757627                | 1.003077056  | 0.180616948                 |              |              |                  |  |  |
|             | 0.466895761                          | 4                           | 0                           | 0.998207054  |                             |              |              |                  |  |  |
| ALKBH2      | ENSG00000189046.10                   | 0.498836832                 | 1                           | 1            | 0.498836832                 |              |              |                  |  |  |
|             | Brain_Cerebellar_Hemisphere          | 0.498836832                 |                             |              | Brain_Cerebellar_Hemisphere | 1            | 1            |                  |  |  |
|             | 1                                    | -0.676321049                | -0.676321049                | -0.676321049 | NA                          | 1            | 0            |                  |  |  |
|             | 0.998207054                          |                             |                             |              |                             |              |              |                  |  |  |
| TMEM248     | ENSG00000106609.16                   | 0.498848446                 | 2                           | 2            | 0.271492468                 |              |              |                  |  |  |
|             | Brain_Cerebellum                     | 0.347705699                 | Brain_Cerebellar_Hemisphere | 1.523726006  |                             |              |              |                  |  |  |
|             | 0.476273994                          | 0.476273994                 | -1.099632059                | -0.939048782 | -1.019340421                |              |              |                  |  |  |
|             | 0.113549524                          | 2                           | 0                           | 0.998207054  |                             |              |              |                  |  |  |
| ATPIF1      | ENSG00000130770.17                   | 0.49887251                  | 10                          | 2            | 0.185420186                 |              |              | Brain_Amygdala   |  |  |
|             | 0.696648488                          | Brain_Cerebellum            | 8.973817748                 | 0.001379505  | 0.311592433                 |              |              |                  |  |  |
|             | -1.324249529                         | -0.389848621                | -0.850228939                | 0.273349031  | 2                           | 0            |              |                  |  |  |
|             | 0.998207054                          |                             |                             |              |                             |              |              |                  |  |  |
| RP11-49P4.7 | ENSG00000282881.1                    | 0.498918938                 | 2                           | 2            | 0.245624686                 |              |              |                  |  |  |
|             | Brain_Anterior_cingulate_cortex_BA24 | 0.812668609                 | Brain_Putamen_basal_ganglia |              |                             |              |              |                  |  |  |
|             | 1.026398117                          | 0.973601883                 | 0.973601883                 | -1.161042329 | 0.236984765                 |              |              |                  |  |  |
|             | -0.462028782                         | 0.988554439                 | 2                           | 0            | 0.998207054                 |              |              |                  |  |  |
| RFC3        | ENSG00000133119.12                   | 0.498994614                 | 1                           | 1            | 0.498994614                 |              |              | Brain_Cerebellum |  |  |
|             | 0.498994614                          | Brain_Cerebellum            | 1                           | 1            | -0.676072502                | -0.676072502 |              |                  |  |  |
|             | -0.676072502                         | NA                          | 1                           | 0            | 0.998207054                 |              |              |                  |  |  |
| LINC01739   | ENSG00000229537.5                    | 0.499001559                 | 1                           | 1            | 0.499001559                 |              |              |                  |  |  |
|             | Brain_Amygdala                       | 0.499001559                 | Brain_Amygdala              | 1            | 1                           | 1            | -0.676061563 |                  |  |  |
|             | -0.676061563                         | -0.676061563                | NA                          | 1            | 0                           | 0.998207054  |              |                  |  |  |
| INTS12      | ENSG00000138785.14                   | 0.499043343                 | 2                           | 2            | 0.239266187                 |              |              |                  |  |  |
|             | Brain_Anterior_cingulate_cortex_BA24 | 0.881335932                 | Brain_Substantia_nigra      |              |                             |              |              |                  |  |  |
|             | 1.065629551                          | 0.934370449                 | 0.934370449                 | -0.149275899 | 1.176822935                 |              |              |                  |  |  |
|             | 0.513773518                          | 0.937693478                 | 2                           | 0            | 0.998207054                 |              |              |                  |  |  |
| U2AF2       | ENSG00000063244.12                   | 0.499080118                 | 2                           | 2            | 0.297233363                 |              |              |                  |  |  |
|             | Brain_Frontal_Cortex_BA9             | 0.594039927                 | Brain_Substantia_nigra      |              |                             |              |              |                  |  |  |
|             | 1.017035168                          | 0.982964832                 | 0.982964832                 | -1.042384687 | -0.532990832                |              |              |                  |  |  |
|             | -0.78768776                          | 0.360195849                 | 2                           | 0            | 0.998207054                 |              |              |                  |  |  |
| TAF13       | ENSG00000197780.9                    | 0.499119911                 | 1                           | 1            | 0.499119911                 |              |              |                  |  |  |
|             | Brain_Cerebellar_Hemisphere          | 0.499119911                 | Brain_Cerebellar_Hemisphere | 1            | 1                           |              |              |                  |  |  |
|             | 1                                    | 0.675875159                 | 0.675875159                 | 0.675875159  | NA                          | 1            | 0            |                  |  |  |
|             | 0.998207054                          |                             |                             |              |                             |              |              |                  |  |  |



|              |                                       |                                       |                                       |              |              |                             |    |   |   |
|--------------|---------------------------------------|---------------------------------------|---------------------------------------|--------------|--------------|-----------------------------|----|---|---|
| KRBA1        | ENSG00000133619.17                    | 0.499240563                           | 2                                     | 2            | 0.252282846  |                             |    |   |   |
|              | Brain_Substantia_nigra                | 0.702944708                           |                                       |              |              | Brain_Cerebellar_Hemisphere |    |   |   |
|              | 1.089006868                           | 0.910993132                           | 0.910993132                           | 0.381348449  | 1.144822131  |                             |    |   |   |
|              | 0.76308529                            | 0.539857418                           | 2                                     | 0            | 0.998207054  |                             |    |   |   |
| TLR2         | ENSG00000137462.6                     | 0.499259885                           | 2                                     | 2            | 0.292766638  | Brain_Cerebellum            |    |   |   |
|              | 0.614169042                           | Brain_Cerebellar_Hemisphere           | 1.789313949                           | 0.210686051  |              |                             |    |   |   |
|              | 0.210686051                           | -1.052071737                          | -0.504131401                          | -0.778101569 | 0.387452327  |                             |    |   |   |
|              | 2                                     | 0                                     | 0.998207054                           |              |              |                             |    |   |   |
| RHBDF2       | ENSG00000129667.12                    | 0.499289022                           | 1                                     | 1            | 0.499289022  |                             |    |   |   |
|              | Brain_Caudate_basal_ganglia           | 0.499289022                           | Brain_Caudate_basal_ganglia           | 1            | 1            |                             |    |   |   |
|              | 1                                     | -0.675608849                          | -0.675608849                          | -0.675608849 | NA           | 1                           | 0  |   |   |
|              | 0.998207054                           |                                       |                                       |              |              |                             |    |   |   |
| FAM96B       | ENSG00000166595.11                    | 0.499312179                           | 1                                     | 1            | 0.499312179  |                             |    |   |   |
|              | Brain_Substantia_nigra                | 0.499312179                           | Brain_Substantia_nigra                | 1            | 1            |                             |    |   |   |
|              | 1                                     | -0.675572386                          | -0.675572386                          | -0.675572386 | NA           | 1                           | 0  |   |   |
|              | 0.998207054                           |                                       |                                       |              |              |                             |    |   |   |
| MCRIP1       | ENSG00000225663.7                     | 0.499324657                           | 1                                     | 1            | 0.499324657  |                             |    |   |   |
|              | Brain_Spinal_cord_cervical_c-1        | 0.499324657                           | Brain_Spinal_cord_cervical_c-1        |              |              |                             |    |   |   |
|              | 1                                     | 1                                     | 1                                     | 0.675552738  | 0.675552738  | 0.675552738                 | NA | 1 | 0 |
|              | 0.998207054                           |                                       |                                       |              |              |                             |    |   |   |
| TMTC2        | ENSG00000179104.8                     | 0.49950884                            | 3                                     | 3            | 0.158287678  | Brain_Cortex                |    |   |   |
|              | 0.732721959                           | Brain_Spinal_cord_cervical_c-1        | 1.06463516                            | 0.946483411  |              |                             |    |   |   |
|              | 0.946483411                           | -0.557274375                          | 1.410853965                           | 0.398362187  | 0.985295224  |                             |    |   |   |
|              | 3                                     | 0                                     | 0.998207054                           |              |              |                             |    |   |   |
| CHADL        | ENSG00000100399.15                    | 0.499509682                           | 2                                     | 2            | 0.243675585  | Brain_Cortex                |    |   |   |
|              | 0.309335059                           | Brain_Nucleus_accumbens_basal_ganglia | 1.78062121                            | 0.21937879   |              |                             |    |   |   |
|              | 0.21937879                            | 1.016618271                           | 1.165848794                           | 1.091233533  | 0.105521914  |                             |    |   | 2 |
|              | 0                                     | 0.998207054                           |                                       |              |              |                             |    |   |   |
| TOR3A        | ENSG00000186283.13                    | 0.499510478                           | 9                                     | 8            | 0.043988649  |                             |    |   |   |
|              | Brain_Cerebellar_Hemisphere           | 0.742258703                           | Brain_Nucleus_accumbens_basal_ganglia |              |              |                             |    |   |   |
|              | 2.668255493                           | 0.064086874                           | 0.182518321                           | -1.13984815  | 2.014198959  |                             |    |   |   |
|              | 0.185415385                           | 0.961635966                           | 8                                     | 0            | 0.998207054  |                             |    |   |   |
| SLC30A2      | ENSG00000158014.14                    | 0.499565782                           | 1                                     | 1            | 0.499565782  |                             |    |   |   |
|              | Brain_Frontal_Cortex_BA9              | 0.499565782                           | Brain_Frontal_Cortex_BA9              | 1            | 1            |                             |    |   |   |
|              | 1                                     | -0.67517312                           | -0.67517312                           | -0.67517312  | NA           | 1                           | 0  |   |   |
|              | 0.998207054                           |                                       |                                       |              |              |                             |    |   |   |
| SNX3         | ENSG00000112335.14                    | 0.499650074                           | 2                                     | 2            | 0.404023869  | Brain_Cortex                |    |   |   |
|              | 0.445306322                           | Brain_Caudate_basal_ganglia           | 1.078674217                           | 0.921325783  |              |                             |    |   |   |
|              | 0.921325783                           | 0.763263405                           | 0.834456361                           | 0.798859883  | 0.050341022  |                             |    |   |   |
|              | 2                                     | 0                                     | 0.998207054                           |              |              |                             |    |   |   |
| TAX1BP3      | ENSG00000213977.7                     | 0.499681187                           | 5                                     | 5            | 0.221529376  |                             |    |   |   |
|              | Brain_Cerebellum                      | 0.939063055                           | Brain_Cerebellar_Hemisphere           | 2.97294002   |              |                             |    |   |   |
|              | 0.220584443                           | 0.220584443                           | -1.222471497                          | 0.076447532  | -0.573678835 |                             |    |   |   |
|              | 0.494226268                           | 5                                     | 0                                     | 0.998207054  |              |                             |    |   |   |
| BCL9L        | ENSG00000186174.12                    | 0.499746084                           | 1                                     | 1            | 0.499746084  |                             |    |   |   |
|              | Brain_Putamen_basal_ganglia           | 0.499746084                           | Brain_Putamen_basal_ganglia           | 1            | 1            |                             |    |   |   |
|              | 1                                     | 0.674889324                           | 0.674889324                           | 0.674889324  | NA           | 1                           | 0  |   |   |
|              | 0.998207054                           |                                       |                                       |              |              |                             |    |   |   |
| RP11-621L6.3 | ENSG00000273321.1                     | 0.499789608                           | 1                                     | 1            | 0.499789608  |                             |    |   |   |
|              | Brain_Anterior_cingulate_cortex_BA24  | 0.499789608                           |                                       |              |              |                             |    |   |   |
|              | Brain_Anterior_cingulate_cortex_BA24  | 1                                     | 1                                     | 1            | 0.674820824  |                             |    |   |   |
|              | 0.674820824                           | 0.674820824                           | NA                                    | 1            | 0            | 0.998207054                 |    |   |   |
| AGO2         | ENSG00000123908.11                    | 0.499805693                           | 1                                     | 1            | 0.499805693  |                             |    |   |   |
|              | Brain_Nucleus_accumbens_basal_ganglia | 0.499805693                           |                                       |              |              |                             |    |   |   |
|              | Brain_Nucleus_accumbens_basal_ganglia | 1                                     | 1                                     | 1            | -0.67479551  |                             |    |   |   |
|              | -0.67479551                           | -0.67479551                           | NA                                    | 1            | 0            | 0.998207054                 |    |   |   |
| GGNBP2       | ENSG00000278311.4                     | 0.499932051                           | 7                                     | 6            | 0.114192789  |                             |    |   |   |
|              | Brain_Caudate_basal_ganglia           | 0.955831588                           | Brain_Cortex                          | 4.031741796  |              |                             |    |   |   |
|              | 0.053147103                           | 0.207663476                           | -1.57962492                           | -0.055385198 | -0.967949107 |                             |    |   |   |
|              | 0.590965566                           | 6                                     | 0                                     | 0.998207054  |              |                             |    |   |   |
| UBR7         | ENSG00000012963.14                    | 0.500008769                           | 1                                     | 1            | 0.500008769  |                             |    |   |   |
|              | Brain_Putamen_basal_ganglia           | 0.500008769                           | Brain_Putamen_basal_ganglia           | 1            | 1            |                             |    |   |   |

|             |                                       |                |                  |             |                             |             |                  |
|-------------|---------------------------------------|----------------|------------------|-------------|-----------------------------|-------------|------------------|
| 1           | -0.674475953                          | -0.674475953   | -0.674475953     | NA          | 1                           | 0           |                  |
| 0.998207054 |                                       |                |                  |             |                             |             |                  |
| AC007228.9  | ENSG00000268568.1                     | 0.500025275    | 1                | 1           | 0.500025275                 |             |                  |
|             | Brain_Nucleus_accumbens_basal_ganglia | 0.500025275    |                  |             |                             |             |                  |
|             | Brain_Nucleus_accumbens_basal_ganglia | 1              | 1                | 1           | 0.674449982                 |             |                  |
|             | 0.674449982                           | 0.674449982    | NA               | 1           | 0                           | 0.998207054 |                  |
| LONP2       | ENSG00000102910.13                    | 0.500054294    | 1                | 1           | 0.500054294                 |             |                  |
|             | Brain_Cerebellar_Hemisphere           | 0.500054294    |                  |             | Brain_Cerebellar_Hemisphere | 1           | 1                |
|             | 1                                     | 0.674404325    | 0.674404325      | 0.674404325 | NA                          | 1           | 0                |
| 0.998207054 |                                       |                |                  |             |                             |             |                  |
| PARVA       | ENSG00000197702.11                    | 0.500098555    | 5                | 4           | 0.133755984                 |             | Brain_Cerebellum |
|             | 0.598463778                           | Brain_Amygdala | 3.435820097      |             | 0.101103211                 |             | 0.167270373      |
|             | 0.526610962                           | 1.499453652    | 0.984349535      |             | 0.454514849                 |             | 4                |
|             | 0.998207054                           |                |                  |             |                             |             | 0                |
| PPP1R11     | ENSG00000204619.7                     | 0.50011505     | 2                | 2           | 0.571470801                 |             |                  |
|             | Brain_Cerebellar_Hemisphere           | 0.963668854    |                  |             | Brain_Cerebellum            | 1.894828383 |                  |
|             | 0.105171617                           | 0.105171617    | 0.045550085      |             | 0.565886703                 |             | 0.305718394      |
|             | 0.367933551                           | 2              | 0                | 0.998207054 |                             |             |                  |
| PIP4K2A     | ENSG00000150867.13                    | 0.500216609    | 9                | 5           | 0.109283828                 |             |                  |
|             | Brain_Caudate_basal_ganglia           | 0.984413608    |                  |             | Brain_Cortex                | 5.681034458 |                  |
|             | 0.023514122                           | 0.266724134    | -0.298443933     |             | 1.601420443                 |             | 0.528728562      |
|             | 0.671510651                           | 5              | 0                | 0.998207054 |                             |             |                  |
| INSL3       | ENSG00000248099.3                     | 0.500281821    | 1                | 1           | 0.500281821                 |             |                  |
|             | Brain_Cerebellar_Hemisphere           | 0.500281821    |                  |             | Brain_Cerebellar_Hemisphere | 1           | 1                |
|             | 1                                     | 0.67404639     | 0.67404639       | 0.67404639  | NA                          | 1           | 0                |
|             | 0.998207054                           |                |                  |             |                             |             |                  |
| CLUAP1      | ENSG00000103351.12                    | 0.500325277    | 13               | 9           | 0.104858132                 |             |                  |
|             | Brain_Anterior_cingulate_cortex_BA24  | 0.957466645    |                  |             | Brain_Cortex                |             |                  |
|             | 5.727653718                           | 0.001041874    | 0.209074553      |             | -0.732943009                |             | 1.621744194      |
|             | 0.254041949                           | 0.607654587    | 9                | 0           | 0.998207054                 |             |                  |
| SLC35E1     | ENSG00000127526.14                    | 0.500368055    | 3                | 3           | 0.147302525                 |             |                  |
|             | Brain_Cerebellar_Hemisphere           | 0.619499823    |                  |             | Brain_Substantia_nigra      | 1.84099849  |                  |
|             | 0.158796403                           | 0.158796403    | 0.496559352      |             | 1.449125546                 |             | 1.016847785      |
|             | 0.482343236                           | 3              | 0                | 0.998207054 |                             |             |                  |
| ZNF823      | ENSG00000197933.12                    | 0.500372385    | 1                | 1           | 0.500372385                 |             |                  |
|             | Brain_Cortex                          | 0.500372385    | Brain_Cortex     | 1           | 1                           | 1           | -0.673903943     |
|             | -0.673903943                          | -0.673903943   | NA               | 1           | 0                           | 0.998207054 |                  |
| UCK1        | ENSG00000130717.12                    | 0.500420173    | 9                | 5           | 0.034238818                 |             |                  |
|             | Brain_Hippocampus                     | 0.832564156    |                  |             | Brain_Cortex                | 5.327616058 |                  |
|             | 0.016365027                           | 0.277997699    | 0.211414099      |             | 2.117247859                 |             | 1.006573105      |
|             | 0.577800988                           | 5              | 0                | 0.998207054 |                             |             |                  |
| CNDP2       | ENSG00000133313.14                    | 0.500482609    | 11               | 1           | 0.249055226                 |             |                  |
|             | Brain_Hippocampus                     | 0.987780996    |                  |             | Brain_Cerebellar_Hemisphere | 9.946766828 |                  |
|             | 0.002237055                           | 9.946766828    | -0.015314849     |             | 1.152647189                 |             | 0.646036951      |
|             | 0.33382473                            | 1              | 0                | 0.998207054 |                             |             |                  |
| CDKAL1      | ENSG00000145996.11                    | 0.500787677    | 1                | 1           | 0.500787677                 |             |                  |
|             | Brain_Cerebellum                      | 0.500787677    | Brain_Cerebellum | 1           | 1                           | 1           | -0.673250912     |
|             | -0.673250912                          | -0.673250912   | NA               | 1           | 0                           | 0.998207054 |                  |
| NPTN        | ENSG00000156642.16                    | 0.500866073    | 3                | 3           | 0.247404484                 |             |                  |
|             | Brain_Hypothalamus                    | 0.928924561    |                  |             | Brain_Caudate_basal_ganglia | 1.280747276 |                  |
|             | 0.719988202                           | 0.719988202    | -1.156676671     |             | -0.089197992                |             | -0.726732015     |
|             | 0.563203064                           | 3              | 0                | 0.998207054 |                             |             |                  |
| CHCHD6      | ENSG00000159685.10                    | 0.500902976    | 2                | 2           | 0.516394871                 |             |                  |
|             | Brain_Cortex                          | 0.744629715    |                  |             | Brain_Hippocampus           | 1.648437439 |                  |
|             | 0.351562561                           | 0.351562561    | -0.325728585     |             | 0.648912599                 |             | 0.161592007      |
|             | 0.68917539                            | 2              | 0                | 0.998207054 |                             |             |                  |
| FOXL1       | ENSG00000176678.5                     | 0.500929458    | 1                | 1           | 0.500929458                 |             | Brain_Cortex     |
|             | 0.500929458                           | Brain_Cortex   | 1                | 1           | 1                           | 0.673028031 | 0.673028031      |
|             | 0.673028031                           | NA             | 1                | 0           | 0.998207054                 |             |                  |
| SMOC1       | ENSG00000198732.10                    | 0.500965984    | 4                | 4           | 0.161334037                 |             |                  |
|             | Brain_Nucleus_accumbens_basal_ganglia | 0.427248888    |                  |             | Brain_Caudate_basal_ganglia |             |                  |
|             | 2.265689614                           | 0.168423152    | 0.168423152      |             | -1.400598943                |             | -0.793908179     |
|             | -1.083896192                          | 0.311208434    | 4                | 0           | 0.998207054                 |             |                  |

OPRK1 ENSG00000082556.10 0.501157908 4 4 0.259924959  
Brain\_Cerebellar\_Hemisphere 0.681452883 Brain\_Cerebellum 1.594782485  
0.536626647 0.536626647 -1.12656851 -0.410481349 -0.830563035  
0.320766912 4 0 0.998207054

PMS2 ENSG00000122512.14 0.501278962 13 8 0.067677625  
Brain\_Hypothalamus 0.867445641 Brain\_Caudate\_basal\_ganglia 7.522704039  
0.013947257 0.294242876 -0.955885326 1.827147303 0.357460977  
0.813756037 8 0 0.998207054

EXD3 ENSG00000187609.15 0.501316298 3 3 0.179929257 Brain\_Cortex  
0.845802287 Brain\_Amygdala 1.264911072 0.720037125 0.720037125  
-1.340972883 0.37656489 -0.386295047 0.874688276 3 0  
0.998207054

IFI27L2 ENSG00000119632.3 0.501326689 9 8 0.077019444  
Brain\_Hypothalamus 0.876984843 Brain\_Cerebellum 3.714708542  
0.084854207 0.236900481 -0.154792577 1.768248054 0.836079599  
0.570056794 8 0 0.998207054

KMO ENSG00000117009.11 0.501326908 2 2 0.332747976 Brain\_Cortex  
0.58650914 Brain\_Frontal\_Cortex\_BA9 1.120482089 0.879517911  
0.879517911 -0.54390167 0.968593643 0.212345987 1.069495692  
2 0 0.998207054

BAIAP2L1 ENSG00000006453.13 0.50148825 1 1 0.50148825  
Brain\_Caudate\_basal\_ganglia 0.50148825 Brain\_Caudate\_basal\_ganglia 1 1 1  
-0.672149935 -0.672149935 -0.672149935 NA 1 0 0.998207054

FIBP ENSG00000172500.12 0.501644977 8 5 0.300171011 Brain\_Cerebellum  
0.918106903 Brain\_Caudate\_basal\_ganglia 6.247320597 0.004270983  
0.218496346 -0.10281865 1.036066733 0.739752752 0.387492985  
5 0 0.998207054

CRIP2 ENSG00000182809.10 0.50165046 2 2 0.245221674 Brain\_Cortex  
0.835284573 Brain\_Caudate\_basal\_ganglia 1.031502074 0.968497926  
0.968497926 0.207928785 1.162033952 0.684981368 0.674654233  
2 0 0.998207054

ASCC3 ENSG00000112249.13 0.50182757 4 4 0.229822713  
Brain\_Frontal\_Cortex\_BA9 0.930620012 Brain\_Cortex 2.434028973  
0.246392688 0.246392688 -1.200815666 0.213173575 -0.195853876  
0.672129312 4 0 0.998207054

CLIC4 ENSG00000169504.14 0.50183933 1 1 0.50183933  
Brain\_Nucleus\_accumbens\_basal\_ganglia 0.50183933  
Brain\_Nucleus\_accumbens\_basal\_ganglia 1 1 1 0.671598505  
0.671598505 0.671598505 NA 1 0 0.998207054

INHBE ENSG00000139269.2 0.501899445 1 1 0.501899445  
Brain\_Spinal\_cord\_cervical\_c-1 0.501899445 Brain\_Spinal\_cord\_cervical\_c-1  
1 1 1 -0.671504105 -0.671504105 -0.671504105 NA 1 0  
0.998207054

DDX31 ENSG00000125485.17 0.502088099 8 2 0.051690619  
Brain\_Frontal\_Cortex\_BA9 0.643036596 Brain\_Putamen\_basal\_ganglia  
6.770160839 0.018033292 0.603435591 -1.945701397 0.650901781  
-0.848523644 0.761196869 2 0 0.998207054

ZNF517 ENSG00000197363.9 0.502133695 11 6 0.13618844  
Brain\_Hippocampus 0.985349403 Brain\_Frontal\_Cortex\_BA9 5.463714364  
0.001563293 0.443447867 -1.490136153 1.190088117 -0.071799225  
0.680256487 6 0 0.998207054

GRIA1 ENSG00000155511.17 0.50216758 3 2 0.197828743  
Brain\_Cerebellar\_Hemisphere 0.611834312 Brain\_Nucleus\_accumbens\_basal\_ganglia  
1.995254053 0.010046808 0.994699139 -1.287762233 0.507456841  
-0.551372257 0.940041553 2 0 0.998207054

DHX33 ENSG00000005100.12 0.502354872 1 1 0.502354872  
Brain\_Hypothalamus 0.502354872 Brain\_Hypothalamus 1 1 1  
-0.670789132 -0.670789132 -0.670789132 NA 1 0 0.998207054

VPS16 ENSG00000215305.9 0.502456531 4 3 0.195520851 Brain\_Cortex  
0.623255706 Brain\_Caudate\_basal\_ganglia 3.453346627 0.02818886  
0.116567692 0.491241421 1.294418653 0.929872049 0.348239302  
3 0 0.998207054

|              |                                       |                                      |              |             |              |                                       |             |             |
|--------------|---------------------------------------|--------------------------------------|--------------|-------------|--------------|---------------------------------------|-------------|-------------|
| TFAP2A       | ENSG00000137203.10                    | 0.50269126                           | 4            | 4           | 0.09671048   | Brain_Hippocampus                     |             |             |
|              | 0.846783995                           | Brain_Frontal_Cortex_BA9             | 1.102917947  |             | 0.92455271   | 0.92455271                            |             |             |
|              | -0.729138331                          | 1.661014773                          | 0.202146118  |             | 1.04318069   | 4                                     | 0           |             |
|              | 0.998207054                           |                                      |              |             |              |                                       |             |             |
| ATXN7        | ENSG00000163635.17                    | 0.50269515                           | 1            | 1           | 0.50269515   | Brain_Hippocampus                     |             |             |
|              | 0.50269515                            | Brain_Hippocampus                    | 1            | 1           | 1            | 0.670255154                           | 0.670255154 |             |
|              | 0.670255154                           | NA                                   | 1            | 0           | 0.998207054  |                                       |             |             |
| RP11-158H5.8 | ENSG00000274184.1                     | 0.502715582                          |              | 8           | 4            | 0.35192503                            |             |             |
|              | Brain_Caudate_basal_ganglia           | 0.983237982                          |              |             |              | Brain_Spinal_cord_cervical_c-1        |             |             |
|              | 5.639800043                           | 0.025283953                          |              |             |              | -0.930861853                          | 0.02100962  |             |
|              | -0.598332444                          | 0.372511033                          | 4            | 0           | 0.998207054  |                                       |             |             |
| BLMH         | ENSG00000108578.14                    | 0.502988524                          | 4            | 4           | 0.308544767  | Brain_Amygdala                        |             |             |
|              | 0.51232504                            | Brain_Putamen_basal_ganglia          | 2.303878766  |             | 0.34487492   | 0.34487492                            |             |             |
|              | -0.767344935                          | 1.0182803                            | 0.419738489  |             | 0.805713336  | 4                                     | 0           |             |
|              | 0.998207054                           |                                      |              |             |              |                                       |             |             |
| CAND2        | ENSG00000144712.11                    | 0.502992759                          | 4            | 4           | 0.360956502  |                                       |             |             |
|              | Brain_Cerebellar_Hemisphere           | 0.813794026                          |              |             |              | Brain_Hypothalamus                    | 2.597084705 |             |
|              | 0.292383211                           | 0.292383211                          | -0.652480161 |             | 0.913544002  |                                       | 0.0649978   |             |
|              | 0.672025158                           | 4                                    | 0            | 0.998207054 |              |                                       |             |             |
| SERINC2      | ENSG00000168528.11                    | 0.503057132                          | 2            | 2           | 0.534153234  |                                       |             |             |
|              | Brain_Cortex                          | 0.660253735                          |              |             |              | Brain_Substantia_nigra                | 1.58705311  | 0.41294689  |
|              | 0.41294689                            | -0.621678588                         | -0.439562873 |             | -0.530620731 | 0.128775257                           | 2           |             |
|              | 0                                     | 0.998207054                          |              |             |              |                                       |             |             |
| RPS10        | ENSG00000124614.13                    | 0.503062535                          | 2            | 2           | 0.253502767  | Brain_Cerebellum                      |             |             |
|              | 0.624876692                           | Brain_Anterior_cingulate_cortex_BA24 | 1.200920594  |             |              |                                       |             |             |
|              | 0.799079406                           | 0.799079406                          | 0.488950571  |             | 1.141882732  | 0.815416651                           |             |             |
|              | 0.461692759                           | 2                                    | 0            | 0.998207054 |              |                                       |             |             |
| AGAP3        | ENSG00000133612.18                    | 0.503176481                          | 1            | 1           | 0.503176481  |                                       |             |             |
|              | Brain_Cerebellar_Hemisphere           | 0.503176481                          |              |             |              | Brain_Cerebellar_Hemisphere           | 1           | 1           |
|              | 1                                     | -0.669500156                         | -0.669500156 |             | -0.669500156 | NA                                    | 1           | 0           |
|              | 0.998207054                           |                                      |              |             |              |                                       |             |             |
| ZNF395       | ENSG00000186918.13                    | 0.503278649                          | 1            | 1           | 0.503278649  |                                       |             |             |
|              | Brain_Hippocampus                     | 0.503278649                          |              |             |              | Brain_Hippocampus                     | 1           | 1           |
|              | 0.669339948                           | 0.669339948                          | 0.669339948  |             | NA           | 1                                     | 0           | 0.998207054 |
| DAAM1        | ENSG00000100592.15                    | 0.50348118                           | 2            | 2           | 0.705871941  |                                       |             |             |
|              | Brain_Cerebellar_Hemisphere           | 0.802502598                          |              |             |              | Brain_Cerebellum                      | 1.856081652 |             |
|              | 0.143918348                           | 0.143918348                          | -0.250109592 |             | 0.377405957  | 0.063648182                           |             |             |
|              | 0.4437205                             | 2                                    | 0            | 0.998207054 |              |                                       |             |             |
| CDK20        | ENSG00000156345.17                    | 0.503682205                          | 2            | 2           | 0.356920231  |                                       |             |             |
|              | Brain_Nucleus_accumbens_basal_ganglia | 0.460884214                          |              |             |              | Brain_Amygdala                        |             |             |
|              | 1.015574431                           | 0.984425569                          | 0.984425569  |             | -0.921249402 | -0.737391646                          |             |             |
|              | -0.829320524                          | 0.130007066                          | 2            | 0           | 0.998207054  |                                       |             |             |
| SHBG         | ENSG00000129214.14                    | 0.503884662                          | 3            | 3           | 0.235470043  |                                       |             |             |
|              | Brain_Cerebellar_Hemisphere           | 0.742482997                          |              |             |              | Brain_Cortex                          | 1.405819494 |             |
|              | 0.63611299                            | 0.63611299                           | -1.186385632 |             | -0.328566997 | -0.832692709                          |             |             |
|              | 0.448258542                           | 3                                    | 0            | 0.998207054 |              |                                       |             |             |
| KRBA2        | ENSG00000184619.3                     | 0.50390499                           | 8            | 3           | 0.382185608  |                                       |             |             |
|              | Brain_Cerebellar_Hemisphere           | 0.991299392                          |              |             |              | Brain_Nucleus_accumbens_basal_ganglia |             |             |
|              | 7.061220822                           | 0.001617026                          | 0.313435975  |             | -0.873876326 | 0.63996017                            |             |             |
|              | -0.362014185                          | 0.477335117                          | 3            | 0           | 0.998207054  |                                       |             |             |
| CDH7         | ENSG00000081138.13                    | 0.504091899                          | 3            | 3           | 0.163960407  |                                       |             |             |
|              | Brain_Putamen_basal_ganglia           | 0.889872959                          |              |             |              | Brain_Cerebellum                      | 1.573650767 |             |
|              | 0.413375662                           | 0.413375662                          | -1.391874492 |             | 0.138464963  | -0.506537648                          |             |             |
|              | 0.792972332                           | 3                                    | 0            | 0.998207054 |              |                                       |             |             |
| CREG2        | ENSG00000175874.9                     | 0.504149454                          | 3            | 3           | 0.229596295  |                                       |             |             |
|              | Brain_Nucleus_accumbens_basal_ganglia | 0.37748273                           |              |             |              | Brain_Frontal_Cortex_BA9              |             |             |
|              | 1.431806983                           | 0.435631417                          | 0.435631417  |             | -1.201399435 | 0.882543939                           |             |             |
|              | -0.416411534                          | 1.133060896                          | 3            | 0           | 0.998207054  |                                       |             |             |
| IGSF21       | ENSG00000117154.11                    | 0.504174036                          | 3            | 2           | 0.370848808  |                                       |             |             |
|              | Brain_Cerebellum                      | 0.824897202                          |              |             |              | Brain_Frontal_Cortex_BA9              | 2.707780723 |             |
|              | 0.036633721                           | 0.255585556                          | -0.894884548 |             | -0.221250741 | -0.480840593                          |             |             |
|              | 0.362405407                           | 2                                    | 0            | 0.998207054 |              |                                       |             |             |

|                |                                       |              |              |              |                                      |              |             |                  |
|----------------|---------------------------------------|--------------|--------------|--------------|--------------------------------------|--------------|-------------|------------------|
| RP11-753A21.1  | ENSG00000259478.2                     | 0.504174363  | 1            | 1            | 0.504174363                          |              |             |                  |
|                | Brain_Hippocampus                     | 0.504174363  |              |              | Brain_Hippocampus                    | 1            | 1           | 1                |
|                | -0.66793613                           | -0.66793613  | -0.66793613  | NA           | 1                                    | 0            | 0.998207054 |                  |
| FBXL18         | ENSG00000155034.18                    | 0.504201063  | 6            | 3            | 0.143728343                          |              |             |                  |
|                | Brain_Cerebellar_Hemisphere           | 0.967857908  |              |              | Brain_Hippocampus                    |              |             | 4.66349773       |
|                | 0.047085886                           | 0.296138244  | -0.040295041 | 1.462046957  |                                      |              |             | 0.956943602      |
|                | 0.522328033                           | 3            | 0            | 0.998207054  |                                      |              |             |                  |
| CITED4         | ENSG00000179862.6                     | 0.504545564  | 3            | 3            | 0.176534235                          |              |             |                  |
|                | Brain_Caudate_basal_ganglia           | 0.610502297  |              |              | Brain_Cerebellum                     | 1.136540271  |             |                  |
|                | 0.841534487                           | 0.841534487  | -1.35150339  | 0.509356592  |                                      |              |             | -0.466606235     |
|                | 0.933766398                           | 3            | 0            | 0.998207054  |                                      |              |             |                  |
| LINC01271      | ENSG00000233077.1                     | 0.50459441   | 1            | 1            | 0.50459441                           |              |             |                  |
|                | Brain_Anterior_cingulate_cortex_BA24  | 0.50459441   |              |              |                                      |              |             |                  |
|                | Brain_Anterior_cingulate_cortex_BA24  | 1            | 1            | 1            | 0.667278261                          |              |             |                  |
|                | 0.667278261                           | 0.667278261  | NA           | 1            | 0                                    | 0.998207054  |             |                  |
| RP1-197B17.4   | ENSG00000274902.1                     | 0.504596872  | 2            | 2            | 0.298114291                          |              |             |                  |
|                | Brain_Substantia_nigra                | 0.514810265  |              |              | Brain_Hypothalamus                   | 1.116067446  |             |                  |
|                | 0.883932554                           | 0.883932554  | -1.040485728 | -0.651365981 |                                      |              |             | -0.845925855     |
|                | 0.275149212                           | 2            | 0            | 0.998207054  |                                      |              |             |                  |
| S1PR2          | ENSG00000267534.2                     | 0.504883702  | 1            | 1            | 0.504883702                          |              |             |                  |
|                | Brain_Hypothalamus                    | 0.504883702  |              |              | Brain_Hypothalamus                   | 1            | 1           | 1                |
|                | -0.666825344                          | -0.666825344 | -0.666825344 | NA           | 1                                    | 0            | 0.998207054 |                  |
| RP11-351I21.11 | ENSG00000270074.1                     | 0.504957746  | 11           | 10           | 0.035833165                          |              |             |                  |
|                | Brain_Spinal_cord_cervical_c-1        | 0.854210855  |              |              | Brain_Putamen_basal_ganglia          |              |             |                  |
|                | 2.959565549                           | 0.074855387  | 0.197129229  | -1.28200523  |                                      |              |             | 2.098815535      |
|                | -0.13480046                           | 0.997673903  | 10           | 0            | 0.998207054                          |              |             |                  |
| RIOX1          | ENSG00000170468.7                     | 0.504971506  | 1            | 1            | 0.504971506                          |              |             |                  |
|                | Brain_Anterior_cingulate_cortex_BA24  | 0.504971506  |              |              |                                      |              |             |                  |
|                | Brain_Anterior_cingulate_cortex_BA24  | 1            | 1            | 1            | -0.666687906                         |              |             |                  |
|                | -0.666687906                          | -0.666687906 | NA           | 1            | 0                                    | 0.998207054  |             |                  |
| GLRA1          | ENSG00000145888.10                    | 0.504978552  | 2            | 2            | 0.48141295                           |              |             |                  |
|                | Brain_Cerebellar_Hemisphere           | 0.684473115  |              |              | Brain_Cerebellum                     | 1.539138126  |             |                  |
|                | 0.460861874                           | 0.460861874  | -0.406366793 | 0.704031833  |                                      |              |             | 0.14883252       |
|                | 0.785170399                           | 2            | 0            | 0.998207054  |                                      |              |             |                  |
| INPP4A         | ENSG00000040933.15                    | 0.505080088  | 1            | 1            | 0.505080088                          |              |             |                  |
|                | Brain_Cerebellar_Hemisphere           | 0.505080088  |              |              | Brain_Cerebellar_Hemisphere          | 1            | 1           |                  |
|                | 1                                     | -0.66651796  | -0.66651796  | -0.66651796  | NA                                   | 1            | 0           |                  |
|                | 0.998207054                           |              |              |              |                                      |              |             |                  |
| TTK            | ENSG00000112742.9                     | 0.505149232  | 2            | 2            | 0.242692004                          |              |             | Brain_Cerebellum |
|                | 0.953269096                           | Brain_Cortex | 1.02429113   | 0.97570887   | 0.97570887                           | -1.168284553 |             |                  |
|                | 0.058602027                           | -0.554841263 | 0.867539821  | 2            | 0                                    | 0.998207054  |             |                  |
| MORC2          | ENSG00000133422.12                    | 0.505340935  | 2            | 2            | 0.346107322                          |              |             |                  |
|                | Brain_Hypothalamus                    | 0.872656447  |              |              | Brain_Anterior_cingulate_cortex_BA24 |              |             |                  |
|                | 1.475138819                           | 0.524861181  | 0.524861181  | -0.160285161 |                                      |              |             | 0.942166658      |
|                | 0.390940748                           | 0.779551157  | 2            | 0            | 0.998207054                          |              |             |                  |
| DFNB59         | ENSG00000204311.12                    | 0.505384501  | 1            | 1            | 0.505384501                          |              |             |                  |
|                | Brain_Substantia_nigra                | 0.505384501  |              |              | Brain_Substantia_nigra               | 1            | 1           |                  |
|                | 1                                     | -0.666041615 | -0.666041615 | -0.666041615 | NA                                   | 1            | 0           |                  |
|                | 0.998207054                           |              |              |              |                                      |              |             |                  |
| ZNF500         | ENSG00000103199.13                    | 0.505469953  | 13           | 5            | 0.152846                             |              |             |                  |
|                | Brain_Anterior_cingulate_cortex_BA24  | 0.98847831   |              |              | Brain_Hippocampus                    |              |             |                  |
|                | 9.740333472                           | 0.002777579  | 0.329139694  | -0.317907851 |                                      |              |             | 1.429550748      |
|                | 0.588016801                           | 0.491129494  | 5            | 0            | 0.998207054                          |              |             |                  |
| VWDE           | ENSG00000146530.11                    | 0.505534633  | 9            | 3            | 0.383514067                          |              |             |                  |
|                | Brain_Anterior_cingulate_cortex_BA24  | 0.968564061  |              |              |                                      |              |             |                  |
|                | Brain_Nucleus_accumbens_basal_ganglia | 7.525805443  |              |              | 0.014054676                          |              |             |                  |
|                | 0.281571308                           | -0.154852439 | 0.871439792  | 0.3077778    | 0.353534197                          |              |             | 3                |
|                | 0                                     | 0.998207054  |              |              |                                      |              |             |                  |
| SERINC3        | ENSG00000132824.13                    | 0.505559734  | 1            | 1            | 0.505559734                          |              |             |                  |
|                | Brain_Hypothalamus                    | 0.505559734  |              |              | Brain_Hypothalamus                   | 1            | 1           | 1                |
|                | 0.66576748                            | 0.66576748   | 0.66576748   | NA           | 1                                    | 0            | 0.998207054 |                  |
| UTP15          | ENSG00000164338.9                     | 0.505571443  | 8            | 4            | 0.221946273                          |              |             |                  |

|              |                                       |                |             |                             |              |  |  |  |                             |
|--------------|---------------------------------------|----------------|-------------|-----------------------------|--------------|--|--|--|-----------------------------|
|              | Brain_Hypothalamus                    | 0.685515334    |             | Brain_Cerebellar_Hemisphere | 6.354007109  |  |  |  |                             |
|              | 0.000336742                           | 0.300062486    |             | 0.404948545                 | 1.221369173  |  |  |  | 0.711408099                 |
|              | 0.310003287                           | 4              | 0           | 0.998207054                 |              |  |  |  |                             |
| SUCO         | ENSG00000094975.13                    | 0.505779682    | 6           | 4                           | 0.199184427  |  |  |  |                             |
|              | Brain_Cerebellar_Hemisphere           | 0.890646462    |             | Brain_Frontal_Cortex_BA9    |              |  |  |  |                             |
|              | 4.249531485                           | 0.076689413    |             | 0.191687438                 | -0.93209702  |  |  |  | 1.283878625                 |
|              | 0.047284743                           | 0.761648622    | 4           | 0                           | 0.998207054  |  |  |  |                             |
| TYSND1       | ENSG00000156521.13                    | 0.505805497    | 10          | 7                           | 0.090989677  |  |  |  |                             |
|              | Brain_Cerebellum                      | 0.923353906    |             | Brain_Frontal_Cortex_BA9    | 6.408289811  |  |  |  |                             |
|              | 0.056967585                           | 0.215580339    |             | -0.88476032                 | 1.690200113  |  |  |  | 0.648081435                 |
|              | 0.74897766                            | 7              | 0           | 0.998207054                 |              |  |  |  |                             |
| CD2AP        | ENSG00000198087.7                     | 0.505845111    | 3           | 3                           | 0.150152942  |  |  |  |                             |
|              | Brain_Spinal_cord_cervical_c-1        | 0.999855272    |             | Brain_Cerebellar_Hemisphere |              |  |  |  |                             |
|              | 1.266601623                           | 0.693187365    |             | 0.693187365                 | -1.43899146  |  |  |  | 0.345156769                 |
|              | -0.364551101                          | 0.946344846    | 3           | 0                           | 0.998207054  |  |  |  |                             |
| SERINC1      | ENSG00000111897.6                     | 0.505963309    | 3           | 3                           | 0.149222594  |  |  |  |                             |
|              | Brain_Hippocampus                     | 0.986690169    |             | Brain_Amygdala              | 1.244960613  |  |  |  |                             |
|              | 0.716550617                           | 0.716550617    |             | -0.655316603                | 1.442282858  |  |  |  | 0.267882809                 |
|              | 1.071124266                           | 3              | 0           | 0.998207054                 |              |  |  |  |                             |
| AMBP         | ENSG00000106927.11                    | 0.506095584    | 3           | 3                           | 0.150793761  |  |  |  | Brain_Cerebellum            |
|              | 0.754387653                           | Brain_Amygdala | 1.937546412 |                             | 0.076631836  |  |  |  | 0.076631836                 |
|              | -1.436733398                          | -0.312859177   |             | -0.990255313                | 0.596460959  |  |  |  | 3                           |
|              | 0.998207054                           |                |             |                             |              |  |  |  | 0                           |
| RP11-54A9.1  | ENSG00000257219.5                     | 0.506214986    | 1           | 1                           | 0.506214986  |  |  |  |                             |
|              | Brain_Putamen_basal_ganglia           | 0.506214986    |             | Brain_Putamen_basal_ganglia | 1            |  |  |  | 1                           |
|              | 1                                     | 0.664742843    |             | 0.664742843                 | NA           |  |  |  | 1                           |
|              | 0.998207054                           |                |             |                             |              |  |  |  | 0                           |
| TRAPPC10     | ENSG00000160218.12                    | 0.506326339    | 4           | 4                           | 0.178877257  |  |  |  |                             |
|              | Brain_Cerebellum                      | 0.93138824     |             | Brain_Cerebellar_Hemisphere | 2.755050197  |  |  |  |                             |
|              | 0.152237493                           | 0.152237493    |             | -1.344219997                | 1.304527165  |  |  |  | 0.188443508                 |
|              | 1.136435634                           | 4              | 0           | 0.998207054                 |              |  |  |  |                             |
| CTC-526N19.1 | ENSG00000277013.1                     | 0.506391397    | 1           | 1                           | 0.506391397  |  |  |  |                             |
|              | Brain_Caudate_basal_ganglia           | 0.506391397    |             | Brain_Caudate_basal_ganglia | 1            |  |  |  | 1                           |
|              | 1                                     | 0.664467104    |             | 0.664467104                 | NA           |  |  |  | 1                           |
|              | 0.998207054                           |                |             |                             |              |  |  |  | 0                           |
| MORN4        | ENSG00000171160.17                    | 0.506393304    | 13          | 3                           | 0.320460608  |  |  |  |                             |
|              | Brain_Substantia_nigra                | 0.993410588    |             | Brain_Caudate_basal_ganglia |              |  |  |  |                             |
|              | 11.10830446                           | 6.90E-05       |             | 0.417572058                 | -0.314058825 |  |  |  | 0.99351179                  |
|              | 0.047236686                           | 0.40128777     | 3           | 0                           | 0.998207054  |  |  |  |                             |
| SUZ12        | ENSG00000178691.10                    | 0.50650536     | 2           | 2                           | 0.30614326   |  |  |  | Brain_Caudate_basal_ganglia |
|              | 0.527912402                           | Brain_Amygdala | 1.071313696 |                             | 0.928686304  |  |  |  | 0.928686304                 |
|              | 0.631195962                           | 1.02334816     |             | 0.827272061                 | 0.277293478  |  |  |  | 2                           |
|              | 0.998207054                           |                |             |                             |              |  |  |  | 0                           |
| GAK          | ENSG00000178950.16                    | 0.506649351    | 7           | 7                           | 0.069132778  |  |  |  |                             |
|              | Brain_Hippocampus                     | 0.874320337    |             | Brain_Cerebellar_Hemisphere | 2.515912965  |  |  |  |                             |
|              | 0.219223763                           | 0.219223763    |             | -1.817551059                | 1.198022934  |  |  |  | -0.573865213                |
|              | 1.101194253                           | 7              | 0           | 0.998207054                 |              |  |  |  |                             |
| WNT7A        | ENSG00000154764.5                     | 0.506656206    | 3           | 3                           | 0.18756806   |  |  |  |                             |
|              | Brain_Spinal_cord_cervical_c-1        | 0.726766317    |             | Brain_Substantia_nigra      |              |  |  |  |                             |
|              | 1.246901176                           | 0.754717176    |             | 0.754717176                 | -0.625901685 |  |  |  | 1.317807609                 |
|              | 0.347112062                           | 0.97185672     | 3           | 0                           | 0.998207054  |  |  |  |                             |
| ZNF704       | ENSG00000164684.13                    | 0.506732264    | 1           | 1                           | 0.506732264  |  |  |  |                             |
|              | Brain_Caudate_basal_ganglia           | 0.506732264    |             | Brain_Caudate_basal_ganglia | 1            |  |  |  | 1                           |
|              | 1                                     | 0.663934453    |             | 0.663934453                 | NA           |  |  |  | 1                           |
|              | 0.998207054                           |                |             |                             |              |  |  |  | 0                           |
| NBAS         | ENSG00000151779.12                    | 0.506767062    | 6           | 2                           | 0.487523926  |  |  |  |                             |
|              | Brain_Nucleus_accumbens_basal_ganglia | 0.922536782    |             | Brain_Cortex                |              |  |  |  |                             |
|              | 5.339649514                           | 0.001768864    |             | 0.366809312                 | -0.694252417 |  |  |  | 0.643806501                 |
|              | 0.028860278                           | 0.451002952    | 2           | 0                           | 0.998207054  |  |  |  |                             |
| LINC01971    | ENSG00000278200.1                     | 0.506874714    | 1           | 1                           | 0.506874714  |  |  |  |                             |
|              | Brain_Cerebellar_Hemisphere           | 0.506874714    |             | Brain_Cerebellar_Hemisphere | 1            |  |  |  | 1                           |
|              | 1                                     | 0.663711912    |             | 0.663711912                 | NA           |  |  |  | 1                           |
|              |                                       |                |             |                             |              |  |  |  | 0                           |

0.998207054  
RP11-724N1.1 ENSG00000272912.1 0.507097316 4 4 0.108207273  
Brain\_Hypothalamus 0.481690982 Brain\_Cortex 2.630349173  
0.113658989 0.113658989 -1.606303356 -0.703585439 -1.24485212  
0.388404299 4 0 0.998207054  
FANCF ENSG00000183161.4 0.50718562 2 2 0.282297919  
Brain\_Nucleus\_accumbens\_basal\_ganglia 0.381370678  
Brain\_Anterior\_cingulate\_cortex\_BA24 1.43875573 0.56124427 0.56124427  
0.875373566 1.075171574 0.97527257 0.141278526 2 0  
0.998207054  
GLRX2 ENSG0000023572.8 0.507245112 5 5 0.068094781  
Brain\_Caudate\_basal\_ganglia 0.791022526 Brain\_Cerebellum 1.456906781  
0.602854054 0.602854054 -1.824379092 0.879776004 -0.379237409  
1.053785968 5 0 0.998207054  
THNSL1 ENSG00000185875.12 0.507319622 2 2 0.325200262  
Brain\_Frontal\_Cortex\_BA9 0.497958788 Brain\_Putamen\_basal\_ganglia  
1.055622313 0.944377687 0.944377687 -0.98382765 -0.67770495  
-0.8307663 0.216461438 2 0 0.998207054  
ATP8B1 ENSG00000081923.11 0.507338151 1 1 0.507338151  
Brain\_Hypothalamus 0.507338151 Brain\_Hypothalamus 1 1 1  
-0.662988138 -0.662988138 -0.662988138 NA 1 0 0.998207054  
TRAPPC13 ENSG00000113597.17 0.507423622 4 4 0.087798577  
Brain\_Anterior\_cingulate\_cortex\_BA24 0.792376482 Brain\_Cerebellar\_Hemisphere  
1.960807643 0.330925571 0.330925571 -0.263225884 1.707126316  
0.97184403 0.89070135 4 0 0.998207054  
SRPK1 ENSG00000096063.15 0.507518845 11 3 0.107781139 Brain\_Cortex  
0.688063455 Brain\_Hypothalamus 9.106423213 0.004002833 0.36560499  
0.401484489 1.608246791 1.25821267 0.32546961 3 0 0.998207054  
SMC5 ENSG00000198887.8 0.507615596 2 2 0.395243659 Brain\_Cerebellum  
0.576178062 Brain\_Cerebellar\_Hemisphere 1.24907742 0.75092258 0.75092258  
-0.850146469 0.558976056 -0.145585207 0.996400093 2 0  
0.998207054  
RP3-522J7.6 ENSG00000260613.1 0.507634371 3 2 0.250240051  
Brain\_Cerebellar\_Hemisphere 0.384238268 Brain\_Hypothalamus 2.889863585  
0.006237484 0.103898931 -1.149766513 -0.870113707 -1.014006692  
0.140003694 2 0 0.998207054  
AF064858.8 ENSG00000235888.1 0.507673181 1 1 0.507673181  
Brain\_Anterior\_cingulate\_cortex\_BA24 0.507673181  
Brain\_Anterior\_cingulate\_cortex\_BA24 1 1 1 -0.662465121  
-0.662465121 -0.662465121 NA 1 0 0.998207054  
NIT1 ENSG00000158793.13 0.507761101 2 2 0.310688762 Brain\_Cortex  
0.533983137 Brain\_Nucleus\_accumbens\_basal\_ganglia 1.049468246  
0.950531754 0.950531754 -1.01377786 -0.62193724 -0.81785755  
0.27707316 2 0 0.998207054  
MYBPHL ENSG00000221986.6 0.508043839 1 1 0.508043839  
Brain\_Spinal\_cord\_cervical\_c-1 0.508043839 Brain\_Spinal\_cord\_cervical\_c-1  
1 1 1 0.661886696 0.661886696 0.661886696 NA 1 0  
0.998207054  
LINC01231 ENSG00000236511.1 0.508057815 2 2 0.363136636  
Brain\_Hypothalamus 0.458368839 Brain\_Cerebellar\_Hemisphere 1.017026617  
0.982973383 0.982973383 -0.909404521 -0.741535461 -0.825469991  
0.118701351 2 0 0.998207054  
GRP ENSG00000134443.9 0.508174311 1 1 0.508174311  
Brain\_Caudate\_basal\_ganglia 0.508174311 Brain\_Caudate\_basal\_ganglia 1 1  
1 0.661683142 0.661683142 0.661683142 NA 1 0  
0.998207054  
EFCAB1 ENSG00000034239.10 0.508175729 13 7 0.20177548 Brain\_Amygdala  
0.978266464 Brain\_Cortex 8.1114182 0.00171457 0.303407825  
-1.276509473 1.041638692 0.22547073 0.602471246 7 0  
0.998207054  
XPC ENSG00000154767.14 0.508292793 4 4 0.267335976  
Brain\_Cerebellar\_Hemisphere 0.441049272 Brain\_Hypothalamus 2.66043328

|                |                                       |                                |                                      |              |                  |
|----------------|---------------------------------------|--------------------------------|--------------------------------------|--------------|------------------|
|                | 0.092150951                           | 0.092150951                    | 0.770422566                          | 1.109218402  | 0.899950519      |
|                | 0.153066928                           | 4 0                            | 0.998207054                          |              |                  |
| RAB11A         | ENSG00000103769.9                     | 0.508351298                    | 1 1                                  | 0.508351298  |                  |
|                | Brain_Substantia_nigra                | 0.508351298                    | Brain_Substantia_nigra               | 1 1          |                  |
|                | 1 0.661407062                         | 0.661407062                    | 0.661407062                          | NA 1 0       |                  |
|                | 0.998207054                           |                                |                                      |              |                  |
| EIF3D          | ENSG00000100353.17                    | 0.508376271                    | 1 1                                  | 0.508376271  | Brain_Cortex     |
|                | 0.508376271                           | Brain_Cortex                   | 1 1 1                                | -0.661368111 | -0.661368111     |
|                | -0.661368111                          | NA 1 0                         | 0.998207054                          |              |                  |
| DGCR2          | ENSG00000070413.19                    | 0.508398379                    | 11 3                                 | 0.146897993  | Brain_Cerebellum |
|                | 0.531491821                           | Brain_Spinal_cord_cervical_c-1 | 9.303609096                          | 0.009566784  |                  |
|                | 0.406245272                           | 0.625730353                    | 1.45057589                           | 1.102772662  | 0.268205624 3    |
|                | 0 0.998207054                         |                                |                                      |              |                  |
| HSF2           | ENSG00000025156.12                    | 0.508514012                    | 3 3                                  | 0.37719564   |                  |
|                | Brain_Putamen_basal_ganglia           | 0.838596725                    | Brain_Cerebellum                     | 1.956949305  |                  |
|                | 0.109673249                           | 0.109673249                    | -0.883075204                         | 0.75200497   | 0.024206176      |
|                | 0.832185252                           | 3 0                            | 0.998207054                          |              |                  |
| EPG5           | ENSG00000152223.12                    | 0.508622698                    | 11 3                                 | 0.094512443  |                  |
|                | Brain_Nucleus_accumbens_basal_ganglia | 0.550807832                    |                                      |              |                  |
|                | Brain_Anterior_cingulate_cortex_BA24  | 9.248929439                    | 0.001951513                          |              |                  |
|                | 0.397504513                           | -1.672060244                   | -0.596550045                         | -1.135298644 | 0.404975711      |
|                | 3 0 0.998207054                       |                                |                                      |              |                  |
| HS2ST1         | ENSG00000153936.16                    | 0.508646239                    | 4 4                                  | 0.338034564  |                  |
|                | Brain_Frontal_Cortex_BA9              | 0.81910064                     | Brain_Anterior_cingulate_cortex_BA24 |              |                  |
|                | 2.495933196                           | 0.305192718                    | 0.305192718                          | -0.958055914 | 0.530939601      |
|                | 0.027739713                           | 0.669503898                    | 4 0                                  | 0.998207054  |                  |
| NOTCH2NL       | ENSG00000264343.5                     | 0.508743955                    | 1 1                                  | 0.508743955  |                  |
|                | Brain_Nucleus_accumbens_basal_ganglia | 0.508743955                    |                                      |              |                  |
|                | Brain_Nucleus_accumbens_basal_ganglia | 1 1 1                          | 0.660794743                          |              |                  |
|                | 0.660794743                           | 0.660794743                    | NA 1 0                               | 0.998207054  |                  |
| DDHD1          | ENSG00000100523.14                    | 0.508857979                    | 6 4                                  | 0.124687647  |                  |
|                | Brain_Spinal_cord_cervical_c-1        | 0.837039617                    | Brain_Hippocampus                    |              |                  |
|                | 5.027841749                           | 0.037734134                    | 0.188251544                          | -1.535391678 | -0.205681619     |
|                | -0.911065756                          | 0.42244288                     | 4 0                                  | 0.998207054  |                  |
| AC004012.1     | ENSG00000233942.1                     | 0.508988962                    | 2 2                                  | 0.290380204  |                  |
|                | Brain_Caudate_basal_ganglia           | 0.334571297                    | Brain_Putamen_basal_ganglia          |              |                  |
|                | 1.523973143                           | 0.476026857                    | 0.476026857                          | -1.057287922 | -0.964947123     |
|                | -1.011117522                          | 0.065294805                    | 2 0                                  | 0.998207054  |                  |
| BRMS1          | ENSG00000174744.13                    | 0.50904886                     | 2 2                                  | 0.282194814  | Brain_Cortex     |
|                | 0.820978569                           | Brain_Amygdala                 | 1.191501924                          | 0.808498076  | 0.808498076      |
|                | -1.075401938                          | 0.226286537                    | -0.424557701                         | 0.920432748  | 2 0              |
|                | 0.998207054                           |                                |                                      |              |                  |
| SEMA4A         | ENSG00000196189.12                    | 0.509260752                    | 3 3                                  | 0.151847761  |                  |
|                | Brain_Cerebellum                      | 0.559172603                    | Brain_Cortex                         | 1.889650787  | 0.222971229      |
|                | 0.222971229                           | -1.433035259                   | -0.584070913                         | -1.136334782 | 0.478716618      |
|                | 3 0 0.998207054                       |                                |                                      |              |                  |
| HCFC1R1        | ENSG00000103145.10                    | 0.509301764                    | 2 2                                  | 0.403156197  |                  |
|                | Brain_Anterior_cingulate_cortex_BA24  | 0.408676006                    | Brain_Cerebellum                     |              |                  |
|                | 1.023798521                           | 0.976201479                    | 0.976201479                          | -0.8359977   | 0.826225817      |
|                | -0.004885941                          | 1.175369521                    | 2 0                                  | 0.998207054  |                  |
| VSX2           | ENSG00000119614.2                     | 0.509313047                    | 1 1                                  | 0.509313047  |                  |
|                | Brain_Nucleus_accumbens_basal_ganglia | 0.509313047                    |                                      |              |                  |
|                | Brain_Nucleus_accumbens_basal_ganglia | 1 1 1                          | -0.659907724                         |              |                  |
|                | -0.659907724                          | -0.659907724                   | NA 1 0                               | 0.998207054  |                  |
| RSPH10B        | ENSG00000155026.16                    | 0.509407706                    | 5 5                                  | 0.281177763  |                  |
|                | Brain_Cerebellar_Hemisphere           | 0.79751497                     | Brain_Cerebellum                     | 2.441860817  |                  |
|                | 0.189917091                           | 0.189917091                    | -1.077677365                         | 1.017780678  | -0.234230331     |
|                | 0.873564852                           | 5 0                            | 0.998207054                          |              |                  |
| RP11-1152H14.1 | ENSG00000271320.1                     | 0.509452635                    | 3 3                                  | 0.192975045  |                  |
|                | Brain_Cerebellum                      | 0.919954909                    | Brain_Caudate_basal_ganglia          | 1.335009252  |                  |
|                | 0.712398198                           | 0.712398198                    | -1.301828422                         | 0.725185255  | -0.225711229     |
|                | 1.019292049                           | 3 0                            | 0.998207054                          |              |                  |



CSTB ENSG00000160213.6 0.509475046 6 5 0.300543246  
Brain\_Nucleus\_accumbens\_basal\_ganglia 0.904885864 Brain\_Cerebellum  
4.179587924 0.100660128 0.20429186 -0.798411786 1.035269122  
-0.148465025 0.693474127 5 0 0.998207054  
DEGS2 ENSG00000168350.7 0.509486087 6 6 0.206236882 Brain\_Cortex  
0.906146679 Brain\_Cerebellar\_Hemisphere 1.687120246 0.387767751  
0.387767751 -1.263980903 0.975225505 -0.147210412 0.957793971  
6 0 0.998207054  
ACOT8 ENSG00000101473.16 0.509632631 1 1 0.509632631 Brain\_Amygdala  
0.509632631 Brain\_Amygdala 1 1 1 -0.659409831 -0.659409831  
-0.659409831 NA 1 0 0.998207054  
GPRC5B ENSG00000167191.11 0.509669069 3 3 0.219993106  
Brain\_Caudate\_basal\_ganglia 0.756613922 Brain\_Nucleus\_accumbens\_basal\_ganglia  
1.503296431 0.525666196 0.525666196 -1.226546451 0.309930351  
-0.518631004 0.775310787 3 0 0.998207054  
MAP3K10 ENSG00000130758.7 0.509771163 1 1 0.509771163  
Brain\_Cerebellar\_Hemisphere 0.509771163 Brain\_Cerebellar\_Hemisphere 1 1  
1 0.659194057 0.659194057 0.659194057 NA 1 0  
0.998207054  
PPP1R14C ENSG00000198729.4 0.509777326 2 2 0.271442487  
Brain\_Cortex 0.648719959 Brain\_Cerebellum 1.077298343 0.922701657  
0.922701657 -1.099746733 0.455541165 -0.322102784 1.099754619  
2 0 0.998207054  
ARPC2 ENSG00000163466.15 0.509826521 2 1 0.492597818  
Brain\_Cerebellar\_Hemisphere 0.530191961 Brain\_Cerebellum 1.98691336 0.01308664  
1.98691336 0.62771301 0.68618284 0.656947925 0.041344413 1 0  
0.998207054  
ZNF575 ENSG00000176472.10 0.509864825 5 5 0.256055488  
Brain\_Amygdala 0.95332453 Brain\_Cerebellum 3.229184745 0.152982608  
0.152982608 -1.135763665 0.599893144 -0.22687807 0.622660393  
5 0 0.998207054  
ARHGEF16 ENSG00000130762.14 0.50994338 3 3 0.178249298  
Brain\_Cerebellar\_Hemisphere 0.790241563 Brain\_Cerebellum 1.495224507  
0.504964067 0.504964067 -1.346165037 0.537781888 -0.358126697  
0.945346456 3 0 0.998207054  
NID1 ENSG00000116962.14 0.509982274 1 1 0.509982274  
Brain\_Cerebellar\_Hemisphere 0.509982274 Brain\_Cerebellar\_Hemisphere 1 1  
1 0.658865294 0.658865294 0.658865294 NA 1 0  
0.998207054  
TRAPPC9 ENSG00000167632.14 0.510056252 3 3 0.136086243  
Brain\_Cortex 0.290819097 Brain\_Cerebellum 2.366099759 0.138592211  
0.138592211 1.056326448 1.49052502 1.318290457 0.230587576 3  
0 0.998207054  
AQP1 ENSG00000240583.11 0.510280612 1 1 0.510280612 Brain\_Cortex  
0.510280612 Brain\_Cortex 1 1 1 0.658400815 0.658400815  
0.658400815 NA 1 0 0.998207054  
YKT6 ENSG00000106636.7 0.510306519 2 2 0.248988212  
Brain\_Frontal\_Cortex\_BA9 0.89350622 Brain\_Cortex 1.004647164  
0.995352836 0.995352836 -0.13386893 1.152810407 0.509470739  
0.909819684 2 0 0.998207054  
C8orf33 ENSG00000182307.12 0.510454309 3 2 0.364628285  
Brain\_Hippocampus 0.463342782 Brain\_Frontal\_Cortex\_BA9 1.953240357  
0.047635707 0.999123936 -0.733353615 0.906581242 0.336916163  
0.92752379 2 0 0.998207054  
PRKCSH ENSG00000130175.9 0.510575561 2 2 0.254314069  
Brain\_Cerebellum 0.898944842 Brain\_Nucleus\_accumbens\_basal\_ganglia  
1.289498743 0.710501257 0.710501257 -1.13993335 -0.126994386  
-0.633463868 0.716256011 2 0 0.998207054  
GJA5 ENSG00000265107.2 0.510594193 1 1 0.510594193  
Brain\_Putamen\_basal\_ganglia 0.510594193 Brain\_Putamen\_basal\_ganglia 1 1  
1 0.657912757 0.657912757 0.657912757 NA 1 0  
0.998207054

|               |                                       |              |              |              |                             |              |             |   |  |
|---------------|---------------------------------------|--------------|--------------|--------------|-----------------------------|--------------|-------------|---|--|
| PRKD2         | ENSG00000105287.12                    | 0.510650339  | 10           | 4            | 0.083950134                 |              |             |   |  |
|               | Brain_Putamen_basal_ganglia           | 0.796970211  |              |              | Brain_Amygdala              | 7.03637915   |             |   |  |
|               | 0.019229832                           | 0.368655628  | 0.25727018   | 1.728212497  |                             | 1.08710057   | 0.4591101   |   |  |
|               | 4                                     | 0            | 0.998207054  |              |                             |              |             |   |  |
| ATP5G3        | ENSG00000154518.9                     | 0.510663533  | 9            | 5            | 0.24229447                  |              |             |   |  |
|               | Brain_Nucleus_accumbens_basal_ganglia | 0.92698839   |              |              | Brain_Hypothalamus          |              |             |   |  |
|               | 6.920411492                           | 0.022475458  | 0.254734359  | -0.091634562 |                             | 1.169270984  |             |   |  |
|               | 0.545262901                           | 0.380377266  | 5            | 0            | 0.998207054                 |              |             |   |  |
| STK38L        | ENSG00000211455.7                     | 0.510825489  | 3            | 3            | 0.520875029                 |              |             |   |  |
|               | Brain_Nucleus_accumbens_basal_ganglia | 0.883064047  |              |              | Brain_Cortex                |              |             |   |  |
|               | 2.114903906                           | 0.177268254  | 0.177268254  | -0.318381295 |                             | 0.641997157  |             |   |  |
|               | 0.058843248                           | 0.512237124  | 3            | 0            | 0.998207054                 |              |             |   |  |
| PAX7          | ENSG00000009709.11                    | 0.510853224  | 2            | 2            | 0.401419593                 |              |             |   |  |
|               | Brain_Anterior_cingulate_cortex_BA24  | 0.978081561  |              |              | Brain_Frontal_Cortex_BA9    |              |             |   |  |
|               | 1.706810367                           | 0.293189633  | 0.293189633  | 0.027474145  |                             | 0.8390886    |             |   |  |
|               | 0.433281372                           | 0.573898085  | 2            | 0            | 0.998207054                 |              |             |   |  |
| OR2L2         | ENSG00000203663.3                     | 0.51096665   | 10           | 7            | 0.047085089                 |              |             |   |  |
|               | Brain_Hippocampus                     | 5.497860483  |              |              | Brain_Cerebellum            |              |             |   |  |
|               | 0.97504598                            | 0.733479211  | 0.154671107  | 0.06374501   | 0.307071276                 |              |             |   |  |
|               | -1.98553402                           |              |              | 0.795869822  | 7                           | 0            |             |   |  |
|               | 0.998207054                           |              |              |              |                             |              |             |   |  |
| TMEM168       | ENSG00000146802.12                    | 0.510977973  | 4            | 3            | 0.179903163                 |              |             |   |  |
|               | Brain_Putamen_basal_ganglia           | 0.813648573  |              |              | Brain_Cerebellum            | 2.588160531  |             |   |  |
|               | 0.02393599                            | 0.394949557  | -1.341053253 | -0.235721773 |                             | -0.639633368 |             |   |  |
|               | 0.486631866                           | 3            | 0            | 0.998207054  |                             |              |             |   |  |
| PEX12         | ENSG00000108733.9                     | 0.511015612  | 4            | 4            | 0.178495428                 |              |             |   |  |
|               | Brain_Hypothalamus                    | 0.705148312  |              |              | Brain_Caudate_basal_ganglia | 2.973773824  |             |   |  |
|               | 0.14742378                            | 0.14742378   | 0.378380015  | 1.345402069  |                             | 0.837081436  |             |   |  |
|               | 0.405675201                           | 4            | 0            | 0.998207054  |                             |              |             |   |  |
| RP11-314C16.1 | ENSG00000230939.1                     | 0.511109857  | 6            | 3            | 0.157693578                 |              |             |   |  |
|               | Brain_Nucleus_accumbens_basal_ganglia | 0.713456005  |              |              | Brain_Caudate_basal_ganglia |              |             |   |  |
|               | 5.147196433                           | 0.021418955  | 0.208998417  | 0.367218548  |                             | 1.41287127   |             |   |  |
|               | 0.806904778                           | 0.386171018  | 3            | 0            | 0.998207054                 |              |             |   |  |
| RDH10         | ENSG00000121039.9                     | 0.511148416  | 3            | 3            | 0.388506252                 |              |             |   |  |
|               | Brain_Cerebellar_Hemisphere           | 2.542301128  |              |              | Brain_Cortex                |              |             |   |  |
|               | 0.762254623                           | -0.862329449 | -0.302521399 | -0.630510913 | 0.104774529                 |              |             |   |  |
|               | 0.104774529                           |              |              |              | 0.292032371                 |              |             |   |  |
|               | 3                                     | 0            | 0.998207054  |              |                             |              |             |   |  |
| RP11-461L13.3 | ENSG00000270750.1                     | 0.511171345  | 1            | 1            | 0.511171345                 |              |             |   |  |
|               | Brain_Hippocampus                     | 0.511171345  |              |              | Brain_Hippocampus           | 1            | 1           | 1 |  |
|               | -0.657014886                          | -0.657014886 | -0.657014886 | NA           | 1                           | 0            | 0.998207054 |   |  |
| RP11-92G12.3  | ENSG00000260088.1                     | 0.511194859  | 13           | 1            | 0.417156308                 |              |             |   |  |
|               | Brain_Cerebellum                      | 0.634157844  |              |              | Brain_Hippocampus           | 12.69417599  |             |   |  |
|               | 0.000793637                           | 12.69417599  | -0.811364625 | -0.475882846 |                             | -0.648988041 |             |   |  |
|               | 0.084128863                           | 1            | 0            | 0.998207054  |                             |              |             |   |  |
| DYNLT1        | ENSG00000146425.10                    | 0.511590929  | 2            | 2            | 0.304985196                 |              |             |   |  |
|               | Brain_Caudate_basal_ganglia           | 0.592869941  |              |              | Brain_Hypothalamus          | 1.002097486  |             |   |  |
|               | 0.997902514                           | 0.997902514  | -1.025801422 | -0.534681754 |                             | -0.780241588 |             |   |  |
|               | 0.347274048                           | 2            | 0            | 0.998207054  |                             |              |             |   |  |
| LINC02054     | ENSG00000224153.2                     | 0.511717421  | 1            | 1            | 0.511717421                 |              |             |   |  |
|               | Brain_Cerebellar_Hemisphere           | 0.511717421  |              |              | Brain_Cerebellar_Hemisphere | 1            | 1           |   |  |
|               | 1                                     | -0.656165847 | -0.656165847 | -0.656165847 | NA                          | 1            | 0           |   |  |
|               | 0.998207054                           |              |              |              |                             |              |             |   |  |
| PDLIM5        | ENSG00000163110.14                    | 0.511732664  | 4            | 2            | 0.264655678                 |              |             |   |  |
|               | Brain_Nucleus_accumbens_basal_ganglia | 0.39458683   |              |              | Brain_Caudate_basal_ganglia |              |             |   |  |
|               | 3.196334148                           | 0.0002205    | 0.74070543   | -1.115454566 |                             | -0.851328621 |             |   |  |
|               | -0.999980755                          | 0.135954161  | 2            | 0            | 0.998207054                 |              |             |   |  |
| RP11-643A5.2  | ENSG00000259669.5                     | 0.511732946  | 2            | 2            | 0.325864245                 |              |             |   |  |
|               | Brain_Cerebellar_Hemisphere           | 0.491817443  |              |              | Brain_Cerebellum            | 1.929482491  |             |   |  |
|               | 0.070517509                           | -0.070517509 | -0.982478347 | -0.687421039 |                             | -0.834949693 |             |   |  |
|               | 0.208637023                           | 2            | 0            | 0.998207054  |                             |              |             |   |  |
| TJP1          | ENSG00000104067.16                    | 0.511736817  | 2            | 2            | 0.26134271                  |              |             |   |  |
|               | Brain_Cerebellar_Hemisphere           | 1.000522909  |              |              | Brain_Hypothalamus          |              |             |   |  |
|               | 0.780121122                           |              |              |              | 0.999477091                 |              |             |   |  |
|               | 0.999477091                           | -1.123223204 | 0.279161195  | -0.422031004 |                             | 0.991635518  |             |   |  |

|               |                                       |             |                                |              |              |             |             |   |  |
|---------------|---------------------------------------|-------------|--------------------------------|--------------|--------------|-------------|-------------|---|--|
|               | 2                                     | 0           | 0.998207054                    |              |              |             |             |   |  |
| RP11-281A20.2 | ENSG00000228512.2                     | 0.511772088 | 1                              | 1            | 0.511772088  |             |             |   |  |
|               | Brain_Cerebellum                      | 0.511772088 | Brain_Cerebellum               | 1            | 1            | 1           | 0.656080876 |   |  |
|               | 0.656080876                           | 0.656080876 | NA                             | 1            | 0            | 0.998207054 |             |   |  |
| ATP8B3        | ENSG00000130270.16                    | 0.511799056 | 4                              | 4            | 0.193218678  |             |             |   |  |
|               | Brain_Caudate_basal_ganglia           | 0.980808405 | Brain_Spinal_cord_cervical_c-1 |              |              |             |             |   |  |
|               | 1.49255894                            | 0.384888209 | 0.384888209                    |              |              |             |             |   |  |
|               | -0.248211739                          | 0.995218785 | 4                              | 0            | 0.998207054  |             |             |   |  |
| FLJ37505      | ENSG00000256597.2                     | 0.511814914 | 1                              | 1            | 0.511814914  |             |             |   |  |
|               | Brain_Putamen_basal_ganglia           | 0.511814914 | Brain_Putamen_basal_ganglia    | 1            | 1            | 1           | 0           |   |  |
|               | 1                                     | 0.656014315 | 0.656014315                    | 0.656014315  | NA           | 1           | 0           |   |  |
|               | 0.998207054                           |             |                                |              |              |             |             |   |  |
| GPR137C       | ENSG00000180998.11                    | 0.511957316 | 3                              | 3            | 0.156494327  |             |             |   |  |
|               | Brain_Cerebellar_Hemisphere           | 0.381340988 | Brain_Frontal_Cortex_BA9       |              |              |             |             |   |  |
|               | 1.891596683                           | 0.535669877 | 0.535669877                    |              |              |             |             |   |  |
|               | -1.12753607                           | 0.272688246 | 3                              | 0            | 0.998207054  |             |             |   |  |
| HLF           | ENSG00000108924.13                    | 0.51218822  | 1                              | 1            | 0.51218822   |             |             |   |  |
|               | Brain_Spinal_cord_cervical_c-1        | 0.51218822  | Brain_Spinal_cord_cervical_c-1 | 1            | 1            | 1           | 0           |   |  |
|               | 1                                     | 0.655434228 | 0.655434228                    | 0.655434228  | NA           | 1           | 0           |   |  |
|               | 0.998207054                           |             |                                |              |              |             |             |   |  |
| RP11-127L20.3 | ENSG00000228261.1                     | 0.512191666 | 8                              | 7            | 0.1031591    |             |             |   |  |
|               | Brain_Putamen_basal_ganglia           | 0.813198976 | Brain_Cortex                   |              |              |             |             |   |  |
|               | 0.038069784                           | 0.165875023 | 0.236301174                    |              |              |             |             |   |  |
|               | 0.491895163                           | 7           | 0                              | 0.998207054  |              |             |             |   |  |
| BCAT1         | ENSG00000060982.14                    | 0.512246969 | 2                              | 2            | 0.267115948  |             |             |   |  |
|               | Brain_Frontal_Cortex_BA9              | 0.730943584 | Brain_Cortex                   |              |              |             |             |   |  |
|               | 0.445518902                           | 0.445518902 | 0.343870625                    |              |              |             |             |   |  |
|               | 0.541543443                           | 2           | 0                              | 0.998207054  |              |             |             |   |  |
| RP11-525A16.4 | ENSG00000273143.1                     | 0.512267194 | 1                              | 1            | 0.512267194  |             |             |   |  |
|               | Brain_Cerebellum                      | 0.512267194 | Brain_Cerebellum               | 1            | 1            | 1           | 0.655311538 |   |  |
|               | 0.655311538                           | 0.655311538 | NA                             | 1            | 0            | 0.998207054 |             |   |  |
| RP13-942N8.1  | ENSG00000256092.2                     | 0.512513643 | 10                             | 3            | 0.118403724  |             |             |   |  |
|               | Brain_Cerebellar_Hemisphere           | 0.440984361 | Brain_Hippocampus              |              |              |             |             |   |  |
|               | 0.000810474                           | 0.314860773 | 0.770532033                    |              |              |             |             |   |  |
|               | 0.240311805                           | 3           | 0                              | 0.998207054  |              |             |             |   |  |
| PHTF2         | ENSG00000006576.16                    | 0.512675065 | 2                              | 2            | 0.301977063  |             |             |   |  |
|               | Brain_Cerebellum                      | 1.168354249 | 0.831645751                    |              |              |             |             |   |  |
|               | 0.68671662                            | 1.032202929 | 0.859459775                    |              |              |             |             |   |  |
|               | 0.998207054                           |             |                                |              |              |             |             |   |  |
| SNTB1         | ENSG00000172164.13                    | 0.512706938 | 2                              | 2            | 0.252241158  |             |             |   |  |
|               | Brain_Putamen_basal_ganglia           | 0.836356976 | Brain_Cerebellum               |              |              |             |             |   |  |
|               | 0.958267846                           | 0.958267846 | -0.206555552                   |              |              |             |             |   |  |
|               | 0.955639474                           | 2           | 0                              | 0.998207054  |              |             |             |   |  |
| MBLAC1        | ENSG00000214309.4                     | 0.51288943  | 8                              | 4            | 0.243148172  |             |             |   |  |
|               | Brain_Nucleus_accumbens_basal_ganglia | 0.874733241 | Brain_Cerebellum               |              |              |             |             |   |  |
|               | 5.867525343                           | 0.000157294 | 0.232380976                    |              |              |             |             |   |  |
|               | -0.593104405                          | 0.464269834 | 4                              | 0            | 0.998207054  |             |             |   |  |
| GPR180        | ENSG00000152749.7                     | 0.512969323 | 7                              | 3            | 0.165566653  |             |             |   |  |
|               | Brain_Spinal_cord_cervical_c-1        | 0.724341239 | Brain_Caudate_basal_ganglia    |              |              |             |             |   |  |
|               | 5.963591574                           | 0.007469207 | 0.307007335                    |              |              |             |             |   |  |
|               | -0.969217562                          | 0.368736227 | 3                              | 0            | 0.998207054  |             |             |   |  |
| COQ9          | ENSG00000088682.13                    | 0.513036957 | 9                              | 2            | 0.28429697   |             |             |   |  |
|               | Brain_Nucleus_accumbens_basal_ganglia | 7.805365186 |                                |              |              |             |             |   |  |
|               | 0.002330158                           | 0.823154207 | 0.773583477                    |              |              |             |             |   |  |
|               | 0.096350096                           | 2           | 0                              | 0.998207054  |              |             |             |   |  |
| NKAPL         | ENSG00000189134.3                     | 0.513212508 | 1                              | 1            | 0.513212508  |             |             |   |  |
|               | Brain_Spinal_cord_cervical_c-1        | 0.513212508 | Brain_Spinal_cord_cervical_c-1 |              |              |             |             |   |  |
|               | 1                                     | 1           | -0.653843701                   | -0.653843701 | -0.653843701 | NA          | 1           | 0 |  |
|               | 0.998207054                           |             |                                |              |              |             |             |   |  |
| PRX           | ENSG00000105227.14                    | 0.513268297 | 1                              | 1            | 0.513268297  |             |             |   |  |
|               | Brain_Nucleus_accumbens_basal_ganglia | 0.513268297 |                                |              |              |             |             |   |  |
|               | Brain_Nucleus_accumbens_basal_ganglia | 1           | 1                              | 1            | -0.653757119 |             |             |   |  |

|           |                                       |                             |                                      |              |              |              |              |   |   |
|-----------|---------------------------------------|-----------------------------|--------------------------------------|--------------|--------------|--------------|--------------|---|---|
|           | -0.653757119                          | -0.653757119                | NA                                   | 1            | 0            | 0.998207054  |              |   |   |
| GABRR2    | ENSG00000111886.10                    | 0.513431098                 |                                      | 3            | 3            | 0.132681147  |              |   |   |
|           | Brain_Cerebellum                      | 0.94069887                  | Brain_Putamen_basal_ganglia          | 1.067687718  |              |              |              |   |   |
|           | 0.919364621                           | 0.919364621                 | -0.093446057                         | 1.503612591  | 0.445258343  |              |              |   |   |
|           | 0.916611179                           | 3                           | 0                                    | 0.998207054  |              |              |              |   |   |
| IST1      | ENSG00000182149.20                    | 0.513698145                 |                                      | 5            | 4            | 0.145472288  |              |   |   |
|           | Brain_Hippocampus                     | 0.563833329                 | Brain_Cerebellar_Hemisphere          | 3.0346093    |              |              |              |   |   |
|           | 0.056110364                           | 0.48103176                  | -1.455711865                         | 0.577157107  | -0.771750325 |              |              |   |   |
|           | 0.800931347                           | 4                           | 0                                    | 0.998207054  |              |              |              |   |   |
| ISY1      | ENSG00000240682.9                     | 0.513706425                 |                                      | 1            | 1            | 0.513706425  |              |   |   |
|           | Brain_Hippocampus                     | 0.513706425                 | Brain_Hippocampus                    | 1            | 1            | 1            |              |   |   |
|           | -0.653077332                          | -0.653077332                | -0.653077332                         | NA           | 1            | 0            | 0.998207054  |   |   |
| CHMP3     | ENSG00000115561.15                    | 0.513915575                 |                                      | 8            | 7            | 0.073116891  |              |   |   |
|           | Brain_Spinal_cord_cervical_c-1        | 0.534732189                 |                                      |              |              |              |              |   |   |
|           | Brain_Nucleus_accumbens_basal_ganglia | 4.389686499                 | 0.084389088                          | 0.18697928   |              |              |              |   |   |
|           | -1.79210036                           | -0.620798532                | -1.409157318                         | 0.437377112  | 7            | 0            |              |   |   |
|           | 0.998207054                           |                             |                                      |              |              |              |              |   |   |
| NYNRIN    | ENSG00000205978.5                     | 0.513922227                 |                                      | 6            | 6            | 0.09707943   |              |   |   |
|           | Brain_Spinal_cord_cervical_c-1        | 0.859432351                 | Brain_Frontal_Cortex_BA9             |              |              |              |              |   |   |
|           | 1.491338938                           | 0.605374695                 | 0.605374695                          | -1.659180481 | 1.010715362  |              |              |   |   |
|           | -0.095406403                          | 1.017189122                 | 6                                    | 0            | 0.998207054  |              |              |   |   |
| CEP290    | ENSG00000198707.14                    | 0.514015338                 |                                      | 1            | 1            | 0.514015338  |              |   |   |
|           | Brain_Cerebellum                      | 0.514015338                 | Brain_Cerebellum                     | 1            | 1            | 1            | -0.652598213 |   |   |
|           | -0.652598213                          | -0.652598213                | NA                                   | 1            | 0            | 0.998207054  |              |   |   |
| NAP1L4    | ENSG00000205531.12                    | 0.514141844                 |                                      | 4            | 4            | 0.267929699  |              |   |   |
|           | Brain_Hippocampus                     | 0.506665829                 | Brain_Substantia_nigra               | 1.86576057   |              |              |              |   |   |
|           | 0.484026045                           | 0.484026045                 | -1.107842831                         | 0.664038251  | -0.577340316 |              |              |   |   |
|           | 0.837217803                           | 4                           | 0                                    | 0.998207054  |              |              |              |   |   |
| ARAP3     | ENSG00000120318.15                    | 0.514312973                 |                                      | 1            | 1            | 0.514312973  |              |   |   |
|           | Brain_Caudate_basal_ganglia           | 0.514312973                 | Brain_Caudate_basal_ganglia          | 1            | 1            |              |              |   |   |
|           | 1                                     | 0.652136728                 | 0.652136728                          | 0.652136728  | NA           | 1            | 0            |   |   |
|           | 0.998207054                           |                             |                                      |              |              |              |              |   |   |
| LINC01659 | ENSG00000234928.1                     | 0.514342388                 |                                      | 5            | 2            | 0.640258179  |              |   |   |
|           | Brain_Caudate_basal_ganglia           | 0.962016099                 | Brain_Anterior_cingulate_cortex_BA24 |              |              |              |              |   |   |
|           | 4.636594868                           | 1.16E-16                    | 0.247098045                          | -0.190159558 | 0.467337853  |              |              |   |   |
|           | 0.199264122                           | 0.296760636                 | 2                                    | 0            | 0.998207054  |              |              |   |   |
| ONECUT1   | ENSG00000169856.8                     | 0.514564337                 |                                      | 1            | 1            | 0.514564337  |              |   |   |
|           | Brain_Cerebellum                      | 0.514564337                 | Brain_Cerebellum                     | 1            | 1            | 1            | 0.651747093  |   |   |
|           | 0.651747093                           | 0.651747093                 | NA                                   | 1            | 0            | 0.998207054  |              |   |   |
| DOT1L     | ENSG00000104885.17                    | 0.514613172                 |                                      | 4            | 4            | 0.170197491  |              |   |   |
|           | Brain_Cerebellum                      |                             |                                      |              |              |              |              |   |   |
|           | 0.696482858                           | Brain_Putamen_basal_ganglia | 3.462787893                          | 0.120339699  |              |              |              |   |   |
|           | 0.120339699                           | -1.371569509                | -0.390072608                         | -0.832714309 | 0.404575346  |              |              |   |   |
|           | 4                                     | 0                           | 0.998207054                          |              |              |              |              |   |   |
| BOLA1     | ENSG00000178096.8                     | 0.514677835                 |                                      | 1            | 1            | 0.514677835  |              |   |   |
|           | Brain_Spinal_cord_cervical_c-1        | 0.514677835                 | Brain_Spinal_cord_cervical_c-1       |              |              |              |              |   |   |
|           | 1                                     | 1                           | 1                                    | -0.651571195 | -0.651571195 | -0.651571195 | NA           | 1 | 0 |
|           | 0.998207054                           |                             |                                      |              |              |              |              |   |   |
| THSD7A    | ENSG00000005108.15                    | 0.514692945                 |                                      | 3            | 3            | 0.200370703  |              |   |   |
|           | Brain_Cortex                          | 0.916986704                 | Brain_Hippocampus                    | 1.645322047  |              |              |              |   |   |
|           | 0.374693326                           | 0.374693326                 | -0.521234442                         | 1.280496136  | 0.287830616  |              |              |   |   |
|           | 0.914789657                           | 3                           | 0                                    | 0.998207054  |              |              |              |   |   |
| AFDN      | ENSG00000130396.20                    | 0.514762587                 |                                      | 3            | 3            | 0.138927006  |              |   |   |
|           | Brain_Putamen_basal_ganglia           | 0.716622183                 | Brain_Cerebellar_Hemisphere          |              |              |              |              |   |   |
|           | 1.554056118                           | 0.639792864                 | 0.639792864                          | 0.362976842  | 1.479798585  |              |              |   |   |
|           | 0.888733657                           | 0.561267818                 | 3                                    | 0            | 0.998207054  |              |              |   |   |
| TSC22D2   | ENSG00000196428.12                    | 0.514876893                 |                                      | 1            | 1            | 0.514876893  |              |   |   |
|           | Brain_Cerebellum                      | 0.514876893                 | Brain_Cerebellum                     | 1            | 1            | 1            | 0.651262745  |   |   |
|           | 0.651262745                           | 0.651262745                 | NA                                   | 1            | 0            | 0.998207054  |              |   |   |
| GNAQ      | ENSG00000156052.10                    | 0.514885622                 |                                      | 7            | 4            | 0.100339016  |              |   |   |
|           | Brain_Anterior_cingulate_cortex_BA24  | 0.990046922                 | Brain_Putamen_basal_ganglia          |              |              |              |              |   |   |
|           | 4.891877878                           | 0.008340199                 | 0.264647812                          | -0.603865055 | 1.643212301  |              |              |   |   |
|           | 0.048576059                           | 0.738479923                 | 4                                    | 0            | 0.998207054  |              |              |   |   |

|               |                                       |                             |              |             |                                |              |              |                  |
|---------------|---------------------------------------|-----------------------------|--------------|-------------|--------------------------------|--------------|--------------|------------------|
| ABHD12B       | ENSG00000131969.14                    | 0.514941225                 | 3            | 3           | 0.131861891                    |              |              |                  |
|               | Brain_Caudate_basal_ganglia           | 0.974381229                 |              |             | Brain_Substantia_nigra         | 1.88822042   |              |                  |
|               | 0.117000258                           | 0.117000258                 |              |             | -1.506800149                   | -0.032113887 | -0.938269355 |                  |
|               | 0.793200926                           | 3                           | 0            | 0.998207054 |                                |              |              |                  |
| RP1-104O17.3  | ENSG00000226207.1                     | 0.514979989                 | 1            | 1           | 0.514979989                    |              |              |                  |
|               | Brain_Spinal_cord_cervical_c-1        | 0.514979989                 |              |             | Brain_Spinal_cord_cervical_c-1 |              |              |                  |
|               | 1                                     | 1                           | 1            | 0.651103017 | 0.651103017                    | NA           | 1            | 0                |
|               | 0.998207054                           |                             |              |             |                                |              |              |                  |
| LINC00284     | ENSG00000233725.7                     | 0.515060237                 | 1            | 1           | 0.515060237                    |              |              |                  |
|               | Brain_Hippocampus                     | 0.515060237                 |              |             | Brain_Hippocampus              | 1            | 1            | 1                |
|               | -0.650978699                          | -0.650978699                |              |             | -0.650978699                   | NA           | 1            | 0                |
|               | 0.998207054                           |                             |              |             |                                |              |              |                  |
| MARVELD3      | ENSG00000140832.9                     | 0.515066989                 | 3            | 2           | 0.210687536                    |              |              |                  |
|               | Brain_Nucleus_accumbens_basal_ganglia | 0.473816234                 |              |             | Brain_Cerebellum               |              |              |                  |
|               | 2.570473968                           | 0.010200615                 |              |             | 0.419325417                    | -1.251677132 | -0.716283628 |                  |
|               | -1.001923893                          | 0.269494824                 | 2            | 0           | 0.998207054                    |              |              |                  |
| UBE2Q2        | ENSG00000140367.11                    | 0.515118695                 | 1            | 1           | 0.515118695                    |              |              |                  |
|               | Brain_Cortex                          | 0.515118695                 |              |             | Brain_Cortex                   | 1            | 1            | 1                |
|               | 0.650888145                           | 0.650888145                 |              |             | NA                             | 1            | 0            | 0.650888145      |
|               | 0.998207054                           |                             |              |             |                                |              |              |                  |
| TMEM92        | ENSG00000167105.7                     | 0.515216453                 | 1            | 1           | 0.515216453                    |              |              |                  |
|               | Brain_Cortex                          | 0.515216453                 |              |             | Brain_Cortex                   | 1            | 1            | 1                |
|               | 0.650736723                           | 0.650736723                 |              |             | NA                             | 1            | 0            | 0.650736723      |
|               | 0.998207054                           |                             |              |             |                                |              |              |                  |
| TRAPPC6B      | ENSG00000182400.14                    | 0.515294915                 | 4            | 4           | 0.138576427                    |              |              | Brain_Cortex     |
|               | 0.95268066                            | Brain_Cerebellar_Hemisphere | 3.286350927  |             | 0.097734486                    |              |              |                  |
|               | 0.216395356                           | -1.48111314                 |              |             | -0.059340806                   | -0.758489728 | 0.657165168  |                  |
|               | 4                                     | 0                           | 0.998207054  |             |                                |              |              |                  |
| FADD          | ENSG00000168040.4                     | 0.515308723                 | 1            | 1           | 0.515308723                    |              |              |                  |
|               | Brain_Caudate_basal_ganglia           | 0.515308723                 |              |             | Brain_Caudate_basal_ganglia    | 1            | 1            |                  |
|               | 1                                     | -0.650593817                | -0.650593817 |             | -0.650593817                   | NA           | 1            | 0                |
|               | 0.998207054                           |                             |              |             |                                |              |              |                  |
| ZNF568        | ENSG00000198453.12                    | 0.515383489                 | 9            | 6           | 0.124328794                    |              |              |                  |
|               | Brain_Putamen_basal_ganglia           | 0.941402656                 |              |             | Brain_Caudate_basal_ganglia    |              |              |                  |
|               | 6.240297961                           | 0.06434661                  | 0.219850539  |             | -0.073507023                   | 1.536855113  |              |                  |
|               | 0.699755244                           | 0.537029011                 | 6            | 0           | 0.998207054                    |              |              |                  |
| BCAS1         | ENSG00000064787.13                    | 0.515387471                 | 1            | 1           | 0.515387471                    |              |              |                  |
|               | Brain_Spinal_cord_cervical_c-1        | 0.515387471                 |              |             | Brain_Spinal_cord_cervical_c-1 | 1            | 1            |                  |
|               | 1                                     | 1                           | 0.650471864  | 0.650471864 | 0.650471864                    | NA           | 1            | 0                |
|               | 0.998207054                           |                             |              |             |                                |              |              |                  |
| RIMS1         | ENSG00000079841.18                    | 0.515478421                 | 2            | 2           | 0.278788244                    |              |              | Brain_Cerebellum |
|               | 0.672808289                           | Brain_Cerebellar_Hemisphere | 1.029704751  |             | 0.970295249                    |              |              |                  |
|               | 0.970295249                           | -1.083045463                | 0.422296943  |             | -0.33037426                    | 1.064437823  |              |                  |
|               | 2                                     | 0                           | 0.998207054  |             |                                |              |              |                  |
| DNAJC11       | ENSG00000007923.15                    | 0.515488732                 | 1            | 1           | 0.515488732                    |              |              |                  |
|               | Brain_Frontal_Cortex_BA9              | 0.515488732                 |              |             | Brain_Frontal_Cortex_BA9       | 1            | 1            |                  |
|               | 1                                     | -0.650315059                | -0.650315059 |             | -0.650315059                   | NA           | 1            | 0                |
|               | 0.998207054                           |                             |              |             |                                |              |              |                  |
| RSPH4A        | ENSG00000111834.12                    | 0.515579289                 | 5            | 5           | 0.274838199                    |              |              |                  |
|               | Brain_Cerebellum                      | 0.931781029                 |              |             | Brain_Cerebellar_Hemisphere    | 2.423413501  |              |                  |
|               | 0.171640865                           | 0.171640865                 |              |             | -1.089462377                   | 1.091988402  | -0.226041995 |                  |
|               | 0.859738188                           | 5                           | 0            | 0.998207054 |                                |              |              |                  |
| PHF14         | ENSG00000106443.15                    | 0.515641221                 | 1            | 1           | 0.515641221                    |              |              |                  |
|               | Brain_Putamen_basal_ganglia           | 0.515641221                 |              |             | Brain_Putamen_basal_ganglia    | 1            | 1            |                  |
|               | 1                                     | -0.650078957                | -0.650078957 |             | -0.650078957                   | NA           | 1            | 0                |
|               | 0.998207054                           |                             |              |             |                                |              |              |                  |
| GABPB1        | ENSG00000104064.16                    | 0.515721967                 | 8            | 3           | 0.242125116                    |              |              |                  |
|               | Brain_Caudate_basal_ganglia           | 0.910202156                 |              |             | Brain_Hippocampus              | 6.216175396  |              |                  |
|               | 0.011127616                           | 0.322304209                 |              |             | -1.169691559                   | 0.300089904  | -0.148353493 |                  |
|               | 0.582952425                           | 3                           | 0            | 0.998207054 |                                |              |              |                  |
| RP11-111M22.3 | ENSG00000255135.3                     | 0.515791694                 | 4            | 4           | 0.131522844                    |              |              |                  |
|               | Brain_Caudate_basal_ganglia           | 0.858738207                 |              |             | Brain_Amygdala                 | 1.533208563  |              |                  |
|               | 0.516102448                           | 0.516102448                 |              |             | -0.177980606                   | 1.508123803  | 0.751596512  |                  |
|               | 0.70621545                            | 4                           | 0            | 0.998207054 |                                |              |              |                  |
| RP11-342K6.4  | ENSG00000270996.1                     | 0.515825326                 | 5            | 5           | 0.177510078                    |              |              |                  |

|                |                                       |                             |              |                             |              |                  |              |  |
|----------------|---------------------------------------|-----------------------------|--------------|-----------------------------|--------------|------------------|--------------|--|
|                | Brain_Putamen_basal_ganglia           | 0.813645707                 |              | Brain_Caudate_basal_ganglia |              |                  |              |  |
|                | 1.691366158                           | 0.367255395                 | 0.367255395  | -1.348461241                | 0.553045841  |                  |              |  |
|                | -0.610417187                          | 0.926421455                 | 5            | 0                           | 0.998207054  |                  |              |  |
| UVSSA          | ENSG00000163945.15                    | 0.515852125                 | 13           | 3                           | 0.071519566  |                  |              |  |
|                | Brain_Nucleus_accumbens_basal_ganglia | 0.681252448                 |              | Brain_Amygdala              |              |                  |              |  |
|                | 9.953626368                           | 0.015337623                 | 0.540060334  | -1.802164262                | -0.410754652 |                  |              |  |
|                | -1.05585419                           | 0.407730544                 | 3            | 0                           | 0.998207054  |                  |              |  |
| FAT2           | ENSG00000086570.12                    | 0.516015131                 | 3            | 3                           | 0.205950425  |                  |              |  |
|                | Brain_Nucleus_accumbens_basal_ganglia | 0.985588125                 |              | Brain_Cerebellar_Hemisphere |              |                  |              |  |
|                | 1.281435501                           | 0.758978552                 | 0.758978552  | -1.264779382                | -0.018063589 |                  |              |  |
|                | -0.778439869                          | 0.667006131                 | 3            | 0                           | 0.998207054  |                  |              |  |
| ZNF106         | ENSG00000103994.16                    | 0.516055252                 | 3            | 2                           | 0.481543452  |                  |              |  |
|                | Brain_Anterior_cingulate_cortex_BA24  | 0.918753696                 |              | Brain_Substantia_nigra      |              |                  |              |  |
|                | 2.633134429                           | 0.038288136                 | 0.328577435  | -0.102003753                | 0.703822287  |                  |              |  |
|                | 0.419317666                           | 0.452106789                 | 2            | 0                           | 0.998207054  |                  |              |  |
| SPRR2G         | ENSG00000159516.8                     | 0.516083829                 | 1            | 1                           | 0.516083829  |                  |              |  |
|                | Brain_Frontal_Cortex_BA9              | 0.516083829                 |              | Brain_Frontal_Cortex_BA9    | 1            | 1                |              |  |
|                | 1                                     | -0.649393864                | -0.649393864 | -0.649393864                | NA           | 1                | 0            |  |
|                | 0.998207054                           |                             |              |                             |              |                  |              |  |
| SCG5           | ENSG00000166922.8                     | 0.516084014                 | 3            | 3                           | 0.304085847  |                  |              |  |
|                | Brain_Substantia_nigra                | 0.542010347                 |              | Brain_Cortex                | 1.364075481  |                  |              |  |
|                | 0.632983902                           | 0.632983902                 | 0.609775782  | 1.027710882                 | 0.875157009  |                  |              |  |
|                | 0.230683649                           | 3                           | 0            | 0.998207054                 |              |                  |              |  |
| RP11-378J18.9  | ENSG00000276997.4                     | 0.516150411                 | 1            | 1                           | 0.516150411  |                  |              |  |
|                | Brain_Hypothalamus                    | 0.516150411                 |              | Brain_Hypothalamus          | 1            | 1                | 1            |  |
|                | -0.649290831                          | -0.649290831                | -0.649290831 | NA                          | 1            | 0                | 0.998207054  |  |
| TSTA3          | ENSG00000104522.15                    | 0.516213272                 | 2            | 2                           | 0.344696139  |                  |              |  |
|                | Brain_Nucleus_accumbens_basal_ganglia | 0.667381406                 |              | Brain_Cortex                |              |                  |              |  |
|                | 1.221591128                           | 0.778408872                 | 0.778408872  | -0.429744642                | 0.944927013  |                  |              |  |
|                | 0.257591186                           | 0.972039649                 | 2            | 0                           | 0.998207054  |                  |              |  |
| TMEM132A       | ENSG00000006118.14                    | 0.51627853                  | 1            | 1                           | 0.51627853   | Brain_Amygdala   |              |  |
|                | 0.51627853                            | Brain_Amygdala              | 1            | 1                           | 1            | -0.649092592     | -0.649092592 |  |
|                | -0.649092592                          | NA                          | 1            | 0                           | 0.998207054  |                  |              |  |
| RP11-468N14.13 | ENSG00000272626.1                     | 0.516307399                 | 3            | 2                           | 0.794895207  |                  |              |  |
|                | Brain_Cerebellum                      | 0.919655021                 |              | Brain_Cerebellar_Hemisphere | 2.874527672  |                  |              |  |
|                | 0.024108411                           | 0.101363916                 | -0.25995925  | 0.242797863                 | 0.027902299  |                  |              |  |
|                | 0.25919916                            | 2                           | 0            | 0.998207054                 |              |                  |              |  |
| CA9            | ENSG00000107159.12                    | 0.516315587                 | 2            | 2                           | 0.464836999  | Brain_Cerebellum |              |  |
|                | 0.964098744                           | Brain_Cerebellar_Hemisphere | 1.796251495  | 0.203748505                 |              |                  |              |  |
|                | 0.203748505                           | -0.730905299                | -0.045010746 | -0.387958022                | 0.48500069   | 2                |              |  |
|                | 0                                     | 0.998207054                 |              |                             |              |                  |              |  |
| SPATA9         | ENSG00000145757.15                    | 0.516381807                 | 2            | 2                           | 0.251089862  |                  |              |  |
|                | Brain_Frontal_Cortex_BA9              | 0.567776584                 |              | Brain_Caudate_basal_ganglia |              |                  |              |  |
|                | 1.444946494                           | 0.555053506                 | 0.555053506  | 0.571329093                 | 1.147706221  |                  |              |  |
|                | 0.859517657                           | 0.407560176                 | 2            | 0                           | 0.998207054  |                  |              |  |
| FAM49A         | ENSG00000197872.11                    | 0.516420871                 | 1            | 1                           | 0.516420871  |                  |              |  |
|                | Brain_Frontal_Cortex_BA9              | 0.516420871                 |              | Brain_Frontal_Cortex_BA9    | 1            | 1                |              |  |
|                | 1                                     | -0.648872376                | -0.648872376 | -0.648872376                | NA           | 1                | 0            |  |
|                | 0.998207054                           |                             |              |                             |              |                  |              |  |
| ZBTB7C         | ENSG00000184828.9                     | 0.51642924                  | 1            | 1                           | 0.51642924   |                  |              |  |
|                | Brain_Nucleus_accumbens_basal_ganglia | 0.51642924                  |              |                             |              |                  |              |  |
|                | Brain_Nucleus_accumbens_basal_ganglia | 1                           | 1            | 1                           | -0.648859429 |                  |              |  |
|                | -0.648859429                          | -0.648859429                | NA           | 1                           | 0            | 0.998207054      |              |  |
| RP11-96A15.1   | ENSG00000278464.1                     | 0.516452055                 | 1            | 1                           | 0.516452055  |                  |              |  |
|                | Brain_Hypothalamus                    | 0.516452055                 |              | Brain_Hypothalamus          | 1            | 1                | 1            |  |
|                | -0.648824136                          | -0.648824136                | -0.648824136 | NA                          | 1            | 0                | 0.998207054  |  |
| OLFML3         | ENSG00000116774.11                    | 0.516526828                 | 4            | 3                           | 0.162401017  |                  |              |  |
|                | Brain_Putamen_basal_ganglia           | 0.710643964                 |              | Brain_Cortex                | 2.723252248  |                  |              |  |
|                | 0.079654465                           | 0.219418778                 | 0.370991363  | 1.39704175                  | 0.767463268  |                  |              |  |
|                | 0.445642366                           | 3                           | 0            | 0.998207054                 |              |                  |              |  |
| PIK3CD         | ENSG00000171608.15                    | 0.516585775                 | 4            | 4                           | 0.179416424  |                  |              |  |
|                | Brain_Cortex                          | 0.752474058                 |              | Brain_Frontal_Cortex_BA9    | 1.356149415  |                  |              |  |

|         |                                       |                             |                                       |              |                             |
|---------|---------------------------------------|-----------------------------|---------------------------------------|--------------|-----------------------------|
|         | 0.769194117                           | 0.769194117                 | -1.342554031                          | 0.927314187  | -0.138101429                |
|         | 0.981552407                           | 4                           | 0                                     | 0.998207054  |                             |
| MTHFR   | ENSG00000177000.10                    | 0.516641619                 | 8                                     | 4            | 0.093856034                 |
|         | Brain_Nucleus_accumbens_basal_ganglia | 0.871732215                 |                                       |              |                             |
|         | Brain_Anterior_cingulate_cortex_BA24  | 6.154406336                 |                                       | 5.37E-18     | 0.248168968                 |
|         | -0.161458601                          | 1.675398687                 | 1.183708732                           | 0.570925351  | 4                           |
|         | 0.998207054                           |                             |                                       |              | 0                           |
| TPCN2   | ENSG00000162341.16                    | 0.516652096                 | 6                                     | 6            | 0.225522734                 |
|         | 0.942444857                           | Brain_Frontal_Cortex_BA9    | 2.427245554                           |              | Brain_Cerebellum            |
|         | 0.360149359                           | -1.211972953                | 0.618876571                           | -0.316523305 | 0.360149359                 |
|         | 6                                     | 0                           | 0.998207054                           |              | 0.786778215                 |
| EAPP    | ENSG00000129518.8                     | 0.516698748                 | 1                                     | 1            | 0.516698748                 |
|         | Brain_Hypothalamus                    | 0.516698748                 | Brain_Hypothalamus                    | 1            | 1                           |
|         | -0.648442564                          | -0.648442564                | -0.648442564                          | NA           | 1                           |
|         |                                       |                             |                                       | 0            | 0.998207054                 |
| HACD4   | ENSG00000188921.13                    | 0.516704941                 | 6                                     | 6            | 0.26389482                  |
|         | Brain_Anterior_cingulate_cortex_BA24  | 0.963021717                 |                                       |              | Brain_Caudate_basal_ganglia |
|         | 2.920021091                           | 0.11767196                  | 0.11767196                            | -1.117232752 | 0.265228924                 |
|         | -0.495567025                          | 0.546619352                 | 6                                     | 0            | 0.998207054                 |
| FANCD2  | ENSG00000144554.10                    | 0.516772398                 | 4                                     | 4            | 0.105949555                 |
|         | Brain_Hippocampus                     | 0.889617286                 | Brain_Spinal_cord_cervical_c-1        |              |                             |
|         | 2.051355223                           | 0.362219985                 | 0.362219985                           | -0.384776241 | 1.616669896                 |
|         | 0.410077176                           | 0.852639406                 | 4                                     | 0            | 0.998207054                 |
| ZFP57   | ENSG00000204644.9                     | 0.516775793                 | 2                                     | 2            | 0.251327634                 |
|         | Brain_Frontal_Cortex_BA9              | 0.95433083                  | Brain_Caudate_basal_ganglia           | 1.007791572  |                             |
|         | 0.992208428                           | 0.992208428                 | 0.057269106                           | 1.147130635  | 0.602199871                 |
|         | 0.770648478                           | 2                           | 0                                     | 0.998207054  |                             |
| CBFA2T2 | ENSG00000078699.21                    | 0.517215293                 | 4                                     | 4            | 0.296354819                 |
|         | Brain_Cerebellum                      | 0.965186695                 | Brain_Caudate_basal_ganglia           | 1.744254456  |                             |
|         | 0.437255156                           | 0.437255156                 | -0.619073363                          | 1.044282258  | 0.041738866                 |
|         | 0.721077175                           | 4                           | 0                                     | 0.998207054  |                             |
| KCNJ11  | ENSG00000187486.5                     | 0.517264761                 | 2                                     | 2            | 0.336534076                 |
|         | Brain_Caudate_basal_ganglia           | 0.367616394                 | Brain_Nucleus_accumbens_basal_ganglia |              |                             |
|         | 1.317486709                           | 0.682513291                 | 0.682513291                           | -0.961035983 | -0.900947199                |
|         | -0.930991591                          | 0.042489186                 | 2                                     | 0            | 0.998207054                 |
| ENDOG   | ENSG00000167136.6                     | 0.517317852                 | 6                                     | 3            | 0.201217422                 |
|         | 0.88776246                            | Brain_Cortex                | 5.164945142                           | 0.01448703   | Brain_Amygdala              |
|         | -1.278090773                          | -0.141136056                | -0.569186312                          | 0.407270285  | 0.198187688                 |
|         | 0.998207054                           |                             |                                       |              | 3                           |
|         |                                       |                             |                                       |              | 0                           |
| NEFM    | ENSG00000104722.13                    | 0.517421366                 | 1                                     | 1            | 0.517421366                 |
|         | Brain_Putamen_basal_ganglia           | 0.517421366                 | Brain_Putamen_basal_ganglia           | 1            | 1                           |
|         | 1                                     | -0.6473254                  | -0.6473254                            | -0.6473254   | NA                          |
|         |                                       |                             |                                       | 1            | 0                           |
|         |                                       |                             |                                       |              | 0.998207054                 |
| GALNT6  | ENSG00000139629.15                    | 0.517499587                 | 12                                    | 1            | 0.27057358                  |
|         | Brain_Cerebellar_Hemisphere           | 0.797958653                 | Brain_Cortex                          | 10.85241926  |                             |
|         | 0.000205356                           | 10.85241926                 | -1.101742625                          | -0.255989878 | -0.616943374                |
|         | 0.213195855                           | 1                           | 0                                     | 0.998207054  |                             |
| WRAP73  | ENSG00000116213.15                    | 0.517534551                 | 1                                     | 1            | 0.517534551                 |
|         | Brain_Hypothalamus                    | 0.517534551                 | Brain_Hypothalamus                    | 1            | 1                           |
|         | -0.64715049                           | -0.64715049                 | -0.64715049                           | NA           | 1                           |
|         |                                       |                             |                                       | 0            | 0.998207054                 |
| FIGN    | ENSG00000182263.13                    | 0.517543349                 | 3                                     | 3            | 0.166524122                 |
|         | Brain_Nucleus_accumbens_basal_ganglia | 0.970600997                 | Brain_Putamen_basal_ganglia           |              |                             |
|         | 1.311210631                           | 0.691618322                 | 0.691618322                           | -0.518656511 | 1.38345916                  |
|         | 0.275982707                           | 0.988894007                 | 3                                     | 0            | 0.998207054                 |
| POLE    | ENSG00000177084.16                    | 0.517682299                 | 8                                     | 1            | 0.475737689                 |
|         | 0.564997114                           | Brain_Caudate_basal_ganglia | 7.904108533                           |              | Brain_Cerebellum            |
|         | 7.904108533                           | 0.575435037                 | 0.713174653                           | 0.642874635  | 0.000876989                 |
|         | 1                                     | 0                           | 0.998207054                           |              | 0.048031871                 |
| MYCN    | ENSG00000134323.11                    | 0.517800474                 | 1                                     | 1            | 0.517800474                 |
|         | Brain_Spinal_cord_cervical_c-1        | 0.517800474                 | Brain_Spinal_cord_cervical_c-1        |              |                             |
|         | 1                                     | 1                           | 1                                     | -0.646739623 | -0.646739623                |
|         |                                       |                             |                                       | -0.646739623 | NA                          |
|         |                                       |                             |                                       |              | 1                           |
|         |                                       |                             |                                       |              | 0                           |
|         | 0.998207054                           |                             |                                       |              |                             |
| SDCBP   | ENSG00000137575.11                    | 0.517901119                 | 1                                     | 1            | 0.517901119                 |
|         | Brain_Hypothalamus                    | 0.517901119                 | Brain_Hypothalamus                    | 1            | 1                           |
|         |                                       |                             |                                       |              | 1                           |

|         |                                       |                             |                                       |             |              |             |                    |   |
|---------|---------------------------------------|-----------------------------|---------------------------------------|-------------|--------------|-------------|--------------------|---|
|         | 0.64658415                            | 0.64658415                  | 0.64658415                            | NA          | 1            | 0           | 0.998207054        |   |
| CASKIN1 | ENSG00000167971.15                    | 0.517937658                 | 0.517937658                           |             | 1            | 1           | 0.517937658        |   |
|         | Brain_Hypothalamus                    | 0.517937658                 | Brain_Hypothalamus                    |             | 1            | 1           | 1                  |   |
|         | 0.646527709                           | 0.646527709                 | 0.646527709                           | NA          | 1            | 0           | 0.998207054        |   |
| SAXO2   | ENSG00000188659.9                     | 0.51800862                  | 13                                    | 2           | 0.170411895  |             | Brain_Hypothalamus |   |
|         | 0.903326033                           | Brain_Putamen_basal_ganglia | 11.87492695                           |             |              |             | 0.000551696        |   |
|         | 0.49244367                            | 0.121460836                 | 1.370881515                           |             | 1.077461984  |             | 0.340989069        | 2 |
|         | 0                                     | 0.998207054                 |                                       |             |              |             |                    |   |
| FSCN1   | ENSG00000075618.17                    | 0.518108902                 | 2                                     | 2           | 0.603734806  |             | Brain_Cerebellum   |   |
|         | 0.773275397                           | Brain_Cerebellar_Hemisphere | 1.749418614                           |             |              |             | 0.250581386        |   |
|         | 0.250581386                           | -0.288093201                | 0.519037192                           |             | 0.115471995  |             | 0.570727374        |   |
|         | 2                                     | 0                           | 0.998207054                           |             |              |             |                    |   |
| MRGPRE  | ENSG00000184350.9                     | 0.518122793                 | 3                                     | 3           | 0.227449945  |             |                    |   |
|         | Brain_Cerebellum                      | 0.641770858                 | Brain_Nucleus_accumbens_basal_ganglia |             |              |             |                    |   |
|         | 1.054622567                           | 0.943608067                 | 0.943608067                           |             | -1.20695378  |             | 0.465224273        |   |
|         | -0.523661975                          | 0.876975389                 | 3                                     | 0           | 0.998207054  |             |                    |   |
| P2RY1   | ENSG00000169860.6                     | 0.518173289                 | 3                                     | 3           | 0.201137452  |             | Brain_Cerebellum   |   |
|         | 0.909682282                           | Brain_Caudate_basal_ganglia | 1.874219514                           |             |              |             | 0.177190676        |   |
|         | 0.177190676                           | -0.113439303                | 1.278317636                           |             | 0.589294265  |             | 0.695979756        |   |
|         | 3                                     | 0                           | 0.998207054                           |             |              |             |                    |   |
| CREB5   | ENSG00000146592.16                    | 0.518197468                 | 1                                     | 1           | 0.518197468  |             |                    |   |
|         | Brain_Nucleus_accumbens_basal_ganglia | 0.518197468                 |                                       |             |              |             |                    |   |
|         | Brain_Nucleus_accumbens_basal_ganglia | 1                           | 1                                     | 1           | 0.646126449  |             |                    |   |
|         | 0.646126449                           | 0.646126449                 | NA                                    | 1           | 0            | 0.998207054 |                    |   |
| CCDC189 | ENSG00000196118.11                    | 0.518282328                 | 7                                     | 2           | 0.480286571  |             |                    |   |
|         | Brain_Frontal_Cortex_BA9              | 0.946522721                 | Brain_Caudate_basal_ganglia           | 6.44199165  |              |             |                    |   |
|         | 0.001207439                           | 0.280749248                 | -0.410204991                          |             | 0.705841725  |             | 0.070168154        |   |
|         | 0.41494709                            | 2                           | 0                                     | 0.998207054 |              |             |                    |   |
| TRIML2  | ENSG00000179046.8                     | 0.518354333                 | 2                                     | 2           | 0.275383862  |             |                    |   |
|         | Brain_Caudate_basal_ganglia           | 0.930853473                 | Brain_Nucleus_accumbens_basal_ganglia |             |              |             |                    |   |
|         | 1.378878151                           | 0.621121849                 | 0.621121849                           |             | 0.086771084  |             | 1.090747821        |   |
|         | 0.588759452                           | 0.709918759                 | 2                                     | 0           | 0.998207054  |             |                    |   |
| SNX30   | ENSG00000148158.16                    | 0.518505331                 | 2                                     | 2           | 0.267557872  |             | Brain_Amygdala     |   |
|         | 0.875809552                           | Brain_Cerebellar_Hemisphere | 1.119181853                           |             |              |             | 0.880818147        |   |
|         | 0.880818147                           | -1.108704054                | -0.156283513                          |             | -0.632493783 |             | 0.673463023        |   |
|         | 2                                     | 0                           | 0.998207054                           |             |              |             |                    |   |
| H1F0    | ENSG00000189060.5                     | 0.518600308                 | 1                                     | 1           | 0.518600308  |             |                    |   |
|         | Brain_Putamen_basal_ganglia           | 0.518600308                 | Brain_Putamen_basal_ganglia           | 1           | 1            |             |                    |   |
|         | 1                                     | 0.645504493                 | 0.645504493                           | 0.645504493 | NA           | 1           | 0                  |   |
|         | 0.998207054                           |                             |                                       |             |              |             |                    |   |
| AGTRAP  | ENSG00000177674.15                    | 0.518639825                 | 2                                     | 2           | 0.257932314  |             |                    |   |
|         | Brain_Spinal_cord_cervical_c-1        | 0.992444565                 | Brain_Substantia_nigra                |             |              |             |                    |   |
|         | 1.167329953                           | 0.832670047                 | 0.832670047                           |             | -1.131291754 |             | -0.009469476       |   |
|         | -0.570380615                          | 0.79324814                  | 2                                     | 0           | 0.998207054  |             |                    |   |
| ZBBX    | ENSG00000169064.12                    | 0.518656201                 | 2                                     | 2           | 0.298568047  |             | Brain_Cortex       |   |
|         | 0.891300867                           | Brain_Frontal_Cortex_BA9    | 1.525940487                           |             |              |             | 0.474059513        |   |
|         | 0.474059513                           | 0.136658331                 | 1.03950906                            | 0.588083696 |              |             | 0.638411873        | 2 |
|         | 0                                     | 0.998207054                 |                                       |             |              |             |                    |   |
| FAM227A | ENSG00000184949.15                    | 0.518684552                 | 10                                    | 2           | 0.131052833  |             |                    |   |
|         | Brain_Cortex                          | 0.450600961                 | Brain_Cerebellum                      | 9.371959931 |              |             | 0.006111483        |   |
|         | 0.317404747                           | 0.754413511                 | 1.509963126                           |             | 1.106461289  |             | 0.24426636         | 2 |
|         | 0                                     | 0.998207054                 |                                       |             |              |             |                    |   |
| NNT     | ENSG00000112992.16                    | 0.518776624                 | 2                                     | 2           | 0.251931319  |             |                    |   |
|         | Brain_Nucleus_accumbens_basal_ganglia | 0.481832877                 | Brain_Caudate_basal_ganglia           |             |              |             |                    |   |
|         | 1.614849105                           | 0.385150895                 | 0.385150895                           |             | -1.145670971 |             | -0.703357674       |   |
|         | -0.924514323                          | 0.312762732                 | 2                                     | 0           | 0.998207054  |             |                    |   |
| CPAMD8  | ENSG00000160111.12                    | 0.518782175                 | 2                                     | 2           | 0.392003964  |             |                    |   |
|         | Brain_Caudate_basal_ganglia           | 0.91046519                  | Brain_Nucleus_accumbens_basal_ganglia |             |              |             |                    |   |
|         | 1.588102328                           | 0.411897672                 | 0.411897672                           |             | -0.112451794 |             | 0.85598882         |   |
|         | 0.371768513                           | 0.684790925                 | 2                                     | 0           | 0.998207054  |             |                    |   |
| AP3S2   | ENSG00000157823.16                    | 0.519173258                 | 12                                    | 2           | 0.135068855  |             | Brain_Cortex       |   |
|         | 0.545612039                           | Brain_Putamen_basal_ganglia | 10.81299921                           |             |              |             | 0.001566261        |   |



|              |                                       |                                      |              |                                       |              |
|--------------|---------------------------------------|--------------------------------------|--------------|---------------------------------------|--------------|
|              | 0.503522006                           | -1.494408602                         | -0.604348393 | -0.981159306                          | 0.228776893  |
|              | 2                                     | 0                                    | 0.998207054  |                                       |              |
| RP3-446N13.5 | ENSG00000275212.1                     | 0.519290812                          | 2            | 2                                     | 0.456039493  |
|              | Brain_Frontal_Cortex_BA9              | 0.849239397                          |              | Brain_Cortex                          | 1.64034369   |
|              | 0.35965631                            | -0.19008899                          | 0.745384199  | 0.277647604                           | 0.35965631   |
|              | 0                                     | 0.998207054                          |              |                                       | 0.661479436  |
|              |                                       |                                      |              |                                       | 2            |
| FBXO7        | ENSG00000100225.17                    | 0.519305176                          | 10           | 4                                     | 0.170465624  |
|              | Brain_Cerebellar_Hemisphere           | 0.87992119                           |              | Brain_Spinal_cord_cervical_c-1        |              |
|              | 7.262872601                           | -0.031368003                         | 0.494516715  | 0.151069122                           | 1.370709206  |
|              | 0.758354523                           | 0.483268789                          | 4            | 0                                     | 0.998207054  |
| RGS14        | ENSG00000169220.17                    | 0.519372836                          | 7            | 7                                     | 0.069998419  |
|              | Brain_Substantia_nigra                | 0.825628658                          |              | Brain_Hypothalamus                    | 1.917414866  |
|              | 0.373895512                           | -0.373895512                         | -1.811920901 | 0.265638156                           | -0.804031753 |
|              | 0.85288988                            | 7                                    | 0            | 0.998207054                           |              |
| C15orf52     | ENSG00000188549.12                    | 0.519401015                          | 2            | 2                                     | 0.266448276  |
|              | Brain_Cerebellum                      | 0.547612135                          |              | Brain_Cerebellar_Hemisphere           | 1.713934543  |
|              | 0.286065457                           | 0.286065457                          | 0.601342129  | 1.111279                              | 0.856310565  |
|              | 0.360579819                           | 2                                    | 0            | 0.998207054                           |              |
| MAN2B2       | ENSG00000013288.8                     | 0.519460667                          | 8            | 1                                     | 0.435970403  |
|              | Brain_Cerebellum                      | 0.746519155                          |              | Brain_Anterior_cingulate_cortex_BA24  |              |
|              | 7.564397828                           | 3.18E-05                             | 7.564397828  | 0.323232519                           | 0.779015808  |
|              | 0.628411551                           | 0.162295815                          | 1            | 0                                     | 0.998207054  |
| FAM129C      | ENSG00000167483.17                    | 0.51946587                           | 2            | 2                                     | 0.275216988  |
|              | Brain_Hypothalamus                    | 0.748631858                          |              | Brain_Cerebellum                      | 1.022854125  |
|              | 0.977145875                           | 0.977145875                          | 0.320443891  | 1.091127036                           | 0.705785464  |
|              | 0.544955278                           | 2                                    | 0            | 0.998207054                           |              |
| CTSO         | ENSG00000256043.2                     | 0.519523415                          | 6            | 5                                     | 0.202847918  |
|              | Brain_Hypothalamus                    | 0.958155727                          |              | Brain_Nucleus_accumbens_basal_ganglia |              |
|              | 4.442977523                           | 0.075386411                          | 0.186153932  | -1.273479568                          | 0.219160605  |
|              | -0.206684137                          | 0.55463105                           | 5            | 0                                     | 0.998207054  |
| NDUFA2       | ENSG00000131495.8                     | 0.519659128                          | 1            | 1                                     | 0.519659128  |
|              | Brain_Anterior_cingulate_cortex_BA24  | 0.519659128                          |              |                                       |              |
|              | Brain_Anterior_cingulate_cortex_BA24  | 1                                    | 1            | 1                                     | 0.643870938  |
|              | 0.643870938                           | 0.643870938                          | NA           | 1                                     | 0            |
|              |                                       |                                      |              | 0.998207054                           |              |
| ZNF774       | ENSG00000196391.10                    | 0.519708748                          | 3            | 3                                     | 0.216474749  |
|              | Brain_Nucleus_accumbens_basal_ganglia | 0.909980424                          |              | Brain_Frontal_Cortex_BA9              |              |
|              | 1.141692155                           | 0.872786102                          | 0.872786102  | -1.235956458                          | 0.917010436  |
|              | -0.068627596                          | 1.08792246                           | 3            | 0                                     | 0.998207054  |
| TDRD9        | ENSG00000156414.18                    | 0.51981337                           | 13           | 3                                     | 0.198514329  |
|              | Brain_Cerebellum                      |                                      |              |                                       |              |
|              | 0.982761525                           | Brain_Anterior_cingulate_cortex_BA24 | 10.99781905  |                                       | 0.0002291    |
|              | 0.433909241                           | -1.285795821                         | -0.021606906 | -0.660679522                          | 0.387069466  |
|              | 3                                     | 0                                    | 0.998207054  |                                       |              |
| BLVRA        | ENSG00000106605.10                    | 0.519824949                          | 8            | 5                                     | 0.134539075  |
|              | Brain_Anterior_cingulate_cortex_BA24  | 0.93439482                           |              | Brain_Substantia_nigra                |              |
|              | 6.075429028                           | 0.07100881                           | 0.227843393  | -0.320833159                          | 1.496439835  |
|              | 0.582354568                           | 0.54340987                           | 5            | 0                                     | 0.998207054  |
| SLC2A4RG     | ENSG00000125520.13                    | 0.519879714                          | 2            | 2                                     | 0.260762493  |
|              | Brain_Cerebellar_Hemisphere           | 0.297172354                          |              | Brain_Cerebellum                      | 1.820998339  |
|              | 0.179001661                           | -0.179001661                         | 1.04251634   | 1.124590756                           | 1.083553548  |
|              | 0.058035376                           | 2                                    | 0            | 0.998207054                           |              |
| ANO7         | ENSG00000146205.13                    | 0.519921389                          | 13           | 5                                     | 0.023547997  |
|              | Brain_Amygdala                        |                                      |              |                                       |              |
|              | 0.551222108                           | Brain_Cerebellar_Hemisphere          | 9.799774939  |                                       | 0.000814856  |
|              | 0.349664148                           | -2.264424856                         | -0.595929825 | -1.336733868                          | 0.503068071  |
|              | 5                                     | 0                                    | 0.998207054  |                                       |              |
| PAM16        | ENSG00000217930.7                     | 0.519933838                          | 2            | 2                                     | 0.274431046  |
|              | Brain_Caudate_basal_ganglia           | 0.337802844                          |              | Brain_Cerebellar_Hemisphere           |              |
|              | 1.640027344                           | 0.359972656                          | 0.359972656  | -0.95851557                           | 1.092915173  |
|              | 1.025715372                           | 0.095034871                          | 2            | 0                                     | 0.998207054  |
| RP11-95D17.1 | ENSG00000269973.1                     | 0.520204507                          | 3            | 3                                     | 0.144745346  |
|              | Brain_Cerebellum                      | 0.796524006                          |              | Brain_Hippocampus                     | 1.905602871  |
|              | 0.095177634                           | 0.095177634                          | 0.257848275  | 1.458345459                           | 0.970636962  |
|              | 0.631105531                           | 3                                    | 0            | 0.998207054                           |              |

|               |                                       |                                       |              |              |              |                                |              |   |
|---------------|---------------------------------------|---------------------------------------|--------------|--------------|--------------|--------------------------------|--------------|---|
| STON1-GTF2A1L | ENSG00000068781.21                    | 0.520301687                           | 4            | 4            | 0.2735304    |                                |              |   |
|               | Brain_Cerebellar_Hemisphere           | 0.902396666                           |              |              |              | Brain_Spinal_cord_cervical_c-1 |              |   |
|               | 2.012236382                           | 0.304230298                           | 0.304230298  |              | -0.95595697  | 1.094968585                    |              |   |
|               | -0.165806563                          | 0.909164966                           | 4            | 0            | 0.998207054  |                                |              |   |
| MEGF10        | ENSG00000145794.16                    | 0.520426851                           | 1            | 1            | 0.520426851  |                                |              |   |
|               | Brain_Frontal_Cortex_BA9              | 0.520426851                           |              |              |              | Brain_Frontal_Cortex_BA9       | 1            | 1 |
|               | 1                                     | 0.642687565                           | 0.642687565  | 0.642687565  | NA           | 1                              | 0            |   |
|               | 0.998207054                           |                                       |              |              |              |                                |              |   |
| CHRA1         | ENSG00000104472.9                     | 0.52054802                            | 1            | 1            | 0.52054802   | Brain_Amygdala                 |              |   |
|               | 0.52054802                            | Brain_Amygdala                        | 1            | 1            | 0.642500877  | 0.642500877                    |              |   |
|               | 0.642500877                           | NA                                    | 1            | 0            | 0.998207054  |                                |              |   |
| RP11-446N19.1 | ENSG00000272369.1                     | 0.52056705                            | 1            | 1            | 0.52056705   | Brain_Amygdala                 |              |   |
|               | 0.52056705                            | Brain_Amygdala                        | 1            | 1            | 0.642471559  | 0.642471559                    |              |   |
|               | 0.642471559                           | NA                                    | 1            | 0            | 0.998207054  |                                |              |   |
| OTOA          | ENSG00000155719.16                    | 0.520604102                           | 1            | 1            | 0.520604102  | Brain_Cortex                   |              |   |
|               | 0.520604102                           | Brain_Cortex                          | 1            | 1            | 1            | -0.642414478                   | -0.642414478 |   |
|               | -0.642414478                          | NA                                    | 1            | 0            | 0.998207054  |                                |              |   |
| NOL11         | ENSG00000130935.9                     | 0.520663975                           | 1            | 1            | 0.520663975  |                                |              |   |
|               | Brain_Nucleus_accumbens_basal_ganglia | 0.520663975                           |              |              |              |                                |              |   |
|               | Brain_Nucleus_accumbens_basal_ganglia | 1                                     | 1            | 1            | -0.642322242 |                                |              |   |
|               | -0.642322242                          | -0.642322242                          | NA           | 1            | 0            | 0.998207054                    |              |   |
| CAND1         | ENSG00000111530.12                    | 0.520737911                           | 1            | 1            | 0.520737911  | Brain_Cortex                   |              |   |
|               | 0.520737911                           | Brain_Cortex                          | 1            | 1            | 1            | 0.642208352                    | 0.642208352  |   |
|               | 0.642208352                           | NA                                    | 1            | 0            | 0.998207054  |                                |              |   |
| PURA          | ENSG00000185129.5                     | 0.520740513                           | 1            | 1            | 0.520740513  |                                |              |   |
|               | Brain_Putamen_basal_ganglia           | 0.520740513                           |              |              |              | Brain_Putamen_basal_ganglia    | 1            | 1 |
|               | 1                                     | -0.642204344                          | -0.642204344 | -0.642204344 | NA           | 1                              | 0            |   |
|               | 0.998207054                           |                                       |              |              |              |                                |              |   |
| NKG7          | ENSG00000105374.9                     | 0.521130837                           | 1            | 1            | 0.521130837  |                                |              |   |
|               | Brain_Hypothalamus                    | 0.521130837                           |              |              |              | Brain_Hypothalamus             | 1            | 1 |
|               | -0.641603227                          | -0.641603227                          | -0.641603227 | NA           | 1            | 0                              | 0.998207054  |   |
| ZNF469        | ENSG00000225614.2                     | 0.521306651                           | 1            | 1            | 0.521306651  |                                |              |   |
|               | Brain_Frontal_Cortex_BA9              | 0.521306651                           |              |              |              | Brain_Frontal_Cortex_BA9       | 1            | 1 |
|               | 1                                     | -0.641332541                          | -0.641332541 | -0.641332541 | NA           | 1                              | 0            |   |
|               | 0.998207054                           |                                       |              |              |              |                                |              |   |
| ANKRD50       | ENSG00000151458.11                    | 0.52140439                            | 2            | 2            | 0.402233308  | Brain_Cerebellum               |              |   |
|               | 0.503969004                           | Brain_Cerebellar_Hemisphere           | 1.120804482  |              | 0.879195518  |                                |              |   |
|               | 0.879195518                           | -0.668257865                          | 0.83763931   | 0.084690723  | 1.064830105  |                                | 2            |   |
|               | 0                                     | 0.998207054                           |              |              |              |                                |              |   |
| GPX3          | ENSG00000211445.11                    | 0.521410523                           | 5            | 5            | 0.185469988  |                                |              |   |
|               | Brain_Anterior_cingulate_cortex_BA24  | 0.945334074                           |              |              |              | Brain_Cortex                   |              |   |
|               | 1.896346001                           | 0.461154908                           | 0.461154908  |              | -1.168867215 | 1.32409954                     |              |   |
|               | 0.381028728                           | 1.022923299                           | 5            | 0            | 0.998207054  |                                |              |   |
| SLC4A1AP      | ENSG00000163798.13                    | 0.521653091                           | 2            | 2            | 0.262987389  |                                |              |   |
|               | Brain_Substantia_nigra                | 0.841698092                           |              |              |              | Brain_Caudate_basal_ganglia    |              |   |
|               | 1.018371469                           | 0.981628531                           | 0.981628531  |              | -1.119358123 | -0.199721891                   |              |   |
|               | -0.659540007                          | 0.650281016                           | 2            | 0            | 0.998207054  |                                |              |   |
| SYT4          | ENSG00000132872.11                    | 0.521671424                           | 1            | 1            | 0.521671424  | Brain_Cerebellum               |              |   |
|               | 0.521671424                           | Brain_Cerebellum                      | 1            | 1            | 1            | 0.640771082                    | 0.640771082  |   |
|               | 0.640771082                           | NA                                    | 1            | 0            | 0.998207054  |                                |              |   |
| CASC3         | ENSG00000108349.16                    | 0.521672531                           | 7            | 3            | 0.077350549  | Brain_Cortex                   |              |   |
|               | 0.494524509                           | Brain_Nucleus_accumbens_basal_ganglia | 5.607595979  |              |              |                                |              |   |
|               | 0.004038336                           | 0.366118859                           | 0.683130303  |              | 1.766270078  | 1.210163073                    |              |   |
|               | 0.333406175                           | 3                                     | 0            | 0.998207054  |              |                                |              |   |
| ME1           | ENSG00000065833.8                     | 0.521722303                           | 4            | 3            | 0.29611615   |                                |              |   |
|               | Brain_Substantia_nigra                | 0.840204819                           |              |              |              | Brain_Cerebellar_Hemisphere    |              |   |
|               | 2.889683465                           | 1.25E-16                              | 0.235861431  |              | -1.044798409 | -0.201631498                   |              |   |
|               | -0.509031282                          | 0.400945354                           | 3            | 0            | 0.998207054  |                                |              |   |
| PFDN5         | ENSG00000123349.13                    | 0.521739465                           | 1            | 1            | 0.521739465  | Brain_Cerebellum               |              |   |
|               | 0.521739465                           | Brain_Cerebellum                      | 1            | 1            | 1            | -0.640666375                   | -0.640666375 |   |
|               | -0.640666375                          | NA                                    | 1            | 0            | 0.998207054  |                                |              |   |
| CA13          | ENSG00000185015.7                     | 0.521756577                           | 4            | 2            | 0.40829047   |                                |              |   |

|               |                                       |              |                                      |              |              |              |                  |             |
|---------------|---------------------------------------|--------------|--------------------------------------|--------------|--------------|--------------|------------------|-------------|
|               | Brain_Cerebellar_Hemisphere           | 0.99698746   | Brain_Cerebellum                     | 3.51735812   | 0.009744231  |              |                  |             |
|               |                                       | 0.457884866  |                                      | -0.826905774 | 0.307993132  | -0.172307254 | 0.478756665      |             |
|               |                                       | 2            | 0                                    | 0.998207054  |              |              |                  |             |
| RARRES1       | ENSG00000118849.9                     | 0.521860113  |                                      | 9            | 9            | 0.133469961  |                  |             |
|               | Brain_Hippocampus                     | 0.567278392  | Brain_Hypothalamus                   | 4.066371416  |              |              |                  |             |
|               |                                       | 0.184158008  |                                      | 0.184158008  | -0.738443814 | 1.500557847  | 0.763086874      |             |
|               |                                       | 0.640928234  | 9                                    | 0            | 0.998207054  |              |                  |             |
| AC011288.2    | ENSG00000229618.2                     | 0.521963858  |                                      | 2            | 2            | 0.25416764   | Brain_Cortex     |             |
|               |                                       | 0.416420416  | Brain_Frontal_Cortex_BA9             | 1.717567443  |              | 0.282432557  |                  |             |
|               |                                       | 0.282432557  |                                      | -1.140284868 | -0.812647105 | -0.976465986 | 0.231674884      |             |
|               |                                       | 2            | 0                                    | 0.998207054  |              |              |                  |             |
| TMEM255B      | ENSG00000184497.12                    | 0.5220116    | 10                                   | 6            | 0.170320654  |              | Brain_Cerebellum |             |
|               |                                       | 0.648320901  | Brain_Cerebellar_Hemisphere          | 6.310565245  |              | 0.019335946  |                  |             |
|               |                                       | 0.357302199  |                                      | 0.456096063  | 1.371174216  | 0.920334566  | 0.352533441      |             |
|               |                                       | 6            | 0                                    | 0.998207054  |              |              |                  |             |
| HLA-DQA2      | ENSG00000237541.3                     | 0.522060291  |                                      | 13           | 1            | 0.119245443  |                  |             |
|               | Brain_Putamen_basal_ganglia           | 0.848600442  | Brain_Cortex                         | 12.02740554  |              |              |                  |             |
|               |                                       | 0.008549707  |                                      | 12.02740554  | -0.319639278 | 1.55794856   | 0.615689547      |             |
|               |                                       | 0.524211634  | 1                                    | 0            | 0.998207054  |              |                  |             |
| DNAI2         | ENSG00000171595.13                    | 0.522116568  |                                      | 4            | 4            | 0.281347455  |                  |             |
|               |                                       | 0.559620876  | Brain_Spinal_cord_cervical_c-1       | 0.559620876  |              |              |                  |             |
|               |                                       | 1.33848617   | Brain_Anterior_cingulate_cortex_BA24 | 1.33848617   | 0.688512591  |              | 0.688512591      |             |
|               |                                       | -0.851658028 |                                      | 1.077297329  | 0.162357639  | 1.022294111  | 4                | 0           |
|               |                                       | 0.998207054  |                                      |              |              |              |                  |             |
| CAV2          | ENSG00000105971.14                    | 0.522234889  |                                      | 4            | 4            | 0.241485668  |                  |             |
|               | Brain_Nucleus_accumbens_basal_ganglia | 0.971748931  | Brain_Caudate_basal_ganglia          | 0.971748931  |              |              |                  |             |
|               |                                       | 1.435965199  |                                      | 0.652129748  | 0.652129748  | -1.171281444 | 0.850718028      |             |
|               |                                       | 0.076697869  |                                      | 0.898839685  | 4            | 0            | 0.998207054      |             |
| TRPC4AP       | ENSG00000100991.11                    | 0.522277773  |                                      | 3            | 3            | 0.151642911  |                  |             |
|               | Brain_Putamen_basal_ganglia           | 0.96255417   | Brain_Cerebellar_Hemisphere          | 1.772583588  |              |              |                  |             |
|               |                                       | 0.242436555  |                                      | 0.242436555  | 0.04694863   | 1.433752477  | 0.529144957      |             |
|               |                                       | 0.783983188  | 3                                    | 0            | 0.998207054  |              |                  |             |
| 5-Sep         | ENSG00000184702.17                    | 0.52230683   |                                      | 2            | 2            | 0.270363431  |                  |             |
|               | Brain_Frontal_Cortex_BA9              | 0.79058518   | Brain_Substantia_nigra               | 1.022114157  |              |              |                  |             |
|               |                                       | 0.977885843  |                                      | 0.977885843  | -1.102225999 | 0.265550802  | -0.418337599     |             |
|               |                                       | 0.967164252  | 2                                    | 0            | 0.998207054  |              |                  |             |
| MIR22HG       | ENSG00000186594.14                    | 0.522339763  |                                      | 2            | 2            | 0.473390014  |                  |             |
|               | Brain_Caudate_basal_ganglia           | 0.656613748  | Brain_Hypothalamus                   | 1.470323559  |              |              |                  |             |
|               |                                       | 0.529676441  |                                      | 0.529676441  | -0.716974203 | 0.44459322   | -0.136190491     |             |
|               |                                       | 0.821352202  | 2                                    | 0            | 0.998207054  |              |                  |             |
| CDH15         | ENSG00000129910.7                     | 0.522392822  |                                      | 2            | 2            | 0.254760453  | Brain_Cerebellum |             |
|               |                                       | 0.438189601  | Brain_Cerebellar_Hemisphere          | 1.653628525  |              | 0.346371475  |                  |             |
|               |                                       | 0.346371475  |                                      | 0.775253974  | 1.138862633  | 0.957058303  | 0.257110149      |             |
|               |                                       | 2            | 0                                    | 0.998207054  |              |              |                  |             |
| ZNF215        | ENSG00000149054.15                    | 0.522442475  |                                      | 1            | 1            | 0.522442475  |                  |             |
|               | Brain_Hippocampus                     | 0.522442475  | Brain_Hippocampus                    | 1            | 1            | 1            |                  |             |
|               |                                       | 0.639584942  |                                      | 0.639584942  | NA           | 1            | 0                | 0.998207054 |
| TPRA1         | ENSG00000163870.14                    | 0.522455922  |                                      | 6            | 3            | 0.149969935  |                  |             |
|               | Brain_Putamen_basal_ganglia           | 0.828260773  | Brain_Cerebellum                     | 4.365140812  |              |              |                  |             |
|               |                                       | 0.010718069  |                                      | 0.675385706  | -1.439637675 | -0.216932726 | -0.611759668     |             |
|               |                                       | 0.431005954  | 3                                    | 0            | 0.998207054  |              |                  |             |
| RP11-538C21.2 | ENSG00000277448.1                     | 0.522496463  |                                      | 1            | 1            | 0.522496463  |                  |             |
|               | Brain_Spinal_cord_cervical_c-1        | 0.522496463  | Brain_Spinal_cord_cervical_c-1       |              |              |              |                  |             |
|               |                                       | 1            | 1                                    | 1            | -0.639501924 | -0.639501924 | -0.639501924     | NA          |
|               |                                       | 0.998207054  |                                      |              |              |              |                  |             |
| DLD           | ENSG00000091140.13                    | 0.522602115  |                                      | 12           | 7            | 0.223898638  | Brain_Cerebellum |             |
|               |                                       | 0.974435528  | Brain_Amygdala                       | 7.407889015  |              | 0.001461016  | 0.356817575      |             |
|               |                                       | -1.216226534 |                                      | 0.755540897  | -0.141906806 | 0.563882414  | 7                | 0           |
|               |                                       | 0.998207054  |                                      |              |              |              |                  |             |
| TRIM54        | ENSG00000138100.13                    | 0.522641007  |                                      | 1            | 1            | 0.522641007  |                  |             |
|               | Brain_Anterior_cingulate_cortex_BA24  | 0.522641007  |                                      |              |              |              |                  |             |
|               | Brain_Anterior_cingulate_cortex_BA24  | 1            | 1                                    | 1            | 1            | 0.639279676  |                  |             |

|               |                                       |                  |              |              |             |              |                                       |              |            |
|---------------|---------------------------------------|------------------|--------------|--------------|-------------|--------------|---------------------------------------|--------------|------------|
|               | 0.639279676                           | 0.639279676      | NA           | 1            | 0           | 0.998207054  |                                       |              |            |
| 10-Sep        | ENSG00000186522.14                    | 0.522720209      |              | 7            | 4           | 0.07351195   |                                       |              |            |
|               | Brain_Hippocampus                     | 0.763645894      |              |              |             |              | Brain_Cerebellar_Hemisphere           | 4.762126596  |            |
|               | 0.035422519                           | 0.242184278      | -1.789639091 |              |             | 0.300696558  |                                       | -1.167426984 |            |
|               | 0.751469768                           | 4                | 0            | 0.998207054  |             |              |                                       |              |            |
| LAPTM4B       | ENSG00000104341.16                    | 0.522746845      |              | 8            | 7           | 0.076364689  |                                       |              |            |
|               | Brain_Nucleus_accumbens_basal_ganglia | 0.941381108      |              |              |             |              | Brain_Putamen_basal_ganglia           |              |            |
|               | 2.291756947                           | 0.050967651      | 0.571594075  |              |             | -1.772179961 |                                       | 0.349590416  |            |
|               | -0.408608016                          | 0.800737582      | 7            | 0            | 0.998207054 |              |                                       |              |            |
| ITGB2         | ENSG00000160255.17                    | 0.522824746      |              | 1            | 1           | 0.522824746  |                                       |              |            |
|               | Brain_Spinal_cord_cervical_c-1        | 0.522824746      |              |              |             |              | Brain_Spinal_cord_cervical_c-1        |              |            |
|               | 1                                     | 1                | -0.638997212 | -0.638997212 |             | -0.638997212 | NA                                    | 1            | 0          |
|               | 0.998207054                           |                  |              |              |             |              |                                       |              |            |
| GALNT1        | ENSG00000141429.13                    | 0.522890414      |              | 3            | 3           | 0.154140829  |                                       |              |            |
|               | Brain_Frontal_Cortex_BA9              | 0.938733984      |              |              |             |              | Brain_Cerebellum                      | 1.661179003  |            |
|               | 0.411463273                           | 0.411463273      | -0.076861175 |              |             | 1.42505664   |                                       | 0.627787657  |            |
|               | 0.755230528                           | 3                | 0            | 0.998207054  |             |              |                                       |              |            |
| PTER          | ENSG00000165983.14                    | 0.523151652      |              | 1            | 1           | 0.523151652  |                                       |              |            |
|               | Brain_Caudate_basal_ganglia           | 0.523151652      |              |              |             |              | Brain_Caudate_basal_ganglia           | 1            | 1          |
|               | 1                                     | -0.638494778     | -0.638494778 | -0.638494778 | NA          | 1            |                                       | 0            |            |
|               | 0.998207054                           |                  |              |              |             |              |                                       |              |            |
| SRD5A3        | ENSG00000128039.10                    | 0.523162362      |              | 10           | 10          | 0.119992787  |                                       |              |            |
|               | Brain_Caudate_basal_ganglia           | 0.950040239      |              |              |             |              | Brain_Cerebellum                      | 2.91857756   |            |
|               | 0.279392805                           | 0.279392805      | -0.666246431 |              |             | 1.554803871  |                                       | 0.645091798  |            |
|               | 0.761817739                           | 10               | 0            | 0.998207054  |             |              |                                       |              |            |
| AKAP11        | ENSG00000023516.8                     | 0.523459515      |              | 10           | 3           | 0.130442213  |                                       |              |            |
|               | Brain_Putamen_basal_ganglia           | 0.783113816      |              |              |             |              | Brain_Anterior_cingulate_cortex_BA24  |              |            |
|               | 8.582614115                           | 1.39E-05         | 0.420613772  |              |             | 0.275263485  |                                       | 1.512360363  |            |
|               | 1.099293086                           | 0.33910247       | 3            | 0            | 0.998207054 |              |                                       |              |            |
| TMEM30A       | ENSG00000112697.15                    | 0.523672067      |              | 3            | 2           | 0.255724777  |                                       |              |            |
|               | Brain_Caudate_basal_ganglia           | 0.343757472      |              |              |             |              | Brain_Cortex                          | 2.762516232  |            |
|               | 0.019645738                           | 0.21783803       | 0.946767097  |              |             | 1.136554006  |                                       | 1.068419173  |            |
|               | 0.105607004                           | 2                | 0            | 0.998207054  |             |              |                                       |              |            |
| CDK2AP2       | ENSG00000167797.7                     | 0.523742683      |              | 1            | 1           | 0.523742683  |                                       |              |            |
|               | Brain_Hippocampus                     | 0.523742683      |              |              |             |              | Brain_Hippocampus                     | 1            | 1          |
|               | -0.637586811                          | -0.637586811     | -0.637586811 | NA           | 1           | 0            |                                       | 0.998207054  |            |
| RP11-775C24.5 | ENSG00000277782.1                     | 0.523798625      |              | 9            | 5           | 0.236250884  |                                       |              |            |
|               | Brain_Substantia_nigra                | 0.931942484      |              |              |             |              | Brain_Putamen_basal_ganglia           |              |            |
|               | 6.260324779                           | 0.004336671      | 0.399896679  |              |             | -1.184409797 |                                       | 0.704852203  |            |
|               | -0.370549255                          | 0.571593524      | 5            | 0            | 0.998207054 |              |                                       |              |            |
| ANO2          | ENSG00000047617.14                    | 0.523849797      |              | 2            | 2           | 0.277069769  |                                       | Brain_Cortex |            |
|               | 0.760835883                           | Brain_Cerebellum | 1.027322914  |              |             | 0.972677086  |                                       | 0.972677086  |            |
|               | -1.086925425                          | 0.304383308      | -0.391271059 |              |             | 0.98380384   | 2                                     | 0            |            |
|               | 0.998207054                           |                  |              |              |             |              |                                       |              |            |
| GPHA2         | ENSG00000149735.6                     | 0.523971686      |              | 2            | 2           | 0.659340743  |                                       |              |            |
|               | Brain_Cerebellar_Hemisphere           | 0.779339478      |              |              |             |              | Brain_Cerebellum                      | 1.79779737   | 0.20220263 |
|               | 0.20220263                            | -0.280179911     | 0.440823551  |              |             | 0.08032182   | 0.509826437                           | 2            | 0          |
|               | 0.998207054                           |                  |              |              |             |              |                                       |              |            |
| CA1           | ENSG00000133742.13                    | 0.523974509      |              | 1            | 1           | 0.523974509  |                                       |              |            |
|               | Brain_Spinal_cord_cervical_c-1        | 0.523974509      |              |              |             |              | Brain_Spinal_cord_cervical_c-1        |              |            |
|               | 1                                     | 1                | 0.637230813  | 0.637230813  |             | 0.637230813  | NA                                    | 1            | 0          |
|               | 0.998207054                           |                  |              |              |             |              |                                       |              |            |
| PTK7          | ENSG00000112655.15                    | 0.524208827      |              | 3            | 3           | 0.145433465  |                                       |              |            |
|               | Brain_Putamen_basal_ganglia           | 0.893616569      |              |              |             |              | Brain_Spinal_cord_cervical_c-1        |              |            |
|               | 1.574208764                           | 0.430581118      | 0.430581118  |              |             | -0.237929037 |                                       | 1.455852261  |            |
|               | 0.361397947                           | 0.949256065      | 3            | 0            | 0.998207054 |              |                                       |              |            |
| FAM83D        | ENSG00000101447.14                    | 0.524257826      |              | 1            | 1           | 0.524257826  |                                       |              |            |
|               | Brain_Cortex                          | 0.524257826      |              |              |             |              | Brain_Cortex                          | 1            | 1          |
|               | 0.636795856                           | 0.636795856      | NA           | 1            | 0           | 0.998207054  |                                       |              |            |
| LCN12         | ENSG00000184925.11                    | 0.524258703      |              | 10           | 8           | 0.033185279  |                                       |              |            |
|               | Brain_Frontal_Cortex_BA9              | 0.853249402      |              |              |             |              | Brain_Nucleus_accumbens_basal_ganglia |              |            |
|               | 3.188860472                           | 0.005243857      | 0.240654494  |              |             | -2.1298345   |                                       | 0.336485893  |            |

|              |                                       |                             |              |              |                                      |             |              |
|--------------|---------------------------------------|-----------------------------|--------------|--------------|--------------------------------------|-------------|--------------|
|              | -0.806089226                          | 0.943882888                 | 8            | 0            | 0.998207054                          |             |              |
| UBXN4        | ENSG00000144224.16                    | 0.524333546                 | 1            | 1            | 0.524333546                          |             |              |
|              | Brain_Cerebellar_Hemisphere           | 0.524333546                 |              |              | Brain_Cerebellar_Hemisphere          | 1           | 1            |
|              | 1                                     | 0.636679627                 | 0.636679627  | 0.636679627  | NA                                   | 1           | 0            |
|              | 0.998207054                           |                             |              |              |                                      |             |              |
| RAB27A       | ENSG00000069974.15                    | 0.524362827                 | 11           | 8            | 0.04715168                           |             |              |
|              | Brain_Substantia_nigra                | 0.809372608                 |              |              | Brain_Cortex                         | 5.102022019 |              |
|              | 0.029191682                           | 0.240517731                 | -1.984935212 | -0.241235488 | -1.109709744                         |             |              |
|              | 0.586015479                           | 8                           | 0            | 0.998207054  |                                      |             |              |
| NEURL2       | ENSG00000124257.6                     | 0.524386846                 | 1            | 1            | 0.524386846                          |             |              |
|              | Brain_Cortex                          | 0.524386846                 |              |              | Brain_Cortex                         | 1           | 1            |
|              | 0.636597819                           | 0.636597819                 | NA           | 1            | 0                                    | 0.998207054 | 0.636597819  |
| ATP9B        | ENSG00000166377.19                    | 0.524416147                 | 2            | 2            | 0.579640797                          |             | Brain_Cortex |
|              | 0.700781174                           | Brain_Frontal_Cortex_BA9    | 1.656786667  | 0.343213333  |                                      |             |              |
|              | 0.343213333                           | -0.384266178                | 0.553909481  | 0.084821651  | 0.66339037                           | 2           |              |
|              | 0                                     | 0.998207054                 |              |              |                                      |             |              |
| RP11-726G1.1 | ENSG00000214776.10                    | 0.524627081                 | 13           | 4            | 0.147151399                          |             |              |
|              | Brain_Putamen_basal_ganglia           | 0.977423621                 |              |              | Brain_Hippocampus                    | 10.05609252 |              |
|              | 7.58E-05                              | 0.366637337                 | -0.537002397 | 1.449667012  | 0.06788072                           |             |              |
|              | 0.526992587                           | 4                           | 0            | 0.998207054  |                                      |             |              |
| RNF10        | ENSG00000022840.15                    | 0.524698342                 | 1            | 1            | 0.524698342                          |             |              |
|              | Brain_Cerebellar_Hemisphere           | 0.524698342                 |              |              | Brain_Cerebellar_Hemisphere          | 1           | 1            |
|              | 1                                     | -0.636119799                | -0.636119799 | -0.636119799 | NA                                   | 1           | 0            |
|              | 0.998207054                           |                             |              |              |                                      |             |              |
| ANGEL2       | ENSG00000174606.13                    | 0.524731612                 | 7            | 4            | 0.034850149                          |             |              |
|              | Brain_Putamen_basal_ganglia           | 0.850182926                 |              |              | Brain_Frontal_Cortex_BA9             |             |              |
|              | 5.250000368                           | 0.001724691                 | 0.220957026  | -2.110095286 | -0.188885031                         |             |              |
|              | -1.420488212                          | 0.616103155                 | 4            | 0            | 0.998207054                          |             |              |
| KLHL23       | ENSG00000213160.9                     | 0.524786467                 | 2            | 2            | 0.50896516                           |             |              |
|              | Brain_Cerebellar_Hemisphere           | 0.819895219                 |              |              | Brain_Cerebellum                     | 1.913565935 |              |
|              | 0.086434065                           | 0.086434065                 | 0.227679746  | 0.660449899  | 0.444064822                          |             |              |
|              | 0.30601471                            | 2                           | 0            | 0.998207054  |                                      |             |              |
| BTBD8        | ENSG00000284413.1                     | 0.524843897                 | 1            | 1            | 0.524843897                          |             |              |
|              | Brain_Nucleus_accumbens_basal_ganglia | 0.524843897                 |              |              |                                      |             |              |
|              | Brain_Nucleus_accumbens_basal_ganglia | 1                           | 1            | 1            | -0.63589648                          |             |              |
|              | -0.63589648                           | -0.63589648                 | NA           | 1            | 0                                    | 0.998207054 |              |
| HTT          | ENSG00000197386.10                    | 0.524864721                 | 1            | 1            | 0.524864721                          |             |              |
|              | Brain_Nucleus_accumbens_basal_ganglia | 0.524864721                 |              |              |                                      |             |              |
|              | Brain_Nucleus_accumbens_basal_ganglia | 1                           | 1            | 1            | 0.635864534                          |             |              |
|              | 0.635864534                           | 0.635864534                 | NA           | 1            | 0                                    | 0.998207054 |              |
| TBKBP1       | ENSG00000198933.9                     | 0.525096765                 | 2            | 2            | 0.314588208                          |             |              |
|              | Brain_Cortex                          | 0.373927979                 |              |              | Brain_Frontal_Cortex_BA9             | 1.405797479 |              |
|              | 0.594202521                           | 0.594202521                 | -1.005641179 | -0.889139749 | -0.947390464                         |             |              |
|              | 0.082378951                           | 2                           | 0            | 0.998207054  |                                      |             |              |
| FER          | ENSG00000151422.12                    | 0.525314541                 | 1            | 1            | 0.525314541                          |             |              |
|              | Brain_Nucleus_accumbens_basal_ganglia | 0.525314541                 |              |              |                                      |             |              |
|              | Brain_Nucleus_accumbens_basal_ganglia | 1                           | 1            | 1            | -0.635174609                         |             |              |
|              | -0.635174609                          | -0.635174609                | NA           | 1            | 0                                    | 0.998207054 |              |
| RLBP1        | ENSG00000140522.11                    | 0.525351752                 | 6            | 6            | 0.215241562                          |             |              |
|              | Brain_Caudate_basal_ganglia           | 0.841006378                 |              |              | Brain_Anterior_cingulate_cortex_BA24 |             |              |
|              | 1.632260624                           | 0.383238567                 | 0.383238567  | -0.360810935 | 1.239280703                          |             |              |
|              | 0.469333678                           | 0.633483101                 | 6            | 0            | 0.998207054                          |             |              |
| PDE6H        | ENSG00000139053.2                     | 0.525360703                 | 5            | 5            | 0.183882153                          |             | Brain_Cortex |
|              | 0.608037833                           | Brain_Putamen_basal_ganglia | 2.062910983  | 0.226627566  |                                      |             |              |
|              | 0.226627566                           | -1.328896397                | 1.004053877  | -0.456050826 | 0.880697255                          |             |              |
|              | 5                                     | 0                           | 0.998207054  |              |                                      |             |              |
| FAM32A       | ENSG00000105058.11                    | 0.525453815                 | 2            | 1            | 0.441534214                          |             |              |
|              | Brain_Nucleus_accumbens_basal_ganglia | 0.625247999                 |              |              | Brain_Caudate_basal_ganglia          |             |              |
|              | 1.962721446                           | 0.037278554                 | 1.962721446  | 0.488426184  | 0.769605041                          |             |              |
|              | 0.629015612                           | 0.198823476                 | 1            | 0            | 0.998207054                          |             |              |
| GSTM3        | ENSG00000134202.10                    | 0.525495096                 | 13           | 7            | 0.163408196                          |             |              |
|              | Brain_Anterior_cingulate_cortex_BA24  | 0.959483463                 |              |              | Brain_Cerebellar_Hemisphere          |             |              |

|               |                                       |                                       |                                |              |              |                  |              |            |   |
|---------------|---------------------------------------|---------------------------------------|--------------------------------|--------------|--------------|------------------|--------------|------------|---|
|               | 6.765969304                           | 0.0001931                             | 0.286948375                    | -0.885144938 | 1.393700068  |                  |              |            |   |
|               | 0.259764504                           | 0.745513686                           | 7                              | 0            | 0.998207054  |                  |              |            |   |
| GOLGA8M       | ENSG00000188626.6                     | 0.525546319                           | 1                              | 1            | 0.525546319  |                  |              |            |   |
|               | Brain_Amygdala                        | 0.525546319                           | Brain_Amygdala                 | 1            | 1            | 1                | -0.634819231 |            |   |
|               | -0.634819231                          | -0.634819231                          | NA                             | 1            | 0            | 0.998207054      |              |            |   |
| CTB-25B13.5   | ENSG00000268798.1                     | 0.525624142                           | 1                              | 1            | 0.525624142  |                  |              |            |   |
|               | Brain_Cerebellum                      | 0.525624142                           | Brain_Cerebellum               | 1            | 1            | 1                | -0.634699926 |            |   |
|               | -0.634699926                          | -0.634699926                          | NA                             | 1            | 0            | 0.998207054      |              |            |   |
| MUT           | ENSG00000146085.7                     | 0.525637786                           | 11                             | 6            | 0.31575275   |                  |              |            |   |
|               | Brain_Putamen_basal_ganglia           | 0.943752409                           | Brain_Cerebellum               | 7.251374681  |              |                  |              |            |   |
|               | 0.061893609                           | 0.329368628                           | -0.798234148                   | 1.003224095  | 0.093373127  |                  |              |            |   |
|               | 0.553528399                           | 6                                     | 0                              | 0.998207054  |              |                  |              |            |   |
| ST3GAL4       | ENSG00000110080.18                    | 0.525755501                           | 3                              | 3            | 0.314756244  |                  |              |            |   |
|               | Brain_Spinal_cord_cervical_c-1        | 0.466959355                           | Brain_Caudate_basal_ganglia    |              |              |                  |              |            |   |
|               | 1.197878635                           | 0.779833677                           | 0.779833677                    | -0.850067867 | 1.005292045  |                  |              |            |   |
|               | -0.190737031                          | 1.037604863                           | 3                              | 0            | 0.998207054  |                  |              |            |   |
| RP11-267M23.4 | ENSG00000253704.1                     | 0.525842835                           | 5                              | 3            | 0.214111731  |                  |              |            |   |
|               | Brain_Cerebellum                      | 0.962478503                           | Brain_Frontal_Cortex_BA9       | 3.546868212  |              |                  |              |            |   |
|               | 0.024483566                           | 0.588623239                           | -1.242338406                   | 0.047043569  | -0.787295603 |                  |              |            |   |
|               | 0.500061047                           | 3                                     | 0                              | 0.998207054  |              |                  |              |            |   |
| ACIN1         | ENSG00000100813.14                    | 0.526037237                           | 2                              | 2            | 0.277186657  | Brain_Cerebellum |              |            |   |
|               | 0.72240427                            | Brain_Nucleus_accumbens_basal_ganglia | 1.030375168                    | 0.969624832  |              |                  |              |            |   |
|               | 0.969624832                           | 0.355247383                           | 1.086660997                    | 0.72095419   | 0.517187526  | 2                |              |            |   |
|               | 0                                     | 0.998207054                           |                                |              |              |                  |              |            |   |
| BTBD2         | ENSG00000133243.8                     | 0.526039224                           | 2                              | 2            | 0.3595808    | Brain_Cerebellum |              |            |   |
|               | 0.533901843                           | Brain_Cerebellar_Hemisphere           | 1.048610054                    | 0.951389946  |              |                  |              |            |   |
|               | 0.951389946                           | -0.91616416                           | 0.62206087                     | -0.147051645 | 1.08768935   | 2                | 0            |            |   |
|               | 0.998207054                           |                                       |                                |              |              |                  |              |            |   |
| RP11-396B14.2 | ENSG00000263033.2                     | 0.526149012                           | 6                              | 5            | 0.075304229  |                  |              |            |   |
|               | Brain_Spinal_cord_cervical_c-1        | 0.815746789                           | Brain_Hippocampus              |              |              |                  |              |            |   |
|               | 2.866460655                           | 0.061742448                           | 0.494808585                    | -1.778606917 | 0.430501753  |                  |              |            |   |
|               | -0.348671103                          | 0.791800234                           | 5                              | 0            | 0.998207054  |                  |              |            |   |
| SYT8          | ENSG00000149043.16                    | 0.526190262                           | 1                              | 1            | 0.526190262  | Brain_Cortex     |              |            |   |
|               | 0.526190262                           | Brain_Cortex                          | 1                              | 1            | 1            | -0.633832314     | -0.633832314 |            |   |
|               | -0.633832314                          | NA                                    | 1                              | 0            | 0.998207054  |                  |              |            |   |
| RIPK2         | ENSG00000104312.7                     | 0.526287331                           | 3                              | 3            | 0.268719669  | Brain_Cortex     |              |            |   |
|               | 0.722269775                           | Brain_Frontal_Cortex_BA9              | 1.796182801                    | 0.211209715  |              |                  |              |            |   |
|               | 0.211209715                           | -1.106015828                          | -0.355426932                   | -0.776347853 | 0.383524768  |                  |              |            |   |
|               | 3                                     | 0                                     | 0.998207054                    |              |              |                  |              |            |   |
| PLD2          | ENSG00000129219.13                    | 0.526392438                           | 3                              | 3            | 0.422878577  |                  |              |            |   |
|               | Brain_Cerebellar_Hemisphere           | 0.913992772                           | Brain_Cerebellum               | 1.87693898   |              |                  |              |            |   |
|               | 0.123493366                           | 0.123493366                           | -0.801437217                   | 0.287584527  | -0.207285457 |                  |              |            |   |
|               | 0.55125742                            | 3                                     | 0                              | 0.998207054  |              |                  |              |            |   |
| LINC01150     | ENSG00000229671.1                     | 0.526430619                           | 1                              | 1            | 0.526430619  |                  |              |            |   |
|               | Brain_Substantia_nigra                | 0.526430619                           | Brain_Substantia_nigra         | 1            | 1            |                  |              |            |   |
|               | 1                                     | -0.633464098                          | -0.633464098                   | -0.633464098 | NA           | 1                | 0            |            |   |
|               | 0.998207054                           |                                       |                                |              |              |                  |              |            |   |
| SRMS          | ENSG00000125508.3                     | 0.526447735                           | 1                              | 1            | 0.526447735  | Brain_Cortex     |              |            |   |
|               | 0.526447735                           | Brain_Cortex                          | 1                              | 1            | 1            | 0.63343788       | 0.63343788   | 0.63343788 |   |
|               | NA                                    | 1                                     | 0                              | 0.998207054  |              |                  |              |            |   |
| MTERF4        | ENSG00000122085.16                    | 0.526475601                           | 11                             | 2            | 0.173003781  |                  |              |            |   |
|               | Brain_Nucleus_accumbens_basal_ganglia | 0.481853746                           |                                |              |              |                  |              |            |   |
|               | Brain_Anterior_cingulate_cortex_BA24  | 9.822531861                           | 0.001948223                    |              |              |                  |              |            |   |
|               | 0.480732273                           | 0.703324178                           | 1.36261531                     | 1.028588882  | 0.191889308  | 2                |              |            |   |
|               | 0                                     | 0.998207054                           |                                |              |              |                  |              |            |   |
| MOV10         | ENSG00000155363.18                    | 0.52651029                            | 1                              | 1            | 0.52651029   |                  |              |            |   |
|               | Brain_Nucleus_accumbens_basal_ganglia | 0.52651029                            |                                |              |              |                  |              |            |   |
|               | Brain_Nucleus_accumbens_basal_ganglia | 1                                     | 1                              | 1            | 0.633342064  |                  |              |            |   |
|               | 0.633342064                           | 0.633342064                           | NA                             | 1            | 0            | 0.998207054      |              |            |   |
| DOK4          | ENSG00000125170.10                    | 0.526703654                           | 1                              | 1            | 0.526703654  |                  |              |            |   |
|               | Brain_Spinal_cord_cervical_c-1        | 0.526703654                           | Brain_Spinal_cord_cervical_c-1 |              |              |                  |              |            |   |
|               | 1                                     | 1                                     | 1                              | 0.633045924  | 0.633045924  | 0.633045924      | NA           | 1          | 0 |

|               |                                       |                             |                             |              |                        |             |             |                  |  |  |
|---------------|---------------------------------------|-----------------------------|-----------------------------|--------------|------------------------|-------------|-------------|------------------|--|--|
| 0.998207054   |                                       |                             |                             |              |                        |             |             |                  |  |  |
| LTBR          | ENSG00000111321.10                    | 0.526760804                 | 13                          | 3            | 0.148723954            |             |             | Brain_Cortex     |  |  |
|               | 0.881828151                           | Brain_Putamen_basal_ganglia | 10.76571746                 |              | 0.003722054            |             |             |                  |  |  |
|               | 0.441510774                           | -1.444053404                | 0.479715076                 |              | -0.969057061           |             |             | 0.542442748      |  |  |
|               | 3                                     | 0                           | 0.998207054                 |              |                        |             |             |                  |  |  |
| FCGR2B        | ENSG00000072694.20                    | 0.526775736                 | 1                           | 1            | 0.526775736            |             |             |                  |  |  |
|               | Brain_Nucleus_accumbens_basal_ganglia | 0.526775736                 |                             |              |                        |             |             |                  |  |  |
|               | Brain_Nucleus_accumbens_basal_ganglia | 1                           | 1                           | 1            | -0.632935543           |             |             |                  |  |  |
|               | -0.632935543                          | -0.632935543                | NA                          | 1            | 0                      | 0.998207054 |             |                  |  |  |
| CREBL2        | ENSG00000111269.2                     | 0.526820651                 | 1                           | 1            | 0.526820651            |             |             |                  |  |  |
|               | Brain_Substantia_nigra                | 0.526820651                 |                             |              | Brain_Substantia_nigra | 1           | 1           |                  |  |  |
|               | 1                                     | -0.632866768                | -0.632866768                | -0.632866768 | NA                     | 1           | 0           |                  |  |  |
|               | 0.998207054                           |                             |                             |              |                        |             |             |                  |  |  |
| RP11-527H14.4 | ENSG00000263618.5                     | 0.526887041                 | 1                           | 1            | 0.526887041            |             |             |                  |  |  |
|               | Brain_Nucleus_accumbens_basal_ganglia | 0.526887041                 |                             |              |                        |             |             |                  |  |  |
|               | Brain_Nucleus_accumbens_basal_ganglia | 1                           | 1                           | 1            | -0.632765114           |             |             |                  |  |  |
|               | -0.632765114                          | -0.632765114                | NA                          | 1            | 0                      | 0.998207054 |             |                  |  |  |
| PON2          | ENSG00000105854.12                    | 0.526910848                 | 1                           | 1            | 0.526910848            |             |             | Brain_Cerebellum |  |  |
|               | 0.526910848                           | Brain_Cerebellum            | 1                           | 1            | -0.632728664           |             |             | -0.632728664     |  |  |
|               | -0.632728664                          | NA                          | 1                           | 0            | 0.998207054            |             |             |                  |  |  |
| TCIRG1        | ENSG00000110719.9                     | 0.52695502                  | 1                           | 1            | 0.52695502             |             |             |                  |  |  |
|               | Brain_Frontal_Cortex_BA9              | 0.52695502                  | Brain_Frontal_Cortex_BA9    | 1            | 1                      | 1           |             |                  |  |  |
|               | 0.632661035                           | 0.632661035                 | 0.632661035                 | NA           | 1                      | 0           | 0.998207054 |                  |  |  |
| EAF2          | ENSG00000145088.8                     | 0.526991549                 | 4                           | 4            | 0.159138766            |             |             |                  |  |  |
|               | Brain_Hippocampus                     | 0.901713171                 | Brain_Amygdala              | 1.888629226  |                        |             |             |                  |  |  |
|               | 0.230067248                           | 0.230067248                 | 0.123497479                 | 1.407974012  | 0.891541989            |             |             |                  |  |  |
|               | 0.598410933                           | 4                           | 0                           | 0.998207054  |                        |             |             |                  |  |  |
| PLGLB2        | ENSG00000125551.18                    | 0.527036002                 | 2                           | 2            | 0.282804409            |             |             |                  |  |  |
|               | Brain_Cerebellum                      | 0.865539944                 | Brain_Cerebellar_Hemisphere | 1.453800819  |                        |             |             |                  |  |  |
|               | 0.546199181                           | 0.546199181                 | 0.169326358                 | 1.074040771  | 0.621683564            |             |             |                  |  |  |
|               | 0.639729696                           | 2                           | 0                           | 0.998207054  |                        |             |             |                  |  |  |
| CLEC7A        | ENSG00000172243.17                    | 0.527133874                 | 2                           | 2            | 0.257982868            |             |             |                  |  |  |
|               | Brain_Hypothalamus                    | 0.516467388                 | Brain_Hippocampus           | 1.549607693  |                        |             |             |                  |  |  |
|               | 0.450392307                           | 0.450392307                 | -1.131171611                | -0.648800416 | -0.889986014           |             |             |                  |  |  |
|               | 0.341087943                           | 2                           | 0                           | 0.998207054  |                        |             |             |                  |  |  |
| PGAM1         | ENSG00000171314.8                     | 0.527180159                 | 9                           | 3            | 0.410759645            |             |             | Brain_Cortex     |  |  |
|               | 0.932101682                           | Brain_Frontal_Cortex_BA9    | 7.556906289                 | 0.010063382  |                        |             |             |                  |  |  |
|               | 0.256732714                           | -0.822557554                | 0.507170567                 | -0.142603229 | 0.42008677             | 3           |             |                  |  |  |
|               | 0                                     | 0.998207054                 |                             |              |                        |             |             |                  |  |  |
| ACPP          | ENSG00000014257.15                    | 0.527188422                 | 5                           | 2            | 0.574854536            |             |             |                  |  |  |
|               | Brain_Nucleus_accumbens_basal_ganglia | 0.80038814                  | Brain_Amygdala              | 4.546010034  |                        |             |             |                  |  |  |
|               | 0.009575074                           | 0.313884098                 | -0.56091639                 | 0.252844809  | -0.309903506           |             |             |                  |  |  |
|               | 0.332280089                           | 2                           | 0                           | 0.998207054  |                        |             |             |                  |  |  |
| METAP1D       | ENSG00000172878.13                    | 0.527521379                 | 5                           | 5            | 0.189914376            |             |             |                  |  |  |
|               | Brain_Cortex                          | 0.942374583                 | Brain_Putamen_basal_ganglia | 2.384319617  |                        |             |             |                  |  |  |
|               | 0.135770864                           | 0.135770864                 | -0.466433705                | 1.310832451  | 0.538514026            |             |             |                  |  |  |
|               | 0.778262579                           | 5                           | 0                           | 0.998207054  |                        |             |             |                  |  |  |
| C15orf59-AS1  | ENSG00000260469.2                     | 0.527528447                 | 9                           | 6            | 0.298009109            |             |             |                  |  |  |
|               | Brain_Spinal_cord_cervical_c-1        | 0.962895843                 |                             |              |                        |             |             |                  |  |  |
|               | Brain_Nucleus_accumbens_basal_ganglia | 5.855733                    | 0.006090937                 | 0.274156895  |                        |             |             |                  |  |  |
|               | -0.812703513                          | 1.040712264                 | 0.208421761                 | 0.633864401  | 6                      | 0           |             |                  |  |  |
|               | 0.998207054                           |                             |                             |              |                        |             |             |                  |  |  |
| TRAM1L1       | ENSG00000174599.5                     | 0.527533969                 | 1                           | 1            | 0.527533969            |             |             |                  |  |  |
|               | Brain_Cerebellum                      | 0.527533969                 | Brain_Cerebellum            | 1            | 1                      | 1           | 0.631774913 |                  |  |  |
|               | 0.631774913                           | 0.631774913                 | NA                          | 1            | 0                      | 0.998207054 |             |                  |  |  |
| CCDC124       | ENSG00000007080.10                    | 0.527580179                 | 4                           | 4            | 0.127966461            |             |             |                  |  |  |
|               | Brain_Cortex                          | 0.975375298                 | Brain_Cerebellum            | 1.077024535  | 0.93318363             |             |             |                  |  |  |
|               | 0.93318363                            | 0.030867388                 | 1.522170116                 | 0.738120797  | 0.631299512            | 4           |             |                  |  |  |
|               | 0                                     | 0.998207054                 |                             |              |                        |             |             |                  |  |  |
| RP3-355L5.5   | ENSG00000272102.1                     | 0.527602419                 | 1                           | 1            | 0.527602419            |             |             |                  |  |  |
|               | Brain_Putamen_basal_ganglia           | 0.527602419                 | Brain_Putamen_basal_ganglia | 1            | 1                      |             |             |                  |  |  |
|               | 1                                     | 0.631670177                 | 0.631670177                 | 0.631670177  | NA                     | 1           | 0           |                  |  |  |

0.998207054

GIMAP1 ENSG00000213203.2 0.527618807 2 2 0.291340066  
 Brain\_Cortex 0.727374901 Brain\_Anterior\_cingulate\_cortex\_BA24  
 1.054401174 0.945598826 0.945598826 -0.348619613 1.055186438  
 0.353283412 0.992640778 2 0 0.998207054

CAPN5 ENSG00000149260.15 0.52762964 4 4 0.189537308 Brain\_Cerebellum  
 0.653904254 Brain\_Cortex 1.099498708 0.910449058 0.910449058  
 -0.87006877 1.311949102 -0.156450577 0.99413536 4 0  
 0.998207054

CAPN12 ENSG00000182472.8 0.52774176 4 4 0.152945077  
 Brain\_Putamen\_basal\_ganglia 0.976589496 Brain\_Nucleus\_accumbens\_basal\_ganglia  
 1.848160953 0.20633389 0.20633389 -1.429205849 -0.029344926  
 -0.800831754 0.577435391 4 0 0.998207054

RCOR1 ENSG00000089902.9 0.527884324 1 1 0.527884324  
 Brain\_Nucleus\_accumbens\_basal\_ganglia 0.527884324  
 Brain\_Nucleus\_accumbens\_basal\_ganglia 1 1 1 -0.63123891  
 -0.63123891 -0.63123891 NA 1 0 0.998207054

RPSA ENSG00000168028.13 0.527888248 9 4 0.208109737  
 Brain\_Frontal\_Cortex\_BA9 0.9978552 Brain\_Cerebellar\_Hemisphere 6.467818617  
 0.011713372 0.393051869 -1.258780192 1.134409235 -0.011145604  
 0.65369236 4 0 0.998207054

KCNJ14 ENSG00000182324.6 0.527981957 5 4 0.30598239  
 Brain\_Substantia\_nigra 0.994406759 Brain\_Caudate\_basal\_ganglia 3.90474191  
 0.071705027 0.143756098 -0.111029726 1.023688583 0.504198613  
 0.524118807 4 0 0.998207054

CCDC96 ENSG00000173013.5 0.528022752 2 2 0.315103831  
 Brain\_Cerebellar\_Hemisphere 0.66874395 Brain\_Nucleus\_accumbens\_basal\_ganglia  
 1.087497097 0.912502903 0.912502903 -0.427872499 1.004570245  
 0.288348873 1.012889978 2 0 0.998207054

RETSAT ENSG00000042445.13 0.528309503 7 6 0.034620426  
 Brain\_Caudate\_basal\_ganglia 0.865379763 Brain\_Spinal\_cord\_cervical\_c-1  
 4.502734447 0.023901939 0.164379018 -2.112770385 -0.169530018  
 -1.424211257 0.69757629 6 0 0.998207054

FAM210B ENSG00000124098.9 0.528774235 4 3 0.346204675  
 Brain\_Cerebellar\_Hemisphere 0.940908584 Brain\_Caudate\_basal\_ganglia  
 2.347839688 0.050405578 0.684808889 -0.941976494 0.155145036  
 -0.447512108 0.57126256 3 0 0.998207054

NSRP1 ENSG00000126653.17 0.528781816 2 2 0.444757061  
 Brain\_Cerebellar\_Hemisphere 0.449993983 Brain\_Hypothalamus 1.093945101  
 0.906054899 0.906054899 -0.764184904 0.755425058 -0.004379923  
 1.074526509 2 0 0.998207054

GIN54 ENSG00000147536.11 0.528927474 1 1 0.528927474  
 Brain\_Putamen\_basal\_ganglia 0.528927474 Brain\_Putamen\_basal\_ganglia 1 1  
 1 0.629644084 0.629644084 0.629644084 NA 1 0  
 0.998207054

TMEM231 ENSG00000205084.10 0.528958296 4 4 0.198908815  
 Brain\_Cerebellum 0.639092699 Brain\_Anterior\_cingulate\_cortex\_BA24  
 2.367191491 0.262280937 0.262280937 -0.468967734 1.284666599  
 0.73903816 0.811839091 4 0 0.998207054

FAM49B ENSG00000153310.19 0.528980896 3 3 0.237253804  
 Brain\_Hippocampus 0.704437616 Brain\_Nucleus\_accumbens\_basal\_ganglia  
 1.237026146 0.749918551 0.749918551 -1.181878778 -0.379337015  
 -0.694331476 0.428192927 3 0 0.998207054

DCP1B ENSG00000151065.13 0.5290995 1 1 0.5290995 Brain\_Cortex 0.5290995  
 Brain\_Cortex 1 1 1 0.629381236 0.629381236 0.629381236  
 NA 1 0 0.998207054

UTS2R ENSG00000181408.3 0.529102263 1 1 0.529102263 Brain\_Amygdala  
 0.529102263 Brain\_Amygdala 1 1 1 0.629377013 0.629377013  
 0.629377013 NA 1 0 0.998207054

ZNF101 ENSG00000181896.11 0.529180442 8 5 0.31439293  
 Brain\_Anterior\_cingulate\_cortex\_BA24 0.824835356 Brain\_Putamen\_basal\_ganglia  
 6.264179897 0.035878829 0.223507122 -1.006047065 1.002999222



|               |                                       |                                       |                                      |              |                             |                  |              |  |  |
|---------------|---------------------------------------|---------------------------------------|--------------------------------------|--------------|-----------------------------|------------------|--------------|--|--|
|               | 0.353301471                           | 0.623142363                           | 5                                    | 0            | 0.998207054                 |                  |              |  |  |
| AURKC         | ENSG00000105146.12                    | 0.529226897                           | 11                                   | 4            | 0.186275356                 |                  |              |  |  |
|               | Brain_Spinal_cord_cervical_c-1        | 0.913632138                           |                                      |              | Brain_Cerebellar_Hemisphere |                  |              |  |  |
|               | 8.338810227                           | 0.006567703                           | 0.377080827                          |              | -0.108458324                | 1.321678125      |              |  |  |
|               | 0.58847828                            | 0.398546037                           | 4                                    | 0            | 0.998207054                 |                  |              |  |  |
| IL7R          | ENSG00000168685.14                    | 0.529249257                           | 1                                    | 1            | 0.529249257                 |                  |              |  |  |
|               | Brain_Substantia_nigra                | 0.529249257                           |                                      |              | Brain_Substantia_nigra      | 1                | 1            |  |  |
|               | 1                                     | -0.629152447                          | -0.629152447                         | -0.629152447 | NA                          | 1                | 0            |  |  |
|               | 0.998207054                           |                                       |                                      |              |                             |                  |              |  |  |
| PMVK          | ENSG00000163344.5                     | 0.529307404                           | 1                                    | 1            | 0.529307404                 |                  |              |  |  |
|               | Brain_Nucleus_accumbens_basal_ganglia | 0.529307404                           |                                      |              |                             |                  |              |  |  |
|               | Brain_Nucleus_accumbens_basal_ganglia | 1                                     | 1                                    | 1            | -0.629063624                |                  |              |  |  |
|               | -0.629063624                          | -0.629063624                          | NA                                   | 1            | 0                           | 0.998207054      |              |  |  |
| LAMP5         | ENSG00000125869.9                     | 0.529328758                           | 2                                    | 2            | 0.317708787                 | Brain_Cerebellum |              |  |  |
|               | 0.569728163                           | Brain_Cerebellar_Hemisphere           | 1.045646257                          |              | 0.954353743                 |                  |              |  |  |
|               | 0.954353743                           | -0.568451893                          | 0.999177348                          |              | 0.215362728                 | 1.108481266      |              |  |  |
|               | 2                                     | 0                                     | 0.998207054                          |              |                             |                  |              |  |  |
| CDYL          | ENSG00000153046.17                    | 0.529431375                           | 1                                    | 1            | 0.529431375                 | Brain_Cortex     |              |  |  |
|               | 0.529431375                           | Brain_Cortex                          | 1                                    | 1            | 1                           | -0.628874265     | -0.628874265 |  |  |
|               | -0.628874265                          | NA                                    | 1                                    | 0            | 0.998207054                 |                  |              |  |  |
| RP11-381K20.4 | ENSG00000270697.1                     | 0.529445687                           | 1                                    | 1            | 0.529445687                 |                  |              |  |  |
|               | Brain_Hippocampus                     | 0.529445687                           | Brain_Hippocampus                    | 1            | 1                           | 1                |              |  |  |
|               | -0.628852407                          | -0.628852407                          | -0.628852407                         | NA           | 1                           | 0                | 0.998207054  |  |  |
| AP003774.6    | ENSG00000231680.1                     | 0.529449717                           | 7                                    | 5            | 0.16290987                  | Brain_Cerebellum |              |  |  |
|               | 0.950487952                           | Brain_Nucleus_accumbens_basal_ganglia | 3.512119831                          |              |                             |                  |              |  |  |
|               | 0.004645494                           | 0.437533236                           | -1.395351496                         |              | -0.062094028                | -0.721544889     |              |  |  |
|               | 0.581532277                           | 5                                     | 0                                    | 0.998207054  |                             |                  |              |  |  |
| ICA1L         | ENSG00000163596.16                    | 0.529453941                           | 3                                    | 3            | 0.476974415                 |                  |              |  |  |
|               | Brain_Caudate_basal_ganglia           | 0.734055989                           | Brain_Frontal_Cortex_BA9             |              |                             |                  |              |  |  |
|               | 2.220252124                           | 0.228375188                           | 0.228375188                          |              | -0.711177233                | 0.702187854      |              |  |  |
|               | 0.11024859                            | 0.734096913                           | 3                                    | 0            | 0.998207054                 |                  |              |  |  |
| RPL22L1       | ENSG00000163584.17                    | 0.529467824                           | 3                                    | 3            | 0.182893761                 |                  |              |  |  |
|               | Brain_Cerebellum                      | 0.702662967                           | Brain_Amygdala                       | 1.386771719  | 0.60354244                  |                  |              |  |  |
|               | 0.60354244                            | -0.381728219                          | 1.33189784                           | 0.505528413  | 0.858434043                 | 3                | 0            |  |  |
|               | 0.998207054                           |                                       |                                      |              |                             |                  |              |  |  |
| DGKA          | ENSG00000065357.19                    | 0.529728566                           | 2                                    | 2            | 0.296635277                 |                  |              |  |  |
|               | Brain_Nucleus_accumbens_basal_ganglia | 0.390357097                           | Brain_Cerebellar_Hemisphere          |              |                             |                  |              |  |  |
|               | 1.460702861                           | 0.539297139                           | 0.539297139                          |              | 0.858969947                 | 1.043676087      |              |  |  |
|               | 0.951323017                           | 0.130606964                           | 2                                    | 0            | 0.998207054                 |                  |              |  |  |
| TMEM229B      | ENSG00000198133.8                     | 0.52973504                            | 2                                    | 2            | 0.357283496                 |                  |              |  |  |
|               | Brain_Nucleus_accumbens_basal_ganglia | 0.471171852                           |                                      |              |                             |                  |              |  |  |
|               | Brain_Anterior_cingulate_cortex_BA24  | 1.078125123                           | 0.921874877                          |              |                             |                  |              |  |  |
|               | 0.921874877                           | -0.920553678                          | 0.720573681                          |              | -0.099989999                | 1.160452284      |              |  |  |
|               | 2                                     | 0                                     | 0.998207054                          |              |                             |                  |              |  |  |
| PDCL3         | ENSG00000115539.13                    | 0.529753177                           | 2                                    | 2            | 0.259659947                 | Brain_Cerebellum |              |  |  |
|               | 0.851554708                           | Brain_Spinal_cord_cervical_c-1        | 1.175549282                          |              | 0.824450718                 |                  |              |  |  |
|               | 0.824450718                           | -0.1871351                            | 1.127195229                          |              | 0.470030064                 | 0.929371888      | 2            |  |  |
|               | 0                                     | 0.998207054                           |                                      |              |                             |                  |              |  |  |
| EIF2A         | ENSG00000144895.11                    | 0.529756017                           | 12                                   | 1            | 0.381940692                 |                  |              |  |  |
|               | Brain_Frontal_Cortex_BA9              | 0.727845519                           | Brain_Anterior_cingulate_cortex_BA24 |              |                             |                  |              |  |  |
|               | 11.59239012                           | 1.57E-05                              | 11.59239012                          |              | -0.874326096                | -0.347992895     |              |  |  |
|               | -0.618322965                          | 0.137350618                           | 1                                    | 0            | 0.998207054                 |                  |              |  |  |
| COX11         | ENSG00000166260.10                    | 0.529780597                           | 12                                   | 2            | 0.212304959                 |                  |              |  |  |
|               | Brain_Frontal_Cortex_BA9              | 0.48203009                            | Brain_Cerebellar_Hemisphere          | 11.01093685  |                             |                  |              |  |  |
|               | 0.000813452                           | 0.698892712                           | 0.703041175                          |              | 1.247252416                 | 1.073663894      |              |  |  |
|               | 0.141594793                           | 2                                     | 0                                    | 0.998207054  |                             |                  |              |  |  |
| NOL8          | ENSG00000198000.11                    | 0.529804207                           | 1                                    | 1            | 0.529804207                 |                  |              |  |  |
|               | Brain_Nucleus_accumbens_basal_ganglia | 0.529804207                           |                                      |              |                             |                  |              |  |  |
|               | Brain_Nucleus_accumbens_basal_ganglia | 1                                     | 1                                    | 1            | 0.628304923                 |                  |              |  |  |
|               | 0.628304923                           | 0.628304923                           | NA                                   | 1            | 0                           | 0.998207054      |              |  |  |
| FLG2          | ENSG00000143520.6                     | 0.529945843                           | 1                                    | 1            | 0.529945843                 |                  |              |  |  |
|               | Brain_Frontal_Cortex_BA9              | 0.529945843                           | Brain_Frontal_Cortex_BA9             | 1            | 1                           |                  |              |  |  |

|              |                                       |                  |              |                                       |              |              |              |
|--------------|---------------------------------------|------------------|--------------|---------------------------------------|--------------|--------------|--------------|
|              | 1                                     | -0.628088687     | -0.628088687 | -0.628088687                          | NA           | 1            | 0            |
|              |                                       | 0.998207054      |              |                                       |              |              |              |
| GCDH         | ENSG00000105607.12                    | 0.529946056      | 12           | 6                                     | 0.161190472  |              |              |
|              | Brain_Hypothalamus                    | 0.989666938      |              | Brain_Substantia_nigra                |              | 7.368820805  |              |
|              | 3.70E-17                              | 0.479942292      | -0.418632624 | 1.401078928                           |              | 0.21097782   | 0.51443542   |
|              | 6                                     | 0                | 0.998207054  |                                       |              |              |              |
| B4GAT1       | ENSG00000174684.6                     | 0.529958892      | 1            | 1                                     | 0.529958892  |              |              |
|              | Brain_Cortex                          | 0.529958892      |              | Brain_Cortex                          | 1            | 1            | -0.628068768 |
|              | -0.628068768                          | -0.628068768     | NA           | 1                                     | 0            | 0.998207054  |              |
| PSORS1C1     | ENSG00000204540.10                    | 0.530087101      | 12           | 11                                    | 0.012320844  |              |              |
|              | Brain_Anterior_cingulate_cortex_BA24  | 0.992486894      |              | Brain_Cerebellar_Hemisphere           |              |              |              |
|              | 3.945574958                           | 0.115982839      | 0.263018186  | -0.720865387                          |              | 2.502819269  |              |
|              | 0.194332553                           | 0.846553315      | 11           | 0                                     | 0.998207054  |              |              |
| WDR90        | ENSG00000161996.18                    | 0.530141203      | 5            | 5                                     | 0.345861274  |              |              |
|              | Brain_Caudate_basal_ganglia           | 0.986910694      |              | Brain_Hippocampus                     |              | 2.556328211  |              |
|              | 0.095869952                           | 0.095869952      | -0.942647425 | 0.016405748                           |              | -0.463684099 |              |
|              | 0.428419721                           | 5                | 0            | 0.998207054                           |              |              |              |
| ZNF143       | ENSG00000166478.9                     | 0.530208291      | 8            | 6                                     | 0.066413766  |              |              |
|              | Brain_Amygdala                        | 0.993911876      |              | Brain_Cerebellar_Hemisphere           | 4.00636946   |              |              |
|              | 0.020702322                           | 0.197523351      | -0.258367691 | 1.83562075                            | 1.080284768  |              |              |
|              | 0.850741467                           | 6                | 0            | 0.998207054                           |              |              |              |
| GOLGA6L9     | ENSG00000197978.9                     | 0.530331765      | 12           | 3                                     | 0.118023913  |              |              |
|              | Brain_Nucleus_accumbens_basal_ganglia | 0.911588751      |              | Brain_Cortex                          |              |              |              |
|              | 9.776732339                           | 0.016191453      | 0.438755047  | -1.563121952                          | 0.111034799  |              |              |
|              | -0.878955791                          | 0.464614473      | 3            | 0                                     | 0.998207054  |              |              |
| RP11-46H11.3 | ENSG00000250790.4                     | 0.530387517      | 7            | 5                                     | 0.246917529  |              |              |
|              | Brain_Substantia_nigra                | 0.953834818      |              | Brain_Frontal_Cortex_BA9              |              |              |              |
|              | 4.853987804                           | 0.027417429      | 0.269614576  | -1.157868928                          | 0.863439305  |              |              |
|              | 0.033553154                           | 0.633548419      | 5            | 0                                     | 0.998207054  |              |              |
| UBE4A        | ENSG00000110344.9                     | 0.530398195      | 2            | 2                                     | 0.320900161  |              |              |
|              | Brain_Frontal_Cortex_BA9              | 0.582611905      |              | Brain_Cerebellar_Hemisphere           |              |              |              |
|              | 1.017830944                           | 0.982169056      | 0.982169056  | -0.992609772                          | 0.549573549  |              |              |
|              | -0.221518111                          | 1.090488284      | 2            | 0                                     | 0.998207054  |              |              |
| LTBP2        | ENSG00000119681.11                    | 0.530423803      | 1            | 1                                     | 0.530423803  |              |              |
|              | Brain_Putamen_basal_ganglia           | 0.530423803      |              | Brain_Putamen_basal_ganglia           | 1            | 1            |              |
|              | 1                                     | -0.627359205     | -0.627359205 | -0.627359205                          | NA           | 1            | 0            |
|              | 0.998207054                           |                  |              |                                       |              |              |              |
| TEFM         | ENSG00000172171.10                    | 0.530470397      | 5            | 4                                     | 0.388361706  |              |              |
|              | Brain_Cerebellar_Hemisphere           | 0.820792582      |              | Brain_Nucleus_accumbens_basal_ganglia |              |              |              |
|              | 3.20909852                            | 0.0789549        | 0.198605567  | -0.550865369                          | 0.862592226  |              |              |
|              | 0.271246561                           | 0.627027922      | 4            | 0                                     | 0.998207054  |              |              |
| ARL6IP1      | ENSG00000170540.14                    | 0.53060967       | 3            | 2                                     | 0.253504722  |              | Brain_Cortex |
|              | 0.497464517                           | Brain_Cerebellum | 2.648092807  | 0.03904053                            | 0.312866663  |              |              |
|              | -1.141878029                          | 0.91651261       | 0.15103971   | 1.126006905                           | 2            | 0            | 0.998207054  |
| C6orf62      | ENSG00000112308.12                    | 0.530750384      | 6            | 3                                     | 0.154641274  |              |              |
|              | Brain_Cerebellum                      | 0.696324623      |              | Brain_Caudate_basal_ganglia           | 4.848042447  |              |              |
|              | 0.003088726                           | 0.22205102       | -1.423327376 | -0.390286611                          | -0.904280038 |              |              |
|              | 0.43204283                            | 3                | 0            | 0.998207054                           |              |              |              |
| PRSS55       | ENSG00000184647.10                    | 0.530812831      | 8            | 3                                     | 0.170582875  |              |              |
|              | Brain_Cerebellum                      | 0.609390819      |              | Brain_Anterior_cingulate_cortex_BA24  |              |              |              |
|              | 6.958480058                           | 0.001211358      | 0.270482176  | 0.510943216                           | 1.370333326  |              |              |
|              | 1.104501781                           | 0.307349935      | 3            | 0                                     | 0.998207054  |              |              |
| AC093627.10  | ENSG00000240859.1                     | 0.530871286      | 8            | 7                                     | 0.216273509  |              |              |
|              | Brain_Anterior_cingulate_cortex_BA24  | 0.935276272      |              | Brain_Frontal_Cortex_BA9              |              |              |              |
|              | 3.518345474                           | 7.06E-17         | 0.19184998   | -1.236497998                          | 0.76447739   | -0.705395929 |              |
|              | 0.742758752                           | 7                | 0            | 0.998207054                           |              |              |              |
| RP11-47A8.5  | ENSG00000272933.1                     | 0.530961773      | 4            | 4                                     | 0.43682247   |              |              |
|              | Brain_Anterior_cingulate_cortex_BA24  | 0.74137993       |              | Brain_Spinal_cord_cervical_c-1        |              |              |              |
|              | 2.447313658                           | 0.203645135      | 0.203645135  | -0.354356531                          | 0.77757014   |              |              |
|              | 0.195048969                           | 0.621531987      | 4            | 0                                     | 0.998207054  |              |              |
| KCNN4        | ENSG00000104783.11                    | 0.53103127       | 13           | 5                                     | 0.042553438  |              |              |
|              | Brain_Frontal_Cortex_BA9              | 0.744515146      |              | Brain_Spinal_cord_cervical_c-1        |              |              |              |

|                |                                      |                                       |                                       |              |                  |
|----------------|--------------------------------------|---------------------------------------|---------------------------------------|--------------|------------------|
|                | 7.505731874                          | 0.006441308                           | 0.388540696                           | -2.028066725 | 0.325880002      |
|                | -1.122335504                         | 0.590275958                           | 5 0                                   | 0.998207054  |                  |
| PARD3B         | ENSG00000116117.17                   | 0.53107428                            | 1 1                                   | 0.53107428   |                  |
|                | Brain_Spinal_cord_cervical_c-1       | 0.53107428                            | Brain_Spinal_cord_cervical_c-1        | 1 1          |                  |
|                | 1 1                                  | -0.626366954                          | -0.626366954                          | -0.626366954 | NA 1 0           |
|                | 0.998207054                          |                                       |                                       |              |                  |
| PROCA1         | ENSG00000167525.13                   | 0.531077758                           | 11 2                                  | 0.117725738  |                  |
|                | Brain_Caudate_basal_ganglia          | 0.683142019                           | Brain_Cortex                          | 8.969270537  |                  |
|                | 0.007792538                          | 1.146181631                           | 0.408179335                           | 1.564391149  | 1.011817832      |
|                | 0.286998928                          | 2 0                                   | 0.998207054                           |              |                  |
| CALU           | ENSG00000128595.16                   | 0.531155313                           | 4 4                                   | 0.25666933   | Brain_Cortex     |
|                | 0.794236885                          | Brain_Cerebellum                      | 1.403171318                           | 0.64677067   | 0.64677067       |
|                | -1.134298567                         | 0.601393553                           | -0.476676756                          | 0.825871833  | 4 0              |
|                | 0.998207054                          |                                       |                                       |              |                  |
| IFI16          | ENSG00000163565.18                   | 0.531156858                           | 1 1                                   | 0.531156858  | Brain_Cortex     |
|                | 0.531156858                          | Brain_Cortex                          | 1 1 1                                 | 0.626241031  | 0.626241031      |
|                | 0.626241031                          | NA 1 0                                | 0.998207054                           |              |                  |
| VWA1           | ENSG00000179403.11                   | 0.531171448                           | 1 1                                   | 0.531171448  |                  |
|                | Brain_Cerebellar_Hemisphere          | 0.531171448                           | Brain_Cerebellar_Hemisphere           | 1 1          |                  |
|                | 1 1                                  | 0.626218784                           | 0.626218784                           | 0.626218784  | NA 1 0           |
|                | 0.998207054                          |                                       |                                       |              |                  |
| RAB8A          | ENSG00000167461.11                   | 0.53118742                            | 2 2                                   | 0.274494153  | Brain_Cortex     |
|                | 0.742579085                          | Brain_Cerebellum                      | 1.056889664                           | 0.943110336  | 0.943110336      |
|                | 0.328439892                          | 1.092771465                           | 0.710605679                           | 0.540464039  | 2 0              |
|                | 0.998207054                          |                                       |                                       |              |                  |
| RP11-177J6.1   | ENSG00000273257.1                    | 0.531303814                           | 3 3                                   | 0.171397833  |                  |
|                | Brain_Putamen_basal_ganglia          | 0.741065802                           | Brain_Nucleus_accumbens_basal_ganglia |              |                  |
|                | 1.657028524                          | 0.352289553                           | 0.352289553                           | -0.330442277 | 1.367726081      |
|                | 0.742564869                          | 0.933471172                           | 3 0                                   | 0.998207054  |                  |
| RP11-1017G21.6 | ENSG00000272444.1                    | 0.531371469                           | 8 7                                   | 0.212193961  |                  |
|                | Brain_Cortex                         | 0.884204946                           | Brain_Substantia_nigra                | 3.413274577  |                  |
|                | 0.111551503                          | 0.254413975                           | -0.88833725                           | 1.247555288  | 0.175150565      |
|                | 0.709325127                          | 7 0                                   | 0.998207054                           |              |                  |
| DNA2           | ENSG00000138346.14                   | 0.531477805                           | 13 1                                  | 0.228973849  |                  |
|                | Brain_Anterior_cingulate_cortex_BA24 | 0.831793793                           |                                       |              |                  |
|                | Brain_Spinal_cord_cervical_c-1       | 12.36771987                           | 0.000487174                           | 12.36771987  |                  |
|                | -1.203006388                         | -0.212401529                          | -0.611690568                          | 0.228707306  | 1 0              |
|                | 0.998207054                          |                                       |                                       |              |                  |
| TTC34          | ENSG00000215912.12                   | 0.53153649                            | 2 1                                   | 0.508797488  | Brain_Cerebellum |
|                | 0.562460169                          | Brain_Nucleus_accumbens_basal_ganglia | 1.963654772                           |              |                  |
|                | 0.036345228                          | 1.963654772                           | 0.579191199                           | 0.66071128   | 0.619951239      |
|                | 0.057643403                          | 1 0                                   | 0.998207054                           |              |                  |
| PLA2G12A       | ENSG00000123739.10                   | 0.531569587                           | 10 8                                  | 0.029919531  |                  |
|                | Brain_Frontal_Cortex_BA9             | 0.903070688                           | Brain_Caudate_basal_ganglia           |              |                  |
|                | 5.278367072                          | 0.013829802                           | 0.236798174                           | -2.171154029 | 0.366205496      |
|                | -0.318177877                         | 0.728581091                           | 8 0                                   | 0.998207054  |                  |
| C7orf50        | ENSG00000146540.14                   | 0.531574328                           | 10 4                                  | 0.225809651  |                  |
|                | Brain_Cortex                         | 0.935939713                           | Brain_Frontal_Cortex_BA9              | 8.168359844  |                  |
|                | 0.012484213                          | 0.296082033                           | -0.122223068                          | 1.211223782  | 0.623170812      |
|                | 0.436515806                          | 4 0                                   | 0.998207054                           |              |                  |
| LDLRAD3        | ENSG00000179241.12                   | 0.531585604                           | 3 3                                   | 0.15701275   |                  |
|                | Brain_Putamen_basal_ganglia          | 0.986408841                           | Brain_Cerebellum                      | 1.292694256  |                  |
|                | 0.712406305                          | 0.712406305                           | -1.415190155                          | 0.389050562  | -0.336368259     |
|                | 0.952623452                          | 3 0                                   | 0.998207054                           |              |                  |
| NOL9           | ENSG00000162408.10                   | 0.531592563                           | 1 1                                   | 0.531592563  |                  |
|                | Brain_Cerebellar_Hemisphere          | 0.531592563                           | Brain_Cerebellar_Hemisphere           | 1 1          |                  |
|                | 1 1                                  | -0.625576794                          | -0.625576794                          | -0.625576794 | NA 1 0           |
|                | 0.998207054                          |                                       |                                       |              |                  |
| RP11-458F8.4   | ENSG00000273142.1                    | 0.531890742                           | 13 3                                  | 0.192453521  |                  |
|                | Brain_Substantia_nigra               | 0.914553                              | Brain_Spinal_cord_cervical_c-1        |              |                  |
|                | 10.41037172                          | 0.018736496                           | 0.531193489                           | -0.340090621 | 1.303355209      |
|                | 0.521970932                          | 0.501518541                           | 3 0                                   | 0.998207054  |                  |

|          |                                       |                                       |                                |             |                                |                             |              |   |   |
|----------|---------------------------------------|---------------------------------------|--------------------------------|-------------|--------------------------------|-----------------------------|--------------|---|---|
| EXT2     | ENSG00000151348.13                    | 0.53190453                            | 8                              | 7           | 0.09229                        | Brain_Putamen_basal_ganglia |              |   |   |
|          | 0.864405894                           | Brain_Frontal_Cortex_BA9              |                                |             | 3.293003532                    | 0.044897084                 |              |   |   |
|          | 0.238544517                           | -1.683439717                          | 1.068790051                    |             | -0.057269502                   | 0.932644602                 |              |   |   |
|          | 7                                     | 0                                     | 0.998207054                    |             |                                |                             |              |   |   |
| MITD1    | ENSG00000158411.11                    | 0.53193362                            | 8                              | 4           | 0.46987089                     |                             |              |   |   |
|          | Brain_Anterior_cingulate_cortex_BA24  | 0.964105366                           |                                |             | Brain_Cerebellum               |                             |              |   |   |
|          | 6.232744534                           | 0.016103898                           | 0.260556385                    |             | -0.703362346                   | 0.722689139                 |              |   |   |
|          | -0.288263866                          | 0.479507854                           | 4                              | 0           | 0.998207054                    |                             |              |   |   |
| ASPA     | ENSG00000108381.10                    | 0.532025256                           | 3                              | 3           | 0.264646142                    | Brain_Cerebellum            |              |   |   |
|          | 0.672101447                           | Brain_Amygdala                        | 1.182692807                    |             | 0.821134962                    | 0.821134962                 |              |   |   |
|          | -0.423265658                          | 1.115476829                           | 0.482454975                    |             | 0.804801577                    | 3                           | 0            |   |   |
|          | 0.998207054                           |                                       |                                |             |                                |                             |              |   |   |
| LNX2     | ENSG00000139517.7                     | 0.532026272                           | 3                              | 3           | 0.562275221                    |                             |              |   |   |
|          | Brain_Cerebellar_Hemisphere           | 0.952777389                           |                                |             | Brain_Spinal_cord_cervical_c-1 |                             |              |   |   |
|          | 1.90422164                            | 0.099833973                           | 0.099833973                    |             | -0.070500838                   | 0.579465349                 |              |   |   |
|          | 0.189394624                           | 0.34398141                            | 3                              | 0           | 0.998207054                    |                             |              |   |   |
| ZNF608   | ENSG00000168916.15                    | 0.532070346                           | 1                              | 1           | 0.532070346                    |                             |              |   |   |
|          | Brain_Cortex                          | 0.532070346                           | Brain_Cortex                   | 1           | 1                              | 1                           | -0.624848727 |   |   |
|          | -0.624848727                          | -0.624848727                          | NA                             | 1           | 0                              | 0.998207054                 |              |   |   |
| ASPH     | ENSG00000198363.17                    | 0.532092263                           | 3                              | 3           | 0.228656304                    | Brain_Cortex                |              |   |   |
|          | 0.713486714                           | Brain_Nucleus_accumbens_basal_ganglia | 1.184848645                    |             |                                |                             |              |   |   |
|          | 0.824055961                           | 0.824055961                           | -0.791807147                   |             | 1.203827382                    | 0.01494762                  |              |   |   |
|          | 1.051263016                           | 3                                     | 0                              | 0.998207054 |                                |                             |              |   |   |
| EED      | ENSG00000074266.19                    | 0.53212583                            | 2                              | 1           | 0.413977761                    |                             |              |   |   |
|          | Brain_Cerebellar_Hemisphere           | 0.67770208                            | Brain_Cerebellum               | 1.945905966 |                                |                             |              |   |   |
|          | 0.054094034                           | 1.945905966                           | -0.816913677                   |             | -0.415600884                   | -0.616257281                |              |   |   |
|          | 0.283770997                           | 1                                     | 0                              | 0.998207054 |                                |                             |              |   |   |
| TNFRSF1B | ENSG00000028137.18                    | 0.532188925                           | 1                              | 1           | 0.532188925                    |                             |              |   |   |
|          | Brain_Cerebellum                      | 0.532188925                           | Brain_Cerebellum               | 1           | 1                              | 1                           | 0.624668083  |   |   |
|          | 0.624668083                           | 0.624668083                           | NA                             | 1           | 0                              | 0.998207054                 |              |   |   |
| TPPP3    | ENSG00000159713.10                    | 0.532300406                           | 2                              | 2           | 0.266804893                    | Brain_Cortex                |              |   |   |
|          | 0.929815299                           | Brain_Putamen_basal_ganglia           | 1.070975491                    |             | 0.929024509                    |                             |              |   |   |
|          | 0.929024509                           | -0.088077223                          | 1.110450626                    |             | 0.511186701                    | 0.847487169                 |              |   |   |
|          | 2                                     | 0                                     | 0.998207054                    |             |                                |                             |              |   |   |
| PCDHGA10 | ENSG00000253846.2                     | 0.532344914                           | 1                              | 1           | 0.532344914                    |                             |              |   |   |
|          | Brain_Nucleus_accumbens_basal_ganglia | 0.532344914                           |                                |             |                                |                             |              |   |   |
|          | Brain_Nucleus_accumbens_basal_ganglia | 1                                     | 1                              | 1           | 0.624430478                    |                             |              |   |   |
|          | 0.624430478                           | 0.624430478                           | NA                             | 1           | 0                              | 0.998207054                 |              |   |   |
| PDP2     | ENSG00000172840.6                     | 0.532438009                           | 2                              | 2           | 0.270796365                    | Brain_Cortex                |              |   |   |
|          | 0.857204322                           | Brain_Cerebellum                      | 1.035161244                    |             | 0.964838756                    | 0.964838756                 |              |   |   |
|          | -1.101230467                          | 0.179934078                           | -0.460648195                   |             | 0.905920138                    | 2                           | 0            |   |   |
|          | 0.998207054                           |                                       |                                |             |                                |                             |              |   |   |
| PPP1R3G  | ENSG00000219607.3                     | 0.532446014                           | 1                              | 1           | 0.532446014                    |                             |              |   |   |
|          | Brain_Spinal_cord_cervical_c-1        | 0.532446014                           | Brain_Spinal_cord_cervical_c-1 |             |                                |                             |              |   |   |
|          | 1                                     | 1                                     | 1                              | 0.6242765   | 0.6242765                      | 0.6242765                   | NA           | 1 | 0 |
|          | 0.998207054                           |                                       |                                |             |                                |                             |              |   |   |
| WNK2     | ENSG00000165238.16                    | 0.532506631                           | 2                              | 2           | 0.307791714                    |                             |              |   |   |
|          | Brain_Nucleus_accumbens_basal_ganglia | 0.830656658                           | Brain_Cerebellum               |             |                                |                             |              |   |   |
|          | 1.237272619                           | 0.762727381                           | 0.762727381                    |             | -1.019866638                   | 0.213859456                 |              |   |   |
|          | -0.403003591                          | 0.872376088                           | 2                              | 0           | 0.998207054                    |                             |              |   |   |
| SLC19A1  | ENSG00000173638.18                    | 0.532590422                           | 8                              | 8           | 0.028605564                    |                             |              |   |   |
|          | Brain_Anterior_cingulate_cortex_BA24  | 0.981464518                           | Brain_Cerebellum               |             |                                |                             |              |   |   |
|          | 2.003033411                           | 0.474775849                           | 0.474775849                    |             | -0.892968908                   | 2.18887999                  |              |   |   |
|          | 0.439543923                           | 0.915390779                           | 8                              | 0           | 0.998207054                    |                             |              |   |   |
| GABRA1   | ENSG00000022355.16                    | 0.532658416                           | 1                              | 1           | 0.532658416                    |                             |              |   |   |
|          | Brain_Hippocampus                     | 0.532658416                           | Brain_Hippocampus              | 1           | 1                              | 1                           |              |   |   |
|          | 0.623953054                           | 0.623953054                           | 0.623953054                    | NA          | 1                              | 0                           | 0.998207054  |   |   |
| FGF11    | ENSG00000161958.10                    | 0.532692963                           | 3                              | 3           | 0.269062694                    | Brain_Amygdala              |              |   |   |
|          | 0.873987899                           | Brain_Hypothalamus                    | 2.444674957                    |             | 0.272524808                    |                             |              |   |   |
|          | 0.272524808                           | 0.158595088                           | 1.105223645                    |             | 0.534657943                    | 0.502394192                 |              |   |   |
|          | 3                                     | 0                                     | 0.998207054                    |             |                                |                             |              |   |   |
| GCK      | ENSG00000106633.15                    | 0.53275265                            | 1                              | 1           | 0.53275265                     | Brain_Hypothalamus          |              |   |   |
|          | 0.53275265                            | Brain_Hypothalamus                    | 1                              | 1           | 1                              | 0.623809576                 | 0.623809576  |   |   |

|         |                                       |                                       |                                      |              |                                      |                |    |              |   |
|---------|---------------------------------------|---------------------------------------|--------------------------------------|--------------|--------------------------------------|----------------|----|--------------|---|
|         | 0.623809576                           | NA                                    | 1                                    | 0            | 0.998207054                          |                |    |              |   |
| LHX2    | ENSG00000106689.10                    | 0.532866494                           | 1                                    | 1            | 0.532866494                          | Brain_Amygdala |    |              |   |
|         | 0.532866494                           | Brain_Amygdala                        | 1                                    | 1            | 1                                    | -0.623636257   |    | -0.623636257 |   |
|         | -0.623636257                          | NA                                    | 1                                    | 0            | 0.998207054                          |                |    |              |   |
| PPP2R5C | ENSG00000078304.19                    | 0.532886161                           | 3                                    | 3            | 0.30565127                           |                |    |              |   |
|         | Brain_Hypothalamus                    | 0.695358432                           |                                      |              | Brain_Amygdala                       | 1.757672201    |    | 0.24193693   |   |
|         | 0.24193693                            | -0.987799621                          | 1.024389647                          |              | -0.118334563                         | 1.033551806    |    | 3            |   |
|         | 0                                     | 0.998207054                           |                                      |              |                                      |                |    |              |   |
| XYLB    | ENSG00000093217.9                     | 0.532939215                           | 1                                    | 1            | 0.532939215                          |                |    |              |   |
|         | Brain_Cerebellar_Hemisphere           | 0.532939215                           |                                      |              | Brain_Cerebellar_Hemisphere          | 1              |    | 1            |   |
|         | 1                                     | -0.623525554                          | 0.623525554                          | 0.623525554  | NA                                   | 1              |    | 0            |   |
|         | 0.998207054                           |                                       |                                      |              |                                      |                |    |              |   |
| NUDT8   | ENSG00000167799.9                     | 0.533029629                           | 3                                    | 3            | 0.575031641                          |                |    |              |   |
|         | Brain_Putamen_basal_ganglia           | 0.769286197                           |                                      |              | Brain_Caudate_basal_ganglia          |                |    |              |   |
|         | 2.372237803                           | 0.285227116                           | 0.285227116                          |              | -0.560656627                         | 0.543294773    |    |              |   |
|         | 0.091982285                           | 0.578857858                           | 3                                    | 0            | 0.998207054                          |                |    |              |   |
| GLI4    | ENSG00000250571.6                     | 0.533099077                           | 1                                    | 1            | 0.533099077                          |                |    |              |   |
|         | Brain_Spinal_cord_cervical_c-1        | 0.533099077                           |                                      |              | Brain_Spinal_cord_cervical_c-1       |                |    |              |   |
|         | 1                                     | 1                                     | 1                                    | 0.623282224  | 0.623282224                          | 0.623282224    | NA | 1            | 0 |
|         | 0.998207054                           |                                       |                                      |              |                                      |                |    |              |   |
| ZFYVE9  | ENSG00000157077.14                    | 0.533369756                           | 1                                    | 1            | 0.533369756                          |                |    |              |   |
|         | Brain_Anterior_cingulate_cortex_BA24  | 0.533369756                           |                                      |              |                                      |                |    |              |   |
|         | Brain_Anterior_cingulate_cortex_BA24  | 1                                     | 1                                    | 1            | -0.622870301                         |                |    |              |   |
|         | -0.622870301                          | -0.622870301                          | NA                                   | 1            | 0                                    | 0.998207054    |    |              |   |
| MX1     | ENSG00000157601.13                    | 0.533416261                           | 3                                    | 3            | 0.254507805                          | Brain_Cortex   |    |              |   |
|         | 0.53239656                            | Brain_Nucleus_accumbens_basal_ganglia | 1.050725463                          |              | 0.953369635                          |                |    |              |   |
|         | 0.953369635                           | -1.139468486                          | 0.651517197                          |              | -0.370767703                         | 0.922028257    |    |              |   |
|         | 3                                     | 0                                     | 0.998207054                          |              |                                      |                |    |              |   |
| RAB4A   | ENSG00000168118.11                    | 0.533459707                           | 1                                    | 1            | 0.533459707                          |                |    |              |   |
|         | Brain_Cerebellar_Hemisphere           | 0.533459707                           |                                      |              | Brain_Cerebellar_Hemisphere          | 1              |    | 1            |   |
|         | 1                                     | 0.622733436                           | 0.622733436                          | 0.622733436  | NA                                   | 1              |    | 0            |   |
|         | 0.998207054                           |                                       |                                      |              |                                      |                |    |              |   |
| ZNF443  | ENSG00000180855.15                    | 0.533475588                           | 10                                   | 2            | 0.206293562                          |                |    |              |   |
|         | Brain_Nucleus_accumbens_basal_ganglia | 0.55873098                            | Brain_Cerebellum                     | 8.601608497  |                                      |                |    |              |   |
|         | 7.69E-05                              | 0.875717546                           | 0.58472747                           | 1.263823006  | 0.920303617                          |                |    |              |   |
|         | 0.237024139                           | 2                                     | 0                                    | 0.998207054  |                                      |                |    |              |   |
| TMEM72  | ENSG00000187783.11                    | 0.533480371                           | 6                                    | 6            | 0.213642645                          |                |    |              |   |
|         | Brain_Nucleus_accumbens_basal_ganglia | 0.954632509                           |                                      |              | Brain_Hypothalamus                   |                |    |              |   |
|         | 1.554927234                           | 0.452394536                           | 0.452394536                          |              | -0.590725057                         | 1.243611328    |    |              |   |
|         | 0.402589685                           | 0.895987974                           | 6                                    | 0            | 0.998207054                          |                |    |              |   |
| C4orf50 | ENSG00000181215.14                    | 0.533494427                           | 1                                    | 1            | 0.533494427                          |                |    |              |   |
|         | Brain_Substantia_nigra                | 0.533494427                           |                                      |              | Brain_Substantia_nigra               | 1              |    | 1            |   |
|         | 1                                     | -0.622680611                          | -0.622680611                         | -0.622680611 | NA                                   | 1              |    | 0            |   |
|         | 0.998207054                           |                                       |                                      |              |                                      |                |    |              |   |
| BAG5    | ENSG00000166170.9                     | 0.533510076                           | 3                                    | 3            | 0.153337016                          |                |    |              |   |
|         | Brain_Cerebellar_Hemisphere           | 0.25640299                            | Brain_Anterior_cingulate_cortex_BA24 |              |                                      |                |    |              |   |
|         | 2.409757658                           | 0.150508876                           | 0.150508876                          |              | 1.13493396                           | 1.427843129    |    |              |   |
|         | 1.233346166                           | 0.168443331                           | 3                                    | 0            | 0.998207054                          |                |    |              |   |
| CNTROB  | ENSG00000170037.13                    | 0.533571459                           | 5                                    | 4            | 0.210185819                          |                |    |              |   |
|         | Brain_Cortex                          | 0.384288704                           | Brain_Cerebellum                     | 3.483228273  | 0.095699827                          |                |    |              |   |
|         | 0.128537375                           | -1.253054649                          | -0.870021411                         |              | -1.071607423                         | 0.168120166    |    |              |   |
|         | 4                                     | 0                                     | 0.998207054                          |              |                                      |                |    |              |   |
| ASAP1   | ENSG00000153317.14                    | 0.533598108                           | 6                                    | 4            | 0.251911148                          |                |    |              |   |
|         | Brain_Putamen_basal_ganglia           | 0.893009097                           |                                      |              | Brain_Cerebellar_Hemisphere          |                |    |              |   |
|         | 4.047134299                           | 0.081282056                           | 0.221796969                          |              | -0.436761173                         | 1.145719704    |    |              |   |
|         | 0.010761807                           | 0.604545885                           | 4                                    | 0            | 0.998207054                          |                |    |              |   |
| BBS2    | ENSG00000125124.11                    | 0.53364612                            | 8                                    | 3            | 0.248566325                          |                |    |              |   |
|         | Brain_Nucleus_accumbens_basal_ganglia | 0.729432051                           |                                      |              | Brain_Cortex                         |                |    |              |   |
|         | 6.018994488                           | 0.001074992                           | 0.654446404                          |              | -0.345881129                         | 1.15383865     |    |              |   |
|         | 0.755804403                           | 0.481236175                           | 3                                    | 0            | 0.998207054                          |                |    |              |   |
| BRINP1  | ENSG00000078725.12                    | 0.533651512                           | 2                                    | 2            | 0.324899161                          |                |    |              |   |
|         | Brain_Caudate_basal_ganglia           | 0.548616264                           |                                      |              | Brain_Anterior_cingulate_cortex_BA24 |                |    |              |   |

|               |                                       |                  |              |                                |              |
|---------------|---------------------------------------|------------------|--------------|--------------------------------|--------------|
|               | 1.066418655                           | 0.933581345      | 0.933581345  | 0.599834912                    | 0.984440118  |
|               | 0.792137515                           | 0.27195695 2     | 0            | 0.998207054                    |              |
| FAM229B       | ENSG00000203778.7                     | 0.533681786      | 12 4         | 0.052203568                    |              |
|               | Brain_Nucleus_accumbens_basal_ganglia | 0.540490703      |              | Brain_Caudate_basal_ganglia    |              |
|               | 9.344746715                           | 0.018897541      | 0.371042026  | -1.941451239                   | -0.612071122 |
|               | -1.17857998                           | 0.37017277 4     | 0            | 0.998207054                    |              |
| KRTAP16-1     | ENSG00000212657.1                     | 0.533779268      | 1 1          | 0.533779268                    |              |
|               | Brain_Cerebellar_Hemisphere           | 0.533779268      |              | Brain_Cerebellar_Hemisphere1   | 1            |
|               | 1                                     | 0.622247301      | 0.622247301  | 0.622247301                    | NA 1 0       |
|               | 0.998207054                           |                  |              |                                |              |
| FAM20C        | ENSG00000177706.8                     | 0.534032727      | 2 2          | 0.348008336                    |              |
|               | Brain_Spinal_cord_cervical_c-1        | 0.532330332      |              | Brain_Hippocampus              |              |
|               | 1.013901736                           | 0.986098264      | 0.986098264  | -0.938459471                   | 0.624452688  |
|               | -0.157003391                          | 1.105145786      | 2 0          | 0.998207054                    |              |
| RAB11FIP4     | ENSG00000131242.17                    | 0.534326137      | 3 3          | 0.155319266                    |              |
|               | Brain_Hippocampus                     | 0.961169205      |              | Brain_Putamen_basal_ganglia    | 1.426701014  |
|               | 0.569599662                           | 0.569599662      | 0.048686412  | 1.420991377                    | 0.601319093  |
|               | 0.724077234                           | 3 0              | 0.998207054  |                                |              |
| RP11-90C4.1   | ENSG00000234810.2                     | 0.534545736      | 1 1          | 0.534545736                    |              |
|               | Brain_Spinal_cord_cervical_c-1        | 0.534545736      |              | Brain_Spinal_cord_cervical_c-1 |              |
|               | 1 1 1                                 | 0.621081902      | 0.621081902  | 0.621081902                    | NA 1 0       |
|               | 0.998207054                           |                  |              |                                |              |
| AP1S1         | ENSG00000106367.13                    | 0.534556188      | 2 2          | 0.299689253                    |              |
|               | Brain_Hypothalamus                    | 0.730302576      |              | Brain_Cerebellar_Hemisphere    | 1.643095764  |
|               | 0.356904236                           | 0.356904236      | 0.344723066  | 1.037100004                    | 0.690911535  |
|               | 0.489584428                           | 2 0              | 0.998207054  |                                |              |
| RP11-554D14.6 | ENSG00000257398.6                     | 0.53456008 3     | 3 3          | 0.393330227                    |              |
|               | Brain_Cerebellum                      | 0.763737956      |              | Brain_Cerebellar_Hemisphere    | 1.919003032  |
|               | 0.094839715                           | 0.094839715      | 0.300575841  | 0.853593562                    | 0.521244903  |
|               | 0.292935828                           | 3 0              | 0.998207054  |                                |              |
| FOXE3         | ENSG00000186790.5                     | 0.534581862      | 3 2          | 0.541692188                    |              |
|               | Brain_Frontal_Cortex_BA9              | 0.844243971      |              | Brain_Cerebellum               | 2.571245459  |
|               | 0.048904829                           | 0.379849712      | -0.427665231 | 0.610256077                    | 0.126352909  |
|               | 0.52250095 2                          | 0                | 0.998207054  |                                |              |
| ASPSCR1       | ENSG00000169696.15                    | 0.534583419      | 2 2          | 0.328795094                    |              |
|               | Brain_Cerebellum                      | 0.652936874      |              | Brain_Frontal_Cortex_BA9       | 1.096734131  |
|               | 0.903265869                           | 0.903265869      | -0.449685991 | 0.976543718                    | 0.263428864  |
|               | 1.008496699                           | 2 0              | 0.998207054  |                                |              |
| OXER1         | ENSG00000162881.6                     | 0.534724649      | 8 3          | 0.086859344                    |              |
|               | Brain_Substantia_nigra                | 0.994981986      |              | Brain_Putamen_basal_ganglia    |              |
|               | 5.893787929                           | 0.000622962      | 0.761199609  | -0.006289189                   | 1.712202571  |
|               | 1.014407914                           | 0.52988864 3     | 0            | 0.998207054                    |              |
| YME1L1        | ENSG00000136758.18                    | 0.534849156      | 1 1          | 0.534849156                    |              |
|               | Brain_Anterior_cingulate_cortex_BA24  | 0.534849156      |              |                                |              |
|               | Brain_Anterior_cingulate_cortex_BA24  | 1 1 1            |              | -0.620620792                   |              |
|               | -0.620620792                          | -0.620620792     | NA 1 0       | 0.998207054                    |              |
| LRRC37A2      | ENSG00000238083.7                     | 0.534857099      | 13 1         | 0.359747475                    |              |
|               | Brain_Amygdala                        | 0.687621775      |              | Brain_Frontal_Cortex_BA9       | 12.3399279   |
|               | 0.000798693                           | 12.3399279       | -0.915846378 | -0.402084588                   | -0.604585095 |
|               | 0.183192915                           | 1 0              | 0.998207054  |                                |              |
| DENND4A       | ENSG00000174485.15                    | 0.534964759      | 3 2          | 0.48103403                     | Brain_Cortex |
|               | 0.751648784                           | Brain_Cerebellum | 2.456437385  | 0.018628527                    | 0.524934088  |
|               | -0.704640433                          | 0.316466058      | -0.34544077  | 0.573923634                    | 2 0          |
|               | 0.998207054                           |                  |              |                                |              |
| AC007228.5    | ENSG00000268352.1                     | 0.535159417      | 1 1          | 0.535159417                    |              |
|               | Brain_Cerebellar_Hemisphere           | 0.535159417      |              | Brain_Cerebellar_Hemisphere1   | 1            |
|               | 1                                     | -0.620149422     | -0.620149422 | -0.620149422                   | NA 1 0       |
|               | 0.998207054                           |                  |              |                                |              |
| RP11-121M22.1 | ENSG00000175773.12                    | 0.535227215      | 10 10        | 0.028630721                    |              |
|               | Brain_Cortex                          | 0.931384243      |              | Brain_Cerebellar_Hemisphere    | 1.254091188  |
|               | 0.7939715                             | 0.7939715        | -2.188534089 | 1.551010544                    | -0.112023423 |
|               | 0.975225499                           | 10 0             | 0.998207054  |                                |              |

|              |                             |                                      |              |             |                             |                    |              |            |
|--------------|-----------------------------|--------------------------------------|--------------|-------------|-----------------------------|--------------------|--------------|------------|
| LRRRC49      | ENSG00000137821.11          | 0.535520817                          | 2            | 2           | 0.381441932                 |                    |              |            |
|              | Brain_Cerebellar_Hemisphere | 0.644381759                          |              |             | Brain_Cerebellum            | 1.242878826        |              |            |
|              | 0.757121174                 | 0.757121174                          |              |             | -0.461581089                | 0.875242576        | 0.206830744  |            |
|              | 0.945277079                 | 2                                    | 0            | 0.998207054 |                             |                    |              |            |
| TRAPPC12     | ENSG00000171853.15          | 0.535552788                          | 11           | 7           | 0.10466438                  |                    |              |            |
|              | Brain_Cerebellar_Hemisphere | 0.936259874                          |              |             | Brain_Hippocampus           | 6.517673818        |              |            |
|              | 0.086213943                 | 0.243170742                          |              |             | -1.622649372                | 0.243331215        | -0.706509697 |            |
|              | 0.614861319                 | 7                                    | 0            | 0.998207054 |                             |                    |              |            |
| KRR1         | ENSG00000111615.13          | 0.53556014                           | 13           | 2           | 0.14845965                  | Brain_Hypothalamus |              |            |
|              | 0.569878022                 | Brain_Anterior_cingulate_cortex_BA24 |              |             | 11.27644624                 |                    |              |            |
|              | 0.000535878                 | 0.848501987                          |              |             | 0.568231152                 | 1.444993718        | 1.015634852  |            |
|              | 0.30321912                  | 2                                    | 0            | 0.998207054 |                             |                    |              |            |
| PHACTR4      | ENSG00000204138.12          | 0.53581147                           | 12           | 3           | 0.10962823                  | Brain_Cortex       |              |            |
|              | 0.44008068                  | Brain_Anterior_cingulate_cortex_BA24 |              |             | 10.18201286                 | 0.00225253         |              |            |
|              | 0.405548135                 | -1.599866374                         |              |             | -0.772056981                | -1.252062454       | 0.278583277  |            |
|              | 3                           | 0                                    | 0.998207054  |             |                             |                    |              |            |
| TMEM129      | ENSG00000168936.10          | 0.535925412                          | 12           | 4           | 0.280072512                 |                    |              |            |
|              | Brain_Frontal_Cortex_BA9    | 0.809715047                          |              |             | Brain_Caudate_basal_ganglia |                    |              |            |
|              | 9.201422909                 | 0.00053555                           | 0.358397051  |             | -1.080156464                | 0.745005938        |              |            |
|              | -0.391158537                | 0.547133265                          | 4            | 0           | 0.998207054                 |                    |              |            |
| ZNF486       | ENSG00000256229.7           | 0.535932617                          | 1            | 1           | 0.535932617                 |                    |              |            |
|              | Brain_Hippocampus           | 0.535932617                          |              |             | Brain_Hippocampus           | 1                  | 1            | 1          |
|              | -0.618975321                | -0.618975321                         |              |             | -0.618975321                | NA                 | 1            | 0          |
|              |                             |                                      |              |             |                             |                    | 0.998207054  |            |
| RP13-20L14.1 | ENSG00000260011.2           | 0.535992996                          | 2            | 2           | 0.264367719                 |                    |              |            |
|              | Brain_Cerebellar_Hemisphere | 0.480487714                          |              |             | Brain_Cerebellum            | 1.604200399        |              |            |
|              | 0.395799601                 | 0.395799601                          |              |             | 0.705518354                 | 1.116127135        | 0.910822744  |            |
|              | 0.290344253                 | 2                                    | 0            | 0.998207054 |                             |                    |              |            |
| WNT8B        | ENSG00000075290.7           | 0.535999289                          | 4            | 2           | 0.654699676                 | Brain_Cortex       |              |            |
|              | 0.952663897                 | Brain_Spinal_cord_cervical_c-1       |              |             | 3.850991497                 | 0.000559052        |              |            |
|              | 0.140790901                 | -0.44724292                          |              |             | 0.059361853                 | -0.295124892       | 0.240148933  |            |
|              | 2                           | 0                                    | 0.998207054  |             |                             |                    |              |            |
| MUSTN1       | ENSG00000272573.5           | 0.536028159                          | 1            | 1           | 0.536028159                 |                    |              |            |
|              | Brain_Cerebellum            | 0.536028159                          |              |             | Brain_Cerebellum            | 1                  | 1            | -0.6188303 |
|              | -0.6188303                  | -0.6188303                           | NA           | 1           | 0                           | 0.998207054        |              |            |
| RNF139-AS1   | ENSG00000245149.3           | 0.536036685                          | 7            | 3           | 0.089175319                 |                    |              |            |
|              | Brain_Cortex                | 0.83158741                           |              |             | Brain_Cerebellar_Hemisphere | 4.967302059        |              |            |
|              | 0.038509841                 | 0.795312129                          |              |             | -0.2126661                  | 1.699764038        | 0.99883252   |            |
|              | 0.626679471                 | 3                                    | 0            | 0.998207054 |                             |                    |              |            |
| CCDC78       | ENSG00000162004.16          | 0.536046378                          | 6            | 4           | 0.09615616                  | Brain_Amygdala     |              |            |
|              | 0.967463999                 | Brain_Cerebellum                     | 3.310709475  |             | 0.000844257                 | 0.620988581        |              |            |
|              | -0.090626395                | 1.66378121                           | 0.341527648  |             | 0.712725725                 | 4                  | 0            |            |
|              | 0.998207054                 |                                      |              |             |                             |                    |              |            |
| PTP4A2       | ENSG00000184007.18          | 0.536123821                          | 2            | 2           | 0.275854283                 |                    |              |            |
|              | Brain_Cerebellum            | 0.844085288                          |              |             | Brain_Caudate_basal_ganglia | 1.042931694        |              |            |
|              | 0.957068306                 | 0.957068306                          |              |             | -1.08967965                 | -0.19667064        | -0.643175145 |            |
|              | 0.631452727                 | 2                                    | 0            | 0.998207054 |                             |                    |              |            |
| MCM9         | ENSG00000111877.17          | 0.536199125                          | 5            | 5           | 0.150672858                 | Brain_Amygdala     |              |            |
|              | 0.957110486                 | Brain_Anterior_cingulate_cortex_BA24 |              |             | 2.19678054                  | 0.085974527        |              |            |
|              | 0.085974527                 | -1.437158867                         |              |             | 0.053779948                 | -0.661691602       | 0.562358263  |            |
|              | 5                           | 0                                    | 0.998207054  |             |                             |                    |              |            |
| UROS         | ENSG00000188690.12          | 0.536229529                          | 12           | 2           | 0.22645098                  |                    |              |            |
|              | Brain_Putamen_basal_ganglia | 0.386280556                          |              |             | Brain_Substantia_nigra      |                    |              |            |
|              | 11.11936134                 | 0.000139689                          | 0.41794288   |             | 0.866382284                 | 1.209551651        |              |            |
|              | 1.070664653                 | 0.122743658                          | 2            | 0           | 0.998207054                 |                    |              |            |
| LHB          | ENSG00000104826.12          | 0.536278757                          | 1            | 1           | 0.536278757                 |                    |              |            |
|              | Brain_Cerebellar_Hemisphere | 0.536278757                          |              |             | Brain_Cerebellar_Hemisphere | 1                  | 1            |            |
|              | 1                           | -0.618449986                         | -0.618449986 |             | -0.618449986                | NA                 | 1            | 0          |
|              | 0.998207054                 |                                      |              |             |                             |                    |              |            |
| IQGAP3       | ENSG00000183856.10          | 0.536290754                          | 1            | 1           | 0.536290754                 |                    |              |            |
|              | Brain_Frontal_Cortex_BA9    | 0.536290754                          |              |             | Brain_Frontal_Cortex_BA9    | 1                  | 1            |            |
|              | 1                           | -0.61843178                          | -0.61843178  |             | -0.61843178                 | NA                 | 1            | 0          |
|              | 0.998207054                 |                                      |              |             |                             |                    |              |            |

|              |                                      |                             |              |              |                                       |             |              |                  |
|--------------|--------------------------------------|-----------------------------|--------------|--------------|---------------------------------------|-------------|--------------|------------------|
| C2orf54      | ENSG00000172478.17                   | 0.536322798                 | 4            | 4            | 0.205532028                           |             |              |                  |
|              | Brain_Cerebellum                     | 0.990175289                 |              |              | Brain_Hippocampus                     | 2.135242358 |              |                  |
|              | 0.200268392                          | 0.200268392                 |              |              | -1.265947083                          | 0.01231376  | -0.688454897 |                  |
|              | 0.535439223                          | 4                           | 0            | 0.998207054  |                                       |             |              |                  |
| COX4I1       | ENSG00000131143.8                    | 0.536323074                 | 1            | 1            | 0.536323074                           |             |              |                  |
|              | Brain_Substantia_nigra               | 0.536323074                 |              |              | Brain_Substantia_nigra                | 1           | 1            |                  |
|              | 1                                    | 0.618382738                 | 0.618382738  | 0.618382738  | NA                                    | 1           | 0            |                  |
|              | 0.998207054                          |                             |              |              |                                       |             |              |                  |
| BECN1        | ENSG00000126581.12                   | 0.536520703                 | 1            | 1            | 0.536520703                           |             |              |                  |
|              | Brain_Hippocampus                    | 0.536520703                 |              |              | Brain_Hippocampus                     | 1           | 1            | 1                |
|              | 0.618082886                          | 0.618082886                 | 0.618082886  | NA           | 1                                     | 0           | 0.998207054  |                  |
| CLNK         | ENSG00000109684.14                   | 0.536672941                 | 2            | 2            | 0.264570035                           |             |              | Brain_Cerebellum |
|              | 0.577582635                          | Brain_Cerebellar_Hemisphere | 1.493798683  | 0.506201317  |                                       |             |              |                  |
|              | 0.506201317                          | 0.556919201                 | 1.115654544  | 0.836286873  | 0.395085551                           |             |              |                  |
|              | 2                                    | 0                           | 0.998207054  |              |                                       |             |              |                  |
| UPK3BL       | ENSG00000267368.1                    | 0.536692746                 | 13           | 5            | 0.112543019                           |             |              |                  |
|              | Brain_Anterior_cingulate_cortex_BA24 | 0.983218011                 |              |              | Brain_Hypothalamus                    |             |              |                  |
|              | 8.547786131                          | 0.010051917                 | 0.386257002  | -1.089887665 | 1.586865904                           |             |              |                  |
|              | 0.282712653                          | 0.672985713                 | 5            | 0            | 0.998207054                           |             |              |                  |
| TMEM132D     | ENSG00000151952.15                   | 0.536694407                 | 1            | 1            | 0.536694407                           |             |              |                  |
|              | Brain_Hippocampus                    | 0.536694407                 |              |              | Brain_Hippocampus                     | 1           | 1            | 1                |
|              | -0.61781938                          | -0.61781938                 | -0.61781938  | NA           | 1                                     | 0           | 0.998207054  |                  |
| C8orf82      | ENSG00000213563.6                    | 0.536746422                 | 1            | 1            | 0.536746422                           |             |              |                  |
|              | Brain_Substantia_nigra               | 0.536746422                 |              |              | Brain_Substantia_nigra                | 1           | 1            |                  |
|              | 1                                    | -0.617740482                | -0.617740482 | -0.617740482 | NA                                    | 1           | 0            |                  |
|              | 0.998207054                          |                             |              |              |                                       |             |              |                  |
| TMEM229A     | ENSG00000234224.2                    | 0.536796043                 | 9            | 6            | 0.096858422                           |             |              |                  |
|              | Brain_Putamen_basal_ganglia          | 0.551579277                 |              |              | Brain_Nucleus_accumbens_basal_ganglia |             |              |                  |
|              | 5.691532184                          | 0.037604654                 | 0.253803368  | -0.615104732 | 1.660278583                           |             |              |                  |
|              | 0.841174916                          | 0.660368262                 | 6            | 0            | 0.998207054                           |             |              |                  |
| PLEKHA1      | ENSG00000107679.14                   | 0.536907508                 | 5            | 4            | 0.245120416                           |             |              |                  |
|              | Brain_Caudate_basal_ganglia          | 0.982634919                 |              |              | Brain_Spinal_cord_cervical_c-1        |             |              |                  |
|              | 3.465080884                          | 0.043069629                 | 0.208075996  | -1.16228328  | 0.233236023                           |             |              |                  |
|              | -0.341115758                         | 0.576958337                 | 4            | 0            | 0.998207054                           |             |              |                  |
| LCORL        | ENSG00000178177.15                   | 0.537146258                 | 1            | 1            | 0.537146258                           |             |              | Brain_Cerebellum |
|              | 0.537146258                          | Brain_Cerebellum            | 1            | 1            | 1                                     | -0.61713413 | -0.61713413  |                  |
|              | -0.61713413                          | NA                          | 1            | 0            | 0.998207054                           |             |              |                  |
| HLA-DOA      | ENSG00000204252.13                   | 0.537303549                 | 3            | 3            | 0.222106911                           |             |              |                  |
|              | Brain_Cerebellum                     | 0.923217022                 |              |              | Brain_Cerebellar_Hemisphere           | 1.454642589 |              |                  |
|              | 0.57341113                           | 0.57341113                  | -0.096382209 | 1.220944824  | 0.593745779                           |             |              |                  |
|              | 0.660914266                          | 3                           | 0            | 0.998207054  |                                       |             |              |                  |
| RP11-673E1.1 | ENSG00000251600.5                    | 0.537322374                 | 11           | 1            | 0.375934704                           |             |              |                  |
|              | Brain_Spinal_cord_cervical_c-1       | 0.73959255                  |              |              | Brain_Nucleus_accumbens_basal_ganglia |             |              |                  |
|              | 10.49145905                          | 0.000425698                 | 10.49145905  | 0.332392965  | 0.885411552                           |             |              |                  |
|              | 0.604181678                          | 0.16357764                  | 1            | 0            | 0.998207054                           |             |              |                  |
| PSMG3-AS1    | ENSG00000230487.7                    | 0.537336099                 | 12           | 4            | 0.40186392                            |             |              |                  |
|              | Brain_Putamen_basal_ganglia          | 0.969375364                 |              |              | Brain_Cerebellar_Hemisphere           |             |              |                  |
|              | 8.625165312                          | 2.48E-16                    | 0.447280929  | -0.838297001 | 0.695131576                           |             |              |                  |
|              | 0.106337046                          | 0.462067954                 | 4            | 0            | 0.998207054                           |             |              |                  |
| STAP1        | ENSG00000035720.7                    | 0.537360122                 | 1            | 1            | 0.537360122                           |             |              |                  |
|              | Brain_Hippocampus                    | 0.537360122                 |              |              | Brain_Hippocampus                     | 1           | 1            | 1                |
|              | 0.616809898                          | 0.616809898                 | 0.616809898  | NA           | 1                                     | 0           | 0.998207054  |                  |
| SLC8B1       | ENSG00000089060.11                   | 0.537440608                 | 4            | 4            | 0.151494749                           |             |              |                  |
|              | Brain_Caudate_basal_ganglia          | 0.766072024                 |              |              | Brain_Putamen_basal_ganglia           |             |              |                  |
|              | 2.864831425                          | 0.178488923                 | 0.178488923  | 0.297516748  | 1.434271679                           |             |              |                  |
|              | 1.126154993                          | 0.553177771                 | 4            | 0            | 0.998207054                           |             |              |                  |
| TAS2R31      | ENSG00000256436.1                    | 0.537536652                 | 1            | 1            | 0.537536652                           |             |              |                  |
|              | Brain_Cortex                         | 0.537536652                 |              |              | Brain_Cortex                          | 1           | 1            | 1                |
|              | 0.616542317                          | 0.616542317                 | NA           | 1            | 0                                     | 0.998207054 |              |                  |
| IPPK         | ENSG00000127080.9                    | 0.537537243                 | 4            | 3            | 0.232420067                           |             |              |                  |
|              | Brain_Cerebellar_Hemisphere          | 0.681518251                 |              |              | Brain_Hypothalamus                    | 2.158810585 |              |                  |
|              | 0.044472999                          | 0.616776806                 | -1.194148033 | 0.734494253  | -0.365719255                          |             |              |                  |



|               |                                       |              |                                       |             |             |                                       |              |                  |   |
|---------------|---------------------------------------|--------------|---------------------------------------|-------------|-------------|---------------------------------------|--------------|------------------|---|
|               | 0.806295941                           | 3            | 0                                     | 0.998207054 |             |                                       |              |                  |   |
| KIN           | ENSG00000151657.11                    |              | 0.537594732                           | 7           | 2           | 0.318392042                           |              |                  |   |
|               | Brain_Nucleus_accumbens_basal_ganglia | 0.969573941  |                                       |             |             | Brain_Cerebellar_Hemisphere           |              |                  |   |
|               | 6.352917426                           | 0.001656234  | 0.282229283                           |             |             | -0.038142657                          | 0.997767646  |                  |   |
|               | 0.525294487                           | 0.334175851  | 2                                     | 0           | 0.998207054 |                                       |              |                  |   |
| RP11-426C22.6 | ENSG00000260953.1                     |              | 0.537686715                           | 7           | 1           | 0.326730213                           |              |                  |   |
|               | Brain_Amygdala                        | 0.715553627  |                                       |             |             | Brain_Nucleus_accumbens_basal_ganglia |              |                  |   |
|               | 6.806680172                           | 0.000302205  | 6.806680172                           |             |             | -0.980721268                          | -0.364407645 |                  |   |
|               | -0.609610794                          | 0.247771704  | 1                                     | 0           | 0.998207054 |                                       |              |                  |   |
| NEURL1        | ENSG00000107954.10                    |              | 0.537785617                           | 4           | 4           | 0.092372726                           |              |                  |   |
|               | Brain_Cortex                          | 0.906178667  |                                       |             |             | Brain_Amygdala                        | 1.552414374  | 0.437292986      |   |
|               | 0.437292986                           | -1.683012218 | 0.1178599                             |             |             | -0.789885343                          | 0.808874508  | 4                |   |
|               | 0                                     | 0.998207054  |                                       |             |             |                                       |              |                  |   |
| PTCH2         | ENSG00000117425.13                    |              | 0.537859818                           | 1           | 1           | 0.537859818                           |              |                  |   |
|               | Brain_Cerebellar_Hemisphere           | 0.537859818  |                                       |             |             | Brain_Cerebellar_Hemisphere1          | 1            | 1                |   |
|               | 1                                     | 0.61605258   | 0.61605258                            | 0.61605258  | NA          | 1                                     | 0            | 0.998207054      |   |
| RPS23         | ENSG00000186468.12                    |              | 0.537948407                           | 13          | 2           | 0.437573652                           |              |                  |   |
|               | Brain_Spinal_cord_cervical_c-1        | 0.998914912  |                                       |             |             | Brain_Cerebellar_Hemisphere           |              |                  |   |
|               | 12.0387936                            | 0.000103118  | 0.492125319                           |             |             | -0.776296986                          | 0.151139871  |                  |   |
|               | -0.030714684                          | 0.237463209  | 2                                     | 0           | 0.998207054 |                                       |              |                  |   |
| EMC2          | ENSG00000104412.7                     |              | 0.538086942                           | 8           | 6           | 0.199337912                           |              | Brain_Cortex     |   |
|               | 0.945116492                           |              | Brain_Caudate_basal_ganglia           | 4.93477796  | 0.070960879 |                                       |              |                  |   |
|               | 0.243293802                           | -1.283440159 | 0.068840611                           |             |             | -0.731219672                          | 0.52410234   | 6                |   |
|               | 0                                     | 0.998207054  |                                       |             |             |                                       |              |                  |   |
| CTSZ          | ENSG00000101160.13                    |              | 0.538101315                           | 2           | 2           | 0.298089097                           |              |                  |   |
|               | Brain_Hippocampus                     | 0.484641885  |                                       |             |             | Brain_Substantia_nigra                | 1.863496502  |                  |   |
|               | 0.136503498                           | 0.136503498  | 0.698856228                           |             |             | 1.040539985                           | 0.869698106  |                  |   |
|               | 0.241606902                           | 2            | 0                                     | 0.998207054 |             |                                       |              |                  |   |
| DCXR          | ENSG00000169738.7                     |              | 0.538210094                           | 9           | 3           | 0.212379722                           |              |                  |   |
|               | Brain_Nucleus_accumbens_basal_ganglia | 0.701133913  |                                       |             |             |                                       |              |                  |   |
|               | Brain_Anterior_cingulate_cortex_BA24  | 7.450705028  |                                       |             |             | 6.34E-08                              | 0.26538416   |                  |   |
|               | 0.383790253                           | 1.247048481  | 0.968543926                           |             |             | 0.31937651                            | 3            | 0                |   |
|               | 0.998207054                           |              |                                       |             |             |                                       |              |                  |   |
| OTOF          | ENSG00000115155.16                    |              | 0.538355036                           | 4           | 4           | 0.159814839                           |              | Brain_Cerebellum |   |
|               | 0.372961465                           |              | Brain_Cerebellar_Hemisphere           | 2.038104692 | 0.268787164 |                                       |              |                  |   |
|               | 0.268787164                           | -1.405694575 | -0.890939804                          |             |             | -1.178100208                          | 0.217236677  |                  |   |
|               | 4                                     | 0            | 0.998207054                           |             |             |                                       |              |                  |   |
| CACNA1E       | ENSG00000198216.10                    |              | 0.538415861                           | 1           | 1           | 0.538415861                           |              |                  |   |
|               | Brain_Cerebellar_Hemisphere           | 0.538415861  |                                       |             |             | Brain_Cerebellar_Hemisphere1          | 1            | 1                |   |
|               | 1                                     | -0.615210279 | -0.615210279                          |             |             | -0.615210279                          | NA           | 1                | 0 |
|               | 0.998207054                           |              |                                       |             |             |                                       |              |                  |   |
| MRPS5         | ENSG00000144029.11                    |              | 0.538440535                           | 2           | 2           | 0.269788649                           |              | Brain_Cortex     |   |
|               | 0.663232475                           |              | Brain_Nucleus_accumbens_basal_ganglia | 1.270179678 |             |                                       |              |                  |   |
|               | 0.729820322                           | 0.729820322  | -1.103549404                          |             |             | -0.435454615                          | -0.769502009 |                  |   |
|               | 0.472414356                           | 2            | 0                                     | 0.998207054 |             |                                       |              |                  |   |
| C3orf80       | ENSG00000180044.5                     |              | 0.53845129                            | 1           | 1           | 0.53845129                            |              |                  |   |
|               | Brain_Anterior_cingulate_cortex_BA24  | 0.53845129   |                                       |             |             |                                       |              |                  |   |
|               | Brain_Anterior_cingulate_cortex_BA24  | 1            | 1                                     | 1           | 0.615156625 |                                       |              |                  |   |
|               | 0.615156625                           | 0.615156625  | NA                                    | 1           | 0           | 0.998207054                           |              |                  |   |
| UBIAD1        | ENSG00000120942.13                    |              | 0.538509653                           | 1           | 1           | 0.538509653                           |              |                  |   |
|               | Brain_Frontal_Cortex_BA9              | 0.538509653  |                                       |             |             | Brain_Frontal_Cortex_BA9              | 1            | 1                |   |
|               | 1                                     | -0.615068243 | -0.615068243                          |             |             | -0.615068243                          | NA           | 1                | 0 |
|               | 0.998207054                           |              |                                       |             |             |                                       |              |                  |   |
| VPS29         | ENSG00000111237.18                    |              | 0.538539485                           | 9           | 5           | 0.221687112                           |              |                  |   |
|               | Brain_Nucleus_accumbens_basal_ganglia | 0.887300432  |                                       |             |             | Brain_Cerebellum                      |              |                  |   |
|               | 6.888629501                           | 0.020236166  | 0.318650798                           |             |             | -1.222054251                          | 0.204764746  |                  |   |
|               | -0.580009591                          | 0.550430751  | 5                                     | 0           | 0.998207054 |                                       |              |                  |   |
| RP5-933K21.3  | ENSG00000271040.1                     |              | 0.538699232                           | 6           | 6           | 0.068835966                           |              |                  |   |
|               | Brain_Nucleus_accumbens_basal_ganglia | 0.963464505  |                                       |             |             | Brain_Amygdala                        |              |                  |   |
|               | 1.396064299                           | 0.537607582  | 0.537607582                           |             |             | -0.045806467                          | 1.81949486   |                  |   |
|               | 0.839830735                           | 0.606376616  | 6                                     | 0           | 0.998207054 |                                       |              |                  |   |
| HPS1          | ENSG00000107521.18                    |              | 0.538775376                           | 12          | 5           | 0.353556908                           |              |                  |   |

|             |                                       |                                      |                |             |                                       |              |                  |
|-------------|---------------------------------------|--------------------------------------|----------------|-------------|---------------------------------------|--------------|------------------|
|             | Brain_Spinal_cord_cervical_c-1        | 0.973916514                          |                |             | Brain_Hippocampus                     |              |                  |
|             | 5.861544502                           | 0.010454896                          | 0.232576851    |             | -0.416713993                          | 0.927712143  |                  |
|             | 0.246985284                           | 0.451903632                          | 5              | 0           | 0.998207054                           |              |                  |
| IL22RA1     | ENSG00000142677.3                     | 0.538847238                          |                |             | 2                                     | 1            | 0.510793087      |
|             | Brain_Cerebellar_Hemisphere           | 0.571222342                          |                |             | Brain_Cerebellum                      | 1.982922645  |                  |
|             | 0.017077355                           | 1.982922645                          | -0.65760328    |             | -0.566252211                          | -0.611927745 |                  |
|             | 0.06459496                            | 0                                    | 0.998207054    |             |                                       |              |                  |
| TRAPPC6A    | ENSG00000007255.10                    | 0.538890541                          | 1              | 1           | 0.538890541                           |              |                  |
|             | Brain_Amygdala                        | 0.538890541                          | Brain_Amygdala | 1           | 1                                     | 1            | -0.614491572     |
|             | -0.614491572                          | -0.614491572                         | NA             | 1           | 0                                     | 0.998207054  |                  |
| PCDHA11     | ENSG00000249158.6                     | 0.538947934                          | 6              | 4           | 0.325288134                           |              |                  |
|             | Brain_Nucleus_accumbens_basal_ganglia | 0.893163811                          |                |             | Brain_Caudate_basal_ganglia           |              |                  |
|             | 3.928966213                           | 0.003440246                          | 0.227709164    |             | -0.385241082                          | 0.983648979  |                  |
|             | 0.347174731                           | 0.510523383                          | 4              | 0           | 0.998207054                           |              |                  |
| GGPS1       | ENSG00000152904.11                    | 0.538954211                          | 4              | 4           | 0.283312647                           |              |                  |
|             | Brain_Spinal_cord_cervical_c-1        | 0.979026911                          |                |             | Brain_Frontal_Cortex_BA9              |              |                  |
|             | 1.641682981                           | 0.371626823                          | 0.371626823    |             | -0.888470816                          | 1.072907442  |                  |
|             | -0.018613909                          | 0.820801287                          | 4              | 0           | 0.998207054                           |              |                  |
| ABCA3       | ENSG00000167972.13                    | 0.539073973                          | 5              | 4           | 0.210910604                           |              | Brain_Cerebellum |
|             | 0.757877509                           | Brain_Frontal_Cortex_BA9             | 2.002954217    |             | 0.021161369                           |              |                  |
|             | 0.9210965                             | -0.821920058                         | 1.251065438    |             | 0.554530286                           | 0.847125059  | 4                |
|             | 0                                     | 0.998207054                          |                |             |                                       |              |                  |
| KIAA0232    | ENSG00000170871.11                    | 0.539092324                          | 2              | 2           | 0.303231587                           |              |                  |
|             | Brain_Anterior_cingulate_cortex_BA24  | 0.499334377                          |                |             |                                       |              |                  |
|             | Brain_Spinal_cord_cervical_c-1        | 1.263258878                          |                |             | 0.736741122                           | 0.736741122  |                  |
|             | -1.029528089                          | -0.675537433                         | -0.852532761   |             | 0.250309193                           | 2            | 0                |
|             | 0.998207054                           |                                      |                |             |                                       |              |                  |
| SHB         | ENSG00000107338.9                     | 0.539110151                          | 3              | 3           | 0.302224352                           |              |                  |
|             | Brain_Caudate_basal_ganglia           | 0.911025035                          |                |             | Brain_Cerebellar_Hemisphere           |              |                  |
|             | 1.467051783                           | 0.519119315                          | 0.519119315    |             | -1.031675087                          | 0.682177119  |                  |
|             | -0.153747893                          | 0.857697781                          | 3              | 0           | 0.998207054                           |              |                  |
| GS1-57L11.1 | ENSG00000253853.1                     | 0.539134757                          | 4              | 3           | 0.257029857                           |              |                  |
|             | Brain_Cerebellar_Hemisphere           | 0.478503267                          |                |             | Brain_Cerebellum                      | 2.502160434  |                  |
|             | 0.041635867                           | 0.46119013                           | -0.833126316   |             | 1.133439208                           | -0.298198275 |                  |
|             | 0.955796648                           | 3                                    | 0              | 0.998207054 |                                       |              |                  |
| TMEM251     | ENSG00000153485.5                     | 0.53923222                           | 2              | 2           | 0.298103713                           |              | Brain_Cortex     |
|             | 0.719757749                           | Brain_Anterior_cingulate_cortex_BA24 | 1.030394969    |             |                                       |              |                  |
|             | 0.969605031                           | 0.969605031                          | -1.040508509   |             | 0.358782575                           | -0.340862967 |                  |
|             | 0.989448214                           | 2                                    | 0              | 0.998207054 |                                       |              |                  |
| CLDN1       | ENSG00000163347.5                     | 0.539264376                          | 1              | 1           | 0.539264376                           |              |                  |
|             | Brain_Hippocampus                     | 0.539264376                          |                |             | Brain_Hippocampus                     | 1            | 1                |
|             | -0.613925776                          | -0.613925776                         | -0.613925776   |             | NA                                    | 1            | 0                |
|             |                                       |                                      |                |             | 0.998207054                           |              |                  |
| TMEM232     | ENSG00000186952.14                    | 0.539326806                          | 4              | 2           | 0.460374742                           |              |                  |
|             | Brain_Cerebellum                      | 0.645927735                          |                |             | Brain_Cerebellar_Hemisphere           | 3.039006157  |                  |
|             | 0.042722339                           | 0.84267669                           | -0.738229923   |             | 0.713030205                           | -0.241937289 |                  |
|             | 0.64903553                            | 2                                    | 0              | 0.998207054 |                                       |              |                  |
| PHF23       | ENSG00000040633.12                    | 0.539356366                          | 2              | 2           | 0.36814602                            |              |                  |
|             | Brain_Spinal_cord_cervical_c-1        | 0.490483315                          |                |             |                                       |              |                  |
|             | Brain_Anterior_cingulate_cortex_BA24  | 1.042591931                          |                |             | 0.957408069                           |              |                  |
|             | 0.957408069                           | 0.689540311                          | 0.899951577    |             | 0.794745944                           | 0.148783233  |                  |
|             | 2                                     | 0                                    | 0.998207054    |             |                                       |              |                  |
| FAM215B     | ENSG00000232300.1                     | 0.539364281                          | 2              | 2           | 0.320085033                           |              |                  |
|             | Brain_Cerebellum                      | 0.461449387                          |                |             | Brain_Cerebellar_Hemisphere           | 1.927375767  |                  |
|             | 0.072624233                           | 0.072624233                          | -0.994283158   |             | -0.736462326                          | -0.865372742 |                  |
|             | 0.182306858                           | 2                                    | 0              | 0.998207054 |                                       |              |                  |
| AMPH        | ENSG00000078053.16                    | 0.539375362                          | 1              | 1           | 0.539375362                           |              | Brain_Cortex     |
|             | 0.539375362                           | Brain_Cortex                         | 1              | 1           | 1                                     | 0.613757837  | 0.613757837      |
|             | 0.613757837                           | NA                                   | 1              | 0           | 0.998207054                           |              |                  |
| VPS41       | ENSG00000006715.15                    | 0.539472614                          | 7              | 5           | 0.344544719                           |              |                  |
|             | Brain_Cerebellar_Hemisphere           | 0.953001349                          |                |             | Brain_Nucleus_accumbens_basal_ganglia |              |                  |
|             | 3.764587455                           | 0.063871706                          | 0.327380452    |             | -0.67952622                           | 0.945223629  |                  |
|             | 0.099332853                           | 0.64644892                           | 5              | 0           | 0.998207054                           |              |                  |

|               |                                       |                             |              |              |                                       |                    |
|---------------|---------------------------------------|-----------------------------|--------------|--------------|---------------------------------------|--------------------|
| EPCAM         | ENSG00000119888.10                    | 0.539615106                 | 12           | 1            | 0.368652844                           | Brain_Cortex       |
|               | 0.756212446                           | Brain_Hypothalamus          | 11.25059744  |              | 0.001149496                           |                    |
|               | 11.25059744                           | 0.310458326                 | 0.898999656  |              | 0.593568628                           | 0.198893737        |
|               | 1                                     | 0                           | 0.998207054  |              |                                       |                    |
| RGMA          | ENSG00000182175.13                    | 0.539725789                 | 5            | 5            | 0.10018252                            | Brain_Hypothalamus |
|               | 0.990657616                           | Brain_Cerebellar_Hemisphere | 1.248414758  |              | 0.811522743                           |                    |
|               | 0.811522743                           | -0.40502173                 | 1.643969417  |              | 0.51736456                            | 0.837322292        |
|               | 0                                     | 0.998207054                 |              |              |                                       | 5                  |
| CUL2          | ENSG00000108094.14                    | 0.53975013                  | 1            | 1            | 0.53975013                            | Brain_Cerebellum   |
|               | Brain_Cerebellum                      | 1                           | 1            | 0.613190886  | 0.613190886                           | 0.613190886        |
|               | NA                                    | 1                           | 0            | 0.998207054  |                                       |                    |
| ZBTB18        | ENSG00000179456.10                    | 0.539772196                 | 2            | 2            | 0.42793639                            | Brain_Amygdala     |
|               | 0.458705166                           | Brain_Hippocampus           | 1.045298145  |              | 0.954701855                           |                    |
|               | 0.954701855                           | -0.740980661                | 0.792727868  |              | 0.025873604                           | 1.084495702        |
|               | 2                                     | 0                           | 0.998207054  |              |                                       |                    |
| KLF2          | ENSG00000127528.5                     | 0.539785197                 | 1            | 1            | 0.539785197                           | Brain_Cortex       |
|               | 0.539785197                           | Brain_Cortex                | 1            | 1            | 0.613137847                           | 0.613137847        |
|               | 0.613137847                           | NA                          | 1            | 0            | 0.998207054                           |                    |
| C10orf107     | ENSG00000183346.6                     | 0.539823583                 | 13           | 2            | 0.126574605                           |                    |
|               | Brain_Substantia_nigra                | 0.411456391                 |              |              | Brain_Nucleus_accumbens_basal_ganglia |                    |
|               | 12.01610516                           | 0.000374715                 | 0.432457482  |              | 0.821333394                           | 1.527750063        |
|               | 1.070945653                           | 0.193012243                 | 2            | 0            | 0.998207054                           |                    |
| TANGO2        | ENSG00000183597.15                    | 0.539884113                 | 3            | 3            | 0.303026567                           |                    |
|               | Brain_Cerebellum                      | 0.754035632                 |              |              | Brain_Cerebellar_Hemisphere           | 1.55540693         |
|               | 0.420622482                           | 0.420622482                 | -0.452897295 |              | 1.029964721                           | 0.087914964        |
|               | 0.818818409                           | 3                           | 0            | 0.998207054  |                                       |                    |
| NRARP         | ENSG00000198435.3                     | 0.53993314                  | 1            | 1            | 0.53993314                            |                    |
|               | Brain_Anterior_cingulate_cortex_BA24  | 0.53993314                  |              |              |                                       |                    |
|               | Brain_Anterior_cingulate_cortex_BA24  | 1                           | 1            | 1            | -0.612914099                          |                    |
|               | -0.612914099                          | -0.612914099                | NA           | 1            | 0                                     | 0.998207054        |
| HARBI1        | ENSG00000180423.4                     | 0.53998757                  | 1            | 1            | 0.53998757                            | Brain_Hippocampus  |
|               | 0.53998757                            | Brain_Hippocampus           | 1            | 1            | 0.612831788                           | 0.612831788        |
|               | 0.612831788                           | NA                          | 1            | 0            | 0.998207054                           |                    |
| AC142472.6    | ENSG00000276728.1                     | 0.539999014                 | 1            | 1            | 0.539999014                           |                    |
|               | Brain_Hypothalamus                    | 0.539999014                 |              |              | Brain_Hypothalamus                    | 1                  |
|               | -0.612814482                          | -0.612814482                | -0.612814482 |              | NA                                    | 1                  |
|               |                                       |                             |              |              | 0                                     | 0.998207054        |
| CLC           | ENSG00000105205.6                     | 0.540000761                 | 1            | 1            | 0.540000761                           |                    |
|               | Brain_Substantia_nigra                | 0.540000761                 |              |              | Brain_Substantia_nigra                | 1                  |
|               | 1                                     | 0.61281184                  | 0.61281184   | 0.61281184   | NA                                    | 1                  |
|               |                                       |                             |              |              | 0                                     | 0.998207054        |
| OS9           | ENSG00000135506.15                    | 0.540003439                 | 1            | 1            | 0.540003439                           |                    |
|               | Brain_Caudate_basal_ganglia           | 0.540003439                 |              |              | Brain_Caudate_basal_ganglia           | 1                  |
|               | 1                                     | -0.61280779                 | -0.61280779  | -0.61280779  | NA                                    | 1                  |
|               |                                       |                             |              |              | 0                                     | 0.998207054        |
| SCNN1G        | ENSG00000166828.2                     | 0.540029512                 | 3            | 2            | 0.239011003                           |                    |
|               | Brain_Cerebellar_Hemisphere           | 0.725787901                 |              |              | Brain_Frontal_Cortex_BA9              |                    |
|               | 2.003581049                           | 0.02188641                  | 0.974532541  |              | -1.177462384                          | 0.350734019        |
|               | -0.522637949                          | 0.787190148                 | 2            | 0            | 0.998207054                           |                    |
| KCTD4         | ENSG00000180332.6                     | 0.540188422                 | 1            | 1            | 0.540188422                           |                    |
|               | Brain_Nucleus_accumbens_basal_ganglia | 0.540188422                 |              |              |                                       |                    |
|               | Brain_Nucleus_accumbens_basal_ganglia | 1                           | 1            | 1            | -0.612528086                          |                    |
|               | -0.612528086                          | -0.612528086                | NA           | 1            | 0                                     | 0.998207054        |
| RP11-758N13.1 | ENSG00000259721.1                     | 0.540218071                 | 1            | 1            | 0.540218071                           |                    |
|               | Brain_Anterior_cingulate_cortex_BA24  | 0.540218071                 |              |              |                                       |                    |
|               | Brain_Anterior_cingulate_cortex_BA24  | 1                           | 1            | 1            | 0.612483258                           |                    |
|               | 0.612483258                           | 0.612483258                 | NA           | 1            | 0                                     | 0.998207054        |
| OTX1          | ENSG00000115507.9                     | 0.540273745                 | 1            | 1            | 0.540273745                           |                    |
|               | Brain_Caudate_basal_ganglia           | 0.540273745                 |              |              | Brain_Caudate_basal_ganglia           | 1                  |
|               | 1                                     | -0.612399088                | -0.612399088 | -0.612399088 | NA                                    | 1                  |
|               |                                       |                             |              |              | 0                                     | 0.998207054        |
| GRM8          | ENSG00000179603.17                    | 0.540280337                 | 2            | 2            | 0.271760445                           |                    |
|               | Brain_Putamen_basal_ganglia           | 0.406825843                 |              |              | Brain_Caudate_basal_ganglia           |                    |
|               | 1.832109889                           | 0.167890111                 | 0.167890111  |              | -1.099017473                          | -0.829492386       |

|           |                                       |                                       |                             |             |                              |             |                  |
|-----------|---------------------------------------|---------------------------------------|-----------------------------|-------------|------------------------------|-------------|------------------|
|           | -0.96425493                           | 0.190583017                           | 2                           | 0           | 0.998207054                  |             |                  |
| MANSC4    | ENSG00000205693.3                     | 0.540360076                           | 1                           | 1           | 0.540360076                  |             |                  |
|           | Brain_Cerebellar_Hemisphere           | 0.540360076                           |                             |             | Brain_Cerebellar_Hemisphere1 | 1           |                  |
|           | 1                                     | 0.612268578                           | 0.612268578                 | 0.612268578 | NA                           | 1           | 0                |
|           | 0.998207054                           |                                       |                             |             |                              |             |                  |
| CLSTN1    | ENSG00000171603.16                    | 0.540502334                           | 1                           | 1           | 0.540502334                  |             |                  |
|           | Brain_Cerebellum                      | 0.540502334                           |                             |             | Brain_Cerebellum1            | 1           | 1                |
|           | 0.612053541                           | 0.612053541                           | NA                          | 1           | 0                            | 0.998207054 | 0.612053541      |
| CCDC58    | ENSG00000160124.9                     | 0.54056698                            | 4                           | 4           | 0.292278996                  |             | Brain_Cerebellum |
|           | 0.971761179                           | Brain_Frontal_Cortex_BA9              | 2.476360896                 |             | 0.157357345                  |             |                  |
|           | 0.157357345                           | -1.053135279                          | 0.447571454                 |             | -0.037067004                 |             | 0.703128222      |
|           | 4                                     | 0                                     | 0.998207054                 |             |                              |             |                  |
| FBXL2     | ENSG00000153558.13                    | 0.54057305                            | 2                           | 2           | 0.269244885                  |             | Brain_Cerebellum |
|           | 0.485847764                           | Brain_Cerebellar_Hemisphere           | 1.694801193                 |             | 0.305198807                  |             |                  |
|           | 0.305198807                           | -1.104803174                          | -0.696928144                |             | -0.900865659                 |             | 0.288411199      |
|           | 2                                     | 0                                     | 0.998207054                 |             |                              |             |                  |
| VAMP4     | ENSG00000117533.14                    | 0.540577567                           | 7                           | 7           | 0.128595068                  |             | Brain_Amygdala   |
|           | 0.881533719                           | Brain_Nucleus_accumbens_basal_ganglia | 3.063930147                 |             |                              |             |                  |
|           | 0.119469578                           | 0.119469578                           | -1.519665496                |             | 0.549684042                  |             | -0.313036946     |
|           | 0.765557243                           | 7                                     | 0                           | 0.998207054 |                              |             |                  |
| PRKAB2    | ENSG00000131791.7                     | 0.540671917                           | 3                           | 3           | 0.223384691                  |             |                  |
|           | Brain_Cortex                          | 0.50324271                            | Brain_Cerebellar_Hemisphere | 2.192457496 |                              | 0.10633524  |                  |
|           | 0.10633524                            | 0.669396303                           | 1.217577179                 |             | 0.947529157                  |             | 0.274179853      |
|           | 0                                     | 0.998207054                           |                             |             |                              |             | 3                |
| CTTNBP2   | ENSG00000077063.10                    | 0.540712987                           | 2                           | 2           | 0.297378948                  |             |                  |
|           | Brain_Putamen_basal_ganglia           | 0.712361921                           |                             |             | Brain_Cerebellum             | 1.010108499 |                  |
|           | 0.989891501                           | 0.989891501                           | -1.042070601                |             | -0.368685818                 |             | -0.705378209     |
|           | 0.476154947                           | 2                                     | 0                           | 0.998207054 |                              |             |                  |
| LINC00533 | ENSG00000235570.1                     | 0.540730857                           | 2                           | 2           | 0.378530413                  |             |                  |
|           | Brain_Cerebellum                      | 0.732054314                           |                             |             | Brain_Cerebellar_Hemisphere  | 1.823259138 |                  |
|           | 0.176740862                           | 0.176740862                           | 0.342394119                 |             | 0.880607286                  |             | 0.611500703      |
|           | 0.38057418                            | 2                                     | 0                           | 0.998207054 |                              |             |                  |
| PDS5A     | ENSG00000121892.14                    | 0.540749169                           | 2                           | 2           | 0.291152169                  |             | Brain_Cerebellum |
|           | 0.738966497                           | Brain_Amygdala                        | 1.006015595                 |             | 0.993984405                  |             | 0.993984405      |
|           | -1.055597443                          | -0.333222285                          | -0.694409864                |             | 0.510796373                  |             | 2                |
|           | 0.998207054                           |                                       |                             |             |                              |             | 0                |
| SLC37A3   | ENSG00000157800.17                    | 0.540964517                           | 6                           | 6           | 0.055715176                  |             |                  |
|           | Brain_Cortex                          | 0.961570178                           | Brain_Putamen_basal_ganglia | 2.071318199 |                              |             |                  |
|           | 0.237499949                           | 0.237499949                           | -0.752109279                |             | 1.913256876                  |             | 0.446183498      |
|           | 0.87907534                            | 6                                     | 0                           | 0.998207054 |                              |             |                  |
| RAB6C     | ENSG00000222014.5                     | 0.540972173                           | 10                          | 9           | 0.066906307                  |             |                  |
|           | Brain_Frontal_Cortex_BA9              | 0.960704746                           |                             |             | Brain_Amygdala               | 2.776701895 |                  |
|           | 1.34E-16                              | 0.122188809                           | -0.715395143                |             | 1.832302886                  |             | 0.29093471       |
|           | 0.969501022                           | 9                                     | 0                           | 0.998207054 |                              |             |                  |
| RAB11FIP5 | ENSG00000135631.16                    | 0.541003869                           | 2                           | 2           | 0.278537812                  |             |                  |
|           | Brain_Hippocampus                     | 0.683725315                           |                             |             | Brain_Cerebellum             | 1.163514466 |                  |
|           | 0.836485534                           | 0.836485534                           | -1.083609871                |             | -0.407384901                 |             | -0.745497386     |
|           | 0.478163262                           | 2                                     | 0                           | 0.998207054 |                              |             |                  |
| HMGXB4    | ENSG00000100281.13                    | 0.54112359                            | 1                           | 1           | 0.54112359                   |             |                  |
|           | Brain_Anterior_cingulate_cortex_BA24  | 0.54112359                            |                             |             |                              |             |                  |
|           | Brain_Anterior_cingulate_cortex_BA24  | 1                                     | 1                           | 1           | 0.611114789                  |             |                  |
|           | 0.611114789                           | 0.611114789                           | NA                          | 1           | 0                            | 0.998207054 |                  |
| LINC01085 | ENSG00000248698.5                     | 0.541210509                           | 5                           | 5           | 0.076730069                  |             |                  |
|           | Brain_Nucleus_accumbens_basal_ganglia | 0.744475463                           |                             |             |                              |             |                  |
|           | Brain_Anterior_cingulate_cortex_BA24  | 2.937774276                           |                             |             | 0.192420834                  |             |                  |
|           | 0.192420834                           | 0.325932451                           | 1.769982424                 |             | 0.955556159                  |             | 0.550807117      |
|           | 5                                     | 0                                     | 0.998207054                 |             |                              |             |                  |
| HPS3      | ENSG00000163755.8                     | 0.541379968                           | 2                           | 2           | 0.499857083                  |             |                  |
|           | Brain_Cerebellar_Hemisphere           | 0.616552043                           |                             |             | Brain_Cerebellum             | 1.432194096 |                  |
|           | 0.567805904                           | 0.567805904                           | -0.500742947                |             | 0.674714637                  |             | 0.086985845      |
|           | 0.831174029                           | 2                                     | 0                           | 0.998207054 |                              |             |                  |
| WDR38     | ENSG00000136918.7                     | 0.541409583                           | 1                           | 1           | 0.541409583                  |             |                  |

|                    |                                       |                                       |                             |              |                                      |                  |              |
|--------------------|---------------------------------------|---------------------------------------|-----------------------------|--------------|--------------------------------------|------------------|--------------|
|                    | Brain_Anterior_cingulate_cortex_BA24  | 0.541409583                           |                             |              |                                      |                  |              |
|                    | Brain_Anterior_cingulate_cortex_BA24  | 1                                     | 1                           | 1            | 0.610682818                          |                  |              |
|                    | 0.610682818                           | 0.610682818                           | NA                          | 1            | 0                                    | 0.998207054      |              |
| FDX2               | ENSG00000267673.6                     | 0.541473989                           | 2                           | 2            | 0.30279133                           | Brain_Cerebellum |              |
|                    | 0.653922627                           | Brain_Nucleus_accumbens_basal_ganglia | 1.041133873                 |              |                                      |                  |              |
|                    | 0.958866127                           | 0.958866127                           | -0.448319503                | 1.030465946  | 0.291073221                          |                  |              |
|                    | 1.045659219                           | 2                                     | 0                           | 0.998207054  |                                      |                  |              |
| UBE2B              | ENSG00000119048.7                     | 0.54155512                            | 2                           | 2            | 0.288437035                          | Brain_Cortex     |              |
|                    | 0.688325467                           | Brain_Nucleus_accumbens_basal_ganglia | 1.081384021                 |              |                                      |                  |              |
|                    | 0.918615979                           | 0.918615979                           | -1.061556578                | -0.401128571 | -0.731342574                         |                  |              |
|                    | 0.466993122                           | 2                                     | 0                           | 0.998207054  |                                      |                  |              |
| KY                 | ENSG00000174611.11                    | 0.541563834                           | 3                           | 3            | 0.342093022                          |                  |              |
|                    | Brain_Spinal_cord_cervical_c-1        | 0.937879489                           |                             |              | Brain_Cerebellum                     | 2.242770204      |              |
|                    | 0.124373514                           | 0.124373514                           | -0.950037848                | -0.077935339 | -0.509074375                         |                  |              |
|                    | 0.436134252                           | 3                                     | 0                           | 0.998207054  |                                      |                  |              |
| ASB1               | ENSG00000065802.11                    | 0.541637205                           | 1                           | 1            | 0.541637205                          | Brain_Cerebellum |              |
|                    | 0.541637205                           | Brain_Cerebellum                      | 1                           | 1            | -0.610339094                         | -0.610339094     |              |
|                    | -0.610339094                          | NA                                    | 1                           | 0            | 0.998207054                          |                  |              |
| SKIV2L2            | ENSG00000039123.15                    | 0.542032117                           | 3                           | 3            | 0.454217272                          |                  |              |
|                    | Brain_Cerebellar_Hemisphere           | 0.628826033                           |                             |              | Brain_Spinal_cord_cervical_c-1       |                  |              |
|                    | 1.909638809                           | 0.447458453                           | 0.447458453                 | -0.748402737 | 0.556938281                          |                  |              |
|                    | -0.224948111                          | 0.689977555                           | 3                           | 0            | 0.998207054                          |                  |              |
| ZUFSP              | ENSG00000153975.9                     | 0.542128263                           | 3                           | 3            | 0.271833981                          | Brain_Cortex     |              |
|                    | 0.678012598                           | Brain_Nucleus_accumbens_basal_ganglia | 2.524447244                 |              |                                      |                  |              |
|                    | 0.224432963                           | 0.224432963                           | -1.098848896                | -0.415176641 | -0.848859699                         |                  |              |
|                    | 0.377040467                           | 3                                     | 0                           | 0.998207054  |                                      |                  |              |
| SCFD1              | ENSG00000092108.20                    | 0.542153028                           | 4                           | 1            | 0.466024699                          |                  |              |
|                    | Brain_Cerebellar_Hemisphere           | 0.676234126                           |                             |              | Brain_Anterior_cingulate_cortex_BA24 |                  |              |
|                    | 3.820664508                           | 0.005340352                           | 3.820664508                 | -0.728962341 | -0.417607482                         |                  |              |
|                    | -0.595182352                          | 0.142004367                           | 1                           | 0            | 0.998207054                          |                  |              |
| OMA1               | ENSG00000162600.11                    | 0.542202723                           | 9                           | 2            | 0.218788653                          |                  |              |
|                    | Brain_Frontal_Cortex_BA9              | 0.537077271                           |                             |              | Brain_Caudate_basal_ganglia          |                  |              |
|                    | 8.171778443                           | 0.001697956                           | 0.488661042                 | -1.229755563 | -0.617238733                         |                  |              |
|                    | -1.018627885                          | 0.182980075                           | 2                           | 0            | 0.998207054                          |                  |              |
| LNPB               | ENSG00000144320.13                    | 0.542250949                           | 8                           | 6            | 0.205605938                          |                  |              |
|                    | Brain_Caudate_basal_ganglia           | 0.826735517                           |                             |              | Brain_Cortex                         | 5.304283868      |              |
|                    | 0.016930989                           | 0.194871184                           | -1.265740683                | 1.019853451  | 0.390502053                          |                  |              |
|                    | 0.72055816                            | 6                                     | 0                           | 0.998207054  |                                      |                  |              |
| MTBP               | ENSG00000172167.7                     | 0.542256995                           | 12                          | 2            | 0.137317056                          |                  |              |
|                    | Brain_Spinal_cord_cervical_c-1        | 0.566518749                           |                             |              | Brain_Substantia_nigra               |                  |              |
|                    | 10.85438471                           | 0.001900221                           | 0.844787562                 | 0.57318602   | 1.485856596                          |                  |              |
|                    | 1.02931156                            | 0.26006135                            | 2                           | 0            | 0.998207054                          |                  |              |
| PICSA              | ENSG00000275874.1                     | 0.542338407                           | 6                           | 6            | 0.445685524                          |                  |              |
|                    | Brain_Hypothalamus                    | 0.962314179                           |                             |              | Brain_Substantia_nigra               | 3.822663947      |              |
|                    | 0.154322835                           | 0.154322835                           | -0.585819428                | 0.762627592  | -0.055173115                         |                  |              |
|                    | 0.473518654                           | 6                                     | 0                           | 0.998207054  |                                      |                  |              |
| TRPC4              | ENSG00000133107.14                    | 0.542406823                           | 2                           | 2            | 0.269706166                          |                  |              |
|                    | Brain_Caudate_basal_ganglia           | 0.986821006                           |                             |              | Brain_Cortex                         | 1.050516636      |              |
|                    | 0.949483364                           | 0.949483364                           | -1.103739476                | 0.01651817   | -0.543610653                         |                  |              |
|                    | 0.792141778                           | 2                                     | 0                           | 0.998207054  |                                      |                  |              |
| PTGER4P2-CDK2AP2P2 | ENSG00000275450.1                     | 0.54261395                            | 1                           | 1            | 0.54261395                           |                  |              |
|                    | Brain_Cerebellum                      | 0.54261395                            | Brain_Cerebellum            | 1            | 1                                    | 1                | -0.608864963 |
|                    | -0.608864963                          | -0.608864963                          | NA                          | 1            | 0                                    | 0.998207054      |              |
| CNTNAP3B           | ENSG00000154529.14                    | 0.54261395                            | 10                          | 1            | 0.54261395                           | Brain_Cerebellum |              |
|                    | 0.54261395                            | Brain_Cortex                          | 10                          | 1.63E-17     | 10                                   | -0.608864963     | 0.608864963  |
|                    | -0.243545985                          | 0.588219438                           | 1                           | 0            | 0.998207054                          |                  |              |
| FAM95B1            | ENSG00000223839.7                     | 0.54261395                            | 1                           | 1            | 0.54261395                           |                  |              |
|                    | Brain_Nucleus_accumbens_basal_ganglia | 0.54261395                            |                             |              |                                      |                  |              |
|                    | Brain_Nucleus_accumbens_basal_ganglia | 1                                     | 1                           | 1            | 0.608864963                          |                  |              |
|                    | 0.608864963                           | 0.608864963                           | NA                          | 1            | 0                                    | 0.998207054      |              |
| RP11-58A12.3       | ENSG00000225655.5                     | 0.54261395                            | 1                           | 1            | 0.54261395                           |                  |              |
|                    | Brain_Caudate_basal_ganglia           | 0.54261395                            | Brain_Caudate_basal_ganglia | 1            | 1                                    | 1                |              |

|                   |                                       |                                       |                                      |              |              |                             |              |
|-------------------|---------------------------------------|---------------------------------------|--------------------------------------|--------------|--------------|-----------------------------|--------------|
|                   | -0.608864963                          | -0.608864963                          | -0.608864963                         | NA           | 1            | 0                           | 0.998207054  |
| BX255923.3        | ENSG00000276462.1                     | 0.54261395                            | 1                                    | 1            | 0.54261395   |                             |              |
|                   | Brain_Frontal_Cortex_BA9              | 0.54261395                            | Brain_Frontal_Cortex_BA9             | 1            | 1            | 1                           |              |
|                   | -0.608864963                          | -0.608864963                          | -0.608864963                         | NA           | 1            | 0                           | 0.998207054  |
| CBWD7             | ENSG00000215126.10                    | 0.54261395                            | 2                                    | 1            | 0.54261395   | Brain_Cerebellar_Hemisphere |              |
|                   | 0.54261395                            | Brain_Cerebellar_Hemisphere2          | 3.35E-17                             | 2            | -0.608864963 |                             |              |
|                   | -0.608864963                          | -0.608864963                          | 0                                    | 1            | 0            | 0.998207054                 |              |
| FOXD4L6           | ENSG00000273514.1                     | 0.54261395                            | 3                                    | 1            | 0.54261395   |                             |              |
|                   | Brain_Cerebellar_Hemisphere           | 0.54261395                            | Brain_Cortex                         | 3            | 2.11E-48     | 3                           |              |
|                   | -0.608864963                          | 0.608864963                           | -0.202954988                         | 0.703056701  | 1            | 0                           |              |
|                   | 0.998207054                           |                                       |                                      |              |              |                             |              |
| MRPL11            | ENSG00000174547.13                    | 0.542796443                           | 1                                    | 1            | 0.542796443  |                             |              |
|                   | Brain_Cortex                          | 0.542796443                           | Brain_Cortex                         | 1            | 1            | 1                           | -0.608589686 |
|                   | -0.608589686                          | -0.608589686                          | NA                                   | 1            | 0            | 0.998207054                 |              |
| CLEC4E            | ENSG00000166523.7                     | 0.54283038                            | 1                                    | 1            | 0.54283038   |                             |              |
|                   | Brain_Substantia_nigra                | 0.54283038                            | Brain_Substantia_nigra               | 1            | 1            | 1                           |              |
|                   | -0.608538499                          | -0.608538499                          | -0.608538499                         | NA           | 1            | 0                           | 0.998207054  |
| SS18              | ENSG00000141380.13                    | 0.542896848                           | 2                                    | 2            | 0.343894766  |                             |              |
|                   | Brain_Cerebellar_Hemisphere           | 0.468330916                           | Brain_Frontal_Cortex_BA9             | 1.17212448   |              |                             |              |
|                   | 0.82787552                            | 0.82787552                            | -0.946497756                         | -0.725197435 | -0.835847596 |                             |              |
|                   | 0.156482957                           | 2                                     | 0                                    | 0.998207054  |              |                             |              |
| MALSU1            | ENSG00000156928.4                     | 0.542943647                           | 1                                    | 1            | 0.542943647  |                             |              |
|                   | Brain_Amygdala                        | 0.542943647                           | Brain_Amygdala                       | 1            | 1            | 1                           | 0.608367674  |
|                   | 0.608367674                           | 0.608367674                           | NA                                   | 1            | 0            | 0.998207054                 |              |
| SELENOI           | ENSG00000138018.17                    | 0.543030657                           | 2                                    | 2            | 0.275220651  |                             |              |
|                   | Brain_Nucleus_accumbens_basal_ganglia | 0.992560744                           | Brain_Cerebellum                     |              |              |                             |              |
|                   | 1.150060684                           | 0.849939316                           | 0.849939316                          | 0.00932386   | 1.091118711  |                             |              |
|                   | 0.550221285                           | 0.764944475                           | 2                                    | 0            | 0.998207054  |                             |              |
| SIVA1             | ENSG00000184990.12                    | 0.543101523                           | 6                                    | 4            | 0.36031562   |                             |              |
|                   | Brain_Cerebellar_Hemisphere           | 0.90884826                            | Brain_Anterior_cingulate_cortex_BA24 |              |              |                             |              |
|                   | 4.464436194                           | 0.019819208                           | 0.222718542                          | -0.386354816 | 0.914763843  |                             |              |
|                   | 0.333106847                           | 0.483890665                           | 4                                    | 0            | 0.998207054  |                             |              |
| EHD4              | ENSG00000103966.10                    | 0.543317333                           | 9                                    | 5            | 0.091841679  | Brain_Cerebellum            |              |
|                   | 0.942218874                           | Brain_Nucleus_accumbens_basal_ganglia | 5.1443692                            | 0.005868094  |              |                             |              |
|                   | 0.282106712                           | -0.151056036                          | 1.685761849                          | 0.48555887   | 0.665350352  | 5                           |              |
|                   | 0                                     | 0.998207054                           |                                      |              |              |                             |              |
| DDI2              | ENSG00000197312.11                    | 0.543329086                           | 4                                    | 3            | 0.223352542  |                             |              |
|                   | Brain_Anterior_cingulate_cortex_BA24  | 0.878179885                           | Brain_Hippocampus                    |              |              |                             |              |
|                   | 1.983328181                           | 0.043119044                           | 0.897898933                          | -1.21766174  | -0.15327694  |                             |              |
|                   | -0.722010819                          | 0.458905456                           | 3                                    | 0            | 0.998207054  |                             |              |
| SMIM19            | ENSG00000176209.11                    | 0.543331772                           | 13                                   | 1            | 0.314955142  |                             |              |
|                   | Brain_Hypothalamus                    | 0.750300972                           | Brain_Cerebellum                     | 12.26488556  |              |                             |              |
|                   | 0.000364645                           | 12.26488556                           | 0.318242533                          | 1.00487895   | 0.58900809   |                             |              |
|                   | 0.195253948                           | 1                                     | 0                                    | 0.998207054  |              |                             |              |
| TNIK              | ENSG00000154310.16                    | 0.543438193                           | 1                                    | 1            | 0.543438193  |                             |              |
|                   | Brain_Frontal_Cortex_BA9              | 0.543438193                           | Brain_Frontal_Cortex_BA9             | 1            | 1            |                             |              |
|                   | 1                                     | -0.607622019                          | -0.607622019                         | -0.607622019 | NA           | 1                           | 0            |
|                   | 0.998207054                           |                                       |                                      |              |              |                             |              |
| XXbac-BPG181B23.7 | ENSG00000272221.1                     | 0.543520144                           | 13                                   | 5            | 0.064596865  |                             |              |
|                   | Brain_Frontal_Cortex_BA9              | 0.676853746                           | Brain_Cerebellum                     | 9.543701614  |              |                             |              |
|                   | 0.009288364                           | 0.389849899                           | -1.84803787                          | -0.416760296 | -1.062524103 |                             |              |
|                   | 0.39450113                            | 5                                     | 0                                    | 0.998207054  |              |                             |              |
| PARP4             | ENSG00000102699.5                     | 0.543713635                           | 1                                    | 1            | 0.543713635  |                             |              |
|                   | Brain_Caudate_basal_ganglia           | 0.543713635                           | Brain_Caudate_basal_ganglia          | 1            | 1            |                             |              |
|                   | 1                                     | 0.607206868                           | 0.607206868                          | 0.607206868  | NA           | 1                           | 0            |
|                   | 0.998207054                           |                                       |                                      |              |              |                             |              |
| NSUN7             | ENSG00000179299.16                    | 0.543760063                           | 2                                    | 2            | 0.278397373  |                             |              |
|                   | Brain_Hypothalamus                    | 0.844266541                           | Brain_Anterior_cingulate_cortex_BA24 |              |              |                             |              |
|                   | 1.011391826                           | 0.988608174                           | 0.988608174                          | 0.196439041  | 1.083926536  |                             |              |
|                   | 0.640182789                           | 0.627548426                           | 2                                    | 0            | 0.998207054  |                             |              |
| DRC1              | ENSG00000157856.10                    | 0.543766263                           | 3                                    | 3            | 0.270080018  | Brain_Cortex                |              |
|                   | 0.721799046                           | Brain_Cerebellum                      | 1.805796037                          | 0.356842981  | 0.356842981  |                             |              |

|               |                                       |                             |                                       |              |              |                  |
|---------------|---------------------------------------|-----------------------------|---------------------------------------|--------------|--------------|------------------|
|               | -0.539483348                          | 1.102878302                 | 0.306483465                           | 0.822302246  | 3            | 0                |
|               | 0.998207054                           |                             |                                       |              |              |                  |
| LRRC43        | ENSG00000158113.12                    | 0.543956381                 | 6                                     | 6            | 0.261639543  |                  |
|               | Brain_Cerebellum                      | 0.92780442                  | Brain_Caudate_basal_ganglia           | 2.067017771  |              |                  |
|               | 0.335980878                           | 0.335980878                 | -0.923413872                          | 1.122524391  | -0.149375094 |                  |
|               | 0.705275292                           | 6                           | 0                                     | 0.998207054  |              |                  |
| DDX55         | ENSG00000111364.15                    | 0.544095835                 | 13                                    | 2            | 0.580188205  |                  |
|               | Brain_Anterior_cingulate_cortex_BA24  | 0.971546814                 |                                       |              |              |                  |
|               | Brain_Nucleus_accumbens_basal_ganglia | 11.63824816                 |                                       | 0.000258687  |              |                  |
|               | 0.551601043                           | -0.540737136                | 0.553109832                           | 0.084249295  | 0.274352249  |                  |
|               | 2                                     | 0                           | 0.998207054                           |              |              |                  |
| HLA-B         | ENSG00000234745.10                    | 0.544110271                 | 13                                    | 9            | 0.191424328  |                  |
|               | Brain_Caudate_basal_ganglia           | 0.991706739                 | Brain_Hypothalamus                    | 6.59258334   |              |                  |
|               | 0.064059682                           | 0.303625113                 | -1.306377162                          | 1.292704634  | -0.249801632 |                  |
|               | 0.73013317                            | 9                           | 0                                     | 0.998207054  |              |                  |
| RP11-569G13.2 | ENSG00000237212.1                     | 0.544136485                 | 3                                     | 3            | 0.14737079   |                  |
|               | Brain_Cerebellar_Hemisphere           | 0.367960409                 | Brain_Hypothalamus                    | 2.463846524  |              |                  |
|               | 0.166417756                           | 0.166417756                 | 0.900300399                           | 1.4488811    | 1.13108292   |                  |
|               | 0.284453846                           | 3                           | 0                                     | 0.998207054  |              |                  |
| IRF1          | ENSG00000125347.13                    | 0.544250266                 | 1                                     | 1            | 0.544250266  |                  |
|               | Brain_Nucleus_accumbens_basal_ganglia | 0.544250266                 |                                       |              |              |                  |
|               | Brain_Nucleus_accumbens_basal_ganglia | 1                           | 1                                     | 1            | 0.606398347  |                  |
|               | 0.606398347                           | 0.606398347                 | NA                                    | 1            | 0            | 0.998207054      |
| PPOX          | ENSG00000143224.17                    | 0.544344129                 | 6                                     | 5            | 0.490966118  |                  |
|               | Brain_Cerebellar_Hemisphere           | 0.979523975                 | Brain_Caudate_basal_ganglia           |              |              |                  |
|               | 4.016382843                           | 0.025840323                 | 0.17674211                            | -0.688773017 | 0.655188408  |                  |
|               | 0.055498471                           | 0.488907544                 | 5                                     | 0            | 0.998207054  |                  |
| SCGN          | ENSG00000079689.13                    | 0.544369849                 | 2                                     | 2            | 0.271353782  |                  |
|               | Brain_Putamen_basal_ganglia           | 0.721111255                 | Brain_Cortex                          | 1.391270455  |              |                  |
|               | 0.608729545                           | 0.608729545                 | -0.35697402                           | 1.099950288  | 0.371488134  |                  |
|               | 1.030201058                           | 2                           | 0                                     | 0.998207054  |              |                  |
| TNKS2         | ENSG00000107854.5                     | 0.544455921                 | 2                                     | 2            | 0.611625769  |                  |
|               | Brain_Frontal_Cortex_BA9              | 0.709661264                 | Brain_Cerebellar_Hemisphere           |              |              |                  |
|               | 1.680078709                           | 0.319921291                 | 0.319921291                           | -0.507754148 | 0.372311061  |                  |
|               | -0.067721543                          | 0.622300078                 | 2                                     | 0            | 0.998207054  |                  |
| DLG2          | ENSG00000150672.16                    | 0.544536847                 | 1                                     | 1            | 0.544536847  |                  |
|               | Brain_Cerebellar_Hemisphere           | 0.544536847                 | Brain_Cerebellar_Hemisphere           | 1            | 1            |                  |
|               | 1                                     | 0.605966729                 | 0.605966729                           | 0.605966729  | NA           | 1                |
|               | 0.998207054                           |                             |                                       |              | 0            |                  |
| MCAM          | ENSG00000076706.16                    | 0.544554271                 | 2                                     | 1            | 0.509202941  | Brain_Cerebellum |
|               | 0.581532114                           | Brain_Cerebellar_Hemisphere | 1.99784354                            | 0.00215646   | 1.99784354   |                  |
|               | -0.660079302                          | -0.55114816                 | -0.605613731                          | 0.077025949  | 1            | 0                |
|               | 0.998207054                           |                             |                                       |              |              |                  |
| L2HGDH        | ENSG00000087299.11                    | 0.544655292                 | 3                                     | 3            | 0.187467594  |                  |
|               | Brain_Caudate_basal_ganglia           | 0.700761473                 | Brain_Cerebellum                      | 2.336897554  |              |                  |
|               | 0.081474564                           | 0.081474564                 | -1.31810771                           | -0.38429276  | -0.757108103 |                  |
|               | 0.494532687                           | 3                           | 0                                     | 0.998207054  |              |                  |
| ZNF331        | ENSG00000130844.16                    | 0.544678397                 | 2                                     | 1            | 0.538342203  |                  |
|               | Brain_Cerebellum                      | 0.555736575                 | Brain_Cerebellar_Hemisphere           | 1.97695692   | 0.02304308   |                  |
|               | 1.97695692                            | -0.615321831                | -0.589185899                          | -0.602253865 | 0.018480895  | 1                |
|               | 0                                     | 0.998207054                 |                                       |              |              |                  |
| PGLS          | ENSG00000130313.6                     | 0.544713023                 | 1                                     | 1            | 0.544713023  |                  |
|               | Brain_Hypothalamus                    | 0.544713023                 | Brain_Hypothalamus                    | 1            | 1            | 1                |
|               | 0.605701447                           | 0.605701447                 | 0.605701447                           | NA           | 1            | 0                |
|               | 0.998207054                           |                             |                                       |              |              |                  |
| EEF1B2        | ENSG00000114942.13                    | 0.544820423                 | 1                                     | 1            | 0.544820423  |                  |
|               | Brain_Hypothalamus                    | 0.544820423                 | Brain_Hypothalamus                    | 1            | 1            | 1                |
|               | 0.605539747                           | 0.605539747                 | 0.605539747                           | NA           | 1            | 0                |
|               | 0.998207054                           |                             |                                       |              |              |                  |
| SMTNL2        | ENSG00000188176.11                    | 0.544826862                 | 1                                     | 1            | 0.544826862  |                  |
|               | Brain_Hippocampus                     | 0.544826862                 | Brain_Hippocampus                     | 1            | 1            | 1                |
|               | 0.605530053                           | 0.605530053                 | 0.605530053                           | NA           | 1            | 0                |
|               | 0.998207054                           |                             |                                       |              |              |                  |
| ADSL          | ENSG00000239900.12                    | 0.544827737                 | 5                                     | 5            | 0.167770022  |                  |
|               | Brain_Cerebellar_Hemisphere           | 0.937672692                 | Brain_Nucleus_accumbens_basal_ganglia |              |              |                  |

|               |                                       |                                |              |              |                                      |                    |              |           |
|---------------|---------------------------------------|--------------------------------|--------------|--------------|--------------------------------------|--------------------|--------------|-----------|
|               | 2.048403932                           | 0.189847863                    | 0.189847863  | -1.379404664 | 0.555887981                          |                    |              |           |
|               | -0.227872611                          | 0.774050113                    | 5            | 0            | 0.998207054                          |                    |              |           |
| IQUB          | ENSG00000164675.10                    | 0.544866441                    | 1            | 1            | 0.544866441                          |                    |              |           |
|               | Brain_Substantia_nigra                | 0.544866441                    |              |              | Brain_Substantia_nigra               | 1                  | 1            |           |
|               | 1                                     | -0.605470469                   | -0.605470469 | -0.605470469 | NA                                   | 1                  | 0            |           |
|               | 0.998207054                           |                                |              |              |                                      |                    |              |           |
| NEO1          | ENSG00000067141.16                    | 0.5449932                      | 1            | 1            | 0.5449932                            | Brain_Amygdala     | 0.5449932    |           |
|               | Brain_Amygdala                        | 1                              | 1            | 1            | 0.60527965                           | 0.60527965         | 0.60527965   | NA        |
|               | 1                                     | 1                              | 1            | 0            |                                      |                    | 1            | 0         |
|               | 0.998207054                           |                                |              |              |                                      |                    |              |           |
| URB1-AS1      | ENSG00000256073.3                     | 0.5451517                      | 7            | 4            | 0.106547716                          |                    |              |           |
|               | Brain_Hypothalamus                    | 0.660502936                    |              |              | Brain_Amygdala                       | 5.104613693        |              |           |
|               | 0.002638111                           | 0.292209315                    | -0.979270664 | 1.613906467  | -0.293895916                         |                    |              |           |
|               | 0.860130949                           | 4                              | 0            | 0.998207054  |                                      |                    |              |           |
| RP11-231C18.1 | ENSG00000248184.1                     | 0.545318584                    | 10           | 3            | 0.141361709                          |                    |              |           |
|               | Brain_Anterior_cingulate_cortex_BA24  | 0.949700497                    |              |              | Brain_Cerebellum                     |                    |              |           |
|               | 7.649668265                           | 0.009880893                    | 0.310748991  | -1.47073902  | -0.063082893                         |                    |              |           |
|               | -0.754821223                          | 0.453334775                    | 3            | 0            | 0.998207054                          |                    |              |           |
| KIAA1211      | ENSG00000109265.13                    | 0.545356089                    | 3            | 3            | 0.194608577                          |                    |              |           |
|               | Brain_Cerebellar_Hemisphere           | 0.382279275                    |              |              | Brain_Spinal_cord_cervical_c-1       |                    |              |           |
|               | 2.781086094                           | 0.102156194                    | 0.102156194  | -1.297065715 | -0.873704362                         |                    |              |           |
|               | -1.105406289                          | 0.214502355                    | 3            | 0            | 0.998207054                          |                    |              |           |
| BARX2         | ENSG00000043039.6                     | 0.545356903                    | 1            | 1            | 0.545356903                          |                    |              |           |
|               | Brain_Hippocampus                     | 0.545356903                    |              |              | Brain_Hippocampus                    | 1                  | 1            | 1         |
|               | -0.60473227                           | -0.60473227                    | -0.60473227  | NA           | 1                                    | 0                  | 0.998207054  |           |
| RGS8          | ENSG00000135824.12                    | 0.545501012                    | 1            | 1            | 0.545501012                          | Brain_Cortex       |              |           |
|               | 0.545501012                           | Brain_Cortex                   | 1            | 1            | 1                                    | -0.604515433       | -0.604515433 |           |
|               | -0.604515433                          | NA                             | 1            | 0            | 0.998207054                          |                    |              |           |
| MUC20         | ENSG00000176945.16                    | 0.545639038                    | 13           | 7            | 0.077112279                          |                    |              |           |
|               | Brain_Nucleus_accumbens_basal_ganglia | 0.757785723                    |              |              | Brain_Frontal_Cortex_BA9             |                    |              |           |
|               | 7.158230303                           | 0.016266842                    | 0.270030766  | -1.351728775 | 1.767692769                          |                    |              |           |
|               | 0.799997218                           | 0.978255916                    | 7            | 0            | 0.998207054                          |                    |              |           |
| AKAIN1        | ENSG00000231824.3                     | 0.545759742                    | 1            | 1            | 0.545759742                          |                    |              |           |
|               | Brain_Cerebellum                      | 0.545759742                    |              |              | Brain_Cerebellum                     | 1                  | 1            | 0.6041262 |
|               | 0.6041262                             | 0.6041262                      | NA           | 1            | 0                                    | 0.998207054        |              |           |
| PTX4          | ENSG00000251692.7                     | 0.545791711                    | 1            | 1            | 0.545791711                          |                    |              |           |
|               | Brain_Hypothalamus                    | 0.545791711                    |              |              | Brain_Hypothalamus                   | 1                  | 1            | 1         |
|               | 0.604078112                           | 0.604078112                    | 0.604078112  | NA           | 1                                    | 0                  | 0.998207054  |           |
| TPK1          | ENSG00000196511.14                    | 0.545833878                    | 1            | 1            | 0.545833878                          |                    |              |           |
|               | Brain_Frontal_Cortex_BA9              | 0.545833878                    |              |              | Brain_Frontal_Cortex_BA9             | 1                  | 1            |           |
|               | 1                                     | 0.604014686                    | 0.604014686  | 0.604014686  | NA                                   | 1                  | 0            |           |
|               | 0.998207054                           |                                |              |              |                                      |                    |              |           |
| APOBEC3C      | ENSG00000244509.3                     | 0.545835235                    | 7            | 7            | 0.057942106                          |                    |              |           |
|               | Brain_Hippocampus                     | 0.873978872                    |              |              | Brain_Putamen_basal_ganglia          | 1.617922644        |              |           |
|               | 0.539830574                           | 0.539830574                    | -1.896135674 | 0.235987171  | -0.57170393                          |                    |              |           |
|               | 0.810896604                           | 7                              | 0            | 0.998207054  |                                      |                    |              |           |
| LYRM9         | ENSG00000232859.9                     | 0.545860279                    | 13           | 2            | 0.180801598                          | Brain_Amygdala     |              |           |
|               | 0.599228789                           | Brain_Spinal_cord_cervical_c-1 |              |              | 11.42755876                          | 6.39E-05           |              |           |
|               | 0.573215631                           | 0.525509877                    | 1.338290988  | 0.985294542  | 0.209402622                          |                    |              |           |
|               | 2                                     | 0                              | 0.998207054  |              |                                      |                    |              |           |
| LRRC7         | ENSG00000033122.18                    | 0.545948581                    | 1            | 1            | 0.545948581                          |                    |              |           |
|               | Brain_Frontal_Cortex_BA9              | 0.545948581                    |              |              | Brain_Frontal_Cortex_BA9             | 1                  | 1            |           |
|               | 1                                     | 0.603842168                    | 0.603842168  | 0.603842168  | NA                                   | 1                  | 0            |           |
|               | 0.998207054                           |                                |              |              |                                      |                    |              |           |
| IL2RA         | ENSG00000134460.15                    | 0.54596685                     | 2            | 2            | 0.326724094                          | Brain_Hypothalamus |              |           |
|               | 0.626903606                           | Brain_Spinal_cord_cervical_c-1 |              |              | 1.012667817                          | 0.987332183        |              |           |
|               | 0.987332183                           | -0.486089649                   | 0.980733673  | 0.247322012  | 1.037200718                          |                    |              |           |
|               | 2                                     | 0                              | 0.998207054  |              |                                      |                    |              |           |
| MTFR1L        | ENSG00000117640.17                    | 0.546039961                    | 5            | 5            | 0.074235952                          |                    |              |           |
|               | Brain_Caudate_basal_ganglia           | 0.936680837                    |              |              | Brain_Anterior_cingulate_cortex_BA24 |                    |              |           |
|               | 2.828316997                           | 0.136630204                    | 0.136630204  | 0.079442284  | 1.785156401                          |                    |              |           |
|               | 1.125653189                           | 0.645958291                    | 5            | 0            | 0.998207054                          |                    |              |           |
| CHAC1         | ENSG00000128965.11                    | 0.546092902                    | 1            | 1            | 0.546092902                          |                    |              |           |



|               |                                       |                                       |                                |                    |              |              |                          |   |
|---------------|---------------------------------------|---------------------------------------|--------------------------------|--------------------|--------------|--------------|--------------------------|---|
|               | Brain_Hypothalamus                    | 0.546092902                           |                                | Brain_Hypothalamus | 1            | 1            | 1                        |   |
|               | -0.603625129                          | -0.603625129                          | -0.603625129                   | NA                 | 1            | 0            | 0.998207054              |   |
| LARP1B        | ENSG00000138709.17                    | 0.546322472                           | 2                              | 2                  | 0.476885576  |              |                          |   |
|               | Brain_Frontal_Cortex_BA9              | 0.86125648                            | Brain_Cortex                   | 1.650060338        |              |              |                          |   |
|               | 0.349939662                           | 0.349939662                           | -0.17477494                    | 0.711320621        | 0.26827284   |              |                          |   |
|               | 0.62656418                            | 2                                     | 0                              | 0.998207054        |              |              |                          |   |
| UNC50         | ENSG00000115446.11                    | 0.54632986                            | 1                              | 1                  | 0.54632986   |              |                          |   |
|               | Brain_Anterior_cingulate_cortex_BA24  | 0.54632986                            |                                |                    |              |              |                          |   |
|               | Brain_Anterior_cingulate_cortex_BA24  | 1                                     | 1                              | 1                  | -0.603268838 |              |                          |   |
|               | -0.603268838                          | -0.603268838                          | NA                             | 1                  | 0            | 0.998207054  |                          |   |
| KLHL29        | ENSG00000119771.14                    | 0.546361125                           | 1                              | 1                  | 0.546361125  |              |                          |   |
|               | Brain_Cortex                          | 0.546361125                           | Brain_Cortex                   | 1                  | 1            | 1            | 0.603221834              |   |
|               | 0.603221834                           | 0.603221834                           | NA                             | 1                  | 0            | 0.998207054  |                          |   |
| OXCT1         | ENSG00000083720.12                    | 0.546363426                           | 1                              | 1                  | 0.546363426  |              |                          |   |
|               | Brain_Spinal_cord_cervical_c-1        | 0.546363426                           | Brain_Spinal_cord_cervical_c-1 |                    |              |              |                          |   |
|               | 1                                     | 1                                     | 1                              | -0.603218374       | -0.603218374 | -0.603218374 | NA                       | 1 |
|               | 0.998207054                           |                                       |                                |                    |              |              |                          | 0 |
| GAB2          | ENSG00000033327.12                    | 0.546396058                           | 2                              | 2                  | 0.278144327  |              | Brain_Cerebellum         |   |
|               | 0.319070735                           | Brain_Cerebellar_Hemisphere           | 1.824371765                    | 0.175628235        |              |              |                          |   |
|               | 0.175628235                           | 0.996369317                           | 1.084497382                    | 1.04043335         | 0.062315952  |              |                          | 2 |
|               | 0                                     | 0.998207054                           |                                |                    |              |              |                          |   |
| NOS1          | ENSG00000089250.18                    | 0.546477499                           | 7                              | 5                  | 0.119708021  |              | Brain_Amygdala           |   |
|               | 0.933322816                           | Brain_Nucleus_accumbens_basal_ganglia | 3.818170027                    |                    |              |              |                          |   |
|               | 0.062411981                           | 0.205170473                           | -1.556000298                   | 0.426901576        | -0.687870155 |              |                          |   |
|               | 0.677385027                           | 5                                     | 0                              | 0.998207054        |              |              |                          |   |
| ACTL8         | ENSG00000117148.7                     | 0.54650061                            | 1                              | 1                  | 0.54650061   |              | Brain_Frontal_Cortex_BA9 |   |
|               | 0.54650061                            | Brain_Frontal_Cortex_BA9              | 1                              | 1                  | 1            | 0.603012145  |                          |   |
|               | 0.603012145                           | 0.603012145                           | NA                             | 1                  | 0            | 0.998207054  |                          |   |
| CPEB3         | ENSG00000107864.14                    | 0.546504527                           | 2                              | 2                  | 0.279509398  |              |                          |   |
|               | Brain_Anterior_cingulate_cortex_BA24  | 0.888010323                           | Brain_Cerebellar_Hemisphere    |                    |              |              |                          |   |
|               | 1.052035179                           | 0.947964821                           | 0.947964821                    | -1.081422094       | 0.140822304  |              |                          |   |
|               | -0.470299895                          | 0.864257302                           | 2                              | 0                  | 0.998207054  |              |                          |   |
| NLGN1         | ENSG00000169760.17                    | 0.546606114                           | 1                              | 1                  | 0.546606114  |              |                          |   |
|               | Brain_Substantia_nigra                | 0.546606114                           | Brain_Substantia_nigra         | 1                  | 1            |              |                          |   |
|               | 1                                     | 0.602853557                           | 0.602853557                    | 0.602853557        | NA           | 1            | 0                        |   |
|               | 0.998207054                           |                                       |                                |                    |              |              |                          |   |
| BEST2         | ENSG00000039987.6                     | 0.546764326                           | 1                              | 1                  | 0.546764326  |              |                          |   |
|               | Brain_Frontal_Cortex_BA9              | 0.546764326                           | Brain_Frontal_Cortex_BA9       | 1                  | 1            |              |                          |   |
|               | 1                                     | 0.602615772                           | 0.602615772                    | 0.602615772        | NA           | 1            | 0                        |   |
|               | 0.998207054                           |                                       |                                |                    |              |              |                          |   |
| C1orf112      | ENSG00000000460.16                    | 0.547035472                           | 6                              | 6                  | 0.317114036  |              |                          |   |
|               | Brain_Putamen_basal_ganglia           | 0.854085628                           | Brain_Cortex                   | 2.915489623        |              |              |                          |   |
|               | 0.152122933                           | 0.152122933                           | -0.942329832                   | 1.000406065        | -0.189973027 |              |                          |   |
|               | 0.731812452                           | 6                                     | 0                              | 0.998207054        |              |              |                          |   |
| C19orf60      | ENSG00000006015.17                    | 0.547039996                           | 1                              | 1                  | 0.547039996  |              |                          |   |
|               | Brain_Amygdala                        | 0.547039996                           | Brain_Amygdala                 | 1                  | 1            | 1            | 0.602201532              |   |
|               | 0.602201532                           | 0.602201532                           | NA                             | 1                  | 0            | 0.998207054  |                          |   |
| SCUBE3        | ENSG00000146197.8                     | 0.547230617                           | 1                              | 1                  | 0.547230617  |              |                          |   |
|               | Brain_Nucleus_accumbens_basal_ganglia | 0.547230617                           |                                |                    |              |              |                          |   |
|               | Brain_Nucleus_accumbens_basal_ganglia | 1                                     | 1                              | 1                  | -0.601915153 |              |                          |   |
|               | -0.601915153                          | -0.601915153                          | NA                             | 1                  | 0            | 0.998207054  |                          |   |
| RP11-479G22.8 | ENSG00000273038.2                     | 0.547318839                           | 12                             | 2                  | 0.299339642  |              |                          |   |
|               | Brain_Putamen_basal_ganglia           | 0.983764376                           | Brain_Hippocampus              | 10.44026824        |              |              |                          |   |
|               | 0.001549392                           | 0.619753192                           | -0.894762296                   | 1.037850542        | 0.285395081  |              |                          |   |
|               | 0.46179748                            | 2                                     | 0                              | 0.998207054        |              |              |                          |   |
| KCNJ16        | ENSG00000153822.13                    | 0.547403902                           | 5                              | 5                  | 0.139107158  |              |                          |   |
|               | Brain_Substantia_nigra                | 0.943281023                           | Brain_Cerebellum               | 1.538035957        |              |              |                          |   |
|               | 0.600269119                           | 0.600269119                           | -0.380913015                   | 1.479124069        | 0.639258474  |              |                          |   |
|               | 0.771362804                           | 5                                     | 0                              | 0.998207054        |              |              |                          |   |
| ILF3-AS1      | ENSG00000267100.1                     | 0.547585642                           | 5                              | 3                  | 0.326183673  |              |                          |   |
|               | Brain_Frontal_Cortex_BA9              | 0.598114018                           | Brain_Putamen_basal_ganglia    |                    |              |              |                          |   |
|               | 3.528213419                           | 0.021830901                           | 0.225027469                    | -0.698811052       | 0.981829864  |              |                          |   |

|               |                                |                |                        |              |                                |                |   |   |  |
|---------------|--------------------------------|----------------|------------------------|--------------|--------------------------------|----------------|---|---|--|
| RTN4R         | ENSG00000040608.13             | 0.547675859    | 1                      | 1            | 0.547675859                    |                |   |   |  |
|               | Brain_Cerebellar_Hemisphere    | 0.547675859    |                        |              | Brain_Cerebellar_Hemisphere    | 1              | 1 |   |  |
|               | 1                              | -0.601246438   | -0.601246438           | -0.601246438 | NA                             | 1              | 0 |   |  |
|               | 0.998207054                    |                |                        |              |                                |                |   |   |  |
| SLC25A45      | ENSG00000162241.12             | 0.54768632     | 1                      | 1            | 0.54768632                     | Brain_Amygdala |   |   |  |
|               | 0.54768632                     | Brain_Amygdala | 1                      | 1            | 0.601230729                    | 0.601230729    |   |   |  |
|               | 0.601230729                    | NA             | 1                      | 0            | 0.998207054                    |                |   |   |  |
| ALG2          | ENSG00000119523.9              | 0.547734343    | 1                      | 1            | 0.547734343                    |                |   |   |  |
|               | Brain_Spinal_cord_cervical_c-1 | 0.547734343    |                        |              | Brain_Spinal_cord_cervical_c-1 |                |   |   |  |
|               | 1                              | 1              | 0.601158619            | 0.601158619  | 0.601158619                    | NA             | 1 | 0 |  |
|               | 0.998207054                    |                |                        |              |                                |                |   |   |  |
| PFKFB4        | ENSG00000114268.11             | 0.547747388    | 3                      | 2            | 0.069245779                    |                |   |   |  |
|               | Brain_Hypothalamus             | 0.589137477    |                        |              | Brain_Cerebellar_Hemisphere    | 2.813427293    |   |   |  |
|               | 0.074399039                    | 0.112173668    | 0.54008636             | 1.816812821  | 1.042705656                    |                |   |   |  |
|               | 0.680284397                    | 2              | 0                      | 0.998207054  |                                |                |   |   |  |
| RP11-332J15.4 | ENSG00000272071.1              | 0.547851477    | 1                      | 1            | 0.547851477                    |                |   |   |  |
|               | Brain_Frontal_Cortex_BA9       | 0.547851477    |                        |              | Brain_Frontal_Cortex_BA9       | 1              | 1 |   |  |
|               | 1                              | 0.600982748    | 0.600982748            | 0.600982748  | NA                             | 1              | 0 |   |  |
|               | 0.998207054                    |                |                        |              |                                |                |   |   |  |
| 1-Mar         | ENSG00000186205.12             | 0.547979552    | 2                      | 2            | 0.492541972                    |                |   |   |  |
|               | Brain_Caudate_basal_ganglia    | 0.708217126    |                        |              | Brain_Putamen_basal_ganglia    |                |   |   |  |
|               | 1.519767429                    | 0.480232571    | 0.480232571            | -0.686271413 | 0.374251615                    |                |   |   |  |
|               | -0.156009899                   | 0.749903025    | 2                      | 0            | 0.998207054                    |                |   |   |  |
| ZNF200        | ENSG00000010539.11             | 0.548038929    | 6                      | 6            | 0.208678283                    |                |   |   |  |
|               | Brain_Cerebellum               | 0.849238898    |                        |              | Brain_Spinal_cord_cervical_c-1 | 2.49178714     |   |   |  |
|               | 0.188954484                    | 0.188954484    | -0.224162289           | 1.257208123  | 0.536008599                    |                |   |   |  |
|               | 0.603484368                    | 6              | 0                      | 0.998207054  |                                |                |   |   |  |
| EIF2AK1       | ENSG00000086232.12             | 0.5480906      | 12                     | 7            | 0.168939151                    |                |   |   |  |
|               | Brain_Putamen_basal_ganglia    | 0.800851732    |                        |              | Brain_Spinal_cord_cervical_c-1 |                |   |   |  |
|               | 6.824002252                    | 0.008186504    | 0.284961423            | -1.013756871 | 1.375620518                    |                |   |   |  |
|               | 0.698038141                    | 0.701214952    | 7                      | 0            | 0.998207054                    |                |   |   |  |
| LINC01819     | ENSG00000231826.5              | 0.548140437    | 2                      | 2            | 0.408869858                    |                |   |   |  |
|               | Brain_Cortex                   | 0.430309594    |                        |              | Brain_Caudate_basal_ganglia    | 1.084621402    |   |   |  |
|               | 0.915378598                    | 0.915378598    | -0.825884069           | -0.788661982 | -0.807273026                   |                |   |   |  |
|               | 0.02631999                     | 2              | 0                      | 0.998207054  |                                |                |   |   |  |
| RASGEF1C      | ENSG00000146090.15             | 0.548289266    | 4                      | 4            | 0.156832286                    |                |   |   |  |
|               | Brain_Cortex                   | 0.90738577     | Brain_Cerebellum       | 2.012078002  | 0.068408273                    |                |   |   |  |
|               | 0.068408273                    | -1.415806089   | 0.212122872            | -0.398111491 | 0.707879972                    |                |   |   |  |
|               | 4                              | 0              | 0.998207054            |              |                                |                |   |   |  |
| EPPK1         | ENSG00000261150.2              | 0.548335394    | 3                      | 3            | 0.314677111                    |                |   |   |  |
|               | Brain_Caudate_basal_ganglia    | 0.615345832    |                        |              | Brain_Cerebellar_Hemisphere    |                |   |   |  |
|               | 1.297175948                    | 0.820223727    | 0.820223727            | -0.50245737  | 1.005456448                    |                |   |   |  |
|               | 0.43785445                     | 0.820143572    | 3                      | 0            | 0.998207054                    |                |   |   |  |
| RAP2A         | ENSG00000125249.6              | 0.548370724    | 1                      | 1            | 0.548370724                    |                |   |   |  |
|               | Brain_Frontal_Cortex_BA9       | 0.548370724    |                        |              | Brain_Frontal_Cortex_BA9       | 1              | 1 |   |  |
|               | 1                              | 0.600203346    | 0.600203346            | 0.600203346  | NA                             | 1              | 0 |   |  |
|               | 0.998207054                    |                |                        |              |                                |                |   |   |  |
| GNA14         | ENSG00000156049.6              | 0.548394343    | 3                      | 3            | 0.173351694                    |                |   |   |  |
|               | Brain_Hypothalamus             | 0.88963198     | Brain_Substantia_nigra | 1.26936273   |                                |                |   |   |  |
|               | 0.777416408                    | 0.777416408    | -0.1387699             | 1.361512792  | 0.562629711                    |                |   |   |  |
|               | 0.754877016                    | 3              | 0                      | 0.998207054  |                                |                |   |   |  |
| SLC38A8       | ENSG00000166558.10             | 0.548572198    | 4                      | 4            | 0.28478238                     |                |   |   |  |
|               | Brain_Hippocampus              | 0.621881318    |                        |              | Brain_Cortex                   | 2.270843702    |   |   |  |
|               | 0.356337494                    | 0.356337494    | -0.63780442            | 1.069637786  | -0.152512743                   |                |   |   |  |
|               | 0.816941705                    | 4              | 0                      | 0.998207054  |                                |                |   |   |  |
| PROK1         | ENSG00000143125.5              | 0.548700795    | 1                      | 1            | 0.548700795                    |                |   |   |  |
|               | Brain_Putamen_basal_ganglia    | 0.548700795    |                        |              | Brain_Putamen_basal_ganglia    | 1              | 1 |   |  |
|               | 1                              | -0.599708091   | -0.599708091           | -0.599708091 | NA                             | 1              | 0 |   |  |
|               | 0.998207054                    |                |                        |              |                                |                |   |   |  |
| ZNF213        | ENSG00000085644.13             | 0.548735404    | 5                      | 4            | 0.195093427                    |                |   |   |  |
|               | Brain_Caudate_basal_ganglia    | 0.907286984    |                        |              | Brain_Hippocampus              | 3.239001548    |   |   |  |

|               |                                       |                             |              |              |                                         |
|---------------|---------------------------------------|-----------------------------|--------------|--------------|-----------------------------------------|
|               | 0.003539039                           | 0.222038702                 | -0.176873603 | 1.295657739  | 0.644598048                             |
|               | 0.731597348                           | 4                           | 0            | 0.998207054  |                                         |
| ZNF24         | ENSG00000172466.15                    | 0.54875958                  | 1            | 1            | 0.54875958 Brain_Cortex 0.54875958      |
|               | Brain_Cortex                          | 1                           | 1            | 1            | -0.599619902 -0.599619902 -0.599619902  |
|               | NA                                    | 1                           | 0            | 0.998207054  |                                         |
| RFK           | ENSG00000135002.11                    | 0.548760526                 | 4            | 4            | 0.10242761                              |
|               | Brain_Putamen_basal_ganglia           | 0.824393876                 |              |              | Brain_Cerebellar_Hemisphere             |
|               | 2.416985884                           | 0.19111993                  | 0.19111993   | -0.814318332 | 1.633196815                             |
|               | 0.029200416                           | 1.096486257                 | 4            | 0            | 0.998207054                             |
| PAFAH2        | ENSG00000158006.13                    | 0.548780202                 | 2            | 2            | 0.305906927                             |
|               | Brain_Cerebellum                      | 0.471100556                 |              |              | Brain_Cerebellar_Hemisphere 1.882735795 |
|               | 0.117264205                           | 0.117264205                 | -1.023848312 | -0.72068953  | -0.872268921                            |
|               | 0.214365631                           | 2                           | 0            | 0.998207054  |                                         |
| SGSM1         | ENSG00000167037.18                    | 0.548851213                 | 2            | 2            | 0.281410751 Brain_Cerebellum            |
|               | 0.456487279                           | Brain_Cerebellar_Hemisphere | 1.801715799  | 0.198284201  |                                         |
|               | 0.198284201                           | -1.077155615                | -0.744643475 | -0.910899545 | 0.235121589                             |
|               | 2                                     | 0                           | 0.998207054  |              |                                         |
| TREML4        | ENSG00000188056.11                    | 0.548855813                 | 1            | 1            | 0.548855813                             |
|               | Brain_Spinal_cord_cervical_c-1        | 0.548855813                 |              |              | Brain_Spinal_cord_cervical_c-1          |
|               | 1                                     | 1                           | 1            | 0.599475545  | 0.599475545 0.599475545 NA 1 0          |
|               | 0.998207054                           |                             |              |              |                                         |
| SERF1B        | ENSG00000205572.9                     | 0.548934778                 | 12           | 2            | 0.540698268                             |
|               | Brain_Hippocampus                     | 0.984972203                 |              |              | Brain_Putamen_basal_ganglia 10.64773277 |
|               | 0.002642978                           | 0.476247939                 | -0.284964556 | 0.611757415  | 0.114256853                             |
|               | 0.276704929                           | 2                           | 0            | 0.998207054  |                                         |
| EP300         | ENSG00000100393.12                    | 0.548955028                 | 3            | 3            | 0.269004595 Brain_Cerebellum            |
|               | 0.67719171                            | Brain_Substantia_nigra      | 1.542096408  | 0.327570142  |                                         |
|               | 0.327570142                           | -1.105357769                | 0.416298336  | -0.573853453 | 0.858270035                             |
|               | 3                                     | 0                           | 0.998207054  |              |                                         |
| PIGN          | ENSG00000197563.10                    | 0.549152391                 | 11           | 4            | 0.105356478 Brain_Cerebellum            |
|               | 0.935998328                           | Brain_Hypothalamus          | 8.049245404  | 0.003149409  |                                         |
|               | 0.642402041                           | -1.619422087                | 0.080300415  | -0.467804761 | 0.429096743                             |
|               | 4                                     | 0                           | 0.998207054  |              |                                         |
| RP11-114G11.5 | ENSG00000260653.5                     | 0.549215446                 | 6            | 4            | 0.115996062                             |
|               | Brain_Anterior_cingulate_cortex_BA24  | 0.306252229                 |              |              | Brain_Cerebellar_Hemisphere             |
|               | 4.094643144                           | 0.004600551                 | 0.144599726  | -1.571803792 | -1.023117636                            |
|               | -1.190413126                          | 0.208861178                 | 4            | 0            | 0.998207054                             |
| PNPLA5        | ENSG00000100341.11                    | 0.549227025                 | 8            | 6            | 0.107489325                             |
|               | Brain_Anterior_cingulate_cortex_BA24  | 0.985415203                 |              |              | Brain_Cerebellum                        |
|               | 4.651950886                           | 0.046693688                 | 0.254349119  | -1.609581155 | -0.01828035                             |
|               | -0.723853694                          | 0.536253262                 | 6            | 0            | 0.998207054                             |
| CLEC5A        | ENSG00000258227.6                     | 0.549254161                 | 2            | 2            | 0.499823493                             |
|               | Brain_Frontal_Cortex_BA9              | 0.642184515                 |              |              | Brain_Nucleus_accumbens_basal_ganglia   |
|               | 1.451365425                           | 0.548634575                 | 0.548634575  | -0.674767498 | 0.464646655                             |
|               | -0.105060421                          | 0.805687474                 | 2            | 0            | 0.998207054                             |
| CDH8          | ENSG00000150394.13                    | 0.549402355                 | 2            | 2            | 0.276618022                             |
|               | Brain_Nucleus_accumbens_basal_ganglia | 0.679168681                 |              |              | Brain_Amygdala                          |
|               | 1.274784298                           | 0.725215702                 | 0.725215702  | -0.413597805 | 1.087948095                             |
|               | 0.337175145                           | 1.061753289                 | 2            | 0            | 0.998207054                             |
| WDTC1         | ENSG00000142784.15                    | 0.549433131                 | 1            | 1            | 0.549433131 Brain_Cortex                |
|               | 0.549433131                           | Brain_Cortex                | 1            | 1            | 1                                       |
|               | 0.598609783                           | NA                          | 1            | 0            | 0.998207054                             |
| IBSP          | ENSG00000029559.6                     | 0.549505328                 | 4            | 4            | 0.339831968 Brain_Amygdala              |
|               | 0.984741554                           | Brain_Frontal_Cortex_BA9    | 2.613263631  | 0.204441914  |                                         |
|               | 0.204441914                           | 0.019124792                 | 0.954497315  | 0.512202906  | 0.490086286                             |
|               | 4                                     | 0                           | 0.998207054  |              |                                         |
| WRB           | ENSG00000182093.14                    | 0.549881381                 | 8            | 5            | 0.182867532                             |
|               | Brain_Caudate_basal_ganglia           | 0.963924779                 |              |              | Brain_Putamen_basal_ganglia             |
|               | 5.721296841                           | 0.038235516                 | 0.265717121  | -0.45163051  | 1.331977651                             |
|               | 0.2221833                             | 0.589443773                 | 5            | 0            | 0.998207054                             |
| GEMIN7        | ENSG00000142252.10                    | 0.549939433                 | 12           | 4            | 0.188677527                             |
|               | Brain_Frontal_Cortex_BA9              | 0.981348708                 |              |              | Brain_Anterior_cingulate_cortex_BA24    |

|                |                                       |                          |              |              |                                |              |            |                  |   |
|----------------|---------------------------------------|--------------------------|--------------|--------------|--------------------------------|--------------|------------|------------------|---|
|                | 8.580683582                           | 0.000796965              | 0.348939789  | -1.3145014   | 0.34020262                     |              |            |                  |   |
|                | -0.380096174                          | 0.45190621               | 4            | 0            | 0.998207054                    |              |            |                  |   |
| PSTPIP2        | ENSG00000152229.18                    | 0.550085747              | 1            | 1            | 0.550085747                    |              |            |                  |   |
|                | Brain_Caudate_basal_ganglia           | 0.550085747              |              |              | Brain_Caudate_basal_ganglia    | 1            | 1          |                  |   |
|                | 1                                     | -0.597631641             | -0.597631641 | -0.597631641 | NA                             | 1            | 0          |                  |   |
|                | 0.998207054                           |                          |              |              |                                |              |            |                  |   |
| CD247          | ENSG00000198821.10                    | 0.550218398              | 4            | 4            | 0.155625311                    |              |            |                  |   |
|                | Brain_Anterior_cingulate_cortex_BA24  | 0.921151877              |              |              | Brain_Caudate_basal_ganglia    |              |            |                  |   |
|                | 1.21004585                            | 0.829227485              | 0.829227485  | 0.098982863  | 1.419939445                    |              |            |                  |   |
|                | 0.785274737                           | 0.603302676              | 4            | 0            | 0.998207054                    |              |            |                  |   |
| F2             | ENSG00000180210.14                    | 0.55025477               | 2            | 2            | 0.279144801                    |              |            |                  |   |
|                | Brain_Cerebellar_Hemisphere           | 0.547717387              |              |              | Brain_Cerebellum               | 1.427445934  |            |                  |   |
|                | 0.572554066                           | 0.572554066              | -1.082242471 | -0.601184079 | -0.841713275                   |              |            |                  |   |
|                | 0.340159651                           | 2                        | 0            | 0.998207054  |                                |              |            |                  |   |
| SNRPC          | ENSG00000124562.9                     | 0.550289078              | 10           | 2            | 0.541479145                    |              |            |                  |   |
|                | Brain_Hypothalamus                    | 0.930006521              |              |              | Brain_Cerebellum               | 8.794967212  | 0.00220946 |                  |   |
|                | 0.669700704                           | -0.610577767             | 0.418484719  | 0.202579177  | 0.323864617                    |              |            |                  |   |
|                | 2                                     | 0                        | 0.998207054  |              |                                |              |            |                  |   |
| RP5-978I12.1   | ENSG00000260951.1                     | 0.550388137              | 1            | 1            | 0.550388137                    |              |            |                  |   |
|                | Brain_Nucleus_accumbens_basal_ganglia | 0.550388137              |              |              |                                |              |            |                  |   |
|                | Brain_Nucleus_accumbens_basal_ganglia | 1                        | 1            | 1            | -0.597178613                   |              |            |                  |   |
|                | -0.597178613                          | -0.597178613             | NA           | 1            | 0                              | 0.998207054  |            |                  |   |
| AKAP1          | ENSG00000121057.12                    | 0.550448362              | 4            | 3            | 0.217702344                    |              |            | Brain_Cerebellum |   |
|                | 0.791247938                           | Brain_Frontal_Cortex_BA9 | 2.63016514   | 0.078338876  |                                |              |            |                  |   |
|                | 0.337960811                           | -1.232660797             | 0.578869438  | 0.0099703    | 0.838298182                    |              |            | 3                |   |
|                | 0                                     | 0.998207054              |              |              |                                |              |            |                  |   |
| SPEF1          | ENSG00000101222.12                    | 0.550455968              | 2            | 2            | 0.343843849                    |              |            |                  |   |
|                | Brain_Nucleus_accumbens_basal_ganglia | 0.58873648               |              |              |                                |              |            |                  |   |
|                | Brain_Anterior_cingulate_cortex_BA24  | 1.005482496              |              |              | 0.994517504                    |              |            |                  |   |
|                | 0.994517504                           | -0.54066794              | 0.946597636  | 0.202964848  | 1.051655574                    |              |            |                  |   |
|                | 2                                     | 0                        | 0.998207054  |              |                                |              |            |                  |   |
| FOXH1          | ENSG00000160973.7                     | 0.550648062              | 1            | 1            | 0.550648062                    |              |            |                  |   |
|                | Brain_Caudate_basal_ganglia           | 0.550648062              |              |              | Brain_Caudate_basal_ganglia    | 1            | 1          |                  |   |
|                | 1                                     | 0.5967893                | 0.5967893    | 0.5967893    | NA                             | 1            | 0          | 0.998207054      |   |
| RP11-110I1.12  | ENSG00000255121.2                     | 0.550664436              | 1            | 1            | 0.550664436                    |              |            |                  |   |
|                | Brain_Anterior_cingulate_cortex_BA24  | 0.550664436              |              |              |                                |              |            |                  |   |
|                | Brain_Anterior_cingulate_cortex_BA24  | 1                        | 1            | 1            | 0.596764779                    |              |            |                  |   |
|                | 0.596764779                           | 0.596764779              | NA           | 1            | 0                              | 0.998207054  |            |                  |   |
| LINC00551      | ENSG00000272274.1                     | 0.550687316              | 6            | 5            | 0.124516363                    |              |            |                  |   |
|                | Brain_Nucleus_accumbens_basal_ganglia | 0.98271657               |              |              | Brain_Cortex                   | 2.001375664  |            |                  |   |
|                | 0.005754208                           | 0.895463024              | -1.314837537 | 1.536089778  | -0.003929095                   |              |            |                  |   |
|                | 0.920217508                           | 5                        | 0            | 0.998207054  |                                |              |            |                  |   |
| SLC17A5        | ENSG00000119899.12                    | 0.550711891              | 1            | 1            | 0.550711891                    |              |            |                  |   |
|                | Brain_Spinal_cord_cervical_c-1        | 0.550711891              |              |              | Brain_Spinal_cord_cervical_c-1 |              |            |                  |   |
|                | 1                                     | 1                        | 1            | -0.596693713 | -0.596693713                   | -0.596693713 | NA         | 1                | 0 |
|                | 0.998207054                           |                          |              |              |                                |              |            |                  |   |
| RP11-274B21.10 | ENSG00000271553.1                     | 0.550745148              | 12           | 5            | 0.056602297                    |              |            |                  |   |
|                | Brain_Frontal_Cortex_BA9              | 0.747133866              |              |              | Brain_Hippocampus              | 8.607821668  |            |                  |   |
|                | 0.01318933                            | 0.332090361              | -1.90636939  | -0.322420883 | -1.020749777                   |              |            |                  |   |
|                | 0.532952346                           | 5                        | 0            | 0.998207054  |                                |              |            |                  |   |
| INO80B         | ENSG00000115274.14                    | 0.550773161              | 3            | 3            | 0.265424793                    |              |            |                  |   |
|                | Brain_Putamen_basal_ganglia           | 0.816145898              |              |              | Brain_Cortex                   | 2.464178595  |            |                  |   |
|                | 0.198042135                           | 0.198042135              | -1.113660658 | -0.232504879 | -0.799605997                   |              |            |                  |   |
|                | 0.49207038                            | 3                        | 0            | 0.998207054  |                                |              |            |                  |   |
| KIF25          | ENSG00000125337.16                    | 0.550794754              | 13           | 10           | 0.147214277                    |              |            |                  |   |
|                | Brain_Caudate_basal_ganglia           | 0.983458897              |              |              | Brain_Hippocampus              | 5.733461375  |            |                  |   |
|                | 9.38E-06                              | 0.264367793              | -0.293567313 | 1.449441676  | 0.510466174                    |              |            |                  |   |
|                | 0.599749108                           | 10                       | 0            | 0.998207054  |                                |              |            |                  |   |
| ABCA5          | ENSG00000154265.15                    | 0.550927467              | 3            | 3            | 0.31484529                     |              |            |                  |   |
|                | Brain_Putamen_basal_ganglia           | 0.921014047              |              |              | Brain_Cerebellum               | 2.466351923  |            |                  |   |
|                | 0.180669193                           | 0.180669193              | -1.005107082 | 0.099156457  | -0.473864332                   |              |            |                  |   |
|                | 0.553315953                           | 3                        | 0            | 0.998207054  |                                |              |            |                  |   |

|                |                                      |                          |              |             |                                       |              |   |                |
|----------------|--------------------------------------|--------------------------|--------------|-------------|---------------------------------------|--------------|---|----------------|
| ACSS1          | ENSG00000154930.14                   | 0.550970908              | 4            | 4           | 0.481568321                           |              |   |                |
|                | Brain_Cerebellar_Hemisphere          | 0.832361046              |              |             | Brain_Cerebellum                      | 1.941180988  |   |                |
|                | 0.186949021                          | 0.186949021              |              |             | 0.211674419                           |              |   | -0.371427846   |
|                | 0.416570643                          | 4                        | 0            | 0.998207054 |                                       |              |   |                |
| GPR108         | ENSG00000125734.15                   | 0.551026618              | 13           | 1           | 0.316232276                           |              |   |                |
|                | Brain_Hippocampus                    | 0.851061155              |              |             | Brain_Nucleus_accumbens_basal_ganglia |              |   |                |
|                | 12.22500816                          | 2.22E-16                 | 12.22500816  |             | 0.187764641                           |              |   | 1.002230509    |
|                | 0.577038851                          | 0.197302417              | 1            | 0           | 0.998207054                           |              |   |                |
| MS4A7          | ENSG00000166927.12                   | 0.551094813              | 2            | 2           | 0.331751628                           |              |   |                |
|                | Brain_Hippocampus                    | 0.660298506              |              |             | Brain_Hypothalamus                    | 1.061010756  |   |                |
|                | 0.938989244                          | 0.938989244              |              |             | 0.439501071                           | 0.970591726  |   | 0.705046399    |
|                | 0.375537804                          | 2                        | 0            | 0.998207054 |                                       |              |   |                |
| RABL2A         | ENSG00000144134.18                   | 0.551231867              | 8            | 5           | 0.219688301                           |              |   |                |
|                | Brain_Cortex                         | 0.977717172              |              |             | Brain_Caudate_basal_ganglia           | 5.684293013  |   |                |
|                | 0.010608616                          | 0.25072347               | -0.335867548 |             | 1.227357372                           |              |   | 0.224336044    |
|                | 0.577307353                          | 5                        | 0            | 0.998207054 |                                       |              |   |                |
| MRPL35         | ENSG00000132313.14                   | 0.551280837              | 10           | 4           | 0.148475222                           |              |   |                |
|                | Brain_Caudate_basal_ganglia          | 0.885521848              |              |             | Brain_Spinal_cord_cervical_c-1        |              |   |                |
|                | 6.152048233                          | 0.000733106              |              |             | 0.398560437                           |              |   | -1.444938284   |
|                | -0.384213173                         | 0.690042304              | 4            | 0           | 0.998207054                           |              |   | 0.838854141    |
| ZNF496         | ENSG00000162714.12                   | 0.551413277              | 10           | 2           | 0.142732544                           |              |   |                |
|                | Brain_Putamen_basal_ganglia          | 0.642294197              |              |             | Brain_Hypothalamus                    | 8.604516162  |   |                |
|                | 0.003385687                          | 0.908821274              |              |             | 0.464493525                           | 1.46569079   |   | 0.984211214    |
|                | 0.309722344                          | 2                        | 0            | 0.998207054 |                                       |              |   |                |
| EIF6           | ENSG00000242372.6                    | 0.551417633              | 4            | 4           | 0.170611237                           |              |   |                |
|                | Brain_Caudate_basal_ganglia          | 0.967304227              |              |             | Brain_Cerebellum                      | 2.224132695  |   |                |
|                | 0.350768559                          | 0.350768559              |              |             | -1.370242431                          | 0.344691569  |   | -0.278173884   |
|                | 0.750702826                          | 4                        | 0            | 0.998207054 |                                       |              |   |                |
| CTA-268H5.14   | ENSG00000273287.2                    | 0.551506399              | 2            | 2           | 0.301480629                           |              |   |                |
|                | Brain_Spinal_cord_cervical_c-1       | 0.744458035              |              |             | Brain_Cortex                          | 1.023275882  |   |                |
|                | 0.976724118                          | 0.976724118              |              |             | -0.325955485                          | 1.033263445  |   | 0.35365398     |
|                | 0.961112923                          | 2                        | 0            | 0.998207054 |                                       |              |   |                |
| THEGL          | ENSG00000249693.2                    | 0.551546168              | 1            | 1           | 0.551546168                           |              |   |                |
|                | Brain_Hypothalamus                   | 0.551546168              |              |             | Brain_Hypothalamus                    | 1            | 1 | 1              |
|                | -0.595444828                         | -0.595444828             |              |             | -0.595444828                          | NA           | 1 | 0              |
|                |                                      |                          |              |             |                                       |              |   | 0.998207054    |
| UBAP2L         | ENSG00000143569.18                   | 0.551579792              | 2            | 2           | 0.322214167                           |              |   |                |
|                | Brain_Cerebellum                     | 0.758949725              |              |             | Brain_Nucleus_accumbens_basal_ganglia |              |   |                |
|                | 1.147851222                          | 0.852148778              |              |             | 0.852148778                           | -0.989918069 |   | 0.306860278    |
|                | -0.341528895                         | 0.916960763              | 2            | 0           | 0.998207054                           |              |   |                |
| RP11-147L13.15 | ENSG00000274712.1                    | 0.551744411              | 8            | 7           | 0.290916293                           |              |   |                |
|                | Brain_Caudate_basal_ganglia          | 0.967225286              |              |             | Brain_Cerebellar_Hemisphere           |              |   |                |
|                | 4.975928156                          | 0.06494897               | 0.217679478  |             | -0.393275822                          |              |   | 1.056113654    |
|                | 0.422917227                          | 0.499125948              | 7            | 0           | 0.998207054                           |              |   |                |
| FAS            | ENSG00000026103.21                   | 0.551763175              | 9            | 3           | 0.095500793                           |              |   |                |
|                | Brain_Anterior_cingulate_cortex_BA24 | 0.708350982              |              |             | Brain_Cerebellum                      |              |   |                |
|                | 7.786346742                          | 0.007067734              | 0.339265723  |             | -1.66706846                           |              |   | 0.374071687    |
|                | -1.108101416                         | 0.585430183              | 3            | 0           | 0.998207054                           |              |   |                |
| IKBKAP         | ENSG00000070061.14                   | 0.551808323              | 5            | 4           | 0.147330485                           |              |   |                |
|                | Brain_Spinal_cord_cervical_c-1       | 0.921494182              |              |             | Brain_Cerebellum                      | 2.850680103  |   |                |
|                | 0.052464628                          | 0.16341626               | -1.449025416 |             | 0.09855175                            | -0.671719221 |   |                |
|                | 0.555376903                          | 4                        | 0            | 0.998207054 |                                       |              |   |                |
| CLDN4          | ENSG00000189143.9                    | 0.551907258              | 11           | 3           | 0.162546046                           |              |   | Brain_Amygdala |
|                | 0.916676052                          | Brain_Frontal_Cortex_BA9 |              |             | 9.238801019                           |              |   | 0.000178595    |
|                | 0.495062329                          | -1.3965596               | -0.104621628 |             | -0.877082909                          |              |   | 0.337422512    |
|                | 0                                    | 0.998207054              |              |             |                                       |              |   | 3              |
| CXXC4          | ENSG00000168772.10                   | 0.551949482              | 2            | 2           | 0.285148634                           |              |   |                |
|                | Brain_Caudate_basal_ganglia          | 0.855757361              |              |             | Brain_Cerebellar_Hemisphere           |              |   |                |
|                | 1.030956612                          | 0.969043388              | 0.969043388  |             | -1.068824775                          |              |   | -0.181777477   |
|                | -0.625301126                         | 0.62723716               | 2            | 0           | 0.998207054                           |              |   |                |
| AF131217.1     | ENSG00000232855.6                    | 0.551960853              | 7            | 4           | 0.125338814                           |              |   |                |
|                | Brain_Frontal_Cortex_BA9             | 0.923487692              |              |             | Brain_Nucleus_accumbens_basal_ganglia |              |   |                |
|                | 4.669936581                          | 0.005725109              | 0.194895939  |             | -1.532744524                          |              |   | -0.096041401   |

|               |                                       |                                       |              |              |                                |              |                  |   |   |
|---------------|---------------------------------------|---------------------------------------|--------------|--------------|--------------------------------|--------------|------------------|---|---|
|               | -0.815648446                          | 0.539350489                           | 4            | 0            | 0.998207054                    |              |                  |   |   |
| MB            | ENSG00000198125.12                    | 0.55209869                            | 1            | 1            | 0.55209869                     |              |                  |   |   |
|               | Brain_Nucleus_accumbens_basal_ganglia | 0.55209869                            |              |              |                                |              |                  |   |   |
|               | Brain_Nucleus_accumbens_basal_ganglia | 1                                     | 1            | 1            | 0.594618233                    |              |                  |   |   |
|               | 0.594618233                           | 0.594618233                           | NA           | 1            | 0                              | 0.998207054  |                  |   |   |
| SCNN1D        | ENSG00000162572.20                    | 0.552103457                           | 3            | 3            | 0.535721088                    |              |                  |   |   |
|               | Brain_Cerebellar_Hemisphere           | 0.800220348                           |              |              | Brain_Cortex                   | 2.310552585  |                  |   |   |
|               | 0.299539873                           | 0.299539873                           | -0.585668702 |              | 0.619296443                    |              | -0.073144734     |   |   |
|               | 0.622304508                           | 3                                     | 0            | 0.998207054  |                                |              |                  |   |   |
| HAGLROS       | ENSG00000226363.3                     | 0.552117588                           | 7            | 7            | 0.048533488                    |              |                  |   |   |
|               | Brain_Hippocampus                     | 0.945100424                           |              |              | Brain_Cerebellum               | 1.789019298  |                  |   |   |
|               | 0.316216726                           | 0.316216726                           | -0.722653329 |              | 1.972667229                    |              | 0.251134987      |   |   |
|               | 0.907064008                           | 7                                     | 0            | 0.998207054  |                                |              |                  |   |   |
| WSB1          | ENSG00000109046.14                    | 0.552166936                           | 1            | 1            | 0.552166936                    |              |                  |   |   |
|               | Brain_Spinal_cord_cervical_c-1        | 0.552166936                           |              |              | Brain_Spinal_cord_cervical_c-1 |              |                  |   |   |
|               | 1                                     | 1                                     | 1            | -0.594516162 | -0.594516162                   | -0.594516162 | NA               | 1 | 0 |
|               | 0.998207054                           |                                       |              |              |                                |              |                  |   |   |
| ZNF420        | ENSG00000197050.10                    | 0.552190191                           | 2            | 2            | 0.602885525                    |              |                  |   |   |
|               | Brain_Nucleus_accumbens_basal_ganglia | 0.638679949                           |              |              | Brain_Cerebellum               |              |                  |   |   |
|               | 1.587289274                           | 0.412710726                           | 0.412710726  |              | -0.46954525                    |              | 0.520255475      |   |   |
|               | 0.025355112                           | 0.699894804                           | 2            | 0            | 0.998207054                    |              |                  |   |   |
| PDGFA         | ENSG00000197461.13                    | 0.552329511                           | 1            | 1            | 0.552329511                    |              |                  |   |   |
|               | Brain_Cerebellar_Hemisphere           | 0.552329511                           |              |              | Brain_Cerebellar_Hemisphere    | 1            | 1                |   |   |
|               | 1                                     | 0.594273035                           | 0.594273035  | 0.594273035  | NA                             | 1            | 0                |   |   |
|               | 0.998207054                           |                                       |              |              |                                |              |                  |   |   |
| ACTL6A        | ENSG00000136518.16                    | 0.552340882                           | 1            | 1            | 0.552340882                    |              |                  |   |   |
|               | Brain_Nucleus_accumbens_basal_ganglia | 0.552340882                           |              |              |                                |              |                  |   |   |
|               | Brain_Nucleus_accumbens_basal_ganglia | 1                                     | 1            | 1            | 0.594256031                    |              |                  |   |   |
|               | 0.594256031                           | 0.594256031                           | NA           | 1            | 0                              | 0.998207054  |                  |   |   |
| PDZK1IP1      | ENSG00000162366.7                     | 0.552385189                           | 7            | 3            | 0.178948259                    |              |                  |   |   |
|               | Brain_Frontal_Cortex_BA9              | 0.771479562                           |              |              | Brain_Amygdala                 | 5.640211329  |                  |   |   |
|               | 0.003020461                           | 0.466524984                           | -1.344000397 |              | -0.29044011                    |              | -0.597121571     |   |   |
|               | 0.350547452                           | 3                                     | 0            | 0.998207054  |                                |              |                  |   |   |
| RP11-338N10.2 | ENSG00000270035.1                     | 0.552627755                           | 1            | 1            | 0.552627755                    |              |                  |   |   |
|               | Brain_Cerebellum                      | 0.552627755                           |              |              | Brain_Cerebellum               | 1            | 1                | 1 |   |
|               | -0.593827109                          | -0.593827109                          | NA           | 1            | 0                              | 0.998207054  |                  |   |   |
| CCDC191       | ENSG00000163617.10                    | 0.552661872                           | 1            | 1            | 0.552661872                    |              |                  |   |   |
|               | Brain_Substantia_nigra                | 0.552661872                           |              |              | Brain_Substantia_nigra         | 1            | 1                |   |   |
|               | 1                                     | -0.593776107                          | -0.593776107 | -0.593776107 | NA                             | 1            | 0                |   |   |
|               | 0.998207054                           |                                       |              |              |                                |              |                  |   |   |
| SKOR1         | ENSG00000188779.10                    | 0.552726098                           | 2            | 2            | 0.277946488                    |              | Brain_Cerebellum |   |   |
|               | 0.99444963                            | Brain_Nucleus_accumbens_basal_ganglia | 1.091930507  |              | 0.908069493                    |              |                  |   |   |
|               | 0.908069493                           | 0.006956414                           | 1.084943934  |              | 0.545950174                    |              | 0.762252286      |   |   |
|               | 2                                     | 0                                     | 0.998207054  |              |                                |              |                  |   |   |
| CTD-3157E16.2 | ENSG00000276855.1                     | 0.552847335                           | 12           | 4            | 0.258180719                    |              |                  |   |   |
|               | Brain_Nucleus_accumbens_basal_ganglia | 0.893376169                           |              |              | Brain_Hypothalamus             |              |                  |   |   |
|               | 9.496988882                           | 0.001623506                           | 0.332213525  |              | -1.130701574                   |              | 0.928134594      |   |   |
|               | 0.175031464                           | 0.695108536                           | 4            | 0            | 0.998207054                    |              |                  |   |   |
| CTC-542B22.2  | ENSG00000263990.1                     | 0.55317522                            | 2            | 2            | 0.42221631                     |              |                  |   |   |
|               | Brain_Anterior_cingulate_cortex_BA24  | 0.44864973                            |              |              |                                |              |                  |   |   |
|               | Brain_Nucleus_accumbens_basal_ganglia | 1.028794889                           |              |              | 0.971205111                    |              |                  |   |   |
|               | 0.971205111                           | -0.802582113                          | -0.75766805  |              | -0.780125081                   |              | 0.031759038      |   |   |
|               | 2                                     | 0                                     | 0.998207054  |              |                                |              |                  |   |   |
| ZNF727        | ENSG00000214652.5                     | 0.55318048                            | 3            | 3            | 0.178334642                    |              | Brain_Cerebellum |   |   |
|               | 0.932683621                           | Brain_Amygdala                        | 1.73995735   | 0.247865743  | 0.247865743                    |              |                  |   |   |
|               | -0.084468909                          | 1.345900394                           | 0.712990858  |              | 0.729243903                    |              | 3                | 0 |   |
|               | 0.998207054                           |                                       |              |              |                                |              |                  |   |   |
| ARMC5         | ENSG00000140691.16                    | 0.553216296                           | 1            | 1            | 0.553216296                    |              |                  |   |   |
|               | Brain_Nucleus_accumbens_basal_ganglia | 0.553216296                           |              |              |                                |              |                  |   |   |
|               | Brain_Nucleus_accumbens_basal_ganglia | 1                                     | 1            | 1            | 0.592947488                    |              |                  |   |   |
|               | 0.592947488                           | 0.592947488                           | NA           | 1            | 0                              | 0.998207054  |                  |   |   |
| GH1           | ENSG00000259384.6                     | 0.553218697                           | 1            | 1            | 0.553218697                    |              |                  |   |   |

|          |                                      |              |                                       |              |             |                  |
|----------|--------------------------------------|--------------|---------------------------------------|--------------|-------------|------------------|
|          | Brain_Hippocampus                    | 0.553218697  | Brain_Hippocampus                     | 1            | 1           | 1                |
|          | 0.592943901                          | 0.592943901  | 0.592943901                           | NA           | 1           | 0.998207054      |
| ADAMTS12 | ENSG00000151388.10                   | 0.553309978  |                                       | 3            | 3           | 0.265957659      |
|          | Brain_Putamen_basal_ganglia          | 0.669879413  | Brain_Caudate_basal_ganglia           |              |             |                  |
|          | 2.666895826                          | 0.160141675  | 0.160141675                           | 0.426313512  |             | 1.112419885      |
|          | 0.7140938                            | 0.356161155  | 3                                     | 0            | 0.998207054 |                  |
| MYO1E    | ENSG00000157483.8                    | 0.553365682  |                                       | 1            | 1           | 0.553365682      |
|          | Brain_Frontal_Cortex_BA9             | 0.553365682  | Brain_Frontal_Cortex_BA9              | 1            | 1           |                  |
|          | 1                                    | 0.592724291  | 0.592724291                           | 0.592724291  | NA          | 1                |
|          | 0.998207054                          |              |                                       |              |             | 0                |
| FHL5     | ENSG00000112214.10                   | 0.553410766  |                                       | 1            | 1           | 0.553410766      |
|          | Brain_Putamen_basal_ganglia          | 0.553410766  | Brain_Putamen_basal_ganglia           | 1            | 1           |                  |
|          | 1                                    | 0.592656937  | 0.592656937                           | 0.592656937  | NA          | 1                |
|          | 0.998207054                          |              |                                       |              |             | 0                |
| SAMD10   | ENSG00000130590.13                   | 0.553452363  |                                       | 3            | 3           | 0.397866927      |
|          | Brain_Hypothalamus                   | 0.991161581  | Brain_Putamen_basal_ganglia           | 2.64106611   |             |                  |
|          | 0.118153673                          | 0.118153673  | -0.845436941                          | 0.011077542  |             | -0.383604292     |
|          | 0.432187677                          | 3            | 0                                     | 0.998207054  |             |                  |
| FUT9     | ENSG00000172461.10                   | 0.553453849  |                                       | 3            | 3           | 0.157226728      |
|          | Brain_Hippocampus                    | 0.876119221  | Brain_Cerebellum                      | 1.514498765  |             |                  |
|          | 0.558673336                          | 0.558673336  | -1.414460531                          | 0.155890643  |             | -0.610067077     |
|          | 0.785880832                          | 3            | 0                                     | 0.998207054  |             |                  |
| SWT1     | ENSG00000116668.12                   | 0.553667578  |                                       | 2            | 2           | 0.303483545      |
|          | Brain_Substantia_nigra               | 1.178346731  | 0.821653269                           |              |             | Brain_Cerebellum |
|          | 0.821653269                          | -1.028991765 | 0.162354782                           | -0.433318491 |             | 0.842409222      |
|          | 2                                    | 0            | 0.998207054                           |              |             |                  |
| FFAR3    | ENSG00000185897.6                    | 0.553676978  |                                       | 2            | 2           | 0.310678741      |
|          | Brain_Hippocampus                    | 0.875919103  | Brain_Substantia_nigra                | 1.223923119  |             |                  |
|          | 0.776076881                          | 0.776076881  | -1.013798856                          | 0.156144525  |             | -0.428827166     |
|          | 0.827274898                          | 2            | 0                                     | 0.998207054  |             |                  |
| YTHDF2   | ENSG00000198492.15                   | 0.553682443  |                                       | 2            | 2           | 0.28712478       |
|          | Brain_Putamen_basal_ganglia          | 0.905885813  | Brain_Amygdala                        | 1.096492293  |             |                  |
|          | 0.903507707                          | 0.903507707  | 0.118229504                           | 1.064450251  |             | 0.591339877      |
|          | 0.669079107                          | 2            | 0                                     | 0.998207054  |             |                  |
| GAPVD1   | ENSG00000165219.21                   | 0.553795656  |                                       | 3            | 3           | 0.489705035      |
|          | Brain_Cortex                         | 0.742620815  | Brain_Cerebellum                      | 2.313931746  |             | 0.314650473      |
|          | 0.314650473                          | -0.414797529 | 0.690778045                           | -0.017468059 |             | 0.614879015      |
|          | 3                                    | 0            | 0.998207054                           |              |             |                  |
| POLR2M   | ENSG00000255529.7                    | 0.553836119  |                                       | 9            | 7           | 0.154314278      |
|          | Brain_Hippocampus                    | 0.955080284  | Brain_Nucleus_accumbens_basal_ganglia |              |             |                  |
|          | 3.892051586                          | 0.035912393  | 0.250666253                           | -1.424456815 |             | 0.43369725       |
|          | -0.560159963                         | 0.633757809  | 7                                     | 0            | 0.998207054 |                  |
| FBXO27   | ENSG00000161243.8                    | 0.553853573  |                                       | 11           | 4           | 0.330222499      |
|          | Brain_Cerebellar_Hemisphere          | 0.990580026  | Brain_Nucleus_accumbens_basal_ganglia |              |             |                  |
|          | 7.638545806                          | 0.006369542  | 0.414791666                           | -0.973665808 |             | 0.845816442      |
|          | -0.069952344                         | 0.457610653  | 4                                     | 0            | 0.998207054 |                  |
| TERF2IP  | ENSG00000166848.5                    | 0.553887308  |                                       | 1            | 1           | 0.553887308      |
|          | Brain_Cortex                         | 0.553887308  | Brain_Cortex                          | 1            | 1           | 1                |
|          | 0.591945166                          | 0.591945166  | NA                                    | 1            | 0           | 0.998207054      |
| WNT10A   | ENSG00000135925.8                    | 0.553926492  |                                       | 1            | 1           | 0.553926492      |
|          | Brain_Hypothalamus                   | 0.553926492  | Brain_Hypothalamus                    | 1            | 1           | 1                |
|          | 0.591886653                          | 0.591886653  | 0.591886653                           | NA           | 1           | 0                |
|          |                                      |              |                                       |              |             | 0.998207054      |
| ERAP1    | ENSG00000164307.12                   | 0.554034752  |                                       | 12           | 2           | 0.164867649      |
|          | Brain_Anterior_cingulate_cortex_BA24 | 0.730063308  | Brain_Substantia_nigra                |              |             |                  |
|          | 10.7172057                           | 0.002900064  | 0.695021656                           | 0.345041319  |             | 1.388885243      |
|          | 0.861730912                          | 0.35042542   | 2                                     | 0            | 0.998207054 |                  |
| ZNF280B  | ENSG00000275004.3                    | 0.554117352  |                                       | 1            | 1           | 0.554117352      |
|          | Brain_Cerebellum                     | 0.554117352  | Brain_Cerebellum                      | 1            | 1           | 1                |
|          | -0.591601675                         | -0.591601675 | NA                                    | 1            | 0           | 0.998207054      |
| TACC3    | ENSG00000013810.18                   | 0.554157875  |                                       | 10           | 4           | 0.261764806      |
|          | Brain_Substantia_nigra               | 0.964632445  | Brain_Anterior_cingulate_cortex_BA24  |              |             |                  |
|          | 7.47469651                           | 0.00184995   | 0.289626661                           | -1.122229658 |             | 0.74527489       |
|          |                                      |              |                                       |              |             | -0.12040218      |

|               |                                       |                             |                             |                          |              |              |                    |            |  |
|---------------|---------------------------------------|-----------------------------|-----------------------------|--------------------------|--------------|--------------|--------------------|------------|--|
|               | 0.519836374                           | 4                           | 0                           | 0.998207054              |              |              |                    |            |  |
| ADAM10        | ENSG00000137845.14                    |                             |                             | 0.554260568              | 3            | 3            | 0.172970607        |            |  |
|               | Brain_Cortex                          | 0.975378537                 |                             | Brain_Cerebellum         | 1.220410129  |              | 0.846381929        |            |  |
|               | 0.846381929                           | 0.030863327                 |                             | 1.362720523              |              | 0.660303996  | 0.668920776        |            |  |
|               | 3                                     | 0                           | 0.998207054                 |                          |              |              |                    |            |  |
| POLD4         | ENSG00000175482.8                     |                             | 0.554342428                 | 1                        | 1            | 0.554342428  | Brain_Cortex       |            |  |
|               | 0.554342428                           | Brain_Cortex                | 1                           | 1                        | 1            | 0.59126567   | 0.59126567         | 0.59126567 |  |
|               | NA                                    | 1                           | 0                           | 0.998207054              |              |              |                    |            |  |
| AC007193.6    | ENSG00000267922.1                     |                             | 0.554346168                 | 2                        | 2            | 0.396792168  |                    |            |  |
|               | Brain_Amygdala                        | 0.742662631                 |                             | Brain_Frontal_Cortex_BA9 | 1.360619884  |              |                    |            |  |
|               | 0.639380116                           | 0.639380116                 |                             | -0.328329382             | 0.847364172  |              | 0.259517395        |            |  |
|               | 0.831340885                           | 2                           | 0                           | 0.998207054              |              |              |                    |            |  |
| IL13          | ENSG00000169194.9                     |                             | 0.554418684                 | 1                        | 1            | 0.554418684  |                    |            |  |
|               | Brain_Nucleus_accumbens_basal_ganglia | 0.554418684                 |                             |                          |              |              |                    |            |  |
|               | Brain_Nucleus_accumbens_basal_ganglia | 1                           | 1                           | 1                        | -0.591151846 |              |                    |            |  |
|               | -0.591151846                          | -0.591151846                | NA                          | 1                        | 0            | 0.998207054  |                    |            |  |
| RAMP2         | ENSG00000131477.10                    |                             | 0.554560025                 | 1                        | 1            | 0.554560025  | Brain_Amygdala     |            |  |
|               | 0.554560025                           | Brain_Amygdala              | 1                           | 1                        | 1            | -0.590940893 | -0.590940893       |            |  |
|               | -0.590940893                          | NA                          | 1                           | 0                        | 0.998207054  |              |                    |            |  |
| YTHDF3        | ENSG00000185728.16                    |                             | 0.55471405                  | 1                        | 1            | 0.55471405   |                    |            |  |
|               | Brain_Cerebellar_Hemisphere           | 0.55471405                  | Brain_Cerebellar_Hemisphere | 1                        | 1            | 1            |                    |            |  |
|               | -0.59071104                           | -0.59071104                 | -0.59071104                 | NA                       | 1            | 0            | 0.998207054        |            |  |
| MIIP          | ENSG00000116691.10                    |                             | 0.554748227                 | 3                        | 3            | 0.212243127  |                    |            |  |
|               | Brain_Frontal_Cortex_BA9              | 0.8179146                   | Brain_Cerebellar_Hemisphere | 1.241965356              |              |              |                    |            |  |
|               | 0.752928269                           | 0.752928269                 | -0.414715034                | 1.247421118              |              | 0.200826026  |                    |            |  |
|               | 0.91105973                            | 3                           | 0                           | 0.998207054              |              |              |                    |            |  |
| CCL25         | ENSG00000131142.13                    |                             | 0.554768081                 | 3                        | 3            | 0.182746291  | Brain_Cortex       |            |  |
|               | 0.99412654                            | Brain_Hippocampus           | 1.92178865                  | 0.178955535              | 0.178955535  |              |                    |            |  |
|               | -0.007361357                          | 1.332346691                 | 0.725913138                 | 0.678801063              | 3            | 0            |                    |            |  |
|               | 0.998207054                           |                             |                             |                          |              |              |                    |            |  |
| SCGB1D2       | ENSG00000124935.3                     |                             | 0.554779913                 | 1                        | 1            | 0.554779913  |                    |            |  |
|               | Brain_Anterior_cingulate_cortex_BA24  | 0.554779913                 |                             |                          |              |              |                    |            |  |
|               | Brain_Anterior_cingulate_cortex_BA24  | 1                           | 1                           | 1                        | 0.59061276   | 0.59061276   |                    |            |  |
|               | 0.59061276                            | NA                          | 1                           | 0                        | 0.998207054  |              |                    |            |  |
| RIPK1         | ENSG00000137275.13                    |                             | 0.554801091                 | 6                        | 6            | 0.236272566  |                    |            |  |
|               | Brain_Nucleus_accumbens_basal_ganglia | 0.924505814                 | Brain_Cortex                |                          |              |              |                    |            |  |
|               | 3.083839998                           | 0.151928441                 | 0.151928441                 | -1.184355                | 0.277299202  |              |                    |            |  |
|               | -0.617853731                          | 0.573103466                 | 6                           | 0                        | 0.998207054  |              |                    |            |  |
| CCDC3         | ENSG00000151468.10                    |                             | 0.554817898                 | 6                        | 6            | 0.090571838  | Brain_Cortex       |            |  |
|               | 0.824519758                           | Brain_Caudate_basal_ganglia | 2.673209589                 | 0.244817922              |              |              |                    |            |  |
|               | 0.244817922                           | -1.692388948                | 0.613377868                 | -0.885174301             | 0.906826035  |              |                    |            |  |
|               | 6                                     | 0                           | 0.998207054                 |                          |              |              |                    |            |  |
| RP11-473M20.9 | ENSG00000262370.5                     |                             | 0.554818059                 | 1                        | 1            | 0.554818059  |                    |            |  |
|               | Brain_Hippocampus                     | 0.554818059                 | Brain_Hippocampus           | 1                        | 1            | 1            |                    |            |  |
|               | 0.590555843                           | 0.590555843                 | 0.590555843                 | NA                       | 1            | 0            | 0.998207054        |            |  |
| MLH3          | ENSG00000119684.15                    |                             | 0.554896084                 | 1                        | 1            | 0.554896084  |                    |            |  |
|               | Brain_Nucleus_accumbens_basal_ganglia | 0.554896084                 |                             |                          |              |              |                    |            |  |
|               | Brain_Nucleus_accumbens_basal_ganglia | 1                           | 1                           | 1                        | 0.590439427  |              |                    |            |  |
|               | 0.590439427                           | 0.590439427                 | NA                          | 1                        | 0            | 0.998207054  |                    |            |  |
| PCDHB7        | ENSG00000113212.6                     |                             | 0.554921496                 | 5                        | 4            | 0.104008443  |                    |            |  |
|               | Brain_Frontal_Cortex_BA9              | 0.398107754                 | Brain_Amygdala              | 3.709816938              |              |              |                    |            |  |
|               | 0.028762444                           | 0.127165278                 | 0.845005525                 | 1.625723713              | 1.230764352  |              |                    |            |  |
|               | 0.287470977                           | 4                           | 0                           | 0.998207054              |              |              |                    |            |  |
| RP11-36B6.1   | ENSG00000271522.1                     |                             | 0.555055728                 | 1                        | 1            | 0.555055728  |                    |            |  |
|               | Brain_Putamen_basal_ganglia           | 0.555055728                 | Brain_Putamen_basal_ganglia | 1                        | 1            |              |                    |            |  |
|               | 1                                     | -0.590201259                | -0.590201259                | -0.590201259             | NA           | 1            | 0                  |            |  |
|               | 0.998207054                           |                             |                             |                          |              |              |                    |            |  |
| XRN2          | ENSG00000088930.7                     |                             | 0.555107583                 | 3                        | 3            | 0.374000169  |                    |            |  |
|               | Brain_Caudate_basal_ganglia           | 0.670569925                 | Brain_Cerebellum            | 1.266938677              |              |              |                    |            |  |
|               | 0.759254755                           | 0.759254755                 | -0.80415521                 | 0.889005416              | -0.113505247 |              |                    |            |  |
|               | 0.888617493                           | 3                           | 0                           | 0.998207054              |              |              |                    |            |  |
| CFL2          | ENSG00000165410.14                    |                             | 0.55516547                  | 1                        | 1            | 0.55516547   | Brain_Hypothalamus |            |  |



|           |                                       |                    |              |              |                                |                         |
|-----------|---------------------------------------|--------------------|--------------|--------------|--------------------------------|-------------------------|
|           | 0.55516547                            | Brain_Hypothalamus | 1            | 1            | 0.590037559                    | 0.590037559             |
|           | 0.590037559                           | NA                 | 1            | 0            | 0.998207054                    |                         |
| RBBP9     | ENSG00000089050.15                    | 0.555176857        | 5            | 5            | 0.156754194                    |                         |
|           | Brain_Nucleus_accumbens_basal_ganglia | 0.896119978        |              |              | Brain_Caudate_basal_ganglia    |                         |
|           | 3.504707361                           | 0.127170071        | 0.127170071  | -0.130564309 | 1.41607279                     |                         |
|           | 0.709980143                           | 0.566249851        | 5            | 0            | 0.998207054                    |                         |
| SKAP1     | ENSG00000141293.15                    | 0.55518497         | 3            | 3            | 0.299685489                    |                         |
|           | Brain_Caudate_basal_ganglia           | 0.535776746        |              |              | Brain_Cortex                   | 1.681669387             |
|           | 0.459136623                           | 0.459136623        | -1.037108083 | 0.624806738  | 0.068970199                    |                         |
|           | 0.957895975                           | 3                  | 0            | 0.998207054  |                                |                         |
| LAMTOR5   | ENSG00000134248.13                    | 0.555195732        | 1            | 1            | 0.555195732                    |                         |
|           | Brain_Frontal_Cortex_BA9              | 0.555195732        |              |              | Brain_Frontal_Cortex_BA9       | 1 1                     |
|           | 1                                     | -0.589992419       | -0.589992419 | -0.589992419 | NA                             | 1 0                     |
|           | 0.998207054                           |                    |              |              |                                |                         |
| ZNF425    | ENSG00000204947.8                     | 0.555246783        | 10           | 8            | 0.138094312                    |                         |
|           | Brain_Caudate_basal_ganglia           | 0.901006611        |              |              | Brain_Cerebellum               | 4.938452931             |
|           | 0.018279478                           | 0.189747904        | -1.482925101 | 0.941775608  | 0.118142079                    |                         |
|           | 0.723363014                           | 8                  | 0            | 0.998207054  |                                |                         |
| ZNF595    | ENSG00000272602.5                     | 0.555329681        | 4            | 4            | 0.22772294                     |                         |
|           | Brain_Cerebellar_Hemisphere           | 0.835062225        |              |              | Brain_Cerebellum               | 1.808592451             |
|           | 0.38606941                            | 0.38606941         | -1.206245252 | 1.192137718  | 0.111189314                    |                         |
|           | 1.051207892                           | 4                  | 0            | 0.998207054  |                                |                         |
| LINC02123 | ENSG00000250668.1                     | 0.555363435        | 1            | 1            | 0.555363435                    |                         |
|           | Brain_Spinal_cord_cervical_c-1        | 0.555363435        |              |              | Brain_Spinal_cord_cervical_c-1 |                         |
|           | 1                                     | 1                  | 1            | -0.589742295 | -0.589742295                   | -0.589742295 NA 1 0     |
|           | 0.998207054                           |                    |              |              |                                |                         |
| FAM118B   | ENSG00000197798.8                     | 0.5555237          | 1            | 1            | 0.5555237                      | Brain_Cerebellum        |
|           | 0.5555237                             | Brain_Cerebellum   | 1            | 1            | 0.589503299                    | 0.589503299             |
|           | 0.589503299                           | NA                 | 1            | 0            | 0.998207054                    |                         |
| ZNF85     | ENSG00000105750.14                    | 0.555528164        | 11           | 2            | 0.184150972                    |                         |
|           | Brain_Hypothalamus                    | 0.968684199        |              |              | Brain_Cerebellum               | 9.550496013             |
|           | 0.014226459                           | 0.623978415        | -1.328082143 | -0.039258618 | -0.763657181                   |                         |
|           | 0.357015388                           | 2                  | 0            | 0.998207054  |                                |                         |
| CASC10    | ENSG00000204682.5                     | 0.555726242        | 2            | 2            | 0.430612817                    |                         |
|           | Brain_Cerebellum                      | 0.475847224        |              |              | Brain_Amygdala                 | 1.038839142 0.961160858 |
|           | 0.961160858                           | -0.788143425       | 0.712997629  | -0.037572898 | 1.061467019                    |                         |
|           | 2                                     | 0                  | 0.998207054  |              |                                |                         |
| PIGR      | ENSG00000162896.5                     | 0.555804234        | 1            | 1            | 0.555804234                    |                         |
|           | Brain_Caudate_basal_ganglia           | 0.555804234        |              |              | Brain_Caudate_basal_ganglia    | 1 1                     |
|           | 1                                     | 0.589085032        | 0.589085032  | 0.589085032  | NA                             | 1 0                     |
|           | 0.998207054                           |                    |              |              |                                |                         |
| NME8      | ENSG00000086288.11                    | 0.555888306        | 3            | 3            | 0.187230002                    |                         |
|           | Brain_Hippocampus                     | 0.914837766        |              |              | Brain_Cerebellum               | 2.149513286             |
|           | 0.227398359                           | 0.227398359        | -1.318817891 | -0.106938504 | -0.821313088                   |                         |
|           | 0.634379451                           | 3                  | 0            | 0.998207054  |                                |                         |
| AP4S1     | ENSG00000100478.14                    | 0.555949204        | 2            | 2            | 0.505580749                    |                         |
|           | Brain_Hippocampus                     | 0.582520826        |              |              | Brain_Hypothalamus             | 1.36826474 0.63173526   |
|           | 0.63173526                            | -0.665734608       | 0.549706313  | -0.058014147 | 0.859446517                    | 2                       |
|           | 0                                     | 0.998207054        |              |              |                                |                         |
| RELT      | ENSG00000054967.12                    | 0.555966039        | 1            | 1            | 0.555966039                    |                         |
|           | Brain_Cerebellar_Hemisphere           | 0.555966039        |              |              | Brain_Cerebellar_Hemisphere    | 1 1                     |
|           | 1                                     | -0.588843833       | -0.588843833 | -0.588843833 | NA                             | 1 0                     |
|           | 0.998207054                           |                    |              |              |                                |                         |
| ADORA2A   | ENSG00000128271.21                    | 0.555980013        | 1            | 1            | 0.555980013                    |                         |
|           | Brain_Caudate_basal_ganglia           | 0.555980013        |              |              | Brain_Caudate_basal_ganglia    | 1 1                     |
|           | 1                                     | 0.588823004        | 0.588823004  | 0.588823004  | NA                             | 1 0                     |
|           | 0.998207054                           |                    |              |              |                                |                         |
| VPS53     | ENSG00000141252.19                    | 0.55598779         | 12           | 4            | 0.094720928                    |                         |
|           | Brain_Frontal_Cortex_BA9              | 0.578021623        |              |              | Brain_Cerebellum               | 8.594764497             |
|           | 0.010609905                           | 0.306591386        | -1.671003795 | -0.556276831 | -1.117939828                   |                         |
|           | 0.306160292                           | 4                  | 0            | 0.998207054  |                                |                         |
| C19orf68  | ENSG00000185453.12                    | 0.556267902        | 1            | 1            | 0.556267902                    |                         |

|                |                             |                             |              |                                      |              |              |                             |
|----------------|-----------------------------|-----------------------------|--------------|--------------------------------------|--------------|--------------|-----------------------------|
|                | Brain_Cerebellar_Hemisphere | 0.556267902                 |              | Brain_Cerebellar_Hemisphere          | 1            | 1            |                             |
| 1              | -0.588393944                | -0.588393944                | -0.588393944 | NA                                   | 1            | 0            |                             |
|                | 0.998207054                 |                             |              |                                      |              |              |                             |
| Clorf127       | ENSG00000175262.14          | 0.556273407                 |              | 2                                    | 2            | 0.279198124  |                             |
|                | Brain_Cerebellar_Hemisphere | 0.937796777                 |              | Brain_Cerebellum                     | 1.030791014  |              |                             |
|                | 0.969208986                 | 0.969208986                 | -0.078039318 | 1.082122445                          |              | 0.502041563  |                             |
|                | 0.82035825                  | 2                           | 0            | 0.998207054                          |              |              |                             |
| NRF1           | ENSG00000106459.14          | 0.556294975                 |              | 6                                    | 5            | 0.025731813  |                             |
|                | Brain_Hypothalamus          | 0.717775854                 |              | Brain_Frontal_Cortex_BA9             | 3.659162729  |              |                             |
|                | 0.088272696                 | 0.240064962                 | 0.361432905  | 2.230235499                          |              | 1.183029005  |                             |
|                | 0.656311009                 | 5                           | 0            | 0.998207054                          |              |              |                             |
| RFLNA          | ENSG00000178882.14          | 0.55631294                  | 3            | 3                                    | 0.346614157  |              | Brain_Cerebellum            |
|                | 0.409019571                 | Brain_Hippocampus           | 1.231563577  | 0.688614717                          |              |              |                             |
|                | 0.688614717                 | -0.941177009                | 0.825620203  | -0.318424864                         |              | 0.992069972  |                             |
|                | 3                           | 0                           | 0.998207054  |                                      |              |              |                             |
| ATXN7L3B       | ENSG00000253719.3           | 0.556362665                 |              | 3                                    | 3            | 0.346329076  |                             |
|                | Brain_Putamen_basal_ganglia | 0.765545242                 |              | Brain_Cerebellum                     | 2.386631732  |              |                             |
|                | 0.100777262                 | 0.100777262                 | -0.941733545 | -0.298206918                         |              | -0.6404906   |                             |
|                | 0.323720383                 | 3                           | 0            | 0.998207054                          |              |              |                             |
| SULT1C2        | ENSG00000198203.9           | 0.556373249                 |              | 12                                   | 7            | 0.143097663  |                             |
|                | Brain_Hippocampus           | 0.988210374                 |              | Brain_Frontal_Cortex_BA9             | 6.913208869  |              |                             |
|                | 0.00941475                  | 0.256314554                 | -1.464352489 | 1.03815773                           | -0.144853066 |              |                             |
|                | 0.959508324                 | 7                           | 0            | 0.998207054                          |              |              |                             |
| VPS25          | ENSG00000131475.6           | 0.556592244                 |              | 1                                    | 1            | 0.556592244  |                             |
|                | Brain_Hippocampus           | 0.556592244                 |              | Brain_Hippocampus                    | 1            | 1            | 1                           |
|                | -0.587910685                | -0.587910685                | -0.587910685 | NA                                   | 1            | 0            | 0.998207054                 |
| CTD-2553L13.10 | ENSG00000274104.1           | 0.556612601                 |              | 4                                    | 2            | 0.308810625  |                             |
|                | Brain_Cortex                | 0.971276361                 |              | Brain_Anterior_cingulate_cortex_BA24 |              |              |                             |
|                | 3.204467262                 | 8.86E-08                    | 0.762526722  | -1.017720873                         |              | -0.036007523 |                             |
|                | -0.37172127                 | 0.463055666                 | 2            | 0                                    | 0.998207054  |              |                             |
| AKAP9          | ENSG00000127914.16          | 0.556843455                 |              | 1                                    | 1            | 0.556843455  | Brain_Cerebellum            |
|                | 0.556843455                 | Brain_Cerebellum            | 1            | 1                                    | 1            | -0.587536484 | -0.587536484                |
|                | -0.587536484                | NA                          | 1            | 0                                    | 0.998207054  |              |                             |
| TTL6           | ENSG00000170703.15          | 0.556865221                 |              | 10                                   | 7            | 0.046551979  |                             |
|                | Brain_Caudate_basal_ganglia | 0.790908814                 |              | Brain_Cerebellum                     | 5.226658163  |              |                             |
|                | 0.005204615                 | 0.181475433                 | -1.990353771 | -0.265130653                         |              | -1.154076955 |                             |
|                | 0.536802532                 | 7                           | 0            | 0.998207054                          |              |              |                             |
| RORC           | ENSG00000143365.17          | 0.55690621                  | 1            | 1                                    | 0.55690621   |              | Brain_Putamen_basal_ganglia |
|                | 0.55690621                  | Brain_Putamen_basal_ganglia | 1            | 1                                    | 1            | -0.587443017 |                             |
|                | -0.587443017                | -0.587443017                | NA           | 1                                    | 0            | 0.998207054  |                             |
| IBA57          | ENSG00000181873.12          | 0.557079426                 |              | 1                                    | 1            | 0.557079426  |                             |
|                | Brain_Cerebellar_Hemisphere | 0.557079426                 |              | Brain_Cerebellar_Hemisphere          | 1            | 1            |                             |
|                | 1                           | -0.587185058                | -0.587185058 | -0.587185058                         | NA           | 1            | 0                           |
|                | 0.998207054                 |                             |              |                                      |              |              |                             |
| VAT1           | ENSG00000108828.15          | 0.557099377                 |              | 2                                    | 2            | 0.413625613  |                             |
|                | Brain_Cerebellar_Hemisphere | 0.757004401                 |              | Brain_Cerebellum                     | 1.843640422  |              |                             |
|                | 0.156359578                 | 0.156359578                 | 0.30941692   | 0.817529998                          |              | 0.563473459  |                             |
|                | 0.359290203                 | 2                           | 0            | 0.998207054                          |              |              |                             |
| KLK4           | ENSG00000167749.11          | 0.557133022                 |              | 1                                    | 1            | 0.557133022  | Brain_Cerebellum            |
|                | 0.557133022                 | Brain_Cerebellum            | 1            | 1                                    | 1            | -0.587105249 | -0.587105249                |
|                | -0.587105249                | NA                          | 1            | 0                                    | 0.998207054  |              |                             |
| FAM198A        | ENSG00000144649.8           | 0.557134784                 |              | 8                                    | 4            | 0.167979634  |                             |
|                | Brain_Frontal_Cortex_BA9    | 0.995283734                 |              | Brain_Putamen_basal_ganglia          |              |              |                             |
|                | 6.331893426                 | 0.024725172                 | 0.25405219   | -0.005910997                         |              | 1.378724754  |                             |
|                | 0.573969547                 | 0.539174167                 | 4            | 0                                    | 0.998207054  |              |                             |
| RCBTB2         | ENSG00000136161.12          | 0.557185188                 |              | 1                                    | 1            | 0.557185188  |                             |
|                | Brain_Substantia_nigra      | 0.557185188                 |              | Brain_Substantia_nigra               | 1            | 1            |                             |
|                | 1                           | -0.587027574                | -0.587027574 | -0.587027574                         | NA           | 1            | 0                           |
|                | 0.998207054                 |                             |              |                                      |              |              |                             |
| TMEM266        | ENSG00000169758.12          | 0.55735295                  | 1            | 1                                    | 0.55735295   |              | Brain_Cerebellum            |
|                | 0.55735295                  | Brain_Cerebellum            | 1            | 1                                    | 1            | -0.586777798 | -0.586777798                |
|                | -0.586777798                | NA                          | 1            | 0                                    | 0.998207054  |              |                             |

|               |                                      |                             |                        |              |                                       |                      |
|---------------|--------------------------------------|-----------------------------|------------------------|--------------|---------------------------------------|----------------------|
| CEP192        | ENSG00000101639.18                   | 0.557436943                 | 13                     | 2            | 0.2895769                             |                      |
|               | Brain_Frontal_Cortex_BA9             | 0.996901027                 |                        |              | Brain_Hypothalamus                    | 12.20461092          |
|               | 0.000447381                          | 0.45264097                  | -1.05905024            | 0.293145853  |                                       | -0.062695095         |
|               | 0.349537554                          | 2                           | 0                      | 0.998207054  |                                       |                      |
| RP11-47L3.1   | ENSG00000267364.1                    | 0.557486376                 | 1                      | 1            | 0.557486376                           |                      |
|               | Brain_Spinal_cord_cervical_c-1       | 0.557486376                 |                        |              | Brain_Spinal_cord_cervical_c-1        |                      |
|               | 1                                    | 1                           | 0.586579169            | 0.586579169  | 0.586579169                           | NA 1 0               |
|               | 0.998207054                          |                             |                        |              |                                       |                      |
| NARS2         | ENSG00000137513.9                    | 0.557603651                 | 13                     | 2            | 0.075970116                           |                      |
|               | Brain_Hippocampus                    | 0.914851285                 |                        |              | Brain_Cortex                          | 11.26708117 5.93E-05 |
|               | 0.809106492                          | -0.236551609                | 1.774562729            | 0.798785201  |                                       | 0.507988133          |
|               | 2                                    | 0                           | 0.998207054            |              |                                       |                      |
| INPP5K        | ENSG00000132376.19                   | 0.557608094                 | 4                      | 4            | 0.130665751                           |                      |
|               | Brain_Putamen_basal_ganglia          | 0.904735444                 |                        |              | Brain_Cerebellum                      | 1.593478155          |
|               | 0.234973788                          | 0.234973788                 | -1.511481764           | 0.427824469  |                                       | -0.296537586         |
|               | 0.852361023                          | 4                           | 0                      | 0.998207054  |                                       |                      |
| CBX5          | ENSG00000094916.15                   | 0.557688306                 | 2                      | 2            | 0.300663782                           |                      |
|               | Brain_Anterior_cingulate_cortex_BA24 | 0.778243868                 |                        |              | Brain_Hippocampus                     |                      |
|               | 1.028187059                          | 0.971812941                 | 0.971812941            | -1.035010984 |                                       | 0.28160831           |
|               | -0.376701337                         | 0.930990431                 | 2                      | 0            | 0.998207054                           |                      |
| RP11-218C14.8 | ENSG00000270001.1                    | 0.557860188                 | 9                      | 6            | 0.103472661                           |                      |
|               | Brain_Amygdala                       | 0.922984711                 |                        |              | Brain_Cerebellar_Hemisphere           | 4.75326299           |
|               | 0.002266704                          | 0.267780034                 | -0.889376593           | 1.628246349  |                                       | -0.179864803         |
|               | 0.722674852                          | 6                           | 0                      | 0.998207054  |                                       |                      |
| AP3M2         | ENSG00000070718.11                   | 0.557918836                 | 3                      | 3            | 0.51873295                            |                      |
|               | Brain_Putamen_basal_ganglia          | 0.839888002                 |                        |              | Brain_Cerebellar_Hemisphere           |                      |
|               | 2.487822987                          | 0.084031499                 | 0.084031499            | -0.248784592 |                                       | 0.645299757          |
|               | 0.199517302                          | 0.447047499                 | 3                      | 0            | 0.998207054                           |                      |
| GUCD1         | ENSG00000138867.16                   | 0.558020346                 | 1                      | 1            | 0.558020346                           | Brain_Cortex         |
|               | 0.558020346                          | Brain_Cortex                | 1                      | 1            | 0.585784492                           | 0.585784492          |
|               | 0.585784492                          | NA 1                        | 0                      | 0.998207054  |                                       |                      |
| DSN1          | ENSG00000149636.15                   | 0.558088823                 | 1                      | 1            | 0.558088823                           | Brain_Cortex         |
|               | 0.558088823                          | Brain_Cortex                | 1                      | 1            | -0.585682609                          | -0.585682609         |
|               | -0.585682609                         | NA 1                        | 0                      | 0.998207054  |                                       |                      |
| MALT1         | ENSG00000172175.12                   | 0.558203408                 | 3                      | 3            | 0.200328268                           |                      |
|               | Brain_Hypothalamus                   | 0.658229178                 |                        |              | Brain_Nucleus_accumbens_basal_ganglia |                      |
|               | 1.365582765                          | 0.634717121                 | 0.634717121            | -0.562741924 |                                       | 1.280616879          |
|               | 0.091838529                          | 1.031270316                 | 3                      | 0            | 0.998207054                           |                      |
| PIK3C3        | ENSG00000078142.12                   | 0.55821608                  | 6                      | 2            | 0.216545722                           | Brain_Cerebellum     |
|               | 0.56990374                           | Brain_Cerebellar_Hemisphere | 5.262832464            | 0.003095026  |                                       |                      |
|               | 0.542165915                          | -1.235765556                | -0.568193272           | -0.971771781 |                                       | 0.226354332          |
|               | 2                                    | 0                           | 0.998207054            |              |                                       |                      |
| RSPH14        | ENSG00000100218.11                   | 0.558287903                 | 4                      | 4            | 0.146780933                           |                      |
|               | Brain_Cerebellar_Hemisphere          | 0.781661954                 |                        |              | Brain_Cortex                          | 2.505882867          |
|               | 0.101593398                          | 0.101593398                 | -1.450996148           | 1.099496007  |                                       | -0.344374945         |
|               | 1.24028602                           | 4                           | 0                      | 0.998207054  |                                       |                      |
| RPGRIP1L      | ENSG00000103494.12                   | 0.558457095                 | 7                      | 5            | 0.182441835                           |                      |
|               | Brain_Substantia_nigra               | 0.927339865                 |                        |              | Brain_Cerebellar_Hemisphere           |                      |
|               | 3.790943691                          | 0.044090764                 | 0.335113426            | -1.333274208 |                                       | 1.152307534          |
|               | 0.523698001                          | 0.90552593                  | 5                      | 0            | 0.998207054                           |                      |
| LRRC66        | ENSG00000188993.3                    | 0.558491802                 | 1                      | 1            | 0.558491802                           |                      |
|               | Brain_Cortex                         | 0.558491802                 | Brain_Cortex           | 1            | 1                                     | 1                    |
|               | -0.585083159                         | -0.585083159                | NA 1                   | 0            | 0.998207054                           | -0.585083159         |
| FGF19         | ENSG00000162344.3                    | 0.558522188                 | 1                      | 1            | 0.558522188                           | Brain_Cerebellum     |
|               | 0.558522188                          | Brain_Cerebellum            | 1                      | 1            | 0.585037968                           | 0.585037968          |
|               | 0.585037968                          | NA 1                        | 0                      | 0.998207054  |                                       |                      |
| CTD-2639E6.9  | ENSG00000267898.1                    | 0.558548526                 | 1                      | 1            | 0.558548526                           |                      |
|               | Brain_Substantia_nigra               | 0.558548526                 | Brain_Substantia_nigra | 1            | 1                                     |                      |
|               | 1                                    | 0.584998797                 | 0.584998797            | 0.584998797  | NA 1                                  | 0                    |
|               | 0.998207054                          |                             |                        |              |                                       |                      |
| TCTEX1D1      | ENSG00000152760.9                    | 0.558607598                 | 8                      | 4            | 0.153561182                           |                      |
|               | Brain_Frontal_Cortex_BA9             | 0.297939776                 |                        |              | Brain_Nucleus_accumbens_basal_ganglia |                      |

|              |                                      |                             |                             |                  |                  |
|--------------|--------------------------------------|-----------------------------|-----------------------------|------------------|------------------|
|              | 6.069691891                          | 0.030345129                 | 0.21197359                  | 1.040861621      | 1.427064924      |
|              | 1.232736847                          | 0.147606302                 | 4 0                         | 0.998207054      |                  |
| PHACTR3      | ENSG00000087495.16                   | 0.558634508                 | 2 2                         | 0.459417619      |                  |
|              | Brain_Cerebellar_Hemisphere          | 0.493006717                 |                             | Brain_Cerebellum | 1.126730639      |
|              | 0.873269361                          | 0.873269361                 | -0.739806163                | 0.685534469      | -0.027135847     |
|              | 1.007868027                          | 2 0                         | 0.998207054                 |                  |                  |
| PSME2        | ENSG00000100911.15                   | 0.558662614                 | 1 1                         | 0.558662614      |                  |
|              | Brain_Anterior_cingulate_cortex_BA24 | 0.558662614                 |                             |                  |                  |
|              | Brain_Anterior_cingulate_cortex_BA24 | 1 1                         | 1                           | 0.584829131      |                  |
|              | 0.584829131                          | 0.584829131                 | NA 1 0                      | 0.998207054      |                  |
| GTPBP3       | ENSG00000130299.16                   | 0.558884962                 | 3 3                         | 0.312844571      |                  |
|              | Brain_Cerebellar_Hemisphere          | 0.64065825                  | Brain_Cortex                | 1.688525191      |                  |
|              | 0.525284737                          | 0.525284737                 | -0.466778653                | 1.009271236      | 0.375006326      |
|              | 0.759591504                          | 3 0                         | 0.998207054                 |                  |                  |
| RP11-757G1.6 | ENSG00000250508.1                    | 0.558981429                 | 7 4                         | 0.116147968      |                  |
|              | Brain_Substantia_nigra               | 0.826158947                 | Brain_Hypothalamus          | 5.854342291      |                  |
|              | 0.000205899                          | 0.201523911                 | 0.219630485                 | 1.571149323      | 0.87244042       |
|              | 0.40809092                           | 4 0                         | 0.998207054                 |                  |                  |
| FAM86B1      | ENSG00000186523.14                   | 0.559063396                 | 4 4                         | 0.331653324      |                  |
|              | Brain_Caudate_basal_ganglia          | 0.706440109                 | Brain_Cerebellar_Hemisphere |                  |                  |
|              | 2.606948576                          | 0.174304547                 | 0.174304547                 | -0.376641411     | 0.970789075      |
|              | 0.560883804                          | 0.63146389                  | 4 0                         | 0.998207054      |                  |
| LINC02003    | ENSG00000264026.1                    | 0.55942583                  | 1 1                         | 0.55942583       | Brain_Cortex     |
|              | 0.55942583                           | Brain_Cortex                | 1 1 1                       | 0.583694557      | 0.583694557      |
|              | 0.583694557                          | NA 1 0                      | 0.998207054                 |                  |                  |
| USP21        | ENSG00000143258.15                   | 0.559452067                 | 2 2                         | 0.295472671      | Brain_Cerebellum |
|              | 0.858505793                          | Brain_Caudate_basal_ganglia | 1.397560278                 | 0.602439722      |                  |
|              | 0.602439722                          | -0.178276552                | 1.046191403                 | 0.433957425      | 0.865829594      |
|              | 2 0                                  | 0.998207054                 |                             |                  |                  |
| ELL          | ENSG00000105656.12                   | 0.559469197                 | 1 1                         | 0.559469197      | Brain_Cerebellum |
|              | 0.559469197                          | Brain_Cerebellum            | 1 1 1                       | 0.583630112      | 0.583630112      |
|              | 0.583630112                          | NA 1 0                      | 0.998207054                 |                  |                  |
| LINC00662    | ENSG00000261824.6                    | 0.559470026                 | 11 7                        | 0.08167356       |                  |
|              | Brain_Anterior_cingulate_cortex_BA24 | 0.668055148                 | Brain_Frontal_Cortex_BA9    |                  |                  |
|              | 6.420759263                          | 0.008455826                 | 0.256968524                 | -1.741057159     | 0.438568668      |
|              | -0.919587436                         | 0.583297851                 | 7 0                         | 0.998207054      |                  |
| LEPROTL1     | ENSG00000104660.17                   | 0.559572794                 | 1 1                         | 0.559572794      |                  |
|              | Brain_Hippocampus                    | 0.559572794                 | Brain_Hippocampus           | 1 1 1            |                  |
|              | 0.58347617                           | 0.58347617                  | 0.58347617                  | NA 1 0           | 0.998207054      |
| SAMD3        | ENSG00000164483.16                   | 0.55969616                  | 1 1                         | 0.55969616       | Brain_Cortex     |
|              | Brain_Cortex                         | 1 1 1                       | -0.583292873                | -0.583292873     | -0.583292873     |
|              | NA 1 0                               | 0.998207054                 |                             |                  |                  |
| STX19        | ENSG00000178750.2                    | 0.559807456                 | 9 4                         | 0.317508685      |                  |
|              | Brain_Hypothalamus                   | 0.947068892                 | Brain_Substantia_nigra      | 7.014113008      |                  |
|              | 0.001324033                          | 0.265587716                 | -0.514377122                | 0.999590578      | -0.058055619     |
|              | 0.527917246                          | 4 0                         | 0.998207054                 |                  |                  |
| LINC01422    | ENSG00000223704.1                    | 0.559839331                 | 7 4                         | 0.257613802      |                  |
|              | Brain_Hippocampus                    | 0.82486638                  | Brain_Hypothalamus          | 4.999507005      |                  |
|              | 0.036139094                          | 0.355757126                 | -1.132049076                | 0.486488743      | -0.477859988     |
|              | 0.508510656                          | 4 0                         | 0.998207054                 |                  |                  |
| KCNQ4        | ENSG00000117013.14                   | 0.559843412                 | 2 2                         | 0.390107074      |                  |
|              | Brain_Spinal_cord_cervical_c-1       | 0.517006981                 | Brain_Cerebellum            | 1.001549204      |                  |
|              | 0.998450796                          | 0.998450796                 | -0.8594232                  | 0.647965938      | -0.105728631     |
|              | 1.065885081                          | 2 0                         | 0.998207054                 |                  |                  |
| RESP18       | ENSG00000182698.11                   | 0.559958566                 | 12 2                        | 0.125722953      |                  |
|              | Brain_Hippocampus                    | 0.609999135                 | Brain_Hypothalamus          | 11.14330941      |                  |
|              | 0.000683977                          | 0.515152167                 | 0.510074692                 | 1.531187929      | 0.974298068      |
|              | 0.280416282                          | 2 0                         | 0.998207054                 |                  |                  |
| SP2          | ENSG00000167182.13                   | 0.560076393                 | 1 1                         | 0.560076393      |                  |
|              | Brain_Caudate_basal_ganglia          | 0.560076393                 | Brain_Caudate_basal_ganglia | 1 1              |                  |
|              | 1                                    | -0.582728042                | -0.582728042                | -0.582728042     | NA 1 0           |
|              | 0.998207054                          |                             |                             |                  |                  |

|               |                                       |                                      |                             |              |              |                  |
|---------------|---------------------------------------|--------------------------------------|-----------------------------|--------------|--------------|------------------|
| SGMS2         | ENSG00000164023.14                    | 0.560086191                          | 1                           | 1            | 0.560086191  | Brain_Cortex     |
|               | 0.560086191                           | Brain_Cortex                         | 1                           | 1            | 1            | -0.582713489     |
|               | -0.582713489                          | NA                                   | 1                           | 0            | 0.998207054  |                  |
| LRR14B        | ENSG00000185028.3                     | 0.560087849                          | 1                           | 1            | 0.560087849  |                  |
|               | Brain_Cerebellum                      | 0.560087849                          | Brain_Cerebellum            | 1            | 1            | 0.582711027      |
|               | 0.582711027                           | 0.582711027                          | NA                          | 1            | 0            | 0.998207054      |
| FCF1          | ENSG00000119616.11                    | 0.560230462                          | 2                           | 2            | 0.330013302  | Brain_Cerebellum |
|               | 0.718686484                           | Brain_Cortex                         | 1.098335592                 |              | 0.901664408  | 0.901664408      |
|               | -0.974087084                          | 0.360214832                          | -0.306936126                |              | 0.943493932  | 2                |
|               | 0.998207054                           |                                      |                             |              |              | 0                |
| PHF19         | ENSG00000119403.13                    | 0.560277358                          | 1                           | 1            | 0.560277358  |                  |
|               | Brain_Putamen_basal_ganglia           | 0.560277358                          | Brain_Putamen_basal_ganglia | 1            | 1            |                  |
|               | 1                                     | 0.582429586                          | 0.582429586                 | 0.582429586  | NA           | 1                |
|               | 0.998207054                           |                                      |                             |              |              | 0                |
| SLC7A6OS      | ENSG00000103061.12                    | 0.560281015                          | 1                           | 1            | 0.560281015  |                  |
|               | Brain_Cortex                          | 0.560281015                          | Brain_Cortex                | 1            | 1            | 1                |
|               | 0.582424156                           | 0.582424156                          | NA                          | 1            | 0            | 0.582424156      |
|               |                                       |                                      |                             |              | 0.998207054  |                  |
| DDX60L        | ENSG00000181381.13                    | 0.560291928                          | 3                           | 3            | 0.298135318  |                  |
|               | Brain_Hippocampus                     | 0.720193782                          | Brain_Caudate_basal_ganglia | 1.788673161  |              |                  |
|               | 0.442367753                           | 0.442367753                          | -1.040440447                |              | 0.35819982   | -0.573975748     |
|               | 0.807287811                           | 3                                    | 0                           | 0.998207054  |              |                  |
| APAF1         | ENSG00000120868.13                    | 0.560332423                          | 1                           | 1            | 0.560332423  |                  |
|               | Brain_Hippocampus                     | 0.560332423                          | Brain_Hippocampus           | 1            | 1            | 1                |
|               | -0.582347817                          | -0.582347817                         | -0.582347817                | NA           | 1            | 0                |
|               |                                       |                                      |                             |              | 0.998207054  |                  |
| ZNF736        | ENSG00000234444.9                     | 0.560337792                          | 6                           | 5            | 0.19947883   |                  |
|               | Brain_Caudate_basal_ganglia           | 0.929203879                          | Brain_Cortex                | 2.953316879  |              |                  |
|               | 0.064778079                           | 0.462298355                          | -0.27175084                 |              | 1.283037809  | 0.437120771      |
|               | 0.683816809                           | 5                                    | 0                           | 0.998207054  |              |                  |
| LPAR3         | ENSG00000171517.5                     | 0.56056505                           | 5                           | 5            | 0.309816173  |                  |
|               | Brain_Anterior_cingulate_cortex_BA24  | 0.765667848                          | Brain_Hypothalamus          |              |              |                  |
|               | 1.428273156                           | 0.759979763                          | 0.759979763                 | -1.015607834 |              | 0.984791422      |
|               | 0.313067421                           | 0.803412118                          | 5                           | 0            | 0.998207054  |                  |
| ATP5O         | ENSG00000241837.6                     | 0.56072722                           | 12                          | 10           | 0.131883351  | Brain_Cerebellum |
|               | 0.952660722                           | Brain_Anterior_cingulate_cortex_BA24 | 4.122685824                 |              |              |                  |
|               | 0.084310378                           | 0.27329756                           | -1.177043965                |              | 1.506716458  | 0.25673335       |
|               | 0.975035642                           | 10                                   | 0                           | 0.998207054  |              |                  |
| PCDHGC3       | ENSG00000240184.6                     | 0.560765226                          | 1                           | 1            | 0.560765226  |                  |
|               | Brain_Nucleus_accumbens_basal_ganglia | 0.560765226                          |                             |              |              |                  |
|               | Brain_Nucleus_accumbens_basal_ganglia | 1                                    | 1                           | 1            | 0.581705262  |                  |
|               | 0.581705262                           | 0.581705262                          | NA                          | 1            | 0            | 0.998207054      |
| RP11-430H10.3 | ENSG00000254651.1                     | 0.560770839                          | 2                           | 2            | 0.322339125  |                  |
|               | Brain_Cerebellar_Hemisphere           | 0.355971968                          | Brain_Cerebellum            | 1.588601588  |              |                  |
|               | 0.411398412                           | 0.411398412                          | 0.92306762                  | 0.989662469  |              | 0.956365044      |
|               | 0.047089669                           | 2                                    | 0                           | 0.998207054  |              |                  |
| PDE4C         | ENSG00000105650.21                    | 0.560804603                          | 6                           | 4            | 0.080438643  |                  |
|               | Brain_Nucleus_accumbens_basal_ganglia | 0.390715741                          | Brain_Frontal_Cortex_BA9    |              |              |                  |
|               | 4.066818489                           | 0.053580499                          | 0.325353216                 | 0.858320086  |              | 1.748146612      |
|               | 1.210986758                           | 0.309095314                          | 4                           | 0            | 0.998207054  |                  |
| GSTT2B        | ENSG00000133433.10                    | 0.56090719                           | 13                          | 1            | 0.301097558  |                  |
|               | Brain_Cerebellar_Hemisphere           | 0.815385767                          | Brain_Substantia_nigra      |              |              |                  |
|               | 11.75768224                           | 0.002423761                          | 11.75768224                 | 0.233483775  |              | 1.034082582      |
|               | 0.554600234                           | 0.223798982                          | 1                           | 0            | 0.998207054  |                  |
| ZNF480        | ENSG00000198464.13                    | 0.560921079                          | 1                           | 1            | 0.560921079  |                  |
|               | Brain_Amygdala                        | 0.560921079                          | Brain_Amygdala              | 1            | 1            | 1                |
|               | 0.581473937                           | 0.581473937                          | NA                          | 1            | 0            | 0.998207054      |
| AC195454.1    | ENSG00000249241.1                     | 0.561010214                          | 1                           | 1            | 0.561010214  |                  |
|               | Brain_Anterior_cingulate_cortex_BA24  | 0.561010214                          |                             |              |              |                  |
|               | Brain_Anterior_cingulate_cortex_BA24  | 1                                    | 1                           | 1            | 0.581341651  |                  |
|               | 0.581341651                           | 0.581341651                          | NA                          | 1            | 0            | 0.998207054      |
| ATMIN         | ENSG00000166454.9                     | 0.561011802                          | 1                           | 1            | 0.561011802  |                  |
|               | Brain_Nucleus_accumbens_basal_ganglia | 0.561011802                          |                             |              |              |                  |
|               | Brain_Nucleus_accumbens_basal_ganglia | 1                                    | 1                           | 1            | -0.581339295 |                  |

|                |                             |                |                                |              |             |                |              |
|----------------|-----------------------------|----------------|--------------------------------|--------------|-------------|----------------|--------------|
|                | -0.581339295                | -0.581339295   | NA                             | 1            | 0           | 0.998207054    |              |
| NDUFA6         | ENSG00000184983.9           | 0.561057504    |                                | 13           | 8           | 0.128658071    |              |
|                | Brain_Cortex                | 0.993935053    | Brain_Amygdala                 |              |             | 7.313206606    | 0.075289982  |
|                | 0.275956232                 | -0.259449433   | 1.519414991                    |              |             | 0.554544767    | 0.519022104  |
|                | 8                           | 0              | 0.998207054                    |              |             |                |              |
| RP11-122G18.12 | ENSG00000283696.1           | 0.5613281      | 3                              | 3            | 0.176637248 |                |              |
|                | Brain_Cerebellar_Hemisphere | 0.756863412    | Brain_Cortex                   |              |             | 1.285488925    |              |
|                | 0.776724635                 | -0.776724635   | -1.35118166                    |              |             | 0.309602294    | -0.450467137 |
|                | 0.839277438                 | 3              | 0                              | 0.998207054  |             |                |              |
| NKX2-2         | ENSG00000125820.5           | 0.561357347    | 2                              | 2            | 0.350373438 |                |              |
|                | Brain_Frontal_Cortex_BA9    | 0.630070123    | Brain_Cerebellum               |              |             | 1.052809414    |              |
|                | 0.947190586                 | 0.947190586    | -0.481628154                   |              |             | 0.933865188    | 0.226118517  |
|                | 1.000904941                 | 2              | 0                              | 0.998207054  |             |                |              |
| MUC6           | ENSG00000184956.15          | 0.561367376    | 6                              | 6            | 0.075765999 |                |              |
|                | Brain_Putamen_basal_ganglia | 0.559941592    | Brain_Cerebellum               |              |             | 2.509986829    |              |
|                | 0.167814826                 | 0.167814826    | 0.582928266                    |              |             | 1.775799325    | 0.965729248  |
|                | 0.438841829                 | 6              | 0                              | 0.998207054  |             |                |              |
| GFPT1          | ENSG00000198380.12          | 0.561510693    | 1                              | 1            | 0.561510693 | Brain_Cortex   |              |
|                | 0.561510693                 | Brain_Cortex   | 1                              | 1            | 1           | 0.580599079    | 0.580599079  |
|                | 0.580599079                 | NA             | 1                              | 0            | 0.998207054 |                |              |
| AC144835.1     | ENSG00000258483.2           | 0.561521717    | 1                              | 1            | 0.561521717 |                |              |
|                | Brain_Hypothalamus          | 0.561521717    | Brain_Hypothalamus             |              |             | 1              | 1            |
|                | 0.580582726                 | 0.580582726    | 0.580582726                    | NA           | 1           | 0              | 0.998207054  |
| GCKR           | ENSG00000084734.8           | 0.561535163    | 1                              | 1            | 0.561535163 |                |              |
|                | Brain_Caudate_basal_ganglia | 0.561535163    | Brain_Caudate_basal_ganglia    |              |             | 1              | 1            |
|                | 1                           | 0.58056278     | 0.58056278                     | 0.58056278   | NA          | 1              | 0            |
|                | 0.998207054                 |                |                                |              |             |                |              |
| CDC20          | ENSG00000117399.13          | 0.561647103    | 2                              | 2            | 0.627088476 |                |              |
|                | Brain_Hypothalamus          | 0.684642893    | Brain_Substantia_nigra         |              |             | 1.654640344    |              |
|                | 0.345359656                 | 0.345359656    | -0.406135704                   |              |             | 0.485828909    | 0.039846602  |
|                | 0.630714226                 | 2              | 0                              | 0.998207054  |             |                |              |
| RP11-131L12.3  | ENSG00000275759.1           | 0.561734995    | 13                             | 5            | 0.132166566 |                |              |
|                | Brain_Caudate_basal_ganglia | 0.908386797    | Brain_Substantia_nigra         |              |             |                |              |
|                | 10.15182857                 | 0.002939921    | 0.368969285                    |              |             | -1.505612934   | -0.115073585 |
|                | -0.838815444                | 0.398850099    | 5                              | 0            | 0.998207054 |                |              |
| CECR6          | ENSG00000183307.3           | 0.56175389     | 3                              | 3            | 0.300433479 |                |              |
|                | Brain_Cerebellar_Hemisphere | 0.643138292    | Brain_Cerebellum               |              |             | 1.791512042    |              |
|                | 0.207935982                 | 0.207935982    | -1.035504258                   |              |             | -0.463315423   | -0.751127487 |
|                | 0.286109885                 | 3              | 0                              | 0.998207054  |             |                |              |
| OR51Q1         | ENSG00000167360.4           | 0.561753956    | 1                              | 1            | 0.561753956 |                |              |
|                | Brain_Cerebellum            | 0.561753956    | Brain_Cerebellum               |              |             | 1              | 1            |
|                | 0.58023826                  | 0.58023826     | NA                             | 1            | 0           | 0.998207054    |              |
| UROC1          | ENSG00000159650.8           | 0.561895789    | 5                              | 5            | 0.120345369 |                |              |
|                | Brain_Caudate_basal_ganglia | 0.765131991    | Brain_Spinal_cord_cervical_c-1 |              |             |                |              |
|                | 1.288184139                 | 0.712564481    | 0.712564481                    |              |             | -1.553325595   | 0.753064167  |
|                | -0.438414621                | 0.839099394    | 5                              | 0            | 0.998207054 |                |              |
| AGPAT2         | ENSG00000169692.12          | 0.562592625    | 1                              | 1            | 0.562592625 |                |              |
|                | Brain_Putamen_basal_ganglia | 0.562592625    | Brain_Putamen_basal_ganglia    |              |             | 1              | 1            |
|                | 1                           | 0.578994884    | 0.578994884                    | 0.578994884  | NA          | 1              | 0            |
|                | 0.998207054                 |                |                                |              |             |                |              |
| HIF1A-AS2      | ENSG00000258667.1           | 0.562606593    | 1                              | 1            | 0.562606593 |                |              |
|                | Brain_Cerebellar_Hemisphere | 0.562606593    | Brain_Cerebellar_Hemisphere    |              |             | 1              | 1            |
|                | 1                           | 0.578974183    | 0.578974183                    | 0.578974183  | NA          | 1              | 0            |
|                | 0.998207054                 |                |                                |              |             |                |              |
| RP11-368I23.3  | ENSG00000272797.1           | 0.56263295     | 1                              | 1            | 0.56263295  | Brain_Amygdala |              |
|                | 0.56263295                  | Brain_Amygdala | 1                              | 1            | 1           | -0.578935123   | -0.578935123 |
|                | -0.578935123                | NA             | 1                              | 0            | 0.998207054 |                |              |
| KB-1000E4.2    | ENSG00000260640.1           | 0.562737724    | 1                              | 1            | 0.562737724 |                |              |
|                | Brain_Caudate_basal_ganglia | 0.562737724    | Brain_Caudate_basal_ganglia    |              |             | 1              | 1            |
|                | 1                           | -0.578779857   | -0.578779857                   | -0.578779857 | NA          | 1              | 0            |
|                | 0.998207054                 |                |                                |              |             |                |              |
| XYLT2          | ENSG00000015532.9           | 0.562771886    | 1                              | 1            | 0.562771886 | Brain_Amygdala |              |
|                | 0.562771886                 | Brain_Amygdala | 1                              | 1            | 1           | 0.578729236    | 0.578729236  |

|             |                             |                  |              |                             |              |             |              |              |                  |
|-------------|-----------------------------|------------------|--------------|-----------------------------|--------------|-------------|--------------|--------------|------------------|
|             | 0.578729236                 | NA               | 1            | 0                           | 0.998207054  |             |              |              |                  |
| RP11-2L8.2  | ENSG00000270321.1           |                  |              | 0.562928986                 | 2            | 2           | 0.304095371  |              |                  |
|             | Brain_Cortex                | 0.813907615      |              | Brain_Frontal_Cortex_BA9    | 1.488113447  |             |              |              |                  |
|             | 0.511886553                 | 0.511886553      |              | -1.027690641                | -0.235387979 |             | -0.63153931  |              |                  |
|             | 0.560242585                 | 2                | 0            | 0.998207054                 |              |             |              |              |                  |
| TTL7        | ENSG00000137941.16          |                  |              | 0.563012963                 | 1            | 1           | 0.563012963  |              |                  |
|             | Brain_Cerebellar_Hemisphere | 0.563012963      |              | Brain_Cerebellar_Hemisphere | 1            | 1           |              |              |                  |
|             | 1                           | 0.578372045      | 0.578372045  | 0.578372045                 | NA           | 1           | 0            |              |                  |
|             | 0.998207054                 |                  |              |                             |              |             |              |              |                  |
| ANKFY1      | ENSG00000185722.16          |                  |              | 0.563190087                 | 1            | 1           | 0.563190087  |              |                  |
|             | Brain_Substantia_nigra      | 0.563190087      |              | Brain_Substantia_nigra      | 1            | 1           |              |              |                  |
|             | 1                           | -0.578109658     | -0.578109658 | -0.578109658                | NA           | 1           | 0            |              |                  |
|             | 0.998207054                 |                  |              |                             |              |             |              |              |                  |
| LINC00943   | ENSG00000189238.5           |                  |              | 0.563206262                 | 1            | 1           | 0.563206262  |              |                  |
|             | Brain_Cortex                | 0.563206262      |              | Brain_Cortex                | 1            | 1           | 1            | 0.578085698  |                  |
|             | 0.578085698                 | 0.578085698      |              | NA                          | 1            | 0           | 0.998207054  |              |                  |
| EIF3F       | ENSG00000175390.13          |                  |              | 0.563229388                 | 11           | 4           | 0.056491448  |              |                  |
|             | Brain_Caudate_basal_ganglia | 0.596471274      |              | Brain_Frontal_Cortex_BA9    |              |             |              |              |                  |
|             | 8.410147305                 | 0.040317767      |              | 0.418667595                 | -1.907225073 |             | -0.52948179  |              |                  |
|             | -1.201298521                | 0.50891214       | 4            | 0                           | 0.998207054  |             |              |              |                  |
| HBE1        | ENSG00000213931.5           |                  |              | 0.563357691                 | 2            | 2           | 0.350544168  |              |                  |
|             | Brain_Frontal_Cortex_BA9    | 0.621726381      |              | Brain_Hypothalamus          | 1.034097982  |             |              |              |                  |
|             | 0.965902018                 | 0.965902018      |              | -0.493405098                | 0.933534302  |             | 0.220064602  |              |                  |
|             | 1.008998527                 | 2                | 0            | 0.998207054                 |              |             |              |              |                  |
| CEBPA       | ENSG00000245848.2           |                  |              | 0.563382267                 | 1            | 1           | 0.563382267  |              | Brain_Cerebellum |
|             | 0.563382267                 | Brain_Cerebellum | 1            | 1                           | 1            | 0.577825012 | 0.577825012  |              |                  |
|             | 0.577825012                 | NA               | 1            | 0                           | 0.998207054  |             |              |              |                  |
| RP11-80H5.7 | ENSG00000240996.1           |                  |              | 0.563587986                 | 1            | 1           | 0.563587986  |              |                  |
|             | Brain_Cerebellum            | 0.563587986      |              | Brain_Cerebellum            | 1            | 1           | 1            | -0.577520364 |                  |
|             | -0.577520364                | -0.577520364     |              | NA                          | 1            | 0           | 0.998207054  |              |                  |
| LINC01445   | ENSG00000231427.5           |                  |              | 0.563802727                 | 2            | 2           | 0.583903353  |              |                  |
|             | Brain_Cortex                | 0.81130248       |              | Brain_Frontal_Cortex_BA9    | 1.723498506  |             |              |              |                  |
|             | 0.276501494                 | 0.276501494      |              | -0.547692078                | 0.238746084  |             | -0.154472997 |              |                  |
|             | 0.556095757                 | 2                | 0            | 0.998207054                 |              |             |              |              |                  |
| PLGLB1      | ENSG00000183281.14          |                  |              | 0.564092266                 | 8            | 8           | 0.100789911  |              |                  |
|             | Brain_Frontal_Cortex_BA9    | 0.998367509      |              | Brain_Hippocampus           | 3.344285965  |             |              |              |                  |
|             | 0.301196625                 | 0.301196625      |              | -1.641036153                | 0.409261595  |             | -0.289129953 |              |                  |
|             | 0.694717957                 | 8                | 0            | 0.998207054                 |              |             |              |              |                  |
| ERCC2       | ENSG00000104884.14          |                  |              | 0.564096768                 | 1            | 1           | 0.564096768  |              |                  |
|             | Brain_Substantia_nigra      | 0.564096768      |              | Brain_Substantia_nigra      | 1            | 1           |              |              |                  |
|             | 1                           | -0.576767144     | -0.576767144 | -0.576767144                | NA           | 1           | 0            |              |                  |
|             | 0.998207054                 |                  |              |                             |              |             |              |              |                  |
| DTNB        | ENSG00000138101.18          |                  |              | 0.564207302                 | 2            | 2           | 0.327518233  |              |                  |
|             | Brain_Frontal_Cortex_BA9    | 0.643958398      |              | Brain_Hypothalamus          | 1.031797705  |             |              |              |                  |
|             | 0.968202295                 | 0.968202295      |              | -0.979124974                | 0.462171419  |             | -0.258476778 |              |                  |
|             | 1.019150453                 | 2                | 0            | 0.998207054                 |              |             |              |              |                  |
| M1AP        | ENSG00000159374.17          |                  |              | 0.564301026                 | 1            | 1           | 0.564301026  |              |                  |
|             | Brain_Hypothalamus          | 0.564301026      |              | Brain_Hypothalamus          | 1            | 1           | 1            |              |                  |
|             | 0.576464843                 | 0.576464843      |              | 0.576464843                 | NA           | 1           | 0            | 0.998207054  |                  |
| CNN2        | ENSG00000064666.14          |                  |              | 0.564335337                 | 4            | 3           | 0.180327025  |              |                  |
|             | Brain_Hippocampus           | 0.393893699      |              | Brain_Hypothalamus          | 2.856833588  |             |              |              |                  |
|             | 0.008964815                 | 0.273946199      |              | -1.339748804                | -0.852577402 |             | -1.173450402 |              |                  |
|             | 0.221393663                 | 3                | 0            | 0.998207054                 |              |             |              |              |                  |
| PXDN        | ENSG00000130508.10          |                  |              | 0.564371896                 | 5            | 5           | 0.145032073  |              |                  |
|             | Brain_Hypothalamus          | 0.809265783      |              | Brain_Cerebellar_Hemisphere | 1.688543161  |             |              |              |                  |
|             | 0.525786836                 | 0.525786836      |              | -1.457305488                | 0.748275164  |             | -0.474918422 |              |                  |
|             | 0.816897471                 | 5                | 0            | 0.998207054                 |              |             |              |              |                  |
| AC001226.7  | ENSG00000274898.1           |                  |              | 0.56453107                  | 2            | 2           | 0.337542198  |              |                  |
|             | Brain_Frontal_Cortex_BA9    | 0.579526794      |              | Brain_Substantia_nigra      |              |             |              |              |                  |
|             | 1.086329415                 | 0.913670585      |              | 0.913670585                 | -0.554076059 |             | 0.959032847  |              |                  |
|             | 0.202478394                 | 1.069929568      |              | 2                           | 0            | 0.998207054 |              |              |                  |
| GPI         | ENSG00000105220.14          |                  |              | 0.564587272                 | 1            | 1           | 0.564587272  |              | Brain_Cortex     |

|          |                                       |                                       |                                      |              |                             |                   |              |
|----------|---------------------------------------|---------------------------------------|--------------------------------------|--------------|-----------------------------|-------------------|--------------|
|          | 0.564587272                           | Brain_Cortex                          | 1                                    | 1            | 1                           | -0.576041291      | -0.576041291 |
|          | -0.576041291                          | NA                                    | 1                                    | 0            | 0.998207054                 |                   |              |
| ZNF426   | ENSG00000130818.11                    | 0.564601058                           | 2                                    | 2            | 0.28666837                  |                   |              |
|          | Brain_Anterior_cingulate_cortex_BA24  | 0.506426561                           |                                      |              | Brain_Cerebellar_Hemisphere |                   |              |
|          | 1.685015359                           | 0.314984641                           | 0.314984641                          |              | -1.065458779                | -0.664412146      |              |
|          | -0.864935463                          | 0.283582793                           | 2                                    | 0            | 0.998207054                 |                   |              |
| TJAP1    | ENSG00000137221.14                    | 0.564752793                           | 1                                    | 1            | 0.564752793                 |                   |              |
|          | Brain_Anterior_cingulate_cortex_BA24  | 0.564752793                           |                                      |              |                             |                   |              |
|          | Brain_Anterior_cingulate_cortex_BA24  | 1                                     | 1                                    | 1            | -0.575796422                |                   |              |
|          | -0.575796422                          | -0.575796422                          | NA                                   | 1            | 0                           | 0.998207054       |              |
| C5orf46  | ENSG00000178776.4                     | 0.564857954                           | 2                                    | 2            | 0.285274151                 |                   |              |
|          | Brain_Cerebellum                      | 0.950189339                           | Brain_Cerebellar_Hemisphere          | 1.036118312  |                             |                   |              |
|          | 0.963881688                           | 0.963881688                           | -1.068546312                         | 0.062469012  | -0.50303865                 |                   |              |
|          | 0.799748605                           | 2                                     | 0                                    | 0.998207054  |                             |                   |              |
| CXCL10   | ENSG00000169245.5                     | 0.564937304                           | 1                                    | 1            | 0.564937304                 |                   |              |
|          | Brain_Hippocampus                     | 0.564937304                           | Brain_Hippocampus                    | 1            | 1                           | 1                 |              |
|          | -0.575523497                          | -0.575523497                          | -0.575523497                         | NA           | 1                           | 0                 | 0.998207054  |
| TUFT1    | ENSG00000143367.15                    | 0.565082379                           | 3                                    | 3            | 0.382414972                 |                   |              |
|          | Brain_Frontal_Cortex_BA9              | 0.967165973                           | Brain_Cerebellar_Hemisphere          |              |                             |                   |              |
|          | 2.220551231                           | 0.220840418                           | 0.220840418                          | -0.873455278 | 0.041162971                 |                   |              |
|          | -0.524830009                          | 0.494538347                           | 3                                    | 0            | 0.998207054                 |                   |              |
| PLA2G16  | ENSG00000176485.11                    | 0.565131071                           | 7                                    | 7            | 0.074080409                 |                   |              |
|          | Brain_Cerebellar_Hemisphere           | 0.824685163                           | Brain_Anterior_cingulate_cortex_BA24 |              |                             |                   |              |
|          | 2.646276363                           | 0.091908821                           | 0.091908821                          | -1.786116428 | 0.68606643                  |                   |              |
|          | -0.417838861                          | 0.81755301                            | 7                                    | 0            | 0.998207054                 |                   |              |
| S100Z    | ENSG00000171643.13                    | 0.565229009                           | 1                                    | 1            | 0.565229009                 |                   |              |
|          | Brain_Hypothalamus                    | 0.565229009                           | Brain_Hypothalamus                   | 1            | 1                           | 1                 |              |
|          | 0.575092102                           | 0.575092102                           | 0.575092102                          | NA           | 1                           | 0                 | 0.998207054  |
| TAP1     | ENSG00000168394.10                    | 0.565346431                           | 2                                    | 2            | 0.291837448                 | Brain_Cerebellum  |              |
|          | 0.749552393                           | Brain_Cerebellar_Hemisphere           | 1.141523934                          | 0.858476066  |                             |                   |              |
|          | 0.858476066                           | 0.319229626                           | 1.05409932                           | 0.686664473  | 0.519631344                 | 2                 |              |
|          | 0                                     | 0.998207054                           |                                      |              |                             |                   |              |
| KIAA2012 | ENSG00000182329.12                    | 0.565352389                           | 1                                    | 1            | 0.565352389                 |                   |              |
|          | Brain_Nucleus_accumbens_basal_ganglia | 0.565352389                           |                                      |              |                             |                   |              |
|          | Brain_Nucleus_accumbens_basal_ganglia | 1                                     | 1                                    | 1            | 0.574909672                 |                   |              |
|          | 0.574909672                           | 0.574909672                           | NA                                   | 1            | 0                           | 0.998207054       |              |
| RTCA     | ENSG00000137996.12                    | 0.565355239                           | 4                                    | 3            | 0.246200523                 | Brain_Amygdala    |              |
|          | 0.796761619                           | Brain_Nucleus_accumbens_basal_ganglia | 2.347302818                          | 0.07306821   |                             |                   |              |
|          | 0.587837932                           | -1.159627443                          | 0.730338676                          | -0.100444973 | 0.813501441                 |                   |              |
|          | 3                                     | 0                                     | 0.998207054                          |              |                             |                   |              |
| ZNF548   | ENSG00000188785.11                    | 0.565361927                           | 1                                    | 1            | 0.565361927                 |                   |              |
|          | Brain_Spinal_cord_cervical_c-1        | 0.565361927                           | Brain_Spinal_cord_cervical_c-1       |              |                             |                   |              |
|          | 1                                     | 1                                     | 1                                    | 0.574895568  | 0.574895568                 | NA                | 1            |
|          | 0.998207054                           |                                       |                                      |              |                             |                   |              |
| MMP9     | ENSG00000100985.7                     | 0.565368335                           | 1                                    | 1            | 0.565368335                 |                   |              |
|          | Brain_Spinal_cord_cervical_c-1        | 0.565368335                           | Brain_Spinal_cord_cervical_c-1       |              |                             |                   |              |
|          | 1                                     | 1                                     | 1                                    | 0.574886094  | 0.574886094                 | NA                | 1            |
|          | 0.998207054                           |                                       |                                      |              |                             |                   |              |
| CHD6     | ENSG00000124177.14                    | 0.565401073                           | 1                                    | 1            | 0.565401073                 | Brain_Cortex      |              |
|          | 0.565401073                           | Brain_Cortex                          | 1                                    | 1            | 1                           | -0.574837692      | -0.574837692 |
|          | -0.574837692                          | NA                                    | 1                                    | 0            | 0.998207054                 |                   |              |
| CENPP    | ENSG00000188312.13                    | 0.56557801                            | 13                                   | 1            | 0.388845074                 | Brain_Hippocampus |              |
|          | 0.764919387                           | Brain_Putamen_basal_ganglia           | 12.61309849                          | 0.00167555   |                             |                   |              |
|          | 12.61309849                           | -0.86171372                           | -0.299027076                         | -0.566993565 | 0.160756506                 |                   |              |
|          | 1                                     | 0                                     | 0.998207054                          |              |                             |                   |              |
| PDK2     | ENSG00000005882.11                    | 0.565658325                           | 2                                    | 2            | 0.285897606                 |                   |              |
|          | Brain_Caudate_basal_ganglia           | 0.64418214                            | Brain_Spinal_cord_cervical_c-1       |              |                             |                   |              |
|          | 1.454717822                           | 0.545282178                           | 0.545282178                          | 0.461859415  | 1.067164398                 |                   |              |
|          | 0.764511907                           | 0.428015258                           | 2                                    | 0            | 0.998207054                 |                   |              |
| FAM53B   | ENSG00000189319.13                    | 0.56566479                            | 1                                    | 1            | 0.56566479                  |                   |              |
|          | Brain_Frontal_Cortex_BA9              | 0.56566479                            | Brain_Frontal_Cortex_BA9             | 1            | 1                           | 1                 |              |
|          | -0.574447837                          | -0.574447837                          | -0.574447837                         | NA           | 1                           | 0                 | 0.998207054  |



|            |                                      |                             |                  |             |                                |                             |             |             |  |
|------------|--------------------------------------|-----------------------------|------------------|-------------|--------------------------------|-----------------------------|-------------|-------------|--|
| ATP5D      | ENSG00000099624.7                    | 0.56571675                  | 1                | 1           | 0.56571675                     | Brain_Caudate_basal_ganglia |             |             |  |
|            | 0.56571675                           | Brain_Caudate_basal_ganglia | 1                | 1           | 1                              | -0.574371033                |             |             |  |
|            | -0.574371033                         | -0.574371033                | NA               | 1           | 0                              | 0.998207054                 |             |             |  |
| FAM149A    | ENSG00000109794.13                   | 0.565828191                 | 11               | 5           | 0.092328503                    |                             |             |             |  |
|            | Brain_Hippocampus                    | 0.613144365                 |                  |             | Brain_Cerebellar_Hemisphere    | 8.189924545                 |             |             |  |
|            | 0.011825339                          | 0.323389485                 | -0.505590196     |             | 1.683240711                    | 1.043725924                 |             |             |  |
|            | 0.592120211                          | 5                           | 0                | 0.998207054 |                                |                             |             |             |  |
| TULP2      | ENSG00000104804.7                    | 0.565974021                 | 4                | 4           | 0.106195025                    | Brain_Cerebellum            |             |             |  |
|            | 0.409939787                          | Brain_Cortex                | 2.313155919      |             | 0.24147154                     | 0.24147154                  |             |             |  |
|            | -1.615534365                         | -0.823999598                | -1.101894837     |             | 0.369654224                    | 4                           | 0           |             |  |
|            | 0.998207054                          |                             |                  |             |                                |                             |             |             |  |
| IFI6       | ENSG00000126709.14                   | 0.565975323                 | 1                | 1           | 0.565975323                    |                             |             |             |  |
|            | Brain_Cerebellar_Hemisphere          | 0.565975323                 |                  |             | Brain_Cerebellar_Hemisphere    | 1                           | 1           |             |  |
|            | 1                                    | 0.573988885                 | 0.573988885      | 0.573988885 | NA                             | 1                           | 0           |             |  |
|            | 0.998207054                          |                             |                  |             |                                |                             |             |             |  |
| LINC00526  | ENSG00000264575.1                    | 0.566096455                 | 2                | 2           | 0.301611221                    |                             |             |             |  |
|            | Brain_Cerebellar_Hemisphere          | 0.91188274                  | Brain_Cerebellum | 1.147849677 |                                |                             |             |             |  |
|            | 0.852150323                          | 0.852150323                 | -1.032984353     |             | 0.110664069                    | -0.461160142                |             |             |  |
|            | 0.808681555                          | 2                           | 0                | 0.998207054 |                                |                             |             |             |  |
| CTB-3204.3 | ENSG00000276251.1                    | 0.56611715                  | 3                | 3           | 0.208649982                    |                             |             |             |  |
|            | Brain_Cerebellar_Hemisphere          | 0.556209435                 |                  |             | Brain_Spinal_cord_cervical_c-1 |                             |             |             |  |
|            | 1.595611272                          | 0.401584325                 | 0.401584325      |             | -1.257286303                   | 0.601740637                 |             |             |  |
|            | -0.022354865                         | 1.069502546                 | 3                | 0           | 0.998207054                    |                             |             |             |  |
| GNA13      | ENSG00000120063.9                    | 0.566537588                 | 4                | 4           | 0.244018128                    |                             |             |             |  |
|            | Brain_Anterior_cingulate_cortex_BA24 | 0.814782322                 |                  |             |                                |                             |             |             |  |
|            | Brain_Spinal_cord_cervical_c-1       | 1.216327585                 |                  |             | 0.751786975                    | 0.751786975                 |             |             |  |
|            | -0.385909223                         | 1.165002136                 | 0.520099049      |             | 0.734302659                    | 4                           | 0           |             |  |
|            | 0.998207054                          |                             |                  |             |                                |                             |             |             |  |
| DCSTAMP    | ENSG00000164935.6                    | 0.566758205                 | 2                | 2           | 0.347424371                    |                             |             |             |  |
|            | Brain_Caudate_basal_ganglia          | 0.742164854                 |                  |             | Brain_Hypothalamus             | 1.176572455                 |             |             |  |
|            | 0.823427545                          | 0.823427545                 | -0.939596891     |             | -0.328987873                   | -0.634292382                |             |             |  |
|            | 0.431765778                          | 2                           | 0                | 0.998207054 |                                |                             |             |             |  |
| GLIPR2     | ENSG00000122694.15                   | 0.567034459                 | 7                | 7           | 0.139646068                    |                             |             |             |  |
|            | Brain_Hippocampus                    | 0.930314916                 |                  |             | Brain_Caudate_basal_ganglia    | 2.281674018                 |             |             |  |
|            | 0.225877713                          | 0.225877713                 | -1.477110318     |             | 0.590051001                    | -0.059255841                |             |             |  |
|            | 0.753317622                          | 7                           | 0                | 0.998207054 |                                |                             |             |             |  |
| ZNF385D    | ENSG00000151789.10                   | 0.567099165                 | 1                | 1           | 0.567099165                    |                             |             |             |  |
|            | Brain_Putamen_basal_ganglia          | 0.567099165                 |                  |             | Brain_Putamen_basal_ganglia    | 1                           | 1           |             |  |
|            | 1                                    | 0.572328914                 | 0.572328914      | 0.572328914 | NA                             | 1                           | 0           |             |  |
|            | 0.998207054                          |                             |                  |             |                                |                             |             |             |  |
| FES        | ENSG00000182511.11                   | 0.567140137                 | 1                | 1           | 0.567140137                    | Brain_Amygdala              |             |             |  |
|            | 0.567140137                          | Brain_Amygdala              | 1                | 1           | 1                              | 0.572268426                 | 0.572268426 |             |  |
|            | 0.572268426                          | NA                          | 1                | 0           | 0.998207054                    |                             |             |             |  |
| SLC28A2    | ENSG00000137860.11                   | 0.567259508                 | 10               | 4           | 0.155658533                    |                             |             |             |  |
|            | Brain_Anterior_cingulate_cortex_BA24 | 0.976418728                 |                  |             | Brain_Hippocampus              |                             |             |             |  |
|            | 7.736517777                          | 0.003201934                 | 0.279288644      |             | -1.419825349                   | 0.199809689                 |             |             |  |
|            | -0.320209016                         | 0.494940553                 | 4                | 0           | 0.998207054                    |                             |             |             |  |
| METAP2     | ENSG00000111142.13                   | 0.567549045                 | 1                | 1           | 0.567549045                    |                             |             |             |  |
|            | Brain_Hippocampus                    | 0.567549045                 |                  |             | Brain_Hippocampus              | 1                           | 1           | 1           |  |
|            | 0.571664861                          | 0.571664861                 | 0.571664861      |             | NA                             | 1                           | 0           | 0.998207054 |  |
| SYN2       | ENSG00000157152.16                   | 0.567649001                 | 2                | 2           | 0.512501325                    | Brain_Cerebellum            |             |             |  |
|            | 0.991675192                          | Brain_Cerebellar_Hemisphere | 1.794178654      |             | 0.205821346                    |                             |             |             |  |
|            | 0.205821346                          | -0.65494786                 | -0.010433789     |             | -0.332690824                   | 0.45574027                  | 2           |             |  |
|            | 0                                    | 0.998207054                 |                  |             |                                |                             |             |             |  |
| MANEAL     | ENSG00000185090.14                   | 0.567678523                 | 1                | 1           | 0.567678523                    |                             |             |             |  |
|            | Brain_Hypothalamus                   | 0.567678523                 |                  |             | Brain_Hypothalamus             | 1                           | 1           | 1           |  |
|            | 0.571473788                          | 0.571473788                 | 0.571473788      |             | NA                             | 1                           | 0           | 0.998207054 |  |
| ZNF75A     | ENSG00000162086.14                   | 0.567712647                 | 2                | 2           | 0.339762336                    |                             |             |             |  |
|            | Brain_Frontal_Cortex_BA9             | 0.917105466                 |                  |             | Brain_Cerebellar_Hemisphere    |                             |             |             |  |
|            | 1.351875963                          | 0.648124037                 | 0.648124037      |             | -0.954634951                   | 0.1040805                   |             |             |  |
|            | -0.425277225                         | 0.748624875                 | 2                | 0           | 0.998207054                    |                             |             |             |  |
| MTFP1      | ENSG00000242114.5                    | 0.567724764                 | 1                | 1           | 0.567724764                    | Brain_Cortex                |             |             |  |

|        |                                      |                                       |              |              |             |                             |                             |
|--------|--------------------------------------|---------------------------------------|--------------|--------------|-------------|-----------------------------|-----------------------------|
|        | 0.567724764                          | Brain_Cortex                          | 1            | 1            | 1           | -0.571405556                | -0.571405556                |
|        | -0.571405556                         | NA                                    | 1            | 0            | 0.998207054 |                             |                             |
| CEP250 | ENSG00000126001.15                   |                                       | 0.567727928  | 2            | 2           | 0.316442173                 |                             |
|        | Brain_Frontal_Cortex_BA9             |                                       | 0.400506848  |              |             | Brain_Cortex                | 1.53725849 0.46274151       |
|        | 0.46274151 -1.001795909              |                                       | -0.84071637  |              |             | -0.921256139                | 0.113900434 2               |
|        | 0                                    |                                       | 0.998207054  |              |             |                             |                             |
| ZNF431 | ENSG00000196705.8                    |                                       | 0.567755875  | 2            | 2           | 0.295701935                 |                             |
|        | Brain_Putamen_basal_ganglia          |                                       | 0.600290638  |              |             | Brain_Cerebellar_Hemisphere |                             |
|        | 1.323169094                          | 0.676830906                           | 0.676830906  |              |             | -1.045694863                | -0.523982606                |
|        | -0.784838734                         | 0.368906275                           | 2            | 0            | 0.998207054 |                             |                             |
| NRCAM  | ENSG00000091129.19                   |                                       | 0.567843645  | 3            | 3           | 0.157012238                 |                             |
|        | Brain_Caudate_basal_ganglia          |                                       | 0.784468006  |              |             | Brain_Cerebellum            | 2.040676681                 |
|        | 0.129942492                          | 0.129942492                           | -1.415191904 |              |             | 0.426324583                 | -0.23845539                 |
|        | 1.021944406                          | 3                                     | 0            | 0.998207054  |             |                             |                             |
| STC1   | ENSG00000159167.11                   |                                       | 0.567870365  | 1            | 1           | 0.567870365                 | Brain_Cortex                |
|        | 0.567870365                          | Brain_Cortex                          | 1            | 1            | 1           | 0.571190725                 | 0.571190725                 |
|        | 0.571190725                          | NA                                    | 1            | 0            | 0.998207054 |                             |                             |
| KLF12  | ENSG00000118922.17                   |                                       | 0.567928703  | 1            | 1           | 0.567928703                 |                             |
|        | Brain_Putamen_basal_ganglia          |                                       | 0.567928703  |              |             | Brain_Putamen_basal_ganglia | 1 1                         |
|        | 1                                    | -0.571104656                          | -0.571104656 | -0.571104656 | NA          | 1                           | 0                           |
|        | 0.998207054                          |                                       |              |              |             |                             |                             |
| TESC   | ENSG00000088992.17                   |                                       | 0.567977825  | 4            | 3           | 0.099709175                 | Brain_Cortex                |
|        | 0.603779505                          | Brain_Nucleus_accumbens_basal_ganglia | 2.424690905  |              |             |                             |                             |
|        | 0.063747924                          | 0.556618146                           | -1.646265181 |              |             | -0.518973092                | -0.942957585                |
|        | 0.514996703                          | 3                                     | 0            | 0.998207054  |             |                             |                             |
| ABCD4  | ENSG00000119688.20                   |                                       | 0.568054929  | 2            | 2           | 0.340867472                 |                             |
|        | Brain_Anterior_cingulate_cortex_BA24 |                                       | 0.542175135  |              |             | Brain_Cerebellum            |                             |
|        | 1.148664418                          | 0.851335582                           | 0.851335582  |              |             | -0.952452644                | -0.609527071                |
|        | -0.780989858                         | 0.242484999                           | 2            | 0            | 0.998207054 |                             |                             |
| FABP5  | ENSG00000164687.10                   |                                       | 0.56809007   | 2            | 2           | 0.290493047                 | Brain_Hypothalamus          |
|        | 0.808033164                          | Brain_Putamen_basal_ganglia           | 1.12026471   | 0.87973529   | 0.87973529  |                             |                             |
|        | -1.057040625                         | -0.242964157                          | -0.650002391 | 0.575638991  | 2           | 0                           |                             |
|        | 0.998207054                          |                                       |              |              |             |                             |                             |
| PRLHR  | ENSG00000119973.5                    |                                       | 0.56810497   | 4            | 4           | 0.195917002                 |                             |
|        | Brain_Cerebellar_Hemisphere          |                                       | 0.921838869  |              |             | Brain_Cortex                | 1.960633039                 |
|        | 0.358865564                          | 0.358865564                           | -0.455190259 | 1.293271998  |             | 0.364627358                 |                             |
|        | 0.737195822                          | 4                                     | 0            | 0.998207054  |             |                             |                             |
| USP24  | ENSG00000162402.13                   |                                       | 0.568106533  | 2            | 2           | 0.331548923                 | Brain_Cerebellum            |
|        | 0.794872357                          | Brain_Cerebellar_Hemisphere           | 1.618639752  | 0.381360248  |             |                             |                             |
|        | 0.381360248                          | 0.259988873                           | 0.970998706  | 0.615493789  |             | 0.502759874                 |                             |
|        | 2                                    | 0                                     | 0.998207054  |              |             |                             |                             |
| ZEB2   | ENSG00000169554.18                   |                                       | 0.56811106   | 1            | 1           | 0.56811106                  | Brain_Cerebellar_Hemisphere |
|        | 0.56811106                           | Brain_Cerebellar_Hemisphere           | 1            | 1            | 1           | -0.570835642                |                             |
|        | -0.570835642                         | -0.570835642                          | NA           | 1            | 0           | 0.998207054                 |                             |
| KRT16  | ENSG00000186832.8                    |                                       | 0.568281292  | 2            | 2           | 0.397517792                 |                             |
|        | Brain_Hypothalamus                   |                                       | 0.505266919  |              |             | Brain_Cortex                | 1.026800211                 |
|        | 0.973199789                          | 0.973199789                           | -0.846062655 | -0.666225589 |             | -0.756144122                |                             |
|        | 0.127164009                          | 2                                     | 0            | 0.998207054  |             |                             |                             |
| TIMM13 | ENSG00000099800.7                    |                                       | 0.568324213  | 12           | 4           | 0.202815978                 |                             |
|        | Brain_Putamen_basal_ganglia          |                                       | 0.965544917  |              |             | Brain_Hypothalamus          | 8.704150908                 |
|        | 1.38E-05                             | 0.402879718                           | -0.590248364 | 1.273569638  |             | 0.388168614                 |                             |
|        | 0.586753056                          | 4                                     | 0            | 0.998207054  |             |                             |                             |
| SLC4A8 | ENSG00000050438.16                   |                                       | 0.568339227  | 5            | 4           | 0.177751247                 |                             |
|        | Brain_Hippocampus                    |                                       | 0.762474545  |              |             | Brain_Cerebellum            | 2.669897314                 |
|        | 0.065987893                          | 0.417324648                           | -1.347711328 | -0.302232874 |             | -0.792442963                |                             |
|        | 0.417519966                          | 4                                     | 0            | 0.998207054  |             |                             |                             |
| MAU2   | ENSG00000129933.20                   |                                       | 0.568443384  | 5            | 5           | 0.138515727                 | Brain_Cerebellum            |
|        | 0.822733395                          | Brain_Frontal_Cortex_BA9              | 2.576337297  | 0.101555669  |             |                             |                             |
|        | 0.101555669                          | -1.481341004                          | 0.224030725  | -1.087904851 |             | 0.736704894                 |                             |
|        | 5                                    | 0                                     | 0.998207054  |              |             |                             |                             |
| AGAP5  | ENSG00000172650.13                   |                                       | 0.568451336  | 1            | 1           | 0.568451336                 | Brain_Cortex                |
|        | 0.568451336                          | Brain_Cortex                          | 1            | 1            | 1           | 0.570333776                 | 0.570333776                 |

|                                       |                          |                                       |    |             |                   |    |     |  |                  |
|---------------------------------------|--------------------------|---------------------------------------|----|-------------|-------------------|----|-----|--|------------------|
| 0.570333776                           | NA                       | 1                                     | 0  | 0.998207054 |                   |    |     |  |                  |
| FAAP20                                | ENSG00000162585.16       | 0.56851826                            | 9  | 9           | 0.154565396       |    |     |  | Brain_Cerebellum |
| 0.96102571                            | Brain_Frontal_Cortex_BA9 | 3.42330802                            |    |             | 0.131590474       |    |     |  | 0.131590474      |
| -0.822173268                          | 1.423589297              | 0.175629199                           |    |             | 0.706891412       |    |     |  | 9 0              |
| 0.998207054                           |                          |                                       |    |             |                   |    |     |  |                  |
| DCAF4                                 | ENSG00000119599.16       | 0.568535788                           | 5  | 5           | 0.341480682       |    |     |  |                  |
| Brain_Cerebellar_Hemisphere           | 0.967844224              |                                       |    |             | Brain_Hippocampus |    |     |  | 2.933197252      |
| 0.129199504                           | 0.129199504              | -0.729567023                          |    |             | 0.951243695       |    |     |  | 0.249536413      |
| 0.686009448                           | 5 0                      | 0.998207054                           |    |             |                   |    |     |  |                  |
| PDE6C                                 | ENSG00000095464.9        | 0.568582935                           | 1  | 1           | 0.568582935       |    |     |  |                  |
| Brain_Hippocampus                     | 0.568582935              | Brain_Hippocampus                     | 1  | 1           | 1                 |    |     |  |                  |
| 0.570139722                           | 0.570139722              | 0.570139722                           | NA | 1 0         | 0.998207054       |    |     |  |                  |
| ZNF202                                | ENSG00000166261.10       | 0.568828898                           | 10 | 4           | 0.168838862       |    |     |  |                  |
| Brain_Frontal_Cortex_BA9              | 0.965073649              | Brain_Hypothalamus                    |    |             | 7.822288001       |    |     |  |                  |
| 0.023570893                           | 0.295477486              | -1.375944352                          |    |             | 0.773842759       |    |     |  | 0.110978774      |
| 0.640823841                           | 4 0                      | 0.998207054                           |    |             |                   |    |     |  |                  |
| GSTA4                                 | ENSG00000170899.10       | 0.568863724                           | 2  | 2           | 0.418268337       |    |     |  |                  |
| Brain_Spinal_cord_cervical_c-1        | 0.709689021              | Brain_Caudate_basal_ganglia           |    |             |                   |    |     |  |                  |
| 1.339370623                           | 0.660629377              | 0.660629377                           |    |             | -0.809429157      |    |     |  | 0.372273776      |
| -0.218577691                          | 0.835590157              | 2 0                                   |    |             | 0.998207054       |    |     |  |                  |
| KIAA1468                              | ENSG00000134444.13       | 0.568940857                           | 3  | 3           | 0.255069116       |    |     |  |                  |
| Brain_Cerebellum                      | 0.506441417              | Brain_Cerebellar_Hemisphere           |    |             | 2.498698443       |    |     |  |                  |
| 0.085944919                           | 0.085944919              | -1.138123022                          |    |             | -0.664388929      |    |     |  | -0.851701223     |
| 0.251938521                           | 3 0                      | 0.998207054                           |    |             |                   |    |     |  |                  |
| CTC-459F4.3                           | ENSG00000267575.6        | 0.568973484                           | 5  | 5           | 0.142090337       |    |     |  |                  |
| Brain_Cortex                          | 0.878672594              | Brain_Nucleus_accumbens_basal_ganglia |    |             |                   |    |     |  |                  |
| 2.472243528                           | 0.196136512              | 0.196136512                           |    |             | -1.468051122      |    |     |  | -0.152652154     |
| -0.672819461                          | 0.660964049              | 5 0                                   |    |             | 0.998207054       |    |     |  |                  |
| FAM163A                               | ENSG00000143340.6        | 0.568981495                           | 5  | 5           | 0.331892375       |    |     |  |                  |
| Brain_Nucleus_accumbens_basal_ganglia | 0.890049574              | Brain_Frontal_Cortex_BA9              |    |             |                   |    |     |  |                  |
| 1.887894369                           | 0.179976503              | 0.179976503                           |    |             | -0.970309235      |    |     |  | 0.832811001      |
| -0.012834519                          | 0.794642565              | 5 0                                   |    |             | 0.998207054       |    |     |  |                  |
| EFCAB6                                | ENSG00000186976.14       | 0.569028784                           | 5  | 5           | 0.361343678       |    |     |  |                  |
| Brain_Nucleus_accumbens_basal_ganglia | 0.810616138              | Brain_Putamen_basal_ganglia           |    |             |                   |    |     |  |                  |
| 3.153587723                           | 0.17102411               | 0.17102411                            |    |             | -0.91280772       |    |     |  | 0.577515282      |
| 0.023863914                           | 0.6046591                | 5 0                                   |    |             | 0.998207054       |    |     |  |                  |
| PDZD3                                 | ENSG00000172367.15       | 0.569064825                           | 1  | 1           | 0.569064825       |    |     |  |                  |
| Brain_Cerebellar_Hemisphere           | 0.569064825              | Brain_Cerebellar_Hemisphere           | 1  | 1           |                   |    |     |  |                  |
| 1                                     | -0.569429318             | -0.569429318                          |    |             | -0.569429318      | NA | 1 0 |  |                  |
| 0.998207054                           |                          |                                       |    |             |                   |    |     |  |                  |
| CLCNKB                                | ENSG00000184908.17       | 0.569443346                           | 4  | 4           | 0.414764872       |    |     |  |                  |
| Brain_Substantia_nigra                | 0.775668199              | Brain_Cerebellar_Hemisphere           |    |             |                   |    |     |  |                  |
| 2.458858098                           | 0.144052236              | 0.144052236                           |    |             | -0.815537214      |    |     |  | 0.337655731      |
| -0.195277191                          | 0.592666604              | 4 0                                   |    |             | 0.998207054       |    |     |  |                  |
| C11orf57                              | ENSG00000150776.17       | 0.569579701                           | 1  | 1           | 0.569579701       |    |     |  |                  |
| Brain_Hypothalamus                    | 0.569579701              | Brain_Hypothalamus                    | 1  | 1           | 1                 |    |     |  |                  |
| 0.568670604                           | 0.568670604              | 0.568670604                           | NA | 1 0         | 0.998207054       |    |     |  |                  |
| CST7                                  | ENSG00000077984.5        | 0.569584069                           | 1  | 1           | 0.569584069       |    |     |  |                  |
| Brain_Cortex                          | 1 1 1                    |                                       |    |             | -0.568664168      |    |     |  | -0.568664168     |
| -0.568664168                          | NA 1 0                   | 0.998207054                           |    |             |                   |    |     |  |                  |
| LINC01116                             | ENSG00000163364.9        | 0.569728458                           | 4  | 4           | 0.201112748       |    |     |  |                  |
| Brain_Cortex                          | 0.803529533              | Brain_Frontal_Cortex_BA9              |    |             | 1.273984282       |    |     |  |                  |
| 0.741853347                           | 0.741853347              | -1.278387731                          |    |             | -0.248781847      |    |     |  | -0.726539918     |
| 0.538439353                           | 4 0                      | 0.998207054                           |    |             |                   |    |     |  |                  |
| PTPN21                                | ENSG00000070778.12       | 0.569740376                           | 3  | 3           | 0.16779864        |    |     |  | Brain_Cerebellum |
| Brain_Hippocampus                     | 1.444637047              | 0.558412088                           |    |             |                   |    |     |  |                  |
| 0.558412088                           | -1.3793118               | 0.272369457                           |    |             | -0.582188768      |    |     |  | 0.827337201 3    |
| 0                                     | 0.998207054              |                                       |    |             |                   |    |     |  |                  |
| AC144652.1                            | ENSG00000273117.1        | 0.569809959                           | 7  | 2           | 0.161602852       |    |     |  |                  |
| Brain_Cerebellum                      | 0.454798705              | Brain_Anterior_cingulate_cortex_BA24  |    |             | 6.21866927        |    |     |  |                  |
| 0.006603691                           | 0.619661625              | 0.747438845                           |    |             | 1.399701075       |    |     |  | 0.995762302      |
| 0.23783389                            | 2 0                      | 0.998207054                           |    |             |                   |    |     |  |                  |

|               |                                       |                             |              |              |                                       |                  |
|---------------|---------------------------------------|-----------------------------|--------------|--------------|---------------------------------------|------------------|
| LILRB2        | ENSG00000131042.14                    | 0.569837124                 | 1            | 1            | 0.569837124                           |                  |
|               | Brain_Caudate_basal_ganglia           | 0.569837124                 |              |              | Brain_Caudate_basal_ganglia           | 1                |
|               | 1                                     | 0.568291391                 | 0.568291391  | 0.568291391  | NA                                    | 1 0              |
|               |                                       | 0.998207054                 |              |              |                                       |                  |
| SLITRK6       | ENSG00000184564.8                     | 0.569869089                 | 3            | 2            | 0.33126169                            |                  |
|               | Brain_Putamen_basal_ganglia           | 0.69612357                  |              |              | Brain_Cerebellar_Hemisphere           | 1.939412058      |
|               | 0.059749205                           | 1.000838737                 | 0.390558548  | 0.971575673  |                                       | 0.601478995      |
|               | 0.321555639                           | 2                           | 0            | 0.998207054  |                                       |                  |
| LENG9         | ENSG00000275183.1                     | 0.569911122                 | 3            | 3            | 0.270432496                           |                  |
|               | Brain_Putamen_basal_ganglia           | 0.795271326                 |              |              | Brain_Amygdala                        | 1.08012251       |
|               | 0.886932542                           | 0.886932542                 | -0.765308161 | 1.102067113  |                                       | 0.198743546      |
|               | 0.93516765                            | 3                           | 0            | 0.998207054  |                                       |                  |
| CCNG1         | ENSG00000113328.18                    | 0.570087545                 | 3            | 3            | 0.178596177                           |                  |
|               | Brain_Putamen_basal_ganglia           | 0.583666456                 |              |              | Brain_Spinal_cord_cervical_c-1        |                  |
|               | 1.595350208                           | 0.59079182                  | 0.59079182   | 0.54803706   | 1.345089984                           | 0.863548011      |
|               | 0.423672121                           | 3                           | 0            | 0.998207054  |                                       |                  |
| RP11-403A3.1  | ENSG00000274331.1                     | 0.570150027                 | 4            | 4            | 0.110202224                           |                  |
|               | Brain_Cortex                          | 0.567568126                 |              |              | Brain_Hypothalamus                    | 2.132684452      |
|               | 0.265669878                           | 0.265669878                 | -1.59728486  | -0.571636701 |                                       | -1.053966347     |
|               | 0.529709632                           | 4                           | 0            | 0.998207054  |                                       |                  |
| RP11-324I22.2 | ENSG00000233200.1                     | 0.570198229                 | 13           | 2            | 0.340584444                           |                  |
|               | Brain_Amygdala                        | 0.97083318                  |              |              | Brain_Hypothalamus                    | 11.33808937      |
|               | 0.724510696                           | -0.113062377                | 0.953011106  | 0.383519263  |                                       | 0.005824628      |
|               | 2                                     | 0                           | 0.998207054  |              |                                       | 0.341809857      |
| RP11-807H17.1 | ENSG00000227869.1                     | 0.57034707                  | 4            | 4            | 0.145188745                           |                  |
|               | Brain_Cortex                          | 0.39985788                  |              |              | Brain_Putamen_basal_ganglia           | 3.095010863      |
|               | 0.111151027                           | 0.111151027                 | -1.456737896 | -0.841875081 |                                       | -1.229791911     |
|               | 0.269069213                           | 4                           | 0            | 0.998207054  |                                       |                  |
| IFIH1         | ENSG00000115267.5                     | 0.570383439                 | 1            | 1            | 0.570383439                           | Brain_Cerebellum |
|               | 0.570383439                           | Brain_Cerebellum            | 1            | 1            | -0.567486878                          | -0.567486878     |
|               | -0.567486878                          | NA                          | 1            | 0            | 0.998207054                           |                  |
| PRKCA         | ENSG00000154229.11                    | 0.570777508                 | 9            | 9            | 0.110957041                           | Brain_Cerebellum |
|               | 0.86984628                            | Brain_Putamen_basal_ganglia | 2.191710299  | 0.397027478  |                                       |                  |
|               | 0.397027478                           | -1.593906222                | 0.970436386  | -0.057178298 |                                       | 0.861128749      |
|               | 9                                     | 0                           | 0.998207054  |              |                                       |                  |
| HSD17B11      | ENSG00000198189.10                    | 0.570786018                 | 3            | 3            | 0.199394548                           |                  |
|               | Brain_Substantia_nigra                | 0.480838052                 |              |              | Brain_Nucleus_accumbens_basal_ganglia |                  |
|               | 1.778636925                           | 0.416982092                 | 0.416982092  | -1.283278425 |                                       | -0.704955304     |
|               | -1.009128461                          | 0.29032818                  | 3            | 0            | 0.998207054                           |                  |
| NKX6-1        | ENSG00000163623.9                     | 0.570798761                 | 5            | 4            | 0.276923926                           |                  |
|               | Brain_Nucleus_accumbens_basal_ganglia | 0.76259349                  |              |              | Brain_Amygdala                        | 2.654325058      |
|               | 0.041281034                           | 0.507284989                 | -0.302076836 | 1.087255461  |                                       | 0.523296507      |
|               | 0.559814507                           | 4                           | 0            | 0.998207054  |                                       |                  |
| GRIK4         | ENSG00000149403.12                    | 0.570847014                 | 2            | 2            | 0.390823009                           |                  |
|               | Brain_Putamen_basal_ganglia           | 0.505997146                 |              |              | Brain_Caudate_basal_ganglia           |                  |
|               | 1.053098302                           | 0.946901698                 | 0.946901698  | -0.665083408 |                                       | 0.858125787      |
|               | 0.09652119                            | 1.077071551                 | 2            | 0            | 0.998207054                           |                  |
| NUP35         | ENSG00000163002.12                    | 0.570880543                 | 7            | 5            | 0.119585739                           |                  |
|               | Brain_Putamen_basal_ganglia           | 0.684677432                 |              |              | Brain_Cerebellar_Hemisphere           |                  |
|               | 5.145201989                           | 0.012841309                 | 0.178178448  | -1.556514744 |                                       | -0.406088695     |
|               | -1.07288926                           | 0.39084983                  | 5            | 0            | 0.998207054                           |                  |
| DENND2C       | ENSG00000175984.14                    | 0.570938164                 | 1            | 1            | 0.570938164                           |                  |
|               | Brain_Cerebellum                      | 0.570938164                 |              |              | Brain_Cerebellum                      | 1 1 1            |
|               | 0.566670357                           | 0.566670357                 | NA           | 1            | 0                                     | 0.998207054      |
| SPECC1        | ENSG00000128487.16                    | 0.57095408                  | 5            | 4            | 0.278908739                           | Brain_Cerebellum |
|               | 0.976896481                           | Brain_Cortex                | 3.756455878  | 0.034188409  |                                       | 0.144182355      |
|               | -0.144177026                          | 1.082774023                 | 0.417891606  | 0.491126972  |                                       | 4 0              |
|               | 0.998207054                           |                             |              |              |                                       |                  |
| NPIP7         | ENSG00000233232.6                     | 0.570977706                 | 11           | 3            | 0.048010719                           |                  |
|               | Brain_Amygdala                        | 0.296693712                 |              |              | Brain_Caudate_basal_ganglia           | 9.419604453      |
|               | 0.004933964                           | 0.364824466                 | -1.977273535 | -1.043549837 |                                       | -1.274691984     |
|               | 0.266697697                           | 3                           | 0            | 0.998207054  |                                       |                  |

RAB43 ENSG00000172780.16 0.571005211 6 5 0.288708451 Brain\_Cerebellum  
0.983640153 Brain\_Putamen\_basal\_ganglia 3.949449625 0.095281938  
0.155587322 -0.770633011 1.060959184 0.136548807 0.612276395  
5 0 0.998207054  
TBC1D3L ENSG00000274512.5 0.571070919 13 1 0.352063411  
Brain\_Nucleus\_accumbens\_basal\_ganglia 0.973816822 Brain\_Caudate\_basal\_ganglia  
12.25166943 1.15E-16 12.25166943 -0.032821639 0.930594403  
0.544666788 0.296384814 1 0 0.998207054  
RNF115 ENSG00000265491.4 0.571328882 1 1 0.571328882  
Brain\_Cerebellar\_Hemisphere 0.571328882 Brain\_Cerebellar\_Hemisphere 1 1  
1 -0.566095471 -0.566095471 -0.566095471 NA 1 0  
0.998207054  
ATP10B ENSG00000118322.12 0.571460066 8 2 0.224906209  
Brain\_Amygdala 0.46997074 Brain\_Cerebellum 7.137905144 0.005480185  
0.368863108 -1.213585077 -0.722526661 -0.938932308 0.151387746  
2 0 0.998207054  
RP11-327J17.9 ENSG00000277135.1 0.571500532 3 3 0.360668637  
Brain\_Cortex 0.770100489 Brain\_Hypothalamus 1.586477116  
0.622668986 0.622668986 -0.914091751 0.292243455 -0.49820472  
0.684859983 3 0 0.998207054  
TBC1D19 ENSG00000109680.10 0.571551097 1 1 0.571551097  
Brain\_Spinal\_cord\_cervical\_c-1 0.571551097 Brain\_Spinal\_cord\_cervical\_c-1  
1 1 1 0.565768596 0.565768596 0.565768596 NA 1 0  
0.998207054  
TXNRD2 ENSG00000184470.20 0.571563958 10 10 0.135778625  
Brain\_Nucleus\_accumbens\_basal\_ganglia 0.770066293 Brain\_Frontal\_Cortex\_BA9  
2.163888775 0.117185509 0.117185509 -1.49169689 0.806373836  
-0.577602389 0.709190931 10 0 0.998207054  
DHRS2 ENSG00000100867.14 0.571690789 2 2 0.290928182  
Brain\_Spinal\_cord\_cervical\_c-1 0.977556566 Brain\_Cortex 1.025147681  
0.974852319 0.974852319 -0.028132383 1.056087628 0.513977622  
0.766659322 2 0 0.998207054  
CAMSAP1 ENSG00000130559.18 0.571720461 1 1 0.571720461  
Brain\_Putamen\_basal\_ganglia 0.571720461 Brain\_Putamen\_basal\_ganglia 1 1  
1 -0.565519505 -0.565519505 -0.565519505 NA 1 0  
0.998207054  
MLIP ENSG00000146147.14 0.571728468 2 1 0.565026182  
Brain\_Cerebellar\_Hemisphere 0.579623926 Brain\_Cerebellum 1.994030068  
0.005969932 1.994030068 0.553934131 0.575392046 0.564663089  
0.015173038 1 0 0.998207054  
DRC3 ENSG00000171962.17 0.571766798 4 4 0.249246583  
Brain\_Nucleus\_accumbens\_basal\_ganglia 0.684864444 Brain\_Substantia\_nigra  
2.366715095 0.198734331 0.198734331 -1.079656317 1.152181292  
0.330348948 0.988613497 4 0 0.998207054  
TIGAR ENSG00000078237.6 0.571855603 3 3 0.261360392  
Brain\_Hypothalamus 0.927196191 Brain\_Nucleus\_accumbens\_basal\_ganglia  
1.28560679 0.686997823 0.686997823 -0.709242906 1.12318156  
0.168437228 0.918639769 3 0 0.998207054  
C9orf153 ENSG00000187753.12 0.571906863 1 1 0.571906863  
Brain\_Substantia\_nigra 0.571906863 Brain\_Substantia\_nigra 1 1  
1 -0.565245397 -0.565245397 -0.565245397 NA 1 0  
0.998207054  
CCDC97 ENSG00000142039.3 0.571923022 1 1 0.571923022  
Brain\_Cerebellum 0.571923022 Brain\_Cerebellum 1 1 1 -0.565221636  
-0.565221636 -0.565221636 NA 1 0 0.998207054  
CFAP206 ENSG00000272514.5 0.572015425 8 3 0.143475622  
Brain\_Nucleus\_accumbens\_basal\_ganglia 0.898938093 Brain\_Caudate\_basal\_ganglia  
6.327557036 0.013283452 0.330745335 -1.462969876 -0.127002913  
-0.807748044 0.486464811 3 0 0.998207054  
USP47 ENSG00000170242.17 0.572083267 4 4 0.249627698  
Brain\_Cerebellar\_Hemisphere 0.74026239 Brain\_Cerebellum 1.127129363  
0.827969096 0.827969096 -0.738440122 1.15125414 0.454206238

|                                       |                                       |              |                             |              |             |                  |  |  |  |
|---------------------------------------|---------------------------------------|--------------|-----------------------------|--------------|-------------|------------------|--|--|--|
| 0.876666014                           | 4                                     | 0            | 0.998207054                 |              |             |                  |  |  |  |
| ERICH1                                | ENSG00000104714.13                    | 0.572150422  | 9                           | 8            | 0.023858646 |                  |  |  |  |
|                                       | Brain_Cerebellar_Hemisphere           | 0.6594089    | Brain_Putamen_basal_ganglia | 3.758796355  |             |                  |  |  |  |
| 0.106195125                           | 0.185218476                           | 0.440729414  | 2.259397887                 | 1.08036291   |             |                  |  |  |  |
| 0.564216846                           | 8                                     | 0            | 0.998207054                 |              |             |                  |  |  |  |
| COL13A1                               | ENSG00000197467.13                    | 0.572221723  | 3                           | 3            | 0.169765693 |                  |  |  |  |
|                                       | Brain_Cortex                          | 0.961959177  | Brain_Cerebellum            | 1.724371946  | 0.274446175 |                  |  |  |  |
| 0.274446175                           | -1.372957071                          | 0.21818555   | -0.369025448                | 0.873599319  | 3           |                  |  |  |  |
| 0                                     | 0.998207054                           |              |                             |              |             |                  |  |  |  |
| MPP6                                  | ENSG00000105926.15                    | 0.572241654  | 2                           | 2            | 0.39294563  |                  |  |  |  |
|                                       | Brain_Putamen_basal_ganglia           | 0.522878919  | Brain_Cerebellum            | 1.020233586  |             |                  |  |  |  |
| 0.979766414                           | 0.979766414                           | -0.854287646 | 0.638913941                 | -0.107686853 |             |                  |  |  |  |
| 1.055852968                           | 2                                     | 0            | 0.998207054                 |              |             |                  |  |  |  |
| BUB1B                                 | ENSG00000156970.12                    | 0.572386604  | 2                           | 2            | 0.330682181 |                  |  |  |  |
|                                       | Brain_Cerebellar_Hemisphere           | 0.784126559  | Brain_Cerebellum            | 1.137776282  |             |                  |  |  |  |
| 0.862223718                           | 0.862223718                           | -0.273945429 | 0.972740721                 | 0.349397646  |             |                  |  |  |  |
| 0.881540231                           | 2                                     | 0            | 0.998207054                 |              |             |                  |  |  |  |
| MSX2                                  | ENSG00000120149.8                     | 0.572406339  | 1                           | 1            | 0.572406339 |                  |  |  |  |
|                                       | Brain_Substantia_nigra                | 0.572406339  | Brain_Substantia_nigra      | 1            | 1           |                  |  |  |  |
| 1                                     | 0.564511113                           | 0.564511113  | 0.564511113                 | NA           | 1           | 0                |  |  |  |
| 0.998207054                           |                                       |              |                             |              |             |                  |  |  |  |
| IGF2BP2                               | ENSG00000073792.15                    | 0.57241692   | 3                           | 3            | 0.172989664 | Brain_Cerebellum |  |  |  |
| 0.955307464                           | Brain_Spinal_cord_cervical_c-1        | 1.071952338  | 0.938551252                 |              |             |                  |  |  |  |
| 0.938551252                           | -1.362660083                          | 0.343198889  | -0.358501435                | 0.892244073  |             |                  |  |  |  |
| 3                                     | 0                                     | 0.998207054  |                             |              |             |                  |  |  |  |
| RP11-9G1.3                            | ENSG00000250241.5                     | 0.572442673  | 5                           | 5            | 0.218917614 |                  |  |  |  |
|                                       | Brain_Caudate_basal_ganglia           | 0.97080572   | Brain_Hippocampus           | 2.215329559  |             |                  |  |  |  |
| 0.234688002                           | 0.234688002                           | -1.229411358 | 0.106019864                 | -0.603676747 |             |                  |  |  |  |
| 0.648493177                           | 5                                     | 0            | 0.998207054                 |              |             |                  |  |  |  |
| KDM2A                                 | ENSG00000173120.14                    | 0.572461901  | 1                           | 1            | 0.572461901 |                  |  |  |  |
|                                       | Brain_Nucleus_accumbens_basal_ganglia | 0.572461901  |                             |              |             |                  |  |  |  |
| Brain_Nucleus_accumbens_basal_ganglia | 1                                     | 1            | 1                           | 0.56442945   | 0.56442945  |                  |  |  |  |
| 0.56442945                            | NA                                    | 1            | 0                           | 0.998207054  |             |                  |  |  |  |
| DNAH5                                 | ENSG00000039139.9                     | 0.572694985  | 6                           | 5            | 0.161333636 | Brain_Cortex     |  |  |  |
| 0.54465267                            | Brain_Caudate_basal_ganglia           | 3.157267382  | 0.054112671                 |              |             |                  |  |  |  |
| 0.138017923                           | -1.196832801                          | 1.400600283  | 0.465885049                 | 1.101796062  |             |                  |  |  |  |
| 5                                     | 0                                     | 0.998207054  |                             |              |             |                  |  |  |  |
| GRIA4                                 | ENSG00000152578.12                    | 0.572738103  | 1                           | 1            | 0.572738103 |                  |  |  |  |
|                                       | Brain_Cerebellar_Hemisphere           | 0.572738103  | Brain_Cerebellar_Hemisphere | 1            | 1           |                  |  |  |  |
| 1                                     | -0.564023553                          | -0.564023553 | -0.564023553                | NA           | 1           | 0                |  |  |  |
| 0.998207054                           |                                       |              |                             |              |             |                  |  |  |  |
| MEP1A                                 | ENSG00000112818.9                     | 0.572910697  | 1                           | 1            | 0.572910697 |                  |  |  |  |
|                                       | Brain_Caudate_basal_ganglia           | 0.572910697  | Brain_Caudate_basal_ganglia | 1            | 1           |                  |  |  |  |
| 1                                     | 0.563769962                           | 0.563769962  | 0.563769962                 | NA           | 1           | 0                |  |  |  |
| 0.998207054                           |                                       |              |                             |              |             |                  |  |  |  |
| TDRD3                                 | ENSG00000083544.13                    | 0.572943926  | 4                           | 4            | 0.126121772 |                  |  |  |  |
|                                       | Brain_Cerebellar_Hemisphere           | 0.765608607  | Brain_Caudate_basal_ganglia |              |             |                  |  |  |  |
| 1.915945607                           | 0.427176853                           | 0.427176853  | -1.529575767                | 0.658415313  |             |                  |  |  |  |
| -0.021265182                          | 1.01625164                            | 4            | 0                           | 0.998207054  |             |                  |  |  |  |
| RNF11                                 | ENSG00000123091.4                     | 0.572989018  | 1                           | 1            | 0.572989018 |                  |  |  |  |
|                                       | Brain_Caudate_basal_ganglia           | 0.572989018  | Brain_Caudate_basal_ganglia | 1            | 1           |                  |  |  |  |
| 1                                     | -0.563654898                          | -0.563654898 | -0.563654898                | NA           | 1           | 0                |  |  |  |
| 0.998207054                           |                                       |              |                             |              |             |                  |  |  |  |
| SLX4IP                                | ENSG00000149346.14                    | 0.573013962  | 1                           | 1            | 0.573013962 |                  |  |  |  |
|                                       | Brain_Nucleus_accumbens_basal_ganglia | 0.573013962  |                             |              |             |                  |  |  |  |
| Brain_Nucleus_accumbens_basal_ganglia | 1                                     | 1            | 1                           | -0.563618253 |             |                  |  |  |  |
| -0.563618253                          | -0.563618253                          | NA           | 1                           | 0            | 0.998207054 |                  |  |  |  |
| FANCG                                 | ENSG00000221829.9                     | 0.573288377  | 4                           | 3            | 0.623156983 |                  |  |  |  |
|                                       | Brain_Hypothalamus                    | 0.947070483  | Brain_Cortex                | 3.363853806  |             |                  |  |  |  |
| 0.106610399                           | 0.175658421                           | -0.491381023 | 0.302253475                 | -0.173190135 |             |                  |  |  |  |
| 0.368973885                           | 3                                     | 0            | 0.998207054                 |              |             |                  |  |  |  |
| GRID1                                 | ENSG00000182771.18                    | 0.573311027  | 1                           | 1            | 0.573311027 |                  |  |  |  |

|              |                                       |                             |              |                                      |              |                  |
|--------------|---------------------------------------|-----------------------------|--------------|--------------------------------------|--------------|------------------|
|              | Brain_Putamen_basal_ganglia           | 0.573311027                 |              | Brain_Putamen_basal_ganglia          | 1            | 1                |
|              | 1                                     | -0.563181899                | -0.563181899 | -0.563181899                         | NA           | 1 0              |
|              | 0.998207054                           |                             |              |                                      |              |                  |
| USP33        | ENSG00000077254.14                    | 0.573394994                 | 2            | 2                                    | 0.328825918  |                  |
|              | Brain_Frontal_Cortex_BA9              | 0.677325094                 |              | Brain_Putamen_basal_ganglia          |              |                  |
|              | 1.712519398                           | 0.287480602                 | 0.287480602  | 0.416116039                          | 0.976481486  |                  |
|              | 0.696298762                           | 0.396238207                 | 2            | 0                                    | 0.998207054  |                  |
| NRTN         | ENSG00000171119.2                     | 0.573441842                 | 1            | 1                                    | 0.573441842  |                  |
|              | Brain_Caudate_basal_ganglia           | 0.573441842                 |              | Brain_Caudate_basal_ganglia          | 1            | 1                |
|              | 1                                     | -0.562989781                | -0.562989781 | -0.562989781                         | NA           | 1 0              |
|              | 0.998207054                           |                             |              |                                      |              |                  |
| WDR18        | ENSG00000065268.10                    | 0.573444061                 | 13           | 2                                    | 0.183928442  |                  |
|              | Brain_Spinal_cord_cervical_c-1        | 0.898148274                 |              | Brain_Hypothalamus                   |              |                  |
|              | 11.85071225                           | 0.000869014                 | 0.643660155  | 0.128000883                          | 1.328756124  |                  |
|              | 0.994878125                           | 0.319536207                 | 2            | 0                                    | 0.998207054  |                  |
| ADO          | ENSG00000181915.4                     | 0.573451824                 | 2            | 2                                    | 0.359943291  |                  |
|              | Brain_Nucleus_accumbens_basal_ganglia | 0.724868168                 |              | Brain_Caudate_basal_ganglia          |              |                  |
|              | 1.178241338                           | 0.821758662                 | 0.821758662  | -0.351960123                         | 0.915473152  |                  |
|              | 0.281756514                           | 0.896210664                 | 2            | 0                                    | 0.998207054  |                  |
| THBS2        | ENSG00000186340.14                    | 0.573527535                 | 10           | 8                                    | 0.15759716   | Brain_Cerebellum |
|              | 0.972832029                           | Brain_Caudate_basal_ganglia | 5.367936727  | 0.069915959                          |              |                  |
|              | 0.20238739                            | -1.413199207                | 0.65178138   | -0.628973986                         | 0.652226286  | 8 0              |
|              | 0.998207054                           |                             |              |                                      |              |                  |
| CNKSR1       | ENSG00000142675.17                    | 0.573670022                 | 13           | 4                                    | 0.143717752  |                  |
|              | Brain_Frontal_Cortex_BA9              | 0.998018857                 |              | Brain_Cortex                         | 10.13840383  |                  |
|              | 0.011473563                           | 0.352850222                 | -0.002482997 | 1.46208561                           | 0.699861627  |                  |
|              | 0.454556232                           | 4                           | 0            | 0.998207054                          |              |                  |
| SORCS2       | ENSG00000184985.16                    | 0.573739503                 | 3            | 2                                    | 0.37396481   |                  |
|              | Brain_Spinal_cord_cervical_c-1        | 0.612876587                 |              | Brain_Hippocampus                    |              |                  |
|              | 2.047294451                           | 0.046067354                 | 0.906638195  | -0.889071211                         | 0.5059716    |                  |
|              | -0.351644316                          | 0.750617657                 | 2            | 0                                    | 0.998207054  |                  |
| RP11-138A9.2 | ENSG00000273319.1                     | 0.573885558                 | 1            | 1                                    | 0.573885558  |                  |
|              | Brain_Hypothalamus                    | 0.573885558                 |              | Brain_Hypothalamus                   | 1 1 1        |                  |
|              | 0.562338286                           | 0.562338286                 | 0.562338286  | NA                                   | 1 0          | 0.998207054      |
| CHRM4        | ENSG00000180720.7                     | 0.57392839                  | 1            | 1                                    | 0.57392839   |                  |
|              | Brain_Spinal_cord_cervical_c-1        | 0.57392839                  |              | Brain_Spinal_cord_cervical_c-1       | 1            | 1                |
|              | 1                                     | 1                           | -0.56227541  | -0.56227541                          | -0.56227541  | NA 1 0           |
|              | 0.998207054                           |                             |              |                                      |              |                  |
| DNAJB5       | ENSG00000137094.14                    | 0.573996049                 | 1            | 1                                    | 0.573996049  |                  |
|              | Brain_Substantia_nigra                | 0.573996049                 |              | Brain_Substantia_nigra               | 1            | 1                |
|              | 1                                     | 0.562176092                 | 0.562176092  | 0.562176092                          | NA           | 1 0              |
|              | 0.998207054                           |                             |              |                                      |              |                  |
| RP4-760C5.3  | ENSG00000231081.1                     | 0.573997796                 | 6            | 3                                    | 0.211888565  |                  |
|              | Brain_Nucleus_accumbens_basal_ganglia | 0.43238758                  |              | Brain_Amygdala                       | 5.064931454  |                  |
|              | 0.016306431                           | 0.253721227                 | -1.248389192 | -0.785112554                         | -1.021541928 |                  |
|              | 0.188439056                           | 3                           | 0            | 0.998207054                          |              |                  |
| KPNA6        | ENSG00000025800.13                    | 0.574087138                 | 5            | 4                                    | 0.249752191  |                  |
|              | Brain_Putamen_basal_ganglia           | 0.972440908                 |              | Brain_Amygdala                       | 2.416616393  |                  |
|              | 0.063085466                           | 0.578805894                 | -0.8152332   | 1.150951495                          | 0.132066789  |                  |
|              | 0.890542486                           | 4                           | 0            | 0.998207054                          |              |                  |
| MARK1        | ENSG00000116141.15                    | 0.574150071                 | 3            | 2                                    | 0.318349754  | Brain_Amygdala   |
|              | 0.975274049                           | Brain_Putamen_basal_ganglia | 2.165314698  | 0.001756503                          |              |                  |
|              | 0.832928799                           | -0.997854837                | 0.047557152  | -0.327097344                         | 0.582219285  |                  |
|              | 2                                     | 0                           | 0.998207054  |                                      |              |                  |
| NAT14        | ENSG00000090971.4                     | 0.574163566                 | 6            | 6                                    | 0.089840177  | Brain_Cortex     |
|              | 0.835413714                           | Brain_Caudate_basal_ganglia | 1.357749785  | 0.708100638                          |              |                  |
|              | 0.708100638                           | -1.696241377                | 0.671656078  | -0.217665953                         | 0.913049286  |                  |
|              | 6                                     | 0                           | 0.998207054  |                                      |              |                  |
| LINC01322    | ENSG00000244128.5                     | 0.574181201                 | 2            | 2                                    | 0.448501249  |                  |
|              | Brain_Substantia_nigra                | 0.57768107                  |              | Brain_Anterior_cingulate_cortex_BA24 |              |                  |
|              | 1.209248128                           | 0.790751872                 | 0.790751872  | -0.757916038                         | 0.556775142  |                  |
|              | -0.100570448                          | 0.929627048                 | 2            | 0                                    | 0.998207054  |                  |

CHIT1 ENSG00000133063.15 0.57418952 2 2 0.344869376  
 Brain\_Frontal\_Cortex\_BA9 0.50047403 Brain\_Cortex 1.913767379  
 0.086232621 0.086232621 -0.944587764 -0.673744083 -0.809165924  
 0.191515403 2 0 0.998207054  
 BAHCC1 ENSG00000266074.8 0.574286072 1 1 0.574286072  
 Brain\_Cerebellar\_Hemisphere 0.574286072 Brain\_Cerebellar\_Hemisphere 1 1  
 1 0.561750426 0.561750426 0.561750426 NA 1 0  
 0.998207054  
 PCDHB8 ENSG00000120322.3 0.574341757 13 3 0.346556579  
 Brain\_Frontal\_Cortex\_BA9 0.964144155 Brain\_Nucleus\_accumbens\_basal\_ganglia  
 10.40703654 0.001707215 0.482062719 -0.274945542 0.94128939  
 0.301730762 0.426952524 3 0 0.998207054  
 CHMP2A ENSG00000130724.8 0.574420179 2 2 0.435390087  
 Brain\_Cerebellar\_Hemisphere 0.863758848 Brain\_Cerebellum 1.783512106  
 0.216487894 -0.216487894 0.171591299 -0.78000134 0.47579632  
 0.430210865 2 0 0.998207054  
 ZWINT ENSG00000122952.16 0.574439558 2 2 0.326491111  
 Brain\_Hippocampus 0.555886665 Brain\_Nucleus\_accumbens\_basal\_ganglia  
 1.220464627 0.779535373 0.779535373 0.58896215 0.981206112  
 0.785084131 0.277358366 2 0 0.998207054  
 ADRB1 ENSG00000043591.5 0.574478025 1 1 0.574478025 Brain\_Cortex  
 0.574478025 Brain\_Cortex 1 1 1 0.561468754 0.561468754  
 0.561468754 NA 1 0 0.998207054  
 DHRS9 ENSG00000073737.16 0.574544168 1 1 0.574544168  
 Brain\_Substantia\_nigra 0.574544168 Brain\_Substantia\_nigra 1 1  
 1 -0.561371706 -0.561371706 -0.561371706 NA 1 0  
 0.998207054  
 HCG27 ENSG00000206344.7 0.574576513 13 5 0.066496364  
 Brain\_Frontal\_Cortex\_BA9 0.452139878 Brain\_Spinal\_cord\_cervical\_c-1  
 9.690257973 0.005108533 0.364613595 0.751852313 1.835062944  
 1.397057699 0.351312225 5 0 0.998207054  
 ZNF337 ENSG00000130684.13 0.574582401 6 4 0.237733261  
 Brain\_Cortex 0.941702413 Brain\_Nucleus\_accumbens\_basal\_ganglia  
 4.370174297 0.033860325 0.236713166 -0.165551695 1.180671466  
 0.674191107 0.621589535 4 0 0.998207054  
 KLHL25 ENSG00000183655.12 0.574601796 4 4 0.110455898  
 Brain\_Anterior\_cingulate\_cortex\_BA24 0.900667905 Brain\_Cerebellum  
 1.807472281 0.35747267 0.35747267 0.124817661 1.596147354  
 0.738335536 0.625283554 4 0 0.998207054  
 ADPGK ENSG00000159322.17 0.574605195 2 2 0.294008682  
 Brain\_Hippocampus 0.55361297 Brain\_Caudate\_basal\_ganglia 1.626499456  
 0.373500544 0.373500544 0.592354885 1.049368213 0.820861549  
 0.323157224 2 0 0.998207054  
 KLF7 ENSG00000118263.14 0.574628061 3 3 0.31550094  
 Brain\_Cerebellar\_Hemisphere 0.480458772 Brain\_Anterior\_cingulate\_cortex\_BA24  
 1.131316313 0.85103092 0.85103092 -0.851180673 1.003746245  
 -0.184333102 1.03147971 3 0 0.998207054  
 PHLDB1 ENSG00000019144.18 0.574812868 2 1 0.433707839  
 Brain\_Cerebellar\_Hemisphere 0.739787799 Brain\_Cerebellum 1.975269811  
 0.024730189 1.975269811 0.332134369 0.782862537 0.557498453  
 0.318712944 1 0 0.998207054  
 SOCS5 ENSG00000171150.7 0.574866049 3 3 0.336532035  
 Brain\_Putamen\_basal\_ganglia 0.663938956 Brain\_Frontal\_Cortex\_BA9  
 1.315545139 0.682239501 0.682239501 -0.434481321 0.961040043  
 0.436057635 0.759227874 3 0 0.998207054  
 RP4-564F22.7 ENSG00000275401.1 0.574898555 6 3 0.190725167  
 Brain\_Cerebellar\_Hemisphere 0.993122868 Brain\_Nucleus\_accumbens\_basal\_ganglia  
 5.073817553 -0.012742128 0.309543732 -1.30843689 0.008619314  
 -0.447787836 0.447904343 3 0 0.998207054  
 RP4-811H24.9 ENSG00000233775.1 0.574921937 1 1 0.574921937  
 Brain\_Putamen\_basal\_ganglia 0.574921937 Brain\_Putamen\_basal\_ganglia 1 1  
 1 0.560817528 0.560817528 0.560817528 NA 1 0



|              |                                       |                                       |                             |   |                    |                    |              |              |   |
|--------------|---------------------------------------|---------------------------------------|-----------------------------|---|--------------------|--------------------|--------------|--------------|---|
|              | 0.998207054                           |                                       |                             |   |                    |                    |              |              |   |
| APRT         | ENSG00000198931.10                    | 0.574952066                           | 6                           | 4 | 0.095430485        | Brain_Cortex       |              |              |   |
|              | 0.337145483                           | Brain_Nucleus_accumbens_basal_ganglia |                             |   | 4.224501986        |                    |              |              |   |
|              | 0.066655949                           | 0.235313069                           |                             |   | 0.959820659        | 1.667422185        |              | 1.322793136  |   |
|              | 0.250036534                           | 4                                     | 0                           |   | 0.998207054        |                    |              |              |   |
| MOV10L1      | ENSG00000073146.15                    | 0.574953292                           | 6                           | 6 | 0.400404884        |                    |              |              |   |
|              | Brain_Nucleus_accumbens_basal_ganglia | 0.900804078                           |                             |   | Brain_Hypothalamus |                    |              |              |   |
|              | 3.1419631                             | 0.168606464                           |                             |   | 0.168606464        | -0.519015091       |              | 0.840898347  |   |
|              | 0.200300433                           | 0.563022641                           | 6                           | 0 | 0.998207054        |                    |              |              |   |
| TFR2         | ENSG00000106327.12                    | 0.574954497                           | 1                           | 1 | 0.574954497        |                    |              |              |   |
|              | Brain_Nucleus_accumbens_basal_ganglia | 0.574954497                           |                             |   |                    |                    |              |              |   |
|              | Brain_Nucleus_accumbens_basal_ganglia | 1                                     | 1                           | 1 | 0.56076977         | 0.56076977         |              |              |   |
|              | 0.56076977                            | NA                                    | 1                           | 0 | 0.998207054        |                    |              |              |   |
| NECTIN4      | ENSG00000143217.8                     | 0.574964805                           | 1                           | 1 | 0.574964805        |                    |              |              |   |
|              | Brain_Cortex                          | 0.574964805                           | Brain_Cortex                | 1 | 1                  | 1                  | 0.560754651  |              |   |
|              | 0.560754651                           | 0.560754651                           | NA                          | 1 | 0                  | 0.998207054        |              |              |   |
| NKD2         | ENSG00000145506.13                    | 0.57501007                            | 10                          | 3 | 0.038227134        |                    |              |              |   |
|              | Brain_Caudate_basal_ganglia           | 0.658852745                           |                             |   | Brain_Cortex       | 7.688272001        |              |              |   |
|              | 0.01365243                            | 0.544877841                           |                             |   | 0.441497674        | 2.072410935        |              | 1.161446946  |   |
|              | 0.462026877                           | 3                                     | 0                           |   | 0.998207054        |                    |              |              |   |
| EIF2B2       | ENSG00000119718.10                    | 0.575037384                           | 11                          | 6 | 0.220405769        |                    |              |              |   |
|              | Brain_Frontal_Cortex_BA9              | 0.853428288                           | Brain_Hippocampus           |   | 7.182931425        |                    |              |              |   |
|              | 0.007997591                           | 0.259959739                           |                             |   | -0.890312447       | 1.225449864        |              | 0.474554846  |   |
|              | 0.64670111                            | 6                                     | 0                           |   | 0.998207054        |                    |              |              |   |
| KLF5         | ENSG00000102554.13                    | 0.575297977                           | 2                           | 2 | 0.295921203        |                    |              |              |   |
|              | Brain_Cerebellar_Hemisphere           | 0.408998208                           | Brain_Cerebellum            |   | 1.712686301        |                    |              |              |   |
|              | 0.287313699                           | 0.287313699                           |                             |   | -1.045220213       | -0.825657851       |              | -0.935439032 |   |
|              | 0.155254036                           | 2                                     | 0                           |   | 0.998207054        |                    |              |              |   |
| ARPC5        | ENSG00000162704.15                    | 0.575454874                           | 2                           | 2 | 0.2966822          | Brain_Hypothalamus |              |              |   |
|              | 0.461608955                           | Brain_Cerebellar_Hemisphere           | 1.781426235                 |   | 0.218573765        |                    |              |              |   |
|              | 0.218573765                           | -1.043574707                          |                             |   | -0.736200062       | -0.889887384       |              | 0.217346696  |   |
|              | 2                                     | 0                                     |                             |   | 0.998207054        |                    |              |              |   |
| CTA-14H9.5   | ENSG00000261353.1                     | 0.575463634                           | 1                           | 1 | 0.575463634        |                    |              |              |   |
|              | Brain_Frontal_Cortex_BA9              | 0.575463634                           | Brain_Frontal_Cortex_BA9    | 1 | 1                  |                    |              |              |   |
|              | 1                                     | -0.56002317                           |                             |   | -0.56002317        | -0.56002317        | NA           | 1            | 0 |
|              | 0.998207054                           |                                       |                             |   |                    |                    |              |              |   |
| FAM27C       | ENSG00000154537.4                     | 0.575528102                           | 1                           | 1 | 0.575528102        |                    |              |              |   |
|              | Brain_Cerebellum                      | 0.575528102                           | Brain_Cerebellum            | 1 | 1                  | 1                  | -0.559928656 |              |   |
|              | -0.559928656                          | -0.559928656                          | NA                          | 1 | 0                  | 0.998207054        |              |              |   |
| RP11-374M1.5 | ENSG00000235659.1                     | 0.575528102                           | 1                           | 1 | 0.575528102        |                    |              |              |   |
|              | Brain_Nucleus_accumbens_basal_ganglia | 0.575528102                           |                             |   |                    |                    |              |              |   |
|              | Brain_Nucleus_accumbens_basal_ganglia | 1                                     | 1                           | 1 | -0.559928656       |                    |              |              |   |
|              | -0.559928656                          | -0.559928656                          | NA                          | 1 | 0                  | 0.998207054        |              |              |   |
| RP11-211N8.2 | ENSG00000226007.2                     | 0.575528102                           | 2                           | 1 | 0.575528102        |                    |              |              |   |
|              | Brain_Cerebellar_Hemisphere           | 0.575528102                           | Brain_Cerebellar_Hemisphere | 2 |                    |                    |              |              |   |
|              | 3.53E-16                              | 2                                     |                             |   | -0.559928656       | -0.559928656       | -0.559928656 | 0            | 1 |
|              | 0.998207054                           |                                       |                             |   |                    |                    |              |              | 0 |
| SMU1         | ENSG00000122692.8                     | 0.575553693                           | 2                           | 2 | 0.343213145        |                    |              |              |   |
|              | Brain_Nucleus_accumbens_basal_ganglia | 0.584582349                           | Brain_Hippocampus           |   |                    |                    |              |              |   |
|              | 1.099807675                           | 0.900192325                           |                             |   | 0.900192325        | 0.546703646        |              | 0.947835618  |   |
|              | 0.747269632                           | 0.283643138                           | 2                           | 0 | 0.998207054        |                    |              |              |   |
| SPATA6       | ENSG00000132122.11                    | 0.575562299                           | 8                           | 6 | 0.115176568        |                    |              |              |   |
|              | Brain_Caudate_basal_ganglia           | 0.974225892                           | Brain_Cerebellum            |   | 4.144855173        |                    |              |              |   |
|              | 0.005689458                           | 0.253701625                           |                             |   | -1.575346147       | 0.305111719        |              | -0.707702623 |   |
|              | 0.634213189                           | 6                                     | 0                           |   | 0.998207054        |                    |              |              |   |
| DNTTIP2      | ENSG00000067334.13                    | 0.575593679                           | 1                           | 1 | 0.575593679        |                    |              |              |   |
|              | Brain_Amygdala                        | 0.575593679                           | Brain_Amygdala              | 1 | 1                  | 1                  | 0.559832521  |              |   |
|              | 0.559832521                           | 0.559832521                           | NA                          | 1 | 0                  | 0.998207054        |              |              |   |
| POLR2C       | ENSG00000102978.12                    | 0.575651495                           | 7                           | 6 | 0.239609079        |                    |              |              |   |
|              | Brain_Substantia_nigra                | 0.678656117                           | Brain_Caudate_basal_ganglia |   |                    |                    |              |              |   |
|              | 3.892935914                           | 0.017536088                           |                             |   | 0.248796651        | -1.175964459       |              | 1.104793294  |   |
|              | 0.448105304                           | 0.884929584                           | 6                           | 0 | 0.998207054        |                    |              |              |   |

|               |                                |                                      |                                      |              |              |                  |
|---------------|--------------------------------|--------------------------------------|--------------------------------------|--------------|--------------|------------------|
| CDH11         | ENSG00000140937.13             | 0.575792577                          | 4                                    | 4            | 0.192938762  | Brain_Cerebellum |
|               | 0.95661696                     | Brain_Anterior_cingulate_cortex_BA24 | 1.497364091                          | 0.438120673  |              |                  |
|               | 0.438120673                    | -1.301934546                         | 0.197269146                          | -0.458250228 | 0.709367987  |                  |
|               | 4                              | 0                                    | 0.998207054                          |              |              |                  |
| BVES          | ENSG00000112276.13             | 0.57580188                           | 4                                    | 4            | 0.285212902  |                  |
|               | Brain_Cerebellar_Hemisphere    | 0.545849669                          | Brain_Hippocampus                    | 1.2248553    |              |                  |
|               | 0.813611547                    | -0.813611547                         | -1.068682185                         | 0.88082567   | 0.297058008  |                  |
|               | 0.917587672                    | 4                                    | 0                                    | 0.998207054  |              |                  |
| RAB26         | ENSG00000167964.12             | 0.575889202                          | 1                                    | 1            | 0.575889202  | Brain_Cerebellum |
|               | 0.575889202                    | Brain_Cerebellum1                    | 1                                    | 1            | -0.559399354 | -0.559399354     |
|               | -0.559399354                   | NA                                   | 1                                    | 0            | 0.998207054  |                  |
| CILP          | ENSG00000138615.5              | 0.575985361                          | 2                                    | 2            | 0.340629477  | Brain_Cerebellum |
|               | 0.758400106                    | Brain_Hypothalamus                   | 1.13661679                           | 0.86338321   | 0.86338321   |                  |
|               | -0.952922228                   | -0.30758241                          | -0.630252319                         | 0.456324161  | 2            | 0                |
|               | 0.998207054                    |                                      |                                      |              |              |                  |
| Clorf198      | ENSG00000119280.16             | 0.576016157                          | 1                                    | 1            | 0.576016157  |                  |
|               | Brain_Hippocampus              | 0.576016157                          | Brain_Hippocampus                    | 1            | 1            | 1                |
|               | -0.559213301                   | -0.559213301                         | -0.559213301                         | NA           | 1            | 0                |
|               |                                |                                      |                                      |              | 0.998207054  |                  |
| SLC6A15       | ENSG00000072041.16             | 0.576024597                          | 2                                    | 2            | 0.382619282  |                  |
|               | Brain_Hippocampus              | 0.578780262                          | Brain_Cortex                         | 1.032556391  |              |                  |
|               | 0.967443609                    | 0.967443609                          | -0.555167258                         | 0.873080353  | 0.158956548  |                  |
|               | 1.009923571                    | 2                                    | 0                                    | 0.998207054  |              |                  |
| FOXL2         | ENSG00000183770.5              | 0.576261019                          | 1                                    | 1            | 0.576261019  |                  |
|               | Brain_Cerebellar_Hemisphere    | 0.576261019                          | Brain_Cerebellar_Hemisphere1         | 1            | 1            |                  |
|               | 1                              | -0.558854508                         | -0.558854508                         | -0.558854508 | NA           | 1                |
|               |                                |                                      |                                      |              | 0            |                  |
|               | 0.998207054                    |                                      |                                      |              |              |                  |
| CFAP57        | ENSG00000243710.7              | 0.576270675                          | 2                                    | 2            | 0.552566607  |                  |
|               | Brain_Frontal_Cortex_BA9       | 0.95829265                           | Brain_Cortex                         | 1.851781332  |              |                  |
|               | 0.148218668                    | 0.148218668                          | 0.052296239                          | 0.593918527  | 0.323107383  |                  |
|               | 0.382984793                    | 2                                    | 0                                    | 0.998207054  |              |                  |
| CHST11        | ENSG00000171310.10             | 0.576377707                          | 2                                    | 2            | 0.300692355  |                  |
|               | Brain_Cerebellar_Hemisphere    | 0.803177727                          | Brain_Cerebellum1                    | 1.071508255  |              |                  |
|               | 0.928491745                    | -0.928491745                         | -1.034949802                         | 0.249236655  | -0.392856573 |                  |
|               | 0.908056953                    | 2                                    | 0                                    | 0.998207054  |              |                  |
| CYP4F12       | ENSG00000186204.14             | 0.5764221                            | 8                                    | 7            | 0.139330284  |                  |
|               | Brain_Putamen_basal_ganglia    | 0.892896821                          | Brain_Anterior_cingulate_cortex_BA24 |              |              |                  |
|               | 4.707164527                    | 0.066520245                          | 0.244790752                          | -0.161937316 | 1.478289587  |                  |
|               | 0.54796366                     | 0.648458061                          | 7                                    | 0            | 0.998207054  |                  |
| MYO1F         | ENSG00000142347.16             | 0.5764575                            | 2                                    | 2            | 0.299235944  |                  |
|               | Brain_Caudate_basal_ganglia    | 0.924965861                          | Brain_Frontal_Cortex_BA9             |              |              |                  |
|               | 1.236080698                    | 0.763919302                          | 0.763919302                          | 0.094180391  | 1.038073271  |                  |
|               | 0.566126831                    | 0.667433056                          | 2                                    | 0            | 0.998207054  |                  |
| RP11-760H22.2 | ENSG00000254343.2              | 0.576460061                          | 2                                    | 2            | 0.301245584  |                  |
|               | Brain_Spinal_cord_cervical_c-1 | 0.835139401                          | Brain_Cerebellar_Hemisphere          |              |              |                  |
|               | 1.364985138                    | 0.635014862                          | 0.635014862                          | -1.03376597  | 0.208114711  |                  |
|               | -0.41282563                    | 0.87814225                           | 2                                    | 0            | 0.998207054  |                  |
| HMCES         | ENSG00000183624.13             | 0.576492339                          | 1                                    | 1            | 0.576492339  | Brain_Cortex     |
|               | 0.576492339                    | Brain_Cortex                         | 1                                    | 1            | 1            | 0.558515624      |
|               | 0.558515624                    | NA                                   | 1                                    | 0            | 0.998207054  |                  |
| LINC00578     | ENSG00000228221.5              | 0.576554138                          | 1                                    | 1            | 0.576554138  |                  |
|               | Brain_Cortex                   | 0.576554138                          | Brain_Cortex                         | 1            | 1            | 1                |
|               | -0.558425099                   | -0.558425099                         | NA                                   | 1            | 0            | 0.998207054      |
| LNX1          | ENSG00000072201.13             | 0.576859347                          | 2                                    | 2            | 0.301869424  |                  |
|               | Brain_Frontal_Cortex_BA9       | 0.773995404                          | Brain_Cerebellum1                    | 1.099385512  |              |                  |
|               | 0.900614488                    | 0.900614488                          | 0.287152698                          | 1.032432778  | 0.659792738  |                  |
|               | 0.526992598                    | 2                                    | 0                                    | 0.998207054  |              |                  |
| ZC3H7B        | ENSG00000100403.11             | 0.576885384                          | 2                                    | 2            | 0.313651916  |                  |
|               | Brain_Cerebellum               | 0.483323384                          | Brain_Frontal_Cortex_BA9             | 1.435191695  |              |                  |
|               | 0.564808305                    | 0.564808305                          | -1.007588784                         | -0.700967361 | -0.854278073 |                  |
|               | 0.216814087                    | 2                                    | 0                                    | 0.998207054  |              |                  |
| CBL           | ENSG00000110395.6              | 0.577064475                          | 9                                    | 4            | 0.146073244  |                  |
|               | Brain_Substantia_nigra         | 0.884397125                          | Brain_Amygdala                       | 5.607815759  |              |                  |

|            |                                       |                                |              |             |                                       |              |  |                  |   |
|------------|---------------------------------------|--------------------------------|--------------|-------------|---------------------------------------|--------------|--|------------------|---|
|            | 0.004175789                           | 0.359674413                    | -0.655434783 | 1.4535423   | 0.28478689                            |              |  |                  |   |
|            | 0.808142942                           | 4                              | 0            | 0.998207054 |                                       |              |  |                  |   |
| LINC02139  | ENSG00000278214.1                     | 0.57711698                     | 2            | 2           | 0.329279512                           |              |  |                  |   |
|            | Brain_Putamen_basal_ganglia           | 0.488566698                    |              |             | Brain_Caudate_basal_ganglia           |              |  |                  |   |
|            | 1.339386249                           | 0.660613751                    | 0.660613751  |             | -0.975566137                          |              |  | -0.692590302     |   |
|            | -0.83407822                           | 0.200094132                    | 2            | 0           | 0.998207054                           |              |  |                  |   |
| RHOJ       | ENSG00000126785.12                    | 0.577255836                    | 1            | 1           | 0.577255836                           |              |  | Brain_Cortex     |   |
|            | 0.577255836                           | Brain_Cortex                   | 1            | 1           | 1                                     | -0.557397555 |  | -0.557397555     |   |
|            | -0.557397555                          | NA                             | 1            | 0           | 0.998207054                           |              |  |                  |   |
| SUMO3      | ENSG00000184900.15                    | 0.577294416                    | 1            | 1           | 0.577294416                           |              |  |                  |   |
|            | Brain_Anterior_cingulate_cortex_BA24  | 0.577294416                    |              |             |                                       |              |  |                  |   |
|            | Brain_Anterior_cingulate_cortex_BA24  | 1                              | 1            | 1           | 0.557341076                           |              |  |                  |   |
|            | 0.557341076                           | 0.557341076                    | NA           | 1           | 0                                     | 0.998207054  |  |                  |   |
| COX10      | ENSG00000006695.10                    | 0.577299049                    | 3            | 3           | 0.187635949                           |              |  |                  |   |
|            | Brain_Hippocampus                     | 0.833031626                    |              |             | Brain_Substantia_nigra                |              |  | 1.141687989      |   |
|            | 0.841202233                           | 0.841202233                    | -1.317604885 |             | -0.21081501                           |              |  | -0.620493379     |   |
|            | 0.606802532                           | 3                              | 0            | 0.998207054 |                                       |              |  |                  |   |
| SCAPER     | ENSG00000140386.12                    | 0.577309211                    | 8            | 6           | 0.079846152                           |              |  |                  |   |
|            | Brain_Anterior_cingulate_cortex_BA24  | 0.983422186                    |              |             | Brain_Hippocampus                     |              |  |                  |   |
|            | 4.164104886                           | 0.046946673                    | 0.139753159  |             | -1.751579431                          |              |  | 0.288124984      |   |
|            | -0.340066432                          | 0.753926688                    | 6            | 0           | 0.998207054                           |              |  |                  |   |
| ESPL1      | ENSG00000135476.11                    | 0.577333241                    | 5            | 2           | 0.295581574                           |              |  |                  |   |
|            | Brain_Substantia_nigra                | 0.669366258                    |              |             | Brain_Nucleus_accumbens_basal_ganglia |              |  |                  |   |
|            | 4.148705703                           | 0.024107804                    | 0.739704045  |             | 0.427017944                           |              |  | 1.04595551       |   |
|            | 0.652002765                           | 0.233276943                    | 2            | 0           | 0.998207054                           |              |  |                  |   |
| UTS2       | ENSG00000049247.13                    | 0.577362321                    | 3            | 3           | 0.208845387                           |              |  | Brain_Cerebellum |   |
|            | 0.458736073                           | Brain_Spinal_cord_cervical_c-1 | 1.881589028  |             | 0.143894416                           |              |  |                  |   |
|            | 0.143894416                           | -1.256746657                   | 0.74092969   |             | -0.559068799                          |              |  | 1.126840851      | 3 |
|            | 0                                     | 0.998207054                    |              |             |                                       |              |  |                  |   |
| GM2A       | ENSG00000196743.8                     | 0.577423675                    | 5            | 4           | 0.265847228                           |              |  |                  |   |
|            | Brain_Spinal_cord_cervical_c-1        | 0.988079412                    |              |             | Brain_Cerebellum                      |              |  | 2.892746405      |   |
|            | 0.088708717                           | 0.461264304                    | -0.963921623 |             | 1.112676882                           |              |  | 0.008460016      |   |
|            | 0.769352052                           | 4                              | 0            | 0.998207054 |                                       |              |  |                  |   |
| ARID5A     | ENSG00000196843.15                    | 0.57743134                     | 2            | 2           | 0.296255756                           |              |  |                  |   |
|            | Brain_Nucleus_accumbens_basal_ganglia | 0.830374273                    |              |             | Brain_Caudate_basal_ganglia           |              |  |                  |   |
|            | 1.123597294                           | 0.876402706                    | 0.876402706  |             | 0.214221573                           |              |  | 1.04449646       |   |
|            | 0.629359017                           | 0.587093003                    | 2            | 0           | 0.998207054                           |              |  |                  |   |
| CHMP1B     | ENSG00000255112.2                     | 0.577597206                    | 2            | 2           | 0.325985757                           |              |  |                  |   |
|            | Brain_Spinal_cord_cervical_c-1        | 0.63783749                     |              |             | Brain_Nucleus_accumbens_basal_ganglia |              |  |                  |   |
|            | 1.110244515                           | 0.889755485                    | 0.889755485  |             | -0.470724495                          |              |  | 0.982231613      |   |
|            | 0.255753559                           | 1.027395117                    | 2            | 0           | 0.998207054                           |              |  |                  |   |
| HDAC2      | ENSG00000196591.11                    | 0.577612727                    | 1            | 1           | 0.577612727                           |              |  |                  |   |
|            | Brain_Substantia_nigra                | 0.577612727                    |              |             | Brain_Substantia_nigra                |              |  | 1                | 1 |
|            | 1                                     | 0.556875161                    | 0.556875161  |             | 0.556875161                           |              |  | NA               | 1 |
|            | 0.998207054                           |                                |              |             |                                       |              |  | 0                |   |
| TXK        | ENSG00000074966.10                    | 0.577639443                    | 1            | 1           | 0.577639443                           |              |  |                  |   |
|            | Brain_Anterior_cingulate_cortex_BA24  | 0.577639443                    |              |             |                                       |              |  |                  |   |
|            | Brain_Anterior_cingulate_cortex_BA24  | 1                              | 1            | 1           | -0.556836061                          |              |  |                  |   |
|            | -0.556836061                          | -0.556836061                   | NA           | 1           | 0                                     | 0.998207054  |  |                  |   |
| ZDHHC14    | ENSG00000175048.16                    | 0.577703707                    | 4            | 4           | 0.326407705                           |              |  |                  |   |
|            | Brain_Cerebellum                      | 0.574925292                    |              |             | Brain_Substantia_nigra                |              |  | 1.546700641      |   |
|            | 0.683099574                           | 0.683099574                    | -0.981375294 |             | 0.58903195                            |              |  | -0.438264355     |   |
|            | 0.706188518                           | 4                              | 0            | 0.998207054 |                                       |              |  |                  |   |
| BBX        | ENSG00000114439.18                    | 0.577745354                    | 2            | 2           | 0.300880342                           |              |  | Brain_Amygdala   |   |
|            | 0.949352899                           | Brain_Cerebellum               | 1.096559938  |             | 0.903440062                           |              |  | 0.903440062      |   |
|            | -1.034547374                          | 0.063519416                    | -0.485513979 |             | 0.776450473                           |              |  | 2                | 0 |
|            | 0.998207054                           |                                |              |             |                                       |              |  |                  |   |
| AC008060.7 | ENSG00000218672.1                     | 0.577770861                    | 10           | 10          | 0.116444683                           |              |  |                  |   |
|            | Brain_Caudate_basal_ganglia           | 0.795341425                    |              |             | Brain_Hypothalamus                    |              |  | 1.611219862      |   |
|            | 0.426600401                           | 0.426600401                    | -1.412697451 |             | 1.569872902                           |              |  | 0.378359254      |   |
|            | 0.993761627                           | 10                             | 0            | 0.998207054 |                                       |              |  |                  |   |
| PLCH2      | ENSG00000149527.17                    | 0.577787061                    | 4            | 4           | 0.289473062                           |              |  |                  |   |

|               |                                       |                    |              |                                       |              |
|---------------|---------------------------------------|--------------------|--------------|---------------------------------------|--------------|
|               | Brain_Nucleus_accumbens_basal_ganglia | 0.663574132        |              | Brain_Cerebellum                      |              |
|               | 1.168440238                           | 0.830628186        | 0.830628186  | -0.434983875                          | 1.059278284  |
|               | 0.612072007                           | 0.701489641        | 4            | 0                                     | 0.998207054  |
| ZNF584        | ENSG00000171574.17                    | 0.577940726        | 12           | 3                                     | 0.40701172   |
|               | Brain_Spinal_cord_cervical_c-1        | 0.924939359        |              |                                       |              |
|               | Brain_Nucleus_accumbens_basal_ganglia | 9.305738578        |              | 0.003953623                           |              |
|               | 0.339614996                           | -0.82916381        | 0.34256969   | -0.172353957                          | 0.429314687  |
|               | 0                                     | 0.998207054        |              |                                       | 3            |
| CH17-189H20.1 | ENSG00000274265.4                     | 0.577962539        | 6            | 5                                     | 0.228641569  |
|               | Brain_Frontal_Cortex_BA9              | 0.926625809        |              | Brain_Hippocampus                     | 2.987366576  |
|               | 8.13E-17                              | 0.190542051        | -0.770849228 | 1.203865498                           | -0.038919816 |
|               | 0.912768655                           | 5                  | 0            | 0.998207054                           |              |
| ZC3H6         | ENSG00000188177.13                    | 0.578011419        | 2            | 2                                     | 0.308150402  |
|               | Brain_Hippocampus                     | 0.689077497        |              | Brain_Hypothalamus                    | 1.159857849  |
|               | 0.840142151                           | 0.840142151        | 0.400107287  | 1.019110727                           | 0.709609007  |
|               | 0.43770153                            | 2                  | 0            | 0.998207054                           |              |
| PSMD5         | ENSG00000095261.13                    | 0.578017351        | 2            | 2                                     | 0.296511987  |
|               | Brain_Caudate_basal_ganglia           | 0.424403292        |              | Brain_Putamen_basal_ganglia           |              |
|               | 1.710923742                           | 0.289076258        | 0.289076258  | 0.798805343                           | 1.043942513  |
|               | 0.921373928                           | 0.173338155        | 2            | 0                                     | 0.998207054  |
| TCTN3         | ENSG00000119977.20                    | 0.5780974          | 8            | 5                                     | 0.357007501  |
|               | Brain_Spinal_cord_cervical_c-1        | 0.913588677        |              | Brain_Cerebellar_Hemisphere           |              |
|               | 4.348072468                           | 0.05734012         | 0.257845335  | -0.921082223                          | 0.461669743  |
|               | -0.253615055                          | 0.456439942        | 5            | 0                                     | 0.998207054  |
| ZNF324B       | ENSG00000249471.7                     | 0.578192764        | 3            | 3                                     | 0.485212338  |
|               | Brain_Cerebellum                      | 0.871866796        |              | Brain_Cerebellar_Hemisphere           | 2.630429236  |
|               | 0.118770611                           | 0.118770611        | -0.198265462 | 0.697943806                           | 0.220322021  |
|               | 0.451011695                           | 3                  | 0            | 0.998207054                           |              |
| CDH12         | ENSG00000154162.14                    | 0.578315548        | 4            | 4                                     | 0.091816726  |
|               | Brain_Putamen_basal_ganglia           | 0.946002473        |              | Brain_Spinal_cord_cervical_c-1        |              |
|               | 1.857361203                           | 0.176778619        | 0.176778619  | -1.68589136                           | 0.102147467  |
|               | -0.398108354                          | 0.861999486        | 4            | 0                                     | 0.998207054  |
| TBC1D16       | ENSG00000167291.15                    | 0.578469394        | 4            | 4                                     | 0.324519356  |
|               | Brain_Cerebellum                      | 0.899816738        |              | Brain_Frontal_Cortex_BA9              | 1.644455002  |
|               | 0.398778681                           | 0.398778681        | -0.342833668 | 0.985213204                           | 0.294291596  |
|               | 0.630897902                           | 4                  | 0            | 0.998207054                           |              |
| SDF4          | ENSG00000078808.16                    | 0.578516697        | 2            | 2                                     | 0.296953253  |
|               | Brain_Cortex                          |                    |              |                                       |              |
|               | 0.391862583                           | Brain_Hypothalamus | 1.770768877  | 0.229231123                           |              |
|               | 0.229231123                           | -1.04298929        | -0.856244445 | -0.949616868                          | 0.132048546  |
|               | 2                                     | 0                  | 0.998207054  |                                       |              |
| RBMS3         | ENSG00000144642.21                    | 0.578600219        | 1            | 1                                     | 0.578600219  |
|               | Brain_Anterior_cingulate_cortex_BA24  | 0.578600219        |              |                                       |              |
|               | Brain_Anterior_cingulate_cortex_BA24  | 1                  | 1            | 1                                     | -0.555430524 |
|               | -0.555430524                          | -0.555430524       | NA           | 1                                     | 0            |
|               |                                       |                    |              | 0.998207054                           |              |
| SHD           | ENSG00000105251.10                    | 0.57869301         | 7            | 6                                     | 0.172102586  |
|               | Brain_Cerebellar_Hemisphere           | 0.948955488        |              | Brain_Nucleus_accumbens_basal_ganglia |              |
|               | 2.467313741                           | 0.009742184        | 0.14284737   | -1.096537299                          | 1.365478881  |
|               | 0.535438806                           | 0.883343395        | 6            | 0                                     | 0.998207054  |
| EXOSC3        | ENSG00000107371.12                    | 0.579049859        | 4            | 4                                     | 0.280944352  |
|               | Brain_Frontal_Cortex_BA9              | 0.717544509        |              | Brain_Nucleus_accumbens_basal_ganglia |              |
|               | 2.485885001                           | 0.298148191        | 0.298148191  | -0.779396545                          | 1.07820036   |
|               | -0.199513465                          | 0.872162924        | 4            | 0                                     | 0.998207054  |
| LINC01115     | ENSG00000272342.1                     | 0.579077226        | 2            | 1                                     | 0.556185302  |
|               | Brain_Anterior_cingulate_cortex_BA24  | 0.604958221        |              | Brain_Hypothalamus                    |              |
|               | 1.986806067                           | 0.013193933        | 1.986806067  | -0.588517037                          | -0.517283571 |
|               | -0.552900304                          | 0.050369667        | 1            | 0                                     | 0.998207054  |
| YTHDC2        | ENSG00000047188.15                    | 0.579200866        | 3            | 2                                     | 0.262728898  |
|               | Brain_Cerebellum                      | 0.606384042        |              | Brain_Cerebellar_Hemisphere           | 2.57443152   |
|               | 0.066169812                           | 0.359398668        | -1.119964481 | -0.51524183                           | -0.884368561 |
|               | 0.323720913                           | 2                  | 0            | 0.998207054                           |              |
| ITGB1BP1      | ENSG00000119185.12                    | 0.579297706        | 1            | 1                                     | 0.579297706  |
|               | Brain_Anterior_cingulate_cortex_BA24  | 0.579297706        |              |                                       |              |

|               |                                       |                                      |                                |                             |              |                  |
|---------------|---------------------------------------|--------------------------------------|--------------------------------|-----------------------------|--------------|------------------|
|               | Brain_Anterior_cingulate_cortex_BA24  | 1                                    | 1                              | 1                           | 0.554410844  |                  |
|               | 0.554410844                           | 0.554410844                          | NA                             | 1                           | 0            | 0.998207054      |
| TMEM179       | ENSG00000258986.6                     | 0.579299982                          | 1                              | 1                           | 0.579299982  |                  |
|               | Brain_Caudate_basal_ganglia           | 0.579299982                          |                                | Brain_Caudate_basal_ganglia | 1            | 1                |
|               | 1                                     | 0.554407518                          | 0.554407518                    | 0.554407518                 | NA           | 1                |
|               | 0.998207054                           |                                      |                                |                             | 0            |                  |
| RP11-400K9.4  | ENSG00000237807.3                     | 0.579385335                          | 2                              | 2                           | 0.415405611  |                  |
|               | Brain_Nucleus_accumbens_basal_ganglia | 0.501521601                          |                                | Brain_Hippocampus           |              |                  |
|               | 1.021866901                           | 0.978133099                          | 0.978133099                    | -0.81441786                 | 0.672097542  |                  |
|               | -0.071160159                          | 1.051125121                          | 2                              | 0                           | 0.998207054  |                  |
| PCNA          | ENSG00000132646.10                    | 0.579514528                          | 1                              | 1                           | 0.579514528  |                  |
|               | Brain_Anterior_cingulate_cortex_BA24  | 0.579514528                          |                                |                             |              |                  |
|               | Brain_Anterior_cingulate_cortex_BA24  | 1                                    | 1                              | 1                           | -0.554093983 |                  |
|               | -0.554093983                          | -0.554093983                         | NA                             | 1                           | 0            | 0.998207054      |
| COL6A6        | ENSG00000206384.10                    | 0.579514627                          | 1                              | 1                           | 0.579514627  |                  |
|               | Brain_Putamen_basal_ganglia           | 0.579514627                          |                                | Brain_Putamen_basal_ganglia | 1            | 1                |
|               | 1                                     | -0.554093838                         | -0.554093838                   | -0.554093838                | NA           | 1                |
|               | 0.998207054                           |                                      |                                |                             | 0            |                  |
| RP11-57A19.2  | ENSG00000246465.1                     | 0.579570004                          | 1                              | 1                           | 0.579570004  |                  |
|               | Brain_Cerebellum                      | 0.579570004                          | Brain_Cerebellum               | 1                           | 1            | 1                |
|               | -0.55401292                           | -0.55401292                          | NA                             | 1                           | 0            | 0.998207054      |
| PPCDC         | ENSG00000138621.11                    | 0.579597321                          | 10                             | 2                           | 0.349266095  | Brain_Amygdala   |
|               | 0.851344833                           | Brain_Putamen_basal_ganglia          | 8.93343852                     | 0.011563565                 |              |                  |
|               | 0.312278704                           | 0.187402793                          | 0.936013775                    | 0.565786187                 | 0.294487304  |                  |
|               | 2                                     | 0                                    | 0.998207054                    |                             |              |                  |
| OR6B3         | ENSG00000178586.4                     | 0.579624541                          | 1                              | 1                           | 0.579624541  |                  |
|               | Brain_Hippocampus                     | 0.579624541                          | Brain_Hippocampus              | 1                           | 1            | 1                |
|               | -0.553933232                          | -0.553933232                         | -0.553933232                   | NA                          | 1            | 0                |
|               |                                       |                                      |                                |                             |              | 0.998207054      |
| ABL1          | ENSG00000097007.17                    | 0.579645048                          | 4                              | 4                           | 0.179933421  |                  |
|               | Brain_Hypothalamus                    | 0.706976955                          | Brain_Spinal_cord_cervical_c-1 | 1.24008321                  |              |                  |
|               | 0.769285403                           | 0.769285403                          | -0.424430827                   | 1.340960058                 | 0.540630229  |                  |
|               | 0.754438552                           | 4                                    | 0                              | 0.998207054                 |              |                  |
| MOXD1         | ENSG00000079931.14                    | 0.579668656                          | 2                              | 2                           | 0.30874018   |                  |
|               | Brain_Cerebellar_Hemisphere           | 0.721026215                          | Brain_Hippocampus              | 1.123126902                 |              |                  |
|               | 0.876873098                           | 0.876873098                          | -0.357087617                   | 1.017869076                 | 0.330390729  |                  |
|               | 0.972241201                           | 2                                    | 0                              | 0.998207054                 |              |                  |
| ABHD15        | ENSG00000168792.4                     | 0.579709715                          | 4                              | 2                           | 0.398044274  |                  |
|               | Brain_Cerebellum                      | 0.77749997                           | Brain_Putamen_basal_ganglia    | 3.539826319                 |              |                  |
|               | 0.026537633                           | 0.383127182                          | -0.845119227                   | 0.282578491                 | -0.286281698 |                  |
|               | 0.460447275                           | 2                                    | 0                              | 0.998207054                 |              |                  |
| SYNJ2BP       | ENSG00000213463.4                     | 0.579722311                          | 2                              | 2                           | 0.315143363  |                  |
|               | Brain_Frontal_Cortex_BA9              | 0.723094392                          | Brain_Cerebellum               | 1.069368041                 |              |                  |
|               | 0.930631959                           | 0.930631959                          | -1.004488186                   | -0.354326258                | -0.679407222 |                  |
|               | 0.459733908                           | 2                                    | 0                              | 0.998207054                 |              |                  |
| SP5           | ENSG00000204335.3                     | 0.579762833                          | 2                              | 2                           | 0.333158762  | Brain_Amygdala   |
|               | 0.474772184                           | Brain_Anterior_cingulate_cortex_BA24 | 1.360720578                    |                             |              |                  |
|               | 0.639279422                           | 0.639279422                          | -0.967770975                   | -0.714736008                | -0.841253492 |                  |
|               | 0.178922742                           | 2                                    | 0                              | 0.998207054                 |              |                  |
| FCER1A        | ENSG00000179639.10                    | 0.579898207                          | 4                              | 4                           | 0.126104829  |                  |
|               | Brain_Anterior_cingulate_cortex_BA24  | 0.783929974                          | Brain_Caudate_basal_ganglia    |                             |              |                  |
|               | 1.409541434                           | 0.606015723                          | 0.606015723                    | -1.529644172                | 0.480081045  |                  |
|               | -0.539804423                          | 0.852037249                          | 4                              | 0                           | 0.998207054  |                  |
| TLE3          | ENSG00000140332.15                    | 0.579898461                          | 1                              | 1                           | 0.579898461  |                  |
|               | Brain_Hippocampus                     | 0.579898461                          | Brain_Hippocampus              | 1                           | 1            | 1                |
|               | 0.553533042                           | 0.553533042                          | 0.553533042                    | NA                          | 1            | 0                |
|               |                                       |                                      |                                |                             |              | 0.998207054      |
| TAF1B         | ENSG00000115750.16                    | 0.579898683                          | 2                              | 2                           | 0.313549591  | Brain_Cerebellum |
|               | 0.469806137                           | Brain_Cerebellar_Hemisphere          | 1.856603679                    | 0.143396321                 |              |                  |
|               | 0.143396321                           | 0.722794516                          | 1.007801863                    | 0.86529819                  | 0.201530628  | 2                |
|               | 0                                     | 0.998207054                          |                                |                             |              |                  |
| RP11-756G20.1 | ENSG00000277851.1                     | 0.580181524                          | 2                              | 2                           | 0.419987634  |                  |
|               | Brain_Substantia_nigra                | 0.530687488                          | Brain_Spinal_cord_cervical_c-1 |                             |              |                  |
|               | 1.042917142                           | 0.957082858                          | 0.957082858                    | -0.6269569                  | 0.806442701  |                  |

|               |                                       |                             |                        |             |                                       |                  |             |
|---------------|---------------------------------------|-----------------------------|------------------------|-------------|---------------------------------------|------------------|-------------|
|               | 0.089742901                           | 1.013566578                 | 2                      | 0           | 0.998207054                           |                  |             |
| THG1L         | ENSG00000113272.13                    | 0.580186187                 | 6                      | 5           | 0.146336367                           |                  |             |
|               | Brain_Caudate_basal_ganglia           | 0.903512098                 |                        |             | Brain_Spinal_cord_cervical_c-1        |                  |             |
|               | 2.2175651                             | 0.022829845                 | 0.760186255            |             | -0.391936559                          | 1.452594527      |             |
|               | 0.473655499                           | 0.695100078                 | 5                      | 0           | 0.998207054                           |                  |             |
| UQCRH         | ENSG00000173660.11                    | 0.580298192                 | 2                      | 2           | 0.29925572                            |                  |             |
|               | Brain_Nucleus_accumbens_basal_ganglia | 0.401515132                 |                        |             | Brain_Cortex                          |                  |             |
|               | 1.859615468                           | 0.140384532                 | 0.140384532            |             | 0.838918345                           | 1.038030791      |             |
|               | 0.938474568                           | 0.14079376                  | 2                      | 0           | 0.998207054                           |                  |             |
| EPHB2         | ENSG00000133216.16                    | 0.580337496                 | 3                      | 3           | 0.20020935                            | Brain_Cortex     |             |
|               | 0.728848851                           | Brain_Putamen_basal_ganglia | 1.856561352            |             | 0.177846269                           |                  |             |
|               | 0.177846269                           | -0.369367162                | 1.280955349            |             | 0.188310321                           | 0.946326478      |             |
|               | 3                                     | 0                           | 0.998207054            |             |                                       |                  |             |
| PUF60         | ENSG00000179950.13                    | 0.580407679                 | 1                      | 1           | 0.580407679                           | Brain_Cerebellum |             |
|               | 0.580407679                           | Brain_Cerebellum            | 1                      | 1           | -0.552789325                          | -0.552789325     |             |
|               | -0.552789325                          | NA                          | 1                      | 0           | 0.998207054                           |                  |             |
| ACCSL         | ENSG00000205126.2                     | 0.580434729                 | 1                      | 1           | 0.580434729                           |                  |             |
|               | Brain_Cerebellar_Hemisphere           | 0.580434729                 |                        |             | Brain_Cerebellar_Hemisphere           | 1                | 1           |
|               | 1                                     | 0.552749827                 | 0.552749827            | 0.552749827 | NA                                    | 1                | 0           |
|               | 0.998207054                           |                             |                        |             |                                       |                  |             |
| BSN           | ENSG00000164061.4                     | 0.580441462                 | 1                      | 1           | 0.580441462                           | Brain_Cortex     |             |
|               | 0.580441462                           | Brain_Cortex                | 1                      | 1           | -0.552739995                          | -0.552739995     |             |
|               | -0.552739995                          | NA                          | 1                      | 0           | 0.998207054                           |                  |             |
| PRKRIP1       | ENSG00000128563.13                    | 0.580715524                 | 8                      | 6           | 0.191464161                           |                  |             |
|               | Brain_Cortex                          | 0.891723146                 |                        |             | Brain_Spinal_cord_cervical_c-1        | 4.910852059      |             |
|               | 0.095926353                           | 0.221681724                 |                        |             | -0.319653218                          | 1.306259983      | 0.64598707  |
|               | 0.604978303                           | 6                           | 0                      | 0.998207054 |                                       |                  |             |
| RP11-351J23.2 | ENSG00000272549.1                     | 0.580728514                 | 2                      | 2           | 0.324732864                           |                  |             |
|               | Brain_Caudate_basal_ganglia           | 0.725255468                 |                        |             | Brain_Nucleus_accumbens_basal_ganglia |                  |             |
|               | 1.009321322                           | 0.990678678                 | 0.990678678            |             | 0.351443746                           | 0.98477854       |             |
|               | 0.668111143                           | 0.447835328                 | 2                      | 0           | 0.998207054                           |                  |             |
| CD5           | ENSG00000110448.10                    | 0.580743161                 | 3                      | 2           | 0.314851564                           | Brain_Amygdala   |             |
|               | 0.769686374                           | Brain_Cerebellum            | 2.000947365            |             | 0.006739522                           | 0.992313113      |             |
|               | 0.292785157                           | 1.005094051                 | 0.560985331            |             | 0.387367852                           | 2                | 0           |
|               | 0.998207054                           |                             |                        |             |                                       |                  |             |
| SSU72         | ENSG00000160075.11                    | 0.580802531                 | 6                      | 3           | 0.164476431                           | Brain_Cortex     |             |
|               | 0.980201802                           | Brain_Caudate_basal_ganglia | 4.295613974            |             | 0.024346656                           |                  |             |
|               | 0.558811478                           | -1.390172733                | 0.024815909            |             | -0.439274801                          | 0.504299662      |             |
|               | 3                                     | 0                           | 0.998207054            |             |                                       |                  |             |
| CNOT8         | ENSG00000155508.13                    | 0.580819538                 | 7                      | 4           | 0.084760591                           |                  |             |
|               | Brain_Nucleus_accumbens_basal_ganglia | 0.230436812                 |                        |             | Brain_Substantia_nigra                |                  |             |
|               | 5.548669974                           | 0.032217631                 | 0.237040825            |             | -1.723707887                          | -1.199234406     |             |
|               | -1.439301369                          | 0.183838938                 | 4                      | 0           | 0.998207054                           |                  |             |
| APOC2         | ENSG00000234906.9                     | 0.580984767                 | 5                      | 2           | 0.246850257                           |                  |             |
|               | Brain_Nucleus_accumbens_basal_ganglia | 0.584815838                 |                        |             | Brain_Cerebellum                      |                  |             |
|               | 3.859996616                           | 0.002585323                 | 0.951167277            |             | -0.561989283                          | 1.158033766      |             |
|               | 0.474915825                           | 0.630175946                 | 2                      | 0           | 0.998207054                           |                  |             |
| VAPB          | ENSG00000124164.15                    | 0.580989831                 | 13                     | 2           | 0.283202783                           |                  |             |
|               | Brain_Hypothalamus                    | 0.974498099                 |                        |             | Brain_Substantia_nigra                | 11.24319722      |             |
|               | 0.002691594                           | 0.96573925                  | -1.073152312           |             | 0.237557866                           | -0.46537504      |             |
|               | 0.368057623                           | 2                           | 0                      | 0.998207054 |                                       |                  |             |
| NPM3          | ENSG00000107833.10                    | 0.581026482                 | 6                      | 4           | 0.307833408                           |                  |             |
|               | Brain_Hippocampus                     | 0.809029259                 |                        |             | Brain_Amygdala                        | 4.179567116      |             |
|               | 0.080347242                           | 0.174060555                 | -1.01977874            |             | 0.688562159                           | 0.246995117      |             |
|               | 0.641982895                           | 4                           | 0                      | 0.998207054 |                                       |                  |             |
| LINS1         | ENSG00000140471.16                    | 0.581048982                 | 3                      | 3           | 0.300550695                           |                  |             |
|               | Brain_Anterior_cingulate_cortex_BA24  | 0.979561394                 |                        |             | Brain_Cerebellum                      |                  |             |
|               | 2.250872395                           | 0.232923385                 | 0.232923385            |             | -0.025618796                          | 1.035253167      |             |
|               | 0.585278809                           | 0.548438282                 | 3                      | 0           | 0.998207054                           |                  |             |
| SLC25A15      | ENSG00000102743.14                    | 0.58115412                  | 1                      | 1           | 0.58115412                            |                  |             |
|               | Brain_Substantia_nigra                | 0.58115412                  | Brain_Substantia_nigra | 1           | 1                                     | 1                |             |
|               | 0.551699693                           | 0.551699693                 | 0.551699693            | NA          | 1                                     | 0                | 0.998207054 |

|               |                                      |                          |              |              |              |                                       |             |
|---------------|--------------------------------------|--------------------------|--------------|--------------|--------------|---------------------------------------|-------------|
| NAALAD2       | ENSG00000077616.10                   | 0.581172139              | 9            | 5            | 0.320070158  |                                       |             |
|               | Brain_Substantia_nigra               | 0.936182473              |              |              |              | Brain_Caudate_basal_ganglia           |             |
|               | 5.754004797                          | 0.027780438              | 0.240286163  | -0.809885872 | 0.994313721  |                                       |             |
|               | -0.131224327                         | 0.602182372              | 5            | 0            | 0.998207054  |                                       |             |
| NUPL2         | ENSG00000136243.16                   | 0.581191517              | 13           | 1            | 0.277408751  |                                       |             |
|               | Brain_Putamen_basal_ganglia          | 0.779397649              |              |              |              | Brain_Spinal_cord_cervical_c-1        |             |
|               | 12.23274307                          | 0.005991825              | 12.23274307  | 0.280104087  | 1.086158778  |                                       |             |
|               | 0.53755879                           | 0.225839905              | 1            | 0            | 0.998207054  |                                       |             |
| HNRNPA3       | ENSG00000170144.20                   | 0.581338978              | 1            | 1            | 0.581338978  |                                       |             |
|               | Brain_Hippocampus                    | 0.581338978              |              |              |              | Brain_Hippocampus                     | 1 1 1       |
|               | -0.551429945                         | -0.551429945             | -0.551429945 | NA           | 1            | 0                                     | 0.998207054 |
| CCDC74A       | ENSG00000163040.14                   | 0.581423061              | 9            | 4            | 0.125952653  |                                       |             |
|               | Brain_Cortex                         | 0.598698929              |              |              |              | Brain_Nucleus_accumbens_basal_ganglia |             |
|               | 7.344801133                          | 0.033522532              | 0.292308298  | -1.530258916 | -0.52627244  |                                       |             |
|               | -0.853300691                         | 0.343629804              | 4            | 0            | 0.998207054  |                                       |             |
| ABHD16A       | ENSG00000204427.11                   | 0.581481857              | 2            | 2            | 0.407323301  |                                       |             |
|               | Brain_Caudate_basal_ganglia          | 0.471076684              |              |              |              | Brain_Cerebellar_Hemisphere           |             |
|               | 1.113607069                          | 0.886392931              | 0.886392931  | -0.828613227 | 0.720728321  |                                       |             |
|               | -0.053942453                         | 1.095549915              | 2            | 0            | 0.998207054  |                                       |             |
| DNAJC18       | ENSG00000170464.9                    | 0.581562724              | 6            | 3            | 0.213429452  |                                       |             |
|               | Brain_Spinal_cord_cervical_c-1       | 0.786695777              |              |              |              | Brain_Cerebellar_Hemisphere           |             |
|               | 4.184858946                          | 0.021438616              | 0.64613176   | -1.244190521 | 0.270603794  |                                       |             |
|               | -0.927666225                         | 0.590384466              | 3            | 0            | 0.998207054  |                                       |             |
| INPP5D        | ENSG00000168918.13                   | 0.581637344              | 1            | 1            | 0.581637344  |                                       |             |
|               | Brain_Cerebellar_Hemisphere          | 0.581637344              |              |              |              | Brain_Cerebellar_Hemisphere           | 1 1         |
|               | 1                                    | -0.550994647             | -0.550994647 | -0.550994647 | NA           | 1                                     | 0           |
|               | 0.998207054                          |                          |              |              |              |                                       |             |
| CANX          | ENSG00000127022.14                   | 0.581648314              | 13           | 7            | 0.071914448  |                                       |             |
|               | Brain_Spinal_cord_cervical_c-1       | 0.923622487              |              |              |              | Brain_Hypothalamus                    | 8.58967953  |
|               | 0.004380389                          | 0.342338469              | 0.09587168   | 1.799659323  | 1.177276777  |                                       |             |
|               | 0.600296916                          | 7                        | 0            | 0.998207054  |              |                                       |             |
| C2orf74       | ENSG00000237651.6                    | 0.581725274              | 13           | 1            | 0.485074685  |                                       |             |
|               | Brain_Amygdala                       | 0.652481244              |              |              |              | Brain_Spinal_cord_cervical_c-1        | 12.85197267 |
|               | 6.60E-05                             | 12.85197267              | 0.450317887  | 0.698163924  | 0.548035831  |                                       |             |
|               | 0.08607805                           | 1                        | 0            | 0.998207054  |              |                                       |             |
| HPSE          | ENSG00000173083.14                   | 0.581786023              | 3            | 3            | 0.279194208  |                                       |             |
|               | Brain_Hippocampus                    | 0.404828492              |              |              |              | Brain_Cerebellum                      | 1.807094609 |
|               | 0.192624722                          | 0.192624722              | 0.833028792  | 1.082131259  | 0.980465184  |                                       |             |
|               | 0.130706546                          | 3                        | 0            | 0.998207054  |              |                                       |             |
| ATXN2L        | ENSG00000168488.18                   | 0.582006509              | 1            | 1            | 0.582006509  |                                       |             |
|               | Brain_Caudate_basal_ganglia          | 0.582006509              |              |              |              | Brain_Caudate_basal_ganglia           | 1 1         |
|               | 1                                    | 0.550456202              | 0.550456202  | 0.550456202  | NA           | 1                                     | 0           |
|               | 0.998207054                          |                          |              |              |              |                                       |             |
| AKT1          | ENSG00000142208.15                   | 0.582067604              | 4            | 4            | 0.114586289  |                                       |             |
|               | Brain_Substantia_nigra               | 0.697673371              |              |              |              | Brain_Cerebellar_Hemisphere           |             |
|               | 2.275087524                          | 0.091739949              | 0.091739949  | 0.38846308   | 1.577909992  |                                       |             |
|               | 0.779408034                          | 0.543063976              | 4            | 0            | 0.998207054  |                                       |             |
| MLLT11        | ENSG00000213190.3                    | 0.58210384               | 2            | 2            | 0.333414039  |                                       |             |
|               | Brain_Anterior_cingulate_cortex_BA24 | 0.641098049              |              |              |              | Brain_Cerebellum                      |             |
|               | 1.087592665                          | 0.912407335              | 0.912407335  | -0.466164093 | 0.967260071  |                                       |             |
|               | 0.250547989                          | 1.013583946              | 2            | 0            | 0.998207054  |                                       |             |
| RP11-162A12.4 | ENSG00000278107.1                    | 0.582152183              | 2            | 2            | 0.298244225  |                                       |             |
|               | Brain_Caudate_basal_ganglia          | 0.402490605              |              |              |              | Brain_Nucleus_accumbens_basal_ganglia |             |
|               | 1.807252205                          | 0.192747795              | 0.192747795  | 0.837181411  | 1.040205956  |                                       |             |
|               | 0.938693683                          | 0.143560032              | 2            | 0            | 0.998207054  |                                       |             |
| YWHAH         | ENSG00000128245.14                   | 0.582211655              | 3            | 3            | 0.291485509  |                                       |             |
|               | Brain_Cerebellar_Hemisphere          | 0.732539723              |              |              |              | Brain_Cerebellum                      | 1.469584598 |
|               | 0.614963851                          | 0.614963851              | -1.054868417 | 0.341749093  | -0.390427903 |                                       |             |
|               | 0.700768357                          | 3                        | 0            | 0.998207054  |              |                                       |             |
| OGFR          | ENSG00000060491.16                   | 0.582326396              | 11           | 10           | 0.13290153   | Brain_Amygdala                        |             |
|               | 0.900460591                          | Brain_Frontal_Cortex_BA9 | 3.885868063  | 0.121522857  |              |                                       |             |
|               | 0.295784339                          | -0.957682389             | 1.50275773   | 0.384855673  | 0.783049037  |                                       | 10          |

|               |                                       |                |                             |              |                                       |                  |              |            |            |
|---------------|---------------------------------------|----------------|-----------------------------|--------------|---------------------------------------|------------------|--------------|------------|------------|
| 0             | 0.998207054                           |                |                             |              |                                       |                  |              |            |            |
| ZDHC11        | ENSG00000188818.12                    | 0.58233373     | 10                          | 9            | 0.051151112                           |                  |              |            |            |
|               | Brain_Frontal_Cortex_BA9              | 0.883123006    |                             |              | Brain_Spinal_cord_cervical_c-1        |                  |              |            |            |
|               | 3.857060056                           | 0.035644803    |                             |              | 0.20251534                            | -0.79542837      |              | 1.95020985 | 0.46643299 |
|               | 0.885255699                           | 9              | 0                           | 0.998207054  |                                       |                  |              |            |            |
| GLIDR         | ENSG00000278175.3                     | 0.582381326    | 1                           | 1            | 0.582381326                           |                  |              |            |            |
|               | Brain_Cerebellar_Hemisphere           | 0.582381326    |                             |              | Brain_Cerebellar_Hemisphere           | 1                | 1            |            |            |
|               | 1                                     | 0.549909678    | 0.549909678                 | 0.549909678  | NA                                    | 1                | 0            |            |            |
|               | 0.998207054                           |                |                             |              |                                       |                  |              |            |            |
| OR51E1        | ENSG00000180785.8                     | 0.582488006    | 1                           | 1            | 0.582488006                           |                  |              |            |            |
|               | Brain_Caudate_basal_ganglia           | 0.582488006    |                             |              | Brain_Caudate_basal_ganglia           | 1                | 1            |            |            |
|               | 1                                     | 0.549754157    | 0.549754157                 | 0.549754157  | NA                                    | 1                | 0            |            |            |
|               | 0.998207054                           |                |                             |              |                                       |                  |              |            |            |
| SAP25         | ENSG00000205307.11                    | 0.582490675    | 12                          | 3            | 0.265778628                           |                  |              |            |            |
|               | Brain_Hypothalamus                    | 0.982281998    |                             |              | Brain_Nucleus_accumbens_basal_ganglia |                  |              |            |            |
|               | 9.847630419                           | 3.33E-09       | 0.496891219                 |              | -0.503391699                          |                  | 1.112836566  |            |            |
|               | -0.020163485                          | 0.507179908    | 3                           | 0            | 0.998207054                           |                  |              |            |            |
| MSRB2         | ENSG00000148450.12                    | 0.582499394    | 4                           | 4            | 0.272226332                           |                  |              |            |            |
|               | Brain_Frontal_Cortex_BA9              | 0.913049493    |                             |              | Brain_Nucleus_accumbens_basal_ganglia |                  |              |            |            |
|               | 2.469439006                           | 0.168895272    | 0.168895272                 |              | -0.580170765                          |                  | 1.09794998   |            |            |
|               | 0.064086249                           | 0.72128695     | 4                           | 0            | 0.998207054                           |                  |              |            |            |
| FAM86B2       | ENSG00000145002.12                    | 0.58250052     | 7                           | 7            | 0.199009875                           |                  |              |            |            |
|               | Brain_Hippocampus                     | 0.990550677    |                             |              | Brain_Nucleus_accumbens_basal_ganglia |                  |              |            |            |
|               | 1.869532743                           | 0.239112091    | 0.239112091                 |              | -0.195960701                          |                  | 1.284377575  |            |            |
|               | 0.496598418                           | 0.577706854    | 7                           | 0            | 0.998207054                           |                  |              |            |            |
| LINC01616     | ENSG00000261340.1                     | 0.582524364    | 3                           | 3            | 0.225928893                           |                  |              |            |            |
|               | Brain_Cortex                          | 0.88468763     | Brain_Caudate_basal_ganglia | 1.358801879  |                                       |                  |              |            |            |
|               | 0.636029544                           | 0.636029544    | -0.560849708                |              | 1.210912625                           |                  | 0.168344494  |            |            |
|               | 0.926519215                           | 3              | 0                           | 0.998207054  |                                       |                  |              |            |            |
| FBXL19        | ENSG00000099364.16                    | 0.582526164    | 1                           | 1            | 0.582526164                           |                  |              |            |            |
|               | Brain_Nucleus_accumbens_basal_ganglia | 0.582526164    |                             |              |                                       |                  |              |            |            |
|               | Brain_Nucleus_accumbens_basal_ganglia | 1              | 1                           | 1            | 0.549698532                           |                  |              |            |            |
|               | 0.549698532                           | 0.549698532    | NA                          | 1            | 0                                     | 0.998207054      |              |            |            |
| ZFP1          | ENSG00000184517.11                    | 0.582714074    | 13                          | 2            | 0.15914358                            | Brain_Cerebellum |              |            |            |
|               | 0.685465894                           | Brain_Amygdala | 11.05740721                 |              | 0.001267669                           | 1.002769029      |              |            |            |
|               | -1.407957755                          | -0.405015804   | -0.918442088                |              | 0.287623698                           | 2                | 0            |            |            |
|               | 0.998207054                           |                |                             |              |                                       |                  |              |            |            |
| NDUFS7        | ENSG00000115286.19                    | 0.582828747    | 2                           | 1            | 0.511598462                           |                  |              |            |            |
|               | Brain_Cerebellar_Hemisphere           | 0.662939325    |                             |              | Brain_Cerebellum                      | 1.977105289      |              |            |            |
|               | 0.022894711                           | 1.977105289    | -0.656350765                |              | -0.435858599                          |                  | -0.546104682 |            |            |
|               | 0.155911505                           | 1              | 0                           | 0.998207054  |                                       |                  |              |            |            |
| NDUFAF1       | ENSG00000137806.8                     | 0.582832994    | 12                          | 2            | 0.160838177                           |                  |              |            |            |
|               | Brain_Hypothalamus                    | 0.596719006    | Brain_Frontal_Cortex_BA9    | 10.51189992  |                                       |                  |              |            |            |
|               | 0.000477133                           | 0.68592365     | -0.557973581                |              | 1.402258136                           |                  | 0.835354828  |            |            |
|               | 0.488039935                           | 2              | 0                           | 0.998207054  |                                       |                  |              |            |            |
| STEAP1B       | ENSG00000105889.14                    | 0.58305629     | 6                           | 5            | 0.366672416                           |                  |              |            |            |
|               | Brain_Substantia_nigra                | 0.793823841    |                             |              | Brain_Putamen_basal_ganglia           |                  |              |            |            |
|               | 3.659343325                           | 0.119754624    | 0.243750361                 |              | -0.902723962                          |                  | 0.509437497  |            |            |
|               | -0.128480009                          | 0.563743299    | 5                           | 0            | 0.998207054                           |                  |              |            |            |
| PDE4A         | ENSG00000065989.15                    | 0.583069682    | 2                           | 2            | 0.414084539                           |                  |              |            |            |
|               | Brain_Cerebellar_Hemisphere           | 0.481125537    |                             |              | Brain_Cerebellum                      | 1.079285893      |              |            |            |
|               | 0.920714107                           | 0.920714107    | -0.816726859                |              | -0.704493435                          |                  | -0.760610147 |            |            |
|               | 0.079361015                           | 2              | 0                           | 0.998207054  |                                       |                  |              |            |            |
| CRYZL1        | ENSG00000205758.11                    | 0.583071701    | 1                           | 1            | 0.583071701                           |                  |              |            |            |
|               | Brain_Spinal_cord_cervical_c-1        | 0.583071701    |                             |              | Brain_Spinal_cord_cervical_c-1        |                  |              |            |            |
|               | 1                                     | 1              | 1                           | -0.548903464 | -0.548903464                          | -0.548903464     | NA           | 1          | 0          |
|               | 0.998207054                           |                |                             |              |                                       |                  |              |            |            |
| BMS1          | ENSG00000165733.7                     | 0.583080894    | 7                           | 6            | 0.171463927                           |                  |              |            |            |
|               | Brain_Caudate_basal_ganglia           | 0.750498896    |                             |              | Brain_Frontal_Cortex_BA9              |                  |              |            |            |
|               | 4.439600602                           | 0.013636766    | 0.1966973                   |              | 0.317981597                           |                  | 1.367515039  |            |            |
|               | 0.931065548                           | 0.355034536    | 6                           | 0            | 0.998207054                           |                  |              |            |            |
| LA16c-381G6.1 | ENSG00000260532.1                     | 0.583146866    | 1                           | 1            | 0.583146866                           |                  |              |            |            |



|              |                                       |                             |              |                                       |              |                  |
|--------------|---------------------------------------|-----------------------------|--------------|---------------------------------------|--------------|------------------|
|              | Brain_Substantia_nigra                | 0.583146866                 |              | Brain_Substantia_nigra                | 1            | 1                |
| 1            | 0.548793945                           | 0.548793945                 | 0.548793945  | NA                                    | 1            | 0                |
|              | 0.998207054                           |                             |              |                                       |              |                  |
| CEP112       | ENSG00000154240.16                    | 0.583324879                 | 4            | 4                                     | 0.315029621  |                  |
|              | Brain_Spinal_cord_cervical_c-1        | 0.947490584                 |              | Brain_Cortex                          | 1.498497449  |                  |
|              | 0.437606581                           | 0.437606581                 | -1.004724307 | 0.689904604                           | -0.333276945 |                  |
|              | 0.806764087                           | 4                           | 0            | 0.998207054                           |              |                  |
| HAR1A        | ENSG00000225978.3                     | 0.583439921                 | 11           | 11                                    | 0.021721977  |                  |
|              | Brain_Caudate_basal_ganglia           | 0.943467169                 |              | Brain_Nucleus_accumbens_basal_ganglia |              |                  |
|              | 2.090515895                           | 0.348622753                 | 0.348622753  | -2.29519456                           | 1.188175461  |                  |
|              | -0.295703636                          | 1.025581274                 | 11           | 0                                     | 0.998207054  |                  |
| RP4-798A10.4 | ENSG00000224174.2                     | 0.583500146                 | 1            | 1                                     | 0.583500146  |                  |
|              | Brain_Cerebellar_Hemisphere           | 0.583500146                 |              | Brain_Cerebellar_Hemisphere1          | 1            | 1                |
| 1            | -0.54827929                           | -0.54827929                 | -0.54827929  | NA                                    | 1            | 0                |
|              | 0.998207054                           |                             |              |                                       |              |                  |
| PCDHB10      | ENSG00000120324.8                     | 0.58366782                  | 8            | 7                                     | 0.065162189  |                  |
|              | Brain_Caudate_basal_ganglia           | 0.959930833                 |              | Brain_Cerebellum                      | 5.069711001  |                  |
|              | 0.082491932                           | 0.185128434                 | 0.050240381  | 1.844143784                           | 0.741713828  |                  |
|              | 0.547357705                           | 7                           | 0            | 0.998207054                           |              |                  |
| NECAB3       | ENSG00000125967.16                    | 0.583742837                 | 1            | 1                                     | 0.583742837  |                  |
|              | Brain_Cerebellum                      | 0.583742837                 |              | Brain_Cerebellum1                     | 1            | 1                |
|              | 0.547925823                           | 0.547925823                 | NA           | 1                                     | 0            | 0.998207054      |
| WDR31        | ENSG00000148225.15                    | 0.583784404                 | 4            | 3                                     | 0.462845282  |                  |
|              | Brain_Cerebellar_Hemisphere           | 0.919212161                 |              | Brain_Cerebellum                      | 2.792483826  |                  |
|              | 0.023594309                           | 0.358775386                 | -0.367129579 | 0.734169759                           | 0.020090143  |                  |
|              | 0.4888016                             | 3                           | 0            | 0.998207054                           |              |                  |
| CDHR5        | ENSG00000099834.18                    | 0.583942253                 | 1            | 1                                     | 0.583942253  | Brain_Cerebellum |
|              | 0.583942253                           | Brain_Cerebellum1           | 1            | 1                                     | 0.547635435  | 0.547635435      |
|              | 0.547635435                           | NA                          | 1            | 0                                     | 0.998207054  |                  |
| CHIC2        | ENSG00000109220.10                    | 0.583946077                 | 1            | 1                                     | 0.583946077  |                  |
|              | Brain_Putamen_basal_ganglia           | 0.583946077                 |              | Brain_Putamen_basal_ganglia1          | 1            | 1                |
| 1            | -0.547629867                          | -0.547629867                | -0.547629867 | NA                                    | 1            | 0                |
|              | 0.998207054                           |                             |              |                                       |              |                  |
| SIGLEC12     | ENSG00000254521.6                     | 0.583982518                 | 2            | 2                                     | 0.451370405  |                  |
|              | Brain_Hypothalamus                    | 0.804770458                 |              | Brain_Amygdala                        | 1.494705541  |                  |
|              | 0.505294459                           | 0.505294459                 | -0.753132319 | 0.247178016                           | -0.252977151 |                  |
|              | 0.707326221                           | 2                           | 0            | 0.998207054                           |              |                  |
| SAP30        | ENSG00000164105.3                     | 0.583995386                 | 1            | 1                                     | 0.583995386  |                  |
|              | Brain_Hippocampus                     | 0.583995386                 |              | Brain_Hippocampus                     | 1            | 1                |
|              | 0.547558071                           | 0.547558071                 | 0.547558071  | NA                                    | 1            | 0                |
|              | 0.998207054                           |                             |              |                                       |              |                  |
| HAAO         | ENSG00000162882.14                    | 0.584037697                 | 9            | 7                                     | 0.027621865  |                  |
|              | Brain_Caudate_basal_ganglia           | 0.840356972                 |              | Brain_Frontal_Cortex_BA9              |              |                  |
|              | 4.564105108                           | 0.00138308                  | 0.33483163   | 0.20143689                            | 2.202615436  | 1.236188027      |
|              | 0.561551789                           | 7                           | 0            | 0.998207054                           |              |                  |
| NHLRC1       | ENSG00000187566.5                     | 0.584106688                 | 3            | 3                                     | 0.168290885  |                  |
|              | Brain_Nucleus_accumbens_basal_ganglia | 0.952090947                 |              | Brain_Cerebellar_Hemisphere           |              |                  |
|              | 1.563383299                           | 0.428464762                 | 0.428464762  | -0.06008122                           | 1.37771634   |                  |
|              | 0.752079712                           | 0.736823549                 | 3            | 0                                     | 0.998207054  |                  |
| HLA-DPA1     | ENSG00000231389.7                     | 0.584198265                 | 3            | 2                                     | 0.309700007  |                  |
|              | Brain_Nucleus_accumbens_basal_ganglia | 0.771190629                 |              | Brain_Cerebellar_Hemisphere           |              |                  |
|              | 2.349233426                           | 0.008173883                 | 0.64259269   | 0.290817855                           | 1.01585171   |                  |
|              | 0.552890543                           | 0.402101553                 | 2            | 0                                     | 0.998207054  |                  |
| GCC2         | ENSG00000135968.20                    | 0.584300234                 | 4            | 4                                     | 0.19579986   | Brain_Cortex     |
|              | 0.680933211                           | Brain_Cerebellar_Hemisphere | 2.421239012  | 0.082970116                           |              |                  |
|              | 0.082970116                           | 0.411190013                 | 1.293610888  | 0.89534762                            | 0.363663121  | 4                |
|              | 0                                     | 0.998207054                 |              |                                       |              |                  |
| RARS         | ENSG00000113643.8                     | 0.584352636                 | 5            | 4                                     | 0.129643803  |                  |
|              | Brain_Frontal_Cortex_BA9              | 0.40111108                  |              | Brain_Cerebellar_Hemisphere           | 3.875591241  |                  |
|              | 0.024334138                           | 0.140215667                 | -1.515508011 | -0.839638545                          | -1.117406029 |                  |
|              | 0.263476461                           | 4                           | 0            | 0.998207054                           |              |                  |
| ZNF25        | ENSG00000175395.15                    | 0.584387092                 | 12           | 3                                     | 0.175056838  |                  |
|              | Brain_Cerebellar_Hemisphere           | 0.688035351                 |              | Brain_Caudate_basal_ganglia           |              |                  |

|          |                                       |                  |              |                                       |              |             |                  |             |  |
|----------|---------------------------------------|------------------|--------------|---------------------------------------|--------------|-------------|------------------|-------------|--|
|          | 9.464197499                           | 0.005180713      | 0.48593517   | 0.40152267                            | 1.356133053  |             |                  |             |  |
|          | 0.753381367                           | 0.309626427      | 3            | 0                                     | 0.998207054  |             |                  |             |  |
| ENHO     | ENSG00000168913.6                     | 0.584593892      | 1            | 1                                     | 0.584593892  |             |                  |             |  |
|          | Brain_Hypothalamus                    | 0.584593892      |              | Brain_Hypothalamus                    | 1            | 1           | 1                |             |  |
|          | 0.546686847                           | 0.546686847      | 0.546686847  | NA                                    | 1            | 0           | 0.998207054      |             |  |
| SCCPDH   | ENSG00000143653.9                     | 0.584613701      | 2            | 2                                     | 0.325422053  |             |                  |             |  |
|          | Brain_Nucleus_accumbens_basal_ganglia | 0.362251527      |              | Brain_Frontal_Cortex_BA9              |              |             |                  |             |  |
|          | 1.684449819                           | 0.315550181      | 0.315550181  | -0.983376742                          | -0.911083219 |             |                  |             |  |
|          | -0.947229981                          | 0.05111924       | 2            | 0                                     | 0.998207054  |             |                  |             |  |
| DCUN1D4  | ENSG00000109184.14                    | 0.584671029      | 3            | 3                                     | 0.201062938  |             |                  |             |  |
|          | Brain_Spinal_cord_cervical_c-1        | 0.7922502        |              | Brain_Nucleus_accumbens_basal_ganglia |              |             |                  |             |  |
|          | 1.851761151                           | 0.175869689      | 0.175869689  | -0.263389737                          | 1.27852908   |             |                  |             |  |
|          | 0.688994303                           | 0.832540149      | 3            | 0                                     | 0.998207054  |             |                  |             |  |
| PRR4     | ENSG00000111215.11                    | 0.5846963        | 13           | 4                                     | 0.199190649  |             |                  |             |  |
|          | Brain_Substantia_nigra                | 0.973378297      |              | Brain_Spinal_cord_cervical_c-1        |              |             |                  |             |  |
|          | 9.911328976                           | 0.002575267      | 0.373458168  | -0.18385551                           | 1.283860846  |             |                  |             |  |
|          | 0.24832101                            | 0.388259022      | 4            | 0                                     | 0.998207054  |             |                  |             |  |
| MTG2     | ENSG00000101181.17                    | 0.584717553      | 9            | 6                                     | 0.192531684  |             |                  |             |  |
|          | Brain_Cerebellar_Hemisphere           | 0.890611712      |              | Brain_Spinal_cord_cervical_c-1        |              |             |                  |             |  |
|          | 4.694115143                           | 0.070002447      | 0.246908692  | -1.303126188                          | 0.896004116  |             |                  |             |  |
|          | -0.429675206                          | 0.82490048       | 6            | 0                                     | 0.998207054  |             |                  |             |  |
| TMEFF2   | ENSG00000144339.11                    | 0.58479258       | 1            | 1                                     | 0.58479258   |             | Brain_Cerebellum |             |  |
|          | 0.58479258                            | Brain_Cerebellum | 1            | 1                                     | 0.546397715  | 0.546397715 |                  |             |  |
|          | 0.546397715                           | NA               | 1            | 0                                     | 0.998207054  |             |                  |             |  |
| MTHFD1L  | ENSG00000120254.15                    | 0.584795768      | 4            | 4                                     | 0.23737588   |             |                  |             |  |
|          | Brain_Hypothalamus                    | 0.606306803      |              | Brain_Putamen_basal_ganglia           | 1.464023667  |             |                  |             |  |
|          | 0.672161811                           | 0.672161811      | -1.181571218 | 0.565040307                           | -0.196909295 |             |                  |             |  |
|          | 0.875043153                           | 4                | 0            | 0.998207054                           |              |             |                  |             |  |
| POLR3E   | ENSG00000058600.15                    | 0.584801249      | 1            | 1                                     | 0.584801249  |             |                  |             |  |
|          | Brain_Caudate_basal_ganglia           | 0.584801249      |              | Brain_Caudate_basal_ganglia           | 1            | 1           |                  |             |  |
|          | 1                                     | -0.546385101     | -0.546385101 | -0.546385101                          | NA           | 1           | 0                |             |  |
|          | 0.998207054                           |                  |              |                                       |              |             |                  |             |  |
| HHIPL2   | ENSG00000143512.12                    | 0.584875984      | 3            | 3                                     | 0.375303733  |             |                  |             |  |
|          | Brain_Amygdala                        | 0.589354478      |              | Brain_Cerebellar_Hemisphere           | 2.084694145  |             |                  |             |  |
|          | 0.292983222                           | 0.292983222      | -0.886582474 | 0.539771712                           | -0.329427323 |             |                  |             |  |
|          | 0.762659888                           | 3                | 0            | 0.998207054                           |              |             |                  |             |  |
| NR1I2    | ENSG00000144852.17                    | 0.584881277      | 1            | 1                                     | 0.584881277  |             |                  |             |  |
|          | Brain_Hypothalamus                    | 0.584881277      |              | Brain_Hypothalamus                    | 1            | 1           | 1                |             |  |
|          | 0.546268659                           | 0.546268659      | 0.546268659  | NA                                    | 1            | 0           | 0.998207054      |             |  |
| EP400NL  | ENSG00000185684.12                    | 0.58493154       | 13           | 5                                     | 0.111632039  |             |                  |             |  |
|          | Brain_Frontal_Cortex_BA9              | 0.971223539      |              | Brain_Cortex                          | 9.148359269  |             |                  |             |  |
|          | 0.007556495                           | 0.324895829      | -1.590900192 | -0.036073768                          | -0.751248613 |             |                  |             |  |
|          | 0.555700093                           | 5                | 0            | 0.998207054                           |              |             |                  |             |  |
| BCL11B   | ENSG00000127152.17                    | 0.585002999      | 1            | 1                                     | 0.585002999  |             |                  |             |  |
|          | Brain_Caudate_basal_ganglia           | 0.585002999      |              | Brain_Caudate_basal_ganglia           | 1            | 1           |                  |             |  |
|          | 1                                     | -0.546091563     | -0.546091563 | -0.546091563                          | NA           | 1           | 0                |             |  |
|          | 0.998207054                           |                  |              |                                       |              |             |                  |             |  |
| SLC25A25 | ENSG00000148339.12                    | 0.585055014      | 1            | 1                                     | 0.585055014  |             |                  |             |  |
|          | Brain_Caudate_basal_ganglia           | 0.585055014      |              | Brain_Caudate_basal_ganglia           | 1            | 1           |                  |             |  |
|          | 1                                     | 0.54601589       | 0.54601589   | 0.54601589                            | NA           | 1           | 0                | 0.998207054 |  |
| RBPJ     | ENSG00000168214.20                    | 0.585059023      | 2            | 2                                     | 0.348021917  |             |                  |             |  |
|          | Brain_Putamen_basal_ganglia           | 0.557495634      |              | Brain_Caudate_basal_ganglia           |              |             |                  |             |  |
|          | 1.165225832                           | 0.834774168      | 0.834774168  | 0.586565388                           | 0.938433032  |             |                  |             |  |
|          | 0.76249921                            | 0.248807997      | 2            | 0                                     | 0.998207054  |             |                  |             |  |
| TRIP11   | ENSG00000100815.12                    | 0.585078287      | 2            | 2                                     | 0.378065663  |             |                  |             |  |
|          | Brain_Cerebellum                      | 0.674125593      |              | Brain_Amygdala                        | 1.133649424  | 0.866350576 |                  |             |  |
|          | 0.866350576                           | -0.881465973     | -0.420492656 | -0.650979315                          | 0.325957358  |             |                  |             |  |
|          | 2                                     | 0                | 0.998207054  |                                       |              |             |                  |             |  |
| DSCAM    | ENSG00000171587.14                    | 0.585160564      | 2            | 2                                     | 0.332245166  |             |                  |             |  |
|          | Brain_Cerebellar_Hemisphere           | 0.6808626        |              | Brain_Hypothalamus                    | 1.050502226  |             |                  |             |  |
|          | 0.949497774                           | 0.949497774      | -0.969601499 | -0.41128632                           | -0.690443909 |             |                  |             |  |
|          | 0.394788449                           | 2                | 0            | 0.998207054                           |              |             |                  |             |  |

|                |                                       |              |                             |              |              |                                      |              |              |
|----------------|---------------------------------------|--------------|-----------------------------|--------------|--------------|--------------------------------------|--------------|--------------|
| UHRF1BP1       | ENSG00000065060.16                    | 0.585226498  | 12                          | 2            | 0.339900677  |                                      |              |              |
|                | Brain_Amygdala                        | 0.935282699  |                             |              |              | Brain_Anterior_cingulate_cortex_BA24 |              |              |
|                | 10.84225336                           | 0.000261953  | 0.603253845                 |              | -0.95436152  |                                      | 0.245893231  |              |
|                | -0.363045064                          | 0.308548967  | 2                           | 0            | 0.998207054  |                                      |              |              |
| LINC00327      | ENSG00000232977.6                     | 0.585240328  | 3                           | 3            | 0.166740505  |                                      |              |              |
|                | Brain_Frontal_Cortex_BA9              | 0.886683347  |                             |              |              | Brain_Putamen_basal_ganglia          |              |              |
|                | 1.113418263                           | 0.89225726   | 0.89225726                  | -1.382753358 | -0.142502193 |                                      |              |              |
|                | -0.601274344                          | 0.680191537  | 3                           | 0            | 0.998207054  |                                      |              |              |
| TMIE           | ENSG00000181585.3                     | 0.585248813  | 2                           | 2            | 0.356598364  |                                      |              |              |
|                | Brain_Nucleus_accumbens_basal_ganglia | 0.571709568  |                             |              |              | Brain_Frontal_Cortex_BA9             |              |              |
|                | 1.105686489                           | 0.894313511  | 0.894313511                 | -0.565535525 | 0.921866215  |                                      |              |              |
|                | 0.178165345                           | 1.051751857  | 2                           | 0            | 0.998207054  |                                      |              |              |
| TBL1XR1        | ENSG00000177565.16                    | 0.585483794  | 4                           | 4            | 0.265354333  |                                      |              |              |
|                | Brain_Amygdala                        | 0.760600819  |                             |              |              | Brain_Caudate_basal_ganglia          | 1.202582147  |              |
|                | 0.874274993                           | 0.874274993  | -1.113824852                |              | 0.955830145  |                                      | 0.221876054  |              |
|                | 0.930758353                           | 4            | 0                           | 0.998207054  |              |                                      |              |              |
| FAM193A        | ENSG00000125386.15                    | 0.585570479  | 1                           | 1            | 0.585570479  |                                      |              |              |
|                | Brain_Hypothalamus                    | 0.585570479  |                             |              |              | Brain_Hypothalamus                   | 1            | 1            |
|                | 0.545266153                           | 0.545266153  | 0.545266153                 | NA           | 1            | 0                                    | 0.998207054  |              |
| SCART1         | ENSG00000214279.13                    | 0.585612003  | 12                          | 5            | 0.301412377  |                                      |              |              |
|                | Brain_Cerebellum                      | 0.84762407   | Brain_Caudate_basal_ganglia | 8.343480749  |              |                                      |              |              |
|                | 0.007289603                           | 0.30146297   | -1.033409341                |              | 0.368028326  |                                      | -0.259373809 |              |
|                | 0.440866618                           | 5            | 0                           | 0.998207054  |              |                                      |              |              |
| DMAP1          | ENSG00000178028.13                    | 0.585643803  | 2                           | 2            | 0.318244545  |                                      |              |              |
|                | Brain_Frontal_Cortex_BA9              | 0.467501252  |                             |              |              | Brain_Cortex                         | 1.86476795   | 0.13523205   |
|                | 0.13523205                            | 0.726550678  | 0.998071796                 |              | 0.862311237  |                                      | 0.191994423  | 2            |
|                | 0                                     | 0.998207054  |                             |              |              |                                      |              |              |
| CTD-2561B21.11 | ENSG00000262873.1                     | 0.585672838  | 4                           | 4            | 0.220916633  |                                      |              |              |
|                | Brain_Putamen_basal_ganglia           | 0.69545824   | Brain_Frontal_Cortex_BA9    | 1.256365695  |              |                                      |              |              |
|                | 0.808461721                           | 0.808461721  | -1.22409436                 |              | 0.690843046  |                                      | -0.220433841 |              |
|                | 0.909589999                           | 4            | 0                           | 0.998207054  |              |                                      |              |              |
| GTF3A          | ENSG00000122034.14                    | 0.585733316  | 5                           | 5            | 0.208596608  |                                      |              |              |
|                | Brain_Spinal_cord_cervical_c-1        | 0.747143145  |                             |              |              | Brain_Putamen_basal_ganglia          |              |              |
|                | 2.171309254                           | 0.445645293  | 0.445645293                 | -0.678257804 | 1.257433769  |                                      |              |              |
|                | 0.034618266                           | 0.829654915  | 5                           | 0            | 0.998207054  |                                      |              |              |
| RP11-546K22.3  | ENSG00000272024.1                     | 0.585734773  | 1                           | 1            | 0.585734773  |                                      |              |              |
|                | Brain_Hippocampus                     | 0.585734773  |                             |              |              | Brain_Hippocampus                    | 1            | 1            |
|                | 0.545027254                           | 0.545027254  | 0.545027254                 | NA           | 1            | 0                                    | 0.998207054  |              |
| SPATA2         | ENSG00000158480.10                    | 0.58573691   | 2                           | 2            | 0.322223199  |                                      |              |              |
|                | Brain_Cerebellar_Hemisphere           | 1.661466865  |                             |              |              | Brain_Cerebellum                     |              |              |
|                | 0.379069041                           | -0.989899591 | -0.879612914                |              | -0.934756253 |                                      | 0.338533135  |              |
|                | 0.338533135                           |              |                             |              |              |                                      | 0.077984457  |              |
|                | 2                                     | 0            | 0.998207054                 |              |              |                                      |              |              |
| HACD2          | ENSG00000206527.9                     | 0.585747915  | 2                           | 2            | 0.361550787  |                                      |              |              |
|                | Brain_Hypothalamus                    | 0.730682159  |                             |              |              | Brain_Substantia_nigra               |              | 1.737673543  |
|                | 0.262326457                           | 0.262326457  | 0.344218249                 |              | 0.912414068  |                                      | 0.628316158  |              |
|                | 0.401775116                           | 2            | 0                           | 0.998207054  |              |                                      |              |              |
| SLC35G6        | ENSG00000259224.2                     | 0.585767927  | 1                           | 1            | 0.585767927  |                                      |              |              |
|                | Brain_Caudate_basal_ganglia           | 0.585767927  |                             |              |              | Brain_Caudate_basal_ganglia          | 1            | 1            |
|                | 1                                     | -0.54497905  | -0.54497905                 | -0.54497905  | NA           | 1                                    | 0            |              |
|                | 0.998207054                           |              |                             |              |              |                                      |              |              |
| RP11-834C11.4  | ENSG00000250742.2                     | 0.585782076  | 1                           | 1            | 0.585782076  |                                      |              |              |
|                | Brain_Cerebellum                      | 0.585782076  |                             |              |              | Brain_Cerebellum                     | 1            | 1            |
|                | 0.544958477                           | 0.544958477  | NA                          | 1            | 0            | 0.998207054                          |              |              |
| RP11-576D8.4   | ENSG00000224717.1                     | 0.585919703  | 1                           | 1            | 0.585919703  |                                      |              |              |
|                | Brain_Cerebellum                      | 0.585919703  |                             |              |              | Brain_Cerebellum                     | 1            | 1            |
|                | -0.544758386                          | -0.544758386 | NA                          | 1            | 0            | 0.998207054                          |              | -0.544758386 |
| AF064860.7     | ENSG00000231713.2                     | 0.585932865  | 3                           | 3            | 0.382819343  |                                      |              |              |
|                | Brain_Nucleus_accumbens_basal_ganglia | 0.917117256  |                             |              |              | Brain_Caudate_basal_ganglia          |              |              |
|                | 2.000020305                           | 0.341077689  | 0.341077689                 | -0.872713343 | 0.36623636   |                                      |              |              |
|                | -0.134137113                          | 0.652919984  | 3                           | 0            | 0.998207054  |                                      |              |              |
| FRMD5          | ENSG00000171877.20                    | 0.586026907  | 1                           | 1            | 0.586026907  |                                      |              |              |
|                | Brain_Caudate_basal_ganglia           | 0.586026907  |                             |              |              | Brain_Caudate_basal_ganglia          | 1            | 1            |

|                                       |                                       |                                      |              |              |              |                             |
|---------------------------------------|---------------------------------------|--------------------------------------|--------------|--------------|--------------|-----------------------------|
| 1                                     | -0.544602541                          | -0.544602541                         | -0.544602541 | NA           | 1            | 0                           |
| 0.998207054                           |                                       |                                      |              |              |              |                             |
| SPATA22                               | ENSG00000141255.12                    | 0.586185461                          | 4            | 4            | 0.133359526  |                             |
| Brain_Nucleus_accumbens_basal_ganglia | 0.945066323                           | Brain_Substantia_nigra               |              |              |              |                             |
| 1.34336772                            | 0.713578004                           | 0.713578004                          | 0.068903638  | 1.500984673  |              |                             |
| 0.616657281                           | 0.631877968                           | 4                                    | 0            | 0.998207054  |              |                             |
| METTL5                                | ENSG00000138382.14                    | 0.58621873                           | 2            | 2            | 0.469673486  |                             |
| Brain_Anterior_cingulate_cortex_BA24  | 0.797597817                           | Brain_Cerebellum                     |              |              |              |                             |
| 1.518615918                           | 0.481384082                           | 0.481384082                          | -0.256457211 | 0.723010415  |              |                             |
| 0.233276602                           | 0.6925882                             | 2                                    | 0            | 0.998207054  |              |                             |
| DLG4                                  | ENSG00000132535.18                    | 0.586330175                          | 3            | 3            | 0.209254424  |                             |
| Brain_Hippocampus                     | 0.846730138                           | Brain_Cortex                         | 1.205814275  |              |              |                             |
| 0.790013693                           | 0.790013693                           | -1.255618215                         | -0.193292196 | -0.753890244 |              |                             |
| 0.533604167                           | 3                                     | 0                                    | 0.998207054  |              |              |                             |
| SDR16C5                               | ENSG00000170786.12                    | 0.586330487                          | 5            | 5            | 0.20837236   |                             |
| Brain_Frontal_Cortex_BA9              | 0.87947513                            | Brain_Putamen_basal_ganglia          | 2.332489173  |              |              |                             |
| 0.357512987                           | 0.357512987                           | -1.001112224                         | 1.258053634  | 0.071266695  |              |                             |
| 0.846601994                           | 5                                     | 0                                    | 0.998207054  |              |              |                             |
| PLEKHD1                               | ENSG00000175985.9                     | 0.58633867                           | 3            | 3            | 0.254957733  |                             |
| Brain_Caudate_basal_ganglia           | 0.579198226                           | Brain_Frontal_Cortex_BA9             |              |              |              |                             |
| 1.064090798                           | 0.946897295                           | 0.946897295                          | -1.138389843 | -0.554556242 |              |                             |
| -0.750120242                          | 0.336254376                           | 3                                    | 0            | 0.998207054  |              |                             |
| C19orf53                              | ENSG00000104979.8                     | 0.586347353                          | 10           | 2            | 0.302385997  |                             |
| Brain_Cerebellum                      | 0.5920125                             | Brain_Anterior_cingulate_cortex_BA24 | 9.279525572  |              |              |                             |
| 5.48E-08                              | 0.484966125                           | -1.031330209                         | -0.535921941 | -0.692643408 |              |                             |
| 0.134699554                           | 2                                     | 0                                    | 0.998207054  |              |              |                             |
| DMXL2                                 | ENSG00000104093.13                    | 0.586556351                          | 2            | 2            | 0.632272136  | Brain_Cerebellum            |
| 0.735157541                           | Brain_Cerebellar_Hemisphere           | 1.685635055                          | 0.314364945  |              |              |                             |
| 0.314364945                           | -0.338272904                          | 0.478531252                          | 0.070129174  | 0.577567757  |              |                             |
| 2                                     | 0                                     | 0.998207054                          |              |              |              |                             |
| RBFA                                  | ENSG00000101546.12                    | 0.58658852                           | 5            | 3            | 0.20700607   | Brain_Cerebellar_Hemisphere |
| 0.896928321                           | Brain_Nucleus_accumbens_basal_ganglia | 2.713061217                          |              |              |              |                             |
| 0.019967909                           | 0.487885466                           | 0.129542597                          | 1.26184082   | 0.798743254  |              |                             |
| 0.443626031                           | 3                                     | 0                                    | 0.998207054  |              |              |                             |
| RP4-669P10.20                         | ENSG00000281538.1                     | 0.586728006                          | 11           | 3            | 0.159469388  |                             |
| Brain_Caudate_basal_ganglia           | 0.787543977                           | Brain_Hippocampus                    | 9.442917497  |              |              |                             |
| 0.003024301                           | 0.439435558                           | 0.269501254                          | 1.406858378  | 0.957678058  |              |                             |
| 0.359257338                           | 3                                     | 0                                    | 0.998207054  |              |              |                             |
| BRDT                                  | ENSG00000137948.18                    | 0.586748962                          | 1            | 1            | 0.586748962  |                             |
| Brain_Putamen_basal_ganglia           | 0.586748962                           | Brain_Putamen_basal_ganglia          | 1            | 1            |              |                             |
| 1                                     | 0.543553215                           | 0.543553215                          | 0.543553215  | NA           | 1            | 0                           |
| 0.998207054                           |                                       |                                      |              |              |              |                             |
| GLT8D1                                | ENSG00000016864.18                    | 0.586862186                          | 1            | 1            | 0.586862186  |                             |
| Brain_Amygdala                        | 0.586862186                           | Brain_Amygdala                       | 1            | 1            | 1            | 0.543388727                 |
| 0.543388727                           | 0.543388727                           | NA                                   | 1            | 0            | 0.998207054  |                             |
| ACAT2                                 | ENSG00000120437.8                     | 0.586894603                          | 2            | 2            | 0.368446121  |                             |
| Brain_Putamen_basal_ganglia           | 0.593171361                           | Brain_Spinal_cord_cervical_c-1       |              |              |              |                             |
| 1.030699271                           | 0.969300729                           | 0.969300729                          | -0.53424598  | 0.899387826  |              |                             |
| 0.182570923                           | 1.013732186                           | 2                                    | 0            | 0.998207054  |              |                             |
| NTAN1                                 | ENSG00000157045.8                     | 0.586998546                          | 5            | 5            | 0.401887385  |                             |
| Brain_Frontal_Cortex_BA9              | 0.932842566                           | Brain_Cerebellum                     | 2.764542021  |              |              |                             |
| 0.173137663                           | 0.173137663                           | -0.497200792                         | 0.83825521   | 0.070554356  |              |                             |
| 0.503442708                           | 5                                     | 0                                    | 0.998207054  |              |              |                             |
| CAMKK1                                | ENSG00000004660.14                    | 0.587182185                          | 2            | 2            | 0.335137102  |                             |
| Brain_Cerebellar_Hemisphere           | 0.51373057                            | Brain_Cerebellum                     | 1.314482857  |              |              |                             |
| 0.685517143                           | 0.685517143                           | -0.963818156                         | -0.653039878 | -0.808429017 |              |                             |
| 0.219753428                           | 2                                     | 0                                    | 0.998207054  |              |              |                             |
| EDIL3                                 | ENSG00000164176.12                    | 0.587206931                          | 1            | 1            | 0.587206931  | Brain_Cerebellum            |
| 0.587206931                           | Brain_Cerebellum                      | 1                                    | 1            | 1            | -0.542887981 | -0.542887981                |
| -0.542887981                          | NA                                    | 1                                    | 0            | 0.998207054  |              |                             |
| LINC01664                             | ENSG00000235478.4                     | 0.587266249                          | 10           | 4            | 0.203101765  |                             |
| Brain_Cerebellar_Hemisphere           | 0.960344705                           | Brain_Hypothalamus                   | 6.801871533  |              |              |                             |

|               |                                       |              |              |              |                                      |              |             |   |
|---------------|---------------------------------------|--------------|--------------|--------------|--------------------------------------|--------------|-------------|---|
|               | 0.000389867                           | 0.845892477  | -1.272764098 | 0.417659651  | -0.179544495                         |              |             |   |
|               | 0.553859662                           | 4            | 0            | 0.998207054  |                                      |              |             |   |
| ALKAL2        | ENSG00000189292.15                    | 0.587358615  | 2            | 2            | 0.310615947                          |              |             |   |
|               | Brain_Caudate_basal_ganglia           | 0.983559597  |              |              | Brain_Spinal_cord_cervical_c-1       |              |             |   |
|               | 1.16472269                            | 0.83527731   | 0.83527731   | -1.013930436 | 0.020606448                          | -0.496661994 |             |   |
|               | 0.731528046                           | 2            | 0            | 0.998207054  |                                      |              |             |   |
| RP11-108L7.15 | ENSG00000273162.1                     | 0.5875374    | 1            | 1            | 0.5875374                            |              |             |   |
|               | Brain_Substantia_nigra                | 0.5875374    |              |              | Brain_Substantia_nigra               | 1            | 1           | 1 |
|               | 0.542408102                           | 0.542408102  | 0.542408102  | NA           | 1                                    | 0            | 0.998207054 |   |
| PABPC1L       | ENSG00000101104.12                    | 0.587579933  | 9            | 1            | 0.516408918                          |              |             |   |
|               | Brain_Hippocampus                     | 0.743535837  |              |              | Brain_Amygdala                       | 8.688645385  | 5.00E-05    |   |
|               | 8.688645385                           | -0.648890867 | -0.327174592 | -0.530791407 | 0.117335628                          |              |             |   |
|               | 1                                     | 0            | 0.998207054  |              |                                      |              |             |   |
| HHEX          | ENSG00000152804.10                    | 0.587627732  | 1            | 1            | 0.587627732                          |              |             |   |
|               | Brain_Nucleus_accumbens_basal_ganglia | 0.587627732  |              |              |                                      |              |             |   |
|               | Brain_Nucleus_accumbens_basal_ganglia | 1            | 1            | 1            | 0.542276951                          |              |             |   |
|               | 0.542276951                           | 0.542276951  | NA           | 1            | 0                                    | 0.998207054  |             |   |
| ALOX15B       | ENSG00000179593.15                    | 0.587662198  | 2            | 2            | 0.313788791                          |              |             |   |
|               | Brain_Spinal_cord_cervical_c-1        | 0.696617337  |              |              | Brain_Cortex                         | 1.171575614  |             |   |
|               | 0.828424386                           | 0.828424386  | -1.007303828 | -0.389890747 | -0.698597287                         |              |             |   |
|               | 0.436576977                           | 2            | 0            | 0.998207054  |                                      |              |             |   |
| SAMD12        | ENSG00000177570.13                    | 0.587775756  | 1            | 1            | 0.587775756                          |              |             |   |
|               | Brain_Cerebellar_Hemisphere           | 0.587775756  |              |              | Brain_Cerebellar_Hemisphere          | 1            | 1           |   |
|               | 1                                     | 0.542062058  | 0.542062058  | 0.542062058  | NA                                   | 1            | 0           |   |
|               | 0.998207054                           |              |              |              |                                      |              |             |   |
| MRPS9         | ENSG00000135972.8                     | 0.587796889  | 13           | 1            | 0.133163291                          |              |             |   |
|               | Brain_Anterior_cingulate_cortex_BA24  | 0.989560151  |              |              |                                      |              |             |   |
|               | Brain_Nucleus_accumbens_basal_ganglia | 11.38712525  |              |              | 2.70E-05                             | 11.38712525  |             |   |
|               | -1.501743784                          | 0.186664339  | -0.499735566 | 0.420303988  | 1                                    | 0            |             |   |
|               | 0.998207054                           |              |              |              |                                      |              |             |   |
| SESTD1        | ENSG00000187231.13                    | 0.587925776  | 3            | 3            | 0.234697187                          |              |             |   |
|               | Brain_Cerebellar_Hemisphere           | 0.668524788  |              |              | Brain_Spinal_cord_cervical_c-1       |              |             |   |
|               | 1.786729661                           | 0.251284847  | 0.251284847  | -1.188345835 | 0.428173528                          |              |             |   |
|               | -0.441943216                          | 0.81532975   | 3            | 0            | 0.998207054                          |              |             |   |
| HSPA12B       | ENSG00000132622.10                    | 0.587949947  | 3            | 3            | 0.176659242                          |              |             |   |
|               | Brain_Substantia_nigra                | 0.861613749  |              |              | Brain_Caudate_basal_ganglia          |              |             |   |
|               | 1.155235876                           | 0.845451373  | 0.845451373  | -1.351112988 | 0.295830141                          |              |             |   |
|               | -0.409867714                          | 0.848361572  | 3            | 0            | 0.998207054                          |              |             |   |
| AXL           | ENSG00000167601.11                    | 0.588194189  | 5            | 5            | 0.240871189                          |              |             |   |
|               | Brain_Hypothalamus                    | 0.892440142  |              |              | Brain_Hippocampus                    | 2.668812949  |             |   |
|               | 0.135115462                           | 0.135115462  | -1.025307688 | 1.17281204   | 0.220524831                          |              |             |   |
|               | 0.870554902                           | 5            | 0            | 0.998207054  |                                      |              |             |   |
| PDK1          | ENSG00000152256.13                    | 0.588238663  | 3            | 3            | 0.338974539                          |              |             |   |
|               | Brain_Cerebellum                      |              |              |              |                                      |              |             |   |
|               | 0.922341405                           | Brain_Cortex | 2.380511741  | 0.25780152   | 0.25780152                           |              |             |   |
|               | -0.097484799                          | 0.95619339   | 0.399327644  | 0.529399878  | 3                                    | 0            |             |   |
|               | 0.998207054                           |              |              |              |                                      |              |             |   |
| SGMS1         | ENSG00000198964.13                    | 0.588359066  | 1            | 1            | 0.588359066                          |              |             |   |
|               | Brain_Hippocampus                     | 0.588359066  |              |              | Brain_Hippocampus                    | 1            | 1           | 1 |
|               | -0.541215484                          | -0.541215484 | -0.541215484 | NA           | 1                                    | 0            | 0.998207054 |   |
| TECTA         | ENSG00000109927.9                     | 0.588554917  | 1            | 1            | 0.588554917                          |              |             |   |
|               | Brain_Substantia_nigra                | 0.588554917  |              |              | Brain_Substantia_nigra               | 1            | 1           |   |
|               | 1                                     | -0.540931328 | -0.540931328 | -0.540931328 | NA                                   | 1            | 0           |   |
|               | 0.998207054                           |              |              |              |                                      |              |             |   |
| ABCC8         | ENSG00000006071.12                    | 0.588647976  | 9            | 7            | 0.057082786                          |              |             |   |
|               | Brain_Cerebellar_Hemisphere           | 0.713489051  |              |              | Brain_Anterior_cingulate_cortex_BA24 |              |             |   |
|               | 5.170466865                           | 0.060287083  | 0.192064043  | -0.945325195 | 1.902676381                          |              |             |   |
|               | 0.768579997                           | 0.833558366  | 7            | 0            | 0.998207054                          |              |             |   |
| RP11-462B18.2 | ENSG00000231193.1                     | 0.588979341  | 2            | 2            | 0.31204198                           |              |             |   |
|               | Brain_Frontal_Cortex_BA9              | 0.93436473   |              |              | Brain_Substantia_nigra               | 1.106986784  |             |   |
|               | 0.893013216                           | 0.893013216  | -1.010946618 | 0.082354609  | -0.464296005                         |              |             |   |
|               | 0.773080712                           | 2            | 0            | 0.998207054  |                                      |              |             |   |
| ASGR2         | ENSG00000161944.16                    | 0.589020587  | 2            | 2            | 0.308826248                          |              |             |   |

|           |                                       |                                |                                      |              |              |             |                  |  |
|-----------|---------------------------------------|--------------------------------|--------------------------------------|--------------|--------------|-------------|------------------|--|
|           | Brain_Putamen_basal_ganglia           | 0.87535149                     | Brain_Hypothalamus                   | 1.005445118  |              |             |                  |  |
|           | 0.994554882                           | 0.994554882                    | -1.017688008                         | -0.156864688 | -0.587276348 |             |                  |  |
|           | 0.608694007                           | 2                              | 0                                    | 0.998207054  |              |             |                  |  |
| LSG1      | ENSG00000041802                       | 10                             | 0.589250423                          | 13           | 1            | 0.238861946 |                  |  |
|           | Brain_Nucleus_accumbens_basal_ganglia | 0.949756566                    | Brain_Caudate_basal_ganglia          |              |              |             |                  |  |
|           | 12.10634973                           | 0.000628164                    | 12.10634973                          | -0.063012481 | 1.177836118  |             |                  |  |
|           | 0.526019159                           | 0.301078536                    | 1                                    | 0            | 0.998207054  |             |                  |  |
| LRIT3     | ENSG00000183423                       | 11                             | 0.589316181                          | 3            | 3            | 0.169262231 | Brain_Cerebellum |  |
|           | 0.363963068                           | Brain_Frontal_Cortex_BA9       | 2.268167783                          | 0.186998501  |              |             |                  |  |
|           | 0.186998501                           | -1.374578263                   | -0.907839419                         | -1.144852196 | 0.233454726  |             |                  |  |
|           | 3                                     | 0                              | 0.998207054                          |              |              |             |                  |  |
| CCRL2     | ENSG00000121797                       | 9                              | 0.589422762                          | 1            | 1            | 0.589422762 |                  |  |
|           | Brain_Hypothalamus                    | 0.589422762                    | Brain_Hypothalamus                   | 1            | 1            | 1           |                  |  |
|           | -0.539672712                          | -0.539672712                   | -0.539672712                         | NA           | 1            | 0           | 0.998207054      |  |
| DNAJC27   | ENSG00000115137                       | 11                             | 0.589496096                          | 2            | 2            | 0.305315532 |                  |  |
|           | Brain_Frontal_Cortex_BA9              | 0.446474076                    | Brain_Anterior_cingulate_cortex_BA24 |              |              |             |                  |  |
|           | 1.789580396                           | 0.210419604                    | 0.210419604                          | -1.025101003 | -0.761306404 |             |                  |  |
|           | -0.893203703                          | 0.18653095                     | 2                                    | 0            | 0.998207054  |             |                  |  |
| ABCB6     | ENSG00000115657                       | 12                             | 0.589513861                          | 2            | 2            | 0.339849212 |                  |  |
|           | Brain_Cerebellar_Hemisphere           | 0.593621719                    | Brain_Cerebellum                     | 1.799464673  |              |             |                  |  |
|           | 0.200535327                           | 0.200535327                    | -0.954463233                         | -0.533595071 | -0.744029152 |             |                  |  |
|           | 0.297598731                           | 2                              | 0                                    | 0.998207054  |              |             |                  |  |
| FIBIN     | ENSG00000176971                       | 13                             | 0.589649321                          | 1            | 1            | 0.589649321 |                  |  |
|           | Brain_Cerebellar_Hemisphere           | 0.589649321                    | Brain_Cerebellar_Hemisphere          | 1            | 1            |             |                  |  |
|           | 1                                     | -0.53934428                    | -0.53934428                          | -0.53934428  | NA           | 1           | 0                |  |
|           | 0.998207054                           |                                |                                      |              |              |             |                  |  |
| PRDX3     | ENSG00000165672                       | 6                              | 0.589723751                          | 2            | 2            | 0.315986471 |                  |  |
|           | Brain_Nucleus_accumbens_basal_ganglia | 0.838654985                    | Brain_Cerebellar_Hemisphere          |              |              |             |                  |  |
|           | 1.021475458                           | 0.978524542                    | 0.978524542                          | -1.002739698 | 0.203614214  |             |                  |  |
|           | -0.399562742                          | 0.853021032                    | 2                                    | 0            | 0.998207054  |             |                  |  |
| EFR3B     | ENSG00000084710                       | 13                             | 0.589885186                          | 1            | 1            | 0.589885186 |                  |  |
|           | Brain_Caudate_basal_ganglia           | 0.589885186                    | Brain_Caudate_basal_ganglia          | 1            | 1            |             |                  |  |
|           | 1                                     | 0.539002419                    | 0.539002419                          | 0.539002419  | NA           | 1           | 0                |  |
|           | 0.998207054                           |                                |                                      |              |              |             |                  |  |
| RP11-408A | 13.3                                  | ENSG00000273399                | 2                                    | 0.589891074  | 5            | 5           | 0.069519302      |  |
|           | Brain_Cerebellar_Hemisphere           | 0.683338747                    | Brain_Cerebellum                     | 2.719391973  |              |             |                  |  |
|           | 0.159991362                           | 0.159991362                    | -1.815029981                         | -0.407911367 | -1.130846449 |             |                  |  |
|           | 0.51632765                            | 5                              | 0                                    | 0.998207054  |              |             |                  |  |
| BMF       | ENSG00000104081                       | 13                             | 0.590163741                          | 3            | 3            | 0.180237322 |                  |  |
|           | Brain_Caudate_basal_ganglia           | 0.785075554                    | Brain_Cortex                         | 1.578722158  |              |             |                  |  |
|           | 0.509975857                           | 0.509975857                    | -1.340024677                         | -0.272710772 | -0.66190603  |             |                  |  |
|           | 0.58940418                            | 3                              | 0                                    | 0.998207054  |              |             |                  |  |
| LINC00342 | ENSG00000232931                       | 15                             | 0.590242144                          | 2            | 2            | 0.351273347 |                  |  |
|           | Brain_Putamen_basal_ganglia           | 0.664612005                    | Brain_Anterior_cingulate_cortex_BA24 |              |              |             |                  |  |
|           | 1.002951728                           | 0.997048272                    | 0.997048272                          | -0.932122256 | 0.433554468  |             |                  |  |
|           | -0.249283894                          | 0.965679272                    | 2                                    | 0            | 0.998207054  |             |                  |  |
| ANKRD26   | ENSG00000107890                       | 16                             | 0.590247388                          | 1            | 1            | 0.590247388 |                  |  |
|           | Brain_Cerebellum                      | 0.590247388                    | Brain_Cerebellum                     | 1            | 1            | 1           | -0.538477567     |  |
|           | -0.538477567                          | -0.538477567                   | NA                                   | 1            | 0            | 0.998207054 |                  |  |
| ADARB1    | ENSG00000197381                       | 15                             | 0.590259123                          | 3            | 3            | 0.229110658 |                  |  |
|           | Brain_Cerebellar_Hemisphere           | 0.625610976                    | Brain_Cerebellum                     | 2.549818162  |              |             |                  |  |
|           | 0.087354025                           | 0.087354025                    | -0.500876283                         | 1.202652924  | 0.396563444  |             |                  |  |
|           | 0.855430646                           | 3                              | 0                                    | 0.998207054  |              |             |                  |  |
| RP11-433J | 8.2                                   | ENSG00000258979                | 1                                    | 0.590431139  | 3            | 3           | 0.268005882      |  |
|           | Brain_Nucleus_accumbens_basal_ganglia | 0.852934124                    | Brain_Putamen_basal_ganglia          |              |              |             |                  |  |
|           | 1.335668797                           | 0.663655751                    | 0.663655751                          | -1.107666477 | 0.835835542  |             |                  |  |
|           | -0.028818308                          | 0.989297442                    | 3                                    | 0            | 0.998207054  |             |                  |  |
| ASB16     | ENSG00000161664                       | 6                              | 0.590648893                          | 3            | 3            | 0.183982058 | Brain_Cerebellum |  |
|           | 0.919237995                           | Brain_Spinal_cord_cervical_c-1 | 1.782643604                          | 0.31153879   |              |             |                  |  |
|           | 0.31153879                            | -0.101393628                   | 1.32859368                           | 0.572770613  | 0.718482462  | 3           | 0                |  |
|           | 0.998207054                           |                                |                                      |              |              |             |                  |  |
| PHYHD1    | ENSG00000175287                       | 18                             | 0.590652087                          | 10           | 4            | 0.280776881 |                  |  |

|                |                                       |              |                             |                                       |              |              |             |                  |
|----------------|---------------------------------------|--------------|-----------------------------|---------------------------------------|--------------|--------------|-------------|------------------|
|                | Brain_Cerebellum                      | 0.909980491  |                             | Brain_Putamen_basal_ganglia           | 7.387948921  |              |             |                  |
|                |                                       | 0.00100067   | 0.609024394                 |                                       | -1.078575785 | 0.867258727  | 0.34644742  |                  |
|                |                                       | 0.547641988  | 4                           | 0                                     | 0.998207054  |              |             |                  |
| SCUBE1         | ENSG00000159307.18                    | 0.590718799  |                             |                                       | 8            | 8            | 0.102826252 |                  |
|                | Brain_Caudate_basal_ganglia           | 0.841377541  |                             | Brain_Frontal_Cortex_BA9              |              |              |             |                  |
|                |                                       | 2.424836846  | 0.215777571                 | 0.215777571                           |              | -1.098882486 | 1.631303704 |                  |
|                |                                       | 0.454123194  | 0.768348424                 | 8                                     | 0            | 0.998207054  |             |                  |
| WNT2B          | ENSG00000134245.17                    | 0.590820415  |                             |                                       | 4            | 2            | 0.225608925 | Brain_Cerebellum |
|                |                                       | 0.980810154  | Brain_Cortex                | 2.939502585                           |              | 0.020542465  | 0.988740519 |                  |
|                |                                       | -0.024053225 | 1.211747827                 | 0.452732915                           |              | 0.557561701  | 2           | 0                |
|                |                                       | 0.998207054  |                             |                                       |              |              |             |                  |
| PARVB          | ENSG00000188677.14                    | 0.590853171  |                             |                                       | 6            | 6            | 0.11039327  | Brain_Cerebellum |
|                |                                       | 0.515809072  | Brain_Cerebellar_Hemisphere | 1.795777912                           |              | 0.435517688  |             |                  |
|                |                                       | 0.435517688  | -1.596427993                | 0.658228688                           |              | -0.733622215 | 0.767224501 |                  |
|                |                                       | 6            | 0                           | 0.998207054                           |              |              |             |                  |
| NAA40          | ENSG00000110583.12                    | 0.590876735  |                             |                                       | 1            | 1            | 0.590876735 |                  |
|                | Brain_Cerebellar_Hemisphere           | 0.590876735  |                             | Brain_Cerebellar_Hemisphere           | 1            | 1            |             |                  |
|                |                                       | 1            | -0.537565962                | -0.537565962                          | -0.537565962 | NA           | 1           | 0                |
|                |                                       | 0.998207054  |                             |                                       |              |              |             |                  |
| MSANTD2        | ENSG00000120458.10                    | 0.590902499  |                             |                                       | 2            | 2            | 0.393817442 |                  |
|                | Brain_Substantia_nigra                | 0.525562426  |                             | Brain_Nucleus_accumbens_basal_ganglia |              |              |             |                  |
|                |                                       | 1.077822879  | 0.922177121                 | 0.922177121                           |              | 0.634794538  | 0.852714872 |                  |
|                |                                       | 0.743754705  | 0.154092946                 | 2                                     | 0            | 0.998207054  |             |                  |
| FILIP1L        | ENSG00000168386.18                    | 0.59092689   |                             |                                       | 1            | 1            | 0.59092689  |                  |
|                | Brain_Anterior_cingulate_cortex_BA24  | 0.59092689   |                             |                                       |              |              |             |                  |
|                | Brain_Anterior_cingulate_cortex_BA24  | 1            | 1                           | 1                                     | 0.537493331  |              |             |                  |
|                |                                       | 0.537493331  | 0.537493331                 | NA                                    | 1            | 0            | 0.998207054 |                  |
| KIAA1143       | ENSG00000163807.5                     | 0.590957567  |                             |                                       | 3            | 3            | 0.307483249 |                  |
|                | Brain_Cerebellar_Hemisphere           | 0.733067629  |                             | Brain_Cortex                          | 2.534478013  |              |             |                  |
|                |                                       | 0.190863117  | 0.190863117                 | 0.341047757                           |              | 1.020517173  | 0.570378666 |                  |
|                |                                       | 0.389854676  | 3                           | 0                                     | 0.998207054  |              |             |                  |
| HSD17B6        | ENSG00000025423.11                    | 0.591029685  |                             |                                       | 9            | 3            | 0.149484925 |                  |
|                | Brain_Amygdala                        | 0.835271583  |                             | Brain_Hypothalamus                    | 7.565458791  | 0.00048013   |             |                  |
|                |                                       | 0.428073941  | -1.441353198                | -0.207945422                          |              | -0.561887312 | 0.368457628 |                  |
|                |                                       | 3            | 0                           | 0.998207054                           |              |              |             |                  |
| EML4           | ENSG00000143924.18                    | 0.591052782  |                             |                                       | 3            | 3            | 0.250660387 | Brain_Cerebellum |
|                |                                       | 0.833129297  | Brain_Frontal_Cortex_BA9    | 1.74165617                            | 0.261047261  |              |             |                  |
|                |                                       | 0.261047261  | -0.392472369                | 1.148746836                           |              | 0.322321438  | 0.776650094 |                  |
|                |                                       | 3            | 0                           | 0.998207054                           |              |              |             |                  |
| SNX19          | ENSG00000120451.10                    | 0.591106669  |                             |                                       | 13           | 8            | 0.220120309 |                  |
|                | Brain_Anterior_cingulate_cortex_BA24  | 0.924407161  |                             | Brain_Cerebellar_Hemisphere           |              |              |             |                  |
|                |                                       | 7.673282746  | 0.011533767                 | 0.267837887                           |              | -1.226208273 | 0.867309808 |                  |
|                |                                       | 0.025597836  | 0.617738387                 | 8                                     | 0            | 0.998207054  |             |                  |
| CMKLR1         | ENSG00000174600.13                    | 0.591135368  |                             |                                       | 3            | 3            | 0.19997801  | Brain_Cerebellum |
|                |                                       | 0.671040264  | Brain_Amygdala              | 1.427989284                           |              | 0.665345783  | 0.665345783 |                  |
|                |                                       | -1.281614219 | -0.424720738                | -0.823573884                          |              | 0.431501972  | 3           | 0                |
|                |                                       | 0.998207054  |                             |                                       |              |              |             |                  |
| CPD            | ENSG00000108582.11                    | 0.591193105  |                             |                                       | 1            | 1            | 0.591193105 |                  |
|                | Brain_Caudate_basal_ganglia           | 0.591193105  |                             | Brain_Caudate_basal_ganglia           | 1            | 1            |             |                  |
|                |                                       | 1            | -0.537107869                | -0.537107869                          | -0.537107869 | NA           | 1           | 0                |
|                |                                       | 0.998207054  |                             |                                       |              |              |             |                  |
| BRD7           | ENSG00000166164.15                    | 0.591293024  |                             |                                       | 1            | 1            | 0.591293024 |                  |
|                | Brain_Putamen_basal_ganglia           | 0.591293024  |                             | Brain_Putamen_basal_ganglia           | 1            | 1            |             |                  |
|                |                                       | 1            | -0.536963214                | -0.536963214                          | -0.536963214 | NA           | 1           | 0                |
|                |                                       | 0.998207054  |                             |                                       |              |              |             |                  |
| CTD-2619J13.19 | ENSG00000269473.1                     | 0.591418552  |                             |                                       | 13           | 3            | 0.136157286 |                  |
|                | Brain_Spinal_cord_cervical_c-1        | 0.713593114  |                             |                                       |              |              |             |                  |
|                | Brain_Nucleus_accumbens_basal_ganglia | 10.83752107  |                             |                                       |              | 0.007365815  |             |                  |
|                |                                       | 0.461069305  | 0.367034728                 | 1.490254674                           |              | 0.998527521  | 0.308101738 |                  |
|                |                                       | 3            | 0                           | 0.998207054                           |              |              |             |                  |
| ZDHHC2         | ENSG00000104219.12                    | 0.591664368  |                             |                                       | 3            | 3            | 0.282098441 |                  |
|                | Brain_Cerebellar_Hemisphere           | 0.977123877  |                             | Brain_Nucleus_accumbens_basal_ganglia |              |              |             |                  |

|               |                                       |                             |                                       |              |                   |                  |             |  |  |
|---------------|---------------------------------------|-----------------------------|---------------------------------------|--------------|-------------------|------------------|-------------|--|--|
|               | 1.04291616                            | 0.960190331                 | 0.960190331                           | -1.075617313 | 0.908710272       |                  |             |  |  |
|               | -0.046077381                          | 0.994273563                 | 3                                     | 0            | 0.998207054       |                  |             |  |  |
| KIF25-AS1     | ENSG00000229921.6                     | 0.591679718                 | 13                                    | 8            | 0.118518343       |                  |             |  |  |
|               | Brain_Anterior_cingulate_cortex_BA24  | 0.919194295                 |                                       |              | Brain_Hippocampus |                  |             |  |  |
|               | 6.930385111                           | 0.073823989                 | 0.307184108                           | -1.244916844 | 1.561022918       |                  |             |  |  |
|               | 0.254814068                           | 0.757677867                 | 8                                     | 0            | 0.998207054       |                  |             |  |  |
| EPC2          | ENSG00000135999.11                    | 0.591699543                 | 1                                     | 1            | 0.591699543       |                  |             |  |  |
|               | Brain_Hippocampus                     | 0.591699543                 | Brain_Hippocampus                     | 1            | 1                 | 1                |             |  |  |
|               | -0.536374801                          | -0.536374801                | -0.536374801                          | NA           | 1                 | 0                | 0.998207054 |  |  |
| COQ10B        | ENSG00000115520.8                     | 0.591720576                 | 1                                     | 1            | 0.591720576       |                  |             |  |  |
|               | Brain_Substantia_nigra                | 0.591720576                 | Brain_Substantia_nigra                | 1            | 1                 | 1                |             |  |  |
|               | 1                                     | -0.536344362                | -0.536344362                          | -0.536344362 | NA                | 1                | 0           |  |  |
|               | 0.998207054                           |                             |                                       |              |                   |                  |             |  |  |
| GPR4          | ENSG00000177464.4                     | 0.591754641                 | 1                                     | 1            | 0.591754641       |                  |             |  |  |
|               | Brain_Anterior_cingulate_cortex_BA24  | 0.591754641                 |                                       |              |                   |                  |             |  |  |
|               | Brain_Anterior_cingulate_cortex_BA24  | 1                           | 1                                     | 1            | 0.536295065       |                  |             |  |  |
|               | 0.536295065                           | 0.536295065                 | NA                                    | 1            | 0                 | 0.998207054      |             |  |  |
| SCN1A         | ENSG00000144285.17                    | 0.591767183                 | 8                                     | 5            | 0.140680708       |                  |             |  |  |
|               | Brain_Nucleus_accumbens_basal_ganglia | 0.870516663                 | Brain_Cerebellar_Hemisphere           |              |                   |                  |             |  |  |
|               | 5.566732573                           | 0.017968086                 | 0.256290079                           | -1.47326087  | 0.627721905       |                  |             |  |  |
|               | -0.388264356                          | 0.581228931                 | 5                                     | 0            | 0.998207054       |                  |             |  |  |
| ATF3          | ENSG00000162772.16                    | 0.591807384                 | 2                                     | 2            | 0.322835212       |                  |             |  |  |
|               | Brain_Spinal_cord_cervical_c-1        | 0.819511238                 | Brain_Frontal_Cortex_BA9              |              |                   |                  |             |  |  |
|               | 1.03987661                            | 0.96012339                  | 0.96012339                            | -0.22817366  | 0.988648368       | 0.380237354      |             |  |  |
|               | 0.860423108                           | 2                           | 0                                     | 0.998207054  |                   |                  |             |  |  |
| OTUD6B        | ENSG00000155100.10                    | 0.592127408                 | 2                                     | 2            | 0.306881097       |                  |             |  |  |
|               | Brain_Frontal_Cortex_BA9              | 0.785399181                 | Brain_Cerebellum                      | 1.32513108   | 0.67486892        |                  |             |  |  |
|               | 0.67486892                            | -1.021788323                | 0.272289822                           | -0.37474925  | 0.915051432       | 2                |             |  |  |
|               | 0                                     | 0.998207054                 |                                       |              |                   |                  |             |  |  |
| ZNF432        | ENSG00000256087.6                     | 0.592142147                 | 5                                     | 3            | 0.182650289       |                  |             |  |  |
|               | Brain_Substantia_nigra                | 0.662139975                 | Brain_Amygdala                        | 4.108731584  |                   |                  |             |  |  |
|               | 0.048989465                           | 0.280691018                 | 0.436960526                           | 1.332639034  | 0.877214356       |                  |             |  |  |
|               | 0.319889747                           | 3                           | 0                                     | 0.998207054  |                   |                  |             |  |  |
| MARVELD2      | ENSG00000152939.14                    | 0.592154132                 | 1                                     | 1            | 0.592154132       |                  |             |  |  |
|               | Brain_Anterior_cingulate_cortex_BA24  | 0.592154132                 |                                       |              |                   |                  |             |  |  |
|               | Brain_Anterior_cingulate_cortex_BA24  | 1                           | 1                                     | 1            | 0.53571703        | 0.53571703       |             |  |  |
|               | 0.53571703                            | NA                          | 1                                     | 0            | 0.998207054       |                  |             |  |  |
| RP11-96H19.1  | ENSG00000257261.5                     | 0.592272036                 | 13                                    | 3            | 0.16310887        |                  |             |  |  |
|               | Brain_Cerebellar_Hemisphere           | 0.743031976                 | Brain_Frontal_Cortex_BA9              |              |                   |                  |             |  |  |
|               | 11.41314492                           | 0.003184195                 | 0.407486233                           | 0.32784088   | 1.394691562       |                  |             |  |  |
|               | 0.795653396                           | 0.28793238                  | 3                                     | 0            | 0.998207054       |                  |             |  |  |
| JAM2          | ENSG00000154721.14                    | 0.592303291                 | 3                                     | 3            | 0.208340366       |                  |             |  |  |
|               | Brain_Nucleus_accumbens_basal_ganglia | 0.964853445                 | Brain_Caudate_basal_ganglia           |              |                   |                  |             |  |  |
|               | 1.540334892                           | 0.705239441                 | 0.705239441                           | 0.04406393   | 1.258142111       |                  |             |  |  |
|               | 0.692401577                           | 0.611239045                 | 3                                     | 0            | 0.998207054       |                  |             |  |  |
| MRPS26        | ENSG00000125901.5                     | 0.592381889                 | 3                                     | 3            | 0.232164719       |                  |             |  |  |
|               | Brain_Spinal_cord_cervical_c-1        | 0.710095884                 |                                       |              |                   |                  |             |  |  |
|               | Brain_Anterior_cingulate_cortex_BA24  | 1.226693607                 | 0.684894611                           |              |                   |                  |             |  |  |
|               | 0.684894611                           | -0.441905548                | 1.194801181                           | 0.127056105  | 0.92535988        | 3                |             |  |  |
|               | 0                                     | 0.998207054                 |                                       |              |                   |                  |             |  |  |
| RP11-420A23.1 | ENSG00000251432.6                     | 0.592391808                 | 3                                     | 3            | 0.263645815       |                  |             |  |  |
|               | Brain_Hippocampus                     | 0.679116275                 | Brain_Nucleus_accumbens_basal_ganglia |              |                   |                  |             |  |  |
|               | 1.665110177                           | 0.410229216                 | 0.410229216                           | -1.117815465 | 0.427446935       |                  |             |  |  |
|               | -0.368012628                          | 0.773642278                 | 3                                     | 0            | 0.998207054       |                  |             |  |  |
| NPSR1         | ENSG00000187258.13                    | 0.592413023                 | 3                                     | 3            | 0.348980222       | Brain_Cerebellum |             |  |  |
|               | 0.584661657                           | Brain_Cerebellar_Hemisphere | 1.155218851                           | 0.844687726  |                   |                  |             |  |  |
|               | 0.844687726                           | 0.54658823                  | 0.93656916                            | 0.803625969  | 0.222645175       | 3                | 0           |  |  |
|               | 0.998207054                           |                             |                                       |              |                   |                  |             |  |  |
| IMP4          | ENSG00000136718.9                     | 0.592498297                 | 2                                     | 1            | 0.55185447        |                  |             |  |  |
|               | Brain_Cerebellar_Hemisphere           | 0.635964041                 | Brain_Cerebellum                      | 1.992139552  |                   |                  |             |  |  |
|               | 0.007860448                           | 1.992139552                 | -0.594983545                          | -0.473349236 | -0.53416639       |                  |             |  |  |
|               | 0.086008445                           | 1                           | 0                                     | 0.998207054  |                   |                  |             |  |  |



|           |                                       |                             |                  |             |              |                                      |             |
|-----------|---------------------------------------|-----------------------------|------------------|-------------|--------------|--------------------------------------|-------------|
| ZNF569    | ENSG00000196437.10                    | 0.59269786                  | 3                | 3           | 0.190629889  |                                      |             |
|           | Brain_Frontal_Cortex_BA9              | 0.871964521                 |                  |             |              | Brain_Hypothalamus                   | 1.152178073 |
|           | 0.835092802                           | 0.835092802                 |                  |             | -0.423592211 | 1.308718008                          | 0.24132072  |
|           | 0.933659422                           | 3                           | 0                | 0.998207054 |              |                                      |             |
| TACSTD2   | ENSG00000184292.6                     | 0.592701982                 | 1                | 1           | 0.592701982  |                                      |             |
|           | Brain_Anterior_cingulate_cortex_BA24  | 0.592701982                 |                  |             |              |                                      |             |
|           | Brain_Anterior_cingulate_cortex_BA24  | 1                           | 1                | 1           | -0.534924622 |                                      |             |
|           | -0.534924622                          | -0.534924622                | NA               | 1           | 0            | 0.998207054                          |             |
| AIF1L     | ENSG00000126878.12                    | 0.592811842                 | 3                | 3           | 0.17926728   | Brain_Hippocampus                    |             |
|           | 0.934618532                           | Brain_Caudate_basal_ganglia | 1.505412684      |             | 0.688434322  |                                      |             |
|           | 0.688434322                           | -1.343014497                | -0.08203544      |             | -0.504769923 | 0.725950083                          |             |
|           | 3                                     | 0                           | 0.998207054      |             |              |                                      |             |
| CMTM6     | ENSG00000091317.7                     | 0.592876842                 | 3                | 3           | 0.375635691  |                                      |             |
|           | Brain_Spinal_cord_cervical_c-1        | 0.914729977                 |                  |             |              | Brain_Cerebellar_Hemisphere          |             |
|           | 2.363322254                           | 0.087257957                 | 0.087257957      |             | -0.885966293 | 0.299258241                          |             |
|           | -0.231260809                          | 0.602292289                 | 3                | 0           | 0.998207054  |                                      |             |
| TRAM2-AS1 | ENSG00000225791.6                     | 0.593010756                 | 3                | 3           | 0.401230133  |                                      |             |
|           | Brain_Caudate_basal_ganglia           | 0.873684079                 |                  |             |              | Brain_Hypothalamus                   | 1.815554736 |
|           | 0.192352549                           | 0.192352549                 |                  |             | -0.595145668 | 0.839426295                          | 0.134420442 |
|           | 0.717601271                           | 3                           | 0                | 0.998207054 |              |                                      |             |
| DRG1      | ENSG00000185721.12                    | 0.593099308                 | 1                | 1           | 0.593099308  |                                      |             |
|           | Brain_Putamen_basal_ganglia           | 0.593099308                 |                  |             |              | Brain_Putamen_basal_ganglia          | 1           |
|           | 1                                     | 0.53435014                  | 0.53435014       | 0.53435014  | NA           | 1                                    | 0           |
|           |                                       |                             |                  |             |              | 0.998207054                          |             |
| WDR55     | ENSG00000120314.18                    | 0.593126966                 | 5                | 2           | 0.307675651  |                                      |             |
|           | Brain_Hypothalamus                    | 0.915789285                 |                  |             |              | Brain_Caudate_basal_ganglia          | 4.20147428  |
|           | 0.028241322                           | 0.559601995                 | 0.105739191      |             | 1.020111358  | 0.636822483                          |             |
|           | 0.348010788                           | 2                           | 0                | 0.998207054 |              |                                      |             |
| HSPB2     | ENSG00000170276.5                     | 0.593145355                 | 2                | 2           | 0.340973661  |                                      |             |
|           | Brain_Nucleus_accumbens_basal_ganglia | 0.600576958                 |                  |             |              | Brain_Caudate_basal_ganglia          |             |
|           | 1.165268528                           | 0.834731472                 | 0.834731472      |             | -0.952243192 | -0.523570997                         |             |
|           | -0.737907095                          | 0.303117016                 | 2                | 0           | 0.998207054  |                                      |             |
| MIR4300HG | ENSG00000245832.6                     | 0.593153427                 | 9                | 4           | 0.203104386  |                                      |             |
|           | Brain_Hippocampus                     | 0.99393044                  | Brain_Amygdala   | 7.043601606 |              | 0.017415173                          |             |
|           | 0.27414394                            | 0.007607139                 | 1.272756713      |             | 0.674182173  | 0.452766942                          | 4           |
|           | 0                                     | 0.998207054                 |                  |             |              |                                      |             |
| DBI       | ENSG00000155368.16                    | 0.593281865                 | 2                | 2           | 0.378983599  | Brain_Amygdala                       |             |
|           | 0.592003639                           | Brain_Cerebellum            | 1.018458974      |             | 0.981541026  | 0.981541026                          |             |
|           | -0.879770591                          | 0.535934761                 | -0.171917915     |             | 1.001054855  | 2                                    | 0           |
|           | 0.998207054                           |                             |                  |             |              |                                      |             |
| FBN2      | ENSG00000138829.11                    | 0.593387481                 | 7                | 4           | 0.121489132  | Brain_Cortex                         |             |
|           | 0.60874571                            | Brain_Frontal_Cortex_BA9    | 5.820507798      |             | 0.010516282  |                                      |             |
|           | 0.253213575                           | -1.548553332                | -0.511864693     |             | -1.178202744 | 0.339586286                          |             |
|           | 4                                     | 0                           | 0.998207054      |             |              |                                      |             |
| PEX13     | ENSG00000162928.8                     | 0.59345277                  | 3                | 3           | 0.177018056  | Brain_Hypothalamus                   |             |
|           | 0.805141778                           | Brain_Cortex                | 1.878093547      |             | 0.284489254  | 0.284489254                          |             |
|           | 0.246698228                           | 1.349993536                 | 0.81014969       | 0.55202638  | 3            | 0                                    | 0.998207054 |
| OLFML2A   | ENSG00000185585.19                    | 0.593465575                 | 6                | 4           | 0.099345073  |                                      |             |
|           | Brain_Putamen_basal_ganglia           | 0.971939295                 |                  |             |              | Brain_Anterior_cingulate_cortex_BA24 |             |
|           | 3.803891102                           | 0.00518439                  | 0.255728333      |             | -0.035176131 | 1.648037029                          |             |
|           | 0.991709406                           | 0.63619566                  | 4                | 0           | 0.998207054  |                                      |             |
| ARHGAP20  | ENSG00000137727.12                    | 0.593532148                 | 4                | 4           | 0.218862632  |                                      |             |
|           | Brain_Cortex                          | 0.959782725                 | Brain_Cerebellum | 1.703547669 |              | 0.320798449                          |             |
|           | 0.320798449                           | 0.050426241                 | 1.22955809       | 0.685215231 |              | 0.519487789                          | 4           |
|           | 0                                     | 0.998207054                 |                  |             |              |                                      |             |
| ABL2      | ENSG00000143322.19                    | 0.593874782                 | 12               | 4           | 0.052757357  |                                      |             |
|           | Brain_Cerebellar_Hemisphere           | 0.874380946                 |                  |             |              | Brain_Hypothalamus                   | 9.105841171 |
|           | 0.023873414                           | 0.401884335                 | -1.936901727     |             | -0.158096262 | -1.131470595                         |             |
|           | 0.494267276                           | 4                           | 0                | 0.998207054 |              |                                      |             |
| LINC01126 | ENSG00000279873.2                     | 0.59396311                  | 1                | 1           | 0.59396311   |                                      |             |
|           | Brain_Nucleus_accumbens_basal_ganglia | 0.59396311                  |                  |             |              |                                      |             |
|           | Brain_Nucleus_accumbens_basal_ganglia | 1                           | 1                | 1           | -0.533101804 |                                      |             |
|           | -0.533101804                          | -0.533101804                | NA               | 1           | 0            | 0.998207054                          |             |

|               |                                       |                             |                                       |             |              |              |                  |
|---------------|---------------------------------------|-----------------------------|---------------------------------------|-------------|--------------|--------------|------------------|
| AFF3          | ENSG00000144218.18                    | 0.594009522                 | 10                                    | 4           | 0.311799745  |              |                  |
|               | Brain_Hypothalamus                    | 0.97738342                  | Brain_Hippocampus                     |             | 8.25455082   | 0.002339129  |                  |
|               | 0.318220094                           | -0.309892406                | 1.011452833                           |             | 0.237339114  | 0.386402554  |                  |
|               | 4                                     | 0                           | 0.998207054                           |             |              |              |                  |
| ANKRD34C      | ENSG00000235711.4                     | 0.594166866                 | 1                                     | 1           | 0.594166866  |              |                  |
|               | Brain_Cerebellum                      | 0.594166866                 | Brain_Cerebellum1                     | 1           | 1            | -0.532807465 |                  |
|               | -0.532807465                          | -0.532807465                | NA                                    | 1           | 0            | 0.998207054  |                  |
| SCRIB         | ENSG00000180900.18                    | 0.594235042                 | 3                                     | 3           | 0.342867392  |              | Brain_Amygdala   |
|               | 0.648309041                           | Brain_Cerebellum1           | 1.211554006                           |             | 0.850696786  |              | 0.850696786      |
|               | -0.948514899                          | 0.746080282                 | -0.219515725                          |             | 0.87172057   | 3            | 0                |
|               | 0.998207054                           |                             |                                       |             |              |              |                  |
| SUDS3         | ENSG00000111707.11                    | 0.594517381                 | 2                                     | 1           | 0.580580337  |              |                  |
|               | Brain_Putamen_basal_ganglia           | 0.617132485                 | Brain_Nucleus_accumbens_basal_ganglia |             |              |              |                  |
|               | 1.954621689                           | 0.045378311                 | 1.954621689                           |             | -0.552537225 | -0.499918472 |                  |
|               | -0.526227849                          | 0.037207077                 | 1                                     | 0           | 0.998207054  |              |                  |
| CDH24         | ENSG00000139880.19                    | 0.594558941                 | 1                                     | 1           | 0.594558941  |              | Brain_Cerebellum |
|               | 0.594558941                           | Brain_Cerebellum1           | 1                                     | 1           | -0.532241215 | -0.532241215 |                  |
|               | -0.532241215                          | NA                          | 1                                     | 0           | 0.998207054  |              |                  |
| LINC01735     | ENSG00000261453.1                     | 0.594608149                 | 2                                     | 2           | 0.448786118  |              |                  |
|               | Brain_Caudate_basal_ganglia           | 0.507944907                 | Brain_Putamen_basal_ganglia           |             |              |              |                  |
|               | 1.026862639                           | 0.973137361                 | 0.973137361                           |             | 0.662041061  | 0.757440303  |                  |
|               | 0.709740682                           | 0.067457451                 | 2                                     | 0           | 0.998207054  |              |                  |
| RNF126        | ENSG00000070423.17                    | 0.594643719                 | 1                                     | 1           | 0.594643719  |              |                  |
|               | Brain_Putamen_basal_ganglia           | 0.594643719                 | Brain_Putamen_basal_ganglia1          | 1           |              |              |                  |
|               | 1                                     | 0.532118797                 | 0.532118797                           | 0.532118797 | NA           | 1            | 0                |
|               | 0.998207054                           |                             |                                       |             |              |              |                  |
| ADCY1         | ENSG00000164742.14                    | 0.59492503                  | 2                                     | 2           | 0.312192364  |              |                  |
|               | Brain_Substantia_nigra                | 0.647020395                 | Brain_Spinal_cord_cervical_c-1        |             |              |              |                  |
|               | 1.560729315                           | 0.439270685                 | 0.439270685                           |             | 0.457905416  | 1.01063248   |                  |
|               | 0.734268948                           | 0.390837055                 | 2                                     | 0           | 0.998207054  |              |                  |
| LRRC4B        | ENSG00000131409.12                    | 0.595037994                 | 3                                     | 3           | 0.201827508  |              |                  |
|               | Brain_Hypothalamus                    | 0.705015179                 | Brain_Spinal_cord_cervical_c-1        |             |              |              |                  |
|               | 1.663107444                           | 0.342913442                 | 0.342913442                           |             | -0.434099793 | 1.276362213  |                  |
|               | 0.154567719                           | 0.971899353                 | 3                                     | 0           | 0.998207054  |              |                  |
| PLK5          | ENSG00000185988.11                    | 0.595072704                 | 7                                     | 7           | 0.136774167  |              |                  |
|               | Brain_Putamen_basal_ganglia           | 0.920970675                 | Brain_Cerebellum1                     | 1.874085691 |              |              |                  |
|               | 0.222499071                           | 0.222499071                 | -0.656388197                          |             | 1.487911756  | 0.215460455  |                  |
|               | 0.855498013                           | 7                           | 0                                     | 0.998207054 |              |              |                  |
| NAA25         | ENSG00000111300.9                     | 0.595101816                 | 6                                     | 2           | 0.725834136  |              | Brain_Cortex     |
|               | 0.986507362                           | Brain_Cerebellar_Hemisphere | 5.592838648                           |             | 0.000969519  |              |                  |
|               | 0.228473757                           | -0.343608465                | 0.350672398                           |             | -0.035690493 | 0.262546025  |                  |
|               | 2                                     | 0                           | 0.998207054                           |             |              |              |                  |
| SLITRK5       | ENSG00000165300.7                     | 0.595209879                 | 5                                     | 5           | 0.219178277  |              |                  |
|               | Brain_Cortex                          | 0.996456136                 | Brain_Cerebellum2                     | 1.130169127 |              | 0.130834273  |                  |
|               | 0.130834273                           | 0.00444159                  | 1.228716075                           |             | 0.500093365  | 0.484190466  | 5                |
|               | 0                                     | 0.998207054                 |                                       |             |              |              |                  |
| CTD-2014B16.3 | ENSG00000258847.1                     | 0.595366032                 | 2                                     | 2           | 0.30958951   |              |                  |
|               | Brain_Nucleus_accumbens_basal_ganglia | 0.955171399                 | Brain_Hippocampus                     |             |              |              |                  |
|               | 1.012368465                           | 0.987631535                 | 0.987631535                           |             | -1.016083743 | 0.056213911  |                  |
|               | -0.479934916                          | 0.758228943                 | 2                                     | 0           | 0.998207054  |              |                  |
| LRRC9         | ENSG00000131951.10                    | 0.595380624                 | 2                                     | 2           | 0.30850601   |              |                  |
|               | Brain_Spinal_cord_cervical_c-1        | 0.884037635                 | Brain_Substantia_nigra                |             |              |              |                  |
|               | 1.13649578                            | 0.86350422                  | 0.86350422                            |             | -1.018361882 | -0.145852746 | -0.582107314     |
|               | 0.616957127                           | 2                           | 0                                     | 0.998207054 |              |              |                  |
| CCL18         | ENSG00000275385.1                     | 0.595388021                 | 2                                     | 2           | 0.324523799  |              |                  |
|               | Brain_Substantia_nigra                | 0.835022558                 | Brain_Spinal_cord_cervical_c-1        |             |              |              |                  |
|               | 1.049944797                           | 0.950055203                 | 0.950055203                           |             | -0.20826436  | 0.985204157  |                  |
|               | 0.388469899                           | 0.843909682                 | 2                                     | 0           | 0.998207054  |              |                  |
| DACT3         | ENSG00000197380.10                    | 0.595525367                 | 1                                     | 1           | 0.595525367  |              |                  |
|               | Brain_Hypothalamus                    | 0.595525367                 | Brain_Hypothalamus                    | 1           | 1            | 1            |                  |
|               | 0.530846193                           | 0.530846193                 | 0.530846193                           | NA          | 1            | 0            | 0.998207054      |
| ANXA1         | ENSG00000135046.13                    | 0.595619646                 | 2                                     | 2           | 0.339937235  |              |                  |

Brain\_Nucleus\_accumbens\_basal\_ganglia 0.752132057  
Brain\_Anterior\_cingulate\_cortex\_BA24 1.04017541 0.95982459 0.95982459  
-0.315829326 0.954289275 0.319229974 0.898109476 2 0  
0.998207054

PCMTD1 ENSG00000168300.13 0.595785182 4 3 0.582603307  
Brain\_Hippocampus 0.841020206 Brain\_Cerebellar\_Hemisphere 2.703916074  
0.034639478 0.248909377 -0.549586082 0.478382352 0.124074105  
0.463384953 3 0 0.998207054

ANKRD63 ENSG00000230778.1 0.595947523 2 2 0.309460956  
Brain\_Cerebellum 0.933099626 Brain\_Cerebellar\_Hemisphere 1.036158549  
0.963841451 0.963841451 -1.016353762 -0.083945672 -0.550149717  
0.659312083 2 0 0.998207054

PRMT1 ENSG00000126457.21 0.596060093 8 4 0.10386111  
Brain\_Putamen\_basal\_ganglia 0.557139457 Brain\_Nucleus\_accumbens\_basal\_ganglia  
6.511178827 0.001395203 0.238317564 -1.626416372 -0.587095668  
-1.257576863 0.32666559 4 0 0.998207054

LINC00391 ENSG00000238230.1 0.596103247 2 2 0.309595823  
Brain\_Cerebellum 0.915316768 Brain\_Substantia\_nigra 1.057700487  
0.942299513 0.942299513 -1.016070484 0.106334741 -0.454867871  
0.793660346 2 0 0.998207054

LRRC61 ENSG00000127399.14 0.596119018 13 2 0.080799895  
Brain\_Substantia\_nigra 0.712127625 Brain\_Amygdala 11.45527445  
0.00042158 0.783552559 -1.746063633 -0.369000133 -0.949210248  
0.307721593 2 0 0.998207054

FAM189A1 ENSG00000104059.4 0.596320789 1 1 0.596320789  
Brain\_Putamen\_basal\_ganglia 0.596320789 Brain\_Putamen\_basal\_ganglia 1 1  
1 0.529698788 0.529698788 0.529698788 NA 1 0  
0.998207054

GSTO1 ENSG00000148834.12 0.596578378 5 5 0.544892938  
Brain\_Anterior\_cingulate\_cortex\_BA24 0.959661956 Brain\_Caudate\_basal\_ganglia  
3.029261445 0.119921285 0.119921285 -0.605430579 0.566699295  
0.034149647 0.417808453 5 0 0.998207054

C8orf86 ENSG00000196166.3 0.596594564 1 1 0.596594564  
Brain\_Anterior\_cingulate\_cortex\_BA24 0.596594564  
Brain\_Anterior\_cingulate\_cortex\_BA24 1 1 1 0.529304024  
0.529304024 0.529304024 NA 1 0 0.998207054

FSHB ENSG00000131808.10 0.596792612 2 2 0.379505955  
Brain\_Anterior\_cingulate\_cortex\_BA24 0.384161496 Brain\_Hypothalamus  
1.481746122 0.518253878 0.518253878 -0.878806954 -0.870254212  
-0.874530583 0.006047702 2 0 0.998207054

LILRA4 ENSG00000239961.2 0.596844347 3 3 0.489024205  
Brain\_Caudate\_basal\_ganglia 0.82674166 Brain\_Hippocampus 1.763763914  
0.241077375 0.241077375 -0.218882396 0.691861667 0.270010916  
0.459058511 3 0 0.998207054

RP11-72304.6 ENSG00000187695.8 0.596990127 2 2 0.370013437  
Brain\_Cerebellum 0.575386192 Brain\_Putamen\_basal\_ganglia 1.09446698 0.90553302  
0.90553302 -0.56013671 0.896448195 0.168155742 1.029961064 2  
0 0.998207054

STAM ENSG00000136738.14 0.596994092 1 1 0.596994092 Brain\_Cerebellum  
0.596994092 Brain\_Cerebellum 1 1 1 0.528728084 0.528728084  
0.528728084 NA 1 0 0.998207054

COL9A1 ENSG00000112280.15 0.597091493 5 5 0.131039486  
Brain\_Cortex 0.948077061 Brain\_Nucleus\_accumbens\_basal\_ganglia  
1.665814689 0.58614242 0.58614242 -0.249116688 1.510015432  
0.421529381 0.780890251 5 0 0.998207054

HCP5B ENSG00000281831.1 0.597210344 13 4 0.11161784 Brain\_Cerebellum  
0.979293375 Brain\_Spinal\_cord\_cervical\_c-1 9.281733662 0.008309867  
0.44373479 -1.590963278 0.059232809 -0.561319494 0.469180552 4  
0 0.998207054

CCR6 ENSG00000112486.15 0.597211234 6 6 0.128020202  
Brain\_Nucleus\_accumbens\_basal\_ganglia 0.55413016 Brain\_Amygdala 2.916759812  
0.254170379 0.254170379 -1.521955616 0.788673718 -0.536200342

|               |                                       |                             |              |              |    |   |  |                                       |                             |
|---------------|---------------------------------------|-----------------------------|--------------|--------------|----|---|--|---------------------------------------|-----------------------------|
|               | 1.006455661                           | 6                           | 0            | 0.998207054  |    |   |  |                                       |                             |
| MGAT5B        | ENSG00000167889.12                    |                             |              | 0.597278727  | 1  | 1 |  | 0.597278727                           |                             |
|               | Brain_Nucleus_accumbens_basal_ganglia |                             |              | 0.597278727  |    |   |  |                                       |                             |
|               | Brain_Nucleus_accumbens_basal_ganglia | 1                           | 1            |              | 1  | 1 |  | 0.528317876                           |                             |
|               | 0.528317876                           | 0.528317876                 | NA           | 1            | 0  |   |  | 0.998207054                           |                             |
| KLHL24        | ENSG00000114796.15                    |                             |              | 0.597343358  | 8  | 4 |  | 0.37397521                            | Brain_Cortex                |
|               | 0.949059772                           | Brain_Frontal_Cortex_BA9    |              | 6.466580154  |    |   |  | 0.013029923                           |                             |
|               | 0.220580269                           | -0.889051858                | 0.063887543  |              |    |   |  | -0.393890449                          | 0.344362284                 |
|               | 4                                     | 0                           | 0.998207054  |              |    |   |  |                                       |                             |
| RP11-357K6.1  | ENSG00000255618.1                     |                             |              | 0.597418109  | 4  | 3 |  | 0.422827657                           |                             |
|               | Brain_Nucleus_accumbens_basal_ganglia |                             |              | 0.987680083  |    |   |  | Brain_Frontal_Cortex_BA9              |                             |
|               | 3.299797971                           | 0.07094069                  | 0.286146048  |              |    |   |  | -0.801525208                          | -0.015441339                |
|               | -0.381535845                          | 0.424436531                 | 3            | 0            |    |   |  | 0.998207054                           |                             |
| RBL1          | ENSG00000080839.11                    |                             |              | 0.59742541   | 1  | 1 |  | 0.59742541                            | Brain_Caudate_basal_ganglia |
|               | 0.59742541                            | Brain_Caudate_basal_ganglia |              | 1            | 1  |   |  | 0.528106514                           |                             |
|               | 0.528106514                           | 0.528106514                 | NA           | 1            | 0  |   |  | 0.998207054                           |                             |
| TAF9          | ENSG00000273841.4                     |                             |              | 0.597456067  | 4  | 4 |  | 0.3644059                             |                             |
|               | Brain_Frontal_Cortex_BA9              |                             |              | 0.870221067  |    |   |  | Brain_Nucleus_accumbens_basal_ganglia |                             |
|               | 2.769512348                           | 0.204899919                 | 0.204899919  |              |    |   |  | -0.907001696                          | 0.528092461                 |
|               | -0.062651242                          | 0.631823722                 | 4            | 0            |    |   |  | 0.998207054                           |                             |
| ZNF577        | ENSG00000161551.14                    |                             |              | 0.597507589  | 11 | 5 |  | 0.248576945                           |                             |
|               | Brain_Hippocampus                     |                             |              | 0.988088406  |    |   |  | Brain_Cerebellar_Hemisphere           | 7.497428619                 |
|               | 0.021485322                           | 0.389181307                 | -1.153812751 |              |    |   |  | 0.545275141                           | -0.090597346                |
|               | 0.624277893                           | 5                           | 0            | 0.998207054  |    |   |  |                                       |                             |
| AC005281.1    | ENSG00000226690.7                     |                             |              | 0.597574473  | 1  | 1 |  | 0.597574473                           |                             |
|               | Brain_Hypothalamus                    |                             |              | 0.597574473  |    |   |  | Brain_Hypothalamus                    | 1 1 1                       |
|               | -0.527891747                          | -0.527891747                | -0.527891747 | NA           | 1  | 0 |  | 0.998207054                           |                             |
| RP11-618L22.1 | ENSG00000274723.1                     |                             |              | 0.59757547   | 3  | 2 |  | 0.392632869                           |                             |
|               | Brain_Caudate_basal_ganglia           |                             |              | 0.78173168   |    |   |  | Brain_Putamen_basal_ganglia           | 2.694836925                 |
|               | 0.046001868                           | 0.259161207                 | 0.277063068  |              |    |   |  | 0.854852393                           | 0.616990654                 |
|               | 0.302114554                           | 2                           | 0            | 0.998207054  |    |   |  |                                       |                             |
| RPS26         | ENSG00000197728.9                     |                             |              | 0.597760855  | 13 | 1 |  | 0.185140134                           |                             |
|               | Brain_Spinal_cord_cervical_c-1        |                             |              | 0.879774809  |    |   |  | Brain_Hippocampus                     |                             |
|               | 12.17759187                           | 0.00251205                  | 12.17759187  |              |    |   |  | 0.151254691                           | 1.325093524                 |
|               | 0.51393156                            | 0.335137586                 | 1            | 0            |    |   |  | 0.998207054                           |                             |
| EBF3          | ENSG00000108001.13                    |                             |              | 0.597784436  | 5  | 5 |  | 0.087809162                           |                             |
|               | Brain_Caudate_basal_ganglia           |                             |              | 0.847118542  |    |   |  | Brain_Cerebellum                      | 2.124927374                 |
|               | 0.314754089                           | 0.314754089                 | -0.666406176 |              |    |   |  | 1.707069354                           | 0.565935667                 |
|               | 0.929702914                           | 5                           | 0            | 0.998207054  |    |   |  |                                       |                             |
| PPP1R7        | ENSG00000115685.14                    |                             |              | 0.597949741  | 2  | 2 |  | 0.348973881                           |                             |
|               | Brain_Frontal_Cortex_BA9              |                             |              | 0.655947696  |    |   |  | Brain_Substantia_nigra                |                             |
|               | 1.061130405                           | 0.938869595                 | 0.938869595  |              |    |   |  | -0.445514897                          | 0.936581482                 |
|               | 0.245533292                           | 0.977289722                 | 2            | 0            |    |   |  | 0.998207054                           |                             |
| BAIAP2L2      | ENSG00000128298.16                    |                             |              | 0.597952611  | 4  | 4 |  | 0.240708388                           |                             |
|               | Brain_Anterior_cingulate_cortex_BA24  |                             |              | 0.865622694  |    |   |  | Brain_Cerebellum                      |                             |
|               | 1.319689202                           | 0.798597444                 | 0.798597444  |              |    |   |  | -1.173218018                          | 1.063961707                 |
|               | 0.228359709                           | 1.009441441                 | 4            | 0            |    |   |  | 0.998207054                           |                             |
| HNF4G         | ENSG00000164749.11                    |                             |              | 0.597981757  | 4  | 4 |  | 0.157881231                           | Brain_Cerebellum            |
|               | 0.538710004                           | Brain_Hypothalamus          |              | 1.762499535  |    |   |  | 0.301635109                           |                             |
|               | 0.301635109                           | 0.614764882                 | 1.412233461  |              |    |   |  | 0.917094809                           | 0.357401619                 |
|               | 4                                     | 0                           | 0.998207054  |              |    |   |  |                                       |                             |
| SLC6A4        | ENSG00000108576.9                     |                             |              | 0.598005663  | 1  | 1 |  | 0.598005663                           |                             |
|               | Brain_Cortex                          |                             |              | 0.598005663  |    |   |  | Brain_Cortex                          | 1 1 1                       |
|               | 0.527270635                           | 0.527270635                 | NA           | 1            | 0  |   |  | 0.998207054                           |                             |
| SNRNP48       | ENSG00000168566.12                    |                             |              | 0.598062749  | 1  | 1 |  | 0.598062749                           |                             |
|               | Brain_Putamen_basal_ganglia           |                             |              | 0.598062749  |    |   |  | Brain_Putamen_basal_ganglia           | 1 1                         |
|               | 1                                     | 0.52718842                  | 0.52718842   | 0.52718842   | NA | 1 |  | 0.998207054                           |                             |
| GBP3          | ENSG00000117226.11                    |                             |              | 0.598104441  | 13 | 1 |  | 0.215505967                           |                             |
|               | Brain_Putamen_basal_ganglia           |                             |              | 0.86968294   |    |   |  | Brain_Anterior_cingulate_cortex_BA24  |                             |
|               | 12.3311697                            | 7.32E-06                    | 12.3311697   | -1.238566807 |    |   |  | 0.619231966                           | -0.509706994                |
|               | 0.443472597                           | 1                           | 0            | 0.998207054  |    |   |  |                                       |                             |
| ST20          | ENSG00000180953.11                    |                             |              | 0.598110715  | 13 | 3 |  | 0.15185232                            | Brain_Cortex                |

|               |                                      |                                |              |              |                                       |                |
|---------------|--------------------------------------|--------------------------------|--------------|--------------|---------------------------------------|----------------|
|               | 0.707048447                          | Brain_Substantia_nigra         | 11.13058885  | 0.009813875  |                                       |                |
|               | 0.445977131                          | 0.375823055                    | 1.433019307  | 0.943989321  | 0.31937585                            | 3              |
|               | 0                                    | 0.998207054                    |              |              |                                       |                |
| ANAPC1        | ENSG00000153107.11                   | 0.59816614                     | 3            | 3            | 0.241813846                           | Brain_Amygdala |
|               | 0.7534123                            | Brain_Spinal_cord_cervical_c-1 | 1.109284826  | 0.890715174  |                                       |                |
|               | 0.890715174                          | -1.170465112                   | 0.314143174  | -0.514714621 | 0.757291255                           |                |
|               | 3                                    | 0                              | 0.998207054  |              |                                       |                |
| PCDHGA5       | ENSG00000253485.2                    | 0.59830256                     | 2            | 2            | 0.364539762                           |                |
|               | Brain_Caudate_basal_ganglia          | 0.494135861                    |              |              | Brain_Anterior_cingulate_cortex_BA24  |                |
|               | 1.273643478                          | 0.726356522                    | 0.726356522  | -0.906748591 | -0.68374554                           |                |
|               | -0.795247065                         | 0.157686969                    | 2            | 0            | 0.998207054                           |                |
| LEMD1         | ENSG00000186007.9                    | 0.598354944                    | 1            | 1            | 0.598354944                           | Brain_Cortex   |
|               | 0.598354944                          | Brain_Cortex                   | 1            | 1            | 0.526767659                           | 0.526767659    |
|               | 0.526767659                          | NA                             | 1            | 0            | 0.998207054                           |                |
| SLC25A51      | ENSG00000122696.13                   | 0.59844491                     | 13           | 1            | 0.366080334                           |                |
|               | Brain_Hippocampus                    | 0.968092149                    |              |              | Brain_Substantia_nigra                | 12.58111807    |
|               | 0.000450389                          | 12.58111807                    | 0.040001225  | 0.903839838  | 0.51709868                            |                |
|               | 0.196433448                          | 1                              | 0            | 0.998207054  |                                       |                |
| ADGRA3        | ENSG00000152990.13                   | 0.598462903                    | 2            | 2            | 0.366443967                           |                |
|               | Brain_Hippocampus                    | 0.573116967                    |              |              | Brain_Caudate_basal_ganglia           | 1.118772455    |
|               | 0.881227545                          | 0.881227545                    | -0.903154378 | -0.563466939 | -0.733310659                          |                |
|               | 0.240195292                          | 2                              | 0            | 0.998207054  |                                       |                |
| RP11-569G13.3 | ENSG00000275465.5                    | 0.598632124                    | 2            | 2            | 0.744864665                           |                |
|               | Brain_Substantia_nigra               | 0.765501948                    |              |              | Brain_Putamen_basal_ganglia           |                |
|               | 1.810441419                          | 0.189558581                    | 0.189558581  | -0.325418091 | 0.298263646                           |                |
|               | -0.013577222                         | 0.441009586                    | 2            | 0            | 0.998207054                           |                |
| HEXIM1        | ENSG00000186834.3                    | 0.598692109                    | 3            | 3            | 0.290756334                           |                |
|               | Brain_Putamen_basal_ganglia          | 0.942143923                    |              |              | Brain_Cortex                          | 1.234503626    |
|               | 0.77142066                           | 0.77142066                     | -1.056463881 | -0.0725755   | -0.658566308                          | 0.518211718    |
|               | 3                                    | 0                              | 0.998207054  |              |                                       |                |
| CCT8          | ENSG00000156261.12                   | 0.598798127                    | 6            | 5            | 0.09343193                            |                |
|               | Brain_Cerebellar_Hemisphere          | 0.94312578                     |              |              | Brain_Anterior_cingulate_cortex_BA24  |                |
|               | 3.425972098                          | 0.033282717                    | 0.117586516  | -0.870024622 | 1.677565616                           |                |
|               | 0.446598469                          | 0.872817206                    | 5            | 0            | 0.998207054                           |                |
| SCGB1B2P      | ENSG00000268751.1                    | 0.598897055                    | 7            | 5            | 0.124474125                           |                |
|               | Brain_Cerebellum                     | 0.78267469                     |              |              | Brain_Putamen_basal_ganglia           | 4.262654742    |
|               | 0.060371355                          | 0.260874441                    | -1.536262043 | 1.049764372  | 0.147729802                           |                |
|               | 0.953159019                          | 5                              | 0            | 0.998207054  |                                       |                |
| MCAT          | ENSG00000100294.12                   | 0.598952417                    | 6            | 5            | 0.186130844                           | Brain_Amygdala |
|               | 0.728961702                          | Brain_Cortex                   | 2.498132509  | 0.067252231  | 0.422618213                           |                |
|               | -1.322112042                         | -0.34650703                    | -0.8020568   | 0.342980325  | 5                                     | 0              |
|               | 0.998207054                          |                                |              |              |                                       |                |
| VCL           | ENSG00000035403.17                   | 0.599000072                    | 2            | 2            | 0.314536443                           |                |
|               | Brain_Frontal_Cortex_BA9             | 0.897839755                    |              |              | Brain_Nucleus_accumbens_basal_ganglia |                |
|               | 1.012326276                          | 0.987673724                    | 0.987673724  | -1.005748756 | 0.128390745                           |                |
|               | -0.438679005                         | 0.801957732                    | 2            | 0            | 0.998207054                           |                |
| FIGNL1        | ENSG00000132436.11                   | 0.5990356                      | 12           | 3            | 0.109837876                           |                |
|               | Brain_Hippocampus                    | 0.945147123                    |              |              | Brain_Putamen_basal_ganglia           | 10.00830978    |
|               | 0.01058853                           | 0.410051347                    | 0.068802129  | 1.598922265  | 0.642073979                           |                |
|               | 0.425378104                          | 3                              | 0            | 0.998207054  |                                       |                |
| PI16          | ENSG00000164530.13                   | 0.599120333                    | 10           | 6            | 0.11604908                            |                |
|               | Brain_Anterior_cingulate_cortex_BA24 | 0.969480661                    |              |              | Brain_Caudate_basal_ganglia           |                |
|               | 6.029900802                          | 0.014691806                    | 0.251479177  | -0.708129481 | 1.571575296                           |                |
|               | 0.130003129                          | 0.729907227                    | 6            | 0            | 0.998207054                           |                |
| LINC02150     | ENSG00000248150.1                    | 0.599435104                    | 6            | 4            | 0.126436142                           |                |
|               | Brain_Cerebellum                     | 0.893684129                    |              |              | Brain_Frontal_Cortex_BA9              | 3.415928011    |
|               | 0.045672286                          | 0.184008105                    | -1.528307769 | 0.370726332  | -0.606836442                          |                |
|               | 0.784742099                          | 4                              | 0            | 0.998207054  |                                       |                |
| ZNF768        | ENSG00000169957.9                    | 0.599607031                    | 1            | 1            | 0.599607031                           |                |
|               | Brain_Putamen_basal_ganglia          | 0.599607031                    |              |              | Brain_Putamen_basal_ganglia           | 1              |
|               | 1                                    | 0.524965706                    | 0.524965706  | 0.524965706  | NA                                    | 1              |
|               | 0.998207054                          |                                |              |              | 0                                     |                |

|               |                             |                             |                                      |              |                                       |                  |             |  |
|---------------|-----------------------------|-----------------------------|--------------------------------------|--------------|---------------------------------------|------------------|-------------|--|
| CTD-2245E15.3 | ENSG00000251532.1           | 0.599609428                 | 5                                    | 5            | 0.098907874                           |                  |             |  |
|               | Brain_Cerebellum            | 0.867061308                 |                                      |              | Brain_Cortex                          | 2.376451712      | 0.238828059 |  |
|               | 0.238828059                 | -0.300939583                | 1.65017145                           | 0.497125031  | 0.720350614                           |                  | 5           |  |
|               | 0                           | 0.998207054                 |                                      |              |                                       |                  |             |  |
| ELAC2         | ENSG0000006744.18           | 0.599632655                 | 13                                   | 1            | 0.392118165                           |                  |             |  |
|               | Brain_Cerebellar_Hemisphere | 0.980028321                 |                                      |              | Brain_Caudate_basal_ganglia           |                  |             |  |
|               | 12.11637606                 | 8.05E-05                    | 12.11637606                          |              | -0.064858248                          | 0.855782377      |             |  |
|               | 0.500555766                 | 0.288472307                 | 1                                    | 0            | 0.998207054                           |                  |             |  |
| LINC01198     | ENSG00000231817.7           | 0.599751223                 | 3                                    | 2            | 0.2961862                             | Brain_Cerebellum |             |  |
|               | 0.610895574                 | Brain_Substantia_nigra      | 2.391420459                          | 0.012795451  |                                       |                  |             |  |
|               | 0.59578409                  | -1.044646888                | -0.5087955                           | -0.841308453 | 0.290342418                           | 2                | 0           |  |
|               | 0.998207054                 |                             |                                      |              |                                       |                  |             |  |
| ALG1L         | ENSG00000189366.9           | 0.599920398                 | 13                                   | 1            | 0.350450674                           |                  |             |  |
|               | Brain_Hypothalamus          | 0.97136834                  | Brain_Putamen_basal_ganglia          | 11.9621893   | 0.00413438                            |                  |             |  |
|               | 11.9621893                  | -0.209579807                | 0.933715487                          | 0.499410444  | 0.322076677                           | 1                |             |  |
|               | 0                           | 0.998207054                 |                                      |              |                                       |                  |             |  |
| CFAP43        | ENSG00000197748.12          | 0.59993711                  | 5                                    | 5            | 0.118741394                           |                  |             |  |
|               | Brain_Frontal_Cortex_BA9    | 0.576471713                 |                                      |              | Brain_Nucleus_accumbens_basal_ganglia |                  |             |  |
|               | 2.82126172                  | 0.140569216                 | 0.140569216                          |              | -1.560078236                          | -0.558545838     |             |  |
|               | -1.060422105                | 0.386402042                 | 5                                    | 0            | 0.998207054                           |                  |             |  |
| TBC1D2        | ENSG00000095383.19          | 0.599952807                 | 13                                   | 3            | 0.342505422                           |                  |             |  |
|               | Brain_Amygdala              | 0.837285536                 | Brain_Substantia_nigra               | 11.06166065  |                                       |                  |             |  |
|               | 0.004117994                 | 0.570002261                 | -0.402795225                         | 0.949226508  | 0.527313464                           |                  |             |  |
|               | 0.355825944                 | 3                           | 0                                    | 0.998207054  |                                       |                  |             |  |
| COX6A2        | ENSG00000156885.5           | 0.599970527                 | 1                                    | 1            | 0.599970527                           |                  |             |  |
|               | Brain_Substantia_nigra      | 0.599970527                 | Brain_Substantia_nigra               | 1            | 1                                     |                  |             |  |
|               | 1                           | 0.524442898                 | 0.524442898                          | 0.524442898  | NA                                    | 1                | 0           |  |
|               | 0.998207054                 |                             |                                      |              |                                       |                  |             |  |
| ST8SIA4       | ENSG00000113532.12          | 0.600121825                 | 1                                    | 1            | 0.600121825                           |                  |             |  |
|               | Brain_Caudate_basal_ganglia | 0.600121825                 | Brain_Caudate_basal_ganglia          | 1            | 1                                     |                  |             |  |
|               | 1                           | -0.52422533                 | -0.52422533                          | -0.52422533  | NA                                    | 1                | 0           |  |
|               | 0.998207054                 |                             |                                      |              |                                       |                  |             |  |
| CCDC94        | ENSG00000105248.15          | 0.600306961                 | 8                                    | 4            | 0.274911565                           |                  |             |  |
|               | Brain_Cerebellar_Hemisphere | 0.749774979                 | Brain_Anterior_cingulate_cortex_BA24 |              |                                       |                  |             |  |
|               | 6.540556188                 | 0.003479536                 | 0.231408232                          | -0.780963302 | 1.091821505                           |                  |             |  |
|               | 0.610343927                 | 0.614312701                 | 4                                    | 0            | 0.998207054                           |                  |             |  |
| PFKL          | ENSG00000141959.16          | 0.600432743                 | 11                                   | 9            | 0.18001336                            | Brain_Cerebellum |             |  |
|               | 0.934372133                 | Brain_Putamen_basal_ganglia | 5.179667062                          | 0.088161699  |                                       |                  |             |  |
|               | 0.184784926                 | -0.600416797                | 1.3407139                            | 0.249595678  | 0.541460008                           | 9                |             |  |
|               | 0                           | 0.998207054                 |                                      |              |                                       |                  |             |  |
| RP11-301G7.1  | ENSG00000272479.1           | 0.600651042                 | 3                                    | 2            | 0.331977909                           |                  |             |  |
|               | Brain_Caudate_basal_ganglia | 0.821264649                 | Brain_Spinal_cord_cervical_c-1       |              |                                       |                  |             |  |
|               | 2.006943726                 | 0.027555999                 | 0.965500275                          | -0.9701376   | 0.225918705                           |                  |             |  |
|               | -0.55042493                 | 0.673072734                 | 2                                    | 0            | 0.998207054                           |                  |             |  |
| ELF1          | ENSG00000120690.15          | 0.600676913                 | 1                                    | 1            | 0.600676913                           |                  |             |  |
|               | Brain_Substantia_nigra      | 0.600676913                 | Brain_Substantia_nigra               | 1            | 1                                     |                  |             |  |
|               | 1                           | 0.523427325                 | 0.523427325                          | 0.523427325  | NA                                    | 1                | 0           |  |
|               | 0.998207054                 |                             |                                      |              |                                       |                  |             |  |
| KANSL2        | ENSG00000139620.12          | 0.600968922                 | 4                                    | 4            | 0.278269146                           |                  |             |  |
|               | Brain_Cortex                | 0.468817495                 | Brain_Substantia_nigra               | 1.92838555   |                                       |                  |             |  |
|               | 0.072800504                 | 0.072800504                 | -0.909493594                         | 1.084215759  | 0.015282214                           |                  |             |  |
|               | 1.037427932                 | 4                           | 0                                    | 0.998207054  |                                       |                  |             |  |
| TOP1MT        | ENSG00000184428.12          | 0.600981608                 | 3                                    | 3            | 0.179045555                           |                  |             |  |
|               | Brain_Cerebellum            | 0.870882875                 | Brain_Hippocampus                    | 2.028419138  |                                       |                  |             |  |
|               | 0.138916967                 | 0.138916967                 | -1.343699574                         | 0.162537151  | -0.726357597                          |                  |             |  |
|               | 0.788982223                 | 3                           | 0                                    | 0.998207054  |                                       |                  |             |  |
| LINC00403     | ENSG00000224243.1           | 0.601061661                 | 3                                    | 3            | 0.257992935                           |                  |             |  |
|               | Brain_Cerebellum            | 0.690366227                 | Brain_Cortex                         | 1.297157351  | 0.742929989                           |                  |             |  |
|               | 0.742929989                 | -0.506968305                | 1.13114769                           | 0.075273756  | 0.916024763                           | 3                |             |  |
|               | 0                           | 0.998207054                 |                                      |              |                                       |                  |             |  |
| JMJD8         | ENSG00000161999.11          | 0.601112516                 | 6                                    | 6            | 0.173741827                           |                  |             |  |
|               | Brain_Hypothalamus          | 0.93579757                  | Brain_Cortex                         | 1.973358203  | 0.432797521                           |                  |             |  |

|               |                                       |                             |                                       |              |              |                  |             |  |  |
|---------------|---------------------------------------|-----------------------------|---------------------------------------|--------------|--------------|------------------|-------------|--|--|
|               | 0.432797521                           | -1.360278443                | 0.435443848                           | -0.657670832 | 0.693064351  |                  |             |  |  |
|               | 6                                     | 0                           | 0.998207054                           |              |              |                  |             |  |  |
| TTL1          | ENSG00000100271.16                    | 0.601142424                 | 11                                    | 11           | 0.246569105  |                  |             |  |  |
|               | Brain_Substantia_nigra                | 0.94921707                  | Brain_Nucleus_accumbens_basal_ganglia |              |              |                  |             |  |  |
|               | 4.028953523                           | 0.142095633                 | 0.142095633                           | -1.085622801 | 1.158723018  |                  |             |  |  |
|               | -0.00494685                           | 0.698708551                 | 11                                    | 0            | 0.998207054  |                  |             |  |  |
| LRRN3         | ENSG00000173114.12                    | 0.601151714                 | 1                                     | 1            | 0.601151714  | Brain_Cortex     |             |  |  |
|               | 0.601151714                           | Brain_Cortex                | 1                                     | 1            | 0.522745006  | 0.522745006      |             |  |  |
|               | 0.522745006                           | NA                          | 1                                     | 0            | 0.998207054  |                  |             |  |  |
| VGLL3         | ENSG00000206538.8                     | 0.601238158                 | 1                                     | 1            | 0.601238158  |                  |             |  |  |
|               | Brain_Caudate_basal_ganglia           | 0.601238158                 | Brain_Caudate_basal_ganglia           | 1            | 1            |                  |             |  |  |
|               | 1                                     | 0.522620807                 | 0.522620807                           | 0.522620807  | NA           | 1                | 0           |  |  |
|               | 0.998207054                           |                             |                                       |              |              |                  |             |  |  |
| APIP          | ENSG00000149089.12                    | 0.60125293                  | 13                                    | 1            | 0.491574198  | Brain_Cerebellum |             |  |  |
|               | 0.752655603                           | Brain_Cerebellar_Hemisphere | 12.86681538                           | 0.000497302  |              |                  |             |  |  |
|               | 12.86681538                           | 0.315139679                 | 0.687807206                           | 0.519827327  | 0.102269218  |                  |             |  |  |
|               | 1                                     | 0                           | 0.998207054                           |              |              |                  |             |  |  |
| PLK2          | ENSG00000145632.14                    | 0.601344238                 | 1                                     | 1            | 0.601344238  |                  |             |  |  |
|               | Brain_Frontal_Cortex_BA9              | 0.601344238                 | Brain_Frontal_Cortex_BA9              | 1            | 1            |                  |             |  |  |
|               | 1                                     | 0.522468407                 | 0.522468407                           | 0.522468407  | NA           | 1                | 0           |  |  |
|               | 0.998207054                           |                             |                                       |              |              |                  |             |  |  |
| MYH14         | ENSG00000105357.15                    | 0.601373728                 | 2                                     | 2            | 0.331974257  |                  |             |  |  |
|               | Brain_Spinal_cord_cervical_c-1        | 0.782011594                 | Brain_Caudate_basal_ganglia           |              |              |                  |             |  |  |
|               | 1.001243203                           | 0.998756797                 | 0.998756797                           | -0.970144928 | 0.276698539  |                  |             |  |  |
|               | -0.346723194                          | 0.88165147                  | 2                                     | 0            | 0.998207054  |                  |             |  |  |
| PIAS1         | ENSG00000033800.13                    | 0.601374005                 | 1                                     | 1            | 0.601374005  |                  |             |  |  |
|               | Brain_Hippocampus                     | 0.601374005                 | Brain_Hippocampus                     | 1            | 1            | 1                |             |  |  |
|               | 0.522425645                           | 0.522425645                 | 0.522425645                           | NA           | 1            | 0                | 0.998207054 |  |  |
| KRT23         | ENSG00000108244.16                    | 0.601425995                 | 3                                     | 3            | 0.208428167  |                  |             |  |  |
|               | Brain_Nucleus_accumbens_basal_ganglia | 0.242525168                 | Brain_Putamen_basal_ganglia           |              |              |                  |             |  |  |
|               | 2.41700609                            | 0.131957042                 | 0.131957042                           | 1.168698396  | 1.257899327  |                  |             |  |  |
|               | 1.221905663                           | 0.047025872                 | 3                                     | 0            | 0.998207054  |                  |             |  |  |
| RP11-624D11.2 | ENSG00000254532.1                     | 0.601432238                 | 3                                     | 1            | 0.544066226  |                  |             |  |  |
|               | Brain_Caudate_basal_ganglia           | 0.71309184                  | Brain_Putamen_basal_ganglia           | 2.96002293   |              |                  |             |  |  |
|               | 0.010421946                           | 2.96002293                  | -0.606675589                          | -0.367706839 | -0.518773966 |                  |             |  |  |
|               | 0.131411287                           | 1                           | 0                                     | 0.998207054  |              |                  |             |  |  |
| TAS2R20       | ENSG00000255837.1                     | 0.601457082                 | 4                                     | 4            | 0.287352537  |                  |             |  |  |
|               | Brain_Cerebellum                      | 0.990865052                 | Brain_Caudate_basal_ganglia           | 3.130765881  |              |                  |             |  |  |
|               | 0.142231231                           | 0.142231231                 | -1.063947381                          | 0.163939207  | -0.345360368 |                  |             |  |  |
|               | 0.555226443                           | 4                           | 0                                     | 0.998207054  |              |                  |             |  |  |
| ASB14         | ENSG00000239388.8                     | 0.601500947                 | 4                                     | 4            | 0.158550361  | Brain_Amygdala   |             |  |  |
|               | 0.981225736                           | Brain_Cerebellar_Hemisphere | 2.575178413                           | 0.180683791  |              |                  |             |  |  |
|               | 0.180683791                           | -0.09565781                 | 1.409963839                           | 0.434057109  | 0.69342381   | 4                |             |  |  |
|               | 0                                     | 0.998207054                 |                                       |              |              |                  |             |  |  |
| SDK2          | ENSG00000069188.16                    | 0.601514551                 | 1                                     | 1            | 0.601514551  | Brain_Cerebellum |             |  |  |
|               | 0.601514551                           | Brain_Cerebellum            | 1                                     | 1            | 0.52222375   | 0.52222375       | 0.52222375  |  |  |
|               | NA                                    | 1                           | 0                                     | 0.998207054  |              |                  |             |  |  |
| CDX2          | ENSG00000165556.9                     | 0.601744757                 | 2                                     | 2            | 0.654887227  |                  |             |  |  |
|               | Brain_Cerebellar_Hemisphere           | 0.93756919                  | Brain_Cerebellum                      | 1.859107819  |              |                  |             |  |  |
|               | 0.140892181                           | 0.140892181                 | -0.078325429                          | 0.446983148  | 0.184328859  |                  |             |  |  |
|               | 0.371449257                           | 2                           | 0                                     | 0.998207054  |              |                  |             |  |  |
| VEZF1         | ENSG00000136451.8                     | 0.601781781                 | 1                                     | 1            | 0.601781781  |                  |             |  |  |
|               | Brain_Hypothalamus                    | 0.601781781                 | Brain_Hypothalamus                    | 1            | 1            | 1                |             |  |  |
|               | 0.521839936                           | 0.521839936                 | 0.521839936                           | NA           | 1            | 0                | 0.998207054 |  |  |
| LONP1         | ENSG00000196365.11                    | 0.601815849                 | 11                                    | 10           | 0.034604167  | Brain_Cortex     |             |  |  |
|               | 0.969629274                           | Brain_Hippocampus           | 2.353268592                           | 9.57E-18     | 0.476966718  |                  |             |  |  |
|               | -2.112960289                          | 0.047171712                 | -0.594426643                          | 0.622978783  | 10           | 0                |             |  |  |
|               | 0.998207054                           |                             |                                       |              |              |                  |             |  |  |
| AHSA2         | ENSG00000173209.22                    | 0.601835247                 | 13                                    | 1            | 0.456654524  |                  |             |  |  |
|               | Brain_Caudate_basal_ganglia           | 0.745250164                 | Brain_Cerebellum                      | 12.13118863  |              |                  |             |  |  |
|               | 0.006646081                           | 12.13118863                 | -0.744366923                          | -0.324908711 | -0.50611933  |                  |             |  |  |
|               | 0.140812606                           | 1                           | 0                                     | 0.998207054  |              |                  |             |  |  |

|               |                                       |                             |                                |              |              |                             |
|---------------|---------------------------------------|-----------------------------|--------------------------------|--------------|--------------|-----------------------------|
| MRPS12        | ENSG00000128626.11                    | 0.601917072                 | 2                              | 2            | 0.5366702    | Brain_Cerebellum            |
|               | 0.559817388                           | Brain_Hippocampus           | 1.289356607                    |              | 0.710643393  |                             |
|               | 0.710643393                           | -0.617856099                | 0.58311277                     | -0.017371665 | 0.849213231  | 2                           |
|               | 0                                     | 0.998207054                 |                                |              |              |                             |
| LA16c-352F7.1 | ENSG00000278716.1                     | 0.602033514                 | 1                              | 1            | 0.602033514  |                             |
|               | Brain_Hypothalamus                    | 0.602033514                 | Brain_Hypothalamus             | 1            | 1            | 1                           |
|               | -0.52147845                           | -0.52147845                 | -0.52147845                    | NA           | 1            | 0                           |
|               |                                       |                             |                                |              |              | 0.998207054                 |
| PHF24         | ENSG00000122733.12                    | 0.602045138                 | 6                              | 6            | 0.136500469  |                             |
|               | Brain_Hippocampus                     | 0.71025113                  | Brain_Frontal_Cortex_BA9       | 1.506637966  |              |                             |
|               | 0.672832521                           | 0.672832521                 | -0.585284687                   | 1.488950252  | 0.369169157  |                             |
|               | 0.919870783                           | 6                           | 0                              | 0.998207054  |              |                             |
| MGEA5         | ENSG00000198408.13                    | 0.602129606                 | 1                              | 1            | 0.602129606  |                             |
|               | Brain_Nucleus_accumbens_basal_ganglia | 0.602129606                 |                                |              |              |                             |
|               | Brain_Nucleus_accumbens_basal_ganglia | 1                           | 1                              | 1            | -0.521340481 |                             |
|               | -0.521340481                          | -0.521340481                | NA                             | 1            | 0            | 0.998207054                 |
| MSS51         | ENSG00000166343.9                     | 0.602144016                 | 1                              | 1            | 0.602144016  |                             |
|               | Brain_Substantia_nigra                | 0.602144016                 | Brain_Substantia_nigra         | 1            | 1            |                             |
|               | 1                                     | 0.521319791                 | 0.521319791                    | 0.521319791  | NA           | 1                           |
|               |                                       |                             |                                |              |              | 0                           |
|               | 0.998207054                           |                             |                                |              |              |                             |
| FSTL4         | ENSG00000053108.16                    | 0.602255401                 | 4                              | 4            | 0.366017901  |                             |
|               | Brain_Putamen_basal_ganglia           | 0.83432356                  | Brain_Cerebellum               | 1.876852852  |              |                             |
|               | 0.359657867                           | 0.359657867                 | -0.90395757                    | 0.444826277  | -0.390529731 |                             |
|               | 0.644885507                           | 4                           | 0                              | 0.998207054  |              |                             |
| MCHR1         | ENSG00000128285.4                     | 0.602260427                 | 5                              | 3            | 0.370762557  |                             |
|               | Brain_Frontal_Cortex_BA9              | 0.808375749                 | Brain_Cerebellum               | 3.364175953  |              |                             |
|               | 0.041154061                           | 0.440601861                 | -0.827286623                   | 0.895045891  | 0.120125905  |                             |
|               | 0.675594809                           | 3                           | 0                              | 0.998207054  |              |                             |
| MEFV          | ENSG00000103313.12                    | 0.60249649                  | 1                              | 1            | 0.60249649   | Brain_Putamen_basal_ganglia |
|               | 0.60249649                            | Brain_Putamen_basal_ganglia | 1                              | 1            | 1            | 0.520813799                 |
|               | 0.520813799                           | 0.520813799                 | NA                             | 1            | 0            | 0.998207054                 |
| HEY1          | ENSG00000164683.16                    | 0.602679916                 | 2                              | 2            | 0.324924794  |                             |
|               | Brain_Hypothalamus                    | 0.769176249                 | Brain_Putamen_basal_ganglia    | 1.0864971    |              |                             |
|               | 0.9135029                             | 0.9135029                   | -0.293452569                   | 0.984387963  | 0.345467697  |                             |
|               | 0.903569705                           | 2                           | 0                              | 0.998207054  |              |                             |
| DMBT1         | ENSG00000187908.16                    | 0.602785614                 | 3                              | 2            | 0.312404012  | Brain_Amygdala              |
|               | 0.988763358                           | Brain_Hippocampus           | 1.95127757                     | 0.06310147   | 0.985620961  |                             |
|               | -0.014083507                          | 1.010190538                 | 0.40245366                     | 0.538240027  | 2            | 0                           |
|               | 0.998207054                           |                             |                                |              |              |                             |
| RGS7          | ENSG00000182901.16                    | 0.602805343                 | 1                              | 1            | 0.602805343  |                             |
|               | Brain_Spinal_cord_cervical_c-1        | 0.602805343                 | Brain_Spinal_cord_cervical_c-1 |              |              |                             |
|               | 1                                     | 1                           | 1                              | 0.520370535  | 0.520370535  | 0.520370535                 |
|               |                                       |                             |                                |              |              | NA                          |
|               |                                       |                             |                                |              |              | 1                           |
|               |                                       |                             |                                |              |              | 0                           |
|               | 0.998207054                           |                             |                                |              |              |                             |
| ZCRB1         | ENSG00000139168.7                     | 0.602829116                 | 6                              | 4            | 0.527727589  | Brain_Cortex                |
|               | 0.899591103                           | Brain_Cerebellum            | 4.398384738                    | 0.018596645  | 0.164947485  |                             |
|               | -0.35458824                           | 0.631478674                 | 0.115760469                    | 0.377314821  | 4            | 0                           |
|               | 0.998207054                           |                             |                                |              |              |                             |
| SMIM22        | ENSG00000267795.5                     | 0.603136656                 | 11                             | 8            | 0.137676621  |                             |
|               | Brain_Hippocampus                     | 0.972942118                 | Brain_Caudate_basal_ganglia    | 5.098188957  |              |                             |
|               | 0.022082654                           | 0.230130315                 | -0.134668156                   | 1.484498877  | 0.722571216  |                             |
|               | 0.577075055                           | 8                           | 0                              | 0.998207054  |              |                             |
| NOTO          | ENSG00000214513.3                     | 0.603197723                 | 2                              | 2            | 0.317474908  | Brain_Cerebellum            |
|               | 0.35502825                            | Brain_Cerebellar_Hemisphere | 1.872283742                    | 0.127716258  |              |                             |
|               | 0.127716258                           | -0.999660346                | -0.924880155                   | -0.962270251 | 0.05287758   | 2                           |
|               | 0                                     | 0.998207054                 |                                |              |              |                             |
| ZNF529        | ENSG00000186020.12                    | 0.60324274                  | 10                             | 6            | 0.05381124   | Brain_Hippocampus           |
|               | 0.66739303                            | Brain_Frontal_Cortex_BA9    | 6.809986212                    | 0.043070315  |              |                             |
|               | 0.261154585                           | -1.92835295                 | -0.429728664                   | -1.228104889 | 0.491469104  |                             |
|               | 6                                     | 0                           | 0.998207054                    |              |              |                             |
| WDR33         | ENSG00000136709.11                    | 0.603718477                 | 1                              | 1            | 0.603718477  |                             |
|               | Brain_Substantia_nigra                | 0.603718477                 | Brain_Substantia_nigra         | 1            | 1            |                             |
|               | 1                                     | -0.519060607                | -0.519060607                   | -0.519060607 | NA           | 1                           |
|               |                                       |                             |                                |              |              | 0                           |
|               | 0.998207054                           |                             |                                |              |              |                             |



|          |                                       |                             |                |              |                                       |                  |
|----------|---------------------------------------|-----------------------------|----------------|--------------|---------------------------------------|------------------|
| ACOT6    | ENSG00000205669.2                     | 0.603795694                 | 8              | 2            | 0.216831379                           | Brain_Cortex     |
|          | 0.988730065                           | Brain_Caudate_basal_ganglia | 6.613118733    | 0.002790968  |                                       |                  |
|          | 0.935469968                           | -1.234997648                | 0.014125238    | -0.889464442 | 0.468579802                           |                  |
|          | 2                                     | 0                           | 0.998207054    |              |                                       |                  |
| ENC1     | ENSG00000171617.13                    | 0.603864299                 | 1              | 1            | 0.603864299                           | Brain_Cerebellum |
|          | 0.603864299                           | Brain_Cerebellum            | 1              | 1            | -0.518851503                          | -0.518851503     |
|          | -0.518851503                          | NA                          | 1              | 0            | 0.998207054                           |                  |
| INA      | ENSG00000148798.10                    | 0.603889359                 | 6              | 4            | 0.129449967                           |                  |
|          | Brain_Anterior_cingulate_cortex_BA24  | 0.454320696                 |                |              | Brain_Putamen_basal_ganglia           |                  |
|          | 3.490667397                           | 0.030012753                 | 0.474239579    | -1.516274462 | -0.748231231                          |                  |
|          | -0.920921701                          | 0.295969404                 | 4              | 0            | 0.998207054                           |                  |
| GDI2     | ENSG00000057608.16                    | 0.603940365                 | 6              | 3            | 0.146983292                           |                  |
|          | Brain_Caudate_basal_ganglia           | 0.754445677                 |                |              | Brain_Frontal_Cortex_BA9              |                  |
|          | 4.608308748                           | 0.011722518                 | 0.291677359    | -1.450269819 | -0.312782808                          |                  |
|          | -0.972715262                          | 0.392410751                 | 3              | 0            | 0.998207054                           |                  |
| DNASE2   | ENSG00000105612.8                     | 0.604068451                 | 4              | 3            | 0.271302889                           |                  |
|          | Brain_Nucleus_accumbens_basal_ganglia | 0.932610535                 |                |              | Brain_Cerebellar_Hemisphere           |                  |
|          | 2.230680611                           | 0.032926492                 | 0.732164348    | -1.100067095 | 0.360488209                           |                  |
|          | -0.306816106                          | 0.61460419                  | 3              | 0            | 0.998207054                           |                  |
| CALCR1   | ENSG00000064989.12                    | 0.604102052                 | 3              | 3            | 0.359720751                           |                  |
|          | Brain_Cerebellum                      | 0.534673144                 |                |              | Brain_Cerebellar_Hemisphere           | 1.634208464      |
|          | 0.332819359                           | 0.332819359                 | -0.915897324   | -0.620888264 | -0.799045715                          |                  |
|          | 0.156768591                           | 3                           | 0              | 0.998207054  |                                       |                  |
| TMEM184B | ENSG00000198792.12                    | 0.604271847                 | 2              | 2            | 0.445374693                           |                  |
|          | Brain_Cerebellar_Hemisphere           | 0.987258473                 |                |              | Brain_Nucleus_accumbens_basal_ganglia |                  |
|          | 1.661566826                           | 0.338433174                 | 0.338433174    | -0.763148743 | -0.015969815                          |                  |
|          | -0.389559279                          | 0.528335287                 | 2              | 0            | 0.998207054                           |                  |
| CYP51A1  | ENSG00000001630.15                    | 0.604450537                 | 2              | 2            | 0.447321752                           |                  |
|          | Brain_Spinal_cord_cervical_c-1        | 0.527200008                 |                |              | Brain_Hypothalamus                    |                  |
|          | 1.029923527                           | 0.970076473                 | 0.970076473    | -0.632286002 | 0.759887637                           |                  |
|          | 0.063800817                           | 0.984415421                 | 2              | 0            | 0.998207054                           |                  |
| VPS37A   | ENSG00000155975.9                     | 0.604580678                 | 3              | 3            | 0.266986675                           |                  |
|          | Brain_Spinal_cord_cervical_c-1        | 0.7361644                   | Brain_Amygdala | 1.095036428  |                                       |                  |
|          | 0.899764238                           | 0.899764238                 | -0.732838773   | 1.110028663  | 0.238042293                           |                  |
|          | 0.925405434                           | 3                           | 0              | 0.998207054  |                                       |                  |
| GOLGA8T  | ENSG00000261247.1                     | 0.604582022                 | 2              | 2            | 0.388223255                           |                  |
|          | Brain_Putamen_basal_ganglia           | 0.705413111                 |                |              | Brain_Caudate_basal_ganglia           |                  |
|          | 1.148464354                           | 0.851535646                 | 0.851535646    | -0.862843979 | 0.378023534                           |                  |
|          | -0.242410222                          | 0.877425833                 | 2              | 0            | 0.998207054                           |                  |
| LACTB2   | ENSG00000147592.8                     | 0.604605851                 | 8              | 3            | 0.373752958                           |                  |
|          | Brain_Caudate_basal_ganglia           | 0.930876839                 |                |              | Brain_Anterior_cingulate_cortex_BA24  |                  |
|          | 6.323787987                           | 0.00398324                  | 0.339127995    | 0.086741688  | 0.889465497                           |                  |
|          | 0.530163012                           | 0.262359643                 | 3              | 0            | 0.998207054                           |                  |
| NCMAP    | ENSG00000184454.6                     | 0.60462718                  | 7              | 6            | 0.141490614                           |                  |
|          | Brain_Nucleus_accumbens_basal_ganglia | 0.958539792                 |                |              | Brain_Cortex                          |                  |
|          | 3.136390634                           | 0.017471199                 | 0.289432932    | -1.145140065 | 1.470262718                           |                  |
|          | -0.108920866                          | 0.868053111                 | 6              | 0            | 0.998207054                           |                  |
| HDAC4    | ENSG00000068024.16                    | 0.604645673                 | 2              | 2            | 0.316758509                           |                  |
|          | Brain_Hippocampus                     | 0.937604345                 |                |              | Brain_Cortex                          | 1.015490131      |
|          | 0.984509869                           | 0.984509869                 | -0.078281233   | 1.001141282  | 0.461430024                           |                  |
|          | 0.76326698                            | 2                           | 0              | 0.998207054  |                                       |                  |
| POPDC2   | ENSG00000121577.13                    | 0.604718529                 | 3              | 3            | 0.182245017                           |                  |
|          | Brain_Cerebellar_Hemisphere           | 0.966174803                 |                |              | Brain_Amygdala                        | 1.153777145      |
|          | 0.865136181                           | 0.865136181                 | -1.333874417   | -0.042406304 | -0.603532315                          |                  |
|          | 0.662154088                           | 3                           | 0              | 0.998207054  |                                       |                  |
| SLC37A2  | ENSG00000134955.11                    | 0.604736121                 | 2              | 2            | 0.325743985                           |                  |
|          | Brain_Cerebellar_Hemisphere           | 0.552821363                 |                |              | Brain_Cerebellum                      | 1.740956142      |
|          | 0.259043858                           | 0.259043858                 | 0.593537696    | 0.9827226    | 0.788130148                           |                  |
|          | 0.275195285                           | 2                           | 0              | 0.998207054  |                                       |                  |
| ATAD3A   | ENSG00000197785.13                    | 0.604767306                 | 3              | 3            | 0.348496514                           |                  |
|          | Brain_Anterior_cingulate_cortex_BA24  | 0.659484226                 |                |              | Brain_Cortex                          |                  |
|          | 1.404391685                           | 0.608339484                 | 0.608339484    | -0.937509549 | 0.538606316                           |                  |

|               |                    |              |                                      |              |                                      |              |                  |             |    |   |
|---------------|--------------------|--------------|--------------------------------------|--------------|--------------------------------------|--------------|------------------|-------------|----|---|
| LCE1C         | ENSG00000197084.5  | 0.013907382  | 0.825406384                          | 3            | 0                                    | 0.998207054  |                  |             |    |   |
|               |                    | 0.396859715  | Brain_Cerebellar_Hemisphere          | 1.765362591  | 0.234637409                          |              |                  |             |    |   |
|               |                    | 0.234637409  | 0.847242956                          | 0.993818557  | 0.920530757                          | 0.103644601  |                  |             |    |   |
|               |                    | 2            | 0                                    | 0.998207054  |                                      |              |                  |             |    |   |
| PC            | ENSG00000173599.13 | 0.766342194  | 0.604830116                          | 2            | 2                                    | 0.335642021  | Brain_Cerebellum |             |    |   |
|               |                    | -0.962811714 | Brain_Caudate_basal_ganglia          | 1.01748302   | 0.98251698                           | 0.98251698   |                  |             |    |   |
|               |                    | 0.998207054  | -0.297162835                         | -0.629987274 | 0.470684836                          | 2            | 0                |             |    |   |
| NCK2          | ENSG00000071051.13 | 1.053788666  | 0.604957953                          | 2            | 2                                    | 0.316058275  |                  |             |    |   |
|               |                    | 0.529267386  | Brain_Cerebellar_Hemisphere          | 0.955386544  | Brain_Caudate_basal_ganglia          |              |                  |             |    |   |
|               |                    | 0.529267386  | 0.946211334                          | 0.946211334  | 0.055943843                          | 1.002590928  |                  |             |    |   |
|               |                    | 0.998207054  | 0.669380573                          | 2            | 0                                    | 0.998207054  |                  |             |    |   |
| QRICH2        | ENSG00000129646.14 | 3.822419813  | 0.604998862                          | 6            | 6                                    | 0.082096045  |                  |             |    |   |
|               |                    | -0.783830933 | Brain_Anterior_cingulate_cortex_BA24 | 0.816874924  | Brain_Cerebellum                     |              |                  |             |    |   |
|               |                    | 0.998207054  | 0.145037357                          | 0.145037357  | -1.738651707                         | -0.231566249 |                  |             |    |   |
| FANCE         | ENSG00000112039.3  | 0.998207054  | 0.605084823                          | 1            | 1                                    | 0.605084823  |                  |             |    |   |
|               |                    | 0.998207054  | Brain_Caudate_basal_ganglia          | 0.605084823  | Brain_Caudate_basal_ganglia          | 1            | 1                |             |    |   |
|               |                    | 0.998207054  | 0.517102193                          | 0.517102193  | 0.517102193                          | NA           | 1                | 0           |    |   |
| RAB2B         | ENSG00000129472.13 | 0.998207054  | 0.605152382                          | 1            | 1                                    | 0.605152382  |                  |             |    |   |
|               |                    | 0.998207054  | Brain_Spinal_cord_cervical_c-1       | 0.605152382  | Brain_Spinal_cord_cervical_c-1       |              |                  |             |    |   |
|               |                    | 0.998207054  | 1                                    | 1            | 1                                    | 0.517005411  | 0.517005411      | 0.517005411 | NA | 1 |
|               |                    | 0.998207054  | 0.517005411                          | 0.517005411  | 0.517005411                          | NA           | 1                | 0           |    |   |
| CHCHD2        | ENSG00000106153.12 | 0.937425903  | 0.605326128                          | 11           | 2                                    | 0.186268496  |                  |             |    |   |
|               |                    | 0.937425903  | Brain_Hypothalamus                   | 0.699189872  | Brain_Anterior_cingulate_cortex_BA24 |              |                  |             |    |   |
|               |                    | 0.998207054  | 9.640494126                          | 0.00043181   | 0.760344318                          | 0.386414286  | 1.321698716      |             |    |   |
|               |                    | 0.998207054  | 0.276795008                          | 2            | 0                                    | 0.998207054  |                  |             |    |   |
| DTX3          | ENSG00000178498.15 | 0.571172762  | 0.605330353                          | 2            | 2                                    | 0.435736599  | Brain_Amygdala   |             |    |   |
|               |                    | 0.921243658  | Brain_Caudate_basal_ganglia          | 1.078756342  | 0.921243658                          |              |                  |             |    |   |
|               |                    | 0.998207054  | -0.566325156                         | 0.779412779  | 0.106543811                          | 0.95158042   | 2                |             |    |   |
|               |                    | 0.998207054  | 0.779412779                          | 0.779412779  | 0.106543811                          | 0.95158042   | 2                |             |    |   |
| SLC27A1       | ENSG00000130304.16 | 0.005218484  | 0.605356723                          | 6            | 2                                    | 0.496009024  |                  |             |    |   |
|               |                    | 0.287356945  | Brain_Substantia_nigra               | 0.846776459  | Brain_Cerebellum                     | 5.484541935  |                  |             |    |   |
|               |                    | 0.998207054  | 0.294758597                          | -0.21793265  | 0.68078266                           | 0.243859582  |                  |             |    |   |
|               |                    | 0.998207054  | 2                                    | 0            | 0.998207054                          |              |                  |             |    |   |
| FBXO22        | ENSG00000167196.13 | -0.798174996 | 0.605404842                          | 5            | 4                                    | 0.138735383  |                  |             |    |   |
|               |                    | 0.998207054  | Brain_Cerebellar_Hemisphere          | 0.974352579  | Brain_Anterior_cingulate_cortex_BA24 |              |                  |             |    |   |
|               |                    | 0.998207054  | 3.252882309                          | 0.059975016  | 0.186268423                          | -1.480516791 | -0.032149813     |             |    |   |
|               |                    | 0.998207054  | -0.798174996                         | 0.636430935  | 4                                    | 0            | 0.998207054      |             |    |   |
| PPP1CB        | ENSG00000213639.9  | 0.008360137  | 0.605502163                          | 9            | 4                                    | 0.468932286  |                  |             |    |   |
|               |                    | 0.458858339  | Brain_Caudate_basal_ganglia          | 0.960737607  | Brain_Hippocampus                    | 7.12621986   |                  |             |    |   |
|               |                    | 0.998207054  | 0.250625177                          | -0.724217387 | 0.584918335                          | -0.176129312 |                  |             |    |   |
|               |                    | 0.998207054  | 4                                    | 0            | 0.998207054                          |              |                  |             |    |   |
| DIS3L2        | ENSG00000144535.19 | 0.516458911  | 0.605533929                          | 1            | 1                                    | 0.605533929  |                  |             |    |   |
|               |                    | 0.516458911  | Brain_Hippocampus                    | 0.605533929  | Brain_Hippocampus                    | 1            | 1                | 1           |    |   |
|               |                    | 0.998207054  | 0.516458911                          | 0.516458911  | NA                                   | 1            | 0                | 0.998207054 |    |   |
| RP11-861E21.1 | ENSG00000267108.1  | 0.005182862  | 0.605555902                          | 13           | 2                                    | 0.188032061  |                  |             |    |   |
|               |                    | 0.508417625  | Brain_Spinal_cord_cervical_c-1       | 0.967930612  | Brain_Amygdala                       | 11.0847111   |                  |             |    |   |
|               |                    | 0.998207054  | 0.748862896                          | -0.866349665 | 1.316423138                          | -0.090491378 |                  |             |    |   |
|               |                    | 0.998207054  | 2                                    | 0            | 0.998207054                          |              |                  |             |    |   |
| PCYOX1        | ENSG00000116005.11 | 0.998207054  | 0.605605754                          | 1            | 1                                    | 0.605605754  |                  |             |    |   |
|               |                    | 0.998207054  | Brain_Caudate_basal_ganglia          | 0.605605754  | Brain_Caudate_basal_ganglia          | 1            | 1                |             |    |   |
|               |                    | 0.998207054  | 1                                    | -0.516356052 | -0.516356052                         | -0.516356052 | NA               | 1           | 0  |   |
|               |                    | 0.998207054  | -0.516356052                         | -0.516356052 | -0.516356052                         | NA           | 1                | 0           |    |   |
| NRIP2         | ENSG00000053702.14 | 0.206251671  | 0.605697333                          | 4            | 4                                    | 0.240108968  |                  |             |    |   |
|               |                    | 0.793408228  | Brain_Caudate_basal_ganglia          | 0.5373702    | Brain_Putamen_basal_ganglia          | 2.387439659  |                  |             |    |   |
|               |                    | 0.998207054  | 0.206251671                          | -1.174714471 | 0.683349871                          | -0.446019769 |                  |             |    |   |
|               |                    | 0.998207054  | 4                                    | 0            | 0.998207054                          |              |                  |             |    |   |
| LYPD8         | ENSG00000259823.5  | 0.735788792  | 0.60574967                           | 4            | 4                                    | 0.153941124  | Brain_Cortex     |             |    |   |
|               |                    | 0.998207054  | Brain_Caudate_basal_ganglia          | 1.995288844  | 0.09020112                           | 0.09020112   |                  |             |    |   |
|               |                    | 0.998207054  | 1.995288844                          | 1.995288844  | 0.09020112                           | 0.09020112   |                  |             |    |   |

|           |                                       |                                |                                |              |                             |                  |
|-----------|---------------------------------------|--------------------------------|--------------------------------|--------------|-----------------------------|------------------|
|           | -0.97217065                           | 1.425747902                    | -0.088555977                   | 1.045882536  | 4                           | 0                |
|           | 0.998207054                           |                                |                                |              |                             |                  |
| LRRC4C    | ENSG00000148948.7                     | 0.605790561                    | 3                              | 3            | 0.191627447                 |                  |
|           | Brain_Spinal_cord_cervical_c-1        | 0.938765192                    |                                |              | Brain_Caudate_basal_ganglia |                  |
|           | 1.154467167                           | 0.875395096                    | 0.875395096                    | -0.076821945 | 1.305779814                 |                  |
|           | 0.550826906                           | 0.700036891                    | 3                              | 0            | 0.998207054                 |                  |
| CAHM      | ENSG00000270419.1                     | 0.605794444                    | 1                              | 1            | 0.605794444                 |                  |
|           | Brain_Nucleus_accumbens_basal_ganglia | 0.605794444                    |                                |              |                             |                  |
|           | Brain_Nucleus_accumbens_basal_ganglia | 1                              | 1                              | 1            | -0.51608586                 |                  |
|           | -0.51608586                           | -0.51608586                    | NA                             | 1            | 0                           | 0.998207054      |
| TRAPPC8   | ENSG00000153339.13                    | 0.605825702                    | 1                              | 1            | 0.605825702                 |                  |
|           | Brain_Cerebellum                      | 0.605825702                    | Brain_Cerebellum               | 1            | 1                           | -0.516041103     |
|           | -0.516041103                          | -0.516041103                   | NA                             | 1            | 0                           | 0.998207054      |
| POMGNT2   | ENSG00000144647.5                     | 0.605895121                    | 10                             | 4            | 0.218623744                 |                  |
|           | Brain_Spinal_cord_cervical_c-1        | 0.819354223                    |                                |              | Brain_Cerebellar_Hemisphere |                  |
|           | 7.597509332                           | 0.001382161                    | 0.396138819                    | -0.633681746 | 1.23019593                  |                  |
|           | -0.268080507                          | 0.539385263                    | 4                              | 0            | 0.998207054                 |                  |
| ZBTB49    | ENSG00000168826.15                    | 0.606102984                    | 4                              | 4            | 0.168190486                 |                  |
|           | Brain_Hippocampus                     | 0.511880025                    | Brain_Spinal_cord_cervical_c-1 |              |                             |                  |
|           | 1.842583583                           | 0.373361399                    | 0.373361399                    | -1.188446394 | 1.378041466                 |                  |
|           | 0.38303131                            | 1.099426543                    | 4                              | 0            | 0.998207054                 |                  |
| CENPJ     | ENSG00000151849.14                    | 0.606107373                    | 8                              | 4            | 0.106495711                 |                  |
|           | Brain_Anterior_cingulate_cortex_BA24  | 0.557954173                    | Brain_Putamen_basal_ganglia    |              |                             |                  |
|           | 5.977707244                           | 0.03402641                     | 0.3330081                      | 0.585882955  | 1.614146234                 |                  |
|           | 1.185402668                           | 0.32743429                     | 4                              | 0            | 0.998207054                 |                  |
| TSGA10    | ENSG00000135951.14                    | 0.606228295                    | 12                             | 3            | 0.29511602                  | Brain_Cerebellum |
|           | 0.782338377                           | Brain_Amygdala                 | 9.564375491                    | 0.001363727  | 0.707041859                 |                  |
|           | -0.464032825                          | 1.046964352                    | 0.493070483                    | 0.459406599  | 3                           | 0                |
|           | 0.998207054                           |                                |                                |              |                             |                  |
| GFPT2     | ENSG00000131459.12                    | 0.606288343                    | 7                              | 7            | 0.097548686                 |                  |
|           | Brain_Caudate_basal_ganglia           | 0.862249113                    | Brain_Putamen_basal_ganglia    |              |                             |                  |
|           | 2.107852049                           | 0.210843729                    | 0.210843729                    | -0.477740153 | 1.656855533                 |                  |
|           | 0.367000691                           | 0.785404568                    | 7                              | 0            | 0.998207054                 |                  |
| LINC00339 | ENSG00000218510.6                     | 0.606302981                    | 13                             | 1            | 0.411571899                 |                  |
|           | Brain_Nucleus_accumbens_basal_ganglia | 0.942718978                    |                                |              |                             |                  |
|           | Brain_Spinal_cord_cervical_c-1        | 12.49107273                    | 0.000460029                    | 12.49107273  |                             |                  |
|           | -0.82113057                           | 0.204418793                    | -0.499033049                   | 0.317189472  | 1                           | 0                |
|           | 0.998207054                           |                                |                                |              |                             |                  |
| Clorf220  | ENSG00000213057.5                     | 0.606360074                    | 3                              | 3            | 0.585057807                 |                  |
|           | Brain_Caudate_basal_ganglia           | 0.778739948                    | Brain_Cerebellum               | 2.102703203  |                             |                  |
|           | 0.121715457                           | 0.121715457                    | -0.546011828                   | 0.280961475  | -0.183470268                |                  |
|           | 0.422797136                           | 3                              | 0                              | 0.998207054  |                             |                  |
| HIPK2     | ENSG00000064393.15                    | 0.606385121                    | 2                              | 2            | 0.341065372                 |                  |
|           | Brain_Hypothalamus                    | 0.752195336                    | Brain_Putamen_basal_ganglia    | 1.009529091  |                             |                  |
|           | 0.990470909                           | 0.990470909                    | -0.95206233                    | -0.315745963 | -0.633904147                |                  |
|           | 0.449943618                           | 2                              | 0                              | 0.998207054  |                             |                  |
| ASRGL1    | ENSG00000162174.12                    | 0.606435109                    | 10                             | 3            | 0.343074325                 |                  |
|           | Brain_Hippocampus                     | 0.906249579                    | Brain_Caudate_basal_ganglia    | 7.520339737  |                             |                  |
|           | 0.000263359                           | 0.934262697                    | -0.355195167                   | 0.948108297  | 0.323750101                 |                  |
|           | 0.520245116                           | 3                              | 0                              | 0.998207054  |                             |                  |
| SH2B1     | ENSG00000178188.14                    | 0.606440489                    | 4                              | 3            | 0.211727629                 | Brain_Cerebellum |
|           | 0.741492178                           | Brain_Hypothalamus             | 1.979147882                    | 0.038463229  | 0.97089311                  |                  |
|           | -1.248828987                          | 0.352496762                    | -0.433893846                   | 0.895625663  | 3                           | 0                |
|           | 0.998207054                           |                                |                                |              |                             |                  |
| WAC       | ENSG00000095787.21                    | 0.606478654                    | 4                              | 4            | 0.289889627                 |                  |
|           | Brain_Substantia_nigra                | 0.930977917                    | Brain_Cerebellar_Hemisphere    |              |                             |                  |
|           | 2.594303088                           | 0.127966548                    | 0.127966548                    | -0.38724801  | 1.058363777                 |                  |
|           | 0.144688745                           | 0.63924169                     | 4                              | 0            | 0.998207054                 |                  |
| UTP18     | ENSG00000011260.13                    | 0.606606133                    | 11                             | 3            | 0.257476261                 | Brain_Cerebellum |
|           | 0.970984458                           | Brain_Spinal_cord_cervical_c-1 | 8.92754264                     | 0.000470483  |                             |                  |
|           | 0.433852814                           | -0.826896042                   | 1.132376309                    | -0.079430803 | 0.526351168                 |                  |
|           | 3                                     | 0                              | 0.998207054                    |              |                             |                  |

|             |                                       |                                |                  |             |              |                                       |                  |   |
|-------------|---------------------------------------|--------------------------------|------------------|-------------|--------------|---------------------------------------|------------------|---|
| KYNU        | ENSG00000115919.14                    | 0.606610789                    | 2                | 2           | 0.336892461  |                                       |                  |   |
|             | Brain_Substantia_nigra                | 0.577611472                    |                  |             |              | Brain_Putamen_basal_ganglia           |                  |   |
|             | 1.303656748                           | 0.696343252                    | 0.696343252      |             | 0.556876998  | 0.96032343                            |                  |   |
|             | 0.758600214                           | 0.285279708                    | 2                | 0           | 0.998207054  |                                       |                  |   |
| PIGK        | ENSG00000142892.14                    | 0.606779245                    | 2                | 2           | 0.4320058    |                                       |                  |   |
|             | Brain_Nucleus_accumbens_basal_ganglia | 0.533118165                    |                  |             |              | Brain_Putamen_basal_ganglia           |                  |   |
|             | 1.006877529                           | 0.993122471                    | 0.993122471      |             | -0.785763933 | 0.623253172                           |                  |   |
|             | -0.081255381                          | 0.99632555                     | 2                | 0           | 0.998207054  |                                       |                  |   |
| ZNF781      | ENSG00000196381.10                    | 0.60701034                     | 10               | 3           | 0.344467641  |                                       | Brain_Cortex     |   |
|             | 0.880673325                           | Brain_Spinal_cord_cervical_c-1 |                  |             | 8.166701072  | 0.015363892                           |                  |   |
|             | 0.339051576                           | -0.473938251                   | 0.945374647      |             | 0.178192224  | 0.503996509                           |                  |   |
|             | 3                                     | 0                              | 0.998207054      |             |              |                                       |                  |   |
| RAB8B       | ENSG00000166128.12                    | 0.607012062                    | 2                | 2           | 0.353870778  |                                       |                  |   |
|             | Brain_Substantia_nigra                | 0.73250373                     | Brain_Cerebellum | 1.033083558 |              |                                       |                  |   |
|             | 0.966916442                           | 0.966916442                    | -0.927107394     |             | 0.341796916  | -0.292655239                          |                  |   |
|             | 0.897250842                           | 2                              | 0                | 0.998207054 |              |                                       |                  |   |
| TMEM45A     | ENSG00000181458.10                    | 0.607029285                    | 4                | 4           | 0.430984452  |                                       |                  |   |
|             | Brain_Spinal_cord_cervical_c-1        | 0.884985856                    |                  |             |              | Brain_Substantia_nigra                |                  |   |
|             | 2.435875249                           | 0.136393638                    | 0.136393638      |             | -0.594167223 | 0.787508162                           |                  |   |
|             | 0.220737788                           | 0.604485176                    | 4                | 0           | 0.998207054  |                                       |                  |   |
| OGFOD3      | ENSG00000181396.12                    | 0.607064507                    | 12               | 9           | 0.139398448  |                                       |                  |   |
|             | Brain_Frontal_Cortex_BA9              | 0.861795892                    |                  |             |              | Brain_Anterior_cingulate_cortex_BA24  |                  |   |
|             | 5.042143231                           | 0.006476779                    | 0.1982555        |             | -1.069670476 | 1.478034858                           |                  |   |
|             | -0.032581797                          | 0.847224226                    | 9                | 0           | 0.998207054  |                                       |                  |   |
| RARS2       | ENSG00000146282.17                    | 0.607152414                    | 2                | 2           | 0.459305617  |                                       | Brain_Cortex     |   |
|             | 0.95547426                            | Brain_Hippocampus              | 1.629329351      |             | 0.370670649  | 0.370670649                           |                  |   |
|             | -0.055833736                          | 0.739990733                    | 0.342078499      |             | 0.562732879  | 2                                     | 0                |   |
|             | 0.998207054                           |                                |                  |             |              |                                       |                  |   |
| LINC02019   | ENSG00000273356.1                     | 0.607266205                    | 2                | 2           | 0.387627255  |                                       |                  |   |
|             | Brain_Caudate_basal_ganglia           | 0.510829595                    |                  |             |              | Brain_Substantia_nigra                |                  |   |
|             | 1.191731997                           | 0.808268003                    | 0.808268003      |             | 0.657546479  | 0.863928344                           |                  |   |
|             | 0.760737412                           | 0.145934016                    | 2                | 0           | 0.998207054  |                                       |                  |   |
| EFEMP2      | ENSG00000172638.12                    | 0.607328454                    | 4                | 3           | 0.183808834  |                                       |                  |   |
|             | Brain_Cerebellar_Hemisphere           | 0.802003753                    |                  |             |              | Brain_Hypothalamus                    | 2.687234065      |   |
|             | 0.059375523                           | 0.434847096                    | 0.250754718      |             | 1.329118634  | 0.824822104                           |                  |   |
|             | 0.508105303                           | 3                              | 0                | 0.998207054 |              |                                       |                  |   |
| TSEN15      | ENSG00000198860.11                    | 0.607526101                    | 9                | 4           | 0.114864679  |                                       |                  |   |
|             | Brain_Cerebellum                      | 0.979419457                    |                  |             |              | Brain_Nucleus_accumbens_basal_ganglia | 7.07117774       |   |
|             | 0.006572691                           | 0.306817227                    | -1.576699529     |             | 0.025796747  | -1.088989006                          |                  |   |
|             | 0.45054089                            | 4                              | 0                | 0.998207054 |              |                                       |                  |   |
| DNAJC3-AS1  | ENSG00000247400.3                     | 0.607589449                    | 6                | 6           | 0.07978137   |                                       |                  |   |
|             | Brain_Nucleus_accumbens_basal_ganglia | 0.760887695                    |                  |             |              | Brain_Caudate_basal_ganglia           |                  |   |
|             | 3.381822394                           | 0.12920723                     | 0.12920723       |             | 0.304315293  | 1.751956026                           |                  |   |
|             | 1.273341991                           | 0.517445008                    | 6                | 0           | 0.998207054  |                                       |                  |   |
| UBE2F       | ENSG00000184182.18                    | 0.607656972                    | 4                | 4           | 0.20303574   |                                       |                  |   |
|             | Brain_Nucleus_accumbens_basal_ganglia | 0.851991684                    |                  |             |              |                                       |                  |   |
|             | Brain_Spinal_cord_cervical_c-1        | 2.638938326                    |                  |             | 0.187184852  | 0.187184852                           |                  |   |
|             | -1.272950126                          | -0.186577788                   | -0.781660146     |             | 0.462753025  | 4                                     | 0                |   |
|             | 0.998207054                           |                                |                  |             |              |                                       |                  |   |
| AC003090.1  | ENSG00000223561.6                     | 0.607792954                    | 4                | 3           | 0.188961432  |                                       |                  |   |
|             | Brain_Caudate_basal_ganglia           | 0.552049753                    |                  |             |              | Brain_Hypothalamus                    | 2.818408846      |   |
|             | 0.093455676                           | 0.406243434                    | 0.594691427      |             | 1.313657671  | 0.841587704                           |                  |   |
|             | 0.332295467                           | 3                              | 0                | 0.998207054 |              |                                       |                  |   |
| AP001065.15 | ENSG00000228709.1                     | 0.607801715                    | 1                | 1           | 0.607801715  |                                       |                  |   |
|             | Brain_Spinal_cord_cervical_c-1        | 0.607801715                    |                  |             |              | Brain_Spinal_cord_cervical_c-1        |                  |   |
|             | 1                                     | 1                              | 1                | 0.513213883 | 0.513213883  | 0.513213883                           | NA               | 1 |
|             | 0.998207054                           |                                |                  |             |              |                                       |                  | 0 |
| ZFP69       | ENSG00000187815.9                     | 0.607826491                    | 12               | 3           | 0.547291836  |                                       | Brain_Cerebellum |   |
|             | 0.963468496                           | Brain_Cortex                   | 10.3296247       | 0.01291083  | 0.52708695   | -0.601823192                          |                  |   |
|             | 0.557420474                           | 0.117494739                    | 0.408505084      |             | 3            | 0                                     | 0.998207054      |   |
| ZCCHC2      | ENSG00000141664.9                     | 0.607854251                    | 1                | 1           | 0.607854251  |                                       |                  |   |
|             | Brain_Cerebellum                      | 0.607854251                    | Brain_Cerebellum | 1           | 1            | 1                                     | 0.513138773      |   |

|              |                                       |                             |              |                                       |             |              |                  |
|--------------|---------------------------------------|-----------------------------|--------------|---------------------------------------|-------------|--------------|------------------|
|              | 0.513138773                           | 0.513138773                 | NA           | 1                                     | 0           | 0.998207054  |                  |
| RASGRP2      | ENSG00000068831.18                    | 0.607876889                 |              | 1                                     | 1           | 0.607876889  |                  |
|              | Brain_Hippocampus                     | 0.607876889                 |              | Brain_Hippocampus                     | 1           | 1            | 1                |
|              | -0.513106409                          | -0.513106409                | -0.513106409 | NA                                    | 1           | 0            | 0.998207054      |
| FAM124A      | ENSG00000150510.16                    | 0.6080096                   |              | 1                                     | 1           | 0.6080096    | Brain_Cortex     |
|              | 0.6080096                             | Brain_Cortex                | 1            | 1                                     | 1           | -0.512916687 | -0.512916687     |
|              | -0.512916687                          | NA                          | 1            | 0                                     | 0.998207054 |              |                  |
| LAYN         | ENSG00000204381.11                    | 0.608113631                 |              | 10                                    | 5           | 0.100965632  | Brain_Amygdala   |
|              | 0.93479934                            | Brain_Putamen_basal_ganglia | 6.643794968  |                                       |             | 0.014956186  |                  |
|              | 0.455798741                           | -1.640190174                | 0.396091736  |                                       |             | -0.051779258 | 0.590796379      |
|              | 5                                     | 0                           | 0.998207054  |                                       |             |              |                  |
| TPM1         | ENSG00000140416.19                    | 0.608160045                 |              | 3                                     | 3           | 0.219086141  |                  |
|              | Brain_Cerebellar_Hemisphere           | 0.980131451                 |              | Brain_Cerebellum                      | 1.409219126 |              |                  |
|              | 0.509202383                           | 0.509202383                 | -1.228961768 |                                       |             | 0.024904107  | -0.571690339     |
|              | 0.62913129                            | 3                           | 0            | 0.998207054                           |             |              |                  |
| ANXA13       | ENSG00000104537.16                    | 0.608236231                 |              | 4                                     | 4           | 0.129947291  |                  |
|              | Brain_Spinal_cord_cervical_c-1        | 0.868812059                 |              | Brain_Hypothalamus                    |             |              |                  |
|              | 1.479112986                           | 0.522442918                 | 0.522442918  |                                       |             | -0.16516761  | 1.514309772      |
|              | 0.645464733                           | 0.68822552                  | 4            | 0                                     | 0.998207054 |              |                  |
| PLPP2        | ENSG00000141934.9                     | 0.608418218                 |              | 1                                     | 1           | 0.608418218  | Brain_Cortex     |
|              | 0.608418218                           | Brain_Cortex                | 1            | 1                                     | 1           | -0.51233265  | -0.51233265      |
|              | -0.51233265                           | NA                          | 1            | 0                                     | 0.998207054 |              |                  |
| VTA1         | ENSG00000009844.15                    | 0.608434988                 |              | 7                                     | 6           | 0.171700921  | Brain_Cortex     |
|              | 0.953866667                           | Brain_Cerebellum            | 4.924282482  |                                       |             | 0.037209361  | 0.168657782      |
|              | -0.24082681                           | 1.3667588                   | 0.48375908   | 0.601752905                           | 6           | 0            | 0.998207054      |
| RAB42        | ENSG00000188060.7                     | 0.608489262                 |              | 1                                     | 1           | 0.608489262  | Brain_Cortex     |
|              | 0.608489262                           | Brain_Cortex                | 1            | 1                                     | 1           | -0.512231126 | -0.512231126     |
|              | -0.512231126                          | NA                          | 1            | 0                                     | 0.998207054 |              |                  |
| RP1-182D15.2 | ENSG00000236173.1                     | 0.608541426                 |              | 10                                    | 3           | 0.216272597  |                  |
|              | Brain_Nucleus_accumbens_basal_ganglia | 0.925883178                 |              | Brain_Hypothalamus                    |             |              |                  |
|              | 7.947524271                           | 0.007403018                 | 0.576385623  |                                       |             | -1.236500455 | 0.327080739      |
|              | -0.449260584                          | 0.460097806                 | 3            | 0                                     | 0.998207054 |              |                  |
| ELK4         | ENSG00000158711.13                    | 0.608614709                 |              | 1                                     | 1           | 0.608614709  | Brain_Cerebellum |
|              | 0.608614709                           | Brain_Cerebellum            | 1            | 1                                     | 1           | -0.512051869 | -0.512051869     |
|              | -0.512051869                          | NA                          | 1            | 0                                     | 0.998207054 |              |                  |
| CA12         | ENSG00000074410.13                    | 0.60862218                  |              | 9                                     | 7           | 0.069144437  |                  |
|              | Brain_Substantia_nigra                | 0.984749698                 |              | Brain_Cerebellum                      | 5.524154078 |              |                  |
|              | 0.019248921                           | 0.233360464                 | -1.817474841 |                                       |             | 0.628106866  | -0.413510579     |
|              | 0.70151004                            | 7                           | 0            | 0.998207054                           |             |              |                  |
| GFM2         | ENSG00000164347.17                    | 0.608747829                 |              | 8                                     | 5           | 0.280451269  |                  |
|              | Brain_Caudate_basal_ganglia           | 0.973854673                 |              | Brain_Cerebellum                      | 5.514577771 |              |                  |
|              | 0.001305738                           | 0.267588869                 | -1.079306158 |                                       |             | 0.60052948   | -0.37686803      |
|              | 0.512636202                           | 5                           | 0            | 0.998207054                           |             |              |                  |
| TMTC4        | ENSG00000125247.15                    | 0.608842933                 |              | 6                                     | 6           | 0.096217015  | Brain_Amygdala   |
|              | 0.974167439                           | Brain_Putamen_basal_ganglia | 3.280904958  |                                       |             | 0.116623861  |                  |
|              | 0.116623861                           | -1.663476882                | 0.230549766  |                                       |             | -0.272187534 | 0.696173523      |
|              | 6                                     | 0                           | 0.998207054  |                                       |             |              |                  |
| PRR15        | ENSG00000176532.3                     | 0.608879904                 |              | 1                                     | 1           | 0.608879904  | Brain_Amygdala   |
|              | 0.608879904                           | Brain_Amygdala              | 1            | 1                                     | 1           | -0.511672974 | -0.511672974     |
|              | -0.511672974                          | NA                          | 1            | 0                                     | 0.998207054 |              |                  |
| DSE          | ENSG00000111817.16                    | 0.609024512                 |              | 3                                     | 3           | 0.294743496  |                  |
|              | Brain_Substantia_nigra                | 0.998103885                 |              | Brain_Cerebellar_Hemisphere           |             |              |                  |
|              | 1.536745576                           | 0.459766881                 | 0.459766881  |                                       |             | -0.00237643  | 1.047772369      |
|              | 0.571708996                           | 0.531892252                 | 3            | 0                                     | 0.998207054 |              |                  |
| AURKA        | ENSG00000087586.17                    | 0.609111625                 |              | 1                                     | 1           | 0.609111625  | Brain_Cortex     |
|              | 0.609111625                           | Brain_Cortex                | 1            | 1                                     | 1           | 0.511341965  | 0.511341965      |
|              | 0.511341965                           | NA                          | 1            | 0                                     | 0.998207054 |              |                  |
| MYOM2        | ENSG00000036448.9                     | 0.609186503                 |              | 13                                    | 5           | 0.328657071  |                  |
|              | Brain_Hypothalamus                    | 0.885020529                 |              | Brain_Nucleus_accumbens_basal_ganglia |             |              |                  |
|              | 7.914367307                           | 0.01059561                  | 0.342844021  |                                       |             | -0.976822427 | 0.886884575      |
|              | -0.228000283                          | 0.629187398                 | 5            | 0                                     | 0.998207054 |              |                  |
| PITRM1       | ENSG00000107959.15                    | 0.609281423                 |              | 11                                    | 5           | 0.164864152  |                  |

|           |                                       |                  |                                       |              |              |                  |  |
|-----------|---------------------------------------|------------------|---------------------------------------|--------------|--------------|------------------|--|
|           | Brain_Amygdala                        | 0.79174526       | Brain_Cerebellum                      | 7.279857644  | 0.021780651  |                  |  |
|           | 0.321241881                           | 0.264044979      | 1.388896741                           | 0.784510716  | 0.40383425   | 5                |  |
|           | 0                                     | 0.998207054      |                                       |              |              |                  |  |
| UCK2      | ENSG00000143179.14                    | 0.609335861      | 1                                     | 1            | 0.609335861  | Brain_Cerebellum |  |
|           | 0.609335861                           | Brain_Cerebellum | 1                                     | 1            | -0.511021702 | -0.511021702     |  |
|           | -0.511021702                          | NA               | 1                                     | 0            | 0.998207054  |                  |  |
| NBR1      | ENSG00000188554.13                    | 0.60939093       | 7                                     | 3            | 0.301887017  |                  |  |
|           | Brain_Caudate_basal_ganglia           | 0.959915138      | Brain_Cerebellum                      | 5.460052436  |              |                  |  |
|           | 0.001685989                           | 0.430968903      | -0.327804024                          | 1.032395206  | 0.278125998  |                  |  |
|           | 0.42353205                            | 3                | 0                                     | 0.998207054  |              |                  |  |
| TPM2      | ENSG00000198467.13                    | 0.609878066      | 12                                    | 2            | 0.418423556  |                  |  |
|           | Brain_Caudate_basal_ganglia           | 0.886907025      | Brain_Nucleus_accumbens_basal_ganglia |              |              |                  |  |
|           | 10.84155913                           | 0.004047949      | 0.403829604                           | -0.809159242 | 0.597855507  |                  |  |
|           | -0.267285786                          | 0.368039502      | 2                                     | 0            | 0.998207054  |                  |  |
| ADGRE2    | ENSG00000127507.17                    | 0.609933777      | 2                                     | 2            | 0.339259074  |                  |  |
|           | Brain_Spinal_cord_cervical_c-1        | 0.65468864       | Brain_Amygdala                        | 1.679176889  |              |                  |  |
|           | 0.320823111                           | 0.320823111      | 0.447258205                           | 0.955630248  | 0.701444226  |                  |  |
|           | 0.359473319                           | 2                | 0                                     | 0.998207054  |              |                  |  |
| ICAM5     | ENSG00000105376.4                     | 0.610076141      | 2                                     | 2            | 0.328541323  |                  |  |
|           | Brain_Cerebellar_Hemisphere           | 0.892584785      | Brain_Putamen_basal_ganglia           |              |              |                  |  |
|           | 1.049462845                           | 0.950537155      | 0.950537155                           | 0.135034262  | 0.977056214  |                  |  |
|           | 0.556045238                           | 0.595399433      | 2                                     | 0            | 0.998207054  |                  |  |
| ODF3B     | ENSG00000177989.13                    | 0.610239159      | 1                                     | 1            | 0.610239159  | Brain_Cortex     |  |
|           | 0.610239159                           | Brain_Cortex     | 1                                     | 1            | -0.509732103 | -0.509732103     |  |
|           | -0.509732103                          | NA               | 1                                     | 0            | 0.998207054  |                  |  |
| GGT1      | ENSG00000100031.18                    | 0.610371367      | 2                                     | 2            | 0.320421232  |                  |  |
|           | Brain_Nucleus_accumbens_basal_ganglia | 0.827786184      | Brain_Cerebellar_Hemisphere           |              |              |                  |  |
|           | 1.206921359                           | 0.793078641      | 0.793078641                           | -0.993592634 | -0.217541737 |                  |  |
|           | -0.605567186                          | 0.548750852      | 2                                     | 0            | 0.998207054  |                  |  |
| FAM184A   | ENSG00000111879.18                    | 0.610647313      | 2                                     | 2            | 0.333491182  |                  |  |
|           | Brain_Cortex                          | 0.337176737      | Brain_Frontal_Cortex_BA9              | 1.88229947   | 0.11770053   |                  |  |
|           | 0.11770053                            | -0.967105728     | -0.959758571                          | -0.96343215  | 0.005195224  | 2                |  |
|           | 0                                     | 0.998207054      |                                       |              |              |                  |  |
| C1QTNF4   | ENSG00000172247.3                     | 0.610665082      | 4                                     | 2            | 0.255997407  |                  |  |
|           | Brain_Caudate_basal_ganglia           | 0.815594201      | Brain_Cerebellum                      | 3.486333439  |              |                  |  |
|           | 0.029088463                           | 0.382270553      | 0.233215332                           | 1.135902415  | 0.63747486   |                  |  |
|           | 0.427881222                           | 2                | 0                                     | 0.998207054  |              |                  |  |
| LINC00664 | ENSG00000268658.5                     | 0.610699046      | 9                                     | 3            | 0.299459624  |                  |  |
|           | Brain_Frontal_Cortex_BA9              | 0.825106736      | Brain_Cortex                          | 7.370917486  |              |                  |  |
|           | 0.004271595                           | 0.27475913       | -0.500594103                          | 1.037592901  | 0.425703134  |                  |  |
|           | 0.41744848                            | 3                | 0                                     | 0.998207054  |              |                  |  |
| PON1      | ENSG00000005421.8                     | 0.610738744      | 2                                     | 2            | 0.321041862  |                  |  |
|           | Brain_Anterior_cingulate_cortex_BA24  | 0.828501744      | Brain_Hypothalamus                    |              |              |                  |  |
|           | 1.25571262                            | 0.74428738       | 0.74428738                            | 0.216623534  | 0.992319155  | 0.604471344      |  |
|           | 0.548499633                           | 2                | 0                                     | 0.998207054  |              |                  |  |
| KDELC2    | ENSG00000178202.12                    | 0.610926048      | 6                                     | 2            | 0.267939475  |                  |  |
|           | Brain_Cortex                          | 0.531471539      | Brain_Nucleus_accumbens_basal_ganglia |              |              |                  |  |
|           | 5.499815795                           | 0.024388684      | 0.244327894                           | 0.62576127   | 1.107820198  |                  |  |
|           | 0.932333324                           | 0.168845165      | 2                                     | 0            | 0.998207054  |                  |  |
| SPOPL     | ENSG00000144228.8                     | 0.610990768      | 1                                     | 1            | 0.610990768  | Brain_Cerebellum |  |
|           | 0.610990768                           | Brain_Cerebellum | 1                                     | 1            | 0.508659709  | 0.508659709      |  |
|           | 0.508659709                           | NA               | 1                                     | 0            | 0.998207054  |                  |  |
| UPP1      | ENSG00000183696.13                    | 0.611070536      | 2                                     | 2            | 0.384957557  |                  |  |
|           | Brain_Cerebellar_Hemisphere           | 0.595768291      | Brain_Cerebellum                      | 1.876502658  |              |                  |  |
|           | 0.123497342                           | 0.123497342      | 0.530495698                           | 0.868798128  | 0.699646913  |                  |  |
|           | 0.239215942                           | 2                | 0                                     | 0.998207054  |              |                  |  |
| CPSF2     | ENSG00000165934.12                    | 0.611150065      | 10                                    | 2            | 0.260920264  |                  |  |
|           | Brain_Nucleus_accumbens_basal_ganglia | 0.789417128      | Brain_Putamen_basal_ganglia           |              |              |                  |  |
|           | 9.042745067                           | 0.001735753      | 0.47298064                            | 0.267067581  | 1.124218688  |                  |  |
|           | 0.732513141                           | 0.250758682      | 2                                     | 0            | 0.998207054  |                  |  |
| IZUMO4    | ENSG00000099840.13                    | 0.611234554      | 1                                     | 1            | 0.611234554  |                  |  |
|           | Brain_Hippocampus                     | 0.611234554      | Brain_Hippocampus                     | 1            | 1            | 1                |  |

|           |                                       |                  |                             |              |                                |                |              |
|-----------|---------------------------------------|------------------|-----------------------------|--------------|--------------------------------|----------------|--------------|
|           | -0.508312003                          | -0.508312003     | -0.508312003                | NA           | 1                              | 0              | 0.998207054  |
| CNOT7     | ENSG00000198791.11                    | 0.61127219       | 11                          | 2            | 0.270431014                    |                |              |
|           | Brain_Frontal_Cortex_BA9              | 0.590172682      |                             |              | Brain_Spinal_cord_cervical_c-1 |                |              |
|           | 9.79797696                            | 0.008323644      | 0.402363316                 |              | 0.538585809                    | 1.102070521    |              |
|           | 0.872395114                           | 0.159270961      | 2                           | 0            | 0.998207054                    |                |              |
| MFSD5     | ENSG00000182544.8                     | 0.611327029      | 2                           | 2            | 0.322276879                    |                |              |
|           | Brain_Nucleus_accumbens_basal_ganglia | 0.844193769      |                             |              | Brain_Frontal_Cortex_BA9       |                |              |
|           | 1.130902494                           | 0.869097506      | 0.869097506                 |              | -0.989789784                   | -0.196532025   |              |
|           | -0.593160904                          | 0.560917941      | 2                           | 0            | 0.998207054                    |                |              |
| SLC7A14   | ENSG00000013293.5                     | 0.611345786      | 2                           | 2            | 0.346599161                    |                |              |
|           | Brain_Caudate_basal_ganglia           | 0.767647867      |                             |              | Brain_Hypothalamus             | 1.019170043    |              |
|           | 0.980829957                           | 0.980829957      | -0.295452979                |              | 0.941206276                    | 0.322876648    |              |
|           | 0.874450145                           | 2                | 0                           | 0.998207054  |                                |                |              |
| PLCXD3    | ENSG00000182836.9                     | 0.611448867      | 1                           | 1            | 0.611448867                    |                |              |
|           | Brain_Cortex                          | 0.611448867      | Brain_Cortex                | 1            | 1                              | 1              | -0.508006383 |
|           | -0.508006383                          | -0.508006383     | NA                          | 1            | 0                              | 0.998207054    |              |
| NR6A1     | ENSG00000148200.16                    | 0.611556853      | 1                           | 1            | 0.611556853                    |                |              |
|           | Brain_Caudate_basal_ganglia           | 0.611556853      |                             |              | Brain_Caudate_basal_ganglia    | 1              | 1            |
|           | 1                                     | -0.507852407     | -0.507852407                | -0.507852407 | NA                             | 1              | 0            |
|           | 0.998207054                           |                  |                             |              |                                |                |              |
| SENP1     | ENSG00000079387.13                    | 0.611680324      | 2                           | 2            | 0.568294928                    |                |              |
|           | Brain_Hypothalamus                    | 0.974490785      | Brain_Cortex                | 1.798852838  |                                |                |              |
|           | 0.201147162                           | 0.201147162      | -0.031976508                |              | 0.570564442                    | 0.269293967    |              |
|           | 0.426060792                           | 2                | 0                           | 0.998207054  |                                |                |              |
| ZNF573    | ENSG00000189144.13                    | 0.611776566      | 1                           | 1            | 0.611776566                    |                |              |
|           | Brain_Cerebellar_Hemisphere           | 0.611776566      |                             |              | Brain_Cerebellar_Hemisphere    | 1              | 1            |
|           | 1                                     | 0.507539162      | 0.507539162                 | 0.507539162  | NA                             | 1              | 0            |
|           | 0.998207054                           |                  |                             |              |                                |                |              |
| LINC01099 | ENSG00000251504.1                     | 0.611785964      | 8                           | 7            | 0.261128075                    |                |              |
|           | Brain_Putamen_basal_ganglia           | 0.93843272       | Brain_Substantia_nigra      | 4.578689676  |                                |                |              |
|           | 0.00965019                            | 0.261097531      | -0.685875214                |              | 1.123728845                    | 0.292913792    |              |
|           | 0.555715388                           | 7                | 0                           | 0.998207054  |                                |                |              |
| CTTNBP2NL | ENSG00000143079.14                    | 0.611787258      | 4                           | 4            | 0.142356415                    |                |              |
|           | Brain_Substantia_nigra                | 0.732550118      |                             |              | Brain_Hypothalamus             | 1.210577519    |              |
|           | 0.810885063                           | 0.810885063      | -1.467072202                |              | 0.372204242                    | -0.271356953   |              |
|           | 0.863405205                           | 4                | 0                           | 0.998207054  |                                |                |              |
| GRM3      | ENSG00000198822.10                    | 0.611817387      | 2                           | 2            | 0.322434413                    | Brain_Amygdala |              |
|           | 0.970511928                           | Brain_Cerebellum | 1.023234921                 |              | 0.976765079                    | 0.976765079    |              |
|           | -0.989467604                          | 0.036966234      | -0.476250685                |              | 0.725798327                    | 2              | 0            |
|           | 0.998207054                           |                  |                             |              |                                |                |              |
| SOHLH1    | ENSG00000165643.10                    | 0.611879115      | 3                           | 3            | 0.25227661                     |                |              |
|           | Brain_Nucleus_accumbens_basal_ganglia | 0.809574313      |                             |              | Brain_Putamen_basal_ganglia    |                |              |
|           | 1.040155575                           | 0.96614825       | 0.96614825                  | -1.144837181 | 0.240975231                    |                |              |
|           | -0.519944574                          | 0.702848888      | 3                           | 0            | 0.998207054                    |                |              |
| CDC26     | ENSG00000176386.8                     | 0.611951494      | 12                          | 2            | 0.08909165                     |                |              |
|           | Brain_Cerebellar_Hemisphere           | 0.88830003       | Brain_Hypothalamus          | 10.7218531   |                                |                |              |
|           | 0.002699234                           | 0.494514781      | 0.1404556                   | 1.70020884   | 0.819566814                    |                |              |
|           | 0.429857956                           | 2                | 0                           | 0.998207054  |                                |                |              |
| DBH       | ENSG00000123454.10                    | 0.611973647      | 3                           | 3            | 0.325767528                    |                |              |
|           | Brain_Frontal_Cortex_BA9              | 0.551944448      |                             |              | Brain_Cortex                   | 1.180580653    |              |
|           | 0.855303866                           | 0.855303866      | -0.635150607                |              | 0.982674778                    | -0.082441591   |              |
|           | 0.922637911                           | 3                | 0                           | 0.998207054  |                                |                |              |
| LINC00909 | ENSG00000264247.1                     | 0.612018226      | 13                          | 3            | 0.327904988                    |                |              |
|           | Brain_Cortex                          | 0.697571157      | Brain_Caudate_basal_ganglia | 10.8310006   |                                |                |              |
|           | 0.004428864                           | 0.402145939      | -0.978342436                |              | 0.429288536                    | -0.653770555   |              |
|           | 0.377135485                           | 3                | 0                           | 0.998207054  |                                |                |              |
| TRABD2A   | ENSG00000186854.10                    | 0.612062158      | 4                           | 4            | 0.221844816                    |                |              |
|           | Brain_Caudate_basal_ganglia           | 0.906717967      |                             |              | Brain_Cerebellar_Hemisphere    |                |              |
|           | 1.887383083                           | 0.36130427       | 0.36130427                  | -0.117179304 | 1.221637303                    |                |              |
|           | 0.555749991                           | 0.558786018      | 4                           | 0            | 0.998207054                    |                |              |
| HIPK4     | ENSG00000160396.8                     | 0.612122861      | 1                           | 1            | 0.612122861                    | Brain_Cortex   |              |
|           | 0.612122861                           | Brain_Cortex     | 1                           | 1            | 1                              | -0.507045547   | -0.507045547 |

|           |                                       |                                |                                |              |              |                                |                |   |  |
|-----------|---------------------------------------|--------------------------------|--------------------------------|--------------|--------------|--------------------------------|----------------|---|--|
|           | -0.507045547                          | NA                             | 1                              | 0            | 0.998207054  |                                |                |   |  |
| FBXW7     | ENSG00000109670.13                    |                                | 0.612160721                    | 1            | 1            | 0.612160721                    |                |   |  |
|           | Brain_Putamen_basal_ganglia           | 0.612160721                    |                                |              |              | Brain_Putamen_basal_ganglia    | 1              | 1 |  |
|           | 1                                     | -0.506991588                   | -0.506991588                   | -0.506991588 | NA           | 1                              | 0              |   |  |
|           | 0.998207054                           |                                |                                |              |              |                                |                |   |  |
| NAA50     | ENSG00000121579.12                    |                                | 0.612167638                    | 2            | 2            | 0.32339962                     |                |   |  |
|           | Brain_Frontal_Cortex_BA9              | 0.951301691                    |                                |              |              | Brain_Spinal_cord_cervical_c-1 |                |   |  |
|           | 1.018837273                           | 0.981162727                    | 0.981162727                    |              |              | 0.061072222                    | 0.987495843    |   |  |
|           | 0.524284033                           | 0.655080425                    | 2                              | 0            | 0.998207054  |                                |                |   |  |
| LINC01678 | ENSG00000225331.1                     |                                | 0.612219636                    | 8            | 6            | 0.179518083                    |                |   |  |
|           | Brain_Hypothalamus                    | 0.92115926                     | Brain_Spinal_cord_cervical_c-1 | 4.867375999  |              |                                |                |   |  |
|           | 1.54E-16                              | 0.189352162                    | -0.147319132                   | 1.342240334  | 0.604942377  |                                |                |   |  |
|           | 0.52903295                            | 6                              | 0                              | 0.998207054  |              |                                |                |   |  |
| CLYBL     | ENSG00000125246.15                    |                                | 0.612285597                    | 3            | 3            | 0.180008612                    |                |   |  |
|           | Brain_Caudate_basal_ganglia           | 0.968391654                    | Brain_Frontal_Cortex_BA9       |              |              |                                |                |   |  |
|           | 1.136508292                           | 0.806584762                    | 0.806584762                    | 0.039625555  | 1.340728517  |                                |                |   |  |
|           | 0.509548207                           | 0.721870869                    | 3                              | 0            | 0.998207054  |                                |                |   |  |
| CAPZA2    | ENSG00000198898.13                    |                                | 0.612553059                    | 1            | 1            | 0.612553059                    |                |   |  |
|           | Brain_Anterior_cingulate_cortex_BA24  | 0.612553059                    |                                |              |              |                                |                |   |  |
|           | Brain_Anterior_cingulate_cortex_BA24  | 1                              | 1                              | 1            | 0.506432508  |                                |                |   |  |
|           | 0.506432508                           | 0.506432508                    | NA                             | 1            | 0            | 0.998207054                    |                |   |  |
| DMC1      | ENSG00000100206.9                     |                                | 0.612682723                    | 1            | 1            | 0.612682723                    |                |   |  |
|           | Brain_Substantia_nigra                | 0.612682723                    | Brain_Substantia_nigra         | 1            | 1            |                                |                |   |  |
|           | 1                                     | -0.506247771                   | -0.506247771                   | -0.506247771 | NA           | 1                              | 0              |   |  |
|           | 0.998207054                           |                                |                                |              |              |                                |                |   |  |
| ATG5      | ENSG00000057663.14                    |                                | 0.612717196                    | 1            | 1            | 0.612717196                    |                |   |  |
|           | Brain_Hypothalamus                    | 0.612717196                    | Brain_Hypothalamus             | 1            | 1            | 1                              |                |   |  |
|           | -0.506198659                          | -0.506198659                   | -0.506198659                   | NA           | 1            | 0                              | 0.998207054    |   |  |
| SLC7A11   | ENSG00000151012.13                    |                                | 0.612738118                    | 3            | 3            | 0.193115321                    |                |   |  |
|           | Brain_Nucleus_accumbens_basal_ganglia | 0.96232683                     | Brain_Caudate_basal_ganglia    |              |              |                                |                |   |  |
|           | 1.171991774                           | 0.809621153                    | 0.809621153                    | -0.047233874 | 1.301418277  |                                |                |   |  |
|           | 0.450133542                           | 0.740715031                    | 3                              | 0            | 0.998207054  |                                |                |   |  |
| GLTP      | ENSG00000139433.9                     |                                | 0.612782552                    | 13           | 6            | 0.215461047                    |                |   |  |
|           | Brain_Anterior_cingulate_cortex_BA24  | 0.992765796                    | Brain_Caudate_basal_ganglia    |              |              |                                |                |   |  |
|           | 9.506515216                           | 0.003279573                    | 0.326689368                    | -0.754468529 | 1.238688047  |                                |                |   |  |
|           | -0.286638023                          | 0.548078009                    | 6                              | 0            | 0.998207054  |                                |                |   |  |
| SDR42E1   | ENSG00000184860.9                     |                                | 0.612795279                    | 1            | 1            | 0.612795279                    |                |   |  |
|           | Brain_Nucleus_accumbens_basal_ganglia | 0.612795279                    |                                |              |              |                                |                |   |  |
|           | Brain_Nucleus_accumbens_basal_ganglia | 1                              | 1                              | 1            | -0.506087424 |                                |                |   |  |
|           | -0.506087424                          | -0.506087424                   | NA                             | 1            | 0            | 0.998207054                    |                |   |  |
| HSD17B7   | ENSG00000132196.13                    |                                | 0.612858999                    | 9            | 8            | 0.078695869                    |                |   |  |
|           | Brain_Hypothalamus                    | 0.784845369                    | Brain_Cortex                   | 4.308029784  |              |                                |                |   |  |
|           | 0.076887919                           | 0.18633189                     | -1.758303579                   | 0.665549633  | 0.14175397   |                                |                |   |  |
|           | 0.769593159                           | 8                              | 0                              | 0.998207054  |              |                                |                |   |  |
| RRH       | ENSG00000180245.4                     |                                | 0.612860003                    | 4            | 4            | 0.108605287                    |                |   |  |
|           | Brain_Hypothalamus                    | 0.292782935                    | Brain_Frontal_Cortex_BA9       | 3.275326859  |              |                                |                |   |  |
|           | 0.149039398                           | 0.149039398                    | -1.604493632                   | -1.052036215 | -1.245357402 |                                |                |   |  |
|           | 0.248371736                           | 4                              | 0                              | 0.998207054  |              |                                |                |   |  |
| PDE8A     | ENSG00000073417.14                    |                                | 0.612910536                    | 2            | 2            | 0.323660907                    | Brain_Amygdala |   |  |
|           | 0.885880425                           | Brain_Spinal_cord_cervical_c-1 | 1.074130451                    | 0.925869549  |              |                                |                |   |  |
|           | 0.925869549                           | -0.986962735                   | 0.14351885                     | -0.421721943 | 0.799371195  | 2                              |                |   |  |
|           | 0                                     | 0.998207054                    |                                |              |              |                                |                |   |  |
| MAPK10    | ENSG00000109339.19                    |                                | 0.612912364                    | 5            | 5            | 0.387165701                    |                |   |  |
|           | Brain_Hypothalamus                    | 0.912955667                    | Brain_Putamen_basal_ganglia    | 3.634561732  |              |                                |                |   |  |
|           | 0.130380691                           | 0.130380691                    | -0.864768795                   | 0.843660784  | 0.082319311  |                                |                |   |  |
|           | 0.610541007                           | 5                              | 0                              | 0.998207054  |              |                                |                |   |  |
| HGS       | ENSG00000185359.12                    |                                | 0.612950615                    | 1            | 1            | 0.612950615                    | Brain_Amygdala |   |  |
|           | 0.612950615                           | Brain_Amygdala                 | 1                              | 1            | 1            | 0.505866153                    | 0.505866153    |   |  |
|           | 0.505866153                           | NA                             | 1                              | 0            | 0.998207054  |                                |                |   |  |
| NCAPD3    | ENSG00000151503.12                    |                                | 0.613054519                    | 1            | 1            | 0.613054519                    |                |   |  |
|           | Brain_Hippocampus                     | 0.613054519                    | Brain_Hippocampus              | 1            | 1            | 1                              |                |   |  |
|           | -0.505718159                          | -0.505718159                   | -0.505718159                   | NA           | 1            | 0                              | 0.998207054    |   |  |



MEOX2-AS1 ENSG00000229108.1 0.61317305 1 1 0.61317305  
Brain\_Nucleus\_accumbens\_basal\_ganglia 0.61317305  
Brain\_Nucleus\_accumbens\_basal\_ganglia 1 1 1 -0.505549344  
-0.505549344 -0.505549344 NA 1 0 0.998207054  
NUDT9 ENSG00000170502.12 0.613247269 3 3 0.432130941  
Brain\_Substantia\_nigra 0.82530254 Brain\_Caudate\_basal\_ganglia 1.864624875  
0.463304091 0.463304091 -0.428856152 0.785550386 0.045321355  
0.649448512 3 0 0.998207054  
KIAA1456 ENSG00000250305.8 0.613427571 3 3 0.210272825  
Brain\_Nucleus\_accumbens\_basal\_ganglia 0.836933155 Brain\_Cerebellum  
2.036418996 0.30925475 0.30925475 -0.205817904 1.252815595  
0.564319507 0.732735901 3 0 0.998207054  
ATG4C ENSG00000125703.14 0.613481098 3 3 0.341995032 Brain\_Cerebellum  
0.760422793 Brain\_Cortex 2.669230138 0.095013626 0.095013626  
-0.95023072 -0.304925633 -0.731930486 0.369828173 3 0  
0.998207054  
ZNF317 ENSG00000130803.14 0.613494912 9 8 0.116854847  
Brain\_Putamen\_basal\_ganglia 0.969248809 Brain\_Cerebellar\_Hemisphere 4.70663075  
0.147996793 0.217241554 -1.568112642 -0.038550448 -0.768805934  
0.529567823 8 0 0.998207054  
DDX43 ENSG00000080007.7 0.613627806 7 7 0.069014464 Brain\_Amygdala  
0.883577562 Brain\_Spinal\_cord\_cervical\_c-1 4.10395941 0.176130234  
0.176130234 -1.818325064 0.364433825 -0.452731257 0.775856473  
7 0 0.998207054  
SPTBN5 ENSG00000137877.9 0.613644618 13 5 0.101063408  
Brain\_Cerebellum 0.987670453 Brain\_Amygdala 8.432155362 0.00320254  
0.38050625 -0.324200593 1.639719953 0.266949383 0.498290012 5  
0 0.998207054  
SMIM1 ENSG00000235169.7 0.613763675 2 2 0.338398895  
Brain\_Cerebellar\_Hemisphere 0.799459447 Brain\_Spinal\_cord\_cervical\_c-1  
1.009936257 0.990063743 0.990063743 -0.957333613 0.254046742  
-0.351643436 0.856575264 2 0 0.998207054  
SH3TC1 ENSG00000125089.16 0.613821748 2 2 0.414116147  
Brain\_Nucleus\_accumbens\_basal\_ganglia 0.803215423 Brain\_Cerebellum  
1.336095252 0.663904748 0.663904748 -0.249187921 0.816671562  
0.283741821 0.753676468 2 0 0.998207054  
CDH23 ENSG00000107736.19 0.613870331 5 5 0.118138388  
Brain\_Caudate\_basal\_ganglia 0.877381116 Brain\_Cerebellum 3.080206523  
0.15381358 0.15381358 -0.154289956 1.562635355 0.809447032  
0.656863694 5 0 0.998207054  
RP11-390P24.1 ENSG00000273576.1 0.613957161 1 1 0.613957161  
Brain\_Putamen\_basal\_ganglia 0.613957161 Brain\_Putamen\_basal\_ganglia 1 1  
1 0.504432961 0.504432961 0.504432961 NA 1 0  
0.998207054  
SERF2 ENSG00000140264.19 0.614000251 1 1 0.614000251  
Brain\_Spinal\_cord\_cervical\_c-1 0.614000251 Brain\_Spinal\_cord\_cervical\_c-1  
1 1 1 0.504371629 0.504371629 0.504371629 NA 1 0  
0.998207054  
KLF13 ENSG00000169926.10 0.614155736 2 2 0.336205786 Brain\_Cerebellum  
0.343973509 Brain\_Cerebellar\_Hemisphere 1.868660483 0.131339517  
0.131339517 0.946343312 0.961689127 0.95401622 0.01085113 2 0  
0.998207054  
RP3-522D1.1 ENSG00000224167.1 0.614166868 1 1 0.614166868  
Brain\_Spinal\_cord\_cervical\_c-1 0.614166868 Brain\_Spinal\_cord\_cervical\_c-1  
1 1 1 0.504134495 0.504134495 0.504134495 NA 1 0  
0.998207054  
CERS1 ENSG00000223802.7 0.614241493 12 2 0.207987405 Brain\_Cortex  
0.527976339 Brain\_Hypothalamus 10.63658846 0.000750625  
0.657995816 -1.259118856 -0.631098168 -0.877217768 0.194119081  
2 0 0.998207054  
KIAA1147 ENSG00000257093.6 0.614472829 2 2 0.517545681  
Brain\_Caudate\_basal\_ganglia 0.602226986 Brain\_Anterior\_cingulate\_cortex\_BA24

|               |                                       |                                        |             |              |                                        |                         |
|---------------|---------------------------------------|----------------------------------------|-------------|--------------|----------------------------------------|-------------------------|
|               | 1.29483177                            | 0.70516823                             | 0.70516823  | -0.521200672 | 0.647133291                            | 0.062966309             |
|               | 0.826136868                           | 2                                      | 0           | 0.998207054  |                                        |                         |
| AC115522.3    | ENSG00000268601.1                     | 0.614503026                            | 6           | 4            | 0.197051406                            |                         |
|               | Brain_Frontal_Cortex_BA9              | 0.995550059                            |             |              | Brain_Cerebellum3.453477277            |                         |
|               | 0.034257666                           | 0.416084334                            |             | -1.289997845 | 0.005577203                            | -0.66033154             |
|               | 0.600304632                           | 4                                      | 0           | 0.998207054  |                                        |                         |
| BCL2L10       | ENSG00000137875.4                     | 0.614635417                            | 2           | 2            | 0.345482585                            |                         |
|               | Brain_Cerebellum0.474587705           |                                        |             |              | Brain_Cerebellar_Hemisphere1.491180207 |                         |
|               | 0.508819793                           | 0.508819793                            |             | 0.715034534  | 0.943387792                            | 0.829211163             |
|               | 0.161470137                           | 2                                      | 0           | 0.998207054  |                                        |                         |
| MAPK9         | ENSG00000050748.17                    | 0.614687492                            | 7           | 7            | 0.159756193                            | Brain_Cortex            |
|               | 0.944224384                           | Brain_Nucleus_accumbens_basal_ganglia  |             |              | 3.264604382                            |                         |
|               | 0.114795961                           | 0.114795961                            |             | -1.405892015 | 1.052882436                            | -0.185347127            |
|               | 0.907313209                           | 7                                      | 0           | 0.998207054  |                                        |                         |
| PPFIA3        | ENSG00000177380.13                    | 0.614691465                            | 2           | 2            | 0.370768533                            |                         |
|               | Brain_Caudate_basal_ganglia0.66550725 |                                        |             |              | Brain_Spinal_cord_cervical_c-1         |                         |
|               | 1.019499022                           | 0.980500978                            |             | 0.980500978  | 0.432322206                            | 0.895034712             |
|               | 0.663678459                           | 0.327187151                            | 2           | 0            | 0.998207054                            |                         |
| NAIF1         | ENSG00000171169.8                     | 0.61473001                             | 1           | 1            | 0.61473001                             | Brain_Cortex 0.61473001 |
|               | Brain_Cortex                          | 1                                      | 1           | 1            | 0.503333226                            | 0.503333226             |
|               | NA                                    | 1                                      | 0           | 0.998207054  |                                        |                         |
| TRIB1         | ENSG00000173334.3                     | 0.614798912                            | 1           | 1            | 0.614798912                            |                         |
|               | Brain_Spinal_cord_cervical_c-1        | 0.614798912                            |             |              | Brain_Spinal_cord_cervical_c-1         |                         |
|               | 1                                     | 1                                      | 1           | -0.50323521  | -0.50323521                            | -0.50323521 NA 1 0      |
|               | 0.998207054                           |                                        |             |              |                                        |                         |
| LIME1         | ENSG00000203896.9                     | 0.614920841                            | 2           | 2            | 0.328056867                            | Brain_Cortex            |
|               | 0.866515455                           | Brain_Caudate_basal_ganglia1.042767051 |             |              | 0.957232949                            |                         |
|               | 0.957232949                           | -0.978035296                           |             | -0.168086213 | -0.573060755                           | 0.572720489             |
|               | 2                                     | 0                                      | 0.998207054 |              |                                        |                         |
| FAM153B       | ENSG00000182230.11                    | 0.615336898                            | 3           | 3            | 0.283980741                            |                         |
|               | Brain_Spinal_cord_cervical_c-1        | 0.778956057                            |             |              | Brain_Cerebellum1.5404458              |                         |
|               | 0.472148908                           | 0.472148908                            |             | -1.07141974  | 0.687647036                            | -0.221484145            |
|               | 0.881026145                           | 3                                      | 0           | 0.998207054  |                                        |                         |
| LINC01515     | ENSG00000228065.10                    | 0.615425023                            | 6           | 4            | 0.188375161                            |                         |
|               | Brain_Spinal_cord_cervical_c-1        | 0.992012776                            |             |              | Brain_Hypothalamus                     |                         |
|               | 4.662686087                           | 0.105406568                            |             | 0.282408703  | -0.320741966                           | 1.315401025             |
|               | 0.42453914                            | 0.617470319                            | 4           | 0            | 0.998207054                            |                         |
| C4A           | ENSG00000244731.7                     | 0.615497333                            | 12          | 4            | 0.078682748                            |                         |
|               | Brain_Frontal_Cortex_BA9              | 0.560691809                            |             |              | Brain_Amygdala                         | 9.199976336             |
|               | 0.048964298                           | 0.369245088                            |             | -1.758380742 | -0.581814243                           | -1.221217416            |
|               | 0.404290536                           | 4                                      | 0           | 0.998207054  |                                        |                         |
| LINC02170     | ENSG00000260896.5                     | 0.615691387                            | 2           | 2            | 0.338608411                            |                         |
|               | Brain_Cortex                          | 0.410571884                            |             |              | Brain_Nucleus_accumbens_basal_ganglia  |                         |
|               | 1.681738064                           | 0.318261936                            |             | 0.318261936  | -0.956918464                           | -0.822887654            |
|               | -0.889903059                          | 0.094774094                            | 2           | 0            | 0.998207054                            |                         |
| MMADHC        | ENSG00000168288.12                    | 0.615706489                            | 1           | 1            | 0.615706489                            |                         |
|               | Brain_Hippocampus                     | 0.615706489                            |             |              | Brain_Hippocampus                      | 1 1 1                   |
|               | -0.501944603                          | -0.501944603                           |             | -0.501944603 | NA 1 0                                 | 0.998207054             |
| DNAJC2        | ENSG00000105821.14                    | 0.615716118                            | 1           | 1            | 0.615716118                            |                         |
|               | Brain_Cerebellar_Hemisphere           | 0.615716118                            |             |              | Brain_Cerebellar_Hemisphere            | 1 1                     |
|               | 1                                     | -0.501930915                           |             | -0.501930915 | -0.501930915                           | NA 1 0                  |
|               | 0.998207054                           |                                        |             |              |                                        |                         |
| RP11-265E18.1 | ENSG00000272905.1                     | 0.615757149                            | 7           | 5            | 0.079132893                            |                         |
|               | Brain_Hypothalamus                    | 0.601035569                            |             |              | Brain_Cerebellar_Hemisphere            | 5.106131738             |
|               | 0.080755795                           | 0.242647744                            |             | -1.755739533 | -0.522911891                           | -0.949162483            |
|               | 0.384079781                           | 5                                      | 0           | 0.998207054  |                                        |                         |
| KCNT1         | ENSG00000107147.12                    | 0.615760931                            | 11          | 8            | 0.115868542                            |                         |
|               | Brain_Nucleus_accumbens_basal_ganglia | 0.935005908                            |             |              | Brain_Putamen_basal_ganglia            |                         |
|               | 5.226643059                           | 0.00860419                             | 0.288373361 |              | -1.572353714                           | 0.104886106             |
|               | -0.766883797                          | 0.563585057                            | 8           | 0            | 0.998207054                            |                         |
| FAM86C1       | ENSG00000158483.15                    | 0.6158742                              | 5           | 4            | 0.31586006                             |                         |
|               | Brain_Caudate_basal_ganglia           | 0.765988317                            |             |              | Brain_Cerebellum                       | 3.068089067             |

|           |                                       |                   |                             |              |                                       |                  |             |   |
|-----------|---------------------------------------|-------------------|-----------------------------|--------------|---------------------------------------|------------------|-------------|---|
|           | 0.029068828                           | 0.107124715       | -1.00300166                 | 0.743229687  | -0.315025803                          |                  |             |   |
|           | 0.64620834                            | 4                 | 0                           | 0.998207054  |                                       |                  |             |   |
| KRTAP5-8  | ENSG00000241233.3                     | 0.615904706       | 3                           | 2            | 0.328315335                           |                  |             |   |
|           | Brain_Nucleus_accumbens_basal_ganglia | 0.467843923       |                             |              | Brain_Caudate_basal_ganglia           |                  |             |   |
|           | 2.764911335                           | 0.035989746       | 0.199098919                 | 0.725991596  | 0.977512819                           |                  |             |   |
|           | 0.866732235                           | 0.128409249       | 2                           | 0            | 0.998207054                           |                  |             |   |
| ANKH      | ENSG00000154122.12                    | 0.615954376       | 4                           | 4            | 0.209127291                           |                  |             |   |
|           | Brain_Hypothalamus                    | 0.878601566       |                             |              | Brain_Cerebellum                      | 1.572087533      |             |   |
|           | 0.571355611                           | 0.571355611       | -1.255968775                | 0.444470496  | -0.335094578                          |                  |             |   |
|           | 0.777559678                           | 4                 | 0                           | 0.998207054  |                                       |                  |             |   |
| LINC01006 | ENSG00000182648.11                    | 0.615960579       | 11                          | 4            | 0.199860104                           |                  |             |   |
|           | Brain_Hypothalamus                    | 0.918706592       |                             |              | Brain_Nucleus_accumbens_basal_ganglia |                  |             |   |
|           | 8.852130695                           | 0.008641181       | 0.296070604                 | -1.281950236 | -0.102063098                          |                  |             |   |
|           | -0.518753955                          | 0.366000697       | 4                           | 0            | 0.998207054                           |                  |             |   |
| LINC00240 | ENSG00000224843.6                     | 0.616037041       | 5                           | 5            | 0.105115166                           |                  |             |   |
|           | Brain_Cerebellar_Hemisphere           | 0.583981576       |                             |              | Brain_Cerebellum                      | 3.370077748      |             |   |
|           | 0.135922565                           | 0.135922565       | -1.62054542                 | -0.547578179 | -1.022393388                          |                  |             |   |
|           | 0.472327758                           | 5                 | 0                           | 0.998207054  |                                       |                  |             |   |
| IFNGR2    | ENSG00000159128.14                    | 0.61605466        | 3                           | 3            | 0.526498496                           |                  |             |   |
|           | Brain_Nucleus_accumbens_basal_ganglia | 0.824326475       |                             |              | Brain_Cerebellum                      |                  |             |   |
|           | 1.886273538                           | 0.119370618       | 0.119370618                 | -0.221983824 | 0.633360128                           |                  |             |   |
|           | 0.25385273                            | 0.435732486       | 3                           | 0            | 0.998207054                           |                  |             |   |
| SLC12A5   | ENSG00000124140.13                    | 0.616092628       | 5                           | 5            | 0.387052735                           |                  |             |   |
|           | Brain_Hippocampus                     | 0.957783653       |                             |              | Brain_Cortex                          | 2.686872311      |             |   |
|           | 0.231398327                           | 0.231398327       | -0.841125973                | 0.864974591  | -0.029164065                          |                  |             |   |
|           | 0.756313825                           | 5                 | 0                           | 0.998207054  |                                       |                  |             |   |
| LINC01125 | ENSG00000228486.10                    | 0.616201657       | 4                           | 4            | 0.149100145                           |                  |             |   |
|           | Brain_Anterior_cingulate_cortex_BA24  | 0.950813283       |                             |              |                                       |                  |             |   |
|           | Brain_Nucleus_accumbens_basal_ganglia | 1.88316539        | 0.457844883                 | 0.457844883  |                                       |                  |             |   |
|           | -0.939520927                          | 1.442717224       | 0.217258327                 | 0.978372982  | 4                                     | 0                |             |   |
|           | 0.998207054                           |                   |                             |              |                                       |                  |             |   |
| B2M       | ENSG00000166710.17                    | 0.616269898       | 2                           | 2            | 0.32522499                            |                  |             |   |
|           | Brain_Spinal_cord_cervical_c-1        | 0.964521027       |                             |              | Brain_Cerebellar_Hemisphere           |                  |             |   |
|           | 1.026963119                           | 0.973036881       | 0.973036881                 | 0.044480962  | 0.983777366                           |                  |             |   |
|           | 0.514129164                           | 0.664182857       | 2                           | 0            | 0.998207054                           |                  |             |   |
| GALE      | ENSG00000117308.14                    | 0.616317452       | 1                           | 1            | 0.616317452                           |                  |             |   |
|           | Brain_Hippocampus                     | 0.616317452       |                             |              | Brain_Hippocampus                     | 1                | 1           | 1 |
|           | 0.501076263                           | 0.501076263       | 0.501076263                 | NA           | 1                                     | 0                | 0.998207054 |   |
| MCTP2     | ENSG00000140563.14                    | 0.616381604       | 1                           | 1            | 0.616381604                           |                  |             |   |
|           | Brain_Hippocampus                     | 0.616381604       |                             |              | Brain_Hippocampus                     | 1                | 1           | 1 |
|           | -0.500985107                          | -0.500985107      | -0.500985107                | NA           | 1                                     | 0                | 0.998207054 |   |
| C14orf132 | ENSG00000227051.6                     | 0.616469199       | 4                           | 4            | 0.177892405                           |                  |             |   |
|           | Brain_Cerebellum                      | 0.93730316        | Brain_Putamen_basal_ganglia | 1.855655528  |                                       |                  |             |   |
|           | 0.146893393                           | 0.146893393       | -1.347272751                | -0.078659877 | -0.86165009                           |                  |             |   |
|           | 0.545681542                           | 4                 | 0                           | 0.998207054  |                                       |                  |             |   |
| CACHD1    | ENSG00000158966.13                    | 0.616644901       | 1                           | 1            | 0.616644901                           |                  |             |   |
|           | Brain_Caudate_basal_ganglia           | 0.616644901       |                             |              | Brain_Caudate_basal_ganglia           | 1                | 1           | 1 |
|           | 1                                     | -0.500611027      | -0.500611027                | -0.500611027 | NA                                    | 1                | 0           |   |
|           | 0.998207054                           |                   |                             |              |                                       |                  |             |   |
| VPREB3    | ENSG00000128218.7                     | 0.616727625       | 12                          | 8            | 0.033506649                           |                  |             |   |
|           | Brain_Frontal_Cortex_BA9              | 0.99110664        | Brain_Putamen_basal_ganglia | 6.534240721  |                                       |                  |             |   |
|           | 0.012835257                           | 0.266538668       | -0.035763652                | 2.125959292  | 0.757141232                           |                  |             |   |
|           | 0.739702643                           | 8                 | 0                           | 0.998207054  |                                       |                  |             |   |
| THUMPD1   | ENSG00000066654.13                    | 0.616814534       | 4                           | 4            | 0.451033521                           |                  |             |   |
|           | Brain_Cerebellar_Hemisphere           | 0.661414909       |                             |              | Brain_Frontal_Cortex_BA9              |                  |             |   |
|           | 3.075017553                           | 0.114260928       | 0.114260928                 | -0.437960511 | 0.753693109                           |                  |             |   |
|           | 0.365012838                           | 0.54230842        | 4                           | 0            | 0.998207054                           |                  |             |   |
| DAGLB     | ENSG00000164535.14                    | 0.616838749       | 4                           | 3            | 0.43251176                            | Brain_Cerebellum |             |   |
|           | 0.890338356                           | Brain_Hippocampus | 3.331087266                 | 0.033151363  |                                       |                  |             |   |
|           | 0.209509745                           | -0.2511401        | 0.784900754                 | 0.235184973  | 0.427909251                           |                  | 3           |   |
|           | 0                                     | 0.998207054       |                             |              |                                       |                  |             |   |
| LRRC74B   | ENSG00000187905.10                    | 0.616868274       | 9                           | 1            | 0.311633907                           |                  |             |   |

|               |                                       |                                       |   |                                |              |              |  |    |              |
|---------------|---------------------------------------|---------------------------------------|---|--------------------------------|--------------|--------------|--|----|--------------|
|               | Brain_Cerebellum                      | 0.841639261                           |   | Brain_Hippocampus              | 8.449636261  |              |  |    |              |
|               | 0.001808135                           | 8.449636261                           |   | -1.011799546                   | -0.199797111 |              |  |    | -0.491173958 |
|               | 0.264243673                           | 1                                     | 0 | 0.998207054                    |              |              |  |    |              |
| B3GAT3        | ENSG00000149541.9                     | 0.617010828                           |   | 8                              | 4            | 0.355281733  |  |    |              |
|               | Brain_Substantia_nigra                | 0.869699767                           |   | Brain_Spinal_cord_cervical_c-1 |              |              |  |    |              |
|               | 5.570907765                           | 0.016522642                           |   | 0.379737248                    |              | -0.92439301  |  |    | 0.561329324  |
|               | -0.123683497                          | 0.569203372                           |   | 4                              | 0            | 0.998207054  |  |    |              |
| FIZ1          | ENSG00000179943.7                     | 0.617081918                           |   | 1                              | 1            | 0.617081918  |  |    |              |
|               | Brain_Frontal_Cortex_BA9              | 0.617081918                           |   | Brain_Frontal_Cortex_BA9       | 1            | 1            |  |    |              |
|               | 1                                     | -0.499990285                          |   | -0.499990285                   |              | -0.499990285 |  | NA | 1 0          |
|               | 0.998207054                           |                                       |   |                                |              |              |  |    |              |
| RNF40         | ENSG00000103549.21                    | 0.617295799                           |   | 7                              | 2            | 0.372379012  |  |    |              |
|               | Brain_Cerebellar_Hemisphere           | 0.854005443                           |   | Brain_Cerebellum               | 6.264627742  |              |  |    |              |
|               | 0.00074908                            | 0.438924314                           |   | -0.196940942                   | 0.892025972  |              |  |    | 0.358971504  |
|               | 0.381736213                           | 2                                     | 0 | 0.998207054                    |              |              |  |    |              |
| D2HGDH        | ENSG00000180902.17                    | 0.617415137                           |   | 13                             | 6            | 0.110213294  |  |    |              |
|               | Brain_Hypothalamus                    | 0.594113814                           |   | Brain_Amygdala                 | 8.503044022  |              |  |    | 2.67E-18     |
|               | 0.522309717                           | 0.532884097                           |   | 1.597235177                    | 1.255234768  |              |  |    | 0.420940578  |
|               | 6                                     | 0                                     |   | 0.998207054                    |              |              |  |    |              |
| ROGDI         | ENSG00000067836.12                    | 0.617647594                           |   | 9                              | 8            | 0.176775267  |  |    |              |
|               | Brain_Substantia_nigra                | 0.905292863                           |   | Brain_Amygdala                 | 3.325724172  |              |  |    |              |
|               | 0.089774234                           | 0.120470541                           |   | -1.35075082                    | -0.118977901 |              |  |    | -0.908929016 |
|               | 0.489057503                           | 8                                     | 0 | 0.998207054                    |              |              |  |    |              |
| COPRS         | ENSG00000172301.10                    | 0.617669503                           |   | 1                              | 1            | 0.617669503  |  |    | Brain_Cortex |
|               | 0.617669503                           | Brain_Cortex                          |   | 1                              | 1            | 1            |  |    | -0.49915598  |
|               | -0.49915598                           | NA                                    |   | 1                              | 0            | 0.998207054  |  |    | -0.49915598  |
| HIF1AN        | ENSG00000166135.13                    | 0.617711851                           |   | 4                              | 4            | 0.110538641  |  |    |              |
|               | Brain_Putamen_basal_ganglia           | 0.931132321                           |   | Brain_Cerebellar_Hemisphere    |              |              |  |    |              |
|               | 2.288692485                           | 0.298102343                           |   | 0.298102343                    |              | -1.595776772 |  |    | 0.117838513  |
|               | -0.442765171                          | 0.780260571                           |   | 4                              | 0            | 0.998207054  |  |    |              |
| C16orf96      | ENSG00000205832.7                     | 0.617728939                           |   | 1                              | 1            | 0.617728939  |  |    |              |
|               | Brain_Frontal_Cortex_BA9              | 0.617728939                           |   | Brain_Frontal_Cortex_BA9       | 1            | 1            |  |    |              |
|               | 1                                     | -0.499071607                          |   | -0.499071607                   |              | -0.499071607 |  | NA | 1 0          |
|               | 0.998207054                           |                                       |   |                                |              |              |  |    |              |
| ANKRD45       | ENSG00000183831.6                     | 0.617906916                           |   | 3                              | 2            | 0.728607352  |  |    |              |
|               | Brain_Nucleus_accumbens_basal_ganglia | 0.934756976                           |   | Brain_Cortex                   |              |              |  |    |              |
|               | 2.727876433                           | 0.043438634                           |   | 0.228684932                    |              | -0.335446476 |  |    | 0.346978659  |
|               | -0.023443053                          | 0.344942805                           |   | 2                              | 0            | 0.998207054  |  |    |              |
| RP11-166O4.6  | ENSG00000273448.1                     | 0.617947047                           |   | 9                              | 3            | 0.3864032    |  |    |              |
|               | Brain_Nucleus_accumbens_basal_ganglia | 0.949334599                           |   | Brain_Cerebellum               |              |              |  |    |              |
|               | 7.339310373                           | 0.013674143                           |   | 0.336290284                    |              | 0.063542398  |  |    | 0.866158587  |
|               | 0.534444661                           | 0.314366136                           |   | 3                              | 0            | 0.998207054  |  |    |              |
| RP11-143E21.6 | ENSG00000259862.1                     | 0.618111782                           |   | 1                              | 1            | 0.618111782  |  |    |              |
|               | Brain_Spinal_cord_cervical_c-1        | 0.618111782                           |   | Brain_Spinal_cord_cervical_c-1 |              |              |  |    |              |
|               | 1                                     | 1                                     |   | 1                              | 0.498528223  |              |  |    | 0.498528223  |
|               | 0.998207054                           |                                       |   | 0.498528223                    |              | 0.498528223  |  | NA | 1 0          |
| PACS1         | ENSG00000175115.11                    | 0.618139696                           |   | 5                              | 3            | 0.094821887  |  |    | Brain_Cortex |
|               | 0.383499585                           | Brain_Nucleus_accumbens_basal_ganglia |   | 4.226273583                    |              |              |  |    |              |
|               | 0.050475032                           | 0.229795469                           |   | -1.670492882                   |              | -0.871466324 |  |    | -1.172921254 |
|               | 0.310779481                           | 3                                     | 0 | 0.998207054                    |              |              |  |    |              |
| TMEM241       | ENSG00000134490.13                    | 0.618198303                           |   | 7                              | 6            | 0.074427602  |  |    |              |
|               | Brain_Cerebellum                      | 0.966530669                           |   | Brain_Cerebellar_Hemisphere    | 2.340149165  |              |  |    |              |
|               | 0.054854263                           | 0.595456677                           |   | -1.783975771                   |              | -0.041959895 |  |    | -0.593892747 |
|               | 0.608722576                           | 6                                     | 0 | 0.998207054                    |              |              |  |    |              |
| SPOCK3        | ENSG00000196104.10                    | 0.618201357                           |   | 1                              | 1            | 0.618201357  |  |    |              |
|               | Brain_Amygdala                        | 0.618201357                           |   | Brain_Amygdala                 | 1            | 1            |  |    | -0.498401106 |
|               | -0.498401106                          | -0.498401106                          |   | NA                             | 1            | 0            |  |    | 0.998207054  |
| PARG          | ENSG00000227345.8                     | 0.618242114                           |   | 3                              | 3            | 0.304861842  |  |    |              |
|               | Brain_Spinal_cord_cervical_c-1        | 0.640155999                           |   | Brain_Cerebellar_Hemisphere    |              |              |  |    |              |
|               | 1.369311225                           | 0.691822666                           |   | 0.691822666                    |              | -1.0260631   |  |    | 0.467480698  |
|               | -0.370491004                          | 0.763295802                           |   | 3                              | 0            | 0.998207054  |  |    |              |
| RMI1          | ENSG00000178966.16                    | 0.618328453                           |   | 5                              | 3            | 0.350812784  |  |    |              |

|           |                                |                                       |    |   |                                |                             |             |                  |
|-----------|--------------------------------|---------------------------------------|----|---|--------------------------------|-----------------------------|-------------|------------------|
|           | Brain_Hypothalamus             | 0.994212476                           |    |   | Brain_Cerebellum               | 3.430209779                 |             |                  |
|           | 0.024600441                    | 0.545635488                           |    |   | -0.308351835                   | 0.933013915                 |             | 0.196348593      |
|           | 0.533240295                    | 3                                     | 0  |   | 0.998207054                    |                             |             |                  |
| FAM92A    | ENSG00000188343.12             | 0.618375501                           |    |   | 2                              | 2                           | 0.443765756 |                  |
|           | Brain_Frontal_Cortex_BA9       | 0.488723448                           |    |   | Brain_Hippocampus              |                             |             | 1.109439749      |
|           | 0.890560251                    | 0.890560251                           |    |   | -0.76584967                    | -0.692340618                |             | -0.729095144     |
|           | 0.051978749                    | 2                                     | 0  |   | 0.998207054                    |                             |             |                  |
| LRRC53    | ENSG00000162621.6              | 0.618392407                           |    |   | 3                              | 3                           | 0.348277713 |                  |
|           | Brain_Cerebellar_Hemisphere    | 0.966072671                           |    |   | Brain_Cerebellum               |                             |             | 1.863006771      |
|           | 0.393144941                    | -0.393144941                          |    |   | -0.937935199                   | 0.27690704                  |             | -0.206164578     |
|           | 0.64447561                     | 3                                     | 0  |   | 0.998207054                    |                             |             |                  |
| TMEM37    | ENSG00000171227.6              | 0.618415914                           |    |   | 3                              | 3                           | 0.22475581  |                  |
|           | Brain_Putamen_basal_ganglia    | 0.581316238                           |    |   | Brain_Hippocampus              |                             |             | 1.393688993      |
|           | 0.605677475                    | 0.605677475                           |    |   | 0.551463125                    | 1.213978825                 |             | 0.782569196      |
|           | 0.373929004                    | 3                                     | 0  |   | 0.998207054                    |                             |             |                  |
| CALD1     | ENSG00000122786.19             | 0.61842754                            | 1  | 1 | 0.61842754                     | Brain_Putamen_basal_ganglia |             |                  |
|           | 0.61842754                     | Brain_Putamen_basal_ganglia           | 1  | 1 | 1                              | 0.498080165                 |             |                  |
|           | 0.498080165                    | 0.498080165                           | NA | 1 | 0                              | 0.998207054                 |             |                  |
| FAM96A    | ENSG00000166797.10             | 0.618500813                           |    |   | 2                              | 2                           | 0.386636649 |                  |
|           | Brain_Amygdala                 | 0.640437953                           |    |   | Brain_Cortex                   |                             |             | 1.008430434      |
|           | 0.991569566                    | 0.467086555                           |    |   | 0.865732908                    | 0.666409732                 |             | 0.281885539      |
|           | 2                              | 0                                     |    |   | 0.998207054                    |                             |             |                  |
| MRO       | ENSG00000134042.12             | 0.618504388                           |    |   | 4                              | 4                           | 0.446049678 | Brain_Cerebellum |
|           | 0.986149292                    | Brain_Nucleus_accumbens_basal_ganglia |    |   | 2.678782415                    |                             |             |                  |
|           | 0.168966237                    | 0.168966237                           |    |   | -0.618616507                   | 0.762017302                 |             | 0.054557624      |
|           | 0.564226531                    | 4                                     | 0  |   | 0.998207054                    |                             |             |                  |
| DNAJB13   | ENSG00000187726.8              | 0.618510853                           |    |   | 4                              | 4                           | 0.301839279 |                  |
|           | Brain_Cerebellum               | 0.871214743                           |    |   | Brain_Cerebellar_Hemisphere    |                             |             | 2.525090055      |
|           | 0.313193861                    | 0.313193861                           |    |   | -0.557284251                   | 1.032497157                 |             | 0.178285124      |
|           | 0.691806791                    | 4                                     | 0  |   | 0.998207054                    |                             |             |                  |
| LINC00609 | ENSG00000257585.1              | 0.618544667                           |    |   | 2                              | 2                           | 0.342937121 |                  |
|           | Brain_Hippocampus              | 0.992116887                           |    |   | Brain_Spinal_cord_cervical_c-1 |                             |             |                  |
|           | 1.242932122                    | 0.757067878                           |    |   | 0.757067878                    | -0.948377871                |             | 0.009880178      |
|           | -0.469248847                   | 0.677590765                           |    |   | 2                              | 0                           |             | 0.998207054      |
| LINC01094 | ENSG00000251442.5              | 0.618556479                           |    |   | 1                              | 1                           | 0.618556479 |                  |
|           | Brain_Substantia_nigra         | 0.618556479                           |    |   | Brain_Substantia_nigra         |                             |             | 1                |
|           | 1                              | 0.497897231                           |    |   | 0.497897231                    | NA                          |             | 1                |
|           | 0.998207054                    |                                       |    |   | 0                              |                             |             |                  |
| PSAP      | ENSG00000197746.13             | 0.618570894                           |    |   | 2                              | 2                           | 0.337891873 | Brain_Amygdala   |
|           | 0.754796578                    | Brain_Putamen_basal_ganglia           |    |   | 1.112722575                    | 0.887277425                 |             |                  |
|           | 0.887277425                    | 0.312321005                           |    |   | 0.958338942                    | 0.635329974                 |             | 0.456803664      |
|           | 2                              | 0                                     |    |   | 0.998207054                    |                             |             |                  |
| HCST      | ENSG00000126264.9              | 0.618610356                           |    |   | 1                              | 1                           | 0.618610356 | Brain_Amygdala   |
|           | 0.618610356                    | Brain_Amygdala                        | 1  | 1 | 1                              | -0.497820797                |             | -0.497820797     |
|           | -0.497820797                   | NA                                    | 1  | 0 |                                | 0.998207054                 |             |                  |
| NBN       | ENSG00000104320.13             | 0.618612384                           |    |   | 4                              | 4                           | 0.623540777 | Brain_Amygdala   |
|           | 0.743527561                    | Brain_Spinal_cord_cervical_c-1        |    |   | 2.679130528                    | 0.110932614                 |             |                  |
|           | 0.110932614                    | -0.490838359                          |    |   | 0.372127816                    | -0.027864855                |             | 0.44541885       |
|           | 0                              |                                       |    |   | 0.998207054                    |                             |             | 4                |
| XPO7      | ENSG00000130227.16             | 0.618681613                           |    |   | 2                              | 2                           | 0.328353115 | Brain_Amygdala   |
|           | 0.956078858                    | Brain_Nucleus_accumbens_basal_ganglia |    |   | 1.015603168                    |                             |             |                  |
|           | 0.984396832                    | 0.984396832                           |    |   | 0.055074818                    | 0.97743647                  |             | 0.516255644      |
|           | 0.652208179                    | 2                                     | 0  |   | 0.998207054                    |                             |             |                  |
| NCR3LG1   | ENSG00000188211.8              | 0.61877346                            | 1  | 1 | 0.61877346                     | Brain_Cerebellum            |             |                  |
|           | 0.61877346                     | Brain_Cerebellum                      | 1  | 1 | 1                              | -0.497589424                |             | -0.497589424     |
|           | -0.497589424                   | NA                                    | 1  | 0 |                                | 0.998207054                 |             |                  |
| RCL1      | ENSG00000120158.11             | 0.618793374                           |    |   | 5                              | 5                           | 0.117501752 |                  |
|           | Brain_Spinal_cord_cervical_c-1 | 0.919458919                           |    |   | Brain_Cerebellum               |                             |             | 3.086047096      |
|           | 0.170437804                    | 0.170437804                           |    |   | -0.101115317                   | 1.565346216                 |             | 0.698286895      |
|           | 0.603699558                    | 5                                     | 0  |   | 0.998207054                    |                             |             |                  |
| RPUSD1    | ENSG00000007376.7              | 0.618852506                           |    |   | 3                              | 3                           | 0.262951796 |                  |
|           | Brain_Cortex                   | 0.976517618                           |    |   | Brain_Cerebellum               |                             |             | 1.425822983      |
|           |                                |                                       |    |   |                                |                             |             | 0.575981201      |

|               |                                       |                             |                                |              |              |                  |
|---------------|---------------------------------------|-----------------------------|--------------------------------|--------------|--------------|------------------|
|               | 0.575981201                           | -0.521284223                | 1.119441591                    | 0.209197473  | 0.83500371   | 3                |
|               | 0                                     | 0.998207054                 |                                |              |              |                  |
| EHF           | ENSG00000135373.12                    | 0.618948361                 | 2                              | 2            | 0.341231811  |                  |
|               | Brain_Spinal_cord_cervical_c-1        | 0.72629409                  | Brain_Substantia_nigra         |              |              |                  |
|               | 1.126348828                           | 0.873651172                 | 0.873651172                    | -0.951734178 | -0.35005944  |                  |
|               | -0.650896809                          | 0.425448287                 | 2                              | 0            | 0.998207054  |                  |
| RP1-122P22.2  | ENSG00000233895.1                     | 0.61897871                  | 1                              | 1            | 0.61897871   |                  |
|               | Brain_Hippocampus                     | 0.61897871                  | Brain_Hippocampus              | 1            | 1            | 1                |
|               | 0.4972983                             | 0.4972983                   | NA                             | 1            | 0            | 0.4972983        |
|               | 0.4972983                             | 0.4972983                   | 0                              | 0.998207054  |              |                  |
| CTC-429P9.2   | ENSG00000268087.1                     | 0.61914543                  | 3                              | 3            | 0.191802901  |                  |
|               | Brain_Cortex                          | 0.763304079                 | Brain_Hippocampus              | 1.767665425  |              |                  |
|               | 0.233888131                           | 0.233888131                 | 0.301144802                    | 1.305264196  | 0.883207505  |                  |
|               | 0.520831434                           | 3                           | 0                              | 0.998207054  |              |                  |
| LINC01750     | ENSG00000231437.3                     | 0.619231263                 | 11                             | 2            | 0.240509991  |                  |
|               | Brain_Nucleus_accumbens_basal_ganglia | 0.947127091                 | Brain_Cerebellum               |              |              |                  |
|               | 9.684614542                           | 0.003696186                 | 0.484561288                    | -1.173713027 | -0.066314937 |                  |
|               | -0.854658538                          | 0.399133866                 | 2                              | 0            | 0.998207054  |                  |
| CHST8         | ENSG00000124302.12                    | 0.619276495                 | 3                              | 3            | 0.286139119  |                  |
|               | Brain_Putamen_basal_ganglia           | 0.928757604                 | Brain_Caudate_basal_ganglia    |              |              |                  |
|               | 1.415317527                           | 0.578476251                 | 0.578476251                    | -1.066629621 | 0.273234037  |                  |
|               | -0.234662502                          | 0.726343556                 | 3                              | 0            | 0.998207054  |                  |
| RP11-117D22.2 | ENSG00000230138.1                     | 0.61932663                  | 1                              | 1            | 0.61932663   |                  |
|               | Brain_Spinal_cord_cervical_c-1        | 0.61932663                  | Brain_Spinal_cord_cervical_c-1 | 1            |              |                  |
|               | 1                                     | 1                           | 0.496804913                    | 0.496804913  | 0.496804913  | NA               |
|               | 0.998207054                           |                             |                                |              | 1            | 0                |
| FTO           | ENSG00000140718.20                    | 0.619431955                 | 9                              | 9            | 0.108294765  | Brain_Cortex     |
|               | 0.954999941                           | Brain_Cerebellum            | 3.20323385                     | 0.256111185  | 0.256111185  |                  |
|               | -0.420227072                          | 1.60590509                  | 0.670752301                    | 0.71217798   | 9            | 0                |
|               |                                       |                             |                                |              | 0.998207054  |                  |
| TAS2R10       | ENSG00000121318.2                     | 0.619432203                 | 1                              | 1            | 0.619432203  |                  |
|               | Brain_Cerebellum                      | 0.619432203                 | Brain_Cerebellum               | 1            | 1            | 1                |
|               | -0.496655224                          | -0.496655224                | NA                             | 1            | 0            | 0.998207054      |
| LINC01139     | ENSG00000215808.2                     | 0.619448884                 | 3                              | 3            | 0.347837056  |                  |
|               | Brain_Nucleus_accumbens_basal_ganglia | 0.656711467                 | Brain_Hypothalamus             |              |              |                  |
|               | 1.054483426                           | 0.972271074                 | 0.972271074                    | 0.444458029  | 0.938792957  |                  |
|               | 0.730768175                           | 0.2562971                   | 3                              | 0            | 0.998207054  |                  |
| CRYGB         | ENSG00000182187.3                     | 0.619517063                 | 2                              | 2            | 0.336260023  |                  |
|               | Brain_Spinal_cord_cervical_c-1        | 0.689898364                 | Brain_Substantia_nigra         |              |              |                  |
|               | 1.231156992                           | 0.768843008                 | 0.768843008                    | -0.961581191 | -0.398992997 |                  |
|               | -0.680287094                          | 0.397809927                 | 2                              | 0            | 0.998207054  |                  |
| ZYG11B        | ENSG00000162378.12                    | 0.619542437                 | 7                              | 4            | 0.111569735  |                  |
|               | Brain_Cortex                          | 0.762702012                 | Brain_Amygdala                 | 5.120315339  | 0.003142687  |                  |
|               | 0.199192993                           | -1.591177056                | 0.301934478                    | -1.012495638 | 0.645163473  |                  |
|               | 4                                     | 0                           | 0.998207054                    |              |              |                  |
| RNF167        | ENSG00000108523.15                    | 0.619609928                 | 1                              | 1            | 0.619609928  |                  |
|               | Brain_Nucleus_accumbens_basal_ganglia | 0.619609928                 |                                |              |              |                  |
|               | Brain_Nucleus_accumbens_basal_ganglia | 1                           | 1                              | 1            | -0.496403256 |                  |
|               | -0.496403256                          | -0.496403256                | NA                             | 1            | 0            | 0.998207054      |
| IRS2          | ENSG00000185950.8                     | 0.619784674                 | 1                              | 1            | 0.619784674  |                  |
|               | Brain_Caudate_basal_ganglia           | 0.619784674                 | Brain_Caudate_basal_ganglia    | 1            | 1            |                  |
|               | 1                                     | 0.496155544                 | 0.496155544                    | 0.496155544  | NA           | 1                |
|               | 0.998207054                           |                             |                                |              | 0            |                  |
| PDZK1         | ENSG00000174827.13                    | 0.619818366                 | 1                              | 1            | 0.619818366  | Brain_Cerebellum |
|               | 0.619818366                           | Brain_Cerebellum            | 1                              | 1            | 1            | 0.496107787      |
|               | 0.496107787                           | NA                          | 1                              | 0            | 0.998207054  | 0.496107787      |
| KRT18         | ENSG00000111057.10                    | 0.61983058                  | 2                              | 2            | 0.38046675   | Brain_Cerebellum |
|               | 0.692241309                           | Brain_Putamen_basal_ganglia | 1.041880736                    | 0.958119264  |              |                  |
|               | 0.958119264                           | -0.395815272                | 0.877036616                    | 0.240610672  | 0.900042202  |                  |
|               | 2                                     | 0                           | 0.998207054                    |              |              |                  |
| LACC1         | ENSG00000179630.10                    | 0.620088317                 | 13                             | 4            | 0.303958435  |                  |
|               | Brain_Spinal_cord_cervical_c-1        | 0.974469312                 | Brain_Frontal_Cortex_BA9       |              |              |                  |
|               | 9.787092209                           | 0.010103442                 | 0.33009172                     | -0.60871364  | 1.027981702  |                  |
|               | 0.017672575                           | 0.475933664                 | 4                              | 0            | 0.998207054  |                  |

|              |                                       |              |     |   |             |                                       |                         |
|--------------|---------------------------------------|--------------|-----|---|-------------|---------------------------------------|-------------------------|
| AC009495.3   | ENSG00000232411.1                     | 0.620218529  | 2   | 2 | 0.350157475 |                                       |                         |
|              | Brain_Cerebellar_Hemisphere           | 0.948491922  |     |   |             | Brain_Cerebellum                      | 1.23000853 0.76999147   |
|              | 0.76999147 -0.934283884               | 0.064600707  |     |   |             | -0.434841589                          | 0.706318068 2           |
|              | 0                                     | 0.998207054  |     |   |             |                                       |                         |
| DIEXF        | ENSG00000117597.17                    | 0.620375852  | 6   | 3 | 0.377159119 |                                       |                         |
|              | Brain_Putamen_basal_ganglia           | 0.890384716  |     |   |             | Brain_Hypothalamus                    | 4.001156812             |
|              | 0.003249917 0.892323503               | -0.883142805 |     |   |             | 0.869795621                           | 0.17029724              |
|              | 0.606777352                           | 3 0          |     |   |             | 0.998207054                           |                         |
| CAMK2N1      | ENSG00000162545.5                     | 0.620427112  | 4   | 4 | 0.421934472 |                                       |                         |
|              | Brain_Substantia_nigra                | 0.970833987  |     |   |             | Brain_Cerebellum                      | 1.824181293             |
|              | 0.186140603 -0.186140603              | -0.803069661 |     |   |             | 0.600865158                           | -0.032906845            |
|              | 0.581504956                           | 4 0          |     |   |             | 0.998207054                           |                         |
| MESP2        | ENSG00000188095.4                     | 0.620453883  | 1   | 1 | 0.620453883 |                                       |                         |
|              | Brain_Nucleus_accumbens_basal_ganglia | 0.620453883  |     |   |             |                                       |                         |
|              | Brain_Nucleus_accumbens_basal_ganglia | 1 1          |     |   |             | -0.495207179                          |                         |
|              | -0.495207179 -0.495207179             | NA 1         |     |   |             | 0.998207054                           |                         |
| TENM3        | ENSG00000218336.8                     | 0.620593157  | 3   | 3 | 0.231215892 |                                       |                         |
|              | Brain_Hypothalamus                    | 0.803419696  |     |   |             | Brain_Nucleus_accumbens_basal_ganglia |                         |
|              | 1.255102237 0.756251597               | 0.756251597  |     |   |             | -0.248923838                          | 1.197232638             |
|              | 0.489720177                           | 0.723580692  | 3 0 |   |             | 0.998207054                           |                         |
| HDAC11       | ENSG00000163517.14                    | 0.620762902  | 3   | 3 | 0.256100411 |                                       |                         |
|              | Brain_Cerebellum                      | 0.490909106  |     |   |             | Brain_Cortex                          | 1.717291975 0.298756628 |
|              | 0.298756628 -1.13565636               | -0.688863603 |     |   |             | -0.958623051                          | 0.237391122             |
|              | 3 0                                   | 0.998207054  |     |   |             |                                       |                         |
| WDR48        | ENSG00000114742.13                    | 0.620780933  | 2   | 2 | 0.454809969 | Brain_Cerebellum                      |                         |
|              | 0.96448009 Brain_Hippocampus          | 1.607971958  |     |   |             | 0.392028042                           | 0.392028042             |
|              | -0.747420178 0.04453232               | -0.351443929 |     |   |             | 0.559994982                           | 2 0                     |
|              | 0.998207054                           |              |     |   |             |                                       |                         |
| RP11-360F5.3 | ENSG00000249685.1                     | 0.620781756  | 10  | 3 | 0.289556884 |                                       |                         |
|              | Brain_Nucleus_accumbens_basal_ganglia | 0.823407126  |     |   |             |                                       |                         |
|              | Brain_Spinal_cord_cervical_c-1        | 8.808041692  |     |   |             | 8.15E-07                              | 0.302291527             |
|              | -1.059094194 0.223164955              | -0.56584368  |     |   |             | 0.344702052                           | 3 0                     |
|              | 0.998207054                           |              |     |   |             |                                       |                         |
| ADAM17       | ENSG00000151694.12                    | 0.62080202   | 6   | 3 | 0.190975888 | Brain_Cortex                          |                         |
|              | 0.553358688 Brain_Frontal_Cortex_BA9  | 5.045121963  |     |   |             | 0.018807818                           |                         |
|              | 0.270585045 -1.307697629              | -0.59273474  |     |   |             | -0.995199119                          | 0.30771241 3            |
|              | 0                                     | 0.998207054  |     |   |             |                                       |                         |
| SLITRK1      | ENSG00000178235.7                     | 0.620848281  | 1   | 1 | 0.620848281 |                                       |                         |
|              | Brain_Cerebellum                      | 0.620848281  |     |   |             | Brain_Cerebellum                      | 1 1 1 -0.494648471      |
|              | -0.494648471 -0.494648471             | NA 1         |     |   |             | 0.998207054                           |                         |
| GYPB         | ENSG00000250361.7                     | 0.620914903  | 1   | 1 | 0.620914903 |                                       |                         |
|              | Brain_Anterior_cingulate_cortex_BA24  | 0.620914903  |     |   |             |                                       |                         |
|              | Brain_Anterior_cingulate_cortex_BA24  | 1 1          |     |   |             | -0.494554108                          |                         |
|              | -0.494554108 -0.494554108             | NA 1         |     |   |             | 0.998207054                           |                         |
| TRIM16L      | ENSG00000108448.20                    | 0.620941413  | 8   | 5 | 0.18752488  |                                       |                         |
|              | Brain_Frontal_Cortex_BA9              | 0.994858614  |     |   |             | Brain_Cerebellum                      | 4.533763195             |
|              | 5.65E-16 0.221692246                  | -0.737936556 |     |   |             | 1.317936576                           | 0.005843932             |
|              | 0.697674327                           | 5 0          |     |   |             | 0.998207054                           |                         |
| CPNE7        | ENSG00000178773.14                    | 0.621219388  | 2   | 2 | 0.356802389 |                                       |                         |
|              | Brain_Anterior_cingulate_cortex_BA24  | 0.977674863  |     |   |             | Brain_Cortex                          |                         |
|              | 1.301725499 0.698274501               | 0.698274501  |     |   |             | -0.027984062                          | 0.921475189             |
|              | 0.446745564 0.671369075               | 2 0          |     |   |             | 0.998207054                           |                         |
| HABP4        | ENSG00000130956.13                    | 0.621380917  | 2   | 2 | 0.466721754 |                                       |                         |
|              | Brain_Frontal_Cortex_BA9              | 0.520153586  |     |   |             | Brain_Substantia_nigra                |                         |
|              | 1.008794469 0.991205531               | 0.991205531  |     |   |             | -0.643108675                          | 0.727823309             |
|              | 0.042357317 0.969395303               | 2 0          |     |   |             | 0.998207054                           |                         |
| C4orf32      | ENSG00000174749.5                     | 0.621449598  | 7   | 6 | 0.381383955 |                                       |                         |
|              | Brain_Caudate_basal_ganglia           | 0.921651534  |     |   |             | Brain_Cortex                          | 3.735562792             |
|              | 0.031660204 0.200929266               | -0.875349157 |     |   |             | 0.227664164                           | -0.361116751            |
|              | 0.485474124                           | 6 0          |     |   |             | 0.998207054                           |                         |
| SVBP         | ENSG00000177868.11                    | 0.621547445  | 13  | 1 | 0.479615939 |                                       |                         |
|              | Brain_Caudate_basal_ganglia           | 0.911017376  |     |   |             | Brain_Spinal_cord_cervical_c-1        |                         |

|               |                                       |                                      |                                      |              |                  |
|---------------|---------------------------------------|--------------------------------------|--------------------------------------|--------------|------------------|
|               | 12.11455493                           | 0.000338133                          | 12.11455493                          | 0.111755369  | 0.706920412      |
|               | 0.475812868                           | 0.186994488                          | 1 0                                  | 0.998207054  |                  |
| EEF1D         | ENSG00000104529.17                    | 0.621547796                          | 1 1                                  | 0.621547796  |                  |
|               | Brain_Substantia_nigra                | 0.621547796                          | Brain_Substantia_nigra               | 1 1          |                  |
|               | 1 -0.493657908                        | -0.493657908                         | -0.493657908 NA 1 0                  |              |                  |
|               | 0.998207054                           |                                      |                                      |              |                  |
| ZNF845        | ENSG00000213799.11                    | 0.621555673                          | 1 1                                  | 0.621555673  |                  |
|               | Brain_Amygdala                        | 0.621555673                          | Brain_Amygdala                       | 1 1 1        | 0.493646758      |
|               | 0.493646758                           | 0.493646758                          | NA 1 0                               | 0.998207054  |                  |
| MRM1          | ENSG00000278619.4                     | 0.621669524                          | 6 6                                  | 0.06101951   |                  |
|               | Brain_Frontal_Cortex_BA9              | 0.948261446                          | Brain_Hypothalamus                   | 2.037467762  |                  |
|               | 0.385076888                           | 0.385076888                          | -0.064890172                         | 1.873354056  | 0.80746421       |
|               | 0.675639718                           | 6 0                                  | 0.998207054                          |              |                  |
| PNPO          | ENSG00000108439.9                     | 0.62174103                           | 8 6                                  | 0.010001104  |                  |
|               | Brain_Substantia_nigra                | 0.73356804                           | Brain_Anterior_cingulate_cortex_BA24 |              |                  |
|               | 5.45627228                            | 0.028092399                          | 0.223901211                          | -2.575791147 | -0.340383105     |
|               | -1.285139117                          | 0.740138038                          | 6 0                                  | 0.998207054  |                  |
| OBP2A         | ENSG00000122136.13                    | 0.621751808                          | 4 4                                  | 0.165897236  | Brain_Cortex     |
|               | 0.311372159                           | Brain_Anterior_cingulate_cortex_BA24 | 2.525438129                          |              |                  |
|               | 0.180840855                           | 0.180840855                          | 1.012347024                          | 1.385507843  | 1.169590044      |
|               | 0.15953383                            | 4 0                                  | 0.998207054                          |              |                  |
| LINC01597     | ENSG00000205611.4                     | 0.622005254                          | 13 3                                 | 0.3626997    |                  |
|               | Brain_Spinal_cord_cervical_c-1        | 0.984727855                          | Brain_Amygdala                       | 10.99173934  |                  |
|               | 0.000116602                           | 0.562969904                          | -0.527990563                         | 0.910232894  | -0.088598012     |
|               | 0.346734116                           | 3 0                                  | 0.998207054                          |              |                  |
| KLHL35        | ENSG00000149243.15                    | 0.622010165                          | 1 1                                  | 0.622010165  |                  |
|               | Brain_Caudate_basal_ganglia           | 0.622010165                          | Brain_Caudate_basal_ganglia          | 1 1          |                  |
|               | 1 0.493003428                         | 0.493003428                          | 0.493003428 NA 1 0                   |              |                  |
|               | 0.998207054                           |                                      |                                      |              |                  |
| PRPH          | ENSG00000135406.13                    | 0.62204571                           | 3 2                                  | 0.43546029   | Brain_Cerebellum |
|               | 0.803388214                           | Brain_Spinal_cord_cervical_c-1       | 2.016204819                          | 0.029739919  |                  |
|               | 0.954055262                           | -0.779882075                         | 0.667892907                          | 0.045658456  | 0.744992028      |
|               | 2 0                                   | 0.998207054                          |                                      |              |                  |
| COX7A2        | ENSG00000112695.11                    | 0.622062896                          | 1 1                                  | 0.622062896  |                  |
|               | Brain_Amygdala                        | 0.622062896                          | Brain_Amygdala                       | 1 1 1        | 0.492928801      |
|               | 0.492928801                           | 0.492928801                          | NA 1 0                               | 0.998207054  |                  |
| YWHAB         | ENSG00000166913.12                    | 0.622106941                          | 1 1                                  | 0.622106941  |                  |
|               | Brain_Cerebellar_Hemisphere           | 0.622106941                          | Brain_Cerebellar_Hemisphere          | 1 1          |                  |
|               | 1 -0.49286647                         | -0.49286647                          | -0.49286647 NA 1 0                   |              |                  |
|               | 0.998207054                           |                                      |                                      |              |                  |
| FIBCD1        | ENSG00000130720.12                    | 0.622134995                          | 2 2                                  | 0.369422459  |                  |
|               | Brain_Nucleus_accumbens_basal_ganglia | 0.705569809                          | Brain_Frontal_Cortex_BA9             |              |                  |
|               | 1.001247764                           | 0.998752236                          | 0.998752236                          | -0.377812605 | 0.897555712      |
|               | 0.259871554                           | 0.901821585                          | 2 0                                  | 0.998207054  |                  |
| RP11-497H16.9 | ENSG00000269983.1                     | 0.622150955                          | 4 2                                  | 0.689926429  |                  |
|               | Brain_Cerebellum                      | 0.922748752                          | Brain_Spinal_cord_cervical_c-1       | 3.815243818  |                  |
|               | 0.001646347                           | 0.155917291                          | -0.39895491                          | 0.096971847  | -0.247308023     |
|               | 0.233747696                           | 2 0                                  | 0.998207054                          |              |                  |
| RP11-963H4.3  | ENSG00000263508.5                     | 0.622253379                          | 7 7                                  | 0.233729977  |                  |
|               | Brain_Substantia_nigra                | 0.733803963                          | Brain_Hippocampus                    | 3.204823167  |                  |
|               | 0.268750932                           | 0.268750932                          | -1.190805429                         | 0.80962866   | 0.031353217      |
|               | 0.840751962                           | 7 0                                  | 0.998207054                          |              |                  |
| AP000343.2    | ENSG00000236611.1                     | 0.622387819                          | 3 3                                  | 0.21726614   |                  |
|               | Brain_Nucleus_accumbens_basal_ganglia | 0.684866676                          | Brain_Cerebellum                     |              |                  |
|               | 1.432217105                           | 0.726468101                          | 0.726468101                          | -1.233830315 | -0.40583114      |
|               | -0.812450441                          | 0.414196891                          | 3 0                                  | 0.998207054  |                  |
| TRMO          | ENSG00000136932.13                    | 0.622442049                          | 13 1                                 | 0.090075586  |                  |
|               | Brain_Spinal_cord_cervical_c-1        | 0.973595859                          | Brain_Frontal_Cortex_BA9             |              |                  |
|               | 12.37085705                           | 0.00042042                           | 12.37085705                          | -0.033098726 | 1.694999129      |
|               | 0.47970802                            | 0.420381747                          | 1 0                                  | 0.998207054  |                  |
| NECAP2        | ENSG00000157191.19                    | 0.622454205                          | 2 2                                  | 0.341377475  |                  |
|               | Brain_Anterior_cingulate_cortex_BA24  | 0.819407016                          | Brain_Hypothalamus                   |              |                  |



|             |                                      |                             |                                       |              |              |                  |              |   |
|-------------|--------------------------------------|-----------------------------|---------------------------------------|--------------|--------------|------------------|--------------|---|
|             | 1.435921733                          | 0.564078267                 | 0.564078267                           | 0.228307729  | 0.95144707   |                  |              |   |
|             | 0.5898774                            | 0.511336732                 | 2                                     | 0            | 0.998207054  |                  |              |   |
| SCN5A       | ENSG00000183873.15                   | 0.622541462                 | 2                                     | 2            | 0.331000157  | Brain_Cortex     |              |   |
|             | 0.969265982                          | Brain_Cerebellar_Hemisphere | 1.015842998                           | 0.984157002  |              |                  |              |   |
|             | 0.984157002                          | -0.972101296                | -0.03852891                           | -0.505315103 | 0.660135365  |                  |              |   |
|             | 2                                    | 0                           | 0.998207054                           |              |              |                  |              |   |
| SLC13A5     | ENSG00000141485.16                   | 0.622710206                 | 3                                     | 3            | 0.244277987  |                  |              |   |
|             | Brain_Cerebellar_Hemisphere          | 0.549373226                 | Brain_Hypothalamus                    | 1.636904917  |              |                  |              |   |
|             | 0.3632996                            | 0.3632996                   | 0.598699596                           | 1.164360404  | 0.834560335  |                  |              |   |
|             | 0.294298294                          | 3                           | 0                                     | 0.998207054  |              |                  |              |   |
| BRD4        | ENSG00000141867.17                   | 0.62286434                  | 1                                     | 1            | 0.62286434   |                  |              |   |
|             | Brain_Spinal_cord_cervical_c-1       | 0.62286434                  | Brain_Spinal_cord_cervical_c-1        | 1            |              |                  |              |   |
|             | 1                                    | 1                           | 0.491794903                           | 0.491794903  | 0.491794903  | NA               | 1            | 0 |
|             | 0.998207054                          |                             |                                       |              |              |                  |              |   |
| UBE2G2      | ENSG00000184787.18                   | 0.622885287                 | 10                                    | 6            | 0.137298479  |                  |              |   |
|             | Brain_Spinal_cord_cervical_c-1       | 0.810735732                 | Brain_Amygdala                        | 5.375737408  |              |                  |              |   |
|             | 0.040779973                          | 0.185489002                 | -0.638704523                          | 1.485926818  | 0.20711804   |                  |              |   |
|             | 0.680116511                          | 6                           | 0                                     | 0.998207054  |              |                  |              |   |
| C3orf52     | ENSG00000114529.12                   | 0.623093416                 | 2                                     | 2            | 0.331139845  |                  |              |   |
|             | Brain_Cerebellum                     | 0.962175825                 | Brain_Cerebellar_Hemisphere           | 1.090831969  |              |                  |              |   |
|             | 0.909168031                          | 0.909168031                 | -0.971820522                          | -0.047423343 | -0.509621932 |                  |              |   |
|             | 0.653647514                          | 2                           | 0                                     | 0.998207054  |              |                  |              |   |
| BEND5       | ENSG00000162373.12                   | 0.623140167                 | 1                                     | 1            | 0.623140167  | Brain_Cerebellum |              |   |
|             | 0.623140167                          | Brain_Cerebellum            | 1                                     | 1            | -0.491404804 | -0.491404804     |              |   |
|             | -0.491404804                         | NA                          | 1                                     | 0            | 0.998207054  |                  |              |   |
| AMACR       | ENSG00000242110.7                    | 0.623195548                 | 13                                    | 2            | 0.285112289  |                  |              |   |
|             | Brain_Anterior_cingulate_cortex_BA24 | 0.942789387                 | Brain_Cerebellum                      |              |              |                  |              |   |
|             | 11.55957447                          | 0.000331126                 | 0.773431342                           | 0.071764422  | 1.068905422  |                  |              |   |
|             | 0.620293939                          | 0.336272423                 | 2                                     | 0            | 0.998207054  |                  |              |   |
| PPT2        | ENSG00000221988.12                   | 0.623284887                 | 1                                     | 1            | 0.623284887  |                  |              |   |
|             | Brain_Caudate_basal_ganglia          | 0.623284887                 | Brain_Caudate_basal_ganglia           | 1            | 1            |                  |              |   |
|             | 1                                    | -0.491200159                | -0.491200159                          | -0.491200159 | NA           | 1                | 0            |   |
|             | 0.998207054                          |                             |                                       |              |              |                  |              |   |
| CTSW        | ENSG00000172543.7                    | 0.623310062                 | 5                                     | 5            | 0.285612704  |                  |              |   |
|             | Brain_Putamen_basal_ganglia          | 0.64009298                  | Brain_Nucleus_accumbens_basal_ganglia |              |              |                  |              |   |
|             | 2.805853708                          | 0.134701187                 | 0.134701187                           | -0.727099827 | 1.067795642  |                  |              |   |
|             | -0.260589655                         | 0.752896668                 | 5                                     | 0            | 0.998207054  |                  |              |   |
| LINC02072   | ENSG00000225860.2                    | 0.623386939                 | 1                                     | 1            | 0.623386939  |                  |              |   |
|             | Brain_Amygdala                       | 0.623386939                 | Brain_Amygdala                        | 1            | 1            | 1                | 0.49105586   |   |
|             | 0.49105586                           | 0.49105586                  | NA                                    | 1            | 0            | 0.998207054      |              |   |
| RP11-26J3.1 | ENSG00000249328.2                    | 0.623411005                 | 7                                     | 7            | 0.056106186  |                  |              |   |
|             | Brain_Amygdala                       | 0.977799402                 | Brain_Substantia_nigra                | 2.675302327  |              |                  |              |   |
|             | 0.105053746                          | 0.105053746                 | -1.910209954                          | 0.08774088   | -0.726985412 |                  |              |   |
|             | 0.733009515                          | 7                           | 0                                     | 0.998207054  |              |                  |              |   |
| EPB41       | ENSG00000159023.19                   | 0.623435795                 | 2                                     | 1            | 0.610594265  |                  |              |   |
|             | Brain_Cerebellar_Hemisphere          | 0.63699136                  | Brain_Cerebellum                      | 1.996585214  |              |                  |              |   |
|             | 0.003414786                          | 1.996585214                 | 0.471909537                           | 0.509225365  | 0.490567451  |                  |              |   |
|             | 0.026386275                          | 1                           | 0                                     | 0.998207054  |              |                  |              |   |
| DNAJB11     | ENSG00000090520.11                   | 0.623448571                 | 1                                     | 1            | 0.623448571  |                  |              |   |
|             | Brain_Cortex                         | 0.623448571                 | Brain_Cortex                          | 1            | 1            | 1                | -0.490968721 |   |
|             | -0.490968721                         | -0.490968721                | NA                                    | 1            | 0            | 0.998207054      |              |   |
| C1orf159    | ENSG00000131591.17                   | 0.62366399                  | 12                                    | 3            | 0.436943491  |                  |              |   |
|             | Brain_Spinal_cord_cervical_c-1       | 0.996814604                 | Brain_Cerebellar_Hemisphere           |              |              |                  |              |   |
|             | 9.630161375                          | 0.001790298                 | 0.377565846                           | -0.738920338 | 0.77736494   |                  |              |   |
|             | 0.002956165                          | 0.373784226                 | 3                                     | 0            | 0.998207054  |                  |              |   |
| C9orf3      | ENSG00000148120.16                   | 0.623746801                 | 3                                     | 3            | 0.334202992  |                  |              |   |
|             | Brain_Cortex                         | 0.929242292                 | Brain_Cerebellum                      | 1.399506238  | 0.713456493  |                  |              |   |
|             | 0.713456493                          | -0.965682675                | 0.725522987                           | -0.109652628 | 0.845795678  |                  |              |   |
|             | 3                                    | 0                           | 0.998207054                           |              |              |                  |              |   |
| KREMEN1     | ENSG00000183762.12                   | 0.623762448                 | 4                                     | 4            | 0.206088038  |                  |              |   |
|             | Brain_Hypothalamus                   | 0.308381538                 | Brain_Cerebellum                      | 2.284441915  |              |                  |              |   |
|             | 0.332993819                          | 0.332993819                 | -1.264395694                          | -1.018623933 | -1.122630822 |                  |              |   |

|               |                                      |                             |              |             |                                       |                  |
|---------------|--------------------------------------|-----------------------------|--------------|-------------|---------------------------------------|------------------|
| MAVS          | ENSG00000088888.17                   | 0.623774951                 | 8            | 4           | 0.510221482                           | Brain_Amygdala   |
|               | 0.989011993                          | Brain_Putamen_basal_ganglia | 5.521872308  |             | 0.017444559                           |                  |
|               | 0.351514232                          | -0.658492862                | 0.482501147  |             | -0.096077852                          | 0.469616179      |
|               | 4                                    | 0                           | 0.998207054  |             |                                       |                  |
| RP11-170M17.1 | ENSG00000228566.1                    | 0.62405172                  | 2            | 2           | 0.399859242                           |                  |
|               | Brain_Cerebellar_Hemisphere          | 0.568840192                 |              |             | Brain_Nucleus_accumbens_basal_ganglia |                  |
|               | 1.104999618                          | 0.895000382                 | 0.895000382  |             | -0.569760438                          | 0.841872648      |
|               | 0.136056105                          | 0.998175327                 | 2            | 0           | 0.998207054                           |                  |
| ZDHHC24       | ENSG00000174165.7                    | 0.624113878                 | 12           | 4           | 0.147735995                           |                  |
|               | Brain_Cerebellum                     | 0.532140405                 |              |             | Brain_Hypothalamus                    | 10.13304573      |
|               | 0.342043314                          | 0.624741996                 | 1.44757483   | 0.941117487 | 0.231103223                           | 6.17E-05         |
|               | 0                                    | 0.998207054                 |              |             |                                       | 4                |
| RP11-294N21.3 | ENSG00000274400.1                    | 0.624228236                 | 3            | 3           | 0.198012752                           |                  |
|               | Brain_Anterior_cingulate_cortex_BA24 | 0.390600237                 |              |             | Brain_Hypothalamus                    |                  |
|               | 2.382830413                          | 0.127044993                 | 0.127044993  |             | -1.287233965                          | -0.858529339     |
|               | -1.026545797                         | 0.228884137                 | 3            | 0           | 0.998207054                           |                  |
| RAB6B         | ENSG00000154917.10                   | 0.624273512                 | 3            | 3           | 0.381198175                           |                  |
|               | Brain_Hypothalamus                   | 0.798083972                 |              |             | Brain_Cerebellar_Hemisphere           | 1.464843515      |
|               | 0.537348596                          | 0.537348596                 | -0.795074329 |             | 0.875690751                           | 0.112148003      |
|               | 0.844598636                          | 3                           | 0            | 0.998207054 |                                       |                  |
| AP000265.1    | ENSG00000261610.1                    | 0.624275204                 | 2            | 2           | 0.372250965                           |                  |
|               | Brain_Cerebellar_Hemisphere          | 0.757373813                 |              |             | Brain_Cerebellum                      | 1.080879385      |
|               | 0.919120615                          | 0.919120615                 | -0.892264897 |             | 0.308931265                           | -0.291666816     |
|               | 0.849373951                          | 2                           | 0            | 0.998207054 |                                       |                  |
| RABGEF1       | ENSG00000154710.16                   | 0.62439954                  | 4            | 4           | 0.524875217                           |                  |
|               | Brain_Cerebellar_Hemisphere          | 0.921772488                 |              |             | Brain_Frontal_Cortex_BA9              |                  |
|               | 3.174345111                          | 0.117287939                 | 0.117287939  |             | -0.635848431                          | 0.318785253      |
|               | -0.129387175                         | 0.423406966                 | 4            | 0           | 0.998207054                           |                  |
| HEATR6        | ENSG00000068097.14                   | 0.62440242                  | 10           | 3           | 0.366925296                           |                  |
|               | Brain_Anterior_cingulate_cortex_BA24 | 0.996710612                 |              |             | Brain_Substantia_nigra                |                  |
|               | 8.431109516                          | 0.001198613                 | 0.494449175  |             | -0.352191646                          | 0.90224771       |
|               | 0.072073573                          | 0.335350528                 | 3            | 0           | 0.998207054                           |                  |
| RBM12         | ENSG00000244462.7                    | 0.624496124                 | 2            | 2           | 0.427261492                           |                  |
|               | Brain_Putamen_basal_ganglia          | 0.511248348                 |              |             | Brain_Cerebellar_Hemisphere           |                  |
|               | 1.130589324                          | 0.869410676                 | 0.869410676  |             | -0.656895134                          | 0.79388653       |
|               | 0.068495698                          | 1.025857552                 | 2            | 0           | 0.998207054                           |                  |
| ZBED8         | ENSG00000221886.3                    | 0.624561352                 | 2            | 2           | 0.421611437                           | Brain_Cerebellum |
|               | Brain_Cerebellar_Hemisphere          | 1.935419835                 |              |             | 0.064580165                           |                  |
|               | 0.064580165                          | -0.80362871                 | -0.559516801 |             | -0.681572755                          | 0.172613187      |
|               | 2                                    | 0                           | 0.998207054  |             |                                       |                  |
| CDH2          | ENSG00000170558.8                    | 0.624580173                 | 2            | 2           | 0.341768172                           |                  |
|               | Brain_Cerebellar_Hemisphere          | 0.468039875                 |              |             | Brain_Cerebellum                      | 1.865456142      |
|               | 0.134543858                          | 0.134543858                 | 0.725671992  |             | 0.950677384                           | 0.838174688      |
|               | 0.159102839                          | 2                           | 0            | 0.998207054 |                                       |                  |
| RAB27B        | ENSG00000041353.9                    | 0.624599716                 | 2            | 2           | 0.44792715                            | Brain_Cerebellum |
|               | Brain_Amygdala                       | 1.297761486                 |              |             | 0.702238514                           | 0.702238514      |
|               | -0.758875309                         | -0.351097739                | -0.554986524 |             | 0.288342285                           | 2                |
|               | 0.998207054                          |                             |              |             | 0                                     |                  |
| TMEM127       | ENSG00000135956.8                    | 0.62469672                  | 3            | 3           | 0.196930837                           |                  |
|               | Brain_Caudate_basal_ganglia          | 0.39479538                  |              |             | Brain_Cerebellar_Hemisphere           | 2.15302611       |
|               | 0.137158612                          | 0.137158612                 | 0.850953148  |             | 1.290345178                           | 1.028586696      |
|               | 0.231460779                          | 3                           | 0            | 0.998207054 |                                       |                  |
| ABCG4         | ENSG00000172350.9                    | 0.624701287                 | 2            | 2           | 0.332037323                           | Brain_Cerebellum |
|               | Brain_Caudate_basal_ganglia          | 1.425817786                 |              |             | 0.574182214                           |                  |
|               | 0.574182214                          | -0.970018396                | -0.408290683 |             | -0.689154539                          | 0.397201475      |
|               | 2                                    | 0                           | 0.998207054  |             |                                       |                  |
| PIEZO1        | ENSG00000103335.21                   | 0.624719209                 | 4            | 4           | 0.213916716                           |                  |
|               | Brain_Cerebellar_Hemisphere          | 0.80478826                  |              |             | Brain_Cerebellum                      | 1.647922444      |
|               | 0.427616791                          | 0.427616791                 | -0.667915845 |             | 1.242867357                           | -0.035257086     |
|               | 0.869241226                          | 4                           | 0            | 0.998207054 |                                       |                  |
| MYCBP2        | ENSG00000005810.17                   | 0.624764802                 | 1            | 1           | 0.624764802                           |                  |

|              |                                       |                    |                             |              |              |             |                  |             |
|--------------|---------------------------------------|--------------------|-----------------------------|--------------|--------------|-------------|------------------|-------------|
|              | Brain_Nucleus_accumbens_basal_ganglia | 0.624764802        |                             |              |              |             |                  |             |
|              | Brain_Nucleus_accumbens_basal_ganglia | 1                  | 1                           | 1            | 0.489108615  |             |                  |             |
|              | 0.489108615                           | 0.489108615        | NA                          | 1            | 0            | 0.998207054 |                  |             |
| LINC01786    | ENSG00000230415.1                     | 0.624818455        | 1                           | 1            | 0.624818455  |             |                  |             |
|              | Brain_Cortex                          | 0.624818455        | Brain_Cortex                | 1            | 1            | 1           | 0.489032829      |             |
|              | 0.489032829                           | 0.489032829        | NA                          | 1            | 0            | 0.998207054 |                  |             |
| ZNF45        | ENSG00000124459.11                    | 0.624836564        | 6                           | 5            | 0.268314066  |             | Brain_Cerebellum |             |
|              | 0.985798593                           | Brain_Hypothalamus | 3.855069956                 |              | 0.061986483  |             |                  |             |
|              | 0.144050849                           | -0.205790708       | 1.106953424                 |              | 0.346830423  |             | 0.509609691      |             |
|              | 5                                     | 0                  | 0.998207054                 |              |              |             |                  |             |
| PROS1        | ENSG00000184500.14                    | 0.624838359        | 4                           | 4            | 0.154486876  |             |                  |             |
|              | Brain_Substantia_nigra                | 0.860956538        | Brain_Cortex                | 2.254121275  |              |             |                  |             |
|              | 0.133362831                           | 0.133362831        | -1.423860437                |              | 0.813437857  |             | -0.260606762     |             |
|              | 0.915431921                           | 4                  | 0                           | 0.998207054  |              |             |                  |             |
| TEPSIN       | ENSG00000167302.10                    | 0.62483951         | 2                           | 2            | 0.437304495  |             |                  |             |
|              | Brain_Spinal_cord_cervical_c-1        | 0.560510111        | Brain_Cerebellar_Hemisphere |              |              |             |                  |             |
|              | 1.001823867                           | 0.998176133        | 0.998176133                 |              | -0.776753028 |             | -0.582083987     |             |
|              | -0.679418507                          | 0.137651799        | 2                           | 0            | 0.998207054  |             |                  |             |
| RING1        | ENSG00000204227.4                     | 0.624911833        | 1                           | 1            | 0.624911833  |             |                  |             |
|              | Brain_Cerebellar_Hemisphere           | 0.624911833        | Brain_Cerebellar_Hemisphere | 1            | 1            |             |                  |             |
|              | 1                                     | -0.488900936       | -0.488900936                | -0.488900936 | NA           | 1           | 0                |             |
|              | 0.998207054                           |                    |                             |              |              |             |                  |             |
| RP11-766N7.3 | ENSG00000255693.1                     | 0.624922247        | 11                          | 7            | 0.129136534  |             |                  |             |
|              | Brain_Cerebellum                      | 0.851786102        | Brain_Caudate_basal_ganglia | 6.889739236  |              |             |                  |             |
|              | 0.000989634                           | 0.251697298        | -0.186839977                |              | 1.517515696  |             | 0.846895033      |             |
|              | 0.473815595                           | 7                  | 0                           | 0.998207054  |              |             |                  |             |
| RECQL        | ENSG00000004700.15                    | 0.624938886        | 3                           | 3            | 0.245357724  |             |                  |             |
|              | Brain_Caudate_basal_ganglia           | 0.490085587        | Brain_Cerebellar_Hemisphere |              |              |             |                  |             |
|              | 1.875012284                           | 0.13172858         | 0.13172858                  | -1.161699069 | 0.690172703  |             |                  |             |
|              | -0.520338902                          | 1.04895533         | 3                           | 0            | 0.998207054  |             |                  |             |
| IGFLR1       | ENSG00000126246.9                     | 0.624970871        | 2                           | 2            | 0.375469072  |             |                  |             |
|              | Brain_Cerebellum                      | 0.654837585        | Brain_Caudate_basal_ganglia | 1.061590097  |              |             |                  |             |
|              | 0.938409903                           | 0.938409903        | 0.447051904                 |              | 0.88627553   |             | 0.666663717      |             |
|              | 0.310578005                           | 2                  | 0                           | 0.998207054  |              |             |                  |             |
| SLC34A2      | ENSG00000157765.11                    | 0.624971303        | 1                           | 1            | 0.624971303  |             |                  |             |
|              | Brain_Hypothalamus                    | 0.624971303        | Brain_Hypothalamus          | 1            | 1            | 1           |                  |             |
|              | -0.488816941                          | -0.488816941       | -0.488816941                | NA           | 1            | 0           | 0.998207054      |             |
| PREX2        | ENSG00000046889.18                    | 0.625018113        | 5                           | 5            | 0.110830271  |             |                  |             |
|              | Brain_Nucleus_accumbens_basal_ganglia | 0.885820233        | Brain_Cortex                | 2.42456133   |              |             |                  |             |
|              | 0.224647475                           | 0.224647475        | -0.870668936                |              | 1.594472386  |             | 0.012337971      |             |
|              | 0.929390989                           | 5                  | 0                           | 0.998207054  |              |             |                  |             |
| ZDHHC22      | ENSG00000177108.5                     | 0.625070019        | 2                           | 2            | 0.340041784  |             |                  |             |
|              | Brain_Cerebellum                      | 0.901031482        | Brain_Putamen_basal_ganglia | 1.049486441  |              |             |                  |             |
|              | 0.950513559                           | 0.950513559        | -0.954082696                |              | 0.124358435  |             | -0.414862131     |             |
|              | 0.762573036                           | 2                  | 0                           | 0.998207054  |              |             |                  |             |
| VSTM2L       | ENSG00000132821.11                    | 0.625152811        | 2                           | 2            | 0.334909767  |             |                  |             |
|              | Brain_Caudate_basal_ganglia           | 0.862194784        | Brain_Cortex                | 1.07819497   | 0.92180503   |             |                  |             |
|              | 0.92180503                            | -0.964271616       | -0.173580976                |              | -0.568926296 |             | 0.559102713      | 2           |
|              | 0                                     | 0.998207054        |                             |              |              |             |                  |             |
| INHBB        | ENSG00000163083.5                     | 0.625312469        | 1                           | 1            | 0.625312469  |             | Brain_Cortex     |             |
|              | 0.625312469                           | Brain_Cortex       | 1                           | 1            | 1            | 0.488335149 | 0.488335149      |             |
|              | 0.488335149                           | NA                 | 1                           | 0            | 0.998207054  |             |                  |             |
| TRMT10B      | ENSG00000165275.9                     | 0.625405272        | 4                           | 4            | 0.596409405  |             |                  |             |
|              | Brain_Nucleus_accumbens_basal_ganglia | 0.894343286        |                             |              |              |             |                  |             |
|              | Brain_Spinal_cord_cervical_c-1        | 2.322807753        |                             |              | 0.118335311  |             | 0.118335311      |             |
|              | -0.529571001                          | 0.19629804         | -0.069941212                |              | 0.34242493   | 4           | 0                | 0.998207054 |
| NDUFAF4      | ENSG00000123545.5                     | 0.625689451        | 13                          | 1            | 0.409027283  |             |                  |             |
|              | Brain_Substantia_nigra                | 0.975006747        | Brain_Hippocampus           | 11.88314875  |              |             |                  |             |
|              | 0.000412232                           | 11.88314875        | 0.031329522                 |              | 0.825606613  |             | 0.464390016      |             |
|              | 0.242093277                           | 1                  | 0                           | 0.998207054  |              |             |                  |             |
| ARC          | ENSG00000198576.3                     | 0.625829473        | 1                           | 1            | 0.625829473  |             | Brain_Cerebellum |             |
|              | 0.625829473                           | Brain_Cerebellum   | 1                           | 1            | 1            | 0.487605255 | 0.487605255      |             |

|         |                                      |                          |              |              |             |             |                                       |              |                  |
|---------|--------------------------------------|--------------------------|--------------|--------------|-------------|-------------|---------------------------------------|--------------|------------------|
|         | 0.487605255                          | NA                       | 1            | 0            | 0.998207054 |             |                                       |              |                  |
| ZNF330  | ENSG00000109445.10                   |                          |              | 0.625835494  | 3           | 3           | 0.194854114                           |              |                  |
|         | Brain_Frontal_Cortex_BA9             |                          |              | 0.825998305  |             |             | Brain_Substantia_nigra                |              |                  |
|         | 1.300130263                          | 0.729314952              |              | 0.729314952  |             |             | 0.21983674                            | 1.296352368  |                  |
|         | 0.666363695                          | 0.561217539              |              | 3            | 0           | 0.998207054 |                                       |              |                  |
| NLRP14  | ENSG00000158077.4                    |                          |              | 0.62587862   | 1           | 1           | 0.62587862                            |              |                  |
|         | Brain_Spinal_cord_cervical_c-1       |                          |              | 0.62587862   |             |             | Brain_Spinal_cord_cervical_c-1        | 1            | 1                |
|         | 1                                    | 1                        | -0.487535883 | -0.487535883 |             |             | -0.487535883                          | NA           | 1                |
|         | 0.998207054                          |                          |              |              |             |             |                                       |              | 0                |
| GCH1    | ENSG00000131979.18                   |                          |              | 0.625907289  | 5           | 4           | 0.136963171                           |              |                  |
|         | Brain_Putamen_basal_ganglia          |                          |              | 0.96744704   |             |             | Brain_Hippocampus                     | 3.381087053  |                  |
|         | 0.083109349                          | 0.200612274              |              | 0.04081041   |             |             | 1.48719555                            | 0.439191613  |                  |
|         | 0.619393482                          | 4                        | 0            | 0.998207054  |             |             |                                       |              |                  |
| CFAP69  | ENSG00000105792.19                   |                          |              | 0.626021598  | 7           | 5           | 0.209754039                           |              |                  |
|         | Brain_Caudate_basal_ganglia          |                          |              | 0.914149905  |             |             | Brain_Hippocampus                     | 5.017886979  |                  |
|         | 0.023087245                          | 0.177133211              |              | 0.107805594  |             |             | 1.254242053                           | 0.704706082  |                  |
|         | 0.381404472                          | 5                        | 0            | 0.998207054  |             |             |                                       |              |                  |
| CCND3   | ENSG00000112576.12                   |                          |              | 0.626062103  | 1           | 1           | 0.626062103                           |              | Brain_Cortex     |
|         | 0.626062103                          | Brain_Cortex             | 1            | 1            | 1           |             | 0.487276917                           | 0.487276917  |                  |
|         | 0.487276917                          | NA                       | 1            | 0            | 0.998207054 |             |                                       |              |                  |
| SLC20A2 | ENSG00000168575.9                    |                          |              | 0.626074264  | 1           | 1           | 0.626074264                           |              |                  |
|         | Brain_Cortex                         |                          |              | 0.626074264  |             |             | Brain_Cortex                          | 1            | 1                |
|         | 0.487259755                          | 0.487259755              |              | NA           | 1           | 0           | 0.998207054                           |              | 0.487259755      |
| CUTC    | ENSG00000119929.12                   |                          |              | 0.62609259   | 1           | 1           | 0.62609259                            |              | Brain_Cortex     |
|         | Brain_Cortex                         | 1                        | 1            | 1            |             |             | -0.487233891                          | -0.487233891 | -0.487233891     |
|         | NA                                   | 1                        | 0            | 0.998207054  |             |             |                                       |              |                  |
| PKLR    | ENSG00000143627.17                   |                          |              | 0.626136219  | 1           | 1           | 0.626136219                           |              |                  |
|         | Brain_Frontal_Cortex_BA9             |                          |              | 0.626136219  |             |             | Brain_Frontal_Cortex_BA9              | 1            | 1                |
|         | 1                                    | 0.487172321              |              | 0.487172321  |             |             | 0.487172321                           | NA           | 1                |
|         | 0.998207054                          |                          |              |              |             |             |                                       |              | 0                |
| CASP1   | ENSG00000137752.23                   |                          |              | 0.626288057  | 1           | 1           | 0.626288057                           |              |                  |
|         | Brain_Anterior_cingulate_cortex_BA24 |                          |              | 0.626288057  |             |             |                                       |              |                  |
|         | Brain_Anterior_cingulate_cortex_BA24 | 1                        | 1            | 1            |             |             | -0.486958053                          |              |                  |
|         | -0.486958053                         | -0.486958053             |              | NA           | 1           | 0           | 0.998207054                           |              |                  |
| FZD1    | ENSG00000157240.3                    |                          |              | 0.626300165  | 4           | 4           | 0.249655313                           |              | Brain_Cerebellum |
|         | 0.637016068                          | Brain_Frontal_Cortex_BA9 |              | 1.339048062  |             |             | 0.723946983                           |              |                  |
|         | 0.723946983                          | -1.151186998             |              | 0.790334612  |             |             | -0.131752625                          | 0.914727171  |                  |
|         | 4                                    | 0                        | 0.998207054  |              |             |             |                                       |              |                  |
| LOXL1   | ENSG00000129038.15                   |                          |              | 0.626319935  | 3           | 3           | 0.256462321                           |              |                  |
|         | Brain_Caudate_basal_ganglia          |                          |              | 0.963583572  |             |             | Brain_Hippocampus                     | 1.320676751  |                  |
|         | 0.705636618                          | 0.705636618              |              | -0.636801689 |             |             | 1.134792377                           | 0.150777869  |                  |
|         | 0.901984701                          | 3                        | 0            | 0.998207054  |             |             |                                       |              |                  |
| ADORA1  | ENSG00000163485.16                   |                          |              | 0.626345008  | 2           | 2           | 0.437015581                           |              |                  |
|         | Brain_Cerebellar_Hemisphere          |                          |              | 0.690666084  |             |             | Brain_Cerebellum                      | 1.212036147  |                  |
|         | 0.787963853                          | 0.787963853              |              | -0.3979513   |             |             | 0.777242723                           | 0.189645711  |                  |
|         | 0.830987662                          | 2                        | 0            | 0.998207054  |             |             |                                       |              |                  |
| ZRANB1  | ENSG00000019995.6                    |                          |              | 0.626507393  | 1           | 1           | 0.626507393                           |              |                  |
|         | Brain_Amygdala                       |                          |              | 0.626507393  |             |             | Brain_Amygdala                        | 1            | 1                |
|         | 0.486648577                          | 0.486648577              |              | NA           | 1           | 0           | 0.998207054                           |              | 0.486648577      |
| CERNA1  | ENSG00000259577.1                    |                          |              | 0.6265469    | 13          | 4           | 0.117291397                           |              |                  |
|         | Brain_Hypothalamus                   |                          |              | 0.909115865  |             |             | Brain_Hippocampus                     | 10.61463315  |                  |
|         | 0.004910803                          | 0.363213554              |              | -1.566244464 |             |             | -0.114153812                          | -1.183204502 |                  |
|         | 0.421741108                          | 4                        | 0            | 0.998207054  |             |             |                                       |              |                  |
| GLRA3   | ENSG00000145451.12                   |                          |              | 0.626578027  | 3           | 2           | 0.337084807                           |              |                  |
|         | Brain_Caudate_basal_ganglia          |                          |              | 0.481701935  |             |             | Brain_Nucleus_accumbens_basal_ganglia |              |                  |
|         | 2.887395387                          | 0.011595688              |              | 0.101008925  |             |             | -0.959941204                          | -0.703567856 |                  |
|         | -0.865153762                         | 0.140635519              |              | 2            | 0           | 0.998207054 |                                       |              |                  |
| ZNF831  | ENSG00000124203.6                    |                          |              | 0.626820877  | 1           | 1           | 0.626820877                           |              |                  |
|         | Brain_Cerebellar_Hemisphere          |                          |              | 0.626820877  |             |             | Brain_Cerebellar_Hemisphere           | 1            | 1                |
|         | 1                                    | -0.48620634              |              | -0.48620634  |             |             | -0.48620634                           | NA           | 1                |
|         | 0.998207054                          |                          |              |              |             |             |                                       |              | 0                |
| CASKIN2 | ENSG00000177303.9                    |                          |              | 0.626845887  | 1           | 1           | 0.626845887                           |              |                  |

|               |                                       |                |                                      |              |                             |              |   |
|---------------|---------------------------------------|----------------|--------------------------------------|--------------|-----------------------------|--------------|---|
|               | Brain_Nucleus_accumbens_basal_ganglia | 0.626845887    |                                      |              |                             |              |   |
|               | Brain_Nucleus_accumbens_basal_ganglia | 1              | 1                                    | 1            | -0.486171062                |              |   |
|               | -0.486171062                          | -0.486171062   | NA                                   | 1            | 0                           | 0.998207054  |   |
| PANK4         | ENSG00000157881.13                    | 0.626953685    | 2                                    | 2            | 0.50051771                  |              |   |
|               | Brain_Frontal_Cortex_BA9              | 0.518915006    |                                      |              | Brain_Substantia_nigra      |              |   |
|               | 1.068464809                           | 0.931535191    | 0.931535191                          |              | -0.645018795                | 0.673675392  |   |
|               | 0.014328298                           | 0.932457602    | 2                                    | 0            | 0.998207054                 |              |   |
| ZNF302        | ENSG00000089335.20                    | 0.627061775    | 12                                   | 3            | 0.137425505                 |              |   |
|               | Brain_Substantia_nigra                | 0.521851743    |                                      |              | Brain_Caudate_basal_ganglia | 10.0754618   |   |
|               | 0.000140713                           | 0.496443264    | -1.485446805                         |              | -0.640493608                | -1.124705277 |   |
|               | 0.263248876                           | 3              | 0                                    | 0.998207054  |                             |              |   |
| RP1-102E24.8  | ENSG00000256433.2                     | 0.627079964    | 6                                    | 6            | 0.125347721                 |              |   |
|               | Brain_Cerebellum                      | 0.94391178     | Brain_Anterior_cingulate_cortex_BA24 | 2.450565999  |                             |              |   |
|               | 0.089504469                           | 0.089504469    | -0.61268517                          | 1.532708389  | 0.504869746                 |              |   |
|               | 0.758890422                           | 6              | 0                                    | 0.998207054  |                             |              |   |
| SIGLEC11      | ENSG00000161640.15                    | 0.627178118    | 8                                    | 7            | 0.274010619                 |              |   |
|               | Brain_Hippocampus                     | 0.988983716    | Brain_Cerebellum                     | 3.978255657  |                             |              |   |
|               | 0.006029161                           | 0.138282312    | -1.093873143                         | 0.751472719  | -0.215100363                |              |   |
|               | 0.640178582                           | 7              | 0                                    | 0.998207054  |                             |              |   |
| KIAA1217      | ENSG00000120549.17                    | 0.627220597    | 2                                    | 2            | 0.481391199                 |              |   |
|               | Brain_Frontal_Cortex_BA9              | 0.503406302    | Brain_Hippocampus                    | 1.011317335  |                             |              |   |
|               | 0.988682665                           | 0.988682665    | -0.669139802                         | 0.704066761  | 0.017463479                 |              |   |
|               | 0.971003673                           | 2              | 0                                    | 0.998207054  |                             |              |   |
| RP11-38G5.2   | ENSG00000259548.1                     | 0.627229026    | 2                                    | 1            | 0.567883393                 |              |   |
|               | Brain_Cerebellum                      | 0.692489452    | Brain_Cerebellar_Hemisphere          | 1.981055565  |                             |              |   |
|               | 0.018944435                           | 1.981055565    | -0.571171504                         | -0.395478953 | -0.483325228                |              |   |
|               | 0.124233394                           | 1              | 0                                    | 0.998207054  |                             |              |   |
| SPHK2         | ENSG00000063176.15                    | 0.627260762    | 3                                    | 2            | 0.347873315                 |              |   |
|               | Brain_Frontal_Cortex_BA9              | 0.485197616    | Brain_Putamen_basal_ganglia          | 2.37336951   |                             |              |   |
|               | 0.037407366                           | 0.589223125    | -0.93872235                          | -0.697967346 | -0.781651992                |              |   |
|               | 0.136124355                           | 2              | 0                                    | 0.998207054  |                             |              |   |
| RP11-162A12.2 | ENSG00000264278.1                     | 0.627337154    | 2                                    | 2            | 0.475057913                 |              |   |
|               | Brain_Nucleus_accumbens_basal_ganglia | 0.511050758    | Brain_Hippocampus                    |              |                             |              |   |
|               | 1.010287569                           | 0.989712431    | 0.989712431                          | -0.714273762 | -0.657202438                |              |   |
|               | -0.6857381                            | 0.04035552     | 2                                    | 0            | 0.998207054                 |              |   |
| ASTE1         | ENSG00000034533.11                    | 0.627447239    | 9                                    | 6            | 0.113287072                 |              |   |
|               | Brain_Anterior_cingulate_cortex_BA24  | 0.993630569    | Brain_Cortex                         |              |                             |              |   |
|               | 5.900583457                           | 0.048458639    | 0.312152944                          | -1.583589908 | 0.782841343                 |              |   |
|               | 0.079239788                           | 0.68109071     | 6                                    | 0            | 0.998207054                 |              |   |
| SLC2A11       | ENSG00000133460.19                    | 0.627448953    | 11                                   | 3            | 0.346396698                 |              |   |
|               | Brain_Cerebellar_Hemisphere           | 0.952415379    | Brain_Hippocampus                    | 9.333010183  |                             |              |   |
|               | 2.66E-08                              | 0.462638798    | -0.941601507                         | 0.686164762  | -0.217193351                |              |   |
|               | 0.398755736                           | 3              | 0                                    | 0.998207054  |                             |              |   |
| UBE2U         | ENSG00000177414.13                    | 0.627480912    | 4                                    | 4            | 0.189478968                 | Brain_Cortex |   |
|               | 0.773237031                           | Brain_Amygdala | 2.291926192                          | 0.183468789  | 0.183468789                 |              |   |
|               | 0.288143323                           | 1.312122017    | 0.728825923                          | 0.428125933  | 4                           | 0            |   |
|               | 0.998207054                           |                |                                      |              |                             |              |   |
| MEIKIN        | ENSG00000239642.5                     | 0.627488548    | 3                                    | 2            | 0.335404014                 |              |   |
|               | Brain_Caudate_basal_ganglia           | 0.429561224    | Brain_Cerebellar_Hemisphere          | 2.68291551   |                             |              |   |
|               | 0.065981637                           | 0.251102853    | 0.789942714                          | 0.963286005  | 0.86631789                  |              |   |
|               | 0.088487434                           | 2              | 0                                    | 0.998207054  |                             |              |   |
| PCTP          | ENSG00000141179.13                    | 0.62749665     | 1                                    | 1            | 0.62749665                  |              |   |
|               | Brain_Nucleus_accumbens_basal_ganglia | 0.62749665     |                                      |              |                             |              |   |
|               | Brain_Nucleus_accumbens_basal_ganglia | 1              | 1                                    | 1            | -0.485253339                |              |   |
|               | -0.485253339                          | -0.485253339   | NA                                   | 1            | 0                           | 0.998207054  |   |
| FABP1         | ENSG00000163586.9                     | 0.627503068    | 13                                   | 2            | 0.467256113                 |              |   |
|               | Brain_Frontal_Cortex_BA9              | 0.942002745    | Brain_Spinal_cord_cervical_c-1       |              |                             |              |   |
|               | 11.4616218                            | 5.26E-18       | 0.748472809                          | -0.275687595 | 0.726950773                 | 0.20304724   |   |
|               | 0.275184336                           | 2              | 0                                    | 0.998207054  |                             |              |   |
| COL14A1       | ENSG00000187955.11                    | 0.627658796    | 1                                    | 1            | 0.627658796                 |              |   |
|               | Brain_Putamen_basal_ganglia           | 0.627658796    | Brain_Putamen_basal_ganglia          | 1            | 1                           |              |   |
|               | 1                                     | 0.48502474     | 0.48502474                           | 0.48502474   | NA                          | 1            | 0 |
|               |                                       |                |                                      |              |                             | 0.998207054  |   |

|               |                                            |              |                                       |              |              |                  |
|---------------|--------------------------------------------|--------------|---------------------------------------|--------------|--------------|------------------|
| RP11-452H21.4 | ENSG00000251323.2                          | 0.62766401   | 1                                     | 1            | 0.62766401   | Brain_Cerebellum |
|               | 0.62766401 Brain_Cerebellum1               | 1            | 1                                     | -0.485017391 | -0.485017391 |                  |
|               | -0.485017391 NA 1 0                        | 0.998207054  |                                       |              |              |                  |
| APLF          | ENSG00000169621.9                          | 0.627686437  | 1                                     | 1            | 0.627686437  | Brain_Cortex     |
|               | 0.627686437 Brain_Cortex                   | 1            | 1                                     | 1            | -0.484985773 | -0.484985773     |
|               | -0.484985773 NA 1 0                        | 0.998207054  |                                       |              |              |                  |
| ADAD2         | ENSG00000140955.10                         | 0.62774101   | 10                                    | 6            | 0.231834287  |                  |
|               | Brain_Substantia_nigra                     | 0.91526064   | Brain_Cortex                          | 4.588907955  |              |                  |
|               | 0.011623109 0.233033215                    | -1.19564714  | 0.853488913                           | 0.094964999  |              |                  |
|               | 0.677012799 6 0                            | 0.998207054  |                                       |              |              |                  |
| AP1S3         | ENSG00000152056.16                         | 0.627800998  | 5                                     | 5            | 0.143927345  | Brain_Cortex     |
|               | 0.772745333 Brain_Spinal_cord_cervical_c-1 | 1.462023576  | 0.693644883                           |              |              |                  |
|               | 0.693644883 -1.46132109                    | 0.674778663  | -0.30326764                           | 0.838455379  |              |                  |
|               | 5 0 0.998207054                            |              |                                       |              |              |                  |
| FKBP11        | ENSG00000134285.10                         | 0.62787237   | 11                                    | 3            | 0.304741795  |                  |
|               | Brain_Caudate_basal_ganglia                | 0.965322572  | Brain_Frontal_Cortex_BA9              |              |              |                  |
|               | 9.336583876 0.000187992                    | 0.37557286   | -1.026317831                          | 0.043475402  |              |                  |
|               | -0.566354525 0.280271685                   | 3 0          | 0.998207054                           |              |              |                  |
| CTC-281F24.1  | ENSG00000261996.1                          | 0.627936086  | 3                                     | 3            | 0.219472004  |                  |
|               | Brain_Cerebellum                           | 0.573128563  | Brain_Amygdala                        | 1.644426897  | 0.47952993   |                  |
|               | 0.47952993 -1.227933309                    | 0.782179807  | 0.039232134                           | 1.102833572  | 3            |                  |
|               | 0 0.998207054                              |              |                                       |              |              |                  |
| SGPP2         | ENSG00000163082.9                          | 0.628025574  | 3                                     | 2            | 0.284721205  |                  |
|               | Brain_Nucleus_accumbens_basal_ganglia      | 0.470760757  | Brain_Putamen_basal_ganglia           |              |              |                  |
|               | 2.623947571 0.011848479                    | 0.36420395   | 0.721241801                           | 1.069773651  |              |                  |
|               | 0.885356741 0.175150621                    | 2 0          | 0.998207054                           |              |              |                  |
| TMEM100       | ENSG00000166292.11                         | 0.628054163  | 1                                     | 1            | 0.628054163  |                  |
|               | Brain_Nucleus_accumbens_basal_ganglia      | 0.628054163  |                                       |              |              |                  |
|               | Brain_Nucleus_accumbens_basal_ganglia      | 1 1 1        | -0.484467445                          |              |              |                  |
|               | -0.484467445 -0.484467445 NA 1 0           | 0.998207054  |                                       |              |              |                  |
| B4GALT2       | ENSG00000117411.16                         | 0.628061353  | 1                                     | 1            | 0.628061353  |                  |
|               | Brain_Hippocampus                          | 0.628061353  | Brain_Hippocampus                     | 1 1 1        |              |                  |
|               | -0.484457312 -0.484457312                  | -0.484457312 | NA 1 0                                | 0.998207054  |              |                  |
| RUFY2         | ENSG00000204130.12                         | 0.628068379  | 3                                     | 1            | 0.557338859  |                  |
|               | Brain_Putamen_basal_ganglia                | 0.682260837  | Brain_Nucleus_accumbens_basal_ganglia |              |              |                  |
|               | 2.882184616 0.02669208                     | 2.882184616  | 0.40937997                            | 0.586798776  |              |                  |
|               | 0.475400406 0.097024357                    | 1 0          | 0.998207054                           |              |              |                  |
| CENPM         | ENSG00000100162.14                         | 0.628084704  | 10                                    | 5            | 0.408631766  |                  |
|               | Brain_Anterior_cingulate_cortex_BA24       | 0.97761366   | Brain_Putamen_basal_ganglia           |              |              |                  |
|               | 6.954872899 0.001935931                    | 0.337709223  | -0.826303823                          | 0.794739288  |              |                  |
|               | -0.042720602 0.497836357                   | 5 0          | 0.998207054                           |              |              |                  |
| POMT1         | ENSG00000130714.15                         | 0.628096935  | 7                                     | 3            | 0.578431483  |                  |
|               | Brain_Cerebellar_Hemisphere                | 0.981209302  | Brain_Spinal_cord_cervical_c-1        |              |              |                  |
|               | 6.195161593 0.006158539                    | 0.274388677  | -0.555677292                          | 0.419546422  |              |                  |
|               | -0.12262814 0.380182299                    | 3 0          | 0.998207054                           |              |              |                  |
| GSDMC         | ENSG00000147697.8                          | 0.628187386  | 1                                     | 1            | 0.628187386  |                  |
|               | Brain_Putamen_basal_ganglia                | 0.628187386  | Brain_Putamen_basal_ganglia           | 1 1          |              |                  |
|               | 1 0.484279692                              | 0.484279692  | 0.484279692                           | NA 1 0       |              |                  |
|               | 0.998207054                                |              |                                       |              |              |                  |
| HDAC1         | ENSG00000116478.11                         | 0.628360031  | 1                                     | 1            | 0.628360031  | Brain_Cortex     |
|               | 0.628360031 Brain_Cortex                   | 1 1 1        | 0.484036408                           | 0.484036408  |              |                  |
|               | 0.484036408 NA 1 0                         | 0.998207054  |                                       |              |              |                  |
| FRAT2         | ENSG00000181274.6                          | 0.628373056  | 2                                     | 2            | 0.550753769  | Brain_Cortex     |
|               | 0.691128943 Brain_Substantia_nigra         | 1.460518422  | 0.539481578                           |              |              |                  |
|               | 0.539481578 -0.397323469                   | 0.596631     | 0.099653766                           | 0.702831945  | 2            |                  |
|               | 0 0.998207054                              |              |                                       |              |              |                  |
| MRPL21        | ENSG00000197345.12                         | 0.628560018  | 13                                    | 1            | 0.447114261  |                  |
|               | Brain_Spinal_cord_cervical_c-1             | 0.793159645  | Brain_Cerebellum                      | 12.800172    |              |                  |
|               | 2.02E-05 12.800172                         | 0.26220987   | 0.760234776                           | 0.48081247   | 0.145090352  | 1                |
|               | 0 0.998207054                              |              |                                       |              |              |                  |
| FAM45A        | ENSG00000119979.16                         | 0.628588944  | 1                                     | 1            | 0.628588944  |                  |
|               | Brain_Putamen_basal_ganglia                | 0.628588944  | Brain_Putamen_basal_ganglia           | 1 1          |              |                  |

|                |                                       |                             |                                      |              |                |                             |              |
|----------------|---------------------------------------|-----------------------------|--------------------------------------|--------------|----------------|-----------------------------|--------------|
|                | 1                                     | 0.483713876                 | 0.483713876                          | 0.483713876  | NA             | 1                           | 0            |
|                |                                       | 0.998207054                 |                                      |              |                |                             |              |
| TUBA8          | ENSG00000183785.14                    | 0.628634894                 | 2                                    | 2            | 0.338493521    |                             |              |
|                | Brain_Frontal_Cortex_BA9              | 0.865647637                 |                                      |              | Brain_Amygdala | 1.061201848                 |              |
|                | 0.938798152                           | 0.938798152                 | -0.957146095                         |              | 0.169189439    | -0.393978328                |              |
|                | 0.796439493                           | 2                           | 0                                    | 0.998207054  |                |                             |              |
| MCTP1          | ENSG00000175471.19                    | 0.628651766                 | 3                                    | 3            | 0.253101745    | Brain_Cortex                |              |
|                | 0.689021966                           | Brain_Cerebellar_Hemisphere | 1.312649952                          |              | 0.691176783    |                             |              |
|                | 0.691176783                           | -0.411549302                | 1.142847905                          |              | 0.37716043     | 0.777454299                 | 3            |
|                | 0                                     | 0.998207054                 |                                      |              |                |                             |              |
| B3GAT1         | ENSG00000109956.12                    | 0.628707736                 | 2                                    | 2            | 0.358269635    |                             |              |
|                | Brain_Frontal_Cortex_BA9              | 0.50133325                  | Brain_Cortex                         | 1.449764243  |                |                             |              |
|                | 0.550235757                           | 0.550235757                 | 0.672393453                          |              | 0.918667269    | 0.795530361                 |              |
|                | 0.174141886                           | 2                           | 0                                    | 0.998207054  |                |                             |              |
| SDHC           | ENSG00000143252.14                    | 0.628795121                 | 8                                    | 5            | 0.195599509    |                             |              |
|                | Brain_Hypothalamus                    | 0.932530564                 | Brain_Anterior_cingulate_cortex_BA24 |              |                |                             |              |
|                | 5.254223664                           | 0.033544709                 | 0.420202113                          |              | -0.331658242   | 1.294190844                 |              |
|                | 0.553801172                           | 0.583986629                 | 5                                    | 0            | 0.998207054    |                             |              |
| GACAT3         | ENSG00000236289.2                     | 0.628803108                 | 1                                    | 1            | 0.628803108    |                             |              |
|                | Brain_Spinal_cord_cervical_c-1        | 0.628803108                 | Brain_Spinal_cord_cervical_c-1       |              |                |                             |              |
|                | 1                                     | 1                           | 1                                    | 0.483412172  | 0.483412172    | NA                          | 1            |
|                | 0.998207054                           |                             |                                      |              |                |                             | 0            |
| DACT1          | ENSG00000165617.14                    | 0.628821205                 | 1                                    | 1            | 0.628821205    | Brain_Cortex                |              |
|                | 0.628821205                           | Brain_Cortex                | 1                                    | 1            | 1              | 0.483386679                 | 0.483386679  |
|                | 0.483386679                           | NA                          | 1                                    | 0            | 0.998207054    |                             |              |
| RP11-399K21.11 | ENSG00000270087.5                     | 0.629065818                 | 2                                    | 2            | 0.41242858     |                             |              |
|                | Brain_Hypothalamus                    | 0.558548265                 | Brain_Hippocampus                    | 1.100450598  |                |                             |              |
|                | 0.899549402                           | 0.899549402                 | -0.819627344                         |              | -0.584999185   | -0.702313265                |              |
|                | 0.165907162                           | 2                           | 0                                    | 0.998207054  |                |                             |              |
| SCAF1          | ENSG00000126461.14                    | 0.629100341                 | 1                                    | 1            | 0.629100341    | Brain_Cerebellum            |              |
|                | 0.629100341                           | Brain_Cerebellum            | 1                                    | 1            | -0.482993514   | -0.482993514                |              |
|                | -0.482993514                          | NA                          | 1                                    | 0            | 0.998207054    |                             |              |
| CLU            | ENSG00000120885.21                    | 0.629111026                 | 1                                    | 1            | 0.629111026    |                             |              |
|                | Brain_Putamen_basal_ganglia           | 0.629111026                 | Brain_Putamen_basal_ganglia          | 1            | 1              |                             |              |
|                | 1                                     | -0.482978466                | -0.482978466                         | -0.482978466 | NA             | 1                           | 0            |
|                | 0.998207054                           |                             |                                      |              |                |                             |              |
| CTC-471C19.1   | ENSG00000261037.1                     | 0.629301776                 | 8                                    | 7            | 0.163848521    |                             |              |
|                | Brain_Nucleus_accumbens_basal_ganglia | 0.925746785                 | Brain_Hypothalamus                   |              |                |                             |              |
|                | 4.042320171                           | 0.076818572                 | 0.165940725                          |              | -0.892046779   | 1.392244006                 |              |
|                | 0.57465246                            | 0.776926076                 | 7                                    | 0            | 0.998207054    |                             |              |
| MYEOV          | ENSG00000172927.7                     | 0.629316924                 | 2                                    | 2            | 0.382249672    | Brain_Cerebellum            |              |
|                | 0.387331535                           | Brain_Cerebellar_Hemisphere | 1.631222875                          |              | 0.368777125    |                             |              |
|                | 0.368777125                           | 0.864466756                 | 0.873758708                          |              | 0.869112732    | 0.006570402                 |              |
|                | 2                                     | 0                           | 0.998207054                          |              |                |                             |              |
| ALDH5A1        | ENSG00000112294.12                    | 0.629320809                 | 6                                    | 4            | 0.084610688    |                             |              |
|                | Brain_Cerebellum                      | 0.964943795                 | Brain_Anterior_cingulate_cortex_BA24 |              |                |                             |              |
|                | 4.097737481                           | 0.047472147                 | 0.409625689                          |              | 0.043950583    | 1.724538427                 |              |
|                | 0.822504295                           | 0.636260124                 | 4                                    | 0            | 0.998207054    |                             |              |
| APBA1          | ENSG00000107282.7                     | 0.62936419                  | 1                                    | 1            | 0.62936419     | Brain_Putamen_basal_ganglia |              |
|                | 0.62936419                            | Brain_Putamen_basal_ganglia | 1                                    | 1            | 1              | 0.482621952                 |              |
|                | 0.482621952                           | 0.482621952                 | NA                                   | 1            | 0              | 0.998207054                 |              |
| SLAIN1         | ENSG00000139737.21                    | 0.629399063                 | 3                                    | 3            | 0.341222439    |                             |              |
|                | Brain_Cerebellar_Hemisphere           | 0.734446142                 | Brain_Cerebellum                     | 1.171797853  |                |                             |              |
|                | 0.847257863                           | 0.847257863                 | -0.951752653                         |              | 0.796202992    | -0.164922274                |              |
|                | 0.886916718                           | 3                           | 0                                    | 0.998207054  |                |                             |              |
| RITA1          | ENSG00000139405.15                    | 0.629406112                 | 6                                    | 3            | 0.133032824    | Brain_Cortex                |              |
|                | 0.393887523                           | Brain_Cerebellar_Hemisphere | 4.735937597                          |              | 0.039300201    |                             |              |
|                | 0.453208873                           | -1.502248965                | -0.852588535                         |              | -1.145611356   | 0.311747472                 |              |
|                | 3                                     | 0                           | 0.998207054                          |              |                |                             |              |
| SLIT1          | ENSG00000187122.16                    | 0.629651623                 | 1                                    | 1            | 0.629651623    | Brain_Cerebellum            |              |
|                | 0.629651623                           | Brain_Cerebellum            | 1                                    | 1            | 1              | -0.482217251                | -0.482217251 |
|                | -0.482217251                          | NA                          | 1                                    | 0            | 0.998207054    |                             |              |

LRTM2 ENSG00000166159.10 0.629719389 3 3 0.272930613  
Brain\_Frontal\_Cortex\_BA9 0.840862234 Brain\_Cerebellum 1.107478455  
0.892957622 0.892957622 -1.096338624 0.728606657 -0.055647088  
0.939109459 3 0 0.998207054  
OAF ENSG00000184232.8 0.629845027 7 3 0.211414827 Brain\_Cortex  
0.894980124 Brain\_Putamen\_basal\_ganglia 5.227947425 0.023673889  
0.435569407 -0.267177409 1.249684486 0.641700109 0.551446003  
3 0 0.998207054  
MGST1 ENSG00000008394.12 0.629848091 6 6 0.057900042 Brain\_Cerebellum  
0.838904084 Brain\_Nucleus\_accumbens\_basal\_ganglia 3.133165753 0.1215729  
0.1215729 -0.66662358 1.896453965 0.363461708 0.942713085 6  
0 0.998207054  
DARS ENSG00000115866.10 0.629915288 2 2 0.356314408 Brain\_Cerebellum  
0.936864977 Brain\_Cerebellar\_Hemisphere 1.201979044 0.798020956  
0.798020956 0.079210772 0.922410667 0.500810719 0.596232364  
2 0 0.998207054  
RP11-672A2.5 ENSG00000255363.2 0.630113619 1 1 0.630113619  
Brain\_Nucleus\_accumbens\_basal\_ganglia 0.630113619  
Brain\_Nucleus\_accumbens\_basal\_ganglia 1 1 1 0.481566936  
0.481566936 0.481566936 NA 1 0 0.998207054  
PLEKHJ1 ENSG00000104886.11 0.630236775 4 4 0.129326541  
Brain\_Hypothalamus 0.893614843 Brain\_Hippocampus 2.311357214  
0.199930951 0.199930951 -0.445526625 1.516762963 0.186449624  
0.897152057 4 0 0.998207054  
JCHAIN ENSG00000132465.10 0.630250559 1 1 0.630250559  
Brain\_Substantia\_nigra 0.630250559 Brain\_Substantia\_nigra 1 1  
1 0.481374216 0.481374216 0.481374216 NA 1 0  
0.998207054  
SART1 ENSG00000175467.14 0.63028949 1 1 0.63028949 Brain\_Cerebellum 0.63028949  
Brain\_Cerebellum 1 1 1 0.48131943 0.48131943 0.48131943 NA 1 0  
0.998207054  
ARHGEF11 ENSG00000132694.18 0.63046697 1 1 0.63046697 Brain\_Hypothalamus  
0.63046697 Brain\_Hypothalamus 1 1 1 -0.481069689 -0.481069689  
-0.481069689 NA 1 0 0.998207054  
LPL ENSG00000175445.14 0.630558638 1 1 0.630558638  
Brain\_Anterior\_cingulate\_cortex\_BA24 0.630558638  
Brain\_Anterior\_cingulate\_cortex\_BA24 1 1 1 -0.48094071  
-0.48094071 -0.48094071 NA 1 0 0.998207054  
BROX ENSG00000162819.11 0.630704403 6 5 0.556949045  
Brain\_Frontal\_Cortex\_BA9 0.895715308 Brain\_Putamen\_basal\_ganglia  
4.710739025 0.08999191 0.164348259 -0.587379222 0.515607545  
-0.140142608 0.425559324 5 0 0.998207054  
MOAP1 ENSG00000165943.4 0.630751453 1 1 0.630751453  
Brain\_Frontal\_Cortex\_BA9 0.630751453 Brain\_Frontal\_Cortex\_BA9 1 1  
1 -0.480669442 -0.480669442 -0.480669442 NA 1 0  
0.998207054  
RP11-382D12.2 ENSG00000271387.1 0.630783954 1 1 0.630783954  
Brain\_Hippocampus 0.630783954 Brain\_Hippocampus 1 1 1  
0.48062372 0.48062372 0.48062372 NA 1 0 0.998207054  
CHI3L1 ENSG00000133048.12 0.63086549 1 1 0.63086549  
Brain\_Frontal\_Cortex\_BA9 0.63086549 Brain\_Frontal\_Cortex\_BA9 1 1 1  
0.480509022 0.480509022 0.480509022 NA 1 0 0.998207054  
EPHA5-AS1 ENSG00000250846.6 0.631021901 1 1 0.631021901  
Brain\_Anterior\_cingulate\_cortex\_BA24 0.631021901  
Brain\_Anterior\_cingulate\_cortex\_BA24 1 1 1 -0.480289012  
-0.480289012 -0.480289012 NA 1 0 0.998207054  
FMO4 ENSG00000076258.9 0.631076811 6 6 0.082699797  
Brain\_Hippocampus 0.862315064 Brain\_Cortex 1.738186582  
0.382555646 0.382555646 -1.735231568 0.489794548 -0.025264088  
0.847573661 6 0 0.998207054  
RP11-392O17.2 ENSG00000277007.1 0.63108896 1 1 0.63108896  
Brain\_Frontal\_Cortex\_BA9 0.63108896 Brain\_Frontal\_Cortex\_BA9 1 1 1



|              |                                       |                          |                                      |                                       |              |              |              |
|--------------|---------------------------------------|--------------------------|--------------------------------------|---------------------------------------|--------------|--------------|--------------|
|              | -0.480194693                          | -0.480194693             | -0.480194693                         | NA                                    | 1            | 0            | 0.998207054  |
| NCOA1        | ENSG00000084676.15                    | 0.631151641              | 4                                    | 4                                     | 0.218182096  |              |              |
|              | Brain_Substantia_nigra                | 0.867415939              |                                      | Brain_Cortex                          | 2.278140585  |              |              |
|              | 0.314346546                           | 0.314346546              | -0.241674547                         | 1.231376463                           | 0.417797137  |              |              |
|              | 0.624260315                           | 4                        | 0                                    | 0.998207054                           |              |              |              |
| RP11-2C24.7  | ENSG00000274678.1                     | 0.631300865              | 1                                    | 1                                     | 0.631300865  |              |              |
|              | Brain_Spinal_cord_cervical_c-1        | 0.631300865              |                                      | Brain_Spinal_cord_cervical_c-1        |              |              |              |
|              | 1                                     | 1                        | 1                                    | 0.479896675                           | 0.479896675  | NA           | 1            |
|              | 0.998207054                           |                          |                                      |                                       |              |              | 0            |
| RABEP1       | ENSG00000029725.16                    | 0.631389391              | 5                                    | 5                                     | 0.12406455   |              |              |
|              | Brain_Substantia_nigra                | 0.933321261              |                                      | Brain_Nucleus_accumbens_basal_ganglia |              |              |              |
|              | 2.8165375                             | 0.198879727              | 0.198879727                          | -0.318841752                          | 1.537934831  |              |              |
|              | 0.238193535                           | 0.757215352              | 5                                    | 0                                     | 0.998207054  |              |              |
| PNP          | ENSG00000198805.11                    | 0.631391063              | 3                                    | 3                                     | 0.372573849  |              |              |
|              | Brain_Putamen_basal_ganglia           | 0.577651416              |                                      | Brain_Amygdala                        | 1.072451988  |              |              |
|              | 0.929885217                           | 0.929885217              | -0.891662519                         | -0.55681854                           | -0.756984513 |              |              |
|              | 0.176767158                           | 3                        | 0                                    | 0.998207054                           |              |              |              |
| CSDC2        | ENSG00000172346.14                    | 0.6313998                | 7                                    | 3                                     | 0.298755824  |              |              |
|              | Brain_Nucleus_accumbens_basal_ganglia | 0.768384445              |                                      | Brain_Putamen_basal_ganglia           |              |              |              |
|              | 6.164087574                           | 0.010545191              | 0.262556141                          | -1.039105177                          | -0.294488767 |              |              |
|              | -0.70204828                           | 0.272347882              | 3                                    | 0                                     | 0.998207054  |              |              |
| CSGALNACT2   | ENSG00000169826.7                     | 0.631481025              | 13                                   | 1                                     | 0.452601312  |              |              |
|              | Brain_Frontal_Cortex_BA9              | 0.8015441                | Brain_Putamen_basal_ganglia          | 12.55630588                           |              |              |              |
|              | 1.27E-05                              | 12.55630588              | 0.251349252                          | 0.751085317                           | 0.470346206  |              |              |
|              | 0.131247653                           | 1                        | 0                                    | 0.998207054                           |              |              |              |
| KLHL28       | ENSG00000179454.13                    | 0.631633172              | 1                                    | 1                                     | 0.631633172  |              |              |
|              | Brain_Putamen_basal_ganglia           | 0.631633172              |                                      | Brain_Putamen_basal_ganglia           | 1            | 1            |              |
|              | 1                                     | 0.479429415              | 0.479429415                          | 0.479429415                           | NA           | 1            | 0            |
|              | 0.998207054                           |                          |                                      |                                       |              |              |              |
| RP11-663P9.1 | ENSG00000250863.1                     | 0.631697755              | 4                                    | 4                                     | 0.239689966  |              |              |
|              | Brain_Cerebellum                      | 0.781481821              | Brain_Cortex                         | 2.334709371                           | 0.33956556   |              |              |
|              | 0.33956556                            | 0.277388487              | 1.175762073                          | 0.702929337                           | 0.463584223  |              | 4            |
|              | 0                                     | 0.998207054              |                                      |                                       |              |              |              |
| DPYD         | ENSG00000188641.12                    | 0.631812196              | 1                                    | 1                                     | 0.631812196  | Brain_Cortex |              |
|              | 0.631812196                           | Brain_Cortex             | 1                                    | 1                                     | 1            | 0.479177729  | 0.479177729  |
|              | 0.479177729                           | NA                       | 1                                    | 0                                     | 0.998207054  |              |              |
| TNFSF13      | ENSG00000161955.16                    | 0.63184221               | 3                                    | 3                                     | 0.31446374   |              |              |
|              | Brain_Caudate_basal_ganglia           | 0.76718902               | Brain_Amygdala                       | 1.19115358                            | 0.822939202  |              |              |
|              | 0.822939202                           | -0.623699439             | 1.005899867                          | 0.028715554                           | 0.861977267  |              |              |
|              | 3                                     | 0                        | 0.998207054                          |                                       |              |              |              |
| LYVE1        | ENSG00000133800.8                     | 0.631890755              | 2                                    | 2                                     | 0.34511517   |              |              |
|              | Brain_Anterior_cingulate_cortex_BA24  | 0.841393117              | Brain_Cerebellar_Hemisphere          |                                       |              |              |              |
|              | 1.038884552                           | 0.961115448              | 0.961115448                          | -0.944106614                          | 0.200111836  |              |              |
|              | -0.371997389                          | 0.809084625              | 2                                    | 0                                     | 0.998207054  |              |              |
| ITGAM        | ENSG00000169896.16                    | 0.631970986              | 2                                    | 2                                     | 0.338552999  |              |              |
|              | Brain_Hippocampus                     | 0.991396063              | Brain_Anterior_cingulate_cortex_BA24 |                                       |              |              |              |
|              | 1.034496488                           | 0.965503512              | 0.965503512                          | -0.957028244                          | 0.010783645  |              |              |
|              | -0.473122299                          | 0.68434635               | 2                                    | 0                                     | 0.998207054  |              |              |
| SOHLH2       | ENSG00000120669.15                    | 0.631971834              | 13                                   | 1                                     | 0.359682798  |              |              |
|              | Brain_Substantia_nigra                | 0.9000928                | Brain_Amygdala                       | 12.54388754                           |              |              |              |
|              | 0.000559503                           | 12.54388754              | 0.125544118                          | 0.91596968                            | 0.471874377  |              |              |
|              | 0.211805086                           | 1                        | 0                                    | 0.998207054                           |              |              |              |
| RP11-20G13.5 | ENSG00000274294.1                     | 0.632015387              | 1                                    | 1                                     | 0.632015387  |              |              |
|              | Brain_Amygdala                        | 0.632015387              | Brain_Amygdala                       | 1                                     | 1            | 1            | -0.478892106 |
|              | -0.478892106                          | -0.478892106             | NA                                   | 1                                     | 0            | 0.998207054  |              |
| TRIB2        | ENSG00000071575.11                    | 0.632016031              | 1                                    | 1                                     | 0.632016031  | Brain_Cortex |              |
|              | 0.632016031                           | Brain_Cortex             | 1                                    | 1                                     | 1            | -0.478891201 | -0.478891201 |
|              | -0.478891201                          | NA                       | 1                                    | 0                                     | 0.998207054  |              |              |
| DISP3        | ENSG00000204624.7                     | 0.632316148              | 2                                    | 2                                     | 0.469432477  | Brain_Cortex |              |
|              | 0.813185674                           | Brain_Frontal_Cortex_BA9 | 1.448350445                          | 0.551649555                           |              |              |              |
|              | 0.551649555                           | -0.723402759             | 0.236318318                          | -0.24354222                           | 0.678625282  |              |              |
|              | 2                                     | 0                        | 0.998207054                          |                                       |              |              |              |

LINC00665 ENSG00000232677.6 0.632708523 12 3 0.157128354  
Brain\_Amygdala 0.748435299 Brain\_Substantia\_nigra 9.449917428  
0.004196016 0.497319575 -1.414795873 -0.320703231 -0.743774498  
0.361220157 3 0 0.998207054  
PSMB3 ENSG00000277791.4 0.632802396 1 1 0.632802396  
Brain\_Cerebellar\_Hemisphere 0.632802396 Brain\_Cerebellar\_Hemisphere 1 1  
1 0.477786183 0.477786183 0.477786183 NA 1 0  
0.998207054  
RP11-1017G21.5 ENSG00000271780.1 0.632965631 11 7 0.286174457  
Brain\_Cerebellar\_Hemisphere 0.998260875 Brain\_Cerebellum 7.115968215  
0.006746458 0.271074338 -1.066551399 1.00051973 0.107695269  
0.654804817 7 0 0.998207054  
RP11-307L14.2 ENSG00000272354.1 0.632986821 1 1 0.632986821  
Brain\_Hippocampus 0.632986821 Brain\_Hippocampus 1 1 1  
0.47752711 0.47752711 0.47752711 NA 1 0 0.998207054  
ANTXR1 ENSG00000169604.19 0.633056701 2 2 0.467508055  
Brain\_Caudate\_basal\_ganglia 0.992750388 Brain\_Nucleus\_accumbens\_basal\_ganglia  
1.64292003 0.35707997 0.35707997 -0.009086166 0.726539576 0.358726705  
0.520165951 2 0 0.998207054  
RP11-173P15.9 ENSG00000277423.1 0.633131461 1 1 0.633131461  
Brain\_Caudate\_basal\_ganglia 0.633131461 Brain\_Caudate\_basal\_ganglia 1 1  
1 0.477323947 0.477323947 0.477323947 NA 1 0  
0.998207054  
HCG20 ENSG00000228022.5 0.633145743 11 5 0.161279564  
Brain\_Putamen\_basal\_ganglia 0.995230791 Brain\_Caudate\_basal\_ganglia  
7.954365616 0.011750268 0.387368686 -0.191454758 1.400781028  
0.250430458 0.446564307 5 0 0.998207054  
DES ENSG00000175084.11 0.633159065 2 2 0.559341901  
Brain\_Caudate\_basal\_ganglia 0.690041478 Brain\_Amygdala 1.465006861  
0.534993139 0.534993139 -0.583819287 0.398798777 -0.092510255  
0.694815896 2 0 0.998207054  
RP1-111D6.4 ENSG00000225924.2 0.633164405 2 2 0.339335108  
Brain\_Hippocampus 0.975265756 Brain\_Caudate\_basal\_ganglia 1.067218467  
0.932781533 0.932781533 0.031004745 0.955479816 0.49324228  
0.653702592 2 0 0.998207054  
SENP7 ENSG00000138468.15 0.633182248 5 3 0.394814312  
Brain\_Caudate\_basal\_ganglia 0.949328467 Brain\_Cerebellar\_Hemisphere 4.12084542  
0.066858243 0.230857725 -0.850919068 -0.063550099 -0.467849919  
0.375118271 3 0 0.998207054  
LRRC37A ENSG00000176681.14 0.633362483 13 3 0.450360354  
Brain\_Hippocampus 0.992762684 Brain\_Cerebellar\_Hemisphere 10.87835631  
0.010517638 0.415270164 -0.329179257 0.754814398 0.130421343  
0.301859662 3 0 0.998207054  
FUT8 ENSG00000033170.16 0.633394512 2 2 0.362631415  
Brain\_Cerebellar\_Hemisphere 0.650604742 Brain\_Amygdala 1.183511503  
0.816488497 0.816488497 -0.91036241 0.452922232 -0.228720089  
0.963987815 2 0 0.998207054  
BLOC1S1 ENSG00000135441.7 0.633395578 10 1 0.419213267  
Brain\_Caudate\_basal\_ganglia 0.921677385 Brain\_Hypothalamus 9.689509629  
6.88E-17 9.689509629 -0.098321023 0.807786901 0.468991893  
0.229868108 1 0 0.998207054  
PPP6R3 ENSG00000110075.14 0.633571751 1 1 0.633571751  
Brain\_Frontal\_Cortex\_BA9 0.633571751 Brain\_Frontal\_Cortex\_BA9 1 1  
1 -0.476705633 -0.476705633 -0.476705633 NA 1 0  
0.998207054  
CFLAR ENSG00000003402.19 0.633587766 1 1 0.633587766  
Brain\_Cerebellar\_Hemisphere 0.633587766 Brain\_Cerebellar\_Hemisphere 1 1  
1 -0.476683146 -0.476683146 -0.476683146 NA 1 0  
0.998207054  
MYLIP ENSG00000007944.14 0.633631719 3 3 0.259134081 Brain\_Cerebellum  
0.737071418 Brain\_Cerebellar\_Hemisphere 1.646397569 0.356081927  
0.356081927 -0.481208526 1.128440147 0.327655228 0.804854747

|             |                                       |                                      |              |             |                                      |                   |   |   |              |
|-------------|---------------------------------------|--------------------------------------|--------------|-------------|--------------------------------------|-------------------|---|---|--------------|
| 3           | 0                                     | 0.998207054                          |              |             |                                      |                   |   |   |              |
| MED31       | ENSG00000108590.10                    | 0.633766618                          | 4            | 4           | 0.202208437                          |                   |   |   |              |
|             | Brain_Caudate_basal_ganglia           | 0.974924079                          |              |             | Brain_Cerebellum                     | 2.382919562       |   |   |              |
|             | 0.180255422                           | 0.180255422                          |              |             | -1.275284854                         | 0.231564468       |   |   | -0.462685104 |
|             | 0.689489314                           | 4                                    | 0            | 0.998207054 |                                      |                   |   |   |              |
| CDH5        | ENSG00000179776.17                    | 0.633770746                          | 1            | 1           | 0.633770746                          |                   |   |   |              |
|             | Brain_Hippocampus                     | 0.633770746                          |              |             | Brain_Hippocampus                    | 1                 | 1 | 1 |              |
|             | -0.476426237                          | -0.476426237                         |              |             | -0.476426237                         | NA                | 1 | 0 | 0.998207054  |
| PARP8       | ENSG00000151883.17                    | 0.633856447                          | 3            | 3           | 0.43285466                           | Brain_Hippocampus |   |   |              |
|             | 0.563536435                           | Brain_Cerebellum                     | 1.787201967  |             | 0.393287742                          | 0.393287742       |   |   | 0.393287742  |
|             | -0.620642897                          | 0.784316092                          | 0.247089965  |             | 0.758553536                          | 3                 |   |   | 0            |
|             | 0.998207054                           |                                      |              |             |                                      |                   |   |   |              |
| DNAJC17     | ENSG00000104129.9                     | 0.633886484                          | 1            | 1           | 0.633886484                          |                   |   |   |              |
|             | Brain_Hippocampus                     | 0.633886484                          |              |             | Brain_Hippocampus                    | 1                 | 1 | 1 |              |
|             | 0.476263754                           | 0.476263754                          |              |             | 0.476263754                          | NA                | 1 | 0 | 0.998207054  |
| SLX4        | ENSG00000188827.10                    | 0.633998098                          | 2            | 2           | 0.344732854                          |                   |   |   |              |
|             | Brain_Cerebellar_Hemisphere           | 0.463920849                          |              |             | Brain_Cerebellum                     | 1.851074659       |   |   |              |
|             | 0.148925341                           | 0.148925341                          |              |             | -0.944855105                         | -0.732405916      |   |   | -0.838630511 |
|             | 0.150224263                           | 2                                    | 0            | 0.998207054 |                                      |                   |   |   |              |
| FBXO38      | ENSG00000145868.16                    | 0.634060836                          | 8            | 2           | 0.232965683                          |                   |   |   |              |
|             | Brain_Caudate_basal_ganglia           | 0.630041855                          |              |             | Brain_Anterior_cingulate_cortex_BA24 |                   |   |   |              |
|             | 6.796457066                           | 0.005771769                          |              |             | 0.637171072                          | 0.481667939       |   |   | 1.19275412   |
|             | 0.78689506                            | 0.268432747                          | 2            | 0           | 0.998207054                          |                   |   |   |              |
| SCGB2B2     | ENSG00000205209.7                     | 0.634355789                          | 3            | 3           | 0.266895817                          |                   |   |   |              |
|             | Brain_Frontal_Cortex_BA9              | 0.786315362                          |              |             | Brain_Caudate_basal_ganglia          |                   |   |   |              |
|             | 2.344103315                           | 0.263865874                          | 0.263865874  |             | 0.271098387                          | 1.110239544       |   |   |              |
|             | 0.670816249                           | 0.420977269                          | 3            | 0           | 0.998207054                          |                   |   |   |              |
| ULBP2       | ENSG00000131015.4                     | 0.634484084                          | 6            | 5           | 0.105021119                          |                   |   |   |              |
|             | Brain_Substantia_nigra                | 0.525415632                          |              |             | Brain_Cerebellar_Hemisphere          |                   |   |   |              |
|             | 3.381316902                           | 0.05411767                           | 0.237678398  |             | -1.620983775                         | -0.6350196        |   |   |              |
|             | -1.111713726                          | 0.325760364                          | 5            | 0           | 0.998207054                          |                   |   |   |              |
| GDAP1       | ENSG00000104381.12                    | 0.634505234                          | 2            | 2           | 0.468450042                          | Brain_Cortex      |   |   |              |
|             | 0.853898297                           | Brain_Cerebellum                     | 1.490858364  |             | 0.509141636                          | 0.509141636       |   |   |              |
|             | -0.184146795                          | 0.725003241                          | 0.270428223  |             | 0.642866155                          | 2                 |   |   | 0            |
|             | 0.998207054                           |                                      |              |             |                                      |                   |   |   |              |
| DDX10       | ENSG00000178105.9                     | 0.634569685                          | 2            | 2           | 0.390458748                          | Brain_Cortex      |   |   |              |
|             | 0.666347284                           | Brain_Cerebellum                     | 1.019083433  |             | 0.980916567                          | 0.980916567       |   |   |              |
|             | -0.858785719                          | 0.431166536                          | -0.213809592 |             | 0.912133987                          | 2                 |   |   | 0            |
|             | 0.998207054                           |                                      |              |             |                                      |                   |   |   |              |
| LHFP        | ENSG00000183722.7                     | 0.634593761                          | 4            | 4           | 0.26938367                           |                   |   |   |              |
|             | Brain_Nucleus_accumbens_basal_ganglia | 0.739982537                          |              |             |                                      |                   |   |   |              |
|             | Brain_Spinal_cord_cervical_c-1        | 1.30282392                           | 0.690133788  |             | 0.690133788                          |                   |   |   |              |
|             | -1.063671655                          | 1.104483008                          | -0.207075827 |             | 0.927096791                          | 4                 |   |   | 0            |
|             | 0.998207054                           |                                      |              |             |                                      |                   |   |   |              |
| AZU1        | ENSG00000172232.9                     | 0.634654769                          | 1            | 1           | 0.634654769                          |                   |   |   |              |
|             | Brain_Putamen_basal_ganglia           | 0.634654769                          |              |             | Brain_Putamen_basal_ganglia          | 1                 |   |   | 1            |
|             | 1                                     | 0.475185489                          | 0.475185489  |             | 0.475185489                          | NA                | 1 |   | 0            |
|             | 0.998207054                           |                                      |              |             |                                      |                   |   |   |              |
| NAV3        | ENSG00000067798.14                    | 0.634683398                          | 1            | 1           | 0.634683398                          | Brain_Cerebellum  |   |   |              |
|             | 0.634683398                           | Brain_Cerebellum                     | 1            | 1           | 0.47514532                           | 0.47514532        |   |   | 0.47514532   |
|             | NA                                    | 1                                    | 0            | 0.998207054 |                                      |                   |   |   |              |
| FOXL2NB     | ENSG00000206262.8                     | 0.63474785                           | 1            | 1           | 0.63474785                           | Brain_Cerebellum  |   |   |              |
|             | 0.63474785                            | Brain_Cerebellum                     | 1            | 1           | 0.47505489                           | 0.47505489        |   |   | 0.47505489   |
|             | 1                                     | 0                                    | 0.998207054  |             |                                      |                   |   |   |              |
| PTHLH       | ENSG00000087494.15                    | 0.634752502                          | 2            | 2           | 0.361587555                          | Brain_Cerebellum  |   |   |              |
|             | 0.775572512                           | Brain_Anterior_cingulate_cortex_BA24 | 1.00900352   |             | 0.99099648                           |                   |   |   |              |
|             | 0.99099648                            | 0.285093497                          | 0.912344196  |             | 0.598718847                          | 0.443533223       |   |   | 2            |
|             | 0                                     | 0.998207054                          |              |             |                                      |                   |   |   |              |
| RP11-3B12.2 | ENSG00000237764.2                     | 0.634796133                          | 1            | 1           | 0.634796133                          |                   |   |   |              |
|             | Brain_Cerebellar_Hemisphere           | 0.634796133                          |              |             | Brain_Cerebellar_Hemisphere          | 1                 |   |   | 1            |
|             | 1                                     | -0.47498715                          | -0.47498715  |             | -0.47498715                          | NA                | 1 |   | 0            |
|             | 0.998207054                           |                                      |              |             |                                      |                   |   |   |              |

|               |                                       |                                      |                                       |              |              |                          |              |  |
|---------------|---------------------------------------|--------------------------------------|---------------------------------------|--------------|--------------|--------------------------|--------------|--|
| C3orf70       | ENSG00000187068.2                     | 0.634886112                          | 9                                     | 4            | 0.389485846  |                          |              |  |
|               | Brain_Nucleus_accumbens_basal_ganglia | 0.998223067                          |                                       |              |              | Brain_Frontal_Cortex_BA9 |              |  |
|               | 6.959304163                           | 2.28E-06                             | 0.236502592                           |              | -0.380796881 | 0.86055016               |              |  |
|               | 0.372590292                           | 0.467167853                          | 4                                     | 0            | 0.998207054  |                          |              |  |
| FAM222B       | ENSG00000173065.13                    | 0.63495261                           | 1                                     | 1            | 0.63495261   | Brain_Cerebellum         |              |  |
|               | 0.63495261 Brain_Cerebellum           | 1                                    | 1                                     | 0.474767627  | 0.474767627  |                          |              |  |
|               | 0.474767627                           | NA                                   | 1                                     | 0            | 0.998207054  |                          |              |  |
| APMAP         | ENSG00000101474.11                    | 0.635065827                          | 6                                     | 5            | 0.530237025  |                          |              |  |
|               | Brain_Substantia_nigra                | 0.79182322                           | Brain_Caudate_basal_ganglia           | 4.051094001  |              |                          |              |  |
|               | 0.036297361                           | 0.198632458                          | -0.577757303                          | 0.627644233  | -0.235417308 |                          |              |  |
|               | 0.444344697                           | 5                                    | 0                                     | 0.998207054  |              |                          |              |  |
| ELAC1         | ENSG00000141642.8                     | 0.635155296                          | 1                                     | 1            | 0.635155296  |                          |              |  |
|               | Brain_Caudate_basal_ganglia           | 0.635155296                          | Brain_Caudate_basal_ganglia           | 1            | 1            |                          |              |  |
|               | 1                                     | -0.474483312                         | -0.474483312                          | -0.474483312 | NA           | 1                        | 0            |  |
|               | 0.998207054                           |                                      |                                       |              |              |                          |              |  |
| RP11-426C22.7 | ENSG00000273582.1                     | 0.635173831                          | 2                                     | 2            | 0.383132319  |                          |              |  |
|               | Brain_Hypothalamus                    | 0.403687559                          | Brain_Spinal_cord_cervical_c-1        |              |              |                          |              |  |
|               | 1.608525287                           | 0.391474713                          | 0.391474713                           | -0.872139429 | -0.835053548 |                          |              |  |
|               | -0.853596488                          | 0.026223678                          | 2                                     | 0            | 0.998207054  |                          |              |  |
| REPS1         | ENSG00000135597.18                    | 0.635187721                          | 6                                     | 6            | 0.26335499   |                          |              |  |
|               | Brain_Frontal_Cortex_BA9              | 0.934707653                          | Brain_Nucleus_accumbens_basal_ganglia |              |              |                          |              |  |
|               | 1.944636753                           | 0.461000468                          | 0.461000468                           | -0.727048067 | 1.118496525  |                          |              |  |
|               | 0.390492447                           | 0.690286856                          | 6                                     | 0            | 0.998207054  |                          |              |  |
| AQP3          | ENSG00000165272.14                    | 0.635231159                          | 4                                     | 4            | 0.187783961  | Brain_Cerebellum         |              |  |
|               | 0.579427454                           | Brain_Anterior_cingulate_cortex_BA24 | 2.333367419                           |              |              |                          |              |  |
|               | 0.244610332                           | 0.244610332                          | 0.554221225                           | 1.317163095  | 0.91738247   |                          |              |  |
|               | 0.414136886                           | 4                                    | 0                                     | 0.998207054  |              |                          |              |  |
| RPRD1A        | ENSG00000141425.17                    | 0.635261455                          | 2                                     | 2            | 0.397259229  |                          |              |  |
|               | Brain_Cortex                          | 0.749159762                          | Brain_Substantia_nigra                | 1.133690581  |              |                          |              |  |
|               | 0.866309419                           | 0.866309419                          | -0.319747483                          | 0.846526264  | 0.263389391  |                          |              |  |
|               | 0.824680075                           | 2                                    | 0                                     | 0.998207054  |              |                          |              |  |
| CLPB          | ENSG00000162129.12                    | 0.635400315                          | 1                                     | 1            | 0.635400315  |                          |              |  |
|               | Brain_Anterior_cingulate_cortex_BA24  | 0.635400315                          |                                       |              |              |                          |              |  |
|               | Brain_Anterior_cingulate_cortex_BA24  | 1                                    | 1                                     | 1            | -0.474139665 |                          |              |  |
|               | -0.474139665                          | -0.474139665                         | NA                                    | 1            | 0            | 0.998207054              |              |  |
| SYMPK         | ENSG00000125755.18                    | 0.635442073                          | 7                                     | 3            | 0.43960891   |                          |              |  |
|               | Brain_Nucleus_accumbens_basal_ganglia | 0.793923769                          | Brain_Cortex                          |              |              |                          |              |  |
|               | 5.979473355                           | 0.027589655                          | 0.311623473                           | -0.261218816 | 0.7728538    |                          |              |  |
|               | 0.418264364                           | 0.326709759                          | 3                                     | 0            | 0.998207054  |                          |              |  |
| C11orf21      | ENSG00000110665.11                    | 0.6354485                            | 6                                     | 6            | 0.15899275   | Brain_Cortex             |              |  |
|               | 0.934873829                           | Brain_Spinal_cord_cervical_c-1       | 1.637105496                           | 0.371215812  |              |                          |              |  |
|               | 0.371215812                           | -1.408467278                         | -0.081714398                          | -0.743375581 | 0.443182288  |                          |              |  |
|               | 6                                     | 0                                    | 0.998207054                           |              |              |                          |              |  |
| DAZAP2        | ENSG00000183283.15                    | 0.635598112                          | 1                                     | 1            | 0.635598112  |                          |              |  |
|               | Brain_Cerebellar_Hemisphere           | 0.635598112                          | Brain_Cerebellar_Hemisphere           | 1            | 1            |                          |              |  |
|               | 1                                     | 0.473862289                          | 0.473862289                           | 0.473862289  | NA           | 1                        | 0            |  |
|               | 0.998207054                           |                                      |                                       |              |              |                          |              |  |
| MOBP          | ENSG00000168314.17                    | 0.635601892                          | 1                                     | 1            | 0.635601892  |                          |              |  |
|               | Brain_Substantia_nigra                | 0.635601892                          | Brain_Substantia_nigra                | 1            | 1            |                          |              |  |
|               | 1                                     | 0.473856989                          | 0.473856989                           | 0.473856989  | NA           | 1                        | 0            |  |
|               | 0.998207054                           |                                      |                                       |              |              |                          |              |  |
| LINC00452     | ENSG00000229373.8                     | 0.635607369                          | 1                                     | 1            | 0.635607369  |                          |              |  |
|               | Brain_Cortex                          | 0.635607369                          | Brain_Cortex                          | 1            | 1            | 1                        | -0.473849309 |  |
|               | -0.473849309                          | -0.473849309                         | NA                                    | 1            | 0            | 0.998207054              |              |  |
| RAB3GAP2      | ENSG00000118873.15                    | 0.635640791                          | 3                                     | 3            | 0.292351356  |                          |              |  |
|               | Brain_Anterior_cingulate_cortex_BA24  | 0.561643726                          |                                       |              |              |                          |              |  |
|               | Brain_Nucleus_accumbens_basal_ganglia | 1.270374033                          | 0.729545536                           |              |              |                          |              |  |
|               | 0.729545536                           | -1.052977388                         | 0.666485802                           | 0.064636721  | 0.968838784  |                          |              |  |
|               | 3                                     | 0                                    | 0.998207054                           |              |              |                          |              |  |
| LINC01476     | ENSG00000265313.5                     | 0.635663946                          | 1                                     | 1            | 0.635663946  |                          |              |  |
|               | Brain_Anterior_cingulate_cortex_BA24  | 0.635663946                          |                                       |              |              |                          |              |  |
|               | Brain_Anterior_cingulate_cortex_BA24  | 1                                    | 1                                     | 1            | 0.473769977  |                          |              |  |

|               |                                |                                      |                          |              |              |                                       |                  |
|---------------|--------------------------------|--------------------------------------|--------------------------|--------------|--------------|---------------------------------------|------------------|
|               | 0.473769977                    | 0.473769977                          | NA                       | 1            | 0            | 0.998207054                           |                  |
| MTIF3         | ENSG00000122033.14             | 0.636044316                          |                          | 6            | 6            | 0.094714788                           |                  |
|               | Brain_Cerebellar_Hemisphere    | 0.901550232                          |                          |              |              | Brain_Nucleus_accumbens_basal_ganglia |                  |
|               | 2.590354657                    | 0.12371216                           | 0.12371216               | -0.2381147   | 1.671034885  | 0.50401233                            |                  |
|               | 0.850607733                    | 6                                    | 0                        | 0.998207054  |              |                                       |                  |
| AC004775.5    | ENSG00000272203.1              | 0.636045998                          |                          | 2            | 2            | 0.354186448                           |                  |
|               | Brain_Spinal_cord_cervical_c-1 | 0.795979855                          |                          |              |              | Brain_Cerebellar_Hemisphere           |                  |
|               | 1.046401461                    | 0.953598539                          | 0.953598539              | -0.926499517 | -0.258553383 |                                       |                  |
|               | -0.59252645                    | 0.472309241                          | 2                        | 0            | 0.998207054  |                                       |                  |
| PSMA2         | ENSG00000106588.10             | 0.636079655                          |                          | 1            | 1            | 0.636079655                           | Brain_Cortex     |
|               | 0.636079655                    | Brain_Cortex                         | 1                        | 1            | 1            | 0.473187163                           | 0.473187163      |
|               | 0.473187163                    | NA                                   | 1                        | 0            | 0.998207054  |                                       |                  |
| CCDC85A       | ENSG00000055813.5              | 0.636114562                          |                          | 4            | 4            | 0.181032641                           |                  |
|               | Brain_Cerebellar_Hemisphere    | 0.939567734                          |                          |              |              | Brain_Putamen_basal_ganglia           |                  |
|               | 1.974067203                    | 0.077283604                          | 0.077283604              | -1.337582288 | -0.075813175 |                                       |                  |
|               | -0.804920083                   | 0.549500428                          | 4                        | 0            | 0.998207054  |                                       |                  |
| EBF4          | ENSG00000088881.20             | 0.636116704                          |                          | 3            | 3            | 0.222280291                           |                  |
|               | Brain_Putamen_basal_ganglia    | 0.806326872                          |                          |              |              | Brain_Cerebellum                      | 1.082851547      |
|               | 0.906213169                    | 0.906213169                          | -1.220487061             | -0.24516733  | -0.58859083  |                                       |                  |
|               | 0.547927488                    | 3                                    | 0                        | 0.998207054  |              |                                       |                  |
| BMP8A         | ENSG00000183682.7              | 0.63618868                           | 6                        | 6            | 0.145976122  |                                       |                  |
|               | Brain_Cerebellar_Hemisphere    | 0.863610855                          |                          |              |              | Brain_Cortex                          | 2.535668591      |
|               | 0.224434216                    | 0.224434216                          | -0.171779535             | 1.453892467  | 0.600625489  |                                       |                  |
|               | 0.58646241                     | 6                                    | 0                        | 0.998207054  |              |                                       |                  |
| PP2D1         | ENSG00000183977.13             | 0.636219593                          |                          | 2            | 2            | 0.352018098                           | Brain_Cerebellum |
|               | 0.804225575                    | Brain_Cerebellar_Hemisphere          | 1.453631606              | 0.546368394  |              |                                       |                  |
|               | 0.546368394                    | 0.247882171                          | 0.930681971              | 0.589282071  | 0.482812368  |                                       |                  |
|               | 2                              | 0                                    | 0.998207054              |              |              |                                       |                  |
| PYROXD1       | ENSG00000121350.15             | 0.636267631                          |                          | 11           | 5            | 0.100826199                           |                  |
|               | Brain_Spinal_cord_cervical_c-1 | 0.477848455                          |                          |              |              | Brain_Caudate_basal_ganglia           |                  |
|               | 8.046741088                    | 0.005220104                          | 0.292946084              | 0.709767292  | 1.640861352  |                                       |                  |
|               | 1.111809581                    | 0.244784449                          | 5                        | 0            | 0.998207054  |                                       |                  |
| TTL12         | ENSG00000100304.12             | 0.63648282                           | 8                        | 8            | 0.211103162  |                                       | Brain_Cortex     |
|               | 0.940548358                    | Brain_Anterior_cingulate_cortex_BA24 | 2.766196133              |              |              |                                       |                  |
|               | 0.251053432                    | 0.251053432                          | -0.30210459              | 1.250537783  | 0.27426628   |                                       |                  |
|               | 0.564552906                    | 8                                    | 0                        | 0.998207054  |              |                                       |                  |
| LINC00348     | ENSG00000226846.1              | 0.636502133                          |                          | 1            | 1            | 0.636502133                           |                  |
|               | Brain_Caudate_basal_ganglia    | 0.636502133                          |                          |              |              | Brain_Caudate_basal_ganglia           | 1                |
|               | 1                              | -0.472595024                         | -0.472595024             | -0.472595024 | NA           | 1                                     | 0                |
|               | 0.998207054                    |                                      |                          |              |              |                                       |                  |
| MAPRE3        | ENSG00000084764.10             | 0.636567804                          |                          | 2            | 2            | 0.39286675                            | Brain_Cerebellum |
|               | 0.686977519                    | Brain_Spinal_cord_cervical_c-1       | 1.015514923              | 0.984485077  |              |                                       |                  |
|               | 0.984485077                    | -0.40296018                          | 0.854430054              | 0.225734937  | 0.889109161  |                                       |                  |
|               | 2                              | 0                                    | 0.998207054              |              |              |                                       |                  |
| RIBC2         | ENSG00000128408.8              | 0.636611679                          |                          | 5            | 2            | 0.390292264                           |                  |
|               | Brain_Hypothalamus             | 0.952926202                          |                          |              |              | Brain_Cortex                          | 4.403546978      |
|               | 0.004583462                    | 0.501784146                          | -0.859087462             | 0.059032525  | -0.331562917 |                                       |                  |
|               | 0.330618993                    | 2                                    | 0                        | 0.998207054  |              |                                       |                  |
| LINC01164     | ENSG00000189275.3              | 0.636612629                          |                          | 2            | 2            | 0.45611209                            | Brain_Cortex     |
|               | 0.955098241                    | Brain_Frontal_Cortex_BA9             | 1.572970509              | 0.427029491  |              |                                       |                  |
|               | 0.427029491                    | -0.056305746                         | 0.745264083              | 0.344479168  | 0.566795462  |                                       |                  |
|               | 2                              | 0                                    | 0.998207054              |              |              |                                       |                  |
| RP11-986G18.2 | ENSG00000274659.1              | 0.636717498                          |                          | 3            | 3            | 0.429037789                           |                  |
|               | Brain_Hypothalamus             | 0.89574344                           | Brain_Frontal_Cortex_BA9 | 2.058735316  |              |                                       |                  |
|               | 0.384794826                    | 0.384794826                          | -0.790839272             | 0.372752478  | -0.09568217  |                                       |                  |
|               | 0.614034807                    | 3                                    | 0                        | 0.998207054  |              |                                       |                  |
| FAM129B       | ENSG00000136830.11             | 0.636862149                          |                          | 4            | 4            | 0.283235071                           |                  |
|               | Brain_Frontal_Cortex_BA9       | 0.934709578                          |                          |              |              | Brain_Amygdala                        | 1.474453914      |
|               | 0.531149228                    | 0.531149228                          | -1.073080339             | 0.673762773  | 0.04022398   |                                       |                  |
|               | 0.82016939                     | 4                                    | 0                        | 0.998207054  |              |                                       |                  |
| LMOD1         | ENSG00000163431.12             | 0.636872987                          |                          | 6            | 6            | 0.310972962                           |                  |
|               | Brain_Hypothalamus             | 0.737836533                          |                          |              |              | Brain_Cortex                          | 3.51557124       |
|               |                                |                                      |                          |              | 0.120292417  |                                       |                  |

|                |                                       |              |              |              |                                       |
|----------------|---------------------------------------|--------------|--------------|--------------|---------------------------------------|
|                | 0.120292417                           | -0.334719709 | 1.013182576  | 0.583366556  | 0.516521361                           |
|                | 6                                     | 0            | 0.998207054  |              |                                       |
| CFAP20         | ENSG00000070761.7                     | 0.637128372  | 2            | 2            | 0.362587734                           |
|                | Brain_Spinal_cord_cervical_c-1        | 0.780927777  |              |              | Brain_Hippocampus                     |
|                | 1.009414404                           | 0.990585596  | 0.990585596  | -0.278110186 | 0.910445268                           |
|                | 0.316167541                           | 0.840435621  | 2            | 0            | 0.998207054                           |
| DHFR           | ENSG00000228716.6                     | 0.637148838  | 13           | 1            | 0.407070767                           |
|                | Brain_Hippocampus                     | 0.907140581  |              |              | Brain_Putamen_basal_ganglia           |
|                | 0.008302598                           | 11.77617812  | -0.829059451 | 0.27119991   | -0.447726341                          |
|                | 0.326571169                           | 1            | 0            | 0.998207054  |                                       |
| ZNF256         | ENSG00000152454.3                     | 0.637205422  | 1            | 1            | 0.637205422                           |
|                | Brain_Anterior_cingulate_cortex_BA24  | 0.637205422  |              |              |                                       |
|                | Brain_Anterior_cingulate_cortex_BA24  | 1            | 1            | 1            | 0.471609672                           |
|                | 0.471609672                           | 0.471609672  | NA           | 1            | 0                                     |
|                | 0.998207054                           |              |              |              |                                       |
| SPSB2          | ENSG00000111671.9                     | 0.637470786  | 11           | 8            | 0.167965667                           |
|                | Brain_Hippocampus                     | 0.875414174  |              |              | Brain_Cortex                          |
|                | 0.215409243                           | -1.107805328 | 1.378770041  | 0.398941572  | 0.003229967                           |
|                | 8                                     | 0            | 0.998207054  |              | 0.700708805                           |
| KIFC2          | ENSG00000167702.11                    | 0.637504363  | 5            | 5            | 0.258820752                           |
|                | Brain_Hypothalamus                    | 0.739231768  |              |              | Brain_Cerebellar_Hemisphere           |
|                | 0.25287788                            | 0.25287788   | -1.129182743 | 0.332870858  | -0.575933587                          |
|                | 0.586998609                           | 5            | 0            | 0.998207054  |                                       |
| KCTD14         | ENSG00000151364.16                    | 0.637710156  | 3            | 3            | 0.284685432                           |
|                | Brain_Caudate_basal_ganglia           | 0.632334805  |              |              | Brain_Cortex                          |
|                | 0.653650169                           | 0.653650169  | -0.478443182 | 1.069853109  | 0.431186358                           |
|                | 0.808931997                           | 3            | 0            | 0.998207054  |                                       |
| TCP11L2        | ENSG00000166046.10                    | 0.637798727  | 1            | 1            | 0.637798727                           |
|                | Brain_Hypothalamus                    | 0.637798727  |              |              | Brain_Hypothalamus                    |
|                | -0.470778769                          | -0.470778769 | -0.470778769 | NA           | 1                                     |
|                | 0.998207054                           |              |              |              |                                       |
| RP11-488L18.10 | ENSG00000259865.1                     | 0.63789488   | 10           | 7            | 0.121145225                           |
|                | Brain_Spinal_cord_cervical_c-1        | 0.973408358  |              |              | Brain_Cerebellar_Hemisphere           |
|                | 4.668569621                           | 0.019946018  | 0.251753429  | -1.549984547 | 0.61800205                            |
|                | -0.596515765                          | 0.66195011   | 7            | 0            | 0.998207054                           |
| GAS1RR         | ENSG00000226237.1                     | 0.637917316  | 11           | 5            | 0.193537239                           |
|                | Brain_Cerebellar_Hemisphere           | 0.959941717  |              |              | Brain_Anterior_cingulate_cortex_BA24  |
|                | 7.928370314                           | 0.01541049   | 0.350369419  | -1.300185966 | 0.219741143                           |
|                | -0.696600228                          | 0.46354149   | 5            | 0            | 0.998207054                           |
| TARSL2         | ENSG00000185418.15                    | 0.637948564  | 8            | 6            | 0.104620908                           |
|                | Brain_Cerebellar_Hemisphere           | 0.872967342  |              |              | Brain_Nucleus_accumbens_basal_ganglia |
|                | 3.278385002                           | 0.027569799  | 0.188789772  | -1.075283552 | 1.622852647                           |
|                | -0.015350658                          | 1.090963773  | 6            | 0            | 0.998207054                           |
| RALGAP1        | ENSG00000174373.16                    | 0.637973487  | 10           | 1            | 0.342404595                           |
|                | Brain_Caudate_basal_ganglia           | 0.999892854  |              |              | Brain_Putamen_basal_ganglia           |
|                | 9.356667545                           | 0.001296384  | 9.356667545  | -0.949424814 | -0.000134288                          |
|                | -0.452741917                          | 0.271010896  | 1            | 0            | 0.998207054                           |
| C2CD3          | ENSG00000168014.16                    | 0.638009616  | 7            | 6            | 0.273921702                           |
|                | Brain_Cortex                          | 3.364328081  |              |              | Brain_Cerebellum                      |
|                | 0.81646577                            | 0.102863133  | 0.23608335   |              |                                       |
|                | -1.094075874                          | 0.771211029  | -0.310184655 | 0.636024382  | 6                                     |
|                | 0.998207054                           |              |              |              | 0                                     |
| ADGRL3         | ENSG00000150471.16                    | 0.638052347  | 1            | 1            | 0.638052347                           |
|                | Brain_Hippocampus                     | 0.638052347  |              |              | Brain_Hippocampus                     |
|                | -0.470423683                          | -0.470423683 | -0.470423683 | NA           | 1                                     |
|                | 0.998207054                           |              |              |              |                                       |
| C2orf73        | ENSG00000177994.15                    | 0.638108335  | 1            | 1            | 0.638108335                           |
|                | Brain_Nucleus_accumbens_basal_ganglia | 0.638108335  |              |              |                                       |
|                | Brain_Nucleus_accumbens_basal_ganglia | 1            | 1            | 1            | 0.470345304                           |
|                | 0.470345304                           | 0.470345304  | NA           | 1            | 0                                     |
|                | 0.998207054                           |              |              |              |                                       |
| THBS3          | ENSG00000169231.13                    | 0.638134702  | 8            | 7            | 0.216415784                           |
|                | Brain_Anterior_cingulate_cortex_BA24  | 0.959551885  |              |              | Brain_Cortex                          |
|                | 4.374364057                           | 0.035663281  | 0.159737193  | -1.236115097 | 0.895705158                           |
|                | 0.209906074                           | 0.695725761  | 7            | 0            | 0.998207054                           |
| FAM167A        | ENSG00000154319.14                    | 0.638267465  | 6            | 6            | 0.212111938                           |
|                | Brain_Caudate_basal_ganglia           | 0.98749197   |              |              | Brain_Cortex                          |
|                |                                       |              |              |              | 3.078718516                           |

|               |                                      |              |                             |                                       |              |
|---------------|--------------------------------------|--------------|-----------------------------|---------------------------------------|--------------|
|               | 0.123068431                          | 0.123068431  | -1.247779173                | 0.641379073                           | -0.074067179 |
|               | 0.735036484                          | 6            | 0                           | 0.998207054                           |              |
| OXSRI         | ENSG00000172939.8                    | 0.638289803  | 1                           | 1                                     | 0.638289803  |
|               | Brain_Substantia_nigra               | 0.638289803  |                             | Brain_Substantia_nigra                | 1            |
|               | 1                                    | -0.470091281 | -0.470091281                | -0.470091281                          | NA           |
|               | 0.998207054                          |              |                             | 1                                     | 0            |
| GAA           | ENSG00000171298.12                   | 0.638290854  | 13                          | 9                                     | 0.235417902  |
|               | Brain_Spinal_cord_cervical_c-1       | 0.892126427  |                             | Brain_Cerebellar_Hemisphere           |              |
|               | 7.104490527                          | 0.020358816  | 0.275242938                 | -1.186517736                          | 0.509855916  |
|               | -0.550349999                         | 0.510813959  | 9                           | 0                                     | 0.998207054  |
| CARM1         | ENSG00000142453.11                   | 0.638310117  | 3                           | 3                                     | 0.200673008  |
|               | Brain_Anterior_cingulate_cortex_BA24 | 0.879235698  |                             | Brain_Substantia_nigra                |              |
|               | 1.73420407                           | 0.341652057  | 0.341652057                 | 0.151938175                           | 1.279636495  |
|               | 0.682214175                          | 0.566839789  | 3                           | 0                                     | 0.998207054  |
| C16orf70      | ENSG00000125149.11                   | 0.638315969  | 1                           | 1                                     | 0.638315969  |
|               | Brain_Cortex                         | 0.638315969  | Brain_Cortex                | 1                                     | 1            |
|               | 0.470054656                          | 0.470054656  | NA                          | 1                                     | 0            |
|               |                                      |              |                             | 0.998207054                           | 0.470054656  |
| RP11-5407.16  | ENSG00000272438.1                    | 0.638344616  | 1                           | 1                                     | 0.638344616  |
|               | Brain_Putamen_basal_ganglia          | 0.638344616  | Brain_Putamen_basal_ganglia | 1                                     | 1            |
|               | 1                                    | -0.470014558 | -0.470014558                | -0.470014558                          | NA           |
|               | 0.998207054                          |              |                             | 1                                     | 0            |
| SNX21         | ENSG00000124104.18                   | 0.638433943  | 2                           | 2                                     | 0.632201295  |
|               | Brain_Cerebellar_Hemisphere          | 1.933141646  |                             | Brain_Cerebellum                      |              |
|               | 0.878623732                          | 0.066858354  | 0.152714112                 | 0.478630811                           | 0.315672461  |
|               | 0.066858354                          | 0.152714112  | 0.478630811                 | 0.315672461                           | 0.230457908  |
|               | 2                                    | 0            | 0.998207054                 |                                       |              |
| COL28A1       | ENSG00000215018.9                    | 0.638459122  | 13                          | 7                                     | 0.195140348  |
|               | Brain_Spinal_cord_cervical_c-1       | 0.780114741  |                             | Brain_Putamen_basal_ganglia           |              |
|               | 7.530779727                          | 0.035709973  | 0.481116651                 | -1.29552162                           | 1.257186936  |
|               | -0.092587766                         | 0.819397673  | 7                           | 0                                     | 0.998207054  |
| SFTPB         | ENSG00000168878.16                   | 0.638535317  | 1                           | 1                                     | 0.638535317  |
|               | Brain_Cerebellum                     | 1            | 1                           | 1                                     | -0.469747653 |
|               | -0.469747653                         | NA           | 1                           | 0                                     | 0.998207054  |
| RP11-439E19.9 | ENSG00000260698.1                    | 0.638571545  | 2                           | 2                                     | 0.447781827  |
|               | Brain_Putamen_basal_ganglia          | 0.528244553  |                             | Brain_Nucleus_accumbens_basal_ganglia |              |
|               | 1.087585619                          | 0.912414381  | 0.912414381                 | 0.630687991                           | 0.759118243  |
|               | 0.694903117                          | 0.090813903  | 2                           | 0                                     | 0.998207054  |
| SLC9A2        | ENSG00000115616.2                    | 0.638730619  | 3                           | 3                                     | 0.425779935  |
|               | Brain_Hippocampus                    | 0.712754891  |                             | Brain_Cortex                          | 1.525738505  |
|               | 0.504489579                          | 0.504489579  | -0.796433806                | 0.549636723                           | 0.040453878  |
|               | 0.730424064                          | 3            | 0                           | 0.998207054                           |              |
| RP5-1028K7.2  | ENSG00000266088.5                    | 0.638760192  | 2                           | 2                                     | 0.397616344  |
|               | Brain_Substantia_nigra               | 0.834768123  |                             | Brain_Spinal_cord_cervical_c-1        |              |
|               | 1.241390535                          | 0.758609465  | 0.758609465                 | 0.208590249                           | 0.845885999  |
|               | 0.527238124                          | 0.450636146  | 2                           | 0                                     | 0.998207054  |
| AC009495.4    | ENSG00000229195.1                    | 0.638778388  | 2                           | 2                                     | 0.346082607  |
|               | Brain_Cerebellum                     | 0.947759108  |                             | Brain_Cerebellar_Hemisphere           | 1.028993681  |
|               | 0.971006319                          | 0.971006319  | -0.942214938                | 0.065521098                           | -0.43834692  |
|               | 0.712576985                          | 2            | 0                           | 0.998207054                           |              |
| SLC2A8        | ENSG00000136856.17                   | 0.638786602  | 13                          | 3                                     | 0.253282019  |
|               | Brain_Hypothalamus                   | 0.823661091  |                             | Brain_Cerebellar_Hemisphere           | 10.7710738   |
|               | 0.000371061                          | 0.869365081  | -0.495379799                | 1.142413892                           | -0.25546477  |
|               | 0.427365                             | 3            | 0                           | 0.998207054                           |              |
| TADA3         | ENSG00000171148.13                   | 0.638789639  | 1                           | 1                                     | 0.638789639  |
|               | Brain_Cerebellum                     | 1            | 1                           | 1                                     | -0.469391758 |
|               | -0.469391758                         | NA           | 1                           | 0                                     | 0.998207054  |
| DSTN          | ENSG00000125868.15                   | 0.638914035  | 3                           | 3                                     | 0.281136163  |
|               | Brain_Hippocampus                    | 0.799977371  |                             | Brain_Hypothalamus                    | 1.131040965  |
|               | 0.843791751                          | 0.843791751  | -1.077770555                | 0.253376389                           | -0.443098772 |
|               | 0.667722091                          | 3            | 0                           | 0.998207054                           |              |
| LINC00222     | ENSG00000203801.8                    | 0.638923906  | 1                           | 1                                     | 0.638923906  |
|               | Brain_Substantia_nigra               | 0.638923906  |                             | Brain_Substantia_nigra                | 1            |
|               | 1                                    | -0.469203888 | -0.469203888                | -0.469203888                          | NA           |
|               |                                      |              |                             | 1                                     | 0            |

|               |                                       |                                       |                                       |              |              |                  |              |  |  |
|---------------|---------------------------------------|---------------------------------------|---------------------------------------|--------------|--------------|------------------|--------------|--|--|
|               | 0.998207054                           |                                       |                                       |              |              |                  |              |  |  |
| LUZP1         | ENSG00000169641.13                    | 0.639061785                           | 2                                     | 2            | 0.348507202  |                  | Brain_Cortex |  |  |
|               | 0.549992578                           | Brain_Nucleus_accumbens_basal_ganglia |                                       |              | 1.520173374  |                  |              |  |  |
|               | 0.479826626                           | 0.479826626                           |                                       | 0.597771247  | 0.937488762  |                  | 0.767630005  |  |  |
|               | 0.240216558                           | 2                                     | 0                                     | 0.998207054  |              |                  |              |  |  |
| MXD4          | ENSG00000123933.16                    | 0.63907666                            | 1                                     | 1            | 0.63907666   | Brain_Cerebellum | 0.63907666   |  |  |
|               | Brain_Cerebellum                      | 1                                     | 1                                     | 0.468990174  | 0.468990174  |                  | 0.468990174  |  |  |
|               | NA                                    | 1                                     | 0                                     | 0.998207054  |              |                  |              |  |  |
| ZDHC8         | ENSG00000099904.15                    | 0.639128323                           | 1                                     | 1            | 0.639128323  |                  |              |  |  |
|               | Brain_Nucleus_accumbens_basal_ganglia |                                       |                                       |              | 0.639128323  |                  |              |  |  |
|               | Brain_Nucleus_accumbens_basal_ganglia | 1                                     | 1                                     | 1            | -0.468917897 |                  |              |  |  |
|               | -0.468917897                          | -0.468917897                          | NA                                    | 1            | 0            | 0.998207054      |              |  |  |
| RORB          | ENSG00000198963.10                    | 0.639154819                           | 1                                     | 1            | 0.639154819  | Brain_Cerebellum |              |  |  |
|               | 0.639154819                           | Brain_Cerebellum                      | 1                                     | 1            | -0.468880831 | -0.468880831     |              |  |  |
|               | -0.468880831                          | NA                                    | 1                                     | 0            | 0.998207054  |                  |              |  |  |
| CXCL12        | ENSG00000107562.16                    | 0.639221765                           | 1                                     | 1            | 0.639221765  |                  |              |  |  |
|               | Brain_Cerebellum                      | 0.639221765                           | Brain_Cerebellum                      | 1            | 1            | 1                | -0.46878718  |  |  |
|               | -0.46878718                           | -0.46878718                           | NA                                    | 1            | 0            | 0.998207054      |              |  |  |
| MCIDAS        | ENSG00000234602.7                     | 0.639280822                           | 2                                     | 2            | 0.482511248  |                  |              |  |  |
|               | Brain_Putamen_basal_ganglia           | 0.550767171                           | Brain_Nucleus_accumbens_basal_ganglia |              |              |                  |              |  |  |
|               | 1.051680335                           | 0.948319665                           | 0.948319665                           | -0.70226928  | -0.596610932 |                  |              |  |  |
|               | -0.649440106                          | 0.074711734                           | 2                                     | 0            | 0.998207054  |                  |              |  |  |
| FAM167B       | ENSG00000183615.5                     | 0.639292838                           | 1                                     | 1            | 0.639292838  |                  |              |  |  |
|               | Brain_Cerebellar_Hemisphere           | 0.639292838                           | Brain_Cerebellar_Hemisphere           | 1            | 1            |                  |              |  |  |
|               | 1                                     | 0.468687758                           | 0.468687758                           | 0.468687758  | NA           | 1                | 0            |  |  |
|               | 0.998207054                           |                                       |                                       |              |              |                  |              |  |  |
| RP11-250B2.3  | ENSG00000233967.6                     | 0.639352243                           | 5                                     | 4            | 0.240562991  |                  |              |  |  |
|               | Brain_Anterior_cingulate_cortex_BA24  | 0.985238648                           | Brain_Cerebellar_Hemisphere           |              |              |                  |              |  |  |
|               | 3.301664572                           | 0.097348168                           | 0.366956172                           | -1.17358076  | 0.018501666  |                  |              |  |  |
|               | -0.525106134                          | 0.479323494                           | 4                                     | 0            | 0.998207054  |                  |              |  |  |
| AGRN          | ENSG00000188157.14                    | 0.639639916                           | 1                                     | 1            | 0.639639916  |                  |              |  |  |
|               | Brain_Hippocampus                     | 0.639639916                           | Brain_Hippocampus                     | 1            | 1            | 1                |              |  |  |
|               | -0.468202316                          | -0.468202316                          | -0.468202316                          | NA           | 1            | 0                | 0.998207054  |  |  |
| RP11-622C24.2 | ENSG00000277152.1                     | 0.639654139                           | 2                                     | 2            | 0.546347811  |                  |              |  |  |
|               | Brain_Cerebellar_Hemisphere           | 0.920366987                           | Brain_Cerebellum                      | 1.698131059  |              |                  |              |  |  |
|               | 0.301868941                           | 0.301868941                           | -0.603241849                          | 0.099971456  | -0.251635196 |                  |              |  |  |
|               | 0.497246897                           | 2                                     | 0                                     | 0.998207054  |              |                  |              |  |  |
| G3BP2         | ENSG00000138757.14                    | 0.639772972                           | 9                                     | 4            | 0.165546513  |                  |              |  |  |
|               | Brain_Nucleus_accumbens_basal_ganglia | 0.881227523                           |                                       |              |              |                  |              |  |  |
|               | Brain_Spinal_cord_cervical_c-1        | 7.467044822                           | 0.011247478                           | 0.249886959  |              |                  |              |  |  |
|               | 0.149413293                           | 1.386656557                           | 0.910348333                           | 0.386299025  | 4            | 0                |              |  |  |
|               | 0.998207054                           |                                       |                                       |              |              |                  |              |  |  |
| TPBG          | ENSG00000146242.8                     | 0.639904404                           | 3                                     | 3            | 0.289896352  | Brain_Cortex     |              |  |  |
|               | 0.59186021                            | Brain_Cerebellum                      | 1.207620884                           | 0.783820519  | 0.783820519  |                  |              |  |  |
|               | -1.058349021                          | 0.678885665                           | -0.305201884                          | 0.89134516   | 3            | 0                |              |  |  |
|               | 0.998207054                           |                                       |                                       |              |              |                  |              |  |  |
| UBAP2         | ENSG00000137073.21                    | 0.639975549                           | 2                                     | 2            | 0.410280166  |                  |              |  |  |
|               | Brain_Caudate_basal_ganglia           | 0.416658157                           | Brain_Cortex                          | 1.498721482  |              |                  |              |  |  |
|               | 0.501278518                           | 0.501278518                           | 0.812232635                           | 0.823400699  | 0.817816667  |                  |              |  |  |
|               | 0.007897014                           | 2                                     | 0                                     | 0.998207054  |              |                  |              |  |  |
| MCM3AP        | ENSG00000160294.10                    | 0.640004734                           | 8                                     | 5            | 0.254953298  |                  |              |  |  |
|               | Brain_Caudate_basal_ganglia           | 0.907085266                           | Brain_Cerebellar_Hemisphere           |              |              |                  |              |  |  |
|               | 5.459210439                           | 0.076540372                           | 0.251513594                           | -0.874221866 | 1.138400469  |                  |              |  |  |
|               | 0.024307226                           | 0.682082372                           | 5                                     | 0            | 0.998207054  |                  |              |  |  |
| SLC16A7       | ENSG00000118596.11                    | 0.640481529                           | 2                                     | 1            | 0.557135011  |                  |              |  |  |
|               | Brain_Cerebellar_Hemisphere           | 0.730611502                           | Brain_Cerebellum                      | 1.988724072  |              |                  |              |  |  |
|               | 0.011275928                           | 1.988724072                           | 0.344312211                           | 0.587102288  | 0.465707249  |                  |              |  |  |
|               | 0.17167851                            | 1                                     | 0                                     | 0.998207054  |              |                  |              |  |  |
| ZNF136        | ENSG00000196646.11                    | 0.640553167                           | 2                                     | 2            | 0.444155779  |                  |              |  |  |
|               | Brain_Putamen_basal_ganglia           | 0.585187332                           | Brain_Hippocampus                     | 1.008777419  |              |                  |              |  |  |
|               | 0.991222581                           | 0.991222581                           | 0.545823406                           | 0.765194426  | 0.655508916  |                  |              |  |  |
|               | 0.155118735                           | 2                                     | 0                                     | 0.998207054  |              |                  |              |  |  |



|               |                                       |                  |              |              |                                      |                          |
|---------------|---------------------------------------|------------------|--------------|--------------|--------------------------------------|--------------------------|
| RNF19A        | ENSG00000034677.12                    | 0.640557081      | 4            | 3            | 0.186169121                          |                          |
|               | Brain_Cerebellum                      | 0.917162665      |              |              | Brain_Anterior_cingulate_cortex_BA24 |                          |
|               | 2.006527667                           | 0.013070327      |              |              | 0.955527276                          | -1.321997086 0.104008423 |
|               | -0.656503108                          | 0.738571726      | 3            | 0            | 0.998207054                          |                          |
| GSTCD         | ENSG00000138780.14                    | 0.640565069      | 3            | 2            | 0.422261456                          | Brain_Cortex             |
|               | 0.791808287                           | Brain_Cerebellum | 2.171130001  |              | 0.048528024                          | 0.780341975              |
|               | -0.802504034                          | 0.263963185      | -0.405503021 |              | 0.583108947                          | 2 0                      |
|               | 0.998207054                           |                  |              |              |                                      |                          |
| GGH           | ENSG00000137563.11                    | 0.640597863      | 11           | 3            | 0.22672709                           | Brain_Amygdala           |
|               | 0.979008407                           | Brain_Cerebellum | 9.19839304   | 0.003437766  | 0.529237229                          |                          |
|               | -0.026312096                          | 1.208832794      | 0.485763521  |              | 0.347897176                          | 3 0                      |
|               | 0.998207054                           |                  |              |              |                                      |                          |
| ALKBH7        | ENSG00000125652.7                     | 0.640650666      | 1            | 1            | 0.640650666                          |                          |
|               | Brain_Cerebellum                      | 0.640650666      |              |              | Brain_Cerebellum                     | 1 1 1 -0.466789253       |
|               | -0.466789253                          | -0.466789253     | NA           | 1            | 0                                    | 0.998207054              |
| MSH2          | ENSG00000095002.13                    | 0.640657643      | 3            | 2            | 0.364623409                          |                          |
|               | Brain_Spinal_cord_cervical_c-1        | 0.444052909      |              |              | Brain_Hippocampus                    |                          |
|               | 2.402009031                           | 0.077047759      | 0.52094321   | 0.765367216  | 0.906590459                          |                          |
|               | 0.83392323                            | 0.070701327      | 2            | 0            | 0.998207054                          |                          |
| OR8S1         | ENSG00000197376.2                     | 0.640659855      | 1            | 1            | 0.640659855                          |                          |
|               | Brain_Anterior_cingulate_cortex_BA24  | 0.640659855      |              |              |                                      |                          |
|               | Brain_Anterior_cingulate_cortex_BA24  | 1                | 1            | 1            | 0.46677641                           | 0.46677641               |
|               | 0.46677641                            | NA               | 1            | 0            | 0.998207054                          |                          |
| MRPS33        | ENSG00000090263.15                    | 0.640725082      | 4            | 4            | 0.247968612                          |                          |
|               | Brain_Substantia_nigra                | 0.992296312      |              |              | Brain_Frontal_Cortex_BA9             |                          |
|               | 2.341619984                           | 0.27218012       | 0.27218012   | -1.155297518 | -0.009655291                         |                          |
|               | -0.526426776                          | 0.496990196      | 4            | 0            | 0.998207054                          |                          |
| LINC02080     | ENSG00000267065.2                     | 0.640999563      | 10           | 4            | 0.199834179                          |                          |
|               | Brain_Cerebellar_Hemisphere           | 0.83995913       |              |              | Brain_Anterior_cingulate_cortex_BA24 |                          |
|               | 7.864204693                           | 0.019370818      | 0.302633442  | -1.282024138 | -0.201945757                         |                          |
|               | -0.903333874                          | 0.359672859      | 4            | 0            | 0.998207054                          |                          |
| RPL26         | ENSG00000161970.12                    | 0.641018512      | 1            | 1            | 0.641018512                          |                          |
|               | Brain_Caudate_basal_ganglia           | 0.641018512      |              |              | Brain_Caudate_basal_ganglia          | 1 1                      |
|               | 1                                     | 0.466275222      | 0.466275222  | 0.466275222  | NA                                   | 1 0                      |
|               | 0.998207054                           |                  |              |              |                                      |                          |
| NATD1         | ENSG00000274180.1                     | 0.641154693      | 4            | 4            | 0.293075214                          |                          |
|               | Brain_Cerebellar_Hemisphere           | 0.940916183      |              |              | Brain_Spinal_cord_cervical_c-1       |                          |
|               | 1.612879201                           | 0.452795256      | 0.452795256  | -1.05139935  | 0.516884625                          |                          |
|               | -0.376030015                          | 0.733577178      | 4            | 0            | 0.998207054                          |                          |
| CCAR2         | ENSG00000158941.16                    | 0.641213741      | 1            | 1            | 0.641213741                          | Brain_Cerebellum         |
|               | 0.641213741                           | Brain_Cerebellum | 1            | 1            | 0.466002458                          | 0.466002458              |
|               | 0.466002458                           | NA               | 1            | 0            | 0.998207054                          |                          |
| LRCH3         | ENSG00000186001.12                    | 0.641246141      | 1            | 1            | 0.641246141                          |                          |
|               | Brain_Putamen_basal_ganglia           | 0.641246141      |              |              | Brain_Putamen_basal_ganglia          | 1 1                      |
|               | 1                                     | 0.465957194      | 0.465957194  | 0.465957194  | NA                                   | 1 0                      |
|               | 0.998207054                           |                  |              |              |                                      |                          |
| RP11-563K23.1 | ENSG00000272619.1                     | 0.641275797      | 4            | 4            | 0.248188504                          |                          |
|               | Brain_Cortex                          | 0.936974361      |              |              | Brain_Frontal_Cortex_BA9             | 1.28921342               |
|               | 0.783471923                           | 0.783471923      | -0.914258234 | 1.154760532  | -0.109288581                         |                          |
|               | 0.94876353                            | 4                | 0            | 0.998207054  |                                      |                          |
| RP11-74E22.8  | ENSG00000277200.1                     | 0.641283256      | 2            | 2            | 0.348138291                          |                          |
|               | Brain_Cerebellar_Hemisphere           | 0.496696713      |              |              | Brain_Cerebellum                     | 1.650554001              |
|               | 0.349445999                           | 0.349445999      | 0.679696405  | 0.938206515  | 0.80895146                           |                          |
|               | 0.182794252                           | 2                | 0            | 0.998207054  |                                      |                          |
| RP5-965G21.4  | ENSG00000274414.1                     | 0.641299258      | 5            | 4            | 0.11816477                           |                          |
|               | Brain_Frontal_Cortex_BA9              | 0.467394142      |              |              | Brain_Cerebellum                     | 3.06016139               |
|               | 0.016276327                           | 0.111108564      | -1.562523262 | -0.726725479 | -1.034542119                         |                          |
|               | 0.3391602                             | 4                | 0            | 0.998207054  |                                      |                          |
| DDIT3         | ENSG00000175197.11                    | 0.641303198      | 2            | 2            | 0.430930585                          |                          |
|               | Brain_Nucleus_accumbens_basal_ganglia | 0.868116108      |              |              | Brain_Caudate_basal_ganglia          |                          |
|               | 1.688006591                           | 0.311993409      | 0.311993409  | 0.166051899  | 0.787600221                          |                          |
|               | 0.47682606                            | 0.439501033      | 2            | 0            | 0.998207054                          |                          |

|               |                                      |                                      |                                      |              |              |                             |
|---------------|--------------------------------------|--------------------------------------|--------------------------------------|--------------|--------------|-----------------------------|
| PRR16         | ENSG00000184838.14                   | 0.641660851                          | 1                                    | 1            | 0.641660851  | Brain_Cortex                |
|               | 0.641660851                          | Brain_Cortex                         | 1                                    | 1            | -0.46537791  | -0.46537791                 |
|               | -0.46537791                          | NA                                   | 1                                    | 0            | 0.998207054  |                             |
| LINC01018     | ENSG00000250056.5                    | 0.641820644                          | 2                                    | 2            | 0.446147285  |                             |
|               | Brain_Cerebellum                     | 0.553488875                          | Brain_Caudate_basal_ganglia          | 1.052101027  |              |                             |
|               | 0.947898973                          | 0.947898973                          | -0.761853769                         | -0.592540251 | -0.67719701  |                             |
|               | 0.119722737                          | 2                                    | 0                                    | 0.998207054  |              |                             |
| DCAKD         | ENSG00000172992.11                   | 0.641885304                          | 10                                   | 7            | 0.148192157  | Brain_Cerebellum            |
|               | 0.837298251                          | Brain_Caudate_basal_ganglia          | 5.013365739                          | 0.059067374  |              |                             |
|               | 0.208556153                          | -1.445946682                         | 1.354090452                          | -0.200862098 | 0.864480564  |                             |
|               | 7                                    | 0                                    | 0.998207054                          |              |              |                             |
| LASPI         | ENSG00000002834.17                   | 0.641944158                          | 3                                    | 3            | 0.250497633  |                             |
|               | Brain_Cerebellar_Hemisphere          | 0.905141551                          | Brain_Cortex                         | 1.322875782  |              |                             |
|               | 0.682187973                          | 0.682187973                          | 0.119168892                          | 1.149141514  | 0.722509334  |                             |
|               | 0.537243201                          | 3                                    | 0                                    | 0.998207054  |              |                             |
| LSM8          | ENSG00000128534.7                    | 0.642024379                          | 6                                    | 4            | 0.267872673  | Brain_Cortex                |
|               | 0.97375282                           | Brain_Frontal_Cortex_BA9             | 4.320374526                          | 0.036470184  |              |                             |
|               | 0.283674896                          | -0.268296101                         | 1.107974861                          | 0.132413933  | 0.502041134  |                             |
|               | 4                                    | 0                                    | 0.998207054                          |              |              |                             |
| SLCO1A2       | ENSG00000084453.16                   | 0.642124528                          | 3                                    | 3            | 0.254420469  |                             |
|               | Brain_Frontal_Cortex_BA9             | 0.312892553                          | Brain_Cerebellum                     | 2.324239737  |              |                             |
|               | 0.119919904                          | 0.119919904                          | -1.139678016                         | -1.009171165 | -1.094682596 |                             |
|               | 0.074088933                          | 3                                    | 0                                    | 0.998207054  |              |                             |
| PHOSPHO2      | ENSG00000144362.11                   | 0.642190125                          | 9                                    | 3            | 0.373504212  |                             |
|               | Brain_Anterior_cingulate_cortex_BA24 | 0.960370801                          | Brain_Hypothalamus                   |              |              |                             |
|               | 7.947068385                          | 0.004973541                          | 0.300744445                          | -0.889928625 | 0.10136709   |                             |
|               | -0.372056235                         | 0.325107912                          | 3                                    | 0            | 0.998207054  |                             |
| PTS           | ENSG00000150787.7                    | 0.642244191                          | 1                                    | 1            | 0.642244191  | Brain_Cortex                |
|               | 0.642244191                          | Brain_Cortex                         | 1                                    | 1            | 0.46456334   | 0.46456334                  |
|               | NA                                   | 1                                    | 0                                    | 0.998207054  | 0.46456334   | 0.46456334                  |
| GFY           | ENSG00000261949.5                    | 0.642246042                          | 1                                    | 1            | 0.642246042  |                             |
|               | Brain_Cerebellar_Hemisphere          | 0.642246042                          | Brain_Cerebellar_Hemisphere          | 1            | 1            |                             |
|               | 1                                    | -0.464560755                         | -0.464560755                         | -0.464560755 | NA           | 1                           |
|               | 0.998207054                          |                                      |                                      |              | 0            |                             |
| CD14          | ENSG00000170458.13                   | 0.642373776                          | 1                                    | 1            | 0.642373776  | Brain_Cerebellum            |
|               | 0.642373776                          | Brain_Cerebellum                     | 1                                    | 1            | -0.46438243  | -0.46438243                 |
|               | -0.46438243                          | NA                                   | 1                                    | 0            | 0.998207054  |                             |
| VPS4A         | ENSG00000132612.15                   | 0.64243329                           | 7                                    | 2            | 0.251548578  |                             |
|               | Brain_Caudate_basal_ganglia          | 0.490509199                          | Brain_Anterior_cingulate_cortex_BA24 |              |              |                             |
|               | 6.335576519                          | 0.005008926                          | 0.265193866                          | -1.146596127 | -0.689499165 |                             |
|               | -0.901217144                         | 0.193262021                          | 2                                    | 0            | 0.998207054  |                             |
| PITHD1        | ENSG00000057757.9                    | 0.642476423                          | 1                                    | 1            | 0.642476423  |                             |
|               | Brain_Spinal_cord_cervical_c-1       | 0.642476423                          | Brain_Spinal_cord_cervical_c-1       |              |              |                             |
|               | 1                                    | 1                                    | 1                                    | 0.464239138  | 0.464239138  | NA                          |
|               | 0.998207054                          |                                      |                                      |              | 1            | 0                           |
| PPM1N         | ENSG00000213889.10                   | 0.642480144                          | 3                                    | 3            | 0.19869169   | Brain_Hypothalamus          |
|               | 0.82706325                           | Brain_Anterior_cingulate_cortex_BA24 | 1.178165456                          | 0.741221553  |              |                             |
|               | 0.741221553                          | -1.28528792                          | 0.237214556                          | -0.422180985 | 0.781426386  |                             |
|               | 3                                    | 0                                    | 0.998207054                          |              |              |                             |
| KCNH5         | ENSG00000140015.19                   | 0.642647698                          | 1                                    | 1            | 0.642647698  |                             |
|               | Brain_Frontal_Cortex_BA9             | 0.642647698                          | Brain_Frontal_Cortex_BA9             | 1            | 1            |                             |
|               | 1                                    | -0.464000067                         | -0.464000067                         | -0.464000067 | NA           | 1                           |
|               | 0.998207054                          |                                      |                                      |              | 0            |                             |
| EID2          | ENSG00000176396.10                   | 0.642773757                          | 1                                    | 1            | 0.642773757  | Brain_Amygdala              |
|               | 0.642773757                          | Brain_Amygdala                       | 1                                    | 1            | 0.463824126  | 0.463824126                 |
|               | 0.463824126                          | NA                                   | 1                                    | 0            | 0.998207054  |                             |
| RP11-867G23.3 | ENSG00000245156.1                    | 0.642797567                          | 2                                    | 2            | 0.35270492   |                             |
|               | Brain_Hypothalamus                   | 0.82155862                           | Brain_Caudate_basal_ganglia          | 1.090574375  |              |                             |
|               | 0.909425625                          | 0.909425625                          | -0.22554076                          | 0.929355425  | 0.351907332  |                             |
|               | 0.816634924                          | 2                                    | 0                                    | 0.998207054  |              |                             |
| ZP1           | ENSG00000149506.11                   | 0.64285751                           | 2                                    | 2            | 0.34869036   | Brain_Cerebellar_Hemisphere |
|               | 0.454523588                          | Brain_Cerebellum                     | 1.840711268                          | 0.159288732  | 0.159288732  |                             |

|          |                                |                             |                    |                             |              |                   |
|----------|--------------------------------|-----------------------------|--------------------|-----------------------------|--------------|-------------------|
|          | 0.747894844                    | 0.937132589                 | 0.842513716        | 0.133811293                 | 2            | 0                 |
|          | 0.998207054                    |                             |                    |                             |              |                   |
| RAB40B   | ENSG00000141542.10             | 0.643071489                 | 2                  | 2                           | 0.413287828  |                   |
|          | Brain_Hippocampus              | 0.604654878                 |                    | Brain_Cerebellar_Hemisphere | 1.069150766  |                   |
|          | 0.930849234                    | 0.930849234                 | -0.818121475       | -0.517718229                | -0.667919852 |                   |
|          | 0.212417173                    | 2                           | 0                  | 0.998207054                 |              |                   |
| GUK1     | ENSG00000143774.16             | 0.643187024                 | 4                  | 3                           | 0.585626191  | Brain_Cortex      |
|          | 0.763377755                    | Brain_Putamen_basal_ganglia | 3.552206764        | 0.048846041                 |              |                   |
|          | 0.167053528                    | -0.301048181                | 0.545185139        | 0.237360292                 | 0.370740898  |                   |
|          | 3                              | 0                           | 0.998207054        |                             |              |                   |
| CAPN7    | ENSG00000131375.9              | 0.643208294                 | 1                  | 1                           | 0.643208294  | Brain_Amygdala    |
|          | 0.643208294                    | Brain_Amygdala              | 1                  | 1                           | 1            | -0.46321775       |
|          | -0.46321775                    | NA                          | 1                  | 0                           | 0.998207054  |                   |
| ADPRH    | ENSG00000144843.11             | 0.643291568                 | 4                  | 4                           | 0.140032431  |                   |
|          | Brain_Cerebellar_Hemisphere    | 0.98702304                  | Brain_Hippocampus  | 1.636482367                 |              |                   |
|          | 0.455752093                    | 0.455752093                 | -1.47567027        | 0.016264925                 | -0.557113466 |                   |
|          | 0.641916713                    | 4                           | 0                  | 0.998207054                 |              |                   |
| TAGLN    | ENSG00000149591.16             | 0.643370351                 | 2                  | 2                           | 0.380294891  | Brain_Cerebellum  |
|          | 0.926687316                    | Brain_Frontal_Cortex_BA9    | 1.263606464        | 0.736393536                 |              |                   |
|          | 0.736393536                    | -0.877353078                | 0.092013497        | -0.392669791                | 0.685445679  |                   |
|          | 2                              | 0                           | 0.998207054        |                             |              |                   |
| ITGAD    | ENSG00000156886.11             | 0.643430054                 | 2                  | 2                           | 0.391587135  |                   |
|          | Brain_Spinal_cord_cervical_c-1 | 0.651928896                 |                    | Brain_Cortex                | 1.079068873  |                   |
|          | 0.920931127                    | 0.920931127                 | -0.856742636       | -0.451084157                | -0.653913396 |                   |
|          | 0.286843861                    | 2                           | 0                  | 0.998207054                 |              |                   |
| JAK3     | ENSG00000105639.18             | 0.643437574                 | 4                  | 4                           | 0.261756774  |                   |
|          | Brain_Spinal_cord_cervical_c-1 | 0.924176433                 |                    | Brain_Cerebellar_Hemisphere |              |                   |
|          | 1.311958855                    | 0.713896317                 | 0.713896317        | -0.996959729                | 1.122248553  |                   |
|          | 0.013395204                    | 0.873605672                 | 4                  | 0                           | 0.998207054  |                   |
| ABHD13   | ENSG00000139826.5              | 0.643518735                 | 1                  | 1                           | 0.643518735  |                   |
|          | Brain_Cerebellum               | 0.643518735                 | Brain_Cerebellum   | 1                           | 1            | -0.462784651      |
|          | -0.462784651                   | -0.462784651                | NA                 | 1                           | 0            | 0.998207054       |
| IFT80    | ENSG00000068885.14             | 0.64353376                  | 4                  | 4                           | 0.136256184  | Brain_Hippocampus |
|          | 0.243654888                    | Brain_Frontal_Cortex_BA9    | 3.096145714        | 0.111866013                 |              |                   |
|          | 0.111866013                    | -1.489878504                | -1.165899978       | -1.378841533                | 0.144776542  |                   |
|          | 4                              | 0                           | 0.998207054        |                             |              |                   |
| CLHC1    | ENSG00000162994.15             | 0.64356924                  | 13                 | 8                           | 0.269250578  |                   |
|          | Brain_Putamen_basal_ganglia    | 0.918556462                 |                    | Brain_Hypothalamus          | 7.790626073  |                   |
|          | 0.015786805                    | 0.269739351                 | -0.730558832       | 1.104790037                 | 0.447449537  |                   |
|          | 0.603638406                    | 8                           | 0                  | 0.998207054                 |              |                   |
| C10orf76 | ENSG00000120029.12             | 0.643607296                 | 1                  | 1                           | 0.643607296  |                   |
|          | Brain_Hypothalamus             | 0.643607296                 | Brain_Hypothalamus | 1                           | 1            | 1                 |
|          | -0.462661113                   | -0.462661113                | -0.462661113       | NA                          | 1            | 0                 |
|          |                                |                             |                    |                             | 0.998207054  |                   |
| USP32    | ENSG00000170832.12             | 0.643646646                 | 1                  | 1                           | 0.643646646  | Brain_Cortex      |
|          | 0.643646646                    | Brain_Cortex                | 1                  | 1                           | 1            | 0.462606224       |
|          | 0.462606224                    | NA                          | 1                  | 0                           | 0.998207054  |                   |
| TOMM7    | ENSG00000196683.10             | 0.643706734                 | 12                 | 1                           | 0.342504031  |                   |
|          | Brain_Substantia_nigra         | 0.795732421                 |                    | Brain_Putamen_basal_ganglia |              |                   |
|          | 11.06501433                    | 4.12E-05                    | 11.06501433        | -0.949229245                | 0.666113739  |                   |
|          | 0.428785774                    | 0.447613849                 | 1                  | 0                           | 0.998207054  |                   |
| ADORA2B  | ENSG00000170425.3              | 0.643748781                 | 9                  | 3                           | 0.373777455  |                   |
|          | Brain_Hypothalamus             | 0.978570414                 |                    | Brain_Frontal_Cortex_BA9    | 8.030400791  |                   |
|          | 0.006160105                    | 0.309163308                 | -0.889419897       | -0.026861233                | -0.315896083 |                   |
|          | 0.27403973                     | 3                           | 0                  | 0.998207054                 |              |                   |
| C21orf58 | ENSG00000160298.17             | 0.644017225                 | 2                  | 2                           | 0.34904065   | Brain_Cerebellum  |
|          | 0.385278542                    | Brain_Cerebellar_Hemisphere | 1.901299151        | 0.098700849                 |              |                   |
|          | 0.098700849                    | -0.936451737                | -0.868211532       | -0.902331635                | 0.048253112  |                   |
|          | 2                              | 0                           | 0.998207054        |                             |              |                   |
| SIX4     | ENSG00000100625.8              | 0.644030357                 | 1                  | 1                           | 0.644030357  |                   |
|          | Brain_Cerebellar_Hemisphere    | 0.644030357                 |                    | Brain_Cerebellar_Hemisphere | 1            | 1                 |
|          | 1                              | -0.462071069                | -0.462071069       | -0.462071069                | NA           | 1                 |
|          | 0.998207054                    |                             |                    |                             | 0            |                   |

|               |                                       |                   |              |              |              |                                |             |   |   |
|---------------|---------------------------------------|-------------------|--------------|--------------|--------------|--------------------------------|-------------|---|---|
| ALDH9A1       | ENSG00000143149.12                    | 0.644152571       | 4            | 4            | 0.165721481  |                                |             |   |   |
|               | Brain_Nucleus_accumbens_basal_ganglia | 0.97373697        |              |              |              | Brain_Frontal_Cortex_BA9       |             |   |   |
|               | 1.872537756                           | 0.243034003       | 0.243034003  | 0.032921773  | 1.386083261  |                                |             |   |   |
|               | 0.825014578                           | 0.664642988       | 4            | 0            | 0.998207054  |                                |             |   |   |
| LMF1          | ENSG00000103227.18                    | 0.644289507       | 12           | 4            | 0.212950856  |                                |             |   |   |
|               | Brain_Spinal_cord_cervical_c-1        | 0.883112309       |              |              |              | Brain_Hippocampus              |             |   |   |
|               | 8.646019842                           | 0.002022722       | 0.298669791  | -1.245492267 | 1.071200911  |                                |             |   |   |
|               | 0.213300515                           | 0.828572944       | 4            | 0            | 0.998207054  |                                |             |   |   |
| RAG1          | ENSG00000166349.9                     | 0.644308906       | 2            | 2            | 0.378829332  |                                |             |   |   |
|               | Brain_Caudate_basal_ganglia           | 0.734110737       |              |              |              | Brain_Substantia_nigra         |             |   |   |
|               | 1.018419998                           | 0.981580002       | 0.981580002  | -0.339662458 | 0.880055338  |                                |             |   |   |
|               | 0.609858898                           | 0.382115472       | 0            | 0.998207054  |              |                                |             |   |   |
| CSK           | ENSG00000103653.16                    | 0.644324822       | 2            | 2            | 0.421655058  |                                |             |   |   |
|               | Brain_Caudate_basal_ganglia           | 0.63590012        |              |              |              | Brain_Cerebellum               | 1.012007046 |   |   |
|               | 0.987992954                           | 0.987992954       | -0.803553204 | -0.473438848 | -0.638496026 |                                |             |   |   |
|               | 0.2334261                             | 2                 | 0            | 0.998207054  |              |                                |             |   |   |
| PRDM1         | ENSG00000057657.15                    | 0.644347101       | 2            | 2            | 0.406144516  |                                |             |   |   |
|               | Brain_Frontal_Cortex_BA9              | 0.638288401       |              |              |              | Brain_Cerebellum               | 1.043074431 |   |   |
|               | 0.956925569                           | 0.956925569       | -0.83069754  | 0.470093244  | -0.180302148 |                                |             |   |   |
|               | 0.919797984                           | 2                 | 0            | 0.998207054  |              |                                |             |   |   |
| RP11-202K23.1 | ENSG00000233359.1                     | 0.644361385       |              |              | 1            | 1                              | 0.644361385 |   |   |
|               | Brain_Spinal_cord_cervical_c-1        | 0.644361385       |              |              |              | Brain_Spinal_cord_cervical_c-1 |             |   |   |
|               | 1                                     | 1                 | 1            | 0.461609495  | 0.461609495  | 0.461609495                    | NA          | 1 | 0 |
|               | 0.998207054                           |                   |              |              |              |                                |             |   |   |
| MAP3K5        | ENSG00000197442.9                     | 0.644472584       | 2            | 2            | 0.348574489  |                                |             |   |   |
|               | Brain_Cerebellum                      | 0.487729332       |              |              |              | Brain_Cerebellar_Hemisphere    | 1.738513667 |   |   |
|               | 0.261486333                           | 0.261486333       | 0.69392486   | 0.9373579    | 0.81564138   | 0.172133153                    |             |   |   |
|               | 2                                     | 0                 | 0.998207054  |              |              |                                |             |   |   |
| CPNE3         | ENSG00000085719.12                    | 0.644540016       | 10           | 7            | 0.064906086  |                                |             |   |   |
|               | Brain_Nucleus_accumbens_basal_ganglia | 0.962008109       |              |              |              | Brain_Caudate_basal_ganglia    |             |   |   |
|               | 5.190699236                           | 0.014862059       | 0.255414136  | -1.845904408 | 0.560627337  |                                |             |   |   |
|               | -0.66199768                           | 0.82138548        | 7            | 0            | 0.998207054  |                                |             |   |   |
| CARHSP1       | ENSG00000153048.10                    | 0.644584265       | 2            | 2            | 0.453109788  |                                |             |   |   |
|               | Brain_Substantia_nigra                | 0.659751481       |              |              |              | Brain_Frontal_Cortex_BA9       |             |   |   |
|               | 1.152980046                           | 0.847019954       | 0.847019954  | -0.440256309 | 0.750240637  |                                |             |   |   |
|               | 0.154992164                           | 0.841808464       | 2            | 0            | 0.998207054  |                                |             |   |   |
| CTHRC1        | ENSG00000164932.12                    | 0.644650828       | 2            | 2            | 0.49357372   |                                |             |   |   |
|               | Brain_Anterior_cingulate_cortex_BA24  | 0.760003045       |              |              |              |                                |             |   |   |
|               | Brain_Nucleus_accumbens_basal_ganglia | 1.407313314       |              |              |              | 0.592686686                    |             |   |   |
|               | 0.592686686                           | -0.68463588       | 0.30547679   | -0.189579545 | 0.700115383  |                                |             |   | 2 |
|               | 0                                     | 0.998207054       |              |              |              |                                |             |   |   |
| C18orf25      | ENSG00000152242.10                    | 0.644679108       | 1            | 1            | 0.644679108  |                                |             |   |   |
|               | Brain_Cerebellum                      | 0.644679108       |              |              |              | Brain_Cerebellum               | 1           | 1 | 1 |
|               | 0.461166564                           | 0.461166564       | NA           | 1            | 0            | 0.998207054                    |             |   |   |
| DNAH9         | ENSG00000007174.17                    | 0.644742802       | 4            | 4            | 0.301635567  |                                |             |   |   |
|               | Brain_Hypothalamus                    | 0.883547183       |              |              |              | Brain_Caudate_basal_ganglia    | 2.304635616 |   |   |
|               | 0.239205223                           | 0.239205223       | -0.334644325 | 1.032932332  | 0.317823529  |                                |             |   |   |
|               | 0.661814469                           | 4                 | 0            | 0.998207054  |              |                                |             |   |   |
| BCL2L15       | ENSG00000188761.11                    | 0.64502831        | 3            | 3            | 0.443771973  |                                |             |   |   |
|               | Brain_Spinal_cord_cervical_c-1        | 0.845030473       |              |              |              | Brain_Cerebellar_Hemisphere    |             |   |   |
|               | 1.731139486                           | 0.288520571       | 0.288520571  | -0.765839223 | 0.580230295  |                                |             |   |   |
|               | -0.127023988                          | 0.675639485       | 3            | 0            | 0.998207054  |                                |             |   |   |
| SLC30A9       | ENSG00000014824.13                    | 0.64503814        | 10           | 7            | 0.078929652  |                                |             |   |   |
|               | Brain_Hippocampus                     | 6.937925909       |              |              |              | Brain_Cerebellum               |             |   |   |
|               | 0.785611775                           | Brain_Hippocampus | 0.021341038  |              |              |                                |             |   |   |
|               | 0.272405034                           | 0.272013323       | 1.756930525  | 1.292670891  | 0.470128099  |                                |             |   |   |
|               | 7                                     | 0                 | 0.998207054  |              |              |                                |             |   |   |
| MED8          | ENSG00000159479.16                    | 0.645055481       | 4            | 3            | 0.273053995  |                                |             |   |   |
|               | Brain_Hippocampus                     | 0.556590873       |              |              |              | Brain_Spinal_cord_cervical_c-1 |             |   |   |
|               | 2.748657185                           | 0.012694912       | 0.269804844  | 0.587912728  | 1.096056625  |                                |             |   |   |
|               | 0.79660673                            | 0.215392384       | 3            | 0            | 0.998207054  |                                |             |   |   |
| SETD9         | ENSG00000155542.11                    | 0.645344042       | 13           | 2            | 0.122985335  |                                |             |   |   |
|               | Brain_Nucleus_accumbens_basal_ganglia | 0.728530188       |              |              |              |                                |             |   |   |

|          |                                       |                                |                             |              |              |                  |
|----------|---------------------------------------|--------------------------------|-----------------------------|--------------|--------------|------------------|
|          | Brain_Spinal_cord_cervical_c-1        | 11.56589815                    | 0.00282168                  | 0.471601436  |              |                  |
|          | -1.542363297                          | -0.347081371                   | -0.743261439                | 0.339863791  | 2            | 0                |
|          | 0.998207054                           |                                |                             |              |              |                  |
| DCAF13   | ENSG00000164934.13                    | 0.645404614                    | 1                           | 1            | 0.645404614  |                  |
|          | Brain_Caudate_basal_ganglia           | 0.645404614                    | Brain_Caudate_basal_ganglia | 1            | 1            |                  |
|          | 1                                     | -0.460155494                   | -0.460155494                | -0.460155494 | NA           | 1 0              |
|          | 0.998207054                           |                                |                             |              |              |                  |
| ITGA11   | ENSG00000137809.16                    | 0.645424567                    | 1                           | 1            | 0.645424567  |                  |
|          | Brain_Frontal_Cortex_BA9              | 0.645424567                    | Brain_Frontal_Cortex_BA9    | 1            | 1            |                  |
|          | 1                                     | -0.460127693                   | -0.460127693                | -0.460127693 | NA           | 1 0              |
|          | 0.998207054                           |                                |                             |              |              |                  |
| DCTN3    | ENSG00000137100.15                    | 0.645752915                    | 1                           | 1            | 0.645752915  | Brain_Amygdala   |
|          | 0.645752915                           | Brain_Amygdala                 | 1                           | 1            | 1            | -0.459670266     |
|          | -0.459670266                          | NA                             | 1                           | 0            | 0.998207054  | -0.459670266     |
|          | 0.998207054                           |                                |                             |              |              |                  |
| PFN4     | ENSG00000176732.6                     | 0.645808407                    | 4                           | 4            | 0.430280464  |                  |
|          | Brain_Cerebellar_Hemisphere           | 0.684116856                    | Brain_Caudate_basal_ganglia | 2.38794623   |              |                  |
|          | 0.114418379                           | 0.114418379                    | -0.732183869                | 0.788711809  | 0.091644215  |                  |
|          | 0.775465422                           | 4                              | 0                           | 0.998207054  |              |                  |
| CCDC74B  | ENSG00000152076.18                    | 0.645939575                    | 7                           | 3            | 0.280379848  |                  |
|          | Brain_Cortex                          | 0.976140228                    | Brain_Hippocampus           | 5.727317957  |              |                  |
|          | 0.013940603                           | 0.223240384                    | -1.079466438                | 0.769222268  | -0.212863231 |                  |
|          | 0.558061052                           | 3                              | 0                           | 0.998207054  |              |                  |
| DDRGK1   | ENSG00000198171.12                    | 0.646118776                    | 1                           | 1            | 0.646118776  |                  |
|          | Brain_Cerebellum                      | 0.646118776                    | Brain_Cerebellum            | 1            | 1            | 0.459160692      |
|          | 0.459160692                           | 0.459160692                    | NA                          | 1            | 0            | 0.998207054      |
|          | 0.998207054                           |                                |                             |              |              |                  |
| PDIA2    | ENSG00000185615.15                    | 0.646126709                    | 2                           | 2            | 0.439143322  | Brain_Cerebellum |
|          | 0.878229485                           | Brain_Spinal_cord_cervical_c-1 | 1.417800284                 | 0.582199716  |              |                  |
|          | 0.582199716                           | 0.153214041                    | 0.773640657                 | 0.463427349  | 0.438707867  |                  |
|          | 2                                     | 0                              | 0.998207054                 |              |              |                  |
| ZNF738   | ENSG00000172687.13                    | 0.646187144                    | 11                          | 1            | 0.460703207  |                  |
|          | Brain_Caudate_basal_ganglia           | 0.951620912                    | Brain_Cerebellar_Hemisphere |              |              |                  |
|          | 10.04209839                           | 0.000439897                    | 10.04209839                 | -0.737689414 | -0.060671396 |                  |
|          | -0.435270844                          | 0.200810538                    | 1                           | 0            | 0.998207054  |                  |
| CCDC144A | ENSG00000170160.17                    | 0.646247698                    | 1                           | 1            | 0.646247698  |                  |
|          | Brain_Cerebellar_Hemisphere           | 0.646247698                    | Brain_Cerebellar_Hemisphere | 1            | 1            |                  |
|          | 1                                     | -0.458981156                   | -0.458981156                | -0.458981156 | NA           | 1 0              |
|          | 0.998207054                           |                                |                             |              |              |                  |
| GABBR1   | ENSG00000204681.10                    | 0.646270193                    | 8                           | 7            | 0.100994487  |                  |
|          | Brain_Cerebellar_Hemisphere           | 0.823022859                    | Brain_Cortex                | 4.520677313  |              |                  |
|          | 0.14883043                            | 0.269097806                    | -0.634052568                | 1.640051368  | 0.830306999  |                  |
|          | 0.720059238                           | 7                              | 0                           | 0.998207054  |              |                  |
| CRNN     | ENSG00000143536.7                     | 0.646301562                    | 2                           | 2            | 0.356194312  |                  |
|          | Brain_Anterior_cingulate_cortex_BA24  | 0.853937445                    | Brain_Frontal_Cortex_BA9    |              |              |                  |
|          | 1.039956705                           | 0.960043295                    | 0.960043295                 | -0.92264102  | -0.184096891 |                  |
|          | -0.553368955                          | 0.522229561                    | 2                           | 0            | 0.998207054  |                  |
| USP48    | ENSG00000090686.15                    | 0.646605073                    | 3                           | 3            | 0.270600342  |                  |
|          | Brain_Nucleus_accumbens_basal_ganglia | 0.563348726                    | Brain_Caudate_basal_ganglia |              |              |                  |
|          | 2.436597771                           | 0.246060439                    | 0.246060439                 | -1.101681088 | -0.577874687 |                  |
|          | -0.909189894                          | 0.2881794                      | 3                           | 0            | 0.998207054  |                  |
| ARMT1    | ENSG00000146476.10                    | 0.646905029                    | 3                           | 3            | 0.292248594  |                  |
|          | Brain_Hypothalamus                    | 0.376269664                    | Brain_Putamen_basal_ganglia | 1.848435403  |              |                  |
|          | 0.414572047                           | 0.414572047                    | -1.053201625                | -0.884790445 | -0.978775054 |                  |
|          | 0.085892194                           | 3                              | 0                           | 0.998207054  |              |                  |
| NKX6-2   | ENSG00000148826.8                     | 0.647000681                    | 2                           | 2            | 0.367083977  |                  |
|          | Brain_Substantia_nigra                | 0.838637426                    | Brain_Cerebellar_Hemisphere |              |              |                  |
|          | 1.039425276                           | 0.960574724                    | 0.960574724                 | -0.203636681 | 0.901948968  |                  |
|          | 0.349156143                           | 0.781767109                    | 2                           | 0            | 0.998207054  |                  |
| CRELD2   | ENSG00000184164.14                    | 0.647028695                    | 2                           | 2            | 0.353396734  |                  |
|          | Brain_Hypothalamus                    | 0.524856144                    | Brain_Hippocampus           | 1.754188492  |              |                  |
|          | 0.245811508                           | 0.245811508                    | 0.635877691                 | 0.92802089   | 0.781949291  |                  |
|          | 0.206576436                           | 2                              | 0                           | 0.998207054  |              |                  |
| LACTB    | ENSG00000103642.11                    | 0.647049071                    | 12                          | 2            | 0.182391413  |                  |

|               |                                       |                                      |              |                                       |              |             |                   |
|---------------|---------------------------------------|--------------------------------------|--------------|---------------------------------------|--------------|-------------|-------------------|
|               | Brain_Nucleus_accumbens_basal_ganglia | 0.781274131                          |              |                                       |              |             |                   |
|               | Brain_Anterior_cingulate_cortex_BA24  | 10.43032709                          |              |                                       | 0.000125687  |             |                   |
|               | 0.717120156                           | -1.333427927                         |              | -0.277659007                          | -0.75652752  |             | 0.285130475       |
|               | 2                                     | 0                                    | 0.998207054  |                                       |              |             |                   |
| GPA33         | ENSG00000143167.11                    | 0.64705897                           | 5            | 3                                     | 0.185702485  |             | Brain_Cortex      |
|               | 0.502876091                           | Brain_Anterior_cingulate_cortex_BA24 |              |                                       | 3.812216154  |             |                   |
|               | 0.036664664                           | 0.4172206                            | 0.669971292  |                                       | 1.323399718  |             | 1.035994775       |
|               | 0.281536615                           | 3                                    | 0            | 0.998207054                           |              |             |                   |
| CHRN3         | ENSG00000147432.6                     | 0.647063484                          |              | 2                                     | 2            | 0.391370067 |                   |
|               | Brain_Cerebellum                      | 0.550397585                          |              | Brain_Cerebellar_Hemisphere           | 1.284291803  |             |                   |
|               | 0.715708197                           | 0.715708197                          |              | 0.59716446                            | 0.857135386  |             | 0.727149923       |
|               | 0.183827204                           | 2                                    | 0            | 0.998207054                           |              |             |                   |
| SMCHD1        | ENSG00000101596.14                    | 0.647137624                          |              | 1                                     | 1            | 0.647137624 |                   |
|               | Brain_Cerebellum                      | 0.647137624                          |              | Brain_Cerebellum                      | 1            | 1           | 0.457742258       |
|               | 0.457742258                           | 0.457742258                          | NA           | 1                                     | 0            | 0.998207054 |                   |
| SHMT1         | ENSG00000176974.19                    | 0.647299526                          |              | 9                                     | 8            | 0.193526462 |                   |
|               | Brain_Anterior_cingulate_cortex_BA24  | 0.947303093                          |              | Brain_Hypothalamus                    |              |             |                   |
|               | 3.762474937                           | 0.02572162                           | 0.175596644  |                                       | -0.403426756 |             | 1.300217419       |
|               | 0.280716207                           | 0.616853328                          | 8            | 0                                     | 0.998207054  |             |                   |
| MS4A14        | ENSG00000166928.10                    | 0.647311247                          |              | 12                                    | 2            | 0.369653221 |                   |
|               | Brain_Spinal_cord_cervical_c-1        | 0.95941422                           |              | Brain_Nucleus_accumbens_basal_ganglia |              |             |                   |
|               | 10.70697796                           | 0.004935359                          | 0.424185123  |                                       | -0.897123123 |             | -0.050888687      |
|               | -0.349550554                          | 0.272375013                          | 2            | 0                                     | 0.998207054  |             |                   |
| PPP4R1-AS1    | ENSG00000263627.1                     | 0.647318834                          |              | 13                                    | 1            | 0.488562981 |                   |
|               | Brain_Putamen_basal_ganglia           | 0.969924443                          |              | Brain_Hippocampus                     | 12.32244888  |             |                   |
|               | 0.001496516                           | 12.32244888                          | 0.037703052  |                                       | 0.692596224  |             | 0.442719497       |
|               | 0.198570562                           | 1                                    | 0            | 0.998207054                           |              |             |                   |
| SIPA1         | ENSG00000213445.9                     | 0.647339539                          |              | 3                                     | 3            | 0.293814334 |                   |
|               | Brain_Hypothalamus                    | 0.774579702                          |              | Brain_Cerebellar_Hemisphere           | 1.349752074  |             |                   |
|               | 0.763137204                           | 0.763137204                          | -1.04979074  |                                       | 0.434460264  |             | -0.109646942      |
|               | 0.81754755                            | 3                                    | 0            | 0.998207054                           |              |             |                   |
| SLC26A8       | ENSG00000112053.13                    | 0.647508589                          |              | 11                                    | 3            | 0.318557031 |                   |
|               | Brain_Hippocampus                     | 0.981185817                          |              | Brain_Putamen_basal_ganglia           | 8.779122525  |             |                   |
|               | 0.005572356                           | 0.617439531                          | -0.056437096 |                                       | 0.997427537  |             | 0.343310196       |
|               | 0.359642198                           | 3                                    | 0            | 0.998207054                           |              |             |                   |
| SPDL1         | ENSG00000040275.16                    | 0.647828368                          |              | 2                                     | 2            | 0.35197577  | Brain_Hippocampus |
|               | 0.967455109                           | Brain_Frontal_Cortex_BA9             | 1.003458848  |                                       | 0.996541152  |             |                   |
|               | 0.996541152                           | -0.930763778                         | 0.040800289  |                                       | -0.444981745 |             | 0.68699954        |
|               | 0                                     | 0.998207054                          |              |                                       |              |             | 2                 |
| GPR65         | ENSG00000140030.5                     | 0.647863944                          |              | 1                                     | 1            | 0.647863944 |                   |
|               | Brain_Hypothalamus                    | 0.647863944                          |              | Brain_Hypothalamus                    | 1            | 1           | 1                 |
|               | 0.456731643                           | 0.456731643                          | 0.456731643  | NA                                    | 1            | 0           | 0.998207054       |
| RP11-258F22.1 | ENSG00000226578.1                     | 0.647906434                          |              | 13                                    | 3            | 0.279109733 |                   |
|               | Brain_Anterior_cingulate_cortex_BA24  | 0.787404953                          |              | Brain_Cortex                          |              |             |                   |
|               | 10.06136709                           | 0.008107662                          | 0.780677301  |                                       | -1.082321416 |             | 0.653478555       |
|               | -0.469553131                          | 0.480504681                          | 3            | 0                                     | 0.998207054  |             |                   |
| ZNF554        | ENSG00000172006.11                    | 0.647928839                          |              | 9                                     | 8            | 0.054188147 |                   |
|               | Brain_Cortex                          | 0.863266024                          |              | Brain_Cerebellum                      | 3.626746776  |             | 0.061885807       |
|               | 0.171009569                           | -0.172218157                         | 1.925329521  |                                       | 0.798273175  |             | 0.666912384       |
|               | 8                                     | 0                                    | 0.998207054  |                                       |              |             |                   |
| PKIA          | ENSG00000171033.12                    | 0.647938755                          |              | 2                                     | 2            | 0.35758002  | Brain_Cortex      |
|               | 0.993414303                           | Brain_Hypothalamus                   | 1.148795699  |                                       | 0.851204301  |             |                   |
|               | 0.851204301                           | -0.00825404                          | 0.919986106  |                                       | 0.455866033  |             | 0.656364902       |
|               | 2                                     | 0                                    | 0.998207054  |                                       |              |             |                   |
| RP11-521C20.5 | ENSG00000275636.1                     | 0.648043611                          |              | 8                                     | 3            | 0.173473268 |                   |
|               | Brain_Cortex                          | 0.349396398                          |              | Brain_Caudate_basal_ganglia           | 7.322797879  |             |                   |
|               | 3.41E-09                              | 0.303835557                          | 0.935760724  |                                       | 1.361127919  |             | 1.199441638       |
|               | 0.132601335                           | 3                                    | 0            | 0.998207054                           |              |             |                   |
| ARHGFP19      | ENSG00000142632.16                    | 0.648048124                          |              | 13                                    | 1            | 0.324017665 |                   |
|               | Brain_Substantia_nigra                | 0.928344465                          |              | Brain_Cerebellar_Hemisphere           |              |             |                   |
|               | 11.86793333                           | -0.002021344                         | 11.86793333  |                                       | -0.312592028 |             | 0.986235292       |
|               | 0.430394122                           | 0.344419839                          | 1            | 0                                     | 0.998207054  |             |                   |

|               |                                       |                             |                             |              |              |                  |
|---------------|---------------------------------------|-----------------------------|-----------------------------|--------------|--------------|------------------|
| RBBP8         | ENSG00000101773.18                    | 0.648111936                 | 3                           | 3            | 0.399449486  | Brain_Cortex     |
|               | 0.996558114                           | Brain_Cerebellar_Hemisphere | 2.044720893                 | 0.104099565  |              |                  |
|               | 0.104099565                           | -0.388547249                | 0.842604836                 | 0.152790455  | 0.628862351  |                  |
|               | 3                                     | 0                           | 0.998207054                 |              |              |                  |
| OSGEP         | ENSG00000092094.10                    | 0.648119796                 | 13                          | 1            | 0.425003298  | Brain_Cerebellum |
|               | 0.762317273                           | Brain_Frontal_Cortex_BA9    | 12.31922635                 | 0.000266699  |              |                  |
|               | 12.31922635                           | -0.302439203                | 0.797771163                 | 0.435124621  | 0.257244913  |                  |
|               | 1                                     | 0                           | 0.998207054                 |              |              |                  |
| LBH           | ENSG00000213626.11                    | 0.648280873                 | 2                           | 2            | 0.505247337  |                  |
|               | Brain_Substantia_nigra                | 0.51431626                  | Brain_Putamen_basal_ganglia | 1.002666053  |              |                  |
|               | 0.997333947                           | -0.997333947                | -0.652131631                | 0.66625623   | 0.0070623    |                  |
|               | 0.932240997                           | 2                           | 0                           | 0.998207054  |              |                  |
| FLNC          | ENSG00000128591.15                    | 0.648416829                 | 2                           | 2            | 0.692287879  | Brain_Cerebellum |
|               | 0.716230984                           | Brain_Substantia_nigra      | 1.667218574                 | 0.332781426  |              |                  |
|               | 0.332781426                           | -0.395752151                | 0.363500574                 | -0.016125788 | 0.536872751  |                  |
|               | 2                                     | 0                           | 0.998207054                 |              |              |                  |
| RP11-706J10.2 | ENSG00000270866.1                     | 0.64847137                  | 2                           | 2            | 0.35283652   |                  |
|               | Brain_Nucleus_accumbens_basal_ganglia | 0.830968528                 | Brain_Cortex                | 1.17122967   |              |                  |
|               | 0.82877033                            | 0.82877033                  | -0.213459561                | 0.929101438  | 0.357820938  | 0.80791263       |
|               | 2                                     | 0                           | 0.998207054                 |              |              |                  |
| NAT8          | ENSG00000144035.3                     | 0.648722343                 | 4                           | 1            | 0.499135404  |                  |
|               | Brain_Spinal_cord_cervical_c-1        | 0.774231618                 | Brain_Cerebellar_Hemisphere |              |              |                  |
|               | 3.878330444                           | 0.011878395                 | 3.878330444                 | 0.2868442    | 0.675850759  |                  |
|               | 0.449625807                           | 0.173230804                 | 1                           | 0            | 0.998207054  |                  |
| PRSS22        | ENSG00000005001.9                     | 0.648842641                 | 4                           | 3            | 0.304375582  |                  |
|               | Brain_Cerebellum                      | 0.969752032                 | Brain_Frontal_Cortex_BA9    | 2.556771706  |              |                  |
|               | 0.057211692                           | 0.308079589                 | -1.027095321                | 0.330365635  | -0.380768756 |                  |
|               | 0.634344904                           | 3                           | 0                           | 0.998207054  |              |                  |
| SOST          | ENSG00000167941.2                     | 0.6489646                   | 2                           | 2            | 0.39796639   | Brain_Cortex     |
|               | 0.678446203                           | Brain_Frontal_Cortex_BA9    | 1.032071635                 | 0.967928365  |              |                  |
|               | 0.967928365                           | -0.845258744                | -0.414584356                | -0.62992155  | 0.304532781  |                  |
|               | 2                                     | 0                           | 0.998207054                 |              |              |                  |
| API5          | ENSG00000166181.12                    | 0.648971593                 | 1                           | 1            | 0.648971593  |                  |
|               | Brain_Cerebellar_Hemisphere           | 0.648971593                 | Brain_Cerebellar_Hemisphere | 1            | 1            |                  |
|               | 1                                     | 0.455191336                 | 0.455191336                 | 0.455191336  | NA           | 1                |
|               | 0.998207054                           |                             |                             |              |              |                  |
| CCT4          | ENSG00000115484.14                    | 0.649171067                 | 1                           | 1            | 0.649171067  |                  |
|               | Brain_Cerebellar_Hemisphere           | 0.649171067                 | Brain_Cerebellar_Hemisphere | 1            | 1            |                  |
|               | 1                                     | -0.45491406                 | -0.45491406                 | -0.45491406  | NA           | 1                |
|               | 0.998207054                           |                             |                             |              |              |                  |
| SNX2          | ENSG00000205302.6                     | 0.649194353                 | 2                           | 2            | 0.35634859   | Brain_Cerebellum |
|               | 0.984710114                           | Brain_Cortex                | 1.103703815                 | 0.896296185  | 0.896296185  |                  |
|               | -0.922345113                          | -0.019164203                | -0.470754658                | 0.638645346  | 2            | 0                |
|               | 0.998207054                           |                             |                             |              |              |                  |
| SRL           | ENSG00000185739.13                    | 0.649211645                 | 1                           | 1            | 0.649211645  | Brain_Amygdala   |
|               | 0.649211645                           | Brain_Amygdala              | 1                           | 1            | 0.45485766   | 0.45485766       |
|               | NA                                    | 1                           | 0                           | 0.998207054  | 0.45485766   |                  |
| RPS11         | ENSG00000142534.6                     | 0.649257568                 | 5                           | 2            | 0.581041972  | Brain_Cerebellum |
|               | 0.803266185                           | Brain_Cerebellar_Hemisphere | 4.238745656                 | 0.000204975  |              |                  |
|               | 0.723555935                           | -0.551863362                | 0.548198005                 | -0.212345036 | 0.438427371  |                  |
|               | 2                                     | 0                           | 0.998207054                 |              |              |                  |
| ZNF625        | ENSG00000257591.5                     | 0.64949209                  | 1                           | 1            | 0.64949209   |                  |
|               | Brain_Substantia_nigra                | 0.64949209                  | Brain_Substantia_nigra      | 1            | 1            | 1                |
|               | 0.454467901                           | 0.454467901                 | 0.454467901                 | NA           | 1            | 0                |
|               | 0.998207054                           |                             |                             |              |              |                  |
| ZMYND10       | ENSG00000004838.13                    | 0.649716179                 | 1                           | 1            | 0.649716179  |                  |
|               | Brain_Amygdala                        | 0.649716179                 | Brain_Amygdala              | 1            | 1            | 1                |
|               | 0.454156514                           | 0.454156514                 | NA                          | 1            | 0            | 0.998207054      |
| TMEM99        | ENSG00000167920.8                     | 0.649765732                 | 6                           | 5            | 0.169220286  |                  |
|               | Brain_Amygdala                        | 0.872231916                 | Brain_Hypothalamus          | 3.190073767  |              |                  |
|               | 0.008679966                           | 0.195279283                 | -0.89419514                 | 1.374713495  | 0.174750641  |                  |
|               | 0.821475679                           | 5                           | 0                           | 0.998207054  |              |                  |
| SLC27A3       | ENSG00000143554.13                    | 0.649765907                 | 2                           | 2            | 0.803359528  |                  |

|            |                                      |                                      |              |              |                                       |              |              |             |
|------------|--------------------------------------|--------------------------------------|--------------|--------------|---------------------------------------|--------------|--------------|-------------|
|            | Brain_Cerebellar_Hemisphere          | 0.837231849                          |              |              | Brain_Cerebellum                      | 1.880182426  |              |             |
|            |                                      | 0.119817574                          | 0.119817574  | -0.205435548 |                                       | 0.24900162   | 0.021783036  |             |
|            |                                      | 0.321335603                          | 2            | 0            | 0.998207054                           |              |              |             |
| HSD17B12   | ENSG00000149084.12                   | 0.649848903                          |              |              | 13                                    | 1            | 0.384844635  |             |
|            | Brain_Amygdala                       | 0.823806899                          |              |              | Brain_Nucleus_accumbens_basal_ganglia |              |              |             |
|            |                                      | 12.66142343                          | 0.001659124  | 12.66142343  | 0.222651309                           |              | 0.869004563  |             |
|            |                                      | 0.448361136                          | 0.180157886  | 1            | 0                                     | 0.998207054  |              |             |
| ZNF263     | ENSG0000006194.9                     | 0.649859385                          |              |              | 4                                     | 3            | 0.390546429  |             |
|            | Brain_Hippocampus                    | 0.955683079                          |              |              | Brain_Nucleus_accumbens_basal_ganglia |              |              |             |
|            |                                      | 3.025122496                          | 0.097559972  | 0.226063834  | -0.858626833                          |              | 0.267539863  |             |
|            |                                      | -0.190982529                         | 0.476011599  | 3            | 0                                     | 0.998207054  |              |             |
| RRP8       | ENSG00000132275.10                   | 0.6498726                            | 4            | 4            | 0.132241788                           |              |              |             |
|            | Brain_Substantia_nigra               | 0.990076969                          |              |              | Brain_Caudate_basal_ganglia           |              |              |             |
|            |                                      | 1.336052353                          | 0.797194529  | 0.797194529  | -1.505320147                          |              | 0.012436996  |             |
|            |                                      | -0.570521024                         | 0.677101702  | 4            | 0                                     | 0.998207054  |              |             |
| ZMYND12    | ENSG00000066185.12                   | 0.649881247                          |              |              | 6                                     | 2            | 0.361462702  |             |
|            | Brain_Cerebellar_Hemisphere          | 0.850606242                          |              |              | Brain_Cortex                          | 5.40222317   |              |             |
|            |                                      | 0.034148114                          | 0.259063253  | 0.188344962  | 0.912581473                           |              | 0.541322459  |             |
|            |                                      | 0.293149494                          | 2            | 0            | 0.998207054                           |              |              |             |
| CRYBB1     | ENSG00000100122.5                    | 0.649915604                          |              |              | 1                                     | 1            | 0.649915604  |             |
|            | Brain_Cortex                         | 0.649915604                          |              |              | Brain_Cortex                          | 1            | 1            | 1           |
|            |                                      | 0.453879437                          | 0.453879437  | NA           | 1                                     | 0            | 0.998207054  | 0.453879437 |
| CA3        | ENSG00000164879.6                    | 0.650013459                          |              |              | 2                                     | 2            | 0.531640454  |             |
|            | Brain_Cerebellar_Hemisphere          | 0.968077261                          |              |              | Brain_Cerebellum                      | 1.767190685  |              |             |
|            |                                      | 0.232809315                          | 0.232809315  | -0.625503802 | -0.040019901                          |              | -0.332761852 |             |
|            |                                      | 0.413999637                          | 2            | 0            | 0.998207054                           |              |              |             |
| SEN8       | ENSG00000166192.14                   | 0.650034839                          | 2            | 2            | 0.42906823                            |              |              |             |
|            | Brain_Anterior_cingulate_cortex_BA24 | 0.535226647                          |              |              | Brain_Frontal_Cortex_BA9              |              |              |             |
|            |                                      | 1.179610035                          | 0.820389965  | 0.820389965  | 0.620047299                           |              | 0.790787116  |             |
|            |                                      | 0.705417207                          | 0.120731282  | 2            | 0                                     | 0.998207054  |              |             |
| PGM1       | ENSG00000079739.15                   | 0.650050632                          |              |              | 3                                     | 3            | 0.256434111  |             |
|            | Brain_Spinal_cord_cervical_c-1       | 0.618417534                          |              |              | Brain_Cerebellum                      | 1.760120732  |              |             |
|            |                                      | 0.258204028                          | 0.258204028  | -1.134859691 | 0.919976161                           |              | -0.237659297 |             |
|            |                                      | 1.051882794                          | 3            | 0            | 0.998207054                           |              |              |             |
| LINC02018  | ENSG00000272690.5                    | 0.650131804                          |              |              | 11                                    | 6            | 0.075299294  |             |
|            | Brain_Substantia_nigra               | 0.799369758                          |              |              | Brain_Frontal_Cortex_BA9              |              |              |             |
|            |                                      | 7.426118515                          | 0.009265697  | 0.269989948  | -0.563621885                          |              | 1.778636997  |             |
|            |                                      | 0.608113443                          | 0.689635981  | 6            | 0                                     | 0.998207054  |              |             |
| SUN1       | ENSG00000164828.17                   | 0.650153291                          |              |              | 3                                     | 3            | 0.578229895  |             |
|            | Brain_Cerebellar_Hemisphere          | 0.932588156                          |              |              | Brain_Cerebellum                      | 2.176908961  |              |             |
|            |                                      | 0.128709793                          | 0.128709793  | -0.555972149 | 0.084588986                           |              | -0.217091827 |             |
|            |                                      | 0.321896714                          | 3            | 0            | 0.998207054                           |              |              |             |
| UNC93B1    | ENSG00000110057.7                    | 0.650159687                          |              |              | 5                                     | 4            | 0.434926149  |             |
|            | Brain_Spinal_cord_cervical_c-1       | 0.901054313                          |              |              | Brain_Frontal_Cortex_BA9              |              |              |             |
|            |                                      | 2.814537169                          | 0.023593082  | 0.227243615  | 0.124329599                           |              | 0.780789774  |             |
|            |                                      | 0.487453226                          | 0.300885839  | 4            | 0                                     | 0.998207054  |              |             |
| CASC6      | ENSG00000224944.1                    | 0.650329627                          |              |              | 1                                     | 1            | 0.650329627  |             |
|            | Brain_Hippocampus                    | 0.650329627                          |              |              | Brain_Hippocampus                     | 1            | 1            | 1           |
|            |                                      | -0.453304313                         | -0.453304313 | -0.453304313 | NA                                    | 1            | 0            | 0.998207054 |
| LIN28B-AS1 | ENSG00000203809.6                    | 0.650440205                          |              |              | 2                                     | 2            | 0.40982506   |             |
|            | Brain_Putamen_basal_ganglia          | 0.452533385                          |              |              | Brain_Cortex                          | 1.450783611  |              |             |
|            |                                      | 0.549216389                          | 0.549216389  | -0.824201526 | -0.751198197                          |              | -0.787699862 |             |
|            |                                      | 0.051621149                          | 2            | 0            | 0.998207054                           |              |              |             |
| CC2D2A     | ENSG00000048342.15                   | 0.65067859                           |              |              | 1                                     | 1            | 0.65067859   |             |
|            | Brain_Putamen_basal_ganglia          | 0.65067859                           |              |              | Brain_Putamen_basal_ganglia           | 1            | 1            | 1           |
|            |                                      | -0.452819682                         | -0.452819682 | -0.452819682 | NA                                    | 1            | 0            | 0.998207054 |
| LINC00636  | ENSG00000240423.1                    | 0.650873516                          |              |              | 1                                     | 1            | 0.650873516  |             |
|            | Brain_Anterior_cingulate_cortex_BA24 | 0.650873516                          |              |              |                                       |              |              |             |
|            |                                      | Brain_Anterior_cingulate_cortex_BA24 | 1            | 1            | 1                                     | -0.452549019 |              |             |
|            |                                      | -0.452549019                         | -0.452549019 | NA           | 1                                     | 0            | 0.998207054  |             |
| TPSAB1     | ENSG00000172236.16                   | 0.650972981                          |              |              | 3                                     | 3            | 0.23125904   |             |
|            | Brain_Putamen_basal_ganglia          | 0.727524363                          |              |              | Brain_Anterior_cingulate_cortex_BA24  |              |              |             |



|                |                                       |                             |                             |              |                  |
|----------------|---------------------------------------|-----------------------------|-----------------------------|--------------|------------------|
|                | 2.001248145                           | 0.400878768                 | 0.400878768                 | 0.348420562  | 1.197121912      |
|                | 0.642098242                           | 0.480936369                 | 3 0                         | 0.998207054  |                  |
| LINC01992      | ENSG00000260019.1                     | 0.651000983                 | 1 1                         | 0.651000983  |                  |
|                | Brain_Hippocampus                     | 0.651000983                 | Brain_Hippocampus           | 1 1          | 1                |
|                | -0.452372044                          | -0.452372044                | -0.452372044                | NA 1 0       | 0.998207054      |
| KIAA0895       | ENSG00000164542.12                    | 0.651051081                 | 2 2                         | 0.357565208  |                  |
|                | Brain_Putamen_basal_ganglia           | 0.936467517                 | Brain_Cerebellar_Hemisphere |              |                  |
|                | 1.031908886                           | 0.968091114                 | 0.968091114                 | -0.92001445  | -0.079710489     |
|                | -0.499862469                          | 0.594184629                 | 2 0                         | 0.998207054  |                  |
| RASGEF1B       | ENSG00000138670.17                    | 0.651190689                 | 4 4                         | 0.293878083  |                  |
|                | Brain_Cerebellum                      | 0.985417936                 | Brain_Cerebellar_Hemisphere | 1.992843453  |                  |
|                | 0.272706654                           | 0.272706654                 | -0.018276925                | 1.049652124  | 0.388374911      |
|                | 0.460115508                           | 4 0                         | 0.998207054                 |              |                  |
| ATOH8          | ENSG00000168874.12                    | 0.651197444                 | 1 1                         | 0.651197444  |                  |
|                | Brain_Substantia_nigra                | 0.651197444                 | Brain_Substantia_nigra      | 1 1          | 1                |
|                | 1 -0.452099306                        | -0.452099306                | -0.452099306                | NA 1 0       | 0.998207054      |
| ZNF223         | ENSG00000178386.12                    | 0.651520535                 | 3 3                         | 0.390037528  |                  |
|                | Brain_Cerebellum                      | 0.500414296                 | Brain_Amygdala              | 1.510769862  | 0.517819323      |
|                | 0.517819323                           | -0.783753176                | 0.859549309                 | 0.249878053  | 0.899954059      |
|                | 3 0                                   | 0.998207054                 |                             |              |                  |
| RP11-370I10.11 | ENSG00000273765.1                     | 0.65155175                  | 3 3                         | 0.205116625  |                  |
|                | Brain_Caudate_basal_ganglia           | 0.856940696                 | Brain_Frontal_Cortex_BA9    |              |                  |
|                | 1.644258253                           | 0.609423991                 | 0.609423991                 | 0.180269886  | 1.267108141      |
|                | 0.60645419                            | 0.58011754                  | 3 0                         | 0.998207054  |                  |
| CCNG2          | ENSG00000138764.14                    | 0.651588497                 | 3 3                         | 0.278148817  |                  |
|                | Brain_Putamen_basal_ganglia           | 0.835858265                 | Brain_Cerebellum            | 1.4694968    |                  |
|                | 0.738336145                           | 0.738336145                 | 0.207194113                 | 1.084487251  | 0.732578325      |
|                | 0.46366051                            | 3 0                         | 0.998207054                 |              |                  |
| PCGF2          | ENSG00000277258.4                     | 0.651599261                 | 2 2                         | 0.367196908  | Brain_Cerebellum |
|                | 0.383749485                           | Brain_Cerebellar_Hemisphere | 1.840614335                 | 0.159385665  |                  |
|                | 0.159385665                           | -0.901736408                | -0.871008549                | -0.886372478 | 0.021727878      |
|                | 2 0                                   | 0.998207054                 |                             |              |                  |
| TAF2           | ENSG00000064313.11                    | 0.651787506                 | 1 1                         | 0.651787506  |                  |
|                | Brain_Cerebellar_Hemisphere           | 0.651787506                 | Brain_Cerebellar_Hemisphere | 1 1          | 1                |
|                | 1 0.45128035                          | 0.45128035                  | 0.45128035                  | NA 1 0       | 0.998207054      |
| NKX3-1         | ENSG00000167034.9                     | 0.652025072                 | 2 1                         | 0.556123368  |                  |
|                | Brain_Putamen_basal_ganglia           | 0.762240461                 | Brain_Caudate_basal_ganglia |              |                  |
|                | 1.952597851                           | 0.047402149                 | 1.952597851                 | -0.588609338 | -0.30253998      |
|                | -0.445574659                          | 0.202281583                 | 1 0                         | 0.998207054  |                  |
| TOMM70         | ENSG00000154174.7                     | 0.65206795                  | 2 2                         | 0.372672142  | Brain_Cerebellum |
|                | 0.702272257                           | Brain_Cortex                | 1.156319732                 | 0.843680268  | 0.843680268      |
|                | -0.891479206                          | 0.382254963                 | -0.254612121                | 0.900666068  | 2 0              |
|                | 0.998207054                           |                             |                             |              |                  |
| MYH2           | ENSG00000125414.18                    | 0.652096718                 | 2 2                         | 0.374424277  |                  |
|                | Brain_Caudate_basal_ganglia           | 0.689598324                 | Brain_Frontal_Cortex_BA9    |              |                  |
|                | 1.163917437                           | 0.836082563                 | 0.836082563                 | -0.888216553 | 0.399400231      |
|                | -0.244408161                          | 0.910482559                 | 2 0                         | 0.998207054  |                  |
| FAM65A         | ENSG00000039523.19                    | 0.652176964                 | 1 1                         | 0.652176964  |                  |
|                | Brain_Cerebellum                      | 0.652176964                 | Brain_Cerebellum            | 1 1 1        | 0.450739981      |
|                | 0.450739981                           | 0.450739981                 | NA 1 0                      | 0.998207054  |                  |
| ZSCAN29        | ENSG00000140265.12                    | 0.652205971                 | 4 4                         | 0.36723292   |                  |
|                | Brain_Anterior_cingulate_cortex_BA24  | 0.915323616                 |                             |              |                  |
|                | Brain_Nucleus_accumbens_basal_ganglia | 2.503433839                 | 0.142236518                 |              |                  |
|                | 0.142236518                           | -0.887021285                | 0.901668633                 | -0.102670448 | 0.746260986      |
|                | 4 0                                   | 0.998207054                 |                             |              |                  |
| WDR37          | ENSG00000047056.14                    | 0.652240631                 | 2 2                         | 0.477897832  | Brain_Cerebellum |
|                | 0.846825807                           | Brain_Cerebellar_Hemisphere | 1.466321457                 | 0.533678543  |                  |
|                | 0.533678543                           | -0.709687683                | 0.193170033                 | -0.258258825 | 0.638416813      |
|                | 2 0                                   | 0.998207054                 |                             |              |                  |
| RP4-535B20.4   | ENSG00000272506.1                     | 0.652256609                 | 1 1                         | 0.652256609  |                  |
|                | Brain_Anterior_cingulate_cortex_BA24  | 0.652256609                 |                             |              |                  |

|               |                                       |              |                             |              |              |
|---------------|---------------------------------------|--------------|-----------------------------|--------------|--------------|
|               | Brain_Anterior_cingulate_cortex_BA24  | 1            | 1                           | 1            | -0.450629489 |
|               | -0.450629489                          | -0.450629489 | NA                          | 1            | 0            |
| RP11-46309.9  | ENSG00000270020.1                     | 0.652329594  | 13                          | 4            | 0.129400638  |
|               | Brain_Hypothalamus                    | 0.846452577  | Brain_Amygdala              | 10.63215042  |              |
|               | 0.001293236                           | 0.398757822  | 0.193646638                 | 1.516469652  | 0.922871356  |
|               | 0.340524111                           | 4            | 0                           | 0.998207054  |              |
| EEF1AKMT1     | ENSG00000150456.10                    | 0.652409635  | 3                           | 3            | 0.235071797  |
|               | Brain_Spinal_cord_cervical_c-1        | 0.977234765  | Brain_Frontal_Cortex_BA9    |              |              |
|               | 1.281940689                           | 0.75579386   | 0.75579386                  | -1.187395137 | 0.028535863  |
|               | -0.516797263                          | 0.617568208  | 3                           | 0            | 0.998207054  |
| LRIG1         | ENSG00000144749.13                    | 0.652433782  | 3                           | 3            | 0.228146226  |
|               | Brain_Hypothalamus                    | 0.929380184  | Brain_Caudate_basal_ganglia | 1.250279284  |              |
|               | 0.754969928                           | 0.754969928  | -1.205147862                | 0.12365645   | -0.390038701 |
|               | 0.713840339                           | 3            | 0                           | 0.998207054  |              |
| SLC25A3       | ENSG00000075415.12                    | 0.652472374  | 3                           | 3            | 0.32342171   |
|               | Brain_Nucleus_accumbens_basal_ganglia | 0.774278844  | Brain_Amygdala              |              |              |
|               | 2.145093534                           | 0.261481721  | 0.261481721                 | 0.286782525  | 0.987450761  |
|               | 0.687099576                           | 0.36087238   | 3                           | 0            | 0.998207054  |
| MAPK14        | ENSG00000112062.10                    | 0.652507506  | 6                           | 5            | 0.206632888  |
|               | Brain_Hypothalamus                    | 0.665996464  | Brain_Amygdala              | 2.887166587  |              |
|               | 0.084533261                           | 0.379695509  | -0.431649104                | 1.262878388  | 0.716975026  |
|               | 0.598781987                           | 5            | 0                           | 0.998207054  |              |
| IRF2BP2       | ENSG00000168264.10                    | 0.65251119   | 1                           | 1            | 0.65251119   |
|               | Brain_Putamen_basal_ganglia           | 0.65251119   | Brain_Putamen_basal_ganglia | 1            | 1            |
|               | -0.45027635                           | -0.45027635  | -0.45027635                 | NA           | 1            |
|               |                                       |              |                             | 0            | 0.998207054  |
| LTV1          | ENSG00000135521.8                     | 0.652755058  | 1                           | 1            | 0.652755058  |
|               | Brain_Nucleus_accumbens_basal_ganglia | 0.652755058  |                             |              |              |
|               | Brain_Nucleus_accumbens_basal_ganglia | 1            | 1                           | 1            | 0.449938123  |
|               | 0.449938123                           | 0.449938123  | NA                          | 1            | 0            |
|               |                                       |              |                             | 0.998207054  |              |
| CTB-16J4.1    | ENSG00000283267.1                     | 0.652807457  | 5                           | 5            | 0.192508204  |
|               | Brain_Cortex                          | 0.880000118  | Brain_Caudate_basal_ganglia | 3.017956237  |              |
|               | 0.188383517                           | 0.188383517  | -1.303194978                | 0.150969066  | -0.658137014 |
|               | 0.530071418                           | 5            | 0                           | 0.998207054  |              |
| TMEM252       | ENSG00000181778.4                     | 0.652842838  | 1                           | 1            | 0.652842838  |
|               | Brain_Cerebellum                      | 0.652842838  | Brain_Cerebellum            | 1            | 1            |
|               | -0.449816391                          | -0.449816391 | NA                          | 1            | 0            |
|               |                                       |              |                             | 0.998207054  |              |
| ST6GAL1       | ENSG00000073849.14                    | 0.652859629  | 2                           | 2            | 0.360263931  |
|               | Brain_Cortex                          | 0.862632161  | Brain_Cerebellar_Hemisphere | 1.051857955  |              |
|               | 0.948142045                           | 0.948142045  | 0.173024511                 | 0.914862286  | 0.543943399  |
|               | 0.524558521                           | 2            | 0                           | 0.998207054  |              |
| SGCG          | ENSG00000102683.7                     | 0.652867256  | 2                           | 2            | 0.394499836  |
|               | Brain_Spinal_cord_cervical_c-1        | 0.826391279  | Brain_Cerebellum            | 1.156949001  |              |
|               | 0.843050999                           | 0.843050999  | -0.851485282                | -0.219332201 | -0.535408742 |
|               | 0.44699973                            | 2            | 0                           | 0.998207054  |              |
| SLC38A11      | ENSG00000169507.9                     | 0.652928819  | 3                           | 3            | 0.357262087  |
|               | Brain_Frontal_Cortex_BA9              | 0.681274341  | Brain_Cortex                | 1.649775192  |              |
|               | 0.356903176                           | 0.356903176  | -0.809935604                | 0.920594669  | 0.173794621  |
|               | 0.889261316                           | 3            | 0                           | 0.998207054  |              |
| RAC2          | ENSG00000128340.14                    | 0.652934789  | 1                           | 1            | 0.652934789  |
|               | Brain_Caudate_basal_ganglia           | 0.652934789  | Brain_Caudate_basal_ganglia | 1            | 1            |
|               | 1                                     | -0.449688882 | -0.449688882                | -0.449688882 | NA           |
|               |                                       |              |                             | 1            | 0            |
|               |                                       |              |                             | 0.998207054  |              |
| RP11-626P14.2 | ENSG00000257185.1                     | 0.653174086  | 1                           | 1            | 0.653174086  |
|               | Brain_Nucleus_accumbens_basal_ganglia | 0.653174086  |                             |              |              |
|               | Brain_Nucleus_accumbens_basal_ganglia | 1            | 1                           | 1            | 0.449357082  |
|               | 0.449357082                           | 0.449357082  | NA                          | 1            | 0            |
|               |                                       |              |                             | 0.998207054  |              |
| CNGB1         | ENSG00000070729.13                    | 0.6532563    | 1                           | 1            | 0.6532563    |
|               | Brain_Anterior_cingulate_cortex_BA24  | 0.6532563    |                             |              |              |
|               | Brain_Anterior_cingulate_cortex_BA24  | 1            | 1                           | 1            | -0.449243099 |
|               | -0.449243099                          | -0.449243099 | NA                          | 1            | 0            |
|               |                                       |              |                             | 0.998207054  |              |
| RP11-287D1.4  | ENSG00000217702.2                     | 0.653307924  | 13                          | 1            | 0.44183484   |
|               | Brain_Hippocampus                     | 0.864043456  | Brain_Cerebellum            | 12.23101323  |              |

|               |                                       |                             |                                       |              |                  |
|---------------|---------------------------------------|-----------------------------|---------------------------------------|--------------|------------------|
|               | 0.001574385                           | 12.23101323                 | 0.171229317                           | 0.769098498  | 0.436141472      |
|               | 0.151760612                           | 1 0                         | 0.998207054                           |              |                  |
| SLC27A2       | ENSG00000140284.10                    | 0.653324204                 | 6 6                                   | 0.107276872  |                  |
|               | Brain_Nucleus_accumbens_basal_ganglia | 0.84111308                  | Brain_Frontal_Cortex_BA9              |              |                  |
|               | 1.734346268                           | 0.287536534                 | 0.287536534                           | -1.014632029 | 1.610554433      |
|               | 0.382154188                           | 0.845805862                 | 6 0                                   | 0.998207054  |                  |
| CSNK1G2       | ENSG00000133275.15                    | 0.653499409                 | 3 3                                   | 0.369018465  |                  |
|               | Brain_Cerebellar_Hemisphere           | 0.744578056                 | Brain_Nucleus_accumbens_basal_ganglia |              |                  |
|               | 1.262249785                           | 0.739666158                 | 0.739666158                           | -0.889403378 | 0.898313448      |
|               | 0.111568976                           | 0.912909115                 | 3 0                                   | 0.998207054  |                  |
| RP11-662J14.2 | ENSG00000258480.1                     | 0.653644675                 | 1 1                                   | 0.653644675  |                  |
|               | Brain_Cortex                          | 0.653644675                 | Brain_Cortex                          | 1 1 1        | 0.448704726      |
|               | 0.448704726                           | 0.448704726                 | NA 1 0                                | 0.998207054  |                  |
| PTPN7         | ENSG00000143851.15                    | 0.653795908                 | 3 3                                   | 0.246971255  |                  |
|               | Brain_Putamen_basal_ganglia           | 0.613602064                 | Brain_Hypothalamus                    | 1.684150359  |                  |
|               | 0.315955098                           | 0.315955098                 | -0.504938455                          | 1.157737306  | 0.527765418      |
|               | 0.901536167                           | 3 0                         | 0.998207054                           |              |                  |
| CDRT4         | ENSG00000239704.10                    | 0.653872256                 | 12 3                                  | 0.206129017  |                  |
|               | Brain_Anterior_cingulate_cortex_BA24  | 0.969497251                 | Brain_Cerebellum                      |              |                  |
|               | 9.024632022                           | 0.019457759                 | 0.873556157                           | -0.197435139 | 1.264281472      |
|               | 0.331542336                           | 0.426662138                 | 3 0                                   | 0.998207054  |                  |
| WDR11         | ENSG00000120008.15                    | 0.653930043                 | 11 2                                  | 0.243246815  |                  |
|               | Brain_Caudate_basal_ganglia           | 0.817669969                 | Brain_Putamen_basal_ganglia           |              |                  |
|               | 9.358160417                           | 0.001829607                 | 0.775639483                           | -1.166909756 | -0.230542852     |
|               | -0.827521511                          | 0.264364743                 | 2 0                                   | 0.998207054  |                  |
| TIMM44        | ENSG00000104980.7                     | 0.65397455                  | 10 1                                  | 0.373806003  |                  |
|               | Brain_Putamen_basal_ganglia           | 0.899715836                 | Brain_Nucleus_accumbens_basal_ganglia |              |                  |
|               | 9.498075249                           | 0.000619809                 | 9.498075249                           | -0.889366761 | -0.126020325     |
|               | -0.442132033                          | 0.277025645                 | 1 0                                   | 0.998207054  |                  |
| TRADD         | ENSG00000102871.15                    | 0.654030888                 | 1 1                                   | 0.654030888  | Brain_Cerebellum |
|               | 0.654030888                           | Brain_Cerebellum            | 1 1 1                                 | 0.448169479  | 0.448169479      |
|               | 0.448169479                           | NA 1 0                      | 0.998207054                           |              |                  |
| LARGE1        | ENSG00000133424.20                    | 0.654275459                 | 1 1                                   | 0.654275459  |                  |
|               | Brain_Caudate_basal_ganglia           | 0.654275459                 | Brain_Caudate_basal_ganglia           | 1 1          |                  |
|               | 1 -0.447830598                        | -0.447830598                | -0.447830598                          | NA 1 0       |                  |
|               | 0.998207054                           |                             |                                       |              |                  |
| RP11-230C9.4  | ENSG00000271265.1                     | 0.654299853                 | 7 4                                   | 0.225751067  |                  |
|               | Brain_Cerebellar_Hemisphere           | 0.903948191                 | Brain_Anterior_cingulate_cortex_BA24  |              |                  |
|               | 4.494090488                           | 1.98E-07                    | 0.67570568                            | -0.406302212 | 1.211376696      |
|               | 0.291926884                           | 0.512300076                 | 4 0                                   | 0.998207054  |                  |
| HELZ          | ENSG00000198265.11                    | 0.654375926                 | 2 2                                   | 0.483698886  | Brain_Amygdala   |
|               | 0.509199438                           | Brain_Cerebellum            | 1.092251129                           | 0.907748871  | 0.907748871      |
|               | -0.66008476                           | 0.700365804                 | 0.020140522                           | 0.961983819  | 2 0              |
|               | 0.998207054                           |                             |                                       |              |                  |
| OIT3          | ENSG00000138315.12                    | 0.654464345                 | 2 2                                   | 0.445155279  | Brain_Cerebellum |
|               | 0.613993292                           | Brain_Cerebellar_Hemisphere | 1.92185247                            | 0.07814753   | 0.07814753       |
|               | -0.763516747                          | -0.504381533                | -0.63394914                           | 0.183236267  | 2 0              |
|               | 0.998207054                           |                             |                                       |              |                  |
| ZNF675        | ENSG00000197372.9                     | 0.654524694                 | 1 1                                   | 0.654524694  |                  |
|               | Brain_Hippocampus                     | 0.654524694                 | Brain_Hippocampus                     | 1 1 1        |                  |
|               | -0.447485307                          | -0.447485307                | -0.447485307                          | NA 1 0       | 0.998207054      |
| AC010729.2    | ENSG00000236106.1                     | 0.654621471                 | 1 1                                   | 0.654621471  |                  |
|               | Brain_Caudate_basal_ganglia           | 0.654621471                 | Brain_Caudate_basal_ganglia           | 1 1          |                  |
|               | 1 0.447351247                         | 0.447351247                 | 0.447351247                           | NA 1 0       |                  |
|               | 0.998207054                           |                             |                                       |              |                  |
| CHST14        | ENSG00000169105.7                     | 0.654776361                 | 2 2                                   | 0.37321618   |                  |
|               | Brain_Caudate_basal_ganglia           | 0.945055401                 | Brain_Amygdala                        | 1.324247494  |                  |
|               | 0.675752506                           | 0.675752506                 | -0.890465138                          | -0.068917358 | -0.479691248     |
|               | 0.580922006                           | 2 0                         | 0.998207054                           |              |                  |
| USP43         | ENSG00000154914.16                    | 0.654778899                 | 1 1                                   | 0.654778899  | Brain_Cerebellum |
|               | 0.654778899                           | Brain_Cerebellum            | 1 1 1                                 | 0.447133186  | 0.447133186      |
|               | 0.447133186                           | NA 1 0                      | 0.998207054                           |              |                  |

|           |                                      |                          |              |              |                                       |                          |
|-----------|--------------------------------------|--------------------------|--------------|--------------|---------------------------------------|--------------------------|
| SLPI      | ENSG00000124107.5                    | 0.65483518               | 4            | 3            | 0.245454738                           | Brain_Amygdala           |
|           | 0.968622157                          | Brain_Hippocampus        |              |              | 2.659727087                           | 0.050186802              |
|           | 0.417329827                          | -0.328808088             | 1.161460352  |              | 0.221791319                           | 0.650818568              |
|           | 3                                    | 0                        | 0.998207054  |              |                                       |                          |
| STAG3     | ENSG00000066923.17                   | 0.654926525              | 13           | 3            | 0.125434359                           |                          |
|           | Brain_Caudate_basal_ganglia          | 0.448073858              |              |              | Brain_Cerebellar_Hemisphere           |                          |
|           | 1.79106922                           | 0.006616443              | 0.39843322   |              | 0.758630105                           | 1.532357012              |
|           | 1.117752084                          | 0.250078333              | 3            | 0            | 0.998207054                           |                          |
| FLRT1     | ENSG00000126500.3                    | 0.654973845              | 2            | 2            | 0.38786423                            |                          |
|           | Brain_Cerebellar_Hemisphere          | 0.911969904              |              |              | Brain_Spinal_cord_cervical_c-1        |                          |
|           | 1.229632966                          | -0.770367034             | 0.770367034  |              | -0.110554155                          | 0.863497069              |
|           | 0.376471457                          | 0.688758226              | 2            | 0            | 0.998207054                           |                          |
| MEAF6     | ENSG00000163875.15                   | 0.654986807              | 3            | 3            | 0.434466276                           |                          |
|           | Brain_Cerebellar_Hemisphere          | 0.925614987              |              |              | Brain_Caudate_basal_ganglia           | 2.43278865               |
|           | 0.214793734                          | -0.214793734             | -0.781571781 |              | 0.123145105                           | -0.188354476             |
|           | 0.51395702                           | 3                        | 0            | 0.998207054  |                                       |                          |
| ZNF100    | ENSG00000197020.10                   | 0.6551245                | 13           | 9            | 0.162570895                           | Brain_Cortex             |
|           | 0.941655147                          | Brain_Substantia_nigra   |              |              | 6.211995852                           | 0.019758993              |
|           | 0.207705633                          | -0.773287292             | 1.396477022  |              | 0.499571352                           | 0.696767004              |
|           | 9                                    | 0                        | 0.998207054  |              |                                       |                          |
| LINC01503 | ENSG00000233901.5                    | 0.655193661              | 1            | 1            | 0.655193661                           |                          |
|           | Brain_Caudate_basal_ganglia          | 0.655193661              |              |              | Brain_Caudate_basal_ganglia           | 1                        |
|           | 1                                    | 0.446558782              | 0.446558782  | 0.446558782  | NA                                    | 1                        |
|           | 0.998207054                          |                          |              |              |                                       | 0                        |
| MSC       | ENSG00000178860.8                    | 0.65521265               | 1            | 1            | 0.65521265                            | Brain_Frontal_Cortex_BA9 |
|           | 0.65521265                           | Brain_Frontal_Cortex_BA9 | 1            | 1            | 1                                     | -0.446532488             |
|           | -0.446532488                         | -0.446532488             | NA           | 1            | 0                                     | 0.998207054              |
| EIF3E     | ENSG00000104408.9                    | 0.655291399              | 4            | 4            | 0.345751767                           |                          |
|           | Brain_Putamen_basal_ganglia          | 0.902936857              |              |              | Brain_Nucleus_accumbens_basal_ganglia |                          |
|           | 2.589624673                          | 0.300710603              | 0.300710603  |              | -0.138735553                          | 0.942861465              |
|           | 0.226865549                          | 0.505961343              | 4            | 0            | 0.998207054                           |                          |
| PLEKHG6   | ENSG00000008323.15                   | 0.655293582              | 1            | 1            | 0.655293582                           |                          |
|           | Brain_Spinal_cord_cervical_c-1       | 0.655293582              |              |              | Brain_Spinal_cord_cervical_c-1        |                          |
|           | 1                                    | 1                        | 1            | 0.446420424  | 0.446420424                           | 0.446420424              |
|           | 0.998207054                          |                          |              |              | NA                                    | 1                        |
|           |                                      |                          |              |              |                                       | 0                        |
| ASL       | ENSG00000126522.16                   | 0.655306776              | 6            | 4            | 0.167494011                           |                          |
|           | Brain_Caudate_basal_ganglia          | 0.947094133              |              |              | Brain_Cerebellar_Hemisphere           |                          |
|           | 3.353619379                          | 0.027805771              | 0.328923537  |              | -1.380300924                          | 0.203764957              |
|           | -0.21012853                          | 0.594435736              | 4            | 0            | 0.998207054                           |                          |
| NDUFB10   | ENSG00000140990.14                   | 0.65535878               | 3            | 3            | 0.224623394                           |                          |
|           | Brain_Putamen_basal_ganglia          | 0.950506147              |              |              | Brain_Cerebellar_Hemisphere           |                          |
|           | 1.453297533                          | 0.665230527              | 0.665230527  |              | 0.06207118                            | 1.21432565               |
|           | 0.454069405                          | 0.658508214              | 3            | 0            | 0.998207054                           |                          |
| IDUA      | ENSG00000127415.12                   | 0.655386006              | 3            | 3            | 0.235114152                           |                          |
|           | Brain_Cerebellar_Hemisphere          | 0.577294645              |              |              | Brain_Nucleus_accumbens_basal_ganglia |                          |
|           | 1.89689166                           | 0.124545876              | 0.124545876  |              | -1.187287715                          | 0.55734074               |
|           | -0.555493874                         | 0.966686237              | 3            | 0            | 0.998207054                           |                          |
| ATP13A2   | ENSG00000159363.17                   | 0.655437943              | 1            | 1            | 0.655437943                           |                          |
|           | Brain_Cerebellum                     | 0.655437943              |              |              | Brain_Cerebellum                      | 1                        |
|           | -0.446220546                         | -0.446220546             | NA           | 1            | 0                                     | 0.998207054              |
|           |                                      |                          |              |              |                                       |                          |
| LRRC63    | ENSG00000173988.12                   | 0.655501937              | 3            | 3            | 0.406520174                           |                          |
|           | Brain_Anterior_cingulate_cortex_BA24 | 0.880097499              |              |              | Brain_Caudate_basal_ganglia           |                          |
|           | 1.787696012                          | 0.21232559               | 0.21232559   | -0.150845619 | 0.830032915                           |                          |
|           | 0.395027699                          | 0.499749414              | 3            | 0            | 0.998207054                           |                          |
| FSHR      | ENSG00000170820.11                   | 0.6556331                | 1            | 1            | 0.6556331                             | Brain_Frontal_Cortex_BA9 |
|           | 0.6556331                            | Brain_Frontal_Cortex_BA9 | 1            | 1            | 1                                     | -0.445950365             |
|           | -0.445950365                         | -0.445950365             | NA           | 1            | 0                                     | 0.998207054              |
| BTN3A2    | ENSG00000186470.13                   | 0.655654045              | 13           | 1            | 0.239155867                           |                          |
|           | Brain_Cerebellar_Hemisphere          | 0.923816601              |              |              | Brain_Substantia_nigra                | 11.6482688               |
|           | 0.014688969                          | 11.6482688               | -1.177099319 |              | 0.220760435                           | -0.422802436             |
|           | 0.39078919                           | 1                        | 0            | 0.998207054  |                                       |                          |
| LINC01649 | ENSG00000228127.2                    | 0.655748245              | 2            | 2            | 0.40019717                            | Brain_Cerebellum         |

|               |                                      |                                       |              |              |                                |                  |
|---------------|--------------------------------------|---------------------------------------|--------------|--------------|--------------------------------|------------------|
|               | 0.467584751                          | Brain_Cortex                          | 1.47815512   | 0.52184488   | 0.52184488                     | -0.841269148     |
|               | -0.726414425                         | -0.783841786                          | 0.081214554  | 2            | 0                              | 0.998207054      |
| LINC00539     | ENSG00000224429.7                    | 0.655829142                           | 4            | 2            | 0.386801361                    |                  |
|               | Brain_Putamen_basal_ganglia          | 0.669140955                           |              |              | Brain_Substantia_nigra         | 3.74118584       |
|               | 0.009054385                          | 0.219125751                           | -0.865432661 |              | -0.427327294                   | -0.619404068     |
|               | 0.18252882                           | 2                                     | 0            | 0.998207054  |                                |                  |
| STAM2         | ENSG00000115145.9                    | 0.655832655                           | 2            | 2            | 0.411503211                    |                  |
|               | Brain_Spinal_cord_cervical_c-1       | 0.696821886                           |              |              | Brain_Putamen_basal_ganglia    |                  |
|               | 1.026347494                          | 0.973652506                           | 0.973652506  |              | -0.821251177                   | 0.389614152      |
|               | -0.215818512                         | 0.856211085                           | 2            | 0            | 0.998207054                    |                  |
| APOB          | ENSG00000084674.14                   | 0.655911131                           | 2            | 2            | 0.389396286                    |                  |
|               | Brain_Spinal_cord_cervical_c-1       | 0.695574191                           |              |              | Brain_Hypothalamus             | 1.08372345       |
|               | 0.91627655                           | 0.91627655                            | -0.860712719 | -0.39130177  | -0.626007245                   |                  |
|               | 0.331923665                          | 2                                     | 0            | 0.998207054  |                                |                  |
| NCOR2         | ENSG00000196498.13                   | 0.655964419                           | 2            | 2            | 0.49259474                     |                  |
|               | Brain_Anterior_cingulate_cortex_BA24 | 0.548937263                           |              |              | Brain_Amygdala                 | 1.01581506       |
|               | 0.98418494                           | 0.98418494                            | -0.599353373 | 0.686187721  | 0.043417174                    |                  |
|               | 0.909014825                          | 2                                     | 0            | 0.998207054  |                                |                  |
| MFSD3         | ENSG00000167700.8                    | 0.655987988                           | 1            | 1            | 0.655987988                    |                  |
|               | Brain_Caudate_basal_ganglia          | 0.655987988                           |              |              | Brain_Caudate_basal_ganglia    | 1                |
|               | 1                                    | 0.445459132                           | 0.445459132  | 0.445459132  | NA                             | 1                |
|               | 0.998207054                          |                                       |              |              | 0                              |                  |
| DIO3OS        | ENSG00000258498.8                    | 0.656050292                           | 2            | 2            | 0.523689368                    |                  |
|               | Brain_Amygdala                       | 0.534092256                           |              |              | Brain_Caudate_basal_ganglia    | 1.059106441      |
|               | 0.940893559                          | 0.940893559                           | -0.637668695 | 0.621771307  | -0.007948694                   |                  |
|               | 0.890558566                          | 2                                     | 0            | 0.998207054  |                                |                  |
| TMBIM4        | ENSG00000155957.17                   | 0.656076425                           | 3            | 2            | 0.694536374                    |                  |
|               | Brain_Cerebellum                     | 0.932598475                           |              |              | Brain_Frontal_Cortex_BA9       | 2.802519827      |
|               | 0.039571329                          | 0.157908843                           | -0.084576006 | 0.392706358  | 0.205510374                    |                  |
|               | 0.254734055                          | 2                                     | 0            | 0.998207054  |                                |                  |
| RP4-669P10.16 | ENSG00000232710.1                    | 0.656166265                           | 2            | 2            | 0.393034124                    |                  |
|               | Brain_Cerebellar_Hemisphere          | 0.491921286                           |              |              | Brain_Cortex                   | 1.453666212      |
|               | 0.546333788                          | 0.546333788                           | 0.687256214  | 0.854127904  | 0.770692059                    |                  |
|               | 0.117996104                          | 2                                     | 0            | 0.998207054  |                                |                  |
| ERMARD        | ENSG00000130023.15                   | 0.656226032                           | 1            | 1            | 0.656226032                    |                  |
|               | Brain_Cerebellum                     | 0.656226032                           |              |              | Brain_Cerebellum               | 1                |
|               | 0.445129692                          | 0.445129692                           | NA           | 1            | 0                              | 0.998207054      |
| RALGAPB       | ENSG00000170471.14                   | 0.656306939                           | 2            | 2            | 0.489263732                    |                  |
|               | Brain_Frontal_Cortex_BA9             | 0.539383828                           |              |              | Brain_Spinal_cord_cervical_c-1 |                  |
|               | 1.015039269                          | 0.984960731                           | 0.984960731  | 0.613745029  | 0.691480339                    |                  |
|               | 0.652612684                          | 0.054967165                           | 2            | 0            | 0.998207054                    |                  |
| IFT57         | ENSG00000114446.4                    | 0.656367164                           | 4            | 4            | 0.278492322                    | Brain_Cortex     |
|               | 0.865761578                          | Brain_Cerebellar_Hemisphere           | 3.03218388   | 0.196281314  |                                |                  |
|               | 0.196281314                          | -0.169044577                          | 1.083712432  | 0.473767943  | 0.517441771                    |                  |
|               | 4                                    | 0                                     | 0.998207054  |              |                                |                  |
| RBP1          | ENSG00000114115.9                    | 0.656426957                           | 7            | 7            | 0.130553753                    | Brain_Cerebellum |
|               | 0.996607754                          | Brain_Nucleus_accumbens_basal_ganglia | 2.716600914  |              |                                |                  |
|               | 0.199937174                          | 0.199937174                           | -1.511921818 | 1.27246244   | -0.478618814                   |                  |
|               | 0.940243648                          | 7                                     | 0            | 0.998207054  |                                |                  |
| TMEM135       | ENSG00000166575.16                   | 0.656446595                           | 7            | 6            | 0.156877384                    |                  |
|               | Brain_Cerebellum                     | 0.820529605                           |              |              | Brain_Cortex                   | 4.130438498      |
|               | 0.142570492                          | -1.415652116                          | 0.423908916  | -0.299037751 | 0.645656627                    |                  |
|               | 6                                    | 0                                     | 0.998207054  |              |                                |                  |
| RP11-317N12.1 | ENSG00000253642.5                    | 0.656690688                           | 1            | 1            | 0.656690688                    |                  |
|               | Brain_Cerebellum                     | 0.656690688                           |              |              | Brain_Cerebellum               | 1                |
|               | 0.444486775                          | 0.444486775                           | NA           | 1            | 0                              | 0.998207054      |
| NOC3L         | ENSG00000173145.11                   | 0.656812143                           | 9            | 6            | 0.134077275                    |                  |
|               | Brain_Hypothalamus                   | 0.883804876                           |              |              | Brain_Hippocampus              | 6.398872018      |
|               | 0.029180165                          | 0.215182354                           | -1.49821548  | -0.146147593 | -0.593489349                   |                  |
|               | 0.461583465                          | 6                                     | 0            | 0.998207054  |                                |                  |
| KIAA0930      | ENSG00000100364.18                   | 0.656954591                           | 5            | 5            | 0.258883375                    |                  |
|               | Brain_Cerebellum                     | 0.970085837                           |              |              | Brain_Hippocampus              | 2.493629916      |

|                |                                       |                             |                             |              |                                      |
|----------------|---------------------------------------|-----------------------------|-----------------------------|--------------|--------------------------------------|
|                | 0.196528603                           | 0.196528603                 | -1.129034276                | 0.149062544  | -0.262880185                         |
|                | 0.505566434                           | 5                           | 0                           | 0.998207054  |                                      |
| GBP7           | ENSG00000213512.1                     | 0.656959701                 | 8                           | 4            | 0.189802082                          |
|                | Brain_Spinal_cord_cervical_c-1        | 0.99019544                  |                             |              | Brain_Putamen_basal_ganglia          |
|                | 5.742553192                           | 0.031715908                 | 0.304745866                 | -0.523979235 | 1.31116483                           |
|                | 0.371417598                           | 0.600207293                 | 4                           | 0            | 0.998207054                          |
| RSPO2          | ENSG00000147655.10                    | 0.656976831                 | 1                           | 1            | 0.656976831                          |
|                | 0.656976831                           | Brain_Cortex                | 1                           | 1            | 0.444090948                          |
|                | 0.444090948                           | NA                          | 1                           | 0            | 0.998207054                          |
| RRN3           | ENSG00000085721.12                    | 0.657020149                 | 8                           | 4            | 0.444183705                          |
|                | Brain_Cerebellar_Hemisphere           | 0.870321124                 |                             |              | Brain_Putamen_basal_ganglia          |
|                | 5.682378511                           | 0.006272931                 | 0.306542341                 | -0.231785053 | 0.765147522                          |
|                | 0.426424475                           | 0.401187622                 | 4                           | 0            | 0.998207054                          |
| CYSTM1         | ENSG00000120306.9                     | 0.657033373                 | 5                           | 4            | 0.150482074                          |
|                | Brain_Nucleus_accumbens_basal_ganglia | 0.789128793                 |                             |              |                                      |
|                | Brain_Spinal_cord_cervical_c-1        | 3.544683842                 |                             |              | 0.077371578                          |
|                | -1.437830779                          | -0.267442094                | -0.72563924                 | 0.440804226  | 4                                    |
|                | 0.998207054                           |                             |                             |              | 0                                    |
| RP11-1228E12.1 | ENSG00000280279.1                     | 0.657034778                 | 1                           | 1            | 0.657034778                          |
|                | Brain_Cerebellum                      | 0.657034778                 | Brain_Cerebellum            | 1            | 1                                    |
|                | 0.444010796                           | 0.444010796                 | NA                          | 1            | 0                                    |
|                | 0.998207054                           |                             |                             |              |                                      |
| COBL           | ENSG00000106078.17                    | 0.657127907                 | 1                           | 1            | 0.657127907                          |
|                | Brain_Cerebellar_Hemisphere           | 0.657127907                 |                             |              | Brain_Cerebellar_Hemisphere          |
|                | 1                                     | 0.443881989                 | 0.443881989                 | 0.443881989  | NA                                   |
|                | 0.998207054                           |                             |                             |              | 1                                    |
|                | 0.998207054                           |                             |                             |              | 0                                    |
| DPH1           | ENSG00000108963.17                    | 0.657272416                 | 8                           | 7            | 0.118119498                          |
|                | 0.935927806                           | Brain_Caudate_basal_ganglia | 3.159524941                 | 0.000196122  | Brain_Cerebellum                     |
|                | 0.372404673                           | -0.249210552                | 1.562715623                 | 0.737592299  | 0.740525894                          |
|                | 7                                     | 0                           | 0.998207054                 |              |                                      |
| NUP214         | ENSG00000126883.16                    | 0.65731123                  | 1                           | 1            | 0.65731123                           |
|                | Brain_Caudate_basal_ganglia           | 0.65731123                  | Brain_Caudate_basal_ganglia | 1            | 1                                    |
|                | 0.443628454                           | 0.443628454                 | 0.443628454                 | NA           | 1                                    |
|                | 0.998207054                           |                             |                             |              | 0                                    |
| C5orf63        | ENSG00000164241.13                    | 0.657317666                 | 5                           | 4            | 0.499725346                          |
|                | Brain_Frontal_Cortex_BA9              | 0.984832353                 |                             |              | Brain_Hypothalamus                   |
|                | 0.084478924                           | 0.15933974                  | -0.674921963                | 0.179135711  | 3.897010242                          |
|                | 0.395660987                           | 4                           | 0                           | 0.998207054  | -0.173977757                         |
| RPA3           | ENSG00000106399.11                    | 0.657435039                 | 9                           | 7            | 0.047288459                          |
|                | Brain_Anterior_cingulate_cortex_BA24  | 0.9062916                   |                             |              | Brain_Cerebellum                     |
|                | 0.011697628                           | 0.166940411                 | -1.360942884                | 1.983707478  | 4.248390995                          |
|                | 1.017263544                           | 7                           | 0                           | 0.998207054  | 0.682370233                          |
| SLC29A1        | ENSG00000112759.16                    | 0.657492808                 | 2                           | 2            | 0.359796545                          |
|                | Brain_Cerebellum                      | 0.952431773                 |                             |              | Brain_Cerebellar_Hemisphere          |
|                | 0.92800081                            | -0.915752837                | 0.059653292                 | -0.428049773 | 1.07199919                           |
|                | 0                                     | 0.998207054                 |                             |              | 0.92800081                           |
|                | 0.998207054                           |                             |                             |              | 2                                    |
| BTD            | ENSG00000169814.12                    | 0.657616653                 | 1                           | 1            | 0.657616653                          |
|                | Brain_Nucleus_accumbens_basal_ganglia | 0.657616653                 |                             |              |                                      |
|                | Brain_Nucleus_accumbens_basal_ganglia | 1                           | 1                           | 1            | 0.44320612                           |
|                | 0.44320612                            | NA                          | 1                           | 0            | 0.44320612                           |
|                | 0.998207054                           |                             |                             |              |                                      |
| PCDHA4         | ENSG00000204967.10                    | 0.657654509                 | 3                           | 3            | 0.208658766                          |
|                | Brain_Cerebellum                      | 0.832332406                 |                             |              | Brain_Spinal_cord_cervical_c-1       |
|                | 0.532246279                           | 0.532246279                 | 0.211711128                 | 1.257262037  | 1.542513734                          |
|                | 0.58265936                            | 3                           | 0                           | 0.998207054  | 0.585940569                          |
| WDR35          | ENSG00000118965.14                    | 0.657714924                 | 2                           | 2            | 0.364186543                          |
|                | Brain_Putamen_basal_ganglia           | 0.608882886                 |                             |              | Brain_Anterior_cingulate_cortex_BA24 |
|                | 1.444763933                           | 0.555236067                 | 0.555236067                 | 0.511668714  | 0.907416583                          |
|                | 0.709542648                           | 0.279836002                 | 2                           | 0            | 0.998207054                          |
| CHFR           | ENSG00000072609.17                    | 0.657868502                 | 11                          | 5            | 0.186121265                          |
|                | Brain_Hippocampus                     | 0.974537642                 |                             |              | Brain_Cortex                         |
|                | 0.019063945                           | 0.393353989                 | -1.322140814                | 0.139167879  | 7.696243645                          |
|                | 0.396303299                           | 5                           | 0                           | 0.998207054  | -0.214628274                         |
| HERC2          | ENSG00000128731.15                    | 0.657881523                 | 2                           | 2            | 0.482581218                          |
|                | Brain_Spinal_cord_cervical_c-1        | 0.573264462                 |                             |              | Brain_Cortex                         |
|                |                                       |                             |                             |              | 1.033202098                          |

|        |                                       |                                |                  |                                       |                  |
|--------|---------------------------------------|--------------------------------|------------------|---------------------------------------|------------------|
|        | 0.966797902                           | 0.966797902                    | 0.563250291      | 0.702157064                           | 0.632703678      |
|        | 0.098221922                           | 2 0                            | 0.998207054      |                                       |                  |
| CAPN1  | ENSG00000014216.15                    | 0.657956417                    | 3 3              | 0.329235517                           |                  |
|        | Brain_Putamen_basal_ganglia           | 0.680895237                    |                  | Brain_Hippocampus                     | 1.117852191      |
|        | 0.934842429                           | 0.934842429                    | -0.975654883     | 0.411241806                           | -0.414880941     |
|        | 0.730532749                           | 3 0                            | 0.998207054      |                                       |                  |
| TTC14  | ENSG00000163728.10                    | 0.658095322                    | 6 4              | 0.137307144                           | Brain_Cortex     |
|        | 0.747253395                           | Brain_Substantia_nigra         | 3.588285044      | 0.018236847                           |                  |
|        | 0.173702068                           | -0.322263087                   | 1.485894064      | 0.899788644                           | 0.665396409      |
|        | 4 0                                   | 0.998207054                    |                  |                                       |                  |
| ADGRD2 | ENSG00000180264.11                    | 0.658141752                    | 2 2              | 0.363045963                           |                  |
|        | Brain_Cerebellar_Hemisphere           | 0.99763034                     | Brain_Cerebellum | 1.102431246                           |                  |
|        | 0.897568754                           | 0.897568754                    | -0.909576373     | 0.002969932                           | -0.45330322      |
|        | 0.645267681                           | 2 0                            | 0.998207054      |                                       |                  |
| C2CD4C | ENSG00000183186.7                     | 0.65831613                     | 3 3              | 0.388278726                           |                  |
|        | Brain_Nucleus_accumbens_basal_ganglia | 0.585648993                    |                  | Brain_Cerebellum                      | 1.05939506       |
|        | 0.920003382                           | 0.920003382                    | -0.862743107     | 0.666273517                           | 0.116227465      |
|        | 0.849973612                           | 3 0                            | 0.998207054      |                                       |                  |
| MNT    | ENSG00000070444.14                    | 0.658406687                    | 2 2              | 0.370842829                           | Brain_Cerebellum |
|        | 0.845195202                           | Brain_Cortex                   | 1.409025138      | 0.590974862                           | 0.590974862      |
|        | 0.195252601                           | 0.894895731                    | 0.545074166      | 0.494722402                           | 2 0              |
|        | 0.998207054                           |                                |                  |                                       |                  |
| EXOC4  | ENSG00000131558.14                    | 0.658433575                    | 8 1              | 0.482702499                           |                  |
|        | Brain_Frontal_Cortex_BA9              | 0.979797698                    |                  | Brain_Nucleus_accumbens_basal_ganglia |                  |
|        | 7.50083995                            | 0.001051049                    | 7.50083995       | -0.701962581                          | -0.025322537     |
|        | -0.427591946                          | 0.214109299                    | 1 0              | 0.998207054                           |                  |
| HMGCL  | ENSG00000117305.14                    | 0.658437633                    | 10 5             | 0.262517394                           | Brain_Amygdala   |
|        | 0.85404425                            | Brain_Spinal_cord_cervical_c-1 | 7.592136752      | 0.013020803                           |                  |
|        | 0.286616513                           | -0.726812988                   | 1.120460927      | 0.25907279                            | 0.522373734 5    |
|        | 0 0.998207054                         |                                |                  |                                       |                  |
| ODF3L2 | ENSG00000181781.9                     | 0.658488476                    | 3 3              | 0.337257754                           |                  |
|        | Brain_Putamen_basal_ganglia           | 0.780070591                    |                  | Brain_Hippocampus                     | 1.043841974      |
|        | 0.970578959                           | 0.970578959                    | -0.279227043     | 0.959597647                           | 0.491148484      |
|        | 0.672340167                           | 3 0                            | 0.998207054      |                                       |                  |
| MAEA   | ENSG00000090316.15                    | 0.658497284                    | 9 6              | 0.5301028                             |                  |
|        | Brain_Cerebellar_Hemisphere           | 0.883658395                    |                  | Brain_Frontal_Cortex_BA9              |                  |
|        | 5.538775244                           | 0.09532092                     | 0.236926734      | -0.627849096                          | 0.583127112      |
|        | 0.052044309                           | 0.429967197                    | 6 0              | 0.998207054                           |                  |
| STON2  | ENSG00000140022.9                     | 0.658503096                    | 4 4              | 0.120891377                           |                  |
|        | Brain_Hypothalamus                    | 0.90061518                     | Brain_Cerebellum | 2.142038328                           | 0.303505925      |
|        | 0.303505925                           | -1.551043011                   | -0.124884259     | -0.62622183                           | 0.63675135 4     |
|        | 0 0.998207054                         |                                |                  |                                       |                  |
| ADGRF3 | ENSG00000173567.14                    | 0.658610392                    | 2 2              | 0.37147519                            |                  |
|        | Brain_Cerebellar_Hemisphere           | 0.719696635                    |                  | Brain_Putamen_basal_ganglia           |                  |
|        | 1.576298267                           | 0.423701733                    | 0.423701733      | -0.358864263                          | 0.893713519      |
|        | 0.267424628                           | 0.885706244                    | 2 0              | 0.998207054                           |                  |
| RGL2   | ENSG00000237441.9                     | 0.658724343                    | 1 1              | 0.658724343                           | Brain_Cerebellum |
|        | 0.658724343                           | Brain_Cerebellum               | 1 1 1            | 0.441675083                           | 0.441675083      |
|        | 0.441675083                           | NA 1                           | 0 0.998207054    |                                       |                  |
| SLC9A3 | ENSG00000066230.10                    | 0.6587644                      | 13 4             | 0.233692139                           |                  |
|        | Brain_Hypothalamus                    | 0.862175397                    |                  | Brain_Cerebellum                      | 10.16173865      |
|        | 0.004522765                           | 0.57130849                     | -0.960062817     | 1.190901797                           | 0.584970381      |
|        | 0.54815371 4                          | 0 0.998207054                  |                  |                                       |                  |
| SFTPA2 | ENSG00000185303.16                    | 0.658948366                    | 3 3              | 0.46510017                            | Brain_Cerebellum |
|        | 0.577076238                           | Brain_Cortex                   | 1.956827259      | 0.249106414                           | 0.249106414      |
|        | -0.730474539                          | 0.557660496                    | -0.28989112      | 0.734193641                           | 3 0              |
|        | 0.998207054                           |                                |                  |                                       |                  |
| ILVBL  | ENSG00000105135.15                    | 0.658971926                    | 4 4              | 0.259519823                           |                  |
|        | Brain_Caudate_basal_ganglia           | 0.775351298                    |                  | Brain_Anterior_cingulate_cortex_BA24  |                  |
|        | 1.878954267                           | 0.136900238                    | 0.136900238      | -0.894214009                          | 1.127526784      |
|        | -0.02601567                           | 0.919691667                    | 4 0              | 0.998207054                           |                  |
| FUCA1  | ENSG00000179163.11                    | 0.658980014                    | 1 1              | 0.658980014                           |                  |

|               |                                       |                             |                          |                    |                             |              |                  |
|---------------|---------------------------------------|-----------------------------|--------------------------|--------------------|-----------------------------|--------------|------------------|
|               | Brain_Hypothalamus                    | 0.658980014                 |                          | Brain_Hypothalamus | 1                           | 1            | 1                |
|               | -0.441321844                          | -0.441321844                | -0.441321844             | NA                 | 1                           | 0            | 0.998207054      |
| AHRR          | ENSG00000063438.16                    | 0.659034898                 | 7                        | 6                  | 0.145956606                 |              | Brain_Cortex     |
|               | 0.762755953                           | Brain_Caudate_basal_ganglia | 2.937867034              |                    | 0.09757648                  | 0.2192072    |                  |
|               | -1.45396285                           | 0.531208986                 | -0.561528024             | 0.638546111        |                             | 6            | 0                |
|               | 0.998207054                           |                             |                          |                    |                             |              |                  |
| NWD1          | ENSG00000188039.13                    | 0.659056566                 | 9                        | 9                  | 0.072138324                 |              | Brain_Cortex     |
|               | 0.986457208                           | Brain_Putamen_basal_ganglia | 1.981325747              |                    | 0.513053516                 |              |                  |
|               | 0.513053516                           | -1.230545494                | 1.798244165              | 0.425560569        |                             |              | 0.879513564      |
|               | 9                                     | 0                           | 0.998207054              |                    |                             |              |                  |
| NUTM2A        | ENSG00000184923.12                    | 0.659137669                 | 13                       | 8                  | 0.183903589                 |              |                  |
|               | Brain_Spinal_cord_cervical_c-1        | 0.984320788                 |                          |                    | Brain_Frontal_Cortex_BA9    |              |                  |
|               | 7.81383528                            | 0.016329778                 | 0.263481604              | -1.328831433       | 0.930152615                 |              |                  |
|               | -0.332751761                          | 0.638767266                 | 8                        | 0                  | 0.998207054                 |              |                  |
| HMCN2         | ENSG00000148357.16                    | 0.659234503                 | 4                        | 4                  | 0.254358972                 |              |                  |
|               | Brain_Cerebellar_Hemisphere           | 0.786738657                 |                          |                    | Brain_Cerebellum            | 1.662430113  |                  |
|               | 0.336179719                           | 0.336179719                 | -0.727184614             | 1.139825585        |                             |              | 0.264375465      |
|               | 0.766317739                           | 4                           | 0                        | 0.998207054        |                             |              |                  |
| HCK           | ENSG00000101336.13                    | 0.659311679                 | 2                        | 2                  | 0.362241745                 |              |                  |
|               | Brain_Anterior_cingulate_cortex_BA24  | 0.756083303                 |                          |                    |                             |              |                  |
|               | Brain_Spinal_cord_cervical_c-1        | 1.283172199                 |                          |                    | 0.716827801                 |              | 0.716827801      |
|               | 0.310628178                           | 0.911101788                 | 0.610864983              | 0.424598961        |                             | 2            | 0                |
|               | 0.998207054                           |                             |                          |                    |                             |              |                  |
| PRG4          | ENSG00000116690.12                    | 0.659330289                 | 1                        | 1                  | 0.659330289                 |              | Brain_Cerebellum |
|               | 0.659330289                           | Brain_Cerebellum            | 1                        | 1                  | -0.44083799                 |              | -0.44083799      |
|               | -0.44083799                           | NA                          | 1                        | 0                  | 0.998207054                 |              |                  |
| LINC01252     | ENSG00000247157.6                     | 0.659391836                 | 13                       | 3                  | 0.328962025                 |              |                  |
|               | Brain_Frontal_Cortex_BA9              | 0.998503928                 |                          |                    | Brain_Hippocampus           | 10.08543963  |                  |
|               | 0.022514467                           | 0.432214416                 | -0.633478821             | 0.976206738        |                             |              | -0.082513308     |
|               | 0.465441535                           | 3                           | 0                        | 0.998207054        |                             |              |                  |
| ZNF248        | ENSG00000198105.13                    | 0.659452686                 | 7                        | 4                  | 0.186591143                 |              |                  |
|               | Brain_Hippocampus                     | 0.61333244                  | Brain_Frontal_Cortex_BA9 | 5.624976253        |                             |              |                  |
|               | 0.013051697                           | 0.3089147                   | 0.505322361              | 1.320730792        |                             |              | 0.804187253      |
|               | 0.284209359                           | 4                           | 0                        | 0.998207054        |                             |              |                  |
| MEGF6         | ENSG00000162591.15                    | 0.659495121                 | 4                        | 4                  | 0.161985965                 |              |                  |
|               | Brain_Putamen_basal_ganglia           | 0.982673246                 |                          |                    | Brain_Cortex                | 1.280692111  |                  |
|               | 0.79397035                            | 0.79397035                  | -0.485875319             | 1.398423383        |                             |              | 0.212934387      |
|               | 0.820077458                           | 4                           | 0                        | 0.998207054        |                             |              |                  |
| RP11-571M6.17 | ENSG00000270039.1                     | 0.659617595                 | 7                        | 5                  | 0.08698623                  |              |                  |
|               | Brain_Frontal_Cortex_BA9              | 0.913914063                 |                          |                    | Brain_Putamen_basal_ganglia |              |                  |
|               | 5.030654833                           | 0.035968671                 | 0.186942313              | -1.711514213       |                             |              | -0.108102907     |
|               | -0.940290848                          | 0.509554193                 | 5                        | 0                  | 0.998207054                 |              |                  |
| POSTN         | ENSG00000133110.14                    | 0.65971571                  | 1                        | 1                  | 0.65971571                  | Brain_Cortex | 0.65971571       |
|               | Brain_Cortex                          | 1                           | 1                        | 1                  | -0.440305704                | -0.440305704 | -0.440305704     |
|               | NA                                    | 1                           | 0                        | 0.998207054        |                             |              |                  |
| SLC25A39      | ENSG00000013306.15                    | 0.659817313                 | 12                       | 7                  | 0.114332021                 |              |                  |
|               | Brain_Nucleus_accumbens_basal_ganglia | 0.911871355                 |                          |                    | Brain_Amygdala              |              |                  |
|               | 6.692228982                           | 0.003694711                 | 0.283728152              | -0.225311356       |                             |              | 1.579017595      |
|               | 0.701036665                           | 0.60521417                  | 7                        | 0                  | 0.998207054                 |              |                  |
| ADRA1A        | ENSG00000120907.17                    | 0.659872896                 | 2                        | 2                  | 0.362692222                 |              |                  |
|               | Brain_Frontal_Cortex_BA9              | 0.890093784                 |                          |                    | Brain_Substantia_nigra      |              |                  |
|               | 1.209325321                           | 0.790674679                 | 0.790674679              | 0.138185538        |                             |              | 0.910247076      |
|               | 0.524216307                           | 0.545929949                 | 2                        | 0                  | 0.998207054                 |              |                  |
| FBXO44        | ENSG00000132879.13                    | 0.659878461                 | 1                        | 1                  | 0.659878461                 |              |                  |
|               | Brain_Cerebellum                      | 0.659878461                 | Brain_Cerebellum         | 1                  | 1                           | 1            | -0.440080974     |
|               | -0.440080974                          | -0.440080974                | NA                       | 1                  | 0                           | 0.998207054  |                  |
| IGHMBP2       | ENSG00000132740.8                     | 0.660089226                 | 13                       | 2                  | 0.293670892                 |              |                  |
|               | Brain_Putamen_basal_ganglia           | 0.990582755                 |                          |                    | Brain_Frontal_Cortex_BA9    |              |                  |
|               | 10.90979587                           | 0.001939175                 | 1.136062032              | -1.050102713       |                             |              | 0.181853046      |
|               | -0.258267472                          | 0.416423286                 | 2                        | 0                  | 0.998207054                 |              |                  |
| CBX3          | ENSG00000122565.18                    | 0.660104238                 | 1                        | 1                  | 0.660104238                 |              | Brain_Cortex     |
|               | 0.660104238                           | Brain_Cortex                | 1                        | 1                  | 1                           | -0.439769254 | -0.439769254     |



|           |                                       |    |   |                                      |              |             |                                       |                  |            |
|-----------|---------------------------------------|----|---|--------------------------------------|--------------|-------------|---------------------------------------|------------------|------------|
|           | -0.439769254                          | NA | 1 | 0                                    | 0.998207054  |             |                                       |                  |            |
| CD163L1   | ENSG00000177675.8                     |    |   | 0.660129332                          | 2            | 2           | 0.47952481                            | Brain_Cerebellum |            |
|           | 0.896957399                           |    |   | Brain_Frontal_Cortex_BA9             | 1.514326486  |             | 0.485673514                           |                  |            |
|           | 0.485673514                           |    |   | -0.707067053                         | 0.129505847  |             | -0.288780603                          | 0.59154637       | 2          |
|           | 0                                     |    |   | 0.998207054                          |              |             |                                       |                  |            |
| GAR1      | ENSG00000109534.16                    |    |   | 0.660196602                          | 11           | 3           | 0.133441385                           |                  |            |
|           | Brain_Hippocampus                     |    |   | 0.890264237                          |              |             | Brain_Amygdala                        | 9.128834567      |            |
|           | 0.009083348                           |    |   | 0.310768697                          | -1.500668266 |             | -0.137969861                          | -0.865467785     |            |
|           | 0.458050194                           |    |   | 3                                    | 0            | 0.998207054 |                                       |                  |            |
| PPME1     | ENSG00000214517.9                     |    |   | 0.660215585                          | 3            | 3           | 0.302412931                           | Brain_Cerebellum |            |
|           | 0.362454574                           |    |   | Brain_Substantia_nigra               | 1.871448614  |             | 0.21916211                            | 0.21916211       |            |
|           | 0.910697895                           |    |   | 1.031272754                          | 0.955900826  |             | 0.065705407                           | 3                | 0          |
|           | 0.998207054                           |    |   |                                      |              |             |                                       |                  |            |
| SLC52A2   | ENSG00000185803.8                     |    |   | 0.660508214                          | 7            | 4           | 0.148013519                           |                  |            |
|           | Brain_Putamen_basal_ganglia           |    |   | 0.741155665                          |              |             | Brain_Cerebellar_Hemisphere           |                  |            |
|           | 5.496622515                           |    |   | 5.11E-05                             | 0.219547499  |             | 0.330323332                           | 1.446583826      |            |
|           | 0.97084451                            |    |   | 0.372390274                          | 4            | 0           | 0.998207054                           |                  |            |
| RGPD1     | ENSG00000187627.14                    |    |   | 0.660622366                          | 1            | 1           | 0.660622366                           | Brain_Cerebellum |            |
|           | 0.660622366                           |    |   | Brain_Cerebellum1                    | 1            | 1           | -0.439054059                          | -0.439054059     |            |
|           | -0.439054059                          |    |   | NA                                   | 1            | 0           | 0.998207054                           |                  |            |
| DCLK1     | ENSG00000133083.14                    |    |   | 0.660667322                          | 1            | 1           | 0.660667322                           | Brain_Cerebellum |            |
|           | 0.660667322                           |    |   | Brain_Cerebellum1                    | 1            | 1           | 0.438992016                           | 0.438992016      |            |
|           | 0.438992016                           |    |   | NA                                   | 1            | 0           | 0.998207054                           |                  |            |
| ZNF146    | ENSG00000167635.11                    |    |   | 0.660864644                          | 2            | 2           | 0.792994725                           |                  |            |
|           | Brain_Putamen_basal_ganglia           |    |   | 0.863828876                          |              |             | Brain_Hypothalamus                    | 1.886052389      |            |
|           | 0.113947611                           |    |   | 0.113947611                          | -0.171502231 |             | 0.262423801                           | 0.045460785      |            |
|           | 0.30683204                            |    |   | 2                                    | 0            | 0.998207054 |                                       |                  |            |
| GRAMD3    | ENSG00000155324.9                     |    |   | 0.660907309                          | 5            | 5           | 0.319727214                           |                  |            |
|           | Brain_Putamen_basal_ganglia           |    |   | 0.946113651                          |              |             | Brain_Nucleus_accumbens_basal_ganglia |                  |            |
|           | 2.697366819                           |    |   | 0.123598203                          | 0.123598203  |             | -0.966805422                          | 0.995018608      |            |
|           | 0.091093279                           |    |   | 0.699607575                          | 5            | 0           | 0.998207054                           |                  |            |
| LYPD5     | ENSG00000159871.14                    |    |   | 0.660919019                          | 6            | 3           | 0.096048067                           |                  |            |
|           | Brain_Anterior_cingulate_cortex_BA24  |    |   | 0.897258349                          |              |             | Brain_Hippocampus                     |                  |            |
|           | 4.090610375                           |    |   | 0.011220207                          | 0.321751161  |             | -1.664322155                          | 0.879686338      |            |
|           | -0.377845761                          |    |   | 1.059303896                          | 3            | 0           | 0.998207054                           |                  |            |
| TFAM      | ENSG00000108064.10                    |    |   | 0.66100157                           | 8            | 4           | 0.331703854                           | Brain_Cortex     |            |
|           | 0.999016596                           |    |   | Brain_Anterior_cingulate_cortex_BA24 | 6.70514781   |             | 0.005776098                           |                  |            |
|           | 0.256266156                           |    |   | -0.97068763                          | 0.012598349  |             | -0.229486186                          | 0.334626077      |            |
|           | 4                                     |    |   | 0                                    | 0.998207054  |             |                                       |                  |            |
| LINC00377 | ENSG00000229246.1                     |    |   | 0.661007103                          | 2            | 1           | 0.608138978                           |                  |            |
|           | Brain_Cerebellum                      |    |   | 0.724041366                          |              |             | Brain_Cerebellar_Hemisphere           | 1.949012702      |            |
|           | 0.050987298                           |    |   | 1.949012702                          | -0.512731749 |             | -0.353062793                          | -0.432897271     |            |
|           | 0.112903002                           |    |   | 1                                    | 0            | 0.998207054 |                                       |                  |            |
| MTCL1     | ENSG00000168502.17                    |    |   | 0.661026428                          | 1            | 1           | 0.661026428                           | Brain_Cerebellum |            |
|           | 0.661026428                           |    |   | Brain_Cerebellum1                    | 1            | 1           | 0.43849647                            | 0.43849647       | 0.43849647 |
|           | NA                                    |    |   | 1                                    | 0            | 0.998207054 |                                       |                  |            |
| ITK       | ENSG00000113263.12                    |    |   | 0.66102934                           | 2            | 2           | 0.392701659                           |                  |            |
|           | Brain_Nucleus_accumbens_basal_ganglia |    |   | 0.69147236                           |              |             | Brain_Caudate_basal_ganglia           |                  |            |
|           | 1.718288434                           |    |   | 0.281711566                          | 0.281711566  |             | -0.854728157                          | -0.396857753     |            |
|           | -0.625792955                          |    |   | 0.323763268                          | 2            | 0           | 0.998207054                           |                  |            |
| LINC02012 | ENSG00000272989.1                     |    |   | 0.661031643                          | 11           | 8           | 0.283618015                           |                  |            |
|           | Brain_Cerebellar_Hemisphere           |    |   | 0.999482694                          |              |             | Brain_Hippocampus                     | 5.21071674       |            |
|           | 0.030625273                           |    |   | 0.186784695                          | -1.072227158 |             | 0.764732005                           | -0.013425365     |            |
|           | 0.546553066                           |    |   | 8                                    | 0            | 0.998207054 |                                       |                  |            |
| CRACR2B   | ENSG00000177685.16                    |    |   | 0.661119467                          | 3            | 3           | 0.25953406                            |                  |            |
|           | Brain_Anterior_cingulate_cortex_BA24  |    |   | 0.707315931                          |              |             | Brain_Caudate_basal_ganglia           |                  |            |
|           | 1.452186935                           |    |   | 0.548538644                          | 0.548538644  |             | -1.127493091                          | -0.375463307     |            |
|           | -0.702272606                          |    |   | 0.385552552                          | 3            | 0           | 0.998207054                           |                  |            |
| KCNA4     | ENSG00000182255.6                     |    |   | 0.661346779                          | 1            | 1           | 0.661346779                           | Brain_Cerebellum |            |
|           | 0.661346779                           |    |   | Brain_Cerebellum1                    | 1            | 1           | 0.438054497                           | 0.438054497      |            |
|           | 0.438054497                           |    |   | NA                                   | 1            | 0           | 0.998207054                           |                  |            |
| PIGZ      | ENSG00000119227.7                     |    |   | 0.661406277                          | 13           | 6           | 0.102504528                           |                  |            |

|            |                                       |                  |             |             |                                |                  |
|------------|---------------------------------------|------------------|-------------|-------------|--------------------------------|------------------|
|            | Brain_Spinal_cord_cervical_c-1        | 0.971475206      |             |             | Brain_Cortex                   | 8.417600864      |
|            | 0.006963097                           | 0.379600211      |             |             | 0.665643662                    | 0.133603711      |
|            | 0.601460864                           | 6                | 0           | 0.998207054 |                                |                  |
| LINC00642  | ENSG00000233208.5                     | 0.661442922      | 3           | 3           | 0.247510845                    |                  |
|            | Brain_Cerebellum                      | 0.799977341      |             |             | Brain_Hippocampus              | 1.112689534      |
|            | 0.892607591                           | 0.892607591      |             |             | -0.367273606                   | 1.156416478      |
|            | 0.766193978                           | 3                | 0           | 0.998207054 |                                | 0.347506433      |
| LINC02202  | ENSG00000245812.2                     | 0.661478542      | 2           | 2           | 0.383689928                    |                  |
|            | Brain_Spinal_cord_cervical_c-1        | 0.858392309      |             |             | Brain_Frontal_Cortex_BA9       |                  |
|            | 1.092606698                           | 0.907393302      |             |             | 0.178421062                    | 0.871117631      |
|            | 0.524769347                           | 0.489810441      | 2           | 0           | 0.998207054                    |                  |
| PVR        | ENSG00000073008.14                    | 0.661489692      | 4           | 3           | 0.3299465                      | Brain_Cerebellum |
|            | 0.637150191                           | Brain_Cortex     | 2.778734854 |             | 0.049541709                    | 0.176317394      |
|            | 0.471687038                           | 0.974221644      | 0.753585934 |             | 0.208276617                    | 3                |
|            | 0.998207054                           |                  |             |             |                                | 0                |
| LRBA       | ENSG00000198589.10                    | 0.661508331      | 2           | 2           | 0.363333985                    |                  |
|            | Brain_Cerebellar_Hemisphere           | 0.526121359      |             |             | Brain_Cerebellum               | 1.688321125      |
|            | 0.311678875                           | 0.311678875      |             |             | 0.633937886                    | 0.909030579      |
|            | 0.194519909                           | 2                | 0           | 0.998207054 |                                | 0.771484233      |
| SLC9C2     | ENSG00000162753.11                    | 0.661509432      | 9           | 1           | 0.298902788                    |                  |
|            | Brain_Spinal_cord_cervical_c-1        | 0.982862737      |             |             | Brain_Cerebellum               | 8.171333829      |
|            | 0.005809901                           | 8.171333829      |             |             | -1.038789194                   | -0.021480025     |
|            | 0.350246403                           | 1                | 0           | 0.998207054 |                                | -0.420357025     |
| SNCAIP     | ENSG00000064692.18                    | 0.661520431      | 3           | 3           | 0.312271463                    |                  |
|            | Brain_Cerebellum                      | 0.375209548      |             |             | Brain_Putamen_basal_ganglia    | 1.964943118      |
|            | 0.146114512                           | 0.146114512      |             |             | -1.010467291                   | -0.886757362     |
|            | 0.062297321                           | 3                | 0           | 0.998207054 |                                | -0.944333712     |
| SPARC      | ENSG00000113140.10                    | 0.661609736      | 3           | 3           | 0.230870697                    |                  |
|            | Brain_Cerebellar_Hemisphere           | 0.915811191      |             |             | Brain_Putamen_basal_ganglia    |                  |
|            | 1.097729222                           | 0.900622772      | 0.900622772 |             | -1.19811899                    | 0.255486081      |
|            | -0.349448164                          | 0.75683391       | 3           | 0           | 0.998207054                    |                  |
| LINC00640  | ENSG00000258479.5                     | 0.66163302       | 1           | 1           | 0.66163302                     |                  |
|            | Brain_Spinal_cord_cervical_c-1        | 0.66163302       |             |             | Brain_Spinal_cord_cervical_c-1 | 1                |
|            | 1                                     | 1                | 0.437659655 | 0.437659655 | 0.437659655                    | NA               |
|            | 0.998207054                           |                  |             |             |                                | 1                |
| 5-Mar      | ENSG00000198060.9                     | 0.661736174      | 1           | 1           | 0.661736174                    |                  |
|            | Brain_Spinal_cord_cervical_c-1        | 0.661736174      |             |             | Brain_Spinal_cord_cervical_c-1 |                  |
|            | 1                                     | 1                | 1           | 0.437517381 | 0.437517381                    | NA               |
|            | 0.998207054                           |                  |             |             |                                | 1                |
| LINC02029  | ENSG00000241544.1                     | 0.661774481      | 2           | 2           | 0.393939243                    |                  |
|            | Brain_Putamen_basal_ganglia           | 0.752599115      |             |             | Brain_Hypothalamus             | 1.000833305      |
|            | 0.999166695                           | 0.999166695      |             |             | 0.315214081                    | 0.852495307      |
|            | 0.379915198                           | 2                | 0           | 0.998207054 |                                | 0.583854694      |
| DOCK9      | ENSG00000088387.18                    | 0.661880758      | 2           | 2           | 0.475096138                    | Brain_Cerebellum |
|            | 0.762361817                           | Brain_Cortex     | 1.321118747 |             | 0.678881253                    | 0.678881253      |
|            | -0.302380765                          | 0.714211936      | 0.205915585 |             | 0.718839592                    | 2                |
|            | 0.998207054                           |                  |             |             |                                | 0                |
| TPD52L2    | ENSG00000101150.17                    | 0.662159048      | 1           | 1           | 0.662159048                    |                  |
|            | Brain_Cortex                          | 0.662159048      |             |             | Brain_Cortex                   | 1                |
|            | 0.436934228                           | 0.436934228      | NA          | 1           | 0                              | 0.998207054      |
|            | 0.998207054                           |                  |             |             |                                |                  |
| ERO1A      | ENSG00000197930.12                    | 0.662191708      | 1           | 1           | 0.662191708                    |                  |
|            | Brain_Cerebellar_Hemisphere           | 0.662191708      |             |             | Brain_Cerebellar_Hemisphere    | 1                |
|            | 1                                     | 0.436889195      | 0.436889195 | 0.436889195 | NA                             | 1                |
|            | 0.998207054                           |                  |             |             |                                | 0                |
| ST6GALNAC4 | ENSG00000136840.18                    | 0.662214412      | 1           | 1           | 0.662214412                    |                  |
|            | Brain_Cerebellum                      | 0.662214412      |             |             | Brain_Cerebellum               | 1                |
|            | 0.436857892                           | 0.436857892      | NA          | 1           | 0                              | 0.998207054      |
|            | 0.998207054                           |                  |             |             |                                |                  |
| GDPD1      | ENSG00000153982.10                    | 0.662314412      | 1           | 1           | 0.662314412                    | Brain_Cerebellum |
|            | 0.662314412                           | Brain_Cerebellum | 1           | 1           | 1                              | 0.436720015      |
|            | 0.436720015                           | NA               | 1           | 0           | 0.998207054                    | 0.436720015      |
| ELP3       | ENSG00000134014.16                    | 0.662327546      | 13          | 1           | 0.510310589                    |                  |
|            | Brain_Nucleus_accumbens_basal_ganglia | 0.808415969      |             |             | Brain_Hippocampus              |                  |

|               |                                |                             |                                      |              |                    |
|---------------|--------------------------------|-----------------------------|--------------------------------------|--------------|--------------------|
|               | 11.81687703                    | 0.000728759                 | 11.81687703                          | -0.658354152 | -0.24247004        |
|               | -0.418464144                   | 0.121172971                 | 1                                    | 0            | 0.998207054        |
| NINJ2         | ENSG00000171840.11             | 0.662444287                 | 1                                    | 1            | 0.662444287        |
|               | Brain_Frontal_Cortex_BA9       | 0.662444287                 | Brain_Frontal_Cortex_BA9             | 1            | 1                  |
|               | 1                              | 0.436540961                 | 0.436540961                          | 0.436540961  | NA 1 0             |
|               | 0.998207054                    |                             |                                      |              |                    |
| RP3-369A17.4  | ENSG00000224164.1              | 0.662589191                 | 1                                    | 1            | 0.662589191        |
|               | Brain_Caudate_basal_ganglia    | 0.662589191                 | Brain_Caudate_basal_ganglia          | 1            | 1                  |
|               | 1                              | -0.436341203                | -0.436341203                         | -0.436341203 | NA 1 0             |
|               | 0.998207054                    |                             |                                      |              |                    |
| LINC01202     | ENSG00000280776.1              | 0.662605657                 | 1                                    | 1            | 0.662605657        |
|               | Brain_Frontal_Cortex_BA9       | 0.662605657                 | Brain_Frontal_Cortex_BA9             | 1            | 1                  |
|               | 1                              | 0.436318506                 | 0.436318506                          | 0.436318506  | NA 1 0             |
|               | 0.998207054                    |                             |                                      |              |                    |
| IL2RB         | ENSG00000100385.13             | 0.66284666                  | 2                                    | 2            | 0.366259895        |
|               | 0.912471147                    | Brain_Caudate_basal_ganglia | 1.035210971                          | 0.964789029  | Brain_Hypothalamus |
|               | 0.964789029                    | -0.903501307                | 0.10992211                           | -0.396789599 | 0.716598571        |
|               | 0                              | 0.998207054                 |                                      |              | 2                  |
| RGS4          | ENSG00000117152.13             | 0.662952161                 | 2                                    | 2            | 0.423246014        |
|               | 0.578033964                    | Brain_Cerebellar_Hemisphere | 1.171488426                          | 0.828511574  | Brain_Cerebellum   |
|               | 0.828511574                    | -0.80080246                 | -0.556258776                         | -0.678530618 | 0.172918498        |
|               | 2                              | 0                           | 0.998207054                          |              |                    |
| PPFIBP1       | ENSG00000110841.13             | 0.663088097                 | 1                                    | 1            | 0.663088097        |
|               | Brain_Spinal_cord_cervical_c-1 | 0.663088097                 | Brain_Spinal_cord_cervical_c-1       | 1            | 1                  |
|               | 1                              | 1                           | 0.435653571                          | 0.435653571  | 0.435653571 NA 1 0 |
|               | 0.998207054                    |                             |                                      |              |                    |
| ARHGAP30      | ENSG00000186517.13             | 0.663108155                 | 2                                    | 2            | 0.500435559        |
|               | Brain_Cerebellar_Hemisphere    | 0.569410664                 | Brain_Cerebellum                     | 1.054181716  |                    |
|               | 0.945818284                    | 0.945818284                 | -0.673804586                         | 0.568919658  | -0.052442464       |
|               | 0.87873874                     | 2                           | 0                                    | 0.998207054  |                    |
| RP11-436D23.1 | ENSG00000271860.6              | 0.663120488                 | 2                                    | 2            | 0.456266009        |
|               | Brain_Frontal_Cortex_BA9       | 0.592814261                 | Brain_Caudate_basal_ganglia          |              |                    |
|               | 1.025007882                    | 0.974992118                 | 0.974992118                          | -0.745009447 | 0.534762263        |
|               | -0.105123592                   | 0.904935255                 | 2                                    | 0            | 0.998207054        |
| TNRC6C        | ENSG00000078687.17             | 0.663257573                 | 1                                    | 1            | 0.663257573        |
|               | Brain_Frontal_Cortex_BA9       | 0.663257573                 | Brain_Frontal_Cortex_BA9             | 1            | 1                  |
|               | 1                              | 0.435420032                 | 0.435420032                          | 0.435420032  | NA 1 0             |
|               | 0.998207054                    |                             |                                      |              |                    |
| FBN3          | ENSG00000142449.12             | 0.663292497                 | 2                                    | 2            | 0.365018111        |
|               | 0.401230806                    | Brain_Frontal_Cortex_BA9    | 1.916571941                          | 0.083428059  | Brain_Cortex       |
|               | 0.083428059                    | 0.839425096                 | 0.905844599                          | 0.872634848  | 0.046965681        |
|               | 2                              | 0                           | 0.998207054                          |              |                    |
| ACO1          | ENSG00000122729.18             | 0.663303069                 | 11                                   | 9            | 0.085149698        |
|               | Brain_Putamen_basal_ganglia    | 0.864685793                 | Brain_Anterior_cingulate_cortex_BA24 |              |                    |
|               | 4.030675205                    | 0.004399052                 | 0.219716797                          | -1.31486918  | 1.721557554        |
|               | 0.248869743                    | 0.993137218                 | 9                                    | 0            | 0.998207054        |
| FILIP1        | ENSG00000118407.14             | 0.663414473                 | 3                                    | 3            | 0.288481732        |
|               | Brain_Cerebellar_Hemisphere    | 0.802905863                 | Brain_Putamen_basal_ganglia          |              |                    |
|               | 1.945941279                    | 0.074439587                 | 0.074439587                          | -1.061458172 | -0.24958815        |
|               | -0.686385615                   | 0.409439502                 | 3                                    | 0            | 0.998207054        |
| RPA2          | ENSG00000117748.9              | 0.663472641                 | 13                                   | 1            | 0.496718564        |
|               | Brain_Frontal_Cortex_BA9       | 0.918795764                 | Brain_Spinal_cord_cervical_c-1       |              |                    |
|               | 12.79881439                    | 0.000185658                 | 12.79881439                          | 0.101950754  | 0.679661903        |
|               | 0.432230883                    | 0.134885053                 | 1                                    | 0            | 0.998207054        |
| ZDHHC6        | ENSG00000023041.11             | 0.663546064                 | 10                                   | 10           | 0.077016067        |
|               | Brain_Caudate_basal_ganglia    | 0.88219697                  | Brain_Anterior_cingulate_cortex_BA24 |              |                    |
|               | 2.744719657                    | 0.173116882                 | 0.173116882                          | -1.338819453 | 1.768268264        |
|               | 0.529407827                    | 0.8873894                   | 10                                   | 0            | 0.998207054        |
| HHIPL1        | ENSG00000182218.9              | 0.663552355                 | 5                                    | 5            | 0.150328934        |
|               | Brain_Cerebellar_Hemisphere    | 0.98392694                  | Brain_Putamen_basal_ganglia          | 2.087588977  |                    |
|               | 0.45143311                     | 0.45143311                  | -0.362515945                         | 1.438370585  | 0.415170386        |
|               | 0.702689818                    | 5                           | 0                                    | 0.998207054  |                    |

UPK1A ENSG00000105668.7 0.663682152 12 6 0.167077415  
 Brain\_Frontal\_Cortex\_BA9 0.997453561 Brain\_Nucleus\_accumbens\_basal\_ganglia  
 7.225198461 0.008655762 0.429158002 -1.381655788 0.194336785  
 -0.572610777 0.560038243 6 0 0.998207054  
 HDAC10 ENSG00000100429.17 0.663727667 13 2 0.312448523  
 Brain\_Nucleus\_accumbens\_basal\_ganglia 0.964669329  
 Brain\_Spinal\_cord\_cervical\_c-1 11.07165891 6.73E-17 0.85951011  
 -1.010097619 -0.04429491 -0.7660155 0.237051248 2 0  
 0.998207054  
 VPS50 ENSG00000004766.15 0.663846427 3 3 0.327810795  
 Brain\_Anterior\_cingulate\_cortex\_BA24 0.880483308 Brain\_Cerebellum  
 1.373142239 0.580775059 0.580775059 -0.509705467 0.978532966  
 0.106156978 0.776571186 3 0 0.998207054  
 CREB1 ENSG00000118260.14 0.663867798 1 1 0.663867798  
 Brain\_Putamen\_basal\_ganglia 0.663867798 Brain\_Putamen\_basal\_ganglia 1 1  
 1 0.434579334 0.434579334 0.434579334 NA 1 0  
 0.998207054  
 ERMP1 ENSG00000099219.13 0.663871192 7 6 0.183331655  
 Brain\_Frontal\_Cortex\_BA9 0.922164905 Brain\_Putamen\_basal\_ganglia  
 4.262414514 0.131976403 0.290883779 -1.330566612 0.398518722  
 -0.565091452 0.612959432 6 0 0.998207054  
 FAM26E ENSG00000178033.5 0.663949024 1 1 0.663949024  
 Brain\_Hippocampus 0.663949024 Brain\_Hippocampus 1 1 1  
 -0.434467453 -0.434467453 -0.434467453 NA 1 0 0.998207054  
 CTNNA3 ENSG00000183230.16 0.663962352 2 2 0.397483453  
 Brain\_Putamen\_basal\_ganglia 0.584158906 Brain\_Amygdala 1.84800866 0.15199134  
 0.15199134 0.54732 0.846124215 0.696722108 0.211286487 2 0  
 0.998207054  
 CTD-307407.2 ENSG00000250105.1 0.663963043 2 1 0.491577452  
 Brain\_Cerebellar\_Hemisphere 0.86647125 Brain\_Cerebellum 1.940820022  
 0.059179978 1.940820022 0.168142405 0.687802039 0.427972222  
 0.367454851 1 0 0.998207054  
 TDGF1 ENSG00000241186.9 0.664008792 13 1 0.514486814  
 Brain\_Hippocampus 0.836706489 Brain\_Hypothalamus 12.57194563  
 8.35E-05 12.57194563 0.206108078 0.651867249 0.426757069  
 0.119371976 1 0 0.998207054  
 ACBD7 ENSG00000176244.6 0.66402505 1 1 0.66402505  
 Brain\_Nucleus\_accumbens\_basal\_ganglia 0.66402505  
 Brain\_Nucleus\_accumbens\_basal\_ganglia 1 1 1 -0.434362741  
 -0.434362741 -0.434362741 NA 1 0 0.998207054  
 FAM83H ENSG00000180921.6 0.664062377 9 9 0.120584151  
 Brain\_Cortex 0.925556539 Brain\_Cerebellar\_Hemisphere 2.333932583  
 0.160711685 0.160711685 -1.552326373 1.157869726 -0.141615038  
 0.728112157 9 0 0.998207054  
 ABHD17B ENSG00000107362.13 0.664064615 1 1 0.664064615  
 Brain\_Putamen\_basal\_ganglia 0.664064615 Brain\_Putamen\_basal\_ganglia 1 1  
 1 -0.434308249 -0.434308249 -0.434308249 NA 1 0  
 0.998207054  
 INCA1 ENSG00000196388.8 0.664182576 11 7 0.036133492  
 Brain\_Spinal\_cord\_cervical\_c-1 0.94825323 Brain\_Putamen\_basal\_ganglia  
 6.382855726 0.003091734 0.300680731 -0.06490049 2.095422038  
 1.173686356 0.587754255 7 0 0.998207054  
 C11orf80 ENSG00000173715.15 0.664302906 9 6 0.050515756  
 Brain\_Cerebellar\_Hemisphere 0.994679176 Brain\_Hypothalamus 5.279315083  
 0.06779574 0.240137779 -1.955570623 -0.006668714 -0.922683751  
 0.570277428 6 0 0.998207054  
 ETV5 ENSG00000244405.7 0.664411869 2 2 0.448092979  
 Brain\_Substantia\_nigra 0.692595901 Brain\_Hypothalamus 1.122748843  
 0.877251157 0.877251157 -0.75859815 -0.395334691 -0.576966421  
 0.256866056 2 0 0.998207054  
 FOXD4L3 ENSG00000187559.5 0.664425069 2 2 0.459342717  
 Brain\_Nucleus\_accumbens\_basal\_ganglia 0.49929874 Brain\_Cortex 1.229295915

|              |                                |                                       |                                       |              |              |                    |              |   |   |
|--------------|--------------------------------|---------------------------------------|---------------------------------------|--------------|--------------|--------------------|--------------|---|---|
|              | 0.770704085                    | 0.770704085                           | -0.739929592                          | -0.675593546 | -0.707761569 |                    |              |   |   |
|              | 0.045492454                    | 2                                     | 0                                     | 0.998207054  |              |                    |              |   |   |
| WDR5B        | ENSG00000196981.3              | 0.664481269                           | 10                                    | 6            | 0.405281806  | Brain_Amygdala     |              |   |   |
|              | 0.905990521                    | Brain_Nucleus_accumbens_basal_ganglia | 6.538081132                           |              |              |                    |              |   |   |
|              | 0.012452733                    | 0.233445688                           | -0.832225264                          | 0.807367965  | 0.276514926  |                    |              |   |   |
|              | 0.43830108                     | 6                                     | 0                                     | 0.998207054  |              |                    |              |   |   |
| ITGA2B       | ENSG00000005961.17             | 0.664506018                           | 1                                     | 1            | 0.664506018  |                    |              |   |   |
|              | Brain_Cerebellar_Hemisphere    | 0.664506018                           | Brain_Cerebellar_Hemisphere           | 1            | 1            |                    |              |   |   |
|              | 1                              | 0.433700398                           | 0.433700398                           | 0.433700398  | NA           | 1                  | 0            |   |   |
|              | 0.998207054                    |                                       |                                       |              |              |                    |              |   |   |
| FAM81A       | ENSG00000157470.11             | 0.664517929                           | 1                                     | 1            | 0.664517929  |                    |              |   |   |
|              | Brain_Frontal_Cortex_BA9       | 0.664517929                           | Brain_Frontal_Cortex_BA9              | 1            | 1            |                    |              |   |   |
|              | 1                              | 0.433683997                           | 0.433683997                           | 0.433683997  | NA           | 1                  | 0            |   |   |
|              | 0.998207054                    |                                       |                                       |              |              |                    |              |   |   |
| TTC23L       | ENSG00000205838.13             | 0.664538719                           | 1                                     | 1            | 0.664538719  |                    |              |   |   |
|              | Brain_Spinal_cord_cervical_c-1 | 0.664538719                           | Brain_Spinal_cord_cervical_c-1        |              |              |                    |              |   |   |
|              | 1                              | 1                                     | 1                                     | 0.433655372  | 0.433655372  | 0.433655372        | NA           | 1 | 0 |
|              | 0.998207054                    |                                       |                                       |              |              |                    |              |   |   |
| STEAP1       | ENSG00000164647.8              | 0.664632957                           | 2                                     | 2            | 0.366064928  |                    |              |   |   |
|              | Brain_Frontal_Cortex_BA9       | 0.449586548                           | Brain_Cortex                          | 1.841219064  |              |                    |              |   |   |
|              | 0.158780936                    | 0.158780936                           | 0.756104494                           | 0.903868888  | 0.829986691  |                    |              |   |   |
|              | 0.104485205                    | 2                                     | 0                                     | 0.998207054  |              |                    |              |   |   |
| CHRNA1       | ENSG00000138435.15             | 0.664695796                           | 2                                     | 2            | 0.402715831  |                    |              |   |   |
|              | Brain_Cortex                   | 0.562683331                           | Brain_Nucleus_accumbens_basal_ganglia | 1.88319785   |              |                    |              |   |   |
|              | 0.11680215                     | 0.11680215                            | 0.578860462                           | 0.83678073   | 0.707820596  | 0.182377171        |              |   |   |
|              | 2                              | 0                                     | 0.998207054                           |              |              |                    |              |   |   |
| OBSL1        | ENSG00000124006.14             | 0.664784854                           | 1                                     | 1            | 0.664784854  | Brain_Cortex       |              |   |   |
|              | 0.664784854                    | Brain_Cortex                          | 1                                     | 1            | 1            | 0.433316498        | 0.433316498  |   |   |
|              | 0.433316498                    | NA                                    | 1                                     | 0            | 0.998207054  |                    |              |   |   |
| ECM1         | ENSG00000143369.14             | 0.664957668                           | 6                                     | 3            | 0.415874648  |                    |              |   |   |
|              | Brain_Hippocampus              | 0.967240511                           | Brain_Nucleus_accumbens_basal_ganglia |              |              |                    |              |   |   |
|              | 4.632740676                    | 0.009796415                           | 0.45893199                            | -0.81359911  | 0.352350678  |                    |              |   |   |
|              | -0.250447263                   | 0.502004072                           | 3                                     | 0            | 0.998207054  |                    |              |   |   |
| CD300LF      | ENSG00000186074.18             | 0.664994041                           | 2                                     | 2            | 0.371594499  |                    |              |   |   |
|              | Brain_Spinal_cord_cervical_c-1 | 0.714694059                           | Brain_Hypothalamus                    |              |              |                    |              |   |   |
|              | 1.265883431                    | 0.734116569                           | 0.734116569                           | 0.365559154  | 0.89349061   |                    |              |   |   |
|              | 0.629524882                    | 0.373303913                           | 2                                     | 0            | 0.998207054  |                    |              |   |   |
| MRFAP1L1     | ENSG00000178988.10             | 0.66513898                            | 1                                     | 1            | 0.66513898   | Brain_Hypothalamus |              |   |   |
|              | 0.66513898                     | Brain_Hypothalamus                    | 1                                     | 1            | 1            | -0.432829032       | -0.432829032 |   |   |
|              | -0.432829032                   | NA                                    | 1                                     | 0            | 0.998207054  |                    |              |   |   |
| KANSL1       | ENSG00000120071.13             | 0.665272872                           | 11                                    | 9            | 0.066973219  |                    |              |   |   |
|              | Brain_Cerebellum               | 0.927004286                           | Brain_Cortex                          | 4.357695237  | 0.028131799  |                    |              |   |   |
|              | 0.222049583                    | -1.831853705                          | 1.236326878                           | -0.088495794 | 0.835371762  |                    |              |   |   |
|              | 9                              | 0                                     | 0.998207054                           |              |              |                    |              |   |   |
| ACTL10       | ENSG00000182584.4              | 0.665278973                           | 1                                     | 1            | 0.665278973  |                    |              |   |   |
|              | Brain_Cortex                   | 0.665278973                           | Brain_Cortex                          | 1            | 1            | 1                  | 0.432636355  |   |   |
|              | 0.432636355                    | 0.432636355                           | NA                                    | 1            | 0            | 0.998207054        |              |   |   |
| MFAP5        | ENSG00000197614.10             | 0.665303053                           | 2                                     | 2            | 0.366992191  | Brain_Cerebellum   |              |   |   |
|              | 0.929495248                    | Brain_Hippocampus                     | 1.136146724                           | 0.863853276  |              |                    |              |   |   |
|              | 0.863853276                    | -0.90212176                           | -0.088479914                          | -0.495300837 | 0.575331667  |                    |              |   |   |
|              | 2                              | 0                                     | 0.998207054                           |              |              |                    |              |   |   |
| ATP11B       | ENSG00000058063.15             | 0.665440274                           | 2                                     | 2            | 0.375581965  |                    |              |   |   |
|              | Brain_Cortex                   | 0.512579473                           | Brain_Cerebellar_Hemisphere           | 1.5813013    | 0.4186987    |                    |              |   |   |
|              | 0.4186987                      | 0.65482649                            | 0.886065997                           | 0.770446243  | 0.163511023  | 2                  | 0            |   |   |
|              | 0.998207054                    |                                       |                                       |              |              |                    |              |   |   |
| ATF7IP       | ENSG00000171681.12             | 0.665466356                           | 1                                     | 1            | 0.665466356  |                    |              |   |   |
|              | Brain_Cortex                   | 0.665466356                           | Brain_Cortex                          | 1            | 1            | 1                  | 0.43237848   |   |   |
|              | 0.43237848                     | 0.43237848                            | NA                                    | 1            | 0            | 0.998207054        |              |   |   |
| TSPAN13      | ENSG00000106537.7              | 0.66548193                            | 1                                     | 1            | 0.66548193   |                    |              |   |   |
|              | Brain_Frontal_Cortex_BA9       | 0.66548193                            | Brain_Frontal_Cortex_BA9              | 1            | 1            | 1                  |              |   |   |
|              | 0.432357048                    | 0.432357048                           | 0.432357048                           | NA           | 1            | 0                  | 0.998207054  |   |   |
| RP11-491F9.8 | ENSG00000259957.2              | 0.665506195                           | 2                                     | 2            | 0.374638413  |                    |              |   |   |

|              |                                       |              |              |                             |              |              |             |             |                    |
|--------------|---------------------------------------|--------------|--------------|-----------------------------|--------------|--------------|-------------|-------------|--------------------|
|              | Brain_Cerebellum                      | 0.377717871  |              | Brain_Cerebellar_Hemisphere | 1.9237532    | 0.0762468    |             |             |                    |
|              |                                       | 0.0762468    | -0.887818456 |                             | -0.882108991 | -0.884963724 | 0.004037202 | 2           |                    |
|              |                                       | 0            | 0.998207054  |                             |              |              |             |             |                    |
| TRHDE        | ENSG00000072657.8                     | 0.665519248  |              |                             | 2            | 2            | 0.379703573 |             |                    |
|              | Brain_Frontal_Cortex_BA9              | 0.825863887  |              | Brain_Putamen_basal_ganglia | 1.01520817   |              |             |             |                    |
|              |                                       | 0.98479183   | 0.98479183   | -0.878442603                | -0.22009332  | -0.549225967 | 0.46558263  |             |                    |
|              |                                       | 2            | 0            | 0.998207054                 |              |              |             |             |                    |
| C18orf54     | ENSG00000166845.13                    | 0.665556769  |              |                             | 2            | 1            | 0.639324131 |             |                    |
|              | Brain_Cerebellum                      | 0.694640441  |              | Brain_Cerebellar_Hemisphere | 1.9847665    | 0.0152335    |             |             |                    |
|              |                                       | 1.9847665    | -0.468643986 | -0.392565478                | -0.430604732 | 0.053795629  | 1           |             |                    |
|              |                                       | 0            | 0.998207054  |                             |              |              |             |             |                    |
| KLRD1        | ENSG00000134539.16                    | 0.665559966  |              |                             | 3            | 3            | 0.461688055 |             |                    |
|              | Brain_Nucleus_accumbens_basal_ganglia | 0.890405893  |              | Brain_Caudate_basal_ganglia |              |              |             |             |                    |
|              |                                       | 1.854964845  | 0.200713483  | 0.200713483                 | -0.736070071 | 0.646299074  |             |             |                    |
|              |                                       | -0.075853874 | 0.693262746  | 3                           | 0            | 0.998207054  |             |             |                    |
| MCL1         | ENSG00000143384.12                    | 0.665655441  |              |                             | 2            | 2            | 0.375782791 |             |                    |
|              | Brain_Caudate_basal_ganglia           | 0.97128214   |              | Brain_Cerebellum            | 1.151093285  |              |             |             |                    |
|              |                                       | 0.848906715  | 0.848906715  | -0.036000274                | 0.885693353  | 0.42484654   |             |             |                    |
|              |                                       | 0.651735814  | 2            | 0                           | 0.998207054  |              |             |             |                    |
| RAD17        | ENSG00000152942.18                    | 0.665685888  |              |                             | 3            | 3            | 0.215426811 |             |                    |
|              | Brain_Spinal_cord_cervical_c-1        | 0.7901793    |              | Brain_Cortex                | 1.984579678  |              |             |             |                    |
|              |                                       | 0.274460743  | 0.274460743  | -1.238780462                | -0.266077789 | -0.812899733 |             |             |                    |
|              |                                       | 0.497501463  | 3            | 0                           | 0.998207054  |              |             |             |                    |
| SLC26A10     | ENSG00000135502.17                    | 0.665830329  |              |                             | 4            | 4            | 0.159936107 |             |                    |
|              | Brain_Cerebellar_Hemisphere           | 0.776236438  |              | Brain_Frontal_Cortex_BA9    |              |              |             |             |                    |
|              |                                       | 1.295652742  | 0.683740744  | 0.683740744                 | -1.40528648  | 0.284226984  |             |             |                    |
|              |                                       | -0.524289204 | 0.693548628  | 4                           | 0            | 0.998207054  |             |             |                    |
| RP11-358N2.2 | ENSG00000277692.1                     | 0.665918872  |              |                             | 2            | 2            | 0.548058278 |             |                    |
|              | Brain_Hypothalamus                    | 0.637954545  |              | Brain_Cerebellar_Hemisphere | 1.288661778  |              |             |             |                    |
|              |                                       | 0.711338222  | 0.711338222  | -0.600672291                | -0.470560606 | -0.535616448 |             |             |                    |
|              |                                       | 0.092002854  | 2            | 0                           | 0.998207054  |              |             |             |                    |
| SLC16A6      | ENSG00000108932.11                    | 0.665966635  |              |                             | 1            | 1            | 0.665966635 |             |                    |
|              | Brain_Cortex                          | 0.665966635  |              | Brain_Cortex                | 1            | 1            | 1           | -0.43169014 |                    |
|              |                                       | -0.43169014  | -0.43169014  | NA                          | 1            | 0            | 0.998207054 |             |                    |
| FARSA        | ENSG00000179115.10                    | 0.665990667  |              |                             | 4            | 3            | 0.550156417 |             |                    |
|              | Brain_Hippocampus                     | 0.98102524   |              | Brain_Caudate_basal_ganglia | 3.591029041  |              |             |             |                    |
|              |                                       | 0.051493035  | 0.123631412  | -0.597525754                | 0.088306376  | -0.278689617 |             |             |                    |
|              |                                       | 0.362016836  | 3            | 0                           | 0.998207054  |              |             |             |                    |
| UAP1L1       | ENSG00000197355.10                    | 0.66611518   |              |                             | 3            | 3            | 0.342175803 |             | Brain_Cortex       |
|              |                                       | 0.720214302  |              | Brain_Cerebellum            | 1.084775897  | 0.912957839  | 0.912957839 |             |                    |
|              |                                       | -0.949874938 | -0.358172398 | -0.689997826                | 0.302341519  | 3            | 0           |             |                    |
|              |                                       | 0.998207054  |              |                             |              |              |             |             |                    |
| CIZ1         | ENSG00000148337.20                    | 0.666222208  |              |                             | 2            | 2            | 0.37858998  |             | Brain_Hypothalamus |
|              |                                       | 0.862264296  |              | Brain_Caudate_basal_ganglia | 1.02133776   | 0.97866224   | 0.97866224  |             |                    |
|              |                                       | -0.880497277 | -0.173492534 | -0.526994906                | 0.499927848  | 2            | 0           |             |                    |
|              |                                       | 0.998207054  |              |                             |              |              |             |             |                    |
| KIAA0355     | ENSG00000166398.12                    | 0.666293732  |              |                             | 2            | 2            | 0.493586166 |             |                    |
|              | Brain_Substantia_nigra                | 0.541979005  |              | Brain_Cerebellum            | 1.035391197  |              |             |             |                    |
|              |                                       | 0.964608803  | 0.964608803  | -0.609823089                | 0.684616162  | 0.037396536  |             |             |                    |
|              |                                       | 0.915306772  | 2            | 0                           | 0.998207054  |              |             |             |                    |
| POLE2        | ENSG00000100479.12                    | 0.666326867  |              |                             | 2            | 2            | 0.392207292 |             | Brain_Cerebellum   |
|              |                                       | 0.766412175  |              | Brain_Amygdala              | 1.016961957  | 0.983038043  | 0.983038043 |             |                    |
|              |                                       | -0.855621286 | 0.29707117   | -0.279275058                | 0.815076652  | 2            | 0           |             |                    |
|              |                                       | 0.998207054  |              |                             |              |              |             |             |                    |
| PROB1        | ENSG00000228672.3                     | 0.66638264   |              |                             | 5            | 4            | 0.169988259 |             | Brain_Cortex       |
|              |                                       | 0.577420515  |              | Brain_Amygdala              | 3.85003533   | 0.041098741  | 0.16776995  |             |                    |
|              |                                       | 0.557156489  | 1.372241537  | 1.050763809                 | 0.348510521  | 4            | 0           |             |                    |
|              |                                       | 0.998207054  |              |                             |              |              |             |             |                    |
| LRRTM4       | ENSG00000176204.13                    | 0.666529609  |              |                             | 1            | 1            | 0.666529609 |             |                    |
|              | Brain_Frontal_Cortex_BA9              | 0.666529609  |              | Brain_Frontal_Cortex_BA9    | 1            | 1            |             |             |                    |
|              |                                       | 1            | 0.43091578   | 0.43091578                  | 0.43091578   | NA           | 1           | 0           | 0.998207054        |
| KLRC1        | ENSG00000134545.13                    | 0.666569141  |              |                             | 12           | 1            | 0.205720579 |             |                    |

|           |                                       |                   |              |              |                                      |   |                  |
|-----------|---------------------------------------|-------------------|--------------|--------------|--------------------------------------|---|------------------|
|           | Brain_Substantia_nigra                | 0.856362367       |              |              | Brain_Anterior_cingulate_cortex_BA24 |   |                  |
|           | 11.49259353                           | 0.000216639       | 11.49259353  |              | -1.265420643                         |   | -0.181006636     |
|           | -0.431701941                          | 0.293338028       | 1            | 0            | 0.998207054                          |   |                  |
| MFAP3L    | ENSG00000198948.11                    | 0.666634          | 3            | 3            | 0.211999577                          |   | Brain_Cerebellum |
|           | 0.99329868                            | Brain_Hippocampus | 1.293725119  |              | 0.712858765                          |   | 0.712858765      |
|           | 0.008398958                           | 1.248085965       | 0.565480271  |              | 0.629303779                          |   | 3 0              |
|           | 0.998207054                           |                   |              |              |                                      |   |                  |
| C1QTNF3   | ENSG00000082196.20                    | 0.666660525       | 3            | 2            | 0.376087737                          |   |                  |
|           | Brain_Cerebellum                      | 0.865975746       |              |              | Brain_Frontal_Cortex_BA9             |   | 1.969355819      |
|           | 0.032558601                           | 0.99808558        | -0.214214436 |              | 0.885127746                          |   | 0.167380336      |
|           | 0.622002617                           | 2                 | 0            | 0.998207054  |                                      |   |                  |
| CD151     | ENSG00000177697.17                    | 0.666690759       | 12           | 2            | 0.279084628                          |   |                  |
|           | Brain_Hippocampus                     | 0.85570529        |              |              | Brain_Anterior_cingulate_cortex_BA24 |   |                  |
|           | 10.89240823                           | 0.002168283       | 0.465103599  |              | 0.181843826                          |   | 1.082377937      |
|           | 0.840646651                           | 0.264689869       | 2            | 0            | 0.998207054                          |   |                  |
| MEDAG     | ENSG00000102802.9                     | 0.666731179       | 1            | 1            | 0.666731179                          |   |                  |
|           | Brain_Caudate_basal_ganglia           | 0.666731179       |              |              | Brain_Caudate_basal_ganglia          | 1 | 1                |
|           | 1                                     | -0.430638588      | -0.430638588 | -0.430638588 | NA                                   | 1 | 0                |
|           | 0.998207054                           |                   |              |              |                                      |   |                  |
| PRTG      | ENSG00000166450.12                    | 0.666763408       | 3            | 3            | 0.254511868                          |   |                  |
|           | Brain_Nucleus_accumbens_basal_ganglia | 0.725284916       |              |              | Brain_Cerebellum                     |   |                  |
|           | 1.133779166                           | 0.888794197       | 0.888794197  |              | -0.351404488                         |   | 1.13945874       |
|           | 0.44028074                            | 0.749724271       | 3            | 0            | 0.998207054                          |   |                  |
| LINC01658 | ENSG00000178248.11                    | 0.666810758       | 7            | 6            | 0.320834015                          |   |                  |
|           | Brain_Hippocampus                     | 0.888833388       |              |              | Brain_Cortex                         |   | 3.165335077      |
|           | 0.090195684                           | 0.35048237        | -0.768206891 |              | 0.992745461                          |   | -0.075568139     |
|           | 0.6270221                             | 6                 | 0            | 0.998207054  |                                      |   |                  |
| FAM136A   | ENSG00000035141.7                     | 0.666832201       | 2            | 2            | 0.405801998                          |   |                  |
|           | Brain_Anterior_cingulate_cortex_BA24  | 0.886932138       |              |              |                                      |   |                  |
|           | Brain_Nucleus_accumbens_basal_ganglia | 1.524813487       |              |              | 0.475186513                          |   |                  |
|           | 0.475186513                           | -0.831303854      | -0.142187205 |              | -0.486745529                         |   | 0.487279055      |
|           | 2                                     | 0                 | 0.998207054  |              |                                      |   |                  |
| ZNF283    | ENSG00000167637.16                    | 0.666879495       | 3            | 3            | 0.264554183                          |   |                  |
|           | Brain_Nucleus_accumbens_basal_ganglia | 0.984836447       |              |              | Brain_Cerebellar_Hemisphere          |   |                  |
|           | 1.916137526                           | 0.518382052       | 0.518382052  |              | -1.115691564                         |   | -0.019005839     |
|           | -0.468686386                          | 0.574354117       | 3            | 0            | 0.998207054                          |   |                  |
| ASPDH     | ENSG00000204653.9                     | 0.66693431        | 9            | 6            | 0.296350106                          |   |                  |
|           | Brain_Frontal_Cortex_BA9              | 0.937562411       |              |              | Brain_Anterior_cingulate_cortex_BA24 |   |                  |
|           | 4.806548483                           | 0.012899563       | 0.248337256  |              | -0.809787954                         |   | 1.044292448      |
|           | -0.170294828                          | 0.575199453       | 6            | 0            | 0.998207054                          |   |                  |
| RCN3      | ENSG00000142552.7                     | 0.666967439       | 2            | 2            | 0.369770982                          |   |                  |
|           | Brain_Hypothalamus                    | 0.967704691       |              |              | Brain_Spinal_cord_cervical_c-1       |   |                  |
|           | 1.127848178                           | 0.872151822       | 0.872151822  |              | 0.040487226                          |   | 0.896902433      |
|           | 0.468694829                           | 0.605577001       | 2            | 0            | 0.998207054                          |   |                  |
| KAT6B     | ENSG00000156650.12                    | 0.666996517       | 1            | 1            | 0.666996517                          |   |                  |
|           | Brain_Caudate_basal_ganglia           | 0.666996517       |              |              | Brain_Caudate_basal_ganglia          | 1 | 1                |
|           | 1                                     | 0.430273754       | 0.430273754  | 0.430273754  | NA                                   | 1 | 0                |
|           | 0.998207054                           |                   |              |              |                                      |   |                  |
| HS3ST4    | ENSG00000182601.6                     | 0.667020542       | 2            | 2            | 0.443752457                          |   |                  |
|           | Brain_Caudate_basal_ganglia           | 0.621864122       |              |              | Brain_Cerebellum                     |   | 1.027196699      |
|           | 0.972803301                           | 0.972803301       | -0.765872018 |              | 0.493210128                          |   | -0.136330945     |
|           | 0.890305524                           | 2                 | 0            | 0.998207054  |                                      |   |                  |
| RPP40     | ENSG00000124787.13                    | 0.667043036       | 1            | 1            | 0.667043036                          |   | Brain_Cerebellum |
|           | 0.667043036                           | Brain_Cerebellum  | 1            | 1            | 1                                    |   | -0.430209797     |
|           | -0.430209797                          | NA                | 1            | 0            | 0.998207054                          |   |                  |
| STYX      | ENSG00000198252.11                    | 0.667059216       | 8            | 2            | 0.243709087                          |   |                  |
|           | Brain_Nucleus_accumbens_basal_ganglia | 0.85791349        |              |              | Brain_Amygdala                       |   | 6.507104974      |
|           | 0.010605587                           | 0.901565488       | -1.165765951 |              | -0.179030835                         |   | -0.801179166     |
|           | 0.348778546                           | 2                 | 0            | 0.998207054  |                                      |   |                  |
| SPINK9    | ENSG00000204909.7                     | 0.667166814       | 8            | 2            | 0.295275713                          |   |                  |
|           | Brain_Hippocampus                     | 0.842976779       |              |              | Brain_Cortex                         |   | 7.409655595      |
|           | 0.000639853                           | 0.271080353       | -1.046618181 |              | -0.198087277                         |   | -0.564599021     |

|              |                                |              |              |              |             |                                |              |   |   |  |
|--------------|--------------------------------|--------------|--------------|--------------|-------------|--------------------------------|--------------|---|---|--|
|              | 0.28035839                     | 2            | 0            | 0.998207054  |             |                                |              |   |   |  |
| PTPN9        | ENSG00000169410.9              |              |              | 0.667179325  | 1           | 1                              | 0.667179325  |   |   |  |
|              | Brain_Hippocampus              |              |              | 0.667179325  |             | Brain_Hippocampus              | 1            | 1 | 1 |  |
|              | 0.430022429                    | 0.430022429  | 0.430022429  | NA           | 1           | 0                              | 0.998207054  |   |   |  |
| TAL2         | ENSG00000186051.6              |              |              | 0.667215154  | 1           | 1                              | 0.667215154  |   |   |  |
|              | Brain_Caudate_basal_ganglia    |              |              | 0.667215154  |             | Brain_Caudate_basal_ganglia    | 1            | 1 | 1 |  |
|              | 1                              | -0.429973175 | -0.429973175 | -0.429973175 | NA          | 1                              | 0            |   |   |  |
|              | 0.998207054                    |              |              |              |             |                                |              |   |   |  |
| NRIP1        | ENSG00000180530.10             |              |              | 0.667229556  | 1           | 1                              | 0.667229556  |   |   |  |
|              | Brain_Caudate_basal_ganglia    |              |              | 0.667229556  |             | Brain_Caudate_basal_ganglia    | 1            | 1 | 1 |  |
|              | 1                              | -0.429953378 | -0.429953378 | -0.429953378 | NA          | 1                              | 0            |   |   |  |
|              | 0.998207054                    |              |              |              |             |                                |              |   |   |  |
| PCDHGA2      | ENSG00000081853.14             |              |              | 0.667290832  | 1           | 1                              | 0.667290832  |   |   |  |
|              | Brain_Caudate_basal_ganglia    |              |              | 0.667290832  |             | Brain_Caudate_basal_ganglia    | 1            | 1 | 1 |  |
|              | 1                              | -0.429869144 | -0.429869144 | -0.429869144 | NA          | 1                              | 0            |   |   |  |
|              | 0.998207054                    |              |              |              |             |                                |              |   |   |  |
| PTRH1        | ENSG00000187024.13             |              |              | 0.667363631  | 7           | 3                              | 0.300649784  |   |   |  |
|              | Brain_Cerebellar_Hemisphere    |              |              | 0.83287781   |             | Brain_Frontal_Cortex_BA9       | 5.159912331  |   |   |  |
|              | 0.000476638                    | 0.538106085  | -0.679812879 | 1.035040957  |             |                                | -0.036744911 |   |   |  |
|              | 0.590511814                    | 3            | 0            | 0.998207054  |             |                                |              |   |   |  |
| MRPL51       | ENSG00000111639.7              |              |              | 0.66738803   | 2           | 2                              | 0.63703983   |   |   |  |
|              | Brain_Caudate_basal_ganglia    |              |              | 0.691190174  |             | Brain_Cortex                   | 1.532001515  |   |   |  |
|              | 0.467998485                    | 0.467998485  | -0.471841635 | 0.397240426  |             |                                | -0.037300604 |   |   |  |
|              | 0.614533819                    | 2            | 0            | 0.998207054  |             |                                |              |   |   |  |
| HMGB2        | ENSG00000164104.11             |              |              | 0.667399673  | 1           | 1                              | 0.667399673  |   |   |  |
|              | Brain_Hippocampus              |              |              | 0.667399673  |             | Brain_Hippocampus              | 1            | 1 | 1 |  |
|              | 0.429719533                    | 0.429719533  | 0.429719533  | NA           | 1           | 0                              | 0.998207054  |   |   |  |
| KLHL3        | ENSG00000146021.14             |              |              | 0.667434062  | 2           | 2                              | 0.438232548  |   |   |  |
|              | Brain_Cerebellar_Hemisphere    |              |              | 1.709309356  |             | Brain_Cerebellum               | 0.290690644  |   |   |  |
|              | 0.819199594                    | -0.77518128  | -0.228574567 | -0.501877924 |             |                                | 0.386509313  |   |   |  |
|              | 0.290690644                    | 2            | 0            | 0.998207054  |             |                                |              |   |   |  |
| TRAK1        | ENSG00000182606.14             |              |              | 0.667509704  | 3           | 3                              | 0.310005252  |   |   |  |
|              | Brain_Hypothalamus             |              |              | 0.860635672  |             | Brain_Putamen_basal_ganglia    | 1.911572908  |   |   |  |
|              | 0.334804434                    | 0.334804434  | -0.308704463 | 1.015211013  |             |                                | 0.294023862  |   |   |  |
|              | 0.669859998                    | 3            | 0            | 0.998207054  |             |                                |              |   |   |  |
| MRPL12       | ENSG00000262814.7              |              |              | 0.667619527  | 3           | 3                              | 0.382647798  |   |   |  |
|              | Brain_Cerebellar_Hemisphere    |              |              | 0.670005219  |             | Brain_Substantia_nigra         |              |   |   |  |
|              | 1.161916952                    | 0.81921455   | 0.81921455   | 0.426140845  |             |                                | 0.873028034  |   |   |  |
|              | 0.656936377                    | 0.22380615   | 3            | 0            | 0.998207054 |                                |              |   |   |  |
| AKR1A1       | ENSG00000117448.13             |              |              | 0.667637022  | 2           | 1                              | 0.594794406  |   |   |  |
|              | Brain_Cerebellum               |              |              | 0.746564747  |             | Brain_Cerebellar_Hemisphere    | 1.982742867  |   |   |  |
|              | 0.017257133                    | 1.982742867  | -0.531901229 | -0.323172314 |             |                                | -0.427536771 |   |   |  |
|              | 0.147593631                    | 1            | 0            | 0.998207054  |             |                                |              |   |   |  |
| NLRP4        | ENSG00000160505.15             |              |              | 0.667639656  | 2           | 2                              | 0.380728218  |   |   |  |
|              | Brain_Substantia_nigra         |              |              | 0.440886776  |             | Brain_Spinal_cord_cervical_c-1 |              |   |   |  |
|              | 1.722040703                    | 0.277959297  | 0.277959297  | 0.77069662   |             |                                | 0.876555317  |   |   |  |
|              | 0.823625968                    | 0.074853402  | 2            | 0            | 0.998207054 |                                |              |   |   |  |
| RP11-302M6.5 | ENSG00000272672.1              |              |              | 0.667665563  | 1           | 1                              | 0.667665563  |   |   |  |
|              | Brain_Substantia_nigra         |              |              | 0.667665563  |             | Brain_Substantia_nigra         | 1            | 1 | 1 |  |
|              | 1                              | -0.429354084 | -0.429354084 | -0.429354084 | NA          | 1                              | 0            |   |   |  |
|              | 0.998207054                    |              |              |              |             |                                |              |   |   |  |
| BCL6B        | ENSG00000161940.10             |              |              | 0.667729631  | 1           | 1                              | 0.667729631  |   |   |  |
|              | Brain_Hippocampus              |              |              | 0.667729631  |             | Brain_Hippocampus              | 1            | 1 | 1 |  |
|              | -0.429266036                   | -0.429266036 | -0.429266036 | NA           | 1           | 0                              | 0.998207054  |   |   |  |
| LPIN2        | ENSG00000101577.9              |              |              | 0.667838936  | 7           | 5                              | 0.220222699  |   |   |  |
|              | Brain_Frontal_Cortex_BA9       |              |              | 4.162807818  |             | Brain_Cortex                   | 0.022395391  |   |   |  |
|              | 0.749046468                    | -0.704734525 | 1.225936162  | 0.632022091  |             |                                | 0.822005933  |   |   |  |
|              | 0.225244306                    | 5            | 0            | 0.998207054  |             |                                |              |   |   |  |
| ZNF268       | ENSG00000090612.20             |              |              | 0.667873921  | 8           | 4                              | 0.120818574  |   |   |  |
|              | Brain_Spinal_cord_cervical_c-1 |              |              | 0.838982205  |             | Brain_Cerebellar_Hemisphere    |              |   |   |  |
|              | 6.243859529                    | 0.018539821  | 0.220647603  | 0.203195531  |             |                                | 1.551346897  |   |   |  |
|              | 0.511402139                    | 0.439722383  | 4            | 0            | 0.998207054 |                                |              |   |   |  |



|             |                                        |                                        |                                      |              |              |                  |
|-------------|----------------------------------------|----------------------------------------|--------------------------------------|--------------|--------------|------------------|
| USP34       | ENSG00000115464.14                     | 0.668413921                            | 1                                    | 1            | 0.668413921  | Brain_Cerebellum |
|             | 0.668413921                            | Brain_Cerebellum1                      | 1                                    | 1            | 0.428325822  | 0.428325822      |
|             | 0.428325822                            | NA                                     | 1                                    | 0            | 0.998207054  |                  |
| ALG8        | ENSG00000159063.12                     | 0.668419671                            | 13                                   | 4            | 0.328322013  |                  |
|             | Brain_Caudate_basal_ganglia0.98061575  | Brain_Spinal_cord_cervical_c-1         |                                      |              |              |                  |
|             | 10.08405925                            | 0.001081505                            | 0.402560955                          | -0.977499323 | 0.61706647   |                  |
|             | -0.091033867                           | 0.486665534                            | 4                                    | 0            | 0.998207054  |                  |
| DDIT4L      | ENSG00000145358.6                      | 0.668432417                            | 6                                    | 6            | 0.204304814  |                  |
|             | Brain_Substantia_nigra                 | 0.946234652                            | Brain_Putamen_basal_ganglia1.8269104 |              |              |                  |
|             | 0.342666118                            | 0.342666118                            | -1.269382109                         | 0.194345993  | -0.517183965 |                  |
|             | 0.590607834                            | 6                                      | 0                                    | 0.998207054  |              |                  |
| SLC18A3     | ENSG00000187714.6                      | 0.668433967                            | 1                                    | 1            | 0.668433967  |                  |
|             | Brain_Cerebellar_Hemisphere0.668433967 | Brain_Cerebellar_Hemisphere1           | 1                                    |              |              |                  |
|             | 1                                      | -0.428298285                           | -0.428298285                         | -0.428298285 | NA           | 1                |
|             | 0.998207054                            |                                        |                                      |              |              | 0                |
| LINC02185   | ENSG00000262097.1                      | 0.668695914                            | 1                                    | 1            | 0.668695914  |                  |
|             | Brain_Putamen_basal_ganglia0.668695914 | Brain_Putamen_basal_ganglia1           | 1                                    |              |              |                  |
|             | 1                                      | 0.427938476                            | 0.427938476                          | 0.427938476  | NA           | 1                |
|             | 0.998207054                            |                                        |                                      |              |              | 0                |
| NEXN        | ENSG00000162614.18                     | 0.668768135                            | 3                                    | 3            | 0.324393707  |                  |
|             | Brain_Nucleus_accumbens_basal_ganglia  | 0.771377251                            |                                      |              |              |                  |
|             | Brain_Spinal_cord_cervical_c-1         | 1.380666597                            | 0.624212587                          | 0.624212587  |              |                  |
|             | -0.985469089                           | 0.290573864                            | -0.489064267                         | 0.683547537  | 3            | 0                |
|             | 0.998207054                            |                                        |                                      |              |              |                  |
| PARP9       | ENSG00000138496.16                     | 0.668783158                            | 3                                    | 2            | 0.431531292  | Brain_Amygdala   |
|             | 0.66990851                             | Brain_Substantia_nigra                 | 2.001201085                          | 0.044026972  |              |                  |
|             | 0.954771942                            | -0.786573987                           | 0.426273576                          | -0.329496442 | 0.65928954   | 2                |
|             | 0                                      | 0.998207054                            |                                      |              |              |                  |
| TCP1        | ENSG00000120438.11                     | 0.668834968                            | 3                                    | 2            | 0.385074866  |                  |
|             | Brain_Hippocampus                      | 0.444744947                            | Brain_Cortex                         | 2.590315782  |              |                  |
|             | 0.077436333                            | 0.332247884                            | 0.764205236                          | 0.868583712  | 0.831248884  |                  |
|             | 0.058186571                            | 2                                      | 0                                    | 0.998207054  |              |                  |
| BCL7A       | ENSG00000110987.8                      | 0.668859309                            | 1                                    | 1            | 0.668859309  |                  |
|             | Brain_Spinal_cord_cervical_c-1         | 0.668859309                            | Brain_Spinal_cord_cervical_c-1       |              |              |                  |
|             | 1                                      | 1                                      | 1                                    | -0.427714064 | -0.427714064 | -0.427714064     |
|             | 0.998207054                            |                                        |                                      |              | NA           | 1                |
|             |                                        |                                        |                                      |              |              | 0                |
| CSNK1G1     | ENSG00000169118.17                     | 0.668901326                            | 1                                    | 1            | 0.668901326  |                  |
|             | Brain_Caudate_basal_ganglia0.668901326 | Brain_Caudate_basal_ganglia1           | 1                                    |              |              |                  |
|             | 1                                      | 0.427656361                            | 0.427656361                          | 0.427656361  | NA           | 1                |
|             | 0.998207054                            |                                        |                                      |              |              | 0                |
| FAM71E1     | ENSG00000142530.10                     | 0.668930465                            | 2                                    | 2            | 0.369910045  |                  |
|             | Brain_Nucleus_accumbens_basal_ganglia  | 0.748247924                            | Brain_Cerebellum                     |              |              |                  |
|             | 1.343753526                            | 0.656246474                            | 0.656246474                          | 0.320950473  | 0.896641877  |                  |
|             | 0.608796175                            | 0.407075295                            | 2                                    | 0            | 0.998207054  |                  |
| AC005753.1  | ENSG00000278925.1                      | 0.668941109                            | 2                                    | 2            | 0.710049165  |                  |
|             | Brain_Cerebellar_Hemisphere0.730650511 | Brain_Cerebellum1.681096793            |                                      |              |              |                  |
|             | 0.318903207                            | 0.318903207                            | -0.344260335                         | 0.371790059  | 0.013764862  |                  |
|             | 0.50632409                             | 2                                      | 0                                    | 0.998207054  |              |                  |
| POLR2J2     | ENSG00000228049.7                      | 0.669001386                            | 13                                   | 2            | 0.626665151  |                  |
|             | Brain_Cerebellar_Hemisphere0.95587398  | Brain_Putamen_basal_ganglia11.78397446 |                                      |              |              |                  |
|             | 0.005664341                            | 0.523431022                            | -0.486426013                         | 0.382841531  | -0.179949973 |                  |
|             | 0.249644423                            | 2                                      | 0                                    | 0.998207054  |              |                  |
| ZNF726      | ENSG00000213967.10                     | 0.669044286                            | 10                                   | 8            | 0.138977994  |                  |
|             | Brain_Spinal_cord_cervical_c-1         | 0.9429358                              | Brain_Amygdala                       | 3.298010046  |              |                  |
|             | 0.004256417                            | 0.114109425                            | -1.479607611                         | 0.770956621  | -0.398031385 |                  |
|             | 0.671169587                            | 8                                      | 0                                    | 0.998207054  |              |                  |
| CTB-88F18.5 | ENSG00000283897.1                      | 0.669048871                            | 1                                    | 1            | 0.669048871  |                  |
|             | Brain_Putamen_basal_ganglia0.669048871 | Brain_Putamen_basal_ganglia1           | 1                                    |              |              |                  |
|             | 1                                      | 0.427453741                            | 0.427453741                          | 0.427453741  | NA           | 1                |
|             | 0.998207054                            |                                        |                                      |              |              | 0                |
| LARP7       | ENSG00000174720.15                     | 0.669111268                            | 4                                    | 4            | 0.4504599    | Brain_Cerebellum |
|             | 0.85013193                             | Brain_Substantia_nigra                 | 2.827501337                          | 0.203759196  |              |                  |

|               |                                       |              |              |              |                                       |
|---------------|---------------------------------------|--------------|--------------|--------------|---------------------------------------|
|               | 0.203759196                           | -0.754648525 | 0.621034836  | 0.049283496  | 0.645820182                           |
|               | 4                                     | 0            | 0.998207054  |              |                                       |
| CAPS          | ENSG00000105519.15                    | 0.669407914  | 6            | 4            | 0.121609573                           |
|               | Brain_Cerebellar_Hemisphere           | 0.545855544  |              |              | Brain_Nucleus_accumbens_basal_ganglia |
|               | 4.668770992                           | 0.030186989  | 0.218988121  | 0.603982098  | 1.548052847                           |
|               | 1.103337882                           | 0.310020981  | 4            | 0            | 0.998207054                           |
| NOTCH3        | ENSG00000074181.8                     | 0.669621331  | 1            | 1            | 0.669621331                           |
|               | Brain_Frontal_Cortex_BA9              | 0.669621331  |              |              | Brain_Frontal_Cortex_BA9              |
|               | 1                                     | -0.426667768 | -0.426667768 | -0.426667768 | NA                                    |
|               | 0.998207054                           |              |              | 1            | 0                                     |
| RP11-39704.1  | ENSG00000229206.3                     | 0.669653458  | 2            | 2            | 0.465052717                           |
|               | Brain_Caudate_basal_ganglia           | 0.626978695  |              |              | Brain_Cerebellar_Hemisphere           |
|               | 1.043111818                           | 0.956888182  | 0.956888182  | -0.48598374  | 0.730552202                           |
|               | 0.122284231                           | 0.860220814  | 2            | 0            | 0.998207054                           |
| PCDHB12       | ENSG00000120328.6                     | 0.669656868  | 7            | 2            | 0.289253021                           |
|               | Brain_Hippocampus                     | 0.880044705  |              |              | Brain_Hypothalamus                    |
|               | 4.94E-07                              | 0.642246397  | -1.059761709 | 0.150912544  | 6.128276226                           |
|               | 0.3880727                             | 2            | 0            | 0.998207054  | -0.601119195                          |
| LINC01315     | ENSG00000229891.1                     | 0.669836196  | 2            | 2            | 0.440343435                           |
|               | Brain_Cerebellum                      | 0.808794366  |              |              | Brain_Putamen_basal_ganglia           |
|               | 0.744792198                           | 0.744792198  | -0.771613401 | 0.241981671  | 1.255207802                           |
|               | 0.716719949                           | 2            | 0            | 0.998207054  | -0.264815865                          |
| CYFIP2        | ENSG00000055163.19                    | 0.66983813   | 1            | 1            | 0.66983813                            |
|               | Brain_Cerebellum                      | 1            | 1            | 0.426370175  | Brain_Cerebellum                      |
|               | 0.66983813                            | 0.426370175  | NA           | 1            | 0.426370175                           |
|               | 0.426370175                           | NA           | 1            | 0            | 0.998207054                           |
| ASF1A         | ENSG00000111875.7                     | 0.669872791  | 3            | 3            | 0.294353931                           |
|               | Brain_Cerebellum                      | 0.675732908  |              |              | Brain_Cerebellar_Hemisphere           |
|               | 0.227351267                           | -1.04861808  | 0.460699148  | -0.335403977 | 1.868536436                           |
|               | 3                                     | 0            | 0.998207054  |              | 0.227351267                           |
|               |                                       |              |              |              | 0.758065014                           |
| TECTB         | ENSG00000119913.4                     | 0.669923407  | 9            | 3            | 0.152972953                           |
|               | Brain_Putamen_basal_ganglia           | 0.541560714  |              |              | Brain_Anterior_cingulate_cortex_BA24  |
|               | 7.742023142                           | 8.77E-05     | 0.280543154  | -1.429108839 | -0.610454592                          |
|               | -1.042915031                          | 0.236682762  | 3            | 0            | 0.998207054                           |
| SMG1          | ENSG00000157106.16                    | 0.669933918  | 2            | 1            | 0.602767564                           |
|               | Brain_Cerebellum                      | 0.740501651  |              |              | Brain_Cerebellar_Hemisphere           |
|               | 1.995950073                           | -0.520424749 | -0.331189102 | -0.425806926 | 1.995950073                           |
|               | 1                                     | 0            | 0.998207054  |              | 0.004049927                           |
|               |                                       |              |              |              | 0.133809809                           |
| CDKN3         | ENSG00000100526.19                    | 0.670163933  | 1            | 1            | 0.670163933                           |
|               | Brain_Nucleus_accumbens_basal_ganglia | 0.670163933  |              |              | Brain_Nucleus_accumbens_basal_ganglia |
|               | 0.42592303                            | NA           | 1            | 0            | 0.42592303                            |
|               | 0.42592303                            | NA           | 1            | 0            | 0.998207054                           |
| CLINT1        | ENSG00000113282.13                    | 0.670210546  | 1            | 1            | 0.670210546                           |
|               | Brain_Amygdala                        | 0.670210546  |              |              | Brain_Amygdala                        |
|               | -0.425859063                          | -0.425859063 | NA           | 1            | 1                                     |
|               |                                       |              | NA           | 1            | 0                                     |
|               |                                       |              |              |              | 0.998207054                           |
| CMBL          | ENSG00000164237.8                     | 0.6703604    | 1            | 1            | 0.6703604                             |
|               | Brain_Cerebellar_Hemisphere           | 0.6703604    |              |              | Brain_Cerebellar_Hemisphere           |
|               | -0.425653431                          | -0.425653431 | NA           | 1            | 0                                     |
|               |                                       |              | NA           | 1            | 0                                     |
|               |                                       |              |              |              | 0.998207054                           |
| CSTF3         | ENSG00000176102.11                    | 0.670364789  | 2            | 2            | 0.522065942                           |
|               | Brain_Anterior_cingulate_cortex_BA24  | 0.560087656  |              |              | Brain_Spinal_cord_cervical_c-1        |
|               | Brain_Spinal_cord_cervical_c-1        | 1.063386525  |              |              | 0.936613475                           |
|               | -0.640164066                          | 0.582711313  | -0.028726377 | 0.864703473  | 0.936613475                           |
|               | 0.998207054                           |              |              |              | 2                                     |
|               |                                       |              |              |              | 0                                     |
| FIP1L1        | ENSG00000145216.15                    | 0.670421668  | 1            | 1            | 0.670421668                           |
|               | Brain_Hypothalamus                    | 0.670421668  |              |              | Brain_Hypothalamus                    |
|               | 0.425569364                           | 0.425569364  | 0.425569364  | NA           | 1                                     |
|               |                                       |              |              | 1            | 0                                     |
|               |                                       |              |              |              | 0.998207054                           |
| NMNAT3        | ENSG00000163864.15                    | 0.670616671  | 7            | 7            | 0.118255803                           |
|               | Brain_Hippocampus                     | 0.756111646  |              |              | Brain_Frontal_Cortex_BA9              |
|               | 0.129728166                           | 0.129728166  | -1.193455417 | 1.562136638  | 2.245935396                           |
|               | 0.972422842                           | 7            | 0            | 0.998207054  | 0.301467132                           |
| RP11-315D16.4 | ENSG00000260657.2                     | 0.670681172  | 12           | 5            | 0.43254523                            |
|               | Brain_Cerebellar_Hemisphere           | 0.994168872  |              |              | Brain_Spinal_cord_cervical_c-1        |
|               | 8.307577478                           | 0.002982912  | 0.402102312  | -0.784843674 | 0.719139623                           |

|               |                                       |                  |                                |              |                             |              |              |   |   |
|---------------|---------------------------------------|------------------|--------------------------------|--------------|-----------------------------|--------------|--------------|---|---|
|               | -0.042718688                          | 0.461344335      | 5                              | 0            | 0.998207054                 |              |              |   |   |
| ZNF74         | ENSG00000185252.18                    | 0.670746843      | 1                              | 1            | 0.670746843                 |              |              |   |   |
|               | Brain_Anterior_cingulate_cortex_BA24  | 0.670746843      |                                |              |                             |              |              |   |   |
|               | Brain_Anterior_cingulate_cortex_BA24  | 1                | 1                              | 1            | 0.425123232                 |              |              |   |   |
|               | 0.425123232                           | 0.425123232      | NA                             | 1            | 0                           | 0.998207054  |              |   |   |
| NFYB          | ENSG00000120837.7                     | 0.670803335      | 4                              | 4            | 0.442888138                 | Brain_Cortex |              |   |   |
|               | 0.999167301                           | Brain_Cerebellum | 2.525775205                    |              | 0.19926633                  | 0.19926633   |              |   |   |
|               | -0.767325285                          | 0.530384637      | 0.041858196                    |              | 0.584740266                 | 4            | 0            |   |   |
|               | 0.998207054                           |                  |                                |              |                             |              |              |   |   |
| RP11-225B17.2 | ENSG00000273014.1                     | 0.671139299      | 4                              | 4            | 0.19666584                  |              |              |   |   |
|               | Brain_Anterior_cingulate_cortex_BA24  | 0.789653716      |                                |              | Brain_Caudate_basal_ganglia |              |              |   |   |
|               | 2.559157407                           | 0.34171964       | 0.34171964                     | 0.266760309  | 1.291109126                 |              |              |   |   |
|               | 0.699894571                           | 0.438091093      | 4                              | 0            | 0.998207054                 |              |              |   |   |
| RP11-273G15.2 | ENSG00000247317.3                     | 0.671165113      | 10                             | 5            | 0.157981213                 |              |              |   |   |
|               | Brain_Cerebellar_Hemisphere           | 0.852590908      | Brain_Hypothalamus             | 7.262691251  |                             |              |              |   |   |
|               | 0.000755051                           | 0.243945303      | -1.411893869                   | -0.185813639 | -1.101451944                |              |              |   |   |
|               | 0.357225705                           | 5                | 0                              | 0.998207054  |                             |              |              |   |   |
| PTPN2         | ENSG00000175354.18                    | 0.671176129      | 1                              | 1            | 0.671176129                 |              |              |   |   |
|               | Brain_Nucleus_accumbens_basal_ganglia | 0.671176129      |                                |              |                             |              |              |   |   |
|               | Brain_Nucleus_accumbens_basal_ganglia | 1                | 1                              | 1            | -0.424534392                |              |              |   |   |
|               | -0.424534392                          | -0.424534392     | NA                             | 1            | 0                           | 0.998207054  |              |   |   |
| C2CD2         | ENSG00000157617.16                    | 0.671223646      | 1                              | 1            | 0.671223646                 |              |              |   |   |
|               | Brain_Spinal_cord_cervical_c-1        | 0.671223646      | Brain_Spinal_cord_cervical_c-1 |              |                             |              |              |   |   |
|               | 1                                     | 1                | 1                              | -0.424469224 | -0.424469224                | -0.424469224 | NA           | 1 | 0 |
|               | 0.998207054                           |                  |                                |              |                             |              |              |   |   |
| RP11-286B14.1 | ENSG00000228971.2                     | 0.671230727      | 3                              | 3            | 0.368634177                 |              |              |   |   |
|               | Brain_Frontal_Cortex_BA9              | 0.99600062       | Brain_Substantia_nigra         | 1.943909253  |                             |              |              |   |   |
|               | 0.158768681                           | 0.158768681      | 0.0050125                      | 0.899034701  | 0.396425399                 |              |              |   |   |
|               | 0.457266229                           | 3                | 0                              | 0.998207054  |                             |              |              |   |   |
| GLRX5         | ENSG00000182512.4                     | 0.67126059       | 7                              | 7            | 0.123675176                 |              |              |   |   |
|               | Brain_Spinal_cord_cervical_c-1        | 0.989664568      | Brain_Putamen_basal_ganglia    |              |                             |              |              |   |   |
|               | 3.084721004                           | 0.2214626        | 0.2214626                      | -0.868370499 | 1.539529113                 | 0.10501859   |              |   |   |
|               | 0.755361215                           | 7                | 0                              | 0.998207054  |                             |              |              |   |   |
| SLC6A7        | ENSG00000011083.8                     | 0.671266622      | 3                              | 3            | 0.296632475                 |              |              |   |   |
|               | Brain_Cerebellar_Hemisphere           | 0.692292315      | Brain_Cerebellum               | 1.515943027  |                             |              |              |   |   |
|               | 0.481264063                           | 0.481264063      | -0.627903293                   | 1.043682141  | 0.270508329                 |              |              |   |   |
|               | 0.842800598                           | 3                | 0                              | 0.998207054  |                             |              |              |   |   |
| CCDC144NL     | ENSG00000205212.3                     | 0.671384471      | 11                             | 5            | 0.205934423                 |              |              |   |   |
|               | Brain_Hypothalamus                    | 0.822255251      | Brain_Frontal_Cortex_BA9       | 5.865797878  |                             |              |              |   |   |
|               | 0.002578499                           | 0.281401113      | 0.224645262                    | 1.264824007  | 0.851315127                 |              |              |   |   |
|               | 0.365640869                           | 5                | 0                              | 0.998207054  |                             |              |              |   |   |
| CLIC6         | ENSG00000159212.12                    | 0.671423257      | 9                              | 4            | 0.211170985                 |              |              |   |   |
|               | Brain_Putamen_basal_ganglia           | 0.623430661      | Brain_Cortex                   | 6.715440963  |                             |              |              |   |   |
|               | 0.000771335                           | 0.300417927      | -1.250352016                   | -0.490994043 | -0.97036535                 |              |              |   |   |
|               | 0.295864475                           | 4                | 0                              | 0.998207054  |                             |              |              |   |   |
| HES4          | ENSG00000188290.10                    | 0.671487953      | 1                              | 1            | 0.671487953                 | Brain_Cortex |              |   |   |
|               | 0.671487953                           | Brain_Cortex     | 1                              | 1            | 1                           | -0.424106763 | -0.424106763 |   |   |
|               | -0.424106763                          | NA               | 1                              | 0            | 0.998207054                 |              |              |   |   |
| PSD4          | ENSG00000125637.15                    | 0.671488624      | 7                              | 2            | 0.37599665                  |              |              |   |   |
|               | Brain_Spinal_cord_cervical_c-1        | 0.837321169      | Brain_Caudate_basal_ganglia    |              |                             |              |              |   |   |
|               | 5.250243706                           | 0.011131345      | 1.358656629                    | -0.885296662 | 0.205321216                 |              |              |   |   |
|               | -0.584741098                          | 0.394681151      | 2                              | 0            | 0.998207054                 |              |              |   |   |
| GGA2          | ENSG00000103365.15                    | 0.671494578      | 1                              | 1            | 0.671494578                 |              |              |   |   |
|               | Brain_Nucleus_accumbens_basal_ganglia | 0.671494578      |                                |              |                             |              |              |   |   |
|               | Brain_Nucleus_accumbens_basal_ganglia | 1                | 1                              | 1            | -0.424097679                |              |              |   |   |
|               | -0.424097679                          | -0.424097679     | NA                             | 1            | 0                           | 0.998207054  |              |   |   |
| PSMD11        | ENSG00000108671.9                     | 0.671516557      | 1                              | 1            | 0.671516557                 |              |              |   |   |
|               | Brain_Hypothalamus                    | 0.671516557      | Brain_Hypothalamus             | 1            | 1                           | 1            |              |   |   |
|               | -0.42406754                           | -0.42406754      | -0.42406754                    | NA           | 1                           | 0            | 0.998207054  |   |   |
| CA4           | ENSG00000167434.9                     | 0.671564242      | 2                              | 2            | 0.380494764                 |              |              |   |   |
|               | Brain_Caudate_basal_ganglia           | 0.89918888       | Brain_Frontal_Cortex_BA9       | 1.043384827  |                             |              |              |   |   |
|               | 0.956615173                           | 0.956615173      | -0.126686059                   | 0.87698504   | 0.37514949                  |              |              |   |   |

|                |                                       |              |             |              |             |                                      |   |              |             |
|----------------|---------------------------------------|--------------|-------------|--------------|-------------|--------------------------------------|---|--------------|-------------|
|                | 0.709702641                           | 2            | 0           | 0.998207054  |             |                                      |   |              |             |
| CROCC          | ENSG00000058453.16                    |              | 0.671603611 | 11           | 9           | 0.086450274                          |   |              |             |
|                | Brain_Hypothalamus                    |              | 0.739595457 |              |             | Brain_Substantia_nigra               |   | 4.214702242  |             |
|                | 0.072715001                           | 0.292631901  |             | -0.713680186 |             | 1.714427325                          |   | 0.946744452  |             |
|                | 0.677468869                           | 9            | 0           | 0.998207054  |             |                                      |   |              |             |
| PLEKHH2        | ENSG00000152527.13                    |              | 0.671774779 | 11           | 8           | 0.057084309                          |   |              |             |
|                | Brain_Spinal_cord_cervical_c-1        |              | 0.867687399 |              |             |                                      |   |              |             |
|                | Brain_Anterior_cingulate_cortex_BA24  |              | 5.253013297 |              |             | 0.05549106                           |   | 0.175343769  |             |
|                | -0.814924815                          | 1.902664711  |             | 0.430817795  |             | 0.722659474                          |   | 8            | 0           |
|                | 0.998207054                           |              |             |              |             |                                      |   |              |             |
| KRT31          | ENSG00000094796.4                     |              | 0.671826357 | 5            | 5           | 0.199460114                          |   |              |             |
|                | Brain_Cerebellar_Hemisphere           |              | 0.657471028 |              |             | Brain_Anterior_cingulate_cortex_BA24 |   |              |             |
|                | 2.323662066                           | 0.079791633  |             | 0.079791633  |             | 0.443407478                          |   | 1.283091236  |             |
|                | 0.859454975                           | 0.321662202  |             | 5            | 0           | 0.998207054                          |   |              |             |
| PJA2           | ENSG00000198961.9                     |              | 0.671933368 | 5            | 5           | 0.196051687                          |   |              |             |
|                | Brain_Anterior_cingulate_cortex_BA24  |              | 0.817340613 |              |             | Brain_Hippocampus                    |   |              |             |
|                | 1.279244502                           | 0.700981643  |             | 0.700981643  |             | -1.292882542                         |   | 0.71618691   |             |
|                | -0.228517597                          | 0.85429306   | 5           | 0            | 0.998207054 |                                      |   |              |             |
| RP11-1055B8.2  | ENSG00000263154.1                     |              | 0.671951506 | 9            | 8           | 0.062007789                          |   |              |             |
|                | Brain_Spinal_cord_cervical_c-1        |              | 0.834996636 |              |             | Brain_Putamen_basal_ganglia          |   |              |             |
|                | 3.945604455                           | 0.019577251  |             | 0.221853845  |             | -1.866240044                         |   | 0.208297561  |             |
|                | -0.956513604                          | 0.567652135  |             | 8            | 0           | 0.998207054                          |   |              |             |
| RP11-473M20.16 | ENSG00000261889.1                     |              | 0.671978026 | 1            | 1           | 0.671978026                          |   |              |             |
|                | Brain_Hippocampus                     |              | 0.671978026 |              |             | Brain_Hippocampus                    |   | 1            | 1           |
|                | -0.423434846                          | -0.423434846 |             | -0.423434846 |             | NA                                   | 1 | 0            | 0.998207054 |
| LINC01732      | ENSG00000237292.1                     |              | 0.671990929 | 1            | 1           | 0.671990929                          |   |              |             |
|                | Brain_Hippocampus                     |              | 0.671990929 |              |             | Brain_Hippocampus                    |   | 1            | 1           |
|                | -0.423417157                          | -0.423417157 |             | -0.423417157 |             | NA                                   | 1 | 0            | 0.998207054 |
| KLRG1          | ENSG00000139187.9                     |              | 0.672020746 | 12           | 1           | 0.478528593                          |   |              |             |
|                | Brain_Hippocampus                     |              | 0.833638356 |              |             | Brain_Anterior_cingulate_cortex_BA24 |   |              |             |
|                | 11.65286407                           | 9.08E-05     |             | 11.65286407  |             | 0.210037563                          |   | 0.708671116  |             |
|                | 0.417964029                           | 0.139573677  |             | 1            | 0           | 0.998207054                          |   |              |             |
| CCDC110        | ENSG00000168491.9                     |              | 0.672126127 | 9            | 2           | 0.450423324                          |   |              |             |
|                | Brain_Hippocampus                     |              | 0.993279697 |              |             | Brain_Cortex                         |   | 7.97732429   | 0.001210268 |
|                | 0.277626888                           | -0.382853684 |             | 0.754709469  |             | 0.292198615                          |   | 0.3373016    | 2           |
|                | 0                                     | 0.998207054  |             |              |             |                                      |   |              |             |
| RP11-65J3.3    | ENSG00000230676.1                     |              | 0.672339417 | 1            | 1           | 0.672339417                          |   |              |             |
|                | Brain_Nucleus_accumbens_basal_ganglia |              | 0.672339417 |              |             |                                      |   |              |             |
|                | Brain_Nucleus_accumbens_basal_ganglia |              | 1           | 1            | 1           | 0.422939481                          |   |              |             |
|                | 0.422939481                           | 0.422939481  |             | NA           | 1           | 0                                    |   | 0.998207054  |             |
| SNAPC5         | ENSG00000174446.12                    |              | 0.672359792 | 5            | 5           | 0.194922786                          |   |              |             |
|                | Brain_Hippocampus                     |              | 0.980963619 |              |             | Brain_Anterior_cingulate_cortex_BA24 |   |              |             |
|                | 1.863722314                           | 0.426531367  |             | 0.426531367  |             | -0.375298824                         |   | 1.296152979  |             |
|                | 0.317250684                           | 0.685471824  |             | 5            | 0           | 0.998207054                          |   |              |             |
| LINC00159      | ENSG00000230323.5                     |              | 0.672562757 | 2            | 2           | 0.393848456                          |   |              |             |
|                | Brain_Cerebellar_Hemisphere           |              | 0.799531015 |              |             | Brain_Frontal_Cortex_BA9             |   |              |             |
|                | 1.004124527                           | 0.995875473  |             | 0.995875473  |             | 0.253954105                          |   | 0.852658961  |             |
|                | 0.553306533                           | 0.423348263  |             | 2            | 0           | 0.998207054                          |   |              |             |
| RP11-662J14.1  | ENSG00000258418.1                     |              | 0.672624099 | 1            | 1           | 0.672624099                          |   |              |             |
|                | Brain_Cortex                          |              | 0.672624099 |              |             | Brain_Cortex                         |   | 1            | 1           |
|                | 0.422549335                           | 0.422549335  |             | NA           | 1           | 0                                    |   | 0.998207054  |             |
| RP11-503C24.2  | ENSG00000237987.1                     |              | 0.672626614 | 2            | 1           | 0.610704684                          |   |              |             |
|                | Brain_Caudate_basal_ganglia           |              | 0.747097602 |              |             | Brain_Putamen_basal_ganglia          |   | 1.93635493   |             |
|                | 0.06364507                            | 1.93635493   |             | -0.509067824 |             | -0.322468758                         |   | -0.415768291 |             |
|                | 0.131945465                           | 1            | 0           | 0.998207054  |             |                                      |   |              |             |
| RP11-28H5.2    | ENSG00000271983.1                     |              | 0.672641296 | 1            | 1           | 0.672641296                          |   |              |             |
|                | Brain_Putamen_basal_ganglia           |              | 0.672641296 |              |             | Brain_Putamen_basal_ganglia          |   | 1            | 1           |
|                | 1                                     | -0.422525768 |             | -0.422525768 |             | -0.422525768                         |   | NA           | 1           |
|                | 0.998207054                           |              |             |              |             |                                      |   | 0            |             |
| LTA4H          | ENSG00000111144.9                     |              | 0.672661332 | 1            | 1           | 0.672661332                          |   |              |             |
|                | Brain_Substantia_nigra                |              | 0.672661332 |              |             | Brain_Substantia_nigra               |   | 1            | 1           |
|                | 1                                     | 0.422498312  |             | 0.422498312  |             | 0.422498312                          |   | NA           | 1           |
|                |                                       |              |             |              |             |                                      |   | 0            |             |

0.998207054  
RP11-534L20.5 ENSG00000261000.1 0.672695726 5 2 0.295776718  
Brain\_Caudate\_basal\_ganglia 0.471589351 Brain\_Putamen\_basal\_ganglia  
4.636815183 0.013526926 0.254889912 -1.045532953 -0.71989548  
-0.842393649 0.129506105 2 0 0.998207054  
PTDSS2 ENSG00000174915.11 0.672704457 6 3 0.436600382  
Brain\_Cortex 0.945910033 Brain\_Frontal\_Cortex\_BA9 5.166030202  
0.022907927 0.259697635 -0.777946791 0.210906283 -0.377961366  
0.398516083 3 0 0.998207054  
SMCP ENSG00000163206.5 0.672735912 3 1 0.535365053  
Brain\_Cerebellar\_Hemisphere 0.823716161 Brain\_Cerebellum 2.840492685  
0.06907936 2.840492685 0.222767889 0.619837082 0.410603076  
0.199397638 1 0 0.998207054  
SERPINC1 ENSG00000117601.13 0.672773964 9 1 0.295067666  
Brain\_Putamen\_basal\_ganglia 0.836379404 Brain\_Nucleus\_accumbens\_basal\_ganglia  
8.43774225 0.00035201 8.43774225 -1.047069195 -0.206526837 -0.414805399  
0.244619031 1 0 0.998207054  
GPIHBP1 ENSG00000277494.1 0.672802202 13 8 0.091516847  
Brain\_Hypothalamus 0.931066524 Brain\_Amygdala 6.810653318  
0.006171717 0.341256989 -1.687450052 1.101469601 -0.189728873  
0.700244713 8 0 0.998207054  
MXD1 ENSG00000059728.10 0.672802784 1 1 0.672802784  
Brain\_Frontal\_Cortex\_BA9 0.672802784 Brain\_Frontal\_Cortex\_BA9 1 1  
1 -0.422304486 -0.422304486 -0.422304486 NA 1 0  
0.998207054  
RP11-321L2.1 ENSG00000231460.2 0.672830197 1 1 0.672830197  
Brain\_Cerebellar\_Hemisphere 0.672830197 Brain\_Cerebellar\_Hemisphere 1 1  
1 -0.422266925 -0.422266925 -0.422266925 NA 1 0  
0.998207054  
DDX50 ENSG00000107625.12 0.672870977 4 4 0.290178029  
Brain\_Nucleus\_accumbens\_basal\_ganglia 0.762373829 Brain\_Substantia\_nigra  
1.110378193 0.922732267 0.922732267 -1.057731152 0.321782857  
-0.343524815 0.758572582 4 0 0.998207054  
C2orf49 ENSG00000135974.9 0.672876671 1 1 0.672876671  
Brain\_Cortex 0.672876671 Brain\_Cortex 1 1 1 0.422203248  
0.422203248 0.422203248 NA 1 0 0.998207054  
TBC1D13 ENSG00000107021.15 0.672978873 1 1 0.672978873  
Brain\_Anterior\_cingulate\_cortex\_BA24 0.672978873  
Brain\_Anterior\_cingulate\_cortex\_BA24 1 1 1 0.42206322 0.42206322  
0.42206322 NA 1 0 0.998207054  
RP11-508N22.12 ENSG00000272983.1 0.673137414 12 2 0.353270543  
Brain\_Caudate\_basal\_ganglia 0.669347993 Brain\_Cerebellar\_Hemisphere  
10.75572005 0.001035762 0.430047803 0.427043021 0.928264192  
0.749604687 0.138727652 2 0 0.998207054  
SUGP1 ENSG00000105705.15 0.673244132 2 2 0.47460579 Brain\_Cortex  
0.62940241 Brain\_Hippocampus 1.06372684 0.93627316 0.93627316 -0.482568134  
0.715005265 0.116218565 0.846812271 2 0 0.998207054  
FLOT1 ENSG00000137312.14 0.673253136 8 8 0.339201766  
Brain\_Hippocampus 0.974080606 Brain\_Cerebellum 3.925958463  
0.160560488 0.160560488 -0.955743646 0.855270728 0.083190754  
0.589973053 8 0 0.998207054  
AMIGO2 ENSG00000139211.6 0.673268942 3 3 0.244036813  
Brain\_Spinal\_cord\_cervical\_c-1 0.601277156 Brain\_Cerebellum 1.440352185  
0.576255255 0.576255255 -0.522564779 1.164955977 0.422137612  
0.861684075 3 0 0.998207054  
NKX2-5 ENSG00000183072.9 0.673485206 2 2 0.431966066  
Brain\_Cerebellum 0.681629567 Brain\_Cerebellar\_Hemisphere 1.007301307  
0.992698693 0.992698693 0.410240455 0.785831746 0.5980361  
0.265583148 2 0 0.998207054  
MYO15A ENSG00000091536.16 0.673553652 8 4 0.364073375  
Brain\_Caudate\_basal\_ganglia 0.953854966 Brain\_Hypothalamus 5.255262484  
0.002708307 0.284496173 -0.907630689 0.821746306 0.356394319

|              |                                       |                    |              |             |             |                                |              |              |   |
|--------------|---------------------------------------|--------------------|--------------|-------------|-------------|--------------------------------|--------------|--------------|---|
| 0.56742563   | 4                                     | 0                  | 0.998207054  |             |             |                                |              |              |   |
| PFAS         | ENSG00000178921.13                    |                    | 0.673981698  | 2           | 2           | 0.375911145                    |              |              |   |
|              | Brain_Caudate_basal_ganglia           | 0.523584312        |              |             |             | Brain_Cortex                   | 1.771520219  |              |   |
|              | 0.228479781                           | 0.228479781        | -0.88545525  |             |             | -0.637830057                   | -0.761642653 |              |   |
|              | 0.175097453                           | 2                  | 0            | 0.998207054 |             |                                |              |              |   |
| KATNAL1      | ENSG00000102781.13                    |                    | 0.674003371  | 5           | 5           | 0.19921065                     |              |              |   |
|              | Brain_Putamen_basal_ganglia           | 0.84300927         |              |             |             | Brain_Cerebellum               | 2.46665589   | 0.139740556  |   |
|              | 0.139740556                           | -1.283803695       | 0.675476454  |             |             | -0.182780017                   | 0.801237783  |              |   |
|              | 5                                     | 0                  | 0.998207054  |             |             |                                |              |              |   |
| ZNHIT6       | ENSG00000117174.10                    |                    | 0.674096302  | 6           | 5           | 0.342699622                    |              |              |   |
|              | Brain_Cerebellum                      | 0.999927905        |              |             |             | Brain_Cortex                   | 4.231251365  | 0.129071188  |   |
|              | 0.157342263                           | -0.948844664       | 0.212389568  |             |             | -0.358165006                   | 0.466748687  |              |   |
|              | 5                                     | 0                  | 0.998207054  |             |             |                                |              |              |   |
| RP11-81A22.5 | ENSG00000262165.2                     |                    | 0.674197354  | 13          | 1           | 0.502668962                    |              |              |   |
|              | Brain_Putamen_basal_ganglia           | 0.852288943        |              |             |             | Brain_Cerebellum               | 12.51540519  |              |   |
|              | 0.000322191                           | 12.51540519        | 0.186198701  |             |             | 0.670296242                    | 0.412441915  |              |   |
|              | 0.158692295                           | 1                  | 0            | 0.998207054 |             |                                |              |              |   |
| LRRC8B       | ENSG00000197147.13                    |                    | 0.674228852  | 6           | 5           | 0.103595584                    |              |              |   |
|              | Brain_Frontal_Cortex_BA9              | 0.610849854        |              |             |             | Brain_Hippocampus              | 2.7940721    |              |   |
|              | 0.042338032                           | 0.190251146        | -1.413104069 |             |             | 1.627666672                    | -0.083438173 |              |   |
|              | 1.206503183                           | 5                  | 0            | 0.998207054 |             |                                |              |              |   |
| MED16        | ENSG00000175221.14                    |                    | 0.674270668  | 5           | 3           | 0.471421757                    |              | Brain_Cortex |   |
|              | 0.702430309                           | Brain_Hypothalamus | 3.727896685  |             |             | 0.01187706                     | 0.403842279  |              |   |
|              | -0.382041869                          | 0.720167687        | 0.355849073  |             |             | 0.430474049                    | 3            | 0            |   |
|              | 0.998207054                           |                    |              |             |             |                                |              |              |   |
| CABIN1       | ENSG00000099991.17                    |                    | 0.674294872  | 2           | 2           | 0.458795875                    |              |              |   |
|              | Brain_Cerebellar_Hemisphere           | 0.839841186        |              |             |             | Brain_Frontal_Cortex_BA9       |              |              |   |
|              | 1.726551276                           | 0.273448724        | 0.273448724  |             |             | 0.202096625                    | 0.740831068  |              |   |
|              | 0.471463847                           | 0.380942778        | 2            | 0           | 0.998207054 |                                |              |              |   |
| MPLKIP       | ENSG00000168303.6                     |                    | 0.67430233   | 1           | 1           | 0.67430233                     |              | Brain_Cortex |   |
|              | 0.67430233                            | Brain_Cortex       | 1            | 1           | 1           | 0.420250687                    | 0.420250687  |              |   |
|              | 0.420250687                           | NA                 | 1            | 0           | 0.998207054 |                                |              |              |   |
| PGBD1        | ENSG00000137338.5                     |                    | 0.674307464  | 7           | 6           | 0.170159402                    |              |              |   |
|              | Brain_Anterior_cingulate_cortex_BA24  | 0.703171467        |              |             |             | Brain_Cerebellar_Hemisphere    |              |              |   |
|              | 3.255129289                           | 0.042385517        | 0.218899885  |             |             | -0.412999728                   | 1.371691801  |              |   |
|              | 0.622586487                           | 0.571410337        | 6            | 0           | 0.998207054 |                                |              |              |   |
| PRKG1        | ENSG00000185532.15                    |                    | 0.674412147  | 12          | 6           | 0.094211889                    |              |              |   |
|              | Brain_Hypothalamus                    | 0.964096479        |              |             |             | Brain_Spinal_cord_cervical_c-1 |              |              |   |
|              | 7.877035818                           | 0.004009006        | 0.382044495  |             |             | -0.325269598                   | 1.673586521  |              |   |
|              | 0.303182455                           | 0.535535897        | 6            | 0           | 0.998207054 |                                |              |              |   |
| KRTAP5-10    | ENSG00000204572.9                     |                    | 0.674457027  | 5           | 2           | 0.310517524                    |              |              |   |
|              | Brain_Nucleus_accumbens_basal_ganglia | 0.797732639        |              |             |             | Brain_Hippocampus              |              |              |   |
|              | 4.00634203                            | 0.000659645        | 0.950629427  |             |             | -1.014136708                   | -0.256282591 |              |   |
|              | -0.754217108                          | 0.295450813        | 2            | 0           | 0.998207054 |                                |              |              |   |
| PLA2G4E      | ENSG00000188089.13                    |                    | 0.674506527  | 1           | 1           | 0.674506527                    |              |              |   |
|              | Brain_Caudate_basal_ganglia           | 0.674506527        |              |             |             | Brain_Caudate_basal_ganglia    | 1            | 1            |   |
|              | 1                                     | -0.419971153       | -0.419971153 |             |             | -0.419971153                   | NA           | 1            | 0 |
|              | 0.998207054                           |                    |              |             |             |                                |              |              |   |
| SGO2         | ENSG00000163535.17                    |                    | 0.674536224  | 2           | 2           | 0.37906296                     |              | Brain_Cortex |   |
|              | 0.951681069                           | Brain_Hypothalamus | 1.064006205  |             |             | 0.935993795                    |              |              |   |
|              | 0.935993795                           | 0.060595862        | 0.879624134  |             |             | 0.470109998                    | 0.579140445  |              |   |
|              | 2                                     | 0                  | 0.998207054  |             |             |                                |              |              |   |
| NOL6         | ENSG00000165271.16                    |                    | 0.674578092  | 11          | 5           | 0.439532544                    |              | Brain_Cortex |   |
|              | 0.998015109                           | Brain_Hippocampus  | 8.087726835  |             |             | 0.02655086                     | 0.277690766  |              |   |
|              | -0.772982826                          | 0.598546809        | -0.119582717 |             |             | 0.44714284                     | 5            | 0            |   |
|              | 0.998207054                           |                    |              |             |             |                                |              |              |   |
| UBE2E3       | ENSG00000170035.15                    |                    | 0.674643031  | 3           | 3           | 0.37604615                     |              |              |   |
|              | Brain_Cerebellar_Hemisphere           | 0.730086225        |              |             |             | Brain_Cerebellum               | 1.206944733  |              |   |
|              | 0.855355901                           | 0.855355901        | -0.885204863 |             |             | 0.683784442                    | 0.047863471  |              |   |
|              | 0.825623569                           | 3                  | 0            | 0.998207054 |             |                                |              |              |   |
| SF3B5        | ENSG00000169976.6                     |                    | 0.674802728  | 1           | 1           | 0.674802728                    |              |              |   |
|              | Brain_Caudate_basal_ganglia           | 0.674802728        |              |             |             | Brain_Caudate_basal_ganglia    | 1            | 1            |   |

|            |                                       |              |                                       |              |              |             |             |
|------------|---------------------------------------|--------------|---------------------------------------|--------------|--------------|-------------|-------------|
|            | 1                                     | -0.41956573  | -0.41956573                           | -0.41956573  | NA           | 1           | 0           |
|            |                                       | 0.998207054  |                                       |              |              |             |             |
| MED4       | ENSG00000136146.14                    | 0.674870462  | 2                                     | 2            | 0.397042653  |             |             |
|            | Brain_Cerebellar_Hemisphere           | 0.40511927   | Brain_Cerebellum                      | 1.794277543  |              |             |             |
|            | 0.205722457                           | -0.205722457 | -0.846914728                          | -0.832513307 | -0.839714017 |             |             |
|            | 0.010183343                           | 2            | 0                                     | 0.998207054  |              |             |             |
| MYOF       | ENSG00000138119.16                    | 0.674907531  | 2                                     | 2            | 0.478391705  |             |             |
|            | Brain_Spinal_cord_cervical_c-1        | 0.752076418  | Brain_Caudate_basal_ganglia           |              |              |             |             |
|            | 1.276589657                           | 0.723410343  | 0.723410343                           | -0.708891669 | 0.315902627  |             |             |
|            | -0.196494521                          | 0.724638997  | 2                                     | 0            | 0.998207054  |             |             |
| LINC02177  | ENSG00000261617.1                     | 0.674908462  | 7                                     | 3            | 0.481547662  |             |             |
|            | Brain_Cortex                          | 0.965754557  | Brain_Putamen_basal_ganglia           | 5.816371794  |              |             |             |
|            | 0.042069436                           | 0.360570223  | -0.703815529                          | -0.042933484 | -0.395147094 |             |             |
|            | 0.283410286                           | 3            | 0                                     | 0.998207054  |              |             |             |
| PINLYP     | ENSG00000234465.10                    | 0.674925874  | 11                                    | 5            | 0.221723934  |             |             |
|            | Brain_Cortex                          | 0.995814275  | Brain_Frontal_Cortex_BA9              | 7.172924868  |              |             |             |
|            | 0.001083669                           | 0.296627897  | -1.221956878                          | 0.938323534  | 0.049279717  |             |             |
|            | 0.652270174                           | 5            | 0                                     | 0.998207054  |              |             |             |
| HERPUD1    | ENSG00000051108.14                    | 0.67520073   | 1                                     | 1            | 0.67520073   |             |             |
|            | Brain_Frontal_Cortex_BA9              | 0.67520073   | Brain_Frontal_Cortex_BA9              | 1            | 1            | 1           |             |
|            | -0.419021075                          | -0.419021075 | -0.419021075                          | NA           | 1            | 0           | 0.998207054 |
| TSPAN15    | ENSG00000099282.9                     | 0.67523093   | 10                                    | 9            | 0.154454442  |             |             |
|            | Brain_Frontal_Cortex_BA9              | 0.963729835  | Brain_Substantia_nigra                |              |              |             |             |
|            | 3.862297216                           | 0.09322913   | 0.131118679                           | -1.423972468 | 0.657546712  |             |             |
|            | -0.234944867                          | 0.655318763  | 9                                     | 0            | 0.998207054  |             |             |
| PLIN1      | ENSG00000166819.11                    | 0.675317747  | 6                                     | 5            | 0.154169304  |             |             |
|            | Brain_Frontal_Cortex_BA9              | 0.965962229  | Brain_Nucleus_accumbens_basal_ganglia |              |              |             |             |
|            | 2.752983431                           | 0.040959253  | 0.298182364                           | -1.424958132 | 0.042672967  |             |             |
|            | -0.645005943                          | 0.559060231  | 5                                     | 0            | 0.998207054  |             |             |
| FAM184B    | ENSG00000047662.4                     | 0.675406079  | 3                                     | 2            | 0.493066114  |             |             |
|            | Brain_Cerebellum                      | 0.869779385  | Brain_Caudate_basal_ganglia           | 2.769169972  |              |             |             |
|            | 0.06707805                            | 0.163751977  | -0.16393872                           | 0.685440312  | 0.374787134  |             |             |
|            | 0.468373829                           | 2            | 0                                     | 0.998207054  |              |             |             |
| PGP        | ENSG00000184207.8                     | 0.675581996  | 1                                     | 1            | 0.675581996  |             |             |
|            | Brain_Nucleus_accumbens_basal_ganglia | 0.675581996  |                                       |              |              |             |             |
|            | Brain_Nucleus_accumbens_basal_ganglia | 1            | 1                                     | 1            | -0.41849944  |             |             |
|            | -0.41849944                           | -0.41849944  | NA                                    | 1            | 0            | 0.998207054 |             |
| TM9SF4     | ENSG00000101337.15                    | 0.675683937  | 1                                     | 1            | 0.675683937  |             |             |
|            | Brain_Hippocampus                     | 0.675683937  | Brain_Hippocampus                     | 1            | 1            | 1           |             |
|            | -0.418359987                          | -0.418359987 | -0.418359987                          | NA           | 1            | 0           | 0.998207054 |
| FRMD3      | ENSG00000172159.15                    | 0.67572704   | 2                                     | 2            | 0.385336388  |             |             |
|            | Brain_Cerebellar_Hemisphere           | 0.739615883  | Brain_Spinal_cord_cervical_c-1        |              |              |             |             |
|            | 1.185753573                           | 0.814246427  | 0.814246427                           | 0.332362061  | 0.868105852  |             |             |
|            | 0.600233956                           | 0.378828068  | 2                                     | 0            | 0.998207054  |             |             |
| QSOX1      | ENSG00000116260.16                    | 0.675767468  | 4                                     | 3            | 0.537485793  |             |             |
|            | Brain_Cerebellar_Hemisphere           | 0.980170784  | Brain_Nucleus_accumbens_basal_ganglia |              |              |             |             |
|            | 3.456482104                           | 0.03072896   | 0.173564146                           | -0.616619403 | 0.323985433  |             |             |
|            | -0.024144646                          | 0.413433428  | 3                                     | 0            | 0.998207054  |             |             |
| STK35      | ENSG00000125834.12                    | 0.675826774  | 3                                     | 3            | 0.321385834  |             |             |
|            | Brain_Frontal_Cortex_BA9              | 0.753663544  | Brain_Cerebellum                      | 1.247326954  |              |             |             |
|            | 0.804414682                           | 0.804414682  | -0.991614048                          | 0.313812377  | -0.435536719 |             |             |
|            | 0.673832338                           | 3            | 0                                     | 0.998207054  |              |             |             |
| FAM46A     | ENSG00000112773.15                    | 0.675838229  | 2                                     | 2            | 0.766576299  |             |             |
|            | Brain_Cerebellar_Hemisphere           | 0.929436492  | Brain_Cerebellum                      | 1.903820618  |              |             |             |
|            | 0.096179382                           | 0.096179382  | -0.296856198                          | 0.088553843  | -0.104151177 |             |             |
|            | 0.272526054                           | 2            | 0                                     | 0.998207054  |              |             |             |
| AC007386.2 | ENSG00000237638.1                     | 0.675860439  | 3                                     | 3            | 0.262930395  |             |             |
|            | Brain_Cerebellum                      | 0.38923038   | Brain_Caudate_basal_ganglia           | 2.007397905  |              |             |             |
|            | 0.411888242                           | 0.411888242  | 0.861013913                           | 1.119491781  | 0.981327302  |             |             |
|            | 0.130160279                           | 3            | 0                                     | 0.998207054  |              |             |             |
| NLRP6      | ENSG00000174885.12                    | 0.676053668  | 1                                     | 1            | 0.676053668  |             |             |
|            | Brain_Spinal_cord_cervical_c-1        | 0.676053668  | Brain_Spinal_cord_cervical_c-1        |              |              |             |             |

|             |                                       |              |              |              |                             |              |             |             |
|-------------|---------------------------------------|--------------|--------------|--------------|-----------------------------|--------------|-------------|-------------|
| 1           | 1                                     | 1            | 0.417854271  | 0.417854271  | 0.417854271                 | NA           | 1           | 0           |
| 0.998207054 |                                       |              |              |              |                             |              |             |             |
| FAM98C      | ENSG00000130244.12                    | 0.676081382  | 7            | 4            | 0.485135346                 |              |             |             |
|             | Brain_Cerebellum                      | 0.907798976  |              |              | Brain_Putamen_basal_ganglia | 5.552015365  |             |             |
|             | 0.0006835                             | 0.262030921  | -0.565662511 | 0.698066917  | -0.216806998                |              |             |             |
|             | 0.438523728                           | 4            | 0            | 0.998207054  |                             |              |             |             |
| KRTCAP2     | ENSG00000163463.11                    | 0.676183828  | 1            | 1            | 0.676183828                 |              |             |             |
|             | Brain_Substantia_nigra                | 0.676183828  |              |              | Brain_Substantia_nigra      | 1            | 1           |             |
|             | 1                                     | -0.417676265 | -0.417676265 | -0.417676265 | NA                          | 1            | 0           |             |
| 0.998207054 |                                       |              |              |              |                             |              |             |             |
| LINC01896   | ENSG00000263146.2                     | 0.676459423  | 1            | 1            | 0.676459423                 |              |             |             |
|             | Brain_Caudate_basal_ganglia           | 0.676459423  |              |              | Brain_Caudate_basal_ganglia | 1            | 1           |             |
|             | 1                                     | -0.417299406 | -0.417299406 | -0.417299406 | NA                          | 1            | 0           |             |
| 0.998207054 |                                       |              |              |              |                             |              |             |             |
| CDKN2AIPNL  | ENSG00000237190.3                     | 0.676571097  | 8            | 8            | 0.075341193                 |              |             |             |
|             | Brain_Cortex                          | 0.937122528  |              |              | Brain_Hypothalamus          | 1.70392172   | 0.478493258 |             |
|             | 0.478493258                           | -0.827780924 | 1.778381661  | 0.355746817  | 0.846432556                 |              |             |             |
|             | 8                                     | 0            | 0.998207054  |              |                             |              |             |             |
| SSRP1       | ENSG00000149136.8                     | 0.676626542  | 2            | 2            | 0.386715929                 |              |             |             |
|             | Brain_Cerebellar_Hemisphere           | 0.437116083  |              |              | Brain_Cerebellum            | 1.764446709  |             |             |
|             | 0.235553291                           | 0.235553291  | 0.777072355  | 0.865588382  | 0.821330368                 |              |             |             |
|             | 0.062590283                           | 2            | 0            | 0.998207054  |                             |              |             |             |
| LINC01537   | ENSG00000227467.3                     | 0.676692633  | 8            | 7            | 0.45746627                  |              |             |             |
|             | Brain_Nucleus_accumbens_basal_ganglia | 0.713902603  |              |              |                             |              |             |             |
|             | Brain_Anterior_cingulate_cortex_BA24  | 2.919681946  |              |              | 0.043833216                 |              |             |             |
|             | 0.244102593                           | -0.743025455 | 0.72080482   | -0.093170113 | 0.691612958                 |              | 7           |             |
|             | 0                                     | 0.998207054  |              |              |                             |              |             |             |
| CCDC138     | ENSG00000163006.11                    | 0.676832985  | 1            | 1            | 0.676832985                 |              |             |             |
|             | Brain_Cerebellum                      | 0.676832985  |              |              | Brain_Cerebellum            | 1            | 1           | 0.416788677 |
|             | 0.416788677                           | 0.416788677  | NA           | 1            | 0                           | 0.998207054  |             |             |
| RBM27       | ENSG00000091009.7                     | 0.676920918  | 1            | 1            | 0.676920918                 |              |             |             |
|             | Brain_Cerebellar_Hemisphere           | 0.676920918  |              |              | Brain_Cerebellar_Hemisphere | 1            | 1           |             |
|             | 1                                     | 0.416668472  | 0.416668472  | 0.416668472  | NA                          | 1            | 0           |             |
| 0.998207054 |                                       |              |              |              |                             |              |             |             |
| HBEGF       | ENSG00000113070.7                     | 0.676950123  | 2            | 2            | 0.381319469                 |              |             |             |
|             | Brain_Frontal_Cortex_BA9              | 0.9343064    |              |              | Brain_Substantia_nigra      | 1.040269271  |             |             |
|             | 0.959730729                           | 0.959730729  | -0.082427963 | 0.875467715  | 0.396519876                 |              |             |             |
|             | 0.67733453                            | 2            | 0            | 0.998207054  |                             |              |             |             |
| ZNF236      | ENSG00000130856.15                    | 0.677194321  | 4            | 3            | 0.263743071                 |              |             |             |
|             | Brain_Spinal_cord_cervical_c-1        | 0.784625771  |              |              | Brain_Putamen_basal_ganglia |              |             |             |
|             | 2.124399674                           | 0.056701996  | 0.827529553  | -1.117587826 | -0.273295895                |              |             |             |
|             | -0.644921405                          | 0.349650396  | 3            | 0            | 0.998207054                 |              |             |             |
| F11R        | ENSG00000158769.17                    | 0.677245299  | 6            | 4            | 0.229285773                 |              |             |             |
|             | Brain_Cerebellar_Hemisphere           | 4.470542862  |              |              | Brain_Cortex                | 0.022781899  |             |             |
|             | 0.271650241                           | -0.009549021 | 1.202200713  | 0.549649692  | 0.483452138                 |              |             |             |
|             | 4                                     | 0            | 0.998207054  |              |                             |              |             |             |
| AAAS        | ENSG00000094914.12                    | 0.677250932  | 1            | 1            | 0.677250932                 |              |             |             |
|             | Brain_Cortex                          | 1            | 1            | 1            | -0.416217395                | -0.416217395 |             |             |
|             | -0.416217395                          | NA           | 1            | 0            | 0.998207054                 |              |             |             |
| NDUFA3      | ENSG00000170906.15                    | 0.677290438  | 11           | 3            | 0.443071562                 |              |             |             |
|             | Brain_Hippocampus                     | 0.812495331  |              |              | Brain_Hypothalamus          | 9.04445734   | 0.00236331  |             |
|             | 0.406627682                           | -0.767016741 | 0.694786698  | 0.16696376   | 0.481300926                 |              | 3           |             |
|             | 0                                     | 0.998207054  |              |              |                             |              |             |             |
| IGFL4       | ENSG00000204869.8                     | 0.677300151  | 1            | 1            | 0.677300151                 |              |             |             |
|             | Brain_Hypothalamus                    | 0.677300151  |              |              | Brain_Hypothalamus          | 1            | 1           | 1           |
|             | -0.416150127                          | -0.416150127 | -0.416150127 | NA           | 1                           | 0            | 0.998207054 |             |
| DENR        | ENSG00000139726.10                    | 0.677376829  | 1            | 1            | 0.677376829                 |              |             |             |
|             | Brain_Cerebellum                      | 1            | 1            | 1            | -0.416045336                | -0.416045336 |             |             |
|             | -0.416045336                          | NA           | 1            | 0            | 0.998207054                 |              |             |             |
| RP11-1C8.7  | ENSG00000271830.1                     | 0.677469316  | 12           | 1            | 0.468762473                 |              |             |             |
|             | Brain_Frontal_Cortex_BA9              | 0.915933122  |              |              | Brain_Amygdala              | 11.37416538  |             |             |
|             | 0.004292659                           | 11.37416538  | -0.72449406  | -0.105557909 | -0.40198367                 |              |             |             |



|               |                                      |                             |             |              |             |             |                                |                   |              |
|---------------|--------------------------------------|-----------------------------|-------------|--------------|-------------|-------------|--------------------------------|-------------------|--------------|
|               | 0.238722536                          | 1                           | 0           | 0.998207054  |             |             |                                |                   |              |
| CACUL1        | ENSG00000151893.14                   |                             |             | 0.677493467  | 5           | 4           | 0.167947313                    |                   |              |
|               | Brain_Hippocampus                    |                             | 0.605651212 |              |             |             | Brain_Cerebellum               | 3.515127079       |              |
|               | 0.071695534                          | 0.134862097                 |             | 0.516290956  |             |             | 1.378829553                    |                   | 0.786310409  |
|               | 0.341840822                          | 4                           | 0           | 0.998207054  |             |             |                                |                   |              |
| KNG1          | ENSG00000113889.11                   |                             |             | 0.677639764  | 2           | 1           | 0.670733575                    |                   |              |
|               | Brain_Frontal_Cortex_BA9             |                             | 0.688817091 |              |             |             | Brain_Cortex                   | 1.972336202       |              |
|               | 0.027663798                          | 1.972336202                 |             | -0.425141434 |             |             | -0.40046088                    |                   | -0.412801157 |
|               | 0.017451787                          | 1                           | 0           | 0.998207054  |             |             |                                |                   |              |
| SPSB4         | ENSG00000175093.4                    |                             |             | 0.677718137  | 1           | 1           | 0.677718137                    |                   |              |
|               | Brain_Hippocampus                    |                             | 0.677718137 |              |             |             | Brain_Hippocampus              | 1                 | 1            |
|               | 0.415578944                          | 0.415578944                 |             | 0.415578944  |             |             | NA                             | 1                 | 0            |
|               |                                      |                             |             |              |             |             |                                |                   | 0.998207054  |
| SMCO2         | ENSG00000165935.9                    |                             |             | 0.677838903  | 4           | 4           | 0.243934754                    |                   |              |
|               | Brain_Caudate_basal_ganglia          |                             | 0.818978523 |              |             |             | Brain_Cerebellar_Hemisphere    |                   |              |
|               | 1.793336748                          | 0.490117905                 |             | 0.490117905  |             |             | -1.165208135                   |                   | 0.5359323    |
|               | -0.398727023                         | 0.731257312                 |             | 4            | 0           | 0.998207054 |                                |                   |              |
| EPS8L1        | ENSG00000131037.14                   |                             |             | 0.677889729  | 4           | 4           | 0.318178796                    |                   |              |
|               | Brain_Cerebellum                     |                             | 0.662630241 |              |             |             | Brain_Frontal_Cortex_BA9       | 2.403083203       |              |
|               | 0.267373098                          | 0.267373098                 |             | -0.644824536 |             |             | 0.998207405                    |                   | 0.369776365  |
|               | 0.714363925                          | 4                           | 0           | 0.998207054  |             |             |                                |                   |              |
| WFS1          | ENSG00000109501.13                   |                             |             | 0.677916001  | 3           | 3           | 0.36541459                     | Brain_Hippocampus |              |
|               | 0.741623871                          | Brain_Cerebellum            | 1.899065515 |              |             |             | 0.102947633                    |                   | 0.102947633  |
|               | 0.329703683                          | 0.905095888                 |             | 0.622931744  |             |             | 0.287855615                    |                   | 3            |
|               | 0.998207054                          |                             |             |              |             |             |                                |                   | 0            |
| NIPAL         | ENSG00000170113.15                   |                             |             | 0.677927854  | 6           | 6           | 0.320991196                    |                   |              |
|               | Brain_Caudate_basal_ganglia          |                             | 0.810801103 |              |             |             | Brain_Hippocampus              | 1.724701412       |              |
|               | 0.287035281                          | 0.287035281                 |             | -0.992423058 |             |             | 0.882072642                    |                   | 0.307456169  |
|               | 0.756150062                          | 6                           | 0           | 0.998207054  |             |             |                                |                   |              |
| TSKU          | ENSG00000182704.7                    |                             |             | 0.677960327  | 4           | 4           | 0.316297557                    |                   |              |
|               | Brain_Caudate_basal_ganglia          |                             | 0.787224482 |              |             |             | Brain_Cerebellar_Hemisphere    |                   |              |
|               | 1.636476853                          | 0.319941686                 |             | 0.319941686  |             |             | -0.683438003                   |                   | 1.002095322  |
|               | 0.298204199                          | 0.719616574                 |             | 4            | 0           | 0.998207054 |                                |                   |              |
| MLXIP         | ENSG00000175727.13                   |                             |             | 0.678002459  | 2           | 2           | 0.53205959                     | Brain_Cerebellum  |              |
|               | 0.604791284                          | Brain_Cerebellar_Hemisphere | 1.155001885 |              |             |             | 0.844998115                    |                   |              |
|               | 0.844998115                          | 0.517522762                 |             | 0.624865115  |             |             | 0.571193938                    |                   | 0.075902505  |
|               | 2                                    | 0                           | 0.998207054 |              |             |             |                                |                   |              |
| TWF1          | ENSG00000151239.13                   |                             |             | 0.678019278  | 1           | 1           | 0.678019278                    |                   |              |
|               | Brain_Caudate_basal_ganglia          |                             | 0.678019278 |              |             |             | Brain_Caudate_basal_ganglia    | 1                 | 1            |
|               | 1                                    | -0.415167514                |             | -0.415167514 |             |             | NA                             | 1                 | 0            |
|               | 0.998207054                          |                             |             |              |             |             |                                |                   |              |
| MAML1         | ENSG00000161021.11                   |                             |             | 0.678122528  | 1           | 1           | 0.678122528                    | Brain_Cortex      |              |
|               | 0.678122528                          | Brain_Cortex                | 1           | 1            | 1           |             | 0.415026467                    |                   | 0.415026467  |
|               | 0.415026467                          | NA                          | 1           | 0            | 0.998207054 |             |                                |                   |              |
| RP5-1125A11.7 | ENSG00000276073.1                    |                             |             | 0.678145062  | 13          | 3           | 0.288685316                    |                   |              |
|               | Brain_Spinal_cord_cervical_c-1       |                             | 0.936074933 |              |             |             |                                |                   |              |
|               | Brain_Anterior_cingulate_cortex_BA24 |                             | 10.73416471 |              |             |             | 0.002354126                    |                   |              |
|               | 0.536833668                          | -0.19235343                 |             | 1.061010089  |             |             | 0.379635294                    |                   | 0.366028914  |
|               | 3                                    | 0                           | 0.998207054 |              |             |             |                                |                   |              |
| SGSM2         | ENSG00000141258.12                   |                             |             | 0.678254262  | 3           | 1           | 0.670155609                    | Brain_Cortex      |              |
|               | 0.698490303                          | Brain_Cerebellar_Hemisphere | 2.951059036 |              |             |             | 0.011614275                    |                   |              |
|               | 2.951059036                          | -0.425934453                |             | -0.387359202 |             |             | -0.411501071                   |                   | 0.021040522  |
|               | 1                                    | 0                           | 0.998207054 |              |             |             |                                |                   |              |
| GPR151        | ENSG00000173250.2                    |                             |             | 0.678395554  | 1           | 1           | 0.678395554                    |                   |              |
|               | Brain_Spinal_cord_cervical_c-1       |                             | 0.678395554 |              |             |             | Brain_Spinal_cord_cervical_c-1 |                   |              |
|               | 1                                    | 1                           | 1           | -0.414653531 |             |             | -0.414653531                   |                   | NA           |
|               | 0.998207054                          |                             |             |              |             |             |                                |                   | 1            |
|               |                                      |                             |             |              |             |             |                                |                   | 0            |
| RBM38         | ENSG00000132819.16                   |                             |             | 0.678556233  | 2           | 1           | 0.634070486                    |                   |              |
|               | Brain_Cerebellar_Hemisphere          |                             | 0.731048809 |              |             |             | Brain_Cerebellum               | 1.956173098       |              |
|               | 0.043826902                          | 1.956173098                 |             | -0.476005463 |             |             | -0.343730716                   |                   | -0.409868089 |
|               | 0.09353237                           | 1                           | 0           | 0.998207054  |             |             |                                |                   |              |
| SMARCB1       | ENSG00000099956.18                   |                             |             | 0.678596013  | 6           | 3           | 0.365528974                    |                   |              |
|               | Brain_Hippocampus                    |                             | 0.995847914 |              |             |             | Brain_Cerebellum               | 4.566054585       |              |

|              |                                |                             |                                      |              |              |                  |
|--------------|--------------------------------|-----------------------------|--------------------------------------|--------------|--------------|------------------|
|              | 0.011358638                    | 0.455814384                 | -0.269484314                         | 0.904879981  | 0.338598832  |                  |
|              | 0.467470754                    | 3                           | 0                                    | 0.998207054  |              |                  |
| UBE2T        | ENSG00000077152.9              | 0.678608762                 | 3                                    | 3            | 0.275672273  | Brain_Cortex     |
|              | 0.822605019                    | Brain_Frontal_Cortex_BA9    | 1.977849629                          | 0.361582506  |              |                  |
|              | 0.361582506                    | 0.224195713                 | 1.090092788                          | 0.638791119  | 0.434113981  |                  |
|              | 3                              | 0                           | 0.998207054                          |              |              |                  |
| KLHDC1       | ENSG00000197776.7              | 0.678688953                 | 3                                    | 3            | 0.474641944  |                  |
|              | Brain_Cerebellum               | 0.92130261                  | Brain_Amygdala                       | 2.175838949  | 0.231971922  |                  |
|              | 0.231971922                    | -0.714946757                | 0.311259943                          | -0.167493278 | 0.51654123   | 3                |
|              | 0                              | 0.998207054                 |                                      |              |              |                  |
| SUN2         | ENSG00000100242.15             | 0.678800622                 | 3                                    | 3            | 0.266247725  |                  |
|              | Brain_Hippocampus              | 0.882286509                 | Brain_Putamen_basal_ganglia          | 1.175378264  |              |                  |
|              | 0.879440155                    | 0.879440155                 | -1.111745188                         | 0.456363823  | -0.267817551 |                  |
|              | 0.790882951                    | 3                           | 0                                    | 0.998207054  |              |                  |
| TRMT44       | ENSG00000155275.18             | 0.67898121                  | 10                                   | 4            | 0.219969614  |                  |
|              | Brain_Hypothalamus             | 0.909703838                 | Brain_Anterior_cingulate_cortex_BA24 |              |              |                  |
|              | 7.863612633                    | 0.04340181                  | 0.340346778                          | -1.226608923 | -0.113412111 |                  |
|              | -0.661524869                   | 0.328657675                 | 4                                    | 0            | 0.998207054  |                  |
| RP11-262I2.2 | ENSG00000224222.1              | 0.679026587                 | 2                                    | 2            | 0.399642492  |                  |
|              | Brain_Substantia_nigra         | 0.833905887                 | Brain_Cerebellum                     | 1.052816596  |              |                  |
|              | 0.947183404                    | 0.947183404                 | 0.209694796                          | 0.842259899  | 0.525977348  |                  |
|              | 0.447291074                    | 2                           | 0                                    | 0.998207054  |              |                  |
| PLEKHH3      | ENSG00000068137.14             | 0.679127099                 | 2                                    | 2            | 0.379165693  |                  |
|              | Brain_Spinal_cord_cervical_c-1 | 0.95740221                  | Brain_Frontal_Cortex_BA9             |              |              |                  |
|              | 1.085783613                    | 0.914216387                 | 0.914216387                          | -0.879434573 | -0.053413801 |                  |
|              | -0.466424187                   | 0.584084889                 | 2                                    | 0            | 0.998207054  |                  |
| TOMM40L      | ENSG00000158882.14             | 0.679136041                 | 1                                    | 1            | 0.679136041  |                  |
|              | Brain_Caudate_basal_ganglia    | 0.679136041                 | Brain_Caudate_basal_ganglia          | 1            | 1            |                  |
|              | 1                              | -0.413642367                | -0.413642367                         | -0.413642367 | NA           | 1                |
|              | 0.998207054                    |                             |                                      |              |              | 0                |
| CD177        | ENSG00000204936.9              | 0.679140461                 | 1                                    | 1            | 0.679140461  | Brain_Cerebellum |
|              | 0.679140461                    | Brain_Cerebellum            | 1                                    | 1            | 0.413636332  | 0.413636332      |
|              | 0.413636332                    | NA                          | 1                                    | 0            | 0.998207054  |                  |
| ADGRF4       | ENSG00000153294.11             | 0.679176537                 | 2                                    | 2            | 0.379085354  |                  |
|              | Brain_Cerebellum               | 0.414734858                 | Brain_Cerebellar_Hemisphere          | 1.93101407   | 0.06898593   |                  |
|              | 0.06898593                     | -0.879582811                | -0.815589672                         | -0.847586241 | 0.045249982  | 2                |
|              | 0                              | 0.998207054                 |                                      |              |              |                  |
| NANP         | ENSG00000170191.4              | 0.679204577                 | 2                                    | 2            | 0.382229309  |                  |
|              | Brain_Caudate_basal_ganglia    | 0.842931659                 | Brain_Hypothalamus                   | 1.112214748  |              |                  |
|              | 0.887785252                    | 0.887785252                 | -0.873796092                         | -0.198144948 | -0.53597052  |                  |
|              | 0.477757506                    | 2                           | 0                                    | 0.998207054  |              |                  |
| CACNA1A      | ENSG00000141837.19             | 0.679376945                 | 2                                    | 2            | 0.379283675  |                  |
|              | Brain_Caudate_basal_ganglia    | 0.926638786                 | Brain_Cerebellum                     | 1.091518361  |              |                  |
|              | 0.908481639                    | 0.908481639                 | -0.879216915                         | 0.092074579  | -0.393571168 |                  |
|              | 0.686806802                    | 2                           | 0                                    | 0.998207054  |              |                  |
| UBR2         | ENSG00000024048.10             | 0.679432379                 | 2                                    | 2            | 0.761340141  | Brain_Cerebellum |
|              | 0.936859898                    | Brain_Cerebellar_Hemisphere | 1.903494017                          | 0.096505983  |              |                  |
|              | 0.096505983                    | -0.079217157                | 0.303721416                          | 0.112252129  | 0.270778462  |                  |
|              | 2                              | 0                           | 0.998207054                          |              |              |                  |
| WBP2NL       | ENSG00000183066.14             | 0.679649495                 | 11                                   | 4            | 0.129958579  |                  |
|              | Brain_Frontal_Cortex_BA9       | 0.602275607                 | Brain_Cerebellum                     | 8.570549173  |              |                  |
|              | 0.013851524                    | 0.30210163                  | 0.521130871                          | 1.514265247  | 0.977995576  |                  |
|              | 0.291444673                    | 4                           | 0                                    | 0.998207054  |              |                  |
| TMEM209      | ENSG00000146842.16             | 0.679800267                 | 1                                    | 1            | 0.679800267  |                  |
|              | Brain_Substantia_nigra         | 0.679800267                 | Brain_Substantia_nigra               | 1            | 1            |                  |
|              | 1                              | 0.412735698                 | 0.412735698                          | 0.412735698  | NA           | 1                |
|              | 0.998207054                    |                             |                                      |              |              | 0                |
| NEAT1        | ENSG00000245532.7              | 0.679965581                 | 13                                   | 2            | 0.217414369  |                  |
|              | Brain_Substantia_nigra         | 0.671892257                 | Brain_Cortex                         | 11.9502465   | 0.00092779   |                  |
|              | 0.586605399                    | 0.423552427                 | 1.233432707                          | 0.809083154  | 0.208295153  |                  |
|              | 2                              | 0                           | 0.998207054                          |              |              |                  |
| WNT9B        | ENSG00000158955.10             | 0.67998212                  | 1                                    | 1            | 0.67998212   | Brain_Cerebellum |
|              |                                |                             |                                      |              | 0.67998212   |                  |

|               |                                |                             |                                       |              |              |                   |             |
|---------------|--------------------------------|-----------------------------|---------------------------------------|--------------|--------------|-------------------|-------------|
|               | Brain_Cerebellum1              | 1                           | 1                                     | 0.412487528  | 0.412487528  | 0.412487528       |             |
|               | NA_1                           | 0                           | 0.998207054                           |              |              |                   |             |
| NTM           | ENSG00000182667.14             | 0.67999561                  | 6                                     | 5            | 0.355634876  | Brain_Hippocampus |             |
|               | 0.917713294                    | Brain_Caudate_basal_ganglia | 3.87054096                            | 0.112345582  |              |                   |             |
|               | 0.261066983                    | -0.447068279                | 0.923714701                           | 0.302138312  | 0.456452554  |                   |             |
|               | 5                              | 0                           | 0.998207054                           |              |              |                   |             |
| ACHE          | ENSG00000087085.13             | 0.68000889                  | 1                                     | 1            | 0.68000889   | Brain_Cerebellum  | 0.68000889  |
|               | Brain_Cerebellum1              | 1                           | 1                                     | -0.412450999 | -0.412450999 | -0.412450999      |             |
|               | NA_1                           | 0                           | 0.998207054                           |              |              |                   |             |
| DIXDC1        | ENSG00000150764.13             | 0.680068186                 | 1                                     | 1            | 0.680068186  |                   |             |
|               | Brain_Hippocampus              | 0.680068186                 | Brain_Hippocampus                     | 1            | 1            | 1                 |             |
|               | -0.412370085                   | -0.412370085                | -0.412370085                          | NA           | 1            | 0                 | 0.998207054 |
| CNGA1         | ENSG00000198515.13             | 0.680075829                 | 13                                    | 3            | 0.232783969  |                   |             |
|               | Brain_Substantia_nigra         | 0.843762705                 | Brain_Amygdala                        | 10.903637    | 0.01055486   |                   |             |
|               | 0.447439393                    | -1.193218097                | -0.197082849                          | -0.758266451 | 0.26392221   | 3                 |             |
|               | 0                              | 0.998207054                 |                                       |              |              |                   |             |
| SHROOM1       | ENSG00000164403.14             | 0.680136041                 | 2                                     | 2            | 0.526684932  |                   |             |
|               | Brain_Cerebellum               | 0.54243436                  | Brain_Hypothalamus                    | 1.001174934  | 0.998825066  |                   |             |
|               | 0.998825066                    | -0.633074594                | -0.609135905                          | -0.62110525  | 0.016927209  |                   |             |
|               | 2                              | 0                           | 0.998207054                           |              |              |                   |             |
| HEXA          | ENSG00000213614.9              | 0.680227938                 | 4                                     | 4            | 0.443623119  |                   |             |
|               | Brain_Spinal_cord_cervical_c-1 | 0.865413607                 | Brain_Caudate_basal_ganglia           |              |              |                   |             |
|               | 2.673946625                    | 0.225332275                 | 0.225332275                           | -0.766089384 | 0.676996114  |                   |             |
|               | -0.042118285                   | 0.613400748                 | 4                                     | 0            | 0.998207054  |                   |             |
| ATN1          | ENSG00000111676.14             | 0.68036981                  | 4                                     | 4            | 0.179169292  | Brain_Cerebellum  |             |
|               | 0.747854814                    | Brain_Hypothalamus          | 1.57901928                            | 0.472694766  | 0.472694766  |                   |             |
|               | -1.343317179                   | 0.519718762                 | -0.381868656                          | 0.761772388  | 4            | 0                 |             |
|               | 0.998207054                    |                             |                                       |              |              |                   |             |
| 11-Sep        | ENSG00000138758.11             | 0.680508371                 | 6                                     | 4            | 0.194910959  |                   |             |
|               | Brain_Hippocampus              | 0.929427129                 | Brain_Cerebellum                      | 3.187334466  |              |                   |             |
|               | 0.043563866                    | 0.342296626                 | -1.296187314                          | 0.088565623  | -0.637485799 |                   |             |
|               | 0.57916804                     | 4                           | 0                                     | 0.998207054  |              |                   |             |
| ALS2CR11      | ENSG00000155754.14             | 0.680586645                 | 1                                     | 1            | 0.680586645  |                   |             |
|               | Brain_Putamen_basal_ganglia    | 0.680586645                 | Brain_Putamen_basal_ganglia           | 1            | 1            |                   |             |
|               | 1                              | 0.411662731                 | 0.411662731                           | 0.411662731  | NA           | 1                 | 0           |
|               | 0.998207054                    |                             |                                       |              |              |                   |             |
| RP11-116D17.3 | ENSG00000271579.1              | 0.680685495                 | 2                                     | 2            | 0.476143069  |                   |             |
|               | Brain_Cerebellum               | 0.630061907                 | Brain_Nucleus_accumbens_basal_ganglia |              |              |                   |             |
|               | 1.041286809                    | 0.958713191                 | 0.958713191                           | -0.481639717 | 0.712519616  |                   |             |
|               | 0.11543995                     | 0.844398162                 | 2                                     | 0            | 0.998207054  |                   |             |
| NUBP2         | ENSG00000095906.16             | 0.68075982                  | 8                                     | 4            | 0.280285839  | Brain_Cortex      |             |
|               | 0.990732372                    | Brain_Hippocampus           | 5.987908711                           | 0.024897049  |              |                   |             |
|               | 0.249896348                    | -0.231261412                | 1.079677449                           | 0.359023919  | 0.497508068  |                   |             |
|               | 4                              | 0                           | 0.998207054                           |              |              |                   |             |
| LINC02145     | ENSG00000250490.1              | 0.680842373                 | 12                                    | 3            | 0.154417243  |                   |             |
|               | Brain_Cortex                   | 0.735562687                 | Brain_Hypothalamus                    | 9.938759143  |              |                   |             |
|               | 0.010893671                    | 0.389189887                 | 0.337735278                           | 1.42410098   | 0.938757504  |                   |             |
|               | 0.35025758                     | 3                           | 0                                     | 0.998207054  |              |                   |             |
| SMKR1         | ENSG00000240204.2              | 0.680979959                 | 2                                     | 1            | 0.672102375  |                   |             |
|               | Brain_Cerebellar_Hemisphere    | 0.69389956                  | Brain_Cerebellum                      | 1.973722657  |              |                   |             |
|               | 0.026277343                    | 1.973722657                 | -0.423264386                          | -0.393568611 | -0.408416499 |                   |             |
|               | 0.020998085                    | 1                           | 0                                     | 0.998207054  |              |                   |             |
| TMEM161B      | ENSG00000164180.13             | 0.681030863                 | 2                                     | 2            | 0.383215524  |                   |             |
|               | Brain_Cerebellum               | 0.647788773                 | Brain_Cerebellar_Hemisphere           | 1.431764263  |              |                   |             |
|               | 0.568235737                    | 0.568235737                 | 0.456836215                           | 0.8719869    | 0.664411557  |                   |             |
|               | 0.293555864                    | 2                           | 0                                     | 0.998207054  |              |                   |             |
| ACVRL1        | ENSG00000139567.12             | 0.681036846                 | 1                                     | 1            | 0.681036846  |                   |             |
|               | Brain_Putamen_basal_ganglia    | 0.681036846                 | Brain_Putamen_basal_ganglia           | 1            | 1            |                   |             |
|               | 1                              | 0.411048672                 | 0.411048672                           | 0.411048672  | NA           | 1                 | 0           |
|               | 0.998207054                    |                             |                                       |              |              |                   |             |
| CCDC7         | ENSG00000216937.13             | 0.681273299                 | 6                                     | 5            | 0.165857242  |                   |             |
|               | Brain_Hippocampus              | 0.932256967                 | Brain_Putamen_basal_ganglia           | 3.540132574  |              |                   |             |

|            |                                       |                                        |                                       |              |                  |
|------------|---------------------------------------|----------------------------------------|---------------------------------------|--------------|------------------|
|            | 0.106382522                           | 0.128449514                            | -0.537523104                          | 1.385638741  | 0.011607587      |
|            | 0.689323385                           | 5                                      | 0                                     | 0.998207054  |                  |
| ABCC9      | ENSG00000069431.11                    | 0.681394839                            | 3                                     | 3            | 0.271853873      |
|            | Brain_Nucleus_accumbens_basal_ganglia | 0.71545562                             | Brain_Cortex                          | 2.236157945  |                  |
|            | 0.182608774                           | 0.182608774                            | 0.364538914                           | 1.098803299  | 0.702283947      |
|            | 0.370643848                           | 3                                      | 0                                     | 0.998207054  |                  |
| FLNB       | ENSG00000136068.14                    | 0.681510304                            | 5                                     | 4            | 0.296502181      |
|            | Brain_Caudate_basal_ganglia           | 0.89291567                             | Brain_Cortex                          | 3.102750045  |                  |
|            | 0.101303392                           | 0.195391583                            | -1.043963707                          | -0.134615773 | -0.639004529     |
|            | 0.356074191                           | 4                                      | 0                                     | 0.998207054  |                  |
| MED12L     | ENSG00000144893.12                    | 0.681656404                            | 3                                     | 3            | 0.311293546      |
|            | Brain_Cortex                          | 0.796571778                            | Brain_Nucleus_accumbens_basal_ganglia |              |                  |
|            | 1.174960997                           | 0.825975966                            | 0.825975966                           | 0.257786379  | 1.012511511      |
|            | 0.655556148                           | 0.379014338                            | 3                                     | 0            | 0.998207054      |
| EIF4EBP3   | ENSG00000243056.1                     | 0.681669722                            | 6                                     | 3            | 0.448157946      |
|            | Brain_Nucleus_accumbens_basal_ganglia | 0.837852347                            | Brain_Frontal_Cortex_BA9              |              |                  |
|            | 4.660285669                           | 0.015172768                            | 0.432575474                           | -0.758489585 | 0.535672226      |
|            | -0.358068695                          | 0.477432326                            | 3                                     | 0            | 0.998207054      |
| CRHR1      | ENSG00000120088.14                    | 0.681773275                            | 6                                     | 6            | 0.245841605      |
|            | Brain_Caudate_basal_ganglia           | 0.773884232                            | Brain_Nucleus_accumbens_basal_ganglia |              |                  |
|            | 2.221093957                           | 0.257539157                            | 0.257539157                           | -0.746384064 | 1.160509064      |
|            | 0.192309029                           | 0.797533046                            | 6                                     | 0            | 0.998207054      |
| AC090044.2 | ENSG00000224239.1                     | 0.681797758                            | 1                                     | 1            | 0.681797758      |
|            | Brain_Cerebellum                      | 0.681797758                            | Brain_Cerebellum1                     | 1            | 1                |
|            | 0.410011164                           | 0.410011164                            | NA                                    | 1            | 0                |
|            |                                       |                                        |                                       |              | 0.998207054      |
| CASP5      | ENSG00000137757.10                    | 0.681823725                            | 1                                     | 1            | 0.681823725      |
|            | Brain_Amygdala                        | 1                                      | 1                                     | 1            | Brain_Amygdala   |
|            | 0.681823725                           | Brain_Amygdala                         | 1                                     | 1            | -0.409975765     |
|            | -0.409975765                          | NA                                     | 1                                     | 0            | 0.998207054      |
| KCNK6      | ENSG00000099337.4                     | 0.68191255                             | 2                                     | 2            | 0.389371929      |
|            | Brain_Nucleus_accumbens_basal_ganglia | 0.985090385                            | Brain_Cerebellar_Hemisphere           |              |                  |
|            | 1.158938217                           | 0.841061783                            | 0.841061783                           | -0.018687519 | 0.860756934      |
|            | 0.421034707                           | 0.621861136                            | 2                                     | 0            | 0.998207054      |
| NPIPA5     | ENSG00000183793.13                    | 0.681919149                            | 13                                    | 9            | 0.38384222       |
|            | Brain_Cerebellar_Hemisphere           | 0.884164453                            | Brain_Amygdala                        | 6.345778547  |                  |
|            | 0.025054715                           | 0.293017775                            | -0.801260181                          | 0.87083872   | -0.147251763     |
|            | 0.546377423                           | 9                                      | 0                                     | 0.998207054  |                  |
| ATP5B      | ENSG00000110955.8                     | 0.682063582                            | 1                                     | 1            | 0.682063582      |
|            | Brain_Caudate_basal_ganglia           | 0.682063582                            | Brain_Caudate_basal_ganglia1          | 1            | 1                |
|            | 1                                     | -0.409648815                           | -0.409648815                          | -0.409648815 | NA               |
|            |                                       |                                        |                                       |              | 1                |
|            |                                       |                                        |                                       |              | 0                |
|            |                                       |                                        |                                       |              | 0.998207054      |
| NUCB2      | ENSG00000070081.15                    | 0.682138415                            | 2                                     | 1            | 0.447806903      |
|            | Brain_Cerebellum                      |                                        |                                       |              | Brain_Cerebellum |
|            | 0.960620161                           | Brain_Cerebellar_Hemisphere1.948368183 | 0.051631817                           |              |                  |
|            | 1.948368183                           | -0.759076321                           | -0.049375364                          | -0.404225842 | 0.501834359      |
|            | 1                                     | 0                                      | 0.998207054                           |              |                  |
| AQP8       | ENSG00000103375.10                    | 0.682226708                            | 1                                     | 1            | 0.682226708      |
|            | Brain_Cerebellum                      | 1                                      | 1                                     | 1            | Brain_Cerebellum |
|            | 0.682226708                           | Brain_Cerebellum1                      | 1                                     | 1            | -0.409426483     |
|            | -0.409426483                          | NA                                     | 1                                     | 0            | 0.998207054      |
| SLC17A8    | ENSG00000179520.10                    | 0.682296471                            | 1                                     | 1            | 0.682296471      |
|            | Brain_Hippocampus                     | 0.682296471                            | Brain_Hippocampus                     | 1            | 1                |
|            | -0.409331406                          | -0.409331406                           | -0.409331406                          | NA           | 1                |
|            |                                       |                                        |                                       |              | 0                |
|            |                                       |                                        |                                       |              | 0.998207054      |
| GSTP1      | ENSG00000084207.15                    | 0.68233463                             | 13                                    | 2            | 0.427007539      |
|            | Brain_Spinal_cord_cervical_c-1        | 0.894210359                            | Brain_Frontal_Cortex_BA9              |              |                  |
|            | 11.65554623                           | 0.000839997                            | 0.456015286                           | -0.794322792 | -0.132978532     |
|            | -0.491768351                          | 0.202166589                            | 2                                     | 0            | 0.998207054      |
| RNF24      | ENSG00000101236.16                    | 0.682474772                            | 9                                     | 4            | 0.170908788      |
|            | Brain_Nucleus_accumbens_basal_ganglia | 0.677221946                            | Brain_Amygdala                        |              |                  |
|            | 7.783950163                           | 0.0109251                              | 0.270282927                           | 0.416257011  | 1.369289534      |
|            | 0.730529091                           | 0.301860338                            | 4                                     | 0            | 0.998207054      |
| HAUS5      | ENSG00000249115.8                     | 0.682588708                            | 2                                     | 2            | 0.527153901      |
|            | Brain_Cerebellar_Hemisphere           | 0.546290653                            | Brain_Nucleus_accumbens_basal_ganglia |              |                  |
|            | 1.000201452                           | 0.999798548                            | 0.999798548                           | -0.603327784 | 0.632356578      |
|            | 0.014514397                           | 0.873760791                            | 2                                     | 0            | 0.998207054      |

|              |                                       |                             |                                       |              |              |                             |             |                  |  |
|--------------|---------------------------------------|-----------------------------|---------------------------------------|--------------|--------------|-----------------------------|-------------|------------------|--|
| CNPPD1       | ENSG00000115649.15                    | 0.682612732                 | 7                                     | 3            | 0.345729386  |                             |             |                  |  |
|              | Brain_Cerebellar_Hemisphere           | 0.971346198                 |                                       |              |              | Brain_Substantia_nigra      |             |                  |  |
|              | 5.967906768                           | 0.013274541                 | 0.267982492                           |              |              | -0.942905218                |             | 0.035919937      |  |
|              | -0.343236042                          | 0.307147259                 | 3                                     | 0            | 0.998207054  |                             |             |                  |  |
| TESK1        | ENSG00000107140.15                    | 0.682638954                 | 2                                     | 2            | 0.638951272  |                             |             | Brain_Cerebellum |  |
|              | 0.948467361                           | Brain_Cerebellar_Hemisphere | 1.80161885                            | 0.19838115   | 0.19838115   |                             |             |                  |  |
|              | -0.064631554                          | 0.4691656                   | 0.202267023                           | 0.377451587  | 2            | 0                           |             |                  |  |
|              | 0.998207054                           |                             |                                       |              |              |                             |             |                  |  |
| FMO2         | ENSG00000094963.13                    | 0.682728707                 | 11                                    | 7            | 0.193105198  |                             |             |                  |  |
|              | Brain_Substantia_nigra                | 0.944577138                 |                                       |              |              | Brain_Cerebellar_Hemisphere |             |                  |  |
|              | 6.763009604                           | 0.008798466                 | 0.235440356                           |              |              | -0.772802743                |             | 1.301447866      |  |
|              | 0.29503346                            | 0.65880439                  | 7                                     | 0            | 0.998207054  |                             |             |                  |  |
| APOC4        | ENSG00000267467.3                     | 0.682803189                 | 1                                     | 1            | 0.682803189  |                             |             |                  |  |
|              | Brain_Hippocampus                     | 0.682803189                 | Brain_Hippocampus                     | 1            | 1            | 1                           |             |                  |  |
|              | 0.40864093                            | 0.40864093                  | 0.40864093                            | NA           | 1            | 0                           | 0.998207054 |                  |  |
| PCM1         | ENSG00000078674.17                    | 0.682809027                 | 13                                    | 1            | 0.426178133  |                             |             |                  |  |
|              | Brain_Hypothalamus                    | 0.922732426                 | Brain_Nucleus_accumbens_basal_ganglia |              |              |                             |             |                  |  |
|              | 12.2242776                            | 0.000824848                 | 12.2242776                            | -0.795748669 |              | -0.096992405                |             |                  |  |
|              | -0.394525276                          | 0.15917895                  | 1                                     | 0            | 0.998207054  |                             |             |                  |  |
| IGF1R        | ENSG00000140443.13                    | 0.68285463                  | 1                                     | 1            | 0.68285463   | Brain_Cerebellum            | 0.68285463  |                  |  |
|              | Brain_Cerebellum                      | 1                           | 1                                     | 0.408570845  | 0.408570845  |                             | 0.408570845 |                  |  |
|              | NA                                    | 1                           | 0                                     | 0.998207054  |              |                             |             |                  |  |
| E2F4         | ENSG00000205250.8                     | 0.6831132                   | 1                                     | 1            | 0.6831132    | Brain_Cerebellar_Hemisphere |             |                  |  |
|              | 0.6831132                             | Brain_Cerebellar_Hemisphere | 1                                     | 1            | 0.408218591  |                             |             |                  |  |
|              | 0.408218591                           | 0.408218591                 | NA                                    | 1            | 0            | 0.998207054                 |             |                  |  |
| TIMM10B      | ENSG00000132286.11                    | 0.68323027                  | 1                                     | 1            | 0.68323027   |                             |             |                  |  |
|              | Brain_Nucleus_accumbens_basal_ganglia | 0.68323027                  |                                       |              |              |                             |             |                  |  |
|              | Brain_Nucleus_accumbens_basal_ganglia | 1                           | 1                                     | 1            | -0.408059122 |                             |             |                  |  |
|              | -0.408059122                          | -0.408059122                | NA                                    | 1            | 0            | 0.998207054                 |             |                  |  |
| ABI3BP       | ENSG00000154175.16                    | 0.683256839                 | 8                                     | 7            | 0.427477611  |                             |             |                  |  |
|              | Brain_Cerebellum                      | 0.836752408                 | Brain_Substantia_nigra                | 3.980047136  |              |                             |             |                  |  |
|              | 0.036307184                           | 0.188251056                 | -0.793515382                          | 0.656007731  |              | -0.062764786                |             |                  |  |
|              | 0.51377955                            | 7                           | 0                                     | 0.998207054  |              |                             |             |                  |  |
| SFT2D2       | ENSG00000213064.9                     | 0.683370115                 | 1                                     | 1            | 0.683370115  |                             |             |                  |  |
|              | Brain_Putamen_basal_ganglia           | 0.683370115                 | Brain_Putamen_basal_ganglia           | 1            | 1            |                             |             |                  |  |
|              | 1                                     | 0.407868643                 | 0.407868643                           | 0.407868643  | NA           | 1                           | 0           |                  |  |
|              | 0.998207054                           |                             |                                       |              |              |                             |             |                  |  |
| RP11-176H8.1 | ENSG00000203546.7                     | 0.683501349                 | 12                                    | 4            | 0.501711858  |                             |             |                  |  |
|              | Brain_Anterior_cingulate_cortex_BA24  | 0.94338477                  | Brain_Frontal_Cortex_BA9              |              |              |                             |             |                  |  |
|              | 10.05980408                           | 0.001740687                 | 0.379283804                           |              |              | -0.331107556                |             | 0.671798697      |  |
|              | 0.028583799                           | 0.34370314                  | 4                                     | 0            | 0.998207054  |                             |             |                  |  |
| LINC02044    | ENSG00000243795.1                     | 0.683721048                 | 13                                    | 10           | 0.109485556  |                             |             |                  |  |
|              | Brain_Amygdala                        | 0.960717993                 | Brain_Cortex                          | 6.004974808  | 0.00506636   |                             |             |                  |  |
|              | 0.24654184                            | -0.978979286                | 1.600509704                           | 0.417046387  | 0.908110265  |                             |             | 10               |  |
|              | 0                                     | 0.998207054                 |                                       |              |              |                             |             |                  |  |
| GMPR         | ENSG00000137198.9                     | 0.684026569                 | 1                                     | 1            | 0.684026569  |                             |             |                  |  |
|              | Brain_Cerebellar_Hemisphere           | 0.684026569                 | Brain_Cerebellar_Hemisphere           | 1            | 1            |                             |             |                  |  |
|              | 1                                     | 0.406974702                 | 0.406974702                           | 0.406974702  | NA           | 1                           | 0           |                  |  |
|              | 0.998207054                           |                             |                                       |              |              |                             |             |                  |  |
| MGAT4B       | ENSG00000161013.16                    | 0.684045196                 | 2                                     | 2            | 0.486347772  |                             |             |                  |  |
|              | Brain_Nucleus_accumbens_basal_ganglia | 0.590244488                 | Brain_Cerebellum                      |              |              |                             |             |                  |  |
|              | 1.020564617                           | 0.979435383                 | 0.979435383                           |              |              | -0.696129439                |             | 0.53848177       |  |
|              | -0.078823834                          | 0.873001958                 | 2                                     | 0            | 0.998207054  |                             |             |                  |  |
| RP11-1C8.5   | ENSG00000261670.1                     | 0.68437516                  | 4                                     | 4            | 0.359929668  |                             |             |                  |  |
|              | Brain_Hypothalamus                    | 0.976843492                 | Brain_Frontal_Cortex_BA9              | 1.462261427  |              |                             |             |                  |  |
|              | 0.581514848                           | 0.581514848                 | -0.674479946                          | 0.915499112  | 0.136106567  |                             |             |                  |  |
|              | 0.665912015                           | 4                           | 0                                     | 0.998207054  |              |                             |             |                  |  |
| HDHD5        | ENSG00000069998.12                    | 0.684411851                 | 3                                     | 3            | 0.27770921   | Brain_Cerebellum            |             |                  |  |
|              | 0.526816593                           | Brain_Cerebellar_Hemisphere | 1.397876747                           | 0.732570189  |              |                             |             |                  |  |
|              | 0.732570189                           | 0.632872981                 | 1.08547979                            | 0.787615045  | 0.25802385   | 3                           | 0           |                  |  |
|              | 0.998207054                           |                             |                                       |              |              |                             |             |                  |  |
| TPD52        | ENSG00000076554.15                    | 0.684462568                 | 4                                     | 4            | 0.175630773  |                             |             |                  |  |

|           |                                       |              |              |                                       |              |              |             |            |
|-----------|---------------------------------------|--------------|--------------|---------------------------------------|--------------|--------------|-------------|------------|
|           | Brain_Putamen_basal_ganglia           | 0.769486107  |              | Brain_Caudate_basal_ganglia           |              |              |             |            |
|           | 1.844833159                           | 0.430139101  | 0.430139101  | -0.318686041                          | 1.354331084  |              |             |            |
|           | 0.656444268                           | 0.812486507  | 4            | 0                                     | 0.998207054  |              |             |            |
| LINC02091 | ENSG00000273172.1                     | 0.684480072  | 3            | 3                                     | 0.265780694  |              |             |            |
|           | Brain_Hypothalamus                    | 0.767702021  |              | Brain_Cerebellar_Hemisphere           | 1.076577871  |              |             |            |
|           | 0.920172194                           | 0.920172194  | -0.447878352 | 1.112831757                           | 0.320111828  |              |             |            |
|           | 0.780648885                           | 3            | 0            | 0.998207054                           |              |              |             |            |
| MAFA      | ENSG00000182759.3                     | 0.684519219  | 2            | 2                                     | 0.499391499  |              |             |            |
|           | Brain_Nucleus_accumbens_basal_ganglia | 0.584980039  |              |                                       |              |              |             |            |
|           | Brain_Spinal_cord_cervical_c-1        | 1.004849141  |              | 0.995150859                           | 0.995150859  |              |             |            |
|           | -0.546124967                          | 0.675447495  | 0.064661264  | 0.863782172                           | 2            | 0            |             |            |
|           | 0.998207054                           |              |              |                                       |              |              |             |            |
| THTPA     | ENSG00000259431.5                     | 0.684581067  | 1            | 1                                     | 0.684581067  |              |             |            |
|           | Brain_Frontal_Cortex_BA9              | 0.684581067  |              | Brain_Frontal_Cortex_BA9              | 1            | 1            |             |            |
|           | 1                                     | -0.406219854 | -0.406219854 | -0.406219854                          | NA           | 1            | 0           |            |
|           | 0.998207054                           |              |              |                                       |              |              |             |            |
| SLC27A5   | ENSG00000083807.9                     | 0.684696191  | 11           | 9                                     | 0.069835627  |              |             |            |
|           | Brain_Amygdala                        | 0.970217132  |              | Brain_Anterior_cingulate_cortex_BA24  |              |              |             |            |
|           | 5.818470638                           | 0.040989511  | 0.195558307  | -0.45379415                           | 1.812975328  |              |             |            |
|           | 0.458139719                           | 0.697863018  | 9            | 0                                     | 0.998207054  |              |             |            |
| POLRMT    | ENSG00000099821.13                    | 0.684700956  | 1            | 1                                     | 0.684700956  |              |             |            |
|           | Brain_Spinal_cord_cervical_c-1        | 0.684700956  |              | Brain_Spinal_cord_cervical_c-1        |              |              |             |            |
|           | 1                                     | 1            | 1            | -0.406056678                          | -0.406056678 | -0.406056678 | NA          | 1          |
|           | 0.998207054                           |              |              |                                       |              |              |             |            |
| FAM78A    | ENSG00000126882.12                    | 0.684723425  | 1            | 1                                     | 0.684723425  |              |             |            |
|           | Brain_Spinal_cord_cervical_c-1        | 0.684723425  |              | Brain_Spinal_cord_cervical_c-1        |              |              |             |            |
|           | 1                                     | 1            | 1            | 0.406026098                           | 0.406026098  | 0.406026098  | NA          | 1          |
|           | 0.998207054                           |              |              |                                       |              |              |             |            |
| LINC01331 | ENSG00000248673.1                     | 0.684850491  | 2            | 2                                     | 0.401453389  |              |             |            |
|           | Brain_Cortex                          | 0.414625864  |              | Brain_Frontal_Cortex_BA9              | 1.811889472  |              |             |            |
|           | 0.188110528                           | 0.188110528  | 0.815780192  | 0.839028371                           | 0.827404282  |              |             |            |
|           | 0.016438945                           | 2            | 0            | 0.998207054                           |              |              |             |            |
| MAD2L1BP  | ENSG00000124688.13                    | 0.684955583  | 1            | 1                                     | 0.684955583  |              |             |            |
|           | Brain_Cortex                          | 0.684955583  |              | Brain_Cortex                          | 1            | 1            | 1           | 0.40571015 |
|           | 0.40571015                            | 0.40571015   | NA           | 1                                     | 0            | 0.998207054  |             |            |
| ITGAE     | ENSG00000083457.11                    | 0.685130038  | 1            | 1                                     | 0.685130038  |              |             |            |
|           | Brain_Caudate_basal_ganglia           | 0.685130038  |              | Brain_Caudate_basal_ganglia           | 1            | 1            |             |            |
|           | 1                                     | 0.405472759  | 0.405472759  | 0.405472759                           | NA           | 1            | 0           |            |
|           | 0.998207054                           |              |              |                                       |              |              |             |            |
| CYB561D2  | ENSG00000114395.10                    | 0.685151965  | 2            | 2                                     | 0.387377011  |              |             |            |
|           | Brain_Cortex                          | 0.935763482  |              | Brain_Hippocampus                     | 1.016919918  |              |             |            |
|           | 0.983080082                           | 0.983080082  | -0.864383942 | -0.080595705                          | -0.472489824 |              |             |            |
|           | 0.554221977                           | 2            | 0            | 0.998207054                           |              |              |             |            |
| USP44     | ENSG00000136014.11                    | 0.685180355  | 5            | 5                                     | 0.12126583   |              |             |            |
|           | Brain_Caudate_basal_ganglia           | 0.909752737  |              | Brain_Cerebellar_Hemisphere           |              |              |             |            |
|           | 2.433523992                           | 0.186230291  | 0.186230291  | -1.549482273                          | 0.147229142  |              |             |            |
|           | -0.438242773                          | 0.656510197  | 5            | 0                                     | 0.998207054  |              |             |            |
| MEPE      | ENSG00000152595.16                    | 0.685181509  | 3            | 3                                     | 0.356174593  |              |             |            |
|           | Brain_Spinal_cord_cervical_c-1        | 0.605113698  |              | Brain_Cortex                          | 1.147084962  |              |             |            |
|           | 0.874246396                           | 0.874246396  | 0.517060826  | 0.922678847                           | 0.684755741  |              |             |            |
|           | 0.211732127                           | 3            | 0            | 0.998207054                           |              |              |             |            |
| CD37      | ENSG00000104894.11                    | 0.685208824  | 1            | 1                                     | 0.685208824  |              |             |            |
|           | Brain_Hippocampus                     | 0.685208824  |              | Brain_Hippocampus                     | 1            | 1            | 1           |            |
|           | 0.405365558                           | 0.405365558  | 0.405365558  | NA                                    | 1            | 0            | 0.998207054 |            |
| SCN11A    | ENSG00000168356.11                    | 0.685443447  | 9            | 4                                     | 0.20645501   |              |             |            |
|           | Brain_Hypothalamus                    | 6.785590386  |              | 0.024619416                           |              |              |             |            |
|           | 0.279899421                           | -1.263373426 | 0.773580234  | -0.041454607                          | 0.591098946  |              |             |            |
|           | 4                                     | 0            | 0.998207054  |                                       |              |              |             |            |
| LINC01858 | ENSG00000261615.6                     | 0.685482758  | 2            | 2                                     | 0.39073802   |              |             |            |
|           | Brain_Caudate_basal_ganglia           | 0.610954     |              | Brain_Nucleus_accumbens_basal_ganglia |              |              |             |            |
|           | 1.45079639                            | 0.54920361   | 0.54920361   | 0.508712157                           | 0.858279728  | 0.683495943  |             |            |
|           | 0.2471816                             | 2            | 0            | 0.998207054                           |              |              |             |            |

|                |                                      |                             |                                |              |                                       |                   |              |  |
|----------------|--------------------------------------|-----------------------------|--------------------------------|--------------|---------------------------------------|-------------------|--------------|--|
| RP11-1070N10.3 | ENSG00000258572.1                    | 0.685500742                 | 3                              | 3            | 0.270962217                           |                   |              |  |
|                | Brain_Caudate_basal_ganglia          | 0.924458723                 |                                |              | Brain_Cerebellum                      | 1.107144628       |              |  |
|                | 0.900408096                          | 0.900408096                 | -1.100849379                   |              | -0.094818838                          |                   | -0.578187026 |  |
|                | 0.504165038                          | 3                           | 0                              | 0.998207054  |                                       |                   |              |  |
| RP11-363J20.1  | ENSG00000258957.1                    | 0.685651939                 | 1                              | 1            | 0.685651939                           |                   |              |  |
|                | Brain_Anterior_cingulate_cortex_BA24 | 0.685651939                 |                                |              |                                       |                   |              |  |
|                | Brain_Anterior_cingulate_cortex_BA24 | 1                           | 1                              | 0.404762714  |                                       |                   |              |  |
|                | 0.404762714                          | 0.404762714                 | NA                             | 1            | 0                                     | 0.998207054       |              |  |
| LINC01273      | ENSG00000231742.5                    | 0.685700071                 | 13                             | 2            | 0.494888169                           |                   |              |  |
|                | Brain_Cerebellar_Hemisphere          | 0.965003966                 |                                |              | Brain_Nucleus_accumbens_basal_ganglia |                   |              |  |
|                | 11.8818062                           | 2.01E-08                    | 0.740526555                    | -0.390150843 | 0.682554855                           |                   |              |  |
|                | -0.093220994                         | 0.292188718                 | 2                              | 0            | 0.998207054                           |                   |              |  |
| FAM161B        | ENSG00000156050.8                    | 0.685761988                 | 1                              | 1            | 0.685761988                           |                   |              |  |
|                | Brain_Putamen_basal_ganglia          | 0.685761988                 |                                |              | Brain_Putamen_basal_ganglia           | 1                 | 1            |  |
|                | 1                                    | 0.404613018                 | 0.404613018                    | 0.404613018  | NA                                    | 1                 | 0            |  |
|                | 0.998207054                          |                             |                                |              |                                       |                   |              |  |
| SRD5A1         | ENSG00000145545.11                   | 0.68584182                  | 5                              | 4            | 0.235338585                           |                   |              |  |
|                | Brain_Frontal_Cortex_BA9             | 0.97117213                  | Brain_Cortex                   | 3.763258416  |                                       |                   |              |  |
|                | 0.019333587                          | 0.237195933                 | -1.186718728                   | -0.036138242 | -0.391515365                          |                   |              |  |
|                | 0.472385865                          | 4                           | 0                              | 0.998207054  |                                       |                   |              |  |
| PTPN11         | ENSG00000179295.17                   | 0.685870842                 | 1                              | 1            | 0.685870842                           |                   |              |  |
|                | Brain_Hypothalamus                   | 0.685870842                 | Brain_Hypothalamus             | 1            | 1                                     | 1                 |              |  |
|                | 0.404464957                          | 0.404464957                 | 0.404464957                    | NA           | 1                                     | 0                 | 0.998207054  |  |
| NNAT           | ENSG00000053438.8                    | 0.685939636                 | 1                              | 1            | 0.685939636                           |                   |              |  |
|                | Brain_Anterior_cingulate_cortex_BA24 | 0.685939636                 |                                |              |                                       |                   |              |  |
|                | Brain_Anterior_cingulate_cortex_BA24 | 1                           | 1                              | 1            | -0.404371389                          |                   |              |  |
|                | -0.404371389                         | -0.404371389                | NA                             | 1            | 0                                     | 0.998207054       |              |  |
| GNAL           | ENSG00000141404.15                   | 0.685985936                 | 2                              | 2            | 0.445692745                           | Brain_Cerebellum  |              |  |
|                | 0.759001601                          | Brain_Cerebellar_Hemisphere | 1.136760129                    | 0.863239871  |                                       |                   |              |  |
|                | 0.863239871                          | -0.762615489                | 0.306792127                    | -0.227911681 | 0.756185377                           |                   |              |  |
|                | 2                                    | 0                           | 0.998207054                    |              |                                       |                   |              |  |
| RUNX2          | ENSG00000124813.20                   | 0.685987626                 | 4                              | 3            | 0.31614807                            | Brain_Hippocampus |              |  |
|                | 0.65478937                           | Brain_Putamen_basal_ganglia | 3.106227888                    | 0.053637867  | 0.27885339                            |                   |              |  |
|                | 0.447118683                          | 1.002404914                 | 0.834180427                    | 0.259645157  | 3                                     | 0                 |              |  |
|                | 0.998207054                          |                             |                                |              |                                       |                   |              |  |
| SLC5A2         | ENSG00000140675.12                   | 0.686038734                 | 3                              | 3            | 0.328563738                           |                   |              |  |
|                | Brain_Cerebellar_Hemisphere          | 0.831894441                 | Brain_Cerebellum               | 2.116080198  |                                       |                   |              |  |
|                | 0.248692379                          | 0.248692379                 | -0.297002971                   | 0.977010937  | 0.297426825                           |                   |              |  |
|                | 0.641261493                          | 3                           | 0                              | 0.998207054  |                                       |                   |              |  |
| PDE6G          | ENSG00000185527.11                   | 0.686066539                 | 1                              | 1            | 0.686066539                           |                   |              |  |
|                | Brain_Cerebellar_Hemisphere          | 0.686066539                 | Brain_Cerebellar_Hemisphere    | 1            | 1                                     |                   |              |  |
|                | 1                                    | 0.404198795                 | 0.404198795                    | 0.404198795  | NA                                    | 1                 | 0            |  |
|                | 0.998207054                          |                             |                                |              |                                       |                   |              |  |
| MYCBPAP        | ENSG00000136449.13                   | 0.68651387                  | 5                              | 5            | 0.165800784                           | Brain_Cortex      |              |  |
|                | 0.818862217                          | Brain_Cerebellum            | 2.68262195                     | 0.295016136  | 0.295016136                           |                   |              |  |
|                | -0.22900862                          | 1.385823567                 | 0.680906951                    | 0.582762931  | 5                                     | 0                 |              |  |
|                | 0.998207054                          |                             |                                |              |                                       |                   |              |  |
| HOGA1          | ENSG00000241935.8                    | 0.686519481                 | 5                              | 5            | 0.268225225                           |                   |              |  |
|                | Brain_Substantia_nigra               | 0.997885621                 | Brain_Caudate_basal_ganglia    |              |                                       |                   |              |  |
|                | 1.730912857                          | 0.306108956                 | 0.306108956                    | -1.005007756 | 1.10715892                            |                   |              |  |
|                | 0.183538072                          | 0.819784827                 | 5                              | 0            | 0.998207054                           |                   |              |  |
| STX1A          | ENSG00000106089.11                   | 0.686530567                 | 4                              | 3            | 0.328922031                           |                   |              |  |
|                | Brain_Cerebellar_Hemisphere          | 0.740748516                 | Brain_Hypothalamus             | 1.9941279    |                                       |                   |              |  |
|                | 0.013041021                          | 0.990873741                 | 0.330862278                    | 0.976287463  | 0.687571006                           |                   |              |  |
|                | 0.319653408                          | 3                           | 0                              | 0.998207054  |                                       |                   |              |  |
| ATF6           | ENSG00000118217.5                    | 0.686533592                 | 3                              | 3            | 0.283188529                           |                   |              |  |
|                | Brain_Substantia_nigra               | 0.592593304                 | Brain_Cerebellum               | 1.780215527  |                                       |                   |              |  |
|                | 0.225361504                          | 0.225361504                 | -0.618445352                   | 1.073184087  | -0.026781017                          |                   |              |  |
|                | 0.953509199                          | 3                           | 0                              | 0.998207054  |                                       |                   |              |  |
| PDXDC1         | ENSG00000179889.18                   | 0.68660126                  | 10                             | 8            | 0.177243087                           |                   |              |  |
|                | Brain_Putamen_basal_ganglia          | 0.982129275                 | Brain_Spinal_cord_cervical_c-1 |              |                                       |                   |              |  |
|                | 5.55746424                           | 0.045676362                 | 0.211722561                    | -1.025389734 | 1.349292333                           |                   |              |  |

|          |                                      |                             |                                      |              |              |                                       |              |
|----------|--------------------------------------|-----------------------------|--------------------------------------|--------------|--------------|---------------------------------------|--------------|
|          | -0.018315508                         | 0.730872688                 | 8                                    | 0            | 0.998207054  |                                       |              |
| SLC37A4  | ENSG00000137700.17                   | 0.686616796                 |                                      | 1            | 1            | 0.686616796                           |              |
|          | Brain_Caudate_basal_ganglia          | 0.686616796                 |                                      |              |              | Brain_Caudate_basal_ganglia           | 1            |
|          | 1                                    | -0.403450564                | -0.403450564                         | -0.403450564 | NA           | 1                                     | 0            |
|          | 0.998207054                          |                             |                                      |              |              |                                       |              |
| TIAM1    | ENSG00000156299.13                   | 0.686623499                 | 4                                    | 3            | 0.471874006  |                                       |              |
|          | Brain_Putamen_basal_ganglia          | 0.924024049                 |                                      |              |              | Brain_Caudate_basal_ganglia           |              |
|          | 2.507843613                          | 0.011594293                 | 0.243735343                          |              | -0.224243289 | 0.719433267                           |              |
|          | 0.056498884                          | 0.445126113                 | 3                                    | 0            | 0.998207054  |                                       |              |
| HOPX     | ENSG00000171476.21                   | 0.686823038                 | 1                                    | 1            | 0.686823038  | Brain_Cerebellum                      |              |
|          | 0.686823038                          | Brain_Cerebellum            | 1                                    | 1            | 1            | -0.403170176                          | -0.403170176 |
|          | -0.403170176                         | NA                          | 1                                    | 0            | 0.998207054  |                                       |              |
| METTL21A | ENSG00000144401.14                   | 0.686866893                 | 2                                    | 2            | 0.398945134  |                                       |              |
|          | Brain_Frontal_Cortex_BA9             | 0.861687333                 |                                      |              |              | Brain_Anterior_cingulate_cortex_BA24  |              |
|          | 1.02963771                           | 0.97036229                  | 0.97036229                           | -0.174226662 | 0.843506675  | 0.334640007                           |              |
|          | 0.719646144                          | 2                           | 0                                    | 0.998207054  |              |                                       |              |
| INPP4B   | ENSG00000109452.12                   | 0.686990845                 | 1                                    | 1            | 0.686990845  |                                       |              |
|          | Brain_Substantia_nigra               | 0.686990845                 |                                      |              |              | Brain_Substantia_nigra                | 1            |
|          | 1                                    | 0.402942066                 | 0.402942066                          | 0.402942066  | NA           | 1                                     | 0            |
|          | 0.998207054                          |                             |                                      |              |              |                                       |              |
| TIMD4    | ENSG00000145850.8                    | 0.687002811                 | 2                                    | 2            | 0.476344386  | Brain_Cortex                          |              |
|          | 0.911142595                          | Brain_Hypothalamus          | 1.459012595                          |              | 0.540987405  |                                       |              |
|          | 0.540987405                          | -0.111597449                | 0.712194429                          |              | 0.30029849   | 0.582508823                           | 2            |
|          | 0                                    | 0.998207054                 |                                      |              |              |                                       |              |
| SPRED3   | ENSG00000188766.12                   | 0.687029091                 | 2                                    | 2            | 0.4579251    |                                       |              |
|          | Brain_Putamen_basal_ganglia          | 0.660184989                 |                                      |              |              | Brain_Nucleus_accumbens_basal_ganglia |              |
|          | 1.009842557                          | 0.990157443                 | 0.990157443                          |              | -0.439657776 | 0.742267795                           |              |
|          | 0.15130501                           | 0.835747586                 | 2                                    | 0            | 0.998207054  |                                       |              |
| BDH1     | ENSG00000161267.11                   | 0.68703865                  | 4                                    | 4            | 0.374536485  |                                       |              |
|          | Brain_Putamen_basal_ganglia          | 0.867918531                 |                                      |              |              | Brain_Caudate_basal_ganglia           | 2.74957286   |
|          | 0.138464088                          | 0.138464088                 | -0.576459848                         |              | 0.888007931  | 0.248561442                           |              |
|          | 0.623979984                          | 4                           | 0                                    | 0.998207054  |              |                                       |              |
| DNAJC12  | ENSG00000108176.14                   | 0.687083832                 | 3                                    | 3            | 0.270212071  |                                       |              |
|          | Brain_Cerebellum                     | 0.678904828                 | Brain_Cortex                         | 1.472821552  |              | 0.548528826                           |              |
|          | 0.548528826                          | 0.413958051                 | 1.102574312                          |              | 0.652586528  | 0.389939298                           |              |
|          | 3                                    | 0                           | 0.998207054                          |              |              |                                       |              |
| NCAN     | ENSG00000130287.13                   | 0.687163737                 | 2                                    | 1            | 0.561086035  | Brain_Cerebellum                      |              |
|          | 0.828701116                          | Brain_Cerebellar_Hemisphere | 1.961364847                          |              | 0.038635153  |                                       |              |
|          | 1.961364847                          | -0.581229134                | -0.216367733                         |              | -0.398798433 | 0.257995971                           |              |
|          | 1                                    | 0                           | 0.998207054                          |              |              |                                       |              |
| KRT13    | ENSG00000171401.14                   | 0.687224342                 | 2                                    | 2            | 0.413986138  |                                       |              |
|          | Brain_Caudate_basal_ganglia          | 0.75273685                  | Brain_Cerebellum                     | 1.033457099  |              |                                       |              |
|          | 0.966542901                          | 0.966542901                 | -0.81689902                          |              | 0.315032668  | -0.250933176                          |              |
|          | 0.800396573                          | 2                           | 0                                    | 0.998207054  |              |                                       |              |
| WRN      | ENSG00000165392.9                    | 0.687245251                 | 2                                    | 2            | 0.403251676  |                                       |              |
|          | Brain_Anterior_cingulate_cortex_BA24 | 0.754673785                 | Brain_Cerebellar_Hemisphere          |              |              |                                       |              |
|          | 1.103763379                          | 0.896236621                 | 0.896236621                          |              | -0.835827993 | -0.312482599                          |              |
|          | -0.574155296                         | 0.370061077                 | 2                                    | 0            | 0.998207054  |                                       |              |
| MTHFS    | ENSG00000136371.10                   | 0.687322518                 | 9                                    | 5            | 0.393926048  |                                       |              |
|          | Brain_Cerebellar_Hemisphere          | 0.847936389                 | Brain_Putamen_basal_ganglia          |              |              |                                       |              |
|          | 5.274837336                          | 0.028824034                 | 0.255222885                          |              | -0.191752106 | 0.852519091                           |              |
|          | 0.492611428                          | 0.319554995                 | 5                                    | 0            | 0.998207054  |                                       |              |
| TMEM128  | ENSG00000132406.11                   | 0.687347078                 | 12                                   | 5            | 0.156760618  |                                       |              |
|          | Brain_Substantia_nigra               | 0.977046936                 | Brain_Anterior_cingulate_cortex_BA24 |              |              |                                       |              |
|          | 7.267490273                          | 0.014737599                 | 0.344248884                          |              | -0.168638765 | 1.416050847                           |              |
|          | 0.650185906                          | 0.560429523                 | 5                                    | 0            | 0.998207054  |                                       |              |
| WASF2    | ENSG00000158195.10                   | 0.687373475                 | 5                                    | 5            | 0.191455586  |                                       |              |
|          | Brain_Cerebellar_Hemisphere          | 0.651275558                 | Brain_Spinal_cord_cervical_c-1       |              |              |                                       |              |
|          | 1.875386562                          | 0.127086987                 | 0.127086987                          |              | -0.451990873 | 1.306285208                           |              |
|          | 0.703585497                          | 0.679845949                 | 5                                    | 0            | 0.998207054  |                                       |              |
| KRT19    | ENSG00000171345.13                   | 0.687422337                 | 2                                    | 1            | 0.668825488  |                                       |              |
|          | Brain_Cerebellar_Hemisphere          | 0.713396201                 | Brain_Cerebellum                     | 1.95231043   | 0.04768957   |                                       |              |



|           |                                       |                             |              |              |              |                                       |              |                  |
|-----------|---------------------------------------|-----------------------------|--------------|--------------|--------------|---------------------------------------|--------------|------------------|
|           | 1.95231043                            | 0.36729873                  | 0.427760513  |              | 0.397529622  | 0.042752937                           | 1            | 0                |
|           | 0.998207054                           |                             |              |              |              |                                       |              |                  |
| PCLO      | ENSG00000186472.19                    | 0.687440759                 |              | 2            | 2            | 0.490560556                           |              |                  |
|           | Brain_Nucleus_accumbens_basal_ganglia |                             | 0.599563236  |              |              |                                       |              |                  |
|           | Brain_Anterior_cingulate_cortex_BA24  | 1.001927278                 |              |              |              | 0.998072722                           |              |                  |
|           | 0.998072722                           | -0.689417528                | -0.525028706 |              |              | -0.607223117                          | 0.11624045   | 2                |
|           | 0                                     | 0.998207054                 |              |              |              |                                       |              |                  |
| BRD1      | ENSG00000100425.18                    | 0.687586924                 |              | 1            | 1            | 0.687586924                           |              |                  |
|           | Brain_Substantia_nigra                | 0.687586924                 |              |              |              | Brain_Substantia_nigra                | 1            | 1                |
|           | 1                                     | 0.402131945                 | 0.402131945  | 0.402131945  | NA           | 1                                     | 0            |                  |
|           | 0.998207054                           |                             |              |              |              |                                       |              |                  |
| FXN       | ENSG00000165060.11                    | 0.687599837                 |              | 2            | 2            | 0.386779648                           |              |                  |
|           | Brain_Anterior_cingulate_cortex_BA24  | 0.909255946                 |              |              |              | Brain_Putamen_basal_ganglia           |              |                  |
|           | 1.123244642                           | 0.876755358                 | 0.876755358  |              |              | 0.113977101                           | 0.865472236  |                  |
|           | 0.489724669                           | 0.531387306                 | 2            | 0            | 0.998207054  |                                       |              |                  |
| LINC00658 | ENSG00000226995.7                     | 0.687770421                 |              | 9            | 7            | 0.254779758                           |              |                  |
|           | Brain_Cortex                          | 0.825390225                 |              |              |              | Brain_Nucleus_accumbens_basal_ganglia |              |                  |
|           | 3.981794831                           | 0.067165183                 | 0.172850258  |              |              | -0.871155709                          | 1.138816357  |                  |
|           | 0.447349219                           | 0.636303278                 | 7            | 0            | 0.998207054  |                                       |              |                  |
| USP39     | ENSG00000168883.19                    | 0.687960457                 |              | 2            | 2            | 0.415201341                           |              | Brain_Amygdala   |
|           | 0.698197254                           | Brain_Cerebellum            | 1.122468029  |              |              | 0.877531971                           | 0.877531971  |                  |
|           | -0.814774602                          | -0.38775513                 | -0.601264866 |              |              | 0.301948365                           | 2            | 0                |
|           | 0.998207054                           |                             |              |              |              |                                       |              |                  |
| ACYP1     | ENSG00000119640.8                     | 0.688177266                 |              | 2            | 2            | 0.420897056                           |              |                  |
|           | Brain_Nucleus_accumbens_basal_ganglia | 0.818370136                 |              |              |              | Brain_Frontal_Cortex_BA9              |              |                  |
|           | 1.104654959                           | 0.895345041                 | 0.895345041  |              |              | -0.804865921                          | -0.229641784 |                  |
|           | -0.517253853                          | 0.406744888                 | 2            | 0            | 0.998207054  |                                       |              |                  |
| CD8A      | ENSG00000153563.15                    | 0.688410825                 |              | 3            | 3            | 0.278457056                           |              | Brain_Cerebellum |
|           | 0.832401382                           | Brain_Cerebellar_Hemisphere | 1.353919685  |              |              | 0.666540298                           |              |                  |
|           | 0.666540298                           | -1.083791949                | -0.211622721 |              |              | -0.6771913                            | 0.439064578  | 3                |
|           | 0                                     | 0.998207054                 |              |              |              |                                       |              |                  |
| TNFRSF11B | ENSG00000164761.8                     | 0.688602922                 |              | 1            | 1            | 0.688602922                           |              |                  |
|           | Brain_Cerebellar_Hemisphere           | 0.688602922                 |              |              |              | Brain_Cerebellar_Hemisphere           | 1            | 1                |
|           | 1                                     | -0.400751729                | -0.400751729 | -0.400751729 | NA           | 1                                     | 0            |                  |
|           | 0.998207054                           |                             |              |              |              |                                       |              |                  |
| LIN7C     | ENSG00000148943.11                    | 0.688945066                 |              | 1            | 1            | 0.688945066                           |              |                  |
|           | Brain_Spinal_cord_cervical_c-1        | 0.688945066                 |              |              |              | Brain_Spinal_cord_cervical_c-1        |              |                  |
|           | 1                                     | 1                           | 1            | -0.400287103 | -0.400287103 | -0.400287103                          | NA           | 1                |
|           | 0.998207054                           |                             |              |              |              |                                       |              | 0                |
| SPINT2    | ENSG00000167642.12                    | 0.68904481                  |              | 2            | 2            | 0.389093731                           |              |                  |
|           | Brain_Frontal_Cortex_BA9              | 0.997018137                 |              |              |              | Brain_Cerebellar_Hemisphere           | 1.0690973    |                  |
|           | 0.9309027                             | 0.9309027                   | -0.861262052 |              |              | 0.00373722                            | -0.428762416 | 0.611646851      |
|           | 2                                     | 0                           | 0.998207054  |              |              |                                       |              |                  |
| GIN3      | ENSG00000181938.13                    | 0.689256742                 |              | 2            | 2            | 0.399342357                           |              | Brain_Cerebellum |
|           | 0.87871375                            | Brain_Caudate_basal_ganglia | 1.037493701  |              |              | 0.962506299                           |              |                  |
|           | 0.962506299                           | -0.842796338                | -0.152599968 |              |              | -0.497698153                          | 0.488042533  |                  |
|           | 2                                     | 0                           | 0.998207054  |              |              |                                       |              |                  |
| CABLES1   | ENSG00000134508.12                    | 0.689499476                 |              | 3            | 3            | 0.236548774                           |              |                  |
|           | Brain_Hypothalamus                    | 0.981304246                 |              |              |              | Brain_Cortex                          | 1.240812743  |                  |
|           | 0.757577283                           | 0.757577283                 | -1.183657234 |              |              | -0.023433797                          | -0.519313912 |                  |
|           | 0.598175974                           | 3                           | 0            | 0.998207054  |              |                                       |              |                  |
| SCML4     | ENSG00000146285.13                    | 0.689536918                 |              | 3            | 3            | 0.353164395                           |              |                  |
|           | Brain_Frontal_Cortex_BA9              | 0.782546165                 |              |              |              | Brain_Cortex                          | 1.532906702  |                  |
|           | 0.511525814                           | 0.511525814                 | -0.928468896 |              |              | 0.405023538                           | -0.266482611 |                  |
|           | 0.666797187                           | 3                           | 0            | 0.998207054  |              |                                       |              |                  |
| WDR91     | ENSG00000105875.13                    | 0.689644521                 |              | 7            | 6            | 0.080444504                           |              |                  |
|           | Brain_Hippocampus                     | 0.911149404                 |              |              |              | Brain_Substantia_nigra                | 3.747669228  |                  |
|           | 0.011643393                           | 0.223202473                 | -1.748112759 |              |              | -0.111588862                          | -1.052130383 |                  |
|           | 0.620519584                           | 6                           | 0            | 0.998207054  |              |                                       |              |                  |
| AGPAT3    | ENSG00000160216.18                    | 0.689669608                 |              | 2            | 2            | 0.626644871                           |              |                  |
|           | Brain_Frontal_Cortex_BA9              | 0.659011474                 |              |              |              | Brain_Cortex                          | 1.420307758  |                  |
|           | 0.579692242                           | 0.579692242                 | -0.486454622 |              |              | 0.441278383                           | -0.02258812  |                  |

|            |                                      |                  |             |                                       |             |              |                             |              |              |
|------------|--------------------------------------|------------------|-------------|---------------------------------------|-------------|--------------|-----------------------------|--------------|--------------|
|            | 0.656006299                          | 2                | 0           | 0.998207054                           |             |              |                             |              |              |
| LRR8C      | ENSG00000171488.14                   |                  |             | 0.689693953                           | 4           | 4            | 0.155024814                 |              |              |
|            | Brain_Cerebellar_Hemisphere          |                  |             | 0.899582068                           |             |              | Brain_Caudate_basal_ganglia |              |              |
|            | 1.683599558                          | 0.492646574      |             | 0.492646574                           |             |              | -1.422004951                |              | -0.126189317 |
|            | -0.643473632                         | 0.568965909      |             | 4                                     | 0           | 0.998207054  |                             |              |              |
| RNF6       | ENSG00000127870.16                   |                  | 0.68975922  | 4                                     | 4           | 0.292337295  | Brain_Hypothalamus          |              |              |
|            | 0.815429356                          | Brain_Cerebellum | 2.501319336 |                                       |             | 0.355423187  |                             | 0.355423187  |              |
|            | -0.233427636                         | 1.053008066      |             | 0.454116612                           |             | 0.560445843  | 4                           | 0            |              |
|            | 0.998207054                          |                  |             |                                       |             |              |                             |              |              |
| WHRN       | ENSG00000095397.13                   |                  | 0.689795553 | 7                                     | 6           | 0.119073588  |                             |              |              |
|            | Brain_Spinal_cord_cervical_c-1       |                  |             | 0.674592783                           |             |              | Brain_Putamen_basal_ganglia |              |              |
|            | 4.123859055                          | 0.108819951      |             | 0.16337391                            |             | -1.558673877 | 0.885554436                 |              |              |
|            | -0.313908798                         | 0.988728608      |             | 6                                     | 0           | 0.998207054  |                             |              |              |
| U2AF1L4    | ENSG00000161265.14                   |                  | 0.689828636 | 12                                    | 6           | 0.219392789  |                             |              |              |
|            | Brain_Amygdala                       | 0.975613494      |             | Brain_Putamen_basal_ganglia           | 8.519988578 |              |                             |              |              |
|            | 0.003909203                          | 0.317289398      |             | -1.228144338                          |             | 0.389956224  |                             | -0.307563556 |              |
|            | 0.407547411                          | 6                | 0           | 0.998207054                           |             |              |                             |              |              |
| ZNF295-AS1 | ENSG00000237232.7                    |                  | 0.690481998 | 11                                    | 11          | 0.121474695  |                             |              |              |
|            | Brain_Frontal_Cortex_BA9             | 0.872457683      |             | Brain_Anterior_cingulate_cortex_BA24  |             |              |                             |              |              |
|            | 2.087039832                          | 0.423332255      |             | 0.423332255                           |             | -1.277565909 | 1.548613349                 |              |              |
|            | 0.240820085                          | 0.945927298      |             | 11                                    | 0           | 0.998207054  |                             |              |              |
| LY75       | ENSG00000054219.10                   |                  | 0.690512544 | 13                                    | 4           | 0.332131005  |                             |              |              |
|            | Brain_Cerebellar_Hemisphere          | 0.920247874      |             | Brain_Spinal_cord_cervical_c-1        |             |              |                             |              |              |
|            | 9.783683961                          | 0.010470883      |             | 0.399461473                           |             | -0.688896174 | 0.969830465                 |              |              |
|            | -0.06256913                          | 0.461700996      |             | 4                                     | 0           | 0.998207054  |                             |              |              |
| TRIOBP     | ENSG00000100106.19                   |                  | 0.690608677 | 12                                    | 4           | 0.14889092   |                             |              |              |
|            | Brain_Cerebellar_Hemisphere          | 0.958587159      |             | Brain_Nucleus_accumbens_basal_ganglia |             |              |                             |              |              |
|            | 8.714677466                          | 0.009060677      |             | 0.387377604                           |             | -1.443460045 | 0.258764695                 |              |              |
|            | -0.218367989                         | 0.524955976      |             | 4                                     | 0           | 0.998207054  |                             |              |              |
| ELOVL2     | ENSG00000197977.3                    |                  | 0.690641802 | 3                                     | 2           | 0.296731701  |                             |              |              |
|            | Brain_Cortex                         | 0.74566028       |             | Brain_Caudate_basal_ganglia           | 2.420088657 |              | 0.06477668                  |              |              |
|            | 0.515134662                          | 0.324366895      |             | 1.043467768                           |             | 0.729988401  | 0.368298991                 |              |              |
|            | 2                                    | 0                | 0.998207054 |                                       |             |              |                             |              |              |
| TRPM4      | ENSG00000130529.15                   |                  | 0.690849816 | 6                                     | 6           | 0.161443828  | Brain_Cerebellum            |              |              |
|            | 0.901430927                          | Brain_Cortex     | 1.988373998 |                                       |             | 0.472653762  | 0.472653762                 |              |              |
|            | -0.362617995                         | 1.400232093      |             | 0.529705341                           |             | 0.693113016  | 6                           | 0            |              |
|            | 0.998207054                          |                  |             |                                       |             |              |                             |              |              |
| IFIT3      | ENSG00000119917.13                   |                  | 0.690864526 | 1                                     | 1           | 0.690864526  |                             |              |              |
|            | Brain_Spinal_cord_cervical_c-1       | 0.690864526      |             | Brain_Spinal_cord_cervical_c-1        |             |              |                             |              |              |
|            | 1                                    | 1                | 1           | 0.397682111                           |             | 0.397682111  | NA                          | 1            | 0            |
|            | 0.998207054                          |                  |             |                                       |             |              |                             |              |              |
| NIP7       | ENSG00000132603.13                   |                  | 0.690873008 | 4                                     | 3           | 0.45345148   |                             |              |              |
|            | Brain_Frontal_Cortex_BA9             | 0.780046053      |             | Brain_Nucleus_accumbens_basal_ganglia |             |              |                             |              |              |
|            | 3.115182532                          | 0.034012336      |             | 0.35319299                            |             | -0.27925902  | 0.749673319                 |              |              |
|            | 0.336053001                          | 0.437616865      |             | 3                                     | 0           | 0.998207054  |                             |              |              |
| PNLDC1     | ENSG00000146453.12                   |                  | 0.690895047 | 11                                    | 2           | 0.308989233  |                             |              |              |
|            | Brain_Substantia_nigra               | 0.830425365      |             | Brain_Nucleus_accumbens_basal_ganglia |             |              |                             |              |              |
|            | 9.680132067                          | 0.000611677      |             | 0.989157377                           |             | 0.214156053  | 1.017345218                 |              |              |
|            | 0.698464479                          | 0.233826032      |             | 2                                     | 0           | 0.998207054  |                             |              |              |
| HIST1H2BE  | ENSG00000274290.2                    |                  | 0.690908588 | 1                                     | 1           | 0.690908588  |                             |              |              |
|            | Brain_Anterior_cingulate_cortex_BA24 | 0.690908588      |             |                                       |             |              |                             |              |              |
|            | Brain_Anterior_cingulate_cortex_BA24 | 1                | 1           | 1                                     |             | -0.397622344 |                             |              |              |
|            | -0.397622344                         | -0.397622344     | NA          | 1                                     | 0           | 0.998207054  |                             |              |              |
| TDRD6      | ENSG00000180113.15                   |                  | 0.691209079 | 13                                    | 6           | 0.158426521  |                             |              |              |
|            | Brain_Anterior_cingulate_cortex_BA24 | 0.992473915      |             | Brain_Cerebellum                      |             |              |                             |              |              |
|            | 8.480829807                          | 0.003834275      |             | 0.317656867                           |             | -1.298014473 | 1.410383343                 |              |              |
|            | -0.41579053                          | 0.655872641      |             | 6                                     | 0           | 0.998207054  |                             |              |              |
| RAPGEFL1   | ENSG00000108352.11                   |                  | 0.691222613 | 4                                     | 4           | 0.196546725  |                             |              |              |
|            | Brain_Cerebellar_Hemisphere          | 0.533929602      |             | Brain_Frontal_Cortex_BA9              |             |              |                             |              |              |
|            | 1.821836728                          | 0.340640198      |             | 0.340640198                           |             | -1.291452761 | -0.622018654                |              |              |
|            | -0.899360795                         | 0.310990412      |             | 4                                     | 0           | 0.998207054  |                             |              |              |
| ATG9A      | ENSG00000198925.10                   |                  | 0.691274479 | 2                                     | 2           | 0.443154602  | Brain_Amygdala              |              |              |

|                |                                      |                                |                                       |              |                             |                    |              |
|----------------|--------------------------------------|--------------------------------|---------------------------------------|--------------|-----------------------------|--------------------|--------------|
|                | 0.600999781                          | Brain_Cerebellum               | 1.185074652                           |              | 0.814925348                 |                    | 0.814925348  |
|                | -0.522963318                         | 0.76687708                     | 0.121956881                           |              | 0.912054892                 | 2                  | 0            |
|                | 0.998207054                          |                                |                                       |              |                             |                    |              |
| TMC4           | ENSG00000167608.11                   | 0.691308188                    | 13                                    | 2            | 0.27381058                  | Brain_Hypothalamus |              |
|                | 0.965150279                          | Brain_Substantia_nigra         |                                       |              | 10.78575931                 | 0.000113354        |              |
|                | 1.386745562                          | -0.273203899                   | 1.094329298                           |              | 0.366141165                 | 0.336923813        |              |
|                | 2                                    | 0                              | 0.998207054                           |              |                             |                    |              |
| L3HYPDH        | ENSG00000126790.11                   | 0.691356401                    | 13                                    | 1            | 0.442344361                 |                    |              |
|                | Brain_Spinal_cord_cervical_c-1       | 0.972047478                    |                                       |              | Brain_Cerebellar_Hemisphere |                    |              |
|                | 12.39056961                          | 0.001336091                    | 12.39056961                           |              | -0.768240426                | -0.035040461       |              |
|                | -0.38555395                          | 0.243048864                    | 1                                     | 0            | 0.998207054                 |                    |              |
| CASP7          | ENSG00000165806.19                   | 0.691707491                    | 12                                    | 4            | 0.161739746                 | Brain_Amygdala     |              |
|                | 0.887135219                          | Brain_Spinal_cord_cervical_c-1 |                                       |              | 9.289148843                 | 0.009076713        |              |
|                | 0.366958932                          | -1.399244266                   | 0.141930099                           |              | -0.964303872                | 0.440096491        |              |
|                | 4                                    | 0                              | 0.998207054                           |              |                             |                    |              |
| ZFAND6         | ENSG00000086666.18                   | 0.691722326                    | 4                                     | 4            | 0.456012404                 |                    |              |
|                | Brain_Anterior_cingulate_cortex_BA24 | 0.969896983                    |                                       |              | Brain_Cerebellum            |                    |              |
|                | 2.020933331                          | 0.082812501                    | 0.082812501                           |              | -0.186425179                | 0.745429022        |              |
|                | 0.246484314                          | 0.43387551                     | 4                                     | 0            | 0.998207054                 |                    |              |
| RP11-1079K10.3 | ENSG00000248714.6                    | 0.691829704                    |                                       | 1            | 1                           | 0.691829704        |              |
|                | Brain_Hypothalamus                   | 0.691829704                    | Brain_Hypothalamus                    | 1            | 1                           | 1                  |              |
|                | -0.39637324                          | -0.39637324                    | -0.39637324                           | NA           | 1                           | 0                  | 0.998207054  |
| RP11-689P11.2  | ENSG00000205959.3                    | 0.691894171                    | 13                                    | 2            | 0.273256418                 |                    |              |
|                | Brain_Hippocampus                    | 0.692293029                    | Brain_Cerebellar_Hemisphere           | 11.16840132  |                             |                    |              |
|                | 0.011299131                          | 0.557028774                    | -1.095594162                          |              | -0.39574517                 | -0.622141732       |              |
|                | 0.246789893                          | 2                              | 0                                     | 0.998207054  |                             |                    |              |
| TPSD1          | ENSG00000095917.13                   | 0.691936844                    | 12                                    | 3            | 0.126987085                 | Brain_Cerebellum   |              |
|                | 0.835537425                          | Brain_Hypothalamus             | 9.558746257                           |              | 0.009876407                 |                    |              |
|                | 0.457672583                          | 0.207604968                    | 1.526091475                           |              | 1.023321755                 | 0.408978323        |              |
|                | 3                                    | 0                              | 0.998207054                           |              |                             |                    |              |
| HINT3          | ENSG00000111911.6                    | 0.69193835                     | 1                                     | 1            | 0.69193835                  | Brain_Cerebellum   | 0.69193835   |
|                | Brain_Cerebellum                     | 1                              | 1                                     | -0.396225949 | -0.396225949                | -0.396225949       |              |
|                | NA                                   | 1                              | 0                                     | 0.998207054  |                             |                    |              |
| TACC1          | ENSG00000147526.19                   | 0.691956901                    | 1                                     | 1            | 0.691956901                 |                    |              |
|                | Brain_Cerebellar_Hemisphere          | 0.691956901                    | Brain_Cerebellar_Hemisphere           | 1            | 1                           |                    |              |
|                | 1                                    | 0.396200801                    | 0.396200801                           | 0.396200801  | NA                          | 1                  | 0            |
|                | 0.998207054                          |                                |                                       |              |                             |                    |              |
| NCCRP1         | ENSG00000188505.4                    | 0.692159702                    | 1                                     | 1            | 0.692159702                 |                    |              |
|                | Brain_Cerebellar_Hemisphere          | 0.692159702                    | Brain_Cerebellar_Hemisphere           | 1            | 1                           |                    |              |
|                | 1                                    | 0.395925889                    | 0.395925889                           | 0.395925889  | NA                          | 1                  | 0            |
|                | 0.998207054                          |                                |                                       |              |                             |                    |              |
| GPAT4          | ENSG00000158669.11                   | 0.692173351                    | 2                                     | 2            | 0.461695574                 | Brain_Cerebellum   |              |
|                | 0.68412596                           | Brain_Cortex                   | 1.045146147                           |              | 0.954853853                 | 0.954853853        |              |
|                | -0.736057717                         | -0.406839382                   | -0.571448549                          |              | 0.232792517                 | 2                  | 0            |
|                | 0.998207054                          |                                |                                       |              |                             |                    |              |
| FOXE1          | ENSG00000178919.8                    | 0.692182683                    | 1                                     | 1            | 0.692182683                 | Brain_Cerebellum   |              |
|                | 0.692182683                          | Brain_Cerebellum               | 1                                     | 1            | 0.395894738                 | 0.395894738        |              |
|                | 0.395894738                          | NA                             | 1                                     | 0            | 0.998207054                 |                    |              |
| LY6D           | ENSG00000167656.4                    | 0.692193196                    | 2                                     | 2            | 0.649714761                 |                    |              |
|                | Brain_Frontal_Cortex_BA9             | 0.674883372                    | Brain_Cortex                          | 1.481079445  |                             |                    |              |
|                | 0.518920555                          | 0.518920555                    | -0.41945536                           |              | 0.454158485                 | 0.017351563        |              |
|                | 0.617738274                          | 2                              | 0                                     | 0.998207054  |                             |                    |              |
| S100A10        | ENSG00000197747.8                    | 0.692202868                    | 7                                     | 4            | 0.151976171                 |                    |              |
|                | Brain_Substantia_nigra               | 0.979787225                    | Brain_Nucleus_accumbens_basal_ganglia |              |                             |                    |              |
|                | 4.768883378                          | 0.015208039                    | 0.217760736                           |              | -1.43258605                 | 0.294079166        |              |
|                | -0.18459588                          | 0.567064539                    | 4                                     | 0            | 0.998207054                 |                    |              |
| ZNF782         | ENSG00000196597.11                   | 0.692203441                    | 1                                     | 1            | 0.692203441                 |                    |              |
|                | Brain_Cerebellum                     | 0.692203441                    | Brain_Cerebellum                      | 1            | 1                           | 1                  | -0.395866601 |
|                | -0.395866601                         | -0.395866601                   | NA                                    | 1            | 0                           | 0.998207054        |              |
| AC007106.1     | ENSG00000251410.1                    | 0.692253652                    | 6                                     | 6            | 0.122057392                 |                    |              |
|                | Brain_Substantia_nigra               | 0.792670371                    | Brain_Hippocampus                     | 3.721331218  |                             |                    |              |
|                | 0.194900672                          | 0.194900672                    | -1.546195367                          |              | 0.262844583                 | -0.636733668       |              |

|               |                                        |                                        |                                |                                        |             |                             |             |                  |  |
|---------------|----------------------------------------|----------------------------------------|--------------------------------|----------------------------------------|-------------|-----------------------------|-------------|------------------|--|
|               | 0.576558351                            | 6                                      | 0                              | 0.998207054                            |             |                             |             |                  |  |
| PUSL1         | ENSG00000169972.11                     |                                        | 0.692431663                    | 3                                      | 3           | 0.27217503                  |             |                  |  |
|               | Brain_Nucleus_accumbens_basal_ganglia  |                                        | 0.670638259                    |                                        |             | Brain_Amygdala              |             |                  |  |
|               | 1.485021669                            | 0.529326888                            | 0.529326888                    |                                        |             | 0.425272197                 |             | 1.098067466      |  |
|               | 0.72022027                             | 0.343973207                            | 3                              | 0                                      | 0.998207054 |                             |             |                  |  |
| RPP14         | ENSG00000163684.11                     |                                        | 0.692447266                    | 7                                      | 5           | 0.252460226                 |             |                  |  |
|               | Brain_Frontal_Cortex_BA9               |                                        | 0.993206598                    |                                        |             | Brain_Cerebellum4.840661933 |             |                  |  |
|               | 0.110253864                            | 0.213349483                            | -1.14439412                    |                                        |             | 0.480353456                 |             | -0.43683322      |  |
|               | 0.595001007                            | 5                                      | 0                              | 0.998207054                            |             |                             |             |                  |  |
| FGFR2         | ENSG00000066468.22                     |                                        | 0.692517283                    | 3                                      | 3           | 0.243487938                 |             | Brain_Cortex     |  |
|               | 0.974796817                            | Brain_Frontal_Cortex_BA9               |                                | 1.060038318                            |             | 0.953956376                 |             |                  |  |
|               | 0.953956376                            | -1.166312952                           | 0.265631436                    |                                        |             | -0.310758092                |             | 0.755689185      |  |
|               | 3                                      | 0                                      | 0.998207054                    |                                        |             |                             |             |                  |  |
| TWNK          | ENSG00000107815.7                      |                                        | 0.692549255                    | 1                                      | 1           | 0.692549255                 |             |                  |  |
|               | Brain_Hippocampus                      |                                        | 0.692549255                    | Brain_Hippocampus                      | 1           | 1                           | 1           |                  |  |
|               | -0.395397905                           | -0.395397905                           | -0.395397905                   | NA                                     | 1           | 0                           | 0.998207054 |                  |  |
| C1orf61       | ENSG00000125462.16                     |                                        | 0.692555034                    | 1                                      | 1           | 0.692555034                 |             |                  |  |
|               | Brain_Cerebellum0.692555034            |                                        | Brain_Cerebellum1              | 1                                      | 1           | 0.395390073                 |             |                  |  |
|               | 0.395390073                            | 0.395390073                            | NA                             | 1                                      | 0           | 0.998207054                 |             |                  |  |
| ADAMTSL1      | ENSG00000178031.16                     |                                        | 0.692648066                    | 3                                      | 3           | 0.263102277                 |             |                  |  |
|               | Brain_Cerebellar_Hemisphere0.685227986 |                                        | Brain_Spinal_cord_cervical_c-1 |                                        |             |                             |             |                  |  |
|               | 1.845631798                            | 0.157931525                            | 0.157931525                    |                                        |             | 0.405339486                 |             | 1.119088755      |  |
|               | 0.837890423                            | 0.380184446                            | 3                              | 0                                      | 0.998207054 |                             |             |                  |  |
| G RTP1        | ENSG00000139835.13                     |                                        | 0.692714948                    | 1                                      | 1           | 0.692714948                 |             |                  |  |
|               | Brain_Anterior_cingulate_cortex_BA24   |                                        | 0.692714948                    |                                        |             |                             |             |                  |  |
|               | Brain_Anterior_cingulate_cortex_BA24   |                                        | 1                              | 1                                      | 1           | 0.395173365                 |             |                  |  |
|               | 0.395173365                            | 0.395173365                            | NA                             | 1                                      | 0           | 0.998207054                 |             |                  |  |
| ZNF415        | ENSG00000170954.11                     |                                        | 0.69281747                     | 11                                     | 9           | 0.111875536                 |             | Brain_Cortex     |  |
|               | 0.898756913                            | Brain_Anterior_cingulate_cortex_BA24   |                                | 3.978117537                            |             |                             |             |                  |  |
|               | 0.029265456                            | 0.197684656                            | -1.589819326                   |                                        |             | 0.713977189                 |             | -0.272372418     |  |
|               | 0.643829069                            | 9                                      | 0                              | 0.998207054                            |             |                             |             |                  |  |
| FANCC         | ENSG00000158169.12                     |                                        | 0.692853613                    | 3                                      | 3           | 0.300425371                 |             | Brain_Cerebellum |  |
|               | 0.887501759                            | Brain_Cerebellar_Hemisphere1.113204332 |                                | 0.870417723                            |             |                             |             |                  |  |
|               | 0.870417723                            | -0.141466075                           | 1.035521628                    |                                        |             | 0.523470429                 |             | 0.603204319      |  |
|               | 3                                      | 0                                      | 0.998207054                    |                                        |             |                             |             |                  |  |
| TRIT1         | ENSG00000043514.15                     |                                        | 0.692900428                    | 12                                     | 8           | 0.295700548                 |             |                  |  |
|               | Brain_Frontal_Cortex_BA9               |                                        | 0.86629607                     | Brain_Putamen_basal_ganglia5.392502211 |             |                             |             |                  |  |
|               | 3.55E-05                               | 0.377622678                            | -1.045697866                   | 1.014741129                            |             | 0.223594787                 |             |                  |  |
|               | 0.609899559                            | 8                                      | 0                              | 0.998207054                            |             |                             |             |                  |  |
| RP5-1007H16.1 | ENSG00000272745.1                      |                                        | 0.692956471                    | 3                                      | 3           | 0.38192068                  |             |                  |  |
|               | Brain_Caudate_basal_ganglia0.712737872 |                                        | Brain_Cortex                   | 1.331227183                            |             |                             |             |                  |  |
|               | 0.626014288                            | 0.626014288                            | -0.750420351                   | 0.874362853                            |             | 0.164041348                 |             |                  |  |
|               | 0.831405454                            | 3                                      | 0                              | 0.998207054                            |             |                             |             |                  |  |
| TULP1         | ENSG00000112041.12                     |                                        | 0.693003259                    | 9                                      | 3           | 0.314730745                 |             | Brain_Cortex     |  |
|               | 0.983060114                            | Brain_Nucleus_accumbens_basal_ganglia  |                                | 7.512548706                            |             |                             |             |                  |  |
|               | 0.002419261                            | 0.459822314                            | -1.005345018                   | -0.021232593                           |             | -0.589994377                |             |                  |  |
|               | 0.383309466                            | 3                                      | 0                              | 0.998207054                            |             |                             |             |                  |  |
| INF2          | ENSG00000203485.12                     |                                        | 0.693006347                    | 2                                      | 2           | 0.42068081                  |             |                  |  |
|               | Brain_Frontal_Cortex_BA9               |                                        | 0.725035638                    | Brain_Nucleus_accumbens_basal_ganglia  |             |                             |             |                  |  |
|               | 1.075745184                            | 0.924254816                            | 0.924254816                    | 0.351736829                            |             | 0.805240673                 |             |                  |  |
|               | 0.578488751                            | 0.320675644                            | 2                              | 0                                      | 0.998207054 |                             |             |                  |  |
| SLAMF8        | ENSG00000158714.10                     |                                        | 0.693008911                    | 8                                      | 4           | 0.169811548                 |             |                  |  |
|               | Brain_Substantia_nigra                 |                                        | 0.990275701                    | Brain_Cerebellar_Hemisphere            |             |                             |             |                  |  |
|               | 5.634597704                            | 2.45E-19                               | 0.33892082                     | -1.372809591                           |             | 0.415555517                 |             |                  |  |
|               | -0.113224018                           | 0.645219127                            | 4                              | 0                                      | 0.998207054 |                             |             |                  |  |
| CYTIP         | ENSG00000115165.9                      |                                        | 0.69303015                     | 1                                      | 1           | 0.69303015                  |             |                  |  |
|               | Brain_Nucleus_accumbens_basal_ganglia  |                                        | 0.69303015                     |                                        |             |                             |             |                  |  |
|               | Brain_Nucleus_accumbens_basal_ganglia  |                                        | 1                              | 1                                      | 1           | 0.394746272                 |             |                  |  |
|               | 0.394746272                            | 0.394746272                            | NA                             | 1                                      | 0           | 0.998207054                 |             |                  |  |
| C14orf93      | ENSG00000100802.14                     |                                        | 0.693087728                    | 1                                      | 1           | 0.693087728                 |             |                  |  |
|               | Brain_Cortex                           |                                        | 0.693087728                    | Brain_Cortex                           | 1           | 1                           | 1           | 0.394668263      |  |
|               | 0.394668263                            | 0.394668263                            | NA                             | 1                                      | 0           | 0.998207054                 |             |                  |  |

|               |                                       |                |                                |              |              |                |              |
|---------------|---------------------------------------|----------------|--------------------------------|--------------|--------------|----------------|--------------|
| FAT4          | ENSG00000196159.11                    | 0.69310489     | 1                              | 1            | 0.69310489   | Brain_Cortex   | 0.69310489   |
|               | Brain_Cortex                          | 1              | 1                              | 1            | -0.394645012 | -0.394645012   | -0.394645012 |
|               | NA                                    | 1              | 0                              | 0.998207054  |              |                |              |
| RP11-989F5.3  | ENSG00000256299.1                     | 0.693109745    | 1                              | 1            | 0.693109745  |                |              |
|               | Brain_Cerebellum                      | 0.693109745    | Brain_Cerebellum               | 1            | 1            | 1              | -0.394638434 |
|               | -0.394638434                          | -0.394638434   | NA                             | 1            | 0            | 0.998207054    |              |
| ZNF710        | ENSG00000140548.9                     | 0.693132818    | 1                              | 1            | 0.693132818  |                |              |
|               | Brain_Nucleus_accumbens_basal_ganglia | 0.693132818    |                                |              |              |                |              |
|               | Brain_Nucleus_accumbens_basal_ganglia | 1              | 1                              | 1            | 0.394607174  |                |              |
|               | 0.394607174                           | 0.394607174    | NA                             | 1            | 0            | 0.998207054    |              |
| COX16         | ENSG00000133983.14                    | 0.693190314    | 7                              | 3            | 0.570172771  |                |              |
|               | Brain_Frontal_Cortex_BA9              | 0.95449615     | Brain_Caudate_basal_ganglia    | 6.150872144  |              |                |              |
|               | 0.024266726                           | 0.249246055    | -0.567797069                   | 0.324333928  | -0.211158968 |                |              |
|               | 0.318644089                           | 3              | 0                              | 0.998207054  |              |                |              |
| IGFBP3        | ENSG00000146674.14                    | 0.693520273    | 3                              | 3            | 0.44604991   |                |              |
|               | Brain_Substantia_nigra                | 0.686374559    | Brain_Cerebellum               | 1.318965593  |              |                |              |
|               | 0.666814368                           | 0.666814368    | -0.762016912                   | 0.403779927  | -0.303288795 |                |              |
|               | 0.621309391                           | 3              | 0                              | 0.998207054  |              |                |              |
| C7orf31       | ENSG00000153790.11                    | 0.69352707     | 1                              | 1            | 0.69352707   | Brain_Cortex   |              |
|               | 0.69352707                            | Brain_Cortex   | 1                              | 1            | 1            | 0.394073101    | 0.394073101  |
|               | 0.394073101                           | NA             | 1                              | 0            | 0.998207054  |                |              |
| DUS3L         | ENSG00000141994.15                    | 0.693529438    | 11                             | 3            | 0.231117251  |                |              |
|               | Brain_Hippocampus                     | 0.79451171     | Brain_Cerebellar_Hemisphere    | 9.716842981  |              |                |              |
|               | 0.001258076                           | 0.32495471     | -1.197485822                   | 1.012380848  | 0.577702945  |                |              |
|               | 0.623907089                           | 3              | 0                              | 0.998207054  |              |                |              |
| LTB4R2        | ENSG00000213906.9                     | 0.69356552     | 1                              | 1            | 0.69356552   |                |              |
|               | Brain_Putamen_basal_ganglia           | 0.69356552     | Brain_Putamen_basal_ganglia    | 1            | 1            | 1              |              |
|               | -0.39402102                           | -0.39402102    | -0.39402102                    | NA           | 1            | 0              | 0.998207054  |
| TBC1D1        | ENSG00000065882.15                    | 0.693615836    | 4                              | 4            | 0.15104254   |                |              |
|               | Brain_Hypothalamus                    | 0.947900405    | Brain_Cerebellum               | 1.349842119  |              |                |              |
|               | 0.648733306                           | 0.648733306    | -1.435858746                   | -0.06534363  | -0.57341643  |                |              |
|               | 0.595757432                           | 4              | 0                              | 0.998207054  |              |                |              |
| METTL7A       | ENSG00000185432.11                    | 0.693642058    | 2                              | 2            | 0.461565459  |                |              |
|               | Brain_Cerebellum                      | 0.653381553    | Brain_Substantia_nigra         | 1.018780044  |              |                |              |
|               | 0.981219956                           | 0.981219956    | -0.449069457                   | 0.736271546  | 0.143601045  |                |              |
|               | 0.838162661                           | 2              | 0                              | 0.998207054  |              |                |              |
| RP3-467K16.4  | ENSG00000228140.1                     | 0.693714631    | 8                              | 8            | 0.151430406  |                |              |
|               | Brain_Amygdala                        | 0.938048834    | Brain_Cerebellar_Hemisphere    | 1.999558461  |              |                |              |
|               | 0.420587073                           | 0.420587073    | -1.434497275                   | 0.951264119  | -0.221938097 |                |              |
|               | 0.747041875                           | 8              | 0                              | 0.998207054  |              |                |              |
| FBXL17        | ENSG00000145743.15                    | 0.693773194    | 3                              | 3            | 0.260469823  |                |              |
|               | Brain_Spinal_cord_cervical_c-1        | 0.799551393    | Brain_Cerebellar_Hemisphere    |              |              |                |              |
|               | 1.163301166                           | 0.833604449    | 0.833604449                    | -1.125281366 | 0.357466882  |                |              |
|               | -0.171295585                          | 0.827796317    | 3                              | 0            | 0.998207054  |                |              |
| LRRN4         | ENSG00000125872.7                     | 0.693862463    | 1                              | 1            | 0.693862463  |                |              |
|               | Brain_Putamen_basal_ganglia           | 0.693862463    | Brain_Putamen_basal_ganglia    | 1            | 1            |                |              |
|               | 1                                     | -0.393618849   | -0.393618849                   | -0.393618849 | NA           | 1              | 0            |
|               | 0.998207054                           |                |                                |              |              |                |              |
| XPO1          | ENSG00000082898.16                    | 0.693869325    | 1                              | 1            | 0.693869325  | Brain_Amygdala |              |
|               | 0.693869325                           | Brain_Amygdala | 1                              | 1            | 1            | -0.393609556   | -0.393609556 |
|               | -0.393609556                          | NA             | 1                              | 0            | 0.998207054  |                |              |
| RP11-274B21.9 | ENSG00000271344.1                     | 0.693911857    | 11                             | 6            | 0.117507178  |                |              |
|               | Brain_Cerebellum                      | 0.980032436    | Brain_Hippocampus              | 7.404312329  |              |                |              |
|               | 0.007596726                           | 0.257690977    | -0.025028243                   | 1.565323063  | 0.59173618   |                |              |
|               | 0.438360128                           | 6              | 0                              | 0.998207054  |              |                |              |
| DLEC1         | ENSG00000008226.19                    | 0.693975869    | 1                              | 1            | 0.693975869  |                |              |
|               | Brain_Caudate_basal_ganglia           | 0.693975869    | Brain_Caudate_basal_ganglia    | 1            | 1            |                |              |
|               | 1                                     | 0.393465271    | 0.393465271                    | 0.393465271  | NA           | 1              | 0            |
|               | 0.998207054                           |                |                                |              |              |                |              |
| RP11-63G10.3  | ENSG00000272226.1                     | 0.694029134    | 1                              | 1            | 0.694029134  |                |              |
|               | Brain_Spinal_cord_cervical_c-1        | 0.694029134    | Brain_Spinal_cord_cervical_c-1 |              |              |                |              |
|               | 1                                     | 1              | 1                              | 0.393393142  | 0.393393142  | 0.393393142    | NA           |
|               |                                       |                |                                |              |              |                | 1            |
|               |                                       |                |                                |              |              |                | 0            |

0.998207054

YAE1D1 ENSG00000241127.7 0.694123372 1 1 0.694123372  
Brain\_Anterior\_cingulate\_cortex\_BA24 0.694123372  
Brain\_Anterior\_cingulate\_cortex\_BA24 1 1 -0.393265533  
-0.393265533 -0.393265533 NA 1 0 0.998207054

PRSS56 ENSG00000237412.6 0.694256066 5 5 0.336757009  
Brain\_Cortex 0.819600071 Brain\_Frontal\_Cortex\_BA9 2.833237574  
0.118182733 0.118182733 -0.960592683 0.741912315 -0.191019834  
0.692245647 5 0 0.998207054

MANBA ENSG00000109323.8 0.69430308 6 6 0.127921814 Brain\_Cerebellum  
0.933763362 Brain\_Spinal\_cord\_cervical\_c-1 2.170100123 0.178176543  
0.178176543 -0.724996869 1.522348371 0.31050569 0.84529262 6 0  
0.998207054

PRKCDBP ENSG00000170955.9 0.694335871 4 4 0.265610598  
Brain\_Cerebellar\_Hemisphere 0.980661422 Brain\_Caudate\_basal\_ganglia 2.18479668  
0.073245446 0.073245446 -1.11322782 0.024239687 -0.783277469  
0.541263127 4 0 0.998207054

RP1-80N2.3 ENSG00000261211.1 0.69467934 1 1 0.69467934  
Brain\_Cerebellar\_Hemisphere 0.69467934 Brain\_Cerebellar\_Hemisphere 1 1 1  
-0.392512821 -0.392512821 -0.392512821 NA 1 0 0.998207054

NEURL4 ENSG00000215041.9 0.694845571 2 2 0.393586072  
Brain\_Hippocampus 0.931027135 Brain\_Cerebellar\_Hemisphere 1.121503536  
0.878496464 0.878496464 -0.853132064 -0.086552611 -0.469842337  
0.542053529 2 0 0.998207054

CECR1 ENSG00000093072.15 0.694918977 10 10 0.15320413 Brain\_Cortex  
0.957349087 Brain\_Substantia\_nigra 2.881147652 0.136950287  
0.136950287 -1.428304859 1.173030096 -0.346628456 0.906125879  
10 0 0.998207054

THOC7 ENSG00000163634.11 0.695049068 10 5 0.236264589  
Brain\_Putamen\_basal\_ganglia 0.990372492 Brain\_Frontal\_Cortex\_BA9  
7.136232818 0.02231556 0.286517167 -0.810429686 1.184375159  
0.494202245 0.595334849 5 0 0.998207054

LINC01167 ENSG00000224758.1 0.695074356 5 4 0.384771985  
Brain\_Amygdala 0.913650814 Brain\_Putamen\_basal\_ganglia 3.897670571  
0.04224354 0.140635591 -0.549493661 0.869137395 -0.015155842  
0.526685461 4 0 0.998207054

SEPHS1 ENSG00000086475.14 0.695092739 1 1 0.695092739  
Brain\_Frontal\_Cortex\_BA9 0.695092739 Brain\_Frontal\_Cortex\_BA9 1 1  
1 0.391953274 0.391953274 0.391953274 NA 1 0  
0.998207054

CCDC141 ENSG00000163492.14 0.695097006 3 3 0.357361423  
Brain\_Caudate\_basal\_ganglia 0.983120003 Brain\_Nucleus\_accumbens\_basal\_ganglia  
2.250306986 0.234724071 0.234724071 -0.92040449 0.021157517  
-0.56228035 0.509616974 3 0 0.998207054

SOAT1 ENSG00000057252.12 0.695128486 3 3 0.279339918  
Brain\_Caudate\_basal\_ganglia 0.677874412 Brain\_Nucleus\_accumbens\_basal\_ganglia  
2.501346268 0.156738669 0.156738669 0.415365427 1.081803349  
0.736915371 0.333831355 3 0 0.998207054

C16orf62 ENSG00000103544.14 0.695144427 7 5 0.104947862  
Brain\_Hippocampus 0.939428835 Brain\_Putamen\_basal\_ganglia 4.920447528  
0.115893627 0.250665461 0.075987762 1.621325438 0.79921691  
0.456231196 5 0 0.998207054

PACS2 ENSG00000179364.13 0.695195143 2 2 0.44161694  
Brain\_Spinal\_cord\_cervical\_c-1 0.645226301 Brain\_Cortex 1.124466647  
0.875533353 0.875533353 -0.769465631 0.460403949 -0.154530841  
0.86964912 2 0 0.998207054

MPV17L2 ENSG00000254858.9 0.695200439 1 1 0.695200439  
Brain\_Cerebellar\_Hemisphere 0.695200439 Brain\_Cerebellar\_Hemisphere 1 1  
1 0.391807519 0.391807519 0.391807519 NA 1 0  
0.998207054

ASF1B ENSG00000105011.8 0.695204335 1 1 0.695204335 Brain\_Amygdala  
0.695204335 Brain\_Amygdala 1 1 1 -0.391802247 -0.391802247

|               |                                       |              |              |                                      |              |             |             |  |  |
|---------------|---------------------------------------|--------------|--------------|--------------------------------------|--------------|-------------|-------------|--|--|
|               | -0.391802247                          | NA           | 1            | 0                                    | 0.998207054  |             |             |  |  |
| ARHGEF28      | ENSG00000214944.9                     |              |              | 0.695245371                          | 1            | 1           | 0.695245371 |  |  |
|               | Brain_Hippocampus                     |              | 0.695245371  | Brain_Hippocampus                    | 1            | 1           | 1           |  |  |
|               | 0.391746714                           | 0.391746714  | 0.391746714  | NA                                   | 1            | 0           | 0.998207054 |  |  |
| SOWAHC        | ENSG00000198142.4                     |              |              | 0.695421222                          | 1            | 1           | 0.695421222 |  |  |
|               | Brain_Anterior_cingulate_cortex_BA24  |              | 0.695421222  |                                      |              |             |             |  |  |
|               | Brain_Anterior_cingulate_cortex_BA24  | 1            | 1            | 1                                    | 0.391508751  |             |             |  |  |
|               | 0.391508751                           | 0.391508751  | NA           | 1                                    | 0            | 0.998207054 |             |  |  |
| EIF3J-AS1     | ENSG00000179523.4                     |              |              | 0.695432197                          | 1            | 1           | 0.695432197 |  |  |
|               | Brain_Cortex                          |              | 0.695432197  | Brain_Cortex                         | 1            | 1           | 0.3914939   |  |  |
|               | 0.3914939                             | 0.3914939    | NA           | 1                                    | 0            | 0.998207054 |             |  |  |
| SLC5A6        | ENSG00000138074.14                    |              |              | 0.695461194                          | 3            | 3           | 0.312598447 |  |  |
|               | Brain_Cerebellar_Hemisphere           |              | 0.998125959  | Brain_Frontal_Cortex_BA9             |              |             |             |  |  |
|               | 1.887880934                           | 0.218224129  | 0.218224129  | -0.002348764                         | 1.009784709  |             |             |  |  |
|               | 0.513991211                           | 0.506379463  | 3            | 0                                    | 0.998207054  |             |             |  |  |
| TMEM268       | ENSG00000157693.14                    |              |              | 0.695579891                          | 3            | 3           | 0.244231332 |  |  |
|               | Brain_Cerebellum                      |              | 0.641554547  | Brain_Frontal_Cortex_BA9             | 2.269697543  |             |             |  |  |
|               | 0.175957941                           | 0.175957941  | -1.164475584 | -0.465526384                         | -0.829819322 |             |             |  |  |
|               | 0.350415818                           | 3            | 0            | 0.998207054                          |              |             |             |  |  |
| RP11-497H17.1 | ENSG00000262663.1                     |              |              | 0.695605187                          | 2            | 2           | 0.47731963  |  |  |
|               | Brain_Cerebellar_Hemisphere           |              | 0.665238716  | Brain_Cerebellum                     | 1.89882709   | 0.10117291  |             |  |  |
|               | 0.10117291                            | 0.432691762  | 0.710620187  | 0.571655974                          | 0.196525074  | 2           |             |  |  |
|               | 0                                     | 0.998207054  |              |                                      |              |             |             |  |  |
| TAS2R43       | ENSG00000255374.3                     |              |              | 0.695618309                          | 2            | 1           | 0.636928455 |  |  |
|               | Brain_Cerebellum                      |              | 0.759635904  | Brain_Cerebellar_Hemisphere          | 1.976922499  |             |             |  |  |
|               | 0.023077501                           | 1.976922499  | -0.471997666 | -0.305958946                         | -0.388978306 |             |             |  |  |
|               | 0.117407104                           | 1            | 0            | 0.998207054                          |              |             |             |  |  |
| ELF2          | ENSG00000109381.19                    |              |              | 0.695627245                          | 2            | 2           | 0.422109624 |  |  |
|               | Brain_Hippocampus                     |              | 0.491903822  | Brain_Spinal_cord_cervical_c-1       |              |             |             |  |  |
|               | 1.562116697                           | 0.437883303  | 0.437883303  | 0.687283932                          | 0.802766645  |             |             |  |  |
|               | 0.745025289                           | 0.08165861   | 2            | 0                                    | 0.998207054  |             |             |  |  |
| AP000318.2    | ENSG00000214955.5                     |              |              | 0.695693246                          | 1            | 1           | 0.695693246 |  |  |
|               | Brain_Putamen_basal_ganglia           |              | 0.695693246  | Brain_Putamen_basal_ganglia          | 1            | 1           |             |  |  |
|               | 1                                     | -0.391140689 | -0.391140689 | -0.391140689                         | NA           | 1           | 0           |  |  |
|               | 0.998207054                           |              |              |                                      |              |             |             |  |  |
| CFHR1         | ENSG00000244414.6                     |              |              | 0.695714817                          | 4            | 4           | 0.162211186 |  |  |
|               | Brain_Anterior_cingulate_cortex_BA24  |              | 0.956353178  | Brain_Hippocampus                    |              |             |             |  |  |
|               | 2.471293874                           | 0.182240277  | 0.182240277  | -0.05473049                          | 1.397673331  |             |             |  |  |
|               | 0.487206796                           | 0.632513963  | 4            | 0                                    | 0.998207054  |             |             |  |  |
| RP11-981G7.3  | ENSG00000253678.1                     |              |              | 0.695844491                          | 13           | 4           | 0.111237617 |  |  |
|               | Brain_Spinal_cord_cervical_c-1        |              | 0.678056754  | Brain_Hypothalamus                   |              |             |             |  |  |
|               | 10.07532029                           | 9.29E-05     | 0.51078564   | -0.48587966                          | 1.592654961  |             |             |  |  |
|               | 0.823838439                           | 0.495848659  | 4            | 0                                    | 0.998207054  |             |             |  |  |
| SRP14-AS1     | ENSG00000248508.6                     |              |              | 0.695897631                          | 13           | 11          | 0.092196619 |  |  |
|               | Brain_Putamen_basal_ganglia           |              | 0.981573458  | Brain_Cortex                         | 4.455678237  |             |             |  |  |
|               | 0.003972912                           | 0.173635914  | -1.605167134 | 1.683922648                          | -0.059010933 |             |             |  |  |
|               | 0.83265685                            | 11           | 0            | 0.998207054                          |              |             |             |  |  |
| ANKRD30BL     | ENSG00000163046.15                    |              |              | 0.695920753                          | 12           | 4           | 0.212378824 |  |  |
|               | Brain_Amygdala                        |              | 0.919432439  | Brain_Anterior_cingulate_cortex_BA24 |              |             |             |  |  |
|               | 9.110970643                           | 0.000755279  | 0.365861049  | -1.063524755                         | 1.247050928  |             |             |  |  |
|               | 0.580921904                           | 0.615748914  | 4            | 0                                    | 0.998207054  |             |             |  |  |
| RP11-244E17.1 | ENSG00000283654.1                     |              |              | 0.695978438                          | 1            | 1           | 0.695978438 |  |  |
|               | Brain_Substantia_nigra                |              | 0.695978438  | Brain_Substantia_nigra               | 1            | 1           |             |  |  |
|               | 1                                     | 0.390754869  | 0.390754869  | 0.390754869                          | NA           | 1           | 0           |  |  |
|               | 0.998207054                           |              |              |                                      |              |             |             |  |  |
| PADI1         | ENSG00000142623.9                     |              |              | 0.696005217                          | 2            | 2           | 0.478774764 |  |  |
|               | Brain_Hypothalamus                    |              | 0.777781383  | Brain_Spinal_cord_cervical_c-1       |              |             |             |  |  |
|               | 1.247710357                           | 0.752289643  | 0.752289643  | -0.282211445                         | 0.708274573  |             |             |  |  |
|               | 0.213031564                           | 0.70037938   | 2            | 0                                    | 0.998207054  |             |             |  |  |
| ABTB2         | ENSG00000166016.5                     |              |              | 0.696313596                          | 1            | 1           | 0.696313596 |  |  |
|               | Brain_Nucleus_accumbens_basal_ganglia |              | 0.696313596  |                                      |              |             |             |  |  |
|               | Brain_Nucleus_accumbens_basal_ganglia | 1            | 1            | 1                                    | -0.390301524 |             |             |  |  |

|              |                                       |                                      |                             |              |              |              |                  |
|--------------|---------------------------------------|--------------------------------------|-----------------------------|--------------|--------------|--------------|------------------|
|              | -0.390301524                          | -0.390301524                         | NA                          | 1            | 0            | 0.998207054  |                  |
| MAP2         | ENSG00000078018.19                    | 0.696417235                          |                             | 1            | 1            | 0.696417235  |                  |
|              | Brain_Nucleus_accumbens_basal_ganglia | 0.696417235                          |                             |              |              |              |                  |
|              | Brain_Nucleus_accumbens_basal_ganglia | 1                                    | 1                           | 1            | 0.390161356  |              |                  |
|              | 0.390161356                           | 0.390161356                          | NA                          | 1            | 0            | 0.998207054  |                  |
| TCP10L2      | ENSG00000166984.11                    | 0.696482649                          |                             | 2            | 1            | 0.633092065  |                  |
|              | Brain_Nucleus_accumbens_basal_ganglia | 0.76701297                           | Brain_Caudate_basal_ganglia |              |              |              |                  |
|              | 1.966902282                           | 0.033097718                          | 1.966902282                 |              | -0.477379281 | -0.296284306 |                  |
|              | -0.386831794                          | 0.128053485                          | 1                           | 0            | 0.998207054  |              |                  |
| ELMOD3       | ENSG00000115459.17                    | 0.696487871                          |                             | 1            | 1            | 0.696487871  |                  |
|              | Brain_Cerebellum                      | 0.696487871                          | Brain_Cerebellum            | 1            | 1            | 0.390065828  |                  |
|              | 0.390065828                           | 0.390065828                          | NA                          | 1            | 0            | 0.998207054  |                  |
| RP11-526I2.5 | ENSG00000270127.2                     | 0.696688074                          |                             | 13           | 2            | 0.237351989  |                  |
|              | Brain_Substantia_nigra                | 0.703809104                          | Brain_Frontal_Cortex_BA9    |              |              |              |                  |
|              | 11.08715976                           | 0.003985505                          | 1.021230835                 |              | -1.181631399 | -0.380183638 |                  |
|              | -0.782069139                          | 0.244800053                          | 2                           | 0            | 0.998207054  |              |                  |
| CYP1B1       | ENSG00000138061.11                    | 0.696866934                          |                             | 1            | 1            | 0.696866934  |                  |
|              | Brain_Caudate_basal_ganglia           | 0.696866934                          | Brain_Caudate_basal_ganglia | 1            | 1            |              |                  |
|              | 1                                     | 0.389553241                          | 0.389553241                 | 0.389553241  | NA           | 1            | 0                |
|              | 0.998207054                           |                                      |                             |              |              |              |                  |
| SEC14L2      | ENSG00000100003.17                    | 0.696895894                          |                             | 3            | 3            | 0.289113239  |                  |
|              | Brain_Caudate_basal_ganglia           | 0.926074801                          | Brain_Cerebellar_Hemisphere |              |              |              |                  |
|              | 2.000416807                           | 0.097701497                          | 0.097701497                 |              | -1.060068936 | 0.092784454  |                  |
|              | -0.380579486                          | 0.603434776                          | 3                           | 0            | 0.998207054  |              |                  |
| C8orf37-AS1  | ENSG00000253773.2                     | 0.696934548                          |                             | 2            | 2            | 0.414617976  |                  |
|              | Brain_Amygdala                        | 0.819154964                          | Brain_Hippocampus           | 1.01137105   | 0.98862895   |              |                  |
|              | 0.98862895                            | -0.815793982                         | -0.228631984                |              | -0.522212983 | 0.415186231  | 2                |
|              | 0                                     | 0.998207054                          |                             |              |              |              |                  |
| SPATA13      | ENSG00000228741.2                     | 0.696946288                          |                             | 6            | 5            | 0.12564049   | Brain_Cortex     |
|              | 0.640234301                           | Brain_Hippocampus                    | 4.037886733                 |              | 0.002250261  |              |                  |
|              | 0.213765441                           | 0.467371232                          | 1.531521772                 |              | 0.828168764  | 0.392004883  |                  |
|              | 5                                     | 0                                    | 0.998207054                 |              |              |              |                  |
| ANK2         | ENSG00000145362.17                    | 0.696968821                          |                             | 1            | 1            | 0.696968821  |                  |
|              | Brain_Cerebellar_Hemisphere           | 0.696968821                          | Brain_Cerebellar_Hemisphere | 1            | 1            |              |                  |
|              | 1                                     | -0.389415482                         | -0.389415482                | -0.389415482 | NA           | 1            | 0                |
|              | 0.998207054                           |                                      |                             |              |              |              |                  |
| F2RL1        | ENSG00000164251.4                     | 0.697049345                          |                             | 6            | 4            | 0.471792382  | Brain_Amygdala   |
|              | 0.980826375                           | Brain_Frontal_Cortex_BA9             | 4.55988705                  | 0.003841074  |              |              |                  |
|              | 0.237201201                           | -0.236961935                         | 0.719565789                 |              | 0.249084857  | 0.366989566  |                  |
|              | 4                                     | 0                                    | 0.998207054                 |              |              |              |                  |
| EIF2D        | ENSG00000143486.15                    | 0.697064174                          |                             | 3            | 3            | 0.323451436  | Brain_Cortex     |
|              | 0.682875539                           | Brain_Anterior_cingulate_cortex_BA24 | 1.881361387                 |              |              |              |                  |
|              | 0.108658981                           | 0.108658981                          | -0.987390099                |              | 0.702321405  | 0.041157888  |                  |
|              | 0.902778907                           | 3                                    | 0                           | 0.998207054  |              |              |                  |
| HNF4A        | ENSG00000101076.16                    | 0.697079762                          |                             | 2            | 2            | 0.400058623  | Brain_Cortex     |
|              | 0.917995019                           | Brain_Frontal_Cortex_BA9             | 1.016014237                 | 0.983985763  |              |              |                  |
|              | 0.983985763                           | -0.10295962                          | 0.841516541                 |              | 0.36927846   | 0.667845498  | 2                |
|              | 0                                     | 0.998207054                          |                             |              |              |              |                  |
| EIF3C        | ENSG00000184110.14                    | 0.69709734                           | 8                           | 5            | 0.089321417  |              |                  |
|              | Brain_Substantia_nigra                | 0.588127533                          | Brain_Hypothalamus          | 5.314015397  |              |              |                  |
|              | 1.20E-06                              | 0.208138435                          | 0.541551468                 |              | 1.698988149  | 1.119488502  |                  |
|              | 0.340513291                           | 5                                    | 0                           | 0.998207054  |              |              |                  |
| PDCD5        | ENSG00000105185.11                    | 0.697107192                          |                             | 12           | 10           | 0.064106956  | Brain_Cerebellum |
|              | 0.923910881                           | Brain_Putamen_basal_ganglia          | 5.653255572                 | 0.07018626   |              |              |                  |
|              | 0.215915422                           | 0.095508573                          | 1.851435293                 |              | 0.857109224  | 0.524322952  |                  |
|              | 10                                    | 0                                    | 0.998207054                 |              |              |              |                  |
| FGFR10P      | ENSG00000213066.11                    | 0.697348846                          |                             | 3            | 3            | 0.395801757  |                  |
|              | Brain_Frontal_Cortex_BA9              | 0.965526178                          | Brain_Caudate_basal_ganglia |              |              |              |                  |
|              | 1.347351148                           | 0.649378536                          | 0.649378536                 |              | -0.04321998  | 0.849142944  |                  |
|              | 0.507799894                           | 0.481716903                          | 3                           | 0            | 0.998207054  |              |                  |
| MRPL58       | ENSG00000167862.9                     | 0.697390939                          |                             | 2            | 2            | 0.400697512  |                  |
|              | Brain_Spinal_cord_cervical_c-1        | 0.769245454                          | Brain_Substantia_nigra      |              |              |              |                  |



|              |                                      |                             |                                       |              |                  |                   |              |   |   |
|--------------|--------------------------------------|-----------------------------|---------------------------------------|--------------|------------------|-------------------|--------------|---|---|
|              | 1.208530209                          | 0.791469791                 | 0.791469791                           | -0.840376159 | -0.293362018     |                   |              |   |   |
|              | -0.566869088                         | 0.386797409                 | 2                                     | 0            | 0.998207054      |                   |              |   |   |
| FKBP14       | ENSG00000106080.10                   | 0.697425584                 | 3                                     | 3            | 0.360098874      |                   |              |   |   |
|              | Brain_Caudate_basal_ganglia          | 0.740159888                 |                                       |              | Brain_Cerebellum | 1.854504552       |              |   |   |
|              | 0.419493242                          | 0.419493242                 | -0.33164162                           | 0.915176702  | 0.38663818       |                   |              |   |   |
|              | 0.644701711                          | 3                           | 0                                     | 0.998207054  |                  |                   |              |   |   |
| C11orf24     | ENSG00000171067.10                   | 0.697613906                 | 8                                     | 5            | 0.079954915      |                   |              |   |   |
|              | Brain_Hypothalamus                   | 0.91881017                  | Brain_Cerebellar_Hemisphere           | 5.083422854  |                  |                   |              |   |   |
|              | 0.007651683                          | 0.297480384                 | -0.101932604                          | 1.750947725  | 0.774809049      |                   |              |   |   |
|              | 0.548230674                          | 5                           | 0                                     | 0.998207054  |                  |                   |              |   |   |
| NIPAL1       | ENSG00000163293.11                   | 0.697652323                 | 4                                     | 4            | 0.368725015      |                   |              |   |   |
|              | Brain_Caudate_basal_ganglia          | 0.989916284                 | Brain_Hypothalamus                    | 2.956940389  |                  |                   |              |   |   |
|              | 0.145902812                          | 0.145902812                 | -0.012638401                          | 0.898864171  | 0.270854985      |                   |              |   |   |
|              | 0.425655866                          | 4                           | 0                                     | 0.998207054  |                  |                   |              |   |   |
| PRSS33       | ENSG00000103355.13                   | 0.697663716                 | 3                                     | 3            | 0.257620149      |                   |              |   |   |
|              | Brain_Anterior_cingulate_cortex_BA24 | 0.884200871                 | Brain_Amygdala                        |              |                  |                   |              |   |   |
|              | 1.013659565                          | 0.9869687                   | 0.9869687                             | -0.366775334 | 1.132033981      |                   |              |   |   |
|              | 0.206537557                          | 0.809093487                 | 3                                     | 0            | 0.998207054      |                   |              |   |   |
| SOAT2        | ENSG00000167780.11                   | 0.697680106                 | 1                                     | 1            | 0.697680106      |                   |              |   |   |
|              | Brain_Spinal_cord_cervical_c-1       | 0.697680106                 | Brain_Spinal_cord_cervical_c-1        |              |                  |                   |              |   |   |
|              | 1                                    | 1                           | 1                                     | 0.388453977  | 0.388453977      | 0.388453977       | NA           | 1 | 0 |
|              | 0.998207054                          |                             |                                       |              |                  |                   |              |   |   |
| CD248        | ENSG00000174807.3                    | 0.697846244                 | 1                                     | 1            | 0.697846244      |                   |              |   |   |
|              | Brain_Hypothalamus                   | 0.697846244                 | Brain_Hypothalamus                    | 1            | 1                | 1                 |              |   |   |
|              | -0.388229446                         | -0.388229446                | -0.388229446                          | NA           | 1                | 0                 | 0.998207054  |   |   |
| FGFBP3       | ENSG00000174721.9                    | 0.697886114                 | 2                                     | 2            | 0.546874085      |                   |              |   |   |
|              | Brain_Hypothalamus                   | 0.561561649                 | Brain_Cerebellum                      | 1.027045969  |                  |                   |              |   |   |
|              | 0.972954031                          | 0.972954031                 | -0.602450828                          | 0.580523493  | -0.010963668     |                   |              |   |   |
|              | 0.836489164                          | 2                           | 0                                     | 0.998207054  |                  |                   |              |   |   |
| RP6-65G23.3  | ENSG00000259153.1                    | 0.6979196                   | 2                                     | 2            | 0.479240596      |                   |              |   |   |
|              | Brain_Hippocampus                    | 0.697317751                 | Brain_Spinal_cord_cervical_c-1        |              |                  |                   |              |   |   |
|              | 1.107438838                          | 0.892561162                 | 0.892561162                           | -0.388943759 | 0.707524494      |                   |              |   |   |
|              | 0.159290368                          | 0.775320138                 | 2                                     | 0            | 0.998207054      |                   |              |   |   |
| MAP3K9       | ENSG00000006432.15                   | 0.698039676                 | 5                                     | 5            | 0.293896033      |                   |              |   |   |
|              | Brain_Putamen_basal_ganglia          | 0.690461756                 | Brain_Anterior_cingulate_cortex_BA24  |              |                  |                   |              |   |   |
|              | 2.682261177                          | 0.103943185                 | 0.103943185                           | -1.049613098 | 0.838587405      |                   |              |   |   |
|              | 0.107235032                          | 0.80078918                  | 5                                     | 0            | 0.998207054      |                   |              |   |   |
| POLR2B       | ENSG00000047315.15                   | 0.698078511                 | 3                                     | 3            | 0.469673642      |                   |              |   |   |
|              | Brain_Hypothalamus                   | 0.502271191                 | Brain_Frontal_Cortex_BA9              | 1.083304579  |                  |                   |              |   |   |
|              | 0.907958763                          | 0.907958763                 | -0.670920477                          | 0.72301016   | 0.241278755      |                   |              |   |   |
|              | 0.790403421                          | 3                           | 0                                     | 0.998207054  |                  |                   |              |   |   |
| RP11-213G2.2 | ENSG00000230303.5                    | 0.698258843                 | 1                                     | 1            | 0.698258843      |                   |              |   |   |
|              | Brain_Substantia_nigra               | 0.698258843                 | Brain_Substantia_nigra                | 1            | 1                |                   |              |   |   |
|              | 1                                    | -0.387671913                | -0.387671913                          | -0.387671913 | NA               | 1                 | 0            |   |   |
|              | 0.998207054                          |                             |                                       |              |                  |                   |              |   |   |
| LEMD3        | ENSG00000174106.2                    | 0.698319118                 | 1                                     | 1            | 0.698319118      | Brain_Cerebellum  |              |   |   |
|              | 0.698319118                          | Brain_Cerebellum            | 1                                     | 1            | 1                | -0.387590476      | -0.387590476 |   |   |
|              | -0.387590476                         | NA                          | 1                                     | 0            | 0.998207054      |                   |              |   |   |
| MTDH         | ENSG00000147649.9                    | 0.698351319                 | 2                                     | 2            | 0.441556545      | Brain_Cortex      |              |   |   |
|              | 0.965088196                          | Brain_Putamen_basal_ganglia | 1.371146115                           | 0.628853885  |                  |                   |              |   |   |
|              | 0.628853885                          | -0.043769428                | 0.769567408                           | 0.36289899   | 0.575115992      | 2                 |              |   |   |
|              | 0                                    | 0.998207054                 |                                       |              |                  |                   |              |   |   |
| CDK5RAP1     | ENSG00000101391.20                   | 0.698412011                 | 1                                     | 1            | 0.698412011      |                   |              |   |   |
|              | Brain_Cortex                         | 0.698412011                 | Brain_Cortex                          | 1            | 1                | 1                 | -0.387464973 |   |   |
|              | -0.387464973                         | -0.387464973                | NA                                    | 1            | 0                | 0.998207054       |              |   |   |
| TMEM147      | ENSG00000105677.11                   | 0.69850513                  | 1                                     | 1            | 0.69850513       | Brain_Hippocampus |              |   |   |
|              | 0.69850513                           | Brain_Hippocampus           | 1                                     | 1            | 1                | -0.387339171      | -0.387339171 |   |   |
|              | -0.387339171                         | NA                          | 1                                     | 0            | 0.998207054      |                   |              |   |   |
| ALKBH8       | ENSG00000137760.14                   | 0.698576802                 | 2                                     | 2            | 0.397000843      |                   |              |   |   |
|              | Brain_Cortex                         | 0.566732842                 | Brain_Nucleus_accumbens_basal_ganglia |              |                  |                   |              |   |   |
|              | 1.671674367                          | 0.328325633                 | 0.328325633                           | 0.572869817  | 0.846989736      |                   |              |   |   |
|              | 0.709929776                          | 0.193832053                 | 2                                     | 0            | 0.998207054      |                   |              |   |   |

|               |                                       |                                |                    |             |             |                                |                  |             |
|---------------|---------------------------------------|--------------------------------|--------------------|-------------|-------------|--------------------------------|------------------|-------------|
| RP11-498P14.3 | ENSG00000242375.1                     | 0.698582545                    | 2                  | 2           | 0.405239055 |                                |                  |             |
|               | Brain_Spinal_cord_cervical_c-1        | 0.985458328                    |                    |             |             | Brain_Hypothalamus             |                  |             |
|               | 1.164284763                           | 0.835715237                    |                    |             |             | -0.018226292                   | 0.832301019      |             |
|               | 0.407037364                           | 0.601413629                    | 2                  | 0           | 0.998207054 |                                |                  |             |
| MYH11         | ENSG00000133392.17                    | 0.698583423                    | 1                  | 1           | 0.698583423 |                                | Brain_Amygdala   |             |
|               | 0.698583423                           | Brain_Amygdala                 | 1                  | 1           | 1           | 0.387233404                    | 0.387233404      |             |
|               | 0.387233404                           | NA                             | 1                  | 0           | 0.998207054 |                                |                  |             |
| PANX1         | ENSG00000110218.8                     | 0.698680234                    | 5                  | 4           | 0.12456796  |                                |                  |             |
|               | Brain_Spinal_cord_cervical_c-1        | 0.883853185                    |                    |             |             | Brain_Cortex                   | 2.884138399      |             |
|               | 0.095940122                           | 0.215606317                    |                    |             |             | 1.535879407                    | 0.354390524      |             |
|               | 0.814596344                           | 4                              | 0                  | 0.998207054 |             |                                |                  |             |
| LGALS2        | ENSG00000100079.6                     | 0.698791508                    | 1                  | 1           | 0.698791508 |                                |                  |             |
|               | Brain_Substantia_nigra                | 0.698791508                    |                    |             |             | Brain_Substantia_nigra         | 1                | 1           |
|               | 1                                     | 0.386952318                    | 0.386952318        | 0.386952318 | NA          | 1                              | 0                |             |
|               | 0.998207054                           |                                |                    |             |             |                                |                  |             |
| MRPL23        | ENSG00000214026.10                    | 0.698825376                    | 11                 | 10          | 0.102486046 |                                |                  |             |
|               | Brain_Cerebellar_Hemisphere           | 0.945733336                    |                    |             |             | Brain_Hypothalamus             | 4.797639663      |             |
|               | 0.123750265                           | 0.172801073                    |                    |             |             | -1.632918939                   | -0.164784469     |             |
|               | 0.76925475                            | 10                             | 0                  | 0.998207054 |             |                                |                  |             |
| ST5           | ENSG00000166444.18                    | 0.698917937                    | 1                  | 1           | 0.698917937 |                                |                  |             |
|               | Brain_Frontal_Cortex_BA9              | 0.698917937                    |                    |             |             | Brain_Frontal_Cortex_BA9       | 1                | 1           |
|               | 1                                     | 0.38678155                     | 0.38678155         | 0.38678155  | NA          | 1                              | 0                | 0.998207054 |
| GSDMA         | ENSG00000167914.11                    | 0.699208759                    | 3                  | 3           | 0.257072775 |                                |                  |             |
|               | Brain_Spinal_cord_cervical_c-1        | 0.440972292                    |                    |             |             | Brain_Substantia_nigra         |                  |             |
|               | 2.642106868                           | 0.131505184                    | 0.131505184        |             |             | -1.133336964                   | -0.770552388     |             |
|               | -0.963990958                          | 0.182588337                    | 3                  | 0           | 0.998207054 |                                |                  |             |
| GOSR2         | ENSG00000108433.16                    | 0.699228732                    | 5                  | 3           | 0.233836827 |                                |                  |             |
|               | Brain_Spinal_cord_cervical_c-1        | 0.834318024                    |                    |             |             | Brain_Cortex                   | 3.945527665      |             |
|               | 0.034112521                           | 0.184755924                    |                    |             |             | -0.209166806                   | -0.645593364     |             |
|               | 0.419466203                           | 3                              | 0                  | 0.998207054 |             |                                |                  |             |
| NUAK2         | ENSG00000163545.8                     | 0.699285836                    | 2                  | 2           | 0.400272848 |                                | Brain_Cerebellum |             |
|               | 0.601388382                           | Brain_Cerebellar_Hemisphere    | 1.53166032         | 0.46833968  | 0.46833968  |                                |                  |             |
|               | 0.52240499                            | 0.841134038                    | 0.681769514        | 0.225375471 | 2           | 0                              |                  |             |
|               | 0.998207054                           |                                |                    |             |             |                                |                  |             |
| MAGOH         | ENSG00000162385.10                    | 0.699320832                    | 1                  | 1           | 0.699320832 |                                | Brain_Cerebellum |             |
|               | 0.699320832                           | Brain_Cerebellum               | 1                  | 1           | 1           | -0.386237435                   | -0.386237435     |             |
|               | -0.386237435                          | NA                             | 1                  | 0           | 0.998207054 |                                |                  |             |
| UST           | ENSG00000111962.7                     | 0.699320896                    | 6                  | 5           | 0.130203886 |                                | Brain_Cortex     |             |
|               | 0.696728651                           | Brain_Cerebellar_Hemisphere    | 2.675196382        | 0.043304684 |             |                                |                  |             |
|               | 0.368076138                           | -1.513298371                   | 0.992982479        |             |             | -0.58553623                    | 1.0225194        | 5           |
|               | 0                                     | 0.998207054                    |                    |             |             |                                |                  |             |
| ABCD3         | ENSG00000117528.11                    | 0.699346486                    | 1                  | 1           | 0.699346486 |                                | Brain_Cortex     |             |
|               | 0.699346486                           | Brain_Cortex                   | 1                  | 1           | 1           | 0.386202792                    | 0.386202792      |             |
|               | 0.386202792                           | NA                             | 1                  | 0           | 0.998207054 |                                |                  |             |
| CTD-2081C10.7 | ENSG00000272416.1                     | 0.699350125                    | 1                  | 1           | 0.699350125 |                                |                  |             |
|               | Brain_Hypothalamus                    | 0.699350125                    | Brain_Hypothalamus | 1           | 1           | 1                              |                  |             |
|               | -0.386197878                          | -0.386197878                   | -0.386197878       | NA          | 1           | 0                              | 0.998207054      |             |
| KRT81         | ENSG00000205426.10                    | 0.69935335                     | 10                 | 4           | 0.425987773 |                                | Brain_Amygdala   |             |
|               | 0.833593154                           | Brain_Putamen_basal_ganglia    | 7.88938153         | 0.001483516 |             |                                |                  |             |
|               | 0.379389079                           | -0.423941087                   | 0.796076155        | 0.444032761 |             | 0.372799511                    |                  |             |
|               | 4                                     | 0                              | 0.998207054        |             |             |                                |                  |             |
| PPP1R9A       | ENSG00000158528.11                    | 0.699363378                    | 1                  | 1           | 0.699363378 |                                |                  |             |
|               | Brain_Nucleus_accumbens_basal_ganglia | 0.699363378                    |                    |             |             |                                |                  |             |
|               | Brain_Nucleus_accumbens_basal_ganglia | 1                              | 1                  | 1           | 0.386179982 |                                |                  |             |
|               | 0.386179982                           | 0.386179982                    | NA                 | 1           | 0           | 0.998207054                    |                  |             |
| DAO           | ENSG00000110887.7                     | 0.699501712                    | 2                  | 2           | 0.660104376 |                                | Brain_Cerebellum |             |
|               | 0.892778658                           | Brain_Spinal_cord_cervical_c-1 | 1.760212455        | 0.239787545 |             |                                |                  |             |
|               | 0.239787545                           | -0.439769064                   | 0.134789057        |             |             | -0.152490003                   | 0.406273944      |             |
|               | 2                                     | 0                              | 0.998207054        |             |             |                                |                  |             |
| FAM170B       | ENSG00000172538.6                     | 0.699639602                    | 1                  | 1           | 0.699639602 |                                |                  |             |
|               | Brain_Spinal_cord_cervical_c-1        | 0.699639602                    |                    |             |             | Brain_Spinal_cord_cervical_c-1 |                  |             |
|               | 1                                     | 1                              | 1                  | 0.385807012 | 0.385807012 | 0.385807012                    | NA               | 1           |
|               |                                       |                                |                    |             |             |                                |                  | 0           |

|              |                                       |                             |              |             |                                       |              |                |
|--------------|---------------------------------------|-----------------------------|--------------|-------------|---------------------------------------|--------------|----------------|
| 0.998207054  |                                       |                             |              |             |                                       |              |                |
| ACSM3        | ENSG00000005187.11                    | 0.699654986                 | 2            | 2           | 0.402034148                           |              |                |
|              | Brain_Hypothalamus                    | 0.940015528                 |              |             | Brain_Cerebellum                      | 1.041367037  |                |
|              | 0.958632963                           | 0.958632963                 | -0.837993867 |             | 0.075250346                           |              | -0.38137176    |
|              | 0.645761176                           | 2                           | 0            | 0.998207054 |                                       |              |                |
| SLC25A17     | ENSG00000100372.14                    | 0.699674006                 | 3            | 3           | 0.336751259                           |              |                |
|              | Brain_Cerebellum                      | 0.963671219                 |              |             | Brain_Putamen_basal_ganglia           | 1.829227566  |                |
|              | 0.41857911                            | 0.41857911                  | -0.960604114 |             | 0.335486595                           |              | -0.223554879   |
|              | 0.666129007                           | 3                           | 0            | 0.998207054 |                                       |              |                |
| ANLN         | ENSG00000011426.10                    | 0.699704118                 | 1            | 1           | 0.699704118                           |              | Brain_Amygdala |
|              | 0.699704118                           | Brain_Amygdala              | 1            | 1           | 1                                     | -0.385719907 | -0.385719907   |
|              | -0.385719907                          | NA                          | 1            | 0           | 0.998207054                           |              |                |
| BAZ1B        | ENSG00000009954.10                    | 0.699749938                 | 1            | 1           | 0.699749938                           |              |                |
|              | Brain_Caudate_basal_ganglia           | 0.699749938                 |              |             | Brain_Caudate_basal_ganglia           | 1            | 1              |
|              | 1                                     | 0.385658046                 | 0.385658046  | 0.385658046 | NA                                    | 1            | 0              |
|              | 0.998207054                           |                             |              |             |                                       |              |                |
| TCP11        | ENSG00000124678.17                    | 0.69976684                  | 5            | 5           | 0.175888488                           |              |                |
|              | Brain_Substantia_nigra                | 0.679143402                 |              |             | Brain_Cortex                          | 1.846030942  |                |
|              | 0.416773109                           | 0.416773109                 | 0.413632316  |             | 1.353523373                           |              | 0.853671853    |
|              | 0.380808728                           | 5                           | 0            | 0.998207054 |                                       |              |                |
| RP11-568A7.3 | ENSG00000231720.1                     | 0.699800212                 | 3            | 3           | 0.235570115                           |              |                |
|              | Brain_Substantia_nigra                | 0.446051533                 |              |             | Brain_Hypothalamus                    | 2.385654279  |                |
|              | 0.107209266                           | 0.107209266                 | 0.762014193  |             | 1.186132151                           |              | 0.974314412    |
|              | 0.212059391                           | 3                           | 0            | 0.998207054 |                                       |              |                |
| GPC5         | ENSG00000179399.14                    | 0.700019213                 | 5            | 5           | 0.229514009                           |              |                |
|              | Brain_Hippocampus                     | 0.987641295                 |              |             | Brain_Frontal_Cortex_BA9              | 1.573668351  |                |
|              | 0.524072969                           | 0.524072969                 | -0.882267286 |             | 1.201611693                           |              | 0.345624077    |
|              | 0.854799691                           | 5                           | 0            | 0.998207054 |                                       |              |                |
| PPFIA1       | ENSG00000131626.16                    | 0.700081814                 | 12           | 2           | 0.447732502                           |              |                |
|              | Brain_Putamen_basal_ganglia           | 0.927582751                 |              |             | Brain_Spinal_cord_cervical_c-1        |              |                |
|              | 10.46212405                           | 0.000574622                 | 0.98227089   |             | -0.759200709                          |              | -0.090886532   |
|              | -0.503096301                          | 0.253635894                 | 2            | 0           | 0.998207054                           |              |                |
| NR2E3        | ENSG00000278570.4                     | 0.700124784                 | 4            | 4           | 0.427354088                           |              | Brain_Cortex   |
|              | 0.550111912                           | Brain_Cerebellar_Hemisphere | 1.815982748  |             | 0.229955659                           |              |                |
|              | 0.229955659                           | -0.778297051                | 0.793727499  |             | 0.320617246                           |              | 0.737075927    |
|              | 4                                     | 0                           | 0.998207054  |             |                                       |              |                |
| PRMT2        | ENSG00000160310.17                    | 0.700152451                 | 9            | 9           | 0.114662329                           |              |                |
|              | Brain_Spinal_cord_cervical_c-1        | 0.856588882                 |              |             |                                       |              |                |
|              | Brain_Nucleus_accumbens_basal_ganglia | 2.369118279                 |              |             | 0.175752676                           |              |                |
|              | 0.175752676                           | -1.51915479                 | 1.577579133  |             | -0.31928871                           |              | 0.840544624    |
|              | 9                                     | 0                           | 0.998207054  |             |                                       |              |                |
| RBM39        | ENSG00000131051.22                    | 0.700181676                 | 3            | 3           | 0.250576901                           |              |                |
|              | Brain_Hypothalamus                    | 0.85897332                  |              |             | Brain_Nucleus_accumbens_basal_ganglia |              |                |
|              | 1.085892136                           | 0.943960446                 | 0.943960446  |             | -0.177681239                          |              | 1.148949265    |
|              | 0.397293149                           | 0.680734492                 | 3            | 0           | 0.998207054                           |              |                |
| AC006946.16  | ENSG00000273203.1                     | 0.700189194                 | 8            | 4           | 0.146909223                           |              |                |
|              | Brain_Putamen_basal_ganglia           | 0.987971573                 |              |             | Brain_Cerebellum                      | 6.379948129  |                |
|              | 0.038348725                           | 0.26652026                  | 0.015075969  |             | 1.450535587                           |              | 0.86221095     |
|              | 0.434082995                           | 4                           | 0            | 0.998207054 |                                       |              |                |
| VSTM5        | ENSG00000214376.5                     | 0.700231487                 | 5            | 5           | 0.285830584                           |              | Brain_Cortex   |
|              | 0.711167439                           | Brain_Frontal_Cortex_BA9    | 2.767004586  |             | 0.108321365                           |              |                |
|              | 0.108321365                           | -0.691314043                | 1.067312858  |             | 0.230598425                           |              | 0.754243216    |
|              | 5                                     | 0                           | 0.998207054  |             |                                       |              |                |
| SIKE1        | ENSG00000052723.11                    | 0.700329896                 | 1            | 1           | 0.700329896                           |              |                |
|              | Brain_Caudate_basal_ganglia           | 0.700329896                 |              |             | Brain_Caudate_basal_ganglia           | 1            | 1              |
|              | 1                                     | 0.384875179                 | 0.384875179  |             | 0.384875179                           | NA           | 1              |
|              | 0.998207054                           |                             |              |             |                                       |              |                |
| RPS24        | ENSG00000138326.18                    | 0.70040337                  | 6            | 6           | 0.434566657                           |              |                |
|              | Brain_Substantia_nigra                | 0.866969354                 |              |             | Brain_Frontal_Cortex_BA9              |              |                |
|              | 2.039120841                           | 0.112569628                 | 0.112569628  |             | -0.627018188                          |              | 0.781401045    |
|              | -0.013512486                          | 0.506936691                 | 6            | 0           | 0.998207054                           |              |                |
| RPL30        | ENSG00000156482.10                    | 0.700451856                 | 1            | 1           | 0.700451856                           |              |                |

|                     |                                       |              |                                       |                             |             |                |                                      |
|---------------------|---------------------------------------|--------------|---------------------------------------|-----------------------------|-------------|----------------|--------------------------------------|
|                     | Brain_Putamen_basal_ganglia           | 0.700451856  |                                       | Brain_Putamen_basal_ganglia | 1           | 1              |                                      |
|                     |                                       | -0.38471058  | -0.38471058                           |                             | NA          | 1              | 0                                    |
|                     |                                       | 0.998207054  |                                       |                             |             |                |                                      |
| HRCT1               | ENSG00000196196.2                     | 0.700694998  | 1                                     | 1                           | 0.700694998 | Brain_Cortex   |                                      |
|                     |                                       | 0.700694998  | Brain_Cortex                          | 1                           | 1           | 1              | -0.38438246                          |
|                     |                                       | -0.38438246  | NA                                    | 1                           | 0           | 0.998207054    | -0.38438246                          |
| RP11-254F7.2        | ENSG00000260077.1                     | 0.700704807  |                                       |                             | 10          | 4              | 0.303895144                          |
|                     | Brain_Spinal_cord_cervical_c-1        | 0.984990266  |                                       |                             |             |                | Brain_Substantia_nigra               |
|                     |                                       | 7.494265581  | 0.016881249                           | 0.392525847                 |             |                | -0.028755672                         |
|                     |                                       | 0.340491517  | 0.375876062                           | 4                           | 0           | 0.998207054    | 1.028116257                          |
| LDLRAD2             | ENSG00000187942.11                    | 0.700722235  | 1                                     | 1                           | 0.700722235 |                |                                      |
|                     | Brain_Amygdala                        | 0.700722235  | Brain_Amygdala                        | 1                           | 1           | 1              | -0.384345708                         |
|                     |                                       | -0.384345708 | NA                                    | 1                           | 0           | 0.998207054    |                                      |
| GTF2A1              | ENSG00000165417.11                    | 0.700723826  | 2                                     | 2                           | 0.415686524 |                |                                      |
|                     | Brain_Caudate_basal_ganglia           | 0.877241778  |                                       |                             |             |                | Brain_Anterior_cingulate_cortex_BA24 |
|                     |                                       | 1.080756993  | 0.919243007                           | 0.919243007                 |             |                | -0.154466684                         |
|                     |                                       | 0.329730374  | 0.684758047                           | 2                           | 0           | 0.998207054    | 0.813927433                          |
| RNASE4              | ENSG00000258818.3                     | 0.70082326   | 3                                     | 3                           | 0.373087249 | Brain_Amygdala |                                      |
|                     | Brain_Nucleus_accumbens_basal_ganglia | 1.779339041  |                                       |                             |             |                | 0.479601749                          |
|                     |                                       | 0.479601749  | -0.302017085                          | 0.890705378                 |             |                | 0.198082094                          |
|                     |                                       | 0            | 0.998207054                           |                             |             |                | 0.61923006                           |
| LRRC75A             | ENSG00000181350.11                    | 0.701005094  | 2                                     | 2                           | 0.467429411 |                |                                      |
|                     | Brain_Cortex                          | 0.493977444  | Brain_Nucleus_accumbens_basal_ganglia |                             |             |                |                                      |
|                     |                                       | 1.403457479  | 0.596542521                           | 0.596542521                 |             |                | -0.726667918                         |
|                     |                                       | -0.705332155 | 0.030173326                           | 2                           | 0           | 0.998207054    | -0.683996392                         |
| C2CD4A              | ENSG00000198535.5                     | 0.701420394  | 2                                     | 2                           | 0.431910309 |                |                                      |
|                     | Brain_Hypothalamus                    | 0.604314131  | Brain_Nucleus_accumbens_basal_ganglia |                             |             |                |                                      |
|                     |                                       | 1.290887325  | 0.709112675                           | 0.709112675                 |             |                | 0.518206599                          |
|                     |                                       | 0.652066754  | 0.189306847                           | 2                           | 0           | 0.998207054    | 0.785926909                          |
| DCLRE1B             | ENSG00000118655.4                     | 0.701444502  | 2                                     | 2                           | 0.457344808 |                |                                      |
|                     | Brain_Spinal_cord_cervical_c-1        | 0.501282192  |                                       |                             |             |                | Brain_Cerebellum                     |
|                     |                                       | 0.578374619  | 0.578374619                           | 0.672473677                 |             |                | 1.421625381                          |
|                     |                                       | 0.050029513  | 2                                     | 0                           | 0.998207054 |                | 0.707849885                          |
| SLC17A7             | ENSG00000104888.9                     | 0.701567173  | 1                                     | 1                           | 0.701567173 |                |                                      |
|                     | Brain_Cerebellar_Hemisphere           | 0.701567173  | Brain_Cerebellar_Hemisphere           | 1                           | 1           |                |                                      |
|                     |                                       | 1            | -0.383205806                          | -0.383205806                |             |                | NA                                   |
|                     |                                       | 0.998207054  |                                       |                             |             |                | 1                                    |
| CFAP97              | ENSG00000164323.12                    | 0.701709551  | 8                                     | 7                           | 0.41051404  |                |                                      |
|                     | Brain_Hypothalamus                    | 0.950979253  | Brain_Cortex                          |                             |             |                | 5.256182498                          |
|                     |                                       | 0.115092302  | 0.211870503                           | -0.822989367                |             |                | 0.754382376                          |
|                     |                                       | 0.589726703  | 7                                     | 0                           | 0.998207054 |                | 0.19226435                           |
| NUDT2               | ENSG00000164978.17                    | 0.70178313   | 13                                    | 2                           | 0.29446022  | Brain_Amygdala |                                      |
|                     |                                       | 0.742978647  | Brain_Caudate_basal_ganglia           | 11.42696762                 |             |                | 0.002808078                          |
|                     |                                       | 0.764919521  | 0.327911409                           | 1.048387262                 |             |                | 0.733024202                          |
|                     |                                       | 2            | 0                                     | 0.998207054                 |             |                | 0.225470318                          |
| ABC13-47488600E17.1 | ENSG00000283199.1                     | 0.701818307  | 1                                     | 1                           | 0.701818307 |                |                                      |
|                     | Brain_Spinal_cord_cervical_c-1        | 0.701818307  | Brain_Spinal_cord_cervical_c-1        |                             |             |                |                                      |
|                     |                                       | 1            | 1                                     | 1                           | 0.382867099 | 0.382867099    | 0.382867099                          |
|                     |                                       | 0.998207054  |                                       |                             |             |                | NA                                   |
| GLP2R               | ENSG00000065325.12                    | 0.701927675  | 3                                     | 2                           | 0.452095788 | Brain_Cortex   |                                      |
|                     |                                       | 0.662785532  | Brain_Nucleus_accumbens_basal_ganglia | 2.790629991                 |             |                |                                      |
|                     |                                       | 0.051219935  | 0.158150074                           | -0.751925623                |             |                | -0.436070566                         |
|                     |                                       | 0.170429781  | 2                                     | 0                           | 0.998207054 |                | -0.630990013                         |
| MRPL40              | ENSG00000185608.8                     | 0.70195421   | 3                                     | 3                           | 0.406380894 |                |                                      |
|                     | Brain_Hippocampus                     | 0.973291188  | Brain_Cerebellum                      | 1.796696934                 |             |                |                                      |
|                     |                                       | 0.307776692  | 0.307776692                           | -0.830279291                |             |                | 0.580907708                          |
|                     |                                       | 0.707555631  | 3                                     | 0                           | 0.998207054 |                | -0.094284123                         |
| FAM221A             | ENSG00000188732.10                    | 0.702275321  | 13                                    | 3                           | 0.515870767 |                |                                      |
|                     | Brain_Caudate_basal_ganglia           | 0.959514132  | Brain_Cerebellar_Hemisphere           |                             |             |                |                                      |
|                     |                                       | 10.08572727  | 0.000713591                           | 0.34944158                  |             |                | -0.621117766                         |
|                     |                                       | -0.211680915 | 0.311299599                           | 3                           | 0           | 0.998207054    | 0.649723616                          |
| ZNF503-AS1          | ENSG00000226051.6                     | 0.702370211  | 1                                     | 1                           | 0.702370211 |                |                                      |

|               |                                       |                    |              |                                       |              |                    |
|---------------|---------------------------------------|--------------------|--------------|---------------------------------------|--------------|--------------------|
|               | Brain_Substantia_nigra                | 0.702370211        |              | Brain_Substantia_nigra                | 1            | 1                  |
|               | 1                                     | 0.382122894        | 0.382122894  | 0.382122894                           | NA           | 1 0                |
|               | 0.998207054                           |                    |              |                                       |              |                    |
| CLN8          | ENSG00000182372.9                     | 0.702392142        | 4            | 4                                     | 0.214453296  |                    |
|               | Brain_Putamen_basal_ganglia           | 0.853392429        |              | Brain_Cerebellum                      | 1.408579333  |                    |
|               | 0.654704931                           | 0.654704931        | -1.241412792 | 0.620196454                           | 0.003266064  |                    |
|               | 0.848900257                           | 4                  | 0            | 0.998207054                           |              |                    |
| MAGI1         | ENSG00000151276.23                    | 0.702601205        | 2            | 2                                     | 0.501371421  |                    |
|               | Brain_Cerebellar_Hemisphere           | 0.974500419        |              | Brain_Cerebellum                      | 1.568844015  |                    |
|               | 0.431155985                           | 0.431155985        | -0.672333479 | 0.031964427                           | -0.320184526 |                    |
|               | 0.498013826                           | 2                  | 0            | 0.998207054                           |              |                    |
| RNF213        | ENSG00000173821.19                    | 0.702685382        | 5            | 5                                     | 0.228302021  |                    |
|               | Brain_Cerebellar_Hemisphere           | 0.98760221         |              | Brain_Cerebellum                      | 2.304043205  |                    |
|               | 0.340455034                           | 0.340455034        | 0.015538951  | 1.20474432                            | 0.556461933  |                    |
|               | 0.5765559                             | 5                  | 0            | 0.998207054                           |              |                    |
| STAU1         | ENSG00000124214.19                    | 0.702779246        | 3            | 3                                     | 0.313769673  |                    |
|               | Brain_Anterior_cingulate_cortex_BA24  | 0.703840762        |              | Brain_Hypothalamus                    |              |                    |
|               | 2.23292184                            | 0.235484177        | 0.235484177  | -1.007343624                          | -0.380140987 |                    |
|               | -0.65143056                           | 0.322050677        | 3            | 0                                     | 0.998207054  |                    |
| FGF22         | ENSG00000070388.11                    | 0.702908756        | 2            | 2                                     | 0.502936849  |                    |
|               | Brain_Cerebellar_Hemisphere           | 0.598503286        |              | Brain_Nucleus_accumbens_basal_ganglia |              |                    |
|               | 1.030615131                           | 0.969384869        | 0.969384869  | 0.526554082                           | 0.669875987  |                    |
|               | 0.598215034                           | 0.101343891        | 2            | 0                                     | 0.998207054  |                    |
| TAF4          | ENSG00000130699.18                    | 0.702921202        | 3            | 3                                     | 0.264470048  |                    |
|               | Brain_Nucleus_accumbens_basal_ganglia | 0.890009756        |              | Brain_Cerebellar_Hemisphere           |              |                    |
|               | 1.405203804                           | 0.595538546        | 0.595538546  | -0.394956348                          | 1.115888073  |                    |
|               | 0.194213287                           | 0.808444477        | 3            | 0                                     | 0.998207054  |                    |
| TBCB          | ENSG00000105254.11                    | 0.702942417        | 1            | 1                                     | 0.702942417  |                    |
|               | Brain_Spinal_cord_cervical_c-1        | 0.702942417        |              | Brain_Spinal_cord_cervical_c-1        |              |                    |
|               | 1                                     | 1                  | 1            | -0.381351536                          | -0.381351536 | NA 1 0             |
|               | 0.998207054                           |                    |              |                                       |              |                    |
| WASHC2C       | ENSG00000172661.17                    | 0.702947081        | 13           | 6                                     | 0.079434848  |                    |
|               | Brain_Substantia_nigra                | 0.919352307        |              | Brain_Frontal_Cortex_BA9              |              |                    |
|               | 8.640261882                           | 0.046923866        | 0.396437796  | -0.325704074                          | 1.753974668  |                    |
|               | 0.43580691                            | 0.509695822        | 6            | 0                                     | 0.998207054  |                    |
| TTC28         | ENSG00000100154.14                    | 0.703027857        | 3            | 3                                     | 0.469006889  |                    |
|               | Brain_Hippocampus                     | 0.986822032        |              | Brain_Cerebellum                      | 2.221727367  |                    |
|               | 0.152502429                           | 0.152502429        | 0.016516885  | 0.724095855                           | 0.458059985  |                    |
|               | 0.385057257                           | 3                  | 0            | 0.998207054                           |              |                    |
| ARHGAP22      | ENSG00000128805.14                    | 0.70313984         | 3            | 3                                     | 0.347982203  |                    |
|               | Brain_Anterior_cingulate_cortex_BA24  | 0.66483426         |              | Brain_Cerebellum                      | 1.23185495   |                    |
|               | 0.758987122                           | 0.758987122        | 0.433248483  | 0.938510345                           | 0.67854566   |                    |
|               | 0.252950072                           | 3                  | 0            | 0.998207054                           |              |                    |
| RP11-479J7.2  | ENSG00000229588.1                     | 0.703195062        | 1            | 1                                     | 0.703195062  |                    |
|               | Brain_Nucleus_accumbens_basal_ganglia | 0.703195062        |              |                                       |              |                    |
|               | Brain_Nucleus_accumbens_basal_ganglia | 1                  | 1            | 1                                     | -0.381011033 |                    |
|               | -0.381011033                          | -0.381011033       | NA           | 1                                     | 0            | 0.998207054        |
| PTAR1         | ENSG00000188647.12                    | 0.703283987        | 3            | 3                                     | 0.248859047  | Brain_Cerebellum   |
|               | Brain_Hypothalamus                    | 1.902829011        |              | 0.098225051                           |              |                    |
|               | 0.790704286                           | Brain_Hypothalamus | 1.902829011  | 0.098225051                           |              |                    |
|               | 0.098225051                           | -0.265396171       | 1.153125085  | 0.625351327                           | 0.775798356  |                    |
|               | 3                                     | 0                  | 0.998207054  |                                       |              |                    |
| GRIP1         | ENSG00000155974.11                    | 0.703291842        | 1            | 1                                     | 0.703291842  |                    |
|               | Brain_Spinal_cord_cervical_c-1        | 0.703291842        |              | Brain_Spinal_cord_cervical_c-1        |              |                    |
|               | 1                                     | 1                  | 1            | 0.380880609                           | 0.380880609  | 0.380880609 NA 1 0 |
|               | 0.998207054                           |                    |              |                                       |              |                    |
| TPGS1         | ENSG00000141933.9                     | 0.703350953        | 2            | 2                                     | 0.414598502  |                    |
|               | Brain_Putamen_basal_ganglia           | 0.84863699         |              | Brain_Cortex                          | 1.005695554  |                    |
|               | 0.994304446                           | 0.994304446        | -0.190857817 | 0.815828025                           | 0.312485104  |                    |
|               | 0.711834385                           | 2                  | 0            | 0.998207054                           |              |                    |
| RP11-218E20.3 | ENSG00000258711.2                     | 0.703449642        | 10           | 6                                     | 0.326977298  |                    |
|               | Brain_Cortex                          | 0.856868758        |              | Brain_Anterior_cingulate_cortex_BA24  | 6.5304242    |                    |
|               | 0.051769334                           | 0.234349337        | -0.225466594 | 0.98022048                            | 0.521640203  |                    |

|               |                                       |                  |             |              |             |             |                                      |             |              |
|---------------|---------------------------------------|------------------|-------------|--------------|-------------|-------------|--------------------------------------|-------------|--------------|
|               | 0.367053571                           | 6                | 0           | 0.998207054  |             |             |                                      |             |              |
| ZNF582        | ENSG00000018869.16                    |                  |             | 0.703669361  | 3           | 3           | 0.342798314                          |             |              |
|               | Brain_Cerebellar_Hemisphere           | 0.992801963      |             |              |             |             | Brain_Amygdala                       | 1.827843583 |              |
|               | 0.200593886                           | 0.200593886      |             | -0.948650664 |             |             | 0.397801545                          |             | -0.186623548 |
|               | 0.690572405                           | 3                | 0           | 0.998207054  |             |             |                                      |             |              |
| KCNH3         | ENSG00000135519.6                     |                  |             | 0.703746891  | 1           | 1           | 0.703746891                          |             |              |
|               | Brain_Cerebellar_Hemisphere           | 0.703746891      |             |              |             |             | Brain_Cerebellar_Hemisphere          | 1           | 1            |
|               | 1                                     | -0.380267456     |             | -0.380267456 |             |             | -0.380267456                         | NA          | 1            |
|               | 0.998207054                           |                  |             |              |             |             |                                      |             | 0            |
| SERAC1        | ENSG00000122335.13                    |                  |             | 0.703872772  | 8           | 5           | 0.222862962                          |             |              |
|               | Brain_Spinal_cord_cervical_c-1        | 0.97013305       |             |              |             |             | Brain_Cerebellar_Hemisphere          |             |              |
|               | 5.260634877                           | 0.027058822      |             | 0.212286343  |             |             | -1.218950548                         |             | 0.676237511  |
|               | 0.073561733                           | 0.585648438      |             | 5            | 0           | 0.998207054 |                                      |             |              |
| ZNF114        | ENSG00000178150.9                     |                  |             | 0.703873444  | 3           | 3           | 0.353036377                          |             |              |
|               | Brain_Cerebellum                      | 0.853702825      |             |              |             |             | Brain_Cortex                         | 1.966273779 | 0.388728106  |
|               | 0.388728106                           | -0.184395978     |             | 0.928715825  |             |             | 0.485710374                          |             | 0.590284326  |
|               | 3                                     | 0                |             | 0.998207054  |             |             |                                      |             |              |
| KBTBD12       | ENSG00000187715.13                    |                  |             | 0.703896318  | 9           | 5           | 0.322576173                          |             |              |
|               | Brain_Putamen_basal_ganglia           | 0.92014874       |             |              |             |             | Brain_Caudate_basal_ganglia          | 6.52241643  |              |
|               | 0.006606152                           | 0.252193386      |             | -0.98917777  |             |             | 0.69605959                           |             | -0.340390131 |
|               | 0.480097079                           | 5                | 0           | 0.998207054  |             |             |                                      |             |              |
| MMP2          | ENSG00000087245.12                    |                  |             | 0.703916087  | 2           | 2           | 0.422844855                          |             |              |
|               | Brain_Putamen_basal_ganglia           | 0.85700095       |             |              |             |             | Brain_Anterior_cingulate_cortex_BA24 |             |              |
|               | 1.079315726                           | 0.920684274      |             | 0.920684274  |             |             | -0.801495488                         |             | 0.180193132  |
|               | -0.310651178                          | 0.69415868       | 2           | 0            | 0.998207054 |             |                                      |             |              |
| CYB5R3        | ENSG00000100243.20                    |                  |             | 0.704023078  | 9           | 2           | 0.335096241                          |             |              |
|               | Brain_Nucleus_accumbens_basal_ganglia | 0.997300651      |             |              |             |             | Brain_Cortex                         |             |              |
|               | 8.105805793                           | 3.50E-05         |             | 0.402505684  |             |             | -0.963899647                         |             | 0.070980663  |
|               | -0.455516586                          | 0.351037705      |             | 2            | 0           | 0.998207054 |                                      |             |              |
| FUBP3         | ENSG00000107164.15                    |                  |             | 0.704092477  | 2           | 2           | 0.416044014                          |             | Brain_Cortex |
|               | 0.867089464                           | Brain_Cerebellum | 1.040634179 |              |             |             | 0.959365821                          |             | 0.959365821  |
|               | -0.813303599                          | 0.167356609      |             | -0.322973495 |             |             | 0.693431483                          |             | 2            |
|               | 0.998207054                           |                  |             |              |             |             |                                      |             | 0            |
| ENTPD1        | ENSG00000138185.18                    |                  |             | 0.704223154  | 3           | 3           | 0.382856318                          |             |              |
|               | Brain_Cerebellum                      | 0.904484396      |             |              |             |             | Brain_Anterior_cingulate_cortex_BA24 |             |              |
|               | 1.920076132                           | 0.336064879      |             | 0.336064879  |             |             | -0.872645525                         |             | 0.470109269  |
|               | -0.174178227                          | 0.673015005      |             | 3            | 0           | 0.998207054 |                                      |             |              |
| RP11-521016.2 | ENSG00000260163.1                     |                  |             | 0.704255028  | 2           | 2           | 0.427063033                          |             |              |
|               | Brain_Substantia_nigra                | 0.646861165      |             |              |             |             | Brain_Spinal_cord_cervical_c-1       |             |              |
|               | 1.784174313                           | 0.215825687      |             | 0.215825687  |             |             | -0.794227447                         |             | -0.458127052 |
|               | -0.626177249                          | 0.237658869      |             | 2            | 0           | 0.998207054 |                                      |             |              |
| SLC35B1       | ENSG00000121073.13                    |                  |             | 0.704272173  | 1           | 1           | 0.704272173                          |             |              |
|               | Brain_Amygdala                        | 0.704272173      |             |              |             |             | Brain_Amygdala                       | 1           | 1            |
|               | -0.379559845                          | -0.379559845     |             | NA           | 1           | 0           | 0.998207054                          |             | -0.379559845 |
| ZFP28         | ENSG00000196867.7                     |                  |             | 0.70440398   | 8           | 8           | 0.178575985                          |             |              |
|               | Brain_Nucleus_accumbens_basal_ganglia | 0.940972712      |             |              |             |             | Brain_Putamen_basal_ganglia          |             |              |
|               | 2.727172139                           | 0.325360326      |             | 0.325360326  |             |             | -0.525449137                         |             | 1.345152522  |
|               | 0.295012674                           | 0.744390017      |             | 8            | 0           | 0.998207054 |                                      |             |              |
| CDCA7L        | ENSG00000164649.19                    |                  |             | 0.704446696  | 4           | 4           | 0.23558426                           |             |              |
|               | Brain_Putamen_basal_ganglia           | 0.965383486      |             |              |             |             | Brain_Cerebellar_Hemisphere          |             |              |
|               | 1.426533564                           | 0.644267288      |             | 0.644267288  |             |             | -1.186096329                         |             | 0.421332802  |
|               | -0.384420259                          | 0.744196699      |             | 4            | 0           | 0.998207054 |                                      |             |              |
| ADAMTS3       | ENSG00000156140.9                     |                  |             | 0.704664605  | 2           | 2           | 0.493533102                          |             |              |
|               | Brain_Frontal_Cortex_BA9              | 0.889695017      |             |              |             |             | Brain_Cortex                         | 1.431145797 |              |
|               | 0.568854203                           | 0.568854203      |             | -0.138690131 |             |             | 0.684700233                          |             | 0.273005051  |
|               | 0.58222491                            | 2                | 0           | 0.998207054  |             |             |                                      |             |              |
| ZNF626        | ENSG00000188171.15                    |                  |             | 0.704823914  | 13          | 3           | 0.304514038                          |             |              |
|               | Brain_Cerebellum                      | 0.955701906      |             |              |             |             | Brain_Substantia_nigra               | 10.87537791 |              |
|               | 0.000691235                           | 0.683404897      |             | -0.293116051 |             |             | 1.026801299                          |             | 0.385011101  |
|               | 0.425894765                           | 3                | 0           | 0.998207054  |             |             |                                      |             |              |
| KIAA1644      | ENSG00000138944.7                     |                  |             | 0.704826487  | 1           | 1           | 0.704826487                          |             |              |
|               | Brain_Spinal_cord_cervical_c-1        | 0.704826487      |             |              |             |             | Brain_Spinal_cord_cervical_c-1       |             |              |

|                                       |                    |                                      |              |             |             |              |                  |   |
|---------------------------------------|--------------------|--------------------------------------|--------------|-------------|-------------|--------------|------------------|---|
| 1                                     | 1                  | 1                                    | 0.378813332  | 0.378813332 | 0.378813332 | NA           | 1                | 0 |
| 0.998207054                           |                    |                                      |              |             |             |              |                  |   |
| RP11-86H7.6                           | ENSG00000223675.1  |                                      | 0.704846854  | 6           | 6           | 0.139744413  |                  |   |
| Brain_Cortex                          | 0.895601599        | Brain_Caudate_basal_ganglia          | 2.805190306  |             |             |              |                  |   |
| 0.152114431                           | 0.152114431        | -0.89626314                          | 1.476743478  |             |             | 0.527602624  |                  |   |
| 0.86760599                            | 6                  | 0                                    | 0.998207054  |             |             |              |                  |   |
| USP20                                 | ENSG00000136878.12 |                                      | 0.704958977  | 5           | 4           | 0.203946613  |                  |   |
| Brain_Hypothalamus                    | 0.942404244        | Brain_Putamen_basal_ganglia          | 2.000772555  |             |             |              |                  |   |
| 0.052054849                           | 0.566778184        | -1.270387559                         | 0.07224838   |             |             | -0.544847723 |                  |   |
| 0.478809766                           | 4                  | 0                                    | 0.998207054  |             |             |              |                  |   |
| NADK2                                 | ENSG00000152620.12 |                                      | 0.705014153  | 3           | 3           | 0.260505162  |                  |   |
| Brain_Anterior_cingulate_cortex_BA24  | 0.387875407        | Brain_Amygdala                       |              |             |             |              |                  |   |
| 2.683020588                           | 0.089770495        | 0.089770495                          | 0.863476732  |             |             | 1.12519795   |                  |   |
| 1.027733733                           | 0.143075001        | 3                                    | 0            | 0.998207054 |             |              |                  |   |
| CDC42BPG                              | ENSG00000171219.8  |                                      | 0.705023467  | 4           | 4           | 0.577370344  |                  |   |
| Brain_Putamen_basal_ganglia           | 0.898031597        | Brain_Cerebellar_Hemisphere          |              |             |             |              |                  |   |
| 1.916090487                           | 0.108790655        | 0.108790655                          | -0.557229929 |             |             | 0.491791739  |                  |   |
| -0.1360715                            | 0.453767422        | 4                                    | 0            | 0.998207054 |             |              |                  |   |
| SLC38A3                               | ENSG00000188338.14 |                                      | 0.705070032  | 2           | 2           | 0.45555933   |                  |   |
| Brain_Frontal_Cortex_BA9              | 0.976669165        | Brain_Caudate_basal_ganglia          | 1.41945852   |             |             |              |                  |   |
| 0.58054148                            | 0.58054148         | -0.746178937                         | 0.029245034  |             |             | -0.358466952 |                  |   |
| 0.548307548                           | 2                  | 0                                    | 0.998207054  |             |             |              |                  |   |
| ZNF462                                | ENSG00000148143.12 |                                      | 0.705131008  | 10          | 3           | 0.211258894  |                  |   |
| Brain_Cortex                          | 0.965319726        | Brain_Substantia_nigra               | 8.576560062  |             |             |              |                  |   |
| 0.003224178                           | 0.298682716        | 0.043478973                          | 1.250111295  |             |             | 0.881306037  |                  |   |
| 0.345468473                           | 3                  | 0                                    | 0.998207054  |             |             |              |                  |   |
| SPSB1                                 | ENSG00000171621.13 |                                      | 0.705145816  | 2           | 2           | 0.420408825  |                  |   |
| Brain_Nucleus_accumbens_basal_ganglia | 0.447764782        | Brain_Caudate_basal_ganglia          |              |             |             |              |                  |   |
| 1.763979206                           | 0.236020794        | 0.236020794                          | 0.75914674   | 0.80571218  | 0.78242946  |              |                  |   |
| 0.032926738                           | 2                  | 0                                    | 0.998207054  |             |             |              |                  |   |
| GTF2A2                                | ENSG00000140307.10 |                                      | 0.705149917  | 1           | 1           | 0.705149917  |                  |   |
| Brain_Caudate_basal_ganglia           | 0.705149917        | Brain_Caudate_basal_ganglia          | 1            | 1           |             |              |                  |   |
| 1                                     | -0.378377855       | -0.378377855                         | -0.378377855 | NA          | 1           | 0            |                  |   |
| 0.998207054                           |                    |                                      |              |             |             |              |                  |   |
| ZNF709                                | ENSG00000242852.6  |                                      | 0.705172584  | 8           | 3           | 0.2416976    | Brain_Cerebellum |   |
| 0.582935927                           | Brain_Hypothalamus | 6.455654193                          | 0.001350216  |             |             |              |                  |   |
| 0.226721661                           | -1.17075418        | -0.549101309                         | -0.889918191 |             |             | 0.234347891  |                  |   |
| 3                                     | 0                  | 0.998207054                          |              |             |             |              |                  |   |
| MBD6                                  | ENSG00000166987.14 |                                      | 0.705528024  | 4           | 4           | 0.264295366  |                  |   |
| Brain_Hippocampus                     | 0.988902224        | Brain_Anterior_cingulate_cortex_BA24 |              |             |             |              |                  |   |
| 2.101640555                           | 0.186634857        | 0.186634857                          | -0.013909449 |             |             | 1.116296203  |                  |   |
| 0.50069212                            | 0.508704127        | 4                                    | 0            | 0.998207054 |             |              |                  |   |
| GRM6                                  | ENSG00000113262.14 |                                      | 0.705545422  | 2           | 2           | 0.426851629  |                  |   |
| Brain_Hippocampus                     | 0.978761104        | Brain_Frontal_Cortex_BA9             | 1.338214383  |             |             |              |                  |   |
| 0.661785617                           | 0.661785617        | -0.794590702                         | -0.026622153 |             |             | -0.410606428 |                  |   |
| 0.543035769                           | 2                  | 0                                    | 0.998207054  |             |             |              |                  |   |
| ALG1L2                                | ENSG00000251287.8  |                                      | 0.705569219  | 4           | 4           | 0.158100528  |                  |   |
| Brain_Caudate_basal_ganglia           | 0.782657631        | Brain_Spinal_cord_cervical_c-1       |              |             |             |              |                  |   |
| 2.372304318                           | 0.210654714        | 0.210654714                          | -0.275857353 |             |             | 1.411488828  |                  |   |
| 0.718260272                           | 0.744431073        | 4                                    | 0            | 0.998207054 |             |              |                  |   |
| TGFB1I1                               | ENSG00000140682.18 |                                      | 0.705637802  | 2           | 2           | 0.419946309  |                  |   |
| Brain_Cerebellar_Hemisphere           | 0.619064463        | Brain_Cerebellum                     | 1.783276719  |             |             |              |                  |   |
| 0.216723281                           | 0.216723281        | 0.497176683                          | 0.806514399  |             |             | 0.651845541  |                  |   |
| 0.218734797                           | 2                  | 0                                    | 0.998207054  |             |             |              |                  |   |
| SEC14L5                               | ENSG00000103184.11 |                                      | 0.705677383  | 2           | 2           | 0.414272373  |                  |   |
| Brain_Cerebellum                      | 0.883772619        | Brain_Frontal_Cortex_BA9             | 1.035377267  |             |             |              |                  |   |
| 0.964622733                           | 0.964622733        | -0.816398292                         | -0.146188455 |             |             | -0.481293374 |                  |   |
| 0.473909921                           | 2                  | 0                                    | 0.998207054  |             |             |              |                  |   |
| CTD-2650P22.1                         | ENSG00000259438.1  |                                      | 0.705814651  | 1           | 1           | 0.705814651  |                  |   |
| Brain_Amygdala                        | 0.705814651        | Brain_Amygdala                       | 1            | 1           | 1           | 0.37748306   |                  |   |
| 0.37748306                            | 0.37748306         | NA                                   | 1            | 0           | 0.998207054 |              |                  |   |
| SLA                                   | ENSG00000155926.13 |                                      | 0.705817473  | 4           | 4           | 0.255989874  |                  |   |

|               |                                       |                          |              |                                       |              |                  |
|---------------|---------------------------------------|--------------------------|--------------|---------------------------------------|--------------|------------------|
|               | Brain_Caudate_basal_ganglia           | 0.971166033              |              | Brain_Putamen_basal_ganglia           |              |                  |
|               | 1.976420036                           | 0.335286891              | 0.335286891  | -1.135920413                          | 0.036145888  |                  |
|               | -0.412073138                          | 0.537311233              | 4            | 0                                     | 0.998207054  |                  |
| SLC16A3       | ENSG00000141526.16                    | 0.70595028               | 1            | 1                                     | 0.70595028   | Brain_Cerebellum |
|               | 0.70595028                            | Brain_Cerebellum1        | 1            | 1                                     | 0.377300528  | 0.377300528      |
|               | 0.377300528                           | NA                       | 1            | 0                                     | 0.998207054  |                  |
| PPP4R4        | ENSG00000119698.11                    | 0.706090694              | 8            | 5                                     | 0.224460917  |                  |
|               | Brain_Cortex                          | 0.975649578              |              | Brain_Caudate_basal_ganglia           | 5.028323516  |                  |
|               | 0.004228499                           | 0.372049886              |              | -1.214751413                          | 0.56074833   | 0.10585606       |
|               | 0.562802148                           | 5                        | 0            | 0.998207054                           |              |                  |
| TMEM260       | ENSG00000070269.13                    | 0.706114679              | 4            | 4                                     | 0.205417319  |                  |
|               | Brain_Cerebellum                      | 0.920465175              |              | Brain_Spinal_cord_cervical_c-1        | 1.732594687  |                  |
|               | 0.479240573                           | 0.479240573              |              | -1.266267525                          | 0.09984778   | -0.495291412     |
|               | 0.56768033                            | 4                        | 0            | 0.998207054                           |              |                  |
| AARD          | ENSG00000205002.3                     | 0.706167656              | 2            | 1                                     | 0.650676143  | Brain_Cortex     |
|               | 0.772167721                           | Brain_Frontal_Cortex_BA9 | 1.938662835  | 0.061337165                           |              |                  |
|               | 1.938662835                           | -0.452823079             | -0.289540593 | -0.371181836                          | 0.115458153  |                  |
|               | 1                                     | 0                        | 0.998207054  |                                       |              |                  |
| SPCS3         | ENSG00000129128.12                    | 0.706305805              | 4            | 4                                     | 0.329524471  |                  |
|               | Brain_Caudate_basal_ganglia           | 0.787614537              |              | Brain_Nucleus_accumbens_basal_ganglia |              |                  |
|               | 1.691698509                           | 0.331656224              | 0.331656224  | -0.975072152                          | 0.930197176  |                  |
|               | 0.027203844                           | 0.829591733              | 4            | 0                                     | 0.998207054  |                  |
| RP11-626G11.1 | ENSG00000261357.1                     | 0.706373085              | 1            | 1                                     | 0.706373085  |                  |
|               | Brain_Cerebellar_Hemisphere           | 0.706373085              |              | Brain_Cerebellar_Hemisphere1          | 1            | 1                |
|               | 1                                     | -0.376731589             | -0.376731589 | -0.376731589                          | NA           | 1                |
|               | 0.998207054                           |                          |              |                                       | 0            |                  |
| IFT46         | ENSG00000118096.7                     | 0.706380755              | 5            | 2                                     | 0.420289007  |                  |
|               | Brain_Putamen_basal_ganglia           | 0.800300306              |              | Brain_Cerebellar_Hemisphere           |              |                  |
|               | 4.458502481                           | 0.011858397              | 0.355435796  | -0.805919951                          | -0.25295847  |                  |
|               | -0.521153503                          | 0.203250653              | 2            | 0                                     | 0.998207054  |                  |
| RSPH3         | ENSG00000130363.11                    | 0.706531301              | 1            | 1                                     | 0.706531301  |                  |
|               | Brain_Hypothalamus                    | 0.706531301              |              | Brain_Hypothalamus                    | 1            | 1                |
|               | 0.376518721                           | 0.376518721              | 0.376518721  | NA                                    | 1            | 0                |
|               | 0.998207054                           |                          |              |                                       | 0.998207054  |                  |
| ARL4D         | ENSG00000175906.4                     | 0.706547472              | 2            | 1                                     | 0.706490844  |                  |
|               | Brain_Cerebellar_Hemisphere           | 0.707246332              |              | Brain_Cerebellum                      | 1.995413645  |                  |
|               | 0.004586355                           | 1.995413645              | 0.375556907  | 0.376573151                           | 0.376065029  |                  |
|               | 0.000718593                           | 1                        | 0            | 0.998207054                           |              |                  |
| BOD1L1        | ENSG00000038219.12                    | 0.706561567              | 2            | 2                                     | 0.4136408    |                  |
|               | Brain_Frontal_Cortex_BA9              | 0.967024183              |              | Brain_Anterior_cingulate_cortex_BA24  |              |                  |
|               | 1.243270987                           | 0.756729013              | 0.756729013  | 0.04134083                            | 0.817503412  |                  |
|               | 0.429422121                           | 0.548829825              | 2            | 0                                     | 0.998207054  |                  |
| Clorf115      | ENSG00000162817.6                     | 0.706681623              | 6            | 6                                     | 0.069386565  |                  |
|               | Brain_Cerebellum                      | 0.88094903               |              | Brain_Nucleus_accumbens_basal_ganglia | 2.725010056  |                  |
|               | 0.093730653                           | 0.093730653              | -1.815894451 | -0.149766259                          | -0.830759227 |                  |
|               | 0.717564492                           | 6                        | 0            | 0.998207054                           |              |                  |
| LY6G5B        | ENSG00000240053.8                     | 0.706718093              | 10           | 7                                     | 0.380920926  |                  |
|               | Brain_Cortex                          | 0.971206352              |              | Brain_Putamen_basal_ganglia           | 6.861502501  |                  |
|               | 0.00546873                            | 0.233737619              | -0.876200719 | 0.557130069                           | -0.273646352 |                  |
|               | 0.512995899                           | 7                        | 0            | 0.998207054                           |              |                  |
| PAPSS2        | ENSG00000198682.12                    | 0.706747283              | 1            | 1                                     | 0.706747283  |                  |
|               | Brain_Nucleus_accumbens_basal_ganglia | 0.706747283              |              |                                       |              |                  |
|               | Brain_Nucleus_accumbens_basal_ganglia | 1                        | 1            | 1                                     | -0.376228159 |                  |
|               | -0.376228159                          | -0.376228159             | NA           | 1                                     | 0            | 0.998207054      |
| ZNF619        | ENSG00000177873.12                    | 0.706783124              | 3            | 2                                     | 0.43643247   | Brain_Cerebellum |
|               | 0.605681432                           | Brain_Frontal_Cortex_BA9 | 2.081696691  | 0.04606991                            |              |                  |
|               | 0.872233399                           | -0.778231636             | -0.516247681 | -0.678098213                          | 0.141476675  |                  |
|               | 2                                     | 0                        | 0.998207054  |                                       |              |                  |
| RPS5          | ENSG00000083845.8                     | 0.706952561              | 4            | 2                                     | 0.407439083  |                  |
|               | Brain_Cerebellar_Hemisphere           | 0.721340078              |              | Brain_Nucleus_accumbens_basal_ganglia |              |                  |
|               | 3.418090835                           | 0.010424656              | 0.544679437  | -0.828408697                          | -0.356668383 |                  |
|               | -0.624863612                          | 0.196171448              | 2            | 0                                     | 0.998207054  |                  |
| RP11-567M16.6 | ENSG00000274828.1                     | 0.707019484              | 13           | 2                                     | 0.511676654  |                  |



|              |                                       |                |              |                                |              |                |             |
|--------------|---------------------------------------|----------------|--------------|--------------------------------|--------------|----------------|-------------|
|              | Brain_Amygdala                        | 0.843134735    |              | Brain_Spinal_cord_cervical_c-1 | 11.37243171  |                |             |
|              | 0.001795342                           | 0.808318694    |              | -0.295355284                   | 0.656229214  |                | 0.42197147  |
|              | 0.253300511                           | 2              | 0            | 0.998207054                    |              |                |             |
| PROCR        | ENSG00000101000.5                     | 0.707112544    | 2            | 2                              | 0.506929834  |                |             |
|              | Brain_Cerebellar_Hemisphere           | 0.736663807    |              | Brain_Cerebellum               | 1.23043191   | 0.76956809     |             |
|              | 0.76956809                            | -0.66362581    | 0.336274593  |                                | -0.163675609 | 0.707036356    | 2           |
|              | 0                                     | 0.998207054    |              |                                |              |                |             |
| FRRS1L       | ENSG00000260230.2                     | 0.707113331    | 4            | 4                              | 0.166694726  |                |             |
|              | Brain_Putamen_basal_ganglia           | 0.722109681    |              | Brain_Cerebellar_Hemisphere    |              |                |             |
|              | 2.107641641                           | 0.258183637    | 0.258183637  |                                | -1.382902624 | 0.657570983    |             |
|              | -0.467306008                          | 0.860066026    | 4            | 0                              | 0.998207054  |                |             |
| ZNF740       | ENSG00000139651.10                    | 0.707249732    | 3            | 3                              | 0.470122748  |                |             |
|              | Brain_Putamen_basal_ganglia           | 0.661113507    |              | Brain_Cortex                   | 1.997462278  |                |             |
|              | 0.196990943                           | 0.196990943    | -0.668482664 |                                | 0.722279347  | 0.164057669    |             |
|              | 0.734842014                           | 3              | 0            | 0.998207054                    |              |                |             |
| FUS          | ENSG00000089280.18                    | 0.707259234    | 1            | 1                              | 0.707259234  | Brain_Amygdala |             |
|              | 0.707259234                           | Brain_Amygdala | 1            | 1                              | 1            | 0.375539555    | 0.375539555 |
|              | 0.375539555                           | NA             | 1            | 0                              | 0.998207054  |                |             |
| LRRC59       | ENSG00000108829.9                     | 0.707385552    | 1            | 1                              | 0.707385552  |                |             |
|              | Brain_Hippocampus                     | 0.707385552    |              | Brain_Hippocampus              | 1            | 1              | 1           |
|              | 0.375369678                           | 0.375369678    | 0.375369678  | NA                             | 1            | 0              | 0.998207054 |
| NOXA1        | ENSG00000188747.8                     | 0.707520028    | 3            | 3                              | 0.366954752  |                |             |
|              | Brain_Hippocampus                     | 0.706496984    |              | Brain_Hypothalamus             | 1.412448846  |                |             |
|              | 0.588238779                           | 0.588238779    | -0.37656489  |                                | 0.902192248  | 0.429191167    |             |
|              | 0.701319727                           | 3              | 0            | 0.998207054                    |              |                |             |
| RPL41        | ENSG00000229117.8                     | 0.707525075    | 2            | 2                              | 0.501761055  |                |             |
|              | Brain_Hypothalamus                    | 0.623373101    |              | Brain_Cerebellar_Hemisphere    | 1.000607209  |                |             |
|              | 0.999392791                           | 0.999392791    | -0.491075426 |                                | 0.671721432  | 0.090323003    |             |
|              | 0.822221543                           | 2              | 0            | 0.998207054                    |              |                |             |
| AP1G2        | ENSG00000213983.11                    | 0.707541799    | 1            | 1                              | 0.707541799  |                |             |
|              | Brain_Substantia_nigra                | 0.707541799    |              | Brain_Substantia_nigra         | 1            | 1              |             |
|              | 1                                     | -0.375159567   | -0.375159567 | -0.375159567                   | NA           | 1              | 0           |
|              | 0.998207054                           |                |              |                                |              |                |             |
| CUL7         | ENSG00000044090.8                     | 0.707597272    | 5            | 5                              | 0.389825853  |                |             |
|              | Brain_Nucleus_accumbens_basal_ganglia | 0.823260578    |              |                                |              |                |             |
|              | Brain_Anterior_cingulate_cortex_BA24  | 2.517469159    |              | 0.088572543                    |              |                |             |
|              | 0.088572543                           | -0.63597685    | 0.859933224  |                                | -0.114476021 | 0.646647972    |             |
|              | 5                                     | 0              | 0.998207054  |                                |              |                |             |
| SMO          | ENSG00000128602.9                     | 0.707619325    | 2            | 2                              | 0.4257561    |                |             |
|              | Brain_Cerebellar_Hemisphere           | 0.898883822    |              | Brain_Hypothalamus             | 1.138183639  |                |             |
|              | 0.861816361                           | 0.861816361    | -0.796474828 |                                | -0.127071483 | -0.461773155   |             |
|              | 0.473339645                           | 2              | 0            | 0.998207054                    |              |                |             |
| INPP5E       | ENSG00000148384.12                    | 0.707731818    | 12           | 1                              | 0.250501418  |                |             |
|              | Brain_Anterior_cingulate_cortex_BA24  | 0.907104888    |              | Brain_Caudate_basal_ganglia    |              |                |             |
|              | 11.58301549                           | 0.00077233     | 11.58301549  |                                | -1.149132333 | -0.116691044   |             |
|              | -0.370904539                          | 0.271346189    | 1            | 0                              | 0.998207054  |                |             |
| KAZALD1      | ENSG00000107821.14                    | 0.707748388    | 3            | 3                              | 0.306378459  |                |             |
|              | Brain_Nucleus_accumbens_basal_ganglia | 0.754771755    |              | Brain_Putamen_basal_ganglia    |              |                |             |
|              | 1.698407144                           | 0.325270706    | 0.325270706  |                                | -1.022850664 | 0.373222495    |             |
|              | -0.320660614                          | 0.69807365     | 3            | 0                              | 0.998207054  |                |             |
| LINC00989    | ENSG00000250334.5                     | 0.707903537    | 1            | 1                              | 0.707903537  |                |             |
|              | Brain_Substantia_nigra                | 0.707903537    |              | Brain_Substantia_nigra         | 1            | 1              |             |
|              | 1                                     | 0.374673185    | 0.374673185  | 0.374673185                    | NA           | 1              | 0           |
|              | 0.998207054                           |                |              |                                |              |                |             |
| PDXK         | ENSG00000160209.18                    | 0.707969793    | 1            | 1                              | 0.707969793  |                |             |
|              | Brain_Putamen_basal_ganglia           | 0.707969793    |              | Brain_Putamen_basal_ganglia    | 1            | 1              |             |
|              | 1                                     | 0.374584109    | 0.374584109  | 0.374584109                    | NA           | 1              | 0           |
|              | 0.998207054                           |                |              |                                |              |                |             |
| RP1-234P15.4 | ENSG00000225793.2                     | 0.708162725    | 1            | 1                              | 0.708162725  |                |             |
|              | Brain_Spinal_cord_cervical_c-1        | 0.708162725    |              | Brain_Spinal_cord_cervical_c-1 |              |                |             |
|              | 1                                     | 1              | 1            | -0.374324745                   | -0.374324745 | -0.374324745   | NA          |
|              | 0.998207054                           |                |              |                                |              |                | 1           |

|              |                                       |                  |              |              |                                      |                  |
|--------------|---------------------------------------|------------------|--------------|--------------|--------------------------------------|------------------|
| FAM69B       | ENSG00000165716.10                    | 0.708418633      | 4            | 4            | 0.337066166                          |                  |
|              | Brain_Cerebellar_Hemisphere           | 0.967811828      |              |              | Brain_Cerebellum                     | 1.819180979      |
|              | 0.230964908                           | 0.230964908      | -0.95997824  | 0.201810481  |                                      | -0.281317725     |
|              | 0.501371836                           | 4                | 0            | 0.998207054  |                                      |                  |
| AP2A1        | ENSG00000196961.12                    | 0.708425097      | 2            | 2            | 0.459613433                          |                  |
|              | Brain_Cerebellar_Hemisphere           | 0.94694817       |              |              | Brain_Cerebellum                     | 1.524683014      |
|              | 0.475316986                           | 0.475316986      | -0.739483537 | -0.066539677 |                                      | -0.403011607     |
|              | 0.475843166                           | 2                | 0            | 0.998207054  |                                      |                  |
| CST6         | ENSG00000175315.2                     | 0.708485769      | 3            | 3            | 0.396563807                          |                  |
|              | Brain_Nucleus_accumbens_basal_ganglia | 0.981975657      |              |              | Brain_Cerebellar_Hemisphere          |                  |
|              | 2.200523373                           | 0.259250256      | 0.259250256  | -0.84777407  |                                      | 0.058118013      |
|              | -0.255687991                          | 0.513069164      | 3            | 0            | 0.998207054                          |                  |
| IMMP2L       | ENSG00000184903.9                     | 0.708525118      | 2            | 2            | 0.451936017                          |                  |
|              | Brain_Cerebellar_Hemisphere           | 0.65257583       |              |              | Brain_Hypothalamus                   | 1.135918762      |
|              | 0.864081238                           | 0.864081238      | -0.450186694 | 0.752191312  |                                      | 0.151002309      |
|              | 0.850209642                           | 2                | 0            | 0.998207054  |                                      |                  |
| LINC00951    | ENSG00000204092.2                     | 0.708537191      | 2            | 1            | 0.705135602                          |                  |
|              | Brain_Cerebellum                      | 0.713043065      |              |              | Brain_Cerebellar_Hemisphere          | 1.992124625      |
|              | 0.007875375                           | 1.992124625      | -0.378397128 | -0.367772246 |                                      | -0.373084687     |
|              | 0.007512926                           | 1                | 0            | 0.998207054  |                                      |                  |
| NUDT14       | ENSG00000183828.14                    | 0.708559776      | 12           | 2            | 0.207696871                          |                  |
|              | Brain_Cerebellar_Hemisphere           | 0.890058176      |              |              | Brain_Spinal_cord_cervical_c-1       |                  |
|              | 11.17364625                           | 7.62E-05         | 0.489835641  | -1.259923747 |                                      | 0.138230595      |
|              | -0.5756697                            | 0.310447476      | 2            | 0            | 0.998207054                          |                  |
| CHTF8        | ENSG00000168802.12                    | 0.708591692      | 2            | 2            | 0.417979023                          |                  |
|              | Brain_Anterior_cingulate_cortex_BA24  | 0.47856653       |              |              | Brain_Spinal_cord_cervical_c-1       |                  |
|              | 1.719141712                           | 0.280858288      | 0.280858288  | -0.708609998 |                                      | 0.809932411      |
|              | 0.050661206                           | 1.073771635      | 2            | 0            | 0.998207054                          |                  |
| ASTN1        | ENSG00000152092.15                    | 0.708624674      | 6            | 4            | 0.262439539                          |                  |
|              | Brain_Frontal_Cortex_BA9              | 0.979257013      |              |              | Brain_Hypothalamus                   | 4.862053781      |
|              | 0.011118614                           | 0.196484113      | -1.120643738 | -0.026000407 |                                      | -0.761257942     |
|              | 0.404479289                           | 4                | 0            | 0.998207054  |                                      |                  |
| NAV1         | ENSG00000134369.15                    | 0.708945599      | 1            | 1            | 0.708945599                          | Brain_Cerebellum |
|              | 0.708945599                           | Brain_Cerebellum | 1            | 1            | -0.373272557                         | -0.373272557     |
|              | -0.373272557                          | NA               | 1            | 0            | 0.998207054                          |                  |
| LRWD1        | ENSG00000161036.12                    | 0.709033284      | 6            | 3            | 0.634645845                          |                  |
|              | Brain_Putamen_basal_ganglia           | 0.859271372      |              |              | Brain_Hippocampus                    | 5.065135574      |
|              | 0.001183491                           | 0.241002627      | -0.474832142 | 0.47519801   | -0.089430478                         |                  |
|              | 0.360290879                           | 3                | 0            | 0.998207054  |                                      |                  |
| RASA3        | ENSG00000185989.10                    | 0.709072973      | 7            | 5            | 0.159726523                          |                  |
|              | Brain_Hippocampus                     | 0.957336471      |              |              | Brain_Cerebellar_Hemisphere          | 4.335968834      |
|              | 0.025946603                           | 0.201518716      | -1.405991923 | -0.05349631  |                                      | -0.483923774     |
|              | 0.446405767                           | 5                | 0            | 0.998207054  |                                      |                  |
| RP4-564F22.5 | ENSG00000224635.1                     | 0.709245945      | 13           | 1            | 0.546803047                          |                  |
|              | Brain_Substantia_nigra                | 0.856180722      |              |              | Brain_Anterior_cingulate_cortex_BA24 |                  |
|              | 12.55004058                           | 1.91E-08         | 12.55004058  | -0.602557581 |                                      | -0.18123806      |
|              | -0.36746836                           | 0.146257275      | 1            | 0            | 0.998207054                          |                  |
| PRUNE1       | ENSG00000143363.15                    | 0.709555069      | 2            | 2            | 0.49805424                           |                  |
|              | Brain_Hippocampus                     | 0.748204713      |              |              | Brain_Caudate_basal_ganglia          | 1.21343939       |
|              | 0.78656061                            | 0.78656061       | -0.321007492 | 0.677554443  |                                      | 0.178273475      |
|              | 0.706089916                           | 2                | 0            | 0.998207054  |                                      |                  |
| OR14I1       | ENSG00000189181.4                     | 0.709576805      | 1            | 1            | 0.709576805                          |                  |
|              | Brain_Caudate_basal_ganglia           | 0.709576805      |              |              | Brain_Caudate_basal_ganglia          | 1                |
|              | 1                                     | -0.372424515     | -0.372424515 | -0.372424515 | NA                                   | 1                |
|              | 0.998207054                           |                  |              |              | 0                                    |                  |
| RP11-421M1.8 | ENSG00000272097.1                     | 0.709615258      | 6            | 5            | 0.251246304                          |                  |
|              | Brain_Substantia_nigra                | 0.897273129      |              |              | Brain_Cerebellar_Hemisphere          | 1.97761057       |
|              | 0.065405897                           | 0.745407274      | -0.611340539 | 1.147327473  |                                      | 0.201071718      |
|              | 0.713228079                           | 5                | 0            | 0.998207054  |                                      |                  |
| LINC00216    | ENSG00000279636.2                     | 0.709634328      | 1            | 1            | 0.709634328                          |                  |
|              | Brain_Anterior_cingulate_cortex_BA24  | 0.709634328      |              |              |                                      |                  |
|              | Brain_Anterior_cingulate_cortex_BA24  | 1                | 1            | 1            | 0.372347244                          |                  |

|              |                                       |                        |                             |              |             |                        |                   |
|--------------|---------------------------------------|------------------------|-----------------------------|--------------|-------------|------------------------|-------------------|
|              | 0.372347244                           | 0.372347244            | NA                          | 1            | 0           | 0.998207054            |                   |
| ABT1         | ENSG00000146109.4                     | 0.709753728            |                             | 4            | 4           | 0.226074536            |                   |
|              | Brain_Caudate_basal_ganglia           | 0.796929459            |                             |              |             | Brain_Cerebellum       | 2.086980905       |
|              | 0.313448958                           | 0.313448958            | -0.257322973                |              |             | 1.210532738            | 0.801433886       |
|              | 0.707090507                           | 4                      | 0                           | 0.998207054  |             |                        |                   |
| CCDC86       | ENSG00000110104.11                    | 0.709847191            |                             | 5            | 5           | 0.37634439             |                   |
|              | Brain_Nucleus_accumbens_basal_ganglia | 0.962647728            |                             |              |             | Brain_Substantia_nigra |                   |
|              | 1.551627814                           | 0.622737661            | 0.622737661                 |              |             | -0.884651929           | 0.798764792       |
|              | -0.037057037                          | 0.774440013            | 5                           | 0            | 0.998207054 |                        |                   |
| NPIPA7       | ENSG00000214967.5                     | 0.709977544            |                             | 1            | 1           | 0.709977544            |                   |
|              | Brain_Hypothalamus                    | 0.709977544            | Brain_Hypothalamus          | 1            | 1           | 1                      |                   |
|              | -0.371886249                          | -0.371886249           | -0.371886249                | NA           | 1           | 0                      | 0.998207054       |
| IL18R1       | ENSG00000115604.10                    | 0.710003157            |                             | 13           | 1           | 0.535635927            |                   |
|              | Brain_Cortex                          | 0.77865397             | Brain_Substantia_nigra      |              |             | 12.84830442            | 5.16E-07          |
|              | 12.84830442                           | -0.619425742           | -0.281073573                |              |             | -0.370211356           | 0.093058054       |
|              | 1                                     | 0                      | 0.998207054                 |              |             |                        |                   |
| RP11-10C24.1 | ENSG00000271020.1                     | 0.71003639             |                             | 1            | 1           | 0.71003639             |                   |
|              | Brain_Hypothalamus                    | 0.71003639             | Brain_Hypothalamus          | 1            | 1           | 1                      |                   |
|              | 0.371807217                           | 0.371807217            | 0.371807217                 | NA           | 1           | 0                      | 0.998207054       |
| TENM4        | ENSG00000149256.15                    | 0.71004389             |                             | 1            | 1           | 0.71004389             | Brain_Cerebellum  |
|              | Brain_Cerebellum                      | 1                      | 1                           | -0.371797144 |             | -0.371797144           | 0.71004389        |
|              | NA                                    | 1                      | 0                           | 0.998207054  |             |                        |                   |
| GPD2         | ENSG00000115159.15                    | 0.710136072            |                             | 1            | 1           | 0.710136072            |                   |
|              | Brain_Anterior_cingulate_cortex_BA24  | 0.710136072            |                             |              |             |                        |                   |
|              | Brain_Anterior_cingulate_cortex_BA24  | 1                      | 1                           | 1            |             | -0.371673347           |                   |
|              | -0.371673347                          | -0.371673347           | NA                          | 1            | 0           | 0.998207054            |                   |
| POLK         | ENSG00000122008.15                    | 0.710145451            |                             | 5            | 4           | 0.375251219            |                   |
|              | Brain_Nucleus_accumbens_basal_ganglia | 0.959224734            | Brain_Caudate_basal_ganglia |              |             |                        |                   |
|              | 2.863353385                           | 0.068121985            | 0.269849787                 |              |             | -0.886679981           | 0.859459381       |
|              | -0.165100742                          | 0.686799894            | 4                           | 0            | 0.998207054 |                        |                   |
| FOXN2        | ENSG00000170802.15                    | 0.71015998             |                             | 13           | 1           | 0.537329069            | Brain_Hippocampus |
|              | 0.927961071                           | Brain_Substantia_nigra |                             |              |             | 12.20782304            | 0.001648062       |
|              | 12.20782304                           | -0.616856973           | -0.090410427                |              |             | -0.359757716           | 0.170591727       |
|              | 1                                     | 0                      | 0.998207054                 |              |             |                        |                   |
| CDK5RAP3     | ENSG00000108465.14                    | 0.710201923            |                             | 13           | 3           | 0.350087355            |                   |
|              | Brain_Amygdala                        | 0.932789313            | Brain_Hippocampus           |              |             | 10.40904525            |                   |
|              | 0.004820651                           | 0.553792656            | -0.934419865                |              |             | 0.397346933            | -0.233395026      |
|              | 0.456416396                           | 3                      | 0                           | 0.998207054  |             |                        |                   |
| NPFF         | ENSG00000139574.8                     | 0.710304363            |                             | 1            | 1           | 0.710304363            | Brain_Amygdala    |
|              | 0.710304363                           | Brain_Amygdala         | 1                           | 1            | 1           | 0.371447351            | 0.371447351       |
|              | 0.371447351                           | NA                     | 1                           | 0            | 0.998207054 |                        |                   |
| LIMCH1       | ENSG00000064042.17                    | 0.710311645            |                             | 3            | 3           | 0.410509883            |                   |
|              | Brain_Anterior_cingulate_cortex_BA24  | 0.924900765            | Brain_Cerebellum            |              |             | 1.55517941             |                   |
|              | 0.442281471                           | 0.442281471            | -0.822996677                |              |             | 0.689791418            | -0.075822533      |
|              | 0.756562605                           | 3                      | 0                           | 0.998207054  |             |                        |                   |
| ZFR          | ENSG00000056097.15                    | 0.710424065            |                             | 1            | 1           | 0.710424065            | Brain_Cerebellum  |
|              | 0.710424065                           | Brain_Cerebellum       | 1                           | 1            | 1           | -0.371286617           | -0.371286617      |
|              | -0.371286617                          | NA                     | 1                           | 0            | 0.998207054 |                        |                   |
| RP11-43A14.2 | ENSG00000282375.1                     | 0.710481397            |                             | 2            | 2           | 0.464242417            |                   |
|              | Brain_Anterior_cingulate_cortex_BA24  | 0.700979623            | Brain_Hippocampus           |              |             |                        |                   |
|              | 1.000930058                           | 0.999069942            | 0.999069942                 |              |             | -0.731879012           | -0.383998414      |
|              | -0.557938713                          | 0.24598873             | 2                           | 0            | 0.998207054 |                        |                   |
| C6orf201     | ENSG00000185689.15                    | 0.710640208            |                             | 6            | 3           | 0.297646496            |                   |
|              | Brain_Frontal_Cortex_BA9              | 0.972207317            | Brain_Cerebellar_Hemisphere |              |             |                        |                   |
|              | 4.699254085                           | 0.052792476            | 0.337830936                 |              |             | -0.403857717           | 1.041493656       |
|              | 0.351674729                           | 0.54011373             | 3                           | 0            | 0.998207054 |                        |                   |
| LINC01219    | ENSG00000232987.1                     | 0.710792841            |                             | 4            | 4           | 0.275419983            |                   |
|              | Brain_Cortex                          | 0.564290426            | Brain_Cerebellum            |              |             | 1.254385023            | 0.754080492       |
|              | 0.754080492                           | -1.090665757           | -0.57648053                 |              |             | -0.751495318           | 0.23056233        |
|              | 0                                     | 0.998207054            |                             |              |             |                        | 4                 |
| MYO3A        | ENSG00000095777.14                    | 0.710923302            |                             | 3            | 3           | 0.742955455            |                   |
|              | Brain_Nucleus_accumbens_basal_ganglia | 0.778226066            | Brain_Caudate_basal_ganglia |              |             |                        |                   |

|           |                                       |                        |                                       |              |                                      |                  |             |   |  |
|-----------|---------------------------------------|------------------------|---------------------------------------|--------------|--------------------------------------|------------------|-------------|---|--|
|           | 1.860413242                           | 0.142629168            | 0.142629168                           | -0.281631523 | 0.327942081                          |                  |             |   |  |
|           | 0.117731447                           | 0.346018713            | 3                                     | 0            | 0.998207054                          |                  |             |   |  |
| LINC00954 | ENSG00000228784.7                     | 0.710942898            | 1                                     | 1            | 0.710942898                          |                  |             |   |  |
|           | Brain_Spinal_cord_cervical_c-1        | 0.710942898            |                                       |              | Brain_Spinal_cord_cervical_c-1       |                  |             |   |  |
|           | 1                                     | 1                      | -0.370590045                          | -0.370590045 | -0.370590045                         | NA               | 1           | 0 |  |
|           | 0.998207054                           |                        |                                       |              |                                      |                  |             |   |  |
| DCUN1D2   | ENSG00000150401.14                    | 0.711157085            | 7                                     | 3            | 0.268625167                          |                  |             |   |  |
|           | Brain_Cerebellar_Hemisphere           | 0.825150836            |                                       |              | Brain_Anterior_cingulate_cortex_BA24 |                  |             |   |  |
|           | 5.74185616                            | 0.001678516            | 0.252969236                           | -1.106234193 | -0.220924993                         |                  |             |   |  |
|           | -0.59133839                           | 0.291113568            | 3                                     | 0            | 0.998207054                          |                  |             |   |  |
| C8orf22   | ENSG00000168333.13                    | 0.711314896            | 1                                     | 1            | 0.711314896                          |                  |             |   |  |
|           | Brain_Hypothalamus                    | 0.711314896            | Brain_Hypothalamus                    | 1            | 1                                    | 1                |             |   |  |
|           | 0.37009072                            | 0.37009072             | 0.37009072                            | NA           | 1                                    | 0                | 0.998207054 |   |  |
| USF3      | ENSG00000176542.9                     | 0.711403197            | 1                                     | 1            | 0.711403197                          | Brain_Cortex     |             |   |  |
|           | 0.711403197                           | Brain_Cortex           | 1                                     | 1            | 1                                    | -0.36997221      | -0.36997221 |   |  |
|           | -0.36997221                           | NA                     | 1                                     | 0            | 0.998207054                          |                  |             |   |  |
| CPSF3     | ENSG00000119203.13                    | 0.711705473            | 2                                     | 2            | 0.43094407                           | Brain_Cerebellum |             |   |  |
|           | 0.923388025                           | Brain_Hippocampus      | 1.183392595                           | 0.816607405  |                                      |                  |             |   |  |
|           | 0.816607405                           | -0.787577174           | 0.096166893                           | -0.345705141 | 0.624901423                          |                  |             |   |  |
|           | 2                                     | 0                      | 0.998207054                           |              |                                      |                  |             |   |  |
| ABLIM2    | ENSG00000163995.19                    | 0.711721437            | 3                                     | 3            | 0.328184278                          |                  |             |   |  |
|           | Brain_Spinal_cord_cervical_c-1        | 0.798691812            |                                       |              | Brain_Substantia_nigra               |                  |             |   |  |
|           | 1.081464695                           | 0.91843793             | 0.91843793                            | 0.255040508  | 0.977777709                          |                  |             |   |  |
|           | 0.618300278                           | 0.361383446            | 3                                     | 0            | 0.998207054                          |                  |             |   |  |
| TSNARE1   | ENSG00000171045.14                    | 0.71174073             | 12                                    | 4            | 0.118394488                          | Brain_Amygdala   |             |   |  |
|           | 0.876120614                           | Brain_Substantia_nigra | 9.066455114                           | 0.017583148  |                                      |                  |             |   |  |
|           | 0.341034813                           | 0.155888876            | 1.561548084                           | 0.95693145   | 0.389136336                          | 4                |             |   |  |
|           | 0                                     | 0.998207054            |                                       |              |                                      |                  |             |   |  |
| DDHD2     | ENSG00000085788.13                    | 0.711890325            | 7                                     | 3            | 0.213862743                          |                  |             |   |  |
|           | Brain_Frontal_Cortex_BA9              | 0.488979677            | Brain_Cortex                          | 5.65605678   | 0.00055865                           |                  |             |   |  |
|           | 0.278015925                           | -1.243013815           | -0.691932568                          | -0.961887527 | 0.165913955                          |                  |             |   |  |
|           | 3                                     | 0                      | 0.998207054                           |              |                                      |                  |             |   |  |
| RADIL     | ENSG00000157927.16                    | 0.711945584            | 8                                     | 4            | 0.18886323                           | Brain_Cerebellum |             |   |  |
|           | 0.987153869                           | Brain_Hypothalamus     | 5.585400872                           | 3.91E-17     | 0.407329016                          |                  |             |   |  |
|           | 0.016100933                           | 1.313949409            | 0.333687076                           | 0.515486467  | 4                                    | 0                |             |   |  |
|           | 0.998207054                           |                        |                                       |              |                                      |                  |             |   |  |
| GABRB2    | ENSG00000145864.12                    | 0.712006127            | 1                                     | 1            | 0.712006127                          |                  |             |   |  |
|           | Brain_Anterior_cingulate_cortex_BA24  | 0.712006127            |                                       |              |                                      |                  |             |   |  |
|           | Brain_Anterior_cingulate_cortex_BA24  | 1                      | 1                                     | 1            | -0.369163142                         |                  |             |   |  |
|           | -0.369163142                          | -0.369163142           | NA                                    | 1            | 0                                    | 0.998207054      |             |   |  |
| QPCTL     | ENSG00000011478.11                    | 0.712017616            | 3                                     | 3            | 0.315505276                          |                  |             |   |  |
|           | Brain_Frontal_Cortex_BA9              | 0.765267001            | Brain_Putamen_basal_ganglia           |              |                                      |                  |             |   |  |
|           | 1.141585857                           | 0.85820123             | 0.85820123                            | -1.003737252 | 0.383244552                          |                  |             |   |  |
|           | -0.107307061                          | 0.777484852            | 3                                     | 0            | 0.998207054                          |                  |             |   |  |
| GRPEL2    | ENSG00000164284.14                    | 0.71208691             | 1                                     | 1            | 0.71208691                           |                  |             |   |  |
|           | Brain_Frontal_Cortex_BA9              | 0.71208691             | Brain_Frontal_Cortex_BA9              | 1            | 1                                    | 1                |             |   |  |
|           | 0.369054759                           | 0.369054759            | 0.369054759                           | NA           | 1                                    | 0                | 0.998207054 |   |  |
| PEX11A    | ENSG00000166821.8                     | 0.712198117            | 3                                     | 3            | 0.285092759                          |                  |             |   |  |
|           | Brain_Substantia_nigra                | 0.693663145            | Brain_Cortex                          | 1.58376428   |                                      |                  |             |   |  |
|           | 0.488082473                           | 0.488082473            | 0.393888793                           | 1.068948761  | 0.677516557                          |                  |             |   |  |
|           | 0.350203994                           | 3                      | 0                                     | 0.998207054  |                                      |                  |             |   |  |
| NUTM2E    | ENSG00000228570.7                     | 0.712210622            | 11                                    | 10           | 0.139883226                          |                  |             |   |  |
|           | Brain_Cerebellar_Hemisphere           | 0.968430656            | Brain_Nucleus_accumbens_basal_ganglia |              |                                      |                  |             |   |  |
|           | 3.745768378                           | 0.078104475            | 0.235755308                           | -0.477254175 | 1.476226022                          |                  |             |   |  |
|           | 0.720237726                           | 0.639271429            | 10                                    | 0            | 0.998207054                          |                  |             |   |  |
| GHDC      | ENSG00000167925.15                    | 0.71224496             | 3                                     | 3            | 0.400085267                          |                  |             |   |  |
|           | Brain_Nucleus_accumbens_basal_ganglia | 0.828460194            | Brain_Hippocampus                     |              |                                      |                  |             |   |  |
|           | 1.280936866                           | 0.74136232             | 0.74136232                            | -0.84146896  | 0.558480233                          |                  |             |   |  |
|           | -0.02210396                           | 0.729881251            | 3                                     | 0            | 0.998207054                          |                  |             |   |  |
| ZSCAN1    | ENSG00000152467.9                     | 0.712273369            | 2                                     | 2            | 0.802246405                          |                  |             |   |  |
|           | Brain_Cerebellar_Hemisphere           | 0.813669541            | Brain_Cerebellum                      | 1.825852385  |                                      |                  |             |   |  |
|           | 0.174147615                           | 0.174147615            | -0.235694754                          | 0.250440899  | 0.007373072                          |                  |             |   |  |

|               |                                       |                  |   |              |             |             |                                |             |                  |
|---------------|---------------------------------------|------------------|---|--------------|-------------|-------------|--------------------------------|-------------|------------------|
|               | 0.343749816                           | 2                | 0 | 0.998207054  |             |             |                                |             |                  |
| CYP4F11       | ENSG00000171903.16                    |                  |   | 0.712381746  | 7           | 6           | 0.234223328                    |             |                  |
|               | Brain_Caudate_basal_ganglia           |                  |   | 0.920770598  |             |             | Brain_Substantia_nigra         |             |                  |
|               | 3.635140073                           | 0.096199868      |   | 0.206596331  |             |             | -0.499768658                   | 1.18954995  |                  |
|               | 0.243811177                           | 0.646852528      |   | 6            | 0           | 0.998207054 |                                |             |                  |
| REEP1         | ENSG00000068615.17                    |                  |   | 0.71244817   | 8           | 6           | 0.185336569                    |             |                  |
|               | Brain_Nucleus_accumbens_basal_ganglia |                  |   | 0.861729572  |             |             | Brain_Caudate_basal_ganglia    |             |                  |
|               | 4.411149929                           | 0.038992152      |   | 0.199257434  |             |             | -1.324501429                   | 1.121191831 |                  |
|               | 0.217417528                           | 0.722333693      |   | 6            | 0           | 0.998207054 |                                |             |                  |
| KRT5          | ENSG00000186081.11                    |                  |   | 0.712602853  | 1           | 1           | 0.712602853                    |             |                  |
|               | Brain_Caudate_basal_ganglia           |                  |   | 0.712602853  |             |             | Brain_Caudate_basal_ganglia    | 1           | 1                |
|               | 1                                     | 0.368362637      |   | 0.368362637  |             |             | 0.368362637                    | NA          | 1                |
|               | 0.998207054                           |                  |   |              |             |             |                                | 0           |                  |
| TAS2R46       | ENSG00000226761.3                     |                  |   | 0.712706566  | 2           | 1           | 0.690062719                    |             |                  |
|               | Brain_Cerebellar_Hemisphere           |                  |   | 0.736471016  |             |             | Brain_Cerebellum               | 1.993775897 |                  |
|               | 0.006224103                           | 1.993775897      |   | -0.398769952 |             |             | -0.336530287                   | -0.36765012 |                  |
|               | 0.044010089                           | 1                | 0 | 0.998207054  |             |             |                                |             |                  |
| RABL2B        | ENSG00000079974.17                    |                  |   | 0.712787673  | 3           | 3           | 0.339425618                    |             |                  |
|               | Brain_Substantia_nigra                |                  |   | 0.896296269  |             |             | Brain_Cerebellar_Hemisphere    |             |                  |
|               | 1.093439842                           | 0.92322227       |   | 0.92322227   |             |             | -0.955300771                   | 0.73672392  | -0.029411793     |
|               | 0.857250091                           | 3                | 0 | 0.998207054  |             |             |                                |             |                  |
| RP11-667K14.3 | ENSG00000263050.1                     |                  |   | 0.712879722  | 1           | 1           | 0.712879722                    |             |                  |
|               | Brain_Cerebellum                      |                  |   | 0.712879722  |             |             | Brain_Cerebellum               | 1           | 1                |
|               | 0.367991298                           | 0.367991298      |   | NA           | 1           | 0           | 0.998207054                    |             |                  |
| COPS3         | ENSG00000141030.12                    |                  |   | 0.712985016  | 1           | 1           | 0.712985016                    |             | Brain_Cortex     |
|               | 0.712985016                           | Brain_Cortex     |   | 1            | 1           | 1           | -0.367850092                   |             | -0.367850092     |
|               | -0.367850092                          | NA               | 1 | 0            | 0.998207054 |             |                                |             |                  |
| MAPK8IP3      | ENSG00000138834.12                    |                  |   | 0.713009032  | 1           | 1           | 0.713009032                    |             |                  |
|               | Brain_Cerebellum                      |                  |   | 0.713009032  |             |             | Brain_Cerebellum               | 1           | 1                |
|               | 0.367817886                           | 0.367817886      |   | NA           | 1           | 0           | 0.998207054                    |             |                  |
| ALDH1A2       | ENSG00000128918.14                    |                  |   | 0.713082331  | 2           | 2           | 0.504806527                    |             |                  |
|               | Brain_Nucleus_accumbens_basal_ganglia |                  |   | 0.584272324  |             |             | Brain_Cerebellum               |             |                  |
|               | 1.102796499                           | 0.897203501      |   | 0.897203501  |             |             | -0.666946156                   | 0.54715489  |                  |
|               | -0.059895633                          | 0.858499083      |   | 2            | 0           | 0.998207054 |                                |             |                  |
| RP11-7F17.3   | ENSG00000258819.1                     |                  |   | 0.713235023  | 1           | 1           | 0.713235023                    |             |                  |
|               | Brain_Cerebellar_Hemisphere           |                  |   | 0.713235023  |             |             | Brain_Cerebellar_Hemisphere    | 1           | 1                |
|               | 1                                     | -0.367514842     |   | -0.367514842 |             |             | -0.367514842                   | NA          | 1                |
|               | 0.998207054                           |                  |   |              |             |             |                                | 0           |                  |
| ZNF99         | ENSG00000213973.8                     |                  |   | 0.713612994  | 1           | 1           | 0.713612994                    |             | Brain_Cerebellum |
|               | 0.713612994                           | Brain_Cerebellum |   | 1            | 1           | 1           | -0.367008076                   |             | -0.367008076     |
|               | -0.367008076                          | NA               | 1 | 0            | 0.998207054 |             |                                |             |                  |
| RP5-994D16.3  | ENSG00000234917.2                     |                  |   | 0.713641339  | 2           | 2           | 0.435808558                    |             |                  |
|               | Brain_Caudate_basal_ganglia           |                  |   | 0.808319315  |             |             | Brain_Cerebellum               | 1.021898521 |                  |
|               | 0.978101479                           | 0.978101479      |   | -0.779290587 |             |             | 0.242594793                    |             | -0.268347897     |
|               | 0.722582082                           | 2                | 0 | 0.998207054  |             |             |                                |             |                  |
| AZGP1         | ENSG00000160862.12                    |                  |   | 0.713756624  | 7           | 6           | 0.250839134                    |             |                  |
|               | Brain_Frontal_Cortex_BA9              |                  |   | 0.999681059  |             |             | Brain_Cerebellum               | 4.606238548 |                  |
|               | 0.040743083                           | 0.170801201      |   | -0.412981279 |             |             | 1.148313582                    |             | 0.529980327      |
|               | 0.568095446                           | 6                | 0 | 0.998207054  |             |             |                                |             |                  |
| ZNF467        | ENSG00000181444.12                    |                  |   | 0.713772985  | 11          | 4           | 0.109799584                    |             |                  |
|               | Brain_Caudate_basal_ganglia           |                  |   | 0.711014888  |             |             | Brain_Hippocampus              | 8.827332861 |                  |
|               | 0.004501144                           | 0.417610313      |   | -1.5990946   |             |             | -0.370493407                   |             | -1.124839917     |
|               | 0.317101719                           | 4                | 0 | 0.998207054  |             |             |                                |             |                  |
| CYB5R1        | ENSG00000159348.12                    |                  |   | 0.713774287  | 2           | 1           | 0.637132728                    |             |                  |
|               | Brain_Cerebellar_Hemisphere           |                  |   | 0.797009321  |             |             | Brain_Cerebellum               | 1.974710812 |                  |
|               | 0.025289188                           | 1.974710812      |   | -0.4717115   |             |             | -0.257219513                   |             | -0.364465506     |
|               | 0.151668738                           | 1                | 0 | 0.998207054  |             |             |                                |             |                  |
| GOLGA6B       | ENSG00000215186.6                     |                  |   | 0.713844052  | 1           | 1           | 0.713844052                    |             |                  |
|               | Brain_Cerebellum                      |                  |   | 0.713844052  |             |             | Brain_Cerebellum               | 1           | 1                |
|               | 0.366698331                           | 0.366698331      |   | NA           | 1           | 0           | 0.998207054                    |             |                  |
| GYPE          | ENSG00000197465.13                    |                  |   | 0.713917006  | 1           | 1           | 0.713917006                    |             |                  |
|               | Brain_Spinal_cord_cervical_c-1        |                  |   | 0.713917006  |             |             | Brain_Spinal_cord_cervical_c-1 |             |                  |

|              |                                       |                             |                                |              |            |    |   |   |                  |
|--------------|---------------------------------------|-----------------------------|--------------------------------|--------------|------------|----|---|---|------------------|
| 1            | 1                                     | 1                           | 0.36660054                     | 0.36660054   | 0.36660054 | NA | 1 | 0 | 0.998207054      |
| LY6G5C       | ENSG00000204428.12                    |                             | 0.713942708                    |              | 13         | 3  |   |   | 0.172556993      |
|              | Brain_Amygdala                        | 0.94309968                  | Brain_Caudate_basal_ganglia    | 11.30380377  |            |    |   |   |                  |
|              | 0.001203851                           | 0.40359961                  | -1.364033594                   | -0.07137453  |            |    |   |   | -0.892468784     |
|              | 0.366864377                           | 3                           | 0                              | 0.998207054  |            |    |   |   |                  |
| CNPY2        | ENSG00000257727.5                     |                             | 0.714021159                    |              | 2          | 2  |   |   | 0.468094125      |
|              | Brain_Nucleus_accumbens_basal_ganglia | 0.645368562                 |                                |              |            |    |   |   | Brain_Cerebellum |
|              | 1.108588281                           | 0.891411719                 | 0.891411719                    | -0.460205725 |            |    |   |   | 0.725583524      |
|              | 0.132688899                           | 0.838479618                 | 2                              | 0            |            |    |   |   | 0.998207054      |
| ZNF454       | ENSG00000178187.7                     |                             | 0.714100952                    |              | 11         | 5  |   |   | 0.083952796      |
|              | Brain_Putamen_basal_ganglia           | 0.99316006                  | Brain_Spinal_cord_cervical_c-1 |              |            |    |   |   |                  |
|              | 8.231894207                           | 7.37E-05                    | 0.275563056                    | -0.008572698 |            |    |   |   | 1.728197644      |
|              | 1.158514024                           | 0.536447389                 | 5                              | 0            |            |    |   |   | 0.998207054      |
| JUP          | ENSG00000173801.16                    |                             | 0.714131373                    |              | 4          | 4  |   |   | 0.427444632      |
|              | Brain_Cerebellum                      |                             |                                |              |            |    |   |   |                  |
|              | 0.852266462                           | Brain_Putamen_basal_ganglia | 2.798190774                    | 0.107620581  |            |    |   |   |                  |
|              | 0.107620581                           | -0.79357201                 | 0.743685963                    | 0.146763626  |            |    |   |   | 0.666955797      |
|              | 4                                     | 0                           | 0.998207054                    |              |            |    |   |   |                  |
| SECISBP2     | ENSG00000187742.14                    |                             | 0.714144506                    |              | 2          | 2  |   |   | 0.433137909      |
|              | Brain_Cerebellum                      | 0.593189293                 | Brain_Cerebellar_Hemisphere    | 1.397301174  |            |    |   |   |                  |
|              | 0.602698826                           | 0.602698826                 | 0.534220059                    | 0.783833338  |            |    |   |   | 0.659026699      |
|              | 0.176503242                           | 2                           | 0                              | 0.998207054  |            |    |   |   |                  |
| SLC35E2B     | ENSG00000189339.11                    |                             | 0.714176583                    |              | 7          | 6  |   |   | 0.175491903      |
|              | Brain_Amygdala                        | 0.825521426                 | Brain_Substantia_nigra         | 2.331784907  |            |    |   |   |                  |
|              | 0.067199682                           | 0.522211649                 | -1.354766689                   | 1.155870606  |            |    |   |   | 0.034722458      |
|              | 0.877652698                           | 6                           | 0                              | 0.998207054  |            |    |   |   |                  |
| ZNF19        | ENSG00000157429.15                    |                             | 0.714268943                    |              | 3          | 3  |   |   | 0.357592306      |
|              | Brain_Nucleus_accumbens_basal_ganglia | 0.69123911                  | Brain_Substantia_nigra         |              |            |    |   |   |                  |
|              | 1.15317112                            | 0.852081861                 | 0.852081861                    | 0.39717406   |            |    |   |   | 0.919962595      |
|              | 0.595509092                           | 0.283295543                 | 3                              | 0            |            |    |   |   | 0.998207054      |
| HPDL         | ENSG00000186603.5                     |                             | 0.714412547                    |              | 1          | 1  |   |   | 0.714412547      |
|              | Brain_Frontal_Cortex_BA9              | 0.714412547                 | Brain_Frontal_Cortex_BA9       | 1            |            |    |   |   | 1                |
|              | 1                                     | 0.365936383                 | 0.365936383                    | 0.365936383  | NA         | 1  |   |   | 0                |
|              | 0.998207054                           |                             |                                |              |            |    |   |   |                  |
| TNF          | ENSG00000232810.3                     |                             | 0.714500772                    |              | 1          | 1  |   |   | 0.714500772      |
|              | Brain_Hippocampus                     | 0.714500772                 | Brain_Hippocampus              | 1            |            |    |   |   | 1                |
|              | 0.365818155                           | 0.365818155                 | 0.365818155                    | NA           | 1          | 0  |   |   | 0.998207054      |
| TMEM97       | ENSG00000109084.13                    |                             | 0.714525211                    |              | 4          | 2  |   |   | 0.417360292      |
|              | Brain_Nucleus_accumbens_basal_ganglia | 0.576740479                 |                                |              |            |    |   |   |                  |
|              | Brain_Spinal_cord_cervical_c-1        | 3.671914056                 |                                | 0.008041438  |            |    |   |   | 0.23134216       |
|              | -0.558152169                          | 0.811009366                 | 0.358836652                    | 0.620042453  |            |    |   |   | 2                |
|              | 0.998207054                           |                             |                                |              |            |    |   |   | 0                |
| MCHR2        | ENSG00000152034.10                    |                             | 0.714607248                    |              | 1          | 1  |   |   | 0.714607248      |
|              | Brain_Cortex                          | 1                           | 1                              | 1            |            |    |   |   | Brain_Cortex     |
|              | 0.714607248                           | Brain_Cortex                | 1                              | 1            |            |    |   |   | 0.365675476      |
|              | 0.365675476                           | NA                          | 1                              | 0            |            |    |   |   | 0.365675476      |
|              | 0.998207054                           |                             |                                |              |            |    |   |   |                  |
| PPL          | ENSG00000118898.15                    |                             | 0.714648133                    |              | 3          | 3  |   |   | 0.2868333        |
|              | Brain_Putamen_basal_ganglia           | 0.761203693                 | Brain_Cortex                   | 1.496707206  |            |    |   |   |                  |
|              | 0.55466144                            | 0.55466144                  | -0.303900506                   | 1.065094207  |            |    |   |   | 0.397161111      |
|              | 0.685098354                           | 3                           | 0                              | 0.998207054  |            |    |   |   |                  |
| CAPRN2       | ENSG00000110888.17                    |                             | 0.714721935                    |              | 8          | 6  |   |   | 0.091364904      |
|              | Brain_Frontal_Cortex_BA9              | 0.617144758                 | Brain_Substantia_nigra         |              |            |    |   |   |                  |
|              | 5.155454184                           | 0.057176909                 | 0.182410238                    | -0.499901042 |            |    |   |   | 1.688241376      |
|              | 1.100459035                           | 0.730225278                 | 6                              | 0            |            |    |   |   | 0.998207054      |
| RP11-128M1.1 | ENSG00000226644.5                     |                             | 0.715339508                    |              | 4          | 4  |   |   | 0.430828934      |
|              | Brain_Cortex                          | 0.517638712                 | Brain_Hypothalamus             | 1.762364917  |            |    |   |   |                  |
|              | 0.441490548                           | 0.441490548                 | -0.787773961                   | 0.646989542  |            |    |   |   | -0.38750263      |
|              | 0.690935537                           | 4                           | 0                              | 0.998207054  |            |    |   |   |                  |
| ICMT         | ENSG00000116237.15                    |                             | 0.715393806                    |              | 10         | 2  |   |   | 0.539506582      |
|              | Brain_Substantia_nigra                | 0.89696315                  | Brain_Hippocampus              | 8.633761037  |            |    |   |   |                  |
|              | 0.001969015                           | 0.621976638                 | -0.41397489                    | 0.613559305  |            |    |   |   | 0.312442894      |
|              | 0.295036682                           | 2                           | 0                              | 0.998207054  |            |    |   |   |                  |
| TRAF3IP2     | ENSG00000056972.18                    |                             | 0.715425936                    |              | 2          | 2  |   |   | 0.484396988      |
|              | Brain_Cerebellar_Hemisphere           | 0.518011398                 | Brain_Hypothalamus             | 1.356233599  |            |    |   |   |                  |

|               |                                      |                |              |              |                                       |
|---------------|--------------------------------------|----------------|--------------|--------------|---------------------------------------|
|               | 0.643766401                          | 0.643766401    | 0.646413812  | 0.699248112  | 0.672830962                           |
|               | 0.037359492                          | 2              | 0            | 0.998207054  |                                       |
| CERS3         | ENSG00000154227.13                   | 0.715428909    | 8            | 4            | 0.186501847                           |
|               | Brain_Spinal_cord_cervical_c-1       | 0.824058074    |              |              | Brain_Cerebellar_Hemisphere           |
|               | 5.955596603                          | 0.018718703    | 0.301582565  | -1.320998552 | -0.222328621                          |
|               | -0.891858701                         | 0.359371501    | 4            | 0            | 0.998207054                           |
| ZBTB22        | ENSG00000236104.2                    | 0.715438313    | 2            | 2            | 0.414471763                           |
|               | Brain_Frontal_Cortex_BA9             | 0.946494847    |              |              | Brain_Nucleus_accumbens_basal_ganglia |
|               | 1.156674661                          | 0.843325339    | 0.843325339  | 0.067109103  | 0.816049608                           |
|               | 0.441579356                          | 0.52958091     | 2            | 0            | 0.998207054                           |
| SLC12A4       | ENSG00000124067.16                   | 0.715621777    | 2            | 2            | 0.550932228                           |
|               | Brain_Amygdala                       | 0.912988338    |              |              | Brain_Spinal_cord_cervical_c-1        |
|               | 0.419002465                          | 0.419002465    | -0.596363786 | -0.109270003 | 1.580997535                           |
|               | 0.344427317                          | 2              | 0            | 0.998207054  | -0.352816894                          |
| ANKRD28       | ENSG00000206560.11                   | 0.715635376    | 1            | 1            | 0.715635376                           |
|               | Brain_Cortex                         | 0.715635376    |              |              | Brain_Cortex                          |
|               | -0.364298157                         | -0.364298157   | NA           | 1            | 0                                     |
|               |                                      |                |              |              | 0.998207054                           |
| GTF3C2        | ENSG00000115207.13                   | 0.715640667    | 1            | 1            | 0.715640667                           |
|               | Brain_Cortex                         | 0.715640667    |              |              | Brain_Cortex                          |
|               | 0.364291071                          | 0.364291071    | NA           | 1            | 0                                     |
|               |                                      |                |              |              | 0.998207054                           |
| RP11-356J5.12 | ENSG00000250303.3                    | 0.715652734    | 1            | 1            | 0.715652734                           |
|               | Brain_Anterior_cingulate_cortex_BA24 | 0.715652734    |              |              |                                       |
|               | Brain_Anterior_cingulate_cortex_BA24 | 1              | 1            | 1            | -0.364274909                          |
|               | -0.364274909                         | -0.364274909   | NA           | 1            | 0                                     |
|               |                                      |                |              |              | 0.998207054                           |
| GLI3          | ENSG00000106571.12                   | 0.715750222    | 2            | 2            | 0.540483684                           |
|               | Brain_Frontal_Cortex_BA9             | 0.565945093    |              |              | Brain_Hippocampus                     |
|               | 0.947086032                          | 0.947086032    | -0.574033558 | 0.612081731  | 1.052913968                           |
|               | 0.838710164                          | 2              | 0            | 0.998207054  | 0.019024086                           |
| HIST3H3       | ENSG00000168148.3                    | 0.715824493    | 1            | 1            | 0.715824493                           |
|               | Brain_Cerebellum                     | 0.715824493    |              |              | Brain_Cerebellum                      |
|               | 0.364044884                          | 0.364044884    | NA           | 1            | 0                                     |
|               |                                      |                |              |              | 0.998207054                           |
| LIPI          | ENSG00000188992.11                   | 0.715870556    | 2            | 2            | 0.415671409                           |
|               | Brain_Cerebellar_Hemisphere          | 1.321027388    |              |              | Brain_Cerebellum                      |
|               | 0.737922124                          | 0.678972612    | 0.813953816  | 0.574280036  | 0.678972612                           |
|               | 0.678972612                          | 0.334606257    | 0.813953816  | 0.574280036  | 0.338949909                           |
|               | 2                                    | 0              | 0.998207054  |              |                                       |
| FEZ2          | ENSG00000171055.14                   | 0.715915777    | 9            | 7            | 0.16903573                            |
|               | Brain_Cerebellar_Hemisphere          | 0.923145508    |              |              | Brain_Hypothalamus                    |
|               | 0.01043354                           | 0.254441485    | -1.296377599 | 1.375308797  | 4.815661453                           |
|               | 0.943815109                          | 7              | 0            | 0.998207054  | -0.050645843                          |
| SRCAP         | ENSG00000080603.16                   | 0.715918615    | 1            | 1            | 0.715918615                           |
|               | Brain_Amygdala                       | 1              | 1            | 1            | Brain_Amygdala                        |
|               | 0.715918615                          | Brain_Amygdala | 1            | 1            | -0.363918841                          |
|               | -0.363918841                         | NA             | 1            | 0            | -0.363918841                          |
|               |                                      |                |              |              | 0.998207054                           |
| PRSS42        | ENSG00000178055.11                   | 0.716032829    | 2            | 2            | 0.454456173                           |
|               | Brain_Frontal_Cortex_BA9             | 0.7527856      |              |              | Brain_Caudate_basal_ganglia           |
|               | 0.980706916                          | 0.980706916    | -0.314968462 | 0.748006606  | 1.019293084                           |
|               | 0.751636879                          | 2              | 0            | 0.998207054  | 0.216519072                           |
| ZBTB37        | ENSG00000185278.15                   | 0.716102269    | 1            | 1            | 0.716102269                           |
|               | Brain_Hippocampus                    | 0.716102269    |              |              | Brain_Hippocampus                     |
|               | -0.363672918                         | -0.363672918   | -0.363672918 | NA           | 1                                     |
|               |                                      |                |              |              | 0                                     |
|               |                                      |                |              |              | 0.998207054                           |
| PIP           | ENSG00000159763.3                    | 0.716118366    | 1            | 1            | 0.716118366                           |
|               | Brain_Substantia_nigra               | 0.716118366    |              |              | Brain_Substantia_nigra                |
|               | 1                                    | 0.363651365    | 0.363651365  | 0.363651365  | 1                                     |
|               |                                      |                |              | NA           | 1                                     |
|               |                                      |                |              |              | 0                                     |
|               |                                      |                |              |              | 0.998207054                           |
| FAHD2A        | ENSG00000115042.9                    | 0.716170782    | 1            | 1            | 0.716170782                           |
|               | Brain_Anterior_cingulate_cortex_BA24 | 0.716170782    |              |              |                                       |
|               | Brain_Anterior_cingulate_cortex_BA24 | 1              | 1            | 1            | 0.363581181                           |
|               | 0.363581181                          | 0.363581181    | NA           | 1            | 0                                     |
|               |                                      |                |              |              | 0.998207054                           |
| NDUFV1        | ENSG00000167792.11                   | 0.716172999    | 6            | 1            | 0.583597856                           |
|               | Brain_Cerebellum                     | 0.920129256    |              |              | Brain_Cerebellar_Hemisphere           |
|               | 0.013929972                          | 5.775043593    | -0.548136971 | -0.100270905 | 5.775043593                           |
|               | 0.195381939                          | 1              | 0            | 0.998207054  | -0.356523406                          |
| PIWIL2        | ENSG00000197181.11                   | 0.716259953    | 10           | 4            | 0.080257767                           |

|           |                             |                                       |                             |                  |             |                             |                  |             |   |
|-----------|-----------------------------|---------------------------------------|-----------------------------|------------------|-------------|-----------------------------|------------------|-------------|---|
|           | Brain_Putamen_basal_ganglia | 0.534003368                           |                             | Brain_Cerebellum | 8.467902928 |                             |                  |             |   |
|           |                             | 0.003752294                           | 0.305460457                 |                  | 0.621906474 | 1.749192404                 | 1.113911856      |             |   |
|           |                             | 0.320509545                           | 4                           | 0                | 0.998207054 |                             |                  |             |   |
| SHC2      | ENSG00000129946             | 10                                    | 0.716341913                 | 9                | 3           | 0.214738193                 | Brain_Cerebellum |             |   |
|           |                             | 0.655234966                           | Brain_Putamen_basal_ganglia | 6.164653721      |             | 0.000427788                 |                  |             |   |
|           |                             | 0.350858949                           | 0.446501588                 | 1.240641557      |             | 0.845931333                 | 0.267020145      |             |   |
|           |                             | 3                                     | 0                           | 0.998207054      |             |                             |                  |             |   |
| RP11-863P | 13.5                        | ENSG00000261193                       | 1                           | 0.716417049      | 1           | 1                           | 0.716417049      |             |   |
|           |                             | Brain_Anterior_cingulate_cortex_BA24  |                             | 0.716417049      |             |                             |                  |             |   |
|           |                             | Brain_Anterior_cingulate_cortex_BA24  | 1                           | 1                | 1           | -0.363251461                |                  |             |   |
|           |                             | -0.363251461                          | -0.363251461                | NA               | 1           | 0                           | 0.998207054      |             |   |
| MPP5      | ENSG00000072415             | 8                                     | 0.716507761                 | 1                | 1           | 0.716507761                 |                  |             |   |
|           |                             | Brain_Nucleus_accumbens_basal_ganglia |                             | 0.716507761      |             |                             |                  |             |   |
|           |                             | Brain_Nucleus_accumbens_basal_ganglia | 1                           | 1                | 1           | 0.363130019                 |                  |             |   |
|           |                             | 0.363130019                           | 0.363130019                 | NA               | 1           | 0                           | 0.998207054      |             |   |
| RBM20     | ENSG00000203867             | 7                                     | 0.716581532                 | 6                | 6           | 0.234713939                 |                  |             |   |
|           |                             | Brain_Putamen_basal_ganglia           |                             | 0.963512026      |             | Brain_Hypothalamus          | 2.394492335      |             |   |
|           |                             | 0.313952872                           | 0.313952872                 | -0.505987388     |             | 1.188303296                 | 0.194387437      |             |   |
|           |                             | 0.701404761                           | 6                           | 0                | 0.998207054 |                             |                  |             |   |
| TOR1A     | ENSG00000136827             | 11                                    | 0.716673942                 | 3                | 2           | 0.403992736                 | Brain_Cortex     |             |   |
|           |                             | 0.532022886                           | Brain_Cerebellum            | 2.830362041      |             | 0.030808148                 | 0.138829811      |             |   |
|           |                             | 0.624921034                           | 0.834511631                 | 0.705252135      |             | 0.113037806                 | 2                | 0           |   |
|           |                             | 0.998207054                           |                             |                  |             |                             |                  |             |   |
| PACRGL    | ENSG00000163138             | 18                                    | 0.716715343                 | 12               | 2           | 0.305646263                 |                  |             |   |
|           |                             | Brain_Cortex                          |                             | 0.827740075      |             | Brain_Substantia_nigra      | 10.38889371      |             |   |
|           |                             | 0.026384036                           | 0.447515679                 | 0.217600911      |             | 1.024400252                 | 0.759219142      |             |   |
|           |                             | 0.259012395                           | 2                           | 0                | 0.998207054 |                             |                  |             |   |
| USP6      | ENSG00000129204             | 16                                    | 0.716722795                 | 5                | 5           | 0.356459626                 |                  |             |   |
|           |                             | Brain_Caudate_basal_ganglia           |                             | 0.961815113      |             | Brain_Cortex                | 1.510284798      |             |   |
|           |                             | 0.534389778                           | 0.534389778                 | -0.440271819     |             | 0.922132194                 | 0.390744386      |             |   |
|           |                             | 0.600350805                           | 5                           | 0                | 0.998207054 |                             |                  |             |   |
| PNMAL1    | ENSG00000182013             | 17                                    | 0.716759461                 | 13               | 2           | 0.528806576                 |                  |             |   |
|           |                             | Brain_Spinal_cord_cervical_c-1        |                             | 0.997067657      |             | Brain_Cerebellum            | 11.53848709      |             |   |
|           |                             | 0.000214255                           | 0.685201227                 | -0.191163249     |             | 0.629828838                 | 0.067433848      |             |   |
|           |                             | 0.212827153                           | 2                           | 0                | 0.998207054 |                             |                  |             |   |
| LRRC23    | ENSG00000010626             | 14                                    | 0.716844211                 | 10               | 4           | 0.212922529                 |                  |             |   |
|           |                             | Brain_Frontal_Cortex_BA9              |                             | 0.949510169      |             | Brain_Putamen_basal_ganglia |                  |             |   |
|           |                             | 7.344686026                           | 0.000538383                 | 0.366118793      |             | 0.06332191                  | 1.245569382      |             |   |
|           |                             | 0.548392068                           | 0.36239784                  | 4                | 0           | 0.998207054                 |                  |             |   |
| CAV1      | ENSG00000105974             | 11                                    | 0.716847785                 | 3                | 3           | 0.499354061                 |                  |             |   |
|           |                             | Brain_Hippocampus                     |                             | 0.62391442       |             | Brain_Cerebellar_Hemisphere | 1.525834151      |             |   |
|           |                             | 0.698599828                           | 0.698599828                 | -0.67550644      |             | 0.490310187                 | -0.272632939     |             |   |
|           |                             | 0.661074658                           | 3                           | 0                | 0.998207054 |                             |                  |             |   |
| WDR1      | ENSG00000071127             | 16                                    | 0.717086201                 | 2                | 2           | 0.644861407                 |                  |             |   |
|           |                             | Brain_Frontal_Cortex_BA9              |                             | 0.66120341       |             | Brain_Cortex                | 1.392046999      |             |   |
|           |                             | 0.607953001                           | 0.607953001                 | -0.460912466     |             | 0.438252286                 | -0.01133009      |             |   |
|           |                             | 0.635805494                           | 2                           | 0                | 0.998207054 |                             |                  |             |   |
| GINS1     | ENSG00000101003             | 9                                     | 0.717272639                 | 1                | 1           | 0.717272639                 | Brain_Amygdala   |             |   |
|           |                             | 0.717272639                           | Brain_Amygdala              | 1                | 1           | 1                           | 0.362106242      | 0.362106242 |   |
|           |                             | 0.362106242                           | NA                          | 1                | 0           | 0.998207054                 |                  |             |   |
| MEST      | ENSG00000106484             | 14                                    | 0.717298194                 | 5                | 4           | 0.526959089                 |                  |             |   |
|           |                             | Brain_Cerebellar_Hemisphere           |                             | 0.86795736       |             | Brain_Cerebellum            | 3.945912731      |             |   |
|           |                             | 0.068662832                           | 0.192163446                 | -0.227335892     |             | 0.632654806                 | 0.125320528      |             |   |
|           |                             | 0.34506134                            | 4                           | 0                | 0.998207054 |                             |                  |             |   |
| TMEM121   | ENSG00000184986             | 10                                    | 0.717394235                 | 1                | 1           | 0.717394235                 |                  |             |   |
|           |                             | Brain_Hippocampus                     |                             | 0.717394235      |             | Brain_Hippocampus           | 1                | 1           | 1 |
|           |                             | -0.361943523                          | -0.361943523                | -0.361943523     | NA          | 1                           | 0                | 0.998207054 |   |
| SLFN1     | ENSG00000171790             | 15                                    | 0.717406055                 | 2                | 1           | 0.591929465                 |                  |             |   |
|           |                             | Brain_Cerebellar_Hemisphere           |                             | 0.855990391      |             | Brain_Cerebellum            | 1.965158419      |             |   |
|           |                             | 0.034841581                           | 1.965158419                 | -0.536042085     |             | -0.181480559                | -0.358761322     |             |   |
|           |                             | 0.25071286                            | 1                           | 0                | 0.998207054 |                             |                  |             |   |
| RP11-80H  | 18.4                        | ENSG00000273493                       | 1                           | 0.717408447      | 3           | 3                           | 0.435210116      |             |   |



|               |                                       |                                |                                |              |                             |              |                  |
|---------------|---------------------------------------|--------------------------------|--------------------------------|--------------|-----------------------------|--------------|------------------|
|               | Brain_Cerebellar_Hemisphere           | 0.972288288                    |                                |              | Brain_Putamen_basal_ganglia |              |                  |
|               | 1.716711906                           | 0.25903371                     | 0.25903371                     | -0.780307132 | 0.145505704                 |              |                  |
|               | -0.200020987                          | 0.505585158                    | 3                              | 0            | 0.998207054                 |              |                  |
| TNFRSF19      | ENSG00000127863.15                    | 0.717414548                    |                                |              | 2                           | 2            | 0.4550517        |
|               | Brain_Nucleus_accumbens_basal_ganglia | 0.799273944                    |                                |              |                             |              | Brain_Cerebellum |
|               | 1.093845124                           | 0.906154876                    | 0.906154876                    | -0.747019649 |                             |              | 0.254286868      |
|               | -0.24636639                           | 0.708030628                    | 2                              | 0            | 0.998207054                 |              |                  |
| UBXN8         | ENSG00000104691.14                    | 0.717443061                    | 3                              | 3            | 0.318096987                 |              | Brain_Cortex     |
|               | 0.820456161                           | Brain_Cerebellum               | 1.328126398                    |              | 0.656690873                 |              | 0.656690873      |
|               | -0.998376165                          | 0.226958309                    | -0.433038552                   | 0.618127352  | 3                           | 0            |                  |
|               | 0.998207054                           |                                |                                |              |                             |              |                  |
| SLC6A12       | ENSG00000111181.12                    | 0.717468863                    | 2                              | 2            | 0.527788537                 |              |                  |
|               | Brain_Cerebellar_Hemisphere           | 0.623539543                    |                                |              | Brain_Hypothalamus          |              | 1.037952086      |
|               | 0.962047914                           | 0.962047914                    | -0.490840104                   | 0.631385435  |                             |              | 0.070272666      |
|               | 0.793533289                           | 2                              | 0                              | 0.998207054  |                             |              |                  |
| ARSI          | ENSG00000183876.8                     | 0.717489764                    | 6                              | 6            | 0.206555308                 |              |                  |
|               | Brain_Spinal_cord_cervical_c-1        | 0.879159622                    |                                |              | Brain_Substantia_nigra      |              |                  |
|               | 1.591680583                           | 0.531293158                    | 0.531293158                    | -1.263094257 | 0.583684003                 |              |                  |
|               | -0.511015183                          | 0.714493259                    | 6                              | 0            | 0.998207054                 |              |                  |
| RAB3IP        | ENSG00000127328.21                    | 0.717628066                    | 5                              | 3            | 0.295026162                 |              |                  |
|               | Brain_Cortex                          | 0.746324484                    | Brain_Spinal_cord_cervical_c-1 | 3.161500409  |                             |              |                  |
|               | 0.050363904                           | 0.65064076                     | -0.54142146                    | 1.047159195  | 0.459789094                 |              |                  |
|               | 0.615911491                           | 3                              | 0                              | 0.998207054  |                             |              |                  |
| LINC00368     | ENSG00000225870.1                     | 0.71763445                     | 1                              | 1            | 0.71763445                  |              | Brain_Amygdala   |
|               | 0.71763445                            | Brain_Amygdala                 | 1                              | 1            | 1                           | -0.361622097 | -0.361622097     |
|               | -0.361622097                          | NA                             | 1                              | 0            | 0.998207054                 |              |                  |
| RP11-60A8.1   | ENSG00000249743.5                     | 0.718065072                    | 4                              | 4            | 0.268863408                 |              |                  |
|               | Brain_Anterior_cingulate_cortex_BA24  | 0.982541214                    |                                |              | Brain_Frontal_Cortex_BA9    |              |                  |
|               | 1.215653338                           | 0.826093964                    | 0.826093964                    | -0.631030455 | 1.105683791                 |              |                  |
|               | -0.022815984                          | 0.798979738                    | 4                              | 0            | 0.998207054                 |              |                  |
| RP11-709A23.1 | ENSG00000248100.2                     | 0.718116156                    | 2                              | 2            | 0.420396588                 |              |                  |
|               | Brain_Hippocampus                     | 0.809955077                    | Brain_Amygdala                 | 1.158524241  |                             |              |                  |
|               | 0.841475759                           | 0.841475759                    | 0.240483985                    | 0.805733397  | 0.523108691                 |              |                  |
|               | 0.399691692                           | 2                              | 0                              | 0.998207054  |                             |              |                  |
| SERF1A        | ENSG00000172058.15                    | 0.718161419                    | 13                             | 1            | 0.657368768                 |              |                  |
|               | Brain_Nucleus_accumbens_basal_ganglia | 0.865522536                    |                                |              | Brain_Hippocampus           |              |                  |
|               | 12.865165                             | 4.12E-19                       | 12.865165                      | -0.443548885 | -0.169348491                | -0.358548986 |                  |
|               | 0.090949786                           | 1                              | 0                              | 0.998207054  |                             |              |                  |
| NBPF1         | ENSG00000219481.10                    | 0.718239624                    | 13                             | 11           | 0.070146839                 |              | Brain_Cortex     |
|               | 0.980952135                           | Brain_Cerebellum               | 4.40602785                     | 0.119642297  | 0.421974591                 |              |                  |
|               | -1.810961321                          | 0.820483945                    | -0.237953151                   | 0.785278094  | 11                          | 0            |                  |
|               | 0.998207054                           |                                |                                |              |                             |              |                  |
| KDSR          | ENSG00000119537.15                    | 0.718242743                    | 4                              | 4            | 0.156608405                 |              |                  |
|               | Brain_Cerebellar_Hemisphere           | 0.878256186                    |                                |              | Brain_Caudate_basal_ganglia |              |                  |
|               | 1.620991472                           | 0.382070167                    | 0.382070167                    | -1.416570957 | -0.153180182                |              |                  |
|               | -0.638080439                          | 0.591015555                    | 4                              | 0            | 0.998207054                 |              |                  |
| TSC22D4       | ENSG00000166925.8                     | 0.718305814                    | 1                              | 1            | 0.718305814                 |              |                  |
|               | Brain_Putamen_basal_ganglia           | 0.718305814                    | Brain_Putamen_basal_ganglia    | 1            | 1                           |              |                  |
|               | 1                                     | -0.360723957                   | -0.360723957                   | -0.360723957 | NA                          | 1            | 0                |
|               | 0.998207054                           |                                |                                |              |                             |              |                  |
| DRAM1         | ENSG00000136048.13                    | 0.718413604                    | 6                              | 4            | 0.136928139                 |              | Brain_Cerebellum |
|               | 0.705288049                           | Brain_Spinal_cord_cervical_c-1 | 4.012805319                    |              | 0.022103584                 |              |                  |
|               | 0.454249213                           | -1.487328242                   | -0.378191891                   | -1.038074236 | 0.39093825                  | 4            |                  |
|               | 0                                     | 0.998207054                    |                                |              |                             |              |                  |
| UPB1          | ENSG00000100024.14                    | 0.718459203                    | 9                              | 5            | 0.284159561                 |              | Brain_Amygdala   |
|               | 0.852859297                           | Brain_Cortex                   | 5.820968409                    | 0.000178595  | 0.247447133                 |              |                  |
|               | -1.071021947                          | 0.946862363                    | 0.328614512                    | 0.70344207   | 5                           | 0            |                  |
|               | 0.998207054                           |                                |                                |              |                             |              |                  |
| NUAK1         | ENSG00000074590.13                    | 0.718637705                    | 3                              | 3            | 0.286920865                 |              |                  |
|               | Brain_Anterior_cingulate_cortex_BA24  | 0.942973355                    |                                |              | Brain_Cerebellum            |              |                  |
|               | 1.849634298                           | 0.1562495                      | 0.1562495                      | -0.071533259 | 1.064900708                 |              |                  |
|               | 0.388280306                           | 0.598434996                    | 3                              | 0            | 0.998207054                 |              |                  |

|             |                                       |                                       |              |             |              |                                       |
|-------------|---------------------------------------|---------------------------------------|--------------|-------------|--------------|---------------------------------------|
| CCDC125     | ENSG00000183323.12                    | 0.718658549                           | 7            | 5           | 0.296090172  |                                       |
|             | Brain_Cerebellar_Hemisphere           | 0.771372383                           |              |             |              | Brain_Anterior_cingulate_cortex_BA24  |
|             | 3.775432929                           | 0.042353704                           | 0.176778552  |             | -0.894935141 | 1.044854607                           |
|             | -0.094988917                          | 0.806318983                           | 5            | 0           | 0.998207054  |                                       |
| PYROXD2     | ENSG00000119943.12                    | 0.71871459                            | 12           | 2           | 0.273866781  | Brain_Cerebellum                      |
|             | 0.883900017                           | Brain_Nucleus_accumbens_basal_ganglia | 10.84325402  |             |              |                                       |
|             | 0.004721605                           | 0.428854468                           | -0.207291403 |             | 1.094201118  | 0.309078884                           |
|             | 0.311882533                           | 2                                     | 0            | 0.998207054 |              |                                       |
| CD82        | ENSG00000085117.11                    | 0.718727343                           | 8            | 8           | 0.131922464  |                                       |
|             | Brain_Putamen_basal_ganglia           | 0.919202241                           |              |             |              | Brain_Caudate_basal_ganglia           |
|             | 1.839899181                           | 0.399176052                           | 0.399176052  |             | -0.506389695 | 1.506563947                           |
|             | 0.486532901                           | 0.692590963                           | 8            | 0           | 0.998207054  |                                       |
| AP000688.29 | ENSG00000233393.1                     | 0.718828088                           | 12           | 7           | 0.068624532  |                                       |
|             | Brain_Putamen_basal_ganglia           | 0.887507027                           |              |             |              | Brain_Substantia_nigra                |
|             | 6.830497272                           | 0.05398068                            | 0.277488774  |             | -1.820883738 | 0.141459405                           |
|             | -0.87632929                           | 0.513721127                           | 7            | 0           | 0.998207054  |                                       |
| ORC3        | ENSG00000135336.14                    | 0.718838235                           | 2            | 2           | 0.531752725  |                                       |
|             | Brain_Cerebellar_Hemisphere           | 0.628396476                           |              |             |              | Brain_Cerebellum                      |
|             | 0.945492251                           | 0.945492251                           | -0.483985054 |             | 0.625332695  | 0.070673821                           |
|             | 0.784406103                           | 2                                     | 0            | 0.998207054 |              |                                       |
| LINC01508   | ENSG00000231107.1                     | 0.71884162                            | 5            | 4           | 0.528381949  | Brain_Cortex                          |
|             | 0.897261436                           | Brain_Frontal_Cortex_BA9              | 2.898672112  |             | 0.040110971  |                                       |
|             | 0.16336869                            | -0.173305012                          | 0.630477914  |             | 0.238038857  | 0.305175559                           |
|             | 0                                     | 0.998207054                           |              |             |              | 4                                     |
| KIAA1191    | ENSG00000122203.14                    | 0.718847063                           | 2            | 2           | 0.458839242  |                                       |
|             | Brain_Putamen_basal_ganglia           | 0.799705136                           |              |             |              | Brain_Nucleus_accumbens_basal_ganglia |
|             | 1.105702018                           | 0.894297982                           | 0.894297982  |             | -0.740759555 | 0.253728731                           |
|             | -0.243515412                          | 0.703209411                           | 2            | 0           | 0.998207054  |                                       |
| LINC01268   | ENSG00000227502.2                     | 0.71895147                            | 1            | 1           | 0.71895147   |                                       |
|             | Brain_Nucleus_accumbens_basal_ganglia | 0.71895147                            |              |             |              |                                       |
|             | Brain_Nucleus_accumbens_basal_ganglia | 1                                     | 1            | 1           | -0.359860483 |                                       |
|             | -0.359860483                          | -0.359860483                          | NA           | 1           | 0            | 0.998207054                           |
| ANO5        | ENSG00000171714.10                    | 0.719053858                           | 10           | 7           | 0.212827863  |                                       |
|             | Brain_Spinal_cord_cervical_c-1        | 0.932388546                           |              |             |              | Brain_Amygdala                        |
|             | 0.009357213                           | 0.284355966                           | -1.19728887  |             | 1.245827142  | 5.307531012                           |
|             | 0.789862257                           | 7                                     | 0            | 0.998207054 |              | 0.292733192                           |
| GALNT9      | ENSG00000182870.12                    | 0.719161412                           | 3            | 3           | 0.36369337   |                                       |
|             | Brain_Cerebellar_Hemisphere           | 0.863348415                           |              |             |              | Brain_Cerebellum                      |
|             | 0.838789602                           | 0.838789602                           | -0.616160369 |             | 0.908349931  | 1.161607918                           |
|             | 0.7840823                             | 3                                     | 0            | 0.998207054 |              | 0.040025403                           |
| PCSK9       | ENSG00000169174.10                    | 0.719167523                           | 2            | 2           | 0.470003529  |                                       |
|             | Brain_Cerebellar_Hemisphere           | 0.953579546                           |              |             |              | Brain_Cerebellum                      |
|             | 0.60853445                            | -0.058212271                          | 0.72247331   | 0.33213052  | 0.552028069  | 1.39146555                            |
|             | 0.998207054                           |                                       |              |             |              | 0.60853445                            |
|             |                                       |                                       |              |             |              | 2                                     |
|             |                                       |                                       |              |             |              | 0                                     |
| ZNF525      | ENSG00000203326.11                    | 0.719174075                           | 6            | 6           | 0.08215918   |                                       |
|             | Brain_Caudate_basal_ganglia           | 0.995532788                           |              |             |              | Brain_Frontal_Cortex_BA9              |
|             | 1.897000476                           | 0.381263176                           | 0.381263176  |             | 0.005598849  | 1.738293107                           |
|             | 0.667374402                           | 0.631648742                           | 6            | 0           | 0.998207054  |                                       |
| RP11-85A1.3 | ENSG00000260475.1                     | 0.719293343                           | 5            | 5           | 0.407456738  |                                       |
|             | Brain_Substantia_nigra                | 0.925801565                           |              |             |              | Brain_Caudate_basal_ganglia           |
|             | 2.910762804                           | 0.171458971                           | 0.171458971  |             | -0.801918607 | 0.828377513                           |
|             | -0.1170275                            | 0.620668607                           | 5            | 0           | 0.998207054  |                                       |
| C9orf16     | ENSG00000171159.4                     | 0.719294191                           | 2            | 2           | 0.54823369   |                                       |
|             | Brain_Nucleus_accumbens_basal_ganglia | 0.584189693                           |              |             |              | Brain_Amygdala                        |
|             | 0.99842806                            | 0.99842806                            | 0.547275179  | 0.600409002 | 0.57384209   | 1.00157194                            |
|             | 2                                     | 0                                     | 0.998207054  |             |              | 0.037571286                           |
| MFSD4B      | ENSG00000173214.5                     | 0.719347929                           | 4            | 3           | 0.531703381  |                                       |
|             | Brain_Nucleus_accumbens_basal_ganglia | 0.950490858                           |              |             |              | Brain_Cerebellar_Hemisphere           |
|             | 3.18485319                            | 0.029434261                           | 0.231471693  |             | -0.389901049 | 0.625407895                           |
|             | -0.030084123                          | 0.458142504                           | 3            | 0           | 0.998207054  |                                       |
| CBLN1       | ENSG00000102924.11                    | 0.719591047                           | 2            | 2           | 0.455842202  | Brain_Cerebellum                      |
|             | 0.759799324                           | Brain_Substantia_nigra                | 1.018331924  |             | 0.981668076  |                                       |

|               |                                |                             |              |                                       |              |                  |
|---------------|--------------------------------|-----------------------------|--------------|---------------------------------------|--------------|------------------|
|               | 0.981668076                    | -0.745710688                | -0.305744323 | -0.525727505                          | 0.3111032    | 2                |
|               | 0                              | 0.998207054                 |              |                                       |              |                  |
| TET1          | ENSG00000138336.8              | 0.719606832                 | 1            | 1                                     | 0.719606832  |                  |
|               | Brain_Cerebellar_Hemisphere    | 0.719606832                 |              | Brain_Cerebellar_Hemisphere           | 1            | 1                |
|               | 1                              | 0.358984304                 | 0.358984304  | 0.358984304                           | NA           | 1                |
|               | 0.998207054                    |                             |              |                                       | 0            |                  |
| EXPH5         | ENSG00000110723.11             | 0.719607876                 | 2            | 2                                     | 0.417234812  |                  |
|               | Brain_Frontal_Cortex_BA9       | 0.677029601                 |              | Brain_Anterior_cingulate_cortex_BA24  |              |                  |
|               | 1.516232245                    | 0.483767755                 | 0.483767755  | -0.811227889                          | -0.41651991  |                  |
|               | -0.6138739                     | 0.279100689                 | 2            | 0                                     | 0.998207054  |                  |
| SCARB2        | ENSG00000138760.9              | 0.719665776                 | 3            | 3                                     | 0.295748886  |                  |
|               | Brain_Cerebellum               | 0.797357442                 |              | Brain_Putamen_basal_ganglia           | 1.779910084  |                  |
|               | 0.234166274                    | 0.234166274                 | -1.045593208 | 0.516847096                           | -0.090659184 |                  |
|               | 0.837158559                    | 3                           | 0            | 0.998207054                           |              |                  |
| EGFLAM        | ENSG00000164318.17             | 0.7196739                   | 1            | 1                                     | 0.7196739    |                  |
|               | Brain_Cerebellar_Hemisphere    | 0.7196739                   |              | Brain_Cerebellar_Hemisphere           | 1            | 1                |
|               | 0.358894653                    | 0.358894653                 | 0.358894653  | NA                                    | 1            | 0                |
|               |                                |                             |              |                                       | 0.998207054  |                  |
| KLHL5         | ENSG00000109790.16             | 0.719820857                 | 2            | 2                                     | 0.428856736  |                  |
|               | Brain_Cerebellar_Hemisphere    | 0.830351297                 |              | Brain_Spinal_cord_cervical_c-1        |              |                  |
|               | 1.046403001                    | 0.953596999                 | 0.953596999  | -0.214251038                          | 0.791149535  |                  |
|               | 0.288449248                    | 0.710925563                 | 2            | 0                                     | 0.998207054  |                  |
| RNF19B        | ENSG00000116514.16             | 0.719917889                 | 1            | 1                                     | 0.719917889  |                  |
|               | Brain_Spinal_cord_cervical_c-1 | 0.719917889                 |              | Brain_Spinal_cord_cervical_c-1        |              |                  |
|               | 1                              | 1                           | 1            | 0.358568534                           | 0.358568534  | 0.358568534      |
|               |                                |                             |              |                                       | NA           | 1                |
|               | 0.998207054                    |                             |              |                                       | 0            |                  |
| CHRN1         | ENSG00000170175.10             | 0.719957605                 | 11           | 4                                     | 0.338655163  |                  |
|               | Brain_Hypothalamus             | 0.981823382                 |              | Brain_Nucleus_accumbens_basal_ganglia |              |                  |
|               | 8.209746942                    | 0.001669587                 | 0.360613239  | -0.390239454                          | 0.956825849  |                  |
|               | 0.28670881                     | 0.414522374                 | 4            | 0                                     | 0.998207054  |                  |
| MYO1C         | ENSG00000197879.14             | 0.720175953                 | 1            | 1                                     | 0.720175953  | Brain_Cerebellum |
|               | 0.720175953                    | Brain_Cerebellum            | 1            | 1                                     | 0.358223646  | 0.358223646      |
|               | 0.358223646                    | NA                          | 1            | 0                                     | 0.998207054  |                  |
| CALCB         | ENSG00000175868.13             | 0.720189037                 | 2            | 1                                     | 0.663307621  | Brain_Cerebellum |
|               | 0.787408224                    | Brain_Cerebellar_Hemisphere | 1.936946254  | 0.063053746                           |              |                  |
|               | 1.936946254                    | 0.269677692                 | 0.43535107   | 0.352514381                           | 0.117148769  | 1                |
|               | 0                              | 0.998207054                 |              |                                       |              |                  |
| SOX1          | ENSG00000182968.4              | 0.720224736                 | 1            | 1                                     | 0.720224736  | Brain_Cortex     |
|               | 0.720224736                    | Brain_Cortex                | 1            | 1                                     | 1            | -0.358158455     |
|               | -0.358158455                   | NA                          | 1            | 0                                     | 0.998207054  | -0.358158455     |
| TMEM14A       | ENSG00000096092.5              | 0.720357992                 | 1            | 1                                     | 0.720357992  |                  |
|               | Brain_Frontal_Cortex_BA9       | 0.720357992                 |              | Brain_Frontal_Cortex_BA9              | 1            | 1                |
|               | 1                              | 0.357980386                 | 0.357980386  | 0.357980386                           | NA           | 1                |
|               | 0.998207054                    |                             |              |                                       | 0            |                  |
| ZNF676        | ENSG00000196109.6              | 0.720417339                 | 1            | 1                                     | 0.720417339  |                  |
|               | Brain_Amygdala                 | 0.720417339                 |              | Brain_Amygdala                        | 1            | 1                |
|               | 0.357901085                    | 0.357901085                 | NA           | 1                                     | 0            | 0.357901085      |
|               |                                |                             |              |                                       | 0.998207054  |                  |
| RP11-536O18.1 | ENSG00000226197.2              | 0.720461681                 | 1            | 1                                     | 0.720461681  |                  |
|               | Brain_Spinal_cord_cervical_c-1 | 0.720461681                 |              | Brain_Spinal_cord_cervical_c-1        |              |                  |
|               | 1                              | 1                           | 1            | -0.357841836                          | -0.357841836 | -0.357841836     |
|               |                                |                             |              |                                       | NA           | 1                |
|               | 0.998207054                    |                             |              |                                       | 0            |                  |
| RUVBL1        | ENSG00000175792.11             | 0.720494585                 | 1            | 1                                     | 0.720494585  |                  |
|               | Brain_Hippocampus              | 0.720494585                 |              | Brain_Hippocampus                     | 1            | 1                |
|               | -0.35779787                    | -0.35779787                 | -0.35779787  | NA                                    | 1            | 0                |
|               |                                |                             |              |                                       | 0.998207054  |                  |
| LINC00880     | ENSG00000243629.1              | 0.720525587                 | 3            | 3                                     | 0.471438897  |                  |
|               | Brain_Cerebellar_Hemisphere    | 0.975662443                 |              | Brain_Substantia_nigra                | 1.84650582   |                  |
|               | 0.409387149                    | 0.409387149                 | -0.338957624 | 0.720139846                           | 0.116891629  |                  |
|               | 0.544717086                    | 3                           | 0            | 0.998207054                           |              |                  |
| MROH1         | ENSG00000179832.17             | 0.720658887                 | 2            | 2                                     | 0.433051828  | Brain_Cerebellum |
|               | 0.599919785                    | Brain_Cerebellar_Hemisphere | 1.817119389  | 0.182880611                           |              |                  |
|               | 0.182880611                    | 0.52451587                  | 0.783980031  | 0.65424795                            | 0.183468868  | 2                |
|               | 0.998207054                    |                             |              |                                       |              | 0                |
| EMC8          | ENSG00000131148.8              | 0.72067029                  | 1            | 1                                     | 0.72067029   |                  |

|               |                                      |                             |              |              |                             |             |             |                                |                  |
|---------------|--------------------------------------|-----------------------------|--------------|--------------|-----------------------------|-------------|-------------|--------------------------------|------------------|
|               | Brain_Anterior_cingulate_cortex_BA24 | 0.72067029                  |              |              |                             |             |             |                                |                  |
|               | Brain_Anterior_cingulate_cortex_BA24 | 1                           | 1            | 1            | -0.357563109                |             |             |                                |                  |
|               | -0.357563109                         | -0.357563109                | NA           | 1            | 0                           | 0.998207054 |             |                                |                  |
| FAM228B       | ENSG00000219626.8                    | 0.720692342                 |              |              | 12                          | 1           | 0.495777985 |                                |                  |
|               | Brain_Caudate_basal_ganglia          | 0.797786832                 |              |              |                             |             |             | Brain_Hypothalamus             | 10.96347679      |
|               | 9.25E-05                             | 10.96347679                 | -0.485336142 |              | 0.681147783                 |             |             | 0.335454134                    |                  |
|               | 0.355981495                          | 1                           | 0            |              | 0.998207054                 |             |             |                                |                  |
| CTD-2526A2.2  | ENSG00000260369.2                    | 0.720756752                 |              |              | 1                           | 1           | 0.720756752 |                                |                  |
|               | Brain_Caudate_basal_ganglia          | 0.720756752                 |              |              |                             |             |             | Brain_Caudate_basal_ganglia    | 1                |
|               | 1                                    | -0.357447594                | -0.357447594 | -0.357447594 | NA                          | 1           | 0           |                                |                  |
|               | 0.998207054                          |                             |              |              |                             |             |             |                                |                  |
| GNG13         | ENSG00000127588.4                    | 0.720806992                 |              |              | 1                           | 1           | 0.720806992 |                                |                  |
|               | Brain_Putamen_basal_ganglia          | 0.720806992                 |              |              |                             |             |             | Brain_Putamen_basal_ganglia    | 1                |
|               | 1                                    | -0.357380474                | -0.357380474 | -0.357380474 | NA                          | 1           | 0           |                                |                  |
|               | 0.998207054                          |                             |              |              |                             |             |             |                                |                  |
| GNAI1         | ENSG00000127955.15                   | 0.720829502                 |              |              | 1                           | 1           | 0.720829502 |                                | Brain_Cerebellum |
|               | 0.720829502                          | Brain_Cerebellum            | 1            | 1            | 1                           | 0.357350402 |             | 0.357350402                    |                  |
|               | 0.357350402                          | NA                          | 1            | 0            | 0.998207054                 |             |             |                                |                  |
| CASP10        | ENSG00000003400.14                   | 0.720926316                 |              |              | 1                           | 1           | 0.720926316 |                                |                  |
|               | Brain_Anterior_cingulate_cortex_BA24 | 0.720926316                 |              |              |                             |             |             |                                |                  |
|               | Brain_Anterior_cingulate_cortex_BA24 | 1                           | 1            | 1            | 0.357221067                 |             |             |                                |                  |
|               | 0.357221067                          | 0.357221067                 | NA           | 1            | 0                           | 0.998207054 |             |                                |                  |
| RNF151        | ENSG00000179580.9                    | 0.720962998                 |              |              | 1                           | 1           | 0.720962998 |                                |                  |
|               | Brain_Cerebellum                     | 0.720962998                 |              |              | Brain_Cerebellum            | 1           | 1           |                                |                  |
|               | -0.357172064                         | -0.357172064                | NA           | 1            | 0                           | 0.998207054 |             |                                |                  |
| SMC2          | ENSG00000136824.18                   | 0.720963825                 |              |              | 13                          | 1           | 0.592335111 |                                |                  |
|               | Brain_Hippocampus                    | 0.859595063                 |              |              |                             |             |             | Brain_Hypothalamus             | 12.76962605      |
|               | 0.000263187                          | 12.76962605                 | -0.535455226 |              | -0.176889657                |             |             | -0.354305928                   |                  |
|               | 0.121784114                          | 1                           | 0            |              | 0.998207054                 |             |             |                                |                  |
| RP11-631N16.2 | ENSG00000257354.2                    | 0.721022202                 |              |              | 6                           | 6           | 0.098852839 |                                |                  |
|               | Brain_Cortex                         | 0.969475523                 |              |              | Brain_Frontal_Cortex_BA9    | 1.518719461 |             |                                |                  |
|               | 0.688500554                          | 0.688500554                 | -1.650440669 |              | 0.721324222                 |             |             | 0.034731312                    |                  |
|               | 0.864566328                          | 6                           | 0            |              | 0.998207054                 |             |             |                                |                  |
| ARL5B         | ENSG00000165997.4                    | 0.721037631                 |              |              | 3                           | 3           | 0.289073254 |                                | Brain_Cerebellum |
|               | 0.953509302                          | Brain_Cerebellar_Hemisphere | 1.088851658  |              | 0.847755102                 |             |             | 0.847755102                    |                  |
|               | 0.847755102                          | -0.058300459                | 1.060156837  |              | 0.450046116                 |             |             | 0.566130406                    |                  |
|               | 3                                    | 0                           | 0.998207054  |              |                             |             |             |                                |                  |
| H1FNT         | ENSG00000187166.1                    | 0.721143114                 |              |              | 8                           | 3           | 0.467171567 |                                |                  |
|               | Brain_Substantia_nigra               | 0.755024543                 |              |              | Brain_Cortex                | 6.486917192 |             |                                |                  |
|               | 0.000312416                          | 0.352101711                 | -0.727088787 |              | -0.312021028                |             |             | -0.457200927                   |                  |
|               | 0.157606491                          | 3                           | 0            |              | 0.998207054                 |             |             |                                |                  |
| HLA-DOB       | ENSG00000241106.6                    | 0.721313257                 |              |              | 13                          | 3           | 0.422972712 |                                |                  |
|               | Brain_Spinal_cord_cervical_c-1       | 0.961352402                 |              |              | Brain_Caudate_basal_ganglia |             |             |                                |                  |
|               | 10.71384893                          | 0.012302971                 | 0.525302163  |              | -0.801274566                |             |             | 0.564483692                    |                  |
|               | -0.019877923                         | 0.411071806                 | 3            | 0            | 0.998207054                 |             |             |                                |                  |
| E2F3          | ENSG00000112242.14                   | 0.721421188                 |              |              | 1                           | 1           | 0.721421188 |                                |                  |
|               | Brain_Spinal_cord_cervical_c-1       | 0.721421188                 |              |              |                             |             |             | Brain_Spinal_cord_cervical_c-1 |                  |
|               | 1                                    | 1                           | 1            | 0.356560051  | 0.356560051                 | 0.356560051 | NA          | 1                              | 0                |
|               | 0.998207054                          |                             |              |              |                             |             |             |                                |                  |
| IFT22         | ENSG00000128581.15                   | 0.72147841                  |              |              | 1                           | 1           | 0.72147841  |                                | Brain_Cerebellum |
|               | Brain_Cerebellum                     | 1                           | 1            | 1            | -0.356483629                |             |             | -0.356483629                   |                  |
|               | NA                                   | 1                           | 0            |              | 0.998207054                 |             |             |                                |                  |
| GIMAP7        | ENSG00000179144.4                    | 0.721479285                 |              |              | 1                           | 1           | 0.721479285 |                                |                  |
|               | Brain_Anterior_cingulate_cortex_BA24 | 0.721479285                 |              |              |                             |             |             |                                |                  |
|               | Brain_Anterior_cingulate_cortex_BA24 | 1                           | 1            | 1            | 0.356482461                 |             |             |                                |                  |
|               | 0.356482461                          | 0.356482461                 | NA           | 1            | 0                           | 0.998207054 |             |                                |                  |
| RP11-118G23.3 | ENSG00000283417.1                    | 0.721483761                 |              |              | 1                           | 1           | 0.721483761 |                                |                  |
|               | Brain_Frontal_Cortex_BA9             | 0.721483761                 |              |              | Brain_Frontal_Cortex_BA9    | 1           | 1           |                                |                  |
|               | 1                                    | 0.356476483                 | 0.356476483  | 0.356476483  | NA                          | 1           | 0           |                                |                  |
|               | 0.998207054                          |                             |              |              |                             |             |             |                                |                  |
| KRI1          | ENSG00000129347.19                   | 0.721494262                 |              |              | 13                          | 5           | 0.269758854 |                                |                  |
|               | Brain_Putamen_basal_ganglia          | 0.727183408                 |              |              | Brain_Cortex                | 9.92134749  |             |                                |                  |

|              |                                       |                                |                                |              |              |                  |             |   |   |
|--------------|---------------------------------------|--------------------------------|--------------------------------|--------------|--------------|------------------|-------------|---|---|
|              | 0.007276023                           | 0.404604376                    | -1.103618058                   | 0.589354262  | -0.563958283 |                  |             |   |   |
|              | 0.412464065                           | 5                              | 0                              | 0.998207054  |              |                  |             |   |   |
| SLC25A27     | ENSG00000153291.15                    | 0.721554479                    | 13                             | 5            | 0.111497145  |                  |             |   |   |
|              | Brain_Amygdala                        | 0.904484701                    | Brain_Spinal_cord_cervical_c-1 | 9.642984065  |              |                  |             |   |   |
|              | 0.006913627                           | 0.326361326                    | 0.11999804                     | 1.59149978   | 0.528504745  |                  |             |   |   |
|              | 0.370109941                           | 5                              | 0                              | 0.998207054  |              |                  |             |   |   |
| PLEKHM1      | ENSG00000225190.10                    | 0.721593377                    | 10                             | 3            | 0.311850378  |                  |             |   |   |
|              | Brain_Putamen_basal_ganglia           | 0.953697732                    | Brain_Cerebellar_Hemisphere    |              |              |                  |             |   |   |
|              | 8.273296895                           | 0.001704117                    | 0.409797403                    | -1.011347    | 0.243265401  |                  |             |   |   |
|              | -0.565014747                          | 0.379164523                    | 3                              | 0            | 0.998207054  |                  |             |   |   |
| POLD3        | ENSG00000077514.8                     | 0.721705367                    | 3                              | 3            | 0.343927803  |                  |             |   |   |
|              | Brain_Frontal_Cortex_BA9              | 0.885392042                    | Brain_Caudate_basal_ganglia    |              |              |                  |             |   |   |
|              | 1.247961112                           | 0.747830883                    | 0.747830883                    | -0.658636641 | 0.946432955  |                  |             |   |   |
|              | 0.047886334                           | 0.819583377                    | 3                              | 0            | 0.998207054  |                  |             |   |   |
| PRSS45       | ENSG00000188086.13                    | 0.721761002                    | 13                             | 2            | 0.220206271  |                  |             |   |   |
|              | Brain_Hippocampus                     | 0.853152901                    | Brain_Caudate_basal_ganglia    | 11.52041386  |              |                  |             |   |   |
|              | 0.001019732                           | 0.666371898                    | -1.225979815                   | -0.185097069 | -0.702117379 |                  |             |   |   |
|              | 0.298419007                           | 2                              | 0                              | 0.998207054  |              |                  |             |   |   |
| CFC1B        | ENSG00000152093.7                     | 0.721809649                    | 1                              | 1            | 0.721809649  |                  |             |   |   |
|              | Brain_Hypothalamus                    | 0.721809649                    | Brain_Hypothalamus             | 1            | 1            | 1                |             |   |   |
|              | 0.356041282                           | 0.356041282                    | 0.356041282                    | NA           | 1            | 0                | 0.998207054 |   |   |
| ATAD3B       | ENSG00000160072.19                    | 0.721847412                    | 10                             | 2            | 0.448716359  |                  |             |   |   |
|              | Brain_Cortex                          | 0.873523547                    | Brain_Cerebellar_Hemisphere    | 8.636879393  |              |                  |             |   |   |
|              | 0.000992267                           | 0.54546812                     | -0.210046701                   | 0.757556786  | 0.372820838  |                  |             |   |   |
|              | 0.273355344                           | 2                              | 0                              | 0.998207054  |              |                  |             |   |   |
| RP11-428J1.4 | ENSG00000271978.1                     | 0.721869622                    | 3                              | 3            | 0.295527993  |                  |             |   |   |
|              | Brain_Cortex                          | 0.859737106                    | Brain_Cerebellar_Hemisphere    | 1.103420453  |              |                  |             |   |   |
|              | 0.884128166                           | 0.884128166                    | 0.176708828                    | 1.046071565  | 0.554382187  |                  |             |   |   |
|              | 0.445755125                           | 3                              | 0                              | 0.998207054  |              |                  |             |   |   |
| RP11-61J19.5 | ENSG00000260805.2                     | 0.721937767                    | 1                              | 1            | 0.721937767  |                  |             |   |   |
|              | Brain_Nucleus_accumbens_basal_ganglia | 0.721937767                    |                                |              |              |                  |             |   |   |
|              | Brain_Nucleus_accumbens_basal_ganglia | 1                              | 1                              | 1            | -0.355870209 |                  |             |   |   |
|              | -0.355870209                          | -0.355870209                   | NA                             | 1            | 0            | 0.998207054      |             |   |   |
| ZNF689       | ENSG00000156853.12                    | 0.722084949                    | 1                              | 1            | 0.722084949  |                  |             |   |   |
|              | Brain_Nucleus_accumbens_basal_ganglia | 0.722084949                    |                                |              |              |                  |             |   |   |
|              | Brain_Nucleus_accumbens_basal_ganglia | 1                              | 1                              | 1            | -0.355673693 |                  |             |   |   |
|              | -0.355673693                          | -0.355673693                   | NA                             | 1            | 0            | 0.998207054      |             |   |   |
| RPL35A       | ENSG00000182899.14                    | 0.722090625                    | 1                              | 1            | 0.722090625  |                  |             |   |   |
|              | Brain_Frontal_Cortex_BA9              | 0.722090625                    | Brain_Frontal_Cortex_BA9       | 1            | 1            |                  |             |   |   |
|              | 1                                     | -0.355666114                   | -0.355666114                   | -0.355666114 | NA           | 1                | 0           |   |   |
|              | 0.998207054                           |                                |                                |              |              |                  |             |   |   |
| MMACHC       | ENSG00000132763.14                    | 0.722097411                    | 4                              | 3            | 0.331135669  |                  |             |   |   |
|              | Brain_Cerebellar_Hemisphere           | 0.870511319                    | Brain_Hypothalamus             | 1.760151908  |              |                  |             |   |   |
|              | 0.024792003                           | 0.667154428                    | -0.926495243                   | 0.971828913  | 0.113756556  |                  |             |   |   |
|              | 0.782838289                           | 3                              | 0                              | 0.998207054  |              |                  |             |   |   |
| LINC01388    | ENSG00000231808.2                     | 0.722123559                    | 2                              | 2            | 0.488164306  |                  |             |   |   |
|              | Brain_Substantia_nigra                | 0.66922185                     | Brain_Spinal_cord_cervical_c-1 | 1.02067082   |              |                  |             |   |   |
|              | 0.97932918                            | 0.97932918                     | -0.693231463                   | 0.427216217  | -0.133007623 |                  |             |   |   |
|              | 0.792276153                           | 2                              | 0                              | 0.998207054  |              |                  |             |   |   |
| RP11-377D9.3 | ENSG00000255621.1                     | 0.722230778                    | 12                             | 4            | 0.224195378  |                  |             |   |   |
|              | Brain_Spinal_cord_cervical_c-1        | 0.998102365                    | Brain_Cerebellar_Hemisphere    |              |              |                  |             |   |   |
|              | 9.296634603                           | 0.005174071                    | 0.447710014                    | -0.613909411 | 1.215447718  |                  |             |   |   |
|              | 0.139235979                           | 0.448175851                    | 4                              | 0            | 0.998207054  |                  |             |   |   |
| LDB2         | ENSG00000169744.12                    | 0.722337902                    | 1                              | 1            | 0.722337902  |                  |             |   |   |
|              | Brain_Spinal_cord_cervical_c-1        | 0.722337902                    | Brain_Spinal_cord_cervical_c-1 |              |              |                  |             |   |   |
|              | 1                                     | 1                              | 1                              | 0.355335982  | 0.355335982  | 0.355335982      | NA          | 1 | 0 |
|              | 0.998207054                           |                                |                                |              |              |                  |             |   |   |
| DHX58        | ENSG00000108771.12                    | 0.72246746                     | 3                              | 3            | 0.394784602  | Brain_Cerebellum |             |   |   |
|              | 0.96914728                            | Brain_Spinal_cord_cervical_c-1 | 2.423193361                    | 0.119559053  |              |                  |             |   |   |
|              | 0.119559053                           | -0.038677792                   | 0.850972548                    | 0.474255133  | 0.460201511  |                  |             |   |   |
|              | 3                                     | 0                              | 0.998207054                    |              |              |                  |             |   |   |
| LIN7A        | ENSG00000111052.7                     | 0.722570505                    | 3                              | 3            | 0.366338802  |                  |             |   |   |

|                |                                       |                                      |              |                             |              |                  |             |  |
|----------------|---------------------------------------|--------------------------------------|--------------|-----------------------------|--------------|------------------|-------------|--|
|                | Brain_Cerebellar_Hemisphere           | 0.993776967                          |              | Brain_Cerebellum            | 1.85311801   |                  |             |  |
|                | 0.408968474                           | 0.408968474                          | -0.007799495 | 0.903352574                 | 0.302468217  |                  |             |  |
|                | 0.520473869                           | 3                                    | 0            | 0.998207054                 |              |                  |             |  |
| AKAP6          | ENSG00000151320.10                    | 0.722632256                          | 1            | 1                           | 0.722632256  | Brain_Cerebellum |             |  |
|                | 0.722632256                           | Brain_Cerebellum                     | 1            | 1                           | 0.35494305   | 0.35494305       | 0.35494305  |  |
|                | NA                                    | 1                                    | 0            | 0.998207054                 |              |                  |             |  |
| HECTD1         | ENSG00000092148.12                    | 0.722651924                          | 1            | 1                           | 0.722651924  |                  |             |  |
|                | Brain_Putamen_basal_ganglia           | 0.722651924                          |              | Brain_Putamen_basal_ganglia | 1            | 1                |             |  |
|                | 1                                     | -0.354916798                         | -0.354916798 | -0.354916798                | NA           | 1                | 0           |  |
|                | 0.998207054                           |                                      |              |                             |              |                  |             |  |
| LINC02094      | ENSG00000227078.1                     | 0.722696768                          | 4            | 4                           | 0.163988813  |                  |             |  |
|                | Brain_Cerebellum                      | 0.917566975                          |              | Brain_Cerebellar_Hemisphere | 1.240895572  |                  |             |  |
|                | 0.717315849                           | 0.717315849                          | -0.217526019 | 1.391780711                 | 0.286333207  |                  |             |  |
|                | 0.749371204                           | 4                                    | 0            | 0.998207054                 |              |                  |             |  |
| SLC39A11       | ENSG00000133195.11                    | 0.722771869                          | 3            | 3                           | 0.277688248  |                  |             |  |
|                | Brain_Cerebellum                      | 0.893140923                          |              | Brain_Amygdala              | 1.348907524  | 0.633164862      |             |  |
|                | 0.633164862                           | -1.085527145                         | 0.134330896  | -0.539833692                | 0.619993576  |                  |             |  |
|                | 3                                     | 0                                    | 0.998207054  |                             |              |                  |             |  |
| ZNF565         | ENSG00000196357.11                    | 0.722773975                          | 7            | 2                           | 0.418588709  |                  |             |  |
|                | Brain_Nucleus_accumbens_basal_ganglia | 0.913392729                          |              | Brain_Cerebellum            |              |                  |             |  |
|                | 5.797964862                           | 0.000343651                          | 0.853095152  | 0.108760154                 | 0.808872117  |                  |             |  |
|                | 0.668682592                           | 0.251227006                          | 2            | 0                           | 0.998207054  |                  |             |  |
| 10-Mar         | ENSG00000173838.11                    | 0.722855542                          | 2            | 2                           | 0.420574894  |                  |             |  |
|                | Brain_Anterior_cingulate_cortex_BA24  | 0.97548032                           |              | Brain_Cortex                | 1.06242798   |                  |             |  |
|                | 0.93757202                            | 0.93757202                           | 0.0307357    | 0.805424264                 | 0.418079982  | 0.547787537      |             |  |
|                | 2                                     | 0                                    | 0.998207054  |                             |              |                  |             |  |
| URB2           | ENSG00000135763.9                     | 0.722962676                          | 2            | 2                           | 0.467175418  |                  |             |  |
|                | Brain_Caudate_basal_ganglia           | 0.735350227                          |              | Brain_Hypothalamus          | 1.01180069   |                  |             |  |
|                | 0.98819931                            | 0.98819931                           | 0.338017199  | 0.727082501                 | 0.53254985   | 0.275110713      |             |  |
|                | 2                                     | 0                                    | 0.998207054  |                             |              |                  |             |  |
| UFL1           | ENSG00000014123.9                     | 0.722979934                          | 3            | 3                           | 0.424476647  | Brain_Cerebellum |             |  |
|                | 0.966302973                           | Brain_Anterior_cingulate_cortex_BA24 | 2.168272013  |                             |              |                  |             |  |
|                | 0.228221809                           | 0.228221809                          | 0.042245522  | 0.798678862                 | 0.323816097  |                  |             |  |
|                | 0.413605189                           | 3                                    | 0            | 0.998207054                 |              |                  |             |  |
| CTD-2619J13.17 | ENSG00000268912.1                     | 0.723008267                          | 6            | 4                           | 0.184936546  |                  |             |  |
|                | Brain_Hippocampus                     | 0.64066433                           |              | Brain_Cerebellum            | 4.76179471   | 0.038657364      |             |  |
|                | 0.254207937                           | -1.325707669                         | -0.466770157 | -0.929606134                | 0.295994279  |                  |             |  |
|                | 4                                     | 0                                    | 0.998207054  |                             |              |                  |             |  |
| CCDC186        | ENSG00000165813.18                    | 0.723220668                          | 1            | 1                           | 0.723220668  |                  |             |  |
|                | Brain_Hippocampus                     | 0.723220668                          |              | Brain_Hippocampus           | 1            | 1                | 1           |  |
|                | -0.354157746                          | -0.354157746                         | -0.354157746 | NA                          | 1            | 0                | 0.998207054 |  |
| CHN1           | ENSG00000128656.13                    | 0.723353228                          | 3            | 2                           | 0.435340804  |                  |             |  |
|                | Brain_Substantia_nigra                | 0.903969309                          |              | Brain_Cerebellum            | 1.98022285   |                  |             |  |
|                | 0.035350479                           | 0.984426672                          | -0.780085069 | 0.133624475                 | -0.175270638 |                  |             |  |
|                | 0.523824842                           | 2                                    | 0            | 0.998207054                 |              |                  |             |  |
| METTL8         | ENSG00000123600.19                    | 0.723384705                          | 2            | 2                           | 0.437386708  |                  |             |  |
|                | Brain_Putamen_basal_ganglia           | 0.984320888                          |              | Brain_Amygdala              | 1.285616292  |                  |             |  |
|                | 0.714383708                           | 0.714383708                          | -0.019652117 | 0.776613713                 | 0.378480798  |                  |             |  |
|                | 0.563044968                           | 2                                    | 0            | 0.998207054                 |              |                  |             |  |
| ZNF318         | ENSG00000171467.15                    | 0.723428453                          | 2            | 2                           | 0.441782055  |                  |             |  |
|                | Brain_Hippocampus                     | 0.786829306                          |              | Brain_Putamen_basal_ganglia | 1.04462206   |                  |             |  |
|                | 0.95537794                            | 0.95537794                           | -0.769187425 | -0.270430204                | -0.519808815 |                  |             |  |
|                | 0.352674613                           | 2                                    | 0            | 0.998207054                 |              |                  |             |  |
| DAGLA          | ENSG00000134780.9                     | 0.723531575                          | 2            | 2                           | 0.772160242  | Brain_Cerebellum |             |  |
|                | 0.987877546                           | Brain_Cerebellar_Hemisphere          | 1.926022177  | 0.073977823                 |              |                  |             |  |
|                | 0.073977823                           | -0.289550367                         | 0.015193828  | -0.137178269                | 0.215486687  |                  |             |  |
|                | 2                                     | 0                                    | 0.998207054  |                             |              |                  |             |  |
| RP11-166P13.3  | ENSG00000263004.1                     | 0.72354379                           | 6            | 4                           | 0.401955533  |                  |             |  |
|                | Brain_Anterior_cingulate_cortex_BA24  | 0.985076512                          |              | Brain_Putamen_basal_ganglia |              |                  |             |  |
|                | 3.926679761                           | 1.41E-05                             | 0.184903461  | -0.493692909                | 0.838133851  |                  |             |  |
|                | -0.059187759                          | 0.522891602                          | 4            | 0                           | 0.998207054  |                  |             |  |
| FAM87B         | ENSG00000177757.2                     | 0.723589947                          | 2            | 2                           | 0.422833783  |                  |             |  |

|               |                                       |              |              |                             |             |              |             |  |
|---------------|---------------------------------------|--------------|--------------|-----------------------------|-------------|--------------|-------------|--|
|               | Brain_Cerebellar_Hemisphere           | 0.951238065  |              | Brain_Cerebellum            | 1.008642707 |              |             |  |
|               | 0.991357293                           | 0.991357293  | -0.061152115 | 0.801514622                 |             | 0.370181253  |             |  |
|               | 0.6099975                             | 2            | 0            | 0.998207054                 |             |              |             |  |
| WBSCR22       | ENSG00000071462.11                    | 0.723609951  | 7            | 2                           | 0.205702505 |              |             |  |
|               | Brain_Cortex                          | 0.787409642  |              | Brain_Putamen_basal_ganglia | 5.241040663 |              |             |  |
|               | 0.014353062                           | 1.350831857  | 0.269675849  | 1.265471093                 |             | 0.631967891  |             |  |
|               | 0.405175962                           | 2            | 0            | 0.998207054                 |             |              |             |  |
| CLEC3A        | ENSG00000166509.10                    | 0.723680466  | 2            | 1                           | 0.675784264 |              |             |  |
|               | Brain_Nucleus_accumbens_basal_ganglia | 0.773840968  |              | Brain_Caudate_basal_ganglia |             |              |             |  |
|               | 1.991459533                           | 0.008540467  | 1.991459533  | 0.287354406                 |             | 0.418222749  |             |  |
|               | 0.352788578                           | 0.092537893  | 1            | 0                           | 0.998207054 |              |             |  |
| RP11-94I2.4   | ENSG00000274372.4                     | 0.723731645  | 1            | 1                           | 0.723731645 |              |             |  |
|               | Brain_Putamen_basal_ganglia           | 0.723731645  |              | Brain_Putamen_basal_ganglia | 1           | 1            |             |  |
|               | 1                                     | 0.353475964  | 0.353475964  | 0.353475964                 | NA          | 1            | 0           |  |
|               | 0.998207054                           |              |              |                             |             |              |             |  |
| TBC1D17       | ENSG00000104946.12                    | 0.72379222   | 3            | 3                           | 0.314093261 |              |             |  |
|               | Brain_Nucleus_accumbens_basal_ganglia | 0.709713998  |              |                             |             |              |             |  |
|               | Brain_Anterior_cingulate_cortex_BA24  | 1.888600003  |              | 0.111027943                 |             |              |             |  |
|               | 0.111027943                           | -0.372240227 | 1.006670254  | 0.451969719                 |             | 0.727890802  |             |  |
|               | 3                                     | 0            | 0.998207054  |                             |             |              |             |  |
| RP11-849H4.2  | ENSG00000254469.7                     | 0.723873156  | 1            | 1                           | 0.723873156 |              |             |  |
|               | Brain_Cerebellar_Hemisphere           | 0.723873156  |              | Brain_Cerebellar_Hemisphere | 1           | 1            |             |  |
|               | 1                                     | -0.353287179 | -0.353287179 | -0.353287179                | NA          | 1            | 0           |  |
|               | 0.998207054                           |              |              |                             |             |              |             |  |
| POU5F1        | ENSG00000204531.17                    | 0.724010118  | 12           | 9                           | 0.282051821 |              |             |  |
|               | Brain_Hypothalamus                    | 0.904674416  |              | Brain_Cerebellum            | 6.66984715  | 0.024643168  |             |  |
|               | 0.228887783                           | -1.075721518 | 0.958970805  | 0.104796035                 |             | 0.637125027  |             |  |
|               | 9                                     | 0            | 0.998207054  |                             |             |              |             |  |
| RP11-66B24.2  | ENSG00000232386.9                     | 0.724018686  | 1            | 1                           | 0.724018686 |              |             |  |
|               | Brain_Cerebellum                      | 0.724018686  |              | Brain_Cerebellum            | 1           | 1            | 1           |  |
|               | 0.353093047                           | 0.353093047  | NA           | 1                           | 0           | 0.998207054  |             |  |
| PCK2          | ENSG00000100889.11                    | 0.724022606  | 3            | 3                           | 0.295916502 |              |             |  |
|               | Brain_Frontal_Cortex_BA9              | 0.846463215  |              | Brain_Hypothalamus          | 1.126365879 |              |             |  |
|               | 0.845329136                           | 0.845329136  | 0.193633054  | 1.045230388                 |             | 0.598575552  |             |  |
|               | 0.427328263                           | 3            | 0            | 0.998207054                 |             |              |             |  |
| RBM15B        | ENSG00000259956.1                     | 0.724265691  | 1            | 1                           | 0.724265691 |              |             |  |
|               | Brain_Hypothalamus                    | 0.724265691  |              | Brain_Hypothalamus          | 1           | 1            | 1           |  |
|               | -0.352763578                          | -0.352763578 | -0.352763578 | NA                          | 1           | 0            | 0.998207054 |  |
| HPN           | ENSG00000105707.13                    | 0.724319007  | 2            | 2                           | 0.423949018 |              |             |  |
|               | Brain_Hypothalamus                    | 0.930892153  |              | Brain_Putamen_basal_ganglia | 1.014010844 |              |             |  |
|               | 0.985989156                           | 0.985989156  | -0.086722423 | 0.799588904                 |             | 0.356433241  |             |  |
|               | 0.62671675                            | 2            | 0            | 0.998207054                 |             |              |             |  |
| RRP15         | ENSG00000067533.5                     | 0.724728155  | 13           | 9                           | 0.118049728 |              |             |  |
|               | Brain_Putamen_basal_ganglia           | 0.789141477  |              | Brain_Hypothalamus          | 6.763045379 |              |             |  |
|               | 0.000679086                           | 0.313723114  | -0.538958176 | 1.56301219                  |             | 0.452789605  |             |  |
|               | 0.585633968                           | 9            | 0            | 0.998207054                 |             |              |             |  |
| CDADC1        | ENSG00000102543.14                    | 0.72474154   | 5            | 2                           | 0.292193513 |              |             |  |
|               | Brain_Frontal_Cortex_BA9              | 0.80199043   |              | Brain_Cortex                | 3.783223313 |              |             |  |
|               | 0.022526556                           | 0.995039183  | -0.278505454 | 1.053321838                 |             | 0.550017336  |             |  |
|               | 0.554868523                           | 2            | 0            | 0.998207054                 |             |              |             |  |
| C19orf24      | ENSG00000228300.13                    | 0.724825807  | 4            | 4                           | 0.170678565 |              |             |  |
|               | Brain_Cerebellum                      | 0.798762403  |              | Brain_Hypothalamus          | 2.220366772 |              |             |  |
|               | 0.106842262                           | 0.106842262  | -1.370026708 | -0.254949112                |             | -0.881959883 |             |  |
|               | 0.472408964                           | 4            | 0            | 0.998207054                 |             |              |             |  |
| FAM174A       | ENSG00000174132.8                     | 0.724902178  | 1            | 1                           | 0.724902178 |              |             |  |
|               | Brain_Cortex                          | 0.724902178  |              | Brain_Cortex                | 1           | 1            | 1           |  |
|               | -0.351914775                          | -0.351914775 | NA           | 1                           | 0           | 0.998207054  |             |  |
| CTD-2587H19.3 | ENSG00000269873.1                     | 0.725177158  | 5            | 5                           | 0.234989177 |              |             |  |
|               | Brain_Putamen_basal_ganglia           | 0.881981706  |              | Brain_Cerebellum            | 2.803776922 |              |             |  |
|               | 0.147682311                           | 0.147682311  | 0.148457523  | 1.187604721                 |             | 0.67747316   |             |  |
|               | 0.384448142                           | 5            | 0            | 0.998207054                 |             |              |             |  |
| LINC00863     | ENSG00000224914.3                     | 0.725357068  | 3            | 3                           | 0.256326861 |              |             |  |

|             |                                       |                  |                             |                          |              |                                       |              |    |                  |
|-------------|---------------------------------------|------------------|-----------------------------|--------------------------|--------------|---------------------------------------|--------------|----|------------------|
|             | Brain_Cerebellum                      | 0.90927909       | Brain_Cortex                | 1.40065798               | 0.539127     | 0.539127                              |              |    |                  |
|             |                                       | -0.113947905     | 1.13511566                  | 0.442730891              | 0.635493533  | 3                                     | 0            |    |                  |
|             |                                       | 0.998207054      |                             |                          |              |                                       |              |    |                  |
| GP6         | ENSG00000088053                       | 11               | 0.725388533                 | 7                        | 6            | 0.160808686                           |              |    |                  |
|             | Brain_Cerebellar_Hemisphere           | 0.957311766      |                             |                          |              | Brain_Frontal_Cortex_BA9              |              |    |                  |
|             |                                       | 2.968649328      | 0.071094822                 | 0.21827613               | -1.402356937 | -0.053527317                          |              |    |                  |
|             |                                       | -0.784440476     | 0.589207637                 | 6                        | 0            | 0.998207054                           |              |    |                  |
| EPB41L4A    | ENSG00000129595                       | 12               | 0.725394428                 | 7                        | 7            | 0.117539819                           |              |    |                  |
|             | Brain_Frontal_Cortex_BA9              | 0.907258483      |                             |                          |              | Brain_Nucleus_accumbens_basal_ganglia |              |    |                  |
|             |                                       | 2.07766432       | 0.3663853                   | 0.116497227              | 1.5651838    | 0.835294636                           |              |    |                  |
|             |                                       | 0.486953981      | 7                           | 0                        | 0.998207054  |                                       |              |    |                  |
| PTPN4       | ENSG00000088179                       | 8                | 0.725415751                 | 2                        | 1            | 0.665747017                           |              |    |                  |
|             | Brain_Cerebellar_Hemisphere           | 0.790080673      |                             |                          |              | Brain_Cerebellum                      | 1.975804634  |    |                  |
|             |                                       | 0.024195366      | 1.975804634                 | 0.266205856              | 0.43199229   | 0.349099073                           |              |    |                  |
|             |                                       | 0.117228711      | 1                           | 0                        | 0.998207054  |                                       |              |    |                  |
| GAS1        | ENSG00000180447                       | 6                | 0.725526644                 | 1                        | 1            | 0.725526644                           |              |    |                  |
|             | Brain_Substantia_nigra                | 0.725526644      |                             |                          |              | Brain_Substantia_nigra                | 1            | 1  |                  |
|             |                                       | 1                | 0.35108225                  | 0.35108225               | 0.35108225   | NA                                    | 1            | 0  | 0.998207054      |
| GAL3ST3     | ENSG00000175229                       | 6                | 0.725621293                 | 2                        | 2            | 0.427346205                           |              |    |                  |
|             | Brain_Frontal_Cortex_BA9              | 0.983993749      |                             |                          |              | Brain_Cerebellar_Hemisphere           |              |    |                  |
|             |                                       | 1.158266243      | 0.841733757                 | 0.841733757              | 0.020062206  | 0.793741036                           |              |    |                  |
|             |                                       | 0.406901621      | 0.547073547                 | 2                        | 0            | 0.998207054                           |              |    |                  |
| GTF2E2      | ENSG00000197265                       | 8                | 0.725642532                 | 1                        | 1            | 0.725642532                           |              |    |                  |
|             | Brain_Spinal_cord_cervical_c-1        | 0.725642532      |                             |                          |              | Brain_Spinal_cord_cervical_c-1        |              |    |                  |
|             |                                       | 1                | 1                           | 1                        | -0.350927777 | -0.350927777                          | -0.350927777 | NA | 1                |
|             |                                       | 0.998207054      |                             |                          |              |                                       |              |    | 0                |
| ADAMTSL3    | ENSG00000156218                       | 12               | 0.725748682                 | 6                        | 4            | 0.420302736                           |              |    |                  |
|             | Brain_Cerebellar_Hemisphere           | 0.864012998      |                             |                          |              | Brain_Cortex                          | 3.555704565  |    |                  |
|             |                                       | 0.002048039      | 0.260781103                 | -0.805896142             | 0.588275364  | -0.211624829                          |              |    |                  |
|             |                                       | 0.659955571      | 4                           | 0                        | 0.998207054  |                                       |              |    |                  |
| FAM134C     | ENSG00000141699                       | 10               | 0.725764722                 | 2                        | 2            | 0.516584111                           |              |    |                  |
|             | Brain_Nucleus_accumbens_basal_ganglia | 0.603931083      |                             |                          |              | Brain_Cerebellar_Hemisphere           |              |    |                  |
|             |                                       | 1.07829075       | 0.92170925                  | 0.92170925               | -0.648619867 | -0.518755745                          | -0.583687806 |    |                  |
|             |                                       | 0.091827801      | 2                           | 0                        | 0.998207054  |                                       |              |    |                  |
| WDR4        | ENSG00000160193                       | 11               | 0.725807267                 | 2                        | 2            | 0.482580046                           |              |    | Brain_Cerebellum |
|             |                                       | 0.769083813      | Brain_Caudate_basal_ganglia | 1.768541466              | 0.231458534  |                                       |              |    |                  |
|             |                                       | 0.231458534      | -0.293573519                | 0.702158944              | 0.204292712  | 0.704089177                           |              |    |                  |
|             |                                       | 2                | 0                           | 0.998207054              |              |                                       |              |    |                  |
| SYNPR       | ENSG00000163630                       | 10               | 0.72585992                  | 3                        | 2            | 0.343794429                           |              |    | Brain_Cerebellum |
|             |                                       | 0.810313442      | Brain_Putamen_basal_ganglia | 1.945132601              | 0.054987005  |                                       |              |    |                  |
|             |                                       | 0.999880394      | -0.946694587                | 0.24002169               | -0.423325457 | 0.605614782                           |              |    | 2                |
|             |                                       | 0                | 0.998207054                 |                          |              |                                       |              |    |                  |
| CTD-2528L19 | 6                                     | ENSG00000267152  | 1                           | 0.726028834              | 2            | 2                                     | 0.463127659  |    |                  |
|             |                                       | Brain_Cerebellum | 0.517412403                 | Brain_Frontal_Cortex_BA9 | 1.507107339  |                                       |              |    |                  |
|             |                                       | 0.492892661      | 0.492892661                 | -0.733706463             | -0.647339252 | -0.690522858                          |              |    |                  |
|             |                                       | 0.06107084       | 2                           | 0                        | 0.998207054  |                                       |              |    |                  |
| KNCN        | ENSG00000162456                       | 9                | 0.726069055                 | 2                        | 2            | 0.44450585                            |              |    |                  |
|             | Brain_Nucleus_accumbens_basal_ganglia | 0.817708613      |                             |                          |              | Brain_Putamen_basal_ganglia           |              |    |                  |
|             |                                       | 1.557470364      | 0.442529636                 | 0.442529636              | -0.764606579 | -0.230493114                          |              |    |                  |
|             |                                       | -0.497549847     | 0.377675253                 | 2                        | 0            | 0.998207054                           |              |    |                  |
| MIF         | ENSG00000240972                       | 1                | 0.72607518                  | 5                        | 4            | 0.293936647                           |              |    |                  |
|             | Brain_Spinal_cord_cervical_c-1        | 0.999169724      |                             |                          |              | Brain_Cerebellum                      | 3.170370921  |    |                  |
|             |                                       | 0.066017344      | 0.210963117                 | -1.049524801             | 0.672431709  | -0.250296895                          |              |    |                  |
|             |                                       | 0.646211566      | 4                           | 0                        | 0.998207054  |                                       |              |    |                  |
| PTOV1       | ENSG00000104960                       | 15               | 0.726154897                 | 4                        | 4            | 0.205198377                           |              |    |                  |
|             | Brain_Spinal_cord_cervical_c-1        | 0.92197852       |                             |                          |              | Brain_Cortex                          | 1.619284594  |    |                  |
|             |                                       | 0.454014146      | 0.454014146                 | -1.266879507             | 0.140485307  | -0.272485359                          |              |    |                  |
|             |                                       | 0.672156036      | 4                           | 0                        | 0.998207054  |                                       |              |    |                  |
| TRIP4       | ENSG00000103671                       | 9                | 0.726359041                 | 9                        | 3            | 0.545683424                           |              |    |                  |
|             | Brain_Putamen_basal_ganglia           | 0.938659743      |                             |                          |              | Brain_Cerebellum                      | 7.679923691  |    |                  |
|             |                                       | 0.010283167      | 0.344886733                 | -0.604241003             | 0.36039219   | -0.187463373                          |              |    |                  |
|             |                                       | 0.328498449      | 3                           | 0                        | 0.998207054  |                                       |              |    |                  |



|              |                                       |                    |                |             |                                       |                  |
|--------------|---------------------------------------|--------------------|----------------|-------------|---------------------------------------|------------------|
| RSAD1        | ENSG00000136444.9                     | 0.726376407        | 10             | 5           | 0.337530548                           |                  |
|              | Brain_Cerebellar_Hemisphere           | 0.893924869        |                |             | Brain_Anterior_cingulate_cortex_BA24  |                  |
|              | 6.124775887                           | 0.016680317        | 0.297024621    |             | -0.959055974                          | 0.680155024      |
|              | 0.136500775                           | 0.457713548        | 5              | 0           | 0.998207054                           |                  |
| RAP2B        | ENSG00000181467.4                     | 0.726391416        | 1              | 1           | 0.726391416                           | Brain_Cerebellum |
|              | 0.726391416                           | Brain_Cerebellum   | 1              | 1           | -0.349929755                          | -0.349929755     |
|              | -0.349929755                          | NA                 | 1              | 0           | 0.998207054                           |                  |
| ADAMTS2      | ENSG00000087116.14                    | 0.726792369        | 5              | 5           | 0.112399452                           |                  |
|              | Brain_Hippocampus                     | 0.427051212        |                |             | Brain_Caudate_basal_ganglia           | 2.984281507      |
|              | 0.121169397                           | 0.121169397        | -1.587499979   |             | -0.794247755                          | -1.093092355     |
|              | 0.33825461                            | 5                  | 0              | 0.998207054 |                                       |                  |
| AIDA         | ENSG00000186063.12                    | 0.726854302        | 9              | 5           | 0.190910698                           |                  |
|              | Brain_Hypothalamus                    | 0.859818767        |                |             | Brain_Cerebellum                      | 5.93341244       |
|              | 0.201532446                           | -1.307889775       | -0.176604872   |             | -0.515959082                          | 0.338521874      |
|              | 5                                     | 0                  | 0.998207054    |             |                                       |                  |
| RPTOR        | ENSG00000141564.13                    | 0.726918806        | 3              | 3           | 0.324517099                           |                  |
|              | Brain_Cerebellar_Hemisphere           | 0.878766727        |                |             | Brain_Cerebellum                      | 1.495501898      |
|              | 0.527410318                           | 0.527410318        | 0.152532794    |             | 0.9852178                             | 0.564052611      |
|              | 0.41642629                            | 3                  | 0              | 0.998207054 |                                       |                  |
| STAC2        | ENSG00000141750.6                     | 0.726935207        | 2              | 2           | 0.433422579                           |                  |
|              | Brain_Putamen_basal_ganglia           | 0.763501793        |                |             | Brain_Nucleus_accumbens_basal_ganglia |                  |
|              | 1.189091627                           | 0.810908373        | 0.810908373    |             | 0.300885519                           | 0.783348347      |
|              | 0.542116933                           | 0.341152738        | 2              | 0           | 0.998207054                           |                  |
| SLC46A2      | ENSG00000119457.7                     | 0.727060257        | 6              | 4           | 0.230279989                           |                  |
|              | Brain_Anterior_cingulate_cortex_BA24  | 0.772254888        |                |             | Brain_Hypothalamus                    |                  |
|              | 4.022917245                           | 0.001479047        | 0.154416476    |             | 0.289426671                           | 1.199637929      |
|              | 0.956219919                           | 0.334212995        | 4              | 0           | 0.998207054                           |                  |
| TTL2         | ENSG00000120440.13                    | 0.727132923        | 4              | 4           | 0.227109867                           |                  |
|              | Brain_Anterior_cingulate_cortex_BA24  | 0.955086591        |                |             | Brain_Frontal_Cortex_BA9              |                  |
|              | 1.301735811                           | 0.731730185        | 0.731730185    |             | -1.207837259                          | 0.135736328      |
|              | -0.425968254                          | 0.639828777        | 4              | 0           | 0.998207054                           |                  |
| MT2A         | ENSG00000125148.6                     | 0.727142898        | 3              | 3           | 0.321103727                           |                  |
|              | Brain_Spinal_cord_cervical_c-1        | 0.903243657        |                |             | Brain_Cerebellum                      | 1.307746394      |
|              | 0.694239967                           | 0.694239967        | 0.121564845    |             | 0.992192303                           | 0.645982852      |
|              | 0.461862274                           | 3                  | 0              | 0.998207054 |                                       |                  |
| RP5-965G21.3 | ENSG00000277938.1                     | 0.727198404        | 1              | 1           | 0.727198404                           |                  |
|              | Brain_Amygdala                        | 0.727198404        | Brain_Amygdala | 1           | 1                                     | 1                |
|              | -0.348854689                          | -0.348854689       | NA             | 1           | 0                                     | 0.998207054      |
| OIP5         | ENSG00000104147.8                     | 0.72727887         | 4              | 4           | 0.212382846                           |                  |
|              | Brain_Nucleus_accumbens_basal_ganglia | 0.743836779        |                |             | Brain_Amygdala                        |                  |
|              | 2.762153414                           | 0.196692797        | 0.196692797    |             | -1.247039961                          | -0.326776707     |
|              | -0.700211539                          | 0.389886861        | 4              | 0           | 0.998207054                           |                  |
| GRIA2        | ENSG00000120251.18                    | 0.727280303        | 3              | 3           | 0.349791657                           |                  |
|              | Brain_Nucleus_accumbens_basal_ganglia | 0.96395063         |                |             | Brain_Cerebellum                      | 1.617743158      |
|              | 0.382590429                           | 0.382590429        | -0.061020254   |             | 0.934993485                           | 0.306389933      |
|              | 0.546971043                           | 3                  | 0              | 0.998207054 |                                       |                  |
| ANKRD55      | ENSG00000164512.17                    | 0.727390572        | 2              | 2           | 0.438231982                           |                  |
|              | Brain_Cortex                          | 0.893745262        |                |             | Brain_Hypothalamus                    | 1.070745655      |
|              | 0.929254345                           | 0.929254345        | -0.133566644   |             | 0.775182239                           | 0.320807798      |
|              | 0.642582498                           | 2                  | 0              | 0.998207054 |                                       |                  |
| DCTD         | ENSG00000129187.14                    | 0.727495479        | 5              | 4           | 0.580571065                           |                  |
|              | Brain_Putamen_basal_ganglia           | 0.821069191        |                |             | Brain_Cerebellum                      | 2.750404422      |
|              | 0.025133284                           | 0.291216533        | -0.411577518   |             | 0.552550764                           | 0.121094087      |
|              | 0.459578825                           | 4                  | 0              | 0.998207054 |                                       |                  |
| LIG3         | ENSG00000005156.11                    | 0.727503479        | 12             | 1           | 0.528049757                           | Brain_Cerebellum |
|              | 0.935426268                           | Brain_Hypothalamus | 11.75417984    |             | 0.000102081                           |                  |
|              | 11.75417984                           | -0.63098588        | -0.081019722   |             | -0.344531909                          | 0.135660191      |
|              | 1                                     | 0                  | 0.998207054    |             |                                       |                  |
| UBXN11       | ENSG00000158062.20                    | 0.727732094        | 3              | 3           | 0.765651676                           |                  |
|              | Brain_Cerebellar_Hemisphere           | 0.913038172        |                |             | Brain_Cerebellum                      | 2.730702829      |
|              | 0.105570358                           | 0.105570358        | -0.204295128   |             | 0.298067461                           | -0.005144946     |
|              | 0.26685905                            | 3                  | 0              | 0.998207054 |                                       |                  |

|               |                                       |                                       |                             |              |              |                  |             |
|---------------|---------------------------------------|---------------------------------------|-----------------------------|--------------|--------------|------------------|-------------|
| CELA3B        | ENSG00000219073.7                     | 0.72773428                            | 1                           | 1            | 0.72773428   |                  |             |
|               | Brain_Cerebellar_Hemisphere           | 0.72773428                            | Brain_Cerebellar_Hemisphere | 1            | 1            | 1                | 1           |
|               | 0.34814102                            | 0.34814102                            | 0.34814102                  | NA           | 1            | 0                | 0.998207054 |
| AC008269.2    | ENSG00000229321.1                     | 0.727750874                           | 1                           | 1            | 0.727750874  |                  |             |
|               | Brain_Caudate_basal_ganglia           | 0.727750874                           | Brain_Caudate_basal_ganglia | 1            | 1            | 1                | 1           |
|               | 1                                     | -0.348118923                          | -0.348118923                | -0.348118923 | NA           | 1                | 0           |
|               | 0.998207054                           |                                       |                             |              |              |                  |             |
| PDE6A         | ENSG00000132915.10                    | 0.727774637                           | 1                           | 1            | 0.727774637  |                  |             |
|               | Brain_Nucleus_accumbens_basal_ganglia | 0.727774637                           |                             |              |              |                  |             |
|               | Brain_Nucleus_accumbens_basal_ganglia | 1                                     | 1                           | 1            | -0.34808728  |                  |             |
|               | -0.34808728                           | -0.34808728                           | NA                          | 1            | 0            | 0.998207054      |             |
| ATP6V1C2      | ENSG00000143882.10                    | 0.72782708                            | 5                           | 5            | 0.189956013  | Brain_Cortex     |             |
|               | 0.976302223                           | Brain_Nucleus_accumbens_basal_ganglia | 1.590836974                 |              |              |                  |             |
|               | 0.616497293                           | 0.616497293                           | -1.310709247                | 0.106087543  | -0.471398931 |                  |             |
|               | 0.564380414                           | 5                                     | 0                           | 0.998207054  |              |                  |             |
| RP11-353N4.6  | ENSG00000275557.1                     | 0.727846049                           | 2                           | 2            | 0.488348393  |                  |             |
|               | Brain_Anterior_cingulate_cortex_BA24  | 0.619853675                           | Brain_Putamen_basal_ganglia |              |              |                  |             |
|               | 1.154206407                           | 0.845793593                           | 0.845793593                 | -0.692938108 | -0.496057738 |                  |             |
|               | -0.594497923                          | 0.139215445                           | 2                           | 0            | 0.998207054  |                  |             |
| SGIP1         | ENSG00000118473.21                    | 0.727853983                           | 5                           | 5            | 0.30666135   | Brain_Cerebellum |             |
|               | 0.960015915                           | Brain_Cerebellar_Hemisphere           | 1.617471313                 | 0.385283158  |              |                  |             |
|               | 0.385283158                           | -0.970065467                          | 1.022252624                 | -0.150878547 | 0.750487289  |                  |             |
|               | 5                                     | 0                                     | 0.998207054                 |              |              |                  |             |
| SLC6A11       | ENSG00000132164.9                     | 0.727868978                           | 2                           | 2            | 0.461323674  |                  |             |
|               | Brain_Anterior_cingulate_cortex_BA24  | 0.754361045                           | Brain_Cerebellar_Hemisphere |              |              |                  |             |
|               | 1.011719724                           | 0.988280276                           | 0.988280276                 | 0.312894198  | 0.736668981  |                  |             |
|               | 0.52478159                            | 0.299654023                           | 2                           | 0            | 0.998207054  |                  |             |
| RP11-338N10.1 | ENSG00000270171.1                     | 0.727912474                           | 12                          | 6            | 0.202875764  |                  |             |
|               | Brain_Cerebellar_Hemisphere           | 0.976485258                           | Brain_Substantia_nigra      |              |              |                  |             |
|               | 8.300647296                           | 0.008444589                           | 0.321783886                 | -0.639315186 | 1.273401053  |                  |             |
|               | 0.023509287                           | 0.542873736                           | 6                           | 0            | 0.998207054  |                  |             |
| ADAMTS17      | ENSG00000140470.13                    | 0.728132693                           | 2                           | 2            | 0.511247547  |                  |             |
|               | Brain_Cerebellar_Hemisphere           | 0.660554674                           | Brain_Hippocampus           | 1.017315797  |              |                  |             |
|               | 0.982684203                           | 0.982684203                           | -0.439147485                | 0.656896378  | 0.108874447  |                  |             |
|               | 0.775020048                           | 2                                     | 0                           | 0.998207054  |              |                  |             |
| VAT1L         | ENSG00000171724.2                     | 0.728138779                           | 3                           | 3            | 0.323606948  | Brain_Cerebellum |             |
|               | 0.808593159                           | Brain_Nucleus_accumbens_basal_ganglia | 1.106119646                 | 0.89396784   |              |                  |             |
|               | 0.89396784                            | -0.987072806                          | 0.568622495                 | -0.220230552 | 0.778081181  | 3                |             |
|               | 0                                     | 0.998207054                           |                             |              |              |                  |             |
| ZFYVE27       | ENSG00000155256.17                    | 0.728198983                           | 1                           | 1            | 0.728198983  |                  |             |
|               | Brain_Cerebellum                      | 0.728198983                           | Brain_Cerebellum            | 1            | 1            | 1                | 0.34752228  |
|               | 0.34752228                            | 0.34752228                            | NA                          | 1            | 0            | 0.998207054      |             |
| LINC01586     | ENSG00000249487.6                     | 0.728200992                           | 3                           | 3            | 0.258026958  |                  |             |
|               | Brain_Spinal_cord_cervical_c-1        | 0.898161879                           | Brain_Cerebellar_Hemisphere |              |              |                  |             |
|               | 1.834098299                           | 0.167832579                           | 0.167832579                 | -1.131066846 | -0.127983692 |                  |             |
|               | -0.489240467                          | 0.557300126                           | 3                           | 0            | 0.998207054  |                  |             |
| CCDC39        | ENSG00000145075.11                    | 0.728230294                           | 1                           | 1            | 0.728230294  |                  |             |
|               | Brain_Putamen_basal_ganglia           | 0.728230294                           | Brain_Putamen_basal_ganglia | 1            | 1            |                  |             |
|               | 1                                     | -0.347480595                          | -0.347480595                | -0.347480595 | NA           | 1                | 0           |
|               | 0.998207054                           |                                       |                             |              |              |                  |             |
| RP11-375I20.6 | ENSG00000260633.1                     | 0.728311545                           | 13                          | 4            | 0.117049888  |                  |             |
|               | Brain_Amygdala                        | 0.742463116                           | Brain_Frontal_Cortex_BA9    | 9.921785538  |              |                  |             |
|               | 3.43E-10                              | 0.491025426                           | -1.567277305                | -0.328593295 | -0.956659792 |                  |             |
|               | 0.341472198                           | 4                                     | 0                           | 0.998207054  |              |                  |             |
| ZNF345        | ENSG00000251247.10                    | 0.728396627                           | 3                           | 3            | 0.334098068  |                  |             |
|               | Brain_Cerebellar_Hemisphere           | 0.75170438                            | Brain_Cerebellum            | 2.459905165  |              |                  |             |
|               | 0.089889216                           | 0.089889216                           | 0.316392802                 | 0.965892316  | 0.632653713  |                  |             |
|               | 0.32508243                            | 3                                     | 0                           | 0.998207054  |              |                  |             |
| ZNF780A       | ENSG00000197782.14                    | 0.728398707                           | 3                           | 2            | 0.624985173  |                  |             |
|               | Brain_Nucleus_accumbens_basal_ganglia | 0.930285577                           | Brain_Caudate_basal_ganglia |              |              |                  |             |
|               | 2.639939781                           | 0.025658556                           | 0.334401663                 | -0.488797353 | 0.087485542  |                  |             |
|               | -0.279925156                          | 0.319180727                           | 2                           | 0            | 0.998207054  |                  |             |

|               |                                       |                             |              |             |             |                                       |             |                  |
|---------------|---------------------------------------|-----------------------------|--------------|-------------|-------------|---------------------------------------|-------------|------------------|
| HEPHL1        | ENSG00000181333.11                    | 0.728439151                 | 1            | 1           | 0.728439151 |                                       |             |                  |
|               | Brain_Cerebellum                      | 0.728439151                 |              |             |             | 1                                     | 1           | 0.347202556      |
|               | 0.347202556                           | 0.347202556                 | NA           | 1           | 0           | 0.998207054                           |             |                  |
| NR0B2         | ENSG00000131910.4                     | 0.728498179                 | 2            | 2           | 0.430415689 |                                       |             | Brain_Cerebellum |
|               | 0.537263298                           | Brain_Cerebellar_Hemisphere | 1.681472207  |             |             | 0.318527793                           |             |                  |
|               | 0.318527793                           | -0.78848052                 | -0.616956683 |             |             | -0.702718601                          |             | 0.121285668      |
|               | 2                                     | 0                           | 0.998207054  |             |             |                                       |             |                  |
| GLIS2         | ENSG00000126603.8                     | 0.728512678                 | 1            | 1           | 0.728512678 |                                       |             |                  |
|               | Brain_Hippocampus                     | 0.728512678                 |              |             |             | Brain_Hippocampus                     | 1           | 1                |
|               | 0.34710468                            | 0.34710468                  | NA           | 1           | 0           | 0.998207054                           |             |                  |
| MRLN          | ENSG00000227877.6                     | 0.728689632                 | 4            | 3           | 0.273266488 |                                       |             |                  |
|               | Brain_Hippocampus                     | 0.923311618                 |              |             |             | Brain_Cerebellum                      | 1.984566175 |                  |
|               | 0.016949448                           | 0.96825669                  | -1.09557116  |             |             | 0.346252447                           |             | -0.182048853     |
|               | 0.635254788                           | 3                           | 0            | 0.998207054 |             |                                       |             |                  |
| ANKRD29       | ENSG00000154065.16                    | 0.728697092                 | 2            | 2           | 0.426617299 |                                       |             |                  |
|               | Brain_Anterior_cingulate_cortex_BA24  | 0.985567395                 |              |             |             | Brain_Frontal_Cortex_BA9              |             |                  |
|               | 1.062049459                           | 0.937950541                 | 0.937950541  |             |             | -0.794993473                          |             | 0.018089575      |
|               | -0.388451949                          | 0.574936537                 | 2            | 0           | 0.998207054 |                                       |             |                  |
| SMG5          | ENSG00000198952.8                     | 0.728799769                 | 5            | 5           | 0.098470575 |                                       |             | Brain_Cortex     |
|               | 0.977029121                           | Brain_Putamen_basal_ganglia | 2.082475721  |             |             | 0.462975404                           |             |                  |
|               | 0.462975404                           | -1.652313913                | 0.028793706  |             |             | -0.594263992                          |             | 0.646855515      |
|               | 5                                     | 0                           | 0.998207054  |             |             |                                       |             |                  |
| PIGL          | ENSG00000108474.16                    | 0.728857984                 | 2            | 2           | 0.529452762 |                                       |             |                  |
|               | Brain_Hypothalamus                    | 0.587724364                 |              |             |             | Brain_Anterior_cingulate_cortex_BA24  |             |                  |
|               | 1.090986318                           | 0.909013682                 | 0.909013682  |             |             | -0.6288416                            |             | -0.542136663     |
|               | -0.585489131                          | 0.061309649                 | 2            | 0           | 0.998207054 |                                       |             |                  |
| ZNF93         | ENSG00000184635.14                    | 0.7289053                   | 7            | 2           | 0.245527087 |                                       |             |                  |
|               | Brain_Putamen_basal_ganglia           | 0.978476934                 |              |             |             | Brain_Nucleus_accumbens_basal_ganglia |             |                  |
|               | 6.056665427                           | 0.026114387                 | 0.526380046  |             |             | 0.026978435                           |             | 1.161282369      |
|               | 0.467214185                           | 0.394481974                 | 2            | 0           | 0.998207054 |                                       |             |                  |
| RP4-809F18.1  | ENSG00000255595.2                     | 0.728907404                 | 5            | 5           | 0.363358939 |                                       |             |                  |
|               | Brain_Anterior_cingulate_cortex_BA24  | 0.948534196                 |              |             |             | Brain_Frontal_Cortex_BA9              |             |                  |
|               | 1.727139383                           | 0.410860803                 | 0.410860803  |             |             | -0.908983305                          |             | 0.83329521       |
|               | 0.251554557                           | 0.720369525                 | 5            | 0           | 0.998207054 |                                       |             |                  |
| VIM           | ENSG00000026025.15                    | 0.729003573                 | 3            | 2           | 0.425763786 |                                       |             |                  |
|               | Brain_Nucleus_accumbens_basal_ganglia | 0.556946206                 |              |             |             | Brain_Frontal_Cortex_BA9              |             |                  |
|               | 2.701984902                           | 0.0649811                   | 0.233033999  |             |             | 0.587383451                           |             | 0.796461601      |
|               | 0.675020183                           | 0.108560977                 | 2            | 0           | 0.998207054 |                                       |             |                  |
| ATF5          | ENSG00000169136.10                    | 0.729003914                 | 3            | 3           | 0.47513848  |                                       |             |                  |
|               | Brain_Cerebellar_Hemisphere           | 0.898974049                 |              |             |             | Brain_Cerebellum                      | 1.516501495 |                  |
|               | 0.516943505                           | 0.516943505                 | -0.126957484 |             |             | 0.71414345                            |             | 0.413913323      |
|               | 0.469354501                           | 3                           | 0            | 0.998207054 |             |                                       |             |                  |
| RP11-54G14.1  | ENSG00000274918.1                     | 0.729032087                 | 1            | 1           | 0.729032087 |                                       |             |                  |
|               | Brain_Cerebellar_Hemisphere           | 0.729032087                 |              |             |             | Brain_Cerebellar_Hemisphere           | 1           | 1                |
|               | 1                                     | -0.346413359                | -0.346413359 |             |             | -0.346413359                          |             | NA               |
|               | 0.998207054                           |                             |              |             |             | 1                                     |             | 0                |
| ZNF230        | ENSG00000159882.12                    | 0.729071411                 | 2            | 2           | 0.428890426 |                                       |             |                  |
|               | Brain_Cerebellar_Hemisphere           | 0.550909617                 |              |             |             | Brain_Cerebellum                      | 1.681388857 |                  |
|               | 0.318611143                           | 0.318611143                 | 0.596397639  |             |             | 0.791091796                           |             | 0.693744718      |
|               | 0.137669558                           | 2                           | 0            | 0.998207054 |             |                                       |             |                  |
| CTC-444N24.11 | ENSG00000268205.1                     | 0.729196152                 | 1            | 1           | 0.729196152 |                                       |             |                  |
|               | Brain_Substantia_nigra                | 0.729196152                 |              |             |             | Brain_Substantia_nigra                | 1           | 1                |
|               | 1                                     | 0.346195026                 | 0.346195026  |             |             | 0.346195026                           |             | NA               |
|               | 0.998207054                           |                             |              |             |             | 1                                     |             | 0                |
| LRCH4         | ENSG00000077454.15                    | 0.729217089                 | 5            | 4           | 0.280586979 |                                       |             |                  |
|               | Brain_Spinal_cord_cervical_c-1        | 0.891044365                 |              |             |             | Brain_Hippocampus                     |             |                  |
|               | 3.575246949                           | 0.073350212                 | 0.132834736  |             |             | -0.625488528                          |             | 1.079001679      |
|               | 0.010666712                           | 0.657223241                 | 4            | 0           | 0.998207054 |                                       |             |                  |
| PRSS12        | ENSG00000164099.3                     | 0.729218886                 | 3            | 3           | 0.263396803 |                                       |             |                  |
|               | Brain_Nucleus_accumbens_basal_ganglia | 0.374327034                 |              |             |             | Brain_Cerebellar_Hemisphere           |             |                  |
|               | 2.614182051                           | 0.16295413                  | 0.16295413   |             |             | 0.888397381                           |             | 1.118398575      |
|               | 0.998988876                           | 0.115253884                 | 3            | 0           | 0.998207054 |                                       |             |                  |

|          |                                       |              |    |             |              |                                |   |             |             |
|----------|---------------------------------------|--------------|----|-------------|--------------|--------------------------------|---|-------------|-------------|
| PLCB1    | ENSG00000182621.17                    | 0.729330712  | 2  | 2           | 0.458268356  |                                |   |             |             |
|          | Brain_Cerebellar_Hemisphere           | 0.826455905  |    |             |              | Brain_Hippocampus              |   | 1.086980694 |             |
|          | 0.913019306                           | 0.913019306  |    |             | -0.219249234 | 0.741701261                    |   | 0.261226014 |             |
|          | 0.679494611                           | 2            | 0  | 0.998207054 |              |                                |   |             |             |
| ALDH7A1  | ENSG00000164904.17                    | 0.729345178  | 5  | 3           | 0.418832265  |                                |   |             |             |
|          | Brain_Cerebellar_Hemisphere           | 0.820534622  |    |             |              | Brain_Spinal_cord_cervical_c-1 |   |             |             |
|          | 4.018794043                           | 0.026660524  |    |             | 0.257575787  | -0.226857408                   |   | 0.808448806 |             |
|          | 0.394425657                           | 0.406058176  | 3  | 0           | 0.998207054  |                                |   |             |             |
| HNRNPA0  | ENSG00000177733.6                     | 0.729389976  | 1  | 1           | 0.729389976  |                                |   |             |             |
|          | Brain_Nucleus_accumbens_basal_ganglia | 0.729389976  |    |             |              |                                |   |             |             |
|          | Brain_Nucleus_accumbens_basal_ganglia | 1            | 1  | 1           | -0.345937114 |                                |   |             |             |
|          | -0.345937114                          | -0.345937114 | NA | 1           | 0            | 0.998207054                    |   |             |             |
| DROSHA   | ENSG00000113360.16                    | 0.729391519  | 2  | 2           | 0.494998     |                                |   |             |             |
|          | Brain_Putamen_basal_ganglia           | 0.691248467  |    |             |              | Brain_Caudate_basal_ganglia    |   |             |             |
|          | 1.013992861                           | 0.986007139  |    |             | 0.986007139  | -0.682381106                   |   | -0.39716137 |             |
|          | -0.539771238                          | 0.20168081   | 2  | 0           | 0.998207054  |                                |   |             |             |
| GAL3ST2  | ENSG00000154252.11                    | 0.72939947   | 10 | 9           | 0.115218087  |                                |   |             |             |
|          | Brain_Putamen_basal_ganglia           | 0.818321471  |    |             |              | Brain_Caudate_basal_ganglia    |   |             |             |
|          | 4.783455584                           | 0.020289704  |    |             | 0.176954114  | -1.575166198                   |   | 1.004918106 |             |
|          | -0.614508424                          | 0.859140195  | 9  | 0           | 0.998207054  |                                |   |             |             |
| TNFAIP1  | ENSG00000109079.9                     | 0.729444116  | 2  | 2           | 0.579588076  |                                |   |             |             |
|          | Brain_Frontal_Cortex_BA9              | 0.641437012  |    |             |              | Brain_Caudate_basal_ganglia    |   |             |             |
|          | 1.171676761                           | 0.828323239  |    |             | 0.828323239  | -0.553986513                   |   | 0.465690558 |             |
|          | -0.044147978                          | 0.721020571  | 2  | 0           | 0.998207054  |                                |   |             |             |
| SLC35G5  | ENSG00000177710.5                     | 0.729632854  | 4  | 4           | 0.238363309  |                                |   |             |             |
|          | Brain_Cortex                          | 0.965773204  |    |             |              | Brain_Hippocampus              |   | 2.026353186 | 0.31370759  |
|          | 0.31370759                            | -1.179087567 |    |             | 0.042910092  | -0.500502813                   |   | 0.553884793 | 4           |
|          | 0                                     | 0.998207054  |    |             |              |                                |   |             |             |
| PIK3IP1  | ENSG00000100100.12                    | 0.729736412  | 1  | 1           | 0.729736412  |                                |   |             |             |
|          | Brain_Caudate_basal_ganglia           | 0.729736412  |    |             |              | Brain_Caudate_basal_ganglia    | 1 | 1           |             |
|          | 1                                     | 0.345476184  |    |             | 0.345476184  | NA                             | 1 | 0           |             |
|          | 0.998207054                           |              |    |             |              |                                |   |             |             |
| EVC      | ENSG00000072840.12                    | 0.729751607  | 1  | 1           | 0.729751607  |                                |   |             |             |
|          | Brain_Caudate_basal_ganglia           | 0.729751607  |    |             |              | Brain_Caudate_basal_ganglia    | 1 | 1           |             |
|          | 1                                     | 0.345455969  |    |             | 0.345455969  | NA                             | 1 | 0           |             |
|          | 0.998207054                           |              |    |             |              |                                |   |             |             |
| PPP1R14D | ENSG00000166143.9                     | 0.729897944  | 1  | 1           | 0.729897944  |                                |   |             |             |
|          | Brain_Cerebellum                      | 0.729897944  |    |             |              | Brain_Cerebellum               | 1 | 1           | 1           |
|          | -0.345261292                          | -0.345261292 | NA | 1           | 0            | 0.998207054                    |   |             |             |
| GNG2     | ENSG00000186469.8                     | 0.730028244  | 3  | 3           | 0.283568067  |                                |   |             |             |
|          | Brain_Putamen_basal_ganglia           | 0.995067063  |    |             |              | Brain_Cerebellum               |   | 1.890578093 |             |
|          | 0.10570732                            | 0.10570732   |    |             | -0.00618256  | 1.072338395                    |   | 0.440588197 |             |
|          | 0.562552138                           | 3            | 0  | 0.998207054 |              |                                |   |             |             |
| RASA1    | ENSG00000145715.14                    | 0.730036383  | 1  | 1           | 0.730036383  |                                |   |             |             |
|          | Brain_Cerebellum                      | 1            | 1  | 1           | 0.345077134  |                                |   | 0.345077134 |             |
|          | 0.345077134                           | NA           | 1  | 0           | 0.998207054  |                                |   |             |             |
| CHP2     | ENSG00000166869.2                     | 0.730135078  | 1  | 1           | 0.730135078  |                                |   |             |             |
|          | Brain_Hippocampus                     | 0.730135078  |    |             |              | Brain_Hippocampus              | 1 | 1           | 1           |
|          | -0.344945853                          | -0.344945853 |    |             | -0.344945853 | NA                             | 1 | 0           | 0.998207054 |
| LYSMD4   | ENSG00000183060.15                    | 0.730175383  | 12 | 8           | 0.197312931  |                                |   |             |             |
|          | Brain_Caudate_basal_ganglia           | 0.883627408  |    |             |              | Brain_Cerebellar_Hemisphere    |   |             |             |
|          | 6.436061714                           | 0.003074274  |    |             | 0.361370774  | -0.323719047                   |   | 1.289244984 |             |
|          | 0.677932424                           | 0.557328614  | 8  | 0           | 0.998207054  |                                |   |             |             |
| HNMT     | ENSG00000150540.13                    | 0.73033787   | 1  | 1           | 0.73033787   |                                |   |             |             |
|          | Brain_Nucleus_accumbens_basal_ganglia | 0.73033787   |    |             |              |                                |   |             |             |
|          | Brain_Nucleus_accumbens_basal_ganglia | 1            | 1  | 1           | -0.344676124 |                                |   |             |             |
|          | -0.344676124                          | -0.344676124 | NA | 1           | 0            | 0.998207054                    |   |             |             |
| RPL19    | ENSG00000108298.9                     | 0.730442812  | 1  | 1           | 0.730442812  |                                |   |             |             |
|          | Brain_Substantia_nigra                | 0.730442812  |    |             |              | Brain_Substantia_nigra         |   | 1           | 1           |
|          | 1                                     | -0.344536552 |    |             | -0.344536552 | NA                             | 1 | 0           |             |
|          | 0.998207054                           |              |    |             |              |                                |   |             |             |
| ASTN2    | ENSG00000148219.16                    | 0.730497851  | 3  | 2           | 0.465306451  |                                |   |             |             |

|              |                                       |                    |              |                             |              |              |                    |
|--------------|---------------------------------------|--------------------|--------------|-----------------------------|--------------|--------------|--------------------|
|              | Brain_Frontal_Cortex_BA9              | 0.830473006        |              | Brain_Cerebellum            | 1.972545259  |              |                    |
|              | 0.029836775                           | 0.997617966        | 0.21409496   | 0.730136993                 | 0.43270634   |              |                    |
|              | 0.266897365                           | 2                  | 0            | 0.998207054                 |              |              |                    |
| FAM41C       | ENSG00000230368.2                     | 0.730518568        | 4            | 4                           | 0.366689397  |              |                    |
|              | Brain_Hippocampus                     | 0.610918496        |              | Brain_Cerebellum            | 1.126983982  |              |                    |
|              | 0.815953693                           | 0.815953693        | -0.902691975 | 0.597717124                 | -0.409876742 |              |                    |
|              | 0.693026536                           | 4                  | 0            | 0.998207054                 |              |              |                    |
| PTX3         | ENSG00000163661.3                     | 0.730536603        | 4            | 4                           | 0.303052655  |              |                    |
|              | Brain_Frontal_Cortex_BA9              | 0.538822296        |              | Brain_Cerebellum            | 1.7041164    |              |                    |
|              | 0.411518901                           | 0.411518901        | -1.029909151 | -0.614594881                | -0.802532766 |              |                    |
|              | 0.171690397                           | 4                  | 0            | 0.998207054                 |              |              |                    |
| HLA-DMB      | ENSG00000242574.8                     | 0.730600085        | 2            | 2                           | 0.527217444  |              |                    |
|              | Brain_Cerebellum                      | 0.875826894        |              | Brain_Cortex                | 1.74822346   | 0.25177654   | 0.25177654         |
|              | 0.15626151                            | 0.632259315        | 0.394260412  | 0.336581276                 | 2            | 0            |                    |
|              | 0.998207054                           |                    |              |                             |              |              |                    |
| MTFR1        | ENSG00000066855.15                    | 0.730689379        | 1            | 1                           | 0.730689379  |              |                    |
|              | Brain_Cerebellar_Hemisphere           | 0.730689379        |              | Brain_Cerebellar_Hemisphere | 1            | 1            |                    |
|              | 1                                     | -0.344208649       | -0.344208649 | -0.344208649                | NA           | 1            | 0                  |
|              | 0.998207054                           |                    |              |                             |              |              |                    |
| METTL7B      | ENSG00000170439.6                     | 0.730744272        | 2            | 2                           | 0.448340436  |              |                    |
|              | Brain_Caudate_basal_ganglia           | 0.792802165        |              | Brain_Cerebellum            | 1.044428653  |              |                    |
|              | 0.955571347                           | 0.955571347        | 0.262673602  | 0.758184671                 | 0.510429137  |              |                    |
|              | 0.350379238                           | 2                  | 0            | 0.998207054                 |              |              |                    |
| EXTL1        | ENSG00000158008.9                     | 0.730865122        | 4            | 3                           | 0.28801211   |              |                    |
|              | Brain_Nucleus_accumbens_basal_ganglia | 0.533697839        |              | Brain_Putamen_basal_ganglia |              |              |                    |
|              | 3.336750307                           | 0.103582235        | 0.165047618  | 0.622371161                 | 1.062492612  |              |                    |
|              | 0.800382167                           | 0.186307502        | 3            | 0                           | 0.998207054  |              |                    |
| PIN1         | ENSG00000127445.13                    | 0.730921966        | 1            | 1                           | 0.730921966  |              | Brain_Amygdala     |
|              | 0.730921966                           | Brain_Amygdala     | 1            | 1                           | 1            | -0.343899369 | -0.343899369       |
|              | -0.343899369                          | NA                 | 1            | 0                           | 0.998207054  |              |                    |
| LINC00242    | ENSG00000229214.1                     | 0.730945812        | 2            | 2                           | 0.515159203  |              |                    |
|              | Brain_Cortex                          | 0.856381879        |              | Brain_Hypothalamus          | 1.366454048  |              |                    |
|              | 0.633545952                           | 0.633545952        | -0.180981778 | 0.650825398                 | 0.23492181   |              |                    |
|              | 0.588176495                           | 2                  | 0            | 0.998207054                 |              |              |                    |
| KIAA1683     | ENSG00000130518.16                    | 0.730991148        | 13           | 3                           | 0.301977434  |              |                    |
|              | Brain_Substantia_nigra                | 0.964124007        |              | Brain_Cerebellum            | 10.67400787  |              |                    |
|              | 0.00094922                            | 0.51484397         | -1.032202137 | 0.308662545                 | -0.233963853 |              |                    |
|              | 0.323118086                           | 3                  | 0            | 0.998207054                 |              |              |                    |
| AC016995.3   | ENSG00000231367.5                     | 0.731142369        | 1            | 1                           | 0.731142369  |              |                    |
|              | Brain_Nucleus_accumbens_basal_ganglia | 0.731142369        |              |                             |              |              |                    |
|              | Brain_Nucleus_accumbens_basal_ganglia | 1                  | 1            | 1                           | 0.343606323  |              |                    |
|              | 0.343606323                           | 0.343606323        | NA           | 1                           | 0            | 0.998207054  |                    |
| TMEM9        | ENSG00000116857.16                    | 0.731259925        | 4            | 4                           | 0.293705482  |              |                    |
|              | Brain_Nucleus_accumbens_basal_ganglia | 0.818879179        |              | Brain_Cortex                |              |              |                    |
|              | 1.295919648                           | 0.597740563        | 0.597740563  | -0.244398132                | 1.050027473  |              |                    |
|              | 0.493240139                           | 0.611574472        | 4            | 0                           | 0.998207054  |              |                    |
| DESI2        | ENSG00000121644.18                    | 0.73137342         | 1            | 1                           | 0.73137342   |              | Brain_Hypothalamus |
|              | 0.73137342                            | Brain_Hypothalamus | 1            | 1                           | 1            | 0.34329915   | 0.34329915         |
|              | NA                                    | 1                  | 0            | 0.998207054                 |              |              |                    |
| ARF3         | ENSG00000134287.9                     | 0.73138465         | 2            | 2                           | 0.568690841  |              |                    |
|              | Brain_Caudate_basal_ganglia           | 0.634909996        |              | Brain_Substantia_nigra      |              |              |                    |
|              | 1.121919144                           | 0.878080856        | 0.878080856  | -0.569980622                | 0.474827407  |              |                    |
|              | -0.047576608                          | 0.738790843        | 2            | 0                           | 0.998207054  |              |                    |
| ADAT2        | ENSG00000189007.15                    | 0.731465495        | 6            | 3                           | 0.247335577  |              |                    |
|              | Brain_Hypothalamus                    | 0.417656559        |              | Brain_Cortex                | 5.062944443  |              | 0.00961798         |
|              | 0.221770314                           | -1.156845283       | -0.81049357  | -1.03379161                 | 0.129496011  |              |                    |
|              | 3                                     | 0                  | 0.998207054  |                             |              |              |                    |
| RP11-180P8.3 | ENSG00000266411.1                     | 0.731534841        | 1            | 1                           | 0.731534841  |              |                    |
|              | Brain_Anterior_cingulate_cortex_BA24  | 0.731534841        |              |                             |              |              |                    |
|              | Brain_Anterior_cingulate_cortex_BA24  | 1                  | 1            | 1                           | 0.343084567  |              |                    |
|              | 0.343084567                           | 0.343084567        | NA           | 1                           | 0            | 0.998207054  |                    |
| ABCG1        | ENSG00000160179.18                    | 0.731554185        | 2            | 2                           | 0.443588005  |              |                    |

|              |                                      |                  |              |                                       |              |                    |              |
|--------------|--------------------------------------|------------------|--------------|---------------------------------------|--------------|--------------------|--------------|
|              | Brain_Cerebellar_Hemisphere          | 0.938518196      |              | Brain_Anterior_cingulate_cortex_BA24  |              |                    |              |
|              | 1.151436361                          | 0.848563639      | 0.848563639  | -0.077132429                          | 0.766148403  |                    |              |
|              | 0.344507987                          | 0.596289595      | 2            | 0                                     | 0.998207054  |                    |              |
| NSUN2        | ENSG00000037474.14                   | 0.731562837      | 13           | 1                                     | 0.647987299  |                    |              |
|              | Brain_Caudate_basal_ganglia          | 0.85240552       |              | Brain_Nucleus_accumbens_basal_ganglia |              |                    |              |
|              | 12.78254601                          | 0.000206776      | 12.78254601  | -0.456560051                          | -0.18605004  |                    |              |
|              | -0.340006232                         | 0.090984616      | 1            | 0                                     | 0.998207054  |                    |              |
| RP11-91I20.3 | ENSG00000228862.3                    | 0.731622439      |              | 1                                     | 1            | 0.731622439        |              |
|              | Brain_Cerebellum                     | 0.731622439      |              | Brain_Cerebellum                      | 1            | 1                  | 0.342968127  |
|              | 0.342968127                          | 0.342968127      | NA           | 1                                     | 0            | 0.998207054        |              |
| LZTR1        | ENSG00000099949.18                   | 0.731645946      | 5            | 4                                     | 0.30206586   | Brain_Hypothalamus |              |
|              | 0.793228445                          | Brain_Cerebellum | 3.313861589  | 0.073653857                           | 0.315007619  |                    |              |
|              | -0.262120627                         | 1.032013358      | 0.609970063  | 0.523555662                           | 4            | 0                  |              |
|              | 0.998207054                          |                  |              |                                       |              |                    |              |
| KHDRBS3      | ENSG00000131773.13                   | 0.731728013      | 4            | 4                                     | 0.179491656  |                    |              |
|              | Brain_Cerebellum                     | 0.879581025      |              | Brain_Caudate_basal_ganglia           | 1.794768458  |                    |              |
|              | 0.25054445                           | 0.25054445       | 0.151500362  | 1.342321866                           | 0.764309429  |                    |              |
|              | 0.649829624                          | 4                | 0            | 0.998207054                           |              |                    |              |
| ADAM28       | ENSG00000042980.12                   | 0.731791994      | 1            | 1                                     | 0.731791994  |                    |              |
|              | Brain_Hippocampus                    | 0.731791994      |              | Brain_Hippocampus                     | 1            | 1                  | 1            |
|              | -0.342742756                         | -0.342742756     | -0.342742756 | NA                                    | 1            | 0                  | 0.998207054  |
| SH2D3C       | ENSG00000095370.19                   | 0.731808554      | 1            | 1                                     | 0.731808554  |                    |              |
|              | Brain_Cortex                         | 0.731808554      |              | Brain_Cortex                          | 1            | 1                  | 1            |
|              | 0.342720746                          | 0.342720746      | NA           | 1                                     | 0            | 0.998207054        | 0.342720746  |
| BOLA2        | ENSG00000183336.8                    | 0.731949172      | 13           | 3                                     | 0.06448208   |                    |              |
|              | Brain_Caudate_basal_ganglia          | 0.620724874      |              | Brain_Hippocampus                     | 11.16606101  |                    |              |
|              | 0.0010151                            | 0.487955949      | -1.848831964 | -0.494823274                          | -0.984585276 |                    |              |
|              | 0.418515921                          | 3                | 0            | 0.998207054                           |              |                    |              |
| LINC00637    | ENSG00000258735.1                    | 0.732050516      | 1            | 1                                     | 0.732050516  |                    |              |
|              | Brain_Cerebellum                     | 0.732050516      |              | Brain_Cerebellum                      | 1            | 1                  | -0.342399166 |
|              | -0.342399166                         | -0.342399166     | NA           | 1                                     | 0            | 0.998207054        |              |
| SVOP         | ENSG00000166111.9                    | 0.732119598      | 1            | 1                                     | 0.732119598  |                    |              |
|              | Brain_Putamen_basal_ganglia          | 0.732119598      |              | Brain_Putamen_basal_ganglia           | 1            | 1                  |              |
|              | 1                                    | 0.342307359      | 0.342307359  | 0.342307359                           | NA           | 1                  | 0            |
|              | 0.998207054                          |                  |              |                                       |              |                    |              |
| SLC4A11      | ENSG00000088836.12                   | 0.732121543      | 8            | 7                                     | 0.274038893  |                    |              |
|              | Brain_Anterior_cingulate_cortex_BA24 | 0.973967943      |              | Brain_Cerebellum                      |              |                    |              |
|              | 4.129381649                          | 0.026523824      | 0.163455249  | -1.093808687                          | 0.792274919  |                    |              |
|              | 0.065516234                          | 0.641242703      | 7            | 0                                     | 0.998207054  |                    |              |
| CHERP        | ENSG00000085872.14                   | 0.73223569       | 1            | 1                                     | 0.73223569   |                    |              |
|              | Brain_Anterior_cingulate_cortex_BA24 | 0.73223569       |              |                                       |              |                    |              |
|              | Brain_Anterior_cingulate_cortex_BA24 | 1                | 1            | 1                                     | 0.342153084  |                    |              |
|              | 0.342153084                          | 0.342153084      | NA           | 1                                     | 0            | 0.998207054        |              |
| TANK         | ENSG00000136560.13                   | 0.732389792      | 3            | 3                                     | 0.503714248  |                    |              |
|              | Brain_Frontal_Cortex_BA9             | 0.808556804      |              | Brain_Caudate_basal_ganglia           |              |                    |              |
|              | 1.905982877                          | 0.095674725      | 0.095674725  | 0.242288267                           | 0.668657087  |                    |              |
|              | 0.498427276                          | 0.2257939        | 3            | 0                                     | 0.998207054  |                    |              |
| LINC01885    | ENSG00000237880.1                    | 0.732520131      | 1            | 1                                     | 0.732520131  |                    |              |
|              | Brain_Caudate_basal_ganglia          | 0.732520131      |              | Brain_Caudate_basal_ganglia           | 1            | 1                  |              |
|              | 1                                    | 0.341775125      | 0.341775125  | 0.341775125                           | NA           | 1                  | 0            |
|              | 0.998207054                          |                  |              |                                       |              |                    |              |
| CIART        | ENSG00000159208.15                   | 0.732652836      | 1            | 1                                     | 0.732652836  | Brain_Cortex       |              |
|              | 0.732652836                          | Brain_Cortex     | 1            | 1                                     | 1            | 0.341598806        | 0.341598806  |
|              | 0.341598806                          | NA               | 1            | 0                                     | 0.998207054  |                    |              |
| RTFDC1       | ENSG00000022277.12                   | 0.732793151      | 1            | 1                                     | 0.732793151  |                    |              |
|              | Brain_Cerebellar_Hemisphere          | 0.732793151      |              | Brain_Cerebellar_Hemisphere           | 1            | 1                  |              |
|              | 1                                    | -0.341412387     | -0.341412387 | -0.341412387                          | NA           | 1                  | 0            |
|              | 0.998207054                          |                  |              |                                       |              |                    |              |
| PHAX         | ENSG00000164902.13                   | 0.732838332      | 1            | 1                                     | 0.732838332  |                    |              |
|              | Brain_Frontal_Cortex_BA9             | 0.732838332      |              | Brain_Frontal_Cortex_BA9              | 1            | 1                  |              |
|              | 1                                    | -0.341352364     | -0.341352364 | -0.341352364                          | NA           | 1                  | 0            |
|              | 0.998207054                          |                  |              |                                       |              |                    |              |

|               |                                       |              |              |              |              |                                       |             |   |  |
|---------------|---------------------------------------|--------------|--------------|--------------|--------------|---------------------------------------|-------------|---|--|
| FBXO6         | ENSG00000116663.10                    | 0.732883576  | 3            | 3            | 0.274681226  |                                       |             |   |  |
|               | Brain_Caudate_basal_ganglia           | 0.978192886  |              |              |              | Brain_Cerebellar_Hemisphere           |             |   |  |
|               | 1.817081141                           | 0.350138136  | 0.350138136  |              | -1.092345597 | 0.027334567                           |             |   |  |
|               | -0.583449631                          | 0.566751115  | 3            | 0            | 0.998207054  |                                       |             |   |  |
| IFT74         | ENSG00000096872.15                    | 0.733015979  | 9            | 2            | 0.422914526  |                                       |             |   |  |
|               | Brain_Putamen_basal_ganglia           | 0.958661365  |              |              |              | Brain_Substantia_nigra                |             |   |  |
|               | 7.534887746                           | 0.003093512  | 0.863355709  |              | -0.801375099 | -0.051833496                          |             |   |  |
|               | -0.401729117                          | 0.224149314  | 2            | 0            | 0.998207054  |                                       |             |   |  |
| FAM78B        | ENSG00000188859.6                     | 0.733072446  | 1            | 1            | 0.733072446  |                                       |             |   |  |
|               | Brain_Cerebellar_Hemisphere           | 0.733072446  |              |              |              | Brain_Cerebellar_Hemisphere1          | 1           | 1 |  |
|               | 1                                     | -0.34104136  | -0.34104136  | -0.34104136  | NA           | 1                                     | 0           |   |  |
|               | 0.998207054                           |              |              |              |              |                                       |             |   |  |
| BAG1          | ENSG00000107262.18                    | 0.733127645  | 2            | 2            | 0.432561972  |                                       |             |   |  |
|               | Brain_Putamen_basal_ganglia           | 0.95297531   |              |              |              | Brain_Nucleus_accumbens_basal_ganglia |             |   |  |
|               | 1.014372089                           | 0.985627911  | 0.985627911  |              | 0.05897087   | 0.784815124                           |             |   |  |
|               | 0.421892997                           | 0.513249394  | 2            | 0            | 0.998207054  |                                       |             |   |  |
| SH3BGR2       | ENSG00000198478.7                     | 0.733155728  | 7            | 7            | 0.111070263  |                                       |             |   |  |
|               | Brain_Frontal_Cortex_BA9              | 0.974799852  |              |              |              | Brain_Caudate_basal_ganglia           |             |   |  |
|               | 1.992799501                           | 0.400284375  | 0.400284375  |              | -1.593400992 | 1.089118403                           |             |   |  |
|               | -0.185788912                          | 0.864106311  | 7            | 0            | 0.998207054  |                                       |             |   |  |
| NKX6-3        | ENSG00000165066.12                    | 0.733167372  | 1            | 1            | 0.733167372  |                                       |             |   |  |
|               | Brain_Cerebellar_Hemisphere           | 0.733167372  |              |              |              | Brain_Cerebellar_Hemisphere1          | 1           | 1 |  |
|               | 1                                     | -0.340915266 | -0.340915266 | -0.340915266 | NA           | 1                                     | 0           |   |  |
|               | 0.998207054                           |              |              |              |              |                                       |             |   |  |
| RP11-430C7.5  | ENSG00000240219.1                     | 0.733186444  | 1            | 1            | 0.733186444  |                                       |             |   |  |
|               | Brain_Substantia_nigra                | 0.733186444  |              |              |              | Brain_Substantia_nigra                | 1           | 1 |  |
|               | 1                                     | -0.340889932 | -0.340889932 | -0.340889932 | NA           | 1                                     | 0           |   |  |
|               | 0.998207054                           |              |              |              |              |                                       |             |   |  |
| ITPR1         | ENSG00000150995.18                    | 0.733220987  | 1            | 1            | 0.733220987  |                                       |             |   |  |
|               | Brain_Nucleus_accumbens_basal_ganglia | 0.733220987  |              |              |              |                                       |             |   |  |
|               | Brain_Nucleus_accumbens_basal_ganglia | 1            | 1            | 1            | -0.34084405  |                                       |             |   |  |
|               | -0.34084405                           | -0.34084405  | NA           | 1            | 0            | 0.998207054                           |             |   |  |
| BBS7          | ENSG00000138686.9                     | 0.733221552  | 7            | 5            | 0.115247337  |                                       |             |   |  |
|               | Brain_Anterior_cingulate_cortex_BA24  | 0.558897807  |              |              |              |                                       |             |   |  |
|               | Brain_Nucleus_accumbens_basal_ganglia | 4.747064923  |              |              | 0.025512553  |                                       |             |   |  |
|               | 0.235309305                           | 0.584479421  | 1.575039456  |              | 1.199329605  | 0.426346337                           |             |   |  |
|               | 5                                     | 0            | 0.998207054  |              |              |                                       |             |   |  |
| FOXO6         | ENSG00000204060.6                     | 0.73337418   | 3            | 2            | 0.682495399  |                                       |             |   |  |
|               | Brain_Caudate_basal_ganglia           | 0.886665489  |              |              |              | Brain_Cerebellum                      | 2.658478572 |   |  |
|               | 0.057353986                           | 0.284167443  | -0.409060315 |              | 0.363715096  | 0.032393195                           |             |   |  |
|               | 0.39798516                            | 2            | 0            | 0.998207054  |              |                                       |             |   |  |
| RP11-771K4.1  | ENSG00000256232.1                     | 0.73338372   | 1            | 1            | 0.73338372   |                                       |             |   |  |
|               | Brain_Cerebellar_Hemisphere           | 0.73338372   |              |              |              | Brain_Cerebellar_Hemisphere1          | 1           | 1 |  |
|               | -0.340627904                          | -0.340627904 | -0.340627904 | NA           | 1            | 0                                     | 0.998207054 |   |  |
| RP11-445P19.3 | ENSG00000272827.1                     | 0.733492307  | 2            | 2            | 0.755587628  |                                       |             |   |  |
|               | Brain_Cerebellum                      | 0.829347104  |              |              |              | Brain_Cerebellar_Hemisphere1          | 1.775197706 |   |  |
|               | 0.224802294                           | 0.224802294  | -0.311280187 |              | 0.215539007  | -0.04787059                           |             |   |  |
|               | 0.372517424                           | 2            | 0            | 0.998207054  |              |                                       |             |   |  |
| ABCB8         | ENSG00000197150.12                    | 0.733530964  | 6            | 5            | 0.23805516   |                                       |             |   |  |
|               | Brain_Putamen_basal_ganglia           | 0.993814033  |              |              |              | Brain_Cortex                          | 2.995791478 |   |  |
|               | 3.72E-16                              | 0.277893134  | -0.349899078 |              | 1.179861862  | 0.379096127                           |             |   |  |
|               | 0.579235374                           | 5            | 0            | 0.998207054  |              |                                       |             |   |  |
| NAA60         | ENSG00000122390.17                    | 0.733620403  | 2            | 2            | 0.439602176  |                                       |             |   |  |
|               | Brain_Caudate_basal_ganglia           | 0.951037451  |              |              |              | Brain_Amygdala                        | 1.265350912 |   |  |
|               | 0.734649088                           | 0.734649088  | 0.06140402   |              | 0.772865177  | 0.417134598                           |             |   |  |
|               | 0.503079009                           | 2            | 0            | 0.998207054  |              |                                       |             |   |  |
| NSUN6         | ENSG00000241058.3                     | 0.733634498  | 13           | 3            | 0.173997815  |                                       |             |   |  |
|               | Brain_Putamen_basal_ganglia           | 10.81077371  |              |              |              | Brain_Cerebellum                      |             |   |  |
|               | 0.911228966                           |              |              |              | 0.008387675  |                                       |             |   |  |
|               | 0.436124573                           | -1.359469647 | -0.111488523 |              | -0.873308596 | 0.370077373                           |             |   |  |
|               | 3                                     | 0            | 0.998207054  |              |              |                                       |             |   |  |
| RP11-271F18.4 | ENSG00000270111.2                     | 0.733663142  | 2            | 2            | 0.450153419  |                                       |             |   |  |
|               | Brain_Cortex                          | 0.802331804  |              |              |              | Brain_Caudate_basal_ganglia           | 1.038144237 |   |  |

|               |                                       |                             |                   |              |                                       |
|---------------|---------------------------------------|-----------------------------|-------------------|--------------|---------------------------------------|
|               | 0.961855763                           | 0.961855763                 | 0.250330458       | 0.755159278  | 0.502744868                           |
|               | 0.356967882                           | 2                           | 0                 | 0.998207054  |                                       |
| CHGB          | ENSG00000089199.9                     | 0.73375137                  | 2                 | 2            | 0.645029146                           |
|               | Brain_Frontal_Cortex_BA9              | 0.952984814                 |                   |              | Brain_Cortex                          |
|               | 0.147706682                           | 0.147706682                 | -0.46067869       | -0.058958937 | 1.852293318                           |
|               | 0.284058761                           | 2                           | 0                 | 0.998207054  | -0.259818814                          |
| IQCB1         | ENSG00000173226.16                    | 0.733856712                 | 13                | 1            | 0.403309716                           |
|               | Brain_Hippocampus                     | 0.879976902                 |                   |              | Brain_Spinal_cord_cervical_c-1        |
|               | 12.23071482                           | 0.005924645                 | 12.23071482       | -0.252547163 | 0.835724844                           |
|               | 0.327213155                           | 0.307867879                 | 1                 | 0            | 0.998207054                           |
| RP11-100K18.1 | ENSG00000266213.1                     | 0.733896647                 | 2                 | 2            | 0.502913153                           |
|               | Brain_Spinal_cord_cervical_c-1        | 0.962932501                 |                   |              | Brain_Hypothalamus                    |
|               | 1.472908358                           | 0.527091642                 | 0.527091642       | -0.669913156 | 0.046473945                           |
|               | -0.311719605                          | 0.506562177                 | 2                 | 0            | 0.998207054                           |
| C11orf87      | ENSG00000185742.6                     | 0.733896871                 | 1                 | 1            | 0.733896871                           |
|               | Brain_Hippocampus                     | 0.733896871                 | Brain_Hippocampus | 1            | 1                                     |
|               | 0.339946429                           | 0.339946429                 | 0.339946429       | NA           | 1                                     |
| ICE2          | ENSG00000128915.11                    | 0.734043412                 | 2                 | 2            | 0.459854646                           |
|               | 0.861521527                           | Brain_Cerebellar_Hemisphere | 1.541503402       | 0.458496598  | Brain_Cerebellum                      |
|               | 0.458496598                           | -0.739086216                | -0.17443765       | -0.456761933 | 0.39926683                            |
|               | 0                                     | 0.998207054                 |                   |              | 2                                     |
| MED30         | ENSG00000164758.7                     | 0.734130178                 | 4                 | 4            | 0.238919867                           |
|               | Brain_Nucleus_accumbens_basal_ganglia | 0.856160028                 |                   |              | Brain_Caudate_basal_ganglia           |
|               | 1.959205151                           | 0.249072151                 | 0.249072151       | -1.177690873 | 0.666892358                           |
|               | 0.068196709                           | 0.858049209                 | 4                 | 0            | 0.998207054                           |
| ZNF438        | ENSG00000183621.15                    | 0.734138884                 | 1                 | 1            | 0.734138884                           |
|               | Brain_Cortex                          | 0.734138884                 | Brain_Cortex      | 1            | 1                                     |
|               | 0.339625086                           | 0.339625086                 | NA                | 1            | 0                                     |
| TMEM254       | ENSG00000133678.13                    | 0.73417478                  | 3                 | 3            | 0.291028387                           |
|               | Brain_Substantia_nigra                | 0.930178126                 |                   |              | Brain_Cortex                          |
|               | 0.301431966                           | 0.301431966                 | -0.100263532      | 1.055868304  | 0.289328014                           |
|               | 0.66387346                            | 3                           | 0                 | 0.998207054  |                                       |
| ZACN          | ENSG00000186919.12                    | 0.734243491                 | 1                 | 1            | 0.734243491                           |
|               | Brain_Spinal_cord_cervical_c-1        | 0.734243491                 |                   |              | Brain_Spinal_cord_cervical_c-1        |
|               | 1                                     | 1                           | 1                 | 0.3394862    | 0.3394862                             |
|               | 0.3394862                             | 0.3394862                   | 0.3394862         | NA           | 1                                     |
| OXCT2         | ENSG00000198754.5                     | 0.73443095                  | 6                 | 5            | 0.356133276                           |
|               | 0.896319006                           | Brain_Cortex                | 3.042054212       | 0.045535487  | Brain_Cerebellum                      |
|               | -0.86724987                           | 0.922758109                 | 0.014240338       | 0.730704261  | 0.299200483                           |
|               | 0.998207054                           |                             |                   |              | 5                                     |
|               |                                       |                             |                   |              | 0                                     |
| RMND1         | ENSG00000155906.16                    | 0.734485579                 | 4                 | 3            | 0.486333725                           |
|               | Brain_Nucleus_accumbens_basal_ganglia | 0.798598257                 |                   |              | Brain_Caudate_basal_ganglia           |
|               | 2.639743568                           | 0.065268433                 | 0.476415427       | -0.696151872 | 0.345252418                           |
|               | -0.116705622                          | 0.500718533                 | 3                 | 0            | 0.998207054                           |
| CKS2          | ENSG00000123975.4                     | 0.73464496                  | 6                 | 6            | 0.334856598                           |
|               | Brain_Putamen_basal_ganglia           | 0.904668142                 |                   |              | Brain_Cerebellar_Hemisphere           |
|               | 1.416070776                           | 0.672312935                 | 0.672312935       | -0.784101126 | 0.964377701                           |
|               | 0.418742597                           | 0.672416108                 | 6                 | 0            | 0.998207054                           |
| CYP4F2        | ENSG00000186115.12                    | 0.734659161                 | 4                 | 4            | 0.177975299                           |
|               | Brain_Cerebellar_Hemisphere           | 0.523135599                 |                   |              | Brain_Cortex                          |
|               | 0.099533569                           | 0.099533569                 | 0.638519447       | 1.347015318  | 1.065345822                           |
|               | 0.301298434                           | 4                           | 0                 | 0.998207054  |                                       |
| LINC00672     | ENSG00000263874.2                     | 0.734671714                 | 9                 | 6            | 0.268766872                           |
|               | Brain_Hippocampus                     | 0.762753589                 |                   |              | Brain_Nucleus_accumbens_basal_ganglia |
|               | 5.779993861                           | 0.00015166                  | 0.199957347       | -0.965135098 | 1.105906775                           |
|               | 0.335630319                           | 0.816024792                 | 6                 | 0            | 0.998207054                           |
| DUBR          | ENSG00000243701.5                     | 0.734737466                 | 3                 | 3            | 0.35097233                            |
|               | Brain_Frontal_Cortex_BA9              | 0.829562652                 |                   |              | Brain_Caudate_basal_ganglia           |
|               | 2.319437875                           | 0.292374024                 | 0.292374024       | -0.932704946 | -0.215262516                          |
|               | -0.563889013                          | 0.359147073                 | 3                 | 0            | 0.998207054                           |
| ADAM8         | ENSG00000151651.15                    | 0.734785337                 | 4                 | 4            | 0.193832262                           |
|               | Brain_Hippocampus                     | 0.919294245                 |                   |              | Brain_Substantia_nigra                |
|               | 0.144765949                           | 0.144765949                 | 0.101322765       | 1.299325456  | 2.603229894                           |
|               |                                       |                             |                   |              | 0.479688221                           |



|               |                                       |              |                                |              |             |                             |             |                  |   |
|---------------|---------------------------------------|--------------|--------------------------------|--------------|-------------|-----------------------------|-------------|------------------|---|
|               | 0.563426421                           | 4            | 0                              | 0.998207054  |             |                             |             |                  |   |
| MTRR          | ENSG00000124275.14                    |              | 0.735137691                    | 12           | 6           | 0.220664773                 |             |                  |   |
|               | Brain_Anterior_cingulate_cortex_BA24  |              | 0.990230219                    |              |             | Brain_Hippocampus           |             |                  |   |
|               | 7.022213836                           | 0.00986951   | 0.36014173                     | -1.224762355 |             | 0.737940624                 |             |                  |   |
|               | -0.179423173                          | 0.5654858    | 6                              | 0            | 0.998207054 |                             |             |                  |   |
| CYP4V2        | ENSG00000145476.15                    |              | 0.73538966                     | 13           | 11          | 0.155638082                 |             | Brain_Cortex     |   |
|               | 0.968431672                           |              | Brain_Spinal_cord_cervical_c-1 |              |             | 4.969623061                 |             | 0.071257609      |   |
|               | 0.185114512                           | -1.419895584 | 0.982131489                    |              |             | -0.273194946                |             | 0.755504175      |   |
|               | 11                                    | 0            | 0.998207054                    |              |             |                             |             |                  |   |
| SSX2IP        | ENSG00000117155.16                    |              | 0.735411264                    | 1            | 1           | 0.735411264                 |             |                  |   |
|               | Brain_Anterior_cingulate_cortex_BA24  |              | 0.735411264                    |              |             |                             |             |                  |   |
|               | Brain_Anterior_cingulate_cortex_BA24  | 1            | 1                              | 1            |             | -0.337936204                |             |                  |   |
|               | -0.337936204                          | -0.337936204 | NA                             | 1            | 0           | 0.998207054                 |             |                  |   |
| PPEF2         | ENSG00000156194.17                    |              | 0.735474699                    | 2            | 2           | 0.633487158                 |             | Brain_Cerebellum |   |
|               | 0.957436856                           |              | Brain_Cerebellar_Hemisphere    | 1.833293385  |             | 0.166706615                 |             |                  |   |
|               | 0.166706615                           | -0.476824415 | -0.053370316                   |              |             | -0.265097366                |             | 0.299427265      |   |
|               | 2                                     | 0            | 0.998207054                    |              |             |                             |             |                  |   |
| C6orf118      | ENSG00000112539.14                    |              | 0.735546001                    | 1            | 1           | 0.735546001                 |             |                  |   |
|               | Brain_Hypothalamus                    |              | 0.735546001                    |              |             | Brain_Hypothalamus          | 1           | 1                | 1 |
|               | -0.337757419                          | -0.337757419 | -0.337757419                   | NA           | 1           | 0                           |             | 0.998207054      |   |
| ERCC3         | ENSG00000163161.12                    |              | 0.735569977                    | 10           | 1           | 0.22117065                  |             |                  |   |
|               | Brain_Caudate_basal_ganglia           |              | 0.997792404                    |              |             | Brain_Cortex                |             | 9.10185308       |   |
|               | 0.006664468                           | 9.10185308   | -1.223421202                   |              |             | 0.111873543                 |             | -0.33449806      |   |
|               | 0.485168399                           | 1            | 0                              | 0.998207054  |             |                             |             |                  |   |
| CTD-2623N2.11 | ENSG00000267289.1                     |              | 0.735617598                    | 11           | 5           | 0.447088607                 |             |                  |   |
|               | Brain_Cerebellum                      |              | 0.965991555                    |              |             | Brain_Hypothalamus          | 8.098727518 | 5.50E-18         |   |
|               | 0.362935403                           | -0.760277703 | 0.482346589                    |              |             | -0.118870132                |             | 0.371362928      |   |
|               | 5                                     | 0            | 0.998207054                    |              |             |                             |             |                  |   |
| ZAR1          | ENSG00000182223.7                     |              | 0.735721629                    | 2            | 2           | 0.492401598                 |             |                  |   |
|               | Brain_Caudate_basal_ganglia           |              | 0.712055751                    |              |             | Brain_Putamen_basal_ganglia |             |                  |   |
|               | 1.012251019                           | 0.987748981  | 0.987748981                    |              |             | -0.369096563                |             | 0.686494077      |   |
|               | 0.158698757                           | 0.7464153    | 2                              | 0            | 0.998207054 |                             |             |                  |   |
| LINC01355     | ENSG00000261326.2                     |              | 0.73575632                     | 2            | 2           | 0.435930571                 |             | Brain_Amygdala   |   |
|               | 0.915283833                           |              | Brain_Cerebellar_Hemisphere    | 1.031201911  |             | 0.968798089                 |             |                  |   |
|               | 0.968798089                           | 0.106376253  | 0.779083429                    |              |             | 0.442729841                 |             | 0.475675806      |   |
|               | 2                                     | 0            | 0.998207054                    |              |             |                             |             |                  |   |
| TMEM134       | ENSG00000172663.8                     |              | 0.735838865                    | 1            | 1           | 0.735838865                 |             |                  |   |
|               | Brain_Hypothalamus                    |              | 0.735838865                    |              |             | Brain_Hypothalamus          | 1           | 1                | 1 |
|               | 0.337368849                           | 0.337368849  | 0.337368849                    | NA           | 1           | 0                           |             | 0.998207054      |   |
| RP11-83N9.6   | ENSG00000275329.1                     |              | 0.735909135                    | 5            | 5           | 0.196493612                 |             |                  |   |
|               | Brain_Cerebellar_Hemisphere           |              | 0.976492501                    |              |             | Brain_Cortex                |             | 1.628081732      |   |
|               | 0.496346023                           | 0.496346023  | -1.291606038                   |              |             | 0.553225                    |             | -0.390901396     |   |
|               | 0.711497036                           | 5            | 0                              | 0.998207054  |             |                             |             |                  |   |
| SLC35F6       | ENSG00000213699.8                     |              | 0.735968824                    | 4            | 4           | 0.192850686                 |             |                  |   |
|               | Brain_Nucleus_accumbens_basal_ganglia |              | 0.994297116                    |              |             | Brain_Hypothalamus          |             |                  |   |
|               | 1.589394912                           | 0.403136037  | 0.403136037                    |              |             | -1.302192213                |             | 0.007147566      |   |
|               | -0.542721331                          | 0.563241639  | 4                              | 0            | 0.998207054 |                             |             |                  |   |
| RP3-406A7.7   | ENSG00000260418.1                     |              | 0.736284766                    | 1            | 1           | 0.736284766                 |             |                  |   |
|               | Brain_Caudate_basal_ganglia           |              | 0.736284766                    |              |             | Brain_Caudate_basal_ganglia | 1           | 1                |   |
|               | 1                                     | -0.336777328 | -0.336777328                   |              |             | -0.336777328                | NA          | 1                | 0 |
|               | 0.998207054                           |              |                                |              |             |                             |             |                  |   |
| CIB1          | ENSG00000185043.10                    |              | 0.736371067                    | 10           | 8           | 0.298915941                 |             |                  |   |
|               | Brain_Caudate_basal_ganglia           |              | 0.964189803                    |              |             | Brain_Hypothalamus          |             | 4.865530968      |   |
|               | 0.047599777                           | 0.275604495  | -1.038760919                   |              |             | 0.838110517                 |             | -0.02035225      |   |
|               | 0.646410267                           | 8            | 0                              | 0.998207054  |             |                             |             |                  |   |
| AGBL3         | ENSG00000146856.14                    |              | 0.736420182                    | 6            | 3           | 0.258654767                 |             | Brain_Cerebellum |   |
|               | 0.794514732                           |              | Brain_Hypothalamus             | 4.363738895  |             | 0.012246922                 |             |                  |   |
|               | 0.412834888                           | -1.129576385 | 0.260452525                    |              |             | -0.597346184                |             | 0.462749096      |   |
|               | 3                                     | 0            | 0.998207054                    |              |             |                             |             |                  |   |
| CEP135        | ENSG00000174799.10                    |              | 0.73650896                     | 3            | 3           | 0.302779314                 |             | Brain_Cortex     |   |
|               | 0.848515971                           |              | Brain_Caudate_basal_ganglia    | 1.519229534  |             | 0.467250186                 |             |                  |   |
|               | 0.467250186                           | -1.030491557 | 0.191012282                    |              |             | -0.393866851                |             | 0.612393754      |   |

|              |                                       |                             |                  |             |                                       |              |             |                  |  |
|--------------|---------------------------------------|-----------------------------|------------------|-------------|---------------------------------------|--------------|-------------|------------------|--|
|              | 3                                     | 0                           | 0.998207054      |             |                                       |              |             |                  |  |
| YDJC         | ENSG00000161179.13                    | 0.736584389                 | 2                | 2           | 0.462351434                           |              |             |                  |  |
|              | Brain_Hippocampus                     | 0.798003259                 |                  |             | Brain_Frontal_Cortex_BA9              | 1.014961423  |             |                  |  |
|              | 0.985038577                           | 0.985038577                 | -0.734980395     |             | 0.255932111                           | -0.239524142 |             |                  |  |
|              | 0.700680952                           | 2                           | 0                | 0.998207054 |                                       |              |             |                  |  |
| NAB1         | ENSG00000138386.16                    | 0.736654056                 | 2                | 2           | 0.453678217                           |              |             | Brain_Cortex     |  |
|              | 0.72195683                            | Brain_Cerebellum            | 1.690415256      |             | 0.309584744                           | 0.309584744  |             |                  |  |
|              | -0.749296998                          | -0.355844756                | -0.552570877     |             | 0.278212749                           | 2            | 0           |                  |  |
|              | 0.998207054                           |                             |                  |             |                                       |              |             |                  |  |
| ACVR2B       | ENSG00000114739.13                    | 0.736953714                 | 2                | 2           | 0.586260087                           |              |             |                  |  |
|              | Brain_Cerebellum                      | 0.801316285                 |                  |             | Brain_Cerebellar_Hemisphere           | 1.903589753  |             |                  |  |
|              | 0.096410247                           | 0.096410247                 | 0.251643949      |             | 0.544263607                           | 0.397953778  |             |                  |  |
|              | 0.206913344                           | 2                           | 0                | 0.998207054 |                                       |              |             |                  |  |
| KCNK15       | ENSG00000124249.6                     | 0.736999913                 | 2                | 2           | 0.458786791                           |              |             |                  |  |
|              | Brain_Frontal_Cortex_BA9              | 0.765847005                 |                  |             | Brain_Caudate_basal_ganglia           |              |             |                  |  |
|              | 1.068071859                           | 0.931928141                 | 0.931928141      |             | 0.297811542                           | 0.740846048  |             |                  |  |
|              | 0.519328795                           | 0.313272704                 | 2                | 0           | 0.998207054                           |              |             |                  |  |
| RNF26        | ENSG00000173456.4                     | 0.737074084                 | 5                | 5           | 0.234053304                           |              |             |                  |  |
|              | Brain_Hippocampus                     | 0.858533085                 |                  |             | Brain_Cerebellar_Hemisphere           | 2.20877397   |             |                  |  |
|              | 0.145646619                           | 0.145646619                 | 0.178241799      |             | 1.189982414                           | 0.847055427  |             |                  |  |
|              | 0.400094212                           | 5                           | 0                | 0.998207054 |                                       |              |             |                  |  |
| CARMIL3      | ENSG00000186648.14                    | 0.737085127                 | 1                | 1           | 0.737085127                           |              |             |                  |  |
|              | Brain_Cerebellum                      | 0.737085127                 | Brain_Cerebellum | 1           | 1                                     | 1            | 0.335715884 |                  |  |
|              | 0.335715884                           | 0.335715884                 | NA               | 1           | 0                                     | 0.998207054  |             |                  |  |
| ANK1         | ENSG00000029534.19                    | 0.73714589                  | 3                | 3           | 0.323782814                           |              |             | Brain_Amygdala   |  |
|              | 0.728625863                           | Brain_Cerebellar_Hemisphere | 1.764232769      |             | 0.299821029                           |              |             |                  |  |
|              | 0.299821029                           | -0.986714103                | 0.596198672      |             | -0.01452047                           | 0.851117541  |             |                  |  |
|              | 3                                     | 0                           | 0.998207054      |             |                                       |              |             |                  |  |
| RP11-72L22.1 | ENSG00000249061.1                     | 0.737157913                 | 2                | 2           | 0.453228873                           |              |             |                  |  |
|              | Brain_Substantia_nigra                | 0.603537052                 |                  |             | Brain_Spinal_cord_cervical_c-1        |              |             |                  |  |
|              | 1.430561618                           | 0.569438382                 | 0.569438382      |             | -0.750042891                          | -0.519320799 |             |                  |  |
|              | -0.634681845                          | 0.163145156                 | 2                | 0           | 0.998207054                           |              |             |                  |  |
| FAM134A      | ENSG00000144567.10                    | 0.737265611                 | 4                | 2           | 0.441604106                           |              |             |                  |  |
|              | Brain_Cortex                          | 0.659510414                 |                  |             | Brain_Spinal_cord_cervical_c-1        | 3.592208305  |             |                  |  |
|              | 0.020693366                           | 0.344485335                 | -0.769487257     |             | -0.440589212                          | -0.577158017 |             |                  |  |
|              | 0.163889067                           | 2                           | 0                | 0.998207054 |                                       |              |             |                  |  |
| ZNF502       | ENSG00000196653.11                    | 0.737269228                 | 11               | 10          | 0.121985485                           |              |             |                  |  |
|              | Brain_Cortex                          | 0.974468547                 |                  |             | Brain_Caudate_basal_ganglia           | 4.354112572  |             |                  |  |
|              | 0.14109849                            | 0.164323907                 | -0.425524812     |             | 1.546493269                           | 0.117651222  |             |                  |  |
|              | 0.616605091                           | 10                          | 0                | 0.998207054 |                                       |              |             |                  |  |
| ZSCAN9       | ENSG00000137185.11                    | 0.737288954                 | 8                | 8           | 0.132432696                           |              |             |                  |  |
|              | Brain_Nucleus_accumbens_basal_ganglia | 0.748895606                 |                  |             | Brain_Hippocampus                     |              |             |                  |  |
|              | 4.151445187                           | 0.174961668                 | 0.174961668      |             | 0.320095936                           | 1.504577649  |             |                  |  |
|              | 0.930028154                           | 0.389957633                 | 8                | 0           | 0.998207054                           |              |             |                  |  |
| ZBED6CL      | ENSG00000188707.5                     | 0.737400346                 | 11               | 2           | 0.321606574                           |              |             |                  |  |
|              | Brain_Frontal_Cortex_BA9              | 0.910859837                 |                  |             | Brain_Nucleus_accumbens_basal_ganglia |              |             |                  |  |
|              | 9.648675537                           | 4.00E-05                    | 1.01379953       |             | -0.352682144                          | 0.991161813  |             |                  |  |
|              | 0.598742607                           | 0.39884258                  | 2                | 0           | 0.998207054                           |              |             |                  |  |
| RFX2         | ENSG00000087903.12                    | 0.7374133                   | 2                | 2           | 0.511554468                           |              |             |                  |  |
|              | Brain_Nucleus_accumbens_basal_ganglia | 0.662953221                 |                  |             | Brain_Caudate_basal_ganglia           |              |             |                  |  |
|              | 1.020783001                           | 0.979216999                 | 0.979216999      |             | -0.435839447                          | 0.656419156  |             |                  |  |
|              | 0.110289855                           | 0.772343465                 | 2                | 0           | 0.998207054                           |              |             |                  |  |
| CRK          | ENSG00000167193.7                     | 0.737551972                 | 1                | 1           | 0.737551972                           |              |             | Brain_Cortex     |  |
|              | 0.737551972                           | Brain_Cortex                | 1                | 1           | 1                                     | -0.335096925 |             | -0.335096925     |  |
|              | -0.335096925                          | NA                          | 1                | 0           | 0.998207054                           |              |             |                  |  |
| PHYH         | ENSG00000107537.13                    | 0.737565954                 | 2                | 2           | 0.436041475                           |              |             | Brain_Cerebellum |  |
|              | 0.675296214                           | Brain_Cerebellar_Hemisphere | 1.486119006      |             | 0.513880994                           |              |             |                  |  |
|              | 0.513880994                           | -0.778895161                | -0.418890427     |             | -0.598892794                          | 0.254561789  |             |                  |  |
|              | 2                                     | 0                           | 0.998207054      |             |                                       |              |             |                  |  |
| ISM2         | ENSG00000100593.17                    | 0.737733352                 | 3                | 3           | 0.432598847                           |              |             |                  |  |
|              | Brain_Caudate_basal_ganglia           | 0.744757338                 |                  |             | Brain_Cortex                          | 2.038273859  |             |                  |  |
|              | 0.317955162                           | 0.317955162                 | -0.325559924     |             | 0.78475224                            | 0.372639279  |             |                  |  |

|           |                                       |                                      |              |              |              |                                |             |   |             |
|-----------|---------------------------------------|--------------------------------------|--------------|--------------|--------------|--------------------------------|-------------|---|-------------|
|           | 0.607932791                           | 3                                    | 0            | 0.998207054  |              |                                |             |   |             |
| MUC15     | ENSG00000169550.12                    |                                      | 0.737841073  | 1            | 1            | 0.737841073                    |             |   |             |
|           | Brain_Putamen_basal_ganglia           | 0.737841073                          |              |              |              | Brain_Putamen_basal_ganglia    | 1           | 1 |             |
|           | 1                                     | -0.334713691                         | -0.334713691 | -0.334713691 | NA           | 1                              | 0           |   |             |
|           | 0.998207054                           |                                      |              |              |              |                                |             |   |             |
| PRMT8     | ENSG00000111218.11                    |                                      | 0.73785035   | 2            | 2            | 0.451580399                    |             |   |             |
|           | Brain_Anterior_cingulate_cortex_BA24  | 0.702493261                          |              |              |              | Brain_Cerebellum               |             |   |             |
|           | 1.245547601                           | 0.754452399                          | 0.754452399  | 0.381956999  |              | 0.752782875                    |             |   |             |
|           | 0.567369937                           | 0.262213491                          | 2            | 0            | 0.998207054  |                                |             |   |             |
| KDM3B     | ENSG00000120733.13                    |                                      | 0.737856739  | 2            | 2            | 0.588045119                    |             |   |             |
|           | Brain_Caudate_basal_ganglia           | 0.631495339                          |              |              |              | Brain_Cortex                   | 1.139861902 |   |             |
|           | 0.860138098                           | 0.860138098                          | -0.541671075 | 0.479623211  |              | -0.031023932                   |             |   |             |
|           | 0.722164115                           | 2                                    | 0            | 0.998207054  |              |                                |             |   |             |
| CCDC159   | ENSG00000183401.11                    |                                      | 0.737867998  | 3            | 2            | 0.443363044                    |             |   |             |
|           | Brain_Anterior_cingulate_cortex_BA24  | 0.956562598                          |              |              |              | Brain_Cerebellar_Hemisphere    |             |   |             |
|           | 2.113583044                           | 5.57E-32                             | 0.886416956  | 0.05446763   | 0.766526577  |                                |             |   |             |
|           | 0.291820612                           | 0.411107425                          | 2            | 0            | 0.998207054  |                                |             |   |             |
| CCL3      | ENSG00000277632.1                     |                                      | 0.737932246  | 1            | 1            | 0.737932246                    |             |   |             |
|           | Brain_Putamen_basal_ganglia           | 0.737932246                          |              |              |              | Brain_Putamen_basal_ganglia    | 1           | 1 |             |
|           | 1                                     | -0.334592841                         | -0.334592841 | -0.334592841 | NA           | 1                              | 0           |   |             |
|           | 0.998207054                           |                                      |              |              |              |                                |             |   |             |
| CFAP36    | ENSG00000163001.11                    |                                      | 0.738082279  | 1            | 1            | 0.738082279                    |             |   |             |
|           | Brain_Cerebellum                      | 0.738082279                          |              |              |              | Brain_Cerebellum               | 1           | 1 | 0.334393983 |
|           | 0.334393983                           | 0.334393983                          | NA           | 1            | 0            | 0.998207054                    |             |   |             |
| IVNS1ABP  | ENSG00000116679.15                    |                                      | 0.738235023  | 1            | 1            | 0.738235023                    |             |   |             |
|           | Brain_Putamen_basal_ganglia           | 0.738235023                          |              |              |              | Brain_Putamen_basal_ganglia    | 1           | 1 |             |
|           | 1                                     | -0.334191546                         | -0.334191546 | -0.334191546 | NA           | 1                              | 0           |   |             |
|           | 0.998207054                           |                                      |              |              |              |                                |             |   |             |
| MIA3      | ENSG00000154305.16                    |                                      | 0.738300772  | 3            | 3            | 0.447386645                    |             |   |             |
|           | Brain_Substantia_nigra                | 0.825610804                          |              |              |              | Brain_Caudate_basal_ganglia    |             |   |             |
|           | 1.733759482                           | 0.266360137                          | 0.266360137  | -0.366508675 | 0.759779088  |                                |             |   |             |
|           | 0.204534907                           | 0.563310081                          | 3            | 0            | 0.998207054  |                                |             |   |             |
| SORCS1    | ENSG00000108018.15                    |                                      | 0.738329824  | 1            | 1            | 0.738329824                    |             |   |             |
|           | Brain_Nucleus_accumbens_basal_ganglia | 0.738329824                          |              |              |              |                                |             |   |             |
|           | Brain_Nucleus_accumbens_basal_ganglia | 1                                    | 1            | 1            | -0.334065909 |                                |             |   |             |
|           | -0.334065909                          | -0.334065909                         | NA           | 1            | 0            | 0.998207054                    |             |   |             |
| ZNF747    | ENSG00000169955.7                     |                                      | 0.7383375    | 2            | 2            | 0.600470475                    |             |   |             |
|           | Brain_Substantia_nigra                | 0.6393137                            |              |              |              | Brain_Cerebellum               | 1.186675685 |   |             |
|           | 0.813324315                           | 0.813324315                          | -0.523724065 | 0.468658578  |              | -0.027532744                   |             |   |             |
|           | 0.701720496                           | 2                                    | 0            | 0.998207054  |              |                                |             |   |             |
| ZNF804A   | ENSG00000170396.7                     |                                      | 0.738340333  | 1            | 1            | 0.738340333                    |             |   |             |
|           | Brain_Anterior_cingulate_cortex_BA24  | 0.738340333                          |              |              |              |                                |             |   |             |
|           | Brain_Anterior_cingulate_cortex_BA24  | 1                                    | 1            | 1            | 0.334051983  |                                |             |   |             |
|           | 0.334051983                           | 0.334051983                          | NA           | 1            | 0            | 0.998207054                    |             |   |             |
| TNFRSF13C | ENSG00000159958.6                     |                                      | 0.738416003  | 4            | 3            | 0.723384965                    |             |   |             |
|           | Brain_Cerebellum                      | 0.973442119                          |              |              |              | Brain_Cerebellar_Hemisphere    | 3.538823861 |   |             |
|           | 0.046161522                           | 0.166985891                          | -0.283855424 | 0.353938511  |              | -0.031492792                   |             |   |             |
|           | 0.291882964                           | 3                                    | 0            | 0.998207054  |              |                                |             |   |             |
| DERL3     | ENSG00000099958.14                    |                                      | 0.738446762  | 5            | 3            | 0.28515336                     |             |   |             |
|           | Brain_Cerebellum                      |                                      |              |              |              |                                |             |   |             |
|           | 0.746351125                           | Brain_Hippocampus                    | 3.719945307  | 7.50E-17     | 0.166853689  |                                |             |   |             |
|           | -1.068814287                          | -0.323454415                         | -0.765998881 | 0.275575167  | 3            | 0                              |             |   |             |
|           | 0.998207054                           |                                      |              |              |              |                                |             |   |             |
| LSM14A    | ENSG00000257103.8                     |                                      | 0.738571129  | 1            | 1            | 0.738571129                    |             |   |             |
|           | Brain_Putamen_basal_ganglia           | 0.738571129                          |              |              |              | Brain_Putamen_basal_ganglia    | 1           | 1 |             |
|           | 1                                     | -0.33374614                          | -0.33374614  | -0.33374614  | NA           | 1                              | 0           |   |             |
|           | 0.998207054                           |                                      |              |              |              |                                |             |   |             |
| RUFY4     | ENSG00000188282.12                    |                                      | 0.738607243  | 2            | 2            | 0.438445544                    |             |   |             |
|           | Brain_Cerebellum                      |                                      |              |              |              |                                |             |   |             |
|           | 0.673071881                           | Brain_Anterior_cingulate_cortex_BA24 | 1.458493196  |              |              |                                |             |   |             |
|           | 0.541506804                           | 0.541506804                          | 0.421935797  | 0.774820822  |              | 0.598378309                    |             |   |             |
|           | 0.249527394                           | 2                                    | 0            | 0.998207054  |              |                                |             |   |             |
| LOXL2     | ENSG00000134013.15                    |                                      | 0.738635922  | 4            | 4            | 0.237111616                    |             |   |             |
|           | Brain_Putamen_basal_ganglia           | 0.769887071                          |              |              |              | Brain_Spinal_cord_cervical_c-1 |             |   |             |

|               |                                       |                                |              |              |                                      |                  |             |    |              |
|---------------|---------------------------------------|--------------------------------|--------------|--------------|--------------------------------------|------------------|-------------|----|--------------|
|               | 1.097228978                           | 0.902154838                    | 0.902154838  | -1.182237148 | 0.292799366                          |                  |             |    |              |
|               | -0.297273502                          | 0.722536104                    | 4            | 0            | 0.998207054                          |                  |             |    |              |
| NUDT12        | ENSG00000112874.9                     | 0.738892246                    | 9            | 9            | 0.050766801                          |                  |             |    |              |
|               | Brain_Frontal_Cortex_BA9              | 0.817154545                    |              |              | Brain_Anterior_cingulate_cortex_BA24 |                  |             |    |              |
|               | 1.967354532                           | 0.245700522                    | 0.245700522  | -1.953445737 | 1.339907831                          |                  |             |    |              |
|               | -0.060059931                          | 1.03014095                     | 9            | 0            | 0.998207054                          |                  |             |    |              |
| SPATA1        | ENSG00000122432.17                    | 0.738949234                    | 5            | 4            | 0.441649814                          |                  |             |    |              |
|               | Brain_Anterior_cingulate_cortex_BA24  | 0.940468683                    |              |              | Brain_Caudate_basal_ganglia          |                  |             |    |              |
|               | 3.936203928                           | 0.027521871                    | 0.176313389  | -0.769410237 | 0.116141135                          |                  |             |    |              |
|               | -0.322833889                          | 0.379687014                    | 4            | 0            | 0.998207054                          |                  |             |    |              |
| LINC00336     | ENSG00000197251.3                     | 0.738961617                    | 9            | 7            | 0.169138139                          |                  |             |    |              |
|               | Brain_Nucleus_accumbens_basal_ganglia | 0.880732616                    |              |              | Brain_Substantia_nigra               |                  |             |    |              |
|               | 4.76869358                            | 0.025989551                    | 0.301260082  | -0.456455975 | 1.374978409                          |                  |             |    |              |
|               | 0.382987837                           | 0.639285866                    | 7            | 0            | 0.998207054                          |                  |             |    |              |
| RP11-395I14.2 | ENSG00000253476.1                     | 0.73906745                     | 1            | 1            | 0.73906745                           | Brain_Cerebellum |             |    |              |
|               | 0.73906745                            | Brain_Cerebellum1              | 1            | 1            | 0.33308854                           | 0.33308854       | 0.33308854  | NA |              |
|               | 1                                     | 0                              | 0.998207054  |              |                                      |                  |             |    |              |
| BAALC         | ENSG00000164929.16                    | 0.739181358                    | 8            | 6            | 0.110536525                          |                  |             |    |              |
|               | Brain_Caudate_basal_ganglia           | 0.567860079                    |              |              | Brain_Cortex                         | 5.92240987       |             |    |              |
|               | 0.052066397                           | 0.263166598                    | -1.595786248 | -0.571205901 | -1.049913935                         |                  |             |    |              |
|               | 0.373746118                           | 6                              | 0            | 0.998207054  |                                      |                  |             |    |              |
| SNAI1         | ENSG00000124216.3                     | 0.739267311                    | 2            | 2            | 0.442210644                          |                  |             |    |              |
|               | Brain_Spinal_cord_cervical_c-1        | 0.894373945                    |              |              | Brain_Cortex                         | 1.020761777      |             |    |              |
|               | 0.979238223                           | 0.979238223                    | -0.768465559 | 0.132771689  | -0.317846935                         |                  |             |    |              |
|               | 0.637270969                           | 2                              | 0            | 0.998207054  |                                      |                  |             |    |              |
| CTD-233602.3  | ENSG00000282021.1                     | 0.739322037                    | 9            | 7            | 0.089090939                          |                  |             |    |              |
|               | Brain_Cerebellar_Hemisphere           | 0.943281443                    |              |              | Brain_Caudate_basal_ganglia          |                  |             |    |              |
|               | 5.027511216                           | 0.028878865                    | 0.17334775   | -1.70021262  | 0.783341985                          |                  |             |    |              |
|               | -0.254697264                          | 0.651976584                    | 7            | 0            | 0.998207054                          |                  |             |    |              |
| BAD           | ENSG00000002330.13                    | 0.739368055                    | 1            | 1            | 0.739368055                          |                  |             |    |              |
|               | Brain_Hypothalamus                    | 0.739368055                    |              |              | Brain_Hypothalamus                   | 1                | 1           | 1  |              |
|               | -0.332690323                          | -0.332690323                   | -0.332690323 | NA           | 1                                    | 0                | 0.998207054 |    |              |
| PDCD1LG2      | ENSG00000197646.7                     | 0.739383041                    | 9            | 6            | 0.083286616                          |                  |             |    |              |
|               | Brain_Putamen_basal_ganglia           | 0.988444366                    |              |              | Brain_Cortex                         | 5.344827945      |             |    |              |
|               | 0.024271644                           | 0.241176182                    | -1.731926689 | 0.38605392   | -0.08524901                          |                  |             |    |              |
|               | 0.674993843                           | 6                              | 0            | 0.998207054  |                                      |                  |             |    |              |
| ANKRD46       | ENSG00000186106.11                    | 0.739466229                    | 1            | 1            | 0.739466229                          |                  |             |    |              |
|               | Brain_Spinal_cord_cervical_c-1        | 0.739466229                    |              |              | Brain_Spinal_cord_cervical_c-1       |                  |             |    |              |
|               | 1                                     | 1                              | 1            | 0.332560282  | 0.332560282                          | 0.332560282      | NA          | 1  | 0            |
|               | 0.998207054                           |                                |              |              |                                      |                  |             |    |              |
| MINDY3        | ENSG00000148481.13                    | 0.739555083                    | 3            | 3            | 0.339004189                          |                  |             |    |              |
|               | Brain_Cerebellum                      | 0.971421051                    |              |              | Brain_Frontal_Cortex_BA9             | 1.256817543      |             |    |              |
|               | 0.737711662                           | 0.737711662                    | -0.323844218 | 0.956134693  | 0.222705512                          |                  |             |    |              |
|               | 0.660135933                           | 3                              | 0            | 0.998207054  |                                      |                  |             |    |              |
| LINC00857     | ENSG00000237523.1                     | 0.73983537                     | 2            | 2            | 0.451033828                          | Brain_Cortex     |             |    |              |
|               | 0.865846048                           | Brain_Spinal_cord_cervical_c-1 | 1.022599638  | 0.977400362  |                                      |                  |             |    |              |
|               | 0.977400362                           | -0.753692597                   | -0.168937188 | -0.461314893 | 0.413484515                          |                  |             |    |              |
|               | 2                                     | 0                              | 0.998207054  |              |                                      |                  |             |    |              |
| CSGALNACT1    | ENSG00000147408.14                    | 0.740041169                    | 12           | 5            | 0.450384356                          |                  |             |    |              |
|               | Brain_Nucleus_accumbens_basal_ganglia | 0.99727593                     |              |              | Brain_Frontal_Cortex_BA9             |                  |             |    |              |
|               | 9.404120563                           | 0.00336803                     | 0.363607858  | -0.59542494  | 0.754774401                          |                  |             |    |              |
|               | 0.269862715                           | 0.440566062                    | 5            | 0            | 0.998207054                          |                  |             |    |              |
| SH3BP2        | ENSG00000087266.15                    | 0.74004736                     | 2            | 2            | 0.437963369                          | Brain_Amygdala   |             |    |              |
|               | 0.974345942                           | Brain_Substantia_nigra         | 1.013527473  | 0.986472527  |                                      |                  |             |    |              |
|               | 0.986472527                           | -0.775636964                   | -0.032158135 | -0.40389755  | 0.525718922                          |                  |             |    |              |
|               | 2                                     | 0                              | 0.998207054  |              |                                      |                  |             |    |              |
| ZNF771        | ENSG00000179965.11                    | 0.740231374                    | 1            | 1            | 0.740231374                          |                  |             |    |              |
|               | Brain_Cortex                          | 0.740231374                    |              |              | Brain_Cortex                         | 1                | 1           | 1  | -0.331546962 |
|               | -0.331546962                          | -0.331546962                   | NA           | 1            | 0                                    | 0.998207054      |             |    |              |
| CTSF          | ENSG00000174080.10                    | 0.740252218                    | 10           | 3            | 0.168793403                          | Brain_Cortex     |             |    |              |
|               | 0.882391064                           | Brain_Hippocampus              | 8.157868898  | 0.007426255  |                                      |                  |             |    |              |
|               | 0.361084854                           | -1.37609119                    | -0.147938804 | -0.72963813  | 0.366529915                          |                  |             |    |              |

3 0 0.998207054  
NEIL2 ENSG00000154328.15 0.7402902 9 9 0.11643083 Brain\_Putamen\_basal\_ganglia  
0.921844655 Brain\_Spinal\_cord\_cervical\_c-1 1.909622311 0.3049739  
0.3049739 -1.479644999 1.569932439 -0.160157613 0.861465314 9  
0 0.998207054  
PWRN3 ENSG00000260760.1 0.740359709 4 3 0.284797151  
Brain\_Putamen\_basal\_ganglia 0.926440042 Brain\_Hypothalamus 2.480539785  
0.044846532 0.434722941 -1.069604983 -0.092324728 -0.599683687  
0.432937653 3 0 0.998207054  
RP11-255H23.4 ENSG00000267924.1 0.740382666 1 1 0.740382666  
Brain\_Hippocampus 0.740382666 Brain\_Hippocampus 1 1 1  
0.331346639 0.331346639 0.331346639 NA 1 0 0.998207054  
SLFN12L ENSG00000205045.8 0.740416289 1 1 0.740416289  
Brain\_Cortex 0.740416289 Brain\_Cortex 1 1 1 0.331302121  
0.331302121 0.331302121 NA 1 0 0.998207054  
PSMD9 ENSG00000110801.13 0.74062402 1 1 0.74062402 Brain\_Cerebellar\_Hemisphere  
0.74062402 Brain\_Cerebellar\_Hemisphere 1 1 1 0.331027094  
0.331027094 0.331027094 NA 1 0 0.998207054  
MTO1 ENSG00000135297.15 0.740651994 1 1 0.740651994 Brain\_Cortex  
0.740651994 Brain\_Cortex 1 1 1 -0.330990059 -0.330990059  
-0.330990059 NA 1 0 0.998207054  
SNX7 ENSG00000162627.16 0.74068374 1 1 0.74068374 Brain\_Cerebellum 0.74068374  
Brain\_Cerebellum 1 1 1 0.330948032 0.330948032 0.330948032  
NA 1 0 0.998207054  
CLEC2D ENSG00000069493.14 0.740796486 1 1 0.740796486  
Brain\_Caudate\_basal\_ganglia 0.740796486 Brain\_Caudate\_basal\_ganglia 1 1  
1 -0.330798776 -0.330798776 -0.330798776 NA 1 0  
0.998207054  
CTXN3 ENSG00000205279.8 0.740884631 1 1 0.740884631  
Brain\_Caudate\_basal\_ganglia 0.740884631 Brain\_Caudate\_basal\_ganglia 1 1  
1 0.330682091 0.330682091 0.330682091 NA 1 0  
0.998207054  
PCDHA13 ENSG00000239389.7 0.740886915 11 2 0.485126003  
Brain\_Amygdala 0.931702475 Brain\_Nucleus\_accumbens\_basal\_ganglia  
9.513705332 0.000476182 0.66696829 -0.698081857 0.393329378  
0.100040595 0.313805472 2 0 0.998207054  
NIPAL4 ENSG00000172548.14 0.74091656 1 1 0.74091656 Brain\_Cerebellum  
0.74091656 Brain\_Cerebellum 1 1 1 -0.330639826 -0.330639826  
-0.330639826 NA 1 0 0.998207054  
SUSD1 ENSG00000106868.16 0.741023496 10 3 0.27577645  
Brain\_Nucleus\_accumbens\_basal\_ganglia 0.964396682 Brain\_Substantia\_nigra  
7.315339836 0.024875065 0.485285118 -1.089856298 -0.04463696  
-0.640999118 0.35839645 3 0 0.998207054  
CT62 ENSG00000225362.8 0.741120609 1 1 0.741120609 Brain\_Cerebellum  
0.741120609 Brain\_Cerebellum 1 1 1 0.330369732 0.330369732  
0.330369732 NA 1 0 0.998207054  
RP11-105N14.1 ENSG00000270659.1 0.7411542 6 5 0.381540605  
Brain\_Caudate\_basal\_ganglia 0.941665952 Brain\_Frontal\_Cortex\_BA9  
3.539556709 0.065760865 0.195112581 -0.676733787 0.875061204  
0.348420637 0.567547637 5 0 0.998207054  
ADAM22 ENSG00000008277.14 0.741227402 2 2 0.440174302  
Brain\_Cerebellum 0.851266303 Brain\_Nucleus\_accumbens\_basal\_ganglia  
1.172229499 0.827770501 0.827770501 -0.771898911 0.18750296  
-0.292197975 0.678399569 2 0 0.998207054  
EBLN3P ENSG00000281649.1 0.741253332 3 3 0.53718528  
Brain\_Putamen\_basal\_ganglia 0.746470447 Brain\_Cerebellum 1.555062081  
0.442965907 0.442965907 -0.32329684 0.617074966 0.227570382  
0.490513209 3 0 0.998207054  
SETD5 ENSG00000168137.15 0.741255046 1 1 0.741255046 Brain\_Cortex  
0.741255046 Brain\_Cortex 1 1 1 0.330191795 0.330191795  
0.330191795 NA 1 0 0.998207054  
LINC00671 ENSG00000213373.7 0.741505776 2 2 0.439985041

|               |                                       |                             |              |                             |              |              |                  |
|---------------|---------------------------------------|-----------------------------|--------------|-----------------------------|--------------|--------------|------------------|
|               | Brain_Anterior_cingulate_cortex_BA24  | 0.989913938                 |              | Brain_Substantia_nigra      |              |              |                  |
|               | 1.038883135                           | 0.961116865                 | 0.961116865  | -0.772218475                | 0.012641341  |              |                  |
|               | -0.379788567                          | 0.554979698                 | 2            | 0                           | 0.998207054  |              |                  |
| TXNRD3        | ENSG00000197763.14                    | 0.741670796                 | 3            | 3                           | 0.619430948  |              |                  |
|               | Brain_Caudate_basal_ganglia           | 0.658321501                 |              | Brain_Frontal_Cortex_BA9    |              |              |                  |
|               | 1.698912854                           | 0.373928777                 | 0.373928777  | -0.442231766                | 0.496657003  |              |                  |
|               | 0.169376842                           | 0.530103791                 | 3            | 0                           | 0.998207054  |              |                  |
| UBE2I         | ENSG00000103275.19                    | 0.741752897                 | 4            | 4                           | 0.272095552  |              |                  |
|               | Brain_Hypothalamus                    | 0.600049175                 |              | Brain_Amygdala              | 1.769232142  |              |                  |
|               | 0.505557437                           | 0.505557437                 | 0.524329798  | 1.098249512                 | 0.891957803  |              |                  |
|               | 0.263140558                           | 4                           | 0            | 0.998207054                 |              |              |                  |
| SBK2          | ENSG00000187550.8                     | 0.741867663                 | 2            | 2                           | 0.47898376   |              |                  |
|               | Brain_Cerebellar_Hemisphere           | 0.693661934                 |              | Brain_Cerebellum            | 1.811892389  |              |                  |
|               | 0.188107611                           | 0.188107611                 | -0.707938    | -0.393890433                | -0.550914217 |              |                  |
|               | 0.222065164                           | 2                           | 0            | 0.998207054                 |              |              |                  |
| CCT7          | ENSG00000135624.15                    | 0.742135281                 | 3            | 2                           | 0.444583168  |              |                  |
|               | Brain_Nucleus_accumbens_basal_ganglia | 0.85688163                  |              | Brain_Hypothalamus          |              |              |                  |
|               | 2.005016822                           | 0.000205971                 | 0.994777207  | -0.764476781                | 0.180345128  |              |                  |
|               | -0.445993797                          | 0.542451445                 | 2            | 0                           | 0.998207054  |              |                  |
| EIF4ENIF1     | ENSG00000184708.17                    | 0.742280714                 | 1            | 1                           | 0.742280714  |              |                  |
|               | Brain_Hippocampus                     | 0.742280714                 |              | Brain_Hippocampus           | 1            | 1            | 1                |
|               | -0.328834594                          | -0.328834594                | -0.328834594 | NA                          | 1            | 0            | 0.998207054      |
| AOC3          | ENSG00000131471.6                     | 0.742287935                 | 1            | 1                           | 0.742287935  |              |                  |
|               | Brain_Cerebellar_Hemisphere           | 0.742287935                 |              | Brain_Cerebellar_Hemisphere | 1            | 1            |                  |
|               | 1                                     | 0.328825041                 | 0.328825041  | 0.328825041                 | NA           | 1            | 0                |
|               | 0.998207054                           |                             |              |                             |              |              |                  |
| PSMB5         | ENSG00000100804.18                    | 0.742306436                 | 7            | 6                           | 0.092955881  |              | Brain_Cerebellum |
|               | 0.429949512                           | Brain_Cerebellar_Hemisphere | 3.974319652  | 0.080031038                 |              |              |                  |
|               | 0.142983227                           | 0.789278051                 | 1.680007372  | 1.246357721                 | 0.353680849  |              |                  |
|               | 6                                     | 0                           | 0.998207054  |                             |              |              |                  |
| RP11-93H24.3  | ENSG00000273723.1                     | 0.742314492                 | 1            | 1                           | 0.742314492  |              |                  |
|               | Brain_Cerebellum                      | 0.742314492                 |              | Brain_Cerebellum            | 1            | 1            | 1                |
|               | -0.328789908                          | -0.328789908                | NA           | 1                           | 0            | 0.998207054  |                  |
| ASB5          | ENSG00000164122.8                     | 0.742345237                 | 13           | 3                           | 0.223029714  |              |                  |
|               | Brain_Hypothalamus                    | 0.804310102                 |              | Brain_Hippocampus           | 11.28589086  |              |                  |
|               | 0.005937204                           | 0.427159633                 | 0.247772928  | 1.218511351                 | 0.706836631  |              |                  |
|               | 0.240785181                           | 3                           | 0            | 0.998207054                 |              |              |                  |
| ATP13A4       | ENSG00000127249.14                    | 0.7424479                   | 6            | 6                           | 0.263511795  |              |                  |
|               | Brain_Cerebellar_Hemisphere           | 0.885715111                 |              | Brain_Caudate_basal_ganglia | 3.36363313   |              |                  |
|               | 0.193382644                           | 0.193382644                 | -0.253288478 | 1.118129251                 | 0.283120451  |              |                  |
|               | 0.510607224                           | 6                           | 0            | 0.998207054                 |              |              |                  |
| RP13-554M15.8 | ENSG00000277186.1                     | 0.742493893                 | 5            | 5                           | 0.205797166  |              |                  |
|               | Brain_Anterior_cingulate_cortex_BA24  | 0.988125192                 |              | Brain_Cerebellum            |              |              |                  |
|               | 2.002988987                           | 0.418497589                 | 0.418497589  | -1.265206911                | 0.897711548  |              |                  |
|               | -0.127738702                          | 0.788089273                 | 5            | 0                           | 0.998207054  |              |                  |
| CWC22         | ENSG00000163510.13                    | 0.742502529                 | 1            | 1                           | 0.742502529  |              |                  |
|               | Brain_Substantia_nigra                | 0.742502529                 |              | Brain_Substantia_nigra      | 1            | 1            |                  |
|               | 1                                     | -0.32854116                 | -0.32854116  | -0.32854116                 | NA           | 1            | 0                |
|               | 0.998207054                           |                             |              |                             |              |              |                  |
| MRPL9         | ENSG00000143436.10                    | 0.742513559                 | 1            | 1                           | 0.742513559  |              | Brain_Cortex     |
|               | 0.742513559                           | Brain_Cortex                | 1            | 1                           | 1            | -0.328526568 | -0.328526568     |
|               | -0.328526568                          | NA                          | 1            | 0                           | 0.998207054  |              |                  |
| REEP4         | ENSG00000168476.11                    | 0.742585243                 | 3            | 3                           | 0.274302306  |              |                  |
|               | Brain_Caudate_basal_ganglia           | 0.926729117                 |              | Brain_Hippocampus           | 1.403072519  |              |                  |
|               | 0.635741374                           | 0.635741374                 | -0.091960885 | 1.093208409                 | 0.442581487  |              |                  |
|               | 0.601051812                           | 3                           | 0            | 0.998207054                 |              |              |                  |
| SFTPC         | ENSG00000168484.12                    | 0.742620098                 | 3            | 3                           | 0.282778904  |              |                  |
|               | Brain_Frontal_Cortex_BA9              | 0.998630366                 |              | Brain_Substantia_nigra      | 1.08362003   |              |                  |
|               | 0.90793585                            | 0.90793585                  | -1.07409768  | 0.225187171                 | -0.282397975 | 0.69467697   |                  |
|               | 3                                     | 0                           | 0.998207054  |                             |              |              |                  |
| COL9A2        | ENSG00000049089.13                    | 0.74264428                  | 1            | 1                           | 0.74264428   |              |                  |
|               | Brain_Nucleus_accumbens_basal_ganglia | 0.74264428                  |              |                             |              |              |                  |

|                  |                                       |                             |                             |              |              |                    |
|------------------|---------------------------------------|-----------------------------|-----------------------------|--------------|--------------|--------------------|
|                  | Brain_Nucleus_accumbens_basal_ganglia | 1                           | 1                           | 1            | 0.328353655  |                    |
|                  | 0.328353655                           | 0.328353655                 | NA                          | 1            | 0            | 0.998207054        |
| AVEN             | ENSG00000169857.7                     | 0.742647468                 | 9                           | 4            | 0.226788361  | Brain_Amygdala     |
|                  | 0.894018297                           | Brain_Hippocampus           | 6.685950796                 |              | 0.015481986  |                    |
|                  | 0.279447005                           | -0.26958914                 | 1.208673357                 |              | 0.722576295  | 0.494293889        |
|                  | 4                                     | 0                           | 0.998207054                 |              |              |                    |
| RP11-419I17.1    | ENSG00000283674.1                     | 0.742718944                 | 6                           | 6            | 0.283389538  |                    |
|                  | Brain_Cerebellar_Hemisphere           | 0.86788344                  | Brain_Cerebellum            | 1.673350683  |              |                    |
|                  | 0.445739177                           | -0.445739177                | -0.800860878                |              | 1.0727361    | 0.304407358        |
|                  | 0.706366857                           | 6                           | 0                           | 0.998207054  |              |                    |
| RP1-78O14.1      | ENSG00000257894.2                     | 0.742747292                 | 1                           | 1            | 0.742747292  |                    |
|                  | Brain_Cortex                          | 0.742747292                 | Brain_Cortex                | 1            | 1            | 1                  |
|                  | -0.3282174                            | -0.3282174                  | NA                          | 1            | 0            | -0.998207054       |
| USP46            | ENSG00000109189.12                    | 0.742768985                 | 2                           | 2            | 0.580868896  | Brain_Cerebellum   |
|                  | 0.806749329                           | Brain_Cerebellar_Hemisphere | 1.889214163                 |              | 0.110785837  |                    |
|                  | 0.110785837                           | -0.552115977                | -0.244621741                |              | -0.398368859 | 0.21743126         |
|                  | 0                                     | 0.998207054                 |                             |              |              | 2                  |
| LINC00910        | ENSG00000188825.13                    | 0.742794084                 | 1                           | 1            | 0.742794084  |                    |
|                  | Brain_Cerebellum                      | 0.742794084                 | Brain_Cerebellum            | 1            | 1            | 1                  |
|                  | 0.328155511                           | 0.328155511                 | NA                          | 1            | 0            | 0.998207054        |
| ROPN1L           | ENSG00000145491.11                    | 0.742795832                 | 1                           | 1            | 0.742795832  |                    |
|                  | Brain_Substantia_nigra                | 0.742795832                 | Brain_Substantia_nigra      | 1            | 1            |                    |
|                  | 1                                     | -0.328153199                | -0.328153199                | -0.328153199 | NA           | 1                  |
|                  | 0.998207054                           |                             |                             |              |              | 0                  |
| TBL2             | ENSG00000106638.15                    | 0.742946994                 | 9                           | 9            | 0.15038178   | Brain_Hypothalamus |
|                  | 0.691888265                           | Brain_Putamen_basal_ganglia | 1.941508524                 |              | 0.144451122  |                    |
|                  | 0.144451122                           | -0.972088478                | 1.438184261                 |              | -0.353748004 | 0.791245712        |
|                  | 9                                     | 0                           | 0.998207054                 |              |              |                    |
| MSH3             | ENSG00000113318.9                     | 0.742989736                 | 10                          | 6            | 0.359331915  | Brain_Cerebellum   |
|                  | 0.970768073                           | Brain_Hypothalamus          | 5.811979817                 |              | 0.003944719  |                    |
|                  | 0.207708609                           | -0.350925989                | 0.916638859                 |              | 0.293377913  | 0.418113833        |
|                  | 6                                     | 0                           | 0.998207054                 |              |              |                    |
| RNF183           | ENSG00000165188.13                    | 0.743013501                 | 1                           | 1            | 0.743013501  |                    |
|                  | Brain_Cortex                          | 0.743013501                 | Brain_Cortex                | 1            | 1            | 1                  |
|                  | 0.327865314                           | 0.327865314                 | NA                          | 1            | 0            | 0.998207054        |
| MMP24            | ENSG00000125966.9                     | 0.743049682                 | 1                           | 1            | 0.743049682  | Brain_Cerebellum   |
|                  | 0.743049682                           | Brain_Cerebellum            | 1                           | 1            | 0.327817464  | 0.327817464        |
|                  | 0.327817464                           | NA                          | 1                           | 0            | 0.998207054  |                    |
| MSMO1            | ENSG00000052802.12                    | 0.743368352                 | 2                           | 2            | 0.632405847  |                    |
|                  | Brain_Cerebellar_Hemisphere           | 0.686288468                 | Brain_Putamen_basal_ganglia |              |              |                    |
|                  | 1.341567762                           | 0.658432238                 | 0.658432238                 |              | -0.403896992 | 0.47834335         |
|                  | 0.037223179                           | 0.623838129                 | 2                           | 0            | 0.998207054  |                    |
| TSPYL4           | ENSG00000187189.10                    | 0.743630657                 | 1                           | 1            | 0.743630657  |                    |
|                  | Brain_Cerebellum                      | 0.743630657                 | Brain_Cerebellum            | 1            | 1            | 1                  |
|                  | -0.327049222                          | -0.327049222                | NA                          | 1            | 0            | 0.998207054        |
| TTC4             | ENSG00000243725.6                     | 0.743696162                 | 8                           | 3            | 0.289316796  |                    |
|                  | Brain_Frontal_Cortex_BA9              | 0.985906817                 | Brain_Cortex                | 6.240850464  |              |                    |
|                  | 0.004205886                           | 0.621342401                 | -1.059621571                |              | 0.285589667  | -0.481807146       |
|                  | 0.444441172                           | 3                           | 0                           | 0.998207054  |              |                    |
| VSIG10           | ENSG00000176834.13                    | 0.743757214                 | 5                           | 5            | 0.237400327  |                    |
|                  | Brain_Cerebellar_Hemisphere           | 0.961525099                 | Brain_Cortex                | 1.842386481  |              |                    |
|                  | 0.164438267                           | 0.164438267                 | -1.181509638                |              | 0.04823984   | -0.751502884       |
|                  | 0.48628163                            | 5                           | 0                           | 0.998207054  |              |                    |
| SNX32            | ENSG00000172803.17                    | 0.74376312                  | 13                          | 2            | 0.400063753  |                    |
|                  | Brain_Anterior_cingulate_cortex_BA24  | 0.818523349                 |                             |              |              |                    |
|                  | Brain_Nucleus_accumbens_basal_ganglia | 11.92980002                 | 7.69E-06                    | 0.607587785  |              |                    |
|                  | 0.229444633                           | 0.841507378                 | 0.610878624                 |              | 0.209863595  | 2                  |
|                  | 0.998207054                           |                             |                             |              |              | 0                  |
| XXbac-BPG308K3.5 | ENSG00000225173.1                     | 0.743835766                 | 1                           | 1            | 0.743835766  |                    |
|                  | Brain_Anterior_cingulate_cortex_BA24  | 0.743835766                 |                             |              |              |                    |
|                  | Brain_Anterior_cingulate_cortex_BA24  | 1                           | 1                           | 1            | 0.326778045  |                    |
|                  | 0.326778045                           | 0.326778045                 | NA                          | 1            | 0            | 0.998207054        |

|               |                                       |                             |                                      |              |              |                  |
|---------------|---------------------------------------|-----------------------------|--------------------------------------|--------------|--------------|------------------|
| CLPSL1        | ENSG00000204140.9                     | 0.743917517                 | 4                                    | 4            | 0.323065077  |                  |
|               | Brain_Frontal_Cortex_BA9              | 0.55110189                  | Brain_Anterior_cingulate_cortex_BA24 |              |              |                  |
|               | 1.53998761                            | 0.40185809                  | 0.40185809                           | -0.607164838 | 0.988178824  | 0.40263644       |
|               | 0.696001056                           | 4                           | 0                                    | 0.998207054  |              |                  |
| RP11-108O10.2 | ENSG00000254990.5                     | 0.743983523                 | 3                                    | 3            | 0.360197173  |                  |
|               | Brain_Cerebellum0.631932814           |                             | Brain_Frontal_Cortex_BA9             |              | 1.194467549  |                  |
|               | 0.871580112                           | 0.871580112                 | -0.914989441                         | -0.479008174 | -0.671436165 |                  |
|               | 0.222441593                           | 3                           | 0                                    | 0.998207054  |              |                  |
| DUOX2         | ENSG00000140279.12                    | 0.744068247                 | 1                                    | 1            | 0.744068247  | Brain_Cerebellum |
|               | 0.744068247                           | Brain_Cerebellum1           | 1                                    | 1            | -0.326470709 | -0.326470709     |
|               | -0.326470709                          | NA                          | 1                                    | 0            | 0.998207054  |                  |
| KCNK5         | ENSG00000164626.8                     | 0.744069184                 | 2                                    | 2            | 0.442023475  |                  |
|               | Brain_Substantia_nigra                | 0.97544812                  | Brain_Frontal_Cortex_BA9             |              | 1.020801594  |                  |
|               | 0.979198406                           | 0.979198406                 | -0.768780756                         | 0.030776076  | -0.36900234  |                  |
|               | 0.565372058                           | 2                           | 0                                    | 0.998207054  |              |                  |
| ZNF557        | ENSG00000130544.11                    | 0.744094219                 | 1                                    | 1            | 0.744094219  |                  |
|               | Brain_Spinal_cord_cervical_c-1        | 0.744094219                 | Brain_Spinal_cord_cervical_c-1       |              |              |                  |
|               | 1                                     | 1                           | 1                                    | -0.326436377 | -0.326436377 | NA               |
|               | 0.998207054                           |                             |                                      |              |              | 1                |
| SAV1          | ENSG00000151748.14                    | 0.744096268                 | 6                                    | 5            | 0.21849334   | Brain_Cortex     |
|               | 0.763944735                           | Brain_Caudate_basal_ganglia | 3.549661567                          |              | 0.062388399  |                  |
|               | 0.177789966                           | 0.300304717                 | 1.230544324                          | 0.818099882  | 0.39201707   | 5                |
|               | 0                                     | 0.998207054                 |                                      |              |              |                  |
| ZNF639        | ENSG00000121864.9                     | 0.744099695                 | 2                                    | 2            | 0.790442297  |                  |
|               | Brain_Cortex                          | 0.955553871                 | Brain_Hippocampus                    |              | 1.910852907  |                  |
|               | 0.089147093                           | 0.089147093                 | -0.055733803                         | 0.265736311  | 0.105001254  |                  |
|               | 0.227313697                           | 2                           | 0                                    | 0.998207054  |              |                  |
| CTC-467M3.3   | ENSG00000250377.1                     | 0.744228342                 | 3                                    | 3            | 0.482706211  |                  |
|               | Brain_Frontal_Cortex_BA9              | 0.910971428                 | Brain_Anterior_cingulate_cortex_BA24 |              |              |                  |
|               | 1.883001439                           | 0.393179735                 | 0.393179735                          | -0.347112692 | 0.70195663   |                  |
|               | 0.155552419                           | 0.525900601                 | 3                                    | 0            | 0.998207054  |                  |
| MBOAT2        | ENSG00000143797.11                    | 0.744258014                 | 2                                    | 2            | 0.448597934  |                  |
|               | Brain_Spinal_cord_cervical_c-1        | 0.884239177                 | Brain_Cerebellum                     |              | 1.02244796   |                  |
|               | 0.97755204                            | 0.97755204                  | -0.757754554                         | -0.145597455 | -0.451676004 |                  |
|               | 0.432860435                           | 2                           | 0                                    | 0.998207054  |              |                  |
| TMEM19        | ENSG00000139291.13                    | 0.744327133                 | 1                                    | 1            | 0.744327133  |                  |
|               | Brain_Cerebellum                      | 0.744327133                 | Brain_Cerebellum                     |              | 1            | 1                |
|               | 0.326128502                           | 0.326128502                 | NA                                   | 1            | 0            | 0.998207054      |
| RWDD1         | ENSG00000111832.12                    | 0.744333467                 | 1                                    | 1            | 0.744333467  |                  |
|               | Brain_Spinal_cord_cervical_c-1        | 0.744333467                 | Brain_Spinal_cord_cervical_c-1       |              |              |                  |
|               | 1                                     | 1                           | 1                                    | 0.32612013   | 0.32612013   | 0.32612013       |
|               | 0.32612013                            | 0.32612013                  | 0.32612013                           | NA           | 1            | 0                |
|               | 0.998207054                           |                             |                                      |              |              |                  |
| FBLN1         | ENSG00000077942.18                    | 0.744376189                 | 2                                    | 2            | 0.444743425  |                  |
|               | Brain_Nucleus_accumbens_basal_ganglia | 0.990435939                 | Brain_Substantia_nigra               |              |              |                  |
|               | 1.088618172                           | 0.911381828                 | 0.911381828                          | 0.01198706   | 0.764207789  |                  |
|               | 0.388097425                           | 0.531900379                 | 2                                    | 0            | 0.998207054  |                  |
| CIT           | ENSG00000122966.15                    | 0.744434982                 | 1                                    | 1            | 0.744434982  | Brain_Cerebellum |
|               | 0.744434982                           | Brain_Cerebellum            | 1                                    | 1            | 1            | 0.325985954      |
|               | 0.325985954                           | NA                          | 1                                    | 0            | 0.998207054  |                  |
| PHB           | ENSG00000167085.11                    | 0.74444067                  | 2                                    | 2            | 0.537371681  |                  |
|               | Brain_Anterior_cingulate_cortex_BA24  | 0.648508389                 | Brain_Amygdala                       |              |              |                  |
|               | 1.003588664                           | 0.996411336                 | 0.996411336                          | -0.616792377 | 0.455835341  |                  |
|               | -0.080478518                          | 0.758462333                 | 2                                    | 0            | 0.998207054  |                  |
| LRRFIP1       | ENSG00000124831.18                    | 0.744444585                 | 1                                    | 1            | 0.744444585  |                  |
|               | Brain_Putamen_basal_ganglia           | 0.744444585                 | Brain_Putamen_basal_ganglia          |              | 1            | 1                |
|               | 1                                     | 0.325973262                 | 0.325973262                          | 0.325973262  | NA           | 1                |
|               | 0.998207054                           |                             |                                      |              |              | 0                |
| FOXRED2       | ENSG00000100350.14                    | 0.744464599                 | 11                                   | 2            | 0.482201629  |                  |
|               | Brain_Anterior_cingulate_cortex_BA24  | 0.98657361                  | Brain_Cerebellum                     |              | 9.780934285  |                  |
|               | 0.008399808                           | 0.604488955                 | -0.322455326                         | 0.702765936  | -0.041488453 |                  |
|               | 0.27533291                            | 2                           | 0                                    | 0.998207054  |              |                  |
| MED15         | ENSG00000099917.17                    | 0.744480855                 | 3                                    | 3            | 0.367350531  |                  |
|               | Brain_Caudate_basal_ganglia           | 0.499770853                 | Brain_Amygdala                       |              | 1.786762484  |                  |



|              |                                |                             |                                      |                                |              |                  |              |             |   |
|--------------|--------------------------------|-----------------------------|--------------------------------------|--------------------------------|--------------|------------------|--------------|-------------|---|
|              | 0.211493991                    | 0.211493991                 | -0.674850341                         | 0.90144732                     | 0.326756753  |                  |              |             |   |
|              | 0.870558367                    | 3                           | 0                                    | 0.998207054                    |              |                  |              |             |   |
| DXO          | ENSG00000204348.9              | 0.744492868                 | 6                                    | 6                              | 0.137969453  |                  |              |             |   |
|              | Brain_Hypothalamus             | 0.824228231                 |                                      | Brain_Putamen_basal_ganglia    | 2.697782421  |                  |              |             |   |
|              | 0.195439452                    | 0.195439452                 | -1.483395157                         | -0.222110028                   | -1.090668856 |                  |              |             |   |
|              | 0.472240262                    | 6                           | 0                                    | 0.998207054                    |              |                  |              |             |   |
| CEP68        | ENSG00000011523.13             | 0.744503279                 | 3                                    | 3                              | 0.372157825  | Brain_Cortex     |              |             |   |
|              | 0.660292555                    | Brain_Cerebellum            | 1.230826723                          | 0.784570758                    | 0.784570758  |                  |              |             |   |
|              | 0.439509286                    | 0.892438721                 | 0.666067887                          | 0.226464776                    | 3            | 0                |              |             |   |
|              | 0.998207054                    |                             |                                      |                                |              |                  |              |             |   |
| PDZRN3       | ENSG00000121440.14             | 0.744532171                 | 1                                    | 1                              | 0.744532171  |                  |              |             |   |
|              | Brain_Spinal_cord_cervical_c-1 | 0.744532171                 |                                      | Brain_Spinal_cord_cervical_c-1 |              |                  |              |             |   |
|              | 1                              | 1                           | 1                                    | 0.325857502                    | 0.325857502  | 0.325857502      | NA           | 1           | 0 |
|              | 0.998207054                    |                             |                                      |                                |              |                  |              |             |   |
| KIAA0895L    | ENSG00000196123.12             | 0.744808004                 | 5                                    | 3                              | 0.488270888  |                  |              |             |   |
|              | Brain_Frontal_Cortex_BA9       | 0.92816584                  | Brain_Anterior_cingulate_cortex_BA24 |                                |              |                  |              |             |   |
|              | 3.857082288                    | 0.068539633                 | 0.365413775                          | -0.693061611                   | 0.48505638   |                  |              |             |   |
|              | -0.036386076                   | 0.445506579                 | 3                                    | 0                              | 0.998207054  |                  |              |             |   |
| TFEC         | ENSG00000105967.15             | 0.744837841                 | 1                                    | 1                              | 0.744837841  | Brain_Amygdala   |              |             |   |
|              | 0.744837841                    | Brain_Amygdala              | 1                                    | 1                              | 1            | -0.325453538     | -0.325453538 |             |   |
|              | -0.325453538                   | NA                          | 1                                    | 0                              | 0.998207054  |                  |              |             |   |
| AGTPBP1      | ENSG00000135049.15             | 0.744866382                 | 2                                    | 2                              | 0.443465558  |                  |              |             |   |
|              | Brain_Cerebellum               | 0.926223368                 | Brain_Frontal_Cortex_BA9             | 1.175363037                    |              |                  |              |             |   |
|              | 0.824636963                    | 0.824636963                 | -0.766354231                         | -0.092597452                   | -0.429475841 |                  |              |             |   |
|              | 0.476417987                    | 2                           | 0                                    | 0.998207054                    |              |                  |              |             |   |
| ZNF597       | ENSG00000167981.5              | 0.744943575                 | 4                                    | 2                              | 0.321023265  |                  |              |             |   |
|              | Brain_Putamen_basal_ganglia    | 0.60532351                  | Brain_Cerebellar_Hemisphere          | 3.526546287                    |              |                  |              |             |   |
|              | 0.016333254                    | 0.383753309                 | 0.51676028                           | 0.99235729                     | 0.69095552   | 0.21505409       | 2            |             |   |
|              | 0                              | 0.998207054                 |                                      |                                |              |                  |              |             |   |
| PPP2R3C      | ENSG00000092020.10             | 0.745000209                 | 10                                   | 4                              | 0.102176666  |                  |              |             |   |
|              | Brain_Frontal_Cortex_BA9       | 0.551967502                 | Brain_Anterior_cingulate_cortex_BA24 |                                |              |                  |              |             |   |
|              | 6.940676687                    | 0.006969068                 | 0.38332375                           | -1.634391529                   | -0.594814458 |                  |              |             |   |
|              | -0.917348945                   | 0.324332232                 | 4                                    | 0                              | 0.998207054  |                  |              |             |   |
| WTAP         | ENSG00000146457.14             | 0.745010627                 | 2                                    | 2                              | 0.497258885  | Brain_Cerebellum |              |             |   |
|              | 0.672607316                    | Brain_Cerebellar_Hemisphere | 1.098147661                          | 0.901852339                    |              |                  |              |             |   |
|              | 0.901852339                    | -0.678809008                | -0.422572333                         | -0.550690671                   | 0.18118669   | 2                |              |             |   |
|              | 0                              | 0.998207054                 |                                      |                                |              |                  |              |             |   |
| CTD-2589M5.5 | ENSG00000254639.1              | 0.745321932                 | 1                                    | 1                              | 0.745321932  |                  |              |             |   |
|              | Brain_Frontal_Cortex_BA9       | 0.745321932                 | Brain_Frontal_Cortex_BA9             | 1                              | 1            |                  |              |             |   |
|              | 1                              | 0.32481389                  | 0.32481389                           | 0.32481389                     | NA           | 1                | 0            | 0.998207054 |   |
| MEF2C        | ENSG00000081189.15             | 0.745474942                 | 3                                    | 2                              | 0.581499983  | Brain_Cerebellum |              |             |   |
|              | 0.603456228                    | Brain_Cerebellar_Hemisphere | 1.98893275                           | 0.011930594                    |              |                  |              |             |   |
|              | 0.999136656                    | -0.535676181                | 0.551195035                          | 0.178318526                    | 0.618541412  |                  |              |             |   |
|              | 2                              | 0                           | 0.998207054                          |                                |              |                  |              |             |   |
| ZNF677       | ENSG00000197928.10             | 0.745607184                 | 2                                    | 2                              | 0.499154072  |                  |              |             |   |
|              | Brain_Caudate_basal_ganglia    | 0.942129353                 | Brain_Spinal_cord_cervical_c-1       |                                |              |                  |              |             |   |
|              | 1.552682196                    | 0.447317804                 | 0.447317804                          | 0.072593809                    | 0.675821359  |                  |              |             |   |
|              | 0.374207584                    | 0.426546291                 | 2                                    | 0                              | 0.998207054  |                  |              |             |   |
| MRGPRD       | ENSG00000172938.3              | 0.745835351                 | 2                                    | 2                              | 0.469145266  |                  |              |             |   |
|              | Brain_Cerebellum               | 0.687538071                 | Brain_Cerebellar_Hemisphere          | 1.218573722                    |              |                  |              |             |   |
|              | 0.781426278                    | 0.781426278                 | -0.723870461                         | -0.40219833                    | -0.563034396 |                  |              |             |   |
|              | 0.227456545                    | 2                           | 0                                    | 0.998207054                    |              |                  |              |             |   |
| RGS19        | ENSG00000171700.13             | 0.745963523                 | 2                                    | 2                              | 0.444467513  | Brain_Cerebellum |              |             |   |
|              | 0.826380264                    | Brain_Cerebellar_Hemisphere | 1.333561068                          | 0.666438932                    |              |                  |              |             |   |
|              | 0.666438932                    | -0.764670943                | -0.219346344                         | -0.492008644                   | 0.385602722  |                  |              |             |   |
|              | 2                              | 0                           | 0.998207054                          |                                |              |                  |              |             |   |
| CAPN3        | ENSG00000092529.23             | 0.746193665                 | 2                                    | 2                              | 0.451741788  | Brain_Cerebellum |              |             |   |
|              | 0.543258477                    | Brain_Cerebellar_Hemisphere | 1.891403058                          | 0.108596942                    |              |                  |              |             |   |
|              | 0.108596942                    | 0.607892948                 | 0.752514375                          | 0.680203661                    | 0.102262792  |                  |              |             |   |
|              | 2                              | 0                           | 0.998207054                          |                                |              |                  |              |             |   |
| RALGDS       | ENSG00000160271.14             | 0.746232656                 | 2                                    | 2                              | 0.512874015  |                  |              |             |   |
|              | Brain_Cerebellum               | 0.784935734                 | Brain_Cerebellar_Hemisphere          | 1.179140147                    |              |                  |              |             |   |

|            |                                       |                             |                          |              |                                |                    |              |             |   |
|------------|---------------------------------------|-----------------------------|--------------------------|--------------|--------------------------------|--------------------|--------------|-------------|---|
|            | 0.820859853                           | 0.820859853                 | -0.272892654             | 0.654369134  | 0.19073824                     |                    |              |             |   |
|            | 0.655673098                           | 2                           | 0                        | 0.998207054  |                                |                    |              |             |   |
| CORT       | ENSG00000241563.3                     | 0.746237827                 | 1                        | 1            | 0.746237827                    |                    |              |             |   |
|            | Brain_Caudate_basal_ganglia           | 0.746237827                 |                          |              | Brain_Caudate_basal_ganglia    | 1                  | 1            |             |   |
|            | 1                                     | -0.323604042                | -0.323604042             | -0.323604042 | NA                             | 1                  | 0            |             |   |
|            | 0.998207054                           |                             |                          |              |                                |                    |              |             |   |
| CA7        | ENSG00000168748.13                    | 0.746238184                 | 1                        | 1            | 0.746238184                    |                    |              |             |   |
|            | Brain_Caudate_basal_ganglia           | 0.746238184                 |                          |              | Brain_Caudate_basal_ganglia    | 1                  | 1            |             |   |
|            | 1                                     | 0.32360357                  | 0.32360357               | 0.32360357   | NA                             | 1                  | 0            | 0.998207054 |   |
| HSPA1L     | ENSG00000204390.9                     | 0.746377613                 | 3                        | 3            | 0.31089356                     | Brain_Cerebellum   |              |             |   |
|            | 0.632757853                           | Brain_Cerebellar_Hemisphere | 2.001242917              |              | 0.391349769                    |                    |              |             |   |
|            | 0.391349769                           | -1.013348854                | -0.47784876              |              | -0.738142241                   | 0.268061353        |              |             |   |
|            | 3                                     | 0                           | 0.998207054              |              |                                |                    |              |             |   |
| NPLOC4     | ENSG00000182446.13                    | 0.746403                    | 8                        | 6            | 0.106421212                    |                    |              |             |   |
|            | Brain_Nucleus_accumbens_basal_ganglia | 0.955572743                 |                          |              | Brain_Putamen_basal_ganglia    |                    |              |             |   |
|            | 4.354429865                           | 0.015111134                 | 0.215339741              |              | -1.614489873                   | 0.374059965        |              |             |   |
|            | -0.877407202                          | 0.690612488                 | 6                        | 0            | 0.998207054                    |                    |              |             |   |
| ZNF627     | ENSG00000198551.9                     | 0.746420681                 | 4                        | 1            | 0.680469564                    |                    |              |             |   |
|            | Brain_Putamen_basal_ganglia           | 0.814830556                 |                          |              | Brain_Frontal_Cortex_BA9       |                    |              |             |   |
|            | 3.856152916                           | 0.006558669                 | 3.856152916              |              | 0.234198916                    | 0.411822452        |              |             |   |
|            | 0.318304342                           | 0.075559392                 | 1                        | 0            | 0.998207054                    |                    |              |             |   |
| AMOTL1     | ENSG00000166025.17                    | 0.746463286                 | 1                        | 1            | 0.746463286                    |                    |              |             |   |
|            | Brain_Amygdala                        | 0.746463286                 | Brain_Amygdala           | 1            | 1                              | 1                  | 0.323306296  |             |   |
|            | 0.323306296                           | 0.323306296                 | NA                       | 1            | 0                              | 0.998207054        |              |             |   |
| ACSM1      | ENSG00000166743.9                     | 0.746603663                 | 7                        | 4            | 0.379862156                    |                    |              |             |   |
|            | Brain_Hippocampus                     | 0.961310694                 | Brain_Frontal_Cortex_BA9 | 4.838756938  |                                |                    |              |             |   |
|            | 0.024030453                           | 0.236031045                 | -0.878150307             |              | 0.597995097                    | -0.118666863       |              |             |   |
|            | 0.531028093                           | 4                           | 0                        | 0.998207054  |                                |                    |              |             |   |
| GTF2H3     | ENSG00000111358.13                    | 0.746632204                 | 4                        | 4            | 0.307795718                    |                    |              |             |   |
|            | Brain_Anterior_cingulate_cortex_BA24  | 0.925694317                 |                          |              | Brain_Hypothalamus             |                    |              |             |   |
|            | 2.024688075                           | 0.274030295                 | 0.274030295              |              | -1.019858196                   | 0.484544777        |              |             |   |
|            | -0.318871904                          | 0.65710701                  | 4                        | 0            | 0.998207054                    |                    |              |             |   |
| RP1-45I4.3 | ENSG00000227192.1                     | 0.746760505                 | 1                        | 1            | 0.746760505                    |                    |              |             |   |
|            | Brain_Spinal_cord_cervical_c-1        | 0.746760505                 |                          |              | Brain_Spinal_cord_cervical_c-1 |                    |              |             |   |
|            | 1                                     | 1                           | 1                        | -0.322913826 | -0.322913826                   | -0.322913826       | NA           | 1           | 0 |
|            | 0.998207054                           |                             |                          |              |                                |                    |              |             |   |
| MRGBP      | ENSG00000101189.6                     | 0.74678937                  | 2                        | 2            | 0.45568681                     | Brain_Hypothalamus |              |             |   |
|            | 0.877116169                           | Brain_Cerebellar_Hemisphere | 1.014899804              |              | 0.985100196                    |                    |              |             |   |
|            | 0.985100196                           | -0.154626003                | 0.745967894              |              | 0.295670945                    | 0.636816052        |              |             |   |
|            | 2                                     | 0                           | 0.998207054              |              |                                |                    |              |             |   |
| LINC02217  | ENSG00000248455.5                     | 0.746832961                 | 6                        | 6            | 0.26887263                     |                    |              |             |   |
|            | Brain_Frontal_Cortex_BA9              | 0.901071689                 |                          |              | Brain_Caudate_basal_ganglia    |                    |              |             |   |
|            | 1.284321756                           | 0.819518944                 | 0.819518944              |              | -0.718404574                   | 1.105662492        |              |             |   |
|            | 0.439897512                           | 0.674857449                 | 6                        | 0            | 0.998207054                    |                    |              |             |   |
| DISP1      | ENSG00000154309.8                     | 0.747168772                 | 1                        | 1            | 0.747168772                    | Brain_Cerebellum   |              |             |   |
|            | 0.747168772                           | Brain_Cerebellum            | 1                        | 1            | 1                              | -0.322374801       | -0.322374801 |             |   |
|            | -0.322374801                          | NA                          | 1                        | 0            | 0.998207054                    |                    |              |             |   |
| SLC28A1    | ENSG00000156222.11                    | 0.747180591                 | 1                        | 1            | 0.747180591                    |                    |              |             |   |
|            | Brain_Spinal_cord_cervical_c-1        | 0.747180591                 |                          |              | Brain_Spinal_cord_cervical_c-1 |                    |              |             |   |
|            | 1                                     | 1                           | 1                        | -0.322359198 | -0.322359198                   | -0.322359198       | NA           | 1           | 0 |
|            | 0.998207054                           |                             |                          |              |                                |                    |              |             |   |
| PRR31      | ENSG00000198454.2                     | 0.747258369                 | 1                        | 1            | 0.747258369                    |                    |              |             |   |
|            | Brain_Hypothalamus                    | 0.747258369                 | Brain_Hypothalamus       | 1            | 1                              | 1                  |              |             |   |
|            | 0.322256521                           | 0.322256521                 | 0.322256521              |              | NA                             | 1                  | 0            | 0.998207054 |   |
| ZNF12      | ENSG00000164631.18                    | 0.747439303                 | 2                        | 2            | 0.59738789                     | Brain_Cerebellum   |              |             |   |
|            | 0.670248489                           | Brain_Cerebellar_Hemisphere | 1.212598737              |              | 0.787401263                    |                    |              |             |   |
|            | 0.787401263                           | -0.528160576                | 0.425806996              |              | -0.05117679                    | 0.674556939        |              |             |   |
|            | 2                                     | 0                           | 0.998207054              |              |                                |                    |              |             |   |
| RELL2      | ENSG00000164620.8                     | 0.747524997                 | 4                        | 4            | 0.367652242                    |                    |              |             |   |
|            | Brain_Nucleus_accumbens_basal_ganglia | 0.819683418                 |                          |              | Brain_Cerebellum               |                    |              |             |   |
|            | 1.957404284                           | 0.260648836                 | 0.260648836              |              | -0.801975434                   | 0.900879783        |              |             |   |
|            | 0.107569785                           | 0.768824384                 | 4                        | 0            | 0.998207054                    |                    |              |             |   |

|               |                                       |                             |                                       |              |             |                                |              |              |
|---------------|---------------------------------------|-----------------------------|---------------------------------------|--------------|-------------|--------------------------------|--------------|--------------|
| DCAF16        | ENSG00000163257.10                    | 0.747819907                 | 2                                     | 2            | 0.490042214 |                                |              |              |
|               | Brain_Cerebellum                      | 0.679957196                 |                                       |              |             | Brain_Spinal_cord_cervical_c-1 | 1.132906708  |              |
|               | 0.867093292                           | 0.867093292                 |                                       |              |             | -0.690241684                   | -0.41252154  | -0.551381612 |
|               | 0.196377797                           | 2                           | 0                                     | 0.998207054  |             |                                |              |              |
| AKAP7         | ENSG00000118507.15                    | 0.747854065                 | 4                                     | 4            | 0.4801327   | Brain_Cortex                   |              |              |
|               | 0.921426288                           | Brain_Cerebellum            | 2.864019026                           |              |             | 0.110635219                    | 0.110635219  |              |
|               | -0.706089148                          | 0.174485497                 | -0.240333751                          |              |             | 0.442292709                    | 4            | 0            |
|               | 0.998207054                           |                             |                                       |              |             |                                |              |              |
| NOX4          | ENSG00000086991.12                    | 0.747890017                 | 3                                     | 3            | 0.309232072 |                                |              |              |
|               | Brain_Hippocampus                     | 0.939565237                 |                                       |              |             | Brain_Spinal_cord_cervical_c-1 |              |              |
|               | 1.656718594                           | 0.421666119                 | 0.421666119                           |              |             | 0.075816313                    | 1.016834699  |              |
|               | 0.668885512                           | 0.516179974                 | 3                                     | 0            | 0.998207054 |                                |              |              |
| PTGES2        | ENSG00000148334.14                    | 0.747907314                 | 3                                     | 3            | 0.380747923 |                                |              |              |
|               | Brain_Spinal_cord_cervical_c-1        | 0.817265499                 |                                       |              |             | Brain_Caudate_basal_ganglia    |              |              |
|               | 1.122525283                           | 0.913255215                 | 0.913255215                           |              |             | 0.231063463                    | 0.876519054  |              |
|               | 0.605213168                           | 0.334792276                 | 3                                     | 0            | 0.998207054 |                                |              |              |
| GRAMD1A       | ENSG00000089351.14                    | 0.747911811                 | 7                                     | 2            | 0.332284713 |                                |              |              |
|               | Brain_Nucleus_accumbens_basal_ganglia | 0.998985949                 |                                       |              |             | Brain_Hypothalamus             |              |              |
|               | 6.182230865                           | 0.013269116                 | 0.312063366                           |              |             | -0.969522193                   | -0.001270924 |              |
|               | -0.361658974                          | 0.307562852                 | 2                                     | 0            | 0.998207054 |                                |              |              |
| SLC35A5       | ENSG00000138459.8                     | 0.74792396                  | 1                                     | 1            | 0.74792396  |                                |              |              |
|               | Brain_Frontal_Cortex_BA9              | 0.74792396                  | Brain_Frontal_Cortex_BA9              | 1            | 1           | 1                              |              |              |
|               | -0.32137799                           | -0.32137799                 | -0.32137799                           | NA           | 1           | 0                              | 0.998207054  |              |
| RP11-300A12.2 | ENSG00000259814.1                     | 0.747948456                 | 1                                     | 1            | 0.747948456 |                                |              |              |
|               | Brain_Frontal_Cortex_BA9              | 0.747948456                 | Brain_Frontal_Cortex_BA9              | 1            | 1           |                                |              |              |
|               | 1                                     | -0.321345662                | -0.321345662                          | -0.321345662 | NA          | 1                              | 0            |              |
|               | 0.998207054                           |                             |                                       |              |             |                                |              |              |
| LINC02172     | ENSG00000251632.1                     | 0.747964139                 | 8                                     | 8            | 0.222399035 |                                |              |              |
|               | Brain_Cerebellum                      | 0.918162827                 | Brain_Substantia_nigra                | 3.695044213  |             |                                |              |              |
|               | 0.153553161                           | 0.153553161                 | -1.220173698                          | 0.578882705  |             |                                | -0.242482025 |              |
|               | 0.739188057                           | 8                           | 0                                     | 0.998207054  |             |                                |              |              |
| DCTN4         | ENSG00000132912.12                    | 0.748019792                 | 1                                     | 1            | 0.748019792 | Brain_Cortex                   |              |              |
|               | 0.748019792                           | Brain_Cortex                | 1                                     | 1            | 1           | 0.32125152                     | 0.32125152   | 0.32125152   |
|               | NA                                    | 1                           | 0                                     | 0.998207054  |             |                                |              |              |
| RTP5          | ENSG00000188011.5                     | 0.748032084                 | 1                                     | 1            | 0.748032084 | Brain_Cerebellum               |              |              |
|               | 0.748032084                           | Brain_Cerebellum            | 1                                     | 1            | 1           | 0.321235299                    | 0.321235299  |              |
|               | 0.321235299                           | NA                          | 1                                     | 0            | 0.998207054 |                                |              |              |
| WASIR2        | ENSG00000231439.4                     | 0.748087313                 | 13                                    | 8            | 0.235725192 |                                |              |              |
|               | Brain_Caudate_basal_ganglia           | 0.939526861                 | Brain_Nucleus_accumbens_basal_ganglia |              |             |                                |              |              |
|               | 7.412088867                           | 0.007596717                 | 0.292074379                           |              |             | -0.807462164                   | 1.185739497  |              |
|               | 0.000672247                           | 0.610131                    | 8                                     | 0            | 0.998207054 |                                |              |              |
| GNRH2         | ENSG00000125787.11                    | 0.748099026                 | 3                                     | 3            | 0.45298842  |                                |              |              |
|               | Brain_Putamen_basal_ganglia           | 0.915007223                 | Brain_Hippocampus                     | 1.347165164  |             |                                |              |              |
|               | 0.759118566                           | 0.759118566                 | -0.658410571                          | 0.750442205  |             |                                | 0.06625218   |              |
|               | 0.705297858                           | 3                           | 0                                     | 0.998207054  |             |                                |              |              |
| CATSPER4      | ENSG00000188782.8                     | 0.748340868                 | 2                                     | 2            | 0.447735242 |                                |              |              |
|               | Brain_Cerebellum                      | 0.905028432                 | Brain_Cerebellar_Hemisphere           | 1.232024215  |             |                                |              |              |
|               | 0.767975785                           | 0.767975785                 | 0.119311678                           | 0.759196127  |             |                                | 0.439253903  |              |
|               | 0.452466634                           | 2                           | 0                                     | 0.998207054  |             |                                |              |              |
| MAP3K2        | ENSG00000169967.16                    | 0.748400561                 | 3                                     | 3            | 0.520640775 |                                |              |              |
|               | Brain_Cortex                          | 0.778757794                 | Brain_Frontal_Cortex_BA9              | 2.11346738   |             |                                |              |              |
|               | 0.413801393                           | 0.413801393                 | -0.642357983                          | 0.280938209  |             |                                | -0.275887251 |              |
|               | 0.490199099                           | 3                           | 0                                     | 0.998207054  |             |                                |              |              |
| IKBKB         | ENSG00000104365.13                    | 0.748467546                 | 2                                     | 2            | 0.549262669 | Brain_Cerebellum               |              |              |
|               | 0.701198728                           | Brain_Cerebellar_Hemisphere | 1.929707695                           | 0.070292305  |             |                                |              |              |
|               | 0.070292305                           | -0.598865366                | -0.383702812                          | -0.491284089 |             |                                | 0.152142901  |              |
|               | 2                                     | 0                           | 0.998207054                           |              |             |                                |              |              |
| TOMM22        | ENSG00000100216.5                     | 0.748488331                 | 2                                     | 2            | 0.462802254 |                                |              |              |
|               | Brain_Cerebellar_Hemisphere           | 0.7750489                   | Brain_Anterior_cingulate_cortex_BA24  |              |             |                                |              |              |
|               | 1.117738604                           | 0.882261396                 | 0.882261396                           | -0.285777032 |             |                                | 0.73424037   |              |
|               | 0.224231669                           | 0.721261222                 | 2                                     | 0            | 0.998207054 |                                |              |              |
| APOBEC3H      | ENSG00000100298.15                    | 0.748550558                 | 2                                     | 2            | 0.459053712 |                                |              |              |

|               |                                       |                                      |                   |             |                             |                                       |                |
|---------------|---------------------------------------|--------------------------------------|-------------------|-------------|-----------------------------|---------------------------------------|----------------|
|               | Brain_Spinal_cord_cervical_c-1        | 0.726162943                          |                   |             | Brain_Cerebellum1.242190648 |                                       |                |
|               | 0.757809352                           | 0.757809352                          | -0.350234198      |             | 0.740405946                 | 0.195085874                           |                |
|               | 0.771199042                           | 2                                    | 0                 | 0.998207054 |                             |                                       |                |
| RP11-426C22.4 | ENSG00000259807.1                     | 0.748627884                          |                   | 6           | 6                           | 0.356255617                           |                |
|               | Brain_Nucleus_accumbens_basal_ganglia | 0.996152444                          |                   |             |                             | Brain_Substantia_nigra                |                |
|               | 2.112612706                           | 0.253760272                          | 0.253760272       |             | -0.918703659                | 0.922523425                           |                |
|               | -0.170416502                          | 0.631008084                          |                   | 6           | 0                           | 0.998207054                           |                |
| RP1-138B7.7   | ENSG00000282876.1                     | 0.748659315                          |                   | 3           | 3                           | 0.304128711                           |                |
|               | Brain_Nucleus_accumbens_basal_ganglia | 0.903896023                          |                   |             |                             | Brain_Hypothalamus                    |                |
|               | 1.737654433                           | 0.533235403                          | 0.533235403       |             | 0.120741202                 | 1.027619791                           |                |
|               | 0.597315932                           | 0.455206479                          |                   | 3           | 0                           | 0.998207054                           |                |
| ADAM33        | ENSG00000149451.17                    | 0.748721464                          |                   | 1           | 1                           | 0.748721464                           |                |
|               | Brain_Cerebellum0.748721464           |                                      | Brain_Cerebellum1 | 1           | 1                           | -0.320325673                          |                |
|               | -0.320325673                          | -0.320325673                         | NA                | 1           | 0                           | 0.998207054                           |                |
| RP11-180P8.1  | ENSG00000283538.1                     | 0.748872529                          |                   | 2           | 2                           | 0.450061508                           |                |
|               | Brain_Hypothalamus                    | 0.818714385                          |                   |             |                             | Brain_Frontal_Cortex_BA9              | 1.188048022    |
|               | 0.811951978                           | 0.811951978                          | 0.229198826       |             | 0.755312488                 | 0.492255657                           |                |
|               | 0.372018538                           | 2                                    | 0                 | 0.998207054 |                             |                                       |                |
| MEI1          | ENSG00000167077.12                    | 0.748950407                          |                   | 7           | 4                           | 0.355099925                           |                |
|               | Brain_Hypothalamus                    | 0.92559                              |                   |             |                             | Brain_Anterior_cingulate_cortex_BA24  |                |
|               | 4.821372834                           | 0.030644197                          | 0.405719903       |             | -0.924742389                | 0.862452924                           |                |
|               | -0.277018744                          | 0.600322159                          |                   | 4           | 0                           | 0.998207054                           |                |
| FAM71D        | ENSG00000172717.15                    | 0.748984531                          |                   | 1           | 1                           | 0.748984531                           |                |
|               | Brain_Cerebellum0.748984531           |                                      | Brain_Cerebellum1 | 1           | 1                           | 0.319978629                           |                |
|               | 0.319978629                           | 0.319978629                          | NA                | 1           | 0                           | 0.998207054                           |                |
| CIAO1         | ENSG00000144021.2                     | 0.749071791                          |                   | 7           | 3                           | 0.195412766                           |                |
|               | Brain_Caudate_basal_ganglia           | 0.510105623                          |                   |             |                             | Brain_Putamen_basal_ganglia           |                |
|               | 6.033857907                           | 1.37E-07                             | 0.301120665       |             | 0.658673237                 | 1.294731801                           |                |
|               | 0.956056478                           | 0.207813306                          |                   | 3           | 0                           | 0.998207054                           |                |
| GPT           | ENSG00000167701.13                    | 0.749352097                          |                   | 2           | 2                           | 0.51444205                            |                |
|               | Brain_Cerebellar_Hemisphere           | 0.875935823                          |                   |             |                             | Brain_Cerebellum1.326005992           |                |
|               | 0.673994008                           | 0.673994008                          | -0.651936636      |             | 0.156123313                 | -0.247906662                          |                |
|               | 0.571384669                           | 2                                    | 0                 | 0.998207054 |                             |                                       |                |
| PPP1R16A      | ENSG00000160972.9                     | 0.749383532                          |                   | 4           | 4                           | 0.26466686                            | Brain_Cortex   |
|               | 0.85009489                            | Brain_Cerebellar_Hemisphere          | 1.756163411       |             | 0.249442391                 |                                       |                |
|               | 0.249442391                           | -0.501080368                         | 1.115428458       |             | 0.289432796                 | 0.759885502                           |                |
|               | 4                                     | 0                                    | 0.998207054       |             |                             |                                       |                |
| LTBP3         | ENSG00000168056.15                    | 0.749421457                          |                   | 1           | 1                           | 0.749421457                           |                |
|               | Brain_Substantia_nigra                | 0.749421457                          |                   |             |                             | Brain_Substantia_nigra                | 1              |
|               | 1                                     | 0.319402313                          | 0.319402313       | 0.319402313 | NA                          | 1                                     | 0              |
|               | 0.998207054                           |                                      |                   |             |                             |                                       |                |
| MLLT1         | ENSG00000130382.8                     | 0.749700527                          |                   | 2           | 2                           | 0.579812294                           |                |
|               | Brain_Nucleus_accumbens_basal_ganglia | 0.632207275                          |                   |             |                             | Brain_Cerebellar_Hemisphere           |                |
|               | 1.071019232                           | 0.928980768                          | 0.928980768       |             | -0.55365892                 | 0.478622407                           |                |
|               | -0.037518257                          | 0.729933127                          |                   | 2           | 0                           | 0.998207054                           |                |
| AL121656.5    | ENSG00000236854.1                     | 0.749782877                          |                   | 2           | 2                           | 0.454628069                           |                |
|               | Brain_Caudate_basal_ganglia           | 0.988202617                          |                   |             |                             | Brain_Nucleus_accumbens_basal_ganglia |                |
|               | 1.151844136                           | 0.848155864                          | 0.848155864       |             | 0.014786366                 | 0.747721651                           |                |
|               | 0.381254008                           | 0.51826351                           | 2                 | 0           | 0.998207054                 |                                       |                |
| ITPA          | ENSG00000125877.12                    | 0.749880594                          |                   | 13          | 1                           | 0.583812557                           | Brain_Amygdala |
|               | 0.962904002                           | Brain_Anterior_cingulate_cortex_BA24 | 12.30611247       |             | 7.52E-05                    |                                       |                |
|               | 12.30611247                           | -0.547824292                         | -0.046509702      |             | -0.309986852                | 0.144084211                           |                |
|               | 1                                     | 0                                    | 0.998207054       |             |                             |                                       |                |
| RTF1          | ENSG00000137815.14                    | 0.749923606                          |                   | 2           | 2                           | 0.51631057                            | Brain_Cortex   |
|               | 0.588379021                           | Brain_Cerebellum1.247400771          |                   |             | 0.752599229                 | 0.752599229                           |                |
|               | -0.64904302                           | -0.54118653                          | -0.595114775      |             | 0.076266055                 | 2                                     | 0              |
|               | 0.998207054                           |                                      |                   |             |                             |                                       |                |
| MON1A         | ENSG00000164077.13                    | 0.749945641                          |                   | 1           | 1                           | 0.749945641                           |                |
|               | Brain_Anterior_cingulate_cortex_BA24  | 0.749945641                          |                   |             |                             |                                       |                |
|               | Brain_Anterior_cingulate_cortex_BA24  | 1                                    | 1                 | 1           | 0.318711042                 |                                       |                |
|               | 0.318711042                           | 0.318711042                          | NA                | 1           | 0                           | 0.998207054                           |                |
| RANBP10       | ENSG00000141084.10                    | 0.749968662                          |                   | 5           | 1                           | 0.407397672                           |                |

|          |                                       |                                       |              |                                      |              |   |                    |
|----------|---------------------------------------|---------------------------------------|--------------|--------------------------------------|--------------|---|--------------------|
|          | Brain_Cortex                          | 0.800843004                           |              | Brain_Cerebellum                     | 4.788605384  |   | 0.007555941        |
|          | 4.788605384                           | -0.291202386                          |              | 0.828481846                          | 0.313293474  |   | 0.403837675        |
|          | 1                                     | 0                                     | 0.998207054  |                                      |              |   |                    |
| KRTAP5-9 | ENSG00000254997.3                     | 0.750025815                           | 12           | 5                                    | 0.433700843  |   |                    |
|          | Brain_Cortex                          | 0.991617004                           |              | Brain_Anterior_cingulate_cortex_BA24 |              |   |                    |
|          | 8.443743366                           | 0.013382771                           |              | 0.319856586                          | -0.756804452 |   | 0.78287445         |
|          | -0.022740201                          | 0.553870179                           | 5            | 0                                    | 0.998207054  |   |                    |
| MAP3K6   | ENSG00000142733.14                    | 0.750034934                           | 2            | 2                                    | 0.555037984  |   |                    |
|          | Brain_Cerebellum                      | 0.574068823                           |              | Brain_Putamen_basal_ganglia          | 1.154996672  |   |                    |
|          | 0.845003328                           | 0.845003328                           |              | 0.562069273                          | 0.590227729  |   | 0.576148501        |
|          | 0.019911036                           | 2                                     | 0            | 0.998207054                          |              |   |                    |
| APT_X    | ENSG00000137074.18                    | 0.750082361                           | 9            | 4                                    | 0.451989074  |   |                    |
|          | Brain_Spinal_cord_cervical_c-1        | 0.89021817                            |              | Brain_Substantia_nigra               |              |   |                    |
|          | 6.464620871                           | 0.001856988                           |              | 0.33370875                           | -0.485186353 |   | 0.752103077        |
|          | 0.310121942                           | 0.352110963                           | 4            | 0                                    | 0.998207054  |   |                    |
| AES      | ENSG00000104964.14                    | 0.750123004                           | 1            | 1                                    | 0.750123004  |   |                    |
|          | Brain_Hippocampus                     | 0.750123004                           |              | Brain_Hippocampus                    | 1            | 1 | 1                  |
|          | -0.318477177                          | -0.318477177                          |              | -0.318477177                         | NA           | 1 | 0                  |
|          |                                       |                                       |              |                                      |              |   | 0.998207054        |
| ARFGF2   | ENSG00000124198.8                     | 0.750125982                           | 1            | 1                                    | 0.750125982  |   |                    |
|          | Brain_Cerebellar_Hemisphere           | 0.750125982                           |              | Brain_Cerebellar_Hemisphere          | 1            | 1 |                    |
|          | 1                                     | -0.318473251                          | -0.318473251 | -0.318473251                         | NA           | 1 | 0                  |
|          | 0.998207054                           |                                       |              |                                      |              |   |                    |
| TMEM144  | ENSG00000164124.10                    | 0.75026553                            | 3            | 3                                    | 0.308901085  |   | Brain_Cerebellum   |
|          | 0.776725807                           | Brain_Nucleus_accumbens_basal_ganglia | 1.144850496  |                                      |              |   |                    |
|          | 0.845021381                           | 0.845021381                           | -1.017530596 |                                      | 0.485176067  |   | -0.271980985       |
|          | 0.751420574                           | 3                                     | 0            | 0.998207054                          |              |   |                    |
| ACAP1    | ENSG00000072818.11                    | 0.750371099                           | 2            | 2                                    | 0.448592823  |   | Brain_Cerebellum   |
|          | 0.962302462                           | Brain_Amygdala                        | 1.045190177  |                                      | 0.954809823  |   | 0.954809823        |
|          | -0.047264449                          | 0.757763088                           | 0.35524932   | 0.569240431                          | 2            | 0 |                    |
|          | 0.998207054                           |                                       |              |                                      |              |   |                    |
| PMPCA    | ENSG00000165688.11                    | 0.750382806                           | 1            | 1                                    | 0.750382806  |   | Brain_Cerebellum   |
|          | 0.750382806                           | Brain_Cerebellum                      | 1            | 1                                    | 0.318134643  |   | 0.318134643        |
|          | 0.318134643                           | NA                                    | 1            | 0                                    | 0.998207054  |   |                    |
| CYP2C8   | ENSG00000138115.13                    | 0.750389614                           | 3            | 2                                    | 0.660488509  |   |                    |
|          | Brain_Nucleus_accumbens_basal_ganglia | 0.723555011                           |              | Brain_Frontal_Cortex_BA9             |              |   |                    |
|          | 2.300048573                           | 0.019926091                           |              | 0.680025336                          | -0.392131714 |   | 0.439238806        |
|          | 0.133606239                           | 0.457306266                           | 2            | 0                                    | 0.998207054  |   |                    |
| DCN      | ENSG00000011465.16                    | 0.75041431                            | 1            | 1                                    | 0.75041431   |   | Brain_Hypothalamus |
|          | 0.75041431                            | Brain_Hypothalamus                    | 1            | 1                                    | 1            |   | -0.31809311        |
|          | -0.31809311                           | NA                                    | 1            | 0                                    | 0.998207054  |   | -0.31809311        |
| MDH1B    | ENSG00000138400.12                    | 0.75049445                            | 11           | 2                                    | 0.314344778  |   |                    |
|          | Brain_Nucleus_accumbens_basal_ganglia | 0.995519268                           |              | Brain_Hypothalamus                   |              |   |                    |
|          | 9.687579053                           | 0.005091119                           |              | 0.40187182                           | 0.005615794  |   | 1.006147176        |
|          | 0.627914655                           | 0.294639643                           | 2            | 0                                    | 0.998207054  |   |                    |
| VWF      | ENSG00000110799.13                    | 0.750619865                           | 1            | 1                                    | 0.750619865  |   |                    |
|          | Brain_Spinal_cord_cervical_c-1        | 0.750619865                           |              | Brain_Spinal_cord_cervical_c-1       |              |   |                    |
|          | 1                                     | 1                                     | 1            | -0.317822127                         | -0.317822127 |   | NA                 |
|          | 0.998207054                           |                                       |              |                                      |              |   | 1                  |
| SIX2     | ENSG00000170577.7                     | 0.750628079                           | 3            | 3                                    | 0.27320095   |   | Brain_Cerebellum   |
|          | 0.914333674                           | Brain_Spinal_cord_cervical_c-1        | 1.217695382  |                                      | 0.67001146   |   |                    |
|          | 0.67001146                            | -0.107573935                          | 1.095720861  |                                      | 0.373876646  |   | 0.636648582        |
|          | 0                                     | 0.998207054                           |              |                                      |              |   | 3                  |
| RARB     | ENSG00000077092.18                    | 0.750629708                           | 1            | 1                                    | 0.750629708  |   |                    |
|          | Brain_Putamen_basal_ganglia           | 0.750629708                           |              | Brain_Putamen_basal_ganglia          | 1            | 1 |                    |
|          | 1                                     | 0.317809152                           | 0.317809152  | 0.317809152                          | NA           | 1 | 0                  |
|          | 0.998207054                           |                                       |              |                                      |              |   |                    |
| TMEM25   | ENSG00000149582.15                    | 0.750646856                           | 3            | 2                                    | 0.494756404  |   |                    |
|          | Brain_Cerebellar_Hemisphere           | 0.833931952                           |              | Brain_Cerebellum                     | 2.73709514   |   |                    |
|          | 0.075826297                           | 0.187078563                           | -0.682763331 |                                      | -0.209661403 |   | -0.386905439       |
|          | 0.257892019                           | 2                                     | 0            | 0.998207054                          |              |   |                    |
| RAPGEF3  | ENSG00000079337.15                    | 0.750755499                           | 13           | 5                                    | 0.475101487  |   |                    |
|          | Brain_Cerebellar_Hemisphere           | 0.960334168                           |              | Brain_Cerebellum                     | 9.719703931  |   |                    |

|          |                                      |                          |                             |             |                                |                  |              |   |
|----------|--------------------------------------|--------------------------|-----------------------------|-------------|--------------------------------|------------------|--------------|---|
|          | 0.001222467                          | 0.339991892              | -0.623505415                | 0.714203283 | 0.146946689                    |                  |              |   |
|          | 0.39909229 5                         | 0                        | 0.998207054                 |             |                                |                  |              |   |
| GAL      | ENSG00000069482.6                    | 0.750760998              | 4                           | 4           | 0.485136071                    | Brain_Cerebellum |              |   |
|          | 0.75183368 Brain_Frontal_Cortex_BA9  | 1.657010011              |                             |             | 0.377326602                    |                  |              |   |
|          | 0.377326602                          | -0.698065758             | 0.316222435                 |             | -0.335437755                   | 0.455508281      |              |   |
|          | 4                                    | 0                        | 0.998207054                 |             |                                |                  |              |   |
| PRPF8    | ENSG00000174231.16                   | 0.750828958              | 1                           | 1           | 0.750828958                    |                  |              |   |
|          | Brain_Spinal_cord_cervical_c-1       | 0.750828958              |                             |             | Brain_Spinal_cord_cervical_c-1 |                  |              |   |
|          | 1                                    | 1                        | 0.317546505                 | 0.317546505 | 0.317546505                    | NA               | 1            | 0 |
|          | 0.998207054                          |                          |                             |             |                                |                  |              |   |
| GIGYF1   | ENSG00000146830.9                    | 0.750933562              | 11                          | 3           | 0.233526871                    |                  |              |   |
|          | Brain_Putamen_basal_ganglia          | 0.859196566              |                             |             | Brain_Caudate_basal_ganglia    |                  |              |   |
|          | 8.794495685                          | 0.012689917              | 0.581706467                 |             | -1.191322841                   | 0.391615563      |              |   |
|          | -0.600499307                         | 0.463754527              | 3                           | 0           | 0.998207054                    |                  |              |   |
| MFSD7    | ENSG00000169026.12                   | 0.750949564              | 11                          | 4           | 0.158535613                    | Brain_Cerebellum |              |   |
|          | 0.674798492                          | Brain_Amygdala           | 8.357836258                 |             | 2.60E-06                       | 0.397814686      |              |   |
|          | 0.419571527                          | 1.410013783              | 0.999501958                 |             | 0.3284967                      | 4                | 0            |   |
|          | 0.998207054                          |                          |                             |             |                                |                  |              |   |
| EPHA2    | ENSG00000142627.12                   | 0.750961493              | 1                           | 1           | 0.750961493                    | Brain_Cortex     |              |   |
|          | 0.750961493                          | Brain_Cortex             | 1                           | 1           | 1                              | -0.317371813     | -0.317371813 |   |
|          | -0.317371813                         | NA                       | 1                           | 0           | 0.998207054                    |                  |              |   |
| NEDD4L   | ENSG00000049759.17                   | 0.750983794              | 1                           | 1           | 0.750983794                    |                  |              |   |
|          | Brain_Hippocampus                    | 0.750983794              | Brain_Hippocampus           | 1           | 1                              | 1                |              |   |
|          | -0.317342419                         | -0.317342419             | -0.317342419                | NA          | 1                              | 0                | 0.998207054  |   |
| WFIKN2   | ENSG00000173714.7                    | 0.751060191              | 2                           | 2           | 0.450320408                    |                  |              |   |
|          | Brain_Amygdala                       | 0.933654078              | Brain_Cerebellar_Hemisphere | 1.041585929 |                                |                  |              |   |
|          | 0.958414071                          | 0.958414071              | 0.083248338                 |             | 0.754880965                    | 0.419064651      |              |   |
|          | 0.474915985                          | 2                        | 0                           | 0.998207054 |                                |                  |              |   |
| NUP210L  | ENSG00000143552.9                    | 0.751172218              | 2                           | 2           | 0.481659919                    |                  |              |   |
|          | Brain_Hypothalamus                   | 0.625160413              | Brain_Cerebellar_Hemisphere | 1.320415486 |                                |                  |              |   |
|          | 0.679584514                          | 0.679584514              | -0.703635305                |             | -0.488549867                   | -0.596092586     |              |   |
|          | 0.152088372                          | 2                        | 0                           | 0.998207054 |                                |                  |              |   |
| MOCS2    | ENSG00000164172.18                   | 0.751191089              | 3                           | 2           | 0.442736602                    |                  |              |   |
|          | Brain_Frontal_Cortex_BA9             | 0.623596459              | Brain_Cerebellar_Hemisphere |             |                                |                  |              |   |
|          | 2.808578463                          | 0.0301388                | 0.161282737                 |             | 0.49075964                     | 0.767580245      |              |   |
|          | 0.665974329                          | 0.152384712              | 2                           | 0           | 0.998207054                    |                  |              |   |
| GPATCH11 | ENSG00000152133.14                   | 0.751275309              | 3                           | 3           | 0.283903577                    |                  |              |   |
|          | Brain_Spinal_cord_cervical_c-1       | 0.951519705              | Brain_Putamen_basal_ganglia |             |                                |                  |              |   |
|          | 1.107731996                          | 0.935415746              | 0.935415746                 |             | -0.176287891                   | 1.071591445      |              |   |
|          | 0.318700676                          | 0.662710999              | 3                           | 0           | 0.998207054                    |                  |              |   |
| ZNF79    | ENSG00000196152.10                   | 0.751299285              | 1                           | 1           | 0.751299285                    | Brain_Cortex     |              |   |
|          | 0.751299285                          | Brain_Cortex             | 1                           | 1           | 1                              | 0.316926616      | 0.316926616  |   |
|          | 0.316926616                          | NA                       | 1                           | 0           | 0.998207054                    |                  |              |   |
| HRAS     | ENSG00000174775.16                   | 0.751341508              | 11                          | 3           | 0.315721532                    | Brain_Cerebellum |              |   |
|          | 0.978063023                          | Brain_Frontal_Cortex_BA9 | 8.717594939                 |             | 0.007105942                    |                  |              |   |
|          | 0.520634088                          | -1.003288813             | 0.939645959                 |             | -0.367230133                   | 0.605330787      |              |   |
|          | 3                                    | 0                        | 0.998207054                 |             |                                |                  |              |   |
| DTD1     | ENSG00000125821.11                   | 0.751531743              | 8                           | 5           | 0.304992515                    |                  |              |   |
|          | Brain_Anterior_cingulate_cortex_BA24 | 0.979644598              | Brain_Putamen_basal_ganglia |             |                                |                  |              |   |
|          | 5.588523465                          | 0.012415349              | 0.213547206                 |             | -1.025785896                   | 0.953478688      |              |   |
|          | -0.129558361                         | 0.57861477 5             | 0                           | 0.998207054 |                                |                  |              |   |
| MYO1H    | ENSG00000174527.9                    | 0.751575422              | 1                           | 1           | 0.751575422                    | Brain_Cerebellum |              |   |
|          | 0.751575422                          | Brain_Cerebellum         | 1                           | 1           | 1                              | -0.316562727     | -0.316562727 |   |
|          | -0.316562727                         | NA                       | 1                           | 0           | 0.998207054                    |                  |              |   |
| ZNF174   | ENSG00000103343.12                   | 0.751644451              | 1                           | 1           | 0.751644451                    |                  |              |   |
|          | Brain_Amygdala                       | 0.751644451              | Brain_Amygdala              | 1           | 1                              | 1                | 0.316471767  |   |
|          | 0.316471767                          | 0.316471767              | NA                          | 1           | 0                              | 0.998207054      |              |   |
| ISPD     | ENSG00000214960.9                    | 0.751655408              | 2                           | 2           | 0.459773772                    |                  |              |   |
|          | Brain_Cerebellar_Hemisphere          | 0.876701491              | Brain_Cerebellum            | 1.403649622 |                                |                  |              |   |
|          | 0.596350378                          | 0.596350378              | 0.155151996                 |             | 0.739219418                    | 0.447185707      |              |   |
|          | 0.412998034                          | 2                        | 0                           | 0.998207054 |                                |                  |              |   |
| TMEM206  | ENSG00000065600.12                   | 0.751717735              | 11                          | 6           | 0.112320932                    |                  |              |   |

|                     |                                       |              |             |                                       |              |              |             |                |
|---------------------|---------------------------------------|--------------|-------------|---------------------------------------|--------------|--------------|-------------|----------------|
|                     | Brain_Frontal_Cortex_BA9              | 0.870147616  |             | Brain_Amygdala                        | 6.456185072  |              |             |                |
|                     | 0.036036794                           | 0.222884961  |             | -0.163470986                          | 1.58784704   | 1.028566157  |             |                |
|                     | 0.523419544                           | 6            | 0           | 0.998207054                           |              |              |             |                |
| XXbac-BPGBPG55C20.1 | ENSG00000272541.1                     | 0.751872923  |             | 13                                    | 3            | 0.313521081  |             |                |
|                     | Brain_Spinal_cord_cervical_c-1        | 0.962850962  |             | Brain_Cortex                          | 10.91885023  |              |             |                |
|                     | 0.004286304                           | 0.684774347  |             | -1.007861242                          | 0.251766331  | -0.312288599 |             |                |
|                     | 0.323145942                           | 3            | 0           | 0.998207054                           |              |              |             |                |
| FBXO32              | ENSG00000156804.7                     | 0.751909954  |             | 2                                     | 2            | 0.527950111  |             |                |
|                     | Brain_Putamen_basal_ganglia           | 0.549584673  |             | Brain_Nucleus_accumbens_basal_ganglia |              |              |             |                |
|                     | 1.327282563                           | 0.672717437  |             | 0.672717437                           | -0.631138283 | -0.5983826   |             |                |
|                     | -0.614760442                          | 0.023161766  |             | 2                                     | 0            | 0.998207054  |             |                |
| SIGLEC5             | ENSG00000105501.12                    | 0.752045068  |             | 3                                     | 3            | 0.277227198  |             |                |
|                     | Brain_Anterior_cingulate_cortex_BA24  | 0.914610021  |             |                                       |              |              |             |                |
|                     | Brain_Spinal_cord_cervical_c-1        | 1.488740077  |             | 0.511760839                           | 0.511760839  |              |             |                |
|                     | -1.086569303                          | 0.159012787  |             | -0.273443645                          | 0.704663381  | 3            | 0           |                |
|                     | 0.998207054                           |              |             |                                       |              |              |             |                |
| HSP90B1             | ENSG00000166598.14                    | 0.752058922  |             | 1                                     | 1            | 0.752058922  |             |                |
|                     | Brain_Cortex                          | 0.752058922  |             | Brain_Cortex                          | 1            | 1            | 1           | -0.315925677   |
|                     | -0.315925677                          | -0.315925677 |             | NA                                    | 1            | 0            | 0.998207054 |                |
| CTD-3224K15.3       | ENSG00000272255.1                     | 0.752191629  |             | 1                                     | 1            | 0.752191629  |             |                |
|                     | Brain_Hypothalamus                    | 0.752191629  |             | Brain_Hypothalamus                    | 1            | 1            | 1           |                |
|                     | -0.315750847                          | -0.315750847 |             | -0.315750847                          | NA           | 1            | 0           | 0.998207054    |
| ALKAL1              | ENSG00000196711.8                     | 0.752249575  |             | 1                                     | 1            | 0.752249575  |             |                |
|                     | Brain_Spinal_cord_cervical_c-1        | 0.752249575  |             | Brain_Spinal_cord_cervical_c-1        |              |              |             |                |
|                     | 1                                     | 1            | 1           | -0.315674512                          | -0.315674512 | -0.315674512 | NA          | 1              |
|                     | 0.998207054                           |              |             |                                       |              |              |             | 0              |
| NDN                 | ENSG00000182636.5                     | 0.752260509  |             | 4                                     | 4            | 0.282754913  |             |                |
|                     | Brain_Frontal_Cortex_BA9              | 0.949272447  |             | Brain_Cortex                          | 1.342080233  |              |             |                |
|                     | 0.747451114                           | 0.747451114  |             | -1.074151217                          | 0.568020457  | -0.281463919 |             |                |
|                     | 0.700680636                           | 4            | 0           | 0.998207054                           |              |              |             |                |
| DUSP15              | ENSG00000149599.15                    | 0.752289334  |             | 2                                     | 2            | 0.455126108  |             |                |
|                     | Brain_Caudate_basal_ganglia           | 0.635692256  |             | Brain_Anterior_cingulate_cortex_BA24  |              |              |             |                |
|                     | 1.731757793                           | 0.268242207  |             | 0.268242207                           | 0.473730282  | 0.746896385  |             |                |
|                     | 0.610313333                           | 0.193157604  |             | 2                                     | 0            | 0.998207054  |             |                |
| REV3L               | ENSG00000009413.15                    | 0.75230869   |             | 3                                     | 3            | 0.278540528  |             |                |
|                     | Brain_Cerebellar_Hemisphere           | 0.351970479  |             | Brain_Hippocampus                     | 2.503872132  |              |             |                |
|                     | 0.142044826                           | 0.142044826  |             | 0.930774006                           | 1.083603749  | 0.982198595  |             |                |
|                     | 0.087822407                           | 3            | 0           | 0.998207054                           |              |              |             |                |
| CTD-2147F2.2        | ENSG00000259664.2                     | 0.752395777  |             | 1                                     | 1            | 0.752395777  |             |                |
|                     | Brain_Anterior_cingulate_cortex_BA24  | 0.752395777  |             |                                       |              |              |             |                |
|                     | Brain_Anterior_cingulate_cortex_BA24  | 1            | 1           | 1                                     | -0.315481919 |              |             |                |
|                     | -0.315481919                          | -0.315481919 |             | NA                                    | 1            | 0            | 0.998207054 |                |
| CBWD3               | ENSG00000196873.15                    | 0.752454036  |             | 2                                     | 2            | 0.517170989  |             |                |
|                     | Brain_Putamen_basal_ganglia           | 0.878111778  |             | Brain_Hippocampus                     | 1.32698123   |              |             |                |
|                     | 0.67301877                            | 0.67301877   |             | -0.153363309                          | 0.64771239   | 0.247174541  |             | 0.566446059    |
|                     | 2                                     | 0            | 0.998207054 |                                       |              |              |             |                |
| LINC01314           | ENSG00000259417.2                     | 0.752481153  |             | 6                                     | 6            | 0.295765052  |             |                |
|                     | Brain_Cortex                          | 0.713075892  |             | Brain_Cerebellum                      | 2.010724306  | 0.422081488  |             |                |
|                     | 0.422081488                           | -1.04555821  |             | 0.402469726                           | -0.451509465 | 0.682217748  |             |                |
|                     | 6                                     | 0            | 0.998207054 |                                       |              |              |             |                |
| SULT4A1             | ENSG00000130540.13                    | 0.752493739  |             | 8                                     | 3            | 0.302911481  |             |                |
|                     | Brain_Nucleus_accumbens_basal_ganglia | 0.761425375  |             | Brain_Cerebellar_Hemisphere           |              |              |             |                |
|                     | 6.388949374                           | 0.000772138  |             | 0.275384367                           | 0.30360955   | 1.030209905  |             |                |
|                     | 0.690186595                           | 0.260297445  |             | 3                                     | 0            | 0.998207054  |             |                |
| RP13-16H11.7        | ENSG00000234296.1                     | 0.752494165  |             | 1                                     | 1            | 0.752494165  |             |                |
|                     | Brain_Nucleus_accumbens_basal_ganglia | 0.752494165  |             |                                       |              |              |             |                |
|                     | Brain_Nucleus_accumbens_basal_ganglia | 1            | 1           | 1                                     | -0.31535232  |              |             |                |
|                     | -0.31535232                           | -0.31535232  |             | NA                                    | 1            | 0            | 0.998207054 |                |
| ARHGAP15            | ENSG00000075884.13                    | 0.752507766  |             | 1                                     | 1            | 0.752507766  |             |                |
|                     | Brain_Amygdala                        | 0.752507766  |             | Brain_Amygdala                        | 1            | 1            | 1           | -0.315334404   |
|                     | -0.315334404                          | -0.315334404 |             | NA                                    | 1            | 0            | 0.998207054 |                |
| CYP26C1             | ENSG00000187553.8                     | 0.75259895   |             | 5                                     | 5            | 0.335830521  |             | Brain_Amygdala |

|           |                                       |                                       |              |              |                                      |                             |             |
|-----------|---------------------------------------|---------------------------------------|--------------|--------------|--------------------------------------|-----------------------------|-------------|
|           | 0.947911112                           | Brain_Anterior_cingulate_cortex_BA24  | 3.823799578  |              |                                      |                             |             |
|           | 0.171477305                           | 0.171477305                           | -0.962436232 | -0.065330182 | -0.584938318                         |                             |             |
|           | 0.390929302                           | 5                                     | 0            | 0.998207054  |                                      |                             |             |
| LCE5A     | ENSG00000186207.4                     | 0.752730983                           | 2            | 2            | 0.518059727                          |                             |             |
|           | Brain_Frontal_Cortex_BA9              | 0.522884237                           |              |              | Brain_Spinal_cord_cervical_c-1       |                             |             |
|           | 1.453984285                           | 0.546015715                           | 0.546015715  | -0.646339167 | -0.638905765                         |                             |             |
|           | -0.642622466                          | 0.005256209                           | 2            | 0            | 0.998207054                          |                             |             |
| MME       | ENSG00000196549.10                    | 0.75275061                            | 1            | 1            | 0.75275061                           | Brain_Putamen_basal_ganglia |             |
|           | 0.75275061                            | Brain_Putamen_basal_ganglia           | 1            | 1            | 0.315014546                          |                             |             |
|           | 0.315014546                           | 0.315014546                           | NA           | 1            | 0                                    | 0.998207054                 |             |
| PPP1R13L  | ENSG00000104881.15                    | 0.752807345                           | 1            | 1            | 0.752807345                          |                             |             |
|           | Brain_Putamen_basal_ganglia           | 0.752807345                           |              |              | Brain_Putamen_basal_ganglia          | 1                           | 1           |
|           | 1                                     | -0.314939823                          | -0.314939823 | -0.314939823 | NA                                   | 1                           | 0           |
|           | 0.998207054                           |                                       |              |              |                                      |                             |             |
| LMO7DN    | ENSG00000178734.5                     | 0.752840402                           | 3            | 3            | 0.489479619                          |                             |             |
|           | Brain_Cortex                          | 0.945391384                           |              |              | Brain_Anterior_cingulate_cortex_BA24 |                             |             |
|           | 1.417483289                           | 0.639193536                           | 0.639193536  | -0.676527826 | 0.691136731                          |                             |             |
|           | -0.017962122                          | 0.685231191                           | 3            | 0            | 0.998207054                          |                             |             |
| SNRNP27   | ENSG00000124380.10                    | 0.752885519                           | 10           | 4            | 0.162762829                          |                             |             |
|           | Brain_Nucleus_accumbens_basal_ganglia | 0.530968797                           |              |              | Brain_Amygdala                       |                             |             |
|           | 7.342041321                           | 0.001987695                           | 0.472971699  | -1.395839512 | -0.626527818                         |                             |             |
|           | -1.13530701                           | 0.277076328                           | 4            | 0            | 0.998207054                          |                             |             |
| GSS       | ENSG00000100983.9                     | 0.752940752                           | 2            | 2            | 0.51330258                           | Brain_Cerebellum            |             |
|           | 0.953941828                           | Brain_Cortex                          | 1.562102205  |              | 0.437897795                          | 0.437897795                 |             |
|           | 0.057757455                           | 0.653703916                           | 0.355730685  | 0.421397784  | 2                                    | 0                           |             |
|           | 0.998207054                           |                                       |              |              |                                      |                             |             |
| MLYCD     | ENSG00000103150.5                     | 0.753115766                           | 3            | 3            | 0.30412734                           | Brain_Cortex                |             |
|           | 0.986812265                           | Brain_Amygdala                        | 1.082352156  |              | 0.925937431                          | 0.925937431                 |             |
|           | -0.415669619                          | 1.027622705                           | 0.198474653  | 0.745280586  | 3                                    | 0                           |             |
|           | 0.998207054                           |                                       |              |              |                                      |                             |             |
| STKLD1    | ENSG00000198870.7                     | 0.753174417                           | 1            | 1            | 0.753174417                          |                             |             |
|           | Brain_Nucleus_accumbens_basal_ganglia | 0.753174417                           |              |              |                                      |                             |             |
|           | Brain_Nucleus_accumbens_basal_ganglia | 1                                     | 1            | 1            | 0.314456411                          |                             |             |
|           | 0.314456411                           | 0.314456411                           | NA           | 1            | 0                                    | 0.998207054                 |             |
| CCDC28A   | ENSG00000024862.17                    | 0.753225229                           | 2            | 2            | 0.461165093                          |                             |             |
|           | Brain_Caudate_basal_ganglia           | 0.850022537                           |              |              | Brain_Cerebellar_Hemisphere          |                             |             |
|           | 1.047852928                           | 0.952147072                           | 0.952147072  | -0.189089671 | 0.736929713                          |                             |             |
|           | 0.273920021                           | 0.654794586                           | 2            | 0            | 0.998207054                          |                             |             |
| CEP19     | ENSG00000174007.7                     | 0.753288033                           | 6            | 3            | 0.37359655                           | Brain_Cerebellum            |             |
|           | 0.88222518                            | Brain_Nucleus_accumbens_basal_ganglia | 5.258351744  |              | 5.98E-08                             |                             |             |
|           | 0.241131089                           | -0.889756684                          | -0.148148999 | -0.50994165  | 0.241706631                          |                             |             |
|           | 3                                     | 0                                     | 0.998207054  |              |                                      |                             |             |
| DMRTA1    | ENSG00000176399.3                     | 0.753339769                           | 1            | 1            | 0.753339769                          |                             |             |
|           | Brain_Hippocampus                     | 0.753339769                           |              |              | Brain_Hippocampus                    | 1                           | 1           |
|           | -0.314238678                          | -0.314238678                          | -0.314238678 | NA           | 1                                    | 0                           | 0.998207054 |
| NUP210    | ENSG00000132182.11                    | 0.753439536                           | 2            | 2            | 0.451997837                          |                             |             |
|           | Brain_Cerebellar_Hemisphere           | 0.51663531                            |              |              | Brain_Cerebellum                     | 1.877615402                 |             |
|           | 0.122384598                           | 0.122384598                           | -0.752088504 | -0.648540678 | -0.700314591                         |                             |             |
|           | 0.07321937                            | 2                                     | 0            | 0.998207054  |                                      |                             |             |
| C9orf170  | ENSG00000204446.4                     | 0.75347554                            | 3            | 3            | 0.289001891                          |                             |             |
|           | Brain_Anterior_cingulate_cortex_BA24  | 0.961803832                           |              |              | Brain_Substantia_nigra               |                             |             |
|           | 1.52794649                            | 0.446482086                           | 0.446482086  | -0.236662883 | 1.060313738                          |                             |             |
|           | 0.290513651                           | 0.681679346                           | 3            | 0            | 0.998207054                          |                             |             |
| MOCOS     | ENSG00000075643.5                     | 0.753550822                           | 12           | 10           | 0.258327569                          | Brain_Cerebellum            |             |
|           | 0.923443268                           | Brain_Cerebellar_Hemisphere           | 5.088851332  |              | 0.076468581                          |                             |             |
|           | 0.185910762                           | -0.931959389                          | 1.130352859  | -0.155910648 | 0.706716156                          |                             |             |
|           | 10                                    | 0                                     | 0.998207054  |              |                                      |                             |             |
| LINC01939 | ENSG00000228799.5                     | 0.753569699                           | 1            | 1            | 0.753569699                          |                             |             |
|           | Brain_Cerebellum                      | 0.753569699                           |              |              | Brain_Cerebellum                     | 1                           | 1           |
|           | -0.313935932                          | -0.313935932                          | NA           | 1            | 0                                    | 0.998207054                 |             |
| PDE9A     | ENSG00000160191.17                    | 0.753572888                           | 6            | 6            | 0.142150806                          |                             |             |
|           | Brain_Caudate_basal_ganglia           | 0.88624246                            |              |              | Brain_Cerebellum                     | 1.921661082                 |             |



|            |                                       |                             |                                       |              |                                      |                  |   |
|------------|---------------------------------------|-----------------------------|---------------------------------------|--------------|--------------------------------------|------------------|---|
|            | 0.107818784                           | 0.107818784                 | -1.46782853                           | 0.715807433  | -0.146510307                         |                  |   |
|            | 0.975290225                           | 6                           | 0                                     | 0.998207054  |                                      |                  |   |
| TPPP       | ENSG00000171368.11                    | 0.753574699                 | 10                                    | 2            | 0.314821798                          |                  |   |
|            | Brain_Putamen_basal_ganglia           | 0.968158071                 |                                       |              | Brain_Anterior_cingulate_cortex_BA24 |                  |   |
|            | 8.024744456                           | 0.044087125                 | 1.078915534                           |              | -1.005155877                         | 0.460494786      |   |
|            | -0.327788879                          | 0.397410368                 | 2                                     | 0            | 0.998207054                          |                  |   |
| TMED2      | ENSG00000086598.10                    | 0.753638728                 | 3                                     | 2            | 0.462218756                          | Brain_Cerebellum |   |
|            | 0.590548681                           | Brain_Frontal_Cortex_BA9    | 2.703000718                           |              | 0.06769699                           |                  |   |
|            | 0.229302292                           | 0.538041091                 | 0.735198265                           |              | 0.65625087                           | 0.104277941      | 2 |
|            | 0                                     | 0.998207054                 |                                       |              |                                      |                  |   |
| PABPN1L    | ENSG00000205022.9                     | 0.753764915                 | 1                                     | 1            | 0.753764915                          |                  |   |
|            | Brain_Cerebellum                      | 0.753764915                 | Brain_Cerebellum1                     | 1            | 1                                    | 0.313678917      |   |
|            | 0.313678917                           | 0.313678917                 | NA                                    | 1            | 0                                    | 0.998207054      |   |
| GPR78      | ENSG00000155269.11                    | 0.753799839                 | 1                                     | 1            | 0.753799839                          |                  |   |
|            | Brain_Anterior_cingulate_cortex_BA24  | 0.753799839                 |                                       |              |                                      |                  |   |
|            | Brain_Anterior_cingulate_cortex_BA24  | 1                           | 1                                     | 1            | 0.31363294                           | 0.31363294       |   |
|            | 0.31363294                            | NA                          | 1                                     | 0            | 0.998207054                          |                  |   |
| PARP11     | ENSG00000111224.13                    | 0.753881409                 | 5                                     | 1            | 0.630989308                          |                  |   |
|            | Brain_Cerebellum                      | 0.926407901                 | Brain_Nucleus_accumbens_basal_ganglia |              |                                      |                  |   |
|            | 4.812191545                           | 0.002480733                 | 4.812191545                           |              | 0.092365183                          | 0.480334856      |   |
|            | 0.306316255                           | 0.159841038                 | 1                                     | 0            | 0.998207054                          |                  |   |
| MAP1A      | ENSG00000166963.12                    | 0.753983372                 | 2                                     | 2            | 0.526274215                          |                  |   |
|            | Brain_Spinal_cord_cervical_c-1        | 0.72357817                  | Brain_Cerebellum1                     | 1.077439139  |                                      |                  |   |
|            | 0.922560861                           | 0.922560861                 | -0.633703693                          |              | 0.353680724                          | -0.140011484     |   |
|            | 0.698186217                           | 2                           | 0                                     | 0.998207054  |                                      |                  |   |
| TOP3B      | ENSG00000100038.19                    | 0.75409033                  | 2                                     | 2            | 0.82423432                           | Brain_Cerebellum |   |
|            | 0.897861712                           | Brain_Cerebellar_Hemisphere | 1.890755921                           |              | 0.109244079                          |                  |   |
|            | 0.109244079                           | -0.222102207                | 0.128362998                           |              | -0.046869604                         | 0.247816323      |   |
|            | 2                                     | 0                           | 0.998207054                           |              |                                      |                  |   |
| EML6       | ENSG00000214595.11                    | 0.754162415                 | 3                                     | 3            | 0.44865675                           |                  |   |
|            | Brain_Putamen_basal_ganglia           | 0.827618167                 | Brain_Nucleus_accumbens_basal_ganglia |              |                                      |                  |   |
|            | 1.550378327                           | 0.54511308                  | 0.54511308                            | -0.424103047 | 0.757656328                          |                  |   |
|            | 0.183770214                           | 0.591612331                 | 3                                     | 0            | 0.998207054                          |                  |   |
| GARNL3     | ENSG00000136895.18                    | 0.754345528                 | 2                                     | 2            | 0.454085628                          |                  |   |
|            | Brain_Hippocampus                     | 0.700230106                 | Brain_Nucleus_accumbens_basal_ganglia |              |                                      |                  |   |
|            | 1.444777879                           | 0.555222121                 | 0.555222121                           | -0.748621072 | -0.385009865                         |                  |   |
|            | -0.566815469                          | 0.25711195                  | 2                                     | 0            | 0.998207054                          |                  |   |
| TGFB3      | ENSG00000119699.7                     | 0.754513162                 | 1                                     | 1            | 0.754513162                          |                  |   |
|            | Brain_Cerebellar_Hemisphere           | 0.754513162                 | Brain_Cerebellar_Hemisphere1          | 1            | 1                                    |                  |   |
|            | 1                                     | -0.31269399                 | -0.31269399                           | -0.31269399  | NA                                   | 1                | 0 |
|            | 0.998207054                           |                             |                                       |              |                                      |                  |   |
| DUSP19     | ENSG00000162999.12                    | 0.754576858                 | 1                                     | 1            | 0.754576858                          |                  |   |
|            | Brain_Nucleus_accumbens_basal_ganglia | 0.754576858                 |                                       |              |                                      |                  |   |
|            | Brain_Nucleus_accumbens_basal_ganglia | 1                           | 1                                     | 1            | 0.31261016                           | 0.31261016       |   |
|            | 0.31261016                            | NA                          | 1                                     | 0            | 0.998207054                          |                  |   |
| SNRK       | ENSG00000163788.13                    | 0.754626452                 | 1                                     | 1            | 0.754626452                          | Brain_Cerebellum |   |
|            | 0.754626452                           | Brain_Cerebellum1           | 1                                     | 1            | -0.312544891                         | -0.312544891     |   |
|            | -0.312544891                          | NA                          | 1                                     | 0            | 0.998207054                          |                  |   |
| AC003005.2 | ENSG00000268266.1                     | 0.75464365                  | 13                                    | 3            | 0.373178138                          |                  |   |
|            | Brain_Spinal_cord_cervical_c-1        | 0.954759152                 | Brain_Cerebellar_Hemisphere           |              |                                      |                  |   |
|            | 10.74003161                           | 0.009113558                 | 0.493952325                           |              | -0.890536016                         | 0.323169113      |   |
|            | -0.035134709                          | 0.384522603                 | 3                                     | 0            | 0.998207054                          |                  |   |
| CREBRF     | ENSG00000164463.12                    | 0.754703461                 | 1                                     | 1            | 0.754703461                          |                  |   |
|            | Brain_Substantia_nigra                | 0.754703461                 | Brain_Substantia_nigra                | 1            | 1                                    |                  |   |
|            | 1                                     | -0.312443546                | -0.312443546                          | -0.312443546 | NA                                   | 1                | 0 |
|            | 0.998207054                           |                             |                                       |              |                                      |                  |   |
| ALK        | ENSG00000171094.16                    | 0.75477935                  | 2                                     | 2            | 0.456552352                          |                  |   |
|            | Brain_Spinal_cord_cervical_c-1        | 0.911152512                 |                                       |              |                                      |                  |   |
|            | Brain_Anterior_cingulate_cortex_BA24  | 1.027362327                 |                                       |              | 0.972637673                          |                  |   |
|            | 0.972637673                           | -0.744535866                | 0.111584942                           |              | -0.316475462                         | 0.605368829      |   |
|            | 2                                     | 0                           | 0.998207054                           |              |                                      |                  |   |
| NELL1      | ENSG00000165973.18                    | 0.755154448                 | 2                                     | 2            | 0.537580303                          | Brain_Cortex     |   |

|                |                             |                |              |                                       |              |
|----------------|-----------------------------|----------------|--------------|---------------------------------------|--------------|
|                | 0.733449129                 | Brain_Amygdala | 1.132783513  | 0.867216487                           | 0.867216487  |
|                | -0.340541031                | 0.616476158    | 0.137967564  | 0.676713345                           | 2 0          |
|                | 0.998207054                 |                |              |                                       |              |
| RNF141         | ENSG00000110315.6           | 0.755154919    | 5            | 5                                     | 0.212967249  |
|                | Brain_Caudate_basal_ganglia | 0.784409055    |              | Brain_Cortex                          | 3.16827599   |
|                | 0.164287653                 | 0.164287653    | -1.245447644 | -0.273577854                          | -0.827866066 |
|                | 0.37817049                  | 5 0            | 0.998207054  |                                       |              |
| ZNF594         | ENSG00000180626.9           | 0.755285868    | 2            | 2                                     | 0.464456842  |
|                | Brain_Cerebellar_Hemisphere | 0.585775861    |              | Brain_Cortex                          | 1.562005258  |
|                | 0.437994742                 | 0.437994742    | -0.731527782 | -0.544967514                          | -0.638247648 |
|                | 0.13191803                  | 2 0            | 0.998207054  |                                       |              |
| IK             | ENSG00000113141.17          | 0.755337436    | 2            | 2                                     | 0.66570387   |
|                | Brain_Amygdala              | 1.798390093    |              | Brain_Cerebellum                      |              |
|                | 0.981212438                 | 0.201609907    |              | 0.201609907                           |              |
|                | -0.432051656                | 0.023548893    | -0.204251381 | 0.322158238                           | 2 0          |
|                | 0.998207054                 |                |              |                                       |              |
| PANO1          | ENSG00000274897.2           | 0.755411343    | 3            | 3                                     | 0.356514097  |
|                | Brain_Putamen_basal_ganglia | 0.959008949    |              | Brain_Spinal_cord_cervical_c-1        |              |
|                | 1.202756699                 | 0.866711648    | 0.866711648  | -0.653340409                          | 0.922027758  |
|                | 0.106694878                 | 0.789138507    | 3 0          | 0.998207054                           |              |
| AC004156.3     | ENSG00000267666.2           | 0.755456232    | 7            | 7                                     | 0.085194842  |
|                | Brain_Cerebellar_Hemisphere | 0.977261504    |              | Brain_Frontal_Cortex_BA9              |              |
|                | 1.427607692                 | 0.529781559    | 0.529781559  | -0.70609986                           | 1.721308589  |
|                | 0.246260942                 | 0.789500675    | 7 0          | 0.998207054                           |              |
| RP11-735G4.1   | ENSG00000226409.2           | 0.755502468    | 2            | 2                                     | 0.455683642  |
|                | Brain_Caudate_basal_ganglia | 0.986340146    |              | Brain_Spinal_cord_cervical_c-1        |              |
|                | 1.110001934                 | 0.889998066    | 0.889998066  | -0.017120924                          | 0.745973138  |
|                | 0.364426107                 | 0.539588986    | 2 0          | 0.998207054                           |              |
| IMPG1          | ENSG00000112706.11          | 0.755566952    | 4            | 4                                     | 0.363940798  |
|                | Brain_Cerebellum            | 1.976351172    |              | Brain_Cortex                          |              |
|                | 0.971949509                 | 0.123186546    |              | 0.123186546                           |              |
|                | -0.907881566                | 0.268651409    | -0.180578117 | 0.506465327                           | 4 0          |
|                | 0.998207054                 |                |              |                                       |              |
| ABCC3          | ENSG00000108846.15          | 0.755646702    | 2            | 2                                     | 0.5232356    |
|                | Brain_Caudate_basal_ganglia | 0.679041535    |              | Brain_Nucleus_accumbens_basal_ganglia |              |
|                | 1.036129738                 | 0.963870262    | 0.963870262  | -0.638365781                          | -0.413771395 |
|                | -0.526068588                | 0.158812213    | 2 0          | 0.998207054                           |              |
| CAMK2D         | ENSG00000145349.16          | 0.755680318    | 3            | 3                                     | 0.38117621   |
|                | Brain_Cerebellar_Hemisphere | 0.685668527    |              | Brain_Cerebellum                      | 1.534824702  |
|                | 0.481233283                 | 0.481233283    | -0.404740148 | 0.875731145                           | 0.345900324  |
|                | 0.668183627                 | 3 0            | 0.998207054  |                                       |              |
| CTD-2619J13.14 | ENSG00000232098.3           | 0.755793589    | 4            | 3                                     | 0.418196448  |
|                | Brain_Cerebellum            | 0.482735169    |              | Brain_Anterior_cingulate_cortex_BA24  | 2.32288329   |
|                | 0.069896581                 | 0.429037334    | -0.809554187 | 0.701910197                           | -0.387305016 |
|                | 0.727499205                 | 3 0            | 0.998207054  |                                       |              |
| LINC00304      | ENSG00000180422.3           | 0.755833119    | 4            | 3                                     | 0.279940389  |
|                | Brain_Cortex                | 0.850580915    |              | Brain_Cerebellum                      | 2.881805955  |
|                | 0.150619524                 | -0.188377272   | 1.080453263  | 0.470361531                           | 0.069385384  |
|                | 3 0                         | 0.998207054    |              | 0.521608455                           |              |
| IHH            | ENSG00000163501.6           | 0.756147551    | 2            | 1                                     | 0.64153422   |
|                | Brain_Cerebellar_Hemisphere | 1.952809621    |              | Brain_Cerebellum                      | 0.047190379  |
|                | 1.952809621                 | -0.465554776   | -0.148161499 | -0.306858137                          | 0.224430938  |
|                | 1 0                         | 0.998207054    |              |                                       |              |
| USP22          | ENSG00000124422.11          | 0.756218297    | 5            | 3                                     | 0.320541186  |
|                | Brain_Putamen_basal_ganglia | 0.755577703    |              | Brain_Hippocampus                     | 2.852954299  |
|                | 0.05605342                  | 0.991724888    | -0.993346372 | 0.311293244                           | -0.5391873   |
|                | 0.501052343                 | 3 0            | 0.998207054  |                                       |              |
| KLHL9          | ENSG00000198642.6           | 0.756317876    | 4            | 4                                     | 0.351816476  |
|                | Brain_Hippocampus           | 2.814485006    |              | Brain_Cortex                          | 0.1883449    |
|                | 0.866804727                 | 0.1883449      | 0.1883449    | 0.1883449                             |              |
|                | -0.931071702                | -0.167718519   | -0.411214339 | 0.351883819                           | 4 0          |
|                | 0.998207054                 |                |              |                                       |              |
| LINC00310      | ENSG00000227456.7           | 0.756343442    | 1            | 1                                     | 0.756343442  |
|                | Brain_Hippocampus           | 0.756343442    |              | Brain_Hippocampus                     | 1 1 1        |
|                | 0.310286045                 | 0.310286045    | 0.310286045  | NA 1 0                                | 0.998207054  |

|               |                                       |                                       |                                      |              |              |                  |
|---------------|---------------------------------------|---------------------------------------|--------------------------------------|--------------|--------------|------------------|
| NGLY1         | ENSG00000151092.16                    | 0.756417432                           | 1                                    | 1            | 0.756417432  | Brain_Cerebellum |
|               | 0.756417432                           | Brain_Cerebellum1                     | 1                                    | 1            | -0.310188741 | -0.310188741     |
|               | -0.310188741                          | NA                                    | 1                                    | 0            | 0.998207054  |                  |
| MOGS          | ENSG00000115275.11                    | 0.756554732                           | 9                                    | 4            | 0.137046535  | Brain_Cerebellum |
|               | 0.764360386                           | Brain_Nucleus_accumbens_basal_ganglia | 6.93224435                           | 0.004066398  |              |                  |
|               | 0.335011844                           | 0.299759793                           | 1.486879896                          | 0.961691579  | 0.379372857  |                  |
|               | 4                                     | 0                                     | 0.998207054                          |              |              |                  |
| ACKR2         | ENSG00000144648.15                    | 0.756690819                           | 5                                    | 4            | 0.30804063   |                  |
|               | Brain_Nucleus_accumbens_basal_ganglia | 0.916673488                           |                                      | Brain_Cortex |              |                  |
|               | 3.301538414                           | 0.016319144                           | 0.304082086                          | -1.019342003 | -0.10462486  |                  |
|               | -0.637036374                          | 0.475301842                           | 4                                    | 0            | 0.998207054  |                  |
| RP11-492E3.2  | ENSG00000227619.1                     | 0.756721414                           | 1                                    | 1            | 0.756721414  |                  |
|               | Brain_Frontal_Cortex_BA9              | 0.756721414                           | Brain_Frontal_Cortex_BA9             | 1            | 1            |                  |
|               | 1                                     | -0.309789003                          | -0.309789003                         | -0.309789003 | NA           | 1                |
|               | 0.998207054                           |                                       |                                      |              |              |                  |
| ZNF488        | ENSG00000265763.3                     | 0.756726508                           | 6                                    | 6            | 0.260660922  |                  |
|               | Brain_Cerebellum                      | 0.792312261                           | Brain_Putamen_basal_ganglia          | 1.619578411  |              |                  |
|               | 0.5276185                             | 0.5276185                             | -1.124830372                         | 0.638066741  | -0.243772984 |                  |
|               | 0.651068354                           | 6                                     | 0                                    | 0.998207054  |              |                  |
| NPC2          | ENSG00000119655.10                    | 0.757033888                           | 2                                    | 2            | 0.457668312  |                  |
|               | Brain_Nucleus_accumbens_basal_ganglia | 0.943048305                           | Brain_Hypothalamus                   |              |              |                  |
|               | 1.000000845                           | 0.999999155                           | 0.999999155                          | -0.742691772 | 0.071439083  |                  |
|               | -0.335626344                          | 0.575677449                           | 2                                    | 0            | 0.998207054  |                  |
| XRRA1         | ENSG00000166435.15                    | 0.757058811                           | 13                                   | 1            | 0.636979768  |                  |
|               | Brain_Hippocampus                     | 0.836782137                           | Brain_Putamen_basal_ganglia          | 12.85212932  |              |                  |
|               | 0.000100761                           | 12.85212932                           | -0.471925777                         | -0.206011233 | -0.30760454  |                  |
|               | 0.06702484                            | 1                                     | 0                                    | 0.998207054  |              |                  |
| BRAF          | ENSG00000157764.12                    | 0.757252655                           | 1                                    | 1            | 0.757252655  |                  |
|               | Brain_Putamen_basal_ganglia           | 0.757252655                           | Brain_Putamen_basal_ganglia          | 1            | 1            |                  |
|               | 1                                     | 0.30909054                            | 0.30909054                           | 0.30909054   | NA           | 1                |
|               | 0.998207054                           |                                       |                                      |              |              |                  |
| RP11-384K6.8  | ENSG00000281731.2                     | 0.757301301                           | 11                                   | 5            | 0.25805228   |                  |
|               | Brain_Frontal_Cortex_BA9              | 0.85385397                            | Brain_Substantia_nigra               | 8.494092424  |              |                  |
|               | 0.023053396                           | 0.283559409                           | -1.131006679                         | -0.184203301 | -0.822221047 |                  |
|               | 0.330770077                           | 5                                     | 0                                    | 0.998207054  |              |                  |
| YEATS4        | ENSG00000127337.6                     | 0.757450274                           | 13                                   | 2            | 0.426977774  |                  |
|               | Brain_Anterior_cingulate_cortex_BA24  | 0.74067563                            | Brain_Amygdala                       | 11.29920968  |              |                  |
|               | 0.008471409                           | 0.974411957                           | 0.330958769                          | 0.794373934  | 0.641537787  |                  |
|               | 0.15591357                            | 2                                     | 0                                    | 0.998207054  |              |                  |
| ZNF284        | ENSG00000186026.6                     | 0.757475083                           | 3                                    | 3            | 0.395964033  |                  |
|               | Brain_Hippocampus                     | 0.893451446                           | Brain_Cerebellum                     | 1.958461664  |              |                  |
|               | 0.127844501                           | 0.127844501                           | -0.848851313                         | 0.39913745   | -0.105258556 |                  |
|               | 0.657480268                           | 3                                     | 0                                    | 0.998207054  |              |                  |
| PDSS2         | ENSG00000164494.11                    | 0.757494673                           | 1                                    | 1            | 0.757494673  |                  |
|               | Brain_Caudate_basal_ganglia           | 0.757494673                           | Brain_Caudate_basal_ganglia          | 1            | 1            |                  |
|               | 1                                     | -0.308772391                          | -0.308772391                         | -0.308772391 | NA           | 1                |
|               | 0.998207054                           |                                       |                                      |              |              |                  |
| RP1-249I4.2   | ENSG00000232311.1                     | 0.757658524                           | 2                                    | 2            | 0.587064646  |                  |
|               | Brain_Frontal_Cortex_BA9              | 0.613341205                           | Brain_Putamen_basal_ganglia          |              |              |                  |
|               | 1.008589002                           | 0.991410998                           | 0.991410998                          | -0.50530988  | 0.543094635  |                  |
|               | 0.018892378                           | 0.741333942                           | 2                                    | 0            | 0.998207054  |                  |
| YPEL1         | ENSG00000100027.14                    | 0.757730757                           | 1                                    | 1            | 0.757730757  | Brain_Cortex     |
|               | 0.757730757                           | Brain_Cortex                          | 1                                    | 1            | 1            | -0.30846207      |
|               | -0.30846207                           | NA                                    | 1                                    | 0            | 0.998207054  |                  |
| FMNL1         | ENSG00000184922.13                    | 0.757763756                           | 3                                    | 2            | 0.467895179  | Brain_Amygdala   |
|               | 0.960968531                           | Brain_Cerebellar_Hemisphere           | 1.976258063                          | 0.023729429  |              |                  |
|               | 1.000012507                           | -0.048938219                          | 0.725907988                          | 0.349658857  | 0.387906218  |                  |
|               | 2                                     | 0                                     | 0.998207054                          |              |              |                  |
| RP11-890B15.3 | ENSG00000255455.2                     | 0.75777167                            | 13                                   | 5            | 0.369721766  |                  |
|               | Brain_Cerebellar_Hemisphere           | 0.975712976                           | Brain_Anterior_cingulate_cortex_BA24 |              |              |                  |
|               | 7.906477217                           | 0.002337013                           | 0.360901543                          | -0.776827603 | 0.896994661  |                  |
|               | -0.106778935                          | 0.482417941                           | 5                                    | 0            | 0.998207054  |                  |
| CORO1B        | ENSG00000172725.13                    | 0.757861972                           | 4                                    | 2            | 0.546009691  |                  |

|          |                                       |              |              |                                |             |              |   |             |
|----------|---------------------------------------|--------------|--------------|--------------------------------|-------------|--------------|---|-------------|
|          | Brain_Putamen_basal_ganglia           | 0.967536623  |              | Brain_Cerebellum               | 3.300585442 |              |   |             |
|          | 0.009303299                           | 0.616272464  | -0.113444159 | 0.603750264                    |             | 0.189744733  |   |             |
|          | 0.332033316                           | 2            | 0            | 0.998207054                    |             |              |   |             |
| CD226    | ENSG00000150637.8                     | 0.757866302  | 1            | 1                              | 0.757866302 |              |   |             |
|          | Brain_Spinal_cord_cervical_c-1        | 0.757866302  |              | Brain_Spinal_cord_cervical_c-1 |             |              |   |             |
|          | 1                                     | 1            | 0.308283918  | 0.308283918                    | 0.308283918 | NA           | 1 | 0           |
|          | 0.998207054                           |              |              |                                |             |              |   |             |
| AK8      | ENSG00000165695.9                     | 0.757867467  | 13           | 2                              | 0.39119246  |              |   |             |
|          | Brain_Frontal_Cortex_BA9              | 0.902505924  |              | Brain_Caudate_basal_ganglia    |             |              |   |             |
|          | 11.08996092                           | 0.001330736  | 1.060769565  | 0.122496366                    |             | 0.857456837  |   |             |
|          | 0.453609469                           | 0.235703549  | 2            | 0                              | 0.998207054 |              |   |             |
| PPP4R1   | ENSG00000154845.15                    | 0.758026704  | 7            | 6                              | 0.104238892 |              |   |             |
|          | Brain_Cortex                          | 0.974996978  |              | Brain_Hypothalamus             | 3.354152045 |              |   |             |
|          | 0.039370575                           | 0.226954215  | -1.624641861 | 0.322016205                    |             | -0.339966906 |   |             |
|          | 0.658581865                           | 6            | 0            | 0.998207054                    |             |              |   |             |
| TMPRSS7  | ENSG00000176040.13                    | 0.758097506  | 2            | 2                              | 0.464602273 |              |   |             |
|          | Brain_Cerebellar_Hemisphere           | 0.874060258  |              | Brain_Cerebellum               | 1.027822977 |              |   |             |
|          | 0.972177023                           | 0.972177023  | -0.731289614 | 0.158503253                    |             | -0.286393181 |   |             |
|          | 0.62917857                            | 2            | 0            | 0.998207054                    |             |              |   |             |
| HIST1H3E | ENSG00000274750.2                     | 0.758235568  | 13           | 4                              | 0.391110677 |              |   |             |
|          | Brain_Anterior_cingulate_cortex_BA24  | 0.96834769   |              |                                |             |              |   |             |
|          | Brain_Nucleus_accumbens_basal_ganglia | 10.45404581  |              | 0.019097013                    |             |              |   |             |
|          | 0.395986634                           | -0.725953054 | 0.857604884  | 0.179570695                    |             | 0.500930891  |   |             |
|          | 4                                     | 0            | 0.998207054  |                                |             |              |   |             |
| MIR155HG | ENSG00000234883.5                     | 0.758308044  | 1            | 1                              | 0.758308044 |              |   |             |
|          | Brain_Cerebellum                      | 0.758308044  |              | Brain_Cerebellum               | 1           | 1            | 1 | 0.307703384 |
|          | 0.307703384                           | 0.307703384  | NA           | 1                              | 0           | 0.998207054  |   |             |
| CKMT2    | ENSG00000131730.15                    | 0.758318222  | 3            | 2                              | 0.486147242 |              |   |             |
|          | Brain_Caudate_basal_ganglia           | 0.614922885  |              | Brain_Putamen_basal_ganglia    |             |              |   |             |
|          | 2.790288257                           | 0.090762099  | 0.118949643  | 0.503058867                    |             | 0.696449708  |   |             |
|          | 0.618767375                           | 0.102149385  | 2            | 0                              | 0.998207054 |              |   |             |
| AAR2     | ENSG00000131043.11                    | 0.758331026  | 1            | 1                              | 0.758331026 |              |   |             |
|          | Brain_Cerebellar_Hemisphere           | 0.758331026  |              | Brain_Cerebellar_Hemisphere    | 1           | 1            |   |             |
|          | 1                                     | 0.307673184  | 0.307673184  | 0.307673184                    | NA          | 1            | 0 |             |
|          | 0.998207054                           |              |              |                                |             |              |   |             |
| SPATA46  | ENSG00000171722.12                    | 0.758338828  | 2            | 2                              | 0.488405741 |              |   |             |
|          | Brain_Cerebellum                      | 0.812020065  |              | Brain_Caudate_basal_ganglia    | 1.046852707 |              |   |             |
|          | 0.953147293                           | 0.953147293  | 0.237820826  | 0.692846733                    |             | 0.46533378   |   |             |
|          | 0.321751904                           | 2            | 0            | 0.998207054                    |             |              |   |             |
| TESPA1   | ENSG00000135426.15                    | 0.758370523  | 2            | 2                              | 0.521056439 |              |   |             |
|          | Brain_Cortex                          | 0.697814036  |              | Brain_Hippocampus              | 1.019257301 |              |   |             |
|          | 0.980742699                           | 0.980742699  | -0.641717785 | -0.388272973                   |             | -0.514995379 |   |             |
|          | 0.179212545                           | 2            | 0            | 0.998207054                    |             |              |   |             |
| GALNTL6  | ENSG00000174473.15                    | 0.758448544  | 3            | 3                              | 0.479038519 |              |   |             |
|          | Brain_Cortex                          | 0.808648852  |              | Brain_Cerebellar_Hemisphere    | 1.515652278 |              |   |             |
|          | 0.488851798                           | 0.488851798  | -0.299187352 | 0.707849828                    |             | 0.05549767   |   |             |
|          | 0.5656724                             | 3            | 0            | 0.998207054                    |             |              |   |             |
| FASTKD2  | ENSG00000118246.13                    | 0.758486362  | 1            | 1                              | 0.758486362 |              |   |             |
|          | Brain_Cerebellum                      | 0.758486362  |              | Brain_Cerebellum               | 1           | 1            | 1 | -0.30746907 |
|          | -0.30746907                           | -0.30746907  | NA           | 1                              | 0           | 0.998207054  |   |             |
| TRMT1L   | ENSG00000121486.11                    | 0.758490773  | 1            | 1                              | 0.758490773 |              |   |             |
|          | Brain_Frontal_Cortex_BA9              | 0.758490773  |              | Brain_Frontal_Cortex_BA9       | 1           | 1            |   |             |
|          | 1                                     | 0.307463274  | 0.307463274  | 0.307463274                    | NA          | 1            | 0 |             |
|          | 0.998207054                           |              |              |                                |             |              |   |             |
| CARD16   | ENSG00000204397.7                     | 0.758686662  | 3            | 3                              | 0.408407736 |              |   |             |
|          | Brain_Caudate_basal_ganglia           | 0.836065144  |              | Brain_Cerebellum               | 1.958539613 |              |   |             |
|          | 0.108489608                           | 0.108489608  | 0.20692921   | 0.826698917                    |             | 0.525327567  |   |             |
|          | 0.310235494                           | 3            | 0            | 0.998207054                    |             |              |   |             |
| MKKS     | ENSG00000125863.18                    | 0.758758286  | 8            | 8                              | 0.203765719 |              |   |             |
|          | Brain_Hippocampus                     | 0.879016421  |              | Brain_Frontal_Cortex_BA9       | 3.328020575 |              |   |             |
|          | 0.170485047                           | 0.170485047  | -1.270895806 | 0.964975455                    |             | 0.193990581  |   |             |
|          | 0.81800209                            | 8            | 0            | 0.998207054                    |             |              |   |             |

|           |                                       |                   |                          |              |                                      |             |                  |  |
|-----------|---------------------------------------|-------------------|--------------------------|--------------|--------------------------------------|-------------|------------------|--|
| RYBP      | ENSG00000163602.10                    | 0.758762511       | 1                        | 1            | 0.758762511                          |             |                  |  |
|           | Brain_Putamen_basal_ganglia           | 0.758762511       |                          |              | Brain_Putamen_basal_ganglia          | 1           | 1                |  |
|           | 1                                     | -0.307106237      | -0.307106237             | -0.307106237 | NA                                   | 1           | 0                |  |
|           | 0.998207054                           |                   |                          |              |                                      |             |                  |  |
| SDCCAG8   | ENSG00000054282.15                    | 0.758789649       | 5                        | 5            | 0.298919787                          |             |                  |  |
|           | Brain_Hippocampus                     | 0.885208686       |                          |              | Brain_Cerebellar_Hemisphere          | 3.599979705 |                  |  |
|           | 0.124943024                           | 0.124943024       | 0.144369517              | 1.038752651  | 0.548853163                          |             |                  |  |
|           | 0.364304616                           | 5                 | 0                        | 0.998207054  |                                      |             |                  |  |
| DAP       | ENSG00000112977.15                    | 0.758836222       | 4                        | 4            | 0.414750991                          |             | Brain_Cortex     |  |
|           | 0.948587303                           | Brain_Cerebellum  | 2.622591404              | 0.161037619  | 0.161037619                          |             |                  |  |
|           | -0.507580854                          | 0.815561474       | 0.082977979              | 0.549912711  | 4                                    | 0           |                  |  |
|           | 0.998207054                           |                   |                          |              |                                      |             |                  |  |
| OR7A5     | ENSG00000188269.8                     | 0.758895962       | 7                        | 4            | 0.153866309                          |             |                  |  |
|           | Brain_Caudate_basal_ganglia           | 0.686767898       |                          |              | Brain_Anterior_cingulate_cortex_BA24 |             |                  |  |
|           | 5.108300092                           | 0.009452139       | 0.20522423               | -1.426007045 | 0.403245137                          |             |                  |  |
|           | -0.868893761                          | 0.583810079       | 4                        | 0            | 0.998207054                          |             |                  |  |
| ZNF264    | ENSG00000083844.10                    | 0.758902928       | 1                        | 1            | 0.758902928                          |             |                  |  |
|           | Brain_Amygdala                        | 0.758902928       | Brain_Amygdala           | 1            | 1                                    | 1           | 0.306921757      |  |
|           | 0.306921757                           | 0.306921757       | NA                       | 1            | 0                                    | 0.998207054 |                  |  |
| PPIL4     | ENSG00000131013.3                     | 0.758974539       | 1                        | 1            | 0.758974539                          |             | Brain_Cerebellum |  |
|           | 0.758974539                           | Brain_Cerebellum  | 1                        | 1            | 1                                    | 0.306827679 | 0.306827679      |  |
|           | 0.306827679                           | NA                | 1                        | 0            | 0.998207054                          |             |                  |  |
| FRYL      | ENSG00000075539.13                    | 0.759059745       | 3                        | 3            | 0.296872739                          |             |                  |  |
|           | Brain_Spinal_cord_cervical_c-1        | 0.807117758       |                          |              | Brain_Hippocampus                    |             |                  |  |
|           | 1.194740548                           | 0.822834876       | 0.822834876              | -0.244145986 | 1.043163145                          |             |                  |  |
|           | 0.351674929                           | 0.648964848       | 3                        | 0            | 0.998207054                          |             |                  |  |
| KCNT2     | ENSG00000162687.16                    | 0.759072606       | 1                        | 1            | 0.759072606                          |             |                  |  |
|           | Brain_Nucleus_accumbens_basal_ganglia | 0.759072606       |                          |              |                                      |             |                  |  |
|           | Brain_Nucleus_accumbens_basal_ganglia | 1                 | 1                        | 1            | 0.306698849                          |             |                  |  |
|           | 0.306698849                           | 0.306698849       | NA                       | 1            | 0                                    | 0.998207054 |                  |  |
| FAM50B    | ENSG00000145945.5                     | 0.75950334        | 1                        | 1            | 0.75950334                           |             |                  |  |
|           | Brain_Frontal_Cortex_BA9              | 0.75950334        | Brain_Frontal_Cortex_BA9 | 1            | 1                                    | 1           |                  |  |
|           | 0.306133057                           | 0.306133057       | 0.306133057              | NA           | 1                                    | 0           | 0.998207054      |  |
| ZNF530    | ENSG00000183647.10                    | 0.759537405       | 7                        | 7            | 0.133437558                          |             |                  |  |
|           | Brain_Anterior_cingulate_cortex_BA24  | 0.943507479       |                          |              | Brain_Putamen_basal_ganglia          |             |                  |  |
|           | 1.609146211                           | 0.451653116       | 0.451653116              | -1.500683053 | 1.344572253                          |             |                  |  |
|           | -0.075523639                          | 0.844943159       | 7                        | 0            | 0.998207054                          |             |                  |  |
| DDX24     | ENSG00000089737.16                    | 0.759621341       | 1                        | 1            | 0.759621341                          |             |                  |  |
|           | Brain_Caudate_basal_ganglia           | 0.759621341       |                          |              | Brain_Caudate_basal_ganglia          | 1           | 1                |  |
|           | 1                                     | 0.305978073       | 0.305978073              | 0.305978073  | NA                                   | 1           | 0                |  |
|           | 0.998207054                           |                   |                          |              |                                      |             |                  |  |
| SLC3A2    | ENSG00000168003.16                    | 0.759640119       | 1                        | 1            | 0.759640119                          |             |                  |  |
|           | Brain_Putamen_basal_ganglia           | 0.759640119       |                          |              | Brain_Putamen_basal_ganglia          | 1           | 1                |  |
|           | 1                                     | -0.30595341       | -0.30595341              | -0.30595341  | NA                                   | 1           | 0                |  |
|           | 0.998207054                           |                   |                          |              |                                      |             |                  |  |
| NDUFB4    | ENSG00000065518.7                     | 0.759683986       | 3                        | 3            | 0.281634897                          |             |                  |  |
|           | Brain_Putamen_basal_ganglia           | 0.555797023       |                          |              | Brain_Cerebellar_Hemisphere          | 2.15469457  |                  |  |
|           | 0.385432456                           | 0.385432456       | -1.076653939             | -0.589095781 | -0.76337063                          |             |                  |  |
|           | 0.271883712                           | 3                 | 0                        | 0.998207054  |                                      |             |                  |  |
| GPR161    | ENSG00000143147.14                    | 0.759697762       | 5                        | 5            | 0.19793298                           |             |                  |  |
|           | Brain_Cerebellar_Hemisphere           | 0.979014113       |                          |              | Brain_Hippocampus                    | 2.266443591 |                  |  |
|           | 0.29594578                            | 0.29594578        | -0.044676536             | 1.287462937  | 0.420207328                          |             |                  |  |
|           | 0.601645975                           | 5                 | 0                        | 0.998207054  |                                      |             |                  |  |
| LINC01836 | ENSG00000267530.2                     | 0.759709423       | 1                        | 1            | 0.759709423                          |             |                  |  |
|           | Brain_Caudate_basal_ganglia           | 0.759709423       |                          |              | Brain_Caudate_basal_ganglia          | 1           | 1                |  |
|           | 1                                     | 0.305862389       | 0.305862389              | 0.305862389  | NA                                   | 1           | 0                |  |
|           | 0.998207054                           |                   |                          |              |                                      |             |                  |  |
| PWRN1     | ENSG00000259905.5                     | 0.759788567       | 12                       | 3            | 0.500686595                          |             | Brain_Cortex     |  |
|           | 0.999500149                           | Brain_Hippocampus | 9.394755593              | 0.033959777  |                                      |             |                  |  |
|           | 0.458188275                           | -0.673409832      | 0.623494445              | 0.075813264  | 0.340350875                          |             |                  |  |
|           | 3                                     | 0                 | 0.998207054              |              |                                      |             |                  |  |
| SOGA3     | ENSG00000214338.10                    | 0.759902063       | 3                        | 3            | 0.368334411                          |             |                  |  |

|            |                                       |                |              |              |                                       |              |              |                |
|------------|---------------------------------------|----------------|--------------|--------------|---------------------------------------|--------------|--------------|----------------|
|            | Brain_Spinal_cord_cervical_c-1        | 0.728608171    |              |              | Brain_Cerebellar_Hemisphere           |              |              |                |
|            | 1.288882204                           | 0.721439742    | 0.721439742  |              | -0.501298013                          | 0.899597645  |              |                |
|            | 0.017107354                           | 0.768144215    | 3            | 0            | 0.998207054                           |              |              |                |
| PKNOX2-AS1 | ENSG00000254880.1                     | 0.759919761    |              |              | 5                                     | 2            | 0.463720668  |                |
|            | Brain_Caudate_basal_ganglia           | 0.763610199    |              |              | Brain_Anterior_cingulate_cortex_BA24  |              |              |                |
|            | 4.539615407                           | 3.46E-05       | 0.312668229  |              | 0.300743364                           | 0.732734025  |              |                |
|            | 0.594742017                           | 0.193932046    | 2            | 0            | 0.998207054                           |              |              |                |
| FAM110A    | ENSG00000125898.12                    | 0.760022935    |              |              | 2                                     | 2            | 0.504513809  |                |
|            | Brain_Hypothalamus                    | 0.777652475    |              |              | Brain_Nucleus_accumbens_basal_ganglia |              |              |                |
|            | 1.057860733                           | 0.942139267    | 0.942139267  |              | -0.667404473                          | 0.282379574  |              |                |
|            | -0.192512449                          | 0.671598741    | 2            | 0            | 0.998207054                           |              |              |                |
| ZMAT4      | ENSG00000165061.14                    | 0.760023595    |              |              | 1                                     | 1            | 0.760023595  |                |
|            | Brain_Putamen_basal_ganglia           | 0.760023595    |              |              | Brain_Putamen_basal_ganglia1          | 1            | 1            |                |
|            | 1                                     | 0.305449804    | 0.305449804  | 0.305449804  | NA                                    | 1            | 0            |                |
|            | 0.998207054                           |                |              |              |                                       |              |              |                |
| PROSER3    | ENSG00000167595.14                    | 0.760132127    |              |              | 4                                     | 4            | 0.407264255  |                |
|            | Brain_Cerebellar_Hemisphere           | 0.782663878    |              |              | Brain_Putamen_basal_ganglia           |              |              |                |
|            | 2.129473296                           | 0.25645225     | 0.25645225   | -0.531436977 | 0.828717546                           |              |              |                |
|            | 0.163803614                           | 0.668242808    | 4            | 0            | 0.998207054                           |              |              |                |
| KIF21B     | ENSG00000116852.14                    | 0.760133062    |              |              | 4                                     | 3            | 0.352689767  |                |
|            | Brain_Cortex                          | 0.570671463    |              |              | Brain_Frontal_Cortex_BA9              | 2.500833129  |              |                |
|            | 0.050732436                           | 0.410571903    | -0.929384676 |              | -0.567062878                          | -0.81947402  |              |                |
|            | 0.170226595                           | 3              | 0            | 0.998207054  |                                       |              |              |                |
| NF1        | ENSG00000196712.17                    | 0.760205335    |              |              | 1                                     | 1            | 0.760205335  | Brain_Amygdala |
|            | 0.760205335                           | Brain_Amygdala | 1            | 1            | 1                                     | -0.305211157 | -0.305211157 |                |
|            | -0.305211157                          | NA             | 1            | 0            | 0.998207054                           |              |              |                |
| SUFU       | ENSG00000107882.11                    | 0.7602959      |              |              | 2                                     | 2            | 0.65837309   |                |
|            | Brain_Nucleus_accumbens_basal_ganglia | 0.718997736    |              |              | Brain_Hippocampus                     |              |              |                |
|            | 1.410711819                           | 0.589288181    | 0.589288181  |              | -0.442160469                          | 0.359798619  |              |                |
|            | -0.041180925                          | 0.56707071     | 2            | 0            | 0.998207054                           |              |              |                |
| ZFHX2      | ENSG00000136367.13                    | 0.760355724    |              |              | 1                                     | 1            | 0.760355724  |                |
|            | Brain_Nucleus_accumbens_basal_ganglia | 0.760355724    |              |              |                                       |              |              |                |
|            | Brain_Nucleus_accumbens_basal_ganglia | 1              | 1            | 1            | -0.305013692                          |              |              |                |
|            | -0.305013692                          | -0.305013692   | NA           | 1            | 0                                     | 0.998207054  |              |                |
| LINC02187  | ENSG00000263082.1                     | 0.760409105    |              |              | 1                                     | 1            | 0.760409105  |                |
|            | Brain_Spinal_cord_cervical_c-1        | 0.760409105    |              |              | Brain_Spinal_cord_cervical_c-1        |              |              |                |
|            | 1                                     | 1              | 1            | 0.304943604  | 0.304943604                           | 0.304943604  | NA           | 1              |
|            | 0.998207054                           |                |              |              |                                       |              |              | 0              |
| PTH1R      | ENSG00000160801.13                    | 0.760466605    |              |              | 1                                     | 1            | 0.760466605  |                |
|            | Brain_Nucleus_accumbens_basal_ganglia | 0.760466605    |              |              |                                       |              |              |                |
|            | Brain_Nucleus_accumbens_basal_ganglia | 1              | 1            | 1            | 0.30486811                            | 0.30486811   |              |                |
|            | 0.30486811                            | NA             | 1            | 0            | 0.998207054                           |              |              |                |
| BHMT2      | ENSG00000132840.9                     | 0.760525635    |              |              | 4                                     | 4            | 0.25068635   |                |
|            | Brain_Cerebellar_Hemisphere           | 0.982024251    |              |              | Brain_Amygdala                        | 1.832872172  |              |                |
|            | 0.524215964                           | 0.524215964    | -1.148683893 |              | 0.407048909                           | -0.251364103 |              |                |
|            | 0.662050681                           | 4              | 0            | 0.998207054  |                                       |              |              |                |
| TLK2       | ENSG00000146872.17                    | 0.760532752    |              |              | 1                                     | 1            | 0.760532752  |                |
|            | Brain_Hippocampus                     | 0.760532752    |              |              | Brain_Hippocampus                     | 1            | 1            | 1              |
|            | 0.304781264                           | 0.304781264    | 0.304781264  |              | NA                                    | 1            | 0            | 0.998207054    |
| IKZF4      | ENSG00000123411.14                    | 0.760693309    |              |              | 1                                     | 1            | 0.760693309  | Brain_Amygdala |
|            | 0.760693309                           | Brain_Amygdala | 1            | 1            | 1                                     | 0.304570475  | 0.304570475  |                |
|            | 0.304570475                           | NA             | 1            | 0            | 0.998207054                           |              |              |                |
| WVOX       | ENSG00000186153.16                    | 0.760777571    |              |              | 12                                    | 10           | 0.300441402  |                |
|            | Brain_Cerebellar_Hemisphere           | 0.960710545    |              |              | Brain_Cortex                          | 5.56055832   |              |                |
|            | 0.092403513                           | 0.234707315    | -0.716022101 |              | 1.035487283                           | 0.082049681  |              |                |
|            | 0.63704213                            | 10             | 0            | 0.998207054  |                                       |              |              |                |
| TXNDC15    | ENSG00000113621.14                    | 0.760778234    |              |              | 10                                    | 3            | 0.228891476  |                |
|            | Brain_Nucleus_accumbens_basal_ganglia | 0.994987526    |              |              | Brain_Frontal_Cortex_BA9              |              |              |                |
|            | 8.096924143                           | 0.003096006    | 0.634405934  |              | -1.203219279                          | 0.006282246  |              |                |
|            | -0.808155966                          | 0.408197713    | 3            | 0            | 0.998207054                           |              |              |                |
| TMEM106C   | ENSG00000134291.11                    | 0.760785053    |              |              | 7                                     | 7            | 0.240530553  |                |
|            | Brain_Cerebellum                      | 0.962542316    |              |              | Brain_Cortex                          | 1.964704535  | 0.480232588  |                |

|               |                                       |              |                                      |              |              |
|---------------|---------------------------------------|--------------|--------------------------------------|--------------|--------------|
|               | 0.480232588                           | -0.948681445 | 1.173661709                          | 0.224624542  | 0.699820514  |
|               | 7                                     | 0            | 0.998207054                          |              |              |
| CHRFAM7A      | ENSG00000166664.13                    | 0.760826461  | 8                                    | 6            | 0.368808517  |
|               | Brain_Putamen_basal_ganglia           | 0.755869598  | Brain_Cortex                         | 5.219632259  |              |
|               | 0.107182826                           | 0.18348699   | -0.596575192                         | 0.898707432  | 0.418218875  |
|               | 0.465850374                           | 6            | 0                                    | 0.998207054  |              |
| CCNYL1        | ENSG00000163249.11                    | 0.760858957  | 1                                    | 1            | 0.760858957  |
|               | Brain_Caudate_basal_ganglia           | 0.760858957  | Brain_Caudate_basal_ganglia          | 1            | 1            |
|               | 1                                     | -0.304353018 | -0.304353018                         | -0.304353018 | NA 1 0       |
|               | 0.998207054                           |              |                                      |              |              |
| RP11-15A1.3   | ENSG00000267058.1                     | 0.760961839  | 2                                    | 2            | 0.607756644  |
|               | Brain_Frontal_Cortex_BA9              | 0.843442788  | Brain_Anterior_cingulate_cortex_BA24 |              |              |
|               | 1.878952422                           | 0.121047578  | 0.121047578                          | 0.197491684  | 0.513278325  |
|               | 0.355385004                           | 0.223294875  | 2                                    | 0            | 0.998207054  |
| DKK3          | ENSG00000050165.17                    | 0.761048534  | 3                                    | 3            | 0.487597356  |
|               | Brain_Frontal_Cortex_BA9              | 0.989015003  | Brain_Cerebellum                     | 1.481555347  |              |
|               | 0.533272829                           | 0.533272829  | -0.694135311                         | 0.665653698  | -0.014083233 |
|               | 0.679894559                           | 3            | 0                                    | 0.998207054  |              |
| SLC28A3       | ENSG00000197506.7                     | 0.76112767   | 1                                    | 1            | 0.76112767   |
|               | Brain_Hippocampus                     | 1            | 1                                    | 1            | 0.304000291  |
|               | 0.304000291                           | NA           | 1                                    | 0            | 0.998207054  |
| KIF21A        | ENSG00000139116.18                    | 0.761326478  | 4                                    | 4            | 0.535701252  |
|               | Brain_Hypothalamus                    | 0.945432169  | Brain_Cerebellum                     | 2.771267596  |              |
|               | 0.189193599                           | 0.189193599  | -0.372596942                         | 0.619326558  | 0.031760469  |
|               | 0.43144606                            | 4            | 0                                    | 0.998207054  |              |
| SHC3          | ENSG00000148082.9                     | 0.761524337  | 1                                    | 1            | 0.761524337  |
|               | Brain_Cerebellum                      | 1            | 1                                    | 1            | 0.303479671  |
|               | 0.303479671                           | NA           | 1                                    | 0            | 0.998207054  |
| TCP10L        | ENSG00000242220.6                     | 0.761551976  | 3                                    | 3            | 0.299392208  |
|               | Brain_Frontal_Cortex_BA9              | 0.881512855  | Brain_Cerebellum                     | 1.599832616  |              |
|               | 0.418794516                           | 0.418794516  | -0.149051679                         | 1.037737657  | 0.415488713  |
|               | 0.595495542                           | 3            | 0                                    | 0.998207054  |              |
| TLDC2         | ENSG00000101342.9                     | 0.761562085  | 3                                    | 3            | 0.409609937  |
|               | Brain_Spinal_cord_cervical_c-1        | 0.760108141  | Brain_Caudate_basal_ganglia          |              |              |
|               | 1.534355708                           | 0.368552505  | 0.368552505                          | 0.305338783  | 0.824580252  |
|               | 0.543212767                           | 0.262338883  | 3                                    | 0            | 0.998207054  |
| TDP2          | ENSG00000111802.13                    | 0.761567799  | 7                                    | 7            | 0.102784275  |
|               | Brain_Putamen_basal_ganglia           | 2.390935874  | Brain_Cortex                         |              |              |
|               | 0.315292879                           | -1.631502775 | 0.520260037                          | -0.065820696 | 0.763746201  |
|               | 7                                     | 0            | 0.998207054                          |              |              |
| AEN           | ENSG00000181026.14                    | 0.761591822  | 3                                    | 2            | 0.460661724  |
|               | Brain_Cerebellar_Hemisphere           | 0.956544321  | Brain_Amygdala                       | 1.980941657  |              |
|               | 0.059842338                           | 0.959216005  | -0.737757664                         | -0.054490571 | -0.318372621 |
|               | 0.367218417                           | 2            | 0                                    | 0.998207054  |              |
| MESDC1        | ENSG00000140406.3                     | 0.76164955   | 2                                    | 2            | 0.482475246  |
|               | Brain_Hypothalamus                    | 0.841941731  | Brain_Anterior_cingulate_cortex_BA24 |              |              |
|               | 1.038247225                           | 0.961752775  | 0.961752775                          | -0.199410394 | 0.702327021  |
|               | 0.251458314                           | 0.637624641  | 2                                    | 0            | 0.998207054  |
| RP11-295M18.6 | ENSG00000272823.1                     | 0.761751674  | 12                                   | 11           | 0.058257424  |
|               | Brain_Anterior_cingulate_cortex_BA24  | 0.961544805  | Brain_Cortex                         |              |              |
|               | 4.033283329                           | 0.132390038  | 0.238873136                          | -0.646652347 | 1.893755854  |
|               | 0.41922559                            | 0.702614921  | 11                                   | 0            | 0.998207054  |
| RHOH          | ENSG00000168421.12                    | 0.762014465  | 1                                    | 1            | 0.762014465  |
|               | Brain_Substantia_nigra                | 0.762014465  | Brain_Substantia_nigra               | 1            | 1            |
|               | 1                                     | -0.302836501 | -0.302836501                         | -0.302836501 | NA 1 0       |
|               | 0.998207054                           |              |                                      |              |              |
| RP11-1277A3.3 | ENSG00000272459.1                     | 0.762044696  | 3                                    | 3            | 0.35239622   |
|               | Brain_Hypothalamus                    | 0.857859292  | Brain_Anterior_cingulate_cortex_BA24 |              |              |
|               | 1.26422087                            | 0.701237718  | 0.701237718                          | -0.929951455 | -0.17909986  |
|               | -0.535862268                          | 0.376814936  | 3                                    | 0            | 0.998207054  |
| GLT8D2        | ENSG00000120820.12                    | 0.762084257  | 4                                    | 4            | 0.533113714  |
|               | Brain_Nucleus_accumbens_basal_ganglia | 0.992144616  | Brain_Cortex                         |              |              |

|         |                                      |                             |              |              |                                       |                  |            |
|---------|--------------------------------------|-----------------------------|--------------|--------------|---------------------------------------|------------------|------------|
|         | 3.125982784                          | 0.110744617                 | 0.110744617  | -0.623259946 | -0.009845423                          |                  |            |
|         | -0.342722698                         | 0.252671347                 | 4            | 0            | 0.998207054                           |                  |            |
| PEX26   | ENSG00000215193.12                   | 0.762260453                 | 3            | 3            | 0.603525002                           | Brain_Cerebellum |            |
|         | 0.971669089                          | Brain_Cerebellar_Hemisphere | 1.967236449  | 0.235505711  |                                       |                  |            |
|         | 0.235505711                          | -0.519338081                | 0.415354064  | -0.022823007 | 0.470068977                           |                  |            |
|         | 3                                    | 0                           | 0.998207054  |              |                                       |                  |            |
| CAT     | ENSG00000121691.4                    | 0.762304449                 | 12           | 3            | 0.249366116                           |                  |            |
|         | Brain_Caudate_basal_ganglia          | 0.930508998                 |              |              | Brain_Anterior_cingulate_cortex_BA24  |                  |            |
|         | 9.971190297                          | 0.003889237                 | 0.449425737  | 0.087204455  | 1.151890394                           |                  |            |
|         | 0.659787498                          | 0.340814122                 | 3            | 0            | 0.998207054                           |                  |            |
| BRICD5  | ENSG00000182685.7                    | 0.7623945                   | 4            | 4            | 0.295660022                           |                  |            |
|         | Brain_Frontal_Cortex_BA9             | 0.839693456                 |              |              | Brain_Caudate_basal_ganglia           |                  |            |
|         | 1.179331318                          | 0.790276235                 | 0.790276235  | -1.045785619 | 0.671166286                           |                  |            |
|         | -0.206534935                         | 0.78355744                  | 4            | 0            | 0.998207054                           |                  |            |
| NTSR1   | ENSG00000101188.4                    | 0.762623838                 | 2            | 2            | 0.5292249                             |                  |            |
|         | Brain_Putamen_basal_ganglia          | 0.600258778                 |              |              | Brain_Nucleus_accumbens_basal_ganglia |                  |            |
|         | 1.24367592                           | 0.75632408                  | 0.75632408   | -0.629189656 | -0.524028413                          | -0.576609034     |            |
|         | 0.074360228                          | 2                           | 0            | 0.998207054  |                                       |                  |            |
| GCNT3   | ENSG00000140297.12                   | 0.762661212                 | 1            | 1            | 0.762661212                           |                  |            |
|         | Brain_Cerebellar_Hemisphere          | 0.762661212                 |              |              | Brain_Cerebellar_Hemisphere           | 1                | 1          |
|         | 1                                    | 0.301987998                 | 0.301987998  | 0.301987998  | NA                                    | 1                | 0          |
|         | 0.998207054                          |                             |              |              |                                       |                  |            |
| RALGPS1 | ENSG00000136828.18                   | 0.76289058                  | 2            | 2            | 0.7590124                             | Brain_Cerebellum |            |
|         | 0.961639475                          | Brain_Cerebellar_Hemisphere | 1.934231724  | 0.065768276  |                                       |                  |            |
|         | 0.065768276                          | 0.048096325                 | 0.306777941  | 0.177437133  | 0.182915525                           |                  |            |
|         | 2                                    | 0                           | 0.998207054  |              |                                       |                  |            |
| THEM4   | ENSG00000159445.12                   | 0.762988737                 | 10           | 2            | 0.380388099                           |                  |            |
|         | Brain_Cerebellar_Hemisphere          | 0.851777822                 |              |              | Brain_Nucleus_accumbens_basal_ganglia |                  |            |
|         | 8.883186789                          | 0.001403801                 | 0.495178701  | -0.877181433 | -0.186850536                          |                  |            |
|         | -0.570869193                         | 0.20213907                  | 2            | 0            | 0.998207054                           |                  |            |
| TRUB1   | ENSG00000165832.5                    | 0.76301138                  | 2            | 2            | 0.478464485                           |                  |            |
|         | Brain_Caudate_basal_ganglia          | 0.891835318                 |              |              | Brain_Cortex                          | 1.084364048      |            |
|         | 0.915635952                          | 0.915635952                 | -0.708774403 | 0.135982244  | -0.28639608                           |                  |            |
|         | 0.597333154                          | 2                           | 0            | 0.998207054  |                                       |                  |            |
| ZNF506  | ENSG00000081665.13                   | 0.763180614                 | 12           | 3            | 0.439394193                           |                  |            |
|         | Brain_Anterior_cingulate_cortex_BA24 | 0.898215412                 |              |              | Brain_Cerebellum                      |                  |            |
|         | 10.08885147                          | 0.010873999                 | 0.471668979  | -0.66374148  | 0.773216618                           |                  |            |
|         | 0.295308975                          | 0.445961025                 | 3            | 0            | 0.998207054                           |                  |            |
| ZNF474  | ENSG00000164185.5                    | 0.763239195                 | 1            | 1            | 0.763239195                           |                  |            |
|         | Brain_Cerebellar_Hemisphere          | 0.763239195                 |              |              | Brain_Cerebellar_Hemisphere           | 1                | 1          |
|         | 1                                    | 0.301229895                 | 0.301229895  | 0.301229895  | NA                                    | 1                | 0          |
|         | 0.998207054                          |                             |              |              |                                       |                  |            |
| WARS    | ENSG00000140105.17                   | 0.763290628                 | 2            | 1            | 0.538888966                           |                  |            |
|         | Brain_Cerebellar_Hemisphere          | 0.983284919                 |              |              | Brain_Cerebellum                      | 1.942106392      |            |
|         | 0.057893608                          | 1.942106392                 | -0.614493955 | 0.020950779  | -0.296771588                          |                  |            |
|         | 0.449327281                          | 1                           | 0            | 0.998207054  |                                       |                  |            |
| MBD3    | ENSG00000071655.17                   | 0.76334148                  | 2            | 2            | 0.476502271                           |                  |            |
|         | Brain_Cerebellar_Hemisphere          | 0.843601937                 |              |              | Brain_Amygdala                        | 1.02107681       | 0.97892319 |
|         | 0.97892319                           | -0.197288296                | 0.71193945   | 0.257325577  | 0.642921106                           | 2                | 0          |
|         | 0.998207054                          |                             |              |              |                                       |                  |            |
| SPOP    | ENSG00000121067.17                   | 0.763387411                 | 1            | 1            | 0.763387411                           |                  |            |
|         | Brain_Spinal_cord_cervical_c-1       | 0.763387411                 |              |              | Brain_Spinal_cord_cervical_c-1        |                  |            |
|         | 1                                    | 1                           | 1            | -0.301035518 | -0.301035518                          | -0.301035518     | NA         |
|         | 0.998207054                          |                             |              |              |                                       |                  |            |
| KLHL30  | ENSG00000168427.8                    | 0.763450002                 | 2            | 2            | 0.484443752                           |                  |            |
|         | Brain_Cerebellar_Hemisphere          | 0.548910156                 |              |              | Brain_Cerebellum                      | 1.598630941      |            |
|         | 0.401369059                          | 0.401369059                 | -0.699173272 | -0.599394032 | -0.649283652                          |                  |            |
|         | 0.070554577                          | 2                           | 0            | 0.998207054  |                                       |                  |            |
| CCDC30  | ENSG00000186409.14                   | 0.76346109                  | 2            | 2            | 0.475265303                           |                  |            |
|         | Brain_Frontal_Cortex_BA9             | 0.681695831                 |              |              | Brain_Caudate_basal_ganglia           |                  |            |
|         | 1.346628708                          | 0.653371292                 | 0.653371292  | -0.713938348 | -0.410150117                          |                  |            |
|         | -0.562044233                         | 0.214810718                 | 2            | 0            | 0.998207054                           |                  |            |



|             |                                       |                             |                                       |              |              |                  |   |  |  |
|-------------|---------------------------------------|-----------------------------|---------------------------------------|--------------|--------------|------------------|---|--|--|
| RP11-54C4.3 | ENSG00000275765.5                     | 0.763468422                 | 12                                    | 2            | 0.261116233  |                  |   |  |  |
|             | Brain_Putamen_basal_ganglia           | 0.75293742                  | Brain_Hippocampus                     |              | 10.81401916  |                  |   |  |  |
|             | 0.000338448                           | 0.727272022                 | 0.314768514                           | 1.123756752  | 0.628030921  |                  |   |  |  |
|             | 0.19886632                            | 2                           | 0                                     | 0.998207054  |              |                  |   |  |  |
| DSP         | ENSG00000096696.13                    | 0.76347761                  | 3                                     | 3            | 0.366295963  | Brain_Cerebellum |   |  |  |
|             | 0.832581225                           | Brain_Caudate_basal_ganglia | 1.231784888                           |              | 0.768226666  |                  |   |  |  |
|             | 0.768226666                           | -0.211392222                | 0.90343332                            | 0.478816533  | 0.60300358   | 3                | 0 |  |  |
|             | 0.998207054                           |                             |                                       |              |              |                  |   |  |  |
| SPIN1       | ENSG00000106723.16                    | 0.763554188                 | 1                                     | 1            | 0.763554188  |                  |   |  |  |
|             | Brain_Substantia_nigra                | 0.763554188                 | Brain_Substantia_nigra                | 1            | 1            |                  |   |  |  |
|             | 1                                     | -0.300816812                | -0.300816812                          | -0.300816812 | NA           | 1                | 0 |  |  |
|             | 0.998207054                           |                             |                                       |              |              |                  |   |  |  |
| MMD         | ENSG00000108960.7                     | 0.76360494                  | 6                                     | 5            | 0.282121991  |                  |   |  |  |
|             | Brain_Nucleus_accumbens_basal_ganglia | 0.956158449                 | Brain_Hippocampus                     |              |              |                  |   |  |  |
|             | 3.207045064                           | 0.051998515                 | 0.297958317                           | -0.367515082 | 1.075564679  |                  |   |  |  |
|             | 0.291231746                           | 0.53920362                  | 5                                     | 0            | 0.998207054  |                  |   |  |  |
| MOB4        | ENSG00000115540.14                    | 0.763704196                 | 1                                     | 1            | 0.763704196  |                  |   |  |  |
|             | Brain_Anterior_cingulate_cortex_BA24  | 0.763704196                 |                                       |              |              |                  |   |  |  |
|             | Brain_Anterior_cingulate_cortex_BA24  | 1                           | 1                                     | 1            | -0.300620109 |                  |   |  |  |
|             | -0.300620109                          | -0.300620109                | NA                                    | 1            | 0            | 0.998207054      |   |  |  |
| TMEM256     | ENSG00000205544.3                     | 0.763714442                 | 2                                     | 2            | 0.46290563   |                  |   |  |  |
|             | Brain_Cerebellar_Hemisphere           | 0.915780187                 | Brain_Nucleus_accumbens_basal_ganglia |              |              |                  |   |  |  |
|             | 1.122141588                           | 0.877858412                 | 0.877858412                           | -0.105750657 | 0.734070733  |                  |   |  |  |
|             | 0.314160038                           | 0.5938434                   | 2                                     | 0            | 0.998207054  |                  |   |  |  |
| SEC16B      | ENSG00000120341.18                    | 0.763818755                 | 7                                     | 6            | 0.35228333   | Brain_Cerebellum |   |  |  |
|             | 0.998128957                           | Brain_Hippocampus           | 3.820891559                           |              | 0.013112832  |                  |   |  |  |
|             | 0.196877313                           | -0.635682229                | 0.930169502                           | 0.096340957  | 0.491184126  |                  |   |  |  |
|             | 6                                     | 0                           | 0.998207054                           |              |              |                  |   |  |  |
| DNAH14      | ENSG00000185842.15                    | 0.763856991                 | 2                                     | 2            | 0.571320049  |                  |   |  |  |
|             | Brain_Hypothalamus                    | 0.660416998                 | Brain_Cortex                          |              | 1.048246588  |                  |   |  |  |
|             | 0.951753412                           | 0.951753412                 | 0.439337511                           | 0.566108465  | 0.502722988  |                  |   |  |  |
|             | 0.089640602                           | 2                           | 0                                     | 0.998207054  |              |                  |   |  |  |
| LMNTD2      | ENSG00000185522.8                     | 0.763864511                 | 5                                     | 5            | 0.206879202  |                  |   |  |  |
|             | Brain_Cerebellar_Hemisphere           | 0.929433891                 | Brain_Hippocampus                     |              | 2.459334434  |                  |   |  |  |
|             | 0.195159681                           | 0.195159681                 | -0.567549626                          | 1.262193402  | -0.060517869 |                  |   |  |  |
|             | 0.761912359                           | 5                           | 0                                     | 0.998207054  |              |                  |   |  |  |
| TRIM61      | ENSG00000183439.7                     | 0.763882571                 | 3                                     | 3            | 0.301935773  |                  |   |  |  |
|             | Brain_Hypothalamus                    | 0.944340414                 | Brain_Hippocampus                     |              | 1.639993802  |                  |   |  |  |
|             | 0.47987657                            | 0.47987657                  | -1.032291092                          | -0.069815621 | -0.600513152 |                  |   |  |  |
|             | 0.488803204                           | 3                           | 0                                     | 0.998207054  |              |                  |   |  |  |
| FBXO36      | ENSG00000153832.11                    | 0.763914017                 | 8                                     | 8            | 0.159490333  |                  |   |  |  |
|             | Brain_Amygdala                        | 0.952603572                 | Brain_Substantia_nigra                |              | 2.919737388  |                  |   |  |  |
|             | 0.141632223                           | 0.141632223                 | -1.406787761                          | 1.136128609  | -0.137692612 |                  |   |  |  |
|             | 0.746188656                           | 8                           | 0                                     | 0.998207054  |              |                  |   |  |  |
| ISL2        | ENSG00000159556.9                     | 0.763972426                 | 1                                     | 1            | 0.763972426  |                  |   |  |  |
|             | Brain_Substantia_nigra                | 0.763972426                 | Brain_Substantia_nigra                | 1            | 1            |                  |   |  |  |
|             | 1                                     | -0.300268412                | -0.300268412                          | -0.300268412 | NA           | 1                | 0 |  |  |
|             | 0.998207054                           |                             |                                       |              |              |                  |   |  |  |
| PGM5P4-AS1  | ENSG00000231943.7                     | 0.764164675                 | 2                                     | 2            | 0.492196584  |                  |   |  |  |
|             | Brain_Caudate_basal_ganglia           | 0.500199402                 | Brain_Spinal_cord_cervical_c-1        |              |              |                  |   |  |  |
|             | 1.722578164                           | 0.277421836                 | 0.277421836                           | -0.686819335 | -0.674176037 |                  |   |  |  |
|             | -0.680497686                          | 0.008940162                 | 2                                     | 0            | 0.998207054  |                  |   |  |  |
| ASIC2       | ENSG00000108684.14                    | 0.764189295                 | 2                                     | 2            | 0.467440692  |                  |   |  |  |
|             | Brain_Cerebellar_Hemisphere           | 0.790450335                 | Brain_Cerebellum                      |              | 1.232789439  |                  |   |  |  |
|             | 0.767210561                           | 0.767210561                 | -0.726649507                          | -0.265725873 | -0.49618769  |                  |   |  |  |
|             | 0.325922227                           | 2                           | 0                                     | 0.998207054  |              |                  |   |  |  |
| WDR46       | ENSG00000227057.9                     | 0.764206865                 | 2                                     | 2            | 0.476387433  | Brain_Cerebellum |   |  |  |
|             | 0.874554902                           | Brain_Cortex                | 1.442395507                           | 0.557604493  | 0.557604493  |                  |   |  |  |
|             | 0.157875503                           | 0.712124905                 | 0.435000204                           | 0.391913511  | 2            | 0                |   |  |  |
|             | 0.998207054                           |                             |                                       |              |              |                  |   |  |  |
| ZDHC17      | ENSG00000186908.14                    | 0.764221086                 | 2                                     | 2            | 0.540848495  |                  |   |  |  |
|             | Brain_Cerebellum                      | 0.685011485                 | Brain_Frontal_Cortex_BA9              |              | 1.001437671  |                  |   |  |  |

|                |                                       |              |                                       |                  |              |
|----------------|---------------------------------------|--------------|---------------------------------------|------------------|--------------|
|                | 0.998562329                           | 0.998562329  | -0.611530406                          | -0.405634079     | -0.508582243 |
|                | 0.145590689                           | 2 0          | 0.998207054                           |                  |              |
| RP11-554A11.8  | ENSG00000261070.1                     |              | 0.764348589                           | 1 1              | 0.764348589  |
|                | Brain_Cerebellum                      | 0.764348589  | Brain_Cerebellum                      | 1 1 1            | 0.299775258  |
|                | 0.299775258                           | 0.299775258  | NA 1                                  | 0                | 0.998207054  |
| NAGK           | ENSG00000124357.12                    | 0.764357225  | 7 7                                   | 7                | 0.142838425  |
|                | Brain_Substantia_nigra                | 0.993127697  | Brain_Frontal_Cortex                  | BA9              |              |
|                | 2.845449366                           | 0.238356841  | 0.238356841                           | -0.084107251     | 1.465302425  |
|                | 0.437410449                           | 0.579538917  | 7 0                                   | 0.998207054      |              |
| HLA-A          | ENSG00000206503.12                    | 0.764540411  | 12 5                                  | 5                | 0.157442966  |
|                | Brain_Hippocampus                     | 0.828207584  | Brain_Cortex                          | 8.088927874      |              |
|                | 0.027076444                           | 0.49405935   | -1.413723964                          | 0.293483106      | -0.652857465 |
|                | 0.437792126                           | 5 0          | 0.998207054                           |                  |              |
| YIPF4          | ENSG00000119820.10                    | 0.764584488  | 6 6                                   | 6                | 0.131532832  |
|                | Brain_Frontal_Cortex                  | BA9          | 0.664433536                           | Brain_Cerebellum | 2.960858101  |
|                | 0.195344973                           | 0.195344973  | -1.508084771                          | 0.4338002        | -0.75836072  |
|                | 0.705051974                           | 6 0          | 0.998207054                           |                  |              |
| TBC1D31        | ENSG00000156787.16                    | 0.76466009   | 8 6                                   | 6                | 0.307118796  |
|                | Brain_Putamen_basal_ganglia           | 0.955749724  | Brain_Cerebellar                      | Hemisphere       |              |
|                | 5.104067402                           | 0.024785677  | 0.198140362                           | -0.731906216     | 1.02128634   |
|                | -0.159363395                          | 0.561422621  | 6 0                                   | 0.998207054      |              |
| KRCC1          | ENSG00000172086.7                     | 0.764754058  | 3 3                                   | 3                | 0.367059501  |
|                | Brain_Caudate_basal_ganglia           | 0.654680104  | Brain_Nucleus_accumbens_basal_ganglia |                  |              |
|                | 1.368084758                           | 0.612037249  | 0.612037249                           | -0.487574743     | 0.901995042  |
|                | 0.287230109                           | 0.708474156  | 3 0                                   | 0.998207054      |              |
| TSPAN17        | ENSG00000048140.17                    | 0.764848596  | 3 3                                   | 3                | 0.477037211  |
|                | Brain_Cortex                          | 0.774587816  | Brain_Nucleus_accumbens_basal_ganglia | 1.25558706       |              |
|                | 0.764158809                           | 0.764158809  | -0.711075887                          | 0.286379054      | -0.349740287 |
|                | 0.552592678                           | 3 0          | 0.998207054                           |                  |              |
| TRIM66         | ENSG00000166436.15                    | 0.764901121  | 8 8                                   | 8                | 0.17938115   |
|                | Brain_Substantia_nigra                | 0.875933034  | Brain_Amygdala                        | 3.897014185      |              |
|                | 0.149079276                           | 0.149079276  | -1.342662908                          | 0.715381769      | -0.522610119 |
|                | 0.605571432                           | 8 0          | 0.998207054                           |                  |              |
| TNS1           | ENSG00000079308.16                    | 0.764948525  | 1 1                                   | 1                | 0.764948525  |
|                | Brain_Nucleus_accumbens_basal_ganglia | 0.764948525  |                                       |                  |              |
|                | Brain_Nucleus_accumbens_basal_ganglia | 1 1          | 1                                     | 0.298988887      |              |
|                | 0.298988887                           | 0.298988887  | NA 1                                  | 0                | 0.998207054  |
| KCNE4          | ENSG00000152049.6                     | 0.764958841  | 1 1                                   | 1                | 0.764958841  |
|                | Brain_Nucleus_accumbens_basal_ganglia | 0.764958841  |                                       |                  |              |
|                | Brain_Nucleus_accumbens_basal_ganglia | 1 1          | 1                                     | 0.298975366      |              |
|                | 0.298975366                           | 0.298975366  | NA 1                                  | 0                | 0.998207054  |
| ARAP1          | ENSG00000186635.14                    | 0.764978621  | 3 3                                   | 3                | 0.316329366  |
|                | Brain_Hypothalamus                    | 0.942165729  | Brain_Cerebellum                      | 1.636582069      | 0.49483008   |
|                | 0.49483008                            | -0.072548099 | 1.002029457                           | 0.393617782      | 0.551230107  |
|                | 0                                     | 0.998207054  |                                       |                  | 3            |
| SFTPD          | ENSG00000133661.15                    | 0.7650039    | 13 6                                  | 6                | 0.257263696  |
|                | Brain_Caudate_basal_ganglia           | 0.957392942  | Brain_Hippocampus                     | 9.22396022       |              |
|                | 0.004292412                           | 0.327052974  | -0.945784067                          | 1.132882272      | -0.107634194 |
|                | 0.523499134                           | 6 0          | 0.998207054                           |                  |              |
| RAB10          | ENSG00000084733.10                    | 0.765204268  | 1 1                                   | 1                | 0.765204268  |
|                | Brain_Cortex                          | 1 1          | 1                                     | -0.298653725     | -0.298653725 |
|                | -0.298653725                          | NA 1         | 0                                     | 0.998207054      |              |
| PEX10          | ENSG00000157911.9                     | 0.76526084   | 10 3                                  | 3                | 0.151998956  |
|                | Brain_Cerebellar_Hemisphere           | 0.844946876  | Brain_Spinal_cord_cervical_c-1        |                  |              |
|                | 7.970882862                           | 2.12E-16     | 0.323047994                           | -1.432506371     | -0.19556983  |
|                | -0.740187021                          | 0.347378701  | 3 0                                   | 0.998207054      |              |
| IL1RL2         | ENSG00000115598.9                     | 0.765347652  | 3 3                                   | 3                | 0.566315428  |
|                | Brain_Caudate_basal_ganglia           | 0.887478105  | Brain_Nucleus_accumbens_basal_ganglia |                  |              |
|                | 1.93631197                            | 0.106040605  | 0.106040605                           | 0.141496019      | 0.573486366  |
|                | 0.41068643                            | 0.234825712  | 3 0                                   | 0.998207054      |              |
| RP11-1246C19.1 | ENSG00000273230.1                     | 0.765347669  | 7 6                                   | 6                | 0.156423833  |
|                | Brain_Cortex                          | 0.986363562  | Brain_Nucleus_accumbens_basal_ganglia |                  |              |

|           |                                       |                   |              |                                      |                  |
|-----------|---------------------------------------|-------------------|--------------|--------------------------------------|------------------|
|           | 3.691992899                           | 0.022135814       | 0.142804483  | -1.417202152                         | -0.017091573     |
|           | -0.778885497                          | 0.508380354       | 6 0          | 0.998207054                          |                  |
| TMPRSS9   | ENSG00000178297.12                    | 0.765465192       | 3 3          | 0.518972111                          |                  |
|           | Brain_Frontal_Cortex_BA9              | 0.785666766       |              | Brain_Cerebellum                     | 1.923863181      |
|           | 0.327236305                           | 0.327236305       | -0.644930677 | 0.626804187                          | -0.096689432     |
|           | 0.653729636                           | 3 0               | 0.998207054  |                                      |                  |
| NUS1      | ENSG00000153989.7                     | 0.765473217       | 3 3          | 0.287368749                          | Brain_Cerebellum |
|           | 0.929629726                           | Brain_Hippocampus | 1.860971027  | 0.128696484                          |                  |
|           | 0.128696484                           | -1.063911597      | -0.088310711 | -0.69060019                          | 0.526566701      |
|           | 3 0                                   | 0.998207054       |              |                                      |                  |
| SLC47A1   | ENSG00000142494.13                    | 0.76547881        | 3 3          | 0.364890461                          |                  |
|           | Brain_Putamen_basal_ganglia           | 0.985097597       |              | Brain_Anterior_cingulate_cortex_BA24 |                  |
|           | 1.696443871                           | 0.302555734       | 0.302555734  | 0.018678478                          | 0.906085762      |
|           | 0.382726545                           | 0.464658965       | 3 0          | 0.998207054                          |                  |
| TMEM230   | ENSG00000089063.14                    | 0.765547925       | 8 1          | 0.493050282                          |                  |
|           | Brain_Cortex                          | 0.826068411       |              | Brain_Caudate_basal_ganglia          | 7.797247161      |
|           | 5.70E-08                              | 7.797247161       | -0.685465408 | -0.219746727                         | -0.297883832     |
|           | 0.157759335                           | 1 0               | 0.998207054  |                                      |                  |
| MIB1      | ENSG00000101752.11                    | 0.76557963        | 9 7          | 0.113656452                          | Brain_Cerebellum |
|           | 0.968645549                           | Brain_Cortex      | 3.798173657  | 0.108033995                          | 0.270724678      |
|           | 0.039307096                           | 1.581969857       | 0.801350553  | 0.521564168                          | 7 0              |
|           | 0.998207054                           |                   |              |                                      |                  |
| PNMA1     | ENSG00000176903.4                     | 0.765608158       | 2 1          | 0.709006016                          |                  |
|           | Brain_Frontal_Cortex_BA9              | 0.824778449       |              | Brain_Hypothalamus                   | 1.988917208      |
|           | 0.011082792                           | 1.988917208       | -0.373191374 | -0.221403267                         | -0.29729732      |
|           | 0.1073304                             | 1 0               | 0.998207054  |                                      |                  |
| IGLON5    | ENSG00000142549.9                     | 0.765641077       | 2 2          | 0.475031611                          |                  |
|           | Brain_Nucleus_accumbens_basal_ganglia | 0.809060774       |              | Brain_Cerebellum                     |                  |
|           | 1.123806851                           | 0.876193149       | 0.876193149  | 0.241637872                          | 0.714316307      |
|           | 0.47797709                            | 0.334234127       | 2 0          | 0.998207054                          |                  |
| KCNMB1    | ENSG00000145936.8                     | 0.765661552       | 4 4          | 0.179640314                          |                  |
|           | Brain_Cortex                          | 0.962637732       |              | Brain_Caudate_basal_ganglia          | 1.507839291      |
|           | 0.500461065                           | 0.500461065       | -0.12489789  | 1.341863328                          | 0.296554245      |
|           | 0.700626836                           | 4 0               | 0.998207054  |                                      |                  |
| LINC01798 | ENSG00000232046.6                     | 0.765753673       | 2 2          | 0.515199169                          |                  |
|           | Brain_Cerebellar_Hemisphere           | 0.520013892       |              | Brain_Cerebellum                     | 1.568843045      |
|           | 0.431156955                           | 0.431156955       | 0.643323991  | 0.650763495                          | 0.647043743      |
|           | 0.005260524                           | 2 0               | 0.998207054  |                                      |                  |
| PCNX4     | ENSG00000126773.12                    | 0.765772173       | 5 4          | 0.312802773                          |                  |
|           | Brain_Anterior_cingulate_cortex_BA24  | 0.961281003       |              | Brain_Cerebellum                     | 3.19205066       |
|           | 0.025425938                           | 0.205196863       | -0.048546128 | 1.009358418                          | 0.388473452      |
|           | 0.419963419                           | 4 0               | 0.998207054  |                                      |                  |
| SRSF5     | ENSG00000100650.15                    | 0.765802306       | 3 3          | 0.373345463                          |                  |
|           | Brain_Cerebellar_Hemisphere           | 0.979410457       |              | Brain_Hypothalamus                   | 1.207319163      |
|           | 0.875244673                           | 0.875244673       | -0.517165207 | 0.890224292                          | 0.132955705      |
|           | 0.709786425                           | 3 0               | 0.998207054  |                                      |                  |
| BEGAIN    | ENSG00000183092.16                    | 0.765812354       | 3 3          | 0.285268731                          |                  |
|           | Brain_Cerebellum                      | 0.970418647       |              | Brain_Hypothalamus                   | 1.200951698      |
|           | 0.790469037                           | 0.790469037       | -1.068558335 | 0.037083225                          | -0.423371905     |
|           | 0.575504175                           | 3 0               | 0.998207054  |                                      |                  |
| GART      | ENSG00000159131.16                    | 0.76586864        | 1 1          | 0.76586864                           |                  |
|           | Brain_Nucleus_accumbens_basal_ganglia | 0.76586864        |              |                                      |                  |
|           | Brain_Nucleus_accumbens_basal_ganglia | 1 1               | 1            | -0.297783197                         |                  |
|           | -0.297783197                          | -0.297783197      | NA 1         | 0.998207054                          |                  |
| C10orf67  | ENSG00000179133.12                    | 0.766072768       | 4 4          | 0.413258239                          |                  |
|           | Brain_Caudate_basal_ganglia           | 0.824849253       |              | Brain_Amygdala                       | 2.736910261      |
|           | 0.214338212                           | 0.214338212       | -0.8181733   | 0.397172351                          | -0.106785105     |
|           | 0.542295939                           | 4 0               | 0.998207054  |                                      |                  |
| RGS2      | ENSG00000116741.7                     | 0.766165262       | 1 1          | 0.766165262                          |                  |
|           | Brain_Caudate_basal_ganglia           | 0.766165262       |              | Brain_Caudate_basal_ganglia          | 1 1              |
|           | 1                                     | -0.297394605      | -0.297394605 | -0.297394605                         | NA 1 0           |
|           | 0.998207054                           |                   |              |                                      |                  |

|               |                                |                             |              |              |             |                                |              |             |
|---------------|--------------------------------|-----------------------------|--------------|--------------|-------------|--------------------------------|--------------|-------------|
| CTC-340D7.1   | ENSG00000249335.1              | 0.766188084                 | 2            | 2            | 0.491410659 |                                |              |             |
|               | Brain_Putamen_basal_ganglia    | 0.623158888                 |              |              |             | Brain_Frontal_Cortex_BA9       |              |             |
|               | 1.388209539                    | 0.611790461                 | 0.611790461  |              |             | -0.688066891                   |              | -0.49137833 |
|               | -0.589722611                   | 0.139079815                 | 2            | 0            | 0.998207054 |                                |              |             |
| TATDN3        | ENSG00000203705.10             | 0.766192063                 | 5            | 3            | 0.291077107 |                                |              |             |
|               | Brain_Cortex                   | 0.847850594                 |              |              |             | Brain_Cerebellum               | 4.06292768   | 0.069659166 |
|               | 0.219884419                    | 0.19186163                  | 1.055761686  |              |             | 0.699933669                    |              | 0.328927902 |
|               | 0                              | 0.998207054                 |              |              |             |                                |              | 3           |
| RP11-318G21.4 | ENSG00000233379.1              | 0.766298891                 | 1            | 1            | 0.766298891 |                                |              |             |
|               | Brain_Caudate_basal_ganglia    | 0.766298891                 |              |              |             | Brain_Caudate_basal_ganglia    | 1            | 1           |
|               | 1                              | 0.297219558                 | 0.297219558  | 0.297219558  | NA          | 1                              | 0            |             |
|               | 0.998207054                    |                             |              |              |             |                                |              |             |
| KAZN          | ENSG00000189337.16             | 0.766365718                 | 1            | 1            | 0.766365718 |                                |              |             |
|               | Brain_Cerebellar_Hemisphere    | 0.766365718                 |              |              |             | Brain_Cerebellar_Hemisphere    | 1            | 1           |
|               | 1                              | -0.297132022                | -0.297132022 | -0.297132022 | NA          | 1                              | 0            |             |
|               | 0.998207054                    |                             |              |              |             |                                |              |             |
| TTL           | ENSG00000114999.7              | 0.766381179                 | 1            | 1            | 0.766381179 |                                |              |             |
|               | Brain_Putamen_basal_ganglia    | 0.766381179                 |              |              |             | Brain_Putamen_basal_ganglia    | 1            | 1           |
|               | 1                              | 0.29711177                  | 0.29711177   | 0.29711177   | NA          | 1                              | 0            | 0.998207054 |
|               | 0.998207054                    |                             |              |              |             |                                |              |             |
| RP11-79P5.9   | ENSG00000272525.1              | 0.766548948                 | 1            | 1            | 0.766548948 |                                |              |             |
|               | Brain_Frontal_Cortex_BA9       | 0.766548948                 |              |              |             | Brain_Frontal_Cortex_BA9       | 1            | 1           |
|               | 1                              | 0.29689202                  | 0.29689202   | 0.29689202   | NA          | 1                              | 0            | 0.998207054 |
|               | 0.998207054                    |                             |              |              |             |                                |              |             |
| RP11-778D9.13 | ENSG00000273181.1              | 0.766634839                 | 1            | 1            | 0.766634839 |                                |              |             |
|               | Brain_Putamen_basal_ganglia    | 0.766634839                 |              |              |             | Brain_Putamen_basal_ganglia    | 1            | 1           |
|               | 1                              | 0.296779525                 | 0.296779525  | 0.296779525  | NA          | 1                              | 0            |             |
|               | 0.998207054                    |                             |              |              |             |                                |              |             |
| NUDT6         | ENSG00000170917.13             | 0.766647634                 | 3            | 3            | 0.321815291 |                                |              |             |
|               | Brain_Hypothalamus             | 0.926434595                 |              |              |             | Brain_Amygdala                 | 1.583292402  |             |
|               | 0.569616329                    | 0.569616329                 | -0.092331584 |              |             | 0.990734395                    |              | 0.386712075 |
|               | 0.552243359                    | 3                           | 0            | 0.998207054  |             |                                |              |             |
| HIST1H2BK     | ENSG00000197903.7              | 0.766747078                 | 1            | 1            | 0.766747078 |                                |              |             |
|               | Brain_Caudate_basal_ganglia    | 0.766747078                 |              |              |             | Brain_Caudate_basal_ganglia    | 1            | 1           |
|               | 1                              | 0.296632523                 | 0.296632523  | 0.296632523  | NA          | 1                              | 0            |             |
|               | 0.998207054                    |                             |              |              |             |                                |              |             |
| RNLS          | ENSG00000184719.11             | 0.766784239                 | 1            | 1            | 0.766784239 |                                |              |             |
|               | Brain_Putamen_basal_ganglia    | 0.766784239                 |              |              |             | Brain_Putamen_basal_ganglia    | 1            | 1           |
|               | 1                              | 0.296583854                 | 0.296583854  | 0.296583854  | NA          | 1                              | 0            |             |
|               | 0.998207054                    |                             |              |              |             |                                |              |             |
| TTC38         | ENSG00000075234.16             | 0.766786946                 | 7            | 3            | 0.242814895 |                                | Brain_Cortex |             |
|               | 0.932476489                    | Brain_Cerebellar_Hemisphere | 5.467164988  |              |             | 0.002884645                    |              |             |
|               | 0.294941503                    | 0.084729442                 | 1.167979845  |              |             | 0.878808502                    |              | 0.359686388 |
|               | 3                              | 0                           | 0.998207054  |              |             |                                |              |             |
| PELI1         | ENSG00000197329.11             | 0.766842522                 | 1            | 1            | 0.766842522 |                                |              |             |
|               | Brain_Spinal_cord_cervical_c-1 | 0.766842522                 |              |              |             | Brain_Spinal_cord_cervical_c-1 |              |             |
|               | 1                              | 1                           | 1            | 0.296507523  | 0.296507523 | 0.296507523                    | NA           | 1           |
|               | 0.998207054                    |                             |              |              |             |                                |              | 0           |
| LGR6          | ENSG00000133067.17             | 0.766886652                 | 3            | 3            | 0.304075696 |                                |              |             |
|               | Brain_Hypothalamus             | 0.492602003                 |              |              |             | Brain_Substantia_nigra         |              | 2.122539013 |
|               | 0.312666447                    | 0.312666447                 | 0.686176202  |              |             | 1.027732457                    |              | 0.805855095 |
|               | 0.192350108                    | 3                           | 0            | 0.998207054  |             |                                |              |             |
| IMPDH1        | ENSG00000106348.16             | 0.766911721                 | 1            | 1            | 0.766911721 |                                |              |             |
|               | Brain_Cortex                   | 0.766911721                 |              |              |             | Brain_Cortex                   | 1            | 1           |
|               | -0.296416899                   | -0.296416899                | NA           | 1            | 0           | 0.998207054                    |              |             |
|               | 0.998207054                    |                             |              |              |             |                                |              |             |
| CRTAP         | ENSG00000170275.14             | 0.766990958                 | 10           | 8            | 0.297079912 |                                |              |             |
|               | Brain_Spinal_cord_cervical_c-1 | 0.997914187                 |              |              |             | Brain_Amygdala                 |              | 5.958056521 |
|               | 0.015879861                    | 0.253729958                 | -0.701885109 |              |             | 1.042715856                    |              | 0.09090032  |
|               | 0.526393932                    | 8                           | 0            | 0.998207054  |             |                                |              |             |
| ZFP41         | ENSG00000181638.17             | 0.767006655                 | 3            | 2            | 0.46726484  |                                |              |             |
|               | Brain_Cerebellar_Hemisphere    | 0.583375595                 |              |              |             | Brain_Cortex                   |              | 2.828046033 |
|               | 0.017530504                    | 0.154423462                 | 0.548460717  |              |             | 0.726936526                    |              | 0.649823217 |
|               | 0.091675629                    | 2                           | 0            | 0.998207054  |             |                                |              |             |
| C22orf29      | ENSG00000215012.8              | 0.767007649                 | 10           | 7            | 0.448883219 |                                |              |             |

|               |                                       |                                      |                   |              |                                       |                |             |
|---------------|---------------------------------------|--------------------------------------|-------------------|--------------|---------------------------------------|----------------|-------------|
|               | Brain_Anterior_cingulate_cortex_BA24  | 0.81811202                           | Brain_Hippocampus |              |                                       |                |             |
|               | 6.056248745                           | 0.002826985                          | 0.256721235       | -0.757278183 | 0.46753652                            |                |             |
|               | -0.150834008                          | 0.450591173                          | 7                 | 0            | 0.998207054                           |                |             |
| RINT1         | ENSG00000135249.7                     | 0.767069275                          | 1                 | 1            | 0.767069275                           | Brain_Cortex   |             |
|               | 0.767069275                           | Brain_Cortex                         | 1                 | 1            | 0.296210573                           | 0.296210573    |             |
|               | 0.296210573                           | NA                                   | 1                 | 0            | 0.998207054                           |                |             |
| SH2B2         | ENSG00000160999.10                    | 0.767156209                          | 8                 | 3            | 0.350876491                           |                |             |
|               | Brain_Caudate_basal_ganglia           | 0.760682211                          |                   |              | Brain_Nucleus_accumbens_basal_ganglia |                |             |
|               | 6.753689851                           | 1.24E-18                             | 0.227824709       |              | 0.304585046                           | 0.932890533    |             |
|               | 0.667805477                           | 0.23675038                           | 3                 | 0            | 0.998207054                           |                |             |
| KLHDC7B       | ENSG00000130487.5                     | 0.767252367                          | 2                 | 2            | 0.512402039                           |                |             |
|               | Brain_Frontal_Cortex_BA9              | 0.746998746                          |                   |              | Brain_Cerebellum                      | 1.008006172    |             |
|               | 0.991993828                           | 0.991993828                          | -0.655102071      |              | 0.32259927                            | -0.1662514     |             |
|               | 0.691339248                           | 2                                    | 0                 | 0.998207054  |                                       |                |             |
| AP5B1         | ENSG00000254470.2                     | 0.767374544                          | 7                 | 7            | 0.160499834                           |                |             |
|               | Brain_Hypothalamus                    | 0.861671176                          |                   |              | Brain_Cortex                          | 3.316282103    |             |
|               | 0.116468145                           | 0.116468145                          | -0.174247221      |              | 1.403392479                           | 0.782819213    |             |
|               | 0.525171859                           | 7                                    | 0                 | 0.998207054  |                                       |                |             |
| ELOF1         | ENSG00000130165.10                    | 0.767400167                          | 1                 | 1            | 0.767400167                           |                |             |
|               | Brain_Hypothalamus                    | 0.767400167                          |                   |              | Brain_Hypothalamus                    | 1              | 1           |
|               | 0.295777291                           | 0.295777291                          | 0.295777291       | NA           | 1                                     | 0              | 0.998207054 |
| ZNF713        | ENSG00000178665.14                    | 0.767429324                          | 6                 | 5            | 0.32185599                            | Brain_Amygdala |             |
|               | 0.975075233                           | Brain_Anterior_cingulate_cortex_BA24 | 3.171536945       |              |                                       |                |             |
|               | 0.089561165                           | 0.190504864                          | -0.990651072      |              | 0.138129895                           | -0.458690869   |             |
|               | 0.539899661                           | 5                                    | 0                 | 0.998207054  |                                       |                |             |
| UG0898H09     | ENSG00000274956.2                     | 0.767481165                          | 1                 | 1            | 0.767481165                           |                |             |
|               | Brain_Nucleus_accumbens_basal_ganglia | 0.767481165                          |                   |              |                                       |                |             |
|               | Brain_Nucleus_accumbens_basal_ganglia | 1                                    | 1                 | 1            | -0.295671238                          |                |             |
|               | -0.295671238                          | -0.295671238                         | NA                | 1            | 0                                     | 0.998207054    |             |
| P2RY13        | ENSG00000181631.6                     | 0.76752738                           | 2                 | 2            | 0.522526959                           |                |             |
|               | Brain_Caudate_basal_ganglia           | 0.768733451                          |                   |              | Brain_Amygdala                        | 1.08072615     | 0.91927385  |
|               | 0.91927385                            | -0.639455031                         | 0.294032001       |              | -0.172711515                          | 0.66007501     | 2           |
|               | 0.998207054                           |                                      |                   |              |                                       |                | 0           |
| HAPLN2        | ENSG00000132702.12                    | 0.767571132                          | 1                 | 1            | 0.767571132                           |                |             |
|               | Brain_Hypothalamus                    | 0.767571132                          |                   |              | Brain_Hypothalamus                    | 1              | 1           |
|               | -0.295553444                          | -0.295553444                         | -0.295553444      | NA           | 1                                     | 0              | 0.998207054 |
| HNRNPUL1      | ENSG00000105323.16                    | 0.767660157                          | 2                 | 2            | 0.473179353                           |                |             |
|               | Brain_Cerebellum                      | 0.690680521                          |                   |              | Brain_Hippocampus                     | 1.402261269    |             |
|               | 0.597738731                           | 0.597738731                          | 0.397931715       |              | 0.71731565                            | 0.557623682    |             |
|               | 0.225838546                           | 2                                    | 0                 | 0.998207054  |                                       |                |             |
| DPP4          | ENSG00000197635.9                     | 0.76769685                           | 2                 | 2            | 0.505762779                           | Brain_Cortex   |             |
|               | 0.687488036                           | Brain_Cerebellar_Hemisphere          | 1.17052666        | 0.82947334   | 0.82947334                            |                |             |
|               | 0.402266324                           | 0.665449898                          | 0.533858111       |              | 0.18609889                            | 2              | 0           |
|               | 0.998207054                           |                                      |                   |              |                                       |                |             |
| CCDC130       | ENSG00000104957.13                    | 0.767859052                          | 1                 | 1            | 0.767859052                           |                |             |
|               | Brain_Hypothalamus                    | 0.767859052                          |                   |              | Brain_Hypothalamus                    | 1              | 1           |
|               | -0.295176501                          | -0.295176501                         | -0.295176501      | NA           | 1                                     | 0              | 0.998207054 |
| SPAG4         | ENSG00000061656.9                     | 0.768129563                          | 1                 | 1            | 0.768129563                           |                |             |
|               | Brain_Cerebellar_Hemisphere           | 0.768129563                          |                   |              | Brain_Cerebellar_Hemisphere           | 1              | 1           |
|               | 1                                     | 0.294822388                          | 0.294822388       | 0.294822388  | NA                                    | 1              | 0           |
|               | 0.998207054                           |                                      |                   |              |                                       |                |             |
| SIX3          | ENSG00000138083.4                     | 0.768143894                          | 2                 | 2            | 0.470468267                           |                |             |
|               | Brain_Cerebellar_Hemisphere           | 0.816119479                          |                   |              | Brain_Cerebellum                      | 1.21151507     | 0.78848493  |
|               | 0.78848493                            | -0.72171736                          | -0.232538898      |              | -0.477128129                          | 0.345901408    | 2           |
|               | 0                                     | 0.998207054                          |                   |              |                                       |                |             |
| RP11-111K18.2 | ENSG00000261019.1                     | 0.768174841                          | 9                 | 2            | 0.336151906                           |                |             |
|               | Brain_Anterior_cingulate_cortex_BA24  | 0.853536908                          |                   |              | Brain_Amygdala                        |                |             |
|               | 7.809365902                           | 0.001107464                          | 0.669314326       |              | -0.277053931                          | 0.961796361    |             |
|               | 0.361250121                           | 0.327533298                          | 2                 | 0            | 0.998207054                           |                |             |
| RMI2          | ENSG00000175643.8                     | 0.768322596                          | 13                | 2            | 0.401826805                           |                |             |
|               | Brain_Anterior_cingulate_cortex_BA24  | 0.83333037                           |                   |              | Brain_Spinal_cord_cervical_c-1        |                |             |
|               | 11.96147866                           | 0.002802928                          | 0.486521013       |              | -0.210432192                          | 0.838363104    |             |

|                                      |                             |   |                                      |             |             |              |    |   |                |
|--------------------------------------|-----------------------------|---|--------------------------------------|-------------|-------------|--------------|----|---|----------------|
| 0.473550204                          | 0.25569987                  | 2 | 0                                    | 0.998207054 |             |              |    |   |                |
| AC018755.17                          | ENSG00000267808.1           |   | 0.768481659                          | 2           | 2           | 0.475140761  |    |   |                |
| Brain_Substantia_nigra               | 0.913936667                 |   | Brain_Putamen_basal_ganglia          |             |             |              |    |   |                |
| 1.322527081                          | 0.677472919                 |   | 0.677472919                          |             |             | -0.714139762 |    |   | -0.10807441    |
| -0.411107086                         | 0.42855292                  | 2 | 0                                    | 0.998207054 |             |              |    |   |                |
| ZNF628                               | ENSG00000197483.9           |   | 0.768499643                          | 2           | 2           | 0.537576403  |    |   |                |
| Brain_Spinal_cord_cervical_c-1       | 0.712291629                 |   | Brain_Caudate_basal_ganglia          |             |             |              |    |   |                |
| 1.022676093                          | 0.977323907                 |   | 0.977323907                          |             |             | -0.368780113 |    |   | 0.616482068    |
| 0.123850978                          | 0.696685569                 | 2 | 0                                    | 0.998207054 |             |              |    |   |                |
| ERMN                                 | ENSG00000136541.14          |   | 0.768521631                          | 1           | 1           | 0.768521631  |    |   |                |
| Brain_Cerebellar_Hemisphere          | 0.768521631                 |   | Brain_Cerebellar_Hemisphere1         |             |             |              |    |   | 1              |
| 1                                    | -0.294309216                |   | -0.294309216                         |             |             | -0.294309216 | NA | 1 | 0              |
| 0.998207054                          |                             |   |                                      |             |             |              |    |   |                |
| ANXA6                                | ENSG00000197043.13          |   | 0.768549095                          | 4           | 4           | 0.185752299  |    |   |                |
| Brain_Caudate_basal_ganglia          | 0.767977831                 |   | Brain_Cerebellum2                    |             |             | 0.076016972  |    |   |                |
| 0.199820307                          | 0.199820307                 |   | -1.323249861                         |             |             | -0.295021009 |    |   | -0.617682324   |
| 0.475757911                          | 4                           | 0 | 0.998207054                          |             |             |              |    |   |                |
| MTOR                                 | ENSG00000198793.12          |   | 0.76861558                           | 3           | 3           | 0.419196988  |    |   | Brain_Cortex   |
| 0.797225358                          | Brain_Putamen_basal_ganglia |   | 1.914258884                          |             |             | 0.342747007  |    |   |                |
| 0.342747007                          | -0.352389209                |   | 0.807815174                          |             |             | 0.066162103  |    |   | 0.644061032    |
| 3                                    | 0                           |   | 0.998207054                          |             |             |              |    |   |                |
| ZNF497                               | ENSG00000174586.10          |   | 0.768621633                          | 5           | 4           | 0.311653434  |    |   |                |
| Brain_Cortex                         | 0.837347502                 |   | Brain_Frontal_Cortex_BA9             |             |             | 2.553342184  |    |   |                |
| 0.033994044                          | 0.272241072                 |   | -1.011758715                         |             |             | 0.502079275  |    |   | -0.323686686   |
| 0.564468654                          | 4                           | 0 | 0.998207054                          |             |             |              |    |   |                |
| NRSN2                                | ENSG00000125841.12          |   | 0.768674203                          | 1           | 1           | 0.768674203  |    |   |                |
| Brain_Hypothalamus                   | 0.768674203                 |   | Brain_Hypothalamus                   |             |             | 1            | 1  | 1 |                |
| -0.294109538                         | -0.294109538                |   | -0.294109538                         |             |             | NA           | 1  | 0 | 0.998207054    |
| NTN4                                 | ENSG00000074527.11          |   | 0.768684148                          | 4           | 4           | 0.277101951  |    |   |                |
| Brain_Frontal_Cortex_BA9             | 0.974638138                 |   | Brain_Cerebellum1                    |             |             | 1.662428321  |    |   |                |
| 0.501734292                          | 0.501734292                 |   | -1.086852614                         |             |             | 0.212836358  |    |   | -0.314658602   |
| 0.564507151                          | 4                           | 0 | 0.998207054                          |             |             |              |    |   |                |
| YAP1                                 | ENSG00000137693.13          |   | 0.768684954                          | 3           | 3           | 0.434814355  |    |   | Brain_Amygdala |
| 0.855823428                          | Brain_Hippocampus           |   | 1.087360397                          |             |             | 0.944777411  |    |   |                |
| 0.944777411                          | -0.664729834                |   | 0.780979835                          |             |             | 0.099314432  |    |   | 0.726366863    |
| 3                                    | 0                           |   | 0.998207054                          |             |             |              |    |   |                |
| THY1                                 | ENSG00000154096.13          |   | 0.768713028                          | 3           | 3           | 0.501160367  |    |   |                |
| Brain_Hypothalamus                   | 0.840138283                 |   | Brain_Cerebellar_Hemisphere1         |             |             | 1.872028971  |    |   |                |
| 0.135558949                          | 0.135558949                 |   | -0.21931977                          |             |             | 0.672665113  |    |   | 0.218353981    |
| 0.446225122                          | 3                           | 0 | 0.998207054                          |             |             |              |    |   |                |
| ZNF835                               | ENSG00000127903.13          |   | 0.768731549                          | 3           | 3           | 0.317340315  |    |   |                |
| Brain_Cerebellum                     | 0.75399786                  |   | Brain_Putamen_basal_ganglia          |             |             | 1.405646888  |    |   |                |
| 0.641553307                          | 0.641553307                 |   | 0.313372256                          |             |             | 0.999938409  |    |   | 0.591427882    |
| 0.361396087                          | 3                           | 0 | 0.998207054                          |             |             |              |    |   |                |
| MCUR1                                | ENSG00000050393.11          |   | 0.76893482                           | 13          | 6           | 0.161340284  |    |   |                |
| Brain_Anterior_cingulate_cortex_BA24 | 0.849784975                 |   | Brain_Cerebellar_Hemisphere          |             |             |              |    |   |                |
| 8.586247904                          | 5.90E-06                    |   | 0.298032818                          |             |             | -0.746487846 |    |   | 1.400578064    |
| 0.774918694                          | 0.648004737                 |   | 6                                    | 0           | 0.998207054 |              |    |   |                |
| PLCG2                                | ENSG00000197943.9           |   | 0.768959214                          | 6           | 4           | 0.299364803  |    |   | Brain_Amygdala |
| 0.899600124                          | Brain_Putamen_basal_ganglia |   | 2.960006591                          |             |             | 0.016381116  |    |   |                |
| 0.842684001                          | -1.037796508                |   | -0.126166506                         |             |             | -0.646404881 |    |   | 0.405493929    |
| 4                                    | 0                           |   | 0.998207054                          |             |             |              |    |   |                |
| RP1-63M2.7                           | ENSG00000275223.1           |   | 0.769174378                          | 1           | 1           | 0.769174378  |    |   |                |
| Brain_Spinal_cord_cervical_c-1       | 0.769174378                 |   | Brain_Spinal_cord_cervical_c-1       |             |             |              |    |   |                |
| 1                                    | 1                           | 1 | -0.293455017                         |             |             | -0.293455017 |    |   | NA             |
| 0.998207054                          |                             |   |                                      |             |             |              |    |   | 1              |
| 0                                    |                             |   |                                      |             |             |              |    |   |                |
| ALDH1A3                              | ENSG00000184254.16          |   | 0.769207033                          | 1           | 1           | 0.769207033  |    |   |                |
| Brain_Frontal_Cortex_BA9             | 0.769207033                 |   | Brain_Frontal_Cortex_BA9             |             |             | 1            |    |   | 1              |
| 1                                    | -0.293412289                |   | -0.293412289                         |             |             | -0.293412289 |    |   | NA             |
| 0.998207054                          |                             |   |                                      |             |             |              |    |   | 1              |
| 0                                    |                             |   |                                      |             |             |              |    |   |                |
| PKP3                                 | ENSG00000184363.9           |   | 0.769376276                          | 3           | 3           | 0.415786052  |    |   |                |
| Brain_Cerebellar_Hemisphere          | 0.744782293                 |   | Brain_Anterior_cingulate_cortex_BA24 |             |             |              |    |   |                |

|               |                                       |                             |                                |              |                  |                  |              |   |   |
|---------------|---------------------------------------|-----------------------------|--------------------------------|--------------|------------------|------------------|--------------|---|---|
|               | 2.131773985                           | 0.182936293                 | 0.182936293                    | -0.813753721 | 0.325526945      |                  |              |   |   |
|               | -0.359000208                          | 0.603396265                 | 3                              | 0            | 0.998207054      |                  |              |   |   |
| RP11-245P10.6 | ENSG00000270104.1                     | 0.769552791                 | 2                              | 2            | 0.474481424      |                  |              |   |   |
|               | Brain_Nucleus_accumbens_basal_ganglia | 0.888318499                 |                                |              | Brain_Cerebellum |                  |              |   |   |
|               | 1.040967766                           | 0.959032234                 | 0.959032234                    | -0.140432224 | 0.715206548      |                  |              |   |   |
|               | 0.287387162                           | 0.605027978                 | 2                              | 0            | 0.998207054      |                  |              |   |   |
| UNC13C        | ENSG00000137766.16                    | 0.769602569                 | 2                              | 2            | 0.576396211      |                  |              |   |   |
|               | Brain_Cerebellar_Hemisphere           | 0.63683425                  | Brain_Caudate_basal_ganglia    | 1.021780974  |                  |                  |              |   |   |
|               | 0.978219026                           | 0.978219026                 | -0.558656443                   | 0.47212965   | -0.043263396     |                  |              |   |   |
|               | 0.728875836                           | 2                           | 0                              | 0.998207054  |                  |                  |              |   |   |
| RAB7B         | ENSG00000276600.4                     | 0.769722855                 | 3                              | 2            | 0.375243319      |                  |              |   |   |
|               | Brain_Nucleus_accumbens_basal_ganglia | 0.587303422                 | Brain_Caudate_basal_ganglia    |              |                  |                  |              |   |   |
|               | 2.638703051                           | 0.070223464                 | 0.291073484                    | -0.886694651 | -0.542747853     |                  |              |   |   |
|               | -0.671352618                          | 0.187662903                 | 2                              | 0            | 0.998207054      |                  |              |   |   |
| LINC02009     | ENSG00000283646.1                     | 0.769782189                 | 2                              | 2            | 0.598769798      |                  |              |   |   |
|               | Brain_Cerebellum                      | 0.711094742                 | Brain_Spinal_cord_cervical_c-1 | 1.217051843  |                  |                  |              |   |   |
|               | 0.782948157                           | 0.782948157                 | -0.526170429                   | -0.370386217 | -0.448278323     |                  |              |   |   |
|               | 0.110156073                           | 2                           | 0                              | 0.998207054  |                  |                  |              |   |   |
| PKD1          | ENSG00000008710.19                    | 0.769813577                 | 1                              | 1            | 0.769813577      |                  |              |   |   |
|               | Brain_Hypothalamus                    | 0.769813577                 | Brain_Hypothalamus             | 1            | 1                | 1                |              |   |   |
|               | 0.292618755                           | 0.292618755                 | 0.292618755                    | NA           | 1                | 0                | 0.998207054  |   |   |
| RNASEH1       | ENSG00000171865.9                     | 0.769875037                 | 1                              | 1            | 0.769875037      |                  |              |   |   |
|               | Brain_Caudate_basal_ganglia           | 0.769875037                 | Brain_Caudate_basal_ganglia    | 1            | 1                |                  |              |   |   |
|               | 1                                     | 0.292538357                 | 0.292538357                    | 0.292538357  | NA               | 1                | 0            |   |   |
|               | 0.998207054                           |                             |                                |              |                  |                  |              |   |   |
| CTC-498M16.4  | ENSG00000271904.1                     | 0.769905984                 | 11                             | 2            | 0.334161119      |                  |              |   |   |
|               | Brain_Putamen_basal_ganglia           | 0.811467456                 | Brain_Substantia_nigra         |              |                  |                  |              |   |   |
|               | 9.617154264                           | 0.004121734                 | 0.593507199                    | 0.238533345  | 0.965766333      |                  |              |   |   |
|               | 0.537220934                           | 0.215517828                 | 2                              | 0            | 0.998207054      |                  |              |   |   |
| DCHS2         | ENSG00000197410.12                    | 0.769941897                 | 1                              | 1            | 0.769941897      | Brain_Amygdala   |              |   |   |
|               | 0.769941897                           | Brain_Amygdala              | 1                              | 1            | 1                | -0.292450899     | -0.292450899 |   |   |
|               | -0.292450899                          | NA                          | 1                              | 0            | 0.998207054      |                  |              |   |   |
| MDN1          | ENSG00000112159.11                    | 0.770012205                 | 1                              | 1            | 0.770012205      |                  |              |   |   |
|               | Brain_Substantia_nigra                | 0.770012205                 | Brain_Substantia_nigra         | 1            | 1                |                  |              |   |   |
|               | 1                                     | -0.292358932                | -0.292358932                   | -0.292358932 | NA               | 1                | 0            |   |   |
|               | 0.998207054                           |                             |                                |              |                  |                  |              |   |   |
| AHSG          | ENSG00000145192.12                    | 0.770042107                 | 2                              | 2            | 0.5998146        | Brain_Cortex     |              |   |   |
|               | 0.623534113                           | Brain_Caudate_basal_ganglia | 1.012297456                    | 0.987702544  |                  |                  |              |   |   |
|               | 0.987702544                           | -0.524667146                | -0.490847781                   | -0.507757464 | 0.023913902      |                  |              |   |   |
|               | 2                                     | 0                           | 0.998207054                    |              |                  |                  |              |   |   |
| ANXA2         | ENSG00000182718.16                    | 0.770292249                 | 2                              | 2            | 0.594686172      |                  |              |   |   |
|               | Brain_Frontal_Cortex_BA9              | 0.599597566                 | Brain_Cerebellum               | 1.070352006  |                  |                  |              |   |   |
|               | 0.929647994                           | 0.929647994                 | -0.532057499                   | -0.524979321 | -0.52851841      |                  |              |   |   |
|               | 0.005005028                           | 2                           | 0                              | 0.998207054  |                  |                  |              |   |   |
| TRMT11        | ENSG00000066651.18                    | 0.770301429                 | 6                              | 5            | 0.334133388      |                  |              |   |   |
|               | Brain_Cerebellum                      | 0.971473912                 | Brain_Spinal_cord_cervical_c-1 | 3.949364486  |                  |                  |              |   |   |
|               | 0.08636077                            | 0.166472096                 | -0.965821741                   | 0.127773247  | -0.371381352     |                  |              |   |   |
|               | 0.47800462                            | 5                           | 0                              | 0.998207054  |                  |                  |              |   |   |
| DCPS          | ENSG00000110063.8                     | 0.770373021                 | 1                              | 1            | 0.770373021      | Brain_Cerebellum |              |   |   |
|               | 0.770373021                           | Brain_Cerebellum            | 1                              | 1            | 1                | 0.291887003      | 0.291887003  |   |   |
|               | 0.291887003                           | NA                          | 1                              | 0            | 0.998207054      |                  |              |   |   |
| VSX1          | ENSG00000100987.14                    | 0.770539885                 | 13                             | 2            | 0.269265751      |                  |              |   |   |
|               | Brain_Anterior_cingulate_cortex_BA24  | 0.990594957                 | Brain_Amygdala                 |              |                  |                  |              |   |   |
|               | 11.49861158                           | 0.001261399                 | 0.56261482                     | -1.104755031 | 0.135257884      |                  |              |   |   |
|               | -0.165628483                          | 0.313394554                 | 2                              | 0            | 0.998207054      |                  |              |   |   |
| ECT2L         | ENSG00000203734.11                    | 0.770736271                 | 1                              | 1            | 0.770736271      |                  |              |   |   |
|               | Brain_Frontal_Cortex_BA9              | 0.770736271                 | Brain_Frontal_Cortex_BA9       | 1            | 1                |                  |              |   |   |
|               | 1                                     | -0.291411956                | -0.291411956                   | -0.291411956 | NA               | 1                | 0            |   |   |
|               | 0.998207054                           |                             |                                |              |                  |                  |              |   |   |
| CD300LB       | ENSG00000178789.8                     | 0.770831964                 | 1                              | 1            | 0.770831964      |                  |              |   |   |
|               | Brain_Spinal_cord_cervical_c-1        | 0.770831964                 | Brain_Spinal_cord_cervical_c-1 |              |                  |                  |              |   |   |
|               | 1                                     | 1                           | 1                              | -0.291286824 | -0.291286824     | -0.291286824     | NA           | 1 | 0 |

0.998207054  
CREG1 ENSG00000143162.7 0.770885008 7 6 0.124293901  
Brain\_Putamen\_basal\_ganglia 0.832905815 Brain\_Amygdala 4.182836919  
0.065169025 0.146327147 -1.536997584 0.210976236 -0.939619676  
0.564308237 6 0 0.998207054  
TIE1 ENSG00000066056.13 0.770897909 2 2 0.58387787 Brain\_Hippocampus  
0.840800113 Brain\_Cortex 1.836454504 0.163545496 0.163545496  
-0.547729184 -0.200870144 -0.374299664 0.245266379 2 0  
0.998207054  
SALL3 ENSG00000256463.8 0.770903253 2 2 0.475138802  
Brain\_Caudate\_basal\_ganglia 0.938843391 Brain\_Amygdala 1.035172899  
0.964827101 0.964827101 -0.71414293 0.076723649 -0.318709641  
0.559227121 2 0 0.998207054  
PPP1R3C ENSG00000119938.8 0.771062887 1 1 0.771062887  
Brain\_Cerebellar\_Hemisphere 0.771062887 Brain\_Cerebellar\_Hemisphere 1 1  
1 -0.290984875 -0.290984875 -0.290984875 NA 1 0  
0.998207054  
BTNL8 ENSG00000113303.11 0.771121923 4 4 0.271367365  
Brain\_Nucleus\_accumbens\_basal\_ganglia 0.865815244 Brain\_Amygdala  
1.864295561 0.373740913 0.373740913 -1.099919116 0.231099681  
-0.368704931 0.559463657 4 0 0.998207054  
GABRA2 ENSG00000151834.15 0.771183227 5 5 0.173103617  
Brain\_Anterior\_cingulate\_cortex\_BA24 0.716686993  
Brain\_Nucleus\_accumbens\_basal\_ganglia 2.529781113 0.140114883  
0.140114883 0.362890086 1.362298764 0.872557574 0.401566769  
5 0 0.998207054  
MESDC2 ENSG00000117899.10 0.771590909 13 3 0.253074977  
Brain\_Caudate\_basal\_ganglia 0.967685385 Brain\_Hypothalamus 11.22978223  
3.82E-08 0.403756578 -1.142912369 0.049704554 -0.589205592  
0.364788854 3 0 0.998207054  
CCIN ENSG00000185972.5 0.77165495 3 3 0.443124858  
Brain\_Nucleus\_accumbens\_basal\_ganglia 0.676998182 Brain\_Hippocampus  
1.126220201 0.840829222 0.840829222 -0.416562857 0.766927103  
0.333020104 0.651844004 3 0 0.998207054  
SETDB2 ENSG00000136169.16 0.771700974 9 4 0.311582335  
Brain\_Cortex 0.996032017 Brain\_Caudate\_basal\_ganglia 5.97659953  
0.012064875 0.342818874 -1.011907391 0.793024236 -0.088805168  
0.564557556 4 0 0.998207054  
PMM2 ENSG00000140650.11 0.771953857 2 2 0.523885606  
Brain\_Caudate\_basal\_ganglia 0.784171123 Brain\_Frontal\_Cortex\_BA9  
1.091792404 0.908207596 0.908207596 -0.273887441 0.637367326  
0.181739942 0.644354425 2 0 0.998207054  
ZFAND2B ENSG00000158552.12 0.771964788 2 2 0.472354275  
Brain\_Cerebellar\_Hemisphere 0.510224163 Brain\_Cerebellum 1.895060597  
0.104939403 0.104939403 -0.718653769 -0.658488689 -0.688571229  
0.042543136 2 0 0.998207054  
ATAD2 ENSG00000156802.12 0.771965083 2 2 0.578077324  
Brain\_Cerebellar\_Hemisphere 0.641587428 Brain\_Putamen\_basal\_ganglia  
1.016481397 0.983518603 0.983518603 -0.465480459 0.556195341  
0.045357441 0.722433886 2 0 0.998207054  
GPR135 ENSG00000181619.11 0.772046463 6 5 0.233779799  
Brain\_Cerebellar\_Hemisphere 0.836519562 Brain\_Caudate\_basal\_ganglia  
4.292734628 0.040817097 0.196169667 -1.190678558 -0.206347392  
-0.740967087 0.439518036 5 0 0.998207054  
ERO1B ENSG00000086619.13 0.772087096 12 3 0.24662259 Brain\_Cerebellum  
0.959607116 Brain\_Substantia\_nigra 9.825191245 0.000239026  
0.551394099 -0.050646616 1.158591857 0.864850512 0.35382488 3  
0 0.998207054  
TYRP1 ENSG00000107165.12 0.772152606 1 1 0.772152606  
Brain\_Caudate\_basal\_ganglia 0.772152606 Brain\_Caudate\_basal\_ganglia 1 1  
1 0.289560348 0.289560348 0.289560348 NA 1 0  
0.998207054



|               |                                      |                                       |              |              |                                       |              |                    |
|---------------|--------------------------------------|---------------------------------------|--------------|--------------|---------------------------------------|--------------|--------------------|
| COX7A2L       | ENSG00000115944.14                   | 0.772178751                           | 4            | 3            | 0.687861161                           |              |                    |
|               | Brain_Cortex                         | 0.912747094                           |              |              | Brain_Cerebellum                      | 2.769710432  | 0.019704251        |
|               | 0.211015992                          | -0.319357326                          | 0.401759324  | -0.035900921 |                                       |              | 0.307574894        |
|               | 3                                    | 0                                     | 0.998207054  |              |                                       |              |                    |
| HARS2         | ENSG00000112855.14                   | 0.772181551                           | 3            | 3            | 0.462634965                           |              | Brain_Cerebellum   |
|               | 0.935169457                          | Brain_Nucleus_accumbens_basal_ganglia | 2.149859893  |              |                                       |              |                    |
|               | 0.163784407                          | 0.163784407                           | -0.734514929 | 0.08134265   | -0.382273578                          |              |                    |
|               | 0.419176776                          | 3                                     | 0            | 0.998207054  |                                       |              |                    |
| CD74          | ENSG00000019582.14                   | 0.77238346                            | 1            | 1            | 0.77238346                            |              |                    |
|               | Brain_Anterior_cingulate_cortex_BA24 | 0.77238346                            |              |              |                                       |              |                    |
|               | Brain_Anterior_cingulate_cortex_BA24 | 1                                     | 1            | 1            | 0.289258641                           |              |                    |
|               | 0.289258641                          | 0.289258641                           | NA           | 1            | 0                                     | 0.998207054  |                    |
| RHOB          | ENSG00000143878.9                    | 0.772388846                           | 1            | 1            | 0.772388846                           |              |                    |
|               | Brain_Caudate_basal_ganglia          | 0.772388846                           |              |              | Brain_Caudate_basal_ganglia           | 1            | 1                  |
|               | 1                                    | 0.289251601                           | 0.289251601  | 0.289251601  | NA                                    | 1            | 0                  |
|               | 0.998207054                          |                                       |              |              |                                       |              |                    |
| PRSS21        | ENSG00000007038.10                   | 0.772463637                           | 2            | 2            | 0.58199117                            |              |                    |
|               | Brain_Caudate_basal_ganglia          | 0.632607129                           |              |              | Brain_Nucleus_accumbens_basal_ganglia |              |                    |
|               | 1.029803846                          | 0.970196154                           | 0.970196154  | 0.478060523  | 0.550478572                           |              |                    |
|               | 0.514269547                          | 0.051207294                           | 2            | 0            | 0.998207054                           |              |                    |
| GPNMB         | ENSG00000136235.15                   | 0.772513582                           | 11           | 1            | 0.536737497                           |              | Brain_Cortex       |
|               | 0.925021739                          | Brain_Amygdala                        | 10.69014259  |              | 0.000783035                           |              | 10.69014259        |
|               | -0.094110048                         | 0.61775402                            | 0.284258677  | 0.180341037  | 1                                     | 0            |                    |
|               | 0.998207054                          |                                       |              |              |                                       |              |                    |
| AC025335.1    | ENSG00000179859.9                    | 0.772528284                           | 2            | 2            | 0.472545554                           |              |                    |
|               | Brain_Cerebellum                     | 0.907037084                           |              |              | Brain_Cerebellar_Hemisphere           | 1.145360065  |                    |
|               | 0.854639935                          | 0.854639935                           | -0.718343437 | -0.116776605 | -0.417560021                          |              |                    |
|               | 0.425371986                          | 2                                     | 0            | 0.998207054  |                                       |              |                    |
| RP11-770G2.2  | ENSG00000255557.1                    | 0.772573287                           |              |              | 1                                     | 1            | 0.772573287        |
|               | Brain_Cortex                         | 0.772573287                           |              |              | Brain_Cortex                          | 1            | 1                  |
|               | -0.289010572                         | -0.289010572                          | NA           | 1            | 0                                     | 0.998207054  | -0.289010572       |
| CELA1         | ENSG00000139610.1                    | 0.772601461                           | 1            | 1            | 0.772601461                           |              |                    |
|               | Brain_Spinal_cord_cervical_c-1       | 0.772601461                           |              |              | Brain_Spinal_cord_cervical_c-1        |              |                    |
|               | 1                                    | 1                                     | 1            | 0.288973756  | 0.288973756                           | 0.288973756  | NA                 |
|               | 0.998207054                          |                                       |              |              |                                       |              | 1                  |
| TFPI2         | ENSG00000105825.11                   | 0.772706595                           | 1            | 1            | 0.772706595                           |              | Brain_Cortex       |
|               | 0.772706595                          | Brain_Cortex                          | 1            | 1            | 1                                     | -0.288836374 | -0.288836374       |
|               | -0.288836374                         | NA                                    | 1            | 0            | 0.998207054                           |              |                    |
| RRAGD         | ENSG00000025039.14                   | 0.772758301                           | 3            | 3            | 0.520268939                           |              |                    |
|               | Brain_Substantia_nigra               | 0.721379237                           |              |              | Brain_Cortex                          | 1.718289693  |                    |
|               | 0.350240285                          | 0.350240285                           | -0.356616081 | 0.642930899  | 0.228718499                           |              |                    |
|               | 0.521282689                          | 3                                     | 0            | 0.998207054  |                                       |              |                    |
| GRB10         | ENSG00000106070.17                   | 0.77340203                            | 1            | 1            | 0.77340203                            |              | Brain_Hypothalamus |
|               | 0.77340203                           | Brain_Hypothalamus                    | 1            | 1            | 1                                     | -0.28792777  | -0.28792777        |
|               | -0.28792777                          | NA                                    | 1            | 0            | 0.998207054                           |              |                    |
| GNPNAT1       | ENSG00000100522.8                    | 0.773407051                           | 2            | 2            | 0.497163472                           |              |                    |
|               | Brain_Putamen_basal_ganglia          | 0.835623264                           |              |              | Brain_Cerebellar_Hemisphere           |              |                    |
|               | 1.033004726                          | 0.966995274                           | 0.966995274  | -0.207495043 | 0.678959582                           |              |                    |
|               | 0.23573227                           | 0.626818077                           | 2            | 0            | 0.998207054                           |              |                    |
| WDR63         | ENSG00000162643.12                   | 0.773508908                           | 2            | 2            | 0.521890181                           |              |                    |
|               | Brain_Substantia_nigra               | 0.748667532                           |              |              | Brain_Cortex                          | 1.002007093  |                    |
|               | 0.997992907                          | 0.997992907                           | -0.320396825 | 0.640434466  | 0.160018821                           |              |                    |
|               | 0.679410322                          | 2                                     | 0            | 0.998207054  |                                       |              |                    |
| FBXO25        | ENSG00000147364.16                   | 0.773512393                           | 1            | 1            | 0.773512393                           |              |                    |
|               | Brain_Cerebellar_Hemisphere          | 0.773512393                           |              |              | Brain_Cerebellar_Hemisphere           | 1            | 1                  |
|               | 1                                    | -0.287783599                          | -0.287783599 | -0.287783599 | NA                                    | 1            | 0                  |
|               | 0.998207054                          |                                       |              |              |                                       |              |                    |
| RP11-799B12.4 | ENSG00000265750.1                    | 0.77356651                            | 9            | 9            | 0.161736447                           |              |                    |
|               | Brain_Substantia_nigra               | 0.965713381                           |              |              | Brain_Hypothalamus                    | 3.259918189  |                    |
|               | 0.194123852                          | 0.194123852                           | -1.399255274 | 1.12865711   | 0.310983434                           |              |                    |
|               | 0.898704605                          | 9                                     | 0            | 0.998207054  |                                       |              |                    |
| CTD-2588E21.1 | ENSG00000277763.1                    | 0.77357297                            | 1            | 1            | 0.77357297                            |              |                    |

|               |                                      |                   |                                       |              |    |                |
|---------------|--------------------------------------|-------------------|---------------------------------------|--------------|----|----------------|
|               | Brain_Frontal_Cortex_BA9             | 0.77357297        | Brain_Frontal_Cortex_BA9              | 1            | 1  | 1              |
|               | -0.287704468                         | -0.287704468      | -0.287704468                          | NA           | 1  | 0              |
| RP11-706P11.2 | ENSG00000278703.1                    | 0.773688913       |                                       | 1            | 1  | 0.773688913    |
|               | Brain_Hippocampus                    | 0.773688913       | Brain_Hippocampus                     | 1            | 1  | 1              |
|               | -0.287553017                         | -0.287553017      | -0.287553017                          | NA           | 1  | 0              |
| RNASE2        | ENSG00000169385.2                    | 0.773697722       |                                       | 1            | 1  | 0.773697722    |
|               | Brain_Caudate_basal_ganglia          | 0.773697722       | Brain_Caudate_basal_ganglia           | 1            | 1  | 1              |
|               | 1                                    | -0.287541511      | -0.287541511                          | -0.287541511 | NA | 1              |
|               | 0.998207054                          |                   |                                       | 1            | 0  |                |
| CTNNAL1       | ENSG00000119326.14                   | 0.773825612       |                                       | 8            | 7  | 0.140943555    |
|               | Brain_Frontal_Cortex_BA9             | 0.968408359       | Brain_Hypothalamus                    |              |    | 3.862888865    |
|               | 0.103571688                          | 0.271481211       | -1.472286397                          |              |    | 0.640877926    |
|               | 0.633299241                          | 7                 | 0                                     |              |    | 0.998207054    |
| NEURL3        | ENSG00000163121.9                    | 0.773884175       |                                       | 2            | 2  | 0.539002316    |
|               | Brain_Caudate_basal_ganglia          | 0.768092478       | Brain_Putamen_basal_ganglia           |              |    |                |
|               | 1.821435051                          | 0.178564949       | 0.178564949                           |              |    | 0.294870932    |
|               | 0.454596656                          | 0.225886286       | 2                                     | 0            |    | 0.614322381    |
| C9orf129      | ENSG00000204352.2                    | 0.773922271       |                                       | 2            | 2  | 0.529945971    |
|               | Brain_Hippocampus                    | 0.700288205       | Brain_Cortex                          |              |    | 1.067007966    |
|               | 0.932992034                          | 0.932992034       | 0.384931449                           |              |    | 0.628088493    |
|               | 0.171937995                          | 2                 | 0                                     |              |    | 0.998207054    |
| RP11-13P5.1   | ENSG00000224478.1                    | 0.773979561       |                                       | 2            | 2  | 0.498825219    |
|               | Brain_Putamen_basal_ganglia          | 0.686250656       | Brain_Caudate_basal_ganglia           |              |    |                |
|               | 1.262735359                          | 0.737264641       | 0.737264641                           |              |    | 0.403948411    |
|               | 0.540143877                          | 0.192609475       | 2                                     | 0            |    | 0.676339343    |
| LINC00606     | ENSG00000226567.1                    | 0.774022818       |                                       | 3            | 3  | 0.363465139    |
|               | Brain_Hippocampus                    | 0.958481009       | Brain_Amygdala                        |              |    | 1.761252053    |
|               | 0.377378737                          | 0.377378737       | -0.908782134                          |              |    | -0.052059845   |
|               | 0.428710249                          | 3                 | 0                                     |              |    | 0.998207054    |
| SERPIND1      | ENSG00000099937.10                   | 0.774075395       |                                       | 2            | 2  | 0.542405026    |
|               | Brain_Hypothalamus                   | 0.649775403       | Brain_Nucleus_accumbens_basal_ganglia |              |    |                |
|               | 1.134423693                          | 0.865576307       | 0.865576307                           |              |    | 0.454074227    |
|               | 0.531627196                          | 0.109676461       | 2                                     | 0            |    | 0.609180166    |
| MRC2          | ENSG00000011028.13                   | 0.774145514       |                                       | 3            | 3  | 0.309205046    |
|               | Brain_Putamen_basal_ganglia          | 0.877352353       | Brain_Cortex                          |              |    | 1.648318608    |
|               | 0.351892283                          | 0.351892283       | -1.016891503                          |              |    | -0.154326438   |
|               | 0.434948199                          | 3                 | 0                                     |              |    | 0.998207054    |
| CHD5          | ENSG00000116254.17                   | 0.774191668       |                                       | 2            | 2  | 0.501014639    |
|               | Brain_Spinal_cord_cervical_c-1       | 0.871299952       | Brain_Substantia_nigra                |              |    |                |
|               | 1.117952986                          | 0.882047014       | 0.882047014                           |              |    | 0.162007494    |
|               | 0.417450818                          | 0.361251413       | 2                                     | 0            |    | 0.672894142    |
| DPY19L4       | ENSG00000156162.16                   | 0.774202585       |                                       | 2            | 2  | 0.474503733    |
|               | Brain_Cerebellum                     | 0.525082674       | Brain_Cerebellar_Hemisphere           |              |    | 1.87556677     |
|               | 0.12443323                           | 0.635530205       | 0.715170439                           |              |    | 0.12443323     |
|               | 0                                    | 0.998207054       |                                       |              |    | 0.675350322    |
| DDA1          | ENSG00000130311.10                   | 0.774208161       |                                       | 3            | 2  | 0.466172467    |
|               | Brain_Cerebellum                     |                   |                                       |              |    |                |
|               | 0.835556711                          | Brain_Hippocampus | 1.977984419                           |              |    | 0.023284012    |
|               | 0.998731569                          | -0.20758027       | 0.728720799                           |              |    | 0.381017292    |
|               | 2                                    | 0                 | 0.998207054                           |              |    | 0.512530372    |
| ZNF808        | ENSG00000198482.11                   | 0.774229713       |                                       | 1            | 1  | 0.774229713    |
|               | Brain_Hypothalamus                   | 0.774229713       | Brain_Hypothalamus                    |              |    | 1              |
|               | 0.286846687                          | 0.286846687       | 0.286846687                           | NA           | 1  | 0              |
| LINC01654     | ENSG00000261781.1                    | 0.774261864       |                                       | 2            | 2  | 0.511049698    |
|               | Brain_Frontal_Cortex_BA9             | 0.877071066       | Brain_Cortex                          |              |    | 1.186829227    |
|               | 0.813170773                          | 0.813170773       | 0.154683212                           |              |    | 0.657204087    |
|               | 0.355335919                          | 2                 | 0                                     |              |    | 0.40594365     |
| AMER3         | ENSG00000178171.10                   | 0.774290795       |                                       | 3            | 3  | 0.402534451    |
|               | Brain_Cortex                         | 1.147033104       |                                       |              |    | Brain_Amygdala |
|               | 0.734553406                          | Brain_Cortex      | 1.147033104                           |              |    | 0.874087607    |
|               | -0.837103397                         | -0.339074768      | -0.553728825                          |              |    | 0.874087607    |
|               | 0.998207054                          |                   |                                       |              |    | 3              |
| LRRC56        | ENSG00000161328.10                   | 0.77431707        |                                       | 10           | 5  | 0.162606672    |
|               | Brain_Anterior_cingulate_cortex_BA24 | 0.935189709       | Brain_Cerebellar_Hemisphere           |              |    |                |

|               |                                       |                             |                             |              |              |                  |             |  |
|---------------|---------------------------------------|-----------------------------|-----------------------------|--------------|--------------|------------------|-------------|--|
|               | 5.962409792                           | 0.037209349                 | 0.319677059                 | -1.396358146 | 0.364320725  |                  |             |  |
|               | -0.442163943                          | 0.516594649                 | 5                           | 0            | 0.998207054  |                  |             |  |
| MYO7B         | ENSG00000169994.18                    | 0.774499668                 | 2                           | 2            | 0.730546502  | Brain_Cerebellum |             |  |
|               | 0.848378465                           | Brain_Putamen_basal_ganglia | 1.71555623                  | 0.28444377   | 0.28444377   |                  |             |  |
|               | -0.344398653                          | 0.191187795                 | -0.076605429                | 0.378716809  | 2            | 0                |             |  |
|               | 0.998207054                           |                             |                             |              |              |                  |             |  |
| CYTH2         | ENSG00000105443.13                    | 0.77452826                  | 10                          | 9            | 0.061704651  | Brain_Amygdala   |             |  |
|               | 0.937983492                           | Brain_Frontal_Cortex_BA9    | 5.126987402                 | 0.13455708   | 0.20099108   |                  |             |  |
|               | -1.868412107                          | -0.077804594                | -0.92877297                 | 0.536667771  | 9            | 0                |             |  |
|               | 0.998207054                           |                             |                             |              |              |                  |             |  |
| RP11-310H4.2  | ENSG00000233977.1                     | 0.774598269                 | 1                           | 1            | 0.774598269  |                  |             |  |
|               | Brain_Nucleus_accumbens_basal_ganglia | 0.774598269                 |                             |              |              |                  |             |  |
|               | Brain_Nucleus_accumbens_basal_ganglia | 1                           | 1                           | -0.286365405 |              |                  |             |  |
|               | -0.286365405                          | -0.286365405                | NA                          | 1            | 0            | 0.998207054      |             |  |
| TRAF3IP3      | ENSG00000009790.14                    | 0.774613416                 | 1                           | 1            | 0.774613416  |                  |             |  |
|               | Brain_Cerebellar_Hemisphere           | 0.774613416                 | Brain_Cerebellar_Hemisphere | 1            | 1            |                  |             |  |
|               | 1                                     | 0.286345626                 | 0.286345626                 | 0.286345626  | NA           | 1                | 0           |  |
|               | 0.998207054                           |                             |                             |              |              |                  |             |  |
| NUF2          | ENSG00000143228.12                    | 0.774692451                 | 1                           | 1            | 0.774692451  |                  |             |  |
|               | Brain_Hippocampus                     | 0.774692451                 | Brain_Hippocampus           | 1            | 1            | 1                |             |  |
|               | 0.286242426                           | 0.286242426                 | 0.286242426                 | NA           | 1            | 0                | 0.998207054 |  |
| ZNF518A       | ENSG00000177853.14                    | 0.774693742                 | 2                           | 2            | 0.493060662  |                  |             |  |
|               | Brain_Spinal_cord_cervical_c-1        | 0.897465458                 | Brain_Cerebellum            | 1.104825831  |              |                  |             |  |
|               | 0.895174169                           | 0.895174169                 | -0.128863753                | 0.685448954  | 0.2782926    |                  |             |  |
|               | 0.575806037                           | 2                           | 0                           | 0.998207054  |              |                  |             |  |
| CDC25B        | ENSG00000101224.17                    | 0.774712916                 | 7                           | 7            | 0.167850122  |                  |             |  |
|               | Brain_Cerebellum                      | 0.908804386                 | Brain_Substantia_nigra      | 1.692238014  |              |                  |             |  |
|               | 0.328030567                           | 0.328030567                 | -1.071360266                | 1.379144771  | 0.006093162  |                  |             |  |
|               | 0.821821933                           | 7                           | 0                           | 0.998207054  |              |                  |             |  |
| KCNH6         | ENSG00000173826.14                    | 0.774820852                 | 1                           | 1            | 0.774820852  |                  |             |  |
|               | Brain_Frontal_Cortex_BA9              | 0.774820852                 | Brain_Frontal_Cortex_BA9    | 1            | 1            |                  |             |  |
|               | 1                                     | -0.286074774                | -0.286074774                | -0.286074774 | NA           | 1                | 0           |  |
|               | 0.998207054                           |                             |                             |              |              |                  |             |  |
| TMEM54        | ENSG00000121900.18                    | 0.774888119                 | 2                           | 2            | 0.540760784  |                  |             |  |
|               | Brain_Cerebellar_Hemisphere           | 0.708152647                 | Brain_Frontal_Cortex_BA9    |              |              |                  |             |  |
|               | 1.009239267                           | 0.990760733                 | 0.990760733                 | -0.611662944 | -0.374338291 |                  |             |  |
|               | -0.493000618                          | 0.167813871                 | 2                           | 0            | 0.998207054  |                  |             |  |
| CTD-3075F15.1 | ENSG00000273565.1                     | 0.775013484                 | 1                           | 1            | 0.775013484  |                  |             |  |
|               | Brain_Caudate_basal_ganglia           | 0.775013484                 | Brain_Caudate_basal_ganglia | 1            | 1            |                  |             |  |
|               | 1                                     | -0.285823271                | -0.285823271                | -0.285823271 | NA           | 1                | 0           |  |
|               | 0.998207054                           |                             |                             |              |              |                  |             |  |
| SLC29A3       | ENSG00000198246.7                     | 0.775038804                 | 6                           | 6            | 0.250400568  |                  |             |  |
|               | Brain_Spinal_cord_cervical_c-1        | 0.997544028                 | Brain_Cortex                | 3.328165467  |              |                  |             |  |
|               | 0.175613247                           | 0.175613247                 | -1.149376981                | 0.482016414  | -0.360140657 |                  |             |  |
|               | 0.629836875                           | 6                           | 0                           | 0.998207054  |              |                  |             |  |
| GMNN          | ENSG00000112312.9                     | 0.775103737                 | 1                           | 1            | 0.775103737  |                  |             |  |
|               | Brain_Putamen_basal_ganglia           | 0.775103737                 | Brain_Putamen_basal_ganglia | 1            | 1            |                  |             |  |
|               | 1                                     | 0.285705442                 | 0.285705442                 | 0.285705442  | NA           | 1                | 0           |  |
|               | 0.998207054                           |                             |                             |              |              |                  |             |  |
| LMBRD1        | ENSG00000168216.10                    | 0.775127063                 | 3                           | 3            | 0.345977859  |                  |             |  |
|               | Brain_Cortex                          | 0.741378785                 | Brain_Cerebellar_Hemisphere | 1.71635197   |              |                  |             |  |
|               | 0.328073378                           | 0.328073378                 | 0.330028027                 | 0.942419594  | 0.64325023   |                  |             |  |
|               | 0.306437546                           | 3                           | 0                           | 0.998207054  |              |                  |             |  |
| SUCLG2-AS1    | ENSG00000241316.6                     | 0.775148196                 | 9                           | 4            | 0.379692719  |                  |             |  |
|               | Brain_Cerebellum                      | 0.871144311                 | Brain_Frontal_Cortex_BA9    | 7.101522192  |              |                  |             |  |
|               | 0.000121642                           | 0.250761928                 | -0.878462613                | -0.162205142 | -0.588619072 |                  |             |  |
|               | 0.196859829                           | 4                           | 0                           | 0.998207054  |              |                  |             |  |
| KRIT1         | ENSG00000001631.15                    | 0.775157248                 | 2                           | 2            | 0.629088129  |                  |             |  |
|               | Brain_Nucleus_accumbens_basal_ganglia | 0.821843777                 | Brain_Cerebellum            |              |              |                  |             |  |
|               | 1.485082442                           | 0.514917558                 | 0.514917558                 | -0.225174178 | 0.483010713  |                  |             |  |
|               | 0.128918268                           | 0.500762339                 | 2                           | 0            | 0.998207054  |                  |             |  |
| GTSE1-AS1     | ENSG00000277232.2                     | 0.775179057                 | 4                           | 4            | 0.305694968  |                  |             |  |

|               |                                       |                                       |                                      |                                |              |                  |   |  |  |
|---------------|---------------------------------------|---------------------------------------|--------------------------------------|--------------------------------|--------------|------------------|---|--|--|
|               | Brain_Hypothalamus                    | 0.751575435                           |                                      | Brain_Spinal_cord_cervical_c-1 | 3.09567587   |                  |   |  |  |
|               | 0.177171343                           | 0.177171343                           | -1.024297098                         | -0.31656271                    | -0.678894822 |                  |   |  |  |
|               | 0.35030814                            | 0                                     | 0.998207054                          |                                |              |                  |   |  |  |
| HN1           | ENSG00000189159.15                    | 0.775248898                           | 2                                    | 2                              | 0.494819356  | Brain_Amygdala   |   |  |  |
|               | 0.86239737                            | Brain_Substantia_nigra                | 1.049883747                          | 0.950116253                    |              |                  |   |  |  |
|               | 0.950116253                           | -0.682663726                          | 0.173323224                          | -0.254670251                   | 0.605274177  |                  |   |  |  |
|               | 2                                     | 0                                     | 0.998207054                          |                                |              |                  |   |  |  |
| TIGD5         | ENSG00000179886.5                     | 0.775429155                           | 2                                    | 2                              | 0.713068663  |                  |   |  |  |
|               | Brain_Cerebellar_Hemisphere           | 0.735183271                           | Brain_Cerebellum                     | 1.509821275                    |              |                  |   |  |  |
|               | 0.490178725                           | -0.490178725                          | -0.338238758                         | 0.36773792                     | 0.014749581  |                  |   |  |  |
|               | 0.499200896                           | 2                                     | 0                                    | 0.998207054                    |              |                  |   |  |  |
| RP11-407H12.8 | ENSG00000229255.1                     | 0.775451187                           | 1                                    | 1                              | 0.775451187  |                  |   |  |  |
|               | Brain_Caudate_basal_ganglia           | 0.775451187                           | Brain_Caudate_basal_ganglia          | 1                              | 1            |                  |   |  |  |
|               | 1                                     | -0.285251865                          | -0.285251865                         | -0.285251865                   | NA           | 1                | 0 |  |  |
|               | 0.998207054                           |                                       |                                      |                                |              |                  |   |  |  |
| CTDP1         | ENSG00000060069.16                    | 0.775523773                           | 1                                    | 1                              | 0.775523773  |                  |   |  |  |
|               | Brain_Nucleus_accumbens_basal_ganglia | 0.775523773                           |                                      |                                |              |                  |   |  |  |
|               | Brain_Nucleus_accumbens_basal_ganglia | 1                                     | 1                                    | 1                              | -0.285157116 |                  |   |  |  |
|               | -0.285157116                          | -0.285157116                          | NA                                   | 1                              | 0            | 0.998207054      |   |  |  |
| KCNJ1         | ENSG00000151704.15                    | 0.775529626                           | 3                                    | 3                              | 0.356797214  |                  |   |  |  |
|               | Brain_Putamen_basal_ganglia           | 0.793758386                           | Brain_Anterior_cingulate_cortex_BA24 |                                |              |                  |   |  |  |
|               | 1.064787091                           | 0.93600534                            | 0.93600534                           | -0.463105907                   | 0.921485106  |                  |   |  |  |
|               | 0.239937497                           | 0.692545753                           | 3                                    | 0                              | 0.998207054  |                  |   |  |  |
| MREG          | ENSG00000118242.15                    | 0.775542928                           | 2                                    | 2                              | 0.486729843  |                  |   |  |  |
|               | Brain_Nucleus_accumbens_basal_ganglia | 0.871856043                           | Brain_Cerebellum                     |                                |              |                  |   |  |  |
|               | 1.006245513                           | 0.993754487                           | 0.993754487                          | -0.695519424                   | 0.161301371  |                  |   |  |  |
|               | -0.267109026                          | 0.605863794                           | 2                                    | 0                              | 0.998207054  |                  |   |  |  |
| HDCC2         | ENSG00000111906.17                    | 0.775568957                           | 5                                    | 5                              | 0.253283735  | Brain_Cerebellum |   |  |  |
|               | 0.659578315                           | Brain_Cortex                          | 2.637569335                          | 0.10394887                     | 0.10394887   |                  |   |  |  |
|               | -1.142409762                          | -0.44049544                           | -0.701318887                         | 0.302537803                    | 5            | 0                |   |  |  |
|               | 0.998207054                           |                                       |                                      |                                |              |                  |   |  |  |
| EPO           | ENSG00000130427.2                     | 0.775579101                           | 4                                    | 4                              | 0.334348779  | Brain_Cerebellum |   |  |  |
|               | 0.922699616                           | Brain_Nucleus_accumbens_basal_ganglia | 1.563716627                          |                                |              |                  |   |  |  |
|               | 0.512513477                           | 0.512513477                           | -0.103095362                         | 0.965391456                    | 0.468848248  |                  |   |  |  |
|               | 0.551338338                           | 4                                     | 0                                    | 0.998207054                    |              |                  |   |  |  |
| THOP1         | ENSG00000172009.14                    | 0.775626311                           | 5                                    | 3                              | 0.19492379   |                  |   |  |  |
|               | Brain_Cerebellar_Hemisphere           | 0.559138365                           | Brain_Putamen_basal_ganglia          |                                |              |                  |   |  |  |
|               | 3.823863091                           | 0.038226593                           | 0.460169407                          | -1.296150062                   | -0.584121806 |                  |   |  |  |
|               | -0.875334416                          | 0.294008884                           | 3                                    | 0                              | 0.998207054  |                  |   |  |  |
| RPP21         | ENSG00000241370.5                     | 0.775681406                           | 3                                    | 3                              | 0.305481442  |                  |   |  |  |
|               | Brain_Substantia_nigra                | 0.880702297                           | Brain_Cerebellum                     | 1.801543642                    |              |                  |   |  |  |
|               | 0.203933603                           | 0.203933603                           | -0.192508325                         | 1.024749412                    | 0.227387366  |                  |   |  |  |
|               | 0.690861589                           | 3                                     | 0                                    | 0.998207054                    |              |                  |   |  |  |
| BPHL          | ENSG00000137274.12                    | 0.775702374                           | 13                                   | 10                             | 0.102461703  |                  |   |  |  |
|               | Brain_Spinal_cord_cervical_c-1        | 0.967761215                           | Brain_Putamen_basal_ganglia          |                                |              |                  |   |  |  |
|               | 5.47691114                            | 0.031993831                           | 0.259603205                          | -1.633034679                   | 1.232290775  |                  |   |  |  |
|               | 0.125853291                           | 0.689717102                           | 10                                   | 0                              | 0.998207054  |                  |   |  |  |
| C11orf45      | ENSG00000174370.9                     | 0.775707019                           | 2                                    | 2                              | 0.481201006  |                  |   |  |  |
|               | Brain_Nucleus_accumbens_basal_ganglia | 0.957947643                           | Brain_Putamen_basal_ganglia          |                                |              |                  |   |  |  |
|               | 1.079011097                           | 0.920988903                           | 0.920988903                          | -0.704372214                   | 0.052729238  |                  |   |  |  |
|               | -0.325821488                          | 0.535351571                           | 2                                    | 0                              | 0.998207054  |                  |   |  |  |
| PLCD4         | ENSG00000115556.13                    | 0.775790631                           | 7                                    | 4                              | 0.32187592   | Brain_Amygdala   |   |  |  |
|               | 0.88765538                            | Brain_Hippocampus                     | 5.177718705                          | 0.001708047                    | 0.334435967  |                  |   |  |  |
|               | -0.990610271                          | -0.141271606                          | -0.676520876                         | 0.278952495                    | 4            | 0                |   |  |  |
|               | 0.998207054                           |                                       |                                      |                                |              |                  |   |  |  |
| GPR83         | ENSG00000123901.8                     | 0.776008502                           | 5                                    | 4                              | 0.346318124  |                  |   |  |  |
|               | Brain_Frontal_Cortex_BA9              | 0.789210931                           | Brain_Cerebellum                     | 3.460722286                    |              |                  |   |  |  |
|               | 0.026821058                           | 0.202544345                           | -0.941754931                         | 0.297506248                    | -0.318650196 |                  |   |  |  |
|               | 0.439351861                           | 4                                     | 0                                    | 0.998207054                    |              |                  |   |  |  |
| LINCR-0001    | ENSG00000253641.5                     | 0.776042428                           | 9                                    | 9                              | 0.055694142  |                  |   |  |  |
|               | Brain_Frontal_Cortex_BA9              | 0.909164324                           | Brain_Spinal_cord_cervical_c-1       |                                |              |                  |   |  |  |
|               | 3.025727059                           | 0.257330923                           | 0.257330923                          | -0.120052086                   | 1.913421286  |                  |   |  |  |

|         |                                       |                                |              |              |                             |                    |   |              |  |
|---------|---------------------------------------|--------------------------------|--------------|--------------|-----------------------------|--------------------|---|--------------|--|
|         | 0.69313089                            | 0.638003999                    | 9            | 0            | 0.998207054                 |                    |   |              |  |
| AP2S1   | ENSG00000042753.11                    | 0.776102028                    | 1            | 1            | 0.776102028                 | Brain_Amygdala     |   |              |  |
|         | 0.776102028                           | Brain_Amygdala                 | 1            | 1            | 1                           | -0.284402389       |   | -0.284402389 |  |
|         | -0.284402389                          | NA                             | 1            | 0            | 0.998207054                 |                    |   |              |  |
| KIF24   | ENSG00000186638.16                    | 0.776131127                    | 1            | 1            | 0.776131127                 |                    |   |              |  |
|         | Brain_Frontal_Cortex_BA9              | 0.776131127                    |              |              | Brain_Frontal_Cortex_BA9    | 1                  | 1 |              |  |
|         | 1                                     | -0.284364414                   | -0.284364414 | -0.284364414 | NA                          | 1                  | 0 |              |  |
|         | 0.998207054                           |                                |              |              |                             |                    |   |              |  |
| ZNF232  | ENSG00000167840.13                    | 0.77622272                     | 11           | 11           | 0.135215541                 |                    |   |              |  |
|         | Brain_Putamen_basal_ganglia           | 0.877399202                    |              |              | Brain_Cortex                | 4.869624374        |   |              |  |
|         | 0.217201771                           | 0.217201771                    | -0.614356465 | 1.493847278  | 0.085099355                 |                    |   |              |  |
|         | 0.737092071                           | 11                             | 0            | 0.998207054  |                             |                    |   |              |  |
| RWDD4   | ENSG00000182552.14                    | 0.776256607                    | 2            | 2            | 0.594661352                 |                    |   |              |  |
|         | Brain_Cerebellar_Hemisphere           | 0.862694974                    |              |              | Brain_Cerebellum            | 1.825892091        |   |              |  |
|         | 0.174107909                           | 0.174107909                    | 0.1729446    | 0.532093337  | 0.352518969                 |                    |   |              |  |
|         | 0.253956508                           | 2                              | 0            | 0.998207054  |                             |                    |   |              |  |
| USP14   | ENSG00000101557.14                    | 0.776380546                    | 4            | 2            | 0.435309116                 |                    |   |              |  |
|         | Brain_Spinal_cord_cervical_c-1        | 0.712355643                    |              |              | Brain_Putamen_basal_ganglia |                    |   |              |  |
|         | 3.282882871                           | 0.039087841                    | 0.593765071  | 0.36869424   | 0.78013891                  |                    |   |              |  |
|         | 0.615935286                           | 0.177109014                    | 2            | 0            | 0.998207054                 |                    |   |              |  |
| PLEKHN1 | ENSG00000187583.10                    | 0.77641122                     | 2            | 2            | 0.548073884                 | Brain_Cortex       |   |              |  |
|         | 0.557834341                           | Brain_Cerebellar_Hemisphere    | 1.391661577  | 0.608338423  |                             |                    |   |              |  |
|         | 0.608338423                           | 0.586061271                    | 0.600648866  | 0.593355068  | 0.010314987                 |                    |   |              |  |
|         | 2                                     | 0                              | 0.998207054  |              |                             |                    |   |              |  |
| ANKRD23 | ENSG00000163126.14                    | 0.77645046                     | 2            | 2            | 0.549581845                 | Brain_Amygdala     |   |              |  |
|         | 0.95113367                            | Brain_Frontal_Cortex_BA9       | 1.466283103  | 0.533716897  |                             |                    |   |              |  |
|         | 0.533716897                           | -0.061283201                   | 0.598386839  | 0.268551819  | 0.466457159                 |                    |   |              |  |
|         | 2                                     | 0                              | 0.998207054  |              |                             |                    |   |              |  |
| IGDCC4  | ENSG00000103742.11                    | 0.77652707                     | 4            | 3            | 0.310787443                 |                    |   |              |  |
|         | Brain_Putamen_basal_ganglia           | 0.801450582                    |              |              | Brain_Cortex                | 2.49355002         |   |              |  |
|         | 0.058602503                           | 0.440250107                    | 0.251470223  | 1.013571123  | 0.71269087                  |                    |   |              |  |
|         | 0.325767294                           | 3                              | 0            | 0.998207054  |                             |                    |   |              |  |
| HBG2    | ENSG00000196565.13                    | 0.776750419                    | 1            | 1            | 0.776750419                 |                    |   |              |  |
|         | Brain_Nucleus_accumbens_basal_ganglia | 0.776750419                    |              |              |                             |                    |   |              |  |
|         | Brain_Nucleus_accumbens_basal_ganglia | 1                              | 1            | 1            | -0.283556315                |                    |   |              |  |
|         | -0.283556315                          | -0.283556315                   | NA           | 1            | 0.998207054                 |                    |   |              |  |
| ZNF510  | ENSG00000081386.12                    | 0.776793841                    | 1            | 1            | 0.776793841                 |                    |   |              |  |
|         | Brain_Putamen_basal_ganglia           | 0.776793841                    |              |              | Brain_Putamen_basal_ganglia | 1                  | 1 |              |  |
|         | 1                                     | -0.283499662                   | -0.283499662 | -0.283499662 | NA                          | 1                  | 0 |              |  |
|         | 0.998207054                           |                                |              |              |                             |                    |   |              |  |
| DCAF6   | ENSG00000143164.15                    | 0.776828994                    | 2            | 2            | 0.538276834                 |                    |   |              |  |
|         | Brain_Caudate_basal_ganglia           | 0.775199726                    |              |              | Brain_Frontal_Cortex_BA9    |                    |   |              |  |
|         | 1.109988069                           | 0.890011931                    | 0.890011931  | 0.285580127  | 0.615420837                 |                    |   |              |  |
|         | 0.450500482                           | 0.233232603                    | 2            | 0            | 0.998207054                 |                    |   |              |  |
| ACTR5   | ENSG00000101442.9                     | 0.77687472                     | 2            | 2            | 0.535379409                 |                    |   |              |  |
|         | Brain_Cerebellar_Hemisphere           | 0.876970272                    |              |              | Brain_Cerebellum            | 1.667353089        |   |              |  |
|         | 0.332646911                           | 0.332646911                    | 0.154811059  | 0.619815278  | 0.387313169                 |                    |   |              |  |
|         | 0.328807637                           | 2                              | 0            | 0.998207054  |                             |                    |   |              |  |
| TYW5    | ENSG00000162971.10                    | 0.776984575                    | 10           | 2            | 0.54053385                  | Brain_Cortex       |   |              |  |
|         | 0.769189802                           | Brain_Putamen_basal_ganglia    | 8.795666709  | 0.00083977   | 0.58060006                  |                    |   |              |  |
|         | -0.293434836                          | 0.612005907                    | 0.400897265  | 0.266798701  | 2                           | 0                  |   |              |  |
|         | 0.998207054                           |                                |              |              |                             |                    |   |              |  |
| GTF2H2C | ENSG00000183474.15                    | 0.777147146                    | 1            | 1            | 0.777147146                 |                    |   |              |  |
|         | Brain_Anterior_cingulate_cortex_BA24  | 0.777147146                    |              |              |                             |                    |   |              |  |
|         | Brain_Anterior_cingulate_cortex_BA24  | 1                              | 1            | 1            | -0.283038733                |                    |   |              |  |
|         | -0.283038733                          | -0.283038733                   | NA           | 1            | 0.998207054                 |                    |   |              |  |
| EFHB    | ENSG00000163576.17                    | 0.777163035                    | 13           | 1            | 0.47087375                  | Brain_Hypothalamus |   |              |  |
|         | 0.98719371                            | Brain_Spinal_cord_cervical_c-1 | 11.81520423  | 0.005168486  |                             |                    |   |              |  |
|         | 11.81520423                           | -0.262189943                   | 0.721058131  | 0.273837902  | 0.245689274                 |                    |   |              |  |
|         | 1                                     | 0                              | 0.998207054  |              |                             |                    |   |              |  |
| UQCRFS1 | ENSG00000169021.5                     | 0.777246253                    | 5            | 4            | 0.460499804                 |                    |   |              |  |
|         | Brain_Cerebellum                      | 0.893476222                    |              |              | Brain_Cerebellar_Hemisphere | 3.534333149        |   |              |  |

|                |                                       |                                       |                                       |              |                    |
|----------------|---------------------------------------|---------------------------------------|---------------------------------------|--------------|--------------------|
|                | 0.007662523                           | 0.143303682                           | -0.7380241                            | 0.133906865  | -0.451145588       |
|                | 0.350035924                           | 4 0                                   | 0.998207054                           |              |                    |
| SLC5A7         | ENSG00000115665.8                     | 0.777271052                           | 1 1                                   | 0.777271052  |                    |
|                | Brain_Hypothalamus                    | 0.777271052                           | Brain_Hypothalamus                    | 1 1 1        |                    |
|                | -0.282877096                          | -0.282877096                          | -0.282877096                          | NA 1 0       | 0.998207054        |
| RP11-834C11.10 | ENSG00000257534.1                     | 0.777368761                           | 3 3                                   | 0.339415459  |                    |
|                | Brain_Spinal_cord_cervical_c-1        | 0.997604951                           | Brain_Hippocampus                     |              |                    |
|                | 1.138142588                           | 0.869420963                           | 0.869420963                           | -0.003001753 | 0.955320866        |
|                | 0.457021026                           | 0.48030658 3                          | 0 0                                   | 0.998207054  |                    |
| CTD-2235C13.3  | ENSG00000271815.1                     | 0.777416504                           | 2 2                                   | 0.778186237  |                    |
|                | Brain_Cerebellar_Hemisphere           | 0.950614602                           | Brain_Nucleus_accumbens_basal_ganglia |              |                    |
|                | 1.879691762                           | -0.120308238                          | 0.120308238                           | -0.061934991 | 0.281683462        |
|                | 0.109874235                           | 0.242974938                           | 2 0                                   | 0.998207054  |                    |
| LINC00924      | ENSG00000259134.5                     | 0.777438484                           | 7 7                                   | 0.234372861  |                    |
|                | Brain_Caudate_basal_ganglia           | 0.819665939                           | Brain_Putamen_basal_ganglia           |              |                    |
|                | 1.703439948                           | 0.509362307                           | 0.509362307                           | -0.44709656  | 1.189169787        |
|                | 0.425906564                           | 0.644071199                           | 7 0                                   | 0.998207054  |                    |
| RP11-473E2.4   | ENSG00000228877.2                     | 0.777759832                           | 1 1                                   | 0.777759832  |                    |
|                | Brain_Frontal_Cortex_BA9              | 0.777759832                           | Brain_Frontal_Cortex_BA9              | 1 1          |                    |
|                | 1 0.282239552                         | 0.282239552                           | 0.282239552                           | NA 1 0       |                    |
|                | 0.998207054                           |                                       |                                       |              |                    |
| HTR3A          | ENSG00000166736.11                    | 0.777834982                           | 2 2                                   | 0.480933339  | Brain_Amygdala     |
|                | 0.943245175                           | Brain_Nucleus_accumbens_basal_ganglia | 1.006442379                           |              |                    |
|                | 0.993557621                           | 0.993557621                           | -0.071191716                          | 0.704802201  | 0.316805243        |
|                | 0.54871056 2                          | 0 0                                   | 0.998207054                           |              |                    |
| HBG1           | ENSG00000213934.6                     | 0.777838041                           | 1 1                                   | 0.777838041  | Brain_Amygdala     |
|                | 0.777838041                           | Brain_Amygdala                        | 1 1 1                                 | -0.282137551 | -0.282137551       |
|                | -0.282137551                          | NA 1 0                                | 0.998207054                           |              |                    |
| AC104653.1     | ENSG00000228857.2                     | 0.777851347                           | 10 3                                  | 0.505611842  |                    |
|                | Brain_Spinal_cord_cervical_c-1        | 0.96869363                            | Brain_Caudate_basal_ganglia           |              |                    |
|                | 8.400246385                           | 0.006125565                           | 0.393759088                           | -0.510274804 | 0.665685972        |
|                | 0.105332562                           | 0.327056498                           | 3 0                                   | 0.998207054  |                    |
| PRRX1          | ENSG00000116132.11                    | 0.777898237                           | 5 5                                   | 0.338001402  |                    |
|                | Brain_Anterior_cingulate_cortex_BA24  | 0.717253826                           | Brain_Frontal_Cortex_BA9              |              |                    |
|                | 1.405348604                           | 0.578329528                           | 0.578329528                           | -0.958121685 | 0.617270444        |
|                | -0.126055637                          | 0.654557848                           | 5 0                                   | 0.998207054  |                    |
| NOA1           | ENSG00000084092.6                     | 0.777962715                           | 4 4                                   | 0.308352063  |                    |
|                | Brain_Spinal_cord_cervical_c-1        | 0.824324056                           | Brain_Cerebellum                      | 2.325731304  |                    |
|                | 0.16928005                            | 0.16928005                            | -0.264530027                          | 1.018685996  | 0.299910576        |
|                | 0.531395039                           | 4 0                                   | 0.998207054                           |              |                    |
| ZNF117         | ENSG00000152926.14                    | 0.778109098                           | 13 5                                  | 0.345328953  |                    |
|                | Brain_Cerebellum                      | 0.986724122                           | Brain_Anterior_cingulate_cortex_BA24  |              |                    |
|                | 9.557449875                           | 0.015317992                           | 0.405152505                           | -0.414029483 | 0.943688303        |
|                | 0.181302481                           | 0.43326036 5                          | 0 0                                   | 0.998207054  |                    |
| ZNF8           | ENSG00000278129.1                     | 0.778145776                           | 5 3                                   | 0.353251977  |                    |
|                | Brain_Nucleus_accumbens_basal_ganglia | 0.665258951                           | Brain_Cerebellum                      | 3.74085148   |                    |
|                | 0.03179978                            | 0.143264413                           | -0.928299995                          | 0.626443555  | -0.408050031       |
|                | 0.60450964 3                          | 0 0                                   | 0.998207054                           |              |                    |
| CTD-2227C6.2   | ENSG00000249664.1                     | 0.778259357                           | 13 4                                  | 0.530181358  |                    |
|                | Brain_Amygdala                        | 0.98495516                            | Brain_Substantia_nigra                | 10.52493586  |                    |
|                | 0.002302093                           | 0.361066579                           | -0.545406556                          | 0.627729193  | 0.163486123        |
|                | 0.351463755                           | 4 0                                   | 0.998207054                           |              |                    |
| FAM169B        | ENSG00000283597.2                     | 0.778336954                           | 2 2                                   | 0.510198371  |                    |
|                | Brain_Caudate_basal_ganglia           | 0.722392832                           | Brain_Nucleus_accumbens_basal_ganglia |              |                    |
|                | 1.784295646                           | 0.215704354                           | 0.215704354                           | 0.355262652  | 0.658528841        |
|                | 0.506895746                           | 0.214441578                           | 2 0                                   | 0.998207054  |                    |
| RPRM           | ENSG00000177519.3                     | 0.778348452                           | 2 2                                   | 0.60648799   | Brain_Hypothalamus |
|                | 0.639637788                           | Brain_Nucleus_accumbens_basal_ganglia | 1.033314115                           |              |                    |
|                | 0.966685885                           | 0.966685885                           | -0.515093063                          | 0.468205292  | -0.023443885       |
|                | 0.695296935                           | 2 0                                   | 0.998207054                           |              |                    |
| RP11-451G4.2   | ENSG00000240045.1                     | 0.778463197                           | 3 2                                   | 0.459027891  |                    |
|                | Brain_Substantia_nigra                | 0.654440273                           | Brain_Putamen_basal_ganglia           |              |                    |

|              |                                      |                        |                                       |              |                  |
|--------------|--------------------------------------|------------------------|---------------------------------------|--------------|------------------|
|              | 2.719285099                          | 0.060242897            | 0.220472003                           | 0.447602258  | 0.740448513      |
|              | 0.584343536                          | 0.14738028 2           | 0                                     | 0.998207054  |                  |
| FYCO1        | ENSG00000163820.14                   | 0.778468065            | 4                                     | 4            | 0.260162272      |
|              | Brain_Anterior_cingulate_cortex_BA24 | 0.986046355            |                                       |              |                  |
|              | Brain_Spinal_cord_cervical_c-1       | 1.541185577            |                                       |              | 0.639101001      |
|              | -1.126007671                         | 0.254082397            | -0.165012335                          | 0.652290603  | 4 0              |
|              | 0.998207054                          |                        |                                       |              |                  |
| ZIC4         | ENSG00000174963.17                   | 0.778484535            | 4                                     | 4            | 0.329226124      |
|              | 0.980495634                          | Brain_Substantia_nigra | 1.533096126                           | 0.650928881  | Brain_Cerebellum |
|              | 0.650928881                          | -0.975673833           | 0.369244456                           | -0.385002846 | 0.686486322      |
|              | 4 0                                  | 0.998207054            |                                       |              |                  |
| DNAH1        | ENSG00000114841.17                   | 0.778525416            | 9                                     | 3            | 0.096680865      |
|              | Brain_Hippocampus                    | 0.966054245            | Brain_Substantia_nigra                | 7.350080057  |                  |
|              | 0.007003094                          | 0.390886883            | -0.042557538                          | 1.661162248  | 0.735064619      |
|              | 0.454525346                          | 3 0                    | 0.998207054                           |              |                  |
| CBR1         | ENSG00000159228.12                   | 0.778607636            | 12                                    | 5            | 0.164735619      |
|              | 0.882275207                          | Brain_Amygdala         | 8.484010068                           | 0.024873549  | Brain_Cerebellum |
|              | -1.389319494                         | -0.148085608           | -0.757859398                          | 0.406310936  | 0.346346358      |
|              | 0.998207054                          |                        |                                       | 5 0          |                  |
| LINC01184    | ENSG00000245937.7                    | 0.778718637            | 13                                    | 5            | 0.207722148      |
|              | Brain_Cortex                         | 0.939979815            | Brain_Anterior_cingulate_cortex_BA24  |              |                  |
|              | 8.890428655                          | 0.011754541            | 0.564328953                           | -0.751243574 | 1.259853689      |
|              | 0.41281157                           | 0.52811869 5 0         | 0.998207054                           |              |                  |
| WDR19        | ENSG00000157796.17                   | 0.778730235            | 1                                     | 1            | 0.778730235      |
|              | 0.778730235                          | Brain_Cerebellum1      | 1 1                                   | -0.280974139 | Brain_Cerebellum |
|              | -0.280974139                         | NA 1 0                 | 0.998207054                           |              | -0.280974139     |
| CCDC129      | ENSG00000180347.13                   | 0.778928385            | 2                                     | 2            | 0.601924009      |
|              | Brain_Hypothalamus                   | 0.689935704            | Brain_Cerebellum1.140631306           |              |                  |
|              | 0.859368694                          | 0.859368694            | -0.521635691                          | -0.398942322 | -0.460289006     |
|              | 0.086757313                          | 2 0                    | 0.998207054                           |              |                  |
| LINC00354    | ENSG00000226903.1                    | 0.779020308            | 2                                     | 2            | 0.489382141      |
|              | Brain_Caudate_basal_ganglia          | 0.903074545            | Brain_Nucleus_accumbens_basal_ganglia |              |                  |
|              | 1.036065388                          | 0.963934612            | 0.963934612                           | -0.121778369 | 0.691291869      |
|              | 0.28475675                           | 0.574927479            | 2 0                                   | 0.998207054  |                  |
| TMEM176B     | ENSG00000106565.17                   | 0.779052138            | 8                                     | 6            | 0.221896215      |
|              | Brain_Putamen_basal_ganglia          | 0.953074427            | Brain_Anterior_cingulate_cortex_BA24  |              |                  |
|              | 5.14858679                           | 0.050328811            | 0.173462498                           | -1.221501455 | 0.05884643       |
|              | -0.58102961                          | 0.449297635            | 6 0                                   | 0.998207054  |                  |
| AP000704.5   | ENSG00000224790.2                    | 0.779062254            | 13                                    | 2            | 0.29161201       |
|              | Brain_Hippocampus                    | 0.988461777            | Brain_Spinal_cord_cervical_c-1        |              |                  |
|              | 11.85841837                          | 6.39E-06               | 0.524952819                           | -1.054591899 | 0.258640912      |
|              | -0.229259934                         | 0.39590642 2 0         | 0.998207054                           |              |                  |
| GPSM2        | ENSG00000121957.12                   | 0.779156064            | 1                                     | 1            | 0.779156064      |
|              | 0.779156064                          | Brain_Cerebellum1      | 1 1                                   | 0.280418997  | Brain_Cerebellum |
|              | 0.280418997                          | NA 1 0                 | 0.998207054                           |              | 0.280418997      |
| OCA2         | ENSG00000104044.15                   | 0.779182056            | 4                                     | 4            | 0.321088976      |
|              | Brain_Putamen_basal_ganglia          | 0.911390521            | Brain_Nucleus_accumbens_basal_ganglia |              |                  |
|              | 1.493265707                          | 0.520743109            | 0.520743109                           | -0.992222548 | 0.459767342      |
|              | -0.348311912                         | 0.654408861            | 4 0                                   | 0.998207054  |                  |
| AATK         | ENSG00000181409.11                   | 0.779557307            | 2                                     | 2            | 0.490522154      |
|              | Brain_Caudate_basal_ganglia          | 0.947884683            | Brain_Cerebellum1.302949204           |              |                  |
|              | 0.697050796                          | 0.697050796            | -0.689478571                          | -0.065363377 | -0.377420974     |
|              | 0.441316086                          | 2 0                    | 0.998207054                           |              |                  |
| RP11-66N24.6 | ENSG00000274002.1                    | 0.779593479            | 2                                     | 2            | 0.543783678      |
|              | Brain_Putamen_basal_ganglia          | 0.700047068            | Brain_Hippocampus                     | 1.04261368   |                  |
|              | 0.95738632                           | 0.95738632             | -0.607101315                          | 0.38525693   | -0.110922192     |
|              | 2 0                                  | 0.998207054            |                                       | 0.701703245  |                  |
| SVIL         | ENSG00000197321.14                   | 0.779624086            | 1                                     | 1            | 0.779624086      |
|              | 0.779624086                          | Brain_Cerebellum1      | 1 1                                   | 0.279808949  | Brain_Cerebellum |
|              | 0.279808949                          | NA 1 0                 | 0.998207054                           |              | 0.279808949      |
| HBQ1         | ENSG00000086506.2                    | 0.779627904            | 5                                     | 5            | 0.324201324      |
|              | Brain_Cerebellar_Hemisphere          | 0.760613451            | Brain_Frontal_Cortex_BA9              |              |                  |

|               |                                       |                                      |              |                                       |              |              |   |
|---------------|---------------------------------------|--------------------------------------|--------------|---------------------------------------|--------------|--------------|---|
|               | 2.615500671                           | 0.127158247                          | 0.127158247  | -0.947325109                          | 0.985861005  |              |   |
|               | 0.294988237                           | 0.739305012                          | 5            | 0                                     | 0.998207054  |              |   |
| VNN2          | ENSG00000112303.13                    | 0.779681345                          | 1            | 1                                     | 0.779681345  |              |   |
|               | Brain_Substantia_nigra                | 0.779681345                          |              | Brain_Substantia_nigra                | 1            | 1            |   |
|               | 1                                     | -0.279734321                         | -0.279734321 | -0.279734321                          | NA           | 1            | 0 |
|               | 0.998207054                           |                                      |              |                                       |              |              |   |
| TRIM8         | ENSG00000171206.13                    | 0.779698729                          | 4            | 4                                     | 0.257862511  |              |   |
|               | Brain_Frontal_Cortex_BA9              | 0.626110449                          |              | Brain_Cortex                          | 2.030647733  |              |   |
|               | 0.3860585                             | 0.3860585                            | 0.487208688  | 1.131457669                           | 0.81859754   | 0.26580585   | 4 |
|               | 0                                     | 0.998207054                          |              |                                       |              |              |   |
| GPSM1         | ENSG00000160360.12                    | 0.779719295                          | 7            | 3                                     | 0.305833506  | Brain_Cortex |   |
|               | 0.998333769                           | Brain_Cerebellum                     | 5.74185745   | 0.0278507                             | 0.392124     | -1.024003744 |   |
|               | 0.02203852                            | -0.409101293                         | 0.416117204  | 3                                     | 0            | 0.998207054  |   |
| AIMP1         | ENSG00000164022.16                    | 0.779741309                          | 2            | 2                                     | 0.481606686  |              |   |
|               | Brain_Cerebellar_Hemisphere           | 0.951288597                          |              | Brain_Cerebellum                      | 1.01773901   | 0.98226099   |   |
|               | 0.98226099                            | 0.061088664                          | 0.703720765  | 0.382404714                           | 0.454409517  | 2            |   |
|               | 0                                     | 0.998207054                          |              |                                       |              |              |   |
| PROSER2       | ENSG00000148426.12                    | 0.779814992                          | 1            | 1                                     | 0.779814992  |              |   |
|               | Brain_Cerebellar_Hemisphere           | 0.779814992                          |              | Brain_Cerebellar_Hemisphere           | 1            | 1            |   |
|               | 1                                     | -0.27956014                          | -0.27956014  | -0.27956014                           | NA           | 1            | 0 |
|               | 0.998207054                           |                                      |              |                                       |              |              |   |
| SHPK          | ENSG00000197417.7                     | 0.779820817                          | 13           | 1                                     | 0.546271296  |              |   |
|               | Brain_Caudate_basal_ganglia           | 0.951732379                          |              | Brain_Amygdala                        | 12.29482901  |              |   |
|               | 2.72E-18                              | 12.29482901                          | -0.603356888 | -0.060531437                          | -0.270772877 |              |   |
|               | 0.153871888                           | 1                                    | 0            | 0.998207054                           |              |              |   |
| OR13J1        | ENSG00000168828.5                     | 0.779830312                          | 1            | 1                                     | 0.779830312  |              |   |
|               | Brain_Cerebellar_Hemisphere           | 0.779830312                          |              | Brain_Cerebellar_Hemisphere           | 1            | 1            |   |
|               | 1                                     | -0.279540174                         | -0.279540174 | -0.279540174                          | NA           | 1            | 0 |
|               | 0.998207054                           |                                      |              |                                       |              |              |   |
| RP11-354A14.1 | ENSG00000254689.1                     | 0.779838884                          | 1            | 1                                     | 0.779838884  |              |   |
|               | Brain_Substantia_nigra                | 0.779838884                          |              | Brain_Substantia_nigra                | 1            | 1            |   |
|               | 1                                     | 0.279529002                          | 0.279529002  | 0.279529002                           | NA           | 1            | 0 |
|               | 0.998207054                           |                                      |              |                                       |              |              |   |
| UPK1B         | ENSG00000114638.7                     | 0.779878345                          | 2            | 2                                     | 0.493634354  |              |   |
|               | Brain_Putamen_basal_ganglia           | 0.738056254                          |              | Brain_Nucleus_accumbens_basal_ganglia |              |              |   |
|               | 1.249117009                           | 0.750882991                          | 0.750882991  | -0.684539819                          | -0.334428477 |              |   |
|               | -0.509484148                          | 0.247566104                          | 2            | 0                                     | 0.998207054  |              |   |
| RIDA          | ENSG00000132541.10                    | 0.780028703                          | 3            | 3                                     | 0.320978521  |              |   |
|               | Brain_Putamen_basal_ganglia           | 0.980728503                          |              | Brain_Substantia_nigra                |              |              |   |
|               | 1.163936306                           | 0.835459458                          | 0.835459458  | -0.251038855                          | 0.992449052  |              |   |
|               | 0.239084869                           | 0.662221411                          | 3            | 0                                     | 0.998207054  |              |   |
| GAS2L3        | ENSG00000139354.10                    | 0.780114414                          | 1            | 1                                     | 0.780114414  |              |   |
|               | Brain_Frontal_Cortex_BA9              | 0.780114414                          |              | Brain_Frontal_Cortex_BA9              | 1            | 1            |   |
|               | 1                                     | -0.279169937                         | -0.279169937 | -0.279169937                          | NA           | 1            | 0 |
|               | 0.998207054                           |                                      |              |                                       |              |              |   |
| Clorf43       | ENSG00000143612.19                    | 0.780123471                          | 1            | 1                                     | 0.780123471  |              |   |
|               | Brain_Cortex                          | 0.780123471                          |              | Brain_Cortex                          | 1            | 1            | 1 |
|               | 0.279158134                           | 0.279158134                          | NA           | 1                                     | 0            | 0.998207054  |   |
| PPP1R12A      | ENSG00000058272.16                    | 0.780153059                          | 2            | 2                                     | 0.57939858   | Brain_Cortex |   |
|               | 0.696059999                           | Brain_Anterior_cingulate_cortex_BA24 | 1.077845608  |                                       |              |              |   |
|               | 0.922154392                           | 0.922154392                          | 0.390644539  | 0.554263421                           | 0.47245398   |              |   |
|               | 0.115696021                           | 2                                    | 0            | 0.998207054                           |              |              |   |
| CTD-3126B10.4 | ENSG00000260176.1                     | 0.780208788                          | 8            | 2                                     | 0.428167935  |              |   |
|               | Brain_Nucleus_accumbens_basal_ganglia | 0.620176266                          |              | Brain_Cortex                          |              |              |   |
|               | 7.524500948                           | 0.001863331                          | 0.258218949  | -0.792330597                          | -0.495600548 |              |   |
|               | -0.601659386                          | 0.107604859                          | 2            | 0                                     | 0.998207054  |              |   |
| EVI5          | ENSG00000067208.14                    | 0.780277535                          | 7            | 3                                     | 0.498082247  |              |   |
|               | Brain_Caudate_basal_ganglia           | 0.989681013                          |              | Brain_Amygdala                        | 5.932146668  |              |   |
|               | 0.00311292                            | 0.374259536                          | -0.155936176 | 0.677510285                           | 0.10355341   |              |   |
|               | 0.326824319                           | 3                                    | 0            | 0.998207054                           |              |              |   |
| NFYC          | ENSG00000066136.20                    | 0.780280494                          | 4            | 3                                     | 0.431865131  |              |   |
|               | Brain_Putamen_basal_ganglia           | 0.713610786                          |              | Brain_Cerebellum                      | 2.425175502  |              |   |



|               |                                       |                                |                                |              |                  |
|---------------|---------------------------------------|--------------------------------|--------------------------------|--------------|------------------|
|               | 0.076165408                           | 0.496603507                    | -0.367011036                   | 0.786004021  | 0.423721842      |
|               | 0.536067754                           | 3 0                            | 0.998207054                    |              |                  |
| RP11-343J18.1 | ENSG00000228392.1                     | 0.780357989                    | 2 2                            | 0.754298328  |                  |
|               | Brain_Hippocampus                     | 0.98023977                     | Brain_Spinal_cord_cervical_c-1 | 1.910905527  |                  |
|               | 0.089094473                           | 0.089094473                    | -0.312976748                   | -0.024768307 | -0.168872528     |
|               | 0.203794143                           | 2 0                            | 0.998207054                    |              |                  |
| IRGQ          | ENSG00000167378.8                     | 0.780434091                    | 2 2                            | 0.590263079  |                  |
|               | Brain_Frontal_Cortex_BA9              | 0.698567821                    | Brain_Cerebellum1.117618217    |              |                  |
|               | 0.882381783                           | 0.882381783                    | -0.38725448                    | 0.538454833  | 0.075600176      |
|               | 0.654575333                           | 2 0                            | 0.998207054                    |              |                  |
| ZFPM1         | ENSG00000179588.8                     | 0.780503107                    | 3 3                            | 0.382912798  | Brain_Cerebellum |
|               | 0.634259534                           | Brain_Frontal_Cortex_BA9       | 1.18784883                     | 0.85352075   | 0.85352075       |
|               | -0.872541941                          | 0.516637581                    | 0.039945254                    | 0.79050162   | 3 0              |
|               | 0.998207054                           |                                |                                |              |                  |
| OTUB2         | ENSG00000089723.9                     | 0.780658975                    | 1 1                            | 0.780658975  |                  |
|               | Brain_Frontal_Cortex_BA9              | 0.780658975                    | Brain_Frontal_Cortex_BA9       | 1 1          |                  |
|               | 1 -0.27846038                         | -0.27846038                    | -0.27846038                    | NA 1 0       |                  |
|               | 0.998207054                           |                                |                                |              |                  |
| LZTS2         | ENSG00000107816.17                    | 0.780847878                    | 2 2                            | 0.565194522  | Brain_Cortex     |
|               | 0.691261777                           | Brain_Caudate_basal_ganglia    | 1.013457677                    | 0.986542323  |                  |
|               | 0.986542323                           | -0.575143099                   | 0.39714332                     | -0.08899989  | 0.68751032 2 0   |
|               | 0.998207054                           |                                |                                |              |                  |
| CCKAR         | ENSG00000163394.5                     | 0.780874856                    | 2 2                            | 0.613001732  |                  |
|               | Brain_Nucleus_accumbens_basal_ganglia | 0.617632496                    | Brain_Caudate_basal_ganglia    |              |                  |
|               | 1.020935158                           | 0.979064842                    | 0.979064842                    | -0.505793343 | 0.499208516      |
|               | -0.003292413                          | 0.71064363 2                   | 0 0.998207054                  |              |                  |
| RFFL          | ENSG00000092871.16                    | 0.780905065                    | 4 4                            | 0.286793421  |                  |
|               | Brain_Caudate_basal_ganglia           | 0.936584591                    | Brain_Cerebellar_Hemisphere    |              |                  |
|               | 2.592303409                           | 0.236305222                    | 0.236305222                    | -1.065182345 | 0.332427075      |
|               | -0.399961124                          | 0.640773751                    | 4 0                            | 0.998207054  |                  |
| PLCB4         | ENSG00000101333.16                    | 0.780943212                    | 1 1                            | 0.780943212  | Brain_Cerebellum |
|               | 0.780943212                           | Brain_Cerebellum1              | 1 1                            | 0.278090078  | 0.278090078      |
|               | 0.278090078                           | NA 1 0                         | 0.998207054                    |              |                  |
| SNX1          | ENSG00000028528.14                    | 0.780955316                    | 2 2                            | 0.535317001  | Brain_Cortex     |
|               | 0.902052766                           | Brain_Cerebellar_Hemisphere    | 1.61905602                     | 0.38094398   | 0.38094398       |
|               | 0.123068612                           | 0.619910061                    | 0.371489337                    | 0.351319958  | 2 0              |
|               | 0.998207054                           |                                |                                |              |                  |
| FSTL1         | ENSG00000163430.11                    | 0.780985864                    | 3 3                            | 0.475901402  | Brain_Cerebellum |
|               | 0.909329603                           | Brain_Spinal_cord_cervical_c-1 | 2.106573906                    | 0.197645798  |                  |
|               | 0.197645798                           | -0.113884185                   | 0.712910078                    | 0.282920738  | 0.414394851      |
|               | 3 0                                   | 0.998207054                    |                                |              |                  |
| FRAS1         | ENSG00000138759.18                    | 0.781349036                    | 5 5                            | 0.275063687  |                  |
|               | Brain_Caudate_basal_ganglia           | 0.99362473                     | Brain_Cerebellar_Hemisphere    | 1.665443263  |                  |
|               | 0.583036702                           | 0.583036702                    | -0.970069262                   | 1.091475545  | -0.010385519     |
|               | 0.732518912                           | 5 0                            | 0.998207054                    |              |                  |
| USO1          | ENSG00000138768.14                    | 0.781365861                    | 2 2                            | 0.485333899  | Brain_Cerebellum |
|               | 0.848595058                           | Brain_Amygdala                 | 1.158925711                    | 0.841074289  | 0.841074289      |
|               | 0.190911337                           | 0.697749446                    | 0.444330392                    | 0.358388664  | 2 0              |
|               | 0.998207054                           |                                |                                |              |                  |
| RP11-897M7.4  | ENSG00000275232.1                     | 0.781369187                    | 1 1                            | 0.781369187  |                  |
|               | Brain_Cortex                          | 0.781369187                    | Brain_Cortex                   | 1 1 1        | -0.277535193     |
|               | -0.277535193                          | -0.277535193                   | NA 1 0                         | 0.998207054  |                  |
| PACSIN2       | ENSG00000100266.18                    | 0.781467837                    | 4 4                            | 0.352750893  |                  |
|               | Brain_Caudate_basal_ganglia           | 0.927080813                    | Brain_Cerebellum2.011157956    |              |                  |
|               | 0.390831221                           | 0.390831221                    | -0.758764969                   | 0.929266691  | 0.006559068      |
|               | 0.707827266                           | 4 0                            | 0.998207054                    |              |                  |
| RP11-154H17.1 | ENSG00000236948.2                     | 0.781469703                    | 2 2                            | 0.484084171  |                  |
|               | Brain_Substantia_nigra                | 0.980009336                    | Brain_Putamen_basal_ganglia    |              |                  |
|               | 1.048749231                           | -0.951250769                   | 0.951250769                    | -0.699748838 | -0.025057203     |
|               | -0.36240302                           | 0.47707903 2                   | 0 0.998207054                  |              |                  |
| RP11-693J15.5 | ENSG00000205056.8                     | 0.781481731                    | 2 2                            | 0.69900091   |                  |
|               | Brain_Cerebellum                      | 0.953254508                    | Brain_Cerebellar_Hemisphere    | 1.785870115  |                  |

|           |                                       |                  |                                       |              |                  |
|-----------|---------------------------------------|------------------|---------------------------------------|--------------|------------------|
|           | 0.214129885                           | 0.214129885      | -0.386669484                          | 0.058620341  | -0.164024571     |
|           | 0.314867455                           | 2                | 0                                     | 0.998207054  |                  |
| SH3BP5    | ENSG00000131370.15                    | 0.781510187      | 1                                     | 1            | 0.781510187      |
|           | Brain_Amygdala                        | 0.781510187      | Brain_Amygdala                        | 1            | 1                |
|           | -0.277351541                          | -0.277351541     | NA                                    | 1            | 0                |
| ASB18     | ENSG00000182177.13                    | 0.781617254      | 3                                     | 3            | 0.307190046      |
|           | Brain_Caudate_basal_ganglia           | 0.866591194      | Brain_Nucleus_accumbens_basal_ganglia |              |                  |
|           | 1.767702105                           | 0.232678408      | 0.232678408                           | -1.021135921 | -0.16798994      |
|           | -0.684661851                          | 0.454222372      | 3                                     | 0            | 0.998207054      |
| CINP      | ENSG00000100865.14                    | 0.781633351      | 3                                     | 3            | 0.318376183      |
|           | Brain_Frontal_Cortex_BA9              | 0.971848977      | Brain_Cerebellum                      | 1.169307417  |                  |
|           | 0.823150295                           | 0.823150295      | -0.997800346                          | 0.357272655  | -0.201746097     |
|           | 0.707951325                           | 3                | 0                                     | 0.998207054  |                  |
| SLC35D2   | ENSG00000130958.11                    | 0.781679078      | 1                                     | 1            | 0.781679078      |
|           | Brain_Hippocampus                     | 0.781679078      | Brain_Hippocampus                     | 1            | 1                |
|           | 0.277131574                           | 0.277131574      | 0.277131574                           | NA           | 1                |
| PXT1      | ENSG00000179165.10                    | 0.781976586      | 1                                     | 1            | 0.781976586      |
|           | 0.781976586                           | Brain_Cerebellum | 1                                     | 1            | Brain_Cerebellum |
|           | -0.276744127                          | NA               | 1                                     | 0            | 0.998207054      |
| LINC01481 | ENSG00000257613.1                     | 0.782036425      | 2                                     | 2            | 0.687901907      |
|           | Brain_Cerebellum                      | 0.994699497      | Brain_Anterior_cingulate_cortex_BA24  |              |                  |
|           | 1.825039986                           | 0.174960014      | 0.174960014                           | -0.401703964 | -0.006643244     |
|           | -0.204173604                          | 0.279350114      | 2                                     | 0            | 0.998207054      |
| CRISPLD2  | ENSG00000103196.11                    | 0.782041127      | 1                                     | 1            | 0.782041127      |
|           | Brain_Nucleus_accumbens_basal_ganglia | 0.782041127      |                                       |              |                  |
|           | Brain_Nucleus_accumbens_basal_ganglia | 1                | 1                                     | 1            | 0.276660081      |
|           | 0.276660081                           | 0.276660081      | NA                                    | 1            | 0                |
| CFC1      | ENSG00000136698.8                     | 0.782102585      | 3                                     | 3            | 0.303934896      |
|           | Brain_Cerebellar_Hemisphere           | 0.93656914       | Brain_Hippocampus                     | 1.120296675  |                  |
|           | 0.828527897                           | 0.828527897      | -0.20307152                           | 1.028031743  | 0.248459168      |
|           | 0.677947211                           | 3                | 0                                     | 0.998207054  |                  |
| SUOX      | ENSG00000139531.12                    | 0.782163421      | 11                                    | 3            | 0.323294951      |
|           | Brain_Cerebellar_Hemisphere           | 0.619684223      | Brain_Nucleus_accumbens_basal_ganglia |              |                  |
|           | 9.353315341                           | 1.16E-05         | 0.420169565                           | -0.987709478 | -0.496297936     |
|           | -0.831024479                          | 0.186583374      | 3                                     | 0            | 0.998207054      |
| PAQR3     | ENSG00000163291.14                    | 0.782237699      | 6                                     | 2            | 0.567748887      |
|           | Brain_Frontal_Cortex_BA9              | 0.986337236      | Brain_Nucleus_accumbens_basal_ganglia |              |                  |
|           | 5.436041301                           | 0.032151637      | 0.251538622                           | -0.571369961 | -0.017124572     |
|           | -0.255964878                          | 0.202880417      | 2                                     | 0            | 0.998207054      |
| SLC5A12   | ENSG00000148942.14                    | 0.782328277      | 3                                     | 2            | 0.48740401       |
|           | Brain_Putamen_basal_ganglia           | 0.607721514      | Brain_Caudate_basal_ganglia           |              |                  |
|           | 2.809126389                           | 0.002931592      | 0.187942018                           | 0.513328553  | 0.694443678      |
|           | 0.627839368                           | 0.09960897       | 2                                     | 0            | 0.998207054      |
| TRIM45    | ENSG00000134253.9                     | 0.782370418      | 12                                    | 8            | 0.203586505      |
|           | Brain_Hypothalamus                    | 0.971045651      | Brain_Cerebellum                      | 7.011038958  | 0.00217305       |
|           | 0.243290594                           | -1.271399657     | 0.60595712                            | -0.027684232 | 0.539820065      |
|           | 0                                     | 0.998207054      |                                       |              | 8                |
| DTNA      | ENSG00000134769.21                    | 0.782561301      | 2                                     | 2            | 0.485644733      |
|           | Brain_Hypothalamus                    | 0.958014917      | Brain_Cortex                          | 1.017483252  |                  |
|           | 0.982516748                           | 0.982516748      | -0.697252588                          | 0.052644805  | -0.322303892     |
|           | 0.530257532                           | 2                | 0                                     | 0.998207054  |                  |
| ZNF737    | ENSG00000237440.8                     | 0.782634398      | 9                                     | 3            | 0.23729316       |
|           | Brain_Frontal_Cortex_BA9              | 0.859999102      | Brain_Substantia_nigra                |              |                  |
|           | 7.562131444                           | 0.003018378      | 0.378765825                           | -1.18177961  | -0.176375308     |
|           | -0.59715923                           | 0.32982486       | 3                                     | 0            | 0.998207054      |
| SASS6     | ENSG00000156876.9                     | 0.782671738      | 4                                     | 4            | 0.422449385      |
|           | Brain_Cerebellar_Hemisphere           | 0.914018074      | Brain_Cerebellum                      | 3.183733663  |                  |
|           | 0.181511309                           | -0.181511309     | -0.802179064                          | -0.107971785 | -0.510113997     |
|           | 0.314290853                           | 4                | 0                                     | 0.998207054  |                  |
| ZCCHC6    | ENSG00000083223.17                    | 0.782721564      | 2                                     | 2            | 0.504842064      |
|           | Brain_Nucleus_accumbens_basal_ganglia | 0.817919498      | Brain_Putamen_basal_ganglia           |              |                  |
|           | 1.026483454                           | 0.973516546      | 0.973516546                           | 0.230221704  | 0.666890525      |

|           |                                       |                             |                                      |              |                             |                  |   |
|-----------|---------------------------------------|-----------------------------|--------------------------------------|--------------|-----------------------------|------------------|---|
|           | 0.448556114                           | 0.308771485                 | 2                                    | 0            | 0.998207054                 |                  |   |
| REEP3     | ENSG00000165476.13                    | 0.782767438                 | 4                                    | 3            | 0.303233046                 |                  |   |
|           | Brain_Caudate_basal_ganglia           | 0.645153097                 |                                      |              | Brain_Putamen_basal_ganglia |                  |   |
|           | 3.368145167                           | 0.02682863                  | 0.124983612                          |              | -1.029524983                | -0.460505957     |   |
|           | -0.822881112                          | 0.256857698                 | 3                                    | 0            | 0.998207054                 |                  |   |
| FHL2      | ENSG00000115641.18                    | 0.782770619                 | 1                                    | 1            | 0.782770619                 | Brain_Cerebellum |   |
|           | 0.782770619                           | Brain_Cerebellum            | 1                                    | 1            | 0.275710255                 | 0.275710255      |   |
|           | 0.275710255                           | NA                          | 1                                    | 0            | 0.998207054                 |                  |   |
| ROCK2     | ENSG00000134318.13                    | 0.782836779                 | 2                                    | 2            | 0.508729036                 | Brain_Cerebellum |   |
|           | 0.564139459                           | Brain_Cerebellar_Hemisphere | 1.591981496                          |              | 0.408018504                 |                  |   |
|           | 0.408018504                           | 0.576703956                 | 0.660818003                          |              | 0.61876098                  | 0.059477613      | 2 |
|           | 0                                     | 0.998207054                 |                                      |              |                             |                  |   |
| CCDC149   | ENSG00000181982.18                    | 0.782956974                 | 6                                    | 6            | 0.251927789                 |                  |   |
|           | Brain_Amygdala                        | 0.974298455                 | Brain_Frontal_Cortex_BA9             | 2.683482809  |                             |                  |   |
|           | 0.220610328                           | 0.220610328                 | -1.145679501                         | 0.195342749  | -0.325228774                |                  |   |
|           | 0.549708494                           | 6                           | 0                                    | 0.998207054  |                             |                  |   |
| MMEL1     | ENSG00000142606.15                    | 0.782978969                 | 4                                    | 3            | 0.351942564                 |                  |   |
|           | Brain_Caudate_basal_ganglia           | 0.956993496                 | Brain_Anterior_cingulate_cortex_BA24 |              |                             |                  |   |
|           | 1.99805692                            | 0.018260298                 | 0.946233807                          |              | -0.93082796                 | 0.053926786      |   |
|           | -0.562292317                          | 0.427665104                 | 3                                    | 0            | 0.998207054                 |                  |   |
| SYT13     | ENSG00000019505.7                     | 0.783365466                 | 2                                    | 2            | 0.485698229                 |                  |   |
|           | Brain_Cerebellar_Hemisphere           | 0.541165709                 | Brain_Cerebellum                     | 1.905479714  |                             |                  |   |
|           | 0.094520286                           | 0.094520286                 | -0.697167095                         | -0.611051164 | -0.65410913                 |                  |   |
|           | 0.060893158                           | 2                           | 0                                    | 0.998207054  |                             |                  |   |
| TSACC     | ENSG00000163467.11                    | 0.783387096                 | 1                                    | 1            | 0.783387096                 |                  |   |
|           | Brain_Putamen_basal_ganglia           | 0.783387096                 | Brain_Putamen_basal_ganglia          | 1            | 1                           |                  |   |
|           | 1                                     | -0.274907772                | -0.274907772                         | -0.274907772 | NA                          | 1                | 0 |
|           | 0.998207054                           |                             |                                      |              |                             |                  |   |
| PLEKHG4   | ENSG00000196155.12                    | 0.783484299                 | 2                                    | 2            | 0.528774517                 |                  |   |
|           | Brain_Nucleus_accumbens_basal_ganglia | 0.652733352                 | Brain_Cortex                         |              |                             |                  |   |
|           | 1.249990704                           | 0.750009296                 | 0.750009296                          | -0.629877832 | -0.449968225                |                  |   |
|           | -0.539923029                          | 0.127215303                 | 2                                    | 0            | 0.998207054                 |                  |   |
| EPS15     | ENSG00000085832.16                    | 0.783564291                 | 6                                    | 6            | 0.336031877                 |                  |   |
|           | Brain_Caudate_basal_ganglia           | 0.968327764                 | Brain_Cortex                         | 3.391770466  |                             |                  |   |
|           | 0.137080753                           | 0.137080753                 | -0.102806114                         | 0.96203529   | 0.346969309                 |                  |   |
|           | 0.39555015                            | 6                           | 0                                    | 0.998207054  |                             |                  |   |
| CYP2U1    | ENSG00000155016.17                    | 0.783589088                 | 2                                    | 2            | 0.618115762                 |                  |   |
|           | Brain_Cerebellum                      | 0.969466389                 | Brain_Cerebellar_Hemisphere          | 1.738397752  |                             |                  |   |
|           | 0.261602248                           | 0.261602248                 | 0.038277552                          | 0.498522575  | 0.268400063                 |                  |   |
|           | 0.325442377                           | 2                           | 0                                    | 0.998207054  |                             |                  |   |
| AAED1     | ENSG00000158122.11                    | 0.783662027                 | 1                                    | 1            | 0.783662027                 |                  |   |
|           | Brain_Nucleus_accumbens_basal_ganglia | 0.783662027                 |                                      |              |                             |                  |   |
|           | Brain_Nucleus_accumbens_basal_ganglia | 1                           | 1                                    | 1            | -0.274549945                |                  |   |
|           | -0.274549945                          | -0.274549945                | NA                                   | 1            | 0                           | 0.998207054      |   |
| METTL21C  | ENSG00000139780.7                     | 0.783826933                 | 5                                    | 5            | 0.16025117                  |                  |   |
|           | Brain_Anterior_cingulate_cortex_BA24  | 0.898911816                 | Brain_Cortex                         |              |                             |                  |   |
|           | 2.451846547                           | 0.220974855                 | 0.220974855                          | -0.237288635 | 1.404227317                 |                  |   |
|           | 0.378035783                           | 0.687328853                 | 5                                    | 0            | 0.998207054                 |                  |   |
| LINC01134 | ENSG00000236423.5                     | 0.783909322                 | 1                                    | 1            | 0.783909322                 |                  |   |
|           | Brain_Nucleus_accumbens_basal_ganglia | 0.783909322                 |                                      |              |                             |                  |   |
|           | Brain_Nucleus_accumbens_basal_ganglia | 1                           | 1                                    | 1            | 0.274228116                 |                  |   |
|           | 0.274228116                           | 0.274228116                 | NA                                   | 1            | 0                           | 0.998207054      |   |
| OTUD7A    | ENSG00000169918.9                     | 0.783991897                 | 8                                    | 4            | 0.255199194                 |                  |   |
|           | Brain_Substantia_nigra                | 0.552248921                 | Brain_Cerebellar_Hemisphere          |              |                             |                  |   |
|           | 6.311546645                           | 0.000190233                 | 0.212615028                          | -0.594393551 | 1.137811519                 |                  |   |
|           | 0.668874193                           | 0.53343752                  | 4                                    | 0            | 0.998207054                 |                  |   |
| STK32A    | ENSG00000169302.14                    | 0.783994992                 | 2                                    | 2            | 0.714835285                 |                  |   |
|           | Brain_Caudate_basal_ganglia           | 0.776391748                 | Brain_Putamen_basal_ganglia          |              |                             |                  |   |
|           | 1.564877544                           | 0.435122456                 | 0.435122456                          | -0.284024314 | 0.36536993                  |                  |   |
|           | 0.040672808                           | 0.459191073                 | 2                                    | 0            | 0.998207054                 |                  |   |
| SLC35E3   | ENSG00000175782.9                     | 0.784284428                 | 6                                    | 5            | 0.281347412                 |                  |   |
|           | Brain_Amygdala                        | 0.87872113                  | Brain_Cerebellum                     | 3.254108096  | 0.056162697                 |                  |   |

|               |                                      |                                      |              |              |                                       |                  |             |             |              |
|---------------|--------------------------------------|--------------------------------------|--------------|--------------|---------------------------------------|------------------|-------------|-------------|--------------|
|               | 0.167423357                          | -1.077297425                         | -0.152590611 | -0.720006842 | 0.315469855                           |                  |             |             |              |
|               | 5                                    | 0                                    | 0.998207054  |              |                                       |                  |             |             |              |
| CD81          | ENSG00000110651.11                   | 0.784390258                          | 2            | 2            | 0.564022257                           | Brain_Cortex     |             |             |              |
|               | 0.6390522                            | Brain_Anterior_cingulate_cortex_BA24 |              |              | 1.142064683                           | 0.857935317      |             |             |              |
|               | 0.857935317                          | -0.576877432                         | -0.469024393 | -0.522950912 | 0.076263615                           |                  |             |             |              |
|               | 2                                    | 0                                    | 0.998207054  |              |                                       |                  |             |             |              |
| VPS35         | ENSG00000069329.16                   | 0.784467858                          | 1            | 1            | 0.784467858                           |                  |             |             |              |
|               | Brain_Substantia_nigra               | 0.784467858                          |              |              | Brain_Substantia_nigra                | 1                | 1           |             |              |
|               | 1                                    | -0.273501346                         | -0.273501346 | -0.273501346 | NA                                    | 1                | 0           |             |              |
|               | 0.998207054                          |                                      |              |              |                                       |                  |             |             |              |
| NIPSNAP1      | ENSG00000184117.11                   | 0.784802847                          | 6            | 2            | 0.359187208                           |                  |             |             |              |
|               | Brain_Anterior_cingulate_cortex_BA24 | 0.598346759                          |              |              | Brain_Caudate_basal_ganglia           |                  |             |             |              |
|               | 5.527037595                          | 0.002310183                          | 0.363921451  | 0.526779444  | 0.916914953                           |                  |             |             |              |
|               | 0.663756979                          | 0.140699281                          | 2            | 0            | 0.998207054                           |                  |             |             |              |
| FAM225B       | ENSG00000225684.3                    | 0.78489127                           | 1            | 1            | 0.78489127                            | Brain_Amygdala   |             |             |              |
|               | 0.78489127                           | Brain_Amygdala                       | 1            | 1            | 0.272950495                           | 0.272950495      |             |             |              |
|               | 0.272950495                          | NA                                   | 1            | 0            | 0.998207054                           |                  |             |             |              |
| RP11-167P20.1 | ENSG00000254186.1                    | 0.784944231                          | 1            | 1            | 0.784944231                           |                  |             |             |              |
|               | Brain_Substantia_nigra               | 0.784944231                          |              |              | Brain_Substantia_nigra                | 1                | 1           |             |              |
|               | 1                                    | -0.2728816                           | -0.2728816   | -0.2728816   | NA                                    | 1                | 0           | 0.998207054 |              |
| DPP10         | ENSG00000175497.16                   | 0.784972603                          | 4            | 4            | 0.539189795                           | Brain_Cerebellum |             |             |              |
|               | 0.956723402                          | Brain_Hippocampus                    | 2.756441429  | 0.102022562  |                                       |                  |             |             |              |
|               | 0.102022562                          | -0.614038638                         | -0.054265794 | -0.384066595 | 0.261055157                           |                  |             |             |              |
|               | 4                                    | 0                                    | 0.998207054  |              |                                       |                  |             |             |              |
| ST3GAL6       | ENSG00000064225.12                   | 0.785045518                          | 2            | 2            | 0.546798993                           |                  |             |             |              |
|               | Brain_Cerebellum                     | 0.741580247                          |              |              | Brain_Hippocampus                     | 1.029633632      |             |             |              |
|               | 0.970366368                          | 0.970366368                          | -0.329761412 | 0.602563672  | 0.13640113                            |                  |             |             |              |
|               | 0.659253389                          | 2                                    | 0            | 0.998207054  |                                       |                  |             |             |              |
| LRRC17        | ENSG00000128606.12                   | 0.785062814                          | 1            | 1            | 0.785062814                           |                  |             |             |              |
|               | Brain_Hypothalamus                   | 0.785062814                          |              |              | Brain_Hypothalamus                    | 1                | 1           | 1           |              |
|               | 0.272727343                          | 0.272727343                          | 0.272727343  | NA           | 1                                     | 0                | 0.998207054 |             |              |
| SMAD3         | ENSG00000166949.15                   | 0.785066783                          | 1            | 1            | 0.785066783                           |                  |             |             |              |
|               | Brain_Cerebellar_Hemisphere          | 0.785066783                          |              |              | Brain_Cerebellar_Hemisphere           | 1                | 1           |             |              |
|               | 1                                    | -0.272722181                         | -0.272722181 | -0.272722181 | NA                                    | 1                | 0           |             |              |
|               | 0.998207054                          |                                      |              |              |                                       |                  |             |             |              |
| FBXL12        | ENSG00000127452.8                    | 0.785128089                          | 1            | 1            | 0.785128089                           |                  |             |             |              |
|               | Brain_Cerebellum                     | 0.785128089                          |              |              | Brain_Cerebellum                      | 1                | 1           | 1           | -0.272642435 |
|               | -0.272642435                         | -0.272642435                         | NA           | 1            | 0                                     | 0.998207054      |             |             |              |
| GABRG1        | ENSG00000163285.7                    | 0.78517139                           | 2            | 2            | 0.592027936                           | Brain_Cortex     |             |             |              |
|               | 0.622163854                          | Brain_Caudate_basal_ganglia          | 1.096169123  | 0.903830877  |                                       |                  |             |             |              |
|               | 0.903830877                          | -0.535899607                         | -0.492785929 | -0.514342768 | 0.030485974                           |                  |             |             |              |
|               | 2                                    | 0                                    | 0.998207054  |              |                                       |                  |             |             |              |
| MRPL18        | ENSG00000112110.9                    | 0.785175349                          | 10           | 3            | 0.226634311                           |                  |             |             |              |
|               | Brain_Putamen_basal_ganglia          | 0.729864749                          |              |              | Brain_Anterior_cingulate_cortex_BA24  |                  |             |             |              |
|               | 7.764885561                          | 0.006796321                          | 0.426934679  | 0.345305451  | 1.209074277                           |                  |             |             |              |
|               | 0.770722292                          | 0.320440242                          | 3            | 0            | 0.998207054                           |                  |             |             |              |
| CCDC77        | ENSG00000120647.9                    | 0.785188786                          | 13           | 3            | 0.224972388                           |                  |             |             |              |
|               | Brain_Cerebellum                     | 0.720236533                          |              |              | Brain_Nucleus_accumbens_basal_ganglia |                  |             |             |              |
|               | 10.63739735                          | 0.003796933                          | 0.53137832   | 0.35814269   | 1.213411877                           |                  |             |             |              |
|               | 0.833049639                          | 0.252035256                          | 3            | 0            | 0.998207054                           |                  |             |             |              |
| YES1          | ENSG00000176105.13                   | 0.785232752                          | 4            | 3            | 0.511577006                           |                  |             |             |              |
|               | Brain_Putamen_basal_ganglia          | 0.740638629                          |              |              | Brain_Caudate_basal_ganglia           |                  |             |             |              |
|               | 3.049550967                          | 0.066060993                          | 0.170243408  | -0.426055414 | 0.656384119                           |                  |             |             |              |
|               | -0.11463874                          | 0.515569739                          | 3            | 0            | 0.998207054                           |                  |             |             |              |
| CDRT1         | ENSG00000241322.10                   | 0.785255245                          | 2            | 2            | 0.514640023                           |                  |             |             |              |
|               | Brain_Putamen_basal_ganglia          | 0.777063187                          |              |              | Brain_Cortex                          | 1.062910423      |             |             |              |
|               | 0.937089577                          | 0.937089577                          | -0.651629794 | 0.283148262  | -0.184240766                          |                  |             |             |              |
|               | 0.660987902                          | 2                                    | 0            | 0.998207054  |                                       |                  |             |             |              |
| DYRK4         | ENSG00000010219.13                   | 0.785276377                          | 2            | 2            | 0.817970714                           |                  |             |             |              |
|               | Brain_Cerebellar_Hemisphere          | 0.834677246                          |              |              | Brain_Cerebellum                      | 1.800749309      |             |             |              |
|               | 0.199250691                          | 0.199250691                          | -0.23015579  | 0.208706653  | -0.010724568                          |                  |             |             |              |
|               | 0.31032261                           | 2                                    | 0            | 0.998207054  |                                       |                  |             |             |              |

|              |                                       |                             |                          |                             |             |             |                  |
|--------------|---------------------------------------|-----------------------------|--------------------------|-----------------------------|-------------|-------------|------------------|
| RP11-57206.1 | ENSG00000271973.1                     | 0.785312505                 | 1                        | 1                           | 0.785312505 |             |                  |
|              | Brain_Hypothalamus                    | 0.785312505                 |                          | Brain_Hypothalamus          | 1           | 1           | 1                |
|              | 0.272402559                           | 0.272402559                 | 0.272402559              | NA                          | 1           | 0           | 0.998207054      |
| ACBD4        | ENSG00000181513.14                    | 0.785488889                 | 8                        | 5                           | 0.237965396 |             | Brain_Cortex     |
|              | 0.956248061                           | Brain_Cerebellar_Hemisphere | 5.952007267              |                             |             |             | 0.036922043      |
|              | 0.262438042                           | -0.437476929                | 1.18008755               | 0.341915752                 |             |             | 0.497587388      |
|              | 0                                     | 0.998207054                 |                          |                             |             |             | 5                |
| GS1-304P7.3  | ENSG00000273198.1                     | 0.785633879                 | 8                        | 3                           | 0.547448186 |             |                  |
|              | Brain_Cortex                          | 0.87994174                  | Brain_Frontal_Cortex_BA9 | 6.763204002                 |             |             |                  |
|              | 0.016228797                           | 0.246542866                 | -0.380023037             | 0.601588349                 |             |             | 0.258870636      |
|              | 0.302249401                           | 3                           | 0                        | 0.998207054                 |             |             |                  |
| SCYL2        | ENSG00000136021.18                    | 0.785675676                 | 1                        | 1                           | 0.785675676 |             | Brain_Cerebellum |
|              | 0.785675676                           | Brain_Cerebellum1           | 1                        | 1                           | 0.271930218 |             | 0.271930218      |
|              | 0.271930218                           | NA                          | 1                        | 0                           | 0.998207054 |             |                  |
| OMG          | ENSG00000126861.4                     | 0.785769561                 | 1                        | 1                           | 0.785769561 |             | Brain_Cortex     |
|              | 0.785769561                           | Brain_Cortex                | 1                        | 1                           | 1           | 0.27180812  | 0.27180812       |
|              | NA                                    | 1                           | 0                        | 0.998207054                 |             |             | 0.27180812       |
| GAL3ST4      | ENSG00000197093.10                    | 0.785790512                 | 2                        | 1                           | 0.725207585 |             |                  |
|              | Brain_Cerebellar_Hemisphere           | 0.848907375                 |                          | Brain_Cerebellum1           | 1.988672799 |             |                  |
|              | 0.011327201                           | 1.988672799                 | -0.351507583             | -0.190512722                |             |             | -0.271010153     |
|              | 0.113840558                           | 1                           | 0                        | 0.998207054                 |             |             |                  |
| WWP1         | ENSG00000123124.13                    | 0.785808637                 | 1                        | 1                           | 0.785808637 |             |                  |
|              | Brain_Caudate_basal_ganglia           | 0.785808637                 |                          | Brain_Caudate_basal_ganglia | 1           | 1           |                  |
|              | 1                                     | 0.271757303                 | 0.271757303              | 0.271757303                 | NA          | 1           | 0                |
|              | 0.998207054                           |                             |                          |                             |             |             |                  |
| RPAP3        | ENSG00000005175.9                     | 0.785851115                 | 2                        | 2                           | 0.487529134 |             |                  |
|              | Brain_Hypothalamus                    | 0.92071498                  | Brain_Cortex             | 1.144770523                 |             |             | 0.855229477      |
|              | 0.855229477                           | -0.694244111                | 0.099533136              | -0.297355487                |             |             | 0.561285274      |
|              | 2                                     | 0                           | 0.998207054              |                             |             |             |                  |
| SEC14L4      | ENSG00000133488.14                    | 0.785863213                 | 5                        | 5                           | 0.203926727 |             |                  |
|              | Brain_Hippocampus                     | 0.938190972                 |                          | Brain_Amygdala              | 1.656975136 |             |                  |
|              | 0.475728877                           | 0.475728877                 | -1.270443414             | 0.077543771                 |             |             | -0.449859384     |
|              | 0.558296741                           | 5                           | 0                        | 0.998207054                 |             |             |                  |
| MAPK7        | ENSG00000166484.19                    | 0.785907898                 | 1                        | 1                           | 0.785907898 |             |                  |
|              | Brain_Caudate_basal_ganglia           | 0.785907898                 |                          | Brain_Caudate_basal_ganglia | 1           | 1           |                  |
|              | 1                                     | -0.271628221                | -0.271628221             | -0.271628221                | NA          | 1           | 0                |
|              | 0.998207054                           |                             |                          |                             |             |             |                  |
| FAM69C       | ENSG00000187773.8                     | 0.785944996                 | 2                        | 2                           | 0.487661698 |             |                  |
|              | Brain_Caudate_basal_ganglia           | 0.973409737                 |                          | Brain_Amygdala              | 1.05874607  | 0.94125393  |                  |
|              | 0.94125393                            | -0.033332124                | 0.694032707              | 0.330350292                 |             | 0.514324604 | 2                |
|              | 0                                     | 0.998207054                 |                          |                             |             |             |                  |
| EBLN2        | ENSG00000255423.1                     | 0.785973443                 | 1                        | 1                           | 0.785973443 |             |                  |
|              | Brain_Substantia_nigra                | 0.785973443                 |                          | Brain_Substantia_nigra      | 1           | 1           |                  |
|              | 1                                     | 0.271542987                 | 0.271542987              | 0.271542987                 | NA          | 1           | 0                |
|              | 0.998207054                           |                             |                          |                             |             |             |                  |
| B3GALT1      | ENSG00000172318.5                     | 0.786035112                 | 4                        | 4                           | 0.225349457 |             |                  |
|              | Brain_Cortex                          | 0.940433689                 |                          | Brain_Substantia_nigra      | 2.078396855 |             |                  |
|              | 0.102505377                           | 0.102505377                 | -0.323089702             | 1.21242573                  |             | 0.209475415 |                  |
|              | 0.688075391                           | 4                           | 0                        | 0.998207054                 |             |             |                  |
| DHFR2        | ENSG00000178700.7                     | 0.786054616                 | 3                        | 3                           | 0.46640002  |             | Brain_Cortex     |
|              | 0.998686145                           | Brain_Caudate_basal_ganglia | 2.145993533              |                             |             |             | 0.188734991      |
|              | 0.188734991                           | -0.728348926                | 0.001646673              | -0.398360588                |             |             | 0.370000515      |
|              | 3                                     | 0                           | 0.998207054              |                             |             |             |                  |
| CCDC117      | ENSG00000159873.9                     | 0.786055577                 | 1                        | 1                           | 0.786055577 |             |                  |
|              | Brain_Nucleus_accumbens_basal_ganglia | 0.786055577                 |                          |                             |             |             |                  |
|              | Brain_Nucleus_accumbens_basal_ganglia | 1                           | 1                        | 1                           | 0.271436183 |             |                  |
|              | 0.271436183                           | 0.271436183                 | NA                       | 1                           | 0           | 0.998207054 |                  |
| KDM4C        | ENSG00000107077.18                    | 0.786078017                 | 2                        | 2                           | 0.584576552 |             |                  |
|              | Brain_Cerebellar_Hemisphere           | 0.873770092                 |                          | Brain_Cerebellum1           | 1.418936324 |             |                  |
|              | 0.581063676                           | 0.581063676                 | -0.546712083             | 0.15887153                  |             |             | -0.193920277     |
|              | 0.498922957                           | 2                           | 0                        | 0.998207054                 |             |             |                  |
| ADAM19       | ENSG00000135074.15                    | 0.786122646                 | 3                        | 3                           | 0.474756093 |             |                  |

|               |                                      |              |              |             |                                       |              |
|---------------|--------------------------------------|--------------|--------------|-------------|---------------------------------------|--------------|
|               | Brain_Putamen_basal_ganglia          | 0.826580466  |              |             | Brain_Spinal_cord_cervical_c-1        |              |
|               | 2.29924902                           | 0.209267275  | 0.209267275  |             | 0.219089325                           | 0.714762044  |
|               | 0.476278093                          | 0.248365182  | 3            | 0           | 0.998207054                           |              |
| MICAL2        | ENSG00000133816.13                   | 0.786134903  |              |             | 3                                     | 3            |
|               | Brain_Cerebellar_Hemisphere          | 0.989100821  |              |             | 0.4892535                             |              |
|               | 0.268401819                          | 0.268401819  | -0.058559495 |             | Brain_Cerebellum                      | 1.737915866  |
|               | 0.420683314                          | 3            | 0            | 0.998207054 | 0.691496626                           | 0.206425537  |
| SURF1         | ENSG00000148290.9                    | 0.78644944   | 13           | 2           | 0.498480894                           |              |
|               | Brain_Spinal_cord_cervical_c-1       | 0.965794544  |              |             | Brain_Hypothalamus                    |              |
|               | 10.57607462                          | 0.008063711  | 1.031175355  |             | -0.676881893                          | 0.274348476  |
|               | -0.121879025                         | 0.280134463  | 2            | 0           | 0.998207054                           |              |
| ETV1          | ENSG00000006468.13                   | 0.786507477  | 2            | 2           | 0.547655869                           |              |
|               | Brain_Hypothalamus                   | 0.721527455  |              |             | Brain_Nucleus_accumbens_basal_ganglia |              |
|               | 1.019709548                          | 0.980290452  | 0.980290452  |             | -0.356418128                          | 0.601276456  |
|               | 0.122429164                          | 0.677192335  | 2            | 0           | 0.998207054                           |              |
| ZSCAN23       | ENSG00000187987.9                    | 0.786559827  | 10           | 4           | 0.413942042                           |              |
|               | Brain_Cortex                         | 0.848664211  |              |             | Brain_Putamen_basal_ganglia           | 7.827503857  |
|               | 0.00987981                           | 0.303832493  | -0.816976177 |             | 0.620680607                           | -0.25968555  |
|               | 0.472973063                          | 4            | 0            | 0.998207054 |                                       |              |
| TBRG4         | ENSG00000136270.13                   | 0.786648065  | 10           | 4           | 0.208197288                           |              |
|               | Brain_Cerebellar_Hemisphere          | 0.720071316  |              |             | Brain_Substantia_nigra                |              |
|               | 7.856682946                          | 0.005621515  | 0.274316874  |             | 0.358363482                           | 1.258537904  |
|               | 0.840634387                          | 0.292795581  | 4            | 0           | 0.998207054                           |              |
| ST3GAL3       | ENSG00000126091.19                   | 0.786775145  | 2            | 2           | 0.5073307                             |              |
|               | Brain_Cerebellar_Hemisphere          | 0.809983878  |              |             | Brain_Cortex                          | 1.061360266  |
|               | 0.938639734                          | 0.938639734  | -0.662999772 |             | -0.24044683                           | -0.451723301 |
|               | 0.298790051                          | 2            | 0            | 0.998207054 |                                       |              |
| TNKS          | ENSG00000173273.15                   | 0.786777456  | 4            | 4           | 0.242430052                           |              |
|               | Brain_Hippocampus                    | 0.958701603  |              |             | Brain_Spinal_cord_cervical_c-1        |              |
|               | 1.617898547                          | 0.284975828  | 0.284975828  |             | -0.456871189                          | 1.168934425  |
|               | 0.306693404                          | 0.686993168  | 4            | 0           | 0.998207054                           |              |
| RP11-218C14.5 | ENSG00000225056.1                    | 0.786856528  | 10           | 9           | 0.247469298                           |              |
|               | Brain_Anterior_cingulate_cortex_BA24 | 0.991836603  |              |             | Brain_Substantia_nigra                |              |
|               | 4.738629385                          | 0.142206457  | 0.217581967  |             | -1.156518106                          | 0.734182637  |
|               | -0.346692849                         | 0.595036176  | 9            | 0           | 0.998207054                           |              |
| FLJ20021      | ENSG00000254531.1                    | 0.786879524  | 11           | 4           | 0.236942895                           |              |
|               | Brain_Hypothalamus                   | 0.910174469  |              |             | Brain_Frontal_Cortex_BA9              | 7.837577539  |
|               | 0.006091955                          | 0.576050894  | -1.182662594 |             | 0.546679973                           | -0.455734122 |
|               | 0.472450316                          | 4            | 0            | 0.998207054 |                                       |              |
| GCSH          | ENSG00000140905.10                   | 0.786889652  | 10           | 2           | 0.396942718                           |              |
|               | Brain_Substantia_nigra               | 0.792424057  |              |             | Brain_Anterior_cingulate_cortex_BA24  |              |
|               | 8.846892486                          | 0.00845955   | 0.296624951  |             | -0.847094019                          | -0.263164155 |
|               | -0.560593557                         | 0.199558487  | 2            | 0           | 0.998207054                           |              |
| SHMT2         | ENSG00000182199.10                   | 0.786947103  | 1            | 1           | 0.786947103                           | Brain_Cortex |
|               | 0.786947103                          | Brain_Cortex | 1            | 1           | 1                                     | -0.270277072 |
|               | -0.270277072                         | NA           | 1            | 0           | 0.998207054                           | -0.270277072 |
| ZBTB45        | ENSG00000119574.12                   | 0.787010559  | 1            | 1           | 0.787010559                           |              |
|               | Brain_Caudate_basal_ganglia          | 0.787010559  |              |             | Brain_Caudate_basal_ganglia           | 1            |
|               | 1                                    | -0.270194584 | -0.270194584 |             | -0.270194584                          | NA           |
|               | 0.998207054                          |              |              |             | 1                                     | 0            |
| KBTBD11-OT1   | ENSG00000253696.2                    | 0.787025886  | 3            | 3           | 0.389928513                           |              |
|               | Brain_Cerebellar_Hemisphere          | 0.866323404  |              |             | Brain_Cerebellum                      | 1.211155417  |
|               | 0.862666315                          | 0.862666315  | -0.859747014 |             | 0.405289671                           | -0.095375667 |
|               | 0.672484274                          | 3            | 0            | 0.998207054 |                                       |              |
| SLC14A2       | ENSG00000132874.14                   | 0.787031262  | 1            | 1           | 0.787031262                           |              |
|               | Brain_Putamen_basal_ganglia          | 0.787031262  |              |             | Brain_Putamen_basal_ganglia           | 1            |
|               | 1                                    | 0.270167672  | 0.270167672  |             | 0.270167672                           | NA           |
|               | 0.998207054                          |              |              |             | 1                                     | 0            |
| PTGR1         | ENSG00000106853.18                   | 0.787047721  | 8            | 8           | 0.06929068                            |              |
|               | Brain_Spinal_cord_cervical_c-1       | 0.963112485  |              |             |                                       |              |
|               | Brain_Anterior_cingulate_cortex_BA24 | 3.346804248  |              |             | 0.133798312                           |              |
|               | 0.133798312                          | -1.816519757 | 0.046248126  |             | -0.608935656                          | 0.637011359  |

|              |                                       |                  |              |              |                             |                  |
|--------------|---------------------------------------|------------------|--------------|--------------|-----------------------------|------------------|
| OSTF1        | ENSG00000134996.11                    | 0.787069707      | 1            | 1            | 0.787069707                 | Brain_Cerebellum |
|              | 0.787069707                           | Brain_Cerebellum | 1            | 1            | 0.270117699                 | 0.270117699      |
|              | 0.270117699                           | NA               | 1            | 0            | 0.998207054                 |                  |
| SCLY         | ENSG00000132330.16                    | 0.787070226      | 10           | 4            | 0.436123048                 |                  |
|              | Brain_Nucleus_accumbens_basal_ganglia | 0.999220402      |              |              | Brain_Frontal_Cortex_BA9    |                  |
|              | 8.056633102                           | 0.002025491      | 0.324904225  | -0.778756701 | 0.018225978                 |                  |
|              | -0.318253635                          | 0.313217159      | 4            | 0            | 0.998207054                 |                  |
| GLB1         | ENSG00000170266.15                    | 0.78721428       | 2            | 2            | 0.637222356                 |                  |
|              | Brain_Cerebellar_Hemisphere           | 0.833667208      |              |              | Brain_Cerebellum            | 1.904033876      |
|              | 0.095966124                           | 0.095966124      | 0.210000596  | 0.471585952  | 0.340793274                 |                  |
|              | 0.184968779                           | 2                | 0            | 0.998207054  |                             |                  |
| DLGAP4       | ENSG00000080845.17                    | 0.787272768      | 1            | 1            | 0.787272768                 |                  |
|              | Brain_Caudate_basal_ganglia           | 0.787272768      |              |              | Brain_Caudate_basal_ganglia | 1                |
|              | 1                                     | -0.269853752     | -0.269853752 | -0.269853752 | NA                          | 1                |
|              | 0.998207054                           |                  |              |              | 0                           |                  |
| SLC39A14     | ENSG00000104635.13                    | 0.787345883      | 2            | 2            | 0.534452614                 |                  |
|              | Brain_Putamen_basal_ganglia           | 0.812915803      |              |              | Brain_Hypothalamus          | 1.105251425      |
|              | 0.894748575                           | 0.894748575      | -0.621223448 | -0.236666143 | -0.428944795                |                  |
|              | 0.271923078                           | 2                | 0            | 0.998207054  |                             |                  |
| ATP6V1C1     | ENSG00000155097.11                    | 0.787368135      | 2            | 2            | 0.533820327                 |                  |
|              | Brain_Amygdala                        | 0.772831774      |              |              | Brain_Hippocampus           | 1.020784768      |
|              | 0.979215232                           | 0.979215232      | -0.622184849 | -0.288672806 | -0.455428828                |                  |
|              | 0.235828627                           | 2                | 0            | 0.998207054  |                             |                  |
| SF3B6        | ENSG00000115128.6                     | 0.787423397      | 1            | 1            | 0.787423397                 |                  |
|              | Brain_Hippocampus                     | 0.787423397      |              |              | Brain_Hippocampus           | 1                |
|              | -0.269657972                          | -0.269657972     | -0.269657972 | NA           | 1                           | 0                |
|              | 0.998207054                           |                  |              |              |                             |                  |
| ELANE        | ENSG00000197561.6                     | 0.787450932      | 1            | 1            | 0.787450932                 |                  |
|              | Brain_Hippocampus                     | 0.787450932      |              |              | Brain_Hippocampus           | 1                |
|              | 0.269622184                           | 0.269622184      | 0.269622184  | NA           | 1                           | 0                |
|              | 0.998207054                           |                  |              |              |                             |                  |
| RPA1         | ENSG00000132383.11                    | 0.787546187      | 8            | 5            | 0.435250828                 |                  |
|              | Brain_Cerebellar_Hemisphere           | 0.992438503      |              |              | Brain_Cortex                | 4.929188098      |
|              | 0.019650558                           | 0.367625622      | -0.780237951 | 0.780224346  | -0.090496236                |                  |
|              | 0.602065394                           | 5                | 0            | 0.998207054  |                             |                  |
| EPB41L5      | ENSG00000115109.13                    | 0.787644066      | 7            | 6            | 0.439551413                 |                  |
|              | Brain_Cerebellum                      | 0.814019971      |              |              | Brain_Frontal_Cortex_BA9    | 3.366433428      |
|              | 0.027066781                           | 0.20801488       | -0.632876401 | 0.772950945  | 0.300182633                 |                  |
|              | 0.536823736                           | 6                | 0            | 0.998207054  |                             |                  |
| TRIM44       | ENSG00000166326.6                     | 0.787751924      | 1            | 1            | 0.787751924                 |                  |
|              | Brain_Putamen_basal_ganglia           | 0.787751924      |              |              | Brain_Putamen_basal_ganglia | 1                |
|              | 1                                     | 0.269231002      | 0.269231002  | 0.269231002  | NA                          | 1                |
|              | 0.998207054                           |                  |              |              | 0                           |                  |
| TIMM10       | ENSG00000134809.8                     | 0.787824841      | 12           | 5            | 0.190051047                 |                  |
|              | Brain_Substantia_nigra                | 0.958534624      |              |              | Brain_Cerebellum            | 8.676852564      |
|              | 0.000809121                           | 0.316928872      | 0.051992558  | 1.310428116  | 0.721964955                 |                  |
|              | 0.40953081                            | 5                | 0            | 0.998207054  |                             |                  |
| FBP1         | ENSG00000165140.9                     | 0.787890304      | 6            | 6            | 0.155923432                 |                  |
|              | Brain_Nucleus_accumbens_basal_ganglia | 0.965166198      |              |              | Brain_Caudate_basal_ganglia |                  |
|              | 3.67684512                            | 0.175945597      | 0.175945597  | -0.234259165 | 1.418916256                 |                  |
|              | 0.281120711                           | 0.640691575      | 6            | 0            | 0.998207054                 |                  |
| HIVEP1       | ENSG00000095951.16                    | 0.787934792      | 1            | 1            | 0.787934792                 |                  |
|              | Brain_Putamen_basal_ganglia           | 0.787934792      |              |              | Brain_Putamen_basal_ganglia | 1                |
|              | 1                                     | 0.268993361      | 0.268993361  | 0.268993361  | NA                          | 1                |
|              | 0.998207054                           |                  |              |              | 0                           |                  |
| RP11-13K12.5 | ENSG00000267466.1                     | 0.787953905      | 2            | 2            | 0.616868771                 |                  |
|              | Brain_Nucleus_accumbens_basal_ganglia | 0.659257069      |              |              |                             |                  |
|              | Brain_Anterior_cingulate_cortex_BA24  | 1.067417857      |              |              | 0.932582143                 |                  |
|              | 0.932582143                           | -0.500293016     | -0.440939123 | -0.47061607  | 0.04196954                  | 2                |
|              | 0                                     | 0.998207054      |              |              |                             |                  |
| GPR39        | ENSG00000183840.6                     | 0.788013967      | 3            | 3            | 0.519145519                 |                  |
|              | Brain_Anterior_cingulate_cortex_BA24  | 0.811792823      |              |              | Brain_Cerebellar_Hemisphere |                  |
|              | 1.892507647                           | 0.225013502      | 0.225013502  | -0.644663122 | 0.599179546                 |                  |

|               |                                       |                                      |                             |              |                                |                  |             |   |  |
|---------------|---------------------------------------|--------------------------------------|-----------------------------|--------------|--------------------------------|------------------|-------------|---|--|
|               | 0.064210078                           | 0.639896888                          | 3                           | 0            | 0.998207054                    |                  |             |   |  |
| CTRL          | ENSG00000141086.17                    | 0.788030418                          | 1                           | 1            | 0.788030418                    |                  |             |   |  |
|               | Brain_Spinal_cord_cervical_c-1        | 0.788030418                          |                             |              | Brain_Spinal_cord_cervical_c-1 |                  |             |   |  |
|               | 1                                     | 1                                    | -0.268869098                | -0.268869098 | -0.268869098                   | NA               | 1           | 0 |  |
|               | 0.998207054                           |                                      |                             |              |                                |                  |             |   |  |
| ACP1          | ENSG00000143727.15                    | 0.788050742                          | 1                           | 1            | 0.788050742                    | Brain_Cerebellum |             |   |  |
|               | 0.788050742                           | Brain_Cerebellum                     | 1                           | 1            | -0.268842688                   | -0.268842688     |             |   |  |
|               | -0.268842688                          | NA                                   | 1                           | 0            | 0.998207054                    |                  |             |   |  |
| RP4-758J18.13 | ENSG00000272455.1                     | 0.788056562                          | 1                           | 1            | 0.788056562                    |                  |             |   |  |
|               | Brain_Amygdala                        | 0.788056562                          | Brain_Amygdala              | 1            | 1                              | 1                | 0.268835125 |   |  |
|               | 0.268835125                           | 0.268835125                          | NA                          | 1            | 0                              | 0.998207054      |             |   |  |
| LCE1E         | ENSG00000186226.8                     | 0.788177659                          | 1                           | 1            | 0.788177659                    |                  |             |   |  |
|               | Brain_Nucleus_accumbens_basal_ganglia | 0.788177659                          |                             |              |                                |                  |             |   |  |
|               | Brain_Nucleus_accumbens_basal_ganglia | 1                                    | 1                           | 1            | 0.268677771                    |                  |             |   |  |
|               | 0.268677771                           | 0.268677771                          | NA                          | 1            | 0                              | 0.998207054      |             |   |  |
| UBALD2        | ENSG00000185262.8                     | 0.788259528                          | 1                           | 1            | 0.788259528                    |                  |             |   |  |
|               | Brain_Nucleus_accumbens_basal_ganglia | 0.788259528                          |                             |              |                                |                  |             |   |  |
|               | Brain_Nucleus_accumbens_basal_ganglia | 1                                    | 1                           | 1            | 0.268571393                    |                  |             |   |  |
|               | 0.268571393                           | 0.268571393                          | NA                          | 1            | 0                              | 0.998207054      |             |   |  |
| CYTL1         | ENSG00000170891.10                    | 0.788349819                          | 1                           | 1            | 0.788349819                    |                  |             |   |  |
|               | Brain_Hippocampus                     | 0.788349819                          | Brain_Hippocampus           | 1            | 1                              | 1                |             |   |  |
|               | 0.268454077                           | 0.268454077                          | 0.268454077                 | NA           | 1                              | 0                | 0.998207054 |   |  |
| PNKD          | ENSG00000127838.13                    | 0.788423306                          | 5                           | 4            | 0.530573412                    |                  |             |   |  |
|               | Brain_Nucleus_accumbens_basal_ganglia | 0.967047196                          |                             |              |                                |                  |             |   |  |
|               | Brain_Anterior_cingulate_cortex_BA24  | 3.319431525                          |                             |              | 0.107061578                    |                  |             |   |  |
|               | 0.185212908                           | -0.368541233                         | 0.627130934                 |              | 0.238282794                    |                  | 0.427187256 |   |  |
|               | 4                                     | 0                                    | 0.998207054                 |              |                                |                  |             |   |  |
| TOM1L2        | ENSG00000175662.17                    | 0.788628877                          | 6                           | 5            | 0.20663348                     |                  |             |   |  |
|               | Brain_Nucleus_accumbens_basal_ganglia | 0.611036727                          | Brain_Frontal_Cortex_BA9    |              |                                |                  |             |   |  |
|               | 3.401829068                           | 0.080142882                          | 0.282094474                 | -1.262876741 | -0.508594155                   |                  |             |   |  |
|               | -0.816470466                          | 0.301092801                          | 5                           | 0            | 0.998207054                    |                  |             |   |  |
| CERS2         | ENSG00000143418.19                    | 0.788752205                          | 2                           | 2            | 0.639941216                    | Brain_Cerebellum |             |   |  |
|               | 0.649879688                           | Brain_Anterior_cingulate_cortex_BA24 | 1.104831022                 |              |                                |                  |             |   |  |
|               | 0.895168978                           | 0.895168978                          | -0.467780991                |              | 0.453929336                    | -0.006925827     |             |   |  |
|               | 0.651747622                           | 2                                    | 0                           | 0.998207054  |                                |                  |             |   |  |
| PTCD3         | ENSG00000132300.18                    | 0.788894725                          | 1                           | 1            | 0.788894725                    |                  |             |   |  |
|               | Brain_Nucleus_accumbens_basal_ganglia | 0.788894725                          |                             |              |                                |                  |             |   |  |
|               | Brain_Nucleus_accumbens_basal_ganglia | 1                                    | 1                           | 1            | 0.267746148                    |                  |             |   |  |
|               | 0.267746148                           | 0.267746148                          | NA                          | 1            | 0                              | 0.998207054      |             |   |  |
| RSPO3         | ENSG00000146374.13                    | 0.788932546                          | 1                           | 1            | 0.788932546                    |                  |             |   |  |
|               | Brain_Cerebellar_Hemisphere           | 0.788932546                          | Brain_Cerebellar_Hemisphere | 1            | 1                              |                  |             |   |  |
|               | 1                                     | -0.267697018                         | -0.267697018                | -0.267697018 | NA                             | 1                | 0           |   |  |
|               | 0.998207054                           |                                      |                             |              |                                |                  |             |   |  |
| OPA1          | ENSG00000198836.8                     | 0.788964792                          | 4                           | 4            | 0.415219814                    |                  |             |   |  |
|               | Brain_Substantia_nigra                | 0.674287918                          | Brain_Cortex                | 1.803737094  |                                |                  |             |   |  |
|               | 0.513861965                           | 0.513861965                          | -0.814742337                |              | 0.537956768                    | -0.055906468     |             |   |  |
|               | 0.668696175                           | 4                                    | 0                           | 0.998207054  |                                |                  |             |   |  |
| DNAH10        | ENSG00000197653.15                    | 0.789073209                          | 2                           | 2            | 0.492206824                    |                  |             |   |  |
|               | Brain_Cerebellum                      | 0.986192456                          | Brain_Hypothalamus          | 1.041370805  |                                |                  |             |   |  |
|               | 0.958629195                           | 0.958629195                          | -0.686803087                |              | 0.017306054                    | -0.334748516     |             |   |  |
|               | 0.497880349                           | 2                                    | 0                           | 0.998207054  |                                |                  |             |   |  |
| TBX21         | ENSG00000073861.2                     | 0.789183394                          | 3                           | 3            | 0.373953832                    | Brain_Cerebellum |             |   |  |
|               | 0.841937115                           | Brain_Anterior_cingulate_cortex_BA24 | 1.08574544                  | 0.919160306  |                                |                  |             |   |  |
|               | 0.919160306                           | -0.88909164                          | 0.199416295                 | -0.361676347 | 0.545034865                    |                  |             |   |  |
|               | 3                                     | 0                                    | 0.998207054                 |              |                                |                  |             |   |  |
| FOXF2         | ENSG00000137273.3                     | 0.789234398                          | 1                           | 1            | 0.789234398                    |                  |             |   |  |
|               | Brain_Nucleus_accumbens_basal_ganglia | 0.789234398                          |                             |              |                                |                  |             |   |  |
|               | Brain_Nucleus_accumbens_basal_ganglia | 1                                    | 1                           | 1            | 0.267304921                    |                  |             |   |  |
|               | 0.267304921                           | 0.267304921                          | NA                          | 1            | 0                              | 0.998207054      |             |   |  |
| PRKAB1        | ENSG00000111725.10                    | 0.789482365                          | 2                           | 2            | 0.498145091                    |                  |             |   |  |
|               | Brain_Caudate_basal_ganglia           | 0.567162582                          | Brain_Putamen_basal_ganglia |              |                                |                  |             |   |  |
|               | 1.724997558                           | 0.275002442                          | 0.275002442                 | 0.57223529   | 0.677411205                    |                  |             |   |  |



|           |                                       |                             |              |             |                                |             |    |   |                    |
|-----------|---------------------------------------|-----------------------------|--------------|-------------|--------------------------------|-------------|----|---|--------------------|
|           | 0.624823247                           | 0.074370603                 | 2            | 0           | 0.998207054                    |             |    |   |                    |
| LINC01792 | ENSG00000237166.1                     | 0.789496694                 | 7            | 4           | 0.21795167                     |             |    |   |                    |
|           | Brain_Hypothalamus                    | 0.924576509                 |              |             | Brain_Cortex                   | 4.626347171 |    |   |                    |
|           | 0.016297527                           | 0.469334034                 | -1.231993076 |             | 0.269723639                    |             |    |   | -0.355608042       |
|           | 0.461089401                           | 4                           | 0            | 0.998207054 |                                |             |    |   |                    |
| SCRG1     | ENSG00000164106.7                     | 0.789565605                 | 13           | 7           | 0.242001583                    |             |    |   | Brain_Cerebellum   |
|           | 0.946700288                           | Brain_Putamen_basal_ganglia | 8.122602205  |             | 1.39E-16                       |             |    |   |                    |
|           | 0.353319106                           | -1.169998473                | 0.461699588  |             | -0.215326527                   |             |    |   | 0.4981292 7        |
|           | 0                                     | 0.998207054                 |              |             |                                |             |    |   |                    |
| IL33      | ENSG00000137033.11                    | 0.789621629                 | 10           | 2           | 0.621980836                    |             |    |   |                    |
|           | Brain_Nucleus_accumbens_basal_ganglia | 0.999298788                 |              |             | Brain_Putamen_basal_ganglia    |             |    |   |                    |
|           | 9.021853904                           | 0.011833629                 | 0.313614585  |             | -0.493044936                   |             |    |   | 0.185836169        |
|           | -0.122045419                          | 0.227601961                 | 2            | 0           | 0.998207054                    |             |    |   |                    |
| DBT       | ENSG00000137992.14                    | 0.789628563                 | 2            | 2           | 0.504244198                    |             |    |   |                    |
|           | Brain_Hypothalamus                    | 0.746219083                 |              |             | Brain_Cerebellum               | 1.248997683 |    |   |                    |
|           | 0.751002317                           | 0.751002317                 | 0.323628798  |             | 0.667826736                    |             |    |   | 0.495727767        |
|           | 0.243384696                           | 2                           | 0            | 0.998207054 |                                |             |    |   |                    |
| FOLH1     | ENSG00000086205.16                    | 0.789640057                 | 8            | 5           | 0.300055919                    |             |    |   |                    |
|           | Brain_Caudate_basal_ganglia           | 0.827617784                 |              |             | Brain_Spinal_cord_cervical_c-1 |             |    |   |                    |
|           | 6.402977793                           | 0.004587621                 | 0.235366572  |             | 0.217757854                    |             |    |   | 1.036313481        |
|           | 0.747850554                           | 0.308318219                 | 5            | 0           | 0.998207054                    |             |    |   |                    |
| ZC3HAV1L  | ENSG00000146858.7                     | 0.789797935                 | 2            | 2           | 0.498261793                    |             |    |   |                    |
|           | Brain_Anterior_cingulate_cortex_BA24  | 0.925631265                 |              |             | Brain_Substantia_nigra         |             |    |   |                    |
|           | 1.032495344                           | 0.967504656                 | 0.967504656  |             | 0.093342757                    |             |    |   | 0.67722723         |
|           | 0.385284993                           | 0.412868671                 | 2            | 0           | 0.998207054                    |             |    |   |                    |
| EHHADH    | ENSG00000113790.10                    | 0.78987785                  | 1            | 1           | 0.78987785                     |             |    |   | Brain_Hypothalamus |
|           | 0.78987785                            | Brain_Hypothalamus          | 1            | 1           | 1                              | 0.266469235 |    |   | 0.266469235        |
|           | 0.266469235                           | NA                          | 1            | 0           | 0.998207054                    |             |    |   |                    |
| MAEL      | ENSG00000143194.12                    | 0.789898341                 | 11           | 4           | 0.060329871                    |             |    |   |                    |
|           | Brain_Hypothalamus                    | 0.703083819                 |              |             | Brain_Putamen_basal_ganglia    | 8.492686463 |    |   |                    |
|           | 0.00698205                            | 0.347533568                 | 0.381160955  |             | 1.87837509                     | 0.932142467 |    |   |                    |
|           | 0.403909377                           | 4                           | 0            | 0.998207054 |                                |             |    |   |                    |
| FGR       | ENSG00000000938.12                    | 0.789938836                 | 2            | 2           | 0.57503199                     |             |    |   |                    |
|           | Brain_Putamen_basal_ganglia           | 0.769232722                 |              |             | Brain_Spinal_cord_cervical_c-1 |             |    |   |                    |
|           | 1.173339295                           | 0.826660705                 | 0.826660705  |             | 0.293378677                    |             |    |   | 0.560656114        |
|           | 0.427017395                           | 0.188993688                 | 2            | 0           | 0.998207054                    |             |    |   |                    |
| ATF1      | ENSG00000123268.8                     | 0.789962805                 | 1            | 1           | 0.789962805                    |             |    |   |                    |
|           | Brain_Nucleus_accumbens_basal_ganglia | 0.789962805                 |              |             |                                |             |    |   |                    |
|           | Brain_Nucleus_accumbens_basal_ganglia | 1                           | 1            | 1           | -0.266358913                   |             |    |   |                    |
|           | -0.266358913                          | -0.266358913                | NA           | 1           | 0                              | 0.998207054 |    |   |                    |
| CEBPE     | ENSG00000092067.5                     | 0.790022736                 | 1            | 1           | 0.790022736                    |             |    |   |                    |
|           | Brain_Spinal_cord_cervical_c-1        | 0.790022736                 |              |             | Brain_Spinal_cord_cervical_c-1 |             |    |   |                    |
|           | 1                                     | 1                           | 1            | 0.26628109  | 0.26628109                     | 0.26628109  | NA | 1 | 0                  |
| ZCCHC17   | ENSG00000121766.15                    | 0.790103433                 | 7            | 6           | 0.348694016                    |             |    |   |                    |
|           | Brain_Hippocampus                     | 0.977093076                 |              |             | Brain_Cerebellum               | 4.467894277 |    |   |                    |
|           | 0.138212063                           | 0.162141431                 | -0.937125481 |             | 0.336426846                    |             |    |   | -0.367317678       |
|           | 0.434041334                           | 6                           | 0            | 0.998207054 |                                |             |    |   |                    |
| ALDH8A1   | ENSG00000118514.13                    | 0.790127996                 | 13           | 2           | 0.327370857                    |             |    |   |                    |
|           | Brain_Cerebellar_Hemisphere           | 0.855788875                 |              |             | Brain_Amygdala                 | 11.87720382 |    |   |                    |
|           | 5.72E-05                              | 0.45452523                  | -0.979423324 |             | -0.181737322                   |             |    |   | -0.652498555       |
|           | 0.199588486                           | 2                           | 0            | 0.998207054 |                                |             |    |   |                    |
| LINC01571 | ENSG00000260057.5                     | 0.790207253                 | 1            | 1           | 0.790207253                    |             |    |   |                    |
|           | Brain_Spinal_cord_cervical_c-1        | 0.790207253                 |              |             | Brain_Spinal_cord_cervical_c-1 |             |    |   |                    |
|           | 1                                     | 1                           | 1            | 0.266041493 | 0.266041493                    | 0.266041493 | NA | 1 | 0                  |
|           | 0.998207054                           |                             |              |             |                                |             |    |   |                    |
| CES5A     | ENSG00000159398.15                    | 0.790223701                 | 1            | 1           | 0.790223701                    |             |    |   |                    |
|           | Brain_Putamen_basal_ganglia           | 0.790223701                 |              |             | Brain_Putamen_basal_ganglia    | 1           |    |   | 1                  |
|           | 1                                     | 0.266020136                 | 0.266020136  |             | 0.266020136                    | NA          | 1  |   | 0                  |
|           | 0.998207054                           |                             |              |             |                                |             |    |   |                    |
| DYNC1I1   | ENSG00000158560.14                    | 0.790777124                 | 3            | 2           | 0.556934723                    |             |    |   |                    |
|           | Brain_Caudate_basal_ganglia           | 0.816076557                 |              |             | Brain_Cerebellar_Hemisphere    |             |    |   |                    |
|           | 1.940211151                           | 0.059875792                 | 0.999913058  |             | 0.232594168                    |             |    |   | 0.587400553        |

|               |                                       |              |                                      |              |              |                    |            |             |   |
|---------------|---------------------------------------|--------------|--------------------------------------|--------------|--------------|--------------------|------------|-------------|---|
|               | 0.429264183                           | 0.180514609  | 2                                    | 0            | 0.998207054  |                    |            |             |   |
| POGZ          | ENSG00000143442.21                    | 0.790811099  | 9                                    | 4            | 0.270132928  |                    |            |             |   |
|               | Brain_Anterior_cingulate_cortex_BA24  | 0.770363578  |                                      |              |              | Brain_Hypothalamus |            |             |   |
|               | 7.572411421                           | 9.00E-07     | 0.292537912                          |              | -1.102756488 | -0.291899353       |            |             |   |
|               | -0.85433537                           | 0.243634079  | 4                                    | 0            | 0.998207054  |                    |            |             |   |
| RP11-863P13.4 | ENSG00000205037.2                     | 0.790850658  | 2                                    | 2            | 0.595355678  |                    |            |             |   |
|               | Brain_Cortex                          | 0.68477311   | Brain_Cerebellar_Hemisphere          | 1.049369945  |              |                    |            |             |   |
|               | 0.950630055                           | 0.950630055  | -0.405958478                         | 0.531091062  | 0.062566292  |                    |            |             |   |
|               | 0.662594084                           | 2            | 0                                    | 0.998207054  |              |                    |            |             |   |
| GALR3         | ENSG00000128310.2                     | 0.79086732   | 1                                    | 1            | 0.79086732   | Brain_Cerebellum   | 0.79086732 |             |   |
|               | Brain_Cerebellum1                     | 1            | 1                                    | 0.265184519  | 0.265184519  | 0.265184519        |            |             |   |
|               | NA                                    | 1            | 0                                    | 0.998207054  |              |                    |            |             |   |
| AC092614.2    | ENSG00000227542.1                     | 0.790908023  | 1                                    | 1            | 0.790908023  |                    |            |             |   |
|               | Brain_Nucleus_accumbens_basal_ganglia | 0.790908023  |                                      |              |              |                    |            |             |   |
|               | Brain_Nucleus_accumbens_basal_ganglia | 1            | 1                                    | 1            | -0.26513168  |                    |            |             |   |
|               | -0.26513168                           | -0.26513168  | NA                                   | 1            | 0            | 0.998207054        |            |             |   |
| ENTPD5        | ENSG00000187097.12                    | 0.791035489  | 6                                    | 5            | 0.135591855  |                    |            |             |   |
|               | Brain_Cortex                          | 0.843003734  | Brain_Cerebellum                     | 3.759196652  | 0.021602507  |                    |            |             |   |
|               | 0.130128123                           | -1.492409389 | 0.247675253                          | -0.632405241 | 0.609862656  |                    |            |             |   |
|               | 5                                     | 0            | 0.998207054                          |              |              |                    |            |             |   |
| HFE2          | ENSG00000168509.19                    | 0.791076255  | 1                                    | 1            | 0.791076255  |                    |            |             |   |
|               | Brain_Cerebellar_Hemisphere           | 0.791076255  | Brain_Cerebellar_Hemisphere          | 1            | 1            |                    |            |             |   |
|               | 1                                     | 0.264913297  | 0.264913297                          | 0.264913297  | NA           | 1                  | 0          |             |   |
|               | 0.998207054                           |              |                                      |              |              |                    |            |             |   |
| WSB2          | ENSG00000176871.8                     | 0.791135838  | 1                                    | 1            | 0.791135838  |                    |            |             |   |
|               | Brain_Spinal_cord_cervical_c-1        | 0.791135838  | Brain_Spinal_cord_cervical_c-1       |              |              |                    |            |             |   |
|               | 1                                     | 1            | 1                                    | -0.264835954 | -0.264835954 | -0.264835954       | NA         | 1           | 0 |
|               | 0.998207054                           |              |                                      |              |              |                    |            |             |   |
| CCDC113       | ENSG00000103021.9                     | 0.791325758  | 7                                    | 3            | 0.306309582  |                    |            |             |   |
|               | Brain_Putamen_basal_ganglia           | 0.497470688  | Brain_Amygdala                       | 5.904388468  |              |                    |            |             |   |
|               | 0.028741992                           | 0.311401577  | -1.022996328                         | -0.678474813 | -0.842430896 |                    |            |             |   |
|               | 0.137278869                           | 3            | 0                                    | 0.998207054  |              |                    |            |             |   |
| TMEM68        | ENSG00000167904.14                    | 0.791368902  | 7                                    | 6            | 0.200224387  |                    |            |             |   |
|               | Brain_Caudate_basal_ganglia           | 0.86891245   | Brain_Anterior_cingulate_cortex_BA24 |              |              |                    |            |             |   |
|               | 3.351745992                           | 0.10254363   | 0.142258505                          | -1.280912541 | 1.279570896  |                    |            |             |   |
|               | 0.006277652                           | 0.864294618  | 6                                    | 0            | 0.998207054  |                    |            |             |   |
| WNT5A         | ENSG00000114251.14                    | 0.791508807  | 3                                    | 3            | 0.567021388  |                    |            |             |   |
|               | Brain_Cerebellar_Hemisphere           | 0.703508536  | Brain_Anterior_cingulate_cortex_BA24 |              |              |                    |            |             |   |
|               | 1.64734652                            | 0.419704796  | 0.419704796                          | -0.572443743 | 0.380588608  |                    |            |             |   |
|               | -0.204823103                          | 0.512486467  | 3                                    | 0            | 0.998207054  |                    |            |             |   |
| SACM1L        | ENSG00000211456.10                    | 0.791536825  | 5                                    | 5            | 0.279621887  |                    |            |             |   |
|               | Brain_Cerebellum                      | 0.859399834  | Brain_Hippocampus                    | 1.33537938   | 0.658205637  |                    |            |             |   |
|               | 0.658205637                           | -0.187594085 | 1.081169129                          | 0.410987494  | 0.514983819  |                    |            |             |   |
|               | 5                                     | 0            | 0.998207054                          |              |              |                    |            |             |   |
| PPRC1         | ENSG00000148840.10                    | 0.791579658  | 1                                    | 1            | 0.791579658  |                    |            |             |   |
|               | Brain_Anterior_cingulate_cortex_BA24  | 0.791579658  |                                      |              |              |                    |            |             |   |
|               | Brain_Anterior_cingulate_cortex_BA24  | 1            | 1                                    | 1            | 0.264259899  |                    |            |             |   |
|               | 0.264259899                           | 0.264259899  | NA                                   | 1            | 0            | 0.998207054        |            |             |   |
| LINC01556     | ENSG00000204709.4                     | 0.791648436  | 4                                    | 4            | 0.327940434  |                    |            |             |   |
|               | Brain_Nucleus_accumbens_basal_ganglia | 0.624598166  | Brain_Amygdala                       |              |              |                    |            |             |   |
|               | 2.244736817                           | 0.260183731  | 0.260183731                          | -0.978270746 | 0.83733991   |                    |            |             |   |
|               | -0.339233802                          | 0.809387902  | 4                                    | 0            | 0.998207054  |                    |            |             |   |
| CYB5A         | ENSG00000166347.18                    | 0.791733663  | 5                                    | 5            | 0.229350516  |                    |            |             |   |
|               | Brain_Cerebellar_Hemisphere           | 0.675977623  | Brain_Putamen_basal_ganglia          | 1.9795324    |              |                    |            |             |   |
|               | 0.271716989                           | 0.271716989  | -1.202033586                         | -0.417958277 | -0.87013255  |                    |            |             |   |
|               | 0.28860899                            | 5            | 0                                    | 0.998207054  |              |                    |            |             |   |
| SEMA4C        | ENSG00000168758.10                    | 0.791753042  | 1                                    | 1            | 0.791753042  |                    |            |             |   |
|               | Brain_Caudate_basal_ganglia           | 0.791753042  | Brain_Caudate_basal_ganglia          | 1            | 1            |                    |            |             |   |
|               | 1                                     | 0.26403488   | 0.26403488                           | 0.26403488   | NA           | 1                  | 0          | 0.998207054 |   |
| ANKRD35       | ENSG00000198483.12                    | 0.791825068  | 1                                    | 1            | 0.791825068  |                    |            |             |   |
|               | Brain_Cerebellar_Hemisphere           | 0.791825068  | Brain_Cerebellar_Hemisphere          | 1            | 1            |                    |            |             |   |
|               | 1                                     | -0.263941407 | -0.263941407                         | -0.263941407 | NA           | 1                  | 0          |             |   |

0.998207054  
C2orf82 ENSG00000182600.9 0.791854873 13 1 0.687020768  
Brain\_Cerebellar\_Hemisphere 0.892067317 Brain\_Amygdala 12.68637925  
0.000205897 12.68637925 -0.402901391 -0.135688782 -0.260414658  
0.081796851 1 0 0.998207054  
RFNG ENSG00000169733.11 0.791864626 7 3 0.350999596  
Brain\_Caudate\_basal\_ganglia 0.985084162 Brain\_Hypothalamus 5.288608264  
0.002202502 0.472646972 -0.932652155 -0.018695319 -0.541783728  
0.284368144 3 0 0.998207054  
MMAA ENSG00000151611.13 0.791905895 4 4 0.371877115  
Brain\_Putamen\_basal\_ganglia 0.853090031 Brain\_Frontal\_Cortex\_BA9  
2.731942342 0.109191511 0.109191511 0.185177226 0.892962762  
0.59370358 0.306734277 4 0 0.998207054  
ZCCHC24 ENSG00000165424.6 0.791935919 1 1 0.791935919  
Brain\_Nucleus\_accumbens\_basal\_ganglia 0.791935919  
Brain\_Nucleus\_accumbens\_basal\_ganglia 1 1 1 -0.263797555  
-0.263797555 -0.263797555 NA 1 0 0.998207054  
PSEN2 ENSG00000143801.16 0.791990174 4 3 0.275488089  
Brain\_Putamen\_basal\_ganglia 0.978661774 Brain\_Nucleus\_accumbens\_basal\_ganglia  
2.909324994 0.027924966 0.328823811 -0.026746689 1.09051105  
0.620514381 0.468241387 3 0 0.998207054  
C10orf10 ENSG00000165507.8 0.792093292 1 1 0.792093292  
Brain\_Hypothalamus 0.792093292 Brain\_Hypothalamus 1 1 1  
0.263593339 0.263593339 0.263593339 NA 1 0 0.998207054  
LINC00920 ENSG00000246898.1 0.792180448 13 11 0.066900313  
Brain\_Putamen\_basal\_ganglia 0.994941254 Brain\_Frontal\_Cortex\_BA9  
3.596746202 1.09E-17 0.322653543 -1.832343145 1.134389218  
-0.306835272 0.778676334 11 0 0.998207054  
CCNI ENSG00000118816.9 0.792364629 1 1 0.792364629  
Brain\_Substantia\_nigra 0.792364629 Brain\_Substantia\_nigra 1 1  
1 -0.263241263 -0.263241263 -0.263241263 NA 1 0  
0.998207054  
NR3C1 ENSG00000113580.14 0.792407277 1 1 0.792407277  
Brain\_Hippocampus 0.792407277 Brain\_Hippocampus 1 1 1  
0.263185927 0.263185927 0.263185927 NA 1 0 0.998207054  
PDHX ENSG00000110435.11 0.792446537 4 4 0.216099086 Brain\_Cerebellum  
0.57265928 Brain\_Cortex 2.98604321 0.120078711 0.120078711  
0.564139379 1.236967668 0.929602526 0.279362632 4 0  
0.998207054  
SNX31 ENSG00000174226.8 0.792526571 13 3 0.156993541 Brain\_Cortex  
0.993290402 Brain\_Caudate\_basal\_ganglia 10.47189411 2.62E-16  
0.699058678 -0.225922892 1.41525569 0.439875909 0.44234696 3 0  
0.998207054  
RP6-91H8.1 ENSG00000258517.1 0.792614294 1 1 0.792614294  
Brain\_Nucleus\_accumbens\_basal\_ganglia 0.792614294  
Brain\_Nucleus\_accumbens\_basal\_ganglia 1 1 1 0.262917336  
0.262917336 0.262917336 NA 1 0 0.998207054  
SLC11A1 ENSG00000018280.16 0.792643928 1 1 0.792643928  
Brain\_Cortex 0.792643928 Brain\_Cortex 1 1 1 0.26287889  
0.26287889 0.26287889 NA 1 0 0.998207054  
TNFRSF10B ENSG00000120889.12 0.792754519 1 1 0.792754519  
Brain\_Cerebellum 0.792754519 Brain\_Cerebellum 1 1 1 -0.262735414  
-0.262735414 -0.262735414 NA 1 0 0.998207054  
LINC01465 ENSG00000221949.5 0.79275635 1 1 0.79275635 Brain\_Hypothalamus  
0.79275635 Brain\_Hypothalamus 1 1 1 -0.262733039 -0.262733039  
-0.262733039 NA 1 0 0.998207054  
HS6ST1 ENSG00000136720.6 0.792836958 1 1 0.792836958  
Brain\_Cerebellar\_Hemisphere 0.792836958 Brain\_Cerebellar\_Hemisphere 1 1  
1 -0.262628465 -0.262628465 -0.262628465 NA 1 0  
0.998207054  
GDF11 ENSG00000135414.9 0.793058678 1 1 0.793058678 Brain\_Amygdala  
0.793058678 Brain\_Amygdala 1 1 1 0.262340841 0.262340841

|          |                                       |                                       |              |              |             |              |                                      |              |                  |
|----------|---------------------------------------|---------------------------------------|--------------|--------------|-------------|--------------|--------------------------------------|--------------|------------------|
|          | 0.262340841                           | NA                                    | 1            | 0            | 0.998207054 |              |                                      |              |                  |
| CRIPAK   | ENSG00000179979.8                     |                                       |              | 0.793064771  | 13          | 4            | 0.303218817                          |              |                  |
|          | Brain_Spinal_cord_cervical_c-1        |                                       |              | 0.958024406  |             |              | Brain_Cortex                         | 10.4911893   |                  |
|          | 0.019581652                           | 0.35638102                            | -1.02955528  |              |             | 0.657087625  |                                      | -0.360316558 |                  |
|          | 0.508894524                           | 4                                     | 0            | 0.998207054  |             |              |                                      |              |                  |
| ANKRD49  | ENSG00000168876.8                     |                                       |              | 0.793186826  | 2           | 2            | 0.538054858                          |              |                  |
|          | Brain_Cerebellar_Hemisphere           |                                       |              | 0.822364721  |             |              | Brain_Substantia_nigra               |              |                  |
|          | 1.104181979                           | 0.895818021                           | 0.895818021  |              |             | 0.224504558  |                                      | 0.61575708   |                  |
|          | 0.420130819                           | 0.276657312                           | 2            | 0            | 0.998207054 |              |                                      |              |                  |
| SEC13    | ENSG00000157020.17                    |                                       |              | 0.793198594  | 1           | 1            | 0.793198594                          |              |                  |
|          | Brain_Nucleus_accumbens_basal_ganglia |                                       |              | 0.793198594  |             |              |                                      |              |                  |
|          | Brain_Nucleus_accumbens_basal_ganglia |                                       |              | 1            | 1           | 1            | -0.262159348                         |              |                  |
|          | -0.262159348                          | -0.262159348                          | NA           | 1            | 0           | 0.998207054  |                                      |              |                  |
| PRPH2    | ENSG00000112619.7                     |                                       |              | 0.793272107  | 12          | 1            | 0.640293975                          |              |                  |
|          | Brain_Nucleus_accumbens_basal_ganglia |                                       |              | 0.928829592  |             |              | Brain_Hypothalamus                   |              |                  |
|          | 11.5655334                            | 0.001531172                           | 11.5655334   | -0.467287813 |             |              | 0.089317493                          |              |                  |
|          | -0.256733458                          | 0.148422577                           | 1            | 0            | 0.998207054 |              |                                      |              |                  |
| OR7C1    | ENSG00000127530.2                     |                                       |              | 0.79366769   | 1           | 1            | 0.79366769                           |              |                  |
|          | Brain_Nucleus_accumbens_basal_ganglia |                                       |              | 0.79366769   |             |              |                                      |              |                  |
|          | Brain_Nucleus_accumbens_basal_ganglia |                                       |              | 1            | 1           | 1            | 0.261550916                          |              |                  |
|          | 0.261550916                           | 0.261550916                           | NA           | 1            | 0           | 0.998207054  |                                      |              |                  |
| RET      | ENSG00000165731.18                    |                                       |              | 0.793842776  | 3           | 3            | 0.444228543                          |              | Brain_Cerebellum |
|          | 0.838488499                           | Brain_Nucleus_accumbens_basal_ganglia |              | 1.54813284   |             |              | 0.491094915                          |              |                  |
|          | 0.491094915                           | -0.765072217                          | 0.415170521  |              |             | -0.048691483 |                                      | 0.629338948  |                  |
|          | 3                                     | 0                                     | 0.998207054  |              |             |              |                                      |              |                  |
| PPP2R3A  | ENSG00000073711.10                    |                                       |              | 0.793934518  | 2           | 2            | 0.507229656                          |              |                  |
|          | Brain_Cerebellum                      |                                       |              | 0.867233506  |             |              | Brain_Cerebellar_Hemisphere          | 1.450538075  |                  |
|          | 0.549461925                           | 0.549461925                           | -0.663157549 |              |             | -0.167173537 |                                      | -0.415165543 |                  |
|          | 0.350713658                           | 2                                     | 0            | 0.998207054  |             |              |                                      |              |                  |
| PLA2G4F  | ENSG00000168907.13                    |                                       |              | 0.794027252  | 1           | 1            | 0.794027252                          |              |                  |
|          | Brain_Putamen_basal_ganglia           |                                       |              | 0.794027252  |             |              | Brain_Putamen_basal_ganglia          | 1            | 1                |
|          | 1                                     | -0.261084619                          | -0.261084619 | -0.261084619 | NA          | 1            | 0                                    |              |                  |
|          | 0.998207054                           |                                       |              |              |             |              |                                      |              |                  |
| PCDHA10  | ENSG00000250120.6                     |                                       |              | 0.794090076  | 7           | 3            | 0.326968017                          |              |                  |
|          | Brain_Spinal_cord_cervical_c-1        |                                       |              | 0.776257627  |             |              | Brain_Frontal_Cortex_BA9             |              |                  |
|          | 5.549681876                           | 0.025133433                           | 0.246820339  |              |             | -0.980239284 |                                      | -0.284199332 |                  |
|          | -0.512682907                          | 0.229994339                           | 3            | 0            | 0.998207054 |              |                                      |              |                  |
| MED26    | ENSG00000105085.10                    |                                       |              | 0.794101684  | 1           | 1            | 0.794101684                          |              |                  |
|          | Brain_Substantia_nigra                |                                       |              | 0.794101684  |             |              | Brain_Substantia_nigra               | 1            | 1                |
|          | 1                                     | -0.2609881                            | -0.2609881   | -0.2609881   | NA          | 1            | 0                                    | 0.998207054  |                  |
| B3GNT8   | ENSG00000177191.2                     |                                       |              | 0.794340009  | 2           | 1            | 0.793884245                          |              |                  |
|          | Brain_Cerebellar_Hemisphere           |                                       |              | 0.79486587   |             |              | Brain_Cerebellum                     | 1.999303546  |                  |
|          | 0.000696454                           | 1.999303546                           | 0.259997282  |              |             | 0.261270071  |                                      | 0.260633676  |                  |
|          | 0.000899998                           | 1                                     | 0            | 0.998207054  |             |              |                                      |              |                  |
| TNPO1    | ENSG00000083312.17                    |                                       |              | 0.794372751  | 1           | 1            | 0.794372751                          |              |                  |
|          | Brain_Putamen_basal_ganglia           |                                       |              | 0.794372751  |             |              | Brain_Putamen_basal_ganglia          | 1            | 1                |
|          | 1                                     | 0.260636614                           | 0.260636614  | 0.260636614  | NA          | 1            | 0                                    |              |                  |
|          | 0.998207054                           |                                       |              |              |             |              |                                      |              |                  |
| CMPK1    | ENSG00000162368.13                    |                                       |              | 0.794412121  | 2           | 2            | 0.504750151                          |              |                  |
|          | Brain_Frontal_Cortex_BA9              |                                       |              | 0.800435781  |             |              | Brain_Cortex                         | 1.535890581  |                  |
|          | 0.464109419                           | 0.464109419                           | 0.25278316   | 0.667034415  |             |              | 0.459908788                          |              |                  |
|          | 0.292919871                           | 2                                     | 0            | 0.998207054  |             |              |                                      |              |                  |
| C6orf163 | ENSG00000203872.6                     |                                       |              | 0.794476387  | 6           | 5            | 0.280130698                          |              |                  |
|          | Brain_Cerebellum                      |                                       |              | 0.986309834  |             |              | Brain_Anterior_cingulate_cortex_BA24 |              |                  |
|          | 3.672613825                           | 0.095486513                           | 0.221936016  | 0.01715892   | 1.080025786 |              |                                      |              |                  |
|          | 0.430522058                           | 0.402906111                           | 5            | 0            | 0.998207054 |              |                                      |              |                  |
| CHRNA7   | ENSG00000175344.17                    |                                       |              | 0.794540847  | 2           | 2            | 0.51574175                           |              |                  |
|          | Brain_Hippocampus                     |                                       |              | 0.871846414  |             |              | Brain_Putamen_basal_ganglia          | 1.049707522  |                  |
|          | 0.950292478                           | 0.950292478                           | -0.161313598 | 0.649923325  |             |              | 0.244304864                          |              |                  |
|          | 0.573631129                           | 2                                     | 0            | 0.998207054  |             |              |                                      |              |                  |
| KIAA0087 | ENSG00000122548.5                     |                                       |              | 0.794790264  | 8           | 8            | 0.175029064                          |              |                  |
|          | Brain_Cerebellar_Hemisphere           |                                       |              | 0.995063317  |             |              | Brain_Cerebellum                     | 2.087830682  |                  |

|                |                                      |              |                             |              |              |
|----------------|--------------------------------------|--------------|-----------------------------|--------------|--------------|
|                | 0.401158831                          | 0.401158831  | -0.725497693                | 1.356220365  | 0.148487008  |
|                | 0.714876693                          | 8            | 0                           | 0.998207054  |              |
| SFMBT2         | ENSG00000198879.11                   | 0.794804807  | 1                           | 1            | 0.794804807  |
|                | Brain_Cerebellar_Hemisphere          | 0.794804807  | Brain_Cerebellar_Hemisphere | 1            | 1            |
|                | 1                                    | 0.260076445  | 0.260076445                 | 0.260076445  | NA 1 0       |
|                | 0.998207054                          |              |                             |              |              |
| CTD-2521M24.11 | ENSG00000269736.1                    | 0.794838525  | 2                           | 2            | 0.522523464  |
|                | Brain_Anterior_cingulate_cortex_BA24 | 0.844586194  | Brain_Caudate_basal_ganglia |              |              |
|                | 1.043913316                          | 0.956086684  | 0.956086684                 | -0.639460405 | -0.196030628 |
|                | -0.417745516                         | 0.313552203  | 2                           | 0            | 0.998207054  |
| RP11-417L19.2  | ENSG00000256955.2                    | 0.795099252  | 2                           | 2            | 0.583918363  |
|                | Brain_Cerebellar_Hemisphere          | 0.635922926  | Brain_Cerebellum            | 1.144826561  |              |
|                | 0.855173439                          | 0.855173439  | 0.473406875                 | 0.547670222  | 0.510538549  |
|                | 0.052512116                          | 2            | 0                           | 0.998207054  |              |
| CNST           | ENSG00000162852.13                   | 0.795157003  | 3                           | 3            | 0.504245611  |
|                | Brain_Cerebellar_Hemisphere          | 1.401142795  | Brain_Cerebellum            | 0.599270907  |              |
|                | 0.738553141                          | -0.667824522 | 0.333769976                 | -0.27084781  | 0.53210337   |
|                | 0.599270907                          | 0            | 0.998207054                 |              | 3            |
|                | 0                                    | 0.998207054  |                             |              |              |
| IL1RL1         | ENSG00000115602.16                   | 0.795181656  | 13                          | 1            | 0.631814104  |
|                | Brain_Cortex                         | 0.987535421  | Brain_Hypothalamus          | 12.43495144  |              |
|                | 0.000311751                          | 12.43495144  | -0.479175047                | 0.015677603  | -0.251172325 |
|                | 0.157552053                          | 1            | 0                           | 0.998207054  |              |
| ATG10          | ENSG00000152348.15                   | 0.795207725  | 13                          | 2            | 0.402660089  |
|                | Brain_Hypothalamus                   | 0.895091214  | Brain_Substantia_nigra      | 11.2747775   |              |
|                | 0.002668009                          | 0.683451085  | -0.836879883                | -0.131864821 | -0.519081034 |
|                | 0.229151462                          | 0            | 0.998207054                 |              |              |
| NEMP1          | ENSG00000166881.9                    | 0.795448391  | 6                           | 6            | 0.327052789  |
|                | Brain_Cerebellar_Hemisphere          | 0.798799075  | Brain_Putamen_basal_ganglia |              |              |
|                | 2.445118221                          | 0.223923303  | 0.223923303                 | -0.941952855 | 0.980067524  |
|                | -0.137118321                         | 0.691395843  | 6                           | 0            | 0.998207054  |
| RP11-615I2.6   | ENSG00000275383.1                    | 0.795485443  | 3                           | 3            | 0.539675938  |
|                | Brain_Hypothalamus                   | 0.786591046  | Brain_Substantia_nigra      | 2.00009278   |              |
|                | 0.31368751                           | 0.31368751   | -0.613303109                | 0.270739953  | -0.293150886 |
|                | 0.489836114                          | 3            | 0                           | 0.998207054  |              |
| TCHH           | ENSG00000159450.12                   | 0.795910936  | 2                           | 2            | 0.533986047  |
|                | Brain_Frontal_Cortex_BA9             | 0.827447637  | Brain_Cortex                | 1.072989107  |              |
|                | 0.927010893                          | 0.927010893  | -0.621932814                | 0.217976223  | -0.201978296 |
|                | 0.593905376                          | 2            | 0                           | 0.998207054  |              |
| PLEKHG2        | ENSG00000090924.14                   | 0.795961981  | 3                           | 3            | 0.469287596  |
|                | Brain_Cerebellum                     | 0.829565068  | Brain_Cerebellar_Hemisphere | 1.72334418   |              |
|                | 0.285728543                          | 0.285728543  | -0.723638668                | -0.215259417 | -0.509315537 |
|                | 0.263401552                          | 3            | 0                           | 0.998207054  |              |
| ANKRD20A4      | ENSG00000172014.12                   | 0.795963456  | 1                           | 1            | 0.795963456  |
|                | Brain_Frontal_Cortex_BA9             | 0.795963456  | Brain_Frontal_Cortex_BA9    | 1            | 1            |
|                | 1                                    | -0.258574635 | -0.258574635                | -0.258574635 | NA 1 0       |
|                | 0.998207054                          |              |                             |              |              |
| PITPNM2        | ENSG00000090975.12                   | 0.795987887  | 3                           | 3            | 0.441071099  |
|                | Brain_Cerebellum                     | 0.841307293  | Brain_Amygdala              | 2.041810311  | 0.089941376  |
|                | 0.089941376                          | -0.200221576 | 0.770385759                 | 0.353963796  | 0.499753657  |
|                | 3                                    | 0            | 0.998207054                 |              |              |
| NMNAT1         | ENSG00000173614.13                   | 0.796214693  | 2                           | 2            | 0.505132431  |
|                | Brain_Putamen_basal_ganglia          | 0.921245799  | Brain_Frontal_Cortex_BA9    |              |              |
|                | 1.013497317                          | 0.986502683  | 0.986502683                 | -0.666436044 | 0.098864571  |
|                | -0.283785736                         | 0.541149254  | 2                           | 0            | 0.998207054  |
| MRPL48         | ENSG00000175581.13                   | 0.796218306  | 9                           | 5            | 0.316263651  |
|                | Brain_Hypothalamus                   | 0.972273081  | Brain_Cortex                | 5.461545772  |              |
|                | 0.015263032                          | 0.225356602  | -0.850052284                | 1.002165535  | 0.094595871  |
|                | 0.503636246                          | 5            | 0                           | 0.998207054  |              |
| LINC01501      | ENSG00000229613.1                    | 0.796291543  | 1                           | 1            | 0.796291543  |
|                | Brain_Cerebellar_Hemisphere          | 0.796291543  | Brain_Cerebellar_Hemisphere | 1            | 1            |
|                | 1                                    | -0.258149484 | -0.258149484                | -0.258149484 | NA 1 0       |
|                | 0.998207054                          |              |                             |              |              |

|               |                                       |                             |                             |              |                                       |                  |                  |  |
|---------------|---------------------------------------|-----------------------------|-----------------------------|--------------|---------------------------------------|------------------|------------------|--|
| NIM1K         | ENSG00000177453.7                     | 0.796311514                 | 1                           | 1            | 0.796311514                           |                  |                  |  |
|               | Brain_Substantia_nigra                | 0.796311514                 |                             |              | Brain_Substantia_nigra                | 1                | 1                |  |
|               | 1                                     | 0.258123605                 | 0.258123605                 | 0.258123605  | NA                                    | 1                | 0                |  |
|               | 0.998207054                           |                             |                             |              |                                       |                  |                  |  |
| RPL6          | ENSG00000089009.15                    | 0.796561363                 | 1                           | 1            | 0.796561363                           |                  | Brain_Cerebellum |  |
|               | 0.796561363                           | Brain_Cerebellum            | 1                           | 1            | 0.257799873                           |                  | 0.257799873      |  |
|               | 0.257799873                           | NA                          | 1                           | 0            | 0.998207054                           |                  |                  |  |
| RP11-231C18.2 | ENSG00000248518.1                     | 0.796588522                 | 4                           | 2            | 0.492111553                           |                  |                  |  |
|               | Brain_Hypothalamus                    | 0.628721468                 |                             |              | Brain_Substantia_nigra                |                  | 3.685008623      |  |
|               | 0.002572645                           | 0.273630975                 | -0.68695426                 | -0.483527177 |                                       |                  | -0.592449161     |  |
|               | 0.084789531                           | 2                           | 0                           | 0.998207054  |                                       |                  |                  |  |
| TSPAN14       | ENSG00000108219.14                    | 0.796644081                 | 6                           | 6            | 0.19858298                            |                  |                  |  |
|               | Brain_Cerebellar_Hemisphere           | 0.982654558                 |                             |              | Brain_Nucleus_accumbens_basal_ganglia |                  |                  |  |
|               | 2.33498374                            | 0.235459898                 | 0.235459898                 | -0.448550754 | 1.28559919                            | 0.20311088       |                  |  |
|               | 0.604206991                           | 6                           | 0                           | 0.998207054  |                                       |                  |                  |  |
| OLFM2         | ENSG00000105088.8                     | 0.796777295                 | 7                           | 5            | 0.207876802                           |                  |                  |  |
|               | Brain_Putamen_basal_ganglia           | 0.95455669                  | Brain_Caudate_basal_ganglia | 4.816159793  |                                       |                  |                  |  |
|               | 0.044740168                           | 0.297279263                 | -0.32352192                 | 1.259425172  |                                       | 0.552610715      |                  |  |
|               | 0.605206972                           | 5                           | 0                           | 0.998207054  |                                       |                  |                  |  |
| MGAT5         | ENSG00000152127.8                     | 0.796943888                 | 1                           | 1            | 0.796943888                           |                  | Brain_Cerebellum |  |
|               | 0.796943888                           | Brain_Cerebellum            | 1                           | 1            | -0.257304281                          |                  | -0.257304281     |  |
|               | -0.257304281                          | NA                          | 1                           | 0            | 0.998207054                           |                  |                  |  |
| LEFTY1        | ENSG00000243709.1                     | 0.796947938                 | 12                          | 8            | 0.081442528                           |                  |                  |  |
|               | Brain_Cortex                          | 0.826610867                 | Brain_Hypothalamus          | 6.407012966  |                                       |                  |                  |  |
|               | 0.068984336                           | 0.246865401                 | -0.750239456                | 1.74237683   | 0.567523735                           |                  |                  |  |
|               | 0.746120612                           | 8                           | 0                           | 0.998207054  |                                       |                  |                  |  |
| INSM1         | ENSG00000173404.4                     | 0.79694975                  | 1                           | 1            | 0.79694975                            | Brain_Cortex     | 0.79694975       |  |
|               | Brain_Cortex                          | 1                           | 1                           | 1            | 0.257296687                           |                  | 0.257296687      |  |
|               | NA                                    | 1                           | 0                           | 0.998207054  |                                       |                  |                  |  |
| CCDC6         | ENSG00000108091.10                    | 0.797111375                 | 3                           | 3            | 0.410377233                           |                  | Brain_Cerebellum |  |
|               | 0.701808602                           | Brain_Cerebellar_Hemisphere | 1.7112517                   | 0.254017916  |                                       |                  |                  |  |
|               | 0.254017916                           | -0.383938744                | 0.823229962                 | 0.274057135  |                                       | 0.610897629      |                  |  |
|               | 3                                     | 0                           | 0.998207054                 |              |                                       |                  |                  |  |
| SP4           | ENSG00000105866.13                    | 0.797119211                 | 1                           | 1            | 0.797119211                           |                  |                  |  |
|               | Brain_Nucleus_accumbens_basal_ganglia | 0.797119211                 |                             |              |                                       |                  |                  |  |
|               | Brain_Nucleus_accumbens_basal_ganglia | 1                           | 1                           | 1            | 0.257077157                           |                  |                  |  |
|               | 0.257077157                           | 0.257077157                 | NA                          | 1            | 0                                     | 0.998207054      |                  |  |
| RP11-71L14.4  | ENSG00000274698.1                     | 0.797218969                 | 1                           | 1            | 0.797218969                           |                  |                  |  |
|               | Brain_Cerebellum                      | 0.797218969                 | Brain_Cerebellum            | 1            | 1                                     | 1                | -0.256947931     |  |
|               | -0.256947931                          | -0.256947931                | NA                          | 1            | 0                                     | 0.998207054      |                  |  |
| EFEMP1        | ENSG00000115380.19                    | 0.797266866                 | 6                           | 6            | 0.196485756                           |                  |                  |  |
|               | Brain_Caudate_basal_ganglia           | 0.523909453                 | Brain_Amygdala              | 2.402650401  |                                       |                  |                  |  |
|               | 0.269530846                           | 0.269530846                 | 0.637330708                 | 1.291628713  |                                       | 0.945086262      |                  |  |
|               | 0.248090631                           | 6                           | 0                           | 0.998207054  |                                       |                  |                  |  |
| CXCR2         | ENSG00000180871.7                     | 0.797293409                 | 1                           | 1            | 0.797293409                           |                  |                  |  |
|               | Brain_Caudate_basal_ganglia           | 0.797293409                 | Brain_Caudate_basal_ganglia | 1            | 1                                     |                  |                  |  |
|               | 1                                     | -0.256851504                | -0.256851504                | -0.256851504 | NA                                    | 1                | 0                |  |
|               | 0.998207054                           |                             |                             |              |                                       |                  |                  |  |
| SEMA3E        | ENSG00000170381.12                    | 0.797308178                 | 3                           | 3            | 0.378269182                           |                  |                  |  |
|               | Brain_Substantia_nigra                | 0.799636026                 | Brain_Putamen_basal_ganglia |              |                                       |                  |                  |  |
|               | 1.799249342                           | 0.390428825                 | 0.390428825                 | -0.881089865 |                                       | 0.253818183      |                  |  |
|               | -0.368752197                          | 0.575428108                 | 3                           | 0            | 0.998207054                           |                  |                  |  |
| PAN3          | ENSG00000152520.13                    | 0.797404243                 | 1                           | 1            | 0.797404243                           |                  |                  |  |
|               | Brain_Cerebellar_Hemisphere           | 0.797404243                 | Brain_Cerebellar_Hemisphere | 1            | 1                                     |                  |                  |  |
|               | 1                                     | -0.256707939                | -0.256707939                | -0.256707939 | NA                                    | 1                | 0                |  |
|               | 0.998207054                           |                             |                             |              |                                       |                  |                  |  |
| KAT2B         | ENSG00000114166.7                     | 0.797521669                 | 4                           | 4            | 0.299546206                           |                  |                  |  |
|               | Brain_Anterior_cingulate_cortex_BA24  | 0.997682229                 | Brain_Hippocampus           |              |                                       |                  |                  |  |
|               | 1.632399184                           | 0.572798212                 | 0.572798212                 | -1.037407025 |                                       | 0.0029049        |                  |  |
|               | -0.547017287                          | 0.564860752                 | 4                           | 0            | 0.998207054                           |                  |                  |  |
| LINC01979     | ENSG00000262585.1                     | 0.79754806                  | 1                           | 1            | 0.79754806                            | Brain_Cerebellum |                  |  |
|               | 0.79754806                            | Brain_Cerebellum            | 1                           | 1            | -0.256521657                          |                  | -0.256521657     |  |

|               |                                       |             |             |                             |             |                                       |             |                                |             |                  |
|---------------|---------------------------------------|-------------|-------------|-----------------------------|-------------|---------------------------------------|-------------|--------------------------------|-------------|------------------|
|               | -0.256521657                          | NA          | 1           | 0                           | 0.998207054 |                                       |             |                                |             |                  |
| TRIP10        | ENSG00000125733.17                    |             |             | 0.797732606                 |             | 1                                     | 1           | 0.797732606                    |             |                  |
|               | Brain_Cerebellar_Hemisphere           |             |             | 0.797732606                 |             |                                       |             | Brain_Cerebellar_Hemisphere    | 1           | 1                |
|               | 1                                     | 0.256282633 |             | 0.256282633                 |             | 0.256282633                           |             | NA                             | 1           | 0                |
|               | 0.998207054                           |             |             |                             |             |                                       |             |                                |             |                  |
| NME3          | ENSG00000103024.7                     |             |             | 0.797804171                 |             | 1                                     | 1           | 0.797804171                    |             |                  |
|               | Brain_Cerebellar_Hemisphere           |             |             | 0.797804171                 |             |                                       |             | Brain_Cerebellar_Hemisphere    | 1           | 1                |
|               | 1                                     | 0.256189947 |             | 0.256189947                 |             | 0.256189947                           |             | NA                             | 1           | 0                |
|               | 0.998207054                           |             |             |                             |             |                                       |             |                                |             |                  |
| NCOA3         | ENSG00000124151.18                    |             |             | 0.797836064                 |             | 1                                     | 1           | 0.797836064                    |             |                  |
|               | Brain_Spinal_cord_cervical_c-1        |             |             | 0.797836064                 |             |                                       |             | Brain_Spinal_cord_cervical_c-1 |             |                  |
|               | 1                                     | 1           | 1           | -0.256148642                |             | -0.256148642                          |             | -0.256148642                   | NA          | 1                |
|               | 0.998207054                           |             |             |                             |             |                                       |             |                                |             |                  |
| AF127936.7    | ENSG00000281903.2                     |             |             | 0.797931319                 |             | 1                                     | 1           | 0.797931319                    |             |                  |
|               | Brain_Cortex                          |             |             | 0.797931319                 |             | Brain_Cortex                          | 1           | 1                              | 1           | -0.256025277     |
|               | -0.256025277                          |             |             | -0.256025277                |             | NA                                    | 1           | 0                              | 0.998207054 |                  |
| RP11-454P21.1 | ENSG00000249937.5                     |             |             | 0.797946905                 |             | 6                                     | 4           | 0.288069743                    |             |                  |
|               | Brain_Cortex                          |             |             | 0.837605234                 |             | Brain_Hypothalamus                    | 5.02210778  | 0.051446755                    |             |                  |
|               | 0.193331382                           |             |             | 0.204957622                 |             | 1.062365603                           |             | 0.529255898                    |             | 0.308952138      |
|               | 4                                     | 0           | 0.998207054 |                             |             |                                       |             |                                |             |                  |
| LINC01377     | ENSG00000249808.2                     |             |             | 0.798011382                 |             | 2                                     | 2           | 0.503990466                    |             |                  |
|               | Brain_Cerebellum                      |             |             | 0.778052883                 |             | Brain_Spinal_cord_cervical_c-1        | 1.510411141 |                                |             |                  |
|               | 0.489588859                           |             |             | 0.489588859                 |             | 0.281857364                           |             | 0.668224237                    |             | 0.4750408        |
|               | 0.273202636                           |             | 2           | 0                           | 0.998207054 |                                       |             |                                |             |                  |
| PRIM1         | ENSG00000198056.13                    |             |             | 0.798482211                 |             | 4                                     | 4           | 0.276911922                    |             |                  |
|               | Brain_Frontal_Cortex_BA9              |             |             | 0.962604197                 |             | Brain_Cortex                          | 1.451236234 |                                |             |                  |
|               | 0.608915929                           |             |             | 0.608915929                 |             | -0.046885861                          |             | 1.087282631                    |             | 0.580525066      |
|               | 0.505400682                           |             | 4           | 0                           | 0.998207054 |                                       |             |                                |             |                  |
| IKZF5         | ENSG00000095574.11                    |             |             | 0.798486923                 |             | 1                                     | 1           | 0.798486923                    |             |                  |
|               | Brain_Anterior_cingulate_cortex_BA24  |             |             | 0.798486923                 |             |                                       |             |                                |             |                  |
|               | Brain_Anterior_cingulate_cortex_BA24  |             |             | 1                           | 1           | 1                                     | 0.255305797 |                                |             |                  |
|               | 0.255305797                           |             |             | 0.255305797                 |             | NA                                    | 1           | 0                              | 0.998207054 |                  |
| GPR18         | ENSG00000125245.12                    |             |             | 0.798487178                 |             | 1                                     | 1           | 0.798487178                    |             |                  |
|               | Brain_Hypothalamus                    |             |             | 0.798487178                 |             | Brain_Hypothalamus                    | 1           | 1                              | 1           |                  |
|               | 0.255305466                           |             |             | 0.255305466                 |             | 0.255305466                           |             | NA                             | 1           | 0                |
|               | 0.998207054                           |             |             |                             |             |                                       |             |                                |             |                  |
| AFAP1         | ENSG00000196526.10                    |             |             | 0.798576826                 |             | 2                                     | 1           | 0.774685317                    |             | Brain_Cerebellum |
|               | 0.825513092                           |             |             | Brain_Cerebellar_Hemisphere |             | 1.971361808                           |             | 0.028638192                    |             |                  |
|               | 1.971361808                           |             |             | -0.286251741                |             | -0.220459781                          |             | -0.253355761                   |             | 0.046521941      |
|               | 1                                     | 0           | 0.998207054 |                             |             |                                       |             |                                |             |                  |
| SLC4A5        | ENSG00000188687.17                    |             |             | 0.798669326                 |             | 7                                     | 4           | 0.312879131                    |             |                  |
|               | Brain_Cortex                          |             |             | 0.776036136                 |             | Brain_Nucleus_accumbens_basal_ganglia |             |                                |             |                  |
|               | 5.680186875                           |             |             | 0.04208826                  |             | 0.225934705                           |             | -1.009199156                   |             | -0.284488382     |
|               | -0.716064569                          |             |             | 0.30142836                  |             | 4                                     | 0           | 0.998207054                    |             |                  |
| HSPB8         | ENSG00000152137.6                     |             |             | 0.798702103                 |             | 2                                     | 2           | 0.51793016                     |             |                  |
|               | Brain_Putamen_basal_ganglia           |             |             | 0.757171625                 |             | Brain_Cortex                          | 1.209737072 |                                |             |                  |
|               | 0.790262928                           |             |             | 0.790262928                 |             | 0.309197067                           |             | 0.64653929                     |             | 0.477868179      |
|               | 0.238536974                           |             | 2           | 0                           | 0.998207054 |                                       |             |                                |             |                  |
| MFN1          | ENSG00000171109.18                    |             |             | 0.798737457                 |             | 12                                    | 4           | 0.176246164                    |             |                  |
|               | Brain_Nucleus_accumbens_basal_ganglia |             |             | 0.976509899                 |             | Brain_Substantia_nigra                |             |                                |             |                  |
|               | 9.512990341                           |             |             | 0.010211768                 |             | 0.399033991                           |             | -1.352403833                   |             | -0.029444729     |
|               | -0.747139538                          |             |             | 0.4640135                   |             | 4                                     | 0           | 0.998207054                    |             |                  |
| CNOT2         | ENSG00000111596.11                    |             |             | 0.798797369                 |             | 1                                     | 1           | 0.798797369                    |             |                  |
|               | Brain_Cerebellar_Hemisphere           |             |             | 0.798797369                 |             | Brain_Cerebellar_Hemisphere           | 1           | 1                              |             |                  |
|               | 1                                     | 0.254903841 |             | 0.254903841                 |             | 0.254903841                           |             | NA                             | 1           | 0                |
|               | 0.998207054                           |             |             |                             |             |                                       |             |                                |             |                  |
| HTR5A         | ENSG00000157219.3                     |             |             | 0.79897533                  |             | 4                                     | 4           | 0.493547304                    |             |                  |
|               | Brain_Frontal_Cortex_BA9              |             |             | 0.576076034                 |             | Brain_Nucleus_accumbens_basal_ganglia |             |                                |             |                  |
|               | 1.462074596                           |             |             | 0.625468936                 |             | 0.625468936                           |             | -0.684677732                   |             | 0.672966221      |
|               | 0.30313297                            |             |             | 0.660583546                 |             | 4                                     | 0           | 0.998207054                    |             |                  |
| FPGS          | ENSG00000136877.14                    |             |             | 0.799002092                 |             | 2                                     | 2           | 0.536469069                    |             |                  |
|               | Brain_Substantia_nigra                |             |             | 0.70482832                  |             | Brain_Hippocampus                     | 1.203909918 |                                |             |                  |
|               | 0.796090082                           |             |             | 0.796090082                 |             | -0.618161222                          |             | -0.378810863                   |             | -0.498486042     |

|               |                                       |                                |             |                             |             |             |                             |                    |   |
|---------------|---------------------------------------|--------------------------------|-------------|-----------------------------|-------------|-------------|-----------------------------|--------------------|---|
|               | 0.169246262                           | 2                              | 0           | 0.998207054                 |             |             |                             |                    |   |
| TXNDC16       | ENSG00000087301.8                     |                                |             | 0.7990904                   | 11          | 5           | 0.163650558                 | Brain_Cerebellum   |   |
|               | 0.66249068                            | Brain_Spinal_cord_cervical_c-1 |             | 8.563090201                 |             |             | 0.008966389                 |                    |   |
|               | 0.318820104                           | -1.392898261                   |             | -0.436477005                |             |             | -1.012673697                | 0.349936107        |   |
|               | 5                                     | 0                              | 0.998207054 |                             |             |             |                             |                    |   |
| CTD-2349P21.5 | ENSG00000263603.1                     |                                |             | 0.7990358                   | 8           | 5           | 0.17398098                  |                    |   |
|               | Brain_Nucleus_accumbens_basal_ganglia | 0.712312414                    |             |                             |             |             | Brain_Amygdala              |                    |   |
|               | 5.486097579                           | 0.043867742                    |             | 0.303202123                 |             |             | -0.767892928                | 1.359522808        |   |
|               | 0.523685471                           | 0.60464232                     | 5           | 0                           | 0.998207054 |             |                             |                    |   |
| SERP2         | ENSG00000151778.10                    |                                |             | 0.799175394                 | 2           | 2           | 0.608942592                 |                    |   |
|               | Brain_Spinal_cord_cervical_c-1        | 0.711295714                    |             |                             |             |             | Brain_Cerebellar_Hemisphere |                    |   |
|               | 1.11534652                            | 0.88465348                     | 0.88465348  | -0.51158342                 |             |             | -0.370116465                | -0.440849943       |   |
|               | 0.100032243                           | 2                              | 0           | 0.998207054                 |             |             |                             |                    |   |
| SLC35G1       | ENSG00000176273.14                    |                                |             | 0.799185702                 | 7           | 6           | 0.139650047                 |                    |   |
|               | Brain_Hippocampus                     | 0.488013101                    |             | Brain_Frontal_Cortex_BA9    |             |             | 3.893267878                 |                    |   |
|               | 0.000590694                           | 0.249553678                    |             | -1.477095474                |             |             | -0.693472463                | -1.063839544       |   |
|               | 0.308149023                           | 6                              | 0           | 0.998207054                 |             |             |                             |                    |   |
| BRSK2         | ENSG00000174672.15                    |                                |             | 0.799199426                 | 1           | 1           | 0.799199426                 | Brain_Cerebellum   |   |
|               | 0.799199426                           | Brain_Cerebellum1              |             | 1                           | 1           |             | -0.254383333                | -0.254383333       |   |
|               | -0.254383333                          | NA                             | 1           | 0                           | 0.998207054 |             |                             |                    |   |
| C3orf62       | ENSG00000188315.7                     |                                |             | 0.799199818                 | 1           | 1           | 0.799199818                 |                    |   |
|               | Brain_Cerebellum                      | 0.799199818                    |             | Brain_Cerebellum1           | 1           | 1           | -0.254382825                | -0.254382825       |   |
|               | -0.254382825                          | -0.254382825                   | NA          | 1                           | 0           | 0.998207054 |                             |                    |   |
| SLC1A1        | ENSG00000106688.11                    |                                |             | 0.799204279                 | 4           | 4           | 0.267963635                 |                    |   |
|               | Brain_Frontal_Cortex_BA9              | 0.79134326                     |             | Brain_Cerebellar_Hemisphere | 1.562899568 |             |                             |                    |   |
|               | 0.444459787                           | 0.444459787                    |             | 0.26456672                  | 1.107764269 |             | 0.701010461                 |                    |   |
|               | 0.432523793                           | 4                              | 0           | 0.998207054                 |             |             |                             |                    |   |
| LTF           | ENSG00000012223.12                    |                                |             | 0.79927441                  | 5           | 2           | 0.586465461                 | Brain_Hypothalamus |   |
|               | 0.906835495                           | Brain_Spinal_cord_cervical_c-1 |             | 4.706353179                 |             |             | 0.000823273                 |                    |   |
|               | 0.158115808                           | 0.117030991                    |             | 0.543965141                 |             |             | 0.344458272                 | 0.168524303        |   |
|               | 2                                     | 0                              | 0.998207054 |                             |             |             |                             |                    |   |
| DLL3          | ENSG00000090932.10                    |                                |             | 0.799337721                 | 1           | 1           | 0.799337721                 |                    |   |
|               | Brain_Cerebellar_Hemisphere           | 0.799337721                    |             | Brain_Cerebellar_Hemisphere | 1           | 1           |                             |                    |   |
|               | 1                                     | -0.25420431                    |             | -0.25420431                 |             |             | NA                          | 1                  | 0 |
|               | 0.998207054                           |                                |             |                             |             |             |                             |                    |   |
| SLC35F5       | ENSG00000115084.13                    |                                |             | 0.7995175                   | 10          | 5           | 0.426463285                 | Brain_Cortex       |   |
|               | 0.813338783                           | Brain_Amygdala                 |             | 7.980121239                 |             |             | 0.009052276                 | 0.295904807        |   |
|               | -0.379149044                          | 0.795258265                    |             | 0.425981488                 |             |             | 0.33797068                  | 5                  | 0 |
|               | 0.998207054                           |                                |             |                             |             |             |                             |                    |   |
| REN           | ENSG00000143839.14                    |                                |             | 0.799545219                 | 3           | 3           | 0.454157906                 | Brain_Amygdala     |   |
|               | 0.860779355                           | Brain_Frontal_Cortex_BA9       |             | 2.141487198                 |             |             | 0.353338252                 |                    |   |
|               | 0.353338252                           | -0.175382163                   |             | 0.748501192                 |             |             | 0.311701769                 | 0.463989776        |   |
|               | 3                                     | 0                              | 0.998207054 |                             |             |             |                             |                    |   |
| MYOZ3         | ENSG00000164591.13                    |                                |             | 0.799623506                 | 3           | 3           | 0.500480274                 |                    |   |
|               | Brain_Nucleus_accumbens_basal_ganglia | 0.661243538                    |             | Brain_Substantia_nigra      |             |             |                             |                    |   |
|               | 1.043064225                           | 0.95349854                     | 0.95349854  | -0.673734264                |             |             | 0.438196924                 |                    |   |
|               | -0.276962257                          | 0.620584834                    |             | 3                           | 0           | 0.998207054 |                             |                    |   |
| RAE1          | ENSG00000101146.12                    |                                |             | 0.799766722                 | 1           | 1           | 0.799766722                 |                    |   |
|               | Brain_Frontal_Cortex_BA9              | 0.799766722                    |             | Brain_Frontal_Cortex_BA9    | 1           | 1           |                             |                    |   |
|               | 1                                     | -0.25364902                    |             | -0.25364902                 |             |             | NA                          | 1                  | 0 |
|               | 0.998207054                           |                                |             |                             |             |             |                             |                    |   |
| KPNA1         | ENSG00000114030.12                    |                                |             | 0.799953245                 | 8           | 4           | 0.28996699                  |                    |   |
|               | Brain_Putamen_basal_ganglia           | 0.932251472                    |             | Brain_Amygdala              | 6.044292184 |             |                             |                    |   |
|               | 0.014860694                           | 0.407270723                    |             | -0.085012476                |             |             | 1.058194035                 | 0.476070057        |   |
|               | 0.383061923                           | 4                              | 0           | 0.998207054                 |             |             |                             |                    |   |
| RP11-10C24.2  | ENSG00000271324.1                     |                                |             | 0.799990604                 | 7           | 5           | 0.441195015                 |                    |   |
|               | Brain_Amygdala                        | 0.955929174                    |             | Brain_Cortex                | 4.982060657 |             | 0.070106348                 |                    |   |
|               | 0.178301495                           | -0.770176815                   |             | 0.675181831                 |             |             | 0.034568187                 | 0.50928023         | 5 |
|               | 0                                     | 0.998207054                    |             |                             |             |             |                             |                    |   |
| SERPINE2      | ENSG00000135919.12                    |                                |             | 0.80001209                  | 1           | 1           | 0.80001209                  | Brain_Hypothalamus |   |
|               | 0.80001209                            | Brain_Hypothalamus             |             | 1                           | 1           | 1           | 0.253331456                 | 0.253331456        |   |
|               | 0.253331456                           | NA                             | 1           | 0                           | 0.998207054 |             |                             |                    |   |



|              |                                |                             |              |             |                                       |              |             |   |  |
|--------------|--------------------------------|-----------------------------|--------------|-------------|---------------------------------------|--------------|-------------|---|--|
| SOX6         | ENSG00000110693.17             | 0.800124764                 | 1            | 1           | 0.800124764                           |              |             |   |  |
|              | Brain_Frontal_Cortex_BA9       | 0.800124764                 |              |             | Brain_Frontal_Cortex_BA9              | 1            | 1           |   |  |
|              | 1                              | 0.253185638                 | 0.253185638  | 0.253185638 | NA                                    | 1            | 0           |   |  |
|              | 0.998207054                    |                             |              |             |                                       |              |             |   |  |
| TYMP         | ENSG00000025708.13             | 0.800165178                 | 5            | 5           | 0.20555254                            | Brain_Cortex |             |   |  |
|              | 0.893358278                    | Brain_Hippocampus           |              |             | 1.547765576                           | 0.471063889  |             |   |  |
|              | 0.471063889                    | -1.265889797                | 0.402348016  |             | -0.389778074                          | 0.669108577  |             |   |  |
|              | 5                              | 0                           | 0.998207054  |             |                                       |              |             |   |  |
| COG3         | ENSG00000136152.14             | 0.8002259                   | 3            | 3           | 0.379663025                           |              |             |   |  |
|              | Brain_Putamen_basal_ganglia    | 0.867861596                 |              |             | Brain_Cerebellum                      | 1.895232846  |             |   |  |
|              | 0.087344506                    | 0.087344506                 | -0.878517353 |             | 0.193892744                           | -0.283666643 |             |   |  |
|              | 0.545741509                    | 3                           | 0            | 0.998207054 |                                       |              |             |   |  |
| BFSP1        | ENSG00000125864.13             | 0.800235858                 | 2            | 2           | 0.505839937                           |              |             |   |  |
|              | Brain_Caudate_basal_ganglia    | 0.957870006                 |              |             | Brain_Cortex                          | 1.161113953  |             |   |  |
|              | 0.838886047                    | 0.838886047                 | 0.052826677  |             | 0.665329233                           | 0.359077955  |             |   |  |
|              | 0.433104711                    | 2                           | 0            | 0.998207054 |                                       |              |             |   |  |
| LMAN2L       | ENSG00000114988.11             | 0.800385733                 | 7            | 5           | 0.361552225                           |              |             |   |  |
|              | Brain_Hippocampus              | 0.670343353                 |              |             | Brain_Putamen_basal_ganglia           | 3.396121777  |             |   |  |
|              | 0.032509223                    | 0.172689193                 | -0.912411334 |             | 0.636312242                           | -0.462704233 |             |   |  |
|              | 0.526011848                    | 5                           | 0            | 0.998207054 |                                       |              |             |   |  |
| KIF7         | ENSG00000166813.14             | 0.800444762                 | 1            | 1           | 0.800444762                           |              |             |   |  |
|              | Brain_Hypothalamus             | 0.800444762                 |              |             | Brain_Hypothalamus                    | 1            | 1           | 1 |  |
|              | 0.25277154                     | 0.25277154                  | 0.25277154   | NA          | 1                                     | 0            | 0.998207054 |   |  |
| POLDIP3      | ENSG00000100227.17             | 0.80049097                  | 4            | 3           | 0.422300414                           | Brain_Cortex |             |   |  |
|              | 0.844484489                    | Brain_Putamen_basal_ganglia | 3.23289433   | 0.073851719 |                                       |              |             |   |  |
|              | 0.281282575                    | -0.80243666                 | -0.19616057  |             | -0.466910384                          | 0.255035826  |             |   |  |
|              | 3                              | 0                           | 0.998207054  |             |                                       |              |             |   |  |
| A2ML1        | ENSG00000166535.19             | 0.800492682                 | 3            | 3           | 0.436563323                           |              |             |   |  |
|              | Brain_Hippocampus              | 0.842498893                 |              |             | Brain_Nucleus_accumbens_basal_ganglia |              |             |   |  |
|              | 1.382680246                    | 0.666574717                 | 0.666574717  |             | -0.778009651                          | 0.198698123  |             |   |  |
|              | -0.355828101                   | 0.501623219                 | 3            | 0           | 0.998207054                           |              |             |   |  |
| RP11-93209.9 | ENSG00000269930.1              | 0.800506374                 | 3            | 3           | 0.424924042                           |              |             |   |  |
|              | Brain_Spinal_cord_cervical_c-1 | 0.989709226                 |              |             | Brain_Hypothalamus                    |              |             |   |  |
|              | 1.564195851                    | 0.480235566                 | 0.480235566  |             | -0.797907722                          | 0.424880538  |             |   |  |
|              | -0.120043085                   | 0.622139669                 | 3            | 0           | 0.998207054                           |              |             |   |  |
| EPHX2        | ENSG00000120915.13             | 0.800559302                 | 13           | 3           | 0.473174211                           | Brain_Cortex |             |   |  |
|              | 0.886368165                    | Brain_Hippocampus           | 10.57155349  | 0.003027176 |                                       |              |             |   |  |
|              | 0.630102546                    | -0.717323985                | 0.174042219  |             | -0.402504767                          | 0.299202671  |             |   |  |
|              | 3                              | 0                           | 0.998207054  |             |                                       |              |             |   |  |
| FREM3        | ENSG00000183090.5              | 0.800582853                 | 2            | 2           | 0.506230501                           |              |             |   |  |
|              | Brain_Frontal_Cortex_BA9       | 0.903689626                 |              |             | Brain_Cortex                          | 1.261301362  |             |   |  |
|              | 0.738698638                    | 0.738698638                 | 0.12100178   | 0.664718591 | 0.392860185                           |              |             |   |  |
|              | 0.384465844                    | 2                           | 0            | 0.998207054 |                                       |              |             |   |  |
| SCG3         | ENSG00000104112.8              | 0.800676142                 | 9            | 1           | 0.596958615                           |              |             |   |  |
|              | Brain_Hippocampus              | 0.877486938                 |              |             | Brain_Putamen_basal_ganglia           | 8.472513225  |             |   |  |
|              | 0.000755029                    | 8.472513225                 | -0.528779219 | 0.344482723 | -0.240960195                          |              |             |   |  |
|              | 0.24470719                     | 1                           | 0            | 0.998207054 |                                       |              |             |   |  |
| PHF20L1      | ENSG00000129292.20             | 0.800752018                 | 3            | 3           | 0.392551995                           |              |             |   |  |
|              | Brain_Frontal_Cortex_BA9       | 0.814678452                 |              |             | Brain_Hypothalamus                    | 1.110695165  |             |   |  |
|              | 0.8649103                      | 0.8649103                   | 0.234394856  | 0.85499847  | 0.539275929                           | 0.310443818  |             |   |  |
|              | 3                              | 0                           | 0.998207054  |             |                                       |              |             |   |  |
| LRRC55       | ENSG00000183908.5              | 0.800834239                 | 1            | 1           | 0.800834239                           |              |             |   |  |
|              | Brain_Caudate_basal_ganglia    | 0.800834239                 |              |             | Brain_Caudate_basal_ganglia           | 1            | 1           |   |  |
|              | 1                              | 0.252267589                 | 0.252267589  | 0.252267589 | NA                                    | 1            | 0           |   |  |
|              | 0.998207054                    |                             |              |             |                                       |              |             |   |  |
| PLD1         | ENSG00000075651.15             | 0.80092417                  | 2            | 2           | 0.506123423                           |              |             |   |  |
|              | Brain_Caudate_basal_ganglia    | 0.864644934                 |              |             | Brain_Cerebellum                      | 1.191963507  |             |   |  |
|              | 0.808036493                    | 0.808036493                 | 0.170464394  |             | 0.664885981                           | 0.417675187  |             |   |  |
|              | 0.349608857                    | 2                           | 0            | 0.998207054 |                                       |              |             |   |  |
| TMEM86B      | ENSG00000180089.5              | 0.80102342                  | 9            | 9           | 0.071779144                           |              |             |   |  |
|              | Brain_Hippocampus              | 0.953593926                 |              |             | Brain_Substantia_nigra                | 1.43200035   |             |   |  |
|              | 0.689540041                    | 0.689540041                 | -1.800516351 | 1.055485411 | -0.147932909                          |              |             |   |  |

|               |                                       |                  |              |              |                                       |             |                                |                  |   |
|---------------|---------------------------------------|------------------|--------------|--------------|---------------------------------------|-------------|--------------------------------|------------------|---|
|               | 0.827031006                           | 9                | 0            | 0.998207054  |                                       |             |                                |                  |   |
| LINC01484     | ENSG00000253686.1                     |                  |              | 0.801103503  | 2                                     | 2           | 0.534360042                    |                  |   |
|               | Brain_Cerebellar_Hemisphere           |                  |              | 0.817500343  |                                       |             | Brain_Amygdala                 | 1.014281761      |   |
|               | 0.985718239                           | 0.985718239      |              | -0.230761178 |                                       |             | 0.621364168                    | 0.195301495      |   |
|               | 0.602543611                           | 2                | 0            | 0.998207054  |                                       |             |                                |                  |   |
| COL1A1        | ENSG00000108821.13                    |                  |              | 0.801261727  | 1                                     | 1           | 0.801261727                    |                  |   |
|               | Brain_Caudate_basal_ganglia           |                  |              | 0.801261727  |                                       |             | Brain_Caudate_basal_ganglia    | 1                | 1 |
|               | 1                                     | -0.251714528     | -0.251714528 | -0.251714528 |                                       |             | NA                             | 1                | 0 |
|               | 0.998207054                           |                  |              |              |                                       |             |                                |                  |   |
| SFXN3         | ENSG00000107819.13                    |                  |              | 0.801370244  | 10                                    | 10          | 0.097216971                    |                  |   |
|               | Brain_Frontal_Cortex_BA9              |                  |              | 0.935817375  |                                       |             | Brain_Spinal_cord_cervical_c-1 |                  |   |
|               | 2.423871221                           | 0.265449546      |              | 0.265449546  |                                       |             | -1.6584981                     | 0.668424513      |   |
|               | -0.563694357                          | 0.740025596      | 10           | 0            | 0.998207054                           |             |                                |                  |   |
| BICC1         | ENSG00000122870.11                    |                  |              | 0.801388748  | 7                                     | 6           | 0.340950024                    |                  |   |
|               | Brain_Caudate_basal_ganglia           |                  |              | 0.990435519  |                                       |             | Brain_Spinal_cord_cervical_c-1 |                  |   |
|               | 3.377128096                           | 0.101779196      |              | 0.398937405  |                                       |             | -0.952289811                   | 0.414051064      |   |
|               | -0.253488041                          | 0.510745299      | 6            | 0            | 0.998207054                           |             |                                |                  |   |
| AKAP13        | ENSG00000170776.21                    |                  |              | 0.801574336  | 4                                     | 3           | 0.440805569                    |                  |   |
|               | Brain_Hippocampus                     |                  |              | 0.973873835  |                                       |             | Brain_Caudate_basal_ganglia    | 2.835839         |   |
|               | 0.04407953                            | 0.250705062      |              | -0.7708336   | -0.032750146                          |             | -0.382732961                   |                  |   |
|               | 0.389029306                           | 3                | 0            | 0.998207054  |                                       |             |                                |                  |   |
| GRIK3         | ENSG00000163873.9                     |                  |              | 0.801627655  | 1                                     | 1           | 0.801627655                    |                  |   |
|               | Brain_Frontal_Cortex_BA9              |                  |              | 0.801627655  |                                       |             | Brain_Frontal_Cortex_BA9       | 1                | 1 |
|               | 1                                     | 0.251241171      | 0.251241171  | 0.251241171  |                                       |             | NA                             | 1                | 0 |
|               | 0.998207054                           |                  |              |              |                                       |             |                                |                  |   |
| OSBPL1        | ENSG00000144909.7                     |                  |              | 0.801652344  | 9                                     | 7           | 0.184835758                    |                  |   |
|               | Brain_Cortex                          |                  |              | 0.950827567  |                                       |             | Brain_Hippocampus              | 4.373216356      |   |
|               | 0.038529776                           | 0.188875256      |              | -0.700804016 | 1.326011894                           |             | 0.179276001                    |                  |   |
|               | 0.686327422                           | 7                | 0            | 0.998207054  |                                       |             |                                |                  |   |
| CCDC180       | ENSG00000197816.13                    |                  |              | 0.801664725  | 4                                     | 3           | 0.37173427                     |                  |   |
|               | Brain_Frontal_Cortex_BA9              |                  |              | 0.868202626  |                                       |             | Brain_Cortex                   | 2.931862135      |   |
|               | 0.059849473                           | 0.185834226      |              | -0.893229526 | -0.16594196                           |             | -0.529504659                   |                  |   |
|               | 0.34838334                            | 3                | 0            | 0.998207054  |                                       |             |                                |                  |   |
| UBE2M         | ENSG00000130725.7                     |                  |              | 0.801784635  | 1                                     | 1           | 0.801784635                    |                  |   |
|               | Brain_Frontal_Cortex_BA9              |                  |              | 0.801784635  |                                       |             | Brain_Frontal_Cortex_BA9       | 1                | 1 |
|               | 1                                     | 0.251038123      | 0.251038123  | 0.251038123  |                                       |             | NA                             | 1                | 0 |
|               | 0.998207054                           |                  |              |              |                                       |             |                                |                  |   |
| DDX11         | ENSG00000013573.16                    |                  |              | 0.801792443  | 13                                    | 1           | 0.635193013                    |                  |   |
|               | Brain_Hypothalamus                    |                  |              | 0.89506942   | Brain_Cerebellum                      | 12.59493058 |                                | 0.001168262      |   |
|               | 12.59493058                           | -0.313505536     |              | 0.474430409  | 0.243533533                           |             | 0.196310932                    |                  |   |
|               | 1                                     | 0                | 0.998207054  |              |                                       |             |                                |                  |   |
| RP11-378I6.1  | ENSG00000261402.1                     |                  |              | 0.801897691  | 13                                    | 13          | 0.182060743                    |                  |   |
|               | Brain_Cerebellum                      |                  |              | 0.811388741  | Brain_Caudate_basal_ganglia           | 3.526411983 |                                |                  |   |
|               | 0.204433074                           | 0.204433074      |              | -0.608213631 | 1.334436811                           |             | 0.088270425                    |                  |   |
|               | 0.742647448                           | 13               | 0            | 0.998207054  |                                       |             |                                |                  |   |
| MEIOC         | ENSG00000180336.17                    |                  |              | 0.801924968  | 4                                     | 4           | 0.280410217                    |                  |   |
|               | Brain_Hypothalamus                    |                  |              | 0.818150517  | Brain_Nucleus_accumbens_basal_ganglia |             |                                |                  |   |
|               | 2.467109504                           | 0.274530738      |              | 0.274530738  | -1.079398281                          |             | -0.229924398                   |                  |   |
|               | -0.7942575                            | 0.397016771      | 4            | 0            | 0.998207054                           |             |                                |                  |   |
| GUSB          | ENSG00000169919.16                    |                  |              | 0.801938303  | 1                                     | 1           | 0.801938303                    | Brain_Cerebellum |   |
|               | 0.801938303                           | Brain_Cerebellum | 1            | 1            | 1                                     | 0.250839369 | 0.250839369                    |                  |   |
|               | 0.250839369                           | NA               | 1            | 0            | 0.998207054                           |             |                                |                  |   |
| RP11-297J22.1 | ENSG00000271709.1                     |                  |              | 0.801993008  | 2                                     | 2           | 0.686247143                    |                  |   |
|               | Brain_Substantia_nigra                |                  |              | 0.979425683  | Brain_Nucleus_accumbens_basal_ganglia |             |                                |                  |   |
|               | 1.816885288                           | 0.183114712      |              | 0.183114712  | 0.025788941                           |             | 0.403953188                    |                  |   |
|               | 0.214871065                           | 0.267402504      | 2            | 0            | 0.998207054                           |             |                                |                  |   |
| SLIRP         | ENSG00000119705.9                     |                  |              | 0.802165861  | 2                                     | 2           | 0.536437025                    |                  |   |
|               | Brain_Hippocampus                     |                  |              | 0.845046976  | Brain_Anterior_cingulate_cortex_BA24  |             |                                |                  |   |
|               | 1.074659443                           | 0.925340557      |              | 0.925340557  | -0.618209839                          |             | 0.195441953                    |                  |   |
|               | -0.211383943                          | 0.575338699      | 2            | 0            | 0.998207054                           |             |                                |                  |   |
| LINC01869     | ENSG00000180279.6                     |                  |              | 0.802229238  | 13                                    | 9           | 0.096663276                    |                  |   |
|               | Brain_Nucleus_accumbens_basal_ganglia |                  |              | 0.963671267  | Brain_Cerebellum                      | 5.56379292  |                                |                  |   |

|          |                                       |                             |                                       |                        |                  |  |  |
|----------|---------------------------------------|-----------------------------|---------------------------------------|------------------------|------------------|--|--|
|          | 0.001757823                           | 0.214764109                 | -1.661249858                          | 0.783504269            | -0.010855167     |  |  |
|          | 0.680625746                           | 9 0                         | 0.998207054                           |                        |                  |  |  |
| NKAIN4   | ENSG00000101198.14                    | 0.802257673                 | 12 4                                  | 0.257244312            |                  |  |  |
|          | Brain_Nucleus_accumbens_basal_ganglia | 0.913693849                 |                                       | Brain_Substantia_nigra |                  |  |  |
|          | 9.684053755                           | 0.000984115                 | 0.348688434                           | 0.108380524            | 1.132928424      |  |  |
|          | 0.784762263                           | 0.323146729                 | 4 0                                   | 0.998207054            |                  |  |  |
| CXCL13   | ENSG00000156234.7                     | 0.80239877 2                | 2 2                                   | 0.507582542            | Brain_Cerebellum |  |  |
|          | 0.625624039                           | Brain_Cerebellar_Hemisphere | 1.698097617                           | 0.301902383            |                  |  |  |
|          | 0.301902383                           | -0.6626066 -0.48789525      | -0.575250925                          | 0.12353958 2           | 0                |  |  |
|          | 0.998207054                           |                             |                                       |                        |                  |  |  |
| ZCCHC4   | ENSG00000168228.14                    | 0.802458842                 | 2 2                                   | 0.516301375            |                  |  |  |
|          | Brain_Cortex                          | 0.756209836                 | Brain_Cerebellum                      | 1.27481113 0.72518887  | 0.72518887       |  |  |
|          | -0.649057246                          | -0.310461759                | -0.479759502                          | 0.239423165            | 2 0              |  |  |
|          | 0.998207054                           |                             |                                       |                        |                  |  |  |
| BTAFL1   | ENSG00000095564.13                    | 0.802461384                 | 1 1                                   | 0.802461384            | Brain_Cerebellum |  |  |
|          | 0.802461384                           | Brain_Cerebellum            | 1 1 1                                 | 0.250162889            | 0.250162889      |  |  |
|          | 0.250162889                           | NA 1 0                      | 0.998207054                           |                        |                  |  |  |
| TUNAR    | ENSG00000250366.2                     | 0.802491287                 | 3 3                                   | 0.326290787            | Brain_Cortex     |  |  |
|          | 0.950358052                           | Brain_Frontal_Cortex_BA9    | 1.433787677                           | 0.571330186            |                  |  |  |
|          | 0.571330186                           | -0.9816125 0.230683338      | -0.271062104                          | 0.632546387            | 3                |  |  |
|          | 0 0.998207054                         |                             |                                       |                        |                  |  |  |
| NPM2     | ENSG00000158806.13                    | 0.802522895                 | 2 2                                   | 0.559400106            |                  |  |  |
|          | Brain_Cerebellar_Hemisphere           | 0.653825102                 | Brain_Cerebellum                      | 1.24501648 0.75498352  |                  |  |  |
|          | 0.75498352 0.448454658                | 0.583732785                 | 0.516093722                           | 0.095656081            | 2                |  |  |
|          | 0 0.998207054                         |                             |                                       |                        |                  |  |  |
| PGAM5    | ENSG00000247077.6                     | 0.80255521 2 2              | 0.558578724                           | Brain_Cerebellum       |                  |  |  |
|          | 0.969873863                           | Brain_Cerebellar_Hemisphere | 1.520811642                           | 0.479188358            |                  |  |  |
|          | 0.479188358                           | -0.584953886 -0.03776649    | -0.311360188                          | 0.386919919            |                  |  |  |
|          | 2 0 0.998207054                       |                             |                                       |                        |                  |  |  |
| CHORDC1  | ENSG00000110172.11                    | 0.802596299                 | 1 1                                   | 0.802596299            |                  |  |  |
|          | Brain_Cortex                          | 0.802596299                 | Brain_Cortex                          | 1 1 1                  | 0.249988427      |  |  |
|          | 0.249988427                           | 0.249988427 NA 1 0          | 0.998207054                           |                        |                  |  |  |
| ZNF296   | ENSG00000170684.8                     | 0.802704243                 | 3 3                                   | 0.433305748            |                  |  |  |
|          | Brain_Hypothalamus                    | 0.724517377                 | Brain_Putamen_basal_ganglia           | 1.390428742            |                  |  |  |
|          | 0.60333889 0.60333889                 | -0.78354737                 | 0.352427906                           | -0.394273627           |                  |  |  |
|          | 0.646858506 3 0                       | 0.998207054                 |                                       |                        |                  |  |  |
| NINJ1    | ENSG00000131669.9                     | 0.802747562                 | 10 6                                  | 0.132259061            |                  |  |  |
|          | Brain_Spinal_cord_cervical_c-1        | 0.992015759                 | Brain_Amygdala                        | 6.42366885             |                  |  |  |
|          | 1.08E-19 0.350024469                  | -1.505252934                | 0.560250502                           | -0.043229181           |                  |  |  |
|          | 0.600665647 6 0                       | 0.998207054                 |                                       |                        |                  |  |  |
| METTL10  | ENSG00000203791.14                    | 0.802833083                 | 12 7                                  | 0.07888108             | Brain_Cortex     |  |  |
|          | 0.828118846                           | Brain_Hippocampus           | 7.345158145                           | 0.0059571              | 0.353072635      |  |  |
|          | 0.217114844                           | 1.757215524 1.176843102     | 0.460930224                           | 7 0                    |                  |  |  |
|          | 0.998207054                           |                             |                                       |                        |                  |  |  |
| PEG10    | ENSG00000242265.5                     | 0.802884587                 | 2 2                                   | 0.562983102            |                  |  |  |
|          | Brain_Hippocampus                     | 0.641084443                 | Brain_Cerebellum                      | 1.267373167            |                  |  |  |
|          | 0.732626833 0.732626833               | 0.466183103                 | 0.578416285                           | 0.522299694            |                  |  |  |
|          | 0.079360843 2 0                       | 0.998207054                 |                                       |                        |                  |  |  |
| IRX6     | ENSG00000159387.7                     | 0.802886163                 | 6 5                                   | 0.417751829            |                  |  |  |
|          | Brain_Nucleus_accumbens_basal_ganglia | 0.909894002                 |                                       |                        |                  |  |  |
|          | Brain_Anterior_cingulate_cortex_BA24  | 4.441750832                 | 0.043226834                           | 0.20904238             |                  |  |  |
|          | 0.113172242 0.810327753               | 0.381941487                 | 0.256910541                           | 5 0                    |                  |  |  |
|          | 0.998207054                           |                             |                                       |                        |                  |  |  |
| ERGIC3   | ENSG00000125991.19                    | 0.802890589                 | 8 3                                   | 0.273896998            |                  |  |  |
|          | Brain_Caudate_basal_ganglia           | 0.755714455                 | Brain_Nucleus_accumbens_basal_ganglia |                        |                  |  |  |
|          | 6.801008002 0.003387618               | 0.30906783                  | 0.311113346                           | 1.094132209            |                  |  |  |
|          | 0.780319812 0.245202002               | 3 0                         | 0.998207054                           |                        |                  |  |  |
| TMEM234  | ENSG00000160055.19                    | 0.803082656                 | 4 3                                   | 0.338814231            |                  |  |  |
|          | Brain_Hypothalamus                    | 0.630147237                 | Brain_Cortex                          | 3.445618247            |                  |  |  |
|          | 0.023555544 0.135223735               | 0.481519622                 | 0.9565108                             | 0.776902515            |                  |  |  |
|          | 0.213113286 3 0                       | 0.998207054                 |                                       |                        |                  |  |  |
| C12orf75 | ENSG00000235162.8                     | 0.803113199                 | 3 2                                   | 0.516684221            |                  |  |  |

|               |                                       |                  |              |                                       |              |                  |   |
|---------------|---------------------------------------|------------------|--------------|---------------------------------------|--------------|------------------|---|
|               | Brain_Frontal_Cortex_BA9              | 0.994318371      |              | Brain_Nucleus_accumbens_basal_ganglia |              |                  |   |
|               | 2.079712675                           | 0.00973258       | 0.910554745  | -0.007120926                          | 0.648465031  |                  |   |
|               | 0.222742146                           | 0.369078632      | 2            | 0                                     | 0.998207054  |                  |   |
| RP11-129K12.1 | ENSG00000272334.1                     | 0.803118628      |              | 1                                     | 1            | 0.803118628      |   |
|               | Brain_Substantia_nigra                | 0.803118628      |              | Brain_Substantia_nigra                | 1            | 1                |   |
|               | 1                                     | -0.249313062     | -0.249313062 | -0.249313062                          | NA           | 1                | 0 |
|               | 0.998207054                           |                  |              |                                       |              |                  |   |
| RGPD2         | ENSG00000185304.14                    | 0.803401644      | 1            | 1                                     | 0.803401644  | Brain_Cerebellum |   |
|               | 0.803401644                           | Brain_Cerebellum | 1            | 1                                     | -0.248947174 | -0.248947174     |   |
|               | -0.248947174                          | NA               | 1            | 0                                     | 0.998207054  |                  |   |
| MELTF         | ENSG00000163975.11                    | 0.803536504      | 1            | 1                                     | 0.803536504  |                  |   |
|               | Brain_Putamen_basal_ganglia           | 0.803536504      |              | Brain_Putamen_basal_ganglia           | 1            | 1                |   |
|               | 1                                     | -0.248772836     | -0.248772836 | -0.248772836                          | NA           | 1                | 0 |
|               | 0.998207054                           |                  |              |                                       |              |                  |   |
| LINC02147     | ENSG00000249797.1                     | 0.803552377      | 1            | 1                                     | 0.803552377  |                  |   |
|               | Brain_Putamen_basal_ganglia           | 0.803552377      |              | Brain_Putamen_basal_ganglia           | 1            | 1                |   |
|               | 1                                     | -0.248752318     | -0.248752318 | -0.248752318                          | NA           | 1                | 0 |
|               | 0.998207054                           |                  |              |                                       |              |                  |   |
| GNB5          | ENSG00000069966.18                    | 0.803610263      | 1            | 1                                     | 0.803610263  |                  |   |
|               | Brain_Cerebellar_Hemisphere           | 0.803610263      |              | Brain_Cerebellar_Hemisphere           | 1            | 1                |   |
|               | 1                                     | 0.248677489      | 0.248677489  | 0.248677489                           | NA           | 1                | 0 |
|               | 0.998207054                           |                  |              |                                       |              |                  |   |
| RP11-680H20.2 | ENSG00000250519.6                     | 0.803612304      | 2            | 2                                     | 0.536645017  |                  |   |
|               | Brain_Cerebellum                      | 0.848809131      |              | Brain_Cerebellar_Hemisphere           | 1.610465266  |                  |   |
|               | 0.389534734                           | 0.389534734      | 0.190638109  | 0.617894299                           | 0.404266204  |                  |   |
|               | 0.302115749                           | 2                | 0            | 0.998207054                           |              |                  |   |
| RP11-930P14.2 | ENSG00000260588.1                     | 0.803703938      | 5            | 5                                     | 0.353180315  |                  |   |
|               | Brain_Cerebellar_Hemisphere           | 0.963280747      |              | Brain_Caudate_basal_ganglia           |              |                  |   |
|               | 1.344803489                           | 0.651533081      | 0.651533081  | -0.719299555                          | 0.928438192  |                  |   |
|               | -0.010069562                          | 0.682280941      | 5            | 0                                     | 0.998207054  |                  |   |
| PSMB7         | ENSG00000136930.12                    | 0.803938266      | 1            | 1                                     | 0.803938266  | Brain_Cerebellum |   |
|               | 0.803938266                           | Brain_Cerebellum | 1            | 1                                     | 0.248253511  | 0.248253511      |   |
|               | 0.248253511                           | NA               | 1            | 0                                     | 0.998207054  |                  |   |
| WNT11         | ENSG00000085741.12                    | 0.804112629      | 3            | 3                                     | 0.405084884  |                  |   |
|               | Brain_Nucleus_accumbens_basal_ganglia | 0.826544331      |              | Brain_Frontal_Cortex_BA9              |              |                  |   |
|               | 1.249623391                           | 0.724472871      | 0.724472871  | 0.219135715                           | 0.832574255  |                  |   |
|               | 0.52223383                            | 0.306783391      | 3            | 0                                     | 0.998207054  |                  |   |
| CHST3         | ENSG00000122863.5                     | 0.804179301      | 1            | 1                                     | 0.804179301  |                  |   |
|               | Brain_Caudate_basal_ganglia           | 0.804179301      |              | Brain_Caudate_basal_ganglia           | 1            | 1                |   |
|               | 1                                     | 0.247941977      | 0.247941977  | 0.247941977                           | NA           | 1                | 0 |
|               | 0.998207054                           |                  |              |                                       |              |                  |   |
| PRICKLE1      | ENSG00000139174.11                    | 0.804218274      | 2            | 2                                     | 0.511321968  |                  |   |
|               | Brain_Cerebellum                      | 0.572083882      |              | Brain_Cerebellar_Hemisphere           | 1.90355011   | 0.09644989       |   |
|               | 0.09644989                            | -0.65678065      | -0.564985125 | -0.610882888                          | 0.064909239  | 2                |   |
|               | 0                                     | 0.998207054      |              |                                       |              |                  |   |
| KAT2A         | ENSG00000108773.10                    | 0.804253622      | 1            | 1                                     | 0.804253622  | Brain_Cerebellum |   |
|               | 0.804253622                           | Brain_Cerebellum | 1            | 1                                     | 0.247845923  | 0.247845923      |   |
|               | 0.247845923                           | NA               | 1            | 0                                     | 0.998207054  |                  |   |
| PGBD4         | ENSG00000182405.5                     | 0.804552894      | 5            | 5                                     | 0.396808692  |                  |   |
|               | Brain_Cerebellar_Hemisphere           | 0.997693892      |              | Brain_Cerebellum                      | 2.93143519   |                  |   |
|               | 0.220369171                           | 0.220369171      | -0.684986746 | 0.847334517                           | 0.10066635   |                  |   |
|               | 0.546385102                           | 5                | 0            | 0.998207054                           |              |                  |   |
| VAMP1         | ENSG00000139190.16                    | 0.804638915      | 9            | 2                                     | 0.322798558  |                  |   |
|               | Brain_Anterior_cingulate_cortex_BA24  | 0.70402382       |              | Brain_Cerebellar_Hemisphere           |              |                  |   |
|               | 8.008531426                           | 0.003158114      | 0.592604311  | 0.379894379                           | 0.988723263  |                  |   |
|               | 0.601358355                           | 0.218181814      | 2            | 0                                     | 0.998207054  |                  |   |
| GLDC          | ENSG00000178445.9                     | 0.804892717      | 3            | 3                                     | 0.526469086  |                  |   |
|               | Brain_Cerebellar_Hemisphere           | 0.597662179      |              | Brain_Cerebellum                      | 1.106051702  |                  |   |
|               | 0.856827273                           | 0.856827273      | 0.527765393  | 0.633405176                           | 0.593365014  |                  |   |
|               | 0.057270458                           | 3                | 0            | 0.998207054                           |              |                  |   |
| LLNLR-246C6.1 | ENSG00000273218.1                     | 0.805005027      | 3            | 3                                     | 0.533410608  |                  |   |
|               | Brain_Anterior_cingulate_cortex_BA24  | 0.79467034       |              | Brain_Hippocampus                     |              |                  |   |

|        |                                       |                             |                                       |              |                  |
|--------|---------------------------------------|-----------------------------|---------------------------------------|--------------|------------------|
|        | 1.308495093                           | 0.728635569                 | 0.728635569                           | -0.260250775 | 0.62280814       |
|        | 0.319714051                           | 0.502435385                 | 3 0                                   | 0.998207054  |                  |
| TATDN2 | ENSG00000157014.10                    | 0.805158586                 | 5 5                                   | 0.256270391  |                  |
|        | Brain_Amygdala                        | 0.613449829                 | Brain_Nucleus_accumbens_basal_ganglia |              |                  |
|        | 2.922496429                           | 0.268326955                 | 0.268326955                           | -1.135250463 | -0.505155206     |
|        | -0.849629086                          | 0.292070307                 | 5 0                                   | 0.998207054  |                  |
| UVRAG  | ENSG00000198382.8                     | 0.805161685                 | 2 2                                   | 0.522644169  |                  |
|        | Brain_Nucleus_accumbens_basal_ganglia | 0.686725206                 | Brain_Cerebellum                      |              |                  |
|        | 1.783731093                           | 0.216268907                 | 0.216268907                           | -0.639274815 | -0.403303176     |
|        | -0.521288995                          | 0.166857146                 | 2 0                                   | 0.998207054  |                  |
| CMSS1  | ENSG00000184220.11                    | 0.805307801                 | 1 1                                   | 0.805307801  | Brain_Cerebellum |
|        | 0.805307801                           | Brain_Cerebellum1           | 1 1                                   | -0.246483725 | -0.246483725     |
|        | -0.246483725                          | NA 1 0                      | 0.998207054                           |              |                  |
| OLFM3  | ENSG00000118733.16                    | 0.805400322                 | 4 4                                   | 0.41596086   |                  |
|        | Brain_Spinal_cord_cervical_c-1        | 0.896430074                 | Brain_Cerebellar_Hemisphere           |              |                  |
|        | 1.833039186                           | 0.301651216                 | 0.301651216                           | -0.495744968 | 0.813448678      |
|        | 0.027372727                           | 0.587626329                 | 4 0                                   | 0.998207054  |                  |
| HEG1   | ENSG00000173706.12                    | 0.805412102                 | 1 1                                   | 0.805412102  | Brain_Cortex     |
|        | 0.805412102                           | Brain_Cortex                | 1 1 1                                 | -0.246348974 | -0.246348974     |
|        | -0.246348974                          | NA 1 0                      | 0.998207054                           |              |                  |
| PNRC1  | ENSG00000146278.10                    | 0.805516987                 | 3 3                                   | 0.368045642  |                  |
|        | Brain_Nucleus_accumbens_basal_ganglia | 0.976216322                 | Brain_Amygdala                        |              |                  |
|        | 1.747571302                           | 0.449922095                 | 0.449922095                           | -0.900140205 | -0.029812836     |
|        | -0.560774658                          | 0.46572447 3                | 0 0                                   | 0.998207054  |                  |
| SPINK2 | ENSG00000128040.10                    | 0.805532702                 | 6 5                                   | 0.40660401   |                  |
|        | Brain_Hypothalamus                    | 0.95289946                  | Brain_Nucleus_accumbens_basal_ganglia |              |                  |
|        | 4.753023482                           | 0.130413555                 | 0.167323266                           | -0.0590661   | 0.829884639      |
|        | 0.525096977                           | 0.343262425                 | 5 0                                   | 0.998207054  |                  |
| SLF1   | ENSG00000133302.12                    | 0.805540151                 | 5 5                                   | 0.217109444  |                  |
|        | Brain_Putamen_basal_ganglia           | 0.873202413                 | Brain_Caudate_basal_ganglia           |              |                  |
|        | 2.592873782                           | 0.128320608                 | 0.128320608                           | 0.159592086  | 1.234250851      |
|        | 0.716614978                           | 0.42789686 5                | 0 0                                   | 0.998207054  |                  |
| KRT80  | ENSG00000167767.13                    | 0.805561025                 | 2 2                                   | 0.634120965  | Brain_Cortex     |
|        | 0.863613614                           | Brain_Frontal_Cortex_BA9    | 1.855160445                           | 0.144839555  |                  |
|        | 0.144839555                           | 0.171776026                 | 0.475934609                           | 0.323855318  | 0.215072597      |
|        | 2 0                                   | 0.998207054                 |                                       |              |                  |
| TRIM28 | ENSG00000130726.11                    | 0.805640974                 | 2 2                                   | 0.540010489  |                  |
|        | Brain_Caudate_basal_ganglia           | 0.813082844                 | Brain_Nucleus_accumbens_basal_ganglia |              |                  |
|        | 1.00276585                            | 0.99723415                  | 0.99723415                            | 0.236450848  | 0.61279713       |
|        | 0.266117008                           | 2 0                         | 0.998207054                           |              | 0.424623989      |
| RBM33  | ENSG00000184863.10                    | 0.805708591                 | 1 1                                   | 0.805708591  |                  |
|        | Brain_Spinal_cord_cervical_c-1        | 0.805708591                 | Brain_Spinal_cord_cervical_c-1        |              |                  |
|        | 1 1 1                                 | -0.24596595                 | -0.24596595                           | -0.24596595  | NA 1 0           |
|        | 0.998207054                           |                             |                                       |              |                  |
| SWSAP1 | ENSG00000173928.2                     | 0.805719497                 | 1 1                                   | 0.805719497  |                  |
|        | Brain_Hypothalamus                    | 0.805719497                 | Brain_Hypothalamus                    | 1 1 1        |                  |
|        | -0.245951862                          | -0.245951862                | -0.245951862                          | NA 1 0       | 0.998207054      |
| ANXA2R | ENSG00000177721.4                     | 0.805820181                 | 3 3                                   | 0.404499083  |                  |
|        | Brain_Cerebellar_Hemisphere           | 0.828365893                 | Brain_Cortex                          | 1.224626521  |                  |
|        | 0.764908501                           | 0.764908501                 | -0.27088148                           | 0.833613026  | 0.25984313       |
|        | 0.553504021                           | 3 0                         | 0.998207054                           |              |                  |
| DOCK8  | ENSG00000107099.15                    | 0.806051709                 | 11 10                                 | 0.122808795  |                  |
|        | Brain_Hypothalamus                    | 0.602107765                 | Brain_Cortex                          | 3.950401435  |                  |
|        | 0.098754928                           | 0.177686917                 | -1.543090602                          | 0.521371839  | -0.960745659     |
|        | 0.569740737                           | 10 0                        | 0.998207054                           |              |                  |
| RABGTB | ENSG00000137955.15                    | 0.806201483                 | 2 2                                   | 0.591557274  |                  |
|        | Brain_Cerebellum                      | 0.997874365                 | Brain_Hippocampus                     | 1.572638852  |                  |
|        | 0.427361148                           | 0.427361148                 | -0.002664092                          | 0.536580707  | 0.266958308      |
|        | 0.381303654                           | 2 0                         | 0.998207054                           |              |                  |
| RIN3   | ENSG00000100599.15                    | 0.806259748                 | 5 5                                   | 0.290431502  | Brain_Cortex     |
|        | 0.853155752                           | Brain_Cerebellar_Hemisphere | 2.106364071                           | 0.282181625  |                  |
|        | 0.282181625                           | -0.185093434                | 1.057175494                           | 0.700019928  | 0.502857525      |

5 0 0.998207054  
MLLT3 ENSG00000171843.15 0.806261582 2 2 0.61190612  
Brain\_Nucleus\_accumbens\_basal\_ganglia 0.683907639 Brain\_Caudate\_basal\_ganglia  
1.017882139 0.982117861 0.982117861 -0.507354479 0.407136634  
-0.050108923 0.646642867 2 0 0.998207054  
NIPAL2 ENSG00000104361.9 0.806299085 7 6 0.095530737  
Brain\_Cerebellar\_Hemisphere 0.493561692 Brain\_Spinal\_cord\_cervical\_c-1  
4.674904878 0.056958624 0.181401015 0.684654935 1.66691787  
0.966731459 0.349681192 6 0 0.998207054  
SLC5A8 ENSG00000256870.2 0.806324808 3 3 0.444054813  
Brain\_Frontal\_Cortex\_BA9 0.774129214 Brain\_Substantia\_nigra  
1.183890377 0.8538787 0.8538787 -0.765364018 -0.286977936  
-0.508028525 0.241248329 3 0 0.998207054  
WDR88 ENSG00000166359.10 0.806329046 2 2 0.511952898  
Brain\_Anterior\_cingulate\_cortex\_BA24 0.600197129 Brain\_Frontal\_Cortex\_BA9  
1.817882363 0.182117637 0.182117637 -0.655799873 -0.524117052  
-0.589958462 0.093113816 2 0 0.998207054  
FRMPD2 ENSG00000170324.20 0.80634134 6 4 0.32761818 Brain\_Cerebellum  
0.909477921 Brain\_Putamen\_basal\_ganglia 4.493831035 0.031874158  
0.289114588 -0.978922689 -0.113697088 -0.70982632 0.350384944  
4 0 0.998207054  
GS1-39E22.2 ENSG00000254239.1 0.806416701 2 2 0.522857986  
Brain\_Hypothalamus 0.886988605 Brain\_Hippocampus 1.010006363  
0.989993637 0.989993637 -0.142115715 0.638946116 0.2484152  
0.552294117 2 0 0.998207054  
LINC01799 ENSG00000230525.5 0.806456165 1 1 0.806456165  
Brain\_Cerebellum 0.806456165 Brain\_Cerebellum1 1 1 -0.245000344  
-0.245000344 -0.245000344 NA 1 0 0.998207054  
UNKL ENSG00000059145.18 0.806516073 1 1 0.806516073  
Brain\_Spinal\_cord\_cervical\_c-1 0.806516073 Brain\_Spinal\_cord\_cervical\_c-1  
1 1 1 0.244922973 0.244922973 0.244922973 NA 1 0  
0.998207054  
LHPP ENSG00000107902.13 0.806565996 12 9 0.221089902  
Brain\_Frontal\_Cortex\_BA9 0.996394039 Brain\_Putamen\_basal\_ganglia  
7.000746882 0.088026471 0.239564417 -1.059853016 1.223635129  
-0.020574381 0.639451986 9 0 0.998207054  
RNASEK ENSG00000219200.11 0.806644665 3 3 0.50248356 Brain\_Cortex  
0.92127958 Brain\_Frontal\_Cortex\_BA9 2.403258139 0.1339691 0.1339691  
-0.670587167 0.098822026 -0.344310053 0.397792583 3 0  
0.998207054  
DNAAF1 ENSG00000154099.17 0.806648065 6 5 0.355989768  
Brain\_Nucleus\_accumbens\_basal\_ganglia 0.894814764 Brain\_Frontal\_Cortex\_BA9  
3.527131218 0.026327343 0.167711858 -0.92303346 0.537757133  
-0.10545454 0.540228702 5 0 0.998207054  
RP1-153G14.4 ENSG00000271755.1 0.80673393 7 4 0.512281036  
Brain\_Hippocampus 0.999961278 Brain\_Hypothalamus 4.709838871  
0.006928762 0.236502986 -0.21014445 0.655290034 0.195935489  
0.286265596 4 0 0.998207054  
ULK2 ENSG00000083290.19 0.806820559 2 2 0.602217665 Brain\_Cortex  
0.66562673 Brain\_Anterior\_cingulate\_cortex\_BA24 1.069195208 0.930804792  
0.930804792 0.432157797 0.521214054 0.476685926 0.062972283  
2 0 0.998207054  
H2AFX ENSG00000188486.3 0.806946533 1 1 0.806946533  
Brain\_Hippocampus 0.806946533 Brain\_Hippocampus 1 1 1  
-0.244367083 -0.244367083 -0.244367083 NA 1 0 0.998207054  
AF127936.3 ENSG00000232884.7 0.807020373 3 3 0.490512927  
Brain\_Cerebellum 0.652537786 Brain\_Cerebellar\_Hemisphere 1.771003704  
0.233093902 0.233093902 -0.689493239 0.683632447 -0.152033417  
0.733528234 3 0 0.998207054  
SMCO4 ENSG00000166002.6 0.807097027 2 2 0.633839496  
Brain\_Nucleus\_accumbens\_basal\_ganglia 0.668003269 Brain\_Putamen\_basal\_ganglia  
1.041706212 0.958293788 0.958293788 -0.476329719 -0.428890012

|               |                                       |                                       |                             |              |                             |                    |              |
|---------------|---------------------------------------|---------------------------------------|-----------------------------|--------------|-----------------------------|--------------------|--------------|
|               | -0.452609866                          | 0.033544939                           | 2                           | 0            | 0.998207054                 |                    |              |
| ECHDC2        | ENSG00000121310.16                    | 0.807169173                           | 4                           | 3            | 0.263940355                 |                    |              |
|               | Brain_Nucleus_accumbens_basal_ganglia | 0.998025626                           |                             |              | Brain_Caudate_basal_ganglia |                    |              |
|               | 2.435884832                           | 0.056680039                           | 0.513372024                 |              | -0.002474513                | 1.117126235        |              |
|               | 0.553850072                           | 0.458780771                           | 3                           | 0            | 0.998207054                 |                    |              |
| PTTG2         | ENSG00000250254.1                     | 0.807229263                           | 2                           | 2            | 0.514033264                 |                    |              |
|               | Brain_Cerebellar_Hemisphere           | 0.716041478                           |                             |              | Brain_Cerebellum            | 1.49139817         | 0.50860183   |
|               | 0.50860183                            | 0.363754318                           | 0.652570415                 |              | 0.508162366                 | 0.204223821        | 2            |
|               | 0                                     | 0.998207054                           |                             |              |                             |                    |              |
| SFTA2         | ENSG00000196260.4                     | 0.80730014                            | 7                           | 4            | 0.364211233                 | Brain_Hypothalamus |              |
|               | 0.955962656                           | Brain_Nucleus_accumbens_basal_ganglia | 5.308913849                 |              |                             |                    |              |
|               | 0.003149033                           | 0.192876675                           | -0.907369877                |              | 0.055220677                 | -0.645783807       |              |
|               | 0.348046179                           | 4                                     | 0                           | 0.998207054  |                             |                    |              |
| CIR1          | ENSG00000138433.15                    | 0.807362875                           | 2                           | 2            | 0.556100816                 |                    |              |
|               | Brain_Spinal_cord_cervical_c-1        | 0.85268517                            | Brain_Substantia_nigra      |              |                             |                    |              |
|               | 1.162935278                           | 0.837064722                           | 0.837064722                 |              | -0.185693444                | 0.58864295         |              |
|               | 0.201474753                           | 0.547538515                           | 2                           | 0            | 0.998207054                 |                    |              |
| RP11-728K20.3 | ENSG00000273011.1                     | 0.807468959                           | 3                           | 3            | 0.438233218                 |                    |              |
|               | Brain_Anterior_cingulate_cortex_BA24  | 0.858087326                           | Brain_Cerebellar_Hemisphere |              |                             |                    |              |
|               | 1.27961151                            | 0.813464191                           | 0.813464191                 |              | -0.178809449                | 0.775180147        |              |
|               | 0.415331564                           | 0.518356773                           | 3                           | 0            | 0.998207054                 |                    |              |
| RPL23         | ENSG00000125691.12                    | 0.807513244                           | 1                           | 1            | 0.807513244                 | Brain_Cortex       |              |
|               | 0.807513244                           | Brain_Cortex                          | 1                           | 1            | 1                           | -0.243635355       | -0.243635355 |
|               | -0.243635355                          | NA                                    | 1                           | 0            | 0.998207054                 |                    |              |
| DNAH6         | ENSG00000115423.18                    | 0.807534542                           | 5                           | 5            | 0.247921123                 |                    |              |
|               | Brain_Spinal_cord_cervical_c-1        | 0.672049617                           | Brain_Cerebellum            | 1.713882618  |                             |                    |              |
|               | 0.455584712                           | 0.455584712                           | -0.496085119                |              | 1.155413531                 | 0.494034138        |              |
|               | 0.629614381                           | 5                                     | 0                           | 0.998207054  |                             |                    |              |
| RAMP2-AS1     | ENSG00000197291.8                     | 0.807614332                           | 1                           | 1            | 0.807614332                 |                    |              |
|               | Brain_Cerebellar_Hemisphere           | 0.807614332                           | Brain_Cerebellar_Hemisphere | 1            | 1                           |                    |              |
|               | 1                                     | -0.243504845                          | -0.243504845                | -0.243504845 | NA                          | 1                  | 0            |
|               | 0.998207054                           |                                       |                             |              |                             |                    |              |
| VARS2         | ENSG00000137411.16                    | 0.807644861                           | 13                          | 3            | 0.248282479                 |                    |              |
|               | Brain_Hypothalamus                    | 0.915242577                           | Brain_Putamen_basal_ganglia | 10.38046974  |                             |                    |              |
|               | 0.017316229                           | 0.456789513                           | -1.154531142                |              | 0.132849303                 | -0.56237706        |              |
|               | 0.444182675                           | 3                                     | 0                           | 0.998207054  |                             |                    |              |
| C7orf26       | ENSG00000146576.12                    | 0.807730287                           | 1                           | 1            | 0.807730287                 |                    |              |
|               | Brain_Putamen_basal_ganglia           | 0.807730287                           | Brain_Putamen_basal_ganglia | 1            | 1                           |                    |              |
|               | 1                                     | -0.243355147                          | -0.243355147                | -0.243355147 | NA                          | 1                  | 0            |
|               | 0.998207054                           |                                       |                             |              |                             |                    |              |
| RP5-1112D6.7  | ENSG00000271789.1                     | 0.807832764                           | 2                           | 2            | 0.630957017                 |                    |              |
|               | Brain_Nucleus_accumbens_basal_ganglia | 0.899825214                           | Brain_Hypothalamus          |              |                             |                    |              |
|               | 1.806711573                           | 0.193288427                           | 0.193288427                 |              | 0.125882148                 | 0.480380275        |              |
|               | 0.303131212                           | 0.250668029                           | 2                           | 0            | 0.998207054                 |                    |              |
| TMEM87B       | ENSG00000153214.9                     | 0.807865343                           | 1                           | 1            | 0.807865343                 |                    |              |
|               | Brain_Putamen_basal_ganglia           | 0.807865343                           | Brain_Putamen_basal_ganglia | 1            | 1                           |                    |              |
|               | 1                                     | 0.243180797                           | 0.243180797                 | 0.243180797  | NA                          | 1                  | 0            |
|               | 0.998207054                           |                                       |                             |              |                             |                    |              |
| SGCE          | ENSG00000127990.15                    | 0.80808408                            | 1                           | 1            | 0.80808408                  |                    |              |
|               | Brain_Anterior_cingulate_cortex_BA24  | 0.80808408                            |                             |              |                             |                    |              |
|               | Brain_Anterior_cingulate_cortex_BA24  | 1                                     | 1                           | 1            | -0.242898433                |                    |              |
|               | -0.242898433                          | -0.242898433                          | NA                          | 1            | 0                           | 0.998207054        |              |
| SLFN13        | ENSG00000154760.13                    | 0.808138111                           | 5                           | 5            | 0.347666907                 |                    |              |
|               | Brain_Anterior_cingulate_cortex_BA24  | 0.978156078                           | Brain_Cortex                |              |                             |                    |              |
|               | 2.651163255                           | 0.25922684                            | 0.25922684                  | -0.939124343 | 0.893193624                 |                    |              |
|               | -0.19316031                           | 0.729597708                           | 5                           | 0            | 0.998207054                 |                    |              |
| GOLGA8R       | ENSG00000186399.10                    | 0.80815787                            | 3                           | 3            | 0.364032924                 |                    |              |
|               | Brain_Anterior_cingulate_cortex_BA24  | 0.995997036                           | Brain_Cerebellar_Hemisphere |              |                             |                    |              |
|               | 1.890842835                           | 0.39413277                            | 0.39413277                  | -0.907707229 | -0.005016993                |                    |              |
|               | -0.333161546                          | 0.499246986                           | 3                           | 0            | 0.998207054                 |                    |              |
| GIT2          | ENSG00000139436.20                    | 0.808227178                           | 1                           | 1            | 0.808227178                 | Brain_Cerebellum   |              |
|               | 0.808227178                           | Brain_Cerebellum                      | 1                           | 1            | 1                           | 0.24271372         | 0.24271372   |
|               |                                       |                                       |                             |              | 0.24271372                  | 0.24271372         |              |

|               |                                       |              |              |              |                             |                                |             |              |                  |
|---------------|---------------------------------------|--------------|--------------|--------------|-----------------------------|--------------------------------|-------------|--------------|------------------|
|               | NA                                    | 1            | 0            | 0.998207054  |                             |                                |             |              |                  |
| ETV3          | ENSG00000117036.11                    |              |              | 0.808336602  | 1                           | 1                              | 0.808336602 |              |                  |
|               | Brain_Hypothalamus                    |              |              | 0.808336602  |                             | Brain_Hypothalamus             | 1           | 1            | 1                |
|               | 0.24257248                            | 0.24257248   | 0.24257248   | NA           | 1                           | 0                              | 0.998207054 |              |                  |
| AP002856.7    | ENSG00000237612.1                     |              |              | 0.808475681  | 2                           | 2                              | 0.56713097  |              |                  |
|               | Brain_Putamen_basal_ganglia           |              |              | 0.996806316  |                             | Brain_Caudate_basal_ganglia    |             |              |                  |
|               | 1.484727235                           | 0.515272765  | 0.515272765  |              |                             | 0.004002701                    |             | 0.572281959  |                  |
|               | 0.28814233                            | 0.401834117  |              | 2            | 0                           | 0.998207054                    |             |              |                  |
| CCDC80        | ENSG00000091986.15                    |              |              | 0.80850467   | 2                           | 2                              | 0.561591733 |              |                  |
|               | Brain_Substantia_nigra                |              |              | 0.730629535  |                             | Brain_Putamen_basal_ganglia    |             |              |                  |
|               | 1.083321552                           | 0.916678448  | 0.916678448  |              |                             | -0.580478869                   |             | 0.34428823   |                  |
|               | -0.118095319                          | 0.653909086  |              | 2            | 0                           | 0.998207054                    |             |              |                  |
| RP11-218F10.3 | ENSG00000273449.1                     |              |              | 0.808641102  | 12                          | 2                              | 0.479675994 |              |                  |
|               | Brain_Cerebellum                      |              |              | 0.78923675   | Brain_Frontal_Cortex_BA9    |                                | 10.84349177 |              |                  |
|               | 0.000742966                           | 0.378617503  |              | -0.706823781 |                             | 0.267301866                    |             | -0.490380215 |                  |
|               | 0.264032316                           | 2            | 0            | 0.998207054  |                             |                                |             |              |                  |
| VWC2          | ENSG00000188730.4                     |              |              | 0.808710362  | 1                           | 1                              | 0.808710362 |              |                  |
|               | Brain_Nucleus_accumbens_basal_ganglia |              |              | 0.808710362  |                             |                                |             |              |                  |
|               | Brain_Nucleus_accumbens_basal_ganglia | 1            | 1            | 1            |                             | -0.242090084                   |             |              |                  |
|               | -0.242090084                          | -0.242090084 | NA           | 1            | 0                           | 0.998207054                    |             |              |                  |
| MINDY4B       | ENSG00000214237.10                    |              |              | 0.808759145  | 1                           | 1                              | 0.808759145 |              |                  |
|               | Brain_Spinal_cord_cervical_c-1        |              |              | 0.808759145  |                             | Brain_Spinal_cord_cervical_c-1 |             |              |                  |
|               | 1                                     | 1            | 1            | 0.242027125  | 0.242027125                 | 0.242027125                    | NA          | 1            | 0                |
|               | 0.998207054                           |              |              |              |                             |                                |             |              |                  |
| TLR4          | ENSG00000136869.13                    |              |              | 0.808895771  | 2                           | 2                              | 0.576388236 |              |                  |
|               | Brain_Hippocampus                     |              |              | 0.97090374   | Brain_Putamen_basal_ganglia |                                | 1.561225044 |              |                  |
|               | 0.438774956                           | 0.438774956  |              | -0.558668126 |                             | -0.036474841                   |             | -0.297571483 |                  |
|               | 0.369246413                           | 2            | 0            | 0.998207054  |                             |                                |             |              |                  |
| AGTR1         | ENSG00000144891.17                    |              |              | 0.808905728  | 2                           | 2                              | 0.571264166 |              |                  |
|               | Brain_Cerebellar_Hemisphere           |              |              | 0.709936109  | Brain_Cerebellum            |                                | 1.090859988 |              |                  |
|               | 0.909140012                           | 0.909140012  |              | 0.371941898  |                             | 0.566190678                    |             | 0.469066288  |                  |
|               | 0.137354629                           | 2            | 0            | 0.998207054  |                             |                                |             |              |                  |
| ATL2          | ENSG00000119787.13                    |              |              | 0.809040371  | 4                           | 4                              | 0.341775558 |              |                  |
|               | Brain_Hypothalamus                    |              |              | 0.763321526  | Brain_Hippocampus           |                                | 2.870060656 |              |                  |
|               | 0.140250021                           | 0.140250021  |              | 0.301121921  |                             | 0.950662839                    |             | 0.588019331  |                  |
|               | 0.327423349                           | 4            | 0            | 0.998207054  |                             |                                |             |              |                  |
| CHMP4A        | ENSG00000254505.9                     |              |              | 0.809083671  | 1                           | 1                              | 0.809083671 |              |                  |
|               | Brain_Cerebellum                      |              |              | 0.809083671  | Brain_Cerebellum            | 1                              | 1           | 1            | 0.241608325      |
|               | 0.241608325                           | 0.241608325  | NA           | 1            | 0                           | 0.998207054                    |             |              |                  |
| TOX2          | ENSG00000124191.17                    |              |              | 0.809111812  | 5                           | 5                              | 0.183522627 |              |                  |
|               | Brain_Cerebellar_Hemisphere           |              |              | 0.945428923  | Brain_Caudate_basal_ganglia |                                |             |              |                  |
|               | 2.107352026                           | 0.303222029  | 0.303222029  |              |                             | -1.329986779                   |             | 0.11333195   |                  |
|               | -0.485917154                          | 0.565659622  |              | 5            | 0                           | 0.998207054                    |             |              |                  |
| C11orf63      | ENSG00000109944.10                    |              |              | 0.809133388  | 2                           | 2                              | 0.523923509 |              |                  |
|               | Brain_Cortex                          |              |              | 0.86181702   | Brain_Hippocampus           |                                | 1.066480304 |              | 0.933519696      |
|               | 0.933519696                           | -0.637309124 | 0.174061639  |              |                             | -0.231623742                   |             | 0.573725769  |                  |
|               | 2                                     | 0            | 0.998207054  |              |                             |                                |             |              |                  |
| LTB4R         | ENSG00000213903.8                     |              |              | 0.809202679  | 7                           | 5                              | 0.242684369 |              |                  |
|               | Brain_Cerebellar_Hemisphere           |              |              | 0.961117926  | Brain_Hypothalamus          |                                | 3.9027325   |              |                  |
|               | 0.058658331                           | 0.217035305  |              | -1.168303487 |                             | 0.099353118                    |             | -0.47295248  |                  |
|               | 0.455940955                           | 5            | 0            | 0.998207054  |                             |                                |             |              |                  |
| GKAP1         | ENSG00000165113.12                    |              |              | 0.809243953  | 3                           | 3                              | 0.491562475 |              | Brain_Cerebellum |
|               | Brain_Hypothalamus                    |              |              | 2.066417209  |                             | 0.285270255                    |             |              |                  |
|               | 0.285270255                           | -0.012087537 | 0.687825819  |              |                             | 0.288145741                    |             | 0.360398288  |                  |
|               | 3                                     | 0            | 0.998207054  |              |                             |                                |             |              |                  |
| LYPD6B        | ENSG00000150556.16                    |              |              | 0.809358809  | 1                           | 1                              | 0.809358809 |              |                  |
|               | Brain_Caudate_basal_ganglia           |              |              | 0.809358809  | Brain_Caudate_basal_ganglia | 1                              | 1           |              |                  |
|               | 1                                     | -0.241253293 | -0.241253293 |              |                             | -0.241253293                   | NA          | 1            | 0                |
|               | 0.998207054                           |              |              |              |                             |                                |             |              |                  |
| RAD9A         | ENSG00000172613.7                     |              |              | 0.809381656  | 10                          | 10                             | 0.233696824 |              |                  |
|               | Brain_Hypothalamus                    |              |              | 0.960753866  | Brain_Frontal_Cortex_BA9    |                                | 3.957558964 |              |                  |
|               | 0.134496955                           | 0.134496955  |              | -1.190889864 |                             | 0.639988914                    |             | -0.10983313  |                  |



|              |                                       |              |              |                                       |              |              |             |                  |            |
|--------------|---------------------------------------|--------------|--------------|---------------------------------------|--------------|--------------|-------------|------------------|------------|
|              | 0.569184455                           | 10           | 0            | 0.998207054                           |              |              |             |                  |            |
| ZSWIM6       | ENSG00000130449.5                     |              |              | 0.809445132                           | 1            | 1            | 0.809445132 |                  |            |
|              | Brain_Cortex                          | 0.809445132  |              | Brain_Cortex                          | 1            | 1            | 1           | -0.241141909     |            |
|              | -0.241141909                          | -0.241141909 | NA           | 1                                     | 0            | 0.998207054  |             |                  |            |
| PWP1         | ENSG00000136045.11                    |              |              | 0.809489107                           | 1            | 1            | 0.809489107 |                  |            |
|              | Brain_Cerebellar_Hemisphere           | 0.809489107  |              | Brain_Cerebellar_Hemisphere           | 1            | 1            |             |                  |            |
|              | 1                                     | 0.241085169  | 0.241085169  | 0.241085169                           | NA           | 1            | 0           |                  |            |
|              | 0.998207054                           |              |              |                                       |              |              |             |                  |            |
| AC004947.2   | ENSG00000233760.1                     |              |              | 0.809528471                           | 10           | 9            | 0.221280006 |                  |            |
|              | Brain_Anterior_cingulate_cortex_BA24  | 0.86274367   |              | Brain_Cerebellum                      | 3            | 3            | 3.998141918 |                  |            |
|              | 0.082915416                           | 0.206832114  | -0.874830244 | 1.22313157                            | 0.137315218  |              |             |                  |            |
|              | 0.626422231                           | 9            | 0            | 0.998207054                           |              |              |             |                  |            |
| DDX52        | ENSG00000278053.4                     |              |              | 0.809537092                           | 2            | 2            | 0.517645857 |                  |            |
|              | Brain_Caudate_basal_ganglia           | 0.78360156   |              | Brain_Cerebellar_Hemisphere           | 1            | 1            | 1.332227745 |                  |            |
|              | 0.667772255                           | 0.667772255  | -0.646978502 | -0.27462864                           | -0.460803571 |              |             |                  |            |
|              | 0.263291112                           | 2            | 0            | 0.998207054                           |              |              |             |                  |            |
| FAM57A       | ENSG00000167695.14                    |              |              | 0.809557415                           | 12           | 10           | 0.172060721 |                  |            |
|              | Brain_Caudate_basal_ganglia           | 0.969624205  |              | Brain_Frontal_Cortex_BA9              |              |              |             |                  |            |
|              | 6.198843188                           | 0.024021804  | 0.208451439  | -1.36561218                           | 0.689240998  |              |             |                  |            |
|              | -0.185581533                          | 0.681875175  | 10           | 0                                     | 0.998207054  |              |             |                  |            |
| AIFM2        | ENSG00000042286.14                    |              |              | 0.809610955                           | 9            | 9            | 0.193406565 |                  |            |
|              | Brain_Cerebellar_Hemisphere           | 0.779249148  |              | Brain_Anterior_cingulate_cortex_BA24  |              |              |             |                  |            |
|              | 2.580498835                           | 0.335307029  | 0.335307029  | -1.30056742                           | 0.794087662  |              |             |                  |            |
|              | -0.252895846                          | 0.646525075  | 9            | 0                                     | 0.998207054  |              |             |                  |            |
| MKL1         | ENSG00000196588.14                    |              |              | 0.809635479                           | 2            | 2            | 0.614286162 |                  |            |
|              | Brain_Putamen_basal_ganglia           | 0.684298322  |              | Brain_Cerebellar_Hemisphere           |              |              |             |                  |            |
|              | 1.007348567                           | 0.992651433  | 0.992651433  | 0.406604731                           | 0.50396473   |              |             |                  |            |
|              | 0.45528473                            | 0.068843915  | 2            | 0                                     | 0.998207054  |              |             |                  |            |
| TTC36        | ENSG00000172425.10                    |              |              | 0.809643617                           | 1            | 1            | 0.809643617 |                  |            |
|              | Brain_Cerebellar_Hemisphere           | 0.809643617  |              | Brain_Cerebellar_Hemisphere           | 1            | 1            |             |                  |            |
|              | 1                                     | -0.240885815 | -0.240885815 | -0.240885815                          | NA           | 1            | 0           |                  |            |
|              | 0.998207054                           |              |              |                                       |              |              |             |                  |            |
| CCL14        | ENSG00000276409.4                     |              |              | 0.80969049                            | 1            | 1            | 0.80969049  | Brain_Cerebellum | 0.80969049 |
|              | Brain_Cerebellum                      | 1            | 1            | -0.240825339                          | -0.240825339 | -0.240825339 |             |                  |            |
|              | NA                                    | 1            | 0            | 0.998207054                           |              |              |             |                  |            |
| NDUFA8       | ENSG00000119421.6                     |              |              | 0.809836563                           | 1            | 1            | 0.809836563 |                  |            |
|              | Brain_Nucleus_accumbens_basal_ganglia | 0.809836563  |              |                                       |              |              |             |                  |            |
|              | Brain_Nucleus_accumbens_basal_ganglia | 1            | 1            | 1                                     | 0.240636881  |              |             |                  |            |
|              | 0.240636881                           | 0.240636881  | NA           | 1                                     | 0            | 0.998207054  |             |                  |            |
| LINC02110    | ENSG00000251518.1                     |              |              | 0.809964255                           | 4            | 4            | 0.456756661 |                  |            |
|              | Brain_Cerebellar_Hemisphere           | 0.708580368  |              | Brain_Cerebellum                      | 1            | 1            | 1.432637289 |                  |            |
|              | 0.610965715                           | 0.610965715  | -0.744198061 | 0.479302875                           | -0.124131176 |              |             |                  |            |
|              | 0.639824826                           | 4            | 0            | 0.998207054                           |              |              |             |                  |            |
| DUSP10       | ENSG00000143507.17                    |              |              | 0.810062001                           | 1            | 1            | 0.810062001 |                  |            |
|              | Brain_Caudate_basal_ganglia           | 0.810062001  |              | Brain_Caudate_basal_ganglia           | 1            | 1            |             |                  |            |
|              | 1                                     | 0.240346046  | 0.240346046  | 0.240346046                           | NA           | 1            | 0           |                  |            |
|              | 0.998207054                           |              |              |                                       |              |              |             |                  |            |
| RP5-1057J7.7 | ENSG00000271420.1                     |              |              | 0.81009959                            | 1            | 1            | 0.81009959  | Brain_Cortex     |            |
|              | 0.81009959                            | Brain_Cortex | 1            | 1                                     | 1            | 0.240297556  | 0.240297556 |                  |            |
|              | 0.240297556                           | NA           | 1            | 0                                     | 0.998207054  |              |             |                  |            |
| CRELD1       | ENSG00000163703.17                    |              |              | 0.810225864                           | 4            | 4            | 0.364338432 |                  |            |
|              | Brain_Hippocampus                     | 0.800916388  |              | Brain_Putamen_basal_ganglia           | 1            | 1            | 1.113881473 |                  |            |
|              | 0.858837007                           | 0.858837007  | -0.66942396  | 0.907129288                           | 0.099911212  |              |             |                  |            |
|              | 0.699082207                           | 4            | 0            | 0.998207054                           |              |              |             |                  |            |
| DENND4B      | ENSG00000198837.9                     |              |              | 0.810237417                           | 5            | 3            | 0.561243289 |                  |            |
|              | Brain_Cerebellum                      | 0.923885497  |              | Brain_Nucleus_accumbens_basal_ganglia |              |              |             |                  |            |
|              | 4.434680791                           | 0.008531604  | 0.173874578  | -0.431272275                          | 0.580995793  |              |             |                  |            |
|              | 0.093788908                           | 0.455358609  | 3            | 0                                     | 0.998207054  |              |             |                  |            |
| GNB1         | ENSG00000078369.17                    |              |              | 0.810253078                           | 2            | 2            | 0.634675495 |                  |            |
|              | Brain_Nucleus_accumbens_basal_ganglia | 0.676768529  |              | Brain_Putamen_basal_ganglia           |              |              |             |                  |            |
|              | 1.050905539                           | 0.949094461  | 0.949094461  | -0.475156408                          | -0.416876793 |              |             |                  |            |
|              | -0.4460166                            | 0.041209911  | 2            | 0                                     | 0.998207054  |              |             |                  |            |

|               |                                      |                             |              |              |                                       |                  |    |   |   |
|---------------|--------------------------------------|-----------------------------|--------------|--------------|---------------------------------------|------------------|----|---|---|
| IVD           | ENSG00000128928.8                    | 0.81043809                  | 10           | 7            | 0.094998352                           |                  |    |   |   |
|               | Brain_Putamen_basal_ganglia          | 0.573160545                 |              |              | Brain_Cortex                          | 5.844036313      |    |   |   |
|               | 0.010724683                          | 0.24428405                  | 0.563402927  |              | 1.669600899                           | 1.031576205      |    |   |   |
|               | 0.314128984                          | 7                           | 0            | 0.998207054  |                                       |                  |    |   |   |
| NAA35         | ENSG00000135040.15                   | 0.810443571                 | 1            | 1            | 0.810443571                           |                  |    |   |   |
|               | Brain_Cerebellar_Hemisphere          | 0.810443571                 |              |              | Brain_Cerebellar_Hemisphere           | 1                | 1  |   |   |
|               | 1                                    | -0.239853834                | -0.239853834 | -0.239853834 | NA                                    | 1                | 0  |   |   |
|               | 0.998207054                          |                             |              |              |                                       |                  |    |   |   |
| CD38          | ENSG00000004468.12                   | 0.81057006                  | 7            | 6            | 0.527703787                           | Brain_Cortex     |    |   |   |
|               | 0.819345361                          | Brain_Caudate_basal_ganglia | 4.202483031  |              | 0.034409022                           |                  |    |   |   |
|               | 0.144122064                          | -0.631515088                | 0.526796247  |              | 0.007395378                           | 0.498757845      |    |   |   |
|               | 6                                    | 0                           | 0.998207054  |              |                                       |                  |    |   |   |
| KLC2          | ENSG00000174996.11                   | 0.810670473                 | 1            | 1            | 0.810670473                           |                  |    |   |   |
|               | Brain_Substantia_nigra               | 0.810670473                 |              |              | Brain_Substantia_nigra                | 1                | 1  |   |   |
|               | 1                                    | -0.239561166                | -0.239561166 | -0.239561166 | NA                                    | 1                | 0  |   |   |
|               | 0.998207054                          |                             |              |              |                                       |                  |    |   |   |
| COG5          | ENSG00000164597.13                   | 0.810778803                 | 4            | 4            | 0.297743606                           | Brain_Cerebellum |    |   |   |
|               | 0.917026993                          | Brain_Cortex                | 2.088165007  |              | 0.246752872                           | 0.246752872      |    |   |   |
|               | -1.041284332                         | 0.36208203                  | -0.256071719 |              | 0.583659207                           | 4                | 0  |   |   |
|               | 0.998207054                          |                             |              |              |                                       |                  |    |   |   |
| SULT1C4       | ENSG00000198075.9                    | 0.810861776                 | 8            | 6            | 0.240617795                           |                  |    |   |   |
|               | Brain_Cerebellum                     | 0.984348755                 |              |              | Brain_Nucleus_accumbens_basal_ganglia |                  |    |   |   |
|               | 4.895046863                          | 0.064694811                 | 0.217667009  |              | -0.53999211                           | 1.173444015      |    |   |   |
|               | 0.252183709                          | 0.489477856                 | 6            | 0            | 0.998207054                           |                  |    |   |   |
| RP3-465N24.6  | ENSG00000272432.1                    | 0.810874983                 | 1            | 1            | 0.810874983                           |                  |    |   |   |
|               | Brain_Spinal_cord_cervical_c-1       | 0.810874983                 |              |              | Brain_Spinal_cord_cervical_c-1        |                  |    |   |   |
|               | 1                                    | 1                           | 1            | 0.239297398  | 0.239297398                           | 0.239297398      | NA | 1 | 0 |
|               | 0.998207054                          |                             |              |              |                                       |                  |    |   |   |
| RP11-262H14.4 | ENSG00000170161.6                    | 0.81100736                  | 2            | 1            | 0.795963456                           |                  |    |   |   |
|               | Brain_Putamen_basal_ganglia          | 0.826143201                 |              |              | Brain_Cortex                          | 1.999765758      |    |   |   |
|               | 0.000234242                          | 1.999765758                 | -0.258574635 |              | -0.219650702                          | -0.239112669     |    |   |   |
|               | 0.027523377                          | 1                           | 0            | 0.998207054  |                                       |                  |    |   |   |
| PLCE1         | ENSG00000138193.15                   | 0.811017534                 | 4            | 4            | 0.283311896                           |                  |    |   |   |
|               | Brain_Cerebellar_Hemisphere          | 0.739564409                 |              |              | Brain_Cortex                          | 1.611939187      |    |   |   |
|               | 0.407473416                          | 0.407473416                 | -1.072909115 |              | -0.332430238                          | -0.586504869     |    |   |   |
|               | 0.331208238                          | 4                           | 0            | 0.998207054  |                                       |                  |    |   |   |
| TOLLIP        | ENSG00000078902.15                   | 0.811027559                 | 1            | 1            | 0.811027559                           |                  |    |   |   |
|               | Brain_Putamen_basal_ganglia          | 0.811027559                 |              |              | Brain_Putamen_basal_ganglia           | 1                | 1  |   |   |
|               | 1                                    | -0.239100623                | -0.239100623 | -0.239100623 | NA                                    | 1                | 0  |   |   |
|               | 0.998207054                          |                             |              |              |                                       |                  |    |   |   |
| DCTN5         | ENSG00000166847.9                    | 0.811055434                 | 1            | 1            | 0.811055434                           |                  |    |   |   |
|               | Brain_Putamen_basal_ganglia          | 0.811055434                 |              |              | Brain_Putamen_basal_ganglia           | 1                | 1  |   |   |
|               | 1                                    | 0.239064674                 | 0.239064674  | 0.239064674  | NA                                    | 1                | 0  |   |   |
|               | 0.998207054                          |                             |              |              |                                       |                  |    |   |   |
| ZNF98         | ENSG00000197360.9                    | 0.811411113                 | 8            | 7            | 0.231007188                           |                  |    |   |   |
|               | Brain_Hippocampus                    | 0.976874522                 |              |              | Brain_Putamen_basal_ganglia           | 3.958819535      |    |   |   |
|               | 0.097942547                          | 0.140738419                 | -1.197768412 |              | 0.385920969                           | -0.292289563     |    |   |   |
|               | 0.507503524                          | 7                           | 0            | 0.998207054  |                                       |                  |    |   |   |
| C6orf106      | ENSG00000196821.9                    | 0.81146202                  | 10           | 5            | 0.174730436                           |                  |    |   |   |
|               | Brain_Hypothalamus                   | 0.831607202                 |              |              | Brain_Cerebellar_Hemisphere           | 6.861965749      |    |   |   |
|               | 0.013157471                          | 0.326673656                 | -1.357159815 |              | 0.212640728                           | -0.800376683     |    |   |   |
|               | 0.473455415                          | 5                           | 0            | 0.998207054  |                                       |                  |    |   |   |
| C1orf50       | ENSG00000164008.14                   | 0.811572721                 | 13           | 2            | 0.494735429                           |                  |    |   |   |
|               | Brain_Anterior_cingulate_cortex_BA24 | 0.886529652                 |              |              | Brain_Substantia_nigra                |                  |    |   |   |
|               | 11.81740046                          | 0.00040787                  | 0.494774074  |              | -0.682796521                          | -0.142696789     |    |   |   |
|               | -0.401555174                         | 0.159321027                 | 2            | 0            | 0.998207054                           |                  |    |   |   |
| RP11-557N21.1 | ENSG00000283031.1                    | 0.811598552                 | 2            | 2            | 0.525025585                           |                  |    |   |   |
|               | Brain_Cerebellum                     | 0.610068431                 |              |              | Brain_Cerebellar_Hemisphere           | 1.886782945      |    |   |   |
|               | 0.113217055                          | 0.113217055                 | 0.509975778  |              | 0.635617768                           | 0.572796773      |    |   |   |
|               | 0.088842304                          | 2                           | 0            | 0.998207054  |                                       |                  |    |   |   |
| SRP14         | ENSG00000140319.10                   | 0.811634742                 | 5            | 3            | 0.365182455                           |                  |    |   |   |
|               | Brain_Frontal_Cortex_BA9             | 0.857677468                 |              |              | Brain_Anterior_cingulate_cortex_BA24  |                  |    |   |   |

|               |                                       |                                |                                       |              |              |                  |   |
|---------------|---------------------------------------|--------------------------------|---------------------------------------|--------------|--------------|------------------|---|
|               | 3.631740722                           | 0.016455259                    | 0.291796507                           | -0.470324652 | 0.905534192  |                  |   |
|               | 0.132932849                           | 0.529578947                    | 3                                     | 0            | 0.998207054  |                  |   |
| PATJ          | ENSG00000132849.19                    | 0.811638656                    | 2                                     | 2            | 0.597396733  | Brain_Cerebellum |   |
|               | 0.972191195                           | Brain_Cerebellar_Hemisphere    | 1.531002734                           | 0.468997266  |              |                  |   |
|               | 0.468997266                           | -0.528147833                   | 0.034860227                           | -0.246643803 | 0.398106817  |                  |   |
|               | 2                                     | 0                              | 0.998207054                           |              |              |                  |   |
| RP11-439C15.4 | ENSG00000253764.1                     | 0.811781255                    | 9                                     | 8            | 0.148622843  |                  |   |
|               | Brain_Cerebellar_Hemisphere           | 0.797533735                    | Brain_Frontal_Cortex_BA9              |              |              |                  |   |
|               | 3.118904999                           | -0.064974389                   | 0.17981413                            | -0.49610883  | 1.444412974  |                  |   |
|               | 0.431393084                           | 0.636803026                    | 8                                     | 0            | 0.998207054  |                  |   |
| XPO4          | ENSG00000132953.16                    | 0.811996239                    | 11                                    | 9            | 0.095540898  |                  |   |
|               | Brain_Hypothalamus                    | 0.890907054                    | Brain_Frontal_Cortex_BA9              | 4.608015788  |              |                  |   |
|               | 0.103725745                           | 0.224186426                    | -0.383505322                          | 1.666866779  | 0.585838028  |                  |   |
|               | 0.585431658                           | 9                              | 0                                     | 0.998207054  |              |                  |   |
| CBX4          | ENSG00000141582.14                    | 0.812002118                    | 1                                     | 1            | 0.812002118  |                  |   |
|               | Brain_Cerebellar_Hemisphere           | 0.812002118                    | Brain_Cerebellar_Hemisphere           | 1            | 1            |                  |   |
|               | 1                                     | 0.237843964                    | 0.237843964                           | 0.237843964  | NA           | 1                | 0 |
|               | 0.998207054                           |                                |                                       |              |              |                  |   |
| C1QL3         | ENSG00000165985.9                     | 0.812007138                    | 1                                     | 1            | 0.812007138  |                  |   |
|               | Brain_Caudate_basal_ganglia           | 0.812007138                    | Brain_Caudate_basal_ganglia           | 1            | 1            |                  |   |
|               | 1                                     | -0.237837492                   | -0.237837492                          | -0.237837492 | NA           | 1                | 0 |
|               | 0.998207054                           |                                |                                       |              |              |                  |   |
| TMEM55A       | ENSG00000155099.7                     | 0.812077011                    | 1                                     | 1            | 0.812077011  |                  |   |
|               | Brain_Cerebellar_Hemisphere           | 0.812077011                    | Brain_Cerebellar_Hemisphere           | 1            | 1            |                  |   |
|               | 1                                     | 0.237747408                    | 0.237747408                           | 0.237747408  | NA           | 1                | 0 |
|               | 0.998207054                           |                                |                                       |              |              |                  |   |
| LINC01378     | ENSG00000236922.9                     | 0.812077318                    | 4                                     | 3            | 0.491250848  |                  |   |
|               | Brain_Nucleus_accumbens_basal_ganglia | 0.993018414                    | Brain_Cortex                          |              |              |                  |   |
|               | 3.426632614                           | 0.07215089                     | 0.163998611                           | -0.180569983 | 0.688320702  |                  |   |
|               | 0.244930719                           | 0.407266195                    | 3                                     | 0            | 0.998207054  |                  |   |
| SPIDR         | ENSG00000164808.16                    | 0.812149929                    | 2                                     | 2            | 0.537667907  |                  |   |
|               | Brain_Frontal_Cortex_BA9              | 0.970552159                    | Brain_Anterior_cingulate_cortex_BA24  |              |              |                  |   |
|               | 1.240031133                           | 0.759968867                    | 0.759968867                           | -0.616343391 | 0.036915779  |                  |   |
|               | -0.289713806                          | 0.461923989                    | 2                                     | 0            | 0.998207054  |                  |   |
| CHPT1         | ENSG00000111666.10                    | 0.812162164                    | 13                                    | 2            | 0.219355794  |                  |   |
|               | Brain_Nucleus_accumbens_basal_ganglia | 0.994294716                    |                                       |              |              |                  |   |
|               | Brain_Spinal_cord_cervical_c-1        | 10.70061648                    | 0.002406999                           | 1.118757016  |              |                  |   |
|               | -1.228242912                          | 0.692290342                    | -0.350062214                          | 0.525005236  | 2            | 0                |   |
|               | 0.998207054                           |                                |                                       |              |              |                  |   |
| DHRS7B        | ENSG00000109016.17                    | 0.812202647                    | 2                                     | 2            | 0.597486352  |                  |   |
|               | Brain_Cortex                          | 0.746132772                    | Brain_Nucleus_accumbens_basal_ganglia |              |              |                  |   |
|               | 1.085803506                           | 0.914196494                    | 0.914196494                           | -0.528018707 | 0.32374279   |                  |   |
|               | -0.102137959                          | 0.602286331                    | 2                                     | 0            | 0.998207054  |                  |   |
| WIPF3         | ENSG00000122574.10                    | 0.81220537                     | 5                                     | 5            | 0.213227984  | Brain_Cortex     |   |
|               | 0.877364517                           | Brain_Spinal_cord_cervical_c-1 | 2.219797007                           | 0.329417299  |              |                  |   |
|               | 0.329417299                           | 0.154311009                    | 1.244738241                           | 0.561861915  | 0.405568639  |                  |   |
|               | 5                                     | 0                              | 0.998207054                           |              |              |                  |   |
| HSPB1         | ENSG00000106211.8                     | 0.812257549                    | 1                                     | 1            | 0.812257549  |                  |   |
|               | Brain_Anterior_cingulate_cortex_BA24  | 0.812257549                    |                                       |              |              |                  |   |
|               | Brain_Anterior_cingulate_cortex_BA24  | 1                              | 1                                     | 1            | -0.237514657 |                  |   |
|               | -0.237514657                          | -0.237514657                   | NA                                    | 1            | 0            | 0.998207054      |   |
| ESPNL         | ENSG00000144488.14                    | 0.812268603                    | 11                                    | 8            | 0.310331073  |                  |   |
|               | Brain_Cerebellar_Hemisphere           | 0.952696491                    | Brain_Frontal_Cortex_BA9              |              |              |                  |   |
|               | 5.769203808                           | 0.05916681                     | 0.208568027                           | -1.014527586 | 0.416009265  |                  |   |
|               | -0.195680699                          | 0.487908784                    | 8                                     | 0            | 0.998207054  |                  |   |
| KHDC1L        | ENSG00000256980.4                     | 0.812403456                    | 13                                    | 10           | 0.080445613  |                  |   |
|               | Brain_Frontal_Cortex_BA9              | 0.960030496                    | Brain_Putamen_basal_ganglia           |              |              |                  |   |
|               | 6.270205824                           | 0.092834173                    | 0.353868407                           | -0.560271492 | 1.748106356  |                  |   |
|               | 0.382235312                           | 0.562094721                    | 10                                    | 0            | 0.998207054  |                  |   |
| ZNF705E       | ENSG00000214534.5                     | 0.812424091                    | 1                                     | 1            | 0.812424091  |                  |   |
|               | Brain_Substantia_nigra                | 0.812424091                    | Brain_Substantia_nigra                | 1            | 1            |                  |   |
|               | 1                                     | 0.237299962                    | 0.237299962                           | 0.237299962  | NA           | 1                | 0 |

0.998207054

LINC00707 ENSG00000238266.1 0.812487342 5 5 0.331802668  
Brain\_Nucleus\_accumbens\_basal\_ganglia 0.958173167 Brain\_Hypothalamus  
1.760387287 0.602518221 0.602518221 -0.199358925 0.970489276  
0.458454966 0.541338729 5 0 0.998207054

COL23A1 ENSG0000050767.15 0.812534124 2 1 0.797229968  
Brain\_Cerebellar\_Hemisphere 0.82833756 Brain\_Cerebellum 1.995378229  
0.004621771 1.995378229 0.216834198 0.256933684 0.236883941  
0.028354618 1 0 0.998207054

FUT10 ENSG00000172728.15 0.81255426 7 4 0.288562883  
Brain\_Spinal\_cord\_cervical\_c-1 0.833422914  
Brain\_Nucleus\_accumbens\_basal\_ganglia 5.476962307 0.006299109  
0.328220702 -1.061279535 -0.21031361 -0.635787345 0.333934443  
4 0 0.998207054

RAET1E ENSG00000164520.11 0.812559216 1 1 0.812559216  
Brain\_Hippocampus 0.812559216 Brain\_Hippocampus 1 1 1  
-0.237125776 -0.237125776 -0.237125776 NA 1 0 0.998207054

AC004448.5 ENSG00000235979.8 0.812592757 7 4 0.546024582  
Brain\_Nucleus\_accumbens\_basal\_ganglia 0.833775601 Brain\_Caudate\_basal\_ganglia  
3.428530733 0.023085612 0.339909437 -0.584622487 0.60372787  
0.296525152 0.411471815 4 0 0.998207054

MCRIP2 ENSG00000172366.19 0.81260789 2 2 0.519450718  
Brain\_Putamen\_basal\_ganglia 0.96575663 Brain\_Spinal\_cord\_cervical\_c-1  
1.058240091 0.941759909 0.941759909 -0.64419234 0.042930883  
-0.300630728 0.48586949 2 0 0.998207054

SLC22A31 ENSG00000259803.6 0.812654941 6 5 0.54334157  
Brain\_Caudate\_basal\_ganglia 0.956639153 Brain\_Nucleus\_accumbens\_basal\_ganglia  
3.508423984 0.033437642 0.159347117 -0.607767676 0.241228853  
-0.106179234 0.285203386 5 0 0.998207054

C3orf20 ENSG00000131379.9 0.812775537 8 8 0.157882278  
Brain\_Nucleus\_accumbens\_basal\_ganglia 0.681162227 Brain\_Hypothalamus  
3.206410033 0.192830776 0.192830776 -1.412229903 0.55860491  
-0.425205524 0.693793847 8 0 0.998207054

ERICH6B ENSG00000165837.11 0.812839033 1 1 0.812839033  
Brain\_Cerebellum 0.812839033 Brain\_Cerebellum 1 1 1 0.236765094  
0.236765094 0.236765094 NA 1 0 0.998207054

LINC01036 ENSG00000236030.1 0.812878451 2 2 0.56182739 Brain\_Cerebellum  
0.625139531 Brain\_Cerebellar\_Hemisphere 1.401946679 0.598053321  
0.598053321 -0.580129354 -0.488579356 -0.534354355 0.064735624  
2 0 0.998207054

LINC00694 ENSG00000225873.3 0.812981272 1 1 0.812981272  
Brain\_Cortex 0.812981272 Brain\_Cortex 1 1 1 -0.23658176  
-0.23658176 -0.23658176 NA 1 0 0.998207054

ARNTL2 ENSG00000029153.14 0.813052463 2 2 0.55474593  
Brain\_Cerebellar\_Hemisphere 0.627720523 Brain\_Cerebellum 1.431517636  
0.568482364 0.568482364 0.484937722 0.590663468 0.537800595  
0.074759391 2 0 0.998207054

RP11-326C3.12 ENSG00000255328.1 0.813118647 11 11 0.118226918  
Brain\_Hippocampus 0.939218924 Brain\_Anterior\_cingulate\_cortex\_BA24  
2.517879836 0.158496873 0.158496873 -0.967553672 1.562259292  
0.282618771 0.865822472 11 0 0.998207054

LY6G6C ENSG00000204421.2 0.813177048 3 3 0.362238177  
Brain\_Nucleus\_accumbens\_basal\_ganglia 0.907795977 Brain\_Cortex  
1.578211322 0.650809703 0.650809703 0.115819019 0.91110856  
0.413571933 0.43365483 3 0 0.998207054

SND1-IT1 ENSG00000279078.1 0.813183859 1 1 0.813183859  
Brain\_Cortex 0.813183859 Brain\_Cortex 1 1 1 0.236320657  
0.236320657 0.236320657 NA 1 0 0.998207054

ADAMTS14 ENSG00000138316.10 0.813274981 9 9 0.07383565  
Brain\_Putamen\_basal\_ganglia 0.911503193 Brain\_Amygdala 3.270942339  
0.169265631 0.169265631 -1.787630449 0.668332817 -0.297187481  
0.781050711 9 0 0.998207054

|               |                                      |                                      |              |                                       |              |              |                  |             |   |
|---------------|--------------------------------------|--------------------------------------|--------------|---------------------------------------|--------------|--------------|------------------|-------------|---|
| LINC01310     | ENSG00000205632.3                    | 0.813351017                          | 3            | 3                                     | 0.703769279  |              |                  |             |   |
|               | Brain_Cerebellum                     | 0.895553991                          |              | Brain_Cortex                          | 2.260656469  | 0.226288618  |                  |             |   |
|               |                                      | 0.226288618                          | -0.237499235 | 0.380237293                           | 0.003819428  | 0.330285407  |                  |             |   |
|               |                                      | 3                                    | 0            | 0.998207054                           |              |              |                  |             |   |
| CDH20         | ENSG00000101542.9                    | 0.813453206                          | 6            | 6                                     | 0.294379717  |              |                  |             |   |
|               | Brain_Putamen_basal_ganglia          | 0.737299701                          |              | Brain_Substantia_nigra                |              |              |                  |             |   |
|               |                                      | 1.200576742                          | 0.79682782   | 0.79682782                            | -1.048562078 | 0.710062511  |                  |             |   |
|               |                                      | -0.301776542                         | 0.702206108  | 6                                     | 0            | 0.998207054  |                  |             |   |
| LINC00315     | ENSG00000184274.3                    | 0.813468604                          | 2            | 2                                     | 0.53843242   |              |                  |             |   |
|               | Brain_Frontal_Cortex_BA9             | 0.868559867                          |              | Brain_Nucleus_accumbens_basal_ganglia |              |              |                  |             |   |
|               |                                      | 1.032514211                          | 0.967485789  | 0.967485789                           | -0.165488035 | 0.6151852    |                  |             |   |
|               |                                      | 0.390336618                          | 0.317983915  | 2                                     | 0            | 0.998207054  |                  |             |   |
| SV2C          | ENSG00000122012.13                   | 0.81359984                           | 2            | 2                                     | 0.790079549  |              |                  |             |   |
|               | Brain_Frontal_Cortex_BA9             | 0.795194279                          |              | Brain_Nucleus_accumbens_basal_ganglia |              |              |                  |             |   |
|               |                                      | 1.664965826                          | 0.335034174  | 0.335034174                           | -0.259571557 | 0.266207315  |                  |             |   |
|               |                                      | 0.003317879                          | 0.371781806  | 2                                     | 0            | 0.998207054  |                  |             |   |
| LRRCC1        | ENSG00000133739.15                   | 0.813649882                          | 12           | 7                                     | 0.487453734  |              |                  |             |   |
|               | Brain_Hippocampus                    | 0.98774213                           |              | Brain_Cerebellar_Hemisphere           | 8.519404807  |              |                  |             |   |
|               |                                      | 0.025606789                          | 0.328408497  | -0.694364368                          | 0.537653477  | -0.147871674 |                  |             |   |
|               |                                      | 0.401357916                          | 7            | 0                                     | 0.998207054  |              |                  |             |   |
| TRPS1         | ENSG00000104447.12                   | 0.81367163                           | 2            | 2                                     | 0.521937744  |              |                  |             |   |
|               | Brain_Frontal_Cortex_BA9             | 0.97465539                           |              | Brain_Nucleus_accumbens_basal_ganglia |              |              |                  |             |   |
|               |                                      | 1.124473606                          | 0.875526394  | 0.875526394                           | -0.640361288 | -0.031770101 |                  |             |   |
|               |                                      | -0.336065695                         | 0.430338955  | 2                                     | 0            | 0.998207054  |                  |             |   |
| TRIM7         | ENSG00000146054.17                   | 0.813716146                          | 3            | 2                                     | 0.420772775  |              | Brain_Cerebellum |             |   |
|               |                                      | 0.737089259                          |              | Brain_Cerebellar_Hemisphere           | 2.76980813   | 0.044973226  |                  |             |   |
|               |                                      | 0.185218643                          | 0.335710405  | 0.805081285                           | 0.57474465   | 0.234806286  |                  | 2           |   |
|               |                                      | 0                                    | 0.998207054  |                                       |              |              |                  |             |   |
| CCDC85C       | ENSG00000205476.8                    | 0.813720274                          | 1            | 1                                     | 0.813720274  |              |                  |             |   |
|               | Brain_Spinal_cord_cervical_c-1       | 0.813720274                          |              | Brain_Spinal_cord_cervical_c-1        |              |              |                  |             |   |
|               |                                      | 1                                    | 1            | 1                                     | -0.23562938  | -0.23562938  | NA               | 1           | 0 |
|               |                                      | 0.998207054                          |              |                                       |              |              |                  |             |   |
| VRK3          | ENSG00000105053.10                   | 0.813761264                          | 2            | 2                                     | 0.538555326  |              |                  |             |   |
|               | Brain_Hypothalamus                   | 0.741857217                          |              | Brain_Hippocampus                     | 1.245129345  |              |                  |             |   |
|               |                                      | 0.754870655                          | 0.754870655  | -0.614999082                          | 0.329394906  | -0.142802088 |                  |             |   |
|               |                                      | 0.667787394                          | 2            | 0                                     | 0.998207054  |              |                  |             |   |
| KRT39         | ENSG00000196859.7                    | 0.813807814                          | 2            | 1                                     | 0.737673278  |              | Brain_Cerebellum |             |   |
|               |                                      | 0.892917741                          |              | Brain_Cerebellar_Hemisphere           | 1.987418737  | 0.012581263  |                  |             |   |
|               |                                      | 1.987418737                          | 0.134613154  | 0.334936116                           | 0.234774635  | 0.141649724  |                  |             |   |
|               |                                      | 1                                    | 0            | 0.998207054                           |              |              |                  |             |   |
| AP000253.1    | ENSG00000234509.1                    | 0.813863054                          | 1            | 1                                     | 0.813863054  |              |                  |             |   |
|               | Brain_Cortex                         | 0.813863054                          |              | Brain_Cortex                          | 1            | 1            | 1                | 0.235445398 |   |
|               |                                      | 0.235445398                          | 0.235445398  | NA                                    | 1            | 0            | 0.998207054      |             |   |
| ZFAND3        | ENSG00000156639.11                   | 0.813923858                          | 1            | 1                                     | 0.813923858  |              |                  |             |   |
|               | Brain_Spinal_cord_cervical_c-1       | 0.813923858                          |              | Brain_Spinal_cord_cervical_c-1        |              |              |                  |             |   |
|               |                                      | 1                                    | 1            | 1                                     | -0.235367049 | -0.235367049 | NA               | 1           | 0 |
|               |                                      | 0.998207054                          |              |                                       |              |              |                  |             |   |
| RP11-342C24.8 | ENSG00000264404.2                    | 0.813949786                          | 1            | 1                                     | 0.813949786  |              |                  |             |   |
|               | Brain_Cerebellar_Hemisphere          | 0.813949786                          |              | Brain_Cerebellar_Hemisphere           | 1            | 1            |                  |             |   |
|               |                                      | 1                                    | -0.235333641 | -0.235333641                          | -0.235333641 | NA           | 1                | 0           |   |
|               |                                      | 0.998207054                          |              |                                       |              |              |                  |             |   |
| AVPI1         | ENSG00000119986.6                    | 0.814011176                          | 3            | 3                                     | 0.391389873  |              | Brain_Cortex     |             |   |
|               |                                      | 0.708339814                          |              | Brain_Anterior_cingulate_cortex_BA24  | 2.103937352  |              |                  |             |   |
|               |                                      | 0.242304349                          | 0.242304349  | 0.374086699                           | 0.857099545  | 0.692434521  |                  |             |   |
|               |                                      | 0.275751979                          | 3            | 0                                     | 0.998207054  |              |                  |             |   |
| KIAA2026      | ENSG00000183354.11                   | 0.814014501                          | 1            | 1                                     | 0.814014501  |              |                  |             |   |
|               | Brain_Caudate_basal_ganglia          | 0.814014501                          |              | Brain_Caudate_basal_ganglia           | 1            | 1            |                  |             |   |
|               |                                      | 1                                    | -0.235250257 | -0.235250257                          | -0.235250257 | NA           | 1                | 0           |   |
|               |                                      | 0.998207054                          |              |                                       |              |              |                  |             |   |
| FPR2          | ENSG00000171049.8                    | 0.81407727                           | 1            | 1                                     | 0.81407727   |              |                  |             |   |
|               | Brain_Anterior_cingulate_cortex_BA24 | 0.81407727                           |              |                                       |              |              |                  |             |   |
|               |                                      | Brain_Anterior_cingulate_cortex_BA24 | 1            | 1                                     | 1            | 0.235169381  |                  |             |   |

|              |                                       |                  |              |             |             |                                       |                  |
|--------------|---------------------------------------|------------------|--------------|-------------|-------------|---------------------------------------|------------------|
|              | 0.235169381                           | 0.235169381      | NA           | 1           | 0           | 0.998207054                           |                  |
| ITPK1        | ENSG00000100605.16                    | 0.814085377      |              | 1           | 1           | 0.814085377                           |                  |
|              | Brain_Cerebellar_Hemisphere           | 0.814085377      |              |             |             | Brain_Cerebellar_Hemisphere           | 1                |
|              | 1                                     | 0.235158935      | 0.235158935  | 0.235158935 | NA          | 1                                     | 0                |
|              | 0.998207054                           |                  |              |             |             |                                       |                  |
| UBQLNL       | ENSG00000175518.6                     | 0.814107996      |              | 2           | 2           | 0.5732682                             |                  |
|              | Brain_Hippocampus                     | 0.902481906      |              |             |             | Brain_Substantia_nigra                | 1.301660898      |
|              | 0.698339102                           | 0.698339102      | -0.122526695 |             |             | 0.563244801                           | 0.220359053      |
|              | 0.484913674                           | 2                | 0            | 0.998207054 |             |                                       |                  |
| SH3RF3-AS1   | ENSG00000259863.1                     | 0.814232486      |              | 3           | 3           | 0.426756093                           |                  |
|              | Brain_Putamen_basal_ganglia           | 0.915956649      |              |             |             | Brain_Hypothalamus                    | 1.073444564      |
|              | 0.882837775                           | 0.882837775      | -0.60330715  |             |             | 0.794754895                           | 0.028639829      |
|              | 0.708622027                           | 3                | 0            | 0.998207054 |             |                                       |                  |
| MARCO        | ENSG00000019169.10                    | 0.814243196      |              | 2           | 2           | 0.52674745                            |                  |
|              | Brain_Substantia_nigra                | 0.932740241      |              |             |             | Brain_Frontal_Cortex_BA9              |                  |
|              | 1.027176429                           | 0.972823571      | 0.972823571  |             |             | -0.084397694                          | 0.632978857      |
|              | 0.274290582                           | 0.507261824      | 2            | 0           | 0.998207054 |                                       |                  |
| GFOD1        | ENSG00000145990.10                    | 0.814247145      |              | 4           | 2           | 0.502114784                           |                  |
|              | Brain_Nucleus_accumbens_basal_ganglia | 0.942237749      |              |             |             | Brain_Cerebellar_Hemisphere           |                  |
|              | 2.067801276                           | 0.010607314      | 1.854760745  |             |             | 0.072457598                           | 0.671166003      |
|              | 0.416171609                           | 0.259563416      | 2            | 0           | 0.998207054 |                                       |                  |
| SLC35E4      | ENSG00000100036.12                    | 0.814325149      |              | 2           | 2           | 0.696874262                           |                  |
|              | Brain_Caudate_basal_ganglia           | 0.741607298      |              |             |             | Brain_Putamen_basal_ganglia           |                  |
|              | 1.368292331                           | 0.631707669      | 0.631707669  |             |             | -0.389543333                          | 0.329725614      |
|              | -0.02990886                           | 0.50859995       | 2            | 0           | 0.998207054 |                                       |                  |
| TRIM69       | ENSG00000185880.12                    | 0.814347406      |              | 11          | 3           | 0.311026818                           |                  |
|              | Brain_Nucleus_accumbens_basal_ganglia | 0.661354086      |              |             |             | Brain_Hippocampus                     |                  |
|              | 9.133838642                           | 0.005551643      | 0.380430177  |             |             | -1.013069809                          | -0.438044417     |
|              | -0.662993144                          | 0.185490012      | 3            | 0           | 0.998207054 |                                       |                  |
| DNAJA4       | ENSG00000140403.12                    | 0.814396366      |              | 3           | 3           | 0.510980237                           |                  |
|              | Brain_Cortex                          | 0.910122371      |              |             |             | Brain_Cerebellum                      | 1.474653668      |
|              | 0.736423511                           | -0.540664845     | 0.657312132  |             |             | 0.001254366                           | 0.736423511      |
|              | 3                                     | 0                | 0.998207054  |             |             |                                       | 0.607089711      |
| CD68         | ENSG00000129226.13                    | 0.814464695      |              | 1           | 1           | 0.814464695                           | Brain_Cerebellum |
|              | 0.814464695                           | Brain_Cerebellum | 1            | 1           | 1           | 0.23467023                            | 0.23467023       |
|              | NA                                    | 1                | 0            | 0.998207054 |             |                                       | 0.23467023       |
| FOXO1        | ENSG00000150907.7                     | 0.814502259      |              | 2           | 2           | 0.556676163                           |                  |
|              | Brain_Cerebellar_Hemisphere           | 0.811538178      |              |             |             | Brain_Frontal_Cortex_BA9              |                  |
|              | 1.027469488                           | 0.972530512      | 0.972530512  |             |             | 0.238442151                           | 0.587785672      |
|              | 0.413113911                           | 0.247023172      | 2            | 0           | 0.998207054 |                                       |                  |
| HIBCH        | ENSG00000198130.15                    | 0.814609363      |              | 13          | 3           | 0.419654433                           |                  |
|              | Brain_Cerebellar_Hemisphere           | 0.961378905      |              |             |             | Brain_Hippocampus                     | 11.42673274      |
|              | 2.98E-05                              | 0.424643598      | -0.807020915 |             |             | 0.048423282                           | -0.329455429     |
|              | 0.187769689                           | 3                | 0            | 0.998207054 |             |                                       |                  |
| OR52I1       | ENSG00000232268.5                     | 0.814624177      |              | 1           | 1           | 0.814624177                           |                  |
|              | Brain_Cerebellum                      | 0.814624177      |              |             |             | Brain_Cerebellum                      | 1                |
|              | 0.234464774                           | 0.234464774      | NA           | 1           | 0           | 0.998207054                           | 0.234464774      |
| MBOAT7       | ENSG00000125505.16                    | 0.814717934      |              | 3           | 3           | 0.404486721                           |                  |
|              | Brain_Cerebellum                      | 0.459522242      |              |             |             | Brain_Nucleus_accumbens_basal_ganglia |                  |
|              | 2.009566796                           | 0.295898619      | 0.295898619  |             |             | -0.833634956                          | -0.739633775     |
|              | -0.788984303                          | 0.0471765        | 3            | 0           | 0.998207054 |                                       |                  |
| RP11-379F4.6 | ENSG00000272440.1                     | 0.814783524      |              | 2           | 2           | 0.605075164                           |                  |
|              | Brain_Putamen_basal_ganglia           | 0.894586448      |              |             |             | Brain_Hypothalamus                    | 1.40925713       |
|              | 0.59074287                            | 0.59074287       | 0.132503003  |             |             | 0.517116031                           | 0.324809517      |
|              | 2                                     | 0                | 0.998207054  |             |             |                                       | 0.27196248       |
| LINC01793    | ENSG00000222030.1                     | 0.815040226      |              | 1           | 1           | 0.815040226                           |                  |
|              | Brain_Cortex                          | 0.815040226      |              |             |             | Brain_Cortex                          | 1                |
|              | -0.233928836                          | -0.233928836     | NA           | 1           | 0           | 0.998207054                           | -0.233928836     |
| RP11-106M7.1 | ENSG00000228484.1                     | 0.815128921      |              | 2           | 2           | 0.565093203                           |                  |
|              | Brain_Cerebellum                      | 0.74059867       |              |             |             | Brain_Cerebellar_Hemisphere           | 1.092528027      |
|              | 0.907471973                           | 0.907471973      | -0.575292929 |             |             | -0.331060655                          | -0.453176792     |
|              | 0.172698297                           | 2                | 0            | 0.998207054 |             |                                       |                  |

|               |                                       |                             |              |             |                                       |              |
|---------------|---------------------------------------|-----------------------------|--------------|-------------|---------------------------------------|--------------|
| SSPO          | ENSG00000197558.11                    | 0.815159561                 | 11           | 1           | 0.550713697                           |              |
|               | Brain_Nucleus_accumbens_basal_ganglia | 0.905448861                 |              |             | Brain_Hypothalamus                    |              |
|               | 10.76659139                           | 0.00129778                  | 10.76659139  |             | -0.596691008                          | 0.418744269  |
|               | -0.229078183                          | 0.260000503                 | 1            | 0           | 0.998207054                           |              |
| RP5-1063M23.2 | ENSG00000236908.2                     | 0.81517399                  | 3            | 3           | 0.429169223                           |              |
|               | Brain_Putamen_basal_ganglia           | 0.612826188                 |              |             | Brain_Cerebellar_Hemisphere           |              |
|               | 1.763508649                           | 0.241676651                 | 0.241676651  |             | -0.790614088                          | -0.506043392 |
|               | -0.631195504                          | 0.145347045                 | 3            | 0           | 0.998207054                           |              |
| IQSEC1        | ENSG00000144711.13                    | 0.815289588                 | 3            | 3           | 0.498604399                           |              |
|               | Brain_Cerebellum                      | 0.745685807                 |              |             | Brain_Hippocampus                     | 1.934422409  |
|               | 0.066915352                           | 0.066915352                 |              |             | -0.676687265                          | -0.324333173 |
|               | 0.183834001                           | 3                           | 0            | 0.998207054 |                                       | -0.470197468 |
| LMF2          | ENSG00000100258.17                    | 0.815336145                 | 5            | 4           | 0.364280028                           |              |
|               | Brain_Putamen_basal_ganglia           | 0.731722654                 |              |             | Brain_Cerebellum                      | 3.620069395  |
|               | 0.046847524                           | 0.16768494                  | -0.600862297 |             | 0.907239749                           | 0.36171182   |
|               | 0.590098663                           | 4                           | 0            | 0.998207054 |                                       |              |
| ZNF556        | ENSG00000172000.7                     | 0.815400721                 | 3            | 3           | 0.45068337                            |              |
|               | Brain_Spinal_cord_cervical_c-1        | 0.786689445                 |              |             | Brain_Putamen_basal_ganglia           |              |
|               | 1.188212187                           | 0.823855608                 | 0.823855608  |             | -0.618925388                          | 0.754276233  |
|               | -0.04508706                           | 0.713839482                 | 3            | 0           | 0.998207054                           |              |
| JAG1          | ENSG00000101384.11                    | 0.815426156                 | 1            | 1           | 0.815426156                           |              |
|               | Brain_Anterior_cingulate_cortex_BA24  | 0.815426156                 |              |             |                                       |              |
|               | Brain_Anterior_cingulate_cortex_BA24  | 1                           | 1            | 1           | -0.233431757                          |              |
|               | -0.233431757                          | -0.233431757                | NA           | 1           | 0                                     | 0.998207054  |
| CD6           | ENSG00000013725.14                    | 0.815522688                 | 8            | 1           | 0.566737124                           |              |
|               | Brain_Hypothalamus                    | 0.997478618                 |              |             | Brain_Hippocampus                     | 7.705765464  |
|               | 0.000358466                           | 7.705765464                 | -0.572863494 |             | 0.258348289                           | -0.227013108 |
|               | 0.262085318                           | 1                           | 0            | 0.998207054 |                                       |              |
| SLC25A24      | ENSG00000085491.15                    | 0.815529598                 | 12           | 4           | 0.155811923                           |              |
|               | Brain_Anterior_cingulate_cortex_BA24  | 0.533998795                 |              |             | Brain_Hypothalamus                    |              |
|               | 9.992766175                           | 0.000835821                 | 0.359287993  |             | -1.419298797                          | -0.621913428 |
|               | -1.020774617                          | 0.245989119                 | 4            | 0           | 0.998207054                           |              |
| ATG16L1       | ENSG00000085978.21                    | 0.815606699                 | 3            | 3           | 0.339057337                           |              |
|               | Brain_Putamen_basal_ganglia           | 0.854788612                 |              |             | Brain_Spinal_cord_cervical_c-1        |              |
|               | 1.346280285                           | 0.684096802                 | 0.684096802  |             | 0.183011989                           | 0.956029487  |
|               | 0.5015129                             | 0.404059663                 | 3            | 0           | 0.998207054                           |              |
| CTC1          | ENSG00000178971.13                    | 0.815622976                 | 3            | 3           | 0.431346738                           |              |
|               | Brain_Cerebellar_Hemisphere           | 0.671368166                 |              |             | Brain_Caudate_basal_ganglia           |              |
|               | 2.652101709                           | 0.114533254                 | 0.114533254  |             | 0.424271027                           | 0.786889187  |
|               | 0.646480266                           | 0.194657267                 | 3            | 0           | 0.998207054                           |              |
| RDH5          | ENSG00000135437.9                     | 0.815658782                 | 9            | 2           | 0.460975362                           |              |
|               | Brain_Putamen_basal_ganglia           | 0.9365725                   |              |             | Brain_Frontal_Cortex_BA9              | 8.203009726  |
|               | 0.000295113                           | 0.64533731                  | -0.737241728 |             | 0.079578494                           | -0.412931815 |
|               | 0.234216455                           | 2                           | 0            | 0.998207054 |                                       |              |
| NEK5          | ENSG00000197168.11                    | 0.815659807                 | 6            | 4           | 0.298136901                           |              |
|               | Brain_Hypothalamus                    | 0.949485449                 |              |             | Brain_Nucleus_accumbens_basal_ganglia |              |
|               | 5.142011805                           | 0.023596317                 | 0.196723682  |             | 0.063352954                           | 1.04043704   |
|               | 0.484794595                           | 0.402009268                 | 4            | 0           | 0.998207054                           |              |
| BEST3         | ENSG00000127325.18                    | 0.815720079                 | 6            | 5           | 0.346004326                           | Brain_Cortex |
|               | 0.877896405                           | Brain_Caudate_basal_ganglia | 3.036851451  |             | 0.099065395                           |              |
|               | 0.351606322                           | -0.725982387                | 0.942367881  |             | 0.245035566                           | 0.600010448  |
|               | 5                                     | 0                           | 0.998207054  |             |                                       |              |
| PRND          | ENSG00000171864.4                     | 0.815757957                 | 2            | 2           | 0.611568149                           |              |
|               | Brain_Cerebellar_Hemisphere           | 0.699095322                 |              |             | Brain_Cerebellum                      | 1.000094837  |
|               | 0.999905163                           | 0.999905163                 | 0.386541975  |             | 0.507836301                           | 0.447189138  |
|               | 0.08576804                            | 2                           | 0            | 0.998207054 |                                       |              |
| NAPRT         | ENSG00000147813.15                    | 0.81580125                  | 13           | 1           | 0.671692904                           |              |
|               | Brain_Caudate_basal_ganglia           | 0.977467884                 |              |             | Brain_Cerebellar_Hemisphere           | 12.5667397   |
|               | 0.000386799                           | 12.5667397                  | -0.028243574 |             | 0.423825742                           | 0.228179471  |
|               | 0.139012026                           | 1                           | 0            | 0.998207054 |                                       |              |
| NOMO3         | ENSG00000103226.17                    | 0.816059074                 | 13           | 6           | 0.099032811                           |              |
|               | Brain_Nucleus_accumbens_basal_ganglia | 0.716056122                 |              |             | Brain_Cerebellar_Hemisphere           |              |

|              |                                       |                             |                                |              |              |                  |              |
|--------------|---------------------------------------|-----------------------------|--------------------------------|--------------|--------------|------------------|--------------|
|              | 8.600668939                           | 0.001469514                 | 0.360602064                    | 0.36373471   | 1.649560739  |                  |              |
|              | 0.764023391                           | 0.405155228                 | 6                              | 0            | 0.998207054  |                  |              |
| LINC00488    | ENSG00000214381.4                     | 0.816067551                 | 3                              | 3            | 0.459096276  |                  |              |
|              | Brain_Cortex                          | 0.782408162                 | Brain_Frontal_Cortex_BA9       |              | 1.608112689  |                  |              |
|              | 0.39339157                            | 0.39339157                  | -0.395502277                   | 0.740335779  | 0.207005219  |                  |              |
|              | 0.571070143                           | 3                           | 0                              | 0.998207054  |              |                  |              |
| CEP44        | ENSG00000164118.12                    | 0.816181004                 | 5                              | 4            | 0.561143506  |                  |              |
|              | Brain_Hippocampus                     | 0.944405265                 | Brain_Caudate_basal_ganglia    |              | 3.565833503  |                  |              |
|              | 0.088173132                           | 0.145521311                 | -0.581143852                   | 0.069734144  | -0.285979965 |                  |              |
|              | 0.2565285                             | 4                           | 0                              | 0.998207054  |              |                  |              |
| RP11-532F6.3 | ENSG00000272463.1                     | 0.816249316                 | 9                              | 9            | 0.15621595   |                  |              |
|              | Brain_Caudate_basal_ganglia           | 0.95903305                  | Brain_Putamen_basal_ganglia    |              | 1.927752469  |                  |              |
|              | 0.518052394                           | 0.518052394                 | -1.108898176                   | 1.417913742  | 0.012315063  |                  |              |
|              | 0.825918758                           | 9                           | 0                              | 0.998207054  |              |                  |              |
| LINC00562    | ENSG00000260388.2                     | 0.816262516                 | 5                              | 3            | 0.25851967   | Brain_Cerebellum |              |
|              | 0.618279292                           | Brain_Cortex                | 3.918542464                    | 0.058649238  | 0.337101013  |                  |              |
|              | -1.129896901                          | -0.498290515                | -0.742181235                   | 0.251767203  | 3            | 0                |              |
|              | 0.998207054                           |                             |                                |              |              |                  |              |
| HCG22        | ENSG00000228789.6                     | 0.816388806                 | 13                             | 4            | 0.232061075  |                  |              |
|              | Brain_Nucleus_accumbens_basal_ganglia | 0.971832429                 | Brain_Cerebellum               |              |              |                  |              |
|              | 9.966357948                           | 0.003679699                 | 0.421411991                    | -0.266419813 | 1.195066435  |                  |              |
|              | 0.681748099                           | 0.502278481                 | 4                              | 0            | 0.998207054  |                  |              |
| RP11-1C8.6   | ENSG00000266289.1                     | 0.816465537                 | 3                              | 2            | 0.555252071  |                  |              |
|              | Brain_Nucleus_accumbens_basal_ganglia | 0.953535502                 | Brain_Cerebellum               |              |              |                  |              |
|              | 2.380930149                           | 0.058280501                 | 0.56078935                     | -0.589908388 | 0.058267567  |                  |              |
|              | -0.288224425                          | 0.326402875                 | 2                              | 0            | 0.998207054  |                  |              |
| CMTM7        | ENSG00000153551.13                    | 0.816600359                 | 2                              | 1            | 0.810357066  | Brain_Cerebellum |              |
|              | 0.827629172                           | Brain_Cerebellar_Hemisphere | 1.947479343                    | 0.052520657  |              |                  |              |
|              | 1.947479343                           | 0.217743239                 | 0.239965418                    | 0.228854329  | 0.015713453  |                  |              |
|              | 1                                     | 0                           | 0.998207054                    |              |              |                  |              |
| CRTAM        | ENSG00000109943.8                     | 0.816634632                 | 1                              | 1            | 0.816634632  | Brain_Amygdala   |              |
|              | 0.816634632                           | Brain_Amygdala              | 1                              | 1            | 1            | -0.231875606     | -0.231875606 |
|              | -0.231875606                          | NA                          | 1                              | 0            | 0.998207054  |                  |              |
| WASL         | ENSG00000106299.7                     | 0.816688911                 | 1                              | 1            | 0.816688911  |                  |              |
|              | Brain_Cerebellar_Hemisphere           | 0.816688911                 | Brain_Cerebellar_Hemisphere    |              | 1            | 1                |              |
|              | 1                                     | -0.231805724                | -0.231805724                   | -0.231805724 | NA           | 1                | 0            |
|              | 0.998207054                           |                             |                                |              |              |                  |              |
| GPR6         | ENSG00000146360.8                     | 0.816704093                 | 1                              | 1            | 0.816704093  |                  |              |
|              | Brain_Nucleus_accumbens_basal_ganglia | 0.816704093                 |                                |              |              |                  |              |
|              | Brain_Nucleus_accumbens_basal_ganglia | 1                           | 1                              | 1            | -0.231786178 |                  |              |
|              | -0.231786178                          | -0.231786178                | NA                             | 1            | 0            | 0.998207054      |              |
| AC079922.3   | ENSG00000237753.1                     | 0.816758686                 | 13                             | 1            | 0.645161921  |                  |              |
|              | Brain_Cerebellum                      | 0.957279646                 | Brain_Spinal_cord_cervical_c-1 |              | 12.6897723   |                  |              |
|              | 0.000809454                           | 12.6897723                  | -0.46049366                    | 0.386440698  | -0.228237272 |                  |              |
|              | 0.234917174                           | 1                           | 0                              | 0.998207054  |              |                  |              |
| NLRP2        | ENSG00000022556.15                    | 0.816776472                 | 13                             | 7            | 0.514410061  |                  |              |
|              | Brain_Substantia_nigra                | 0.981986743                 | Brain_Putamen_basal_ganglia    |              |              |                  |              |
|              | 8.162978613                           | 0.000381875                 | 0.339515623                    | -0.651986221 | 0.649927183  |                  |              |
|              | 0.130839899                           | 0.398501989                 | 7                              | 0            | 0.998207054  |                  |              |
| RRNAD1       | ENSG00000143303.11                    | 0.816935438                 | 1                              | 1            | 0.816935438  |                  |              |
|              | Brain_Frontal_Cortex_BA9              | 0.816935438                 | Brain_Frontal_Cortex_BA9       |              | 1            | 1                |              |
|              | 1                                     | -0.231488347                | -0.231488347                   | -0.231488347 | NA           | 1                | 0            |
|              | 0.998207054                           |                             |                                |              |              |                  |              |
| TTC33        | ENSG00000113638.13                    | 0.817002852                 | 2                              | 2            | 0.573587472  | Brain_Cerebellum |              |
|              | 0.582044618                           | Brain_Frontal_Cortex_BA9    | 1.533383809                    | 0.466616191  |              |                  |              |
|              | 0.466616191                           | 0.550400629                 | 0.562775931                    | 0.55658828   | 0.00875066   | 2                | 0            |
|              | 0.998207054                           |                             |                                |              |              |                  |              |
| BCR          | ENSG00000186716.20                    | 0.817065552                 | 11                             | 11           | 0.118988044  | Brain_Cortex     |              |
|              | 0.855711152                           | Brain_Cerebellum            | 3.537919798                    | 0.195681393  | 0.195681393  |                  |              |
|              | -0.966643488                          | 1.55903522                  | 0.282919196                    | 0.898683919  | 11           | 0                |              |
|              | 0.998207054                           |                             |                                |              |              |                  |              |
| CYP4A22-AS1  | ENSG00000225506.2                     | 0.817184808                 | 6                              | 6            | 0.149042859  |                  |              |



|              |                                       |                             |              |                                       |              |             |                   |  |
|--------------|---------------------------------------|-----------------------------|--------------|---------------------------------------|--------------|-------------|-------------------|--|
|              | Brain_Hippocampus                     | 0.935083694                 |              | Brain_Hypothalamus                    | 1.936322607  |             |                   |  |
|              | 0.479458398                           | 0.479458398                 | 0.081450495  | 1.44292053                            | 0.555700093  |             |                   |  |
|              | 0.504389759                           | 6                           | 0            | 0.998207054                           |              |             |                   |  |
| KIF1A        | ENSG00000130294.15                    | 0.817238731                 | 2            | 2                                     | 0.78968571   |             |                   |  |
|              | Brain_Cerebellar_Hemisphere           | 0.863405575                 |              | Brain_Cerebellum                      | 1.760023569  |             |                   |  |
|              | 0.239976431                           | 0.239976431                 | -0.266718759 | 0.172040645                           | -0.047339057 |             |                   |  |
|              | 0.31024975                            | 2                           | 0            | 0.998207054                           |              |             |                   |  |
| TMEM184A     | ENSG00000164855.15                    | 0.817253853                 | 1            | 1                                     | 0.817253853  |             |                   |  |
|              | Brain_Frontal_Cortex_BA9              | 0.817253853                 |              | Brain_Frontal_Cortex_BA9              | 1            | 1           |                   |  |
|              | 1                                     | -0.231078455                | -0.231078455 | -0.231078455                          | NA           | 1           | 0                 |  |
|              | 0.998207054                           |                             |              |                                       |              |             |                   |  |
| ZNF665       | ENSG00000197497.10                    | 0.817328914                 | 2            | 2                                     | 0.584949392  |             |                   |  |
|              | Brain_Hippocampus                     | 0.692083512                 |              | Brain_Nucleus_accumbens_basal_ganglia |              |             |                   |  |
|              | 1.137058723                           | 0.862941277                 | 0.862941277  | -0.546169555                          | 0.396029166  |             |                   |  |
|              | -0.075070194                          | 0.666235105                 | 2            | 0                                     | 0.998207054  |             |                   |  |
| RP11-94H18.1 | ENSG00000248964.6                     | 0.8173379                   | 1            | 1                                     | 0.8173379    |             |                   |  |
|              | Brain_Hippocampus                     | 0.8173379                   |              | Brain_Hippocampus                     | 1            | 1           | 1                 |  |
|              | -0.230970268                          | -0.230970268                | -0.230970268 | NA                                    | 1            | 0           | 0.998207054       |  |
| MPZ          | ENSG00000158887.15                    | 0.81753989                  | 2            | 2                                     | 0.620729235  |             | Brain_Hippocampus |  |
|              | 0.699518581                           | Brain_Caudate_basal_ganglia | 1.023238658  | 0.976761342                           |              |             |                   |  |
|              | 0.976761342                           | 0.385970414                 | 0.494817097  | 0.440393755                           | 0.076966228  |             |                   |  |
|              | 2                                     | 0                           | 0.998207054  |                                       |              |             |                   |  |
| CPE          | ENSG00000109472.13                    | 0.817630064                 | 2            | 2                                     | 0.592974999  |             |                   |  |
|              | Brain_Putamen_basal_ganglia           | 0.891729137                 |              | Brain_Hippocampus                     | 1.707086191  |             |                   |  |
|              | 0.292913809                           | 0.292913809                 | -0.534529857 | -0.136116559                          | -0.335323208 |             |                   |  |
|              | 0.281720744                           | 2                           | 0            | 0.998207054                           |              |             |                   |  |
| ZNF445       | ENSG00000185219.16                    | 0.81771398                  | 2            | 2                                     | 0.532118553  |             |                   |  |
|              | Brain_Nucleus_accumbens_basal_ganglia | 0.946065641                 |              | Brain_Cortex                          | 1.27770186   |             |                   |  |
|              | 0.72229814                            | 0.72229814                  | 0.067648256  | 0.624775286                           | 0.346211771  |             |                   |  |
|              | 0.393948301                           | 2                           | 0            | 0.998207054                           |              |             |                   |  |
| CCNA1        | ENSG00000133101.9                     | 0.817715903                 | 1            | 1                                     | 0.817715903  |             |                   |  |
|              | Brain_Anterior_cingulate_cortex_BA24  | 0.817715903                 |              |                                       |              |             |                   |  |
|              | Brain_Anterior_cingulate_cortex_BA24  | 1                           | 1            | 1                                     | 0.230483732  |             |                   |  |
|              | 0.230483732                           | 0.230483732                 | NA           | 1                                     | 0            | 0.998207054 |                   |  |
| ZP2          | ENSG00000103310.10                    | 0.817933638                 | 2            | 2                                     | 0.621106086  |             | Brain_Cerebellum  |  |
|              | 0.693764822                           | Brain_Cerebellar_Hemisphere | 1.006614319  | 0.993385681                           |              |             |                   |  |
|              | 0.993385681                           | -0.494283344                | 0.393751085  | -0.05026613                           | 0.627935167  |             |                   |  |
|              | 2                                     | 0                           | 0.998207054  |                                       |              |             |                   |  |
| LINC01270    | ENSG00000203999.8                     | 0.818006283                 | 3            | 3                                     | 0.336690244  |             |                   |  |
|              | Brain_Hippocampus                     | 0.923936706                 |              | Brain_Anterior_cingulate_cortex_BA24  |              |             |                   |  |
|              | 1.343901066                           | 0.679817643                 | 0.679817643  | -0.960725426                          | -0.095476058 |             |                   |  |
|              | -0.429522343                          | 0.46509915                  | 3            | 0                                     | 0.998207054  |             |                   |  |
| SLC17A9      | ENSG00000101194.17                    | 0.818017629                 | 2            | 2                                     | 0.626051977  |             |                   |  |
|              | Brain_Substantia_nigra                | 0.640987764                 |              | Brain_Spinal_cord_cervical_c-1        |              |             |                   |  |
|              | 1.132497146                           | 0.867502854                 | 0.867502854  | -0.487291208                          | -0.466318185 |             |                   |  |
|              | -0.476804697                          | 0.014830167                 | 2            | 0                                     | 0.998207054  |             |                   |  |
| RP11-495K9.6 | ENSG00000249926.2                     | 0.818060819                 | 12           | 6                                     | 0.337177924  |             |                   |  |
|              | Brain_Putamen_basal_ganglia           | 0.993487456                 |              | Brain_Frontal_Cortex_BA9              |              |             |                   |  |
|              | 7.198845015                           | 0.025649778                 | 0.32381775   | -0.959756214                          | 0.804068039  |             |                   |  |
|              | -0.115236307                          | 0.529324563                 | 6            | 0                                     | 0.998207054  |             |                   |  |
| MTMR9        | ENSG00000104643.9                     | 0.818169602                 | 1            | 1                                     | 0.818169602  |             |                   |  |
|              | Brain_Frontal_Cortex_BA9              | 0.818169602                 |              | Brain_Frontal_Cortex_BA9              | 1            | 1           |                   |  |
|              | 1                                     | 0.229899839                 | 0.229899839  | 0.229899839                           | NA           | 1           | 0                 |  |
|              | 0.998207054                           |                             |              |                                       |              |             |                   |  |
| PRR22        | ENSG00000212123.3                     | 0.81817964                  | 4            | 4                                     | 0.344547791  |             |                   |  |
|              | Brain_Nucleus_accumbens_basal_ganglia | 0.800761688                 |              | Brain_Frontal_Cortex_BA9              |              |             |                   |  |
|              | 2.120299151                           | 0.183203262                 | 0.183203262  | -0.94521761                           | 0.252361458  |             |                   |  |
|              | -0.474060315                          | 0.525732641                 | 4            | 0                                     | 0.998207054  |             |                   |  |
| RP4-655C5.9  | ENSG00000280850.1                     | 0.818185946                 | 1            | 1                                     | 0.818185946  |             |                   |  |
|              | Brain_Substantia_nigra                | 0.818185946                 |              | Brain_Substantia_nigra                | 1            | 1           |                   |  |
|              | 1                                     | 0.229878806                 | 0.229878806  | 0.229878806                           | NA           | 1           | 0                 |  |
|              | 0.998207054                           |                             |              |                                       |              |             |                   |  |

|              |                                       |                                       |              |              |                                |                  |   |
|--------------|---------------------------------------|---------------------------------------|--------------|--------------|--------------------------------|------------------|---|
| EML3         | ENSG00000149499.11                    | 0.818186852                           | 5            | 2            | 0.42236523                     |                  |   |
|              | Brain_Spinal_cord_cervical_c-1        | 0.977400074                           |              |              |                                |                  |   |
|              | Brain_Nucleus_accumbens_basal_ganglia | 4.22431366                            | 0.026198401  |              | 0.543873805                    |                  |   |
|              | -0.802324576                          | 0.028328595                           | -0.398449053 | 0.325851755  | 2                              | 0                |   |
|              | 0.998207054                           |                                       |              |              |                                |                  |   |
| CPEB4        | ENSG00000113742.12                    | 0.818194975                           | 1            | 1            | 0.818194975                    |                  |   |
|              | Brain_Caudate_basal_ganglia           | 0.818194975                           |              |              | Brain_Caudate_basal_ganglia    | 1                | 1 |
|              | 1                                     | -0.229867187                          | -0.229867187 | -0.229867187 | NA                             | 1                | 0 |
|              | 0.998207054                           |                                       |              |              |                                |                  |   |
| KYAT1        | ENSG00000171097.13                    | 0.818349237                           | 4            | 4            | 0.414239494                    |                  |   |
|              | Brain_Hypothalamus                    | 0.861918704                           |              |              | Brain_Spinal_cord_cervical_c-1 |                  |   |
|              | 2.233764651                           | 0.185948947                           | 0.185948947  | -0.816455799 | 0.674824603                    |                  |   |
|              | -0.174759411                          | 0.626399711                           | 4            | 0            | 0.998207054                    |                  |   |
| ROR2         | ENSG00000169071.14                    | 0.818429021                           | 2            | 2            | 0.529129942                    | Brain_Cortex     |   |
|              | 0.970411866                           | Brain_Nucleus_accumbens_basal_ganglia | 1.166074254  |              |                                |                  |   |
|              | 0.833925746                           | 0.833925746                           | 0.037091729  | 0.629334726  | 0.333213228                    |                  |   |
|              | 0.418779039                           | 2                                     | 0            | 0.998207054  |                                |                  |   |
| PLOD1        | ENSG00000083444.16                    | 0.818521788                           | 9            | 3            | 0.326925695                    |                  |   |
|              | Brain_Spinal_cord_cervical_c-1        | 0.569753275                           |              |              | Brain_Cerebellar_Hemisphere    |                  |   |
|              | 7.434094125                           | 1.19E-07                              | 0.357535423  | 0.568414901  | 0.980325047                    |                  |   |
|              | 0.783186084                           | 0.148229417                           | 3            | 0            | 0.998207054                    |                  |   |
| GATC         | ENSG00000257218.5                     | 0.818531003                           | 13           | 2            | 0.523344599                    |                  |   |
|              | Brain_Spinal_cord_cervical_c-1        | 0.900687741                           |              |              | Brain_Cortex                   | 11.81082373      |   |
|              | 0.000580829                           | 0.625064729                           | 0.124792606  | 0.638198308  | 0.418361681                    |                  |   |
|              | 0.177646633                           | 2                                     | 0            | 0.998207054  |                                |                  |   |
| RP3-416J7.4  | ENSG00000263667.1                     | 0.818540342                           | 10           | 8            | 0.247668037                    |                  |   |
|              | Brain_Nucleus_accumbens_basal_ganglia | 0.998709494                           |              |              | Brain_Caudate_basal_ganglia    |                  |   |
|              | 4.600249318                           | 0.07169139                            | 0.217714589  | -1.156032077 | 0.939928052                    |                  |   |
|              | -0.352656556                          | 0.56738654                            | 8            | 0            | 0.998207054                    |                  |   |
| CBY1         | ENSG00000100211.10                    | 0.81867519                            | 2            | 2            | 0.52928787                     | Brain_Cortex     |   |
|              | 0.648536247                           | Brain_Hippocampus                     | 1.789126222  | 0.210873778  |                                |                  |   |
|              | 0.210873778                           | -0.629093463                          | -0.455796603 | -0.542445033 | 0.122539385                    |                  |   |
|              | 2                                     | 0                                     | 0.998207054  |              |                                |                  |   |
| ARL16        | ENSG00000214087.8                     | 0.818764325                           | 13           | 2            | 0.409439426                    |                  |   |
|              | Brain_Spinal_cord_cervical_c-1        | 0.750722614                           |              |              | Brain_Frontal_Cortex_BA9       |                  |   |
|              | 11.0986824                            | 0.006977923                           | 0.652434891  | -0.824880521 | 0.317686682                    |                  |   |
|              | -0.528361557                          | 0.292592996                           | 2            | 0            | 0.998207054                    |                  |   |
| GALNT18      | ENSG00000110328.5                     | 0.818865673                           | 1            | 1            | 0.818865673                    |                  |   |
|              | Brain_Cerebellar_Hemisphere           | 0.818865673                           |              |              | Brain_Cerebellar_Hemisphere    | 1                | 1 |
|              | 1                                     | 0.229004173                           | 0.229004173  | 0.229004173  | NA                             | 1                | 0 |
|              | 0.998207054                           |                                       |              |              |                                |                  |   |
| P2RX6        | ENSG00000099957.16                    | 0.818924597                           | 4            | 3            | 0.36023097                     |                  |   |
|              | Brain_Frontal_Cortex_BA9              | 0.889226027                           |              |              | Brain_Spinal_cord_cervical_c-1 |                  |   |
|              | 2.608554495                           | 0.011504839                           | 0.380668152  | 0.139283628  | 0.914925066                    |                  |   |
|              | 0.491734664                           | 0.321373641                           | 3            | 0            | 0.998207054                    |                  |   |
| GREM2        | ENSG00000180875.4                     | 0.818990466                           | 4            | 4            | 0.371060841                    |                  |   |
|              | Brain_Cerebellar_Hemisphere           | 0.921112476                           |              |              | Brain_Caudate_basal_ganglia    |                  |   |
|              | 1.171709834                           | 0.819438544                           | 0.819438544  | 0.099032487  | 0.894488011                    |                  |   |
|              | 0.494287577                           | 0.389035236                           | 4            | 0            | 0.998207054                    |                  |   |
| DDX39A       | ENSG00000123136.14                    | 0.819030613                           | 1            | 1            | 0.819030613                    |                  |   |
|              | Brain_Nucleus_accumbens_basal_ganglia | 0.819030613                           |              |              |                                |                  |   |
|              | Brain_Nucleus_accumbens_basal_ganglia | 1                                     | 1            | 1            | -0.228791963                   |                  |   |
|              | -0.228791963                          | -0.228791963                          | NA           | 1            | 0                              | 0.998207054      |   |
| PDGFB        | ENSG00000100311.16                    | 0.819152782                           | 1            | 1            | 0.819152782                    |                  |   |
|              | Brain_Cerebellar_Hemisphere           | 0.819152782                           |              |              | Brain_Cerebellar_Hemisphere    | 1                | 1 |
|              | 1                                     | 0.22863479                            | 0.22863479   | 0.22863479   | NA                             | 1                | 0 |
|              | 0.998207054                           |                                       |              |              |                                |                  |   |
| RP11-168K9.2 | ENSG00000255087.2                     | 0.819207323                           | 1            | 1            | 0.819207323                    |                  |   |
|              | Brain_Cortex                          | 0.819207323                           |              |              | Brain_Cortex                   | 1                | 1 |
|              | -0.228564624                          | -0.228564624                          | NA           | 1            | 0                              | 0.998207054      |   |
| RDH16        | ENSG00000139547.7                     | 0.819368295                           | 2            | 2            | 0.535032517                    | Brain_Cerebellum |   |
|              | 0.637775401                           | Brain_Cerebellar_Hemisphere           | 1.856158936  | 0.143841064  |                                |                  |   |
|              | 0.143841064                           | -0.620342201                          | -0.470811431 | -0.545576816 | 0.105734222                    |                  |   |

|         |                                       |                                |              |              |                                      |             |            |                  |
|---------|---------------------------------------|--------------------------------|--------------|--------------|--------------------------------------|-------------|------------|------------------|
| 2       | 0                                     | 0.998207054                    |              |              |                                      |             |            |                  |
| ST8SIA3 | ENSG00000177511.5                     | 0.819544051                    | 1            | 1            | 0.819544051                          |             |            |                  |
|         | Brain_Frontal_Cortex_BA9              | 0.819544051                    |              |              | Brain_Frontal_Cortex_BA9             | 1           | 1          |                  |
|         | 1                                     | -0.22813145                    | -0.22813145  | -0.22813145  | NA                                   | 1           | 0          |                  |
|         | 0.998207054                           |                                |              |              |                                      |             |            |                  |
| LGALS16 | ENSG00000249861.3                     | 0.819620526                    | 1            | 1            | 0.819620526                          |             |            |                  |
|         | Brain_Cerebellum                      | 0.819620526                    | 1            | 1            | Brain_Cerebellum                     | 1           | 1          | 0.228033078      |
|         | 0.228033078                           | 0.228033078                    | NA           | 1            | 0                                    | 0.998207054 |            |                  |
| RPP38   | ENSG00000152464.14                    | 0.819637467                    | 1            | 1            | 0.819637467                          |             |            | Brain_Cerebellum |
|         | 0.819637467                           | Brain_Cerebellum               | 1            | 1            | 0.228011285                          | 0.228011285 |            |                  |
|         | 0.228011285                           | NA                             | 1            | 0            | 0.998207054                          |             |            |                  |
| ZNF184  | ENSG00000096654.15                    | 0.819643937                    | 5            | 5            | 0.56824773                           |             |            |                  |
|         | Brain_Frontal_Cortex_BA9              | 0.960455056                    |              |              | Brain_Cerebellar_Hemisphere          |             |            |                  |
|         | 3.060319609                           | 0.140874755                    | 0.140874755  | -0.508938183 | 0.570634054                          |             |            |                  |
|         | 0.009532826                           | 0.423026224                    | 5            | 0            | 0.998207054                          |             |            |                  |
| ZNF793  | ENSG00000188227.12                    | 0.819742                       | 3            | 3            | 0.535231373                          |             |            |                  |
|         | Brain_Cerebellar_Hemisphere           | 0.861717195                    |              |              | Brain_Cerebellum                     | 1.874745379 |            |                  |
|         | 0.428301363                           | 0.428301363                    | -0.189473329 | 0.620040122  | 0.085459377                          |             |            |                  |
|         | 0.463023579                           | 3                              | 0            | 0.998207054  |                                      |             |            |                  |
| ZNF483  | ENSG00000173258.12                    | 0.820013053                    | 3            | 3            | 0.456304432                          |             |            |                  |
|         | Brain_Cerebellum                      | 0.755755498                    |              |              | Brain_Caudate_basal_ganglia          | 1.189636919 |            |                  |
|         | 0.856646615                           | 0.856646615                    | -0.311059357 | 0.74494589   | 0.333386501                          |             |            |                  |
|         | 0.565211333                           | 3                              | 0            | 0.998207054  |                                      |             |            |                  |
| SNX24   | ENSG00000064652.10                    | 0.820187174                    | 8            | 4            | 0.227202088                          |             |            | Brain_Cerebellum |
|         | 0.54509897                            | Brain_Frontal_Cortex_BA9       | 6.182897755  | 0.011371852  |                                      |             |            |                  |
|         | 0.286301485                           | -1.207597587                   | -0.605120446 | -0.915469644 | 0.2154165                            | 4           |            |                  |
|         | 0                                     | 0.998207054                    |              |              |                                      |             |            |                  |
| BCAP29  | ENSG00000075790.10                    | 0.820273166                    | 7            | 6            | 0.354389351                          |             |            |                  |
|         | Brain_Substantia_nigra                | 0.900768529                    |              |              | Brain_Hypothalamus                   | 4.000617397 |            |                  |
|         | 0.001577621                           | 0.196192883                    | -0.438943552 | 0.926108973  | -0.037471509                         |             |            |                  |
|         | 0.496635396                           | 6                              | 0            | 0.998207054  |                                      |             |            |                  |
| COX17   | ENSG00000138495.6                     | 0.820465929                    | 3            | 3            | 0.390443187                          |             |            |                  |
|         | Brain_Nucleus_accumbens_basal_ganglia | 0.615140455                    |              |              | Brain_Cerebellum                     |             |            |                  |
|         | 1.578875198                           | 0.561510836                    | 0.561510836  | 0.502749426  | 0.858813919                          |             |            |                  |
|         | 0.666937485                           | 0.179639821                    | 3            | 0            | 0.998207054                          |             |            |                  |
| GSG1L   | ENSG00000169181.12                    | 0.820643705                    | 2            | 2            | 0.650686021                          |             |            |                  |
|         | Brain_Putamen_basal_ganglia           | 0.666530616                    |              |              | Brain_Cerebellum                     | 1.011672394 |            |                  |
|         | 0.988327606                           | 0.988327606                    | -0.452809364 | 0.430914396  | -0.010947484                         |             |            |                  |
|         | 0.624887063                           | 2                              | 0            | 0.998207054  |                                      |             |            |                  |
| MED29   | ENSG00000063322.13                    | 0.82074822                     | 3            | 2            | 0.677452803                          |             |            | Brain_Cerebellum |
|         | 0.863944251                           | Brain_Spinal_cord_cervical_c-1 | 2.819081758  | 0.057593298  |                                      |             |            |                  |
|         | 0.123324944                           | -0.41594151                    | -0.17135549  | -0.327485152 | 0.135610978                          |             |            |                  |
|         | 2                                     | 0                              | 0.998207054  |              |                                      |             |            |                  |
| DHX16   | ENSG00000204560.9                     | 0.820931799                    | 2            | 2            | 0.546208529                          |             |            |                  |
|         | Brain_Caudate_basal_ganglia           | 0.942114526                    |              |              | Brain_Cerebellum                     | 1.16500329  | 0.83499671 |                  |
|         | 0.83499671                            | -0.072612442                   | 0.603451263  | 0.26541941   | 0.47804923                           | 2           | 0          |                  |
|         | 0.998207054                           |                                |              |              |                                      |             |            |                  |
| KANK2   | ENSG00000197256.10                    | 0.821025701                    | 7            | 5            | 0.240497746                          |             |            |                  |
|         | Brain_Substantia_nigra                | 0.948579869                    |              |              | Brain_Cerebellum                     | 4.740012097 |            |                  |
|         | 0.00309204                            | 0.179695468                    | -1.173743587 | 0.670233896  | -0.179108731                         |             |            |                  |
|         | 0.564311084                           | 5                              | 0            | 0.998207054  |                                      |             |            |                  |
| NOP16   | ENSG00000048162.20                    | 0.821055826                    | 2            | 2            | 0.618584664                          |             |            |                  |
|         | Brain_Hypothalamus                    | 0.701639509                    |              |              | Brain_Anterior_cingulate_cortex_BA24 |             |            |                  |
|         | 1.000801293                           | 0.999198707                    | 0.999198707  | -0.497857246 | -0.383108242                         |             |            |                  |
|         | -0.440482744                          | 0.081139799                    | 2            | 0            | 0.998207054                          |             |            |                  |
| DARS2   | ENSG00000117593.9                     | 0.82115385                     | 9            | 4            | 0.431651244                          |             |            |                  |
|         | Brain_Spinal_cord_cervical_c-1        | 0.918818679                    |              |              | Brain_Putamen_basal_ganglia          |             |            |                  |
|         | 7.550254512                           | 0.009290011                    | 0.255852914  | -0.12322458  | 0.786369162                          |             |            |                  |
|         | 0.270614979                           | 0.28369068                     | 4            | 0            | 0.998207054                          |             |            |                  |
| CCDC15  | ENSG00000149548.14                    | 0.821213008                    | 3            | 3            | 0.482167197                          |             |            |                  |
|         | Brain_Cerebellar_Hemisphere           | 0.614760136                    |              |              | Brain_Frontal_Cortex_BA9             |             |            |                  |
|         | 1.286212689                           | 0.715819768                    | 0.715819768  | -0.58603558  | 0.702821179                          |             |            |                  |

|               |                                       |                             |             |             |             |                             |                |   |  |
|---------------|---------------------------------------|-----------------------------|-------------|-------------|-------------|-----------------------------|----------------|---|--|
|               | 0.20669199                            | 0.693733296                 | 3           | 0           | 0.998207054 |                             |                |   |  |
| CREB3L4       | ENSG00000143578.15                    |                             | 0.821421049 | 3           | 3           | 0.511982032                 |                |   |  |
|               | Brain_Frontal_Cortex_BA9              |                             | 0.791328907 |             |             | Brain_Caudate_basal_ganglia |                |   |  |
|               | 1.933921992                           | 0.333210522                 | 0.333210522 |             |             | -0.475458755                | 0.655754599    |   |  |
|               | 0.148293731                           | 0.574503019                 | 3           | 0           | 0.998207054 |                             |                |   |  |
| GRK6          | ENSG00000198055.10                    |                             | 0.821434039 | 1           | 1           | 0.821434039                 |                |   |  |
|               | Brain_Frontal_Cortex_BA9              |                             | 0.821434039 |             |             | Brain_Frontal_Cortex_BA9    | 1              | 1 |  |
|               | 1                                     | 0.225700925                 | 0.225700925 | 0.225700925 | NA          | 1                           | 0              |   |  |
|               | 0.998207054                           |                             |             |             |             |                             |                |   |  |
| IFI30         | ENSG00000216490.3                     |                             | 0.821507471 | 3           | 3           | 0.376234023                 |                |   |  |
|               | Brain_Anterior_cingulate_cortex_BA24  |                             | 0.898737362 |             |             | Brain_Caudate_basal_ganglia |                |   |  |
|               | 1.110201575                           | 0.898850727                 | 0.898850727 |             |             | -0.884856516                | 0.372138197    |   |  |
|               | -0.213324951                          | 0.632901854                 | 3           | 0           | 0.998207054 |                             |                |   |  |
| LYRM2         | ENSG00000083099.10                    |                             | 0.821585299 | 12          | 2           | 0.435823855                 |                |   |  |
|               | Brain_Nucleus_accumbens_basal_ganglia |                             | 0.942035148 |             |             |                             |                |   |  |
|               | Brain_Anterior_cingulate_cortex_BA24  |                             | 10.65274691 |             |             | 0.001238242                 |                |   |  |
|               | 0.609369893                           | 0.07271219                  | 0.779264613 |             |             | 0.585866521                 | 0.191657399    | 2 |  |
|               | 0                                     | 0.998207054                 |             |             |             |                             |                |   |  |
| RP5-884C9.2   | ENSG00000224592.5                     |                             | 0.82163532  | 2           | 2           | 0.581997085                 |                |   |  |
|               | Brain_Putamen_basal_ganglia           |                             | 0.74014773  |             |             | Brain_Substantia_nigra      | 1.058753838    |   |  |
|               | 0.941246162                           | 0.941246162                 | 0.33165772  | 0.550469946 |             | 0.441063833                 |                |   |  |
|               | 0.154723609                           | 2                           | 0           | 0.998207054 |             |                             |                |   |  |
| TMEM45B       | ENSG00000151715.7                     |                             | 0.82171789  | 3           | 3           | 0.396426165                 |                |   |  |
|               | Brain_Spinal_cord_cervical_c-1        |                             | 0.675568636 |             |             | Brain_Substantia_nigra      |                |   |  |
|               | 1.182771166                           | 0.704476981                 | 0.704476981 |             |             | -0.848021198                | -0.418517716   |   |  |
|               | -0.56610181                           | 0.244239204                 | 3           | 0           | 0.998207054 |                             |                |   |  |
| MAST2         | ENSG00000086015.20                    |                             | 0.821736126 | 3           | 2           | 0.579444015                 | Brain_Cortex   |   |  |
|               | 0.756997238                           | Brain_Cerebellum            | 1.982852888 |             |             | 0.022292937                 | 0.994854175    |   |  |
|               | 0.309426337                           | 0.554197024                 | 0.431640382 |             |             | 0.122385703                 | 2              | 0 |  |
|               | 0.998207054                           |                             |             |             |             |                             |                |   |  |
| AC008746.12   | ENSG00000267838.2                     |                             | 0.821751856 | 11          | 8           | 0.329931822                 |                |   |  |
|               | Brain_Anterior_cingulate_cortex_BA24  |                             | 0.943266569 |             |             | Brain_Caudate_basal_ganglia |                |   |  |
|               | 6.76967224                            | 0.042899796                 | 0.246258269 |             |             | -0.974251212                | 0.687370137    |   |  |
|               | -0.006200902                          | 0.485137481                 | 8           | 0           | 0.998207054 |                             |                |   |  |
| RINL          | ENSG00000187994.13                    |                             | 0.821893726 | 6           | 6           | 0.265352057                 |                |   |  |
|               | Brain_Nucleus_accumbens_basal_ganglia |                             | 0.86891453  |             |             | Brain_Cerebellar_Hemisphere |                |   |  |
|               | 2.711288147                           | 0.157607126                 | 0.157607126 |             |             | -1.113830156                | 0.658906069    |   |  |
|               | 0.148288379                           | 0.691900245                 | 6           | 0           | 0.998207054 |                             |                |   |  |
| KCNIP1        | ENSG00000182132.13                    |                             | 0.821918193 | 1           | 1           | 0.821918193                 |                |   |  |
|               | Brain_Cerebellar_Hemisphere           |                             | 0.821918193 |             |             | Brain_Cerebellar_Hemisphere | 1              | 1 |  |
|               | 1                                     | 0.225078517                 | 0.225078517 | 0.225078517 | NA          | 1                           | 0              |   |  |
|               | 0.998207054                           |                             |             |             |             |                             |                |   |  |
| RP11-350N15.5 | ENSG00000272092.1                     |                             | 0.821994529 | 1           | 1           | 0.821994529                 |                |   |  |
|               | Brain_Anterior_cingulate_cortex_BA24  |                             | 0.821994529 |             |             |                             |                |   |  |
|               | Brain_Anterior_cingulate_cortex_BA24  |                             | 1           | 1           | 1           | -0.224980391                |                |   |  |
|               | -0.224980391                          | -0.224980391                | NA          | 1           | 0           | 0.998207054                 |                |   |  |
| NUPR2         | ENSG00000185290.3                     |                             | 0.822053231 | 13          | 2           | 0.43741606                  |                |   |  |
|               | Brain_Putamen_basal_ganglia           |                             | 0.947084754 |             |             | Brain_Frontal_Cortex_BA9    |                |   |  |
|               | 11.51980294                           | 0.009827438                 | 0.525638851 |             |             | -0.77656398                 | 0.163793885    |   |  |
|               | -0.287302635                          | 0.297403603                 | 2           | 0           | 0.998207054 |                             |                |   |  |
| ERV3-1        | ENSG00000213462.4                     |                             | 0.82208124  | 13          | 1           | 0.526630505                 | Brain_Amygdala |   |  |
|               | 0.897838482                           | Brain_Cerebellar_Hemisphere | 12.24709924 |             |             | 0.001192414                 |                |   |  |
|               | 12.24709924                           | -0.633157947                | 0.586135988 |             |             | -0.211269031                | 0.304602444    |   |  |
|               | 1                                     | 0                           | 0.998207054 |             |             |                             |                |   |  |
| RP11-351D16.3 | ENSG00000273008.1                     |                             | 0.822194126 | 1           | 1           | 0.822194126                 |                |   |  |
|               | Brain_Frontal_Cortex_BA9              |                             | 0.822194126 |             |             | Brain_Frontal_Cortex_BA9    | 1              | 1 |  |
|               | 1                                     | 0.224723829                 | 0.224723829 | 0.224723829 | NA          | 1                           | 0              |   |  |
|               | 0.998207054                           |                             |             |             |             |                             |                |   |  |
| GXYLT1        | ENSG00000151233.10                    |                             | 0.822540876 | 4           | 4           | 0.577028021                 |                |   |  |
|               | Brain_Nucleus_accumbens_basal_ganglia |                             | 0.881055745 |             |             | Brain_Cerebellum            |                |   |  |
|               | 2.274825359                           | 0.117391259                 | 0.117391259 |             |             | -0.149631005                | 0.557731095    |   |  |
|               | 0.321862658                           | 0.3270009                   | 4           | 0           | 0.998207054 |                             |                |   |  |

|              |                                       |                                |                                |              |              |                                       |                  |   |
|--------------|---------------------------------------|--------------------------------|--------------------------------|--------------|--------------|---------------------------------------|------------------|---|
| ACTR1A       | ENSG00000138107.12                    | 0.822763895                    | 6                              | 4            | 0.318516566  |                                       |                  |   |
|              | Brain_Substantia_nigra                | 0.581535803                    |                                |              |              | Brain_Putamen_basal_ganglia           |                  |   |
|              | 4.185140806                           | 0.044825092                    | 0.175031831                    |              | -0.99751094  |                                       | -0.551142777     |   |
|              | -0.809078482                          | 0.179212141                    | 4                              | 0            | 0.998207054  |                                       |                  |   |
| MRPS31       | ENSG00000102738.7                     | 0.822949491                    | 2                              | 2            | 0.577808365  |                                       |                  |   |
|              | Brain_Frontal_Cortex_BA9              | 0.920639894                    |                                |              |              | Brain_Nucleus_accumbens_basal_ganglia |                  |   |
|              | 1.304784114                           | 0.695215886                    | 0.695215886                    |              | -0.556588862 |                                       | 0.099627709      |   |
|              | -0.228480576                          | 0.464015188                    | 2                              | 0            | 0.998207054  |                                       |                  |   |
| JRK          | ENSG00000234616.8                     | 0.822969523                    | 3                              | 3            | 0.462101147  |                                       | Brain_Cerebellum |   |
|              | 0.969658953                           | Brain_Spinal_cord_cervical_c-1 | 1.851647001                    |              |              |                                       | 0.414292334      |   |
|              | 0.414292334                           | -0.735391418                   | -0.038036033                   |              | -0.326299942 |                                       | 0.364040669      |   |
|              | 3                                     | 0                              | 0.998207054                    |              |              |                                       |                  |   |
| MZT2B        | ENSG00000152082.13                    | 0.822981055                    | 3                              | 3            | 0.455903263  |                                       |                  |   |
|              | Brain_Hypothalamus                    | 0.585752156                    | Brain_Cortex                   | 1.928484658  |              |                                       |                  |   |
|              | 0.071799101                           | 0.071799101                    | 0.54500198                     | 0.745609631  |              | 0.632102422                           |                  |   |
|              | 0.102877818                           | 3                              | 0                              | 0.998207054  |              |                                       |                  |   |
| CLCNKA       | ENSG00000186510.11                    | 0.823092303                    | 12                             | 2            | 0.409016692  |                                       |                  |   |
|              | Brain_Substantia_nigra                | 0.821478847                    | Brain_Cerebellar_Hemisphere    |              |              |                                       |                  |   |
|              | 9.086545614                           | 7.32E-05                       | 2.232556395                    |              | -0.825625277 |                                       | 0.661596676      |   |
|              | -0.413809947                          | 0.379587162                    | 2                              | 0            | 0.998207054  |                                       |                  |   |
| URGCP        | ENSG00000106608.16                    | 0.823118828                    | 2                              | 2            | 0.554767414  |                                       |                  |   |
|              | Brain_Spinal_cord_cervical_c-1        | 0.830279361                    |                                |              |              |                                       |                  |   |
|              | Brain_Nucleus_accumbens_basal_ganglia | 1.022412105                    |                                |              | 0.977587895  |                                       |                  |   |
|              | 0.977587895                           | 0.214343291                    | 0.59063141                     | 0.402487351  |              | 0.266075881                           |                  | 2 |
|              | 0                                     | 0.998207054                    |                                |              |              |                                       |                  |   |
| RAB12        | ENSG00000206418.3                     | 0.823202528                    | 1                              | 1            | 0.823202528  |                                       |                  |   |
|              | Brain_Cerebellar_Hemisphere           | 0.823202528                    | Brain_Cerebellar_Hemisphere    | 1            |              |                                       | 1                |   |
|              | 1                                     | -0.223427853                   | -0.223427853                   | -0.223427853 | NA           | 1                                     | 0                |   |
|              | 0.998207054                           |                                |                                |              |              |                                       |                  |   |
| ATP6V0A1     | ENSG00000033627.16                    | 0.823377252                    | 1                              | 1            | 0.823377252  |                                       |                  |   |
|              | Brain_Cerebellar_Hemisphere           | 0.823377252                    | Brain_Cerebellar_Hemisphere    | 1            |              |                                       | 1                |   |
|              | 1                                     | 0.223203341                    | 0.223203341                    | 0.223203341  | NA           | 1                                     | 0                |   |
|              | 0.998207054                           |                                |                                |              |              |                                       |                  |   |
| AC145343.2   | ENSG00000265055.1                     | 0.823451763                    | 1                              | 1            | 0.823451763  |                                       |                  |   |
|              | Brain_Cerebellum                      | 0.823451763                    | Brain_Cerebellum               | 1            | 1            | 1                                     | 0.2231076        |   |
|              | 0.2231076                             | 0.2231076                      | NA                             | 1            | 0            | 0.998207054                           |                  |   |
| PRSS27       | ENSG00000172382.9                     | 0.823607969                    | 2                              | 2            | 0.537601401  |                                       |                  |   |
|              | Brain_Frontal_Cortex_BA9              | 0.972764188                    | Brain_Spinal_cord_cervical_c-1 |              |              |                                       |                  |   |
|              | 1.090178846                           | 0.909821154                    | 0.909821154                    |              | -0.616444182 |                                       | -0.03414166      |   |
|              | -0.325292921                          | 0.411750062                    | 2                              | 0            | 0.998207054  |                                       |                  |   |
| SIDT2        | ENSG00000149577.15                    | 0.823631714                    | 1                              | 1            | 0.823631714  |                                       |                  |   |
|              | Brain_Frontal_Cortex_BA9              | 0.823631714                    | Brain_Frontal_Cortex_BA9       | 1            |              |                                       | 1                |   |
|              | 1                                     | -0.222876388                   | -0.222876388                   | -0.222876388 | NA           | 1                                     | 0                |   |
|              | 0.998207054                           |                                |                                |              |              |                                       |                  |   |
| CTC-497E21.3 | ENSG00000254670.1                     | 0.823731918                    | 2                              | 2            | 0.590271532  |                                       |                  |   |
|              | Brain_Spinal_cord_cervical_c-1        | 0.837866157                    | Brain_Amygdala                 | 1.190437703  |              |                                       |                  |   |
|              | 0.809562297                           | 0.809562297                    | -0.538442587                   |              | -0.204623675 |                                       | -0.371533131     |   |
|              | 0.236045616                           | 2                              | 0                              | 0.998207054  |              |                                       |                  |   |
| RP1-288L1.5  | ENSG00000234891.1                     | 0.823949306                    | 1                              | 1            | 0.823949306  |                                       |                  |   |
|              | Brain_Anterior_cingulate_cortex_BA24  | 0.823949306                    |                                |              |              |                                       |                  |   |
|              | Brain_Anterior_cingulate_cortex_BA24  | 1                              | 1                              | 1            |              | -0.222468354                          |                  |   |
|              | -0.222468354                          | -0.222468354                   | NA                             | 1            | 0            | 0.998207054                           |                  |   |
| PEMT         | ENSG00000133027.17                    | 0.824097648                    | 1                              | 1            | 0.824097648  |                                       |                  |   |
|              | Brain_Substantia_nigra                | 0.824097648                    | Brain_Substantia_nigra         | 1            |              |                                       | 1                |   |
|              | 1                                     | 0.222277781                    | 0.222277781                    | 0.222277781  | NA           | 1                                     | 0                |   |
|              | 0.998207054                           |                                |                                |              |              |                                       |                  |   |
| FANK1        | ENSG00000203780.10                    | 0.824166919                    | 6                              | 4            | 0.286597906  |                                       |                  |   |
|              | Brain_Caudate_basal_ganglia           | 0.981638976                    | Brain_Putamen_basal_ganglia    | 3.56120709   |              |                                       |                  |   |
|              | 0.014692022                           | 0.508055772                    | 0.023014162                    |              | 1.065614579  |                                       | 0.363465081      |   |
|              | 0.374546686                           | 4                              | 0                              | 0.998207054  |              |                                       |                  |   |
| TRAM1        | ENSG00000067167.7                     | 0.824309358                    | 2                              | 2            | 0.575244593  |                                       |                  |   |
|              | Brain_Caudate_basal_ganglia           | 0.605559736                    | Brain_Putamen_basal_ganglia    |              |              |                                       |                  |   |

|              |                                       |                                       |                                       |              |              |
|--------------|---------------------------------------|---------------------------------------|---------------------------------------|--------------|--------------|
|              | 1.507867392                           | 0.492132608                           | 0.492132608                           | -0.560344335 | -0.516421953 |
|              | -0.538383144                          | 0.031057814                           | 2                                     | 0            | 0.998207054  |
| SPEN         | ENSG00000065526.10                    | 0.824315222                           | 1                                     | 1            | 0.824315222  |
|              | Brain_Hypothalamus                    | 0.824315222                           | Brain_Hypothalamus                    | 1            | 1            |
|              | 0.221998281                           | 0.221998281                           | 0.221998281                           | NA           | 1            |
| THEM6        | ENSG00000130193.7                     | 0.824366803                           | 11                                    | 1            | 0.621985007  |
|              | Brain_Cerebellar_Hemisphere           | 0.919376544                           | Brain_Hippocampus                     | 10.03836135  |              |
|              | 0.004555103                           | 10.03836135                           | -0.493039033                          | 0.157968198  | -0.209107554 |
|              | 0.209551258                           | 1                                     | 0                                     | 0.998207054  |              |
| CACNA1I      | ENSG00000100346.17                    | 0.824381383                           | 2                                     | 1            | 0.803601492  |
|              | Brain_Putamen_basal_ganglia           | 0.850447458                           | Brain_Caudate_basal_ganglia           |              |              |
|              | 1.941046382                           | 0.058953618                           | 1.941046382                           | -0.248688827 | -0.188547533 |
|              | -0.21861818                           | 0.042526317                           | 1                                     | 0            | 0.998207054  |
| RHBDL3       | ENSG00000141314.12                    | 0.82442889                            | 9                                     | 5            | 0.22192078   |
|              | Brain_Nucleus_accumbens_basal_ganglia | 4.780210745                           | Brain_Cortex                          |              |              |
|              | 0.916613091                           | Brain_Nucleus_accumbens_basal_ganglia | 4.780210745                           |              |              |
|              | 0.012669183                           | 0.752772931                           | -0.893261286                          | 1.221436538  | 0.216888579  |
|              | 0.597618449                           | 5                                     | 0                                     | 0.998207054  |              |
| BACE1        | ENSG00000186318.16                    | 0.824522381                           | 2                                     | 2            | 0.594673835  |
|              | Brain_Cerebellar_Hemisphere           | 1.23298298                            | 0.76701702                            | 0.76701702   |              |
|              | 0.851007323                           | Brain_Cerebellar_Hemisphere           | 1.23298298                            | 0.76701702   | 0.76701702   |
|              | -0.532075313                          | 0.18783331                            | -0.172121001                          | 0.509052269  | 2            |
|              | 0.998207054                           |                                       |                                       | 0            |              |
| ROBO1        | ENSG00000169855.19                    | 0.824551062                           | 4                                     | 4            | 0.265120226  |
|              | Brain_Frontal_Cortex_BA9              | 2.065631561                           | 0.385089772                           |              |              |
|              | 0.921940978                           | Brain_Frontal_Cortex_BA9              | 2.065631561                           | 0.385089772  |              |
|              | 0.385089772                           | 0.097989063                           | 1.114370611                           | 0.497146239  | 0.443857994  |
|              | 4                                     | 0                                     | 0.998207054                           |              |              |
| DEAF1        | ENSG00000177030.16                    | 0.824556016                           | 3                                     | 3            | 0.363932575  |
|              | Brain_Cerebellar_Hemisphere           | 0.709323023                           | Brain_Nucleus_accumbens_basal_ganglia |              |              |
|              | 1.942449069                           | 0.130722498                           | 0.130722498                           | 0.372765445  | 0.907897129  |
|              | 0.722652294                           | 0.303185957                           | 3                                     | 0            | 0.998207054  |
| LINC01168    | ENSG00000240707.2                     | 0.824611847                           | 7                                     | 6            | 0.285810836  |
|              | Brain_Caudate_basal_ganglia           | 0.924829378                           | Brain_Amygdala                        | 3.63692419   | 0.0369741    |
|              | 0.146228877                           | -1.067356606                          | 0.491242574                           | -0.190557746 | 0.543020063  |
|              | 6                                     | 0                                     | 0.998207054                           |              |              |
| RP11-981G7.6 | ENSG00000272505.1                     | 0.824627523                           | 11                                    | 6            | 0.128828378  |
|              | Brain_Nucleus_accumbens_basal_ganglia | 0.954771486                           | Brain_Hippocampus                     |              |              |
|              | 6.775442732                           | 0.010638923                           | 0.279138931                           | -1.518738316 | 0.259013874  |
|              | -0.772978898                          | 0.589461002                           | 6                                     | 0            | 0.998207054  |
| ZNF511       | ENSG00000198546.14                    | 0.824656156                           | 1                                     | 1            | 0.824656156  |
|              | Brain_Frontal_Cortex_BA9              | 0.824656156                           | Brain_Frontal_Cortex_BA9              | 1            | 1            |
|              | 1                                     | 0.221560344                           | 0.221560344                           | 0.221560344  | NA           |
|              | 0.998207054                           |                                       |                                       | 1            | 0            |
| AEBP1        | ENSG00000106624.10                    | 0.824663551                           | 9                                     | 4            | 0.194985494  |
|              | Brain_Nucleus_accumbens_basal_ganglia | 0.552287366                           | Brain_Cerebellum                      |              |              |
|              | 6.842854825                           | 0.013367599                           | 0.392879949                           | 0.594336058  | 1.295970948  |
|              | 0.853621912                           | 0.282882115                           | 4                                     | 0            | 0.998207054  |
| SLC39A6      | ENSG00000141424.12                    | 0.824780261                           | 2                                     | 2            | 0.59633399   |
|              | Brain_Nucleus_accumbens_basal_ganglia | 0.654259379                           | Brain_Substantia_nigra                |              |              |
|              | 1.254738907                           | 0.745261093                           | 0.745261093                           | -0.529679751 | -0.447852877 |
|              | -0.488766314                          | 0.057860337                           | 2                                     | 0            | 0.998207054  |
| REXO1        | ENSG00000079313.13                    | 0.824786604                           | 1                                     | 1            | 0.824786604  |
|              | Brain_Cerebellum                      | 1                                     | 1                                     | 1            | -0.221392793 |
|              | 0.824786604                           | Brain_Cerebellum                      | 1                                     | 1            | -0.221392793 |
|              | -0.221392793                          | NA                                    | 1                                     | 0            | 0.998207054  |
| TSR1         | ENSG00000167721.10                    | 0.824866978                           | 1                                     | 1            | 0.824866978  |
|              | Brain_Substantia_nigra                | 0.824866978                           | Brain_Substantia_nigra                | 1            | 1            |
|              | 1                                     | 0.22128956                            | 0.22128956                            | 0.22128956   | NA           |
|              | 0.998207054                           |                                       |                                       | 1            | 0            |
| ZNF564       | ENSG00000249709.7                     | 0.824868277                           | 4                                     | 3            | 0.420686277  |
|              | Brain_Caudate_basal_ganglia           | 0.580172057                           | Brain_Cerebellar_Hemisphere           |              |              |
|              | 3.263941681                           | 4.93E-19                              | 0.161073902                           | -0.805231197 | -0.553133415 |
|              | -0.733282216                          | 0.120393586                           | 3                                     | 0            | 0.998207054  |
| TPRG1L       | ENSG00000158109.14                    | 0.825031989                           | 6                                     | 6            | 0.145627657  |
|              | Brain_Anterior_cingulate_cortex_BA24  | 0.932679927                           | Brain_Amygdala                        |              |              |
|              | 2.559677748                           | 0.188890367                           | 0.188890367                           | -1.455150298 | 0.398470921  |

|               |                                       |                             |                                       |              |              |                  |             |
|---------------|---------------------------------------|-----------------------------|---------------------------------------|--------------|--------------|------------------|-------------|
|               | -0.681447906                          | 0.7070927                   | 6                                     | 0            | 0.998207054  |                  |             |
| NBPF20        | ENSG00000162825.16                    | 0.825036639                 | 2                                     | 2            | 0.553973004  |                  |             |
|               | Brain_Caudate_basal_ganglia           | 0.791825068                 |                                       | Brain_Cortex | 1.135444708  |                  |             |
|               | 0.864555292                           | 0.864555292                 | 0.263941407                           | 0.5918172    | 0.427879304  |                  |             |
|               | 0.231843197                           | 2                           | 0                                     | 0.998207054  |              |                  |             |
| RAB23         | ENSG00000112210.11                    | 0.825074245                 | 2                                     | 2            | 0.548802134  | Brain_Cerebellum |             |
|               | 0.848897162                           | Brain_Hypothalamus          | 1.053936825                           | 0.946063175  |              |                  |             |
|               | 0.946063175                           | 0.190525756                 | 0.599556067                           | 0.395040911  | 0.289228106  |                  |             |
|               | 2                                     | 0                           | 0.998207054                           |              |              |                  |             |
| MMD2          | ENSG00000136297.14                    | 0.825252205                 | 7                                     | 4            | 0.42003723   |                  |             |
|               | Brain_Frontal_Cortex_BA9              | 0.983161571                 | Brain_Hypothalamus                    | 4.493443866  |              |                  |             |
|               | 0.008125815                           | 0.374441564                 | -0.10689321                           | 0.806356658  | 0.285174191  |                  |             |
|               | 0.373863609                           | 4                           | 0                                     | 0.998207054  |              |                  |             |
| EPN3          | ENSG00000049283.17                    | 0.825461209                 | 3                                     | 3            | 0.663710238  | Brain_Cerebellum |             |
|               | 0.977916109                           | Brain_Caudate_basal_ganglia | 1.963280022                           | 0.130073265  |              |                  |             |
|               | 0.130073265                           | -0.040989917                | 0.434796373                           | 0.122041623  | 0.270935284  |                  |             |
|               | 3                                     | 0                           | 0.998207054                           |              |              |                  |             |
| ANKRD2        | ENSG00000165887.11                    | 0.825503052                 | 3                                     | 3            | 0.401510682  |                  |             |
|               | Brain_Nucleus_accumbens_basal_ganglia | 0.685446465                 | Brain_Hippocampus                     |              |              |                  |             |
|               | 1.603212622                           | 0.396477137                 | 0.396477137                           | -0.838926276 | 0.405042236  |                  |             |
|               | -0.326400176                          | 0.650236633                 | 3                                     | 0            | 0.998207054  |                  |             |
| FRMD8         | ENSG00000126391.13                    | 0.825521004                 | 1                                     | 1            | 0.825521004  | Brain_Amygdala   |             |
|               | 0.825521004                           | Brain_Amygdala              | 1                                     | 1            | -0.22044962  | -0.22044962      |             |
|               | -0.22044962                           | NA                          | 1                                     | 0            | 0.998207054  |                  |             |
| LINC00844     | ENSG00000237949.1                     | 0.825618129                 | 1                                     | 1            | 0.825618129  |                  |             |
|               | Brain_Nucleus_accumbens_basal_ganglia | 0.825618129                 |                                       |              |              |                  |             |
|               | Brain_Nucleus_accumbens_basal_ganglia | 1                           | 1                                     | 1            | -0.2203249   | -0.2203249       |             |
|               | -0.2203249                            | NA                          | 1                                     | 0            | 0.998207054  |                  |             |
| ERRFI1        | ENSG00000116285.12                    | 0.825650061                 | 1                                     | 1            | 0.825650061  |                  |             |
|               | Brain_Cerebellum                      | 0.825650061                 | Brain_Cerebellum                      | 1            | 1            | 1                | 0.220283896 |
|               | 0.220283896                           | 0.220283896                 | NA                                    | 1            | 0            | 0.998207054      |             |
| AC091814.2    | ENSG00000225231.1                     | 0.825741646                 | 12                                    | 9            | 0.075863397  |                  |             |
|               | Brain_Hippocampus                     | 0.932399853                 | Brain_Nucleus_accumbens_basal_ganglia |              |              |                  |             |
|               | 5.448244879                           | 0.047183672                 | 0.201598245                           | -1.775208921 | 1.130012927  |                  |             |
|               | 0.246241262                           | 0.704772694                 | 9                                     | 0            | 0.998207054  |                  |             |
| P2RX5         | ENSG00000083454.21                    | 0.825749253                 | 2                                     | 2            | 0.543779421  |                  |             |
|               | Brain_Cerebellar_Hemisphere           | 0.570920079                 | Brain_Cerebellum                      | 1.820707776  |              |                  |             |
|               | 0.179292224                           | 0.179292224                 | -0.60710773                           | -0.566696971 | -0.586902351 |                  |             |
|               | 0.028574721                           | 2                           | 0                                     | 0.998207054  |              |                  |             |
| C7orf49       | ENSG00000122783.16                    | 0.825842987                 | 2                                     | 2            | 0.542618207  |                  |             |
|               | Brain_Cortex                          | 0.982929406                 | Brain_Nucleus_accumbens_basal_ganglia |              |              |                  |             |
|               | 1.142874479                           | 0.857125521                 | 0.857125521                           | -0.021396449 | 0.608858541  |                  |             |
|               | 0.293731046                           | 0.445657578                 | 2                                     | 0            | 0.998207054  |                  |             |
| RP11-441015.3 | ENSG00000224934.2                     | 0.825849759                 | 1                                     | 1            | 0.825849759  |                  |             |
|               | Brain_Cerebellum                      | 0.825849759                 | Brain_Cerebellum                      | 1            | 1            | 1                | 0.220027472 |
|               | 0.220027472                           | 0.220027472                 | NA                                    | 1            | 0            | 0.998207054      |             |
| NUSAP1        | ENSG00000137804.12                    | 0.825851534                 | 13                                    | 2            | 0.505461197  |                  |             |
|               | Brain_Putamen_basal_ganglia           | 0.990059853                 | Brain_Caudate_basal_ganglia           |              |              |                  |             |
|               | 12.24365241                           | 0.001086043                 | 0.577890141                           | -0.665921626 | -0.012458449 |                  |             |
|               | -0.341484107                          | 0.187659267                 | 2                                     | 0            | 0.998207054  |                  |             |
| COL21A1       | ENSG00000124749.16                    | 0.825867791                 | 4                                     | 3            | 0.629557278  |                  |             |
|               | Brain_Amygdala                        | 0.952785592                 | Brain_Frontal_Cortex_BA9              | 2.478210785  |              |                  |             |
|               | 0.015397571                           | 0.506453864                 | -0.482350079                          | 0.381551952  | 0.070892605  |                  |             |
|               | 0.394704467                           | 3                           | 0                                     | 0.998207054  |              |                  |             |
| RP11-284N8.3  | ENSG00000259834.1                     | 0.825942521                 | 3                                     | 3            | 0.402529624  |                  |             |
|               | Brain_Nucleus_accumbens_basal_ganglia | 0.79544833                  | Brain_Cerebellum                      | 1.069561687  |              |                  |             |
|               | 0.943247539                           | 0.943247539                 | -0.259242256                          | 0.837111985  | 0.315492602  |                  |             |
|               | 0.550103714                           | 3                           | 0                                     | 0.998207054  |              |                  |             |
| ZNF708        | ENSG00000182141.10                    | 0.82595084                  | 2                                     | 2            | 0.578175424  |                  |             |
|               | Brain_Cerebellar_Hemisphere           | 0.869254759                 | Brain_Cerebellum                      | 1.661176093  |              |                  |             |
|               | 0.338823907                           | 0.338823907                 | 0.164605173                           | 0.55605183   | 0.360328501  |                  |             |
|               | 0.276794585                           | 2                           | 0                                     | 0.998207054  |              |                  |             |

|            |                                       |                             |                    |              |              |                                       |              |
|------------|---------------------------------------|-----------------------------|--------------------|--------------|--------------|---------------------------------------|--------------|
| KCNH8      | ENSG00000183960.8                     | 0.825992291                 | 2                  | 2            | 0.573566989  |                                       |              |
|            | Brain_Putamen_basal_ganglia           | 0.779490893                 |                    |              |              | Brain_Frontal_Cortex_BA9              |              |
|            | 1.042846194                           | 0.957153806                 | 0.957153806        |              | 0.27998255   | 0.562806008                           |              |
|            | 0.421394279                           | 0.199986385                 | 2                  | 0            | 0.998207054  |                                       |              |
| INSL5      | ENSG00000172410.4                     | 0.826062893                 | 1                  | 1            | 0.826062893  |                                       |              |
|            | Brain_Nucleus_accumbens_basal_ganglia | 0.826062893                 |                    |              |              |                                       |              |
|            | Brain_Nucleus_accumbens_basal_ganglia | 1                           | 1                  | 1            | -0.219753812 |                                       |              |
|            | -0.219753812                          | -0.219753812                | NA                 | 1            | 0            | 0.998207054                           |              |
| NDUFC1     | ENSG00000109390.11                    | 0.826231742                 | 1                  | 1            | 0.826231742  |                                       |              |
|            | Brain_Cerebellum                      | 0.826231742                 | Brain_Cerebellum   | 1            | 1            | 1                                     | -0.219537024 |
|            | -0.219537024                          | -0.219537024                | NA                 | 1            | 0            | 0.998207054                           |              |
| PLK1       | ENSG00000166851.14                    | 0.826252086                 | 2                  | 2            | 0.57251465   |                                       |              |
|            | Brain_Anterior_cingulate_cortex_BA24  | 0.816239446                 |                    |              |              | Brain_Cerebellum                      |              |
|            | 1.033499703                           | 0.966500297                 | 0.966500297        |              | -0.232384423 | 0.564351925                           |              |
|            | 0.165983751                           | 0.563377675                 | 2                  | 0            | 0.998207054  |                                       |              |
| SOD1       | ENSG00000142168.14                    | 0.826269058                 | 1                  | 1            | 0.826269058  | Brain_Cerebellum                      |              |
|            | 0.826269058                           | Brain_Cerebellum            | 1                  | 1            | 1            | -0.219489115                          | -0.219489115 |
|            | -0.219489115                          | NA                          | 1                  | 0            | 0.998207054  |                                       |              |
| RFX6       | ENSG00000185002.9                     | 0.826335963                 | 1                  | 1            | 0.826335963  | Brain_Cortex                          |              |
|            | 0.826335963                           | Brain_Cortex                | 1                  | 1            | 1            | 0.219403219                           | 0.219403219  |
|            | 0.219403219                           | NA                          | 1                  | 0            | 0.998207054  |                                       |              |
| VCAM1      | ENSG00000162692.10                    | 0.826408258                 | 4                  | 4            | 0.4570882    |                                       |              |
|            | Brain_Spinal_cord_cervical_c-1        | 0.619720362                 |                    |              |              | Brain_Amygdala                        | 1.748648665  |
|            | 0.283883182                           | 0.283883182                 | -0.743650076       |              | 0.646579136  | -0.005085432                          |              |
|            | 0.717760118                           | 4                           | 0                  | 0.998207054  |              |                                       |              |
| LPCAT2     | ENSG00000087253.12                    | 0.826839797                 | 3                  | 3            | 0.417198323  |                                       |              |
|            | Brain_Frontal_Cortex_BA9              | 0.840338041                 |                    |              |              | Brain_Nucleus_accumbens_basal_ganglia |              |
|            | 1.509900617                           | 0.495509219                 | 0.495509219        |              | -0.811291442 | -0.201461103                          |              |
|            | -0.595359765                          | 0.341653987                 | 3                  | 0            | 0.998207054  |                                       |              |
| HAPLN3     | ENSG00000140511.11                    | 0.82685164                  | 6                  | 3            | 0.404361209  | Brain_Cerebellum                      |              |
|            | 0.878729432                           | Brain_Hippocampus           | 5.27611634         |              | 0.02740655   | 0.208553255                           |              |
|            | -0.833857641                          | 0.152580083                 | -0.318875283       |              | 0.317332571  | 3                                     | 0            |
|            | 0.998207054                           |                             |                    |              |              |                                       |              |
| EMC1       | ENSG00000127463.13                    | 0.82700005                  | 13                 | 4            | 0.351208887  | Brain_Amygdala                        |              |
|            | 0.983084495                           | Brain_Cerebellar_Hemisphere | 9.359043629        |              | 0.001449956  |                                       |              |
|            | 0.660895238                           | -0.932247007                | 0.647538489        |              | -0.346303779 | 0.487335028                           |              |
|            | 4                                     | 0                           | 0.998207054        |              |              |                                       |              |
| TAS2R14    | ENSG00000212127.5                     | 0.827015983                 | 11                 | 2            | 0.467318175  |                                       |              |
|            | Brain_Amygdala                        | 0.924259092                 | Brain_Cortex       | 9.715497936  | 0.003312794  |                                       |              |
|            | 0.643597882                           | -0.72684947                 | -0.09507017        |              | -0.461555926 | 0.208622539                           |              |
|            | 2                                     | 0                           | 0.998207054        |              |              |                                       |              |
| AC091801.1 | ENSG00000217455.8                     | 0.827111257                 | 1                  | 1            | 0.827111257  |                                       |              |
|            | Brain_Cortex                          | 0.827111257                 | Brain_Cortex       | 1            | 1            | 1                                     | 0.218407969  |
|            | 0.218407969                           | 0.218407969                 | NA                 | 1            | 0            | 0.998207054                           |              |
| PRAP1      | ENSG00000165828.14                    | 0.827134279                 | 2                  | 2            | 0.576285757  |                                       |              |
|            | Brain_Frontal_Cortex_BA9              | 0.797233244                 |                    |              |              | Brain_Spinal_cord_cervical_c-1        |              |
|            | 1.004451781                           | 0.995548219                 | 0.995548219        |              | 0.256929439  | 0.558818264                           |              |
|            | 0.407873851                           | 0.213467635                 | 2                  | 0            | 0.998207054  |                                       |              |
| RIMKLB     | ENSG00000166532.15                    | 0.827158033                 | 2                  | 2            | 0.605537034  |                                       |              |
|            | Brain_Hippocampus                     | 0.628104592                 | Brain_Hypothalamus | 1.322341943  |              |                                       |              |
|            | 0.677658057                           | 0.677658057                 | 0.484396373        |              | 0.516454466  | 0.50042542                            |              |
|            | 0.022668494                           | 2                           | 0                  | 0.998207054  |              |                                       |              |
| UNC13A     | ENSG00000130477.15                    | 0.827182037                 | 1                  | 1            | 0.827182037  |                                       |              |
|            | Brain_Anterior_cingulate_cortex_BA24  | 0.827182037                 |                    |              |              |                                       |              |
|            | Brain_Anterior_cingulate_cortex_BA24  | 1                           | 1                  | 1            | 0.218317119  |                                       |              |
|            | 0.218317119                           | 0.218317119                 | NA                 | 1            | 0            | 0.998207054                           |              |
| FASTK      | ENSG00000164896.19                    | 0.827189504                 | 5                  | 5            | 0.181645661  |                                       |              |
|            | Brain_Frontal_Cortex_BA9              | 0.962162231                 |                    |              |              | Brain_Caudate_basal_ganglia           |              |
|            | 2.134694046                           | 0.30081886                  | 0.30081886         | -1.335705163 | 0.0474404    | -0.456024946                          |              |
|            | 0.531630318                           | 5                           | 0                  | 0.998207054  |              |                                       |              |
| PRCC       | ENSG00000143294.14                    | 0.82731592                  | 3                  | 3            | 0.608112057  |                                       |              |
|            | Brain_Substantia_nigra                | 0.813152748                 |                    |              |              | Brain_Amygdala                        | 1.655954488  |



|          |                                        |              |                                        |              |                  |
|----------|----------------------------------------|--------------|----------------------------------------|--------------|------------------|
|          | 0.402280439                            | 0.402280439  | -0.343195809                           | 0.512770229  | -0.022262111     |
|          | 0.466420557                            | 3            | 0                                      | 0.998207054  |                  |
| UQCR11   | ENSG00000127540.11                     | 0.827362298  | 2                                      | 2            | 0.543524524      |
|          | Brain_Hippocampus                      | 0.94712167   | Brain_Anterior_cingulate_cortex_BA24   |              |                  |
|          | 1.055014493                            | 0.944985507  | 0.944985507                            | -0.607491889 | 0.066321747      |
|          | -0.270585071                           | 0.476458192  | 2                                      | 0            | 0.998207054      |
| SP7      | ENSG00000170374.5                      | 0.827593629  | 1                                      | 1            | 0.827593629      |
|          | Brain_Cerebellum1                      | 1            | 1                                      | -0.217788855 | Brain_Cerebellum |
|          | -0.217788855                           | NA           | 1                                      | 0            | -0.217788855     |
|          | 0.998207054                            |              |                                        |              |                  |
| TRIB3    | ENSG00000101255.10                     | 0.827664498  | 11                                     | 11           | 0.155911558      |
|          | Brain_Cerebellum1.844867244            |              |                                        | 0.331610384  | Brain_Cortex     |
|          | 0.883716396                            | 0.331610384  |                                        | 0.331610384  |                  |
|          | -1.30302992                            | 1.418956982  | -0.099386517                           | 0.7443646    | 11               |
|          | 0.998207054                            |              |                                        |              | 0                |
| GPATCH4  | ENSG00000160818.16                     | 0.82772004   | 6                                      | 4            | 0.242502613      |
|          | Brain_Hypothalamus                     | 0.62732359   | Brain_Nucleus_accumbens_basal_ganglia  |              |                  |
|          | 4.732778646                            | 0.025312737  | 0.278360548                            | 0.485497353  | 1.16875436       |
|          | 0.844281595                            | 0.243598095  | 4                                      | 0            | 0.998207054      |
| PNMAL2   | ENSG00000204851.6                      | 0.827744207  | 3                                      | 3            | 0.374261117      |
|          | Brain_Frontal_Cortex_BA9               | 0.805584775  | Brain_Cerebellum1.70692383             |              |                  |
|          | 0.518367215                            | 0.518367215  | -0.246125899                           | 0.888519973  | 0.352553921      |
|          | 0.569916728                            | 3            | 0                                      | 0.998207054  |                  |
| RPL12    | ENSG00000197958.12                     | 0.827786007  | 13                                     | 1            | 0.415805565      |
|          | Brain_Substantia_nigra                 | 0.989920668  | Brain_Hippocampus                      | 11.91678666  |                  |
|          | 0.0010485                              | 11.91678666  | -0.169787331                           | 0.813719666  | 0.216498218      |
|          | 0.273952589                            | 1            | 0                                      | 0.998207054  |                  |
| SEMA4G   | ENSG00000095539.15                     | 0.827791802  | 2                                      | 2            | 0.573421604      |
|          | Brain_Hypothalamus                     | 0.671626917  | Brain_Caudate_basal_ganglia1.340483023 |              |                  |
|          | 0.659516977                            | 0.659516977  | 0.423916216                            | 0.563019503  | 0.49346786       |
|          | 0.098360877                            | 2            | 0                                      | 0.998207054  |                  |
| C2orf16  | ENSG00000221843.4                      | 0.827836992  | 1                                      | 1            | 0.827836992      |
|          | Brain_Putamen_basal_ganglia0.827836992 |              | Brain_Putamen_basal_ganglia1           | 1            |                  |
|          | 1                                      | 0.217476535  | 0.217476535                            | 0.217476535  | NA               |
|          | 0.998207054                            |              |                                        |              | 1                |
|          |                                        |              |                                        |              | 0                |
| CDX1     | ENSG00000113722.16                     | 0.827919626  | 2                                      | 2            | 0.657536712      |
|          | Brain_Putamen_basal_ganglia0.683381425 |              | Brain_Cortex                           | 1.039324634  |                  |
|          | 0.960675366                            | 0.960675366  | -0.443316653                           | 0.407853238  | -0.017731707     |
|          | 0.601868002                            | 2            | 0                                      | 0.998207054  |                  |
| COL25A1  | ENSG00000188517.14                     | 0.82794885   | 1                                      | 1            | 0.82794885       |
|          | Brain_Spinal_cord_cervical_c-1         | 0.82794885   | Brain_Spinal_cord_cervical_c-1         | 1            |                  |
|          | 1                                      | 1            | 0.217332989                            | 0.217332989  | 0.217332989      |
|          | 0.998207054                            |              |                                        |              | NA               |
|          |                                        |              |                                        |              | 1                |
|          |                                        |              |                                        |              | 0                |
| LEXM     | ENSG00000162398.11                     | 0.82815034   | 2                                      | 2            | 0.580385737      |
|          | Brain_Putamen_basal_ganglia0.898196419 |              | Brain_Caudate_basal_ganglia            |              |                  |
|          | 1.613445732                            | 0.386554268  | 0.386554268                            | 0.127940046  | 0.552821365      |
|          | 0.340380706                            | 0.300436462  | 2                                      | 0            | 0.998207054      |
| ATP6V1B2 | ENSG00000147416.10                     | 0.828406123  | 1                                      | 1            | 0.828406123      |
|          | Brain_Putamen_basal_ganglia0.828406123 |              | Brain_Putamen_basal_ganglia1           | 1            |                  |
|          | 1                                      | -0.216746224 | -0.216746224                           | -0.216746224 | NA               |
|          | 0.998207054                            |              |                                        |              | 1                |
|          |                                        |              |                                        |              | 0                |
| GTF2H5   | ENSG00000272047.1                      | 0.828518226  | 9                                      | 8            | 0.101760772      |
|          | Brain_Cerebellar_Hemisphere0.632676243 |              | Brain_Cortex                           | 4.892203963  |                  |
|          | 0.019746807                            | 0.17519475   | 0.477963417                            | 1.6363767    | 0.968102958      |
|          | 0.372388564                            | 8            | 0                                      | 0.998207054  |                  |
| TEK      | ENSG00000120156.20                     | 0.828659182  | 2                                      | 2            | 0.566473945      |
|          | Brain_Cerebellar_Hemisphere0.672449902 |              | Brain_Cerebellum1.901596593            |              |                  |
|          | 0.098403407                            | 0.098403407  | -0.5732522                             | -0.422788057 | -0.498020128     |
|          | 0.106394216                            | 2            | 0                                      | 0.998207054  |                  |
| PRR13    | ENSG00000205352.10                     | 0.828662066  | 1                                      | 1            | 0.828662066      |
|          | Brain_Spinal_cord_cervical_c-1         | 0.828662066  | Brain_Spinal_cord_cervical_c-1         | 1            |                  |
|          | 1                                      | 1            | -0.216417834                           | -0.216417834 | -0.216417834     |
|          | 0.998207054                            |              |                                        |              | NA               |
|          |                                        |              |                                        |              | 1                |
|          |                                        |              |                                        |              | 0                |
| DNAJC28  | ENSG00000177692.11                     | 0.82866726   | 6                                      | 4            | 0.447030513      |

|           |                                      |                   |                                      |                          |              |                |             |  |
|-----------|--------------------------------------|-------------------|--------------------------------------|--------------------------|--------------|----------------|-------------|--|
|           | Brain_Anterior_cingulate_cortex_BA24 | 0.903982974       |                                      | Brain_Frontal_Cortex_BA9 |              |                |             |  |
|           | 3.909950181                          | 0.032723215       | 0.267496373                          | -0.760374916             | 0.40725018   |                |             |  |
|           | -0.182436705                         | 0.429315948       | 4                                    | 0                        | 0.998207054  |                |             |  |
| GALNT7    | ENSG00000109586.11                   | 0.828866248       | 5                                    | 3                        | 0.226017227  |                |             |  |
|           | Brain_Cerebellum                     | 0.829005021       | Brain_Substantia_nigra               | 2.978746409              |              |                |             |  |
|           | 0.032410558                          | 0.696989362       | -1.210682199                         | 1.039565914              | -0.043241526 |                |             |  |
|           | 0.848325359                          | 3                 | 0                                    | 0.998207054              |              |                |             |  |
| ADAM32    | ENSG00000197140.14                   | 0.828883314       | 3                                    | 3                        | 0.624897247  |                |             |  |
|           | Brain_Cortex                         | 0.996072915       | Brain_Cerebellar_Hemisphere          | 2.138306434              |              |                |             |  |
|           | 0.136417537                          | 0.136417537       | -0.004921891                         | 0.488921538              | 0.166189832  |                |             |  |
|           | 0.279663722                          | 3                 | 0                                    | 0.998207054              |              |                |             |  |
| ZNF550    | ENSG00000251369.8                    | 0.828969681       | 1                                    | 1                        | 0.828969681  |                |             |  |
|           | Brain_Cerebellum                     | 0.828969681       | Brain_Cerebellum1                    | 1                        | 1            | -0.216023177   |             |  |
|           | -0.216023177                         | -0.216023177      | NA                                   | 1                        | 0            | 0.998207054    |             |  |
| HECA      | ENSG00000112406.4                    | 0.828971064       | 1                                    | 1                        | 0.828971064  |                |             |  |
|           | Brain_Hippocampus                    | 0.828971064       | Brain_Hippocampus                    | 1                        | 1            | 1              |             |  |
|           | -0.216021403                         | -0.216021403      | -0.216021403                         | NA                       | 1            | 0              | 0.998207054 |  |
| ZNF770    | ENSG00000198146.4                    | 0.82902799        | 1                                    | 1                        | 0.82902799   |                |             |  |
|           | Brain_Substantia_nigra               | 0.82902799        | Brain_Substantia_nigra               | 1                        | 1            | 1              |             |  |
|           | 0.215948374                          | 0.215948374       | 0.215948374                          | NA                       | 1            | 0              | 0.998207054 |  |
| TMEM243   | ENSG00000135185.11                   | 0.829084138       | 1                                    | 1                        | 0.829084138  |                |             |  |
|           | Brain_Cerebellum                     | 0.829084138       | Brain_Cerebellum1                    | 1                        | 1            | 0.215876342    |             |  |
|           | 0.215876342                          | 0.215876342       | NA                                   | 1                        | 0            | 0.998207054    |             |  |
| GALNTL5   | ENSG00000106648.13                   | 0.829188335       | 4                                    | 4                        | 0.418376558  |                |             |  |
|           | Brain_Putamen_basal_ganglia          | 0.998659997       | Brain_Frontal_Cortex_BA9             |                          |              |                |             |  |
|           | 2.069236033                          | 0.366682285       | 0.366682285                          | -0.809240961             | 0.678794017  |                |             |  |
|           | -0.149585787                         | 0.643814028       | 4                                    | 0                        | 0.998207054  |                |             |  |
| BICD1     | ENSG00000151746.13                   | 0.829259299       | 2                                    | 2                        | 0.596461907  |                |             |  |
|           | Brain_Spinal_cord_cervical_c-1       | 0.779556677       | Brain_Caudate_basal_ganglia          |                          |              |                |             |  |
|           | 1.049942391                          | 0.950057609       | 0.950057609                          | -0.279896806             | 0.529495296  |                |             |  |
|           | 0.124799245                          | 0.572326644       | 2                                    | 0                        | 0.998207054  |                |             |  |
| F2RL2     | ENSG00000164220.6                    | 0.829281581       | 3                                    | 3                        | 0.615600698  |                |             |  |
|           | Brain_Frontal_Cortex_BA9             | 0.820980197       | Brain_Anterior_cingulate_cortex_BA24 |                          |              |                |             |  |
|           | 2.136714164                          | 0.272199962       | 0.272199962                          | -0.421223258             | 0.502094999  |                |             |  |
|           | 0.102385395                          | 0.473964536       | 3                                    | 0                        | 0.998207054  |                |             |  |
| POLI      | ENSG00000101751.10                   | 0.829285842       | 13                                   | 2                        | 0.53209759   | Brain_Amygdala |             |  |
|           | 0.966072641                          | Brain_Cortex      | 11.55635076                          | 0.001412715              | 0.727805439  |                |             |  |
|           | -0.624807222                         | -0.042534461      | -0.355120727                         | 0.219067868              | 2            | 0              |             |  |
|           | 0.998207054                          |                   |                                      |                          |              |                |             |  |
| NODAL     | ENSG00000156574.9                    | 0.829412436       | 9                                    | 6                        | 0.190320577  |                |             |  |
|           | Brain_Cerebellar_Hemisphere          | 0.794878954       | Brain_Caudate_basal_ganglia          |                          |              |                |             |  |
|           | 5.450545834                          | 0.030564412       | 0.245616451                          | -1.309631352             | -0.259980321 |                |             |  |
|           | -0.678553115                         | 0.378949491       | 6                                    | 0                        | 0.998207054  |                |             |  |
| CTNNBIP1  | ENSG00000178585.14                   | 0.829417101       | 3                                    | 3                        | 0.614400533  |                |             |  |
|           | Brain_Hypothalamus                   | 0.657796718       | Brain_Hippocampus                    | 1.292599018              |              |                |             |  |
|           | 0.7295476                            | 0.7295476         | 0.442957165                          | 0.503801984              | 0.481650536  |                |             |  |
|           | 0.033626618                          | 3                 | 0                                    | 0.998207054              |              |                |             |  |
| BUB3      | ENSG00000154473.17                   | 0.829432842       | 2                                    | 2                        | 0.609922758  |                |             |  |
|           | Brain_Frontal_Cortex_BA9             | 0.741180392       | Brain_Cerebellum1                    | 1.013583696              |              |                |             |  |
|           | 0.986416304                          | 0.986416304       | -0.510183717                         | 0.330290604              | -0.089946557 |                |             |  |
|           | 0.594305092                          | 2                 | 0                                    | 0.998207054              |              |                |             |  |
| COMMD9    | ENSG00000110442.11                   | 0.829436642       | 1                                    | 1                        | 0.829436642  |                |             |  |
|           | Brain_Frontal_Cortex_BA9             | 0.829436642       | Brain_Frontal_Cortex_BA9             | 1                        | 1            |                |             |  |
|           | 1                                    | 0.215424152       | 0.215424152                          | 0.215424152              | NA           | 1              | 0           |  |
|           | 0.998207054                          |                   |                                      |                          |              |                |             |  |
| LINC01324 | ENSG00000241767.2                    | 0.829514991       | 1                                    | 1                        | 0.829514991  |                |             |  |
|           | Brain_Hippocampus                    | 0.829514991       | Brain_Hippocampus                    | 1                        | 1            | 1              |             |  |
|           | 0.215323651                          | 0.215323651       | 0.215323651                          | NA                       | 1            | 0              | 0.998207054 |  |
| BBC3      | ENSG00000105327.17                   | 0.829515446       | 2                                    | 2                        | 0.541751924  | Brain_Cortex   |             |  |
|           | 0.981479616                          | Brain_Cerebellum1 | 1.02592765                           | 0.97407235               | 0.97407235   | -0.610165889   |             |  |
|           | -0.023213944                         | -0.316689916      | 0.4150377                            | 2                        | 0            | 0.998207054    |             |  |
| PDIA6     | ENSG00000143870.12                   | 0.829553541       | 1                                    | 1                        | 0.829553541  |                |             |  |

|        |                                       |                                      |              |              |                                       |              |                  |
|--------|---------------------------------------|--------------------------------------|--------------|--------------|---------------------------------------|--------------|------------------|
|        | Brain_Nucleus_accumbens_basal_ganglia | 0.829553541                          |              |              |                                       |              |                  |
|        | Brain_Nucleus_accumbens_basal_ganglia | 1                                    | 1            | 1            | -0.215274203                          |              |                  |
|        |                                       | -0.215274203                         | -0.215274203 | NA           | 1                                     | 0            | 0.998207054      |
| GJA9   | ENSG00000131233.9                     | 0.829628584                          | 2            | 2            | 0.541103547                           |              | Brain_Amygdala   |
|        | 0.910473225                           | Brain_Anterior_cingulate_cortex_BA24 | 1.171918111  |              |                                       |              |                  |
|        | 0.828081889                           | 0.828081889                          | -0.112441659 | 0.611145066  |                                       |              | 0.249351703      |
|        | 0.51165308                            | 2                                    | 0            | 0.998207054  |                                       |              |                  |
| ALG5   | ENSG00000120697.8                     | 0.829657884                          | 1            | 1            | 0.829657884                           |              | Brain_Cortex     |
|        | 0.829657884                           | Brain_Cortex                         | 1            | 1            | 1                                     | -0.215140364 | -0.215140364     |
|        | -0.215140364                          | NA                                   | 1            | 0            | 0.998207054                           |              |                  |
| KNOP1  | ENSG00000103550.13                    | 0.829717399                          | 13           | 1            | 0.660773014                           |              | Brain_Amygdala   |
|        | 0.984245081                           | Brain_Anterior_cingulate_cortex_BA24 | 12.50000833  |              |                                       |              |                  |
|        | 0.000776412                           | 12.50000833                          | -0.112671314 | 0.438846156  |                                       |              | 0.212494265      |
|        | 0.165716218                           | 1                                    | 0            | 0.998207054  |                                       |              |                  |
| CYP4X1 | ENSG00000186377.7                     | 0.82973281                           | 2            | 2            | 0.555432799                           |              |                  |
|        | Brain_Frontal_Cortex_BA9              | 0.867836327                          |              |              | Brain_Putamen_basal_ganglia           |              |                  |
|        | 1.010728062                           | 0.989271938                          | 0.989271938  | -0.16640743  |                                       |              | 0.589638852      |
|        | 0.211615711                           | 0.534605453                          | 2            | 0            | 0.998207054                           |              |                  |
| SMYD2  | ENSG00000143499.13                    | 0.829767027                          | 4            | 4            | 0.271528366                           |              | Brain_Cerebellum |
|        | 0.835780875                           | Brain_Frontal_Cortex_BA9             | 1.440038248  | 0.515444238  |                                       |              |                  |
|        | 0.515444238                           | -0.411629835                         | 1.099549706  | 0.206221813  |                                       |              | 0.675727944      |
|        | 4                                     | 0                                    | 0.998207054  |              |                                       |              |                  |
| PAN2   | ENSG00000135473.14                    | 0.829781065                          | 2            | 2            | 0.699677876                           |              |                  |
|        | Brain_Putamen_basal_ganglia           | 0.805635751                          |              |              | Brain_Cortex                          | 1.455375383  |                  |
|        | 0.544624617                           | 0.544624617                          | -0.246060045 | 0.385755336  |                                       |              | 0.069847646      |
|        | 0.446760941                           | 2                                    | 0            | 0.998207054  |                                       |              |                  |
| ZNF829 | ENSG00000185869.14                    | 0.829792497                          | 2            | 2            | 0.591011398                           |              |                  |
|        | Brain_Anterior_cingulate_cortex_BA24  | 0.667682857                          |              |              | Brain_Hypothalamus                    |              |                  |
|        | 1.279964857                           | 0.720035143                          | 0.720035143  | 0.429330317  |                                       |              | 0.537370961      |
|        | 0.483350639                           | 0.076396272                          | 2            | 0            | 0.998207054                           |              |                  |
| COL5A1 | ENSG00000130635.15                    | 0.829793232                          | 3            | 3            | 0.418097271                           |              |                  |
|        | Brain_Amygdala                        | 0.845401917                          |              |              | Brain_Substantia_nigra                | 1.489669185  |                  |
|        | 0.511417919                           | 0.511417919                          | 0.194988543  | 0.809726697  |                                       |              | 0.470217668      |
|        | 0.312369459                           | 3                                    | 0            | 0.998207054  |                                       |              |                  |
| RPAP2  | ENSG00000122484.8                     | 0.829874978                          | 2            | 2            | 0.665857906                           |              |                  |
|        | Brain_Caudate_basal_ganglia           | 0.667570117                          |              |              | Brain_Hypothalamus                    | 1.005408968  |                  |
|        | 0.994591032                           | 0.994591032                          | 0.429485261  | 0.431839724  |                                       |              | 0.430662493      |
|        | 0.001664856                           | 2                                    | 0            | 0.998207054  |                                       |              |                  |
| CTSB   | ENSG00000164733.20                    | 0.829952887                          | 9            | 8            | 0.17841502                            |              | Brain_Cerebellum |
|        | 0.990228353                           | Brain_Cerebellar_Hemisphere          | 3.90078765   | 0.030040251  |                                       |              |                  |
|        | 0.201246437                           | -0.53510216                          | 1.345651235  | 0.332291719  |                                       |              | 0.570288902      |
|        | 8                                     | 0                                    | 0.998207054  |              |                                       |              |                  |
| SKA1   | ENSG00000154839.9                     | 0.829955829                          | 1            | 1            | 0.829955829                           |              | Brain_Cerebellum |
|        | 0.829955829                           | Brain_Cerebellum                     | 1            | 1            | 1                                     | -0.214758219 | -0.214758219     |
|        | -0.214758219                          | NA                                   | 1            | 0            | 0.998207054                           |              |                  |
| ARIH1  | ENSG00000166233.14                    | 0.829973647                          | 1            | 1            | 0.829973647                           |              | Brain_Cerebellum |
|        | 0.829973647                           | Brain_Cerebellum                     | 1            | 1            | 1                                     | 0.214735366  | 0.214735366      |
|        | 0.214735366                           | NA                                   | 1            | 0            | 0.998207054                           |              |                  |
| 1-Mar  | ENSG00000145416.13                    | 0.829989832                          | 3            | 2            | 0.523476936                           |              | Brain_Cerebellum |
|        | 0.886507331                           | Brain_Hippocampus                    | 2.123084799  | 0.015232398  |                                       |              |                  |
|        | 0.861682803                           | -0.637994998                         | -0.142725051 | -0.452571301 |                                       |              | 0.270062602      |
|        | 2                                     | 0                                    | 0.998207054  |              |                                       |              |                  |
| SHISA4 | ENSG00000198892.6                     | 0.830045981                          | 12           | 2            | 0.556372928                           |              |                  |
|        | Brain_Hypothalamus                    | 0.999508692                          |              |              | Brain_Spinal_cord_cervical_c-1        |              |                  |
|        | 10.26754193                           | 0.006007387                          | 0.565065683  | -0.588237443 |                                       |              | 0.570344089      |
|        | -0.128657934                          | 0.331049614                          | 2            | 0            | 0.998207054                           |              |                  |
| ZNF169 | ENSG00000175787.16                    | 0.830219091                          | 4            | 4            | 0.308907444                           |              |                  |
|        | Brain_Cerebellum                      | 0.697849245                          |              |              | Brain_Frontal_Cortex_BA9              | 2.492403135  |                  |
|        | 0.128304779                           | 0.128304779                          | -0.582735626 | 1.017517221  |                                       |              | 0.401315751      |
|        | 0.705537197                           | 4                                    | 0            | 0.998207054  |                                       |              |                  |
| PARD6B | ENSG00000124171.8                     | 0.830244653                          | 2            | 2            | 0.650451691                           |              |                  |
|        | Brain_Amygdala                        | 0.697250921                          |              |              | Brain_Nucleus_accumbens_basal_ganglia |              |                  |

|          |                                       |              |              |              |                                      |              |             |   |            |
|----------|---------------------------------------|--------------|--------------|--------------|--------------------------------------|--------------|-------------|---|------------|
|          | 1.041809243                           | 0.958190757  | 0.958190757  | -0.453134781 | 0.3890341                            |              |             |   |            |
|          | -0.032050341                          | 0.595503327  | 2            | 0            | 0.998207054                          |              |             |   |            |
| LRP2BP   | ENSG00000109771.15                    | 0.830267111  | 9            | 5            | 0.326514066                          |              |             |   |            |
|          | Brain_Nucleus_accumbens_basal_ganglia | 0.949825367  |              |              | Brain_Putamen_basal_ganglia          |              |             |   |            |
|          | 5.865037046                           | 0.01181094   | 0.267952279  | -0.981159555 | 0.270735861                          |              |             |   |            |
|          | -0.523100682                          | 0.461590887  | 5            | 0            | 0.998207054                          |              |             |   |            |
| NVL      | ENSG00000143748.17                    | 0.830383573  | 2            | 2            | 0.543909561                          |              |             |   |            |
|          | Brain_Hypothalamus                    | 0.941127112  |              |              | Brain_Hippocampus                    | 1.025736762  |             |   |            |
|          | 0.974263238                           | 0.974263238  | -0.073853304 | 0.606911629  | 0.266529162                          |              |             |   |            |
|          | 0.4813735                             | 2            | 0            | 0.998207054  |                                      |              |             |   |            |
| SH3TC2   | ENSG00000169247.11                    | 0.830444223  | 1            | 1            | 0.830444223                          |              |             |   |            |
|          | Brain_Cortex                          | 0.830444223  |              |              | Brain_Cortex                         | 1            | 1           | 1 | 0.21413187 |
|          | 0.21413187                            | 0.21413187   | NA           | 1            | 0                                    | 0.998207054  |             |   |            |
| SLC2A4   | ENSG00000181856.14                    | 0.830500308  | 4            | 3            | 0.609217324                          |              |             |   |            |
|          | Brain_Cerebellar_Hemisphere           | 0.927426759  |              |              | Brain_Hippocampus                    | 2.814422535  |             |   |            |
|          | 0.05027585                            | 0.137521561  | 0.091082851  | 0.511190994  | 0.350085089                          |              |             |   |            |
|          | 0.196500382                           | 3            | 0            | 0.998207054  |                                      |              |             |   |            |
| GJB2     | ENSG00000165474.5                     | 0.830521174  | 6            | 6            | 0.195367624                          |              |             |   |            |
|          | Brain_Hippocampus                     | 0.891439217  |              |              | Brain_Caudate_basal_ganglia          | 1.575404566  |             |   |            |
|          | 0.552366267                           | 0.552366267  | -1.294862623 | 0.467034689  | -0.277997428                         |              |             |   |            |
|          | 0.685990488                           | 6            | 0            | 0.998207054  |                                      |              |             |   |            |
| SP140L   | ENSG00000185404.16                    | 0.830603008  | 2            | 2            | 0.550725393                          |              |             |   |            |
|          | Brain_Caudate_basal_ganglia           | 0.573830809  |              |              | Brain_Amygdala                       | 1.826243399  |             |   |            |
|          | 0.173756601                           | 0.173756601  | 0.562418658  | 0.596673493  | 0.579546076                          |              |             |   |            |
|          | 0.024221826                           | 2            | 0            | 0.998207054  |                                      |              |             |   |            |
| FAM107B  | ENSG00000065809.13                    | 0.830660524  | 5            | 1            | 0.643732973                          |              |             |   |            |
|          | Brain_Caudate_basal_ganglia           | 0.952329596  |              |              | Brain_Hippocampus                    | 4.771877121  |             |   |            |
|          | 0.026612112                           | 4.771877121  | 0.059781581  | 0.462485815  | 0.208765245                          |              |             |   |            |
|          | 0.163693005                           | 1            | 0            | 0.998207054  |                                      |              |             |   |            |
| PRR5L    | ENSG00000135362.13                    | 0.830668599  | 1            | 1            | 0.830668599                          |              |             |   |            |
|          | Brain_Hippocampus                     | 0.830668599  |              |              | Brain_Hippocampus                    | 1            | 1           | 1 |            |
|          | 0.213844144                           | 0.213844144  | 0.213844144  | NA           | 1                                    | 0            | 0.998207054 |   |            |
| MYL7     | ENSG00000106631.8                     | 0.830705423  | 5            | 3            | 0.362618906                          |              |             |   |            |
|          | Brain_Frontal_Cortex_BA9              | 3.492516872  |              |              | Brain_Cerebellum                     |              |             |   |            |
|          | 0.821743458                           | 0.050389712  |              |              |                                      |              |             |   |            |
|          | 0.471020636                           | 0.225303138  | 0.910386137  | 0.667976877  | 0.268860094                          |              |             |   |            |
|          | 3                                     | 0            | 0.998207054  |              |                                      |              |             |   |            |
| TBC1D26  | ENSG00000214946.14                    | 0.830740828  | 10           | 7            | 0.157253249                          |              |             |   |            |
|          | Brain_Cerebellum                      | 0.770852309  |              |              | Brain_Anterior_cingulate_cortex_BA24 | 6.16349565   |             |   |            |
|          | 0.05597984                            | 0.242615953  | -1.414370153 | 0.291260219  | -0.633760442                         |              |             |   |            |
|          | 0.423281493                           | 7            | 0            | 0.998207054  |                                      |              |             |   |            |
| KC6      | ENSG00000267313.7                     | 0.830741848  | 1            | 1            | 0.830741848                          |              |             |   |            |
|          | Brain_Spinal_cord_cervical_c-1        | 0.830741848  |              |              | Brain_Spinal_cord_cervical_c-1       |              |             |   |            |
|          | 1                                     | 1            | 1            | -0.213750217 | -0.213750217                         | -0.213750217 | NA          | 1 | 0          |
|          | 0.998207054                           |              |              |              |                                      |              |             |   |            |
| GABRD    | ENSG00000187730.8                     | 0.830742303  | 1            | 1            | 0.830742303                          |              |             |   |            |
|          | Brain_Cerebellar_Hemisphere           | 0.830742303  |              |              | Brain_Cerebellar_Hemisphere          | 1            | 1           |   |            |
|          | 1                                     | 0.213749635  | 0.213749635  | 0.213749635  | NA                                   | 1            | 0           |   |            |
|          | 0.998207054                           |              |              |              |                                      |              |             |   |            |
| TRPM2    | ENSG00000142185.16                    | 0.830809955  | 8            | 1            | 0.241076785                          |              |             |   |            |
|          | Brain_Nucleus_accumbens_basal_ganglia | 7.484059     |              |              | Brain_Cortex                         |              |             |   |            |
|          | 0.98260056                            | 0.002618773  |              |              |                                      |              |             |   |            |
|          | 7.484059                              | -1.172299618 | 0.21751157   | -0.210774241 | 0.438888119                          | 1            | 0           |   |            |
|          | 0.998207054                           |              |              |              |                                      |              |             |   |            |
| RPS27L   | ENSG00000185088.13                    | 0.830966431  | 10           | 2            | 0.350602217                          |              |             |   |            |
|          | Brain_Hippocampus                     | 0.812292109  |              |              | Brain_Caudate_basal_ganglia          | 8.470422726  |             |   |            |
|          | 0.008012705                           | 0.734192638  | -0.933421823 | 0.368343947  | -0.301404867                         |              |             |   |            |
|          | 0.384491426                           | 2            | 0            | 0.998207054  |                                      |              |             |   |            |
| C22orf31 | ENSG00000100249.4                     | 0.831027933  | 5            | 5            | 0.188968162                          |              |             |   |            |
|          | Brain_Nucleus_accumbens_basal_ganglia | 0.988920978  |              |              | Brain_Cortex                         |              |             |   |            |
|          | 2.280993657                           | 0.196712832  | 0.196712832  | -0.013885941 | 1.313637679                          |              |             |   |            |
|          | 0.602370295                           | 0.557479896  | 5            | 0            | 0.998207054                          |              |             |   |            |
| KXD1     | ENSG00000105700.10                    | 0.831167378  | 3            | 3            | 0.408596331                          |              |             |   |            |
|          | Brain_Anterior_cingulate_cortex_BA24  | 0.863903786  |              |              | Brain_Cortex                         |              |             |   |            |

|               |                                       |                                |                                      |              |              |                  |   |  |  |
|---------------|---------------------------------------|--------------------------------|--------------------------------------|--------------|--------------|------------------|---|--|--|
|               | 1.473009844                           | 0.490959104                    | 0.490959104                          | -0.353067738 | 0.826366306  |                  |   |  |  |
|               | 0.100630538                           | 0.635035013                    | 0                                    | 0.998207054  |              |                  |   |  |  |
| RP11-666A20.4 | ENSG00000248787.1                     | 0.831251094                    | 1                                    | 1            | 0.831251094  |                  |   |  |  |
|               | Brain_Nucleus_accumbens_basal_ganglia | 0.831251094                    |                                      |              |              |                  |   |  |  |
|               | Brain_Nucleus_accumbens_basal_ganglia | 1                              | 1                                    | 1            | -0.213097271 |                  |   |  |  |
|               | -0.213097271                          | -0.213097271                   | NA                                   | 1            | 0            | 0.998207054      |   |  |  |
| VWA8          | ENSG00000102763.17                    | 0.831317311                    | 8                                    | 5            | 0.147831667  |                  |   |  |  |
|               | Brain_Hippocampus                     | 0.778016007                    | Brain_Substantia_nigra               | 5.743495338  |              |                  |   |  |  |
|               | 1.14E-16                              | 0.254550083                    | -1.447233036                         | -0.281905455 | -0.79516908  |                  |   |  |  |
|               | 0.346523262                           | 5                              | 0                                    | 0.998207054  |              |                  |   |  |  |
| SLC39A1       | ENSG00000143570.17                    | 0.831485997                    | 1                                    | 1            | 0.831485997  |                  |   |  |  |
|               | Brain_Substantia_nigra                | 0.831485997                    | Brain_Substantia_nigra               | 1            | 1            |                  |   |  |  |
|               | 1                                     | 0.212796111                    | 0.212796111                          | 0.212796111  | NA           | 1                | 0 |  |  |
|               | 0.998207054                           |                                |                                      |              |              |                  |   |  |  |
| EMILIN2       | ENSG00000132205.10                    | 0.831508138                    | 4                                    | 3            | 0.347389125  |                  |   |  |  |
|               | Brain_Cortex                          | 0.904301597                    | Brain_Caudate_basal_ganglia          | 2.800211375  |              |                  |   |  |  |
|               | 0.043594678                           | 0.18966272                     | 0.120229188                          | 0.939665582  | 0.663241328  |                  |   |  |  |
|               | 0.377256397                           | 3                              | 0                                    | 0.998207054  |              |                  |   |  |  |
| HTR6          | ENSG00000158748.3                     | 0.831517731                    | 2                                    | 2            | 0.566914516  |                  |   |  |  |
|               | Brain_Nucleus_accumbens_basal_ganglia | 0.611105575                    | Brain_Frontal_Cortex_BA9             |              |              |                  |   |  |  |
|               | 1.606405465                           | 0.393594535                    | 0.393594535                          | -0.572601541 | -0.508495956 |                  |   |  |  |
|               | -0.540548748                          | 0.045329494                    | 2                                    | 0            | 0.998207054  |                  |   |  |  |
| RFTN1         | ENSG00000131378.13                    | 0.831527866                    | 2                                    | 1            | 0.651894838  |                  |   |  |  |
|               | Brain_Cerebellar_Hemisphere           | 0.974384697                    | Brain_Cerebellum                     | 1.939702576  |              |                  |   |  |  |
|               | 0.060297424                           | 1.939702576                    | -0.451131414                         | 0.032109538  | -0.209510938 |                  |   |  |  |
|               | 0.341702954                           | 1                              | 0                                    | 0.998207054  |              |                  |   |  |  |
| RPL18         | ENSG00000063177.12                    | 0.831530295                    | 1                                    | 1            | 0.831530295  |                  |   |  |  |
|               | Brain_Frontal_Cortex_BA9              | 0.831530295                    | Brain_Frontal_Cortex_BA9             | 1            | 1            |                  |   |  |  |
|               | 1                                     | 0.212739321                    | 0.212739321                          | 0.212739321  | NA           | 1                | 0 |  |  |
|               | 0.998207054                           |                                |                                      |              |              |                  |   |  |  |
| SPRYD7        | ENSG00000123178.14                    | 0.831531956                    | 2                                    | 1            | 0.554664362  |                  |   |  |  |
|               | Brain_Cerebellar_Hemisphere           | 0.863362378                    | Brain_Cerebellum                     | 1.93672294   | 0.06327706   |                  |   |  |  |
|               | 1.93672294                            | -0.172095592                   | 0.590785187                          | 0.209344797  | 0.539438172  | 1                |   |  |  |
|               | 0                                     | 0.998207054                    |                                      |              |              |                  |   |  |  |
| PCED1B        | ENSG00000179715.12                    | 0.831673129                    | 5                                    | 4            | 0.344677769  |                  |   |  |  |
|               | Brain_Frontal_Cortex_BA9              | 0.880947819                    | Brain_Hypothalamus                   | 2.935242354  |              |                  |   |  |  |
|               | 0.075250588                           | 0.12740502                     | 0.149767794                          | 0.944962994  | 0.645648496  |                  |   |  |  |
|               | 0.318629491                           | 4                              | 0                                    | 0.998207054  |              |                  |   |  |  |
| AC004540.5    | ENSG00000214870.8                     | 0.831746872                    | 9                                    | 9            | 0.321126758  |                  |   |  |  |
|               | Brain_Hypothalamus                    | 0.990227715                    | Brain_Frontal_Cortex_BA9             | 2.246944942  |              |                  |   |  |  |
|               | 0.349236486                           | 0.349236486                    | -0.992145082                         | 0.770493912  | 0.026486695  |                  |   |  |  |
|               | 0.585043922                           | 9                              | 0                                    | 0.998207054  |              |                  |   |  |  |
| ANKRD40       | ENSG00000154945.6                     | 0.831763916                    | 5                                    | 4            | 0.312158989  |                  |   |  |  |
|               | Brain_Caudate_basal_ganglia           | 0.869321744                    | Brain_Cerebellum                     | 2.016035486  |              |                  |   |  |  |
|               | 0.000889945                           | 0.938243361                    | -1.010702189                         | 0.506263623  | -0.096369359 |                  |   |  |  |
|               | 0.630771598                           | 4                              | 0                                    | 0.998207054  |              |                  |   |  |  |
| HINT1         | ENSG00000169567.11                    | 0.831851733                    | 2                                    | 2            | 0.551903931  | Brain_Cerebellum |   |  |  |
|               | 0.971665771                           | Brain_Spinal_cord_cervical_c-1 | 1.13924027                           | 0.86075973   | 0.86075973   |                  |   |  |  |
|               | -0.594909553                          | 0.035519157                    | -0.279695198                         | 0.445780416  | 2            | 0                |   |  |  |
|               | 0.998207054                           |                                |                                      |              |              |                  |   |  |  |
| CR1           | ENSG00000203710.10                    | 0.831856007                    | 8                                    | 4            | 0.468296141  |                  |   |  |  |
|               | Brain_Caudate_basal_ganglia           | 0.988140388                    | Brain_Anterior_cingulate_cortex_BA24 |              |              |                  |   |  |  |
|               | 6.328226494                           | 0.007067377                    | 0.3085434                            | -0.283701058 | 0.725254129  |                  |   |  |  |
|               | 0.094376472                           | 0.314578559                    | 4                                    | 0            | 0.998207054  |                  |   |  |  |
| MSLN          | ENSG00000102854.15                    | 0.831958995                    | 2                                    | 2            | 0.560902451  | Brain_Cerebellum |   |  |  |
|               | 0.626477955                           | Brain_Cerebellar_Hemisphere    | 1.599308592                          | 0.400691408  |              |                  |   |  |  |
|               | 0.400691408                           | 0.48669011                     | 0.581501583                          | 0.534095847  | 0.067041836  | 2                |   |  |  |
|               | 0                                     | 0.998207054                    |                                      |              |              |                  |   |  |  |
| MIEF1         | ENSG00000100335.13                    | 0.832213565                    | 2                                    | 2            | 0.668017075  | Brain_Cerebellum |   |  |  |
|               | 0.981050623                           | Brain_Cerebellar_Hemisphere    | 1.733786092                          | 0.266213908  |              |                  |   |  |  |
|               | 0.266213908                           | -0.428871043                   | -0.023751755                         | -0.226311399 | 0.286462596  |                  |   |  |  |
|               | 2                                     | 0                              | 0.998207054                          |              |              |                  |   |  |  |

|              |                                       |              |                                       |              |              |                    |              |             |
|--------------|---------------------------------------|--------------|---------------------------------------|--------------|--------------|--------------------|--------------|-------------|
| CNTN4-AS2    | ENSG00000227588.2                     | 0.832309898  | 1                                     | 1            | 0.832309898  |                    |              |             |
|              | Brain_Cerebellum                      | 0.832309898  | Brain_Cerebellum                      | 1            | 1            | 1                  | -0.211739977 |             |
|              |                                       | -0.211739977 | NA                                    | 1            | 0            | 0.998207054        |              |             |
| GIMAP5       | ENSG00000196329.11                    | 0.832374337  | 2                                     | 2            | 0.569972608  |                    |              |             |
|              | Brain_Putamen_basal_ganglia           | 0.743337725  | Brain_Cerebellum                      | 1.798975312  |              |                    |              |             |
|              |                                       | 0.201024688  | 0.201024688                           | -0.56809184  | -0.327436551 | -0.447764196       |              |             |
|              |                                       | 0.170168987  | 2                                     | 0            | 0.998207054  |                    |              |             |
| ZNF33A       | ENSG00000189180.15                    | 0.832425849  | 1                                     | 1            | 0.832425849  |                    |              |             |
|              | Brain_Cortex                          | 0.832425849  | Brain_Cortex                          | 1            | 1            | 1                  | -0.211591362 |             |
|              |                                       | -0.211591362 | NA                                    | 1            | 0            | 0.998207054        |              |             |
| RP11-180I4.4 | ENSG00000268926.2                     | 0.832595402  | 2                                     | 2            | 0.674765812  |                    |              |             |
|              | Brain_Cerebellar_Hemisphere           | 0.86536858   | Brain_Cerebellum                      | 1.886047218  |              |                    |              |             |
|              |                                       | 0.113952782  | 0.113952782                           | 0.169544237  | 0.419616255  | 0.294580246        |              |             |
|              |                                       | 0.17682762   | 2                                     | 0            | 0.998207054  |                    |              |             |
| MRPL32       | ENSG00000106591.3                     | 0.832602599  | 4                                     | 3            | 0.383787929  |                    |              |             |
|              | Brain_Cerebellum                      | 0.965722188  | Brain_Nucleus_accumbens_basal_ganglia |              |              |                    |              |             |
|              |                                       | 2.810188378  | 0.035946321                           | 0.166673914  | -0.04297409  | 0.870938142        |              |             |
|              |                                       | 0.521099295  | 0.39937715                            | 3            | 0            | 0.998207054        |              |             |
| PPP1R18      | ENSG00000146112.11                    | 0.832636351  | 3                                     | 3            | 0.457180266  |                    |              |             |
|              | Brain_Spinal_cord_cervical_c-1        | 0.788916068  | Brain_Amygdala                        | 1.302376406  |              |                    |              |             |
|              |                                       | 0.774682162  | 0.774682162                           | -0.743497943 | 0.269034732  | -0.068914929       |              |             |
|              |                                       | 0.584206398  | 3                                     | 0            | 0.998207054  |                    |              |             |
| ALDH2        | ENSG00000111275.12                    | 0.83279886   | 8                                     | 4            | 0.377349555  | Brain_Hypothalamus |              |             |
|              |                                       | 0.951893986  | Brain_Putamen_basal_ganglia           | 6.316752536  | 0.00320901   |                    |              |             |
|              |                                       | 0.305139418  | -0.882790351                          | 0.579956134  | -0.09896171  | 0.435308033        |              |             |
|              |                                       | 4            | 0                                     | 0.998207054  |              |                    |              |             |
| SMTNL1       | ENSG00000214872.8                     | 0.832813584  | 13                                    | 2            | 0.452337461  |                    |              |             |
|              | Brain_Anterior_cingulate_cortex_BA24  | 0.840774213  | Brain_Cortex                          |              |              |                    |              |             |
|              |                                       | 11.87807235  | 0.000432584                           | 0.456294738  | 0.200903267  | 0.751523837        |              |             |
|              |                                       | 0.562756149  | 0.151336678                           | 2            | 0            | 0.998207054        |              |             |
| ETHE1        | ENSG00000105755.7                     | 0.832890925  | 1                                     | 1            | 0.832890925  |                    |              |             |
|              | Brain_Nucleus_accumbens_basal_ganglia | 0.832890925  |                                       |              |              |                    |              |             |
|              | Brain_Nucleus_accumbens_basal_ganglia | 1            | 1                                     | 1            | 0.210995318  |                    |              |             |
|              |                                       | 0.210995318  | 0.210995318                           | NA           | 1            | 0                  | 0.998207054  |             |
| NUDT13       | ENSG00000166321.13                    | 0.832904248  | 11                                    | 1            | 0.591284608  |                    |              |             |
|              | Brain_Cortex                          | 0.982261879  | Brain_Frontal_Cortex_BA9              | 10.2749049   | 7.18E-05     |                    |              |             |
|              |                                       | 10.2749049   | -0.536975398                          | 0.055179444  | -0.202453856 | 0.171157823        | 1            |             |
|              |                                       | 0            | 0.998207054                           |              |              |                    |              |             |
| MICAL3       | ENSG00000243156.7                     | 0.832970088  | 1                                     | 1            | 0.832970088  |                    |              |             |
|              | Brain_Nucleus_accumbens_basal_ganglia | 0.832970088  |                                       |              |              |                    |              |             |
|              | Brain_Nucleus_accumbens_basal_ganglia | 1            | 1                                     | 1            | 0.210893869  |                    |              |             |
|              |                                       | 0.210893869  | 0.210893869                           | NA           | 1            | 0                  | 0.998207054  |             |
| MTCH2        | ENSG00000109919.9                     | 0.832976165  | 12                                    | 3            | 0.172304359  | Brain_Cerebellum   |              |             |
|              | Brain_Frontal_Cortex_BA9              | 9.50151189   | 0.000391179                           | 0.800544967  |              |                    |              |             |
|              |                                       | -1.364836771 | -0.381558502                          | -0.757164047 | 0.302920864  | 3                  | 0            |             |
|              |                                       | 0.998207054  |                                       |              |              |                    |              |             |
| KLHL21       | ENSG00000162413.16                    | 0.832980106  | 1                                     | 1            | 0.832980106  |                    |              |             |
|              | Brain_Putamen_basal_ganglia           | 0.832980106  | Brain_Putamen_basal_ganglia           | 1            | 1            |                    |              |             |
|              |                                       | 1            | -0.210881032                          | -0.210881032 | -0.210881032 | NA                 | 1            | 0           |
|              |                                       | 0.998207054  |                                       |              |              |                    |              |             |
| POMC         | ENSG00000115138.10                    | 0.833027318  | 1                                     | 1            | 0.833027318  |                    |              |             |
|              | Brain_Frontal_Cortex_BA9              | 0.833027318  | Brain_Frontal_Cortex_BA9              | 1            | 1            |                    |              |             |
|              |                                       | 1            | -0.21082053                           | -0.21082053  | -0.21082053  | NA                 | 1            | 0           |
|              |                                       | 0.998207054  |                                       |              |              |                    |              |             |
| MYH15        | ENSG00000144821.9                     | 0.833056957  | 1                                     | 1            | 0.833056957  |                    |              |             |
|              | Brain_Cerebellar_Hemisphere           | 0.833056957  | Brain_Cerebellar_Hemisphere           | 1            | 1            |                    |              |             |
|              |                                       | 1            | 0.210782549                           | 0.210782549  | 0.210782549  | NA                 | 1            | 0           |
|              |                                       | 0.998207054  |                                       |              |              |                    |              |             |
| OSR1         | ENSG00000143867.6                     | 0.833115556  | 1                                     | 1            | 0.833115556  |                    |              |             |
|              | Brain_Hippocampus                     | 0.833115556  | Brain_Hippocampus                     | 1            | 1            | 1                  |              |             |
|              |                                       | 0.210707456  | 0.210707456                           | 0.210707456  | NA           | 1                  | 0            | 0.998207054 |
| CDC14B       | ENSG00000081377.16                    | 0.833161895  | 3                                     | 3            | 0.436471076  |                    |              |             |

|               |                                       |                             |             |                                |              |              |             |                  |
|---------------|---------------------------------------|-----------------------------|-------------|--------------------------------|--------------|--------------|-------------|------------------|
|               | Brain_Cortex                          | 0.616651578                 |             | Brain_Caudate_basal_ganglia    | 1.913423059  |              |             |                  |
|               | 0.221659127                           | 0.221659127                 |             | 0.500601541                    | 0.77816614   | 0.659684923  |             |                  |
|               | 0.143167484                           | 3                           | 0           | 0.998207054                    |              |              |             |                  |
| MUL1          | ENSG00000090432.6                     | 0.833230512                 | 13          | 8                              | 0.417874644  |              |             |                  |
|               | Brain_Substantia_nigra                | 0.993500986                 |             | Brain_Caudate_basal_ganglia    |              |              |             |                  |
|               | 7.344321913                           | 0.007384483                 |             | 0.331010065                    | -0.810114026 | 0.651597196  |             |                  |
|               | -0.262573127                          | 0.479403963                 |             | 8                              | 0            | 0.998207054  |             |                  |
| CDK5RAP2      | ENSG00000136861.17                    | 0.83323653                  | 4           | 3                              | 0.505464034  |              |             |                  |
|               | Brain_Nucleus_accumbens_basal_ganglia | 0.917074327                 |             | Brain_Cerebellum               |              |              |             |                  |
|               | 3.196226797                           | 0.074709672                 |             | 0.139528631                    | -0.665917187 | 0.104119738  |             |                  |
|               | -0.338170765                          | 0.321292522                 |             | 3                              | 0            | 0.998207054  |             |                  |
| RP11-309L24.4 | ENSG00000272899.3                     | 0.833239636                 |             | 11                             | 9            | 0.332220694  |             |                  |
|               | Brain_Nucleus_accumbens_basal_ganglia | 0.945620825                 |             | Brain_Putamen_basal_ganglia    |              |              |             |                  |
|               | 3.086624851                           | 0.018327549                 |             | 0.211834292                    | -0.969650575 | 0.690549781  |             |                  |
|               | -0.203307616                          | 0.572518354                 |             | 9                              | 0            | 0.998207054  |             |                  |
| SLC44A3       | ENSG00000143036.16                    | 0.833329456                 |             | 12                             | 3            | 0.253732073  |             |                  |
|               | Brain_Putamen_basal_ganglia           | 0.843237618                 |             | Brain_Cerebellum               | 9.026469287  |              |             |                  |
|               | 0.006789983                           | 0.312649837                 |             | -0.237507958                   | 1.14133132   | 0.677284364  |             |                  |
|               | 0.442235199                           | 3                           | 0           | 0.998207054                    |              |              |             |                  |
| RGL4          | ENSG00000159496.14                    | 0.833363729                 |             | 2                              | 2            | 0.570566509  |             | Brain_Cerebellum |
|               | 0.624552534                           | Brain_Cerebellar_Hemisphere | 1.560696544 |                                | 0.439303456  |              |             |                  |
|               | 0.439303456                           | -0.567217369                |             | -0.489408479                   | -0.528312924 | 0.055019194  |             |                  |
|               | 2                                     | 0                           | 0.998207054 |                                |              |              |             |                  |
| LINC00862     | ENSG00000203721.6                     | 0.833463178                 |             | 3                              | 3            | 0.480458212  |             |                  |
|               | Brain_Putamen_basal_ganglia           | 0.847061302                 |             | Brain_Spinal_cord_cervical_c-1 |              |              |             |                  |
|               | 1.533901056                           | 0.632334704                 |             | 0.632334704                    | -0.306832713 | 0.705565779  |             |                  |
|               | 0.068621244                           | 0.554545461                 |             | 3                              | 0            | 0.998207054  |             |                  |
| CAMLG         | ENSG00000164615.4                     | 0.833491786                 |             | 13                             | 2            | 0.463257726  |             |                  |
|               | Brain_Spinal_cord_cervical_c-1        | 0.68107637                  |             | Brain_Frontal_Cortex_BA9       |              |              |             |                  |
|               | 11.97956706                           | 0.000148793                 |             | 0.521159457                    | -0.733493114 | -0.410994769 |             |                  |
|               | -0.57178174                           | 0.105987269                 |             | 2                              | 0            | 0.998207054  |             |                  |
| ARHGEF5       | ENSG00000050327.14                    | 0.833494955                 |             | 8                              | 5            | 0.154458092  |             |                  |
|               | Brain_Amygdala                        | 0.369333556                 |             | Brain_Substantia_nigra         | 6.050258583  |              |             |                  |
|               | 1.19E-07                              | 0.257891458                 |             | -1.42395986                    | -0.897722416 | -1.16057853  |             |                  |
|               | 0.176332464                           | 5                           | 0           | 0.998207054                    |              |              |             |                  |
| SRRM1         | ENSG00000133226.16                    | 0.833522342                 |             | 1                              | 1            | 0.833522342  |             |                  |
|               | Brain_Frontal_Cortex_BA9              | 0.833522342                 |             | Brain_Frontal_Cortex_BA9       | 1            | 1            |             |                  |
|               | 1                                     | -0.21018621                 |             | -0.21018621                    | -0.21018621  | NA           | 1           | 0                |
|               | 0.998207054                           |                             |             |                                |              |              |             |                  |
| POP4          | ENSG00000105171.9                     | 0.833540267                 |             | 2                              | 2            | 0.583233096  |             |                  |
|               | Brain_Cerebellar_Hemisphere           | 0.814319566                 |             | Brain_Caudate_basal_ganglia    |              |              |             |                  |
|               | 1.029615129                           | 0.970384871                 |             | 0.970384871                    | -0.548668312 | -0.234857205 |             |                  |
|               | -0.391762758                          | 0.221897962                 |             | 2                              | 0            | 0.998207054  |             |                  |
| AF131215.8    | ENSG00000270076.1                     | 0.833554106                 |             | 1                              | 1            | 0.833554106  |             |                  |
|               | Brain_Cerebellum                      | 0.833554106                 |             | Brain_Cerebellum               | 1            | 1            | 1           | 0.210145511      |
|               | 0.210145511                           | 0.210145511                 |             | NA                             | 1            | 0            | 0.998207054 |                  |
| CCNB1IP1      | ENSG00000100814.17                    | 0.833756414                 |             | 11                             | 3            | 0.305873439  |             |                  |
|               | Brain_Amygdala                        | 0.994704102                 |             | Brain_Hippocampus              | 8.750862293  |              |             |                  |
|               | 0.001041677                           | 0.566840199                 |             | -1.023919203                   | 0.494703353  | -0.259999059 |             |                  |
|               | 0.42689972                            | 3                           | 0           | 0.998207054                    |              |              |             |                  |
| AFF1          | ENSG00000172493.20                    | 0.833797101                 |             | 7                              | 6            | 0.256765765  |             |                  |
|               | Brain_Nucleus_accumbens_basal_ganglia | 0.922681825                 |             | Brain_Frontal_Cortex_BA9       |              |              |             |                  |
|               | 3.400190928                           | 0.093371687                 |             | 0.240352729                    | -0.924498902 | 1.134068621  |             |                  |
|               | 0.089033067                           | 0.721434905                 |             | 6                              | 0            | 0.998207054  |             |                  |
| RP11-20G6.2   | ENSG00000261090.1                     | 0.833889058                 |             | 2                              | 2            | 0.667195795  |             |                  |
|               | Brain_Anterior_cingulate_cortex_BA24  | 0.681337814                 |             | Brain_Frontal_Cortex_BA9       |              |              |             |                  |
|               | 1.026963413                           | 0.973036587                 |             | 0.973036587                    | -0.429999788 | -0.410638247 |             |                  |
|               | -0.420319018                          | 0.013690677                 |             | 2                              | 0            | 0.998207054  |             |                  |
| UTP6          | ENSG00000108651.9                     | 0.833908476                 |             | 4                              | 3            | 0.537835556  |             | Brain_Cerebellum |
|               | 0.820986527                           | Brain_Frontal_Cortex_BA9    | 3.353973488 |                                | 0.03704144   |              |             |                  |
|               | 0.123168688                           | -0.325772409                |             | 0.616089343                    | 0.23602253   | 0.406948708  |             | 3                |
|               | 0                                     | 0.998207054                 |             |                                |              |              |             |                  |

PTPRQ ENSG00000139304.12 0.833923471 3 3 0.630141079  
Brain\_Nucleus\_accumbens\_basal\_ganglia 0.882406784 Brain\_Caudate\_basal\_ganglia  
1.85057329 0.218244717 0.218244717 -0.147918886 0.481528289  
0.253912741 0.349019151 3 0 0.998207054

COPS2 ENSG00000166200.14 0.834002699 1 1 0.834002699  
Brain\_Frontal\_Cortex\_BA9 0.834002699 Brain\_Frontal\_Cortex\_BA9 1 1  
1 0.209570765 0.209570765 0.209570765 NA 1 0  
0.998207054

HTRA3 ENSG00000170801.9 0.834035962 4 3 0.364010473 Brain\_Cortex  
0.832249452 Brain\_Hippocampus 2.768208442 0.025110056  
0.345776392 -0.907749712 -0.211817452 -0.539793825 0.298253582  
3 0 0.998207054

GCFC2 ENSG0000005436.13 0.834064679 3 3 0.616277221  
Brain\_Nucleus\_accumbens\_basal\_ganglia 0.906888366 Brain\_Cortex 2.16533147  
0.263335223 0.263335223 -0.159842361 0.50113343 0.15275178  
0.331937959 3 0 0.998207054

SORBS1 ENSG00000095637.21 0.834092257 2 2 0.657202914  
Brain\_Cerebellum 0.727981368 Brain\_Cortex 1.126633099 0.873366901  
0.873366901 -0.347812011 0.443778251 0.04798312 0.559738843 2  
0 0.998207054

RP11-502I4.3 ENSG00000270964.1 0.834154269 10 6 0.426114534  
Brain\_Anterior\_cingulate\_cortex\_BA24 0.942944751 Brain\_Cortex  
6.406611765 0.032158042 0.269478226 -0.795858072 0.775994751  
-0.142247586 0.522753077 6 0 0.998207054

IFITM2 ENSG00000185201.16 0.834261309 8 8 0.108615209  
Brain\_Caudate\_basal\_ganglia 0.998711103 Brain\_Anterior\_cingulate\_cortex\_BA24  
2.721945526 0.288468146 0.288468146 -0.827812104 1.604448583  
-0.180037806 0.795364991 8 0 0.998207054

PLPPR2 ENSG00000105520.10 0.834283832 4 4 0.40234259 Brain\_Cerebellum  
0.841914057 Brain\_Spinal\_cord\_cervical\_c-1 1.584264588 0.510354626  
0.510354626 -0.837444804 0.806024865 0.108510303 0.686642735  
4 0 0.998207054

TMEM173 ENSG00000184584.12 0.834302179 2 2 0.564643573  
Brain\_Nucleus\_accumbens\_basal\_ganglia 0.907917059 Brain\_Caudate\_basal\_ganglia  
1.469025968 0.530974032 0.530974032 0.115666245 0.575957997  
0.345812121 0.325475419 2 0 0.998207054

CTD-3157E16.1 ENSG00000265519.1 0.834406341 11 5 0.249190937  
Brain\_Cerebellar\_Hemisphere 0.989577757 Brain\_Spinal\_cord\_cervical\_c-1  
8.352426367 0.001163084 0.287274168 -1.15231675 0.415985151  
0.066979507 0.436181858 5 0 0.998207054

OST4 ENSG00000228474.5 0.834457399 1 1 0.834457399  
Brain\_Anterior\_cingulate\_cortex\_BA24 0.834457399  
Brain\_Anterior\_cingulate\_cortex\_BA24 1 1 1 0.208988265  
0.208988265 0.208988265 NA 1 0 0.998207054

LINC00158 ENSG00000185433.8 0.834566794 2 2 0.615120221  
Brain\_Cerebellum 0.773890891 Brain\_Cerebellar\_Hemisphere 1.881419803  
0.118580197 0.118580197 0.287289201 0.502778201 0.395033701  
0.152373733 2 0 0.998207054

AC104024.1 ENSG00000230709.1 0.834690834 2 2 0.561780119  
Brain\_Nucleus\_accumbens\_basal\_ganglia 0.60722557 Brain\_Putamen\_basal\_ganglia  
1.689569837 0.310430163 0.310430163 -0.580199458 -0.51403779  
-0.547118624 0.046783364 2 0 0.998207054

IQCH ENSG00000103599.19 0.834802187 4 4 0.347060022  
Brain\_Cerebellar\_Hemisphere 0.875622843 Brain\_Hypothalamus 2.610670887  
0.270837272 0.270837272 -0.156520396 0.940307172 0.363611353  
0.463513397 4 0 0.998207054

EDEM2 ENSG00000088298.12 0.83483237 9 4 0.084336953 Brain\_Cortex  
0.822327593 Brain\_Anterior\_cingulate\_cortex\_BA24 6.738109399  
0.001697683 0.25334285 -1.726058141 0.224552278 -0.778865538  
0.527193174 4 0 0.998207054

SMIM24 ENSG00000095932.6 0.834847122 1 1 0.834847122  
Brain\_Cerebellar\_Hemisphere 0.834847122 Brain\_Cerebellar\_Hemisphere 1 1



|                                       |                    |                                      |              |              |              |   |                   |
|---------------------------------------|--------------------|--------------------------------------|--------------|--------------|--------------|---|-------------------|
| 1                                     | -0.208489063       | -0.208489063                         | -0.208489063 | NA           | 1            | 0 |                   |
| 0.998207054                           |                    |                                      |              |              |              |   |                   |
| PIGB                                  | ENSG00000069943.9  | 0.834847972                          | 9            | 7            | 0.123616348  |   | Brain_Amygdala    |
| 0.743958801                           | Brain_Cerebellum   | 4.503973652                          |              |              | 0.068144562  |   | 0.222482034       |
| 0.326615391                           | 1.539770323        | 0.672505018                          |              |              | 0.371826694  | 7 | 0                 |
| 0.998207054                           |                    |                                      |              |              |              |   |                   |
| C11orf95                              | ENSG00000188070.9  | 0.83490257                           | 1            | 1            | 0.83490257   |   |                   |
| Brain_Frontal_Cortex_BA9              | 0.83490257         | Brain_Frontal_Cortex_BA9             | 1            | 1            | 1            |   |                   |
| -0.208418043                          | -0.208418043       | -0.208418043                         | NA           | 1            | 0            |   | 0.998207054       |
| C8orf59                               | ENSG00000176731.11 | 0.835002644                          | 1            | 1            | 0.835002644  |   |                   |
| Brain_Frontal_Cortex_BA9              | 0.835002644        | Brain_Frontal_Cortex_BA9             | 1            | 1            |              |   |                   |
| 1                                     | 0.208289865        | 0.208289865                          | 0.208289865  | NA           | 1            | 0 |                   |
| 0.998207054                           |                    |                                      |              |              |              |   |                   |
| ASB8                                  | ENSG00000177981.10 | 0.835026415                          | 13           | 3            | 0.372992779  |   |                   |
| Brain_Anterior_cingulate_cortex_BA24  | 0.942964526        |                                      |              |              |              |   |                   |
| Brain_Nucleus_accumbens_basal_ganglia | 10.33637634        | 0.000850722                          |              |              |              |   |                   |
| 0.861211163                           | -0.271745912       | 0.890881438                          |              |              | 0.245298582  |   | 0.317419075       |
| 3                                     | 0                  | 0.998207054                          |              |              |              |   |                   |
| WNT16                                 | ENSG00000002745.12 | 0.835026935                          | 1            | 1            | 0.835026935  |   |                   |
| Brain_Putamen_basal_ganglia           | 0.835026935        | Brain_Putamen_basal_ganglia          | 1            | 1            |              |   |                   |
| 1                                     | -0.208258754       | -0.208258754                         | -0.208258754 | NA           | 1            | 0 |                   |
| 0.998207054                           |                    |                                      |              |              |              |   |                   |
| PROM1                                 | ENSG00000007062.11 | 0.835038755                          | 7            | 4            | 0.411926874  |   |                   |
| Brain_Spinal_cord_cervical_c-1        | 0.964485219        |                                      |              |              |              |   |                   |
| Brain_Nucleus_accumbens_basal_ganglia | 4.529278642        | 0.020114383                          |              |              |              |   |                   |
| 0.496316337                           | -0.806041938       | 0.820507467                          |              |              | 0.054561253  |   | 0.511413634       |
| 4                                     | 0                  | 0.998207054                          |              |              |              |   |                   |
| ZNF766                                | ENSG00000196214.10 | 0.8351639                            | 1            | 1            | 0.8351639    |   | Brain_Hippocampus |
| 0.8351639                             | Brain_Hippocampus  | 1                                    | 1            | 1            | 0.208083334  |   | 0.208083334       |
| 0.208083334                           | NA                 | 1                                    | 0            | 0.998207054  |              |   |                   |
| PKDCC                                 | ENSG00000162878.12 | 0.835254046                          | 8            | 8            | 0.336352566  |   |                   |
| Brain_Spinal_cord_cervical_c-1        | 0.921824286        | Brain_Cerebellum                     | 2.374208466  |              |              |   |                   |
| 0.160942428                           | 0.160942428        | 0.09813602                           | 0.961397052  |              | 0.606277911  |   |                   |
| 0.358493412                           | 8                  | 0                                    | 0.998207054  |              |              |   |                   |
| TUBE1                                 | ENSG00000074935.13 | 0.835258277                          | 1            | 1            | 0.835258277  |   |                   |
| Brain_Nucleus_accumbens_basal_ganglia | 0.835258277        |                                      |              |              |              |   |                   |
| Brain_Nucleus_accumbens_basal_ganglia | 1                  | 1                                    | 1            | 0.207962462  |              |   |                   |
| 0.207962462                           | 0.207962462        | NA                                   | 1            | 0            | 0.998207054  |   |                   |
| CTD-2270L9.4                          | ENSG00000260136.5  | 0.835326218                          | 5            | 3            | 0.679964623  |   |                   |
| Brain_Anterior_cingulate_cortex_BA24  | 0.913792743        | Brain_Hypothalamus                   |              |              |              |   |                   |
| 4.08170306                            | 0.001153702        | 0.209718755                          | -0.412511406 |              | 0.108255851  |   |                   |
| -0.278206949                          | 0.220387796        | 3                                    | 0            | 0.998207054  |              |   |                   |
| FDXR                                  | ENSG00000161513.11 | 0.835332977                          | 3            | 3            | 0.354140325  |   |                   |
| Brain_Anterior_cingulate_cortex_BA24  | 0.498015146        | Brain_Cortex                         |              |              |              |   |                   |
| 2.577398313                           | 0.132171141        | 0.132171141                          | 0.677616084  |              | 0.926588314  |   |                   |
| 0.773603843                           | 0.133915129        | 3                                    | 0            | 0.998207054  |              |   |                   |
| CYSRT1                                | ENSG00000197191.4  | 0.835355099                          | 2            | 2            | 0.551624498  |   |                   |
| Brain_Cerebellum                      | 0.968244509        | Brain_Anterior_cingulate_cortex_BA24 |              |              |              |   |                   |
| 1.056161878                           | 0.943838122        | 0.943838122                          | -0.039810119 |              | 0.595327618  |   |                   |
| 0.277758749                           | 0.449110201        | 2                                    | 0            | 0.998207054  |              |   |                   |
| NUCKS1                                | ENSG00000069275.12 | 0.835362505                          | 4            | 4            | 0.432158531  |   |                   |
| Brain_Hippocampus                     | 0.904206143        | Brain_Caudate_basal_ganglia          | 2.242954559  |              |              |   |                   |
| 0.337386685                           | 0.337386685        | -0.785503309                         | 0.666840527  |              | -0.161772584 |   |                   |
| 0.615906338                           | 4                  | 0                                    | 0.998207054  |              |              |   |                   |
| IMPA2                                 | ENSG00000141401.11 | 0.835375534                          | 2            | 2            | 0.638874214  |   | Brain_Cerebellum  |
| 0.702942205                           | Brain_Hypothalamus | 1.016763742                          | 0.983236258  |              |              |   |                   |
| 0.983236258                           | -0.381351822       | 0.469273417                          | 0.043960797  |              | 0.601482875  |   |                   |
| 2                                     | 0                  | 0.998207054                          |              |              |              |   |                   |
| LINC01877                             | ENSG00000238217.5  | 0.835393767                          | 1            | 1            | 0.835393767  |   |                   |
| Brain_Anterior_cingulate_cortex_BA24  | 0.835393767        |                                      |              |              |              |   |                   |
| Brain_Anterior_cingulate_cortex_BA24  | 1                  | 1                                    | 1            | -0.207788942 |              |   |                   |
| -0.207788942                          | -0.207788942       | NA                                   | 1            | 0            | 0.998207054  |   |                   |

|              |                                       |                  |                                       |              |             |              |              |   |   |
|--------------|---------------------------------------|------------------|---------------------------------------|--------------|-------------|--------------|--------------|---|---|
| ZNF664       | ENSG00000179195.15                    | 0.835468189      | 1                                     | 1            | 0.835468189 |              |              |   |   |
|              | Brain_Amygdala                        | 0.835468189      | Brain_Amygdala                        | 1            | 1           | 1            | 0.207693634  |   |   |
|              | 0.207693634                           | 0.207693634      | NA                                    | 1            | 0           | 0.998207054  |              |   |   |
| CHCHD4       | ENSG00000163528.12                    | 0.835615212      | 5                                     | 3            | 0.530095459 |              |              |   |   |
|              | Brain_Cerebellum                      | 0.835747038      | Brain_Spinal_cord_cervical_c-1        |              |             |              | 4.349568876  |   |   |
|              | 0.00135135                            | 0.181489878      | 0.207336541                           |              |             | 0.627860302  | 0.363866324  |   |   |
|              | 0.207803894                           | 3                | 0                                     | 0.998207054  |             |              |              |   |   |
| FAN1         | ENSG00000198690.9                     | 0.835647859      | 5                                     | 3            | 0.363865554 |              |              |   |   |
|              | Brain_Anterior_cingulate_cortex_BA24  | 0.990997751      | Brain_Cerebellar_Hemisphere           |              |             |              |              |   |   |
|              | 2.865180497                           | 0.004287012      | 0.162630973                           |              |             | -0.908023977 | -0.011282886 |   |   |
|              | -0.625324618                          | 0.360498452      | 3                                     | 0            | 0.998207054 |              |              |   |   |
| TBC1D29      | ENSG00000266733.5                     | 0.835655511      | 1                                     | 1            | 0.835655511 |              |              |   |   |
|              | Brain_Amygdala                        | 0.835655511      | Brain_Amygdala                        | 1            | 1           | 1            | -0.207453747 |   |   |
|              | -0.207453747                          | -0.207453747     | NA                                    | 1            | 0           | 0.998207054  |              |   |   |
| TTC3         | ENSG00000182670.13                    | 0.835688209      | 11                                    | 2            | 0.287284163 |              |              |   |   |
|              | Brain_Spinal_cord_cervical_c-1        | 0.979716868      | Brain_Hypothalamus                    |              |             |              |              |   |   |
|              | 9.841337038                           | 0.005317003      | 0.370924893                           |              |             | -0.115932291 | 1.064098318  |   |   |
|              | 0.355777826                           | 0.333635896      | 2                                     | 0            | 0.998207054 |              |              |   |   |
| CCDC66       | ENSG00000180376.16                    | 0.83570374       | 13                                    | 9            | 0.12591771  |              |              |   |   |
|              | Brain_Putamen_basal_ganglia           | 0.932740209      | Brain_Cerebellar_Hemisphere           |              |             |              |              |   |   |
|              | 5.864828541                           | 0.037777546      | 0.254188964                           |              |             | -0.623264355 | 1.530400159  |   |   |
|              | 0.686595232                           | 0.635554594      | 9                                     | 0            | 0.998207054 |              |              |   |   |
| PUM1         | ENSG00000134644.15                    | 0.835844035      | 1                                     | 1            | 0.835844035 |              |              |   |   |
|              | Brain_Spinal_cord_cervical_c-1        | 0.835844035      | Brain_Spinal_cord_cervical_c-1        |              |             |              |              |   |   |
|              | 1                                     | 1                | 1                                     | 0.207212334  | 0.207212334 | 0.207212334  | NA           | 1 | 0 |
|              | 0.998207054                           |                  |                                       |              |             |              |              |   |   |
| GLDN         | ENSG00000186417.13                    | 0.836039082      | 3                                     | 3            | 0.586336551 |              |              |   |   |
|              | Brain_Amygdala                        |                  | Brain_Cerebellum                      |              |             |              |              |   |   |
|              | 0.696872646                           | Brain_Cerebellum | 1.675652686                           |              |             | 0.647026198  | 0.647026198  |   |   |
|              | -0.544152477                          | 0.389545518      | -0.200923601                          |              |             | 0.513608596  | 3            | 0 |   |
|              | 0.998207054                           |                  |                                       |              |             |              |              |   |   |
| BEST4        | ENSG00000142959.4                     | 0.836065654      | 2                                     | 2            | 0.572359071 |              |              |   |   |
|              | Brain_Nucleus_accumbens_basal_ganglia | 0.719846138      | Brain_Cerebellar_Hemisphere           |              |             |              |              |   |   |
|              | 1.830811605                           | 0.169188395      | 0.169188395                           |              |             | 0.358664434  | 0.564580589  |   |   |
|              | 0.461622512                           | 0.145604709      | 2                                     | 0            | 0.998207054 |              |              |   |   |
| HTRA1        | ENSG00000166033.11                    | 0.836087304      | 1                                     | 1            | 0.836087304 |              |              |   |   |
|              | Brain_Putamen_basal_ganglia           | 0.836087304      | Brain_Putamen_basal_ganglia           | 1            | 1           |              |              |   |   |
|              | 1                                     | -0.206900835     | -0.206900835                          | -0.206900835 | NA          | 1            | 0            |   |   |
|              | 0.998207054                           |                  |                                       |              |             |              |              |   |   |
| RP4-777O23.1 | ENSG00000263683.1                     | 0.836087354      | 4                                     | 4            | 0.576700372 |              |              |   |   |
|              | Brain_Substantia_nigra                | 0.96306928       | Brain_Putamen_basal_ganglia           |              |             |              |              |   |   |
|              | 0.286400903                           | 0.286400903      | -0.289797241                          |              |             | 0.558210909  | 0.199397836  |   |   |
|              | 0.396592308                           | 4                | 0                                     | 0.998207054  |             |              |              |   |   |
| AKR1C3       | ENSG00000196139.13                    | 0.836289388      | 6                                     | 6            | 0.279543388 |              |              |   |   |
|              | Brain_Putamen_basal_ganglia           | 0.930536271      | Brain_Hypothalamus                    |              |             |              |              |   |   |
|              | 0.423759752                           | 0.423759752      | -1.08134565                           |              |             | 1.046334361  | -0.077689773 |   |   |
|              | 0.804965549                           | 6                | 0                                     | 0.998207054  |             |              |              |   |   |
| IGFL2        | ENSG00000204866.8                     | 0.836457373      | 7                                     | 5            | 0.503485967 |              |              |   |   |
|              | Brain_Frontal_Cortex_BA9              | 0.860898508      | Brain_Nucleus_accumbens_basal_ganglia |              |             |              |              |   |   |
|              | 4.692721014                           | 0.000411961      | 0.182320191                           |              |             | -0.669014909 | 0.356640167  |   |   |
|              | 0.100568746                           | 0.395085814      | 5                                     | 0            | 0.998207054 |              |              |   |   |
| MAP2K2       | ENSG00000126934.13                    | 0.836575483      | 2                                     | 2            | 0.551868299 |              |              |   |   |
|              | Brain_Cortex                          | 0.970819158      | Brain_Cerebellum                      |              |             |              |              |   |   |
|              | 0.971068154                           | 0.036580919      | 0.594962858                           |              |             | 0.315771888  | 0.394835656  |   |   |
|              | 2                                     | 0                | 0.998207054                           |              |             |              |              |   |   |
| TMEM63C      | ENSG00000165548.10                    | 0.836585281      | 5                                     | 3            | 0.400339244 |              |              |   |   |
|              | Brain_Hypothalamus                    | 0.764357777      | Brain_Cerebellum                      |              |             |              |              |   |   |
|              | 0.011676755                           | 0.347796314      | -0.841015513                          |              |             | -0.299763214 | -0.473067981 |   |   |
|              | 0.214735869                           | 3                | 0                                     | 0.998207054  |             |              |              |   |   |
| OR2K2        | ENSG00000171133.2                     | 0.836709311      | 1                                     | 1            | 0.836709311 |              |              |   |   |
|              | Brain_Hippocampus                     | 0.836709311      | Brain_Hippocampus                     | 1            | 1           | 1            |              |   |   |
|              | -0.206104465                          | -0.206104465     | -0.206104465                          | NA           | 1           | 0            | 0.998207054  |   |   |
| FAM43B       | ENSG00000183114.7                     | 0.836720728      | 2                                     | 2            | 0.700710986 |              |              |   |   |

|               |                                       |                        |              |                                       |              |              |             |                  |  |
|---------------|---------------------------------------|------------------------|--------------|---------------------------------------|--------------|--------------|-------------|------------------|--|
|               | Brain_Cerebellar_Hemisphere           | 0.999315396            |              | Brain_Cerebellum                      | 1.764342498  |              |             |                  |  |
|               | 0.235657502                           | 0.235657502            | -0.000858024 | 0.384360887                           |              | 0.191751432  |             |                  |  |
|               | 0.272390904                           | 2                      | 0            | 0.998207054                           |              |              |             |                  |  |
| ZNF720        | ENSG00000197302.10                    | 0.836763395            |              | 7                                     | 3            | 0.323548022  |             |                  |  |
|               | Brain_Hypothalamus                    | 0.697159499            |              | Brain_Frontal_Cortex_BA9              | 5.299290312  |              |             |                  |  |
|               | 0.008464488                           | 0.325989672            | -0.987193022 | -0.389157691                          | -0.789471958 |              |             |                  |  |
|               | 0.204587404                           | 3                      | 0            | 0.998207054                           |              |              |             |                  |  |
| FRS3          | ENSG00000137218.10                    | 0.836765393            |              | 7                                     | 6            | 0.348859392  |             |                  |  |
|               | Brain_Caudate_basal_ganglia           | 0.854428991            |              | Brain_Cerebellum                      | 2.331594133  |              |             |                  |  |
|               | 0.039902                              | 0.522508218            | -0.904845493 | 0.936803991                           | 0.148940894  |              |             |                  |  |
|               | 0.737388916                           | 6                      | 0            | 0.998207054                           |              |              |             |                  |  |
| CCDC169       | ENSG00000242715.7                     | 0.837011635            |              | 11                                    | 4            | 0.400425239  |             |                  |  |
|               | Brain_Hypothalamus                    | 0.936719245            |              | Brain_Caudate_basal_ganglia           | 8.615292984  |              |             |                  |  |
|               | 0.003274376                           | 0.452039426            | -0.840862018 | 0.411011401                           | -0.181872229 |              |             |                  |  |
|               | 0.34397237                            | 4                      | 0            | 0.998207054                           |              |              |             |                  |  |
| RP11-463I20.3 | ENSG00000259181.1                     | 0.837032582            |              | 1                                     | 1            | 0.837032582  |             |                  |  |
|               | Brain_Nucleus_accumbens_basal_ganglia | 0.837032582            |              |                                       |              |              |             |                  |  |
|               | Brain_Nucleus_accumbens_basal_ganglia | 1                      | 1            | 1                                     | -0.205690625 |              |             |                  |  |
|               | -0.205690625                          | -0.205690625           | NA           | 1                                     | 0            | 0.998207054  |             |                  |  |
| ATP6V1D       | ENSG00000100554.11                    | 0.837067227            |              | 2                                     | 2            | 0.788382952  |             |                  |  |
|               | Brain_Cortex                          | 0.818617517            |              | Brain_Caudate_basal_ganglia           | 1.651305874  |              |             |                  |  |
|               | 0.348694126                           | 0.348694126            | -0.268411028 | 0.229323464                           | -0.019543782 |              |             |                  |  |
|               | 0.351951435                           | 2                      | 0            | 0.998207054                           |              |              |             |                  |  |
| CCDC122       | ENSG00000151773.12                    | 0.8371204              | 10           | 4                                     | 0.311553447  |              |             |                  |  |
|               | Brain_Anterior_cingulate_cortex_BA24  | 0.836197636            |              | Brain_Hippocampus                     |              |              |             |                  |  |
|               | 7.407589827                           | 0.04032331             | 0.265092269  | -0.302393573                          | 1.011967805  |              |             |                  |  |
|               | 0.432595974                           | 0.365624054            | 4            | 0                                     | 0.998207054  |              |             |                  |  |
| CMC2          | ENSG00000103121.8                     | 0.837183904            |              | 2                                     | 2            | 0.557340777  |             | Brain_Cerebellum |  |
|               | 0.934778311                           | Brain_Substantia_nigra | 1.039890699  | 0.960109301                           |              |              |             |                  |  |
|               | 0.960109301                           | -0.081834512           | 0.586795921  | 0.252480704                           | 0.472793113  |              |             |                  |  |
|               | 2                                     | 0                      | 0.998207054  |                                       |              |              |             |                  |  |
| MAT1A         | ENSG00000151224.12                    | 0.837359551            |              | 1                                     | 1            | 0.837359551  |             |                  |  |
|               | Brain_Putamen_basal_ganglia           | 0.837359551            |              | Brain_Putamen_basal_ganglia           | 1            | 1            |             |                  |  |
|               | 1                                     | 0.205272086            | 0.205272086  | 0.205272086                           | NA           | 1            | 0           |                  |  |
|               | 0.998207054                           |                        |              |                                       |              |              |             |                  |  |
| LACE1         | ENSG00000135537.16                    | 0.837402023            |              | 3                                     | 3            | 0.416274954  |             |                  |  |
|               | Brain_Cerebellar_Hemisphere           | 0.963343731            |              | Brain_Substantia_nigra                |              |              |             |                  |  |
|               | 2.086216139                           | 0.086973528            | 0.086973528  | -0.812900768                          | -0.045957993 |              |             |                  |  |
|               | -0.477874114                          | 0.392544241            | 3            | 0                                     | 0.998207054  |              |             |                  |  |
| CTCF          | ENSG00000102974.14                    | 0.837436198            |              | 2                                     | 2            | 0.55153267   |             |                  |  |
|               | Brain_Nucleus_accumbens_basal_ganglia | 0.605830151            |              | Brain_Hypothalamus                    |              |              |             |                  |  |
|               | 1.852977843                           | 0.147022157            | 0.147022157  | -0.595465027                          | -0.516034733 |              |             |                  |  |
|               | -0.55574988                           | 0.0561657              | 2            | 0                                     | 0.998207054  |              |             |                  |  |
| PSMC1         | ENSG00000100764.13                    | 0.837475561            |              | 1                                     | 1            | 0.837475561  |             |                  |  |
|               | Brain_Hippocampus                     | 0.837475561            |              | Brain_Hippocampus                     | 1            | 1            | 1           |                  |  |
|               | -0.205123597                          | -0.205123597           | -0.205123597 | NA                                    | 1            | 0            | 0.998207054 |                  |  |
| EMP3          | ENSG00000142227.10                    | 0.837475926            |              | 2                                     | 2            | 0.551596596  |             |                  |  |
|               | Brain_Nucleus_accumbens_basal_ganglia | 0.868007852            |              | Brain_Putamen_basal_ganglia           |              |              |             |                  |  |
|               | 1.30497119                            | 0.69502881             | 0.69502881   | -0.595369368                          | -0.166189462 | -0.380779415 |             |                  |  |
|               | 0.303476022                           | 2                      | 0            | 0.998207054                           |              |              |             |                  |  |
| AGBL4         | ENSG00000186094.16                    | 0.837558681            |              | 2                                     | 2            | 0.619594718  |             |                  |  |
|               | Brain_Hypothalamus                    | 0.656260175            |              | Brain_Cerebellar_Hemisphere           | 1.256445915  |              |             |                  |  |
|               | 0.743554085                           | 0.743554085            | 0.445082445  | 0.49642482                            | 0.470753632  |              |             |                  |  |
|               | 0.036304542                           | 2                      | 0            | 0.998207054                           |              |              |             |                  |  |
| ZNF561        | ENSG00000171469.10                    | 0.837699745            |              | 10                                    | 4            | 0.269337669  |             |                  |  |
|               | Brain_Substantia_nigra                | 0.833919302            |              | Brain_Nucleus_accumbens_basal_ganglia |              |              |             |                  |  |
|               | 8.031402922                           | 0.001396486            | 0.348992021  | -0.827460661                          | 1.104589118  |              |             |                  |  |
|               | 0.410717672                           | 0.571561652            | 4            | 0                                     | 0.998207054  |              |             |                  |  |
| RP4-813D12.3  | ENSG00000226308.1                     | 0.837740152            |              | 2                                     | 2            | 0.551898538  |             |                  |  |
|               | Brain_Amygdala                        | 0.987163247            |              | Brain_Cerebellar_Hemisphere           | 1.005281029  |              |             |                  |  |
|               | 0.994718971                           | 0.994718971            | 0.016089179  | 0.594917621                           | 0.3055034    |              |             |                  |  |
|               | 0.409293517                           | 2                      | 0            | 0.998207054                           |              |              |             |                  |  |

|               |                                       |                                       |                             |             |              |                  |
|---------------|---------------------------------------|---------------------------------------|-----------------------------|-------------|--------------|------------------|
| RALB          | ENSG00000144118.13                    | 0.837744043                           | 5                           | 4           | 0.400409481  | Brain_Cortex     |
|               | 0.915796437                           | Brain_Cerebellum                      | 3.156399778                 |             | 0.001927875  | 0.336076663      |
|               | -0.840890143                          | 0.553870356                           | -0.270604341                |             | 0.580013293  | 4 0              |
|               | 0.998207054                           |                                       |                             |             |              |                  |
| COPG1         | ENSG00000181789.14                    | 0.837749361                           | 1                           | 1           | 0.837749361  | Brain_Cerebellum |
|               | 0.837749361                           | Brain_Cerebellum                      | 1                           | 1           | -0.204773155 | -0.204773155     |
|               | -0.204773155                          | NA                                    | 1                           | 0           | 0.998207054  |                  |
| PAQR8         | ENSG00000170915.8                     | 0.837874457                           | 8                           | 6           | 0.265426903  | Brain_Cerebellum |
|               | 0.821665663                           | Brain_Nucleus_accumbens_basal_ganglia | 5.202013847                 |             |              |                  |
|               | 0.086846974                           | 0.281414111                           | -0.359896893                |             | 1.113655741  | 0.33892637       |
|               | 0.571264726                           | 6                                     | 0                           | 0.998207054 |              |                  |
| ZNF728        | ENSG00000269067.1                     | 0.837954881                           | 1                           | 1           | 0.837954881  |                  |
|               | Brain_Cortex                          | 0.837954881                           | Brain_Cortex                | 1           | 1            | 1                |
|               | 0.204510124                           | 0.204510124                           | NA                          | 1           | 0            | 0.998207054      |
| SF3A2         | ENSG00000104897.9                     | 0.838029344                           | 2                           | 2           | 0.616626743  | Brain_Cerebellum |
|               | 0.728113329                           | Brain_Putamen_basal_ganglia           | 1.055027847                 |             | 0.944972153  |                  |
|               | 0.944972153                           | 0.347636316                           | 0.500636822                 |             | 0.424136569  | 0.108187695      |
|               | 2                                     | 0                                     | 0.998207054                 |             |              |                  |
| NT5M          | ENSG00000205309.13                    | 0.83803674                            | 5                           | 2           | 0.641418573  |                  |
|               | Brain_Cerebellar_Hemisphere           | 0.952133319                           | Brain_Putamen_basal_ganglia |             |              |                  |
|               | 4.691000404                           | 0.014604462                           | 0.225804589                 |             | -0.465716314 | 0.060028019      |
|               | -0.284061767                          | 0.20402312                            | 2                           | 0           | 0.998207054  |                  |
| SNRPF         | ENSG00000139343.10                    | 0.838049537                           | 6                           | 3           | 0.477300446  |                  |
|               | Brain_Putamen_basal_ganglia           | 0.979159882                           | Brain_Amygdala              | 5.151874142 |              |                  |
|               | 0.021879375                           | 0.186099177                           | -0.29580336                 |             | 0.710651137  | 0.134100154      |
|               | 0.357733053                           | 3                                     | 0                           | 0.998207054 |              |                  |
| PELI2         | ENSG00000139946.9                     | 0.838050953                           | 1                           | 1           | 0.838050953  | Brain_Cortex     |
|               | 0.838050953                           | Brain_Cortex                          | 1                           | 1           | -0.204387173 | -0.204387173     |
|               | -0.204387173                          | NA                                    | 1                           | 0           | 0.998207054  |                  |
| LENG1         | ENSG00000105617.3                     | 0.838191786                           | 1                           | 1           | 0.838191786  | Brain_Cerebellum |
|               | 0.838191786                           | Brain_Cerebellum                      | 1                           | 1           | -0.204206943 | -0.204206943     |
|               | -0.204206943                          | NA                                    | 1                           | 0           | 0.998207054  |                  |
| ISM1          | ENSG00000101230.5                     | 0.838281199                           | 2                           | 2           | 0.59268816   |                  |
|               | Brain_Substantia_nigra                | 0.788857368                           | Brain_Cerebellum            | 1.018122336 |              |                  |
|               | 0.981877664                           | 0.981877664                           | -0.267794678                |             | 0.53494461   | 0.133574966      |
|               | 0.567622394                           | 2                                     | 0                           | 0.998207054 |              |                  |
| MAX           | ENSG00000125952.18                    | 0.838305159                           | 2                           | 2           | 0.594681692  | Brain_Cortex     |
|               | 0.843248204                           | Brain_Frontal_Cortex_BA9              | 1.120754355                 |             | 0.879245645  |                  |
|               | 0.879245645                           | -0.532063969                          | -0.197740368                |             | -0.364902168 | 0.236402485      |
|               | 2                                     | 0                                     | 0.998207054                 |             |              |                  |
| SRP19         | ENSG00000153037.13                    | 0.838374592                           | 5                           | 4           | 0.394532312  | Brain_Cortex     |
|               | 0.988909186                           | Brain_Frontal_Cortex_BA9              | 3.401635781                 |             | 0.094597935  |                  |
|               | 0.27284328                            | -0.238577387                          | 0.851426795                 |             | 0.118583701  | 0.44537888       |
|               | 0.998207054                           |                                       |                             |             | 4            | 0                |
| FAM102B       | ENSG00000162636.15                    | 0.83838285                            | 1                           | 1           | 0.83838285   | Brain_Cerebellum |
|               | 0.83838285                            | Brain_Cerebellum                      | 1                           | 1           | 0.203962441  | 0.203962441      |
|               | 0.203962441                           | NA                                    | 1                           | 0           | 0.998207054  |                  |
| RP11-45506.9  | ENSG00000275542.1                     | 0.838526131                           | 1                           | 1           | 0.838526131  |                  |
|               | Brain_Frontal_Cortex_BA9              | 0.838526131                           | Brain_Frontal_Cortex_BA9    | 1           | 1            |                  |
|               | 1                                     | 0.203779094                           | 0.203779094                 | 0.203779094 | NA           | 1                |
|               | 0.998207054                           |                                       |                             |             | 0            |                  |
| RP11-380D11.2 | ENSG00000260926.2                     | 0.838560091                           | 1                           | 1           | 0.838560091  |                  |
|               | Brain_Substantia_nigra                | 0.838560091                           | Brain_Substantia_nigra      | 1           | 1            |                  |
|               | 1                                     | 0.203735638                           | 0.203735638                 | 0.203735638 | NA           | 1                |
|               | 0.998207054                           |                                       |                             |             | 0            |                  |
| AC010894.3    | ENSG00000226853.2                     | 0.83860213                            | 1                           | 1           | 0.83860213   | Brain_Cerebellum |
|               | 0.83860213                            | Brain_Cerebellum                      | 1                           | 1           | -0.203681845 | -0.203681845     |
|               | -0.203681845                          | NA                                    | 1                           | 0           | 0.998207054  |                  |
| DPF3          | ENSG00000205683.11                    | 0.838644719                           | 1                           | 1           | 0.838644719  |                  |
|               | Brain_Nucleus_accumbens_basal_ganglia | 0.838644719                           |                             |             |              |                  |
|               | Brain_Nucleus_accumbens_basal_ganglia | 1                                     | 1                           | 1           | -0.20362735  |                  |
|               | -0.20362735                           | -0.20362735                           | NA                          | 1           | 0            | 0.998207054      |

|               |                                       |              |             |             |                                       |              |    |              |
|---------------|---------------------------------------|--------------|-------------|-------------|---------------------------------------|--------------|----|--------------|
| USP35         | ENSG00000118369.12                    | 0.838930768  | 7           | 4           | 0.382834343                           |              |    |              |
|               | Brain_Hypothalamus                    | 0.994688609  |             |             | Brain_Caudate_basal_ganglia           | 5.091612233  |    |              |
|               | 0.008692697                           | 0.253660822  |             |             | -0.278801951                          | 0.872685831  |    | 0.473813638  |
|               | 0.453961685                           | 4            | 0           | 0.998207054 |                                       |              |    |              |
| GADD45G       | ENSG00000130222.10                    | 0.838956898  | 2           | 2           | 0.555479659                           |              |    |              |
|               | Brain_Cerebellum                      | 0.973102076  |             |             | Brain_Cortex                          | 1.044482234  |    | 0.955517766  |
|               | 0.955517766                           | -0.033717936 |             |             | 0.589568972                           | 0.277925518  |    | 0.440730399  |
|               | 2                                     | 0            | 0.998207054 |             |                                       |              |    |              |
| RNF25         | ENSG00000163481.7                     | 0.838984625  | 3           | 3           | 0.36671955                            |              |    |              |
|               | Brain_Frontal_Cortex_BA9              | 0.973010125  |             |             | Brain_Cortex                          | 1.115524794  |    |              |
|               | 0.90816075                            | 0.90816075   |             |             | -0.902635179                          | -0.033833245 |    | -0.359880258 |
|               | 0.473208134                           | 3            | 0           | 0.998207054 |                                       |              |    |              |
| KCTD15        | ENSG00000153885.14                    | 0.839050276  | 8           | 7           | 0.09103927                            |              |    |              |
|               | Brain_Hypothalamus                    | 0.914771182  |             |             | Brain_Hippocampus                     | 2.844810124  |    |              |
|               | 0.015779916                           | 0.34898791   |             |             | -1.689940856                          | 0.398738995  |    | -0.167460481 |
|               | 0.751395138                           | 7            | 0           | 0.998207054 |                                       |              |    |              |
| NECTIN2       | ENSG00000130202.9                     | 0.8391889    | 1           | 1           | 0.8391889                             |              |    |              |
|               | Brain_Spinal_cord_cervical_c-1        | 0.8391889    |             |             | Brain_Spinal_cord_cervical_c-1        | 1            |    |              |
|               | 1                                     | 1            | 0.202931081 |             | 0.202931081                           | 0.202931081  | NA | 1            |
|               | 0.998207054                           |              |             |             |                                       |              |    | 0            |
| SLC44A5       | ENSG00000137968.16                    | 0.839204605  | 2           | 2           | 0.564623234                           |              |    |              |
|               | Brain_Cerebellar_Hemisphere           | 0.626206173  |             |             | Brain_Cerebellum                      | 1.932002431  |    |              |
|               | 0.067997569                           | 0.067997569  |             |             | 0.487073602                           | 0.575988087  |    | 0.531530844  |
|               | 0.062872035                           | 2            | 0           | 0.998207054 |                                       |              |    |              |
| YTHDF1        | ENSG00000149658.17                    | 0.839356742  | 1           | 1           | 0.839356742                           |              |    |              |
|               | Brain_Cerebellum                      | 0.839356742  |             |             | Brain_Cerebellum                      | 1            | 1  | 1            |
|               | 0.202716352                           | 0.202716352  |             |             | NA                                    | 1            | 0  | 0.998207054  |
| FUOM          | ENSG00000148803.11                    | 0.839505913  | 1           | 1           | 0.839505913                           |              |    |              |
|               | Brain_Putamen_basal_ganglia           | 0.839505913  |             |             | Brain_Putamen_basal_ganglia           | 1            |    | 1            |
|               | 1                                     | -0.202525516 |             |             | -0.202525516                          | -0.202525516 | NA | 1            |
|               | 0.998207054                           |              |             |             |                                       |              |    | 0            |
| RP11-2E11.5   | ENSG00000259920.1                     | 0.839516228  | 1           | 1           | 0.839516228                           |              |    |              |
|               | Brain_Hypothalamus                    | 0.839516228  |             |             | Brain_Hypothalamus                    | 1            | 1  | 1            |
|               | -0.202512321                          | -0.202512321 |             |             | -0.202512321                          | NA           | 1  | 0            |
|               | 0.998207054                           |              |             |             |                                       |              |    |              |
| LINC00864     | ENSG00000228055.2                     | 0.839736543  | 1           | 1           | 0.839736543                           |              |    |              |
|               | Brain_Nucleus_accumbens_basal_ganglia | 0.839736543  |             |             |                                       |              |    |              |
|               | Brain_Nucleus_accumbens_basal_ganglia | 1            | 1           | 1           | 0.202230484                           |              |    |              |
|               | 0.202230484                           | 0.202230484  |             |             | NA                                    | 1            | 0  | 0.998207054  |
| RAB7A         | ENSG00000075785.12                    | 0.839797687  | 2           | 2           | 0.55526439                            |              |    |              |
|               | Brain_Frontal_Cortex_BA9              | 0.982314698  |             |             | Brain_Anterior_cingulate_cortex_BA24  |              |    |              |
|               | 1.021578611                           | 0.978421389  |             |             | 0.978421389                           | -0.589890014 |    | 0.022167055  |
|               | -0.28386148                           | 0.432789704  |             |             | 2                                     | 0            |    | 0.998207054  |
| MBTPS1        | ENSG00000140943.16                    | 0.839851315  | 3           | 3           | 0.368836022                           |              |    |              |
|               | Brain_Cerebellar_Hemisphere           | 0.981132242  |             |             | Brain_Nucleus_accumbens_basal_ganglia |              |    |              |
|               | 1.716630662                           | 0.28361059   |             |             | 0.28361059                            | -0.898655809 |    | 0.023649432  |
|               | -0.464201937                          | 0.463465435  |             |             | 3                                     | 0            |    | 0.998207054  |
| FERMT2        | ENSG00000073712.14                    | 0.839872911  | 1           | 1           | 0.839872911                           |              |    |              |
|               | Brain_Nucleus_accumbens_basal_ganglia | 0.839872911  |             |             |                                       |              |    |              |
|               | Brain_Nucleus_accumbens_basal_ganglia | 1            | 1           | 1           | 0.202056044                           |              |    |              |
|               | 0.202056044                           | 0.202056044  |             |             | NA                                    | 1            | 0  | 0.998207054  |
| CDKN2C        | ENSG00000123080.10                    | 0.839877597  | 2           | 2           | 0.610002476                           |              |    |              |
|               | Brain_Cerebellum                      | 0.763835836  |             |             | Brain_Anterior_cingulate_cortex_BA24  |              |    |              |
|               | 1.004729554                           | 0.995270446  |             |             | 0.995270446                           | 0.3004475    |    | 0.510069923  |
|               | 0.405258712                           | 0.148225436  |             |             | 2                                     | 0            |    | 0.998207054  |
| RP11-359J14.2 | ENSG00000256973.1                     | 0.84000812   | 2           | 2           | 0.653420474                           |              |    |              |
|               | Brain_Spinal_cord_cervical_c-1        | 0.733214469  |             |             |                                       |              |    |              |
|               | Brain_Nucleus_accumbens_basal_ganglia | 1.091404944  |             |             | 0.908595056                           |              |    |              |
|               | 0.908595056                           | -0.449015502 |             |             | 0.340852708                           | -0.054081397 |    | 0.558521167  |
|               | 2                                     | 0            | 0.998207054 |             |                                       |              |    |              |
| ATP8B2        | ENSG00000143515.16                    | 0.840018251  | 2           | 2           | 0.573516776                           |              |    |              |
|               | Brain_Putamen_basal_ganglia           | 0.989049873  |             |             | Brain_Cerebellum                      | 1.32421842   |    | 0.67578158   |
|               | 0.67578158                            | -0.013724379 |             |             | 0.562879741                           | 0.274577681  |    | 0.407720684  |
|               |                                       |              |             |             |                                       |              |    | 2            |

|           |                                       |                                       |              |             |                                       |                             |              |              |  |
|-----------|---------------------------------------|---------------------------------------|--------------|-------------|---------------------------------------|-----------------------------|--------------|--------------|--|
| 0         | 0.998207054                           |                                       |              |             |                                       |                             |              |              |  |
| LINC02138 | ENSG00000205015.1                     | 0.840049899                           | 3            | 3           | 0.650569773                           |                             |              |              |  |
|           | Brain_Hippocampus                     | 0.964950282                           |              |             | Brain_Cerebellum                      | 2.542251096                 |              |              |  |
|           | 0.107595641                           | 0.107595641                           | -0.452970793 |             | 0.295631348                           |                             |              | -0.067093963 |  |
|           | 0.37483768                            | 3                                     | 0            | 0.998207054 |                                       |                             |              |              |  |
| PER1      | ENSG00000179094.15                    | 0.840056537                           | 2            | 2           | 0.609657079                           |                             |              |              |  |
|           | Brain_Nucleus_accumbens_basal_ganglia | 0.747844423                           |              |             | Brain_Substantia_nigra                |                             |              |              |  |
|           | 1.049698216                           | 0.950301784                           | 0.950301784  |             | -0.510563015                          |                             | 0.321482961  |              |  |
|           | -0.094540027                          | 0.588345352                           | 2            | 0           | 0.998207054                           |                             |              |              |  |
| SSR1      | ENSG00000124783.12                    | 0.840118463                           | 4            | 1           | 0.784586291                           |                             |              |              |  |
|           | Brain_Nucleus_accumbens_basal_ganglia | 0.871532618                           |              |             | Brain_Hypothalamus                    |                             |              |              |  |
|           | 3.897831143                           | 0.008195992                           | 3.897831143  |             | -0.273347258                          |                             | -0.161712046 |              |  |
|           | -0.199385246                          | 0.050287539                           | 1            | 0           | 0.998207054                           |                             |              |              |  |
| CCP110    | ENSG00000103540.16                    | 0.840200222                           | 1            | 1           | 0.840200222                           |                             |              |              |  |
|           | Brain_Hippocampus                     | 0.840200222                           |              |             | Brain_Hippocampus                     | 1                           | 1            | 1            |  |
|           | -0.201637378                          | -0.201637378                          | -0.201637378 | NA          | 1                                     | 0                           | 0.998207054  |              |  |
| HELQ      | ENSG00000163312.10                    | 0.84023396                            | 1            | 1           | 0.84023396                            | Brain_Frontal_Cortex_BA9    |              |              |  |
|           | 0.84023396                            | Brain_Frontal_Cortex_BA9              | 1            | 1           | 1                                     | 0.201594225                 |              |              |  |
|           | 0.201594225                           | 0.201594225                           | NA           | 1           | 0                                     | 0.998207054                 |              |              |  |
| CYP2J2    | ENSG00000134716.9                     | 0.840298915                           | 5            | 5           | 0.272145089                           |                             |              |              |  |
|           | Brain_Anterior_cingulate_cortex_BA24  | 0.857315949                           |              |             | Brain_Cortex                          | 1.52507281                  |              |              |  |
|           | 0.459619033                           | 0.459619033                           | -1.098136043 |             | 0.857579631                           |                             | -0.031714948 |              |  |
|           | 0.763320751                           | 5                                     | 0            | 0.998207054 |                                       |                             |              |              |  |
| TFEB      | ENSG00000112561.17                    | 0.840318438                           | 3            | 3           | 0.488484572                           | Brain_Cerebellum            |              |              |  |
|           | 0.838120947                           | Brain_Nucleus_accumbens_basal_ganglia | 1.81961835   | 0.191147569 |                                       |                             |              |              |  |
|           | 0.191147569                           | -0.692721137                          | -0.204297598 |             | -0.37289488                           |                             | 0.277113768  |              |  |
|           | 3                                     | 0                                     | 0.998207054  |             |                                       |                             |              |              |  |
| MFSD14B   | ENSG00000148110.15                    | 0.840601236                           | 6            | 5           | 0.261402437                           |                             |              |              |  |
|           | Brain_Anterior_cingulate_cortex_BA24  | 0.737365518                           |              |             | Brain_Frontal_Cortex_BA9              |                             |              |              |  |
|           | 3.96884151                            | 0.024167145                           | 0.155966302  |             | -1.123082549                          |                             | -0.335344117 |              |  |
|           | -0.634377002                          | 0.279424544                           | 5            | 0           | 0.998207054                           |                             |              |              |  |
| APOL1     | ENSG00000100342.20                    | 0.840685094                           | 1            | 1           | 0.840685094                           | Brain_Cortex                |              |              |  |
|           | 0.840685094                           | Brain_Cortex                          | 1            | 1           | 1                                     | -0.201017239                |              | -0.201017239 |  |
|           | -0.201017239                          | NA                                    | 1            | 0           | 0.998207054                           |                             |              |              |  |
| TM9SF2    | ENSG00000125304.8                     | 0.84079795                            | 3            | 3           | 0.388710089                           |                             |              |              |  |
|           | Brain_Cerebellar_Hemisphere           | 0.985239621                           |              |             | Brain_Caudate_basal_ganglia           |                             |              |              |  |
|           | 1.333911143                           | 0.713960378                           | 0.713960378  |             | -0.861958983                          |                             | 0.451531342  |              |  |
|           | -0.142976029                          | 0.665533498                           | 3            | 0           | 0.998207054                           |                             |              |              |  |
| GPR68     | ENSG00000119714.10                    | 0.840804305                           | 2            | 2           | 0.565654018                           |                             |              |              |  |
|           | Brain_Cerebellar_Hemisphere           | 0.865480891                           |              |             | Brain_Cerebellum                      | 1.069917635                 |              |              |  |
|           | 0.930082365                           | 0.930082365                           | 0.16940144   | 0.574463758 |                                       | 0.371932599                 |              |              |  |
|           | 0.286422312                           | 2                                     | 0            | 0.998207054 |                                       |                             |              |              |  |
| DHDH      | ENSG00000104808.7                     | 0.840817421                           | 5            | 5           | 0.262860428                           | Brain_Cortex                |              |              |  |
|           | 0.950000287                           | Brain_Anterior_cingulate_cortex_BA24  | 1.473619284  |             |                                       |                             |              |              |  |
|           | 0.664357481                           | 0.664357481                           | 0.062706418  |             | 1.119655892                           |                             | 0.643798762  |              |  |
|           | 0.473670285                           | 5                                     | 0            | 0.998207054 |                                       |                             |              |              |  |
| MRPL27    | ENSG00000108826.15                    | 0.840867721                           | 4            | 3           | 0.44495769                            | Brain_Cortex                |              |              |  |
|           | 0.789287704                           | Brain_Anterior_cingulate_cortex_BA24  | 2.00281867   | 0.029984048 |                                       |                             |              |              |  |
|           | 0.883846098                           | -0.763848233                          | 0.458887344  |             | -0.057748927                          |                             | 0.56819448   | 3            |  |
|           | 0                                     | 0.998207054                           |              |             |                                       |                             |              |              |  |
| CHST2     | ENSG00000175040.5                     | 0.84091202                            | 1            | 1           | 0.84091202                            | Brain_Cerebellar_Hemisphere |              |              |  |
|           | 0.84091202                            | Brain_Cerebellar_Hemisphere           | 1            | 1           | 1                                     | 0.200727034                 |              |              |  |
|           | 0.200727034                           | 0.200727034                           | NA           | 1           | 0                                     | 0.998207054                 |              |              |  |
| IQGAP1    | ENSG00000140575.12                    | 0.840921509                           | 13           | 1           | 0.597401415                           |                             |              |              |  |
|           | Brain_Hypothalamus                    | 0.956587716                           |              |             | Brain_Nucleus_accumbens_basal_ganglia |                             |              |              |  |
|           | 12.26282605                           | 0.000267122                           | 12.26282605  |             | -0.528141087                          |                             | 0.390278323  |              |  |
|           | -0.184380617                          | 0.333855623                           | 1            | 0           | 0.998207054                           |                             |              |              |  |
| ZNF33B    | ENSG00000196693.14                    | 0.840934891                           | 11           | 4           | 0.176174403                           |                             |              |              |  |
|           | Brain_Cerebellum                      | 0.968060718                           |              |             | Brain_Cortex                          | 7.635292063                 |              | 0.012141525  |  |
|           | 0.326675857                           | -1.352628312                          | 0.040040651  |             | -0.664788788                          |                             | 0.408210017  |              |  |
|           | 4                                     | 0                                     | 0.998207054  |             |                                       |                             |              |              |  |
| UQCRC2    | ENSG00000140740.10                    | 0.840944943                           | 2            | 2           | 0.572250467                           |                             |              |              |  |

|                |                                       |                             |                                |              |                             |              |
|----------------|---------------------------------------|-----------------------------|--------------------------------|--------------|-----------------------------|--------------|
|                | Brain_Nucleus_accumbens_basal_ganglia | 0.815768907                 |                                |              | Brain_Caudate_basal_ganglia |              |
|                | 1.120934321                           | 0.879065679                 | 0.879065679                    | 0.23299034   | 0.564740229                 |              |
|                | 0.398865285                           | 0.234582596                 | 2                              | 0            | 0.998207054                 |              |
| PCBD1          | ENSG00000166228.8                     | 0.840982402                 | 2                              | 2            | 0.605700081                 | Brain_Cortex |
|                | 0.612444775                           | Brain_Cerebellum            | 1.510559448                    |              | 0.489440552                 | 0.489440552  |
|                | -0.516220978                          | -0.506586795                | -0.511403886                   |              | 0.006812396                 | 2            |
|                | 0.998207054                           |                             |                                |              |                             | 0            |
| RP11-561O23.5  | ENSG00000234394.8                     | 0.841009857                 | 1                              | 1            | 0.841009857                 |              |
|                | Brain_Hippocampus                     | 0.841009857                 | Brain_Hippocampus              | 1            | 1                           | 1            |
|                | 0.20060192                            | 0.20060192                  | 0.20060192                     | NA           | 1                           | 0            |
|                |                                       |                             |                                |              | 0.998207054                 |              |
| B3GNT9         | ENSG00000237172.3                     | 0.84107828                  | 1                              | 1            | 0.84107828                  |              |
|                | Brain_Nucleus_accumbens_basal_ganglia | 0.84107828                  |                                |              |                             |              |
|                | Brain_Nucleus_accumbens_basal_ganglia | 1                           | 1                              | 1            | 0.200514422                 |              |
|                | 0.200514422                           | 0.200514422                 | NA                             | 1            | 0                           | 0.998207054  |
| LRRFIP2        | ENSG00000093167.17                    | 0.841359641                 | 11                             | 5            | 0.503125179                 |              |
|                | Brain_Frontal_Cortex_BA9              | 0.961865298                 | Brain_Hypothalamus             | 8.076928473  |                             |              |
|                | 0.001487935                           | 0.313514446                 | -0.504148105                   | 0.669580609  | -0.082797036                |              |
|                | 0.460852463                           | 5                           | 0                              | 0.998207054  |                             |              |
| RP11-1094H24.4 | ENSG00000246640.1                     | 0.841426928                 | 3                              | 3            | 0.525701216                 |              |
|                | Brain_Cerebellar_Hemisphere           | 0.988311186                 | Brain_Caudate_basal_ganglia    |              |                             |              |
|                | 2.505213094                           | 0.090485403                 | 0.090485403                    | -0.027078969 | 0.634581778                 |              |
|                | 0.207384363                           | 0.370551691                 | 3                              | 0            | 0.998207054                 |              |
| PPA1           | ENSG00000180817.11                    | 0.841506404                 | 9                              | 8            | 0.22615538                  |              |
|                | Brain_Frontal_Cortex_BA9              | 0.978840712                 | Brain_Putamen_basal_ganglia    |              |                             |              |
|                | 4.188832615                           | 0.026428797                 | 0.265999484                    | -0.033482403 | 1.210321945                 |              |
|                | 0.458636                              | 0.53502158                  | 8                              | 0            | 0.998207054                 |              |
| COL26A1        | ENSG00000160963.13                    | 0.84162296                  | 7                              | 3            | 0.4726463                   |              |
|                | Brain_Frontal_Cortex_BA9              | 0.970672873                 | Brain_Caudate_basal_ganglia    |              |                             |              |
|                | 5.574134036                           | 0.009865018                 | 0.244986719                    | -0.718180012 | 0.209282512                 |              |
|                | -0.148909875                          | 0.337616062                 | 3                              | 0            | 0.998207054                 |              |
| RP11-281A20.1  | ENSG00000231901.1                     | 0.841664035                 | 1                              | 1            | 0.841664035                 |              |
|                | Brain_Cerebellum                      | 0.841664035                 | Brain_Cerebellum               | 1            | 1                           | 1            |
|                | 0.199765436                           | 0.199765436                 | NA                             | 1            | 0                           | 0.998207054  |
| ZNF772         | ENSG00000197128.11                    | 0.841704702                 | 4                              | 4            | 0.447993141                 |              |
|                | Brain_Hippocampus                     | 0.872021069                 | Brain_Cerebellar_Hemisphere    | 2.517927569  |                             |              |
|                | 0.391558641                           | 0.391558641                 | -0.758765009                   | 0.348457404  | -0.281241476                |              |
|                | 0.487560676                           | 4                           | 0                              | 0.998207054  |                             |              |
| LAP3           | ENSG00000002549.12                    | 0.841764197                 | 4                              | 2            | 0.587427803                 |              |
|                | Brain_Anterior_cingulate_cortex_BA24  | 0.798149474                 | Brain_Cerebellar_Hemisphere    |              |                             |              |
|                | 3.767683235                           | 0.017027193                 | 0.172443527                    | 0.255742762  | 0.542567235                 |              |
|                | 0.419634413                           | 0.122358369                 | 2                              | 0            | 0.998207054                 |              |
| RP11-500B12.1  | ENSG00000233569.1                     | 0.841784081                 | 10                             | 4            | 0.328710485                 |              |
|                | Brain_Nucleus_accumbens_basal_ganglia | 0.906932483                 | Brain_Frontal_Cortex_BA9       |              |                             |              |
|                | 7.499198488                           | 0.011045073                 | 0.286399606                    | -0.1169086   | 0.97671456                  | 0.61752401   |
|                | 0.291358964                           | 4                           | 0                              | 0.998207054  |                             |              |
| HERC5          | ENSG00000138646.8                     | 0.841837036                 | 1                              | 1            | 0.841837036                 |              |
|                | Brain_Hippocampus                     | 0.841837036                 | Brain_Hippocampus              | 1            | 1                           | 1            |
|                | 0.199544246                           | 0.199544246                 | 0.199544246                    | NA           | 1                           | 0            |
|                |                                       |                             |                                |              | 0.998207054                 |              |
| EPHA6          | ENSG00000080224.17                    | 0.841956549                 | 1                              | 1            | 0.841956549                 |              |
|                | Brain_Spinal_cord_cervical_c-1        | 0.841956549                 | Brain_Spinal_cord_cervical_c-1 |              |                             |              |
|                | 1                                     | 1                           | 1                              | 0.199391448  | 0.199391448                 | 0.199391448  |
|                | 0.998207054                           |                             |                                |              | NA                          | 1            |
|                |                                       |                             |                                |              |                             | 0            |
| NFAM1          | ENSG00000235568.6                     | 0.841967045                 | 1                              | 1            | 0.841967045                 |              |
|                | Brain_Hypothalamus                    | 0.841967045                 | Brain_Hypothalamus             | 1            | 1                           | 1            |
|                | 0.199378029                           | 0.199378029                 | 0.199378029                    | NA           | 1                           | 0            |
|                |                                       |                             |                                |              | 0.998207054                 |              |
| LCLAT1         | ENSG00000172954.13                    | 0.8420206                   | 5                              | 4            | 0.363424173                 | Brain_Cortex |
|                | 0.999528656                           | Brain_Caudate_basal_ganglia | 3.186574811                    | 0.051729073  |                             |              |
|                | 0.115294654                           | -0.90885973                 | -0.000590742                   | -0.501936876 | 0.341935284                 |              |
|                | 4                                     | 0                           | 0.998207054                    |              |                             |              |
| RP11-24H2.3    | ENSG00000279325.1                     | 0.842257675                 | 2                              | 2            | 0.770901023                 |              |
|                | Brain_Anterior_cingulate_cortex_BA24  | 0.777692074                 | Brain_Amygdala                 |              |                             |              |
|                | 1.520946529                           | 0.479053471                 | 0.479053471                    | -0.282327927 | 0.291196521                 |              |

|              |                                      |                             |              |              |                                |             |   |              |                  |
|--------------|--------------------------------------|-----------------------------|--------------|--------------|--------------------------------|-------------|---|--------------|------------------|
|              | 0.004434297                          | 0.405543026                 | 2            | 0            | 0.998207054                    |             |   |              |                  |
| IMP3         | ENSG00000177971.8                    | 0.842337433                 | 1            | 1            | 0.842337433                    |             |   |              |                  |
|              | Brain_Frontal_Cortex_BA9             | 0.842337433                 |              |              | Brain_Frontal_Cortex_BA9       | 1           | 1 |              |                  |
|              | 1                                    | -0.198904521                | -0.198904521 | -0.198904521 | NA                             | 1           | 0 |              |                  |
|              | 0.998207054                          |                             |              |              |                                |             |   |              |                  |
| KCNK12       | ENSG00000184261.4                    | 0.842401712                 | 1            | 1            | 0.842401712                    |             |   |              |                  |
|              | Brain_Spinal_cord_cervical_c-1       | 0.842401712                 |              |              | Brain_Spinal_cord_cervical_c-1 |             |   |              |                  |
|              | 1                                    | 1                           | 0.19882235   | 0.19882235   | 0.19882235                     | NA          | 1 | 0            | 0.998207054      |
| RFX5         | ENSG00000143390.17                   | 0.842419548                 | 1            | 1            | 0.842419548                    |             |   |              |                  |
|              | Brain_Hypothalamus                   | 0.842419548                 |              |              | Brain_Hypothalamus             | 1           | 1 | 1            |                  |
|              | 0.198799551                          | 0.198799551                 | 0.198799551  | NA           | 1                              | 0           |   | 0.998207054  |                  |
| TBC1D32      | ENSG00000146350.13                   | 0.84245732                  | 3            | 3            | 0.411763146                    |             |   |              | Brain_Cerebellum |
|              | 0.88051745                           | Brain_Putamen_basal_ganglia | 1.731029364  |              | 0.289437574                    |             |   |              |                  |
|              | 0.289437574                          | -0.150313287                | 0.820794827  |              | 0.492207139                    |             |   | 0.556487255  |                  |
|              | 3                                    | 0                           | 0.998207054  |              |                                |             |   |              |                  |
| MOB2         | ENSG00000182208.13                   | 0.842464449                 | 2            | 2            | 0.630320539                    |             |   |              |                  |
|              | Brain_Putamen_basal_ganglia          | 0.816688495                 |              |              | Brain_Cerebellum               | 1.197630159 |   |              |                  |
|              | 0.802369841                          | 0.802369841                 | 0.231806259  |              | 0.481275737                    |             |   | 0.356540998  |                  |
|              | 0.17640156                           | 2                           | 0            | 0.998207054  |                                |             |   |              |                  |
| CCZ1B        | ENSG00000146574.15                   | 0.842560461                 | 13           | 6            | 0.128304603                    |             |   |              |                  |
|              | Brain_Spinal_cord_cervical_c-1       | 0.890792049                 |              |              | Brain_Hypothalamus             |             |   |              |                  |
|              | 8.960738313                          | 0.047342968                 | 0.386055461  |              | 0.137302052                    |             |   | 1.520821638  |                  |
|              | 0.626323588                          | 0.425406721                 | 6            | 0            | 0.998207054                    |             |   |              |                  |
| MDS2         | ENSG00000197880.8                    | 0.842604361                 | 2            | 2            | 0.559640963                    |             |   |              |                  |
|              | Brain_Spinal_cord_cervical_c-1       | 0.746596803                 |              |              | Brain_Hippocampus              |             |   | 1.48369967   |                  |
|              | 0.51630033                           | 0.51630033                  | 0.323129984  |              | 0.583374882                    |             |   | 0.453252433  |                  |
|              | 0.184020932                          | 2                           | 0            | 0.998207054  |                                |             |   |              |                  |
| LILRB5       | ENSG00000105609.16                   | 0.84279047                  | 1            | 1            | 0.84279047                     |             |   |              |                  |
|              | Brain_Anterior_cingulate_cortex_BA24 | 0.84279047                  |              |              |                                |             |   |              |                  |
|              | Brain_Anterior_cingulate_cortex_BA24 | 1                           | 1            | 1            | -0.198325413                   |             |   |              |                  |
|              | -0.198325413                         | -0.198325413                | NA           | 1            | 0                              | 0.998207054 |   |              |                  |
| FAAH         | ENSG00000117480.15                   | 0.842828156                 | 8            | 4            | 0.401274192                    |             |   |              |                  |
|              | Brain_Putamen_basal_ganglia          | 0.972219503                 |              |              | Brain_Substantia_nigra         |             |   |              |                  |
|              | 5.808873232                          | 0.019102696                 | 0.211298255  |              | -0.839347755                   |             |   | 0.434210741  |                  |
|              | -0.395170045                         | 0.440069459                 | 4            | 0            | 0.998207054                    |             |   |              |                  |
| KCNMB2       | ENSG00000197584.11                   | 0.842837212                 | 1            | 1            | 0.842837212                    |             |   |              |                  |
|              | Brain_Frontal_Cortex_BA9             | 0.842837212                 |              |              | Brain_Frontal_Cortex_BA9       | 1           | 1 |              |                  |
|              | 1                                    | -0.198265667                | -0.198265667 | -0.198265667 | NA                             | 1           | 0 |              |                  |
|              | 0.998207054                          |                             |              |              |                                |             |   |              |                  |
| RP11-74E22.6 | ENSG00000272911.1                    | 0.842904638                 | 2            | 2            | 0.572698746                    |             |   |              |                  |
|              | Brain_Substantia_nigra               | 0.591631876                 |              |              | Brain_Cerebellar_Hemisphere    |             |   |              |                  |
|              | 1.780871549                          | 0.219128451                 | 0.219128451  |              | 0.536472732                    |             |   | 0.564081385  |                  |
|              | 0.550277058                          | 0.019522266                 | 2            | 0            | 0.998207054                    |             |   |              |                  |
| FAM160B1     | ENSG00000151553.14                   | 0.842998539                 | 4            | 4            | 0.290499756                    |             |   |              |                  |
|              | Brain_Cerebellar_Hemisphere          | 0.785399855                 |              |              | Brain_Frontal_Cortex_BA9       |             |   |              |                  |
|              | 1.269307913                          | 0.751720709                 | 0.751720709  |              | -1.057025925                   |             |   | 0.418557935  |                  |
|              | -0.371759368                         | 0.618038555                 | 4            | 0            | 0.998207054                    |             |   |              |                  |
| EPB41L2      | ENSG00000079819.18                   | 0.84300649                  | 5            | 3            | 0.447997977                    |             |   |              |                  |
|              | Brain_Spinal_cord_cervical_c-1       | 0.959095149                 |              |              | Brain_Hippocampus              |             |   |              |                  |
|              | 3.959506565                          | 0.01020454                  | 0.268056895  |              | -0.758756925                   |             |   | 0.051289106  |                  |
|              | -0.298501511                         | 0.299972172                 | 3            | 0            | 0.998207054                    |             |   |              |                  |
| PCF11        | ENSG00000165494.11                   | 0.843007676                 | 1            | 1            | 0.843007676                    |             |   |              |                  |
|              | Brain_Caudate_basal_ganglia          | 0.843007676                 |              |              | Brain_Caudate_basal_ganglia    | 1           | 1 |              |                  |
|              | 1                                    | 0.198047786                 | 0.198047786  | 0.198047786  | NA                             | 1           | 0 |              |                  |
|              | 0.998207054                          |                             |              |              |                                |             |   |              |                  |
| NRROS        | ENSG00000174004.5                    | 0.843031902                 | 3            | 3            | 0.588881954                    |             |   |              | Brain_Cerebellum |
|              | 0.719337643                          | Brain_Cerebellar_Hemisphere | 1.24386727   |              | 0.79559373                     |             |   | 0.79559373   |                  |
|              | -0.51099408                          | 0.540456933                 | -0.109960435 |              | 0.568358592                    |             |   | 3            | 0                |
|              | 0.998207054                          |                             |              |              |                                |             |   |              |                  |
| RHBDD3       | ENSG00000100263.13                   | 0.843126815                 | 6            | 5            | 0.2551139                      |             |   |              |                  |
|              | Brain_Hypothalamus                   | 0.941230811                 |              |              | Brain_Caudate_basal_ganglia    | 4.087798025 |   |              |                  |
|              | 0.083052647                          | 0.202559303                 | -1.138015765 |              | 0.739840987                    |             |   | -0.358216015 |                  |



|              |                                       |                             |                             |              |              |              |                  |  |
|--------------|---------------------------------------|-----------------------------|-----------------------------|--------------|--------------|--------------|------------------|--|
|              | 0.644658003                           | 5                           | 0                           | 0.998207054  |              |              |                  |  |
| KCNB2        | ENSG00000182674.5                     |                             | 0.843149633                 | 5            | 5            | 0.214614849  |                  |  |
|              | Brain_Nucleus_accumbens_basal_ganglia |                             | 0.976823979                 |              |              | Brain_Cortex |                  |  |
|              | 1.244331625                           | 0.790413715                 | 0.790413715                 |              |              | -1.240975366 | 0.059132195      |  |
|              | -0.401439859                          | 0.553164443                 | 5                           | 0            | 0.998207054  |              |                  |  |
| SGPL1        | ENSG00000166224.16                    |                             | 0.843244831                 | 1            | 1            | 0.843244831  |                  |  |
|              | Brain_Anterior_cingulate_cortex_BA24  |                             | 0.843244831                 |              |              |              |                  |  |
|              | Brain_Anterior_cingulate_cortex_BA24  | 1                           | 1                           | 1            | 0.197744679  |              |                  |  |
|              | 0.197744679                           | 0.197744679                 | NA                          | 1            | 0            | 0.998207054  |                  |  |
| TP53TG1      | ENSG00000182165.17                    |                             | 0.843411222                 | 5            | 2            | 0.758411134  |                  |  |
|              | Brain_Cortex                          | 0.946692362                 | Brain_Frontal_Cortex_BA9    | 4.442150096  |              |              |                  |  |
|              | 1.66E-06                              | 0.440557298                 | -0.307567919                | 0.225289231  | 0.068270498  |              |                  |  |
|              | 0.219950481                           | 2                           | 0                           | 0.998207054  |              |              |                  |  |
| ST3GAL1      | ENSG00000008513.14                    |                             | 0.84351893                  | 3            | 3            | 0.504770438  | Brain_Cerebellum |  |
|              | 0.984393454                           | Brain_Cerebellar_Hemisphere | 1.437444055                 | 0.574987434  |              |              |                  |  |
|              | 0.574987434                           | -0.557126343                | 0.667002655                 | 0.043145821  | 0.6124052    | 3            |                  |  |
|              | 0                                     | 0.998207054                 |                             |              |              |              |                  |  |
| CYP4F3       | ENSG00000186529.15                    |                             | 0.84356486                  | 11           | 4            | 0.292634629  |                  |  |
|              | Brain_Hypothalamus                    | 0.851664372                 | Brain_Hippocampus           | 7.846090382  |              |              |                  |  |
|              | 6.62E-17                              | 0.494113685                 | -0.443193174                | 1.05235953   | 0.529672387  |              |                  |  |
|              | 0.386347294                           | 4                           | 0                           | 0.998207054  |              |              |                  |  |
| GAL3ST1      | ENSG00000128242.12                    |                             | 0.843576886                 | 2            | 2            | 0.572021843  |                  |  |
|              | Brain_Nucleus_accumbens_basal_ganglia | 0.81566883                  | Brain_Cortex                | 1.16001982   |              |              |                  |  |
|              | 0.83998018                            | 0.83998018                  | -0.565076336                | -0.233119221 | -0.399097778 |              |                  |  |
|              | 0.234729127                           | 2                           | 0                           | 0.998207054  |              |              |                  |  |
| RP11-328D5.4 | ENSG00000284237.1                     |                             | 0.843641307                 | 2            | 2            | 0.615976875  |                  |  |
|              | Brain_Spinal_cord_cervical_c-1        | 0.680582274                 | Brain_Caudate_basal_ganglia |              |              |              |                  |  |
|              | 1.245879431                           | 0.754120569                 | 0.754120569                 | -0.501560266 | -0.411668693 |              |                  |  |
|              | -0.45661448                           | 0.06356294                  | 2                           | 0            | 0.998207054  |              |                  |  |
| AC068282.3   | ENSG00000236682.1                     |                             | 0.843708624                 | 13           | 1            | 0.566684097  |                  |  |
|              | Brain_Spinal_cord_cervical_c-1        | 0.930850029                 | Brain_Cerebellum            | 12.8124339   |              |              |                  |  |
|              | 0.000466831                           | 12.8124339                  | -0.139693244                | 0.572941806  | 0.195589736  |              |                  |  |
|              | 0.165502438                           | 1                           | 0                           | 0.998207054  |              |              |                  |  |
| CTSV         | ENSG00000136943.10                    |                             | 0.843718627                 | 7            | 5            | 0.442950548  |                  |  |
|              | Brain_Spinal_cord_cervical_c-1        | 0.962420441                 | Brain_Putamen_basal_ganglia |              |              |              |                  |  |
|              | 4.832110138                           | 0.016825992                 | 0.207412684                 | -0.649461618 | 0.767220295  |              |                  |  |
|              | -0.104358927                          | 0.456153084                 | 5                           | 0            | 0.998207054  |              |                  |  |
| DHRS12       | ENSG00000102796.10                    |                             | 0.843731246                 | 6            | 6            | 0.205126907  |                  |  |
|              | Brain_Hypothalamus                    | 0.880130385                 | Brain_Cerebellar_Hemisphere | 3.513630186  |              |              |                  |  |
|              | 0.176954878                           | 0.176954878                 | -0.18051032                 | 1.267079382  | 0.490763326  |              |                  |  |
|              | 0.513969403                           | 6                           | 0                           | 0.998207054  |              |              |                  |  |
| SIPA1L1      | ENSG00000197555.9                     |                             | 0.843833707                 | 1            | 1            | 0.843833707  |                  |  |
|              | Brain_Caudate_basal_ganglia           | 0.843833707                 | Brain_Caudate_basal_ganglia | 1            | 1            |              |                  |  |
|              | 1                                     | 0.196992117                 | 0.196992117                 | 0.196992117  | NA           | 1            | 0                |  |
|              | 0.998207054                           |                             |                             |              |              |              |                  |  |
| ENDOD1       | ENSG00000149218.4                     |                             | 0.843917206                 | 2            | 2            | 0.569174994  |                  |  |
|              | Brain_Nucleus_accumbens_basal_ganglia | 0.605737775                 | Brain_Caudate_basal_ganglia |              |              |              |                  |  |
|              | 1.767180918                           | 0.232819082                 | 0.232819082                 | 0.516167002  | 0.569266947  |              |                  |  |
|              | 0.542716975                           | 0.037547331                 | 2                           | 0            | 0.998207054  |              |                  |  |
| HLA-DQB2     | ENSG00000232629.8                     |                             | 0.843965317                 | 13           | 7            | 0.227283735  |                  |  |
|              | Brain_Anterior_cingulate_cortex_BA24  | 0.853192086                 | Brain_Hippocampus           |              |              |              |                  |  |
|              | 8.053462264                           | 0.036880732                 | 0.35387975                  | -1.207385453 | 0.381115352  |              |                  |  |
|              | -0.517982431                          | 0.431797958                 | 7                           | 0            | 0.998207054  |              |                  |  |
| LSP1         | ENSG00000130592.15                    |                             | 0.843984152                 | 3            | 2            | 0.650560049  |                  |  |
|              | Brain_Hypothalamus                    | 0.945840146                 | Brain_Substantia_nigra      | 2.407647387  |              |              |                  |  |
|              | 0.008393643                           | 0.583958969                 | -0.452984297                | 0.067931522  | -0.27619979  |              |                  |  |
|              | 0.298063814                           | 2                           | 0                           | 0.998207054  |              |              |                  |  |
| PDE12        | ENSG00000174840.8                     |                             | 0.843985777                 | 1            | 1            | 0.843985777  |                  |  |
|              | Brain_Putamen_basal_ganglia           | 0.843985777                 | Brain_Putamen_basal_ganglia | 1            | 1            |              |                  |  |
|              | 1                                     | 0.196797795                 | 0.196797795                 | 0.196797795  | NA           | 1            | 0                |  |
|              | 0.998207054                           |                             |                             |              |              |              |                  |  |
| RP11-582E3.6 | ENSG00000275764.1                     |                             | 0.844000438                 | 13           | 6            | 0.201657409  |                  |  |

|              |                                |                                |                                |              |                                       |                  |              |  |
|--------------|--------------------------------|--------------------------------|--------------------------------|--------------|---------------------------------------|------------------|--------------|--|
|              | Brain_Amygdala                 | 0.90824746                     | Brain_Spinal_cord_cervical_c-1 | 9.011877922  |                                       |                  |              |  |
|              | 0.027142648                    | 0.414485181                    | -1.27684377                    | -0.11524938  | -0.644597222                          |                  |              |  |
|              | 0.339804832                    | 6                              | 0                              | 0.998207054  |                                       |                  |              |  |
| ARTN         | ENSG00000117407.16             | 0.844100139                    | 11                             | 2            | 0.330063582                           | Brain_Amygdala   |              |  |
|              | 0.99658566                     | Brain_Putamen_basal_ganglia    | 9.815821596                    |              | 0.003185492                           |                  |              |  |
|              | 0.372315982                    | -0.04078972                    | 0.973985816                    |              | 0.497072767                           | 0.337192668      |              |  |
|              | 2                              | 0                              | 0.998207054                    |              |                                       |                  |              |  |
| PSMA7        | ENSG00000101182.14             | 0.844166011                    | 3                              | 3            | 0.409045807                           |                  |              |  |
|              | Brain_Cerebellar_Hemisphere    | 0.846444658                    |                                |              | Brain_Frontal_Cortex_BA9              |                  |              |  |
|              | 1.578510189                    | -0.43041688                    | 0.43041688                     | -0.825573969 | -0.193656751                          |                  |              |  |
|              | -0.455551213                   | 0.329543075                    | 3                              | 0            | 0.998207054                           |                  |              |  |
| PI4K2B       | ENSG00000038210.12             | 0.844169456                    | 3                              | 2            | 0.577313499                           |                  |              |  |
|              | Brain_Frontal_Cortex_BA9       | 0.782509729                    |                                |              | Brain_Cerebellum                      | 2.015505021      |              |  |
|              | 0.056252664                    | 0.928242315                    | -0.557313141                   |              | -0.276049914                          | -0.381558777     |              |  |
|              | 0.153225564                    | 2                              | 0                              | 0.998207054  |                                       |                  |              |  |
| BEND6        | ENSG00000151917.17             | 0.844185833                    | 13                             | 2            | 0.472859444                           |                  |              |  |
|              | Brain_Putamen_basal_ganglia    | 0.906233676                    |                                |              | Brain_Cerebellar_Hemisphere           |                  |              |  |
|              | 11.81778442                    | 0.000275447                    | 0.770523349                    |              | 0.117790476                           | 0.717834329      |              |  |
|              | 0.454648285                    | 0.192096107                    | 2                              | 0            | 0.998207054                           |                  |              |  |
| RIOK3        | ENSG00000101782.14             | 0.844313414                    | 2                              | 2            | 0.565507132                           | Brain_Cerebellum |              |  |
|              | 0.867400379                    | Brain_Spinal_cord_cervical_c-1 | 1.134338323                    |              | 0.865661677                           |                  |              |  |
|              | 0.865661677                    | 0.166961453                    | 0.574680893                    |              | 0.370821173                           | 0.288301181      |              |  |
|              | 2                              | 0                              | 0.998207054                    |              |                                       |                  |              |  |
| MPI          | ENSG00000178802.17             | 0.844665094                    | 10                             | 2            | 0.376184273                           |                  |              |  |
|              | Brain_Caudate_basal_ganglia    | 0.888837149                    |                                |              | Brain_Cortex                          | 9.161189643      |              |  |
|              | 0.000548238                    | 0.314146624                    | 0.139775781                    |              | 0.884948751                           | 0.483617864      |              |  |
|              | 0.270490862                    | 2                              | 0                              | 0.998207054  |                                       |                  |              |  |
| ACTN4        | ENSG00000130402.11             | 0.844668587                    | 1                              | 1            | 0.844668587                           | Brain_Cortex     |              |  |
|              | 0.844668587                    | Brain_Cortex                   | 1                              | 1            | 1                                     | -0.195925361     | -0.195925361 |  |
|              | -0.195925361                   | NA                             | 1                              | 0            | 0.998207054                           |                  |              |  |
| CDH1         | ENSG00000039068.18             | 0.844795999                    | 5                              | 3            | 0.307926292                           |                  |              |  |
|              | Brain_Substantia_nigra         | 0.759282846                    |                                |              | Brain_Nucleus_accumbens_basal_ganglia |                  |              |  |
|              | 4.304758578                    | 0.028408419                    | 0.19371641                     | 0.306422675  | 1.019582956                           |                  |              |  |
|              | 0.621334208                    | 0.282953757                    | 3                              | 0            | 0.998207054                           |                  |              |  |
| CLIC5        | ENSG00000112782.15             | 0.844810556                    | 2                              | 2            | 0.596250039                           | Brain_Cortex     |              |  |
|              | 0.861420858                    | Brain_Frontal_Cortex_BA9       | 1.66489606                     | 0.33510394   | 0.33510394                            |                  |              |  |
|              | 0.174565756                    | 0.529800816                    | 0.352183286                    |              | 0.25118912                            | 2                | 0            |  |
|              | 0.998207054                    |                                |                                |              |                                       |                  |              |  |
| PILRA        | ENSG00000085514.15             | 0.844811544                    | 13                             | 1            | 0.709181415                           |                  |              |  |
|              | Brain_Putamen_basal_ganglia    | 0.922306518                    |                                |              | Brain_Hippocampus                     | 12.83208881      |              |  |
|              | 2.74E-06                       | 12.83208881                    | -0.3729557                     | -0.097528732 | -0.194917835                          | 0.07680471       |              |  |
|              | 1                              | 0                              | 0.998207054                    |              |                                       |                  |              |  |
| WDR54        | ENSG00000005448.16             | 0.845131331                    | 1                              | 1            | 0.845131331                           |                  |              |  |
|              | Brain_Substantia_nigra         | 0.845131331                    |                                |              | Brain_Substantia_nigra                | 1                | 1            |  |
|              | 1                              | -0.195334192                   | -0.195334192                   | -0.195334192 | NA                                    | 1                | 0            |  |
|              | 0.998207054                    |                                |                                |              |                                       |                  |              |  |
| HEXB         | ENSG00000049860.13             | 0.845199065                    | 7                              | 4            | 0.356811353                           |                  |              |  |
|              | Brain_Caudate_basal_ganglia    | 0.94653478                     | Brain_Cerebellar_Hemisphere    | 5.325377929  |                                       |                  |              |  |
|              | 0.001972333                    | 0.235183958                    | -0.148279491                   | 0.921458011  | 0.310834512                           |                  |              |  |
|              | 0.394577857                    | 4                              | 0                              | 0.998207054  |                                       |                  |              |  |
| SNHG18       | ENSG00000250786.1              | 0.845274609                    | 13                             | 6            | 0.196477168                           |                  |              |  |
|              | Brain_Putamen_basal_ganglia    | 0.987634811                    |                                |              | Brain_Substantia_nigra                |                  |              |  |
|              | 7.997419376                    | 0.050263274                    | 0.365215623                    |              | -0.717297784                          | 1.291653498      |              |  |
|              | 0.372165651                    | 0.518020666                    | 6                              | 0            | 0.998207054                           |                  |              |  |
| MAP4K4       | ENSG00000071054.16             | 0.845339117                    | 2                              | 2            | 0.580272113                           |                  |              |  |
|              | Brain_Spinal_cord_cervical_c-1 | 0.850037254                    |                                |              | Brain_Hippocampus                     |                  |              |  |
|              | 1.594718739                    | 0.405281261                    | 0.405281261                    |              | -0.552987291                          | -0.189070893     |              |  |
|              | -0.371029092                   | 0.257327753                    | 2                              | 0            | 0.998207054                           |                  |              |  |
| RP11-710E1.2 | ENSG00000272856.1              | 0.845382111                    | 5                              | 5            | 0.320504857                           |                  |              |  |
|              | Brain_Caudate_basal_ganglia    | 0.907222432                    |                                |              | Brain_Putamen_basal_ganglia           |                  |              |  |
|              | 1.971487386                    | 0.184520654                    | 0.184520654                    |              | -0.906129077                          | 0.993420949      |              |  |
|              | -0.029497518                   | 0.736202213                    | 5                              | 0            | 0.998207054                           |                  |              |  |

|               |                                       |                                      |                             |              |                                       |                  |
|---------------|---------------------------------------|--------------------------------------|-----------------------------|--------------|---------------------------------------|------------------|
| YPEL2         | ENSG00000175155.8                     | 0.845420128                          | 4                           | 4            | 0.32161004                            |                  |
|               | Brain_Substantia_nigra                | 0.960267688                          |                             |              | Brain_Caudate_basal_ganglia           |                  |
|               | 1.754825903                           | 0.288722641                          | 0.288722641                 |              | -0.38936998                           | 0.991154713      |
|               | 0.090724833                           | 0.628994946                          | 4                           | 0            | 0.998207054                           |                  |
| GCNT2         | ENSG00000111846.16                    | 0.845426289                          | 1                           | 1            | 0.845426289                           |                  |
|               | Brain_Cerebellar_Hemisphere           | 0.845426289                          |                             |              | Brain_Cerebellar_Hemisphere1          | 1                |
|               | 1                                     | 0.19495741                           | 0.19495741                  | NA           | 1                                     | 0.998207054      |
| RPS6KL1       | ENSG00000198208.11                    | 0.845479151                          | 3                           | 3            | 0.38740795                            | Brain_Cortex     |
|               | 0.597570325                           | Brain_Cerebellar_Hemisphere          | 2.599718057                 |              | 0.1548921                             | 0.1548921        |
|               | -0.864327605                          | -0.527897723                         | -0.64676874                 |              | 0.18868157                            | 3                |
|               | 0.998207054                           |                                      |                             |              | 0                                     |                  |
| STRA8         | ENSG00000146857.3                     | 0.845525298                          | 2                           | 2            | 0.567718012                           |                  |
|               | Brain_Nucleus_accumbens_basal_ganglia | 0.870952983                          |                             |              | Brain_Caudate_basal_ganglia           |                  |
|               | 1.118722481                           | 0.881277519                          | 0.881277519                 |              | -0.571415519                          | -0.162448116     |
|               | -0.366931817                          | 0.289183624                          | 2                           | 0            | 0.998207054                           |                  |
| CCDC142       | ENSG00000135637.13                    | 0.845635544                          | 2                           | 2            | 0.580540328                           |                  |
|               | Brain_Amygdala                        | 0.881622677                          |                             |              | Brain_Caudate_basal_ganglia           | 1.043516117      |
|               | 0.956483883                           | 0.956483883                          | -0.552595641                |              | 0.1489125                             | -0.20184157      |
|               | 0.496041164                           | 2                                    | 0                           |              | 0.998207054                           |                  |
| TSPEAR        | ENSG00000175894.14                    | 0.845646168                          | 3                           | 3            | 0.553624936                           |                  |
|               | Brain_Caudate_basal_ganglia           | 0.754026488                          |                             |              | Brain_Nucleus_accumbens_basal_ganglia |                  |
|               | 1.074356413                           | 0.92513487                           | 0.92513487                  | -0.592337012 | 0.31333457                            | -0.281719878     |
|               | 0.51549849                            | 3                                    | 0                           |              | 0.998207054                           |                  |
| PRLR          | ENSG00000113494.16                    | 0.84572315                           | 4                           | 4            | 0.452263547                           |                  |
|               | Brain_Nucleus_accumbens_basal_ganglia | 0.942507102                          |                             |              | Brain_Frontal_Cortex_BA9              |                  |
|               | 2.079010873                           | 0.389270061                          | 0.389270061                 |              | -0.751646708                          | 0.232616736      |
|               | -0.075166067                          | 0.455731206                          | 4                           | 0            | 0.998207054                           |                  |
| PLEKHA8       | ENSG00000106086.18                    | 0.845744692                          | 2                           | 1            | 0.825365156                           |                  |
|               | Brain_Cerebellum                      | 0.87006617                           | Brain_Cerebellar_Hemisphere | 1.950175826  |                                       |                  |
|               | 0.049824174                           | 1.950175826                          | -0.220649756                |              | -0.163574437                          | -0.192112096     |
|               | 0.040358346                           | 1                                    | 0                           |              | 0.998207054                           |                  |
| C1QTNF6       | ENSG00000133466.13                    | 0.845763125                          | 13                          | 3            | 0.494965401                           |                  |
|               | Brain_Hypothalamus                    | 0.929033835                          |                             |              | Brain_Cerebellum                      | 11.43101697      |
|               | 0.002981935                           | 0.403442944                          | -0.434831743                |              | 0.682432674                           | 0.185233895      |
|               | 0.333100258                           | 3                                    | 0                           |              | 0.998207054                           |                  |
| CADM2         | ENSG00000175161.13                    | 0.845876146                          | 9                           | 7            | 0.301285842                           |                  |
|               | Brain_Cerebellar_Hemisphere           | 0.921202383                          |                             |              | Brain_Spinal_cord_cervical_c-1        |                  |
|               | 5.020162855                           | 0.020482518                          | 0.202297606                 |              | -0.50924505                           | 1.03367988       |
|               | 0.377851379                           | 0.485137635                          | 7                           | 0            | 0.998207054                           |                  |
| HHATL         | ENSG0000010282.14                     | 0.845951073                          | 13                          | 4            | 0.095930542                           | Brain_Amygdala   |
|               | 0.774936575                           | Brain_Anterior_cingulate_cortex_BA24 | 10.14051207                 |              |                                       |                  |
|               | 0.001888918                           | 0.490079802                          | -0.285923681                |              | 1.664910858                           | 0.776679119      |
|               | 0.456100243                           | 4                                    | 0                           |              | 0.998207054                           |                  |
| MRPL19        | ENSG00000115364.13                    | 0.845975765                          | 12                          | 2            | 0.452011446                           |                  |
|               | Brain_Spinal_cord_cervical_c-1        | 0.897350123                          |                             |              | Brain_Frontal_Cortex_BA9              |                  |
|               | 11.02932478                           | 2.30E-06                             | 0.656135508                 |              | -0.752065873                          | 0.566161909      |
|               | -0.302084357                          | 0.310972241                          | 2                           | 0            | 0.998207054                           |                  |
| SYNM          | ENSG00000182253.14                    | 0.846031094                          | 7                           | 6            | 0.489180544                           | Brain_Cerebellum |
|               | 0.947984976                           | Brain_Amygdala                       | 3.490892882                 |              | 0.101752409                           | 0.21844675       |
|               | -0.573681785                          | 0.691612764                          | 0.073175236                 |              | 0.542829152                           | 6                |
|               | 0.998207054                           |                                      |                             |              | 0                                     |                  |
| RP1-273N12.4  | ENSG00000283010.1                     | 0.846044842                          | 1                           | 1            | 0.846044842                           |                  |
|               | Brain_Anterior_cingulate_cortex_BA24  | 0.846044842                          |                             |              |                                       |                  |
|               | Brain_Anterior_cingulate_cortex_BA24  | 1                                    | 1                           | 1            | -0.194167357                          |                  |
|               | -0.194167357                          | -0.194167357                         | NA                          | 1            | 0                                     | 0.998207054      |
| HUS1          | ENSG00000136273.11                    | 0.846227268                          | 2                           | 2            | 0.623525373                           |                  |
|               | Brain_Hippocampus                     | 0.771634662                          |                             |              | Brain_Cortex                          | 1.02968754       |
|               | 0.97031246                            | -0.490860137                         | 0.290237352                 |              | -0.100311392                          | 0.97031246       |
|               | 0                                     | 0.998207054                          |                             |              | 0.552319332                           | 2                |
| RP11-210M15.2 | ENSG00000259495.2                     | 0.846249612                          | 13                          | 2            | 0.336169346                           |                  |
|               | Brain_Nucleus_accumbens_basal_ganglia | 0.977693906                          |                             |              | Brain_Cerebellum                      |                  |
|               | 11.38746305                           | 4.36E-05                             | 0.397039772                 |              | -0.96176165                           | 0.7890042        |

|              |                                       |                             |              |              |                                       |                    |             |   |  |
|--------------|---------------------------------------|-----------------------------|--------------|--------------|---------------------------------------|--------------------|-------------|---|--|
|              | -0.03866305                           | 0.402413294                 | 2            | 0            | 0.998207054                           |                    |             |   |  |
| ZNF670       | ENSG00000277462.1                     | 0.846287138                 | 9            | 6            | 0.337542326                           |                    |             |   |  |
|              | Brain_Putamen_basal_ganglia           | 0.999783733                 |              |              | Brain_Cerebellar_Hemisphere           |                    |             |   |  |
|              | 5.687920622                           | 0.056375016                 | 0.201141286  |              | -0.342584183                          | 0.959032593        |             |   |  |
|              | 0.314737095                           | 0.429630329                 | 6            | 0            | 0.998207054                           |                    |             |   |  |
| DMPK         | ENSG00000104936.17                    | 0.846360228                 | 3            | 3            | 0.380471162                           |                    |             |   |  |
|              | Brain_Anterior_cingulate_cortex_BA24  | 0.809600983                 |              |              | Brain_Cerebellum                      |                    |             |   |  |
|              | 2.272898784                           | 0.149744422                 | 0.149744422  |              | -0.877028493                          | -0.240940822       |             |   |  |
|              | -0.57611863                           | 0.319425422                 | 3            | 0            | 0.998207054                           |                    |             |   |  |
| RP11-263K4.3 | ENSG00000257431.1                     | 0.846379926                 | 13           | 3            | 0.535281124                           |                    |             |   |  |
|              | Brain_Anterior_cingulate_cortex_BA24  | 0.987916191                 |              |              | Brain_Cerebellar_Hemisphere           |                    |             |   |  |
|              | 10.78809407                           | 0.017630594                 | 0.364522411  |              | -0.619964553                          | 0.319461484        |             |   |  |
|              | -0.110551617                          | 0.324607174                 | 3            | 0            | 0.998207054                           |                    |             |   |  |
| TMEM131      | ENSG00000075568.16                    | 0.846401643                 | 1            | 1            | 0.846401643                           |                    |             |   |  |
|              | Brain_Cerebellar_Hemisphere           | 0.846401643                 |              |              | Brain_Cerebellar_Hemisphere1          | 1                  | 1           |   |  |
|              | 1                                     | 0.193711683                 | 0.193711683  | 0.193711683  | NA                                    | 1                  | 0           |   |  |
|              | 0.998207054                           |                             |              |              |                                       |                    |             |   |  |
| KCTD16       | ENSG00000183775.10                    | 0.846472572                 | 1            | 1            | 0.846472572                           |                    |             |   |  |
|              | Brain_Hypothalamus                    | 0.846472572                 |              |              | Brain_Hypothalamus                    | 1                  | 1           | 1 |  |
|              | 0.193621105                           | 0.193621105                 | 0.193621105  | NA           | 1                                     | 0                  | 0.998207054 |   |  |
| ATP5A1       | ENSG00000152234.15                    | 0.846553496                 | 1            | 1            | 0.846553496                           |                    |             |   |  |
|              | Brain_Substantia_nigra                | 0.846553496                 |              |              | Brain_Substantia_nigra                | 1                  | 1           |   |  |
|              | 1                                     | -0.193517763                | -0.193517763 | -0.193517763 | NA                                    | 1                  | 0           |   |  |
|              | 0.998207054                           |                             |              |              |                                       |                    |             |   |  |
| POU2AF1      | ENSG00000110777.11                    | 0.846577164                 | 2            | 2            | 0.668847075                           |                    |             |   |  |
|              | Brain_Anterior_cingulate_cortex_BA24  | 0.726470451                 |              |              |                                       |                    |             |   |  |
|              | Brain_Nucleus_accumbens_basal_ganglia | 1.08481195                  | 0.91518805   | 0.91518805   |                                       |                    |             |   |  |
|              | -0.427730866                          | -0.349824447                | -0.388777656 | 0.055088157  | 2                                     | 0                  |             |   |  |
|              | 0.998207054                           |                             |              |              |                                       |                    |             |   |  |
| PSPH         | ENSG00000146733.13                    | 0.84659567                  | 13           | 1            | 0.578889323                           | Brain_Hypothalamus |             |   |  |
|              | 0.99635211                            | Brain_Putamen_basal_ganglia | 12.07151787  |              | 0.000969203                           |                    |             |   |  |
|              | 12.07151787                           | -0.555007803                | 0.500404624  |              | -0.188457702                          | 0.304240178        |             |   |  |
|              | 1                                     | 0                           | 0.998207054  |              |                                       |                    |             |   |  |
| CTB-35F21.1  | ENSG00000249526.1                     | 0.84671501                  | 1            | 1            | 0.84671501                            |                    |             |   |  |
|              | Brain_Hippocampus                     | 0.84671501                  |              |              | Brain_Hippocampus                     | 1                  | 1           | 1 |  |
|              | -0.193311513                          | -0.193311513                | -0.193311513 | NA           | 1                                     | 0                  | 0.998207054 |   |  |
| HNRNPH1      | ENSG00000169045.17                    | 0.846767659                 | 4            | 4            | 0.43781009                            |                    |             |   |  |
|              | Brain_Anterior_cingulate_cortex_BA24  | 0.929802853                 |              |              | Brain_Cerebellum                      |                    |             |   |  |
|              | 2.047447646                           | 0.299913346                 | 0.299913346  |              | -0.453092533                          | 0.775896515        |             |   |  |
|              | 0.023295867                           | 0.551917753                 | 4            | 0            | 0.998207054                           |                    |             |   |  |
| NARFL        | ENSG00000103245.13                    | 0.846829195                 | 12           | 2            | 0.448404594                           |                    |             |   |  |
|              | Brain_Anterior_cingulate_cortex_BA24  | 0.9110829                   |              |              | Brain_Substantia_nigra                |                    |             |   |  |
|              | 10.56034407                           | 7.59E-05                    | 0.611948093  |              | -0.111672733                          | 0.758077491        |             |   |  |
|              | 0.309581635                           | 0.212009656                 | 2            | 0            | 0.998207054                           |                    |             |   |  |
| ANKS1A       | ENSG00000064999.13                    | 0.846847377                 | 5            | 3            | 0.548437745                           |                    |             |   |  |
|              | Brain_Amygdala                        | 0.976785809                 |              |              | Brain_Nucleus_accumbens_basal_ganglia |                    |             |   |  |
|              | 4.476306506                           | 0.035221673                 | 0.16114699   | 0.02909878   | 0.600102773                           |                    |             |   |  |
|              | 0.375363367                           | 0.223384234                 | 3            | 0            | 0.998207054                           |                    |             |   |  |
| PCMTD2       | ENSG00000203880.11                    | 0.846925303                 | 11           | 7            | 0.211595329                           |                    |             |   |  |
|              | Brain_Caudate_basal_ganglia           | 0.927461206                 |              |              | Brain_Frontal_Cortex_BA9              |                    |             |   |  |
|              | 5.696322715                           | 0.017246169                 | 0.346057231  |              | -0.155675244                          | 1.249190711        |             |   |  |
|              | 0.661604185                           | 0.409296694                 | 7            | 0            | 0.998207054                           |                    |             |   |  |
| SH3BP5L      | ENSG00000175137.10                    | 0.847191156                 | 6            | 6            | 0.285131015                           |                    |             |   |  |
|              | Brain_Cortex                          | 0.981922297                 |              |              | Brain_Anterior_cingulate_cortex_BA24  |                    |             |   |  |
|              | 2.244564566                           | 0.153180648                 | 0.153180648  |              | -1.068863869                          | 0.02265898         |             |   |  |
|              | -0.602772379                          | 0.408418608                 | 6            | 0            | 0.998207054                           |                    |             |   |  |
| LINC01535    | ENSG00000226686.7                     | 0.847215071                 | 13           | 1            | 0.61983879                            |                    |             |   |  |
|              | Brain_Caudate_basal_ganglia           | 0.970925691                 |              |              | Brain_Spinal_cord_cervical_c-1        |                    |             |   |  |
|              | 12.70755285                           | 0.000100163                 | 12.70755285  |              | -0.043898457                          | 0.496078837        |             |   |  |
|              | 0.191036565                           | 0.1404125                   | 1            | 0            | 0.998207054                           |                    |             |   |  |
| TTC6         | ENSG00000139865.16                    | 0.847223273                 | 1            | 1            | 0.847223273                           |                    |             |   |  |
|              | Brain_Hippocampus                     | 0.847223273                 |              |              | Brain_Hippocampus                     | 1                  | 1           | 1 |  |

|               |                                       |                             |                                       |              |             |             |                             |
|---------------|---------------------------------------|-----------------------------|---------------------------------------|--------------|-------------|-------------|-----------------------------|
|               | 0.192662526                           | 0.192662526                 | 0.192662526                           | NA           | 1           | 0           | 0.998207054                 |
| ST6GALNAC6    | ENSG00000160408.14                    | 0.847226624                 | 2                                     | 2            |             |             | 0.574283018                 |
|               | Brain_Nucleus_accumbens_basal_ganglia | 0.839510884                 |                                       |              |             |             | Brain_Putamen_basal_ganglia |
|               | 1.137438432                           | 0.862561568                 | 0.862561568                           | -0.202519156 |             |             | 0.561754909                 |
|               | 0.179617876                           | 0.540423374                 | 2                                     | 0            | 0.998207054 |             |                             |
| CLCC1         | ENSG00000121940.15                    | 0.847342233                 | 3                                     | 3            |             |             | 0.425633407                 |
|               | Brain_Anterior_cingulate_cortex_BA24  | 0.591696983                 |                                       |              |             |             |                             |
|               | Brain_Nucleus_accumbens_basal_ganglia | 1.953855278                 |                                       |              |             |             | 0.168480922                 |
|               | 0.168480922                           | -0.796686016                | -0.536378506                          | -0.640339458 |             |             | 0.137833917                 |
|               | 3                                     | 0                           | 0.998207054                           |              |             |             |                             |
| DHRS7         | ENSG00000100612.13                    | 0.84745416                  | 9                                     | 4            | 0.576777137 |             | Brain_Amygdala              |
|               | 0.979725666                           | Brain_Cerebellar_Hemisphere | 7.370681265                           |              |             |             | 0.000471529                 |
|               | 0.371177822                           | -0.379049952                | 0.558098482                           | 0.041951     |             |             | 0.263245044                 |
|               | 0                                     | 0.998207054                 |                                       |              |             |             | 4                           |
| SLC25A4       | ENSG00000151729.10                    | 0.847504271                 | 1                                     | 1            | 0.847504271 |             |                             |
|               | Brain_Cerebellum                      | 0.847504271                 | Brain_Cerebellum                      | 1            | 1           | 1           | 0.192303763                 |
|               | 0.192303763                           | 0.192303763                 | NA                                    | 1            | 0           | 0.998207054 |                             |
| RGP1          | ENSG00000107185.9                     | 0.847508835                 | 1                                     | 1            | 0.847508835 |             |                             |
|               | Brain_Hippocampus                     | 0.847508835                 | Brain_Hippocampus                     | 1            | 1           | 1           |                             |
|               | 0.192297937                           | 0.192297937                 | 0.192297937                           | NA           | 1           | 0           | 0.998207054                 |
| RP11-890B15.2 | ENSG00000254842.6                     | 0.847527657                 | 2                                     | 2            |             |             | 0.571539862                 |
|               | Brain_Frontal_Cortex_BA9              | 0.918967402                 | Brain_Cerebellum                      | 1.003448272  |             |             |                             |
|               | 0.996551728                           | 0.996551728                 | 0.101734519                           | 0.565785121  |             |             | 0.33375982                  |
|               | 0.328133328                           | 2                           | 0                                     | 0.998207054  |             |             |                             |
| CAD           | ENSG00000084774.13                    | 0.847571226                 | 3                                     | 3            | 0.426680036 |             |                             |
|               | Brain_Hypothalamus                    | 0.705347051                 | Brain_Nucleus_accumbens_basal_ganglia |              |             |             |                             |
|               | 2.292354146                           | 0.198194462                 | 0.198194462                           | 0.378112462  |             |             | 0.794885627                 |
|               | 0.51870149                            | 0.239195512                 | 3                                     | 0            | 0.998207054 |             |                             |
| SLC7A4        | ENSG00000099960.12                    | 0.847623016                 | 2                                     | 2            | 0.673386065 |             |                             |
|               | Brain_Cortex                          | 0.704189732                 | Brain_Hypothalamus                    | 1.026819365  |             |             |                             |
|               | 0.973180635                           | 0.973180635                 | -0.421505405                          | -0.37967089  |             |             | -0.400588147                |
|               | 0.029581469                           | 2                           | 0                                     | 0.998207054  |             |             |                             |
| DAP3          | ENSG00000132676.15                    | 0.84767524                  | 1                                     | 1            | 0.84767524  |             | Brain_Cerebellar_Hemisphere |
|               | 0.84767524                            | Brain_Cerebellar_Hemisphere | 1                                     | 1            | 1           |             | -0.192085491                |
|               | -0.192085491                          | -0.192085491                | NA                                    | 1            | 0           | 0.998207054 |                             |
| GLS           | ENSG00000115419.12                    | 0.847874579                 | 2                                     | 2            | 0.627870059 |             |                             |
|               | Brain_Hypothalamus                    | 0.816985884                 | Brain_Cerebellum                      | 1.151386423  |             |             |                             |
|               | 0.848613577                           | 0.848613577                 | -0.231423405                          | 0.484726933  |             |             | 0.126651764                 |
|               | 0.50639476                            | 2                           | 0                                     | 0.998207054  |             |             |                             |
| CCDC115       | ENSG00000136710.9                     | 0.847995608                 | 2                                     | 2            | 0.586127481 |             |                             |
|               | Brain_Cortex                          | 0.905143407                 | Brain_Nucleus_accumbens_basal_ganglia |              |             |             |                             |
|               | 1.507738058                           | 0.492261942                 | 0.492261942                           | -0.544456346 |             |             | -0.11916655                 |
|               | -0.331811448                          | 0.300725299                 | 2                                     | 0            | 0.998207054 |             |                             |
| CH17-360D5.1  | ENSG00000264717.5                     | 0.848004462                 | 2                                     | 2            | 0.599626293 |             |                             |
|               | Brain_Cerebellar_Hemisphere           | 0.764389669                 | Brain_Cerebellum                      | 1.131398418  |             |             |                             |
|               | 0.868601582                           | 0.868601582                 | -0.524937998                          | -0.299721407 |             |             | -0.412329703                |
|               | 0.159252179                           | 2                           | 0                                     | 0.998207054  |             |             |                             |
| FAM234B       | ENSG00000084444.13                    | 0.848178388                 | 3                                     | 3            | 0.405557395 |             |                             |
|               | Brain_Frontal_Cortex_BA9              | 0.733587289                 | Brain_Cortex                          | 1.886842251  |             |             |                             |
|               | 0.358960632                           | 0.358960632                 | -0.831737029                          | -0.340357541 |             |             | -0.581353141                |
|               | 0.245824237                           | 3                           | 0                                     | 0.998207054  |             |             |                             |
| RP11-109A6.5  | ENSG00000283141.1                     | 0.848181961                 | 5                                     | 5            | 0.26772276  |             |                             |
|               | Brain_Cortex                          | 0.767812483                 | Brain_Amygdala                        | 1.634574248  |             |             | 0.471964142                 |
|               | 0.471964142                           | -1.10832204                 | 0.295237466                           | -0.503702762 |             |             | 0.515083178                 |
|               | 5                                     | 0                           | 0.998207054                           |              |             |             |                             |
| PCP4L1        | ENSG00000248485.1                     | 0.84819443                  | 1                                     | 1            | 0.84819443  |             |                             |
|               | Brain_Putamen_basal_ganglia           | 0.84819443                  | Brain_Putamen_basal_ganglia           | 1            | 1           | 1           |                             |
|               | -0.191422709                          | -0.191422709                | -0.191422709                          | NA           | 1           | 0           | 0.998207054                 |
| GLRX3         | ENSG00000108010.11                    | 0.84820216                  | 3                                     | 3            | 0.421476353 |             |                             |
|               | Brain_Nucleus_accumbens_basal_ganglia | 0.956945699                 | Brain_Cerebellar_Hemisphere           |              |             |             |                             |
|               | 1.601734613                           | 0.571562217                 | 0.571562217                           | 0.053986778  |             |             | 0.803862563                 |
|               | 0.427305345                           | 0.374948383                 | 3                                     | 0            | 0.998207054 |             |                             |

|              |                                       |                             |              |             |                                      |              |            |                    |
|--------------|---------------------------------------|-----------------------------|--------------|-------------|--------------------------------------|--------------|------------|--------------------|
| AREL1        | ENSG00000119682.16                    | 0.848245592                 | 6            | 4           | 0.335268659                          |              |            |                    |
|              | Brain_Hypothalamus                    | 0.938916954                 |              |             | Brain_Frontal_Cortex_BA9             | 3.982167428  |            |                    |
|              | 0.055405769                           | 0.24618169                  | -0.963555833 |             | 0.429394417                          | 0.041797026  |            |                    |
|              | 0.509939494                           | 4                           | 0            | 0.998207054 |                                      |              |            |                    |
| ANAPC16      | ENSG00000166295.8                     | 0.848273127                 | 1            | 1           | 0.848273127                          |              |            |                    |
|              | Brain_Cortex                          | 0.848273127                 |              |             | Brain_Cortex                         | 1            | 1          | -0.191322254       |
|              | -0.191322254                          | -0.191322254                | NA           | 1           | 0                                    | 0.998207054  |            |                    |
| C17orf105    | ENSG00000231256.7                     | 0.848284066                 | 2            | 2           | 0.569452775                          |              |            |                    |
|              | Brain_Cerebellar_Hemisphere           | 0.694728201                 |              |             | Brain_Cerebellum                     | 1.772521804  |            |                    |
|              | 0.227478196                           | 0.227478196                 | 0.39244668   |             | 0.568857609                          | 0.480652145  |            |                    |
|              | 0.124741364                           | 2                           | 0            | 0.998207054 |                                      |              |            |                    |
| C14orf79     | ENSG00000140104.13                    | 0.848373123                 | 9            | 7           | 0.131934232                          |              |            |                    |
|              | Brain_Cerebellar_Hemisphere           | 0.984784138                 |              |             | Brain_Anterior_cingulate_cortex_BA24 |              |            |                    |
|              | 4.030458464                           | 0.022999018                 | 0.193779732  |             | -1.506518068                         | 0.079467504  |            |                    |
|              | -0.531978182                          | 0.593610491                 | 7            | 0           | 0.998207054                          |              |            |                    |
| ULK4         | ENSG00000168038.10                    | 0.84839524                  | 13           | 1           | 0.541643291                          |              |            | Brain_Hypothalamus |
|              | 0.933627159                           | Brain_Cortex                | 12.49710552  |             | 0.000137695                          | 12.49710552  |            |                    |
|              | -0.610329905                          | 0.291597951                 | -0.188421188 |             | 0.275133761                          | 1            | 0          |                    |
|              | 0.998207054                           |                             |              |             |                                      |              |            |                    |
| SLC8A2       | ENSG00000118160.13                    | 0.848500052                 | 1            | 1           | 0.848500052                          |              |            |                    |
|              | Brain_Cortex                          | 0.848500052                 |              |             | Brain_Cortex                         | 1            | 1          | -0.1910326         |
|              | -0.1910326                            | -0.1910326                  | NA           | 1           | 0                                    | 0.998207054  |            |                    |
| RP1-137D17.1 | ENSG00000226194.5                     | 0.848510173                 | 10           | 5           | 0.393218135                          |              |            |                    |
|              | Brain_Hippocampus                     | 0.877112194                 |              |             | Brain_Caudate_basal_ganglia          | 6.685677921  |            |                    |
|              | 0.01635716                            | 0.234203742                 | -0.853795812 |             | 0.528537756                          | -0.184094251 |            |                    |
|              | 0.471803102                           | 5                           | 0            | 0.998207054 |                                      |              |            |                    |
| NOV          | ENSG00000136999.4                     | 0.848638958                 | 2            | 1           | 0.790830401                          |              |            |                    |
|              | Brain_Cerebellar_Hemisphere           | 0.909149201                 |              |             | Brain_Cerebellum                     | 1.975278977  |            |                    |
|              | 0.024721023                           | 1.975278977                 | -0.265232447 |             | -0.114111759                         | -0.189672103 |            |                    |
|              | 0.106858463                           | 1                           | 0            | 0.998207054 |                                      |              |            |                    |
| CTF1         | ENSG00000150281.6                     | 0.848666593                 | 1            | 1           | 0.848666593                          |              |            |                    |
|              | Brain_Hypothalamus                    | 0.848666593                 |              |             | Brain_Hypothalamus                   | 1            | 1          | 1                  |
|              | 0.190820033                           | 0.190820033                 | 0.190820033  |             | NA                                   | 1            | 0          | 0.998207054        |
| RBMS2        | ENSG00000076067.12                    | 0.848736454                 | 2            | 2           | 0.827711373                          |              |            | Brain_Cerebellum   |
|              | 0.930704751                           | Brain_Cerebellar_Hemisphere | 1.856563597  |             | 0.143436403                          |              |            |                    |
|              | 0.143436403                           | -0.217637745                | 0.086958184  |             | -0.06533978                          | 0.215381847  |            |                    |
|              | 2                                     | 0                           | 0.998207054  |             |                                      |              |            |                    |
| DCHS1        | ENSG00000166341.7                     | 0.84896827                  | 7            | 7           | 0.177927046                          |              |            |                    |
|              | Brain_Nucleus_accumbens_basal_ganglia | 0.996145707                 |              |             | Brain_Putamen_basal_ganglia          |              |            |                    |
|              | 2.121919556                           | 0.263771541                 | 0.263771541  |             | -1.34716516                          | 1.098297281  |            |                    |
|              | -0.070237572                          | 0.719265406                 | 7            | 0           | 0.998207054                          |              |            |                    |
| B3GNT7       | ENSG00000156966.6                     | 0.848968434                 | 1            | 1           | 0.848968434                          |              |            |                    |
|              | Brain_Hypothalamus                    | 0.848968434                 |              |             | Brain_Hypothalamus                   | 1            | 1          | 1                  |
|              | -0.190434796                          | -0.190434796                | -0.190434796 |             | NA                                   | 1            | 0          | 0.998207054        |
| MRPL55       | ENSG00000162910.18                    | 0.849076722                 | 6            | 3           | 0.396689166                          |              |            |                    |
|              | Brain_Spinal_cord_cervical_c-1        | 0.705540814                 |              |             | Brain_Cortex                         | 4.823287843  |            |                    |
|              | 0.013080396                           | 0.191802413                 | -0.847549039 |             | -0.377851633                         | -0.57112962  |            |                    |
|              | 0.203261855                           | 3                           | 0            | 0.998207054 |                                      |              |            |                    |
| C1orf228     | ENSG00000198520.10                    | 0.849122051                 | 8            | 3           | 0.449718924                          |              |            |                    |
|              | Brain_Anterior_cingulate_cortex_BA24  | 0.995625037                 |              |             | Brain_Hippocampus                    |              |            |                    |
|              | 6.74436078                            | 0.025393661                 | 0.350902353  |             | -0.755883705                         | 0.443920014  |            |                    |
|              | -0.151627718                          | 0.391670094                 | 3            | 0           | 0.998207054                          |              |            |                    |
| RALY-AS1     | ENSG00000228265.5                     | 0.849231138                 | 2            | 2           | 0.625407006                          |              |            |                    |
|              | Brain_Cerebellum                      | 0.828811377                 |              |             | Brain_Frontal_Cortex_BA9             | 1.15875026   | 0.84124974 |                    |
|              | 0.84124974                            | -0.488201665                | 0.216226271  |             | -0.135987697                         | 0.49810577   | 2          | 0                  |
|              | 0.998207054                           |                             |              |             |                                      |              |            |                    |
| COMMD2       | ENSG00000114744.8                     | 0.849248513                 | 13           | 4           | 0.257398153                          |              |            |                    |
|              | Brain_Cerebellum                      | 0.914900164                 |              |             | Brain_Spinal_cord_cervical_c-1       | 10.32554716  |            |                    |
|              | 0.000913313                           | 0.548037504                 | -1.132562193 |             | 0.106859852                          | -0.889772787 |            |                    |
|              | 0.324436989                           | 4                           | 0            | 0.998207054 |                                      |              |            |                    |
| NMT1         | ENSG00000136448.11                    | 0.849447627                 | 10           | 6           | 0.062347767                          |              |            |                    |
|              | Brain_Nucleus_accumbens_basal_ganglia | 0.703878799                 |              |             | Brain_Frontal_Cortex_BA9             |              |            |                    |

|               |                                       |                             |                                       |                  |                        |
|---------------|---------------------------------------|-----------------------------|---------------------------------------|------------------|------------------------|
|               | 6.343442785                           | 0.026443487                 | 0.235535406                           | 0.380089744      | 1.863814438            |
|               | 1.002295415                           | 0.445483684                 | 6 0                                   | 0.998207054      |                        |
| RP11-286N22.8 | ENSG00000256591.5                     |                             | 0.849512819                           | 1 1              | 0.849512819            |
|               | Brain_Cerebellum                      | 0.849512819                 | Brain_Cerebellum                      | 1 1              | 0.189740071            |
|               | 0.189740071                           | 0.189740071                 | NA 1                                  | 0                | 0.998207054            |
| PAPLN         | ENSG00000100767.15                    | 0.849523466                 | 2 2                                   | 0.624928467      |                        |
|               | Brain_Anterior_cingulate_cortex_BA24  | 0.721975316                 |                                       | Brain_Cerebellum |                        |
|               | 1.128990695                           | 0.871009305                 | 0.871009305                           | -0.488877442     | 0.355820073            |
|               | -0.066528684                          | 0.597291341                 | 2 0                                   | 0.998207054      |                        |
| SLCO4C1       | ENSG00000173930.8                     | 0.849574594                 | 2 2                                   | 0.652685635      |                        |
|               | Brain_Cortex                          | 0.864397146                 | Brain_Frontal_Cortex_BA9              | 1.823033419      |                        |
|               | 0.176966581                           | 0.176966581                 | 0.170779504                           | 0.450034402      | 0.310406953            |
|               | 0.197463032                           | 2 0                         | 0.998207054                           |                  |                        |
| KIAA0753      | ENSG00000198920.9                     | 0.849600312                 | 2 2                                   | 0.587402872      |                        |
|               | Brain_Cerebellum                      | 0.762852661                 | Brain_Cerebellar_Hemisphere           | 1.766403205      |                        |
|               | 0.233596795                           | 0.233596795                 | -0.542603437                          | -0.301736868     | -0.422170152           |
|               | 0.170318384                           | 2 0                         | 0.998207054                           |                  |                        |
| RPL37         | ENSG00000145592.13                    | 0.849654592                 | 2 2                                   | 0.756900569      |                        |
|               | Brain_Hippocampus                     | 0.78312314                  | Brain_Substantia_nigra                | 1.474581702      |                        |
|               | 0.525418298                           | 0.525418298                 | -0.275251348                          | 0.309553438      | 0.017151045            |
|               | 0.41351943                            | 2 0                         | 0.998207054                           |                  |                        |
| KIR3DX1       | ENSG00000104970.10                    | 0.849669062                 | 3 3                                   | 0.479372432      |                        |
|               | Brain_Nucleus_accumbens_basal_ganglia | 0.6759138                   | Brain_Hippocampus                     |                  |                        |
|               | 1.142759579                           | 0.841603673                 | 0.841603673                           | -0.707312286     | 0.41804557             |
|               | -0.248371031                          | 0.590670881                 | 3 0                                   | 0.998207054      |                        |
| RPS12         | ENSG00000112306.7                     | 0.849721876                 | 5 5                                   | 0.26874395       |                        |
|               | Brain_Substantia_nigra                | 0.830661381                 | Brain_Nucleus_accumbens_basal_ganglia |                  |                        |
|               | 2.647804493                           | 0.338035756                 | 0.338035756                           | -1.10595973      | -0.2138534             |
|               | -0.680246242                          | 0.347887063                 | 5 0                                   | 0.998207054      |                        |
| RP11-317N8.3  | ENSG00000257272.1                     | 0.84987858                  | 1 1                                   | 0.84987858       |                        |
|               | Brain_Putamen_basal_ganglia           | 0.84987858                  | Brain_Putamen_basal_ganglia           | 1 1              | 1                      |
|               | -0.189273352                          | -0.189273352                | -0.189273352                          | NA 1             | 0                      |
|               |                                       |                             |                                       | 0.998207054      |                        |
| AK6           | ENSG00000085231.13                    | 0.850047165                 | 1 1                                   | 0.850047165      |                        |
|               | Brain_Hypothalamus                    | 0.850047165                 | Brain_Hypothalamus                    | 1 1              | 1                      |
|               | 0.189058248                           | 0.189058248                 | 0.189058248                           | NA 1             | 0                      |
|               |                                       |                             |                                       | 0.998207054      |                        |
| ABCF1         | ENSG00000204574.12                    | 0.85005204                  | 1 1                                   | 0.85005204       | Brain_Substantia_nigra |
|               | 0.85005204                            | Brain_Substantia_nigra      | 1 1                                   | 1                | 0.189052027            |
|               | 0.189052027                           | 0.189052027                 | NA 1                                  | 0                | 0.998207054            |
| GOLT1A        | ENSG00000174567.7                     | 0.850360718                 | 3 3                                   | 0.480152771      |                        |
|               | Brain_Putamen_basal_ganglia           | 0.626344786                 | Brain_Cortex                          | 1.813233753      |                        |
|               | 0.195533699                           | 0.195533699                 | -0.706056872                          | 0.486878007      | -0.287875006           |
|               | 0.671662597                           | 3 0                         | 0.998207054                           |                  |                        |
| LRRC8A        | ENSG00000136802.11                    | 0.850411228                 | 3 2                                   | 0.867592496      |                        |
|               | Brain_Caudate_basal_ganglia           | 0.932832935                 | Brain_Cerebellum                      | 2.8703643        | 1.59E-08               |
|               | 0.129635684                           | -0.084460148                | 0.166717296                           | -0.000674652     | 0.144965707            |
|               | 2 0                                   | 0.998207054                 |                                       |                  |                        |
| KCP           | ENSG00000135253.13                    | 0.850436118                 | 2 2                                   | 0.65344431       | Brain_Cerebellum       |
|               | 0.746247295                           | Brain_Cerebellar_Hemisphere | 1.057304645                           | 0.942695355      |                        |
|               | 0.942695355                           | -0.44898246                 | 0.323591538                           | -0.062695461     | 0.546292313            |
|               | 2 0                                   | 0.998207054                 |                                       |                  |                        |
| CBLL1         | ENSG00000105879.11                    | 0.850465798                 | 1 1                                   | 0.850465798      |                        |
|               | Brain_Anterior_cingulate_cortex_BA24  | 0.850465798                 |                                       |                  |                        |
|               | Brain_Anterior_cingulate_cortex_BA24  | 1 1                         | 1                                     | -0.188524135     |                        |
|               | -0.188524135                          | -0.188524135                | NA 1                                  | 0                | 0.998207054            |
| SMIM6         | ENSG00000259120.2                     | 0.850555413                 | 1 1                                   | 0.850555413      |                        |
|               | Brain_Frontal_Cortex_BA9              | 0.850555413                 | Brain_Frontal_Cortex_BA9              | 1 1              | 1                      |
|               | 1 -0.188409806                        | -0.188409806                | -0.188409806                          | NA 1             | 0                      |
|               | 0.998207054                           |                             |                                       |                  |                        |
| OLIG1         | ENSG00000184221.12                    | 0.850614032                 | 2 2                                   | 0.570794961      |                        |
|               | Brain_Frontal_Cortex_BA9              | 0.988099971                 | Brain_Hippocampus                     | 1.057032002      |                        |
|               | 0.942967998                           | 0.942967998                 | 0.014915027                           | 0.566881107      | 0.290898067            |
|               | 0.390298958                           | 2 0                         | 0.998207054                           |                  |                        |

|                                       |                                       |                                |              |             |              |                  |   |   |
|---------------------------------------|---------------------------------------|--------------------------------|--------------|-------------|--------------|------------------|---|---|
| RP11-247C2.2                          | ENSG00000248540.2                     | 0.850660367                    | 1            | 1           | 0.850660367  |                  |   |   |
| Brain_Cortex                          | 0.850660367                           | Brain_Cortex                   | 1            | 1           | 1            | 0.188275913      |   |   |
| 0.188275913                           | 0.188275913                           | NA                             | 1            | 0           | 0.998207054  |                  |   |   |
| LINC02026                             | ENSG00000214146.2                     | 0.850702874                    | 1            | 1           | 0.850702874  |                  |   |   |
| Brain_Amygdala                        | 0.850702874                           | Brain_Amygdala                 | 1            | 1           | 1            | -0.188221686     |   |   |
| -0.188221686                          | -0.188221686                          | NA                             | 1            | 0           | 0.998207054  |                  |   |   |
| AC005082.12                           | ENSG00000226816.2                     | 0.850710808                    | 8            | 2           | 0.424692917  |                  |   |   |
| Brain_Caudate_basal_ganglia           | 0.889395396                           | Brain_Putamen_basal_ganglia    |              |             |              |                  |   |   |
| 6.666526517                           | 0.005331188                           | 0.762675377                    |              |             | -0.798306035 | -0.139069289     |   |   |
| -0.428713338                          | 0.208729092                           | 2                              | 0            | 0.998207054 |              |                  |   |   |
| MICU2                                 | ENSG00000165487.13                    | 0.850724356                    | 1            | 1           | 0.850724356  |                  |   |   |
| Brain_Cerebellar_Hemisphere           | 0.850724356                           | Brain_Cerebellar_Hemisphere1   |              |             |              |                  |   | 1 |
| 1                                     | -0.188194281                          | -0.188194281                   | -0.188194281 | NA          | 1            | 0                |   |   |
| 0.998207054                           |                                       |                                |              |             |              |                  |   |   |
| KCNAB2                                | ENSG00000069424.14                    | 0.8507502                      | 3            | 3           | 0.53511416   | Brain_Cerebellum |   |   |
| 0.826789343                           | Brain_Cerebellar_Hemisphere1          | 0.078351529                    |              |             | 0.935899847  |                  |   |   |
| 0.935899847                           | -0.620218171                          | 0.592825763                    |              |             | 0.063809593  | 0.621200726      |   |   |
| 3                                     | 0                                     | 0.998207054                    |              |             |              |                  |   |   |
| FAM46B                                | ENSG00000158246.7                     | 0.850761575                    | 1            | 1           | 0.850761575  |                  |   |   |
| Brain_Amygdala                        | 0.850761575                           | Brain_Amygdala                 | 1            | 1           | 1            | -0.1881468       |   |   |
| -0.1881468                            | -0.1881468                            | NA                             | 1            | 0           | 0.998207054  |                  |   |   |
| MCOLN3                                | ENSG00000055732.12                    | 0.850848337                    | 8            | 3           | 0.594331071  |                  |   |   |
| Brain_Frontal_Cortex_BA9              | 0.975884584                           | Brain_Cortex                   |              |             | 6.606586919  |                  |   |   |
| 0.007835494                           | 0.439494608                           | -0.532570293                   |              |             | 0.529476519  | 0.073527189      |   |   |
| 0.341876481                           | 3                                     | 0                              | 0.998207054  |             |              |                  |   |   |
| LINC01963                             | ENSG00000260804.3                     | 0.850857016                    | 13           | 3           | 0.353360787  |                  |   |   |
| Brain_Substantia_nigra                | 0.990271923                           | Brain_Cortex                   |              |             | 11.48262553  |                  |   |   |
| 2.14E-16                              | 0.537199616                           | -0.928090192                   |              |             | 0.012192638  | -0.400908724     |   |   |
| 0.232100655                           | 3                                     | 0                              | 0.998207054  |             |              |                  |   |   |
| RP11-644K8.1                          | ENSG00000223734.2                     | 0.850869691                    | 1            | 1           | 0.850869691  |                  |   |   |
| Brain_Nucleus_accumbens_basal_ganglia | 0.850869691                           |                                |              |             |              |                  |   |   |
| Brain_Nucleus_accumbens_basal_ganglia | 1                                     | 1                              | 1            | 0.188008879 |              |                  |   |   |
| 0.188008879                           | 0.188008879                           | NA                             | 1            | 0           | 0.998207054  |                  |   |   |
| RP11-219G17.9                         | ENSG00000283914.1                     | 0.850994849                    | 1            | 1           | 0.850994849  |                  |   |   |
| Brain_Spinal_cord_cervical_c-1        | 0.850994849                           | Brain_Spinal_cord_cervical_c-1 |              |             |              |                  |   |   |
| 1                                     | 1                                     | 1                              | 0.187849222  | 0.187849222 | 0.187849222  | NA               | 1 | 0 |
| 0.998207054                           |                                       |                                |              |             |              |                  |   |   |
| OXTR                                  | ENSG00000180914.10                    | 0.851111195                    | 10           | 10          | 0.103882467  |                  |   |   |
| Brain_Nucleus_accumbens_basal_ganglia | 0.954517585                           |                                |              |             |              |                  |   |   |
| Brain_Spinal_cord_cervical_c-1        | 2.159332316                           | 0.233210589                    |              |             | 0.233210589  |                  |   |   |
| -1.62631592                           | 1.02950225                            | 0.02711704                     | 0.824794744  | 10          | 0            | 0.998207054      |   |   |
| IGFBP4                                | ENSG00000141753.6                     | 0.851242472                    | 2            | 2           | 0.573000515  |                  |   |   |
| Brain_Putamen_basal_ganglia           | 0.908595618                           | Brain_Cerebellum               |              |             | 1.086062968  |                  |   |   |
| 0.913937032                           | 0.913937032                           | -0.563638007                   |              |             | -0.114810132 | -0.33922407      |   |   |
| 0.317369234                           | 2                                     | 0                              | 0.998207054  |             |              |                  |   |   |
| KCNE3                                 | ENSG00000175538.10                    | 0.851327746                    | 4            | 4           | 0.519661915  | Brain_Cortex     |   |   |
| 0.882736399                           | Brain_Nucleus_accumbens_basal_ganglia | 1.791020288                    |              |             |              |                  |   |   |
| 0.277753404                           | 0.277753404                           | -0.643866641                   |              |             | 0.400342109  | 0.068237946      |   |   |
| 0.487890564                           | 4                                     | 0                              | 0.998207054  |             |              |                  |   |   |
| AGAP4                                 | ENSG00000188234.13                    | 0.851332716                    | 13           | 11          | 0.139905124  |                  |   |   |
| Brain_Nucleus_accumbens_basal_ganglia | 0.851177785                           | Brain_Frontal_Cortex_BA9       |              |             |              |                  |   |   |
| 3.536983874                           | 0.074187132                           | 0.142881883                    |              |             | -1.212988645 | 1.47614443       |   |   |
| 0.096857097                           | 0.852452346                           | 11                             | 0            | 0.998207054 |              |                  |   |   |
| SLIT2                                 | ENSG00000145147.19                    | 0.851356438                    | 3            | 3           | 0.377254845  |                  |   |   |
| Brain_Cerebellar_Hemisphere           | 0.961022767                           | Brain_Cortex                   |              |             | 1.622923707  |                  |   |   |
| 0.404890688                           | 0.404890688                           | -0.882965625                   |              |             | 0.048870163  | -0.457390613     |   |   |
| 0.471128569                           | 3                                     | 0                              | 0.998207054  |             |              |                  |   |   |
| TMCO6                                 | ENSG00000113119.12                    | 0.851414745                    | 6            | 3           | 0.395651851  |                  |   |   |
| Brain_Spinal_cord_cervical_c-1        | 0.818999236                           | Brain_Cerebellum               |              |             | 4.614958167  |                  |   |   |
| 0.008295116                           | 0.296937637                           | 0.228832333                    |              |             | 0.849412408  | 0.439182324      |   |   |
| 0.230206334                           | 3                                     | 0                              | 0.998207054  |             |              |                  |   |   |
| RP11-147L13.8                         | ENSG00000267731.1                     | 0.851422004                    | 10           | 4           | 0.295351493  |                  |   |   |



|              |                                      |                                      |                                      |                |              |                  |
|--------------|--------------------------------------|--------------------------------------|--------------------------------------|----------------|--------------|------------------|
|              | Brain_Anterior_cingulate_cortex_BA24 | 0.889621566                          |                                      | Brain_Amygdala |              |                  |
|              | 7.195353603                          | 0.012748137                          | 0.378454306                          | -0.138783079   | 1.046453954  |                  |
|              | 0.63698426                           | 0.391625128                          | 4                                    | 0              | 0.998207054  |                  |
| MAP10        | ENSG00000212916.4                    | 0.851479406                          | 1                                    | 1              | 0.851479406  |                  |
|              | Brain_Hippocampus                    | 0.851479406                          | Brain_Hippocampus                    | 1              | 1            | 1                |
|              | 0.187231145                          | 0.187231145                          | 0.187231145                          | NA             | 1            | 0                |
|              |                                      |                                      |                                      |                |              | 0.998207054      |
| LMAN1L       | ENSG00000140506.16                   | 0.851513484                          | 1                                    | 1              | 0.851513484  |                  |
|              | Brain_Caudate_basal_ganglia          | 0.851513484                          | Brain_Caudate_basal_ganglia          | 1              | 1            | 1                |
|              | 1                                    | 0.18718768                           | 0.18718768                           | NA             | 1            | 0                |
|              |                                      |                                      |                                      |                |              | 0.998207054      |
| ZNF681       | ENSG00000196172.9                    | 0.851533124                          | 11                                   | 8              | 0.051594291  |                  |
|              | Brain_Cerebellar_Hemisphere          | 0.951172879                          | Brain_Hippocampus                    | 5.440662629    |              |                  |
|              | 0.035412944                          | 0.198585232                          | -1.946503471                         | -0.061233966   | -0.767225989 |                  |
|              | 0.577587713                          | 8                                    | 0                                    | 0.998207054    |              |                  |
| ZFAND1       | ENSG00000104231.10                   | 0.851555536                          | 11                                   | 9              | 0.150323874  |                  |
|              | Brain_Frontal_Cortex_BA9             | 0.977255562                          | Brain_Anterior_cingulate_cortex_BA24 |                |              |                  |
|              | 6.287195673                          | 0.011830511                          | 0.209830305                          | -0.237966594   | 1.438388427  |                  |
|              | 0.610817775                          | 0.513682199                          | 9                                    | 0              | 0.998207054  |                  |
| SLC2A1-AS1   | ENSG00000227533.5                    | 0.851626456                          | 13                                   | 3              | 0.541845428  |                  |
|              | Brain_Amygdala                       | 0.938908322                          | Brain_Cerebellum                     | 10.95009665    | 0.005290589  |                  |
|              | 0.426247616                          | -0.272547215                         | 0.610024727                          | 0.123019064    | 0.290185395  |                  |
|              | 3                                    | 0                                    | 0.998207054                          |                |              |                  |
| ARHGAP45     | ENSG00000180448.10                   | 0.851719128                          | 2                                    | 2              | 0.580298506  |                  |
|              | Brain_Cerebellum                     | 0.690372426                          | Brain_Cerebellar_Hemisphere          | 1.84116234     | 0.15883766   |                  |
|              | 0.15883766                           | -0.552948747                         | -0.398349706                         | -0.475649227   | 0.109318031  | 2                |
|              | 0                                    | 0.998207054                          |                                      |                |              |                  |
| FCHSD2       | ENSG00000137478.14                   | 0.851858608                          | 1                                    | 1              | 0.851858608  |                  |
|              | Brain_Cerebellum                     | 0.851858608                          | Brain_Cerebellum                     | 1              | 1            | 1                |
|              | 0.186747505                          | 0.186747505                          | NA                                   | 1              | 0            | 0.998207054      |
| PALLD        | ENSG00000129116.17                   | 0.851893777                          | 3                                    | 3              | 0.515905731  | Brain_Cerebellum |
|              | 0.98668609                           | Brain_Anterior_cingulate_cortex_BA24 | 1.812228157                          | 0.192759107    |              |                  |
|              | 0.192759107                          | -0.649669498                         | 0.016687286                          | -0.267528169   | 0.343802194  |                  |
|              | 3                                    | 0                                    | 0.998207054                          |                |              |                  |
| CETP         | ENSG00000087237.10                   | 0.851898131                          | 1                                    | 1              | 0.851898131  |                  |
|              | Brain_Caudate_basal_ganglia          | 0.851898131                          | Brain_Caudate_basal_ganglia          | 1              | 1            |                  |
|              | 1                                    | 0.186697099                          | 0.186697099                          | 0.186697099    | NA           | 1                |
|              |                                      |                                      |                                      |                |              | 0                |
|              |                                      |                                      |                                      |                |              | 0.998207054      |
| RP5-902P8.12 | ENSG00000260179.1                    | 0.851921477                          | 4                                    | 4              | 0.478569708  |                  |
|              | Brain_Caudate_basal_ganglia          | 0.84909338                           | Brain_Putamen_basal_ganglia          | 2.721577722    |              |                  |
|              | 0.192523192                          | 0.192523192                          | -0.708604878                         | 0.306501089    | -0.241435933 |                  |
|              | 0.423676128                          | 4                                    | 0                                    | 0.998207054    |              |                  |
| LINC02070    | ENSG00000241328.1                    | 0.852001549                          | 3                                    | 2              | 0.450122888  |                  |
|              | Brain_Cerebellar_Hemisphere          | 0.991435666                          | Brain_Hippocampus                    | 2.058091431    |              |                  |
|              | 0.024062505                          | 0.917846064                          | -0.010734007                         | 0.75521017     | 0.362052686  |                  |
|              | 0.383378204                          | 2                                    | 0                                    | 0.998207054    |              |                  |
| DKK1         | ENSG00000107984.9                    | 0.852021116                          | 4                                    | 4              | 0.575523833  |                  |
|              | Brain_Putamen_basal_ganglia          | 0.805289121                          | Brain_Anterior_cingulate_cortex_BA24 |                |              |                  |
|              | 1.630735435                          | 0.514602384                          | 0.514602384                          | -0.559934914   | 0.364628642  |                  |
|              | -0.232336685                         | 0.419926177                          | 4                                    | 0              | 0.998207054  |                  |
| PAK2         | ENSG00000180370.10                   | 0.852071399                          | 1                                    | 1              | 0.852071399  |                  |
|              | Brain_Frontal_Cortex_BA9             | 0.852071399                          | Brain_Frontal_Cortex_BA9             | 1              | 1            |                  |
|              | 1                                    | 0.186476126                          | 0.186476126                          | 0.186476126    | NA           | 1                |
|              |                                      |                                      |                                      |                |              | 0                |
|              |                                      |                                      |                                      |                |              | 0.998207054      |
| CPO          | ENSG00000144410.4                    | 0.852134382                          | 1                                    | 1              | 0.852134382  |                  |
|              | Brain_Frontal_Cortex_BA9             | 0.852134382                          | Brain_Frontal_Cortex_BA9             | 1              | 1            |                  |
|              | 1                                    | -0.186395805                         | -0.186395805                         | -0.186395805   | NA           | 1                |
|              |                                      |                                      |                                      |                |              | 0                |
|              |                                      |                                      |                                      |                |              | 0.998207054      |
| IFIT5        | ENSG00000152778.8                    | 0.852254701                          | 11                                   | 3              | 0.402989205  | Brain_Amygdala   |
|              | 0.908624566                          | Brain_Putamen_basal_ganglia          | 9.304882509                          | 0.004961739    |              |                  |
|              | 0.34187188                           | -0.836294574                         | -0.114773611                         | -0.45396346    | 0.263396174  | 3                |
|              | 0                                    | 0.998207054                          |                                      |                |              |                  |
| NBPF10       | ENSG00000271425.7                    | 0.852341751                          | 9                                    | 6              | 0.199691293  |                  |
|              | Brain_Caudate_basal_ganglia          | 0.953386606                          | Brain_Hippocampus                    | 3.787994709    |              |                  |

|             |                                       |                                       |                                |              |                  |
|-------------|---------------------------------------|---------------------------------------|--------------------------------|--------------|------------------|
|             | 0.003723985                           | 0.127753193                           | -0.599323999                   | 1.282431578  | 0.466564404      |
|             | 0.720778349                           | 6 0                                   | 0.998207054                    |              |                  |
| LRRN1       | ENSG00000175928.5                     | 0.852377764                           | 2 2                            | 0.64102794   | Brain_Cerebellum |
|             | 0.750440041                           | Brain_Substantia_nigra                | 1.00298766                     | 0.99701234   | 0.99701234       |
|             | -0.46626205                           | -0.318059187                          | -0.392160618                   | 0.104795249  | 2 0              |
|             | 0.998207054                           |                                       |                                |              |                  |
| SMOC2       | ENSG00000112562.18                    | 0.852469895                           | 10 7                           | 0.220378423  |                  |
|             | Brain_Substantia_nigra                | 0.998787517                           | Brain_Frontal_Cortex_BA9       |              |                  |
|             | 5.883392935                           | 0.001050117                           | 0.383826348                    | -1.225522486 | 0.791894366      |
|             | -0.038770309                          | 0.586173295                           | 7 0                            | 0.998207054  |                  |
| RNU6ATAC35P | ENSG00000221571.3                     | 0.852488302                           | 2 2                            | 0.572187     |                  |
|             | Brain_Nucleus_accumbens_basal_ganglia | 0.710063363                           | Brain_Putamen_basal_ganglia    |              |                  |
|             | 1.641301317                           | 0.358698683                           | 0.358698683                    | -0.564833528 | -0.371770992     |
|             | -0.46830226                           | 0.136515828                           | 2 0                            | 0.998207054  |                  |
| PI4K2A      | ENSG00000155252.13                    | 0.85261498                            | 5 4                            | 0.350355894  | Brain_Cerebellum |
|             | 0.934002495                           | Brain_Cerebellar_Hemisphere           | 2.048703282                    | 0.006157399  |                  |
|             | 0.889587207                           | -0.933899194                          | 0.400982905                    | -0.31202897  | 0.50569965 4     |
|             | 0 0.998207054                         |                                       |                                |              |                  |
| GNAZ        | ENSG00000128266.8                     | 0.852742296                           | 11 4                           | 0.200621663  |                  |
|             | Brain_Anterior_cingulate_cortex_BA24  | 0.988972861                           | Brain_Caudate_basal_ganglia    |              |                  |
|             | 8.115277482                           | 0.037580261                           | 0.472513833                    | -1.279782435 | -0.013820909     |
|             | -0.700904934                          | 0.400820375                           | 4 0                            | 0.998207054  |                  |
| SCD5        | ENSG00000145284.11                    | 0.852796366                           | 5 5                            | 0.173905273  |                  |
|             | Brain_Putamen_basal_ganglia           | 0.90921175                            | Brain_Cortex                   | 2.163912426  | 0.1987565        |
|             | 0.1987565                             | -1.35976193                           | 0.114032853                    | -0.446891245 | 0.56098107 5 0   |
|             | 0.998207054                           |                                       |                                |              |                  |
| 2-Mar       | ENSG00000117791.15                    | 0.852886276                           | 6 5                            | 0.508483976  | Brain_Cortex     |
|             | 0.920595102                           | Brain_Nucleus_accumbens_basal_ganglia | 3.437571867                    |              |                  |
|             | 0.066162594                           | 0.213177381                           | -0.356441184                   | 0.661200133  | 0.24998585       |
|             | 0.406410803                           | 5 0                                   | 0.998207054                    |              |                  |
| SSTR2       | ENSG00000180616.8                     | 0.852904296                           | 5 5                            | 0.428778699  |                  |
|             | Brain_Cerebellar_Hemisphere           | 0.970280958                           | Brain_Spinal_cord_cervical_c-1 |              |                  |
|             | 1.358312821                           | 0.752915979                           | 0.752915979                    | -0.775437447 | 0.791283287      |
|             | 0.070810479                           | 0.634679132                           | 5 0                            | 0.998207054  |                  |
| PKDREJ      | ENSG00000130943.6                     | 0.852990677                           | 11 5                           | 0.371127145  |                  |
|             | Brain_Caudate_basal_ganglia           | 0.857055503                           | Brain_Frontal_Cortex_BA9       |              |                  |
|             | 7.769050303                           | 2.41E-17                              | 0.270819772                    | -0.894364041 | -0.180123641     |
|             | -0.50576508                           | 0.23249759                            | 5 0                            | 0.998207054  |                  |
| COMMD4      | ENSG00000140365.15                    | 0.853053749                           | 4 3                            | 0.290727359  |                  |
|             | Brain_Anterior_cingulate_cortex_BA24  | 0.915239392                           |                                |              |                  |
|             | Brain_Nucleus_accumbens_basal_ganglia | 2.870275404                           | 0.071152045                    |              |                  |
|             | 0.368390563                           | -0.106432269                          | 1.056527335                    | 0.432497751  | 0.477340526      |
|             | 3 0                                   | 0.998207054                           |                                |              |                  |
| DEPDC5      | ENSG00000100150.16                    | 0.853076365                           | 3 3                            | 0.410627194  |                  |
|             | Brain_Cerebellar_Hemisphere           | 0.607615372                           | Brain_Cortex                   | 2.182293489  |                  |
|             | 0.210849812                           | 0.210849812                           | 0.513480323                    | 0.822790406  | 0.648940186      |
|             | 0.158188326                           | 3 0                                   | 0.998207054                    |              |                  |
| C9orf69     | ENSG00000238227.7                     | 0.853097715                           | 1 1                            | 0.853097715  |                  |
|             | Brain_Cerebellar_Hemisphere           | 0.853097715                           | Brain_Cerebellar_Hemisphere    | 1 1          |                  |
|             | 1 0.185167429                         | 0.185167429                           | 0.185167429                    | NA 1 0       |                  |
|             | 0.998207054                           |                                       |                                |              |                  |
| TK2         | ENSG00000166548.15                    | 0.853219359                           | 3 3                            | 0.701684324  |                  |
|             | Brain_Caudate_basal_ganglia           | 0.950829179                           | Brain_Cerebellum               | 2.251590528  |                  |
|             | 0.130505251                           | 0.130505251                           | -0.383047798                   | 0.061665544  | -0.139689454     |
|             | 0.22531245 3 0                        | 0.998207054                           |                                |              |                  |
| LINC00467   | ENSG00000153363.12                    | 0.853299586                           | 5 4                            | 0.470435756  |                  |
|             | Brain_Hippocampus                     | 0.976085416                           | Brain_Spinal_cord_cervical_c-1 |              |                  |
|             | 3.098017059                           | 0.032411687                           | 0.151311105                    | 0.029976975  | 0.721770228      |
|             | 0.381465062                           | 0.291529038                           | 4 0                            | 0.998207054  |                  |
| MURC        | ENSG00000170681.6                     | 0.853539784                           | 3 3                            | 0.432683951  | Brain_Cerebellum |
|             | 0.677994225                           | Brain_Caudate_basal_ganglia           | 1.618282956                    | 0.537973578  |                  |
|             | 0.537973578                           | -0.784607125                          | -0.41520174                    | -0.57597676  | 0.189295232      |

|            |                                       |                  |                                       |              |              |                    |              |
|------------|---------------------------------------|------------------|---------------------------------------|--------------|--------------|--------------------|--------------|
| 3          | 0                                     | 0.998207054      |                                       |              |              |                    |              |
| ATXN7L3    | ENSG00000087152.15                    | 0.853555585      | 1                                     | 1            | 0.853555585  |                    |              |
|            | Brain_Amygdala                        | 0.853555585      | Brain_Amygdala                        | 1            | 1            | 1                  | -0.184583684 |
|            | -0.184583684                          | -0.184583684     | NA                                    | 1            | 0            | 0.998207054        |              |
| ZNF320     | ENSG00000182986.12                    | 0.853577252      | 11                                    | 11           | 0.068482983  |                    |              |
|            | Brain_Cerebellar_Hemisphere           | 0.987727571      | Brain_Putamen_basal_ganglia           |              |              |                    |              |
|            | 1.982544842                           | 0.44793488       | 0.44793488                            | -1.821815511 | 0.62526069   | -0.144137715       |              |
|            | 0.772234966                           | 11               | 0                                     | 0.998207054  |              |                    |              |
| LINC01410  | ENSG00000238113.6                     | 0.853580181      | 1                                     | 1            | 0.853580181  |                    |              |
|            | Brain_Substantia_nigra                | 0.853580181      | Brain_Substantia_nigra                | 1            | 1            |                    |              |
|            | 1                                     | 0.184552327      | 0.184552327                           | 0.184552327  | NA           | 1                  | 0            |
|            | 0.998207054                           |                  |                                       |              |              |                    |              |
| TRAPPC3    | ENSG00000054116.11                    | 0.853636448      | 2                                     | 2            | 0.602296834  |                    |              |
|            | Brain_Putamen_basal_ganglia           | 0.645037922      | Brain_Nucleus_accumbens_basal_ganglia |              |              |                    |              |
|            | 1.542129351                           | 0.457870649      | 0.457870649                           | -0.521100397 | -0.46066646  |                    |              |
|            | -0.490883428                          | 0.042733247      | 2                                     | 0            | 0.998207054  |                    |              |
| GPC2       | ENSG00000213420.7                     | 0.853654788      | 8                                     | 4            | 0.438300082  |                    |              |
|            | Brain_Cerebellar_Hemisphere           | 0.963189711      | Brain_Substantia_nigra                |              | 5.96208054   |                    |              |
|            | 0.01155371                            | 0.260607198      | -0.77506698                           | 0.191468091  | -0.326851699 |                    |              |
|            | 0.347068237                           | 4                | 0                                     | 0.998207054  |              |                    |              |
| TNFSF12    | ENSG00000239697.10                    | 0.853668416      | 5                                     | 5            | 0.240892267  |                    |              |
|            | Brain_Spinal_cord_cervical_c-1        | 0.969689059      | Brain_Amygdala                        | 2.693522155  |              |                    |              |
|            | 0.131250265                           | 0.131250265      | -1.172759491                          | -0.037998273 | -0.814609087 |                    |              |
|            | 0.45288979                            | 5                | 0                                     | 0.998207054  |              |                    |              |
| XDH        | ENSG00000158125.9                     | 0.853728606      | 1                                     | 1            | 0.853728606  | Brain_Cerebellum   |              |
|            | 0.853728606                           | Brain_Cerebellum | 1                                     | 1            | 0.184363112  | 0.184363112        |              |
|            | 0.184363112                           | NA               | 1                                     | 0            | 0.998207054  |                    |              |
| AC009961.3 | ENSG00000226266.6                     | 0.853787554      | 5                                     | 5            | 0.30655433   |                    |              |
|            | Brain_Caudate_basal_ganglia           | 0.839861246      | Brain_Hippocampus                     | 1.6126138    |              |                    |              |
|            | 0.544555417                           | 0.544555417      | -0.841048979                          | 1.022478824  | 0.109703861  |                    |              |
|            | 0.698773082                           | 5                | 0                                     | 0.998207054  |              |                    |              |
| LINC01738  | ENSG00000227947.1                     | 0.853807984      | 1                                     | 1            | 0.853807984  |                    |              |
|            | Brain_Nucleus_accumbens_basal_ganglia | 0.853807984      |                                       |              |              |                    |              |
|            | Brain_Nucleus_accumbens_basal_ganglia | 1                | 1                                     | 1            | -0.184261923 |                    |              |
|            | -0.184261923                          | -0.184261923     | NA                                    | 1            | 0            | 0.998207054        |              |
| DUSP12     | ENSG00000081721.11                    | 0.853834866      | 1                                     | 1            | 0.853834866  |                    |              |
|            | Brain_Cerebellum                      | 0.853834866      | Brain_Cerebellum                      | 1            | 1            | 1                  | 0.184227653  |
|            | 0.184227653                           | 0.184227653      | NA                                    | 1            | 0            | 0.998207054        |              |
| EXTL2      | ENSG00000162694.13                    | 0.853903182      | 1                                     | 1            | 0.853903182  |                    |              |
|            | Brain_Nucleus_accumbens_basal_ganglia | 0.853903182      |                                       |              |              |                    |              |
|            | Brain_Nucleus_accumbens_basal_ganglia | 1                | 1                                     | 1            | 0.184140568  |                    |              |
|            | 0.184140568                           | 0.184140568      | NA                                    | 1            | 0            | 0.998207054        |              |
| RND2       | ENSG00000108830.9                     | 0.853908315      | 4                                     | 3            | 0.380042003  |                    |              |
|            | Brain_Hypothalamus                    | 0.70556816       | Brain_Cerebellar_Hemisphere           | 3.462082734  |              |                    |              |
|            | 0.037247831                           | 0.153070458      | -0.663049329                          | 0.877818906  | 0.098010698  |                    |              |
|            | 0.735446084                           | 3                | 0                                     | 0.998207054  |              |                    |              |
| GDF9       | ENSG00000164404.8                     | 0.853936867      | 7                                     | 4            | 0.519484518  |                    |              |
|            | Brain_Hypothalamus                    | 0.968889072      | Brain_Caudate_basal_ganglia           | 5.540264057  |              |                    |              |
|            | 0.03418539                            | 0.247880029      | -0.334302964                          | 0.644140209  | 0.235617764  |                    |              |
|            | 0.337572457                           | 4                | 0                                     | 0.998207054  |              |                    |              |
| NDUFS8     | ENSG00000110717.12                    | 0.853938733      | 5                                     | 3            | 0.422081043  |                    |              |
|            | Brain_Cerebellum                      | 0.887493455      | Brain_Cortex                          | 4.318665482  | 0.005825088  |                    |              |
|            | 0.152649947                           | -0.802816087     | -0.141476586                          | -0.404366662 | 0.283105493  |                    |              |
|            | 3                                     | 0                | 0.998207054                           |              |              |                    |              |
| IFT88      | ENSG00000032742.17                    | 0.853969496      | 11                                    | 1            | 0.393218187  |                    |              |
|            | Brain_Nucleus_accumbens_basal_ganglia | 0.941988438      | Brain_Cerebellar_Hemisphere           |              |              |                    |              |
|            | 10.19342441                           | 0.002916171      | 10.19342441                           | -0.097086694 | 0.853795718  |                    |              |
|            | 0.179149621                           | 0.260376218      | 1                                     | 0            | 0.998207054  |                    |              |
| A4GNT      | ENSG00000118017.3                     | 0.854097376      | 6                                     | 5            | 0.43086059   | Brain_Hypothalamus |              |
|            | 0.959739118                           | Brain_Cortex     | 4.472241781                           | 0.040379797  | 0.159591284  |                    |              |
|            | -0.787719853                          | 0.206128384      | -0.150446909                          | 0.370089288  | 5            | 0                  |              |
|            | 0.998207054                           |                  |                                       |              |              |                    |              |

|               |                                       |                             |                                |              |              |             |             |  |
|---------------|---------------------------------------|-----------------------------|--------------------------------|--------------|--------------|-------------|-------------|--|
| RAD51AP1      | ENSG00000111247.14                    | 0.854104619                 | 1                              | 1            | 0.854104619  |             |             |  |
|               | Brain_Cerebellum                      | 0.854104619                 | Brain_Cerebellum               | 1            | 1            | 0.183883793 |             |  |
|               | 0.183883793                           | 0.183883793                 | NA                             | 1            | 0            | 0.998207054 |             |  |
| TUBGCP6       | ENSG00000128159.11                    | 0.854148924                 | 9                              | 4            | 0.213335798  |             |             |  |
|               | Brain_Frontal_Cortex_BA9              | 0.948682312                 | Brain_Cerebellum               | 7.060399268  |              |             |             |  |
|               | 0.008373483                           | 0.280982021                 | 0.064361592                    | 1.244445086  | 0.64548463   |             |             |  |
|               | 0.356149327                           | 4                           | 0                              | 0.998207054  |              |             |             |  |
| RP5-848E13.4  | ENSG00000283973.1                     | 0.854303677                 | 1                              | 1            | 0.854303677  |             |             |  |
|               | Brain_Caudate_basal_ganglia           | 0.854303677                 | Brain_Caudate_basal_ganglia    | 1            | 1            |             |             |  |
|               | 1                                     | -0.183630063                | -0.183630063                   | -0.183630063 | NA           | 1           | 0           |  |
|               | 0.998207054                           |                             |                                |              |              |             |             |  |
| HLA-C         | ENSG00000204525.16                    | 0.854308619                 | 13                             | 4            | 0.344424366  |             |             |  |
|               | Brain_Hippocampus                     | 0.975488538                 | Brain_Spinal_cord_cervical_c-1 | 9.38186436   |              |             |             |  |
|               | 0.011911624                           | 0.389472618                 | -0.945459446                   | 0.444784423  | -0.229050706 |             |             |  |
|               | 0.439517302                           | 4                           | 0                              | 0.998207054  |              |             |             |  |
| ASAH2B        | ENSG00000204147.9                     | 0.854441105                 | 10                             | 1            | 0.29712437   |             |             |  |
|               | Brain_Hypothalamus                    | 0.997264128                 | Brain_Caudate_basal_ganglia    | 9.299597987  |              |             |             |  |
|               | 2.38E-05                              | 9.299597987                 | -0.418896599                   | 1.042619898  | 0.181633269  |             |             |  |
|               | 0.37645566                            | 1                           | 0                              | 0.998207054  |              |             |             |  |
| CDC14A        | ENSG00000079335.18                    | 0.854558661                 | 1                              | 1            | 0.854558661  |             |             |  |
|               | Brain_Hypothalamus                    | 0.854558661                 | Brain_Hypothalamus             | 1            | 1            | 1           |             |  |
|               | 0.183305065                           | 0.183305065                 | 0.183305065                    | NA           | 1            | 0           | 0.998207054 |  |
| B4GALNT3      | ENSG00000139044.10                    | 0.854595816                 | 4                              | 4            | 0.327696233  |             |             |  |
|               | Brain_Hypothalamus                    | 0.818109292                 | Brain_Cerebellar_Hemisphere    | 1.258612159  |              |             |             |  |
|               | 0.72059935                            | 0.72059935                  | -0.978764744                   | 0.554962933  | -0.254914331 |             |             |  |
|               | 0.630554095                           | 4                           | 0                              | 0.998207054  |              |             |             |  |
| PPP1R15B      | ENSG00000158615.8                     | 0.85463036                  | 1                              | 1            | 0.85463036   |             |             |  |
|               | Brain_Substantia_nigra                | 0.85463036                  | Brain_Substantia_nigra         | 1            | 1            | 1           |             |  |
|               | -0.183213681                          | -0.183213681                | -0.183213681                   | NA           | 1            | 0           | 0.998207054 |  |
| HDHD2         | ENSG00000167220.11                    | 0.85464299                  | 2                              | 2            | 0.728827814  |             |             |  |
|               | Brain_Spinal_cord_cervical_c-1        | 0.741952405                 | Brain_Putamen_basal_ganglia    |              |              |             |             |  |
|               | 1.272484806                           | 0.727515194                 | 0.727515194                    | -0.329268959 | 0.346685221  |             |             |  |
|               | 0.008708131                           | 0.477971784                 | 2                              | 0            | 0.998207054  |             |             |  |
| CYP3A5        | ENSG00000106258.13                    | 0.854649936                 | 2                              | 2            | 0.61815864   |             |             |  |
|               | Brain_Frontal_Cortex_BA9              | 0.859518782                 | Brain_Cerebellum               | 1.152960317  |              |             |             |  |
|               | 0.847039683                           | 0.847039683                 | -0.17698677                    | 0.498461726  | 0.160737478  |             |             |  |
|               | 0.477614212                           | 2                           | 0                              | 0.998207054  |              |             |             |  |
| RP11-406H21.2 | ENSG00000273153.1                     | 0.854673303                 | 1                              | 1            | 0.854673303  |             |             |  |
|               | Brain_Nucleus_accumbens_basal_ganglia | 0.854673303                 |                                |              |              |             |             |  |
|               | Brain_Nucleus_accumbens_basal_ganglia | 1                           | 1                              | 1            | -0.183158949 |             |             |  |
|               | -0.183158949                          | -0.183158949                | NA                             | 1            | 0            | 0.998207054 |             |  |
| OGN           | ENSG00000106809.10                    | 0.854799786                 | 3                              | 3            | 0.508015213  |             |             |  |
|               | Brain_Putamen_basal_ganglia           | 0.913195594                 | Brain_Caudate_basal_ganglia    |              |              |             |             |  |
|               | 1.958687764                           | 0.263343664                 | 0.263343664                    | -0.661931359 | -0.109008695 |             |             |  |
|               | -0.373571772                          | 0.277228378                 | 3                              | 0            | 0.998207054  |             |             |  |
| TMEM269       | ENSG00000274386.5                     | 0.854904274                 | 3                              | 3            | 0.447904081  |             |             |  |
|               | Brain_Cerebellar_Hemisphere           | 0.744333703                 | Brain_Substantia_nigra         |              |              |             |             |  |
|               | 1.690247788                           | 0.3423096                   | 0.3423096                      | 0.326119818  | 0.758913871  |             |             |  |
|               | 0.544872302                           | 0.216435481                 | 3                              | 0            | 0.998207054  |             |             |  |
| UBE2D4        | ENSG00000078967.12                    | 0.854936868                 | 2                              | 2            | 0.672754683  |             |             |  |
|               | Brain_Cerebellum                      | 0.726604977                 | Brain_Caudate_basal_ganglia    | 1.041529587  |              |             |             |  |
|               | 0.958470413                           | 0.958470413                 | -0.422370395                   | -0.34964521  | -0.386007803 |             |             |  |
|               | 0.051424472                           | 2                           | 0                              | 0.998207054  |              |             |             |  |
| FGD3          | ENSG00000127084.17                    | 0.855071395                 | 5                              | 5            | 0.240482894  |             |             |  |
|               | Brain_Putamen_basal_ganglia           | 1.867355165                 | Brain_Cerebellum               |              |              |             |             |  |
|               | 0.981803291                           | Brain_Putamen_basal_ganglia | 1.867355165                    | 0.161834226  |              |             |             |  |
|               | 0.161834226                           | -0.540148266                | 1.173780656                    | 0.22503375   | 0.639853832  |             | 5           |  |
|               | 0                                     | 0.998207054                 |                                |              |              |             |             |  |
| RP11-554L12.1 | ENSG00000258144.1                     | 0.855075954                 | 5                              | 5            | 0.28567946   |             |             |  |
|               | Brain_Caudate_basal_ganglia           | 0.826750033                 | Brain_Substantia_nigra         |              |              |             |             |  |
|               | 1.731110966                           | 0.223483774                 | 0.223483774                    | -1.067647696 | 0.390606942  |             |             |  |
|               | -0.091188922                          | 0.60565581                  | 5                              | 0            | 0.998207054  |             |             |  |
| RP11-54O7.1   | ENSG00000230699.2                     | 0.855209039                 | 1                              | 1            | 0.855209039  |             |             |  |

|               |                                       |                                      |                              |              |             |              |                  |
|---------------|---------------------------------------|--------------------------------------|------------------------------|--------------|-------------|--------------|------------------|
|               | Brain_Cortex                          | 0.855209039                          | Brain_Cortex                 | 1            | 1           | 1            | -0.182476189     |
|               | -0.182476189                          | -0.182476189                         | NA                           | 1            | 0           | 0.998207054  |                  |
| POMP          | ENSG00000132963.7                     | 0.855241837                          |                              | 1            | 1           | 0.855241837  |                  |
|               | Brain_Hypothalamus                    | 0.855241837                          | Brain_Hypothalamus           | 1            | 1           | 1            |                  |
|               | 0.182434393                           | 0.182434393                          | 0.182434393                  | NA           | 1           | 0            | 0.998207054      |
| TDRD12        | ENSG00000173809.17                    | 0.855269397                          |                              | 4            | 4           | 0.513259246  |                  |
|               | Brain_Nucleus_accumbens_basal_ganglia | 0.84995752                           | Brain_Putamen_basal_ganglia  |              |             |              |                  |
|               | 2.311345999                           | 0.298644065                          | 0.298644065                  | -0.653771165 |             |              | 0.189172628      |
|               | -0.29826733                           | 0.365689613                          | 4                            | 0            | 0.998207054 |              |                  |
| TMUB2         | ENSG00000168591.15                    | 0.855294541                          |                              | 1            | 1           | 0.855294541  | Brain_Cerebellum |
|               | 0.855294541                           | Brain_Cerebellum1                    | 1                            | 1            | 1           | -0.18236723  | -0.18236723      |
|               | -0.18236723                           | NA                                   | 1                            | 0            | 0.998207054 |              |                  |
| RP11-156K13.3 | ENSG00000254054.2                     | 0.855303218                          |                              | 5            | 5           | 0.40108153   |                  |
|               | Brain_Hypothalamus                    | 0.961865834                          | Brain_Hippocampus            |              |             | 3.462198641  |                  |
|               | 0.188963221                           | 0.188963221                          | -0.839691235                 | 0.423527352  |             |              | -0.036112771     |
|               | 0.480862471                           | 5                                    | 0                            | 0.998207054  |             |              |                  |
| UBB           | ENSG00000170315.13                    | 0.855324475                          |                              | 1            | 1           | 0.855324475  |                  |
|               | Brain_Hypothalamus                    | 0.855324475                          | Brain_Hypothalamus           | 1            | 1           | 1            |                  |
|               | 0.182329085                           | 0.182329085                          | 0.182329085                  | NA           | 1           | 0            | 0.998207054      |
| PAOX          | ENSG00000148832.15                    | 0.855476612                          |                              | 5            | 5           | 0.430990747  | Brain_Cortex     |
|               | 0.834092244                           | Brain_Anterior_cingulate_cortex_BA24 | 2.229612711                  |              |             |              |                  |
|               | 0.345290351                           | 0.345290351                          | -0.787497405                 | 0.552474386  |             |              | -0.005164044     |
|               | 0.539656265                           | 5                                    | 0                            | 0.998207054  |             |              |                  |
| RP11-134O21.1 | ENSG00000254319.5                     | 0.855555558                          |                              | 5            | 5           | 0.426546309  |                  |
|               | Brain_Hippocampus                     | 0.763280299                          | Brain_Frontal_Cortex_BA9     |              |             | 1.773990212  |                  |
|               | 0.534855205                           | 0.534855205                          | -0.493464708                 | 0.795115518  |             |              | -0.045356005     |
|               | 0.570147058                           | 5                                    | 0                            | 0.998207054  |             |              |                  |
| PAPSS1        | ENSG00000138801.8                     | 0.855635334                          |                              | 1            | 1           | 0.855635334  |                  |
|               | Brain_Cerebellar_Hemisphere           | 0.855635334                          | Brain_Cerebellar_Hemisphere1 | 1            | 1           |              |                  |
|               | 1                                     | -0.181932964                         | -0.181932964                 | -0.181932964 | NA          | 1            | 0                |
|               | 0.998207054                           |                                      |                              |              |             |              |                  |
| ZNF585A       | ENSG00000196967.10                    | 0.855828353                          |                              | 2            | 2           | 0.592817276  |                  |
|               | Brain_Amygdala                        | 0.732224408                          | Brain_Putamen_basal_ganglia  |              |             | 1.813285662  |                  |
|               | 0.186714338                           | 0.186714338                          | 0.342168077                  | 0.534757904  |             |              | 0.43846299       |
|               | 0.136181572                           | 2                                    | 0                            | 0.998207054  |             |              |                  |
| LINC02001     | ENSG00000267321.2                     | 0.855870087                          |                              | 1            | 1           | 0.855870087  |                  |
|               | Brain_Cortex                          | 0.855870087                          | Brain_Cortex                 | 1            | 1           | 1            | 0.181633844      |
|               | 0.181633844                           | 0.181633844                          | NA                           | 1            | 0           | 0.998207054  |                  |
| NIPAL3        | ENSG00000001461.16                    | 0.855932234                          |                              | 3            | 3           | 0.441844511  |                  |
|               | Brain_Nucleus_accumbens_basal_ganglia | 0.799149998                          | Brain_Caudate_basal_ganglia  |              |             |              |                  |
|               | 1.930905247                           | 0.262577768                          | 0.262577768                  | 0.254447319  |             |              | 0.769082206      |
|               | 0.449852582                           | 0.278768042                          | 3                            | 0            | 0.998207054 |              |                  |
| MAP2K5        | ENSG00000137764.19                    | 0.855958853                          |                              | 4            | 3           | 0.685286785  |                  |
|               | Brain_Cerebellum                      | 0.981109977                          | Brain_Frontal_Cortex_BA9     |              |             | 3.370119576  |                  |
|               | 0.048879757                           | 0.172804489                          | -0.175694889                 | 0.405259484  |             |              | 0.02393727       |
|               | 0.26172696                            | 3                                    | 0                            | 0.998207054  |             |              |                  |
| MZT2A         | ENSG00000173272.15                    | 0.855992287                          |                              | 12           | 3           | 0.699383844  |                  |
|               | Brain_Spinal_cord_cervical_c-1        | 0.944982784                          | Brain_Amygdala               |              |             | 10.62232463  |                  |
|               | 0.000690206                           | 0.462338725                          | -0.386152346                 | 0.223915559  |             |              | -0.049264773     |
|               | 0.194773404                           | 3                                    | 0                            | 0.998207054  |             |              |                  |
| SNHG9         | ENSG00000255198.4                     | 0.8559964                            |                              | 7            | 5           | 0.171497941  |                  |
|               | Brain_Nucleus_accumbens_basal_ganglia | 0.999481962                          | Brain_Putamen_basal_ganglia  |              |             |              |                  |
|               | 3.36319964                            | 3.99E-18                             | 0.589195736                  | -0.357637233 |             |              | 1.367406453      |
|               | 0.151835885                           | 0.566954415                          | 5                            | 0            | 0.998207054 |              |                  |
| CCPG1         | ENSG00000260916.7                     | 0.856004437                          |                              | 1            | 1           | 0.856004437  | Brain_Cerebellum |
|               | 0.856004437                           | Brain_Cerebellum1                    | 1                            | 1            | 1           | -0.181462663 | -0.181462663     |
|               | -0.181462663                          | NA                                   | 1                            | 0            | 0.998207054 |              |                  |
| SLC25A16      | ENSG00000122912.14                    | 0.856159602                          |                              | 12           | 2           | 0.46028573   |                  |
|               | Brain_Putamen_basal_ganglia           | 0.966624583                          | Brain_Frontal_Cortex_BA9     |              |             |              |                  |
|               | 10.88862703                           | 0.009078035                          | 0.366135251                  | -0.041842087 |             |              | 0.738376435      |
|               | 0.526258656                           | 0.2290399                            | 2                            | 0            | 0.998207054 |              |                  |
| SNRNP35       | ENSG00000184209.14                    | 0.856228447                          |                              | 2            | 2           | 0.577609172  |                  |

|              |                                       |                             |                                      |              |              |                  |            |            |
|--------------|---------------------------------------|-----------------------------|--------------------------------------|--------------|--------------|------------------|------------|------------|
|              | Brain_Putamen_basal_ganglia           | 0.88475541                  | Brain_Cortex                         | 1.291028513  |              |                  |            |            |
|              | 0.708971487                           | 0.708971487                 | 0.14494359                           | 0.556880363  | 0.350911977  |                  |            |            |
|              | 0.291283286                           | 2                           | 0                                    | 0.998207054  |              |                  |            |            |
| MYSM1        | ENSG00000162601.9                     | 0.856319367                 | 3                                    | 2            | 0.672615763  | Brain_Cerebellum |            |            |
|              | 0.887601369                           | Brain_Cerebellar_Hemisphere | 2.829906411                          | 0.009335871  |              |                  |            |            |
|              | 0.160757718                           | -0.422560758                | -0.141339977                         | -0.276225869 | 0.140959539  |                  |            |            |
|              | 2                                     | 0                           | 0.998207054                          |              |              |                  |            |            |
| PRKAA2       | ENSG00000162409.10                    | 0.856389594                 | 1                                    | 1            | 0.856389594  |                  |            |            |
|              | Brain_Substantia_nigra                | 0.856389594                 | Brain_Substantia_nigra               | 1            | 1            |                  |            |            |
|              | 1                                     | -0.180971948                | -0.180971948                         | -0.180971948 | NA           | 1                | 0          |            |
|              | 0.998207054                           |                             |                                      |              |              |                  |            |            |
| AGPAT1       | ENSG00000204310.12                    | 0.856675319                 | 3                                    | 3            | 0.520381793  |                  |            |            |
|              | Brain_Caudate_basal_ganglia           | 0.823172621                 | Brain_Cerebellar_Hemisphere          |              |              |                  |            |            |
|              | 1.594510154                           | 0.639407756                 | 0.639407756                          | -0.642756994 | 0.4085209    |                  |            |            |
|              | -0.15256746                           | 0.529212892                 | 3                                    | 0            | 0.998207054  |                  |            |            |
| CPQ          | ENSG00000104324.15                    | 0.856779462                 | 3                                    | 2            | 0.634256509  |                  |            |            |
|              | Brain_Frontal_Cortex_BA9              | 0.652563395                 | Brain_Hypothalamus                   | 2.20865104   |              |                  |            |            |
|              | 0.001402028                           | 0.789946932                 | 0.450203941                          | 0.475744367  | 0.459507008  |                  |            |            |
|              | 0.014111756                           | 2                           | 0                                    | 0.998207054  |              |                  |            |            |
| AP1G1        | ENSG00000166747.12                    | 0.856786612                 | 3                                    | 3            | 0.470382968  |                  |            |            |
|              | Brain_Putamen_basal_ganglia           | 0.735004401                 | Brain_Cortex                         | 1.844055522  |              |                  |            |            |
|              | 0.281747639                           | 0.281747639                 | -0.338476145                         | 0.721856077  | 0.272135048  |                  |            |            |
|              | 0.548169991                           | 3                           | 0                                    | 0.998207054  |              |                  |            |            |
| C20orf24     | ENSG00000101084.17                    | 0.857084813                 | 1                                    | 1            | 0.857084813  |                  |            |            |
|              | Brain_Anterior_cingulate_cortex_BA24  | 0.857084813                 |                                      |              |              |                  |            |            |
|              | Brain_Anterior_cingulate_cortex_BA24  | 1                           | 1                                    | 1            | -0.180086306 |                  |            |            |
|              | -0.180086306                          | -0.180086306                | NA                                   | 1            | 0            | 0.998207054      |            |            |
| RP5-1056H1.2 | ENSG00000278192.1                     | 0.857346221                 | 3                                    | 3            | 0.565452525  |                  |            |            |
|              | Brain_Cortex                          | 0.978522674                 | Brain_Caudate_basal_ganglia          | 1.806412008  |              |                  |            |            |
|              | 0.438828381                           | 0.438828381                 | -0.574761623                         | 0.268620641  | -0.11102069  |                  |            |            |
|              | 0.427934537                           | 3                           | 0                                    | 0.998207054  |              |                  |            |            |
| FAM162B      | ENSG00000183807.7                     | 0.85738807                  | 1                                    | 1            | 0.85738807   | Brain_Amygdala   |            |            |
|              | 0.85738807                            | Brain_Amygdala              | 1                                    | 1            | 1            | 0.17970003       | 0.17970003 | 0.17970003 |
|              | 1                                     | 0                           | 0.998207054                          |              |              |                  |            |            |
| EPHX1        | ENSG00000143819.12                    | 0.857451127                 | 1                                    | 1            | 0.857451127  |                  |            |            |
|              | Brain_Caudate_basal_ganglia           | 0.857451127                 | Brain_Caudate_basal_ganglia          | 1            | 1            |                  |            |            |
|              | 1                                     | 0.179619714                 | 0.179619714                          | 0.179619714  | NA           | 1                | 0          |            |
|              | 0.998207054                           |                             |                                      |              |              |                  |            |            |
| VTN          | ENSG00000109072.13                    | 0.857462926                 | 3                                    | 2            | 0.557855728  |                  |            |            |
|              | Brain_Nucleus_accumbens_basal_ganglia | 0.677912864                 | Brain_Putamen_basal_ganglia          |              |              |                  |            |            |
|              | 2.792259673                           | 0.037335869                 | 0.170404459                          | 0.415312893  | 0.586029444  |                  |            |            |
|              | 0.503488351                           | 0.08549763                  | 2                                    | 0            | 0.998207054  |                  |            |            |
| SNX11        | ENSG00000002919.14                    | 0.857505779                 | 6                                    | 3            | 0.517027972  |                  |            |            |
|              | Brain_Frontal_Cortex_BA9              | 0.995915581                 | Brain_Cerebellar_Hemisphere          |              |              |                  |            |            |
|              | 4.657267085                           | 0.023805599                 | 0.436785309                          | -0.523584551 | 0.647933485  |                  |            |            |
|              | -0.026128494                          | 0.426298709                 | 3                                    | 0            | 0.998207054  |                  |            |            |
| PDE7A        | ENSG00000205268.10                    | 0.857549542                 | 2                                    | 2            | 0.582758691  |                  |            |            |
|              | Brain_Caudate_basal_ganglia           | 0.657775593                 | Brain_Putamen_basal_ganglia          |              |              |                  |            |            |
|              | 1.710944189                           | 0.289055811                 | 0.289055811                          | 0.44298637   | 0.549359603  |                  |            |            |
|              | 0.496172987                           | 0.075217234                 | 2                                    | 0            | 0.998207054  |                  |            |            |
| C17orf82     | ENSG00000187013.4                     | 0.857591888                 | 3                                    | 3            | 0.596089156  |                  |            |            |
|              | Brain_Cerebellum                      | 0.792150314                 | Brain_Cortex                         | 1.360322005  | 0.682131095  |                  |            |            |
|              | 0.682131095                           | -0.480059482                | 0.530032848                          | -0.071181994 | 0.531805295  |                  |            |            |
|              | 3                                     | 0                           | 0.998207054                          |              |              |                  |            |            |
| MET          | ENSG00000105976.14                    | 0.857614626                 | 10                                   | 2            | 0.261422008  |                  |            |            |
|              | Brain_Hypothalamus                    | 0.8800321                   | Brain_Spinal_cord_cervical_c-1       | 9.364909583  |              |                  |            |            |
|              | 1.16E-05                              | 0.417251935                 | -1.123036465                         | -0.150928524 | -0.530580648 |                  |            |            |
|              | 0.270598974                           | 2                           | 0                                    | 0.998207054  |              |                  |            |            |
| TRIM58       | ENSG00000162722.8                     | 0.85769572                  | 5                                    | 4            | 0.375392674  |                  |            |            |
|              | Brain_Frontal_Cortex_BA9              | 0.948878714                 | Brain_Anterior_cingulate_cortex_BA24 |              |              |                  |            |            |
|              | 3.288386841                           | 0.083064447                 | 0.219327128                          | -0.88641735  | 0.074264657  |                  |            |            |
|              | -0.263778606                          | 0.369361669                 | 4                                    | 0            | 0.998207054  |                  |            |            |

|              |                                |                                |                                       |              |              |                                       |             |
|--------------|--------------------------------|--------------------------------|---------------------------------------|--------------|--------------|---------------------------------------|-------------|
| ZSCAN26      | ENSG00000197062.11             | 0.857703772                    | 12                                    | 3            | 0.411740225  |                                       |             |
|              | Brain_Substantia_nigra         | 0.951827696                    |                                       |              |              | Brain_Nucleus_accumbens_basal_ganglia |             |
|              | 10.09370108                    | 0.007652582                    | 0.348335627                           | 0.060411756  | 0.820835061  |                                       |             |
|              | 0.487941241                    | 0.251442283                    | 3                                     | 0            | 0.998207054  |                                       |             |
| AC011298.2   | ENSG00000219159.4              | 0.857780375                    | 1                                     | 1            | 0.857780375  |                                       |             |
|              | Brain_Cortex                   | 0.857780375                    | Brain_Cortex                          | 1            | 1            | 1                                     | 0.179200367 |
|              | 0.179200367                    | 0.179200367                    | NA                                    | 1            | 0            | 0.998207054                           |             |
| NEK7         | ENSG00000151414.14             | 0.85784747                     | 2                                     | 2            | 0.580655173  | Brain_Hippocampus                     |             |
|              | 0.638110194                    | Brain_Spinal_cord_cervical_c-1 |                                       |              | 1.883981971  | 0.116018029                           |             |
|              | 0.116018029                    | 0.470342702                    | 0.552427968                           | 0.511385335  | 0.058043049  |                                       |             |
|              | 2                              | 0                              | 0.998207054                           |              |              |                                       |             |
| YIF1B        | ENSG00000167645.16             | 0.857893507                    | 4                                     | 4            | 0.487557068  |                                       |             |
|              | Brain_Cerebellar_Hemisphere    | 0.9472641                      | Brain_Amygdala                        | 2.047708075  |              |                                       |             |
|              | 0.292965128                    | 0.292965128                    | -0.066142846                          | 0.694199562  | 0.459520245  |                                       |             |
|              | 0.359625335                    | 4                              | 0                                     | 0.998207054  |              |                                       |             |
| RILPL1       | ENSG00000188026.12             | 0.857919528                    | 1                                     | 1            | 0.857919528  |                                       |             |
|              | Brain_Hypothalamus             | 0.857919528                    | Brain_Hypothalamus                    | 1            | 1            | 1                                     |             |
|              | 0.179023145                    | 0.179023145                    | 0.179023145                           | NA           | 1            | 0                                     | 0.998207054 |
| HTR1D        | ENSG00000179546.4              | 0.857946025                    | 7                                     | 4            | 0.366116467  |                                       |             |
|              | Brain_Frontal_Cortex_BA9       | 0.933880104                    | Brain_Substantia_nigra                |              |              |                                       |             |
|              | 5.286144602                    | 0.001677544                    | 0.220091668                           | -0.903771708 | -0.082964076 |                                       |             |
|              | -0.589026637                   | 0.296910253                    | 4                                     | 0            | 0.998207054  |                                       |             |
| RP11-18H21.1 | ENSG00000245954.6              | 0.857989683                    | 4                                     | 4            | 0.298120107  |                                       |             |
|              | Brain_Spinal_cord_cervical_c-1 | 0.767878868                    | Brain_Cortex                          | 1.451586253  |              |                                       |             |
|              | 0.510095047                    | 0.510095047                    | -1.040473203                          | 0.63221396   | -0.162623938 |                                       |             |
|              | 0.764284308                    | 4                              | 0                                     | 0.998207054  |              |                                       |             |
| SPATA5L1     | ENSG00000171763.18             | 0.858032144                    | 13                                    | 1            | 0.458361283  |                                       |             |
|              | Brain_Hippocampus              | 0.999093307                    | Brain_Substantia_nigra                | 12.05486278  |              |                                       |             |
|              | 8.86E-05                       | 12.05486278                    | -0.741547927                          | 0.217560619  | -0.176634651 |                                       |             |
|              | 0.349650777                    | 1                              | 0                                     | 0.998207054  |              |                                       |             |
| CALCOCO2     | ENSG00000136436.14             | 0.858090631                    | 2                                     | 1            | 0.738142239  |                                       |             |
|              | Brain_Cerebellar_Hemisphere    | 0.984557436                    | Brain_Cerebellum                      | 1.956168371  |              |                                       |             |
|              | 0.043831629                    | 1.956168371                    | 0.019355593                           | 0.334314514  | 0.176835054  |                                       |             |
|              | 0.222709589                    | 1                              | 0                                     | 0.998207054  |              |                                       |             |
| CEP95        | ENSG00000258890.6              | 0.85810665                     | 1                                     | 1            | 0.85810665   | Brain_Cortex                          | 0.85810665  |
|              | Brain_Cortex                   | 1                              | 1                                     | 1            | 0.178784839  | 0.178784839                           | 0.178784839 |
|              | NA                             | 1                              | 0                                     | 0.998207054  |              |                                       |             |
| SLC15A3      | ENSG00000110446.10             | 0.858111226                    | 2                                     | 2            | 0.667737935  |                                       |             |
|              | Brain_Caudate_basal_ganglia    | 0.722889037                    | Brain_Nucleus_accumbens_basal_ganglia |              |              |                                       |             |
|              | 1.013175338                    | 0.986824662                    | 0.986824662                           | -0.354600319 | 0.429254624  |                                       |             |
|              | 0.037327152                    | 0.554269146                    | 2                                     | 0            | 0.998207054  |                                       |             |
| LINC00092    | ENSG00000225194.2              | 0.85812769                     | 4                                     | 4            | 0.451787081  |                                       |             |
|              | Brain_Caudate_basal_ganglia    | 0.876355585                    | Brain_Substantia_nigra                |              |              |                                       |             |
|              | 1.772948354                    | 0.236334365                    | 0.236334365                           | -0.752439033 | 0.75243264   |                                       |             |
|              | 0.216467503                    | 0.700856811                    | 4                                     | 0            | 0.998207054  |                                       |             |
| ZNF613       | ENSG00000176024.17             | 0.858192152                    | 1                                     | 1            | 0.858192152  |                                       |             |
|              | Brain_Cerebellum               | 0.858192152                    | Brain_Cerebellum                      | 1            | 1            | 1                                     | 0.178675953 |
|              | 0.178675953                    | 0.178675953                    | NA                                    | 1            | 0            | 0.998207054                           |             |
| CFAP77       | ENSG00000188523.8              | 0.858344266                    | 2                                     | 2            | 0.664180103  |                                       |             |
|              | Brain_Cerebellum               | 0.721494202                    | Brain_Amygdala                        | 1.033586828  | 0.966413172  |                                       |             |
|              | 0.966413172                    | -0.434149195                   | -0.356462538                          | -0.395305867 | 0.054932762  |                                       |             |
|              | 2                              | 0                              | 0.998207054                           |              |              |                                       |             |
| AC084149.2   | ENSG00000227088.1              | 0.858465242                    | 2                                     | 2            | 0.712911642  |                                       |             |
|              | Brain_Substantia_nigra         | 0.978583209                    | Brain_Spinal_cord_cervical_c-1        |              |              |                                       |             |
|              | 1.777422751                    | 0.222577249                    | 0.222577249                           | 0.026845191  | 0.367948492  |                                       |             |
|              | 0.197396841                    | 0.241196457                    | 2                                     | 0            | 0.998207054  |                                       |             |
| CRYM         | ENSG00000103316.10             | 0.858655157                    | 4                                     | 3            | 0.4461701    | Brain_Cerebellum                      |             |
|              | 0.905665324                    | Brain_Hypothalamus             | 1.959049901                           | 0.042866009  |              |                                       |             |
|              | 0.909048261                    | -0.498621142                   | 0.761815547                           | 0.023408899  | 0.554923576  |                                       |             |
|              | 3                              | 0                              | 0.998207054                           |              |              |                                       |             |
| CTB-1I21.1   | ENSG00000250284.1              | 0.858718889                    | 2                                     | 2            | 0.596757111  |                                       |             |
|              | Brain_Spinal_cord_cervical_c-1 | 0.887997785                    | Brain_Hypothalamus                    |              |              |                                       |             |

|           |                                       |                             |                          |                                      |                |
|-----------|---------------------------------------|-----------------------------|--------------------------|--------------------------------------|----------------|
|           | 1.030789344                           | 0.969210656                 | 0.969210656              | -0.529069684                         | -0.140838175   |
|           | -0.334953929                          | 0.274521133                 | 2 0                      | 0.998207054                          |                |
| NPRL3     | ENSG00000103148.15                    | 0.858737003                 | 13 7                     | 0.206346872                          |                |
|           | Brain_Substantia_nigra                | 0.941694112                 |                          | Brain_Anterior_cingulate_cortex_BA24 |                |
|           | 8.248717642                           | 0.013316343                 | 0.349481027              | -1.263674526                         | 0.168832141    |
|           | -0.626690988                          | 0.423999522                 | 7 0                      | 0.998207054                          |                |
| HAUS1     | ENSG00000152240.12                    | 0.8588842                   | 4 4                      | 0.412418474                          | Brain_Amygdala |
|           | 0.971995941                           | Brain_Cerebellar_Hemisphere | 2.978440183              | 0.246332161                          |                |
|           | 0.246332161                           | -0.035105092                | 0.819645067              | 0.282160639                          | 0.373657495    |
|           | 4 0                                   | 0.998207054                 |                          |                                      |                |
| TNFAIP8L3 | ENSG00000183578.6                     | 0.859007501                 | 2 2                      | 0.623449493                          |                |
|           | Brain_Frontal_Cortex_BA9              | 0.906179062                 |                          | Brain_Cortex                         | 1.634784485    |
|           | 0.365215515                           | 0.365215515                 | -0.490967416             | -0.117859401                         | -0.304413409   |
|           | 0.263827207                           | 2 0                         | 0.998207054              |                                      |                |
| SEMA4B    | ENSG00000185033.14                    | 0.859017133                 | 1 1                      | 0.859017133                          |                |
|           | Brain_Cerebellar_Hemisphere           | 0.859017133                 |                          | Brain_Cerebellar_Hemisphere1         | 1              |
|           | 1 -0.177625454                        | -0.177625454                | -0.177625454             | NA 1                                 | 0              |
|           | 0.998207054                           |                             |                          |                                      |                |
| PIGS      | ENSG00000087111.20                    | 0.859199355                 | 2 2                      | 0.588138899                          | Brain_Cortex   |
|           | 0.823713386                           | Brain_Frontal_Cortex_BA9    | 1.229415892              | 0.770584108                          |                |
|           | 0.770584108                           | -0.541534972                | -0.222771454             | -0.382153213                         | 0.225399845    |
|           | 2 0                                   | 0.998207054                 |                          |                                      |                |
| TIGD1     | ENSG00000221944.6                     | 0.859231397                 | 3 2                      | 0.600129244                          | Brain_Cortex   |
|           | 0.974245286                           | Brain_Frontal_Cortex_BA9    | 2.416544183              | 0.050288536                          |                |
|           | 0.533167281                           | -0.524214662                | -0.032284354             | -0.292539454                         | 0.247207331    |
|           | 2 0                                   | 0.998207054                 |                          |                                      |                |
| KRAS      | ENSG00000133703.11                    | 0.859252016                 | 2 2                      | 0.634261053                          |                |
|           | Brain_Putamen_basal_ganglia           | 0.799805883                 |                          | Brain_Cerebellum                     | 1.049720795    |
|           | 0.950279205                           | 0.950279205                 | -0.475737989             | 0.253598335                          | -0.111069827   |
|           | 0.51571866 2                          | 0 0.998207054               |                          |                                      |                |
| DOC2B     | ENSG00000272636.3                     | 0.859293331                 | 7 6                      | 0.382518304                          |                |
|           | Brain_Substantia_nigra                | 0.891596109                 |                          | Brain_Cerebellar_Hemisphere          |                |
|           | 2.130302096                           | 0.047967308                 | 0.53224087               | -0.87326564                          | 0.39753241     |
|           | -0.304411607                          | 0.55894205 6                | 0 0.998207054            |                                      |                |
| DIP2A     | ENSG00000160305.17                    | 0.859339304                 | 5 5                      | 0.300737183                          |                |
|           | Brain_Putamen_basal_ganglia           | 0.900370747                 |                          | Brain_Cerebellum                     | 1.509485636    |
|           | 0.548889007                           | 0.548889007                 | -1.034853822             | 0.585661437                          | -0.156717415   |
|           | 0.610700149                           | 5 0                         | 0.998207054              |                                      |                |
| ADD3      | ENSG00000148700.14                    | 0.85937589 4                | 2 0.664887587            |                                      |                |
|           | Brain_Putamen_basal_ganglia           | 0.9494551                   | Brain_Frontal_Cortex_BA9 | 3.687359193                          |                |
|           | 0.010086041                           | 0.271506158                 | -0.433175072             | -0.063391067                         | -0.231969957   |
|           | 0.168804367                           | 2 0                         | 0.998207054              |                                      |                |
| COMMD5    | ENSG00000170619.9                     | 0.859454551                 | 4 3                      | 0.449496971                          |                |
|           | Brain_Cerebellar_Hemisphere           | 0.908409997                 |                          | Brain_Cerebellum                     | 2.445037039    |
|           | 0.003006014                           | 0.647948141                 | -0.29153011              | 0.756253918                          | 0.05266911     |
|           | 0.475524516                           | 3 0                         | 0.998207054              |                                      |                |
| PLD3      | ENSG00000105223.19                    | 0.859493108                 | 1 1                      | 0.859493108                          |                |
|           | Brain_Nucleus_accumbens_basal_ganglia | 0.859493108                 |                          |                                      |                |
|           | Brain_Nucleus_accumbens_basal_ganglia | 1 1                         | 1 -0.177019456           |                                      |                |
|           | -0.177019456                          | -0.177019456                | NA 1                     | 0 0.998207054                        |                |
| CHUK      | ENSG00000213341.10                    | 0.85954156 1                | 1 0.85954156             | Brain_Cerebellum                     | 0.85954156     |
|           | Brain_Cerebellum1                     | 1 1                         | 0.176957771              | 0.176957771                          | 0.176957771    |
|           | NA 1                                  | 0 0.998207054               |                          |                                      |                |
| GHR       | ENSG00000112964.13                    | 0.859728132                 | 2 2                      | 0.684697449                          |                |
|           | Brain_Frontal_Cortex_BA9              | 0.687175687                 |                          | Brain_Anterior_cingulate_cortex_BA24 |                |
|           | 1.081940046                           | 0.918059954                 | 0.918059954              | -0.406061451                         | 0.402690822    |
|           | -0.001685314                          | 0.571874216                 | 2 0                      | 0.998207054                          |                |
| NTF3      | ENSG00000185652.11                    | 0.859734279                 | 1 1                      | 0.859734279                          |                |
|           | Brain_Anterior_cingulate_cortex_BA24  | 0.859734279                 |                          |                                      |                |
|           | Brain_Anterior_cingulate_cortex_BA24  | 1 1                         | 1 -0.176712427           |                                      |                |
|           | -0.176712427                          | -0.176712427                | NA 1                     | 0 0.998207054                        |                |
| PPP1R1C   | ENSG00000150722.10                    | 0.859761589                 | 4 4                      | 0.357898622                          |                |



|             |                                       |                        |              |                                      |              |              |             |              |
|-------------|---------------------------------------|------------------------|--------------|--------------------------------------|--------------|--------------|-------------|--------------|
|             | Brain_Frontal_Cortex_BA9              | 0.890870575            |              | Brain_Hippocampus                    | 1.825510694  |              |             |              |
|             | 0.1523012                             | 0.1523012              | -0.919376605 | 0.137202702                          | -0.287285527 |              |             |              |
|             | 0.448345862                           | 4                      | 0            | 0.998207054                          |              |              |             |              |
| LINC01521   | ENSG00000213888.3                     | 0.859788239            |              | 2                                    | 2            | 0.588221766  |             |              |
|             | Brain_Cortex                          | 0.930597699            |              | Brain_Cerebellum                     | 1.014425035  | 0.985574965  |             |              |
|             | 0.985574965                           | -0.541414716           |              | -0.087092863                         | -0.314253789 | 0.321254064  |             |              |
|             | 2                                     | 0                      | 0.998207054  |                                      |              |              |             |              |
| HEATR5B     | ENSG00000008869.11                    | 0.859961512            |              | 1                                    | 1            | 0.859961512  |             |              |
|             | Brain_Substantia_nigra                | 0.859961512            |              | Brain_Substantia_nigra               | 1            | 1            |             |              |
|             | 1                                     | -0.176423159           | -0.176423159 | -0.176423159                         | NA           | 1            | 0           |              |
|             | 0.998207054                           |                        |              |                                      |              |              |             |              |
| OLA1        | ENSG00000138430.15                    | 0.859986851            |              | 3                                    | 3            | 0.392216376  |             |              |
|             | Brain_Hippocampus                     | 0.8781739              |              | Brain_Spinal_cord_cervical_c-1       | 1.131464479  |              |             |              |
|             | 0.870514143                           | 0.870514143            |              | 0.15328453                           | 0.85560487   | 0.389584893  |             |              |
|             | 0.403598551                           | 3                      | 0            | 0.998207054                          |              |              |             |              |
| ZSCAN5A     | ENSG00000131848.9                     | 0.86006597             |              | 1                                    | 1            | 0.86006597   |             |              |
|             | Brain_Nucleus_accumbens_basal_ganglia | 0.86006597             |              |                                      |              |              |             |              |
|             | Brain_Nucleus_accumbens_basal_ganglia | 1                      | 1            | 1                                    | -0.176290188 |              |             |              |
|             | -0.176290188                          | -0.176290188           | NA           | 1                                    | 0            | 0.998207054  |             |              |
| CTSD        | ENSG00000117984.13                    | 0.860227358            |              | 1                                    | 1            | 0.860227358  |             |              |
|             | Brain_Hippocampus                     | 0.860227358            |              | Brain_Hippocampus                    | 1            | 1            | 1           |              |
|             | -0.176084755                          | -0.176084755           | -0.176084755 | NA                                   | 1            | 0            | 0.998207054 |              |
| VIT         | ENSG00000205221.12                    | 0.860298814            |              | 3                                    | 3            | 0.527525502  |             |              |
|             | Brain_Putamen_basal_ganglia           | 0.972183739            |              | Brain_Cerebellum                     | 1.047208039  |              |             |              |
|             | 0.928668442                           | 0.928668442            |              | -0.631787869                         | 0.034869578  | -0.387134845 |             |              |
|             | 0.367012503                           | 3                      | 0            | 0.998207054                          |              |              |             |              |
| RP11-65J3.2 | ENSG00000226355.1                     | 0.860327601            |              | 1                                    | 1            | 0.860327601  |             |              |
|             | Brain_Amygdala                        | 0.860327601            |              | Brain_Amygdala                       | 1            | 1            | 1           | -0.175957157 |
|             | -0.175957157                          | -0.175957157           | NA           | 1                                    | 0            | 0.998207054  |             |              |
| SPPL2A      | ENSG00000138600.9                     | 0.860343725            |              | 9                                    | 7            | 0.302659084  |             |              |
|             | Brain_Cortex                          | 0.866495611            |              | Brain_Caudate_basal_ganglia          | 5.539345575  |              |             |              |
|             | 0.007031581                           | 0.188705556            |              | -1.03074784                          | 0.246479665  | -0.345025636 |             |              |
|             | 0.408835919                           | 7                      | 0            | 0.998207054                          |              |              |             |              |
| VWC2L       | ENSG00000174453.9                     | 0.860375461            |              | 2                                    | 2            | 0.65484224   |             |              |
|             | Brain_Spinal_cord_cervical_c-1        | 0.665511144            |              | Brain_Frontal_Cortex_BA9             |              |              |             |              |
|             | 1.286135051                           | 0.713864949            |              | 0.713864949                          | -0.432316847 | 0.447045456  |             |              |
|             | 0.007364304                           | 0.621803048            |              | 2                                    | 0            | 0.998207054  |             |              |
| ZC3H11A     | ENSG00000058673.16                    | 0.860431917            |              | 1                                    | 1            | 0.860431917  |             |              |
|             | Brain_Cortex                          | 0.860431917            |              | Brain_Cortex                         | 1            | 1            | 1           | 0.175824379  |
|             | 0.175824379                           | 0.175824379            | NA           | 1                                    | 0            | 0.998207054  |             |              |
| MYBPC1      | ENSG00000196091.13                    | 0.86046111             |              | 2                                    | 2            | 0.638807616  |             |              |
|             | Brain_Frontal_Cortex_BA9              | 0.780540595            |              | Brain_Cerebellum                     | 1.009989166  |              |             |              |
|             | 0.990010834                           | 0.990010834            |              | -0.469366602                         | 0.278614616  | -0.095375993 |             |              |
|             | 0.528902591                           | 2                      | 0            | 0.998207054                          |              |              |             |              |
| CYTOR       | ENSG00000222041.10                    | 0.860475556            |              | 7                                    | 7            | 0.195904548  |             |              |
|             | Brain_Caudate_basal_ganglia           | 0.945468295            |              | Brain_Anterior_cingulate_cortex_BA24 |              |              |             |              |
|             | 1.536147785                           | 0.415534278            |              | 0.415534278                          | -1.29330802  | 0.757815551  |             |              |
|             | -0.181484311                          | 0.73641237             | 7            | 0                                    | 0.998207054  |              |             |              |
| CHST10      | ENSG00000115526.10                    | 0.86058691             |              | 7                                    | 6            | 0.149368307  |             | Brain_Cortex |
|             | 0.759214746                           | Brain_Substantia_nigra |              | 4.037424711                          | 0.025781377  |              |             |              |
|             | 0.201691378                           | -1.441766321           |              | -0.306512129                         | -0.912916925 | 0.404604518  |             |              |
|             | 6                                     | 0                      | 0.998207054  |                                      |              |              |             |              |
| SIGIRR      | ENSG00000185187.12                    | 0.860651107            |              | 13                                   | 8            | 0.281001295  |             |              |
|             | Brain_Hippocampus                     | 0.894081728            |              | Brain_Hypothalamus                   | 6.656393947  |              |             |              |
|             | 1.05E-17                              | 0.327898531            |              | -0.978438566                         | 1.078072742  | 0.378073906  |             |              |
|             | 0.593341551                           | 8                      | 0            | 0.998207054                          |              |              |             |              |
| KLHL18      | ENSG00000114648.11                    | 0.86065585             |              | 3                                    | 3            | 0.401907561  |             |              |
|             | Brain_Hippocampus                     | 0.933422489            |              | Brain_Cerebellar_Hemisphere          | 1.335727127  |              |             |              |
|             | 0.64412906                            | 0.64412906             | -0.83821928  | 0.083539603                          | -0.347805738 | 0.46370966   |             |              |
|             | 3                                     | 0                      | 0.998207054  |                                      |              |              |             |              |
| LINC01547   | ENSG00000183250.11                    | 0.860764094            |              | 11                                   | 9            | 0.243870053  |             |              |
|             | Brain_Substantia_nigra                | 0.965832091            |              | Brain_Cerebellum                     | 4.999499665  |              |             |              |

|              |                                |                          |              |              |                                       |
|--------------|--------------------------------|--------------------------|--------------|--------------|---------------------------------------|
|              | 0.099081105                    | 0.253580307              | -1.089303021 | 1.165368028  | -0.132147919                          |
|              | 0.70145862                     | 9                        | 0            | 0.998207054  |                                       |
| POLA2        | ENSG00000014138.8              | 0.860772038              | 9            | 5            | 0.407531893                           |
|              | Brain_Spinal_cord_cervical_c-1 | 0.991330414              |              |              | Brain_Amygdala                        |
|              | 0.018845435                    | 0.238007178              | -0.151979804 | 0.828244772  | 6.866549969                           |
|              | 0.307169254                    | 5                        | 0            | 0.998207054  | 0.325338105                           |
| DYX1C1       | ENSG00000256061.7              | 0.860801028              | 2            | 2            | 0.59694305                            |
|              | Brain_Frontal_Cortex_BA9       | 0.86138946               |              |              | Brain_Nucleus_accumbens_basal_ganglia |
|              | 1.062256291                    | 0.937743709              | 0.937743709  | 0.174605712  | 0.528801655                           |
|              | 0.351703683                    | 0.250454354              | 2            | 0            | 0.998207054                           |
| ZC3H3        | ENSG00000014164.6              | 0.860816949              | 10           | 6            | 0.317497595                           |
|              | Brain_Putamen_basal_ganglia    | 0.979404556              |              |              | Brain_Hippocampus                     |
|              | 0.004185723                    | 0.416247132              | -0.763654284 | 0.999613484  | 6.007439275                           |
|              | 0.497669516                    | 6                        | 0            | 0.998207054  | -0.237021518                          |
| NANOS1       | ENSG00000188613.6              | 0.860825721              | 4            | 4            | 0.623191681                           |
|              | Brain_Spinal_cord_cervical_c-1 | 0.994659146              |              |              | Brain_Hippocampus                     |
|              | 2.666985902                    | 0.099225145              | 0.099225145  | -0.452979875 | 0.491331957                           |
|              | -0.075083901                   | 0.422023785              | 4            | 0            | 0.998207054                           |
| KCTD7        | ENSG00000243335.9              | 0.860927881              | 6            | 3            | 0.369504029                           |
|              | Brain_Caudate_basal_ganglia    | 0.813538477              |              |              | Brain_Putamen_basal_ganglia           |
|              | 5.255900209                    | 0.006890438              | 0.282981256  | 0.235863648  | 0.89740278                            |
|              | 0.518608791                    | 0.219852499              | 3            | 0            | 0.998207054                           |
| SNAP23       | ENSG00000092531.9              | 0.86093202               | 1            | 1            | 0.86093202                            |
|              | Brain_Amygdala                 | 1                        | 1            | 1            | Brain_Amygdala                        |
|              | 0.86093202                     | Brain_Amygdala           | 1            | 1            | -0.175187864                          |
|              | -0.175187864                   | NA                       | 1            | 0            | -0.175187864                          |
| CHPF         | ENSG00000123989.13             | 0.860964104              | 1            | 1            | 0.860964104                           |
|              | Brain_Cortex                   | 1                        | 1            | 1            | Brain_Cortex                          |
|              | 0.860964104                    | Brain_Cortex             | 1            | 1            | 0.175147031                           |
|              | 0.175147031                    | NA                       | 1            | 0            | 0.175147031                           |
| HDC          | ENSG00000140287.10             | 0.861130532              | 3            | 3            | 0.424361058                           |
|              | Brain_Frontal_Cortex_BA9       | 1.558065454              |              |              | Brain_Cortex                          |
|              | 0.890192799                    | Brain_Frontal_Cortex_BA9 | 1.558065454  | 0.499393978  | 0.499393978                           |
|              | 0.499393978                    | -0.508959112             | 0.798878171  | 0.050619602  | 0.674024966                           |
|              | 3                              | 0                        | 0.998207054  |              |                                       |
| MRPS35       | ENSG00000061794.12             | 0.861166604              | 1            | 1            | 0.861166604                           |
|              | Brain_Spinal_cord_cervical_c-1 | 0.861166604              |              |              | Brain_Spinal_cord_cervical_c-1        |
|              | 1                              | 1                        | 1            | -0.174889317 | -0.174889317                          |
|              | 0.998207054                    | -0.174889317             | -0.174889317 | -0.174889317 | NA                                    |
|              |                                |                          |              |              | 1                                     |
|              |                                |                          |              |              | 0                                     |
| ZSWIM7       | ENSG00000214941.7              | 0.861208379              | 12           | 1            | 0.588956256                           |
|              | Brain_Hippocampus              | 0.921326692              |              |              | Brain_Hypothalamus                    |
|              | 0.000203494                    | 11.70626647              | -0.540349169 | 0.173105071  | 11.70626647                           |
|              | 0.199018307                    | 1                        | 0            | 0.998207054  | -0.128781237                          |
| KSR1         | ENSG00000141068.13             | 0.861230512              | 2            | 1            | 0.71632189                            |
|              | Brain_Cerebellar_Hemisphere    | 0.98583161               |              |              | Brain_Cerebellum                      |
|              | 0.045451683                    | 1.954548317              | -0.017758376 | 0.363378862  | 1.954548317                           |
|              | 0.269504726                    | 1                        | 0            | 0.998207054  | 0.172810243                           |
| RP11-410E4.1 | ENSG00000259915.2              | 0.861275642              | 11           | 3            | 0.152441456                           |
|              | Brain_Hypothalamus             | 0.866364631              |              |              | Brain_Putamen_basal_ganglia           |
|              | 0.002853119                    | 0.374787685              | -1.43096078  | 0.309668759  | 9.433345537                           |
|              | 0.492105799                    | 3                        | 0            | 0.998207054  | -0.750720575                          |
| MESP1        | ENSG00000166823.5              | 0.8613678                | 3            | 3            | 0.462108863                           |
|              | Brain_Caudate_basal_ganglia    | 0.732997835              |              |              | Brain_Anterior_cingulate_cortex_BA24  |
|              | 1.117533007                    | 0.885896409              | 0.885896409  | -0.407667582 | 0.735378745                           |
|              | -0.004476436                   | 0.641596237              | 3            | 0            | 0.998207054                           |
| CACYBP       | ENSG00000116161.17             | 0.861377678              | 1            | 1            | 0.861377678                           |
|              | Brain_Cerebellum               | 0.861377678              |              |              | Brain_Cerebellum                      |
|              | 0.174620706                    | 0.174620706              | NA           | 1            | 0.174620706                           |
|              | 0.174620706                    | 0.174620706              | NA           | 1            | 0.998207054                           |
| MRVI1        | ENSG00000072952.18             | 0.861518768              | 10           | 8            | 0.135891012                           |
|              | Brain_Substantia_nigra         | 0.972627674              |              |              | Brain_Hypothalamus                    |
|              | 0.040918039                    | -0.268721371             | -0.731441364 | 1.491268513  | 4.574006076                           |
|              | 0.662329674                    | 8                        | 0            | 0.998207054  | 0.307961072                           |
| RP11-989F5.1 | ENSG00000256250.1              | 0.861519461              | 2            | 1            | 0.847054785                           |
|              | Brain_Cerebellum               | 0.876247685              |              |              | Brain_Cerebellar_Hemisphere           |
|              | 0.003154365                    | 1.996845635              | -0.192877655 | -0.155727671 | 1.996845635                           |
|              |                                |                          |              |              | -0.174302663                          |

|           |                                       |                |              |              |              |              |                                       |             |                |
|-----------|---------------------------------------|----------------|--------------|--------------|--------------|--------------|---------------------------------------|-------------|----------------|
|           | 0.026269006                           | 1              | 0            | 0.998207054  |              |              |                                       |             |                |
| LY6G6D    | ENSG00000244355.7                     |                |              | 0.861519718  | 1            | 1            | 0.861519718                           |             |                |
|           | Brain_Substantia_nigra                |                |              | 0.861519718  |              |              | Brain_Substantia_nigra                | 1           | 1              |
|           | 1                                     | 0.174439953    | 0.174439953  | 0.174439953  | NA           | 1            | 0                                     |             |                |
|           | 0.998207054                           |                |              |              |              |              |                                       |             |                |
| NFIC      | ENSG00000141905.17                    |                |              | 0.861586054  | 2            | 2            | 0.616177777                           |             |                |
|           | Brain_Frontal_Cortex_BA9              |                |              | 0.837543539  |              |              | Brain_Cerebellum                      | 1.71178584  | 0.28821416     |
|           | 0.28821416                            | -0.501274745   | -0.205036588 | -0.205036588 | -0.353155666 | 0.20947201   | 2                                     | 0           |                |
|           | 0.998207054                           |                |              |              |              |              |                                       |             |                |
| UMAD1     | ENSG00000219545.11                    |                |              | 0.861615588  | 1            | 1            | 0.861615588                           |             |                |
|           | Brain_Caudate_basal_ganglia           |                |              | 0.861615588  |              |              | Brain_Caudate_basal_ganglia           | 1           | 1              |
|           | 1                                     | 0.174317956    | 0.174317956  | 0.174317956  | NA           | 1            | 0                                     |             |                |
|           | 0.998207054                           |                |              |              |              |              |                                       |             |                |
| NRN1      | ENSG00000124785.8                     |                |              | 0.861806852  | 1            | 1            | 0.861806852                           |             |                |
|           | Brain_Hippocampus                     |                |              | 0.861806852  |              |              | Brain_Hippocampus                     | 1           | 1              |
|           | 0.174074578                           | 0.174074578    | 0.174074578  | 0.174074578  | NA           | 1            | 0                                     | 0.998207054 |                |
| SAMD8     | ENSG00000156671.12                    |                |              | 0.861843048  | 1            | 1            | 0.861843048                           |             |                |
|           | Brain_Nucleus_accumbens_basal_ganglia |                |              | 0.861843048  |              |              |                                       |             |                |
|           | Brain_Nucleus_accumbens_basal_ganglia |                |              | 1            | 1            | 1            | -0.17402852                           |             |                |
|           | -0.17402852                           | -0.17402852    | NA           | 1            | 0            | 0.998207054  |                                       |             |                |
| OGFOD2    | ENSG00000111325.16                    |                |              | 0.861845814  | 2            | 2            | 0.604059306                           |             |                |
|           | Brain_Frontal_Cortex_BA9              |                |              | 0.708896333  |              |              | Brain_Cerebellum                      | 1.425659704 |                |
|           | 0.574340296                           | 0.574340296    | -0.518571904 | -0.518571904 | -0.373338759 | -0.445955332 |                                       |             |                |
|           | 0.102695342                           | 2              | 0            | 0.998207054  |              |              |                                       |             |                |
| ZCCHC9    | ENSG00000131732.11                    |                |              | 0.862044426  | 3            | 3            | 0.550482162                           |             |                |
|           | Brain_Spinal_cord_cervical_c-1        |                |              | 0.841321604  |              |              | Brain_Frontal_Cortex_BA9              |             |                |
|           | 1.191648364                           | 0.854428501    | 0.854428501  | 0.854428501  | -0.523140978 | 0.597037773  |                                       |             |                |
|           | 0.091366691                           | 0.567964929    | 3            | 0            | 0.998207054  |              |                                       |             |                |
| LINC00115 | ENSG00000225880.5                     |                |              | 0.862070816  | 13           | 2            | 0.463960206                           |             |                |
|           | Brain_Nucleus_accumbens_basal_ganglia |                |              | 0.981130595  |              |              | Brain_Amygdala                        |             |                |
|           | 11.64846703                           | 3.37E-05       | 0.626372472  | 0.626372472  | -0.515952836 | 0.732341417  |                                       |             |                |
|           | -0.003918397                          | 0.294138172    | 2            | 0            | 0.998207054  |              |                                       |             |                |
| ALS2CR12  | ENSG00000155749.12                    |                |              | 0.862156085  | 12           | 1            | 0.425998804                           |             |                |
|           | Brain_Substantia_nigra                |                |              | 0.999231063  |              |              | Brain_Hypothalamus                    | 11.29381188 |                |
|           | 0.001061769                           | 11.29381188    | -0.796057175 | -0.796057175 | 0.320860373  | -0.169856204 |                                       |             |                |
|           | 0.269905552                           | 1              | 0            | 0.998207054  |              |              |                                       |             |                |
| SMN2      | ENSG00000205571.13                    |                |              | 0.862339169  | 12           | 4            | 0.425073511                           |             |                |
|           | Brain_Spinal_cord_cervical_c-1        |                |              | 0.943012692  |              |              | Brain_Caudate_basal_ganglia           |             |                |
|           | 8.363358376                           | 0.007778929    | 0.53924512   | 0.53924512   | -0.797650199 | 0.516371332  |                                       |             |                |
|           | -0.244510439                          | 0.382617294    | 4            | 0            | 0.998207054  |              |                                       |             |                |
| CD86      | ENSG00000114013.15                    |                |              | 0.862554457  | 1            | 1            | 0.862554457                           |             | Brain_Amygdala |
|           | 0.862554457                           | Brain_Amygdala | 1            | 1            | 1            | 0.173123368  | 0.173123368                           |             |                |
|           | 0.173123368                           | NA             | 1            | 0            | 0.998207054  |              |                                       |             |                |
| ADD2      | ENSG00000075340.22                    |                |              | 0.862660307  | 3            | 3            | 0.479900571                           |             |                |
|           | Brain_Anterior_cingulate_cortex_BA24  |                |              | 0.811459356  |              |              | Brain_Putamen_basal_ganglia           |             |                |
|           | 1.060906253                           | 0.910972247    | 0.910972247  | 0.910972247  | -0.706462491 | 0.23854379   |                                       |             |                |
|           | -0.281547092                          | 0.479638402    | 3            | 0            | 0.998207054  |              |                                       |             |                |
| LDLRAP1   | ENSG00000157978.11                    |                |              | 0.862737235  | 13           | 2            | 0.730387836                           |             |                |
|           | Brain_Hypothalamus                    |                |              | 0.996902975  |              |              | Brain_Nucleus_accumbens_basal_ganglia |             |                |
|           | 11.97660133                           | 0.000237274    | 0.457625077  | 0.457625077  | -0.344609669 | 0.234589552  |                                       |             |                |
|           | -0.005256135                          | 0.127873953    | 2            | 0            | 0.998207054  |              |                                       |             |                |
| SLC35F2   | ENSG00000110660.14                    |                |              | 0.862870117  | 9            | 2            | 0.582611638                           |             |                |
|           | Brain_Cerebellar_Hemisphere           |                |              | 0.98197473   |              |              | Brain_Nucleus_accumbens_basal_ganglia |             |                |
|           | 8.176218863                           | 0.000632574    | 0.44959159   | 0.44959159   | -0.176952536 | 0.549573939  |                                       |             |                |
|           | 0.100575895                           | 0.258627859    | 2            | 0            | 0.998207054  |              |                                       |             |                |
| NCK1      | ENSG00000158092.6                     |                |              | 0.862870994  | 3            | 3            | 0.59187832                            |             |                |
|           | Brain_Caudate_basal_ganglia           |                |              | 0.88442005   |              |              | Brain_Hypothalamus                    | 2.152724733 |                |
|           | 0.269315878                           | 0.269315878    | -0.167760931 | -0.167760931 | 0.536116091  | 0.171241171  |                                       |             |                |
|           | 0.352651056                           | 3              | 0            | 0.998207054  |              |              |                                       |             |                |
| DCT       | ENSG00000080166.15                    |                |              | 0.862883957  | 9            | 3            | 0.316336899                           |             |                |
|           | Brain_Anterior_cingulate_cortex_BA24  |                |              | 0.928144202  |              |              | Brain_Caudate_basal_ganglia           |             |                |
|           | 6.805687483                           | 0.002751416    | 0.656476038  | 0.656476038  | -1.002013859 | 0.090179968  |                                       |             |                |

|               |                                       |                        |              |              |                                       |             |             |   |
|---------------|---------------------------------------|------------------------|--------------|--------------|---------------------------------------|-------------|-------------|---|
|               | -0.589664281                          | 0.358480271            | 3            | 0            | 0.998207054                           |             |             |   |
| ECD           | ENSG00000122882.10                    | 0.862910074            | 3            | 3            | 0.431785316                           |             |             |   |
|               | Brain_Nucleus_accumbens_basal_ganglia | 0.955517335            |              |              | Brain_Amygdala                        | 1.64889614  |             |   |
|               | 0.36273778                            | 0.36273778             | -0.786140267 | 0.055779665  | -0.320419113                          | 0.4280397   |             |   |
|               | 3                                     | 0                      | 0.998207054  |              |                                       |             |             |   |
| ALG12         | ENSG00000182858.13                    | 0.863152003            | 7            | 6            | 0.156848785                           |             |             |   |
|               | Brain_Nucleus_accumbens_basal_ganglia | 0.594712413            |              |              | Brain_Caudate_basal_ganglia           |             |             |   |
|               | 4.562987322                           | 0.07153875             | 0.190149349  | 0.532019611  | 1.415749756                           |             |             |   |
|               | 1.000562236                           | 0.296039202            | 6            | 0            | 0.998207054                           |             |             |   |
| ZKSCAN7       | ENSG00000196345.12                    | 0.863193571            | 1            | 1            | 0.863193571                           |             |             |   |
|               | Brain_Cerebellar_Hemisphere           | 0.863193571            |              |              | Brain_Cerebellar_Hemisphere1          | 1           |             |   |
|               | 1                                     | -0.172310321           | -0.172310321 | -0.172310321 | NA                                    | 1           | 0           |   |
|               | 0.998207054                           |                        |              |              |                                       |             |             |   |
| LINC00266-1   | ENSG00000149656.8                     | 0.863200433            | 8            | 4            | 0.134795835                           |             |             |   |
|               | Brain_Nucleus_accumbens_basal_ganglia | 0.878536501            |              |              | Brain_Cerebellum                      | 5.53555652  |             |   |
|               | 0.031049092                           | 0.283153864            | -0.152824722 | 1.495454618  | 0.79405084                            |             |             |   |
|               | 0.493403406                           | 4                      | 0            | 0.998207054  |                                       |             |             |   |
| COMMD6        | ENSG00000188243.12                    | 0.863251802            | 4            | 4            | 0.562370094                           |             |             |   |
|               | Brain_Cerebellar_Hemisphere           | 0.903806688            |              |              | Brain_Putamen_basal_ganglia           |             |             |   |
|               | 2.075020978                           | 0.221091155            | 0.221091155  | -0.579324712 | 0.333528082                           |             |             |   |
|               | -0.151551146                          | 0.447662763            | 4            | 0            | 0.998207054                           |             |             |   |
| MGAT4C        | ENSG00000182050.13                    | 0.863255271            | 3            | 3            | 0.389923804                           |             |             |   |
|               | Brain_Substantia_nigra                | 0.895392198            |              |              | Brain_Cerebellum                      | 1.302541814 |             |   |
|               | 0.831011729                           | 0.831011729            | 0.13148431   | 0.859755554  | 0.386691364                           |             |             |   |
|               | 0.410111021                           | 3                      | 0            | 0.998207054  |                                       |             |             |   |
| SELENOM       | ENSG00000198832.10                    | 0.863446616            | 3            | 3            | 0.607181115                           |             |             |   |
|               | Brain_Nucleus_accumbens_basal_ganglia | 0.839651427            |              |              | Brain_Substantia_nigra                |             |             |   |
|               | 1.965970197                           | 0.303195864            | 0.303195864  | -0.514101377 | 0.202339366                           |             |             |   |
|               | -0.241414978                          | 0.387646767            | 3            | 0            | 0.998207054                           |             |             |   |
| RP11-340F14.6 | ENSG00000274029.1                     | 0.863618644            | 3            | 3            | 0.453268576                           |             |             |   |
|               | Brain_Cerebellar_Hemisphere           | 0.844421666            |              |              | Brain_Putamen_basal_ganglia           |             |             |   |
|               | 1.729597642                           | 0.28476385             | 0.28476385   | -0.749976969 | -0.196240837                          | -0.4461219  |             |   |
|               | 0.280786077                           | 3                      | 0            | 0.998207054  |                                       |             |             |   |
| PKIB          | ENSG00000135549.14                    | 0.863655493            | 2            | 2            | 0.686850103                           |             |             |   |
|               | Brain_Nucleus_accumbens_basal_ganglia | 0.702337318            |              |              | Brain_Putamen_basal_ganglia           |             |             |   |
|               | 1.052633231                           | 0.947366769            | 0.947366769  | -0.403133383 | -0.382167242                          |             |             |   |
|               | -0.392650313                          | 0.0148253              | 2            | 0            | 0.998207054                           |             |             |   |
| DEDD2         | ENSG00000160570.13                    | 0.863758854            | 2            | 2            | 0.598208588                           |             |             |   |
|               | Brain_Cerebellum                      |                        |              |              |                                       |             |             |   |
|               | 0.66367478                            | Brain_Cortex           | 1.646600669  | 0.353399331  | 0.353399331                           |             |             |   |
|               | 0.434845219                           | 0.5269784              | 0.48091181   | 0.065147997  | 2                                     | 0           | 0.998207054 |   |
| USF2          | ENSG00000105698.15                    | 0.86377238             | 1            | 1            | 0.86377238                            |             |             |   |
|               | Brain_Substantia_nigra                |                        |              |              | Brain_Substantia_nigra                |             |             |   |
|               | 0.86377238                            | Brain_Substantia_nigra | 1            | 1            | 1                                     | 0.171574088 |             |   |
|               | 0.171574088                           | 0.171574088            | NA           | 1            | 0                                     | 0.998207054 |             |   |
| LINC01233     | ENSG00000269364.1                     | 0.863960147            | 1            | 1            | 0.863960147                           |             |             |   |
|               | Brain_Caudate_basal_ganglia           | 0.863960147            |              |              | Brain_Caudate_basal_ganglia1          | 1           |             |   |
|               | 1                                     | 0.171335272            | 0.171335272  | 0.171335272  | NA                                    | 1           | 0           |   |
|               | 0.998207054                           |                        |              |              |                                       |             |             |   |
| CTD-2378E12.1 | ENSG00000273674.4                     | 0.863960166            | 12           | 7            | 0.205305065                           |             |             |   |
|               | Brain_Putamen_basal_ganglia           | 0.984458455            |              |              | Brain_Nucleus_accumbens_basal_ganglia |             |             |   |
|               | 7.804336656                           | 0.025887285            | 0.29512765   | 0.01947967   | 1.266581238                           |             |             |   |
|               | 0.557638155                           | 0.374538057            | 7            | 0            | 0.998207054                           |             |             |   |
| SUMF1         | ENSG00000144455.13                    | 0.864179641            | 12           | 2            | 0.344945454                           |             |             |   |
|               | Brain_Hippocampus                     | 0.885948208            |              |              | Brain_Caudate_basal_ganglia           | 10.57368058 |             |   |
|               | 0.021017507                           | 0.36940632             | -0.944438815 | 0.330778441  | -0.461320319                          |             |             |   |
|               | 0.354298208                           | 2                      | 0            | 0.998207054  |                                       |             |             |   |
| SNX25         | ENSG00000109762.15                    | 0.864315754            | 2            | 2            | 0.606349012                           |             |             |   |
|               | Brain_Cerebellum                      |                        |              |              |                                       |             |             |   |
|               | 0.82859367                            | Brain_Substantia_nigra | 1.108438264  | 0.891561736  |                                       |             |             |   |
|               | 0.891561736                           | -0.515291966           | -0.216505588 | -0.365898777 | 0.211273874                           |             |             |   |
|               | 2                                     | 0                      | 0.998207054  |              |                                       |             |             |   |
| ZNF551        | ENSG00000204519.10                    | 0.864405466            | 1            | 1            | 0.864405466                           |             |             |   |
|               | Brain_Hypothalamus                    | 0.864405466            |              |              | Brain_Hypothalamus                    | 1           | 1           | 1 |
|               | 0.170768923                           | 0.170768923            | 0.170768923  | NA           | 1                                     | 0           | 0.998207054 |   |

|            |                                       |                                |              |              |                                       |                    |
|------------|---------------------------------------|--------------------------------|--------------|--------------|---------------------------------------|--------------------|
| WDR87      | ENSG00000171804.10                    | 0.864532166                    | 3            | 2            | 0.65366179                            | Brain_Cerebellum   |
|            | 0.669810525                           | Brain_Spinal_cord_cervical_c-1 |              |              | 2.134871941                           | 0.040960317        |
|            | 0.824167742                           | 0.426408065                    | 0.448681004  |              | 0.439908927                           | 0.01186558 2       |
|            | 0                                     | 0.998207054                    |              |              |                                       |                    |
| LINC01436  | ENSG00000231106.2                     | 0.864568097                    | 3            | 2            | 0.596566899                           |                    |
|            | Brain_Anterior_cingulate_cortex_BA24  | 0.77440093                     |              |              | Brain_Frontal_Cortex_BA9              |                    |
|            | 2.786500857                           | 0.02437935                     | 0.189119793  |              | 0.286623093                           | 0.529343912        |
|            | 0.417295139                           | 0.122427401                    | 2            | 0            | 0.998207054                           |                    |
| TIFA       | ENSG00000145365.10                    | 0.864612326                    | 4            | 2            | 0.646674595                           |                    |
|            | Brain_Hypothalamus                    | 0.934160746                    |              |              | Brain_Cerebellum                      | 3.251443221        |
|            | 0.029121375                           | 0.620325256                    | -0.45838677  |              | 0.113380152                           | -0.141543018       |
|            | 0.237246486                           | 2                              | 0            | 0.998207054  |                                       |                    |
| HK1        | ENSG00000156515.21                    | 0.864657064                    | 2            | 2            | 0.606663747                           |                    |
|            | Brain_Spinal_cord_cervical_c-1        | 0.847972154                    |              |              |                                       |                    |
|            | Brain_Nucleus_accumbens_basal_ganglia | 1.061059243                    |              |              | 0.938940757                           |                    |
|            | 0.938940757                           | -0.514841551                   | 0.191706449  |              | -0.161567551                          | 0.499604882        |
|            | 2                                     | 0                              | 0.998207054  |              |                                       |                    |
| FCER1G     | ENSG00000158869.10                    | 0.864686254                    | 1            | 1            | 0.864686254                           |                    |
|            | Brain_Spinal_cord_cervical_c-1        | 0.864686254                    |              |              | Brain_Spinal_cord_cervical_c-1        |                    |
|            | 1                                     | 1                              | 1            | 0.170411849  | 0.170411849                           | 0.170411849 NA 1 0 |
|            | 0.998207054                           |                                |              |              |                                       |                    |
| GRIN3A     | ENSG00000198785.4                     | 0.864755266                    | 2            | 2            | 0.600966088                           |                    |
|            | Brain_Anterior_cingulate_cortex_BA24  | 0.821761402                    |              |              | Brain_Cerebellum                      |                    |
|            | 1.185205843                           | 0.814794157                    | 0.814794157  |              | -0.523011733                          | -0.225280072       |
|            | -0.374145903                          | 0.210528077                    | 2            | 0            | 0.998207054                           |                    |
| AC004381.6 | ENSG00000005189.19                    | 0.864942                       | 2            | 1            | 0.807503207                           |                    |
|            | Brain_Cerebellar_Hemisphere           | 0.926532656                    |              |              | Brain_Cerebellum                      | 1.949561937        |
|            | 0.050438063                           | 1.949561937                    | -0.243648313 |              | -0.092208158                          | -0.167928236       |
|            | 0.10708436                            | 1                              | 0            | 0.998207054  |                                       |                    |
| RPS8       | ENSG00000142937.11                    | 0.864946203                    | 6            | 4            | 0.431529515                           |                    |
|            | Brain_Nucleus_accumbens_basal_ganglia | 0.998611653                    |              |              | Brain_Caudate_basal_ganglia           |                    |
|            | 4.774115903                           | 0.014404995                    | 0.173478961  |              | -0.255457002                          | 0.786577022        |
|            | 0.031073223                           | 0.380921478                    | 4            | 0            | 0.998207054                           |                    |
| CEACAM19   | ENSG00000186567.12                    | 0.864974503                    | 10           | 10           | 0.242741815                           |                    |
|            | Brain_Amygdala                        | 0.776870713                    |              |              | Brain_Nucleus_accumbens_basal_ganglia |                    |
|            | 2.170693193                           | 0.35473993                     | 0.35473993   | -0.409473138 | 1.168161035                           |                    |
|            | 0.462577171                           | 0.533689275                    | 10           | 0            | 0.998207054                           |                    |
| LRP8       | ENSG00000157193.15                    | 0.865070637                    | 4            | 3            | 0.406287445                           |                    |
|            | Brain_Caudate_basal_ganglia           | 0.957551925                    |              |              | Brain_Cortex                          | 2.051412517        |
|            | 0.043413418                           | 0.910920286                    | -0.149503664 |              | 0.830444624                           | 0.130590489        |
|            | 0.468225867                           | 3                              | 0            | 0.998207054  |                                       |                    |
| TP53TG5    | ENSG00000124251.10                    | 0.865134741                    | 2            | 2            | 0.76628509                            |                    |
|            | Brain_Hippocampus                     | 0.949023824                    |              |              | Brain_Cerebellum                      | 1.893394611        |
|            | 0.106605389                           | 0.106605389                    | 0.063932689  |              | 0.297237637                           | 0.180585163        |
|            | 0.164971511                           | 2                              | 0            | 0.998207054  |                                       |                    |
| NDUFC2     | ENSG00000151366.12                    | 0.865149787                    | 6            | 5            | 0.283058906                           |                    |
|            | Brain_Nucleus_accumbens_basal_ganglia | 0.972715297                    |              |              | Brain_Cerebellum                      |                    |
|            | 2.498582775                           | 0.013201954                    | 0.446379566  |              | -0.278779875                          | 1.07347309         |
|            | 0.297295056                           | 0.460096922                    | 5            | 0            | 0.998207054                           |                    |
| TMEM106A   | ENSG00000184988.8                     | 0.865151809                    | 3            | 2            | 0.542808788                           |                    |
|            | Brain_Putamen_basal_ganglia           | 0.739766064                    |              |              | Brain_Cerebellar_Hemisphere           |                    |
|            | 2.682733246                           | 0.039869252                    | 0.277397501  |              | 0.332163154                           | 0.608571066        |
|            | 0.45347718                            | 0.141266212                    | 2            | 0            | 0.998207054                           |                    |
| FBLN5      | ENSG00000140092.14                    | 0.865252625                    | 2            | 2            | 0.673200628                           | Brain_Cerebellum   |
|            | 0.725327107                           | Brain_Cortex                   | 1.041714115  |              | 0.958285885                           | 0.958285885        |
|            | 0.351348243                           | 0.421759421                    | 0.386553832  |              | 0.049788222                           | 2 0                |
|            | 0.998207054                           |                                |              |              |                                       |                    |
| SYT3       | ENSG00000213023.10                    | 0.865293991                    | 6            | 5            | 0.409889587                           |                    |
|            | Brain_Hypothalamus                    | 0.935602433                    |              |              | Brain_Hippocampus                     | 2.966371718        |
|            | 0.089116669                           | 0.297624591                    | -0.159835997 |              | 0.824087949                           | 0.306301522        |
|            | 0.365627168                           | 5                              | 0            | 0.998207054  |                                       |                    |
| BLK        | ENSG00000136573.12                    | 0.865394435                    | 1            | 1            | 0.865394435                           |                    |

|               |                                       |                             |              |                                       |              |                  |
|---------------|---------------------------------------|-----------------------------|--------------|---------------------------------------|--------------|------------------|
|               | Brain_Cerebellar_Hemisphere           | 0.865394435                 |              | Brain_Cerebellar_Hemisphere           | 1            | 1                |
|               | 1                                     | -0.169511363                | -0.169511363 | -0.169511363                          | NA           | 1 0              |
|               | 0.998207054                           |                             |              |                                       |              |                  |
| GNL2          | ENSG00000134697.12                    | 0.865603277                 | 7            | 4                                     | 0.489964118  |                  |
|               | Brain_Putamen_basal_ganglia           | 0.975698234                 |              | Brain_Caudate_basal_ganglia           |              |                  |
|               | 5.885015961                           | 0.032775371                 | 0.199724085  | -0.37059818                           | 0.690365895  |                  |
|               | 0.062479512                           | 0.352522669                 | 4            | 0                                     | 0.998207054  |                  |
| FOXP4         | ENSG00000137166.14                    | 0.865606133                 | 1            | 1                                     | 0.865606133  |                  |
|               | Brain_Substantia_nigra                | 0.865606133                 |              | Brain_Substantia_nigra                | 1            | 1                |
|               | 1                                     | 0.169242206                 | 0.169242206  | 0.169242206                           | NA           | 1 0              |
|               | 0.998207054                           |                             |              |                                       |              |                  |
| TBX19         | ENSG00000143178.12                    | 0.865615211                 | 3            | 3                                     | 0.609150371  |                  |
|               | Brain_Substantia_nigra                | 0.857511007                 |              | Brain_Hippocampus                     | 2.10518808   |                  |
|               | 0.279160748                           | 0.279160748                 | -0.179543446 | 0.511286622                           | 0.27020067   |                  |
|               | 0.389827164                           | 3                           | 0            | 0.998207054                           |              |                  |
| RP3-510D11.4  | ENSG00000281937.1                     | 0.865634289                 | 1            | 1                                     | 0.865634289  |                  |
|               | Brain_Caudate_basal_ganglia           | 0.865634289                 |              | Brain_Caudate_basal_ganglia           | 1            | 1                |
|               | 1                                     | 0.169206409                 | 0.169206409  | 0.169206409                           | NA           | 1 0              |
|               | 0.998207054                           |                             |              |                                       |              |                  |
| RP11-405M12.4 | ENSG00000273669.1                     | 0.865780073                 | 1            | 1                                     | 0.865780073  |                  |
|               | Brain_Frontal_Cortex_BA9              | 0.865780073                 |              | Brain_Frontal_Cortex_BA9              | 1            | 1                |
|               | 1                                     | -0.169021064                | -0.169021064 | -0.169021064                          | NA           | 1 0              |
|               | 0.998207054                           |                             |              |                                       |              |                  |
| RP11-774O3.3  | ENSG00000251615.3                     | 0.865794102                 | 8            | 3                                     | 0.412113235  |                  |
|               | Brain_Cerebellum                      | 0.985960793                 |              | Brain_Frontal_Cortex_BA9              | 6.04220537   |                  |
|               | 0.022926457                           | 0.268946723                 | -0.127321448 | 0.820180467                           | 0.264126503  |                  |
|               | 0.350847286                           | 3                           | 0            | 0.998207054                           |              |                  |
| RP11-1398P2.1 | ENSG00000244459.2                     | 0.865857291                 | 1            | 1                                     | 0.865857291  |                  |
|               | Brain_Frontal_Cortex_BA9              | 0.865857291                 |              | Brain_Frontal_Cortex_BA9              | 1            | 1                |
|               | 1                                     | -0.168922894                | -0.168922894 | -0.168922894                          | NA           | 1 0              |
|               | 0.998207054                           |                             |              |                                       |              |                  |
| ZCCHC11       | ENSG00000134744.13                    | 0.865996526                 | 12           | 1                                     | 0.488803301  |                  |
|               | Brain_Cerebellum                      | 0.996623488                 |              | Brain_Nucleus_accumbens_basal_ganglia |              |                  |
|               | 11.48176514                           | 0.000347996                 | 11.48176514  | -0.692213438                          | 0.205912264  |                  |
|               | -0.166513782                          | 0.247873172                 | 1            | 0                                     | 0.998207054  |                  |
| STK24         | ENSG00000102572.14                    | 0.866057397                 | 2            | 2                                     | 0.675033059  | Brain_Cerebellum |
|               | 0.709305485                           | Brain_Cerebellar_Hemisphere | 1.095134297  | 0.904865703                           |              |                  |
|               | 0.904865703                           | -0.419250514                | 0.372789007  | -0.023230753                          | 0.560056516  |                  |
|               | 2                                     | 0                           | 0.998207054  |                                       |              |                  |
| RP11-110I1.14 | ENSG00000271751.1                     | 0.866148592                 | 10           | 5                                     | 0.48637807   |                  |
|               | Brain_Nucleus_accumbens_basal_ganglia | 0.971862225                 |              |                                       |              |                  |
|               | Brain_Spinal_cord_cervical_c-1        | 7.241730199                 |              | 0.001008187                           | 0.304661096  |                  |
|               | -0.696081056                          | 0.552299515                 | -0.212101128 | 0.333103869                           | 5            | 0                |
|               | 0.998207054                           |                             |              |                                       |              |                  |
| HJURP         | ENSG00000123485.11                    | 0.866222452                 | 2            | 2                                     | 0.698846815  |                  |
|               | Brain_Frontal_Cortex_BA9              | 0.765295695                 |              | Brain_Caudate_basal_ganglia           |              |                  |
|               | 1.172613062                           | 0.827386938                 | 0.827386938  | -0.386877613                          | -0.298533915 |                  |
|               | -0.342705764                          | 0.062468428                 | 2            | 0                                     | 0.998207054  |                  |
| LRFN4         | ENSG00000173621.8                     | 0.866244424                 | 1            | 1                                     | 0.866244424  | Brain_Cerebellum |
|               | 0.866244424                           | Brain_Cerebellum            | 1            | 1                                     | 1            | -0.168430743     |
|               | -0.168430743                          | NA                          | 1            | 0                                     | 0.998207054  | -0.168430743     |
| RNASEH2B      | ENSG00000136104.19                    | 0.866299398                 | 12           | 2                                     | 0.504883577  |                  |
|               | Brain_Amygdala                        | 0.934204991                 |              | Brain_Cortex                          | 10.38747084  | 0.00046832       |
|               | 0.655293798                           | -0.66682554                 | 0.198114288  | -0.213015737                          | 0.260329563  |                  |
|               | 2                                     | 0                           | 0.998207054  |                                       |              |                  |
| HTR7          | ENSG00000148680.15                    | 0.866304128                 | 1            | 1                                     | 0.866304128  |                  |
|               | Brain_Putamen_basal_ganglia           | 0.866304128                 |              | Brain_Putamen_basal_ganglia           | 1            | 1                |
|               | 1                                     | -0.168354847                | -0.168354847 | -0.168354847                          | NA           | 1 0              |
|               | 0.998207054                           |                             |              |                                       |              |                  |
| TTC19         | ENSG00000011295.15                    | 0.866315747                 | 8            | 3                                     | 0.078630083  |                  |
|               | Brain_Substantia_nigra                | 0.885697316                 |              | Brain_Putamen_basal_ganglia           |              |                  |
|               | 6.940720252                           | 0.007524009                 | 0.31912286   | 0.143750723                           | 1.75869055   |                  |

|                |                                      |              |              |              |             |              |    |                                |
|----------------|--------------------------------------|--------------|--------------|--------------|-------------|--------------|----|--------------------------------|
| LINC01166      | ENSG00000232903.2                    | 0.866344237  | 3            | 0            | 0.998207054 | 6            | 1  | 0.344159189                    |
|                | Brain_Cerebellum                     | 0.995391628  |              |              |             |              |    | Brain_Caudate_basal_ganglia    |
|                | 0.00104356                           | 5.692595291  | -0.115026761 |              |             | 0.945979212  |    | 5.692595291                    |
|                | 0.420983628                          | 1            | 0            | 0.998207054  |             |              |    | 0.167777566                    |
| GSPT1          | ENSG00000103342.12                   | 0.866413807  | 3            | 3            | 0.516526582 |              |    |                                |
|                | Brain_Hippocampus                    | 0.932773469  |              |              |             |              |    | Brain_Putamen_basal_ganglia    |
|                | 0.714874528                          | 0.714874528  | -0.084355899 |              |             | 0.648708851  |    | 1.28000084                     |
|                | 0.393268007                          | 3            | 0            | 0.998207054  |             |              |    | 0.364464067                    |
| RP11-122G18.11 | ENSG00000283317.1                    | 0.866453482  | 9            | 7            | 0.326875962 |              |    |                                |
|                | Brain_Putamen_basal_ganglia          | 0.982637587  |              |              |             |              |    | Brain_Cerebellar_Hemisphere    |
|                | 4.917377644                          | 0.005248226  | 0.324281065  |              |             | -0.980425835 |    | 0.274430255                    |
|                | -0.133962105                         | 0.445949855  | 7            | 0            | 0.998207054 |              |    |                                |
| RP11-340I6.8   | ENSG00000226581.1                    | 0.866483166  | 3            | 3            | 0.509221229 |              |    |                                |
|                | Brain_Frontal_Cortex_BA9             | 0.780092503  |              |              |             |              |    | Brain_Cortex                   |
|                | 0.715745925                          | 0.715745925  | -0.603241734 |              |             | 0.660050802  |    | 1.354558769                    |
|                | 0.648029997                          | 3            | 0            | 0.998207054  |             |              |    | 0.112002519                    |
| OARD1          | ENSG00000124596.16                   | 0.866533823  | 1            | 1            | 0.866533823 |              |    |                                |
|                | Brain_Spinal_cord_cervical_c-1       | 0.866533823  |              |              |             |              |    | Brain_Spinal_cord_cervical_c-1 |
|                | 1                                    | 1            | 1            | 0.168062866  | 0.168062866 | 0.168062866  | NA | 1                              |
|                | 0.998207054                          |              |              |              |             |              |    | 0                              |
| NDST3          | ENSG00000164100.8                    | 0.866562028  | 4            | 4            | 0.32142684  |              |    |                                |
|                | Brain_Cerebellar_Hemisphere          | 0.927922568  |              |              |             |              |    | Brain_Putamen_basal_ganglia    |
|                | 1.541147854                          | 0.556322267  | 0.556322267  |              |             | -0.991530023 |    | 0.296757502                    |
|                | -0.302954463                         | 0.600365264  | 4            | 0            | 0.998207054 |              |    |                                |
| AIRE           | ENSG00000160224.16                   | 0.866566986  | 3            | 3            | 0.521956261 |              |    |                                |
|                | Brain_Caudate_basal_ganglia          | 0.874572691  |              |              |             |              |    | Brain_Putamen_basal_ganglia    |
|                | 1.258253828                          | 0.771422904  | 0.771422904  |              |             | -0.6403328   |    | 0.611561775                    |
|                | -0.062207984                         | 0.63140397   | 3            | 0            | 0.998207054 |              |    |                                |
| CFAP100        | ENSG00000163885.11                   | 0.866729017  | 5            | 5            | 0.391124712 |              |    |                                |
|                | Brain_Putamen_basal_ganglia          | 0.925763896  |              |              |             |              |    | Brain_Cerebellum               |
|                | 0.219298656                          | 0.219298656  | -0.093175804 |              |             | 0.857579475  |    | 1.76089359                     |
|                | 0.338105394                          | 5            | 0            | 0.998207054  |             |              |    | 0.359651212                    |
| ABO            | ENSG00000175164.13                   | 0.866848034  | 7            | 5            | 0.157004546 |              |    |                                |
|                | Brain_Frontal_Cortex_BA9             | 0.834999005  |              |              |             |              |    | Brain_Cerebellar_Hemisphere    |
|                | 4.613235259                          | 0.055656531  | 0.161747605  |              |             | -1.415218144 |    | -0.208294527                   |
|                | -0.721707636                         | 0.438068885  | 5            | 0            | 0.998207054 |              |    |                                |
| MAMDC2         | ENSG00000165072.9                    | 0.866920952  | 3            | 3            | 0.551920631 |              |    |                                |
|                | Brain_Frontal_Cortex_BA9             | 0.978956039  |              |              |             |              |    | Brain_Cerebellum               |
|                | 0.133203493                          | 0.133203493  | -0.594884571 |              |             | 0.026377752  |    | -0.281595489                   |
|                | 0.310665274                          | 3            | 0            | 0.998207054  |             |              |    |                                |
| SLC26A11       | ENSG00000181045.14                   | 0.866994691  | 2            | 2            | 0.666990767 |              |    |                                |
|                | Brain_Substantia_nigra               | 0.732916512  |              |              |             |              |    | Brain_Cerebellum               |
|                | 0.941709728                          | 0.941709728  | -0.430281659 |              |             | -0.341248504 |    | -0.385765081                   |
|                | 0.062955948                          | 2            | 0            | 0.998207054  |             |              |    |                                |
| RP11-193M21.1  | ENSG00000269916.1                    | 0.867036638  | 1            | 1            | 0.867036638 |              |    |                                |
|                | Brain_Frontal_Cortex_BA9             | 0.867036638  |              |              |             |              |    | Brain_Frontal_Cortex_BA9       |
|                | 1                                    | 0.167423751  | 0.167423751  | 0.167423751  | NA          | 1            | 0  | 1                              |
|                | 0.998207054                          |              |              |              |             |              |    |                                |
| ZBTB32         | ENSG00000011590.13                   | 0.867093668  | 10           | 2            | 0.435391917 |              |    |                                |
|                | Brain_Hypothalamus                   | 0.960717781  |              |              |             |              |    | Brain_Caudate_basal_ganglia    |
|                | 0.000690941                          | 0.371592257  | -0.08974271  |              |             | 0.77999823   |    | 9.006652291                    |
|                | 0.296092683                          | 2            | 0            | 0.998207054  |             |              |    | 0.335868098                    |
| TMEM246        | ENSG00000165152.8                    | 0.867281587  | 2            | 2            | 0.672817557 |              |    |                                |
|                | Brain_Anterior_cingulate_cortex_BA24 | 0.741379325  |              |              |             |              |    | Brain_Cerebellar_Hemisphere    |
|                | 1.008902635                          | 0.991097365  | 0.991097365  |              |             | 0.330027312  |    | 0.422284244                    |
|                | 0.376155778                          | 0.065235502  | 2            | 0            | 0.998207054 |              |    |                                |
| PPFIBP2        | ENSG00000166387.11                   | 0.867308578  | 1            | 1            | 0.867308578 |              |    |                                |
|                | Brain_Putamen_basal_ganglia          | 0.867308578  |              |              |             |              |    | Brain_Putamen_basal_ganglia    |
|                | 1                                    | -0.167078125 | -0.167078125 | -0.167078125 | NA          | 1            | 0  | 1                              |
|                | 0.998207054                          |              |              |              |             |              |    |                                |
| C17orf67       | ENSG00000214226.8                    | 0.867327625  | 8            | 4            | 0.337800411 |              |    |                                |

|            |                                       |                             |                                |                          |             |
|------------|---------------------------------------|-----------------------------|--------------------------------|--------------------------|-------------|
|            | Brain_Putamen_basal_ganglia           | 0.845280395                 |                                | Brain_Frontal_Cortex_BA9 | 5.4186516   |
|            | 0.047953611                           | 0.229380948                 | -0.195143773                   | 0.958520397              | 0.505371703 |
|            | 0.357595599                           | 4                           | 0                              | 0.998207054              |             |
| LINC01141  | ENSG00000236963.6                     | 0.86743983                  | 1                              | 1                        | 0.86743983  |
|            | Brain_Caudate_basal_ganglia           | 0.86743983                  | Brain_Caudate_basal_ganglia    | 1                        | 1           |
|            | -0.166911315                          | -0.166911315                | -0.166911315                   | NA                       | 1           |
|            | 0                                     | 0                           | 0                              | 0.998207054              |             |
| CEP63      | ENSG00000182923.16                    | 0.867509377                 | 4                              | 4                        | 0.329167598 |
|            | Brain_Frontal_Cortex_BA9              | 0.950776906                 | Brain_Hippocampus              | 2.39818476               |             |
|            | 0.095068619                           | 0.095068619                 | -0.431909633                   | 0.975791903              | 0.032269774 |
|            | 0.648850518                           | 4                           | 0                              | 0.998207054              |             |
| MXRA7      | ENSG00000182534.13                    | 0.8675528                   | 13                             | 3                        | 0.267154128 |
|            | Brain_Cerebellum                      | 10.01687155                 | 0.007290874                    | Brain_Amygdala           | 0.485011213 |
|            | -0.611421227                          | 1.109640137                 | 0.128462117                    | 0.444544722              | 3           |
|            | 0.998207054                           |                             |                                | 0                        |             |
| B3GALT6    | ENSG00000176022.4                     | 0.867562377                 | 10                             | 3                        | 0.253619556 |
|            | Brain_Amygdala                        | 0.859253544                 | Brain_Cortex                   | 8.315690578              | 0.002271367 |
|            | 0.419322007                           | 0.177324453                 | 1.141601847                    | 0.589911162              | 0.328321475 |
|            | 3                                     | 0                           | 0.998207054                    |                          |             |
| HAUS2      | ENSG00000137814.10                    | 0.867563681                 | 1                              | 1                        | 0.867563681 |
|            | Brain_Frontal_Cortex_BA9              | 0.867563681                 | Brain_Frontal_Cortex_BA9       | 1                        | 1           |
|            | 1                                     | 0.166753916                 | 0.166753916                    | 0.166753916              | NA          |
|            | 0.998207054                           |                             |                                | 1                        | 0           |
| MPPED1     | ENSG00000186732.13                    | 0.867699689                 | 5                              | 5                        | 0.347893156 |
|            | Brain_Spinal_cord_cervical_c-1        | 0.729941775                 | Brain_Amygdala                 | 2.192756145              |             |
|            | 0.260505607                           | 0.260505607                 | -0.345202985                   | 0.938683718              | 0.531290588 |
|            | 0.519921193                           | 5                           | 0                              | 0.998207054              |             |
| NMNAT2     | ENSG00000157064.10                    | 0.867715324                 | 2                              | 2                        | 0.619786317 |
|            | Brain_Frontal_Cortex_BA9              | 0.950844944                 | Brain_Cerebellum               | 1.469405359              |             |
|            | 0.530594641                           | 0.530594641                 | 0.061645749                    | 0.496153215              | 0.278899482 |
|            | 0.307243176                           | 2                           | 0                              | 0.998207054              |             |
| KB-226F1.2 | ENSG00000272787.1                     | 0.867854825                 | 5                              | 4                        | 0.286422314 |
|            | Brain_Cerebellum                      | 0.775465483                 | Brain_Cerebellar_Hemisphere    | 3.135361774              |             |
|            | 0.101930982                           | 0.347015963                 | -1.066002938                   | 0.818388946              | 0.16732118  |
|            | 0.81932988                            | 4                           | 0                              | 0.998207054              |             |
| LINC01115  | ENSG00000237667.5                     | 0.867855162                 | 11                             | 5                        | 0.4668306   |
|            | Brain_Hypothalamus                    | 7.338900419                 | 0.006242527                    | Brain_Cerebellum         | 0.267183781 |
|            | -0.727645533                          | 0.416553259                 | -0.104034332                   | 0.373521044              | 5           |
|            | 0.998207054                           |                             |                                | 0                        |             |
| ADARB2     | ENSG00000185736.15                    | 0.867901304                 | 9                              | 9                        | 0.203588896 |
|            | Brain_Putamen_basal_ganglia           | 0.965814377                 | Brain_Spinal_cord_cervical_c-1 |                          |             |
|            | 2.638068495                           | 0.204832916                 | 0.204832916                    | -1.271392932             | 0.460685084 |
|            | -0.350177432                          | 0.579360858                 | 9                              | 0                        | 0.998207054 |
| PRSS1      | ENSG00000204983.13                    | 0.867933118                 | 1                              | 1                        | 0.867933118 |
|            | Brain_Anterior_cingulate_cortex_BA24  | 0.867933118                 |                                |                          |             |
|            | Brain_Anterior_cingulate_cortex_BA24  | 1                           | 1                              | 1                        | -0.16628443 |
|            | -0.16628443                           | -0.16628443                 | NA                             | 1                        | 0           |
|            | 0.998207054                           |                             |                                |                          |             |
| ITGA2      | ENSG00000164171.10                    | 0.867949668                 | 3                              | 2                        | 0.646051492 |
|            | Brain_Nucleus_accumbens_basal_ganglia | 0.931167063                 | Brain_Cerebellar_Hemisphere    |                          |             |
|            | 2.670701223                           | 0.046974157                 | 0.28232462                     | 0.086376581              | 0.459254397 |
|            | 0.256147511                           | 0.188660888                 | 2                              | 0                        | 0.998207054 |
| IFRD1      | ENSG00000006652.13                    | 0.868042098                 | 7                              | 4                        | 0.514635776 |
|            | Brain_Cerebellar_Hemisphere           | 4.721684963                 | 0.005014987                    | Brain_Cerebellum         |             |
|            | 0.820027446                           | Brain_Cerebellar_Hemisphere | 4.721684963                    | 0.005014987              |             |
|            | 0.274351847                           | -0.651636375                | -0.227509676                   | -0.434827956             | 0.185854616 |
|            | 4                                     | 0                           | 0.998207054                    |                          |             |
| ADCYAP1R1  | ENSG00000078549.14                    | 0.868121963                 | 3                              | 3                        | 0.491678417 |
|            | Brain_Nucleus_accumbens_basal_ganglia | 0.923875254                 |                                |                          |             |
|            | Brain_Spinal_cord_cervical_c-1        | 1.050903182                 | 0.943428048                    | 0.943428048              |             |
|            | -0.462955574                          | 0.68764174                  | 0.106746532                    | 0.575380317              | 3           |
|            | 0.998207054                           |                             |                                | 0                        |             |
| CTIF       | ENSG00000134030.13                    | 0.86822106                  | 4                              | 4                        | 0.278088308 |
|            | Brain_Cortex                          | 1.199961929                 | 0.803435243                    | Brain_Hypothalamus       | 0.803435243 |
|            | -1.084623804                          | -0.160662929                | -0.453520551                   | 0.433179821              | 4           |
|            |                                       |                             |                                | 0                        |             |



|              |                                |                    |              |              |                                |              |                  |             |             |
|--------------|--------------------------------|--------------------|--------------|--------------|--------------------------------|--------------|------------------|-------------|-------------|
| 0.998207054  |                                |                    |              |              |                                |              |                  |             |             |
| RFWD2        | ENSG00000143207.19             | 0.868425082        | 3            | 3            | 0.550847057                    |              |                  |             |             |
|              | Brain_Hippocampus              | 0.970237794        |              |              | Brain_Cortex                   | 1.860607578  |                  | 0.34834867  |             |
|              | 0.34834867                     | -0.098809146       | 0.59649131   | 0.153457372  |                                | 0.384908869  |                  | 3           | 0           |
| 0.998207054  |                                |                    |              |              |                                |              |                  |             |             |
| PUS1         | ENSG00000177192.13             | 0.868445865        | 1            | 1            | 0.868445865                    |              | Brain_Cerebellum |             |             |
|              | 0.868445865                    | Brain_Cerebellum   | 1            | 1            | -0.165632887                   |              | -0.165632887     |             |             |
|              | -0.165632887                   | NA                 | 1            | 0            | 0.998207054                    |              |                  |             |             |
| PKNOX2       | ENSG00000165495.15             | 0.868467692        | 1            | 1            | 0.868467692                    |              |                  |             |             |
|              | Brain_Caudate_basal_ganglia    | 0.868467692        |              |              | Brain_Caudate_basal_ganglia    | 1            | 1                |             |             |
|              | 1                              | 0.165605152        | 0.165605152  | 0.165605152  | NA                             | 1            | 0                |             |             |
| 0.998207054  |                                |                    |              |              |                                |              |                  |             |             |
| ZNF609       | ENSG00000180357.9              | 0.868471592        | 1            | 1            | 0.868471592                    |              |                  |             |             |
|              | Brain_Substantia_nigra         | 0.868471592        |              |              | Brain_Substantia_nigra         | 1            | 1                |             |             |
|              | 1                              | -0.165600197       | -0.165600197 | -0.165600197 | NA                             | 1            | 0                |             |             |
| 0.998207054  |                                |                    |              |              |                                |              |                  |             |             |
| MSANTD3      | ENSG00000066697.14             | 0.868539189        | 2            | 2            | 0.609365226                    |              |                  |             |             |
|              | Brain_Cortex                   | 0.866881528        |              |              | Brain_Cerebellum               | 1.046196344  |                  | 0.953803656 |             |
|              | 0.953803656                    | -0.1676209         | 0.510979765  | 0.171679433  |                                | 0.479843132  |                  | 2           |             |
| 0            | 0.998207054                    |                    |              |              |                                |              |                  |             |             |
| ALKBH1       | ENSG00000100601.9              | 0.868582325        | 3            | 2            | 0.707037602                    |              |                  |             |             |
|              | Brain_Amygdala                 | 0.771107704        |              |              | Brain_Cerebellar_Hemisphere    | 2.02285079   |                  |             |             |
|              | 0.013691902                    | 0.963457308        |              | 0.290926277  |                                | 0.375837642  |                  | 0.337544511 |             |
|              | 0.043063505                    | 2                  | 0            | 0.998207054  |                                |              |                  |             |             |
| NLRC4        | ENSG00000091106.18             | 0.868648141        | 4            | 4            | 0.427773523                    |              | Brain_Amygdala   |             |             |
|              | 0.840322993                    | Brain_Hypothalamus | 1.814334284  |              | 0.331416065                    |              |                  |             |             |
|              | 0.331416065                    | -0.693591061       | 0.79300738   | 0.014153854  |                                | 0.634926663  |                  | 4           |             |
| 0            | 0.998207054                    |                    |              |              |                                |              |                  |             |             |
| GJC3         | ENSG00000176402.5              | 0.868651653        | 2            | 2            | 0.612401931                    |              |                  |             |             |
|              | Brain_Putamen_basal_ganglia    | 0.853683791        |              |              | Brain_Caudate_basal_ganglia    | 1.05276788   |                  |             |             |
|              | 0.94723212                     | 0.94723212         | 0.184420242  | 0.506647846  |                                | 0.345534044  |                  |             |             |
|              | 0.227849324                    | 2                  | 0            | 0.998207054  |                                |              |                  |             |             |
| NFIX         | ENSG00000008441.16             | 0.868691279        | 1            | 1            | 0.868691279                    |              |                  |             |             |
|              | Brain_Putamen_basal_ganglia    | 0.868691279        |              |              | Brain_Putamen_basal_ganglia    | 1            | 1                |             |             |
|              | 1                              | -0.165321066       | -0.165321066 | -0.165321066 | NA                             | 1            | 0                |             |             |
| 0.998207054  |                                |                    |              |              |                                |              |                  |             |             |
| RP11-646I6.5 | ENSG00000269921.1              | 0.868786216        | 3            | 3            | 0.50960576                     |              |                  |             |             |
|              | Brain_Spinal_cord_cervical_c-1 | 0.747392715        |              |              | Brain_Cerebellum               | 1.108418452  |                  |             |             |
|              | 0.874865616                    | 0.874865616        | -0.659451688 | 0.416953109  |                                | -0.188192584 |                  |             |             |
|              | 0.550550666                    | 3                  | 0            | 0.998207054  |                                |              |                  |             |             |
| RPL39L       | ENSG00000163923.9              | 0.868803282        | 1            | 1            | 0.868803282                    |              |                  |             |             |
|              | Brain_Cortex                   | 0.868803282        |              |              | Brain_Cortex                   | 1            | 1                | 1           | 0.165178761 |
|              | 0.165178761                    | 0.165178761        | NA           | 1            | 0                              | 0.998207054  |                  |             |             |
| RP4-561L24.3 | ENSG00000260464.1              | 0.86883597         | 5            | 4            | 0.266556066                    |              |                  |             |             |
|              | Brain_Cortex                   | 0.866604104        |              |              | Brain_Hippocampus              | 2.801980233  |                  |             |             |
|              | 0.009381246                    | 0.396202475        | 0.167973529  | 1.111028537  |                                | 0.587249357  |                  |             |             |
|              | 0.393047496                    | 4                  | 0            | 0.998207054  |                                |              |                  |             |             |
| ANKRD20A1    | ENSG00000260691.5              | 0.868906616        | 1            | 1            | 0.868906616                    |              |                  |             |             |
|              | Brain_Frontal_Cortex_BA9       | 0.868906616        |              |              | Brain_Frontal_Cortex_BA9       | 1            | 1                |             |             |
|              | 1                              | -0.165047473       | -0.165047473 | -0.165047473 | NA                             | 1            | 0                |             |             |
| 0.998207054  |                                |                    |              |              |                                |              |                  |             |             |
| RPP25        | ENSG00000178718.6              | 0.869080458        | 1            | 1            | 0.869080458                    |              | Brain_Cortex     |             |             |
|              | 0.869080458                    | Brain_Cortex       | 1            | 1            | 1                              | 0.164826611  |                  | 0.164826611 |             |
|              | 0.164826611                    | NA                 | 1            | 0            | 0.998207054                    |              |                  |             |             |
| DSCC1        | ENSG00000136982.5              | 0.869110021        | 13           | 1            | 0.435590171                    |              |                  |             |             |
|              | Brain_Spinal_cord_cervical_c-1 | 0.968281724        |              |              | Brain_Hypothalamus             | 12.0301029   |                  |             |             |
|              | 0.001102795                    | 12.0301029         | -0.130003729 | 0.779661457  |                                | 0.159582188  |                  |             |             |
|              | 0.217715726                    | 1                  | 0            | 0.998207054  |                                |              |                  |             |             |
| MMP23B       | ENSG00000189409.13             | 0.869141114        | 2            | 2            | 0.596937365                    |              |                  |             |             |
|              | Brain_Substantia_nigra         | 0.96102571         |              |              | Brain_Spinal_cord_cervical_c-1 |              |                  |             |             |
|              | 1.036999699                    | 0.963000301        | 0.963000301  | -0.048866469 |                                | 0.528809848  |                  |             |             |
|              | 0.239971689                    | 0.408478842        | 2            | 0            | 0.998207054                    |              |                  |             |             |

|                |                                       |                                       |                             |                |              |                  |
|----------------|---------------------------------------|---------------------------------------|-----------------------------|----------------|--------------|------------------|
| BCAS2          | ENSG00000116752.5                     | 0.869354683                           | 2                           | 2              | 0.607593966  |                  |
|                | Brain_Anterior_cingulate_cortex_BA24  | 0.751428992                           |                             |                |              |                  |
|                | Brain_Spinal_cord_cervical_c-1        | 1.387545038                           |                             |                | 0.612454962  | 0.612454962      |
|                | -0.513510931                          | -0.316755685                          | -0.415133308                |                | 0.139126968  | 2 0              |
|                | 0.998207054                           |                                       |                             |                |              |                  |
| RP11-333A23.4  | ENSG00000253967.1                     | 0.869444347                           | 1                           | 1              | 0.869444347  |                  |
|                | Brain_Cortex                          | 0.869444347                           | Brain_Cortex                | 1 1 1          |              | -0.164364323     |
|                | -0.164364323                          | -0.164364323                          | NA 1 0                      |                | 0.998207054  |                  |
| GS1-124K5.4    | ENSG00000237310.1                     | 0.869514101                           | 13                          | 3              | 0.529016496  |                  |
|                | Brain_Hypothalamus                    | 0.998367523                           | Brain_Putamen_basal_ganglia | 11.39773891    |              |                  |
|                | 0.001416411                           | 0.450352561                           | -0.08678368                 | 0.629508056    | 0.215188278  |                  |
|                | 0.230773945                           | 3 0                                   | 0.998207054                 |                |              |                  |
| HARS           | ENSG00000170445.12                    | 0.869523238                           | 6                           | 5              | 0.245223555  |                  |
|                | Brain_Nucleus_accumbens_basal_ganglia | 0.712772948                           | Brain_Cortex                |                |              |                  |
|                | 3.472561682                           | 0.110095501                           | 0.342509953                 | -1.162029322   | 0.659410006  |                  |
|                | -0.501180029                          | 0.627643627                           | 5 0                         | 0.998207054    |              |                  |
| MRPL50         | ENSG00000136897.7                     | 0.869670014                           | 5                           | 4              | 0.355611908  |                  |
|                | Brain_Cerebellar_Hemisphere           | 0.964860357                           | Brain_Frontal_Cortex_BA9    |                |              |                  |
|                | 2.748150402                           | 0.082024634                           | 0.460267571                 | -0.923758805   | 0.66596033   |                  |
|                | -0.103556306                          | 0.57588675 4                          | 0                           | 0.998207054    |              |                  |
| SLC45A3        | ENSG00000158715.5                     | 0.869781617                           | 1                           | 1              | 0.869781617  |                  |
|                | Brain_Nucleus_accumbens_basal_ganglia | 0.869781617                           |                             |                |              |                  |
|                | Brain_Nucleus_accumbens_basal_ganglia | 1 1 1                                 | 0.163935885                 |                |              |                  |
|                | 0.163935885                           | 0.163935885                           | NA 1 0                      | 0.998207054    |              |                  |
| RPE            | ENSG00000197713.14                    | 0.869787198                           | 1                           | 1              | 0.869787198  | Brain_Cortex     |
|                | 0.869787198                           | Brain_Cortex                          | 1 1 1                       | -0.163928796   | -0.163928796 |                  |
|                | -0.163928796                          | NA 1 0                                | 0.998207054                 |                |              |                  |
| MED24          | ENSG00000008838.19                    | 0.869867103                           | 9                           | 4              | 0.586276338  |                  |
|                | Brain_Nucleus_accumbens_basal_ganglia | 0.944878099                           | Brain_Putamen_basal_ganglia |                |              |                  |
|                | 7.05386564                            | 0.006557923                           | 0.250150824                 | -0.370386304   | 0.544239988  |                  |
|                | 0.216056743                           | 0.346932296                           | 4 0                         | 0.998207054    |              |                  |
| ANKRD13A       | ENSG00000076513.16                    | 0.869926914                           | 2                           | 2              | 0.600203588  |                  |
|                | Brain_Cerebellum                      | 0.939774872                           | Brain_Frontal_Cortex_BA9    | 1.023467211    |              |                  |
|                | 0.976532789                           | 0.976532789                           | 0.075552821                 | 0.524107765    | 0.299830293  |                  |
|                | 0.317176242                           | 2 0                                   | 0.998207054                 |                |              |                  |
| FNDC1          | ENSG00000164694.16                    | 0.870002074                           | 4                           | 4              | 0.560023044  | Brain_Cerebellum |
|                | 0.962174306                           | Brain_Nucleus_accumbens_basal_ganglia | 2.362835062                 |                |              |                  |
|                | 0.208430232                           | 0.208430232                           | -0.58280728                 | 0.412417388    | -0.188542564 |                  |
|                | 0.468147127                           | 4 0                                   | 0.998207054                 |                |              |                  |
| PLEC           | ENSG00000178209.14                    | 0.870082277                           | 8                           | 8              | 0.153879383  | Brain_Cortex     |
|                | 0.822580634                           | Brain_Hypothalamus                    | 2.738401953                 | 0.244371022    |              |                  |
|                | 0.244371022                           | -0.782310092                          | 1.425961752                 | 0.421839753    | 0.84595847 8 |                  |
|                | 0                                     | 0.998207054                           |                             |                |              |                  |
| ENPP6          | ENSG00000164303.10                    | 0.870099774                           | 5                           | 2              | 0.40938669   | Brain_Amygdala   |
|                | 0.994631792                           | Brain_Caudate_basal_ganglia           | 3.780908051                 | 0.03364059     |              |                  |
|                | 1.009980144                           | -0.824973404                          | 0.281032069                 | -0.23456999    | 0.427266387  |                  |
|                | 2                                     | 0                                     | 0.998207054                 |                |              |                  |
| LSAMP          | ENSG00000185565.11                    | 0.870158686                           | 2                           | 2              | 0.600843846  | Brain_Cerebellum |
|                | 0.99484438                            | Brain_Cortex                          | 1.138404369                 | 0.861595631    | 0.861595631  |                  |
|                | 0.006461656                           | 0.523187403                           | 0.26482453                  | 0.36538028 2 0 | 0.998207054  |                  |
| TEX2           | ENSG00000136478.7                     | 0.870279854                           | 2                           | 2              | 0.604067507  |                  |
|                | Brain_Spinal_cord_cervical_c-1        | 0.899160584                           | Brain_Cerebellum            | 1.062019845    |              |                  |
|                | 0.937980155                           | 0.937980155                           | -0.126721809                | 0.518560146    | 0.195919169  |                  |
|                | 0.456283246                           | 2 0                                   | 0.998207054                 |                |              |                  |
| ATF4           | ENSG00000128272.14                    | 0.870373757                           | 8                           | 4              | 0.161782629  | Brain_Cortex     |
|                | 0.949392317                           | Brain_Cerebellar_Hemisphere           | 5.995614109                 | 0.008974638    |              |                  |
|                | 0.301566287                           | -1.399101229                          | -0.063469913                | -0.690919172   | 0.385809816  |                  |
|                | 4                                     | 0                                     | 0.998207054                 |                |              |                  |
| CTD-2192J16.26 | ENSG00000268945.1                     | 0.870446216                           | 1                           | 1              | 0.870446216  |                  |
|                | Brain_Hypothalamus                    | 0.870446216                           | Brain_Hypothalamus          | 1 1 1          |              |                  |
|                | 0.163091723                           | 0.163091723                           | 0.163091723                 | NA 1 0         | 0.998207054  |                  |
| RP11-332J15.2  | ENSG00000250060.1                     | 0.870509872                           | 9                           | 3              | 0.576655836  |                  |

|              |                                       |                |                             |                                |              |              |              |   |   |
|--------------|---------------------------------------|----------------|-----------------------------|--------------------------------|--------------|--------------|--------------|---|---|
|              | Brain_Hypothalamus                    | 0.979864417    |                             | Brain_Cerebellar_Hemisphere    | 7.662222993  |              |              |   |   |
|              | 0.012976746                           | 0.31445658     | -0.519657144                | 0.558276139                    |              | -0.119768349 |              |   |   |
|              | 0.378382136                           | 3              | 0                           | 0.998207054                    |              |              |              |   |   |
| FBLL1        | ENSG00000188573.7                     | 0.870555442    | 10                          | 5                              | 0.309583393  |              |              |   |   |
|              | Brain_Putamen_basal_ganglia           | 0.988629174    |                             | Brain_Cerebellar_Hemisphere    |              |              |              |   |   |
|              | 6.722095279                           | 0.034079169    | 0.398775817                 | -1.016096589                   | 0.569150884  |              |              |   |   |
|              | -0.135613639                          | 0.530879129    | 5                           | 0                              | 0.998207054  |              |              |   |   |
| CLDN10       | ENSG00000134873.9                     | 0.870597628    | 3                           | 2                              | 0.636566066  |              |              |   |   |
|              | Brain_Frontal_Cortex_BA9              | 0.947694841    |                             | Brain_Caudate_basal_ganglia    |              |              |              |   |   |
|              | 1.975408908                           | 0.026375966    | 0.998215126                 | -0.472505432                   | 0.366391899  |              |              |   |   |
|              | -0.013503905                          | 0.425006435    | 2                           | 0                              | 0.998207054  |              |              |   |   |
| GS1-166A23.1 | ENSG00000272537.1                     | 0.870654485    | 1                           | 1                              | 0.870654485  |              |              |   |   |
|              | Brain_Amygdala                        | 0.870654485    | Brain_Amygdala              | 1                              | 1            | 1            | -0.162827209 |   |   |
|              | -0.162827209                          | -0.162827209   | NA                          | 1                              | 0            | 0.998207054  |              |   |   |
| ADCY4        | ENSG00000129467.13                    | 0.870662311    | 7                           | 5                              | 0.517940029  |              |              |   |   |
|              | Brain_Nucleus_accumbens_basal_ganglia | 0.971755275    |                             | Brain_Caudate_basal_ganglia    |              |              |              |   |   |
|              | 5.359832734                           | 0.038876847    | 0.21044274                  | -0.646524046                   | 0.474607427  |              |              |   |   |
|              | 0.021676215                           | 0.431414149    | 5                           | 0                              | 0.998207054  |              |              |   |   |
| TUBGCP2      | ENSG00000130640.13                    | 0.87069062     | 3                           | 3                              | 0.532250701  |              |              |   |   |
|              | Brain_Spinal_cord_cervical_c-1        | 0.799709028    |                             |                                |              |              |              |   |   |
|              | Brain_Nucleus_accumbens_basal_ganglia | 1.570441586    | 0.43821679                  | 0.43821679                     |              |              |              |   |   |
|              | -0.550956716                          | 0.624573982    | 0.109113653                 | 0.60095936                     | 3            | 0            |              |   |   |
|              | 0.998207054                           |                |                             |                                |              |              |              |   |   |
| ZNF160       | ENSG00000170949.17                    | 0.870728866    | 8                           | 8                              | 0.255454852  |              |              |   |   |
|              | Brain_Amygdala                        | 0.870321885    | Brain_Putamen_basal_ganglia | 4.133330238                    |              |              |              |   |   |
|              | 0.152798151                           | 0.152798151    | -1.137199606                | 1.015309828                    | -0.370499707 |              |              |   |   |
|              | 0.67708923                            | 8              | 0                           | 0.998207054                    |              |              |              |   |   |
| C9orf24      | ENSG00000164972.12                    | 0.87073758     | 6                           | 5                              | 0.546002555  |              | Brain_Cortex |   |   |
|              | 0.886062439                           | Brain_Amygdala | 4.337842478                 | 0.117012959                    | 0.154188441  |              |              |   |   |
|              | -0.174850359                          | 0.603760995    | 0.265382852                 | 0.350106466                    | 5            | 0            |              |   |   |
|              | 0.998207054                           |                |                             |                                |              |              |              |   |   |
| NOL10        | ENSG00000115761.15                    | 0.87083385     | 9                           | 5                              | 0.234953046  |              |              |   |   |
|              | Brain_Frontal_Cortex_BA9              | 0.68275376     | Brain_Putamen_basal_ganglia | 6.645823906                    |              |              |              |   |   |
|              | 0.000190574                           | 0.244090788    | -1.187696391                | -0.408708276                   | -0.792980706 |              |              |   |   |
|              | 0.2658647                             | 5              | 0                           | 0.998207054                    |              |              |              |   |   |
| TRPM6        | ENSG00000119121.21                    | 0.871011481    | 2                           | 2                              | 0.599207971  |              |              |   |   |
|              | Brain_Cerebellar_Hemisphere           | 0.769667008    |                             | Brain_Cerebellum               | 1.552640741  |              |              |   |   |
|              | 0.447359259                           | 0.447359259    | 0.292810492                 | 0.525539832                    | 0.409175162  |              |              |   |   |
|              | 0.164564495                           | 2              | 0                           | 0.998207054                    |              |              |              |   |   |
| SEMA3A       | ENSG00000075213.10                    | 0.871204291    | 2                           | 2                              | 0.775687334  |              |              |   |   |
|              | Brain_Spinal_cord_cervical_c-1        | 0.822814763    |                             |                                |              |              |              |   |   |
|              | Brain_Nucleus_accumbens_basal_ganglia | 1.52839504     | 0.47160496                  | 0.47160496                     |              |              |              |   |   |
|              | 0.223926156                           | 0.284943624    | 0.25443489                  | 0.043145865                    | 2            | 0            |              |   |   |
|              | 0.998207054                           |                |                             |                                |              |              |              |   |   |
| CSNK1A1L     | ENSG00000180138.7                     | 0.871236804    | 1                           | 1                              | 0.871236804  |              |              |   |   |
|              | Brain_Spinal_cord_cervical_c-1        | 0.871236804    |                             | Brain_Spinal_cord_cervical_c-1 |              |              |              |   |   |
|              | 1                                     | 1              | 1                           | 0.162087685                    | 0.162087685  | 0.162087685  | NA           | 1 | 0 |
|              | 0.998207054                           |                |                             |                                |              |              |              |   |   |
| MDC1         | ENSG00000137337.14                    | 0.871249903    | 4                           | 4                              | 0.53161643   |              |              |   |   |
|              | Brain_Substantia_nigra                | 0.789151832    |                             | Brain_Cortex                   | 2.083231974  |              |              |   |   |
|              | 0.389268483                           | 0.389268483    | -0.625540417                | 0.562059636                    | -0.010356448 |              |              |   |   |
|              | 0.536060732                           | 4              | 0                           | 0.998207054                    |              |              |              |   |   |
| LRRC19       | ENSG00000184434.7                     | 0.871335723    | 1                           | 1                              | 0.871335723  |              |              |   |   |
|              | Brain_Cerebellum                      | 0.871335723    | Brain_Cerebellum            | 1                              | 1            | 1            | -0.16196207  |   |   |
|              | -0.16196207                           | -0.16196207    | NA                          | 1                              | 0            | 0.998207054  |              |   |   |
| ZNF440       | ENSG00000171295.12                    | 0.871359887    | 1                           | 1                              | 0.871359887  |              |              |   |   |
|              | Brain_Nucleus_accumbens_basal_ganglia | 0.871359887    |                             |                                |              |              |              |   |   |
|              | Brain_Nucleus_accumbens_basal_ganglia | 1              | 1                           | 1                              | 0.161931385  |              |              |   |   |
|              | 0.161931385                           | 0.161931385    | NA                          | 1                              | 0            | 0.998207054  |              |   |   |
| LINC00847    | ENSG00000245060.6                     | 0.871396266    | 1                           | 1                              | 0.871396266  |              |              |   |   |
|              | Brain_Caudate_basal_ganglia           | 0.871396266    |                             | Brain_Caudate_basal_ganglia    | 1            | 1            |              |   |   |
|              | 1                                     | 0.161885189    | 0.161885189                 | 0.161885189                    | NA           | 1            | 0            |   |   |

0.998207054

ATP10A ENSG00000206190.11 0.87139738 3 3 0.582080196  
Brain\_Frontal\_Cortex\_BA9 0.9609357 Brain\_Cerebellum1.274829312  
0.673929348 0.673929348 -0.452517625 0.550348746 0.048936846  
0.501433187 3 0 0.998207054

CTD-2256P15.5 ENSG00000271715.1 0.87140355 1 1 0.87140355  
Brain\_Cerebellar\_Hemisphere0.87140355 Brain\_Cerebellar\_Hemisphere1 1 1  
0.16187594 0.16187594 0.16187594 NA 1 0 0.998207054

ZNF140 ENSG00000196387.9 0.871415997 3 3 0.561096644  
Brain\_Cerebellar\_Hemisphere0.766315102 Brain\_Cerebellum2.31755746  
0.091167638 -0.091167638 0.297198323 -0.581213391 0.445025795  
0.142364865 3 0 0.998207054

AP000473.8 ENSG00000270093.1 0.871519988 2 2 0.653716236  
Brain\_Nucleus\_accumbens\_basal\_ganglia 0.81774901 Brain\_Cerebellum1.089403587  
0.910596413 0.910596413 -0.448605541 0.230441122 -0.109082209  
0.4801585 2 0 0.998207054

LINC01013 ENSG00000228495.1 0.871592364 1 1 0.871592364  
Brain\_Frontal\_Cortex\_BA9 0.871592364 Brain\_Frontal\_Cortex\_BA9 1 1  
1 -0.161636181 -0.161636181 -0.161636181 NA 1 0  
0.998207054

KIAA0513 ENSG00000135709.12 0.871662925 3 3 0.54518522 Brain\_Cerebellum  
0.916707961 Brain\_Cortex 2.391609038 0.116736575 0.116736575  
-0.604990634 0.104581418 -0.293030723 0.36245738 3 0  
0.998207054

LCN9 ENSG00000148386.9 0.871691065 5 4 0.279639649  
Brain\_Anterior\_cingulate\_cortex\_BA24 0.932665876 Brain\_Amygdala  
2.347362668 2.30E-16 0.258401641 -1.081129193 -0.084491229  
-0.53534036 0.502301634 4 0 0.998207054

CASZ1 ENSG00000130940.14 0.871841979 4 4 0.525440809  
Brain\_Hippocampus 0.70522241 Brain\_Anterior\_cingulate\_cortex\_BA24  
1.397686143 0.595361803 0.595361803 -0.634980997 0.378280257  
-0.291508383 0.456936564 4 0 0.998207054

TRIM4 ENSG00000146833.15 0.871863589 12 1 0.750558283  
Brain\_Hippocampus 0.943243951 Brain\_Anterior\_cingulate\_cortex\_BA24  
11.78265122 6.36E-10 11.78265122 0.071193253 0.317903308  
0.160532415 0.075654839 1 0 0.998207054

AXIN1 ENSG00000103126.14 0.871883279 3 3 0.484756554  
Brain\_Hypothalamus 0.750620215 Brain\_Cerebellum1.93446299 0.068309191  
0.068309191 -0.698672771 0.439478004 0.0195423 0.624959784 3  
0 0.998207054

TGIF1 ENSG00000177426.20 0.871900562 1 1 0.871900562  
Brain\_Cerebellar\_Hemisphere0.871900562 Brain\_Cerebellar\_Hemisphere1 1  
1 0.161244845 0.161244845 0.161244845 NA 1 0  
0.998207054

ZNF286B ENSG00000249459.8 0.871909497 1 1 0.871909497  
Brain\_Cerebellum0.871909497 Brain\_Cerebellum1 1 1 -0.161233501  
-0.161233501 -0.161233501 NA 1 0 0.998207054

MON1B ENSG00000103111.14 0.871974529 9 5 0.305246377  
Brain\_Spinal\_cord\_cervical\_c-1 0.995055491 Brain\_Cerebellar\_Hemisphere  
6.769289317 0.033692631 0.252367019 -0.099236482 1.025247592  
0.263625994 0.350827097 5 0 0.998207054

C16orf46 ENSG00000166455.13 0.871977357 2 2 0.636024646  
Brain\_Caudate\_basal\_ganglia0.918330552 Brain\_Putamen\_basal\_ganglia  
1.241817506 0.758182494 0.758182494 -0.473264276 0.102536866  
-0.185363705 0.407152892 2 0 0.998207054

SLC10A7 ENSG00000120519.14 0.872051239 2 2 0.665864185  
Brain\_Cortex 0.738043198 Brain\_Cerebellar\_Hemisphere1.093097579  
0.906902421 0.906902421 0.334445781 -0.431831085 0.383138433  
0.068861809 2 0 0.998207054

RHOV ENSG00000104140.6 0.872101244 5 4 0.634774895  
Brain\_Frontal\_Cortex\_BA9 0.960724783 Brain\_Anterior\_cingulate\_cortex\_BA24  
3.86946489 0.056301646 0.139822115 -0.475016946 0.240957752

|              |                                       |                             |                  |             |             |                             |                             |              |
|--------------|---------------------------------------|-----------------------------|------------------|-------------|-------------|-----------------------------|-----------------------------|--------------|
|              | -0.092061137                          | 0.312658582                 | 4                | 0           | 0.998207054 |                             |                             |              |
| NAPB         | ENSG00000125814.17                    | 0.872107001                 | 1                | 1           | 0.872107001 |                             |                             |              |
|              | Brain_Anterior_cingulate_cortex_BA24  |                             |                  |             | 0.872107001 |                             |                             |              |
|              | Brain_Anterior_cingulate_cortex_BA24  |                             | 1                | 1           |             | -0.160982732                |                             |              |
|              | -0.160982732                          | -0.160982732                | NA               | 1           | 0           | 0.998207054                 |                             |              |
| FAM153C      | ENSG00000204677.10                    | 0.872137587                 |                  | 9           | 9           | 0.142122744                 |                             |              |
|              | Brain_Cortex                          | 0.882344997                 |                  |             |             | Brain_Putamen_basal_ganglia | 2.987909645                 |              |
|              | 0.120063137                           | 0.120063137                 |                  |             |             | -1.467931819                | 0.606911128                 | -0.637782368 |
|              | 0.654552892                           | 9                           | 0                |             | 0.998207054 |                             |                             |              |
| NDUFB1       | ENSG00000183648.9                     | 0.872173626                 |                  | 2           | 2           | 0.601105916                 |                             |              |
|              | Brain_Cerebellar_Hemisphere           | 0.823076695                 |                  |             |             | Brain_Cortex                | 1.451941445                 |              |
|              | 0.548058555                           | 0.548058555                 |                  |             |             | 0.223589551                 | 0.52281081                  | 0.37320018   |
|              | 0.211581382                           | 2                           | 0                |             | 0.998207054 |                             |                             |              |
| CCAR1        | ENSG00000060339.13                    | 0.872667563                 |                  | 1           | 1           | 0.872667563                 |                             |              |
|              | Brain_Nucleus_accumbens_basal_ganglia |                             |                  |             |             | 0.872667563                 |                             |              |
|              | Brain_Nucleus_accumbens_basal_ganglia |                             | 1                | 1           | 1           |                             | 0.16027105                  | 0.16027105   |
|              | 0.16027105                            | NA                          | 1                | 0           |             | 0.998207054                 |                             |              |
| CSNK2B       | ENSG00000204435.13                    | 0.872680582                 |                  | 2           | 2           | 0.605106525                 |                             |              |
|              | Brain_Frontal_Cortex_BA9              | 0.945668889                 |                  |             |             | Brain_Caudate_basal_ganglia | 1.0050776                   |              |
|              | 0.9949224                             | 0.9949224                   | 0.068146658      |             |             | 0.517071103                 | 0.292608881                 | 0.31743752   |
|              | 2                                     | 0                           |                  |             | 0.998207054 |                             |                             |              |
| RP11-583F2.2 | ENSG00000265912.1                     | 0.872729047                 |                  | 5           | 5           | 0.204567701                 |                             |              |
|              | Brain_Nucleus_accumbens_basal_ganglia | 0.843680179                 |                  |             |             | Brain_Caudate_basal_ganglia |                             |              |
|              | 1.300733447                           | 0.77250546                  | 0.77250546       |             |             | -0.476570906                | 1.268645015                 |              |
|              | 0.294205105                           | 0.624678593                 | 5                | 0           |             | 0.998207054                 |                             |              |
| DNAH11       | ENSG00000105877.17                    | 0.872782227                 |                  | 4           | 3           | 0.582160358                 |                             |              |
|              | Brain_Frontal_Cortex_BA9              | 0.87959501                  |                  |             |             | Brain_Cortex                | 2.834839304                 |              |
|              | 0.004999188                           | 0.159961614                 |                  |             |             | -0.550231854                | 0.416354962                 | -0.174175002 |
|              | 0.426968696                           | 3                           | 0                |             | 0.998207054 |                             |                             |              |
| ITGA8        | ENSG00000077943.7                     | 0.87289469                  | 6                | 6           |             | 0.24193357                  | Brain_Caudate_basal_ganglia |              |
|              | 0.90049586                            | Brain_Cerebellum            | 2.145604176      |             |             | 0.367452948                 | 0.367452948                 |              |
|              | -1.170167497                          | 0.595387325                 |                  |             |             | -0.379172435                | 0.660425719                 | 6            |
|              | 0.998207054                           |                             |                  |             |             |                             |                             | 0            |
| GAREM1       | ENSG00000141441.15                    | 0.872963766                 |                  | 2           | 2           | 0.602186483                 |                             |              |
|              | Brain_Anterior_cingulate_cortex_BA24  | 0.979357615                 |                  |             |             | Brain_Cerebellum            |                             |              |
|              | 1.043082479                           | 0.956917521                 | 0.956917521      |             |             | -0.521258821                | 0.02587428                  |              |
|              | -0.247692271                          | 0.386881526                 | 2                | 0           |             | 0.998207054                 |                             |              |
| RAP1A        | ENSG00000116473.14                    | 0.872999053                 |                  | 3           | 3           | 0.404586895                 | Brain_Amygdala              |              |
|              | 0.888028817                           | Brain_Cerebellar_Hemisphere | 1.846740486      |             |             | 0.253513625                 |                             |              |
|              | 0.253513625                           | -0.833457256                | -0.140798893     |             |             | -0.373589333                | 0.398267547                 |              |
|              | 3                                     | 0                           |                  |             | 0.998207054 |                             |                             |              |
| SENP6        | ENSG00000112701.17                    | 0.873004057                 |                  | 5           | 3           | 0.429347288                 |                             |              |
|              | Brain_Cerebellar_Hemisphere           | 0.981546187                 |                  |             |             | Brain_Putamen_basal_ganglia |                             |              |
|              | 3.621348046                           | 0.03565614                  | 0.309330338      |             |             | -0.790309076                | 0.065218005                 |              |
|              | -0.178717894                          | 0.349301712                 | 3                | 0           |             | 0.998207054                 |                             |              |
| CLEC2L       | ENSG00000236279.6                     | 0.873040467                 |                  | 3           | 3           | 0.535110266                 |                             |              |
|              | Brain_Putamen_basal_ganglia           | 0.97160875                  | Brain_Cerebellum | 1.911694177 |             |                             |                             |              |
|              | 0.102584115                           | 0.102584115                 |                  |             |             | -0.620224087                | 0.035590667                 | -0.297743436 |
|              | 0.328042064                           | 3                           | 0                |             | 0.998207054 |                             |                             |              |
| ST6GALNAC5   | ENSG00000117069.14                    | 0.873048897                 |                  | 1           | 1           | 0.873048897                 |                             |              |
|              | Brain_Putamen_basal_ganglia           | 0.873048897                 |                  |             |             | Brain_Putamen_basal_ganglia | 1                           | 1            |
|              | 1                                     | -0.15978696                 | -0.15978696      |             |             | -0.15978696                 | NA                          | 1            |
|              | 0.998207054                           |                             |                  |             |             |                             |                             | 0            |
| PRPF38A      | ENSG00000134748.12                    | 0.873154294                 |                  | 1           | 1           | 0.873154294                 |                             |              |
|              | Brain_Caudate_basal_ganglia           | 0.873154294                 |                  |             |             | Brain_Caudate_basal_ganglia | 1                           | 1            |
|              | 1                                     | -0.159653169                | -0.159653169     |             |             | -0.159653169                | NA                          | 1            |
|              | 0.998207054                           |                             |                  |             |             |                             |                             | 0            |
| FBXO30       | ENSG00000118496.4                     | 0.873170638                 |                  | 1           | 1           | 0.873170638                 |                             |              |
|              | Brain_Hypothalamus                    | 0.873170638                 |                  |             |             | Brain_Hypothalamus          | 1                           | 1            |
|              | 0.159632422                           | 0.159632422                 | 0.159632422      |             |             | NA                          | 1                           | 0            |
|              |                                       |                             |                  |             |             |                             |                             | 0.998207054  |
| CRYL1        | ENSG00000165475.13                    | 0.873265841                 |                  | 2           | 2           | 0.61817593                  | Brain_Hippocampus           |              |
|              | 0.873946379                           | Brain_Amygdala              | 1.01678514       |             |             | 0.98321486                  | 0.98321486                  | -0.49843719  |

|               |                                       |              |              |             |   |   |             |   |   |             |
|---------------|---------------------------------------|--------------|--------------|-------------|---|---|-------------|---|---|-------------|
| PHF1          | ENSG00000112511.17                    | 0.158647785  | -0.169894702 | 0.87339816  | 1 | 1 | 0.87339816  | 2 | 0 | 0.998207054 |
|               | Brain_Spinal_cord_cervical_c-1        | 0.159343615  | 0.159343615  | 0.87339816  | 1 | 1 | 0.87339816  | 2 | 0 | 0.998207054 |
|               | Brain_Spinal_cord_cervical_c-1        | 0.159343615  | 0.159343615  | 0.87339816  | 1 | 1 | 0.87339816  | 2 | 0 | 0.998207054 |
| ARIH2OS       | ENSG00000221883.2                     | 0.159092316  | 0.159092316  | 0.873596142 | 1 | 1 | 0.873596142 | 1 | 1 | 0.998207054 |
|               | Brain_Hypothalamus                    | 0.159092316  | 0.159092316  | 0.873596142 | 1 | 1 | 0.873596142 | 1 | 1 | 0.998207054 |
|               | Brain_Hypothalamus                    | 0.159092316  | 0.159092316  | 0.873596142 | 1 | 1 | 0.873596142 | 1 | 1 | 0.998207054 |
| SND1          | ENSG00000197157.10                    | 0.066581024  | 0.241947835  | 0.873626526 | 7 | 4 | 0.329314244 | 4 | 0 | 0.998207054 |
|               | Brain_Putamen_basal_ganglia           | 0.066581024  | 0.241947835  | 0.873626526 | 7 | 4 | 0.329314244 | 4 | 0 | 0.998207054 |
|               | Brain_Cerebellum                      | 0.277166231  | 0.277166231  | 0.873626526 | 7 | 4 | 0.329314244 | 4 | 0 | 0.998207054 |
| DCLRE1A       | ENSG00000198924.7                     | 0.831222581  | 0.471735818  | 0.873632218 | 3 | 3 | 0.466830664 | 3 | 3 | 0.998207054 |
|               | Brain_Cortex                          | 0.831222581  | 0.471735818  | 0.873632218 | 3 | 3 | 0.466830664 | 3 | 3 | 0.998207054 |
|               | Brain_Nucleus_accumbens_basal_ganglia | 0.82552307   | 0.82552307   | 0.873632218 | 3 | 3 | 0.466830664 | 3 | 3 | 0.998207054 |
| AP3D1         | ENSG00000065000.15                    | 0.597534389  | 0.597534389  | 0.824359429 | 3 | 3 | 0.617059236 | 3 | 3 | 0.998207054 |
|               | Brain_Hypothalamus                    | 0.597534389  | 0.597534389  | 0.824359429 | 3 | 3 | 0.617059236 | 3 | 3 | 0.998207054 |
|               | Brain_Cortex                          | 0.506004044  | 0.506004044  | 0.824359429 | 3 | 3 | 0.617059236 | 3 | 3 | 0.998207054 |
| LINC00959     | ENSG00000237489.3                     | 0.907816891  | 0.907816891  | 0.873842673 | 3 | 3 | 0.523260249 | 3 | 3 | 0.998207054 |
|               | Brain_Hippocampus                     | 0.907816891  | 0.907816891  | 0.873842673 | 3 | 3 | 0.523260249 | 3 | 3 | 0.998207054 |
|               | Brain_Caudate_basal_ganglia           | 0.127936301  | 0.127936301  | 0.873842673 | 3 | 3 | 0.523260249 | 3 | 3 | 0.998207054 |
| TAF1A         | ENSG00000143498.17                    | 0.772627356  | -0.830257886 | 0.873850196 | 3 | 3 | 0.406392993 | 3 | 3 | 0.998207054 |
|               | Brain_Caudate_basal_ganglia           | 0.772627356  | -0.830257886 | 0.873850196 | 3 | 3 | 0.406392993 | 3 | 3 | 0.998207054 |
|               | Brain_Cortex                          | 0.161876538  | -0.161876538 | 0.873850196 | 3 | 3 | 0.406392993 | 3 | 3 | 0.998207054 |
| ANXA4         | ENSG00000196975.15                    | 0.158730643  | 0.158730643  | 0.873881094 | 1 | 1 | 0.873881094 | 1 | 1 | 0.998207054 |
|               | Brain_Cerebellar_Hemisphere           | 0.158730643  | 0.158730643  | 0.873881094 | 1 | 1 | 0.873881094 | 1 | 1 | 0.998207054 |
|               | Brain_Cerebellar_Hemisphere           | 0.158730643  | 0.158730643  | 0.873881094 | 1 | 1 | 0.873881094 | 1 | 1 | 0.998207054 |
| RP11-219A15.5 | ENSG00000283033.1                     | 0.255784019  | -0.917284811 | 0.87391606  | 9 | 4 | 0.358993415 | 9 | 4 | 0.998207054 |
|               | Brain_Cortex                          | 0.255784019  | -0.917284811 | 0.87391606  | 9 | 4 | 0.358993415 | 9 | 4 | 0.998207054 |
|               | Brain_Amygdala                        | 0.081081384  | 0.081081384  | 0.87391606  | 9 | 4 | 0.358993415 | 9 | 4 | 0.998207054 |
| VSIG10L       | ENSG00000186806.5                     | 0.016736403  | 1.983263597  | 0.873975372 | 2 | 1 | 0.863395818 | 2 | 1 | 0.998207054 |
|               | Brain_Cerebellar_Hemisphere           | 0.016736403  | 1.983263597  | 0.873975372 | 2 | 1 | 0.863395818 | 2 | 1 | 0.998207054 |
|               | Brain_Cerebellum                      | 0.019950464  | 0.019950464  | 0.873975372 | 2 | 1 | 0.863395818 | 2 | 1 | 0.998207054 |
| AKIP1         | ENSG00000166452.11                    | 0.730399608  | 0.684547022  | 0.874014769 | 6 | 6 | 0.493629808 | 6 | 6 | 0.998207054 |
|               | Brain_Cerebellum                      | 0.730399608  | 0.684547022  | 0.874014769 | 6 | 6 | 0.493629808 | 6 | 6 | 0.998207054 |
|               | Brain_Cortex                          | -0.406648986 | 0.406648986  | 0.874014769 | 6 | 6 | 0.493629808 | 6 | 6 | 0.998207054 |
| PRR15L        | ENSG00000167183.2                     | 0.158369823  | 0.158369823  | 0.874165391 | 1 | 1 | 0.874165391 | 1 | 1 | 0.998207054 |
|               | Brain_Cerebellum                      | 0.158369823  | 0.158369823  | 0.874165391 | 1 | 1 | 0.874165391 | 1 | 1 | 0.998207054 |
|               | Brain_Cerebellum                      | 0.158369823  | 0.158369823  | 0.874165391 | 1 | 1 | 0.874165391 | 1 | 1 | 0.998207054 |
| IMPG2         | ENSG00000081148.11                    | 0.912271669  | 0.912271669  | 0.874176003 | 1 | 1 | 0.874176003 | 1 | 1 | 0.998207054 |
|               | Brain_Cerebellar_Hemisphere           | 0.912271669  | 0.912271669  | 0.874176003 | 1 | 1 | 0.874176003 | 1 | 1 | 0.998207054 |
|               | Brain_Cerebellar_Hemisphere           | 0.912271669  | 0.912271669  | 0.874176003 | 1 | 1 | 0.874176003 | 1 | 1 | 0.998207054 |
| MYRIP         | ENSG00000170011.13                    | 0.071763843  | 0.699341043  | 0.874320974 | 3 | 2 | 0.601718627 | 3 | 2 | 0.998207054 |
|               | Brain_Substantia_nigra                | 0.071763843  | 0.699341043  | 0.874320974 | 3 | 2 | 0.601718627 | 3 | 2 | 0.998207054 |
|               | Brain_Cerebellum                      | 0.436704912  | 0.436704912  | 0.874320974 | 3 | 2 | 0.601718627 | 3 | 2 | 0.998207054 |
| RP11-16E12.2  | ENSG00000259772.6                     | 0.912271669  | 0.912271669  | 0.874458626 | 2 | 2 | 0.612491737 | 2 | 2 | 0.998207054 |
|               | Brain_Cerebellar_Hemisphere           | 0.912271669  | 0.912271669  | 0.874458626 | 2 | 2 | 0.612491737 | 2 | 2 | 0.998207054 |
|               | Brain_Cerebellum                      | 0.313270049  | 0.313270049  | 0.874458626 | 2 | 2 | 0.612491737 | 2 | 2 | 0.998207054 |
| RP11-127B20.2 | ENSG00000273156.1                     | -0.157895027 | -0.157895027 | 0.874539517 | 1 | 1 | 0.874539517 | 1 | 1 | 0.998207054 |
|               | Brain_Hypothalamus                    | -0.157895027 | -0.157895027 | 0.874539517 | 1 | 1 | 0.874539517 | 1 | 1 | 0.998207054 |
|               | Brain_Hypothalamus                    | -0.157895027 | -0.157895027 | 0.874539517 | 1 | 1 | 0.874539517 | 1 | 1 | 0.998207054 |

|              |                                       |                             |                                |              |                             |                           |
|--------------|---------------------------------------|-----------------------------|--------------------------------|--------------|-----------------------------|---------------------------|
| TRAPPC5      | ENSG00000181029.8                     | 0.874835993                 | 4                              | 4            | 0.387868677                 |                           |
|              | Brain_Putamen_basal_ganglia           | 0.809122291                 |                                |              | Brain_Cerebellum            | 1.90609143                |
|              | 0.121990126                           | 0.121990126                 |                                |              | -0.241558488                | -0.532490727              |
|              | 0.277308296                           | 4                           | 0                              | 0.998207054  |                             |                           |
| FAM160A1     | ENSG00000164142.15                    | 0.875051236                 | 2                              | 1            | 0.825856984                 |                           |
|              | Brain_Cerebellar_Hemisphere           | 0.924964978                 |                                |              | Brain_Cerebellum            | 1.99629232 0.00370768     |
|              | 1.99629232                            | 0.094181503                 | 0.220018196                    | 0.157099849  | 0.088979978                 | 1                         |
|              | 0                                     | 0.998207054                 |                                |              |                             |                           |
| ZNF605       | ENSG00000196458.10                    | 0.875061906                 | 9                              | 8            | 0.107420667                 |                           |
|              | Brain_Caudate_basal_ganglia           | 0.695866916                 |                                |              | Brain_Cerebellar_Hemisphere |                           |
|              | 4.351144366                           | 0.038749856                 | 0.194029122                    |              | -1.609895519                | -0.390905733              |
|              | -0.714882945                          | 0.361801362                 | 8                              | 0            | 0.998207054                 |                           |
| ADCY9        | ENSG00000162104.9                     | 0.875088331                 | 1                              | 1            | 0.875088331                 | Brain_Cortex              |
|              | 0.875088331                           | Brain_Cortex                | 1                              | 1            | 1                           | -0.157198601 -0.157198601 |
|              | -0.157198601                          | NA                          | 1                              | 0            | 0.998207054                 |                           |
| RP11-112L6.3 | ENSG00000237595.3                     | 0.875176174                 | 4                              | 3            | 0.46368019                  |                           |
|              | Brain_Putamen_basal_ganglia           | 0.86071744                  | Brain_Caudate_basal_ganglia    | 2.626185507  |                             |                           |
|              | 0.084591032                           | 0.297519302                 | -0.73280038                    | 0.364034613  | -0.264182377                |                           |
|              | 0.477421522                           | 3                           | 0                              | 0.998207054  |                             |                           |
| APOBEC2      | ENSG00000124701.5                     | 0.875176858                 | 3                              | 3            | 0.507635842                 |                           |
|              | Brain_Amygdala                        | 0.887055841                 | Brain_Cerebellar_Hemisphere    | 1.385715908  |                             |                           |
|              | 0.620320547                           | 0.620320547                 | -0.142030593                   | 0.662523402  | 0.330757733                 |                           |
|              | 0.420407332                           | 3                           | 0                              | 0.998207054  |                             |                           |
| LRCOL1       | ENSG00000204583.9                     | 0.875182271                 | 2                              | 2            | 0.653007993                 |                           |
|              | Brain_Caudate_basal_ganglia           | 0.78696187                  | Brain_Cortex                   | 1.036532774  |                             |                           |
|              | 0.963467226                           | 0.963467226                 | 0.270257877                    | 0.449587375  | 0.359922626                 |                           |
|              | 0.126805104                           | 2                           | 0                              | 0.998207054  |                             |                           |
| RP11-532F6.4 | ENSG00000271727.1                     | 0.875611014                 | 1                              | 1            | 0.875611014                 |                           |
|              | Brain_Cortex                          | 0.875611014                 | Brain_Cortex                   | 1            | 1                           | 1 0.156535405             |
|              | 0.156535405                           | 0.156535405                 | NA                             | 1            | 0                           | 0.998207054               |
| Clorf145     | ENSG00000162913.9                     | 0.875657972                 | 7                              | 5            | 0.502185452                 |                           |
|              | Brain_Cerebellar_Hemisphere           | 0.8544859                   | Brain_Spinal_cord_cervical_c-1 |              |                             |                           |
|              | 3.803104918                           | 0.054206674                 | 0.210887404                    | -0.671055064 | 0.330723053                 |                           |
|              | -0.236778405                          | 0.386805987                 | 5                              | 0            | 0.998207054                 |                           |
| CHEK1        | ENSG00000149554.12                    | 0.87574164                  | 5                              | 4            | 0.422811512                 | Brain_Cortex              |
|              | 0.999467932                           | Brain_Cerebellar_Hemisphere | 4.117441279                    | 0.096241786  |                             |                           |
|              | 0.162663481                           | -0.007056888                | 0.801553108                    | 0.287336848  | 0.331500727                 |                           |
|              | 4                                     | 0                           | 0.998207054                    |              |                             |                           |
| LINC01277    | ENSG00000229017.6                     | 0.875759418                 | 2                              | 2            | 0.65779917                  | Brain_Cortex              |
|              | 0.830219021                           | Brain_Hypothalamus          | 1.106108842                    | 0.893891158  |                             |                           |
|              | 0.893891158                           | -0.442953775                | -0.214420674                   | -0.328687225 | 0.161597305                 |                           |
|              | 2                                     | 0                           | 0.998207054                    |              |                             |                           |
| ZNF572       | ENSG00000180938.5                     | 0.87576502                  | 1                              | 1            | 0.87576502                  | Brain_Cortex              |
|              | 0.87576502                            | Brain_Cortex                | 1                              | 1            | 1                           | -0.156340011 -0.156340011 |
|              | -0.156340011                          | NA                          | 1                              | 0            | 0.998207054                 |                           |
| NRP2         | ENSG00000118257.16                    | 0.875805541                 | 1                              | 1            | 0.875805541                 |                           |
|              | Brain_Nucleus_accumbens_basal_ganglia | 0.875805541                 |                                |              |                             |                           |
|              | Brain_Nucleus_accumbens_basal_ganglia | 1                           | 1                              | 1            | 0.156288601                 |                           |
|              | 0.156288601                           | 0.156288601                 | NA                             | 1            | 0                           | 0.998207054               |
| RYR3         | ENSG00000198838.13                    | 0.875844424                 | 2                              | 2            | 0.632034969                 | Brain_Cortex              |
|              | 0.837709797                           | Brain_Cerebellar_Hemisphere | 1.032696406                    | 0.967303594  |                             |                           |
|              | 0.967303594                           | 0.204823793                 | 0.478864582                    | 0.341844188  | 0.1937761                   | 2                         |
|              | 0                                     | 0.998207054                 |                                |              |                             |                           |
| HMG20A       | ENSG00000140382.14                    | 0.875974894                 | 6                              | 5            | 0.209754597                 |                           |
|              | Brain_Cerebellum                      | 0.849514365                 | Brain_Putamen_basal_ganglia    | 4.157948126  |                             |                           |
|              | 0.073849316                           | 0.139154412                 | 0.189738099                    | 1.254240518  | 0.857549537                 |                           |
|              | 0.355282754                           | 5                           | 0                              | 0.998207054  |                             |                           |
| SERPINB9     | ENSG00000170542.5                     | 0.87598958                  | 2                              | 2            | 0.609464714                 | Brain_Cerebellum          |
|              | 0.689109632                           | Brain_Cerebellar_Hemisphere | 1.695965736                    | 0.304034264  |                             |                           |
|              | 0.304034264                           | 0.400063657                 | 0.510837691                    | 0.455450674  | 0.078329071                 |                           |
|              | 2                                     | 0                           | 0.998207054                    |              |                             |                           |
| CAMK2B       | ENSG00000058404.19                    | 0.876198199                 | 9                              | 5            | 0.166060312                 |                           |

|               |                                      |                  |              |                                       |              |              |             |                  |              |
|---------------|--------------------------------------|------------------|--------------|---------------------------------------|--------------|--------------|-------------|------------------|--------------|
|               | Brain_Cortex                         | 0.963222913      |              | Brain_Caudate_basal_ganglia           | 6.423129262  |              |             |                  |              |
|               | 0.027746281                          | 0.235040442      |              | -1.384974347                          | 0.118025239  |              |             |                  | -0.796300584 |
|               | 0.529100629                          | 5                | 0            | 0.998207054                           |              |              |             |                  |              |
| DAD1          | ENSG00000129562                      | 10               | 0.876316968  | 10                                    | 2            | 0.707146085  |             |                  |              |
|               | Brain_Anterior_cingulate_cortex_BA24 | 0.981616812      |              | Brain_Frontal_Cortex_BA9              |              |              |             |                  |              |
|               | 9.062325291                          | 5.77E-05         | 0.489250842  | -0.292776353                          | 0.375691732  |              |             |                  |              |
|               | -0.038418069                         | 0.215142371      | 2            | 0                                     | 0.998207054  |              |             |                  |              |
| FRMD4A        | ENSG00000151474                      | 21               | 0.876349997  | 1                                     | 1            | 0.876349997  |             |                  |              |
|               | Brain_Frontal_Cortex_BA9             | 0.876349997      |              | Brain_Frontal_Cortex_BA9              | 1            | 1            |             |                  |              |
|               | 1                                    | 0.155597878      | 0.155597878  | 0.155597878                           | NA           | 1            | 0           |                  |              |
|               | 0.998207054                          |                  |              |                                       |              |              |             |                  |              |
| C1QL4         | ENSG00000186897                      | 4                | 0.876413983  | 3                                     | 2            | 0.545587962  |             |                  |              |
|               | Brain_Hippocampus                    | 0.997006476      |              | Brain_Amygdala                        | 2.376857801  |              |             |                  |              |
|               | 0.077469751                          | 0.545672449      | 0.003751835  | 0.604384615                           | 0.343621911  |              |             |                  |              |
|               | 0.308031519                          | 2                | 0            | 0.998207054                           |              |              |             |                  |              |
| MED25         | ENSG00000104973                      | 16               | 0.876522473  | 3                                     | 3            | 0.410699265  |             |                  |              |
|               | Brain_Spinal_cord_cervical_c-1       | 0.836683686      |              | Brain_Frontal_Cortex_BA9              |              |              |             |                  |              |
|               | 1.81347591                           | 0.292763506      | 0.292763506  | -0.822663697                          | -0.20613727  |              |             |                  |              |
|               | -0.44103795                          | 0.333425243      | 3            | 0                                     | 0.998207054  |              |             |                  |              |
| AP5Z1         | ENSG00000242802                      | 6                | 0.876525243  | 1                                     | 1            | 0.876525243  |             | Brain_Amygdala   |              |
|               | 0.876525243                          | Brain_Amygdala   | 1            | 1                                     | 1            | -0.15537557  |             | -0.15537557      |              |
|               | -0.15537557                          | NA               | 1            | 0                                     | 0.998207054  |              |             |                  |              |
| PDZRN4        | ENSG00000165966                      | 14               | 0.876684904  | 3                                     | 3            | 0.503996995  |             |                  |              |
|               | Brain_Frontal_Cortex_BA9             | 0.844694915      |              | Brain_Cortex                          | 1.417745778  |              |             |                  |              |
|               | 0.58985086                           | 0.58985086       | -0.668214008 | 0.506941397                           | -0.119054778 |              |             |                  |              |
|               | 0.591333657                          | 3                | 0            | 0.998207054                           |              |              |             |                  |              |
| RP5-998N21.4  | ENSG00000234571                      | 1.1              | 0.876694739  | 1                                     | 1            | 0.876694739  |             |                  |              |
|               | Brain_Substantia_nigra               | 0.876694739      |              | Brain_Substantia_nigra                | 1            | 1            |             |                  |              |
|               | 1                                    | -0.155160561     | -0.155160561 | -0.155160561                          | NA           | 1            | 0           |                  |              |
|               | 0.998207054                          |                  |              |                                       |              |              |             |                  |              |
| RP11-403I13.5 | ENSG00000232721                      | 2                | 0.876694739  | 9                                     | 1            | 0.876694739  |             |                  |              |
|               | Brain_Anterior_cingulate_cortex_BA24 | 0.876694739      |              | Brain_Caudate_basal_ganglia           |              |              |             |                  |              |
|               | 9                                    | 1.36E-33         | 9            | 0.155160561                           | 0.155160561  | 0.155160561  | 1.39E-17    |                  |              |
|               | 1                                    | 0                | 0.998207054  |                                       |              |              |             |                  |              |
| RP11-14N7.2   | ENSG00000232527                      | 7                | 0.876694739  | 2                                     | 1            | 0.876694739  |             |                  |              |
|               | Brain_Hippocampus                    | 0.876694739      |              | Brain_Nucleus_accumbens_basal_ganglia | 2            |              |             |                  |              |
|               | 3.35E-17                             | 2                | -0.155160561 | 0.155160561                           | 1.39E-17     | 0.21943017   | 1           | 0                |              |
|               | 0.998207054                          |                  |              |                                       |              |              |             |                  |              |
| C3orf14       | ENSG00000114405                      | 10               | 0.87673038   | 1                                     | 1            | 0.87673038   |             | Brain_Cerebellum |              |
|               | 0.87673038                           | Brain_Cerebellum | 1            | 1                                     | 0.155115351  | 0.155115351  |             |                  |              |
|               | 0.155115351                          | NA               | 1            | 0                                     | 0.998207054  |              |             |                  |              |
| IPCEF1        | ENSG00000074706                      | 13               | 0.876790945  | 1                                     | 1            | 0.876790945  |             |                  |              |
|               | Brain_Spinal_cord_cervical_c-1       | 0.876790945      |              | Brain_Spinal_cord_cervical_c-1        |              |              |             |                  |              |
|               | 1                                    | 1                | 1            | -0.155038526                          | -0.155038526 | -0.155038526 | NA          | 1                | 0            |
|               | 0.998207054                          |                  |              |                                       |              |              |             |                  |              |
| LINC00475     | ENSG00000225511                      | 6                | 0.876822925  | 3                                     | 3            | 0.441556086  |             |                  |              |
|               | Brain_Hypothalamus                   | 0.653026247      |              | Brain_Cerebellum                      | 2.286789498  |              |             |                  |              |
|               | 0.271045776                          | 0.271045776      | 0.449562064  | 0.76956818                            | 0.627447279  |              |             |                  |              |
|               | 0.16297329                           | 3                | 0            | 0.998207054                           |              |              |             |                  |              |
| FGF20         | ENSG00000078579                      | 8                | 0.876867462  | 1                                     | 1            | 0.876867462  |             |                  |              |
|               | Brain_Cerebellar_Hemisphere          | 0.876867462      |              | Brain_Cerebellar_Hemisphere           | 1            | 1            |             |                  |              |
|               | 1                                    | -0.154941468     | -0.154941468 | -0.154941468                          | NA           | 1            | 0           |                  |              |
|               | 0.998207054                          |                  |              |                                       |              |              |             |                  |              |
| ART3          | ENSG00000156219                      | 16               | 0.876874921  | 5                                     | 4            | 0.318648391  |             |                  |              |
|               | Brain_Frontal_Cortex_BA9             | 0.986282794      |              | Brain_Cortex                          | 2.808310857  |              |             |                  |              |
|               | 0.079591089                          | 0.140005764      | -0.751015386 | 0.997239254                           | 0.03765424   |              |             |                  |              |
|               | 0.788494814                          | 4                | 0            | 0.998207054                           |              |              |             |                  |              |
| NGF           | ENSG00000134259                      | 3                | 0.87690493   | 1                                     | 1            | 0.87690493   |             | Brain_Cerebellum | 0.87690493   |
|               | Brain_Cerebellum                     | 1                | 1            | 1                                     | 0.154893941  | 0.154893941  | 0.154893941 |                  |              |
|               | NA                                   | 1                | 0            | 0.998207054                           |              |              |             |                  |              |
| KLHL7-AS1     | ENSG00000230658                      | 1                | 0.876961614  | 13                                    | 1            | 0.535394109  |             |                  |              |
|               | Brain_Cerebellum                     | 0.962858719      |              | Brain_Putamen_basal_ganglia           | 12.72497448  |              |             |                  |              |



|              |                                       |                                      |              |                                       |                    |
|--------------|---------------------------------------|--------------------------------------|--------------|---------------------------------------|--------------------|
|              | 0.000126775                           | 12.72497448                          | -0.124027117 | 0.619792953                           | 0.155251882        |
|              | 0.176312678                           | 1 0                                  | 0.998207054  |                                       |                    |
| PHLDA1       | ENSG00000139289.13                    | 0.876985037                          | 1 1          | 0.876985037                           |                    |
|              | Brain_Nucleus_accumbens_basal_ganglia | 0.876985037                          |              |                                       |                    |
|              | Brain_Nucleus_accumbens_basal_ganglia | 1 1                                  | 1            | 0.154792331                           |                    |
|              | 0.154792331                           | 0.154792331                          | NA 1         | 0                                     | 0.998207054        |
| PRDM15       | ENSG00000141956.13                    | 0.877137134                          | 11 11        | 0.047878172                           |                    |
|              | Brain_Frontal_Cortex_BA9              | 0.955406775                          |              | Brain_Cerebellar_Hemisphere           |                    |
|              | 2.459700766                           | 0.327377858                          | 0.327377858  | -0.348457423                          | 1.978448151        |
|              | 0.337062829                           | 0.682260308                          | 11 0         | 0.998207054                           |                    |
| LINC01114    | ENSG00000234177.5                     | 0.877209046                          | 13 2         | 0.614904376                           |                    |
|              | Brain_Spinal_cord_cervical_c-1        | 0.98689898                           |              | Brain_Nucleus_accumbens_basal_ganglia |                    |
|              | 11.09513574                           | 8.43E-05                             | 1.035544553  | -0.426727234                          | 0.503085193        |
|              | -0.124773955                          | 0.287585464                          | 2 0          | 0.998207054                           |                    |
| MFF          | ENSG00000168958.19                    | 0.87723365                           | 10 6         | 0.203430374                           | Brain_Hypothalamus |
|              | 0.982019591                           | Brain_Cortex                         | 6.224134466  | 0.017204162                           | 0.329641157        |
|              | -1.271838874                          | 0.307391069                          | -0.119445391 | 0.490808625                           | 6 0                |
|              | 0.998207054                           |                                      |              |                                       |                    |
| TTC39A       | ENSG00000085831.15                    | 0.877300876                          | 1 1          | 0.877300876                           |                    |
|              | Brain_Nucleus_accumbens_basal_ganglia | 0.877300876                          |              |                                       |                    |
|              | Brain_Nucleus_accumbens_basal_ganglia | 1 1                                  | 1            | -0.154391727                          |                    |
|              | -0.154391727                          | -0.154391727                         | NA 1         | 0                                     | 0.998207054        |
| CTD-2126E3.4 | ENSG00000267890.1                     | 0.877550017                          | 1 1          | 0.877550017                           |                    |
|              | Brain_Spinal_cord_cervical_c-1        | 0.877550017                          |              | Brain_Spinal_cord_cervical_c-1        |                    |
|              | 1 1 1                                 | 0.15407574                           | 0.15407574   | 0.15407574                            | NA 1 0             |
|              |                                       |                                      |              |                                       | 0.998207054        |
| ABCA9        | ENSG00000154258.16                    | 0.877628787                          | 5 4          | 0.637448541                           | Brain_Cerebellum   |
|              | 0.988903972                           | Brain_Anterior_cingulate_cortex_BA24 | 2.992570857  |                                       |                    |
|              | 0.083832328                           | 0.19249084                           | -0.3683047   | 0.471269153                           | 0.133006229        |
|              | 0.331480325                           | 4 0                                  | 0.998207054  |                                       |                    |
| CCNDBP1      | ENSG00000166946.13                    | 0.877725011                          | 4 4          | 0.323382687                           |                    |
|              | Brain_Caudate_basal_ganglia           | 0.933866004                          |              | Brain_Anterior_cingulate_cortex_BA24  |                    |
|              | 1.673766447                           | 0.292167181                          | 0.292167181  | -0.082981809                          | 0.987530401        |
|              | 0.400379847                           | 0.482397944                          | 4 0          | 0.998207054                           |                    |
| DNMBP        | ENSG00000107554.16                    | 0.877751385                          | 2 2          | 0.613967971                           | Brain_Cerebellum   |
|              | 0.80487102                            | Brain_Cerebellar_Hemisphere          | 1.614382387  | 0.385617613                           |                    |
|              | 0.385617613                           | -0.504417573                         | -0.247048073 | -0.375732823                          | 0.181987719        |
|              | 2 0                                   | 0.998207054                          |              |                                       |                    |
| LINC00854    | ENSG00000236383.8                     | 0.877810531                          | 4 2          | 0.568260126                           |                    |
|              | Brain_Hypothalamus                    | 0.711214153                          |              | Brain_Hippocampus                     | 3.76298388         |
|              | 0.012832349                           | 0.181579004                          | 0.370225937  | 0.57061577                            | 0.49291813         |
|              | 0.087941835                           | 2 0                                  | 0.998207054  |                                       |                    |
| ESYT2        | ENSG00000117868.15                    | 0.877819425                          | 8 4          | 0.590378506                           | Brain_Cortex       |
|              | 0.931987131                           | Brain_Frontal_Cortex_BA9             | 6.214821365  | 0.087228528                           |                    |
|              | 0.217909242                           | -0.502360667                         | 0.538287607  | 0.248515865                           | 0.33633997 4       |
|              | 0                                     | 0.998207054                          |              |                                       |                    |
| SUMO4        | ENSG00000177688.6                     | 0.877973316                          | 2 2          | 0.613620238                           | Brain_Cortex       |
|              | 0.940384292                           | Brain_Frontal_Cortex_BA9             | 1.003371096  | 0.996628904                           |                    |
|              | 0.996628904                           | -0.504912579                         | -0.074786866 | -0.289849722                          | 0.304144809        |
|              | 2 0                                   | 0.998207054                          |              |                                       |                    |
| POMT2        | ENSG00000009830.11                    | 0.878025108                          | 7 7          | 0.097635989                           |                    |
|              | Brain_Anterior_cingulate_cortex_BA24  | 0.826170862                          |              | Brain_Caudate_basal_ganglia           |                    |
|              | 1.586665797                           | 0.419847089                          | 0.419847089  | 0.219615188                           | 1.656423978        |
|              | 0.606941459                           | 0.512516352                          | 7 0          | 0.998207054                           |                    |
| PSMG2        | ENSG00000128789.20                    | 0.878027169                          | 3 3          | 0.490448596                           |                    |
|              | Brain_Substantia_nigra                | 0.92456979                           |              | Brain_Cerebellum                      | 1.277761722        |
|              | 0.701843287                           | 0.701843287                          | -0.689595504 | 0.483378166                           | -0.100298783       |
|              | 0.586507028                           | 3 0                                  | 0.998207054  |                                       |                    |
| C4orf33      | ENSG00000151470.12                    | 0.878171655                          | 13 3         | 0.233965238                           |                    |
|              | Brain_Amygdala                        | 0.960634017                          |              | Brain_Cortex                          | 9.887909443        |
|              | 0.733504809                           | -0.193549098                         | 1.190206503  | 0.489716246                           | 0.008303273        |
|              | 3 0                                   | 0.998207054                          |              |                                       | 0.448702967        |
| FCRLB        | ENSG00000162746.14                    | 0.878272365                          | 7 7          | 0.232207545                           |                    |

|             |                                       |                                      |                                       |              |              |                  |    |   |
|-------------|---------------------------------------|--------------------------------------|---------------------------------------|--------------|--------------|------------------|----|---|
|             | Brain_Anterior_cingulate_cortex_BA24  | 0.96465053                           | Brain_Cerebellar_Hemisphere           |              |              |                  |    |   |
|             | 3.533452717                           | 0.226074361                          | 0.226074361                           | -1.194691601 | -0.044318494 |                  |    |   |
|             | -0.600179991                          | 0.42505922                           | 7                                     | 0            | 0.998207054  |                  |    |   |
| VIPR1       | ENSG00000114812.12                    | 0.878319815                          | 3                                     | 2            | 0.595308039  | Brain_Cortex     |    |   |
|             | 0.653598467                           | Brain_Anterior_cingulate_cortex_BA24 | 2.88895387                            | 0.000833877  |              |                  |    |   |
|             | 0.110212252                           | -0.531159813                         | -0.448768773                          | -0.488783025 | 0.041246297  |                  |    |   |
|             | 2                                     | 0                                    | 0.998207054                           |              |              |                  |    |   |
| CHRND       | ENSG00000135902.9                     | 0.878321395                          | 2                                     | 2            | 0.614339075  |                  |    |   |
|             | Brain_Nucleus_accumbens_basal_ganglia | 0.98150538                           | Brain_Cerebellum                      | 1.101485812  |              |                  |    |   |
|             | 0.898514188                           | 0.898514188                          | 0.023181645                           | 0.503889435  | 0.26353554   |                  |    |   |
|             | 0.339911738                           | 2                                    | 0                                     | 0.998207054  |              |                  |    |   |
| ASAP2       | ENSG00000151693.9                     | 0.878365729                          | 2                                     | 2            | 0.687656796  |                  |    |   |
|             | Brain_Cerebellar_Hemisphere           | 0.695667663                          | Brain_Spinal_cord_cervical_c-1        |              |              |                  |    |   |
|             | 1.213194679                           | -0.786805321                         | 0.786805321                           | -0.391175301 | 0.402037     |                  |    |   |
|             | 0.005430849                           | 0.560885797                          | 2                                     | 0            | 0.998207054  |                  |    |   |
| TMA16       | ENSG00000198498.9                     | 0.878440883                          | 2                                     | 2            | 0.629340921  |                  |    |   |
|             | Brain_Caudate_basal_ganglia           | 0.87932463                           | Brain_Nucleus_accumbens_basal_ganglia |              |              |                  |    |   |
|             | 1.021093714                           | 0.978906286                          | 0.978906286                           | 0.151825423  | 0.482654717  |                  |    |   |
|             | 0.31724007                            | 0.233931637                          | 2                                     | 0            | 0.998207054  |                  |    |   |
| HGD         | ENSG00000113924.11                    | 0.878505711                          | 1                                     | 1            | 0.878505711  |                  |    |   |
|             | Brain_Spinal_cord_cervical_c-1        | 0.878505711                          | Brain_Spinal_cord_cervical_c-1        |              |              |                  |    |   |
|             | 1                                     | 1                                    | 1                                     | 0.152863766  | 0.152863766  | 0.152863766      | NA | 1 |
|             | 0.998207054                           |                                      |                                       |              |              |                  |    | 0 |
| LINC01550   | ENSG00000246223.8                     | 0.878512503                          | 2                                     | 2            | 0.628501512  |                  |    |   |
|             | Brain_Caudate_basal_ganglia           | 0.877530214                          | Brain_Cerebellum                      | 1.0079698    | 0.9920302    |                  |    |   |
|             | 0.9920302                             | -0.483837059                         | 0.154100855                           | -0.164868102 | 0.451090225  | 2                |    |   |
|             | 0                                     | 0.998207054                          |                                       |              |              |                  |    |   |
| ENDOU       | ENSG00000111405.8                     | 0.878594783                          | 2                                     | 2            | 0.630092735  |                  |    |   |
|             | Brain_Frontal_Cortex_BA9              | 0.859861738                          | Brain_Caudate_basal_ganglia           |              |              |                  |    |   |
|             | 1.025972275                           | 0.974027725                          | 0.974027725                           | -0.481596328 | -0.17655017  |                  |    |   |
|             | -0.329073249                          | 0.215700207                          | 2                                     | 0            | 0.998207054  |                  |    |   |
| IL17B       | ENSG00000127743.5                     | 0.878637534                          | 2                                     | 2            | 0.647801152  |                  |    |   |
|             | Brain_Spinal_cord_cervical_c-1        | 0.843968709                          | Brain_Cerebellar_Hemisphere           |              |              |                  |    |   |
|             | 1.058209387                           | 0.941790613                          | 0.941790613                           | -0.456818995 | -0.196819604 |                  |    |   |
|             | -0.326819299                          | 0.183847332                          | 2                                     | 0            | 0.998207054  |                  |    |   |
| ZFP69B      | ENSG00000187801.14                    | 0.878643026                          | 1                                     | 1            | 0.878643026  |                  |    |   |
|             | Brain_Frontal_Cortex_BA9              | 0.878643026                          | Brain_Frontal_Cortex_BA9              | 1            | 1            |                  |    |   |
|             | 1                                     | -0.152689646                         | -0.152689646                          | -0.152689646 | NA           | 1                | 0  |   |
|             | 0.998207054                           |                                      |                                       |              |              |                  |    |   |
| RP11-38M8.1 | ENSG00000273297.1                     | 0.878724985                          | 2                                     | 2            | 0.613925319  |                  |    |   |
|             | Brain_Frontal_Cortex_BA9              | 0.858032167                          | Brain_Spinal_cord_cervical_c-1        |              |              |                  |    |   |
|             | 1.466421868                           | 0.533578132                          | 0.533578132                           | -0.504478284 | -0.178879694 |                  |    |   |
|             | -0.341678989                          | 0.230232971                          | 2                                     | 0            | 0.998207054  |                  |    |   |
| ENPP1       | ENSG00000197594.11                    | 0.878745902                          | 3                                     | 2            | 0.616865485  |                  |    |   |
|             | Brain_Cerebellar_Hemisphere           | 0.751908129                          | Brain_Substantia_nigra                |              |              |                  |    |   |
|             | 2.513596086                           | 0.048570601                          | 0.437833313                           | 0.316124345  | 0.500297683  |                  |    |   |
|             | 0.415470848                           | 0.092941219                          | 2                                     | 0            | 0.998207054  |                  |    |   |
| RFLNB       | ENSG00000183688.4                     | 0.878787436                          | 12                                    | 5            | 0.193231781  |                  |    |   |
|             | Brain_Hypothalamus                    | 0.962371285                          | Brain_Putamen_basal_ganglia           | 7.956669983  |              |                  |    |   |
|             | 0.027265395                           | 0.318827848                          | -1.30107793                           | 0.047178096  | -0.63712797  |                  |    |   |
|             | 0.377359805                           | 5                                    | 0                                     | 0.998207054  |              |                  |    |   |
| PARP1       | ENSG00000143799.12                    | 0.878969674                          | 2                                     | 2            | 0.789932393  |                  |    |   |
|             | Brain_Cerebellar_Hemisphere           | 0.940242939                          | Brain_Cerebellum                      | 1.764708833  |              |                  |    |   |
|             | 0.235291167                           | 0.235291167                          | -0.266398406                          | 0.074964523  | -0.095716941 |                  |    |   |
|             | 0.241380042                           | 2                                    | 0                                     | 0.998207054  |              |                  |    |   |
| SNAP29      | ENSG00000099940.11                    | 0.878984767                          | 13                                    | 3            | 0.388723067  |                  |    |   |
|             | Brain_Cerebellar_Hemisphere           | 0.935407585                          | Brain_Hypothalamus                    | 9.810235536  |              |                  |    |   |
|             | 0.000657477                           | -0.974606554                         | -0.861935401                          | -0.562354868 | -0.205393872 |                  |    |   |
|             | 0.378054127                           | 3                                    | 0                                     | 0.998207054  |              |                  |    |   |
| ST7L        | ENSG00000007341.18                    | 0.879064808                          | 11                                    | 2            | 0.283400637  | Brain_Cerebellum |    |   |
|             | 0.942501456                           | Brain_Cerebellar_Hemisphere          | 9.531859377                           | 0.000371797  |              |                  |    |   |
|             | 0.813313953                           | -1.07271137                          | 0.072126225                           | -0.447748975 | 0.302399187  |                  |    |   |

|               |                                       |                   |                                |              |             |             |                  |            |    |
|---------------|---------------------------------------|-------------------|--------------------------------|--------------|-------------|-------------|------------------|------------|----|
|               | 2                                     | 0                 | 0.998207054                    |              |             |             |                  |            |    |
| LINC00404     | ENSG00000229520.1                     | 0.879119899       | 1                              | 1            | 0.879119899 |             |                  |            |    |
|               | Brain_Amygdala                        | 0.879119899       | Brain_Amygdala                 | 1            | 1           | 1           | -0.152084994     |            |    |
|               | -0.152084994                          | -0.152084994      | NA                             | 1            | 0           | 0.998207054 |                  |            |    |
| CNR1          | ENSG00000118432.12                    | 0.879230019       | 1                              | 1            | 0.879230019 |             | Brain_Cerebellum |            |    |
|               | 0.879230019                           | Brain_Cerebellum1 | 1                              | 1            | 0.151945376 |             | 0.151945376      |            |    |
|               | 0.151945376                           | NA                | 1                              | 0            | 0.998207054 |             |                  |            |    |
| SELENOV       | ENSG00000186838.13                    | 0.879350423       | 2                              | 2            | 0.694594761 |             |                  |            |    |
|               | Brain_Amygdala                        | 0.761078906       | Brain_Frontal_Cortex_BA9       | 1.042193693  |             |             |                  |            |    |
|               | 0.957806307                           | 0.957806307       | 0.304064297                    | 0.392627316  |             |             | 0.348345807      |            |    |
|               | 0.062623511                           | 2                 | 0                              | 0.998207054  |             |             |                  |            |    |
| ARSA          | ENSG00000100299.17                    | 0.879492244       | 12                             | 8            | 0.09877711  |             |                  |            |    |
|               | Brain_Anterior_cingulate_cortex_BA24  | 0.89344516        | Brain_Cerebellar_Hemisphere    |              |             |             |                  |            |    |
|               | 6.205447765                           | 0.018371587       | 0.212080705                    | -0.133946146 |             |             | 1.650811311      |            |    |
|               | 0.90686627                            | 0.602313713       | 8                              | 0            | 0.998207054 |             |                  |            |    |
| KRT83         | ENSG00000170523.3                     | 0.879495628       | 5                              | 3            | 0.376856478 |             |                  |            |    |
|               | Brain_Spinal_cord_cervical_c-1        | 0.65887342        | Brain_Cortex                   | 4.137934795  |             |             |                  |            |    |
|               | 0.05112066                            | 0.230403009       | -0.740341653                   | 0.883703153  |             |             | -0.040660912     |            |    |
|               | 0.741407746                           | 3                 | 0                              | 0.998207054  |             |             |                  |            |    |
| RP11-504A18.1 | ENSG00000260971.3                     | 0.879505546       | 1                              | 1            | 0.879505546 |             |                  |            |    |
|               | Brain_Nucleus_accumbens_basal_ganglia | 0.879505546       |                                |              |             |             |                  |            |    |
|               | Brain_Nucleus_accumbens_basal_ganglia | 1                 | 1                              | 1            | 0.151596054 |             |                  |            |    |
|               | 0.151596054                           | 0.151596054       | NA                             | 1            | 0           | 0.998207054 |                  |            |    |
| XXYLT1        | ENSG00000173950.15                    | 0.879801961       | 9                              | 4            | 0.218172428 |             |                  |            |    |
|               | Brain_Cerebellum                      | 0.92816317        | Brain_Caudate_basal_ganglia    | 7.031001869  |             |             | 0.0346525        |            |    |
|               | 0.296674491                           | 0.090156099       | 1.231402324                    | 0.630218416  |             |             | 0.347287231      |            |    |
|               | 4                                     | 0                 | 0.998207054                    |              |             |             |                  |            |    |
| POLR1E        | ENSG00000137054.15                    | 0.879869013       | 1                              | 1            | 0.879869013 |             |                  |            |    |
|               | Brain_Cerebellum                      | 0.879869013       | Brain_Cerebellum1              | 1            | 1           | 1           | -0.151135267     |            |    |
|               | -0.151135267                          | -0.151135267      | NA                             | 1            | 0           | 0.998207054 |                  |            |    |
| TEX10         | ENSG00000136891.13                    | 0.879929507       | 6                              | 6            | 0.181992414 |             |                  |            |    |
|               | Brain_Caudate_basal_ganglia           | 0.799543453       | Brain_Hippocampus              | 2.590937586  |             |             |                  |            |    |
|               | 0.134762268                           | 0.134762268       | -1.334645453                   | -0.253938005 |             |             | -0.847863052     |            |    |
|               | 0.395429531                           | 6                 | 0                              | 0.998207054  |             |             |                  |            |    |
| UNC119        | ENSG00000109103.11                    | 0.880023266       | 3                              | 3            | 0.505613646 |             |                  |            |    |
|               | Brain_Cortex                          | 0.844967531       | Brain_Frontal_Cortex_BA9       | 1.281550785  |             |             |                  |            |    |
|               | 0.726038809                           | 0.726038809       | -0.255228284                   | 0.665683149  |             |             | 0.071637141      |            |    |
|               | 0.515323748                           | 3                 | 0                              | 0.998207054  |             |             |                  |            |    |
| RP13-977J11.2 | ENSG00000256576.2                     | 0.880099182       | 13                             | 9            | 0.321682219 |             |                  |            |    |
|               | Brain_Spinal_cord_cervical_c-1        | 0.989107572       | Brain_Caudate_basal_ganglia    |              |             |             |                  |            |    |
|               | 6.511490588                           | 0.002326301       | 0.217074896                    | -0.904886163 |             |             | 0.991006883      |            |    |
|               | 0.562200167                           | 0.512695709       | 9                              | 0            | 0.998207054 |             |                  |            |    |
| SPAG8         | ENSG00000137098.13                    | 0.88016562        | 1                              | 1            | 0.88016562  |             | Brain_Cerebellum | 0.88016562 |    |
|               | Brain_Cerebellum1                     | 1                 | 1                              | -0.150759266 |             |             | -0.150759266     |            |    |
|               | NA                                    | 1                 | 0                              | 0.998207054  |             |             |                  |            |    |
| DEPDC1B       | ENSG00000035499.12                    | 0.880174049       | 3                              | 3            | 0.431480376 |             |                  |            |    |
|               | Brain_Cerebellar_Hemisphere           | 0.694510759       | Brain_Spinal_cord_cervical_c-1 |              |             |             |                  |            |    |
|               | 2.5176659                             | 0.169511795       | 0.169511795                    | -0.392741035 |             |             | 0.786660938      |            |    |
|               | 0.337463918                           | 0.63794306        | 3                              | 0            | 0.998207054 |             |                  |            |    |
| TAS2R4        | ENSG00000127364.3                     | 0.880225266       | 13                             | 1            | 0.602958094 |             |                  |            |    |
|               | Brain_Hippocampus                     | 0.999206282       | Brain_Caudate_basal_ganglia    | 12.48832346  |             |             |                  |            |    |
|               | 0.001236254                           | 12.48832346       | -0.520151344                   | 0.073710072  |             |             | -0.147156746     |            |    |
|               | 0.159022118                           | 1                 | 0                              | 0.998207054  |             |             |                  |            |    |
| MOB1B         | ENSG00000173542.8                     | 0.880321857       | 3                              | 3            | 0.44505538  |             |                  |            |    |
|               | Brain_Anterior_cingulate_cortex_BA24  | 0.967026972       | Brain_Hippocampus              |              |             |             |                  |            |    |
|               | 1.202493317                           | 0.831019252       | 0.831019252                    | -0.041337331 |             |             | 0.763684332      |            |    |
|               | 0.334211415                           | 0.405210849       | 3                              | 0            | 0.998207054 |             |                  |            |    |
| TLK1          | ENSG00000198586.13                    | 0.880353169       | 1                              | 1            | 0.880353169 |             |                  |            |    |
|               | Brain_Spinal_cord_cervical_c-1        | 0.880353169       | Brain_Spinal_cord_cervical_c-1 |              |             |             |                  |            |    |
|               | 1                                     | 1                 | 1                              | 0.150521526  |             |             | 0.150521526      |            | NA |
|               | 0.998207054                           |                   |                                |              |             |             |                  |            | 1  |
|               |                                       |                   |                                |              |             |             |                  |            | 0  |
| RP11-7807.2   | ENSG00000270091.1                     | 0.880415832       | 6                              | 3            | 0.572760936 |             |                  |            |    |

|               |                                       |                             |              |              |                                |                          |              |
|---------------|---------------------------------------|-----------------------------|--------------|--------------|--------------------------------|--------------------------|--------------|
|               | Brain_Cerebellum                      | 0.958925723                 |              | Brain_Cortex | 5.102582781                    |                          | 0.004247426  |
|               | 0.257143042                           | 0.05150173                  | 0.563990002  |              | 0.377868415                    | 0.210034932              | 3            |
|               | 0                                     | 0.998207054                 |              |              |                                |                          |              |
| KIF20B        | ENSG00000138182.14                    | 0.88050842                  | 3            | 3            | 0.592494444                    | Brain_Cerebellum         |              |
|               | 0.938168539                           | Brain_Cerebellar_Hemisphere | 1.699147611  |              | 0.403987653                    |                          |              |
|               | 0.403987653                           | -0.535224765                | 0.077571971  |              | -0.292837152                   | 0.32584059               | 3            |
|               | 0                                     | 0.998207054                 |              |              |                                |                          |              |
| FRK           | ENSG00000111816.7                     | 0.880553838                 | 5            | 5            | 0.253884595                    |                          |              |
|               | Brain_Spinal_cord_cervical_c-1        | 0.994867099                 |              |              | Brain_Cortex                   | 2.691629668              |              |
|               | 0.231974977                           | 0.231974977                 | -1.140964743 |              | 0.031185601                    | -0.328496042             |              |
|               | 0.484243814                           | 5                           | 0            | 0.998207054  |                                |                          |              |
| RP11-111H13.1 | ENSG00000241962.9                     | 0.88055972                  | 1            | 1            | 0.88055972                     | Brain_Cortex             |              |
|               | 0.88055972                            | Brain_Cortex                | 1            | 1            | 0.150259708                    | 0.150259708              |              |
|               | 0.150259708                           | NA                          | 1            | 0            | 0.998207054                    |                          |              |
| PLEKHF1       | ENSG00000166289.5                     | 0.880588383                 | 1            | 1            | 0.880588383                    |                          |              |
|               | Brain_Cerebellar_Hemisphere           | 0.880588383                 |              |              | Brain_Cerebellar_Hemisphere    | 1                        | 1            |
|               | 1                                     | -0.150223377                | -0.150223377 | -0.150223377 | NA                             | 1                        | 0            |
|               | 0.998207054                           |                             |              |              |                                |                          |              |
| MAB21L3       | ENSG00000173212.4                     | 0.880643051                 | 2            | 1            | 0.865297976                    |                          |              |
|               | Brain_Cerebellar_Hemisphere           | 0.898352363                 |              |              | Brain_Cerebellum               | 1.961148455              |              |
|               | 0.038851545                           | 1.961148455                 | -0.169634008 |              | -0.127742997                   | -0.148688502             |              |
|               | 0.029621418                           | 1                           | 0            | 0.998207054  |                                |                          |              |
| RP11-496D24.2 | ENSG00000261121.1                     | 0.880739057                 | 3            | 3            | 0.474382805                    |                          |              |
|               | Brain_Amygdala                        | 0.905191036                 |              |              | Brain_Spinal_cord_cervical_c-1 | 1.322036189              |              |
|               | 0.661975692                           | 0.661975692                 | 0.119106431  |              | 0.715366179                    | 0.407963156              |              |
|               | 0.298562214                           | 3                           | 0            | 0.998207054  |                                |                          |              |
| RAPGEF6       | ENSG00000158987.20                    | 0.880761753                 | 3            | 3            | 0.538200715                    |                          |              |
|               | Brain_Putamen_basal_ganglia           | 0.969042284                 |              |              | Brain_Cortex                   | 1.503219629              |              |
|               | 0.519356397                           | 0.519356397                 | -0.495435974 |              | 0.615536133                    | 0.052969881              |              |
|               | 0.555621403                           | 3                           | 0            | 0.998207054  |                                |                          |              |
| FCN1          | ENSG00000085265.10                    | 0.880766794                 | 1            | 1            | 0.880766794                    |                          |              |
|               | Brain_Nucleus_accumbens_basal_ganglia | 0.880766794                 |              |              |                                |                          |              |
|               | Brain_Nucleus_accumbens_basal_ganglia | 1                           | 1            | 1            | 0.149997239                    |                          |              |
|               | 0.149997239                           | 0.149997239                 | NA           | 1            | 0                              | 0.998207054              |              |
| PPP3R1        | ENSG00000221823.10                    | 0.880814068                 | 1            | 1            | 0.880814068                    |                          |              |
|               | Brain_Cortex                          | 0.880814068                 |              |              | Brain_Cortex                   | 1                        | 1            |
|               | 0.149937319                           | 0.149937319                 | NA           | 1            | 0                              | 0.998207054              |              |
| RP11-50D16.4  | ENSG00000273507.4                     | 0.880873969                 | 1            | 1            | 0.880873969                    |                          |              |
|               | Brain_Caudate_basal_ganglia           | 0.880873969                 |              |              | Brain_Caudate_basal_ganglia    | 1                        | 1            |
|               | 1                                     | -0.149861397                | -0.149861397 | -0.149861397 | NA                             | 1                        | 0            |
|               | 0.998207054                           |                             |              |              |                                |                          |              |
| TRMU          | ENSG00000100416.12                    | 0.880918591                 | 4            | 3            | 0.46409742                     |                          |              |
|               | Brain_Putamen_basal_ganglia           | 0.65408085                  |              |              | Brain_Hippocampus              | 2.646570995              |              |
|               | 0.030228849                           | 0.380174282                 | 0.448100247  |              | 0.732116572                    | 0.587847714              |              |
|               | 0.117161055                           | 3                           | 0            | 0.998207054  |                                |                          |              |
| TEKT3         | ENSG00000125409.12                    | 0.880953599                 | 11           | 4            | 0.489034169                    |                          |              |
|               | Brain_Caudate_basal_ganglia           | 0.984161191                 |              |              | Brain_Hypothalamus             | 7.851684234              |              |
|               | 0.009544741                           | 0.288147354                 | -0.691845803 |              | 0.550468199                    | 0.004373137              |              |
|               | 0.356096425                           | 4                           | 0            | 0.998207054  |                                |                          |              |
| DUS1L         | ENSG00000169718.17                    | 0.8809542                   | 1            | 1            | 0.8809542                      | Brain_Cortex             | 0.8809542    |
|               | Brain_Cortex                          | 1                           | 1            | 1            | -0.149759707                   | -0.149759707             | -0.149759707 |
|               | NA                                    | 1                           | 0            | 0.998207054  |                                |                          |              |
| ZNF7          | ENSG00000147789.15                    | 0.881013317                 | 1            | 1            | 0.881013317                    |                          |              |
|               | Brain_Caudate_basal_ganglia           | 0.881013317                 |              |              | Brain_Caudate_basal_ganglia    | 1                        | 1            |
|               | 1                                     | -0.14968478                 | -0.14968478  | -0.14968478  | NA                             | 1                        | 0            |
|               | 0.998207054                           |                             |              |              |                                |                          |              |
| PSD2          | ENSG00000146005.3                     | 0.88106369                  | 1            | 1            | 0.88106369                     | Brain_Frontal_Cortex_BA9 |              |
|               | 0.88106369                            | Brain_Frontal_Cortex_BA9    | 1            | 1            | 1                              | -0.149620935             |              |
|               | -0.149620935                          | -0.149620935                | NA           | 1            | 0                              | 0.998207054              |              |
| CD300E        | ENSG00000186407.6                     | 0.881280655                 | 2            | 2            | 0.61829694                     |                          |              |
|               | Brain_Hypothalamus                    | 0.939203843                 |              |              | Brain_Cerebellum               | 1.018617039              |              |
|               | 0.981382961                           | 0.981382961                 | -0.498265473 |              | -0.076270565                   | -0.287268019             |              |

|                |                                       |              |             |             |                                       |              |   |             |             |
|----------------|---------------------------------------|--------------|-------------|-------------|---------------------------------------|--------------|---|-------------|-------------|
| 0.298395461    | 2                                     | 0            | 0.998207054 |             |                                       |              |   |             |             |
| STOML1         | ENSG00000067221.13                    | 0.8813165    | 8           | 6           | 0.179598683                           |              |   |             |             |
|                | Brain_Frontal_Cortex_BA9              | 0.966718388  |             |             | Brain_Cerebellar_Hemisphere           |              |   |             |             |
| 3.923270583    | 0.027946541                           | 0.249182984  |             |             | -1.341991713                          | 0.496517301  |   |             |             |
| -0.615933551   | 0.608864752                           | 6            | 0           | 0.998207054 |                                       |              |   |             |             |
| HIRIP3         | ENSG00000149929.15                    | 0.881341635  |             | 1           | 1                                     | 0.881341635  |   |             |             |
|                | Brain_Cerebellar_Hemisphere           | 0.881341635  |             |             | Brain_Cerebellar_Hemisphere1          | 1            | 1 | 0           |             |
| 1              | 0.149268672                           | 0.149268672  | 0.149268672 | NA          | 1                                     | 0            |   |             |             |
| 0.998207054    |                                       |              |             |             |                                       |              |   |             |             |
| CDK3           | ENSG00000250506.7                     | 0.881357874  | 13          | 3           | 0.221286989                           |              |   |             |             |
|                | Brain_Nucleus_accumbens_basal_ganglia | 0.972812881  |             |             |                                       |              |   |             |             |
|                | Brain_Spinal_cord_cervical_c-1        | 10.76288943  |             |             | 0.005183634                           | 0.538678606  |   |             |             |
| -1.223113079   | 0.090297805                           | -0.581013549 |             |             | 0.443388188                           | 3            | 0 |             |             |
| 0.998207054    |                                       |              |             |             |                                       |              |   |             |             |
| TTL4           | ENSG00000135912.10                    | 0.881405137  | 3           | 3           | 0.443506003                           |              |   |             |             |
|                | Brain_Cerebellar_Hemisphere           | 0.840830644  |             |             | Brain_Substantia_nigra                |              |   |             |             |
| 1.080313607    | 0.925934454                           | 0.925934454  |             |             | -0.2008311                            | 0.766286242  |   |             |             |
| 0.265931203    | 0.484433011                           | 3            | 0           | 0.998207054 |                                       |              |   |             |             |
| SLC41A3        | ENSG00000114544.16                    | 0.881489825  | 3           | 3           | 0.740315589                           |              |   |             |             |
|                | Brain_Cerebellar_Hemisphere           | 0.929048562  |             |             | Brain_Cerebellum2.199420378           |              |   |             |             |
| 0.166853623    | 0.166853623                           | -0.331435453 |             |             | 0.298892487                           | 0.018832999  |   |             |             |
| 0.320975547    | 3                                     | 0            | 0.998207054 |             |                                       |              |   |             |             |
| FBXL5          | ENSG00000118564.14                    | 0.881548542  | 3           | 3           | 0.530225188                           |              |   |             |             |
|                | Brain_Putamen_basal_ganglia           | 0.735590283  |             |             | Brain_Hypothalamus                    | 1.1233238    |   |             |             |
| 0.897202852    | 0.897202852                           | -0.627662299 |             |             | -0.337698662                          | -0.483195799 |   |             |             |
| 0.144984566    | 3                                     | 0            | 0.998207054 |             |                                       |              |   |             |             |
| RPS28          | ENSG00000233927.4                     | 0.881558165  | 13          | 1           | 0.424983802                           |              |   |             |             |
|                | Brain_Cerebellar_Hemisphere           | 0.959874022  |             |             | Brain_Putamen_basal_ganglia           |              |   |             |             |
| 12.03246482    | 0.000497333                           | 12.03246482  |             |             | -0.797804753                          | 0.79049634   |   |             |             |
| 0.14284738     | 0.410481709                           | 1            | 0           | 0.998207054 |                                       |              |   |             |             |
| RP11-173P15.10 | ENSG00000276188.1                     | 0.881614997  |             | 1           | 1                                     | 0.881614997  |   |             |             |
|                | Brain_Nucleus_accumbens_basal_ganglia | 0.881614997  |             |             |                                       |              |   |             |             |
|                | Brain_Nucleus_accumbens_basal_ganglia | 1            | 1           | 1           | -0.148922234                          |              |   |             |             |
| -0.148922234   | -0.148922234                          | NA           | 1           | 0           | 0.998207054                           |              |   |             |             |
| LINC01103      | ENSG00000234781.2                     | 0.881620108  |             | 1           | 1                                     | 0.881620108  |   |             |             |
|                | Brain_Hypothalamus                    | 0.881620108  |             |             | Brain_Hypothalamus                    | 1            | 1 | 1           |             |
| -0.148915757   | -0.148915757                          | -0.148915757 |             |             | NA                                    | 1            | 0 | 0.998207054 |             |
| PID1           | ENSG00000153823.18                    | 0.881674109  | 1           | 1           | 0.881674109                           |              |   |             |             |
|                | Brain_Putamen_basal_ganglia           | 0.881674109  |             |             | Brain_Putamen_basal_ganglia1          | 1            | 1 |             |             |
| 1              | 0.148847322                           | 0.148847322  | 0.148847322 | NA          | 1                                     | 0            |   |             |             |
| 0.998207054    |                                       |              |             |             |                                       |              |   |             |             |
| CNGA4          | ENSG00000132259.12                    | 0.881678042  | 3           | 3           | 0.464964227                           |              |   |             |             |
|                | Brain_Cerebellar_Hemisphere           | 0.947775813  |             |             | Brain_Cortex                          | 1.335528525  |   |             |             |
| 0.669669646    | 0.669669646                           | 0.065500117  |             |             | 0.730697034                           | 0.432963153  |   |             |             |
| 0.33803602     | 3                                     | 0            | 0.998207054 |             |                                       |              |   |             |             |
| FAM90A1        | ENSG00000171847.10                    | 0.881798946  |             | 1           | 1                                     | 0.881798946  |   |             |             |
|                | Brain_Cerebellum                      | 0.881798946  |             |             | Brain_Cerebellum1                     | 1            | 1 | 1           | 0.148689121 |
| 0.148689121    | 0.148689121                           | NA           | 1           | 0           | 0.998207054                           |              |   |             |             |
| PRPF4          | ENSG00000136875.12                    | 0.881815265  | 10          | 5           | 0.134938536                           |              |   |             |             |
|                | Brain_Caudate_basal_ganglia           | 0.976980615  |             |             | Brain_Putamen_basal_ganglia           |              |   |             |             |
| 6.862642058    | 0.007572757                           | 0.319528418  |             |             | -1.494907687                          | 0.573331578  |   |             |             |
| -0.191800457   | 0.561730143                           | 5            | 0           | 0.998207054 |                                       |              |   |             |             |
| MEMO1          | ENSG00000162959.13                    | 0.881890379  | 1           | 1           | 0.881890379                           |              |   |             |             |
|                | Brain_Cortex                          | 1            | 1           | 1           | 0.148573254                           | 0.148573254  |   |             |             |
| 0.148573254    | NA                                    | 1            | 0           | 0.998207054 |                                       |              |   |             |             |
| ICOSLG         | ENSG00000160223.16                    | 0.88200698   | 9           | 6           | 0.314167447                           |              |   |             |             |
|                | Brain_Caudate_basal_ganglia           | 0.990982605  |             |             | Brain_Cortex                          | 5.743971061  |   |             |             |
| 0.046357685    | 0.213275899                           | -1.006515942 |             |             | 0.311851451                           | -0.458461756 |   |             |             |
| 0.492317556    | 6                                     | 0            | 0.998207054 |             |                                       |              |   |             |             |
| CTC-459F4.1    | ENSG00000261770.1                     | 0.882107645  | 13          | 1           | 0.717587486                           |              |   |             |             |
|                | Brain_Substantia_nigra                | 0.922016061  |             |             | Brain_Nucleus_accumbens_basal_ganglia |              |   |             |             |
| 12.60076874    | 6.77E-05                              | 12.60076874  |             |             | -0.318921054                          | 0.361684936  |   |             |             |

|               |                                       |                                      |                                      |              |                |                  |              |  |
|---------------|---------------------------------------|--------------------------------------|--------------------------------------|--------------|----------------|------------------|--------------|--|
|               | 0.14549066                            | 0.205633914                          | 1                                    | 0            | 0.998207054    |                  |              |  |
| ZC2HC1C       | ENSG00000119703.13                    | 0.882122806                          | 6                                    | 5            | 0.357960627    |                  |              |  |
|               | Brain_Nucleus_accumbens_basal_ganglia | 0.976351622                          |                                      |              | Brain_Amygdala |                  |              |  |
|               | 3.125192966                           | 0.051794381                          | 0.291965726                          | -0.373867133 | 0.919258026    |                  |              |  |
|               | 0.369521515                           | 0.479255978                          | 5                                    | 0            | 0.998207054    |                  |              |  |
| TMEM9B        | ENSG00000175348.10                    | 0.882152701                          | 1                                    | 1            | 0.882152701    |                  |              |  |
|               | Brain_Cerebellum                      | 0.882152701                          | Brain_Cerebellum1                    | 1            | 1              | 0.148240841      |              |  |
|               | 0.148240841                           | 0.148240841                          | NA                                   | 1            | 0              | 0.998207054      |              |  |
| DNAH10OS      | ENSG00000250091.2                     | 0.882173949                          | 8                                    | 3            | 0.404347632    |                  |              |  |
|               | Brain_Cerebellar_Hemisphere           | 0.952731638                          | Brain_Hypothalamus                   |              | 6.745829372    |                  |              |  |
|               | 0.004192837                           | 0.364165567                          | 0.059276803                          | 0.833881732  | 0.477663629    |                  |              |  |
|               | 0.236281669                           | 3                                    | 0                                    | 0.998207054  |                |                  |              |  |
| METTL22       | ENSG00000067365.14                    | 0.882193508                          | 7                                    | 2            | 0.486006472    |                  |              |  |
|               | Brain_Cerebellar_Hemisphere           | 0.915342544                          | Brain_Hippocampus                    |              | 6.431925287    |                  |              |  |
|               | 0.008542845                           | 0.37824612                           | 0.106302253                          | 0.696674578  | 0.37250201     |                  |              |  |
|               | 0.221485709                           | 2                                    | 0                                    | 0.998207054  |                |                  |              |  |
| PIKFYVE       | ENSG00000115020.16                    | 0.882203304                          | 1                                    | 1            | 0.882203304    |                  |              |  |
|               | Brain_Cortex                          | 0.882203304                          | Brain_Cortex                         | 1            | 1              | 1                | -0.148176719 |  |
|               | -0.148176719                          | -0.148176719                         | NA                                   | 1            | 0              | 0.998207054      |              |  |
| TMEM44        | ENSG00000145014.17                    | 0.882283453                          | 2                                    | 2            | 0.669432648    |                  |              |  |
|               | Brain_Cortex                          | 0.754855876                          | Brain_Hippocampus                    |              | 1.124343385    |                  |              |  |
|               | 0.875656615                           | 0.875656615                          | -0.426926795                         | -0.312242973 | -0.369584884   |                  |              |  |
|               | 0.081093708                           | 2                                    | 0                                    | 0.998207054  |                |                  |              |  |
| TAF3          | ENSG00000165632.7                     | 0.882328602                          | 3                                    | 3            | 0.445477484    | Brain_Amygdala   |              |  |
|               | 0.647020307                           | Brain_Spinal_cord_cervical_c-1       |                                      | 2.251527383  | 0.129354469    |                  |              |  |
|               | 0.129354469                           | -0.762976377                         | -0.45790554                          | -0.591786636 | 0.155919867    |                  |              |  |
|               | 3                                     | 0                                    | 0.998207054                          |              |                |                  |              |  |
| ADSSL1        | ENSG00000185100.10                    | 0.88268659                           | 2                                    | 2            | 0.736511433    |                  |              |  |
|               | Brain_Hypothalamus                    | 0.892965834                          | Brain_Putamen_basal_ganglia          |              | 1.893249586    |                  |              |  |
|               | 0.106750414                           | 0.106750414                          | -0.336476682                         | -0.13455233  | -0.235514506   |                  |              |  |
|               | 0.142782079                           | 2                                    | 0                                    | 0.998207054  |                |                  |              |  |
| COQ7          | ENSG00000167186.10                    | 0.882687509                          | 5                                    | 5            | 0.280642815    |                  |              |  |
|               | Brain_Spinal_cord_cervical_c-1        | 0.75174898                           | Brain_Caudate_basal_ganglia          |              |                |                  |              |  |
|               | 3.800702508                           | 0.1837864                            | 0.1837864                            | 0.316334036  | 1.078876436    |                  |              |  |
|               | 0.728826093                           | 0.288876077                          | 5                                    | 0            | 0.998207054    |                  |              |  |
| ITPR3         | ENSG00000096433.10                    | 0.882706142                          | 2                                    | 2            | 0.627257777    | Brain_Cerebellum |              |  |
|               | 0.888628088                           | Brain_Anterior_cingulate_cortex_BA24 |                                      | 1.047375636  |                |                  |              |  |
|               | 0.952624364                           | 0.952624364                          | -0.485590156                         | 0.140040378  | -0.172774889   |                  |              |  |
|               | 0.442387593                           | 2                                    | 0                                    | 0.998207054  |                |                  |              |  |
| ZBTB11        | ENSG00000066422.4                     | 0.882945684                          | 2                                    | 2            | 0.691301122    |                  |              |  |
|               | Brain_Hippocampus                     | 0.827952048                          | Brain_Cerebellum1                    |              | 1.198498738    |                  |              |  |
|               | 0.801501262                           | 0.801501262                          | -0.397089962                         | 0.217328885  | -0.089880538   |                  |              |  |
|               | 0.434459733                           | 2                                    | 0                                    | 0.998207054  |                |                  |              |  |
| RP11-678G14.3 | ENSG00000268555.1                     | 0.883088327                          | 13                                   | 3            | 0.434550708    |                  |              |  |
|               | Brain_Hypothalamus                    | 0.915438492                          | Brain_Cortex                         |              | 10.02060462    |                  |              |  |
|               | 0.006319996                           | 0.641215907                          | -0.78142817                          | -0.10618132  | -0.341406457   |                  |              |  |
|               | 0.224669147                           | 3                                    | 0                                    | 0.998207054  |                |                  |              |  |
| PLA2G4A       | ENSG00000116711.9                     | 0.883094673                          | 2                                    | 2            | 0.62126673     |                  |              |  |
|               | Brain_Frontal_Cortex_BA9              | 0.995860283                          | Brain_Anterior_cingulate_cortex_BA24 |              |                |                  |              |  |
|               | 1.125025165                           | 0.874974835                          | 0.874974835                          | -0.49405586  | 0.005188389    |                  |              |  |
|               | -0.244433735                          | 0.353018994                          | 2                                    | 0            | 0.998207054    |                  |              |  |
| KCNIP3        | ENSG00000115041.12                    | 0.883129401                          | 5                                    | 4            | 0.475138332    |                  |              |  |
|               | Brain_Spinal_cord_cervical_c-1        | 0.992895036                          | Brain_Hippocampus                    |              |                |                  |              |  |
|               | 3.241244192                           | 0.062106769                          | 0.130871301                          | -0.71414369  | 0.00890487     |                  |              |  |
|               | -0.358988844                          | 0.305572025                          | 4                                    | 0            | 0.998207054    |                  |              |  |
| SERP1         | ENSG00000120742.10                    | 0.883182401                          | 1                                    | 1            | 0.883182401    |                  |              |  |
|               | Brain_Substantia_nigra                | 0.883182401                          | Brain_Substantia_nigra               | 1            | 1              |                  |              |  |
|               | 1                                     | 0.146936171                          | 0.146936171                          | 0.146936171  | NA             | 1                | 0            |  |
|               | 0.998207054                           |                                      |                                      |              |                |                  |              |  |
| GLIPR1L1      | ENSG00000173401.9                     | 0.88326424                           | 2                                    | 2            | 0.679984783    | Brain_Cortex     |              |  |
|               | 0.765807918                           | Brain_Hypothalamus                   |                                      | 1.045216933  | 0.954783067    |                  |              |  |
|               | 0.954783067                           | -0.412483894                         | -0.297862752                         | -0.355173323 | 0.081049386    |                  |              |  |

|              |                                      |                             |                                      |              |                                |                    |   |  |
|--------------|--------------------------------------|-----------------------------|--------------------------------------|--------------|--------------------------------|--------------------|---|--|
| 2            | 0                                    | 0.998207054                 |                                      |              |                                |                    |   |  |
| STYXL1       | ENSG00000127952.16                   | 0.883353595                 | 12                                   | 2            | 0.491694193                    |                    |   |  |
|              | Brain_Frontal_Cortex_BA9             | 0.896805515                 |                                      |              | Brain_Spinal_cord_cervical_c-1 |                    |   |  |
|              | 11.11706972                          | 0.000450212                 | 0.562695917                          |              | -0.687616694                   | 0.12969781         |   |  |
|              | -0.420293242                         | 0.210545021                 | 2                                    | 0            | 0.998207054                    |                    |   |  |
| KRTAP5-11    | ENSG00000204571.6                    | 0.883402773                 | 2                                    | 2            | 0.715704767                    |                    |   |  |
|              | Brain_Caudate_basal_ganglia          | 0.80641612                  | Brain_Cerebellum                     | 1.233683605  |                                |                    |   |  |
|              | 0.766316395                          | 0.766316395                 | -0.364205223                         |              | -0.245052062                   | -0.304628643       |   |  |
|              | 0.084254007                          | 2                           | 0                                    | 0.998207054  |                                |                    |   |  |
| TBC1D7       | ENSG00000145979.17                   | 0.883762806                 | 12                                   | 5            | 0.463576892                    |                    |   |  |
|              | Brain_Cerebellar_Hemisphere          | 0.972507313                 | Brain_Hippocampus                    | 7.379210002  |                                |                    |   |  |
|              | 0.025373268                          | -0.304117161                | -0.696065467                         |              | 0.73296973                     | 0.140245892        |   |  |
|              | 0.425377499                          | 5                           | 0                                    | 0.998207054  |                                |                    |   |  |
| CLEC12A      | ENSG00000172322.13                   | 0.883785239                 | 8                                    | 6            | 0.146231169                    |                    |   |  |
|              | Brain_Cortex                         | 0.848956653                 | Brain_Spinal_cord_cervical_c-1       | 4.678098986  |                                |                    |   |  |
|              | 6.67E-17                             | 0.27775435                  | 0.190449831                          | 1.452973295  | 0.700201713                    |                    |   |  |
|              | 0.517737477                          | 6                           | 0                                    | 0.998207054  |                                |                    |   |  |
| SUCLG2       | ENSG00000172340.14                   | 0.883897043                 | 11                                   | 9            | 0.255751104                    |                    |   |  |
|              | Brain_Caudate_basal_ganglia          | 0.791880978                 | Brain_Hypothalamus                   | 4.382028259  |                                |                    |   |  |
|              | 0.056710611                          | 0.248740534                 | -0.57238546                          |              | 1.136491063                    | 0.50411163         |   |  |
|              | 0.543722794                          | 9                           | 0                                    | 0.998207054  |                                |                    |   |  |
| MYDGF        | ENSG00000074842.7                    | 0.883932568                 | 2                                    | 2            | 0.629831634                    |                    |   |  |
|              | Brain_Anterior_cingulate_cortex_BA24 | 0.873354996                 | Brain_Putamen_basal_ganglia          |              |                                |                    |   |  |
|              | 1.082070293                          | 0.917929707                 | 0.917929707                          |              | -0.48196384                    | -0.159398405       |   |  |
|              | -0.320681122                         | 0.228088207                 | 2                                    | 0            | 0.998207054                    |                    |   |  |
| CARNMT1      | ENSG00000156017.12                   | 0.883952944                 | 3                                    | 2            | 0.658614752                    |                    |   |  |
|              | Brain_Anterior_cingulate_cortex_BA24 | 0.873924638                 | Brain_Cerebellar_Hemisphere          |              |                                |                    |   |  |
|              | 1.978190788                          | 0.021776811                 | 1.000032401                          |              | -0.441826512                   | -0.158675378       |   |  |
|              | -0.2979102                           | 0.141633607                 | 2                                    | 0            | 0.998207054                    |                    |   |  |
| ALS2CL       | ENSG00000178038.16                   | 0.883967338                 | 6                                    | 4            | 0.562270452                    |                    |   |  |
|              | Brain_Cortex                         | 0.978872961                 | Brain_Anterior_cingulate_cortex_BA24 | 3.81128014   |                                |                    |   |  |
|              | 0.015790586                          | 0.296803401                 | -0.579472419                         |              | 0.214145298                    | -0.112030542       |   |  |
|              | 0.313862604                          | 4                           | 0                                    | 0.998207054  |                                |                    |   |  |
| CSH2         | ENSG00000213218.10                   | 0.884079327                 | 2                                    | 2            | 0.667714756                    |                    |   |  |
|              | Brain_Cerebellar_Hemisphere          | 0.838880541                 | Brain_Cerebellum                     | 1.812292307  |                                |                    |   |  |
|              | 0.187707693                          | 0.187707693                 | 0.203325608                          |              | 0.429286478                    | 0.316306043        |   |  |
|              | 0.159778463                          | 2                           | 0                                    | 0.998207054  |                                |                    |   |  |
| TRAF1        | ENSG00000056558.10                   | 0.88408973                  | 13                                   | 2            | 0.466710217                    | Brain_Amygdala     |   |  |
|              | 0.794776741                          | Brain_Cerebellar_Hemisphere | 11.97340031                          |              | 0.003344472                    |                    |   |  |
|              | 0.45209147                           | -0.727842154                | -0.26011283                          |              | -0.471375924                   | 0.169723358        | 2 |  |
|              | 0                                    | 0.998207054                 |                                      |              |                                |                    |   |  |
| HLA-G        | ENSG00000204632.11                   | 0.88419757                  | 9                                    | 6            | 0.455138504                    | Brain_Hypothalamus |   |  |
|              | 0.786491994                          | Brain_Frontal_Cortex_BA9    | 5.311694812                          |              | 0.068866449                    |                    |   |  |
|              | 0.261335037                          | -0.746875852                | 0.450581683                          |              | -0.400583348                   | 0.363984294        |   |  |
|              | 6                                    | 0                           | 0.998207054                          |              |                                |                    |   |  |
| ANKRD39      | ENSG00000213337.8                    | 0.884314124                 | 1                                    | 1            | 0.884314124                    |                    |   |  |
|              | Brain_Putamen_basal_ganglia          | 0.884314124                 | Brain_Putamen_basal_ganglia          | 1            | 1                              |                    |   |  |
|              | 1                                    | -0.145502523                | -0.145502523                         | -0.145502523 | NA                             | 1                  | 0 |  |
|              | 0.998207054                          |                             |                                      |              |                                |                    |   |  |
| GATAD1       | ENSG00000157259.6                    | 0.884318504                 | 9                                    | 8            | 0.267162054                    |                    |   |  |
|              | Brain_Hypothalamus                   | 0.910174243                 | Brain_Cortex                         | 4.077267831  |                                |                    |   |  |
|              | 0.076844108                          | 0.249530878                 | -1.109621751                         |              | 0.976634174                    | 0.145650942        |   |  |
|              | 0.554558466                          | 8                           | 0                                    | 0.998207054  |                                |                    |   |  |
| RP11-214O1.3 | ENSG00000266378.1                    | 0.884366186                 | 1                                    | 1            | 0.884366186                    |                    |   |  |
|              | Brain_Cerebellar_Hemisphere          | 0.884366186                 | Brain_Cerebellar_Hemisphere          | 1            | 1                              |                    |   |  |
|              | 1                                    | 0.145436578                 | 0.145436578                          | 0.145436578  | NA                             | 1                  | 0 |  |
|              | 0.998207054                          |                             |                                      |              |                                |                    |   |  |
| PTMS         | ENSG00000159335.15                   | 0.884381119                 | 1                                    | 1            | 0.884381119                    |                    |   |  |
|              | Brain_Frontal_Cortex_BA9             | 0.884381119                 | Brain_Frontal_Cortex_BA9             | 1            | 1                              |                    |   |  |
|              | 1                                    | -0.145417663                | -0.145417663                         | -0.145417663 | NA                             | 1                  | 0 |  |
|              | 0.998207054                          |                             |                                      |              |                                |                    |   |  |
| MAP4K3       | ENSG00000011566.14                   | 0.884384657                 | 1                                    | 1            | 0.884384657                    |                    |   |  |

|              |                                       |                        |                             |              |              |                          |             |  |  |
|--------------|---------------------------------------|------------------------|-----------------------------|--------------|--------------|--------------------------|-------------|--|--|
|              | Brain_Anterior_cingulate_cortex_BA24  | 0.884384657            |                             |              |              |                          |             |  |  |
|              | Brain_Anterior_cingulate_cortex_BA24  | 1                      | 1                           | 1            | 0.145413183  |                          |             |  |  |
|              | 0.145413183                           | 0.145413183            | NA                          | 1            | 0            | 0.998207054              |             |  |  |
| AGER         | ENSG00000204305.13                    | 0.884393453            | 2                           | 2            | 0.630474045  |                          |             |  |  |
|              | Brain_Nucleus_accumbens_basal_ganglia | 0.671531479            |                             |              |              | Brain_Frontal_Cortex_BA9 |             |  |  |
|              | 1.70534984                            | 0.29465016             | 0.29465016                  | 0.42404708   | 0.481059734  | 0.452553407              |             |  |  |
|              | 0.040314034                           | 2                      | 0                           | 0.998207054  |              |                          |             |  |  |
| RP11-71N10.1 | ENSG00000239922.1                     | 0.884513195            | 2                           | 2            | 0.620625137  |                          |             |  |  |
|              | Brain_Cerebellar_Hemisphere           | 0.640049514            |                             |              |              | Brain_Cerebellum         | 1.928986028 |  |  |
|              | 0.071013972                           | 0.071013972            | -0.494964561                | -0.467629571 | -0.481297066 |                          |             |  |  |
|              | 0.019328757                           | 2                      | 0                           | 0.998207054  |              |                          |             |  |  |
| TGDS         | ENSG00000088451.10                    | 0.884541289            | 1                           | 1            | 0.884541289  | Brain_Cerebellum         |             |  |  |
|              | 0.884541289                           | Brain_Cerebellum       | 1                           | 1            | -0.14521479  | -0.14521479              |             |  |  |
|              | -0.14521479                           | NA                     | 1                           | 0            | 0.998207054  |                          |             |  |  |
| RP4-563E14.1 | ENSG00000273759.1                     | 0.884608029            | 1                           | 1            | 0.884608029  |                          |             |  |  |
|              | Brain_Amygdala                        | 0.884608029            | Brain_Amygdala              | 1            | 1            | 1                        | 0.145130257 |  |  |
|              | 0.145130257                           | 0.145130257            | NA                          | 1            | 0            | 0.998207054              |             |  |  |
| ZC3H15       | ENSG00000065548.17                    | 0.884635707            | 1                           | 1            | 0.884635707  |                          |             |  |  |
|              | Brain_Caudate_basal_ganglia           | 0.884635707            | Brain_Caudate_basal_ganglia | 1            | 1            |                          |             |  |  |
|              | 1                                     | 0.145095202            | 0.145095202                 | 0.145095202  | NA           | 1                        | 0           |  |  |
|              | 0.998207054                           |                        |                             |              |              |                          |             |  |  |
| FAM110C      | ENSG00000184731.5                     | 0.88466039             | 1                           | 1            | 0.88466039   |                          |             |  |  |
|              | Brain_Frontal_Cortex_BA9              | 0.88466039             | Brain_Frontal_Cortex_BA9    | 1            | 1            | 1                        |             |  |  |
|              | -0.145063938                          | -0.145063938           | -0.145063938                | NA           | 1            | 0                        | 0.998207054 |  |  |
| ZNF680       | ENSG00000173041.11                    | 0.884686052            | 12                          | 4            | 0.14943391   |                          |             |  |  |
|              | Brain_Caudate_basal_ganglia           | 0.696837165            | Brain_Amygdala              | 9.318674514  |              |                          |             |  |  |
|              | 0.019562909                           | 0.416595179            | -1.44153389                 | -0.389593492 | -0.849766599 |                          |             |  |  |
|              | 0.262609755                           | 4                      | 0                           | 0.998207054  |              |                          |             |  |  |
| IPO8         | ENSG00000133704.9                     | 0.884745442            | 12                          | 4            | 0.507242302  |                          |             |  |  |
|              | Brain_Putamen_basal_ganglia           | 0.989405204            | Brain_Frontal_Cortex_BA9    |              |              |                          |             |  |  |
|              | 9.589513142                           | 0.008533399            | 0.396019193                 | -0.372684424 | 0.663137803  |                          |             |  |  |
|              | 0.019610868                           | 0.276747214            | 4                           | 0            | 0.998207054  |                          |             |  |  |
| CKLF         | ENSG00000217555.12                    | 0.884760653            | 1                           | 1            | 0.884760653  |                          |             |  |  |
|              | Brain_Hypothalamus                    | 0.884760653            | Brain_Hypothalamus          | 1            | 1            | 1                        |             |  |  |
|              | -0.144936949                          | -0.144936949           | -0.144936949                | NA           | 1            | 0                        | 0.998207054 |  |  |
| CDO1         | ENSG00000129596.4                     | 0.884810688            | 6                           | 6            | 0.229186661  |                          |             |  |  |
|              | Brain_Nucleus_accumbens_basal_ganglia | 0.889323764            |                             |              |              |                          |             |  |  |
|              | Brain_Spinal_cord_cervical_c-1        | 1.51160513             | 0.59390676                  | 0.59390676   | -0.828106974 |                          |             |  |  |
|              | 1.202456627                           | 0.10644654             | 0.753631743                 | 6            | 0            | 0.998207054              |             |  |  |
| CLEC4F       | ENSG00000152672.7                     | 0.884926285            | 2                           | 2            | 0.620980423  |                          |             |  |  |
|              | Brain_Cerebellar_Hemisphere           | 0.674435702            | Brain_Cerebellum            | 1.846160153  |              |                          |             |  |  |
|              | 0.153839847                           | 0.153839847            | -0.494461312                | -0.420068105 | -0.457264708 |                          |             |  |  |
|              | 0.052603941                           | 2                      | 0                           | 0.998207054  |              |                          |             |  |  |
| FNIP2        | ENSG00000052795.12                    | 0.8849379              | 3                           | 3            | 0.501215978  | Brain_Amygdala           |             |  |  |
|              | 0.856778425                           | Brain_Substantia_nigra | 1.662019888                 | 0.372689254  |              |                          |             |  |  |
|              | 0.372689254                           | -0.180476598           | 0.672577723                 | 0.235661817  | 0.426906544  |                          |             |  |  |
|              | 3                                     | 0                      | 0.998207054                 |              |              |                          |             |  |  |
| CRYBB3       | ENSG00000100053.9                     | 0.885141415            | 2                           | 2            | 0.622310598  |                          |             |  |  |
|              | Brain_Cortex                          | 0.977396285            | Brain_Frontal_Cortex_BA9    | 1.132336937  |              |                          |             |  |  |
|              | 0.867663063                           | 0.867663063            | 0.028333347                 | 0.49257828   | 0.260455813  |                          |             |  |  |
|              | 0.328270741                           | 2                      | 0                           | 0.998207054  |              |                          |             |  |  |
| UTS2B        | ENSG00000188958.9                     | 0.885146894            | 2                           | 1            | 0.874324764  |                          |             |  |  |
|              | Brain_Anterior_cingulate_cortex_BA24  | 0.89612433             | Brain_Amygdala              | 1.997658285  |              |                          |             |  |  |
|              | 0.002341715                           | 1.997658285            | 0.130558809                 | 0.158167561  | 0.144363185  |                          |             |  |  |
|              | 0.019522336                           | 1                      | 0                           | 0.998207054  |              |                          |             |  |  |
| AC025811.3   | ENSG00000270947.1                     | 0.885192731            | 8                           | 7            | 0.239880499  |                          |             |  |  |
|              | Brain_Caudate_basal_ganglia           | 0.981300511            | Brain_Amygdala              | 4.525191905  |              |                          |             |  |  |
|              | 0.076817131                           | 0.162636963            | -1.175285536                | 0.829144174  | -0.244754476 |                          |             |  |  |
|              | 0.64114162                            | 7                      | 0                           | 0.998207054  |              |                          |             |  |  |
| TRANK1       | ENSG00000168016.13                    | 0.885280495            | 1                           | 1            | 0.885280495  |                          |             |  |  |
|              | Brain_Cortex                          | 0.885280495            | Brain_Cortex                | 1            | 1            | 1                        | 0.144278576 |  |  |
|              | 0.144278576                           | 0.144278576            | NA                          | 1            | 0            | 0.998207054              |             |  |  |



GALNT16 ENSG00000100626.16 0.885294783 3 3 0.476088426  
 Brain\_Cerebellum 0.990961177 Brain\_Nucleus\_accumbens\_basal\_ganglia 1.34315283  
 0.655184636 0.655184636 0.011328727 0.712607893 0.369718804  
 0.350896463 3 0 0.998207054  
 OR2H2 ENSG00000204657.3 0.885444244 3 3 0.541910649  
 Brain\_Frontal\_Cortex\_BA9 0.919361005 Brain\_Caudate\_basal\_ganglia  
 1.769914319 0.403557945 0.403557945 -0.609926271 0.140332925  
 -0.190277337 0.382972753 3 0 0.998207054  
 ANKRD12 ENSG00000101745.16 0.885512902 1 1 0.885512902  
 Brain\_Spinal\_cord\_cervical\_c-1 0.885512902 Brain\_Spinal\_cord\_cervical\_c-1  
 1 1 1 -0.143984256 -0.143984256 -0.143984256 NA 1 0  
 0.998207054  
 NSUN4 ENSG00000117481.10 0.885571002 4 3 0.611944454 Brain\_Cerebellum  
 0.960758877 Brain\_Spinal\_cord\_cervical\_c-1 2.789804579 0.057550325  
 0.221580162 -0.507299836 -0.049201298 -0.253936214 0.189301865  
 3 0 0.998207054  
 DTYMK ENSG00000168393.12 0.885668336 9 4 0.10306418  
 Brain\_Cerebellar\_Hemisphere 0.766646826 Brain\_Putamen\_basal\_ganglia  
 6.808794219 0.054557023 0.32587928 0.296763824 1.630176591  
 0.75144682 0.392508663 4 0 0.998207054  
 RIMBP2 ENSG00000060709.14 0.885705329 1 1 0.885705329  
 Brain\_Putamen\_basal\_ganglia 0.885705329 Brain\_Putamen\_basal\_ganglia 1 1  
 1 -0.143740576 -0.143740576 -0.143740576 NA 1 0  
 0.998207054  
 Clorf216 ENSG00000142686.7 0.885820664 1 1 0.885820664  
 Brain\_Spinal\_cord\_cervical\_c-1 0.885820664 Brain\_Spinal\_cord\_cervical\_c-1  
 1 1 1 -0.143594525 -0.143594525 -0.143594525 NA 1 0  
 0.998207054  
 UBE2Q2L ENSG00000259511.2 0.885831345 7 7 0.328239414  
 Brain\_Amygdala 0.937735222 Brain\_Hippocampus 2.704167189  
 0.343006064 0.343006064 -0.761334884 0.97766626 -0.154076371  
 0.643724802 7 0 0.998207054  
 FGF8 ENSG00000107831.12 0.886063582 1 1 0.886063582 Brain\_Cerebellum  
 0.886063582 Brain\_Cerebellum 1 1 1 0.143286924 0.143286924  
 0.143286924 NA 1 0 0.998207054  
 ATP1A4 ENSG00000132681.16 0.886118948 5 5 0.315972087  
 Brain\_Nucleus\_accumbens\_basal\_ganglia 0.993126402 Brain\_Putamen\_basal\_ganglia  
 1.181367696 0.860130605 0.860130605 0.008614885 1.002769503  
 0.476793976 0.41312785 5 0 0.998207054  
 MAPK13 ENSG00000156711.16 0.886179902 9 6 0.220593793  
 Brain\_Cortex 0.966514958 Brain\_Caudate\_basal\_ganglia 4.521379652  
 0.0208675 0.20213089 -0.966462417 1.224950708 0.212582216  
 0.772095367 6 0 0.998207054  
 NRIP3 ENSG00000175352.10 0.886192195 1 1 0.886192195  
 Brain\_Anterior\_cingulate\_cortex\_BA24 0.886192195  
 Brain\_Anterior\_cingulate\_cortex\_BA24 1 1 1 0.14312407 0.14312407  
 0.14312407 NA 1 0 0.998207054  
 BRSK1 ENSG00000160469.16 0.886239718 2 2 0.7100907  
 Brain\_Caudate\_basal\_ganglia 0.83302734 Brain\_Cortex 1.266425588  
 0.733574412 0.733574412 -0.210820502 0.371734279 0.080456888  
 0.411928436 2 0 0.998207054  
 GLTSCR1L ENSG00000112624.12 0.88624902 3 3 0.432147766  
 Brain\_Frontal\_Cortex\_BA9 0.796971659 Brain\_Cerebellar\_Hemisphere  
 2.095063887 0.332130955 0.332130955 -0.785521677 -0.257268304  
 -0.478192477 0.274521908 3 0 0.998207054  
 PRKCQ ENSG00000065675.14 0.88629977 1 1 0.88629977 Brain\_Putamen\_basal\_ganglia  
 0.88629977 Brain\_Putamen\_basal\_ganglia 1 1 1 0.142987858  
 0.142987858 -0.142987858 NA 1 0 0.998207054  
 KRT40 ENSG00000204889.10 0.886432491 2 2 0.806902274  
 Brain\_Cerebellar\_Hemisphere 0.984581407 Brain\_Cerebellum 1.886218239  
 0.113781761 -0.113781761 -0.244424235 -0.019325544 -0.131874889  
 0.159168811 2 0 0.998207054

|               |                                      |              |                                      |              |                             |              |             |
|---------------|--------------------------------------|--------------|--------------------------------------|--------------|-----------------------------|--------------|-------------|
| FBXL7         | ENSG00000183580.9                    | 0.886434653  | 1                                    | 1            | 0.886434653                 |              |             |
|               | Brain_Frontal_Cortex_BA9             | 0.886434653  |                                      |              | Brain_Frontal_Cortex_BA9    | 1            | 1           |
|               | 1                                    | -0.142817074 | -0.142817074                         | -0.142817074 | NA                          | 1            | 0           |
|               | 0.998207054                          |              |                                      |              |                             |              |             |
| ASB2          | ENSG00000100628.11                   | 0.886509852  | 2                                    | 2            | 0.625277509                 |              |             |
|               | Brain_Frontal_Cortex_BA9             | 0.941160121  |                                      |              | Brain_Cerebellum1.050815752 |              |             |
|               | 0.949184248                          | 0.949184248  | 0.073811821                          | 0.488384514  | 0.281098168                 |              |             |
|               | 0.293147163                          | 2            | 0                                    | 0.998207054  |                             |              |             |
| NSMF          | ENSG00000165802.21                   | 0.886577087  | 1                                    | 1            | 0.886577087                 |              |             |
|               | Brain_Frontal_Cortex_BA9             | 0.886577087  |                                      |              | Brain_Frontal_Cortex_BA9    | 1            | 1           |
|               | 1                                    | -0.142636731 | -0.142636731                         | -0.142636731 | NA                          | 1            | 0           |
|               | 0.998207054                          |              |                                      |              |                             |              |             |
| LINC00654     | ENSG00000205181.5                    | 0.886690191  | 9                                    | 5            | 0.383891377                 |              |             |
|               | Brain_Cerebellar_Hemisphere          | 0.91583993   | Brain_Cortex                         | 6.43023538   | 2.71E-08                    |              |             |
|               | 0.3618904                            | 0.105675361  | 0.870748707                          | 0.668871598  | 0.260001054                 |              | 5           |
|               | 0                                    | 0.998207054  |                                      |              |                             |              |             |
| DDX4          | ENSG00000152670.18                   | 0.886884817  | 8                                    | 5            | 0.361143814                 |              |             |
|               | Brain_Hypothalamus                   | 0.97325307   | Brain_Amygdala                       | 5.383011578  | 0.055114059                 |              |             |
|               | 0.243615501                          | -0.163707725 | 0.913187733                          | 0.225763295  | 0.35590737                  |              | 5           |
|               | 0                                    | 0.998207054  |                                      |              |                             |              |             |
| ISG15         | ENSG00000187608.8                    | 0.886924154  | 1                                    | 1            | 0.886924154                 | Brain_Cortex |             |
|               | 0.886924154                          | Brain_Cortex | 1                                    | 1            | 1                           | 0.142197314  | 0.142197314 |
|               | 0.142197314                          | NA           | 1                                    | 0            | 0.998207054                 |              |             |
| MTG1          | ENSG00000148824.18                   | 0.886953237  | 13                                   | 3            | 0.626784459                 |              |             |
|               | Brain_Hippocampus                    | 0.934999043  | Brain_Cerebellar_Hemisphere          | 11.38116761  |                             |              |             |
|               | 0.000624707                          | 0.392763454  | -0.48625771                          | 0.199200512  | -0.248724453                |              |             |
|               | 0.215991558                          | 3            | 0                                    | 0.998207054  |                             |              |             |
| ZNF335        | ENSG00000198026.7                    | 0.887043402  | 2                                    | 2            | 0.633017932                 |              |             |
|               | Brain_Hippocampus                    | 0.851700931  | Brain_Cerebellum                     | 1.167901996  |                             |              |             |
|               | 0.832098004                          | 0.832098004  | 0.186948604                          | 0.477483409  | 0.332216007                 |              |             |
|               | 0.205439131                          | 2            | 0                                    | 0.998207054  |                             |              |             |
| RFX3-AS1      | ENSG00000232104.3                    | 0.887046854  | 2                                    | 2            | 0.631103962                 |              |             |
|               | Brain_Cortex                         | 0.870846837  | Brain_Cerebellum                     | 1.141401672  | 0.858598328                 |              |             |
|               | 0.858598328                          | 0.162582919  | 0.480173593                          | 0.321378256  | 0.224570519                 |              |             |
|               | 2                                    | 0            | 0.998207054                          |              |                             |              |             |
| RPL36         | ENSG00000130255.12                   | 0.88711544   | 2                                    | 2            | 0.722092367                 |              |             |
|               | Brain_Cerebellar_Hemisphere          | 0.745545194  | Brain_Cerebellum                     | 1.032482712  |                             |              |             |
|               | 0.967517288                          | 0.967517288  | -0.355663788                         | -0.324518929 | -0.340091358                |              |             |
|               | 0.022022742                          | 2            | 0                                    | 0.998207054  |                             |              |             |
| UNC79         | ENSG00000133958.13                   | 0.887215392  | 7                                    | 3            | 0.558031023                 |              |             |
|               | Brain_Substantia_nigra               | 0.893899328  | Brain_Cerebellar_Hemisphere          | 5.72602409   |                             |              |             |
|               | 0.036181258                          | 0.300632934  | -0.585768606                         | -0.133371823 | -0.451118833                |              |             |
|               | 0.17780939                           | 3            | 0                                    | 0.998207054  |                             |              |             |
| CTA-217C2.2   | ENSG00000273243.1                    | 0.887217588  | 1                                    | 1            | 0.887217588                 |              |             |
|               | Brain_Substantia_nigra               | 0.887217588  | Brain_Substantia_nigra               | 1            | 1                           |              |             |
|               | 1                                    | -0.141825821 | -0.141825821                         | -0.141825821 | NA                          | 1            | 0           |
|               | 0.998207054                          |              |                                      |              |                             |              |             |
| ST8SIA1       | ENSG00000111728.10                   | 0.887233402  | 6                                    | 5            | 0.388220051                 |              |             |
|               | Brain_Cerebellum                     | 0.917127662  | Brain_Anterior_cingulate_cortex_BA24 |              |                             |              |             |
|               | 3.341425452                          | 0.038837885  | 0.222398135                          | -0.862849805 | 0.65178952                  |              |             |
|               | -0.142133205                         | 0.481230161  | 5                                    | 0            | 0.998207054                 |              |             |
| RP11-278A23.1 | ENSG00000226180.3                    | 0.887286108  | 7                                    | 6            | 0.153220304                 |              |             |
|               | Brain_Anterior_cingulate_cortex_BA24 | 0.962948231  | Brain_Amygdala                       |              |                             |              |             |
|               | 3.732822377                          | 0.085403348  | 0.27615286                           | -1.428248644 | 0.046454209                 |              |             |
|               | -0.745029366                         | 0.541905776  | 6                                    | 0            | 0.998207054                 |              |             |
| BMT2          | ENSG00000164603.11                   | 0.887306646  | 1                                    | 1            | 0.887306646                 |              |             |
|               | Brain_Anterior_cingulate_cortex_BA24 | 0.887306646  |                                      |              |                             |              |             |
|               | Brain_Anterior_cingulate_cortex_BA24 | 1            | 1                                    | 1            | -0.141713076                |              |             |
|               | -0.141713076                         | -0.141713076 | NA                                   | 1            | 0                           | 0.998207054  |             |
| SURF6         | ENSG00000148296.6                    | 0.887510438  | 10                                   | 3            | 0.325372251                 |              |             |
|               | Brain_Spinal_cord_cervical_c-1       | 0.964454958  | Brain_Cortex                         | 7.371028821  |                             |              |             |
|               | 0.029203657                          | 0.433476496  | -0.2198824                           | 0.983477973  | 0.433349347                 |              |             |

|               |                                       |                             |                             |                             |             |                                |             |                  |   |
|---------------|---------------------------------------|-----------------------------|-----------------------------|-----------------------------|-------------|--------------------------------|-------------|------------------|---|
|               | 0.422098567                           | 3                           | 0                           | 0.998207054                 |             |                                |             |                  |   |
| MFGE8         | ENSG00000140545.14                    |                             | 0.887570014                 | 6                           | 4           | 0.386238532                    |             |                  |   |
|               | Brain_Hippocampus                     |                             | 0.991007682                 |                             |             | Brain_Cerebellum               | 3.807843536 |                  |   |
|               | 0.035375296                           | 0.180970986                 |                             | -0.866458944                |             | -0.011270438                   |             | -0.384490054     |   |
|               | 0.330016886                           | 4                           | 0                           | 0.998207054                 |             |                                |             |                  |   |
| SAMMSON       | ENSG00000240405.5                     |                             | 0.887587041                 | 1                           | 1           | 0.887587041                    |             |                  |   |
|               | Brain_Spinal_cord_cervical_c-1        |                             | 0.887587041                 |                             |             | Brain_Spinal_cord_cervical_c-1 |             |                  |   |
|               | 1                                     | 1                           | 0.141358115                 | 0.141358115                 |             | 0.141358115                    | NA          | 1                | 0 |
|               | 0.998207054                           |                             |                             |                             |             |                                |             |                  |   |
| ZNF513        | ENSG00000163795.13                    |                             | 0.887608613                 | 1                           | 1           | 0.887608613                    |             |                  |   |
|               | Brain_Anterior_cingulate_cortex_BA24  |                             | 0.887608613                 |                             |             |                                |             |                  |   |
|               | Brain_Anterior_cingulate_cortex_BA24  | 1                           | 1                           | 1                           |             | 0.141330808                    |             |                  |   |
|               | 0.141330808                           | 0.141330808                 | NA                          | 1                           | 0           | 0.998207054                    |             |                  |   |
| PKD1L1        | ENSG00000158683.7                     |                             | 0.887710771                 | 8                           | 4           | 0.495719389                    |             |                  |   |
|               | Brain_Anterior_cingulate_cortex_BA24  |                             | 0.963070748                 |                             |             |                                |             |                  |   |
|               | Brain_Nucleus_accumbens_basal_ganglia |                             | 6.076962675                 |                             |             | 0.004475617                    |             |                  |   |
|               | 0.341403219                           | -0.681240399                |                             | 0.059816011                 |             | -0.1833379                     | 0.266063761 |                  | 4 |
|               | 0                                     | 0.998207054                 |                             |                             |             |                                |             |                  |   |
| EP400         | ENSG00000183495.13                    |                             | 0.887724581                 | 2                           | 2           | 0.644167273                    |             | Brain_Cerebellum |   |
|               | 0.95317498                            | Brain_Putamen_basal_ganglia | 1.206814655                 |                             |             | 0.793185345                    |             |                  |   |
|               | 0.793185345                           | -0.461880145                |                             | 0.058720187                 |             | -0.201579979                   |             | 0.368120025      |   |
|               | 2                                     | 0                           | 0.998207054                 |                             |             |                                |             |                  |   |
| RP11-594C13.1 | ENSG00000258859.1                     |                             | 0.887735722                 | 1                           | 1           | 0.887735722                    |             |                  |   |
|               | Brain_Cortex                          |                             | 0.887735722                 | Brain_Cortex                | 1           | 1                              | 1           | -0.141169902     |   |
|               | -0.141169902                          | -0.141169902                | NA                          | 1                           | 0           | 0.998207054                    |             |                  |   |
| METTL6        | ENSG00000206562.11                    |                             | 0.888124602                 | 7                           | 6           | 0.252626366                    |             |                  |   |
|               | Brain_Cerebellar_Hemisphere           |                             | 0.999738046                 |                             |             | Brain_Caudate_basal_ganglia    |             |                  |   |
|               | 4.095090293                           | 0.103432579                 |                             | 0.197687657                 |             | -1.143993419                   |             | 0.183876262      |   |
|               | -0.388748071                          | 0.459671068                 | 6                           | 0                           | 0.998207054 |                                |             |                  |   |
| GGT5          | ENSG00000099998.17                    |                             | 0.888140486                 | 1                           | 1           | 0.888140486                    |             |                  |   |
|               | Brain_Substantia_nigra                |                             | 0.888140486                 | Brain_Substantia_nigra      | 1           | 1                              |             |                  |   |
|               | 1                                     | 0.140657544                 | 0.140657544                 | 0.140657544                 | NA          | 1                              | 0           |                  |   |
|               | 0.998207054                           |                             |                             |                             |             |                                |             |                  |   |
| MNAT1         | ENSG00000020426.10                    |                             | 0.888316337                 | 2                           | 2           | 0.626491935                    |             | Brain_Cerebellum |   |
|               | 0.98488071                            | Brain_Hippocampus           | 1.044238184                 |                             |             | 0.955761816                    |             | 0.955761816      |   |
|               | -0.486670385                          | -0.018950354                |                             | -0.252810369                |             | 0.330728006                    |             | 2                | 0 |
|               | 0.998207054                           |                             |                             |                             |             |                                |             |                  |   |
| IL1R1         | ENSG00000115594.11                    |                             | 0.888580805                 | 2                           | 2           | 0.66308275                     |             |                  |   |
|               | Brain_Caudate_basal_ganglia           |                             | 0.966054097                 | Brain_Hippocampus           |             | 1.363266108                    |             |                  |   |
|               | 0.636733892                           | 0.636733892                 |                             | -0.435660939                |             | 0.042557723                    |             | -0.196551608     |   |
|               | 0.338151658                           | 2                           | 0                           | 0.998207054                 |             |                                |             |                  |   |
| MEG9          | ENSG00000223403.3                     |                             | 0.888681675                 | 1                           | 1           | 0.888681675                    |             |                  |   |
|               | Brain_Putamen_basal_ganglia           |                             | 0.888681675                 | Brain_Putamen_basal_ganglia | 1           | 1                              |             |                  |   |
|               | 1                                     | 0.139972555                 | 0.139972555                 | 0.139972555                 | NA          | 1                              | 0           |                  |   |
|               | 0.998207054                           |                             |                             |                             |             |                                |             |                  |   |
| RNF43         | ENSG00000108375.12                    |                             | 0.88868981                  | 2                           | 2           | 0.630911002                    |             | Brain_Cerebellum |   |
|               | 0.788458317                           | Brain_Amygdala              | 1.422612531                 |                             |             | 0.577387469                    |             | 0.577387469      |   |
|               | -0.480445001                          | -0.268313109                |                             | -0.374379055                |             | 0.1499999                      | 2           | 0                |   |
|               | 0.998207054                           |                             |                             |                             |             |                                |             |                  |   |
| IER5          | ENSG00000162783.10                    |                             | 0.888744699                 | 1                           | 1           | 0.888744699                    |             | Brain_Cerebellum |   |
|               | 0.888744699                           | Brain_Cerebellum            | 1                           | 1                           | 1           | 0.139892789                    |             | 0.139892789      |   |
|               | 0.139892789                           | NA                          | 1                           | 0                           | 0.998207054 |                                |             |                  |   |
| TM7SF2        | ENSG00000149809.14                    |                             | 0.888806385                 | 1                           | 1           | 0.888806385                    |             |                  |   |
|               | Brain_Caudate_basal_ganglia           |                             | 0.888806385                 | Brain_Caudate_basal_ganglia | 1           | 1                              |             |                  |   |
|               | 1                                     | -0.139814717                | -0.139814717                | -0.139814717                | NA          | 1                              | 0           |                  |   |
|               | 0.998207054                           |                             |                             |                             |             |                                |             |                  |   |
| OTOG          | ENSG00000188162.10                    |                             | 0.888955766                 | 1                           | 1           | 0.888955766                    |             |                  |   |
|               | Brain_Caudate_basal_ganglia           |                             | 0.888955766                 | Brain_Caudate_basal_ganglia | 1           | 1                              |             |                  |   |
|               | 1                                     | -0.139625659                | -0.139625659                | -0.139625659                | NA          | 1                              | 0           |                  |   |
|               | 0.998207054                           |                             |                             |                             |             |                                |             |                  |   |
| MPHOSPH6      | ENSG00000135698.9                     |                             | 0.889128737                 | 8                           | 4           | 0.488632688                    |             |                  |   |
|               | Brain_Cerebellum                      | 0.99417167                  | Brain_Putamen_basal_ganglia | 5.734905096                 |             |                                |             | 0.0188085        |   |

|              |                                       |                             |              |              |                                       |                  |
|--------------|---------------------------------------|-----------------------------|--------------|--------------|---------------------------------------|------------------|
|              | 0.244934683                           | -0.692485182                | 0.657792509  | -0.027986847 | 0.38228277                            | 4                |
|              | 0                                     | 0.998207054                 |              |              |                                       |                  |
| RP11-973H7.1 | ENSG00000260302.1                     | 0.889280386                 | 3            | 3            | 0.594941768                           |                  |
|              | Brain_Nucleus_accumbens_basal_ganglia | 0.993244536                 |              |              | Brain_Cortex                          |                  |
|              | 2.483227403                           | 0.088700468                 | 0.088700468  | -0.531688485 | 0.008466819                           |                  |
|              | -0.218096469                          | 0.280396929                 | 3            | 0            | 0.998207054                           |                  |
| MINK1        | ENSG00000141503.15                    | 0.889459642                 | 3            | 3            | 0.517093371                           |                  |
|              | Brain_Caudate_basal_ganglia           | 0.974786583                 |              |              | Brain_Cerebellum                      | 1.929860012      |
|              | 0.148430712                           | 0.148430712                 | -0.647832379 | 0.031605593  | -0.237726381                          |                  |
|              | 0.360932104                           | 3                           | 0            | 0.998207054  |                                       |                  |
| NOP58        | ENSG00000055044.10                    | 0.889555314                 | 2            | 2            | 0.666757115                           |                  |
|              | Brain_Hippocampus                     | 0.889663957                 |              |              | Brain_Nucleus_accumbens_basal_ganglia |                  |
|              | 1.181534741                           | 0.818465259                 | 0.818465259  | -0.138729435 | 0.430602923                           |                  |
|              | 0.145936744                           | 0.402578771                 | 2            | 0            | 0.998207054                           |                  |
| CTRB2        | ENSG00000168928.12                    | 0.889577073                 | 1            | 1            | 0.889577073                           |                  |
|              | Brain_Anterior_cingulate_cortex_BA24  | 0.889577073                 |              |              |                                       |                  |
|              | Brain_Anterior_cingulate_cortex_BA24  | 1                           | 1            | 1            | 0.138839382                           |                  |
|              | 0.138839382                           | 0.138839382                 | NA           | 1            | 0                                     | 0.998207054      |
| ZC3HAV1      | ENSG00000105939.12                    | 0.889658134                 | 1            | 1            | 0.889658134                           |                  |
|              | Brain_Spinal_cord_cervical_c-1        | 0.889658134                 |              |              | Brain_Spinal_cord_cervical_c-1        |                  |
|              | 1                                     | 1                           | 1            | 0.138736803  | 0.138736803                           | 0.138736803      |
|              | 0.998207054                           |                             |              |              | NA                                    | 1                |
|              |                                       |                             |              |              |                                       | 0                |
| RP11-81H3.2  | ENSG00000251138.6                     | 0.889676492                 | 1            | 1            | 0.889676492                           |                  |
|              | Brain_Hippocampus                     | 0.889676492                 |              |              | Brain_Hippocampus                     | 1                |
|              | -0.138713573                          | -0.138713573                | -0.138713573 | NA           | 1                                     | 0                |
|              |                                       |                             |              |              |                                       | 0.998207054      |
| NUBP1        | ENSG00000103274.10                    | 0.889688605                 | 1            | 1            | 0.889688605                           | Brain_Amygdala   |
|              | 0.889688605                           | Brain_Amygdala              | 1            | 1            | 1                                     | -0.138698245     |
|              | -0.138698245                          | NA                          | 1            | 0            | 0.998207054                           |                  |
| UBE2K        | ENSG00000078140.13                    | 0.889691477                 | 3            | 3            | 0.534570257                           | Brain_Cerebellum |
|              | 0.946933471                           | Brain_Cerebellar_Hemisphere | 1.416108154  | 0.637399652  |                                       |                  |
|              | 0.637399652                           | -0.06655814                 | 0.621044633  | 0.326174361  | 0.354093427                           |                  |
|              | 3                                     | 0                           | 0.998207054  |              |                                       |                  |
| THOC6        | ENSG00000131652.13                    | 0.889822006                 | 1            | 1            | 0.889822006                           |                  |
|              | Brain_Spinal_cord_cervical_c-1        | 0.889822006                 |              |              | Brain_Spinal_cord_cervical_c-1        |                  |
|              | 1                                     | 1                           | 1            | -0.138529437 | -0.138529437                          | -0.138529437     |
|              | 0.998207054                           |                             |              |              | NA                                    | 1                |
|              |                                       |                             |              |              |                                       | 0                |
| RP11-333E1.2 | ENSG00000263164.1                     | 0.889843263                 | 1            | 1            | 0.889843263                           |                  |
|              | Brain_Cerebellum                      | 0.889843263                 |              |              | Brain_Cerebellum                      | 1                |
|              | -0.13850254                           | -0.13850254                 | NA           | 1            | 0                                     | 0.998207054      |
|              |                                       |                             |              |              |                                       | -0.13850254      |
| ZNF611       | ENSG00000213020.9                     | 0.889982384                 | 2            | 2            | 0.71882575                            |                  |
|              | Brain_Caudate_basal_ganglia           | 0.757050526                 |              |              | Brain_Frontal_Cortex_BA9              |                  |
|              | 1.033757739                           | 0.966242261                 | 0.966242261  | -0.360028594 | 0.309356278                           |                  |
|              | -0.025336158                          | 0.473326582                 | 2            | 0            | 0.998207054                           |                  |
| PFKFB3       | ENSG00000170525.19                    | 0.890028505                 | 1            | 1            | 0.890028505                           |                  |
|              | Brain_Putamen_basal_ganglia           | 0.890028505                 |              |              | Brain_Putamen_basal_ganglia           | 1                |
|              | 1                                     | 0.138268139                 | 0.138268139  | 0.138268139  | NA                                    | 1                |
|              | 0.998207054                           |                             |              |              |                                       | 0                |
| MEGF11       | ENSG00000157890.17                    | 0.890105922                 | 3            | 3            | 0.611499451                           |                  |
|              | Brain_Cerebellum                      | 0.709469049                 |              |              | Brain_Hippocampus                     | 1.096413051      |
|              | 0.8956067                             | -0.507934255                | -0.372569269 | -0.431540675 | 0.069343846                           | 3                |
|              | 0                                     | 0.998207054                 |              |              |                                       |                  |
| ATP6V1B1     | ENSG00000116039.11                    | 0.890262115                 | 1            | 1            | 0.890262115                           |                  |
|              | Brain_Amygdala                        | 0.890262115                 |              |              | Brain_Amygdala                        | 1                |
|              | 0.137972547                           | 0.137972547                 | NA           | 1            | 0                                     | 0.998207054      |
|              |                                       |                             |              |              |                                       | -0.137972547     |
| CUL1         | ENSG00000055130.15                    | 0.890332198                 | 1            | 1            | 0.890332198                           | Brain_Cerebellum |
|              | 0.890332198                           | Brain_Cerebellum            | 1            | 1            | 1                                     | -0.13788387      |
|              | -0.13788387                           | NA                          | 1            | 0            | 0.998207054                           |                  |
| KIF17        | ENSG00000117245.12                    | 0.890474848                 | 10           | 10           | 0.137046086                           |                  |
|              | Brain_Caudate_basal_ganglia           | 0.767646289                 |              |              | Brain_Nucleus_accumbens_basal_ganglia |                  |
|              | 2.913752239                           | 0.268198164                 | 0.268198164  | -1.486881593 | -0.295455045                          |                  |
|              | -0.877733877                          | 0.361613622                 | 10           | 0            | 0.998207054                           |                  |
| LINGO2       | ENSG00000174482.10                    | 0.890591056                 | 4            | 3            | 0.445759775                           |                  |

|                |                                      |                  |             |             |                                |              |   |                   |
|----------------|--------------------------------------|------------------|-------------|-------------|--------------------------------|--------------|---|-------------------|
|                | Brain_Cerebellar_Hemisphere          | 0.966120216      |             |             | Brain_Frontal_Cortex_BA9       | 1.99911279   |   |                   |
|                | 0.001228042                          | -0.607953736     |             |             | -0.762503131                   | -0.04247478  |   | -0.451545447      |
|                | 0.326919564                          | 3                | 0           | 0.998207054 |                                |              |   |                   |
| KCNH7          | ENSG00000184611                      | 11               | 0.890602776 | 2           | 2                              | 0.631148964  |   |                   |
|                | Brain_Cerebellar_Hemisphere          | 0.729396081      |             |             | Brain_Cerebellum               | 1.666563185  |   |                   |
|                | 0.333436815                          | -0.333436815     |             |             | -0.4801103                     | -0.34592899  |   | -0.413019645      |
|                | 0.094880515                          | 2                | 0           | 0.998207054 |                                |              |   |                   |
| CDC42EP3       | ENSG00000163171                      | 7                | 0.890721226 | 2           | 2                              | 0.633986793  |   |                   |
|                | Brain_Cerebellar_Hemisphere          | 0.917321598      |             |             | Brain_Frontal_Cortex_BA9       |              |   |                   |
|                | 1.073599219                          | -0.926400781     |             |             | 0.926400781                    | -0.10380815  |   | 0.476122943       |
|                | 0.289965546                          | 0.263266314      |             |             | 2                              | 0            |   | 0.998207054       |
| CLEC2B         | ENSG00000110852                      | 4                | 0.890762998 | 1           | 1                              | 0.890762998  |   |                   |
|                | Brain_Cortex                         | 0.890762998      |             |             | Brain_Cortex                   | 1            | 1 | 1                 |
|                | -0.137338806                         | -0.137338806     |             |             | NA                             | 1            | 0 | -0.137338806      |
|                | 0.998207054                          |                  |             |             |                                |              |   |                   |
| SLMAP          | ENSG00000163681                      | 14               | 0.890787614 | 1           | 1                              | 0.890787614  |   |                   |
|                | Brain_Spinal_cord_cervical_c-1       | 0.890787614      |             |             | Brain_Spinal_cord_cervical_c-1 |              |   |                   |
|                | 1                                    | 1                | 1           | 0.137307662 | 0.137307662                    | 0.137307662  |   | NA                |
|                | 0.998207054                          |                  |             |             |                                |              |   | 1                 |
|                |                                      |                  |             |             |                                |              |   | 0                 |
| ICA1           | ENSG00000003147                      | 17               | 0.89085666  | 1           | 1                              | 0.89085666   |   | Brain_Cortex      |
|                | Brain_Cortex                         | 1                | 1           | 1           | -0.137220307                   | -0.137220307 |   | -0.137220307      |
|                | NA                                   | 1                | 0           | 0.998207054 |                                |              |   |                   |
| CTD-2555A7.2   | ENSG00000256982                      | 1                | 0.890858216 | 2           | 2                              | 0.641098599  |   |                   |
|                | Brain_Cerebellar_Hemisphere          | 0.899118132      |             |             | Brain_Cerebellum               | 1.019713851  |   |                   |
|                | 0.980286149                          | -0.980286149     |             |             | 0.126775444                    | 0.466163324  |   | 0.296469384       |
|                | 0.239983472                          | 2                | 0           | 0.998207054 |                                |              |   |                   |
| LYRM4          | ENSG00000214113                      | 10               | 0.89089762  | 8           | 6                              | 0.22371729   |   | Brain_Hippocampus |
|                | 0.785210098                          | Brain_Cerebellum | 5.453864721 |             | 0.036615398                    | 0.196249022  |   |                   |
|                | 0.272535761                          | 1.216702861      |             |             | 0.795766279                    | 0.328980018  |   | 6                 |
|                | 0.998207054                          |                  |             |             |                                |              |   | 0                 |
| SRP72          | ENSG00000174780                      | 15               | 0.890931566 | 5           | 3                              | 0.566065394  |   | Brain_Cerebellum  |
|                | 0.954190637                          | Brain_Cortex     | 3.8063239   |             | 0.001866161                    | 0.255726421  |   |                   |
|                | 0.057445101                          | 0.573855788      |             |             | 0.335265147                    | 0.189651086  |   | 3                 |
|                | 0.998207054                          |                  |             |             |                                |              |   | 0                 |
| CACFD1         | ENSG00000160325                      | 14               | 0.890978724 | 3           | 3                              | 0.535072875  |   |                   |
|                | Brain_Caudate_basal_ganglia          | 0.778952808      |             |             | Brain_Amygdala                 | 1.515785752  |   |                   |
|                | 0.482306901                          | 0.482306901      |             |             | -0.620280888                   | 0.472883463  |   | -0.142693797      |
|                | 0.559493556                          | 3                | 0           | 0.998207054 |                                |              |   |                   |
| CTD-2349P21.9  | ENSG00000266490                      | 1                | 0.891003612 | 11          | 3                              | 0.291926983  |   |                   |
|                | Brain_Putamen_basal_ganglia          | 0.732417247      |             |             | Brain_Cerebellum               | 9.12566837   |   | 0.00182092        |
|                | 0.407522995                          | -1.053903756     |             |             | -0.341911829                   | -0.626668216 |   | 0.21429237        |
|                | 0                                    | 0.998207054      |             |             |                                |              |   | 3                 |
| RPF1           | ENSG00000117133                      | 10               | 0.891175105 | 1           | 1                              | 0.891175105  |   |                   |
|                | Brain_Cerebellar_Hemisphere          | 0.891175105      |             |             | Brain_Cerebellar_Hemisphere    | 1            |   | 1                 |
|                | 1                                    | -0.136817432     |             |             | -0.136817432                   | NA           |   | 1                 |
|                | 0.998207054                          |                  |             |             |                                |              |   | 0                 |
| RP11-227G15.11 | ENSG00000278668                      | 1                | 0.891273337 | 1           | 1                              | 0.891273337  |   |                   |
|                | Brain_Putamen_basal_ganglia          | 0.891273337      |             |             | Brain_Putamen_basal_ganglia    | 1            |   | 1                 |
|                | 1                                    | -0.136693159     |             |             | -0.136693159                   | NA           |   | 1                 |
|                | 0.998207054                          |                  |             |             |                                |              |   | 0                 |
| MAL2           | ENSG00000253972                      | 5                | 0.891322185 | 1           | 1                              | 0.891322185  |   | Brain_Cerebellum  |
|                | 0.891322185                          | Brain_Cerebellum | 1           | 1           | 1                              | -0.136631363 |   | -0.136631363      |
|                | -0.136631363                         | NA               |             |             | 1                              | 0            |   | 0.998207054       |
| THRSP          | ENSG00000151365                      | 2                | 0.891409106 | 2           | 1                              | 0.733346605  |   |                   |
|                | Brain_Cerebellar_Hemisphere          | 0.942637259      |             |             | Brain_Cerebellum               | 1.93719679   |   | 0.06280321        |
|                | 1.93719679                           | -0.071955579     |             |             | 0.3406772                      | 0.13436081   |   | 0.291775436       |
|                | 0.998207054                          |                  |             |             |                                |              |   | 1                 |
|                |                                      |                  |             |             |                                |              |   | 0                 |
| RGS18          | ENSG00000150681                      | 9                | 0.891437466 | 1           | 1                              | 0.891437466  |   | Brain_Cerebellum  |
|                | 0.891437466                          | Brain_Cerebellum | 1           | 1           | 1                              | -0.136485526 |   | -0.136485526      |
|                | -0.136485526                         | NA               |             |             | 1                              | 0            |   | 0.998207054       |
| CDH22          | ENSG00000149654                      | 9                | 0.891731659 | 1           | 1                              | 0.891731659  |   |                   |
|                | Brain_Anterior_cingulate_cortex_BA24 | 0.891731659      |             |             |                                |              |   |                   |
|                | Brain_Anterior_cingulate_cortex_BA24 | 1                | 1           | 1           | 1                              | 0.136113369  |   |                   |

|               |                                       |                                       |                                       |             |                             |                  |   |
|---------------|---------------------------------------|---------------------------------------|---------------------------------------|-------------|-----------------------------|------------------|---|
|               | 0.136113369                           | 0.136113369                           | NA                                    | 1           | 0                           | 0.998207054      |   |
| TBX2          | ENSG00000121068.13                    | 0.8918117                             | 5                                     | 4           | 0.493379557                 | Brain_Cortex     |   |
|               | 0.888134687                           | Brain_Putamen_basal_ganglia           | 2.740808108                           |             | 0.002512485                 |                  |   |
|               | 0.589346892                           | -0.34597861                           | 0.684943528                           |             | 0.033880695                 | 0.418608112      |   |
|               | 4                                     | 0                                     | 0.998207054                           |             |                             |                  |   |
| SYNE1         | ENSG00000131018.22                    | 0.891912842                           | 5                                     | 5           | 0.351743829                 | Brain_Cortex     |   |
|               | 0.898151475                           | Brain_Nucleus_accumbens_basal_ganglia | 1.34318413                            |             | 0.805223946                 |                  |   |
|               | 0.805223946                           | -0.93121216                           | 0.682035484                           |             | -0.185384707                | 0.578045818      |   |
|               | 5                                     | 0                                     | 0.998207054                           |             |                             |                  |   |
| DDX59         | ENSG00000118197.13                    | 0.891952473                           | 12                                    | 1           | 0.702289524                 |                  |   |
|               | Brain_Spinal_cord_cervical_c-1        | 0.987205114                           |                                       |             | Brain_Cerebellum            | 11.06714665      |   |
|               | 0.000160082                           | 11.06714665                           | -0.101060389                          |             | 0.382231682                 | 0.13115638       |   |
|               | 0.138402869                           | 1                                     | 0                                     | 0.998207054 |                             |                  |   |
| KLK5          | ENSG00000167754.12                    | 0.891981868                           | 2                                     | 2           | 0.664215975                 | Brain_Cortex     |   |
|               | 0.825707771                           | Brain_Frontal_Cortex_BA9              | 1.04603077                            |             | 0.95396923                  | 0.95396923       |   |
|               | -0.220209791                          | 0.434099793                           | 0.106945001                           |             | 0.462666744                 | 2                | 0 |
|               | 0.998207054                           |                                       |                                       |             |                             |                  |   |
| MFSD11        | ENSG00000092931.11                    | 0.892037597                           | 3                                     | 3           | 0.541172901                 |                  |   |
|               | Brain_Amygdala                        | 0.73140011                            | Brain_Anterior_cingulate_cortex_BA24  |             | 1.195209389                 |                  |   |
|               | 0.806434128                           | 0.806434128                           | -0.6110403                            |             | 0.343263669                 | -0.220417247     |   |
|               | 0.500135766                           | 3                                     | 0                                     | 0.998207054 |                             |                  |   |
| RPH3AL        | ENSG00000181031.15                    | 0.892058761                           | 10                                    | 3           | 0.4350966                   |                  |   |
|               | Brain_Spinal_cord_cervical_c-1        | 0.734895484                           |                                       |             | Brain_Putamen_basal_ganglia |                  |   |
|               | 7.674035621                           | 0.000234252                           | 0.968137244                           |             | -0.402016253                | 0.780500046      |   |
|               | 0.414292237                           | 0.32350661                            | 3                                     | 0           | 0.998207054                 |                  |   |
| CD44          | ENSG00000026508.17                    | 0.892163936                           | 4                                     | 4           | 0.40807373                  |                  |   |
|               | Brain_Spinal_cord_cervical_c-1        | 0.893121409                           |                                       |             |                             |                  |   |
|               | Brain_Nucleus_accumbens_basal_ganglia | 1.609378438                           |                                       |             | 0.451623038                 |                  |   |
|               | 0.451623038                           | -0.377213103                          | 0.827288201                           |             | 0.20159867                  | 0.493776886      | 4 |
|               | 0                                     | 0.998207054                           |                                       |             |                             |                  |   |
| FARSB         | ENSG00000116120.9                     | 0.892191292                           | 2                                     | 2           | 0.634373131                 |                  |   |
|               | Brain_Frontal_Cortex_BA9              | 0.938020454                           |                                       |             | Brain_Substantia_nigra      |                  |   |
|               | 1.070347784                           | 0.929652216                           | 0.929652216                           |             | -0.475580696                | 0.077758128      |   |
|               | -0.198911284                          | 0.391269635                           | 2                                     | 0           | 0.998207054                 |                  |   |
| CD33          | ENSG00000105383.14                    | 0.892222082                           | 3                                     | 3           | 0.47529735                  | Brain_Cerebellum |   |
|               | 0.844548861                           | Brain_Spinal_cord_cervical_c-1        | 1.115042983                           |             | 0.89324445                  |                  |   |
|               | 0.89324445                            | -0.258399467                          | 0.713886525                           |             | 0.086469578                 | 0.544251781      | 3 |
|               | 0                                     | 0.998207054                           |                                       |             |                             |                  |   |
| BZW2          | ENSG00000136261.14                    | 0.892342268                           | 1                                     | 1           | 0.892342268                 | Brain_Amygdala   |   |
|               | 0.892342268                           | Brain_Amygdala                        | 1                                     | 1           | 0.135341002                 | 0.135341002      |   |
|               | 0.135341002                           | NA                                    | 1                                     | 0           | 0.998207054                 |                  |   |
| CCDC57        | ENSG00000176155.18                    | 0.892370834                           | 8                                     | 1           | 0.730566573                 |                  |   |
|               | Brain_Hippocampus                     | 0.961033432                           | Brain_Putamen_basal_ganglia           |             | 7.668493956                 |                  |   |
|               | 0.00142253                            | 7.668493956                           | -0.180266555                          |             | 0.344371961                 | 0.131043479      |   |
|               | 0.18692849                            | 1                                     | 0                                     | 0.998207054 |                             |                  |   |
| CBWD1         | ENSG00000172785.18                    | 0.89248751                            | 13                                    | 12          | 0.188217805                 |                  |   |
|               | Brain_Cerebellar_Hemisphere           | 0.992110697                           |                                       |             | Brain_Substantia_nigra      |                  |   |
|               | 4.534130393                           | 0.13898381                            | 0.172941135                           |             | -1.315869626                | 0.295359766      |   |
|               | -0.456521572                          | 0.531913122                           | 12                                    | 0           | 0.998207054                 |                  |   |
| TRIM6         | ENSG00000121236.20                    | 0.892559687                           | 1                                     | 1           | 0.892559687                 |                  |   |
|               | Brain_Hippocampus                     | 0.892559687                           | Brain_Hippocampus                     |             | 1                           | 1                | 1 |
|               | 0.135066006                           | 0.135066006                           | 0.135066006                           |             | NA                          | 1                | 0 |
|               |                                       |                                       |                                       |             | 0.998207054                 |                  |   |
| CFAP54        | ENSG00000188596.10                    | 0.892694651                           | 4                                     | 4           | 0.463193737                 |                  |   |
|               | Brain_Cortex                          | 0.79747732                            | Brain_Nucleus_accumbens_basal_ganglia |             | 1.399052812                 |                  |   |
|               | 0.620137161                           | 0.620137161                           | -0.733598071                          |             | 0.300069905                 | -0.353521744     |   |
|               | 0.489300551                           | 4                                     | 0                                     | 0.998207054 |                             |                  |   |
| ZG16B         | ENSG00000162078.11                    | 0.892799763                           | 2                                     | 2           | 0.63536731                  |                  |   |
|               | Brain_Caudate_basal_ganglia           | 0.945657865                           | Brain_Amygdala                        |             | 1.051130648                 |                  |   |
|               | 0.948869352                           | 0.948869352                           | -0.474185953                          |             | 0.068160507                 | -0.203012723     |   |
|               | 0.383496859                           | 2                                     | 0                                     | 0.998207054 |                             |                  |   |
| RP11-769N22.1 | ENSG00000249228.1                     | 0.892877805                           | 2                                     | 2           | 0.65668056                  |                  |   |
|               | Brain_Frontal_Cortex_BA9              | 0.757373952                           | Brain_Cortex                          |             | 1.333661662                 |                  |   |

|                |                                        |                                       |                                        |              |              |
|----------------|----------------------------------------|---------------------------------------|----------------------------------------|--------------|--------------|
|                | 0.666338338                            | 0.666338338                           | -0.444500787                           | -0.308931082 | -0.376715935 |
|                | 0.095862258                            | 2                                     | 0                                      | 0.998207054  |              |
| ZNF761         | ENSG00000160336.14                     | 0.892934307                           | 7                                      | 7            | 0.258334275  |
|                | Brain_Cerebellum0.912272869            | Brain_Spinal_cord_cervical_c-1        |                                        |              | 2.341232341  |
|                | 0.121461                               | 0.121461                              | -0.655487636                           | 1.130336939  | 0.034981392  |
|                | 0.659247317                            | 7                                     | 0                                      | 0.998207054  |              |
| YTHDC1         | ENSG00000083896.12                     | 0.892950803                           | 1                                      | 1            | 0.892950803  |
|                | Brain_Cerebellum0.892950803            | Brain_Cerebellum1                     | 1                                      | 1            | -0.13457134  |
|                | -0.13457134                            | -0.13457134                           | NA                                     | 1            | 0            |
|                |                                        |                                       |                                        | 0.998207054  |              |
| MAF1           | ENSG00000179632.9                      | 0.892978008                           | 2                                      | 1            | 0.889658068  |
|                | Brain_Caudate_basal_ganglia0.896300926 | Brain_Putamen_basal_ganglia1.99997931 |                                        |              |              |
|                | 2.07E-05                               | 1.99997931                            | -0.138736887                           | -0.130335587 | -0.134536237 |
|                | 0.005940616                            | 1                                     | 0                                      | 0.998207054  |              |
| KBTBD2         | ENSG00000170852.10                     | 0.893039553                           | 6                                      | 3            | 0.412556775  |
|                | Brain_Hippocampus                      | 0.766791938                           | Brain_Cerebellum5.24333438             | 0.022115329  |              |
|                | 0.193214327                            | 0.296573771                           | 0.819402559                            | 0.497190522  | 0.191913919  |
|                | 3                                      | 0                                     | 0.998207054                            |              |              |
| KMT5A          | ENSG00000183955.12                     | 0.893163601                           | 5                                      | 4            | 0.428089589  |
|                | Brain_Hippocampus                      | 0.967905351                           | Brain_Putamen_basal_ganglia3.361357721 |              |              |
|                | 0.073425149                            | 0.309821827                           | -0.792465004                           | -0.040235531 | -0.282638564 |
|                | 0.323749067                            | 4                                     | 0                                      | 0.998207054  |              |
| GCNT4          | ENSG00000176928.5                      | 0.893168876                           | 3                                      | 3            | 0.48726608   |
|                | Brain_Cerebellum                       | 0.81737158                            | Brain_Nucleus_accumbens_basal_ganglia  | 1.55047266   | 0.51173291   |
|                | -0.375429097                           | 0.694663703                           | 0.183387174                            | 0.536628056  | 3            |
|                | 0.998207054                            |                                       |                                        |              | 0            |
| PLPP4          | ENSG00000203805.10                     | 0.893249661                           | 3                                      | 2            | 0.7021347    |
|                | Brain_Cerebellum                       | 0.753691578                           | Brain_Cerebellar_Hemisphere2.005790855 | 0.004743699  |              |
|                | 0.989465447                            | 0.313775468                           | 0.382440438                            | 0.347887411  | 0.03433461   |
|                | 0                                      | 0.998207054                           |                                        |              | 2            |
| STYK1          | ENSG00000060140.8                      | 0.893364594                           | 1                                      | 1            | 0.893364594  |
|                | Brain_Anterior_cingulate_cortex_BA24   | 0.893364594                           |                                        |              |              |
|                | Brain_Anterior_cingulate_cortex_BA24   | 1                                     | 1                                      | 1            | -0.134048031 |
|                | -0.134048031                           | -0.134048031                          | NA                                     | 1            | 0            |
|                |                                        |                                       |                                        | 0.998207054  |              |
| RP11-370I10.10 | ENSG00000275228.1                      | 0.893370582                           | 5                                      | 3            | 0.456583347  |
|                | Brain_Cortex                           | 0.814331363                           | Brain_Cerebellum4.256705383            | 0.044627441  |              |
|                | 0.183834178                            | -0.744484613                          | -0.234842007                           | -0.4116209   | 0.199172823  |
|                | 0                                      | 0.998207054                           |                                        |              | 3            |
| FAM20A         | ENSG00000108950.11                     | 0.89340416                            | 1                                      | 1            | 0.89340416   |
|                | Brain_Cerebellum1                      | 1                                     | 1                                      | -0.133997995 | -0.133997995 |
|                | -0.133997995                           | NA                                    | 1                                      | 0            | 0.998207054  |
| TGFBR1         | ENSG00000106799.12                     | 0.893423905                           | 1                                      | 1            | 0.893423905  |
|                | Brain_Cerebellum0.893423905            | Brain_Cerebellum1                     | 1                                      | 1            | -0.133973025 |
|                | -0.133973025                           | -0.133973025                          | NA                                     | 1            | 0            |
|                |                                        |                                       |                                        | 0.998207054  |              |
| GNB4           | ENSG00000114450.9                      | 0.893519877                           | 3                                      | 3            | 0.56727007   |
|                | Brain_Nucleus_accumbens_basal_ganglia  | 0.883282632                           | Brain_Frontal_Cortex_BA9               |              |              |
|                | 1.69103478                             | 0.6141537                             | 0.6141537                              | -0.274363274 | 0.572076617  |
|                | 0.423221596                            | 3                                     | 0                                      | 0.998207054  | 0.148174177  |
| CTD-2027I19.3  | ENSG00000276030.1                      | 0.893530307                           | 1                                      | 1            | 0.893530307  |
|                | Brain_Cerebellar_Hemisphere0.893530307 | Brain_Cerebellar_Hemisphere1          | 1                                      | 1            |              |
|                | 1                                      | -0.133838469                          | -0.133838469                           | -0.133838469 | NA           |
|                | 0.998207054                            |                                       |                                        |              | 1            |
| LINC01978      | ENSG00000262188.1                      | 0.893610537                           | 1                                      | 1            | 0.893610537  |
|                | Brain_Anterior_cingulate_cortex_BA24   | 0.893610537                           |                                        |              |              |
|                | Brain_Anterior_cingulate_cortex_BA24   | 1                                     | 1                                      | 1            | 0.133737011  |
|                | 0.133737011                            | 0.133737011                           | NA                                     | 1            | 0            |
|                |                                        |                                       |                                        | 0.998207054  |              |
| FAM171A1       | ENSG00000148468.16                     | 0.893648106                           | 4                                      | 4            | 0.397905462  |
|                | Brain_Nucleus_accumbens_basal_ganglia  | 0.734299439                           | Brain_Hippocampus                      |              |              |
|                | 1.479510813                            | 0.531748028                           | 0.531748028                            | -0.845367898 | 0.49354884   |
|                | -0.282824474                           | 0.561883129                           | 4                                      | 0            | 0.998207054  |
| RP11-313P18.2  | ENSG00000259241.1                      | 0.893651695                           | 1                                      | 1            | 0.893651695  |
|                | Brain_Cerebellar_Hemisphere0.893651695 | Brain_Cerebellar_Hemisphere1          | 1                                      | 1            |              |
|                | 1                                      | 0.133684965                           | 0.133684965                            | 0.133684965  | NA           |
|                |                                        |                                       |                                        |              | 1            |
|                |                                        |                                       |                                        |              | 0            |

|              |                                |                        |              |              |                                       |                        |                  |   |  |
|--------------|--------------------------------|------------------------|--------------|--------------|---------------------------------------|------------------------|------------------|---|--|
| 0.998207054  |                                |                        |              |              |                                       |                        |                  |   |  |
| MAP3K20      | ENSG00000091436.16             | 0.893705548            | 1            | 1            | 0.893705548                           |                        |                  |   |  |
|              | Brain_Putamen_basal_ganglia    | 0.893705548            |              |              | Brain_Putamen_basal_ganglia           | 1                      | 1                |   |  |
|              | 1                              | -0.133616864           | -0.133616864 | -0.133616864 | NA                                    | 1                      | 0                |   |  |
| 0.998207054  |                                |                        |              |              |                                       |                        |                  |   |  |
| CHST9        | ENSG00000154080.13             | 0.893725687            | 5            | 1            | 0.78477967                            | Brain_Hypothalamus     |                  |   |  |
|              | 0.99968938                     | Brain_Substantia_nigra | 4.843222018  |              | 0.00363722                            | 4.843222018            |                  |   |  |
|              | -0.224324738                   | 0.273095677            | 0.038542292  |              | 0.187294918                           | 1                      | 0                |   |  |
| 0.998207054  |                                |                        |              |              |                                       |                        |                  |   |  |
| EIF4E3       | ENSG00000163412.12             | 0.89390909             | 4            | 3            | 0.537438381                           |                        |                  |   |  |
|              | Brain_Substantia_nigra         | 0.885806662            |              |              | Brain_Spinal_cord_cervical_c-1        |                        |                  |   |  |
|              | 3.460544949                    | 0.004606179            | 0.205531545  |              | 0.143612256                           | 0.616691269            |                  |   |  |
|              | 0.292071771                    | 0.220902315            | 3            | 0            | 0.998207054                           |                        |                  |   |  |
| CD302        | ENSG00000241399.6              | 0.894004427            | 2            | 2            | 0.702131476                           | Brain_Cortex           |                  |   |  |
|              | 0.795614334                    | Brain_Cerebellum       | 1.051193249  |              | 0.948806751                           | 0.948806751            |                  |   |  |
|              | -0.259027096                   | 0.382444786            | 0.061708845  |              | 0.453589117                           | 2                      | 0                |   |  |
| 0.998207054  |                                |                        |              |              |                                       |                        |                  |   |  |
| NRBF2        | ENSG00000148572.15             | 0.89402539             | 1            | 1            | 0.89402539                            | Brain_Substantia_nigra |                  |   |  |
|              | 0.89402539                     | Brain_Substantia_nigra | 1            | 1            | 1                                     | -0.133212418           |                  |   |  |
|              | -0.133212418                   | -0.133212418           | NA           | 1            | 0                                     | 0.998207054            |                  |   |  |
| PCDHA6       | ENSG00000081842.17             | 0.894037109            |              | 3            | 3                                     | 0.471607431            |                  |   |  |
|              | Brain_Frontal_Cortex_BA9       | 0.756981281            |              |              | Brain_Cerebellar_Hemisphere           |                        |                  |   |  |
|              | 1.810526427                    | 0.19038472             | 0.19038472   | 0.309447317  | 0.719866118                           |                        |                  |   |  |
|              | 0.513032362                    | 0.205228686            | 3            | 0            | 0.998207054                           |                        |                  |   |  |
| ZNF234       | ENSG00000263002.7              | 0.894079461            |              | 2            | 2                                     | 0.686704521            |                  |   |  |
|              | Brain_Cerebellar_Hemisphere    | 0.800555794            |              |              | Brain_Cortex                          | 1.012819985            |                  |   |  |
|              | 0.987180015                    | 0.987180015            | 0.252627866  |              | 0.403331297                           | 0.327979581            |                  |   |  |
|              | 0.106563418                    | 2                      | 0            | 0.998207054  |                                       |                        |                  |   |  |
| ZFYVE19      | ENSG00000166140.17             | 0.894185058            |              | 11           | 6                                     | 0.390433246            |                  |   |  |
|              | Brain_Hippocampus              | 0.850273992            |              |              | Brain_Nucleus_accumbens_basal_ganglia |                        |                  |   |  |
|              | 6.232352618                    | 9.49E-06               | 0.463141644  |              | -0.858831934                          | 0.815719993            |                  |   |  |
|              | -0.381711333                   | 0.581877323            | 6            | 0            | 0.998207054                           |                        |                  |   |  |
| AGPAT4       | ENSG00000026652.13             | 0.894219608            |              | 6            | 6                                     | 0.288784585            |                  |   |  |
|              | Brain_Cerebellum               | 0.979939384            |              |              | Brain_Hippocampus                     | 1.618290713            |                  |   |  |
|              | 0.318290929                    | 0.318290929            | -1.060791678 |              | 0.026167293                           | -0.436753077           |                  |   |  |
|              | 0.473059506                    | 6                      | 0            | 0.998207054  |                                       |                        |                  |   |  |
| ZNF641       | ENSG00000167528.12             | 0.894236987            |              | 4            | 4                                     | 0.537635649            |                  |   |  |
|              | Brain_Cortex                   | 0.635198806            |              |              | Brain_Cerebellar_Hemisphere           | 2.340503072            |                  |   |  |
|              | 0.180810331                    | 0.180810331            | -0.616392277 |              | 0.523584446                           | -0.268102779           |                  |   |  |
|              | 0.53130282                     | 4                      | 0            | 0.998207054  |                                       |                        |                  |   |  |
| DDX56        | ENSG00000136271.10             | 0.894380957            |              | 1            | 1                                     | 0.894380957            | Brain_Cerebellum |   |  |
|              | 0.894380957                    | Brain_Cerebellum       | 1            | 1            | 1                                     | -0.132762823           | -0.132762823     |   |  |
|              | -0.132762823                   | NA                     | 1            | 0            | 0.998207054                           |                        |                  |   |  |
| DSG1         | ENSG00000134760.5              | 0.894396536            |              | 1            | 1                                     | 0.894396536            | Brain_Cortex     |   |  |
|              | 0.894396536                    | Brain_Cortex           | 1            | 1            | 1                                     | -0.132743124           | -0.132743124     |   |  |
|              | -0.132743124                   | NA                     | 1            | 0            | 0.998207054                           |                        |                  |   |  |
| BCL2L13      | ENSG00000099968.17             | 0.894439859            |              | 7            | 5                                     | 0.279430057            |                  |   |  |
|              | Brain_Substantia_nigra         | 0.947135242            |              |              | Brain_Cortex                          | 4.756720292            |                  |   |  |
|              | 0.026939714                    | 0.195659032            | 0.066304699  |              | 1.081600556                           | 0.618545822            |                  |   |  |
|              | 0.333695871                    | 5                      | 0            | 0.998207054  |                                       |                        |                  |   |  |
| RP11-62L18.3 | ENSG00000223432.1              | 0.894715846            |              | 1            | 1                                     | 0.894715846            |                  |   |  |
|              | Brain_Spinal_cord_cervical_c-1 | 0.894715846            |              |              | Brain_Spinal_cord_cervical_c-1        |                        |                  |   |  |
|              | 1                              | 1                      | -0.132339398 | -0.132339398 | -0.132339398                          | NA                     | 1                | 0 |  |
| 0.998207054  |                                |                        |              |              |                                       |                        |                  |   |  |
| RP11-214N9.1 | ENSG00000271855.1              | 0.894727281            |              | 6            | 6                                     | 0.218858828            |                  |   |  |
|              | Brain_Cerebellum               | 0.955225613            |              |              | Brain_Amygdala                        | 2.651205993            | 0.420358944      |   |  |
|              | 0.420358944                    | -1.229568242           | 0.325404253  |              | -0.409782445                          | 0.536738889            |                  |   |  |
|              | 6                              | 0                      | 0.998207054  |              |                                       |                        |                  |   |  |
| PILRB        | ENSG00000121716.20             | 0.894743538            |              | 13           | 1                                     | 0.796147703            |                  |   |  |
|              | Brain_Frontal_Cortex_BA9       | 0.976506934            |              |              | Brain_Amygdala                        | 12.92828126            |                  |   |  |
|              | 0.000217298                    | 12.92828126            | -0.258335873 |              | 0.031111149                           | -0.131959813           |                  |   |  |
|              | 0.094317156                    | 1                      | 0            | 0.998207054  |                                       |                        |                  |   |  |



|               |                                |                  |             |                                       |              |              |            |    |                  |
|---------------|--------------------------------|------------------|-------------|---------------------------------------|--------------|--------------|------------|----|------------------|
| C2orf66       | ENSG00000187944.2              | 0.894756751      | 1           | 1                                     | 0.894756751  |              |            |    |                  |
|               | Brain_Cortex                   | 0.894756751      |             | Brain_Cortex                          | 1            | 1            | 1          |    | -0.132287681     |
|               | -0.132287681                   | -0.132287681     | NA          | 1                                     | 0            | 0.998207054  |            |    |                  |
| C9orf152      | ENSG00000188959.9              | 0.894794524      | 2           | 1                                     | 0.798459002  |              |            |    |                  |
|               | Brain_Cerebellum               | 0.994894         |             | Brain_Cerebellar_Hemisphere           | 1.958798302  |              |            |    |                  |
|               | 0.041201698                    | 1.958798302      |             | 0.006399465                           | 0.25534195   | 0.130870707  |            |    |                  |
|               | 0.176028919                    | 1                | 0           | 0.998207054                           |              |              |            |    |                  |
| BMP2          | ENSG00000125845.6              | 0.894807607      | 2           | 2                                     | 0.706944899  |              |            |    |                  |
|               | Brain_Caudate_basal_ganglia    | 0.761677089      |             | Brain_Cerebellar_Hemisphere           |              |              |            |    |                  |
|               | 1.050906728                    | 0.949093272      |             | 0.949093272                           | -0.375962332 | 0.30327921   |            |    |                  |
|               | -0.036341561                   | 0.480296301      | 2           | 0                                     | 0.998207054  |              |            |    |                  |
| ZNF43         | ENSG00000198521.11             | 0.894823938      | 1           | 1                                     | 0.894823938  |              |            |    | Brain_Cerebellum |
|               | 0.894823938                    | Brain_Cerebellum | 1           | 1                                     | 1            | 0.132202735  |            |    | 0.132202735      |
|               | 0.132202735                    | NA               | 1           | 0                                     | 0.998207054  |              |            |    |                  |
| ANAPC10       | ENSG00000164162.12             | 0.894838774      | 1           | 1                                     | 0.894838774  |              |            |    |                  |
|               | Brain_Hippocampus              | 0.894838774      |             | Brain_Hippocampus                     | 1            | 1            | 1          |    |                  |
|               | 0.132183977                    | 0.132183977      |             | 0.132183977                           | NA           | 1            | 0          |    | 0.998207054      |
| COL2A1        | ENSG00000139219.17             | 0.894968468      | 1           | 1                                     | 0.894968468  |              |            |    |                  |
|               | Brain_Frontal_Cortex_BA9       | 0.894968468      |             | Brain_Frontal_Cortex_BA9              | 1            | 1            |            |    |                  |
|               | 1                              | 0.132020005      |             | 0.132020005                           | 0.132020005  | NA           | 1          | 0  |                  |
|               | 0.998207054                    |                  |             |                                       |              |              |            |    |                  |
| RP11-248M19.1 | ENSG00000278075.1              | 0.895012061      | 1           | 1                                     | 0.895012061  |              |            |    |                  |
|               | Brain_Cerebellar_Hemisphere    | 0.895012061      |             | Brain_Cerebellar_Hemisphere           | 1            | 1            |            |    |                  |
|               | 1                              | 0.131964892      |             | 0.131964892                           | 0.131964892  | NA           | 1          | 0  |                  |
|               | 0.998207054                    |                  |             |                                       |              |              |            |    |                  |
| SUCNR1        | ENSG00000198829.6              | 0.895044552      | 3           | 3                                     | 0.536418839  |              |            |    |                  |
|               | Brain_Hypothalamus             | 0.986248855      |             | Brain_Nucleus_accumbens_basal_ganglia |              |              |            |    |                  |
|               | 2.367472008                    | 0.235483242      |             | 0.235483242                           | -0.618237431 | -0.017235358 |            |    |                  |
|               | -0.273544001                   | 0.310096398      | 3           | 0                                     | 0.998207054  |              |            |    |                  |
| RP5-944M2.1   | ENSG00000256494.1              | 0.895121635      | 1           | 1                                     | 0.895121635  |              |            |    |                  |
|               | Brain_Cortex                   | 0.895121635      |             | Brain_Cortex                          | 1            | 1            | 1          |    | 0.131826361      |
|               | 0.131826361                    | 0.131826361      | NA          | 1                                     | 0            | 0.998207054  |            |    |                  |
| RTBDN         | ENSG00000132026.13             | 0.895147031      | 3           | 3                                     | 0.481993455  |              |            |    |                  |
|               | Brain_Putamen_basal_ganglia    | 0.899361535      |             | Brain_Cerebellar_Hemisphere           |              |              |            |    |                  |
|               | 1.246987783                    | 0.859877375      |             | 0.859877375                           | -0.703099963 | 0.187403148  |            |    |                  |
|               | -0.129742963                   | 0.49747559       | 3           | 0                                     | 0.998207054  |              |            |    |                  |
| TAGLN2        | ENSG00000158710.14             | 0.895214651      | 2           | 2                                     | 0.638488334  |              |            |    |                  |
|               | Brain_Frontal_Cortex_BA9       | 0.968876631      |             | Brain_Caudate_basal_ganglia           |              |              |            |    |                  |
|               | 1.028434901                    | 0.971565099      |             | 0.971565099                           | -0.469813408 | -0.039017256 |            |    |                  |
|               | -0.254415332                   | 0.304618881      | 2           | 0                                     | 0.998207054  |              |            |    |                  |
| DPP6          | ENSG00000130226.16             | 0.895240838      | 5           | 5                                     | 0.347838805  |              |            |    |                  |
|               | Brain_Hypothalamus             | 0.959990203      |             | Brain_Nucleus_accumbens_basal_ganglia |              |              |            |    |                  |
|               | 2.360365499                    | 0.31724942       | 0.31724942  | -0.938789551                          | -0.050165878 |              |            |    |                  |
|               | -0.454546264                   | 0.389128618      | 5           | 0                                     | 0.998207054  |              |            |    |                  |
| ITGA7         | ENSG00000135424.15             | 0.895246507      | 4           | 3                                     | 0.406754092  |              |            |    |                  |
|               | Brain_Cerebellar_Hemisphere    | 0.774488244      |             | Brain_Frontal_Cortex_BA9              |              |              |            |    |                  |
|               | 2.380851229                    | 0.071187931      |             | 0.551060119                           | -0.829619245 | 0.286509075  |            |    |                  |
|               | -0.396739857                   | 0.482737371      | 3           | 0                                     | 0.998207054  |              |            |    |                  |
| SAR1B         | ENSG00000152700.13             | 0.89532637       | 1           | 1                                     | 0.89532637   |              |            |    | Brain_Cerebellum |
|               | Brain_Cerebellum               | 1                | 1           | 1                                     | 0.13156753   | 0.13156753   | 0.13156753 | NA | 1                |
|               | 0.998207054                    |                  |             |                                       |              |              |            |    | 0                |
| TRMT61B       | ENSG00000171103.10             | 0.895340959      | 13          | 1                                     | 0.565658299  |              |            |    |                  |
|               | Brain_Hypothalamus             | 0.856403026      |             | Brain_Cortex                          | 11.95567605  |              |            |    | 0.00209209       |
|               | 11.95567605                    | -0.574457431     |             | 0.453405322                           | 0.122672267  | 0.343373632  |            |    |                  |
|               | 1                              | 0                | 0.998207054 |                                       |              |              |            |    |                  |
| TMEM120A      | ENSG00000189077.10             | 0.895394251      | 3           | 3                                     | 0.489021529  |              |            |    |                  |
|               | Brain_Spinal_cord_cervical_c-1 | 0.777430047      |             | Brain_Cerebellum                      | 1.600821585  |              |            |    |                  |
|               | 0.421392616                    | 0.421392616      |             | 0.282669698                           | 0.691865929  | 0.474205192  |            |    |                  |
|               | 0.205845294                    | 3                | 0           | 0.998207054                           |              |              |            |    |                  |
| MATN3         | ENSG00000132031.12             | 0.895548232      | 1           | 1                                     | 0.895548232  |              |            |    |                  |
|               | Brain_Frontal_Cortex_BA9       | 0.895548232      |             | Brain_Frontal_Cortex_BA9              | 1            | 1            |            |    |                  |
|               | 1                              | -0.131287055     |             | -0.131287055                          | -0.131287055 | NA           | 1          | 0  |                  |

0.998207054  
 NKPD1 ENSG00000179846.9 0.895894074 1 1 0.895894074  
 Brain\_Spinal\_cord\_cervical\_c-1 0.895894074 Brain\_Spinal\_cord\_cervical\_c-1  
 1 1 1 -0.130849867 -0.130849867 -0.130849867 NA 1 0  
 0.998207054  
 TRPV3 ENSG00000167723.14 0.895910174 9 9 0.13710939  
 Brain\_Putamen\_basal\_ganglia 0.927375164 Brain\_Anterior\_cingulate\_cortex\_BA24  
 2.097620743 0.250584865 0.250584865 -0.662581786 1.486641996  
 0.25303592 0.658655455 9 0 0.998207054  
 AK5 ENSG00000154027.18 0.895928874 4 3 0.529082181  
 Brain\_Spinal\_cord\_cervical\_c-1 0.993137963 Brain\_Cortex 2.651492667  
 0.057486337 0.344464131 -0.22917631 0.629407696 0.152336186  
 0.366662342 3 0 0.998207054  
 CLGN ENSG00000153132.12 0.895992118 5 5 0.350582176  
 Brain\_Nucleus\_accumbens\_basal\_ganglia 0.981649781 Brain\_Cerebellar\_Hemisphere  
 2.390374711 0.209018651 0.209018651 -0.663151045 0.933460654  
 0.007839585 0.577317983 5 0 0.998207054  
 PGLYRP1 ENSG00000008438.4 0.896098705 1 1 0.896098705  
 Brain\_Cerebellum 0.896098705 Brain\_Cerebellum 1 1 1 0.1305912  
 0.1305912 0.1305912 NA 1 0 0.998207054  
 ANO10 ENSG00000160746.12 0.896193963 1 1 0.896193963  
 Brain\_Nucleus\_accumbens\_basal\_ganglia 0.896193963  
 Brain\_Nucleus\_accumbens\_basal\_ganglia 1 1 1 0.13047079 0.13047079  
 0.13047079 NA 1 0 0.998207054  
 RP4-794I6.4 ENSG00000277287.1 0.896200833 3 3 0.510643318  
 Brain\_Nucleus\_accumbens\_basal\_ganglia 0.797817946 Brain\_Frontal\_Cortex\_BA9  
 1.336716121 0.655750877 0.655750877 -0.256172106 0.657836313  
 0.297298707 0.486590448 3 0 0.998207054  
 NFKBIZ ENSG00000144802.11 0.896279813 2 2 0.710549333  
 Brain\_Hippocampus 0.852229629 Brain\_Hypothalamus 1.243200591  
 0.756799409 0.756799409 0.18627434 0.371118419 0.27869638  
 0.130704502 2 0 0.998207054  
 FSIP2 ENSG00000188738.14 0.896344695 5 4 0.368596169 Brain\_Cerebellum  
 0.649637026 Brain\_Hypothalamus 3.996847809 0.028150743  
 0.156592818 0.454266499 0.899106063 0.706762145 0.176705369  
 4 0 0.998207054  
 FYN ENSG00000010810.17 0.896539136 2 2 0.708587155  
 Brain\_Caudate\_basal\_ganglia 0.976506053 Brain\_Nucleus\_accumbens\_basal\_ganglia  
 1.649583131 0.350416869 0.350416869 0.029449552 0.373754257  
 0.201601904 0.243460192 2 0 0.998207054  
 OVOL1 ENSG00000172818.9 0.896590407 6 3 0.647947387  
 Brain\_Anterior\_cingulate\_cortex\_BA24 0.983930243  
 Brain\_Nucleus\_accumbens\_basal\_ganglia 5.228901499 0.00055466 0.179346534  
 0.020141815 0.456615568 0.158445813 0.165404122 3 0  
 0.998207054  
 LINC02128 ENSG00000261241.5 0.896628313 2 2 0.644499499  
 Brain\_Spinal\_cord\_cervical\_c-1 0.824678892 Brain\_Hypothalamus  
 1.330911449 0.669088551 0.669088551 -0.461416941 -0.221531141  
 -0.341474041 0.169624876 2 0 0.998207054  
 CABP1 ENSG00000157782.9 0.896689293 2 2 0.649255539  
 Brain\_Hypothalamus 0.916068912 Brain\_Cerebellar\_Hemisphere 1.001511172  
 0.998488828 0.998488828 0.105386772 0.454796652 0.280091712  
 0.247070096 2 0 0.998207054  
 GRHL1 ENSG00000134317.17 0.896774766 2 2 0.772716558  
 Brain\_Cerebellar\_Hemisphere 0.991313334 Brain\_Cerebellum 1.770957457  
 0.229042543 0.229042543 -0.288823356 0.010887336 -0.13896801  
 0.211927463 2 0 0.998207054  
 KCNG4 ENSG00000168418.7 0.896785734 7 5 0.244936145  
 Brain\_Cerebellar\_Hemisphere 0.937787635 Brain\_Amygdala 3.977300445  
 0.032436995 0.327813729 -0.233363778 1.162737196 0.226516363  
 0.515792674 5 0 0.998207054  
 GVQW1 ENSG00000241043.1 0.896915667 13 4 0.214828124

|           |                                       |              |                             |                                |              |              |             |             |   |
|-----------|---------------------------------------|--------------|-----------------------------|--------------------------------|--------------|--------------|-------------|-------------|---|
|           | Brain_Substantia_nigra                | 0.799107329  |                             | Brain_Frontal_Cortex_BA9       |              |              |             |             |   |
|           | 10.46793012                           | 0.000678699  | 0.354931463                 | 0.254502557                    | 1.24039826   |              |             |             |   |
|           | 0.892661133                           | 0.266392873  | 4                           | 0                              | 0.998207054  |              |             |             |   |
| CAMK2N2   | ENSG00000163888.3                     | 0.897030308  |                             | 1                              | 1            | 0.897030308  |             |             |   |
|           | Brain_Frontal_Cortex_BA9              | 0.897030308  |                             | Brain_Frontal_Cortex_BA9       | 1            | 1            |             |             |   |
|           | 1                                     | 0.1294137    | 0.1294137                   | 0.1294137                      | NA           | 1            | 0           | 0.998207054 |   |
| RHOD      | ENSG00000173156.6                     | 0.897116108  | 11                          | 1                              | 0.499334641  |              |             |             |   |
|           | Brain_Caudate_basal_ganglia           | 0.981034191  |                             | Brain_Cerebellar_Hemisphere    |              |              |             |             |   |
|           | 10.24505179                           | 7.62E-05     | 10.24505179                 | -0.466422149                   | 0.675537018  |              |             |             |   |
|           | 0.125817162                           | 0.288066335  | 1                           | 0                              | 0.998207054  |              |             |             |   |
| PCGF5     | ENSG00000180628.14                    | 0.897139855  | 1                           | 1                              | 0.897139855  |              |             |             |   |
|           | Brain_Caudate_basal_ganglia           | 0.897139855  |                             | Brain_Caudate_basal_ganglia    | 1            | 1            |             |             |   |
|           | 1                                     | 0.129275249  | 0.129275249                 | 0.129275249                    | NA           | 1            | 0           | 0.998207054 |   |
| SNAPC3    | ENSG00000164975.15                    | 0.89722859   | 1                           | 1                              | 0.89722859   |              |             |             |   |
|           | Brain_Cerebellar_Hemisphere           | 0.89722859   | Brain_Cerebellar_Hemisphere | 1                              | 1            | 1            |             |             |   |
|           | -0.129163105                          | -0.129163105 | -0.129163105                | NA                             | 1            | 0            | 0.998207054 |             |   |
| ANKRD7    | ENSG00000106013.14                    | 0.897292589  | 7                           | 3                              | 0.658015856  |              |             |             |   |
|           | Brain_Nucleus_accumbens_basal_ganglia | 0.900373159  |                             |                                |              |              |             |             |   |
|           | Brain_Anterior_cingulate_cortex_BA24  | 6.096744915  |                             | 0.00694389                     | 0.236348136  |              |             |             |   |
|           | -0.442654226                          | 0.428025332  | 0.025410187                 | 0.344326171                    | 3            | 0            |             |             |   |
|           | 0.998207054                           |              |                             |                                |              |              |             |             |   |
| ALX3      | ENSG00000156150.6                     | 0.897342909  | 1                           | 1                              | 0.897342909  |              |             |             |   |
|           | Brain_Putamen_basal_ganglia           | 0.897342909  |                             | Brain_Putamen_basal_ganglia    | 1            | 1            |             |             |   |
|           | 1                                     | 0.129018628  | 0.129018628                 | 0.129018628                    | NA           | 1            | 0           | 0.998207054 |   |
| FAM196B   | ENSG00000204767.3                     | 0.897431117  | 2                           | 2                              | 0.643403073  |              |             |             |   |
|           | Brain_Putamen_basal_ganglia           | 0.966304016  |                             | Brain_Frontal_Cortex_BA9       | 1.00817569   |              |             |             |   |
|           | 0.99182431                            | 0.99182431   | 0.042244215                 | 0.462946002                    | 0.252595109  |              |             |             |   |
|           | 0.297481087                           | 2            | 0                           | 0.998207054                    |              |              |             |             |   |
| MLEC      | ENSG00000110917.7                     | 0.897449722  | 3                           | 3                              | 0.498320077  |              |             |             |   |
|           | Brain_Cerebellar_Hemisphere           | 0.878390372  |                             | Brain_Caudate_basal_ganglia    |              |              |             |             |   |
|           | 1.521206779                           | 0.48004836   | 0.48004836                  | -0.352532966                   | 0.677135358  |              |             |             |   |
|           | 0.057197457                           | 0.546071975  | 3                           | 0                              | 0.998207054  |              |             |             |   |
| HMCN1     | ENSG00000143341.11                    | 0.897500935  | 3                           | 3                              | 0.593903925  |              |             |             |   |
|           | Brain_Anterior_cingulate_cortex_BA24  | 0.797307429  |                             | Brain_Frontal_Cortex_BA9       |              |              |             |             |   |
|           | 1.290247697                           | 0.726295381  | 0.726295381                 | -0.414958248                   | 0.533187309  |              |             |             |   |
|           | 0.125020801                           | 0.487622712  | 3                           | 0                              | 0.998207054  |              |             |             |   |
| SKIDA1    | ENSG00000180592.16                    | 0.897541078  | 1                           | 1                              | 0.897541078  |              |             |             |   |
|           | Brain_Anterior_cingulate_cortex_BA24  | 0.897541078  |                             |                                |              |              |             |             |   |
|           | Brain_Anterior_cingulate_cortex_BA24  | 1            | 1                           | 1                              | 0.128768189  |              |             |             |   |
|           | 0.128768189                           | 0.128768189  | NA                          | 1                              | 0            | 0.998207054  |             |             |   |
| RAB21     | ENSG00000080371.5                     | 0.897596474  | 1                           | 1                              | 0.897596474  |              |             |             |   |
|           | Brain_Hippocampus                     | 0.897596474  |                             | Brain_Hippocampus              | 1            | 1            | 1           |             |   |
|           | 0.128698182                           | 0.128698182  | 0.128698182                 | NA                             | 1            | 0            | 0.998207054 |             |   |
| AGMO      | ENSG00000187546.13                    | 0.897655535  | 9                           | 8                              | 0.171396385  |              |             |             |   |
|           | Brain_Anterior_cingulate_cortex_BA24  | 0.963607861  |                             | Brain_Putamen_basal_ganglia    |              |              |             |             |   |
|           | 3.660735854                           | 0.059726494  | 0.161918758                 | -1.039847475                   | 1.367730706  |              |             |             |   |
|           | -0.06078722                           | 0.748922613  | 8                           | 0                              | 0.998207054  |              |             |             |   |
| CYP8B1    | ENSG00000180432.5                     | 0.897678864  | 1                           | 1                              | 0.897678864  |              |             |             |   |
|           | Brain_Nucleus_accumbens_basal_ganglia | 0.897678864  |                             |                                |              |              |             |             |   |
|           | Brain_Nucleus_accumbens_basal_ganglia | 1            | 1                           | 1                              | -0.128594064 |              |             |             |   |
|           | -0.128594064                          | -0.128594064 | NA                          | 1                              | 0            | 0.998207054  |             |             |   |
| FRG2      | ENSG00000205097.6                     | 0.897690726  | 1                           | 1                              | 0.897690726  |              |             |             |   |
|           | Brain_Cerebellar_Hemisphere           | 0.897690726  |                             | Brain_Cerebellar_Hemisphere    | 1            | 1            |             |             |   |
|           | 1                                     | 0.128579073  | 0.128579073                 | 0.128579073                    | NA           | 1            | 0           | 0.998207054 |   |
| LINC00964 | ENSG00000249816.6                     | 0.897691698  | 1                           | 1                              | 0.897691698  |              |             |             |   |
|           | Brain_Spinal_cord_cervical_c-1        | 0.897691698  |                             | Brain_Spinal_cord_cervical_c-1 |              |              |             |             |   |
|           | 1                                     | 1            | 1                           | -0.128577845                   | -0.128577845 | -0.128577845 | NA          | 1           | 0 |
|           | 0.998207054                           |              |                             |                                |              |              |             |             |   |
| HSPBAP1   | ENSG00000169087.10                    | 0.897833637  | 3                           | 3                              | 0.457161529  |              |             |             |   |

|                |                                       |              |                                      |              |              |                          |                  |             |
|----------------|---------------------------------------|--------------|--------------------------------------|--------------|--------------|--------------------------|------------------|-------------|
|                | Brain_Nucleus_accumbens_basal_ganglia | 0.489049463  |                                      |              |              |                          |                  |             |
|                | Brain_Anterior_cingulate_cortex_BA24  | 2.664003401  |                                      |              | 0.160221038  |                          |                  |             |
|                |                                       | 0.160221038  | 0.691821452                          | 0.743528904  | 0.720927519  |                          | 0.026460316      |             |
|                |                                       | 3            | 0                                    | 0.998207054  |              |                          |                  |             |
| SH3D21         | ENSG00000214193.10                    | 0.897888163  |                                      | 9            | 8            | 0.20738361               | Brain_Cortex     |             |
|                | Brain_Hippocampus                     | 0.83159843   | 2.191293118                          |              |              | 0.061286009              | 0.241901632      |             |
|                |                                       | -1.260792518 | 0.970248133                          | -0.008683709 |              | 0.784789906              | 8                | 0           |
|                |                                       | 0.998207054  |                                      |              |              |                          |                  |             |
| CDC42SE2       | ENSG00000158985.13                    | 0.897969294  |                                      | 4            | 4            | 0.532556466              |                  |             |
|                | Brain_Putamen_basal_ganglia           | 0.829554865  |                                      |              |              | Brain_Frontal_Cortex_BA9 |                  |             |
|                |                                       | 1.970971959  | 0.322897333                          | 0.322897333  |              | -0.624108296             | 0.409809128      |             |
|                |                                       | -0.046683124 | 0.466922744                          | 4            | 0            | 0.998207054              |                  |             |
| RP11-1109F11.5 | ENSG00000271259.1                     | 0.898050058  |                                      | 1            | 1            | 0.898050058              |                  |             |
|                | Brain_Cerebellum                      | 0.898050058  | Brain_Cerebellum1                    | 1            | 1            | 1                        | -0.128124993     |             |
|                |                                       | -0.128124993 | -0.128124993                         | NA           | 1            | 0                        | 0.998207054      |             |
| PROM2          | ENSG00000155066.15                    | 0.898130014  |                                      | 10           | 5            | 0.381791981              |                  |             |
|                | Brain_Frontal_Cortex_BA9              | 0.9498138    | Brain_Cortex                         | 5.918870503  |              |                          |                  |             |
|                |                                       | 0.014563294  | 0.361626216                          | -0.874599278 |              | 0.233919851              | -0.218705706     |             |
|                |                                       | 0.342350809  | 5                                    | 0            | 0.998207054  |                          |                  |             |
| GSR            | ENSG00000104687.12                    | 0.898130414  |                                      | 6            | 5            | 0.308172238              |                  |             |
|                | Brain_Nucleus_accumbens_basal_ganglia | 0.994260655  | Brain_Caudate_basal_ganglia          |              |              |                          |                  |             |
|                |                                       | 2.731380659  | 0.03562325                           | 0.457141425  |              | -0.274055552             | 1.019064728      |             |
|                |                                       | 0.171519835  | 0.47053032                           | 5            | 0            | 0.998207054              |                  |             |
| ACER3          | ENSG00000078124.11                    | 0.898165239  |                                      | 5            | 5            | 0.418970436              |                  |             |
|                | Brain_Cerebellar_Hemisphere           | 0.849318462  | Brain_Putamen_basal_ganglia          |              |              |                          |                  |             |
|                |                                       | 1.561639066  | 0.608158111                          | 0.608158111  |              | -0.772439275             | 0.808208724      |             |
|                |                                       | -0.217164527 | 0.610054028                          | 5            | 0            | 0.998207054              |                  |             |
| SLC47A2        | ENSG00000180638.17                    | 0.898274794  |                                      | 1            | 1            | 0.898274794              |                  |             |
|                | Brain_Caudate_basal_ganglia           | 0.898274794  | Brain_Caudate_basal_ganglia1         | 1            | 1            |                          |                  |             |
|                |                                       | 1            | -0.127841011                         | -0.127841011 | -0.127841011 | NA                       | 1                | 0           |
|                |                                       | 0.998207054  |                                      |              |              |                          |                  |             |
| SPTBN2         | ENSG00000173898.11                    | 0.898297598  |                                      | 1            | 1            | 0.898297598              |                  |             |
|                | Brain_Hippocampus                     | 0.898297598  | Brain_Hippocampus                    | 1            | 1            | 1                        |                  |             |
|                |                                       | -0.127812196 | -0.127812196                         | -0.127812196 | NA           | 1                        | 0                | 0.998207054 |
| RFX7           | ENSG00000181827.14                    | 0.898313147  |                                      | 2            | 2            | 0.68969665               | Brain_Cerebellum |             |
|                |                                       | 0.839796784  | Brain_Spinal_cord_cervical_c-1       | 1.079521672  |              | 0.920478328              |                  |             |
|                |                                       | 0.920478328  | -0.202153424                         | 0.39926677   | 0.098556673  | 0.425268297              | 2                |             |
|                |                                       | 0            | 0.998207054                          |              |              |                          |                  |             |
| PPP2R1B        | ENSG00000137713.15                    | 0.898331795  |                                      | 12           | 7            | 0.208663423              |                  |             |
|                | Brain_Nucleus_accumbens_basal_ganglia | 0.95885214   | Brain_Cerebellar_Hemisphere          |              |              |                          |                  |             |
|                |                                       | 6.604217758  | 0.011900071                          | 0.266041366  |              | -0.051594076             | 1.257249172      |             |
|                |                                       | 0.558656965  | 0.434252998                          | 7            | 0            | 0.998207054              |                  |             |
| STK10          | ENSG00000072786.12                    | 0.898371918  |                                      | 5            | 4            | 0.429368269              |                  |             |
|                | Brain_Anterior_cingulate_cortex_BA24  | 0.984935662  | Brain_Hippocampus                    |              |              |                          |                  |             |
|                |                                       | 2.036669322  | 0.013579378                          | 0.926723392  |              | -0.790273142             | 0.730885267      |             |
|                |                                       | 0.086229403  | 0.611019104                          | 4            | 0            | 0.998207054              |                  |             |
| IL20RA         | ENSG00000016402.13                    | 0.89837686   |                                      | 7            | 3            | 0.549688612              | Brain_Cerebellum |             |
|                | Brain_Putamen_basal_ganglia           | 6.28298576   | 0.001865876                          |              |              | 0.244083236              |                  |             |
|                |                                       | -0.598226799 | -0.101831465                         | -0.241370319 |              | 0.170750187              | 3                | 0           |
|                |                                       | 0.998207054  |                                      |              |              |                          |                  |             |
| CCL4L2         | ENSG00000276070.4                     | 0.89839546   |                                      | 11           | 2            | 0.714324119              |                  |             |
|                | Brain_Putamen_basal_ganglia           | 0.992293479  | Brain_Hippocampus                    |              |              | 9.486580959              |                  |             |
|                |                                       | 0.000817986  | 0.454684486                          | -0.366054888 |              | 0.178926634              | -0.06267803      |             |
|                |                                       | 0.133036414  | 2                                    | 0            | 0.998207054  |                          |                  |             |
| RP11-7908.1    | ENSG00000271991.1                     | 0.898907855  |                                      | 2            | 2            | 0.653292383              |                  |             |
|                | Brain_Cerebellum                      | 0.874937718  | Brain_Putamen_basal_ganglia          | 1.114510407  |              |                          |                  |             |
|                |                                       | 0.885489593  | 0.885489593                          | 0.157389716  |              | 0.449193074              | 0.303291395      |             |
|                |                                       | 0.206336134  | 2                                    | 0            | 0.998207054  |                          |                  |             |
| PRH1           | ENSG00000231887.6                     | 0.898920901  |                                      | 13           | 2            | 0.665839153              |                  |             |
|                | Brain_Cerebellar_Hemisphere           | 0.983755892  | Brain_Anterior_cingulate_cortex_BA24 |              |              |                          |                  |             |
|                |                                       | 11.9566004   | 0.002486285                          | 0.434546576  |              | -0.431865524             | 0.06283551       |             |
|                |                                       | -0.179962293 | 0.146913402                          | 2            | 0            | 0.998207054              |                  |             |

|               |                                      |                             |                                       |              |              |              |
|---------------|--------------------------------------|-----------------------------|---------------------------------------|--------------|--------------|--------------|
| IFT52         | ENSG00000101052.12                   | 0.898948656                 | 6                                     | 5            | 0.544913673  | Brain_Cortex |
|               | 0.959155296                          | Brain_Caudate_basal_ganglia | 4.088939222                           | 0.009611566  |              |              |
|               | 0.176092616                          | -0.605399365                | 0.379686541                           | -0.089117216 | 0.401884485  |              |
|               | 5                                    | 0                           | 0.998207054                           |              |              |              |
| SPP1          | ENSG00000118785.13                   | 0.898954177                 | 2                                     | 2            | 0.660224671  |              |
|               | Brain_Hypothalamus                   | 0.809369872                 | Brain_Anterior_cingulate_cortex_BA24  |              |              |              |
|               | 1.237899851                          | 0.762100149                 | 0.762100149                           | -0.439602995 | -0.241239018 |              |
|               | -0.340421006                         | 0.140264513                 | 2                                     | 0            | 0.998207054  |              |
| LZTS3         | ENSG00000088899.14                   | 0.898992842                 | 1                                     | 1            | 0.898992842  |              |
|               | Brain_Spinal_cord_cervical_c-1       | 0.898992842                 | Brain_Spinal_cord_cervical_c-1        |              |              |              |
|               | 1                                    | 1                           | 0.12693374                            | 0.12693374   | 0.12693374   | NA           |
|               |                                      |                             |                                       |              |              | 1            |
|               |                                      |                             |                                       |              |              | 0            |
|               |                                      |                             |                                       |              |              | 0.998207054  |
| CCDC157       | ENSG00000187860.10                   | 0.89902621                  | 3                                     | 2            | 0.819298316  |              |
|               | Brain_Frontal_Cortex_BA9             | 0.863225159                 | Brain_Caudate_basal_ganglia           |              |              |              |
|               | 2.500756333                          | 0.024953298                 | 0.474290369                           | -0.172270139 | 0.228447564  |              |
|               | 0.090276175                          | 0.227476396                 | 2                                     | 0            | 0.998207054  |              |
| NETO2         | ENSG00000171208.9                    | 0.89903949                  | 2                                     | 2            | 0.652296782  | Brain_Cortex |
|               | 0.918442013                          | Brain_Cerebellar_Hemisphere | 1.007107724                           | 0.992892276  |              |              |
|               | 0.992892276                          | -0.450573761                | -0.102396435                          | -0.276485098 | 0.246198548  |              |
|               | 2                                    | 0                           | 0.998207054                           |              |              |              |
| RTN4IP1       | ENSG00000130347.12                   | 0.899073203                 | 1                                     | 1            | 0.899073203  |              |
|               | Brain_Anterior_cingulate_cortex_BA24 | 0.899073203                 |                                       |              |              |              |
|               | Brain_Anterior_cingulate_cortex_BA24 | 1                           | 1                                     | 1            | 0.126832209  |              |
|               | 0.126832209                          | 0.126832209                 | NA                                    | 1            | 0            | 0.998207054  |
| ZFP2          | ENSG00000198939.7                    | 0.899253769                 | 4                                     | 4            | 0.499780069  |              |
|               | Brain_Spinal_cord_cervical_c-1       | 0.966061415                 | Brain_Cerebellum                      | 1.807268675  |              |              |
|               | 0.268081403                          | 0.268081403                 | -0.674835837                          | 0.653702934  | -0.093735602 |              |
|               | 0.579222341                          | 4                           | 0                                     | 0.998207054  |              |              |
| AHCY          | ENSG00000101444.12                   | 0.899261001                 | 3                                     | 3            | 0.476294817  |              |
|               | Brain_Caudate_basal_ganglia          | 0.909123057                 | Brain_Hypothalamus                    | 1.547951878  |              |              |
|               | 0.523889476                          | 0.523889476                 | -0.712274492                          | 0.202867877  | -0.207850451 |              |
|               | 0.464711695                          | 3                           | 0                                     | 0.998207054  |              |              |
| RCAN3         | ENSG00000117602.11                   | 0.899276497                 | 1                                     | 1            | 0.899276497  |              |
|               | Brain_Substantia_nigra               | 0.899276497                 | Brain_Substantia_nigra                | 1            | 1            |              |
|               | 1                                    | -0.126575364                | -0.126575364                          | -0.126575364 | NA           | 1            |
|               |                                      |                             |                                       |              |              | 0            |
|               |                                      |                             |                                       |              |              | 0.998207054  |
| CDK5          | ENSG00000164885.12                   | 0.899373185                 | 2                                     | 2            | 0.667792158  |              |
|               | Brain_Spinal_cord_cervical_c-1       | 0.936918925                 | Brain_Hypothalamus                    |              |              |              |
|               | 1.197267127                          | 0.802732873                 | 0.802732873                           | -0.429180108 | 0.079142945  |              |
|               | -0.175018581                         | 0.359438678                 | 2                                     | 0            | 0.998207054  |              |
| CTA-25406.1   | ENSG00000261462.1                    | 0.899387095                 | 2                                     | 2            | 0.65201246   |              |
|               | Brain_Caudate_basal_ganglia          | 0.878617684                 | Brain_Nucleus_accumbens_basal_ganglia |              |              |              |
|               | 1.515942346                          | 0.484057654                 | 0.484057654                           | 0.15272178   | 0.450968211  |              |
|               | 0.301844996                          | 0.210892074                 | 2                                     | 0            | 0.998207054  |              |
| NSFL1C        | ENSG00000088833.17                   | 0.899492948                 | 3                                     | 2            | 0.660619141  |              |
|               | Brain_Cerebellum                     | 0.869168158                 | Brain_Caudate_basal_ganglia           | 2.006705509  |              |              |
|               | 4.59E-32                             | 0.993294491                 | -0.43905851                           | -0.164715193 | -0.347325526 |              |
|               | 0.158145767                          | 2                           | 0                                     | 0.998207054  |              |              |
| WDR47         | ENSG00000085433.15                   | 0.899541863                 | 2                                     | 2            | 0.667682399  |              |
|               | Brain_Cerebellar_Hemisphere          | 0.84662482                  | Brain_Caudate_basal_ganglia           | 1.065711226  |              |              |
|               | 0.934288774                          | 0.934288774                 | -0.429330947                          | 0.193426683  | -0.117952132 |              |
|               | 0.440356143                          | 2                           | 0                                     | 0.998207054  |              |              |
| DZIP1L        | ENSG00000158163.14                   | 0.899582655                 | 4                                     | 3            | 0.472573846  |              |
|               | Brain_Cerebellum                     | 0.763504264                 | Brain_Frontal_Cortex_BA9              | 2.826587794  |              |              |
|               | 0.091408908                          | 0.231043752                 | 0.300882278                           | 0.718297541  | 0.556900359  |              |
|               | 0.193064004                          | 3                           | 0                                     | 0.998207054  |              |              |
| RP11-121G22.3 | ENSG00000257467.5                    | 0.899645812                 | 2                                     | 2            | 0.649457714  |              |
|               | Brain_Putamen_basal_ganglia          | 0.956368865                 | Brain_Frontal_Cortex_BA9              | 1.2690617    |              |              |
|               | 0.7309383                            | 0.7309383                   | -0.454515673                          | -0.0547108   | -0.254613236 | 0.282704737  |
|               | 2                                    | 0                           | 0.998207054                           |              |              |              |
| KLHDC8A       | ENSG00000162873.14                   | 0.89967921                  | 4                                     | 4            | 0.407170521  |              |
|               | Brain_Caudate_basal_ganglia          | 0.955885847                 | Brain_Nucleus_accumbens_basal_ganglia |              |              |              |
|               | 2.36220105                           | 0.202469632                 | 0.202469632                           | 0.05531709   | 0.828883168  |              |

|               |                                       |                                       |                                      |              |                                       |                    |              |             |
|---------------|---------------------------------------|---------------------------------------|--------------------------------------|--------------|---------------------------------------|--------------------|--------------|-------------|
|               | 0.489576509                           | 0.336346321                           | 4                                    | 0            | 0.998207054                           |                    |              |             |
| RNPEPL1       | ENSG00000142327.12                    | 0.900027108                           | 2                                    | 2            | 0.766028332                           |                    |              |             |
|               | Brain_Cerebellum                      | 0.775891644                           |                                      |              | Brain_Nucleus_accumbens_basal_ganglia |                    |              |             |
|               | 1.195084692                           | 0.804915308                           | 0.804915308                          | -0.284676959 | 0.297573985                           |                    |              |             |
|               | 0.006448513                           | 0.411713591                           | 2                                    | 0            | 0.998207054                           |                    |              |             |
| EOMES         | ENSG00000163508.12                    | 0.90005347                            | 2                                    | 2            | 0.670394299                           | Brain_Hypothalamus |              |             |
|               | 0.838336559                           | Brain_Cerebellum                      | 1.077285134                          | 0.922714866  | 0.922714866                           |                    |              |             |
|               | 0.204021678                           | 0.425606917                           | 0.314814297                          | 0.156684425  | 2                                     | 0                  |              |             |
|               | 0.998207054                           |                                       |                                      |              |                                       |                    |              |             |
| RP11-587H10.2 | ENSG00000253634.1                     | 0.900091748                           | 1                                    | 1            | 0.900091748                           |                    |              |             |
|               | Brain_Cerebellum                      | 0.900091748                           | Brain_Cerebellum                     | 1            | 1                                     | 1                  | -0.125545447 |             |
|               | -0.125545447                          | -0.125545447                          | NA                                   | 1            | 0                                     | 0.998207054        |              |             |
| ERCC6L2       | ENSG00000182150.15                    | 0.90018848                            | 7                                    | 4            | 0.410734698                           | Brain_Cortex       |              |             |
|               | 0.846084416                           | Brain_Cerebellar_Hemisphere           | 5.479664452                          | 0.007002512  |                                       |                    |              |             |
|               | 0.339103661                           | 0.194116814                           | 0.822601408                          | 0.593673232  | 0.262044188                           |                    |              |             |
|               | 4                                     | 0                                     | 0.998207054                          |              |                                       |                    |              |             |
| TCOF1         | ENSG00000070814.17                    | 0.900251794                           | 1                                    | 1            | 0.900251794                           | Brain_Cerebellum   |              |             |
|               | 0.900251794                           | Brain_Cerebellum                      | 1                                    | 1            | 1                                     | 0.125343274        | 0.125343274  |             |
|               | 0.125343274                           | NA                                    | 1                                    | 0            | 0.998207054                           |                    |              |             |
| WDYHV1        | ENSG00000156795.6                     | 0.900401113                           | 13                                   | 1            | 0.611284962                           |                    |              |             |
|               | Brain_Spinal_cord_cervical_c-1        | 0.998209212                           | Brain_Frontal_Cortex_BA9             |              |                                       |                    |              |             |
|               | 12.30614648                           | 0.000120831                           | 12.30614648                          | -0.508240114 | 0.066816462                           |                    |              |             |
|               | -0.124137698                          | 0.156370786                           | 1                                    | 0            | 0.998207054                           |                    |              |             |
| TLCD2         | ENSG00000185561.9                     | 0.900413966                           | 6                                    | 2            | 0.511318345                           |                    |              |             |
|               | Brain_Nucleus_accumbens_basal_ganglia | 0.760353377                           | Brain_Cerebellum                     |              |                                       |                    |              |             |
|               | 5.178379417                           | 0.034057855                           | 0.569633529                          | -0.656786284 | -0.305016774                          |                    |              |             |
|               | -0.420832951                          | 0.127794748                           | 2                                    | 0            | 0.998207054                           |                    |              |             |
| KCNN1         | ENSG00000105642.15                    | 0.900444345                           | 1                                    | 1            | 0.900444345                           |                    |              |             |
|               | Brain_Hippocampus                     | 0.900444345                           | Brain_Hippocampus                    | 1            | 1                                     | 1                  |              |             |
|               | -0.125100048                          | -0.125100048                          | -0.125100048                         | NA           | 1                                     | 0                  | 0.998207054  |             |
| GCA           | ENSG00000115271.10                    | 0.900452432                           | 2                                    | 2            | 0.667814203                           |                    |              |             |
|               | Brain_Caudate_basal_ganglia           | 0.882273246                           | Brain_Cerebellar_Hemisphere          |              |                                       |                    |              |             |
|               | 1.027227797                           | 0.972772203                           | 0.972772203                          | -0.429149814 | -0.148088093                          |                    |              |             |
|               | -0.288618953                          | 0.198740649                           | 2                                    | 0            | 0.998207054                           |                    |              |             |
| RP11-775C24.3 | ENSG00000260619.1                     | 0.900569159                           | 1                                    | 1            | 0.900569159                           |                    |              |             |
|               | Brain_Cerebellum                      | 0.900569159                           | Brain_Cerebellum                     | 1            | 1                                     | 1                  | 0.12494239   |             |
|               | 0.12494239                            | 0.12494239                            | NA                                   | 1            | 0                                     | 0.998207054        |              |             |
| ANO3          | ENSG00000134343.12                    | 0.900593757                           | 1                                    | 1            | 0.900593757                           |                    |              |             |
|               | Brain_Putamen_basal_ganglia           | 0.900593757                           | Brain_Putamen_basal_ganglia          | 1            | 1                                     |                    |              |             |
|               | 1                                     | 0.12491132                            | 0.12491132                           | 0.12491132   | NA                                    | 1                  | 0            | 0.998207054 |
| AC138647.1    | ENSG00000226490.1                     | 0.900693204                           | 2                                    | 1            | 0.785946834                           |                    |              |             |
|               | Brain_Putamen_basal_ganglia           | 0.981149882                           | Brain_Caudate_basal_ganglia          |              |                                       |                    |              |             |
|               | 1.974101609                           | 0.025898391                           | 1.974101609                          | -0.271577588 | 0.023627317                           |                    |              |             |
|               | -0.123975135                          | 0.208741391                           | 1                                    | 0            | 0.998207054                           |                    |              |             |
| PLD6          | ENSG00000179598.5                     | 0.900771014                           | 3                                    | 3            | 0.523643679                           | Brain_Cortex       |              |             |
|               | 0.876309923                           | Brain_Cerebellum                      | 1.952463445                          | 0.113245864  | 0.113245864                           |                    |              |             |
|               | -0.637738869                          | -0.155648716                          | -0.376919229                         | 0.243466279  | 3                                     | 0                  |              |             |
|               | 0.998207054                           |                                       |                                      |              |                                       |                    |              |             |
| TDRP          | ENSG00000180190.11                    | 0.900863915                           | 3                                    | 3            | 0.484692947                           | Brain_Cerebellum   |              |             |
|               | 0.82639155                            | Brain_Putamen_basal_ganglia           | 1.360715705                          | 0.62454927   | 0.62454927                            |                    |              |             |
|               | -0.342385439                          | 0.698774531                           | 0.191906982                          | 0.521121496  | 3                                     | 0                  |              |             |
|               | 0.998207054                           |                                       |                                      |              |                                       |                    |              |             |
| LINC01918     | ENSG00000226508.1                     | 0.901010608                           | 1                                    | 1            | 0.901010608                           |                    |              |             |
|               | Brain_Caudate_basal_ganglia           | 0.901010608                           | Brain_Caudate_basal_ganglia          | 1            | 1                                     |                    |              |             |
|               | 1                                     | -0.1243848                            | -0.1243848                           | -0.1243848   | NA                                    | 1                  | 0            | 0.998207054 |
| MTF1          | ENSG00000188786.9                     | 0.901023822                           | 3                                    | 3            | 0.47398862                            | Brain_Cerebellum   |              |             |
|               | 0.817114514                           | Brain_Nucleus_accumbens_basal_ganglia | 1.276920367                          |              |                                       |                    |              |             |
|               | 0.721501203                           | 0.721501203                           | -0.231257819                         | 0.716004419  | 0.272532023                           |                    |              |             |
|               | 0.476502972                           | 3                                     | 0                                    | 0.998207054  |                                       |                    |              |             |
| RBPMS2        | ENSG00000166831.8                     | 0.901032601                           | 3                                    | 2            | 0.649118018                           |                    |              |             |
|               | Brain_Cortex                          | 0.728512845                           | Brain_Anterior_cingulate_cortex_BA24 |              |                                       |                    |              |             |
|               | 2.777672781                           | 0.065468991                           | 0.156858228                          | -0.454987798 | -0.347104457                          |                    |              |             |

|              |                                      |                             |             |                                       |              |             |                  |              |  |
|--------------|--------------------------------------|-----------------------------|-------------|---------------------------------------|--------------|-------------|------------------|--------------|--|
|              | -0.390065628                         | 0.05719631                  | 2           | 0                                     | 0.998207054  |             |                  |              |  |
| RP5-1025A1.3 | ENSG00000275358.1                    |                             |             | 0.901036764                           | 12           | 8           | 0.168305493      |              |  |
|              | Brain_Amygdala                       | 0.955482134                 |             | Brain_Cerebellar_Hemisphere           | 5.905200019  |             |                  |              |  |
|              | 0.032491823                          | 0.228102185                 |             | -1.377669044                          | 0.526775371  |             | -0.238702975     |              |  |
|              | 0.581133235                          | 8                           | 0           | 0.998207054                           |              |             |                  |              |  |
| DDX58        | ENSG00000107201.9                    | 0.901222093                 | 2           | 2                                     | 0.691427716  |             |                  |              |  |
|              | Brain_Cerebellar_Hemisphere          | 0.708823457                 |             | Brain_Cerebellum                      | 1.429829758  |             |                  |              |  |
|              | 0.570170242                          | 0.570170242                 |             | -0.39691829                           | -0.373436689 |             | -0.38517749      |              |  |
|              | 0.016603999                          | 2                           | 0           | 0.998207054                           |              |             |                  |              |  |
| STXBP4       | ENSG00000166263.13                   | 0.901254809                 | 6           | 4                                     | 0.601374333  |             |                  |              |  |
|              | Brain_Cerebellum                     | 0.987008192                 |             | Brain_Putamen_basal_ganglia           | 4.563708962  |             |                  |              |  |
|              | 0.030112177                          | 0.171677076                 |             | -0.522425173                          | 0.39438899   |             | -0.05585712      |              |  |
|              | 0.312919211                          | 4                           | 0           | 0.998207054                           |              |             |                  |              |  |
| MMP11        | ENSG00000099953.9                    | 0.901304131                 | 2           | 2                                     | 0.652695768  |             | Brain_Cerebellum |              |  |
|              | 0.833837362                          | Brain_Cerebellar_Hemisphere | 1.596130538 | 0.403869462                           |              |             |                  |              |  |
|              | 0.403869462                          | 0.20978259                  | 0.450020349 | 0.32990147                            | 0.169873748  | 2           | 0                |              |  |
|              | 0.998207054                          |                             |             |                                       |              |             |                  |              |  |
| GZMM         | ENSG00000197540.7                    | 0.901371593                 | 2           | 2                                     | 0.682673066  |             |                  |              |  |
|              | Brain_Cerebellar_Hemisphere          | 0.785592252                 |             | Brain_Cerebellum                      | 1.889999389  |             |                  |              |  |
|              | 0.110000611                          | 0.110000611                 |             | -0.408818223                          | -0.272038714 |             | -0.340428468     |              |  |
|              | 0.096717719                          | 2                           | 0           | 0.998207054                           |              |             |                  |              |  |
| ANKMY1       | ENSG00000144504.15                   | 0.901549418                 | 10          | 3                                     | 0.539804394  |             |                  |              |  |
|              | Brain_Hypothalamus                   | 0.987743414                 |             | Brain_Substantia_nigra                | 8.935253241  |             |                  |              |  |
|              | 2.55E-17                             | 0.317209482                 |             | 0.015361957                           | 0.613108812  |             | 0.283770937      |              |  |
|              | 0.191818312                          | 3                           | 0           | 0.998207054                           |              |             |                  |              |  |
| S100A7       | ENSG00000143556.8                    | 0.901602839                 | 1           | 1                                     | 0.901602839  |             |                  |              |  |
|              | Brain_Cerebellum                     | 0.901602839                 |             | Brain_Cerebellum                      | 1            | 1           | 1                | -0.123636818 |  |
|              | -0.123636818                         | -0.123636818                | NA          | 1                                     | 0            | 0.998207054 |                  |              |  |
| ZNF707       | ENSG00000181135.15                   | 0.901629086                 | 4           | 4                                     | 0.486518873  |             |                  |              |  |
|              | Brain_Caudate_basal_ganglia          | 0.912503476                 |             | Brain_Nucleus_accumbens_basal_ganglia |              |             |                  |              |  |
|              | 1.98430635                           | 0.284982823                 | 0.284982823 | -0.1791392                            | 0.695856227  |             |                  |              |  |
|              | 0.274515816                          | 0.38696428                  | 4           | 0                                     | 0.998207054  |             |                  |              |  |
| DNTTIP1      | ENSG00000101457.12                   | 0.901667752                 | 3           | 3                                     | 0.591919784  |             |                  |              |  |
|              | Brain_Cortex                         | 0.832248608                 |             | Brain_Cerebellar_Hemisphere           | 2.512194223  |             |                  |              |  |
|              | 0.123201019                          | 0.123201019                 |             | 0.211818535                           | 0.536056093  |             | 0.332160281      |              |  |
|              | 0.177534391                          | 3                           | 0           | 0.998207054                           |              |             |                  |              |  |
| PRDX1        | ENSG00000117450.13                   | 0.901717259                 | 4           | 4                                     | 0.342971528  |             |                  |              |  |
|              | Brain_Hippocampus                    | 0.929160166                 |             | Brain_Amygdala                        | 1.208256731  |             |                  |              |  |
|              | 0.763643495                          | 0.763643495                 |             | -0.948310262                          | 0.475928307  |             | -0.203506339     |              |  |
|              | 0.586493171                          | 4                           | 0           | 0.998207054                           |              |             |                  |              |  |
| DPYS         | ENSG00000147647.12                   | 0.901722282                 | 1           | 1                                     | 0.901722282  |             | Brain_Cortex     |              |  |
|              | 0.901722282                          | Brain_Cortex                | 1           | 1                                     | 1            | 0.123485972 | 0.123485972      |              |  |
|              | 0.123485972                          | NA                          | 1           | 0                                     | 0.998207054  |             |                  |              |  |
| C6orf226     | ENSG00000221821.3                    | 0.901911143                 | 3           | 2                                     | 0.744315667  |             |                  |              |  |
|              | Brain_Cortex                         | 0.97842002                  |             | Brain_Nucleus_accumbens_basal_ganglia | 2.38504428   |             |                  |              |  |
|              | 0.01247066                           | 0.602485061                 |             | -0.282601732                          | 0.326143658  |             | 0.005497378      |              |  |
|              | 0.305675034                          | 2                           | 0           | 0.998207054                           |              |             |                  |              |  |
| FAM149B1     | ENSG00000138286.14                   | 0.902079281                 | 2           | 2                                     | 0.684041965  |             |                  |              |  |
|              | Brain_Putamen_basal_ganglia          | 0.732163032                 |             | Brain_Cerebellar_Hemisphere           |              |             |                  |              |  |
|              | 1.384541686                          | 0.615458314                 | 0.615458314 | 0.342249638                           | 0.40695374   |             |                  |              |  |
|              | 0.374601689                          | 0.045752709                 | 2           | 0                                     | 0.998207054  |             |                  |              |  |
| CFAP52       | ENSG00000166596.14                   | 0.902131665                 | 1           | 1                                     | 0.902131665  |             |                  |              |  |
|              | Brain_Cortex                         | 0.902131665                 |             | Brain_Cortex                          | 1            | 1           | 1                | 0.122968976  |  |
|              | 0.122968976                          | 0.122968976                 | NA          | 1                                     | 0            | 0.998207054 |                  |              |  |
| BBS10        | ENSG00000179941.6                    | 0.902280491                 | 4           | 4                                     | 0.375479744  |             |                  |              |  |
|              | Brain_Frontal_Cortex_BA9             | 0.829937749                 |             | Brain_Hypothalamus                    | 2.065592833  |             |                  |              |  |
|              | 0.119264746                          | 0.119264746                 |             | -0.214781408                          | 0.88625572   | 0.549238958 |                  |              |  |
|              | 0.51287992                           | 4                           | 0           | 0.998207054                           |              |             |                  |              |  |
| MCU          | ENSG00000156026.14                   | 0.90228426                  | 4           | 3                                     | 0.458096013  |             |                  |              |  |
|              | Brain_Anterior_cingulate_cortex_BA24 | 0.946805949                 |             | Brain_Cerebellum                      |              |             |                  |              |  |
|              | 2.041562072                          | 0.024691701                 | 0.933003336 | -0.741985679                          | 0.066718321  |             |                  |              |  |
|              | -0.217715591                         | 0.358014318                 | 3           | 0                                     | 0.998207054  |             |                  |              |  |

|         |                                       |                             |              |              |                                       |             |   |                  |   |
|---------|---------------------------------------|-----------------------------|--------------|--------------|---------------------------------------|-------------|---|------------------|---|
| ATP6V0B | ENSG00000117410.13                    | 0.902327312                 | 1            | 1            | 0.902327312                           |             |   |                  |   |
|         | Brain_Frontal_Cortex_BA9              | 0.902327312                 |              |              | Brain_Frontal_Cortex_BA9              | 1           | 1 |                  |   |
|         | 1                                     | -0.122721911                | -0.122721911 | -0.122721911 | NA                                    | 1           | 0 |                  |   |
|         | 0.998207054                           |                             |              |              |                                       |             |   |                  |   |
| APBB2   | ENSG00000163697.16                    | 0.902391259                 | 3            | 3            | 0.574518147                           |             |   | Brain_Cerebellum |   |
|         | 0.773639785                           | Brain_Amygdala              | 1.243110959  |              | 0.753512409                           |             |   | 0.753512409      |   |
|         | -0.561409884                          | -0.28761719                 | -0.468706981 |              | 0.156843206                           |             |   | 3                | 0 |
|         | 0.998207054                           |                             |              |              |                                       |             |   |                  |   |
| CDC34   | ENSG00000099804.8                     | 0.902480939                 | 2            | 2            | 0.6517613                             |             |   | Brain_Cerebellum |   |
|         | 0.664808508                           | Brain_Cerebellar_Hemisphere | 1.927703247  |              | 0.072296753                           |             |   |                  |   |
|         | 0.072296753                           | -0.451316714                | -0.433283934 |              | -0.442300324                          |             |   | 0.012751101      |   |
|         | 2                                     | 0                           | 0.998207054  |              |                                       |             |   |                  |   |
| GLUD1   | ENSG00000148672.8                     | 0.902586104                 | 2            | 2            | 0.659839334                           |             |   |                  |   |
|         | Brain_Caudate_basal_ganglia           | 0.823307351                 |              |              | Brain_Cerebellar_Hemisphere           |             |   |                  |   |
|         | 1.275532165                           | 0.724467835                 | 0.724467835  |              | 0.22329316                            | 0.440135    |   | 0.33171408       |   |
|         | 0.153330336                           | 2                           | 0            | 0.998207054  |                                       |             |   |                  |   |
| GTF2H2  | ENSG00000145736.14                    | 0.902623507                 | 12           | 7            | 0.204978292                           |             |   |                  |   |
|         | Brain_Cerebellar_Hemisphere           | 0.998097923                 |              |              | Brain_Hippocampus                     |             |   | 6.095707433      |   |
|         | 1.31E-17                              | 0.329797638                 | -1.267495164 |              | 0.002383902                           |             |   | -0.505451889     |   |
|         | 0.394208634                           | 7                           | 0            | 0.998207054  |                                       |             |   |                  |   |
| MVB12B  | ENSG00000196814.14                    | 0.902641175                 | 2            | 2            | 0.682329441                           |             |   |                  |   |
|         | Brain_Cerebellum                      | 0.877741593                 |              |              | Brain_Nucleus_accumbens_basal_ganglia |             |   |                  |   |
|         | 1.708882447                           | 0.291117553                 | 0.291117553  |              | 0.153832772                           |             |   | 0.409286473      |   |
|         | 0.281559623                           | 0.180633044                 | 2            | 0            | 0.998207054                           |             |   |                  |   |
| ZNF221  | ENSG00000159905.14                    | 0.902858522                 | 5            | 5            | 0.471651971                           |             |   |                  |   |
|         | Brain_Anterior_cingulate_cortex_BA24  | 0.886035276                 |              |              | Brain_Cortex                          |             |   |                  |   |
|         | 2.173803067                           | 0.341548357                 | 0.341548357  |              | -0.719793787                          |             |   | 0.403357444      |   |
|         | -0.038945549                          | 0.442771974                 | 5            | 0            | 0.998207054                           |             |   |                  |   |
| HOMER1  | ENSG00000152413.14                    | 0.902991188                 | 1            | 1            | 0.902991188                           |             |   |                  |   |
|         | Brain_Nucleus_accumbens_basal_ganglia | 0.902991188                 |              |              |                                       |             |   |                  |   |
|         | Brain_Nucleus_accumbens_basal_ganglia | 1                           | 1            | 1            | 0.12188362                            |             |   | 0.12188362       |   |
|         | 0.12188362                            | NA                          | 1            | 0            | 0.998207054                           |             |   |                  |   |
| WASHC5  | ENSG00000164961.15                    | 0.903224828                 | 1            | 1            | 0.903224828                           |             |   |                  |   |
|         | Brain_Frontal_Cortex_BA9              | 0.903224828                 |              |              | Brain_Frontal_Cortex_BA9              | 1           | 1 |                  |   |
|         | 1                                     | -0.121588618                | -0.121588618 | -0.121588618 | NA                                    | 1           | 0 |                  |   |
|         | 0.998207054                           |                             |              |              |                                       |             |   |                  |   |
| PM20D1  | ENSG00000162877.12                    | 0.903260423                 | 12           | 2            | 0.367124978                           |             |   |                  |   |
|         | Brain_Caudate_basal_ganglia           | 0.958180512                 |              |              | Brain_Cerebellar_Hemisphere           |             |   |                  |   |
|         | 10.28969706                           | 0.002999884                 | 1.052877075  |              | -0.19486864                           |             |   | 0.901871791      |   |
|         | 0.37461923                            | 0.314228262                 | 2            | 0            | 0.998207054                           |             |   |                  |   |
| TUSC3   | ENSG00000104723.20                    | 0.903271301                 | 4            | 4            | 0.328161577                           |             |   |                  |   |
|         | Brain_Cerebellar_Hemisphere           | 0.996419132                 |              |              | Brain_Hippocampus                     |             |   | 1.223103429      |   |
|         | 0.800812111                           | 0.800812111                 | -0.977823599 |              | 0.05502422                            |             |   | -0.34851839      |   |
|         | 0.480005518                           | 4                           | 0            | 0.998207054  |                                       |             |   |                  |   |
| EIF3J   | ENSG00000104131.12                    | 0.903380386                 | 1            | 1            | 0.903380386                           |             |   |                  |   |
|         | Brain_Anterior_cingulate_cortex_BA24  | 0.903380386                 |              |              |                                       |             |   |                  |   |
|         | Brain_Anterior_cingulate_cortex_BA24  | 1                           | 1            | 1            | -0.121392211                          |             |   |                  |   |
|         | -0.121392211                          | -0.121392211                | NA           | 1            | 0                                     | 0.998207054 |   |                  |   |
| PNMT    | ENSG00000141744.3                     | 0.903421669                 | 2            | 2            | 0.660661969                           |             |   |                  |   |
|         | Brain_Cerebellar_Hemisphere           | 0.865340848                 |              |              | Brain_Anterior_cingulate_cortex_BA24  |             |   |                  |   |
|         | 1.156731257                           | 0.843268743                 | 0.843268743  |              | -0.438999403                          |             |   | -0.169579498     |   |
|         | -0.30428945                           | 0.190508642                 | 2            | 0            | 0.998207054                           |             |   |                  |   |
| ZNF347  | ENSG00000197937.12                    | 0.903424791                 | 10           | 10           | 0.175604047                           |             |   |                  |   |
|         | Brain_Cerebellar_Hemisphere           | 0.998051939                 |              |              | Brain_Caudate_basal_ganglia           |             |   |                  |   |
|         | 3.590013886                           | 0.266001503                 | 0.266001503  |              | -1.354414898                          |             |   | 0.529112108      |   |
|         | -0.399894649                          | 0.646506674                 | 10           | 0            | 0.998207054                           |             |   |                  |   |
| ATOH7   | ENSG00000179774.8                     | 0.903503126                 | 2            | 2            | 0.686882499                           |             |   |                  |   |
|         | Brain_Cerebellar_Hemisphere           | 0.818394647                 |              |              | Brain_Cerebellum                      | 1.07183882  |   | 0.92816118       |   |
|         | 0.92816118                            | -0.403089345                | -0.229610243 |              | -0.316349794                          |             |   | 0.122668249      | 2 |
|         | 0                                     | 0.998207054                 |              |              |                                       |             |   |                  |   |
| SHPRH   | ENSG00000146414.15                    | 0.903561494                 | 1            | 1            | 0.903561494                           |             |   | Brain_Cerebellum |   |
|         | 0.903561494                           | Brain_Cerebellum            | 1            | 1            | 1                                     | 0.121163551 |   | 0.121163551      |   |



|              |                                       |                             |              |              |                             |                |   |   |              |
|--------------|---------------------------------------|-----------------------------|--------------|--------------|-----------------------------|----------------|---|---|--------------|
|              | 0.121163551                           | NA                          | 1            | 0            | 0.998207054                 |                |   |   |              |
| GRHL3        | ENSG00000158055.15                    | 0.903681377                 | 1            | 1            | 0.903681377                 |                |   |   |              |
|              | Brain_Caudate_basal_ganglia           | 0.903681377                 |              |              | Brain_Caudate_basal_ganglia | 1              | 1 |   |              |
|              | 1                                     | -0.121012194                | -0.121012194 | -0.121012194 | NA                          | 1              | 0 |   |              |
|              | 0.998207054                           |                             |              |              |                             |                |   |   |              |
| RP11-452L6.1 | ENSG00000261474.1                     | 0.90389869                  | 2            | 2            | 0.684840066                 |                |   |   |              |
|              | Brain_Hippocampus                     | 0.922243277                 |              |              | Brain_Cortex                | 1.223604719    |   |   |              |
|              | 0.776395281                           | 0.776395281                 | -0.405867355 | -0.097608371 | -0.251737863                |                |   |   |              |
|              | 0.217972018                           | 2                           | 0            | 0.998207054  |                             |                |   |   |              |
| LINC01844    | ENSG00000236714.1                     | 0.903947118                 | 1            | 1            | 0.903947118                 |                |   |   |              |
|              | Brain_Substantia_nigra                | 0.903947118                 |              |              | Brain_Substantia_nigra      | 1              | 1 |   |              |
|              | 1                                     | -0.120676696                | -0.120676696 | -0.120676696 | NA                          | 1              | 0 |   |              |
|              | 0.998207054                           |                             |              |              |                             |                |   |   |              |
| ZNF189       | ENSG00000136870.10                    | 0.903960856                 | 10           | 4            | 0.368669577                 |                |   |   |              |
|              | Brain_Hypothalamus                    | 0.977860312                 |              |              | Brain_Substantia_nigra      | 8.032650291    |   |   |              |
|              | 0.010859379                           | 0.341149875                 | -0.210882853 | 0.898968241  | 0.299107818                 |                |   |   |              |
|              | 0.305895711                           | 4                           | 0            | 0.998207054  |                             |                |   |   |              |
| TAF11        | ENSG00000064995.16                    | 0.904007846                 | 4            | 4            | 0.570178107                 |                |   |   |              |
|              | Brain_Frontal_Cortex_BA9              | 0.934646768                 |              |              | Brain_Cortex                | 3.177956689    |   |   |              |
|              | 0.167681468                           | 0.167681468                 | 0.081999932  | 0.567789211  | 0.371407147                 |                |   |   |              |
|              | 0.22174771                            | 4                           | 0            | 0.998207054  |                             |                |   |   |              |
| LINC01930    | ENSG00000269998.1                     | 0.904010397                 | 1            | 1            | 0.904010397                 |                |   |   |              |
|              | Brain_Putamen_basal_ganglia           | 0.904010397                 |              |              | Brain_Putamen_basal_ganglia | 1              | 1 |   |              |
|              | 1                                     | 0.120596809                 | 0.120596809  | 0.120596809  | NA                          | 1              | 0 |   |              |
|              | 0.998207054                           |                             |              |              |                             |                |   |   |              |
| PSRC1        | ENSG00000134222.16                    | 0.904039584                 | 9            | 7            | 0.188521606                 |                |   |   |              |
|              | Brain_Cerebellar_Hemisphere           | 0.972583408                 |              |              | Brain_Hypothalamus          | 4.593035313    |   |   |              |
|              | 0.018736348                           | 0.328101711                 | -0.573649916 | 1.314965177  | 0.477863742                 |                |   |   |              |
|              | 0.583875547                           | 7                           | 0            | 0.998207054  |                             |                |   |   |              |
| CCDC152      | ENSG00000198865.9                     | 0.904174541                 | 3            | 3            | 0.519654706                 |                |   |   |              |
|              | Brain_Cerebellar_Hemisphere           | 0.866880228                 |              |              | Brain_Hypothalamus          | 1.611198333    |   |   |              |
|              | 0.402133493                           | 0.402133493                 | -0.643877758 | 0.311146587  | -0.166784574                |                |   |   |              |
|              | 0.477512724                           | 3                           | 0            | 0.998207054  |                             |                |   |   |              |
| RPAP1        | ENSG00000103932.11                    | 0.904203171                 | 13           | 3            | 0.3662209                   | Brain_Cortex   |   |   |              |
|              | 0.929831129                           | Brain_Putamen_basal_ganglia | 11.51088395  | 0.004004266  |                             |                |   |   |              |
|              | 0.447786271                           | -0.903574817                | -0.088057306 | -0.651011512 | 0.243554684                 |                |   |   |              |
|              | 3                                     | 0                           | 0.998207054  |              |                             |                |   |   |              |
| LY6H         | ENSG00000176956.12                    | 0.904217868                 | 5            | 5            | 0.241406692                 | Brain_Cortex   |   |   |              |
|              | 0.82010645                            | Brain_Frontal_Cortex_BA9    | 1.212449266  | 0.720148896  |                             |                |   |   |              |
|              | 0.720148896                           | -0.273595249                | 1.171478009  | 0.238138571  | 0.58527856                  | 5              |   |   |              |
|              | 0                                     | 0.998207054                 |              |              |                             |                |   |   |              |
| EBF1         | ENSG00000164330.16                    | 0.904237273                 | 1            | 1            | 0.904237273                 |                |   |   |              |
|              | Brain_Nucleus_accumbens_basal_ganglia | 0.904237273                 |              |              |                             |                |   |   |              |
|              | Brain_Nucleus_accumbens_basal_ganglia | 1                           | 1            | 1            | 0.120310391                 |                |   |   |              |
|              | 0.120310391                           | 0.120310391                 | NA           | 1            | 0                           | 0.998207054    |   |   |              |
| RBP4         | ENSG00000138207.13                    | 0.904251946                 | 5            | 4            | 0.640125565                 |                |   |   |              |
|              | Brain_Frontal_Cortex_BA9              | 0.854759961                 |              |              | Brain_Putamen_basal_ganglia | 2.35850425     |   |   |              |
|              | 0.001396481                           | 0.539702903                 | -0.467523246 | 0.417130596  | -0.007672604                |                |   |   |              |
|              | 0.386457909                           | 4                           | 0            | 0.998207054  |                             |                |   |   |              |
| TOPORS       | ENSG00000197579.7                     | 0.904591632                 | 1            | 1            | 0.904591632                 |                |   |   |              |
|              | Brain_Amygdala                        | 0.904591632                 |              |              | Brain_Amygdala              | 1              | 1 | 1 | -0.119863054 |
|              | -0.119863054                          | -0.119863054                | NA           | 1            | 0                           | 0.998207054    |   |   |              |
| KCNRG        | ENSG00000198553.8                     | 0.904604976                 | 2            | 2            | 0.903427611                 |                |   |   |              |
|              | Brain_Cerebellar_Hemisphere           | 0.962215895                 |              |              | Brain_Cerebellum            | 1.928522807    |   |   |              |
|              | 0.071477193                           | 0.071477193                 | -0.121332585 | 0.047373067  | -0.036979759                |                |   |   |              |
|              | 0.119292911                           | 2                           | 0            | 0.998207054  |                             |                |   |   |              |
| COL19A1      | ENSG00000082293.12                    | 0.904698957                 | 2            | 2            | 0.707228768                 |                |   |   |              |
|              | Brain_Putamen_basal_ganglia           | 0.82646621                  |              |              | Brain_Cerebellum            | 1.063057694    |   |   |              |
|              | 0.936942306                           | 0.936942306                 | -0.375580529 | 0.219236005  | -0.078172262                |                |   |   |              |
|              | 0.420598805                           | 2                           | 0            | 0.998207054  |                             |                |   |   |              |
| CD209        | ENSG00000090659.17                    | 0.904744592                 | 3            | 3            | 0.530305219                 | Brain_Amygdala |   |   |              |
|              | 0.99629438                            | Brain_Cerebellar_Hemisphere | 1.678226906  | 0.318501543  |                             |                |   |   |              |

|               |                                       |                             |                                      |              |              |                  |             |   |
|---------------|---------------------------------------|-----------------------------|--------------------------------------|--------------|--------------|------------------|-------------|---|
|               | 0.318501543                           | -0.627540162                | -0.004644322                         | -0.325271669 | 0.311853479  |                  |             |   |
|               | 3                                     | 0                           | 0.998207054                          |              |              |                  |             |   |
| TBX1          | ENSG00000184058.12                    | 0.904775604                 | 1                                    | 1            | 0.904775604  |                  |             |   |
|               | Brain_Hippocampus                     | 0.904775604                 | Brain_Hippocampus                    | 1            | 1            | 1                |             |   |
|               | 0.11963082                            | 0.11963082                  | NA                                   | 1            | 0            | 0.998207054      |             |   |
| DPY19L3       | ENSG00000178904.18                    | 0.904794777                 | 3                                    | 3            | 0.692350806  |                  |             |   |
|               | Brain_Nucleus_accumbens_basal_ganglia | 0.937705357                 | Brain_Caudate_basal_ganglia          |              |              |                  |             |   |
|               | 2.60903213                            | 0.125279703                 | 0.125279703                          | -0.395666861 | 0.134758591  |                  |             |   |
|               | -0.113020839                          | 0.266926112                 | 3                                    | 0            | 0.998207054  |                  |             |   |
| PYY           | ENSG00000131096.10                    | 0.904858237                 | 1                                    | 1            | 0.904858237  |                  |             |   |
|               | Brain_Hypothalamus                    | 0.904858237                 | Brain_Hypothalamus                   | 1            | 1            | 1                |             |   |
|               | -0.119526512                          | -0.119526512                | -0.119526512                         | NA           | 1            | 0                | 0.998207054 |   |
| ARHGAP9       | ENSG00000123329.17                    | 0.904929652                 | 2                                    | 2            | 0.892774145  |                  |             |   |
|               | Brain_Cerebellar_Hemisphere           | 0.973727471                 | Brain_Cerebellum                     | 1.928635357  |              |                  |             |   |
|               | 0.071364643                           | 0.071364643                 | -0.134794766                         | 0.032933684  | -0.050930541 |                  |             |   |
|               | 0.118601924                           | 2                           | 0                                    | 0.998207054  |              |                  |             |   |
| METAP1        | ENSG00000164024.11                    | 0.904935271                 | 4                                    | 4            | 0.500802997  |                  |             |   |
|               | Brain_Anterior_cingulate_cortex_BA24  | 0.839272729                 | Brain_Frontal_Cortex_BA9             |              |              |                  |             |   |
|               | 1.485523258                           | 0.51754697                  | 0.51754697                           | -0.673226826 | 0.593104115  |                  |             |   |
|               | 0.153994655                           | 0.575792102                 | 4                                    | 0            | 0.998207054  |                  |             |   |
| LINC01353     | ENSG00000231507.1                     | 0.904975731                 | 3                                    | 3            | 0.586067024  |                  |             |   |
|               | Brain_Nucleus_accumbens_basal_ganglia | 0.81335038                  | Brain_Caudate_basal_ganglia          |              |              |                  |             |   |
|               | 1.1474018                             | 0.861051611                 | 0.861051611                          | -0.544544225 | 0.236106049  |                  |             |   |
|               | -0.224449266                          | 0.40884049                  | 3                                    | 0            | 0.998207054  |                  |             |   |
| CCDC137       | ENSG00000185298.12                    | 0.905025618                 | 8                                    | 8            | 0.229247088  |                  |             |   |
|               | Brain_Cerebellar_Hemisphere           | 0.969229645                 | Brain_Caudate_basal_ganglia          |              |              |                  |             |   |
|               | 2.119758054                           | 0.244028788                 | 0.244028788                          | -0.846510005 | 1.202300592  |                  |             |   |
|               | 0.346096595                           | 0.606712658                 | 8                                    | 0            | 0.998207054  |                  |             |   |
| MYBPH         | ENSG00000133055.8                     | 0.905082181                 | 2                                    | 2            | 0.657291568  |                  |             |   |
|               | Brain_Spinal_cord_cervical_c-1        | 0.915863563                 | Brain_Hypothalamus                   |              |              |                  |             |   |
|               | 1.123443843                           | 0.876556157                 | 0.876556157                          | 0.105645576  | 0.443655646  |                  |             |   |
|               | 0.274650611                           | 0.239009213                 | 2                                    | 0            | 0.998207054  |                  |             |   |
| AF064858.11   | ENSG00000237721.1                     | 0.905157997                 | 2                                    | 2            | 0.672485083  |                  |             |   |
|               | Brain_Frontal_Cortex_BA9              | 0.893735009                 | Brain_Anterior_cingulate_cortex_BA24 |              |              |                  |             |   |
|               | 1.023294929                           | 0.976705071                 | 0.976705071                          | -0.422739843 | 0.13357961   |                  |             |   |
|               | -0.144580117                          | 0.393377258                 | 2                                    | 0            | 0.998207054  |                  |             |   |
| STAT2         | ENSG00000170581.13                    | 0.905170522                 | 2                                    | 1            | 0.824327552  | Brain_Cerebellum |             |   |
|               | 0.988587267                           | Brain_Cerebellar_Hemisphere | 1.966931412                          | 0.033068588  |              |                  |             |   |
|               | 1.966931412                           | -0.221982442                | -0.014304227                         | -0.118143335 | 0.146850674  |                  |             |   |
|               | 1                                     | 0                           | 0.998207054                          |              |              |                  |             |   |
| KRTCAP3       | ENSG00000157992.12                    | 0.905498766                 | 4                                    | 4            | 0.366658321  |                  |             |   |
|               | Brain_Cerebellum                      | 0.807875099                 | Brain_Caudate_basal_ganglia          | 2.292955014  |              |                  |             |   |
|               | 0.093199795                           | 0.093199795                 | 0.243168201                          | 0.902750513  | 0.649556563  |                  |             |   |
|               | 0.288643235                           | 4                           | 0                                    | 0.998207054  |              |                  |             |   |
| KLHL14        | ENSG00000197705.9                     | 0.90555763                  | 6                                    | 6            | 0.602810734  |                  |             |   |
|               | Brain_Nucleus_accumbens_basal_ganglia | 0.975617993                 | Brain_Amygdala                       |              |              |                  |             |   |
|               | 2.288284502                           | 0.109547352                 | 0.109547352                          | -0.520362798 | 0.487762666  |                  |             |   |
|               | 0.034831695                           | 0.39946394                  | 6                                    | 0            | 0.998207054  |                  |             |   |
| ST3GAL5       | ENSG00000115525.17                    | 0.905581153                 | 1                                    | 1            | 0.905581153  |                  |             |   |
|               | Brain_Spinal_cord_cervical_c-1        | 0.905581153                 | Brain_Spinal_cord_cervical_c-1       |              |              |                  |             |   |
|               | 1                                     | 1                           | 1                                    | -0.118614025 | -0.118614025 | -0.118614025     | NA          | 1 |
|               | 0.998207054                           |                             |                                      |              |              |                  |             | 0 |
| PHLPP1        | ENSG00000081913.13                    | 0.905582762                 | 2                                    | 2            | 0.689016089  |                  |             |   |
|               | Brain_Nucleus_accumbens_basal_ganglia | 0.846966084                 | Brain_Hypothalamus                   |              |              |                  |             |   |
|               | 1.006135212                           | 0.993864788                 | 0.993864788                          | -0.400190667 | 0.192990914  |                  |             |   |
|               | -0.103599876                          | 0.419442718                 | 2                                    | 0            | 0.998207054  |                  |             |   |
| CREM          | ENSG00000095794.19                    | 0.905584156                 | 1                                    | 1            | 0.905584156  |                  |             |   |
|               | Brain_Substantia_nigra                | 0.905584156                 | Brain_Substantia_nigra               | 1            | 1            |                  |             |   |
|               | 1                                     | 0.118610235                 | 0.118610235                          | 0.118610235  | NA           | 1                | 0           |   |
|               | 0.998207054                           |                             |                                      |              |              |                  |             |   |
| RP11-552E20.4 | ENSG00000226070.1                     | 0.905899442                 | 3                                    | 3            | 0.548115566  |                  |             |   |
|               | Brain_Cerebellum                      | 0.723009773                 | Brain_Hippocampus                    | 1.926046591  |              |                  |             |   |

|           |                                       |                |              |              |                                       |                  |    |   |   |
|-----------|---------------------------------------|----------------|--------------|--------------|---------------------------------------|------------------|----|---|---|
|           | 0.085354304                           | 0.085354304    | -0.600586299 | -0.354439185 | -0.448939308                          |                  |    |   |   |
|           | 0.132651513                           | 3              | 0            | 0.998207054  |                                       |                  |    |   |   |
| LINC00598 | ENSG00000215483.9                     | 0.905976664    | 3            | 3            | 0.502390045                           |                  |    |   |   |
|           | Brain_Cortex                          | 0.817790225    |              |              | Brain_Nucleus_accumbens_basal_ganglia |                  |    |   |   |
|           | 1.054603081                           | 0.94108352     | 0.94108352   | -0.670733928 | 0.270309123                           |                  |    |   |   |
|           | -0.056678909                          | 0.532161721    | 3            | 0            | 0.998207054                           |                  |    |   |   |
| CDK2AP1   | ENSG00000111328.6                     | 0.905986082    | 2            | 2            | 0.718909632                           |                  |    |   |   |
|           | Brain_Substantia_nigra                | 0.804367471    |              |              | Brain_Cortex                          | 1.035445828      |    |   |   |
|           | 0.964554172                           | 0.964554172    | -0.359916428 | 0.247698786  | -0.056108821                          |                  |    |   |   |
|           | 0.429648838                           | 2              | 0            | 0.998207054  |                                       |                  |    |   |   |
| USP13     | ENSG00000058056.8                     | 0.90610728     | 2            | 2            | 0.660232777                           |                  |    |   |   |
|           | Brain_Anterior_cingulate_cortex_BA24  | 0.979761825    |              |              | Brain_Cerebellum                      |                  |    |   |   |
|           | 1.084824476                           | 0.915175524    | 0.915175524  | 0.025367512  | 0.439591806                           |                  |    |   |   |
|           | 0.232479659                           | 0.292900807    | 2            | 0            | 0.998207054                           |                  |    |   |   |
| ZNF816    | ENSG00000180257.13                    | 0.906264691    | 3            | 2            | 0.659897552                           |                  |    |   |   |
|           | Brain_Putamen_basal_ganglia           | 0.927552807    |              |              | Brain_Cerebellum                      | 2.012173706      |    |   |   |
|           | 1.24E-07                              | 0.98782617     | -0.090939454 | 0.440054615  | 0.086063648                           | 0.30656517       |    |   |   |
|           | 2                                     | 0              | 0.998207054  |              |                                       |                  |    |   |   |
| EAR52     | ENSG00000103356.15                    | 0.906281067    | 12           | 2            | 0.66713918                            | Brain_Cerebellum |    |   |   |
|           | 0.997950441                           | Brain_Cortex   | 10.96316828  | 0.006827382  | 0.459480049                           |                  |    |   |   |
|           | -0.308631398                          | 0.430077619    | -0.019673469 | 0.206871044  | 2                                     | 0                |    |   |   |
|           | 0.998207054                           |                |              |              |                                       |                  |    |   |   |
| KRBOX1    | ENSG00000240747.7                     | 0.906347607    | 1            | 1            | 0.906347607                           |                  |    |   |   |
|           | Brain_Nucleus_accumbens_basal_ganglia | 0.906347607    |              |              |                                       |                  |    |   |   |
|           | Brain_Nucleus_accumbens_basal_ganglia | 1              | 1            | 1            | 0.117646692                           |                  |    |   |   |
|           | 0.117646692                           | 0.117646692    | NA           | 1            | 0                                     | 0.998207054      |    |   |   |
| MPV17L    | ENSG00000156968.8                     | 0.906350754    | 1            | 1            | 0.906350754                           |                  |    |   |   |
|           | Brain_Putamen_basal_ganglia           | 0.906350754    |              |              | Brain_Putamen_basal_ganglia           | 1                | 1  |   |   |
|           | 1                                     | 0.117642721    | 0.117642721  | 0.117642721  | NA                                    | 1                | 0  |   |   |
|           | 0.998207054                           |                |              |              |                                       |                  |    |   |   |
| KIF15     | ENSG00000163808.16                    | 0.906401874    | 5            | 4            | 0.421867718                           | Brain_Cerebellum |    |   |   |
|           | 0.868417962                           | Brain_Cortex   | 3.525924167  | 0.045329259  | 0.224830459                           |                  |    |   |   |
|           | -0.284490599                          | 0.803185166    | 0.181669945  | 0.435828336  | 4                                     | 0                |    |   |   |
|           | 0.998207054                           |                |              |              |                                       |                  |    |   |   |
| SCARF2    | ENSG00000244486.8                     | 0.906542187    | 3            | 3            | 0.60443069                            |                  |    |   |   |
|           | Brain_Caudate_basal_ganglia           | 0.84323771     |              |              | Brain_Hippocampus                     | 1.267149962      |    |   |   |
|           | 0.830735452                           | 0.830735452    | -0.423033266 | 0.518039529  | -0.034249172                          |                  |    |   |   |
|           | 0.491380524                           | 3              | 0            | 0.998207054  |                                       |                  |    |   |   |
| CLSTN2    | ENSG00000158258.16                    | 0.906590307    | 2            | 2            | 0.733543825                           |                  |    |   |   |
|           | Brain_Cerebellar_Hemisphere           | 0.742303103    |              |              | Brain_Putamen_basal_ganglia           |                  |    |   |   |
|           | 1.142193695                           | 0.857806305    | 0.857806305  | -0.340415265 | 0.328804974                           |                  |    |   |   |
|           | -0.005805145                          | 0.473210169    | 2            | 0            | 0.998207054                           |                  |    |   |   |
| LSM6      | ENSG00000164167.10                    | 0.906599524    | 7            | 3            | 0.480440973                           |                  |    |   |   |
|           | Brain_Spinal_cord_cervical_c-1        | 0.998124284    |              |              | Brain_Cortex                          | 5.352344344      |    |   |   |
|           | 0.016784114                           | 0.427606568    | 0.002350864  | 0.705593492  | 0.358125766                           |                  |    |   |   |
|           | 0.257176035                           | 3              | 0            | 0.998207054  |                                       |                  |    |   |   |
| DOCK1     | ENSG00000150760.12                    | 0.906620716    | 1            | 1            | 0.906620716                           |                  |    |   |   |
|           | Brain_Spinal_cord_cervical_c-1        | 0.906620716    |              |              | Brain_Spinal_cord_cervical_c-1        |                  |    |   |   |
|           | 1                                     | 1              | 1            | 0.11730203   | 0.11730203                            | 0.11730203       | NA | 1 | 0 |
|           | 0.998207054                           |                |              |              |                                       |                  |    |   |   |
| SNX14     | ENSG00000135317.12                    | 0.90685211     | 3            | 3            | 0.459291622                           | Brain_Cortex     |    |   |   |
|           | 0.860716722                           | Brain_Amygdala | 1.351350655  | 0.656698187  | 0.656698187                           |                  |    |   |   |
|           | -0.175461879                          | 0.740013799    | 0.265284051  | 0.45868301   | 3                                     | 0                |    |   |   |
|           | 0.998207054                           |                |              |              |                                       |                  |    |   |   |
| SPSB3     | ENSG00000162032.15                    | 0.906877951    | 1            | 1            | 0.906877951                           |                  |    |   |   |
|           | Brain_Caudate_basal_ganglia           | 0.906877951    |              |              | Brain_Caudate_basal_ganglia           | 1                | 1  |   |   |
|           | 1                                     | 0.116977415    | 0.116977415  | 0.116977415  | NA                                    | 1                | 0  |   |   |
|           | 0.998207054                           |                |              |              |                                       |                  |    |   |   |
| IL17REL   | ENSG00000188263.10                    | 0.906965927    | 1            | 1            | 0.906965927                           |                  |    |   |   |
|           | Brain_Frontal_Cortex_BA9              | 0.906965927    |              |              | Brain_Frontal_Cortex_BA9              | 1                | 1  |   |   |
|           | 1                                     | 0.116866397    | 0.116866397  | 0.116866397  | NA                                    | 1                | 0  |   |   |
|           | 0.998207054                           |                |              |              |                                       |                  |    |   |   |
| TBX10     | ENSG00000167800.9                     | 0.906993042    | 1            | 1            | 0.906993042                           |                  |    |   |   |

|               |                                       |                             |              |                                |              |                  |             |
|---------------|---------------------------------------|-----------------------------|--------------|--------------------------------|--------------|------------------|-------------|
|               | Brain_Spinal_cord_cervical_c-1        | 0.906993042                 |              | Brain_Spinal_cord_cervical_c-1 |              |                  |             |
| AC093627.8    | ENSG00000242611.2                     | 0.907041997                 | 2            | 2                              | 0.673376739  |                  |             |
|               | Brain_Frontal_Cortex_BA9              | 0.899918997                 |              | Brain_Cortex                   | 1.015042202  |                  |             |
|               | 0.984957798                           | 0.984957798                 | -0.421518179 | 0.125763674                    | -0.147877253 |                  |             |
|               | 0.38698671                            | 2                           | 0            | 0.998207054                    |              |                  |             |
| MAATS1        | ENSG00000183833.16                    | 0.907070407                 | 1            | 1                              | 0.907070407  |                  |             |
|               | Brain_Nucleus_accumbens_basal_ganglia | 0.907070407                 |              |                                |              |                  |             |
|               | Brain_Nucleus_accumbens_basal_ganglia | 1                           | 1            | 1                              | 0.116734554  |                  |             |
|               | 0.116734554                           | 0.116734554                 | NA           | 1                              | 0            | 0.998207054      |             |
| PYGB          | ENSG00000100994.11                    | 0.907471138                 | 5            | 4                              | 0.320685872  |                  |             |
|               | Brain_Substantia_nigra                | 0.746746657                 |              | Brain_Cerebellar_Hemisphere    |              |                  |             |
|               | 3.437320399                           | -0.03212452                 | 0.197100842  | -0.893896144                   | 0.993049418  |                  |             |
|               | -0.020689266                          | 0.88120733                  | 4            | 0                              | 0.998207054  |                  |             |
| ARL17B        | ENSG00000228696.8                     | 0.907530163                 | 12           | 8                              | 0.267351995  |                  |             |
|               | Brain_Cerebellar_Hemisphere           | 0.905152531                 |              | Brain_Cerebellum               | 5.817758371  |                  |             |
|               | 0.092369616                           | -0.271967143                | -1.109181261 | 0.850982689                    | -0.259878359 |                  |             |
|               | 0.702899369                           | 8                           | 0            | 0.998207054                    |              |                  |             |
| RP5-1116H23.5 | ENSG00000276768.1                     | 0.907553812                 | 3            | 3                              | 0.553399705  |                  |             |
|               | Brain_Cerebellum                      | 0.890034639                 |              | Brain_Caudate_basal_ganglia    | 1.600442351  |                  |             |
|               | 0.43372455                            | 0.43372455                  | -0.138260377 | 0.592673461                    | 0.273671887  |                  |             |
|               | 0.374223401                           | 3                           | 0            | 0.998207054                    |              |                  |             |
| TMBIM6        | ENSG00000139644.12                    | 0.907618676                 | 2            | 2                              | 0.66194505   | Brain_Cerebellum |             |
|               | 0.934321477                           | Brain_Cortex                | 1.070096152  | 0.929903848                    | 0.929903848  |                  |             |
|               | -0.082409003                          | 0.437229317                 | 0.177410157  | 0.36743978                     | 2            | 0                |             |
|               | 0.998207054                           |                             |              |                                |              |                  |             |
| CCDC188       | ENSG00000234409.6                     | 0.907622968                 | 7            | 7                              | 0.241747512  |                  |             |
|               | Brain_Hippocampus                     | 0.932666139                 |              | Brain_Amygdala                 | 1.617649758  |                  |             |
|               | 0.411002259                           | 0.411002259                 | -0.687372435 | 1.170630053                    | 0.157633798  |                  |             |
|               | 0.639013583                           | 7                           | 0            | 0.998207054                    |              |                  |             |
| FNTA          | ENSG00000168522.12                    | 0.907650915                 | 1            | 1                              | 0.907650915  |                  |             |
|               | Brain_Anterior_cingulate_cortex_BA24  | 0.907650915                 |              |                                |              |                  |             |
|               | Brain_Anterior_cingulate_cortex_BA24  | 1                           | 1            | 1                              | -0.116002052 |                  |             |
|               | -0.116002052                          | -0.116002052                | NA           | 1                              | 0            | 0.998207054      |             |
| FZD3          | ENSG00000104290.10                    | 0.907723869                 | 2            | 2                              | 0.699052132  | Brain_Amygdala   |             |
|               | 0.831426822                           | Brain_Substantia_nigra      | 1.007009282  | 0.992990718                    |              |                  |             |
|               | 0.992990718                           | -0.386600306                | -0.212871975 | -0.29973614                    | 0.122844481  |                  |             |
|               | 2                                     | 0                           | 0.998207054  |                                |              |                  |             |
| LYZ           | ENSG00000090382.6                     | 0.907868035                 | 7            | 5                              | 0.283614212  |                  |             |
|               | Brain_Spinal_cord_cervical_c-1        | 0.787858557                 |              |                                |              |                  |             |
|               | Brain_Nucleus_accumbens_basal_ganglia | 4.190262403                 |              | 0.050952677                    |              |                  |             |
|               | 0.190150309                           | -0.510983834                | 1.072235626  | 0.509717753                    | 0.633318114  |                  |             |
|               | 5                                     | 0                           | 0.998207054  |                                |              |                  |             |
| NDST4         | ENSG00000138653.9                     | 0.907919456                 | 1            | 1                              | 0.907919456  |                  |             |
|               | Brain_Hypothalamus                    | 0.907919456                 |              | Brain_Hypothalamus             | 1            | 1                | 1           |
|               | 0.115663221                           | 0.115663221                 | 0.115663221  | NA                             | 1            | 0                | 0.998207054 |
| VPS28         | ENSG00000160948.13                    | 0.907942932                 | 12           | 2                              | 0.640448463  | Brain_Cortex     |             |
|               | 0.95463963                            | Brain_Substantia_nigra      | 11.36701377  | 1.81E-07                       | 0.464814466  |                  |             |
|               | -0.467071864                          | 0.056881452                 | -0.241984138 | 0.133455929                    | 2            | 0                |             |
|               | 0.998207054                           |                             |              |                                |              |                  |             |
| INPP1         | ENSG00000151689.12                    | 0.907949543                 | 11           | 1                              | 0.681473834  | Brain_Amygdala   |             |
|               | 0.983355742                           | Brain_Hypothalamus          | 10.43165601  | 0.000799086                    |              |                  |             |
|               | 10.43165601                           | -0.07851184                 | 0.410452783  | 0.114020861                    | 0.143813904  |                  |             |
|               | 1                                     | 0                           | 0.998207054  |                                |              |                  |             |
| C9orf40       | ENSG00000135045.6                     | 0.908054539                 | 2            | 2                              | 0.6676423    | Brain_Cerebellum |             |
|               | 0.938254176                           | Brain_Cerebellar_Hemisphere | 1.379409274  | 0.620590726                    |              |                  |             |
|               | 0.620590726                           | -0.429386055                | -0.077464318 | -0.253425187                   | 0.248846247  |                  |             |
|               | 2                                     | 0                           | 0.998207054  |                                |              |                  |             |
| BCL2L2        | ENSG00000129473.9                     | 0.908116661                 | 3            | 3                              | 0.472909409  |                  |             |
|               | Brain_Cortex                          | 0.910221201                 |              | Brain_Cerebellar_Hemisphere    | 1.260206392  |                  |             |
|               | 0.744315824                           | 0.744315824                 | -0.112759533 | 0.717753307                    | 0.293688866  |                  |             |
|               | 0.415536567                           | 3                           | 0            | 0.998207054                    |              |                  |             |

|                |                             |                                      |              |              |                                |                   |             |             |
|----------------|-----------------------------|--------------------------------------|--------------|--------------|--------------------------------|-------------------|-------------|-------------|
| GRIP2          | ENSG00000144596.12          | 0.908117713                          | 1            | 1            | 0.908117713                    |                   |             |             |
|                | Brain_Putamen_basal_ganglia | 0.908117713                          |              |              | Brain_Putamen_basal_ganglia    | 1                 | 1           |             |
|                | 1                           | 0.115413078                          | 0.115413078  | 0.115413078  | NA                             | 1                 | 0           |             |
|                | 0.998207054                 |                                      |              |              |                                |                   |             |             |
| RP11-863P13.3  | ENSG00000261327.4           | 0.908145628                          | 4            | 4            | 0.325115393                    |                   |             |             |
|                | Brain_Hypothalamus          | 0.937385967                          |              |              | Brain_Spinal_cord_cervical_c-1 | 1.33761067        |             |             |
|                | 0.656169992                 | 0.656169992                          | -0.213762814 | 0.984000244  | 0.238511506                    |                   |             |             |
|                | 0.535850146                 | 4                                    | 0            | 0.998207054  |                                |                   |             |             |
| LINC00484      | ENSG00000229694.6           | 0.908212576                          | 8            | 6            | 0.297106353                    |                   |             |             |
|                | Brain_Cerebellar_Hemisphere | 0.975486769                          |              |              | Brain_Cortex                   | 4.976905626       |             |             |
|                | 0.050099107                 | -0.192594907                         | -0.089527455 | 1.042658784  | 0.399623271                    |                   |             |             |
|                | 0.426412099                 | 6                                    | 0            | 0.998207054  |                                |                   |             |             |
| PLA2G4D        | ENSG00000159337.6           | 0.908249319                          | 1            | 1            | 0.908249319                    |                   |             |             |
|                | Brain_Caudate_basal_ganglia | 0.908249319                          |              |              | Brain_Caudate_basal_ganglia    | 1                 | 1           |             |
|                | 1                           | 0.115247034                          | 0.115247034  | 0.115247034  | NA                             | 1                 | 0           |             |
|                | 0.998207054                 |                                      |              |              |                                |                   |             |             |
| CNIH1          | ENSG00000100528.11          | 0.908257313                          | 8            | 3            | 0.417036178                    |                   |             |             |
|                | Brain_Hypothalamus          | 0.852383054                          |              |              | Brain_Caudate_basal_ganglia    | 6.897915767       |             |             |
|                | 0.010609596                 | 0.329712311                          | -0.811573891 | -0.186078689 | -0.526260813                   |                   |             |             |
|                | 0.20092429                  | 3                                    | 0            | 0.998207054  |                                |                   |             |             |
| CRCP           | ENSG00000241258.6           | 0.908279762                          | 10           | 4            | 0.207929977                    | Brain_Amygdala    |             |             |
|                | 0.866443377                 | Brain_Anterior_cingulate_cortex_BA24 | 7.03690291   | 0.016947402  |                                |                   |             |             |
|                | 0.351478376                 | -1.259277888                         | -0.168177835 | -0.658761626 | 0.353502505                    |                   |             |             |
|                | 4                           | 0                                    | 0.998207054  |              |                                |                   |             |             |
| PRSS3          | ENSG00000010438.16          | 0.908298435                          | 8            | 6            | 0.362275594                    |                   |             |             |
|                | Brain_Hippocampus           | 0.969002663                          |              |              | Brain_Cortex                   | 4.90223773        | 0.076483422 |             |
|                | 0.263493316                 | -0.348412021                         | 0.91103754   | 0.317089706  | 0.483032948                    |                   | 6           |             |
|                | 0                           | 0.998207054                          |              |              |                                |                   |             |             |
| HFM1           | ENSG00000162669.15          | 0.908381315                          | 13           | 5            | 0.376743506                    |                   |             |             |
|                | Brain_Hippocampus           | 0.928264744                          |              |              | Brain_Putamen_basal_ganglia    | 9.106890795       |             |             |
|                | 0.007749072                 | 0.30790487                           | -0.173777926 | 0.883912394  | 0.419891559                    |                   |             |             |
|                | 0.320001595                 | 5                                    | 0            | 0.998207054  |                                |                   |             |             |
| LRRC26         | ENSG00000184709.7           | 0.90843703                           | 1            | 1            | 0.90843703                     | Brain_Hippocampus |             |             |
|                | 0.90843703                  | Brain_Hippocampus                    | 1            | 1            | 1                              | 0.115010209       | 0.115010209 |             |
|                | 0.115010209                 | NA                                   | 1            | 0            | 0.998207054                    |                   |             |             |
| CTD-2575K13.6  | ENSG00000268041.2           | 0.908500534                          | 1            | 1            | 0.908500534                    |                   |             |             |
|                | Brain_Cortex                | 0.908500534                          |              |              | Brain_Cortex                   | 1                 | 1           | 1           |
|                | 0.114930091                 | 0.114930091                          | NA           | 1            | 0                              | 0.998207054       |             | 0.114930091 |
|                |                             |                                      |              |              |                                |                   |             |             |
| TNFRSF4        | ENSG00000186827.10          | 0.908515503                          | 4            | 4            | 0.388259582                    |                   |             |             |
|                | Brain_Substantia_nigra      | 0.968353407                          |              |              | Brain_Cerebellar_Hemisphere    |                   |             |             |
|                | 1.630734681                 | 0.369819527                          | 0.369819527  | -0.862777919 | 0.039673528                    |                   |             |             |
|                | -0.347258275                | 0.385278422                          | 4            | 0            | 0.998207054                    |                   |             |             |
| PSMD12         | ENSG00000197170.9           | 0.908547841                          | 1            | 1            | 0.908547841                    |                   |             |             |
|                | Brain_Hippocampus           | 0.908547841                          |              |              | Brain_Hippocampus              | 1                 | 1           | 1           |
|                | 0.114870408                 | 0.114870408                          | 0.114870408  | NA           | 1                              | 0                 | 0.998207054 |             |
| RP11-147L13.14 | ENSG00000278740.1           | 0.908558918                          | 13           | 2            | 0.590970375                    |                   |             |             |
|                | Brain_Hypothalamus          | 0.993960534                          |              |              | Brain_Cortex                   | 11.62200835       |             |             |
|                | 0.003151068                 | 0.663076922                          | -0.255979505 | 0.537430363  | 0.010528215                    |                   |             |             |
|                | 0.218030042                 | 2                                    | 0            | 0.998207054  |                                |                   |             |             |
| PAQR4          | ENSG00000162073.13          | 0.908801703                          | 3            | 3            | 0.521883531                    | Brain_Amygdala    |             |             |
|                | 0.929092744                 | Brain_Cerebellar_Hemisphere          | 1.116132731  | 0.902659163  |                                |                   |             |             |
|                | 0.902659163                 | -0.351794255                         | 0.640444699  | 0.066554692  | 0.514081026                    |                   |             |             |
|                | 3                           | 0                                    | 0.998207054  |              |                                |                   |             |             |
| ZZEF1          | ENSG00000074755.14          | 0.908859235                          | 2            | 2            | 0.780000793                    | Brain_Cortex      |             |             |
|                | 0.952270675                 | Brain_Putamen_basal_ganglia          | 1.674570757  | 0.325429243  |                                |                   |             |             |
|                | 0.325429243                 | -0.279318001                         | 0.059855559  | -0.109731221 | 0.239831924                    |                   |             |             |
|                | 2                           | 0                                    | 0.998207054  |              |                                |                   |             |             |
| TAS2R5         | ENSG00000127366.5           | 0.908860837                          | 4            | 4            | 0.545920383                    |                   |             |             |
|                | Brain_Cerebellar_Hemisphere | 0.790222225                          |              |              | Brain_Cerebellum               | 2.000667895       |             |             |
|                | 0.102644855                 | 0.102644855                          | -0.312678648 | 0.603884578  | 0.224130769                    |                   |             |             |
|                | 0.386175697                 | 4                                    | 0            | 0.998207054  |                                |                   |             |             |
| RP3-453C12.15  | ENSG00000277022.1           | 0.908965937                          | 1            | 1            | 0.908965937                    |                   |             |             |

|            |                                       |              |              |              |                                |                   |             |             |
|------------|---------------------------------------|--------------|--------------|--------------|--------------------------------|-------------------|-------------|-------------|
|            | Brain_Spinal_cord_cervical_c-1        | 0.908965937  |              |              | Brain_Spinal_cord_cervical_c-1 |                   |             |             |
|            | 1 1 1                                 | 0.114342949  | 0.114342949  | 0.114342949  | NA                             | 1                 | 0           |             |
|            | 0.998207054                           |              |              |              |                                |                   |             |             |
| ELMO3      | ENSG00000102890.14                    | 0.908993899  | 5            | 5            | 0.433029689                    |                   |             |             |
|            | Brain_Anterior_cingulate_cortex_BA24  | 0.920994978  |              |              | Brain_Cerebellum               |                   |             |             |
|            | 1.748458905                           | 0.349502861  | 0.349502861  | -0.78401776  | 0.11165513                     |                   |             |             |
|            | -0.345385577                          | 0.428335214  | 5            | 0            | 0.998207054                    |                   |             |             |
| TEX264     | ENSG00000164081.12                    | 0.90901658   | 6            | 2            | 0.286380614                    | Brain_Cortex      |             |             |
|            | Brain_Nucleus_accumbens_basal_ganglia | 5.203795226  |              |              |                                |                   |             |             |
|            | 0.998708572                           | 0.627413371  | -1.06609519  | 0.050017518  | -0.351339969                   |                   |             |             |
|            | 0.001958234                           | 0.627413371  | -1.06609519  | 0.050017518  | -0.351339969                   |                   |             |             |
|            | 0.412934037                           | 2            | 0            | 0.998207054  |                                |                   |             |             |
| BNIP3L     | ENSG00000104765.15                    | 0.909029882  | 4            | 4            | 0.453668173                    |                   |             |             |
|            | Brain_Anterior_cingulate_cortex_BA24  | 0.807592964  |              |              | Brain_Cerebellum               |                   |             |             |
|            | 1.184830486                           | 0.85314965   | 0.85314965   | -0.749313666 | 0.510182857                    |                   |             |             |
|            | -0.209612618                          | 0.526592922  | 4            | 0            | 0.998207054                    |                   |             |             |
| NT5E       | ENSG00000135318.11                    | 0.90915327   | 7            | 5            | 0.484494125                    | Brain_Cortex      |             |             |
|            | Brain_Nucleus_accumbens_basal_ganglia | 4.709096591  |              |              |                                |                   |             |             |
|            | 0.950220075                           | 0.174179162  | -0.699092661 | 0.66026376   | -0.09362524                    |                   |             |             |
|            | 0.086062025                           | 0.174179162  | -0.699092661 | 0.66026376   | -0.09362524                    |                   |             |             |
|            | 0.430178527                           | 5            | 0            | 0.998207054  |                                |                   |             |             |
| TCN2       | ENSG00000185339.8                     | 0.90938819   | 7            | 7            | 0.289232532                    | Brain_Hippocampus |             |             |
|            | Brain_Cerebellum                      | 3.889505188  |              |              | 0.137933483                    | 0.137933483       |             |             |
|            | 0.908874167                           | 0.433299408  | -0.192187473 | 0.512322687  | 7                              | 0                 |             |             |
|            | -1.059806736                          | 0.433299408  | -0.192187473 | 0.512322687  | 7                              | 0                 |             |             |
|            | 0.998207054                           |              |              |              |                                |                   |             |             |
| RAD51D     | ENSG00000185379.20                    | 0.909457553  | 2            | 2            | 0.744125307                    |                   |             |             |
|            | Brain_Nucleus_accumbens_basal_ganglia | 0.795085972  |              |              |                                |                   |             |             |
|            | Brain_Spinal_cord_cervical_c-1        | 1.085235982  |              |              | 0.914764018                    | 0.914764018       |             |             |
|            | -0.326395281                          | -0.259711952 | -0.293053617 | 0.047152234  | 2                              | 0                 |             |             |
|            | 0.998207054                           |              |              |              |                                |                   |             |             |
| FAM106A    | ENSG00000213077.5                     | 0.90948675   | 11           | 10           | 0.074027509                    | Brain_Amygdala    |             |             |
|            | Brain_Frontal_Cortex_BA9              | 2.761281445  |              |              | 0.021733538                    |                   |             |             |
|            | 0.963837598                           | -1.786443308 | 0.290859566  | -0.459497481 | 0.684905598                    |                   |             |             |
|            | 0.109178165                           | -1.786443308 | 0.290859566  | -0.459497481 | 0.684905598                    |                   |             |             |
|            | 10                                    | 0            | 0.998207054  |              |                                |                   |             |             |
| FSCN2      | ENSG00000186765.11                    | 0.90958513   | 5            | 5            | 0.414803825                    |                   |             |             |
|            | Brain_Anterior_cingulate_cortex_BA24  | 0.883622583  |              |              | Brain_Cortex                   |                   |             |             |
|            | 2.067758878                           | 0.1108524    | 0.1108524    | -0.815469135 | 0.759169513                    |                   |             |             |
|            | -0.197223483                          | 0.643451317  | 5            | 0            | 0.998207054                    |                   |             |             |
| TRPM1      | ENSG00000134160.13                    | 0.909721851  | 12           | 1            | 0.72733893                     | Brain_Cerebellum  |             |             |
|            | Brain_Frontal_Cortex_BA9              | 11.87107176  |              |              | 3.78E-06                       |                   |             |             |
|            | 0.967348528                           | -0.348667522 | 0.04093398   | -0.113332065 | 0.091756607                    | 1                 |             |             |
|            | 11.87107176                           | -0.348667522 | 0.04093398   | -0.113332065 | 0.091756607                    | 1                 |             |             |
|            | 0                                     | 0.998207054  |              |              |                                |                   |             |             |
| AC093627.9 | ENSG00000242474.2                     | 0.909844016  | 1            | 1            | 0.909844016                    |                   |             |             |
|            | Brain_Cerebellar_Hemisphere           | 0.909844016  |              |              | Brain_Cerebellar_Hemisphere    | 1                 | 1           |             |
|            | 1                                     | -0.113235293 | -0.113235293 | -0.113235293 | NA                             | 1                 | 0           |             |
|            | 0.998207054                           |              |              |              |                                |                   |             |             |
| NDUFV3     | ENSG00000160194.17                    | 0.909856082  | 13           | 10           | 0.140489862                    |                   |             |             |
|            | Brain_Cortex                          | 0.969626507  |              |              | Brain_Caudate_basal_ganglia    | 6.639565307       |             |             |
|            | 0.053290378                           | 0.268502841  | -0.293343345 | 1.473969281  | 0.511691722                    |                   |             |             |
|            | 0.592994547                           | 10           | 0            | 0.998207054  |                                |                   |             |             |
| PSMB9      | ENSG00000240065.7                     | 0.909881063  | 2            | 2            | 0.765879532                    | Brain_Cortex      |             |             |
|            | Brain_Hypothalamus                    | 1.920959392  |              |              | 0.079040608                    |                   |             |             |
|            | 0.880071203                           | 0.150878954  | 0.297768927  | 0.224323941  | 0.103866896                    |                   |             |             |
|            | 0.079040608                           | 0.150878954  | 0.297768927  | 0.224323941  | 0.103866896                    |                   |             |             |
|            | 2                                     | 0            | 0.998207054  |              |                                |                   |             |             |
| KLF4       | ENSG00000136826.14                    | 0.909901742  | 1            | 1            | 0.909901742                    |                   |             |             |
|            | Brain_Cerebellar_Hemisphere           | 0.909901742  |              |              | Brain_Cerebellar_Hemisphere    | 1                 | 1           |             |
|            | 1                                     | -0.113162479 | -0.113162479 | -0.113162479 | NA                             | 1                 | 0           |             |
|            | 0.998207054                           |              |              |              |                                |                   |             |             |
| NBPF19     | ENSG00000271383.6                     | 0.909904718  | 1            | 1            | 0.909904718                    |                   |             |             |
|            | Brain_Cerebellum                      | 0.909904718  |              |              | Brain_Cerebellum               | 1                 | 1           | 0.113158726 |
|            | 0.113158726                           | 0.113158726  | NA           | 1            | 0                              | 0.998207054       |             |             |
| PSORS1C2   | ENSG00000204538.3                     | 0.909929641  | 1            | 1            | 0.909929641                    |                   |             |             |
|            | Brain_Hippocampus                     | 0.909929641  |              |              | Brain_Hippocampus              | 1                 | 1           | 1           |
|            | -0.113127288                          | -0.113127288 | -0.113127288 | NA           | 1                              | 0                 | 0.998207054 |             |

|               |                                       |              |     |   |                             |              |  |             |
|---------------|---------------------------------------|--------------|-----|---|-----------------------------|--------------|--|-------------|
| PTPRD-AS1     | ENSG00000225706.1                     | 0.909941996  | 13  | 3 | 0.464277021                 |              |  |             |
|               | Brain_Substantia_nigra                | 0.979019731  |     |   | Brain_Cerebellum            | 10.48181645  |  |             |
|               | 7.91E-05 0.671544641                  | -0.493119727 |     |   | 0.731822325                 | 0.121933138  |  |             |
|               | 0.356208334 3 0                       | 0.998207054  |     |   |                             |              |  |             |
| SLC2A13       | ENSG00000151229.12                    | 0.910055134  | 1   | 1 | 0.910055134                 |              |  |             |
|               | Brain_Hippocampus                     | 0.910055134  |     |   | Brain_Hippocampus           | 1 1 1        |  |             |
|               | 0.112968998 0.112968998               | 0.112968998  |     |   | NA                          | 1 0          |  | 0.998207054 |
| KRTAP5-7      | ENSG00000244411.3                     | 0.910163456  | 6   | 3 | 0.652920072                 |              |  |             |
|               | Brain_Cortex                          | 0.922212362  |     |   | Brain_Caudate_basal_ganglia | 5.211836379  |  |             |
|               | 0.011015751 0.236983765               | -0.097647303 |     |   | 0.44970929                  | 0.298347415  |  |             |
|               | 0.21748802 3 0                        | 0.998207054  |     |   |                             |              |  |             |
| RDX           | ENSG00000137710.14                    | 0.910394461  | 1   | 1 | 0.910394461                 |              |  |             |
|               | Brain_Nucleus_accumbens_basal_ganglia | 0.910394461  |     |   |                             |              |  |             |
|               | Brain_Nucleus_accumbens_basal_ganglia | 1 1 1        |     |   | 0.112541002                 |              |  |             |
|               | 0.112541002 0.112541002               | NA           | 1 0 |   | 0.998207054                 |              |  |             |
| SLFN11        | ENSG00000172716.16                    | 0.910439562  | 4   | 4 | 0.350517051                 |              |  |             |
|               | Brain_Nucleus_accumbens_basal_ganglia | 0.861713297  |     |   | Brain_Cerebellar_Hemisphere |              |  |             |
|               | 1.254018084 0.770515958               | 0.770515958  |     |   | -0.293500575                | 0.933586849  |  |             |
|               | 0.255721778 0.506627039               | 4 0          |     |   | 0.998207054                 |              |  |             |
| RP11-348P10.2 | ENSG00000272077.1                     | 0.910459168  | 1   | 1 | 0.910459168                 |              |  |             |
|               | Brain_Caudate_basal_ganglia           | 0.910459168  |     |   | Brain_Caudate_basal_ganglia | 1 1          |  |             |
|               | 1 0.112459389 0.112459389             | 0.112459389  |     |   | NA                          | 1 0          |  |             |
|               | 0.998207054                           |              |     |   |                             |              |  |             |
| PHTF1         | ENSG00000116793.15                    | 0.910550875  | 1   | 1 | 0.910550875                 |              |  |             |
|               | Brain_Cerebellar_Hemisphere           | 0.910550875  |     |   | Brain_Cerebellar_Hemisphere | 1 1          |  |             |
|               | 1 -0.112343723 -0.112343723           | -0.112343723 |     |   | NA                          | 1 0          |  |             |
|               | 0.998207054                           |              |     |   |                             |              |  |             |
| METT14        | ENSG00000145388.14                    | 0.910677649  | 5   | 4 | 0.365037821                 |              |  |             |
|               | Brain_Spinal_cord_cervical_c-1        | 0.955143703  |     |   | Brain_Cerebellum            | 2.963042495  |  |             |
|               | 0.039236816 0.279494506               | -0.905807367 |     |   | 0.537733093                 | -0.100038668 |  |             |
|               | 0.529488807 4 0                       | 0.998207054  |     |   |                             |              |  |             |
| CTC-344H19.4  | ENSG00000268401.1                     | 0.910855544  | 8   | 8 | 0.302598954                 |              |  |             |
|               | Brain_Caudate_basal_ganglia           | 0.957610357  |     |   | Brain_Cerebellum            | 1.538984264  |  |             |
|               | 0.476671365 0.476671365               | -0.619575469 |     |   | 1.03087604                  | 0.041447274  |  |             |
|               | 0.521773402 8 0                       | 0.998207054  |     |   |                             |              |  |             |
| PTPN20        | ENSG00000204179.10                    | 0.910884015  | 4   | 4 | 0.457885989                 |              |  |             |
|               | Brain_Frontal_Cortex_BA9              | 0.654889514  |     |   | Brain_Cerebellar_Hemisphere |              |  |             |
|               | 1.707106958 0.271523321               | 0.271523321  |     |   | 0.446979981                 | 0.742332362  |  |             |
|               | 0.60524355 0.151804801                | 4 0          |     |   | 0.998207054                 |              |  |             |
| KLRL1         | ENSG00000111796.3                     | 0.910907796  | 2   | 2 | 0.667493959                 |              |  |             |
|               | Brain_Substantia_nigra                | 0.990986081  |     |   | Brain_Cerebellar_Hemisphere |              |  |             |
|               | 1.079521472 0.920478528               | 0.920478528  |     |   | 0.011297512                 | 0.429589936  |  |             |
|               | 0.220443724 0.295777409               | 2 0          |     |   | 0.998207054                 |              |  |             |
| MYADM         | ENSG00000179820.15                    | 0.910944939  | 2   | 2 | 0.665968087                 |              |  |             |
|               | Brain_Caudate_basal_ganglia           | 0.75881451   |     |   | Brain_Cerebellar_Hemisphere | 1.73302547   |  |             |
|               | 0.26697453 0.26697453                 | 0.30703792   |     |   | 0.431688141                 | 0.369363031  |  | 0.088141017 |
|               | 2 0 0.998207054                       |              |     |   |                             |              |  |             |
| DEFB134       | ENSG00000205882.8                     | 0.911044036  | 5   | 5 | 0.449471552                 |              |  |             |
|               | Brain_Nucleus_accumbens_basal_ganglia | 0.927108882  |     |   | Brain_Cortex                |              |  |             |
|               | 3.062503276 0.14424595                | 0.14424595   |     |   | -0.756296323                | 0.091482914  |  |             |
|               | -0.330420422 0.307473443              | 5 0          |     |   | 0.998207054                 |              |  |             |
| RP11-486O12.2 | ENSG00000247373.3                     | 0.911089304  | 1   | 1 | 0.911089304                 |              |  |             |
|               | Brain_Cerebellum                      | 0.911089304  |     |   | Brain_Cerebellum            | 1 1 1        |  | 0.111664656 |
|               | 0.111664656 0.111664656               | NA           | 1 0 |   | 0.998207054                 |              |  |             |
| NPTX2         | ENSG00000106236.3                     | 0.911101703  | 1   | 1 | 0.911101703                 |              |  |             |
|               | Brain_Frontal_Cortex_BA9              | 0.911101703  |     |   | Brain_Frontal_Cortex_BA9    | 1 1          |  | 1           |
|               | 1 0.111649019 0.111649019             | 0.111649019  |     |   | NA                          | 1 0          |  |             |
|               | 0.998207054                           |              |     |   |                             |              |  |             |
| ADHFE1        | ENSG00000147576.15                    | 0.911141218  | 13  | 2 | 0.390565652                 |              |  |             |
|               | Brain_Spinal_cord_cervical_c-1        | 0.812376301  |     |   |                             |              |  |             |
|               | Brain_Nucleus_accumbens_basal_ganglia | 11.54627683  |     |   | 0.004337859                 |              |  |             |
|               | 0.617002785 -0.36192121               | 0.858592002  |     |   | 0.396901089                 | 0.285815454  |  |             |

|         |                                       |                                |                                       |              |              |                             |   |  |
|---------|---------------------------------------|--------------------------------|---------------------------------------|--------------|--------------|-----------------------------|---|--|
| ZMYM1   | ENSG00000197056.9                     | 0.911149173                    | 2                                     | 2            | 0.731590856  |                             |   |  |
|         | Brain_Frontal_Cortex_BA9              | 0.761831102                    |                                       |              |              | Brain_Cerebellar_Hemisphere |   |  |
|         | 1.127065176                           | 0.872934824                    | 0.872934824                           | 0.303077105  | 0.343010108  |                             |   |  |
|         | 0.323043606                           | 0.028236897                    | 2                                     | 0            | 0.998207054  |                             |   |  |
| TRIM68  | ENSG00000167333.12                    | 0.911150361                    | 3                                     | 3            | 0.488976417  |                             |   |  |
|         | Brain_Cerebellum                      | 0.8402457                      | Brain_Frontal_Cortex_BA9              | 2.203498588  |              |                             |   |  |
|         | 0.107553161                           | 0.107553161                    | -0.691937759                          | -0.20157921  | -0.470218771 |                             |   |  |
|         | 0.248523705                           | 3                              | 0                                     | 0.998207054  |              |                             |   |  |
| LYRM7   | ENSG00000186687.15                    | 0.911176526                    | 4                                     | 4            | 0.362338933  |                             |   |  |
|         | Brain_Putamen_basal_ganglia           | 0.940083989                    | Brain_Cerebellar_Hemisphere           |              |              |                             |   |  |
|         | 1.744420992                           | 0.294982189                    | 0.294982189                           | 0.0751643    | 0.910917331  |                             |   |  |
|         | 0.544794115                           | 0.41389176                     | 4                                     | 0            | 0.998207054  |                             |   |  |
| DLK1    | ENSG00000185559.13                    | 0.911202661                    | 1                                     | 1            | 0.911202661  |                             |   |  |
|         | Brain_Caudate_basal_ganglia           | 0.911202661                    | Brain_Caudate_basal_ganglia           | 1            | 1            |                             |   |  |
|         | 1                                     | -0.111521697                   | -0.111521697                          | -0.111521697 | NA           | 1                           | 0 |  |
|         | 0.998207054                           |                                |                                       |              |              |                             |   |  |
| PTN     | ENSG00000105894.11                    | 0.911244259                    | 1                                     | 1            | 0.911244259  |                             |   |  |
|         | Brain_Frontal_Cortex_BA9              | 0.911244259                    | Brain_Frontal_Cortex_BA9              | 1            | 1            |                             |   |  |
|         | 1                                     | 0.111469237                    | 0.111469237                           | 0.111469237  | NA           | 1                           | 0 |  |
|         | 0.998207054                           |                                |                                       |              |              |                             |   |  |
| MAT2B   | ENSG00000038274.16                    | 0.911276199                    | 3                                     | 3            | 0.582683826  |                             |   |  |
|         | Brain_Cerebellar_Hemisphere           | 0.97259875                     | Brain_Cortex                          | 1.13729269   | 0.865751909  |                             |   |  |
|         | 0.865751909                           | -0.549468719                   | -0.034349127                          | -0.354005294 | 0.27911454   | 3                           |   |  |
|         | 0                                     | 0.998207054                    |                                       |              |              |                             |   |  |
| ZNF429  | ENSG00000197013.9                     | 0.911368065                    | 5                                     | 4            | 0.380930214  |                             |   |  |
|         | Brain_Cerebellar_Hemisphere           | 0.934505911                    | Brain_Substantia_nigra                |              |              |                             |   |  |
|         | 2.600136326                           | 0.04313893                     | 0.454662234                           | -0.87618363  | 0.235041219  |                             |   |  |
|         | -0.299261365                          | 0.483775642                    | 4                                     | 0            | 0.998207054  |                             |   |  |
| DOK3    | ENSG00000146094.13                    | 0.911411094                    | 1                                     | 1            | 0.911411094  |                             |   |  |
|         | Brain_Anterior_cingulate_cortex_BA24  | 0.911411094                    |                                       |              |              |                             |   |  |
|         | Brain_Anterior_cingulate_cortex_BA24  | 1                              | 1                                     | 1            | -0.111258839 |                             |   |  |
|         | -0.111258839                          | -0.111258839                   | NA                                    | 1            | 0            | 0.998207054                 |   |  |
| ACSM5   | ENSG00000183549.10                    | 0.911415734                    | 8                                     | 5            | 0.35408189   | Brain_Cerebellum            |   |  |
|         | 0.963121873                           | Brain_Spinal_cord_cervical_c-1 | 5.420848296                           | 0.016242885  |              |                             |   |  |
|         | 0.309237777                           | -0.926700824                   | 0.388449996                           | -0.339103791 | 0.420630995  |                             |   |  |
|         | 5                                     | 0                              | 0.998207054                           |              |              |                             |   |  |
| TRIM71  | ENSG00000206557.5                     | 0.911657997                    | 1                                     | 1            | 0.911657997  |                             |   |  |
|         | Brain_Nucleus_accumbens_basal_ganglia | 0.911657997                    |                                       |              |              |                             |   |  |
|         | Brain_Nucleus_accumbens_basal_ganglia | 1                              | 1                                     | 1            | -0.110947477 |                             |   |  |
|         | -0.110947477                          | -0.110947477                   | NA                                    | 1            | 0            | 0.998207054                 |   |  |
| SLC52A3 | ENSG00000101276.14                    | 0.911831981                    | 2                                     | 2            | 0.667962049  |                             |   |  |
|         | Brain_Anterior_cingulate_cortex_BA24  | 0.931005896                    | Brain_Cortex                          |              |              |                             |   |  |
|         | 1.145161088                           | 0.854838912                    | 0.854838912                           | 0.086579331  | 0.428946652  |                             |   |  |
|         | 0.257762991                           | 0.242090254                    | 2                                     | 0            | 0.998207054  |                             |   |  |
| TSPAN8  | ENSG00000127324.8                     | 0.911897262                    | 2                                     | 2            | 0.695167116  |                             |   |  |
|         | Brain_Substantia_nigra                | 0.892320568                    | Brain_Amygdala                        | 1.100903602  |              |                             |   |  |
|         | 0.899096398                           | 0.899096398                    | -0.13536845                           | 0.391852615  | 0.128242083  |                             |   |  |
|         | 0.372801591                           | 2                              | 0                                     | 0.998207054  |              |                             |   |  |
| PCDHAC2 | ENSG00000243232.4                     | 0.911966199                    | 2                                     | 2            | 0.681586027  |                             |   |  |
|         | Brain_Substantia_nigra                | 0.89954659                     | Brain_Nucleus_accumbens_basal_ganglia |              |              |                             |   |  |
|         | 1.000228769                           | 0.999771231                    | 0.999771231                           | 0.126234138  | 0.410299816  |                             |   |  |
|         | 0.268266977                           | 0.200864767                    | 2                                     | 0            | 0.998207054  |                             |   |  |
| NDRG1   | ENSG00000104419.14                    | 0.912014965                    | 1                                     | 1            | 0.912014965  |                             |   |  |
|         | Brain_Putamen_basal_ganglia           | 0.912014965                    | Brain_Putamen_basal_ganglia           | 1            | 1            |                             |   |  |
|         | 1                                     | 0.110497333                    | 0.110497333                           | 0.110497333  | NA           | 1                           | 0 |  |
|         | 0.998207054                           |                                |                                       |              |              |                             |   |  |
| MPC2    | ENSG00000143158.10                    | 0.912040021                    | 5                                     | 4            | 0.623956951  |                             |   |  |
|         | Brain_Cerebellar_Hemisphere           | 0.921866384                    | Brain_Nucleus_accumbens_basal_ganglia |              |              |                             |   |  |
|         | 3.717610192                           | 0.038124117                    | 0.154554943                           | -0.490250074 | 0.098083003  |                             |   |  |
|         | -0.230047826                          | 0.241892087                    | 4                                     | 0            | 0.998207054  |                             |   |  |
| CFAP73  | ENSG00000186710.11                    | 0.912130929                    | 1                                     | 1            | 0.912130929  |                             |   |  |



|               |                                       |                                       |                                |             |                             |                        |              |   |
|---------------|---------------------------------------|---------------------------------------|--------------------------------|-------------|-----------------------------|------------------------|--------------|---|
|               | Brain_Nucleus_accumbens_basal_ganglia | 0.912130929                           |                                |             |                             |                        |              |   |
|               | Brain_Nucleus_accumbens_basal_ganglia | 1                                     | 1                              | 1           | -0.110351104                |                        |              |   |
|               | -0.110351104                          | -0.110351104                          | NA                             | 1           | 0                           | 0.998207054            |              |   |
| SPC25         | ENSG00000152253.8                     | 0.912251704                           | 3                              | 3           | 0.555920101                 |                        |              |   |
|               | Brain_Spinal_cord_cervical_c-1        | 0.938654618                           |                                |             | Brain_Putamen_basal_ganglia |                        |              |   |
|               | 2.523918376                           | 0.140368082                           | 0.140368082                    |             | -0.588912308                | -0.07696094            |              |   |
|               | -0.311928245                          | 0.258549041                           | 3                              | 0           | 0.998207054                 |                        |              |   |
| SST           | ENSG00000157005.3                     | 0.91228692                            | 1                              | 1           | 0.91228692                  | Brain_Substantia_nigra |              |   |
|               | 0.91228692                            | Brain_Substantia_nigra                | 1                              | 1           | 1                           | -0.110154407           |              |   |
|               | -0.110154407                          | -0.110154407                          | NA                             | 1           | 0                           | 0.998207054            |              |   |
| TMEM258       | ENSG00000134825.15                    | 0.912293141                           | 2                              | 2           | 0.832345875                 |                        |              |   |
|               | Brain_Putamen_basal_ganglia           | 0.952464878                           |                                |             | Brain_Caudate_basal_ganglia |                        |              |   |
|               | 1.792230172                           | 0.207769828                           | 0.207769828                    |             | -0.211693865                | 0.059611727            |              |   |
|               | -0.076041069                          | 0.191842024                           | 2                              | 0           | 0.998207054                 |                        |              |   |
| NPHP4         | ENSG00000131697.17                    | 0.912363584                           | 12                             | 7           | 0.10490307                  | Brain_Amygdala         |              |   |
|               | 0.734270543                           | Brain_Nucleus_accumbens_basal_ganglia | 8.066384059                    |             |                             |                        |              |   |
|               | 0.004733275                           | 0.272675928                           | -0.468376935                   |             | 1.621534441                 | 0.778765921            |              |   |
|               | 0.559304191                           | 7                                     | 0                              | 0.998207054 |                             |                        |              |   |
| PIK3R3        | ENSG00000117461.14                    | 0.912385505                           | 1                              | 1           | 0.912385505                 |                        |              |   |
|               | Brain_Cortex                          | 0.912385505                           | Brain_Cortex                   | 1           | 1                           | 1                      | -0.110030098 |   |
|               | -0.110030098                          | -0.110030098                          | NA                             | 1           | 0                           | 0.998207054            |              |   |
| RP11-383I23.2 | ENSG00000273374.1                     | 0.912433699                           | 6                              | 5           | 0.303287742                 |                        |              |   |
|               | Brain_Cerebellar_Hemisphere           | 0.687308097                           | Brain_Cortex                   | 4.145990932 |                             |                        |              |   |
|               | 0.039528385                           | 0.147101563                           | -0.479895157                   |             | 1.029408532                 | 0.499559181            |              |   |
|               | 0.5221799                             | 5                                     | 0                              | 0.998207054 |                             |                        |              |   |
| SNAP91        | ENSG00000065609.14                    | 0.912518988                           | 2                              | 2           | 0.761822409                 |                        |              |   |
|               | Brain_Cortex                          | 0.868309961                           | Brain_Caudate_basal_ganglia    | 1.376263943 |                             |                        |              |   |
|               | 0.623736057                           | 0.623736057                           | -0.303088512                   |             | 0.165805572                 | -0.06864147            |              |   |
|               | 0.331558186                           | 2                                     | 0                              | 0.998207054 |                             |                        |              |   |
| C15orf62      | ENSG00000188277.9                     | 0.912642857                           | 1                              | 1           | 0.912642857                 |                        |              |   |
|               | Brain_Putamen_basal_ganglia           | 0.912642857                           | Brain_Putamen_basal_ganglia    | 1           | 1                           |                        |              |   |
|               | 1                                     | 0.109705603                           | 0.109705603                    | 0.109705603 | NA                          | 1                      | 0            |   |
|               | 0.998207054                           |                                       |                                |             |                             |                        |              |   |
| FANCL         | ENSG00000115392.11                    | 0.912726704                           | 1                              | 1           | 0.912726704                 |                        |              |   |
|               | Brain_Spinal_cord_cervical_c-1        | 0.912726704                           | Brain_Spinal_cord_cervical_c-1 |             |                             |                        |              |   |
|               | 1                                     | 1                                     | 1                              | 0.109599882 | 0.109599882                 | 0.109599882            | NA           | 1 |
|               | 0.998207054                           |                                       |                                |             |                             |                        |              | 0 |
| RP11-678G14.4 | ENSG00000268240.1                     | 0.912740997                           | 2                              | 2           | 0.765699207                 |                        |              |   |
|               | Brain_Cerebellum                      | 0.947862919                           | Brain_Cerebellar_Hemisphere    | 1.814980723 |                             |                        |              |   |
|               | 0.185019277                           | 0.185019277                           | 0.065390712                    |             | 0.298005184                 | 0.181697948            |              |   |
|               | 0.164483271                           | 2                                     | 0                              | 0.998207054 |                             |                        |              |   |
| IL18BP        | ENSG00000137496.17                    | 0.91283309                            | 3                              | 3           | 0.514321904                 |                        |              |   |
|               | Brain_Hippocampus                     | 0.888811652                           | Brain_Amygdala                 | 1.449788818 |                             |                        |              |   |
|               | 0.608072993                           | 0.608072993                           | 0.139808051                    |             | 0.652122882                 | 0.446059646            |              |   |
|               | 0.270453142                           | 3                                     | 0                              | 0.998207054 |                             |                        |              |   |
| NCEH1         | ENSG00000144959.9                     | 0.912930942                           | 4                              | 3           | 0.527366789                 |                        |              |   |
|               | Brain_Putamen_basal_ganglia           | 0.661932309                           | Brain_Caudate_basal_ganglia    |             |                             |                        |              |   |
|               | 2.492804141                           | 0.023647853                           | 0.514240654                    |             | 0.437246888                 | 0.632030743            |              |   |
|               | 0.550465808                           | 0.084592549                           | 3                              | 0           | 0.998207054                 |                        |              |   |
| ESR2          | ENSG00000140009.18                    | 0.913089404                           | 2                              | 2           | 0.675170823                 | Brain_Cerebellum       |              |   |
|               | 0.924618103                           | Brain_Anterior_cingulate_cortex_BA24  | 1.037568564                    |             |                             |                        |              |   |
|               | 0.962431436                           | 0.962431436                           | 0.094618188                    |             | 0.419061998                 | 0.256840093            |              |   |
|               | 0.229416418                           | 2                                     | 0                              | 0.998207054 |                             |                        |              |   |
| MGAM          | ENSG00000257335.8                     | 0.91316702                            | 12                             | 1           | 0.751152091                 |                        |              |   |
|               | Brain_Spinal_cord_cervical_c-1        | 0.997674573                           | Brain_Cerebellum               | 11.34723519 |                             |                        |              |   |
|               | 0.000125252                           | 11.34723519                           | -0.119155808                   |             | 0.317120604                 | 0.103760721            |              |   |
|               | 0.142140375                           | 1                                     | 0                              | 0.998207054 |                             |                        |              |   |
| RP3-466P17.1  | ENSG00000270638.1                     | 0.913247317                           | 8                              | 3           | 0.544231969                 |                        |              |   |
|               | Brain_Hippocampus                     | 0.896001076                           | Brain_Cortex                   | 6.859527307 |                             |                        |              |   |
|               | 0.004281066                           | 0.334890489                           | -0.519126849                   |             | 0.606425908                 | -0.065874376           |              |   |
|               | 0.409629321                           | 3                                     | 0                              | 0.998207054 |                             |                        |              |   |
| RNF217        | ENSG00000146373.16                    | 0.913248269                           | 5                              | 5           | 0.489119943                 |                        |              |   |

|                 |                                      |              |                                       |                                |                                       |              |                  |
|-----------------|--------------------------------------|--------------|---------------------------------------|--------------------------------|---------------------------------------|--------------|------------------|
|                 | Brain_Cortex                         | 0.802453901  |                                       | Brain_Spinal_cord_cervical_c-1 | 2.153230071                           |              |                  |
|                 |                                      | 0.209761824  | 0.209761824                           | -0.625002616                   | 0.69170924                            | -0.023592657 |                  |
|                 |                                      | 0.629914682  | 5                                     | 0                              | 0.998207054                           |              |                  |
| SOX5            | ENSG00000134532.15                   | 0.913259821  | 2                                     | 2                              | 0.692392696                           |              |                  |
|                 | Brain_Cerebellar_Hemisphere          | 0.813529216  |                                       |                                | Brain_Amygdala                        | 1.20537558   | 0.79462442       |
|                 |                                      | 0.79462442   | -0.395610085                          | -0.235875583                   | -0.315742834                          | 0.11294935   | 2                |
|                 |                                      | 0.998207054  |                                       |                                |                                       |              | 0                |
| LINC00029       | ENSG00000125514.9                    | 0.913281528  | 1                                     | 1                              | 0.913281528                           |              |                  |
|                 | Brain_Cerebellar_Hemisphere          | 0.913281528  |                                       |                                | Brain_Cerebellar_Hemisphere1          |              | 1                |
|                 |                                      | 1            | 0.108900351                           | 0.108900351                    | 0.108900351                           | NA           | 1                |
|                 |                                      | 0.998207054  |                                       |                                |                                       |              | 0                |
| CRHR2           | ENSG00000106113.18                   | 0.913317645  | 4                                     | 4                              | 0.792580729                           |              | Brain_Cerebellum |
|                 |                                      | 0.820900405  |                                       |                                | Brain_Amygdala                        | 1.73793643   | 0.244460446      |
|                 |                                      | -0.262515891 | 0.262960883                           | -0.001423125                   | 0.28482373                            | 4            | 0                |
|                 |                                      | 0.998207054  |                                       |                                |                                       |              |                  |
| LINC01345       | ENSG00000226374.2                    | 0.913519458  | 1                                     | 1                              | 0.913519458                           |              |                  |
|                 | Brain_Hypothalamus                   | 0.913519458  |                                       |                                | Brain_Hypothalamus                    | 1            | 1                |
|                 |                                      | -0.108600382 | -0.108600382                          | -0.108600382                   | NA                                    | 1            | 0                |
|                 |                                      | 0.998207054  |                                       |                                |                                       |              |                  |
| CGGBP1          | ENSG00000163320.10                   | 0.913550255  | 9                                     | 9                              | 0.19030325                            |              |                  |
|                 | Brain_Anterior_cingulate_cortex_BA24 | 0.983369867  |                                       |                                | Brain_Cerebellum                      |              |                  |
|                 |                                      | 1.892213565  | 0.43736517                            | 0.43736517                     | -1.309682547                          | 0.546240432  |                  |
|                 |                                      | -0.184924342 | 0.591777247                           | 9                              | 0                                     | 0.998207054  |                  |
| PCNX3           | ENSG00000197136.4                    | 0.913551841  | 2                                     | 1                              | 0.883105253                           |              | Brain_Cerebellum |
|                 |                                      | 0.946034148  | Brain_Cerebellar_Hemisphere           | 1.956076729                    | 0.043923271                           |              |                  |
|                 |                                      | 1.956076729  | -0.147033913                          | -0.067687817                   | -0.107360865                          | 0.056106162  |                  |
|                 |                                      | 1            | 0                                     | 0.998207054                    |                                       |              |                  |
| KTN1            | ENSG00000126777.17                   | 0.913569792  | 3                                     | 2                              | 0.685262998                           |              | Brain_Cerebellum |
|                 |                                      | 0.708040288  | Brain_Nucleus_accumbens_basal_ganglia | 2.567344615                    |                                       |              |                  |
|                 |                                      | 0.043191585  | 0.3894638                             | 0.374489337                    | 0.405291847                           | 0.39243677   |                  |
|                 |                                      | 0.016020229  | 2                                     | 0                              | 0.998207054                           |              |                  |
| LL21NC02-21A1.1 | ENSG00000273796.1                    | 0.913603048  | 2                                     | 2                              | 0.692798375                           |              |                  |
|                 | Brain_Cerebellum                     | 0.835837065  |                                       |                                | Brain_Cerebellar_Hemisphere           | 1.775443221  |                  |
|                 |                                      | 0.224556779  | 0.224556779                           | -0.395060316                   | -0.207221259                          | -0.301140788 |                  |
|                 |                                      | 0.132822271  | 2                                     | 0                              | 0.998207054                           |              |                  |
| WASHC1          | ENSG00000181404.15                   | 0.91360832   | 11                                    | 11                             | 0.197921191                           |              | Brain_Cortex     |
|                 |                                      | 0.969101817  | Brain_Substantia_nigra                | 2.646941725                    | 0.123988881                           |              |                  |
|                 |                                      | 0.123988881  | -1.28749678                           | 0.844272298                    | -0.05163005                           | 0.632755633  |                  |
|                 |                                      | 11           | 0                                     | 0.998207054                    |                                       |              |                  |
| ACTR1B          | ENSG00000115073.7                    | 0.913718951  | 5                                     | 5                              | 0.553581996                           |              |                  |
|                 | Brain_Cortex                         | 0.987322476  |                                       |                                | Brain_Cerebellum                      | 2.777539203  | 0.212285696      |
|                 |                                      | 0.212285696  | -0.116276174                          | 0.592401151                    | 0.246911802                           | 0.318125524  |                  |
|                 |                                      | 5            | 0                                     | 0.998207054                    |                                       |              |                  |
| GOLGA6L4        | ENSG00000184206.11                   | 0.913724749  | 13                                    | 5                              | 0.3789832                             |              |                  |
|                 | Brain_Hippocampus                    | 0.935207058  |                                       |                                | Brain_Nucleus_accumbens_basal_ganglia |              |                  |
|                 |                                      | 9.544665611  | 0.018518776                           | 0.378877153                    | -0.467140142                          | 0.879771329  |                  |
|                 |                                      | 0.011399451  | 0.372831447                           | 5                              | 0                                     | 0.998207054  |                  |
| ZNRF2           | ENSG00000180233.10                   | 0.913773529  | 2                                     | 2                              | 0.718209494                           |              | Brain_Cerebellum |
|                 |                                      | 0.980643629  | Brain_Cerebellar_Hemisphere           | 1.477820478                    | 0.522179522                           |              |                  |
|                 |                                      | 0.522179522  | -0.024261994                          | 0.360852794                    | 0.1682954                             | 0.272317278  | 2                |
|                 |                                      | 0            | 0.998207054                           |                                |                                       |              |                  |
| C17orf107       | ENSG00000205710.3                    | 0.913775286  | 9                                     | 8                              | 0.143424476                           |              |                  |
|                 | Brain_Hypothalamus                   | 0.812970091  |                                       |                                | Brain_Cerebellum                      | 4.349771971  |                  |
|                 |                                      | 0.048212131  | 0.190530868                           | 0.236596171                    | 1.46315681                            | 0.647067233  |                  |
|                 |                                      | 0.421146761  | 8                                     | 0                              | 0.998207054                           |              |                  |
| ZNF34           | ENSG00000196378.11                   | 0.913821176  | 11                                    | 2                              | 0.596032681                           |              |                  |
|                 | Brain_Caudate_basal_ganglia          | 0.9689509    |                                       |                                | Brain_Substantia_nigra                | 9.907609561  |                  |
|                 |                                      | 0.001767212  | 0.462373972                           | -0.10170083                    | 0.530114306                           | 0.139340621  |                  |
|                 |                                      | 0.184766171  | 2                                     | 0                              | 0.998207054                           |              |                  |
| LINC00683       | ENSG00000266256.1                    | 0.913876704  | 4                                     | 4                              | 0.535158946                           |              |                  |
|                 | Brain_Cortex                         | 0.766208106  |                                       |                                | Brain_Hypothalamus                    | 1.164178702  |                  |
|                 |                                      | 0.811938688  | 0.811938688                           | -0.620150137                   | 0.5376638                             | 0.151617287  |                  |
|                 |                                      | 0.523924739  | 4                                     | 0                              | 0.998207054                           |              |                  |

|              |                                       |              |              |              |                                       |             |   |
|--------------|---------------------------------------|--------------|--------------|--------------|---------------------------------------|-------------|---|
| ADAM29       | ENSG00000168594.15                    | 0.913885785  | 1            | 1            | 0.913885785                           |             |   |
|              | Brain_Nucleus_accumbens_basal_ganglia | 0.913885785  |              |              |                                       |             |   |
|              | Brain_Nucleus_accumbens_basal_ganglia | 1            | 1            | 1            | 0.108138554                           |             |   |
|              | 0.108138554                           | 0.108138554  | NA           | 1            | 0                                     | 0.998207054 |   |
| UBA7         | ENSG00000182179.12                    | 0.913888807  | 1            | 1            | 0.913888807                           |             |   |
|              | Brain_Caudate_basal_ganglia           | 0.913888807  |              |              | Brain_Caudate_basal_ganglia           | 1           | 1 |
|              | 1                                     | 0.108134746  | 0.108134746  | 0.108134746  | NA                                    | 1           | 0 |
|              | 0.998207054                           |              |              |              |                                       |             |   |
| POP1         | ENSG00000104356.10                    | 0.913945796  | 1            | 1            | 0.913945796                           |             |   |
|              | Brain_Cerebellar_Hemisphere           | 0.913945796  |              |              | Brain_Cerebellar_Hemisphere           | 1           | 1 |
|              | 1                                     | 0.108062902  | 0.108062902  | 0.108062902  | NA                                    | 1           | 0 |
|              | 0.998207054                           |              |              |              |                                       |             |   |
| RP11-167B3.2 | ENSG00000274312.1                     | 0.914162932  | 4            | 2            | 0.677564484                           |             |   |
|              | Brain_Frontal_Cortex_BA9              | 0.979328441  |              |              | Brain_Nucleus_accumbens_basal_ganglia |             |   |
|              | 2.923002639                           | 0.00047345   | 0.996324177  | -0.240086306 | 0.415788897                           |             |   |
|              | 0.027040352                           | 0.27688841   | 2            | 0            | 0.998207054                           |             |   |
| HLA-DRB1     | ENSG00000196126.11                    | 0.914180744  | 13           | 4            | 0.424635317                           |             |   |
|              | Brain_Substantia_nigra                | 0.957662469  |              |              | Brain_Amygdala                        | 9.961615974 |   |
|              | 0.003007532                           | 0.367655138  | -0.798405319 | 0.209474299  | -0.307208729                          |             |   |
|              | 0.309938409                           | 4            | 0            | 0.998207054  |                                       |             |   |
| PRSS46       | ENSG00000261603.1                     | 0.914182355  | 4            | 4            | 0.388610288                           |             |   |
|              | Brain_Cerebellum                      | 0.978212271  |              |              | Brain_Substantia_nigra                | 1.595339029 |   |
|              | 0.487280878                           | 0.487280878  | 0.027310263  | 0.862140353  | 0.264515081                           |             |   |
|              | 0.400953528                           | 4            | 0            | 0.998207054  |                                       |             |   |
| MUC21        | ENSG00000204544.5                     | 0.914312741  | 2            | 2            | 0.672754706                           |             |   |
|              | Brain_Substantia_nigra                | 0.920798007  |              |              | Brain_Anterior_cingulate_cortex_BA24  |             |   |
|              | 1.170736991                           | 0.829263009  | 0.829263009  | -0.422370364 | -0.09942856                           |             |   |
|              | -0.260899462                          | 0.22835434   | 2            | 0            | 0.998207054                           |             |   |
| RAP1GAP2     | ENSG00000132359.14                    | 0.914447353  | 2            | 2            | 0.754210865                           |             |   |
|              | Brain_Cerebellum                      | 0.933100728  |              |              | Brain_Cerebellar_Hemisphere           | 1.511977324 |   |
|              | 0.488022676                           | 0.488022676  | -0.313091871 | 0.083944286  | -0.114573793                          |             |   |
|              | 0.280746959                           | 2            | 0            | 0.998207054  |                                       |             |   |
| TMSB10       | ENSG00000034510.5                     | 0.914515182  | 2            | 2            | 0.746634552                           |             |   |
|              | Brain_Cerebellar_Hemisphere           | 0.961935553  |              |              | Brain_Cerebellum                      | 1.554554801 |   |
|              | 0.445445199                           | 0.445445199  | -0.323080138 | 0.04772482   | -0.137677659                          |             |   |
|              | 0.2621987                             | 2            | 0            | 0.998207054  |                                       |             |   |
| CDKN2AIP     | ENSG00000168564.5                     | 0.914654769  | 3            | 3            | 0.644662193                           |             |   |
|              | Brain_Hypothalamus                    | 0.932204782  |              |              | Brain_Cerebellum                      | 2.162642619 |   |
|              | 0.144025032                           | 0.144025032  | -0.461190143 | 0.185995832  | -0.120088505                          |             |   |
|              | 0.325010892                           | 3            | 0            | 0.998207054  |                                       |             |   |
| SLC11A2      | ENSG00000110911.14                    | 0.914682026  | 3            | 3            | 0.476393204                           |             |   |
|              | Brain_Caudate_basal_ganglia           | 0.866758365  |              |              | Brain_Anterior_cingulate_cortex_BA24  |             |   |
|              | 1.214483018                           | 0.761088649  | 0.761088649  | -0.712115586 | 0.186197028                           |             |   |
|              | -0.231232002                          | 0.452505523  | 3            | 0            | 0.998207054                           |             |   |
| ATXN7L2      | ENSG00000162650.16                    | 0.914718649  | 2            | 2            | 0.675593799                           |             |   |
|              | Brain_Cerebellum                      | 0.718312413  |              |              | Brain_Cerebellar_Hemisphere           | 1.777651017 |   |
|              | 0.222348983                           | 0.222348983  | -0.418483293 | -0.36071513  | -0.389599211                          |             |   |
|              | 0.040848259                           | 2            | 0            | 0.998207054  |                                       |             |   |
| WDR93        | ENSG00000140527.14                    | 0.914752397  | 1            | 1            | 0.914752397                           |             |   |
|              | Brain_Nucleus_accumbens_basal_ganglia | 0.914752397  |              |              |                                       |             |   |
|              | Brain_Nucleus_accumbens_basal_ganglia | 1            | 1            | 1            | 0.107046112                           |             |   |
|              | 0.107046112                           | 0.107046112  | NA           | 1            | 0                                     | 0.998207054 |   |
| VDAC3        | ENSG00000078668.13                    | 0.914769356  | 1            | 1            | 0.914769356                           |             |   |
|              | Brain_Caudate_basal_ganglia           | 0.914769356  |              |              | Brain_Caudate_basal_ganglia           | 1           | 1 |
|              | 1                                     | -0.107024736 | -0.107024736 | -0.107024736 | NA                                    | 1           | 0 |
|              | 0.998207054                           |              |              |              |                                       |             |   |
| NIF3L1       | ENSG00000196290.14                    | 0.914833595  | 2            | 2            | 0.769572148                           |             |   |
|              | Brain_Cerebellum                      | 0.952038189  |              |              | Brain_Nucleus_accumbens_basal_ganglia | 1.61339376  |   |
|              | 0.38660624                            | 0.38660624   | -0.060147462 | 0.292934591  | 0.116393564                           |             |   |
|              | 0.249666714                           | 2            | 0            | 0.998207054  |                                       |             |   |
| DCBLD2       | ENSG00000057019.15                    | 0.915232104  | 4            | 4            | 0.42078                               |             |   |
|              | Brain_Cerebellar_Hemisphere           | 0.90325174   |              |              | Brain_Cerebellum                      | 2.397877076 |   |

|               |                                       |                             |                                       |                                |              |              |                    |   |   |
|---------------|---------------------------------------|-----------------------------|---------------------------------------|--------------------------------|--------------|--------------|--------------------|---|---|
|               | 0.186821718                           | 0.186821718                 | -0.805068763                          | 0.233941358                    | -0.236046576 |              |                    |   |   |
|               | 0.431285772                           | 4                           | 0                                     | 0.998207054                    |              |              |                    |   |   |
| CCDC61        | ENSG00000104983.8                     | 0.915306362                 | 4                                     | 4                              | 0.355169855  |              |                    |   |   |
|               | Brain_Substantia_nigra                | 0.987585824                 |                                       | Brain_Hippocampus              | 1.849760538  |              |                    |   |   |
|               | 0.363908224                           | 0.363908224                 | -0.924607991                          | 0.361258274                    | -0.054693178 |              |                    |   |   |
|               | 0.600537738                           | 4                           | 0                                     | 0.998207054                    |              |              |                    |   |   |
| MLPH          | ENSG00000115648.13                    | 0.91539064                  | 2                                     | 2                              | 0.745190243  |              | Brain_Hypothalamus |   |   |
|               | 0.795829663                           | Brain_Putamen_basal_ganglia | 1.024582268                           |                                | 0.975417732  |              |                    |   |   |
|               | 0.975417732                           | -0.258748025                | 0.324987883                           | 0.033119929                    | 0.412763618  |              |                    |   |   |
|               | 2                                     | 0                           | 0.998207054                           |                                |              |              |                    |   |   |
| PLA2G4C       | ENSG00000105499.13                    | 0.915472988                 | 11                                    | 7                              | 0.249546838  |              |                    |   |   |
|               | Brain_Frontal_Cortex_BA9              | 0.92379165                  | Brain_Hippocampus                     | 7.200978735                    |              |              |                    |   |   |
|               | 0.044283632                           | 0.28554259                  | -1.151450769                          | 0.199565087                    | -0.419129047 |              |                    |   |   |
|               | 0.417117234                           | 7                           | 0                                     | 0.998207054                    |              |              |                    |   |   |
| ADCK2         | ENSG00000133597.10                    | 0.915482805                 | 8                                     | 4                              | 0.363058454  |              |                    |   |   |
|               | Brain_Nucleus_accumbens_basal_ganglia | 0.815937152                 |                                       | Brain_Frontal_Cortex_BA9       |              |              |                    |   |   |
|               | 6.260946322                           | 0.008568621                 | 0.235094865                           | -0.854573585                   | 0.909552699  |              |                    |   |   |
|               | 0.332132943                           | 0.686663839                 | 4                                     | 0                              | 0.998207054  |              |                    |   |   |
| LINC00930     | ENSG00000258647.5                     | 0.915519213                 | 1                                     | 1                              | 0.915519213  |              |                    |   |   |
|               | Brain_Caudate_basal_ganglia           | 0.915519213                 |                                       | Brain_Caudate_basal_ganglia    | 1            | 1            |                    |   |   |
|               | 1                                     | 0.106079579                 | 0.106079579                           | 0.106079579                    | NA           | 1            | 0                  |   |   |
|               | 0.998207054                           |                             |                                       |                                |              |              |                    |   |   |
| CH17-385C13.3 | ENSG00000270339.3                     | 0.91553563                  | 2                                     | 2                              | 0.684005351  |              |                    |   |   |
|               | Brain_Nucleus_accumbens_basal_ganglia | 0.957868739                 |                                       |                                |              |              |                    |   |   |
|               | Brain_Spinal_cord_cervical_c-1        | 1.124036671                 |                                       | 0.875963329                    | 0.875963329  |              |                    |   |   |
|               | 0.052828267                           | 0.407003591                 | 0.229915929                           | 0.250439773                    | 2            | 0            |                    |   |   |
|               | 0.998207054                           |                             |                                       |                                |              |              |                    |   |   |
| E2F7          | ENSG00000165891.15                    | 0.91561405                  | 2                                     | 1                              | 0.893054005  |              | Brain_Cortex       |   |   |
|               | 0.938288519                           | Brain_Amygdala              | 1.99890293                            | 0.00109707                     | 1.99890293   | 0.077421146  |                    |   |   |
|               | 0.13444082                            | 0.105930983                 | 0.040318998                           | 1                              | 0            | 0.998207054  |                    |   |   |
| MTRNR2L6      | ENSG00000270672.1                     | 0.915626053                 | 1                                     | 1                              | 0.915626053  |              |                    |   |   |
|               | Brain_Spinal_cord_cervical_c-1        | 0.915626053                 |                                       | Brain_Spinal_cord_cervical_c-1 |              |              |                    |   |   |
|               | 1                                     | 1                           | 1                                     | -0.105944921                   | -0.105944921 | -0.105944921 | NA                 | 1 | 0 |
|               | 0.998207054                           |                             |                                       |                                |              |              |                    |   |   |
| SNX18         | ENSG00000178996.13                    | 0.915892645                 | 4                                     | 4                              | 0.557009064  |              | Brain_Cerebellum   |   |   |
|               | 0.801300674                           | Brain_Hippocampus           | 1.461001952                           |                                | 0.534398822  |              |                    |   |   |
|               | 0.534398822                           | -0.58728984                 | 0.342472771                           | -0.096603276                   | 0.462909852  |              |                    |   |   |
|               | 4                                     | 0                           | 0.998207054                           |                                |              |              |                    |   |   |
| LINC01806     | ENSG00000227403.1                     | 0.915927333                 | 1                                     | 1                              | 0.915927333  |              |                    |   |   |
|               | Brain_Spinal_cord_cervical_c-1        | 0.915927333                 |                                       | Brain_Spinal_cord_cervical_c-1 |              |              |                    |   |   |
|               | 1                                     | 1                           | 1                                     | -0.105565205                   | -0.105565205 | -0.105565205 | NA                 | 1 | 0 |
|               | 0.998207054                           |                             |                                       |                                |              |              |                    |   |   |
| PHACTR2       | ENSG00000112419.14                    | 0.915951891                 | 2                                     | 2                              | 0.680507019  |              |                    |   |   |
|               | Brain_Substantia_nigra                | 0.81995488                  | Brain_Nucleus_accumbens_basal_ganglia |                                |              |              |                    |   |   |
|               | 1.37820612                            | 0.62179388                  | 0.62179388                            | 0.22760301                     | 0.411771355  | 0.319687182  |                    |   |   |
|               | 0.130226686                           | 2                           | 0                                     | 0.998207054                    |              |              |                    |   |   |
| RNASEH2C      | ENSG00000172922.8                     | 0.91605823                  | 10                                    | 7                              | 0.446570883  |              |                    |   |   |
|               | Brain_Spinal_cord_cervical_c-1        | 0.990369972                 |                                       |                                |              |              |                    |   |   |
|               | Brain_Anterior_cingulate_cortex_BA24  | 4.655436175                 |                                       | 0.049595056                    |              |              |                    |   |   |
|               | 0.243814266                           | -0.761144301                | 0.540397764                           | -0.022012394                   | 0.532213303  |              |                    |   |   |
|               | 7                                     | 0                           | 0.998207054                           |                                |              |              |                    |   |   |
| RPL7L1        | ENSG00000146223.14                    | 0.91607767                  | 10                                    | 5                              | 0.512696778  |              |                    |   |   |
|               | Brain_Hypothalamus                    | 0.930397225                 | Brain_Caudate_basal_ganglia           | 7.836176576                    |              |              |                    |   |   |
|               | 0.004143755                           | 0.305522848                 | -0.654644326                          | 0.401046389                    | 0.113005924  |              |                    |   |   |
|               | 0.326175256                           | 5                           | 0                                     | 0.998207054                    |              |              |                    |   |   |
| CTC-552D5.1   | ENSG00000251293.1                     | 0.916361894                 | 2                                     | 2                              | 0.733480231  |              |                    |   |   |
|               | Brain_Amygdala                        | 0.801139031                 | Brain_Nucleus_accumbens_basal_ganglia |                                |              |              |                    |   |   |
|               | 1.028164581                           | 0.971835419                 | 0.971835419                           | -0.251873257                   | 0.340499723  |              |                    |   |   |
|               | 0.044313233                           | 0.418870951                 | 2                                     | 0                              | 0.998207054  |              |                    |   |   |
| ZNF404        | ENSG00000176222.8                     | 0.916369048                 | 12                                    | 2                              | 0.615057018  |              |                    |   |   |
|               | Brain_Hypothalamus                    | 0.983656101                 | Brain_Cortex                          | 10.89346446                    |              |              |                    |   |   |
|               | 0.001458907                           | 0.364274548                 | -0.502868089                          | 0.393163393                    | 0.024361069  |              |                    |   |   |

|               |                                       |                                      |              |                                       |             |              |                   |   |  |
|---------------|---------------------------------------|--------------------------------------|--------------|---------------------------------------|-------------|--------------|-------------------|---|--|
|               | 0.279117446                           | 2                                    | 0            | 0.998207054                           |             |              |                   |   |  |
| RPF2          | ENSG00000197498.12                    |                                      | 0.916481084  | 3                                     | 3           | 0.518683277  |                   |   |  |
|               | Brain_Frontal_Cortex_BA9              |                                      | 0.90473176   | Brain_Substantia_nigra                |             | 1.568787099  |                   |   |  |
|               | 0.432105077                           | 0.432105077                          | 0.119686165  | 0.645376425                           |             | 0.298772192  |                   |   |  |
|               | 0.30022379                            | 3                                    | 0            | 0.998207054                           |             |              |                   |   |  |
| GFOD2         | ENSG00000141098.12                    |                                      | 0.916767586  | 2                                     | 2           | 0.680727394  |                   |   |  |
|               | Brain_Hippocampus                     |                                      | 0.937927136  | Brain_Cortex                          |             | 1.342344769  |                   |   |  |
|               | 0.657655231                           | 0.657655231                          | 0.07787544   | 0.411470738                           |             | 0.244673089  |                   |   |  |
|               | 0.235887497                           | 2                                    | 0            | 0.998207054                           |             |              |                   |   |  |
| HEATR3        | ENSG00000155393.12                    |                                      | 0.916789582  | 13                                    | 1           | 0.715564316  |                   |   |  |
|               | Brain_Hypothalamus                    |                                      | 0.995392258  | Brain_Putamen_basal_ganglia           |             | 12.51357714  |                   |   |  |
|               | 0.000906808                           | 12.51357714                          | -0.265095754 | 0.36439333                            |             | 0.102156928  |                   |   |  |
|               | 0.163838261                           | 1                                    | 0            | 0.998207054                           |             |              |                   |   |  |
| LINC00960     | ENSG00000242516.1                     |                                      | 0.91680313   | 6                                     | 6           | 0.201634269  | Brain_Amygdala    |   |  |
|               | 0.981646585                           | Brain_Cortex                         | 1.8514106    | 0.30433583                            | 0.30433583  | -0.466914351 |                   |   |  |
|               | 1.276909304                           | 0.124687835                          | 0.599365847  | 6                                     | 0           | 0.998207054  |                   |   |  |
| MGRN1         | ENSG00000102858.12                    |                                      | 0.916923092  | 13                                    | 1           | 0.24508902   | Brain_Hippocampus |   |  |
|               | 0.959269961                           | Brain_Anterior_cingulate_cortex_BA24 | 12.04846901  |                                       |             |              |                   |   |  |
|               | 0.003553227                           | 12.04846901                          | -1.162360602 | 0.256929825                           |             | -0.109733471 |                   |   |  |
|               | 0.406973125                           | 1                                    | 0            | 0.998207054                           |             |              |                   |   |  |
| DNAH12        | ENSG00000174844.14                    |                                      | 0.916946196  | 2                                     | 2           | 0.897471324  |                   |   |  |
|               | Brain_Putamen_basal_ganglia           |                                      | 0.916362123  | Brain_Cerebellum                      |             | 1.842152661  |                   |   |  |
|               | 0.157847339                           | 0.157847339                          | -0.105017247 | 0.12885634                            |             | 0.011919546  |                   |   |  |
|               | 0.165373599                           | 2                                    | 0            | 0.998207054                           |             |              |                   |   |  |
| DCUN1D3       | ENSG00000188215.9                     |                                      | 0.916954934  | 2                                     | 2           | 0.758211535  |                   |   |  |
|               | Brain_Cerebellum                      |                                      | 0.820102084  | Brain_Cerebellar_Hemisphere           |             | 1.160394086  |                   |   |  |
|               | 0.839605914                           | 0.839605914                          | -0.22741368  | 0.307830207                           |             | 0.040208264  |                   |   |  |
|               | 0.378474581                           | 2                                    | 0            | 0.998207054                           |             |              |                   |   |  |
| FREM2         | ENSG00000150893.10                    |                                      | 0.917020533  | 9                                     | 2           | 0.710596895  | Brain_Cerebellum  |   |  |
|               | 0.965274882                           | Brain_Putamen_basal_ganglia          | 8.040309894  | 1.81E-17                              |             |              |                   |   |  |
|               | 0.456534225                           | -0.142607934                         | 0.37105456   | 0.136692068                           |             | 0.219136893  |                   | 2 |  |
|               | 0                                     | 0.998207054                          |              |                                       |             |              |                   |   |  |
| LIN54         | ENSG00000189308.10                    |                                      | 0.917360344  | 1                                     | 1           | 0.917360344  | Brain_Amygdala    |   |  |
|               | 0.917360344                           | Brain_Amygdala                       | 1            | 1                                     | 1           | -0.103759328 | -0.103759328      |   |  |
|               | -0.103759328                          | NA                                   | 1            | 0                                     | 0.998207054 |              |                   |   |  |
| HMSD          | ENSG00000221887.5                     |                                      | 0.917407794  | 3                                     | 2           | 0.640465844  |                   |   |  |
|               | Brain_Spinal_cord_cervical_c-1        |                                      | 0.941189301  | Brain_Amygdala                        |             | 1.985607182  |                   |   |  |
|               | 0.029086323                           | 0.985306495                          | -0.46704757  | -0.07377515                           |             | -0.298269609 |                   |   |  |
|               | 0.202469863                           | 2                                    | 0            | 0.998207054                           |             |              |                   |   |  |
| LRRC36        | ENSG00000159708.17                    |                                      | 0.917474465  | 3                                     | 3           | 0.492293097  |                   |   |  |
|               | Brain_Hypothalamus                    |                                      | 0.917315325  | Brain_Nucleus_accumbens_basal_ganglia |             |              |                   |   |  |
|               | 1.523560333                           | 0.474748239                          | 0.474748239  | -0.686666207                          |             | 0.103816055  |                   |   |  |
|               | -0.330518908                          | 0.40099942                           | 3            | 0                                     | 0.998207054 |              |                   |   |  |
| AL132709.1    | ENSG00000230805.6                     |                                      | 0.917488426  | 6                                     | 3           | 0.542528023  |                   |   |  |
|               | Brain_Hypothalamus                    |                                      | 0.990317918  | Brain_Frontal_Cortex_BA9              |             | 5.027271483  |                   |   |  |
|               | 0.084797088                           | 0.28734771                           | -0.434054357 | 0.608994593                           |             | 0.173238005  |                   |   |  |
|               | 0.37324072                            | 3                                    | 0            | 0.998207054                           |             |              |                   |   |  |
| RP11-498C9.15 | ENSG00000263731.1                     |                                      | 0.917548033  | 1                                     | 1           | 0.917548033  |                   |   |  |
|               | Brain_Nucleus_accumbens_basal_ganglia |                                      | 0.917548033  |                                       |             |              |                   |   |  |
|               | Brain_Nucleus_accumbens_basal_ganglia |                                      | 1            | 1                                     | 1           | -0.103522828 |                   |   |  |
|               | -0.103522828                          | -0.103522828                         | NA           | 1                                     | 0           | 0.998207054  |                   |   |  |
| HCG17         | ENSG00000270604.5                     |                                      | 0.917572845  | 13                                    | 8           | 0.251933516  |                   |   |  |
|               | Brain_Frontal_Cortex_BA9              |                                      | 0.860467646  | Brain_Anterior_cingulate_cortex_BA24  |             |              |                   |   |  |
|               | 7.331795188                           | 0.03507001                           | 0.297336808  | -1.145665665                          |             | 0.342107121  |                   |   |  |
|               | -0.355941604                          | 0.55428736                           | 8            | 0                                     | 0.998207054 |              |                   |   |  |
| KLHL20        | ENSG00000076321.10                    |                                      | 0.917613922  | 1                                     | 1           | 0.917613922  |                   |   |  |
|               | Brain_Putamen_basal_ganglia           |                                      | 0.917613922  | Brain_Putamen_basal_ganglia           |             | 1            | 1                 |   |  |
|               | 1                                     | -0.103439805                         | -0.103439805 | -0.103439805                          |             | NA           | 1                 | 0 |  |
|               | 0.998207054                           |                                      |              |                                       |             |              |                   |   |  |
| CNOT9         | ENSG00000144580.13                    |                                      | 0.91782928   | 4                                     | 4           | 0.51538667   | Brain_Cortex      |   |  |
|               | 0.771103022                           | Brain_Hypothalamus                   | 2.254392824  | 0.080326348                           |             |              |                   |   |  |
|               | 0.080326348                           | -0.317501704                         | 0.650473104  | 0.316075706                           |             | 0.454261215  |                   |   |  |

|           |                                       |                                |              |              |                             |             |             |   |
|-----------|---------------------------------------|--------------------------------|--------------|--------------|-----------------------------|-------------|-------------|---|
| 4         | 0                                     | 0.998207054                    |              |              |                             |             |             |   |
| FLII      | ENSG00000177731.15                    | 0.917873759                    | 2            | 2            | 0.738213753                 |             |             |   |
|           | Brain_Cerebellar_Hemisphere           | 0.7767082                      |              |              | Brain_Cerebellum            | 1.12315212  | 0.87684788  |   |
|           | 0.87684788                            | -0.283611399                   | 0.334219735  | 0.025304168  | 0.436872585                 |             | 2           |   |
|           | 0                                     | 0.998207054                    |              |              |                             |             |             |   |
| LINC00463 | ENSG00000234056.1                     | 0.917922813                    | 2            | 2            | 0.680344012                 |             |             |   |
|           | Brain_Putamen_basal_ganglia           | 0.86425261                     |              |              | Brain_Cerebellum            | 1.497717621 |             |   |
|           | 0.502282379                           | 0.502282379                    | -0.41199374  | -0.170963317 | -0.291478528                |             |             |   |
|           | 0.170434247                           | 2                              | 0            | 0.998207054  |                             |             |             |   |
| CP        | ENSG00000047457.13                    | 0.918080372                    | 3            | 2            | 0.629572843                 |             |             |   |
|           | Brain_Substantia_nigra                | 0.856616008                    |              |              | Brain_Frontal_Cortex_BA9    |             |             |   |
|           | 2.837004705                           | 0.04254973                     | 0.120445565  | 0.180683503  | 0.482328164                 |             |             |   |
|           | 0.295349668                           | 0.163307012                    | 2            | 0            | 0.998207054                 |             |             |   |
| OR2T8     | ENSG00000177462.6                     | 0.918130735                    | 4            | 4            | 0.599731462                 |             |             |   |
|           | Brain_Nucleus_accumbens_basal_ganglia | 0.947927019                    |              |              | Brain_Caudate_basal_ganglia |             |             |   |
|           | 2.046459298                           | 0.272963571                    | 0.272963571  | -0.360447736 | 0.524786724                 |             |             |   |
|           | -0.031467368                          | 0.421118288                    | 4            | 0            | 0.998207054                 |             |             |   |
| PPP1R3B   | ENSG00000173281.4                     | 0.918138228                    | 1            | 1            | 0.918138228                 |             |             |   |
|           | Brain_Hippocampus                     | 0.918138228                    |              |              | Brain_Hippocampus           | 1           | 1           | 1 |
|           | 0.102779182                           | 0.102779182                    | 0.102779182  | NA           | 1                           | 0           | 0.998207054 |   |
| CPS1      | ENSG00000021826.14                    | 0.918190118                    | 4            | 2            | 0.765581145                 |             |             |   |
|           | Brain_Cerebellar_Hemisphere           | 3.016222348                    |              |              | Brain_Cortex                |             |             |   |
|           | 0.853437402                           |                                |              |              | 0.0278761                   |             |             |   |
|           | 0.888822213                           | -0.298159875                   | -0.184734351 | -0.240961776 | 0.052524585                 |             |             |   |
|           | 2                                     | 0                              | 0.998207054  |              |                             |             |             |   |
| NIT2      | ENSG00000114021.11                    | 0.918292539                    | 11           | 5            | 0.186206319                 |             |             |   |
|           | Brain_Anterior_cingulate_cortex_BA24  | 0.918979884                    |              |              | Brain_Cerebellum            |             |             |   |
|           | 7.142725693                           | 0.001201858                    | 0.277679971  | -0.421065315 | 1.321885387                 |             |             |   |
|           | 0.579053994                           | 0.549060398                    | 5            | 0            | 0.998207054                 |             |             |   |
| CUZD1     | ENSG00000138161.13                    | 0.918346409                    | 6            | 5            | 0.396586202                 |             |             |   |
|           | Brain_Anterior_cingulate_cortex_BA24  | 0.990924369                    |              |              | Brain_Caudate_basal_ganglia |             |             |   |
|           | 2.706997401                           | 0.072987756                    | 0.238346027  | -0.847733865 | 0.697749633                 |             |             |   |
|           | 0.168203697                           | 0.574445885                    | 5            | 0            | 0.998207054                 |             |             |   |
| APBB1IP   | ENSG00000077420.15                    | 0.918536515                    | 2            | 2            | 0.728226544                 |             |             |   |
|           | Brain_Nucleus_accumbens_basal_ganglia | 0.742886636                    |              |              | Brain_Frontal_Cortex_BA9    |             |             |   |
|           | 1.344835691                           | 0.655164309                    | 0.655164309  | -0.347485588 | -0.328033099                |             |             |   |
|           | -0.337759344                          | 0.013754987                    | 2            | 0            | 0.998207054                 |             |             |   |
| ORC1      | ENSG00000085840.12                    | 0.918553489                    | 2            | 2            | 0.684064953                 |             |             |   |
|           | Brain_Substantia_nigra                | 1.433877542                    |              |              | Brain_Amygdala              |             |             |   |
|           | 0.813585832                           |                                |              |              | 0.566122458                 |             |             |   |
|           | 0.566122458                           | 0.235802624                    | 0.406922442  | 0.321362533  | 0.120999984                 |             |             |   |
|           | 2                                     | 0                              | 0.998207054  |              |                             |             |             |   |
| EPN2      | ENSG00000072134.15                    | 0.918632366                    | 3            | 3            | 0.554160948                 |             |             |   |
|           | Brain_Cerebellum                      |                                |              |              |                             |             |             |   |
|           | 0.932853532                           | Brain_Amygdala                 | 1.52937809   | 0.476582837  | 0.476582837                 |             |             |   |
|           | -0.084255198                          | 0.591536588                    | 0.265079178  | 0.338476219  | 3                           | 0           |             |   |
|           | 0.998207054                           |                                |              |              |                             |             |             |   |
| PPP4R3B   | ENSG00000275052.4                     | 0.918710916                    | 3            | 3            | 0.562199756                 |             |             |   |
|           | Brain_Frontal_Cortex_BA9              | 0.989567488                    |              |              | Brain_Cerebellar_Hemisphere |             |             |   |
|           | 2.010083803                           | 0.11982103                     | 0.11982103   | -0.579577223 | 0.277923367                 |             |             |   |
|           | -0.104909815                          | 0.436064169                    | 3            | 0            | 0.998207054                 |             |             |   |
| BPNT1     | ENSG00000162813.17                    | 0.918917565                    | 1            | 1            | 0.918917565                 |             |             |   |
|           | Brain_Putamen_basal_ganglia           | 0.918917565                    |              |              | Brain_Putamen_basal_ganglia | 1           | 1           |   |
|           | 1                                     | 0.101797305                    | 0.101797305  | 0.101797305  | NA                          | 1           | 0           |   |
|           | 0.998207054                           |                                |              |              |                             |             |             |   |
| DHCR24    | ENSG00000116133.11                    | 0.91907393                     | 4            | 4            | 0.438055046                 |             |             |   |
|           | Brain_Amygdala                        |                                |              |              |                             |             |             |   |
|           | 0.788332383                           | Brain_Spinal_cord_cervical_c-1 | 1.657975572  | 0.264265957  |                             |             |             |   |
|           | 0.264265957                           | -0.775481749                   | 0.268476731  | -0.45286686  | 0.484729369                 |             |             |   |
|           | 4                                     | 0                              | 0.998207054  |              |                             |             |             |   |
| NPY2R     | ENSG00000185149.5                     | 0.919202944                    | 8            | 8            | 0.375405403                 |             |             |   |
|           | Brain_Hippocampus                     | 0.805909101                    |              |              | Brain_Hypothalamus          | 3.193860108 |             |   |
|           | 0.134433808                           | 0.134433808                    | -0.886393718 | 0.708519334  | -0.253272665                |             |             |   |
|           | 0.523855767                           | 8                              | 0            | 0.998207054  |                             |             |             |   |
| LINC00997 | ENSG00000281332.1                     | 0.919432505                    | 8            | 5            | 0.234507238                 |             |             |   |
|           | Brain_Frontal_Cortex_BA9              | 0.723660618                    |              |              | Brain_Substantia_nigra      |             |             |   |

|               |                                       |              |              |              |                                |              |              |   |
|---------------|---------------------------------------|--------------|--------------|--------------|--------------------------------|--------------|--------------|---|
|               | 5.789007035                           | 0.100396018  | 0.274076568  | 0.353570724  | 1.188828302                    |              |              |   |
|               | 0.844147504                           | 0.281255581  | 5            | 0            | 0.998207054                    |              |              |   |
| SIAH3         | ENSG00000215475.4                     | 0.919577219  | 2            | 2            | 0.714113588                    |              |              |   |
|               | Brain_Substantia_nigra                | 0.857414346  |              |              | Brain_Cerebellum               | 1.009009631  |              |   |
|               | 0.990990369                           | 0.990990369  | -0.366337047 | 0.179666562  | -0.093335243                   |              |              |   |
|               | 0.386082855                           | 2            | 0            | 0.998207054  |                                |              |              |   |
| ADK           | ENSG00000156110.13                    | 0.919657437  | 1            | 1            | 0.919657437                    |              |              |   |
|               | Brain_Cerebellar_Hemisphere           | 0.919657437  |              |              | Brain_Cerebellar_Hemisphere    | 1            | 1            |   |
|               | 1                                     | -0.10086524  | -0.10086524  | -0.10086524  | NA                             | 1            | 0            |   |
|               | 0.998207054                           |              |              |              |                                |              |              |   |
| SLF2          | ENSG00000119906.11                    | 0.919698872  | 1            | 1            | 0.919698872                    |              |              |   |
|               | Brain_Substantia_nigra                | 0.919698872  |              |              | Brain_Substantia_nigra         | 1            | 1            |   |
|               | 1                                     | 0.100813044  | 0.100813044  | 0.100813044  | NA                             | 1            | 0            |   |
|               | 0.998207054                           |              |              |              |                                |              |              |   |
| BTC           | ENSG00000174808.11                    | 0.919785407  | 1            | 1            | 0.919785407                    |              |              |   |
|               | Brain_Putamen_basal_ganglia           | 0.919785407  |              |              | Brain_Putamen_basal_ganglia    | 1            | 1            |   |
|               | 1                                     | -0.100704036 | -0.100704036 | -0.100704036 | NA                             | 1            | 0            |   |
|               | 0.998207054                           |              |              |              |                                |              |              |   |
| CLEC1A        | ENSG00000150048.10                    | 0.919803734  | 3            | 3            | 0.5104528                      |              |              |   |
|               | Brain_Frontal_Cortex_BA9              | 0.882237085  |              |              | Brain_Amygdala                 | 1.842136675  |              |   |
|               | 0.15753764                            | 0.15753764   | -0.148133914 | 0.658132801  | 0.38757101                     | 0.463941984  |              |   |
|               | 3                                     | 0            | 0.998207054  |              |                                |              |              |   |
| GCLM          | ENSG00000023909.9                     | 0.919857062  | 5            | 4            | 0.509661974                    |              |              |   |
|               | Brain_Frontal_Cortex_BA9              | 0.980130192  |              |              | Brain_Caudate_basal_ganglia    |              |              |   |
|               | 3.933019822                           | 0.024060178  | 0.20702282   | -0.659364123 | 0.024905686                    |              |              |   |
|               | -0.313859787                          | 0.28604342   | 4            | 0            | 0.998207054                    |              |              |   |
| FAM66A        | ENSG00000227888.4                     | 0.919873871  | 13           | 9            | 0.290611646                    |              |              |   |
|               | Brain_Caudate_basal_ganglia           | 0.977339357  |              |              | Brain_Cerebellum               | 7.487035522  |              |   |
|               | 0.007798079                           | 0.255187795  | -1.056780784 | 0.46574262   | -0.262959739                   |              |              |   |
|               | 0.398920971                           | 9            | 0            | 0.998207054  |                                |              |              |   |
| RP11-53019.3  | ENSG00000272335.1                     | 0.919963447  | 8            | 4            | 0.399891807                    |              |              |   |
|               | Brain_Nucleus_accumbens_basal_ganglia | 0.958138888  |              |              |                                |              |              |   |
|               | Brain_Spinal_cord_cervical_c-1        | 6.590644854  |              |              | 0.004333701                    | 0.231075741  |              |   |
|               | -0.841814477                          | -0.052489216 | -0.524493979 | 0.257033893  | 4                              | 0            |              |   |
|               | 0.998207054                           |              |              |              |                                |              |              |   |
| PRIMPOL       | ENSG00000164306.10                    | 0.92002275   | 7            | 6            | 0.379918325                    |              |              |   |
|               | Brain_Nucleus_accumbens_basal_ganglia | 0.938966486  |              |              | Brain_Hypothalamus             |              |              |   |
|               | 3.55512681                            | 0.019795648  | 0.152581097  | -0.878046793 | 0.556863599                    |              |              |   |
|               | -0.385111011                          | 0.535914417  | 6            | 0            | 0.998207054                    |              |              |   |
| RP11-256I23.3 | ENSG00000267919.1                     | 0.920087413  | 1            | 1            | 0.920087413                    |              |              |   |
|               | Brain_Substantia_nigra                | 0.920087413  |              |              | Brain_Substantia_nigra         | 1            | 1            |   |
|               | 1                                     | -0.100323611 | -0.100323611 | -0.100323611 | NA                             | 1            | 0            |   |
|               | 0.998207054                           |              |              |              |                                |              |              |   |
| PTPRD         | ENSG00000153707.16                    | 0.920123226  | 1            | 1            | 0.920123226                    |              |              |   |
|               | Brain_Spinal_cord_cervical_c-1        | 0.920123226  |              |              | Brain_Spinal_cord_cervical_c-1 |              |              |   |
|               | 1                                     | 1            | 1            | 0.100278499  | 0.100278499                    | 0.100278499  | NA           | 1 |
|               | 0.998207054                           |              |              |              |                                |              |              |   |
| HSBP1         | ENSG00000230989.6                     | 0.920225564  | 1            | 1            | 0.920225564                    | Brain_Cortex |              |   |
|               | 0.920225564                           | Brain_Cortex | 1            | 1            | 1                              | -0.100149593 | -0.100149593 |   |
|               | -0.100149593                          | NA           | 1            | 0            | 0.998207054                    |              |              |   |
| C5orf17       | ENSG00000248874.5                     | 0.920427777  | 2            | 1            | 0.920102432                    |              |              |   |
|               | Brain_Substantia_nigra                | 0.920753177  |              |              | Brain_Spinal_cord_cervical_c-1 |              |              |   |
|               | 1.999998917                           | 1.08E-06     | 1.999998917  | 0.099485025  | 0.100304692                    |              |              |   |
|               | 0.099894858                           | 0.000579592  | 1            | 0            | 0.998207054                    |              |              |   |
| SIRT2         | ENSG00000068903.19                    | 0.920599075  | 2            | 1            | 0.919969042                    |              |              |   |
|               | Brain_Cerebellar_Hemisphere           | 0.922212221  |              |              | Brain_Cerebellum               | 1.975236416  |              |   |
|               | 0.024763584                           | 1.975236416  | -0.100472717 | -0.09764748  | -0.099060098                   |              |              |   |
|               | 0.001997744                           | 1            | 0            | 0.998207054  |                                |              |              |   |
| SLC22A15      | ENSG00000163393.12                    | 0.920697878  | 1            | 1            | 0.920697878                    |              |              |   |
|               | Brain_Spinal_cord_cervical_c-1        | 0.920697878  |              |              | Brain_Spinal_cord_cervical_c-1 |              |              |   |
|               | 1                                     | 1            | 1            | 0.099554677  | 0.099554677                    | 0.099554677  | NA           | 1 |
|               | 0.998207054                           |              |              |              |                                |              |              |   |

|               |                                       |              |              |              |                             |                    |            |
|---------------|---------------------------------------|--------------|--------------|--------------|-----------------------------|--------------------|------------|
| MRPL57        | ENSG00000173141.4                     | 0.920797681  | 1            | 1            | 0.920797681                 |                    |            |
|               | Brain_Putamen_basal_ganglia           | 0.920797681  |              |              | Brain_Putamen_basal_ganglia | 1                  | 1          |
|               | 1                                     | -0.099428971 | -0.099428971 | -0.099428971 | NA                          | 1                  | 0          |
|               | 0.998207054                           |              |              |              |                             |                    |            |
| RHPN2         | ENSG00000131941.7                     | 0.921021474  | 11           | 5            | 0.366554309                 |                    |            |
|               | Brain_Nucleus_accumbens_basal_ganglia | 0.893884404  |              |              | Brain_Frontal_Cortex_BA9    |                    |            |
|               | 8.569414047                           | 0.004386442  | 0.301066761  | -0.902946465 | 0.580243135                 |                    |            |
|               | -0.353000337                          | 0.3640402    | 5            | 0            | 0.998207054                 |                    |            |
| AMD1          | ENSG00000123505.15                    | 0.921110823  | 3            | 3            | 0.55260574                  | Brain_Hypothalamus |            |
|               | 0.877438121                           | Brain_Cortex | 1.34021056   | 0.67778902   | 0.67778902                  | -0.593860021       |            |
|               | 0.457525033                           | 0.005960889  | 0.541144791  | 3            | 0                           | 0.998207054        |            |
| RP11-478K15.6 | ENSG00000230731.2                     | 0.921148561  | 2            | 2            | 0.741945457                 |                    |            |
|               | Brain_Frontal_Cortex_BA9              | 0.964010557  |              |              | Brain_Cortex                | 1.669879363        |            |
|               | 0.330120637                           | 0.330120637  | -0.329278152 | -0.045121384 | -0.187199768                |                    |            |
|               | 0.200929177                           | 2            | 0            | 0.998207054  |                             |                    |            |
| SLC25A32      | ENSG00000164933.11                    | 0.92121357   | 3            | 3            | 0.605117761                 |                    |            |
|               | Brain_Anterior_cingulate_cortex_BA24  | 0.987501954  |              |              | Brain_Cortex                |                    |            |
|               | 1.703815452                           | 0.445515034  | 0.445515034  | -0.517055006 | 0.308335616                 |                    |            |
|               | -0.07479467                           | 0.415860183  | 3            | 0            | 0.998207054                 |                    |            |
| C11orf91      | ENSG00000205177.6                     | 0.921261445  | 4            | 4            | 0.374626628                 |                    |            |
|               | Brain_Cerebellum                      | 0.943573915  |              |              | Brain_Frontal_Cortex_BA9    | 1.184192521        |            |
|               | 0.862184597                           | 0.862184597  | -0.887840363 | 0.321069557  | -0.113964462                |                    |            |
|               | 0.540806817                           | 4            | 0            | 0.998207054  |                             |                    |            |
| CHAF1A        | ENSG00000167670.15                    | 0.921289836  | 13           | 1            | 0.455469244                 |                    |            |
|               | Brain_Cerebellum                      | 0.942572693  |              |              | Brain_Hippocampus           | 12.02146921        |            |
|               | 0.000772853                           | 12.02146921  | -0.254274814 | 0.746328095  | 0.101145767                 |                    |            |
|               | 0.320672427                           | 1            | 0            | 0.998207054  |                             |                    |            |
| ATP2A3        | ENSG00000074370.17                    | 0.921375007  | 2            | 1            | 0.803977522                 |                    |            |
|               | Brain_Caudate_basal_ganglia           | 0.958991329  |              |              | Brain_Frontal_Cortex_BA9    |                    |            |
|               | 1.987450447                           | 0.012549553  | 1.987450447  | -0.248202772 | 0.051419397                 |                    |            |
|               | -0.098391688                          | 0.211864867  | 1            | 0            | 0.998207054                 |                    |            |
| ZNF682        | ENSG00000197124.11                    | 0.921383235  | 10           | 3            | 0.390098465                 |                    |            |
|               | Brain_Nucleus_accumbens_basal_ganglia | 0.9916077    |              |              | Brain_Cerebellum            | 7.938065197        |            |
|               | 0.00564539                            | 0.550564129  | -0.859438811 | 0.010518383  | -0.511442989                |                    |            |
|               | 0.281277705                           | 3            | 0            | 0.998207054  |                             |                    |            |
| CTD-2026G6.3  | ENSG00000272710.1                     | 0.9214227    | 4            | 4            | 0.464664775                 |                    |            |
|               | Brain_Anterior_cingulate_cortex_BA24  | 0.857850931  |              |              | Brain_Cortex                |                    |            |
|               | 1.365037886                           | 0.708952596  | 0.708952596  | -0.4069322   | 0.73118727                  |                    |            |
|               | -0.045037766                          | 0.525995202  | 4            | 0            | 0.998207054                 |                    |            |
| RP11-109E12.1 | ENSG00000273073.1                     | 0.921483874  | 13           | 3            | 0.560593509                 |                    |            |
|               | Brain_Anterior_cingulate_cortex_BA24  | 0.979923273  |              |              |                             |                    |            |
|               | Brain_Spinal_cord_cervical_c-1        | 10.91529543  |              |              | 0.005745955                 | 0.576252742        |            |
|               | -0.328161125                          | 0.581960172  | 0.15034262   | 0.226215572  | 3                           | 0                  |            |
|               | 0.998207054                           |              |              |              |                             |                    |            |
| CEP126        | ENSG00000110318.13                    | 0.921517073  | 3            | 3            | 0.638623444                 |                    |            |
|               | Brain_Cerebellar_Hemisphere           | 0.830637548  |              |              | Brain_Cerebellum            | 2.378430183        |            |
|               | 0.099593556                           | 0.099593556  | 0.213883961  | 0.469624323  | 0.32763393                  |                    |            |
|               | 0.130188034                           | 3            | 0            | 0.998207054  |                             |                    |            |
| CTD-2196P11.2 | ENSG00000251189.1                     | 0.921593824  | 3            | 3            | 0.547490626                 |                    |            |
|               | Brain_Cerebellar_Hemisphere           | 0.876314649  |              |              | Brain_Hippocampus           | 1.166439478        |            |
|               | 0.848039656                           | 0.848039656  | -0.601524609 | 0.244101121  | -0.067260256                |                    |            |
|               | 0.464795677                           | 3            | 0            | 0.998207054  |                             |                    |            |
| PTDSS1        | ENSG00000156471.12                    | 0.921946139  | 2            | 2            | 0.742183492                 |                    |            |
|               | Brain_Anterior_cingulate_cortex_BA24  | 0.820962333  |              |              | Brain_Hypothalamus          |                    |            |
|               | 1.020400228                           | 0.979599772  | 0.979599772  | -0.226307413 | 0.328963216                 |                    |            |
|               | 0.051327901                           | 0.392635627  | 2            | 0            | 0.998207054                 |                    |            |
| PCYOX1L       | ENSG00000145882.10                    | 0.921975571  | 4            | 2            | 0.724532677                 |                    |            |
|               | Brain_Caudate_basal_ganglia           | 0.921777791  |              |              | Brain_Cortex                | 3.576469608        |            |
|               | 0.031023155                           | 0.310409271  | -0.176089285 | 0.352407501  | 0.057950202                 |                    |            |
|               | 0.2415398                             | 2            | 0            | 0.998207054  |                             |                    |            |
| LINC01003     | ENSG00000261455.1                     | 0.922011898  | 10           | 8            | 0.16672766                  |                    |            |
|               | Brain_Frontal_Cortex_BA9              | 0.9897406    |              |              | Brain_Cortex                | 4.290676899        | 0.02753999 |



|               |                                       |                                |                                       |              |              |                  |              |   |             |
|---------------|---------------------------------------|--------------------------------|---------------------------------------|--------------|--------------|------------------|--------------|---|-------------|
|               | 0.242377697                           | 0.012858606                    | 1.382795237                           | 0.451960438  | 0.389319623  |                  |              |   |             |
|               | 8                                     | 0                              | 0.998207054                           |              |              |                  |              |   |             |
| CTD-2162K18.4 | ENSG00000267260.1                     | 0.922014703                    | 9                                     | 5            | 0.340270157  |                  |              |   |             |
|               | Brain_Hypothalamus                    | 0.984620699                    | Brain_Putamen_basal_ganglia           | 6.778703537  |              |                  |              |   |             |
|               | 0.026911357                           | 0.243058041                    | -0.953631595                          | 0.491599102  | -0.270716245 |                  |              |   |             |
|               | 0.477581237                           | 5                              | 0                                     | 0.998207054  |              |                  |              |   |             |
| STX18         | ENSG00000168818.9                     | 0.922038173                    | 2                                     | 2            | 0.705239468  |                  |              |   |             |
|               | Brain_Hippocampus                     | 0.89343376                     | Brain_Substantia_nigra                | 1.012700524  |              |                  |              |   |             |
|               | 0.987299476                           | 0.987299476                    | -0.133960563                          | 0.378257293  | 0.122148365  |                  |              |   |             |
|               | 0.362192719                           | 2                              | 0                                     | 0.998207054  |              |                  |              |   |             |
| ZSCAN31       | ENSG00000235109.7                     | 0.922074162                    | 13                                    | 2            | 0.406848944  |                  |              |   |             |
|               | Brain_Cerebellar_Hemisphere           | 0.957381623                    | Brain_Cerebellum                      | 10.12945172  |              |                  |              |   |             |
|               | 0.012046786                           | 1.514358605                    | -0.829451547                          | 0.13065241   | -0.273532151 |                  |              |   |             |
|               | 0.329911456                           | 2                              | 0                                     | 0.998207054  |              |                  |              |   |             |
| CTAGE5        | ENSG00000150527.16                    | 0.922240648                    | 1                                     | 1            | 0.922240648  |                  |              |   |             |
|               | Brain_Cerebellum                      | 0.922240648                    | Brain_Cerebellum                      | 1            | 1            | 1                | -0.097611681 |   |             |
|               | -0.097611681                          | -0.097611681                   | NA                                    | 1            | 0            | 0.998207054      |              |   |             |
| COTL1         | ENSG00000103187.7                     | 0.922317439                    | 1                                     | 1            | 0.922317439  |                  |              |   |             |
|               | Brain_Cerebellar_Hemisphere           | 0.922317439                    | Brain_Cerebellar_Hemisphere           | 1            | 1            |                  |              |   |             |
|               | 1                                     | -0.097514979                   | -0.097514979                          | -0.097514979 | NA           | 1                | 0            |   |             |
|               | 0.998207054                           |                                |                                       |              |              |                  |              |   |             |
| ARMS2         | ENSG00000254636.1                     | 0.922357766                    | 2                                     | 2            | 0.687663419  |                  |              |   |             |
|               | Brain_Frontal_Cortex_BA9              | 0.965194518                    | Brain_Nucleus_accumbens_basal_ganglia |              |              |                  |              |   |             |
|               | 1.11892527                            | 0.88107473                     | 0.88107473                            | -0.402028001 | 0.043636046  | -0.179195977     |              |   |             |
|               | 0.31513207                            | 2                              | 0                                     | 0.998207054  |              |                  |              |   |             |
| METTL24       | ENSG00000053328.8                     | 0.922416149                    | 3                                     | 2            | 0.636815116  |                  |              |   |             |
|               | Brain_Cerebellum                      | 0.811662284                    | Brain_Nucleus_accumbens_basal_ganglia |              |              |                  |              |   |             |
|               | 2.659658102                           | 0.032820361                    | 0.307521537                           | -0.472156459 | -0.238282126 |                  |              |   |             |
|               | -0.338926057                          | 0.120294262                    | 2                                     | 0            | 0.998207054  |                  |              |   |             |
| ATP13A5       | ENSG00000187527.10                    | 0.922424056                    | 2                                     | 2            | 0.687779252  |                  |              |   |             |
|               | Brain_Caudate_basal_ganglia           | 0.991394648                    | Brain_Nucleus_accumbens_basal_ganglia |              |              |                  |              |   |             |
|               | 1.025126936                           | 0.974873064                    | 0.974873064                           | 0.010785419  | 0.401870612  |                  |              |   |             |
|               | 0.206328015                           | 0.276538992                    | 2                                     | 0            | 0.998207054  |                  |              |   |             |
| AC005592.3    | ENSG00000261757.1                     | 0.92245227                     | 1                                     | 1            | 0.92245227   |                  |              |   |             |
|               | Brain_Spinal_cord_cervical_c-1        | 0.92245227                     | Brain_Spinal_cord_cervical_c-1        | 1            | 1            |                  |              |   |             |
|               | 1                                     | 1                              | 0.09734519                            | 0.09734519   | 0.09734519   | NA               | 1            | 0 | 0.998207054 |
| SGSM3         | ENSG00000100359.20                    | 0.922614733                    | 4                                     | 4            | 0.594812687  |                  |              |   |             |
|               | Brain_Substantia_nigra                | 0.939284872                    | Brain_Cerebellum                      | 2.371391705  |              |                  |              |   |             |
|               | 0.085543755                           | 0.085543755                    | -0.531874835                          | 0.10503805   | -0.167733573 |                  |              |   |             |
|               | 0.31078275                            | 4                              | 0                                     | 0.998207054  |              |                  |              |   |             |
| RAB3IL1       | ENSG00000167994.11                    | 0.922657856                    | 8                                     | 3            | 0.465541894  |                  |              |   |             |
|               | Brain_Hypothalamus                    | 0.954608038                    | Brain_Cerebellar_Hemisphere           | 7.059448186  |              |                  |              |   |             |
|               | 0.002809174                           | 0.29978674                     | -0.729751829                          | -0.05692111  | -0.303145487 |                  |              |   |             |
|               | 0.25584952                            | 3                              | 0                                     | 0.998207054  |              |                  |              |   |             |
| RP11-725P16.2 | ENSG00000272769.1                     | 0.922670847                    | 1                                     | 1            | 0.922670847  |                  |              |   |             |
|               | Brain_Caudate_basal_ganglia           | 0.922670847                    | Brain_Caudate_basal_ganglia           | 1            | 1            |                  |              |   |             |
|               | 1                                     | -0.097069947                   | -0.097069947                          | -0.097069947 | NA           | 1                | 0            |   |             |
|               | 0.998207054                           |                                |                                       |              |              |                  |              |   |             |
| RP11-580I1.2  | ENSG00000261621.1                     | 0.922756343                    | 1                                     | 1            | 0.922756343  |                  |              |   |             |
|               | Brain_Spinal_cord_cervical_c-1        | 0.922756343                    | Brain_Spinal_cord_cervical_c-1        |              |              |                  |              |   |             |
|               | 1                                     | 1                              | 1                                     | 0.096962288  | 0.096962288  | 0.096962288      | NA           | 1 | 0           |
|               | 0.998207054                           |                                |                                       |              |              |                  |              |   |             |
| ADAMTS18      | ENSG00000140873.15                    | 0.922805644                    | 13                                    | 2            | 0.571787759  |                  |              |   |             |
|               | Brain_Nucleus_accumbens_basal_ganglia | 0.929635928                    | Brain_Hypothalamus                    |              |              |                  |              |   |             |
|               | 10.97855817                           | 6.05E-05                       | 1.702420313                           | -0.565420537 | 0.217690089  |                  |              |   |             |
|               | -0.295419936                          | 0.294412714                    | 2                                     | 0            | 0.998207054  |                  |              |   |             |
| PUS7L         | ENSG00000129317.14                    | 0.922860353                    | 2                                     | 2            | 0.761045571  | Brain_Cerebellum |              |   |             |
|               | 0.802037581                           | Brain_Spinal_cord_cervical_c-1 | 1.033061992                           | 0.966938008  |              |                  |              |   |             |
|               | 0.966938008                           | -0.250710968                   | 0.304108055                           | 0.026698544  | 0.392316293  |                  |              |   |             |
|               | 2                                     | 0                              | 0.998207054                           |              |              |                  |              |   |             |
| XPA           | ENSG00000136936.10                    | 0.922941839                    | 2                                     | 2            | 0.720973395  |                  |              |   |             |
|               | Brain_Anterior_cingulate_cortex_BA24  | 0.723651424                    | Brain_Cortex                          |              |              |                  |              |   |             |

|              |                                       |                                |                                       |              |              |                    |              |  |  |
|--------------|---------------------------------------|--------------------------------|---------------------------------------|--------------|--------------|--------------------|--------------|--|--|
|              | 1.575029004                           | 0.424970996                    | 0.424970996                           | 0.353582989  | 0.357158176  |                    |              |  |  |
|              | 0.355370583                           | 0.002528039                    | 2                                     | 0            | 0.998207054  |                    |              |  |  |
| Clorf174     | ENSG00000198912.10                    | 0.922960113                    | 12                                    | 6            | 0.404820621  |                    |              |  |  |
|              | Brain_Amygdala                        | 0.985335662                    | Brain_Cerebellar_Hemisphere           | 8.262290217  |              |                    |              |  |  |
|              | 0.001535271                           | 0.351684913                    | -0.833042747                          | 0.60427727   | -0.031142556 |                    |              |  |  |
|              | 0.325042024                           | 6                              | 0                                     | 0.998207054  |              |                    |              |  |  |
| EDEM1        | ENSG00000134109.10                    | 0.92299326                     | 1                                     | 1            | 0.92299326   | Brain_Hypothalamus |              |  |  |
|              | 0.92299326                            | Brain_Hypothalamus             | 1                                     | 1            | 1            | 0.096663962        | 0.096663962  |  |  |
|              | 0.096663962                           | NA                             | 1                                     | 0            | 0.998207054  |                    |              |  |  |
| INO80E       | ENSG00000169592.14                    | 0.923027758                    | 7                                     | 2            | 0.577948044  |                    |              |  |  |
|              | Brain_Putamen_basal_ganglia           | 0.964089421                    | Brain_Frontal_Cortex_BA9              |              |              |                    |              |  |  |
|              | 6.193810774                           | 0.002841999                    | 0.564920163                           | -0.556384484 | 0.451444943  |                    |              |  |  |
|              | 0.033024201                           | 0.382506168                    | 2                                     | 0            | 0.998207054  |                    |              |  |  |
| RNF169       | ENSG00000166439.5                     | 0.923242984                    | 2                                     | 2            | 0.697113185  |                    |              |  |  |
|              | Brain_Frontal_Cortex_BA9              | 0.740149428                    | Brain_Cortex                          | 1.68149624   | 0.31850376   |                    |              |  |  |
|              | 0.31850376                            | -0.389220304                   | -0.331655471                          | -0.360437888 | 0.040704484  | 2                  |              |  |  |
|              | 0                                     | 0.998207054                    |                                       |              |              |                    |              |  |  |
| PIM1         | ENSG00000137193.13                    | 0.923361838                    | 1                                     | 1            | 0.923361838  |                    |              |  |  |
|              | Brain_Hippocampus                     | 0.923361838                    | Brain_Hippocampus                     | 1            | 1            | 1                  |              |  |  |
|              | 0.096199865                           | 0.096199865                    | 0.096199865                           | NA           | 1            | 0                  | 0.998207054  |  |  |
| CH17-408M7.1 | ENSG00000277420.1                     | 0.923394862                    | 2                                     | 2            | 0.718606464  |                    |              |  |  |
|              | Brain_Nucleus_accumbens_basal_ganglia | 0.843237297                    |                                       |              |              |                    |              |  |  |
|              | Brain_Spinal_cord_cervical_c-1        | 1.07290021                     | 0.92709979                            | 0.92709979   | -0.360321846 |                    |              |  |  |
|              | -0.197754309                          | -0.279038077                   | 0.114952608                           | 2            | 0            | 0.998207054        |              |  |  |
| SLC9A8       | ENSG00000197818.11                    | 0.923404921                    | 4                                     | 4            | 0.682747929  |                    |              |  |  |
|              | Brain_Cortex                          | 0.893898934                    | Brain_Nucleus_accumbens_basal_ganglia |              |              |                    |              |  |  |
|              | 3.148949425                           | 0.113701403                    | 0.113701403                           | -0.40871622  | 0.349055165  |                    |              |  |  |
|              | -0.041919749                          | 0.345406442                    | 4                                     | 0            | 0.998207054  |                    |              |  |  |
| SNRNP25      | ENSG00000161981.10                    | 0.923418994                    | 9                                     | 8            | 0.314797057  |                    |              |  |  |
|              | Brain_Caudate_basal_ganglia           | 0.958678235                    | Brain_Cortex                          | 2.592343328  |              |                    |              |  |  |
|              | 0.040851466                           | 0.305925334                    | -0.830605447                          | 1.005207266  | 0.292048485  |                    |              |  |  |
|              | 0.542221768                           | 8                              | 0                                     | 0.998207054  |              |                    |              |  |  |
| NDUFA10      | ENSG00000130414.11                    | 0.923520832                    | 12                                    | 6            | 0.300927952  |                    |              |  |  |
|              | Brain_Hippocampus                     | 0.835211658                    | Brain_Putamen_basal_ganglia           | 7.380393565  |              |                    |              |  |  |
|              | 0.003234746                           | 0.358390657                    | -0.730092783                          | 1.03444548   | 0.335244447  |                    |              |  |  |
|              | 0.46734307                            | 6                              | 0                                     | 0.998207054  |              |                    |              |  |  |
| KIF3B        | ENSG00000101350.7                     | 0.92363575                     | 2                                     | 2            | 0.748066959  | Brain_Amygdala     |              |  |  |
|              | 0.816580123                           | Brain_Frontal_Cortex_BA9       | 1.012671943                           | 0.987328057  |              |                    |              |  |  |
|              | 0.987328057                           | 0.231945785                    | 0.321189275                           | 0.27656753   | 0.063104677  | 2                  |              |  |  |
|              | 0                                     | 0.998207054                    |                                       |              |              |                    |              |  |  |
| SPNS3        | ENSG00000182557.7                     | 0.923666542                    | 6                                     | 3            | 0.366178466  | Brain_Cortex       |              |  |  |
|              | 0.972905926                           | Brain_Spinal_cord_cervical_c-1 | 4.914073948                           | 0.008599254  |              |                    |              |  |  |
|              | 0.199537761                           | -0.903654814                   | 0.033963915                           | -0.577968549 | 0.322686842  |                    |              |  |  |
|              | 3                                     | 0                              | 0.998207054                           |              |              |                    |              |  |  |
| CD164L2      | ENSG00000174950.10                    | 0.923711192                    | 7                                     | 3            | 0.402477755  |                    |              |  |  |
|              | Brain_Cerebellar_Hemisphere           | 0.920293145                    | Brain_Hippocampus                     | 5.412191993  |              |                    |              |  |  |
|              | 0.002826033                           | 0.361610172                    | -0.837204275                          | 0.101766819  | -0.260572917 |                    |              |  |  |
|              | 0.339140592                           | 3                              | 0                                     | 0.998207054  |              |                    |              |  |  |
| CDK19        | ENSG00000155111.14                    | 0.923722701                    | 2                                     | 2            | 0.690965557  | Brain_Amygdala     |              |  |  |
|              | 0.987762799                           | Brain_Cerebellum               | 1.102113227                           | 0.897886773  | 0.897886773  |                    |              |  |  |
|              | -0.397545071                          | 0.015337658                    | -0.191103706                          | 0.291952178  | 2            | 0                  |              |  |  |
|              | 0.998207054                           |                                |                                       |              |              |                    |              |  |  |
| AGMAT        | ENSG00000116771.5                     | 0.923726386                    | 6                                     | 3            | 0.585138228  |                    |              |  |  |
|              | Brain_Cerebellar_Hemisphere           | 0.984267689                    | Brain_Nucleus_accumbens_basal_ganglia |              |              |                    |              |  |  |
|              | 4.76281253                            | 0.000157758                    | 0.185221933                           | -0.098387964 | 0.545894837  |                    |              |  |  |
|              | 0.122763285                           | 0.22471601                     | 3                                     | 0            | 0.998207054  |                    |              |  |  |
| BAAT         | ENSG00000136881.11                    | 0.92377678                     | 11                                    | 5            | 0.251652466  |                    |              |  |  |
|              | Brain_Nucleus_accumbens_basal_ganglia | 0.63433052                     | Brain_Putamen_basal_ganglia           |              |              |                    |              |  |  |
|              | 8.509542265                           | 0.02786821                     | 0.325284171                           | 0.475640496  | 1.146344913  |                    |              |  |  |
|              | 0.851199343                           | 0.191636283                    | 5                                     | 0            | 0.998207054  |                    |              |  |  |
| ZNF407       | ENSG00000215421.9                     | 0.923828728                    | 1                                     | 1            | 0.923828728  |                    |              |  |  |
|              | Brain_Cortex                          | 0.923828728                    | Brain_Cortex                          | 1            | 1            | 1                  | -0.095612008 |  |  |

|                |                                       |              |                                       |             |             |              |   |              |
|----------------|---------------------------------------|--------------|---------------------------------------|-------------|-------------|--------------|---|--------------|
|                | -0.095612008                          | -0.095612008 | NA                                    | 1           | 0           | 0.998207054  |   |              |
| NKX3-2         | ENSG00000109705.7                     | 0.923842798  |                                       | 1           | 1           | 0.923842798  |   |              |
|                | Brain_Cerebellum                      | 0.923842798  | Brain_Cerebellum                      | 1           | 1           |              |   | -0.095594293 |
|                | -0.095594293                          | -0.095594293 | NA                                    | 1           | 0           | 0.998207054  |   |              |
| LRR2           | ENSG00000163827.12                    | 0.923877648  |                                       | 5           | 4           | 0.407762965  |   |              |
|                | Brain_Cerebellar_Hemisphere           | 0.792057621  | Brain_Frontal_Cortex_BA9              |             |             |              |   |              |
|                | 3.196443056                           | 0.085055492  | 0.265028135                           |             |             | -0.597382747 |   | 0.827836739  |
|                | -0.038348083                          | 0.617578719  | 4                                     | 0           | 0.998207054 |              |   |              |
| CTD-2521M24.13 | ENSG00000269720.2                     | 0.924020596  |                                       | 1           | 1           | 0.924020596  |   |              |
|                | Brain_Nucleus_accumbens_basal_ganglia | 0.924020596  |                                       |             |             |              |   |              |
|                | Brain_Nucleus_accumbens_basal_ganglia | 1            | 1                                     | 1           | 0.095370438 |              |   |              |
|                | 0.095370438                           | 0.095370438  | NA                                    | 1           | 0           | 0.998207054  |   |              |
| BTBD16         | ENSG00000138152.8                     | 0.924035376  |                                       | 3           | 3           | 0.542568768  |   |              |
|                | Brain_Cerebellum                      | 0.72181187   | Brain_Hippocampus                     |             |             | 2.555168834  |   | 0.151486767  |
|                | 0.151486767                           | -0.608933123 | -0.356038317                          |             |             | -0.492624885 |   | 0.127661089  |
|                | 3                                     | 0            | 0.998207054                           |             |             |              |   |              |
| DGKB           | ENSG00000136267.13                    | 0.92416362   | 6                                     | 6           | 0.278564669 |              |   |              |
|                | Brain_Anterior_cingulate_cortex_BA24  | 0.846091147  | Brain_Cortex                          |             |             | 2.68006107   |   |              |
|                | 0.267573834                           | 0.267573834  | -1.083549327                          |             |             | 0.629032438  |   | -0.150477071 |
|                | 0.689759008                           | 6            | 0                                     | 0.998207054 |             |              |   |              |
| TAGLN3         | ENSG00000144834.13                    | 0.924184079  |                                       | 3           | 3           | 0.529921793  |   |              |
|                | Brain_Cerebellar_Hemisphere           | 0.982452104  | Brain_Cerebellum                      |             |             | 1.106512933  |   |              |
|                | 0.853083524                           | 0.853083524  | -0.021994799                          |             |             | 0.628125403  |   | 0.306304396  |
|                | 0.325108512                           | 3            | 0                                     | 0.998207054 |             |              |   |              |
| RNASET2        | ENSG00000026297.15                    | 0.924201602  |                                       | 5           | 4           | 0.616263682  |   |              |
|                | Brain_Nucleus_accumbens_basal_ganglia | 0.993158244  | Brain_Cerebellum                      |             |             |              |   |              |
|                | 3.504429617                           | 0.031730563  | 0.122883304                           |             |             | -0.501152668 |   | 0.249992535  |
|                | -0.010634388                          | 0.300137057  | 4                                     | 0           | 0.998207054 |              |   |              |
| RP11-439M11.1  | ENSG00000271947.1                     | 0.924254457  |                                       | 9           | 5           | 0.201244558  |   |              |
|                | Brain_Cerebellar_Hemisphere           | 0.775993027  | Brain_Spinal_cord_cervical_c-1        |             |             |              |   |              |
|                | 5.9614395                             | 0.018424807  | 0.207912891                           |             |             | -1.278013807 |   | -0.284544643 |
|                | -0.836352631                          | 0.319384449  | 5                                     | 0           | 0.998207054 |              |   |              |
| MFN2           | ENSG00000116688.16                    | 0.924273571  |                                       | 6           | 6           | 0.364357712  |   |              |
|                | Brain_Hippocampus                     | 0.958449977  | Brain_Putamen_basal_ganglia           |             |             | 2.35867514   |   |              |
|                | 0.329442807                           | 0.329442807  | -0.05209879                           |             |             | 0.907092824  |   | 0.422526814  |
|                | 0.420683252                           | 6            | 0                                     | 0.998207054 |             |              |   |              |
| LCMT2          | ENSG00000168806.7                     | 0.924315096  |                                       | 8           | 6           | 0.232335044  |   |              |
|                | Brain_Frontal_Cortex_BA9              | 0.902980589  | Brain_Nucleus_accumbens_basal_ganglia |             |             |              |   |              |
|                | 4.870924695                           | 0.064855042  | 0.205730317                           |             |             | -1.194365455 |   | -0.121897003 |
|                | -0.505021189                          | 0.383032951  | 6                                     | 0           | 0.998207054 |              |   |              |
| ACSS3          | ENSG00000111058.7                     | 0.9244666    |                                       | 4           | 4           | 0.528340637  |   |              |
|                | Brain_Caudate_basal_ganglia           | 0.89320659   | Brain_Frontal_Cortex_BA9              |             |             | 1.553008834  |   |              |
|                | 0.514257771                           | 0.514257771  | -0.568055046                          |             |             | 0.630541076  |   | 0.093637163  |
|                | 0.548456146                           | 4            | 0                                     | 0.998207054 |             |              |   |              |
| HERPUD2        | ENSG00000122557.9                     | 0.924468315  |                                       | 1           | 1           | 0.924468315  |   |              |
|                | Brain_Cortex                          | 0.924468315  | Brain_Cortex                          |             |             | 1            | 1 | 1            |
|                | -0.094806763                          | -0.094806763 | NA                                    | 1           | 0           | 0.998207054  |   | -0.094806763 |
| RP11-638L3.1   | ENSG00000265533.1                     | 0.924476169  |                                       | 2           | 2           | 0.694832437  |   |              |
|                | Brain_Nucleus_accumbens_basal_ganglia | 0.938152279  | Brain_Hypothalamus                    |             |             |              |   |              |
|                | 1.054884114                           | 0.945115886  | 0.945115886                           |             |             | -0.077592412 |   | 0.392305586  |
|                | 0.157356587                           | 0.332268061  | 2                                     | 0           | 0.998207054 |              |   |              |
| POU3F2         | ENSG00000184486.9                     | 0.924560334  |                                       | 2           | 1           | 0.867533393  |   |              |
|                | Brain_Cerebellar_Hemisphere           | 0.983209113  | Brain_Cerebellum                      |             |             | 1.967529675  |   |              |
|                | 0.032470325                           | 1.967529675  | 0.02104581                            |             |             | 0.166792408  |   | 0.093919109  |
|                | 0.103058408                           | 1            | 0                                     | 0.998207054 |             |              |   |              |
| AGAP6          | ENSG00000204149.10                    | 0.924760115  |                                       | 11          | 6           | 0.348050542  |   |              |
|                | Brain_Hypothalamus                    | 0.924139522  | Brain_Putamen_basal_ganglia           |             |             | 7.476252     |   |              |
|                | 0.00143336                            | 0.319036689  | -0.93837731                           |             |             | 0.095220708  |   | -0.626360531 |
|                | 0.318772369                           | 6            | 0                                     | 0.998207054 |             |              |   |              |
| SLC27A6        | ENSG00000113396.12                    | 0.925007287  |                                       | 11          | 4           | 0.393134942  |   |              |
|                | Brain_Substantia_nigra                | 0.995524726  | Brain_Anterior_cingulate_cortex_BA24  |             |             |              |   |              |
|                | 8.193976249                           | 0.013906998  | 0.485423114                           |             |             | -0.373766108 |   | 0.853945943  |

|               |                                       |                                |              |                                       |             |                                |                  |
|---------------|---------------------------------------|--------------------------------|--------------|---------------------------------------|-------------|--------------------------------|------------------|
|               | 0.367634269                           | 0.3960947                      | 4            | 0                                     | 0.998207054 |                                |                  |
| PLSCR1        | ENSG00000188313.12                    | 0.925038268                    |              | 3                                     | 2           | 0.714329258                    |                  |
|               | Brain_Putamen_basal_ganglia           | 0.912441484                    |              |                                       |             | Brain_Cerebellum               | 2.506774386      |
|               | 3.19E-16                              | 0.493225614                    |              | 0.109959513                           |             | 0.366048001                    | 0.195322342      |
|               | 0.147852757                           | 2                              | 0            | 0.998207054                           |             |                                |                  |
| MKS1          | ENSG00000011143.16                    | 0.925144184                    |              | 1                                     | 1           | 0.925144184                    |                  |
|               | Brain_Spinal_cord_cervical_c-1        | 0.925144184                    |              |                                       |             | Brain_Spinal_cord_cervical_c-1 |                  |
|               | 1                                     | 1                              | -0.093955906 | -0.093955906                          |             | -0.093955906                   | NA 1 0           |
|               | 0.998207054                           |                                |              |                                       |             |                                |                  |
| SLC25A13      | ENSG00000004864.13                    | 0.925166991                    |              | 2                                     | 2           | 0.696486499                    |                  |
|               | Brain_Cerebellar_Hemisphere           | 0.81380059                     |              | Brain_Cerebellum                      |             | 1.709321322                    |                  |
|               | 0.290678678                           | 0.290678678                    |              | 0.235525885                           |             | 0.390067683                    | 0.312796784      |
|               | 0.109277553                           | 2                              | 0            | 0.998207054                           |             |                                |                  |
| TMEM183A      | ENSG00000163444.11                    | 0.925184368                    |              | 8                                     | 5           | 0.246062923                    |                  |
|               | Brain_Cortex                          | 0.783468225                    |              | Brain_Spinal_cord_cervical_c-1        |             | 5.949727895                    |                  |
|               | 0.007675248                           | 0.206536289                    |              | -1.159965328                          |             | -0.274802178                   | -0.640499447     |
|               | 0.371142168                           | 5                              | 0            | 0.998207054                           |             |                                |                  |
| CACNG6        | ENSG00000130433.7                     | 0.925201803                    |              | 5                                     | 5           | 0.287524123                    |                  |
|               | Brain_Cortex                          | 0.948278571                    |              | Brain_Frontal_Cortex_BA9              |             | 1.168989166                    |                  |
|               | 0.797161328                           | 0.797161328                    |              | -1.063568711                          |             | -0.064868663                   | -0.420633104     |
|               | 0.400840434                           | 5                              | 0            | 0.998207054                           |             |                                |                  |
| RP11-732A21.2 | ENSG00000260008.1                     | 0.925229048                    |              | 1                                     | 1           | 0.925229048                    |                  |
|               | Brain_Cerebellar_Hemisphere           | 0.925229048                    |              | Brain_Cerebellar_Hemisphere           |             | 1                              | 1                |
|               | 1                                     | 0.093849075                    | 0.093849075  | 0.093849075                           |             | NA                             | 1 0              |
|               | 0.998207054                           |                                |              |                                       |             |                                |                  |
| LDHA          | ENSG00000134333.13                    | 0.925422017                    |              | 1                                     | 1           | 0.925422017                    | Brain_Cerebellum |
|               | 0.925422017                           | Brain_Cerebellum               | 1            | 1                                     | 1           | -0.093606159                   | -0.093606159     |
|               | -0.093606159                          | NA                             | 1            | 0                                     | 0.998207054 |                                |                  |
| MST1R         | ENSG00000164078.12                    | 0.925425453                    |              | 6                                     | 4           | 0.452280316                    |                  |
|               | Brain_Anterior_cingulate_cortex_BA24  | 0.974108685                    |              | Brain_Cerebellum                      |             |                                |                  |
|               | 4.628462676                           | 0.02839448                     | 0.267838967  | -0.75161883                           |             | 0.138290038                    |                  |
|               | -0.242100297                          | 0.307241303                    | 4            | 0                                     | 0.998207054 |                                |                  |
| IGSF22        | ENSG00000179057.13                    | 0.925522499                    |              | 5                                     | 5           | 0.321388857                    |                  |
|               | Brain_Putamen_basal_ganglia           | 0.9812279                      |              | Brain_Caudate_basal_ganglia           |             | 1.114353716                    |                  |
|               | 0.835192401                           | 0.835192401                    |              | -0.60802561                           |             | 0.991607852                    | 0.096360109      |
|               | 0.584898777                           | 5                              | 0            | 0.998207054                           |             |                                |                  |
| GEMIN4        | ENSG00000179409.10                    | 0.925728596                    |              | 1                                     | 1           | 0.925728596                    |                  |
|               | Brain_Caudate_basal_ganglia           | 0.925728596                    |              | Brain_Caudate_basal_ganglia           |             | 1                              | 1                |
|               | 1                                     | -0.093220239                   | -0.093220239 | -0.093220239                          |             | NA                             | 1 0              |
|               | 0.998207054                           |                                |              |                                       |             |                                |                  |
| COQ5          | ENSG00000110871.14                    | 0.925746898                    |              | 9                                     | 1           | 0.596384601                    |                  |
|               | Brain_Anterior_cingulate_cortex_BA24  | 0.987050535                    |              | Brain_Caudate_basal_ganglia           |             |                                |                  |
|               | 8.723359609                           | 1.97E-07                       | 8.723359609  | -0.077548781                          |             | 0.529606767                    |                  |
|               | 0.094722842                           | 0.198030981                    | 1            | 0                                     | 0.998207054 |                                |                  |
| RP11-255P5.3  | ENSG00000278445.1                     | 0.925819483                    |              | 9                                     | 6           | 0.532890293                    |                  |
|               | Brain_Putamen_basal_ganglia           | 0.989010006                    |              | Brain_Nucleus_accumbens_basal_ganglia |             |                                |                  |
|               | 5.932355845                           | 0.001995142                    | 0.295269721  | -0.479144141                          |             | 0.623600027                    |                  |
|               | 0.124843837                           | 0.379595358                    | 6            | 0                                     | 0.998207054 |                                |                  |
| NUP107        | ENSG00000111581.9                     | 0.925829199                    |              | 11                                    | 3           | 0.417196263                    |                  |
|               | Brain_Hippocampus                     | 0.965466468                    |              | Brain_Anterior_cingulate_cortex_BA24  |             |                                |                  |
|               | 8.907200892                           | 0.012088437                    | 0.389974544  | -0.043294886                          |             | 0.81129503                     |                  |
|               | 0.407002814                           | 0.241516003                    | 3            | 0                                     | 0.998207054 |                                |                  |
| IPO4          | ENSG00000196497.16                    | 0.925863355                    |              | 2                                     | 2           | 0.715731238                    | Brain_Cerebellum |
|               | 0.877098625                           | Brain_Spinal_cord_cervical_c-1 |              | 1.022709501                           |             | 0.977290499                    |                  |
|               | 0.977290499                           | 0.154648256                    | 0.364169772  | 0.259409014                           |             | 0.148154085                    |                  |
|               | 2                                     | 0                              | 0.998207054  |                                       |             |                                |                  |
| ZNF546        | ENSG00000187187.13                    | 0.925869616                    |              | 1                                     | 1           | 0.925869616                    |                  |
|               | Brain_Nucleus_accumbens_basal_ganglia | 0.925869616                    |              |                                       |             |                                |                  |
|               | Brain_Nucleus_accumbens_basal_ganglia | 1                              | 1            | 1                                     |             | 0.093042728                    |                  |
|               | 0.093042728                           | 0.093042728                    | NA           | 1                                     | 0           | 0.998207054                    |                  |
| TERF2         | ENSG00000132604.10                    | 0.925876276                    |              | 2                                     | 2           | 0.820743801                    |                  |
|               | Brain_Cerebellar_Hemisphere           | 0.926121889                    |              | Brain_Cerebellum                      |             | 1.656978393                    |                  |

|             |                                       |                             |                             |              |                   |  |  |
|-------------|---------------------------------------|-----------------------------|-----------------------------|--------------|-------------------|--|--|
|             | 0.343021607                           | 0.343021607                 | -0.092725184                | 0.226588416  | 0.066931616       |  |  |
|             | 0.225788812                           | 2 0                         | 0.998207054                 |              |                   |  |  |
| DIAPH3      | ENSG00000139734.17                    | 0.92593807                  | 5 4                         | 0.705241772  | Brain_Cortex      |  |  |
|             | 0.983386865                           | Brain_Frontal_Cortex_BA9    | 3.572797924                 | 0.057094659  |                   |  |  |
|             | 0.131386934                           | -0.378254191                | 0.171016037                 | -0.124756816 | 0.227334197       |  |  |
|             | 4 0                                   | 0.998207054                 |                             |              |                   |  |  |
| MFHAS1      | ENSG00000147324.10                    | 0.92597282                  | 1 1                         | 0.92597282   | Brain_Hippocampus |  |  |
|             | 0.92597282                            | Brain_Hippocampus           | 1 1 1                       | -0.092912821 | -0.092912821      |  |  |
|             | -0.092912821                          | NA 1 0                      | 0.998207054                 |              |                   |  |  |
| DDX49       | ENSG00000105671.11                    | 0.925975236                 | 1 1                         | 0.925975236  |                   |  |  |
|             | Brain_Hippocampus                     | 0.925975236                 | Brain_Hippocampus           | 1 1 1        |                   |  |  |
|             | 0.09290978                            | 0.09290978                  | 0.09290978 NA 1 0           | 0.998207054  |                   |  |  |
| RPL31       | ENSG00000071082.10                    | 0.926000497                 | 3 3                         | 0.641710041  | Brain_Cortex      |  |  |
|             | 0.722610218                           | Brain_Amygdala              | 1.14807996                  | 0.862632587  | 0.862632587       |  |  |
|             | 0.354972467                           | 0.465309209                 | 0.415026537                 | 0.055813612  | 3 0               |  |  |
|             | 0.998207054                           |                             |                             |              |                   |  |  |
| CD8B        | ENSG00000172116.21                    | 0.926003889                 | 1 1                         | 0.926003889  |                   |  |  |
|             | Brain_Caudate_basal_ganglia           | 0.926003889                 | Brain_Caudate_basal_ganglia | 1 1          |                   |  |  |
|             | 1 0.092873714                         | 0.092873714                 | 0.092873714 NA 1 0          |              |                   |  |  |
|             | 0.998207054                           |                             |                             |              |                   |  |  |
| NMUR1       | ENSG00000171596.6                     | 0.926038085                 | 6 3                         | 0.369823223  |                   |  |  |
|             | Brain_Frontal_Cortex_BA9              | 0.94133975                  | Brain_Cerebellum            | 4.300340321  |                   |  |  |
|             | 0.008998555                           | 0.394039445                 | -0.896804544                | 0.179591473  | -0.207015089      |  |  |
|             | 0.397794645                           | 3 0                         | 0.998207054                 |              |                   |  |  |
| ZNRD1       | ENSG00000066379.14                    | 0.926310186                 | 7 7                         | 0.256081587  |                   |  |  |
|             | Brain_Anterior_cingulate_cortex_BA24  | 0.994586483                 | Brain_Putamen_basal_ganglia |              |                   |  |  |
|             | 3.381018016                           | 0.131990153                 | 0.131990153                 | -0.319352652 | 1.135701322       |  |  |
|             | 0.37625057                            | 0.530264828                 | 7 0                         | 0.998207054  |                   |  |  |
| ZFP14       | ENSG00000142065.13                    | 0.926356599                 | 2 2                         | 0.787409324  |                   |  |  |
|             | Brain_Cerebellar_Hemisphere           | 0.922773096                 | Brain_Cerebellum            | 1.872602896  |                   |  |  |
|             | 0.127397104                           | 0.127397104                 | -0.269676263                | -0.096941193 | -0.183308728      |  |  |
|             | 0.122142139                           | 2 0                         | 0.998207054                 |              |                   |  |  |
| PCOLCE2     | ENSG00000163710.7                     | 0.926390285                 | 4 3                         | 0.858785574  |                   |  |  |
|             | Brain_Frontal_Cortex_BA9              | 0.923494762                 | Brain_Hypothalamus          | 3.500099311  |                   |  |  |
|             | 0.001350816                           | 0.15008964                  | -0.170011435                | 0.177920293  | -0.010704341      |  |  |
|             | 0.174032132                           | 3 0                         | 0.998207054                 |              |                   |  |  |
| ZNF83       | ENSG00000167766.18                    | 0.926396781                 | 12 4                        | 0.252033463  | Brain_Cortex      |  |  |
|             | 0.925894352                           | Brain_Hypothalamus          | 9.5419314                   | 0.00393104   | 0.379073015       |  |  |
|             | -1.145424237                          | -0.093011592                | -0.65048512                 | 0.387868834  | 4 0               |  |  |
|             | 0.998207054                           |                             |                             |              |                   |  |  |
| COL6A1      | ENSG00000142156.14                    | 0.926401833                 | 10 8                        | 0.457985804  |                   |  |  |
|             | Brain_Caudate_basal_ganglia           | 0.964568802                 | Brain_Cortex                | 4.798312347  |                   |  |  |
|             | 0.074851788                           | 0.305846192                 | -0.637166194                | 0.742167588  | 0.104082105       |  |  |
|             | 0.484050438                           | 8 0                         | 0.998207054                 |              |                   |  |  |
| ZNF660      | ENSG00000144792.9                     | 0.926438059                 | 13 2                        | 0.422450182  |                   |  |  |
|             | Brain_Caudate_basal_ganglia           | 0.944526867                 | Brain_Hypothalamus          | 11.87693912  |                   |  |  |
|             | 0.002857393                           | 0.402989108                 | -0.802177686                | 0.187236085  | -0.373315629      |  |  |
|             | 0.259466039                           | 2 0                         | 0.998207054                 |              |                   |  |  |
| ANKRD33B    | ENSG00000164236.11                    | 0.926538604                 | 1 1                         | 0.926538604  |                   |  |  |
|             | Brain_Cerebellum                      | 0.926538604                 | Brain_Cerebellum            | 1 1 1        | -0.092200673      |  |  |
|             | -0.092200673                          | -0.092200673                | NA 1 0                      | 0.998207054  |                   |  |  |
| PAK6        | ENSG00000137843.11                    | 0.926564643                 | 2 2                         | 0.699396038  | Brain_Cerebellum  |  |  |
|             | 0.824252457                           | Brain_Cerebellar_Hemisphere | 1.438586637                 | 0.561413363  |                   |  |  |
|             | 0.561413363                           | -0.386135881                | -0.222078908                | -0.304107394 | 0.116005798       |  |  |
|             | 2 0                                   | 0.998207054                 |                             |              |                   |  |  |
| TRPC6       | ENSG00000137672.12                    | 0.926610409                 | 1 1                         | 0.926610409  |                   |  |  |
|             | Brain_Nucleus_accumbens_basal_ganglia | 0.926610409                 |                             |              |                   |  |  |
|             | Brain_Nucleus_accumbens_basal_ganglia | 1 1 1                       | -0.092110295                |              |                   |  |  |
|             | -0.092110295                          | -0.092110295                | NA 1 0                      | 0.998207054  |                   |  |  |
| CTC-241N9.1 | ENSG00000245317.2                     | 0.926643875                 | 1 1                         | 0.926643875  |                   |  |  |
|             | Brain_Putamen_basal_ganglia           | 0.926643875                 | Brain_Putamen_basal_ganglia | 1 1          |                   |  |  |
|             | 1 0.092068173                         | 0.092068173                 | 0.092068173                 | NA 1 0       |                   |  |  |

0.998207054  
RP11-387H17.4 ENSG00000264968.1 0.926704913 1 1 0.926704913  
Brain\_Spinal\_cord\_cervical\_c-1 0.926704913 Brain\_Spinal\_cord\_cervical\_c-1  
1 1 1 -0.091991349 -0.091991349 -0.091991349 NA 1 0  
0.998207054  
GBF1 ENSG00000107862.4 0.926710916 1 1 0.926710916  
Brain\_Putamen\_basal\_ganglia 0.926710916 Brain\_Putamen\_basal\_ganglia 1 1  
1 -0.091983793 -0.091983793 -0.091983793 NA 1 0  
0.998207054  
ADI1 ENSG00000182551.13 0.926711844 8 7 0.341266253  
Brain\_Anterior\_cingulate\_cortex\_BA24 0.998778836 Brain\_Caudate\_basal\_ganglia  
3.563645255 0.031582061 0.262871443 -0.951666285 0.254219152  
-0.299857858 0.425845254 7 0 0.998207054  
RP11-736K20.6 ENSG00000246523.7 0.926766181 1 1 0.926766181  
Brain\_Putamen\_basal\_ganglia 0.926766181 Brain\_Putamen\_basal\_ganglia 1 1  
1 0.091914235 0.091914235 0.091914235 NA 1 0  
0.998207054  
RER1 ENSG00000157916.19 0.926815315 2 2 0.702317302  
Brain\_Cerebellar\_Hemisphere 0.961444483 Brain\_Cortex 1.074434924  
0.925565076 0.925565076 -0.382194229 0.048340996 -0.166926616  
0.304434377 2 0 0.998207054  
LIMS1 ENSG00000169756.16 0.926917434 5 4 0.407678761 Brain\_Cortex  
0.9625345 Brain\_Cerebellum 2.760677393 0.01931888 0.237443457  
-0.827985413 0.091501504 -0.249531576 0.416102606 4 0  
0.998207054  
LIF ENSG00000128342.4 0.926962881 1 1 0.926962881  
Brain\_Substantia\_nigra 0.926962881 Brain\_Substantia\_nigra 1 1  
1 0.091666668 0.091666668 0.091666668 NA 1 0  
0.998207054  
KCNK3 ENSG00000171303.6 0.926999663 6 6 0.416929733  
Brain\_Nucleus\_accumbens\_basal\_ganglia 0.899402771 Brain\_Cerebellum  
2.719470497 0.094559289 0.094559289 -0.611412126 0.811759347  
0.251151841 0.565692035 6 0 0.998207054  
ZKSCAN2 ENSG00000155592.15 0.927013577 3 3 0.514189637  
Brain\_Cerebellum 0.958753944 Brain\_Cortex 1.212065334 0.794007247  
0.794007247 0.05171731 0.652327945 0.33533877 0.301692454 3 0  
0.998207054  
CCDC91 ENSG00000123106.10 0.927034972 1 1 0.927034972  
Brain\_Cerebellum 0.927034972 Brain\_Cerebellum 1 1 1 -0.091575935  
-0.091575935 -0.091575935 NA 1 0 0.998207054  
TTC5 ENSG00000136319.11 0.927060639 5 5 0.421210255  
Brain\_Caudate\_basal\_ganglia 0.870192503 Brain\_Frontal\_Cortex\_BA9  
2.335657658 0.222612254 0.222612254 -0.445726423 0.804323352  
0.141747391 0.477783767 5 0 0.998207054  
CPNE8 ENSG00000139117.13 0.927077281 5 5 0.558885886  
Brain\_Frontal\_Cortex\_BA9 0.890328344 Brain\_Caudate\_basal\_ganglia 3.3421265  
0.152861222 0.152861222 -0.160351322 0.584497144 0.212417292  
0.357104696 5 0 0.998207054  
HLA-DQB1 ENSG00000179344.16 0.927100008 13 5 0.471150906  
Brain\_Cerebellum 0.905584 Brain\_Frontal\_Cortex\_BA9 8.715107522  
0.003370653 0.460392834 -0.720607715 0.510849246 -0.125484573  
0.433946106 5 0 0.998207054  
TOR1B ENSG00000136816.15 0.927208572 9 2 0.61661982  
Brain\_Cerebellar\_Hemisphere 0.994501781 Brain\_Putamen\_basal\_ganglia  
8.083039663 0.002538644 0.407162956 -0.500646657 -0.006891051  
-0.201887994 0.179160261 2 0 0.998207054  
GAN ENSG00000261609.5 0.927212284 1 1 0.927212284  
Brain\_Hypothalamus 0.927212284 Brain\_Hypothalamus 1 1 1  
0.091352776 0.091352776 0.091352776 NA 1 0 0.998207054  
RP11-680F20.6 ENSG00000283703.1 0.927266708 1 1 0.927266708  
Brain\_Cerebellum 0.927266708 Brain\_Cerebellum 1 1 1 -0.091284281  
-0.091284281 -0.091284281 NA 1 0 0.998207054

|           |                                       |                             |                                      |             |              |                    |
|-----------|---------------------------------------|-----------------------------|--------------------------------------|-------------|--------------|--------------------|
| RXRA      | ENSG00000186350.9                     | 0.927278598                 | 2                                    | 2           | 0.824654939  | Brain_Cerebellum   |
|           | 0.828054065                           | Brain_Cerebellar_Hemisphere | 1.362529713                          |             | 0.637470287  |                    |
|           | 0.637470287                           | -0.221561908                | 0.217197972                          |             | -0.002181968 | 0.310250086        |
|           | 2                                     | 0                           | 0.998207054                          |             |              |                    |
| FAR2      | ENSG00000064763.10                    | 0.927338503                 | 3                                    | 3           | 0.57428225   | Brain_Cerebellum   |
|           | 0.831495711                           | Brain_Putamen_basal_ganglia | 1.92086992                           |             | 0.076962811  |                    |
|           | 0.076962811                           | -0.561756035                | 0.212783658                          |             | -0.254214862 | 0.411154373        |
|           | 3                                     | 0                           | 0.998207054                          |             |              |                    |
| ZNF385C   | ENSG00000187595.15                    | 0.927346706                 | 3                                    | 3           | 0.535515133  |                    |
|           | Brain_Cortex                          | 0.741277989                 | Brain_Anterior_cingulate_cortex_BA24 |             |              |                    |
|           | 2.439681448                           | 0.180061623                 | 0.180061623                          |             | -0.619609162 | -0.330161429       |
|           | -0.434848344                          | 0.160480123                 | 3                                    | 0           | 0.998207054  |                    |
| LINC00942 | ENSG00000249628.2                     | 0.927358937                 | 4                                    | 4           | 0.56482304   |                    |
|           | Brain_Hypothalamus                    | 0.969268853                 | Brain_Frontal_Cortex_BA9             |             | 1.475439517  |                    |
|           | 0.638476543                           | 0.638476543                 | -0.575692508                         |             | 0.038525309  | -0.35830938        |
|           | 0.271351934                           | 4                           | 0                                    | 0.998207054 |              |                    |
| ZNF792    | ENSG00000180884.9                     | 0.927440517                 | 2                                    | 2           | 0.759741465  |                    |
|           | Brain_Nucleus_accumbens_basal_ganglia | 0.820292779                 | Brain_Putamen_basal_ganglia          |             |              |                    |
|           | 1.038160969                           | 0.961839031                 | 0.961839031                          |             | -0.305820309 | -0.227168426       |
|           | -0.266494367                          | 0.05561528                  | 2                                    | 0           | 0.998207054  |                    |
| CALR      | ENSG00000179218.13                    | 0.927499517                 | 8                                    | 6           | 0.227626059  |                    |
|           | Brain_Spinal_cord_cervical_c-1        | 0.937891601                 | Brain_Hippocampus                    |             | 4.43835295   |                    |
|           | 0.007358978                           | 0.27401351                  | -1.206496626                         |             | -0.077920112 | -0.407859893       |
|           | 0.398977392                           | 6                           | 0                                    | 0.998207054 |              |                    |
| ZBTB40    | ENSG00000184677.16                    | 0.927503037                 | 3                                    | 3           | 0.660917032  |                    |
|           | Brain_Cerebellum                      | 0.954324801                 | Brain_Cortex                         |             | 2.247342914  | 0.194459071        |
|           | 0.194459071                           | -0.057276674                | 0.438647419                          |             | 0.173594417  | 0.249722804        |
|           | 3                                     | 0                           | 0.998207054                          |             |              |                    |
| ZMAT5     | ENSG00000100319.12                    | 0.92750815                  | 1                                    | 1           | 0.92750815   | Brain_Hypothalamus |
|           | 0.92750815                            | Brain_Hypothalamus          | 1                                    | 1           | 1            | 0.090980419        |
|           | 0.090980419                           | NA                          | 1                                    | 0           | 0.998207054  |                    |
| TPI1      | ENSG00000111669.14                    | 0.927529504                 | 1                                    | 1           | 0.927529504  |                    |
|           | Brain_Substantia_nigra                | 0.927529504                 | Brain_Substantia_nigra               |             | 1            | 1                  |
|           | 1                                     | -0.090953545                | -0.090953545                         |             | -0.090953545 | NA                 |
|           | 0.998207054                           |                             |                                      |             | 1            | 0                  |
| TALDO1    | ENSG00000177156.10                    | 0.927614066                 | 1                                    | 1           | 0.927614066  |                    |
|           | Brain_Caudate_basal_ganglia           | 0.927614066                 | Brain_Caudate_basal_ganglia          |             | 1            | 1                  |
|           | 1                                     | 0.090847123                 | 0.090847123                          |             | 0.090847123  | NA                 |
|           | 0.998207054                           |                             |                                      |             | 1            | 0                  |
| MSL1      | ENSG00000188895.11                    | 0.927858185                 | 9                                    | 8           | 0.202414096  |                    |
|           | Brain_Nucleus_accumbens_basal_ganglia | 0.976528189                 | Brain_Putamen_basal_ganglia          |             |              |                    |
|           | 4.512093696                           | 0.107564558                 | 0.206346401                          |             | -0.433600612 | 1.274703815        |
|           | 0.33223887                            | 0.535642046                 | 8                                    | 0           | 0.998207054  |                    |
| LVCAT1    | ENSG00000251350.1                     | 0.927868186                 | 9                                    | 3           | 0.698489346  |                    |
|           | Brain_Hypothalamus                    | 0.893655754                 | Brain_Caudate_basal_ganglia          |             | 7.722326253  |                    |
|           | 0.011466497                           | 0.327353987                 | -0.387360495                         |             | 0.351948161  | -0.147758249       |
|           | 0.266488186                           | 3                           | 0                                    | 0.998207054 |              |                    |
| SGTB      | ENSG00000197860.9                     | 0.927869795                 | 2                                    | 2           | 0.7230933    |                    |
|           | Brain_Nucleus_accumbens_basal_ganglia | 0.909193075                 |                                      |             |              |                    |
|           | Brain_Spinal_cord_cervical_c-1        | 1.114092436                 |                                      |             | 0.885907564  | 0.885907564        |
|           | 0.114056412                           | 0.354327714                 | 0.234192063                          |             | 0.169897467  | 2                  |
|           | 0.998207054                           |                             |                                      |             | 0            |                    |
| CAMK4     | ENSG00000152495.10                    | 0.927955194                 | 4                                    | 4           | 0.6178754    |                    |
|           | Brain_Cerebellar_Hemisphere           | 0.816221941                 | Brain_Hypothalamus                   |             | 1.482081799  |                    |
|           | 0.604445071                           | 0.604445071                 | -0.319329796                         |             | 0.498863711  | 0.109918757        |
|           | 0.446887232                           | 4                           | 0                                    | 0.998207054 |              |                    |
| FAM87A    | ENSG00000182366.9                     | 0.92798893                  | 4                                    | 3           | 0.614737801  |                    |
|           | Brain_Hippocampus                     | 0.826674417                 | Brain_Cortex                         |             | 3.005418236  |                    |
|           | 0.070422066                           | 0.113055872                 | -0.503322142                         |             | -0.218968717 | -0.321510598       |
|           | 0.127676979                           | 3                           | 0                                    | 0.998207054 |              |                    |
| HRASLS5   | ENSG00000168004.9                     | 0.927988932                 | 2                                    | 2           | 0.716904876  |                    |
|           | Brain_Cortex                          | 0.941642772                 | Brain_Hypothalamus                   |             | 1.518268843  |                    |

|           |                                       |                                       |              |              |                             |
|-----------|---------------------------------------|---------------------------------------|--------------|--------------|-----------------------------|
|           | 0.481731157                           | 0.481731157                           | 0.073205271  | 0.362598439  | 0.217901855                 |
|           | 0.204631871                           | 2                                     | 0            | 0.998207054  |                             |
| ABHD6     | ENSG00000163686.14                    | 0.928079989                           | 8            | 8            | 0.36602363 Brain_Cerebellum |
|           | 0.974665059                           | Brain_Nucleus_accumbens_basal_ganglia | 3.342761409  |              |                             |
|           | 0.129579027                           | 0.129579027                           | -0.903946765 | 0.031757977  | -0.466802503                |
|           | 0.361521405                           | 8                                     | 0            | 0.998207054  |                             |
| WIF1      | ENSG00000156076.9                     | 0.928091406                           | 2            | 2            | 0.701486508                 |
|           | Brain_Nucleus_accumbens_basal_ganglia | 0.971191005                           |              |              | Brain_Frontal_Cortex_BA9    |
|           | 1.031379584                           | 0.968620416                           | 0.968620416  | -0.38331461  | 0.03611457                  |
|           | -0.17360002                           | 0.296581217                           | 2            | 0            | 0.998207054                 |
| CHD3      | ENSG00000170004.16                    | 0.928123384                           | 1            | 1            | 0.928123384                 |
|           | Brain_Frontal_Cortex_BA9              | 0.928123384                           |              |              | Brain_Frontal_Cortex_BA9    |
|           | 1                                     | 0.090206167                           | 0.090206167  | 0.090206167  | NA                          |
|           | 0.998207054                           |                                       |              |              | 1                           |
|           |                                       |                                       |              |              | 0                           |
| ERCC6     | ENSG00000225830.12                    | 0.928560787                           | 5            | 5            | 0.547749558                 |
|           | Brain_Putamen_basal_ganglia           | 0.96481215                            |              |              | Brain_Cerebellar_Hemisphere |
|           | 0.150902327                           | 0.150902327                           | -0.601135774 | 0.252084216  | -0.120284343                |
|           | 0.35250982                            | 5                                     | 0            | 0.998207054  |                             |
| LINC02060 | ENSG00000250156.3                     | 0.928760183                           | 3            | 3            | 0.581216666                 |
|           | Brain_Cerebellar_Hemisphere           | 0.878971021                           |              |              | Brain_Frontal_Cortex_BA9    |
|           | 0.695642522                           | 0.695642522                           | -0.551608421 | -0.152273759 | -0.323232403                |
|           | 0.205765908                           | 3                                     | 0            | 0.998207054  |                             |
| NCOR1     | ENSG00000141027.20                    | 0.928764825                           | 2            | 2            | 0.702541983                 |
|           | Brain_Nucleus_accumbens_basal_ganglia | 0.980848687                           |              |              | Brain_Frontal_Cortex_BA9    |
|           | 1.052862575                           | 0.947137425                           | 0.947137425  | -0.381891314 | 0.024004916                 |
|           | -0.178943199                          | 0.287011977                           | 2            | 0            | 0.998207054                 |
| AOC2      | ENSG00000131480.8                     | 0.928883146                           | 2            | 2            | 0.718103467                 |
|           | Brain_Cerebellar_Hemisphere           | 0.928252826                           |              |              | Brain_Putamen_basal_ganglia |
|           | 1.111875621                           | 0.888124379                           | 0.888124379  | -0.090043275 | 0.360994622                 |
|           | 0.135475674                           | 0.318931956                           | 2            | 0            | 0.998207054                 |
| ARHGAP25  | ENSG00000163219.11                    | 0.928899477                           | 3            | 3            | 0.691412432                 |
|           | Brain_Cortex                          | 0.934086646                           |              |              | Brain_Cerebellar_Hemisphere |
|           | 0.419808044                           | 0.419808044                           | -0.396939016 | 0.306123757  | -0.057839861                |
|           | 0.352190285                           | 3                                     | 0            | 0.998207054  |                             |
| GORASP2   | ENSG00000115806.12                    | 0.929011951                           | 4            | 4            | 0.536910893                 |
|           | Brain_Spinal_cord_cervical_c-1        | 0.995563265                           |              |              | Brain_Frontal_Cortex_BA9    |
|           | 1.647228571                           | 0.602248449                           | 0.602248449  | -0.005560651 | 0.617491034                 |
|           | 0.42109669                            | 0.289297985                           | 4            | 0            | 0.998207054                 |
| SLU7      | ENSG00000164609.9                     | 0.929115709                           | 2            | 2            | 0.701440516                 |
|           | Brain_Cerebellum                      |                                       |              |              |                             |
|           | 0.808620831                           | Brain_Caudate_basal_ganglia           | 1.647951317  | 0.352048683  |                             |
|           | 0.352048683                           | 0.242205632                           | 0.383376647  | 0.31279114   | 0.099822982                 |
|           | 0                                     | 0.998207054                           |              |              | 2                           |
| DOLK      | ENSG00000175283.7                     | 0.929160326                           | 2            | 2            | 0.714185367                 |
|           | Brain_Caudate_basal_ganglia           | 0.922640556                           |              |              | Brain_Amygdala              |
|           | 0.956340339                           | 0.956340339                           | -0.366240844 | 0.097108091  | -0.134566377                |
|           | 0.327637174                           | 2                                     | 0            | 0.998207054  |                             |
| CAPNS1    | ENSG00000126247.10                    | 0.929208946                           | 4            | 4            | 0.426547758                 |
|           | Brain_Cortex                          | 0.959087955                           |              |              | Brain_Cerebellar_Hemisphere |
|           | 0.565226441                           | 0.565226441                           | 0.051298135  | 0.795113027  | 0.432366523                 |
|           | 0.305964508                           | 4                                     | 0            | 0.998207054  |                             |
| WDR36     | ENSG00000134987.11                    | 0.929232141                           | 6            | 4            | 0.33238009                  |
|           | Brain_Cerebellum                      |                                       |              |              |                             |
|           | 0.629976892                           | Brain_Cortex                          | 4.67795192   | 0.017850238  | 0.258655777                 |
|           | -0.969330954                          | -0.481759374                          | -0.708752425 | 0.185397798  | 4                           |
|           | 0.998207054                           |                                       |              |              | 0                           |
| CLECL1    | ENSG00000184293.7                     | 0.929233989                           | 9            | 2            | 0.392951496                 |
|           | Brain_Nucleus_accumbens_basal_ganglia | 0.973048057                           |              |              | Brain_Amygdala              |
|           | 8.124427464                           | 0.006258964                           | 0.30837731   | -0.033785677 | 0.854277057                 |
|           | 0.358856566                           | 0.292891317                           | 2            | 0            | 0.998207054                 |
| ABCA4     | ENSG00000198691.11                    | 0.929351981                           | 1            | 1            | 0.929351981                 |
|           | Brain_Caudate_basal_ganglia           | 0.929351981                           |              |              | Brain_Caudate_basal_ganglia |
|           | 1                                     | -0.088660178                          | -0.088660178 | -0.088660178 | NA                          |
|           | 0.998207054                           |                                       |              |              | 1                           |
|           |                                       |                                       |              |              | 0                           |



WASF3 ENSG00000132970.12 0.929561002 11 4 0.567969733  
 Brain\_Cerebellar\_Hemisphere0.974507234 Brain\_Cerebellum8.05966524  
 0.000240494 0.457124717 -0.435537561 0.571044124 0.025296888  
 0.343288027 4 0 0.998207054  
 PI4KB ENSG00000143393.16 0.929776722 1 1 0.929776722  
 Brain\_Cerebellar\_Hemisphere0.929776722 Brain\_Cerebellar\_Hemisphere1 1  
 1 0.088125761 0.088125761 0.088125761 NA 1 0  
 0.998207054  
 RP11-847H18.3 ENSG00000256538.1 0.929990821 1 1 0.929990821  
 Brain\_Hippocampus 0.929990821 Brain\_Hippocampus 1 1 1  
 -0.087856386 -0.087856386 -0.087856386 NA 1 0 0.998207054  
 FOXD2 ENSG00000186564.5 0.930100564 1 1 0.930100564  
 Brain\_Hippocampus 0.930100564 Brain\_Hippocampus 1 1 1  
 0.087718313 0.087718313 0.087718313 NA 1 0 0.998207054  
 B4GALT7 ENSG00000027847.13 0.930113949 8 5 0.323815408  
 Brain\_Cortex 0.794586481 Brain\_Putamen\_basal\_ganglia5.819916855  
 0.01181949 0.223866902 -0.986647638 -0.260359499 -0.521332252  
 0.261730885 5 0 0.998207054  
 IRF6 ENSG00000117595.10 0.93021978 5 3 0.601867631 Brain\_Cerebellum  
 0.861194133 Brain\_Putamen\_basal\_ganglia3.508057043 0.085799511  
 0.439180186 0.174854284 0.521716649 0.331742938 0.156725227  
 3 0 0.998207054  
 OTOS ENSG00000178602.7 0.930235582 4 4 0.542449143 Brain\_Cerebellum  
 0.975783106 Brain\_Cortex 1.466513097 0.596150587 0.596150587  
 0.030356037 0.6091136 0.438686146 0.276317859 4 0  
 0.998207054  
 SUPT5H ENSG00000196235.13 0.930240238 6 1 0.297030218  
 Brain\_Caudate\_basal\_ganglia0.989046198 Brain\_Anterior\_cingulate\_cortex\_BA24  
 5.4666337 0.020233082 5.4666337 -0.390678197 1.042823126  
 0.088511962 0.49190108 1 0 0.998207054  
 MCF2L ENSG00000126217.20 0.930277704 9 4 0.527805853  
 Brain\_Cerebellar\_Hemisphere0.992246309 Brain\_Spinal\_cord\_cervical\_c-1  
 6.309622171 0.014009549 0.232806008 -0.631358946 0.133574389  
 -0.225630186 0.264742664 4 0 0.998207054  
 GYS2 ENSG00000111713.2 0.930381277 4 4 0.411714196 Brain\_Amygdala  
 0.941489694 Brain\_Cerebellar\_Hemisphere1.526377066 0.629889202  
 0.629889202 -0.820880752 0.087678008 -0.234002875 0.425903138  
 4 0 0.998207054  
 PGBD5 ENSG00000177614.10 0.930431715 5 5 0.463066396  
 Brain\_Nucleus\_accumbens\_basal\_ganglia 0.956008738 Brain\_Cerebellum  
 2.636832311 0.095461326 0.095461326 -0.733806964 0.344293064  
 -0.139436015 0.400159602 5 0 0.998207054  
 AP4E1 ENSG00000081014.10 0.930449145 2 2 0.728533513  
 Brain\_Anterior\_cingulate\_cortex\_BA24 0.819068224 Brain\_Cerebellum  
 1.226954437 0.773045563 0.773045563 0.228743576 0.347076945  
 0.28791026 0.083674328 2 0 0.998207054  
 PTPN13 ENSG00000163629.12 0.930487312 8 3 0.472669578  
 Brain\_Substantia\_nigra 0.961600855 Brain\_Cerebellum6.959055031  
 0.003439725 0.317283818 -0.718142255 0.244277882 -0.191738313  
 0.290356676 3 0 0.998207054  
 PRIM2 ENSG00000146143.17 0.930540996 1 1 0.930540996  
 Brain\_Anterior\_cingulate\_cortex\_BA24 0.930540996  
 Brain\_Anterior\_cingulate\_cortex\_BA24 1 1 1 0.087164199  
 0.087164199 0.087164199 NA 1 0 0.998207054  
 RGS6 ENSG00000182732.16 0.930558523 1 1 0.930558523  
 Brain\_Hypothalamus 0.930558523 Brain\_Hypothalamus 1 1 1  
 0.087142149 0.087142149 0.087142149 NA 1 0 0.998207054  
 CREB3L2 ENSG00000182158.14 0.930906517 1 1 0.930906517  
 Brain\_Hypothalamus 0.930906517 Brain\_Hypothalamus 1 1 1  
 -0.086704351 -0.086704351 -0.086704351 NA 1 0 0.998207054  
 AMY2A ENSG00000243480.7 0.930926945 3 3 0.514397049  
 Brain\_Cerebellar\_Hemisphere0.957828003 Brain\_Cortex 2.01671633

|               |                                       |                                       |                                |              |              |
|---------------|---------------------------------------|---------------------------------------|--------------------------------|--------------|--------------|
|               | 0.144240005                           | 0.144240005                           | 0.052879393                    | 0.652006392  | 0.267351138  |
|               | 0.333856422                           | 3                                     | 0                              | 0.998207054  |              |
| GORASP1       | ENSG00000114745.13                    | 0.931056106                           | 2                              | 2            | 0.746973663  |
|               | Brain_Cerebellum                      | 0.820188543                           | Brain_Cortex                   | 1.097032421  | 0.902967579  |
|               | 0.902967579                           | 0.227302482                           | 0.322632387                    | 0.274967435  | 0.067408422  |
|               | 2                                     | 0                                     | 0.998207054                    |              |              |
| KIAA0141      | ENSG00000081791.8                     | 0.931102818                           | 2                              | 2            | 0.835870216  |
|               | Brain_Cerebellar_Hemisphere           | 0.951297703                           | Brain_Cerebellum               | 1.736647586  |              |
|               | 0.263352414                           | -0.263352414                          | -0.207178809                   | 0.061077231  | -0.073050789 |
|               | 0.189685665                           | 2                                     | 0                              | 0.998207054  |              |
| CHAD          | ENSG00000136457.9                     | 0.931112888                           | 7                              | 3            | 0.557627173  |
|               | Brain_Nucleus_accumbens_basal_ganglia | 0.957936013                           | Brain_Caudate_basal_ganglia    |              |              |
|               | 5.733087896                           | 0.011890697                           | 0.406332861                    | -0.324097974 | 0.586369594  |
|               | 0.103964955                           | 0.306623699                           | 3                              | 0            | 0.998207054  |
| INVS          | ENSG00000119509.12                    | 0.931223584                           | 7                              | 3            | 0.776022972  |
|               | Brain_Frontal_Cortex_BA9              | 5.40899138                            | 0.009173918                    | Brain_Cortex |              |
|               | 0.231002231                           | -0.284505562                          | 0.2774072                      | -0.058462418 | 0.178796788  |
|               | 0                                     | 0.998207054                           |                                |              | 3            |
| TMEM186       | ENSG00000184857.7                     | 0.93122849                            | 2                              | 2            | 0.71252644   |
|               | Brain_Hypothalamus                    |                                       |                                |              |              |
|               | 0.763415764                           | Brain_Nucleus_accumbens_basal_ganglia | 1.647092569                    |              |              |
|               | 0.352907431                           | 0.352907431                           | 0.300998335                    | 0.368465132  | 0.334731733  |
|               | 0.04770623                            | 2                                     | 0                              | 0.998207054  |              |
| RP11-539G18.3 | ENSG00000255458.5                     | 0.931290151                           | 1                              | 1            | 0.931290151  |
|               | Brain_Caudate_basal_ganglia           | 0.931290151                           | Brain_Caudate_basal_ganglia    | 1            | 1            |
|               | 1                                     | -0.086221738                          | -0.086221738                   | -0.086221738 | NA           |
|               | 0.998207054                           |                                       |                                |              | 1            |
| CLPSL2        | ENSG00000196748.9                     | 0.931297757                           | 3                              | 3            | 0.603267707  |
|               | Brain_Anterior_cingulate_cortex_BA24  | 0.697944528                           | Brain_Cortex                   |              |              |
|               | 1.508036739                           | 0.507806487                           | 0.507806487                    | -0.519707143 | 0.388096627  |
|               | -0.175268038                          | 0.491907737                           | 3                              | 0            | 0.998207054  |
| MANF          | ENSG00000145050.15                    | 0.931325382                           | 2                              | 2            | 0.706025652  |
|               | Brain_Nucleus_accumbens_basal_ganglia | 0.872797384                           | Brain_Frontal_Cortex_BA9       |              |              |
|               | 1.415446726                           | 0.584553274                           | 0.584553274                    | 0.160106242  | 0.377199096  |
|               | 0.268652669                           | 0.153507829                           | 2                              | 0            | 0.998207054  |
| WDR97         | ENSG00000179698.13                    | 0.93147547                            | 13                             | 9            | 0.367877466  |
|               | Brain_Cerebellar_Hemisphere           | 0.961220943                           | Brain_Spinal_cord_cervical_c-1 |              |              |
|               | 6.486294592                           | 0.037742169                           | 0.240770936                    | -0.900456309 | 0.665595269  |
|               | -0.239334686                          | 0.451645856                           | 9                              | 0            | 0.998207054  |
| TAF8          | ENSG00000137413.15                    | 0.931502605                           | 1                              | 1            | 0.931502605  |
|               | Brain_Cerebellar_Hemisphere           | 0.931502605                           | Brain_Cerebellar_Hemisphere    | 1            | 1            |
|               | 1                                     | 0.085954478                           | 0.085954478                    | 0.085954478  | NA           |
|               | 0.998207054                           |                                       |                                |              | 1            |
| IL23A         | ENSG00000110944.8                     | 0.931525064                           | 3                              | 3            | 0.599862405  |
|               | Brain_Caudate_basal_ganglia           | 0.881882045                           | Brain_Hypothalamus             | 1.854448095  |              |
|               | 0.162367793                           | 0.162367793                           | -0.524598391                   | -0.148583815 | -0.300846704 |
|               | 0.197938694                           | 3                                     | 0                              | 0.998207054  |              |
| CASP6         | ENSG00000138794.9                     | 0.931923072                           | 5                              | 2            | 0.683685756  |
|               | Brain_Cerebellum                      |                                       |                                |              |              |
|               | 0.927823598                           | Brain_Cerebellar_Hemisphere           | 3.988624076                    | 0.003287395  |              |
|               | 0.95385736                            | -0.407438772                          | -0.09058343                    | -0.301083674 | 0.130557463  |
|               | 0                                     | 0.998207054                           |                                |              | 2            |
| SLBP          | ENSG00000163950.12                    | 0.931937416                           | 2                              | 2            | 0.720908826  |
|               | Brain_Caudate_basal_ganglia           | 0.890949118                           | Brain_Cortex                   | 1.060885732  |              |
|               | 0.939114268                           | 0.939114268                           | -0.357244431                   | 0.137103333  | -0.110070549 |
|               | 0.349556656                           | 2                                     | 0                              | 0.998207054  |              |
| EFCAB14       | ENSG00000159658.10                    | 0.932061566                           | 2                              | 2            | 0.783300497  |
|               | Brain_Cerebellar_Hemisphere           | 0.917306875                           | Brain_Cerebellum               | 1.450561353  |              |
|               | 0.549438647                           | -0.549438647                          | -0.103826704                   | 0.275020489  | 0.085596893  |
|               | 0.267885419                           | 2                                     | 0                              | 0.998207054  |              |
| RP11-96O20.5  | ENSG00000275709.1                     | 0.93209496                            | 2                              | 2            | 0.710837648  |
|               | Brain_Cerebellar_Hemisphere           | 0.905178103                           | Brain_Hypothalamus             | 1.170992369  |              |
|               | 0.829007631                           | -0.829007631                          | -0.370731336                   | 0.119122755  | -0.12580429  |
|               | 0.34637915                            | 2                                     | 0                              | 0.998207054  |              |

|              |                                |                             |              |              |                                       |              |              |   |
|--------------|--------------------------------|-----------------------------|--------------|--------------|---------------------------------------|--------------|--------------|---|
| WNT3A        | ENSG00000154342.5              | 0.932123079                 | 1            | 1            | 0.932123079                           |              |              |   |
|              | Brain_Caudate_basal_ganglia    | 0.932123079                 |              |              | Brain_Caudate_basal_ganglia           | 1            | 1            |   |
|              | 1                              | 0.085173977                 | 0.085173977  | 0.085173977  | NA                                    | 1            | 0            |   |
|              | 0.998207054                    |                             |              |              |                                       |              |              |   |
| EFNB3        | ENSG00000108947.4              | 0.932144198                 | 2            | 2            | 0.722588056                           |              |              |   |
|              | Brain_Cerebellar_Hemisphere    | 0.845816808                 |              |              | Brain_Cerebellum                      | 1.765918686  |              |   |
|              | 0.234081314                    | 0.234081314                 | 0.194458601  | 0.355002049  |                                       | 0.274730325  |              |   |
|              | 0.113521361                    | 2                           | 0            | 0.998207054  |                                       |              |              |   |
| SCHIP1       | ENSG00000151967.18             | 0.932216194                 | 2            | 2            | 0.770134218                           |              |              |   |
|              | Brain_Spinal_cord_cervical_c-1 | 0.80033964                  |              |              | Brain_Nucleus_accumbens_basal_ganglia |              |              |   |
|              | 1.064597461                    | 0.935402539                 | 0.935402539  | -0.292199337 |                                       | -0.252907569 |              |   |
|              | -0.272553453                   | 0.027783476                 | 2            | 0            | 0.998207054                           |              |              |   |
| FGB          | ENSG00000171564.11             | 0.932229048                 | 1            | 1            | 0.932229048                           |              |              |   |
|              | Brain_Hippocampus              | 0.932229048                 |              |              | Brain_Hippocampus                     | 1            | 1            | 1 |
|              | 0.085040682                    | 0.085040682                 | 0.085040682  | NA           | 1                                     | 0            | 0.998207054  |   |
| ARVCF        | ENSG00000099889.13             | 0.932345863                 | 4            | 4            | 0.64727008                            |              |              |   |
|              | Brain_Substantia_nigra         | 1.72442521                  | 0.281796594  |              | Brain_Hippocampus                     |              |              |   |
|              | 0.281796594                    | -0.457557921                | 0.377293373  | -0.022181175 |                                       | 0.365682209  |              |   |
|              | 4                              | 0                           | 0.998207054  |              |                                       |              |              |   |
| ABCC6        | ENSG00000091262.15             | 0.932381494                 | 8            | 8            | 0.319451638                           |              |              |   |
|              | Brain_Frontal_Cortex_BA9       | 0.927849309                 |              |              | Brain_Substantia_nigra                |              |              |   |
|              | 3.074861873                    | 0.26239217                  | 0.26239217   | -0.265418208 |                                       | 0.995585387  |              |   |
|              | 0.352820695                    | 0.456894072                 | 8            | 0            | 0.998207054                           |              |              |   |
| YBEY         | ENSG00000182362.13             | 0.932458425                 | 13           | 2            | 0.393628932                           |              |              |   |
|              | Brain_Substantia_nigra         | 0.981283835                 |              |              | Brain_Hypothalamus                    | 11.51256029  |              |   |
|              | 0.002511921                    | 0.415725509                 | -0.853054771 | 0.4336873    |                                       | -0.020457808 |              |   |
|              | 0.418923499                    | 2                           | 0            | 0.998207054  |                                       |              |              |   |
| CLPP         | ENSG00000125656.8              | 0.932477446                 | 8            | 7            | 0.199500684                           |              |              |   |
|              | Brain_Hippocampus              | 0.937939206                 |              |              | Brain_Hypothalamus                    | 3.905226515  |              |   |
|              | 0.012375073                    | 0.13354878                  | -1.282975431 | 0.169629783  |                                       | -0.400858879 |              |   |
|              | 0.439324463                    | 7                           | 0            | 0.998207054  |                                       |              |              |   |
| RP3-500L14.2 | ENSG00000272209.1              | 0.932527994                 | 3            | 3            | 0.590954502                           |              |              |   |
|              | Brain_Cerebellum               | 0.979685147                 |              |              | Brain_Frontal_Cortex_BA9              | 1.198195231  |              |   |
|              | 0.811655945                    | 0.811655945                 | -0.285343631 | 0.537453347  |                                       | 0.07554869   |              |   |
|              | 0.420596405                    | 3                           | 0            | 0.998207054  |                                       |              |              |   |
| NFYA         | ENSG00000001167.14             | 0.932569611                 | 3            | 2            | 0.723098571                           |              |              |   |
|              | Brain_Cerebellar_Hemisphere    | 2.593008349                 |              |              | Brain_Cerebellum                      |              |              |   |
|              | 0.927763751                    | Brain_Cerebellar_Hemisphere | 2.593008349  | 0.055831249  |                                       |              |              |   |
|              | 0.351160401                    | -0.090658746                | 0.35432068   | 0.194048563  |                                       | 0.247213997  | 2            |   |
|              | 0                              | 0.998207054                 |              |              |                                       |              |              |   |
| SMAD2        | ENSG00000175387.15             | 0.93263989                  | 1            | 1            | 0.93263989                            |              |              |   |
|              | Brain_Cortex                   | 1                           | 1            | 1            | Brain_Cortex                          | 0.93263989   |              |   |
|              | NA                             | 1                           | 0            | 0.998207054  |                                       |              |              |   |
| TSPO         | ENSG00000100300.17             | 0.932660637                 | 5            | 5            | 0.324962333                           |              |              |   |
|              | Brain_Hypothalamus             | 0.907674148                 |              |              | Brain_Frontal_Cortex_BA9              | 1.734255064  |              |   |
|              | 0.311850113                    | 0.311850113                 | -0.984311588 | -0.115972738 |                                       | -0.470146378 |              |   |
|              | 0.343476225                    | 5                           | 0            | 0.998207054  |                                       |              |              |   |
| GANC         | ENSG00000214013.9              | 0.932669702                 | 5            | 4            | 0.425241425                           |              |              |   |
|              | Brain_Cerebellar_Hemisphere    | 0.95288753                  |              |              | Brain_Frontal_Cortex_BA9              | 3.65963234   |              |   |
|              | 0.053359292                    | 0.181427768                 | -0.797360961 | 0.059081078  |                                       | -0.584567538 |              |   |
|              | 0.362192278                    | 4                           | 0            | 0.998207054  |                                       |              |              |   |
| P4HB         | ENSG00000185624.14             | 0.932691644                 | 4            | 4            | 0.46139016                            |              |              |   |
|              | Brain_Hypothalamus             | 1.836393733                 |              |              | Brain_Hypothalamus                    |              |              |   |
|              | 0.993922411                    | Brain_Cerebellum            | 1.836393733  | 0.162631745  |                                       | 0.162631745  |              |   |
|              | -0.054919525                   | 0.736559684                 | 0.262661529  | 0.370348949  |                                       | 4            | 0            |   |
|              | 0.998207054                    |                             |              |              |                                       |              |              |   |
| ISCA2        | ENSG00000165898.13             | 0.932786306                 | 2            | 2            | 0.742476124                           |              |              |   |
|              | Brain_Caudate_basal_ganglia    | 0.843644988                 |              |              | Brain_Frontal_Cortex_BA9              |              |              |   |
|              | 1.063818753                    | 0.936181247                 | 0.936181247  | -0.328576088 |                                       | 0.197233281  |              |   |
|              | -0.065671404                   | 0.37180337                  | 2            | 0            | 0.998207054                           |              |              |   |
| RIN1         | ENSG00000174791.10             | 0.932933553                 | 1            | 1            | 0.932933553                           |              |              |   |
|              | Brain_Amygdala                 | 1                           | 1            | 1            | Brain_Amygdala                        |              |              |   |
|              | 0.932933553                    | Brain_Amygdala              | 1            | 1            | 1                                     | -0.084154551 | -0.084154551 |   |
|              | -0.084154551                   | NA                          | 1            | 0            | 0.998207054                           |              |              |   |
| DENND2A      | ENSG00000146966.12             | 0.93310124                  | 2            | 2            | 0.709853916                           |              |              |   |

|              |                                       |                             |                             |             |                          |                  |             |   |
|--------------|---------------------------------------|-----------------------------|-----------------------------|-------------|--------------------------|------------------|-------------|---|
|              | Brain_Spinal_cord_cervical_c-1        | 0.974176928                 |                             |             | Brain_Substantia_nigra   |                  |             |   |
|              | 1.066188686                           | 0.933811314                 | 0.933811314                 |             | -0.372052292             | 0.032370073      |             |   |
|              | -0.16984111                           | 0.285969797                 | 2                           | 0           | 0.998207054              |                  |             |   |
| SMG7         | ENSG00000116698.21                    | 0.933146032                 | 5                           | 4           | 0.461587749              |                  |             |   |
|              | Brain_Nucleus_accumbens_basal_ganglia | 0.970204489                 |                             |             | Brain_Frontal_Cortex_BA9 |                  |             |   |
|              | 3.821781639                           | 0.014581074                 | 0.144441893                 |             | -0.147611736             | 0.736234912      |             |   |
|              | 0.178228355                           | 0.332251767                 | 4                           | 0           | 0.998207054              |                  |             |   |
| RHBDF1       | ENSG00000007384.15                    | 0.933168236                 | 3                           | 3           | 0.66173257               | Brain_Cerebellum |             |   |
|              | 0.885853464                           | Brain_Cerebellar_Hemisphere | 1.800413797                 |             | 0.199587775              |                  |             |   |
|              | 0.199587775                           | 0.14355299                  | 0.437522352                 |             | 0.308594762              | 0.15027532       | 3           | 0 |
|              | 0.998207054                           |                             |                             |             |                          |                  |             |   |
| NPIPA1       | ENSG00000183426.16                    | 0.933224093                 | 13                          | 4           | 0.486307154              |                  |             |   |
|              | Brain_Anterior_cingulate_cortex_BA24  | 0.896879299                 |                             |             |                          |                  |             |   |
|              | Brain_Nucleus_accumbens_basal_ganglia | 10.27838992                 |                             |             | 0.030487497              |                  |             |   |
|              | 0.363623338                           | -0.696194304                | 0.370697481                 |             | -0.318680168             | 0.311474064      |             |   |
|              | 4                                     | 0                           | 0.998207054                 |             |                          |                  |             |   |
| RP4-738P15.1 | ENSG00000230725.5                     | 0.933305795                 | 8                           | 6           | 0.315515602              |                  |             |   |
|              | Brain_Anterior_cingulate_cortex_BA24  | 0.866993255                 |                             |             |                          |                  |             |   |
|              | Brain_Nucleus_accumbens_basal_ganglia | 4.240082497                 |                             |             | 0.075293756              |                  |             |   |
|              | 0.304813491                           | -1.003715835                | 0.245969895                 |             | -0.430994062             | 0.47696862       | 6           |   |
|              | 0                                     | 0.998207054                 |                             |             |                          |                  |             |   |
| RP11-51J9.6  | ENSG00000272375.1                     | 0.93337286                  | 5                           | 4           | 0.499596685              |                  |             |   |
|              | Brain_Cerebellum                      | 0.69549501                  | Brain_Cerebellar_Hemisphere | 3.627082384 |                          |                  |             |   |
|              | 0.085556874                           | 0.183393113                 | -0.391408907                |             | 0.675124475              | 0.432801907      |             |   |
|              | 0.462127592                           | 4                           | 0                           | 0.998207054 |                          |                  |             |   |
| RHOT2        | ENSG00000140983.13                    | 0.933612628                 | 1                           | 1           | 0.933612628              | Brain_Cerebellum |             |   |
|              | 0.933612628                           | Brain_Cerebellum            | 1                           | 1           | 0.083300468              | 0.083300468      |             |   |
|              | 0.083300468                           | NA                          | 1                           | 0           | 0.998207054              |                  |             |   |
| HIST3H2BB    | ENSG00000196890.4                     | 0.933622673                 | 1                           | 1           | 0.933622673              |                  |             |   |
|              | Brain_Frontal_Cortex_BA9              | 0.933622673                 | Brain_Frontal_Cortex_BA9    | 1           | 1                        |                  |             |   |
|              | 1                                     | -0.083287834                | -0.083287834                |             | -0.083287834             | NA               | 1           | 0 |
|              | 0.998207054                           |                             |                             |             |                          |                  |             |   |
| GPR150       | ENSG00000178015.4                     | 0.93365409                  | 1                           | 1           | 0.93365409               |                  |             |   |
|              | Brain_Anterior_cingulate_cortex_BA24  | 0.93365409                  |                             |             |                          |                  |             |   |
|              | Brain_Anterior_cingulate_cortex_BA24  | 1                           | 1                           | 1           | 0.083248323              |                  |             |   |
|              | 0.083248323                           | 0.083248323                 | NA                          | 1           | 0                        | 0.998207054      |             |   |
| SLC39A12     | ENSG00000148482.11                    | 0.933679588                 | 1                           | 1           | 0.933679588              |                  |             |   |
|              | Brain_Cerebellar_Hemisphere           | 0.933679588                 | Brain_Cerebellar_Hemisphere | 1           | 1                        |                  |             |   |
|              | 1                                     | -0.083216255                | -0.083216255                |             | -0.083216255             | NA               | 1           | 0 |
|              | 0.998207054                           |                             |                             |             |                          |                  |             |   |
| MRPL3        | ENSG00000114686.8                     | 0.933776017                 | 1                           | 1           | 0.933776017              |                  |             |   |
|              | Brain_Caudate_basal_ganglia           | 0.933776017                 | Brain_Caudate_basal_ganglia | 1           | 1                        |                  |             |   |
|              | 1                                     | 0.083094981                 | 0.083094981                 |             | 0.083094981              | NA               | 1           | 0 |
|              | 0.998207054                           |                             |                             |             |                          |                  |             |   |
| CCNO         | ENSG00000152669.8                     | 0.933826062                 | 7                           | 3           | 0.560250179              |                  |             |   |
|              | Brain_Anterior_cingulate_cortex_BA24  | 0.930641992                 | Brain_Cerebellum            |             |                          |                  |             |   |
|              | 5.686880814                           | 0.000298238                 | 0.197862599                 |             | -0.582469946             | 0.218708314      |             |   |
|              | -0.326555032                          | 0.30827029                  | 3                           | 0           | 0.998207054              |                  |             |   |
| SNPH         | ENSG00000101298.13                    | 0.933856684                 | 2                           | 2           | 0.759709382              | Brain_Cerebellum |             |   |
|              | 0.759751478                           | Brain_Cerebellar_Hemisphere | 1.366824342                 |             | 0.633175658              |                  |             |   |
|              | 0.633175658                           | -0.305862444                | -0.305807158                |             | -0.305834801             | 3.91E-05         | 2           |   |
|              | 0                                     | 0.998207054                 |                             |             |                          |                  |             |   |
| TMPRSS3      | ENSG00000160183.13                    | 0.933971908                 | 1                           | 1           | 0.933971908              |                  |             |   |
|              | Brain_Cerebellum                      | 0.933971908                 | Brain_Cerebellum            | 1           | 1                        | 1                | 0.082848621 |   |
|              | 0.082848621                           | 0.082848621                 | NA                          | 1           | 0                        | 0.998207054      |             |   |
| DYNC1LI2     | ENSG00000135720.12                    | 0.934119208                 | 3                           | 3           | 0.530889804              |                  |             |   |
|              | Brain_Putamen_basal_ganglia           | 0.850008663                 | Brain_Cerebellar_Hemisphere |             |                          |                  |             |   |
|              | 1.381179096                           | 0.621205985                 | 0.621205985                 |             | -0.626648294             | 0.199275169      |             |   |
|              | -0.079421917                          | 0.473939212                 | 3                           | 0           | 0.998207054              |                  |             |   |
| ATG13        | ENSG00000175224.16                    | 0.934132784                 | 2                           | 2           | 0.712309747              | Brain_Cortex     |             |   |
|              | 0.941149998                           | Brain_Frontal_Cortex_BA9    | 1.154373973                 |             | 0.845626027              |                  |             |   |
|              | 0.845626027                           | -0.368755808                | -0.073824543                |             | -0.221290175             | 0.208547897      |             |   |

|                |                                      |                             |              |              |                                      |              |                  |
|----------------|--------------------------------------|-----------------------------|--------------|--------------|--------------------------------------|--------------|------------------|
| 2              | 0                                    | 0.998207054                 |              |              |                                      |              |                  |
| ACVR2A         | ENSG00000121989.14                   | 0.934190307                 | 2            | 2            | 0.741746045                          |              |                  |
|                | Brain_Cerebellar_Hemisphere          | 0.990363022                 |              |              | Brain_Cortex                         | 1.478845892  |                  |
|                | 0.521154108                          | 0.521154108                 |              |              | -0.012078455                         | -0.170810233 |                  |
|                | 0.224480634                          | 2                           | 0            | 0.998207054  |                                      |              |                  |
| SH3GLB2        | ENSG00000148341.17                   | 0.934205098                 | 1            | 1            | 0.934205098                          |              |                  |
|                | Brain_Cerebellar_Hemisphere          | 0.934205098                 |              |              | Brain_Cerebellar_Hemisphere          | 1            | 1                |
|                | 1                                    | 0.082555359                 | 0.082555359  | 0.082555359  | NA                                   | 1            | 0                |
|                | 0.998207054                          |                             |              |              |                                      |              |                  |
| CTD-2341M24.1  | ENSG00000258733.5                    | 0.934257933                 | 3            | 3            | 0.543398654                          |              |                  |
|                | Brain_Cortex                         | 0.814302141                 |              |              | Brain_Hippocampus                    | 1.555584487  |                  |
|                | 0.445525628                          | 0.445525628                 |              |              | -0.607681623                         | -0.234879655 | -0.365571883     |
|                | 0.209894552                          | 3                           | 0            | 0.998207054  |                                      |              |                  |
| BORCS5         | ENSG00000165714.10                   | 0.934304398                 | 9            | 8            | 0.275072172                          |              |                  |
|                | Brain_Hippocampus                    | 0.981658303                 |              |              | Brain_Spinal_cord_cervical_c-1       | 5.20158241   |                  |
|                | 0.065630566                          | 0.177706856                 |              |              | -0.160098271                         | 1.091456252  | 0.372250644      |
|                | 0.45235144                           | 8                           | 0            | 0.998207054  |                                      |              |                  |
| GPC6           | ENSG00000183098.10                   | 0.934361853                 | 4            | 4            | 0.379556795                          |              | Brain_Cerebellum |
|                | 0.99773686                           | Brain_Putamen_basal_ganglia | 2.551677661  |              | 0.183296286                          |              |                  |
|                | 0.183296286                          | -0.016192868                |              |              | 0.878713208                          | 0.259292347  | 0.421503914      |
|                | 4                                    | 0                           | 0.998207054  |              |                                      |              |                  |
| RP11-1152H15.1 | ENSG00000258807.5                    | 0.934428459                 | 2            | 2            | 0.774621446                          |              |                  |
|                | Brain_Frontal_Cortex_BA9             | 0.826271254                 |              |              | Brain_Cortex                         | 1.04170804   | 0.95829196       |
|                | 0.95829196                           | -0.28633514                 |              |              | 0.219486296                          | -0.033424422 | 0.357669768      |
|                | 0                                    | 0.998207054                 |              |              |                                      |              | 2                |
| FZR1           | ENSG00000105325.13                   | 0.934510546                 | 4            | 3            | 0.574715506                          |              |                  |
|                | Brain_Hippocampus                    | 0.953030874                 |              |              | Brain_Cerebellar_Hemisphere          | 2.333859019  |                  |
|                | 0.045475809                          | 0.638416153                 |              |              | 0.05890111                           | 0.561120336  | 0.222300305      |
|                | 0.236604945                          | 3                           | 0            | 0.998207054  |                                      |              |                  |
| RELL1          | ENSG00000181826.9                    | 0.934539423                 | 2            | 2            | 0.715902038                          |              |                  |
|                | Brain_Cerebellar_Hemisphere          | 0.968919025                 |              |              | Brain_Hypothalamus                   | 1.042040986  |                  |
|                | 0.957959014                          | 0.957959014                 |              |              | 0.038964082                          | 0.36394104   | 0.201452561      |
|                | 0.22979341                           | 2                           | 0            | 0.998207054  |                                      |              |                  |
| SEC14L6        | ENSG00000214491.8                    | 0.934748689                 | 13           | 9            | 0.263645123                          |              |                  |
|                | Brain_Anterior_cingulate_cortex_BA24 | 0.949046693                 |              |              | Brain_Putamen_basal_ganglia          |              |                  |
|                | 6.299001957                          | 0.072564467                 |              |              | 0.255868197                          | -0.946111735 | 1.117817086      |
|                | 0.028342159                          | 0.509797367                 | 9            | 0            | 0.998207054                          |              |                  |
| NAPEPLD        | ENSG00000161048.11                   | 0.934765981                 | 1            | 1            | 0.934765981                          |              |                  |
|                | Brain_Caudate_basal_ganglia          | 0.934765981                 |              |              | Brain_Caudate_basal_ganglia          | 1            | 1                |
|                | 1                                    | -0.081850018                | -0.081850018 | -0.081850018 | NA                                   | 1            | 0                |
|                | 0.998207054                          |                             |              |              |                                      |              |                  |
| NCAPD2         | ENSG00000010292.12                   | 0.934782981                 | 7            | 4            | 0.353783058                          |              |                  |
|                | Brain_Caudate_basal_ganglia          | 0.936220064                 |              |              | Brain_Frontal_Cortex_BA9             |              |                  |
|                | 4.888191997                          | 0.054565611                 |              |              | 0.277463488                          | -0.927276374 | 0.617575985      |
|                | -0.246011521                         | 0.584547865                 | 4            | 0            | 0.998207054                          |              |                  |
| ANKLE2         | ENSG00000176915.14                   | 0.934823323                 | 2            | 2            | 0.746132269                          |              |                  |
|                | Brain_Cerebellar_Hemisphere          | 0.842933371                 |              |              | Brain_Anterior_cingulate_cortex_BA24 |              |                  |
|                | 1.078821431                          | 0.921178569                 |              |              | 0.921178569                          | 0.19814276   | 0.323743455      |
|                | 0.260943107                          | 0.088813103                 | 2            | 0            | 0.998207054                          |              |                  |
| HES6           | ENSG00000144485.10                   | 0.93482673                  | 13           | 4            | 0.339202981                          |              |                  |
|                | Brain_Cerebellar_Hemisphere          | 0.702859897                 |              |              | Brain_Anterior_cingulate_cortex_BA24 |              |                  |
|                | 10.55296564                          | 0.002954452                 |              |              | 0.358022594                          | -0.955741241 | -0.381462763     |
|                | -0.735700198                         | 0.184196767                 | 4            | 0            | 0.998207054                          |              |                  |
| RP1-90G24.6    | ENSG00000224050.1                    | 0.934942588                 | 4            | 4            | 0.401524861                          |              |                  |
|                | Brain_Cerebellar_Hemisphere          | 0.861628341                 |              |              | Brain_Anterior_cingulate_cortex_BA24 |              |                  |
|                | 2.560311662                          | 0.181096528                 |              |              | 0.181096528                          | -0.838901011 | -0.174301729     |
|                | -0.529148798                         | 0.280626437                 | 4            | 0            | 0.998207054                          |              |                  |
| C10orf128      | ENSG00000204161.13                   | 0.935100524                 | 3            | 3            | 0.70069119                           |              |                  |
|                | Brain_Caudate_basal_ganglia          | 0.80172622                  |              |              | Brain_Cerebellum                     | 1.126526414  |                  |
|                | 0.809828086                          | 0.809828086                 |              |              | -0.384387599                         | 0.251113679  | -0.16852921      |
|                | 0.36347154                           | 3                           | 0            | 0.998207054  |                                      |              |                  |
| LDHD           | ENSG00000166816.13                   | 0.935111933                 | 1            | 1            | 0.935111933                          |              | Brain_Cerebellum |

|               |                                      |                             |                                |              |                             |                  |
|---------------|--------------------------------------|-----------------------------|--------------------------------|--------------|-----------------------------|------------------|
|               | 0.935111933                          | Brain_Cerebellum1           | 1                              | 1            | -0.081414984                | -0.081414984     |
|               | -0.081414984                         | NA                          | 1                              | 0            | 0.998207054                 |                  |
| GEN1          | ENSG00000178295.14                   | 0.935148466                 | 10                             | 7            | 0.285134212                 |                  |
|               | Brain_Anterior_cingulate_cortex_BA24 | 0.982475812                 |                                |              | Brain_Putamen_basal_ganglia |                  |
|               | 6.470065813                          | 0.039933977                 | 0.248635729                    |              | -1.068856774                | 0.376244653      |
|               | -0.177001361                         | 0.399225313                 | 7                              | 0            | 0.998207054                 |                  |
| KRT34         | ENSG00000131737.5                    | 0.935164728                 | 2                              | 2            | 0.726436268                 | Brain_Cerebellum |
|               | 0.737895047                          | Brain_Cerebellar_Hemisphere | 1.753653033                    |              | 0.246346967                 |                  |
|               | 0.246346967                          | 0.334642148                 | 0.349869993                    |              | 0.342256071                 | 0.010767712      |
|               | 2                                    | 0                           | 0.998207054                    |              |                             |                  |
| ABCC10        | ENSG00000124574.14                   | 0.935273304                 | 1                              | 1            | 0.935273304                 |                  |
|               | Brain_Putamen_basal_ganglia          | 0.935273304                 |                                |              | Brain_Putamen_basal_ganglia | 1                |
|               | 1                                    | 0.081212067                 | 0.081212067                    | 0.081212067  | NA                          | 1                |
|               | 0.998207054                          |                             |                                |              |                             |                  |
| CASP14        | ENSG00000105141.5                    | 0.935425014                 | 1                              | 1            | 0.935425014                 |                  |
|               | Brain_Putamen_basal_ganglia          | 0.935425014                 |                                |              | Brain_Putamen_basal_ganglia | 1                |
|               | 1                                    | -0.0810213                  | -0.0810213                     | -0.0810213   | NA                          | 1                |
|               | 0.998207054                          |                             |                                |              |                             |                  |
| HEXDC         | ENSG00000169660.15                   | 0.935437148                 | 7                              | 7            | 0.417396109                 | Brain_Cortex     |
|               | 0.990771233                          | Brain_Frontal_Cortex_BA9    | 3.459468198                    |              | 0.182382079                 |                  |
|               | 0.182382079                          | -0.810946999                | 0.502478719                    |              | -0.278914211                | 0.481286158      |
|               | 7                                    | 0                           | 0.998207054                    |              |                             |                  |
| RP11-262A16.1 | ENSG00000275322.1                    | 0.93544408                  | 1                              | 1            | 0.93544408                  |                  |
|               | Brain_Hypothalamus                   | 0.93544408                  | Brain_Hypothalamus             | 1            | 1                           | 1                |
|               | 0.080997325                          | 0.080997325                 | 0.080997325                    | NA           | 1                           | 0                |
|               | 0.998207054                          |                             |                                |              |                             |                  |
| TRIM34        | ENSG00000258659.6                    | 0.935451                    | 1                              | 1            | 0.935451                    |                  |
|               | Brain_Putamen_basal_ganglia          | 0.935451                    | Brain_Putamen_basal_ganglia    | 1            | 1                           | 1                |
|               | -0.080988623                         | -0.080988623                | -0.080988623                   | NA           | 1                           | 0                |
|               | 0.998207054                          |                             |                                |              |                             |                  |
| C17orf50      | ENSG00000270806.1                    | 0.935471891                 | 10                             | 1            | 0.623544785                 |                  |
|               | Brain_Caudate_basal_ganglia          | 0.987570467                 | Brain_Amygdala                 | 9.334217372  |                             |                  |
|               | 0.001212224                          | 9.334217372                 | -0.490832693                   |              | 0.364418354                 | 0.079158603      |
|               | 0.231979473                          | 1                           | 0                              | 0.998207054  |                             |                  |
| LINC01030     | ENSG00000253799.1                    | 0.935700187                 | 1                              | 1            | 0.935700187                 |                  |
|               | Brain_Spinal_cord_cervical_c-1       | 0.935700187                 | Brain_Spinal_cord_cervical_c-1 |              |                             |                  |
|               | 1                                    | 1                           | 1                              | 0.080675292  | 0.080675292                 | 0.080675292      |
|               | 0.998207054                          |                             |                                |              | NA                          | 1                |
|               | 0                                    |                             |                                |              |                             |                  |
| TMCO4         | ENSG00000162542.13                   | 0.935732664                 | 2                              | 2            | 0.735748783                 |                  |
|               | Brain_Substantia_nigra               | 0.89484776                  | Brain_Cortex                   | 1.016229933  |                             |                  |
|               | 0.983770067                          | 0.983770067                 | -0.337488363                   |              | -0.132172616                | -0.23483049      |
|               | 0.145180157                          | 2                           | 0                              | 0.998207054  |                             |                  |
| C3orf38       | ENSG00000179021.9                    | 0.935751365                 | 1                              | 1            | 0.935751365                 |                  |
|               | Brain_Frontal_Cortex_BA9             | 0.935751365                 | Brain_Frontal_Cortex_BA9       | 1            | 1                           |                  |
|               | 1                                    | 0.08061094                  | 0.08061094                     | 0.08061094   | NA                          | 1                |
|               | 0.998207054                          |                             |                                |              |                             |                  |
| SNRPD2        | ENSG00000125743.10                   | 0.935768484                 | 2                              | 2            | 0.750839738                 |                  |
|               | Brain_Cortex                         | 0.863312236                 | Brain_Frontal_Cortex_BA9       | 1.020601396  |                             |                  |
|               | 0.979398604                          | 0.979398604                 | -0.317532295                   |              | -0.172159374                | -0.244845835     |
|               | 0.102794179                          | 2                           | 0                              | 0.998207054  |                             |                  |
| TBXAS1        | ENSG00000059377.16                   | 0.936070788                 | 1                              | 1            | 0.936070788                 |                  |
|               | Brain_Substantia_nigra               | 0.936070788                 | Brain_Substantia_nigra         | 1            | 1                           |                  |
|               | 1                                    | -0.080209307                | -0.080209307                   | -0.080209307 | NA                          | 1                |
|               | 0.998207054                          |                             |                                |              |                             |                  |
| INSIG2        | ENSG00000125629.14                   | 0.936157769                 | 1                              | 1            | 0.936157769                 |                  |
|               | Brain_Frontal_Cortex_BA9             | 0.936157769                 | Brain_Frontal_Cortex_BA9       | 1            | 1                           |                  |
|               | 1                                    | 0.080099942                 | 0.080099942                    | 0.080099942  | NA                          | 1                |
|               | 0.998207054                          |                             |                                |              |                             |                  |
| RP11-62J1.4   | ENSG00000272915.1                    | 0.936181526                 | 3                              | 3            | 0.532660445                 |                  |
|               | Brain_Cerebellum                     | 0.918191066                 | Brain_Cortex                   | 1.873899328  |                             | 0.266362932      |
|               | 0.266362932                          | 0.102712609                 | 0.623949965                    |              | 0.356786268                 | 0.260865113      |
|               | 3                                    | 0                           | 0.998207054                    |              |                             |                  |
| RBM6          | ENSG00000004534.14                   | 0.93626305                  | 13                             | 2            | 0.667753789                 |                  |
|               | Brain_Anterior_cingulate_cortex_BA24 | 0.968684808                 | Brain_Cerebellar_Hemisphere    |              |                             |                  |
|               | 12.19964624                          | 0.000577652                 | 0.468085329                    |              | -0.060109671                | 0.429232836      |
|               | 0.194920884                          | 0.146115598                 | 2                              | 0            | 0.998207054                 |                  |

|               |                                       |                                      |              |             |              |                                      |
|---------------|---------------------------------------|--------------------------------------|--------------|-------------|--------------|--------------------------------------|
| RP11-531A24.3 | ENSG00000260838.3                     | 0.936385621                          | 4            | 3           | 0.720724972  |                                      |
|               | Brain_Cortex                          | 0.910013905                          |              |             |              | Brain_Anterior_cingulate_cortex_BA24 |
|               | 3.525422962                           | 0.02136196                           | 0.161932668  |             | -0.357490053 | 0.113021002                          |
|               | -0.17699202                           | 0.215463261                          | 3            | 0           | 0.998207054  |                                      |
| TBP           | ENSG00000112592.13                    | 0.936458783                          | 1            | 1           | 0.936458783  | Brain_Amygdala                       |
|               | 0.936458783                           | Brain_Amygdala                       | 1            | 1           | 1            | -0.07972147                          |
|               | -0.07972147                           | NA                                   | 1            | 0           | 0.998207054  | -0.07972147                          |
| EIF1AD        | ENSG00000175376.8                     | 0.936633872                          | 1            | 1           | 0.936633872  |                                      |
|               | Brain_Cortex                          | 0.936633872                          |              |             |              | Brain_Cortex                         |
|               | -0.079501333                          | -0.079501333                         | NA           | 1           | 0            | -0.079501333                         |
|               |                                       |                                      |              |             | 0.998207054  |                                      |
| C2orf68       | ENSG00000168887.10                    | 0.936768326                          | 2            | 2           | 0.719361219  |                                      |
|               | Brain_Substantia_nigra                | 0.963616106                          |              |             |              | Brain_Frontal_Cortex_BA9             |
|               | 1.018004645                           | 0.981995355                          | 0.981995355  |             | 0.045616263  | 0.359312641                          |
|               | 0.202464452                           | 0.221816836                          | 2            | 0           | 0.998207054  |                                      |
| E2F5          | ENSG00000133740.10                    | 0.936851722                          | 4            | 3           | 0.761802895  |                                      |
|               | Brain_Caudate_basal_ganglia           | 0.901350431                          |              |             |              | Brain_Putamen_basal_ganglia          |
|               | 2.246749515                           | 0.030698865                          | 0.237727871  |             | -0.179566324 | 0.303114119                          |
|               | -0.033184808                          | 0.225531893                          | 3            | 0           | 0.998207054  |                                      |
| GOSR1         | ENSG00000108587.15                    | 0.936852382                          | 11           | 3           | 0.566515202  |                                      |
|               | Brain_Caudate_basal_ganglia           | 0.979173176                          |              |             |              | Brain_Hippocampus                    |
|               | 0.000673184                           | 0.323379786                          | -0.573191259 |             | 0.200998362  | 9.484785424                          |
|               | 0.233585462                           | 3                                    | 0            | 0.998207054 |              | -0.08412382                          |
| MCM3          | ENSG00000112118.18                    | 0.936897846                          | 7            | 4           | 0.256330181  | Brain_Cortex                         |
|               | 0.929254544                           | Brain_Anterior_cingulate_cortex_BA24 | 5.719604577  |             |              |                                      |
|               | 0.015543662                           | 0.261661177                          | 0.088782779  |             | 1.135107735  | 0.76118784                           |
|               | 0.367943115                           | 4                                    | 0            | 0.998207054 |              |                                      |
| A4GALT        | ENSG00000128274.15                    | 0.937023738                          | 5            | 5           | 0.448133306  |                                      |
|               | Brain_Hypothalamus                    | 0.818994194                          |              |             |              | Brain_Cortex                         |
|               | 0.491699506                           | 0.491699506                          | -0.725082535 |             | 0.75853076   | 0.078188019                          |
|               | 0.654431972                           | 5                                    | 0            | 0.998207054 |              |                                      |
| SARM1         | ENSG00000004139.13                    | 0.937026676                          | 1            | 1           | 0.937026676  |                                      |
|               | Brain_Putamen_basal_ganglia           | 0.937026676                          |              |             |              | Brain_Putamen_basal_ganglia          |
|               | 1                                     | -0.079007477                         | -0.079007477 |             | -0.079007477 | NA                                   |
|               | 0.998207054                           |                                      |              |             | 1            | 0                                    |
| GFER          | ENSG00000127554.12                    | 0.937066332                          | 9            | 5           | 0.306726812  |                                      |
|               | Brain_Anterior_cingulate_cortex_BA24  | 0.821914116                          |              |             |              | Brain_Cortex                         |
|               | 6.685779286                           | 0.017240758                          | 0.25511141   | 0.225083758 |              | 1.022114286                          |
|               | 0.585591051                           | 0.234684962                          | 5            | 0           | 0.998207054  |                                      |
| CH17-174L20.1 | ENSG00000282142.1                     | 0.93706956                           | 4            | 4           | 0.451245155  |                                      |
|               | Brain_Amygdala                        | 0.875919311                          |              |             |              | Brain_Hippocampus                    |
|               | 0.722046305                           | 0.722046305                          | -0.753340787 |             | 0.410820313  | -0.166045314                         |
|               | 0.54119934                            | 4                                    | 0            | 0.998207054 |              |                                      |
| DRAXIN        | ENSG00000162490.6                     | 0.937070646                          | 7            | 7           | 0.345368661  |                                      |
|               | Brain_Frontal_Cortex_BA9              | 0.882160824                          |              |             |              | Brain_Spinal_cord_cervical_c-1       |
|               | 2.258144848                           | 0.319641118                          | 0.319641118  |             | -0.943610624 | 0.913532548                          |
|               | 0.159325675                           | 0.581007666                          | 7            | 0           | 0.998207054  |                                      |
| WDR60         | ENSG00000126870.15                    | 0.937074968                          | 10           | 2           | 0.61924935   |                                      |
|               | Brain_Frontal_Cortex_BA9              | 0.980318587                          |              |             |              | Brain_Hypothalamus                   |
|               | 0.003434772                           | 0.65001718                           | -0.496914494 |             | 0.446490942  | 8.93758396                           |
|               | 0.256363176                           | 2                                    | 0            | 0.998207054 |              | -0.1319057                           |
| MKRN2         | ENSG00000075975.15                    | 0.937150802                          | 7            | 3           | 0.450179971  |                                      |
|               | Brain_Anterior_cingulate_cortex_BA24  | 0.774883331                          |              |             |              |                                      |
|               | Brain_Nucleus_accumbens_basal_ganglia | 5.550522854                          |              |             | 0.015139862  |                                      |
|               | 0.291581143                           | 0.285993198                          | 0.755115021  |             | 0.525477542  | 0.159771727                          |
|               | 3                                     | 0                                    | 0.998207054  |             |              |                                      |
| COL1A2        | ENSG00000164692.17                    | 0.937260904                          | 2            | 2           | 0.731466125  |                                      |
|               | Brain_Frontal_Cortex_BA9              | 0.994410272                          |              |             |              | Brain_Hippocampus                    |
|               | 0.679522264                           | 0.679522264                          | -0.343175911 |             | -0.007005743 | 1.320477736                          |
|               | 0.237708206                           | 2                                    | 0            | 0.998207054 |              | -0.175090827                         |
| RP11-311F12.1 | ENSG00000262681.2                     | 0.937276406                          | 9            | 6           | 0.329351899  |                                      |
|               | Brain_Putamen_basal_ganglia           | 0.834361103                          |              |             |              | Brain_Amygdala                       |
|               | 0.007477932                           | 0.538872528                          | -0.975420137 |             | 0.449084848  | 4.357298292                          |
|               |                                       |                                      |              |             |              | -0.499134682                         |

|               |                                       |                             |                                      |             |             |                             |                  |             |   |
|---------------|---------------------------------------|-----------------------------|--------------------------------------|-------------|-------------|-----------------------------|------------------|-------------|---|
|               | 0.547870743                           | 6                           | 0                                    | 0.998207054 |             |                             |                  |             |   |
| SMYD5         | ENSG00000135632.11                    |                             | 0.937364472                          | 10          | 4           | 0.344207176                 |                  |             |   |
|               | Brain_Anterior_cingulate_cortex_BA24  |                             | 0.955065348                          |             |             | Brain_Cerebellar_Hemisphere |                  |             |   |
|               | 7.334465501                           | 0.003352102                 | 0.402297163                          |             |             | -0.327275697                | 0.945885135      |             |   |
|               | 0.503730051                           | 0.408204297                 | 4                                    | 0           | 0.998207054 |                             |                  |             |   |
| RP11-665C14.2 | ENSG00000249460.1                     |                             | 0.937513076                          | 3           | 3           | 0.617432336                 |                  |             |   |
|               | Brain_Hypothalamus                    | 0.77207805                  | Brain_Anterior_cingulate_cortex_BA24 |             |             | 1.14710659                  |                  |             |   |
|               | 0.837980238                           | 0.837980238                 | -0.49949269                          |             |             | 0.289657791                 | -0.166944538     |             |   |
|               | 0.408939726                           | 3                           | 0                                    | 0.998207054 |             |                             |                  |             |   |
| LINC00384     | ENSG00000232117.1                     |                             | 0.93761669                           | 1           | 1           | 0.93761669                  |                  |             |   |
|               | Brain_Nucleus_accumbens_basal_ganglia |                             | 0.93761669                           |             |             |                             |                  |             |   |
|               | Brain_Nucleus_accumbens_basal_ganglia | 1                           | 1                                    | 1           |             | 0.078265714                 |                  |             |   |
|               | 0.078265714                           | 0.078265714                 | NA                                   | 1           | 0           | 0.998207054                 |                  |             |   |
| FGGY          | ENSG00000172456.17                    |                             | 0.937636019                          | 5           | 5           | 0.265843178                 | Brain_Amygdala   |             |   |
|               | 0.993341717                           | Brain_Frontal_Cortex_BA9    | 1.191214554                          |             |             | 0.750716352                 |                  |             |   |
|               | 0.750716352                           | 0.008345017                 | 1.112686308                          |             |             | 0.275896128                 | 0.469345465      |             |   |
|               | 5                                     | 0                           | 0.998207054                          |             |             |                             |                  |             |   |
| ATP12A        | ENSG00000075673.11                    |                             | 0.93763765                           | 1           | 1           | 0.93763765                  | Brain_Cortex     |             |   |
|               | 0.93763765                            | Brain_Cortex                | 1                                    | 1           | 1           | 0.078239364                 | 0.078239364      |             |   |
|               | 0.078239364                           | NA                          | 1                                    | 0           | 0.998207054 |                             |                  |             |   |
| DRAM2         | ENSG00000156171.14                    |                             | 0.93770762                           | 13          | 2           | 0.2592158                   |                  |             |   |
|               | Brain_Anterior_cingulate_cortex_BA24  | 0.84749942                  | Brain_Cerebellar_Hemisphere          |             |             |                             |                  |             |   |
|               | 11.78488516                           | 8.40E-05                    | 0.447902188                          |             |             | -1.128246574                | 0.197955413      |             |   |
|               | -0.322368495                          | 0.291654409                 | 2                                    | 0           | 0.998207054 |                             |                  |             |   |
| SETD4         | ENSG00000185917.13                    |                             | 0.937768802                          | 12          | 5           | 0.194831196                 | Brain_Amygdala   |             |   |
|               | 0.687861307                           | Brain_Cerebellum            | 9.386059779                          |             |             | 0.01104999                  | 0.321470828      |             |   |
|               | -1.296418924                          | -0.401759124                | -0.804649858                         |             |             | 0.259295426                 | 5                | 0           |   |
|               | 0.998207054                           |                             |                                      |             |             |                             |                  |             |   |
| AGA           | ENSG00000038002.8                     |                             | 0.937869378                          | 13          | 4           | 0.453431645                 |                  |             |   |
|               | Brain_Hippocampus                     | 0.993241524                 | Brain_Spinal_cord_cervical_c-1       |             |             |                             |                  |             |   |
|               | 10.75117073                           | 0.001237321                 | 0.420613257                          |             |             | -0.676832993                | 0.749706246      |             |   |
|               | -0.066120562                          | 0.374467205                 | 4                                    | 0           | 0.998207054 |                             |                  |             |   |
| SPATA4        | ENSG00000150628.6                     |                             | 0.937930835                          | 1           | 1           | 0.937930835                 |                  |             |   |
|               | Brain_Substantia_nigra                | 0.937930835                 | Brain_Substantia_nigra               | 1           | 1           |                             |                  |             |   |
|               | 1                                     | 0.07787079                  | 0.07787079                           | 0.07787079  | NA          | 1                           | 0                | 0.998207054 |   |
| TMEM167A      | ENSG00000174695.9                     |                             | 0.937931032                          | 10          | 3           | 0.604045894                 |                  |             |   |
|               | Brain_Caudate_basal_ganglia           | 0.997320284                 | Brain_Cerebellum                     | 8.021481492 |             |                             |                  |             |   |
|               | 0.000580157                           | 0.588582331                 | -0.518591132                         |             |             | 0.490545368                 | 0.077001511      |             |   |
|               | 0.286468625                           | 3                           | 0                                    | 0.998207054 |             |                             |                  |             |   |
| SFR1          | ENSG00000156384.14                    |                             | 0.937947129                          | 3           | 2           | 0.68871742                  | Brain_Cerebellum |             |   |
|               | 0.996417115                           | Brain_Cerebellar_Hemisphere | 1.975386375                          |             |             | 0.035528973                 |                  |             |   |
|               | 0.989084651                           | -0.400596232                | 0.004490495                          |             |             | -0.235157329                | 0.212494793      |             |   |
|               | 2                                     | 0                           | 0.998207054                          |             |             |                             |                  |             |   |
| ARG2          | ENSG00000081181.7                     |                             | 0.937995683                          | 1           | 1           | 0.937995683                 |                  |             |   |
|               | Brain_Cerebellar_Hemisphere           | 0.937995683                 | Brain_Cerebellar_Hemisphere          | 1           | 1           |                             |                  |             |   |
|               | 1                                     | 0.077789269                 | 0.077789269                          | 0.077789269 | NA          | 1                           | 0                |             |   |
|               | 0.998207054                           |                             |                                      |             |             |                             |                  |             |   |
| RP3-483K16.4  | ENSG00000271367.1                     |                             | 0.938004768                          | 2           | 2           | 0.753441372                 |                  |             |   |
|               | Brain_Spinal_cord_cervical_c-1        | 0.816838835                 | Brain_Putamen_basal_ganglia          |             |             |                             |                  |             |   |
|               | 1.203468931                           | 0.796531069                 | 0.796531069                          |             |             | 0.231612709                 | 0.314104895      |             |   |
|               | 0.272858802                           | 0.058330784                 | 2                                    | 0           | 0.998207054 |                             |                  |             |   |
| RPS3A         | ENSG00000145425.9                     |                             | 0.938034203                          | 1           | 1           | 0.938034203                 |                  |             |   |
|               | Brain_Spinal_cord_cervical_c-1        | 0.938034203                 | Brain_Spinal_cord_cervical_c-1       |             |             |                             |                  |             |   |
|               | 1                                     | 1                           | 1                                    | 0.077740845 | 0.077740845 | 0.077740845                 | NA               | 1           | 0 |
|               | 0.998207054                           |                             |                                      |             |             |                             |                  |             |   |
| CPOX          | ENSG00000080819.6                     |                             | 0.938087781                          | 2           | 1           | 0.906067685                 | Brain_Cerebellum |             |   |
|               | 0.970486286                           | Brain_Cerebellar_Hemisphere | 1.99103345                           |             |             | 0.00896655                  | 1.99103345       |             |   |
|               | 0.036998394                           | 0.117999966                 | 0.07749918                           |             |             | 0.057276761                 | 1                | 0           |   |
|               | 0.998207054                           |                             |                                      |             |             |                             |                  |             |   |
| ZNF311        | ENSG00000197935.6                     |                             | 0.938099971                          | 8           | 6           | 0.464005445                 |                  |             |   |
|               | Brain_Cortex                          | 0.995600025                 | Brain_Substantia_nigra               |             |             | 3.540660946                 |                  |             |   |
|               | 0.03654143                            | 0.146360946                 | -0.732267281                         |             |             | 0.724084486                 | 0.004432926      |             |   |



|              |                                       |             |                             |              |    |             |                                |   |                  |
|--------------|---------------------------------------|-------------|-----------------------------|--------------|----|-------------|--------------------------------|---|------------------|
|              | 0.46163737                            | 6           | 0                           | 0.998207054  |    |             |                                |   |                  |
| SLC34A3      | ENSG00000198569.9                     |             |                             | 0.938178592  | 1  | 1           | 0.938178592                    |   |                  |
|              | Brain_Cortex                          |             |                             | 0.938178592  |    | 1           | 1                              | 1 | -0.077559334     |
|              | -0.077559334                          |             | -0.077559334                | NA           | 1  | 0           | 0.998207054                    |   |                  |
| RP11-477N3.1 | ENSG00000272156.1                     |             |                             | 0.938182363  | 7  | 5           | 0.389806365                    |   |                  |
|              | Brain_Cerebellum                      |             |                             | 0.897554757  |    |             | Brain_Hypothalamus             |   | 4.055882662      |
|              | 0.045698257                           |             | 0.313372173                 | -0.245293292 |    |             | 0.859968576                    |   | 0.334838746      |
|              | 0.41400896                            | 5           | 0                           | 0.998207054  |    |             |                                |   |                  |
| ACAD10       | ENSG00000111271.14                    |             |                             | 0.938260737  | 2  | 2           | 0.776324155                    |   |                  |
|              | Brain_Frontal_Cortex_BA9              |             |                             | 0.83719229   |    |             | Brain_Amygdala                 |   | 1.037123653      |
|              | 0.962876347                           |             | 0.962876347                 | 0.205486185  |    |             | 0.284112517                    |   | 0.244799351      |
|              | 0.055597212                           | 2           | 0                           | 0.998207054  |    |             |                                |   |                  |
| RAB5C        | ENSG00000108774.14                    |             |                             | 0.938279086  | 5  | 4           | 0.633680715                    |   | Brain_Amygdala   |
|              | 0.932160813                           |             | Brain_Cortex                | 3.157987104  |    |             | 0.033936404                    |   | 0.119112643      |
|              | -0.408231387                          |             | 0.476552639                 | 0.015245931  |    |             | 0.402070724                    |   | 4                |
|              | 0.998207054                           |             |                             |              |    |             |                                |   | 0                |
| PAPOLG       | ENSG00000115421.12                    |             |                             | 0.938355073  | 2  | 2           | 0.730795559                    |   |                  |
|              | Brain_Putamen_basal_ganglia           |             |                             | 0.991745457  |    |             | Brain_Cerebellum               |   | 1.291894784      |
|              | 0.708105216                           |             | 0.708105216                 | -0.344067453 |    |             | 0.01034572                     |   | -0.166860866     |
|              | 0.250607958                           | 2           | 0                           | 0.998207054  |    |             |                                |   |                  |
| C2orf70      | ENSG00000173557.14                    |             |                             | 0.938364232  | 2  | 2           | 0.721592908                    |   |                  |
|              | Brain_Cerebellum                      |             |                             | 0.975001522  |    |             | Brain_Cerebellar_Hemisphere    |   | 1.04250347       |
|              | 0.95749653                            | 0.031336073 |                             | 0.356330717  |    |             | 0.193833395                    |   | 0.229805917      |
|              | 0                                     |             | 0.998207054                 |              |    |             |                                |   | 2                |
| C19orf44     | ENSG00000105072.8                     |             |                             | 0.938491456  | 11 | 2           | 0.502532886                    |   |                  |
|              | Brain_Nucleus_accumbens_basal_ganglia |             |                             | 0.959417279  |    |             | Brain_Hippocampus              |   |                  |
|              | 9.556251645                           |             | 0.000784154                 | 0.494154911  |    |             | -0.670509761                   |   | 0.470978685      |
|              | 0.040642731                           |             | 0.30198763                  | 2            | 0  | 0.998207054 |                                |   |                  |
| PYGL         | ENSG00000100504.16                    |             |                             | 0.938562958  | 5  | 5           | 0.516749424                    |   | Brain_Cerebellum |
|              | 0.984938525                           |             | Brain_Cortex                | 2.404225372  |    |             | 0.193846856                    |   | 0.193846856      |
|              | -0.648364193                          |             | 0.585213184                 | 0.03770705   |    | 0.473410907 | 5                              |   | 0                |
|              | 0.998207054                           |             |                             |              |    |             |                                |   |                  |
| ARHGAP17     | ENSG00000140750.16                    |             |                             | 0.938835314  | 2  | 2           | 0.791367738                    |   |                  |
|              | Brain_Spinal_cord_cervical_c-1        |             |                             | 0.900020112  |    |             | Brain_Cerebellar_Hemisphere    |   |                  |
|              | 1.361133593                           |             | 0.638866407                 | 0.638866407  |    |             | -0.264534949                   |   | -0.125635941     |
|              | -0.195085445                          |             | 0.098216431                 | 2            | 0  | 0.998207054 |                                |   |                  |
| CSF1R        | ENSG00000182578.13                    |             |                             | 0.939136522  | 2  | 2           | 0.758681517                    |   |                  |
|              | Brain_Cerebellar_Hemisphere           |             |                             | 0.874459074  |    |             | Brain_Spinal_cord_cervical_c-1 |   |                  |
|              | 1.059726825                           |             | 0.940273175                 | 0.940273175  |    |             | -0.307212651                   |   | 0.157997112      |
|              | -0.074607769                          |             | 0.328952978                 | 2            | 0  | 0.998207054 |                                |   |                  |
| LINC00574    | ENSG00000231690.2                     |             |                             | 0.939193653  | 4  | 4           | 0.656235928                    |   |                  |
|              | Brain_Cortex                          |             |                             | 0.979143413  |    |             | Brain_Amygdala                 |   | 2.514184072      |
|              | 0.189119652                           |             | -0.445115998                | 0.159887288  |    |             | -0.046995879                   |   | 0.189119652      |
|              | 4                                     | 0           | 0.998207054                 |              |    |             |                                |   | 0.277348036      |
| LMNTD1       | ENSG00000152936.10                    |             |                             | 0.939269716  | 2  | 2           | 0.793704339                    |   |                  |
|              | Brain_Hippocampus                     |             |                             | 0.794157043  |    |             | Brain_Cerebellum               |   | 1.089031973      |
|              | 0.910968027                           |             | 0.910968027                 | -0.261503385 |    |             | -0.260916316                   |   | -0.26120985      |
|              | 0.000415121                           | 2           | 0                           | 0.998207054  |    |             |                                |   |                  |
| ALDH1L2      | ENSG00000136010.13                    |             |                             | 0.939346505  | 7  | 7           | 0.403972716                    |   |                  |
|              | Brain_Cerebellar_Hemisphere           |             |                             | 0.991528348  |    |             | Brain_Spinal_cord_cervical_c-1 |   |                  |
|              | 3.083195613                           |             | 0.153152786                 | 0.153152786  |    |             | -0.834547175                   |   | 0.45772454       |
|              | 0.022279299                           |             | 0.431653917                 | 7            | 0  | 0.998207054 |                                |   |                  |
| TMEM242      | ENSG00000215712.10                    |             |                             | 0.939465762  | 6  | 6           | 0.339438195                    |   |                  |
|              | Brain_Nucleus_accumbens_basal_ganglia |             |                             | 0.847814914  |    |             |                                |   |                  |
|              | Brain_Anterior_cingulate_cortex_BA24  |             |                             | 1.206453451  |    |             | 0.810081243                    |   |                  |
|              | 0.810081243                           |             | -0.955275893                | 0.191907179  |    |             | -0.420066049                   |   | 0.439734666      |
|              | 6                                     | 0           | 0.998207054                 |              |    |             |                                |   |                  |
| TBC1D20      | ENSG00000125875.13                    |             |                             | 0.93948004   | 2  | 1           | 0.903329945                    |   | Brain_Cerebellum |
|              | 0.97593977                            |             | Brain_Cerebellar_Hemisphere | 1.993911538  |    |             | 0.006088462                    |   |                  |
|              | 1.993911538                           |             | 0.030159598                 | 0.121455897  |    |             | 0.075807748                    |   | 0.064556232      |
|              | 1                                     | 0           | 0.998207054                 |              |    |             |                                |   |                  |
| C20orf85     | ENSG00000124237.5                     |             |                             | 0.939481912  | 1  | 1           | 0.939481912                    |   |                  |

|             |                                      |              |              |                             |             |                                       |
|-------------|--------------------------------------|--------------|--------------|-----------------------------|-------------|---------------------------------------|
|             | Brain_Caudate_basal_ganglia          | 0.939481912  |              | Brain_Caudate_basal_ganglia | 1           | 1                                     |
|             | 1                                    | 0.075921048  | 0.075921048  | 0.075921048                 | NA          | 1 0                                   |
|             |                                      | 0.998207054  |              |                             |             |                                       |
| RP4-777L9.2 | ENSG00000273998.1                    | 0.939540526  |              | 3                           | 3           | 0.546598998                           |
|             | Brain_Anterior_cingulate_cortex_BA24 | 0.908130095  |              |                             |             | Brain_Caudate_basal_ganglia           |
|             | 1.097801599                          | 0.893370838  | 0.893370838  | 0.115397456                 |             | 0.602864253                           |
|             | 0.309617713                          | 0.258380772  | 3            | 0                           | 0.998207054 |                                       |
| AFMID       | ENSG00000183077.15                   | 0.939579337  |              | 2                           | 2           | 0.727483187                           |
|             | Brain_Anterior_cingulate_cortex_BA24 | 0.988001805  |              |                             |             | Brain_Cerebellum                      |
|             | 1.202397081                          | 0.797602919  | 0.797602919  | 0.015038074                 |             | 0.348475397                           |
|             | 0.181756736                          | 0.235775792  | 2            | 0                           | 0.998207054 |                                       |
| SMAD9       | ENSG00000120693.13                   | 0.939599188  |              | 11                          | 11          | 0.23569807                            |
|             | Brain_Frontal_Cortex_BA9             | 0.945191847  |              |                             |             | Brain_Anterior_cingulate_cortex_BA24  |
|             | 3.587905678                          | 0.137492882  | 0.137492882  | -0.341481199                |             | 1.185808157                           |
|             | 0.265422368                          | 0.581562654  | 11           | 0                           | 0.998207054 |                                       |
| KIF6        | ENSG00000164627.17                   | 0.939600562  |              | 10                          | 6           | 0.51083433                            |
|             | Brain_Putamen_basal_ganglia          | 0.993084037  |              |                             |             | Brain_Spinal_cord_cervical_c-1        |
|             | 6.568979601                          | 1.09E-07     | 0.282679273  | -0.16540978                 |             | 0.657539113                           |
|             | 0.435833999                          | 0.285972062  | 6            | 0                           | 0.998207054 |                                       |
| ALDOB       | ENSG00000136872.17                   | 0.939606359  |              | 3                           | 3           | 0.731219544                           |
|             | Brain_Frontal_Cortex_BA9             | 0.996595186  |              |                             |             | Brain_Hippocampus                     |
|             | 0.1672249                            | 0.1672249    | 0.004267315  | 0.343503718                 |             | 2.050834554                           |
|             | 0.169742816                          | 3            | 0            | 0.998207054                 |             | 0.170130988                           |
| ZCCHC3      | ENSG00000247315.3                    | 0.939628592  |              | 1                           | 1           | 0.939628592                           |
|             | Brain_Hypothalamus                   | 0.939628592  |              |                             |             | Brain_Hypothalamus                    |
|             | -0.075736682                         | -0.075736682 | -0.075736682 | NA                          | 1           | 1 0 0.998207054                       |
| JDP2        | ENSG00000140044.12                   | 0.93967038   |              | 1                           | 1           | 0.93967038                            |
|             | Brain_Cerebellum                     | 1            | 1            | 0.93967038                  |             | Brain_Cerebellum                      |
|             | Brain_Cerebellum                     | 1            | 1            | 0.075684157                 |             | 0.075684157                           |
|             | NA                                   | 1            | 0            | 0.998207054                 |             |                                       |
| SLC1A7      | ENSG00000162383.11                   | 0.939699208  |              | 13                          | 5           | 0.072263217                           |
|             | Brain_Cerebellar_Hemisphere          | 0.995894932  |              |                             |             | Brain_Amygdala                        |
|             | 0.000657439                          | 0.381385235  | -1.797456255 | 0.116533699                 |             | 9.717486176                           |
|             | 0.587341416                          | 5            | 0            | 0.998207054                 |             | -0.471690592                          |
| SLC3A1      | ENSG00000138079.13                   | 0.939838308  |              | 1                           | 1           | 0.939838308                           |
|             | Brain_Cerebellum                     | 0.939838308  |              |                             |             | Brain_Cerebellum                      |
|             | Brain_Cerebellum                     | 1            | 1            | 1                           | 1           | 0.07547309                            |
|             | 0.07547309                           | 0.07547309   | NA           | 1                           | 0           | 0.998207054                           |
| SERHL2      | ENSG00000183569.17                   | 0.940064964  |              | 8                           | 4           | 0.579579932                           |
|             | Brain_Putamen_basal_ganglia          | 0.978047752  |              |                             |             | Brain_Cortex                          |
|             | 0.014517388                          | 0.265785077  | -0.044774681 | 0.553998413                 |             | 6.580825882                           |
|             | 0.218675505                          | 4            | 0            | 0.998207054                 |             | 0.198148078                           |
| VPS11       | ENSG00000160695.14                   | 0.940106136  |              | 12                          | 2           | 0.614261881                           |
|             | Brain_Anterior_cingulate_cortex_BA24 | 0.994178951  |              |                             |             | Brain_Cerebellar_Hemisphere           |
|             | 10.11137449                          | 0.010322634  | 0.640183079  | -0.503999283                |             | 0.325884543                           |
|             | 0.004597932                          | 0.230317662  | 2            | 0                           | 0.998207054 |                                       |
| AMDHD2      | ENSG00000162066.14                   | 0.940193261  |              | 2                           | 2           | 0.811161956                           |
|             | Brain_Caudate_basal_ganglia          | 0.83394083   |              |                             |             | Brain_Nucleus_accumbens_basal_ganglia |
|             | 1.181873148                          | 0.818126852  | 0.818126852  | -0.238927301                |             | 0.209650028                           |
|             | -0.014638636                         | 0.317192071  | 2            | 0                           | 0.998207054 |                                       |
| ADIPOQ      | ENSG00000181092.9                    | 0.940418805  |              | 1                           | 1           | 0.940418805                           |
|             | Brain_Putamen_basal_ganglia          | 0.940418805  |              |                             |             | Brain_Putamen_basal_ganglia           |
|             | 1                                    | 0.074743489  | 0.074743489  | 0.074743489                 | NA          | 1 0                                   |
|             |                                      | 0.998207054  |              |                             |             |                                       |
| SLC39A10    | ENSG00000196950.13                   | 0.940466259  |              | 6                           | 5           | 0.456859641                           |
|             | Brain_Cerebellar_Hemisphere          | 0.866488606  |              |                             |             | Brain_Cerebellum                      |
|             | 0.050586395                          | 0.143392782  | -0.45738246  | 0.744027827                 |             | 4.088306052                           |
|             | 0.448985839                          | 5            | 0            | 0.998207054                 |             | 0.340129647                           |
| AC068057.1  | ENSG00000228528.1                    | 0.940474258  |              | 2                           | 2           | 0.78006426                            |
|             | Brain_Frontal_Cortex_BA9             | 0.798396632  |              |                             |             | Brain_Anterior_cingulate_cortex_BA24  |
|             | 1.167712519                          | 0.832287481  | 0.832287481  | -0.279235294                |             | -0.25542271                           |
|             | -0.267329002                         | 0.01683804   | 2            | 0                           | 0.998207054 |                                       |
| GAB1        | ENSG00000109458.8                    | 0.940484051  |              | 1                           | 1           | 0.940484051                           |
|             | Brain_Substantia_nigra               | 0.940484051  |              |                             |             | Brain_Substantia_nigra                |
|             |                                      |              |              |                             |             | 1 1                                   |

|                |                                       |                                       |                             |              |                             |                  |              |
|----------------|---------------------------------------|---------------------------------------|-----------------------------|--------------|-----------------------------|------------------|--------------|
|                | 1                                     | -0.074661487                          | -0.074661487                | -0.074661487 | NA                          | 1                | 0            |
|                |                                       | 0.998207054                           |                             |              |                             |                  |              |
| TTC16          | ENSG00000167094.15                    | 0.940676261                           | 3                           | 2            | 0.661523188                 |                  |              |
|                | Brain_Putamen_basal_ganglia           | 0.935488361                           |                             |              | Brain_Caudate_basal_ganglia |                  |              |
|                | 2.033569437                           | 0.008113669                           | 0.958316894                 |              | -0.437811149                | -0.080941645     |              |
|                | -0.258795222                          | 0.178437592                           | 2                           | 0            | 0.998207054                 |                  |              |
| KIAA1328       | ENSG00000150477.14                    | 0.940731395                           | 4                           | 4            | 0.61120009                  |                  |              |
|                | Brain_Caudate_basal_ganglia           | 0.994729669                           |                             |              | Brain_Substantia_nigra      |                  |              |
|                | 2.695425271                           | 0.109604766                           | 0.109604766                 |              | -0.508361154                | 0.133660336      |              |
|                | -0.142541404                          | 0.280416327                           | 4                           | 0            | 0.998207054                 |                  |              |
| CYP4A11        | ENSG00000187048.12                    | 0.940797049                           | 7                           | 6            | 0.21212119                  |                  |              |
|                | Brain_Frontal_Cortex_BA9              | 0.95361065                            | Brain_Putamen_basal_ganglia | 4.46216144   |                             |                  |              |
|                | 0.093488295                           | 0.153015148                           | -0.058173222                | 1.247753916  | 0.695393198                 |                  |              |
|                | 0.456029085                           | 6                                     | 0                           | 0.998207054  |                             |                  |              |
| RP11-147L13.11 | ENSG00000278730.1                     | 0.940821138                           | 9                           | 3            | 0.762957303                 |                  |              |
|                | Brain_Hippocampus                     | 0.909684907                           | Brain_Hypothalamus          | 7.796693109  |                             |                  |              |
|                | 0.00553525                            | 0.285021914                           | -0.227825526                | 0.301599612  | 0.083125148                 |                  |              |
|                | 0.221801774                           | 3                                     | 0                           | 0.998207054  |                             |                  |              |
| AFP            | ENSG00000081051.7                     | 0.940844834                           | 1                           | 1            | 0.940844834                 | Brain_Cortex     |              |
|                | 0.940844834                           | Brain_Cortex                          | 1                           | 1            | 1                           | -0.074208059     | -0.074208059 |
|                | -0.074208059                          | NA                                    | 1                           | 0            | 0.998207054                 |                  |              |
| TMEM69         | ENSG00000159596.6                     | 0.941025941                           | 3                           | 3            | 0.616968857                 |                  |              |
|                | Brain_Hypothalamus                    | 0.953489365                           | Brain_Caudate_basal_ganglia | 1.964324728  |                             |                  |              |
|                | 0.078530093                           | 0.078530093                           | -0.08910019                 | 0.500150859  | 0.156458719                 |                  |              |
|                | 0.306637894                           | 3                                     | 0                           | 0.998207054  |                             |                  |              |
| WDR5           | ENSG00000196363.9                     | 0.941084973                           | 3                           | 1            | 0.823813836                 |                  |              |
|                | Brain_Anterior_cingulate_cortex_BA24  | 0.98816531                            | Brain_Cerebellum            | 2.90721003   |                             |                  |              |
|                | 0.009646324                           | 2.90721003                            | -0.222642398                | 0.014833128  | -0.075046658                |                  |              |
|                | 0.128829364                           | 1                                     | 0                           | 0.998207054  |                             |                  |              |
| CARS           | ENSG00000110619.17                    | 0.941096109                           | 1                           | 1            | 0.941096109                 |                  |              |
|                | Brain_Caudate_basal_ganglia           | 0.941096109                           | Brain_Caudate_basal_ganglia | 1            | 1                           |                  |              |
|                | 1                                     | 0.073892267                           | 0.073892267                 | 0.073892267  | NA                          | 1                | 0            |
|                | 0.998207054                           |                                       |                             |              |                             |                  |              |
| GRID2IP        | ENSG00000215045.8                     | 0.941105567                           | 2                           | 2            | 0.732337488                 |                  |              |
|                | Brain_Anterior_cingulate_cortex_BA24  | 0.983050212                           | Brain_Cortex                |              |                             |                  |              |
|                | 1.250388961                           | 0.749611039                           | 0.749611039                 | 0.021245007  | 0.342017812                 |                  |              |
|                | 0.181631409                           | 0.226820625                           | 2                           | 0            | 0.998207054                 |                  |              |
| RP11-51J9.5    | ENSG00000271869.1                     | 0.941151536                           | 1                           | 1            | 0.941151536                 |                  |              |
|                | Brain_Cerebellar_Hemisphere           | 0.941151536                           | Brain_Cerebellar_Hemisphere | 1            | 1                           |                  |              |
|                | 1                                     | 0.073822609                           | 0.073822609                 | 0.073822609  | NA                          | 1                | 0            |
|                | 0.998207054                           |                                       |                             |              |                             |                  |              |
| SNX5           | ENSG00000089006.16                    | 0.941240419                           | 3                           | 3            | 0.570596414                 | Brain_Cerebellum |              |
|                | 0.971436419                           | Brain_Nucleus_accumbens_basal_ganglia | 1.318137855                 |              |                             |                  |              |
|                | 0.663007694                           | 0.663007694                           | -0.03580679                 | 0.567173347  | 0.265528016                 |                  |              |
|                | 0.301490189                           | 3                                     | 0                           | 0.998207054  |                             |                  |              |
| COA5           | ENSG00000183513.8                     | 0.94137366                            | 8                           | 2            | 0.774828791                 |                  |              |
|                | Brain_Nucleus_accumbens_basal_ganglia | 0.930700019                           | Brain_Caudate_basal_ganglia |              |                             |                  |              |
|                | 7.604329636                           | 2.14E-05                              | 0.265287744                 | -0.264543863 | 0.286064409                 |                  |              |
|                | -0.104379983                          | 0.19034154                            | 2                           | 0            | 0.998207054                 |                  |              |
| KCNJ6          | ENSG00000157542.9                     | 0.941416201                           | 10                          | 6            | 0.377725441                 |                  |              |
|                | Brain_Putamen_basal_ganglia           | 0.918516997                           | Brain_Amygdala              | 5.362820492  |                             |                  |              |
|                | 0.000122813                           | 0.366407473                           | -0.882094991                | 0.708598491  | -0.044593771                |                  |              |
|                | 0.498699524                           | 6                                     | 0                           | 0.998207054  |                             |                  |              |
| ALKBH3         | ENSG00000166199.12                    | 0.941424265                           | 11                          | 6            | 0.272461876                 |                  |              |
|                | Brain_Cortex                          | 0.976063215                           | Brain_Cerebellum            | 6.678006739  | 0.034806068                 |                  |              |
|                | 0.256321067                           | -1.097410751                          | 0.596240259                 | -0.239995682 | 0.477701586                 |                  |              |
|                | 6                                     | 0                                     | 0.998207054                 |              |                             |                  |              |
| MSRA           | ENSG00000175806.14                    | 0.941452843                           | 4                           | 4            | 0.533649155                 |                  |              |
|                | Brain_Spinal_cord_cervical_c-1        | 0.995089534                           |                             |              |                             |                  |              |
|                | Brain_Nucleus_accumbens_basal_ganglia | 1.540266798                           | 0.581343895                 |              |                             |                  |              |
|                | 0.581343895                           | -0.269590043                          | 0.622445218                 | 0.236022184  | 0.445047264                 |                  |              |
|                | 4                                     | 0                                     | 0.998207054                 |              |                             |                  |              |

|                |                                      |                             |                                       |              |              |                          |
|----------------|--------------------------------------|-----------------------------|---------------------------------------|--------------|--------------|--------------------------|
| APPL2          | ENSG00000136044.11                   | 0.941564718                 | 6                                     | 6            | 0.375482512  | Brain_Cortex             |
|                | 0.978971295                          | Brain_Caudate_basal_ganglia | 1.797557966                           | 0.317389333  |              |                          |
|                | 0.317389333                          | -0.886250582                | 0.416926286                           | -0.201480321 | 0.513386831  |                          |
|                | 6                                    | 0                           | 0.998207054                           |              |              |                          |
| UMODL1         | ENSG00000177398.18                   | 0.941617959                 | 2                                     | 2            | 0.772763505  |                          |
|                | Brain_Caudate_basal_ganglia          | 0.997967894                 | Brain_Nucleus_accumbens_basal_ganglia |              |              |                          |
|                | 1.547889807                          | 0.452110193                 | 0.452110193                           | -0.002546869 | 0.288762011  |                          |
|                | 0.143107571                          | 0.205986485                 | 2                                     | 0            | 0.998207054  |                          |
| C2orf42        | ENSG00000115998.7                    | 0.941731975                 | 6                                     | 4            | 0.459682923  |                          |
|                | Brain_Cortex                         | 0.624850832                 | Brain_Caudate_basal_ganglia           | 4.682896163  |              |                          |
|                | 0.005781408                          | 0.251583583                 | -0.739369062                          | 0.488987097  | -0.440148654 |                          |
|                | 0.464935221                          | 4                           | 0                                     | 0.998207054  |              |                          |
| GADD45A        | ENSG00000116717.11                   | 0.941753994                 | 1                                     | 1            | 0.941753994  |                          |
|                | Brain_Caudate_basal_ganglia          | 0.941753994                 | Brain_Caudate_basal_ganglia           | 1            | 1            |                          |
|                | 1                                    | 0.073065502                 | 0.073065502                           | 0.073065502  | NA           | 1                        |
|                | 0.998207054                          |                             |                                       |              |              | 0                        |
| COASY          | ENSG00000068120.14                   | 0.941863914                 | 1                                     | 1            | 0.941863914  | Brain_Cerebellum         |
|                | 0.941863914                          | Brain_Cerebellum            | 1                                     | 1            | 0.07292737   | 0.07292737               |
|                | NA                                   | 1                           | 0                                     | 0.998207054  |              | 0.07292737               |
| RP11-565N2.2   | ENSG00000259815.1                    | 0.94195735                  | 1                                     | 1            | 0.94195735   |                          |
|                | Brain_Caudate_basal_ganglia          | 0.94195735                  | Brain_Caudate_basal_ganglia           | 1            | 1            | 1                        |
|                | 0.072809953                          | 0.072809953                 | 0.072809953                           | NA           | 1            | 0                        |
|                | 0.998207054                          |                             |                                       |              |              |                          |
| LLNLR-249E10.1 | ENSG00000268673.3                    | 0.942003234                 | 7                                     | 1            | 0.703717484  |                          |
|                | Brain_Cerebellar_Hemisphere          | 0.979278192                 | Brain_Anterior_cingulate_cortex_BA24  |              |              |                          |
|                | 6.697692891                          | 0.003307746                 | 6.697692891                           | -0.380307075 | 0.343066198  |                          |
|                | -0.066035331                         | 0.285280177                 | 1                                     | 0            | 0.998207054  |                          |
| ZNF491         | ENSG00000177599.12                   | 0.942055667                 | 3                                     | 3            | 0.574250424  |                          |
|                | Brain_Cerebellum                     | 0.907300116                 | Brain_Anterior_cingulate_cortex_BA24  | 1.27888567   |              |                          |
|                | 0.664796871                          | 0.664796871                 | -0.561802742                          | -0.116444693 | -0.355825677 |                          |
|                | 0.224550249                          | 3                           | 0                                     | 0.998207054  |              |                          |
| TSPAN18        | ENSG00000157570.11                   | 0.942200844                 | 4                                     | 3            | 0.699098556  |                          |
|                | Brain_Anterior_cingulate_cortex_BA24 | 0.760537387                 | Brain_Cerebellum                      |              |              |                          |
|                | 1.998964013                          | 0.015524399                 | 0.985627832                           | -0.386537608 | 0.320719913  |                          |
|                | -0.020302409                         | 0.385581261                 | 3                                     | 0            | 0.998207054  |                          |
| TSSC4          | ENSG00000184281.14                   | 0.94222001                  | 1                                     | 1            | 0.94222001   | Brain_Hippocampus        |
|                | 0.94222001                           | Brain_Hippocampus           | 1                                     | 1            | 1            | 0.072479889              |
|                | 0.072479889                          | NA                          | 1                                     | 0            | 0.998207054  | 0.072479889              |
| MKNK1          | ENSG00000079277.19                   | 0.942346043                 | 4                                     | 4            | 0.668033798  |                          |
|                | Brain_Frontal_Cortex_BA9             | 0.930557559                 | Brain_Cerebellum                      | 2.722181906  |              |                          |
|                | 0.147045272                          | 0.147045272                 | -0.428848064                          | 0.270665512  | -0.095400043 |                          |
|                | 0.329043005                          | 4                           | 0                                     | 0.998207054  |              |                          |
| TCAP           | ENSG00000173991.5                    | 0.942417744                 | 1                                     | 1            | 0.942417744  |                          |
|                | Brain_Cerebellar_Hemisphere          | 0.942417744                 | Brain_Cerebellar_Hemisphere           | 1            | 1            |                          |
|                | 1                                    | 0.072231416                 | 0.072231416                           | 0.072231416  | NA           | 1                        |
|                | 0.998207054                          |                             |                                       |              |              | 0                        |
| ATAD1          | ENSG00000138138.13                   | 0.942434908                 | 1                                     | 1            | 0.942434908  |                          |
|                | Brain_Anterior_cingulate_cortex_BA24 | 0.942434908                 |                                       |              |              |                          |
|                | Brain_Anterior_cingulate_cortex_BA24 | 1                           | 1                                     | 1            | -0.072209848 |                          |
|                | -0.072209848                         | -0.072209848                | NA                                    | 1            | 0            | 0.998207054              |
| LINC00471      | ENSG00000181798.2                    | 0.94244482                  | 11                                    | 5            | 0.304807494  |                          |
|                | Brain_Frontal_Cortex_BA9             | 0.779644951                 | Brain_Spinal_cord_cervical_c-1        |              |              |                          |
|                | 8.40266993                           | 0.000596111                 | 0.287655106                           | 0.279781754  | 1.026178415  |                          |
|                | 0.574557867                          | 0.273009071                 | 5                                     | 0            | 0.998207054  |                          |
| PRRT1          | ENSG00000204314.10                   | 0.94255733                  | 1                                     | 1            | 0.94255733   | Brain_Hippocampus        |
|                | 0.94255733                           | Brain_Hippocampus           | 1                                     | 1            | 1            | 0.072056015              |
|                | 0.072056015                          | NA                          | 1                                     | 0            | 0.998207054  | 0.072056015              |
| SALL4          | ENSG00000101115.12                   | 0.942632082                 | 1                                     | 1            | 0.942632082  | Brain_Cerebellum         |
|                | 0.942632082                          | Brain_Cerebellum            | 1                                     | 1            | 1            | -0.071962084             |
|                | -0.071962084                         | NA                          | 1                                     | 0            | 0.998207054  | -0.071962084             |
| PARVG          | ENSG00000138964.16                   | 0.94263238                  | 1                                     | 1            | 0.94263238   | Brain_Frontal_Cortex_BA9 |
|                | 0.94263238                           | Brain_Frontal_Cortex_BA9    | 1                                     | 1            | 1            | 0.071961709              |
|                | 0.071961709                          | 0.071961709                 | NA                                    | 1            | 0            | 0.998207054              |

|            |                                       |                                |                                       |              |              |                |              |   |   |
|------------|---------------------------------------|--------------------------------|---------------------------------------|--------------|--------------|----------------|--------------|---|---|
| LYPLA1     | ENSG00000120992.17                    | 0.942724166                    | 1                                     | 1            | 0.942724166  |                |              |   |   |
|            | Brain_Cortex                          | 0.942724166                    | Brain_Cortex                          | 1            | 1            | 1              | -0.071846375 |   |   |
|            | -0.071846375                          | -0.071846375                   | NA                                    | 1            | 0            | 0.998207054    |              |   |   |
| SH3PXD2B   | ENSG00000174705.12                    | 0.94273847                     | 4                                     | 3            | 0.6017095    | Brain_Cortex   |              |   |   |
|            | 0.976522824                           | Brain_Spinal_cord_cervical_c-1 |                                       |              | 3.022562574  | 0.092021147    |              |   |   |
|            | 0.240218925                           | -0.521943744                   | 0.085245236                           |              | -0.134853773 | 0.266575217    |              |   |   |
|            | 3                                     | 0                              | 0.998207054                           |              |              |                |              |   |   |
| ARHGAP44   | ENSG00000006740.16                    | 0.942792703                    | 5                                     | 5            | 0.545535206  |                |              |   |   |
|            | Brain_Cortex                          | 0.98207242                     | Brain_Cerebellum                      | 3.07361404   | 0.107703541  |                |              |   |   |
|            | 0.107703541                           | -0.604463986                   | 0.384379459                           |              | -0.016060741 | 0.368850379    |              |   |   |
|            | 5                                     | 0                              | 0.998207054                           |              |              |                |              |   |   |
| MRPS10     | ENSG00000048544.5                     | 0.942818536                    | 10                                    | 2            | 0.542155284  |                |              |   |   |
|            | Brain_Frontal_Cortex_BA9              | 0.936423196                    | Brain_Putamen_basal_ganglia           |              |              |                |              |   |   |
|            | 7.616057144                           | 0.001238949                    | 2.097689779                           |              | -0.59615444  | 0.609557029    |              |   |   |
|            | 0.273998551                           | 0.356927468                    | 2                                     | 0            | 0.998207054  |                |              |   |   |
| NTN5       | ENSG00000142233.11                    | 0.942865362                    | 12                                    | 7            | 0.479626067  |                |              |   |   |
|            | Brain_Spinal_cord_cervical_c-1        | 0.998042159                    | Brain_Substantia_nigra                |              |              |                |              |   |   |
|            | 7.091057082                           | 2.47E-17                       | 0.422181473                           |              | -0.706904114 | 0.570871089    |              |   |   |
|            | -0.136256879                          | 0.454824387                    | 7                                     | 0            | 0.998207054  |                |              |   |   |
| CENPH      | ENSG00000153044.9                     | 0.942885547                    | 6                                     | 4            | 0.561101649  |                |              |   |   |
|            | Brain_Frontal_Cortex_BA9              | 0.990690203                    | Brain_Nucleus_accumbens_basal_ganglia |              |              |                |              |   |   |
|            | 4.361708649                           | 0.037172173                    | 0.279514843                           |              | -0.581205963 | 0.579708595    |              |   |   |
|            | 0.160741766                           | 0.417166653                    | 4                                     | 0            | 0.998207054  |                |              |   |   |
| CACNA1H    | ENSG00000196557.12                    | 0.94289884                     | 1                                     | 1            | 0.94289884   |                |              |   |   |
|            | Brain_Putamen_basal_ganglia           | 0.94289884                     | Brain_Putamen_basal_ganglia           | 1            | 1            | 1              |              |   |   |
|            | 0.07162689                            | 0.07162689                     | 0.07162689                            | NA           | 1            | 0              | 0.998207054  |   |   |
| THBS1      | ENSG00000137801.10                    | 0.943168004                    | 1                                     | 1            | 0.943168004  |                |              |   |   |
|            | Brain_Anterior_cingulate_cortex_BA24  | 0.943168004                    |                                       |              |              |                |              |   |   |
|            | Brain_Anterior_cingulate_cortex_BA24  | 1                              | 1                                     | 1            | 0.071288681  |                |              |   |   |
|            | 0.071288681                           | 0.071288681                    | NA                                    | 1            | 0            | 0.998207054    |              |   |   |
| OR2L13     | ENSG00000196071.4                     | 0.943171103                    | 13                                    | 5            | 0.467838366  |                |              |   |   |
|            | Brain_Putamen_basal_ganglia           | 0.947903721                    | Brain_Cerebellar_Hemisphere           |              |              |                |              |   |   |
|            | 9.445061984                           | 0.022996069                    | 0.372894098                           |              | -0.305855866 | 0.72600066     |              |   |   |
|            | 0.241144785                           | 0.280631726                    | 5                                     | 0            | 0.998207054  |                |              |   |   |
| FAM131C    | ENSG00000185519.8                     | 0.943183536                    | 13                                    | 8            | 0.431317821  |                |              |   |   |
|            | Brain_Hypothalamus                    | 0.996566768                    | Brain_Hippocampus                     | 6.21224431   | 2.79E-05     |                |              |   |   |
|            | 0.335843085                           | -0.786938581                   | 0.679273336                           |              | 0.029745288  | 0.510269073    |              |   |   |
|            | 8                                     | 0                              | 0.998207054                           |              |              |                |              |   |   |
| STX16      | ENSG00000124222.22                    | 0.943265989                    | 1                                     | 1            | 0.943265989  |                |              |   |   |
|            | Brain_Frontal_Cortex_BA9              | 0.943265989                    | Brain_Frontal_Cortex_BA9              | 1            | 1            |                |              |   |   |
|            | 1                                     | -0.071165562                   | -0.071165562                          | -0.071165562 | NA           | 1              | 0            |   |   |
|            | 0.998207054                           |                                |                                       |              |              |                |              |   |   |
| CCBE1      | ENSG00000183287.13                    | 0.943284362                    | 6                                     | 5            | 0.390628086  | Brain_Amygdala |              |   |   |
|            | 0.877650241                           | Brain_Caudate_basal_ganglia    | 3.686279747                           |              | 0.046429576  |                |              |   |   |
|            | 0.133644739                           | -0.309623705                   | 0.858478882                           |              | 0.399638708  | 0.421432062    |              |   |   |
|            | 5                                     | 0                              | 0.998207054                           |              |              |                |              |   |   |
| CLRN1      | ENSG00000163646.10                    | 0.943304298                    | 1                                     | 1            | 0.943304298  |                |              |   |   |
|            | Brain_Spinal_cord_cervical_c-1        | 0.943304298                    | Brain_Spinal_cord_cervical_c-1        |              |              |                |              |   |   |
|            | 1                                     | 1                              | 1                                     | 0.071117427  | 0.071117427  | 0.071117427    | NA           | 1 | 0 |
|            | 0.998207054                           |                                |                                       |              |              |                |              |   |   |
| ANKRD18B   | ENSG00000230453.9                     | 0.943323263                    | 4                                     | 3            | 0.706778034  |                |              |   |   |
|            | Brain_Nucleus_accumbens_basal_ganglia | 0.906035649                    | Brain_Frontal_Cortex_BA9              |              |              |                |              |   |   |
|            | 3.298944683                           | 0.08696915                     | 0.217800137                           |              | -0.376186792 | 0.118040397    |              |   |   |
|            | -0.149129281                          | 0.203551031                    | 3                                     | 0            | 0.998207054  |                |              |   |   |
| ST6GALNAC2 | ENSG00000070731.10                    | 0.94340558                     | 3                                     | 3            | 0.56418794   |                |              |   |   |
|            | Brain_Caudate_basal_ganglia           | 0.831174006                    | Brain_Frontal_Cortex_BA9              |              |              |                |              |   |   |
|            | 1.900028211                           | 0.146620287                    | 0.146620287                           |              | 0.213196105  | 0.576632203    |              |   |   |
|            | 0.393572895                           | 0.181732898                    | 3                                     | 0            | 0.998207054  |                |              |   |   |
| FAM89A     | ENSG00000182118.7                     | 0.943532129                    | 12                                    | 8            | 0.234420552  |                |              |   |   |
|            | Brain_Hypothalamus                    | 0.956883923                    | Brain_Frontal_Cortex_BA9              | 7.800492869  |              |                |              |   |   |
|            | 0.013482671                           | 0.313398639                    | -0.300711441                          | 1.189048577  | 0.265959702  |                |              |   |   |
|            | 0.383668826                           | 8                              | 0                                     | 0.998207054  |              |                |              |   |   |

|              |                                |                             |              |              |              |                                      |             |   |   |
|--------------|--------------------------------|-----------------------------|--------------|--------------|--------------|--------------------------------------|-------------|---|---|
| ZNF718       | ENSG00000250312.6              | 0.943727048                 | 13           | 1            | 0.524889925  |                                      |             |   |   |
|              | Brain_Spinal_cord_cervical_c-1 | 0.996635182                 |              |              |              | Brain_Substantia_nigra               |             |   |   |
|              | 12.44857998                    | 0.000851387                 | 12.44857998  |              | -0.246136588 | 0.635825868                          |             |   |   |
|              | -0.062867499                   | 0.232166533                 | 1            | 0            | 0.998207054  |                                      |             |   |   |
| TRPV2        | ENSG00000187688.14             | 0.943771248                 | 12           | 12           | 0.071909649  |                                      |             |   |   |
|              | Brain_Substantia_nigra         | 0.952568334                 |              |              |              | Brain_Hypothalamus                   | 3.660613149 |   |   |
|              | 0.163217886                    | 0.163217886                 | -0.716616844 |              | 1.799689699  | -0.039834061                         |             |   |   |
|              | 0.71809173                     | 0                           | 0.998207054  |              |              |                                      |             |   |   |
| BST1         | ENSG00000109743.10             | 0.943790119                 | 1            | 1            | 0.943790119  |                                      |             |   |   |
|              | Brain_Caudate_basal_ganglia    | 0.943790119                 |              |              |              | Brain_Caudate_basal_ganglia          | 1           | 1 |   |
|              | 1                              | 0.070507012                 | 0.070507012  | 0.070507012  | NA           | 1                                    | 0           |   |   |
|              | 0.998207054                    |                             |              |              |              |                                      |             |   |   |
| RP11-242D8.1 | ENSG00000267002.2              | 0.94381853                  | 5            | 3            | 0.548429728  |                                      |             |   |   |
|              | Brain_Hypothalamus             | 0.843768245                 |              |              |              | Brain_Hippocampus                    | 3.060926829 |   |   |
|              | 0.013083771                    | 0.243070545                 | 0.197075769  |              | 0.600114803  | 0.398023615                          |             |   |   |
|              | 0.196607635                    | 3                           | 0            | 0.998207054  |              |                                      |             |   |   |
| INSC         | ENSG00000188487.11             | 0.943849117                 | 2            | 2            | 0.846516737  |                                      |             |   |   |
|              | 0.876950316                    | Brain_Cerebellar_Hemisphere | 1.472561298  |              | 0.527438702  |                                      |             |   |   |
|              | 0.527438702                    | -0.154836372                | 0.193564705  |              | 0.019364167  | 0.246356764                          |             |   |   |
|              | 2                              | 0                           | 0.998207054  |              |              |                                      |             |   |   |
| LINC00426    | ENSG00000238121.5              | 0.943989768                 | 5            | 4            | 0.547190012  |                                      |             |   |   |
|              | Brain_Putamen_basal_ganglia    | 0.800109591                 |              |              |              | Brain_Cortex                         | 3.050366159 |   |   |
|              | 0.043143108                    | 0.189443692                 | -0.601976151 |              | 0.415244337  | -0.224179301                         |             |   |   |
|              | 0.385070566                    | 4                           | 0            | 0.998207054  |              |                                      |             |   |   |
| SLC38A9      | ENSG00000177058.11             | 0.944036365                 | 5            | 4            | 0.503834952  |                                      |             |   |   |
|              | Brain_Putamen_basal_ganglia    | 0.941415286                 |              |              |              | Brain_Cerebellar_Hemisphere          |             |   |   |
|              | 2.564608829                    | 0.016592375                 | 0.335732636  |              | -0.446962189 | 0.668467921                          |             |   |   |
|              | -0.013119661                   | 0.410960014                 | 4            | 0            | 0.998207054  |                                      |             |   |   |
| LINC00570    | ENSG00000224177.6              | 0.944096583                 | 1            | 1            | 0.944096583  |                                      |             |   |   |
|              | Brain_Caudate_basal_ganglia    | 0.944096583                 |              |              |              | Brain_Caudate_basal_ganglia          | 1           | 1 |   |
|              | 1                              | -0.070121966                | -0.070121966 | -0.070121966 | NA           | 1                                    | 0           |   |   |
|              | 0.998207054                    |                             |              |              |              |                                      |             |   |   |
| KNTC1        | ENSG00000184445.11             | 0.944130155                 | 4            | 4            | 0.479120977  |                                      |             |   |   |
|              | Brain_Cerebellar_Hemisphere    | 0.898354166                 |              |              |              | Brain_Anterior_cingulate_cortex_BA24 |             |   |   |
|              | 2.286428053                    | 0.199998451                 | 0.199998451  |              | -0.320391655 | 0.707717067                          |             |   |   |
|              | 0.207247042                    | 0.426838631                 | 4            | 0            | 0.998207054  |                                      |             |   |   |
| ARSJ         | ENSG00000180801.13             | 0.944235291                 | 6            | 6            | 0.357129851  |                                      |             |   |   |
|              | Brain_Caudate_basal_ganglia    | 0.843945856                 |              |              |              | Brain_Spinal_cord_cervical_c-1       |             |   |   |
|              | 1.223212618                    | 0.755721459                 | 0.755721459  |              | -0.920847883 | 0.646879771                          |             |   |   |
|              | 0.027252383                    | 0.602163569                 | 6            | 0            | 0.998207054  |                                      |             |   |   |
| IRAK2        | ENSG00000134070.4              | 0.944305931                 | 5            | 5            | 0.509681897  |                                      |             |   |   |
|              | Brain_Cerebellar_Hemisphere    | 0.914002301                 |              |              |              | Brain_Hypothalamus                   | 1.838484779 |   |   |
|              | 0.468018091                    | 0.468018091                 | -0.3116602   |              | 0.659333091  | 0.179640917                          |             |   |   |
|              | 0.394849391                    | 5                           | 0            | 0.998207054  |              |                                      |             |   |   |
| KIF14        | ENSG00000118193.11             | 0.944326471                 | 2            | 2            | 0.848571341  |                                      |             |   |   |
|              | 0.979983135                    | Brain_Cerebellar_Hemisphere | 1.781605148  |              | 0.218394852  |                                      |             |   |   |
|              | 0.218394852                    | -0.190941608                | 0.025090052  |              | -0.082925778 | 0.152757452                          |             |   |   |
|              | 2                              | 0                           | 0.998207054  |              |              |                                      |             |   |   |
| PIGX         | ENSG00000163964.14             | 0.944372321                 | 12           | 4            | 0.296671284  |                                      |             |   |   |
|              | Brain_Caudate_basal_ganglia    | 0.934020148                 |              |              |              | Brain_Anterior_cingulate_cortex_BA24 |             |   |   |
|              | 8.974287768                    | 0.006885331                 | 0.374282513  |              | -1.04359829  | -0.082787954                         |             |   |   |
|              | -0.407054261                   | 0.269107389                 | 4            | 0            | 0.998207054  |                                      |             |   |   |
| BBIP1        | ENSG00000214413.7              | 0.944378319                 | 1            | 1            | 0.944378319  |                                      |             |   |   |
|              | Brain_Hippocampus              | 0.944378319                 |              |              |              | Brain_Hippocampus                    | 1           | 1 | 1 |
|              | -0.069767998                   | -0.069767998                | -0.069767998 | NA           | 1            | 0                                    | 0.998207054 |   |   |
| RP11-61G23.2 | ENSG00000253321.1              | 0.944495239                 | 1            | 1            | 0.944495239  |                                      |             |   |   |
|              | Brain_Frontal_Cortex_BA9       | 0.944495239                 |              |              |              | Brain_Frontal_Cortex_BA9             | 1           | 1 |   |
|              | 1                              | -0.069621104                | -0.069621104 | -0.069621104 | NA           | 1                                    | 0           |   |   |
|              | 0.998207054                    |                             |              |              |              |                                      |             |   |   |
| KIAA1522     | ENSG00000162522.10             | 0.944517811                 | 1            | 1            | 0.944517811  |                                      |             |   |   |
|              | Brain_Frontal_Cortex_BA9       | 0.944517811                 |              |              |              | Brain_Frontal_Cortex_BA9             | 1           | 1 |   |
|              | 1                              | -0.069592745                | -0.069592745 | -0.069592745 | NA           | 1                                    | 0           |   |   |

0.998207054  
SH2D4A ENSG00000104611.11 0.94451837 2 2 0.737593939  
Brain\_Putamen\_basal\_ganglia 0.948769857 Brain\_Cerebellum 1.061659403  
0.938340597 0.938340597 -0.335041291 0.064251643 -0.135394824  
0.282342741 2 0 0.998207054  
ZMYND19 ENSG00000165724.5 0.944591853 1 1 0.944591853  
Brain\_Cortex 0.944591853 Brain\_Cortex 1 1 1 0.069499724  
0.069499724 0.069499724 NA 1 0 0.998207054  
RP11-104O19.4 ENSG00000274363.1 0.944620649 3 3 0.567250166  
Brain\_Nucleus\_accumbens\_basal\_ganglia 0.95865724 Brain\_Cortex 1.991351763  
0.309761674 0.309761674 0.051838673 0.572105997 0.363560706  
0.275051999 3 0 0.998207054  
RAB29 ENSG00000117280.12 0.944698539 11 7 0.211099306  
Brain\_Anterior\_cingulate\_cortex\_BA24 0.923056093 Brain\_Hippocampus  
7.564199831 0.018237658 0.253822821 -1.250548346 -0.096584844  
-0.859273096 0.317983922 7 0 0.998207054  
FURIN ENSG00000140564.11 0.944742794 2 2 0.74116417  
Brain\_Frontal\_Cortex\_BA9 0.900323422 Brain\_Nucleus\_accumbens\_basal\_ganglia  
1.177588556 0.822411444 0.822411444 -0.330312075 -0.125252795  
-0.227782435 0.144998808 2 0 0.998207054  
BRINP2 ENSG00000198797.6 0.944821032 1 1 0.944821032  
Brain\_Frontal\_Cortex\_BA9 0.944821032 Brain\_Frontal\_Cortex\_BA9 1 1  
1 -0.069211798 -0.069211798 -0.069211798 NA 1 0  
0.998207054  
HSD17B3 ENSG00000130948.9 0.944877565 1 1 0.944877565  
Brain\_Cerebellar\_Hemisphere 0.944877565 Brain\_Cerebellar\_Hemisphere 1 1  
1 0.069140774 0.069140774 0.069140774 NA 1 0  
0.998207054  
CPXM1 ENSG00000088882.7 0.945003628 1 1 0.945003628 Brain\_Cortex  
0.945003628 Brain\_Cortex 1 1 1 -0.068982401 -0.068982401  
-0.068982401 NA 1 0 0.998207054  
EML1 ENSG00000066629.16 0.945064312 1 1 0.945064312  
Brain\_Cerebellar\_Hemisphere 0.945064312 Brain\_Cerebellar\_Hemisphere 1 1  
1 -0.068906165 -0.068906165 -0.068906165 NA 1 0  
0.998207054  
CLMN ENSG00000165959.11 0.945148539 2 2 0.795286963  
Brain\_Hippocampus 0.852423887 Brain\_Putamen\_basal\_ganglia 1.101041688  
0.898958312 0.898958312 -0.259451417 -0.186026619 -0.222739018  
0.051919172 2 0 0.998207054  
PNPLA8 ENSG00000135241.16 0.945158622 1 1 0.945158622  
Brain\_Anterior\_cingulate\_cortex\_BA24 0.945158622  
Brain\_Anterior\_cingulate\_cortex\_BA24 1 1 1 -0.068787683  
-0.068787683 -0.068787683 NA 1 0 0.998207054  
GDE1 ENSG0000006007.11 0.945274722 3 3 0.582801279 Brain\_Cerebellum  
0.925592248 Brain\_Hypothalamus 1.91875106 0.078772297 0.078772297  
-0.549297534 -0.093391871 -0.346965876 0.23223227 3 0  
0.998207054  
MXI1 ENSG00000119950.20 0.945364229 4 4 0.711773796  
Brain\_Cerebellar\_Hemisphere 0.984835618 Brain\_Cortex 3.085413657  
0.16606354 0.16606354 -0.369474876 0.274588198 -0.068015832  
0.278241494 4 0 0.998207054  
FAM198B ENSG00000164125.15 0.945377271 6 5 0.393532459  
Brain\_Hippocampus 0.896421023 Brain\_Anterior\_cingulate\_cortex\_BA24  
2.504348855 0.023315528 0.479487894 -0.441233547 0.853228757  
0.16299494 0.492269553 5 0 0.998207054  
FNDC7 ENSG00000143107.8 0.945378472 5 4 0.693357057  
Brain\_Caudate\_basal\_ganglia 0.951921345 Brain\_Nucleus\_accumbens\_basal\_ganglia  
3.409674807 0.098290517 0.260162698 -0.394303395 0.291745561  
0.073921217 0.277090991 4 0 0.998207054  
CAB39L ENSG00000102547.18 0.945381987 9 8 0.307969376  
Brain\_Cortex 0.989718079 Brain\_Cerebellar\_Hemisphere 3.718393582  
0.008212706 0.26075128 -1.019492155 0.729394486 -0.179558384

|                |                                       |                  |              |              |                                |              |             |              |                  |
|----------------|---------------------------------------|------------------|--------------|--------------|--------------------------------|--------------|-------------|--------------|------------------|
|                | 0.561878848                           | 8                | 0            | 0.998207054  |                                |              |             |              |                  |
| ANKRD36        | ENSG00000135976.17                    |                  |              | 0.945392512  | 11                             | 5            | 0.232618213 |              |                  |
|                | Brain_Hippocampus                     |                  | 0.899710859  |              | Brain_Amygdala                 |              | 7.374445928 |              |                  |
|                | 0.003445312                           | 0.471263051      |              | 0.126026612  |                                | 1.193641552  |             | 0.580417181  |                  |
|                | 0.292386791                           | 5                | 0            | 0.998207054  |                                |              |             |              |                  |
| PARP12         | ENSG00000059378.12                    |                  |              | 0.94540363   | 3                              | 3            | 0.596411241 |              |                  |
|                | Brain_Nucleus_accumbens_basal_ganglia |                  | 0.883884873  |              | Brain_Cortex                   |              |             |              |                  |
|                | 1.759792179                           | 0.567690991      |              | 0.567690991  |                                | -0.529568353 |             | -0.146046256 |                  |
|                | -0.364730686                          | 0.197349703      |              | 3            | 0                              | 0.998207054  |             |              |                  |
| FPR1           | ENSG00000171051.8                     |                  |              | 0.945428015  | 5                              | 5            | 0.3778476   |              |                  |
|                | Brain_Caudate_basal_ganglia           |                  | 0.916532165  |              | Brain_Amygdala                 |              | 1.196505525 |              |                  |
|                | 0.794117522                           | 0.794117522      |              | -0.881869098 |                                | 0.322837491  |             | -0.140962159 |                  |
|                | 0.517329082                           | 5                | 0            | 0.998207054  |                                |              |             |              |                  |
| CNIH3          | ENSG00000143786.7                     |                  |              | 0.945479586  | 1                              | 1            | 0.945479586 |              |                  |
|                | Brain_Spinal_cord_cervical_c-1        |                  | 0.945479586  |              | Brain_Spinal_cord_cervical_c-1 |              |             |              |                  |
|                | 1                                     | 1                | 1            | 0.068384467  |                                | 0.068384467  |             | 0.068384467  | NA 1 0           |
|                | 0.998207054                           |                  |              |              |                                |              |             |              |                  |
| CTA-384D8.33   | ENSG00000272940.1                     |                  |              | 0.945679337  | 3                              | 3            | 0.596368858 |              |                  |
|                | Brain_Putamen_basal_ganglia           |                  | 0.865430604  |              | Brain_Frontal_Cortex_BA9       |              |             |              |                  |
|                | 1.278188096                           | 0.72766837       | 0.72766837   | 0.169465376  |                                | 0.52962947   |             | 0.322182164  |                  |
|                | 0.18621524                            | 3                | 0            | 0.998207054  |                                |              |             |              |                  |
| FAM204A        | ENSG00000165669.13                    |                  |              | 0.945680743  | 1                              | 1            | 0.945680743 |              |                  |
|                | Brain_Cerebellar_Hemisphere           |                  | 0.945680743  |              | Brain_Cerebellar_Hemisphere    | 1            | 1           |              |                  |
|                | 1                                     | -0.068131766     | -0.068131766 | -0.068131766 |                                | NA           | 1           | 0            |                  |
|                | 0.998207054                           |                  |              |              |                                |              |             |              |                  |
| CPVL           | ENSG00000106066.14                    |                  |              | 0.945691647  | 11                             | 7            | 0.2751993   |              |                  |
|                | Brain_Caudate_basal_ganglia           |                  | 0.933265907  |              | Brain_Putamen_basal_ganglia    |              |             |              |                  |
|                | 6.361503549                           | 0.049479158      |              | 0.33711337   |                                | -0.752299602 |             | 1.091167239  |                  |
|                | -0.063885784                          | 0.56433183       | 7            | 0            | 0.998207054                    |              |             |              |                  |
| STOX1          | ENSG00000165730.14                    |                  |              | 0.945696071  | 5                              | 5            | 0.600219682 |              |                  |
|                | Brain_Nucleus_accumbens_basal_ganglia |                  | 0.958333892  |              | Brain_Cerebellar_Hemisphere    |              |             |              |                  |
|                | 2.760728463                           | 0.097076077      |              | 0.097076077  |                                | -0.524084625 |             | 0.330120995  |                  |
|                | -0.088050728                          | 0.326487196      |              | 5            | 0                              | 0.998207054  |             |              |                  |
| B4GALT4        | ENSG00000121578.12                    |                  |              | 0.945791506  | 1                              | 1            | 0.945791506 |              |                  |
|                | Brain_Substantia_nigra                |                  | 0.945791506  |              | Brain_Substantia_nigra         | 1            | 1           |              |                  |
|                | 1                                     | -0.067992624     | -0.067992624 | -0.067992624 |                                | NA           | 1           | 0            |                  |
|                | 0.998207054                           |                  |              |              |                                |              |             |              |                  |
| SMPD1          | ENSG00000166311.9                     |                  |              | 0.945855068  | 2                              | 2            | 0.755993682 |              |                  |
|                | Brain_Cerebellar_Hemisphere           |                  | 0.90186593   |              | Brain_Cerebellum               |              | 1.682600176 |              |                  |
|                | 0.317399824                           | 0.317399824      |              | 0.12330456   |                                | 0.310746056  |             | 0.217025308  |                  |
|                | 0.132541153                           | 2                | 0            | 0.998207054  |                                |              |             |              |                  |
| MAP1S          | ENSG00000130479.10                    |                  |              | 0.945928129  | 1                              | 1            | 0.945928129 |              | Brain_Cerebellum |
|                | 0.945928129                           | Brain_Cerebellum | 1            | 1            | 1                              | 0.067820997  |             | 0.067820997  |                  |
|                | 0.067820997                           | NA               | 1            | 0            | 0.998207054                    |              |             |              |                  |
| RP11-6L6.2     | ENSG00000250673.2                     |                  |              | 0.945959532  | 10                             | 4            | 0.436569643 |              |                  |
|                | Brain_Spinal_cord_cervical_c-1        |                  | 0.91746079   |              | Brain_Frontal_Cortex_BA9       |              |             |              |                  |
|                | 7.483144349                           | 0.005369861      |              | 0.333221855  |                                | -0.103632758 |             | 0.777998933  |                  |
|                | 0.344747078                           | 0.239083272      |              | 4            | 0                              | 0.998207054  |             |              |                  |
| XRCC1          | ENSG00000073050.11                    |                  |              | 0.946026801  | 12                             | 5            | 0.175062315 |              |                  |
|                | Brain_Hippocampus                     |                  | 0.888177153  |              | Brain_Hypothalamus             |              | 8.850731464 |              |                  |
|                | 0.000799454                           | 0.343603642      |              | 0.140611133  |                                | 1.356115836  |             | 0.532256682  |                  |
|                | 0.385075275                           | 5                | 0            | 0.998207054  |                                |              |             |              |                  |
| RASGRF2        | ENSG00000113319.12                    |                  |              | 0.94603239   | 1                              | 1            | 0.94603239  |              |                  |
|                | Brain_Cerebellar_Hemisphere           |                  | 0.94603239   |              | Brain_Cerebellar_Hemisphere    | 1            | 1           | 1            |                  |
|                | -0.067690025                          | -0.067690025     |              | -0.067690025 |                                | NA           | 1           | 0            | 0.998207054      |
| RP11-1134I14.8 | ENSG00000255366.1                     |                  |              | 0.946117984  | 2                              | 2            | 0.750773304 |              |                  |
|                | Brain_Spinal_cord_cervical_c-1        |                  | 0.981740857  |              | Brain_Cerebellar_Hemisphere    |              |             |              |                  |
|                | 1.232523039                           | 0.767476961      |              | 0.767476961  |                                | -0.02288644  |             | 0.317619865  |                  |
|                | 0.147366713                           | 0.240774317      |              | 2            | 0                              | 0.998207054  |             |              |                  |
| NRGN           | ENSG00000154146.12                    |                  |              | 0.946325328  | 2                              | 2            | 0.751763606 |              |                  |
|                | Brain_Hypothalamus                    |                  | 0.966644881  |              | Brain_Cerebellum               |              | 1.182967383 |              |                  |
|                | 0.817032617                           | 0.817032617      |              | -0.316314763 |                                | 0.041816626  |             | -0.137249069 |                  |



|              |                                       |                   |   |                                       |              |   |              |   |                  |
|--------------|---------------------------------------|-------------------|---|---------------------------------------|--------------|---|--------------|---|------------------|
|              | 0.253237134                           | 2                 | 0 | 0.998207054                           |              |   |              |   |                  |
| SMIM10L1     | ENSG00000256537.4                     |                   |   | 0.946430728                           | 10           | 4 | 0.577712324  |   |                  |
|              | Brain_Cerebellum                      | 0.975149342       |   | Brain_Amygdala                        | 6.702302889  |   | 0.014957724  |   |                  |
|              | 0.270107216                           | -0.556729404      |   | 0.377314558                           | -0.093398088 |   | 0.339916153  |   |                  |
|              | 4                                     | 0                 |   | 0.998207054                           |              |   |              |   |                  |
| GRSF1        | ENSG00000132463.13                    |                   |   | 0.946445302                           | 1            | 1 | 0.946445302  |   |                  |
|              | Brain_Nucleus_accumbens_basal_ganglia | 0.946445302       |   |                                       |              |   |              |   |                  |
|              | Brain_Nucleus_accumbens_basal_ganglia | 1                 |   | 1                                     | 1            |   | -0.067171338 |   |                  |
|              | -0.067171338                          | -0.067171338      |   | NA                                    | 1            | 0 | 0.998207054  |   |                  |
| MMP10        | ENSG00000166670.9                     |                   |   | 0.946458049                           | 1            | 1 | 0.946458049  |   |                  |
|              | Brain_Substantia_nigra                | 0.946458049       |   | Brain_Substantia_nigra                | 1            | 1 |              |   |                  |
|              | 1                                     | -0.067155327      |   | -0.067155327                          | -0.067155327 |   | NA           | 1 | 0                |
|              | 0.998207054                           |                   |   |                                       |              |   |              |   |                  |
| TSPAN32      | ENSG00000064201.15                    |                   |   | 0.946693382                           | 4            | 4 | 0.485691961  |   |                  |
|              | Brain_Spinal_cord_cervical_c-1        | 0.927451595       |   | Brain_Substantia_nigra                |              |   |              |   |                  |
|              | 1.415297564                           | 0.582327024       |   | 0.582327024                           | -0.106956478 |   | 0.697177112  |   |                  |
|              | 0.257157696                           | 0.347334445       |   | 4                                     | 0            |   | 0.998207054  |   |                  |
| TRPT1        | ENSG00000149743.13                    |                   |   | 0.946749902                           | 13           | 3 | 0.224002918  |   | Brain_Cerebellum |
|              | 0.995503075                           | Brain_Hippocampus |   | 10.58668007                           | 0.000449131  |   |              |   |                  |
|              | 0.657032213                           | -1.215952761      |   | 0.191792438                           | -0.261006022 |   | 0.426108154  |   |                  |
|              | 3                                     | 0                 |   | 0.998207054                           |              |   |              |   |                  |
| RP11-554I8.1 | ENSG00000225948.2                     |                   |   | 0.946806495                           | 1            | 1 | 0.946806495  |   |                  |
|              | Brain_Amygdala                        | 0.946806495       |   | Brain_Amygdala                        | 1            | 1 | 1            |   | 0.066717635      |
|              | 0.066717635                           | 0.066717635       |   | NA                                    | 1            | 0 | 0.998207054  |   |                  |
| EFNA1        | ENSG00000169242.11                    |                   |   | 0.946820475                           | 4            | 4 | 0.415337552  |   |                  |
|              | Brain_Caudate_basal_ganglia           | 0.874728321       |   | Brain_Hippocampus                     | 1.662245532  |   |              |   |                  |
|              | 0.335594112                           | 0.335594112       |   | -0.814536707                          | 0.242656397  |   | -0.296100063 |   |                  |
|              | 0.448481937                           | 4                 |   | 0                                     | 0.998207054  |   |              |   |                  |
| SIMC1        | ENSG00000170085.17                    |                   |   | 0.946839185                           | 4            | 3 | 0.414610752  |   |                  |
|              | Brain_Caudate_basal_ganglia           | 0.867046037       |   | Brain_Hypothalamus                    | 2.503214926  |   |              |   |                  |
|              | 0.039212465                           | 0.45753645        |   | 0.167411805                           | 0.815806611  |   | 0.372359543  |   |                  |
|              | 0.299469509                           | 3                 |   | 0                                     | 0.998207054  |   |              |   |                  |
| TIMM21       | ENSG00000075336.11                    |                   |   | 0.946925896                           | 3            | 3 | 0.671571704  |   |                  |
|              | Brain_Putamen_basal_ganglia           | 0.853873063       |   | Brain_Nucleus_accumbens_basal_ganglia |              |   |              |   |                  |
|              | 1.425682499                           | 0.569514975       |   | 0.569514975                           | -0.423991923 |   | 0.194291445  |   |                  |
|              | -0.015173839                          | 0.354082949       |   | 3                                     | 0            |   | 0.998207054  |   |                  |
| SYS1         | ENSG00000204070.9                     |                   |   | 0.947067771                           | 4            | 4 | 0.442223419  |   |                  |
|              | Brain_Anterior_cingulate_cortex_BA24  | 0.922311766       |   | Brain_Amygdala                        |              |   |              |   |                  |
|              | 2.974215861                           | 0.135357319       |   | 0.135357319                           | 0.097522123  |   | 0.768444049  |   |                  |
|              | 0.422388136                           | 0.276561224       |   | 4                                     | 0            |   | 0.998207054  |   |                  |
| EIF4H        | ENSG00000106682.14                    |                   |   | 0.947308833                           | 1            | 1 | 0.947308833  |   |                  |
|              | Brain_Hippocampus                     | 0.947308833       |   | Brain_Hippocampus                     | 1            | 1 | 1            |   |                  |
|              | -0.066086658                          | -0.066086658      |   | -0.066086658                          | NA           | 1 | 0            |   | 0.998207054      |
| TRNT1        | ENSG00000072756.16                    |                   |   | 0.947335845                           | 7            | 5 | 0.336234384  |   |                  |
|              | Brain_Hippocampus                     | 0.906786333       |   | Brain_Anterior_cingulate_cortex_BA24  |              |   |              |   |                  |
|              | 5.464236922                           | 0.015958014       |   | 0.207585462                           | 0.11709303   |   | 0.961632213  |   |                  |
|              | 0.477732784                           | 0.296540677       |   | 5                                     | 0            |   | 0.998207054  |   |                  |
| TMX1         | ENSG00000139921.12                    |                   |   | 0.947345214                           | 3            | 3 | 0.673061486  |   |                  |
|              | Brain_Substantia_nigra                | 0.821891286       |   | Brain_Nucleus_accumbens_basal_ganglia |              |   |              |   |                  |
|              | 1.487174271                           | 0.556295625       |   | 0.556295625                           | -0.421950037 |   | 0.331755703  |   |                  |
|              | 0.044972924                           | 0.407867564       |   | 3                                     | 0            |   | 0.998207054  |   |                  |
| KCNJ8        | ENSG00000121361.3                     |                   |   | 0.947399572                           | 1            | 1 | 0.947399572  |   |                  |
|              | Brain_Caudate_basal_ganglia           | 0.947399572       |   | Brain_Caudate_basal_ganglia           | 1            | 1 |              |   |                  |
|              | 1                                     | -0.065972686      |   | -0.065972686                          | -0.065972686 |   | NA           | 1 | 0                |
|              | 0.998207054                           |                   |   |                                       |              |   |              |   |                  |
| SLC25A26     | ENSG00000144741.17                    |                   |   | 0.947417105                           | 12           | 2 | 0.528031354  |   |                  |
|              | Brain_Hippocampus                     | 0.958170045       |   | Brain_Anterior_cingulate_cortex_BA24  |              |   |              |   |                  |
|              | 10.38032946                           | 1.57E-06          |   | 0.498947992                           | -0.631014025 |   | 0.184804492  |   |                  |
|              | -0.302545267                          | 0.220592699       |   | 2                                     | 0            |   | 0.998207054  |   |                  |
| SELENOK      | ENSG00000113811.10                    |                   |   | 0.947554687                           | 2            | 2 | 0.823831681  |   |                  |
|              | Brain_Spinal_cord_cervical_c-1        | 0.937038932       |   | Brain_Cerebellum                      | 1.550043325  |   |              |   |                  |
|              | 0.449956675                           | 0.449956675       |   | -0.078992068                          | 0.222619471  |   | 0.071813702  |   |                  |

|           |                                       |             |                             |                                      |             |             |              |  |                  |   |   |  |
|-----------|---------------------------------------|-------------|-----------------------------|--------------------------------------|-------------|-------------|--------------|--|------------------|---|---|--|
|           | 0.213271564                           | 2           | 0                           | 0.998207054                          |             |             |              |  |                  |   |   |  |
| PASK      | ENSG00000115687.13                    |             |                             | 0.947558924                          | 10          | 7           | 0.237812784  |  | Brain_Cortex     |   |   |  |
|           | 0.912135883                           |             | Brain_Cerebellar_Hemisphere | 6.780936508                          |             |             | 0.085687446  |  |                  |   |   |  |
|           | 0.244345294                           |             | -0.840164038                | 1.180471388                          |             |             | 0.147581663  |  | 0.544595712      |   |   |  |
|           | 7                                     | 0           | 0.998207054                 |                                      |             |             |              |  |                  |   |   |  |
| MAD2L2    | ENSG00000116670.14                    |             |                             | 0.947718508                          | 1           | 1           | 0.947718508  |  |                  |   |   |  |
|           | Brain_Cerebellum                      | 0.947718508 |                             | Brain_Cerebellum                     | 1           | 1           | 1            |  | 0.065572093      |   |   |  |
|           | 0.065572093                           |             | 0.065572093                 | NA                                   | 1           | 0           | 0.998207054  |  |                  |   |   |  |
| PLEKHM2   | ENSG00000116786.11                    |             |                             | 0.94772447                           | 2           | 2           | 0.761981351  |  | Brain_Cerebellum |   |   |  |
|           | 0.827272977                           |             | Brain_Cerebellar_Hemisphere | 1.900235924                          |             |             | 0.099764076  |  |                  |   |   |  |
|           | 0.099764076                           |             | -0.30287995                 | -0.218200395                         |             |             | -0.260540173 |  | 0.059877488      |   |   |  |
|           | 2                                     | 0           | 0.998207054                 |                                      |             |             |              |  |                  |   |   |  |
| NCAPG2    | ENSG00000146918.19                    |             |                             | 0.947922723                          | 8           | 5           | 0.499447757  |  |                  |   |   |  |
|           | Brain_Cortex                          | 0.901725611 |                             | Brain_Amygdala                       | 5.922142062 |             | 0.000337265  |  |                  |   |   |  |
|           | 0.215570187                           |             | -0.339681219                | 0.675358922                          |             |             | 0.224332423  |  | 0.283659087      |   |   |  |
|           | 5                                     | 0           | 0.998207054                 |                                      |             |             |              |  |                  |   |   |  |
| CLTB      | ENSG00000175416.12                    |             |                             | 0.947981798                          | 1           | 1           | 0.947981798  |  |                  |   |   |  |
|           | Brain_Spinal_cord_cervical_c-1        | 0.947981798 |                             | Brain_Spinal_cord_cervical_c-1       |             |             |              |  |                  |   |   |  |
|           | 1                                     | 1           | 1                           | 0.065241401                          |             |             | 0.065241401  |  | NA               | 1 | 0 |  |
|           | 0.998207054                           |             |                             |                                      |             |             |              |  |                  |   |   |  |
| TSTD2     | ENSG00000136925.14                    |             |                             | 0.947998014                          | 2           | 2           | 0.744770527  |  | Brain_Cerebellum |   |   |  |
|           | 0.870602383                           |             | Brain_Caudate_basal_ganglia | 1.420173744                          |             |             | 0.579826256  |  |                  |   |   |  |
|           | 0.579826256                           |             | 0.162893381                 | 0.325542494                          |             |             | 0.244217937  |  | 0.115010291      |   |   |  |
|           | 2                                     | 0           | 0.998207054                 |                                      |             |             |              |  |                  |   |   |  |
| ZNF181    | ENSG00000197841.14                    |             |                             | 0.948008868                          | 13          | 2           | 0.354984444  |  |                  |   |   |  |
|           | Brain_Anterior_cingulate_cortex_BA24  | 0.913239558 |                             |                                      |             |             |              |  |                  |   |   |  |
|           | Brain_Nucleus_accumbens_basal_ganglia | 11.88967064 |                             |                                      |             |             | 0.000203571  |  |                  |   |   |  |
|           | 0.457540652                           |             | 0.108953265                 | 0.924964365                          |             |             | 0.268338358  |  | 0.2175553        |   | 2 |  |
|           | 0                                     |             | 0.998207054                 |                                      |             |             |              |  |                  |   |   |  |
| USP17L7   | ENSG00000226430.6                     |             |                             | 0.948077556                          | 1           | 1           | 0.948077556  |  |                  |   |   |  |
|           | Brain_Cerebellum                      | 0.948077556 |                             | Brain_Cerebellum                     | 1           | 1           | 1            |  | 0.065121131      |   |   |  |
|           | 0.065121131                           |             | 0.065121131                 | NA                                   | 1           | 0           | 0.998207054  |  |                  |   |   |  |
| BMP1      | ENSG00000168487.17                    |             |                             | 0.948106844                          | 2           | 2           | 0.773440727  |  |                  |   |   |  |
|           | Brain_Cerebellar_Hemisphere           | 0.900280547 |                             | Brain_Cerebellum                     | 1.097000986 |             |              |  |                  |   |   |  |
|           | 0.902999014                           |             | 0.902999014                 | -0.125306955                         |             |             | 0.287877217  |  | 0.081285131      |   |   |  |
|           | 0.292165329                           |             | 2                           | 0                                    | 0.998207054 |             |              |  |                  |   |   |  |
| SYBU      | ENSG00000147642.16                    |             |                             | 0.94815313                           | 2           | 2           | 0.926450842  |  | Brain_Cerebellum |   |   |  |
|           | 0.939806595                           |             | Brain_Cerebellar_Hemisphere | 1.867649741                          |             |             | 0.132350259  |  |                  |   |   |  |
|           | 0.132350259                           |             | -0.092311134                | 0.07551295                           |             |             | -0.008399092 |  | 0.118669548      |   | 2 |  |
|           | 0                                     |             | 0.998207054                 |                                      |             |             |              |  |                  |   |   |  |
| LINC00871 | ENSG00000258700.5                     |             |                             | 0.948202581                          | 2           | 2           | 0.771830937  |  |                  |   |   |  |
|           | Brain_Nucleus_accumbens_basal_ganglia | 0.858924942 |                             | Brain_Caudate_basal_ganglia          |             |             |              |  |                  |   |   |  |
|           | 1.868304854                           |             | 0.131695146                 | 0.131695146                          |             |             | -0.289980786 |  | -0.177742836     |   |   |  |
|           | -0.233861811                          |             | 0.079364216                 | 2                                    | 0           | 0.998207054 |              |  |                  |   |   |  |
| TMEM41B   | ENSG00000166471.10                    |             |                             | 0.948230004                          | 2           | 2           | 0.803800545  |  |                  |   |   |  |
|           | Brain_Putamen_basal_ganglia           | 0.827813249 |                             | Brain_Anterior_cingulate_cortex_BA24 |             |             |              |  |                  |   |   |  |
|           | 1.025738397                           |             | 0.974261603                 | 0.974261603                          |             |             | -0.217507005 |  | 0.248431524      |   |   |  |
|           | 0.01546226                            |             | 0.329468293                 | 2                                    | 0           | 0.998207054 |              |  |                  |   |   |  |
| MORN2     | ENSG00000188010.12                    |             |                             | 0.948251592                          | 2           | 2           | 0.74541055   |  |                  |   |   |  |
|           | Brain_Spinal_cord_cervical_c-1        | 0.941571479 |                             |                                      |             |             |              |  |                  |   |   |  |
|           | Brain_Anterior_cingulate_cortex_BA24  | 1.137167566 |                             |                                      |             |             | 0.862832434  |  |                  |   |   |  |
|           | 0.862832434                           |             | -0.324696809                | -0.073294863                         |             |             | -0.198995836 |  | 0.177768021      |   |   |  |
|           | 2                                     | 0           | 0.998207054                 |                                      |             |             |              |  |                  |   |   |  |
| LINC01606 | ENSG00000253301.5                     |             |                             | 0.948289879                          | 1           | 1           | 0.948289879  |  |                  |   |   |  |
|           | Brain_Cerebellum                      | 0.948289879 |                             | Brain_Cerebellum                     | 1           | 1           | 1            |  | -0.064854461     |   |   |  |
|           | -0.064854461                          |             | -0.064854461                | NA                                   | 1           | 0           | 0.998207054  |  |                  |   |   |  |
| YPEL5     | ENSG00000119801.12                    |             |                             | 0.948361172                          | 1           | 1           | 0.948361172  |  |                  |   |   |  |
|           | Brain_Substantia_nigra                | 0.948361172 |                             | Brain_Substantia_nigra               | 1           | 1           |              |  |                  |   |   |  |
|           | 1                                     |             | -0.06476492                 | -0.06476492                          |             |             | -0.06476492  |  | NA               | 1 | 0 |  |
|           | 0.998207054                           |             |                             |                                      |             |             |              |  |                  |   |   |  |
| PIP5K1B   | ENSG00000107242.17                    |             |                             | 0.94842259                           | 1           | 1           | 0.94842259   |  |                  |   |   |  |
|           | Brain_Frontal_Cortex_BA9              | 0.94842259  |                             | Brain_Frontal_Cortex_BA9             | 1           | 1           | 1            |  |                  |   |   |  |

|             |                                       |                  |                                       |              |                |                             |              |
|-------------|---------------------------------------|------------------|---------------------------------------|--------------|----------------|-----------------------------|--------------|
|             | 0.064687784                           | 0.064687784      | 0.064687784                           | NA           | 1              | 0                           | 0.998207054  |
| DHX35       | ENSG00000101452.14                    | 0.94846691       | 3                                     | 3            | 0.555090903    |                             |              |
|             | Brain_Spinal_cord_cervical_c-1        | 0.729850333      |                                       |              | Brain_Cortex   |                             | 2.324064232  |
|             | 0.139261596                           | 0.139261596      | 0.345324629                           | 0.590148788  |                |                             | 0.468596581  |
|             | 0.122421139                           | 3                | 0                                     | 0.998207054  |                |                             |              |
| STARD6      | ENSG00000174448.8                     | 0.94862349       | 7                                     | 5            | 0.664292684    |                             |              |
|             | Brain_Nucleus_accumbens_basal_ganglia | 0.998462127      |                                       |              | Brain_Amygdala |                             |              |
|             | 4.934663365                           | 0.032783364      | 0.257121395                           | -0.433994158 |                |                             | 0.396456767  |
|             | -0.026079328                          | 0.296466942      | 5                                     | 0            | 0.998207054    |                             |              |
| RP11-5407.3 | ENSG00000223764.2                     | 0.94867914       | 1                                     | 1            | 0.94867914     |                             |              |
|             | Brain_Cerebellar_Hemisphere           | 0.94867914       | Brain_Cerebellar_Hemisphere           | 1            | 1              | 1                           | 1            |
|             | 0.064365576                           | 0.064365576      | 0.064365576                           | NA           | 1              | 0                           | 0.998207054  |
| WTIP        | ENSG00000142279.12                    | 0.94874147       | 1                                     | 1            | 0.94874147     |                             |              |
|             | Brain_Nucleus_accumbens_basal_ganglia | 0.94874147       |                                       |              |                |                             |              |
|             | Brain_Nucleus_accumbens_basal_ganglia | 1                | 1                                     | 1            | -0.064287295   |                             |              |
|             | -0.064287295                          | -0.064287295     | NA                                    | 1            | 0              | 0.998207054                 |              |
| PRPF18      | ENSG00000165630.13                    | 0.948840054      | 1                                     | 1            | 0.948840054    |                             |              |
|             | Brain_Cerebellar_Hemisphere           | 0.948840054      | Brain_Cerebellar_Hemisphere           | 1            | 1              |                             |              |
|             | 1                                     | 0.064163482      | 0.064163482                           | 0.064163482  | NA             | 1                           | 0            |
|             | 0.998207054                           |                  |                                       |              |                |                             |              |
| CCDC158     | ENSG00000163749.17                    | 0.948888147      | 7                                     | 6            | 0.223402284    |                             |              |
|             | Brain_Cortex                          | 0.877653844      | Brain_Nucleus_accumbens_basal_ganglia |              |                |                             |              |
|             | 3.459331523                           | 0.034031766      | 0.127269468                           | -1.217530909 | -0.153944059   |                             |              |
|             | -0.646382552                          | 0.39987765       | 6                                     | 0            | 0.998207054    |                             |              |
| CCDC27      | ENSG00000162592.9                     | 0.949170682      | 1                                     | 1            | 0.949170682    |                             |              |
|             | Brain_Cerebellum                      | 0.949170682      | Brain_Cerebellum                      | 1            | 1              | 1                           | 0.063748254  |
|             | 0.063748254                           | 0.063748254      | NA                                    | 1            | 0              | 0.998207054                 |              |
| NAGS        | ENSG00000161653.10                    | 0.949441974      | 10                                    | 4            | 0.544145524    |                             |              |
|             | Brain_Frontal_Cortex_BA9              | 0.975434368      | Brain_Spinal_cord_cervical_c-1        |              |                |                             |              |
|             | 7.985689457                           | 0.026827181      | 0.353115629                           | -0.606556127 | 0.524970341    |                             |              |
|             | -0.001865935                          | 0.338874181      | 4                                     | 0            | 0.998207054    |                             |              |
| ANP32A      | ENSG00000140350.15                    | 0.949476686      | 2                                     | 2            | 0.773008621    |                             |              |
|             | Brain_Cortex                          | 0.832014008      | Brain_Hippocampus                     |              | 1.255620745    |                             |              |
|             | 0.744379255                           | 0.744379255      | 0.212119242                           | 0.288441739  | 0.250280491    |                             |              |
|             | 0.053968155                           | 2                | 0                                     | 0.998207054  |                |                             |              |
| MSTN        | ENSG00000138379.4                     | 0.94949134       | 2                                     | 2            | 0.81014359     | Brain_Cerebellar_Hemisphere |              |
|             | 0.996720153                           | Brain_Cerebellum | 1.656158504                           | 0.343841496  | 0.343841496    |                             |              |
|             | -0.00411069                           | 0.240240795      | 0.118065053                           | 0.172782592  | 2              | 0                           |              |
|             | 0.998207054                           |                  |                                       |              |                |                             |              |
| CD27        | ENSG00000139193.3                     | 0.949514772      | 2                                     | 2            | 0.790714919    |                             |              |
|             | Brain_Cerebellar_Hemisphere           | 0.859064002      | Brain_Cortex                          |              | 1.017192839    |                             |              |
|             | 0.982807161                           | 0.982807161      | -0.177565779                          | 0.265382366  | 0.043908294    |                             |              |
|             | 0.313211637                           | 2                | 0                                     | 0.998207054  |                |                             |              |
| LINC00858   | ENSG00000229404.5                     | 0.949536135      | 1                                     | 1            | 0.949536135    |                             |              |
|             | Brain_Cerebellum                      | 0.949536135      | Brain_Cerebellum                      | 1            | 1              | 1                           | -0.063289301 |
|             | -0.063289301                          | -0.063289301     | NA                                    | 1            | 0              | 0.998207054                 |              |
| FAM107A     | ENSG00000168309.16                    | 0.949536441      | 1                                     | 1            | 0.949536441    |                             |              |
|             | Brain_Nucleus_accumbens_basal_ganglia | 0.949536441      |                                       |              |                |                             |              |
|             | Brain_Nucleus_accumbens_basal_ganglia | 1                | 1                                     | 1            | -0.063288917   |                             |              |
|             | -0.063288917                          | -0.063288917     | NA                                    | 1            | 0              | 0.998207054                 |              |
| CNTNAP1     | ENSG00000108797.11                    | 0.949544175      | 1                                     | 1            | 0.949544175    |                             |              |
|             | Brain_Substantia_nigra                | 0.949544175      | Brain_Substantia_nigra                |              | 1              | 1                           |              |
|             | 1                                     | 0.063279205      | 0.063279205                           | 0.063279205  | NA             | 1                           | 0            |
|             | 0.998207054                           |                  |                                       |              |                |                             |              |
| CD9         | ENSG0000010278.12                     | 0.949600029      | 3                                     | 3            | 0.552711972    |                             |              |
|             | Brain_Cerebellar_Hemisphere           | 0.979946119      | Brain_Hippocampus                     |              | 1.160390233    |                             |              |
|             | 0.881131207                           | 0.881131207      | -0.593701213                          | -0.025136459 | -0.238189552   |                             |              |
|             | 0.309898858                           | 3                | 0                                     | 0.998207054  |                |                             |              |
| LRRC1       | ENSG00000137269.14                    | 0.949621126      | 9                                     | 6            | 0.339285454    |                             |              |
|             | Brain_Caudate_basal_ganglia           | 0.979189267      | Brain_Hippocampus                     |              | 5.923366918    |                             |              |
|             | 0.021864104                           | 0.207760912      | -0.955438917                          | 0.955578053  | 0.366491116    |                             |              |
|             | 0.567746093                           | 6                | 0                                     | 0.998207054  |                |                             |              |

|               |                                      |                             |              |             |                                       |              |                  |              |
|---------------|--------------------------------------|-----------------------------|--------------|-------------|---------------------------------------|--------------|------------------|--------------|
| STARD4        | ENSG00000164211.12                   | 0.949831084                 | 3            | 3           | 0.565157636                           |              |                  |              |
|               | Brain_Cerebellum                     | 0.870234266                 |              |             | Brain_Caudate_basal_ganglia           | 1.302469826  |                  |              |
|               | 0.736506223                          | 0.736506223                 |              |             | -0.575197643                          | 0.163360926  |                  | -0.221709496 |
|               | 0.370290791                          | 3                           | 0            | 0.998207054 |                                       |              |                  |              |
| RP13-735L24.1 | ENSG00000260423.1                    | 0.949872236                 |              |             | 8                                     | 5            | 0.383053918      |              |
|               | Brain_Spinal_cord_cervical_c-1       | 0.860430475                 |              |             |                                       |              | Brain_Cerebellum | 5.53997364   |
|               | 0.064418909                          | 0.216125003                 |              |             | 0.175826214                           |              | 0.872283167      | 0.517113639  |
|               | 0.234469385                          | 5                           | 0            | 0.998207054 |                                       |              |                  |              |
| ZNF410        | ENSG00000119725.18                   | 0.949979697                 | 3            | 2           | 0.775599018                           |              |                  |              |
|               | Brain_Cerebellum                     | 0.795019431                 |              |             | Brain_Cerebellar_Hemisphere           | 2.30024895   |                  |              |
|               | 0.072039587                          | 0.627711463                 |              |             | -0.285058899                          | -0.259798211 |                  | -0.272315155 |
|               | 0.012631871                          | 2                           | 0            | 0.998207054 |                                       |              |                  |              |
| DDIAS         | ENSG00000165490.12                   | 0.950039536                 | 2            | 2           | 0.78531997                            |              | Brain_Cerebellum |              |
|               | 0.982001214                          | Brain_Frontal_Cortex_BA9    | 1.584137179  |             | 0.415862821                           |              |                  |              |
|               | 0.415862821                          | -0.272392849                |              |             | -0.022560046                          | -0.147476448 |                  | 0.176658469  |
|               | 2                                    | 0                           | 0.998207054  |             |                                       |              |                  |              |
| PCDHB13       | ENSG00000187372.11                   | 0.950040307                 | 1            | 1           | 0.950040307                           |              |                  |              |
|               | Brain_Substantia_nigra               | 0.950040307                 |              |             | Brain_Substantia_nigra                | 1            | 1                |              |
|               | 1                                    | 0.062656162                 | 0.062656162  | 0.062656162 | NA                                    | 1            | 0                |              |
|               | 0.998207054                          |                             |              |             |                                       |              |                  |              |
| MRPL39        | ENSG00000154719.13                   | 0.950201013                 | 6            | 2           | 0.732608602                           |              |                  |              |
|               | Brain_Anterior_cingulate_cortex_BA24 | 0.891783148                 |              |             | Brain_Amygdala                        |              |                  |              |
|               | 5.224396285                          | 0.017835209                 | 0.431908122  |             | -0.341657576                          | 0.136048237  |                  |              |
|               | -0.183827632                         | 0.175610805                 | 2            | 0           | 0.998207054                           |              |                  |              |
| GVQW2         | ENSG00000279968.1                    | 0.950264951                 | 3            | 3           | 0.63855795                            |              |                  |              |
|               | Brain_Caudate_basal_ganglia          | 0.885713765                 |              |             | Brain_Cerebellar_Hemisphere           |              |                  |              |
|               | 2.561386688                          | 0.159957972                 | 0.159957972  |             | 0.143729894                           | 0.46971598   |                  |              |
|               | 0.297394731                          | 0.163791875                 | 3            | 0           | 0.998207054                           |              |                  |              |
| HGH1          | ENSG00000235173.6                    | 0.950384697                 | 2            | 2           | 0.752495256                           |              |                  |              |
|               | Brain_Putamen_basal_ganglia          | 0.971873722                 |              |             | Brain_Spinal_cord_cervical_c-1        |              |                  |              |
|               | 1.041153898                          | 0.958846102                 | 0.958846102  |             | 0.035258365                           | 0.315350881  |                  |              |
|               | 0.175304623                          | 0.198055318                 | 2            | 0           | 0.998207054                           |              |                  |              |
| CLVS1         | ENSG00000177182.10                   | 0.950394418                 | 2            | 2           | 0.818516007                           |              | Brain_Cerebellum |              |
|               | 0.897949752                          | Brain_Cerebellar_Hemisphere | 1.925270323  |             | 0.074729677                           |              |                  |              |
|               | 0.074729677                          | 0.128251745                 | 0.229454081  |             | 0.178852913                           | 0.071560858  |                  |              |
|               | 2                                    | 0                           | 0.998207054  |             |                                       |              |                  |              |
| MRRF          | ENSG00000148187.17                   | 0.950401063                 | 1            | 1           | 0.950401063                           |              | Brain_Cortex     |              |
|               | 0.950401063                          | Brain_Cortex                | 1            | 1           | 1                                     | -0.062203138 |                  | -0.062203138 |
|               | -0.062203138                         | NA                          | 1            | 0           | 0.998207054                           |              |                  |              |
| PTPN1         | ENSG00000196396.9                    | 0.950409184                 | 5            | 4           | 0.533345935                           |              |                  |              |
|               | Brain_Caudate_basal_ganglia          | 0.966488863                 |              |             | Brain_Spinal_cord_cervical_c-1        |              |                  |              |
|               | 3.117316964                          | 0.048572952                 | 0.110561744  |             | -0.622906548                          | 0.042012337  |                  |              |
|               | -0.355659416                         | 0.272180085                 | 4            | 0           | 0.998207054                           |              |                  |              |
| MOB3C         | ENSG00000142961.14                   | 0.950417152                 | 2            | 2           | 0.83507398                            |              | Brain_Cerebellum |              |
|               | 0.97698309                           | Brain_Cerebellar_Hemisphere | 1.695340777  |             | 0.304659223                           |              |                  |              |
|               | 0.304659223                          | -0.028851421                | 0.208198499  |             | 0.089673539                           | 0.167619606  |                  |              |
|               | 2                                    | 0                           | 0.998207054  |             |                                       |              |                  |              |
| SDR42E2       | ENSG00000183921.7                    | 0.950514653                 | 2            | 2           | 0.782214314                           |              |                  |              |
|               | Brain_Hippocampus                    | 0.806279464                 |              |             | Brain_Nucleus_accumbens_basal_ganglia |              |                  |              |
|               | 1.350482701                          | 0.649517299                 | 0.649517299  |             | 0.245228559                           | 0.276434562  |                  |              |
|               | 0.260831561                          | 0.022065976                 | 2            | 0           | 0.998207054                           |              |                  |              |
| LMO1          | ENSG00000166407.13                   | 0.950569918                 | 1            | 1           | 0.950569918                           |              | Brain_Cortex     |              |
|               | 0.950569918                          | Brain_Cortex                | 1            | 1           | 1                                     | -0.061991102 |                  | -0.061991102 |
|               | -0.061991102                         | NA                          | 1            | 0           | 0.998207054                           |              |                  |              |
| ACOX3         | ENSG00000087008.15                   | 0.950630281                 | 7            | 6           | 0.470970355                           |              |                  |              |
|               | Brain_Spinal_cord_cervical_c-1       | 0.999734169                 |              |             | Brain_Cortex                          | 4.562493074  |                  |              |
|               | 0.142802892                          | 0.237566365                 | -0.129917541 |             | 0.720901117                           | 0.238780524  |                  |              |
|               | 0.317483479                          | 6                           | 0            | 0.998207054 |                                       |              |                  |              |
| FAM207A       | ENSG00000160256.12                   | 0.950766225                 | 4            | 4           | 0.50349758                            |              |                  |              |
|               | Brain_Cerebellar_Hemisphere          | 0.884616144                 |              |             | Brain_Putamen_basal_ganglia           |              |                  |              |
|               | 2.470595208                          | -0.098725458                | 0.098725458  |             | -0.668996705                          | 0.342771885  |                  |              |
|               | -0.257873158                         | 0.459666654                 | 4            | 0           | 0.998207054                           |              |                  |              |

|           |                                       |                                       |              |             |              |                             |
|-----------|---------------------------------------|---------------------------------------|--------------|-------------|--------------|-----------------------------|
| SDR9C7    | ENSG00000170426.1                     | 0.950787651                           | 1            | 1           | 0.950787651  |                             |
|           | Brain_Anterior_cingulate_cortex_BA24  | 0.950787651                           |              |             |              |                             |
|           | Brain_Anterior_cingulate_cortex_BA24  | 1                                     | 1            | 1           | -0.061717692 |                             |
|           | -0.061717692                          | -0.061717692                          | NA           | 1           | 0            | 0.998207054                 |
| ZDHHC4    | ENSG00000136247.14                    | 0.950922675                           | 5            | 4           | 0.511496538  |                             |
|           | Brain_Frontal_Cortex_BA9              | 0.923671757                           |              |             |              | Brain_Cerebellum2.309795857 |
|           | 0.071521463                           | 0.543728347                           |              |             | -0.656509219 | 0.233172079                 |
|           | 0.386312717                           | 4                                     | 0            | 0.998207054 |              | -0.085555194                |
| LINC00896 | ENSG00000236499.2                     | 0.950935312                           | 1            | 1           | 0.950935312  |                             |
|           | Brain_Cortex                          | 0.950935312                           |              |             |              | Brain_Cortex                |
|           | -0.061532275                          | -0.061532275                          | NA           | 1           | 0            | 0.998207054                 |
| ZSCAN30   | ENSG00000186814.13                    | 0.950948544                           | 2            | 2           | 0.780541687  |                             |
|           | Brain_Cortex                          | 0.951747312                           |              |             |              | Brain_Cerebellum1.301428782 |
|           | 0.698571218                           | -0.278613193                          |              |             | 0.060512687  | -0.109050253                |
|           | 0                                     | 0.998207054                           |              |             |              | 0.23979821                  |
| PAXIP1    | ENSG00000157212.18                    | 0.951005096                           | 1            | 1           | 0.951005096  |                             |
|           | Brain_Cerebellum                      | 0.951005096                           |              |             |              | Brain_Cerebellum1           |
|           | 0.061444647                           | 0.061444647                           | NA           | 1           | 0            | 0.998207054                 |
| CILP2     | ENSG00000160161.9                     | 0.951201021                           | 3            | 1           | 0.830036709  |                             |
|           | Brain_Putamen_basal_ganglia           | 0.874250622                           |              |             |              | Brain_Caudate_basal_ganglia |
|           | 2.917469102                           | 0.023364134                           |              |             | 2.917469102  | -0.214654487                |
|           | -0.059993782                          | 0.22084992                            | 1            | 0           | 0.998207054  | 0.192934796                 |
| BCL9      | ENSG00000116128.10                    | 0.951273749                           | 1            | 1           | 0.951273749  | Brain_Cortex                |
|           | 0.951273749                           | Brain_Cortex                          | 1            | 1           | 1            | 0.061107308                 |
|           | 0.061107308                           | NA                                    | 1            | 0           | 0.998207054  | 0.061107308                 |
| MSR1      | ENSG00000038945.14                    | 0.951481064                           | 3            | 3           | 0.664274804  |                             |
|           | Brain_Nucleus_accumbens_basal_ganglia | 0.923987886                           |              |             |              | Brain_Cerebellar_Hemisphere |
|           | 1.3292088                             | 0.715023385                           |              |             | 0.715023385  | -0.355660667                |
|           | -0.005684503                          | 0.402413499                           | 3            | 0           | 0.998207054  | 0.43401878                  |
| PLXDC1    | ENSG00000161381.13                    | 0.951552514                           | 3            | 3           | 0.704795778  |                             |
|           | Brain_Nucleus_accumbens_basal_ganglia | 0.752048822                           |              |             |              | Brain_Amygdala              |
|           | 0.91884298                            | 0.91884298                            | -0.338816608 |             | 0.378854682  | 1.07428784                  |
|           | 0.407903932                           | 3                                     | 0            | 0.998207054 |              | -0.09196697                 |
| KIAA0368  | ENSG00000136813.14                    | 0.951764361                           | 2            | 2           | 0.867274585  |                             |
|           | Brain_Spinal_cord_cervical_c-1        | 0.878182765                           |              |             |              | Brain_Substantia_nigra      |
|           | 1.480559413                           | 0.519440587                           |              |             | 0.519440587  | -0.153273288                |
|           | 0.00692402                            | 0.226553205                           | 2            | 0           | 0.998207054  | 0.167121328                 |
| ALDH3B1   | ENSG00000006534.15                    | 0.951886511                           | 2            | 2           | 0.75610777   | Brain_Amygdala              |
|           | 0.937992655                           | Brain_Spinal_cord_cervical_c-1        |              |             | 1.388024151  | 0.611975849                 |
|           | 0.611975849                           | 0.077793075                           |              |             | 0.310595998  | 0.194194536                 |
|           | 2                                     | 0                                     | 0.998207054  |             |              | 0.164616526                 |
| ACSF2     | ENSG00000167107.12                    | 0.951896915                           | 2            | 2           | 0.762087291  |                             |
|           | Brain_Nucleus_accumbens_basal_ganglia | 0.875598532                           |              |             |              | Brain_Cerebellar_Hemisphere |
|           | 1.710752028                           | 0.289247972                           |              |             | 0.289247972  | -0.156551242                |
|           | 0.073094852                           | 0.324768621                           | 2            | 0           | 0.998207054  | 0.302740946                 |
| MPPE1     | ENSG00000154889.16                    | 0.951902201                           | 13           | 13          | 0.174636614  |                             |
|           | Brain_Anterior_cingulate_cortex_BA24  | 0.961894985                           |              |             |              | Brain_Amygdala              |
|           | 2.747954493                           | 0.350892494                           |              |             | 0.350892494  | -0.736524043                |
|           | 0.276051386                           | 0.596487507                           | 13           | 0           | 0.998207054  | 1.357455216                 |
| NPIPB4    | ENSG00000185864.16                    | 0.951979855                           | 5            | 4           | 0.554049122  |                             |
|           | Brain_Cerebellum                      | 0.893275787                           |              |             |              | Brain_Putamen_basal_ganglia |
|           | 0.064115051                           | 0.646487909                           |              |             | -0.591703546 | 2.215087403                 |
|           | 0.372094311                           | 4                                     | 0            | 0.998207054 |              | 0.319138013                 |
| COL5A3    | ENSG00000080573.6                     | 0.95199629                            | 7            | 1           | 0.286242293  | Brain_Amygdala              |
|           | 0.989761446                           | Brain_Nucleus_accumbens_basal_ganglia |              |             | 6.748548297  | 6.28E-05                    |
|           | 6.748548297                           | -1.066401258                          |              |             | 0.261795972  | -0.065167915                |
|           | 1                                     | 0                                     | 0.998207054  |             |              | 0.462746923                 |
| CAPN14    | ENSG00000214711.9                     | 0.952105031                           | 2            | 2           | 0.879520481  |                             |
|           | Brain_Cortex                          | 0.968382469                           |              |             |              | Brain_Cerebellum            |
|           | 0.193061062                           | -0.15157712                           |              |             | 1.806938938  | 0.193061062                 |
|           | 2                                     | 0                                     | 0.998207054  |             | -0.055970022 | 0.135208854                 |
| NDUFS1    | ENSG00000023228.13                    | 0.952289459                           | 13           | 3           | 0.596924697  |                             |

|               |                                       |                                       |              |             |                                       |                     |
|---------------|---------------------------------------|---------------------------------------|--------------|-------------|---------------------------------------|---------------------|
|               | Brain_Nucleus_accumbens_basal_ganglia | 0.990828828                           |              |             | Brain_Hippocampus                     |                     |
|               | 10.80287472                           | 0.000304435                           | 0.571842249  |             | -0.528828108                          | 0.520033483         |
|               | 0.153057325                           | 0.297509666                           | 3            | 0           | 0.998207054                           |                     |
| CPB2          | ENSG00000080618.13                    | 0.952356007                           | 1            | 1           | 0.952356007                           |                     |
|               | Brain_Spinal_cord_cervical_c-1        | 0.952356007                           |              |             | Brain_Spinal_cord_cervical_c-1        |                     |
|               | 1                                     | 1                                     | -0.05974842  | -0.05974842 | -0.05974842                           | NA 1 0              |
|               | 0.998207054                           |                                       |              |             |                                       |                     |
| HLA-DMA       | ENSG00000204257.14                    | 0.952510451                           | 8            | 3           | 0.621744462                           |                     |
|               | Brain_Cortex                          | 0.987566958                           |              |             | Brain_Nucleus_accumbens_basal_ganglia |                     |
|               | 6.896279777                           | 0.000462854                           | 0.325398001  |             | -0.478134268                          | 0.493379504         |
|               | -0.126766732                          | 0.322243538                           | 3            | 0           | 0.998207054                           |                     |
| PIRT          | ENSG00000233670.6                     | 0.952560932                           | 5            | 5           | 0.46356455                            |                     |
|               | Brain_Caudate_basal_ganglia           | 0.88728235                            |              |             | Brain_Hippocampus                     | 1.972465124         |
|               | 0.432548433                           | 0.432548433                           | -0.268684749 |             | 0.732989965                           | 0.183716914         |
|               | 0.399696583                           | 5                                     | 0            | 0.998207054 |                                       |                     |
| VSIR          | ENSG00000107738.19                    | 0.952791517                           | 1            | 1           | 0.952791517                           | Brain_Cerebellum    |
|               | 0.952791517                           | Brain_Cerebellum                      | 1            | 1           | -0.059201623                          | -0.059201623        |
|               | -0.059201623                          | NA                                    | 1            | 0           | 0.998207054                           |                     |
| DEF6          | ENSG00000023892.10                    | 0.952867099                           | 4            | 3           | 0.739430811                           |                     |
|               | Brain_Nucleus_accumbens_basal_ganglia | 0.942342683                           |              |             | Brain_Caudate_basal_ganglia           |                     |
|               | 3.050148924                           | 0.026966068                           | 0.249381525  |             | -0.165996897                          | 0.332607196         |
|               | 0.047320249                           | 0.218693871                           | 3            | 0           | 0.998207054                           |                     |
| IQCJ-SCHIP1   | ENSG00000283154.2                     | 0.953207118                           | 9            | 2           | 0.68630666                            |                     |
|               | Brain_Spinal_cord_cervical_c-1        | 0.991963313                           |              |             | Brain_Hypothalamus                    |                     |
|               | 8.265758039                           | 7.79E-05                              | 0.481748531  |             | -0.356057583                          | 0.403872255         |
|               | -0.117484449                          | 0.226244487                           | 2            | 0           | 0.998207054                           |                     |
| MRE11         | ENSG00000020922.12                    | 0.953332541                           | 13           | 1           | 0.589101598                           |                     |
|               | Brain_Anterior_cingulate_cortex_BA24  | 0.997882904                           |              |             |                                       |                     |
|               | Brain_Spinal_cord_cervical_c-1        | 12.0405681                            | 0.000536455  |             | 12.0405681                            |                     |
|               | -0.54013839                           | 0.510546307                           | -0.054820599 |             | 0.321318753                           | 1 0                 |
|               | 0.998207054                           |                                       |              |             |                                       |                     |
| MAPK8         | ENSG00000107643.15                    | 0.953530234                           | 4            | 4           | 0.479958897                           |                     |
|               | Brain_Caudate_basal_ganglia           | 0.987912429                           |              |             | Brain_Cerebellum                      | 1.594369892         |
|               | 0.448139881                           | 0.448139881                           | -0.166842406 |             | 0.706368674                           | 0.14023623          |
|               | 0.3871671                             | 4                                     | 0            | 0.998207054 |                                       |                     |
| CCDC175       | ENSG00000151838.11                    | 0.953536117                           | 1            | 1           | 0.953536117                           |                     |
|               | Brain_Cerebellum                      | 0.953536117                           |              |             | Brain_Cerebellum                      | 1 1 1 0.058266795   |
|               | 0.058266795                           | 0.058266795                           | NA           | 1           | 0                                     | 0.998207054         |
| SDCBP2        | ENSG00000125775.14                    | 0.953608322                           | 4            | 4           | 0.44639406                            |                     |
|               | Brain_Anterior_cingulate_cortex_BA24  | 0.668856239                           |              |             | Brain_Cortex                          |                     |
|               | 2.023354993                           | 0.425710839                           | 0.425710839  |             | 0.427718281                           | 0.761440407         |
|               | 0.547309472                           | 0.146799493                           | 4            | 0           | 0.998207054                           |                     |
| CTD-2287016.4 | ENSG00000272265.1                     | 0.953614049                           | 3            | 3           | 0.600847859                           |                     |
|               | Brain_Anterior_cingulate_cortex_BA24  | 0.982091098                           |              |             | Brain_Caudate_basal_ganglia           |                     |
|               | 1.587913892                           | 0.475182141                           | 0.475182141  |             | -0.523181637                          | 0.022447365         |
|               | -0.228551169                          | 0.275418883                           | 3            | 0           | 0.998207054                           |                     |
| C8orf46       | ENSG00000169085.11                    | 0.953665671                           | 2            | 2           | 0.758979685                           |                     |
|               | Brain_Cerebellar_Hemisphere           | 0.851304477                           |              |             | Brain_Cerebellum                      | 1.676479075         |
|               | 0.323520925                           | 0.323520925                           | -0.306820918 |             | -0.187454268                          | -0.247137593        |
|               | 0.084404968                           | 2                                     | 0            | 0.998207054 |                                       |                     |
| LINC01037     | ENSG00000231599.1                     | 0.953719966                           | 2            | 2           | 0.766926332                           |                     |
|               | Brain_Cerebellum                      | 0.936696355                           |              |             | Brain_Cerebellar_Hemisphere           | 1.5094455 0.4905545 |
|               | 0.4905545                             | -0.296397766                          | -0.079422773 |             | -0.187910269                          | 0.153424488 2       |
|               | 0                                     | 0.998207054                           |              |             |                                       |                     |
| TK1           | ENSG00000167900.11                    | 0.953739442                           | 5            | 1           | 0.788840751                           | Brain_Cerebellum    |
|               | 0.986634593                           | Brain_Nucleus_accumbens_basal_ganglia | 4.861249127  |             |                                       |                     |
|               | 0.005377745                           | 4.861249127                           | -0.137344191 |             | 0.267816264                           | 0.058311069         |
|               | 0.172247356                           | 1                                     | 0            | 0.998207054 |                                       |                     |
| LYNX1         | ENSG00000180155.19                    | 0.953766566                           | 8            | 8           | 0.230699016                           |                     |
|               | Brain_Cerebellar_Hemisphere           | 0.953998599                           |              |             | Brain_Frontal_Cortex_BA9              |                     |
|               | 2.116202103                           | 0.110401105                           | 0.110401105  |             | -1.198560163                          | 0.636550377         |
|               | -0.317531403                          | 0.594614662                           | 8            | 0           | 0.998207054                           |                     |

|               |                                      |              |                                       |              |              |                  |              |  |
|---------------|--------------------------------------|--------------|---------------------------------------|--------------|--------------|------------------|--------------|--|
| DENND2D       | ENSG00000162777.16                   | 0.953926791  | 1                                     | 1            | 0.953926791  |                  |              |  |
|               | Brain_Hypothalamus                   | 0.953926791  | Brain_Hypothalamus                    | 1            | 1            | 1                |              |  |
|               | -0.057776332                         | -0.057776332 | -0.057776332                          | NA           | 1            | 0                | 0.998207054  |  |
| TRIM41        | ENSG00000146063.19                   | 0.953948783  | 1                                     | 1            | 0.953948783  |                  |              |  |
|               | Brain_Cerebellum                     | 0.953948783  | Brain_Cerebellum                      | 1            | 1            | 1                | 0.057748723  |  |
|               | 0.057748723                          | 0.057748723  | NA                                    | 1            | 0            | 0.998207054      |              |  |
| GJA1          | ENSG00000152661.7                    | 0.95411827   | 2                                     | 2            | 0.770435624  |                  |              |  |
|               | Brain_Substantia_nigra               | 0.898855357  | Brain_Putamen_basal_ganglia           |              |              |                  |              |  |
|               | 1.116577505                          | 0.883422495  | 0.883422495                           | -0.127107448 | 0.291805128  |                  |              |  |
|               | 0.08234884                           | 0.296215923  | 2                                     | 0            | 0.998207054  |                  |              |  |
| NBPF12        | ENSG00000268043.7                    | 0.954124736  | 8                                     | 8            | 0.316690251  |                  |              |  |
|               | Brain_Putamen_basal_ganglia          | 0.951354711  | Brain_Cortex                          | 2.383716692  |              |                  |              |  |
|               | 0.277641861                          | 0.277641861  | -1.001282499                          | 0.571252556  | -0.225509472 |                  |              |  |
|               | 0.586199496                          | 8            | 0                                     | 0.998207054  |              |                  |              |  |
| FAM214A       | ENSG00000047346.12                   | 0.954126748  | 12                                    | 3            | 0.464853295  |                  |              |  |
|               | Brain_Caudate_basal_ganglia          | 0.977540793  | Brain_Cortex                          | 9.900737542  |              |                  |              |  |
|               | 1.08E-16                             | 0.485120059  | -0.730878621                          | 0.056300711  | -0.329089308 |                  |              |  |
|               | 0.249396668                          | 3            | 0                                     | 0.998207054  |              |                  |              |  |
| ARHGAP33      | ENSG00000004777.18                   | 0.954143553  | 1                                     | 1            | 0.954143553  |                  |              |  |
|               | Brain_Cerebellum                     | 0.954143553  | Brain_Cerebellum                      | 1            | 1            | 1                | -0.057504209 |  |
|               | -0.057504209                         | -0.057504209 | NA                                    | 1            | 0            | 0.998207054      |              |  |
| SPTSSB        | ENSG00000196542.8                    | 0.954303814  | 4                                     | 4            | 0.41179394   |                  |              |  |
|               | Brain_Hypothalamus                   | 0.972649204  | Brain_Putamen_basal_ganglia           | 1.803512347  |              |                  |              |  |
|               | 0.391496448                          | 0.391496448  | -0.820740774                          | -0.034285856 | -0.346514284 |                  |              |  |
|               | 0.343348069                          | 4            | 0                                     | 0.998207054  |              |                  |              |  |
| RP11-439C15.5 | ENSG00000270988.1                    | 0.954329399  | 3                                     | 3            | 0.612179784  |                  |              |  |
|               | Brain_Cerebellar_Hemisphere          | 0.884078013  | Brain_Hypothalamus                    | 1.124901095  |              |                  |              |  |
|               | 0.852646616                          | 0.852646616  | -0.147109182                          | 0.506964419  | 0.168552279  |                  |              |  |
|               | 0.327629767                          | 3            | 0                                     | 0.998207054  |              |                  |              |  |
| PI4KA         | ENSG00000241973.10                   | 0.954376905  | 3                                     | 3            | 0.608326886  | Brain_Cerebellum |              |  |
|               | Brain_Anterior_cingulate_cortex_BA24 | 1.868498965  |                                       |              |              |                  |              |  |
|               | 0.137627267                          | 0.137627267  | -0.512463175                          | 0.125869404  | -0.238948764 |                  |              |  |
|               | 0.328815149                          | 3            | 0                                     | 0.998207054  |              |                  |              |  |
| CHRD2         | ENSG00000054938.15                   | 0.954484369  | 2                                     | 2            | 0.77491499   |                  |              |  |
|               | Brain_Putamen_basal_ganglia          | 0.828523992  | Brain_Cortex                          | 1.418309954  |              |                  |              |  |
|               | 0.581690046                          | 0.581690046  | -0.285951863                          | 0.216594988  | -0.034678438 |                  |              |  |
|               | 0.355354287                          | 2            | 0                                     | 0.998207054  |              |                  |              |  |
| TMEM171       | ENSG00000157111.12                   | 0.954719109  | 6                                     | 6            | 0.289845562  |                  |              |  |
|               | Brain_Amygdala                       | 0.716233054  | Brain_Nucleus_accumbens_basal_ganglia |              |              |                  |              |  |
|               | 1.524087908                          | 0.568523748  | 0.568523748                           | -1.058460474 | 0.416877568  |                  |              |  |
|               | -0.264387213                         | 0.562445269  | 6                                     | 0            | 0.998207054  |                  |              |  |
| P3H1          | ENSG00000117385.15                   | 0.954736769  | 1                                     | 1            | 0.954736769  | Brain_Cerebellum |              |  |
|               | Brain_Cerebellum                     | 1            | 1                                     | 1            | -0.056759509 | -0.056759509     |              |  |
|               | -0.056759509                         | NA           | 1                                     | 0            | 0.998207054  |                  |              |  |
| MDM1          | ENSG00000111554.14                   | 0.95475147   | 6                                     | 6            | 0.546817209  | Brain_Cortex     |              |  |
|               | Brain_Hypothalamus                   | 2.997591077  | 0.22960116                            | 0.22960116   |              |                  |              |  |
|               | -0.602536298                         | 0.347115622  | -0.190550551                          | 0.401858926  | 6            | 0                |              |  |
|               | 0.998207054                          |              |                                       |              |              |                  |              |  |
| KCNB1         | ENSG00000158445.9                    | 0.954890396  | 2                                     | 2            | 0.773853819  | Brain_Cerebellum |              |  |
|               | Brain_Spinal_cord_cervical_c-1       | 1.04007925   | 0.95992075                            | 0.95992075   |              |                  |              |  |
|               | -0.110201884                         | 0.287337622  | 0.088567869                           | 0.28110288   | 2            | 0                |              |  |
|               | 0.998207054                          |              |                                       |              |              |                  |              |  |
| ABCG5         | ENSG00000138075.11                   | 0.954984378  | 1                                     | 1            | 0.954984378  |                  |              |  |
|               | Brain_Putamen_basal_ganglia          | 0.954984378  | Brain_Putamen_basal_ganglia           | 1            | 1            |                  |              |  |
|               | 1                                    | -0.056448679 | -0.056448679                          | -0.056448679 | NA           | 1                | 0            |  |
|               | 0.998207054                          |              |                                       |              |              |                  |              |  |
| CCDC68        | ENSG00000166510.13                   | 0.955044769  | 2                                     | 2            | 0.788735549  |                  |              |  |
|               | Brain_Hypothalamus                   | 0.897240517  | Brain_Nucleus_accumbens_basal_ganglia |              |              |                  |              |  |
|               | 1.04776984                           | 0.95223016   | 0.95223016                            | -0.267952932 | -0.129148031 | -0.198550482     |              |  |
|               | 0.098149887                          | 2            | 0                                     | 0.998207054  |              |                  |              |  |
| ITPRIP        | ENSG00000148841.15                   | 0.95513321   | 1                                     | 1            | 0.95513321   |                  |              |  |
|               | Brain_Anterior_cingulate_cortex_BA24 | 0.95513321   |                                       |              |              |                  |              |  |

|               |                                       |                             |              |              |             |                                        |
|---------------|---------------------------------------|-----------------------------|--------------|--------------|-------------|----------------------------------------|
|               | Brain_Anterior_cingulate_cortex_BA24  | 1                           | 1            | 1            | 0.056261851 |                                        |
|               | 0.056261851                           | 0.056261851                 | NA           | 1            | 0           | 0.998207054                            |
| EXOSC10       | ENSG00000171824.13                    | 0.955195391                 | 2            | 2            | 0.890295814 |                                        |
|               | Brain_Cerebellum                      | 0.925836176                 |              |              |             | Brain_Cerebellar_Hemisphere1.707058979 |
|               | 0.292941021                           | 0.292941021                 | -0.137929907 | 0.093084821  |             | -0.022422543                           |
|               | 0.163352081                           | 2                           | 0            | 0.998207054  |             |                                        |
| LSM14B        | ENSG00000149657.19                    | 0.955238349                 | 1            | 1            | 0.955238349 |                                        |
|               | Brain_Anterior_cingulate_cortex_BA24  | 0.955238349                 |              |              |             |                                        |
|               | Brain_Anterior_cingulate_cortex_BA24  | 1                           | 1            | 1            | 0.056129869 |                                        |
|               | 0.056129869                           | 0.056129869                 | NA           | 1            | 0           | 0.998207054                            |
| CCDC25        | ENSG00000147419.17                    | 0.955241942                 | 11           | 2            | 0.431545139 |                                        |
|               | Brain_Putamen_basal_ganglia           | 0.969871626                 |              |              |             | Brain_Nucleus_accumbens_basal_ganglia  |
|               | 9.629437477                           | 0.003363448                 | 0.428827474  | -0.06856715  |             | 0.786550341                            |
|               | 0.281427933                           | 0.247978697                 | 2            | 0            | 0.998207054 |                                        |
| TSPOAP1       | ENSG00000005379.15                    | 0.955244696                 | 4            | 4            | 0.458337883 |                                        |
|               | Brain_Caudate_basal_ganglia           | 0.926817808                 |              |              |             | Brain_Cerebellum1.854017413            |
|               | 0.139450123                           | 0.139450123                 | -0.121283966 | 0.741586537  |             | 0.263599132                            |
|               | 0.43656803                            | 4                           | 0            | 0.998207054  |             |                                        |
| NPTX1         | ENSG00000171246.5                     | 0.955251447                 | 4            | 4            | 0.54116663  | Brain_Cerebellum                       |
|               | 0.959161572                           | Brain_Caudate_basal_ganglia | 1.47635599   | 0.535009085  |             |                                        |
|               | 0.535009085                           | -0.051205747                | 0.611049773  | 0.31770343   | 0.280217961 | 4                                      |
|               | 0                                     | 0.998207054                 |              |              |             |                                        |
| BLACAT1       | ENSG00000281406.1                     | 0.955327983                 | 6            | 6            | 0.358975148 |                                        |
|               | Brain_Nucleus_accumbens_basal_ganglia | 0.824429377                 |              |              |             | Brain_Cerebellum                       |
|               | 1.783370814                           | 0.274882088                 | 0.274882088  | -0.917319679 |             | 0.54073906                             |
|               | 0.022963318                           | 0.53134266                  | 6            | 0            | 0.998207054 |                                        |
| LINC00565     | ENSG00000260910.1                     | 0.95535644                  | 2            | 2            | 0.770814103 |                                        |
|               | Brain_Hypothalamus                    | 0.931049621                 |              |              |             | Brain_Caudate_basal_ganglia1.020746531 |
|               | 0.979253469                           | 0.979253469                 | -0.291310179 | -0.086524324 |             | -0.188917251                           |
|               | 0.144805467                           | 2                           | 0            | 0.998207054  |             |                                        |
| MYOZ2         | ENSG00000172399.5                     | 0.955396293                 | 2            | 2            | 0.776064722 | Brain_Amygdala                         |
|               | 0.866108573                           | Brain_Caudate_basal_ganglia | 1.246155956  | 0.753844044  |             |                                        |
|               | 0.753844044                           | 0.168603442                 | 0.284451076  | 0.226527259  |             | 0.081916648                            |
|               | 2                                     | 0                           | 0.998207054  |              |             |                                        |
| RP11-338N10.3 | ENSG00000269978.1                     | 0.955400887                 | 7            | 5            | 0.525207471 |                                        |
|               | Brain_Cerebellar_Hemisphere           | 0.949923612                 |              |              |             | Brain_Caudate_basal_ganglia3.42666625  |
|               | 0.000237332                           | 0.22152509                  | -0.297240667 | 0.635338804  |             | 0.031589147                            |
|               | 0.304775576                           | 5                           | 0            | 0.998207054  |             |                                        |
| AMN           | ENSG00000166126.10                    | 0.955406142                 | 2            | 2            | 0.765528489 | Brain_Cerebellum                       |
|               | 0.797244895                           | Brain_Cerebellar_Hemisphere | 1.756335109  | 0.243664891  |             |                                        |
|               | 0.243664891                           | 0.256914347                 | 0.29822887   | 0.277571609  | 0.029213779 | 2                                      |
|               | 0                                     | 0.998207054                 |              |              |             |                                        |
| INO80C        | ENSG00000153391.15                    | 0.955446986                 | 2            | 1            | 0.791942986 |                                        |
|               | Brain_Cerebellar_Hemisphere           | 0.877779303                 |              |              |             | Brain_Cerebellum1.938459376            |
|               | 0.061540624                           | 1.938459376                 | -0.263788383 | 0.153784947  |             | -0.055001718                           |
|               | 0.295268933                           | 1                           | 0            | 0.998207054  |             |                                        |
| DNALI1        | ENSG00000163879.10                    | 0.955509475                 | 10           | 3            | 0.640193033 |                                        |
|               | Brain_Cortex                          | 0.994422156                 |              |              |             | Brain_Caudate_basal_ganglia7.02979044  |
|               | 0.004174603                           | 0.264449048                 | -0.143067079 | 0.467428924  |             | 0.124613005                            |
|               | 0.229848989                           | 3                           | 0            | 0.998207054  |             |                                        |
| TSEN2         | ENSG00000154743.17                    | 0.955754697                 | 2            | 2            | 0.84687504  |                                        |
|               | Brain_Cerebellar_Hemisphere           | 0.978874575                 |              |              |             | Brain_Cerebellum1.707330378            |
|               | 0.292669622                           | 0.292669622                 | -0.026479888 | 0.193107166  |             | 0.083313639                            |
|               | 0.155271495                           | 2                           | 0            | 0.998207054  |             |                                        |
| RDH11         | ENSG00000072042.12                    | 0.955762266                 | 1            | 1            | 0.955762266 | Brain_Cerebellum                       |
|               | 0.955762266                           | Brain_Cerebellum            | 1            | 1            | 1           | 0.055472213                            |
|               | 0.055472213                           | NA                          | 1            | 0            | 0.998207054 |                                        |
| GNAI3         | ENSG00000065135.10                    | 0.955774869                 | 2            | 2            | 0.796065315 | Brain_Cerebellum                       |
|               | 0.997247098                           | Brain_Cerebellar_Hemisphere | 1.501657327  | 0.498342673  |             |                                        |
|               | 0.498342673                           | -0.003450258                | 0.258442636  | 0.127496189  |             | 0.185186241                            |
|               | 2                                     | 0                           | 0.998207054  |              |             |                                        |
| MB21D2        | ENSG00000180611.6                     | 0.955804378                 | 1            | 1            | 0.955804378 |                                        |



|            |                    |                                      |                                      |                                      |              |                             |                    |             |
|------------|--------------------|--------------------------------------|--------------------------------------|--------------------------------------|--------------|-----------------------------|--------------------|-------------|
|            | Brain_Cerebellum   | 0.955804378                          | Brain_Cerebellum                     | 1                                    | 1            | 0.055419354                 |                    |             |
|            |                    | 0.055419354                          |                                      | 1                                    | 0            | 0.998207054                 |                    |             |
| WDR27      | ENSG00000184465.15 | 0.955823381                          |                                      | 8                                    | 3            | 0.446720513                 | Brain_Cortex       |             |
|            |                    | 0.989078185                          | Brain_Anterior_cingulate_cortex_BA24 | 6.87385875                           |              | 0.019210377                 |                    |             |
|            |                    | 0.230354185                          |                                      | -0.760893782                         | 0.046235158  | -0.303144575                | 0.289677182        |             |
|            |                    | 3                                    | 0                                    | 0.998207054                          |              |                             |                    |             |
| EMX1       | ENSG00000135638.13 | 0.95582561                           |                                      | 1                                    | 1            | 0.95582561                  | Brain_Cortex       | 0.95582561  |
|            |                    | Brain_Cortex                         | 1                                    | 1                                    | 1            | 0.055392701                 | 0.055392701        | 0.055392701 |
|            |                    | NA                                   | 1                                    | 0                                    | 0.998207054  |                             |                    |             |
| SLC51B     | ENSG00000186198.3  | 0.955853726                          |                                      | 2                                    | 2            | 0.765576238                 |                    |             |
|            |                    | Brain_Anterior_cingulate_cortex_BA24 | 0.939262145                          |                                      |              | Brain_Putamen_basal_ganglia |                    |             |
|            |                    | 1.371939985                          | 0.628060015                          | 0.628060015                          | -0.298166304 | -0.076197282                |                    |             |
|            |                    | -0.187181793                         | 0.156955801                          | 2                                    | 0            | 0.998207054                 |                    |             |
| NFKBID     | ENSG00000167604.13 | 0.955966014                          |                                      | 1                                    | 1            | 0.955966014                 |                    |             |
|            |                    | Brain_Putamen_basal_ganglia          | 0.955966014                          | Brain_Putamen_basal_ganglia          | 1            | 1                           |                    |             |
|            |                    | 1                                    | 0.055216462                          | 0.055216462                          | 0.055216462  | NA                          | 1                  | 0           |
|            |                    | 0.998207054                          |                                      |                                      |              |                             |                    |             |
| KCNV2      | ENSG00000168263.8  | 0.956036672                          |                                      | 1                                    | 1            | 0.956036672                 |                    |             |
|            |                    | Brain_Spinal_cord_cervical_c-1       | 0.956036672                          | Brain_Spinal_cord_cervical_c-1       |              |                             |                    |             |
|            |                    | 1                                    | 1                                    | 1                                    | 0.05512777   | 0.05512777                  | 0.05512777         | NA          |
|            |                    | 1                                    | 0                                    | 0.998207054                          |              |                             |                    |             |
| H1FX       | ENSG00000184897.5  | 0.956053309                          |                                      | 1                                    | 1            | 0.956053309                 |                    |             |
|            |                    | Brain_Hippocampus                    | 0.956053309                          | Brain_Hippocampus                    | 1            | 1                           | 1                  |             |
|            |                    | -0.055106887                         | -0.055106887                         | -0.055106887                         | NA           | 1                           | 0                  | 0.998207054 |
| AC002064.5 | ENSG00000225498.1  | 0.956091393                          |                                      | 3                                    | 3            | 0.722546892                 |                    |             |
|            |                    | Brain_Frontal_Cortex_BA9             | 0.983419154                          | Brain_Caudate_basal_ganglia          |              |                             |                    |             |
|            |                    | 2.405245272                          | 0.265882562                          | 0.265882562                          | -0.355056997 | 0.020782504                 |                    |             |
|            |                    | -0.194969723                         | 0.19400457                           | 3                                    | 0            | 0.998207054                 |                    |             |
| RASEF      | ENSG00000165105.9  | 0.956124217                          |                                      | 1                                    | 1            | 0.956124217                 |                    |             |
|            |                    | Brain_Caudate_basal_ganglia          | 0.956124217                          | Brain_Caudate_basal_ganglia          | 1            | 1                           |                    |             |
|            |                    | 1                                    | -0.055017883                         | -0.055017883                         | -0.055017883 | NA                          | 1                  | 0           |
|            |                    | 0.998207054                          |                                      |                                      |              |                             |                    |             |
| FGF3       | ENSG00000186895.2  | 0.956150244                          |                                      | 2                                    | 1            | 0.944835625                 | Brain_Cerebellum   |             |
|            |                    | 0.967843122                          | Brain_Cerebellar_Hemisphere          | 1.983180969                          | 0.016819031  |                             |                    |             |
|            |                    | 1.983180969                          | -0.069193465                         | -0.040313586                         | -0.054753525 | 0.020421158                 |                    |             |
|            |                    | 1                                    | 0                                    | 0.998207054                          |              |                             |                    |             |
| LINC00094  | ENSG00000235106.9  | 0.956151578                          |                                      | 1                                    | 1            | 0.956151578                 |                    |             |
|            |                    | Brain_Frontal_Cortex_BA9             | 0.956151578                          | Brain_Frontal_Cortex_BA9             | 1            | 1                           |                    |             |
|            |                    | 1                                    | -0.054983539                         | -0.054983539                         | -0.054983539 | NA                          | 1                  | 0           |
|            |                    | 0.998207054                          |                                      |                                      |              |                             |                    |             |
| LINC01605  | ENSG00000253161.5  | 0.956183608                          |                                      | 1                                    | 1            | 0.956183608                 |                    |             |
|            |                    | Brain_Anterior_cingulate_cortex_BA24 | 0.956183608                          |                                      |              |                             |                    |             |
|            |                    | Brain_Anterior_cingulate_cortex_BA24 | 1                                    | 1                                    | 1            | -0.054943335                |                    |             |
|            |                    | -0.054943335                         | -0.054943335                         | NA                                   | 1            | 0                           | 0.998207054        |             |
| GDF7       | ENSG00000143869.6  | 0.956250917                          |                                      | 4                                    | 4            | 0.505684036                 |                    |             |
|            |                    | Brain_Putamen_basal_ganglia          | 0.990073656                          | Brain_Cerebellum                     | 1.431810808  |                             |                    |             |
|            |                    | 0.645610202                          | 0.645610202                          | -0.346099528                         | 0.665573052  | 0.005489125                 |                    |             |
|            |                    | 0.468643681                          | 4                                    | 0                                    | 0.998207054  |                             |                    |             |
| NRN1L      | ENSG00000188038.7  | 0.956384842                          |                                      | 1                                    | 1            | 0.956384842                 |                    |             |
|            |                    | Brain_Cerebellar_Hemisphere          | 0.956384842                          | Brain_Cerebellar_Hemisphere          | 1            | 1                           |                    |             |
|            |                    | 1                                    | -0.054690746                         | -0.054690746                         | -0.054690746 | NA                          | 1                  | 0           |
|            |                    | 0.998207054                          |                                      |                                      |              |                             |                    |             |
| IBTK       | ENSG00000005700.14 | 0.95642831                           |                                      | 2                                    | 2            | 0.794866309                 | Brain_Hypothalamus |             |
|            |                    | 0.915791124                          | Brain_Frontal_Cortex_BA9             | 1.150834045                          | 0.849165955  |                             |                    |             |
|            |                    | 0.849165955                          | -0.105736873                         | 0.259996713                          | 0.07712992   | 0.258612698                 |                    | 2           |
|            |                    | 0                                    | 0.998207054                          |                                      |              |                             |                    |             |
| PLEKHA2    | ENSG00000169499.14 | 0.956488181                          |                                      | 1                                    | 1            | 0.956488181                 |                    |             |
|            |                    | Brain_Frontal_Cortex_BA9             | 0.956488181                          | Brain_Frontal_Cortex_BA9             | 1            | 1                           |                    |             |
|            |                    | 1                                    | -0.054561036                         | -0.054561036                         | -0.054561036 | NA                          | 1                  | 0           |
|            |                    | 0.998207054                          |                                      |                                      |              |                             |                    |             |
| SMAGP      | ENSG00000170545.16 | 0.956658362                          |                                      | 2                                    | 2            | 0.76912617                  |                    |             |
|            |                    | Brain_Frontal_Cortex_BA9             | 0.945051208                          | Brain_Anterior_cingulate_cortex_BA24 |              |                             |                    |             |
|            |                    | 1.066033972                          | 0.933966028                          | 0.933966028                          | -0.293518096 | 0.068922626                 |                    |             |

|          |                                       |                             |                                       |                                       |              |             |                  |             |
|----------|---------------------------------------|-----------------------------|---------------------------------------|---------------------------------------|--------------|-------------|------------------|-------------|
|          | -0.112297735                          | 0.256284292                 | 2                                     | 0                                     | 0.998207054  |             |                  |             |
| SERPINB8 | ENSG00000166401.14                    | 0.956679316                 | 3                                     | 3                                     | 0.674857774  |             |                  |             |
|          | Brain_Cerebellum                      | 0.935777529                 |                                       | Brain_Hippocampus                     | 1.348023681  |             |                  |             |
|          | 0.711857669                           | 0.711857669                 |                                       | -0.279513496                          | 0.419490394  |             | 0.019799618      |             |
|          | 0.360150476                           | 3                           | 0                                     | 0.998207054                           |              |             |                  |             |
| EPSTI1   | ENSG00000133106.14                    | 0.956697232                 | 2                                     | 2                                     | 0.766264128  |             |                  |             |
|          | Brain_Amygdala                        | 0.90151141                  | Brain_Cortex                          | 1.455362186                           | 0.544637814  |             |                  |             |
|          | 0.544637814                           | -0.297265095                | -0.123752289                          | -0.210508692                          | 0.122692082  |             |                  |             |
|          | 2                                     | 0                           | 0.998207054                           |                                       |              |             |                  |             |
| TFG      | ENSG00000114354.13                    | 0.95685922                  | 6                                     | 4                                     | 0.557436143  |             |                  |             |
|          | Brain_Putamen_basal_ganglia           | 0.856727091                 |                                       | Brain_Hippocampus                     | 4.416935002  |             |                  |             |
|          | 0.024262192                           | 0.147561598                 |                                       | -0.586653948                          | -0.180541993 |             | -0.406529999     |             |
|          | 0.155167702                           | 4                           | 0                                     | 0.998207054                           |              |             |                  |             |
| EML2     | ENSG00000125746.16                    | 0.956877316                 | 3                                     | 3                                     | 0.794120771  |             |                  |             |
|          | Brain_Cerebellar_Hemisphere           | 0.916966309                 |                                       | Brain_Cortex                          | 1.875455482  |             |                  |             |
|          | 0.292308564                           | 0.292308564                 |                                       | -0.135479465                          | 0.260963349  |             | 0.007076009      |             |
|          | 0.220426438                           | 3                           | 0                                     | 0.998207054                           |              |             |                  |             |
| PTBP3    | ENSG00000119314.15                    | 0.956923827                 | 3                                     | 3                                     | 0.636601202  |             |                  |             |
|          | Brain_Cerebellar_Hemisphere           | 0.989708499                 |                                       | Brain_Cerebellum                      | 1.558179011  |             |                  |             |
|          | 0.443819949                           | 0.443819949                 |                                       | -0.472456195                          | -0.012898841 |             | -0.168226564     |             |
|          | 0.263490179                           | 3                           | 0                                     | 0.998207054                           |              |             |                  |             |
| SYCE1    | ENSG00000171772.15                    | 0.956955012                 | 9                                     | 4                                     | 0.518125485  |             | Brain_Cortex     |             |
|          | 0.973848609                           | Brain_Caudate_basal_ganglia | 6.467668358                           | 0.012383311                           |              |             |                  |             |
|          | 0.220048357                           | -0.646237611                | 0.574768943                           | -0.059783667                          | 0.396693192  |             |                  |             |
|          | 4                                     | 0                           | 0.998207054                           |                                       |              |             |                  |             |
| HMG20B   | ENSG00000064961.18                    | 0.957035022                 | 1                                     | 1                                     | 0.957035022  |             |                  |             |
|          | Brain_Frontal_Cortex_BA9              | 0.957035022                 |                                       | Brain_Frontal_Cortex_BA9              | 1            | 1           |                  |             |
|          | 1                                     | 0.053874665                 | 0.053874665                           | 0.053874665                           | NA           | 1           | 0                |             |
|          | 0.998207054                           |                             |                                       |                                       |              |             |                  |             |
| CHKB     | ENSG00000100288.19                    | 0.957051546                 | 12                                    | 4                                     | 0.564042268  |             |                  |             |
|          | Brain_Frontal_Cortex_BA9              | 0.985496173                 |                                       | Brain_Nucleus_accumbens_basal_ganglia |              |             |                  |             |
|          | 8.75156611                            | 0.000117839                 | 0.415422483                           | -0.576847811                          | 0.156127812  |             |                  |             |
|          | -0.196638331                          | 0.202926358                 | 4                                     | 0                                     | 0.998207054  |             |                  |             |
| EMC9     | ENSG00000100908.13                    | 0.957158408                 | 3                                     | 3                                     | 0.847667118  |             |                  |             |
|          | Brain_Nucleus_accumbens_basal_ganglia | 0.928902179                 |                                       | Brain_Caudate_basal_ganglia           |              |             |                  |             |
|          | 2.473262534                           | 0.147129313                 | 0.147129313                           | -0.126611188                          | 0.19209586   |             |                  |             |
|          | 0.051570276                           | 0.162656139                 | 3                                     | 0                                     | 0.998207054  |             |                  |             |
| STX2     | ENSG00000111450.13                    | 0.957190165                 | 5                                     | 3                                     | 0.654896228  |             |                  |             |
|          | Brain_Hippocampus                     | 0.983848918                 |                                       | Brain_Caudate_basal_ganglia           | 3.878946259  |             |                  |             |
|          | 0.029004581                           | 0.254141542                 | -0.205347069                          | 0.446970683                           | 0.065398343  |             |                  |             |
|          | 0.25078733                            | 3                           | 0                                     | 0.998207054                           |              |             |                  |             |
| DNAJC3   | ENSG00000102580.14                    | 0.9571964                   | 2                                     | 2                                     | 0.770538664  |             | Brain_Amygdala   |             |
|          | 0.939358865                           | Brain_Caudate_basal_ganglia | 1.414382638                           | 0.585617362                           |              |             |                  |             |
|          | 0.585617362                           | -0.291670373                | -0.07607571                           | -0.183873041                          | 0.152448448  |             |                  |             |
|          | 2                                     | 0                           | 0.998207054                           |                                       |              |             |                  |             |
| CPT1B    | ENSG00000205560.12                    | 0.957379904                 | 13                                    | 2                                     | 0.594760948  |             |                  |             |
|          | Brain_Putamen_basal_ganglia           | 0.977456845                 |                                       | Brain_Hippocampus                     | 12.05756801  |             |                  |             |
|          | 0.001539784                           | 0.413604449                 | -0.531949535                          | 0.186892888                           | -0.181767985 |             |                  |             |
|          | 0.171139921                           | 2                           | 0                                     | 0.998207054                           |              |             |                  |             |
| SARAF    | ENSG00000133872.13                    | 0.957388068                 | 1                                     | 1                                     | 0.957388068  |             |                  |             |
|          | Brain_Putamen_basal_ganglia           | 0.957388068                 |                                       | Brain_Putamen_basal_ganglia           | 1            | 1           |                  |             |
|          | 1                                     | 0.05343155                  | 0.05343155                            | 0.05343155                            | NA           | 1           | 0                | 0.998207054 |
| COPS6    | ENSG00000168090.9                     | 0.957486968                 | 1                                     | 1                                     | 0.957486968  |             | Brain_Cerebellum |             |
|          | 0.957486968                           | Brain_Cerebellum            | 1                                     | 1                                     | 1            | 0.05330742  | 0.05330742       | 0.05330742  |
|          | NA                                    | 1                           | 0                                     | 0.998207054                           |              |             |                  |             |
| C9orf85  | ENSG00000155621.14                    | 0.957723332                 | 2                                     | 2                                     | 0.768815286  |             |                  |             |
|          | Brain_Cortex                          | 0.9946998                   | Brain_Nucleus_accumbens_basal_ganglia | 1.019501658                           |              |             |                  |             |
|          | 0.980498342                           | 0.980498342                 | -0.293924906                          | -0.006642865                          | -0.150283885 |             |                  |             |
|          | 0.203139079                           | 2                           | 0                                     | 0.998207054                           |              |             |                  |             |
| TRIM67   | ENSG00000119283.15                    | 0.957798377                 | 1                                     | 1                                     | 0.957798377  |             |                  |             |
|          | Brain_Cerebellum                      | 0.957798377                 |                                       | Brain_Cerebellum                      | 1            | 1           | 1                | 0.052916576 |
|          | 0.052916576                           | 0.052916576                 | NA                                    | 1                                     | 0            | 0.998207054 |                  |             |

FAM193B ENSG00000146067.15 0.958290389 5 5 0.435279193  
Brain\_Nucleus\_accumbens\_basal\_ganglia 0.944586604 Brain\_Cortex 1.81391206  
0.238148151 0.238148151 -0.780189753 0.593245447 -0.031854347  
0.53876613 5 0 0.998207054

Clorf123 ENSG00000162384.13 0.958484232 12 2 0.527422742  
Brain\_Hippocampus 0.966809355 Brain\_Putamen\_basal\_ganglia 10.88270497  
0.001109131 0.524025743 -0.16789448 0.631945115 0.178773892  
0.219182913 2 0 0.998207054

SMIM12 ENSG00000163866.8 0.958566019 7 4 0.646228822  
Brain\_Caudate\_basal\_ganglia 0.991994366 Brain\_Hippocampus 5.613082705  
0.058181058 0.216847972 -0.391601545 0.459007442 -0.071874337  
0.324575134 4 0 0.998207054

PRKRA ENSG00000180228.12 0.958715369 1 1 0.958715369  
Brain\_Putamen\_basal\_ganglia 0.958715369 Brain\_Putamen\_basal\_ganglia 1 1  
1 0.051765721 0.051765721 0.051765721 NA 1 0  
0.998207054

PPP6R2 ENSG00000100239.15 0.958721799 10 3 0.397240112  
Brain\_Cortex 0.954999763 Brain\_Amygdala 7.864467812 0.001442627  
0.350457761 -0.846560547 0.056429367 -0.456346862 0.277927554  
3 0 0.998207054

CDC7 ENSG00000097046.12 0.958881162 12 9 0.239438335 Brain\_Cerebellum  
0.961702835 Brain\_Amygdala 5.490791583 0.005361628 0.275027994  
-0.323390163 1.17639183 0.429865501 0.591883759 9 0  
0.998207054

SCN9A ENSG00000169432.14 0.958886461 5 5 0.490114635 Brain\_Cerebellum  
0.977176491 Brain\_Anterior\_cingulate\_cortex\_BA24 2.783091798  
0.118118339 0.118118339 -0.028608929 0.690126508 0.312533917  
0.302819586 5 0 0.998207054

CER1 ENSG00000147869.4 0.958934343 3 3 0.691975269  
Brain\_Putamen\_basal\_ganglia 0.968068322 Brain\_Cerebellum 1.906267973  
0.093751787 0.093751787 -0.206806888 0.396175899 0.0497793  
0.311362318 3 0 0.998207054

IQCK ENSG00000174628.16 0.959011874 1 1 0.959011874  
Brain\_Frontal\_Cortex\_BA9 0.959011874 Brain\_Frontal\_Cortex\_BA9 1 1  
1 0.051393613 0.051393613 0.051393613 NA 1 0  
0.998207054

RP11-307C12.13 ENSG00000270361.1 0.959019016 1 1 0.959019016  
Brain\_Hypothalamus 0.959019016 Brain\_Hypothalamus 1 1 1  
-0.051384651 -0.051384651 -0.051384651 NA 1 0 0.998207054

RPUSD3 ENSG00000156990.14 0.95925954 13 1 0.437103296  
Brain\_Anterior\_cingulate\_cortex\_BA24 0.978638387 Brain\_Frontal\_Cortex\_BA9  
11.94386212 0.000783136 11.94386212 -0.777094031 0.354919674  
-0.053208951 0.294174613 1 0 0.998207054

ALG3 ENSG00000214160.9 0.959435072 3 2 0.832651579  
Brain\_Substantia\_nigra 0.935485225 Brain\_Putamen\_basal\_ganglia  
2.506606632 0.05253957 0.440853798 -0.120573437 0.211302055  
0.057224735 0.1672045 2 0 0.998207054

RP11-507B12.2 ENSG00000259616.2 0.959492177 1 1 0.959492177  
Brain\_Hypothalamus 0.959492177 Brain\_Hypothalamus 1 1 1  
-0.050790857 -0.050790857 -0.050790857 NA 1 0 0.998207054

C12orf66 ENSG00000174206.12 0.959550436 1 1 0.959550436  
Brain\_Putamen\_basal\_ganglia 0.959550436 Brain\_Putamen\_basal\_ganglia 1 1  
1 0.050717746 0.050717746 0.050717746 NA 1 0  
0.998207054

ZNF367 ENSG00000165244.6 0.959624134 2 2 0.809055811  
Brain\_Anterior\_cingulate\_cortex\_BA24 0.887146523 Brain\_Cerebellum  
1.053368942 0.946631058 0.946631058 -0.241644276 -0.141915789  
-0.191780033 0.07051869 2 0 0.998207054

PPP1R12B ENSG00000077157.21 0.959652342 1 1 0.959652342  
Brain\_Nucleus\_accumbens\_basal\_ganglia 0.959652342  
Brain\_Nucleus\_accumbens\_basal\_ganglia 1 1 1 -0.050589862  
-0.050589862 -0.050589862 NA 1 0 0.998207054

|              |                                       |                          |                                       |              |                  |             |                  |   |
|--------------|---------------------------------------|--------------------------|---------------------------------------|--------------|------------------|-------------|------------------|---|
| DNAAF3       | ENSG00000167646.13                    | 0.95969062               | 2                                     | 2            | 0.816659045      |             |                  |   |
|              | Brain_Cerebellar_Hemisphere           | 0.860881822              |                                       |              | Brain_Cerebellum | 1.027549305 |                  |   |
|              | 0.972450695                           | 0.972450695              | 0.175251751                           |              | 0.231844176      |             | 0.203547963      |   |
|              | 0.040016887                           | 2                        | 0                                     | 0.998207054  |                  |             |                  |   |
| ERAP2        | ENSG00000164308.16                    | 0.959771055              | 13                                    | 1            | 0.773661045      |             | Brain_Cortex     |   |
|              | 0.982592981                           | Brain_Frontal_Cortex_BA9 | 12.94055807                           |              | 9.30E-06         |             |                  |   |
|              | 12.94055807                           | -0.209016326             | 0.28758942                            | 0.050227895  | 0.144193464      |             |                  | 1 |
|              | 0                                     | 0.998207054              |                                       |              |                  |             |                  |   |
| TMEM235      | ENSG00000204278.12                    | 0.959838167              | 8                                     | 5            | 0.502980294      |             |                  |   |
|              | Brain_Cortex                          | 0.998224224              | Brain_Hippocampus                     | 5.71970779   | 0.000742977      |             |                  |   |
|              | 0.26956424                            | -0.669807842             | 0.018901881                           | -0.276970178 | 0.24926037       | 5           |                  | 0 |
|              | 0.998207054                           |                          |                                       |              |                  |             |                  |   |
| CTD-2339F6.1 | ENSG00000254139.1                     | 0.959838817              | 9                                     | 4            | 0.543174068      |             |                  |   |
|              | Brain_Anterior_cingulate_cortex_BA24  | 0.988981746              | Brain_Substantia_nigra                |              |                  |             |                  |   |
|              | 6.83483697                            | 6.12E-06                 | 0.448474692                           | -0.242219003 | 0.608020214      |             |                  |   |
|              | 0.185841331                           | 0.254021528              | 4                                     | 0            | 0.998207054      |             |                  |   |
| CTB-113P19.5 | ENSG00000272112.1                     | 0.959969412              | 1                                     | 1            | 0.959969412      |             |                  |   |
|              | Brain_Caudate_basal_ganglia           | 0.959969412              | Brain_Caudate_basal_ganglia           | 1            |                  |             |                  | 1 |
|              | 1                                     | -0.050191969             | -0.050191969                          | -0.050191969 | NA               | 1           |                  | 0 |
|              | 0.998207054                           |                          |                                       |              |                  |             |                  |   |
| CHCHD7       | ENSG00000170791.17                    | 0.959976403              | 2                                     | 2            | 0.775848224      |             |                  |   |
|              | Brain_Frontal_Cortex_BA9              | 0.964361398              | Brain_Spinal_cord_cervical_c-1        |              |                  |             |                  |   |
|              | 1.069692467                           | 0.930307533              | 0.930307533                           | -0.28473363  | -0.044681227     |             |                  |   |
|              | -0.164707428                          | 0.169742682              | 2                                     | 0            | 0.998207054      |             |                  |   |
| IER3         | ENSG00000137331.11                    | 0.959982745              | 1                                     | 1            | 0.959982745      |             |                  |   |
|              | Brain_Substantia_nigra                | 0.959982745              | Brain_Substantia_nigra                | 1            |                  |             |                  | 1 |
|              | 1                                     | 0.050175237              | 0.050175237                           | 0.050175237  | NA               | 1           |                  | 0 |
|              | 0.998207054                           |                          |                                       |              |                  |             |                  |   |
| INO80D       | ENSG00000114933.15                    | 0.96002006               | 6                                     | 5            | 0.525690066      |             |                  |   |
|              | Brain_Spinal_cord_cervical_c-1        | 0.991737999              |                                       |              |                  |             |                  |   |
|              | Brain_Nucleus_accumbens_basal_ganglia | 3.925176154              | 0.013321859                           |              |                  |             |                  |   |
|              | 0.261832699                           | -0.52258119              | 0.634598868                           | 0.095897833  | 0.374640194      |             |                  |   |
|              | 5                                     | 0                        | 0.998207054                           |              |                  |             |                  |   |
| TRAPPC4      | ENSG00000196655.11                    | 0.96016057               | 13                                    | 1            | 0.677217123      |             | Brain_Cerebellum |   |
|              | 0.992583432                           | Brain_Hypothalamus       | 12.83577122                           | 1.20E-06     | 12.83577122      |             |                  |   |
|              | -0.186677786                          | 0.416263603              | 0.050154707                           | 0.186798841  | 1                |             | 0                |   |
|              | 0.998207054                           |                          |                                       |              |                  |             |                  |   |
| CHGA         | ENSG00000100604.12                    | 0.960162179              | 3                                     | 3            | 0.590067106      |             |                  |   |
|              | Brain_Caudate_basal_ganglia           | 0.839768024              | Brain_Cerebellum                      | 1.889786757  |                  |             |                  |   |
|              | 0.376327002                           | 0.376327002              | -0.538738787                          | -0.202190213 | -0.335849837     |             |                  |   |
|              | 0.178635832                           | 3                        | 0                                     | 0.998207054  |                  |             |                  |   |
| EIF2AK3      | ENSG00000172071.11                    | 0.960204545              | 2                                     | 2            | 0.921108792      |             |                  |   |
|              | Brain_Cortex                          | 0.942402547              | Brain_Frontal_Cortex_BA9              | 1.818938437  |                  |             |                  |   |
|              | 0.181061563                           | 0.181061563              | -0.099037127                          | 0.072250512  | -0.013393308     |             |                  |   |
|              | 0.121118651                           | 2                        | 0                                     | 0.998207054  |                  |             |                  |   |
| LINC02058    | ENSG00000248528.1                     | 0.960220272              | 1                                     | 1            | 0.960220272      |             |                  |   |
|              | Brain_Nucleus_accumbens_basal_ganglia | 0.960220272              |                                       |              |                  |             |                  |   |
|              | Brain_Nucleus_accumbens_basal_ganglia | 1                        | 1                                     | 1            | 0.049877168      |             |                  |   |
|              | 0.049877168                           | 0.049877168              | NA                                    | 1            | 0                | 0.998207054 |                  |   |
| DZIP3        | ENSG00000198919.12                    | 0.960305352              | 3                                     | 3            | 0.706312616      |             |                  |   |
|              | Brain_Frontal_Cortex_BA9              | 0.890210896              | Brain_Nucleus_accumbens_basal_ganglia |              |                  |             |                  |   |
|              | 1.477373364                           | 0.478231367              | 0.478231367                           | -0.168295203 | 0.37681295       |             |                  |   |
|              | 0.023493464                           | 0.306357436              | 3                                     | 0            | 0.998207054      |             |                  |   |
| RP11-57G10.8 | ENSG00000272892.1                     | 0.960315896              | 2                                     | 2            | 0.790207291      |             |                  |   |
|              | Brain_Amygdala                        | 0.997282567              | Brain_Spinal_cord_cervical_c-1        | 1.366191836  |                  |             |                  |   |
|              | 0.633808164                           | 0.633808164              | -0.003405803                          | 0.266041444  | 0.13131782       |             |                  |   |
|              | 0.190527975                           | 2                        | 0                                     | 0.998207054  |                  |             |                  |   |
| ELMOD2       | ENSG00000179387.9                     | 0.960378154              | 1                                     | 1            | 0.960378154      |             |                  |   |
|              | Brain_Frontal_Cortex_BA9              | 0.960378154              | Brain_Frontal_Cortex_BA9              | 1            |                  |             |                  | 1 |
|              | 1                                     | -0.049679047             | -0.049679047                          | -0.049679047 | NA               | 1           |                  | 0 |
|              | 0.998207054                           |                          |                                       |              |                  |             |                  |   |
| PGM5         | ENSG00000154330.12                    | 0.960398596              | 2                                     | 2            | 0.800169838      |             | Brain_Cerebellum |   |

|               |                                       |                                       |                  |             |                                       |                   |
|---------------|---------------------------------------|---------------------------------------|------------------|-------------|---------------------------------------|-------------------|
|               | 0.995530261                           | Brain_Cerebellar_Hemisphere           | 1.437498769      |             | 0.562501231                           |                   |
|               | 0.562501231                           | -0.253127307                          | 0.005602017      |             | -0.123762645                          | 0.182949259       |
|               | 2                                     | 0                                     | 0.998207054      |             |                                       |                   |
| GABARAP       | ENSG00000170296.9                     | 0.960450366                           | 1                | 1           | 0.960450366                           |                   |
|               | Brain_Nucleus_accumbens_basal_ganglia | 0.960450366                           |                  |             |                                       |                   |
|               | Brain_Nucleus_accumbens_basal_ganglia | 1                                     | 1                | 1           | 0.049588431                           |                   |
|               | 0.049588431                           | 0.049588431                           | NA               | 1           | 0                                     | 0.998207054       |
| NUP62         | ENSG00000213024.11                    | 0.960565242                           | 2                | 2           | 0.826079944                           |                   |
|               | Brain_Substantia_nigra                | 0.868614437                           |                  |             | Brain_Cerebellum                      | 1.062058643       |
|               | 0.937941357                           | 0.937941357                           | -0.219731919     |             | -0.165418699                          | -0.192575309      |
|               | 0.038405246                           | 2                                     | 0                | 0.998207054 |                                       |                   |
| PDE6D         | ENSG00000156973.13                    | 0.960627957                           | 5                | 4           | 0.512425709                           |                   |
|               | Brain_Spinal_cord_cervical_c-1        | 0.955064479                           |                  |             |                                       |                   |
|               | Brain_Anterior_cingulate_cortex_BA24  | 2.612928534                           |                  |             | 0.064420612                           |                   |
|               | 0.171721171                           | -0.655065305                          | 0.264105982      |             | -0.1778767                            | 0.345796756       |
|               | 0                                     | 0.998207054                           |                  |             |                                       | 4                 |
| CNNM1         | ENSG00000119946.10                    | 0.960632197                           | 2                | 2           | 0.817900042                           | Brain_Cortex      |
|               | 0.90181873                            | Brain_Nucleus_accumbens_basal_ganglia | 1.171379273      |             | 0.828620727                           |                   |
|               | 0.828620727                           | -0.123364168                          | 0.230246742      |             | 0.053441287                           | 0.250040673       |
|               | 2                                     | 0                                     | 0.998207054      |             |                                       |                   |
| BIK           | ENSG00000100290.2                     | 0.960635325                           | 3                | 3           | 0.679012963                           | Brain_Amygdala    |
|               | 0.884763447                           | Brain_Cerebellum                      | 1.538539925      |             | 0.463935827                           | 0.463935827       |
|               | -0.413810405                          | 0.348948084                           | 0.026690363      |             | 0.394887568                           | 3                 |
|               | 0.998207054                           |                                       |                  |             |                                       | 0                 |
| FBXO42        | ENSG00000037637.10                    | 0.960866579                           | 9                | 3           | 0.549571045                           |                   |
|               | Brain_Cerebellum                      | 0.934132478                           |                  |             | Brain_Cerebellar_Hemisphere           | 7.285799263       |
|               | 0.000927608                           | 0.55183149                            | -0.598403029     |             | 0.119010687                           | -0.20995655       |
|               | 0.236639942                           | 3                                     | 0                | 0.998207054 |                                       |                   |
| KRTAP5-5      | ENSG00000185940.10                    | 0.960926434                           | 2                | 2           | 0.798475557                           |                   |
|               | Brain_Cerebellar_Hemisphere           | 0.871079799                           |                  |             | Brain_Cerebellum                      | 1.869108736       |
|               | 0.130891264                           | 0.130891264                           | -0.255320514     |             | -0.162287067                          | -0.20880379       |
|               | 0.065784581                           | 2                                     | 0                | 0.998207054 |                                       |                   |
| RP11-666A8.13 | ENSG00000284526.1                     | 0.960996343                           | 3                | 2           | 0.776282802                           |                   |
|               | Brain_Anterior_cingulate_cortex_BA24  | 0.981902356                           |                  |             | Brain_Cerebellum                      |                   |
|               | 1.941153252                           | 0.061875955                           | 0.996970793      |             | -0.284166481                          | 0.054097315       |
|               | -0.084251048                          | 0.177337184                           | 2                | 0           | 0.998207054                           |                   |
| CYP2C18       | ENSG00000108242.12                    | 0.960997614                           | 1                | 1           | 0.960997614                           |                   |
|               | Brain_Cerebellum                      | 0.960997614                           | Brain_Cerebellum | 1           | 1                                     | 1                 |
|               | -0.048901725                          | -0.048901725                          | NA               | 1           | 0                                     | 0.998207054       |
| S100B         | ENSG00000160307.9                     | 0.96102661                            | 8                | 5           | 0.493730506                           | Brain_Hippocampus |
|               | 0.922079834                           | Brain_Putamen_basal_ganglia           | 4.063788418      |             | 0.02533453                            |                   |
|               | 0.364578641                           | -0.684387501                          | 0.642196357      |             | -0.217543427                          | 0.433544851       |
|               | 5                                     | 0                                     | 0.998207054      |             |                                       |                   |
| TMEM52B       | ENSG00000165685.8                     | 0.961048055                           | 1                | 1           | 0.961048055                           |                   |
|               | Brain_Nucleus_accumbens_basal_ganglia | 0.961048055                           |                  |             |                                       |                   |
|               | Brain_Nucleus_accumbens_basal_ganglia | 1                                     | 1                | 1           | -0.048838432                          |                   |
|               | -0.048838432                          | -0.048838432                          | NA               | 1           | 0                                     | 0.998207054       |
| ZNF544        | ENSG00000198131.13                    | 0.961064895                           | 7                | 3           | 0.729584256                           |                   |
|               | Brain_Caudate_basal_ganglia           | 0.938986019                           |                  |             | Brain_Cortex                          | 6.07351922        |
|               | 0.007326157                           | 0.247006929                           | -0.345678617     |             | 0.145785825                           | -0.164818552      |
|               | 0.161583032                           | 3                                     | 0                | 0.998207054 |                                       |                   |
| NEPRO         | ENSG00000163608.14                    | 0.961609063                           | 6                | 4           | 0.543340914                           |                   |
|               | Brain_Caudate_basal_ganglia           | 0.936149861                           |                  |             | Brain_Nucleus_accumbens_basal_ganglia |                   |
|               | 4.26845697                            | 0.055207946                           | 0.153595764      |             | -0.607768666                          | 0.080109885       |
|               | -0.330055621                          | 0.268003845                           | 4                | 0           | 0.998207054                           |                   |
| DRGX          | ENSG00000165606.8                     | 0.961611957                           | 1                | 1           | 0.961611957                           | Brain_Cortex      |
|               | 0.961611957                           | Brain_Cortex                          | 1                | 1           | 1                                     | 0.048130854       |
|               | 0.048130854                           | NA                                    | 1                | 0           | 0.998207054                           |                   |
| SLC7A9        | ENSG0000021488.12                     | 0.961817407                           | 13               | 2           | 0.76611609                            |                   |
|               | Brain_Substantia_nigra                | 0.984429918                           |                  |             | Brain_Anterior_cingulate_cortex_BA24  |                   |
|               | 12.18415484                           | 0.001262085                           | 0.425559771      |             | -0.29745902                           | 0.266046145       |
|               | -0.018411459                          | 0.167818263                           | 2                | 0           | 0.998207054                           |                   |

|              |                                       |                             |              |              |                             |              |                  |
|--------------|---------------------------------------|-----------------------------|--------------|--------------|-----------------------------|--------------|------------------|
| RP11-12G12.7 | ENSG00000274605.1                     | 0.962344104                 | 1            | 1            | 0.962344104                 |              |                  |
|              | Brain_Putamen_basal_ganglia           | 0.962344104                 |              |              | Brain_Putamen_basal_ganglia | 1            | 1                |
|              | 1                                     | -0.0472122                  | -0.0472122   | NA           | 1                           | 0            | 0.998207054      |
| TCTN2        | ENSG00000168778.11                    | 0.962445122                 | 11           | 2            | 0.491733441                 |              |                  |
|              | Brain_Nucleus_accumbens_basal_ganglia | 0.925595439                 |              |              | Brain_Caudate_basal_ganglia |              |                  |
|              | 8.986156343                           | 0.000585081                 | 1.287086795  |              | -0.216047966                | 0.687554385  |                  |
|              | 0.199652847                           | 0.295097961                 | 2            | 0            | 0.998207054                 |              |                  |
| PROKR1       | ENSG00000169618.6                     | 0.962535602                 | 1            | 1            | 0.962535602                 |              |                  |
|              | Brain_Amygdala                        | 0.962535602                 |              |              | Brain_Amygdala              | 1            | 1                |
|              | 0.046971926                           | 0.046971926                 | NA           | 1            | 0                           | 0.998207054  | 0.046971926      |
| ZCCHC10      | ENSG00000155329.11                    | 0.962614697                 | 1            | 1            | 0.962614697                 |              |                  |
|              | Brain_Substantia_nigra                | 0.962614697                 |              |              | Brain_Substantia_nigra      | 1            | 1                |
|              | 1                                     | -0.046872687                | -0.046872687 | -0.046872687 | NA                          | 1            | 0                |
|              | 0.998207054                           |                             |              |              |                             |              |                  |
| GIGYF2       | ENSG00000204120.14                    | 0.962646465                 | 1            | 1            | 0.962646465                 |              |                  |
|              | Brain_Frontal_Cortex_BA9              | 0.962646465                 |              |              | Brain_Frontal_Cortex_BA9    | 1            | 1                |
|              | 1                                     | 0.046832827                 | 0.046832827  | 0.046832827  | NA                          | 1            | 0                |
|              | 0.998207054                           |                             |              |              |                             |              |                  |
| TSPAN11      | ENSG00000110900.14                    | 0.962667569                 | 12           | 11           | 0.197616881                 |              |                  |
|              | Brain_Caudate_basal_ganglia           | 0.954880506                 |              |              | Brain_Hippocampus           | 3.350404113  |                  |
|              | 0.098068135                           | 0.312884459                 | -1.288370908 |              | 0.680330995                 | 0.160908983  |                  |
|              | 0.593432481                           | 11                          | 0            | 0.998207054  |                             |              |                  |
| EHD1         | ENSG00000110047.17                    | 0.962680665                 | 3            | 3            | 0.614137479                 |              | Brain_Cerebellum |
|              | 0.945571327                           | Brain_Cortex                | 1.080699315  |              | 0.928781721                 | 0.928781721  |                  |
|              | -0.156781724                          | 0.504176321                 | 0.093041793  |              | 0.358792859                 | 3            | 0                |
|              | 0.998207054                           |                             |              |              |                             |              |                  |
| ZNF786       | ENSG00000197362.14                    | 0.96272884                  | 13           | 2            | 0.689032864                 |              |                  |
|              | Brain_Hippocampus                     | 0.911086098                 |              |              | Brain_Putamen_basal_ganglia | 11.71907795  |                  |
|              | 0.001860052                           | 0.667038371                 | -0.1116687   | 0.400167889  | 0.211642487                 |              |                  |
|              | 0.121974964                           | 2                           | 0            | 0.998207054  |                             |              |                  |
| COMTD1       | ENSG00000165644.10                    | 0.962895333                 | 2            | 2            | 0.792745001                 |              |                  |
|              | Brain_Cerebellum                      | 0.995797526                 |              |              | Brain_Substantia_nigra      | 1.313331727  |                  |
|              | 0.686668273                           | 0.686668273                 | -0.262747762 |              | -0.005267044                | -0.134007403 |                  |
|              | 0.182066362                           | 2                           | 0            | 0.998207054  |                             |              |                  |
| WNT4         | ENSG00000162552.14                    | 0.962992366                 | 1            | 1            | 0.962992366                 |              |                  |
|              | Brain_Caudate_basal_ganglia           | 0.962992366                 |              |              | Brain_Caudate_basal_ganglia | 1            | 1                |
|              | 1                                     | -0.046398834                | -0.046398834 | -0.046398834 | NA                          | 1            | 0                |
|              | 0.998207054                           |                             |              |              |                             |              |                  |
| ABCC5        | ENSG00000114770.16                    | 0.963058533                 | 10           | 4            | 0.46914462                  |              |                  |
|              | Brain_Caudate_basal_ganglia           | 0.991777313                 |              |              | Brain_Hypothalamus          | 7.791837636  |                  |
|              | 0.005830233                           | 0.260344065                 | -0.718836339 |              | 0.723871514                 | -0.01046607  |                  |
|              | 0.451979311                           | 4                           | 0            | 0.998207054  |                             |              |                  |
| SHISA7       | ENSG00000187902.11                    | 0.963082889                 | 1            | 1            | 0.963082889                 |              |                  |
|              | Brain_Cerebellum                      | 0.963082889                 |              |              | Brain_Cerebellum            | 1            | 1                |
|              | 0.046285258                           | 0.046285258                 | NA           | 1            | 0                           | 0.998207054  | 0.046285258      |
| TCHP         | ENSG00000139437.17                    | 0.963252349                 | 3            | 3            | 0.658455959                 |              | Brain_Cerebellum |
|              | 0.89805805                            | Brain_Cerebellar_Hemisphere | 1.748255974  |              | 0.568589321                 |              |                  |
|              | 0.568589321                           | -0.396683335                | 0.442045944  |              | 0.057825834                 | 0.423759501  |                  |
|              | 3                                     | 0                           | 0.998207054  |              |                             |              |                  |
| ACBD5        | ENSG00000107897.18                    | 0.963431153                 | 2            | 2            | 0.791901274                 |              | Brain_Cerebellum |
|              | 0.828589821                           | Brain_Cerebellar_Hemisphere | 1.610587102  |              | 0.389412898                 |              |                  |
|              | 0.389412898                           | 0.216510526                 | 0.263842513  |              | 0.24017652                  | 0.033468769  | 2                |
|              | 0                                     | 0.998207054                 |              |              |                             |              |                  |
| THBD         | ENSG00000178726.6                     | 0.963463532                 | 1            | 1            | 0.963463532                 |              |                  |
|              | Brain_Nucleus_accumbens_basal_ganglia | 0.963463532                 |              |              |                             |              |                  |
|              | Brain_Nucleus_accumbens_basal_ganglia | 1                           | 1            | 1            | -0.045807687                |              |                  |
|              | -0.045807687                          | -0.045807687                | NA           | 1            | 0                           | 0.998207054  |                  |
| OBSCN        | ENSG00000154358.20                    | 0.963489947                 | 2            | 2            | 0.788434074                 |              |                  |
|              | Brain_Nucleus_accumbens_basal_ganglia | 0.851098428                 |              |              | Brain_Cortex                |              |                  |
|              | 1.806877004                           | 0.193122996                 | 0.193122996  |              | -0.268344607                | -0.187717096 |                  |
|              | -0.228030851                          | 0.05701226                  | 2            | 0            | 0.998207054                 |              |                  |
| CTD-3224I3.3 | ENSG00000255260.1                     | 0.963497199                 | 2            | 2            | 0.812602876                 |              |                  |

|               |                                       |                          |                  |                                       |              |             |             |                          |              |
|---------------|---------------------------------------|--------------------------|------------------|---------------------------------------|--------------|-------------|-------------|--------------------------|--------------|
|               | Brain_Cerebellar_Hemisphere           | 0.832121292              |                  | Brain_Cerebellum                      | 1.364766786  |             |             |                          |              |
|               | 0.635233214                           | 0.635233214              | -0.237069497     |                                       | -0.211981724 |             |             |                          | -0.224525611 |
|               | 0.017739734                           | 2                        | 0                | 0.998207054                           |              |             |             |                          |              |
| RP11-701H24.3 | ENSG00000257647.1                     |                          | 0.963622886      | 1                                     | 1            | 0.963622886 |             |                          |              |
|               | Brain_Amygdala                        | 0.963622886              | Brain_Amygdala   | 1                                     | 1            | 1           | 0.045607757 |                          |              |
|               | 0.045607757                           | 0.045607757              | NA               | 1                                     | 0            | 0.998207054 |             |                          |              |
| ACBD6         | ENSG00000230124.6                     |                          | 0.963671166      | 5                                     | 5            | 0.407188398 |             |                          |              |
|               | Brain_Anterior_cingulate_cortex_BA24  | 0.930490353              |                  | Brain_Hippocampus                     |              |             |             |                          |              |
|               | 1.670916832                           | 0.444591554              | 0.444591554      |                                       | -0.38036608  |             | 0.828851578 |                          |              |
|               | 0.200879471                           | 0.441089158              | 5                | 0                                     | 0.998207054  |             |             |                          |              |
| SIRPG         | ENSG00000089012.14                    |                          | 0.963699878      | 3                                     | 3            | 0.769713289 |             |                          |              |
|               | Brain_Frontal_Cortex_BA9              | 0.887973431              |                  | Brain_Cerebellar_Hemisphere           |              |             |             |                          |              |
|               | 2.445244699                           | 0.161629973              | 0.161629973      |                                       | -0.292749948 |             | 0.154706213 |                          |              |
|               | -0.092970912                          | 0.227541039              | 3                | 0                                     | 0.998207054  |             |             |                          |              |
| RP11-394I13.2 | ENSG00000271151.1                     |                          | 0.963825147      | 2                                     | 2            | 0.836912078 |             |                          |              |
|               | Brain_Hypothalamus                    | 0.90665064               | Brain_Cerebellum | 1.260396602                           |              | 0.739603398 |             |                          |              |
|               | 0.739603398                           | -0.205844886             | 0.117264268      |                                       | -0.044290309 |             | 0.228472673 |                          |              |
|               | 2                                     | 0                        | 0.998207054      |                                       |              |             |             |                          |              |
| HLA-DRB5      | ENSG00000198502.5                     |                          | 0.963939123      | 13                                    | 1            | 0.6362638   |             |                          |              |
|               | Brain_Spinal_cord_cervical_c-1        | 0.998196608              |                  | Brain_Cerebellar_Hemisphere           |              |             |             |                          |              |
|               | 12.53800937                           | 0.000627002              | 12.53800937      |                                       | -0.472929049 |             | 0.342343207 |                          |              |
|               | -0.047461064                          | 0.257412865              | 1                | 0                                     | 0.998207054  |             |             |                          |              |
| CEPT1         | ENSG00000134255.13                    |                          | 0.963969038      | 2                                     | 2            | 0.786612897 |             |                          |              |
|               | Brain_Caudate_basal_ganglia           | 0.973011503              |                  | Brain_Anterior_cingulate_cortex_BA24  |              |             |             |                          |              |
|               | 1.086823536                           | 0.913176464              | 0.913176464      |                                       | -0.270711545 |             | 0.033831518 |                          |              |
|               | -0.118440014                          | 0.215344465              | 2                | 0                                     | 0.998207054  |             |             |                          |              |
| CTSA          | ENSG00000064601.16                    |                          | 0.964152289      | 3                                     | 2            | 0.844630272 |             | Brain_Cortex             |              |
|               | 0.931177059                           | Brain_Cerebellum         | 2.479286708      |                                       | 0.014433272  |             | 0.50628002  |                          |              |
|               | -0.195974313                          | 0.157396332              | -0.041647329     |                                       | 0.180879487  |             | 2           | 0                        |              |
|               | 0.998207054                           |                          |                  |                                       |              |             |             |                          |              |
| SGCZ          | ENSG00000185053.13                    |                          | 0.964179619      | 1                                     | 1            | 0.964179619 |             |                          |              |
|               | Brain_Substantia_nigra                | 0.964179619              |                  | Brain_Substantia_nigra                | 1            | 1           |             |                          |              |
|               | 1                                     | 0.044909281              | 0.044909281      | 0.044909281                           | NA           | 1           | 0           |                          |              |
|               | 0.998207054                           |                          |                  |                                       |              |             |             |                          |              |
| P2RX1         | ENSG00000108405.3                     |                          | 0.964261027      | 2                                     | 2            | 0.796491155 |             |                          |              |
|               | Brain_Nucleus_accumbens_basal_ganglia | 0.976749407              |                  |                                       |              |             |             |                          |              |
|               | Brain_Spinal_cord_cervical_c-1        | 1.188725492              |                  | 0.811274508                           |              | 0.811274508 |             |                          |              |
|               | -0.029144422                          | 0.25789084               | 0.114373209      | 0.20296458                            | 2            | 0           | 0.998207054 |                          |              |
| MIR4435-2HG   | ENSG00000172965.14                    |                          | 0.964263017      | 1                                     | 1            | 0.964263017 |             |                          |              |
|               | Brain_Hippocampus                     | 0.964263017              |                  | Brain_Hippocampus                     | 1            | 1           | 1           |                          |              |
|               | -0.044804652                          | -0.044804652             | -0.044804652     | NA                                    | 1            | 0           | 0.998207054 |                          |              |
| SUSD2         | ENSG00000099994.10                    |                          | 0.964267686      | 8                                     | 4            | 0.557916118 |             |                          |              |
|               | Brain_Frontal_Cortex_BA9              | 0.940882825              |                  | Brain_Nucleus_accumbens_basal_ganglia |              |             |             |                          |              |
|               | 6.639535193                           | 0.006783537              | 0.246094797      |                                       | -0.58593958  |             | 0.565072927 |                          |              |
|               | -0.156664554                          | 0.385741952              | 4                | 0                                     | 0.998207054  |             |             |                          |              |
| PLA2G1B       | ENSG00000170890.13                    |                          | 0.964346983      | 1                                     | 1            | 0.964346983 |             |                          |              |
|               | Brain_Hippocampus                     | 0.964346983              |                  | Brain_Hippocampus                     | 1            | 1           | 1           |                          |              |
|               | 0.044699311                           | 0.044699311              | 0.044699311      | NA                                    | 1            | 0           | 0.998207054 |                          |              |
| RAB1B         | ENSG00000174903.15                    |                          | 0.96437175       | 1                                     | 1            | 0.96437175  |             | Brain_Frontal_Cortex_BA9 |              |
|               | 0.96437175                            | Brain_Frontal_Cortex_BA9 | 1                | 1                                     | 1            | 0.044668239 |             |                          |              |
|               | 0.044668239                           | 0.044668239              | NA               | 1                                     | 0            | 0.998207054 |             |                          |              |
| MAST4         | ENSG00000069020.18                    |                          | 0.964386423      | 1                                     | 1            | 0.964386423 |             |                          |              |
|               | Brain_Spinal_cord_cervical_c-1        | 0.964386423              |                  | Brain_Spinal_cord_cervical_c-1        |              |             |             |                          |              |
|               | 1                                     | 1                        | 1                | 0.044649831                           | 0.044649831  | 0.044649831 | NA          | 1                        | 0            |
|               | 0.998207054                           |                          |                  |                                       |              |             |             |                          |              |
| CTC-304I17.5  | ENSG00000263571.2                     |                          | 0.964432512      | 3                                     | 2            | 0.801837651 |             |                          |              |
|               | Brain_Spinal_cord_cervical_c-1        | 0.866751411              |                  | Brain_Cerebellum                      | 2.351472563  |             |             |                          |              |
|               | 0.00453618                            | 0.643991257              | 0.167786286      | 0.250969551                           |              | 0.222081088 |             |                          |              |
|               | 0.0470529                             | 2                        | 0                | 0.998207054                           |              |             |             |                          |              |
| BTBD18        | ENSG00000233436.7                     |                          | 0.964453658      | 1                                     | 1            | 0.964453658 |             |                          |              |
|               | Brain_Cerebellar_Hemisphere           | 0.964453658              |                  | Brain_Cerebellar_Hemisphere           | 1            | 1           |             |                          |              |
|               | 1                                     | 0.044565481              | 0.044565481      | 0.044565481                           | NA           | 1           | 0           |                          |              |

0.998207054

ATRN1 ENSG00000107518.16 0.964519636 3 3 0.628449055  
Brain\_Hypothalamus 0.957391372 Brain\_Cerebellum 1.18522866 0.823024955  
0.823024955 -0.483910969 0.053427403 -0.210023136 0.268821194  
3 0 0.998207054

RHPN1 ENSG00000158106.13 0.96458547 1 1 0.96458547 Brain\_Cerebellar\_Hemisphere  
0.96458547 Brain\_Cerebellar\_Hemisphere 1 1 -0.044400115  
-0.044400115 -0.044400115 NA 1 0 0.998207054

SLC4A10 ENSG00000144290.16 0.96463277 1 1 0.96463277 Brain\_Cerebellum  
0.96463277 Brain\_Cerebellum 1 1 0.044340775 0.044340775  
0.044340775 NA 1 0 0.998207054

CLASP2 ENSG00000163539.16 0.964672124 1 1 0.964672124  
Brain\_Cortex 0.964672124 Brain\_Cortex 1 1 1 0.044291404  
0.044291404 0.044291404 NA 1 0 0.998207054

ST3GAL5-AS1 ENSG00000232504.4 0.964707325 4 3 0.638838118  
Brain\_Hippocampus 0.942040072 Brain\_Spinal\_cord\_cervical\_c-1  
2.965092987 0.028082546 0.16961958 -0.469323923 0.072706002  
-0.302560442 0.251991568 3 0 0.998207054

ERLEC1 ENSG00000068912.13 0.964719886 2 2 0.819816881  
Brain\_Frontal\_Cortex\_BA9 0.879582303 Brain\_Hypothalamus 1.04564869  
0.95435131 0.95435131 0.151498742 0.227780508 0.189639625  
0.053939354 2 0 0.998207054

HLA-DPB1 ENSG00000223865.10 0.964726949 8 8 0.234106889  
Brain\_Cortex 0.968249158 Brain\_Cerebellar\_Hemisphere 3.081570921  
0.119934386 0.119934386 -0.039804288 1.189846095 0.747479874  
0.408947176 8 0 0.998207054

NGRN ENSG00000182768.8 0.964958959 2 2 0.816522283 Brain\_Cortex  
0.864610223 Brain\_Putamen\_basal\_ganglia 1.173257323 0.826742677  
0.826742677 0.170508534 0.232020253 0.201264394 0.043495353  
2 0 0.998207054

RGMB ENSG00000174136.11 0.964979705 8 6 0.414537377  
Brain\_Putamen\_basal\_ganglia 0.680166473 Brain\_Hippocampus 4.744244074  
0.033772987 0.166633524 -0.815934889 0.427936871 -0.494944951  
0.392147502 6 0 0.998207054

KIAA1551 ENSG00000174718.11 0.965038862 6 6 0.385945163  
Brain\_Cerebellum 0.892297973 Brain\_Cerebellar\_Hemisphere 3.568389631  
0.159551343 0.159551343 0.13539703 0.866994244 0.429768605  
0.24750896 6 0 0.998207054

DNM1L ENSG00000087470.17 0.965144867 2 2 0.804197952 Brain\_Cerebellum  
0.973287666 Brain\_Nucleus\_accumbens\_basal\_ganglia 1.245832397  
0.754167603 0.754167603 0.033485202 0.247917872 0.140701537  
0.151626795 2 0 0.998207054

SCAP ENSG00000114650.18 0.965178242 7 3 0.423480364 Brain\_Cortex  
0.980258956 Brain\_Substantia\_nigra 5.716208873 0.031729184  
0.376090813 -0.800397784 0.359523322 -0.228543148 0.363048766  
3 0 0.998207054

NEUROD1 ENSG00000162992.3 0.965273716 1 1 0.965273716  
Brain\_Frontal\_Cortex\_BA9 0.965273716 Brain\_Frontal\_Cortex\_BA9 1 1  
1 -0.043536692 -0.043536692 -0.043536692 NA 1 0  
0.998207054

RP11-438L19.1 ENSG00000272800.1 0.965311994 4 3 0.831111366  
Brain\_Cortex 0.980190161 Brain\_Cerebellum 3.440853365 0.096248706  
0.135704606 -0.173770857 0.213276419 0.028555956 0.166280768  
3 0 0.998207054

ARF4 ENSG00000168374.10 0.965556366 8 4 0.47273013  
Brain\_Substantia\_nigra 0.985808838 Brain\_Cortex 5.518484245  
0.006780986 0.258839409 -0.090011252 0.718044044 0.203358321  
0.245675209 4 0 0.998207054

RP11-298J23.10 ENSG00000124593.15 0.965598302 1 1 0.965598302  
Brain\_Cerebellar\_Hemisphere 0.965598302 Brain\_Cerebellar\_Hemisphere 1 1  
1 0.043129502 0.043129502 0.043129502 NA 1 0  
0.998207054



|               |                                       |                                       |              |              |                                       |                  |
|---------------|---------------------------------------|---------------------------------------|--------------|--------------|---------------------------------------|------------------|
| HMBS          | ENSG00000256269.7                     | 0.965747974                           | 11           | 3            | 0.592114186                           |                  |
|               | Brain_Putamen_basal_ganglia           | 0.963859548                           |              |              | Brain_Caudate_basal_ganglia           |                  |
|               | 9.493404349                           | 0.000431655                           | 0.34760199   | -0.399199961 | 0.535774821                           |                  |
|               | 0.148834544                           | 0.255060702                           | 3            | 0            | 0.998207054                           |                  |
| AC008592.8    | ENSG00000272021.1                     | 0.965771561                           | 2            | 2            | 0.820773805                           |                  |
|               | Brain_Hippocampus                     | 0.980743253                           |              |              | Brain_Putamen_basal_ganglia           | 1.43234355       |
|               | 0.56765645                            | 0.56765645                            | -0.226549833 | 0.024137097  | -0.101206368                          |                  |
|               | 0.177262428                           | 2                                     | 0            | 0.998207054  |                                       |                  |
| SLCO1C1       | ENSG00000139155.8                     | 0.965862514                           | 6            | 6            | 0.4555133                             |                  |
|               | Brain_Hippocampus                     | 0.835459578                           |              |              | Brain_Spinal_cord_cervical_c-1        | 2.12686141       |
|               | 0.19800984                            | 0.19800984                            | 0.207704662  | 0.746255148  | 0.497709524                           |                  |
|               | 0.220128417                           | 6                                     | 0            | 0.998207054  |                                       |                  |
| AC015849.16   | ENSG00000270977.1                     | 0.96587884                            | 1            | 1            | 0.96587884                            |                  |
|               | Brain_Nucleus_accumbens_basal_ganglia | 0.96587884                            |              |              |                                       |                  |
|               | Brain_Nucleus_accumbens_basal_ganglia | 1                                     | 1            | 1            | -0.042777576                          |                  |
|               | -0.042777576                          | -0.042777576                          | NA           | 1            | 0                                     | 0.998207054      |
| WFDC3         | ENSG00000124116.18                    | 0.965907968                           | 13           | 1            | 0.794958301                           | Brain_Amygdala   |
|               | 0.9986189                             | Brain_Nucleus_accumbens_basal_ganglia | 12.59477448  |              | 0.000626343                           |                  |
|               | 12.59477448                           | -0.256043818                          | 0.259877457  | -0.042877367 | 0.147236374                           |                  |
|               | 1                                     | 0                                     | 0.998207054  |              |                                       |                  |
| TTL13P        | ENSG00000213471.9                     | 0.965916156                           | 9            | 4            | 0.565590708                           |                  |
|               | Brain_Nucleus_accumbens_basal_ganglia | 0.881888316                           |              |              | Brain_Hypothalamus                    |                  |
|               | 6.590641438                           | 0.008782841                           | 0.47391085   | -0.574557344 | 0.188142982                           |                  |
|               | -0.258971604                          | 0.270975545                           | 4            | 0            | 0.998207054                           |                  |
| TTYH2         | ENSG00000141540.10                    | 0.966019462                           | 2            | 2            | 0.838172552                           |                  |
|               | Brain_Cerebellar_Hemisphere           | 0.88908836                            |              |              | Brain_Hippocampus                     | 1.122066672      |
|               | 0.877933328                           | 0.877933328                           | 0.139457852  | 0.204231557  | 0.171844704                           |                  |
|               | 0.045801926                           | 2                                     | 0            | 0.998207054  |                                       |                  |
| KLHL2         | ENSG00000109466.13                    | 0.966046019                           | 3            | 3            | 0.623580179                           | Brain_Cerebellum |
|               | 0.94747072                            | Brain_Putamen_basal_ganglia           | 1.137057234  |              | 0.862086569                           |                  |
|               | 0.862086569                           | -0.06588332                           | 0.490782655  | 0.173930196  | 0.286217577                           |                  |
|               | 3                                     | 0                                     | 0.998207054  |              |                                       |                  |
| RP11-1I2.1    | ENSG00000283458.1                     | 0.966080627                           | 5            | 5            | 0.509809831                           |                  |
|               | Brain_Hippocampus                     | 0.79463981                            |              |              | Brain_Nucleus_accumbens_basal_ganglia |                  |
|               | 1.865324791                           | 0.34156519                            | 0.34156519   | -0.260290357 | 0.659133833                           |                  |
|               | 0.331662632                           | 0.357742582                           | 5            | 0            | 0.998207054                           |                  |
| OPTC          | ENSG00000188770.9                     | 0.96608532                            | 2            | 2            | 0.799707139                           |                  |
|               | Brain_Cerebellar_Hemisphere           | 0.905763054                           |              |              | Brain_Cerebellum                      | 1.204067483      |
|               | 0.795932517                           | 0.795932517                           | -0.253726139 | -0.11838444  | -0.18605529                           |                  |
|               | 0.095701033                           | 2                                     | 0            | 0.998207054  |                                       |                  |
| BCO2          | ENSG00000197580.11                    | 0.966135752                           | 11           | 3            | 0.609397309                           |                  |
|               | Brain_Cerebellar_Hemisphere           | 0.953806992                           |              |              | Brain_Hippocampus                     | 9.073332357      |
|               | 0.000504424                           | 0.375710798                           | -0.510933948 | 0.334330411  | -0.176117905                          |                  |
|               | 0.287259583                           | 3                                     | 0            | 0.998207054  |                                       |                  |
| SNTG2         | ENSG00000172554.11                    | 0.966276091                           | 5            | 5            | 0.382441913                           |                  |
|               | Brain_Cerebellar_Hemisphere           | 0.876453369                           |              |              | Brain_Substantia_nigra                | 2.05644679       |
|               | 0.124909031                           | 0.124909031                           | -0.214184952 | 0.873405833  | 0.302993114                           |                  |
|               | 0.493905171                           | 5                                     | 0            | 0.998207054  |                                       |                  |
| MRPL43        | ENSG00000055950.16                    | 0.96631087                            | 11           | 4            | 0.597045827                           |                  |
|               | Brain_Hippocampus                     | 0.992419219                           |              |              | Brain_Nucleus_accumbens_basal_ganglia |                  |
|               | 8.750318252                           | 0.000553268                           | 0.34743395   | -0.488746694 | 0.528653518                           |                  |
|               | 0.068827433                           | 0.288108271                           | 4            | 0            | 0.998207054                           |                  |
| RP11-98D18.17 | ENSG00000269489.1                     | 0.966385436                           | 4            | 4            | 0.539604871                           |                  |
|               | Brain_Nucleus_accumbens_basal_ganglia | 0.85428895                            |              |              | Brain_Cerebellum                      | 1.998384593      |
|               | 0.274482494                           | 0.274482494                           | -0.613410612 | 0.246823692  | -0.217149947                          |                  |
|               | 0.357612765                           | 4                                     | 0            | 0.998207054  |                                       |                  |
| RP11-70D24.2  | ENSG00000278058.1                     | 0.966620914                           | 5            | 5            | 0.491480202                           |                  |
|               | Brain_Putamen_basal_ganglia           | 0.920194881                           |              |              | Brain_Cortex                          | 1.816332902      |
|               | 0.339158773                           | 0.339158773                           | 0.100188242  | 0.687956457  | 0.354412277                           |                  |
|               | 0.291256232                           | 5                                     | 0            | 0.998207054  |                                       |                  |
| RP11-247A12.7 | ENSG00000268707.1                     | 0.966742363                           | 12           | 8            | 0.385670367                           |                  |
|               | Brain_Substantia_nigra                | 0.924430749                           |              |              | Brain_Caudate_basal_ganglia           |                  |

|            |                                |                |              |                                       |                |
|------------|--------------------------------|----------------|--------------|---------------------------------------|----------------|
|            | 6.109710578                    | 0.006802836    | 0.300297012  | -0.867495882                          | 0.324734661    |
|            | -0.135086685                   | 0.405991891    | 8 0          | 0.998207054                           |                |
| GRN        | ENSG00000030582.17             | 0.96674705     | 4 4          | 0.485034115                           |                |
|            | Brain_Caudate_basal_ganglia    | 0.916380407    |              | Brain_Frontal_Cortex_BA9              |                |
|            | 1.709838551                    | 0.341735302    | 0.341735302  | -0.698228805                          | 0.104994205    |
|            | -0.338195876                   | 0.396161365    | 4 0          | 0.998207054                           |                |
| LINC00486  | ENSG00000230876.6              | 0.966761547    | 5 5          | 0.503455151                           |                |
|            | Brain_Putamen_basal_ganglia    | 0.709502111    |              | Brain_Hippocampus                     | 3.089526989    |
|            | 0.169897194                    | 0.169897194    | -0.669063219 | -0.372524854                          | -0.52241696    |
|            | 0.126724092                    | 5 0            | 0.998207054  |                                       |                |
| SELENOF    | ENSG00000183291.15             | 0.966853014    | 8 1          | 0.661970908                           |                |
|            | Brain_Cerebellar_Hemisphere    | 0.980254403    |              | Brain_Hippocampus                     | 7.612184015    |
|            | 0.004125153                    | 7.612184015    | -0.360068049 | 0.437193659                           | -0.038264543   |
|            | 0.269858626                    | 1 0            | 0.998207054  |                                       |                |
| PHYHIPL    | ENSG00000165443.11             | 0.966934405    | 1 1          | 0.966934405                           |                |
|            | Brain_Cerebellar_Hemisphere    | 0.966934405    |              | Brain_Cerebellar_Hemisphere1          | 1              |
|            | 1 0.041453447                  | 0.041453447    | 0.041453447  | NA 1 0                                |                |
|            | 0.998207054                    |                |              |                                       |                |
| C19orf48   | ENSG00000167747.13             | 0.967029561    | 3 3          | 0.667368891                           |                |
|            | Brain_Caudate_basal_ganglia    | 0.916872411    |              | Brain_Spinal_cord_cervical_c-1        |                |
|            | 1.638008896                    | 0.363753259    | 0.363753259  | -0.429761844                          | -0.104374181   |
|            | -0.23376972                    | 0.172614054    | 3 0          | 0.998207054                           |                |
| FHOD3      | ENSG00000134775.15             | 0.967073497    | 4 4          | 0.628642227                           |                |
|            | Brain_Putamen_basal_ganglia    | 0.963477403    |              | Brain_Cerebellar_Hemisphere           |                |
|            | 1.902436961                    | 0.128531915    | 0.128531915  | -0.483638809                          | -0.045790284   |
|            | -0.303283229                   | 0.205847867    | 4 0          | 0.998207054                           |                |
| ST6GAL2    | ENSG00000144057.15             | 0.967112953    | 2 2          | 0.810843629                           |                |
|            | Brain_Cerebellum               | 0.979007021    |              | Brain_Anterior_cingulate_cortex_BA24  |                |
|            | 1.282682491                    | 0.717317509    | 0.717317509  | -0.239337836                          | 0.026313834    |
|            | -0.106512001                   | 0.187844097    | 2 0          | 0.998207054                           |                |
| CEP85      | ENSG00000130695.14             | 0.967338869    | 11 5         | 0.48108824                            |                |
|            | Brain_Cerebellar_Hemisphere    | 0.976639575    |              | Brain_Caudate_basal_ganglia           |                |
|            | 7.106030238                    | 0.006220041    | 0.246335324  | -0.704553347                          | 0.336041859    |
|            | -0.191274661                   | 0.295683081    | 5 0          | 0.998207054                           |                |
| FAM153A    | ENSG00000170074.19             | 0.967393481    | 13 11        | 0.334183858                           |                |
|            | Brain_Hippocampus              | 0.996355186    |              | Brain_Nucleus_accumbens_basal_ganglia |                |
|            | 5.301308377                    | 0.071853708    | 0.216940297  | -0.965720901                          | 0.759170414    |
|            | -0.147932214                   | 0.477441485    | 11 0         | 0.998207054                           |                |
| PPIP5K1    | ENSG00000168781.21             | 0.967462475    | 3 3          | 0.686540574                           |                |
|            | Brain_Amygdala                 | 0.860958806    |              | Brain_Putamen_basal_ganglia           | 1.172765344    |
|            | 0.860759995                    | 0.860759995    | -0.403554196 | 0.175153774                           | -0.169983173   |
|            | 0.305058921                    | 3 0            | 0.998207054  |                                       |                |
| PPARA      | ENSG00000186951.16             | 0.967502727    | 1 1          | 0.967502727                           | Brain_Amygdala |
|            | 0.967502727                    | Brain_Amygdala | 1 1 1        | 0.040740559                           | 0.040740559    |
|            | 0.040740559                    | NA 1 0         | 0.998207054  |                                       |                |
| MFSD6      | ENSG00000151690.14             | 0.967611651    | 12 6         | 0.244142698                           |                |
|            | Brain_Substantia_nigra         | 0.655624915    |              | Brain_Cortex                          | 8.426505653    |
|            | 0.014242612                    | 0.320321578    | 0.445961696  | 1.164694447                           | 0.714842899    |
|            | 0.198057346                    | 6 0            | 0.998207054  |                                       |                |
| AC099754.1 | ENSG00000225386.1              | 0.967720882    | 1 1          | 0.967720882                           |                |
|            | Brain_Substantia_nigra         | 0.967720882    |              | Brain_Substantia_nigra                | 1 1            |
|            | 1 0.040466917                  | 0.040466917    | 0.040466917  | NA 1 0                                |                |
|            | 0.998207054                    |                |              |                                       |                |
| PUS3       | ENSG00000110060.8              | 0.967789004    | 2 2          | 0.811671818                           |                |
|            | Brain_Putamen_basal_ganglia    | 0.974039119    |              | Brain_Cerebellar_Hemisphere           |                |
|            | 1.243331852                    | 0.756668148    | 0.756668148  | -0.032542882                          | 0.238269832    |
|            | 0.102863475                    | 0.191493506    | 2 0          | 0.998207054                           |                |
| TMEM200C   | ENSG00000206432.4              | 0.967931998    | 1 1          | 0.967931998                           |                |
|            | Brain_Cortex                   | 0.967931998    |              | Brain_Cortex                          | 1 1 1          |
|            | -0.040202106                   | -0.040202106   | NA 1 0       | 0.998207054                           | -0.040202106   |
| LINC02081  | ENSG00000267123.5              | 0.967946491    | 1 1          | 0.967946491                           |                |
|            | Brain_Spinal_cord_cervical_c-1 | 0.967946491    |              | Brain_Spinal_cord_cervical_c-1        |                |

|           |                                       |                             |                                |              |              |                     |             |             |   |
|-----------|---------------------------------------|-----------------------------|--------------------------------|--------------|--------------|---------------------|-------------|-------------|---|
|           | 1                                     | 1                           | 1                              | 0.040183927  | 0.040183927  | 0.040183927         | NA          | 1           | 0 |
|           | 0.998207054                           |                             |                                |              |              |                     |             |             |   |
| YWHAG     | ENSG00000170027.6                     | 0.967964419                 | 2                              | 2            | 0.806067727  | Brain_Cerebellum    |             |             |   |
|           | 0.946125291                           | Brain_Caudate_basal_ganglia |                                |              | 1.008376548  | 0.991623452         |             |             |   |
|           | 0.991623452                           | -0.067573324                | 0.245502042                    |              | 0.088964359  | 0.221377715         |             |             |   |
|           | 2                                     | 0                           | 0.998207054                    |              |              |                     |             |             |   |
| LINC02125 | ENSG00000250514.1                     | 0.96796669                  | 2                              | 2            | 0.857574954  |                     |             |             |   |
|           | Brain_Cerebellar_Hemisphere           | 0.929701046                 | Brain_Cerebellum               |              |              | 1.423927549         |             |             |   |
|           | 0.576072451                           | -0.576072451                | -0.088220975                   |              | 0.179461998  | 0.045620511         |             |             |   |
|           | 0.189280446                           | 2                           | 0                              | 0.998207054  |              |                     |             |             |   |
| BCL11A    | ENSG00000119866.20                    | 0.968071447                 | 1                              | 1            | 0.968071447  |                     |             |             |   |
|           | Brain_Hippocampus                     | 0.968071447                 | Brain_Hippocampus              |              | 1            | 1                   | 1           |             |   |
|           | 0.040027193                           | 0.040027193                 | 0.040027193                    |              | NA           | 1                   | 0           | 0.998207054 |   |
| CSTF1     | ENSG00000101138.11                    | 0.968325766                 | 1                              | 1            | 0.968325766  |                     |             |             |   |
|           | Brain_Caudate_basal_ganglia           | 0.968325766                 | Brain_Caudate_basal_ganglia    |              |              | 1                   | 1           |             |   |
|           | 1                                     | -0.039708198                | -0.039708198                   | -0.039708198 | NA           | 1                   | 0           |             |   |
|           | 0.998207054                           |                             |                                |              |              |                     |             |             |   |
| GRIN2A    | ENSG00000183454.16                    | 0.968529409                 | 7                              | 7            | 0.639399707  |                     |             |             |   |
|           | Brain_Spinal_cord_cervical_c-1        | 0.986309983                 | Brain_Hippocampus              |              |              |                     |             |             |   |
|           | 3.263278098                           | 0.167556197                 | 0.167556197                    |              | -0.366166308 | 0.468538274         |             |             |   |
|           | 0.004871808                           | 0.353313801                 | 7                              | 0            | 0.998207054  |                     |             |             |   |
| RBM46     | ENSG00000151962.7                     | 0.968575164                 | 1                              | 1            | 0.968575164  |                     |             |             |   |
|           | Brain_Spinal_cord_cervical_c-1        | 0.968575164                 | Brain_Spinal_cord_cervical_c-1 |              |              |                     |             |             |   |
|           | 1                                     | 1                           | 1                              | -0.039395379 | -0.039395379 | -0.039395379        | NA          | 1           | 0 |
|           | 0.998207054                           |                             |                                |              |              |                     |             |             |   |
| Clorf146  | ENSG00000203910.8                     | 0.968702279                 | 4                              | 3            | 0.660560458  |                     |             |             |   |
|           | Brain_Anterior_cingulate_cortex_BA24  | 0.919728594                 | Brain_Cortex                   |              |              |                     |             |             |   |
|           | 2.274407902                           | 0.059979578                 | 0.670873868                    |              | -0.135407163 | 0.439139502         |             |             |   |
|           | 0.110150352                           | 0.276451873                 | 3                              | 0            | 0.998207054  |                     |             |             |   |
| SLC45A2   | ENSG00000164175.14                    | 0.96870518                  | 1                              | 1            | 0.96870518   | Brain_Hippocampus   |             |             |   |
|           | 0.96870518                            | Brain_Hippocampus           |                                | 1            | 1            | 1                   | 0.039232303 |             |   |
|           | 0.039232303                           | NA                          | 1                              | 0            | 0.998207054  |                     |             |             |   |
| POU1F1    | ENSG00000064835.10                    | 0.968789831                 | 4                              | 4            | 0.636373555  |                     |             |             |   |
|           | Brain_Cerebellum                      | 0.996633273                 | Brain_Putamen_basal_ganglia    |              |              | 3.084644779         |             |             |   |
|           | 0.123525376                           | 0.123525376                 | -0.472775219                   |              | -0.00421958  | -0.295491186        |             |             |   |
|           | 0.205834213                           | 4                           | 0                              | 0.998207054  |              |                     |             |             |   |
| ZNF135    | ENSG00000176293.19                    | 0.968853988                 | 5                              | 4            | 0.503247278  |                     |             |             |   |
|           | Brain_Cerebellum                      | 0.699883643                 | Brain_Frontal_Cortex_BA9       |              |              | 3.384565529         |             |             |   |
|           | 0.000303353                           | 0.139212161                 | 0.385477541                    |              | 0.669389139  | 0.49234719          |             |             |   |
|           | 0.113442791                           | 4                           | 0                              | 0.998207054  |              |                     |             |             |   |
| CARS2     | ENSG00000134905.16                    | 0.968896756                 | 6                              | 2            | 0.743415578  |                     |             |             |   |
|           | Brain_Hippocampus                     | 0.965380128                 | Brain_Hypothalamus             |              |              | 5.56584428 1.78E-05 |             |             |   |
|           | 0.295445889                           | -0.167656339                | 0.327333606                    |              | 0.000657229  | 0.211682463         |             |             |   |
|           | 2                                     | 0                           | 0.998207054                    |              |              |                     |             |             |   |
| TNFRSF11A | ENSG00000141655.16                    | 0.9689403                   | 2                              | 2            | 0.850038774  |                     |             |             |   |
|           | Brain_Substantia_nigra                | 0.889003234                 | Brain_Caudate_basal_ganglia    |              |              |                     |             |             |   |
|           | 1.129301607                           | 0.870698393                 | 0.870698393                    |              | -0.189068954 | 0.139565585         |             |             |   |
|           | -0.024751685                          | 0.232379711                 | 2                              | 0            | 0.998207054  |                     |             |             |   |
| DPM1      | ENSG00000000419.12                    | 0.968944825                 | 1                              | 1            | 0.968944825  |                     |             |             |   |
|           | Brain_Nucleus_accumbens_basal_ganglia | 0.968944825                 |                                |              |              |                     |             |             |   |
|           | Brain_Nucleus_accumbens_basal_ganglia | 1                           | 1                              | 1            | -0.038931722 |                     |             |             |   |
|           | -0.038931722                          | -0.038931722                | NA                             | 1            | 0            | 0.998207054         |             |             |   |
| CORO2A    | ENSG00000106789.12                    | 0.969118786                 | 3                              | 3            | 0.818355508  |                     |             |             |   |
|           | Brain_Hypothalamus                    | 0.868719982                 | Brain_Frontal_Cortex_BA9       |              |              | 2.045946463         |             |             |   |
|           | 0.400345194                           | 0.400345194                 | -0.229660607                   |              | 0.205192759  | -0.063250815        |             |             |   |
|           | 0.234696681                           | 3                           | 0                              | 0.998207054  |              |                     |             |             |   |
| KBTBD7    | ENSG00000120696.8                     | 0.969154487                 | 1                              | 1            | 0.969154487  |                     |             |             |   |
|           | Brain_Putamen_basal_ganglia           | 0.969154487                 | Brain_Putamen_basal_ganglia    |              |              | 1                   | 1           |             |   |
|           | 1                                     | -0.038668752                | -0.038668752                   | -0.038668752 | NA           | 1                   | 0           |             |   |
|           | 0.998207054                           |                             |                                |              |              |                     |             |             |   |
| LINC01239 | ENSG00000234840.1                     | 0.969160593                 | 5                              | 5            | 0.446713687  |                     |             |             |   |
|           | Brain_Caudate_basal_ganglia           | 0.987834969                 | Brain_Amygdala                 |              |              | 1.714966987         |             |             |   |

|          |                                       |                   |                                       |              |                       |
|----------|---------------------------------------|-------------------|---------------------------------------|--------------|-----------------------|
|          | 0.510654322                           | 0.510654322       | -0.760905208                          | 0.342301805  | -0.094769232          |
|          | 0.437142625                           | 5 0               | 0.998207054                           |              |                       |
| R3HDM1   | ENSG00000048991.16                    | 0.969298808       | 1 1                                   | 0.969298808  |                       |
|          | Brain_Cerebellum0.969298808           | Brain_Cerebellum1 | 1 1                                   |              | -0.038487738          |
|          | -0.038487738                          | -0.038487738      | NA 1 0                                | 0.998207054  |                       |
| CACTIN   | ENSG00000105298.13                    | 0.96931579        | 1 1                                   | 0.96931579   |                       |
|          | Brain_Substantia_nigra                | 0.96931579        | Brain_Substantia_nigra                | 1 1 1        |                       |
|          | -0.038466438                          | -0.038466438      | -0.038466438                          | NA 1 0       | 0.998207054           |
| ALS2     | ENSG00000003393.14                    | 0.969326901       | 3 2                                   | 0.815631779  |                       |
|          | Brain_Frontal_Cortex_BA9              | 0.999411016       | Brain_Hypothalamus                    | 2.190480558  |                       |
|          | 0.006488269                           | 0.803031173       | -0.233166937                          | 0.006634091  | -0.075264888          |
|          | 0.136778958                           | 2 0               | 0.998207054                           |              |                       |
| CCDC81   | ENSG00000149201.9                     | 0.96943445        | 2 2                                   | 0.855374027  |                       |
|          | Brain_Cerebellar_Hemisphere           | 0.955988763       | Brain_Nucleus_accumbens_basal_ganglia |              |                       |
|          | 1.826927563                           | -0.173072437      | 0.173072437                           | -0.182265939 | -0.055187907          |
|          | -0.118726923                          | 0.089857738       | 2 0                                   | 0.998207054  |                       |
| NRXN3    | ENSG00000021645.18                    | 0.969444155       | 1 1                                   | 0.969444155  |                       |
|          | Brain_Spinal_cord_cervical_c-1        | 0.969444155       | Brain_Spinal_cord_cervical_c-1        |              |                       |
|          | 1 1 1                                 | 0.038305438       | 0.038305438                           | 0.038305438  | NA 1 0                |
|          | 0.998207054                           |                   |                                       |              |                       |
| SNED1    | ENSG00000162804.13                    | 0.969447164       | 3 3                                   | 0.716452362  |                       |
|          | Brain_Cerebellar_Hemisphere           | 0.80614957        | Brain_Cerebellum1.538547651           | 0.43840206   |                       |
|          | 0.43840206                            | -0.363204185      | -0.24539633                           | -0.312586448 | 0.060627185 3         |
|          | 0                                     | 0.998207054       |                                       |              |                       |
| EXOG     | ENSG00000157036.12                    | 0.969518713       | 12 2                                  | 0.547501539  |                       |
|          | Brain_Nucleus_accumbens_basal_ganglia | 0.970365731       | Brain_Substantia_nigra                |              |                       |
|          | 10.45916398                           | 0.005874306       | 0.40589613                            | -0.601508219 | 0.570569808           |
|          | -0.071257802                          | 0.327744922       | 2 0                                   | 0.998207054  |                       |
| ZNF730   | ENSG00000183850.13                    | 0.969547039       | 7 6                                   | 0.339668023  |                       |
|          | Brain_Spinal_cord_cervical_c-1        | 0.978129396       | Brain_Hypothalamus                    |              |                       |
|          | 3.455910375                           | 0.006755858       | 0.276155686                           | -0.544537141 | 0.954821401           |
|          | 0.140175647                           | 0.442707249       | 6 0                                   | 0.998207054  |                       |
| MED11    | ENSG00000161920.9                     | 0.969581106       | 1 1                                   | 0.969581106  | Brain_Cortex          |
|          | 0.969581106                           | Brain_Cortex      | 1 1 1                                 | 0.03813367   | 0.03813367 0.03813367 |
|          | NA 1 0                                | 0.998207054       |                                       |              |                       |
| C15orf61 | ENSG00000189227.5                     | 0.969659399       | 8 4                                   | 0.713925132  |                       |
|          | Brain_Nucleus_accumbens_basal_ganglia | 0.995325198       | Brain_Cortex                          |              |                       |
|          | 6.112730825                           | 0.009671129       | 0.450162803                           | -0.35436989  | 0.366589647           |
|          | 0.089497619                           | 0.25102195 4      | 0 0.998207054                         |              |                       |
| LTBP1    | ENSG00000049323.15                    | 0.969660148       | 2 2                                   | 0.807060457  |                       |
|          | Brain_Putamen_basal_ganglia           | 0.911357746       | Brain_Caudate_basal_ganglia           |              |                       |
|          | 1.601277727                           | 0.398722273       | 0.398722273                           | -0.244219976 | -0.111326117          |
|          | -0.177773047                          | 0.093970149       | 2 0                                   | 0.998207054  |                       |
| SAAL1    | ENSG00000166788.9                     | 0.969678757       | 12 1                                  | 0.559899509  |                       |
|          | Brain_Spinal_cord_cervical_c-1        | 0.974581112       | Brain_Putamen_basal_ganglia           |              |                       |
|          | 11.23207569                           | 0.000138077       | 11.23207569                           | -0.582990778 | 0.273445638           |
|          | 0.029707939                           | 0.238088738       | 1 0                                   | 0.998207054  |                       |
| HHLA3    | ENSG00000197568.13                    | 0.96968582        | 13 5                                  | 0.597138307  |                       |
|          | Brain_Spinal_cord_cervical_c-1        | 0.969331245       | Brain_Cortex                          | 9.260744169  |                       |
|          | 0.023699304                           | 0.323393011       | -0.380656663                          | 0.528520235  | 0.096037419           |
|          | 0.262430938                           | 5 0               | 0.998207054                           |              |                       |
| REEP5    | ENSG00000129625.12                    | 0.969703544       | 2 2                                   | 0.846057719  |                       |
|          | Brain_Hypothalamus                    | 0.880404361       | Brain_Substantia_nigra                | 1.020080778  |                       |
|          | 0.979919222                           | 0.979919222       | 0.150456636                           | 0.194150911  | 0.172303773           |
|          | 0.030896518                           | 2 0               | 0.998207054                           |              |                       |
| IL17RB   | ENSG00000056736.9                     | 0.969712655       | 4 3                                   | 0.748070627  |                       |
|          | Brain_Hippocampus                     | 0.993274654       | Brain_Cerebellar_Hemisphere           | 3.465266217  |                       |
|          | 0.071637494                           | 0.137512529       | -0.242641723                          | 0.321184434  | 0.098856343           |
|          | 0.269665723                           | 3 0               | 0.998207054                           |              |                       |
| CEP164   | ENSG00000110274.15                    | 0.969832776       | 9 6                                   | 0.449476249  |                       |
|          | Brain_Cortex                          | 0.825951583       | Brain_Putamen_basal_ganglia           | 4.978640661  |                       |
|          | 0.013876146                           | 0.255520856       | -0.756288488                          | 0.698310397  | -0.202937565          |

|               |                                       |                                |   |                             |             |   |                                       |                    |              |
|---------------|---------------------------------------|--------------------------------|---|-----------------------------|-------------|---|---------------------------------------|--------------------|--------------|
|               | 0.536667713                           | 6                              | 0 | 0.998207054                 |             |   |                                       |                    |              |
| LINC00513     | ENSG00000233559.1                     |                                |   | 0.969875473                 | 2           | 2 | 0.81029655                            | Brain_Cerebellum   |              |
|               | 0.960949529                           | Brain_Frontal_Cortex_BA9       |   |                             | 1.044149885 |   | 0.955850115                           |                    |              |
|               | 0.955850115                           | 0.048962063                    |   | 0.240043479                 |             |   | 0.144502771                           | 0.135114965        |              |
|               | 2                                     | 0                              |   | 0.998207054                 |             |   |                                       |                    |              |
| PICALM        | ENSG00000073921.17                    |                                |   | 0.970021289                 | 2           | 2 | 0.836152073                           |                    |              |
|               | Brain_Caudate_basal_ganglia           | 0.891356104                    |   |                             |             |   | Brain_Cerebellar_Hemisphere           |                    |              |
|               | 1.009939198                           | 0.990060802                    |   | 0.990060802                 |             |   | -0.206817904                          | 0.136588453        |              |
|               | -0.035114726                          | 0.242824963                    |   | 2                           | 0           |   | 0.998207054                           |                    |              |
| ANGPTL2       | ENSG00000136859.9                     |                                |   | 0.970047065                 | 2           | 2 | 0.833325881                           |                    |              |
|               | Brain_Hypothalamus                    | 0.9920968                      |   | Brain_Cerebellar_Hemisphere | 1.555290093 |   |                                       |                    |              |
|               | 0.444709907                           | 0.444709907                    |   | 0.009905354                 |             |   | 0.210437943                           | 0.110171649        |              |
|               | 0.141797953                           | 2                              | 0 | 0.998207054                 |             |   |                                       |                    |              |
| UNC5B         | ENSG00000107731.12                    |                                |   | 0.970069182                 | 3           | 3 | 0.686344933                           |                    |              |
|               | Brain_Spinal_cord_cervical_c-1        | 0.885966504                    |   |                             |             |   | Brain_Putamen_basal_ganglia           |                    |              |
|               | 1.33087032                            | 0.702237035                    |   | 0.702237035                 |             |   | -0.143409851                          | 0.403820211        |              |
|               | 0.158455894                           | 0.277955921                    |   | 3                           | 0           |   | 0.998207054                           |                    |              |
| B9D1          | ENSG00000108641.14                    |                                |   | 0.970110534                 | 1           | 1 | 0.970110534                           | Brain_Cerebellum   |              |
|               | 0.970110534                           | Brain_Cerebellum1              |   | 1                           | 1           |   | 0.037469656                           | 0.037469656        |              |
|               | 0.037469656                           | NA                             | 1 | 0                           | 0.998207054 |   |                                       |                    |              |
| SDR39U1       | ENSG00000100445.17                    |                                |   | 0.970312077                 | 4           | 4 | 0.828392569                           |                    |              |
|               | Brain_Amygdala                        | 0.98765332                     |   | Brain_Cerebellar_Hemisphere | 2.234322069 |   |                                       |                    |              |
|               | 0.150016483                           | 0.150016483                    |   | -0.216763615                |             |   | 0.172580408                           | -0.065212863       |              |
|               | 0.183009864                           | 4                              | 0 | 0.998207054                 |             |   |                                       |                    |              |
| ABCB9         | ENSG00000150967.17                    |                                |   | 0.970326152                 | 3           | 3 | 0.623621846                           |                    |              |
|               | Brain_Cerebellar_Hemisphere           | 0.994645207                    |   |                             |             |   | Brain_Putamen_basal_ganglia           |                    |              |
|               | 1.287183644                           | 0.708158686                    |   | 0.708158686                 |             |   | -0.006711288                          | 0.490723751        |              |
|               | 0.222286675                           | 0.251051762                    |   | 3                           | 0           |   | 0.998207054                           |                    |              |
| NUDCD3        | ENSG00000015676.17                    |                                |   | 0.970394175                 | 8           | 3 | 0.751491566                           |                    |              |
|               | Brain_Cerebellar_Hemisphere           | 0.986505881                    |   |                             |             |   | Brain_Spinal_cord_cervical_c-1        |                    |              |
|               | 7.105240663                           | 0.002826864                    |   | 0.306282139                 |             |   | -0.316673227                          | 0.129009782        |              |
|               | -0.102726801                          | 0.146575869                    |   | 3                           | 0           |   | 0.998207054                           |                    |              |
| OLMALINC      | ENSG00000235823.1                     |                                |   | 0.970410983                 | 2           | 2 | 0.847478314                           |                    |              |
|               | Brain_Nucleus_accumbens_basal_ganglia | 0.88716338                     |   | Brain_Amygdala              | 1.051061041 |   |                                       |                    |              |
|               | 0.948938959                           | 0.948938959                    |   | 0.141894448                 |             |   | 0.192336902                           | 0.167115675        |              |
|               | 0.035668201                           | 2                              | 0 | 0.998207054                 |             |   |                                       |                    |              |
| RP11-498P14.5 | ENSG00000203279.3                     |                                |   | 0.970458631                 | 13          | 3 | 0.579300172                           |                    |              |
|               | Brain_Spinal_cord_cervical_c-1        | 0.860287277                    |   |                             |             |   | Brain_Substantia_nigra                |                    |              |
|               | 11.46942835                           | 0.000791191                    |   | 0.425964285                 |             |   | -0.554407241                          | -0.176008484       |              |
|               | -0.340354704                          | 0.121168333                    |   | 3                           | 0           |   | 0.998207054                           |                    |              |
| ZNFx1         | ENSG00000124201.14                    |                                |   | 0.970515559                 | 2           | 2 | 0.806958653                           |                    |              |
|               | Brain_Hippocampus                     | 0.993968917                    |   |                             |             |   | Brain_Nucleus_accumbens_basal_ganglia |                    |              |
|               | 1.08057077                            | 0.91942923                     |   | 0.91942923                  |             |   | -0.244351433                          | -0.007558913       | -0.125955173 |
|               | 0.167437596                           | 2                              | 0 | 0.998207054                 |             |   |                                       |                    |              |
| RP11-84C13.2  | ENSG00000270720.1                     |                                |   | 0.970593146                 | 1           | 1 | 0.970593146                           |                    |              |
|               | Brain_Cerebellar_Hemisphere           | 0.970593146                    |   |                             |             |   | Brain_Cerebellar_Hemisphere1          | 1                  |              |
|               | 1                                     | -0.036864373                   |   | -0.036864373                |             |   | NA                                    | 1                  | 0            |
|               | 0.998207054                           |                                |   |                             |             |   |                                       |                    |              |
| ZFP30         | ENSG00000120784.15                    |                                |   | 0.970601396                 | 3           | 2 | 0.685489352                           |                    |              |
|               | Brain_Cerebellar_Hemisphere           | 0.985840048                    |   |                             |             |   | Brain_Cerebellum                      | 2.37829108         |              |
|               | 0.029099457                           | 0.592609463                    |   | -0.404983891                |             |   | 0.0177478                             | -0.140601237       |              |
|               | 0.230451441                           | 2                              | 0 | 0.998207054                 |             |   |                                       |                    |              |
| ADSS          | ENSG00000035687.9                     |                                |   | 0.970681318                 | 6           | 6 | 0.616417092                           |                    |              |
|               | Brain_Hippocampus                     | 0.952046231                    |   |                             |             |   | Brain_Nucleus_accumbens_basal_ganglia |                    |              |
|               | 3.08655158                            | 0.120677588                    |   | 0.120677588                 |             |   | -0.365049048                          | 0.500934684        |              |
|               | -0.090423386                          | 0.310101826                    |   | 6                           | 0           |   | 0.998207054                           |                    |              |
| CASP9         | ENSG00000132906.17                    |                                |   | 0.97070406                  | 4           | 2 | 0.801559514                           | Brain_Hypothalamus |              |
|               | 0.970071707                           | Brain_Spinal_cord_cervical_c-1 |   |                             | 3.324531637 |   | 0.001472764                           |                    |              |
|               | 0.599664761                           | -0.251329313                   |   | -0.037518352                |             |   | -0.172448348                          | 0.093356265        |              |
|               | 2                                     | 0                              |   | 0.998207054                 |             |   |                                       |                    |              |
| HBZ           | ENSG00000130656.4                     |                                |   | 0.97080519                  | 2           | 2 | 0.808267821                           | Brain_Hippocampus  |              |
|               | 0.98638454                            | Brain_Putamen_basal_ganglia    |   | 1.009412798                 |             |   | 0.990587202                           |                    |              |

|                     |                                       |              |                                       |              |              |
|---------------------|---------------------------------------|--------------|---------------------------------------|--------------|--------------|
|                     | 0.990587202                           | 0.017065276  | 0.242661259                           | 0.129863268  | 0.159520449  |
|                     | 2                                     | 0            | 0.998207054                           |              |              |
| TOM1L1              | ENSG00000141198.14                    | 0.970906094  | 4                                     | 4            | 0.53278032   |
|                     | Brain_Hypothalamus                    | 0.906693743  | Brain_Caudate_basal_ganglia           | 3.072568646  |              |
|                     | 0.151784168                           | 0.151784168  | 0.117209873                           | 0.623767449  | 0.344688798  |
|                     | 0.210903259                           | 4            | 0                                     | 0.998207054  |              |
| RGL3                | ENSG00000205517.12                    | 0.970960787  | 1                                     | 1            | 0.970960787  |
|                     | Brain_Hypothalamus                    | 0.970960787  | Brain_Hypothalamus                    | 1            | 1            |
|                     | 0.036403295                           | 0.036403295  | 0.036403295                           | NA           | 1            |
|                     |                                       |              |                                       | 0            | 0.998207054  |
| C19orf57            | ENSG00000132016.11                    | 0.971055703  | 2                                     | 2            | 0.810787057  |
|                     | Brain_Cerebellum                      | 0.880748877  | Brain_Cerebellar_Hemisphere           | 1.733760895  |              |
|                     | 0.266239105                           | 0.266239105  | 0.150019948                           | 0.239410799  | 0.194715373  |
|                     | 0.063208877                           | 2            | 0                                     | 0.998207054  |              |
| AC068535.2          | ENSG00000227157.1                     | 0.97117664   | 2                                     | 2            | 0.820091724  |
|                     | Brain_Substantia_nigra                | 1.090732739  | Brain_Amygdala                        | 0.909267261  |              |
|                     | 0.909267261                           | 0.102580437  | 0.227427004                           | 0.16500372   | 0.088279854  |
|                     | 0                                     | 0.998207054  |                                       |              | 2            |
| CCDC88C             | ENSG00000015133.18                    | 0.971191064  | 5                                     | 5            | 0.488417798  |
|                     | Brain_Anterior_cingulate_cortex_BA24  | 0.962002531  | Brain_Cortex                          |              |              |
|                     | 2.028638636                           | 0.072905497  | 0.072905497                           | -0.35371722  | 0.692827523  |
|                     | 0.313662535                           | 0.451420262  | 5                                     | 0            | 0.998207054  |
| DPH6-AS1            | ENSG00000248079.2                     | 0.971228993  | 2                                     | 2            | 0.845736428  |
|                     | Brain_Cortex                          | 0.856924374  | Brain_Frontal_Cortex_BA9              | 1.205967612  |              |
|                     | 0.794032388                           | 0.794032388  | -0.194561267                          | -0.180290677 | -0.187425972 |
|                     | 0.010090831                           | 2            | 0                                     | 0.998207054  |              |
| XXbac-BPGBPG55C20.2 | ENSG00000272316.1                     | 0.971256908  | 13                                    | 2            | 0.386781743  |
|                     | Brain_Anterior_cingulate_cortex_BA24  | 0.984252666  | Brain_Frontal_Cortex_BA9              |              |              |
|                     | 11.80204925                           | 0.002122427  | 0.427399815                           | -0.37386096  | 0.865468418  |
|                     | 0.216995269                           | 0.318706184  | 2                                     | 0            | 0.998207054  |
| RMDN2               | ENSG00000115841.19                    | 0.971299105  | 2                                     | 2            | 0.817129398  |
|                     | Brain_Cerebellar_Hemisphere           | 1.460272799  | Brain_Cerebellum                      | 0.539727201  |              |
|                     | 0.539727201                           | -0.231238659 | -0.167749465                          | -0.199494062 | 0.04489364   |
|                     | 0                                     | 0.998207054  |                                       |              | 2            |
| RPS20               | ENSG00000008988.9                     | 0.971406322  | 8                                     | 1            | 0.581298872  |
|                     | Brain_Putamen_basal_ganglia           | 7.534408364  | Brain_Cerebellum                      | 0.005020389  |              |
|                     | 7.534408364                           | -0.551488465 | 0.437466425                           | 0.032807838  | 0.317119709  |
|                     | 1                                     | 0            | 0.998207054                           |              |              |
| PALM3               | ENSG00000187867.8                     | 0.971409247  | 1                                     | 1            | 0.971409247  |
|                     | Brain_Spinal_cord_cervical_c-1        | 0.971409247  | Brain_Spinal_cord_cervical_c-1        |              |              |
|                     | 1                                     | 1            | 1                                     | -0.035840867 | -0.035840867 |
|                     |                                       |              |                                       | -0.035840867 | NA           |
|                     |                                       |              |                                       |              | 1            |
|                     |                                       |              |                                       |              | 0            |
|                     | 0.998207054                           |              |                                       |              |              |
| RNF149              | ENSG00000163162.8                     | 0.971420496  | 11                                    | 5            | 0.420947428  |
|                     | Brain_Frontal_Cortex_BA9              | 0.998067384  | Brain_Hypothalamus                    | 7.70318885   |              |
|                     | 0.005450283                           | 0.348794784  | -0.804778643                          | 0.682063552  | 0.029264162  |
|                     | 0.45924014                            | 5            | 0                                     | 0.998207054  |              |
| FXYD1               | ENSG00000266964.5                     | 0.971422442  | 1                                     | 1            | 0.971422442  |
|                     | Brain_Anterior_cingulate_cortex_BA24  | 0.971422442  |                                       |              |              |
|                     | Brain_Anterior_cingulate_cortex_BA24  | 1            | 1                                     | 1            | -0.035824318 |
|                     | -0.035824318                          | -0.035824318 | NA                                    | 1            | 0            |
|                     |                                       |              |                                       | 0.998207054  |              |
| AMN1                | ENSG00000151743.10                    | 0.971556718  | 1                                     | 1            | 0.971556718  |
|                     | Brain_Caudate_basal_ganglia           | 0.971556718  | Brain_Caudate_basal_ganglia           | 1            | 1            |
|                     | 1                                     | 0.035655921  | 0.035655921                           | 0.035655921  | NA           |
|                     |                                       |              |                                       |              | 1            |
|                     |                                       |              |                                       |              | 0            |
|                     | 0.998207054                           |              |                                       |              |              |
| CLPTM1              | ENSG00000104853.15                    | 0.971584182  | 1                                     | 1            | 0.971584182  |
|                     | Brain_Cortex                          | 0.971584182  | Brain_Cortex                          | 1            | 1            |
|                     | -0.035621478                          | -0.035621478 | NA                                    | 1            | 0            |
|                     |                                       |              |                                       | 0.998207054  |              |
| THADA               | ENSG00000115970.18                    | 0.971609685  | 2                                     | 2            | 0.8487633    |
|                     | Brain_Frontal_Cortex_BA9              | 0.929760227  | Brain_Nucleus_accumbens_basal_ganglia |              |              |
|                     | 1.856575429                           | 0.143424571  | 0.143424571                           | 0.088146515  | 0.190696603  |
|                     | 0.139421559                           | 0.072513863  | 2                                     | 0            | 0.998207054  |
| CDHR3               | ENSG00000128536.15                    | 0.971659999  | 9                                     | 8            | 0.290678951  |
|                     | Brain_Nucleus_accumbens_basal_ganglia | 0.914519394  | Brain_Frontal_Cortex_BA9              |              |              |

|           |                                      |                          |                                       |              |              |
|-----------|--------------------------------------|--------------------------|---------------------------------------|--------------|--------------|
|           | 4.547273063                          | 0.057836679              | 0.227028017                           | -0.490618822 | 1.056633357  |
|           | 0.493116948                          | 0.472216955              | 8                                     | 0            | 0.998207054  |
| FGF10     | ENSG00000070193.4                    | 0.971900898              | 1                                     | 1            | 0.971900898  |
|           | Brain_Putamen_basal_ganglia          | 0.971900898              | Brain_Putamen_basal_ganglia           | 1            | 1            |
|           | 1                                    | 0.035224284              | 0.035224284                           | 0.035224284  | NA 1 0       |
|           | 0.998207054                          |                          |                                       |              |              |
| RPS29     | ENSG00000213741.9                    | 0.971923519              | 1                                     | 1            | 0.971923519  |
|           | Brain_Anterior_cingulate_cortex_BA24 | 0.971923519              |                                       |              |              |
|           | Brain_Anterior_cingulate_cortex_BA24 | 1                        | 1                                     | 1            | 0.035195915  |
|           | 0.035195915                          | 0.035195915              | NA                                    | 1            | 0            |
|           | 0.998207054                          |                          |                                       |              |              |
| BOLA3     | ENSG00000163170.11                   | 0.971948431              | 4                                     | 1            | 0.916347111  |
|           | Brain_Cortex                         |                          |                                       |              |              |
|           | 0.970424594                          | Brain_Frontal_Cortex_BA9 | 3.85002276                            | 0.008389032  | 3.85002276   |
|           | -0.105036166                         | 0.048481336              | -0.034585572                          | 0.063172085  | 1 0          |
|           | 0.998207054                          |                          |                                       |              |              |
| RNF181    | ENSG00000168894.9                    | 0.972150419              | 2                                     | 2            | 0.86303328   |
|           | Brain_Caudate_basal_ganglia          | 0.864814153              | Brain_Hypothalamus                    | 1.039948956  |              |
|           | 0.960051044                          | 0.960051044              | -0.172514224                          | -0.170249209 | -0.171381716 |
|           | 0.001601607                          | 2                        | 0                                     | 0.998207054  |              |
| ZSCAN16   | ENSG00000196812.4                    | 0.972151819              | 4                                     | 4            | 0.783444139  |
|           | Brain_Cortex                         | 0.899935979              | Brain_Anterior_cingulate_cortex_BA24  |              |              |
|           | 1.989785334                          | 0.153749584              | 0.153749584                           | -0.208394632 | 0.274833527  |
|           | 0.041680595                          | 0.244207173              | 4                                     | 0            | 0.998207054  |
| ZNF696    | ENSG00000185730.7                    | 0.972168269              | 5                                     | 5            | 0.373680791  |
|           | Brain_Cerebellum                     | 0.795454594              | Brain_Caudate_basal_ganglia           | 2.788431382  |              |
|           | 0.227449229                          | 0.227449229              | 0.259234136                           | 0.889599842  | 0.441716181  |
|           | 0.258650148                          | 5                        | 0                                     | 0.998207054  |              |
| LINC00588 | ENSG00000215117.5                    | 0.972189604              | 7                                     | 4            | 0.397084203  |
|           | Brain_Frontal_Cortex_BA9             | 0.896593429              | Brain_Amygdala                        | 5.249425994  |              |
|           | 0.011588136                          | 0.272747379              | -0.846840191                          | -0.129965871 | -0.531490921 |
|           | 0.275283185                          | 4                        | 0                                     | 0.998207054  |              |
| DTWD2     | ENSG00000169570.9                    | 0.972209598              | 7                                     | 6            | 0.365716614  |
|           | Brain_Anterior_cingulate_cortex_BA24 | 0.981521239              | Brain_Putamen_basal_ganglia           |              |              |
|           | 3.566743558                          | 0.019546503              | 0.421257338                           | -0.904525887 | 0.144367243  |
|           | -0.317350372                         | 0.355652403              | 6                                     | 0            | 0.998207054  |
| C20orf196 | ENSG00000171984.14                   | 0.972379542              | 5                                     | 5            | 0.406066755  |
|           | Brain_Frontal_Cortex_BA9             | 0.976370769              | Brain_Cortex                          | 1.340509784  |              |
|           | 0.701352741                          | 0.701352741              | -0.394636457                          | 0.830835164  | 0.017244898  |
|           | 0.476305304                          | 5                        | 0                                     | 0.998207054  |              |
| ERP44     | ENSG00000023318.7                    | 0.972565109              | 1                                     | 1            | 0.972565109  |
|           | Brain_Caudate_basal_ganglia          | 0.972565109              | Brain_Caudate_basal_ganglia           | 1            | 1            |
|           | 1                                    | -0.034391315             | -0.034391315                          | -0.034391315 | NA 1 0       |
|           | 0.998207054                          |                          |                                       |              |              |
| CES1      | ENSG00000198848.12                   | 0.972569937              | 10                                    | 8            | 0.270009267  |
|           | Brain_Hypothalamus                   | 0.859471341              | Brain_Putamen_basal_ganglia           | 4.147495395  |              |
|           | 0.016853983                          | 0.344513779              | -0.433639765                          | 1.103041215  | 0.175570118  |
|           | 0.438694457                          | 8                        | 0                                     | 0.998207054  |              |
| MTERF3    | ENSG00000156469.8                    | 0.972600201              | 2                                     | 2            | 0.856924424  |
|           | Brain_Hypothalamus                   | 0.984736896              | Brain_Nucleus_accumbens_basal_ganglia |              |              |
|           | 1.580012468                          | 0.419987532              | 0.419987532                           | -0.019130631 | 0.180290614  |
|           | 0.080579992                          | 0.141012115              | 2                                     | 0            | 0.998207054  |
| TMIGD2    | ENSG00000167664.8                    | 0.972739257              | 1                                     | 1            | 0.972739257  |
|           | Brain_Amygdala                       | 0.972739257              | Brain_Amygdala                        | 1 1 1        | -0.034172924 |
|           | -0.034172924                         | -0.034172924             | NA                                    | 1            | 0            |
|           | 0.998207054                          |                          |                                       |              |              |
| RNF214    | ENSG00000167257.10                   | 0.97274127               | 1                                     | 1            | 0.97274127   |
|           | Brain_Putamen_basal_ganglia          | 0.97274127               | Brain_Putamen_basal_ganglia           | 1            | 1            |
|           | -0.0341704                           | -0.0341704               | -0.0341704                            | NA           | 1 0          |
|           | 0.998207054                          |                          |                                       |              |              |
| TMEM14B   | ENSG00000137210.13                   | 0.972746175              | 1                                     | 1            | 0.972746175  |
|           | Brain_Substantia_nigra               | 0.972746175              | Brain_Substantia_nigra                | 1            | 1            |
|           | 1                                    | -0.034164249             | -0.034164249                          | -0.034164249 | NA 1 0       |
|           | 0.998207054                          |                          |                                       |              |              |
| HSBP1L1   | ENSG00000226742.3                    | 0.972769749              | 1                                     | 1            | 0.972769749  |
|           | Brain_Cerebellum                     | 0.972769749              | Brain_Cerebellum                      | 1            | 1 1          |
|           |                                      |                          |                                       |              | 0.034134687  |

|               |                                |                                      |              |                                       |              |                  |                  |
|---------------|--------------------------------|--------------------------------------|--------------|---------------------------------------|--------------|------------------|------------------|
|               | 0.034134687                    | 0.034134687                          | NA           | 1                                     | 0            | 0.998207054      |                  |
| MRPL53        | ENSG00000204822.6              | 0.972769758                          |              | 1                                     | 1            | 0.972769758      |                  |
|               | Brain_Hippocampus              | 0.972769758                          |              | Brain_Hippocampus                     | 1            | 1                | 1                |
|               | -0.034134675                   | -0.034134675                         | -0.034134675 | NA                                    | 1            | 0                | 0.998207054      |
| HMP19         | ENSG00000170091.10             | 0.972904011                          |              | 3                                     | 3            | 0.748508545      |                  |
|               | Brain_Cerebellar_Hemisphere    | 0.870608753                          |              | Brain_Cortex                          | 1.058467164  |                  |                  |
|               | 0.911578581                    | 0.911578581                          | -0.320606587 | 0.319834356                           |              |                  | -0.054552507     |
|               | 0.333681201                    | 3                                    | 0            | 0.998207054                           |              |                  |                  |
| KDM4B         | ENSG00000127663.14             | 0.972908413                          |              | 2                                     | 2            | 0.89681369       |                  |
|               | Brain_Cerebellar_Hemisphere    | 0.928279258                          |              | Brain_Cerebellum                      | 1.556573087  |                  |                  |
|               | 0.443426913                    | 0.443426913                          | -0.090010013 | 0.129687478                           |              |                  | 0.019838733      |
|               | 0.155349586                    | 2                                    | 0            | 0.998207054                           |              |                  |                  |
| TNIP1         | ENSG00000145901.14             | 0.972924411                          |              | 4                                     | 4            | 0.673993799      |                  |
|               | Brain_Cerebellar_Hemisphere    | 0.997761267                          |              | Brain_Frontal_Cortex_BA9              |              |                  |                  |
|               | 2.882373071                    | 0.209113848                          | 0.209113848  | -0.273201909                          |              |                  | 0.420673111      |
|               | 0.056696167                    | 0.28606455                           | 4            | 0                                     | 0.998207054  |                  |                  |
| RP5-1180C18.1 | ENSG00000223944.1              | 0.972971959                          |              | 1                                     | 1            | 0.972971959      |                  |
|               | Brain_Spinal_cord_cervical_c-1 | 0.972971959                          |              | Brain_Spinal_cord_cervical_c-1        |              |                  |                  |
|               | 1                              | 1                                    | 1            | -0.033881108                          | -0.033881108 | -0.033881108     | NA               |
|               | 0.998207054                    |                                      |              |                                       |              |                  | 1                |
|               |                                |                                      |              |                                       |              |                  | 0                |
| RPL3L         | ENSG00000140986.7              | 0.972976287                          |              | 3                                     | 3            | 0.72688777       |                  |
|               | Brain_Caudate_basal_ganglia    | 0.816536569                          |              | Brain_Nucleus_accumbens_basal_ganglia |              |                  |                  |
|               | 1.178104967                    | 0.822519882                          | 0.822519882  | -0.349268466                          |              |                  | 0.25192626       |
|               | 0.044886551                    | 0.3414936                            | 3            | 0                                     | 0.998207054  |                  |                  |
| NOLC1         | ENSG00000166197.16             | 0.973177565                          |              | 1                                     | 1            | 0.973177565      | Brain_Cerebellum |
|               | 0.973177565                    | Brain_Cerebellum                     | 1            | 1                                     | 1            | 0.033623272      | 0.033623272      |
|               | 0.033623272                    | NA                                   | 1            | 0                                     | 0.998207054  |                  |                  |
| AKAP3         | ENSG00000111254.7              | 0.973236864                          |              | 13                                    | 7            | 0.232246802      |                  |
|               | Brain_Putamen_basal_ganglia    | 0.987297958                          |              | Brain_Cerebellum                      | 9.045456282  |                  |                  |
|               | 2.34E-16                       | 0.302835941                          | -1.194591167 | 0.190413874                           |              |                  | -0.351792186     |
|               | 0.356607893                    | 7                                    | 0            | 0.998207054                           |              |                  |                  |
| EFCAB2        | ENSG00000203666.12             | 0.97325801                           | 13           | 4                                     | 0.377344449  | Brain_Cerebellum |                  |
|               | 0.939128541                    | Brain_Anterior_cingulate_cortex_BA24 | 9.22975483   | 0.001385897                           |              |                  |                  |
|               | 0.378359182                    | -0.538538909                         | 0.882799799  | -0.211424656                          |              |                  | 0.41903076       |
|               | 0                              | 0.998207054                          |              |                                       |              |                  | 4                |
| CNTFR         | ENSG00000122756.14             | 0.973274018                          |              | 3                                     | 3            | 0.767499652      |                  |
|               | Brain_Hippocampus              | 0.881254953                          |              | Brain_Caudate_basal_ganglia           | 1.292709465  |                  |                  |
|               | 0.65124489                     | 0.65124489                           | -0.295647032 | 0.149378529                           |              |                  | -0.117318908     |
|               | 0.235305736                    | 3                                    | 0            | 0.998207054                           |              |                  |                  |
| DENND6B       | ENSG00000205593.11             | 0.973316985                          |              | 5                                     | 4            | 0.611303182      |                  |
|               | Brain_Cortex                   | 0.929434006                          |              | Brain_Frontal_Cortex_BA9              | 2.879061007  |                  |                  |
|               | 0.063746011                    | 0.376430101                          | -0.508214131 | 0.439997597                           |              |                  | -0.182155635     |
|               | 0.380219084                    | 4                                    | 0            | 0.998207054                           |              |                  |                  |
| FGF14         | ENSG00000102466.15             | 0.973321                             |              | 1                                     | 1            | 0.973321         | Brain_Cerebellum |
|               | Brain_Cerebellum               | 1                                    | 1            | 1                                     | -0.033443401 | -0.033443401     | -0.033443401     |
|               | NA                             | 1                                    | 0            | 0.998207054                           |              |                  |                  |
| ACOT13        | ENSG00000112304.10             | 0.973567008                          |              | 1                                     | 1            | 0.973567008      |                  |
|               | Brain_Spinal_cord_cervical_c-1 | 0.973567008                          |              | Brain_Spinal_cord_cervical_c-1        |              |                  |                  |
|               | 1                              | 1                                    | 1            | -0.033134904                          | -0.033134904 | -0.033134904     | NA               |
|               | 0.998207054                    |                                      |              |                                       |              |                  | 1                |
|               |                                |                                      |              |                                       |              |                  | 0                |
| CNNM2         | ENSG00000148842.17             | 0.973602492                          |              | 3                                     | 3            | 0.749872071      |                  |
|               | Brain_Caudate_basal_ganglia    | 0.876207438                          |              | Brain_Frontal_Cortex_BA9              |              |                  |                  |
|               | 1.708566037                    | 0.588715765                          | 0.588715765  | -0.318808054                          |              |                  | 0.155778729      |
|               | -0.112381663                   | 0.243241585                          | 3            | 0                                     | 0.998207054  |                  |                  |
| HACE1         | ENSG00000085382.11             | 0.973647946                          |              | 8                                     | 1            | 0.716254182      |                  |
|               | Brain_Putamen_basal_ganglia    | 0.963345523                          |              | Brain_Caudate_basal_ganglia           |              |                  |                  |
|               | 7.563824571                    | 0.00076325                           | 7.563824571  | -0.284896723                          |              |                  | 0.363469514      |
|               | 0.035478412                    | 0.250940983                          | 1            | 0                                     | 0.998207054  |                  |                  |
| ARFGEF3       | ENSG00000112379.8              | 0.973655189                          |              | 1                                     | 1            | 0.973655189      |                  |
|               | Brain_Caudate_basal_ganglia    | 0.973655189                          |              | Brain_Caudate_basal_ganglia           | 1            |                  | 1                |
|               | 1                              | 0.033024326                          | 0.033024326  | 0.033024326                           | NA           | 1                | 0                |
|               | 0.998207054                    |                                      |              |                                       |              |                  |                  |



|            |                                       |              |                                      |              |                        |                  |             |  |
|------------|---------------------------------------|--------------|--------------------------------------|--------------|------------------------|------------------|-------------|--|
| CRAT       | ENSG00000095321.16                    | 0.973723858  | 6                                    | 4            | 0.598197445            |                  |             |  |
|            | Brain_Spinal_cord_cervical_c-1        | 0.899982572  |                                      |              | Brain_Substantia_nigra |                  |             |  |
|            | 3.514146134                           | 0.048151821  | 0.454752937                          |              | -0.41143424            | 0.526994447      |             |  |
|            | -0.116412603                          | 0.368878193  | 4                                    | 0            | 0.998207054            |                  |             |  |
| SPACA6P-AS | ENSG00000269959.1                     | 0.973761328  | 1                                    | 1            | 0.973761328            |                  |             |  |
|            | Brain_Cerebellum                      | 0.973761328  | Brain_Cerebellum1                    | 1            | 1                      | 0.032891228      |             |  |
|            | 0.032891228                           | 0.032891228  | NA                                   | 1            | 0                      | 0.998207054      |             |  |
| LPAR1      | ENSG00000198121.13                    | 0.973763183  | 1                                    | 1            | 0.973763183            |                  |             |  |
|            | Brain_Hippocampus                     | 0.973763183  | Brain_Hippocampus                    | 1            | 1                      | 1                |             |  |
|            | 0.032888902                           | 0.032888902  | 0.032888902                          | NA           | 1                      | 0                | 0.998207054 |  |
| TMCC3      | ENSG00000057704.12                    | 0.973873069  | 2                                    | 2            | 0.849302021            |                  |             |  |
|            | Brain_Cerebellar_Hemisphere           | 0.914306261  | Brain_Cerebellum1                    | 1.11240452   | 0.88759548             |                  |             |  |
|            | 0.88759548                            | -0.107608491 | 0.190009072                          | 0.041200291  | 0.210447397            | 2                |             |  |
|            | 0                                     | 0.998207054  |                                      |              |                        |                  |             |  |
| KRT24      | ENSG00000167916.4                     | 0.973881612  | 3                                    | 3            | 0.754116026            |                  |             |  |
|            | Brain_Cerebellar_Hemisphere           | 0.969528653  | Brain_Hypothalamus                   | 1.927162785  |                        |                  |             |  |
|            | 0.083270462                           | 0.083270462  | 0.038199458                          | 0.313216708  | 0.166442655            |                  |             |  |
|            | 0.138441924                           | 3            | 0                                    | 0.998207054  |                        |                  |             |  |
| TCF24      | ENSG00000261787.1                     | 0.973899173  | 1                                    | 1            | 0.973899173            |                  |             |  |
|            | Brain_Caudate_basal_ganglia           | 0.973899173  | Brain_Caudate_basal_ganglia1         | 1            | 1                      |                  |             |  |
|            | 1                                     | 0.032718372  | 0.032718372                          | 0.032718372  | NA                     | 1                | 0           |  |
|            | 0.998207054                           |              |                                      |              |                        |                  |             |  |
| ZNF286A    | ENSG00000187607.15                    | 0.973963619  | 8                                    | 7            | 0.37932243             |                  |             |  |
|            | Brain_Frontal_Cortex_BA9              | 0.930314057  | Brain_Hippocampus                    | 2.656935541  |                        |                  |             |  |
|            | 0.03659578                            | 0.355135535  | -0.20295689                          | 0.879145427  | 0.29944649             |                  |             |  |
|            | 0.331813323                           | 7            | 0                                    | 0.998207054  |                        |                  |             |  |
| JOSD1      | ENSG00000100221.10                    | 0.973980003  | 2                                    | 2            | 0.850401655            |                  |             |  |
|            | Brain_Cerebellar_Hemisphere           | 0.8901976    | Brain_Putamen_basal_ganglia          | 1.037987921  |                        |                  |             |  |
|            | 0.962012079                           | 0.962012079  | -0.138054177                         | 0.188605968  | 0.025275895            |                  |             |  |
|            | 0.230983604                           | 2            | 0                                    | 0.998207054  |                        |                  |             |  |
| PARK2      | ENSG00000185345.18                    | 0.974106179  | 4                                    | 3            | 0.655612757            | Brain_Cerebellum |             |  |
|            | 0.839317316                           | Brain_Cortex | 3.465551462                          | 0.019809193  | 0.164019578            |                  |             |  |
|            | 0.202766791                           | 0.445978526  | 0.309890968                          | 0.116936652  | 3                      | 0                |             |  |
|            | 0.998207054                           |              |                                      |              |                        |                  |             |  |
| ANKRD9     | ENSG00000156381.8                     | 0.974154389  | 11                                   | 3            | 0.605936083            |                  |             |  |
|            | Brain_Nucleus_accumbens_basal_ganglia | 0.966416202  | Brain_Cortex                         |              |                        |                  |             |  |
|            | 8.846366668                           | 0.002930801  | 0.587453358                          | -0.411729208 | 0.515883064            |                  |             |  |
|            | 0.094259203                           | 0.276357518  | 3                                    | 0            | 0.998207054            |                  |             |  |
| RNF2       | ENSG00000121481.10                    | 0.974209944  | 1                                    | 1            | 0.974209944            |                  |             |  |
|            | Brain_Anterior_cingulate_cortex_BA24  | 0.974209944  |                                      |              |                        |                  |             |  |
|            | Brain_Anterior_cingulate_cortex_BA24  | 1            | 1                                    | 1            | 0.032328672            |                  |             |  |
|            | 0.032328672                           | 0.032328672  | NA                                   | 1            | 0                      | 0.998207054      |             |  |
| TMOD3      | ENSG00000138594.13                    | 0.974260572  | 1                                    | 1            | 0.974260572            |                  |             |  |
|            | Brain_Nucleus_accumbens_basal_ganglia | 0.974260572  |                                      |              |                        |                  |             |  |
|            | Brain_Nucleus_accumbens_basal_ganglia | 1            | 1                                    | 1            | -0.032265186           |                  |             |  |
|            | -0.032265186                          | -0.032265186 | NA                                   | 1            | 0                      | 0.998207054      |             |  |
| ART5       | ENSG00000167311.13                    | 0.974290422  | 6                                    | 6            | 0.429973532            |                  |             |  |
|            | Brain_Spinal_cord_cervical_c-1        | 0.971616099  | Brain_Hippocampus                    |              |                        |                  |             |  |
|            | 1.249233006                           | 0.753943124  | 0.753943124                          | -0.551383159 | 0.789236946            |                  |             |  |
|            | 0.144940434                           | 0.463080246  | 6                                    | 0            | 0.998207054            |                  |             |  |
| MORN1      | ENSG00000116151.13                    | 0.974394977  | 8                                    | 6            | 0.244991001            |                  |             |  |
|            | Brain_Caudate_basal_ganglia           | 0.779810586  | Brain_Anterior_cingulate_cortex_BA24 |              |                        |                  |             |  |
|            | 5.343926148                           | 0.025116652  | 0.232988575                          | -1.162602044 | -0.279565882           |                  |             |  |
|            | -0.612021929                          | 0.277541535  | 6                                    | 0            | 0.998207054            |                  |             |  |
| KHK        | ENSG00000138030.12                    | 0.974742277  | 3                                    | 2            | 0.83381571             |                  |             |  |
|            | Brain_Caudate_basal_ganglia           | 0.899248944  | Brain_Putamen_basal_ganglia          |              |                        |                  |             |  |
|            | 2.775216681                           | 0.007334778  | 0.217448541                          | -0.20981033  | -0.126610174           |                  |             |  |
|            | -0.155014327                          | 0.047465396  | 2                                    | 0            | 0.998207054            |                  |             |  |
| ROS1       | ENSG00000047936.10                    | 0.97486253   | 2                                    | 2            | 0.823841441            |                  |             |  |
|            | Brain_Frontal_Cortex_BA9              | 0.886482834  | Brain_Cortex                         | 1.750859443  |                        |                  |             |  |
|            | 0.249140557                           | 0.249140557  | 0.142756068                          | 0.222606932  | 0.1826815              |                  |             |  |
|            | 0.056463087                           | 2            | 0                                    | 0.998207054  |                        |                  |             |  |

|               |                                       |                          |             |             |                             |                |   |              |
|---------------|---------------------------------------|--------------------------|-------------|-------------|-----------------------------|----------------|---|--------------|
| RP11-96L14.8  | ENSG00000282872.1                     | 0.974906129              | 1           | 1           | 0.974906129                 |                |   |              |
|               | Brain_Hypothalamus                    | 0.974906129              |             |             | Brain_Hypothalamus          | 1              | 1 | 1            |
|               | -0.031455689                          | -0.031455689             |             |             | NA                          | 1              | 0 | 0.998207054  |
| GLYR1         | ENSG00000140632.16                    | 0.974906215              | 3           | 3           | 0.655040752                 |                |   |              |
|               | Brain_Frontal_Cortex_BA9              | 0.808394424              |             |             | Brain_Cortex                | 1.957847854    |   |              |
|               | 0.301595202                           | 0.301595202              |             |             | 0.242497848                 | 0.446770529    |   | 0.321469342  |
|               | 0.109734508                           | 3                        | 0           | 0.998207054 |                             |                |   |              |
| AC004449.6    | ENSG00000261204.1                     | 0.975032186              | 2           | 2           | 0.835302109                 |                |   |              |
|               | Brain_Spinal_cord_cervical_c-1        | 0.952369148              |             |             | Brain_Cerebellum            | 1.121833828    |   |              |
|               | 0.878166172                           | 0.878166172              |             |             | 0.05973192                  | 0.207906326    |   | 0.133819123  |
|               | 0.104775127                           | 2                        | 0           | 0.998207054 |                             |                |   |              |
| LINC01933     | ENSG00000254226.5                     | 0.975310298              | 3           | 3           | 0.727481821                 |                |   |              |
|               | Brain_Cerebellum                      | 0.780502619              |             |             | Brain_Cortex                | 1.679933604    |   | 0.353378557  |
|               | 0.353378557                           | -0.341192516             |             |             | 0.348477217                 | -0.090459798   |   | 0.381414116  |
|               | 3                                     | 0                        | 0.998207054 |             |                             |                |   |              |
| ERP27         | ENSG00000139055.6                     | 0.975424835              | 2           | 2           | 0.827818434                 |                |   |              |
|               | Brain_Nucleus_accumbens_basal_ganglia | 0.976190786              |             |             | Brain_Hypothalamus          |                |   |              |
|               | 1.3506847                             | 0.6493153                | 0.6493153   |             | -0.217500351                | -0.029844855   |   | -0.123672603 |
|               | 0.132692473                           | 2                        | 0           | 0.998207054 |                             |                |   |              |
| RP11-460M2.1  | ENSG00000282890.1                     | 0.975530841              | 2           | 2           | 0.841524128                 |                |   |              |
|               | Brain_Cerebellum                      | 0.84383976               |             |             | Brain_Cerebellar_Hemisphere | 1.590271624    |   |              |
|               | 0.409728376                           | 0.409728376              |             |             | 0.196984381                 | 0.19994432     |   | 0.19846435   |
|               | 0.002092993                           | 2                        | 0           | 0.998207054 |                             |                |   |              |
| ANAPC4        | ENSG00000053900.10                    | 0.97553796               | 12          | 3           | 0.265641206                 |                |   |              |
|               | Brain_Anterior_cingulate_cortex_BA24  | 0.963387297              |             |             | Brain_Frontal_Cortex_BA9    |                |   |              |
|               | 9.137009577                           | 0.000420031              |             |             | 0.549892051                 | -0.379268492   |   | 1.113156536  |
|               | 0.235246362                           | 0.383896007              | 3           | 0           | 0.998207054                 |                |   |              |
| APOL3         | ENSG00000128284.19                    | 0.975573879              | 3           | 3           | 0.656252586                 |                |   |              |
|               | Brain_Hippocampus                     | 0.976368853              |             |             | Brain_Cortex                | 1.065476165    |   |              |
|               | 0.954305087                           | 0.954305087              |             |             | -0.13711555                 | 0.445092946    |   | 0.092785272  |
|               | 0.309805199                           | 3                        | 0           | 0.998207054 |                             |                |   |              |
| XAF1          | ENSG00000132530.16                    | 0.975577765              | 1           | 1           | 0.975577765                 |                |   |              |
|               | Brain_Hippocampus                     | 0.975577765              |             |             | Brain_Hippocampus           | 1              | 1 | 1            |
|               | -0.030613514                          | -0.030613514             |             |             | -0.030613514                | NA             | 1 | 0            |
|               |                                       |                          |             |             |                             |                |   | 0.998207054  |
| EMSY          | ENSG00000158636.16                    | 0.975606245              | 1           | 1           | 0.975606245                 |                |   |              |
|               | Brain_Anterior_cingulate_cortex_BA24  | 0.975606245              |             |             |                             |                |   |              |
|               | Brain_Anterior_cingulate_cortex_BA24  | 1                        | 1           | 1           | 0.030577802                 |                |   |              |
|               | 0.030577802                           | 0.030577802              |             |             | NA                          | 1              | 0 | 0.998207054  |
| RP11-554D14.8 | ENSG00000274395.1                     | 0.97566372               | 3           | 2           | 0.824621286                 |                |   |              |
|               | Brain_Hypothalamus                    | 0.905394448              |             |             | Brain_Cerebellar_Hemisphere | 2.514146239    |   |              |
|               | 0.004666496                           | 0.481187265              |             |             | 0.118849681                 | 0.221605134    |   | 0.172415193  |
|               | 0.051517279                           | 2                        | 0           | 0.998207054 |                             |                |   |              |
| AMFR          | ENSG00000159461.14                    | 0.975695149              | 6           | 6           | 0.778266994                 |                |   |              |
|               | Brain_Spinal_cord_cervical_c-1        | 0.961662903              |             |             | Brain_Cerebellum            | 3.006706262    |   |              |
|               | 0.123802383                           | 0.123802383              |             |             | -0.276691707                | 0.281578153    |   | -0.048840701 |
|               | 0.230956099                           | 6                        | 0           | 0.998207054 |                             |                |   |              |
| PPIL3         | ENSG00000240344.8                     | 0.975790453              | 13          | 1           | 0.67839118                  | Brain_Amygdala |   |              |
|               | 0.990893185                           | Brain_Frontal_Cortex_BA9 | 12.41902591 |             | 0.000800089                 |                |   |              |
|               | 12.41902591                           | -0.302116391             |             |             | 0.414659506                 | -0.02839044    |   | 0.233353272  |
|               | 1                                     | 0                        | 0.998207054 |             |                             |                |   |              |
| SLC25A2       | ENSG00000120329.6                     | 0.975855572              | 1           | 1           | 0.975855572                 |                |   |              |
|               | Brain_Frontal_Cortex_BA9              | 0.975855572              |             |             | Brain_Frontal_Cortex_BA9    | 1              | 1 |              |
|               | 1                                     | 0.030265173              |             |             | 0.030265173                 | NA             | 1 | 0            |
|               | 0.998207054                           |                          |             |             |                             |                |   |              |
| PRPSAP2       | ENSG00000141127.14                    | 0.975932496              | 13          | 2           | 0.656668406                 |                |   |              |
|               | Brain_Cerebellar_Hemisphere           | 0.967233102              |             |             | Brain_Hippocampus           | 11.59408318    |   |              |
|               | 0.001177929                           | 0.541415677              |             |             | -0.215363598                | 0.444517602    |   | 0.11815368   |
|               | 0.201010699                           | 2                        | 0           | 0.998207054 |                             |                |   |              |
| CCM2L         | ENSG00000101331.15                    | 0.976033152              | 2           | 2           | 0.836965861                 |                |   |              |
|               | Brain_Nucleus_accumbens_basal_ganglia | 0.924773612              |             |             | Brain_Cerebellar_Hemisphere |                |   |              |
|               | 1.07819298                            | 0.92180702               | 0.92180702  |             | 0.094422413                 | 0.205776036    |   | 0.150099225  |
|               | 0.078738901                           | 2                        | 0           | 0.998207054 |                             |                |   |              |

ESRP1 ENSG00000104413.15 0.976042838 3 3 0.687574623  
 Brain\_Frontal\_Cortex\_BA9 0.879076202 Brain\_Cortex 2.416151342  
 0.287688069 0.287688069 0.152140399 0.40214866 0.283719215  
 0.12552176 3 0 0.998207054  
 RP11-480C22.1 ENSG00000273409.2 0.976058728 2 2 0.866248917  
 Brain\_Hypothalamus 0.898205156 Brain\_Hippocampus 1.079500529  
 0.920499471 0.920499471 -0.127929007 0.168425032 0.020248012  
 0.20955395 2 0 0.998207054  
 GSDMB ENSG00000073605.18 0.976401478 6 2 0.748851906 Brain\_Cortex  
 0.968040031 Brain\_Putamen\_basal\_ganglia 5.504278987 0.001414112  
 0.340776007 -0.144241755 0.320153586 0.092227012 0.152344956  
 2 0 0.998207054  
 CLEC4A ENSG00000111729.13 0.976476469 3 3 0.713219613  
 Brain\_Anterior\_cingulate\_cortex\_BA24 0.972030826 Brain\_Cerebellum  
 1.781616396 0.220878944 0.220878944 -0.367535505 -0.035061343  
 -0.196389055 0.166454416 3 0 0.998207054  
 HSF2BP ENSG00000160207.8 0.976590684 2 2 0.829151803  
 Brain\_Anterior\_cingulate\_cortex\_BA24 0.851122497  
 Brain\_Nucleus\_accumbens\_basal\_ganglia 1.788666786 0.211333214  
 0.211333214 -0.215789539 -0.187686394 -0.201737967 0.019871925  
 2 0 0.998207054  
 CLCA2 ENSG00000137975.7 0.976704802 3 3 0.724929662  
 Brain\_Hippocampus 0.997331227 Brain\_Substantia\_nigra 1.89830186  
 0.157118983 0.157118983 -0.155732551 0.351878129 0.066496798  
 0.259631046 3 0 0.998207054  
 TPH2 ENSG00000139287.12 0.976725821 1 1 0.976725821  
 Brain\_Frontal\_Cortex\_BA9 0.976725821 Brain\_Frontal\_Cortex\_BA9 1 1  
 1 -0.029173995 -0.029173995 -0.029173995 NA 1 0  
 0.998207054  
 RNASE1 ENSG00000129538.13 0.976826781 1 1 0.976826781  
 Brain\_Hypothalamus 0.976826781 Brain\_Hypothalamus 1 1 1  
 -0.029047407 -0.029047407 -0.029047407 NA 1 0 0.998207054  
 TRMT1 ENSG00000104907.12 0.976964435 1 1 0.976964435  
 Brain\_Substantia\_nigra 0.976964435 Brain\_Substantia\_nigra 1 1  
 1 -0.028874811 -0.028874811 -0.028874811 NA 1 0  
 0.998207054  
 PELP1 ENSG00000141456.14 0.977005132 4 3 0.660727282  
 Brain\_Spinal\_cord\_cervical\_c-1 0.980094255 Brain\_Caudate\_basal\_ganglia  
 2.70161426 0.068456472 0.230666474 -0.438909267 0.02495074  
 -0.168058229 0.197209507 3 0 0.998207054  
 CTD-2024P10.2 ENSG00000271874.1 0.97707515 1 1 0.97707515  
 Brain\_Spinal\_cord\_cervical\_c-1 0.97707515 Brain\_Spinal\_cord\_cervical\_c-1 1  
 1 1 -0.028735994 -0.028735994 -0.028735994 NA 1 0  
 0.998207054  
 RTN4RL1 ENSG00000185924.6 0.977153269 1 1 0.977153269  
 Brain\_Cerebellum 0.977153269 Brain\_Cerebellum 1 1 1 0.028638045  
 0.028638045 0.028638045 NA 1 0 0.998207054  
 LINC00163 ENSG00000234880.1 0.977202239 1 1 0.977202239  
 Brain\_Spinal\_cord\_cervical\_c-1 0.977202239 Brain\_Spinal\_cord\_cervical\_c-1  
 1 1 1 -0.028576645 -0.028576645 -0.028576645 NA 1 0  
 0.998207054  
 OAT ENSG00000065154.11 0.977292924 4 3 0.67513157  
 Brain\_Cerebellar\_Hemisphere 0.901009675 Brain\_Cerebellum 2.122296026  
 0.050722793 0.819648349 -0.419115709 0.210834193 -0.034548681  
 0.29923576 3 0 0.998207054  
 SLC36A1 ENSG00000123643.12 0.977300442 11 8 0.34198239  
 Brain\_Hippocampus 0.976408912 Brain\_Putamen\_basal\_ganglia 3.892082934  
 0.020959403 0.157150081 -0.235129121 0.950255607 0.265608357  
 0.426897106 8 0 0.998207054  
 GABRA6 ENSG00000145863.10 0.977383262 3 3 0.748084229  
 Brain\_Caudate\_basal\_ganglia 0.906485467 Brain\_Cerebellum 1.888207827  
 0.121037148 0.121037148 -0.321166485 0.2362483 0.010851509

|                |                                       |                             |                             |                          |              |              |              |                  |  |
|----------------|---------------------------------------|-----------------------------|-----------------------------|--------------------------|--------------|--------------|--------------|------------------|--|
|                | 0.293604958                           | 3                           | 0                           | 0.998207054              |              |              |              |                  |  |
| RP11-147L13.12 | ENSG00000274561.1                     |                             |                             | 0.977417643              | 4            | 3            | 0.647082468  |                  |  |
|                | Brain_Caudate_basal_ganglia           | 0.848171578                 |                             | Brain_Cortex             |              |              | 3.025428709  |                  |  |
|                | 0.049437574                           | 0.290797999                 |                             | -0.457819022             |              | -0.19145188  |              | -0.336161552     |  |
|                | 0.132778565                           | 3                           | 0                           | 0.998207054              |              |              |              |                  |  |
| SKA2           | ENSG00000182628.12                    |                             |                             | 0.9774532                | 13           | 6            | 0.311489718  |                  |  |
|                | Brain_Spinal_cord_cervical_c-1        | 0.875752732                 |                             | Brain_Substantia_nigra   |              |              |              |                  |  |
|                | 9.471688956                           | 0.01012206                  | 0.344219912                 | -1.012101098             |              |              | -0.156355601 |                  |  |
|                | -0.506343474                          | 0.223116614                 |                             | 6                        | 0            | 0.998207054  |              |                  |  |
| BATF           | ENSG00000156127.6                     |                             |                             | 0.977487383              | 1            | 1            | 0.977487383  | Brain_Cerebellum |  |
|                | 0.977487383                           | Brain_Cerebellum            | 1                           | 1                        | 1            | -0.028219127 |              | -0.028219127     |  |
|                | -0.028219127                          | NA                          | 1                           | 0                        | 0.998207054  |              |              |                  |  |
| ERVK3-1        | ENSG00000142396.10                    |                             |                             | 0.977550246              | 2            | 2            | 0.881141403  |                  |  |
|                | Brain_Cerebellar_Hemisphere           | 0.982407225                 |                             | Brain_Cerebellum         | 1.636083556  |              |              |                  |  |
|                | 0.363916444                           | 0.363916444                 |                             | -0.149522441             |              | 0.022051061  |              | -0.06373569      |  |
|                | 0.121320787                           | 2                           | 0                           | 0.998207054              |              |              |              |                  |  |
| GPRIN2         | ENSG00000204175.5                     |                             |                             | 0.977613478              | 5            | 5            | 0.478163253  |                  |  |
|                | Brain_Amygdala                        | 0.932015823                 |                             | Brain_Cerebellum         | 1.618406056  |              | 0.400418195  |                  |  |
|                | 0.400418195                           | -0.245884234                |                             | 0.709259827              |              | 0.131313452  |              | 0.416346941      |  |
|                | 5                                     | 0                           | 0.998207054                 |                          |              |              |              |                  |  |
| ESF1           | ENSG00000089048.14                    |                             |                             | 0.977621181              | 1            | 1            | 0.977621181  | Brain_Cerebellum |  |
|                | 0.977621181                           | Brain_Cerebellum            | 1                           | 1                        | 1            | 0.028051369  |              | 0.028051369      |  |
|                | 0.028051369                           | NA                          | 1                           | 0                        | 0.998207054  |              |              |                  |  |
| MARS           | ENSG00000166986.14                    |                             |                             | 0.977667068              | 2            | 2            | 0.848896221  | Brain_Cerebellum |  |
|                | 0.944292035                           | Brain_Cerebellar_Hemisphere | 1.123806143                 |                          | 0.876193857  |              |              |                  |  |
|                | 0.876193857                           | -0.190526958                | 0.069876403                 |                          | -0.060325278 |              | 0.184132982  |                  |  |
|                | 2                                     | 0                           | 0.998207054                 |                          |              |              |              |                  |  |
| SMIM25         | ENSG00000224397.5                     |                             |                             | 0.977677961              | 1            | 1            | 0.977677961  |                  |  |
|                | Brain_Cortex                          | 0.977677961                 | Brain_Cortex                | 1                        | 1            | 1            | -0.027980177 |                  |  |
|                | -0.027980177                          | -0.027980177                | NA                          | 1                        | 0            | 0.998207054  |              |                  |  |
| PXK            | ENSG00000168297.15                    |                             |                             | 0.978003705              | 6            | 5            | 0.653652669  |                  |  |
|                | Brain_Cerebellar_Hemisphere           | 0.995747703                 |                             | Brain_Frontal_Cortex_BA9 |              |              |              |                  |  |
|                | 3.394416458                           | 0.068758039                 | 0.136366432                 |                          | -0.448693646 |              | 0.163236048  |                  |  |
|                | -0.144476035                          | 0.224877759                 |                             | 5                        | 0            | 0.998207054  |              |                  |  |
| LINC00839      | ENSG00000185904.11                    |                             |                             | 0.978157118              | 12           | 9            | 0.34886266   |                  |  |
|                | Brain_Spinal_cord_cervical_c-1        | 0.90458692                  | Brain_Cerebellum            | 5.887540748              |              |              |              |                  |  |
|                | 0.008069771                           | 0.249815264                 |                             | -0.936797639             |              | 0.477877943  |              | -0.204307926     |  |
|                | 0.361992004                           | 9                           | 0                           | 0.998207054              |              |              |              |                  |  |
| CTD-2538C1.2   | ENSG00000267475.1                     |                             |                             | 0.97824388               | 5            | 4            | 0.62250346   |                  |  |
|                | Brain_Caudate_basal_ganglia           | 0.923019709                 | Brain_Putamen_basal_ganglia |                          |              |              |              |                  |  |
|                | 3.189801118                           | 0.03599595                  | 0.397617887                 |                          | -0.23570795  |              | 0.492305405  |                  |  |
|                | 0.144006918                           | 0.300173626                 |                             | 4                        | 0            | 0.998207054  |              |                  |  |
| TAS2R19        | ENSG00000212124.2                     |                             |                             | 0.97843646               | 3            | 3            | 0.67496873   |                  |  |
|                | Brain_Cerebellar_Hemisphere           | 0.767771946                 | Brain_Cerebellum            | 2.385307968              |              |              |              |                  |  |
|                | 0.11638693                            | 0.11638693                  | 0.295290536                 |                          | 0.419338546  |              | 0.351495056  |                  |  |
|                | 0.062837699                           | 3                           | 0                           | 0.998207054              |              |              |              |                  |  |
| TMEM160        | ENSG00000130748.6                     |                             |                             | 0.978459376              | 1            | 1            | 0.978459376  |                  |  |
|                | Brain_Caudate_basal_ganglia           | 0.978459376                 | Brain_Caudate_basal_ganglia | 1                        | 1            |              |              |                  |  |
|                | 1                                     | -0.027000449                | -0.027000449                |                          | -0.027000449 | NA           | 1            | 0                |  |
|                | 0.998207054                           |                             |                             |                          |              |              |              |                  |  |
| RP11-557L19.1  | ENSG00000272002.1                     |                             |                             | 0.978564152              | 5            | 5            | 0.48756074   |                  |  |
|                | Brain_Hippocampus                     | 0.942198663                 | Brain_Frontal_Cortex_BA9    | 1.699862556              |              |              |              |                  |  |
|                | 0.638758741                           | 0.638758741                 |                             | -0.694193704             |              | -0.072506713 |              | -0.407372914     |  |
|                | 0.276294412                           | 5                           | 0                           | 0.998207054              |              |              |              |                  |  |
| STK31          | ENSG00000196335.12                    |                             |                             | 0.978581331              | 9            | 5            | 0.589575387  |                  |  |
|                | Brain_Nucleus_accumbens_basal_ganglia | 0.873955452                 | Brain_Substantia_nigra      |                          |              |              |              |                  |  |
|                | 5.103652735                           | 0.026522612                 | 0.266329325                 |                          | -0.539451452 |              | 0.304898154  |                  |  |
|                | -0.086514116                          | 0.341507989                 |                             | 5                        | 0            | 0.998207054  |              |                  |  |
| CABP4          | ENSG00000175544.13                    |                             |                             | 0.978611759              | 4            | 4            | 0.679816561  |                  |  |
|                | Brain_Hippocampus                     | 0.975971013                 | Brain_Cerebellum            | 2.466071396              |              |              |              |                  |  |
|                | 0.123549412                           | 0.123549412                 |                             | -0.030120423             |              | 0.412713462  |              | 0.234886204      |  |
|                | 0.214330531                           | 4                           | 0                           | 0.998207054              |              |              |              |                  |  |

|              |                                       |                             |                                       |              |              |                             |
|--------------|---------------------------------------|-----------------------------|---------------------------------------|--------------|--------------|-----------------------------|
| RP11-385F7.1 | ENSG00000270761.1                     | 0.97871591                  | 3                                     | 1            | 0.811196441  |                             |
|              | Brain_Cerebellum                      | 0.97189152                  | Brain_Cerebellar_Hemisphere           | 2.895786442  |              |                             |
|              | 0.016757736                           | 2.895786442                 | -0.124924897                          | 0.238882828  | 0.026240629  |                             |
|              | 0.189535093                           | 1                           | 0                                     | 0.998207054  |              |                             |
| DPP9         | ENSG00000142002.16                    | 0.978834764                 | 3                                     | 2            | 0.838613336  | Brain_Cerebellum            |
|              | 0.987682777                           | Brain_Cerebellar_Hemisphere | 2.012466183                           | 0.006512991  |              |                             |
|              | 0.981020826                           | -0.061412803                | 0.203667507                           | 0.052564222  | 0.136384244  |                             |
|              | 2                                     | 0                           | 0.998207054                           |              |              |                             |
| TMCO1        | ENSG00000143183.16                    | 0.978867449                 | 3                                     | 3            | 0.674119399  |                             |
|              | Brain_Caudate_basal_ganglia           | 0.901443742                 | Brain_Cortex                          | 2.239886024  |              |                             |
|              | 0.078680499                           | 0.078680499                 | -0.420501138                          | -0.123837749 | -0.238164521 |                             |
|              | 0.159597292                           | 3                           | 0                                     | 0.998207054  |              |                             |
| SORD         | ENSG00000140263.13                    | 0.979000336                 | 5                                     | 1            | 0.892235646  |                             |
|              | Brain_Frontal_Cortex_BA9              | 0.981641743                 | Brain_Hypothalamus                    | 4.79481105   |              |                             |
|              | 0.000431553                           | 4.79481105                  | -0.135475864                          | 0.090922256  | -0.026772243 |                             |
|              | 0.102322886                           | 1                           | 0                                     | 0.998207054  |              |                             |
| LINC00484    | ENSG00000235641.4                     | 0.979039589                 | 2                                     | 2            | 0.837708975  |                             |
|              | Brain_Cerebellar_Hemisphere           | 0.86356002                  | Brain_Cerebellum                      | 1.776441098  |              |                             |
|              | 0.223558902                           | 0.223558902                 | -0.204824845                          | -0.171844195 | -0.18833452  |                             |
|              | 0.023320841                           | 2                           | 0                                     | 0.998207054  |              |                             |
| FLT3         | ENSG00000122025.14                    | 0.979096437                 | 13                                    | 1            | 0.632698871  | Brain_Amygdala              |
|              | 0.99837817                            | Brain_Hippocampus           | 12.16484739                           | 0.00403485   | 12.16484739  |                             |
|              | -0.423298866                          | 0.477931626                 | 0.021386322                           | 0.263242802  | 1            | 0                           |
|              | 0.998207054                           |                             |                                       |              |              |                             |
| C1QTNF9B     | ENSG00000205863.10                    | 0.979300356                 | 5                                     | 4            | 0.604793285  |                             |
|              | Brain_Spinal_cord_cervical_c-1        | 0.831541221                 | Brain_Cortex                          | 2.715610595  |              |                             |
|              | 0.014874599                           | 0.276991542                 | -0.318017902                          | 0.517519894  | 0.006777279  |                             |
|              | 0.370740303                           | 4                           | 0                                     | 0.998207054  |              |                             |
| FBXO40       | ENSG00000163833.7                     | 0.979385781                 | 1                                     | 1            | 0.979385781  |                             |
|              | Brain_Cerebellum                      | 0.979385781                 | Brain_Cerebellum                      | 1            | 1            | 0.025838967                 |
|              | 0.025838967                           | 0.025838967                 | NA                                    | 1            | 0            | 0.998207054                 |
| ANKIB1       | ENSG00000001629.9                     | 0.979392631                 | 1                                     | 1            | 0.979392631  |                             |
|              | Brain_Caudate_basal_ganglia           | 0.979392631                 | Brain_Caudate_basal_ganglia           | 1            | 1            |                             |
|              | 1                                     | 0.02583038                  | 0.02583038                            | 0.02583038   | NA           | 1                           |
|              | 0.02583038                            | 0.02583038                  | 0.02583038                            | NA           | 1            | 0                           |
|              | 0.998207054                           |                             |                                       |              |              |                             |
| TMEM223      | ENSG00000168569.7                     | 0.97955018                  | 3                                     | 3            | 0.752189634  |                             |
|              | Brain_Putamen_basal_ganglia           | 0.919357164                 | Brain_Caudate_basal_ganglia           | 1.19912482   |              |                             |
|              | 0.819604564                           | 0.819604564                 | -0.101243502                          | 0.315753475  | 0.147779029  |                             |
|              | 0.219995941                           | 3                           | 0                                     | 0.998207054  |              |                             |
| ZNF28        | ENSG00000198538.10                    | 0.979627363                 | 3                                     | 3            | 0.724951573  |                             |
|              | Brain_Cerebellar_Hemisphere           | 0.848624274                 | Brain_Nucleus_accumbens_basal_ganglia |              |              |                             |
|              | 1.264570556                           | 0.747832032                 | 0.747832032                           | -0.351848915 | -0.190874047 |                             |
|              | -0.262040535                          | 0.082090603                 | 3                                     | 0            | 0.998207054  |                             |
| VPS52        | ENSG00000223501.8                     | 0.97968646                  | 1                                     | 1            | 0.97968646   | Brain_Caudate_basal_ganglia |
|              | 0.97968646                            | Brain_Caudate_basal_ganglia | 1                                     | 1            | -0.025461998 |                             |
|              | -0.025461998                          | -0.025461998                | NA                                    | 1            | 0            | 0.998207054                 |
| IFNA2        | ENSG00000188379.6                     | 0.979755659                 | 1                                     | 1            | 0.979755659  |                             |
|              | Brain_Nucleus_accumbens_basal_ganglia | 0.979755659                 |                                       |              |              |                             |
|              | Brain_Nucleus_accumbens_basal_ganglia | 1                           | 1                                     | 1            | 0.025375241  |                             |
|              | 0.025375241                           | 0.025375241                 | NA                                    | 1            | 0            | 0.998207054                 |
| KCNK10       | ENSG00000100433.15                    | 0.979855813                 | 2                                     | 2            | 0.845775541  |                             |
|              | Brain_Cerebellum                      | 0.918767776                 | Brain_Cerebellar_Hemisphere           | 1.258488947  |              |                             |
|              | 0.741511053                           | 0.741511053                 | 0.101986014                           | 0.194511309  | 0.148248662  |                             |
|              | 0.065425264                           | 2                           | 0                                     | 0.998207054  |              |                             |
| TTC21A       | ENSG00000168026.18                    | 0.979860544                 | 6                                     | 5            | 0.516513818  |                             |
|              | Brain_Putamen_basal_ganglia           | 0.98826123                  | Brain_Cerebellum                      | 2.983938516  |              |                             |
|              | 0.032804199                           | 0.127402355                 | -0.179221361                          | 0.648728596  | 0.159063532  |                             |
|              | 0.326614248                           | 5                           | 0                                     | 0.998207054  |              |                             |
| MTMR2        | ENSG00000087053.18                    | 0.979870875                 | 2                                     | 2            | 0.867143629  |                             |
|              | Brain_Putamen_basal_ganglia           | 0.93539054                  | Brain_Substantia_nigra                | 1.177902922  |              |                             |
|              | 0.822097078                           | 0.822097078                 | -0.167287767                          | 0.081064648  | -0.04311156  |                             |
|              | 0.175611677                           | 2                           | 0                                     | 0.998207054  |              |                             |
| KCNMB3       | ENSG00000171121.16                    | 0.979877257                 | 7                                     | 7            | 0.603875663  |                             |

|               |                                       |                                |                             |              |                             |                  |              |  |
|---------------|---------------------------------------|--------------------------------|-----------------------------|--------------|-----------------------------|------------------|--------------|--|
|               | Brain_Spinal_cord_cervical_c-1        | 0.874792452                    |                             |              | Brain_Putamen_basal_ganglia |                  |              |  |
|               | 3.172167032                           | 0.244267747                    | 0.244267747                 |              | -0.507546584                | 0.518835209      |              |  |
|               | -0.067794968                          | 0.396058097                    | 7                           | 0            | 0.998207054                 |                  |              |  |
| RP11-820I16.1 | ENSG00000267079.1                     | 0.979989484                    | 10                          | 4            | 0.554656604                 |                  |              |  |
|               | Brain_Nucleus_accumbens_basal_ganglia | 0.982304537                    |                             |              | Brain_Substantia_nigra      |                  |              |  |
|               | 7.896344953                           | 0.003019041                    | 0.318230169                 |              | -0.590796763                | 0.285740114      |              |  |
|               | -0.135172093                          | 0.270038069                    | 4                           | 0            | 0.998207054                 |                  |              |  |
| C4orf26       | ENSG00000174792.10                    | 0.980003831                    | 10                          | 7            | 0.504645825                 |                  |              |  |
|               | Brain_Amygdala                        | 0.872459034                    |                             |              | Brain_Substantia_nigra      | 5.249671716      |              |  |
|               | 0.025498524                           | 0.390790018                    | -0.612092338                |              | 0.667197754                 | -0.132256792     |              |  |
|               | 0.390654198                           | 7                              | 0                           | 0.998207054  |                             |                  |              |  |
| HOKK2         | ENSG00000095066.11                    | 0.980044271                    | 1                           | 1            | 0.980044271                 | Brain_Cerebellum |              |  |
|               | 0.980044271                           | Brain_Cerebellum1              | 1                           | 1            | -0.025013405                | -0.025013405     |              |  |
|               | -0.025013405                          | NA                             | 1                           | 0            | 0.998207054                 |                  |              |  |
| MAP3K11       | ENSG00000173327.7                     | 0.980058226                    | 3                           | 2            | 0.917703723                 |                  |              |  |
|               | Brain_Cerebellar_Hemisphere           | 0.99578944                     | Brain_Cerebellum            | 2.726073035  |                             |                  |              |  |
|               | 0.045347502                           | 0.228579463                    | -0.103326653                |              | 0.065773105                 | -0.01075879      |              |  |
|               | 0.085682824                           | 2                              | 0                           | 0.998207054  |                             |                  |              |  |
| CLDN20        | ENSG00000171217.5                     | 0.98006885                     | 1                           | 1            | 0.98006885                  |                  |              |  |
|               | Brain_Caudate_basal_ganglia           | 0.98006885                     | Brain_Caudate_basal_ganglia | 1            | 1                           | 1                |              |  |
|               | 0.02498259                            | 0.02498259                     | 0.02498259                  | NA           | 1                           | 0                | 0.998207054  |  |
| COL3A1        | ENSG00000168542.14                    | 0.980089305                    | 1                           | 1            | 0.980089305                 |                  |              |  |
|               | Brain_Putamen_basal_ganglia           | 0.980089305                    | Brain_Putamen_basal_ganglia | 1            | 1                           |                  |              |  |
|               | 1                                     | -0.024956946                   | -0.024956946                | -0.024956946 | NA                          | 1                | 0            |  |
|               | 0.998207054                           |                                |                             |              |                             |                  |              |  |
| NUP188        | ENSG00000095319.14                    | 0.980109282                    | 2                           | 2            | 0.842634623                 |                  |              |  |
|               | Brain_Putamen_basal_ganglia           | 0.88454964                     | Brain_Substantia_nigra      | 1.812851704  |                             |                  |              |  |
|               | 0.187148296                           | 0.187148296                    | -0.198524621                |              | -0.145204213                | -0.171864417     |              |  |
|               | 0.037703223                           | 2                              | 0                           | 0.998207054  |                             |                  |              |  |
| RGS11         | ENSG00000076344.15                    | 0.980308618                    | 8                           | 8            | 0.19372049                  | Brain_Cerebellum |              |  |
|               | 0.989782055                           | Brain_Putamen_basal_ganglia    | 1.647091724                 |              | 0.482968438                 |                  |              |  |
|               | 0.482968438                           | -0.401074187                   | 1.299651355                 |              | 0.220204587                 | 0.526575992      |              |  |
|               | 8                                     | 0                              | 0.998207054                 |              |                             |                  |              |  |
| NUDT16L1      | ENSG00000168101.14                    | 0.980339832                    | 3                           | 2            | 0.851886983                 |                  |              |  |
|               | Brain_Cerebellar_Hemisphere           | 0.915314967                    | Brain_Cerebellum            | 1.98932022   |                             |                  |              |  |
|               | 0.011930323                           | 0.998749458                    | -0.131295643                |              | 0.186711316                 | 0.053917561      |              |  |
|               | 0.165357054                           | 2                              | 0                           | 0.998207054  |                             |                  |              |  |
| SAYS1         | ENSG00000112167.9                     | 0.980367252                    | 5                           | 5            | 0.436814212                 |                  |              |  |
|               | Brain_Caudate_basal_ganglia           | 0.875918178                    | Brain_Frontal_Cortex_BA9    |              |                             |                  |              |  |
|               | 1.389117528                           | 0.568386956                    | 0.568386956                 |              | -0.156145698                | 0.777584144      |              |  |
|               | 0.266877842                           | 0.334709776                    | 5                           | 0            | 0.998207054                 |                  |              |  |
| XKR9          | ENSG00000221947.7                     | 0.980688571                    | 13                          | 1            | 0.672641085                 | Brain_Cortex     |              |  |
|               | 0.960650676                           | Brain_Spinal_cord_cervical_c-1 | 12.73401771                 |              | 0.00020302                  |                  |              |  |
|               | 12.73401771                           | -0.422526058                   | 0.381397704                 |              | -0.023065746                | 0.221418186      |              |  |
|               | 1                                     | 0                              | 0.998207054                 |              |                             |                  |              |  |
| FGFR10P2      | ENSG00000111790.13                    | 0.980715649                    | 1                           | 1            | 0.980715649                 |                  |              |  |
|               | Brain_Cerebellum                      | 0.980715649                    | Brain_Cerebellum            | 1            | 1                           | 1                | 0.024171703  |  |
|               | 0.024171703                           | 0.024171703                    | NA                          | 1            | 0                           | 0.998207054      |              |  |
| TM2D2         | ENSG00000169490.16                    | 0.9807304                      | 4                           | 2            | 0.831919912                 |                  |              |  |
|               | Brain_Cerebellar_Hemisphere           | 0.993717973                    | Brain_Cerebellum            | 2.901950469  |                             |                  |              |  |
|               | 0.029255456                           | 1.000157884                    | -0.212239859                |              | 0.188600585                 | 0.011144794      |              |  |
|               | 0.167155242                           | 2                              | 0                           | 0.998207054  |                             |                  |              |  |
| UBXN2B        | ENSG00000215114.8                     | 0.980753177                    | 8                           | 5            | 0.633143388                 |                  |              |  |
|               | Brain_Nucleus_accumbens_basal_ganglia | 0.963913849                    | Brain_Amygdala              |              |                             |                  |              |  |
|               | 5.531628085                           | 0.017676701                    | 0.292818861                 |              | -0.477307195                | 0.395111507      |              |  |
|               | -0.121288959                          | 0.277275137                    | 5                           | 0            | 0.998207054                 |                  |              |  |
| MYO18A        | ENSG00000196535.15                    | 0.980761426                    | 1                           | 1            | 0.980761426                 |                  |              |  |
|               | Brain_Hypothalamus                    | 0.980761426                    | Brain_Hypothalamus          | 1            | 1                           | 1                |              |  |
|               | 0.024114314                           | 0.024114314                    | 0.024114314                 | NA           | 1                           | 0                | 0.998207054  |  |
| CHST15        | ENSG00000182022.17                    | 0.980762414                    | 1                           | 1            | 0.980762414                 |                  |              |  |
|               | Brain_Cerebellum                      | 0.980762414                    | Brain_Cerebellum            | 1            | 1                           | 1                | -0.024113075 |  |
|               | -0.024113075                          | -0.024113075                   | NA                          | 1            | 0                           | 0.998207054      |              |  |

|         |                                       |              |              |             |              |                                      |              |   |
|---------|---------------------------------------|--------------|--------------|-------------|--------------|--------------------------------------|--------------|---|
| ZKSCAN3 | ENSG00000189298.13                    | 0.980819262  | 10           | 8           | 0.413310426  |                                      |              |   |
|         | Brain_Putamen_basal_ganglia           | 0.936471076  |              |             |              | Brain_Caudate_basal_ganglia          |              |   |
|         | 5.591560378                           | 0.016016643  | 0.188678879  |             |              | -0.421686824                         | 0.818081896  |   |
|         | 0.115551115                           | 0.382613331  | 8            | 0           | 0.998207054  |                                      |              |   |
| RIOK1   | ENSG00000124784.8                     | 0.980824107  | 13           | 3           | 0.545427177  |                                      |              |   |
|         | Brain_Putamen_basal_ganglia           | 0.974742426  |              |             |              | Brain_Cortex                         | 10.5608647   |   |
|         | 0.003260339                           | 0.770513825  | -0.604626527 |             |              | 0.531456661                          | -0.155045063 |   |
|         | 0.335361786                           | 3            | 0            | 0.998207054 |              |                                      |              |   |
| DPYSL2  | ENSG00000092964.17                    | 0.980878832  | 1            | 1           | 0.980878832  |                                      |              |   |
|         | Brain_Anterior_cingulate_cortex_BA24  | 0.980878832  |              |             |              |                                      |              |   |
|         | Brain_Anterior_cingulate_cortex_BA24  | 1            | 1            | 1           | 0.023967125  |                                      |              |   |
|         | 0.023967125                           | 0.023967125  | NA           | 1           | 0            | 0.998207054                          |              |   |
| IRF2    | ENSG00000168310.10                    | 0.980963119  | 1            | 1           | 0.980963119  |                                      |              |   |
|         | Brain_Hypothalamus                    | 0.980963119  |              |             |              | Brain_Hypothalamus                   | 1            | 1 |
|         | -0.023861456                          | -0.023861456 | -0.023861456 | NA          | 1            | 0                                    | 0.998207054  |   |
| PTPRK   | ENSG00000152894.14                    | 0.981053364  | 2            | 2           | 0.873833739  |                                      |              |   |
|         | Brain_Caudate_basal_ganglia           | 1.043679579  |              |             |              | Brain_Cortex                         | 0.956320421  |   |
|         | 0.914663495                           | 0.107158176  | 0.158790748  |             |              | 0.132974462                          | 0.036509741  |   |
|         | 0.956320421                           | 0.107158176  | 0.158790748  |             |              |                                      |              |   |
|         | 2                                     | 0            | 0.998207054  |             |              |                                      |              |   |
| MIOS    | ENSG00000164654.15                    | 0.981071543  | 5            | 3           | 0.507971858  |                                      |              |   |
|         | Brain_Nucleus_accumbens_basal_ganglia | 0.937382686  |              |             |              | Brain_Caudate_basal_ganglia          |              |   |
|         | 4.252389723                           | 0.102485237  | 0.182637934  |             |              | -0.661999007                         | 0.605653752  |   |
|         | 0.001004647                           | 0.484943352  | 3            | 0           | 0.998207054  |                                      |              |   |
| PLIN2   | ENSG00000147872.9                     | 0.981119663  | 2            | 2           | 0.851418478  |                                      |              |   |
|         | Brain_Nucleus_accumbens_basal_ganglia | 1.020617207  |              |             |              |                                      |              |   |
|         | 0.959137275                           | 0.979382793  | -0.187308858 |             |              | 0.051236239                          | -0.06803631  |   |
|         | 0.979382793                           | 0.979382793  | -0.187308858 |             |              |                                      |              |   |
|         | 0.168676856                           | 2            | 0            | 0.998207054 |              |                                      |              |   |
| PAMR1   | ENSG00000149090.11                    | 0.981149654  | 2            | 2           | 0.888639207  |                                      |              |   |
|         | Brain_Nucleus_accumbens_basal_ganglia | 0.894074719  |              |             |              |                                      |              |   |
|         | Brain_Spinal_cord_cervical_c-1        | 1.019052315  |              |             |              | 0.980947685                          | 0.980947685  |   |
|         | -0.133150043                          | 0.140026305  | 0.003438131  |             |              | 0.193164848                          | 2            | 0 |
|         | 0.998207054                           |              |              |             |              |                                      |              |   |
| POLR3B  | ENSG00000013503.9                     | 0.981156906  | 3            | 3           | 0.677312557  |                                      |              |   |
|         | Brain_Cerebellar_Hemisphere           | 0.953828351  |              |             |              | Brain_Anterior_cingulate_cortex_BA24 |              |   |
|         | 1.295190491                           | 0.715160355  | 0.715160355  |             |              | -0.416133173                         | -0.057899914 |   |
|         | -0.196169288                          | 0.19258313   | 3            | 0           | 0.998207054  |                                      |              |   |
| TTL5    | ENSG00000119685.19                    | 0.981200659  | 6            | 3           | 0.457102328  |                                      |              |   |
|         | Brain_Putamen_basal_ganglia           | 0.983709936  |              |             |              | Brain_Hippocampus                    | 4.861418533  |   |
|         | 0.028896375                           | 0.271517835  | -0.743626729 |             |              | -0.020417986                         | -0.294420503 |   |
|         | 0.257762407                           | 3            | 0            | 0.998207054 |              |                                      |              |   |
| CNTNAP3 | ENSG00000106714.17                    | 0.981215456  | 2            | 2           | 0.870375326  |                                      |              |   |
|         | Brain_Cerebellar_Hemisphere           | 0.911084388  |              |             |              | Brain_Spinal_cord_cervical_c-1       |              |   |
|         | 1.033319637                           | 0.966680363  | 0.966680363  |             |              | -0.111670857                         | 0.163181762  |   |
|         | 0.025755453                           | 0.19435015   | 2            | 0           | 0.998207054  |                                      |              |   |
| PCDHGB6 | ENSG00000253305.2                     | 0.981258264  | 1            | 1           | 0.981258264  |                                      |              |   |
|         | Brain_Nucleus_accumbens_basal_ganglia | 0.981258264  |              |             |              |                                      |              |   |
|         | Brain_Nucleus_accumbens_basal_ganglia | 1            | 1            | 1           | 0.023491443  |                                      |              |   |
|         | 0.023491443                           | 0.023491443  | NA           | 1           | 0            | 0.998207054                          |              |   |
| STX17   | ENSG00000136874.10                    | 0.981290914  | 2            | 2           | 0.954788794  |                                      |              |   |
|         | Brain_Caudate_basal_ganglia           | 0.976983699  |              |             |              | Brain_Putamen_basal_ganglia          |              |   |
|         | 1.902606622                           | 0.097393378  | 0.097393378  |             |              | -0.028850657                         | 0.056694201  |   |
|         | 0.013921772                           | 0.060489349  | 2            | 0           | 0.998207054  |                                      |              |   |
| RRM2    | ENSG00000171848.13                    | 0.981315172  | 1            | 1           | 0.981315172  |                                      |              |   |
|         | Brain_Cerebellum                      | 1            | 1            | 1           | -0.023420101 |                                      | -0.023420101 |   |
|         | -0.023420101                          | NA           | 1            | 0           | 0.998207054  |                                      |              |   |
| ZFAND4  | ENSG00000172671.19                    | 0.9813223    | 6            | 5           | 0.655890492  |                                      |              |   |
|         | Brain_Anterior_cingulate_cortex_BA24  | 3.627246978  |              |             |              |                                      |              |   |
|         | 0.92341072                            | -0.445594074 | 0.412275816  |             |              | 0.162764556                          | 0.318528138  |   |
|         | 0.215444921                           | -0.445594074 | 0.412275816  |             |              |                                      |              |   |
|         | 5                                     | 0            | 0.998207054  |             |              |                                      |              |   |
| TBC1D8  | ENSG00000204634.12                    | 0.981326501  | 1            | 1           | 0.981326501  |                                      |              |   |
|         | Brain_Caudate_basal_ganglia           | 0.981326501  |              |             |              | Brain_Caudate_basal_ganglia          | 1            | 1 |
|         | 1                                     | -0.023405898 | -0.023405898 |             |              | -0.023405898                         | NA           | 1 |
|         |                                       |              |              |             |              |                                      |              | 0 |

|               |                                       |                             |                                       |              |              |                  |              |  |  |
|---------------|---------------------------------------|-----------------------------|---------------------------------------|--------------|--------------|------------------|--------------|--|--|
| 0.998207054   |                                       |                             |                                       |              |              |                  |              |  |  |
| MAIP1         | ENSG00000162972.10                    | 0.981418844                 | 1                                     | 1            | 0.981418844  | Brain_Amygdala   |              |  |  |
|               | 0.981418844                           | Brain_Amygdala              | 1                                     | 1            | 0.023290131  |                  | 0.023290131  |  |  |
|               | 0.023290131                           | NA                          | 1                                     | 0            | 0.998207054  |                  |              |  |  |
| RP5-1068E13.7 | ENSG00000273148.1                     | 0.981586049                 | 1                                     | 1            | 0.981586049  |                  |              |  |  |
|               | Brain_Amygdala                        | 0.981586049                 | Brain_Amygdala                        | 1            | 1            | 1                | -0.023080515 |  |  |
|               | -0.023080515                          | -0.023080515                | NA                                    | 1            | 0            | 0.998207054      |              |  |  |
| PCDHA8        | ENSG00000204962.5                     | 0.981657825                 | 5                                     | 2            | 0.659875485  |                  |              |  |  |
|               | Brain_Frontal_Cortex_BA9              | 0.854919311                 | Brain_Nucleus_accumbens_basal_ganglia |              |              |                  |              |  |  |
|               | 4.35974858                            | 0.009536243                 | 0.489928372                           | -0.22387791  | 0.440085084  |                  |              |  |  |
|               | 0.174557935                           | 0.243995851                 | 2                                     | 0            | 0.998207054  |                  |              |  |  |
| BAG6          | ENSG00000204463.12                    | 0.981734013                 | 11                                    | 8            | 0.279536515  | Brain_Amygdala   |              |  |  |
|               | 0.94474825                            | Brain_Cerebellar_Hemisphere | 6.053508032                           | 0.010236094  |              |                  |              |  |  |
|               | 0.221454787                           | -1.081361107                | 0.295445512                           | -0.274310239 | 0.477658368  |                  |              |  |  |
|               | 8                                     | 0                           | 0.998207054                           |              |              |                  |              |  |  |
| MAPKAPK5      | ENSG00000089022.13                    | 0.98175616                  | 2                                     | 2            | 0.848518141  | Brain_Cerebellum |              |  |  |
|               | 0.914214884                           | Brain_Cortex                | 1.638281915                           | 0.361718085  | 0.361718085  |                  |              |  |  |
|               | 0.107723681                           | 0.191009511                 | 0.149366596                           | 0.058891976  | 2            | 0                |              |  |  |
|               | 0.998207054                           |                             |                                       |              |              |                  |              |  |  |
| ZNF778        | ENSG00000170100.13                    | 0.981800485                 | 8                                     | 7            | 0.373205388  |                  |              |  |  |
|               | Brain_Frontal_Cortex_BA9              | 0.994829731                 | Brain_Putamen_basal_ganglia           |              |              |                  |              |  |  |
|               | 2.747584101                           | 0.08256232                  | 0.12299512                            | -0.890485245 | 0.480999202  |                  |              |  |  |
|               | -0.146811669                          | 0.394115536                 | 7                                     | 0            | 0.998207054  |                  |              |  |  |
| SLC38A10      | ENSG00000157637.12                    | 0.98183541                  | 6                                     | 6            | 0.366621365  |                  |              |  |  |
|               | Brain_Cerebellar_Hemisphere           | 0.981469823                 | Brain_Nucleus_accumbens_basal_ganglia |              |              |                  |              |  |  |
|               | 1.680193258                           | 0.3487048                   | 0.3487048                             | -0.023226221 | 0.902820131  |                  |              |  |  |
|               | 0.318812345                           | 0.31465096                  | 6                                     | 0            | 0.998207054  |                  |              |  |  |
| TNPO3         | ENSG00000064419.13                    | 0.981900524                 | 2                                     | 2            | 0.852577324  |                  |              |  |  |
|               | Brain_Putamen_basal_ganglia           | 0.866522264                 | Brain_Hypothalamus                    | 1.743682685  |              |                  |              |  |  |
|               | 0.256317315                           | 0.256317315                 | 0.168077558                           | 0.185830961  | 0.176954259  |                  |              |  |  |
|               | 0.012553552                           | 2                           | 0                                     | 0.998207054  |              |                  |              |  |  |
| ZNF790        | ENSG00000197863.8                     | 0.981953089                 | 3                                     | 3            | 0.766588783  |                  |              |  |  |
|               | Brain_Nucleus_accumbens_basal_ganglia | 0.92020061                  | Brain_Putamen_basal_ganglia           |              |              |                  |              |  |  |
|               | 1.527568178                           | 0.282422664                 | 0.282422664                           | -0.256002393 | 0.296839846  |                  |              |  |  |
|               | -0.019781191                          | 0.285055671                 | 3                                     | 0            | 0.998207054  |                  |              |  |  |
| CD276         | ENSG00000103855.17                    | 0.981971076                 | 2                                     | 2            | 0.84872842   |                  |              |  |  |
|               | Brain_Caudate_basal_ganglia           | 0.907763478                 | Brain_Cortex                          | 1.61634772   | 0.38365228   |                  |              |  |  |
|               | 0.38365228                            | -0.190741121                | -0.115860024                          | -0.153300573 | 0.052948931  | 2                |              |  |  |
|               | 0                                     | 0.998207054                 |                                       |              |              |                  |              |  |  |
| ALG10         | ENSG00000139133.6                     | 0.982026313                 | 2                                     | 2            | 0.889518226  |                  |              |  |  |
|               | Brain_Hypothalamus                    | 0.984897046                 | Brain_Putamen_basal_ganglia           | 1.608243252  |              |                  |              |  |  |
|               | 0.391756748                           | 0.391756748                 | -0.018929876                          | 0.13891385   | 0.059991987  |                  |              |  |  |
|               | 0.111612369                           | 2                           | 0                                     | 0.998207054  |              |                  |              |  |  |
| WDR74         | ENSG00000133316.15                    | 0.982059176                 | 3                                     | 3            | 0.732060727  |                  |              |  |  |
|               | Brain_Cerebellar_Hemisphere           | 0.863557397                 | Brain_Cerebellum                      | 1.342079337  |              |                  |              |  |  |
|               | 0.665155134                           | 0.665155134                 | -0.342385596                          | -0.17184753  | -0.249058935 |                  |              |  |  |
|               | 0.086403611                           | 3                           | 0                                     | 0.998207054  |              |                  |              |  |  |
| TTPAL         | ENSG00000124120.10                    | 0.982164633                 | 2                                     | 2            | 0.869463011  | Brain_Cerebellum |              |  |  |
|               | 0.911895477                           | Brain_Putamen_basal_ganglia | 1.099358922                           | 0.900641078  |              |                  |              |  |  |
|               | 0.900641078                           | -0.164340614                | -0.110648008                          | -0.137494311 | 0.037966406  |                  |              |  |  |
|               | 2                                     | 0                           | 0.998207054                           |              |              |                  |              |  |  |
| LYNX1         | ENSG00000283992.1                     | 0.982199606                 | 5                                     | 5            | 0.534666704  |                  |              |  |  |
|               | Brain_Substantia_nigra                | 0.96736501                  | Brain_Cerebellum                      | 2.710630613  |              |                  |              |  |  |
|               | 0.176171254                           | 0.176171254                 | -0.477681658                          | 0.62089805   | 0.070620519  |                  |              |  |  |
|               | 0.401576682                           | 5                           | 0                                     | 0.998207054  |              |                  |              |  |  |
| CDK5R1        | ENSG00000176749.8                     | 0.982257523                 | 1                                     | 1            | 0.982257523  |                  |              |  |  |
|               | Brain_Caudate_basal_ganglia           | 0.982257523                 | Brain_Caudate_basal_ganglia           | 1            | 1            |                  |              |  |  |
|               | 1                                     | -0.02223873                 | -0.02223873                           | -0.02223873  | NA           | 1                | 0            |  |  |
|               | 0.998207054                           |                             |                                       |              |              |                  |              |  |  |
| PPM1D         | ENSG00000170836.11                    | 0.982341789                 | 2                                     | 2            | 0.864656741  |                  |              |  |  |
|               | Brain_Cerebellar_Hemisphere           | 0.927991474                 | Brain_Substantia_nigra                |              |              |                  |              |  |  |
|               | 1.055056696                           | 0.944943304                 | 0.944943304                           | -0.170449379 | -0.090372167 |                  |              |  |  |



|               |                                       |                                       |   |                                      |              |                                |                  |             |             |
|---------------|---------------------------------------|---------------------------------------|---|--------------------------------------|--------------|--------------------------------|------------------|-------------|-------------|
|               | -0.130410773                          | 0.05662314                            | 2 | 0                                    | 0.998207054  |                                |                  |             |             |
| UBA52         | ENSG00000221983.7                     | 0.98238163                            | 5 | 5                                    | 0.461422553  | Brain_Cortex                   |                  |             |             |
|               | 0.859189092                           | Brain_Cerebellar_Hemisphere           |   |                                      | 1.84686735   | 0.287652932                    |                  |             |             |
|               | 0.287652932                           | -0.736506435                          |   | 0.29872744                           | -0.120993378 | 0.493567793                    |                  | 5           |             |
|               | 0                                     | 0.998207054                           |   |                                      |              |                                |                  |             |             |
| CASP8         | ENSG00000064012.21                    | 0.982634172                           |   | 6                                    | 1            | 0.690553841                    | Brain_Cerebellum |             |             |
|               | 0.974350754                           | Brain_Cortex                          |   | 5.699426312                          |              | 0.002227901                    | 5.699426312      |             |             |
|               | -0.398103572                          | 0.208162896                           |   | -0.025729594                         |              | 0.222313917                    | 1                | 0           |             |
|               | 0.998207054                           |                                       |   |                                      |              |                                |                  |             |             |
| LHFPL5        | ENSG00000197753.8                     | 0.982756999                           |   | 1                                    | 1            | 0.982756999                    |                  |             |             |
|               | Brain_Spinal_cord_cervical_c-1        | 0.982756999                           |   |                                      |              | Brain_Spinal_cord_cervical_c-1 |                  |             |             |
|               | 1                                     | 1                                     |   | -0.021612579                         | -0.021612579 | -0.021612579                   | NA               | 1           | 0           |
|               | 0.998207054                           |                                       |   |                                      |              |                                |                  |             |             |
| RP11-151A10.3 | ENSG00000282787.1                     | 0.982757911                           |   | 1                                    | 1            | 0.982757911                    |                  |             |             |
|               | Brain_Hippocampus                     | 0.982757911                           |   | Brain_Hippocampus                    |              | 1                              | 1                | 1           |             |
|               | -0.021611437                          | -0.021611437                          |   | -0.021611437                         | NA           | 1                              | 0                | 0.998207054 |             |
| FAM110B       | ENSG00000169122.11                    | 0.98282742                            | 2 | 2                                    | 0.881667953  |                                |                  |             |             |
|               | Brain_Caudate_basal_ganglia           | 0.920154365                           |   | Brain_Cerebellar_Hemisphere          |              |                                |                  |             |             |
|               | 1.075133491                           | 0.924866509                           |   | 0.924866509                          |              | -0.100239277                   | 0.148855123      |             |             |
|               | 0.024307923                           | 0.176136339                           |   | 2                                    | 0            | 0.998207054                    |                  |             |             |
| PLSCR4        | ENSG00000114698.14                    | 0.982859898                           |   | 7                                    | 4            | 0.691358768                    |                  |             |             |
|               | Brain_Cerebellar_Hemisphere           | 0.989072904                           |   | Brain_Substantia_nigra               |              |                                |                  |             |             |
|               | 5.204075256                           | 0.007490846                           |   | 0.2836795                            | 0.013695512  | 0.397011789                    |                  |             |             |
|               | 0.26967751                            | 0.147160481                           |   | 4                                    | 0            | 0.998207054                    |                  |             |             |
| GTF2H4        | ENSG00000213780.10                    | 0.982932645                           |   | 4                                    | 4            | 0.660088515                    |                  |             |             |
|               | Brain_Frontal_Cortex_BA9              | 0.891471009                           |   | Brain_Caudate_basal_ganglia          |              |                                |                  |             |             |
|               | 2.036018318                           | 0.191049894                           |   | 0.191049894                          |              | 0.136443093                    | 0.439790961      |             |             |
|               | 0.282268456                           | 0.124035687                           |   | 4                                    | 0            | 0.998207054                    |                  |             |             |
| MRPL42        | ENSG00000198015.12                    | 0.982934004                           |   | 1                                    | 1            | 0.982934004                    |                  |             |             |
|               | Brain_Cerebellum                      | 0.982934004                           |   | Brain_Cerebellum                     |              | 1                              | 1                | 1           | 0.021390685 |
|               | 0.021390685                           | 0.021390685                           |   | NA                                   | 1            | 0                              | 0.998207054      |             |             |
| DVL3          | ENSG00000161202.17                    | 0.983007255                           |   | 1                                    | 1            | 0.983007255                    |                  |             |             |
|               | Brain_Frontal_Cortex_BA9              | 0.983007255                           |   | Brain_Frontal_Cortex_BA9             |              | 1                              | 1                |             |             |
|               | 1                                     | -0.021298858                          |   | -0.021298858                         | -0.021298858 | NA                             | 1                | 0           |             |
|               | 0.998207054                           |                                       |   |                                      |              |                                |                  |             |             |
| CORO1C        | ENSG00000110880.10                    | 0.983025775                           |   | 4                                    | 4            | 0.541390072                    |                  |             |             |
|               | Brain_Nucleus_accumbens_basal_ganglia | 0.996533046                           |   | Brain_Frontal_Cortex_BA9             |              |                                |                  |             |             |
|               | 2.571358109                           | 0.127282992                           |   | 0.127282992                          |              | -0.610712284                   | -0.004345197     |             |             |
|               | -0.17541943                           | 0.291191646                           |   | 4                                    | 0            | 0.998207054                    |                  |             |             |
| ZNF714        | ENSG00000160352.15                    | 0.983047902                           |   | 7                                    | 7            | 0.416508718                    |                  |             |             |
|               | Brain_Cerebellum                      | 0.879662442                           |   | Brain_Frontal_Cortex_BA9             |              | 3.654840814                    |                  |             |             |
|               | 0.307803518                           | 0.307803518                           |   | -0.151397145                         |              | 0.812493145                    | 0.354885733      |             |             |
|               | 0.314726766                           | 7                                     | 0 | 0.998207054                          |              |                                |                  |             |             |
| HKDC1         | ENSG00000156510.12                    | 0.983089019                           |   | 3                                    | 3            | 0.695790022                    | Brain_Amygdala   |             |             |
|               | 0.935155813                           | Brain_Nucleus_accumbens_basal_ganglia |   | 1.323627663                          |              |                                |                  |             |             |
|               | 0.696065434                           | 0.696065434                           |   | 0.081359806                          |              | 0.391009759                    | 0.224107965      |             |             |
|               | 0.156231629                           | 3                                     | 0 | 0.998207054                          |              |                                |                  |             |             |
| FXYD2         | ENSG00000137731.13                    | 0.983112435                           |   | 7                                    | 7            | 0.52243087                     |                  |             |             |
|               | Brain_Anterior_cingulate_cortex_BA24  | 0.962399312                           |   | Brain_Frontal_Cortex_BA9             |              |                                |                  |             |             |
|               | 1.637085224                           | 0.446869112                           |   | 0.446869112                          |              | -0.639602787                   | 0.601543279      |             |             |
|               | 0.031358849                           | 0.496427897                           |   | 7                                    | 0            | 0.998207054                    |                  |             |             |
| LINC00836     | ENSG00000280809.2                     | 0.983340655                           |   | 3                                    | 3            | 0.743013114                    |                  |             |             |
|               | Brain_Cerebellum                      | 0.977896022                           |   | Brain_Cerebellar_Hemisphere          |              | 1.067091717                    |                  |             |             |
|               | 0.932312946                           | 0.932312946                           |   | -0.232069551                         |              | 0.327865825                    | 0.0226965        |             |             |
|               | 0.283350091                           | 3                                     | 0 | 0.998207054                          |              |                                |                  |             |             |
| RP11-253I19.3 | ENSG00000255670.1                     | 0.983390752                           |   | 3                                    | 3            | 0.786993913                    |                  |             |             |
|               | Brain_Frontal_Cortex_BA9              | 0.897258789                           |   | Brain_Anterior_cingulate_cortex_BA24 |              |                                |                  |             |             |
|               | 1.3312793                             | 0.656638504                           |   | 0.656638504                          |              | -0.270216222                   | -0.129124938     |             |             |
|               | -0.206964072                          | 0.071667794                           |   | 3                                    | 0            | 0.998207054                    |                  |             |             |
| ITSN1         | ENSG00000205726.14                    | 0.983442323                           |   | 3                                    | 3            | 0.843788949                    |                  |             |             |
|               | Brain_Spinal_cord_cervical_c-1        | 0.867191047                           |   | Brain_Hypothalamus                   |              |                                |                  |             |             |
|               | 1.649114829                           | 0.43904132                            |   | 0.43904132                           |              | -0.1672275                     | 0.197049312      |             | 0.069686029 |

|               |                                       |                             |   |                             |    |             |                                      |              |                  |
|---------------|---------------------------------------|-----------------------------|---|-----------------------------|----|-------------|--------------------------------------|--------------|------------------|
|               | 0.205366359                           | 3                           | 0 | 0.998207054                 |    |             |                                      |              |                  |
| ABHD17C       | ENSG00000136379.11                    |                             |   | 0.983461242                 | 3  | 3           | 0.741628873                          |              |                  |
|               | Brain_Cerebellar_Hemisphere           | 0.836180516                 |   |                             |    |             | Brain_Caudate_basal_ganglia          |              |                  |
|               | 1.542907656                           | 0.413693102                 |   | 0.413693102                 |    |             | -0.210619303                         | 0.329697063  |                  |
|               | 0.108619748                           | 0.283217652                 |   | 3                           | 0  | 0.998207054 |                                      |              |                  |
| PDCD2         | ENSG00000071994.10                    |                             |   | 0.983525534                 | 7  | 3           | 0.735935551                          |              |                  |
|               | Brain_Cerebellar_Hemisphere           | 0.955200551                 |   |                             |    |             | Brain_Hypothalamus                   | 4.61270378   |                  |
|               | 0.007668279                           | 0.315840447                 |   | -0.056177318                |    |             | 0.337240577                          | 0.177921731  |                  |
|               | 0.125011665                           | 3                           | 0 | 0.998207054                 |    |             |                                      |              |                  |
| DNAJC1        | ENSG00000136770.10                    |                             |   | 0.983620191                 | 1  | 1           | 0.983620191                          |              |                  |
|               | Brain_Caudate_basal_ganglia           | 0.983620191                 |   |                             |    |             | Brain_Caudate_basal_ganglia          | 1            | 1                |
|               | 1                                     | -0.020530488                |   | -0.020530488                |    |             | NA                                   | 1            | 0                |
|               | 0.998207054                           |                             |   |                             |    |             |                                      |              |                  |
| PLAUR         | ENSG00000011422.11                    |                             |   | 0.983676375                 | 2  | 2           | 0.863071495                          |              |                  |
|               | Brain_Hippocampus                     | 0.939277746                 |   |                             |    |             | Brain_Amygdala                       | 1.117381193  |                  |
|               | 0.882618807                           | 0.882618807                 |   | -0.076177673                |    |             | 0.172465611                          | 0.048143969  |                  |
|               | 0.175817352                           | 2                           | 0 | 0.998207054                 |    |             |                                      |              |                  |
| RIMS2         | ENSG00000176406.22                    |                             |   | 0.983795594                 | 2  | 2           | 0.893659781                          |              |                  |
|               | Brain_Cerebellar_Hemisphere           | 0.913693251                 |   |                             |    |             | Brain_Caudate_basal_ganglia          |              |                  |
|               | 1.095319794                           | 0.904680206                 |   | 0.904680206                 |    |             | -0.133674739                         | 0.108381279  |                  |
|               | -0.01264673                           | 0.171159452                 |   | 2                           | 0  | 0.998207054 |                                      |              |                  |
| KIAA1614      | ENSG00000135835.11                    |                             |   | 0.983832195                 | 7  | 7           | 0.434587712                          |              |                  |
|               | Brain_Cortex                          | 0.956952996                 |   |                             |    |             | Brain_Cerebellar_Hemisphere          | 2.572055645  |                  |
|               | 0.176542248                           | 0.176542248                 |   | -0.781365235                |    |             | 0.335752317                          | -0.189983362 |                  |
|               | 0.40555195                            | 7                           | 0 | 0.998207054                 |    |             |                                      |              |                  |
| EIF2AK4       | ENSG00000128829.11                    |                             |   | 0.983855158                 | 5  | 4           | 0.760916396                          |              |                  |
|               | Brain_Hypothalamus                    | 0.951963742                 |   |                             |    |             | Brain_Anterior_cingulate_cortex_BA24 |              |                  |
|               | 2.535545628                           | 0.018826173                 |   | 0.444879713                 |    |             | -0.203400766                         | 0.304277618  |                  |
|               | 0.128480401                           | 0.207912926                 |   | 4                           | 0  | 0.998207054 |                                      |              |                  |
| NEUROD6       | ENSG00000164600.6                     |                             |   | 0.984020396                 | 2  | 2           | 0.865652868                          |              |                  |
|               | Brain_Cerebellar_Hemisphere           | 0.948522736                 |   |                             |    |             | Brain_Putamen_basal_ganglia          |              |                  |
|               | 1.027369041                           | 0.972630959                 |   | 0.972630959                 |    |             | -0.169182788                         | 0.064562006  |                  |
|               | -0.052310391                          | 0.165282529                 |   | 2                           | 0  | 0.998207054 |                                      |              |                  |
| RAD54L        | ENSG00000085999.11                    |                             |   | 0.984069915                 | 9  | 5           | 0.521102118                          |              |                  |
|               | Brain_Caudate_basal_ganglia           | 0.997687181                 |   |                             |    |             | Brain_Frontal_Cortex_BA9             |              |                  |
|               | 5.931293783                           | 0.022979337                 |   | 0.291483685                 |    |             | -0.641647449                         | 0.541188557  |                  |
|               | 0.051576978                           | 0.383014084                 |   | 5                           | 0  | 0.998207054 |                                      |              |                  |
| RP5-1098D14.1 | ENSG00000273384.1                     |                             |   | 0.984135333                 | 3  | 3           | 0.717865817                          |              |                  |
|               | Brain_Caudate_basal_ganglia           | 0.966576966                 |   |                             |    |             | Brain_Cerebellar_Hemisphere          |              |                  |
|               | 1.290365751                           | 0.692959162                 |   | 0.692959162                 |    |             | -0.041901819                         | 0.361312545  |                  |
|               | 0.124372037                           | 0.210691214                 |   | 3                           | 0  | 0.998207054 |                                      |              |                  |
| UQCC2         | ENSG00000137288.9                     |                             |   | 0.984211464                 | 5  | 4           | 0.669478936                          |              | Brain_Amygdala   |
|               | 0.986712449                           | Brain_Caudate_basal_ganglia |   | 3.059861384                 |    |             | 0.034171928                          |              |                  |
|               | 0.153086803                           | -0.426863247                |   | 0.098706812                 |    |             | -0.103831325                         | 0.229286107  |                  |
|               | 4                                     | 0                           |   | 0.998207054                 |    |             |                                      |              |                  |
| MOB1A         | ENSG00000114978.17                    |                             |   | 0.984216177                 | 2  | 1           | 0.96890412                           |              | Brain_Cerebellum |
|               | 0.999545255                           | Brain_Cerebellar_Hemisphere |   | 1.998580621                 |    |             | 0.001419379                          |              |                  |
|               | 1.998580621                           | -0.038982778                |   | -0.000569939                |    |             | -0.019776358                         | 0.027161979  |                  |
|               | 1                                     | 0                           |   | 0.998207054                 |    |             |                                      |              |                  |
| TMEM52        | ENSG00000178821.12                    |                             |   | 0.98424482                  | 1  | 1           | 0.98424482                           |              | Brain_Cerebellum |
|               | 0.98424482                            | Brain_Cerebellum            |   | 1                           | 1  | 1           | 0.019747473                          | 0.019747473  |                  |
|               | 0.019747473                           | NA                          |   | 1                           | 0  | 0.998207054 |                                      |              |                  |
| CEP170        | ENSG00000143702.15                    |                             |   | 0.98430776                  | 1  | 1           | 0.98430776                           |              |                  |
|               | Brain_Nucleus_accumbens_basal_ganglia | 0.98430776                  |   |                             |    |             |                                      |              |                  |
|               | Brain_Nucleus_accumbens_basal_ganglia | 1                           |   | 1                           | 1  | 1           | 0.019668574                          |              |                  |
|               | 0.019668574                           | 0.019668574                 |   | NA                          | 1  | 0           | 0.998207054                          |              |                  |
| SPATA20       | ENSG00000006282.20                    |                             |   | 0.98433571                  | 13 | 3           | 0.535046166                          |              |                  |
|               | Brain_Hypothalamus                    | 0.99328129                  |   | Brain_Caudate_basal_ganglia |    |             | 10.93864831                          |              |                  |
|               | 0.001289507                           | 0.439767172                 |   | -0.620321465                |    |             | 0.61872643                           | -0.024076401 |                  |
|               | 0.326299094                           | 3                           | 0 | 0.998207054                 |    |             |                                      |              |                  |
| CTU2          | ENSG00000174177.12                    |                             |   | 0.984346488                 | 10 | 5           | 0.4865203                            |              |                  |
|               | Brain_Putamen_basal_ganglia           | 0.980994484                 |   |                             |    |             | Brain_Cerebellum                     | 7.099153362  |                  |

|               |                                       |                                |                             |              |              |             |                  |  |
|---------------|---------------------------------------|--------------------------------|-----------------------------|--------------|--------------|-------------|------------------|--|
|               | 0.007709139                           | 0.316211023                    | -0.023822135                | 0.695853949  | 0.312271584  |             |                  |  |
|               | 0.248865103                           | 5                              | 0                           | 0.998207054  |              |             |                  |  |
| DLGAP3        | ENSG00000116544.11                    | 0.984380545                    | 1                           | 1            | 0.984380545  |             |                  |  |
|               | Brain_Hypothalamus                    | 0.984380545                    | Brain_Hypothalamus          | 1            | 1            | 1           |                  |  |
|               | 0.019577334                           | 0.019577334                    | 0.019577334                 | NA           | 1            | 0           | 0.998207054      |  |
| Clorf226      | ENSG00000239887.4                     | 0.984492881                    | 2                           | 2            | 0.907713101  |             |                  |  |
|               | Brain_Cerebellar_Hemisphere           | 0.990115328                    | Brain_Cerebellum            | 1.799123468  |              |             |                  |  |
|               | 0.200876532                           | 0.200876532                    | 0.012388916                 | 0.115923589  | 0.064156252  |             |                  |  |
|               | 0.073210069                           | 2                              | 0                           | 0.998207054  |              |             |                  |  |
| CFAP70        | ENSG00000156042.17                    | 0.984504327                    | 5                           | 3            | 0.826063464  |             |                  |  |
|               | Brain_Cortex                          | 0.99000266                     | Brain_Hippocampus           | 4.064935175  | 0.008386923  |             |                  |  |
|               | 0.376848468                           | -0.219753079                   | 0.132301095                 | -0.066120763 | 0.133282848  |             |                  |  |
|               | 3                                     | 0                              | 0.998207054                 |              |              |             |                  |  |
| IGFBP2        | ENSG00000115457.9                     | 0.984521466                    | 3                           | 3            | 0.709154989  |             |                  |  |
|               | Brain_Cortex                          | 0.954853598                    | Brain_Substantia_nigra      | 1.408592504  |              |             |                  |  |
|               | 0.615672078                           | 0.615672078                    | -0.372991206                | 0.05661285   | -0.154248253 |             |                  |  |
|               | 0.214910456                           | 3                              | 0                           | 0.998207054  |              |             |                  |  |
| KIF5B         | ENSG00000170759.10                    | 0.984591491                    | 1                           | 1            | 0.984591491  |             |                  |  |
|               | Brain_Cerebellar_Hemisphere           | 0.984591491                    | Brain_Cerebellar_Hemisphere | 1            | 1            |             |                  |  |
|               | 1                                     | 0.019312903                    | 0.019312903                 | 0.019312903  | NA           | 1           | 0                |  |
|               | 0.998207054                           |                                |                             |              |              |             |                  |  |
| STK3          | ENSG00000104375.15                    | 0.984651113                    | 1                           | 1            | 0.984651113  |             |                  |  |
|               | Brain_Caudate_basal_ganglia           | 0.984651113                    | Brain_Caudate_basal_ganglia | 1            | 1            |             |                  |  |
|               | 1                                     | -0.019238164                   | -0.019238164                | -0.019238164 | NA           | 1           | 0                |  |
|               | 0.998207054                           |                                |                             |              |              |             |                  |  |
| RP11-324E6.10 | ENSG00000274191.1                     | 0.984685152                    | 2                           | 2            | 0.862138507  |             |                  |  |
|               | Brain_Cortex                          | 0.987447455                    | Brain_Caudate_basal_ganglia | 1.062697058  |              |             |                  |  |
|               | 0.937302942                           | 0.937302942                    | -0.015732931                | 0.17365258   | 0.078959824  |             |                  |  |
|               | 0.133915779                           | 2                              | 0                           | 0.998207054  |              |             |                  |  |
| MCEMP1        | ENSG00000183019.7                     | 0.984707506                    | 1                           | 1            | 0.984707506  |             |                  |  |
|               | Brain_Putamen_basal_ganglia           | 0.984707506                    | Brain_Putamen_basal_ganglia | 1            | 1            |             |                  |  |
|               | 1                                     | -0.019167473                   | -0.019167473                | -0.019167473 | NA           | 1           | 0                |  |
|               | 0.998207054                           |                                |                             |              |              |             |                  |  |
| RAB1F         | ENSG00000183155.4                     | 0.984727026                    | 1                           | 1            | 0.984727026  |             |                  |  |
|               | Brain_Hippocampus                     | 0.984727026                    | Brain_Hippocampus           | 1            | 1            | 1           |                  |  |
|               | 0.019143003                           | 0.019143003                    | 0.019143003                 | NA           | 1            | 0           | 0.998207054      |  |
| ZNF492        | ENSG00000229676.2                     | 0.984859464                    | 2                           | 1            | 0.767766866  |             |                  |  |
|               | Brain_Cerebellum                      | 0.796438532                    | Brain_Cerebellar_Hemisphere | 1.935625719  |              |             |                  |  |
|               | 0.064374281                           | 1.935625719                    | -0.295297186                | 0.257959023  | -0.018669082 |             |                  |  |
|               | 0.391211217                           | 1                              | 0                           | 0.998207054  |              |             |                  |  |
| SLC32A1       | ENSG00000101438.3                     | 0.984860148                    | 1                           | 1            | 0.984860148  |             |                  |  |
|               | Brain_Cortex                          | 0.984860148                    | Brain_Cortex                | 1            | 1            | 1           | -0.018976129     |  |
|               | -0.018976129                          | -0.018976129                   | NA                          | 1            | 0            | 0.998207054 |                  |  |
| PLIN3         | ENSG00000105355.8                     | 0.984907834                    | 4                           | 4            | 0.598068775  |             | Brain_Cortex     |  |
|               | 0.905365739                           | Brain_Spinal_cord_cervical_c-1 | 1.998867844                 | 0.446203503  |              |             |                  |  |
|               | 0.446203503                           | -0.527179742                   | -0.118885918                | -0.293619376 | 0.187087819  |             |                  |  |
|               | 4                                     | 0                              | 0.998207054                 |              |              |             |                  |  |
| STN1          | ENSG00000107960.10                    | 0.984990481                    | 1                           | 1            | 0.984990481  |             |                  |  |
|               | Brain_Putamen_basal_ganglia           | 0.984990481                    | Brain_Putamen_basal_ganglia | 1            | 1            |             |                  |  |
|               | 1                                     | -0.018812752                   | -0.018812752                | -0.018812752 | NA           | 1           | 0                |  |
|               | 0.998207054                           |                                |                             |              |              |             |                  |  |
| MORN5         | ENSG00000185681.12                    | 0.985016872                    | 2                           | 2            | 0.881297132  |             |                  |  |
|               | Brain_Substantia_nigra                | 0.921022441                    | Brain_Hippocampus           | 1.070398752  |              |             |                  |  |
|               | 0.929601248                           | 0.929601248                    | -0.149325072                | 0.099145885  | -0.025089594 |             |                  |  |
|               | 0.175695499                           | 2                              | 0                           | 0.998207054  |              |             |                  |  |
| SLC7A6        | ENSG00000103064.13                    | 0.985120348                    | 1                           | 1            | 0.985120348  |             |                  |  |
|               | Brain_Nucleus_accumbens_basal_ganglia | 0.985120348                    |                             |              |              |             |                  |  |
|               | Brain_Nucleus_accumbens_basal_ganglia | 1                              | 1                           | 1            | -0.01864996  |             |                  |  |
|               | -0.01864996                           | -0.01864996                    | NA                          | 1            | 0            | 0.998207054 |                  |  |
| AOX1          | ENSG00000138356.13                    | 0.985127724                    | 3                           | 3            | 0.755667668  |             | Brain_Cerebellum |  |
|               | 0.927942367                           | Brain_Caudate_basal_ganglia    | 1.254043536                 | 0.757866187  |              |             |                  |  |
|               | 0.757866187                           | 0.090433965                    | 0.311174894                 | 0.213485261  | 0.112534661  |             |                  |  |

|              |                                       |                             |                                |              |              |                  |             |             |              |
|--------------|---------------------------------------|-----------------------------|--------------------------------|--------------|--------------|------------------|-------------|-------------|--------------|
|              | 3                                     | 0                           | 0.998207054                    |              |              |                  |             |             |              |
| ZNF543       | ENSG00000178229.7                     | 0.985140129                 | 1                              | 1            | 0.985140129  |                  |             |             |              |
|              | Brain_Cortex                          | 0.985140129                 | Brain_Cortex                   | 1            | 1            | 1                |             |             | -0.018625163 |
|              | -0.018625163                          | -0.018625163                | NA                             | 1            | 0            | 0.998207054      |             |             |              |
| ZKSCAN8      | ENSG00000198315.10                    | 0.985166164                 | 11                             | 5            | 0.574328255  |                  |             |             |              |
|              | Brain_Cerebellum                      | 0.928457948                 | Brain_Frontal_Cortex_BA9       | 8.035382593  |              |                  |             |             |              |
|              | 0.038084537                           | 0.360452601                 | -0.561688524                   | 0.51035907   | 0.057637078  |                  |             |             |              |
|              | 0.334465256                           | 5                           | 0                              | 0.998207054  |              |                  |             |             |              |
| PLTP         | ENSG00000100979.14                    | 0.985219132                 | 1                              | 1            | 0.985219132  |                  |             |             |              |
|              | Brain_Nucleus_accumbens_basal_ganglia | 0.985219132                 |                                |              |              |                  |             |             |              |
|              | Brain_Nucleus_accumbens_basal_ganglia | 1                           | 1                              | 1            | 0.018526131  |                  |             |             |              |
|              | 0.018526131                           | 0.018526131                 | NA                             | 1            | 0            | 0.998207054      |             |             |              |
| GSN          | ENSG00000148180.19                    | 0.985234817                 | 1                              | 1            | 0.985234817  |                  |             |             |              |
|              | Brain_Hippocampus                     | 0.985234817                 | Brain_Hippocampus              | 1            | 1            | 1                |             |             |              |
|              | -0.018506469                          | -0.018506469                | -0.018506469                   | NA           | 1            | 0                | 0.998207054 |             |              |
| ZNF197       | ENSG00000186448.14                    | 0.985326316                 | 4                              | 4            | 0.703262786  |                  |             |             |              |
|              | Brain_Cerebellum                      | 0.945421171                 | Brain_Substantia_nigra         | 2.225174262  |              |                  |             |             |              |
|              | 0.246629468                           | 0.246629468                 | -0.137945242                   | 0.380919764  | 0.142016923  |                  |             |             |              |
|              | 0.226569853                           | 4                           | 0                              | 0.998207054  |              |                  |             |             |              |
| TTC7B        | ENSG00000165914.14                    | 0.985385945                 | 2                              | 1            | 0.93064881   | Brain_Cerebellum |             |             |              |
|              | 0.959473675                           | Brain_Cerebellar_Hemisphere | 1.954450562                    | 0.045549438  |              |                  |             |             |              |
|              | 1.954450562                           | -0.087028561                | 0.050814076                    | -0.018107243 | 0.097469463  |                  |             |             |              |
|              | 1                                     | 0                           | 0.998207054                    |              |              |                  |             |             |              |
| LINC01998    | ENSG00000243321.3                     | 0.985417681                 | 7                              | 6            | 0.401278727  |                  |             |             |              |
|              | Brain_Hippocampus                     | 0.954792874                 | Brain_Hypothalamus             | 3.876395801  |              |                  |             |             |              |
|              | 0.098996214                           | 0.2476186                   | -0.284896581                   | 0.839339672  | 0.14404483   |                  |             |             |              |
|              | 0.345138225                           | 6                           | 0                              | 0.998207054  |              |                  |             |             |              |
| LAMC3        | ENSG00000050555.17                    | 0.985423247                 | 2                              | 2            | 0.872867602  |                  |             |             |              |
|              | Brain_Cerebellar_Hemisphere           | 0.95240807                  | Brain_Spinal_cord_cervical_c-1 |              |              |                  |             |             |              |
|              | 1.010334644                           | 0.989665356                 | 0.989665356                    | -0.059683053 | 0.160017102  |                  |             |             |              |
|              | 0.050167025                           | 0.155351469                 | 2                              | 0            | 0.998207054  |                  |             |             |              |
| OPRM1        | ENSG00000112038.17                    | 0.985485531                 | 1                              | 1            | 0.985485531  | Brain_Cerebellum |             |             |              |
|              | 0.985485531                           | Brain_Cerebellum            | 1                              | 1            | 0.018192193  | 0.018192193      |             |             |              |
|              | 0.018192193                           | NA                          | 1                              | 0            | 0.998207054  |                  |             |             |              |
| DPYSL5       | ENSG00000157851.16                    | 0.98549952                  | 9                              | 3            | 0.562033935  |                  |             |             |              |
|              | Brain_Cerebellar_Hemisphere           | 0.870491043                 | Brain_Cerebellum               | 7.553929017  |              |                  |             |             |              |
|              | 0.003170717                           | 0.33172719                  | -0.579823074                   | 0.163034789  | -0.286612013 |                  |             |             |              |
|              | 0.213390122                           | 3                           | 0                              | 0.998207054  |              |                  |             |             |              |
| HP           | ENSG00000257017.8                     | 0.98550205                  | 3                              | 2            | 0.864338621  |                  |             |             |              |
|              | Brain_Nucleus_accumbens_basal_ganglia | 0.943897402                 | Brain_Amygdala                 |              |              |                  |             |             |              |
|              | 2.234787231                           | 0.011989579                 | 0.75322319                     | 0.070372219  | 0.170853931  |                  |             |             |              |
|              | 0.108591505                           | 0.054384723                 | 2                              | 0            | 0.998207054  |                  |             |             |              |
| AP2B1        | ENSG00000006125.17                    | 0.9855074                   | 2                              | 2            | 0.889133903  |                  |             |             |              |
|              | Brain_Substantia_nigra                | 0.896581679                 | Brain_Putamen_basal_ganglia    |              |              |                  |             |             |              |
|              | 1.245192039                           | 0.754807961                 | 0.754807961                    | -0.139400214 | -0.129980722 |                  |             |             |              |
|              | -0.134690468                          | 0.006660587                 | 2                              | 0            | 0.998207054  |                  |             |             |              |
| RP11-15I11.3 | ENSG00000226251.5                     | 0.98571725                  | 7                              | 1            | 0.780496224  |                  |             |             |              |
|              | Brain_Substantia_nigra                | 0.986962518                 | Brain_Putamen_basal_ganglia    |              |              |                  |             |             |              |
|              | 6.846632071                           | 0.001541003                 | 6.846632071                    | -0.146362618 | 0.278672427  |                  |             |             |              |
|              | 0.018207168                           | 0.14065064                  | 1                              | 0            | 0.998309353  |                  |             |             |              |
| CES4A        | ENSG00000172824.14                    | 0.985900622                 | 1                              | 1            | 0.985900622  |                  |             |             |              |
|              | Brain_Cerebellar_Hemisphere           | 0.985900622                 | Brain_Cerebellar_Hemisphere    | 1            | 1            |                  |             |             |              |
|              | 1                                     | 0.01767187                  | 0.01767187                     | 0.01767187   | NA           | 1                | 0           | 0.998309353 |              |
| CNTN1        | ENSG00000018236.14                    | 0.98590667                  | 2                              | 2            | 0.913853454  |                  |             |             |              |
|              | Brain_Cerebellar_Hemisphere           | 0.988109447                 | Brain_Cerebellum               | 1.820433687  |              |                  |             |             |              |
|              | 0.179566313                           | 0.179566313                 | 0.01490315                     | 0.108179314  | 0.061541232  |                  |             |             |              |
|              | 0.065956208                           | 2                           | 0                              | 0.998309353  |              |                  |             |             |              |
| ABR          | ENSG00000159842.14                    | 0.986052586                 | 3                              | 3            | 0.767681119  |                  |             |             |              |
|              | Brain_Spinal_cord_cervical_c-1        | 0.936582508                 | Brain_Cerebellar_Hemisphere    |              |              |                  |             |             |              |
|              | 1.374976466                           | 0.63755866                  | 0.63755866                     | 0.079565912  | 0.295409445  |                  |             |             |              |
|              | 0.211879385                           | 0.115896393                 | 3                              | 0            | 0.998309353  |                  |             |             |              |
| C1QL1        | ENSG00000131094.3                     | 0.986140305                 | 1                              | 1            | 0.986140305  | Brain_Cerebellum |             |             |              |

|           |                                       |                   |                                       |              |              |                  |
|-----------|---------------------------------------|-------------------|---------------------------------------|--------------|--------------|------------------|
|           | 0.986140305                           | Brain_Cerebellum1 | 1                                     | 1            | 0.017371425  | 0.017371425      |
|           | 0.017371425                           | NA                | 1                                     | 0            | 0.998309353  |                  |
| MT1X      | ENSG00000187193.8                     | 0.986191946       | 1                                     | 1            | 0.986191946  | Brain_Cortex     |
|           | 0.986191946                           | Brain_Cortex      | 1                                     | 1            | 0.017306693  | 0.017306693      |
|           | 0.017306693                           | NA                | 1                                     | 0            | 0.998309353  |                  |
| ENTPD8    | ENSG00000188833.9                     | 0.986254917       | 1                                     | 1            | 0.986254917  |                  |
|           | Brain_Nucleus_accumbens_basal_ganglia | 0.986254917       |                                       |              |              |                  |
|           | Brain_Nucleus_accumbens_basal_ganglia | 1                 | 1                                     | 1            | 0.017227759  |                  |
|           | 0.017227759                           | 0.017227759       | NA                                    | 1            | 0            | 0.998309353      |
| ZNF624    | ENSG00000197566.9                     | 0.986309554       | 3                                     | 2            | 0.870362178  |                  |
|           | Brain_Cortex                          | 0.973348114       | Brain_Cerebellar_Hemisphere1          | 0.996680211  |              |                  |
|           | 0.007410436                           | 0.995909353       | 0.0334094                             | 0.16319846   | 0.079724222  |                  |
|           | 0.072435604                           | 2                 | 0                                     | 0.998309353  |              |                  |
| COA1      | ENSG00000106603.18                    | 0.986371818       | 9                                     | 5            | 0.447556612  |                  |
|           | Brain_Cerebellar_Hemisphere0          | 0.993850342       | Brain_Caudate_basal_ganglia           |              |              |                  |
|           | 6.523708885                           | 0.027932074       | 0.287252161                           | -0.75949482  | 0.230421075  |                  |
|           | -0.204093777                          | 0.31879717        | 5                                     | 0            | 0.998309353  |                  |
| NOS1AP    | ENSG00000198929.12                    | 0.986511645       | 4                                     | 3            | 0.779293684  |                  |
|           | Brain_Spinal_cord_cervical_c-1        | 0.942374934       | Brain_Cerebellum2                     | 0.006900083  |              |                  |
|           | 0.035646101                           | 0.926445021       | -0.280239603                          | 0.196871805  | 0.045157558  |                  |
|           | 0.224436241                           | 3                 | 0                                     | 0.998309353  |              |                  |
| HPCAL1    | ENSG00000115756.12                    | 0.986573288       | 1                                     | 1            | 0.986573288  |                  |
|           | Brain_Caudate_basal_ganglia           | 0.986573288       | Brain_Caudate_basal_ganglia           | 1            | 1            |                  |
|           | 1                                     | -0.016828682      | -0.016828682                          | -0.016828682 | NA           | 1                |
|           | 0.998309353                           |                   |                                       |              | 0            |                  |
| DCK       | ENSG00000156136.9                     | 0.986760406       | 1                                     | 1            | 0.986760406  |                  |
|           | Brain_Caudate_basal_ganglia           | 0.986760406       | Brain_Caudate_basal_ganglia           | 1            | 1            |                  |
|           | 1                                     | -0.016594132      | -0.016594132                          | -0.016594132 | NA           | 1                |
|           | 0.998309353                           |                   |                                       |              | 0            |                  |
| B3GLCT    | ENSG00000187676.7                     | 0.986760507       | 4                                     | 4            | 0.687244185  |                  |
|           | Brain_Spinal_cord_cervical_c-1        | 0.984371532       | Brain_Caudate_basal_ganglia           |              |              |                  |
|           | 1.21527457                            | 0.699244987       | 0.699244987                           | -0.402597724 | -0.019588633 |                  |
|           | -0.211473112                          | 0.207165905       | 4                                     | 0            | 0.998309353  |                  |
| GRB14     | ENSG00000115290.9                     | 0.986765577       | 3                                     | 3            | 0.794269292  | Brain_Cerebellum |
|           | 0.978334854                           | Brain_Cortex      | 1.357133916                           | 0.66256338   | 0.66256338   |                  |
|           | -0.260770763                          | 0.027156572       | -0.156288155                          | 0.15937942   | 3            | 0                |
|           | 0.998309353                           |                   |                                       |              |              |                  |
| PEAR1     | ENSG00000187800.13                    | 0.986834867       | 1                                     | 1            | 0.986834867  |                  |
|           | Brain_Spinal_cord_cervical_c-1        | 0.986834867       | Brain_Spinal_cord_cervical_c-1        |              |              |                  |
|           | 1                                     | 1                 | 1                                     | -0.016500796 | -0.016500796 | -0.016500796     |
|           | 0.998309353                           |                   |                                       |              | NA           | 1                |
|           |                                       |                   |                                       |              |              | 0                |
| LINC01561 | ENSG00000177234.7                     | 0.986901143       | 4                                     | 3            | 0.744313788  |                  |
|           | Brain_Cerebellum                      | 0.960386565       | Brain_Nucleus_accumbens_basal_ganglia |              |              |                  |
|           | 2.262383441                           | 0.005875837       | 0.498640482                           | -0.049668492 | 0.326146141  |                  |
|           | 0.163901532                           | 0.156951659       | 3                                     | 0            | 0.998309353  |                  |
| TMEM50B   | ENSG00000142188.16                    | 0.986922186       | 12                                    | 2            | 0.797748552  |                  |
|           | Brain_Anterior_cingulate_cortex_BA24  | 0.97373459        | Brain_Cortex                          | 11.06245919  |              |                  |
|           | 0.000298349                           | 0.383295699       | -0.256261981                          | 0.207958337  | 0.054856747  |                  |
|           | 0.132879478                           | 2                 | 0                                     | 0.998309353  |              |                  |
| ARL8B     | ENSG00000134108.12                    | 0.986952425       | 3                                     | 2            | 0.866745098  |                  |
|           | Brain_Caudate_basal_ganglia           | 0.915163343       | Brain_Putamen_basal_ganglia           |              |              |                  |
|           | 2.341602506                           | 0.003372774       | 0.65502472                            | -0.167794311 | -0.106528124 |                  |
|           | -0.138696811                          | 0.030748343       | 2                                     | 0            | 0.998309353  |                  |
| ATPAF1    | ENSG00000123472.12                    | 0.987036174       | 2                                     | 2            | 0.876717706  |                  |
|           | Brain_Nucleus_accumbens_basal_ganglia | 0.917753378       | Brain_Cerebellum                      | 1.39928417   |              |                  |
|           | 0.60071583                            | 0.60071583        | -0.155131428                          | 0.103264086  | -0.025933671 | 0.18271322       |
|           | 2                                     | 0                 | 0.998309353                           |              |              |                  |
| FKBP1A    | ENSG00000088832.16                    | 0.987108975       | 3                                     | 3            | 0.748176891  |                  |
|           | Brain_Caudate_basal_ganglia           | 0.986573513       | Brain_Cortex                          | 1.817145396  |              |                  |
|           | 0.263035075                           | 0.263035075       | -0.321044206                          | 0.0168284    | -0.150304884 |                  |
|           | 0.168965165                           | 3                 | 0                                     | 0.998309353  |              |                  |
| OPA3      | ENSG00000125741.4                     | 0.987209282       | 4                                     | 3            | 0.707085187  |                  |

|          |                                       |                             |              |              |                                      |              |                  |
|----------|---------------------------------------|-----------------------------|--------------|--------------|--------------------------------------|--------------|------------------|
|          | Brain_Cerebellar_Hemisphere           | 0.945827697                 |              |              | Brain_Caudate_basal_ganglia          |              |                  |
|          | 1.956025349                           | -0.04786741                 | 0.87441778   | -0.067947161 | 0.375773638                          |              |                  |
|          | 0.179657216                           | 0.204121604                 | 3            | 0            | 0.998309353                          |              |                  |
| LDOC1L   | ENSG00000188636.3                     | 0.987281953                 |              | 2            | 2                                    | 0.884495664  |                  |
|          | Brain_Cerebellum                      | 0.971488219                 |              |              | Brain_Cerebellar_Hemisphere          | 1.205620817  |                  |
|          | 0.794379183                           | 0.794379183                 |              | -0.145272579 | 0.035741826                          | -0.054765376 |                  |
|          | 0.127996513                           | 2                           | 0            | 0.998309353  |                                      |              |                  |
| KIAA1107 | ENSG00000069712.12                    | 0.987323902                 |              | 4            | 4                                    | 0.747119516  |                  |
|          | Brain_Cortex                          | 0.980670274                 |              |              | Brain_Cerebellar_Hemisphere          | 2.394176783  |                  |
|          | 0.136982318                           | 0.136982318                 |              | -0.322439827 | 0.02422859                           | -0.155933356 |                  |
|          | 0.167923261                           | 4                           | 0            | 0.998309353  |                                      |              |                  |
| TMC2     | ENSG00000149488.12                    | 0.987545998                 |              | 6            | 6                                    | 0.497557247  |                  |
|          | Brain_Caudate_basal_ganglia           | 0.983778193                 |              |              | Brain_Cerebellar_Hemisphere          |              |                  |
|          | 1.669876007                           | 0.318462071                 | 0.318462071  | -0.678338257 | 0.513231321                          |              |                  |
|          | -0.059733459                          | 0.418461778                 | 6            | 0            | 0.998309353                          |              |                  |
| MIXL1    | ENSG00000185155.11                    | 0.987594343                 |              | 6            | 5                                    | 0.456538254  |                  |
|          | Brain_Caudate_basal_ganglia           | 0.997479603                 |              |              | Brain_Cortex                         | 4.326419383  |                  |
|          | 0.04216199                            | 0.161856387                 | -0.0259561   | 0.744559178  | 0.226215441                          |              |                  |
|          | 0.278797484                           | 5                           | 0            | 0.998309353  |                                      |              |                  |
| ZNF26    | ENSG00000198393.7                     | 0.987609274                 |              | 3            | 3                                    | 0.831653483  |                  |
|          | Brain_Nucleus_accumbens_basal_ganglia | 0.881517261                 |              |              | Brain_Cerebellum                     | 1.17697109   |                  |
|          | 0.728089368                           | 0.728089368                 | -0.176162056 | 0.212581397  | -0.037542251                         |              |                  |
|          | 0.21703732                            | 3                           | 0            | 0.998309353  |                                      |              |                  |
| DPF1     | ENSG00000011332.19                    | 0.987637102                 |              | 1            | 1                                    | 0.987637102  |                  |
|          | Brain_Nucleus_accumbens_basal_ganglia | 0.987637102                 |              |              |                                      |              |                  |
|          | Brain_Nucleus_accumbens_basal_ganglia | 1                           | 1            | 1            | 0.015495214                          |              |                  |
|          | 0.015495214                           | 0.015495214                 | NA           | 1            | 0                                    | 0.998309353  |                  |
| VWA3B    | ENSG00000168658.18                    | 0.987761045                 |              | 4            | 4                                    | 0.617536448  | Brain_Amygdala   |
|          | 0.980393244                           | Brain_Cortex                | 2.464110934  | 0.224807653  | 0.224807653                          |              |                  |
|          | -0.499344873                          | -0.024575898                | -0.339830202 | 0.214879588  | 4                                    | 0            |                  |
|          | 0.998309353                           |                             |              |              |                                      |              |                  |
| OR2M4    | ENSG00000171180.1                     | 0.987862435                 |              | 3            | 3                                    | 0.733723295  | Brain_Cortex     |
|          | 0.909237406                           | Brain_Frontal_Cortex_BA9    | 1.508695677  | 0.480310333  |                                      |              |                  |
|          | 0.480310333                           | -0.340176924                | 0.12040545   | -0.111257321 | 0.230303441                          |              | 3                |
|          | 0                                     | 0.998309353                 |              |              |                                      |              |                  |
| OCLN     | ENSG00000197822.10                    | 0.987915918                 |              | 3            | 3                                    | 0.767952454  | Brain_Cerebellum |
|          | 0.877818374                           | Brain_Cerebellar_Hemisphere | 1.70482965   | 0.326498918  |                                      |              |                  |
|          | 0.326498918                           | 0.153735397                 | 0.295054228  | 0.217815293  | 0.071572504                          |              |                  |
|          | 3                                     | 0                           | 0.998309353  |              |                                      |              |                  |
| TBC1D3D  | ENSG00000274419.6                     | 0.987947351                 |              | 7            | 3                                    | 0.709580437  |                  |
|          | Brain_Frontal_Cortex_BA9              | 0.995945465                 |              |              | Brain_Amygdala                       | 5.95099776   |                  |
|          | 0.001881115                           | 0.210549029                 | -0.372419636 | 0.112897031  | -0.06790488                          |              |                  |
|          | 0.175753786                           | 3                           | 0            | 0.998309353  |                                      |              |                  |
| FMO3     | ENSG00000007933.12                    | 0.987953358                 |              | 10           | 8                                    | 0.49807286   | Brain_Cerebellum |
|          | 0.988731324                           | Brain_Hippocampus           | 5.851053438  | 0.033840512  |                                      |              |                  |
|          | 0.201732199                           | -0.577218148                | 0.677525085  | 0.151531078  | 0.373860439                          |              |                  |
|          | 8                                     | 0                           | 0.998309353  |              |                                      |              |                  |
| ODF2L    | ENSG00000122417.15                    | 0.988005499                 |              | 13           | 2                                    | 0.313252994  |                  |
|          | Brain_Caudate_basal_ganglia           | 0.986446968                 |              |              | Brain_Anterior_cingulate_cortex_BA24 |              |                  |
|          | 11.6306931                            | 0.000362263                 | 0.44204351   | -1.008419754 | 0.260855429                          |              |                  |
|          | -0.147261765                          | 0.351835764                 | 2            | 0            | 0.998309353                          |              |                  |
| ACOT2    | ENSG00000119673.14                    | 0.988246377                 |              | 12           | 12                                   | 0.177158565  |                  |
|          | Brain_Putamen_basal_ganglia           | 0.955428305                 |              |              | Brain_Hippocampus                    | 3.404298115  |                  |
|          | 0.191451574                           | 0.191451574                 | -0.382560863 | 1.349555629  | 0.15803373                           |              |                  |
|          | 0.528161295                           | 12                          | 0            | 0.998309353  |                                      |              |                  |
| SLC26A4  | ENSG00000091137.11                    | 0.988254641                 |              | 1            | 1                                    | 0.988254641  |                  |
|          | Brain_Nucleus_accumbens_basal_ganglia | 0.988254641                 |              |              |                                      |              |                  |
|          | Brain_Nucleus_accumbens_basal_ganglia | 1                           | 1            | 1            | -0.014721156                         |              |                  |
|          | -0.014721156                          | -0.014721156                | NA           | 1            | 0                                    | 0.998309353  |                  |
| CD52     | ENSG00000169442.8                     | 0.98826573                  |              | 3            | 2                                    | 0.805838111  |                  |
|          | Brain_Anterior_cingulate_cortex_BA24  | 0.956165697                 |              |              | Brain_Cortex                         |              |                  |
|          | 2.602236722                           | 0.06249984                  | 0.335263439  | -0.245798638 | -0.054965816                         |              |                  |

|               |                                       |                    |                                       |              |              |                  |    |   |   |
|---------------|---------------------------------------|--------------------|---------------------------------------|--------------|--------------|------------------|----|---|---|
|               | -0.135808388                          | 0.098698946        | 2                                     | 0            | 0.998309353  |                  |    |   |   |
| HDAC5         | ENSG00000108840.15                    | 0.988451577        | 2                                     | 2            | 0.893272661  | Brain_Cerebellum |    |   |   |
|               | 0.953806625                           | Brain_Hypothalamus | 1.10438435                            | 0.89561565   | 0.89561565   |                  |    |   |   |
|               | -0.05792719                           | 0.134164292        | 0.038118551                           | 0.13582919   | 2            | 0                |    |   |   |
|               | 0.998309353                           |                    |                                       |              |              |                  |    |   |   |
| LINC00601     | ENSG00000235180.1                     | 0.988452155        | 4                                     | 4            | 0.686512039  |                  |    |   |   |
|               | Brain_Hippocampus                     | 0.834007735        | Brain_Putamen_basal_ganglia           | 2.519025051  |              |                  |    |   |   |
|               | 0.113371867                           | 0.113371867        | -0.403592993                          | -0.209564313 | -0.308904417 |                  |    |   |   |
|               | 0.088389257                           | 4                  | 0                                     | 0.998309353  |              |                  |    |   |   |
| RTN4          | ENSG00000115310.17                    | 0.988603566        | 2                                     | 2            | 0.890662386  |                  |    |   |   |
|               | Brain_Nucleus_accumbens_basal_ganglia | 0.962374765        | Brain_Cerebellar_Hemisphere           |              |              |                  |    |   |   |
|               | 1.115371696                           | 0.884628304        | 0.884628304                           | -0.137466101 | 0.04717373   |                  |    |   |   |
|               | -0.045146185                          | 0.130560076        | 2                                     | 0            | 0.998309353  |                  |    |   |   |
| NRM           | ENSG00000137404.14                    | 0.988713848        | 3                                     | 3            | 0.734218347  |                  |    |   |   |
|               | Brain_Caudate_basal_ganglia           | 0.968680637        | Brain_Cerebellum                      | 1.147068004  |              |                  |    |   |   |
|               | 0.86169471                            | 0.86169471         | -0.039263085                          | 0.339519583  | 0.124660667  | 0.19446046       |    |   |   |
|               | 3                                     | 0                  | 0.998309353                           |              |              |                  |    |   |   |
| SV2B          | ENSG00000185518.11                    | 0.988714133        | 3                                     | 3            | 0.829153415  |                  |    |   |   |
|               | Brain_Putamen_basal_ganglia           | 0.909881232        | Brain_Spinal_cord_cervical_c-1        |              |              |                  |    |   |   |
|               | 2.299888101                           | 0.139049564        | 0.139049564                           | -0.11318835  | 0.21578747   |                  |    |   |   |
|               | 0.090899335                           | 0.178215316        | 3                                     | 0            | 0.998309353  |                  |    |   |   |
| PUS7          | ENSG00000091127.13                    | 0.98878845         | 3                                     | 2            | 0.795771207  |                  |    |   |   |
|               | Brain_Cerebellar_Hemisphere           | 0.987923919        | Brain_Cerebellum                      | 1.96023836   |              |                  |    |   |   |
|               | 0.043285194                           | 0.996476446        | -0.053181276                          | 0.258823783  | 0.073592736  |                  |    |   |   |
|               | 0.164011305                           | 2                  | 0                                     | 0.998309353  |              |                  |    |   |   |
| BORCS6        | ENSG00000196544.7                     | 0.988885008        | 1                                     | 1            | 0.988885008  |                  |    |   |   |
|               | Brain_Anterior_cingulate_cortex_BA24  | 0.988885008        |                                       |              |              |                  |    |   |   |
|               | Brain_Anterior_cingulate_cortex_BA24  | 1                  | 1                                     | 1            | -0.013931027 |                  |    |   |   |
|               | -0.013931027                          | -0.013931027       | NA                                    | 1            | 0            | 0.998309353      |    |   |   |
| ADGB          | ENSG00000118492.16                    | 0.988952561        | 1                                     | 1            | 0.988952561  |                  |    |   |   |
|               | Brain_Caudate_basal_ganglia           | 0.988952561        | Brain_Caudate_basal_ganglia           | 1            | 1            |                  |    |   |   |
|               | 1                                     | -0.013846353       | -0.013846353                          | -0.013846353 | NA           | 1                | 0  |   |   |
|               | 0.998309353                           |                    |                                       |              |              |                  |    |   |   |
| GIMAP2        | ENSG00000106560.10                    | 0.988973742        | 1                                     | 1            | 0.988973742  |                  |    |   |   |
|               | Brain_Spinal_cord_cervical_c-1        | 0.988973742        | Brain_Spinal_cord_cervical_c-1        |              |              |                  |    |   |   |
|               | 1                                     | 1                  | 1                                     | 0.013819805  | 0.013819805  | 0.013819805      | NA | 1 | 0 |
|               | 0.998309353                           |                    |                                       |              |              |                  |    |   |   |
| AC007563.3    | ENSG00000229352.1                     | 0.989032662        | 4                                     | 4            | 0.736180652  |                  |    |   |   |
|               | Brain_Hippocampus                     | 0.946668468        | Brain_Caudate_basal_ganglia           | 1.285912256  |              |                  |    |   |   |
|               | 0.793428157                           | 0.793428157        | -0.323270376                          | 0.336915432  | -0.021040637 |                  |    |   |   |
|               | 0.287428225                           | 4                  | 0                                     | 0.998309353  |              |                  |    |   |   |
| CYP1A1        | ENSG00000140465.13                    | 0.98909286         | 5                                     | 5            | 0.481266954  |                  |    |   |   |
|               | Brain_Nucleus_accumbens_basal_ganglia | 0.744297082        | Brain_Cortex                          |              |              |                  |    |   |   |
|               | 3.578646944                           | 0.135232096        | 0.135232096                           | -0.704266292 | -0.326168223 |                  |    |   |   |
|               | -0.504503777                          | 0.149378195        | 5                                     | 0            | 0.998309353  |                  |    |   |   |
| PXMP2         | ENSG00000176894.9                     | 0.98929703         | 11                                    | 4            | 0.636694726  | Brain_Cortex     |    |   |   |
|               | 0.993561302                           | Brain_Cerebellum   | 8.708734628                           | 0.006739353  | 0.313509745  |                  |    |   |   |
|               | -0.385013719                          | 0.472325144        | 0.035331276                           | 0.240476326  | 4            | 0                |    |   |   |
|               | 0.998309353                           |                    |                                       |              |              |                  |    |   |   |
| PRSS16        | ENSG00000112812.15                    | 0.989340711        | 3                                     | 3            | 0.743683777  |                  |    |   |   |
|               | Brain_Cerebellum                      | 0.843608157        | Brain_Cerebellar_Hemisphere           | 2.420327947  |              |                  |    |   |   |
|               | 0.176505665                           | 0.176505665        | 0.197280348                           | 0.326978989  | 0.251538625  |                  |    |   |   |
|               | 0.067393954                           | 3                  | 0                                     | 0.998309353  |              |                  |    |   |   |
| AC005307.1    | ENSG00000260725.1                     | 0.989342361        | 2                                     | 2            | 0.885106581  |                  |    |   |   |
|               | Brain_Putamen_basal_ganglia           | 0.979147525        | Brain_Nucleus_accumbens_basal_ganglia |              |              |                  |    |   |   |
|               | 1.333840655                           | 0.666159345        | 0.666159345                           | -0.144498829 | -0.026137677 |                  |    |   |   |
|               | -0.085318253                          | 0.083693973        | 2                                     | 0            | 0.998309353  |                  |    |   |   |
| MISP          | ENSG00000099812.8                     | 0.989392364        | 1                                     | 1            | 0.989392364  |                  |    |   |   |
|               | Brain_Anterior_cingulate_cortex_BA24  | 0.989392364        |                                       |              |              |                  |    |   |   |
|               | Brain_Anterior_cingulate_cortex_BA24  | 1                  | 1                                     | 1            | 0.013295092  |                  |    |   |   |
|               | 0.013295092                           | 0.013295092        | NA                                    | 1            | 0            | 0.998309353      |    |   |   |
| RP11-676J12.4 | ENSG00000262228.2                     | 0.989433715        | 4                                     | 4            | 0.739344958  |                  |    |   |   |

|              |                                       |              |              |                                |              |              |             |              |
|--------------|---------------------------------------|--------------|--------------|--------------------------------|--------------|--------------|-------------|--------------|
|              | Brain_Cerebellum                      | 0.941786337  |              | Brain_Caudate_basal_ganglia    | 2.76416079   |              |             |              |
|              |                                       | 0.201947962  | 0.201947962  |                                | -0.332720918 | 0.132460497  |             | -0.072409009 |
|              |                                       | 0.215238842  | 4            | 0                              | 0.998309353  |              |             |              |
| CDON         | ENSG00000064309                       | 14           | 0.989440933  | 10                             | 10           | 0.288331752  |             | Brain_Cortex |
|              |                                       | 0.953905726  |              | Brain_Cerebellar_Hemisphere    | 2.986407195  | 0.199675994  |             |              |
|              |                                       | 0.199675994  | -1.061788411 |                                | 0.347573741  | -0.238528744 |             | 0.469782578  |
|              |                                       | 10           | 0            | 0.998309353                    |              |              |             |              |
| CTD-2095E4.5 | ENSG00000277511                       | 1.1          | 0.989461496  | 3                              | 3            | 0.741328572  |             |              |
|              | Brain_Spinal_cord_cervical_c-1        |              | 0.951025035  |                                |              | Brain_Cortex | 1.062904237 |              |
|              |                                       | 0.930643061  | 0.930643061  |                                | -0.330094483 | -0.061419611 |             | -0.158621792 |
|              |                                       | 0.148941694  | 3            | 0                              | 0.998309353  |              |             |              |
| COX8A        | ENSG00000176340                       | 3            | 0.989590378  | 3                              | 3            | 0.798891127  |             |              |
|              | Brain_Cerebellar_Hemisphere           | 0.908416303  |              | Brain_Frontal_Cortex_BA9       |              |              |             |              |
|              |                                       | 2.096622536  | -0.129274169 | 0.129274169                    |              | -0.120333129 |             | 0.254782456  |
|              |                                       | 0.006470989  | 0.215060346  | 3                              | 0            | 0.998365972  |             |              |
| TPBGL        | ENSG00000261594                       | 3            | 0.989660329  | 3                              | 2            | 0.844320482  |             |              |
|              | Brain_Anterior_cingulate_cortex_BA24  | 0.980502281  |              | Brain_Amygdala                 |              |              |             |              |
|              |                                       | 1.939059557  | 0.063839101  | 0.997101342                    |              | -0.0244392   | 0.19637012  |              |
|              |                                       | 0.085623651  | 0.110406247  | 2                              | 0            | 0.998365972  |             |              |
| OLFM4        | ENSG00000102837                       | 6            | 0.98994373   | 2                              | 2            | 0.912570516  |             |              |
|              | Brain_Nucleus_accumbens_basal_ganglia | 0.97036933   |              | Brain_Cortex                   |              |              | 1.815007515 |              |
|              |                                       | 0.184992485  | 0.184992485  |                                | 0.037145078  | 0.109796817  |             | 0.073470947  |
|              |                                       | 0.051372537  | 2            | 0                              | 0.998449044  |              |             |              |
| TMEM150C     | ENSG00000249242                       | 7            | 0.989957831  | 6                              | 5            | 0.604371469  |             |              |
|              | Brain_Frontal_Cortex_BA9              | 0.979241049  |              | Brain_Putamen_basal_ganglia    |              |              |             |              |
|              |                                       | 3.990685785  | 0.075324963  | 0.164204922                    |              | -0.026020423 |             | 0.518124412  |
|              |                                       | 0.181100027  | 0.196881768  | 5                              | 0            | 0.998449044  |             |              |
| SLC15A4      | ENSG00000139370                       | 11           | 0.990046823  | 2                              | 2            | 0.896930433  |             |              |
|              | Brain_Spinal_cord_cervical_c-1        | 0.949663397  |              | Brain_Cerebellar_Hemisphere    |              |              |             |              |
|              |                                       | 1.04944859   | 0.95055141   | 0.95055141                     | 0.063129483  | 0.129539928  |             | 0.096334705  |
|              |                                       | 0.046959276  | 2            | 0                              | 0.998449044  |              |             |              |
| WNT2         | ENSG00000105989                       | 8            | 0.990067268  | 2                              | 2            | 0.918881734  |             |              |
|              | Brain_Substantia_nigra                | 0.928589072  |              | Brain_Spinal_cord_cervical_c-1 |              |              |             |              |
|              |                                       | 1.078740223  | 0.921259777  | 0.921259777                    |              | -0.089620149 |             | 0.101842445  |
|              |                                       | 0.006111148  | 0.135384499  | 2                              | 0            | 0.998449044  |             |              |
| ATP8B4       | ENSG00000104043                       | 14           | 0.990099495  | 4                              | 4            | 0.655350397  |             |              |
|              | Brain_Nucleus_accumbens_basal_ganglia | 0.978103835  |              | Brain_Cerebellum               |              |              |             |              |
|              |                                       | 1.709661786  | 0.312827344  | 0.312827344                    |              | -0.446341758 |             | 0.044000719  |
|              |                                       | -0.207519796 | 0.251585696  | 4                              | 0            | 0.998449044  |             |              |
| LIMD2        | ENSG00000136490                       | 8            | 0.990311505  | 1                              | 1            | 0.990311505  |             |              |
|              | Brain_Putamen_basal_ganglia           | 0.990311505  |              | Brain_Putamen_basal_ganglia1   | 1            | 1            |             |              |
|              |                                       | 1            | -0.012143026 | -0.012143026                   | -0.012143026 | NA           | 1           | 0            |
|              |                                       |              |              |                                |              |              |             | 0.99854153   |
| FANCM        | ENSG00000187790                       | 10           | 0.990361526  | 4                              | 4            | 0.661658258  |             |              |
|              | Brain_Cerebellar_Hemisphere           | 0.979513762  |              | Brain_Caudate_basal_ganglia    | 2.68975393   |              |             |              |
|              |                                       | 0.122566616  | 0.122566616  | 0.025678514                    |              | 0.437624844  |             | 0.25580333   |
|              |                                       | 0.173406328  | 4            | 0                              | 0.99854153   |              |             |              |
| STX8         | ENSG00000170310                       | 14           | 0.990428191  | 2                              | 2            | 0.899432736  |             |              |
|              | Brain_Hypothalamus                    | 0.976440084  |              | Brain_Putamen_basal_ganglia    | 1.208481626  |              |             |              |
|              |                                       | 0.791518374  | 0.791518374  | -0.029532268                   |              | 0.126377974  |             | 0.048422853  |
|              |                                       | 0.11024519   | 2            | 0                              | 0.99854153   |              |             |              |
| LINC01372    | ENSG00000235475                       | 1            | 0.990476689  | 7                              | 4            | 0.366014751  |             |              |
|              | Brain_Nucleus_accumbens_basal_ganglia | 0.961747504  |              | Brain_Putamen_basal_ganglia    |              |              |             |              |
|              |                                       | 5.793516604  | 0.039731579  | 0.217779506                    |              | -0.47846791  |             | 0.903963509  |
|              |                                       | 0.003984388  | 0.474541746  | 4                              | 0            | 0.99854153   |             |              |
| 3-Sep        | ENSG00000100167                       | 19           | 0.990878091  | 5                              | 5            | 0.502444419  |             | Brain_Cortex |
|              |                                       | 0.796903983  |              | Brain_Hippocampus              | 2.908123636  | 0.172296991  |             |              |
|              |                                       | 0.172296991  | -0.670648593 | -0.257355978                   |              | -0.441385416 |             | 0.174925964  |
|              |                                       | 5            | 0            | 0.998796219                    |              |              |             |              |
| FAM169A      | ENSG00000198780                       | 11           | 0.99092045   | 1                              | 1            | 0.99092045   |             |              |
|              | Brain_Cerebellar_Hemisphere           | 0.99092045   |              | Brain_Cerebellar_Hemisphere1   | 1            | 1            |             | 1            |
|              |                                       | 0.011379774  | 0.011379774  | 0.011379774                    |              | NA           | 1           | 0            |
|              |                                       |              |              |                                |              |              |             | 0.998796219  |
| LINC01554    | ENSG00000236882                       | 7            | 0.991214579  | 6                              | 4            | 0.766516919  |             |              |



|              |                                       |                   |              |                             |                                      |             |                   |
|--------------|---------------------------------------|-------------------|--------------|-----------------------------|--------------------------------------|-------------|-------------------|
|              | Brain_Amygdala                        | 0.978791631       |              | Brain_Caudate_basal_ganglia | 4.714359058                          |             |                   |
|              | 0.012996422                           | 0.173557293       |              | -0.296933973                | 0.193688776                          |             | 0.010399178       |
|              | 0.204809471                           | 4                 | 0            | 0.998796219                 |                                      |             |                   |
| MCM4         | ENSG00000104738.16                    | 0.991296318       | 11           | 9                           | 0.42138611                           |             |                   |
|              | Brain_Nucleus_accumbens_basal_ganglia | 0.999165498       |              |                             | Brain_Substantia_nigra               |             |                   |
|              | 4.543689127                           | 0.103337888       |              | 0.223204204                 | -0.804018814                         |             | 0.724731204       |
|              | -0.182779356                          | 0.432650032       | 9            | 0                           | 0.998796219                          |             |                   |
| SAPCD2       | ENSG00000186193.8                     | 0.991304966       | 2            | 2                           | 0.913272417                          |             |                   |
|              | Brain_Caudate_basal_ganglia           | 0.944591853       |              |                             | Brain_Frontal_Cortex_BA9             |             |                   |
|              | 1.048428799                           | 0.951571201       |              | 0.951571201                 | -0.069499724                         |             | 0.108911838       |
|              | 0.019706057                           | 0.126156025       | 2            | 0                           | 0.998796219                          |             |                   |
| PPP5C        | ENSG00000011485.14                    | 0.99139361        | 3            | 3                           | 0.782899404                          |             | Brain_Cerebellum  |
|              | 0.870198354                           | Brain_Amygdala    | 1.762403025  |                             | 0.237659506                          |             | 0.237659506       |
|              | -0.16340654                           | 0.275542597       | 0.115528106  |                             | 0.242436773                          | 3           | 0                 |
|              | 0.998796219                           |                   |              |                             |                                      |             |                   |
| LRRC69       | ENSG00000214954.8                     | 0.991562726       | 2            | 2                           | 0.896781093                          |             |                   |
|              | Brain_Putamen_basal_ganglia           | 0.965968637       |              |                             | Brain_Hippocampus                    |             | 1.248243977       |
|              | 0.751756023                           | 0.751756023       |              | 0.042664929                 | 0.129728677                          |             | 0.086196803       |
|              | 0.061563367                           | 2                 | 0            | 0.998796219                 |                                      |             |                   |
| ZNF555       | ENSG00000186300.11                    | 0.991575811       | 2            | 2                           | 0.910190025                          |             |                   |
|              | Brain_Caudate_basal_ganglia           | 0.949389596       |              |                             | Brain_Anterior_cingulate_cortex_BA24 |             |                   |
|              | 1.011526518                           | 0.988473482       |              | 0.988473482                 | -0.063473329                         |             | 0.112798857       |
|              | 0.024662764                           | 0.124643258       | 2            | 0                           | 0.998796219                          |             |                   |
| RP4-621B10.8 | ENSG00000273487.1                     | 0.991750818       | 9            | 6                           | 0.441805606                          |             |                   |
|              | Brain_Cerebellar_Hemisphere           | 0.918980781       |              |                             | Brain_Cortex                         |             | 5.557384593       |
|              | 0.007810963                           | 0.185982312       |              | -0.175843888                | 0.769147746                          |             | 0.35813397        |
|              | 0.309188967                           | 6                 | 0            | 0.998796219                 |                                      |             |                   |
| SDHA         | ENSG00000073578.16                    | 0.991769249       | 3            | 3                           | 0.756874519                          |             |                   |
|              | Brain_Spinal_cord_cervical_c-1        | 0.958633052       |              |                             | Brain_Cortex                         |             | 1.51701042        |
|              | 0.516264465                           | 0.516264465       |              | -0.05186903                 | 0.309587689                          |             | 0.12628002        |
|              | 0.180783568                           | 3                 | 0            | 0.998796219                 |                                      |             |                   |
| ZXDC         | ENSG00000070476.14                    | 0.991849993       | 12           | 2                           | 0.323737767                          |             | Brain_Cortex      |
|              | 0.975817522                           | Brain_Hippocampus | 10.75416001  |                             | 0.012598981                          |             |                   |
|              | 0.378265035                           | -0.818089181      | 0.98680597   |                             | -0.050994046                         | 0.435566744 | 2                 |
|              | 0                                     | 0.998796219       |              |                             |                                      |             |                   |
| CDRT15       | ENSG00000223510.6                     | 0.991937972       | 2            | 2                           | 0.906292446                          |             |                   |
|              | Brain_Cerebellum                      | 0.92977466        |              |                             | Brain_Cerebellar_Hemisphere          |             | 1.914569255       |
|              | 0.085430745                           | 0.085430745       |              | 0.088128355                 | 0.117716307                          |             | 0.102922331       |
|              | 0.020921841                           | 2                 | 0            | 0.998796219                 |                                      |             |                   |
| PDE2A        | ENSG00000186642.15                    | 0.992021946       | 6            | 6                           | 0.635511072                          |             |                   |
|              | Brain_Substantia_nigra                | 0.801063672       |              |                             | Brain_Spinal_cord_cervical_c-1       |             |                   |
|              | 2.442440234                           | 0.123859957       |              | 0.123859957                 | -0.473984343                         |             | 0.251970751       |
|              | -0.263060683                          | 0.26507753        | 6            | 0                           | 0.998796219                          |             |                   |
| SAMD5        | ENSG00000203727.3                     | 0.992112584       | 4            | 2                           | 0.600281497                          |             |                   |
|              | Brain_Hypothalamus                    | 0.968234822       |              |                             | Brain_Cerebellum                     |             | 3.424857503       |
|              | 0.052440139                           | 0.424159371       |              | -0.523995748                | 0.244922303                          |             | -0.102876571      |
|              | 0.317483151                           | 2                 | 0            | 0.998796219                 |                                      |             |                   |
| RNF144A      | ENSG00000151692.14                    | 0.992244637       | 3            | 2                           | 0.901059628                          |             |                   |
|              | Brain_Cerebellar_Hemisphere           | 0.937440488       |              |                             | Brain_Cerebellum                     |             | 2.25358981        |
|              | 0.009232212                           | 0.737177979       |              | 0.07848723                  | 0.124322885                          |             | 0.105953792       |
|              | 0.024234269                           | 2                 | 0            | 0.998796219                 |                                      |             |                   |
| CLTCL1       | ENSG00000070371.15                    | 0.992251345       | 8            | 3                           | 0.616437218                          |             |                   |
|              | Brain_Putamen_basal_ganglia           | 0.985153902       |              |                             | Brain_Frontal_Cortex_BA9             |             | 6.11464022        |
|              | 0.007000995                           | 0.307108234       |              | -0.172776934                | 0.500906088                          |             | 0.074555893       |
|              | 0.251444331                           | 3                 | 0            | 0.998796219                 |                                      |             |                   |
| HMBOX1       | ENSG00000147421.17                    | 0.992252669       | 2            | 2                           | 0.90385307                           |             |                   |
|              | Brain_Hippocampus                     | 0.969381505       |              |                             | Brain_Cortex                         |             | 1.061283016       |
|              | 0.938716984                           | 0.938716984       |              | -0.12079543                 | 0.038384016                          |             | -0.041205707      |
|              | 0.112556866                           | 2                 | 0            | 0.998796219                 |                                      |             |                   |
| NEU3         | ENSG00000162139.9                     | 0.99234569        | 8            | 3                           | 0.691623525                          |             | Brain_Hippocampus |
|              | 0.992817504                           | Brain_Cortex      | 6.481512223  |                             | 0.005464163                          |             | 0.408135596       |
|              | -0.396652781                          | 0.118854277       | -0.120273683 |                             | 0.199914236                          | 3           | 0                 |

0.998796219

COL18A1 ENSG00000182871.14 0.992408922 4 3 0.791708427  
Brain\_Spinal\_cord\_cervical\_c-1 0.983210556 Brain\_Cerebellum2.484197999  
0.072777334 0.172029834 -0.26409278 0.021044001 -0.091563588  
0.121525441 3 0 0.998796219

SUPV3L1 ENSG00000156502.13 0.992562454 2 2 0.902764567  
Brain\_Cerebellum0.943501714 Brain\_Cerebellar\_Hemisphere1.564637199  
0.435362801 0.435362801 -0.12216977 -0.07086938 -0.096519575  
0.036274854 2 0 0.998796219

TEAD4 ENSG00000197905.8 0.992624969 2 2 0.921158673 Brain\_Cerebellum  
0.942155993 Brain\_Cerebellar\_Hemisphere1.01817728 0.98182272 0.98182272  
0.072560333 0.098974303 0.085767318 0.018677497 2 0  
0.998796219

PSD3 ENSG00000156011.16 0.992655468 4 4 0.729296184  
Brain\_Cerebellar\_Hemisphere0.828294089 Brain\_Spinal\_cord\_cervical\_c-1  
1.464284033 0.544963716 0.544963716 -0.346061915 -0.216889977  
-0.273755347 0.0577132 4 0 0.998796219

ZNF610 ENSG00000167554.14 0.992709655 1 1 0.992709655  
Brain\_Hippocampus 0.992709655 Brain\_Hippocampus 1 1 1  
0.00913722 0.00913722 0.00913722 NA 1 0 0.998796219

SFXN4 ENSG00000183605.16 0.992854254 13 1 0.584680722  
Brain\_Frontal\_Cortex\_BA9 0.99861246 Brain\_Substantia\_nigra 12.29177908  
0.000412547 12.29177908 -0.546560486 0.371812222 -0.00916953  
0.213956771 1 0 0.998796219

GJB6 ENSG00000121742.16 0.992886245 2 2 0.907284706  
Brain\_Cerebellar\_Hemisphere0.968123976 Brain\_Cerebellum1.536764033  
0.463235967 0.463235967 -0.116464138 -0.039961305 -0.078212721  
0.054095672 2 0 0.998796219

SSPN ENSG00000123096.11 0.99289271 2 2 0.918836642  
Brain\_Cerebellar\_Hemisphere0.929154331 Brain\_Cerebellum1.286762153  
0.713237847 0.713237847 0.088908874 0.101899254 0.095404064  
0.009185586 2 0 0.998796219

SAMM50 ENSG00000100347.14 0.992944807 6 4 0.74420362  
Brain\_Frontal\_Cortex\_BA9 0.952721571 Brain\_Cerebellum4.957517054  
0.005140416 0.170006445 -0.059289441 0.326291762 0.219744114  
0.146494472 4 0 0.998796219

GTPBP8 ENSG00000163607.15 0.992990954 2 2 0.91035274 Brain\_Cortex  
0.927576407 Brain\_Cerebellum1.525558675 0.474441325 0.474441325  
-0.112593625 -0.090894517 -0.101744071 0.015343587 2 0  
0.998796219

TVP23C ENSG00000175106.16 0.993116164 6 4 0.559785436  
Brain\_Substantia\_nigra 0.942425366 Brain\_Hippocampus 4.414277444  
0.003495952 0.168859697 0.072221838 0.583160238 0.28613253  
0.206773131 4 0 0.998796219

RP11-302L19.3 ENSG00000273100.1 0.993121916 12 2 0.621196697  
Brain\_Hippocampus 0.985600976 Brain\_Cortex 10.63233256  
0.004063124 0.517133018 -0.494155028 0.465086924 -0.0036581  
0.284779787 2 0 0.998796219

SRA1 ENSG00000213523.10 0.993136077 13 3 0.588051035 Brain\_Amygdala  
0.96572298 Brain\_Frontal\_Cortex\_BA9 10.50336886 0.001138354  
0.494534616 -0.187736271 0.54166249 0.163453745 0.186116026 3  
0 0.998796219

PRNP ENSG00000171867.16 0.993170311 3 3 0.817949834 Brain\_Cerebellum  
0.984156038 Brain\_Putamen\_basal\_ganglia1.487628284 0.513005757  
0.513005757 -0.052409009 0.230182662 0.065877473 0.146808733  
3 0 0.998796219

METTL13 ENSG00000010165.19 0.993213545 3 3 0.7821618  
Brain\_Cerebellar\_Hemisphere0.949426425 Brain\_Frontal\_Cortex\_BA9  
1.934037597 0.076443355 0.076443355 0.063427078 0.276502942  
0.189662144 0.111867163 3 0 0.998796219

OXLD1 ENSG00000204237.4 0.993227051 6 4 0.500417691 Brain\_Cerebellum  
0.913201256 Brain\_Cerebellar\_Hemisphere4.528520859 1.59E-08

|          |                                       |                  |                                       |              |              |                  |
|----------|---------------------------------------|------------------|---------------------------------------|--------------|--------------|------------------|
|          | 0.306684574                           | 0.109001556      | 0.673832687                           | 0.309059318  | 0.23076745   | 4                |
|          | 0                                     | 0.998796219      |                                       |              |              |                  |
| C21orf2  | ENSG00000160226.15                    | 0.993227917      | 10                                    | 8            | 0.396636018  |                  |
|          | Brain_Hypothalamus                    | 0.574241256      | Brain_Cerebellum                      | 5.070360454  | 4.95E-18     |                  |
|          | 0.257310769                           | 0.561816196      | 0.847644439                           | 0.655861515  | 0.108494729  |                  |
|          | 8                                     | 0                | 0.998796219                           |              |              |                  |
| KHDC1    | ENSG00000135314.12                    | 0.993414467      | 2                                     | 2            | 0.914071664  |                  |
|          | Brain_Nucleus_accumbens_basal_ganglia | 0.927825439      | Brain_Frontal_Cortex_BA9              |              |              |                  |
|          | 1.527326348                           | 0.472673652      | 0.472673652                           | -0.107904227 | -0.090581114 |                  |
|          | -0.09924267                           | 0.012249291      | 2                                     | 0            | 0.998851766  |                  |
| ASCC2    | ENSG00000100325.14                    | 0.99342594       | 9                                     | 5            | 0.571597423  |                  |
|          | Brain_Nucleus_accumbens_basal_ganglia | 0.874724453      | Brain_Caudate_basal_ganglia           |              |              |                  |
|          | 6.998476102                           | 0.011357289      | 0.250446874                           | -0.347495909 | 0.565700459  |                  |
|          | 0.303765457                           | 0.284888365      | 5                                     | 0            | 0.998851766  |                  |
| ACP7     | ENSG00000183760.10                    | 0.993520822      | 8                                     | 7            | 0.422029728  |                  |
|          | Brain_Nucleus_accumbens_basal_ganglia | 0.913328758      | Brain_Putamen_basal_ganglia           |              |              |                  |
|          | 3.541233996                           | 0.083252298      | 0.180107147                           | -0.802904857 | 0.415403617  |                  |
|          | -0.257290159                          | 0.385518148      | 7                                     | 0            | 0.998875383  |                  |
| FAM212A  | ENSG00000185614.4                     | 0.993867244      | 2                                     | 1            | 0.805907393  |                  |
|          | Brain_Cerebellum                      | 0.817769501      | Brain_Cerebellar_Hemisphere           | 1.97967906   | 0.02032094   |                  |
|          | 1.97967906                            | -0.245709144     | 0.230414749                           | -0.007647198 | 0.336670434  | 1                |
|          | 0                                     | 0.999030827      |                                       |              |              |                  |
| DGKE     | ENSG00000153933.9                     | 0.993912694      | 4                                     | 4            | 0.693950838  |                  |
|          | Brain_Cerebellar_Hemisphere           | 0.936750252      | Brain_Putamen_basal_ganglia           | 2.23641329   |              |                  |
|          | 0.295406691                           | 0.295406691      | -0.079355011                          | 0.393499168  | 0.157118139  |                  |
|          | 0.19907231                            | 4                | 0                                     | 0.999030827  |              |                  |
| NT5C3B   | ENSG00000141698.16                    | 0.993938486      | 12                                    | 2            | 0.716954481  |                  |
|          | Brain_Putamen_basal_ganglia           | 0.984710607      | Brain_Caudate_basal_ganglia           |              |              |                  |
|          | 10.86107735                           | 0.000709567      | 0.454244269                           | -0.277074548 | 0.362532045  |                  |
|          | 0.095541548                           | 0.197534498      | 2                                     | 0            | 0.999030827  |                  |
| FBRSL1   | ENSG00000112787.12                    | 0.99404445       | 1                                     | 1            | 0.99404445   | Brain_Cerebellum |
|          | 0.99404445                            | Brain_Cerebellum | 1                                     | 1            | -0.007464245 | -0.007464245     |
|          | -0.007464245                          | NA               | 1                                     | 0            | 0.999030827  |                  |
| BHMT     | ENSG00000145692.14                    | 0.994125875      | 7                                     | 4            | 0.654107691  |                  |
|          | Brain_Caudate_basal_ganglia           | 0.876931942      | Brain_Cortex                          | 4.882680476  |              |                  |
|          | 0.000988167                           | 0.224157895      | 0.154859678                           | 0.448063054  | 0.305295789  |                  |
|          | 0.125020069                           | 4                | 0                                     | 0.999030827  |              |                  |
| TFDP2    | ENSG00000114126.17                    | 0.994196222      | 1                                     | 1            | 0.994196222  |                  |
|          | Brain_Anterior_cingulate_cortex_BA24  | 0.994196222      |                                       |              |              |                  |
|          | Brain_Anterior_cingulate_cortex_BA24  | 1                | 1                                     | 1            | -0.007274021 |                  |
|          | -0.007274021                          | -0.007274021     | NA                                    | 1            | 0            | 0.999030827      |
| MAST3    | ENSG00000099308.10                    | 0.994248149      | 3                                     | 3            | 0.807966709  |                  |
|          | Brain_Caudate_basal_ganglia           | 0.976528872      | Brain_Cerebellum                      | 1.216344966  |              |                  |
|          | 0.793777118                           | 0.793777118      | -0.243049942                          | -0.02942094  | -0.136191972 |                  |
|          | 0.106814527                           | 3                | 0                                     | 0.999030827  |              |                  |
| ORC5     | ENSG00000164815.10                    | 0.994343         | 1                                     | 1            | 0.994343     | Brain_Cortex     |
|          | Brain_Cortex                          | 1                | 1                                     | 1            | -0.007090058 | -0.007090058     |
|          | NA                                    | 1                | 0                                     | 0.999030827  |              |                  |
| FGFBP2   | ENSG00000137441.7                     | 0.994380221      | 2                                     | 2            | 0.941028557  |                  |
|          | Brain_Amygdala                        | 0.942504873      | Brain_Cortex                          | 1.05298768   | 0.94701232   | 0.94701232       |
|          | 0.072121931                           | 0.073977163      | 0.073049547                           | 0.001311847  | 2            | 0                |
|          | 0.999030827                           |                  |                                       |              |              |                  |
| C6orf222 | ENSG00000189325.6                     | 0.994389486      | 3                                     | 3            | 0.797996003  |                  |
|          | Brain_Anterior_cingulate_cortex_BA24  | 0.992770487      | Brain_Frontal_Cortex_BA9              |              |              |                  |
|          | 1.190311524                           | 0.82356208       | 0.82356208                            | -0.009060975 | 0.255941507  |                  |
|          | 0.121929283                           | 0.132527085      | 3                                     | 0            | 0.999030827  |                  |
| SUPT3H   | ENSG00000196284.15                    | 0.994483837      | 11                                    | 3            | 0.353812548  |                  |
|          | Brain_Caudate_basal_ganglia           | 0.979552881      | Brain_Nucleus_accumbens_basal_ganglia |              |              |                  |
|          | 9.175047819                           | 0.001064882      | 0.428968345                           | -0.318989251 | 0.927219563  |                  |
|          | 0.214971949                           | 0.306209417      | 3                                     | 0            | 0.999053879  |                  |
| TRIM13   | ENSG00000204977.9                     | 0.994835118      | 8                                     | 4            | 0.516748775  |                  |
|          | Brain_Hippocampus                     | 0.902730162      | Brain_Cerebellar_Hemisphere           | 6.561145699  |              |                  |

|              |                                |                   |                                       |              |                  |
|--------------|--------------------------------|-------------------|---------------------------------------|--------------|------------------|
|              | 0.042033116                    | 0.242789232       | 0.122213213                           | 0.648365197  | 0.340648298      |
|              | 0.199081241                    | 4 0               | 0.999259749                           |              |                  |
| RP11-320P7.2 | ENSG00000257139.1              | 0.994891435       | 11 2                                  | 0.617910152  |                  |
|              | Brain_Hypothalamus             | 0.990194829       | Brain_Spinal_cord_cervical_c-1        |              |                  |
|              | 9.448196736                    | 0.002665309       | 0.859929691                           | -0.498814385 | 0.113711123      |
|              | -0.094254132                   | 0.173357449       | 2 0                                   | 0.999259749  |                  |
| ENTPD7       | ENSG00000198018.6              | 0.99490303 1      | 1 1                                   | 0.99490303   | Brain_Cerebellum |
|              | 0.99490303                     | Brain_Cerebellum1 | 1 1                                   | -0.006388148 | -0.006388148     |
|              | -0.006388148                   | NA 1              | 0                                     | 0.999259749  |                  |
| KLHL31       | ENSG00000124743.5              | 0.994995671       | 3 3                                   | 0.851439187  |                  |
|              | Brain_Putamen_basal_ganglia    | 0.968479007       | Brain_Caudate_basal_ganglia           |              |                  |
|              | 1.544691974                    | 0.462214464       | 0.462214464                           | 0.039515987  | 0.187282445      |
|              | 0.137507766                    | 0.084866943       | 3 0                                   | 0.999281059  |                  |
| TSSC1        | ENSG00000032389.12             | 0.995077401       | 1 1                                   | 0.995077401  |                  |
|              | Brain_Substantia_nigra         | 0.995077401       | Brain_Substantia_nigra                | 1 1          |                  |
|              | 1                              | -0.006169602      | -0.006169602                          | NA 1         | 0 0.99929141     |
| MLH1         | ENSG00000076242.14             | 0.995200657       | 2 2                                   | 0.930455244  |                  |
|              | Brain_Putamen_basal_ganglia    | 0.940399086       | Brain_Nucleus_accumbens_basal_ganglia |              |                  |
|              | 1.382654952                    | 0.617345048       | 0.617345048                           | -0.087272083 | -0.074768273     |
|              | -0.081020178                   | 0.008841529       | 2 0                                   | 0.999343458  |                  |
| CSAD         | ENSG00000139631.18             | 0.995320512       | 5 4                                   | 0.663161657  |                  |
|              | Brain_Cerebellar_Hemisphere    | 0.958552069       | Brain_Amygdala                        | 3.457756298  |                  |
|              | 0.067711589                    | 0.171215698       | -0.435552201                          | 0.294746157  | -0.182197809     |
|              | 0.30686098                     | 4 0               | 0.999392083                           |              |                  |
| CELA3A       | ENSG00000142789.19             | 0.995573965       | 1 1                                   | 0.995573965  |                  |
|              | Brain_Cerebellar_Hemisphere    | 0.995573965       | Brain_Cerebellar_Hemisphere           | 1 1          |                  |
|              | 1                              | -0.00554724       | -0.00554724                           | -0.00554724  | NA 1 0           |
|              | 0.999439009                    |                   |                                       |              |                  |
| PLGRKT       | ENSG00000107020.9              | 0.995651417       | 7 4                                   | 0.53560136   |                  |
|              | Brain_Putamen_basal_ganglia    | 0.923040953       | Brain_Amygdala                        | 5.033414728  |                  |
|              | 0.005066152                    | 0.194504139       | -0.111960225                          | 0.619478228  | 0.249719478      |
|              | 0.252343233                    | 4 0               | 0.999439009                           |              |                  |
| MRPS24       | ENSG00000062582.13             | 0.995666693       | 1 1                                   | 0.995666693  |                  |
|              | Brain_Cerebellum               | 0.995666693       | Brain_Cerebellum                      | 1 1 1        | 0.005431021      |
|              | 0.005431021                    | 0.005431021       | NA 1                                  | 0            | 0.999439009      |
| FAM114A2     | ENSG00000055147.18             | 0.995671768       | 2 2                                   | 0.927075187  |                  |
|              | Brain_Cerebellar_Hemisphere    | 0.997061201       | Brain_Putamen_basal_ganglia           |              |                  |
|              | 1.224166862                    | 0.775833138       | 0.775833138                           | -0.003683247 | 0.091525321      |
|              | 0.043921037                    | 0.067322624       | 2 0                                   | 0.999439009  |                  |
| TMPRSS5      | ENSG00000166682.10             | 0.995724419       | 12 5                                  | 0.395664432  |                  |
|              | Brain_Cortex                   | 0.899709352       | Brain_Cerebellum                      | 9.136571508  | 2.48E-18         |
|              | 0.411713547                    | 0.126028516       | 0.849389792                           | 0.454102419  | 0.211418613      |
|              | 5 0                            | 0.999439009       |                                       |              |                  |
| DPPA4        | ENSG00000121570.12             | 0.995849884       | 4 3                                   | 0.872493501  |                  |
|              | Brain_Spinal_cord_cervical_c-1 | 0.967541321       | Brain_Putamen_basal_ganglia           |              |                  |
|              | 3.025458154                    | 0.03759935        | 0.327644707                           | -0.100533064 | 0.160492028      |
|              | 0.002236798                    | 0.12370669        | 3 0                                   | 0.999443254  |                  |
| POMGNT1      | ENSG00000085998.13             | 0.995871518       | 3 3                                   | 0.817956643  |                  |
|              | Brain_Cerebellum               | 0.983888522       | Brain_Caudate_basal_ganglia           | 1.261350533  |                  |
|              | 0.727667827                    | 0.727667827       | -0.230173899                          | -0.020194116 | -0.1143405       |
|              | 0.106656562                    | 3 0               | 0.999443254                           |              |                  |
| RP11-158H5.7 | ENSG00000268573.1              | 0.996222794       | 3 3                                   | 0.820108164  |                  |
|              | Brain_Caudate_basal_ganglia    | 0.994799674       | Brain_Nucleus_accumbens_basal_ganglia |              |                  |
|              | 1.896565736                    | 0.245092652       | 0.245092652                           | 0.006517689  | 0.22740586       |
|              | 0.082946296                    | 0.125176093       | 3 0                                   | 0.999449516  |                  |
| GGACT        | ENSG00000134864.10             | 0.996293497       | 2 2                                   | 0.931730721  |                  |
|              | Brain_Hippocampus              | 0.992819149       | Brain_Cerebellum                      | 1.004353635  |                  |
|              | 0.995646365                    | 0.995646365       | -0.008999984                          | 0.085667522  | 0.038333769      |
|              | 0.066940035                    | 2 0               | 0.999449516                           |              |                  |
| RPLP1        | ENSG00000137818.11             | 0.996312852       | 2 2                                   | 0.941718396  |                  |
|              | Brain_Spinal_cord_cervical_c-1 | 0.95860706        | Brain_Nucleus_accumbens_basal_ganglia |              |                  |
|              | 1.094463147                    | 0.905536853       | 0.905536853                           | 0.05190165   | 0.073110236      |

|               |                                       |                             |                                       |              |              |                  |   |  |
|---------------|---------------------------------------|-----------------------------|---------------------------------------|--------------|--------------|------------------|---|--|
|               | 0.062505943                           | 0.014996735                 | 2                                     | 0            | 0.999449516  |                  |   |  |
| ARID4B        | ENSG00000054267.21                    | 0.996341858                 | 1                                     | 1            | 0.996341858  |                  |   |  |
|               | Brain_Cerebellum                      | 0.996341858                 | Brain_Cerebellum                      | 1            | 1            | 0.004584818      |   |  |
|               | 0.004584818                           | 0.004584818                 | NA                                    | 1            | 0.999449516  |                  |   |  |
| FFAR1         | ENSG00000126266.3                     | 0.996426798                 | 9                                     | 9            | 0.464543702  |                  |   |  |
|               | Brain_Putamen_basal_ganglia           | 0.88103702                  | Brain_Cortex                          | 2.047965045  | 0.27171897   |                  |   |  |
|               | 0.27171897                            | -0.343106234                | 0.731385529                           | 0.127866246  | 0.438072564  | 9                |   |  |
|               | 0                                     | 0.999449516                 |                                       |              |              |                  |   |  |
| KB-1732A1.1   | ENSG00000253669.3                     | 0.996687602                 | 2                                     | 2            | 0.950912372  |                  |   |  |
|               | Brain_Hypothalamus                    | 0.999898572                 | Brain_Anterior_cingulate_cortex_BA24  |              |              |                  |   |  |
|               | 1.653716959                           | 0.346283041                 | 0.346283041                           | -0.000127122 | 0.061561079  |                  |   |  |
|               | 0.030716979                           | 0.043620145                 | 2                                     | 0            | 0.999449516  |                  |   |  |
| COMMD10       | ENSG00000145781.8                     | 0.996717587                 | 9                                     | 4            | 0.670395729  |                  |   |  |
|               | Brain_Substantia_nigra                | 0.954257653                 | Brain_Cerebellar_Hemisphere           |              |              |                  |   |  |
|               | 6.218808587                           | -0.023820951                | 0.553195354                           | -0.262176814 | 0.425604955  |                  |   |  |
|               | 0.089375931                           | 0.231320735                 | 4                                     | 0            | 0.999449516  |                  |   |  |
| RP11-562A8.5  | ENSG00000259618.1                     | 0.996787195                 | 1                                     | 1            | 0.996787195  |                  |   |  |
|               | Brain_Hypothalamus                    | 0.996787195                 | Brain_Hypothalamus                    | 1            | 1            | 1                |   |  |
|               | -0.004026664                          | -0.004026664                | -0.004026664                          | NA           | 1            | 0.999449516      |   |  |
| RP11-276H19.2 | ENSG00000269994.1                     | 0.996878989                 | 3                                     | 3            | 0.866267174  |                  |   |  |
|               | Brain_Cerebellum                      | 0.978859986                 | Brain_Nucleus_accumbens_basal_ganglia |              |              |                  |   |  |
|               | 1.029558526                           | 0.966742655                 | 0.966742655                           | -0.14750148  | 0.168401823  |                  |   |  |
|               | 0.015799508                           | 0.158223167                 | 3                                     | 0            | 0.999449516  |                  |   |  |
| BPTF          | ENSG00000171634.16                    | 0.996904167                 | 3                                     | 2            | 0.913294449  | Brain_Cerebellum |   |  |
|               | 0.991062883                           | Brain_Cerebellar_Hemisphere | 2.826848633                           | 0.001475907  |              |                  |   |  |
|               | 0.17167546                            | -0.039371747                | 0.108884061                           | 0.019437021  | 0.078733562  | 2                |   |  |
|               | 0                                     | 0.999449516                 |                                       |              |              |                  |   |  |
| AC007557.3    | ENSG00000227021.1                     | 0.997006536                 | 1                                     | 1            | 0.997006536  |                  |   |  |
|               | Brain_Cerebellum                      | 0.997006536                 | Brain_Cerebellum                      | 1            | 1            | 0.003751759      |   |  |
|               | 0.003751759                           | 0.003751759                 | NA                                    | 1            | 0.999449516  |                  |   |  |
| RP11-148B3.1  | ENSG00000258018.1                     | 0.997038269                 | 2                                     | 2            | 0.94202428   |                  |   |  |
|               | Brain_Cerebellar_Hemisphere           | 0.962560089                 | Brain_Cerebellum                      | 1.314413102  |              |                  |   |  |
|               | 0.685586898                           | -0.685586898                | 0.046941203                           | 0.072725847  | 0.059833525  |                  |   |  |
|               | 0.018232497                           | 2                           | 0                                     | 0.999449516  |              |                  |   |  |
| ADRA2A        | ENSG00000150594.6                     | 0.997156851                 | 3                                     | 3            | 0.902881922  |                  |   |  |
|               | Brain_Nucleus_accumbens_basal_ganglia | 0.927748223                 | Brain_Caudate_basal_ganglia           |              |              |                  |   |  |
|               | 1.663396304                           | 0.556827498                 | 0.556827498                           | -0.122021587 | 0.105106283  |                  |   |  |
|               | 0.024587661                           | 0.12717211                  | 3                                     | 0            | 0.999449516  |                  |   |  |
| C19orf66      | ENSG00000130813.17                    | 0.997260833                 | 2                                     | 2            | 0.948774334  |                  |   |  |
|               | Brain_Spinal_cord_cervical_c-1        | 0.988374796                 | Brain_Caudate_basal_ganglia           |              |              |                  |   |  |
|               | 1.317232485                           | 0.682767515                 | 0.682767515                           | -0.064246021 | -0.014570547 |                  |   |  |
|               | -0.039408284                          | 0.035125864                 | 2                                     | 0            | 0.999449516  |                  |   |  |
| ZNF607        | ENSG00000198182.12                    | 0.997264512                 | 13                                    | 2            | 0.460181712  |                  |   |  |
|               | Brain_Hippocampus                     | 0.886299109                 | Brain_Hypothalamus                    | 10.54942851  |              |                  |   |  |
|               | 0.003424585                           | 1.546290818                 | -0.738547667                          | 0.585017286  | -0.049194198 |                  |   |  |
|               | 0.350850311                           | 2                           | 0                                     | 0.999449516  |              |                  |   |  |
| RP11-886D15.1 | ENSG00000256422.5                     | 0.997314229                 | 5                                     | 4            | 0.85617276   |                  |   |  |
|               | Brain_Cerebellar_Hemisphere           | 0.964385543                 | Brain_Spinal_cord_cervical_c-1        |              |              |                  |   |  |
|               | 3.669770483                           | -0.053917109                | 0.236570006                           | -0.173166124 | 0.181248204  |                  |   |  |
|               | 0.033480326                           | 0.128296393                 | 4                                     | 0            | 0.999449516  |                  |   |  |
| UBA6          | ENSG00000033178.12                    | 0.997370183                 | 8                                     | 2            | 0.781901581  |                  |   |  |
|               | Brain_Putamen_basal_ganglia           | 0.990208324                 | Brain_Caudate_basal_ganglia           |              |              |                  |   |  |
|               | 7.299914162                           | 0.000267794                 | 0.486668585                           | -0.276841803 | 0.127730927  |                  |   |  |
|               | -0.067118413                          | 0.125008362                 | 2                                     | 0            | 0.999449516  |                  |   |  |
| SREK1         | ENSG00000153914.15                    | 0.997384076                 | 1                                     | 1            | 0.997384076  |                  |   |  |
|               | Brain_Cerebellar_Hemisphere           | 0.997384076                 | Brain_Cerebellar_Hemisphere           | 1            | 1            |                  |   |  |
|               | 1                                     | -0.003278581                | -0.003278581                          | -0.003278581 | NA           | 1                | 0 |  |
|               | 0.999449516                           |                             |                                       |              |              |                  |   |  |
| GPR107        | ENSG00000148358.19                    | 0.997431459                 | 2                                     | 2            | 0.950825292  |                  |   |  |
|               | Brain_Frontal_Cortex_BA9              | 0.971972013                 | Brain_Caudate_basal_ganglia           |              |              |                  |   |  |
|               | 1.023782601                           | 0.976217399                 | 0.976217399                           | -0.035135101 | 0.061670425  |                  |   |  |
|               | 0.013267662                           | 0.068451844                 | 2                                     | 0            | 0.999449516  |                  |   |  |

|           |                                       |                             |              |              |              |                                       |             |
|-----------|---------------------------------------|-----------------------------|--------------|--------------|--------------|---------------------------------------|-------------|
| IFI27L1   | ENSG00000165948.10                    | 0.997441124                 | 9            | 5            | 0.470438167  |                                       |             |
|           | Brain_Cerebellar_Hemisphere           | 0.941277101                 |              |              |              | Brain_Anterior_cingulate_cortex_BA24  |             |
|           | 6.440609426                           | 0.060800921                 | 0.256885416  | -0.721766308 | 0.464821648  |                                       |             |
|           | 0.058911876                           | 0.354360542                 | 5            | 0            | 0.999449516  |                                       |             |
| NEK1      | ENSG00000137601.16                    | 0.997472852                 | 7            | 2            | 0.339387683  | Brain_Cortex                          |             |
|           | 0.944091476                           | Brain_Putamen_basal_ganglia | 5.987338246  | 0.002710897  |              |                                       |             |
|           | 0.738684874                           | -0.405745068                | 0.95537581   | 0.042800334  | 0.463567227  |                                       | 2           |
|           | 0                                     | 0.999449516                 |              |              |              |                                       |             |
| NPHP3     | ENSG00000113971.19                    | 0.997636744                 | 13           | 1            | 0.395783582  | Brain_Amygdala                        |             |
|           | 0.984687776                           | Brain_Cerebellum            | 12.15863702  | 3.23E-07     | 12.15863702  |                                       |             |
|           | -0.849175611                          | 0.246151671                 | -0.005309806 | 0.270770739  | 1            | 0                                     |             |
|           | 0.999449516                           |                             |              |              |              |                                       |             |
| L1TD1     | ENSG00000240563.1                     | 0.997700048                 | 3            | 3            | 0.87546663   |                                       |             |
|           | Brain_Cerebellar_Hemisphere           | 0.968059288                 |              |              |              | Brain_Cerebellum                      | 1.585556974 |
|           | 0.415511007                           | 0.415511007                 | -0.156718597 | -0.040042444 | -0.104338913 |                                       |             |
|           | 0.05924389                            | 3                           | 0            | 0.999449516  |              |                                       |             |
| PDCD6IP   | ENSG00000170248.13                    | 0.997763184                 | 6            | 3            | 0.824116619  |                                       |             |
|           | Brain_Nucleus_accumbens_basal_ganglia | 0.978320556                 |              |              |              | Brain_Hippocampus                     |             |
|           | 4.446947863                           | 0.004486857                 | 0.462998943  | -0.22225341  | 0.132444501  |                                       |             |
|           | -0.027595975                          | 0.127483592                 | 3            | 0            | 0.999449516  |                                       |             |
| LY6K      | ENSG00000160886.13                    | 0.997775016                 | 12           | 3            | 0.694356762  | Brain_Amygdala                        |             |
|           | 0.998934619                           | Brain_Hypothalamus          | 10.37347112  | 0.001103124  | 0.3804479    |                                       |             |
|           | -0.392949526                          | 0.189104051                 | -0.089837047 | 0.201909301  | 3            | 0                                     |             |
|           | 0.999449516                           |                             |              |              |              |                                       |             |
| AKAP8     | ENSG00000105127.8                     | 0.997780545                 | 3            | 2            | 0.948917573  | Brain_Cerebellum                      |             |
|           | 0.991305709                           | Brain_Frontal_Cortex_BA9    | 1.945105035  | 0.055690692  |              |                                       |             |
|           | 0.999204273                           | -0.064066127                | -0.010896894 | -0.032389085 | 0.028009645  |                                       |             |
|           | 2                                     | 0                           | 0.999449516  |              |              |                                       |             |
| SPATA6L   | ENSG00000106686.16                    | 0.997806507                 | 5            | 5            | 0.711497189  |                                       |             |
|           | Brain_Frontal_Cortex_BA9              | 0.986327242                 |              |              |              | Brain_Cerebellar_Hemisphere           |             |
|           | 2.107735309                           | 0.09514542                  | 0.09514542   | -0.369846066 | 0.106602687  |                                       |             |
|           | -0.086915254                          | 0.202576016                 | 5            | 0            | 0.999449516  |                                       |             |
| RNF39     | ENSG00000204618.8                     | 0.997887873                 | 13           | 6            | 0.687306249  |                                       |             |
|           | Brain_Nucleus_accumbens_basal_ganglia | 0.984313357                 |              |              |              | Brain_Cerebellar_Hemisphere           |             |
|           | 9.705065895                           | 0.001087349                 | 0.371970352  | -0.215334565 | 0.402513373  |                                       |             |
|           | 0.049106548                           | 0.180799795                 | 6            | 0            | 0.999459462  |                                       |             |
| NCF2      | ENSG00000116701.14                    | 0.998096628                 | 1            | 1            | 0.998096628  |                                       |             |
|           | Brain_Cerebellar_Hemisphere           | 0.998096628                 |              |              |              | Brain_Cerebellar_Hemisphere           | 1           |
|           | 1                                     | -0.002385526                | -0.002385526 | -0.002385526 | NA           | 1                                     | 0           |
|           | 0.999559027                           |                             |              |              |              |                                       |             |
| RALYL     | ENSG00000184672.11                    | 0.998256792                 | 2            | 2            | 0.953188138  |                                       |             |
|           | Brain_Cerebellar_Hemisphere           | 0.994633601                 |              |              |              | Brain_Cerebellum                      | 1.002429995 |
|           | 0.997570005                           | 0.997570005                 | -0.058703668 | -0.006725835 | -0.032714751 |                                       |             |
|           | 0.036753879                           | 2                           | 0            | 0.999559027  |              |                                       |             |
| NAA16     | ENSG00000172766.18                    | 0.998269587                 | 2            | 2            | 0.953296678  | Brain_Cerebellum                      |             |
|           | 0.990748989                           | Brain_Caudate_basal_ganglia | 1.099365399  | 0.900634601  |              |                                       |             |
|           | 0.900634601                           | 0.011594682                 | 0.058567398  | 0.03508104   | 0.033214726  |                                       | 2           |
|           | 0                                     | 0.999559027                 |              |              |              |                                       |             |
| LNP1      | ENSG00000206535.7                     | 0.998410239                 | 13           | 5            | 0.581522352  |                                       |             |
|           | Brain_Frontal_Cortex_BA9              | 0.986303507                 |              |              |              | Brain_Hippocampus                     | 10.12006718 |
|           | 0.000217542                           | 0.377417337                 | -0.017166851 | 0.5511624    | 0.298046933  |                                       |             |
|           | 0.152852843                           | 5                           | 0            | 0.999559027  |              |                                       |             |
| WASHC4    | ENSG00000136051.13                    | 0.998426839                 | 7            | 4            | 0.64445829   |                                       |             |
|           | Brain_Cerebellar_Hemisphere           | 0.976449663                 |              |              |              | Brain_Substantia_nigra                |             |
|           | 4.669845357                           | 0.03366131                  | 0.181363215  | -0.461474391 | 0.069959896  |                                       |             |
|           | -0.138411429                          | 0.222271088                 | 4            | 0            | 0.999559027  |                                       |             |
| ADCY10    | ENSG00000143199.17                    | 0.99847065                  | 6            | 4            | 0.738410614  |                                       |             |
|           | Brain_Cerebellar_Hemisphere           | 0.973230133                 |              |              |              | Brain_Caudate_basal_ganglia           |             |
|           | 5.021276638                           | 0.043567477                 | 0.167587239  | -0.175322322 | 0.333958846  |                                       |             |
|           | 0.107658689                           | 0.177005364                 | 4            | 0            | 0.999559027  |                                       |             |
| RP11-378A | 12.1                                  | ENSG00000277526.4           | 0.998499442  | 8            | 8            | 0.566874514                           |             |
|           | Brain_Cortex                          | 0.869474512                 |              |              |              | Brain_Nucleus_accumbens_basal_ganglia |             |

|               |                                       |                             |                                      |              |                    |                  |             |            |    |    |    |    |    |
|---------------|---------------------------------------|-----------------------------|--------------------------------------|--------------|--------------------|------------------|-------------|------------|----|----|----|----|----|
|               | 2.834313233                           | 0.271456696                 | 0.271456696                          | -0.572660608 | 0.164326004        |                  |             |            |    |    |    |    |    |
|               | -0.280925657                          | 0.211866856                 | 8                                    | 0            | 0.999559027        |                  |             |            |    |    |    |    |    |
| RDM1          | ENSG00000278023.5                     | 0.998579609                 | 7                                    | 4            | 0.745467021        |                  |             |            |    |    |    |    |    |
|               | Brain_Nucleus_accumbens_basal_ganglia | 0.925024661                 |                                      |              | Brain_Hypothalamus |                  |             |            |    |    |    |    |    |
|               | 5.034547503                           | 0.013752511                 | 0.34084797                           | -0.324622203 | -0.09410637        |                  |             |            |    |    |    |    |    |
|               | -0.253814435                          | 0.076003282                 | 4                                    | 0            | 0.999559027        |                  |             |            |    |    |    |    |    |
| ZNF804B       | ENSG00000182348.6                     | 0.998630268                 | 1                                    | 1            | 0.998630268        |                  |             |            |    |    |    |    |    |
|               | Brain_Hypothalamus                    | 0.998630268                 | Brain_Hypothalamus                   | 1            | 1                  | 1                |             |            |    |    |    |    |    |
|               | -0.001716705                          | -0.001716705                | -0.001716705                         | NA           | 1                  | 0                | 0.999559027 |            |    |    |    |    |    |
| LINC01135     | ENSG00000234807.5                     | 0.998873734                 | 2                                    | 2            | 0.966081934        |                  |             |            |    |    |    |    |    |
|               | Brain_Cerebellum                      | 0.985289716                 | Brain_Amygdala                       | 1.061883337  | 0.938116663        |                  |             |            |    |    |    |    |    |
|               | 0.938116663                           | -0.042522802                | 0.018437651                          | -0.012042576 | 0.04310555         | 2                |             |            |    |    |    |    |    |
|               | 0                                     | 0.999731197                 |                                      |              |                    |                  |             |            |    |    |    |    |    |
| RP11-94C24.13 | ENSG00000275897.1                     | 0.99925063                  | 4                                    | 2            | 0.895167409        |                  |             |            |    |    |    |    |    |
|               | Brain_Cerebellum                      | 0.968259325                 | Brain_Cortex                         | 3.316469208  | 0.022341254        |                  |             |            |    |    |    |    |    |
|               | 0.596539911                           | -0.131293656                | 0.131768492                          | -0.009452976 | 0.118213236        |                  |             |            |    |    |    |    |    |
|               | 2                                     | 0                           | 0.99985256                           |              |                    |                  |             |            |    |    |    |    |    |
| ARHGEF12      | ENSG00000196914.8                     | 0.9992658                   | 2                                    | 2            | 0.971295397        | Brain_Cerebellum |             |            |    |    |    |    |    |
|               | 0.980594863                           | Brain_Cerebellar_Hemisphere | 1.861898024                          | 0.138101976  |                    |                  |             |            |    |    |    |    |    |
|               | 0.138101976                           | 0.024323131                 | 0.035983648                          | 0.03015339   | 0.008245231        | 2                |             |            |    |    |    |    |    |
|               | 0                                     | 0.99985256                  |                                      |              |                    |                  |             |            |    |    |    |    |    |
| PAX3          | ENSG00000135903.18                    | 0.999520549                 | 1                                    | 1            | 0.999520549        |                  |             |            |    |    |    |    |    |
|               | Brain_Hypothalamus                    | 0.999520549                 | Brain_Hypothalamus                   | 1            | 1                  | 1                |             |            |    |    |    |    |    |
|               | -0.000600903                          | -0.000600903                | -0.000600903                         | NA           | 1                  | 0                | 0.99985256  |            |    |    |    |    |    |
| ZNF841        | ENSG00000197608.11                    | 0.999540861                 | 2                                    | 2            | 0.983155269        |                  |             |            |    |    |    |    |    |
|               | Brain_Hippocampus                     | 0.99114329                  | Brain_Putamen_basal_ganglia          | 1.922716264  |                    |                  |             |            |    |    |    |    |    |
|               | 0.077283736                           | 0.077283736                 | 0.011100467                          | 0.021113308  | 0.016106887        |                  |             |            |    |    |    |    |    |
|               | 0.007080147                           | 2                           | 0                                    | 0.99985256   |                    |                  |             |            |    |    |    |    |    |
| OAZ3          | ENSG00000143450.16                    | 0.999548841                 | 2                                    | 2            | 0.976611404        | Brain_Cerebellum |             |            |    |    |    |    |    |
|               | 0.999905982                           | Brain_Cerebellar_Hemisphere | 1.222123516                          | 0.777876484  |                    |                  |             |            |    |    |    |    |    |
|               | 0.777876484                           | -0.029317458                | -0.000117835                         | -0.014717646 | 0.020647252        |                  |             |            |    |    |    |    |    |
|               | 2                                     | 0                           | 0.99985256                           |              |                    |                  |             |            |    |    |    |    |    |
| CTNNB1        | ENSG00000168036.16                    | 0.999561925                 | 7                                    | 4            | 0.760330078        |                  |             |            |    |    |    |    |    |
|               | Brain_Caudate_basal_ganglia           | 0.957195619                 | Brain_Hippocampus                    | 5.453246313  |                    |                  |             |            |    |    |    |    |    |
|               | 0.021658216                           | 0.254134259                 | -0.088727369                         | 0.305047365  | 0.098873367        |                  |             |            |    |    |    |    |    |
|               | 0.140726765                           | 4                           | 0                                    | 0.99985256   |                    |                  |             |            |    |    |    |    |    |
| ARID4A        | ENSG00000032219.18                    | 0.999607608                 | 1                                    | 1            | 0.999607608        |                  |             |            |    |    |    |    |    |
|               | Brain_Caudate_basal_ganglia           | 0.999607608                 | Brain_Caudate_basal_ganglia          | 1            | 1                  |                  |             |            |    |    |    |    |    |
|               | 1                                     | 0.00049179                  | 0.00049179                           | 0.00049179   | NA                 | 1                | 0           | 0.99985256 |    |    |    |    |    |
| C12orf73      | ENSG00000204954.9                     | 0.999622515                 | 12                                   | 4            | 0.549470593        |                  |             |            |    |    |    |    |    |
|               | Brain_Frontal_Cortex_BA9              | 0.994955694                 | Brain_Cerebellar_Hemisphere          |              |                    |                  |             |            |    |    |    |    |    |
|               | 9.335100839                           | 0.018316148                 | 0.380748461                          | -0.598553618 | 0.069802839        |                  |             |            |    |    |    |    |    |
|               | -0.161486096                          | 0.212552904                 | 4                                    | 0            | 0.99985256         |                  |             |            |    |    |    |    |    |
| ALOX15        | ENSG00000161905.12                    | 0.999638168                 | 10                                   | 1            | 0.817655227        |                  |             |            |    |    |    |    |    |
|               | Brain_Cerebellum                      | 0.995406675                 | Brain_Frontal_Cortex_BA9             | 9.504807836  |                    |                  |             |            |    |    |    |    |    |
|               | 0.000739862                           | 9.504807836                 | -0.230561826                         | 0.202273209  | 0.000866678        |                  |             |            |    |    |    |    |    |
|               | 0.133758997                           | 1                           | 0                                    | 0.99985256   |                    |                  |             |            |    |    |    |    |    |
| ZFHX4         | ENSG00000091656.15                    | 0.999727025                 | 1                                    | 1            | 0.999727025        | Brain_Cerebellum |             |            |    |    |    |    |    |
|               | 0.999727025                           | Brain_Cerebellum            | 1                                    | 1            | 1                  | 0.000342123      | 0.000342123 |            |    |    |    |    |    |
|               | 0.000342123                           | NA                          | 1                                    | 0            | 0.999863651        |                  |             |            |    |    |    |    |    |
| URB1          | ENSG00000142207.6                     | 0.999792186                 | 8                                    | 4            | 0.660834396        |                  |             |            |    |    |    |    |    |
|               | Brain_Putamen_basal_ganglia           | 0.969229197                 | Brain_Anterior_cingulate_cortex_BA24 |              |                    |                  |             |            |    |    |    |    |    |
|               | 6.069227184                           | 0.032504048                 | 0.213396159                          | -0.438761451 | 0.23261721         |                  |             |            |    |    |    |    |    |
|               | -0.014517646                          | 0.217130755                 | 4                                    | 0            | 0.999863651        |                  |             |            |    |    |    |    |    |
| ZFYVE26       | ENSG00000072121.15                    | 0.999873733                 | 1                                    | 1            | 0.999873733        |                  |             |            |    |    |    |    |    |
|               | Brain_Cerebellum                      | 0.999873733                 | Brain_Cerebellum                     | 1            | 1                  | 1                | 0.000158252 |            |    |    |    |    |    |
|               | 0.000158252                           | 0.000158252                 | NA                                   | 1            | 0                  | 0.999873733      |             |            |    |    |    |    |    |
| ZC3H12A       | ENSG00000163874.10                    | NA                          | NA                                   | NA           | NA                 | NA               | NA          | NA         | NA | NA | NA | NA | NA |
|               | NA                                    | NA                          | NA                                   | NA           | -2                 | NA               |             |            |    |    |    |    |    |
| HSPG2         | ENSG00000142798.17                    | NA                          | NA                                   | NA           | NA                 | NA               | NA          | NA         | NA | NA | NA | NA | NA |
|               | NA                                    | NA                          | NA                                   | NA           | -2                 | NA               |             |            |    |    |    |    |    |
| RP5-965F6.2   | ENSG00000231246.1                     | NA                          | NA                                   | NA           | NA                 | NA               | NA          | NA         | NA | NA | NA | NA | NA |

|               |                    |    |    |    |    |    |    |    |    |    |    |    |    |    |    |    |
|---------------|--------------------|----|----|----|----|----|----|----|----|----|----|----|----|----|----|----|
|               | NA                 | NA | NA | NA | NA | NA | -2 | NA |    |    |    |    |    |    |    |    |
| PADI3         | ENSG00000142619.4  |    |    |    | NA | NA | NA | NA | NA | NA | NA | NA | NA | NA | NA | NA |
|               | NA                 | NA | NA | NA | -2 | NA |    |    |    |    |    |    |    |    |    |    |
| E2F2          | ENSG00000007968.6  |    |    |    | NA | NA | NA | NA | NA | NA | NA | NA | NA | NA | NA | NA |
|               | NA                 | NA | NA | NA | -2 | NA |    |    |    |    |    |    |    |    |    |    |
| LMX1A         | ENSG00000162761.14 |    |    |    | NA | NA | NA | NA | NA | NA | NA | NA | NA | NA | NA | NA |
|               | NA                 | NA | NA | NA | -2 | NA |    |    |    |    |    |    |    |    |    |    |
| PRR9          | ENSG00000203783.4  |    |    |    | NA | NA | NA | NA | NA | NA | NA | NA | NA | NA | NA | NA |
|               | NA                 | NA | NA | NA | -2 | NA |    |    |    |    |    |    |    |    |    |    |
| DMRTA2        | ENSG00000142700.11 |    |    |    | NA | NA | NA | NA | NA | NA | NA | NA | NA | NA | NA | NA |
|               | NA                 | NA | NA | NA | -2 | NA |    |    |    |    |    |    |    |    |    |    |
| C1orf94       | ENSG00000142698.14 |    |    |    | NA | NA | NA | NA | NA | NA | NA | NA | NA | NA | NA | NA |
|               | NA                 | NA | NA | NA | -2 | NA |    |    |    |    |    |    |    |    |    |    |
| LINC01757     | ENSG00000228105.1  |    |    |    | NA | NA | NA | NA | NA | NA | NA | NA | NA | NA | NA | NA |
|               | NA                 | NA | NA | NA | -2 | NA |    |    |    |    |    |    |    |    |    |    |
| CHRM3         | ENSG00000133019.11 |    |    |    | NA | NA | NA | NA | NA | NA | NA | NA | NA | NA | NA | NA |
|               | NA                 | NA | NA | NA | -2 | NA |    |    |    |    |    |    |    |    |    |    |
| IFFO2         | ENSG00000169991.10 |    |    |    | NA | NA | NA | NA | NA | NA | NA | NA | NA | NA | NA | NA |
|               | NA                 | NA | NA | NA | -2 | NA |    |    |    |    |    |    |    |    |    |    |
| HEYL          | ENSG00000163909.7  |    |    |    | NA | NA | NA | NA | NA | NA | NA | NA | NA | NA | NA | NA |
|               | NA                 | NA | NA | NA | -2 | NA |    |    |    |    |    |    |    |    |    |    |
| BLZF1         | ENSG00000117475.13 |    |    |    | NA | NA | NA | NA | NA | NA | NA | NA | NA | NA | NA | NA |
|               | NA                 | NA | NA | NA | -2 | NA |    |    |    |    |    |    |    |    |    |    |
| LCE1F         | ENSG00000240386.3  |    |    |    | NA | NA | NA | NA | NA | NA | NA | NA | NA | NA | NA | NA |
|               | NA                 | NA | NA | NA | -2 | NA |    |    |    |    |    |    |    |    |    |    |
| FH            | ENSG00000091483.6  |    |    |    | NA | NA | NA | NA | NA | NA | NA | NA | NA | NA | NA | NA |
|               | NA                 | NA | NA | NA | -2 | NA |    |    |    |    |    |    |    |    |    |    |
| ARID1A        | ENSG00000117713.18 |    |    |    | NA | NA | NA | NA | NA | NA | NA | NA | NA | NA | NA | NA |
|               | NA                 | NA | NA | NA | -2 | NA |    |    |    |    |    |    |    |    |    |    |
| SPRR2A        | ENSG00000241794.1  |    |    |    | NA | NA | NA | NA | NA | NA | NA | NA | NA | NA | NA | NA |
|               | NA                 | NA | NA | NA | -2 | NA |    |    |    |    |    |    |    |    |    |    |
| TSHB          | ENSG00000134200.3  |    |    |    | NA | NA | NA | NA | NA | NA | NA | NA | NA | NA | NA | NA |
|               | NA                 | NA | NA | NA | -2 | NA |    |    |    |    |    |    |    |    |    |    |
| LINC01707     | ENSG00000223883.1  |    |    |    | NA | NA | NA | NA | NA | NA | NA | NA | NA | NA | NA | NA |
|               | NA                 | NA | NA | NA | -2 | NA |    |    |    |    |    |    |    |    |    |    |
| SLC30A1       | ENSG00000170385.9  |    |    |    | NA | NA | NA | NA | NA | NA | NA | NA | NA | NA | NA | NA |
|               | NA                 | NA | NA | NA | -2 | NA |    |    |    |    |    |    |    |    |    |    |
| INSRR         | ENSG00000027644.4  |    |    |    | NA | NA | NA | NA | NA | NA | NA | NA | NA | NA | NA | NA |
|               | NA                 | NA | NA | NA | -2 | NA |    |    |    |    |    |    |    |    |    |    |
| C4BPA         | ENSG00000123838.10 |    |    |    | NA | NA | NA | NA | NA | NA | NA | NA | NA | NA | NA | NA |
|               | NA                 | NA | NA | NA | -2 | NA |    |    |    |    |    |    |    |    |    |    |
| SLC25A44      | ENSG00000160785.13 |    |    |    | NA | NA | NA | NA | NA | NA | NA | NA | NA | NA | NA | NA |
|               | NA                 | NA | NA | NA | -2 | NA |    |    |    |    |    |    |    |    |    |    |
| RHOC          | ENSG00000155366.16 |    |    |    | NA | NA | NA | NA | NA | NA | NA | NA | NA | NA | NA | NA |
|               | NA                 | NA | NA | NA | -2 | NA |    |    |    |    |    |    |    |    |    |    |
| ACAP3         | ENSG00000131584.18 |    |    |    | NA | NA | NA | NA | NA | NA | NA | NA | NA | NA | NA | NA |
|               | NA                 | NA | NA | NA | -2 | NA |    |    |    |    |    |    |    |    |    |    |
| RP11-392O17.1 | ENSG00000228536.2  |    |    |    | NA | NA | NA | NA | NA | NA | NA | NA | NA | NA | NA | NA |
|               | NA                 | NA | NA | NA | NA | -2 | NA |    |    |    |    |    |    |    |    |    |
| YRDC          | ENSG00000196449.3  |    |    |    | NA | NA | NA | NA | NA | NA | NA | NA | NA | NA | NA | NA |
|               | NA                 | NA | NA | NA | -2 | NA |    |    |    |    |    |    |    |    |    |    |
| KLF17         | ENSG00000171872.4  |    |    |    | NA | NA | NA | NA | NA | NA | NA | NA | NA | NA | NA | NA |
|               | NA                 | NA | NA | NA | -2 | NA |    |    |    |    |    |    |    |    |    |    |
| DCAF8         | ENSG00000132716.18 |    |    |    | NA | NA | NA | NA | NA | NA | NA | NA | NA | NA | NA | NA |
|               | NA                 | NA | NA | NA | -2 | NA |    |    |    |    |    |    |    |    |    |    |
| RP1-140J1.1   | ENSG00000229699.1  |    |    |    | NA | NA | NA | NA | NA | NA | NA | NA | NA | NA | NA | NA |
|               | NA                 | NA | NA | NA | NA | -2 | NA |    |    |    |    |    |    |    |    |    |
| HOOK1         | ENSG00000134709.10 |    |    |    | NA | NA | NA | NA | NA | NA | NA | NA | NA | NA | NA | NA |
|               | NA                 | NA | NA | NA | -2 | NA |    |    |    |    |    |    |    |    |    |    |
| PBXIP1        | ENSG00000163346.16 |    |    |    | NA | NA | NA | NA | NA | NA | NA | NA | NA | NA | NA | NA |
|               | NA                 | NA | NA | NA | -2 | NA |    |    |    |    |    |    |    |    |    |    |
| LCE3A         | ENSG00000185962.1  |    |    |    | NA | NA | NA | NA | NA | NA | NA | NA | NA | NA | NA | NA |



|               |                    |    |    |    |    |    |    |    |    |    |    |    |    |    |
|---------------|--------------------|----|----|----|----|----|----|----|----|----|----|----|----|----|
| NA            | NA                 | NA | NA | -2 | NA |    |    |    |    |    |    |    |    |    |
| SYDE2         | ENSG00000097096.8  |    |    |    | NA | NA | NA | NA | NA | NA | NA | NA | NA | NA |
| NA            | NA                 | NA | NA | -2 | NA |    |    |    |    |    |    |    |    |    |
| LINC01144     | ENSG00000281912.1  |    |    |    | NA | NA | NA | NA | NA | NA | NA | NA | NA | NA |
| NA            | NA                 | NA | NA | NA | -2 | NA |    |    |    |    |    |    |    |    |
| LINC01698     | ENSG00000231648.1  |    |    |    | NA | NA | NA | NA | NA | NA | NA | NA | NA | NA |
| NA            | NA                 | NA | NA | NA | -2 | NA |    |    |    |    |    |    |    |    |
| LCE3E         | ENSG00000185966.3  |    |    |    | NA | NA | NA | NA | NA | NA | NA | NA | NA | NA |
| NA            | NA                 | NA | NA | -2 | NA |    |    |    |    |    |    |    |    |    |
| UHMK1         | ENSG00000152332.15 |    |    |    | NA | NA | NA | NA | NA | NA | NA | NA | NA | NA |
| NA            | NA                 | NA | NA | -2 | NA |    |    |    |    |    |    |    |    |    |
| KIF26B        | ENSG00000162849.15 |    |    |    | NA | NA | NA | NA | NA | NA | NA | NA | NA | NA |
| NA            | NA                 | NA | NA | NA | -2 | NA |    |    |    |    |    |    |    |    |
| ZNF362        | ENSG00000160094.14 |    |    |    | NA | NA | NA | NA | NA | NA | NA | NA | NA | NA |
| NA            | NA                 | NA | NA | NA | -2 | NA |    |    |    |    |    |    |    |    |
| LCE4A         | ENSG00000187170.4  |    |    |    | NA | NA | NA | NA | NA | NA | NA | NA | NA | NA |
| NA            | NA                 | NA | NA | -2 | NA |    |    |    |    |    |    |    |    |    |
| RP11-181G12.4 | ENSG00000234396.3  |    |    |    | NA | NA | NA | NA | NA | NA | NA | NA | NA | NA |
| NA            | NA                 | NA | NA | NA | -2 | NA |    |    |    |    |    |    |    |    |
| MEX3A         | ENSG00000254726.2  |    |    |    | NA | NA | NA | NA | NA | NA | NA | NA | NA | NA |
| NA            | NA                 | NA | NA | -2 | NA |    |    |    |    |    |    |    |    |    |
| DNAJB4        | ENSG00000162616.8  |    |    |    | NA | NA | NA | NA | NA | NA | NA | NA | NA | NA |
| NA            | NA                 | NA | NA | NA | -2 | NA |    |    |    |    |    |    |    |    |
| CLSPN         | ENSG00000092853.13 |    |    |    | NA | NA | NA | NA | NA | NA | NA | NA | NA | NA |
| NA            | NA                 | NA | NA | -2 | NA |    |    |    |    |    |    |    |    |    |
| FRRS1         | ENSG00000156869.12 |    |    |    | NA | NA | NA | NA | NA | NA | NA | NA | NA | NA |
| NA            | NA                 | NA | NA | -2 | NA |    |    |    |    |    |    |    |    |    |
| LY9           | ENSG00000122224.17 |    |    |    | NA | NA | NA | NA | NA | NA | NA | NA | NA | NA |
| NA            | NA                 | NA | NA | -2 | NA |    |    |    |    |    |    |    |    |    |
| RP11-148B18.1 | ENSG00000226835.2  |    |    |    | NA | NA | NA | NA | NA | NA | NA | NA | NA | NA |
| NA            | NA                 | NA | NA | NA | -2 | NA |    |    |    |    |    |    |    |    |
| CH17-353B19.1 | ENSG00000276509.1  |    |    |    | NA | NA | NA | NA | NA | NA | NA | NA | NA | NA |
| NA            | NA                 | NA | NA | NA | -2 | NA |    |    |    |    |    |    |    |    |
| ITPKB         | ENSG00000143772.9  |    |    |    | NA | NA | NA | NA | NA | NA | NA | NA | NA | NA |
| NA            | NA                 | NA | NA | -2 | NA |    |    |    |    |    |    |    |    |    |
| MYCL          | ENSG00000116990.10 |    |    |    | NA | NA | NA | NA | NA | NA | NA | NA | NA | NA |
| NA            | NA                 | NA | NA | -2 | NA |    |    |    |    |    |    |    |    |    |
| MNDA          | ENSG00000163563.7  |    |    |    | NA | NA | NA | NA | NA | NA | NA | NA | NA | NA |
| NA            | NA                 | NA | NA | -2 | NA |    |    |    |    |    |    |    |    |    |
| HIST2H3PS2    | ENSG00000203818.7  |    |    |    | NA | NA | NA | NA | NA | NA | NA | NA | NA | NA |
| NA            | NA                 | NA | NA | NA | -2 | NA |    |    |    |    |    |    |    |    |
| KIFAP3        | ENSG00000075945.12 |    |    |    | NA | NA | NA | NA | NA | NA | NA | NA | NA | NA |
| NA            | NA                 | NA | NA | NA | -2 | NA |    |    |    |    |    |    |    |    |
| FAM72D        | ENSG00000215784.5  |    |    |    | NA | NA | NA | NA | NA | NA | NA | NA | NA | NA |
| NA            | NA                 | NA | NA | NA | -2 | NA |    |    |    |    |    |    |    |    |
| LRIG2         | ENSG00000198799.11 |    |    |    | NA | NA | NA | NA | NA | NA | NA | NA | NA | NA |
| NA            | NA                 | NA | NA | -2 | NA |    |    |    |    |    |    |    |    |    |
| DEPDC1        | ENSG00000024526.16 |    |    |    | NA | NA | NA | NA | NA | NA | NA | NA | NA | NA |
| NA            | NA                 | NA | NA | NA | -2 | NA |    |    |    |    |    |    |    |    |
| OR11L1        | ENSG00000197591.3  |    |    |    | NA | NA | NA | NA | NA | NA | NA | NA | NA | NA |
| NA            | NA                 | NA | NA | NA | -2 | NA |    |    |    |    |    |    |    |    |
| RP1-163M9.7   | ENSG00000279151.1  |    |    |    | NA | NA | NA | NA | NA | NA | NA | NA | NA | NA |
| NA            | NA                 | NA | NA | NA | -2 | NA |    |    |    |    |    |    |    |    |
| RP11-312J18.6 | ENSG00000232188.1  |    |    |    | NA | NA | NA | NA | NA | NA | NA | NA | NA | NA |
| NA            | NA                 | NA | NA | NA | -2 | NA |    |    |    |    |    |    |    |    |
| CDC42SE1      | ENSG00000197622.12 |    |    |    | NA | NA | NA | NA | NA | NA | NA | NA | NA | NA |
| NA            | NA                 | NA | NA | NA | -2 | NA |    |    |    |    |    |    |    |    |
| PEX11B        | ENSG00000131779.10 |    |    |    | NA | NA | NA | NA | NA | NA | NA | NA | NA | NA |
| NA            | NA                 | NA | NA | NA | -2 | NA |    |    |    |    |    |    |    |    |
| SOX13         | ENSG00000143842.14 |    |    |    | NA | NA | NA | NA | NA | NA | NA | NA | NA | NA |
| NA            | NA                 | NA | NA | -2 | NA |    |    |    |    |    |    |    |    |    |
| RP11-385M4.1  | ENSG00000232537.1  |    |    |    | NA | NA | NA | NA | NA | NA | NA | NA | NA | NA |

|               |                    |    |    |    |    |    |    |    |    |    |    |    |    |    |    |
|---------------|--------------------|----|----|----|----|----|----|----|----|----|----|----|----|----|----|
| MIGA1         | NA                 | NA | NA | NA | NA | NA | -2 | NA | NA | NA | NA | NA | NA | NA | NA |
|               | ENSG00000180488.14 |    |    |    |    |    |    |    |    |    |    |    |    |    |    |
|               | NA                 | NA | NA | NA | NA | NA | -2 | NA | NA | NA | NA | NA | NA | NA | NA |
| TMEM82        | NA                 | NA | NA | NA | NA | NA | NA | NA | NA | NA | NA | NA | NA | NA | NA |
|               | ENSG00000162460.6  |    |    |    |    |    |    |    |    |    |    |    |    |    |    |
|               | NA                 | NA | NA | NA | NA | NA | -2 | NA | NA | NA | NA | NA | NA | NA | NA |
| IFI44         | NA                 | NA | NA | NA | NA | NA | NA | NA | NA | NA | NA | NA | NA | NA | NA |
|               | ENSG00000137965.10 |    |    |    |    |    |    |    |    |    |    |    |    |    |    |
|               | NA                 | NA | NA | NA | NA | NA | -2 | NA | NA | NA | NA | NA | NA | NA | NA |
| WDR26         | NA                 | NA | NA | NA | NA | NA | NA | NA | NA | NA | NA | NA | NA | NA | NA |
|               | ENSG00000162923.14 |    |    |    |    |    |    |    |    |    |    |    |    |    |    |
|               | NA                 | NA | NA | NA | NA | NA | -2 | NA | NA | NA | NA | NA | NA | NA | NA |
| TRIM11        | NA                 | NA | NA | NA | NA | NA | NA | NA | NA | NA | NA | NA | NA | NA | NA |
|               | ENSG00000154370.15 |    |    |    |    |    |    |    |    |    |    |    |    |    |    |
|               | NA                 | NA | NA | NA | NA | NA | -2 | NA | NA | NA | NA | NA | NA | NA | NA |
| CLK2          | NA                 | NA | NA | NA | NA | NA | NA | NA | NA | NA | NA | NA | NA | NA | NA |
|               | ENSG00000176444.18 |    |    |    |    |    |    |    |    |    |    |    |    |    |    |
|               | NA                 | NA | NA | NA | NA | NA | -2 | NA | NA | NA | NA | NA | NA | NA | NA |
| C1orf87       | NA                 | NA | NA | NA | NA | NA | NA | NA | NA | NA | NA | NA | NA | NA | NA |
|               | ENSG00000162598.13 |    |    |    |    |    |    |    |    |    |    |    |    |    |    |
|               | NA                 | NA | NA | NA | NA | NA | -2 | NA | NA | NA | NA | NA | NA | NA | NA |
| STRIP1        | NA                 | NA | NA | NA | NA | NA | NA | NA | NA | NA | NA | NA | NA | NA | NA |
|               | ENSG00000143093.14 |    |    |    |    |    |    |    |    |    |    |    |    |    |    |
|               | NA                 | NA | NA | NA | NA | NA | -2 | NA | NA | NA | NA | NA | NA | NA | NA |
| RP11-496N12.9 | NA                 | NA | NA | NA | NA | NA | NA | NA | NA | NA | NA | NA | NA | NA | NA |
|               | ENSG00000282418.1  |    |    |    |    |    |    |    |    |    |    |    |    |    |    |
|               | NA                 | NA | NA | NA | NA | NA | -2 | NA | NA | NA | NA | NA | NA | NA | NA |
| F13B          | NA                 | NA | NA | NA | NA | NA | NA | NA | NA | NA | NA | NA | NA | NA | NA |
|               | ENSG00000143278.3  |    |    |    |    |    |    |    |    |    |    |    |    |    |    |
|               | NA                 | NA | NA | NA | NA | NA | -2 | NA | NA | NA | NA | NA | NA | NA | NA |
| HAO2          | NA                 | NA | NA | NA | NA | NA | NA | NA | NA | NA | NA | NA | NA | NA | NA |
|               | ENSG00000116882.14 |    |    |    |    |    |    |    |    |    |    |    |    |    |    |
|               | NA                 | NA | NA | NA | NA | NA | -2 | NA | NA | NA | NA | NA | NA | NA | NA |
| ERICH3        | NA                 | NA | NA | NA | NA | NA | NA | NA | NA | NA | NA | NA | NA | NA | NA |
|               | ENSG00000178965.13 |    |    |    |    |    |    |    |    |    |    |    |    |    |    |
|               | NA                 | NA | NA | NA | NA | NA | -2 | NA | NA | NA | NA | NA | NA | NA | NA |
| S100A14       | NA                 | NA | NA | NA | NA | NA | NA | NA | NA | NA | NA | NA | NA | NA | NA |
|               | ENSG00000189334.8  |    |    |    |    |    |    |    |    |    |    |    |    |    |    |
|               | NA                 | NA | NA | NA | NA | NA | -2 | NA | NA | NA | NA | NA | NA | NA | NA |
| C1orf122      | NA                 | NA | NA | NA | NA | NA | NA | NA | NA | NA | NA | NA | NA | NA | NA |
|               | ENSG00000197982.13 |    |    |    |    |    |    |    |    |    |    |    |    |    |    |
|               | NA                 | NA | NA | NA | NA | NA | -2 | NA | NA | NA | NA | NA | NA | NA | NA |
| PTPRF         | NA                 | NA | NA | NA | NA | NA | NA | NA | NA | NA | NA | NA | NA | NA | NA |
|               | ENSG00000142949.16 |    |    |    |    |    |    |    |    |    |    |    |    |    |    |
|               | NA                 | NA | NA | NA | NA | NA | -2 | NA | NA | NA | NA | NA | NA | NA | NA |
| LINC01714     | NA                 | NA | NA | NA | NA | NA | NA | NA | NA | NA | NA | NA | NA | NA | NA |
|               | ENSG00000227634.2  |    |    |    |    |    |    |    |    |    |    |    |    |    |    |
|               | NA                 | NA | NA | NA | NA | NA | -2 | NA | NA | NA | NA | NA | NA | NA | NA |
| PRKCZ         | NA                 | NA | NA | NA | NA | NA | NA | NA | NA | NA | NA | NA | NA | NA | NA |
|               | ENSG00000067606.16 |    |    |    |    |    |    |    |    |    |    |    |    |    |    |
|               | NA                 | NA | NA | NA | NA | NA | -2 | NA | NA | NA | NA | NA | NA | NA | NA |
| DIO1          | NA                 | NA | NA | NA | NA | NA | NA | NA | NA | NA | NA | NA | NA | NA | NA |
|               | ENSG00000211452.10 |    |    |    |    |    |    |    |    |    |    |    |    |    |    |
|               | NA                 | NA | NA | NA | NA | NA | -2 | NA | NA | NA | NA | NA | NA | NA | NA |
| PACERR        | NA                 | NA | NA | NA | NA | NA | NA | NA | NA | NA | NA | NA | NA | NA | NA |
|               | ENSG00000273129.1  |    |    |    |    |    |    |    |    |    |    |    |    |    |    |
|               | NA                 | NA | NA | NA | NA | NA | -2 | NA | NA | NA | NA | NA | NA | NA | NA |
| CELA2B        | NA                 | NA | NA | NA | NA | NA | NA | NA | NA | NA | NA | NA | NA | NA | NA |
|               | ENSG00000215704.9  |    |    |    |    |    |    |    |    |    |    |    |    |    |    |
|               | NA                 | NA | NA | NA | NA | NA | -2 | NA | NA | NA | NA | NA | NA | NA | NA |
| SMAP2         | NA                 | NA | NA | NA | NA | NA | NA | NA | NA | NA | NA | NA | NA | NA | NA |
|               | ENSG00000084070.11 |    |    |    |    |    |    |    |    |    |    |    |    |    |    |
|               | NA                 | NA | NA | NA | NA | NA | -2 | NA | NA | NA | NA | NA | NA | NA | NA |
| HIST2H2AA3    | NA                 | NA | NA | NA | NA | NA | NA | NA | NA | NA | NA | NA | NA | NA | NA |
|               | ENSG00000203812.2  |    |    |    |    |    |    |    |    |    |    |    |    |    |    |
|               | NA                 | NA | NA | NA | NA | NA | -2 | NA | NA | NA | NA | NA | NA | NA | NA |
| MED18         | NA                 | NA | NA | NA | NA | NA | NA | NA | NA | NA | NA | NA | NA | NA | NA |
|               | ENSG00000130772.13 |    |    |    |    |    |    |    |    |    |    |    |    |    |    |
|               | NA                 | NA | NA | NA | NA | NA | -2 | NA | NA | NA | NA | NA | NA | NA | NA |
| ELOA          | NA                 | NA | NA | NA | NA | NA | NA | NA | NA | NA | NA | NA | NA | NA | NA |
|               | ENSG00000011007.12 |    |    |    |    |    |    |    |    |    |    |    |    |    |    |
|               | NA                 | NA | NA | NA | NA | NA | -2 | NA | NA | NA | NA | NA | NA | NA | NA |
| RAP1GAP       | NA                 | NA | NA | NA | NA | NA | NA | NA | NA | NA | NA | NA | NA | NA | NA |
|               | ENSG00000076864.19 |    |    |    |    |    |    |    |    |    |    |    |    |    |    |
|               | NA                 | NA | NA | NA | NA | NA | -2 | NA | NA | NA | NA | NA | NA | NA | NA |
| CSDE1         | NA                 | NA | NA | NA | NA | NA | NA | NA | NA | NA | NA | NA | NA | NA | NA |
|               | ENSG00000009307.15 |    |    |    |    |    |    |    |    |    |    |    |    |    |    |
|               | NA                 | NA | NA | NA | NA | NA | -2 | NA | NA | NA | NA | NA | NA | NA | NA |
| PLA2G2D       | NA                 | NA | NA | NA | NA | NA | NA | NA | NA | NA | NA | NA | NA | NA | NA |
|               | ENSG00000117215.14 |    |    |    |    |    |    |    |    |    |    |    |    |    |    |
|               | NA                 | NA | NA | NA | NA | NA | -2 | NA | NA | NA | NA | NA | NA | NA | NA |
| RP11-262K1.1  | NA                 | NA | NA | NA | NA | NA | NA | NA | NA | NA | NA | NA | NA | NA | NA |
|               | ENSG00000227016.3  |    |    |    |    |    |    |    |    |    |    |    |    |    |    |
|               | NA                 | NA | NA | NA | NA | NA | -2 | NA | NA | NA | NA | NA | NA | NA | NA |
| LINC01759     | NA                 | NA | NA | NA | NA | NA | NA | NA | NA | NA | NA | NA | NA | NA | NA |
|               | ENSG00000234546.3  |    |    |    |    |    |    |    |    |    |    |    |    |    |    |
|               | NA                 | NA | NA | NA | NA | NA | -2 | NA | NA | NA | NA | NA | NA | NA | NA |
| SPRR2D        | NA                 | NA | NA | NA | NA | NA | NA | NA | NA | NA | NA | NA | NA | NA | NA |
|               | ENSG00000163216.6  |    |    |    |    |    |    |    |    |    |    |    |    |    |    |
|               | NA                 | NA | NA | NA | NA | NA | -2 | NA | NA | NA | NA | NA | NA | NA | NA |
| TAF5L         | NA                 | NA | NA | NA | NA | NA | NA | NA | NA | NA | NA | NA | NA | NA | NA |
|               | ENSG00000135801.9  |    |    |    |    |    |    |    |    |    |    |    |    |    |    |

|             |                    |    |    |    |    |    |    |    |    |    |    |    |    |    |
|-------------|--------------------|----|----|----|----|----|----|----|----|----|----|----|----|----|
| NA          | NA                 | NA | NA | -2 | NA |    |    |    |    |    |    |    |    |    |
| HP1BP3      | ENSG00000127483.17 | NA | NA | NA | NA | NA | NA | NA | NA | NA | NA | NA | NA | NA |
| NA          | NA                 | NA | NA | NA | -2 | NA |    |    |    |    |    |    |    |    |
| GPBP1L1     | ENSG00000159592.10 | NA | NA | NA | NA | NA | NA | NA | NA | NA | NA | NA | NA | NA |
| NA          | NA                 | NA | NA | NA | -2 | NA |    |    |    |    |    |    |    |    |
| GPR157      | ENSG00000180758.11 | NA | NA | NA | NA | NA | NA | NA | NA | NA | NA | NA | NA | NA |
| NA          | NA                 | NA | NA | NA | -2 | NA |    |    |    |    |    |    |    |    |
| ACTA1       | ENSG00000143632.14 | NA | NA | NA | NA | NA | NA | NA | NA | NA | NA | NA | NA | NA |
| NA          | NA                 | NA | NA | -2 | NA |    |    |    |    |    |    |    |    |    |
| LINC01681   | ENSG00000233985.1  | NA | NA | NA | NA | NA | NA | NA | NA | NA | NA | NA | NA | NA |
| NA          | NA                 | NA | NA | NA | -2 | NA |    |    |    |    |    |    |    |    |
| RP4-726F1.2 | ENSG00000282898.1  | NA | NA | NA | NA | NA | NA | NA | NA | NA | NA | NA | NA | NA |
| NA          | NA                 | NA | NA | NA | -2 | NA |    |    |    |    |    |    |    |    |
| POU2F1      | ENSG00000143190.21 | NA | NA | NA | NA | NA | NA | NA | NA | NA | NA | NA | NA | NA |
| NA          | NA                 | NA | NA | NA | -2 | NA |    |    |    |    |    |    |    |    |
| CAMTA1      | ENSG00000171735.18 | NA | NA | NA | NA | NA | NA | NA | NA | NA | NA | NA | NA | NA |
| NA          | NA                 | NA | NA | NA | -2 | NA |    |    |    |    |    |    |    |    |
| CHI3L2      | ENSG00000064886.13 | NA | NA | NA | NA | NA | NA | NA | NA | NA | NA | NA | NA | NA |
| NA          | NA                 | NA | NA | NA | -2 | NA |    |    |    |    |    |    |    |    |
| VANGL1      | ENSG00000173218.14 | NA | NA | NA | NA | NA | NA | NA | NA | NA | NA | NA | NA | NA |
| NA          | NA                 | NA | NA | NA | -2 | NA |    |    |    |    |    |    |    |    |
| CD1D        | ENSG00000158473.6  | NA | NA | NA | NA | NA | NA | NA | NA | NA | NA | NA | NA | NA |
| NA          | NA                 | NA | NA | -2 | NA |    |    |    |    |    |    |    |    |    |
| C1orf210    | ENSG00000253313.5  | NA | NA | NA | NA | NA | NA | NA | NA | NA | NA | NA | NA | NA |
| NA          | NA                 | NA | NA | NA | -2 | NA |    |    |    |    |    |    |    |    |
| ZZZ3        | ENSG00000036549.12 | NA | NA | NA | NA | NA | NA | NA | NA | NA | NA | NA | NA | NA |
| NA          | NA                 | NA | NA | -2 | NA |    |    |    |    |    |    |    |    |    |
| PARS2       | ENSG00000162396.5  | NA | NA | NA | NA | NA | NA | NA | NA | NA | NA | NA | NA | NA |
| NA          | NA                 | NA | NA | -2 | NA |    |    |    |    |    |    |    |    |    |
| LRRC38      | ENSG00000162494.5  | NA | NA | NA | NA | NA | NA | NA | NA | NA | NA | NA | NA | NA |
| NA          | NA                 | NA | NA | NA | -2 | NA |    |    |    |    |    |    |    |    |
| CD1A        | ENSG00000158477.6  | NA | NA | NA | NA | NA | NA | NA | NA | NA | NA | NA | NA | NA |
| NA          | NA                 | NA | NA | -2 | NA |    |    |    |    |    |    |    |    |    |
| FASLG       | ENSG00000117560.7  | NA | NA | NA | NA | NA | NA | NA | NA | NA | NA | NA | NA | NA |
| NA          | NA                 | NA | NA | -2 | NA |    |    |    |    |    |    |    |    |    |
| LINC01360   | ENSG00000233973.6  | NA | NA | NA | NA | NA | NA | NA | NA | NA | NA | NA | NA | NA |
| NA          | NA                 | NA | NA | NA | -2 | NA |    |    |    |    |    |    |    |    |
| LINC01641   | ENSG00000234277.2  | NA | NA | NA | NA | NA | NA | NA | NA | NA | NA | NA | NA | NA |
| NA          | NA                 | NA | NA | NA | -2 | NA |    |    |    |    |    |    |    |    |
| COG2        | ENSG00000135775.13 | NA | NA | NA | NA | NA | NA | NA | NA | NA | NA | NA | NA | NA |
| NA          | NA                 | NA | NA | -2 | NA |    |    |    |    |    |    |    |    |    |
| FCRL5       | ENSG00000143297.18 | NA | NA | NA | NA | NA | NA | NA | NA | NA | NA | NA | NA | NA |
| NA          | NA                 | NA | NA | -2 | NA |    |    |    |    |    |    |    |    |    |
| TIMM17A     | ENSG00000134375.10 | NA | NA | NA | NA | NA | NA | NA | NA | NA | NA | NA | NA | NA |
| NA          | NA                 | NA | NA | NA | -2 | NA |    |    |    |    |    |    |    |    |
| TRMT13      | ENSG00000122435.9  | NA | NA | NA | NA | NA | NA | NA | NA | NA | NA | NA | NA | NA |
| NA          | NA                 | NA | NA | NA | -2 | NA |    |    |    |    |    |    |    |    |
| IL20        | ENSG00000162891.10 | NA | NA | NA | NA | NA | NA | NA | NA | NA | NA | NA | NA | NA |
| NA          | NA                 | NA | NA | -2 | NA |    |    |    |    |    |    |    |    |    |
| OR1C1       | ENSG00000221888.3  | NA | NA | NA | NA | NA | NA | NA | NA | NA | NA | NA | NA | NA |
| NA          | NA                 | NA | NA | -2 | NA |    |    |    |    |    |    |    |    |    |
| CSF3R       | ENSG00000119535.17 | NA | NA | NA | NA | NA | NA | NA | NA | NA | NA | NA | NA | NA |
| NA          | NA                 | NA | NA | -2 | NA |    |    |    |    |    |    |    |    |    |
| FCRL4       | ENSG00000163518.10 | NA | NA | NA | NA | NA | NA | NA | NA | NA | NA | NA | NA | NA |
| NA          | NA                 | NA | NA | -2 | NA |    |    |    |    |    |    |    |    |    |
| REG4        | ENSG00000134193.14 | NA | NA | NA | NA | NA | NA | NA | NA | NA | NA | NA | NA | NA |
| NA          | NA                 | NA | NA | -2 | NA |    |    |    |    |    |    |    |    |    |
| SNRNP40     | ENSG00000060688.12 | NA | NA | NA | NA | NA | NA | NA | NA | NA | NA | NA | NA | NA |
| NA          | NA                 | NA | NA | NA | -2 | NA |    |    |    |    |    |    |    |    |
| RBM15       | ENSG00000162775.14 | NA | NA | NA | NA | NA | NA | NA | NA | NA | NA | NA | NA | NA |
| NA          | NA                 | NA | NA | -2 | NA |    |    |    |    |    |    |    |    |    |
| RGSL1       | ENSG00000121446.18 | NA | NA | NA | NA | NA | NA | NA | NA | NA | NA | NA | NA | NA |

|               |                    |    |    |    |    |    |    |    |    |    |    |    |    |    |
|---------------|--------------------|----|----|----|----|----|----|----|----|----|----|----|----|----|
| NA            | NA                 | NA | NA | -2 | NA |    |    |    |    |    |    |    |    |    |
| CYB561D1      | ENSG00000174151.14 | NA | NA | NA | NA | NA | NA | NA | NA | NA | NA | NA | NA | NA |
| NA            | NA                 | NA | NA | NA | -2 | NA |    |    |    |    |    |    |    |    |
| PHGDH         | ENSG0000092621.11  | NA | NA | NA | NA | NA | NA | NA | NA | NA | NA | NA | NA | NA |
| NA            | NA                 | NA | NA | NA | -2 | NA |    |    |    |    |    |    |    |    |
| RP11-161I10.1 | ENSG00000241505.1  | NA | NA | NA | NA | NA | NA | NA | NA | NA | NA | NA | NA | NA |
| NA            | NA                 | NA | NA | NA | NA | -2 | NA |    |    |    |    |    |    |    |
| DUSP23        | ENSG00000158716.8  | NA | NA | NA | NA | NA | NA | NA | NA | NA | NA | NA | NA | NA |
| NA            | NA                 | NA | NA | NA | -2 | NA |    |    |    |    |    |    |    |    |
| RP11-168F9.2  | ENSG00000272088.1  | NA | NA | NA | NA | NA | NA | NA | NA | NA | NA | NA | NA | NA |
| NA            | NA                 | NA | NA | NA | NA | -2 | NA |    |    |    |    |    |    |    |
| DMRTB1        | ENSG00000143006.7  | NA | NA | NA | NA | NA | NA | NA | NA | NA | NA | NA | NA | NA |
| NA            | NA                 | NA | NA | NA | NA | -2 | NA |    |    |    |    |    |    |    |
| OR14A16       | ENSG00000196772.3  | NA | NA | NA | NA | NA | NA | NA | NA | NA | NA | NA | NA | NA |
| NA            | NA                 | NA | NA | NA | NA | -2 | NA |    |    |    |    |    |    |    |
| C1orf140      | ENSG00000234754.1  | NA | NA | NA | NA | NA | NA | NA | NA | NA | NA | NA | NA | NA |
| NA            | NA                 | NA | NA | NA | NA | -2 | NA |    |    |    |    |    |    |    |
| SLC35F3       | ENSG00000183780.12 | NA | NA | NA | NA | NA | NA | NA | NA | NA | NA | NA | NA | NA |
| NA            | NA                 | NA | NA | NA | NA | -2 | NA |    |    |    |    |    |    |    |
| GPATCH3       | ENSG00000198746.12 | NA | NA | NA | NA | NA | NA | NA | NA | NA | NA | NA | NA | NA |
| NA            | NA                 | NA | NA | NA | NA | -2 | NA |    |    |    |    |    |    |    |
| RP11-31F15.2  | ENSG00000238198.1  | NA | NA | NA | NA | NA | NA | NA | NA | NA | NA | NA | NA | NA |
| NA            | NA                 | NA | NA | NA | NA | -2 | NA |    |    |    |    |    |    |    |
| EDARADD       | ENSG00000186197.13 | NA | NA | NA | NA | NA | NA | NA | NA | NA | NA | NA | NA | NA |
| NA            | NA                 | NA | NA | NA | NA | -2 | NA |    |    |    |    |    |    |    |
| NCDN          | ENSG00000020129.15 | NA | NA | NA | NA | NA | NA | NA | NA | NA | NA | NA | NA | NA |
| NA            | NA                 | NA | NA | NA | NA | -2 | NA |    |    |    |    |    |    |    |
| LINC01696     | ENSG00000227940.1  | NA | NA | NA | NA | NA | NA | NA | NA | NA | NA | NA | NA | NA |
| NA            | NA                 | NA | NA | NA | NA | -2 | NA |    |    |    |    |    |    |    |
| IBA57-AS1     | ENSG00000203684.5  | NA | NA | NA | NA | NA | NA | NA | NA | NA | NA | NA | NA | NA |
| NA            | NA                 | NA | NA | NA | NA | -2 | NA |    |    |    |    |    |    |    |
| IARS2         | ENSG00000067704.9  | NA | NA | NA | NA | NA | NA | NA | NA | NA | NA | NA | NA | NA |
| NA            | NA                 | NA | NA | NA | NA | -2 | NA |    |    |    |    |    |    |    |
| OR6F1         | ENSG00000169214.3  | NA | NA | NA | NA | NA | NA | NA | NA | NA | NA | NA | NA | NA |
| NA            | NA                 | NA | NA | NA | NA | -2 | NA |    |    |    |    |    |    |    |
| CFHR4         | ENSG00000134365.12 | NA | NA | NA | NA | NA | NA | NA | NA | NA | NA | NA | NA | NA |
| NA            | NA                 | NA | NA | NA | NA | -2 | NA |    |    |    |    |    |    |    |
| SRSF11        | ENSG00000116754.13 | NA | NA | NA | NA | NA | NA | NA | NA | NA | NA | NA | NA | NA |
| NA            | NA                 | NA | NA | NA | NA | -2 | NA |    |    |    |    |    |    |    |
| GS1-204I12.4  | ENSG00000261729.1  | NA | NA | NA | NA | NA | NA | NA | NA | NA | NA | NA | NA | NA |
| NA            | NA                 | NA | NA | NA | NA | NA | -2 | NA |    |    |    |    |    |    |
| RXRG          | ENSG00000143171.12 | NA | NA | NA | NA | NA | NA | NA | NA | NA | NA | NA | NA | NA |
| NA            | NA                 | NA | NA | NA | NA | -2 | NA |    |    |    |    |    |    |    |
| TINAGL1       | ENSG00000142910.15 | NA | NA | NA | NA | NA | NA | NA | NA | NA | NA | NA | NA | NA |
| NA            | NA                 | NA | NA | NA | NA | -2 | NA |    |    |    |    |    |    |    |
| ESRRG         | ENSG00000196482.16 | NA | NA | NA | NA | NA | NA | NA | NA | NA | NA | NA | NA | NA |
| NA            | NA                 | NA | NA | NA | NA | -2 | NA |    |    |    |    |    |    |    |
| HECTD3        | ENSG00000126107.14 | NA | NA | NA | NA | NA | NA | NA | NA | NA | NA | NA | NA | NA |
| NA            | NA                 | NA | NA | NA | NA | -2 | NA |    |    |    |    |    |    |    |
| C1orf167      | ENSG00000215910.7  | NA | NA | NA | NA | NA | NA | NA | NA | NA | NA | NA | NA | NA |
| NA            | NA                 | NA | NA | NA | NA | -2 | NA |    |    |    |    |    |    |    |
| OCLM          | ENSG00000262180.1  | NA | NA | NA | NA | NA | NA | NA | NA | NA | NA | NA | NA | NA |
| NA            | NA                 | NA | NA | NA | NA | -2 | NA |    |    |    |    |    |    |    |
| DISC1         | ENSG00000162946.21 | NA | NA | NA | NA | NA | NA | NA | NA | NA | NA | NA | NA | NA |
| NA            | NA                 | NA | NA | NA | NA | -2 | NA |    |    |    |    |    |    |    |
| LINC01653     | ENSG00000232100.1  | NA | NA | NA | NA | NA | NA | NA | NA | NA | NA | NA | NA | NA |
| NA            | NA                 | NA | NA | NA | NA | -2 | NA |    |    |    |    |    |    |    |
| LINC01307     | ENSG00000231671.1  | NA | NA | NA | NA | NA | NA | NA | NA | NA | NA | NA | NA | NA |
| NA            | NA                 | NA | NA | NA | NA | -2 | NA |    |    |    |    |    |    |    |
| CYP4Z1        | ENSG00000186160.4  | NA | NA | NA | NA | NA | NA | NA | NA | NA | NA | NA | NA | NA |
| NA            | NA                 | NA | NA | NA | NA | -2 | NA |    |    |    |    |    |    |    |
| XPR1          | ENSG00000143324.13 | NA | NA | NA | NA | NA | NA | NA | NA | NA | NA | NA | NA | NA |

|              |                    |    |    |    |    |    |    |    |    |    |    |    |    |    |
|--------------|--------------------|----|----|----|----|----|----|----|----|----|----|----|----|----|
| NA           | NA                 | NA | NA | -2 | NA |    |    |    |    |    |    |    |    |    |
| ADGRL4       | ENSG00000162618.13 | NA | NA | NA | NA | NA | NA | NA | NA | NA | NA | NA | NA | NA |
| NA           | NA                 | NA | NA | NA | -2 | NA |    |    |    |    |    |    |    |    |
| CLDN19       | ENSG00000164007.10 | NA | NA | NA | NA | NA | NA | NA | NA | NA | NA | NA | NA | NA |
| NA           | NA                 | NA | NA | NA | -2 | NA |    |    |    |    |    |    |    |    |
| SAMD13       | ENSG00000203943.8  | NA | NA | NA | NA | NA | NA | NA | NA | NA | NA | NA | NA | NA |
| NA           | NA                 | NA | NA | NA | -2 | NA |    |    |    |    |    |    |    |    |
| IL24         | ENSG00000162892.15 | NA | NA | NA | NA | NA | NA | NA | NA | NA | NA | NA | NA | NA |
| NA           | NA                 | NA | NA | -2 | NA |    |    |    |    |    |    |    |    |    |
| LINC01704    | ENSG00000231666.6  | NA | NA | NA | NA | NA | NA | NA | NA | NA | NA | NA | NA | NA |
| NA           | NA                 | NA | NA | NA | -2 | NA |    |    |    |    |    |    |    |    |
| TGFB2        | ENSG00000092969.11 | NA | NA | NA | NA | NA | NA | NA | NA | NA | NA | NA | NA | NA |
| NA           | NA                 | NA | NA | -2 | NA |    |    |    |    |    |    |    |    |    |
| RP3-454G6.2  | ENSG00000283683.1  | NA | NA | NA | NA | NA | NA | NA | NA | NA | NA | NA | NA | NA |
| NA           | NA                 | NA | NA | NA | -2 | NA |    |    |    |    |    |    |    |    |
| ECE1         | ENSG00000117298.14 | NA | NA | NA | NA | NA | NA | NA | NA | NA | NA | NA | NA | NA |
| NA           | NA                 | NA | NA | -2 | NA |    |    |    |    |    |    |    |    |    |
| SLC2A7       | ENSG00000197241.3  | NA | NA | NA | NA | NA | NA | NA | NA | NA | NA | NA | NA | NA |
| NA           | NA                 | NA | NA | NA | -2 | NA |    |    |    |    |    |    |    |    |
| TPR          | ENSG00000047410.13 | NA | NA | NA | NA | NA | NA | NA | NA | NA | NA | NA | NA | NA |
| NA           | NA                 | NA | NA | -2 | NA |    |    |    |    |    |    |    |    |    |
| IL19         | ENSG00000142224.15 | NA | NA | NA | NA | NA | NA | NA | NA | NA | NA | NA | NA | NA |
| NA           | NA                 | NA | NA | -2 | NA |    |    |    |    |    |    |    |    |    |
| SLC30A7      | ENSG00000162695.11 | NA | NA | NA | NA | NA | NA | NA | NA | NA | NA | NA | NA | NA |
| NA           | NA                 | NA | NA | NA | -2 | NA |    |    |    |    |    |    |    |    |
| SLC16A1      | ENSG00000155380.11 | NA | NA | NA | NA | NA | NA | NA | NA | NA | NA | NA | NA | NA |
| NA           | NA                 | NA | NA | NA | -2 | NA |    |    |    |    |    |    |    |    |
| SPRR2F       | ENSG00000244094.1  | NA | NA | NA | NA | NA | NA | NA | NA | NA | NA | NA | NA | NA |
| NA           | NA                 | NA | NA | NA | -2 | NA |    |    |    |    |    |    |    |    |
| YY1AP1       | ENSG00000163374.19 | NA | NA | NA | NA | NA | NA | NA | NA | NA | NA | NA | NA | NA |
| NA           | NA                 | NA | NA | NA | -2 | NA |    |    |    |    |    |    |    |    |
| C1orf158     | ENSG00000157330.9  | NA | NA | NA | NA | NA | NA | NA | NA | NA | NA | NA | NA | NA |
| NA           | NA                 | NA | NA | NA | -2 | NA |    |    |    |    |    |    |    |    |
| HSPB11       | ENSG00000081870.11 | NA | NA | NA | NA | NA | NA | NA | NA | NA | NA | NA | NA | NA |
| NA           | NA                 | NA | NA | NA | -2 | NA |    |    |    |    |    |    |    |    |
| LINC01133    | ENSG00000224259.6  | NA | NA | NA | NA | NA | NA | NA | NA | NA | NA | NA | NA | NA |
| NA           | NA                 | NA | NA | NA | -2 | NA |    |    |    |    |    |    |    |    |
| C1orf106     | ENSG00000163362.10 | NA | NA | NA | NA | NA | NA | NA | NA | NA | NA | NA | NA | NA |
| NA           | NA                 | NA | NA | NA | -2 | NA |    |    |    |    |    |    |    |    |
| RP1-117P20.3 | ENSG00000230704.1  | NA | NA | NA | NA | NA | NA | NA | NA | NA | NA | NA | NA | NA |
| NA           | NA                 | NA | NA | NA | NA | -2 | NA |    |    |    |    |    |    |    |
| LIX1L        | ENSG00000271601.3  | NA | NA | NA | NA | NA | NA | NA | NA | NA | NA | NA | NA | NA |
| NA           | NA                 | NA | NA | -2 | NA |    |    |    |    |    |    |    |    |    |
| INTS3        | ENSG00000143624.13 | NA | NA | NA | NA | NA | NA | NA | NA | NA | NA | NA | NA | NA |
| NA           | NA                 | NA | NA | -2 | NA |    |    |    |    |    |    |    |    |    |
| RP11-410C4.4 | ENSG00000231529.1  | NA | NA | NA | NA | NA | NA | NA | NA | NA | NA | NA | NA | NA |
| NA           | NA                 | NA | NA | NA | NA | -2 | NA |    |    |    |    |    |    |    |
| OR2B11       | ENSG00000177535.7  | NA | NA | NA | NA | NA | NA | NA | NA | NA | NA | NA | NA | NA |
| NA           | NA                 | NA | NA | NA | -2 | NA |    |    |    |    |    |    |    |    |
| TARDBP       | ENSG00000120948.16 | NA | NA | NA | NA | NA | NA | NA | NA | NA | NA | NA | NA | NA |
| NA           | NA                 | NA | NA | NA | -2 | NA |    |    |    |    |    |    |    |    |
| TCTEX1D4     | ENSG00000188396.3  | NA | NA | NA | NA | NA | NA | NA | NA | NA | NA | NA | NA | NA |
| NA           | NA                 | NA | NA | NA | -2 | NA |    |    |    |    |    |    |    |    |
| FCAMR        | ENSG00000162897.14 | NA | NA | NA | NA | NA | NA | NA | NA | NA | NA | NA | NA | NA |
| NA           | NA                 | NA | NA | -2 | NA |    |    |    |    |    |    |    |    |    |
| ZMYM4        | ENSG00000146463.11 | NA | NA | NA | NA | NA | NA | NA | NA | NA | NA | NA | NA | NA |
| NA           | NA                 | NA | NA | -2 | NA |    |    |    |    |    |    |    |    |    |
| RP11-354K1.2 | ENSG00000228792.2  | NA | NA | NA | NA | NA | NA | NA | NA | NA | NA | NA | NA | NA |
| NA           | NA                 | NA | NA | NA | NA | -2 | NA |    |    |    |    |    |    |    |
| PSMB2        | ENSG00000126067.11 | NA | NA | NA | NA | NA | NA | NA | NA | NA | NA | NA | NA | NA |
| NA           | NA                 | NA | NA | -2 | NA |    |    |    |    |    |    |    |    |    |
| LRRC52       | ENSG00000162763.3  | NA | NA | NA | NA | NA | NA | NA | NA | NA | NA | NA | NA | NA |

|                |                    |    |    |    |    |    |    |    |    |    |    |    |    |    |
|----------------|--------------------|----|----|----|----|----|----|----|----|----|----|----|----|----|
| NA             | NA                 | NA | NA | NA | -2 | NA |    |    |    |    |    |    |    |    |
| RP11-10N16.2   | ENSG00000230023.2  |    |    |    |    | NA | NA | NA | NA | NA | NA | NA | NA | NA |
| NA             | NA                 | NA | NA | NA | NA | -2 | NA |    |    |    |    |    |    |    |
| CTBS           | ENSG00000117151.12 |    |    |    |    | NA | NA | NA | NA | NA | NA | NA | NA | NA |
| NA             | NA                 | NA | NA | NA | -2 | NA |    |    |    |    |    |    |    |    |
| LINC01364      | ENSG00000227290.1  |    |    |    |    | NA | NA | NA | NA | NA | NA | NA | NA | NA |
| NA             | NA                 | NA | NA | NA | NA | -2 | NA |    |    |    |    |    |    |    |
| RP11-415J8.7   | ENSG00000270115.1  |    |    |    |    | NA | NA | NA | NA | NA | NA | NA | NA | NA |
| NA             | NA                 | NA | NA | NA | NA | -2 | NA |    |    |    |    |    |    |    |
| DPH2           | ENSG00000132768.13 |    |    |    |    | NA | NA | NA | NA | NA | NA | NA | NA | NA |
| NA             | NA                 | NA | NA | NA | -2 | NA |    |    |    |    |    |    |    |    |
| RIMKLA         | ENSG00000177181.14 |    |    |    |    | NA | NA | NA | NA | NA | NA | NA | NA | NA |
| NA             | NA                 | NA | NA | NA | NA | -2 | NA |    |    |    |    |    |    |    |
| FAM76A         | ENSG00000009780.15 |    |    |    |    | NA | NA | NA | NA | NA | NA | NA | NA | NA |
| NA             | NA                 | NA | NA | NA | NA | -2 | NA |    |    |    |    |    |    |    |
| C1orf186       | ENSG00000263961.6  |    |    |    |    | NA | NA | NA | NA | NA | NA | NA | NA | NA |
| NA             | NA                 | NA | NA | NA | NA | -2 | NA |    |    |    |    |    |    |    |
| TSPAN1         | ENSG00000117472.9  |    |    |    |    | NA | NA | NA | NA | NA | NA | NA | NA | NA |
| NA             | NA                 | NA | NA | NA | NA | -2 | NA |    |    |    |    |    |    |    |
| HSD3B2         | ENSG00000203859.9  |    |    |    |    | NA | NA | NA | NA | NA | NA | NA | NA | NA |
| NA             | NA                 | NA | NA | NA | NA | -2 | NA |    |    |    |    |    |    |    |
| SH3GLB1        | ENSG00000097033.14 |    |    |    |    | NA | NA | NA | NA | NA | NA | NA | NA | NA |
| NA             | NA                 | NA | NA | NA | NA | -2 | NA |    |    |    |    |    |    |    |
| RP11-53A1.3    | ENSG00000283518.1  |    |    |    |    | NA | NA | NA | NA | NA | NA | NA | NA | NA |
| NA             | NA                 | NA | NA | NA | NA | -2 | NA |    |    |    |    |    |    |    |
| C1orf100       | ENSG00000173728.10 |    |    |    |    | NA | NA | NA | NA | NA | NA | NA | NA | NA |
| NA             | NA                 | NA | NA | NA | NA | -2 | NA |    |    |    |    |    |    |    |
| XCL1           | ENSG00000143184.4  |    |    |    |    | NA | NA | NA | NA | NA | NA | NA | NA | NA |
| NA             | NA                 | NA | NA | NA | NA | -2 | NA |    |    |    |    |    |    |    |
| YOD1           | ENSG00000180667.10 |    |    |    |    | NA | NA | NA | NA | NA | NA | NA | NA | NA |
| NA             | NA                 | NA | NA | NA | NA | -2 | NA |    |    |    |    |    |    |    |
| KIAA0319L      | ENSG00000142687.17 |    |    |    |    | NA | NA | NA | NA | NA | NA | NA | NA | NA |
| NA             | NA                 | NA | NA | NA | NA | -2 | NA |    |    |    |    |    |    |    |
| RP11-422P24.11 | ENSG00000272654.1  |    |    |    |    | NA | NA | NA | NA | NA | NA | NA | NA | NA |
| NA             | NA                 | NA | NA | NA | NA | -2 | NA |    |    |    |    |    |    |    |
| HES2           | ENSG00000069812.11 |    |    |    |    | NA | NA | NA | NA | NA | NA | NA | NA | NA |
| NA             | NA                 | NA | NA | NA | NA | -2 | NA |    |    |    |    |    |    |    |
| PRAMEF11       | ENSG00000239810.3  |    |    |    |    | NA | NA | NA | NA | NA | NA | NA | NA | NA |
| NA             | NA                 | NA | NA | NA | NA | -2 | NA |    |    |    |    |    |    |    |
| NFASC          | ENSG00000163531.15 |    |    |    |    | NA | NA | NA | NA | NA | NA | NA | NA | NA |
| NA             | NA                 | NA | NA | NA | NA | -2 | NA |    |    |    |    |    |    |    |
| OTUD7B         | ENSG00000264522.5  |    |    |    |    | NA | NA | NA | NA | NA | NA | NA | NA | NA |
| NA             | NA                 | NA | NA | NA | NA | -2 | NA |    |    |    |    |    |    |    |
| NENF           | ENSG00000117691.9  |    |    |    |    | NA | NA | NA | NA | NA | NA | NA | NA | NA |
| NA             | NA                 | NA | NA | NA | NA | -2 | NA |    |    |    |    |    |    |    |
| KDF1           | ENSG00000175707.8  |    |    |    |    | NA | NA | NA | NA | NA | NA | NA | NA | NA |
| NA             | NA                 | NA | NA | NA | NA | -2 | NA |    |    |    |    |    |    |    |
| RP11-330M19.1  | ENSG00000225028.1  |    |    |    |    | NA | NA | NA | NA | NA | NA | NA | NA | NA |
| NA             | NA                 | NA | NA | NA | NA | -2 | NA |    |    |    |    |    |    |    |
| RP11-147G16.1  | ENSG00000233290.1  |    |    |    |    | NA | NA | NA | NA | NA | NA | NA | NA | NA |
| NA             | NA                 | NA | NA | NA | NA | -2 | NA |    |    |    |    |    |    |    |
| ABCB10         | ENSG00000135776.4  |    |    |    |    | NA | NA | NA | NA | NA | NA | NA | NA | NA |
| NA             | NA                 | NA | NA | NA | NA | -2 | NA |    |    |    |    |    |    |    |
| NBPF4          | ENSG00000196427.13 |    |    |    |    | NA | NA | NA | NA | NA | NA | NA | NA | NA |
| NA             | NA                 | NA | NA | NA | NA | -2 | NA |    |    |    |    |    |    |    |
| TMEM222        | ENSG00000186501.14 |    |    |    |    | NA | NA | NA | NA | NA | NA | NA | NA | NA |
| NA             | NA                 | NA | NA | NA | NA | -2 | NA |    |    |    |    |    |    |    |
| DIRAS3         | ENSG00000162595.5  |    |    |    |    | NA | NA | NA | NA | NA | NA | NA | NA | NA |
| NA             | NA                 | NA | NA | NA | NA | -2 | NA |    |    |    |    |    |    |    |
| RPL22          | ENSG00000116251.9  |    |    |    |    | NA | NA | NA | NA | NA | NA | NA | NA | NA |
| NA             | NA                 | NA | NA | NA | NA | -2 | NA |    |    |    |    |    |    |    |
| GDAP2          | ENSG00000196505.10 |    |    |    |    | NA | NA | NA | NA | NA | NA | NA | NA | NA |

|               |                    |    |    |    |    |    |    |    |    |    |    |    |    |    |
|---------------|--------------------|----|----|----|----|----|----|----|----|----|----|----|----|----|
| NA            | NA                 | NA | NA | -2 | NA |    |    |    |    |    |    |    |    |    |
| LINC01688     | ENSG00000227181.1  |    |    |    | NA | NA | NA | NA | NA | NA | NA | NA | NA | NA |
| NA            | NA                 | NA | NA | NA | -2 | NA |    |    |    |    |    |    |    |    |
| LAPTM5        | ENSG00000162511.7  |    |    |    | NA | NA | NA | NA | NA | NA | NA | NA | NA | NA |
| NA            | NA                 | NA | NA | NA | -2 | NA |    |    |    |    |    |    |    |    |
| RP11-22L13.1  | ENSG00000272235.1  |    |    |    | NA | NA | NA | NA | NA | NA | NA | NA | NA | NA |
| NA            | NA                 | NA | NA | NA | -2 | NA |    |    |    |    |    |    |    |    |
| PHF13         | ENSG00000116273.5  |    |    |    | NA | NA | NA | NA | NA | NA | NA | NA | NA | NA |
| NA            | NA                 | NA | NA | NA | -2 | NA |    |    |    |    |    |    |    |    |
| COL8A2        | ENSG00000171812.12 |    |    |    | NA | NA | NA | NA | NA | NA | NA | NA | NA | NA |
| NA            | NA                 | NA | NA | NA | -2 | NA |    |    |    |    |    |    |    |    |
| GBP1          | ENSG00000117228.9  |    |    |    | NA | NA | NA | NA | NA | NA | NA | NA | NA | NA |
| NA            | NA                 | NA | NA | NA | -2 | NA |    |    |    |    |    |    |    |    |
| LYPLA2        | ENSG00000011009.10 |    |    |    | NA | NA | NA | NA | NA | NA | NA | NA | NA | NA |
| NA            | NA                 | NA | NA | NA | -2 | NA |    |    |    |    |    |    |    |    |
| RP11-504P24.9 | ENSG00000278467.1  |    |    |    | NA | NA | NA | NA | NA | NA | NA | NA | NA | NA |
| NA            | NA                 | NA | NA | NA | -2 | NA |    |    |    |    |    |    |    |    |
| PGLYRP3       | ENSG00000159527.3  |    |    |    | NA | NA | NA | NA | NA | NA | NA | NA | NA | NA |
| NA            | NA                 | NA | NA | NA | -2 | NA |    |    |    |    |    |    |    |    |
| PABPC4        | ENSG00000090621.13 |    |    |    | NA | NA | NA | NA | NA | NA | NA | NA | NA | NA |
| NA            | NA                 | NA | NA | NA | -2 | NA |    |    |    |    |    |    |    |    |
| SRSF10        | ENSG00000188529.14 |    |    |    | NA | NA | NA | NA | NA | NA | NA | NA | NA | NA |
| NA            | NA                 | NA | NA | NA | -2 | NA |    |    |    |    |    |    |    |    |
| CD101         | ENSG00000134256.12 |    |    |    | NA | NA | NA | NA | NA | NA | NA | NA | NA | NA |
| NA            | NA                 | NA | NA | NA | -2 | NA |    |    |    |    |    |    |    |    |
| FAM72A        | ENSG00000196550.10 |    |    |    | NA | NA | NA | NA | NA | NA | NA | NA | NA | NA |
| NA            | NA                 | NA | NA | NA | -2 | NA |    |    |    |    |    |    |    |    |
| SFPQ          | ENSG00000116560.10 |    |    |    | NA | NA | NA | NA | NA | NA | NA | NA | NA | NA |
| NA            | NA                 | NA | NA | NA | -2 | NA |    |    |    |    |    |    |    |    |
| KCNA10        | ENSG00000143105.7  |    |    |    | NA | NA | NA | NA | NA | NA | NA | NA | NA | NA |
| NA            | NA                 | NA | NA | NA | -2 | NA |    |    |    |    |    |    |    |    |
| LAX1          | ENSG00000122188.12 |    |    |    | NA | NA | NA | NA | NA | NA | NA | NA | NA | NA |
| NA            | NA                 | NA | NA | NA | -2 | NA |    |    |    |    |    |    |    |    |
| LINC01346     | ENSG00000233304.6  |    |    |    | NA | NA | NA | NA | NA | NA | NA | NA | NA | NA |
| NA            | NA                 | NA | NA | NA | -2 | NA |    |    |    |    |    |    |    |    |
| GJA4          | ENSG00000187513.8  |    |    |    | NA | NA | NA | NA | NA | NA | NA | NA | NA | NA |
| NA            | NA                 | NA | NA | NA | -2 | NA |    |    |    |    |    |    |    |    |
| RP4-781K5.9   | ENSG00000272362.1  |    |    |    | NA | NA | NA | NA | NA | NA | NA | NA | NA | NA |
| NA            | NA                 | NA | NA | NA | NA | -2 | NA |    |    |    |    |    |    |    |
| MACF1         | ENSG00000127603.23 |    |    |    | NA | NA | NA | NA | NA | NA | NA | NA | NA | NA |
| NA            | NA                 | NA | NA | NA | -2 | NA |    |    |    |    |    |    |    |    |
| RP1-272L16.1  | ENSG00000224260.6  |    |    |    | NA | NA | NA | NA | NA | NA | NA | NA | NA | NA |
| NA            | NA                 | NA | NA | NA | NA | -2 | NA |    |    |    |    |    |    |    |
| GOLPH3L       | ENSG00000143457.10 |    |    |    | NA | NA | NA | NA | NA | NA | NA | NA | NA | NA |
| NA            | NA                 | NA | NA | NA | -2 | NA |    |    |    |    |    |    |    |    |
| TBCE          | ENSG00000116957.12 |    |    |    | NA | NA | NA | NA | NA | NA | NA | NA | NA | NA |
| NA            | NA                 | NA | NA | NA | -2 | NA |    |    |    |    |    |    |    |    |
| KDM1A         | ENSG00000004487.15 |    |    |    | NA | NA | NA | NA | NA | NA | NA | NA | NA | NA |
| NA            | NA                 | NA | NA | NA | -2 | NA |    |    |    |    |    |    |    |    |
| RP11-533E19.2 | ENSG00000261831.2  |    |    |    | NA | NA | NA | NA | NA | NA | NA | NA | NA | NA |
| NA            | NA                 | NA | NA | NA | NA | -2 | NA |    |    |    |    |    |    |    |
| SPAG17        | ENSG00000155761.13 |    |    |    | NA | NA | NA | NA | NA | NA | NA | NA | NA | NA |
| NA            | NA                 | NA | NA | NA | -2 | NA |    |    |    |    |    |    |    |    |
| LINC01743     | ENSG00000242042.1  |    |    |    | NA | NA | NA | NA | NA | NA | NA | NA | NA | NA |
| NA            | NA                 | NA | NA | NA | -2 | NA |    |    |    |    |    |    |    |    |
| TMEM200B      | ENSG00000253304.1  |    |    |    | NA | NA | NA | NA | NA | NA | NA | NA | NA | NA |
| NA            | NA                 | NA | NA | NA | -2 | NA |    |    |    |    |    |    |    |    |
| PGLYRP4       | ENSG00000163218.14 |    |    |    | NA | NA | NA | NA | NA | NA | NA | NA | NA | NA |
| NA            | NA                 | NA | NA | NA | -2 | NA |    |    |    |    |    |    |    |    |
| CADM3         | ENSG00000162706.12 |    |    |    | NA | NA | NA | NA | NA | NA | NA | NA | NA | NA |
| NA            | NA                 | NA | NA | NA | -2 | NA |    |    |    |    |    |    |    |    |
| TXNDC12       | ENSG00000117862.11 |    |    |    | NA | NA | NA | NA | NA | NA | NA | NA | NA | NA |

|               |                    |    |    |    |    |    |    |    |    |    |    |    |    |    |    |    |
|---------------|--------------------|----|----|----|----|----|----|----|----|----|----|----|----|----|----|----|
|               | NA                 | NA | NA | NA | NA | -2 | NA |    |    |    |    |    |    |    |    |    |
| CD1C          | ENSG00000158481.12 |    |    |    |    | NA | NA | NA | NA | NA | NA | NA | NA | NA | NA | NA |
|               | NA                 | NA | NA | NA |    | -2 | NA |    |    |    |    |    |    |    |    |    |
| GLMN          | ENSG00000174842.16 |    |    |    |    | NA | NA | NA | NA | NA | NA | NA | NA | NA | NA | NA |
|               | NA                 | NA | NA | NA |    | -2 | NA |    |    |    |    |    |    |    |    |    |
| VPS72         | ENSG00000163159.12 |    |    |    |    | NA | NA | NA | NA | NA | NA | NA | NA | NA | NA | NA |
|               | NA                 | NA | NA | NA |    | -2 | NA |    |    |    |    |    |    |    |    |    |
| RP11-180D21.3 | ENSG00000224943.1  |    |    |    |    | NA | NA | NA | NA | NA | NA | NA | NA | NA | NA | NA |
|               | NA                 | NA | NA | NA |    | NA | -2 | NA |    |    |    |    |    |    |    |    |
| SLC2A1        | ENSG00000117394.20 |    |    |    |    | NA | NA | NA | NA | NA | NA | NA | NA | NA | NA | NA |
|               | NA                 | NA | NA | NA |    | NA | -2 | NA |    |    |    |    |    |    |    |    |
| RP11-35L17.3  | ENSG00000231979.1  |    |    |    |    | NA | NA | NA | NA | NA | NA | NA | NA | NA | NA | NA |
|               | NA                 | NA | NA | NA |    | NA | -2 | NA |    |    |    |    |    |    |    |    |
| TRNP1         | ENSG00000253368.3  |    |    |    |    | NA | NA | NA | NA | NA | NA | NA | NA | NA | NA | NA |
|               | NA                 | NA | NA | NA |    | NA | -2 | NA |    |    |    |    |    |    |    |    |
| C1orf234      | ENSG00000227868.5  |    |    |    |    | NA | NA | NA | NA | NA | NA | NA | NA | NA | NA | NA |
|               | NA                 | NA | NA | NA |    | NA | -2 | NA |    |    |    |    |    |    |    |    |
| ADIPOR1       | ENSG00000159346.12 |    |    |    |    | NA | NA | NA | NA | NA | NA | NA | NA | NA | NA | NA |
|               | NA                 | NA | NA | NA |    | NA | -2 | NA |    |    |    |    |    |    |    |    |
| ZNF281        | ENSG00000162702.7  |    |    |    |    | NA | NA | NA | NA | NA | NA | NA | NA | NA | NA | NA |
|               | NA                 | NA | NA | NA |    | NA | -2 | NA |    |    |    |    |    |    |    |    |
| RP11-356N1.2  | ENSG00000226822.2  |    |    |    |    | NA | NA | NA | NA | NA | NA | NA | NA | NA | NA | NA |
|               | NA                 | NA | NA | NA |    | NA | -2 | NA |    |    |    |    |    |    |    |    |
| RP11-533E19.7 | ENSG00000272906.1  |    |    |    |    | NA | NA | NA | NA | NA | NA | NA | NA | NA | NA | NA |
|               | NA                 | NA | NA | NA |    | NA | -2 | NA |    |    |    |    |    |    |    |    |
| HES5          | ENSG00000197921.5  |    |    |    |    | NA | NA | NA | NA | NA | NA | NA | NA | NA | NA | NA |
|               | NA                 | NA | NA | NA |    | NA | -2 | NA |    |    |    |    |    |    |    |    |
| PSMB4         | ENSG00000159377.10 |    |    |    |    | NA | NA | NA | NA | NA | NA | NA | NA | NA | NA | NA |
|               | NA                 | NA | NA | NA |    | NA | -2 | NA |    |    |    |    |    |    |    |    |
| RP4-594I10.3  | ENSG00000264443.1  |    |    |    |    | NA | NA | NA | NA | NA | NA | NA | NA | NA | NA | NA |
|               | NA                 | NA | NA | NA |    | NA | -2 | NA |    |    |    |    |    |    |    |    |
| LINC01776     | ENSG00000226053.1  |    |    |    |    | NA | NA | NA | NA | NA | NA | NA | NA | NA | NA | NA |
|               | NA                 | NA | NA | NA |    | NA | -2 | NA |    |    |    |    |    |    |    |    |
| RP11-61J19.2  | ENSG00000224535.1  |    |    |    |    | NA | NA | NA | NA | NA | NA | NA | NA | NA | NA | NA |
|               | NA                 | NA | NA | NA |    | NA | -2 | NA |    |    |    |    |    |    |    |    |
| S100A9        | ENSG00000163220.10 |    |    |    |    | NA | NA | NA | NA | NA | NA | NA | NA | NA | NA | NA |
|               | NA                 | NA | NA | NA |    | NA | -2 | NA |    |    |    |    |    |    |    |    |
| RP11-278H7.3  | ENSG00000237759.1  |    |    |    |    | NA | NA | NA | NA | NA | NA | NA | NA | NA | NA | NA |
|               | NA                 | NA | NA | NA |    | NA | -2 | NA |    |    |    |    |    |    |    |    |
| RP4-580N22.2  | ENSG00000229291.1  |    |    |    |    | NA | NA | NA | NA | NA | NA | NA | NA | NA | NA | NA |
|               | NA                 | NA | NA | NA |    | NA | -2 | NA |    |    |    |    |    |    |    |    |
| CR1L          | ENSG00000197721.16 |    |    |    |    | NA | NA | NA | NA | NA | NA | NA | NA | NA | NA | NA |
|               | NA                 | NA | NA | NA |    | NA | -2 | NA |    |    |    |    |    |    |    |    |
| LAD1          | ENSG00000159166.13 |    |    |    |    | NA | NA | NA | NA | NA | NA | NA | NA | NA | NA | NA |
|               | NA                 | NA | NA | NA |    | NA | -2 | NA |    |    |    |    |    |    |    |    |
| CYR61         | ENSG00000142871.16 |    |    |    |    | NA | NA | NA | NA | NA | NA | NA | NA | NA | NA | NA |
|               | NA                 | NA | NA | NA |    | NA | -2 | NA |    |    |    |    |    |    |    |    |
| KLHDC7A       | ENSG00000179023.8  |    |    |    |    | NA | NA | NA | NA | NA | NA | NA | NA | NA | NA | NA |
|               | NA                 | NA | NA | NA |    | NA | -2 | NA |    |    |    |    |    |    |    |    |
| PYHIN1        | ENSG00000163564.14 |    |    |    |    | NA | NA | NA | NA | NA | NA | NA | NA | NA | NA | NA |
|               | NA                 | NA | NA | NA |    | NA | -2 | NA |    |    |    |    |    |    |    |    |
| FOXJ3         | ENSG00000198815.8  |    |    |    |    | NA | NA | NA | NA | NA | NA | NA | NA | NA | NA | NA |
|               | NA                 | NA | NA | NA |    | NA | -2 | NA |    |    |    |    |    |    |    |    |
| RP1-206D15.6  | ENSG00000213062.4  |    |    |    |    | NA | NA | NA | NA | NA | NA | NA | NA | NA | NA | NA |
|               | NA                 | NA | NA | NA |    | NA | -2 | NA |    |    |    |    |    |    |    |    |
| NRAS          | ENSG00000213281.4  |    |    |    |    | NA | NA | NA | NA | NA | NA | NA | NA | NA | NA | NA |
|               | NA                 | NA | NA | NA |    | NA | -2 | NA |    |    |    |    |    |    |    |    |
| NR1I3         | ENSG00000143257.11 |    |    |    |    | NA | NA | NA | NA | NA | NA | NA | NA | NA | NA | NA |
|               | NA                 | NA | NA | NA |    | NA | -2 | NA |    |    |    |    |    |    |    |    |
| IGSF3         | ENSG00000143061.17 |    |    |    |    | NA | NA | NA | NA | NA | NA | NA | NA | NA | NA | NA |
|               | NA                 | NA | NA | NA |    | NA | -2 | NA |    |    |    |    |    |    |    |    |
| LINC01777     | ENSG00000235054.3  |    |    |    |    | NA | NA | NA | NA | NA | NA | NA | NA | NA | NA | NA |



|               |                    |    |    |    |    |    |    |    |    |    |    |    |    |    |
|---------------|--------------------|----|----|----|----|----|----|----|----|----|----|----|----|----|
| NA            | NA                 | NA | NA | NA | -2 | NA | NA | NA | NA | NA | NA | NA | NA | NA |
| ZNF684        | ENSG00000117010.15 | NA | NA | NA | NA | NA | NA | NA | NA | NA | NA | NA | NA | NA |
| NA            | NA                 | NA | NA | NA | -2 | NA | NA | NA | NA | NA | NA | NA | NA | NA |
| RNF207        | ENSG00000158286.12 | NA | NA | NA | NA | NA | NA | NA | NA | NA | NA | NA | NA | NA |
| NA            | NA                 | NA | NA | NA | -2 | NA | NA | NA | NA | NA | NA | NA | NA | NA |
| PIAS3         | ENSG00000131788.15 | NA | NA | NA | NA | NA | NA | NA | NA | NA | NA | NA | NA | NA |
| NA            | NA                 | NA | NA | NA | -2 | NA | NA | NA | NA | NA | NA | NA | NA | NA |
| LINC01348     | ENSG00000280587.1  | NA | NA | NA | NA | NA | NA | NA | NA | NA | NA | NA | NA | NA |
| NA            | NA                 | NA | NA | NA | -2 | NA | NA | NA | NA | NA | NA | NA | NA | NA |
| RP11-815M8.1  | ENSG00000238042.5  | NA | NA | NA | NA | NA | NA | NA | NA | NA | NA | NA | NA | NA |
| NA            | NA                 | NA | NA | NA | NA | -2 | NA | NA | NA | NA | NA | NA | NA | NA |
| MAP1LC3C      | ENSG00000197769.5  | NA | NA | NA | NA | NA | NA | NA | NA | NA | NA | NA | NA | NA |
| NA            | NA                 | NA | NA | NA | -2 | NA | NA | NA | NA | NA | NA | NA | NA | NA |
| AMPD1         | ENSG00000116748.21 | NA | NA | NA | NA | NA | NA | NA | NA | NA | NA | NA | NA | NA |
| NA            | NA                 | NA | NA | NA | -2 | NA | NA | NA | NA | NA | NA | NA | NA | NA |
| ENAH          | ENSG00000154380.17 | NA | NA | NA | NA | NA | NA | NA | NA | NA | NA | NA | NA | NA |
| NA            | NA                 | NA | NA | NA | -2 | NA | NA | NA | NA | NA | NA | NA | NA | NA |
| RP11-104L21.3 | ENSG00000273160.1  | NA | NA | NA | NA | NA | NA | NA | NA | NA | NA | NA | NA | NA |
| NA            | NA                 | NA | NA | NA | NA | -2 | NA | NA | NA | NA | NA | NA | NA | NA |
| HIST2H4A      | ENSG00000270882.2  | NA | NA | NA | NA | NA | NA | NA | NA | NA | NA | NA | NA | NA |
| NA            | NA                 | NA | NA | NA | -2 | NA | NA | NA | NA | NA | NA | NA | NA | NA |
| NBPF15        | ENSG00000266338.6  | NA | NA | NA | NA | NA | NA | NA | NA | NA | NA | NA | NA | NA |
| NA            | NA                 | NA | NA | NA | -2 | NA | NA | NA | NA | NA | NA | NA | NA | NA |
| IL10          | ENSG00000136634.5  | NA | NA | NA | NA | NA | NA | NA | NA | NA | NA | NA | NA | NA |
| NA            | NA                 | NA | NA | NA | -2 | NA | NA | NA | NA | NA | NA | NA | NA | NA |
| PRRC2C        | ENSG00000117523.15 | NA | NA | NA | NA | NA | NA | NA | NA | NA | NA | NA | NA | NA |
| NA            | NA                 | NA | NA | NA | -2 | NA | NA | NA | NA | NA | NA | NA | NA | NA |
| LINC01686     | ENSG00000261504.1  | NA | NA | NA | NA | NA | NA | NA | NA | NA | NA | NA | NA | NA |
| NA            | NA                 | NA | NA | NA | -2 | NA | NA | NA | NA | NA | NA | NA | NA | NA |
| RP11-533E19.5 | ENSG00000260360.1  | NA | NA | NA | NA | NA | NA | NA | NA | NA | NA | NA | NA | NA |
| NA            | NA                 | NA | NA | NA | NA | -2 | NA | NA | NA | NA | NA | NA | NA | NA |
| WNT9A         | ENSG00000143816.7  | NA | NA | NA | NA | NA | NA | NA | NA | NA | NA | NA | NA | NA |
| NA            | NA                 | NA | NA | NA | -2 | NA | NA | NA | NA | NA | NA | NA | NA | NA |
| C1orf53       | ENSG00000203724.10 | NA | NA | NA | NA | NA | NA | NA | NA | NA | NA | NA | NA | NA |
| NA            | NA                 | NA | NA | NA | -2 | NA | NA | NA | NA | NA | NA | NA | NA | NA |
| RP4-799D16.1  | ENSG00000233755.1  | NA | NA | NA | NA | NA | NA | NA | NA | NA | NA | NA | NA | NA |
| NA            | NA                 | NA | NA | NA | NA | -2 | NA | NA | NA | NA | NA | NA | NA | NA |
| RP1-224A6.9   | ENSG00000271840.1  | NA | NA | NA | NA | NA | NA | NA | NA | NA | NA | NA | NA | NA |
| NA            | NA                 | NA | NA | NA | NA | -2 | NA | NA | NA | NA | NA | NA | NA | NA |
| MINDY1        | ENSG00000143409.15 | NA | NA | NA | NA | NA | NA | NA | NA | NA | NA | NA | NA | NA |
| NA            | NA                 | NA | NA | NA | -2 | NA | NA | NA | NA | NA | NA | NA | NA | NA |
| RP11-199H2.2  | ENSG00000282265.1  | NA | NA | NA | NA | NA | NA | NA | NA | NA | NA | NA | NA | NA |
| NA            | NA                 | NA | NA | NA | NA | -2 | NA | NA | NA | NA | NA | NA | NA | NA |
| GJB4          | ENSG00000189433.5  | NA | NA | NA | NA | NA | NA | NA | NA | NA | NA | NA | NA | NA |
| NA            | NA                 | NA | NA | NA | -2 | NA | NA | NA | NA | NA | NA | NA | NA | NA |
| KCNA3         | ENSG00000177272.8  | NA | NA | NA | NA | NA | NA | NA | NA | NA | NA | NA | NA | NA |
| NA            | NA                 | NA | NA | NA | -2 | NA | NA | NA | NA | NA | NA | NA | NA | NA |
| ASPM          | ENSG00000066279.17 | NA | NA | NA | NA | NA | NA | NA | NA | NA | NA | NA | NA | NA |
| NA            | NA                 | NA | NA | NA | -2 | NA | NA | NA | NA | NA | NA | NA | NA | NA |
| RP4-534N18.2  | ENSG00000228634.1  | NA | NA | NA | NA | NA | NA | NA | NA | NA | NA | NA | NA | NA |
| NA            | NA                 | NA | NA | NA | NA | -2 | NA | NA | NA | NA | NA | NA | NA | NA |
| CFH           | ENSG00000000971.15 | NA | NA | NA | NA | NA | NA | NA | NA | NA | NA | NA | NA | NA |
| NA            | NA                 | NA | NA | NA | -2 | NA | NA | NA | NA | NA | NA | NA | NA | NA |
| CFHR3         | ENSG00000116785.13 | NA | NA | NA | NA | NA | NA | NA | NA | NA | NA | NA | NA | NA |
| NA            | NA                 | NA | NA | NA | -2 | NA | NA | NA | NA | NA | NA | NA | NA | NA |
| PADI6         | ENSG00000276747.1  | NA | NA | NA | NA | NA | NA | NA | NA | NA | NA | NA | NA | NA |
| NA            | NA                 | NA | NA | NA | -2 | NA | NA | NA | NA | NA | NA | NA | NA | NA |
| RP11-177F15.1 | ENSG00000231877.1  | NA | NA | NA | NA | NA | NA | NA | NA | NA | NA | NA | NA | NA |
| NA            | NA                 | NA | NA | NA | NA | -2 | NA | NA | NA | NA | NA | NA | NA | NA |
| RPL5          | ENSG00000122406.12 | NA | NA | NA | NA | NA | NA | NA | NA | NA | NA | NA | NA | NA |
| NA            | NA                 | NA | NA | NA | -2 | NA | NA | NA | NA | NA | NA | NA | NA | NA |
| MASP2         | ENSG00000009724.16 | NA | NA | NA | NA | NA | NA | NA | NA | NA | NA | NA | NA | NA |

|             |                    |    |    |    |    |    |    |    |    |    |    |    |    |    |
|-------------|--------------------|----|----|----|----|----|----|----|----|----|----|----|----|----|
| NA          | NA                 | NA | NA | -2 | NA |    |    |    |    |    |    |    |    |    |
| TGFBR3      | ENSG00000069702.10 |    |    |    | NA | NA | NA | NA | NA | NA | NA | NA | NA | NA |
| NA          | NA                 | NA | NA | NA | -2 | NA |    |    |    |    |    |    |    |    |
| BTF3L4      | ENSG00000134717.17 |    |    |    | NA | NA | NA | NA | NA | NA | NA | NA | NA | NA |
| NA          | NA                 | NA | NA | NA | -2 | NA |    |    |    |    |    |    |    |    |
| PLK3        | ENSG00000173846.12 |    |    |    | NA | NA | NA | NA | NA | NA | NA | NA | NA | NA |
| NA          | NA                 | NA | NA | NA | -2 | NA |    |    |    |    |    |    |    |    |
| SF3B4       | ENSG00000143368.9  |    |    |    | NA | NA | NA | NA | NA | NA | NA | NA | NA | NA |
| NA          | NA                 | NA | NA | NA | -2 | NA |    |    |    |    |    |    |    |    |
| TNFAIP8L2   | ENSG00000163154.5  |    |    |    | NA | NA | NA | NA | NA | NA | NA | NA | NA | NA |
| NA          | NA                 | NA | NA | NA | -2 | NA |    |    |    |    |    |    |    |    |
| FCMR        | ENSG00000162894.11 |    |    |    | NA | NA | NA | NA | NA | NA | NA | NA | NA | NA |
| NA          | NA                 | NA | NA | NA | -2 | NA |    |    |    |    |    |    |    |    |
| ZNF687      | ENSG00000143373.17 |    |    |    | NA | NA | NA | NA | NA | NA | NA | NA | NA | NA |
| NA          | NA                 | NA | NA | NA | -2 | NA |    |    |    |    |    |    |    |    |
| DDOST       | ENSG00000244038.9  |    |    |    | NA | NA | NA | NA | NA | NA | NA | NA | NA | NA |
| NA          | NA                 | NA | NA | NA | -2 | NA |    |    |    |    |    |    |    |    |
| ANGPTL3     | ENSG00000132855.4  |    |    |    | NA | NA | NA | NA | NA | NA | NA | NA | NA | NA |
| NA          | NA                 | NA | NA | NA | -2 | NA |    |    |    |    |    |    |    |    |
| KIAA0907    | ENSG00000132680.10 |    |    |    | NA | NA | NA | NA | NA | NA | NA | NA | NA | NA |
| NA          | NA                 | NA | NA | NA | -2 | NA |    |    |    |    |    |    |    |    |
| AHDC1       | ENSG00000126705.13 |    |    |    | NA | NA | NA | NA | NA | NA | NA | NA | NA | NA |
| NA          | NA                 | NA | NA | NA | -2 | NA |    |    |    |    |    |    |    |    |
| LINC01753   | ENSG00000230250.2  |    |    |    | NA | NA | NA | NA | NA | NA | NA | NA | NA | NA |
| NA          | NA                 | NA | NA | NA | -2 | NA |    |    |    |    |    |    |    |    |
| TAF12       | ENSG00000120656.11 |    |    |    | NA | NA | NA | NA | NA | NA | NA | NA | NA | NA |
| NA          | NA                 | NA | NA | NA | -2 | NA |    |    |    |    |    |    |    |    |
| S1PR1       | ENSG00000170989.8  |    |    |    | NA | NA | NA | NA | NA | NA | NA | NA | NA | NA |
| NA          | NA                 | NA | NA | NA | -2 | NA |    |    |    |    |    |    |    |    |
| PDC         | ENSG00000116703.13 |    |    |    | NA | NA | NA | NA | NA | NA | NA | NA | NA | NA |
| NA          | NA                 | NA | NA | NA | -2 | NA |    |    |    |    |    |    |    |    |
| LINC00337   | ENSG00000225077.2  |    |    |    | NA | NA | NA | NA | NA | NA | NA | NA | NA | NA |
| NA          | NA                 | NA | NA | NA | -2 | NA |    |    |    |    |    |    |    |    |
| MPZL1       | ENSG00000197965.11 |    |    |    | NA | NA | NA | NA | NA | NA | NA | NA | NA | NA |
| NA          | NA                 | NA | NA | NA | -2 | NA |    |    |    |    |    |    |    |    |
| SETDB1      | ENSG00000143379.12 |    |    |    | NA | NA | NA | NA | NA | NA | NA | NA | NA | NA |
| NA          | NA                 | NA | NA | NA | -2 | NA |    |    |    |    |    |    |    |    |
| XKR8        | ENSG00000158156.7  |    |    |    | NA | NA | NA | NA | NA | NA | NA | NA | NA | NA |
| NA          | NA                 | NA | NA | NA | -2 | NA |    |    |    |    |    |    |    |    |
| LINC01646   | ENSG00000232596.2  |    |    |    | NA | NA | NA | NA | NA | NA | NA | NA | NA | NA |
| NA          | NA                 | NA | NA | NA | -2 | NA |    |    |    |    |    |    |    |    |
| S100A5      | ENSG00000196420.7  |    |    |    | NA | NA | NA | NA | NA | NA | NA | NA | NA | NA |
| NA          | NA                 | NA | NA | NA | -2 | NA |    |    |    |    |    |    |    |    |
| PNRC2       | ENSG00000189266.11 |    |    |    | NA | NA | NA | NA | NA | NA | NA | NA | NA | NA |
| NA          | NA                 | NA | NA | NA | -2 | NA |    |    |    |    |    |    |    |    |
| AKNAD1      | ENSG00000162641.18 |    |    |    | NA | NA | NA | NA | NA | NA | NA | NA | NA | NA |
| NA          | NA                 | NA | NA | NA | -2 | NA |    |    |    |    |    |    |    |    |
| OR2T10      | ENSG00000184022.3  |    |    |    | NA | NA | NA | NA | NA | NA | NA | NA | NA | NA |
| NA          | NA                 | NA | NA | NA | -2 | NA |    |    |    |    |    |    |    |    |
| ITGA10      | ENSG00000143127.12 |    |    |    | NA | NA | NA | NA | NA | NA | NA | NA | NA | NA |
| NA          | NA                 | NA | NA | NA | -2 | NA |    |    |    |    |    |    |    |    |
| BTG2        | ENSG00000159388.5  |    |    |    | NA | NA | NA | NA | NA | NA | NA | NA | NA | NA |
| NA          | NA                 | NA | NA | NA | -2 | NA |    |    |    |    |    |    |    |    |
| ZSWIM5      | ENSG00000162415.6  |    |    |    | NA | NA | NA | NA | NA | NA | NA | NA | NA | NA |
| NA          | NA                 | NA | NA | NA | -2 | NA |    |    |    |    |    |    |    |    |
| RP11-12M5.1 | ENSG00000243062.5  |    |    |    | NA | NA | NA | NA | NA | NA | NA | NA | NA | NA |
| NA          | NA                 | NA | NA | NA | NA | -2 | NA |    |    |    |    |    |    |    |
| TSNAX       | ENSG00000116918.13 |    |    |    | NA | NA | NA | NA | NA | NA | NA | NA | NA | NA |
| NA          | NA                 | NA | NA | NA | -2 | NA |    |    |    |    |    |    |    |    |
| AURKAIP1    | ENSG00000175756.13 |    |    |    | NA | NA | NA | NA | NA | NA | NA | NA | NA | NA |
| NA          | NA                 | NA | NA | NA | -2 | NA |    |    |    |    |    |    |    |    |
| LHX4        | ENSG00000121454.5  |    |    |    | NA | NA | NA | NA | NA | NA | NA | NA | NA | NA |

|               |                    |    |    |    |    |    |    |    |    |    |    |    |    |    |
|---------------|--------------------|----|----|----|----|----|----|----|----|----|----|----|----|----|
| NA            | NA                 | NA | NA | -2 | NA |    |    |    |    |    |    |    |    |    |
| CSRP1         | ENSG00000159176.13 |    |    |    | NA | NA | NA | NA | NA | NA | NA | NA | NA | NA |
| NA            | NA                 | NA | NA | -2 | NA |    |    |    |    |    |    |    |    |    |
| RP11-335E6.2  | ENSG00000203605.3  |    |    |    | NA | NA | NA | NA | NA | NA | NA | NA | NA | NA |
| NA            | NA                 | NA | NA | NA | NA | -2 | NA |    |    |    |    |    |    |    |
| ENO1          | ENSG00000074800.13 |    |    |    | NA | NA | NA | NA | NA | NA | NA | NA | NA | NA |
| NA            | NA                 | NA | NA | -2 | NA |    |    |    |    |    |    |    |    |    |
| RP11-23I7.1   | ENSG00000228153.1  |    |    |    | NA | NA | NA | NA | NA | NA | NA | NA | NA | NA |
| NA            | NA                 | NA | NA | NA | NA | -2 | NA |    |    |    |    |    |    |    |
| SLAMF7        | ENSG00000026751.16 |    |    |    | NA | NA | NA | NA | NA | NA | NA | NA | NA | NA |
| NA            | NA                 | NA | NA | NA | NA | -2 | NA |    |    |    |    |    |    |    |
| RNF186        | ENSG00000178828.6  |    |    |    | NA | NA | NA | NA | NA | NA | NA | NA | NA | NA |
| NA            | NA                 | NA | NA | NA | NA | -2 | NA |    |    |    |    |    |    |    |
| FCGR2A        | ENSG00000143226.13 |    |    |    | NA | NA | NA | NA | NA | NA | NA | NA | NA | NA |
| NA            | NA                 | NA | NA | NA | NA | -2 | NA |    |    |    |    |    |    |    |
| LHX8          | ENSG00000162624.14 |    |    |    | NA | NA | NA | NA | NA | NA | NA | NA | NA | NA |
| NA            | NA                 | NA | NA | -2 | NA |    |    |    |    |    |    |    |    |    |
| HMGCS2        | ENSG00000134240.11 |    |    |    | NA | NA | NA | NA | NA | NA | NA | NA | NA | NA |
| NA            | NA                 | NA | NA | NA | NA | -2 | NA |    |    |    |    |    |    |    |
| OVAAL         | ENSG00000236719.2  |    |    |    | NA | NA | NA | NA | NA | NA | NA | NA | NA | NA |
| NA            | NA                 | NA | NA | -2 | NA |    |    |    |    |    |    |    |    |    |
| HSD11B1       | ENSG00000117594.9  |    |    |    | NA | NA | NA | NA | NA | NA | NA | NA | NA | NA |
| NA            | NA                 | NA | NA | NA | NA | -2 | NA |    |    |    |    |    |    |    |
| ZNF672        | ENSG00000171161.12 |    |    |    | NA | NA | NA | NA | NA | NA | NA | NA | NA | NA |
| NA            | NA                 | NA | NA | NA | NA | -2 | NA |    |    |    |    |    |    |    |
| DTL           | ENSG00000143476.17 |    |    |    | NA | NA | NA | NA | NA | NA | NA | NA | NA | NA |
| NA            | NA                 | NA | NA | -2 | NA |    |    |    |    |    |    |    |    |    |
| RHBG          | ENSG00000132677.12 |    |    |    | NA | NA | NA | NA | NA | NA | NA | NA | NA | NA |
| NA            | NA                 | NA | NA | -2 | NA |    |    |    |    |    |    |    |    |    |
| LINC01351     | ENSG00000237457.6  |    |    |    | NA | NA | NA | NA | NA | NA | NA | NA | NA | NA |
| NA            | NA                 | NA | NA | NA | NA | -2 | NA |    |    |    |    |    |    |    |
| KDM4A         | ENSG00000066135.12 |    |    |    | NA | NA | NA | NA | NA | NA | NA | NA | NA | NA |
| NA            | NA                 | NA | NA | -2 | NA |    |    |    |    |    |    |    |    |    |
| ARL8A         | ENSG00000143862.7  |    |    |    | NA | NA | NA | NA | NA | NA | NA | NA | NA | NA |
| NA            | NA                 | NA | NA | -2 | NA |    |    |    |    |    |    |    |    |    |
| KTI12         | ENSG00000198841.3  |    |    |    | NA | NA | NA | NA | NA | NA | NA | NA | NA | NA |
| NA            | NA                 | NA | NA | -2 | NA |    |    |    |    |    |    |    |    |    |
| FAM159A       | ENSG00000182183.14 |    |    |    | NA | NA | NA | NA | NA | NA | NA | NA | NA | NA |
| NA            | NA                 | NA | NA | NA | NA | -2 | NA |    |    |    |    |    |    |    |
| COL11A1       | ENSG00000060718.20 |    |    |    | NA | NA | NA | NA | NA | NA | NA | NA | NA | NA |
| NA            | NA                 | NA | NA | NA | NA | -2 | NA |    |    |    |    |    |    |    |
| RP4-597N16.4  | ENSG00000273416.1  |    |    |    | NA | NA | NA | NA | NA | NA | NA | NA | NA | NA |
| NA            | NA                 | NA | NA | NA | NA | -2 | NA |    |    |    |    |    |    |    |
| LINC01342     | ENSG00000223823.1  |    |    |    | NA | NA | NA | NA | NA | NA | NA | NA | NA | NA |
| NA            | NA                 | NA | NA | NA | NA | -2 | NA |    |    |    |    |    |    |    |
| EFNA3         | ENSG00000143590.13 |    |    |    | NA | NA | NA | NA | NA | NA | NA | NA | NA | NA |
| NA            | NA                 | NA | NA | -2 | NA |    |    |    |    |    |    |    |    |    |
| RP4-680D5.9   | ENSG00000271742.1  |    |    |    | NA | NA | NA | NA | NA | NA | NA | NA | NA | NA |
| NA            | NA                 | NA | NA | NA | NA | -2 | NA |    |    |    |    |    |    |    |
| RP1-158P9.1   | ENSG00000235612.1  |    |    |    | NA | NA | NA | NA | NA | NA | NA | NA | NA | NA |
| NA            | NA                 | NA | NA | NA | NA | -2 | NA |    |    |    |    |    |    |    |
| TARBP1        | ENSG00000059588.9  |    |    |    | NA | NA | NA | NA | NA | NA | NA | NA | NA | NA |
| NA            | NA                 | NA | NA | NA | NA | -2 | NA |    |    |    |    |    |    |    |
| SHC1          | ENSG00000160691.18 |    |    |    | NA | NA | NA | NA | NA | NA | NA | NA | NA | NA |
| NA            | NA                 | NA | NA | -2 | NA |    |    |    |    |    |    |    |    |    |
| RP4-683M8.2   | ENSG00000226133.6  |    |    |    | NA | NA | NA | NA | NA | NA | NA | NA | NA | NA |
| NA            | NA                 | NA | NA | NA | NA | -2 | NA |    |    |    |    |    |    |    |
| RNPC3         | ENSG00000185946.15 |    |    |    | NA | NA | NA | NA | NA | NA | NA | NA | NA | NA |
| NA            | NA                 | NA | NA | -2 | NA |    |    |    |    |    |    |    |    |    |
| TIPRL         | ENSG00000143155.12 |    |    |    | NA | NA | NA | NA | NA | NA | NA | NA | NA | NA |
| NA            | NA                 | NA | NA | -2 | NA |    |    |    |    |    |    |    |    |    |
| RP11-380J14.1 | ENSG00000204362.6  |    |    |    | NA | NA | NA | NA | NA | NA | NA | NA | NA | NA |

|               |                    |    |    |    |    |    |    |    |    |    |    |    |    |    |    |
|---------------|--------------------|----|----|----|----|----|----|----|----|----|----|----|----|----|----|
|               | NA                 | NA | NA | NA | NA | NA | -2 | NA |    |    |    |    |    |    |    |
| POGK          | ENSG00000143157.11 |    |    |    | NA | NA | NA | NA | NA | NA | NA | NA | NA | NA | NA |
|               | NA                 | NA | NA | NA | -2 | NA |    |    |    |    |    |    |    |    |    |
| ALPL          | ENSG00000162551.13 |    |    |    | NA | NA | NA | NA | NA | NA | NA | NA | NA | NA | NA |
|               | NA                 | NA | NA | NA | -2 | NA |    |    |    |    |    |    |    |    |    |
| SYT11         | ENSG00000132718.8  |    |    |    | NA | NA | NA | NA | NA | NA | NA | NA | NA | NA | NA |
|               | NA                 | NA | NA | NA | -2 | NA |    |    |    |    |    |    |    |    |    |
| PRKACB        | ENSG00000142875.19 |    |    |    | NA | NA | NA | NA | NA | NA | NA | NA | NA | NA | NA |
|               | NA                 | NA | NA | NA | NA | -2 | NA |    |    |    |    |    |    |    |    |
| FAM72C        | ENSG00000263513.5  |    |    |    | NA | NA | NA | NA | NA | NA | NA | NA | NA | NA | NA |
|               | NA                 | NA | NA | NA | NA | -2 | NA |    |    |    |    |    |    |    |    |
| CD1B          | ENSG00000158485.10 |    |    |    | NA | NA | NA | NA | NA | NA | NA | NA | NA | NA | NA |
|               | NA                 | NA | NA | NA | -2 | NA |    |    |    |    |    |    |    |    |    |
| LINC01787     | ENSG00000231987.1  |    |    |    | NA | NA | NA | NA | NA | NA | NA | NA | NA | NA | NA |
|               | NA                 | NA | NA | NA | NA | -2 | NA |    |    |    |    |    |    |    |    |
| CD244         | ENSG00000122223.12 |    |    |    | NA | NA | NA | NA | NA | NA | NA | NA | NA | NA | NA |
|               | NA                 | NA | NA | NA | -2 | NA |    |    |    |    |    |    |    |    |    |
| SPRR2E        | ENSG00000203785.8  |    |    |    | NA | NA | NA | NA | NA | NA | NA | NA | NA | NA | NA |
|               | NA                 | NA | NA | NA | NA | -2 | NA |    |    |    |    |    |    |    |    |
| MAP7D1        | ENSG00000116871.15 |    |    |    | NA | NA | NA | NA | NA | NA | NA | NA | NA | NA | NA |
|               | NA                 | NA | NA | NA | NA | -2 | NA |    |    |    |    |    |    |    |    |
| RP5-1182A14.5 | ENSG00000271732.1  |    |    |    | NA | NA | NA | NA | NA | NA | NA | NA | NA | NA | NA |
|               | NA                 | NA | NA | NA | NA | -2 | NA |    |    |    |    |    |    |    |    |
| UQCRHL        | ENSG00000233954.6  |    |    |    | NA | NA | NA | NA | NA | NA | NA | NA | NA | NA | NA |
|               | NA                 | NA | NA | NA | NA | -2 | NA |    |    |    |    |    |    |    |    |
| LINC01136     | ENSG00000233791.5  |    |    |    | NA | NA | NA | NA | NA | NA | NA | NA | NA | NA | NA |
|               | NA                 | NA | NA | NA | NA | -2 | NA |    |    |    |    |    |    |    |    |
| LHX9          | ENSG00000143355.15 |    |    |    | NA | NA | NA | NA | NA | NA | NA | NA | NA | NA | NA |
|               | NA                 | NA | NA | NA | -2 | NA |    |    |    |    |    |    |    |    |    |
| RP11-84A19.4  | ENSG00000269967.1  |    |    |    | NA | NA | NA | NA | NA | NA | NA | NA | NA | NA | NA |
|               | NA                 | NA | NA | NA | NA | NA | -2 | NA |    |    |    |    |    |    |    |
| ACBD3         | ENSG00000182827.8  |    |    |    | NA | NA | NA | NA | NA | NA | NA | NA | NA | NA | NA |
|               | NA                 | NA | NA | NA | -2 | NA |    |    |    |    |    |    |    |    |    |
| LINC01635     | ENSG00000228397.2  |    |    |    | NA | NA | NA | NA | NA | NA | NA | NA | NA | NA | NA |
|               | NA                 | NA | NA | NA | NA | -2 | NA |    |    |    |    |    |    |    |    |
| C1QTNF12      | ENSG00000184163.3  |    |    |    | NA | NA | NA | NA | NA | NA | NA | NA | NA | NA | NA |
|               | NA                 | NA | NA | NA | NA | -2 | NA |    |    |    |    |    |    |    |    |
| KCNK2         | ENSG00000082482.13 |    |    |    | NA | NA | NA | NA | NA | NA | NA | NA | NA | NA | NA |
|               | NA                 | NA | NA | NA | -2 | NA |    |    |    |    |    |    |    |    |    |
| SYCP1         | ENSG00000198765.11 |    |    |    | NA | NA | NA | NA | NA | NA | NA | NA | NA | NA | NA |
|               | NA                 | NA | NA | NA | -2 | NA |    |    |    |    |    |    |    |    |    |
| GFI1          | ENSG00000162676.11 |    |    |    | NA | NA | NA | NA | NA | NA | NA | NA | NA | NA | NA |
|               | NA                 | NA | NA | NA | -2 | NA |    |    |    |    |    |    |    |    |    |
| SERBP1        | ENSG00000142864.14 |    |    |    | NA | NA | NA | NA | NA | NA | NA | NA | NA | NA | NA |
|               | NA                 | NA | NA | NA | NA | -2 | NA |    |    |    |    |    |    |    |    |
| FAM177B       | ENSG00000197520.10 |    |    |    | NA | NA | NA | NA | NA | NA | NA | NA | NA | NA | NA |
|               | NA                 | NA | NA | NA | NA | -2 | NA |    |    |    |    |    |    |    |    |
| USF1          | ENSG00000158773.14 |    |    |    | NA | NA | NA | NA | NA | NA | NA | NA | NA | NA | NA |
|               | NA                 | NA | NA | NA | -2 | NA |    |    |    |    |    |    |    |    |    |
| RP13-392I16.1 | ENSG00000235263.1  |    |    |    | NA | NA | NA | NA | NA | NA | NA | NA | NA | NA | NA |
|               | NA                 | NA | NA | NA | NA | NA | -2 | NA |    |    |    |    |    |    |    |
| PALMD         | ENSG00000099260.10 |    |    |    | NA | NA | NA | NA | NA | NA | NA | NA | NA | NA | NA |
|               | NA                 | NA | NA | NA | -2 | NA |    |    |    |    |    |    |    |    |    |
| OR6K3         | ENSG00000203757.1  |    |    |    | NA | NA | NA | NA | NA | NA | NA | NA | NA | NA | NA |
|               | NA                 | NA | NA | NA | -2 | NA |    |    |    |    |    |    |    |    |    |
| ILF2          | ENSG00000143621.16 |    |    |    | NA | NA | NA | NA | NA | NA | NA | NA | NA | NA | NA |
|               | NA                 | NA | NA | NA | -2 | NA |    |    |    |    |    |    |    |    |    |
| ZSCAN20       | ENSG00000121903.14 |    |    |    | NA | NA | NA | NA | NA | NA | NA | NA | NA | NA | NA |
|               | NA                 | NA | NA | NA | NA | -2 | NA |    |    |    |    |    |    |    |    |
| PLPPR4        | ENSG00000117600.12 |    |    |    | NA | NA | NA | NA | NA | NA | NA | NA | NA | NA | NA |
|               | NA                 | NA | NA | NA | NA | -2 | NA |    |    |    |    |    |    |    |    |
| C1orf195      | ENSG00000204464.7  |    |    |    | NA | NA | NA | NA | NA | NA | NA | NA | NA | NA | NA |

|              |                    |    |    |    |    |    |    |    |    |    |    |    |    |    |
|--------------|--------------------|----|----|----|----|----|----|----|----|----|----|----|----|----|
| NA           | NA                 | NA | NA | NA | -2 | NA |    |    |    |    |    |    |    |    |
| FCRL2        | ENSG00000132704.15 |    |    | NA | NA | NA | NA | NA | NA | NA | NA | NA | NA | NA |
| NA           | NA                 | NA | NA | NA | -2 | NA |    |    |    |    |    |    |    |    |
| LINC01685    | ENSG00000238063.2  |    |    | NA | NA | NA | NA | NA | NA | NA | NA | NA | NA | NA |
| NA           | NA                 | NA | NA | NA | -2 | NA |    |    |    |    |    |    |    |    |
| LINC01705    | ENSG00000232679.1  |    |    | NA | NA | NA | NA | NA | NA | NA | NA | NA | NA | NA |
| NA           | NA                 | NA | NA | NA | -2 | NA |    |    |    |    |    |    |    |    |
| RP11-443B7.3 | ENSG00000258082.1  |    |    | NA | NA | NA | NA | NA | NA | NA | NA | NA | NA | NA |
| NA           | NA                 | NA | NA | NA | -2 | NA |    |    |    |    |    |    |    |    |
| OR13G1       | ENSG00000197437.3  |    |    | NA | NA | NA | NA | NA | NA | NA | NA | NA | NA | NA |
| NA           | NA                 | NA | NA | NA | -2 | NA |    |    |    |    |    |    |    |    |
| LINC01725    | ENSG00000233008.5  |    |    | NA | NA | NA | NA | NA | NA | NA | NA | NA | NA | NA |
| NA           | NA                 | NA | NA | NA | -2 | NA |    |    |    |    |    |    |    |    |
| IPP          | ENSG00000197429.10 |    |    | NA | NA | NA | NA | NA | NA | NA | NA | NA | NA | NA |
| NA           | NA                 | NA | NA | NA | -2 | NA |    |    |    |    |    |    |    |    |
| C1orf21      | ENSG00000116667.12 |    |    | NA | NA | NA | NA | NA | NA | NA | NA | NA | NA | NA |
| NA           | NA                 | NA | NA | NA | -2 | NA |    |    |    |    |    |    |    |    |
| HMGB4        | ENSG00000176256.10 |    |    | NA | NA | NA | NA | NA | NA | NA | NA | NA | NA | NA |
| NA           | NA                 | NA | NA | NA | -2 | NA |    |    |    |    |    |    |    |    |
| SARS         | ENSG00000031698.12 |    |    | NA | NA | NA | NA | NA | NA | NA | NA | NA | NA | NA |
| NA           | NA                 | NA | NA | NA | -2 | NA |    |    |    |    |    |    |    |    |
| SPTA1        | ENSG00000163554.12 |    |    | NA | NA | NA | NA | NA | NA | NA | NA | NA | NA | NA |
| NA           | NA                 | NA | NA | NA | -2 | NA |    |    |    |    |    |    |    |    |
| PPCS         | ENSG00000127125.8  |    |    | NA | NA | NA | NA | NA | NA | NA | NA | NA | NA | NA |
| NA           | NA                 | NA | NA | NA | -2 | NA |    |    |    |    |    |    |    |    |
| SYT2         | ENSG00000143858.11 |    |    | NA | NA | NA | NA | NA | NA | NA | NA | NA | NA | NA |
| NA           | NA                 | NA | NA | NA | -2 | NA |    |    |    |    |    |    |    |    |
| NLRP3        | ENSG00000162711.16 |    |    | NA | NA | NA | NA | NA | NA | NA | NA | NA | NA | NA |
| NA           | NA                 | NA | NA | NA | -2 | NA |    |    |    |    |    |    |    |    |
| RP11-550H2.2 | ENSG00000230027.1  |    |    | NA | NA | NA | NA | NA | NA | NA | NA | NA | NA | NA |
| NA           | NA                 | NA | NA | NA | NA | -2 | NA |    |    |    |    |    |    |    |
| MPL          | ENSG00000117400.16 |    |    | NA | NA | NA | NA | NA | NA | NA | NA | NA | NA | NA |
| NA           | NA                 | NA | NA | NA | -2 | NA |    |    |    |    |    |    |    |    |
| EIF3I        | ENSG00000084623.11 |    |    | NA | NA | NA | NA | NA | NA | NA | NA | NA | NA | NA |
| NA           | NA                 | NA | NA | NA | -2 | NA |    |    |    |    |    |    |    |    |
| OR2T3        | ENSG00000196539.3  |    |    | NA | NA | NA | NA | NA | NA | NA | NA | NA | NA | NA |
| NA           | NA                 | NA | NA | NA | -2 | NA |    |    |    |    |    |    |    |    |
| MFSD14A      | ENSG00000156875.13 |    |    | NA | NA | NA | NA | NA | NA | NA | NA | NA | NA | NA |
| NA           | NA                 | NA | NA | NA | -2 | NA |    |    |    |    |    |    |    |    |
| RP4-660H19.1 | ENSG00000225087.1  |    |    | NA | NA | NA | NA | NA | NA | NA | NA | NA | NA | NA |
| NA           | NA                 | NA | NA | NA | NA | -2 | NA |    |    |    |    |    |    |    |
| INTS7        | ENSG00000143493.12 |    |    | NA | NA | NA | NA | NA | NA | NA | NA | NA | NA | NA |
| NA           | NA                 | NA | NA | NA | -2 | NA |    |    |    |    |    |    |    |    |
| ZBTB8B       | ENSG00000273274.1  |    |    | NA | NA | NA | NA | NA | NA | NA | NA | NA | NA | NA |
| NA           | NA                 | NA | NA | NA | -2 | NA |    |    |    |    |    |    |    |    |
| LCE1D        | ENSG00000172155.9  |    |    | NA | NA | NA | NA | NA | NA | NA | NA | NA | NA | NA |
| NA           | NA                 | NA | NA | NA | -2 | NA |    |    |    |    |    |    |    |    |
| ATP1A1       | ENSG00000163399.15 |    |    | NA | NA | NA | NA | NA | NA | NA | NA | NA | NA | NA |
| NA           | NA                 | NA | NA | NA | -2 | NA |    |    |    |    |    |    |    |    |
| IGFN1        | ENSG00000163395.16 |    |    | NA | NA | NA | NA | NA | NA | NA | NA | NA | NA | NA |
| NA           | NA                 | NA | NA | NA | -2 | NA |    |    |    |    |    |    |    |    |
| FAM46C       | ENSG00000183508.4  |    |    | NA | NA | NA | NA | NA | NA | NA | NA | NA | NA | NA |
| NA           | NA                 | NA | NA | NA | -2 | NA |    |    |    |    |    |    |    |    |
| SLC6A17      | ENSG00000197106.6  |    |    | NA | NA | NA | NA | NA | NA | NA | NA | NA | NA | NA |
| NA           | NA                 | NA | NA | NA | -2 | NA |    |    |    |    |    |    |    |    |
| CAPZB        | ENSG00000077549.17 |    |    | NA | NA | NA | NA | NA | NA | NA | NA | NA | NA | NA |
| NA           | NA                 | NA | NA | NA | -2 | NA |    |    |    |    |    |    |    |    |
| FOXD3        | ENSG00000187140.5  |    |    | NA | NA | NA | NA | NA | NA | NA | NA | NA | NA | NA |
| NA           | NA                 | NA | NA | NA | -2 | NA |    |    |    |    |    |    |    |    |
| RASAL2       | ENSG00000075391.16 |    |    | NA | NA | NA | NA | NA | NA | NA | NA | NA | NA | NA |
| NA           | NA                 | NA | NA | NA | -2 | NA |    |    |    |    |    |    |    |    |
| RP11-443B7.1 | ENSG00000238005.2  |    |    | NA | NA | NA | NA | NA | NA | NA | NA | NA | NA | NA |

|              |                    |    |    |    |    |    |    |    |    |    |    |    |    |    |
|--------------|--------------------|----|----|----|----|----|----|----|----|----|----|----|----|----|
| NA           | NA                 | NA | NA | NA | NA | -2 | NA |    |    |    |    |    |    |    |
| AP006222.2   | ENSG00000228463.9  |    |    |    |    | NA | NA | NA | NA | NA | NA | NA | NA | NA |
| NA           | NA                 | NA | NA | NA | NA | -2 | NA |    |    |    |    |    |    |    |
| PRPF38B      | ENSG00000134186.11 |    |    |    |    | NA | NA | NA | NA | NA | NA | NA | NA | NA |
| NA           | NA                 | NA | NA | NA | NA | -2 | NA |    |    |    |    |    |    |    |
| PADI2        | ENSG00000117115.12 |    |    |    |    | NA | NA | NA | NA | NA | NA | NA | NA | NA |
| NA           | NA                 | NA | NA | NA | NA | -2 | NA |    |    |    |    |    |    |    |
| CCSAP        | ENSG00000154429.10 |    |    |    |    | NA | NA | NA | NA | NA | NA | NA | NA | NA |
| NA           | NA                 | NA | NA | NA | NA | -2 | NA |    |    |    |    |    |    |    |
| LCE3D        | ENSG00000163202.4  |    |    |    |    | NA | NA | NA | NA | NA | NA | NA | NA | NA |
| NA           | NA                 | NA | NA | NA | NA | -2 | NA |    |    |    |    |    |    |    |
| RP11-306I1.2 | ENSG00000236206.1  |    |    |    |    | NA | NA | NA | NA | NA | NA | NA | NA | NA |
| NA           | NA                 | NA | NA | NA | NA | -2 | NA |    |    |    |    |    |    |    |
| TCEANC2      | ENSG00000116205.12 |    |    |    |    | NA | NA | NA | NA | NA | NA | NA | NA | NA |
| NA           | NA                 | NA | NA | NA | NA | -2 | NA |    |    |    |    |    |    |    |
| ATP5F1       | ENSG00000116459.10 |    |    |    |    | NA | NA | NA | NA | NA | NA | NA | NA | NA |
| NA           | NA                 | NA | NA | NA | NA | -2 | NA |    |    |    |    |    |    |    |
| MIB2         | ENSG00000197530.12 |    |    |    |    | NA | NA | NA | NA | NA | NA | NA | NA | NA |
| NA           | NA                 | NA | NA | NA | NA | -2 | NA |    |    |    |    |    |    |    |
| CLCA1        | ENSG00000016490.15 |    |    |    |    | NA | NA | NA | NA | NA | NA | NA | NA | NA |
| NA           | NA                 | NA | NA | NA | NA | -2 | NA |    |    |    |    |    |    |    |
| OSBPL9       | ENSG00000117859.18 |    |    |    |    | NA | NA | NA | NA | NA | NA | NA | NA | NA |
| NA           | NA                 | NA | NA | NA | NA | -2 | NA |    |    |    |    |    |    |    |
| LMO4         | ENSG00000143013.12 |    |    |    |    | NA | NA | NA | NA | NA | NA | NA | NA | NA |
| NA           | NA                 | NA | NA | NA | NA | -2 | NA |    |    |    |    |    |    |    |
| LINC01773    | ENSG00000224235.1  |    |    |    |    | NA | NA | NA | NA | NA | NA | NA | NA | NA |
| NA           | NA                 | NA | NA | NA | NA | -2 | NA |    |    |    |    |    |    |    |
| OR2T5        | ENSG00000203661.3  |    |    |    |    | NA | NA | NA | NA | NA | NA | NA | NA | NA |
| NA           | NA                 | NA | NA | NA | NA | -2 | NA |    |    |    |    |    |    |    |
| ALG14        | ENSG00000172339.9  |    |    |    |    | NA | NA | NA | NA | NA | NA | NA | NA | NA |
| NA           | NA                 | NA | NA | NA | NA | -2 | NA |    |    |    |    |    |    |    |
| TMEM125      | ENSG00000179178.10 |    |    |    |    | NA | NA | NA | NA | NA | NA | NA | NA | NA |
| NA           | NA                 | NA | NA | NA | NA | -2 | NA |    |    |    |    |    |    |    |
| MYOG         | ENSG00000122180.4  |    |    |    |    | NA | NA | NA | NA | NA | NA | NA | NA | NA |
| NA           | NA                 | NA | NA | NA | NA | -2 | NA |    |    |    |    |    |    |    |
| B3GALT2      | ENSG00000162630.5  |    |    |    |    | NA | NA | NA | NA | NA | NA | NA | NA | NA |
| NA           | NA                 | NA | NA | NA | NA | -2 | NA |    |    |    |    |    |    |    |
| PRSS38       | ENSG00000185888.5  |    |    |    |    | NA | NA | NA | NA | NA | NA | NA | NA | NA |
| NA           | NA                 | NA | NA | NA | NA | -2 | NA |    |    |    |    |    |    |    |
| CA6          | ENSG00000131686.14 |    |    |    |    | NA | NA | NA | NA | NA | NA | NA | NA | NA |
| NA           | NA                 | NA | NA | NA | NA | -2 | NA |    |    |    |    |    |    |    |
| SLAMF9       | ENSG00000162723.9  |    |    |    |    | NA | NA | NA | NA | NA | NA | NA | NA | NA |
| NA           | NA                 | NA | NA | NA | NA | -2 | NA |    |    |    |    |    |    |    |
| S100A12      | ENSG00000163221.8  |    |    |    |    | NA | NA | NA | NA | NA | NA | NA | NA | NA |
| NA           | NA                 | NA | NA | NA | NA | -2 | NA |    |    |    |    |    |    |    |
| F3           | ENSG00000117525.13 |    |    |    |    | NA | NA | NA | NA | NA | NA | NA | NA | NA |
| NA           | NA                 | NA | NA | NA | NA | -2 | NA |    |    |    |    |    |    |    |
| RP5-968D22.3 | ENSG00000228697.2  |    |    |    |    | NA | NA | NA | NA | NA | NA | NA | NA | NA |
| NA           | NA                 | NA | NA | NA | NA | -2 | NA |    |    |    |    |    |    |    |
| ATP1A2       | ENSG00000018625.14 |    |    |    |    | NA | NA | NA | NA | NA | NA | NA | NA | NA |
| NA           | NA                 | NA | NA | NA | NA | -2 | NA |    |    |    |    |    |    |    |
| RP5-943J3.2  | ENSG00000272931.1  |    |    |    |    | NA | NA | NA | NA | NA | NA | NA | NA | NA |
| NA           | NA                 | NA | NA | NA | NA | -2 | NA |    |    |    |    |    |    |    |
| PLPPR5       | ENSG00000117598.11 |    |    |    |    | NA | NA | NA | NA | NA | NA | NA | NA | NA |
| NA           | NA                 | NA | NA | NA | NA | -2 | NA |    |    |    |    |    |    |    |
| GPN2         | ENSG00000142751.14 |    |    |    |    | NA | NA | NA | NA | NA | NA | NA | NA | NA |
| NA           | NA                 | NA | NA | NA | NA | -2 | NA |    |    |    |    |    |    |    |
| RP11-443B7.2 | ENSG00000237520.1  |    |    |    |    | NA | NA | NA | NA | NA | NA | NA | NA | NA |
| NA           | NA                 | NA | NA | NA | NA | -2 | NA |    |    |    |    |    |    |    |
| PLA2G2F      | ENSG00000158786.4  |    |    |    |    | NA | NA | NA | NA | NA | NA | NA | NA | NA |
| NA           | NA                 | NA | NA | NA | NA | -2 | NA |    |    |    |    |    |    |    |
| RP4-781K5.6  | ENSG00000230628.1  |    |    |    |    | NA | NA | NA | NA | NA | NA | NA | NA | NA |

|               |                    |    |    |    |    |    |    |    |    |    |    |    |    |    |
|---------------|--------------------|----|----|----|----|----|----|----|----|----|----|----|----|----|
| NA            | NA                 | NA | NA | NA | NA | -2 | NA |    |    |    |    |    |    |    |
| SLC45A1       | ENSG00000162426.14 | NA | NA | NA | NA | NA | NA | NA | NA | NA | NA | NA | NA | NA |
| NA            | NA                 | NA | NA | NA | NA | -2 | NA |    |    |    |    |    |    |    |
| RPS6KC1       | ENSG00000136643.11 | NA | NA | NA | NA | NA | NA | NA | NA | NA | NA | NA | NA | NA |
| NA            | NA                 | NA | NA | NA | NA | -2 | NA |    |    |    |    |    |    |    |
| PER3          | ENSG00000049246.14 | NA | NA | NA | NA | NA | NA | NA | NA | NA | NA | NA | NA | NA |
| NA            | NA                 | NA | NA | NA | NA | -2 | NA |    |    |    |    |    |    |    |
| STIL          | ENSG00000123473.15 | NA | NA | NA | NA | NA | NA | NA | NA | NA | NA | NA | NA | NA |
| NA            | NA                 | NA | NA | NA | NA | -2 | NA |    |    |    |    |    |    |    |
| GPR61         | ENSG00000156097.12 | NA | NA | NA | NA | NA | NA | NA | NA | NA | NA | NA | NA | NA |
| NA            | NA                 | NA | NA | NA | NA | -2 | NA |    |    |    |    |    |    |    |
| RP11-108M9.2  | ENSG00000230239.1  | NA | NA | NA | NA | NA | NA | NA | NA | NA | NA | NA | NA | NA |
| NA            | NA                 | NA | NA | NA | NA | -2 | NA |    |    |    |    |    |    |    |
| CNR2          | ENSG00000188822.7  | NA | NA | NA | NA | NA | NA | NA | NA | NA | NA | NA | NA | NA |
| NA            | NA                 | NA | NA | NA | NA | -2 | NA |    |    |    |    |    |    |    |
| GPR25         | ENSG00000170128.4  | NA | NA | NA | NA | NA | NA | NA | NA | NA | NA | NA | NA | NA |
| NA            | NA                 | NA | NA | NA | NA | -2 | NA |    |    |    |    |    |    |    |
| S100A6        | ENSG00000197956.9  | NA | NA | NA | NA | NA | NA | NA | NA | NA | NA | NA | NA | NA |
| NA            | NA                 | NA | NA | NA | NA | -2 | NA |    |    |    |    |    |    |    |
| LINC01778     | ENSG00000223382.4  | NA | NA | NA | NA | NA | NA | NA | NA | NA | NA | NA | NA | NA |
| NA            | NA                 | NA | NA | NA | NA | -2 | NA |    |    |    |    |    |    |    |
| PRAMEF19      | ENSG00000204480.7  | NA | NA | NA | NA | NA | NA | NA | NA | NA | NA | NA | NA | NA |
| NA            | NA                 | NA | NA | NA | NA | -2 | NA |    |    |    |    |    |    |    |
| OPN3          | ENSG00000054277.13 | NA | NA | NA | NA | NA | NA | NA | NA | NA | NA | NA | NA | NA |
| NA            | NA                 | NA | NA | NA | NA | -2 | NA |    |    |    |    |    |    |    |
| RP11-278H7.1  | ENSG00000226828.1  | NA | NA | NA | NA | NA | NA | NA | NA | NA | NA | NA | NA | NA |
| NA            | NA                 | NA | NA | NA | NA | -2 | NA |    |    |    |    |    |    |    |
| ST6GALNAC3    | ENSG00000184005.10 | NA | NA | NA | NA | NA | NA | NA | NA | NA | NA | NA | NA | NA |
| NA            | NA                 | NA | NA | NA | NA | -2 | NA |    |    |    |    |    |    |    |
| LINC01347     | ENSG00000231512.5  | NA | NA | NA | NA | NA | NA | NA | NA | NA | NA | NA | NA | NA |
| NA            | NA                 | NA | NA | NA | NA | -2 | NA |    |    |    |    |    |    |    |
| TP53BP2       | ENSG00000143514.16 | NA | NA | NA | NA | NA | NA | NA | NA | NA | NA | NA | NA | NA |
| NA            | NA                 | NA | NA | NA | NA | -2 | NA |    |    |    |    |    |    |    |
| PEX14         | ENSG00000142655.12 | NA | NA | NA | NA | NA | NA | NA | NA | NA | NA | NA | NA | NA |
| NA            | NA                 | NA | NA | NA | NA | -2 | NA |    |    |    |    |    |    |    |
| SSBP3         | ENSG00000157216.15 | NA | NA | NA | NA | NA | NA | NA | NA | NA | NA | NA | NA | NA |
| NA            | NA                 | NA | NA | NA | NA | -2 | NA |    |    |    |    |    |    |    |
| HNRNPR        | ENSG00000125944.18 | NA | NA | NA | NA | NA | NA | NA | NA | NA | NA | NA | NA | NA |
| NA            | NA                 | NA | NA | NA | NA | -2 | NA |    |    |    |    |    |    |    |
| C4BPB         | ENSG00000123843.12 | NA | NA | NA | NA | NA | NA | NA | NA | NA | NA | NA | NA | NA |
| NA            | NA                 | NA | NA | NA | NA | -2 | NA |    |    |    |    |    |    |    |
| RP5-1086K13.1 | ENSG00000224950.2  | NA | NA | NA | NA | NA | NA | NA | NA | NA | NA | NA | NA | NA |
| NA            | NA                 | NA | NA | NA | NA | -2 | NA |    |    |    |    |    |    |    |
| LINC01709     | ENSG00000226715.2  | NA | NA | NA | NA | NA | NA | NA | NA | NA | NA | NA | NA | NA |
| NA            | NA                 | NA | NA | NA | NA | -2 | NA |    |    |    |    |    |    |    |
| DYRK3         | ENSG00000143479.15 | NA | NA | NA | NA | NA | NA | NA | NA | NA | NA | NA | NA | NA |
| NA            | NA                 | NA | NA | NA | NA | -2 | NA |    |    |    |    |    |    |    |
| SLAMF1        | ENSG00000117090.14 | NA | NA | NA | NA | NA | NA | NA | NA | NA | NA | NA | NA | NA |
| NA            | NA                 | NA | NA | NA | NA | -2 | NA |    |    |    |    |    |    |    |
| PTAFR         | ENSG00000169403.11 | NA | NA | NA | NA | NA | NA | NA | NA | NA | NA | NA | NA | NA |
| NA            | NA                 | NA | NA | NA | NA | -2 | NA |    |    |    |    |    |    |    |
| UBE2Q1        | ENSG00000160714.9  | NA | NA | NA | NA | NA | NA | NA | NA | NA | NA | NA | NA | NA |
| NA            | NA                 | NA | NA | NA | NA | -2 | NA |    |    |    |    |    |    |    |
| FDPS          | ENSG00000160752.14 | NA | NA | NA | NA | NA | NA | NA | NA | NA | NA | NA | NA | NA |
| NA            | NA                 | NA | NA | NA | NA | -2 | NA |    |    |    |    |    |    |    |
| STUM          | ENSG00000203685.9  | NA | NA | NA | NA | NA | NA | NA | NA | NA | NA | NA | NA | NA |
| NA            | NA                 | NA | NA | NA | NA | -2 | NA |    |    |    |    |    |    |    |
| HIST2H2BF     | ENSG00000203814.6  | NA | NA | NA | NA | NA | NA | NA | NA | NA | NA | NA | NA | NA |
| NA            | NA                 | NA | NA | NA | NA | -2 | NA |    |    |    |    |    |    |    |
| EPHX4         | ENSG00000172031.6  | NA | NA | NA | NA | NA | NA | NA | NA | NA | NA | NA | NA | NA |
| NA            | NA                 | NA | NA | NA | NA | -2 | NA |    |    |    |    |    |    |    |
| ISG20L2       | ENSG00000143319.16 | NA | NA | NA | NA | NA | NA | NA | NA | NA | NA | NA | NA | NA |

|                |                    |    |    |    |    |    |    |    |    |    |    |    |    |    |
|----------------|--------------------|----|----|----|----|----|----|----|----|----|----|----|----|----|
| NA             | NA                 | NA | NA | NA | -2 | NA |    |    |    |    |    |    |    |    |
| PAQR6          | ENSG00000160781.15 | NA | NA | NA | NA | NA | NA | NA | NA | NA | NA | NA | NA | NA |
| NA             | NA                 | NA | NA | NA | -2 | NA |    |    |    |    |    |    |    |    |
| PEX19          | ENSG00000162735.18 | NA | NA | NA | NA | NA | NA | NA | NA | NA | NA | NA | NA | NA |
| NA             | NA                 | NA | NA | NA | -2 | NA |    |    |    |    |    |    |    |    |
| RP5-857K21.4   | ENSG00000230021.8  | NA | NA | NA | NA | NA | NA | NA | NA | NA | NA | NA | NA | NA |
| NA             | NA                 | NA | NA | NA | NA | -2 | NA |    |    |    |    |    |    |    |
| RSRP1          | ENSG00000117616.17 | NA | NA | NA | NA | NA | NA | NA | NA | NA | NA | NA | NA | NA |
| NA             | NA                 | NA | NA | NA | -2 | NA |    |    |    |    |    |    |    |    |
| PMF1           | ENSG00000160783.19 | NA | NA | NA | NA | NA | NA | NA | NA | NA | NA | NA | NA | NA |
| NA             | NA                 | NA | NA | NA | -2 | NA |    |    |    |    |    |    |    |    |
| FLAD1          | ENSG00000160688.18 | NA | NA | NA | NA | NA | NA | NA | NA | NA | NA | NA | NA | NA |
| NA             | NA                 | NA | NA | NA | -2 | NA |    |    |    |    |    |    |    |    |
| OLFML2B        | ENSG00000162745.10 | NA | NA | NA | NA | NA | NA | NA | NA | NA | NA | NA | NA | NA |
| NA             | NA                 | NA | NA | NA | -2 | NA |    |    |    |    |    |    |    |    |
| EDN2           | ENSG00000127129.9  | NA | NA | NA | NA | NA | NA | NA | NA | NA | NA | NA | NA | NA |
| NA             | NA                 | NA | NA | NA | -2 | NA |    |    |    |    |    |    |    |    |
| IPO9           | ENSG00000198700.9  | NA | NA | NA | NA | NA | NA | NA | NA | NA | NA | NA | NA | NA |
| NA             | NA                 | NA | NA | NA | -2 | NA |    |    |    |    |    |    |    |    |
| LINC01648      | ENSG00000233399.2  | NA | NA | NA | NA | NA | NA | NA | NA | NA | NA | NA | NA | NA |
| NA             | NA                 | NA | NA | NA | -2 | NA |    |    |    |    |    |    |    |    |
| JTB            | ENSG00000143543.14 | NA | NA | NA | NA | NA | NA | NA | NA | NA | NA | NA | NA | NA |
| NA             | NA                 | NA | NA | NA | -2 | NA |    |    |    |    |    |    |    |    |
| LINC01031      | ENSG00000232077.1  | NA | NA | NA | NA | NA | NA | NA | NA | NA | NA | NA | NA | NA |
| NA             | NA                 | NA | NA | NA | -2 | NA |    |    |    |    |    |    |    |    |
| DEGS1          | ENSG00000143753.12 | NA | NA | NA | NA | NA | NA | NA | NA | NA | NA | NA | NA | NA |
| NA             | NA                 | NA | NA | NA | -2 | NA |    |    |    |    |    |    |    |    |
| RNF220         | ENSG00000187147.17 | NA | NA | NA | NA | NA | NA | NA | NA | NA | NA | NA | NA | NA |
| NA             | NA                 | NA | NA | NA | -2 | NA |    |    |    |    |    |    |    |    |
| PRELP          | ENSG00000188783.5  | NA | NA | NA | NA | NA | NA | NA | NA | NA | NA | NA | NA | NA |
| NA             | NA                 | NA | NA | NA | -2 | NA |    |    |    |    |    |    |    |    |
| RP11-284F21.8  | ENSG00000260460.1  | NA | NA | NA | NA | NA | NA | NA | NA | NA | NA | NA | NA | NA |
| NA             | NA                 | NA | NA | NA | NA | -2 | NA |    |    |    |    |    |    |    |
| RP11-85G21.3   | ENSG00000271736.1  | NA | NA | NA | NA | NA | NA | NA | NA | NA | NA | NA | NA | NA |
| NA             | NA                 | NA | NA | NA | NA | -2 | NA |    |    |    |    |    |    |    |
| SELE           | ENSG00000007908.15 | NA | NA | NA | NA | NA | NA | NA | NA | NA | NA | NA | NA | NA |
| NA             | NA                 | NA | NA | NA | -2 | NA |    |    |    |    |    |    |    |    |
| LCE3C          | ENSG00000244057.4  | NA | NA | NA | NA | NA | NA | NA | NA | NA | NA | NA | NA | NA |
| NA             | NA                 | NA | NA | NA | -2 | NA |    |    |    |    |    |    |    |    |
| LINC01142      | ENSG00000224286.5  | NA | NA | NA | NA | NA | NA | NA | NA | NA | NA | NA | NA | NA |
| NA             | NA                 | NA | NA | NA | -2 | NA |    |    |    |    |    |    |    |    |
| LZIC           | ENSG00000162441.11 | NA | NA | NA | NA | NA | NA | NA | NA | NA | NA | NA | NA | NA |
| NA             | NA                 | NA | NA | NA | -2 | NA |    |    |    |    |    |    |    |    |
| FCGR3A         | ENSG00000203747.10 | NA | NA | NA | NA | NA | NA | NA | NA | NA | NA | NA | NA | NA |
| NA             | NA                 | NA | NA | NA | -2 | NA |    |    |    |    |    |    |    |    |
| PDE4B          | ENSG00000184588.17 | NA | NA | NA | NA | NA | NA | NA | NA | NA | NA | NA | NA | NA |
| NA             | NA                 | NA | NA | NA | -2 | NA |    |    |    |    |    |    |    |    |
| NPPB           | ENSG00000120937.8  | NA | NA | NA | NA | NA | NA | NA | NA | NA | NA | NA | NA | NA |
| NA             | NA                 | NA | NA | NA | -2 | NA |    |    |    |    |    |    |    |    |
| POU3F1         | ENSG00000185668.7  | NA | NA | NA | NA | NA | NA | NA | NA | NA | NA | NA | NA | NA |
| NA             | NA                 | NA | NA | NA | -2 | NA |    |    |    |    |    |    |    |    |
| DPM3           | ENSG00000179085.7  | NA | NA | NA | NA | NA | NA | NA | NA | NA | NA | NA | NA | NA |
| NA             | NA                 | NA | NA | NA | -2 | NA |    |    |    |    |    |    |    |    |
| CD1E           | ENSG00000158488.15 | NA | NA | NA | NA | NA | NA | NA | NA | NA | NA | NA | NA | NA |
| NA             | NA                 | NA | NA | NA | -2 | NA |    |    |    |    |    |    |    |    |
| RP11-122G18.10 | ENSG00000283360.1  | NA | NA | NA | NA | NA | NA | NA | NA | NA | NA | NA | NA | NA |
| NA             | NA                 | NA | NA | NA | NA | -2 | NA |    |    |    |    |    |    |    |
| C8B            | ENSG00000021852.12 | NA | NA | NA | NA | NA | NA | NA | NA | NA | NA | NA | NA | NA |
| NA             | NA                 | NA | NA | NA | -2 | NA |    |    |    |    |    |    |    |    |
| C1orf68        | ENSG00000198854.5  | NA | NA | NA | NA | NA | NA | NA | NA | NA | NA | NA | NA | NA |
| NA             | NA                 | NA | NA | NA | -2 | NA |    |    |    |    |    |    |    |    |
| GATAD2B        | ENSG00000143614.9  | NA | NA | NA | NA | NA | NA | NA | NA | NA | NA | NA | NA | NA |



|               |                    |    |    |    |    |    |    |    |    |    |    |    |    |    |
|---------------|--------------------|----|----|----|----|----|----|----|----|----|----|----|----|----|
| NA            | NA                 | NA | NA | NA | -2 | NA |    |    |    |    |    |    |    |    |
| RP11-309H21.3 | ENSG00000261642.1  |    |    |    |    | NA | NA | NA | NA | NA | NA | NA | NA | NA |
| NA            | NA                 | NA | NA | NA | NA | -2 | NA |    |    |    |    |    |    |    |
| LINC01767     | ENSG00000223956.2  |    |    |    |    | NA | NA | NA | NA | NA | NA | NA | NA | NA |
| NA            | NA                 | NA | NA | NA | NA | -2 | NA |    |    |    |    |    |    |    |
| ZBTB8OS       | ENSG00000176261.15 |    |    |    |    | NA | NA | NA | NA | NA | NA | NA | NA | NA |
| NA            | NA                 | NA | NA | NA | NA | -2 | NA |    |    |    |    |    |    |    |
| ARHGAP29      | ENSG00000137962.12 |    |    |    |    | NA | NA | NA | NA | NA | NA | NA | NA | NA |
| NA            | NA                 | NA | NA | NA | NA | -2 | NA |    |    |    |    |    |    |    |
| SORT1         | ENSG00000134243.11 |    |    |    |    | NA | NA | NA | NA | NA | NA | NA | NA | NA |
| NA            | NA                 | NA | NA | NA | NA | -2 | NA |    |    |    |    |    |    |    |
| SLC30A10      | ENSG00000196660.10 |    |    |    |    | NA | NA | NA | NA | NA | NA | NA | NA | NA |
| NA            | NA                 | NA | NA | NA | NA | -2 | NA |    |    |    |    |    |    |    |
| DCDC2B        | ENSG00000222046.2  |    |    |    |    | NA | NA | NA | NA | NA | NA | NA | NA | NA |
| NA            | NA                 | NA | NA | NA | NA | -2 | NA |    |    |    |    |    |    |    |
| RGS13         | ENSG00000127074.14 |    |    |    |    | NA | NA | NA | NA | NA | NA | NA | NA | NA |
| NA            | NA                 | NA | NA | NA | NA | -2 | NA |    |    |    |    |    |    |    |
| LINC01763     | ENSG00000225446.2  |    |    |    |    | NA | NA | NA | NA | NA | NA | NA | NA | NA |
| NA            | NA                 | NA | NA | NA | NA | -2 | NA |    |    |    |    |    |    |    |
| UBE2J2        | ENSG00000160087.20 |    |    |    |    | NA | NA | NA | NA | NA | NA | NA | NA | NA |
| NA            | NA                 | NA | NA | NA | NA | -2 | NA |    |    |    |    |    |    |    |
| BRINP3        | ENSG00000162670.10 |    |    |    |    | NA | NA | NA | NA | NA | NA | NA | NA | NA |
| NA            | NA                 | NA | NA | NA | NA | -2 | NA |    |    |    |    |    |    |    |
| ZYG11A        | ENSG00000203995.9  |    |    |    |    | NA | NA | NA | NA | NA | NA | NA | NA | NA |
| NA            | NA                 | NA | NA | NA | NA | -2 | NA |    |    |    |    |    |    |    |
| FCRLA         | ENSG00000132185.16 |    |    |    |    | NA | NA | NA | NA | NA | NA | NA | NA | NA |
| NA            | NA                 | NA | NA | NA | NA | -2 | NA |    |    |    |    |    |    |    |
| ACKR1         | ENSG00000213088.9  |    |    |    |    | NA | NA | NA | NA | NA | NA | NA | NA | NA |
| NA            | NA                 | NA | NA | NA | NA | -2 | NA |    |    |    |    |    |    |    |
| AKT3          | ENSG00000117020.16 |    |    |    |    | NA | NA | NA | NA | NA | NA | NA | NA | NA |
| NA            | NA                 | NA | NA | NA | NA | -2 | NA |    |    |    |    |    |    |    |
| SDE2          | ENSG00000143751.9  |    |    |    |    | NA | NA | NA | NA | NA | NA | NA | NA | NA |
| NA            | NA                 | NA | NA | NA | NA | -2 | NA |    |    |    |    |    |    |    |
| S100A8        | ENSG00000143546.9  |    |    |    |    | NA | NA | NA | NA | NA | NA | NA | NA | NA |
| NA            | NA                 | NA | NA | NA | NA | -2 | NA |    |    |    |    |    |    |    |
| RCC1          | ENSG00000180198.15 |    |    |    |    | NA | NA | NA | NA | NA | NA | NA | NA | NA |
| NA            | NA                 | NA | NA | NA | NA | -2 | NA |    |    |    |    |    |    |    |
| PRDX6         | ENSG00000117592.8  |    |    |    |    | NA | NA | NA | NA | NA | NA | NA | NA | NA |
| NA            | NA                 | NA | NA | NA | NA | -2 | NA |    |    |    |    |    |    |    |
| ZBTB8A        | ENSG00000160062.14 |    |    |    |    | NA | NA | NA | NA | NA | NA | NA | NA | NA |
| NA            | NA                 | NA | NA | NA | NA | -2 | NA |    |    |    |    |    |    |    |
| TMEM201       | ENSG00000188807.12 |    |    |    |    | NA | NA | NA | NA | NA | NA | NA | NA | NA |
| NA            | NA                 | NA | NA | NA | NA | -2 | NA |    |    |    |    |    |    |    |
| LINC01741     | ENSG00000236720.1  |    |    |    |    | NA | NA | NA | NA | NA | NA | NA | NA | NA |
| NA            | NA                 | NA | NA | NA | NA | -2 | NA |    |    |    |    |    |    |    |
| TNNI1         | ENSG00000159173.18 |    |    |    |    | NA | NA | NA | NA | NA | NA | NA | NA | NA |
| NA            | NA                 | NA | NA | NA | NA | -2 | NA |    |    |    |    |    |    |    |
| APCS          | ENSG00000132703.3  |    |    |    |    | NA | NA | NA | NA | NA | NA | NA | NA | NA |
| NA            | NA                 | NA | NA | NA | NA | -2 | NA |    |    |    |    |    |    |    |
| LINC01525     | ENSG00000235202.1  |    |    |    |    | NA | NA | NA | NA | NA | NA | NA | NA | NA |
| NA            | NA                 | NA | NA | NA | NA | -2 | NA |    |    |    |    |    |    |    |
| TOR1AIP1      | ENSG00000143337.18 |    |    |    |    | NA | NA | NA | NA | NA | NA | NA | NA | NA |
| NA            | NA                 | NA | NA | NA | NA | -2 | NA |    |    |    |    |    |    |    |
| C8A           | ENSG00000157131.10 |    |    |    |    | NA | NA | NA | NA | NA | NA | NA | NA | NA |
| NA            | NA                 | NA | NA | NA | NA | -2 | NA |    |    |    |    |    |    |    |
| EXO1          | ENSG00000174371.16 |    |    |    |    | NA | NA | NA | NA | NA | NA | NA | NA | NA |
| NA            | NA                 | NA | NA | NA | NA | -2 | NA |    |    |    |    |    |    |    |
| NTNG1         | ENSG00000162631.18 |    |    |    |    | NA | NA | NA | NA | NA | NA | NA | NA | NA |
| NA            | NA                 | NA | NA | NA | NA | -2 | NA |    |    |    |    |    |    |    |
| TNFRSF9       | ENSG00000049249.8  |    |    |    |    | NA | NA | NA | NA | NA | NA | NA | NA | NA |
| NA            | NA                 | NA | NA | NA | NA | -2 | NA |    |    |    |    |    |    |    |
| SPRR1B        | ENSG00000169469.8  |    |    |    |    | NA | NA | NA | NA | NA | NA | NA | NA | NA |

|               |                    |    |    |    |    |    |    |    |    |    |    |    |    |    |
|---------------|--------------------|----|----|----|----|----|----|----|----|----|----|----|----|----|
| NA            | NA                 | NA | NA | NA | -2 | NA |    |    |    |    |    |    |    |    |
| IFNLR1        | ENSG00000185436.11 | NA | NA | NA | NA | NA | NA | NA | NA | NA | NA | NA | NA | NA |
| NA            | NA                 | NA | NA | NA | -2 | NA |    |    |    |    |    |    |    |    |
| RGS1          | ENSG00000090104.11 | NA | NA | NA | NA | NA | NA | NA | NA | NA | NA | NA | NA | NA |
| NA            | NA                 | NA | NA | NA | -2 | NA |    |    |    |    |    |    |    |    |
| TMEM240       | ENSG00000205090.8  | NA | NA | NA | NA | NA | NA | NA | NA | NA | NA | NA | NA | NA |
| NA            | NA                 | NA | NA | NA | -2 | NA |    |    |    |    |    |    |    |    |
| FBXO2         | ENSG00000116661.9  | NA | NA | NA | NA | NA | NA | NA | NA | NA | NA | NA | NA | NA |
| NA            | NA                 | NA | NA | NA | -2 | NA |    |    |    |    |    |    |    |    |
| FCRL3         | ENSG00000160856.20 | NA | NA | NA | NA | NA | NA | NA | NA | NA | NA | NA | NA | NA |
| NA            | NA                 | NA | NA | NA | -2 | NA |    |    |    |    |    |    |    |    |
| GLUL          | ENSG00000135821.17 | NA | NA | NA | NA | NA | NA | NA | NA | NA | NA | NA | NA | NA |
| NA            | NA                 | NA | NA | NA | -2 | NA |    |    |    |    |    |    |    |    |
| RP11-404O13.5 | ENSG00000176320.2  | NA | NA | NA | NA | NA | NA | NA | NA | NA | NA | NA | NA | NA |
| NA            | NA                 | NA | NA | NA | NA | -2 | NA |    |    |    |    |    |    |    |
| CACNA1S       | ENSG00000081248.10 | NA | NA | NA | NA | NA | NA | NA | NA | NA | NA | NA | NA | NA |
| NA            | NA                 | NA | NA | NA | -2 | NA |    |    |    |    |    |    |    |    |
| C1orf105      | ENSG00000180999.10 | NA | NA | NA | NA | NA | NA | NA | NA | NA | NA | NA | NA | NA |
| NA            | NA                 | NA | NA | NA | -2 | NA |    |    |    |    |    |    |    |    |
| SLC9A1        | ENSG00000090020.10 | NA | NA | NA | NA | NA | NA | NA | NA | NA | NA | NA | NA | NA |
| NA            | NA                 | NA | NA | NA | -2 | NA |    |    |    |    |    |    |    |    |
| OR2T34        | ENSG00000183310.3  | NA | NA | NA | NA | NA | NA | NA | NA | NA | NA | NA | NA | NA |
| NA            | NA                 | NA | NA | NA | -2 | NA |    |    |    |    |    |    |    |    |
| TEDDM1        | ENSG00000203730.2  | NA | NA | NA | NA | NA | NA | NA | NA | NA | NA | NA | NA | NA |
| NA            | NA                 | NA | NA | NA | -2 | NA |    |    |    |    |    |    |    |    |
| TPM3          | ENSG00000143549.19 | NA | NA | NA | NA | NA | NA | NA | NA | NA | NA | NA | NA | NA |
| NA            | NA                 | NA | NA | NA | -2 | NA |    |    |    |    |    |    |    |    |
| STK40         | ENSG00000196182.10 | NA | NA | NA | NA | NA | NA | NA | NA | NA | NA | NA | NA | NA |
| NA            | NA                 | NA | NA | NA | -2 | NA |    |    |    |    |    |    |    |    |
| RP11-107M16.2 | ENSG00000236427.1  | NA | NA | NA | NA | NA | NA | NA | NA | NA | NA | NA | NA | NA |
| NA            | NA                 | NA | NA | NA | NA | -2 | NA |    |    |    |    |    |    |    |
| GPR89B        | ENSG00000188092.14 | NA | NA | NA | NA | NA | NA | NA | NA | NA | NA | NA | NA | NA |
| NA            | NA                 | NA | NA | NA | -2 | NA |    |    |    |    |    |    |    |    |
| LINC01784     | ENSG00000228338.1  | NA | NA | NA | NA | NA | NA | NA | NA | NA | NA | NA | NA | NA |
| NA            | NA                 | NA | NA | NA | -2 | NA |    |    |    |    |    |    |    |    |
| TRIM62        | ENSG00000116525.13 | NA | NA | NA | NA | NA | NA | NA | NA | NA | NA | NA | NA | NA |
| NA            | NA                 | NA | NA | NA | -2 | NA |    |    |    |    |    |    |    |    |
| FAM183A       | ENSG00000186973.10 | NA | NA | NA | NA | NA | NA | NA | NA | NA | NA | NA | NA | NA |
| NA            | NA                 | NA | NA | NA | -2 | NA |    |    |    |    |    |    |    |    |
| RP5-855F14.2  | ENSG00000230404.1  | NA | NA | NA | NA | NA | NA | NA | NA | NA | NA | NA | NA | NA |
| NA            | NA                 | NA | NA | NA | NA | -2 | NA |    |    |    |    |    |    |    |
| YBX1          | ENSG00000065978.18 | NA | NA | NA | NA | NA | NA | NA | NA | NA | NA | NA | NA | NA |
| NA            | NA                 | NA | NA | NA | -2 | NA |    |    |    |    |    |    |    |    |
| GBP6          | ENSG00000183347.14 | NA | NA | NA | NA | NA | NA | NA | NA | NA | NA | NA | NA | NA |
| NA            | NA                 | NA | NA | NA | -2 | NA |    |    |    |    |    |    |    |    |
| HIST2H2BE     | ENSG00000184678.10 | NA | NA | NA | NA | NA | NA | NA | NA | NA | NA | NA | NA | NA |
| NA            | NA                 | NA | NA | NA | -2 | NA |    |    |    |    |    |    |    |    |
| LINC01710     | ENSG00000225561.1  | NA | NA | NA | NA | NA | NA | NA | NA | NA | NA | NA | NA | NA |
| NA            | NA                 | NA | NA | NA | -2 | NA |    |    |    |    |    |    |    |    |
| AQP10         | ENSG00000143595.12 | NA | NA | NA | NA | NA | NA | NA | NA | NA | NA | NA | NA | NA |
| NA            | NA                 | NA | NA | NA | -2 | NA |    |    |    |    |    |    |    |    |
| ZC3H11B       | ENSG00000215817.5  | NA | NA | NA | NA | NA | NA | NA | NA | NA | NA | NA | NA | NA |
| NA            | NA                 | NA | NA | NA | -2 | NA |    |    |    |    |    |    |    |    |
| CAMSAP2       | ENSG00000118200.14 | NA | NA | NA | NA | NA | NA | NA | NA | NA | NA | NA | NA | NA |
| NA            | NA                 | NA | NA | NA | -2 | NA |    |    |    |    |    |    |    |    |
| FAM231B       | ENSG00000268991.2  | NA | NA | NA | NA | NA | NA | NA | NA | NA | NA | NA | NA | NA |
| NA            | NA                 | NA | NA | NA | -2 | NA |    |    |    |    |    |    |    |    |
| RP11-160H22.3 | ENSG00000224977.1  | NA | NA | NA | NA | NA | NA | NA | NA | NA | NA | NA | NA | NA |
| NA            | NA                 | NA | NA | NA | NA | -2 | NA |    |    |    |    |    |    |    |
| RP11-538D16.2 | ENSG00000224810.1  | NA | NA | NA | NA | NA | NA | NA | NA | NA | NA | NA | NA | NA |
| NA            | NA                 | NA | NA | NA | NA | -2 | NA |    |    |    |    |    |    |    |
| CHIA          | ENSG00000134216.18 | NA | NA | NA | NA | NA | NA | NA | NA | NA | NA | NA | NA | NA |

|               |                    |    |    |    |    |    |    |    |    |    |    |    |    |    |
|---------------|--------------------|----|----|----|----|----|----|----|----|----|----|----|----|----|
|               | NA                 | NA | NA | NA | -2 | NA |    |    |    |    |    |    |    |    |
| CD58          | ENSG00000116815.15 |    |    |    |    | NA | NA | NA | NA | NA | NA | NA | NA | NA |
|               | NA                 | NA | NA | NA | -2 | NA |    |    |    |    |    |    |    |    |
| GUCA2B        | ENSG00000044012.3  |    |    |    |    | NA | NA | NA | NA | NA | NA | NA | NA | NA |
|               | NA                 | NA | NA | NA | -2 | NA |    |    |    |    |    |    |    |    |
| RP4-712E4.1   | ENSG00000226172.2  |    |    |    |    | NA | NA | NA | NA | NA | NA | NA | NA | NA |
|               | NA                 | NA | NA | NA | NA | -2 | NA |    |    |    |    |    |    |    |
| SELP          | ENSG00000174175.16 |    |    |    |    | NA | NA | NA | NA | NA | NA | NA | NA | NA |
|               | NA                 | NA | NA | NA | -2 | NA |    |    |    |    |    |    |    |    |
| RUSC1         | ENSG00000160753.15 |    |    |    |    | NA | NA | NA | NA | NA | NA | NA | NA | NA |
|               | NA                 | NA | NA | NA | -2 | NA |    |    |    |    |    |    |    |    |
| MROH9         | ENSG00000117501.14 |    |    |    |    | NA | NA | NA | NA | NA | NA | NA | NA | NA |
|               | NA                 | NA | NA | NA | -2 | NA |    |    |    |    |    |    |    |    |
| DUSP27        | ENSG00000198842.9  |    |    |    |    | NA | NA | NA | NA | NA | NA | NA | NA | NA |
|               | NA                 | NA | NA | NA | NA | -2 | NA |    |    |    |    |    |    |    |
| LAMTOR2       | ENSG00000116586.11 |    |    |    |    | NA | NA | NA | NA | NA | NA | NA | NA | NA |
|               | NA                 | NA | NA | NA | NA | -2 | NA |    |    |    |    |    |    |    |
| HORMAD1       | ENSG00000143452.15 |    |    |    |    | NA | NA | NA | NA | NA | NA | NA | NA | NA |
|               | NA                 | NA | NA | NA | NA | -2 | NA |    |    |    |    |    |    |    |
| METTL11B      | ENSG00000203740.3  |    |    |    |    | NA | NA | NA | NA | NA | NA | NA | NA | NA |
|               | NA                 | NA | NA | NA | NA | -2 | NA |    |    |    |    |    |    |    |
| C1orf116      | ENSG00000182795.12 |    |    |    |    | NA | NA | NA | NA | NA | NA | NA | NA | NA |
|               | NA                 | NA | NA | NA | NA | -2 | NA |    |    |    |    |    |    |    |
| FCGR1A        | ENSG00000150337.13 |    |    |    |    | NA | NA | NA | NA | NA | NA | NA | NA | NA |
|               | NA                 | NA | NA | NA | NA | -2 | NA |    |    |    |    |    |    |    |
| ANKRD13C      | ENSG00000118454.12 |    |    |    |    | NA | NA | NA | NA | NA | NA | NA | NA | NA |
|               | NA                 | NA | NA | NA | NA | -2 | NA |    |    |    |    |    |    |    |
| RP11-538D16.3 | ENSG00000225982.1  |    |    |    |    | NA | NA | NA | NA | NA | NA | NA | NA | NA |
|               | NA                 | NA | NA | NA | NA | NA | -2 | NA |    |    |    |    |    |    |
| ADGRB2        | ENSG00000121753.12 |    |    |    |    | NA | NA | NA | NA | NA | NA | NA | NA | NA |
|               | NA                 | NA | NA | NA | NA | -2 | NA |    |    |    |    |    |    |    |
| CAP1          | ENSG00000131236.16 |    |    |    |    | NA | NA | NA | NA | NA | NA | NA | NA | NA |
|               | NA                 | NA | NA | NA | -2 | NA |    |    |    |    |    |    |    |    |
| CKS1B         | ENSG00000173207.12 |    |    |    |    | NA | NA | NA | NA | NA | NA | NA | NA | NA |
|               | NA                 | NA | NA | NA | -2 | NA |    |    |    |    |    |    |    |    |
| RP5-881P19.7  | ENSG00000276255.2  |    |    |    |    | NA | NA | NA | NA | NA | NA | NA | NA | NA |
|               | NA                 | NA | NA | NA | NA | NA | -2 | NA |    |    |    |    |    |    |
| SLC16A4       | ENSG00000168679.17 |    |    |    |    | NA | NA | NA | NA | NA | NA | NA | NA | NA |
|               | NA                 | NA | NA | NA | NA | -2 | NA |    |    |    |    |    |    |    |
| EFHD2         | ENSG00000142634.12 |    |    |    |    | NA | NA | NA | NA | NA | NA | NA | NA | NA |
|               | NA                 | NA | NA | NA | -2 | NA |    |    |    |    |    |    |    |    |
| PRDM2         | ENSG00000116731.22 |    |    |    |    | NA | NA | NA | NA | NA | NA | NA | NA | NA |
|               | NA                 | NA | NA | NA | -2 | NA |    |    |    |    |    |    |    |    |
| LINC01555     | ENSG00000180869.4  |    |    |    |    | NA | NA | NA | NA | NA | NA | NA | NA | NA |
|               | NA                 | NA | NA | NA | NA | -2 | NA |    |    |    |    |    |    |    |
| CCDC24        | ENSG00000159214.12 |    |    |    |    | NA | NA | NA | NA | NA | NA | NA | NA | NA |
|               | NA                 | NA | NA | NA | NA | -2 | NA |    |    |    |    |    |    |    |
| LDLRAD1       | ENSG00000203985.10 |    |    |    |    | NA | NA | NA | NA | NA | NA | NA | NA | NA |
|               | NA                 | NA | NA | NA | NA | -2 | NA |    |    |    |    |    |    |    |
| LIN9          | ENSG00000183814.15 |    |    |    |    | NA | NA | NA | NA | NA | NA | NA | NA | NA |
|               | NA                 | NA | NA | NA | -2 | NA |    |    |    |    |    |    |    |    |
| C1orf64       | ENSG00000183888.4  |    |    |    |    | NA | NA | NA | NA | NA | NA | NA | NA | NA |
|               | NA                 | NA | NA | NA | NA | -2 | NA |    |    |    |    |    |    |    |
| HENMT1        | ENSG00000162639.15 |    |    |    |    | NA | NA | NA | NA | NA | NA | NA | NA | NA |
|               | NA                 | NA | NA | NA | NA | -2 | NA |    |    |    |    |    |    |    |
| S100A4        | ENSG00000196154.11 |    |    |    |    | NA | NA | NA | NA | NA | NA | NA | NA | NA |
|               | NA                 | NA | NA | NA | NA | -2 | NA |    |    |    |    |    |    |    |
| ARHGEF2       | ENSG00000116584.17 |    |    |    |    | NA | NA | NA | NA | NA | NA | NA | NA | NA |
|               | NA                 | NA | NA | NA | NA | -2 | NA |    |    |    |    |    |    |    |
| ZNF683        | ENSG00000176083.17 |    |    |    |    | NA | NA | NA | NA | NA | NA | NA | NA | NA |
|               | NA                 | NA | NA | NA | NA | -2 | NA |    |    |    |    |    |    |    |
| RP1-15D23.2   | ENSG00000224228.2  |    |    |    |    | NA | NA | NA | NA | NA | NA | NA | NA | NA |

|               |                    |    |    |    |    |    |    |    |    |    |    |    |    |    |
|---------------|--------------------|----|----|----|----|----|----|----|----|----|----|----|----|----|
|               | NA                 | NA | NA | NA | NA | NA | -2 | NA |    |    |    |    |    |    |
| NASP          | ENSG00000132780.16 |    |    | NA | NA | NA | NA | NA | NA | NA | NA | NA | NA | NA |
|               | NA                 | NA | NA | NA | NA | NA | -2 | NA |    |    |    |    |    |    |
| RP11-550H2.1  | ENSG00000225605.2  |    |    | NA | NA | NA | NA | NA | NA | NA | NA | NA | NA | NA |
|               | NA                 | NA | NA | NA | NA | NA | -2 | NA |    |    |    |    |    |    |
| PGBD2         | ENSG00000185220.11 |    |    | NA | NA | NA | NA | NA | NA | NA | NA | NA | NA | NA |
|               | NA                 | NA | NA | NA | NA | NA | -2 | NA |    |    |    |    |    |    |
| RNF223        | ENSG00000237330.2  |    |    | NA | NA | NA | NA | NA | NA | NA | NA | NA | NA | NA |
|               | NA                 | NA | NA | NA | NA | NA | -2 | NA |    |    |    |    |    |    |
| RP4-739H11.3  | ENSG00000237899.1  |    |    | NA | NA | NA | NA | NA | NA | NA | NA | NA | NA | NA |
|               | NA                 | NA | NA | NA | NA | NA | -2 | NA |    |    |    |    |    |    |
| RP11-348H3.8  | ENSG00000282718.1  |    |    | NA | NA | NA | NA | NA | NA | NA | NA | NA | NA | NA |
|               | NA                 | NA | NA | NA | NA | NA | -2 | NA |    |    |    |    |    |    |
| NPL           | ENSG00000135838.13 |    |    | NA | NA | NA | NA | NA | NA | NA | NA | NA | NA | NA |
|               | NA                 | NA | NA | NA | NA | NA | -2 | NA |    |    |    |    |    |    |
| SZRD1         | ENSG00000055070.16 |    |    | NA | NA | NA | NA | NA | NA | NA | NA | NA | NA | NA |
|               | NA                 | NA | NA | NA | NA | NA | -2 | NA |    |    |    |    |    |    |
| LINC01655     | ENSG00000227925.1  |    |    | NA | NA | NA | NA | NA | NA | NA | NA | NA | NA | NA |
|               | NA                 | NA | NA | NA | NA | NA | -2 | NA |    |    |    |    |    |    |
| AMY1A         | ENSG00000237763.9  |    |    | NA | NA | NA | NA | NA | NA | NA | NA | NA | NA | NA |
|               | NA                 | NA | NA | NA | NA | NA | -2 | NA |    |    |    |    |    |    |
| RP11-466F5.10 | ENSG00000273365.1  |    |    | NA | NA | NA | NA | NA | NA | NA | NA | NA | NA | NA |
|               | NA                 | NA | NA | NA | NA | NA | -2 | NA |    |    |    |    |    |    |
| IFI44L        | ENSG00000137959.15 |    |    | NA | NA | NA | NA | NA | NA | NA | NA | NA | NA | NA |
|               | NA                 | NA | NA | NA | NA | NA | -2 | NA |    |    |    |    |    |    |
| TMEM79        | ENSG00000163472.18 |    |    | NA | NA | NA | NA | NA | NA | NA | NA | NA | NA | NA |
|               | NA                 | NA | NA | NA | NA | NA | -2 | NA |    |    |    |    |    |    |
| SPATA17       | ENSG00000162814.10 |    |    | NA | NA | NA | NA | NA | NA | NA | NA | NA | NA | NA |
|               | NA                 | NA | NA | NA | NA | NA | -2 | NA |    |    |    |    |    |    |
| MYOC          | ENSG00000034971.16 |    |    | NA | NA | NA | NA | NA | NA | NA | NA | NA | NA | NA |
|               | NA                 | NA | NA | NA | NA | NA | -2 | NA |    |    |    |    |    |    |
| USH2A         | ENSG00000042781.12 |    |    | NA | NA | NA | NA | NA | NA | NA | NA | NA | NA | NA |
|               | NA                 | NA | NA | NA | NA | NA | -2 | NA |    |    |    |    |    |    |
| GBP2          | ENSG00000162645.12 |    |    | NA | NA | NA | NA | NA | NA | NA | NA | NA | NA | NA |
|               | NA                 | NA | NA | NA | NA | NA | -2 | NA |    |    |    |    |    |    |
| LMNA          | ENSG00000160789.19 |    |    | NA | NA | NA | NA | NA | NA | NA | NA | NA | NA | NA |
|               | NA                 | NA | NA | NA | NA | NA | -2 | NA |    |    |    |    |    |    |
| ZBTB7B        | ENSG00000160685.13 |    |    | NA | NA | NA | NA | NA | NA | NA | NA | NA | NA | NA |
|               | NA                 | NA | NA | NA | NA | NA | -2 | NA |    |    |    |    |    |    |
| TNFRSF8       | ENSG00000120949.14 |    |    | NA | NA | NA | NA | NA | NA | NA | NA | NA | NA | NA |
|               | NA                 | NA | NA | NA | NA | NA | -2 | NA |    |    |    |    |    |    |
| NPHS2         | ENSG00000116218.12 |    |    | NA | NA | NA | NA | NA | NA | NA | NA | NA | NA | NA |
|               | NA                 | NA | NA | NA | NA | NA | -2 | NA |    |    |    |    |    |    |
| LCE2A         | ENSG00000187173.3  |    |    | NA | NA | NA | NA | NA | NA | NA | NA | NA | NA | NA |
|               | NA                 | NA | NA | NA | NA | NA | -2 | NA |    |    |    |    |    |    |
| LYST          | ENSG00000143669.13 |    |    | NA | NA | NA | NA | NA | NA | NA | NA | NA | NA | NA |
|               | NA                 | NA | NA | NA | NA | NA | -2 | NA |    |    |    |    |    |    |
| TRIM17        | ENSG00000162931.11 |    |    | NA | NA | NA | NA | NA | NA | NA | NA | NA | NA | NA |
|               | NA                 | NA | NA | NA | NA | NA | -2 | NA |    |    |    |    |    |    |
| CYB5RL        | ENSG00000215883.10 |    |    | NA | NA | NA | NA | NA | NA | NA | NA | NA | NA | NA |
|               | NA                 | NA | NA | NA | NA | NA | -2 | NA |    |    |    |    |    |    |
| SH2D1B        | ENSG00000198574.5  |    |    | NA | NA | NA | NA | NA | NA | NA | NA | NA | NA | NA |
|               | NA                 | NA | NA | NA | NA | NA | -2 | NA |    |    |    |    |    |    |
| BCAR3         | ENSG00000137936.16 |    |    | NA | NA | NA | NA | NA | NA | NA | NA | NA | NA | NA |
|               | NA                 | NA | NA | NA | NA | NA | -2 | NA |    |    |    |    |    |    |
| CDK11A        | ENSG00000008128.22 |    |    | NA | NA | NA | NA | NA | NA | NA | NA | NA | NA | NA |
|               | NA                 | NA | NA | NA | NA | NA | -2 | NA |    |    |    |    |    |    |
| TEX38         | ENSG00000186118.8  |    |    | NA | NA | NA | NA | NA | NA | NA | NA | NA | NA | NA |
|               | NA                 | NA | NA | NA | NA | NA | -2 | NA |    |    |    |    |    |    |
| C1orf132      | ENSG00000203709.11 |    |    | NA | NA | NA | NA | NA | NA | NA | NA | NA | NA | NA |
|               | NA                 | NA | NA | NA | NA | NA | -2 | NA |    |    |    |    |    |    |
| SRP9          | ENSG00000143742.12 |    |    | NA | NA | NA | NA | NA | NA | NA | NA | NA | NA | NA |

|               |                    |    |    |    |    |    |    |    |    |    |    |    |    |    |
|---------------|--------------------|----|----|----|----|----|----|----|----|----|----|----|----|----|
| NA            | NA                 | NA | NA | -2 | NA |    |    |    |    |    |    |    |    |    |
| KLHDC9        | ENSG00000162755.13 |    |    |    | NA | NA | NA | NA | NA | NA | NA | NA | NA | NA |
| NA            | NA                 | NA | NA | NA | -2 | NA |    |    |    |    |    |    |    |    |
| RP11-235D19.4 | ENSG00000283324.1  |    |    |    | NA | NA | NA | NA | NA | NA | NA | NA | NA | NA |
| NA            | NA                 | NA | NA | NA | NA | -2 | NA |    |    |    |    |    |    |    |
| CELSR2        | ENSG00000143126.7  |    |    |    | NA | NA | NA | NA | NA | NA | NA | NA | NA | NA |
| NA            | NA                 | NA | NA | NA | -2 | NA |    |    |    |    |    |    |    |    |
| DEDD          | ENSG00000158796.16 |    |    |    | NA | NA | NA | NA | NA | NA | NA | NA | NA | NA |
| NA            | NA                 | NA | NA | -2 | NA |    |    |    |    |    |    |    |    |    |
| RP11-357P18.3 | ENSG00000283044.1  |    |    |    | NA | NA | NA | NA | NA | NA | NA | NA | NA | NA |
| NA            | NA                 | NA | NA | NA | NA | -2 | NA |    |    |    |    |    |    |    |
| LINC01770     | ENSG00000225285.1  |    |    |    | NA | NA | NA | NA | NA | NA | NA | NA | NA | NA |
| NA            | NA                 | NA | NA | NA | -2 | NA |    |    |    |    |    |    |    |    |
| RP1-20N18.10  | ENSG00000283227.1  |    |    |    | NA | NA | NA | NA | NA | NA | NA | NA | NA | NA |
| NA            | NA                 | NA | NA | NA | NA | -2 | NA |    |    |    |    |    |    |    |
| CDC73         | ENSG00000134371.10 |    |    |    | NA | NA | NA | NA | NA | NA | NA | NA | NA | NA |
| NA            | NA                 | NA | NA | -2 | NA |    |    |    |    |    |    |    |    |    |
| TRABD2B       | ENSG00000269113.3  |    |    |    | NA | NA | NA | NA | NA | NA | NA | NA | NA | NA |
| NA            | NA                 | NA | NA | NA | -2 | NA |    |    |    |    |    |    |    |    |
| GON4L         | ENSG00000116580.18 |    |    |    | NA | NA | NA | NA | NA | NA | NA | NA | NA | NA |
| NA            | NA                 | NA | NA | -2 | NA |    |    |    |    |    |    |    |    |    |
| RP5-866L20.1  | ENSG00000235741.1  |    |    |    | NA | NA | NA | NA | NA | NA | NA | NA | NA | NA |
| NA            | NA                 | NA | NA | NA | NA | -2 | NA |    |    |    |    |    |    |    |
| S100A11       | ENSG00000163191.5  |    |    |    | NA | NA | NA | NA | NA | NA | NA | NA | NA | NA |
| NA            | NA                 | NA | NA | NA | -2 | NA |    |    |    |    |    |    |    |    |
| LINC01701     | ENSG00000232212.1  |    |    |    | NA | NA | NA | NA | NA | NA | NA | NA | NA | NA |
| NA            | NA                 | NA | NA | NA | -2 | NA |    |    |    |    |    |    |    |    |
| NCSTN         | ENSG00000162736.15 |    |    |    | NA | NA | NA | NA | NA | NA | NA | NA | NA | NA |
| NA            | NA                 | NA | NA | -2 | NA |    |    |    |    |    |    |    |    |    |
| RBMXL1        | ENSG00000213516.9  |    |    |    | NA | NA | NA | NA | NA | NA | NA | NA | NA | NA |
| NA            | NA                 | NA | NA | NA | -2 | NA |    |    |    |    |    |    |    |    |
| MEF2D         | ENSG00000116604.17 |    |    |    | NA | NA | NA | NA | NA | NA | NA | NA | NA | NA |
| NA            | NA                 | NA | NA | -2 | NA |    |    |    |    |    |    |    |    |    |
| HIST2H2AC     | ENSG00000184260.5  |    |    |    | NA | NA | NA | NA | NA | NA | NA | NA | NA | NA |
| NA            | NA                 | NA | NA | NA | -2 | NA |    |    |    |    |    |    |    |    |
| GTF2B         | ENSG00000137947.11 |    |    |    | NA | NA | NA | NA | NA | NA | NA | NA | NA | NA |
| NA            | NA                 | NA | NA | -2 | NA |    |    |    |    |    |    |    |    |    |
| RCC2          | ENSG00000179051.13 |    |    |    | NA | NA | NA | NA | NA | NA | NA | NA | NA | NA |
| NA            | NA                 | NA | NA | -2 | NA |    |    |    |    |    |    |    |    |    |
| RP11-42O15.3  | ENSG00000271992.1  |    |    |    | NA | NA | NA | NA | NA | NA | NA | NA | NA | NA |
| NA            | NA                 | NA | NA | NA | NA | -2 | NA |    |    |    |    |    |    |    |
| CEP350        | ENSG00000135837.15 |    |    |    | NA | NA | NA | NA | NA | NA | NA | NA | NA | NA |
| NA            | NA                 | NA | NA | NA | -2 | NA |    |    |    |    |    |    |    |    |
| CLEC20A       | ENSG00000188585.7  |    |    |    | NA | NA | NA | NA | NA | NA | NA | NA | NA | NA |
| NA            | NA                 | NA | NA | NA | -2 | NA |    |    |    |    |    |    |    |    |
| NR5A2         | ENSG00000116833.13 |    |    |    | NA | NA | NA | NA | NA | NA | NA | NA | NA | NA |
| NA            | NA                 | NA | NA | -2 | NA |    |    |    |    |    |    |    |    |    |
| CFAP45        | ENSG00000213085.9  |    |    |    | NA | NA | NA | NA | NA | NA | NA | NA | NA | NA |
| NA            | NA                 | NA | NA | NA | -2 | NA |    |    |    |    |    |    |    |    |
| RP4-791M13.3  | ENSG00000254539.1  |    |    |    | NA | NA | NA | NA | NA | NA | NA | NA | NA | NA |
| NA            | NA                 | NA | NA | NA | NA | -2 | NA |    |    |    |    |    |    |    |
| KDM5B         | ENSG00000117139.16 |    |    |    | NA | NA | NA | NA | NA | NA | NA | NA | NA | NA |
| NA            | NA                 | NA | NA | -2 | NA |    |    |    |    |    |    |    |    |    |
| ZNF648        | ENSG00000179930.5  |    |    |    | NA | NA | NA | NA | NA | NA | NA | NA | NA | NA |
| NA            | NA                 | NA | NA | NA | -2 | NA |    |    |    |    |    |    |    |    |
| PPM1J         | ENSG00000155367.15 |    |    |    | NA | NA | NA | NA | NA | NA | NA | NA | NA | NA |
| NA            | NA                 | NA | NA | -2 | NA |    |    |    |    |    |    |    |    |    |
| OPRD1         | ENSG00000116329.10 |    |    |    | NA | NA | NA | NA | NA | NA | NA | NA | NA | NA |
| NA            | NA                 | NA | NA | -2 | NA |    |    |    |    |    |    |    |    |    |
| CTRC          | ENSG00000162438.11 |    |    |    | NA | NA | NA | NA | NA | NA | NA | NA | NA | NA |
| NA            | NA                 | NA | NA | -2 | NA |    |    |    |    |    |    |    |    |    |
| RP4-781K5.7   | ENSG00000282097.1  |    |    |    | NA | NA | NA | NA | NA | NA | NA | NA | NA | NA |

|               |                    |    |    |    |    |    |    |    |    |    |    |    |    |    |    |    |
|---------------|--------------------|----|----|----|----|----|----|----|----|----|----|----|----|----|----|----|
|               | NA                 | NA | NA | NA | NA | NA | -2 | NA |    |    |    |    |    |    |    |    |
| CGN           | ENSG00000143375.14 |    |    | NA | NA | NA | NA | NA | NA | NA | NA | NA | NA | NA | NA | NA |
|               | NA                 | NA | NA | NA | -2 | NA |    |    |    |    |    |    |    |    |    |    |
| STMN1         | ENSG00000117632.22 |    |    | NA | NA | NA | NA | NA | NA | NA | NA | NA | NA | NA | NA | NA |
|               | NA                 | NA | NA | NA | -2 | NA |    |    |    |    |    |    |    |    |    |    |
| SPRR2B        | ENSG00000196805.7  |    |    | NA | NA | NA | NA | NA | NA | NA | NA | NA | NA | NA | NA | NA |
|               | NA                 | NA | NA | NA | -2 | NA |    |    |    |    |    |    |    |    |    |    |
| PEA15         | ENSG00000162734.12 |    |    | NA | NA | NA | NA | NA | NA | NA | NA | NA | NA | NA | NA | NA |
|               | NA                 | NA | NA | NA | -2 | NA |    |    |    |    |    |    |    |    |    |    |
| SPRR1A        | ENSG00000169474.4  |    |    | NA | NA | NA | NA | NA | NA | NA | NA | NA | NA | NA | NA | NA |
|               | NA                 | NA | NA | NA | -2 | NA |    |    |    |    |    |    |    |    |    |    |
| LINC01774     | ENSG00000236950.1  |    |    | NA | NA | NA | NA | NA | NA | NA | NA | NA | NA | NA | NA | NA |
|               | NA                 | NA | NA | NA | -2 | NA |    |    |    |    |    |    |    |    |    |    |
| MINOS1        | ENSG00000173436.13 |    |    | NA | NA | NA | NA | NA | NA | NA | NA | NA | NA | NA | NA | NA |
|               | NA                 | NA | NA | NA | -2 | NA |    |    |    |    |    |    |    |    |    |    |
| TROVE2        | ENSG00000116747.12 |    |    | NA | NA | NA | NA | NA | NA | NA | NA | NA | NA | NA | NA | NA |
|               | NA                 | NA | NA | NA | -2 | NA |    |    |    |    |    |    |    |    |    |    |
| CCDC17        | ENSG00000159588.14 |    |    | NA | NA | NA | NA | NA | NA | NA | NA | NA | NA | NA | NA | NA |
|               | NA                 | NA | NA | NA | -2 | NA |    |    |    |    |    |    |    |    |    |    |
| RP5-1024N4.2  | ENSG00000223720.2  |    |    | NA | NA | NA | NA | NA | NA | NA | NA | NA | NA | NA | NA | NA |
|               | NA                 | NA | NA | NA | -2 | NA |    |    |    |    |    |    |    |    |    |    |
| ZNF691        | ENSG00000164011.17 |    |    | NA | NA | NA | NA | NA | NA | NA | NA | NA | NA | NA | NA | NA |
|               | NA                 | NA | NA | NA | -2 | NA |    |    |    |    |    |    |    |    |    |    |
| GPR3          | ENSG00000181773.6  |    |    | NA | NA | NA | NA | NA | NA | NA | NA | NA | NA | NA | NA | NA |
|               | NA                 | NA | NA | NA | -2 | NA |    |    |    |    |    |    |    |    |    |    |
| GJC2          | ENSG00000198835.3  |    |    | NA | NA | NA | NA | NA | NA | NA | NA | NA | NA | NA | NA | NA |
|               | NA                 | NA | NA | NA | -2 | NA |    |    |    |    |    |    |    |    |    |    |
| PROX1         | ENSG00000117707.15 |    |    | NA | NA | NA | NA | NA | NA | NA | NA | NA | NA | NA | NA | NA |
|               | NA                 | NA | NA | NA | -2 | NA |    |    |    |    |    |    |    |    |    |    |
| ELF3          | ENSG00000163435.15 |    |    | NA | NA | NA | NA | NA | NA | NA | NA | NA | NA | NA | NA | NA |
|               | NA                 | NA | NA | NA | -2 | NA |    |    |    |    |    |    |    |    |    |    |
| LACTBL1       | ENSG00000215906.8  |    |    | NA | NA | NA | NA | NA | NA | NA | NA | NA | NA | NA | NA | NA |
|               | NA                 | NA | NA | NA | -2 | NA |    |    |    |    |    |    |    |    |    |    |
| EPS8L3        | ENSG00000198758.10 |    |    | NA | NA | NA | NA | NA | NA | NA | NA | NA | NA | NA | NA | NA |
|               | NA                 | NA | NA | NA | -2 | NA |    |    |    |    |    |    |    |    |    |    |
| CD160         | ENSG00000117281.15 |    |    | NA | NA | NA | NA | NA | NA | NA | NA | NA | NA | NA | NA | NA |
|               | NA                 | NA | NA | NA | -2 | NA |    |    |    |    |    |    |    |    |    |    |
| GPR88         | ENSG00000181656.6  |    |    | NA | NA | NA | NA | NA | NA | NA | NA | NA | NA | NA | NA | NA |
|               | NA                 | NA | NA | NA | -2 | NA |    |    |    |    |    |    |    |    |    |    |
| LINC01343     | ENSG00000237290.1  |    |    | NA | NA | NA | NA | NA | NA | NA | NA | NA | NA | NA | NA | NA |
|               | NA                 | NA | NA | NA | -2 | NA |    |    |    |    |    |    |    |    |    |    |
| RP11-469A15.2 | ENSG00000230623.4  |    |    | NA | NA | NA | NA | NA | NA | NA | NA | NA | NA | NA | NA | NA |
|               | NA                 | NA | NA | NA | -2 | NA |    |    |    |    |    |    |    |    |    |    |
| UFC1          | ENSG00000143222.11 |    |    | NA | NA | NA | NA | NA | NA | NA | NA | NA | NA | NA | NA | NA |
|               | NA                 | NA | NA | NA | -2 | NA |    |    |    |    |    |    |    |    |    |    |
| PIFO          | ENSG00000173947.13 |    |    | NA | NA | NA | NA | NA | NA | NA | NA | NA | NA | NA | NA | NA |
|               | NA                 | NA | NA | NA | -2 | NA |    |    |    |    |    |    |    |    |    |    |
| RP11-121P12.1 | ENSG00000282849.1  |    |    | NA | NA | NA | NA | NA | NA | NA | NA | NA | NA | NA | NA | NA |
|               | NA                 | NA | NA | NA | -2 | NA |    |    |    |    |    |    |    |    |    |    |
| FCRL1         | ENSG00000163534.14 |    |    | NA | NA | NA | NA | NA | NA | NA | NA | NA | NA | NA | NA | NA |
|               | NA                 | NA | NA | NA | -2 | NA |    |    |    |    |    |    |    |    |    |    |
| RP11-465B22.8 | ENSG00000272141.1  |    |    | NA | NA | NA | NA | NA | NA | NA | NA | NA | NA | NA | NA | NA |
|               | NA                 | NA | NA | NA | -2 | NA |    |    |    |    |    |    |    |    |    |    |
| RCSD1         | ENSG00000198771.10 |    |    | NA | NA | NA | NA | NA | NA | NA | NA | NA | NA | NA | NA | NA |
|               | NA                 | NA | NA | NA | -2 | NA |    |    |    |    |    |    |    |    |    |    |
| VTCN1         | ENSG00000134258.16 |    |    | NA | NA | NA | NA | NA | NA | NA | NA | NA | NA | NA | NA | NA |
|               | NA                 | NA | NA | NA | -2 | NA |    |    |    |    |    |    |    |    |    |    |
| LINC01349     | ENSG00000230402.2  |    |    | NA | NA | NA | NA | NA | NA | NA | NA | NA | NA | NA | NA | NA |
|               | NA                 | NA | NA | NA | -2 | NA |    |    |    |    |    |    |    |    |    |    |
| SES2          | ENSG00000130766.4  |    |    | NA | NA | NA | NA | NA | NA | NA | NA | NA | NA | NA | NA | NA |
|               | NA                 | NA | NA | NA | -2 | NA |    |    |    |    |    |    |    |    |    |    |
| TLR5          | ENSG00000187554.11 |    |    | NA | NA | NA | NA | NA | NA | NA | NA | NA | NA | NA | NA | NA |

|               |                    |    |    |    |    |    |    |    |    |    |    |    |    |    |
|---------------|--------------------|----|----|----|----|----|----|----|----|----|----|----|----|----|
| NA            | NA                 | NA | NA | -2 | NA |    |    |    |    |    |    |    |    |    |
| GPR89A        | ENSG00000117262.18 | NA | NA | NA | NA | NA | NA | NA | NA | NA | NA | NA | NA | NA |
| NA            | NA                 | NA | NA | NA | -2 | NA |    |    |    |    |    |    |    |    |
| GBP5          | ENSG00000154451.14 | NA | NA | NA | NA | NA | NA | NA | NA | NA | NA | NA | NA | NA |
| NA            | NA                 | NA | NA | NA | -2 | NA |    |    |    |    |    |    |    |    |
| NBPF6         | ENSG00000186086.18 | NA | NA | NA | NA | NA | NA | NA | NA | NA | NA | NA | NA | NA |
| NA            | NA                 | NA | NA | NA | -2 | NA |    |    |    |    |    |    |    |    |
| ZBTB17        | ENSG00000116809.11 | NA | NA | NA | NA | NA | NA | NA | NA | NA | NA | NA | NA | NA |
| NA            | NA                 | NA | NA | NA | -2 | NA |    |    |    |    |    |    |    |    |
| LINC01788     | ENSG00000229051.1  | NA | NA | NA | NA | NA | NA | NA | NA | NA | NA | NA | NA | NA |
| NA            | NA                 | NA | NA | NA | -2 | NA |    |    |    |    |    |    |    |    |
| TEX35         | ENSG00000240021.9  | NA | NA | NA | NA | NA | NA | NA | NA | NA | NA | NA | NA | NA |
| NA            | NA                 | NA | NA | NA | -2 | NA |    |    |    |    |    |    |    |    |
| RP4-591L5.1   | ENSG00000236335.1  | NA | NA | NA | NA | NA | NA | NA | NA | NA | NA | NA | NA | NA |
| NA            | NA                 | NA | NA | NA | NA | -2 | NA |    |    |    |    |    |    |    |
| MAPKAPK2      | ENSG00000162889.10 | NA | NA | NA | NA | NA | NA | NA | NA | NA | NA | NA | NA | NA |
| NA            | NA                 | NA | NA | NA | -2 | NA |    |    |    |    |    |    |    |    |
| OR2C3         | ENSG00000196242.7  | NA | NA | NA | NA | NA | NA | NA | NA | NA | NA | NA | NA | NA |
| NA            | NA                 | NA | NA | NA | -2 | NA |    |    |    |    |    |    |    |    |
| DPH5          | ENSG00000117543.20 | NA | NA | NA | NA | NA | NA | NA | NA | NA | NA | NA | NA | NA |
| NA            | NA                 | NA | NA | NA | -2 | NA |    |    |    |    |    |    |    |    |
| SLC6A9        | ENSG00000196517.11 | NA | NA | NA | NA | NA | NA | NA | NA | NA | NA | NA | NA | NA |
| NA            | NA                 | NA | NA | NA | -2 | NA |    |    |    |    |    |    |    |    |
| ITLN2         | ENSG00000158764.6  | NA | NA | NA | NA | NA | NA | NA | NA | NA | NA | NA | NA | NA |
| NA            | NA                 | NA | NA | NA | -2 | NA |    |    |    |    |    |    |    |    |
| AIM1L         | ENSG00000176092.14 | NA | NA | NA | NA | NA | NA | NA | NA | NA | NA | NA | NA | NA |
| NA            | NA                 | NA | NA | NA | -2 | NA |    |    |    |    |    |    |    |    |
| HIST3H2A      | ENSG00000181218.5  | NA | NA | NA | NA | NA | NA | NA | NA | NA | NA | NA | NA | NA |
| NA            | NA                 | NA | NA | NA | -2 | NA |    |    |    |    |    |    |    |    |
| ADORA3        | ENSG00000282608.1  | NA | NA | NA | NA | NA | NA | NA | NA | NA | NA | NA | NA | NA |
| NA            | NA                 | NA | NA | NA | -2 | NA |    |    |    |    |    |    |    |    |
| LINC01779     | ENSG00000235933.1  | NA | NA | NA | NA | NA | NA | NA | NA | NA | NA | NA | NA | NA |
| NA            | NA                 | NA | NA | NA | -2 | NA |    |    |    |    |    |    |    |    |
| GNG5          | ENSG00000174021.10 | NA | NA | NA | NA | NA | NA | NA | NA | NA | NA | NA | NA | NA |
| NA            | NA                 | NA | NA | NA | -2 | NA |    |    |    |    |    |    |    |    |
| LINC01350     | ENSG00000228309.6  | NA | NA | NA | NA | NA | NA | NA | NA | NA | NA | NA | NA | NA |
| NA            | NA                 | NA | NA | NA | -2 | NA |    |    |    |    |    |    |    |    |
| CTSE          | ENSG00000196188.10 | NA | NA | NA | NA | NA | NA | NA | NA | NA | NA | NA | NA | NA |
| NA            | NA                 | NA | NA | NA | -2 | NA |    |    |    |    |    |    |    |    |
| IPO13         | ENSG00000117408.10 | NA | NA | NA | NA | NA | NA | NA | NA | NA | NA | NA | NA | NA |
| NA            | NA                 | NA | NA | NA | -2 | NA |    |    |    |    |    |    |    |    |
| CD5L          | ENSG00000073754.5  | NA | NA | NA | NA | NA | NA | NA | NA | NA | NA | NA | NA | NA |
| NA            | NA                 | NA | NA | NA | -2 | NA |    |    |    |    |    |    |    |    |
| THEM5         | ENSG00000196407.11 | NA | NA | NA | NA | NA | NA | NA | NA | NA | NA | NA | NA | NA |
| NA            | NA                 | NA | NA | NA | -2 | NA |    |    |    |    |    |    |    |    |
| MIR34AHG      | ENSG00000228526.6  | NA | NA | NA | NA | NA | NA | NA | NA | NA | NA | NA | NA | NA |
| NA            | NA                 | NA | NA | NA | -2 | NA |    |    |    |    |    |    |    |    |
| PYGO2         | ENSG00000163348.3  | NA | NA | NA | NA | NA | NA | NA | NA | NA | NA | NA | NA | NA |
| NA            | NA                 | NA | NA | NA | -2 | NA |    |    |    |    |    |    |    |    |
| LINC00272     | ENSG00000203729.8  | NA | NA | NA | NA | NA | NA | NA | NA | NA | NA | NA | NA | NA |
| NA            | NA                 | NA | NA | NA | -2 | NA |    |    |    |    |    |    |    |    |
| RP11-339D23.1 | ENSG00000225598.1  | NA | NA | NA | NA | NA | NA | NA | NA | NA | NA | NA | NA | NA |
| NA            | NA                 | NA | NA | NA | NA | -2 | NA |    |    |    |    |    |    |    |
| SNIP1         | ENSG00000163877.10 | NA | NA | NA | NA | NA | NA | NA | NA | NA | NA | NA | NA | NA |
| NA            | NA                 | NA | NA | NA | -2 | NA |    |    |    |    |    |    |    |    |
| RP11-467C18.1 | ENSG00000270457.1  | NA | NA | NA | NA | NA | NA | NA | NA | NA | NA | NA | NA | NA |
| NA            | NA                 | NA | NA | NA | NA | -2 | NA |    |    |    |    |    |    |    |
| RP11-147C23.1 | ENSG00000237435.9  | NA | NA | NA | NA | NA | NA | NA | NA | NA | NA | NA | NA | NA |
| NA            | NA                 | NA | NA | NA | NA | -2 | NA |    |    |    |    |    |    |    |
| LINC01762     | ENSG00000233154.5  | NA | NA | NA | NA | NA | NA | NA | NA | NA | NA | NA | NA | NA |
| NA            | NA                 | NA | NA | NA | NA | -2 | NA |    |    |    |    |    |    |    |
| CPT2          | ENSG00000157184.6  | NA | NA | NA | NA | NA | NA | NA | NA | NA | NA | NA | NA | NA |

|               |                    |    |    |    |    |    |    |    |    |    |    |    |    |    |
|---------------|--------------------|----|----|----|----|----|----|----|----|----|----|----|----|----|
| NA            | NA                 | NA | NA | -2 | NA |    |    |    |    |    |    |    |    |    |
| TFCP2L1       | ENSG00000115112.7  |    |    |    | NA | NA | NA | NA | NA | NA | NA | NA | NA | NA |
| NA            | NA                 | NA | NA | NA | -2 | NA |    |    |    |    |    |    |    |    |
| ZNF512        | ENSG00000243943.9  |    |    |    | NA | NA | NA | NA | NA | NA | NA | NA | NA | NA |
| NA            | NA                 | NA | NA | NA | -2 | NA |    |    |    |    |    |    |    |    |
| LINC01913     | ENSG00000214691.7  |    |    |    | NA | NA | NA | NA | NA | NA | NA | NA | NA | NA |
| NA            | NA                 | NA | NA | NA | -2 | NA |    |    |    |    |    |    |    |    |
| ACOXL         | ENSG00000153093.18 |    |    |    | NA | NA | NA | NA | NA | NA | NA | NA | NA | NA |
| NA            | NA                 | NA | NA | NA | -2 | NA |    |    |    |    |    |    |    |    |
| RBKS          | ENSG00000171174.13 |    |    |    | NA | NA | NA | NA | NA | NA | NA | NA | NA | NA |
| NA            | NA                 | NA | NA | NA | -2 | NA |    |    |    |    |    |    |    |    |
| AC104088.1    | ENSG00000232555.1  |    |    |    | NA | NA | NA | NA | NA | NA | NA | NA | NA | NA |
| NA            | NA                 | NA | NA | NA | -2 | NA |    |    |    |    |    |    |    |    |
| AC098828.2    | ENSG00000234378.1  |    |    |    | NA | NA | NA | NA | NA | NA | NA | NA | NA | NA |
| NA            | NA                 | NA | NA | NA | -2 | NA |    |    |    |    |    |    |    |    |
| SEMA4F        | ENSG00000135622.12 |    |    |    | NA | NA | NA | NA | NA | NA | NA | NA | NA | NA |
| NA            | NA                 | NA | NA | NA | -2 | NA |    |    |    |    |    |    |    |    |
| AC007463.2    | ENSG00000226506.5  |    |    |    | NA | NA | NA | NA | NA | NA | NA | NA | NA | NA |
| NA            | NA                 | NA | NA | NA | -2 | NA |    |    |    |    |    |    |    |    |
| NRXN1         | ENSG00000179915.22 |    |    |    | NA | NA | NA | NA | NA | NA | NA | NA | NA | NA |
| NA            | NA                 | NA | NA | NA | -2 | NA |    |    |    |    |    |    |    |    |
| NEU2          | ENSG00000115488.3  |    |    |    | NA | NA | NA | NA | NA | NA | NA | NA | NA | NA |
| NA            | NA                 | NA | NA | NA | -2 | NA |    |    |    |    |    |    |    |    |
| SP100         | ENSG00000067066.16 |    |    |    | NA | NA | NA | NA | NA | NA | NA | NA | NA | NA |
| NA            | NA                 | NA | NA | NA | -2 | NA |    |    |    |    |    |    |    |    |
| AC067960.1    | ENSG00000234455.1  |    |    |    | NA | NA | NA | NA | NA | NA | NA | NA | NA | NA |
| NA            | NA                 | NA | NA | NA | -2 | NA |    |    |    |    |    |    |    |    |
| HTR2B         | ENSG00000135914.5  |    |    |    | NA | NA | NA | NA | NA | NA | NA | NA | NA | NA |
| NA            | NA                 | NA | NA | NA | -2 | NA |    |    |    |    |    |    |    |    |
| LINC01118     | ENSG00000222005.8  |    |    |    | NA | NA | NA | NA | NA | NA | NA | NA | NA | NA |
| NA            | NA                 | NA | NA | NA | -2 | NA |    |    |    |    |    |    |    |    |
| CKAP2L        | ENSG00000169607.12 |    |    |    | NA | NA | NA | NA | NA | NA | NA | NA | NA | NA |
| NA            | NA                 | NA | NA | NA | -2 | NA |    |    |    |    |    |    |    |    |
| SULT1C3       | ENSG00000196228.3  |    |    |    | NA | NA | NA | NA | NA | NA | NA | NA | NA | NA |
| NA            | NA                 | NA | NA | NA | -2 | NA |    |    |    |    |    |    |    |    |
| FIGLA         | ENSG00000183733.6  |    |    |    | NA | NA | NA | NA | NA | NA | NA | NA | NA | NA |
| NA            | NA                 | NA | NA | NA | -2 | NA |    |    |    |    |    |    |    |    |
| LINC01805     | ENSG00000223863.1  |    |    |    | NA | NA | NA | NA | NA | NA | NA | NA | NA | NA |
| NA            | NA                 | NA | NA | NA | -2 | NA |    |    |    |    |    |    |    |    |
| AC009229.6    | ENSG00000229160.1  |    |    |    | NA | NA | NA | NA | NA | NA | NA | NA | NA | NA |
| NA            | NA                 | NA | NA | NA | -2 | NA |    |    |    |    |    |    |    |    |
| RSAD2         | ENSG00000134321.11 |    |    |    | NA | NA | NA | NA | NA | NA | NA | NA | NA | NA |
| NA            | NA                 | NA | NA | NA | -2 | NA |    |    |    |    |    |    |    |    |
| LINC01789     | ENSG00000229457.1  |    |    |    | NA | NA | NA | NA | NA | NA | NA | NA | NA | NA |
| NA            | NA                 | NA | NA | NA | -2 | NA |    |    |    |    |    |    |    |    |
| TEX37         | ENSG00000172073.3  |    |    |    | NA | NA | NA | NA | NA | NA | NA | NA | NA | NA |
| NA            | NA                 | NA | NA | NA | -2 | NA |    |    |    |    |    |    |    |    |
| LINC01127     | ENSG00000281162.2  |    |    |    | NA | NA | NA | NA | NA | NA | NA | NA | NA | NA |
| NA            | NA                 | NA | NA | NA | -2 | NA |    |    |    |    |    |    |    |    |
| LINC01412     | ENSG00000232606.1  |    |    |    | NA | NA | NA | NA | NA | NA | NA | NA | NA | NA |
| NA            | NA                 | NA | NA | NA | -2 | NA |    |    |    |    |    |    |    |    |
| AC144525.1    | ENSG00000226992.1  |    |    |    | NA | NA | NA | NA | NA | NA | NA | NA | NA | NA |
| NA            | NA                 | NA | NA | NA | -2 | NA |    |    |    |    |    |    |    |    |
| EIF2AK2       | ENSG00000055332.16 |    |    |    | NA | NA | NA | NA | NA | NA | NA | NA | NA | NA |
| NA            | NA                 | NA | NA | NA | -2 | NA |    |    |    |    |    |    |    |    |
| RP11-480C16.1 | ENSG00000272563.1  |    |    |    | NA | NA | NA | NA | NA | NA | NA | NA | NA | NA |
| NA            | NA                 | NA | NA | NA | NA | -2 | NA |    |    |    |    |    |    |    |
| LINC01320     | ENSG00000228262.8  |    |    |    | NA | NA | NA | NA | NA | NA | NA | NA | NA | NA |
| NA            | NA                 | NA | NA | NA | -2 | NA |    |    |    |    |    |    |    |    |
| AC017074.1    | ENSG00000233479.1  |    |    |    | NA | NA | NA | NA | NA | NA | NA | NA | NA | NA |
| NA            | NA                 | NA | NA | NA | -2 | NA |    |    |    |    |    |    |    |    |
| BOK           | ENSG00000176720.4  |    |    |    | NA | NA | NA | NA | NA | NA | NA | NA | NA | NA |



|              |                    |    |    |    |    |    |    |    |    |    |    |    |    |    |
|--------------|--------------------|----|----|----|----|----|----|----|----|----|----|----|----|----|
| NA           | NA                 | NA | NA | -2 | NA |    |    |    |    |    |    |    |    |    |
| AC011752.1   | ENSG00000231204.5  |    |    |    | NA | NA | NA | NA | NA | NA | NA | NA | NA | NA |
| NA           | NA                 | NA | NA | NA | -2 | NA |    |    |    |    |    |    |    |    |
| LINC01936    | ENSG00000235997.2  |    |    |    | NA | NA | NA | NA | NA | NA | NA | NA | NA | NA |
| NA           | NA                 | NA | NA | NA | -2 | NA |    |    |    |    |    |    |    |    |
| COL4A4       | ENSG00000081052.11 |    |    |    | NA | NA | NA | NA | NA | NA | NA | NA | NA | NA |
| NA           | NA                 | NA | NA | NA | -2 | NA |    |    |    |    |    |    |    |    |
| DCDC2C       | ENSG00000214866.8  |    |    |    | NA | NA | NA | NA | NA | NA | NA | NA | NA | NA |
| NA           | NA                 | NA | NA | NA | -2 | NA |    |    |    |    |    |    |    |    |
| AGXT         | ENSG00000172482.4  |    |    |    | NA | NA | NA | NA | NA | NA | NA | NA | NA | NA |
| NA           | NA                 | NA | NA | NA | -2 | NA |    |    |    |    |    |    |    |    |
| ARL4C        | ENSG00000188042.7  |    |    |    | NA | NA | NA | NA | NA | NA | NA | NA | NA | NA |
| NA           | NA                 | NA | NA | NA | -2 | NA |    |    |    |    |    |    |    |    |
| NHEJ1        | ENSG00000187736.12 |    |    |    | NA | NA | NA | NA | NA | NA | NA | NA | NA | NA |
| NA           | NA                 | NA | NA | NA | -2 | NA |    |    |    |    |    |    |    |    |
| ANKRD53      | ENSG00000144031.11 |    |    |    | NA | NA | NA | NA | NA | NA | NA | NA | NA | NA |
| NA           | NA                 | NA | NA | NA | -2 | NA |    |    |    |    |    |    |    |    |
| HOXD8        | ENSG00000175879.8  |    |    |    | NA | NA | NA | NA | NA | NA | NA | NA | NA | NA |
| NA           | NA                 | NA | NA | NA | -2 | NA |    |    |    |    |    |    |    |    |
| SPDYA        | ENSG00000163806.15 |    |    |    | NA | NA | NA | NA | NA | NA | NA | NA | NA | NA |
| NA           | NA                 | NA | NA | NA | -2 | NA |    |    |    |    |    |    |    |    |
| YWHAQ        | ENSG00000134308.13 |    |    |    | NA | NA | NA | NA | NA | NA | NA | NA | NA | NA |
| NA           | NA                 | NA | NA | NA | -2 | NA |    |    |    |    |    |    |    |    |
| SUMO1        | ENSG00000116030.16 |    |    |    | NA | NA | NA | NA | NA | NA | NA | NA | NA | NA |
| NA           | NA                 | NA | NA | NA | -2 | NA |    |    |    |    |    |    |    |    |
| LINC01831    | ENSG00000225765.1  |    |    |    | NA | NA | NA | NA | NA | NA | NA | NA | NA | NA |
| NA           | NA                 | NA | NA | NA | -2 | NA |    |    |    |    |    |    |    |    |
| STAT1        | ENSG00000115415.18 |    |    |    | NA | NA | NA | NA | NA | NA | NA | NA | NA | NA |
| NA           | NA                 | NA | NA | NA | -2 | NA |    |    |    |    |    |    |    |    |
| IWS1         | ENSG00000163166.14 |    |    |    | NA | NA | NA | NA | NA | NA | NA | NA | NA | NA |
| NA           | NA                 | NA | NA | NA | -2 | NA |    |    |    |    |    |    |    |    |
| AC141930.3   | ENSG00000283766.1  |    |    |    | NA | NA | NA | NA | NA | NA | NA | NA | NA | NA |
| NA           | NA                 | NA | NA | NA | -2 | NA |    |    |    |    |    |    |    |    |
| REG3G        | ENSG00000143954.12 |    |    |    | NA | NA | NA | NA | NA | NA | NA | NA | NA | NA |
| NA           | NA                 | NA | NA | NA | -2 | NA |    |    |    |    |    |    |    |    |
| SLC30A3      | ENSG00000115194.10 |    |    |    | NA | NA | NA | NA | NA | NA | NA | NA | NA | NA |
| NA           | NA                 | NA | NA | NA | -2 | NA |    |    |    |    |    |    |    |    |
| IL36A        | ENSG00000136694.8  |    |    |    | NA | NA | NA | NA | NA | NA | NA | NA | NA | NA |
| NA           | NA                 | NA | NA | NA | -2 | NA |    |    |    |    |    |    |    |    |
| AC007179.1   | ENSG00000231815.1  |    |    |    | NA | NA | NA | NA | NA | NA | NA | NA | NA | NA |
| NA           | NA                 | NA | NA | NA | -2 | NA |    |    |    |    |    |    |    |    |
| VPS54        | ENSG00000143952.19 |    |    |    | NA | NA | NA | NA | NA | NA | NA | NA | NA | NA |
| NA           | NA                 | NA | NA | NA | -2 | NA |    |    |    |    |    |    |    |    |
| C2orf69      | ENSG00000178074.5  |    |    |    | NA | NA | NA | NA | NA | NA | NA | NA | NA | NA |
| NA           | NA                 | NA | NA | NA | -2 | NA |    |    |    |    |    |    |    |    |
| RP11-546J1.1 | ENSG00000270557.1  |    |    |    | NA | NA | NA | NA | NA | NA | NA | NA | NA | NA |
| NA           | NA                 | NA | NA | NA | NA | -2 | NA |    |    |    |    |    |    |    |
| AC104695.4   | ENSG00000227938.1  |    |    |    | NA | NA | NA | NA | NA | NA | NA | NA | NA | NA |
| NA           | NA                 | NA | NA | NA | -2 | NA |    |    |    |    |    |    |    |    |
| LINC01460    | ENSG00000205334.2  |    |    |    | NA | NA | NA | NA | NA | NA | NA | NA | NA | NA |
| NA           | NA                 | NA | NA | NA | -2 | NA |    |    |    |    |    |    |    |    |
| GLI2         | ENSG00000074047.21 |    |    |    | NA | NA | NA | NA | NA | NA | NA | NA | NA | NA |
| NA           | NA                 | NA | NA | NA | -2 | NA |    |    |    |    |    |    |    |    |
| IL1RN        | ENSG00000136689.18 |    |    |    | NA | NA | NA | NA | NA | NA | NA | NA | NA | NA |
| NA           | NA                 | NA | NA | NA | -2 | NA |    |    |    |    |    |    |    |    |
| RGPD4        | ENSG00000196862.9  |    |    |    | NA | NA | NA | NA | NA | NA | NA | NA | NA | NA |
| NA           | NA                 | NA | NA | NA | -2 | NA |    |    |    |    |    |    |    |    |
| KIAA1211L    | ENSG00000196872.11 |    |    |    | NA | NA | NA | NA | NA | NA | NA | NA | NA | NA |
| NA           | NA                 | NA | NA | NA | -2 | NA |    |    |    |    |    |    |    |    |
| NR4A2        | ENSG00000153234.13 |    |    |    | NA | NA | NA | NA | NA | NA | NA | NA | NA | NA |
| NA           | NA                 | NA | NA | NA | -2 | NA |    |    |    |    |    |    |    |    |
| STRN         | ENSG00000115808.11 |    |    |    | NA | NA | NA | NA | NA | NA | NA | NA | NA | NA |

|               |                    |    |    |    |    |    |    |    |    |    |    |    |    |    |
|---------------|--------------------|----|----|----|----|----|----|----|----|----|----|----|----|----|
| NA            | NA                 | NA | NA | -2 | NA |    |    |    |    |    |    |    |    |    |
| CHRNA         | ENSG00000196811.11 | NA | NA | NA | NA | NA | NA | NA | NA | NA | NA | NA | NA | NA |
| NA            | NA                 | NA | NA | -2 | NA |    |    |    |    |    |    |    |    |    |
| MYO3B         | ENSG00000071909.18 | NA | NA | NA | NA | NA | NA | NA | NA | NA | NA | NA | NA | NA |
| NA            | NA                 | NA | NA | -2 | NA |    |    |    |    |    |    |    |    |    |
| MYOSLID       | ENSG00000229647.1  | NA | NA | NA | NA | NA | NA | NA | NA | NA | NA | NA | NA | NA |
| NA            | NA                 | NA | NA | -2 | NA |    |    |    |    |    |    |    |    |    |
| AC110769.3    | ENSG00000243179.1  | NA | NA | NA | NA | NA | NA | NA | NA | NA | NA | NA | NA | NA |
| NA            | NA                 | NA | NA | -2 | NA |    |    |    |    |    |    |    |    |    |
| AC011286.1    | ENSG00000232328.1  | NA | NA | NA | NA | NA | NA | NA | NA | NA | NA | NA | NA | NA |
| NA            | NA                 | NA | NA | -2 | NA |    |    |    |    |    |    |    |    |    |
| SPAG16        | ENSG00000144451.18 | NA | NA | NA | NA | NA | NA | NA | NA | NA | NA | NA | NA | NA |
| NA            | NA                 | NA | NA | -2 | NA |    |    |    |    |    |    |    |    |    |
| DOK1          | ENSG00000115325.13 | NA | NA | NA | NA | NA | NA | NA | NA | NA | NA | NA | NA | NA |
| NA            | NA                 | NA | NA | -2 | NA |    |    |    |    |    |    |    |    |    |
| UGT1A5        | ENSG00000240224.1  | NA | NA | NA | NA | NA | NA | NA | NA | NA | NA | NA | NA | NA |
| NA            | NA                 | NA | NA | -2 | NA |    |    |    |    |    |    |    |    |    |
| GKN1          | ENSG00000169605.5  | NA | NA | NA | NA | NA | NA | NA | NA | NA | NA | NA | NA | NA |
| NA            | NA                 | NA | NA | -2 | NA |    |    |    |    |    |    |    |    |    |
| PCBP1         | ENSG00000169564.6  | NA | NA | NA | NA | NA | NA | NA | NA | NA | NA | NA | NA | NA |
| NA            | NA                 | NA | NA | -2 | NA |    |    |    |    |    |    |    |    |    |
| LGALS1        | ENSG00000119862.12 | NA | NA | NA | NA | NA | NA | NA | NA | NA | NA | NA | NA | NA |
| NA            | NA                 | NA | NA | -2 | NA |    |    |    |    |    |    |    |    |    |
| LINC01825     | ENSG00000223466.1  | NA | NA | NA | NA | NA | NA | NA | NA | NA | NA | NA | NA | NA |
| NA            | NA                 | NA | NA | -2 | NA |    |    |    |    |    |    |    |    |    |
| LINC01871     | ENSG00000235576.1  | NA | NA | NA | NA | NA | NA | NA | NA | NA | NA | NA | NA | NA |
| NA            | NA                 | NA | NA | -2 | NA |    |    |    |    |    |    |    |    |    |
| RPL37A        | ENSG00000197756.9  | NA | NA | NA | NA | NA | NA | NA | NA | NA | NA | NA | NA | NA |
| NA            | NA                 | NA | NA | -2 | NA |    |    |    |    |    |    |    |    |    |
| MROH2A        | ENSG00000185038.14 | NA | NA | NA | NA | NA | NA | NA | NA | NA | NA | NA | NA | NA |
| NA            | NA                 | NA | NA | -2 | NA |    |    |    |    |    |    |    |    |    |
| CMPK2         | ENSG00000134326.11 | NA | NA | NA | NA | NA | NA | NA | NA | NA | NA | NA | NA | NA |
| NA            | NA                 | NA | NA | -2 | NA |    |    |    |    |    |    |    |    |    |
| AC124861.1    | ENSG00000227479.1  | NA | NA | NA | NA | NA | NA | NA | NA | NA | NA | NA | NA | NA |
| NA            | NA                 | NA | NA | -2 | NA |    |    |    |    |    |    |    |    |    |
| ASTL          | ENSG00000188886.3  | NA | NA | NA | NA | NA | NA | NA | NA | NA | NA | NA | NA | NA |
| NA            | NA                 | NA | NA | -2 | NA |    |    |    |    |    |    |    |    |    |
| RP11-734K21.5 | ENSG00000261104.1  | NA | NA | NA | NA | NA | NA | NA | NA | NA | NA | NA | NA | NA |
| NA            | NA                 | NA | NA | -2 | NA |    |    |    |    |    |    |    |    |    |
| SCN2A         | ENSG00000136531.15 | NA | NA | NA | NA | NA | NA | NA | NA | NA | NA | NA | NA | NA |
| NA            | NA                 | NA | NA | -2 | NA |    |    |    |    |    |    |    |    |    |
| LBX2          | ENSG00000179528.15 | NA | NA | NA | NA | NA | NA | NA | NA | NA | NA | NA | NA | NA |
| NA            | NA                 | NA | NA | -2 | NA |    |    |    |    |    |    |    |    |    |
| AC016730.1    | ENSG00000227718.1  | NA | NA | NA | NA | NA | NA | NA | NA | NA | NA | NA | NA | NA |
| NA            | NA                 | NA | NA | -2 | NA |    |    |    |    |    |    |    |    |    |
| RP11-353K11.1 | ENSG00000273265.1  | NA | NA | NA | NA | NA | NA | NA | NA | NA | NA | NA | NA | NA |
| NA            | NA                 | NA | NA | -2 | NA |    |    |    |    |    |    |    |    |    |
| LINC01828     | ENSG00000235885.7  | NA | NA | NA | NA | NA | NA | NA | NA | NA | NA | NA | NA | NA |
| NA            | NA                 | NA | NA | -2 | NA |    |    |    |    |    |    |    |    |    |
| AC012442.6    | ENSG00000228251.1  | NA | NA | NA | NA | NA | NA | NA | NA | NA | NA | NA | NA | NA |
| NA            | NA                 | NA | NA | -2 | NA |    |    |    |    |    |    |    |    |    |
| AC013727.1    | ENSG00000232597.5  | NA | NA | NA | NA | NA | NA | NA | NA | NA | NA | NA | NA | NA |
| NA            | NA                 | NA | NA | -2 | NA |    |    |    |    |    |    |    |    |    |
| LAPTM4A       | ENSG00000068697.6  | NA | NA | NA | NA | NA | NA | NA | NA | NA | NA | NA | NA | NA |
| NA            | NA                 | NA | NA | -2 | NA |    |    |    |    |    |    |    |    |    |
| RP11-3304.1   | ENSG00000272644.1  | NA | NA | NA | NA | NA | NA | NA | NA | NA | NA | NA | NA | NA |
| NA            | NA                 | NA | NA | -2 | NA |    |    |    |    |    |    |    |    |    |
| AC017002.2    | ENSG00000224959.1  | NA | NA | NA | NA | NA | NA | NA | NA | NA | NA | NA | NA | NA |
| NA            | NA                 | NA | NA | -2 | NA |    |    |    |    |    |    |    |    |    |
| UGT1A7        | ENSG00000244122.2  | NA | NA | NA | NA | NA | NA | NA | NA | NA | NA | NA | NA | NA |
| NA            | NA                 | NA | NA | -2 | NA |    |    |    |    |    |    |    |    |    |
| RP11-444A22.1 | ENSG00000271955.1  | NA | NA | NA | NA | NA | NA | NA | NA | NA | NA | NA | NA | NA |

|               |                    |    |    |    |    |    |    |    |    |    |    |    |    |    |
|---------------|--------------------|----|----|----|----|----|----|----|----|----|----|----|----|----|
| NA            | NA                 | NA | NA | NA | NA | -2 | NA |    |    |    |    |    |    |    |
| COL6A3        | ENSG00000163359.15 | NA | NA | NA | NA | NA | NA | NA | NA | NA | NA | NA | NA | NA |
| NA            | NA                 | NA | NA | NA | NA | -2 | NA |    |    |    |    |    |    |    |
| AC011747.3    | ENSG00000231435.1  | NA | NA | NA | NA | NA | NA | NA | NA | NA | NA | NA | NA | NA |
| NA            | NA                 | NA | NA | NA | NA | -2 | NA |    |    |    |    |    |    |    |
| PKP4          | ENSG00000144283.21 | NA | NA | NA | NA | NA | NA | NA | NA | NA | NA | NA | NA | NA |
| NA            | NA                 | NA | NA | NA | NA | -2 | NA |    |    |    |    |    |    |    |
| WDFY1         | ENSG00000085449.14 | NA | NA | NA | NA | NA | NA | NA | NA | NA | NA | NA | NA | NA |
| NA            | NA                 | NA | NA | NA | NA | -2 | NA |    |    |    |    |    |    |    |
| AC067956.1    | ENSG00000236451.2  | NA | NA | NA | NA | NA | NA | NA | NA | NA | NA | NA | NA | NA |
| NA            | NA                 | NA | NA | NA | NA | -2 | NA |    |    |    |    |    |    |    |
| COPS7B        | ENSG00000144524.17 | NA | NA | NA | NA | NA | NA | NA | NA | NA | NA | NA | NA | NA |
| NA            | NA                 | NA | NA | NA | NA | -2 | NA |    |    |    |    |    |    |    |
| LINC01880     | ENSG00000232002.1  | NA | NA | NA | NA | NA | NA | NA | NA | NA | NA | NA | NA | NA |
| NA            | NA                 | NA | NA | NA | NA | -2 | NA |    |    |    |    |    |    |    |
| AC023469.1    | ENSG00000222031.1  | NA | NA | NA | NA | NA | NA | NA | NA | NA | NA | NA | NA | NA |
| NA            | NA                 | NA | NA | NA | NA | -2 | NA |    |    |    |    |    |    |    |
| CFAP65        | ENSG00000181378.13 | NA | NA | NA | NA | NA | NA | NA | NA | NA | NA | NA | NA | NA |
| NA            | NA                 | NA | NA | NA | NA | -2 | NA |    |    |    |    |    |    |    |
| AGBL5         | ENSG00000084693.15 | NA | NA | NA | NA | NA | NA | NA | NA | NA | NA | NA | NA | NA |
| NA            | NA                 | NA | NA | NA | NA | -2 | NA |    |    |    |    |    |    |    |
| HSPD1         | ENSG00000144381.16 | NA | NA | NA | NA | NA | NA | NA | NA | NA | NA | NA | NA | NA |
| NA            | NA                 | NA | NA | NA | NA | -2 | NA |    |    |    |    |    |    |    |
| DIRC1         | ENSG00000174325.4  | NA | NA | NA | NA | NA | NA | NA | NA | NA | NA | NA | NA | NA |
| NA            | NA                 | NA | NA | NA | NA | -2 | NA |    |    |    |    |    |    |    |
| HNRNPLL       | ENSG00000143889.15 | NA | NA | NA | NA | NA | NA | NA | NA | NA | NA | NA | NA | NA |
| NA            | NA                 | NA | NA | NA | NA | -2 | NA |    |    |    |    |    |    |    |
| HECW2         | ENSG00000138411.10 | NA | NA | NA | NA | NA | NA | NA | NA | NA | NA | NA | NA | NA |
| NA            | NA                 | NA | NA | NA | NA | -2 | NA |    |    |    |    |    |    |    |
| RP11-574016.1 | ENSG00000259855.1  | NA | NA | NA | NA | NA | NA | NA | NA | NA | NA | NA | NA | NA |
| NA            | NA                 | NA | NA | NA | NA | -2 | NA |    |    |    |    |    |    |    |
| LINC01804     | ENSG00000231031.6  | NA | NA | NA | NA | NA | NA | NA | NA | NA | NA | NA | NA | NA |
| NA            | NA                 | NA | NA | NA | NA | -2 | NA |    |    |    |    |    |    |    |
| UGT1A4        | ENSG00000244474.5  | NA | NA | NA | NA | NA | NA | NA | NA | NA | NA | NA | NA | NA |
| NA            | NA                 | NA | NA | NA | NA | -2 | NA |    |    |    |    |    |    |    |
| EPAS1         | ENSG00000116016.13 | NA | NA | NA | NA | NA | NA | NA | NA | NA | NA | NA | NA | NA |
| NA            | NA                 | NA | NA | NA | NA | -2 | NA |    |    |    |    |    |    |    |
| SLC30A6       | ENSG00000152683.14 | NA | NA | NA | NA | NA | NA | NA | NA | NA | NA | NA | NA | NA |
| NA            | NA                 | NA | NA | NA | NA | -2 | NA |    |    |    |    |    |    |    |
| FN1           | ENSG00000115414.18 | NA | NA | NA | NA | NA | NA | NA | NA | NA | NA | NA | NA | NA |
| NA            | NA                 | NA | NA | NA | NA | -2 | NA |    |    |    |    |    |    |    |
| FBXO11        | ENSG00000138081.20 | NA | NA | NA | NA | NA | NA | NA | NA | NA | NA | NA | NA | NA |
| NA            | NA                 | NA | NA | NA | NA | -2 | NA |    |    |    |    |    |    |    |
| PLEKHM3       | ENSG00000178385.14 | NA | NA | NA | NA | NA | NA | NA | NA | NA | NA | NA | NA | NA |
| NA            | NA                 | NA | NA | NA | NA | -2 | NA |    |    |    |    |    |    |    |
| TTN           | ENSG00000155657.26 | NA | NA | NA | NA | NA | NA | NA | NA | NA | NA | NA | NA | NA |
| NA            | NA                 | NA | NA | NA | NA | -2 | NA |    |    |    |    |    |    |    |
| LINC01814     | ENSG00000236008.1  | NA | NA | NA | NA | NA | NA | NA | NA | NA | NA | NA | NA | NA |
| NA            | NA                 | NA | NA | NA | NA | -2 | NA |    |    |    |    |    |    |    |
| RP11-796E10.1 | ENSG00000270460.1  | NA | NA | NA | NA | NA | NA | NA | NA | NA | NA | NA | NA | NA |
| NA            | NA                 | NA | NA | NA | NA | -2 | NA |    |    |    |    |    |    |    |
| ITSN2         | ENSG00000198399.14 | NA | NA | NA | NA | NA | NA | NA | NA | NA | NA | NA | NA | NA |
| NA            | NA                 | NA | NA | NA | NA | -2 | NA |    |    |    |    |    |    |    |
| DIRC3         | ENSG00000231672.6  | NA | NA | NA | NA | NA | NA | NA | NA | NA | NA | NA | NA | NA |
| NA            | NA                 | NA | NA | NA | NA | -2 | NA |    |    |    |    |    |    |    |
| NT5DC4        | ENSG00000144130.11 | NA | NA | NA | NA | NA | NA | NA | NA | NA | NA | NA | NA | NA |
| NA            | NA                 | NA | NA | NA | NA | -2 | NA |    |    |    |    |    |    |    |
| LINC01593     | ENSG00000231221.1  | NA | NA | NA | NA | NA | NA | NA | NA | NA | NA | NA | NA | NA |
| NA            | NA                 | NA | NA | NA | NA | -2 | NA |    |    |    |    |    |    |    |
| LINC01827     | ENSG00000234919.1  | NA | NA | NA | NA | NA | NA | NA | NA | NA | NA | NA | NA | NA |
| NA            | NA                 | NA | NA | NA | NA | -2 | NA |    |    |    |    |    |    |    |
| RP11-111J6.2  | ENSG00000260331.1  | NA | NA | NA | NA | NA | NA | NA | NA | NA | NA | NA | NA | NA |

|               |                    |    |    |    |    |    |    |    |    |    |    |    |    |    |
|---------------|--------------------|----|----|----|----|----|----|----|----|----|----|----|----|----|
| NA            | NA                 | NA | NA | NA | NA | -2 | NA |    |    |    |    |    |    |    |
| AC097721.2    | ENSG00000228043.5  |    |    |    |    | NA | NA | NA | NA | NA | NA | NA | NA | NA |
| NA            | NA                 | NA | NA | NA | NA | -2 | NA |    |    |    |    |    |    |    |
| C2orf83       | ENSG00000042304.10 |    |    |    |    | NA | NA | NA | NA | NA | NA | NA | NA | NA |
| NA            | NA                 | NA | NA | NA | NA | -2 | NA |    |    |    |    |    |    |    |
| C2orf76       | ENSG00000186132.14 |    |    |    |    | NA | NA | NA | NA | NA | NA | NA | NA | NA |
| NA            | NA                 | NA | NA | NA | NA | -2 | NA |    |    |    |    |    |    |    |
| SAG           | ENSG00000130561.16 |    |    |    |    | NA | NA | NA | NA | NA | NA | NA | NA | NA |
| NA            | NA                 | NA | NA | NA | NA | -2 | NA |    |    |    |    |    |    |    |
| DUSP11        | ENSG00000144048.10 |    |    |    |    | NA | NA | NA | NA | NA | NA | NA | NA | NA |
| NA            | NA                 | NA | NA | NA | NA | -2 | NA |    |    |    |    |    |    |    |
| RP11-1057B6.1 | ENSG00000273165.1  |    |    |    |    | NA | NA | NA | NA | NA | NA | NA | NA | NA |
| NA            | NA                 | NA | NA | NA | NA | -2 | NA |    |    |    |    |    |    |    |
| AC067959.1    | ENSG00000233005.1  |    |    |    |    | NA | NA | NA | NA | NA | NA | NA | NA | NA |
| NA            | NA                 | NA | NA | NA | NA | -2 | NA |    |    |    |    |    |    |    |
| AC019064.1    | ENSG00000237320.2  |    |    |    |    | NA | NA | NA | NA | NA | NA | NA | NA | NA |
| NA            | NA                 | NA | NA | NA | NA | -2 | NA |    |    |    |    |    |    |    |
| FZD5          | ENSG00000163251.3  |    |    |    |    | NA | NA | NA | NA | NA | NA | NA | NA | NA |
| NA            | NA                 | NA | NA | NA | NA | -2 | NA |    |    |    |    |    |    |    |
| HOXD13        | ENSG00000128714.5  |    |    |    |    | NA | NA | NA | NA | NA | NA | NA | NA | NA |
| NA            | NA                 | NA | NA | NA | NA | -2 | NA |    |    |    |    |    |    |    |
| RP11-332H14.1 | ENSG00000272861.1  |    |    |    |    | NA | NA | NA | NA | NA | NA | NA | NA | NA |
| NA            | NA                 | NA | NA | NA | NA | -2 | NA |    |    |    |    |    |    |    |
| MYL1          | ENSG00000168530.15 |    |    |    |    | NA | NA | NA | NA | NA | NA | NA | NA | NA |
| NA            | NA                 | NA | NA | NA | NA | -2 | NA |    |    |    |    |    |    |    |
| CAB39         | ENSG00000135932.10 |    |    |    |    | NA | NA | NA | NA | NA | NA | NA | NA | NA |
| NA            | NA                 | NA | NA | NA | NA | -2 | NA |    |    |    |    |    |    |    |
| RP11-443F4.1  | ENSG00000282828.1  |    |    |    |    | NA | NA | NA | NA | NA | NA | NA | NA | NA |
| NA            | NA                 | NA | NA | NA | NA | -2 | NA |    |    |    |    |    |    |    |
| LOXL3         | ENSG00000115318.11 |    |    |    |    | NA | NA | NA | NA | NA | NA | NA | NA | NA |
| NA            | NA                 | NA | NA | NA | NA | -2 | NA |    |    |    |    |    |    |    |
| AC073321.4    | ENSG00000225794.1  |    |    |    |    | NA | NA | NA | NA | NA | NA | NA | NA | NA |
| NA            | NA                 | NA | NA | NA | NA | -2 | NA |    |    |    |    |    |    |    |
| AC096574.5    | ENSG00000227107.1  |    |    |    |    | NA | NA | NA | NA | NA | NA | NA | NA | NA |
| NA            | NA                 | NA | NA | NA | NA | -2 | NA |    |    |    |    |    |    |    |
| LINC01891     | ENSG00000231682.1  |    |    |    |    | NA | NA | NA | NA | NA | NA | NA | NA | NA |
| NA            | NA                 | NA | NA | NA | NA | -2 | NA |    |    |    |    |    |    |    |
| RP11-171I2.3  | ENSG00000271401.1  |    |    |    |    | NA | NA | NA | NA | NA | NA | NA | NA | NA |
| NA            | NA                 | NA | NA | NA | NA | -2 | NA |    |    |    |    |    |    |    |
| MTIF2         | ENSG00000085760.14 |    |    |    |    | NA | NA | NA | NA | NA | NA | NA | NA | NA |
| NA            | NA                 | NA | NA | NA | NA | -2 | NA |    |    |    |    |    |    |    |
| RFTN2         | ENSG00000162944.10 |    |    |    |    | NA | NA | NA | NA | NA | NA | NA | NA | NA |
| NA            | NA                 | NA | NA | NA | NA | -2 | NA |    |    |    |    |    |    |    |
| RTKN          | ENSG00000114993.16 |    |    |    |    | NA | NA | NA | NA | NA | NA | NA | NA | NA |
| NA            | NA                 | NA | NA | NA | NA | -2 | NA |    |    |    |    |    |    |    |
| RP11-181E10.3 | ENSG00000271590.1  |    |    |    |    | NA | NA | NA | NA | NA | NA | NA | NA | NA |
| NA            | NA                 | NA | NA | NA | NA | -2 | NA |    |    |    |    |    |    |    |
| TMEM182       | ENSG00000170417.15 |    |    |    |    | NA | NA | NA | NA | NA | NA | NA | NA | NA |
| NA            | NA                 | NA | NA | NA | NA | -2 | NA |    |    |    |    |    |    |    |
| IL1A          | ENSG00000115008.5  |    |    |    |    | NA | NA | NA | NA | NA | NA | NA | NA | NA |
| NA            | NA                 | NA | NA | NA | NA | -2 | NA |    |    |    |    |    |    |    |
| NRBP1         | ENSG00000115216.13 |    |    |    |    | NA | NA | NA | NA | NA | NA | NA | NA | NA |
| NA            | NA                 | NA | NA | NA | NA | -2 | NA |    |    |    |    |    |    |    |
| ACSL3         | ENSG00000123983.13 |    |    |    |    | NA | NA | NA | NA | NA | NA | NA | NA | NA |
| NA            | NA                 | NA | NA | NA | NA | -2 | NA |    |    |    |    |    |    |    |
| LINC01117     | ENSG00000224577.1  |    |    |    |    | NA | NA | NA | NA | NA | NA | NA | NA | NA |
| NA            | NA                 | NA | NA | NA | NA | -2 | NA |    |    |    |    |    |    |    |
| CENPA         | ENSG00000115163.14 |    |    |    |    | NA | NA | NA | NA | NA | NA | NA | NA | NA |
| NA            | NA                 | NA | NA | NA | NA | -2 | NA |    |    |    |    |    |    |    |
| IL37          | ENSG00000125571.9  |    |    |    |    | NA | NA | NA | NA | NA | NA | NA | NA | NA |
| NA            | NA                 | NA | NA | NA | NA | -2 | NA |    |    |    |    |    |    |    |
| KANSL3        | ENSG00000114982.17 |    |    |    |    | NA | NA | NA | NA | NA | NA | NA | NA | NA |

|               |                    |    |    |    |    |    |    |    |    |    |    |    |    |    |
|---------------|--------------------|----|----|----|----|----|----|----|----|----|----|----|----|----|
|               | NA                 | NA | NA | NA | NA | -2 | NA |    |    |    |    |    |    |    |
| NMI           | ENSG00000123609.10 |    |    |    | NA | NA | NA | NA | NA | NA | NA | NA | NA | NA |
|               | NA                 | NA | NA | NA | -2 | NA |    |    |    |    |    |    |    |    |
| RBM45         | ENSG00000155636.14 |    |    |    | NA | NA | NA | NA | NA | NA | NA | NA | NA | NA |
|               | NA                 | NA | NA | NA | -2 | NA |    |    |    |    |    |    |    |    |
| AC007682.1    | ENSG00000231918.1  |    |    |    | NA | NA | NA | NA | NA | NA | NA | NA | NA | NA |
|               | NA                 | NA | NA | NA | -2 | NA |    |    |    |    |    |    |    |    |
| AC023347.1    | ENSG00000235774.1  |    |    |    | NA | NA | NA | NA | NA | NA | NA | NA | NA | NA |
|               | NA                 | NA | NA | NA | -2 | NA |    |    |    |    |    |    |    |    |
| AC017048.2    | ENSG00000236231.1  |    |    |    | NA | NA | NA | NA | NA | NA | NA | NA | NA | NA |
|               | NA                 | NA | NA | NA | -2 | NA |    |    |    |    |    |    |    |    |
| RP11-68606.1  | ENSG00000272966.1  |    |    |    | NA | NA | NA | NA | NA | NA | NA | NA | NA | NA |
|               | NA                 | NA | NA | NA | NA | -2 | NA |    |    |    |    |    |    |    |
| LINC01874     | ENSG00000223985.1  |    |    |    | NA | NA | NA | NA | NA | NA | NA | NA | NA | NA |
|               | NA                 | NA | NA | NA | -2 | NA |    |    |    |    |    |    |    |    |
| CDK15         | ENSG00000138395.14 |    |    |    | NA | NA | NA | NA | NA | NA | NA | NA | NA | NA |
|               | NA                 | NA | NA | NA | -2 | NA |    |    |    |    |    |    |    |    |
| RP11-506F3.1  | ENSG00000282033.1  |    |    |    | NA | NA | NA | NA | NA | NA | NA | NA | NA | NA |
|               | NA                 | NA | NA | NA | NA | -2 | NA |    |    |    |    |    |    |    |
| STK11IP       | ENSG00000144589.21 |    |    |    | NA | NA | NA | NA | NA | NA | NA | NA | NA | NA |
|               | NA                 | NA | NA | NA | -2 | NA |    |    |    |    |    |    |    |    |
| COMMD1        | ENSG00000173163.10 |    |    |    | NA | NA | NA | NA | NA | NA | NA | NA | NA | NA |
|               | NA                 | NA | NA | NA | -2 | NA |    |    |    |    |    |    |    |    |
| RP11-521D12.2 | ENSG00000244260.1  |    |    |    | NA | NA | NA | NA | NA | NA | NA | NA | NA | NA |
|               | NA                 | NA | NA | NA | NA | -2 | NA |    |    |    |    |    |    |    |
| TPO           | ENSG00000115705.20 |    |    |    | NA | NA | NA | NA | NA | NA | NA | NA | NA | NA |
|               | NA                 | NA | NA | NA | -2 | NA |    |    |    |    |    |    |    |    |
| NIFK          | ENSG00000155438.11 |    |    |    | NA | NA | NA | NA | NA | NA | NA | NA | NA | NA |
|               | NA                 | NA | NA | NA | -2 | NA |    |    |    |    |    |    |    |    |
| LINC01818     | ENSG00000230645.1  |    |    |    | NA | NA | NA | NA | NA | NA | NA | NA | NA | NA |
|               | NA                 | NA | NA | NA | -2 | NA |    |    |    |    |    |    |    |    |
| PLCL1         | ENSG00000115896.15 |    |    |    | NA | NA | NA | NA | NA | NA | NA | NA | NA | NA |
|               | NA                 | NA | NA | NA | -2 | NA |    |    |    |    |    |    |    |    |
| ARL5A         | ENSG00000162980.16 |    |    |    | NA | NA | NA | NA | NA | NA | NA | NA | NA | NA |
|               | NA                 | NA | NA | NA | -2 | NA |    |    |    |    |    |    |    |    |
| SLC9A4        | ENSG00000180251.4  |    |    |    | NA | NA | NA | NA | NA | NA | NA | NA | NA | NA |
|               | NA                 | NA | NA | NA | -2 | NA |    |    |    |    |    |    |    |    |
| LINC01107     | ENSG00000225493.1  |    |    |    | NA | NA | NA | NA | NA | NA | NA | NA | NA | NA |
|               | NA                 | NA | NA | NA | -2 | NA |    |    |    |    |    |    |    |    |
| AC010967.2    | ENSG00000228033.5  |    |    |    | NA | NA | NA | NA | NA | NA | NA | NA | NA | NA |
|               | NA                 | NA | NA | NA | -2 | NA |    |    |    |    |    |    |    |    |
| GPR1          | ENSG00000183671.12 |    |    |    | NA | NA | NA | NA | NA | NA | NA | NA | NA | NA |
|               | NA                 | NA | NA | NA | -2 | NA |    |    |    |    |    |    |    |    |
| DNAJB2        | ENSG00000135924.15 |    |    |    | NA | NA | NA | NA | NA | NA | NA | NA | NA | NA |
|               | NA                 | NA | NA | NA | -2 | NA |    |    |    |    |    |    |    |    |
| KCNG3         | ENSG00000171126.7  |    |    |    | NA | NA | NA | NA | NA | NA | NA | NA | NA | NA |
|               | NA                 | NA | NA | NA | -2 | NA |    |    |    |    |    |    |    |    |
| MIR3681HG     | ENSG00000224184.5  |    |    |    | NA | NA | NA | NA | NA | NA | NA | NA | NA | NA |
|               | NA                 | NA | NA | NA | -2 | NA |    |    |    |    |    |    |    |    |
| LINC01889     | ENSG00000235491.1  |    |    |    | NA | NA | NA | NA | NA | NA | NA | NA | NA | NA |
|               | NA                 | NA | NA | NA | -2 | NA |    |    |    |    |    |    |    |    |
| LINC01937     | ENSG00000234279.1  |    |    |    | NA | NA | NA | NA | NA | NA | NA | NA | NA | NA |
|               | NA                 | NA | NA | NA | -2 | NA |    |    |    |    |    |    |    |    |
| CH17-132F21.5 | ENSG00000281904.1  |    |    |    | NA | NA | NA | NA | NA | NA | NA | NA | NA | NA |
|               | NA                 | NA | NA | NA | NA | -2 | NA |    |    |    |    |    |    |    |
| NT5C1B        | ENSG00000185013.16 |    |    |    | NA | NA | NA | NA | NA | NA | NA | NA | NA | NA |
|               | NA                 | NA | NA | NA | -2 | NA |    |    |    |    |    |    |    |    |
| POTEJ         | ENSG00000222038.3  |    |    |    | NA | NA | NA | NA | NA | NA | NA | NA | NA | NA |
|               | NA                 | NA | NA | NA | -2 | NA |    |    |    |    |    |    |    |    |
| AC005042.5    | ENSG00000228586.1  |    |    |    | NA | NA | NA | NA | NA | NA | NA | NA | NA | NA |
|               | NA                 | NA | NA | NA | -2 | NA |    |    |    |    |    |    |    |    |
| AC012462.3    | ENSG00000228618.1  |    |    |    | NA | NA | NA | NA | NA | NA | NA | NA | NA | NA |

|             |                    |    |    |    |    |    |    |    |    |    |    |    |    |    |
|-------------|--------------------|----|----|----|----|----|----|----|----|----|----|----|----|----|
| NA          | NA                 | NA | NA | NA | -2 | NA |    |    |    |    |    |    |    |    |
| ARMC9       | ENSG00000135931.17 |    |    |    |    | NA | NA | NA | NA | NA | NA | NA | NA | NA |
| NA          | NA                 | NA | NA | NA | -2 | NA |    |    |    |    |    |    |    |    |
| CNRIP1      | ENSG00000119865.8  |    |    |    |    | NA | NA | NA | NA | NA | NA | NA | NA | NA |
| NA          | NA                 | NA | NA | NA | -2 | NA |    |    |    |    |    |    |    |    |
| BCS1L       | ENSG00000074582.12 |    |    |    |    | NA | NA | NA | NA | NA | NA | NA | NA | NA |
| NA          | NA                 | NA | NA | NA | -2 | NA |    |    |    |    |    |    |    |    |
| AC114752.1  | ENSG00000238012.1  |    |    |    |    | NA | NA | NA | NA | NA | NA | NA | NA | NA |
| NA          | NA                 | NA | NA | NA | -2 | NA |    |    |    |    |    |    |    |    |
| GALNT14     | ENSG00000158089.14 |    |    |    |    | NA | NA | NA | NA | NA | NA | NA | NA | NA |
| NA          | NA                 | NA | NA | NA | -2 | NA |    |    |    |    |    |    |    |    |
| PUM2        | ENSG00000055917.15 |    |    |    |    | NA | NA | NA | NA | NA | NA | NA | NA | NA |
| NA          | NA                 | NA | NA | NA | -2 | NA |    |    |    |    |    |    |    |    |
| IKZF2       | ENSG00000030419.16 |    |    |    |    | NA | NA | NA | NA | NA | NA | NA | NA | NA |
| NA          | NA                 | NA | NA | NA | -2 | NA |    |    |    |    |    |    |    |    |
| LINC01873   | ENSG00000232164.1  |    |    |    |    | NA | NA | NA | NA | NA | NA | NA | NA | NA |
| NA          | NA                 | NA | NA | NA | -2 | NA |    |    |    |    |    |    |    |    |
| AC012370.3  | ENSG00000234255.8  |    |    |    |    | NA | NA | NA | NA | NA | NA | NA | NA | NA |
| NA          | NA                 | NA | NA | NA | -2 | NA |    |    |    |    |    |    |    |    |
| SUPT7L      | ENSG00000119760.15 |    |    |    |    | NA | NA | NA | NA | NA | NA | NA | NA | NA |
| NA          | NA                 | NA | NA | NA | -2 | NA |    |    |    |    |    |    |    |    |
| LINC01796   | ENSG00000277527.1  |    |    |    |    | NA | NA | NA | NA | NA | NA | NA | NA | NA |
| NA          | NA                 | NA | NA | NA | -2 | NA |    |    |    |    |    |    |    |    |
| CYP26B1     | ENSG00000003137.8  |    |    |    |    | NA | NA | NA | NA | NA | NA | NA | NA | NA |
| NA          | NA                 | NA | NA | NA | -2 | NA |    |    |    |    |    |    |    |    |
| SPAST       | ENSG00000021574.11 |    |    |    |    | NA | NA | NA | NA | NA | NA | NA | NA | NA |
| NA          | NA                 | NA | NA | NA | -2 | NA |    |    |    |    |    |    |    |    |
| UGT1A3      | ENSG00000243135.6  |    |    |    |    | NA | NA | NA | NA | NA | NA | NA | NA | NA |
| NA          | NA                 | NA | NA | NA | -2 | NA |    |    |    |    |    |    |    |    |
| STK36       | ENSG00000163482.11 |    |    |    |    | NA | NA | NA | NA | NA | NA | NA | NA | NA |
| NA          | NA                 | NA | NA | NA | -2 | NA |    |    |    |    |    |    |    |    |
| POTEF       | ENSG00000196604.12 |    |    |    |    | NA | NA | NA | NA | NA | NA | NA | NA | NA |
| NA          | NA                 | NA | NA | NA | -2 | NA |    |    |    |    |    |    |    |    |
| LINC01884   | ENSG00000233587.1  |    |    |    |    | NA | NA | NA | NA | NA | NA | NA | NA | NA |
| NA          | NA                 | NA | NA | NA | -2 | NA |    |    |    |    |    |    |    |    |
| AC114783.1  | ENSG00000237524.8  |    |    |    |    | NA | NA | NA | NA | NA | NA | NA | NA | NA |
| NA          | NA                 | NA | NA | NA | -2 | NA |    |    |    |    |    |    |    |    |
| DLX2        | ENSG00000115844.10 |    |    |    |    | NA | NA | NA | NA | NA | NA | NA | NA | NA |
| NA          | NA                 | NA | NA | NA | -2 | NA |    |    |    |    |    |    |    |    |
| HADHA       | ENSG00000084754.10 |    |    |    |    | NA | NA | NA | NA | NA | NA | NA | NA | NA |
| NA          | NA                 | NA | NA | NA | -2 | NA |    |    |    |    |    |    |    |    |
| MGAT4A      | ENSG00000071073.12 |    |    |    |    | NA | NA | NA | NA | NA | NA | NA | NA | NA |
| NA          | NA                 | NA | NA | NA | -2 | NA |    |    |    |    |    |    |    |    |
| TUBA4A      | ENSG00000127824.13 |    |    |    |    | NA | NA | NA | NA | NA | NA | NA | NA | NA |
| NA          | NA                 | NA | NA | NA | -2 | NA |    |    |    |    |    |    |    |    |
| STARD7      | ENSG00000084090.13 |    |    |    |    | NA | NA | NA | NA | NA | NA | NA | NA | NA |
| NA          | NA                 | NA | NA | NA | -2 | NA |    |    |    |    |    |    |    |    |
| AC073046.25 | ENSG00000235499.1  |    |    |    |    | NA | NA | NA | NA | NA | NA | NA | NA | NA |
| NA          | NA                 | NA | NA | NA | -2 | NA |    |    |    |    |    |    |    |    |
| AC013269.5  | ENSG00000184761.7  |    |    |    |    | NA | NA | NA | NA | NA | NA | NA | NA | NA |
| NA          | NA                 | NA | NA | NA | -2 | NA |    |    |    |    |    |    |    |    |
| PRKCE       | ENSG00000171132.13 |    |    |    |    | NA | NA | NA | NA | NA | NA | NA | NA | NA |
| NA          | NA                 | NA | NA | NA | -2 | NA |    |    |    |    |    |    |    |    |
| MAP3K19     | ENSG00000176601.12 |    |    |    |    | NA | NA | NA | NA | NA | NA | NA | NA | NA |
| NA          | NA                 | NA | NA | NA | -2 | NA |    |    |    |    |    |    |    |    |
| LINC01965   | ENSG00000256637.6  |    |    |    |    | NA | NA | NA | NA | NA | NA | NA | NA | NA |
| NA          | NA                 | NA | NA | NA | -2 | NA |    |    |    |    |    |    |    |    |
| FBXO48      | ENSG00000204923.3  |    |    |    |    | NA | NA | NA | NA | NA | NA | NA | NA | NA |
| NA          | NA                 | NA | NA | NA | -2 | NA |    |    |    |    |    |    |    |    |
| AC017002.4  | ENSG00000225744.1  |    |    |    |    | NA | NA | NA | NA | NA | NA | NA | NA | NA |
| NA          | NA                 | NA | NA | NA | -2 | NA |    |    |    |    |    |    |    |    |
| NFE2L2      | ENSG00000116044.15 |    |    |    |    | NA | NA | NA | NA | NA | NA | NA | NA | NA |

|               |                    |    |    |    |    |    |    |    |    |    |    |    |    |
|---------------|--------------------|----|----|----|----|----|----|----|----|----|----|----|----|
| NA            | NA                 | NA | NA | NA | -2 | NA |    |    |    |    |    |    |    |
| SH3BP4        | ENSG00000130147.15 |    |    |    |    | NA | NA | NA | NA | NA | NA | NA | NA |
| NA            | NA                 | NA | NA | NA | -2 | NA |    |    |    |    |    |    |    |
| RP11-521D12.5 | ENSG00000243491.1  |    |    |    |    | NA | NA | NA | NA | NA | NA | NA | NA |
| NA            | NA                 | NA | NA | NA | NA | -2 | NA |    |    |    |    |    |    |
| FAP           | ENSG00000078098.13 |    |    |    |    | NA | NA | NA | NA | NA | NA | NA | NA |
| NA            | NA                 | NA | NA | NA | -2 | NA |    |    |    |    |    |    |    |
| SLC8A1        | ENSG00000183023.18 |    |    |    |    | NA | NA | NA | NA | NA | NA | NA | NA |
| NA            | NA                 | NA | NA | NA | -2 | NA |    |    |    |    |    |    |    |
| REL           | ENSG00000162924.13 |    |    |    |    | NA | NA | NA | NA | NA | NA | NA | NA |
| NA            | NA                 | NA | NA | NA | -2 | NA |    |    |    |    |    |    |    |
| AC079305.11   | ENSG00000236501.5  |    |    |    |    | NA | NA | NA | NA | NA | NA | NA | NA |
| NA            | NA                 | NA | NA | NA | NA | -2 | NA |    |    |    |    |    |    |
| FAM168B       | ENSG00000152102.17 |    |    |    |    | NA | NA | NA | NA | NA | NA | NA | NA |
| NA            | NA                 | NA | NA | NA | -2 | NA |    |    |    |    |    |    |    |
| IL1B          | ENSG00000125538.11 |    |    |    |    | NA | NA | NA | NA | NA | NA | NA | NA |
| NA            | NA                 | NA | NA | NA | -2 | NA |    |    |    |    |    |    |    |
| AC012462.2    | ENSG00000225166.1  |    |    |    |    | NA | NA | NA | NA | NA | NA | NA | NA |
| NA            | NA                 | NA | NA | NA | -2 | NA |    |    |    |    |    |    |    |
| ABCB11        | ENSG00000073734.8  |    |    |    |    | NA | NA | NA | NA | NA | NA | NA | NA |
| NA            | NA                 | NA | NA | NA | -2 | NA |    |    |    |    |    |    |    |
| AC017002.1    | ENSG00000240350.2  |    |    |    |    | NA | NA | NA | NA | NA | NA | NA | NA |
| NA            | NA                 | NA | NA | NA | -2 | NA |    |    |    |    |    |    |    |
| MRPL33        | ENSG00000243147.7  |    |    |    |    | NA | NA | NA | NA | NA | NA | NA | NA |
| NA            | NA                 | NA | NA | NA | -2 | NA |    |    |    |    |    |    |    |
| LINC01865     | ENSG00000233684.2  |    |    |    |    | NA | NA | NA | NA | NA | NA | NA | NA |
| NA            | NA                 | NA | NA | NA | -2 | NA |    |    |    |    |    |    |    |
| LIMS4         | ENSG00000256671.6  |    |    |    |    | NA | NA | NA | NA | NA | NA | NA | NA |
| NA            | NA                 | NA | NA | NA | -2 | NA |    |    |    |    |    |    |    |
| C2orf78       | ENSG00000187833.7  |    |    |    |    | NA | NA | NA | NA | NA | NA | NA | NA |
| NA            | NA                 | NA | NA | NA | -2 | NA |    |    |    |    |    |    |    |
| CYS1          | ENSG00000205795.4  |    |    |    |    | NA | NA | NA | NA | NA | NA | NA | NA |
| NA            | NA                 | NA | NA | NA | -2 | NA |    |    |    |    |    |    |    |
| CTDSP1        | ENSG00000144579.7  |    |    |    |    | NA | NA | NA | NA | NA | NA | NA | NA |
| NA            | NA                 | NA | NA | NA | -2 | NA |    |    |    |    |    |    |    |
| KIF5C         | ENSG00000168280.16 |    |    |    |    | NA | NA | NA | NA | NA | NA | NA | NA |
| NA            | NA                 | NA | NA | NA | -2 | NA |    |    |    |    |    |    |    |
| LINC01850     | ENSG00000227708.1  |    |    |    |    | NA | NA | NA | NA | NA | NA | NA | NA |
| NA            | NA                 | NA | NA | NA | -2 | NA |    |    |    |    |    |    |    |
| IDH1          | ENSG00000138413.13 |    |    |    |    | NA | NA | NA | NA | NA | NA | NA | NA |
| NA            | NA                 | NA | NA | NA | -2 | NA |    |    |    |    |    |    |    |
| COL4A3        | ENSG00000169031.18 |    |    |    |    | NA | NA | NA | NA | NA | NA | NA | NA |
| NA            | NA                 | NA | NA | NA | -2 | NA |    |    |    |    |    |    |    |
| AC092625.1    | ENSG00000230991.1  |    |    |    |    | NA | NA | NA | NA | NA | NA | NA | NA |
| NA            | NA                 | NA | NA | NA | -2 | NA |    |    |    |    |    |    |    |
| AC007389.3    | ENSG00000235725.1  |    |    |    |    | NA | NA | NA | NA | NA | NA | NA | NA |
| NA            | NA                 | NA | NA | NA | -2 | NA |    |    |    |    |    |    |    |
| RGPD3         | ENSG00000153165.18 |    |    |    |    | NA | NA | NA | NA | NA | NA | NA | NA |
| NA            | NA                 | NA | NA | NA | -2 | NA |    |    |    |    |    |    |    |
| LINC01816     | ENSG00000231327.1  |    |    |    |    | NA | NA | NA | NA | NA | NA | NA | NA |
| NA            | NA                 | NA | NA | NA | -2 | NA |    |    |    |    |    |    |    |
| AC092620.3    | ENSG00000237772.1  |    |    |    |    | NA | NA | NA | NA | NA | NA | NA | NA |
| NA            | NA                 | NA | NA | NA | -2 | NA |    |    |    |    |    |    |    |
| RP11-459I19.1 | ENSG00000272555.1  |    |    |    |    | NA | NA | NA | NA | NA | NA | NA | NA |
| NA            | NA                 | NA | NA | NA | NA | -2 | NA |    |    |    |    |    |    |
| KIDINS220     | ENSG00000134313.15 |    |    |    |    | NA | NA | NA | NA | NA | NA | NA | NA |
| NA            | NA                 | NA | NA | NA | -2 | NA |    |    |    |    |    |    |    |
| ACKR3         | ENSG00000144476.5  |    |    |    |    | NA | NA | NA | NA | NA | NA | NA | NA |
| NA            | NA                 | NA | NA | NA | -2 | NA |    |    |    |    |    |    |    |
| UGT1A1        | ENSG00000241635.7  |    |    |    |    | NA | NA | NA | NA | NA | NA | NA | NA |
| NA            | NA                 | NA | NA | NA | -2 | NA |    |    |    |    |    |    |    |
| RBMS1         | ENSG00000153250.19 |    |    |    |    | NA | NA | NA | NA | NA | NA | NA | NA |

|               |                    |    |    |    |    |    |    |    |    |    |    |    |    |    |
|---------------|--------------------|----|----|----|----|----|----|----|----|----|----|----|----|----|
| NA            | NA                 | NA | NA | -2 | NA |    |    |    |    |    |    |    |    |    |
| BMPR2         | ENSG00000204217.13 |    |    |    | NA | NA | NA | NA | NA | NA | NA | NA | NA | NA |
| NA            | NA                 | NA | NA | -2 | NA |    |    |    |    |    |    |    |    |    |
| UGT1A8        | ENSG00000242366.3  |    |    |    | NA | NA | NA | NA | NA | NA | NA | NA | NA | NA |
| NA            | NA                 | NA | NA | NA | -2 | NA |    |    |    |    |    |    |    |    |
| AC007249.3    | ENSG00000217258.2  |    |    |    | NA | NA | NA | NA | NA | NA | NA | NA | NA | NA |
| NA            | NA                 | NA | NA | NA | -2 | NA |    |    |    |    |    |    |    |    |
| G6PC2         | ENSG00000152254.10 |    |    |    | NA | NA | NA | NA | NA | NA | NA | NA | NA | NA |
| NA            | NA                 | NA | NA | -2 | NA |    |    |    |    |    |    |    |    |    |
| LINC01317     | ENSG00000203386.6  |    |    |    | NA | NA | NA | NA | NA | NA | NA | NA | NA | NA |
| NA            | NA                 | NA | NA | NA | -2 | NA |    |    |    |    |    |    |    |    |
| FAM98A        | ENSG00000119812.18 |    |    |    | NA | NA | NA | NA | NA | NA | NA | NA | NA | NA |
| NA            | NA                 | NA | NA | NA | -2 | NA |    |    |    |    |    |    |    |    |
| UNC80         | ENSG00000144406.18 |    |    |    | NA | NA | NA | NA | NA | NA | NA | NA | NA | NA |
| NA            | NA                 | NA | NA | -2 | NA |    |    |    |    |    |    |    |    |    |
| MIR7515HG     | ENSG00000236172.6  |    |    |    | NA | NA | NA | NA | NA | NA | NA | NA | NA | NA |
| NA            | NA                 | NA | NA | NA | -2 | NA |    |    |    |    |    |    |    |    |
| C2orf48       | ENSG00000163009.8  |    |    |    | NA | NA | NA | NA | NA | NA | NA | NA | NA | NA |
| NA            | NA                 | NA | NA | NA | -2 | NA |    |    |    |    |    |    |    |    |
| LINC01473     | ENSG00000237877.6  |    |    |    | NA | NA | NA | NA | NA | NA | NA | NA | NA | NA |
| NA            | NA                 | NA | NA | NA | -2 | NA |    |    |    |    |    |    |    |    |
| AC007405.4    | ENSG00000234350.4  |    |    |    | NA | NA | NA | NA | NA | NA | NA | NA | NA | NA |
| NA            | NA                 | NA | NA | NA | -2 | NA |    |    |    |    |    |    |    |    |
| AC096669.1    | ENSG00000225588.2  |    |    |    | NA | NA | NA | NA | NA | NA | NA | NA | NA | NA |
| NA            | NA                 | NA | NA | NA | -2 | NA |    |    |    |    |    |    |    |    |
| UGT1A9        | ENSG00000241119.1  |    |    |    | NA | NA | NA | NA | NA | NA | NA | NA | NA | NA |
| NA            | NA                 | NA | NA | NA | -2 | NA |    |    |    |    |    |    |    |    |
| LINC01250     | ENSG00000234423.1  |    |    |    | NA | NA | NA | NA | NA | NA | NA | NA | NA | NA |
| NA            | NA                 | NA | NA | NA | -2 | NA |    |    |    |    |    |    |    |    |
| DCTN1         | ENSG00000204843.12 |    |    |    | NA | NA | NA | NA | NA | NA | NA | NA | NA | NA |
| NA            | NA                 | NA | NA | -2 | NA |    |    |    |    |    |    |    |    |    |
| RP11-467P9.1  | ENSG00000272735.1  |    |    |    | NA | NA | NA | NA | NA | NA | NA | NA | NA | NA |
| NA            | NA                 | NA | NA | NA | NA | -2 | NA |    |    |    |    |    |    |    |
| TEX44         | ENSG00000177673.3  |    |    |    | NA | NA | NA | NA | NA | NA | NA | NA | NA | NA |
| NA            | NA                 | NA | NA | -2 | NA |    |    |    |    |    |    |    |    |    |
| RP11-625N16.1 | ENSG00000284452.1  |    |    |    | NA | NA | NA | NA | NA | NA | NA | NA | NA | NA |
| NA            | NA                 | NA | NA | NA | NA | -2 | NA |    |    |    |    |    |    |    |
| AC009505.4    | ENSG00000234162.1  |    |    |    | NA | NA | NA | NA | NA | NA | NA | NA | NA | NA |
| NA            | NA                 | NA | NA | NA | -2 | NA |    |    |    |    |    |    |    |    |
| FAM161A       | ENSG00000170264.12 |    |    |    | NA | NA | NA | NA | NA | NA | NA | NA | NA | NA |
| NA            | NA                 | NA | NA | NA | -2 | NA |    |    |    |    |    |    |    |    |
| TEX41         | ENSG00000226674.8  |    |    |    | NA | NA | NA | NA | NA | NA | NA | NA | NA | NA |
| NA            | NA                 | NA | NA | -2 | NA |    |    |    |    |    |    |    |    |    |
| HS1BP3        | ENSG00000118960.12 |    |    |    | NA | NA | NA | NA | NA | NA | NA | NA | NA | NA |
| NA            | NA                 | NA | NA | NA | -2 | NA |    |    |    |    |    |    |    |    |
| LINC01911     | ENSG00000231040.1  |    |    |    | NA | NA | NA | NA | NA | NA | NA | NA | NA | NA |
| NA            | NA                 | NA | NA | NA | -2 | NA |    |    |    |    |    |    |    |    |
| LINC01907     | ENSG00000226125.1  |    |    |    | NA | NA | NA | NA | NA | NA | NA | NA | NA | NA |
| NA            | NA                 | NA | NA | NA | -2 | NA |    |    |    |    |    |    |    |    |
| LINC01941     | ENSG00000226813.2  |    |    |    | NA | NA | NA | NA | NA | NA | NA | NA | NA | NA |
| NA            | NA                 | NA | NA | NA | -2 | NA |    |    |    |    |    |    |    |    |
| MALL          | ENSG00000144063.3  |    |    |    | NA | NA | NA | NA | NA | NA | NA | NA | NA | NA |
| NA            | NA                 | NA | NA | -2 | NA |    |    |    |    |    |    |    |    |    |
| BRE           | ENSG00000158019.20 |    |    |    | NA | NA | NA | NA | NA | NA | NA | NA | NA | NA |
| NA            | NA                 | NA | NA | -2 | NA |    |    |    |    |    |    |    |    |    |
| AC007879.2    | ENSG00000234902.6  |    |    |    | NA | NA | NA | NA | NA | NA | NA | NA | NA | NA |
| NA            | NA                 | NA | NA | NA | -2 | NA |    |    |    |    |    |    |    |    |
| TM4SF20       | ENSG00000168955.3  |    |    |    | NA | NA | NA | NA | NA | NA | NA | NA | NA | NA |
| NA            | NA                 | NA | NA | NA | -2 | NA |    |    |    |    |    |    |    |    |
| LRRTM1        | ENSG00000162951.10 |    |    |    | NA | NA | NA | NA | NA | NA | NA | NA | NA | NA |
| NA            | NA                 | NA | NA | NA | -2 | NA |    |    |    |    |    |    |    |    |
| HOXD9         | ENSG00000128709.12 |    |    |    | NA | NA | NA | NA | NA | NA | NA | NA | NA | NA |



|               |                    |    |    |    |    |    |    |    |    |    |    |    |    |    |
|---------------|--------------------|----|----|----|----|----|----|----|----|----|----|----|----|----|
|               | NA                 | NA | NA | NA | -2 | NA |    |    |    |    |    |    |    |    |
| TRPM8         | ENSG00000144481.16 | NA | NA | NA | NA | NA | NA | NA | NA | NA | NA | NA | NA | NA |
|               | NA                 | NA | NA | NA | -2 | NA |    |    |    |    |    |    |    |    |
| LYG2          | ENSG00000185674.9  | NA | NA | NA | NA | NA | NA | NA | NA | NA | NA | NA | NA | NA |
|               | NA                 | NA | NA | NA | -2 | NA |    |    |    |    |    |    |    |    |
| PTMA          | ENSG00000187514.16 | NA | NA | NA | NA | NA | NA | NA | NA | NA | NA | NA | NA | NA |
|               | NA                 | NA | NA | NA | -2 | NA |    |    |    |    |    |    |    |    |
| MRPL44        | ENSG00000135900.3  | NA | NA | NA | NA | NA | NA | NA | NA | NA | NA | NA | NA | NA |
|               | NA                 | NA | NA | NA | -2 | NA |    |    |    |    |    |    |    |    |
| MOGAT1        | ENSG00000124003.12 | NA | NA | NA | NA | NA | NA | NA | NA | NA | NA | NA | NA | NA |
|               | NA                 | NA | NA | NA | -2 | NA |    |    |    |    |    |    |    |    |
| AC062020.2    | ENSG00000237856.1  | NA | NA | NA | NA | NA | NA | NA | NA | NA | NA | NA | NA | NA |
|               | NA                 | NA | NA | NA | -2 | NA |    |    |    |    |    |    |    |    |
| CCDC121       | ENSG00000176714.9  | NA | NA | NA | NA | NA | NA | NA | NA | NA | NA | NA | NA | NA |
|               | NA                 | NA | NA | NA | -2 | NA |    |    |    |    |    |    |    |    |
| TMEM150A      | ENSG00000168890.13 | NA | NA | NA | NA | NA | NA | NA | NA | NA | NA | NA | NA | NA |
|               | NA                 | NA | NA | NA | -2 | NA |    |    |    |    |    |    |    |    |
| TACR1         | ENSG00000115353.10 | NA | NA | NA | NA | NA | NA | NA | NA | NA | NA | NA | NA | NA |
|               | NA                 | NA | NA | NA | -2 | NA |    |    |    |    |    |    |    |    |
| CXCR4         | ENSG00000121966.6  | NA | NA | NA | NA | NA | NA | NA | NA | NA | NA | NA | NA | NA |
|               | NA                 | NA | NA | NA | -2 | NA |    |    |    |    |    |    |    |    |
| LINC01191     | ENSG00000234199.2  | NA | NA | NA | NA | NA | NA | NA | NA | NA | NA | NA | NA | NA |
|               | NA                 | NA | NA | NA | -2 | NA |    |    |    |    |    |    |    |    |
| TSN           | ENSG00000211460.11 | NA | NA | NA | NA | NA | NA | NA | NA | NA | NA | NA | NA | NA |
|               | NA                 | NA | NA | NA | -2 | NA |    |    |    |    |    |    |    |    |
| LINC01293     | ENSG00000230836.1  | NA | NA | NA | NA | NA | NA | NA | NA | NA | NA | NA | NA | NA |
|               | NA                 | NA | NA | NA | -2 | NA |    |    |    |    |    |    |    |    |
| LINC01857     | ENSG00000224137.1  | NA | NA | NA | NA | NA | NA | NA | NA | NA | NA | NA | NA | NA |
|               | NA                 | NA | NA | NA | -2 | NA |    |    |    |    |    |    |    |    |
| RP11-259N19.1 | ENSG00000272711.1  | NA | NA | NA | NA | NA | NA | NA | NA | NA | NA | NA | NA | NA |
|               | NA                 | NA | NA | NA | NA | -2 | NA |    |    |    |    |    |    |    |
| RP11-481J13.1 | ENSG00000272180.1  | NA | NA | NA | NA | NA | NA | NA | NA | NA | NA | NA | NA | NA |
|               | NA                 | NA | NA | NA | NA | -2 | NA |    |    |    |    |    |    |    |
| PTRHD1        | ENSG00000184924.5  | NA | NA | NA | NA | NA | NA | NA | NA | NA | NA | NA | NA | NA |
|               | NA                 | NA | NA | NA | -2 | NA |    |    |    |    |    |    |    |    |
| SCN3A         | ENSG00000153253.16 | NA | NA | NA | NA | NA | NA | NA | NA | NA | NA | NA | NA | NA |
|               | NA                 | NA | NA | NA | -2 | NA |    |    |    |    |    |    |    |    |
| DAPL1         | ENSG00000163331.11 | NA | NA | NA | NA | NA | NA | NA | NA | NA | NA | NA | NA | NA |
|               | NA                 | NA | NA | NA | -2 | NA |    |    |    |    |    |    |    |    |
| CACNB4        | ENSG00000182389.19 | NA | NA | NA | NA | NA | NA | NA | NA | NA | NA | NA | NA | NA |
|               | NA                 | NA | NA | NA | -2 | NA |    |    |    |    |    |    |    |    |
| REG1B         | ENSG00000172023.7  | NA | NA | NA | NA | NA | NA | NA | NA | NA | NA | NA | NA | NA |
|               | NA                 | NA | NA | NA | -2 | NA |    |    |    |    |    |    |    |    |
| RP11-440D17.3 | ENSG00000272913.1  | NA | NA | NA | NA | NA | NA | NA | NA | NA | NA | NA | NA | NA |
|               | NA                 | NA | NA | NA | NA | -2 | NA |    |    |    |    |    |    |    |
| PDCD1         | ENSG00000188389.10 | NA | NA | NA | NA | NA | NA | NA | NA | NA | NA | NA | NA | NA |
|               | NA                 | NA | NA | NA | -2 | NA |    |    |    |    |    |    |    |    |
| GPAT2         | ENSG00000186281.12 | NA | NA | NA | NA | NA | NA | NA | NA | NA | NA | NA | NA | NA |
|               | NA                 | NA | NA | NA | -2 | NA |    |    |    |    |    |    |    |    |
| LINC01249     | ENSG00000231532.5  | NA | NA | NA | NA | NA | NA | NA | NA | NA | NA | NA | NA | NA |
|               | NA                 | NA | NA | NA | -2 | NA |    |    |    |    |    |    |    |    |
| RDH14         | ENSG00000240857.1  | NA | NA | NA | NA | NA | NA | NA | NA | NA | NA | NA | NA | NA |
|               | NA                 | NA | NA | NA | -2 | NA |    |    |    |    |    |    |    |    |
| WDCP          | ENSG00000163026.11 | NA | NA | NA | NA | NA | NA | NA | NA | NA | NA | NA | NA | NA |
|               | NA                 | NA | NA | NA | -2 | NA |    |    |    |    |    |    |    |    |
| NDUFB3        | ENSG00000119013.8  | NA | NA | NA | NA | NA | NA | NA | NA | NA | NA | NA | NA | NA |
|               | NA                 | NA | NA | NA | -2 | NA |    |    |    |    |    |    |    |    |
| VIL1          | ENSG00000127831.10 | NA | NA | NA | NA | NA | NA | NA | NA | NA | NA | NA | NA | NA |
|               | NA                 | NA | NA | NA | -2 | NA |    |    |    |    |    |    |    |    |
| BAZ2B         | ENSG00000123636.17 | NA | NA | NA | NA | NA | NA | NA | NA | NA | NA | NA | NA | NA |
|               | NA                 | NA | NA | NA | -2 | NA |    |    |    |    |    |    |    |    |
| LIMS2         | ENSG00000072163.19 | NA | NA | NA | NA | NA | NA | NA | NA | NA | NA | NA | NA | NA |

|               |                    |    |    |    |    |    |    |    |    |    |    |    |    |    |
|---------------|--------------------|----|----|----|----|----|----|----|----|----|----|----|----|----|
|               | NA                 | NA | NA | NA | -2 | NA |    |    |    |    |    |    |    |    |
| AUP1          | ENSG00000115307.16 |    |    |    |    | NA | NA | NA | NA | NA | NA | NA | NA | NA |
|               | NA                 | NA | NA | NA | -2 | NA |    |    |    |    |    |    |    |    |
| RP11-333I13.1 | ENSG00000260977.1  |    |    |    |    | NA | NA | NA | NA | NA | NA | NA | NA | NA |
|               | NA                 | NA | NA | NA | NA | -2 | NA |    |    |    |    |    |    |    |
| ABCA12        | ENSG00000144452.14 |    |    |    |    | NA | NA | NA | NA | NA | NA | NA | NA | NA |
|               | NA                 | NA | NA | NA | NA | -2 | NA |    |    |    |    |    |    |    |
| NCKAP5        | ENSG00000176771.16 |    |    |    |    | NA | NA | NA | NA | NA | NA | NA | NA | NA |
|               | NA                 | NA | NA | NA | NA | -2 | NA |    |    |    |    |    |    |    |
| SRBD1         | ENSG00000068784.12 |    |    |    |    | NA | NA | NA | NA | NA | NA | NA | NA | NA |
|               | NA                 | NA | NA | NA | NA | -2 | NA |    |    |    |    |    |    |    |
| AQP12A        | ENSG00000184945.13 |    |    |    |    | NA | NA | NA | NA | NA | NA | NA | NA | NA |
|               | NA                 | NA | NA | NA | NA | -2 | NA |    |    |    |    |    |    |    |
| IL1F10        | ENSG00000136697.12 |    |    |    |    | NA | NA | NA | NA | NA | NA | NA | NA | NA |
|               | NA                 | NA | NA | NA | NA | -2 | NA |    |    |    |    |    |    |    |
| SCG2          | ENSG00000171951.4  |    |    |    |    | NA | NA | NA | NA | NA | NA | NA | NA | NA |
|               | NA                 | NA | NA | NA | NA | -2 | NA |    |    |    |    |    |    |    |
| AC092484.1    | ENSG00000225107.1  |    |    |    |    | NA | NA | NA | NA | NA | NA | NA | NA | NA |
|               | NA                 | NA | NA | NA | NA | -2 | NA |    |    |    |    |    |    |    |
| TMEM247       | ENSG00000187600.12 |    |    |    |    | NA | NA | NA | NA | NA | NA | NA | NA | NA |
|               | NA                 | NA | NA | NA | NA | -2 | NA |    |    |    |    |    |    |    |
| PTH2R         | ENSG00000144407.9  |    |    |    |    | NA | NA | NA | NA | NA | NA | NA | NA | NA |
|               | NA                 | NA | NA | NA | NA | -2 | NA |    |    |    |    |    |    |    |
| ARHGEF4       | ENSG00000136002.18 |    |    |    |    | NA | NA | NA | NA | NA | NA | NA | NA | NA |
|               | NA                 | NA | NA | NA | NA | -2 | NA |    |    |    |    |    |    |    |
| LINC01823     | ENSG00000224655.5  |    |    |    |    | NA | NA | NA | NA | NA | NA | NA | NA | NA |
|               | NA                 | NA | NA | NA | NA | -2 | NA |    |    |    |    |    |    |    |
| C2orf61       | ENSG00000239605.9  |    |    |    |    | NA | NA | NA | NA | NA | NA | NA | NA | NA |
|               | NA                 | NA | NA | NA | NA | -2 | NA |    |    |    |    |    |    |    |
| AC092431.3    | ENSG00000231024.1  |    |    |    |    | NA | NA | NA | NA | NA | NA | NA | NA | NA |
|               | NA                 | NA | NA | NA | NA | -2 | NA |    |    |    |    |    |    |    |
| RP11-314C9.2  | ENSG00000273006.1  |    |    |    |    | NA | NA | NA | NA | NA | NA | NA | NA | NA |
|               | NA                 | NA | NA | NA | NA | NA | -2 | NA |    |    |    |    |    |    |
| AC009495.2    | ENSG00000235192.1  |    |    |    |    | NA | NA | NA | NA | NA | NA | NA | NA | NA |
|               | NA                 | NA | NA | NA | NA | -2 | NA |    |    |    |    |    |    |    |
| AC007403.3    | ENSG00000223859.1  |    |    |    |    | NA | NA | NA | NA | NA | NA | NA | NA | NA |
|               | NA                 | NA | NA | NA | NA | -2 | NA |    |    |    |    |    |    |    |
| MARS2         | ENSG00000247626.4  |    |    |    |    | NA | NA | NA | NA | NA | NA | NA | NA | NA |
|               | NA                 | NA | NA | NA | NA | -2 | NA |    |    |    |    |    |    |    |
| NEB           | ENSG00000183091.19 |    |    |    |    | NA | NA | NA | NA | NA | NA | NA | NA | NA |
|               | NA                 | NA | NA | NA | NA | -2 | NA |    |    |    |    |    |    |    |
| SLC23A3       | ENSG00000213901.10 |    |    |    |    | NA | NA | NA | NA | NA | NA | NA | NA | NA |
|               | NA                 | NA | NA | NA | NA | -2 | NA |    |    |    |    |    |    |    |
| GPBAR1        | ENSG00000179921.14 |    |    |    |    | NA | NA | NA | NA | NA | NA | NA | NA | NA |
|               | NA                 | NA | NA | NA | NA | -2 | NA |    |    |    |    |    |    |    |
| CGREF1        | ENSG00000138028.15 |    |    |    |    | NA | NA | NA | NA | NA | NA | NA | NA | NA |
|               | NA                 | NA | NA | NA | NA | -2 | NA |    |    |    |    |    |    |    |
| NCKAP1        | ENSG00000061676.14 |    |    |    |    | NA | NA | NA | NA | NA | NA | NA | NA | NA |
|               | NA                 | NA | NA | NA | NA | -2 | NA |    |    |    |    |    |    |    |
| TDRD15        | ENSG00000218819.4  |    |    |    |    | NA | NA | NA | NA | NA | NA | NA | NA | NA |
|               | NA                 | NA | NA | NA | NA | -2 | NA |    |    |    |    |    |    |    |
| LINC01961     | ENSG00000234148.2  |    |    |    |    | NA | NA | NA | NA | NA | NA | NA | NA | NA |
|               | NA                 | NA | NA | NA | NA | -2 | NA |    |    |    |    |    |    |    |
| LINC01087     | ENSG00000224559.2  |    |    |    |    | NA | NA | NA | NA | NA | NA | NA | NA | NA |
|               | NA                 | NA | NA | NA | NA | -2 | NA |    |    |    |    |    |    |    |
| AQP12B        | ENSG00000185176.12 |    |    |    |    | NA | NA | NA | NA | NA | NA | NA | NA | NA |
|               | NA                 | NA | NA | NA | NA | -2 | NA |    |    |    |    |    |    |    |
| ALPI          | ENSG00000163295.4  |    |    |    |    | NA | NA | NA | NA | NA | NA | NA | NA | NA |
|               | NA                 | NA | NA | NA | NA | -2 | NA |    |    |    |    |    |    |    |
| IL36RN        | ENSG00000136695.14 |    |    |    |    | NA | NA | NA | NA | NA | NA | NA | NA | NA |
|               | NA                 | NA | NA | NA | NA | -2 | NA |    |    |    |    |    |    |    |
| ITM2C         | ENSG00000135916.15 |    |    |    |    | NA | NA | NA | NA | NA | NA | NA | NA | NA |

|               |    |                    |    |    |    |    |    |    |    |    |    |    |    |    |
|---------------|----|--------------------|----|----|----|----|----|----|----|----|----|----|----|----|
| NA            | NA | NA                 | NA | -2 | NA |    |    |    |    |    |    |    |    |    |
| RP11-152D8.1  |    | ENSG00000282998.1  |    |    |    | NA | NA | NA | NA | NA | NA | NA | NA | NA |
| NA            | NA | NA                 | NA | NA | NA | -2 | NA |    |    |    |    |    |    |    |
| ORC2          |    | ENSG00000115942.8  |    |    |    | NA | NA | NA | NA | NA | NA | NA | NA | NA |
| NA            | NA | NA                 | NA | -2 | NA |    |    |    |    |    |    |    |    |    |
| PGAP1         |    | ENSG00000197121.14 |    |    |    | NA | NA | NA | NA | NA | NA | NA | NA | NA |
| NA            | NA | NA                 | NA | -2 | NA |    |    |    |    |    |    |    |    |    |
| TUBA3E        |    | ENSG00000152086.8  |    |    |    | NA | NA | NA | NA | NA | NA | NA | NA | NA |
| NA            | NA | NA                 | NA | NA | -2 | NA |    |    |    |    |    |    |    |    |
| HK2           |    | ENSG00000159399.9  |    |    |    | NA | NA | NA | NA | NA | NA | NA | NA | NA |
| NA            | NA | NA                 | NA | -2 | NA |    |    |    |    |    |    |    |    |    |
| KIF3C         |    | ENSG00000084731.14 |    |    |    | NA | NA | NA | NA | NA | NA | NA | NA | NA |
| NA            | NA | NA                 | NA | -2 | NA |    |    |    |    |    |    |    |    |    |
| RP11-434P11.2 |    | ENSG00000273245.1  |    |    |    | NA | NA | NA | NA | NA | NA | NA | NA | NA |
| NA            | NA | NA                 | NA | NA | NA | -2 | NA |    |    |    |    |    |    |    |
| ICOS          |    | ENSG00000163600.12 |    |    |    | NA | NA | NA | NA | NA | NA | NA | NA | NA |
| NA            | NA | NA                 | NA | -2 | NA |    |    |    |    |    |    |    |    |    |
| LINC01794     |    | ENSG00000233128.1  |    |    |    | NA | NA | NA | NA | NA | NA | NA | NA | NA |
| NA            | NA | NA                 | NA | NA | -2 | NA |    |    |    |    |    |    |    |    |
| AC013402.4    |    | ENSG00000231626.1  |    |    |    | NA | NA | NA | NA | NA | NA | NA | NA | NA |
| NA            | NA | NA                 | NA | NA | -2 | NA |    |    |    |    |    |    |    |    |
| RP11-407P15.2 |    | ENSG00000259916.1  |    |    |    | NA | NA | NA | NA | NA | NA | NA | NA | NA |
| NA            | NA | NA                 | NA | NA | NA | -2 | NA |    |    |    |    |    |    |    |
| HOXD11        |    | ENSG00000128713.13 |    |    |    | NA | NA | NA | NA | NA | NA | NA | NA | NA |
| NA            | NA | NA                 | NA | NA | -2 | NA |    |    |    |    |    |    |    |    |
| MYCNOS        |    | ENSG00000233718.6  |    |    |    | NA | NA | NA | NA | NA | NA | NA | NA | NA |
| NA            | NA | NA                 | NA | NA | -2 | NA |    |    |    |    |    |    |    |    |
| AC092687.4    |    | ENSG00000232056.1  |    |    |    | NA | NA | NA | NA | NA | NA | NA | NA | NA |
| NA            | NA | NA                 | NA | NA | -2 | NA |    |    |    |    |    |    |    |    |
| FNDC4         |    | ENSG00000115226.9  |    |    |    | NA | NA | NA | NA | NA | NA | NA | NA | NA |
| NA            | NA | NA                 | NA | -2 | NA |    |    |    |    |    |    |    |    |    |
| ZFP36L2       |    | ENSG00000152518.7  |    |    |    | NA | NA | NA | NA | NA | NA | NA | NA | NA |
| NA            | NA | NA                 | NA | NA | -2 | NA |    |    |    |    |    |    |    |    |
| AC011747.6    |    | ENSG00000231083.1  |    |    |    | NA | NA | NA | NA | NA | NA | NA | NA | NA |
| NA            | NA | NA                 | NA | NA | -2 | NA |    |    |    |    |    |    |    |    |
| NFU1          |    | ENSG00000169599.12 |    |    |    | NA | NA | NA | NA | NA | NA | NA | NA | NA |
| NA            | NA | NA                 | NA | -2 | NA |    |    |    |    |    |    |    |    |    |
| CLK1          |    | ENSG00000013441.15 |    |    |    | NA | NA | NA | NA | NA | NA | NA | NA | NA |
| NA            | NA | NA                 | NA | -2 | NA |    |    |    |    |    |    |    |    |    |
| RAB1A         |    | ENSG00000138069.16 |    |    |    | NA | NA | NA | NA | NA | NA | NA | NA | NA |
| NA            | NA | NA                 | NA | -2 | NA |    |    |    |    |    |    |    |    |    |
| ABHD1         |    | ENSG00000143994.13 |    |    |    | NA | NA | NA | NA | NA | NA | NA | NA | NA |
| NA            | NA | NA                 | NA | -2 | NA |    |    |    |    |    |    |    |    |    |
| C2orf27B      |    | ENSG00000186825.5  |    |    |    | NA | NA | NA | NA | NA | NA | NA | NA | NA |
| NA            | NA | NA                 | NA | NA | -2 | NA |    |    |    |    |    |    |    |    |
| AC008268.1    |    | ENSG00000235584.2  |    |    |    | NA | NA | NA | NA | NA | NA | NA | NA | NA |
| NA            | NA | NA                 | NA | NA | -2 | NA |    |    |    |    |    |    |    |    |
| AC093901.1    |    | ENSG00000226856.5  |    |    |    | NA | NA | NA | NA | NA | NA | NA | NA | NA |
| NA            | NA | NA                 | NA | NA | -2 | NA |    |    |    |    |    |    |    |    |
| ZSWIM2        |    | ENSG00000163012.3  |    |    |    | NA | NA | NA | NA | NA | NA | NA | NA | NA |
| NA            | NA | NA                 | NA | NA | -2 | NA |    |    |    |    |    |    |    |    |
| LINC01964     |    | ENSG00000260840.1  |    |    |    | NA | NA | NA | NA | NA | NA | NA | NA | NA |
| NA            | NA | NA                 | NA | NA | -2 | NA |    |    |    |    |    |    |    |    |
| AC062032.1    |    | ENSG00000227902.2  |    |    |    | NA | NA | NA | NA | NA | NA | NA | NA | NA |
| NA            | NA | NA                 | NA | NA | -2 | NA |    |    |    |    |    |    |    |    |
| FKBP7         |    | ENSG00000079150.17 |    |    |    | NA | NA | NA | NA | NA | NA | NA | NA | NA |
| NA            | NA | NA                 | NA | -2 | NA |    |    |    |    |    |    |    |    |    |
| AC105393.2    |    | ENSG00000226277.1  |    |    |    | NA | NA | NA | NA | NA | NA | NA | NA | NA |
| NA            | NA | NA                 | NA | NA | -2 | NA |    |    |    |    |    |    |    |    |
| CAPN13        |    | ENSG00000162949.16 |    |    |    | NA | NA | NA | NA | NA | NA | NA | NA | NA |
| NA            | NA | NA                 | NA | NA | -2 | NA |    |    |    |    |    |    |    |    |
| AC105393.1    |    | ENSG00000236856.1  |    |    |    | NA | NA | NA | NA | NA | NA | NA | NA | NA |

|            |                    |    |    |    |    |    |    |    |    |    |    |    |    |    |
|------------|--------------------|----|----|----|----|----|----|----|----|----|----|----|----|----|
| NA         | NA                 | NA | NA | NA | -2 | NA |    |    |    |    |    |    |    |    |
| ANKZF1     | ENSG00000163516.13 | NA | NA | NA | NA | NA | NA | NA | NA | NA | NA | NA | NA | NA |
| NA         | NA                 | NA | NA | NA | -2 | NA |    |    |    |    |    |    |    |    |
| AC073636.1 | ENSG00000227098.1  | NA | NA | NA | NA | NA | NA | NA | NA | NA | NA | NA | NA | NA |
| NA         | NA                 | NA | NA | NA | -2 | NA |    |    |    |    |    |    |    |    |
| PLEKHB2    | ENSG00000115762.16 | NA | NA | NA | NA | NA | NA | NA | NA | NA | NA | NA | NA | NA |
| NA         | NA                 | NA | NA | NA | -2 | NA |    |    |    |    |    |    |    |    |
| IL18RAP    | ENSG00000115607.9  | NA | NA | NA | NA | NA | NA | NA | NA | NA | NA | NA | NA | NA |
| NA         | NA                 | NA | NA | NA | -2 | NA |    |    |    |    |    |    |    |    |
| GPR17      | ENSG00000144230.16 | NA | NA | NA | NA | NA | NA | NA | NA | NA | NA | NA | NA | NA |
| NA         | NA                 | NA | NA | NA | -2 | NA |    |    |    |    |    |    |    |    |
| GPR155     | ENSG00000163328.13 | NA | NA | NA | NA | NA | NA | NA | NA | NA | NA | NA | NA | NA |
| NA         | NA                 | NA | NA | NA | -2 | NA |    |    |    |    |    |    |    |    |
| C1D        | ENSG00000197223.11 | NA | NA | NA | NA | NA | NA | NA | NA | NA | NA | NA | NA | NA |
| NA         | NA                 | NA | NA | NA | -2 | NA |    |    |    |    |    |    |    |    |
| GALNT5     | ENSG00000136542.8  | NA | NA | NA | NA | NA | NA | NA | NA | NA | NA | NA | NA | NA |
| NA         | NA                 | NA | NA | NA | -2 | NA |    |    |    |    |    |    |    |    |
| PREB       | ENSG00000138073.13 | NA | NA | NA | NA | NA | NA | NA | NA | NA | NA | NA | NA | NA |
| NA         | NA                 | NA | NA | NA | -2 | NA |    |    |    |    |    |    |    |    |
| DGUOK      | ENSG00000114956.19 | NA | NA | NA | NA | NA | NA | NA | NA | NA | NA | NA | NA | NA |
| NA         | NA                 | NA | NA | NA | -2 | NA |    |    |    |    |    |    |    |    |
| TTC30B     | ENSG00000196659.9  | NA | NA | NA | NA | NA | NA | NA | NA | NA | NA | NA | NA | NA |
| NA         | NA                 | NA | NA | NA | -2 | NA |    |    |    |    |    |    |    |    |
| SPATS2L    | ENSG00000196141.13 | NA | NA | NA | NA | NA | NA | NA | NA | NA | NA | NA | NA | NA |
| NA         | NA                 | NA | NA | NA | -2 | NA |    |    |    |    |    |    |    |    |
| PPM1G      | ENSG00000115241.10 | NA | NA | NA | NA | NA | NA | NA | NA | NA | NA | NA | NA | NA |
| NA         | NA                 | NA | NA | NA | -2 | NA |    |    |    |    |    |    |    |    |
| IL36B      | ENSG00000136696.10 | NA | NA | NA | NA | NA | NA | NA | NA | NA | NA | NA | NA | NA |
| NA         | NA                 | NA | NA | NA | -2 | NA |    |    |    |    |    |    |    |    |
| SOX11      | ENSG00000176887.6  | NA | NA | NA | NA | NA | NA | NA | NA | NA | NA | NA | NA | NA |
| NA         | NA                 | NA | NA | NA | -2 | NA |    |    |    |    |    |    |    |    |
| LINC01143  | ENSG00000237751.2  | NA | NA | NA | NA | NA | NA | NA | NA | NA | NA | NA | NA | NA |
| NA         | NA                 | NA | NA | NA | -2 | NA |    |    |    |    |    |    |    |    |
| DNAJC10    | ENSG00000077232.17 | NA | NA | NA | NA | NA | NA | NA | NA | NA | NA | NA | NA | NA |
| NA         | NA                 | NA | NA | NA | -2 | NA |    |    |    |    |    |    |    |    |
| FAM84A     | ENSG00000162981.13 | NA | NA | NA | NA | NA | NA | NA | NA | NA | NA | NA | NA | NA |
| NA         | NA                 | NA | NA | NA | -2 | NA |    |    |    |    |    |    |    |    |
| NPAS2      | ENSG00000170485.16 | NA | NA | NA | NA | NA | NA | NA | NA | NA | NA | NA | NA | NA |
| NA         | NA                 | NA | NA | NA | -2 | NA |    |    |    |    |    |    |    |    |
| AGAP1      | ENSG00000157985.18 | NA | NA | NA | NA | NA | NA | NA | NA | NA | NA | NA | NA | NA |
| NA         | NA                 | NA | NA | NA | -2 | NA |    |    |    |    |    |    |    |    |
| RAPH1      | ENSG00000173166.17 | NA | NA | NA | NA | NA | NA | NA | NA | NA | NA | NA | NA | NA |
| NA         | NA                 | NA | NA | NA | -2 | NA |    |    |    |    |    |    |    |    |
| AC013727.2 | ENSG00000236141.1  | NA | NA | NA | NA | NA | NA | NA | NA | NA | NA | NA | NA | NA |
| NA         | NA                 | NA | NA | NA | -2 | NA |    |    |    |    |    |    |    |    |
| CERS6      | ENSG00000172292.14 | NA | NA | NA | NA | NA | NA | NA | NA | NA | NA | NA | NA | NA |
| NA         | NA                 | NA | NA | NA | -2 | NA |    |    |    |    |    |    |    |    |
| NPPC       | ENSG00000163273.3  | NA | NA | NA | NA | NA | NA | NA | NA | NA | NA | NA | NA | NA |
| NA         | NA                 | NA | NA | NA | -2 | NA |    |    |    |    |    |    |    |    |
| NCAPH      | ENSG00000121152.9  | NA | NA | NA | NA | NA | NA | NA | NA | NA | NA | NA | NA | NA |
| NA         | NA                 | NA | NA | NA | -2 | NA |    |    |    |    |    |    |    |    |
| LINC01185  | ENSG00000228414.6  | NA | NA | NA | NA | NA | NA | NA | NA | NA | NA | NA | NA | NA |
| NA         | NA                 | NA | NA | NA | -2 | NA |    |    |    |    |    |    |    |    |
| MAL        | ENSG00000172005.10 | NA | NA | NA | NA | NA | NA | NA | NA | NA | NA | NA | NA | NA |
| NA         | NA                 | NA | NA | NA | -2 | NA |    |    |    |    |    |    |    |    |
| NYAP2      | ENSG00000144460.12 | NA | NA | NA | NA | NA | NA | NA | NA | NA | NA | NA | NA | NA |
| NA         | NA                 | NA | NA | NA | -2 | NA |    |    |    |    |    |    |    |    |
| AC017048.1 | ENSG00000229434.1  | NA | NA | NA | NA | NA | NA | NA | NA | NA | NA | NA | NA | NA |
| NA         | NA                 | NA | NA | NA | -2 | NA |    |    |    |    |    |    |    |    |
| DNMT3A     | ENSG00000119772.16 | NA | NA | NA | NA | NA | NA | NA | NA | NA | NA | NA | NA | NA |
| NA         | NA                 | NA | NA | NA | -2 | NA |    |    |    |    |    |    |    |    |
| AC114752.3 | ENSG00000238201.1  | NA | NA | NA | NA | NA | NA | NA | NA | NA | NA | NA | NA | NA |

|            |                    |    |    |    |    |    |    |    |    |    |    |    |    |    |
|------------|--------------------|----|----|----|----|----|----|----|----|----|----|----|----|----|
| NA         | NA                 | NA | NA | NA | -2 | NA |    |    |    |    |    |    |    |    |
| RPS27A     | ENSG00000143947.13 | NA | NA | NA | NA | NA | NA | NA | NA | NA | NA | NA | NA | NA |
| NA         | NA                 | NA | NA | NA | -2 | NA |    |    |    |    |    |    |    |    |
| SCHLAP1    | ENSG00000281131.1  | NA | NA | NA | NA | NA | NA | NA | NA | NA | NA | NA | NA | NA |
| NA         | NA                 | NA | NA | NA | -2 | NA |    |    |    |    |    |    |    |    |
| ODC1       | ENSG00000115758.12 | NA | NA | NA | NA | NA | NA | NA | NA | NA | NA | NA | NA | NA |
| NA         | NA                 | NA | NA | NA | -2 | NA |    |    |    |    |    |    |    |    |
| LINC01803  | ENSG00000228909.1  | NA | NA | NA | NA | NA | NA | NA | NA | NA | NA | NA | NA | NA |
| NA         | NA                 | NA | NA | NA | -2 | NA |    |    |    |    |    |    |    |    |
| AC108463.1 | ENSG00000230499.1  | NA | NA | NA | NA | NA | NA | NA | NA | NA | NA | NA | NA | NA |
| NA         | NA                 | NA | NA | NA | -2 | NA |    |    |    |    |    |    |    |    |
| CRYGD      | ENSG00000118231.4  | NA | NA | NA | NA | NA | NA | NA | NA | NA | NA | NA | NA | NA |
| NA         | NA                 | NA | NA | NA | -2 | NA |    |    |    |    |    |    |    |    |
| DYTN       | ENSG00000232125.2  | NA | NA | NA | NA | NA | NA | NA | NA | NA | NA | NA | NA | NA |
| NA         | NA                 | NA | NA | NA | -2 | NA |    |    |    |    |    |    |    |    |
| AC092162.1 | ENSG00000230552.5  | NA | NA | NA | NA | NA | NA | NA | NA | NA | NA | NA | NA | NA |
| NA         | NA                 | NA | NA | NA | -2 | NA |    |    |    |    |    |    |    |    |
| ECEL1      | ENSG00000171551.11 | NA | NA | NA | NA | NA | NA | NA | NA | NA | NA | NA | NA | NA |
| NA         | NA                 | NA | NA | NA | -2 | NA |    |    |    |    |    |    |    |    |
| LINC01868  | ENSG00000234169.1  | NA | NA | NA | NA | NA | NA | NA | NA | NA | NA | NA | NA | NA |
| NA         | NA                 | NA | NA | NA | -2 | NA |    |    |    |    |    |    |    |    |
| LINC01956  | ENSG00000258910.2  | NA | NA | NA | NA | NA | NA | NA | NA | NA | NA | NA | NA | NA |
| NA         | NA                 | NA | NA | NA | -2 | NA |    |    |    |    |    |    |    |    |
| AC007381.3 | ENSG00000228590.1  | NA | NA | NA | NA | NA | NA | NA | NA | NA | NA | NA | NA | NA |
| NA         | NA                 | NA | NA | NA | -2 | NA |    |    |    |    |    |    |    |    |
| AC073257.2 | ENSG00000237614.1  | NA | NA | NA | NA | NA | NA | NA | NA | NA | NA | NA | NA | NA |
| NA         | NA                 | NA | NA | NA | -2 | NA |    |    |    |    |    |    |    |    |
| VAX2       | ENSG00000116035.2  | NA | NA | NA | NA | NA | NA | NA | NA | NA | NA | NA | NA | NA |
| NA         | NA                 | NA | NA | NA | -2 | NA |    |    |    |    |    |    |    |    |
| UXS1       | ENSG00000115652.14 | NA | NA | NA | NA | NA | NA | NA | NA | NA | NA | NA | NA | NA |
| NA         | NA                 | NA | NA | NA | -2 | NA |    |    |    |    |    |    |    |    |
| MTHFD2     | ENSG00000065911.11 | NA | NA | NA | NA | NA | NA | NA | NA | NA | NA | NA | NA | NA |
| NA         | NA                 | NA | NA | NA | -2 | NA |    |    |    |    |    |    |    |    |
| CD207      | ENSG00000116031.8  | NA | NA | NA | NA | NA | NA | NA | NA | NA | NA | NA | NA | NA |
| NA         | NA                 | NA | NA | NA | -2 | NA |    |    |    |    |    |    |    |    |
| NPHP1      | ENSG00000144061.12 | NA | NA | NA | NA | NA | NA | NA | NA | NA | NA | NA | NA | NA |
| NA         | NA                 | NA | NA | NA | -2 | NA |    |    |    |    |    |    |    |    |
| ACVR1C     | ENSG00000123612.15 | NA | NA | NA | NA | NA | NA | NA | NA | NA | NA | NA | NA | NA |
| NA         | NA                 | NA | NA | NA | -2 | NA |    |    |    |    |    |    |    |    |
| PPM1B      | ENSG00000138032.20 | NA | NA | NA | NA | NA | NA | NA | NA | NA | NA | NA | NA | NA |
| NA         | NA                 | NA | NA | NA | -2 | NA |    |    |    |    |    |    |    |    |
| AC093702.1 | ENSG00000231156.1  | NA | NA | NA | NA | NA | NA | NA | NA | NA | NA | NA | NA | NA |
| NA         | NA                 | NA | NA | NA | -2 | NA |    |    |    |    |    |    |    |    |
| AC006037.2 | ENSG00000226442.2  | NA | NA | NA | NA | NA | NA | NA | NA | NA | NA | NA | NA | NA |
| NA         | NA                 | NA | NA | NA | -2 | NA |    |    |    |    |    |    |    |    |
| SDPR       | ENSG00000168497.4  | NA | NA | NA | NA | NA | NA | NA | NA | NA | NA | NA | NA | NA |
| NA         | NA                 | NA | NA | NA | -2 | NA |    |    |    |    |    |    |    |    |
| SULT6B1    | ENSG00000138068.10 | NA | NA | NA | NA | NA | NA | NA | NA | NA | NA | NA | NA | NA |
| NA         | NA                 | NA | NA | NA | -2 | NA |    |    |    |    |    |    |    |    |
| OR6B2      | ENSG00000182083.7  | NA | NA | NA | NA | NA | NA | NA | NA | NA | NA | NA | NA | NA |
| NA         | NA                 | NA | NA | NA | -2 | NA |    |    |    |    |    |    |    |    |
| NABP1      | ENSG00000173559.12 | NA | NA | NA | NA | NA | NA | NA | NA | NA | NA | NA | NA | NA |
| NA         | NA                 | NA | NA | NA | -2 | NA |    |    |    |    |    |    |    |    |
| DCAF17     | ENSG00000115827.13 | NA | NA | NA | NA | NA | NA | NA | NA | NA | NA | NA | NA | NA |
| NA         | NA                 | NA | NA | NA | -2 | NA |    |    |    |    |    |    |    |    |
| TNP1       | ENSG00000118245.2  | NA | NA | NA | NA | NA | NA | NA | NA | NA | NA | NA | NA | NA |
| NA         | NA                 | NA | NA | NA | -2 | NA |    |    |    |    |    |    |    |    |
| RGPD4-AS1  | ENSG00000230651.7  | NA | NA | NA | NA | NA | NA | NA | NA | NA | NA | NA | NA | NA |
| NA         | NA                 | NA | NA | NA | -2 | NA |    |    |    |    |    |    |    |    |
| PRADC1     | ENSG00000135617.3  | NA | NA | NA | NA | NA | NA | NA | NA | NA | NA | NA | NA | NA |
| NA         | NA                 | NA | NA | NA | -2 | NA |    |    |    |    |    |    |    |    |
| TMBIM1     | ENSG00000135926.14 | NA | NA | NA | NA | NA | NA | NA | NA | NA | NA | NA | NA | NA |

|              |                    |    |    |    |    |    |    |    |    |    |    |    |    |    |
|--------------|--------------------|----|----|----|----|----|----|----|----|----|----|----|----|----|
| NA           | NA                 | NA | NA | NA | -2 | NA |    |    |    |    |    |    |    |    |
| CSRNP3       | ENSG00000178662.15 |    |    |    |    | NA | NA | NA | NA | NA | NA | NA | NA | NA |
| NA           | NA                 | NA | NA | NA | -2 | NA |    |    |    |    |    |    |    |    |
| SAP130       | ENSG00000136715.17 |    |    |    |    | NA | NA | NA | NA | NA | NA | NA | NA | NA |
| NA           | NA                 | NA | NA | NA | -2 | NA |    |    |    |    |    |    |    |    |
| MTA3         | ENSG00000057935.13 |    |    |    |    | NA | NA | NA | NA | NA | NA | NA | NA | NA |
| NA           | NA                 | NA | NA | NA | -2 | NA |    |    |    |    |    |    |    |    |
| MTX2         | ENSG00000128654.13 |    |    |    |    | NA | NA | NA | NA | NA | NA | NA | NA | NA |
| NA           | NA                 | NA | NA | NA | -2 | NA |    |    |    |    |    |    |    |    |
| LHCGR        | ENSG00000138039.14 |    |    |    |    | NA | NA | NA | NA | NA | NA | NA | NA | NA |
| NA           | NA                 | NA | NA | NA | -2 | NA |    |    |    |    |    |    |    |    |
| TUBA4B       | ENSG00000243910.7  |    |    |    |    | NA | NA | NA | NA | NA | NA | NA | NA | NA |
| NA           | NA                 | NA | NA | NA | -2 | NA |    |    |    |    |    |    |    |    |
| AC009229.5   | ENSG00000227292.1  |    |    |    |    | NA | NA | NA | NA | NA | NA | NA | NA | NA |
| NA           | NA                 | NA | NA | NA | -2 | NA |    |    |    |    |    |    |    |    |
| LINC01826    | ENSG00000232740.1  |    |    |    |    | NA | NA | NA | NA | NA | NA | NA | NA | NA |
| NA           | NA                 | NA | NA | NA | -2 | NA |    |    |    |    |    |    |    |    |
| AC093326.3   | ENSG00000233633.1  |    |    |    |    | NA | NA | NA | NA | NA | NA | NA | NA | NA |
| NA           | NA                 | NA | NA | NA | -2 | NA |    |    |    |    |    |    |    |    |
| ALPPL2       | ENSG00000163286.8  |    |    |    |    | NA | NA | NA | NA | NA | NA | NA | NA | NA |
| NA           | NA                 | NA | NA | NA | -2 | NA |    |    |    |    |    |    |    |    |
| GPR75        | ENSG00000119737.5  |    |    |    |    | NA | NA | NA | NA | NA | NA | NA | NA | NA |
| NA           | NA                 | NA | NA | NA | -2 | NA |    |    |    |    |    |    |    |    |
| AC068138.1   | ENSG00000235070.3  |    |    |    |    | NA | NA | NA | NA | NA | NA | NA | NA | NA |
| NA           | NA                 | NA | NA | NA | -2 | NA |    |    |    |    |    |    |    |    |
| HOXD4        | ENSG00000170166.5  |    |    |    |    | NA | NA | NA | NA | NA | NA | NA | NA | NA |
| NA           | NA                 | NA | NA | NA | -2 | NA |    |    |    |    |    |    |    |    |
| AC112715.2   | ENSG00000224132.2  |    |    |    |    | NA | NA | NA | NA | NA | NA | NA | NA | NA |
| NA           | NA                 | NA | NA | NA | -2 | NA |    |    |    |    |    |    |    |    |
| AC092669.6   | ENSG00000225815.2  |    |    |    |    | NA | NA | NA | NA | NA | NA | NA | NA | NA |
| NA           | NA                 | NA | NA | NA | -2 | NA |    |    |    |    |    |    |    |    |
| PSMD1        | ENSG00000173692.12 |    |    |    |    | NA | NA | NA | NA | NA | NA | NA | NA | NA |
| NA           | NA                 | NA | NA | NA | -2 | NA |    |    |    |    |    |    |    |    |
| AC012485.2   | ENSG00000232306.2  |    |    |    |    | NA | NA | NA | NA | NA | NA | NA | NA | NA |
| NA           | NA                 | NA | NA | NA | -2 | NA |    |    |    |    |    |    |    |    |
| PLA2R1       | ENSG00000153246.12 |    |    |    |    | NA | NA | NA | NA | NA | NA | NA | NA | NA |
| NA           | NA                 | NA | NA | NA | -2 | NA |    |    |    |    |    |    |    |    |
| AC092168.4   | ENSG00000228488.1  |    |    |    |    | NA | NA | NA | NA | NA | NA | NA | NA | NA |
| NA           | NA                 | NA | NA | NA | -2 | NA |    |    |    |    |    |    |    |    |
| LINC01943    | ENSG00000280721.1  |    |    |    |    | NA | NA | NA | NA | NA | NA | NA | NA | NA |
| NA           | NA                 | NA | NA | NA | -2 | NA |    |    |    |    |    |    |    |    |
| LINC01304    | ENSG00000237401.6  |    |    |    |    | NA | NA | NA | NA | NA | NA | NA | NA | NA |
| NA           | NA                 | NA | NA | NA | -2 | NA |    |    |    |    |    |    |    |    |
| NXP2         | ENSG00000144227.4  |    |    |    |    | NA | NA | NA | NA | NA | NA | NA | NA | NA |
| NA           | NA                 | NA | NA | NA | -2 | NA |    |    |    |    |    |    |    |    |
| LINC01890    | ENSG00000228329.1  |    |    |    |    | NA | NA | NA | NA | NA | NA | NA | NA | NA |
| NA           | NA                 | NA | NA | NA | -2 | NA |    |    |    |    |    |    |    |    |
| MDH1         | ENSG00000014641.17 |    |    |    |    | NA | NA | NA | NA | NA | NA | NA | NA | NA |
| NA           | NA                 | NA | NA | NA | -2 | NA |    |    |    |    |    |    |    |    |
| RP11-33301.1 | ENSG00000261117.1  |    |    |    |    | NA | NA | NA | NA | NA | NA | NA | NA | NA |
| NA           | NA                 | NA | NA | NA | NA | -2 | NA |    |    |    |    |    |    |    |
| GTDC1        | ENSG00000121964.14 |    |    |    |    | NA | NA | NA | NA | NA | NA | NA | NA | NA |
| NA           | NA                 | NA | NA | NA | -2 | NA |    |    |    |    |    |    |    |    |
| CD28         | ENSG00000178562.17 |    |    |    |    | NA | NA | NA | NA | NA | NA | NA | NA | NA |
| NA           | NA                 | NA | NA | NA | -2 | NA |    |    |    |    |    |    |    |    |
| AC012506.1   | ENSG00000223530.1  |    |    |    |    | NA | NA | NA | NA | NA | NA | NA | NA | NA |
| NA           | NA                 | NA | NA | NA | -2 | NA |    |    |    |    |    |    |    |    |
| DYSF         | ENSG00000135636.13 |    |    |    |    | NA | NA | NA | NA | NA | NA | NA | NA | NA |
| NA           | NA                 | NA | NA | NA | -2 | NA |    |    |    |    |    |    |    |    |
| WBP1         | ENSG00000239779.6  |    |    |    |    | NA | NA | NA | NA | NA | NA | NA | NA | NA |
| NA           | NA                 | NA | NA | NA | -2 | NA |    |    |    |    |    |    |    |    |
| HOXD10       | ENSG00000128710.5  |    |    |    |    | NA | NA | NA | NA | NA | NA | NA | NA | NA |

|               |                    |    |    |    |    |    |    |    |    |    |    |    |    |    |
|---------------|--------------------|----|----|----|----|----|----|----|----|----|----|----|----|----|
| NA            | NA                 | NA | NA | NA | -2 | NA |    |    |    |    |    |    |    |    |
| EDAR          | ENSG00000135960.9  |    |    |    | NA | NA | NA | NA | NA | NA | NA | NA | NA | NA |
| NA            | NA                 | NA | NA | NA | -2 | NA |    |    |    |    |    |    |    |    |
| RP11-394I13.3 | ENSG00000273258.1  |    |    |    | NA | NA | NA | NA | NA | NA | NA | NA | NA | NA |
| NA            | NA                 | NA | NA | NA | NA | -2 | NA |    |    |    |    |    |    |    |
| LINC01817     | ENSG00000231420.1  |    |    |    | NA | NA | NA | NA | NA | NA | NA | NA | NA | NA |
| NA            | NA                 | NA | NA | NA | -2 | NA |    |    |    |    |    |    |    |    |
| LINC01940     | ENSG00000227744.4  |    |    |    | NA | NA | NA | NA | NA | NA | NA | NA | NA | NA |
| NA            | NA                 | NA | NA | NA | -2 | NA |    |    |    |    |    |    |    |    |
| AC092635.1    | ENSG00000229370.1  |    |    |    | NA | NA | NA | NA | NA | NA | NA | NA | NA | NA |
| NA            | NA                 | NA | NA | NA | -2 | NA |    |    |    |    |    |    |    |    |
| TMEM169       | ENSG00000163449.10 |    |    |    | NA | NA | NA | NA | NA | NA | NA | NA | NA | NA |
| NA            | NA                 | NA | NA | NA | -2 | NA |    |    |    |    |    |    |    |    |
| AC019330.1    | ENSG00000225421.2  |    |    |    | NA | NA | NA | NA | NA | NA | NA | NA | NA | NA |
| NA            | NA                 | NA | NA | NA | -2 | NA |    |    |    |    |    |    |    |    |
| AC114765.1    | ENSG00000239498.1  |    |    |    | NA | NA | NA | NA | NA | NA | NA | NA | NA | NA |
| NA            | NA                 | NA | NA | NA | -2 | NA |    |    |    |    |    |    |    |    |
| TXNDC9        | ENSG00000115514.11 |    |    |    | NA | NA | NA | NA | NA | NA | NA | NA | NA | NA |
| NA            | NA                 | NA | NA | NA | -2 | NA |    |    |    |    |    |    |    |    |
| RP11-130L8.2  | ENSG00000269976.1  |    |    |    | NA | NA | NA | NA | NA | NA | NA | NA | NA | NA |
| NA            | NA                 | NA | NA | NA | NA | -2 | NA |    |    |    |    |    |    |    |
| CLASP1        | ENSG00000074054.17 |    |    |    | NA | NA | NA | NA | NA | NA | NA | NA | NA | NA |
| NA            | NA                 | NA | NA | NA | -2 | NA |    |    |    |    |    |    |    |    |
| AC093843.1    | ENSG00000224819.1  |    |    |    | NA | NA | NA | NA | NA | NA | NA | NA | NA | NA |
| NA            | NA                 | NA | NA | NA | -2 | NA |    |    |    |    |    |    |    |    |
| FAM124B       | ENSG00000124019.9  |    |    |    | NA | NA | NA | NA | NA | NA | NA | NA | NA | NA |
| NA            | NA                 | NA | NA | NA | -2 | NA |    |    |    |    |    |    |    |    |
| LINC01614     | ENSG00000230838.1  |    |    |    | NA | NA | NA | NA | NA | NA | NA | NA | NA | NA |
| NA            | NA                 | NA | NA | NA | -2 | NA |    |    |    |    |    |    |    |    |
| PER2          | ENSG00000132326.11 |    |    |    | NA | NA | NA | NA | NA | NA | NA | NA | NA | NA |
| NA            | NA                 | NA | NA | NA | -2 | NA |    |    |    |    |    |    |    |    |
| AC007365.1    | ENSG00000233694.5  |    |    |    | NA | NA | NA | NA | NA | NA | NA | NA | NA | NA |
| NA            | NA                 | NA | NA | NA | -2 | NA |    |    |    |    |    |    |    |    |
| AC142119.1    | ENSG00000236989.5  |    |    |    | NA | NA | NA | NA | NA | NA | NA | NA | NA | NA |
| NA            | NA                 | NA | NA | NA | -2 | NA |    |    |    |    |    |    |    |    |
| LINC01931     | ENSG00000162947.4  |    |    |    | NA | NA | NA | NA | NA | NA | NA | NA | NA | NA |
| NA            | NA                 | NA | NA | NA | -2 | NA |    |    |    |    |    |    |    |    |
| AC116609.1    | ENSG00000227713.1  |    |    |    | NA | NA | NA | NA | NA | NA | NA | NA | NA | NA |
| NA            | NA                 | NA | NA | NA | -2 | NA |    |    |    |    |    |    |    |    |
| AC116609.2    | ENSG00000223751.1  |    |    |    | NA | NA | NA | NA | NA | NA | NA | NA | NA | NA |
| NA            | NA                 | NA | NA | NA | -2 | NA |    |    |    |    |    |    |    |    |
| LINC01797     | ENSG00000237179.5  |    |    |    | NA | NA | NA | NA | NA | NA | NA | NA | NA | NA |
| NA            | NA                 | NA | NA | NA | -2 | NA |    |    |    |    |    |    |    |    |
| AAMP          | ENSG00000127837.9  |    |    |    | NA | NA | NA | NA | NA | NA | NA | NA | NA | NA |
| NA            | NA                 | NA | NA | NA | -2 | NA |    |    |    |    |    |    |    |    |
| LINC01960     | ENSG00000260868.1  |    |    |    | NA | NA | NA | NA | NA | NA | NA | NA | NA | NA |
| NA            | NA                 | NA | NA | NA | -2 | NA |    |    |    |    |    |    |    |    |
| KLHL41        | ENSG00000239474.6  |    |    |    | NA | NA | NA | NA | NA | NA | NA | NA | NA | NA |
| NA            | NA                 | NA | NA | NA | -2 | NA |    |    |    |    |    |    |    |    |
| TGFBRAP1      | ENSG00000135966.12 |    |    |    | NA | NA | NA | NA | NA | NA | NA | NA | NA | NA |
| NA            | NA                 | NA | NA | NA | -2 | NA |    |    |    |    |    |    |    |    |
| FAM117B       | ENSG00000138439.11 |    |    |    | NA | NA | NA | NA | NA | NA | NA | NA | NA | NA |
| NA            | NA                 | NA | NA | NA | -2 | NA |    |    |    |    |    |    |    |    |
| AC019055.1    | ENSG00000235911.1  |    |    |    | NA | NA | NA | NA | NA | NA | NA | NA | NA | NA |
| NA            | NA                 | NA | NA | NA | -2 | NA |    |    |    |    |    |    |    |    |
| KCNJ13        | ENSG00000115474.6  |    |    |    | NA | NA | NA | NA | NA | NA | NA | NA | NA | NA |
| NA            | NA                 | NA | NA | NA | -2 | NA |    |    |    |    |    |    |    |    |
| REG3A         | ENSG00000172016.15 |    |    |    | NA | NA | NA | NA | NA | NA | NA | NA | NA | NA |
| NA            | NA                 | NA | NA | NA | -2 | NA |    |    |    |    |    |    |    |    |
| INHA          | ENSG00000123999.4  |    |    |    | NA | NA | NA | NA | NA | NA | NA | NA | NA | NA |
| NA            | NA                 | NA | NA | NA | -2 | NA |    |    |    |    |    |    |    |    |
| TET3          | ENSG00000187605.15 |    |    |    | NA | NA | NA | NA | NA | NA | NA | NA | NA | NA |

|              |                    |    |    |    |    |    |    |    |    |    |    |    |    |    |
|--------------|--------------------|----|----|----|----|----|----|----|----|----|----|----|----|----|
|              | NA                 | NA | NA | NA | -2 | NA |    |    |    |    |    |    |    |    |
| HAT1         | ENSG00000128708.12 |    |    |    |    | NA | NA | NA | NA | NA | NA | NA | NA | NA |
|              | NA                 | NA | NA | NA | -2 | NA |    |    |    |    |    |    |    |    |
| LINC01807    | ENSG00000232023.2  |    |    |    |    | NA | NA | NA | NA | NA | NA | NA | NA | NA |
|              | NA                 | NA | NA | NA | -2 | NA |    |    |    |    |    |    |    |    |
| RP11-38408.1 | ENSG00000267034.1  |    |    |    |    | NA | NA | NA | NA | NA | NA | NA | NA | NA |
|              | NA                 | NA | NA | NA | NA | -2 | NA |    |    |    |    |    |    |    |
| AC007879.3   | ENSG00000240440.1  |    |    |    |    | NA | NA | NA | NA | NA | NA | NA | NA | NA |
|              | NA                 | NA | NA | NA | -2 | NA |    |    |    |    |    |    |    |    |
| BIRC6        | ENSG00000115760.13 |    |    |    |    | NA | NA | NA | NA | NA | NA | NA | NA | NA |
|              | NA                 | NA | NA | NA | -2 | NA |    |    |    |    |    |    |    |    |
| RNF103       | ENSG00000239305.6  |    |    |    |    | NA | NA | NA | NA | NA | NA | NA | NA | NA |
|              | NA                 | NA | NA | NA | NA | -2 | NA |    |    |    |    |    |    |    |
| AC079610.2   | ENSG00000196096.3  |    |    |    |    | NA | NA | NA | NA | NA | NA | NA | NA | NA |
|              | NA                 | NA | NA | NA | NA | -2 | NA |    |    |    |    |    |    |    |
| PLEKHA3      | ENSG00000116095.10 |    |    |    |    | NA | NA | NA | NA | NA | NA | NA | NA | NA |
|              | NA                 | NA | NA | NA | NA | -2 | NA |    |    |    |    |    |    |    |
| PPIG         | ENSG00000138398.15 |    |    |    |    | NA | NA | NA | NA | NA | NA | NA | NA | NA |
|              | NA                 | NA | NA | NA | -2 | NA |    |    |    |    |    |    |    |    |
| IFT172       | ENSG00000138002.14 |    |    |    |    | NA | NA | NA | NA | NA | NA | NA | NA | NA |
|              | NA                 | NA | NA | NA | NA | -2 | NA |    |    |    |    |    |    |    |
| POTEI        | ENSG00000196834.11 |    |    |    |    | NA | NA | NA | NA | NA | NA | NA | NA | NA |
|              | NA                 | NA | NA | NA | -2 | NA |    |    |    |    |    |    |    |    |
| FOSL2        | ENSG00000075426.11 |    |    |    |    | NA | NA | NA | NA | NA | NA | NA | NA | NA |
|              | NA                 | NA | NA | NA | -2 | NA |    |    |    |    |    |    |    |    |
| LRP2         | ENSG00000081479.12 |    |    |    |    | NA | NA | NA | NA | NA | NA | NA | NA | NA |
|              | NA                 | NA | NA | NA | -2 | NA |    |    |    |    |    |    |    |    |
| ANKAR        | ENSG00000151687.14 |    |    |    |    | NA | NA | NA | NA | NA | NA | NA | NA | NA |
|              | NA                 | NA | NA | NA | -2 | NA |    |    |    |    |    |    |    |    |
| AC013402.3   | ENSG00000236109.1  |    |    |    |    | NA | NA | NA | NA | NA | NA | NA | NA | NA |
|              | NA                 | NA | NA | NA | NA | -2 | NA |    |    |    |    |    |    |    |
| CROCC2       | ENSG00000226321.5  |    |    |    |    | NA | NA | NA | NA | NA | NA | NA | NA | NA |
|              | NA                 | NA | NA | NA | NA | -2 | NA |    |    |    |    |    |    |    |
| AC106053.1   | ENSG00000224626.1  |    |    |    |    | NA | NA | NA | NA | NA | NA | NA | NA | NA |
|              | NA                 | NA | NA | NA | NA | -2 | NA |    |    |    |    |    |    |    |
| LINC00211    | ENSG00000237803.5  |    |    |    |    | NA | NA | NA | NA | NA | NA | NA | NA | NA |
|              | NA                 | NA | NA | NA | NA | -2 | NA |    |    |    |    |    |    |    |
| MFSD2B       | ENSG00000205639.9  |    |    |    |    | NA | NA | NA | NA | NA | NA | NA | NA | NA |
|              | NA                 | NA | NA | NA | NA | -2 | NA |    |    |    |    |    |    |    |
| LINC01854    | ENSG00000204460.3  |    |    |    |    | NA | NA | NA | NA | NA | NA | NA | NA | NA |
|              | NA                 | NA | NA | NA | NA | -2 | NA |    |    |    |    |    |    |    |
| AC079163.1   | ENSG00000226218.1  |    |    |    |    | NA | NA | NA | NA | NA | NA | NA | NA | NA |
|              | NA                 | NA | NA | NA | NA | -2 | NA |    |    |    |    |    |    |    |
| AC106900.6   | ENSG00000224638.1  |    |    |    |    | NA | NA | NA | NA | NA | NA | NA | NA | NA |
|              | NA                 | NA | NA | NA | NA | -2 | NA |    |    |    |    |    |    |    |
| FMNL2        | ENSG00000157827.19 |    |    |    |    | NA | NA | NA | NA | NA | NA | NA | NA | NA |
|              | NA                 | NA | NA | NA | -2 | NA |    |    |    |    |    |    |    |    |
| HOXD3        | ENSG00000128652.11 |    |    |    |    | NA | NA | NA | NA | NA | NA | NA | NA | NA |
|              | NA                 | NA | NA | NA | -2 | NA |    |    |    |    |    |    |    |    |
| POTEE        | ENSG00000188219.14 |    |    |    |    | NA | NA | NA | NA | NA | NA | NA | NA | NA |
|              | NA                 | NA | NA | NA | -2 | NA |    |    |    |    |    |    |    |    |
| GYPC         | ENSG00000136732.14 |    |    |    |    | NA | NA | NA | NA | NA | NA | NA | NA | NA |
|              | NA                 | NA | NA | NA | -2 | NA |    |    |    |    |    |    |    |    |
| KANSL1L      | ENSG00000144445.16 |    |    |    |    | NA | NA | NA | NA | NA | NA | NA | NA | NA |
|              | NA                 | NA | NA | NA | NA | -2 | NA |    |    |    |    |    |    |    |
| RP11-171I2.4 | ENSG00000271141.1  |    |    |    |    | NA | NA | NA | NA | NA | NA | NA | NA | NA |
|              | NA                 | NA | NA | NA | NA | NA | -2 | NA |    |    |    |    |    |    |
| EVA1A        | ENSG00000115363.13 |    |    |    |    | NA | NA | NA | NA | NA | NA | NA | NA | NA |
|              | NA                 | NA | NA | NA | -2 | NA |    |    |    |    |    |    |    |    |
| UGT1A10      | ENSG00000242515.5  |    |    |    |    | NA | NA | NA | NA | NA | NA | NA | NA | NA |
|              | NA                 | NA | NA | NA | NA | -2 | NA |    |    |    |    |    |    |    |
| EIF5B        | ENSG00000158417.10 |    |    |    |    | NA | NA | NA | NA | NA | NA | NA | NA | NA |



|               |                    |    |    |    |    |    |    |    |    |    |    |    |    |    |
|---------------|--------------------|----|----|----|----|----|----|----|----|----|----|----|----|----|
| NA            | NA                 | NA | NA | -2 | NA |    |    |    |    |    |    |    |    |    |
| SRSF7         | ENSG00000115875.18 | NA | NA | NA | NA | NA | NA | NA | NA | NA | NA | NA | NA | NA |
| NA            | NA                 | NA | NA | -2 | NA |    |    |    |    |    |    |    |    |    |
| UGT1A6        | ENSG00000167165.18 | NA | NA | NA | NA | NA | NA | NA | NA | NA | NA | NA | NA | NA |
| NA            | NA                 | NA | NA | NA | -2 | NA |    |    |    |    |    |    |    |    |
| ASXL2         | ENSG00000143970.16 | NA | NA | NA | NA | NA | NA | NA | NA | NA | NA | NA | NA | NA |
| NA            | NA                 | NA | NA | -2 | NA |    |    |    |    |    |    |    |    |    |
| AC069277.2    | ENSG00000189229.10 | NA | NA | NA | NA | NA | NA | NA | NA | NA | NA | NA | NA | NA |
| NA            | NA                 | NA | NA | NA | -2 | NA |    |    |    |    |    |    |    |    |
| PRRT3         | ENSG00000163704.11 | NA | NA | NA | NA | NA | NA | NA | NA | NA | NA | NA | NA | NA |
| NA            | NA                 | NA | NA | -2 | NA |    |    |    |    |    |    |    |    |    |
| PSMD6         | ENSG00000163636.10 | NA | NA | NA | NA | NA | NA | NA | NA | NA | NA | NA | NA | NA |
| NA            | NA                 | NA | NA | -2 | NA |    |    |    |    |    |    |    |    |    |
| PLCL2         | ENSG00000154822.17 | NA | NA | NA | NA | NA | NA | NA | NA | NA | NA | NA | NA | NA |
| NA            | NA                 | NA | NA | -2 | NA |    |    |    |    |    |    |    |    |    |
| CCR5          | ENSG00000160791.13 | NA | NA | NA | NA | NA | NA | NA | NA | NA | NA | NA | NA | NA |
| NA            | NA                 | NA | NA | -2 | NA |    |    |    |    |    |    |    |    |    |
| GRM7          | ENSG00000196277.15 | NA | NA | NA | NA | NA | NA | NA | NA | NA | NA | NA | NA | NA |
| NA            | NA                 | NA | NA | -2 | NA |    |    |    |    |    |    |    |    |    |
| TMEM89        | ENSG00000183396.3  | NA | NA | NA | NA | NA | NA | NA | NA | NA | NA | NA | NA | NA |
| NA            | NA                 | NA | NA | NA | -2 | NA |    |    |    |    |    |    |    |    |
| AADAC         | ENSG00000114771.13 | NA | NA | NA | NA | NA | NA | NA | NA | NA | NA | NA | NA | NA |
| NA            | NA                 | NA | NA | -2 | NA |    |    |    |    |    |    |    |    |    |
| GPR160        | ENSG00000173890.16 | NA | NA | NA | NA | NA | NA | NA | NA | NA | NA | NA | NA | NA |
| NA            | NA                 | NA | NA | NA | -2 | NA |    |    |    |    |    |    |    |    |
| RP11-90K6.1   | ENSG00000239482.6  | NA | NA | NA | NA | NA | NA | NA | NA | NA | NA | NA | NA | NA |
| NA            | NA                 | NA | NA | NA | NA | -2 | NA |    |    |    |    |    |    |    |
| GPR149        | ENSG00000174948.5  | NA | NA | NA | NA | NA | NA | NA | NA | NA | NA | NA | NA | NA |
| NA            | NA                 | NA | NA | NA | -2 | NA |    |    |    |    |    |    |    |    |
| LINC01267     | ENSG00000251576.1  | NA | NA | NA | NA | NA | NA | NA | NA | NA | NA | NA | NA | NA |
| NA            | NA                 | NA | NA | NA | -2 | NA |    |    |    |    |    |    |    |    |
| CAMKV         | ENSG00000164076.16 | NA | NA | NA | NA | NA | NA | NA | NA | NA | NA | NA | NA | NA |
| NA            | NA                 | NA | NA | -2 | NA |    |    |    |    |    |    |    |    |    |
| UBA3          | ENSG00000144744.16 | NA | NA | NA | NA | NA | NA | NA | NA | NA | NA | NA | NA | NA |
| NA            | NA                 | NA | NA | -2 | NA |    |    |    |    |    |    |    |    |    |
| RP11-88H10.3  | ENSG00000240095.1  | NA | NA | NA | NA | NA | NA | NA | NA | NA | NA | NA | NA | NA |
| NA            | NA                 | NA | NA | NA | NA | -2 | NA |    |    |    |    |    |    |    |
| LINC01839     | ENSG00000227509.1  | NA | NA | NA | NA | NA | NA | NA | NA | NA | NA | NA | NA | NA |
| NA            | NA                 | NA | NA | NA | -2 | NA |    |    |    |    |    |    |    |    |
| LMCD1         | ENSG00000071282.11 | NA | NA | NA | NA | NA | NA | NA | NA | NA | NA | NA | NA | NA |
| NA            | NA                 | NA | NA | -2 | NA |    |    |    |    |    |    |    |    |    |
| SLC2A2        | ENSG00000163581.13 | NA | NA | NA | NA | NA | NA | NA | NA | NA | NA | NA | NA | NA |
| NA            | NA                 | NA | NA | NA | -2 | NA |    |    |    |    |    |    |    |    |
| RP11-389G6.3  | ENSG00000261292.2  | NA | NA | NA | NA | NA | NA | NA | NA | NA | NA | NA | NA | NA |
| NA            | NA                 | NA | NA | NA | NA | -2 | NA |    |    |    |    |    |    |    |
| GPR171        | ENSG00000174946.6  | NA | NA | NA | NA | NA | NA | NA | NA | NA | NA | NA | NA | NA |
| NA            | NA                 | NA | NA | NA | -2 | NA |    |    |    |    |    |    |    |    |
| AP2M1         | ENSG00000161203.13 | NA | NA | NA | NA | NA | NA | NA | NA | NA | NA | NA | NA | NA |
| NA            | NA                 | NA | NA | -2 | NA |    |    |    |    |    |    |    |    |    |
| ZNF621        | ENSG00000172888.11 | NA | NA | NA | NA | NA | NA | NA | NA | NA | NA | NA | NA | NA |
| NA            | NA                 | NA | NA | NA | -2 | NA |    |    |    |    |    |    |    |    |
| LINC01980     | ENSG00000225548.5  | NA | NA | NA | NA | NA | NA | NA | NA | NA | NA | NA | NA | NA |
| NA            | NA                 | NA | NA | NA | -2 | NA |    |    |    |    |    |    |    |    |
| LZTFL1        | ENSG00000163818.16 | NA | NA | NA | NA | NA | NA | NA | NA | NA | NA | NA | NA | NA |
| NA            | NA                 | NA | NA | NA | -2 | NA |    |    |    |    |    |    |    |    |
| LINC00879     | ENSG00000239589.5  | NA | NA | NA | NA | NA | NA | NA | NA | NA | NA | NA | NA | NA |
| NA            | NA                 | NA | NA | NA | -2 | NA |    |    |    |    |    |    |    |    |
| RP11-501O2.3  | ENSG00000244650.2  | NA | NA | NA | NA | NA | NA | NA | NA | NA | NA | NA | NA | NA |
| NA            | NA                 | NA | NA | NA | NA | -2 | NA |    |    |    |    |    |    |    |
| RP11-528N21.1 | ENSG00000226302.1  | NA | NA | NA | NA | NA | NA | NA | NA | NA | NA | NA | NA | NA |
| NA            | NA                 | NA | NA | NA | NA | -2 | NA |    |    |    |    |    |    |    |
| LINC02022     | ENSG00000232746.1  | NA | NA | NA | NA | NA | NA | NA | NA | NA | NA | NA | NA | NA |

|               |                    |    |    |    |    |    |    |    |    |    |    |    |    |    |
|---------------|--------------------|----|----|----|----|----|----|----|----|----|----|----|----|----|
| NA            | NA                 | NA | NA | NA | -2 | NA |    |    |    |    |    |    |    |    |
| TMEM158       | ENSG00000249992.1  |    |    |    |    | NA | NA | NA | NA | NA | NA | NA | NA | NA |
| NA            | NA                 | NA | NA | NA | -2 | NA |    |    |    |    |    |    |    |    |
| PROK2         | ENSG00000163421.8  |    |    |    |    | NA | NA | NA | NA | NA | NA | NA | NA | NA |
| NA            | NA                 | NA | NA | NA | -2 | NA |    |    |    |    |    |    |    |    |
| USP19         | ENSG00000172046.18 |    |    |    |    | NA | NA | NA | NA | NA | NA | NA | NA | NA |
| NA            | NA                 | NA | NA | NA | -2 | NA |    |    |    |    |    |    |    |    |
| RP11-494H4.3  | ENSG00000270178.1  |    |    |    |    | NA | NA | NA | NA | NA | NA | NA | NA | NA |
| NA            | NA                 | NA | NA | NA | NA | -2 | NA |    |    |    |    |    |    |    |
| RP11-439C8.1  | ENSG00000243969.1  |    |    |    |    | NA | NA | NA | NA | NA | NA | NA | NA | NA |
| NA            | NA                 | NA | NA | NA | NA | -2 | NA |    |    |    |    |    |    |    |
| CLDND1        | ENSG00000080822.16 |    |    |    |    | NA | NA | NA | NA | NA | NA | NA | NA | NA |
| NA            | NA                 | NA | NA | NA | -2 | NA |    |    |    |    |    |    |    |    |
| GTF2E1        | ENSG00000153767.9  |    |    |    |    | NA | NA | NA | NA | NA | NA | NA | NA | NA |
| NA            | NA                 | NA | NA | NA | -2 | NA |    |    |    |    |    |    |    |    |
| FAM43A        | ENSG00000185112.5  |    |    |    |    | NA | NA | NA | NA | NA | NA | NA | NA | NA |
| NA            | NA                 | NA | NA | NA | -2 | NA |    |    |    |    |    |    |    |    |
| OGG1          | ENSG00000114026.21 |    |    |    |    | NA | NA | NA | NA | NA | NA | NA | NA | NA |
| NA            | NA                 | NA | NA | NA | -2 | NA |    |    |    |    |    |    |    |    |
| PRR23C        | ENSG00000233701.3  |    |    |    |    | NA | NA | NA | NA | NA | NA | NA | NA | NA |
| NA            | NA                 | NA | NA | NA | -2 | NA |    |    |    |    |    |    |    |    |
| ARMC8         | ENSG00000114098.17 |    |    |    |    | NA | NA | NA | NA | NA | NA | NA | NA | NA |
| NA            | NA                 | NA | NA | NA | -2 | NA |    |    |    |    |    |    |    |    |
| BRPF1         | ENSG00000156983.15 |    |    |    |    | NA | NA | NA | NA | NA | NA | NA | NA | NA |
| NA            | NA                 | NA | NA | NA | -2 | NA |    |    |    |    |    |    |    |    |
| HTR3D         | ENSG00000186090.10 |    |    |    |    | NA | NA | NA | NA | NA | NA | NA | NA | NA |
| NA            | NA                 | NA | NA | NA | -2 | NA |    |    |    |    |    |    |    |    |
| CAMP          | ENSG00000164047.4  |    |    |    |    | NA | NA | NA | NA | NA | NA | NA | NA | NA |
| NA            | NA                 | NA | NA | NA | -2 | NA |    |    |    |    |    |    |    |    |
| CAV3          | ENSG00000182533.6  |    |    |    |    | NA | NA | NA | NA | NA | NA | NA | NA | NA |
| NA            | NA                 | NA | NA | NA | -2 | NA |    |    |    |    |    |    |    |    |
| P2RY14        | ENSG00000174944.8  |    |    |    |    | NA | NA | NA | NA | NA | NA | NA | NA | NA |
| NA            | NA                 | NA | NA | NA | NA | -2 | NA |    |    |    |    |    |    |    |
| CD80          | ENSG00000121594.11 |    |    |    |    | NA | NA | NA | NA | NA | NA | NA | NA | NA |
| NA            | NA                 | NA | NA | NA | -2 | NA |    |    |    |    |    |    |    |    |
| DOCK3         | ENSG00000088538.12 |    |    |    |    | NA | NA | NA | NA | NA | NA | NA | NA | NA |
| NA            | NA                 | NA | NA | NA | -2 | NA |    |    |    |    |    |    |    |    |
| AC106706.1    | ENSG00000233987.1  |    |    |    |    | NA | NA | NA | NA | NA | NA | NA | NA | NA |
| NA            | NA                 | NA | NA | NA | NA | -2 | NA |    |    |    |    |    |    |    |
| RP11-211G3.2  | ENSG00000223401.2  |    |    |    |    | NA | NA | NA | NA | NA | NA | NA | NA | NA |
| NA            | NA                 | NA | NA | NA | NA | -2 | NA |    |    |    |    |    |    |    |
| RP11-501O2.1  | ENSG00000241792.1  |    |    |    |    | NA | NA | NA | NA | NA | NA | NA | NA | NA |
| NA            | NA                 | NA | NA | NA | NA | -2 | NA |    |    |    |    |    |    |    |
| SLC25A36      | ENSG00000114120.11 |    |    |    |    | NA | NA | NA | NA | NA | NA | NA | NA | NA |
| NA            | NA                 | NA | NA | NA | -2 | NA |    |    |    |    |    |    |    |    |
| LINC01213     | ENSG00000244541.5  |    |    |    |    | NA | NA | NA | NA | NA | NA | NA | NA | NA |
| NA            | NA                 | NA | NA | NA | -2 | NA |    |    |    |    |    |    |    |    |
| TMEM212       | ENSG00000186329.9  |    |    |    |    | NA | NA | NA | NA | NA | NA | NA | NA | NA |
| NA            | NA                 | NA | NA | NA | -2 | NA |    |    |    |    |    |    |    |    |
| TM4SF4        | ENSG00000169903.6  |    |    |    |    | NA | NA | NA | NA | NA | NA | NA | NA | NA |
| NA            | NA                 | NA | NA | NA | -2 | NA |    |    |    |    |    |    |    |    |
| RP11-803P9.1  | ENSG00000273375.1  |    |    |    |    | NA | NA | NA | NA | NA | NA | NA | NA | NA |
| NA            | NA                 | NA | NA | NA | NA | -2 | NA |    |    |    |    |    |    |    |
| TBCCD1        | ENSG00000113838.12 |    |    |    |    | NA | NA | NA | NA | NA | NA | NA | NA | NA |
| NA            | NA                 | NA | NA | NA | -2 | NA |    |    |    |    |    |    |    |    |
| MAPKAPK3      | ENSG00000114738.10 |    |    |    |    | NA | NA | NA | NA | NA | NA | NA | NA | NA |
| NA            | NA                 | NA | NA | NA | -2 | NA |    |    |    |    |    |    |    |    |
| POC1A         | ENSG00000164087.7  |    |    |    |    | NA | NA | NA | NA | NA | NA | NA | NA | NA |
| NA            | NA                 | NA | NA | NA | -2 | NA |    |    |    |    |    |    |    |    |
| RP11-379B18.6 | ENSG00000272840.1  |    |    |    |    | NA | NA | NA | NA | NA | NA | NA | NA | NA |
| NA            | NA                 | NA | NA | NA | NA | -2 | NA |    |    |    |    |    |    |    |
| ZNF385D-AS2   | ENSG00000223351.5  |    |    |    |    | NA | NA | NA | NA | NA | NA | NA | NA | NA |

|               |                    |    |    |    |    |    |    |    |    |    |    |    |    |    |
|---------------|--------------------|----|----|----|----|----|----|----|----|----|----|----|----|----|
| NA            | NA                 | NA | NA | NA | NA | -2 | NA |    |    |    |    |    |    |    |
| SLC4A7        | ENSG00000033867.16 | NA | NA | NA | NA | NA | NA | NA | NA | NA | NA | NA | NA | NA |
| NA            | NA                 | NA | NA | NA | NA | -2 | NA |    |    |    |    |    |    |    |
| RBP2          | ENSG00000114113.6  | NA | NA | NA | NA | NA | NA | NA | NA | NA | NA | NA | NA | NA |
| NA            | NA                 | NA | NA | NA | NA | -2 | NA |    |    |    |    |    |    |    |
| AC022007.5    | ENSG00000206567.9  | NA | NA | NA | NA | NA | NA | NA | NA | NA | NA | NA | NA | NA |
| NA            | NA                 | NA | NA | NA | NA | -2 | NA |    |    |    |    |    |    |    |
| THPO          | ENSG00000090534.17 | NA | NA | NA | NA | NA | NA | NA | NA | NA | NA | NA | NA | NA |
| NA            | NA                 | NA | NA | NA | NA | -2 | NA |    |    |    |    |    |    |    |
| TRA2B         | ENSG00000136527.17 | NA | NA | NA | NA | NA | NA | NA | NA | NA | NA | NA | NA | NA |
| NA            | NA                 | NA | NA | NA | NA | -2 | NA |    |    |    |    |    |    |    |
| ZBTB20        | ENSG00000181722.16 | NA | NA | NA | NA | NA | NA | NA | NA | NA | NA | NA | NA | NA |
| NA            | NA                 | NA | NA | NA | NA | -2 | NA |    |    |    |    |    |    |    |
| AC018832.1    | ENSG00000228351.1  | NA | NA | NA | NA | NA | NA | NA | NA | NA | NA | NA | NA | NA |
| NA            | NA                 | NA | NA | NA | NA | -2 | NA |    |    |    |    |    |    |    |
| LRRIQ4        | ENSG00000188306.6  | NA | NA | NA | NA | NA | NA | NA | NA | NA | NA | NA | NA | NA |
| NA            | NA                 | NA | NA | NA | NA | -2 | NA |    |    |    |    |    |    |    |
| DENND6A       | ENSG00000174839.12 | NA | NA | NA | NA | NA | NA | NA | NA | NA | NA | NA | NA | NA |
| NA            | NA                 | NA | NA | NA | NA | -2 | NA |    |    |    |    |    |    |    |
| CCDC36        | ENSG00000173421.16 | NA | NA | NA | NA | NA | NA | NA | NA | NA | NA | NA | NA | NA |
| NA            | NA                 | NA | NA | NA | NA | -2 | NA |    |    |    |    |    |    |    |
| CDHR4         | ENSG00000187492.8  | NA | NA | NA | NA | NA | NA | NA | NA | NA | NA | NA | NA | NA |
| NA            | NA                 | NA | NA | NA | NA | -2 | NA |    |    |    |    |    |    |    |
| PLCXD2        | ENSG00000240891.7  | NA | NA | NA | NA | NA | NA | NA | NA | NA | NA | NA | NA | NA |
| NA            | NA                 | NA | NA | NA | NA | -2 | NA |    |    |    |    |    |    |    |
| RPL32         | ENSG00000144713.12 | NA | NA | NA | NA | NA | NA | NA | NA | NA | NA | NA | NA | NA |
| NA            | NA                 | NA | NA | NA | NA | -2 | NA |    |    |    |    |    |    |    |
| APPL1         | ENSG00000157500.10 | NA | NA | NA | NA | NA | NA | NA | NA | NA | NA | NA | NA | NA |
| NA            | NA                 | NA | NA | NA | NA | -2 | NA |    |    |    |    |    |    |    |
| LINC02020     | ENSG00000234548.5  | NA | NA | NA | NA | NA | NA | NA | NA | NA | NA | NA | NA | NA |
| NA            | NA                 | NA | NA | NA | NA | -2 | NA |    |    |    |    |    |    |    |
| ATP2B2        | ENSG00000157087.17 | NA | NA | NA | NA | NA | NA | NA | NA | NA | NA | NA | NA | NA |
| NA            | NA                 | NA | NA | NA | NA | -2 | NA |    |    |    |    |    |    |    |
| TMEM40        | ENSG00000088726.15 | NA | NA | NA | NA | NA | NA | NA | NA | NA | NA | NA | NA | NA |
| NA            | NA                 | NA | NA | NA | NA | -2 | NA |    |    |    |    |    |    |    |
| LINC01192     | ENSG00000241369.5  | NA | NA | NA | NA | NA | NA | NA | NA | NA | NA | NA | NA | NA |
| NA            | NA                 | NA | NA | NA | NA | -2 | NA |    |    |    |    |    |    |    |
| RP11-755B10.3 | ENSG00000241933.1  | NA | NA | NA | NA | NA | NA | NA | NA | NA | NA | NA | NA | NA |
| NA            | NA                 | NA | NA | NA | NA | -2 | NA |    |    |    |    |    |    |    |
| PBRM1         | ENSG00000163939.18 | NA | NA | NA | NA | NA | NA | NA | NA | NA | NA | NA | NA | NA |
| NA            | NA                 | NA | NA | NA | NA | -2 | NA |    |    |    |    |    |    |    |
| ADAMTS9       | ENSG00000163638.13 | NA | NA | NA | NA | NA | NA | NA | NA | NA | NA | NA | NA | NA |
| NA            | NA                 | NA | NA | NA | NA | -2 | NA |    |    |    |    |    |    |    |
| RP11-280H21.1 | ENSG00000241754.1  | NA | NA | NA | NA | NA | NA | NA | NA | NA | NA | NA | NA | NA |
| NA            | NA                 | NA | NA | NA | NA | -2 | NA |    |    |    |    |    |    |    |
| ARL14         | ENSG00000179674.3  | NA | NA | NA | NA | NA | NA | NA | NA | NA | NA | NA | NA | NA |
| NA            | NA                 | NA | NA | NA | NA | -2 | NA |    |    |    |    |    |    |    |
| TMF1          | ENSG00000144747.15 | NA | NA | NA | NA | NA | NA | NA | NA | NA | NA | NA | NA | NA |
| NA            | NA                 | NA | NA | NA | NA | -2 | NA |    |    |    |    |    |    |    |
| ARL6          | ENSG00000113966.9  | NA | NA | NA | NA | NA | NA | NA | NA | NA | NA | NA | NA | NA |
| NA            | NA                 | NA | NA | NA | NA | -2 | NA |    |    |    |    |    |    |    |
| ACAD11        | ENSG00000240303.7  | NA | NA | NA | NA | NA | NA | NA | NA | NA | NA | NA | NA | NA |
| NA            | NA                 | NA | NA | NA | NA | -2 | NA |    |    |    |    |    |    |    |
| SEC62         | ENSG00000008952.16 | NA | NA | NA | NA | NA | NA | NA | NA | NA | NA | NA | NA | NA |
| NA            | NA                 | NA | NA | NA | NA | -2 | NA |    |    |    |    |    |    |    |
| HCLS1         | ENSG00000180353.10 | NA | NA | NA | NA | NA | NA | NA | NA | NA | NA | NA | NA | NA |
| NA            | NA                 | NA | NA | NA | NA | -2 | NA |    |    |    |    |    |    |    |
| RP4-555D20.4  | ENSG00000272121.1  | NA | NA | NA | NA | NA | NA | NA | NA | NA | NA | NA | NA | NA |
| NA            | NA                 | NA | NA | NA | NA | -2 | NA |    |    |    |    |    |    |    |
| GADL1         | ENSG00000144644.14 | NA | NA | NA | NA | NA | NA | NA | NA | NA | NA | NA | NA | NA |
| NA            | NA                 | NA | NA | NA | NA | -2 | NA |    |    |    |    |    |    |    |
| RPL15         | ENSG00000174748.18 | NA | NA | NA | NA | NA | NA | NA | NA | NA | NA | NA | NA | NA |

|               |                    |    |    |    |    |    |    |    |    |    |    |    |    |    |
|---------------|--------------------|----|----|----|----|----|----|----|----|----|----|----|----|----|
| NA            | NA                 | NA | NA | -2 | NA |    |    |    |    |    |    |    |    |    |
| RP11-456N14.4 | ENSG00000283148.1  | NA | NA | NA | NA | NA | NA | NA | NA | NA | NA | NA | NA | NA |
| NA            | NA                 | NA | NA | NA | NA | -2 | NA |    |    |    |    |    |    |    |
| LINC01210     | ENSG00000239513.5  | NA | NA | NA | NA | NA | NA | NA | NA | NA | NA | NA | NA | NA |
| NA            | NA                 | NA | NA | NA | NA | -2 | NA |    |    |    |    |    |    |    |
| RP11-444P10.1 | ENSG00000241667.1  | NA | NA | NA | NA | NA | NA | NA | NA | NA | NA | NA | NA | NA |
| NA            | NA                 | NA | NA | NA | NA | -2 | NA |    |    |    |    |    |    |    |
| EMC3          | ENSG00000125037.12 | NA | NA | NA | NA | NA | NA | NA | NA | NA | NA | NA | NA | NA |
| NA            | NA                 | NA | NA | NA | NA | -2 | NA |    |    |    |    |    |    |    |
| ZNF654        | ENSG00000175105.6  | NA | NA | NA | NA | NA | NA | NA | NA | NA | NA | NA | NA | NA |
| NA            | NA                 | NA | NA | NA | NA | -2 | NA |    |    |    |    |    |    |    |
| MRPS25        | ENSG00000131368.7  | NA | NA | NA | NA | NA | NA | NA | NA | NA | NA | NA | NA | NA |
| NA            | NA                 | NA | NA | NA | NA | -2 | NA |    |    |    |    |    |    |    |
| SSUH2         | ENSG00000125046.14 | NA | NA | NA | NA | NA | NA | NA | NA | NA | NA | NA | NA | NA |
| NA            | NA                 | NA | NA | NA | NA | -2 | NA |    |    |    |    |    |    |    |
| GNAI2         | ENSG00000114353.16 | NA | NA | NA | NA | NA | NA | NA | NA | NA | NA | NA | NA | NA |
| NA            | NA                 | NA | NA | NA | NA | -2 | NA |    |    |    |    |    |    |    |
| CHMP2B        | ENSG00000083937.8  | NA | NA | NA | NA | NA | NA | NA | NA | NA | NA | NA | NA | NA |
| NA            | NA                 | NA | NA | NA | NA | -2 | NA |    |    |    |    |    |    |    |
| SOX2          | ENSG00000181449.3  | NA | NA | NA | NA | NA | NA | NA | NA | NA | NA | NA | NA | NA |
| NA            | NA                 | NA | NA | NA | NA | -2 | NA |    |    |    |    |    |    |    |
| CCDC54        | ENSG00000138483.2  | NA | NA | NA | NA | NA | NA | NA | NA | NA | NA | NA | NA | NA |
| NA            | NA                 | NA | NA | NA | NA | -2 | NA |    |    |    |    |    |    |    |
| FRMD4B        | ENSG00000114541.14 | NA | NA | NA | NA | NA | NA | NA | NA | NA | NA | NA | NA | NA |
| NA            | NA                 | NA | NA | NA | NA | -2 | NA |    |    |    |    |    |    |    |
| LINC02016     | ENSG00000244215.1  | NA | NA | NA | NA | NA | NA | NA | NA | NA | NA | NA | NA | NA |
| NA            | NA                 | NA | NA | NA | NA | -2 | NA |    |    |    |    |    |    |    |
| HACL1         | ENSG00000131373.14 | NA | NA | NA | NA | NA | NA | NA | NA | NA | NA | NA | NA | NA |
| NA            | NA                 | NA | NA | NA | NA | -2 | NA |    |    |    |    |    |    |    |
| TNFSF10       | ENSG00000121858.10 | NA | NA | NA | NA | NA | NA | NA | NA | NA | NA | NA | NA | NA |
| NA            | NA                 | NA | NA | NA | NA | -2 | NA |    |    |    |    |    |    |    |
| LINC02027     | ENSG00000243694.2  | NA | NA | NA | NA | NA | NA | NA | NA | NA | NA | NA | NA | NA |
| NA            | NA                 | NA | NA | NA | NA | -2 | NA |    |    |    |    |    |    |    |
| IP6K1         | ENSG00000176095.11 | NA | NA | NA | NA | NA | NA | NA | NA | NA | NA | NA | NA | NA |
| NA            | NA                 | NA | NA | NA | NA | -2 | NA |    |    |    |    |    |    |    |
| DNAJC13       | ENSG00000138246.15 | NA | NA | NA | NA | NA | NA | NA | NA | NA | NA | NA | NA | NA |
| NA            | NA                 | NA | NA | NA | NA | -2 | NA |    |    |    |    |    |    |    |
| STT3B         | ENSG00000163527.9  | NA | NA | NA | NA | NA | NA | NA | NA | NA | NA | NA | NA | NA |
| NA            | NA                 | NA | NA | NA | NA | -2 | NA |    |    |    |    |    |    |    |
| ZPLD1         | ENSG00000170044.8  | NA | NA | NA | NA | NA | NA | NA | NA | NA | NA | NA | NA | NA |
| NA            | NA                 | NA | NA | NA | NA | -2 | NA |    |    |    |    |    |    |    |
| STAB1         | ENSG00000010327.10 | NA | NA | NA | NA | NA | NA | NA | NA | NA | NA | NA | NA | NA |
| NA            | NA                 | NA | NA | NA | NA | -2 | NA |    |    |    |    |    |    |    |
| LINC02005     | ENSG00000242741.1  | NA | NA | NA | NA | NA | NA | NA | NA | NA | NA | NA | NA | NA |
| NA            | NA                 | NA | NA | NA | NA | -2 | NA |    |    |    |    |    |    |    |
| LINC01968     | ENSG00000237222.3  | NA | NA | NA | NA | NA | NA | NA | NA | NA | NA | NA | NA | NA |
| NA            | NA                 | NA | NA | NA | NA | -2 | NA |    |    |    |    |    |    |    |
| ATP13A3       | ENSG00000133657.14 | NA | NA | NA | NA | NA | NA | NA | NA | NA | NA | NA | NA | NA |
| NA            | NA                 | NA | NA | NA | NA | -2 | NA |    |    |    |    |    |    |    |
| LPP           | ENSG00000145012.13 | NA | NA | NA | NA | NA | NA | NA | NA | NA | NA | NA | NA | NA |
| NA            | NA                 | NA | NA | NA | NA | -2 | NA |    |    |    |    |    |    |    |
| LINC02017     | ENSG00000243572.1  | NA | NA | NA | NA | NA | NA | NA | NA | NA | NA | NA | NA | NA |
| NA            | NA                 | NA | NA | NA | NA | -2 | NA |    |    |    |    |    |    |    |
| HHLA2         | ENSG00000114455.13 | NA | NA | NA | NA | NA | NA | NA | NA | NA | NA | NA | NA | NA |
| NA            | NA                 | NA | NA | NA | NA | -2 | NA |    |    |    |    |    |    |    |
| XRN1          | ENSG00000114127.10 | NA | NA | NA | NA | NA | NA | NA | NA | NA | NA | NA | NA | NA |
| NA            | NA                 | NA | NA | NA | NA | -2 | NA |    |    |    |    |    |    |    |
| RP11-2A4.4    | ENSG00000261146.1  | NA | NA | NA | NA | NA | NA | NA | NA | NA | NA | NA | NA | NA |
| NA            | NA                 | NA | NA | NA | NA | -2 | NA |    |    |    |    |    |    |    |
| AMOTL2        | ENSG00000114019.14 | NA | NA | NA | NA | NA | NA | NA | NA | NA | NA | NA | NA | NA |
| NA            | NA                 | NA | NA | NA | NA | -2 | NA |    |    |    |    |    |    |    |
| FBLN2         | ENSG00000163520.13 | NA | NA | NA | NA | NA | NA | NA | NA | NA | NA | NA | NA | NA |

|               |                    |    |    |    |    |    |    |    |    |    |    |    |    |    |
|---------------|--------------------|----|----|----|----|----|----|----|----|----|----|----|----|----|
| NA            | NA                 | NA | NA | -2 | NA |    |    |    |    |    |    |    |    |    |
| LINC01214     | ENSG00000243550.2  | NA | NA | NA | NA | NA | NA | NA | NA | NA | NA | NA | NA | NA |
| NA            | NA                 | NA | NA | NA | -2 | NA |    |    |    |    |    |    |    |    |
| LINC01215     | ENSG00000271856.1  | NA | NA | NA | NA | NA | NA | NA | NA | NA | NA | NA | NA | NA |
| NA            | NA                 | NA | NA | NA | -2 | NA |    |    |    |    |    |    |    |    |
| SMIM4         | ENSG00000168273.7  | NA | NA | NA | NA | NA | NA | NA | NA | NA | NA | NA | NA | NA |
| NA            | NA                 | NA | NA | NA | -2 | NA |    |    |    |    |    |    |    |    |
| U73166.2      | ENSG00000230454.1  | NA | NA | NA | NA | NA | NA | NA | NA | NA | NA | NA | NA | NA |
| NA            | NA                 | NA | NA | NA | -2 | NA |    |    |    |    |    |    |    |    |
| LMLN          | ENSG00000185621.11 | NA | NA | NA | NA | NA | NA | NA | NA | NA | NA | NA | NA | NA |
| NA            | NA                 | NA | NA | NA | -2 | NA |    |    |    |    |    |    |    |    |
| PAQR9         | ENSG00000188582.8  | NA | NA | NA | NA | NA | NA | NA | NA | NA | NA | NA | NA | NA |
| NA            | NA                 | NA | NA | NA | -2 | NA |    |    |    |    |    |    |    |    |
| ZCWPW2        | ENSG00000206559.7  | NA | NA | NA | NA | NA | NA | NA | NA | NA | NA | NA | NA | NA |
| NA            | NA                 | NA | NA | NA | -2 | NA |    |    |    |    |    |    |    |    |
| COL8A1        | ENSG00000144810.15 | NA | NA | NA | NA | NA | NA | NA | NA | NA | NA | NA | NA | NA |
| NA            | NA                 | NA | NA | NA | -2 | NA |    |    |    |    |    |    |    |    |
| RP11-543D10.2 | ENSG00000239628.1  | NA | NA | NA | NA | NA | NA | NA | NA | NA | NA | NA | NA | NA |
| NA            | NA                 | NA | NA | NA | NA | -2 | NA |    |    |    |    |    |    |    |
| RP11-231E6.1  | ENSG00000243081.2  | NA | NA | NA | NA | NA | NA | NA | NA | NA | NA | NA | NA | NA |
| NA            | NA                 | NA | NA | NA | NA | -2 | NA |    |    |    |    |    |    |    |
| FYTTD1        | ENSG00000122068.12 | NA | NA | NA | NA | NA | NA | NA | NA | NA | NA | NA | NA | NA |
| NA            | NA                 | NA | NA | NA | -2 | NA |    |    |    |    |    |    |    |    |
| EXOSC7        | ENSG00000075914.12 | NA | NA | NA | NA | NA | NA | NA | NA | NA | NA | NA | NA | NA |
| NA            | NA                 | NA | NA | NA | -2 | NA |    |    |    |    |    |    |    |    |
| LINC02004     | ENSG00000240006.1  | NA | NA | NA | NA | NA | NA | NA | NA | NA | NA | NA | NA | NA |
| NA            | NA                 | NA | NA | NA | -2 | NA |    |    |    |    |    |    |    |    |
| GRM2          | ENSG00000164082.14 | NA | NA | NA | NA | NA | NA | NA | NA | NA | NA | NA | NA | NA |
| NA            | NA                 | NA | NA | NA | -2 | NA |    |    |    |    |    |    |    |    |
| TRMT10C       | ENSG00000174173.6  | NA | NA | NA | NA | NA | NA | NA | NA | NA | NA | NA | NA | NA |
| NA            | NA                 | NA | NA | NA | -2 | NA |    |    |    |    |    |    |    |    |
| EIF5A2        | ENSG00000163577.7  | NA | NA | NA | NA | NA | NA | NA | NA | NA | NA | NA | NA | NA |
| NA            | NA                 | NA | NA | NA | -2 | NA |    |    |    |    |    |    |    |    |
| KALRN         | ENSG00000160145.15 | NA | NA | NA | NA | NA | NA | NA | NA | NA | NA | NA | NA | NA |
| NA            | NA                 | NA | NA | NA | -2 | NA |    |    |    |    |    |    |    |    |
| RP11-761N21.1 | ENSG00000231873.1  | NA | NA | NA | NA | NA | NA | NA | NA | NA | NA | NA | NA | NA |
| NA            | NA                 | NA | NA | NA | NA | -2 | NA |    |    |    |    |    |    |    |
| PRKCI         | ENSG00000163558.12 | NA | NA | NA | NA | NA | NA | NA | NA | NA | NA | NA | NA | NA |
| NA            | NA                 | NA | NA | NA | -2 | NA |    |    |    |    |    |    |    |    |
| CDCP1         | ENSG00000163814.7  | NA | NA | NA | NA | NA | NA | NA | NA | NA | NA | NA | NA | NA |
| NA            | NA                 | NA | NA | NA | -2 | NA |    |    |    |    |    |    |    |    |
| SLC6A1        | ENSG00000157103.10 | NA | NA | NA | NA | NA | NA | NA | NA | NA | NA | NA | NA | NA |
| NA            | NA                 | NA | NA | NA | -2 | NA |    |    |    |    |    |    |    |    |
| XIRP1         | ENSG00000168334.8  | NA | NA | NA | NA | NA | NA | NA | NA | NA | NA | NA | NA | NA |
| NA            | NA                 | NA | NA | NA | -2 | NA |    |    |    |    |    |    |    |    |
| TMEM39A       | ENSG00000176142.12 | NA | NA | NA | NA | NA | NA | NA | NA | NA | NA | NA | NA | NA |
| NA            | NA                 | NA | NA | NA | -2 | NA |    |    |    |    |    |    |    |    |
| IL17RD        | ENSG00000144730.17 | NA | NA | NA | NA | NA | NA | NA | NA | NA | NA | NA | NA | NA |
| NA            | NA                 | NA | NA | NA | -2 | NA |    |    |    |    |    |    |    |    |
| TPRG1         | ENSG00000188001.9  | NA | NA | NA | NA | NA | NA | NA | NA | NA | NA | NA | NA | NA |
| NA            | NA                 | NA | NA | NA | -2 | NA |    |    |    |    |    |    |    |    |
| TGM4          | ENSG00000163810.11 | NA | NA | NA | NA | NA | NA | NA | NA | NA | NA | NA | NA | NA |
| NA            | NA                 | NA | NA | NA | -2 | NA |    |    |    |    |    |    |    |    |
| RP11-18H7.1   | ENSG00000242622.1  | NA | NA | NA | NA | NA | NA | NA | NA | NA | NA | NA | NA | NA |
| NA            | NA                 | NA | NA | NA | NA | -2 | NA |    |    |    |    |    |    |    |
| RP11-136C24.2 | ENSG00000227245.1  | NA | NA | NA | NA | NA | NA | NA | NA | NA | NA | NA | NA | NA |
| NA            | NA                 | NA | NA | NA | NA | -2 | NA |    |    |    |    |    |    |    |
| MBNL1         | ENSG00000152601.17 | NA | NA | NA | NA | NA | NA | NA | NA | NA | NA | NA | NA | NA |
| NA            | NA                 | NA | NA | NA | -2 | NA |    |    |    |    |    |    |    |    |
| WDR82         | ENSG00000164091.11 | NA | NA | NA | NA | NA | NA | NA | NA | NA | NA | NA | NA | NA |
| NA            | NA                 | NA | NA | NA | -2 | NA |    |    |    |    |    |    |    |    |
| MYD88         | ENSG00000172936.12 | NA | NA | NA | NA | NA | NA | NA | NA | NA | NA | NA | NA | NA |

|              |                    |    |    |    |    |    |    |    |    |    |    |    |    |    |
|--------------|--------------------|----|----|----|----|----|----|----|----|----|----|----|----|----|
| CCR3         | NA                 | NA | NA | NA | -2 | NA | NA | NA | NA | NA | NA | NA | NA | NA |
|              | ENSG00000183625.14 |    |    |    |    | NA | NA | NA | NA | NA | NA | NA | NA | NA |
|              | NA                 | NA | NA | NA | -2 | NA |    |    |    |    |    |    |    |    |
| BFSP2        | ENSG00000170819.4  |    |    |    |    | NA | NA | NA | NA | NA | NA | NA | NA | NA |
|              | NA                 | NA | NA | NA | -2 | NA |    |    |    |    |    |    |    |    |
| ERICH6       | ENSG00000163645.14 |    |    |    |    | NA | NA | NA | NA | NA | NA | NA | NA | NA |
|              | NA                 | NA | NA | NA | -2 | NA |    |    |    |    |    |    |    |    |
| KIAA1524     | ENSG00000163507.13 |    |    |    |    | NA | NA | NA | NA | NA | NA | NA | NA | NA |
|              | NA                 | NA | NA | NA | -2 | NA |    |    |    |    |    |    |    |    |
| ZIC1         | ENSG00000152977.9  |    |    |    |    | NA | NA | NA | NA | NA | NA | NA | NA | NA |
|              | NA                 | NA | NA | NA | -2 | NA |    |    |    |    |    |    |    |    |
| WDR53        | ENSG00000185798.7  |    |    |    |    | NA | NA | NA | NA | NA | NA | NA | NA | NA |
|              | NA                 | NA | NA | NA | -2 | NA |    |    |    |    |    |    |    |    |
| LINC01206    | ENSG00000242512.8  |    |    |    |    | NA | NA | NA | NA | NA | NA | NA | NA | NA |
|              | NA                 | NA | NA | NA | -2 | NA |    |    |    |    |    |    |    |    |
| TF           | ENSG00000091513.14 |    |    |    |    | NA | NA | NA | NA | NA | NA | NA | NA | NA |
|              | NA                 | NA | NA | NA | -2 | NA |    |    |    |    |    |    |    |    |
| ACTRT3       | ENSG00000184378.2  |    |    |    |    | NA | NA | NA | NA | NA | NA | NA | NA | NA |
|              | NA                 | NA | NA | NA | -2 | NA |    |    |    |    |    |    |    |    |
| ECT2         | ENSG00000114346.13 |    |    |    |    | NA | NA | NA | NA | NA | NA | NA | NA | NA |
|              | NA                 | NA | NA | NA | -2 | NA |    |    |    |    |    |    |    |    |
| LINC01100    | ENSG00000242107.2  |    |    |    |    | NA | NA | NA | NA | NA | NA | NA | NA | NA |
|              | NA                 | NA | NA | NA | -2 | NA |    |    |    |    |    |    |    |    |
| HESX1        | ENSG00000163666.8  |    |    |    |    | NA | NA | NA | NA | NA | NA | NA | NA | NA |
|              | NA                 | NA | NA | NA | -2 | NA |    |    |    |    |    |    |    |    |
| RP11-58O15.1 | ENSG00000240777.2  |    |    |    |    | NA | NA | NA | NA | NA | NA | NA | NA | NA |
|              | NA                 | NA | NA | NA | -2 | NA |    |    |    |    |    |    |    |    |
| SPATA16      | ENSG00000144962.6  |    |    |    |    | NA | NA | NA | NA | NA | NA | NA | NA | NA |
|              | NA                 | NA | NA | NA | -2 | NA |    |    |    |    |    |    |    |    |
| GMNC         | ENSG00000205835.8  |    |    |    |    | NA | NA | NA | NA | NA | NA | NA | NA | NA |
|              | NA                 | NA | NA | NA | -2 | NA |    |    |    |    |    |    |    |    |
| SKIL         | ENSG00000136603.13 |    |    |    |    | NA | NA | NA | NA | NA | NA | NA | NA | NA |
|              | NA                 | NA | NA | NA | -2 | NA |    |    |    |    |    |    |    |    |
| TM4SF19      | ENSG00000145107.15 |    |    |    |    | NA | NA | NA | NA | NA | NA | NA | NA | NA |
|              | NA                 | NA | NA | NA | -2 | NA |    |    |    |    |    |    |    |    |
| LINC01565    | ENSG00000198685.3  |    |    |    |    | NA | NA | NA | NA | NA | NA | NA | NA | NA |
|              | NA                 | NA | NA | NA | -2 | NA |    |    |    |    |    |    |    |    |
| GPR87        | ENSG00000138271.5  |    |    |    |    | NA | NA | NA | NA | NA | NA | NA | NA | NA |
|              | NA                 | NA | NA | NA | -2 | NA |    |    |    |    |    |    |    |    |
| PHC3         | ENSG00000173889.15 |    |    |    |    | NA | NA | NA | NA | NA | NA | NA | NA | NA |
|              | NA                 | NA | NA | NA | -2 | NA |    |    |    |    |    |    |    |    |
| CMC1         | ENSG00000187118.12 |    |    |    |    | NA | NA | NA | NA | NA | NA | NA | NA | NA |
|              | NA                 | NA | NA | NA | -2 | NA |    |    |    |    |    |    |    |    |
| SLC9C1       | ENSG00000172139.14 |    |    |    |    | NA | NA | NA | NA | NA | NA | NA | NA | NA |
|              | NA                 | NA | NA | NA | -2 | NA |    |    |    |    |    |    |    |    |
| CCDC12       | ENSG00000160799.11 |    |    |    |    | NA | NA | NA | NA | NA | NA | NA | NA | NA |
|              | NA                 | NA | NA | NA | -2 | NA |    |    |    |    |    |    |    |    |
| RP11-62G11.2 | ENSG00000240842.1  |    |    |    |    | NA | NA | NA | NA | NA | NA | NA | NA | NA |
|              | NA                 | NA | NA | NA | -2 | NA |    |    |    |    |    |    |    |    |
| OXSM         | ENSG00000151093.7  |    |    |    |    | NA | NA | NA | NA | NA | NA | NA | NA | NA |
|              | NA                 | NA | NA | NA | -2 | NA |    |    |    |    |    |    |    |    |
| RP11-167H9.5 | ENSG00000241048.1  |    |    |    |    | NA | NA | NA | NA | NA | NA | NA | NA | NA |
|              | NA                 | NA | NA | NA | -2 | NA |    |    |    |    |    |    |    |    |
| RP11-439C8.2 | ENSG00000243953.1  |    |    |    |    | NA | NA | NA | NA | NA | NA | NA | NA | NA |
|              | NA                 | NA | NA | NA | -2 | NA |    |    |    |    |    |    |    |    |
| LINC01209    | ENSG00000228308.1  |    |    |    |    | NA | NA | NA | NA | NA | NA | NA | NA | NA |
|              | NA                 | NA | NA | NA | -2 | NA |    |    |    |    |    |    |    |    |
| ALCAM        | ENSG00000170017.12 |    |    |    |    | NA | NA | NA | NA | NA | NA | NA | NA | NA |
|              | NA                 | NA | NA | NA | -2 | NA |    |    |    |    |    |    |    |    |
| RETNLB       | ENSG00000163515.6  |    |    |    |    | NA | NA | NA | NA | NA | NA | NA | NA | NA |
|              | NA                 | NA | NA | NA | -2 | NA |    |    |    |    |    |    |    |    |
| CASR         | ENSG00000036828.15 |    |    |    |    | NA | NA | NA | NA | NA | NA | NA | NA | NA |

|               |                    |                    |    |    |    |    |    |    |    |    |    |    |    |    |
|---------------|--------------------|--------------------|----|----|----|----|----|----|----|----|----|----|----|----|
| NA            | NA                 | NA                 | NA | -2 | NA |    |    |    |    |    |    |    |    |    |
| RP11-91K8.5   |                    | ENSG00000272832.1  |    |    |    | NA | NA | NA | NA | NA | NA | NA | NA | NA |
| NA            | NA                 | NA                 | NA | NA | NA | -2 | NA |    |    |    |    |    |    |    |
| PTPRG         | ENSG00000144724.19 |                    | NA | NA | NA | NA | NA | NA | NA | NA | NA | NA | NA | NA |
| NA            | NA                 | NA                 | NA | -2 | NA |    |    |    |    |    |    |    |    |    |
| RP11-372H2.1  |                    | ENSG00000233919.1  |    |    |    | NA | NA | NA | NA | NA | NA | NA | NA | NA |
| NA            | NA                 | NA                 | NA | NA | NA | -2 | NA |    |    |    |    |    |    |    |
| HRH1          | ENSG00000196639.6  |                    | NA | NA | NA | NA | NA | NA | NA | NA | NA | NA | NA | NA |
| NA            | NA                 | NA                 | NA | -2 | NA |    |    |    |    |    |    |    |    |    |
| LINC01972     |                    | ENSG00000230401.1  |    |    |    | NA | NA | NA | NA | NA | NA | NA | NA | NA |
| NA            | NA                 | NA                 | NA | NA | NA | -2 | NA |    |    |    |    |    |    |    |
| MAP4          | ENSG00000047849.21 |                    | NA | NA | NA | NA | NA | NA | NA | NA | NA | NA | NA | NA |
| NA            | NA                 | NA                 | NA | -2 | NA |    |    |    |    |    |    |    |    |    |
| RP11-33A14.1  |                    | ENSG00000223930.5  |    |    |    | NA | NA | NA | NA | NA | NA | NA | NA | NA |
| NA            | NA                 | NA                 | NA | NA | NA | -2 | NA |    |    |    |    |    |    |    |
| ALAS1         | ENSG00000023330.14 |                    | NA | NA | NA | NA | NA | NA | NA | NA | NA | NA | NA | NA |
| NA            | NA                 | NA                 | NA | -2 | NA |    |    |    |    |    |    |    |    |    |
| PLSCR5        |                    | ENSG00000231213.6  |    |    |    | NA | NA | NA | NA | NA | NA | NA | NA | NA |
| NA            | NA                 | NA                 | NA | NA | NA | -2 | NA |    |    |    |    |    |    |    |
| ACKR4         | ENSG00000129048.6  |                    | NA | NA | NA | NA | NA | NA | NA | NA | NA | NA | NA | NA |
| NA            | NA                 | NA                 | NA | -2 | NA |    |    |    |    |    |    |    |    |    |
| RNF13         | ENSG00000082996.19 |                    | NA | NA | NA | NA | NA | NA | NA | NA | NA | NA | NA | NA |
| NA            | NA                 | NA                 | NA | -2 | NA |    |    |    |    |    |    |    |    |    |
| ABHD10        |                    | ENSG00000144827.8  |    |    |    | NA | NA | NA | NA | NA | NA | NA | NA | NA |
| NA            | NA                 | NA                 | NA | NA | NA | -2 | NA |    |    |    |    |    |    |    |
| U2SURP        |                    | ENSG00000163714.17 |    |    |    | NA | NA | NA | NA | NA | NA | NA | NA | NA |
| NA            | NA                 | NA                 | NA | NA | NA | -2 | NA |    |    |    |    |    |    |    |
| LINC00501     |                    | ENSG00000203645.2  |    |    |    | NA | NA | NA | NA | NA | NA | NA | NA | NA |
| NA            | NA                 | NA                 | NA | NA | NA | -2 | NA |    |    |    |    |    |    |    |
| TPRG1-AS1     |                    | ENSG00000234076.1  |    |    |    | NA | NA | NA | NA | NA | NA | NA | NA | NA |
| NA            | NA                 | NA                 | NA | NA | NA | -2 | NA |    |    |    |    |    |    |    |
| KLHL40        |                    | ENSG00000157119.11 |    |    |    | NA | NA | NA | NA | NA | NA | NA | NA | NA |
| NA            | NA                 | NA                 | NA | NA | NA | -2 | NA |    |    |    |    |    |    |    |
| CPA3          | ENSG00000163751.3  |                    | NA | NA | NA | NA | NA | NA | NA | NA | NA | NA | NA | NA |
| NA            | NA                 | NA                 | NA | -2 | NA |    |    |    |    |    |    |    |    |    |
| NCBP2         | ENSG00000114503.10 |                    | NA | NA | NA | NA | NA | NA | NA | NA | NA | NA | NA | NA |
| NA            | NA                 | NA                 | NA | -2 | NA |    |    |    |    |    |    |    |    |    |
| RP11-646E18.4 |                    | ENSG00000260377.1  |    |    |    | NA | NA | NA | NA | NA | NA | NA | NA | NA |
| NA            | NA                 | NA                 | NA | NA | NA | -2 | NA |    |    |    |    |    |    |    |
| SLC25A38      |                    | ENSG00000144659.10 |    |    |    | NA | NA | NA | NA | NA | NA | NA | NA | NA |
| NA            | NA                 | NA                 | NA | NA | NA | -2 | NA |    |    |    |    |    |    |    |
| TGFBR2        |                    | ENSG00000163513.17 |    |    |    | NA | NA | NA | NA | NA | NA | NA | NA | NA |
| NA            | NA                 | NA                 | NA | NA | NA | -2 | NA |    |    |    |    |    |    |    |
| LINC02050     |                    | ENSG00000242781.1  |    |    |    | NA | NA | NA | NA | NA | NA | NA | NA | NA |
| NA            | NA                 | NA                 | NA | NA | NA | -2 | NA |    |    |    |    |    |    |    |
| NPRL2         | ENSG00000114388.12 |                    | NA | NA | NA | NA | NA | NA | NA | NA | NA | NA | NA | NA |
| NA            | NA                 | NA                 | NA | -2 | NA |    |    |    |    |    |    |    |    |    |
| RP11-2L8.1    |                    | ENSG00000225790.1  |    |    |    | NA | NA | NA | NA | NA | NA | NA | NA | NA |
| NA            | NA                 | NA                 | NA | NA | NA | -2 | NA |    |    |    |    |    |    |    |
| PLA1A         | ENSG00000144837.8  |                    | NA | NA | NA | NA | NA | NA | NA | NA | NA | NA | NA | NA |
| NA            | NA                 | NA                 | NA | -2 | NA |    |    |    |    |    |    |    |    |    |
| LINC01471     |                    | ENSG00000239921.3  |    |    |    | NA | NA | NA | NA | NA | NA | NA | NA | NA |
| NA            | NA                 | NA                 | NA | NA | NA | -2 | NA |    |    |    |    |    |    |    |
| TIGIT         | ENSG00000181847.11 |                    | NA | NA | NA | NA | NA | NA | NA | NA | NA | NA | NA | NA |
| NA            | NA                 | NA                 | NA | -2 | NA |    |    |    |    |    |    |    |    |    |
| CD200R1L      |                    | ENSG00000206531.10 |    |    |    | NA | NA | NA | NA | NA | NA | NA | NA | NA |
| NA            | NA                 | NA                 | NA | NA | NA | -2 | NA |    |    |    |    |    |    |    |
| DNAJB8        |                    | ENSG00000179407.3  |    |    |    | NA | NA | NA | NA | NA | NA | NA | NA | NA |
| NA            | NA                 | NA                 | NA | NA | NA | -2 | NA |    |    |    |    |    |    |    |
| C3orf22       |                    | ENSG00000180697.8  |    |    |    | NA | NA | NA | NA | NA | NA | NA | NA | NA |
| NA            | NA                 | NA                 | NA | NA | NA | -2 | NA |    |    |    |    |    |    |    |
| CCR9          | ENSG00000173585.15 |                    | NA | NA | NA | NA | NA | NA | NA | NA | NA | NA | NA | NA |

|               |                    |    |    |    |    |    |    |    |    |    |    |    |    |    |
|---------------|--------------------|----|----|----|----|----|----|----|----|----|----|----|----|----|
|               | NA                 | NA | NA | NA | -2 | NA |    |    |    |    |    |    |    |    |
| HTR3C         | ENSG00000178084.1  |    |    |    |    | NA | NA | NA | NA | NA | NA | NA | NA | NA |
|               | NA                 | NA | NA | NA | -2 | NA |    |    |    |    |    |    |    |    |
| HTR1F         | ENSG00000179097.5  |    |    |    |    | NA | NA | NA | NA | NA | NA | NA | NA | NA |
|               | NA                 | NA | NA | NA | -2 | NA |    |    |    |    |    |    |    |    |
| LAMB2         | ENSG00000172037.13 |    |    |    |    | NA | NA | NA | NA | NA | NA | NA | NA | NA |
|               | NA                 | NA | NA | NA | -2 | NA |    |    |    |    |    |    |    |    |
| ELP6          | ENSG00000163832.15 |    |    |    |    | NA | NA | NA | NA | NA | NA | NA | NA | NA |
|               | NA                 | NA | NA | NA | -2 | NA |    |    |    |    |    |    |    |    |
| DUSP7         | ENSG00000164086.9  |    |    |    |    | NA | NA | NA | NA | NA | NA | NA | NA | NA |
|               | NA                 | NA | NA | NA | -2 | NA |    |    |    |    |    |    |    |    |
| TRAT1         | ENSG00000163519.13 |    |    |    |    | NA | NA | NA | NA | NA | NA | NA | NA | NA |
|               | NA                 | NA | NA | NA | -2 | NA |    |    |    |    |    |    |    |    |
| RP11-534C12.1 | ENSG00000272707.1  |    |    |    |    | NA | NA | NA | NA | NA | NA | NA | NA | NA |
|               | NA                 | NA | NA | NA | NA | -2 | NA |    |    |    |    |    |    |    |
| RP11-398A8.5  | ENSG00000276471.1  |    |    |    |    | NA | NA | NA | NA | NA | NA | NA | NA | NA |
|               | NA                 | NA | NA | NA | NA | -2 | NA |    |    |    |    |    |    |    |
| LRRC31        | ENSG00000114248.9  |    |    |    |    | NA | NA | NA | NA | NA | NA | NA | NA | NA |
|               | NA                 | NA | NA | NA | NA | -2 | NA |    |    |    |    |    |    |    |
| IQCF3         | ENSG00000229972.7  |    |    |    |    | NA | NA | NA | NA | NA | NA | NA | NA | NA |
|               | NA                 | NA | NA | NA | -2 | NA |    |    |    |    |    |    |    |    |
| RP11-14D22.1  | ENSG00000244564.1  |    |    |    |    | NA | NA | NA | NA | NA | NA | NA | NA | NA |
|               | NA                 | NA | NA | NA | NA | -2 | NA |    |    |    |    |    |    |    |
| H1FOO         | ENSG00000178804.7  |    |    |    |    | NA | NA | NA | NA | NA | NA | NA | NA | NA |
|               | NA                 | NA | NA | NA | -2 | NA |    |    |    |    |    |    |    |    |
| ZNF620        | ENSG00000177842.11 |    |    |    |    | NA | NA | NA | NA | NA | NA | NA | NA | NA |
|               | NA                 | NA | NA | NA | NA | -2 | NA |    |    |    |    |    |    |    |
| DNASE1L3      | ENSG00000163687.13 |    |    |    |    | NA | NA | NA | NA | NA | NA | NA | NA | NA |
|               | NA                 | NA | NA | NA | NA | -2 | NA |    |    |    |    |    |    |    |
| RP11-114M1.1  | ENSG00000228561.2  |    |    |    |    | NA | NA | NA | NA | NA | NA | NA | NA | NA |
|               | NA                 | NA | NA | NA | NA | -2 | NA |    |    |    |    |    |    |    |
| LINC01487     | ENSG00000241336.1  |    |    |    |    | NA | NA | NA | NA | NA | NA | NA | NA | NA |
|               | NA                 | NA | NA | NA | NA | -2 | NA |    |    |    |    |    |    |    |
| AC024560.2    | ENSG00000236833.1  |    |    |    |    | NA | NA | NA | NA | NA | NA | NA | NA | NA |
|               | NA                 | NA | NA | NA | NA | -2 | NA |    |    |    |    |    |    |    |
| RP11-469J4.3  | ENSG00000242578.1  |    |    |    |    | NA | NA | NA | NA | NA | NA | NA | NA | NA |
|               | NA                 | NA | NA | NA | NA | -2 | NA |    |    |    |    |    |    |    |
| MCF2L2        | ENSG00000053524.12 |    |    |    |    | NA | NA | NA | NA | NA | NA | NA | NA | NA |
|               | NA                 | NA | NA | NA | NA | -2 | NA |    |    |    |    |    |    |    |
| CCR2          | ENSG00000121807.5  |    |    |    |    | NA | NA | NA | NA | NA | NA | NA | NA | NA |
|               | NA                 | NA | NA | NA | -2 | NA |    |    |    |    |    |    |    |    |
| CD96          | ENSG00000153283.12 |    |    |    |    | NA | NA | NA | NA | NA | NA | NA | NA | NA |
|               | NA                 | NA | NA | NA | -2 | NA |    |    |    |    |    |    |    |    |
| TMEM115       | ENSG00000126062.3  |    |    |    |    | NA | NA | NA | NA | NA | NA | NA | NA | NA |
|               | NA                 | NA | NA | NA | NA | -2 | NA |    |    |    |    |    |    |    |
| MYLK          | ENSG00000065534.18 |    |    |    |    | NA | NA | NA | NA | NA | NA | NA | NA | NA |
|               | NA                 | NA | NA | NA | -2 | NA |    |    |    |    |    |    |    |    |
| ZNF80         | ENSG00000174255.6  |    |    |    |    | NA | NA | NA | NA | NA | NA | NA | NA | NA |
|               | NA                 | NA | NA | NA | -2 | NA |    |    |    |    |    |    |    |    |
| TWF2          | ENSG00000247596.8  |    |    |    |    | NA | NA | NA | NA | NA | NA | NA | NA | NA |
|               | NA                 | NA | NA | NA | -2 | NA |    |    |    |    |    |    |    |    |
| UBE2E1        | ENSG00000170142.11 |    |    |    |    | NA | NA | NA | NA | NA | NA | NA | NA | NA |
|               | NA                 | NA | NA | NA | NA | -2 | NA |    |    |    |    |    |    |    |
| SHOX2         | ENSG00000168779.19 |    |    |    |    | NA | NA | NA | NA | NA | NA | NA | NA | NA |
|               | NA                 | NA | NA | NA | -2 | NA |    |    |    |    |    |    |    |    |
| SCN10A        | ENSG00000185313.6  |    |    |    |    | NA | NA | NA | NA | NA | NA | NA | NA | NA |
|               | NA                 | NA | NA | NA | NA | -2 | NA |    |    |    |    |    |    |    |
| RP11-290K4.2  | ENSG00000242536.1  |    |    |    |    | NA | NA | NA | NA | NA | NA | NA | NA | NA |
|               | NA                 | NA | NA | NA | NA | -2 | NA |    |    |    |    |    |    |    |
| IQCF6         | ENSG00000214686.4  |    |    |    |    | NA | NA | NA | NA | NA | NA | NA | NA | NA |
|               | NA                 | NA | NA | NA | -2 | NA |    |    |    |    |    |    |    |    |
| SLC6A20       | ENSG00000163817.15 |    |    |    |    | NA | NA | NA | NA | NA | NA | NA | NA | NA |



|               |                    |    |    |    |    |    |    |    |    |    |    |    |    |    |
|---------------|--------------------|----|----|----|----|----|----|----|----|----|----|----|----|----|
| NA            | NA                 | NA | NA | NA | -2 | NA |    |    |    |    |    |    |    |    |
| ARL13B        | ENSG00000169379.15 | NA | NA | NA | NA | NA | NA | NA | NA | NA | NA | NA | NA | NA |
| NA            | NA                 | NA | NA | NA | -2 | NA |    |    |    |    |    |    |    |    |
| CSTA          | ENSG00000121552.3  | NA | NA | NA | NA | NA | NA | NA | NA | NA | NA | NA | NA | NA |
| NA            | NA                 | NA | NA | NA | -2 | NA |    |    |    |    |    |    |    |    |
| RTP2          | ENSG00000198471.1  | NA | NA | NA | NA | NA | NA | NA | NA | NA | NA | NA | NA | NA |
| NA            | NA                 | NA | NA | NA | -2 | NA |    |    |    |    |    |    |    |    |
| AC027119.1    | ENSG00000229642.1  | NA | NA | NA | NA | NA | NA | NA | NA | NA | NA | NA | NA | NA |
| NA            | NA                 | NA | NA | NA | -2 | NA |    |    |    |    |    |    |    |    |
| ARPP21        | ENSG00000172995.16 | NA | NA | NA | NA | NA | NA | NA | NA | NA | NA | NA | NA | NA |
| NA            | NA                 | NA | NA | NA | -2 | NA |    |    |    |    |    |    |    |    |
| ARIH2         | ENSG00000177479.19 | NA | NA | NA | NA | NA | NA | NA | NA | NA | NA | NA | NA | NA |
| NA            | NA                 | NA | NA | NA | -2 | NA |    |    |    |    |    |    |    |    |
| B3GALNT1      | ENSG00000169255.13 | NA | NA | NA | NA | NA | NA | NA | NA | NA | NA | NA | NA | NA |
| NA            | NA                 | NA | NA | NA | -2 | NA |    |    |    |    |    |    |    |    |
| FANCD2OS      | ENSG00000163705.12 | NA | NA | NA | NA | NA | NA | NA | NA | NA | NA | NA | NA | NA |
| NA            | NA                 | NA | NA | NA | -2 | NA |    |    |    |    |    |    |    |    |
| PLSCR2        | ENSG00000163746.11 | NA | NA | NA | NA | NA | NA | NA | NA | NA | NA | NA | NA | NA |
| NA            | NA                 | NA | NA | NA | -2 | NA |    |    |    |    |    |    |    |    |
| CPNE9         | ENSG00000144550.12 | NA | NA | NA | NA | NA | NA | NA | NA | NA | NA | NA | NA | NA |
| NA            | NA                 | NA | NA | NA | -2 | NA |    |    |    |    |    |    |    |    |
| USP4          | ENSG00000114316.12 | NA | NA | NA | NA | NA | NA | NA | NA | NA | NA | NA | NA | NA |
| NA            | NA                 | NA | NA | NA | -2 | NA |    |    |    |    |    |    |    |    |
| GPR15         | ENSG00000154165.4  | NA | NA | NA | NA | NA | NA | NA | NA | NA | NA | NA | NA | NA |
| NA            | NA                 | NA | NA | NA | -2 | NA |    |    |    |    |    |    |    |    |
| TUSC2         | ENSG00000114383.9  | NA | NA | NA | NA | NA | NA | NA | NA | NA | NA | NA | NA | NA |
| NA            | NA                 | NA | NA | NA | -2 | NA |    |    |    |    |    |    |    |    |
| TOP2B         | ENSG00000077097.15 | NA | NA | NA | NA | NA | NA | NA | NA | NA | NA | NA | NA | NA |
| NA            | NA                 | NA | NA | NA | -2 | NA |    |    |    |    |    |    |    |    |
| COL6A5        | ENSG00000172752.14 | NA | NA | NA | NA | NA | NA | NA | NA | NA | NA | NA | NA | NA |
| NA            | NA                 | NA | NA | NA | -2 | NA |    |    |    |    |    |    |    |    |
| DAG1          | ENSG00000173402.11 | NA | NA | NA | NA | NA | NA | NA | NA | NA | NA | NA | NA | NA |
| NA            | NA                 | NA | NA | NA | -2 | NA |    |    |    |    |    |    |    |    |
| THRB          | ENSG00000151090.17 | NA | NA | NA | NA | NA | NA | NA | NA | NA | NA | NA | NA | NA |
| NA            | NA                 | NA | NA | NA | -2 | NA |    |    |    |    |    |    |    |    |
| TIPARP        | ENSG00000163659.12 | NA | NA | NA | NA | NA | NA | NA | NA | NA | NA | NA | NA | NA |
| NA            | NA                 | NA | NA | NA | -2 | NA |    |    |    |    |    |    |    |    |
| ANKUB1        | ENSG00000206199.10 | NA | NA | NA | NA | NA | NA | NA | NA | NA | NA | NA | NA | NA |
| NA            | NA                 | NA | NA | NA | -2 | NA |    |    |    |    |    |    |    |    |
| LINC01986     | ENSG00000223587.1  | NA | NA | NA | NA | NA | NA | NA | NA | NA | NA | NA | NA | NA |
| NA            | NA                 | NA | NA | NA | -2 | NA |    |    |    |    |    |    |    |    |
| CNOT10        | ENSG00000182973.18 | NA | NA | NA | NA | NA | NA | NA | NA | NA | NA | NA | NA | NA |
| NA            | NA                 | NA | NA | NA | -2 | NA |    |    |    |    |    |    |    |    |
| IL1RAP        | ENSG00000196083.9  | NA | NA | NA | NA | NA | NA | NA | NA | NA | NA | NA | NA | NA |
| NA            | NA                 | NA | NA | NA | -2 | NA |    |    |    |    |    |    |    |    |
| ABTB1         | ENSG00000114626.17 | NA | NA | NA | NA | NA | NA | NA | NA | NA | NA | NA | NA | NA |
| NA            | NA                 | NA | NA | NA | -2 | NA |    |    |    |    |    |    |    |    |
| RP11-246A10.1 | ENSG00000239941.1  | NA | NA | NA | NA | NA | NA | NA | NA | NA | NA | NA | NA | NA |
| NA            | NA                 | NA | NA | NA | NA | -2 | NA |    |    |    |    |    |    |    |
| POLQ          | ENSG00000051341.13 | NA | NA | NA | NA | NA | NA | NA | NA | NA | NA | NA | NA | NA |
| NA            | NA                 | NA | NA | NA | -2 | NA |    |    |    |    |    |    |    |    |
| MRPL47        | ENSG00000136522.13 | NA | NA | NA | NA | NA | NA | NA | NA | NA | NA | NA | NA | NA |
| NA            | NA                 | NA | NA | NA | -2 | NA |    |    |    |    |    |    |    |    |
| LRRC3B        | ENSG00000179796.11 | NA | NA | NA | NA | NA | NA | NA | NA | NA | NA | NA | NA | NA |
| NA            | NA                 | NA | NA | NA | -2 | NA |    |    |    |    |    |    |    |    |
| RP4-555D20.2  | ENSG00000261786.1  | NA | NA | NA | NA | NA | NA | NA | NA | NA | NA | NA | NA | NA |
| NA            | NA                 | NA | NA | NA | NA | -2 | NA |    |    |    |    |    |    |    |
| LINC02025     | ENSG00000242339.1  | NA | NA | NA | NA | NA | NA | NA | NA | NA | NA | NA | NA | NA |
| NA            | NA                 | NA | NA | NA | -2 | NA |    |    |    |    |    |    |    |    |
| LINC02038     | ENSG00000229155.1  | NA | NA | NA | NA | NA | NA | NA | NA | NA | NA | NA | NA | NA |
| NA            | NA                 | NA | NA | NA | -2 | NA |    |    |    |    |    |    |    |    |
| RP11-360P21.2 | ENSG00000229102.1  | NA | NA | NA | NA | NA | NA | NA | NA | NA | NA | NA | NA | NA |

|              |                    |    |    |    |    |    |    |    |    |    |    |    |    |    |
|--------------|--------------------|----|----|----|----|----|----|----|----|----|----|----|----|----|
| NA           | NA                 | NA | NA | NA | NA | -2 | NA |    |    |    |    |    |    |    |
| ZBED2        | ENSG00000177494.5  |    |    | NA | NA | NA | NA | NA | NA | NA | NA | NA | NA | NA |
| NA           | NA                 | NA | NA | -2 | NA |    |    |    |    |    |    |    |    |    |
| IL5RA        | ENSG00000091181.19 |    |    | NA | NA | NA | NA | NA | NA | NA | NA | NA | NA | NA |
| NA           | NA                 | NA | NA | -2 | NA |    |    |    |    |    |    |    |    |    |
| SMARCC1      | ENSG00000173473.10 |    |    | NA | NA | NA | NA | NA | NA | NA | NA | NA | NA | NA |
| NA           | NA                 | NA | NA | -2 | NA |    |    |    |    |    |    |    |    |    |
| HYAL1        | ENSG00000114378.16 |    |    | NA | NA | NA | NA | NA | NA | NA | NA | NA | NA | NA |
| NA           | NA                 | NA | NA | -2 | NA |    |    |    |    |    |    |    |    |    |
| LINC01985    | ENSG00000227260.1  |    |    | NA | NA | NA | NA | NA | NA | NA | NA | NA | NA | NA |
| NA           | NA                 | NA | NA | -2 | NA |    |    |    |    |    |    |    |    |    |
| EIF1B        | ENSG00000114784.3  |    |    | NA | NA | NA | NA | NA | NA | NA | NA | NA | NA | NA |
| NA           | NA                 | NA | NA | -2 | NA |    |    |    |    |    |    |    |    |    |
| TOPBP1       | ENSG00000163781.12 |    |    | NA | NA | NA | NA | NA | NA | NA | NA | NA | NA | NA |
| NA           | NA                 | NA | NA | -2 | NA |    |    |    |    |    |    |    |    |    |
| CNBP         | ENSG00000169714.16 |    |    | NA | NA | NA | NA | NA | NA | NA | NA | NA | NA | NA |
| NA           | NA                 | NA | NA | -2 | NA |    |    |    |    |    |    |    |    |    |
| RP11-875H7.5 | ENSG00000242317.1  |    |    | NA | NA | NA | NA | NA | NA | NA | NA | NA | NA | NA |
| NA           | NA                 | NA | NA | -2 | NA |    |    |    |    |    |    |    |    |    |
| PTPN23       | ENSG00000076201.14 |    |    | NA | NA | NA | NA | NA | NA | NA | NA | NA | NA | NA |
| NA           | NA                 | NA | NA | -2 | NA |    |    |    |    |    |    |    |    |    |
| PARL         | ENSG00000175193.13 |    |    | NA | NA | NA | NA | NA | NA | NA | NA | NA | NA | NA |
| NA           | NA                 | NA | NA | -2 | NA |    |    |    |    |    |    |    |    |    |
| LINC02046    | ENSG00000242440.1  |    |    | NA | NA | NA | NA | NA | NA | NA | NA | NA | NA | NA |
| NA           | NA                 | NA | NA | -2 | NA |    |    |    |    |    |    |    |    |    |
| MLF1         | ENSG00000178053.17 |    |    | NA | NA | NA | NA | NA | NA | NA | NA | NA | NA | NA |
| NA           | NA                 | NA | NA | -2 | NA |    |    |    |    |    |    |    |    |    |
| SLC22A13     | ENSG00000172940.11 |    |    | NA | NA | NA | NA | NA | NA | NA | NA | NA | NA | NA |
| NA           | NA                 | NA | NA | -2 | NA |    |    |    |    |    |    |    |    |    |
| ZBTB47       | ENSG00000114853.13 |    |    | NA | NA | NA | NA | NA | NA | NA | NA | NA | NA | NA |
| NA           | NA                 | NA | NA | -2 | NA |    |    |    |    |    |    |    |    |    |
| GPR156       | ENSG00000175697.10 |    |    | NA | NA | NA | NA | NA | NA | NA | NA | NA | NA | NA |
| NA           | NA                 | NA | NA | -2 | NA |    |    |    |    |    |    |    |    |    |
| QTRT2        | ENSG00000151576.10 |    |    | NA | NA | NA | NA | NA | NA | NA | NA | NA | NA | NA |
| NA           | NA                 | NA | NA | -2 | NA |    |    |    |    |    |    |    |    |    |
| CSRNP1       | ENSG00000144655.14 |    |    | NA | NA | NA | NA | NA | NA | NA | NA | NA | NA | NA |
| NA           | NA                 | NA | NA | -2 | NA |    |    |    |    |    |    |    |    |    |
| C3orf30      | ENSG00000163424.8  |    |    | NA | NA | NA | NA | NA | NA | NA | NA | NA | NA | NA |
| NA           | NA                 | NA | NA | -2 | NA |    |    |    |    |    |    |    |    |    |
| AY269186.2   | ENSG00000224918.1  |    |    | NA | NA | NA | NA | NA | NA | NA | NA | NA | NA | NA |
| NA           | NA                 | NA | NA | -2 | NA |    |    |    |    |    |    |    |    |    |
| AC128709.4   | ENSG00000229912.1  |    |    | NA | NA | NA | NA | NA | NA | NA | NA | NA | NA | NA |
| NA           | NA                 | NA | NA | -2 | NA |    |    |    |    |    |    |    |    |    |
| NR1D2        | ENSG00000174738.12 |    |    | NA | NA | NA | NA | NA | NA | NA | NA | NA | NA | NA |
| NA           | NA                 | NA | NA | -2 | NA |    |    |    |    |    |    |    |    |    |
| FAM162A      | ENSG00000114023.15 |    |    | NA | NA | NA | NA | NA | NA | NA | NA | NA | NA | NA |
| NA           | NA                 | NA | NA | -2 | NA |    |    |    |    |    |    |    |    |    |
| EIF4A2       | ENSG00000156976.16 |    |    | NA | NA | NA | NA | NA | NA | NA | NA | NA | NA | NA |
| NA           | NA                 | NA | NA | -2 | NA |    |    |    |    |    |    |    |    |    |
| FAM19A4      | ENSG00000163377.15 |    |    | NA | NA | NA | NA | NA | NA | NA | NA | NA | NA | NA |
| NA           | NA                 | NA | NA | -2 | NA |    |    |    |    |    |    |    |    |    |
| GRM7-AS3     | ENSG00000226258.6  |    |    | NA | NA | NA | NA | NA | NA | NA | NA | NA | NA | NA |
| NA           | NA                 | NA | NA | -2 | NA |    |    |    |    |    |    |    |    |    |
| LIPH         | ENSG00000163898.9  |    |    | NA | NA | NA | NA | NA | NA | NA | NA | NA | NA | NA |
| NA           | NA                 | NA | NA | -2 | NA |    |    |    |    |    |    |    |    |    |
| ZNF35        | ENSG00000169981.10 |    |    | NA | NA | NA | NA | NA | NA | NA | NA | NA | NA | NA |
| NA           | NA                 | NA | NA | -2 | NA |    |    |    |    |    |    |    |    |    |
| FXR1         | ENSG00000114416.17 |    |    | NA | NA | NA | NA | NA | NA | NA | NA | NA | NA | NA |
| NA           | NA                 | NA | NA | -2 | NA |    |    |    |    |    |    |    |    |    |
| SLCO2A1      | ENSG00000174640.12 |    |    | NA | NA | NA | NA | NA | NA | NA | NA | NA | NA | NA |
| NA           | NA                 | NA | NA | -2 | NA |    |    |    |    |    |    |    |    |    |
| MUC13        | ENSG00000173702.7  |    |    | NA | NA | NA | NA | NA | NA | NA | NA | NA | NA | NA |

|               |                    |    |    |    |    |    |    |    |    |    |    |    |    |    |
|---------------|--------------------|----|----|----|----|----|----|----|----|----|----|----|----|----|
| NA            | NA                 | NA | NA | -2 | NA |    |    |    |    |    |    |    |    |    |
| YEATS2        | ENSG00000163872.15 | NA | NA | NA | NA | NA | NA | NA | NA | NA | NA | NA | NA | NA |
| NA            | NA                 | NA | NA | NA | -2 | NA |    |    |    |    |    |    |    |    |
| RPL14         | ENSG00000188846.13 | NA | NA | NA | NA | NA | NA | NA | NA | NA | NA | NA | NA | NA |
| NA            | NA                 | NA | NA | NA | -2 | NA |    |    |    |    |    |    |    |    |
| EIF4G1        | ENSG00000114867.20 | NA | NA | NA | NA | NA | NA | NA | NA | NA | NA | NA | NA | NA |
| NA            | NA                 | NA | NA | NA | -2 | NA |    |    |    |    |    |    |    |    |
| IQCF2         | ENSG00000184345.4  | NA | NA | NA | NA | NA | NA | NA | NA | NA | NA | NA | NA | NA |
| NA            | NA                 | NA | NA | NA | -2 | NA |    |    |    |    |    |    |    |    |
| CXCR6         | ENSG00000172215.5  | NA | NA | NA | NA | NA | NA | NA | NA | NA | NA | NA | NA | NA |
| NA            | NA                 | NA | NA | NA | -2 | NA |    |    |    |    |    |    |    |    |
| RASA2         | ENSG00000155903.11 | NA | NA | NA | NA | NA | NA | NA | NA | NA | NA | NA | NA | NA |
| NA            | NA                 | NA | NA | NA | -2 | NA |    |    |    |    |    |    |    |    |
| TMEM108       | ENSG00000144868.13 | NA | NA | NA | NA | NA | NA | NA | NA | NA | NA | NA | NA | NA |
| NA            | NA                 | NA | NA | NA | -2 | NA |    |    |    |    |    |    |    |    |
| AC128709.2    | ENSG00000237167.1  | NA | NA | NA | NA | NA | NA | NA | NA | NA | NA | NA | NA | NA |
| NA            | NA                 | NA | NA | NA | -2 | NA |    |    |    |    |    |    |    |    |
| LINC01981     | ENSG00000229243.1  | NA | NA | NA | NA | NA | NA | NA | NA | NA | NA | NA | NA | NA |
| NA            | NA                 | NA | NA | NA | -2 | NA |    |    |    |    |    |    |    |    |
| RBM5          | ENSG00000003756.16 | NA | NA | NA | NA | NA | NA | NA | NA | NA | NA | NA | NA | NA |
| NA            | NA                 | NA | NA | NA | -2 | NA |    |    |    |    |    |    |    |    |
| RP11-446H18.5 | ENSG00000239828.6  | NA | NA | NA | NA | NA | NA | NA | NA | NA | NA | NA | NA | NA |
| NA            | NA                 | NA | NA | NA | NA | -2 | NA |    |    |    |    |    |    |    |
| CACNA2D3      | ENSG00000157445.14 | NA | NA | NA | NA | NA | NA | NA | NA | NA | NA | NA | NA | NA |
| NA            | NA                 | NA | NA | NA | -2 | NA |    |    |    |    |    |    |    |    |
| LINC00885     | ENSG00000224652.1  | NA | NA | NA | NA | NA | NA | NA | NA | NA | NA | NA | NA | NA |
| NA            | NA                 | NA | NA | NA | -2 | NA |    |    |    |    |    |    |    |    |
| OXNAD1        | ENSG00000154814.13 | NA | NA | NA | NA | NA | NA | NA | NA | NA | NA | NA | NA | NA |
| NA            | NA                 | NA | NA | NA | -2 | NA |    |    |    |    |    |    |    |    |
| LINC01391     | ENSG00000244578.1  | NA | NA | NA | NA | NA | NA | NA | NA | NA | NA | NA | NA | NA |
| NA            | NA                 | NA | NA | NA | -2 | NA |    |    |    |    |    |    |    |    |
| P2RY12        | ENSG00000169313.9  | NA | NA | NA | NA | NA | NA | NA | NA | NA | NA | NA | NA | NA |
| NA            | NA                 | NA | NA | NA | -2 | NA |    |    |    |    |    |    |    |    |
| AC087430.1    | ENSG00000235158.1  | NA | NA | NA | NA | NA | NA | NA | NA | NA | NA | NA | NA | NA |
| NA            | NA                 | NA | NA | NA | -2 | NA |    |    |    |    |    |    |    |    |
| RP11-314M24.1 | ENSG00000240241.5  | NA | NA | NA | NA | NA | NA | NA | NA | NA | NA | NA | NA | NA |
| NA            | NA                 | NA | NA | NA | NA | -2 | NA |    |    |    |    |    |    |    |
| UBA5          | ENSG00000081307.12 | NA | NA | NA | NA | NA | NA | NA | NA | NA | NA | NA | NA | NA |
| NA            | NA                 | NA | NA | NA | -2 | NA |    |    |    |    |    |    |    |    |
| RP11-154H23.3 | ENSG00000270562.1  | NA | NA | NA | NA | NA | NA | NA | NA | NA | NA | NA | NA | NA |
| NA            | NA                 | NA | NA | NA | NA | -2 | NA |    |    |    |    |    |    |    |
| LINC02066     | ENSG00000241151.1  | NA | NA | NA | NA | NA | NA | NA | NA | NA | NA | NA | NA | NA |
| NA            | NA                 | NA | NA | NA | -2 | NA |    |    |    |    |    |    |    |    |
| RP11-114M1.2  | ENSG00000236385.1  | NA | NA | NA | NA | NA | NA | NA | NA | NA | NA | NA | NA | NA |
| NA            | NA                 | NA | NA | NA | NA | -2 | NA |    |    |    |    |    |    |    |
| C3orf49       | ENSG00000163632.12 | NA | NA | NA | NA | NA | NA | NA | NA | NA | NA | NA | NA | NA |
| NA            | NA                 | NA | NA | NA | -2 | NA |    |    |    |    |    |    |    |    |
| RPL24         | ENSG00000114391.12 | NA | NA | NA | NA | NA | NA | NA | NA | NA | NA | NA | NA | NA |
| NA            | NA                 | NA | NA | NA | -2 | NA |    |    |    |    |    |    |    |    |
| UBXN7         | ENSG00000163960.11 | NA | NA | NA | NA | NA | NA | NA | NA | NA | NA | NA | NA | NA |
| NA            | NA                 | NA | NA | NA | -2 | NA |    |    |    |    |    |    |    |    |
| CEP97         | ENSG00000182504.10 | NA | NA | NA | NA | NA | NA | NA | NA | NA | NA | NA | NA | NA |
| NA            | NA                 | NA | NA | NA | -2 | NA |    |    |    |    |    |    |    |    |
| CCR8          | ENSG00000179934.6  | NA | NA | NA | NA | NA | NA | NA | NA | NA | NA | NA | NA | NA |
| NA            | NA                 | NA | NA | NA | -2 | NA |    |    |    |    |    |    |    |    |
| DCLK3         | ENSG00000163673.7  | NA | NA | NA | NA | NA | NA | NA | NA | NA | NA | NA | NA | NA |
| NA            | NA                 | NA | NA | NA | -2 | NA |    |    |    |    |    |    |    |    |
| GCSAM         | ENSG00000174500.12 | NA | NA | NA | NA | NA | NA | NA | NA | NA | NA | NA | NA | NA |
| NA            | NA                 | NA | NA | NA | -2 | NA |    |    |    |    |    |    |    |    |
| DRD3          | ENSG00000151577.12 | NA | NA | NA | NA | NA | NA | NA | NA | NA | NA | NA | NA | NA |
| NA            | NA                 | NA | NA | NA | -2 | NA |    |    |    |    |    |    |    |    |
| TM4SF18       | ENSG00000163762.6  | NA | NA | NA | NA | NA | NA | NA | NA | NA | NA | NA | NA | NA |

|               |                    |    |    |    |    |    |    |    |    |    |    |    |    |    |
|---------------|--------------------|----|----|----|----|----|----|----|----|----|----|----|----|----|
| NA            | NA                 | NA | NA | NA | -2 | NA |    |    |    |    |    |    |    |    |
| LSM3          | ENSG00000170860.3  |    |    | NA | NA | NA | NA | NA | NA | NA | NA | NA | NA | NA |
| NA            | NA                 | NA | NA | NA | -2 | NA |    |    |    |    |    |    |    |    |
| STXBP5L       | ENSG00000145087.12 |    |    | NA | NA | NA | NA | NA | NA | NA | NA | NA | NA | NA |
| NA            | NA                 | NA | NA | NA | -2 | NA |    |    |    |    |    |    |    |    |
| BTLA          | ENSG00000186265.9  |    |    | NA | NA | NA | NA | NA | NA | NA | NA | NA | NA | NA |
| NA            | NA                 | NA | NA | NA | -2 | NA |    |    |    |    |    |    |    |    |
| AC128709.3    | ENSG00000235126.1  |    |    | NA | NA | NA | NA | NA | NA | NA | NA | NA | NA | NA |
| NA            | NA                 | NA | NA | NA | -2 | NA |    |    |    |    |    |    |    |    |
| AC026188.1    | ENSG00000223727.6  |    |    | NA | NA | NA | NA | NA | NA | NA | NA | NA | NA | NA |
| NA            | NA                 | NA | NA | NA | -2 | NA |    |    |    |    |    |    |    |    |
| CD200R1       | ENSG00000163606.10 |    |    | NA | NA | NA | NA | NA | NA | NA | NA | NA | NA | NA |
| NA            | NA                 | NA | NA | NA | -2 | NA |    |    |    |    |    |    |    |    |
| RP11-278L15.2 | ENSG00000243885.1  |    |    | NA | NA | NA | NA | NA | NA | NA | NA | NA | NA | NA |
| NA            | NA                 | NA | NA | NA | -2 | NA |    |    |    |    |    |    |    |    |
| RTP3          | ENSG00000163825.3  |    |    | NA | NA | NA | NA | NA | NA | NA | NA | NA | NA | NA |
| NA            | NA                 | NA | NA | NA | -2 | NA |    |    |    |    |    |    |    |    |
| DNAJC19       | ENSG00000205981.6  |    |    | NA | NA | NA | NA | NA | NA | NA | NA | NA | NA | NA |
| NA            | NA                 | NA | NA | NA | -2 | NA |    |    |    |    |    |    |    |    |
| LINC02000     | ENSG00000243832.1  |    |    | NA | NA | NA | NA | NA | NA | NA | NA | NA | NA | NA |
| NA            | NA                 | NA | NA | NA | -2 | NA |    |    |    |    |    |    |    |    |
| AZI2          | ENSG00000163512.13 |    |    | NA | NA | NA | NA | NA | NA | NA | NA | NA | NA | NA |
| NA            | NA                 | NA | NA | NA | -2 | NA |    |    |    |    |    |    |    |    |
| TRIM42        | ENSG00000155890.3  |    |    | NA | NA | NA | NA | NA | NA | NA | NA | NA | NA | NA |
| NA            | NA                 | NA | NA | NA | -2 | NA |    |    |    |    |    |    |    |    |
| RYK           | ENSG00000163785.12 |    |    | NA | NA | NA | NA | NA | NA | NA | NA | NA | NA | NA |
| NA            | NA                 | NA | NA | NA | -2 | NA |    |    |    |    |    |    |    |    |
| ZNF148        | ENSG00000163848.19 |    |    | NA | NA | NA | NA | NA | NA | NA | NA | NA | NA | NA |
| NA            | NA                 | NA | NA | NA | -2 | NA |    |    |    |    |    |    |    |    |
| LINC02052     | ENSG00000224406.5  |    |    | NA | NA | NA | NA | NA | NA | NA | NA | NA | NA | NA |
| NA            | NA                 | NA | NA | NA | -2 | NA |    |    |    |    |    |    |    |    |
| PODXL2        | ENSG00000114631.10 |    |    | NA | NA | NA | NA | NA | NA | NA | NA | NA | NA | NA |
| NA            | NA                 | NA | NA | NA | -2 | NA |    |    |    |    |    |    |    |    |
| FRG2C         | ENSG00000172969.7  |    |    | NA | NA | NA | NA | NA | NA | NA | NA | NA | NA | NA |
| NA            | NA                 | NA | NA | NA | -2 | NA |    |    |    |    |    |    |    |    |
| SMC4          | ENSG00000113810.15 |    |    | NA | NA | NA | NA | NA | NA | NA | NA | NA | NA | NA |
| NA            | NA                 | NA | NA | NA | -2 | NA |    |    |    |    |    |    |    |    |
| CCR1          | ENSG00000163823.3  |    |    | NA | NA | NA | NA | NA | NA | NA | NA | NA | NA | NA |
| NA            | NA                 | NA | NA | NA | -2 | NA |    |    |    |    |    |    |    |    |
| KLHL6         | ENSG00000172578.11 |    |    | NA | NA | NA | NA | NA | NA | NA | NA | NA | NA | NA |
| NA            | NA                 | NA | NA | NA | -2 | NA |    |    |    |    |    |    |    |    |
| ILDR1         | ENSG00000145103.12 |    |    | NA | NA | NA | NA | NA | NA | NA | NA | NA | NA | NA |
| NA            | NA                 | NA | NA | NA | -2 | NA |    |    |    |    |    |    |    |    |
| CLEC3B        | ENSG00000163815.5  |    |    | NA | NA | NA | NA | NA | NA | NA | NA | NA | NA | NA |
| NA            | NA                 | NA | NA | NA | -2 | NA |    |    |    |    |    |    |    |    |
| LINC00994     | ENSG00000189196.4  |    |    | NA | NA | NA | NA | NA | NA | NA | NA | NA | NA | NA |
| NA            | NA                 | NA | NA | NA | -2 | NA |    |    |    |    |    |    |    |    |
| APEH          | ENSG00000164062.12 |    |    | NA | NA | NA | NA | NA | NA | NA | NA | NA | NA | NA |
| NA            | NA                 | NA | NA | NA | -2 | NA |    |    |    |    |    |    |    |    |
| LINC01208     | ENSG00000223715.1  |    |    | NA | NA | NA | NA | NA | NA | NA | NA | NA | NA | NA |
| NA            | NA                 | NA | NA | NA | -2 | NA |    |    |    |    |    |    |    |    |
| ITIH1         | ENSG00000055957.10 |    |    | NA | NA | NA | NA | NA | NA | NA | NA | NA | NA | NA |
| NA            | NA                 | NA | NA | NA | -2 | NA |    |    |    |    |    |    |    |    |
| SNTN          | ENSG00000188817.7  |    |    | NA | NA | NA | NA | NA | NA | NA | NA | NA | NA | NA |
| NA            | NA                 | NA | NA | NA | -2 | NA |    |    |    |    |    |    |    |    |
| CPN2          | ENSG00000178772.6  |    |    | NA | NA | NA | NA | NA | NA | NA | NA | NA | NA | NA |
| NA            | NA                 | NA | NA | NA | -2 | NA |    |    |    |    |    |    |    |    |
| SETMAR        | ENSG00000170364.12 |    |    | NA | NA | NA | NA | NA | NA | NA | NA | NA | NA | NA |
| NA            | NA                 | NA | NA | NA | -2 | NA |    |    |    |    |    |    |    |    |
| RABL3         | ENSG00000144840.8  |    |    | NA | NA | NA | NA | NA | NA | NA | NA | NA | NA | NA |
| NA            | NA                 | NA | NA | NA | -2 | NA |    |    |    |    |    |    |    |    |
| CCDC14        | ENSG00000175455.14 |    |    | NA | NA | NA | NA | NA | NA | NA | NA | NA | NA | NA |

|               |                    |    |    |    |    |    |    |    |    |    |    |    |    |    |
|---------------|--------------------|----|----|----|----|----|----|----|----|----|----|----|----|----|
| NA            | NA                 | NA | NA | NA | -2 | NA |    |    |    |    |    |    |    |    |
| TRAI          | ENSG00000183763.8  |    |    |    | NA | NA | NA | NA | NA | NA | NA | NA | NA | NA |
| NA            | NA                 | NA | NA | NA | -2 | NA |    |    |    |    |    |    |    |    |
| FGD5          | ENSG00000154783.11 |    |    |    | NA | NA | NA | NA | NA | NA | NA | NA | NA | NA |
| NA            | NA                 | NA | NA | NA | -2 | NA |    |    |    |    |    |    |    |    |
| AADACL2       | ENSG00000197953.5  |    |    |    | NA | NA | NA | NA | NA | NA | NA | NA | NA | NA |
| NA            | NA                 | NA | NA | NA | -2 | NA |    |    |    |    |    |    |    |    |
| CCR4          | ENSG00000183813.6  |    |    |    | NA | NA | NA | NA | NA | NA | NA | NA | NA | NA |
| NA            | NA                 | NA | NA | NA | -2 | NA |    |    |    |    |    |    |    |    |
| SETD2         | ENSG00000181555.20 |    |    |    | NA | NA | NA | NA | NA | NA | NA | NA | NA | NA |
| NA            | NA                 | NA | NA | NA | -2 | NA |    |    |    |    |    |    |    |    |
| LINC00887     | ENSG00000214145.6  |    |    |    | NA | NA | NA | NA | NA | NA | NA | NA | NA | NA |
| NA            | NA                 | NA | NA | NA | -2 | NA |    |    |    |    |    |    |    |    |
| RP11-384F7.1  | ENSG00000243276.5  |    |    |    | NA | NA | NA | NA | NA | NA | NA | NA | NA | NA |
| NA            | NA                 | NA | NA | NA | NA | -2 | NA |    |    |    |    |    |    |    |
| TMPPE         | ENSG00000188167.8  |    |    |    | NA | NA | NA | NA | NA | NA | NA | NA | NA | NA |
| NA            | NA                 | NA | NA | NA | -2 | NA |    |    |    |    |    |    |    |    |
| LINC02014     | ENSG00000248243.1  |    |    |    | NA | NA | NA | NA | NA | NA | NA | NA | NA | NA |
| NA            | NA                 | NA | NA | NA | -2 | NA |    |    |    |    |    |    |    |    |
| RBSN          | ENSG00000131381.12 |    |    |    | NA | NA | NA | NA | NA | NA | NA | NA | NA | NA |
| NA            | NA                 | NA | NA | NA | -2 | NA |    |    |    |    |    |    |    |    |
| LINC02030     | ENSG00000240708.1  |    |    |    | NA | NA | NA | NA | NA | NA | NA | NA | NA | NA |
| NA            | NA                 | NA | NA | NA | -2 | NA |    |    |    |    |    |    |    |    |
| GP5           | ENSG00000178732.5  |    |    |    | NA | NA | NA | NA | NA | NA | NA | NA | NA | NA |
| NA            | NA                 | NA | NA | NA | -2 | NA |    |    |    |    |    |    |    |    |
| TCTA          | ENSG00000145022.4  |    |    |    | NA | NA | NA | NA | NA | NA | NA | NA | NA | NA |
| NA            | NA                 | NA | NA | NA | -2 | NA |    |    |    |    |    |    |    |    |
| BPESC1        | ENSG00000232416.3  |    |    |    | NA | NA | NA | NA | NA | NA | NA | NA | NA | NA |
| NA            | NA                 | NA | NA | NA | -2 | NA |    |    |    |    |    |    |    |    |
| RP11-10022.1  | ENSG00000241168.1  |    |    |    | NA | NA | NA | NA | NA | NA | NA | NA | NA | NA |
| NA            | NA                 | NA | NA | NA | NA | -2 | NA |    |    |    |    |    |    |    |
| TBC1D23       | ENSG00000036054.12 |    |    |    | NA | NA | NA | NA | NA | NA | NA | NA | NA | NA |
| NA            | NA                 | NA | NA | NA | -2 | NA |    |    |    |    |    |    |    |    |
| AC116035.2    | ENSG00000227549.1  |    |    |    | NA | NA | NA | NA | NA | NA | NA | NA | NA | NA |
| NA            | NA                 | NA | NA | NA | -2 | NA |    |    |    |    |    |    |    |    |
| LINC02045     | ENSG00000243347.1  |    |    |    | NA | NA | NA | NA | NA | NA | NA | NA | NA | NA |
| NA            | NA                 | NA | NA | NA | -2 | NA |    |    |    |    |    |    |    |    |
| LRRC15        | ENSG00000172061.8  |    |    |    | NA | NA | NA | NA | NA | NA | NA | NA | NA | NA |
| NA            | NA                 | NA | NA | NA | -2 | NA |    |    |    |    |    |    |    |    |
| NAALADL2      | ENSG00000177694.15 |    |    |    | NA | NA | NA | NA | NA | NA | NA | NA | NA | NA |
| NA            | NA                 | NA | NA | NA | -2 | NA |    |    |    |    |    |    |    |    |
| CX3CR1        | ENSG00000168329.13 |    |    |    | NA | NA | NA | NA | NA | NA | NA | NA | NA | NA |
| NA            | NA                 | NA | NA | NA | -2 | NA |    |    |    |    |    |    |    |    |
| AC123023.1    | ENSG00000236452.1  |    |    |    | NA | NA | NA | NA | NA | NA | NA | NA | NA | NA |
| NA            | NA                 | NA | NA | NA | -2 | NA |    |    |    |    |    |    |    |    |
| C3orf56       | ENSG00000214324.5  |    |    |    | NA | NA | NA | NA | NA | NA | NA | NA | NA | NA |
| NA            | NA                 | NA | NA | NA | -2 | NA |    |    |    |    |    |    |    |    |
| B3GNT5        | ENSG00000176597.11 |    |    |    | NA | NA | NA | NA | NA | NA | NA | NA | NA | NA |
| NA            | NA                 | NA | NA | NA | -2 | NA |    |    |    |    |    |    |    |    |
| LINC02068     | ENSG00000223387.6  |    |    |    | NA | NA | NA | NA | NA | NA | NA | NA | NA | NA |
| NA            | NA                 | NA | NA | NA | -2 | NA |    |    |    |    |    |    |    |    |
| TMEM41A       | ENSG00000163900.10 |    |    |    | NA | NA | NA | NA | NA | NA | NA | NA | NA | NA |
| NA            | NA                 | NA | NA | NA | -2 | NA |    |    |    |    |    |    |    |    |
| GBE1          | ENSG00000114480.12 |    |    |    | NA | NA | NA | NA | NA | NA | NA | NA | NA | NA |
| NA            | NA                 | NA | NA | NA | -2 | NA |    |    |    |    |    |    |    |    |
| MORC1         | ENSG00000114487.9  |    |    |    | NA | NA | NA | NA | NA | NA | NA | NA | NA | NA |
| NA            | NA                 | NA | NA | NA | -2 | NA |    |    |    |    |    |    |    |    |
| TNNC1         | ENSG00000114854.7  |    |    |    | NA | NA | NA | NA | NA | NA | NA | NA | NA | NA |
| NA            | NA                 | NA | NA | NA | -2 | NA |    |    |    |    |    |    |    |    |
| IQCJ          | ENSG00000214216.10 |    |    |    | NA | NA | NA | NA | NA | NA | NA | NA | NA | NA |
| NA            | NA                 | NA | NA | NA | -2 | NA |    |    |    |    |    |    |    |    |
| RP11-797D24.3 | ENSG00000273454.1  |    |    |    | NA | NA | NA | NA | NA | NA | NA | NA | NA | NA |

|               |                    |    |    |    |    |    |    |    |    |    |    |    |    |    |
|---------------|--------------------|----|----|----|----|----|----|----|----|----|----|----|----|----|
| NA            | NA                 | NA | NA | NA | NA | -2 | NA |    |    |    |    |    |    |    |
| RP11-194G10.3 | ENSG00000269391.1  |    |    |    |    | NA | NA | NA | NA | NA | NA | NA | NA | NA |
| NA            | NA                 | NA | NA | NA | NA | -2 | NA |    |    |    |    |    |    |    |
| SI            | ENSG0000090402.7   |    |    |    |    | NA | NA | NA | NA | NA | NA | NA | NA | NA |
| NA            | NA                 | NA | NA | NA | NA | -2 | NA |    |    |    |    |    |    |    |
| C3orf36       | ENSG00000221972.3  |    |    |    |    | NA | NA | NA | NA | NA | NA | NA | NA | NA |
| NA            | NA                 | NA | NA | NA | NA | -2 | NA |    |    |    |    |    |    |    |
| LINC00881     | ENSG00000241135.5  |    |    |    |    | NA | NA | NA | NA | NA | NA | NA | NA | NA |
| NA            | NA                 | NA | NA | NA | NA | -2 | NA |    |    |    |    |    |    |    |
| KLF15         | ENSG00000163884.3  |    |    |    |    | NA | NA | NA | NA | NA | NA | NA | NA | NA |
| NA            | NA                 | NA | NA | NA | NA | -2 | NA |    |    |    |    |    |    |    |
| PDCD10        | ENSG00000114209.14 |    |    |    |    | NA | NA | NA | NA | NA | NA | NA | NA | NA |
| NA            | NA                 | NA | NA | NA | NA | -2 | NA |    |    |    |    |    |    |    |
| LINC02023     | ENSG00000239205.1  |    |    |    |    | NA | NA | NA | NA | NA | NA | NA | NA | NA |
| NA            | NA                 | NA | NA | NA | NA | -2 | NA |    |    |    |    |    |    |    |
| OTOL1         | ENSG00000182447.4  |    |    |    |    | NA | NA | NA | NA | NA | NA | NA | NA | NA |
| NA            | NA                 | NA | NA | NA | NA | -2 | NA |    |    |    |    |    |    |    |
| RP11-88H10.2  | ENSG00000244358.1  |    |    |    |    | NA | NA | NA | NA | NA | NA | NA | NA | NA |
| NA            | NA                 | NA | NA | NA | NA | -2 | NA |    |    |    |    |    |    |    |
| DTX3L         | ENSG00000163840.9  |    |    |    |    | NA | NA | NA | NA | NA | NA | NA | NA | NA |
| NA            | NA                 | NA | NA | NA | NA | -2 | NA |    |    |    |    |    |    |    |
| LINC02015     | ENSG00000231574.5  |    |    |    |    | NA | NA | NA | NA | NA | NA | NA | NA | NA |
| NA            | NA                 | NA | NA | NA | NA | -2 | NA |    |    |    |    |    |    |    |
| XCR1          | ENSG00000173578.7  |    |    |    |    | NA | NA | NA | NA | NA | NA | NA | NA | NA |
| NA            | NA                 | NA | NA | NA | NA | -2 | NA |    |    |    |    |    |    |    |
| RP11-292E2.1  | ENSG00000241220.1  |    |    |    |    | NA | NA | NA | NA | NA | NA | NA | NA | NA |
| NA            | NA                 | NA | NA | NA | NA | -2 | NA |    |    |    |    |    |    |    |
| MKRN2OS       | ENSG00000225526.4  |    |    |    |    | NA | NA | NA | NA | NA | NA | NA | NA | NA |
| NA            | NA                 | NA | NA | NA | NA | -2 | NA |    |    |    |    |    |    |    |
| HRG           | ENSG00000113905.4  |    |    |    |    | NA | NA | NA | NA | NA | NA | NA | NA | NA |
| NA            | NA                 | NA | NA | NA | NA | -2 | NA |    |    |    |    |    |    |    |
| KCTD8         | ENSG00000183783.6  |    |    |    |    | NA | NA | NA | NA | NA | NA | NA | NA | NA |
| NA            | NA                 | NA | NA | NA | NA | -2 | NA |    |    |    |    |    |    |    |
| RP11-234K19.1 | ENSG00000251399.1  |    |    |    |    | NA | NA | NA | NA | NA | NA | NA | NA | NA |
| NA            | NA                 | NA | NA | NA | NA | -2 | NA |    |    |    |    |    |    |    |
| RP11-614F17.2 | ENSG00000251676.1  |    |    |    |    | NA | NA | NA | NA | NA | NA | NA | NA | NA |
| NA            | NA                 | NA | NA | NA | NA | -2 | NA |    |    |    |    |    |    |    |
| ABCE1         | ENSG00000164163.10 |    |    |    |    | NA | NA | NA | NA | NA | NA | NA | NA | NA |
| NA            | NA                 | NA | NA | NA | NA | -2 | NA |    |    |    |    |    |    |    |
| RP11-73K9.3   | ENSG00000272567.1  |    |    |    |    | NA | NA | NA | NA | NA | NA | NA | NA | NA |
| NA            | NA                 | NA | NA | NA | NA | -2 | NA |    |    |    |    |    |    |    |
| C1QTNF7       | ENSG00000163145.12 |    |    |    |    | NA | NA | NA | NA | NA | NA | NA | NA | NA |
| NA            | NA                 | NA | NA | NA | NA | -2 | NA |    |    |    |    |    |    |    |
| AMTN          | ENSG00000187689.9  |    |    |    |    | NA | NA | NA | NA | NA | NA | NA | NA | NA |
| NA            | NA                 | NA | NA | NA | NA | -2 | NA |    |    |    |    |    |    |    |
| MFSD8         | ENSG00000164073.9  |    |    |    |    | NA | NA | NA | NA | NA | NA | NA | NA | NA |
| NA            | NA                 | NA | NA | NA | NA | -2 | NA |    |    |    |    |    |    |    |
| RP11-608O21.1 | ENSG00000248515.1  |    |    |    |    | NA | NA | NA | NA | NA | NA | NA | NA | NA |
| NA            | NA                 | NA | NA | NA | NA | -2 | NA |    |    |    |    |    |    |    |
| SLC9B1        | ENSG00000164037.16 |    |    |    |    | NA | NA | NA | NA | NA | NA | NA | NA | NA |
| NA            | NA                 | NA | NA | NA | NA | -2 | NA |    |    |    |    |    |    |    |
| UGT2B15       | ENSG00000196620.9  |    |    |    |    | NA | NA | NA | NA | NA | NA | NA | NA | NA |
| NA            | NA                 | NA | NA | NA | NA | -2 | NA |    |    |    |    |    |    |    |
| EXOSC9        | ENSG00000123737.12 |    |    |    |    | NA | NA | NA | NA | NA | NA | NA | NA | NA |
| NA            | NA                 | NA | NA | NA | NA | -2 | NA |    |    |    |    |    |    |    |
| TKTL2         | ENSG00000151005.4  |    |    |    |    | NA | NA | NA | NA | NA | NA | NA | NA | NA |
| NA            | NA                 | NA | NA | NA | NA | -2 | NA |    |    |    |    |    |    |    |
| RP11-142A22.4 | ENSG00000272727.1  |    |    |    |    | NA | NA | NA | NA | NA | NA | NA | NA | NA |
| NA            | NA                 | NA | NA | NA | NA | -2 | NA |    |    |    |    |    |    |    |
| DTHD1         | ENSG00000197057.9  |    |    |    |    | NA | NA | NA | NA | NA | NA | NA | NA | NA |
| NA            | NA                 | NA | NA | NA | NA | -2 | NA |    |    |    |    |    |    |    |
| SEPSECS       | ENSG00000109618.11 |    |    |    |    | NA | NA | NA | NA | NA | NA | NA | NA | NA |

|               |                    |    |    |    |    |    |    |    |    |    |    |    |    |    |
|---------------|--------------------|----|----|----|----|----|----|----|----|----|----|----|----|----|
| NA            | NA                 | NA | NA | NA | -2 | NA |    |    |    |    |    |    |    |    |
| RP11-168E17.1 | ENSG00000251210.5  |    |    |    |    | NA | NA | NA | NA | NA | NA | NA | NA | NA |
| NA            | NA                 | NA | NA | NA | NA | -2 | NA |    |    |    |    |    |    |    |
| PF4           | ENSG00000163737.3  |    |    |    |    | NA | NA | NA | NA | NA | NA | NA | NA | NA |
| NA            | NA                 | NA | NA | NA | NA | -2 | NA |    |    |    |    |    |    |    |
| SLC10A4       | ENSG00000145248.6  |    |    |    |    | NA | NA | NA | NA | NA | NA | NA | NA | NA |
| NA            | NA                 | NA | NA | NA | NA | -2 | NA |    |    |    |    |    |    |    |
| NAT8L         | ENSG00000185818.7  |    |    |    |    | NA | NA | NA | NA | NA | NA | NA | NA | NA |
| NA            | NA                 | NA | NA | NA | NA | -2 | NA |    |    |    |    |    |    |    |
| PSAPL1        | ENSG00000178597.6  |    |    |    |    | NA | NA | NA | NA | NA | NA | NA | NA | NA |
| NA            | NA                 | NA | NA | NA | NA | -2 | NA |    |    |    |    |    |    |    |
| GK3P          | ENSG00000229894.4  |    |    |    |    | NA | NA | NA | NA | NA | NA | NA | NA | NA |
| NA            | NA                 | NA | NA | NA | NA | -2 | NA |    |    |    |    |    |    |    |
| RP11-73G16.3  | ENSG00000249818.1  |    |    |    |    | NA | NA | NA | NA | NA | NA | NA | NA | NA |
| NA            | NA                 | NA | NA | NA | NA | -2 | NA |    |    |    |    |    |    |    |
| PRR27         | ENSG00000187533.13 |    |    |    |    | NA | NA | NA | NA | NA | NA | NA | NA | NA |
| NA            | NA                 | NA | NA | NA | NA | -2 | NA |    |    |    |    |    |    |    |
| ADH1A         | ENSG00000187758.7  |    |    |    |    | NA | NA | NA | NA | NA | NA | NA | NA | NA |
| NA            | NA                 | NA | NA | NA | NA | -2 | NA |    |    |    |    |    |    |    |
| RP11-269F21.2 | ENSG00000248432.1  |    |    |    |    | NA | NA | NA | NA | NA | NA | NA | NA | NA |
| NA            | NA                 | NA | NA | NA | NA | -2 | NA |    |    |    |    |    |    |    |
| RP11-223C24.1 | ENSG00000249806.1  |    |    |    |    | NA | NA | NA | NA | NA | NA | NA | NA | NA |
| NA            | NA                 | NA | NA | NA | NA | -2 | NA |    |    |    |    |    |    |    |
| PPAT          | ENSG00000128059.8  |    |    |    |    | NA | NA | NA | NA | NA | NA | NA | NA | NA |
| NA            | NA                 | NA | NA | NA | NA | -2 | NA |    |    |    |    |    |    |    |
| WDFY3         | ENSG00000163625.15 |    |    |    |    | NA | NA | NA | NA | NA | NA | NA | NA | NA |
| NA            | NA                 | NA | NA | NA | NA | -2 | NA |    |    |    |    |    |    |    |
| COX18         | ENSG00000163626.16 |    |    |    |    | NA | NA | NA | NA | NA | NA | NA | NA | NA |
| NA            | NA                 | NA | NA | NA | NA | -2 | NA |    |    |    |    |    |    |    |
| ODAM          | ENSG00000109205.16 |    |    |    |    | NA | NA | NA | NA | NA | NA | NA | NA | NA |
| NA            | NA                 | NA | NA | NA | NA | -2 | NA |    |    |    |    |    |    |    |
| TMPRSS11B     | ENSG00000185873.7  |    |    |    |    | NA | NA | NA | NA | NA | NA | NA | NA | NA |
| NA            | NA                 | NA | NA | NA | NA | -2 | NA |    |    |    |    |    |    |    |
| POLN          | ENSG00000130997.16 |    |    |    |    | NA | NA | NA | NA | NA | NA | NA | NA | NA |
| NA            | NA                 | NA | NA | NA | NA | -2 | NA |    |    |    |    |    |    |    |
| DUX4          | ENSG00000260596.5  |    |    |    |    | NA | NA | NA | NA | NA | NA | NA | NA | NA |
| NA            | NA                 | NA | NA | NA | NA | -2 | NA |    |    |    |    |    |    |    |
| SEC24B        | ENSG00000138802.11 |    |    |    |    | NA | NA | NA | NA | NA | NA | NA | NA | NA |
| NA            | NA                 | NA | NA | NA | NA | -2 | NA |    |    |    |    |    |    |    |
| RP11-18H21.3  | ENSG00000251377.1  |    |    |    |    | NA | NA | NA | NA | NA | NA | NA | NA | NA |
| NA            | NA                 | NA | NA | NA | NA | -2 | NA |    |    |    |    |    |    |    |
| TMEM184C      | ENSG00000164168.7  |    |    |    |    | NA | NA | NA | NA | NA | NA | NA | NA | NA |
| NA            | NA                 | NA | NA | NA | NA | -2 | NA |    |    |    |    |    |    |    |
| KLHL8         | ENSG00000145332.13 |    |    |    |    | NA | NA | NA | NA | NA | NA | NA | NA | NA |
| NA            | NA                 | NA | NA | NA | NA | -2 | NA |    |    |    |    |    |    |    |
| RP11-55L3.1   | ENSG00000250791.1  |    |    |    |    | NA | NA | NA | NA | NA | NA | NA | NA | NA |
| NA            | NA                 | NA | NA | NA | NA | -2 | NA |    |    |    |    |    |    |    |
| RP11-731D1.4  | ENSG00000270265.1  |    |    |    |    | NA | NA | NA | NA | NA | NA | NA | NA | NA |
| NA            | NA                 | NA | NA | NA | NA | -2 | NA |    |    |    |    |    |    |    |
| RP11-529E10.7 | ENSG00000270090.5  |    |    |    |    | NA | NA | NA | NA | NA | NA | NA | NA | NA |
| NA            | NA                 | NA | NA | NA | NA | -2 | NA |    |    |    |    |    |    |    |
| RP11-440I14.3 | ENSG00000251584.1  |    |    |    |    | NA | NA | NA | NA | NA | NA | NA | NA | NA |
| NA            | NA                 | NA | NA | NA | NA | -2 | NA |    |    |    |    |    |    |    |
| RP11-203B7.1  | ENSG00000251024.1  |    |    |    |    | NA | NA | NA | NA | NA | NA | NA | NA | NA |
| NA            | NA                 | NA | NA | NA | NA | -2 | NA |    |    |    |    |    |    |    |
| RASL11B       | ENSG00000128045.6  |    |    |    |    | NA | NA | NA | NA | NA | NA | NA | NA | NA |
| NA            | NA                 | NA | NA | NA | NA | -2 | NA |    |    |    |    |    |    |    |
| RP11-24I21.1  | ENSG00000248210.1  |    |    |    |    | NA | NA | NA | NA | NA | NA | NA | NA | NA |
| NA            | NA                 | NA | NA | NA | NA | -2 | NA |    |    |    |    |    |    |    |
| UGT2B28       | ENSG00000135226.17 |    |    |    |    | NA | NA | NA | NA | NA | NA | NA | NA | NA |
| NA            | NA                 | NA | NA | NA | NA | -2 | NA |    |    |    |    |    |    |    |
| RP11-263J14.1 | ENSG00000283314.1  |    |    |    |    | NA | NA | NA | NA | NA | NA | NA | NA | NA |

|               |                    |    |    |    |    |    |    |    |    |    |    |    |    |    |
|---------------|--------------------|----|----|----|----|----|----|----|----|----|----|----|----|----|
| NA            | NA                 | NA | NA | NA | NA | -2 | NA |    |    |    |    |    |    |    |
| ATO1          | ENSG00000172238.4  |    |    | NA | NA | NA | NA | NA | NA | NA | NA | NA | NA | NA |
| NA            | NA                 | NA | NA | NA | NA | -2 | NA |    |    |    |    |    |    |    |
| ERVH-1        | ENSG00000251292.1  |    |    | NA | NA | NA | NA | NA | NA | NA | NA | NA | NA | NA |
| NA            | NA                 | NA | NA | NA | NA | -2 | NA |    |    |    |    |    |    |    |
| DHX15         | ENSG00000109606.12 |    |    | NA | NA | NA | NA | NA | NA | NA | NA | NA | NA | NA |
| NA            | NA                 | NA | NA | NA | NA | -2 | NA |    |    |    |    |    |    |    |
| HAUS3         | ENSG00000214367.7  |    |    | NA | NA | NA | NA | NA | NA | NA | NA | NA | NA | NA |
| NA            | NA                 | NA | NA | NA | NA | -2 | NA |    |    |    |    |    |    |    |
| RP11-576E20.1 | ENSG00000250819.1  |    |    | NA | NA | NA | NA | NA | NA | NA | NA | NA | NA | NA |
| NA            | NA                 | NA | NA | NA | NA | -2 | NA |    |    |    |    |    |    |    |
| LINC01612     | ENSG00000250266.1  |    |    | NA | NA | NA | NA | NA | NA | NA | NA | NA | NA | NA |
| NA            | NA                 | NA | NA | NA | NA | -2 | NA |    |    |    |    |    |    |    |
| SPATA18       | ENSG00000163071.10 |    |    | NA | NA | NA | NA | NA | NA | NA | NA | NA | NA | NA |
| NA            | NA                 | NA | NA | NA | NA | -2 | NA |    |    |    |    |    |    |    |
| RP3-368B9.2   | ENSG00000250681.1  |    |    | NA | NA | NA | NA | NA | NA | NA | NA | NA | NA | NA |
| NA            | NA                 | NA | NA | NA | NA | -2 | NA |    |    |    |    |    |    |    |
| TMPRSS11E     | ENSG00000087128.9  |    |    | NA | NA | NA | NA | NA | NA | NA | NA | NA | NA | NA |
| NA            | NA                 | NA | NA | NA | NA | -2 | NA |    |    |    |    |    |    |    |
| AC004069.2    | ENSG00000251259.1  |    |    | NA | NA | NA | NA | NA | NA | NA | NA | NA | NA | NA |
| NA            | NA                 | NA | NA | NA | NA | -2 | NA |    |    |    |    |    |    |    |
| RP11-61G19.2  | ENSG00000283083.1  |    |    | NA | NA | NA | NA | NA | NA | NA | NA | NA | NA | NA |
| NA            | NA                 | NA | NA | NA | NA | -2 | NA |    |    |    |    |    |    |    |
| RP11-646I6.6  | ENSG00000270147.1  |    |    | NA | NA | NA | NA | NA | NA | NA | NA | NA | NA | NA |
| NA            | NA                 | NA | NA | NA | NA | -2 | NA |    |    |    |    |    |    |    |
| RP11-362F19.1 | ENSG00000248810.1  |    |    | NA | NA | NA | NA | NA | NA | NA | NA | NA | NA | NA |
| NA            | NA                 | NA | NA | NA | NA | -2 | NA |    |    |    |    |    |    |    |
| LINC01365     | ENSG00000250772.5  |    |    | NA | NA | NA | NA | NA | NA | NA | NA | NA | NA | NA |
| NA            | NA                 | NA | NA | NA | NA | -2 | NA |    |    |    |    |    |    |    |
| PABPC4L       | ENSG00000254535.3  |    |    | NA | NA | NA | NA | NA | NA | NA | NA | NA | NA | NA |
| NA            | NA                 | NA | NA | NA | NA | -2 | NA |    |    |    |    |    |    |    |
| NEIL3         | ENSG00000109674.3  |    |    | NA | NA | NA | NA | NA | NA | NA | NA | NA | NA | NA |
| NA            | NA                 | NA | NA | NA | NA | -2 | NA |    |    |    |    |    |    |    |
| CWH43         | ENSG00000109182.11 |    |    | NA | NA | NA | NA | NA | NA | NA | NA | NA | NA | NA |
| NA            | NA                 | NA | NA | NA | NA | -2 | NA |    |    |    |    |    |    |    |
| OPRPN         | ENSG00000171199.10 |    |    | NA | NA | NA | NA | NA | NA | NA | NA | NA | NA | NA |
| NA            | NA                 | NA | NA | NA | NA | -2 | NA |    |    |    |    |    |    |    |
| RP11-519M16.1 | ENSG00000246876.6  |    |    | NA | NA | NA | NA | NA | NA | NA | NA | NA | NA | NA |
| NA            | NA                 | NA | NA | NA | NA | -2 | NA |    |    |    |    |    |    |    |
| RP11-452C8.1  | ENSG00000248408.1  |    |    | NA | NA | NA | NA | NA | NA | NA | NA | NA | NA | NA |
| NA            | NA                 | NA | NA | NA | NA | -2 | NA |    |    |    |    |    |    |    |
| RP11-281P23.2 | ENSG00000249631.5  |    |    | NA | NA | NA | NA | NA | NA | NA | NA | NA | NA | NA |
| NA            | NA                 | NA | NA | NA | NA | -2 | NA |    |    |    |    |    |    |    |
| MAP9          | ENSG00000164114.18 |    |    | NA | NA | NA | NA | NA | NA | NA | NA | NA | NA | NA |
| NA            | NA                 | NA | NA | NA | NA | -2 | NA |    |    |    |    |    |    |    |
| RP11-774O3.2  | ENSG00000249145.1  |    |    | NA | NA | NA | NA | NA | NA | NA | NA | NA | NA | NA |
| NA            | NA                 | NA | NA | NA | NA | -2 | NA |    |    |    |    |    |    |    |
| TAPT1         | ENSG00000169762.16 |    |    | NA | NA | NA | NA | NA | NA | NA | NA | NA | NA | NA |
| NA            | NA                 | NA | NA | NA | NA | -2 | NA |    |    |    |    |    |    |    |
| LINC02173     | ENSG00000249613.1  |    |    | NA | NA | NA | NA | NA | NA | NA | NA | NA | NA | NA |
| NA            | NA                 | NA | NA | NA | NA | -2 | NA |    |    |    |    |    |    |    |
| RASSF6        | ENSG00000169435.13 |    |    | NA | NA | NA | NA | NA | NA | NA | NA | NA | NA | NA |
| NA            | NA                 | NA | NA | NA | NA | -2 | NA |    |    |    |    |    |    |    |
| C4orf48       | ENSG00000243449.6  |    |    | NA | NA | NA | NA | NA | NA | NA | NA | NA | NA | NA |
| NA            | NA                 | NA | NA | NA | NA | -2 | NA |    |    |    |    |    |    |    |
| RP11-74M11.2  | ENSG00000248300.1  |    |    | NA | NA | NA | NA | NA | NA | NA | NA | NA | NA | NA |
| NA            | NA                 | NA | NA | NA | NA | -2 | NA |    |    |    |    |    |    |    |
| KIT           | ENSG00000157404.15 |    |    | NA | NA | NA | NA | NA | NA | NA | NA | NA | NA | NA |
| NA            | NA                 | NA | NA | NA | NA | -2 | NA |    |    |    |    |    |    |    |
| NPFFR2        | ENSG00000056291.17 |    |    | NA | NA | NA | NA | NA | NA | NA | NA | NA | NA | NA |
| NA            | NA                 | NA | NA | NA | NA | -2 | NA |    |    |    |    |    |    |    |
| CCNA2         | ENSG00000145386.9  |    |    | NA | NA | NA | NA | NA | NA | NA | NA | NA | NA | NA |



|               |                    |    |    |    |    |    |    |    |    |    |    |    |    |    |
|---------------|--------------------|----|----|----|----|----|----|----|----|----|----|----|----|----|
| NA            | NA                 | NA | NA | -2 | NA |    |    |    |    |    |    |    |    |    |
| CRMP1         | ENSG00000072832.14 |    |    |    | NA | NA | NA | NA | NA | NA | NA | NA | NA | NA |
| NA            | NA                 | NA | NA | -2 | NA |    |    |    |    |    |    |    |    |    |
| RP11-362F19.3 | ENSG00000272632.1  |    |    |    | NA | NA | NA | NA | NA | NA | NA | NA | NA | NA |
| NA            | NA                 | NA | NA | NA | NA | -2 | NA |    |    |    |    |    |    |    |
| AC007126.1    | ENSG00000250497.1  |    |    |    | NA | NA | NA | NA | NA | NA | NA | NA | NA | NA |
| NA            | NA                 | NA | NA | NA | NA | -2 | NA |    |    |    |    |    |    |    |
| UGDH          | ENSG00000109814.11 |    |    |    | NA | NA | NA | NA | NA | NA | NA | NA | NA | NA |
| NA            | NA                 | NA | NA | -2 | NA |    |    |    |    |    |    |    |    |    |
| NMU           | ENSG00000109255.11 |    |    |    | NA | NA | NA | NA | NA | NA | NA | NA | NA | NA |
| NA            | NA                 | NA | NA | -2 | NA |    |    |    |    |    |    |    |    |    |
| FGFR3         | ENSG00000068078.17 |    |    |    | NA | NA | NA | NA | NA | NA | NA | NA | NA | NA |
| NA            | NA                 | NA | NA | -2 | NA |    |    |    |    |    |    |    |    |    |
| RP11-319E12.2 | ENSG00000251459.1  |    |    |    | NA | NA | NA | NA | NA | NA | NA | NA | NA | NA |
| NA            | NA                 | NA | NA | NA | NA | -2 | NA |    |    |    |    |    |    |    |
| FABP2         | ENSG00000145384.3  |    |    |    | NA | NA | NA | NA | NA | NA | NA | NA | NA | NA |
| NA            | NA                 | NA | NA | -2 | NA |    |    |    |    |    |    |    |    |    |
| ARHGAP10      | ENSG00000071205.11 |    |    |    | NA | NA | NA | NA | NA | NA | NA | NA | NA | NA |
| NA            | NA                 | NA | NA | NA | NA | -2 | NA |    |    |    |    |    |    |    |
| NWD2          | ENSG00000174145.7  |    |    |    | NA | NA | NA | NA | NA | NA | NA | NA | NA | NA |
| NA            | NA                 | NA | NA | -2 | NA |    |    |    |    |    |    |    |    |    |
| ANXA10        | ENSG00000109511.11 |    |    |    | NA | NA | NA | NA | NA | NA | NA | NA | NA | NA |
| NA            | NA                 | NA | NA | NA | NA | -2 | NA |    |    |    |    |    |    |    |
| UBE2D3        | ENSG00000109332.19 |    |    |    | NA | NA | NA | NA | NA | NA | NA | NA | NA | NA |
| NA            | NA                 | NA | NA | NA | NA | -2 | NA |    |    |    |    |    |    |    |
| TRAPPC11      | ENSG00000168538.15 |    |    |    | NA | NA | NA | NA | NA | NA | NA | NA | NA | NA |
| NA            | NA                 | NA | NA | NA | NA | -2 | NA |    |    |    |    |    |    |    |
| RP11-785F11.1 | ENSG00000250341.1  |    |    |    | NA | NA | NA | NA | NA | NA | NA | NA | NA | NA |
| NA            | NA                 | NA | NA | NA | NA | -2 | NA |    |    |    |    |    |    |    |
| CASP3         | ENSG00000164305.18 |    |    |    | NA | NA | NA | NA | NA | NA | NA | NA | NA | NA |
| NA            | NA                 | NA | NA | -2 | NA |    |    |    |    |    |    |    |    |    |
| RP11-362I1.1  | ENSG00000248744.1  |    |    |    | NA | NA | NA | NA | NA | NA | NA | NA | NA | NA |
| NA            | NA                 | NA | NA | NA | NA | -2 | NA |    |    |    |    |    |    |    |
| GUCY1A3       | ENSG00000164116.16 |    |    |    | NA | NA | NA | NA | NA | NA | NA | NA | NA | NA |
| NA            | NA                 | NA | NA | NA | NA | -2 | NA |    |    |    |    |    |    |    |
| CDS1          | ENSG00000163624.5  |    |    |    | NA | NA | NA | NA | NA | NA | NA | NA | NA | NA |
| NA            | NA                 | NA | NA | -2 | NA |    |    |    |    |    |    |    |    |    |
| PRKG2         | ENSG00000138669.9  |    |    |    | NA | NA | NA | NA | NA | NA | NA | NA | NA | NA |
| NA            | NA                 | NA | NA | -2 | NA |    |    |    |    |    |    |    |    |    |
| RAB28         | ENSG00000157869.14 |    |    |    | NA | NA | NA | NA | NA | NA | NA | NA | NA | NA |
| NA            | NA                 | NA | NA | -2 | NA |    |    |    |    |    |    |    |    |    |
| S100P         | ENSG00000163993.6  |    |    |    | NA | NA | NA | NA | NA | NA | NA | NA | NA | NA |
| NA            | NA                 | NA | NA | -2 | NA |    |    |    |    |    |    |    |    |    |
| RP11-696F12.1 | ENSG00000250971.1  |    |    |    | NA | NA | NA | NA | NA | NA | NA | NA | NA | NA |
| NA            | NA                 | NA | NA | NA | NA | -2 | NA |    |    |    |    |    |    |    |
| TLR3          | ENSG00000164342.12 |    |    |    | NA | NA | NA | NA | NA | NA | NA | NA | NA | NA |
| NA            | NA                 | NA | NA | -2 | NA |    |    |    |    |    |    |    |    |    |
| RP11-503L19.1 | ENSG00000250357.1  |    |    |    | NA | NA | NA | NA | NA | NA | NA | NA | NA | NA |
| NA            | NA                 | NA | NA | NA | NA | -2 | NA |    |    |    |    |    |    |    |
| FGG           | ENSG00000171557.16 |    |    |    | NA | NA | NA | NA | NA | NA | NA | NA | NA | NA |
| NA            | NA                 | NA | NA | -2 | NA |    |    |    |    |    |    |    |    |    |
| CPZ           | ENSG00000109625.18 |    |    |    | NA | NA | NA | NA | NA | NA | NA | NA | NA | NA |
| NA            | NA                 | NA | NA | -2 | NA |    |    |    |    |    |    |    |    |    |
| RP11-552M14.1 | ENSG00000249645.1  |    |    |    | NA | NA | NA | NA | NA | NA | NA | NA | NA | NA |
| NA            | NA                 | NA | NA | NA | NA | -2 | NA |    |    |    |    |    |    |    |
| RP11-123O22.1 | ENSG00000250064.1  |    |    |    | NA | NA | NA | NA | NA | NA | NA | NA | NA | NA |
| NA            | NA                 | NA | NA | NA | NA | -2 | NA |    |    |    |    |    |    |    |
| RP11-344G13.1 | ENSG00000248872.1  |    |    |    | NA | NA | NA | NA | NA | NA | NA | NA | NA | NA |
| NA            | NA                 | NA | NA | NA | NA | -2 | NA |    |    |    |    |    |    |    |
| COPS4         | ENSG00000138663.8  |    |    |    | NA | NA | NA | NA | NA | NA | NA | NA | NA | NA |
| NA            | NA                 | NA | NA | -2 | NA |    |    |    |    |    |    |    |    |    |
| RP11-22A3.2   | ENSG00000250371.1  |    |    |    | NA | NA | NA | NA | NA | NA | NA | NA | NA | NA |

|               |                    |    |    |    |    |    |    |    |    |    |    |    |    |    |
|---------------|--------------------|----|----|----|----|----|----|----|----|----|----|----|----|----|
| NA            | NA                 | NA | NA | NA | NA | -2 | NA |    |    |    |    |    |    |    |
| RP11-756P10.5 | ENSG00000251619.1  |    |    |    |    | NA | NA | NA | NA | NA | NA | NA | NA | NA |
| NA            | NA                 | NA | NA | NA | NA | -2 | NA |    |    |    |    |    |    |    |
| SLAIN2        | ENSG00000109171.14 |    |    |    |    | NA | NA | NA | NA | NA | NA | NA | NA | NA |
| NA            | NA                 | NA | NA | NA | NA | -2 | NA |    |    |    |    |    |    |    |
| RP11-440I14.2 | ENSG00000250596.1  |    |    |    |    | NA | NA | NA | NA | NA | NA | NA | NA | NA |
| NA            | NA                 | NA | NA | NA | NA | -2 | NA |    |    |    |    |    |    |    |
| RP11-366H4.1  | ENSG00000248370.1  |    |    |    |    | NA | NA | NA | NA | NA | NA | NA | NA | NA |
| NA            | NA                 | NA | NA | NA | NA | -2 | NA |    |    |    |    |    |    |    |
| RP11-617I14.1 | ENSG00000251182.1  |    |    |    |    | NA | NA | NA | NA | NA | NA | NA | NA | NA |
| NA            | NA                 | NA | NA | NA | NA | -2 | NA |    |    |    |    |    |    |    |
| RP11-610P16.1 | ENSG00000251611.1  |    |    |    |    | NA | NA | NA | NA | NA | NA | NA | NA | NA |
| NA            | NA                 | NA | NA | NA | NA | -2 | NA |    |    |    |    |    |    |    |
| NPY5R         | ENSG00000164129.11 |    |    |    |    | NA | NA | NA | NA | NA | NA | NA | NA | NA |
| NA            | NA                 | NA | NA | -2 | NA |    |    |    |    |    |    |    |    |    |
| RP11-93I21.3  | ENSG00000261083.1  |    |    |    |    | NA | NA | NA | NA | NA | NA | NA | NA | NA |
| NA            | NA                 | NA | NA | NA | NA | -2 | NA |    |    |    |    |    |    |    |
| AP1AR         | ENSG00000138660.11 |    |    |    |    | NA | NA | NA | NA | NA | NA | NA | NA | NA |
| NA            | NA                 | NA | NA | -2 | NA |    |    |    |    |    |    |    |    |    |
| DMP1          | ENSG00000152592.13 |    |    |    |    | NA | NA | NA | NA | NA | NA | NA | NA | NA |
| NA            | NA                 | NA | NA | -2 | NA |    |    |    |    |    |    |    |    |    |
| RP11-11N5.3   | ENSG00000272218.1  |    |    |    |    | NA | NA | NA | NA | NA | NA | NA | NA | NA |
| NA            | NA                 | NA | NA | NA | NA | -2 | NA |    |    |    |    |    |    |    |
| LINC01259     | ENSG00000249667.1  |    |    |    |    | NA | NA | NA | NA | NA | NA | NA | NA | NA |
| NA            | NA                 | NA | NA | NA | -2 | NA |    |    |    |    |    |    |    |    |
| FGFBP1        | ENSG00000137440.4  |    |    |    |    | NA | NA | NA | NA | NA | NA | NA | NA | NA |
| NA            | NA                 | NA | NA | NA | -2 | NA |    |    |    |    |    |    |    |    |
| RP11-161D15.1 | ENSG00000250708.1  |    |    |    |    | NA | NA | NA | NA | NA | NA | NA | NA | NA |
| NA            | NA                 | NA | NA | NA | NA | -2 | NA |    |    |    |    |    |    |    |
| LINC01207     | ENSG00000248771.5  |    |    |    |    | NA | NA | NA | NA | NA | NA | NA | NA | NA |
| NA            | NA                 | NA | NA | NA | -2 | NA |    |    |    |    |    |    |    |    |
| ZNF827        | ENSG00000151612.15 |    |    |    |    | NA | NA | NA | NA | NA | NA | NA | NA | NA |
| NA            | NA                 | NA | NA | NA | -2 | NA |    |    |    |    |    |    |    |    |
| UGT2A1        | ENSG00000173610.12 |    |    |    |    | NA | NA | NA | NA | NA | NA | NA | NA | NA |
| NA            | NA                 | NA | NA | NA | -2 | NA |    |    |    |    |    |    |    |    |
| USP46-AS1     | ENSG00000248866.1  |    |    |    |    | NA | NA | NA | NA | NA | NA | NA | NA | NA |
| NA            | NA                 | NA | NA | NA | -2 | NA |    |    |    |    |    |    |    |    |
| GPAT3         | ENSG00000138678.10 |    |    |    |    | NA | NA | NA | NA | NA | NA | NA | NA | NA |
| NA            | NA                 | NA | NA | -2 | NA |    |    |    |    |    |    |    |    |    |
| MRFAP1        | ENSG00000179010.14 |    |    |    |    | NA | NA | NA | NA | NA | NA | NA | NA | NA |
| NA            | NA                 | NA | NA | NA | -2 | NA |    |    |    |    |    |    |    |    |
| RP11-818C3.1  | ENSG00000250024.1  |    |    |    |    | NA | NA | NA | NA | NA | NA | NA | NA | NA |
| NA            | NA                 | NA | NA | NA | NA | -2 | NA |    |    |    |    |    |    |    |
| PPARGC1A      | ENSG00000109819.8  |    |    |    |    | NA | NA | NA | NA | NA | NA | NA | NA | NA |
| NA            | NA                 | NA | NA | NA | -2 | NA |    |    |    |    |    |    |    |    |
| RP11-386B13.3 | ENSG00000250754.5  |    |    |    |    | NA | NA | NA | NA | NA | NA | NA | NA | NA |
| NA            | NA                 | NA | NA | NA | NA | -2 | NA |    |    |    |    |    |    |    |
| RP11-577G20.2 | ENSG00000250078.1  |    |    |    |    | NA | NA | NA | NA | NA | NA | NA | NA | NA |
| NA            | NA                 | NA | NA | NA | NA | -2 | NA |    |    |    |    |    |    |    |
| RP11-308D13.3 | ENSG00000261268.1  |    |    |    |    | NA | NA | NA | NA | NA | NA | NA | NA | NA |
| NA            | NA                 | NA | NA | NA | NA | -2 | NA |    |    |    |    |    |    |    |
| RP11-96A1.5   | ENSG00000253825.1  |    |    |    |    | NA | NA | NA | NA | NA | NA | NA | NA | NA |
| NA            | NA                 | NA | NA | NA | NA | -2 | NA |    |    |    |    |    |    |    |
| ALB           | ENSG00000163631.16 |    |    |    |    | NA | NA | NA | NA | NA | NA | NA | NA | NA |
| NA            | NA                 | NA | NA | -2 | NA |    |    |    |    |    |    |    |    |    |
| RP11-722M1.1  | ENSG00000248215.5  |    |    |    |    | NA | NA | NA | NA | NA | NA | NA | NA | NA |
| NA            | NA                 | NA | NA | NA | NA | -2 | NA |    |    |    |    |    |    |    |
| PF4V1         | ENSG00000109272.3  |    |    |    |    | NA | NA | NA | NA | NA | NA | NA | NA | NA |
| NA            | NA                 | NA | NA | -2 | NA |    |    |    |    |    |    |    |    |    |
| PDCL2         | ENSG00000163440.11 |    |    |    |    | NA | NA | NA | NA | NA | NA | NA | NA | NA |
| NA            | NA                 | NA | NA | -2 | NA |    |    |    |    |    |    |    |    |    |
| LGI2          | ENSG00000153012.11 |    |    |    |    | NA | NA | NA | NA | NA | NA | NA | NA | NA |

|               |                    |    |    |    |    |    |    |    |    |    |    |    |    |    |
|---------------|--------------------|----|----|----|----|----|----|----|----|----|----|----|----|----|
| NA            | NA                 | NA | NA | -2 | NA |    |    |    |    |    |    |    |    |    |
| RP11-814H16.2 | ENSG00000272862.1  | NA | NA | NA | NA | NA | NA | NA | NA | NA | NA | NA | NA | NA |
| NA            | NA                 | NA | NA | NA | NA | -2 | NA |    |    |    |    |    |    |    |
| RP11-73G16.2  | ENSG00000248991.1  | NA | NA | NA | NA | NA | NA | NA | NA | NA | NA | NA | NA | NA |
| NA            | NA                 | NA | NA | NA | NA | -2 | NA |    |    |    |    |    |    |    |
| ZNF732        | ENSG00000186777.11 | NA | NA | NA | NA | NA | NA | NA | NA | NA | NA | NA | NA | NA |
| NA            | NA                 | NA | NA | NA | NA | -2 | NA |    |    |    |    |    |    |    |
| TMEM192       | ENSG00000170088.13 | NA | NA | NA | NA | NA | NA | NA | NA | NA | NA | NA | NA | NA |
| NA            | NA                 | NA | NA | NA | NA | -2 | NA |    |    |    |    |    |    |    |
| RP11-242J7.1  | ENSG00000254233.1  | NA | NA | NA | NA | NA | NA | NA | NA | NA | NA | NA | NA | NA |
| NA            | NA                 | NA | NA | NA | NA | -2 | NA |    |    |    |    |    |    |    |
| RP11-290F5.2  | ENSG00000180712.3  | NA | NA | NA | NA | NA | NA | NA | NA | NA | NA | NA | NA | NA |
| NA            | NA                 | NA | NA | NA | NA | -2 | NA |    |    |    |    |    |    |    |
| RP11-203B7.2  | ENSG00000260303.1  | NA | NA | NA | NA | NA | NA | NA | NA | NA | NA | NA | NA | NA |
| NA            | NA                 | NA | NA | NA | NA | -2 | NA |    |    |    |    |    |    |    |
| GABRB1        | ENSG00000163288.13 | NA | NA | NA | NA | NA | NA | NA | NA | NA | NA | NA | NA | NA |
| NA            | NA                 | NA | NA | NA | NA | -2 | NA |    |    |    |    |    |    |    |
| EDNRA         | ENSG00000151617.15 | NA | NA | NA | NA | NA | NA | NA | NA | NA | NA | NA | NA | NA |
| NA            | NA                 | NA | NA | NA | NA | -2 | NA |    |    |    |    |    |    |    |
| RP11-489G11.3 | ENSG00000261646.1  | NA | NA | NA | NA | NA | NA | NA | NA | NA | NA | NA | NA | NA |
| NA            | NA                 | NA | NA | NA | NA | -2 | NA |    |    |    |    |    |    |    |
| DAPP1         | ENSG00000070190.12 | NA | NA | NA | NA | NA | NA | NA | NA | NA | NA | NA | NA | NA |
| NA            | NA                 | NA | NA | NA | NA | -2 | NA |    |    |    |    |    |    |    |
| DEFB131       | ENSG00000186146.1  | NA | NA | NA | NA | NA | NA | NA | NA | NA | NA | NA | NA | NA |
| NA            | NA                 | NA | NA | NA | NA | -2 | NA |    |    |    |    |    |    |    |
| AC112518.3    | ENSG00000228277.1  | NA | NA | NA | NA | NA | NA | NA | NA | NA | NA | NA | NA | NA |
| NA            | NA                 | NA | NA | NA | NA | -2 | NA |    |    |    |    |    |    |    |
| MAML3         | ENSG00000196782.12 | NA | NA | NA | NA | NA | NA | NA | NA | NA | NA | NA | NA | NA |
| NA            | NA                 | NA | NA | NA | NA | -2 | NA |    |    |    |    |    |    |    |
| RP11-798L4.1  | ENSG00000205682.2  | NA | NA | NA | NA | NA | NA | NA | NA | NA | NA | NA | NA | NA |
| NA            | NA                 | NA | NA | NA | NA | -2 | NA |    |    |    |    |    |    |    |
| RP11-281P23.1 | ENSG00000251152.1  | NA | NA | NA | NA | NA | NA | NA | NA | NA | NA | NA | NA | NA |
| NA            | NA                 | NA | NA | NA | NA | -2 | NA |    |    |    |    |    |    |    |
| RP11-314N14.1 | ENSG00000250102.5  | NA | NA | NA | NA | NA | NA | NA | NA | NA | NA | NA | NA | NA |
| NA            | NA                 | NA | NA | NA | NA | -2 | NA |    |    |    |    |    |    |    |
| DDX60         | ENSG00000137628.16 | NA | NA | NA | NA | NA | NA | NA | NA | NA | NA | NA | NA | NA |
| NA            | NA                 | NA | NA | NA | NA | -2 | NA |    |    |    |    |    |    |    |
| GSX2          | ENSG00000180613.10 | NA | NA | NA | NA | NA | NA | NA | NA | NA | NA | NA | NA | NA |
| NA            | NA                 | NA | NA | NA | NA | -2 | NA |    |    |    |    |    |    |    |
| JADE1         | ENSG00000077684.15 | NA | NA | NA | NA | NA | NA | NA | NA | NA | NA | NA | NA | NA |
| NA            | NA                 | NA | NA | NA | NA | -2 | NA |    |    |    |    |    |    |    |
| FDCSP         | ENSG00000181617.5  | NA | NA | NA | NA | NA | NA | NA | NA | NA | NA | NA | NA | NA |
| NA            | NA                 | NA | NA | NA | NA | -2 | NA |    |    |    |    |    |    |    |
| RP11-789C1.2  | ENSG00000251061.2  | NA | NA | NA | NA | NA | NA | NA | NA | NA | NA | NA | NA | NA |
| NA            | NA                 | NA | NA | NA | NA | -2 | NA |    |    |    |    |    |    |    |
| ADH6          | ENSG00000172955.17 | NA | NA | NA | NA | NA | NA | NA | NA | NA | NA | NA | NA | NA |
| NA            | NA                 | NA | NA | NA | NA | -2 | NA |    |    |    |    |    |    |    |
| RP11-427M20.1 | ENSG00000251388.1  | NA | NA | NA | NA | NA | NA | NA | NA | NA | NA | NA | NA | NA |
| NA            | NA                 | NA | NA | NA | NA | -2 | NA |    |    |    |    |    |    |    |
| MTNR1A        | ENSG00000168412.6  | NA | NA | NA | NA | NA | NA | NA | NA | NA | NA | NA | NA | NA |
| NA            | NA                 | NA | NA | NA | NA | -2 | NA |    |    |    |    |    |    |    |
| COX7B2        | ENSG00000170516.16 | NA | NA | NA | NA | NA | NA | NA | NA | NA | NA | NA | NA | NA |
| NA            | NA                 | NA | NA | NA | NA | -2 | NA |    |    |    |    |    |    |    |
| ATP8A1        | ENSG00000124406.16 | NA | NA | NA | NA | NA | NA | NA | NA | NA | NA | NA | NA | NA |
| NA            | NA                 | NA | NA | NA | NA | -2 | NA |    |    |    |    |    |    |    |
| RP11-130C6.1  | ENSG00000273077.1  | NA | NA | NA | NA | NA | NA | NA | NA | NA | NA | NA | NA | NA |
| NA            | NA                 | NA | NA | NA | NA | -2 | NA |    |    |    |    |    |    |    |
| RP11-775H9.2  | ENSG00000251567.5  | NA | NA | NA | NA | NA | NA | NA | NA | NA | NA | NA | NA | NA |
| NA            | NA                 | NA | NA | NA | NA | -2 | NA |    |    |    |    |    |    |    |
| STOX2         | ENSG00000173320.11 | NA | NA | NA | NA | NA | NA | NA | NA | NA | NA | NA | NA | NA |
| NA            | NA                 | NA | NA | NA | NA | -2 | NA |    |    |    |    |    |    |    |
| LINC01396     | ENSG00000273396.1  | NA | NA | NA | NA | NA | NA | NA | NA | NA | NA | NA | NA | NA |

|               |                    |    |    |    |    |    |    |    |    |    |    |    |    |    |    |
|---------------|--------------------|----|----|----|----|----|----|----|----|----|----|----|----|----|----|
|               | NA                 | NA | NA | NA | NA | -2 | NA |    |    |    |    |    |    |    |    |
| GC            | ENSG00000145321.12 |    |    |    |    | NA | NA | NA | NA | NA | NA | NA | NA | NA | NA |
|               | NA                 | NA | NA | NA |    | -2 | NA |    |    |    |    |    |    |    |    |
| TTC29         | ENSG00000137473.17 |    |    |    |    | NA | NA | NA | NA | NA | NA | NA | NA | NA | NA |
|               | NA                 | NA | NA | NA |    | -2 | NA |    |    |    |    |    |    |    |    |
| CXCL5         | ENSG00000163735.6  |    |    |    |    | NA | NA | NA | NA | NA | NA | NA | NA | NA | NA |
|               | NA                 | NA | NA | NA |    | -2 | NA |    |    |    |    |    |    |    |    |
| LINC01256     | ENSG00000251398.1  |    |    |    |    | NA | NA | NA | NA | NA | NA | NA | NA | NA | NA |
|               | NA                 | NA | NA | NA |    | -2 | NA |    |    |    |    |    |    |    |    |
| OTUD4         | ENSG00000164164.15 |    |    |    |    | NA | NA | NA | NA | NA | NA | NA | NA | NA | NA |
|               | NA                 | NA | NA | NA |    | -2 | NA |    |    |    |    |    |    |    |    |
| UGT2B7        | ENSG00000171234.13 |    |    |    |    | NA | NA | NA | NA | NA | NA | NA | NA | NA | NA |
|               | NA                 | NA | NA | NA |    | -2 | NA |    |    |    |    |    |    |    |    |
| LINC01091     | ENSG00000249464.5  |    |    |    |    | NA | NA | NA | NA | NA | NA | NA | NA | NA | NA |
|               | NA                 | NA | NA | NA |    | -2 | NA |    |    |    |    |    |    |    |    |
| PPP3CA        | ENSG00000138814.16 |    |    |    |    | NA | NA | NA | NA | NA | NA | NA | NA | NA | NA |
|               | NA                 | NA | NA | NA |    | -2 | NA |    |    |    |    |    |    |    |    |
| HMX1          | ENSG00000215612.7  |    |    |    |    | NA | NA | NA | NA | NA | NA | NA | NA | NA | NA |
|               | NA                 | NA | NA | NA |    | -2 | NA |    |    |    |    |    |    |    |    |
| PCDH7         | ENSG00000169851.15 |    |    |    |    | NA | NA | NA | NA | NA | NA | NA | NA | NA | NA |
|               | NA                 | NA | NA | NA |    | -2 | NA |    |    |    |    |    |    |    |    |
| RP11-381N20.2 | ENSG00000249125.1  |    |    |    |    | NA | NA | NA | NA | NA | NA | NA | NA | NA | NA |
|               | NA                 | NA | NA | NA |    | -2 | NA |    |    |    |    |    |    |    |    |
| TMPRSS11D     | ENSG00000153802.11 |    |    |    |    | NA | NA | NA | NA | NA | NA | NA | NA | NA | NA |
|               | NA                 | NA | NA | NA |    | -2 | NA |    |    |    |    |    |    |    |    |
| SMARCD1       | ENSG00000163104.17 |    |    |    |    | NA | NA | NA | NA | NA | NA | NA | NA | NA | NA |
|               | NA                 | NA | NA | NA |    | -2 | NA |    |    |    |    |    |    |    |    |
| SCOC          | ENSG00000153130.17 |    |    |    |    | NA | NA | NA | NA | NA | NA | NA | NA | NA | NA |
|               | NA                 | NA | NA | NA |    | -2 | NA |    |    |    |    |    |    |    |    |
| H2AFZ         | ENSG00000164032.11 |    |    |    |    | NA | NA | NA | NA | NA | NA | NA | NA | NA | NA |
|               | NA                 | NA | NA | NA |    | -2 | NA |    |    |    |    |    |    |    |    |
| SLC10A6       | ENSG00000145283.7  |    |    |    |    | NA | NA | NA | NA | NA | NA | NA | NA | NA | NA |
|               | NA                 | NA | NA | NA |    | -2 | NA |    |    |    |    |    |    |    |    |
| RP11-265O12.1 | ENSG00000248516.1  |    |    |    |    | NA | NA | NA | NA | NA | NA | NA | NA | NA | NA |
|               | NA                 | NA | NA | NA |    | -2 | NA |    |    |    |    |    |    |    |    |
| PDHA2         | ENSG00000163114.5  |    |    |    |    | NA | NA | NA | NA | NA | NA | NA | NA | NA | NA |
|               | NA                 | NA | NA | NA |    | -2 | NA |    |    |    |    |    |    |    |    |
| FBXO8         | ENSG00000164117.13 |    |    |    |    | NA | NA | NA | NA | NA | NA | NA | NA | NA | NA |
|               | NA                 | NA | NA | NA |    | -2 | NA |    |    |    |    |    |    |    |    |
| UGT2B11       | ENSG00000213759.9  |    |    |    |    | NA | NA | NA | NA | NA | NA | NA | NA | NA | NA |
|               | NA                 | NA | NA | NA |    | -2 | NA |    |    |    |    |    |    |    |    |
| RP11-542G1.2  | ENSG00000251454.1  |    |    |    |    | NA | NA | NA | NA | NA | NA | NA | NA | NA | NA |
|               | NA                 | NA | NA | NA |    | -2 | NA |    |    |    |    |    |    |    |    |
| NSD2          | ENSG00000109685.17 |    |    |    |    | NA | NA | NA | NA | NA | NA | NA | NA | NA | NA |
|               | NA                 | NA | NA | NA |    | -2 | NA |    |    |    |    |    |    |    |    |
| RP11-685F15.1 | ENSG00000251049.2  |    |    |    |    | NA | NA | NA | NA | NA | NA | NA | NA | NA | NA |
|               | NA                 | NA | NA | NA |    | -2 | NA |    |    |    |    |    |    |    |    |
| DKK2          | ENSG00000155011.8  |    |    |    |    | NA | NA | NA | NA | NA | NA | NA | NA | NA | NA |
|               | NA                 | NA | NA | NA |    | -2 | NA |    |    |    |    |    |    |    |    |
| MYL5          | ENSG00000215375.6  |    |    |    |    | NA | NA | NA | NA | NA | NA | NA | NA | NA | NA |
|               | NA                 | NA | NA | NA |    | -2 | NA |    |    |    |    |    |    |    |    |
| MAB21L2       | ENSG00000181541.5  |    |    |    |    | NA | NA | NA | NA | NA | NA | NA | NA | NA | NA |
|               | NA                 | NA | NA | NA |    | -2 | NA |    |    |    |    |    |    |    |    |
| NOCT          | ENSG00000151014.5  |    |    |    |    | NA | NA | NA | NA | NA | NA | NA | NA | NA | NA |
|               | NA                 | NA | NA | NA |    | -2 | NA |    |    |    |    |    |    |    |    |
| ADH4          | ENSG00000198099.8  |    |    |    |    | NA | NA | NA | NA | NA | NA | NA | NA | NA | NA |
|               | NA                 | NA | NA | NA |    | -2 | NA |    |    |    |    |    |    |    |    |
| IL15          | ENSG00000164136.16 |    |    |    |    | NA | NA | NA | NA | NA | NA | NA | NA | NA | NA |
|               | NA                 | NA | NA | NA |    | -2 | NA |    |    |    |    |    |    |    |    |
| FAM175A       | ENSG00000163322.13 |    |    |    |    | NA | NA | NA | NA | NA | NA | NA | NA | NA | NA |
|               | NA                 | NA | NA | NA |    | -2 | NA |    |    |    |    |    |    |    |    |
| SDAD1         | ENSG00000198301.11 |    |    |    |    | NA | NA | NA | NA | NA | NA | NA | NA | NA | NA |

|               |                    |    |    |    |    |    |    |    |    |    |    |    |    |    |
|---------------|--------------------|----|----|----|----|----|----|----|----|----|----|----|----|----|
| NA            | NA                 | NA | NA | -2 | NA |    |    |    |    |    |    |    |    |    |
| SMAD1         | ENSG00000170365.9  |    |    |    | NA | NA | NA | NA | NA | NA | NA | NA | NA | NA |
| NA            | NA                 | NA | NA | -2 | NA |    |    |    |    |    |    |    |    |    |
| RP11-365H22.2 | ENSG00000272576.1  |    |    |    | NA | NA | NA | NA | NA | NA | NA | NA | NA | NA |
| NA            | NA                 | NA | NA | NA | -2 | NA |    |    |    |    |    |    |    |    |
| CTD-2325B11.1 | ENSG00000249837.1  |    |    |    | NA | NA | NA | NA | NA | NA | NA | NA | NA | NA |
| NA            | NA                 | NA | NA | NA | -2 | NA |    |    |    |    |    |    |    |    |
| ANKRD37       | ENSG00000186352.8  |    |    |    | NA | NA | NA | NA | NA | NA | NA | NA | NA | NA |
| NA            | NA                 | NA | NA | NA | -2 | NA |    |    |    |    |    |    |    |    |
| PGRMC2        | ENSG00000164040.16 |    |    |    | NA | NA | NA | NA | NA | NA | NA | NA | NA | NA |
| NA            | NA                 | NA | NA | NA | -2 | NA |    |    |    |    |    |    |    |    |
| PAICS         | ENSG00000128050.8  |    |    |    | NA | NA | NA | NA | NA | NA | NA | NA | NA | NA |
| NA            | NA                 | NA | NA | -2 | NA |    |    |    |    |    |    |    |    |    |
| ZFP42         | ENSG00000179059.9  |    |    |    | NA | NA | NA | NA | NA | NA | NA | NA | NA | NA |
| NA            | NA                 | NA | NA | -2 | NA |    |    |    |    |    |    |    |    |    |
| RNF150        | ENSG00000170153.10 |    |    |    | NA | NA | NA | NA | NA | NA | NA | NA | NA | NA |
| NA            | NA                 | NA | NA | NA | -2 | NA |    |    |    |    |    |    |    |    |
| RP11-419L4.1  | ENSG00000250193.1  |    |    |    | NA | NA | NA | NA | NA | NA | NA | NA | NA | NA |
| NA            | NA                 | NA | NA | NA | -2 | NA |    |    |    |    |    |    |    |    |
| COQ2          | ENSG00000173085.13 |    |    |    | NA | NA | NA | NA | NA | NA | NA | NA | NA | NA |
| NA            | NA                 | NA | NA | -2 | NA |    |    |    |    |    |    |    |    |    |
| LINC01093     | ENSG00000249173.5  |    |    |    | NA | NA | NA | NA | NA | NA | NA | NA | NA | NA |
| NA            | NA                 | NA | NA | NA | -2 | NA |    |    |    |    |    |    |    |    |
| RP11-11N5.1   | ENSG00000250829.2  |    |    |    | NA | NA | NA | NA | NA | NA | NA | NA | NA | NA |
| NA            | NA                 | NA | NA | NA | -2 | NA |    |    |    |    |    |    |    |    |
| LINC01096     | ENSG00000246095.2  |    |    |    | NA | NA | NA | NA | NA | NA | NA | NA | NA | NA |
| NA            | NA                 | NA | NA | NA | -2 | NA |    |    |    |    |    |    |    |    |
| RP11-400D2.3  | ENSG00000251291.1  |    |    |    | NA | NA | NA | NA | NA | NA | NA | NA | NA | NA |
| NA            | NA                 | NA | NA | NA | -2 | NA |    |    |    |    |    |    |    |    |
| TIGD4         | ENSG00000169989.2  |    |    |    | NA | NA | NA | NA | NA | NA | NA | NA | NA | NA |
| NA            | NA                 | NA | NA | -2 | NA |    |    |    |    |    |    |    |    |    |
| BANK1         | ENSG00000153064.11 |    |    |    | NA | NA | NA | NA | NA | NA | NA | NA | NA | NA |
| NA            | NA                 | NA | NA | -2 | NA |    |    |    |    |    |    |    |    |    |
| TEC           | ENSG00000135605.12 |    |    |    | NA | NA | NA | NA | NA | NA | NA | NA | NA | NA |
| NA            | NA                 | NA | NA | -2 | NA |    |    |    |    |    |    |    |    |    |
| RP11-324J13.2 | ENSG00000248143.1  |    |    |    | NA | NA | NA | NA | NA | NA | NA | NA | NA | NA |
| NA            | NA                 | NA | NA | NA | -2 | NA |    |    |    |    |    |    |    |    |
| CABS1         | ENSG00000145309.5  |    |    |    | NA | NA | NA | NA | NA | NA | NA | NA | NA | NA |
| NA            | NA                 | NA | NA | -2 | NA |    |    |    |    |    |    |    |    |    |
| HNRNPD        | ENSG00000138668.18 |    |    |    | NA | NA | NA | NA | NA | NA | NA | NA | NA | NA |
| NA            | NA                 | NA | NA | NA | -2 | NA |    |    |    |    |    |    |    |    |
| KDR           | ENSG00000128052.8  |    |    |    | NA | NA | NA | NA | NA | NA | NA | NA | NA | NA |
| NA            | NA                 | NA | NA | -2 | NA |    |    |    |    |    |    |    |    |    |
| PITX2         | ENSG00000164093.15 |    |    |    | NA | NA | NA | NA | NA | NA | NA | NA | NA | NA |
| NA            | NA                 | NA | NA | -2 | NA |    |    |    |    |    |    |    |    |    |
| TBC1D9        | ENSG00000109436.7  |    |    |    | NA | NA | NA | NA | NA | NA | NA | NA | NA | NA |
| NA            | NA                 | NA | NA | NA | -2 | NA |    |    |    |    |    |    |    |    |
| RP11-366M4.13 | ENSG00000250887.1  |    |    |    | NA | NA | NA | NA | NA | NA | NA | NA | NA | NA |
| NA            | NA                 | NA | NA | NA | -2 | NA |    |    |    |    |    |    |    |    |
| RP11-138B4.1  | ENSG00000250658.1  |    |    |    | NA | NA | NA | NA | NA | NA | NA | NA | NA | NA |
| NA            | NA                 | NA | NA | NA | -2 | NA |    |    |    |    |    |    |    |    |
| TMPRSS11A     | ENSG00000187054.15 |    |    |    | NA | NA | NA | NA | NA | NA | NA | NA | NA | NA |
| NA            | NA                 | NA | NA | NA | -2 | NA |    |    |    |    |    |    |    |    |
| UGT2B4        | ENSG00000156096.13 |    |    |    | NA | NA | NA | NA | NA | NA | NA | NA | NA | NA |
| NA            | NA                 | NA | NA | NA | -2 | NA |    |    |    |    |    |    |    |    |
| PLRG1         | ENSG00000171566.11 |    |    |    | NA | NA | NA | NA | NA | NA | NA | NA | NA | NA |
| NA            | NA                 | NA | NA | -2 | NA |    |    |    |    |    |    |    |    |    |
| LINC01095     | ENSG00000248809.5  |    |    |    | NA | NA | NA | NA | NA | NA | NA | NA | NA | NA |
| NA            | NA                 | NA | NA | NA | -2 | NA |    |    |    |    |    |    |    |    |
| ARHGEF38      | ENSG00000236699.8  |    |    |    | NA | NA | NA | NA | NA | NA | NA | NA | NA | NA |
| NA            | NA                 | NA | NA | NA | -2 | NA |    |    |    |    |    |    |    |    |
| NAA11         | ENSG00000156269.4  |    |    |    | NA | NA | NA | NA | NA | NA | NA | NA | NA | NA |

|               |                    |    |    |    |    |    |    |    |    |    |    |    |    |    |
|---------------|--------------------|----|----|----|----|----|----|----|----|----|----|----|----|----|
| NA            | NA                 | NA | NA | -2 | NA |    |    |    |    |    |    |    |    |    |
| SMR3A         | ENSG00000109208.4  |    |    |    | NA | NA | NA | NA | NA | NA | NA | NA | NA | NA |
| NA            | NA                 | NA | NA | -2 | NA |    |    |    |    |    |    |    |    |    |
| RP11-502M1.2  | ENSG00000249425.1  |    |    |    | NA | NA | NA | NA | NA | NA | NA | NA | NA | NA |
| NA            | NA                 | NA | NA | NA | NA | -2 | NA |    |    |    |    |    |    |    |
| CLCN3         | ENSG00000109572.13 |    |    |    | NA | NA | NA | NA | NA | NA | NA | NA | NA | NA |
| NA            | NA                 | NA | NA | -2 | NA |    |    |    |    |    |    |    |    |    |
| ADH7          | ENSG00000196344.11 |    |    |    | NA | NA | NA | NA | NA | NA | NA | NA | NA | NA |
| NA            | NA                 | NA | NA | -2 | NA |    |    |    |    |    |    |    |    |    |
| ELOVL6        | ENSG00000170522.9  |    |    |    | NA | NA | NA | NA | NA | NA | NA | NA | NA | NA |
| NA            | NA                 | NA | NA | NA | NA | -2 | NA |    |    |    |    |    |    |    |
| RP13-1016M1.2 | ENSG00000272783.1  |    |    |    | NA | NA | NA | NA | NA | NA | NA | NA | NA | NA |
| NA            | NA                 | NA | NA | NA | NA | -2 | NA |    |    |    |    |    |    |    |
| RP11-44F21.5  | ENSG00000260265.1  |    |    |    | NA | NA | NA | NA | NA | NA | NA | NA | NA | NA |
| NA            | NA                 | NA | NA | NA | NA | -2 | NA |    |    |    |    |    |    |    |
| RP11-576N17.5 | ENSG00000250057.1  |    |    |    | NA | NA | NA | NA | NA | NA | NA | NA | NA | NA |
| NA            | NA                 | NA | NA | NA | NA | -2 | NA |    |    |    |    |    |    |    |
| RP11-765K14.1 | ENSG00000250263.1  |    |    |    | NA | NA | NA | NA | NA | NA | NA | NA | NA | NA |
| NA            | NA                 | NA | NA | NA | NA | -2 | NA |    |    |    |    |    |    |    |
| RP11-660M5.1  | ENSG00000271172.1  |    |    |    | NA | NA | NA | NA | NA | NA | NA | NA | NA | NA |
| NA            | NA                 | NA | NA | NA | NA | -2 | NA |    |    |    |    |    |    |    |
| GRXCR1        | ENSG00000215203.2  |    |    |    | NA | NA | NA | NA | NA | NA | NA | NA | NA | NA |
| NA            | NA                 | NA | NA | NA | NA | -2 | NA |    |    |    |    |    |    |    |
| PDE6B         | ENSG00000133256.12 |    |    |    | NA | NA | NA | NA | NA | NA | NA | NA | NA | NA |
| NA            | NA                 | NA | NA | -2 | NA |    |    |    |    |    |    |    |    |    |
| RP11-125O18.1 | ENSG00000248491.5  |    |    |    | NA | NA | NA | NA | NA | NA | NA | NA | NA | NA |
| NA            | NA                 | NA | NA | NA | NA | -2 | NA |    |    |    |    |    |    |    |
| PDGFRA        | ENSG00000134853.11 |    |    |    | NA | NA | NA | NA | NA | NA | NA | NA | NA | NA |
| NA            | NA                 | NA | NA | NA | NA | -2 | NA |    |    |    |    |    |    |    |
| SFRP2         | ENSG00000145423.4  |    |    |    | NA | NA | NA | NA | NA | NA | NA | NA | NA | NA |
| NA            | NA                 | NA | NA | -2 | NA |    |    |    |    |    |    |    |    |    |
| SNCA          | ENSG00000145335.15 |    |    |    | NA | NA | NA | NA | NA | NA | NA | NA | NA | NA |
| NA            | NA                 | NA | NA | -2 | NA |    |    |    |    |    |    |    |    |    |
| SLC4A4        | ENSG00000080493.15 |    |    |    | NA | NA | NA | NA | NA | NA | NA | NA | NA | NA |
| NA            | NA                 | NA | NA | NA | NA | -2 | NA |    |    |    |    |    |    |    |
| FRG1          | ENSG00000109536.11 |    |    |    | NA | NA | NA | NA | NA | NA | NA | NA | NA | NA |
| NA            | NA                 | NA | NA | -2 | NA |    |    |    |    |    |    |    |    |    |
| RP11-205M3.3  | ENSG00000248319.1  |    |    |    | NA | NA | NA | NA | NA | NA | NA | NA | NA | NA |
| NA            | NA                 | NA | NA | NA | NA | -2 | NA |    |    |    |    |    |    |    |
| RP11-752L20.5 | ENSG00000251688.1  |    |    |    | NA | NA | NA | NA | NA | NA | NA | NA | NA | NA |
| NA            | NA                 | NA | NA | NA | NA | -2 | NA |    |    |    |    |    |    |    |
| PCAT4         | ENSG00000251321.1  |    |    |    | NA | NA | NA | NA | NA | NA | NA | NA | NA | NA |
| NA            | NA                 | NA | NA | -2 | NA |    |    |    |    |    |    |    |    |    |
| RP11-27G13.1  | ENSG00000249924.2  |    |    |    | NA | NA | NA | NA | NA | NA | NA | NA | NA | NA |
| NA            | NA                 | NA | NA | NA | NA | -2 | NA |    |    |    |    |    |    |    |
| RP11-367N14.3 | ENSG00000272744.1  |    |    |    | NA | NA | NA | NA | NA | NA | NA | NA | NA | NA |
| NA            | NA                 | NA | NA | NA | NA | -2 | NA |    |    |    |    |    |    |    |
| RP11-386B13.4 | ENSG00000248517.1  |    |    |    | NA | NA | NA | NA | NA | NA | NA | NA | NA | NA |
| NA            | NA                 | NA | NA | NA | NA | -2 | NA |    |    |    |    |    |    |    |
| CORIN         | ENSG00000145244.11 |    |    |    | NA | NA | NA | NA | NA | NA | NA | NA | NA | NA |
| NA            | NA                 | NA | NA | -2 | NA |    |    |    |    |    |    |    |    |    |
| RP11-45I20.1  | ENSG00000235149.1  |    |    |    | NA | NA | NA | NA | NA | NA | NA | NA | NA | NA |
| NA            | NA                 | NA | NA | NA | NA | -2 | NA |    |    |    |    |    |    |    |
| AC097381.1    | ENSG00000228919.5  |    |    |    | NA | NA | NA | NA | NA | NA | NA | NA | NA | NA |
| NA            | NA                 | NA | NA | NA | NA | -2 | NA |    |    |    |    |    |    |    |
| RP11-171N4.2  | ENSG00000251283.1  |    |    |    | NA | NA | NA | NA | NA | NA | NA | NA | NA | NA |
| NA            | NA                 | NA | NA | NA | NA | -2 | NA |    |    |    |    |    |    |    |
| CXCL6         | ENSG00000124875.9  |    |    |    | NA | NA | NA | NA | NA | NA | NA | NA | NA | NA |
| NA            | NA                 | NA | NA | -2 | NA |    |    |    |    |    |    |    |    |    |
| UCP1          | ENSG00000109424.3  |    |    |    | NA | NA | NA | NA | NA | NA | NA | NA | NA | NA |
| NA            | NA                 | NA | NA | -2 | NA |    |    |    |    |    |    |    |    |    |
| UTP3          | ENSG00000132467.3  |    |    |    | NA | NA | NA | NA | NA | NA | NA | NA | NA | NA |

|               |                    |    |    |    |    |    |    |    |    |    |    |    |    |    |
|---------------|--------------------|----|----|----|----|----|----|----|----|----|----|----|----|----|
| NA            | NA                 | NA | NA | -2 | NA |    |    |    |    |    |    |    |    |    |
| SETD7         | ENSG00000145391.13 | NA | NA | NA | NA | NA | NA | NA | NA | NA | NA | NA | NA | NA |
| NA            | NA                 | NA | NA | -2 | NA |    |    |    |    |    |    |    |    |    |
| PARM1         | ENSG00000169116.11 | NA | NA | NA | NA | NA | NA | NA | NA | NA | NA | NA | NA | NA |
| NA            | NA                 | NA | NA | -2 | NA |    |    |    |    |    |    |    |    |    |
| GABRA4        | ENSG00000109158.10 | NA | NA | NA | NA | NA | NA | NA | NA | NA | NA | NA | NA | NA |
| NA            | NA                 | NA | NA | -2 | NA |    |    |    |    |    |    |    |    |    |
| RP11-91J3.3   | ENSG00000250620.1  | NA | NA | NA | NA | NA | NA | NA | NA | NA | NA | NA | NA | NA |
| NA            | NA                 | NA | NA | NA | -2 | NA |    |    |    |    |    |    |    |    |
| MGAT4D        | ENSG00000205301.11 | NA | NA | NA | NA | NA | NA | NA | NA | NA | NA | NA | NA | NA |
| NA            | NA                 | NA | NA | -2 | NA |    |    |    |    |    |    |    |    |    |
| ABCG2         | ENSG00000118777.10 | NA | NA | NA | NA | NA | NA | NA | NA | NA | NA | NA | NA | NA |
| NA            | NA                 | NA | NA | -2 | NA |    |    |    |    |    |    |    |    |    |
| SMR3B         | ENSG00000171201.10 | NA | NA | NA | NA | NA | NA | NA | NA | NA | NA | NA | NA | NA |
| NA            | NA                 | NA | NA | -2 | NA |    |    |    |    |    |    |    |    |    |
| RP11-79E3.2   | ENSG00000250723.5  | NA | NA | NA | NA | NA | NA | NA | NA | NA | NA | NA | NA | NA |
| NA            | NA                 | NA | NA | NA | -2 | NA |    |    |    |    |    |    |    |    |
| CXCL2         | ENSG00000081041.8  | NA | NA | NA | NA | NA | NA | NA | NA | NA | NA | NA | NA | NA |
| NA            | NA                 | NA | NA | -2 | NA |    |    |    |    |    |    |    |    |    |
| SMIM14        | ENSG00000163683.11 | NA | NA | NA | NA | NA | NA | NA | NA | NA | NA | NA | NA | NA |
| NA            | NA                 | NA | NA | NA | -2 | NA |    |    |    |    |    |    |    |    |
| HSPA4L        | ENSG00000164070.11 | NA | NA | NA | NA | NA | NA | NA | NA | NA | NA | NA | NA | NA |
| NA            | NA                 | NA | NA | NA | -2 | NA |    |    |    |    |    |    |    |    |
| RP11-766F14.2 | ENSG00000248713.1  | NA | NA | NA | NA | NA | NA | NA | NA | NA | NA | NA | NA | NA |
| NA            | NA                 | NA | NA | NA | -2 | NA |    |    |    |    |    |    |    |    |
| ERVMER34-1    | ENSG00000226887.7  | NA | NA | NA | NA | NA | NA | NA | NA | NA | NA | NA | NA | NA |
| NA            | NA                 | NA | NA | NA | -2 | NA |    |    |    |    |    |    |    |    |
| CXCL9         | ENSG00000138755.5  | NA | NA | NA | NA | NA | NA | NA | NA | NA | NA | NA | NA | NA |
| NA            | NA                 | NA | NA | -2 | NA |    |    |    |    |    |    |    |    |    |
| RP11-364P22.2 | ENSG00000249275.1  | NA | NA | NA | NA | NA | NA | NA | NA | NA | NA | NA | NA | NA |
| NA            | NA                 | NA | NA | NA | -2 | NA |    |    |    |    |    |    |    |    |
| CXCL8         | ENSG00000169429.10 | NA | NA | NA | NA | NA | NA | NA | NA | NA | NA | NA | NA | NA |
| NA            | NA                 | NA | NA | -2 | NA |    |    |    |    |    |    |    |    |    |
| TRIM60        | ENSG00000176979.12 | NA | NA | NA | NA | NA | NA | NA | NA | NA | NA | NA | NA | NA |
| NA            | NA                 | NA | NA | NA | -2 | NA |    |    |    |    |    |    |    |    |
| RP11-756P10.2 | ENSG00000250626.2  | NA | NA | NA | NA | NA | NA | NA | NA | NA | NA | NA | NA | NA |
| NA            | NA                 | NA | NA | NA | -2 | NA |    |    |    |    |    |    |    |    |
| RP11-422J15.1 | ENSG00000249618.5  | NA | NA | NA | NA | NA | NA | NA | NA | NA | NA | NA | NA | NA |
| NA            | NA                 | NA | NA | NA | -2 | NA |    |    |    |    |    |    |    |    |
| RP11-577G20.1 | ENSG00000250340.1  | NA | NA | NA | NA | NA | NA | NA | NA | NA | NA | NA | NA | NA |
| NA            | NA                 | NA | NA | NA | -2 | NA |    |    |    |    |    |    |    |    |
| RP11-622A1.2  | ENSG00000250436.1  | NA | NA | NA | NA | NA | NA | NA | NA | NA | NA | NA | NA | NA |
| NA            | NA                 | NA | NA | NA | -2 | NA |    |    |    |    |    |    |    |    |
| RP11-273B19.1 | ENSG00000251256.1  | NA | NA | NA | NA | NA | NA | NA | NA | NA | NA | NA | NA | NA |
| NA            | NA                 | NA | NA | NA | -2 | NA |    |    |    |    |    |    |    |    |
| SULT1B1       | ENSG00000173597.8  | NA | NA | NA | NA | NA | NA | NA | NA | NA | NA | NA | NA | NA |
| NA            | NA                 | NA | NA | NA | -2 | NA |    |    |    |    |    |    |    |    |
| WWC2-AS2      | ENSG00000251359.4  | NA | NA | NA | NA | NA | NA | NA | NA | NA | NA | NA | NA | NA |
| NA            | NA                 | NA | NA | NA | -2 | NA |    |    |    |    |    |    |    |    |
| TET2          | ENSG00000168769.13 | NA | NA | NA | NA | NA | NA | NA | NA | NA | NA | NA | NA | NA |
| NA            | NA                 | NA | NA | -2 | NA |    |    |    |    |    |    |    |    |    |
| RP11-308K2.1  | ENSG00000249747.1  | NA | NA | NA | NA | NA | NA | NA | NA | NA | NA | NA | NA | NA |
| NA            | NA                 | NA | NA | NA | -2 | NA |    |    |    |    |    |    |    |    |
| RP11-665I14.1 | ENSG00000249882.1  | NA | NA | NA | NA | NA | NA | NA | NA | NA | NA | NA | NA | NA |
| NA            | NA                 | NA | NA | NA | -2 | NA |    |    |    |    |    |    |    |    |
| GK2           | ENSG00000196475.5  | NA | NA | NA | NA | NA | NA | NA | NA | NA | NA | NA | NA | NA |
| NA            | NA                 | NA | NA | -2 | NA |    |    |    |    |    |    |    |    |    |
| RP11-12K22.1  | ENSG00000250775.1  | NA | NA | NA | NA | NA | NA | NA | NA | NA | NA | NA | NA | NA |
| NA            | NA                 | NA | NA | NA | -2 | NA |    |    |    |    |    |    |    |    |
| RP11-774O3.1  | ENSG00000248986.1  | NA | NA | NA | NA | NA | NA | NA | NA | NA | NA | NA | NA | NA |
| NA            | NA                 | NA | NA | NA | -2 | NA |    |    |    |    |    |    |    |    |
| SPRY1         | ENSG00000164056.10 | NA | NA | NA | NA | NA | NA | NA | NA | NA | NA | NA | NA | NA |

|               |                    |    |    |    |    |    |    |    |    |    |    |    |    |    |
|---------------|--------------------|----|----|----|----|----|----|----|----|----|----|----|----|----|
| NA            | NA                 | NA | NA | -2 | NA |    |    |    |    |    |    |    |    |    |
| EXOC1         | ENSG00000090989.17 |    |    |    | NA | NA | NA | NA | NA | NA | NA | NA | NA | NA |
| NA            | NA                 | NA | NA | -2 | NA |    |    |    |    |    |    |    |    |    |
| PHOX2B        | ENSG00000109132.6  |    |    |    | NA | NA | NA | NA | NA | NA | NA | NA | NA | NA |
| NA            | NA                 | NA | NA | NA | -2 | NA |    |    |    |    |    |    |    |    |
| MAD2L1        | ENSG00000164109.13 |    |    |    | NA | NA | NA | NA | NA | NA | NA | NA | NA | NA |
| NA            | NA                 | NA | NA | NA | -2 | NA |    |    |    |    |    |    |    |    |
| RP11-103J17.1 | ENSG00000247810.6  |    |    |    | NA | NA | NA | NA | NA | NA | NA | NA | NA | NA |
| NA            | NA                 | NA | NA | NA | -2 | NA |    |    |    |    |    |    |    |    |
| CHRNA9        | ENSG00000174343.5  |    |    |    | NA | NA | NA | NA | NA | NA | NA | NA | NA | NA |
| NA            | NA                 | NA | NA | NA | -2 | NA |    |    |    |    |    |    |    |    |
| ATP5I         | ENSG00000169020.9  |    |    |    | NA | NA | NA | NA | NA | NA | NA | NA | NA | NA |
| NA            | NA                 | NA | NA | -2 | NA |    |    |    |    |    |    |    |    |    |
| RP11-457P14.5 | ENSG00000249771.1  |    |    |    | NA | NA | NA | NA | NA | NA | NA | NA | NA | NA |
| NA            | NA                 | NA | NA | NA | -2 | NA |    |    |    |    |    |    |    |    |
| DKFZP434I0714 | ENSG00000268471.6  |    |    |    | NA | NA | NA | NA | NA | NA | NA | NA | NA | NA |
| NA            | NA                 | NA | NA | NA | -2 | NA |    |    |    |    |    |    |    |    |
| LINC01182     | ENSG00000250634.5  |    |    |    | NA | NA | NA | NA | NA | NA | NA | NA | NA | NA |
| NA            | NA                 | NA | NA | NA | -2 | NA |    |    |    |    |    |    |    |    |
| RPL34         | ENSG00000109475.16 |    |    |    | NA | NA | NA | NA | NA | NA | NA | NA | NA | NA |
| NA            | NA                 | NA | NA | -2 | NA |    |    |    |    |    |    |    |    |    |
| RP11-725M22.1 | ENSG00000250597.5  |    |    |    | NA | NA | NA | NA | NA | NA | NA | NA | NA | NA |
| NA            | NA                 | NA | NA | NA | -2 | NA |    |    |    |    |    |    |    |    |
| RP11-600L4.1  | ENSG00000251642.1  |    |    |    | NA | NA | NA | NA | NA | NA | NA | NA | NA | NA |
| NA            | NA                 | NA | NA | NA | -2 | NA |    |    |    |    |    |    |    |    |
| RP11-292B1.2  | ENSG00000250190.1  |    |    |    | NA | NA | NA | NA | NA | NA | NA | NA | NA | NA |
| NA            | NA                 | NA | NA | NA | -2 | NA |    |    |    |    |    |    |    |    |
| SYNPO2        | ENSG00000172403.10 |    |    |    | NA | NA | NA | NA | NA | NA | NA | NA | NA | NA |
| NA            | NA                 | NA | NA | NA | -2 | NA |    |    |    |    |    |    |    |    |
| MUC7          | ENSG00000171195.10 |    |    |    | NA | NA | NA | NA | NA | NA | NA | NA | NA | NA |
| NA            | NA                 | NA | NA | -2 | NA |    |    |    |    |    |    |    |    |    |
| LINC01596     | ENSG00000250666.1  |    |    |    | NA | NA | NA | NA | NA | NA | NA | NA | NA | NA |
| NA            | NA                 | NA | NA | NA | -2 | NA |    |    |    |    |    |    |    |    |
| RP11-326I11.3 | ENSG00000271646.1  |    |    |    | NA | NA | NA | NA | NA | NA | NA | NA | NA | NA |
| NA            | NA                 | NA | NA | NA | -2 | NA |    |    |    |    |    |    |    |    |
| RP11-102N12.3 | ENSG00000273472.1  |    |    |    | NA | NA | NA | NA | NA | NA | NA | NA | NA | NA |
| NA            | NA                 | NA | NA | NA | -2 | NA |    |    |    |    |    |    |    |    |
| UGT2A3        | ENSG00000135220.10 |    |    |    | NA | NA | NA | NA | NA | NA | NA | NA | NA | NA |
| NA            | NA                 | NA | NA | NA | -2 | NA |    |    |    |    |    |    |    |    |
| LINC01262     | ENSG00000250739.1  |    |    |    | NA | NA | NA | NA | NA | NA | NA | NA | NA | NA |
| NA            | NA                 | NA | NA | NA | -2 | NA |    |    |    |    |    |    |    |    |
| RP11-161D15.3 | ENSG00000251216.1  |    |    |    | NA | NA | NA | NA | NA | NA | NA | NA | NA | NA |
| NA            | NA                 | NA | NA | NA | -2 | NA |    |    |    |    |    |    |    |    |
| RP11-415C15.1 | ENSG00000251080.1  |    |    |    | NA | NA | NA | NA | NA | NA | NA | NA | NA | NA |
| NA            | NA                 | NA | NA | NA | -2 | NA |    |    |    |    |    |    |    |    |
| STPG2         | ENSG00000163116.9  |    |    |    | NA | NA | NA | NA | NA | NA | NA | NA | NA | NA |
| NA            | NA                 | NA | NA | -2 | NA |    |    |    |    |    |    |    |    |    |
| OTOP1         | ENSG00000163982.5  |    |    |    | NA | NA | NA | NA | NA | NA | NA | NA | NA | NA |
| NA            | NA                 | NA | NA | -2 | NA |    |    |    |    |    |    |    |    |    |
| RP11-184M15.1 | ENSG00000248187.1  |    |    |    | NA | NA | NA | NA | NA | NA | NA | NA | NA | NA |
| NA            | NA                 | NA | NA | NA | -2 | NA |    |    |    |    |    |    |    |    |
| EREG          | ENSG00000124882.3  |    |    |    | NA | NA | NA | NA | NA | NA | NA | NA | NA | NA |
| NA            | NA                 | NA | NA | -2 | NA |    |    |    |    |    |    |    |    |    |
| EGF           | ENSG00000138798.11 |    |    |    | NA | NA | NA | NA | NA | NA | NA | NA | NA | NA |
| NA            | NA                 | NA | NA | -2 | NA |    |    |    |    |    |    |    |    |    |
| RP11-184M15.2 | ENSG00000248802.1  |    |    |    | NA | NA | NA | NA | NA | NA | NA | NA | NA | NA |
| NA            | NA                 | NA | NA | NA | -2 | NA |    |    |    |    |    |    |    |    |
| KCNIP4        | ENSG00000185774.14 |    |    |    | NA | NA | NA | NA | NA | NA | NA | NA | NA | NA |
| NA            | NA                 | NA | NA | NA | -2 | NA |    |    |    |    |    |    |    |    |
| MIR3945HG     | ENSG00000251230.5  |    |    |    | NA | NA | NA | NA | NA | NA | NA | NA | NA | NA |
| NA            | NA                 | NA | NA | NA | -2 | NA |    |    |    |    |    |    |    |    |
| RP11-567N4.2  | ENSG00000248646.1  |    |    |    | NA | NA | NA | NA | NA | NA | NA | NA | NA | NA |



|               |                    |    |    |    |    |    |    |    |    |    |    |    |    |    |    |    |
|---------------|--------------------|----|----|----|----|----|----|----|----|----|----|----|----|----|----|----|
|               | NA                 | NA | NA | NA | NA | NA | -2 | NA |    |    |    |    |    |    |    |    |
| INTU          | ENSG00000164066.12 | NA | NA | NA | NA | NA | NA | NA | NA | NA | NA | NA | NA | NA | NA | NA |
|               | NA                 | NA | NA | NA | -2 | NA |    |    |    |    |    |    |    |    |    |    |
| MTTP          | ENSG00000138823.13 | NA | NA | NA | NA | NA | NA | NA | NA | NA | NA | NA | NA | NA | NA | NA |
|               | NA                 | NA | NA | NA | -2 | NA |    |    |    |    |    |    |    |    |    |    |
| OSTC          | ENSG00000198856.12 | NA | NA | NA | NA | NA | NA | NA | NA | NA | NA | NA | NA | NA | NA | NA |
|               | NA                 | NA | NA | NA | -2 | NA |    |    |    |    |    |    |    |    |    |    |
| HELT          | ENSG00000187821.8  | NA | NA | NA | NA | NA | NA | NA | NA | NA | NA | NA | NA | NA | NA | NA |
|               | NA                 | NA | NA | NA | -2 | NA |    |    |    |    |    |    |    |    |    |    |
| LINC00575     | ENSG00000231782.6  | NA | NA | NA | NA | NA | NA | NA | NA | NA | NA | NA | NA | NA | NA | NA |
|               | NA                 | NA | NA | NA | -2 | NA |    |    |    |    |    |    |    |    |    |    |
| RP11-138I17.1 | ENSG00000248869.5  | NA | NA | NA | NA | NA | NA | NA | NA | NA | NA | NA | NA | NA | NA | NA |
|               | NA                 | NA | NA | NA | NA | -2 | NA |    |    |    |    |    |    |    |    |    |
| PRMT9         | ENSG00000164169.12 | NA | NA | NA | NA | NA | NA | NA | NA | NA | NA | NA | NA | NA | NA | NA |
|               | NA                 | NA | NA | NA | -2 | NA |    |    |    |    |    |    |    |    |    |    |
| COMMD8        | ENSG00000169019.10 | NA | NA | NA | NA | NA | NA | NA | NA | NA | NA | NA | NA | NA | NA | NA |
|               | NA                 | NA | NA | NA | -2 | NA |    |    |    |    |    |    |    |    |    |    |
| RP11-381N20.1 | ENSG00000251526.1  | NA | NA | NA | NA | NA | NA | NA | NA | NA | NA | NA | NA | NA | NA | NA |
|               | NA                 | NA | NA | NA | NA | -2 | NA |    |    |    |    |    |    |    |    |    |
| ENOPH1        | ENSG00000145293.15 | NA | NA | NA | NA | NA | NA | NA | NA | NA | NA | NA | NA | NA | NA | NA |
|               | NA                 | NA | NA | NA | NA | -2 | NA |    |    |    |    |    |    |    |    |    |
| TMEM154       | ENSG00000170006.11 | NA | NA | NA | NA | NA | NA | NA | NA | NA | NA | NA | NA | NA | NA | NA |
|               | NA                 | NA | NA | NA | NA | -2 | NA |    |    |    |    |    |    |    |    |    |
| NPNT          | ENSG00000168743.12 | NA | NA | NA | NA | NA | NA | NA | NA | NA | NA | NA | NA | NA | NA | NA |
|               | NA                 | NA | NA | NA | -2 | NA |    |    |    |    |    |    |    |    |    |    |
| ABHD18        | ENSG00000164074.14 | NA | NA | NA | NA | NA | NA | NA | NA | NA | NA | NA | NA | NA | NA | NA |
|               | NA                 | NA | NA | NA | NA | -2 | NA |    |    |    |    |    |    |    |    |    |
| TNIP3         | ENSG00000050730.15 | NA | NA | NA | NA | NA | NA | NA | NA | NA | NA | NA | NA | NA | NA | NA |
|               | NA                 | NA | NA | NA | -2 | NA |    |    |    |    |    |    |    |    |    |    |
| UGT8          | ENSG00000174607.10 | NA | NA | NA | NA | NA | NA | NA | NA | NA | NA | NA | NA | NA | NA | NA |
|               | NA                 | NA | NA | NA | -2 | NA |    |    |    |    |    |    |    |    |    |    |
| RP11-706F1.1  | ENSG00000251310.1  | NA | NA | NA | NA | NA | NA | NA | NA | NA | NA | NA | NA | NA | NA | NA |
|               | NA                 | NA | NA | NA | NA | -2 | NA |    |    |    |    |    |    |    |    |    |
| SOWAHB        | ENSG00000186212.3  | NA | NA | NA | NA | NA | NA | NA | NA | NA | NA | NA | NA | NA | NA | NA |
|               | NA                 | NA | NA | NA | NA | -2 | NA |    |    |    |    |    |    |    |    |    |
| NAA15         | ENSG00000164134.12 | NA | NA | NA | NA | NA | NA | NA | NA | NA | NA | NA | NA | NA | NA | NA |
|               | NA                 | NA | NA | NA | -2 | NA |    |    |    |    |    |    |    |    |    |    |
| THAP6         | ENSG00000174796.12 | NA | NA | NA | NA | NA | NA | NA | NA | NA | NA | NA | NA | NA | NA | NA |
|               | NA                 | NA | NA | NA | -2 | NA |    |    |    |    |    |    |    |    |    |    |
| TMPRSS11F     | ENSG00000198092.5  | NA | NA | NA | NA | NA | NA | NA | NA | NA | NA | NA | NA | NA | NA | NA |
|               | NA                 | NA | NA | NA | NA | -2 | NA |    |    |    |    |    |    |    |    |    |
| RP11-700N1.1  | ENSG00000250392.2  | NA | NA | NA | NA | NA | NA | NA | NA | NA | NA | NA | NA | NA | NA | NA |
|               | NA                 | NA | NA | NA | NA | -2 | NA |    |    |    |    |    |    |    |    |    |
| AREG          | ENSG00000109321.10 | NA | NA | NA | NA | NA | NA | NA | NA | NA | NA | NA | NA | NA | NA | NA |
|               | NA                 | NA | NA | NA | -2 | NA |    |    |    |    |    |    |    |    |    |    |
| TRPC3         | ENSG00000138741.10 | NA | NA | NA | NA | NA | NA | NA | NA | NA | NA | NA | NA | NA | NA | NA |
|               | NA                 | NA | NA | NA | -2 | NA |    |    |    |    |    |    |    |    |    |    |
| RXFP1         | ENSG00000171509.15 | NA | NA | NA | NA | NA | NA | NA | NA | NA | NA | NA | NA | NA | NA | NA |
|               | NA                 | NA | NA | NA | -2 | NA |    |    |    |    |    |    |    |    |    |    |
| ENAM          | ENSG00000132464.11 | NA | NA | NA | NA | NA | NA | NA | NA | NA | NA | NA | NA | NA | NA | NA |
|               | NA                 | NA | NA | NA | -2 | NA |    |    |    |    |    |    |    |    |    |    |
| ETNPPL        | ENSG00000164089.8  | NA | NA | NA | NA | NA | NA | NA | NA | NA | NA | NA | NA | NA | NA | NA |
|               | NA                 | NA | NA | NA | NA | -2 | NA |    |    |    |    |    |    |    |    |    |
| RP11-6N13.1   | ENSG00000251574.6  | NA | NA | NA | NA | NA | NA | NA | NA | NA | NA | NA | NA | NA | NA | NA |
|               | NA                 | NA | NA | NA | NA | -2 | NA |    |    |    |    |    |    |    |    |    |
| DDX46         | ENSG00000145833.15 | NA | NA | NA | NA | NA | NA | NA | NA | NA | NA | NA | NA | NA | NA | NA |
|               | NA                 | NA | NA | NA | -2 | NA |    |    |    |    |    |    |    |    |    |    |
| ZNF300        | ENSG00000145908.12 | NA | NA | NA | NA | NA | NA | NA | NA | NA | NA | NA | NA | NA | NA | NA |
|               | NA                 | NA | NA | NA | NA | -2 | NA |    |    |    |    |    |    |    |    |    |
| NREP          | ENSG00000134986.13 | NA | NA | NA | NA | NA | NA | NA | NA | NA | NA | NA | NA | NA | NA | NA |
|               | NA                 | NA | NA | NA | -2 | NA |    |    |    |    |    |    |    |    |    |    |
| SOWAHA        | ENSG00000198944.5  | NA | NA | NA | NA | NA | NA | NA | NA | NA | NA | NA | NA | NA | NA | NA |

|               |                    |    |    |    |    |    |    |    |    |    |    |    |    |    |
|---------------|--------------------|----|----|----|----|----|----|----|----|----|----|----|----|----|
| NA            | NA                 | NA | NA | NA | -2 | NA |    |    |    |    |    |    |    |    |
| RP11-114J13.1 | ENSG00000248752.1  |    |    |    |    | NA | NA | NA | NA | NA | NA | NA | NA | NA |
| NA            | NA                 | NA | NA | NA | NA | -2 | NA |    |    |    |    |    |    |    |
| LINC01948     | ENSG00000248727.5  |    |    |    |    | NA | NA | NA | NA | NA | NA | NA | NA | NA |
| NA            | NA                 | NA | NA | NA | NA | -2 | NA |    |    |    |    |    |    |    |
| CHSY3         | ENSG00000198108.3  |    |    |    |    | NA | NA | NA | NA | NA | NA | NA | NA | NA |
| NA            | NA                 | NA | NA | NA | NA | -2 | NA |    |    |    |    |    |    |    |
| TRIM36        | ENSG00000152503.9  |    |    |    |    | NA | NA | NA | NA | NA | NA | NA | NA | NA |
| NA            | NA                 | NA | NA | NA | NA | -2 | NA |    |    |    |    |    |    |    |
| PLPP1         | ENSG00000067113.16 |    |    |    |    | NA | NA | NA | NA | NA | NA | NA | NA | NA |
| NA            | NA                 | NA | NA | NA | NA | -2 | NA |    |    |    |    |    |    |    |
| LINC02148     | ENSG00000250427.1  |    |    |    |    | NA | NA | NA | NA | NA | NA | NA | NA | NA |
| NA            | NA                 | NA | NA | NA | NA | -2 | NA |    |    |    |    |    |    |    |
| LINC01843     | ENSG00000251169.2  |    |    |    |    | NA | NA | NA | NA | NA | NA | NA | NA | NA |
| NA            | NA                 | NA | NA | NA | NA | -2 | NA |    |    |    |    |    |    |    |
| CTC-332L22.1  | ENSG00000271849.1  |    |    |    |    | NA | NA | NA | NA | NA | NA | NA | NA | NA |
| NA            | NA                 | NA | NA | NA | NA | -2 | NA |    |    |    |    |    |    |    |
| PCDHB15       | ENSG00000113248.5  |    |    |    |    | NA | NA | NA | NA | NA | NA | NA | NA | NA |
| NA            | NA                 | NA | NA | NA | NA | -2 | NA |    |    |    |    |    |    |    |
| SLC25A46      | ENSG00000164209.16 |    |    |    |    | NA | NA | NA | NA | NA | NA | NA | NA | NA |
| NA            | NA                 | NA | NA | NA | NA | -2 | NA |    |    |    |    |    |    |    |
| CTD-2376I4.2  | ENSG00000272081.1  |    |    |    |    | NA | NA | NA | NA | NA | NA | NA | NA | NA |
| NA            | NA                 | NA | NA | NA | NA | -2 | NA |    |    |    |    |    |    |    |
| JAKMIP2       | ENSG00000176049.15 |    |    |    |    | NA | NA | NA | NA | NA | NA | NA | NA | NA |
| NA            | NA                 | NA | NA | NA | NA | -2 | NA |    |    |    |    |    |    |    |
| LINC02201     | ENSG00000251538.5  |    |    |    |    | NA | NA | NA | NA | NA | NA | NA | NA | NA |
| NA            | NA                 | NA | NA | NA | NA | -2 | NA |    |    |    |    |    |    |    |
| DIMT1         | ENSG00000086189.9  |    |    |    |    | NA | NA | NA | NA | NA | NA | NA | NA | NA |
| NA            | NA                 | NA | NA | NA | NA | -2 | NA |    |    |    |    |    |    |    |
| CTB-78H18.1   | ENSG00000253110.1  |    |    |    |    | NA | NA | NA | NA | NA | NA | NA | NA | NA |
| NA            | NA                 | NA | NA | NA | NA | -2 | NA |    |    |    |    |    |    |    |
| RP11-434D9.1  | ENSG00000249364.5  |    |    |    |    | NA | NA | NA | NA | NA | NA | NA | NA | NA |
| NA            | NA                 | NA | NA | NA | NA | -2 | NA |    |    |    |    |    |    |    |
| SLC6A19       | ENSG00000174358.15 |    |    |    |    | NA | NA | NA | NA | NA | NA | NA | NA | NA |
| NA            | NA                 | NA | NA | NA | NA | -2 | NA |    |    |    |    |    |    |    |
| RP11-257I8.2  | ENSG00000250411.1  |    |    |    |    | NA | NA | NA | NA | NA | NA | NA | NA | NA |
| NA            | NA                 | NA | NA | NA | NA | -2 | NA |    |    |    |    |    |    |    |
| APC           | ENSG00000134982.16 |    |    |    |    | NA | NA | NA | NA | NA | NA | NA | NA | NA |
| NA            | NA                 | NA | NA | NA | NA | -2 | NA |    |    |    |    |    |    |    |
| RP11-730N24.1 | ENSG00000248908.1  |    |    |    |    | NA | NA | NA | NA | NA | NA | NA | NA | NA |
| NA            | NA                 | NA | NA | NA | NA | -2 | NA |    |    |    |    |    |    |    |
| ATP6V0E1      | ENSG00000113732.8  |    |    |    |    | NA | NA | NA | NA | NA | NA | NA | NA | NA |
| NA            | NA                 | NA | NA | NA | NA | -2 | NA |    |    |    |    |    |    |    |
| RP11-423H2.4  | ENSG00000280207.1  |    |    |    |    | NA | NA | NA | NA | NA | NA | NA | NA | NA |
| NA            | NA                 | NA | NA | NA | NA | -2 | NA |    |    |    |    |    |    |    |
| RP11-78C3.1   | ENSG00000248112.1  |    |    |    |    | NA | NA | NA | NA | NA | NA | NA | NA | NA |
| NA            | NA                 | NA | NA | NA | NA | -2 | NA |    |    |    |    |    |    |    |
| CWC27         | ENSG00000153015.15 |    |    |    |    | NA | NA | NA | NA | NA | NA | NA | NA | NA |
| NA            | NA                 | NA | NA | NA | NA | -2 | NA |    |    |    |    |    |    |    |
| SNCB          | ENSG00000074317.10 |    |    |    |    | NA | NA | NA | NA | NA | NA | NA | NA | NA |
| NA            | NA                 | NA | NA | NA | NA | -2 | NA |    |    |    |    |    |    |    |
| SPINK7        | ENSG00000145879.10 |    |    |    |    | NA | NA | NA | NA | NA | NA | NA | NA | NA |
| NA            | NA                 | NA | NA | NA | NA | -2 | NA |    |    |    |    |    |    |    |
| MAN2A1        | ENSG00000112893.9  |    |    |    |    | NA | NA | NA | NA | NA | NA | NA | NA | NA |
| NA            | NA                 | NA | NA | NA | NA | -2 | NA |    |    |    |    |    |    |    |
| C5orf66-AS1   | ENSG00000249082.2  |    |    |    |    | NA | NA | NA | NA | NA | NA | NA | NA | NA |
| NA            | NA                 | NA | NA | NA | NA | -2 | NA |    |    |    |    |    |    |    |
| C6            | ENSG00000039537.13 |    |    |    |    | NA | NA | NA | NA | NA | NA | NA | NA | NA |
| NA            | NA                 | NA | NA | NA | NA | -2 | NA |    |    |    |    |    |    |    |
| NRG2          | ENSG00000158458.19 |    |    |    |    | NA | NA | NA | NA | NA | NA | NA | NA | NA |
| NA            | NA                 | NA | NA | NA | NA | -2 | NA |    |    |    |    |    |    |    |
| PRKAA1        | ENSG00000132356.11 |    |    |    |    | NA | NA | NA | NA | NA | NA | NA | NA | NA |

|               |                    |    |    |    |    |    |    |    |    |    |    |    |    |    |
|---------------|--------------------|----|----|----|----|----|----|----|----|----|----|----|----|----|
| NA            | NA                 | NA | NA | NA | -2 | NA |    |    |    |    |    |    |    |    |
| CTD-2066L21.3 | ENSG00000250697.1  |    |    |    |    | NA | NA | NA | NA | NA | NA | NA | NA | NA |
| NA            | NA                 | NA | NA | NA | NA | -2 | NA |    |    |    |    |    |    |    |
| LINC02160     | ENSG00000251443.1  |    |    |    |    | NA | NA | NA | NA | NA | NA | NA | NA | NA |
| NA            | NA                 | NA | NA | NA | NA | -2 | NA |    |    |    |    |    |    |    |
| SLC6A3        | ENSG00000142319.17 |    |    |    |    | NA | NA | NA | NA | NA | NA | NA | NA | NA |
| NA            | NA                 | NA | NA | NA | NA | -2 | NA |    |    |    |    |    |    |    |
| CTB-73N10.1   | ENSG00000248125.1  |    |    |    |    | NA | NA | NA | NA | NA | NA | NA | NA | NA |
| NA            | NA                 | NA | NA | NA | NA | -2 | NA |    |    |    |    |    |    |    |
| MTMR12        | ENSG00000150712.10 |    |    |    |    | NA | NA | NA | NA | NA | NA | NA | NA | NA |
| NA            | NA                 | NA | NA | NA | NA | -2 | NA |    |    |    |    |    |    |    |
| CTD-2023N9.2  | ENSG00000248294.1  |    |    |    |    | NA | NA | NA | NA | NA | NA | NA | NA | NA |
| NA            | NA                 | NA | NA | NA | NA | -2 | NA |    |    |    |    |    |    |    |
| LINC01942     | ENSG00000253428.1  |    |    |    |    | NA | NA | NA | NA | NA | NA | NA | NA | NA |
| NA            | NA                 | NA | NA | NA | NA | -2 | NA |    |    |    |    |    |    |    |
| LINC02122     | ENSG00000248474.1  |    |    |    |    | NA | NA | NA | NA | NA | NA | NA | NA | NA |
| NA            | NA                 | NA | NA | NA | NA | -2 | NA |    |    |    |    |    |    |    |
| NEURL1B       | ENSG00000214357.8  |    |    |    |    | NA | NA | NA | NA | NA | NA | NA | NA | NA |
| NA            | NA                 | NA | NA | NA | NA | -2 | NA |    |    |    |    |    |    |    |
| RP11-325L7.2  | ENSG00000250260.1  |    |    |    |    | NA | NA | NA | NA | NA | NA | NA | NA | NA |
| NA            | NA                 | NA | NA | NA | NA | -2 | NA |    |    |    |    |    |    |    |
| RP11-420O16.1 | ENSG00000249854.1  |    |    |    |    | NA | NA | NA | NA | NA | NA | NA | NA | NA |
| NA            | NA                 | NA | NA | NA | NA | -2 | NA |    |    |    |    |    |    |    |
| GNPDA1        | ENSG00000113552.15 |    |    |    |    | NA | NA | NA | NA | NA | NA | NA | NA | NA |
| NA            | NA                 | NA | NA | NA | NA | -2 | NA |    |    |    |    |    |    |    |
| IRX2          | ENSG00000170561.12 |    |    |    |    | NA | NA | NA | NA | NA | NA | NA | NA | NA |
| NA            | NA                 | NA | NA | NA | NA | -2 | NA |    |    |    |    |    |    |    |
| RP11-136K7.3  | ENSG00000253985.1  |    |    |    |    | NA | NA | NA | NA | NA | NA | NA | NA | NA |
| NA            | NA                 | NA | NA | NA | NA | -2 | NA |    |    |    |    |    |    |    |
| SLC34A1       | ENSG00000131183.10 |    |    |    |    | NA | NA | NA | NA | NA | NA | NA | NA | NA |
| NA            | NA                 | NA | NA | NA | NA | -2 | NA |    |    |    |    |    |    |    |
| RP11-32D16.1  | ENSG00000254135.1  |    |    |    |    | NA | NA | NA | NA | NA | NA | NA | NA | NA |
| NA            | NA                 | NA | NA | NA | NA | -2 | NA |    |    |    |    |    |    |    |
| CCL28         | ENSG00000151882.11 |    |    |    |    | NA | NA | NA | NA | NA | NA | NA | NA | NA |
| NA            | NA                 | NA | NA | NA | NA | -2 | NA |    |    |    |    |    |    |    |
| LINC00603     | ENSG00000250048.2  |    |    |    |    | NA | NA | NA | NA | NA | NA | NA | NA | NA |
| NA            | NA                 | NA | NA | NA | NA | -2 | NA |    |    |    |    |    |    |    |
| TERT          | ENSG00000164362.18 |    |    |    |    | NA | NA | NA | NA | NA | NA | NA | NA | NA |
| NA            | NA                 | NA | NA | NA | NA | -2 | NA |    |    |    |    |    |    |    |
| FNIP1         | ENSG00000217128.11 |    |    |    |    | NA | NA | NA | NA | NA | NA | NA | NA | NA |
| NA            | NA                 | NA | NA | NA | NA | -2 | NA |    |    |    |    |    |    |    |
| LINC02111     | ENSG00000250822.1  |    |    |    |    | NA | NA | NA | NA | NA | NA | NA | NA | NA |
| NA            | NA                 | NA | NA | NA | NA | -2 | NA |    |    |    |    |    |    |    |
| PCDHGA8       | ENSG00000253767.2  |    |    |    |    | NA | NA | NA | NA | NA | NA | NA | NA | NA |
| NA            | NA                 | NA | NA | NA | NA | -2 | NA |    |    |    |    |    |    |    |
| RP11-478P10.1 | ENSG00000249584.1  |    |    |    |    | NA | NA | NA | NA | NA | NA | NA | NA | NA |
| NA            | NA                 | NA | NA | NA | NA | -2 | NA |    |    |    |    |    |    |    |
| GAPT          | ENSG00000175857.8  |    |    |    |    | NA | NA | NA | NA | NA | NA | NA | NA | NA |
| NA            | NA                 | NA | NA | NA | NA | -2 | NA |    |    |    |    |    |    |    |
| SMIM23        | ENSG00000185662.9  |    |    |    |    | NA | NA | NA | NA | NA | NA | NA | NA | NA |
| NA            | NA                 | NA | NA | NA | NA | -2 | NA |    |    |    |    |    |    |    |
| PPP2CA        | ENSG00000113575.9  |    |    |    |    | NA | NA | NA | NA | NA | NA | NA | NA | NA |
| NA            | NA                 | NA | NA | NA | NA | -2 | NA |    |    |    |    |    |    |    |
| PCDH12        | ENSG00000113555.5  |    |    |    |    | NA | NA | NA | NA | NA | NA | NA | NA | NA |
| NA            | NA                 | NA | NA | NA | NA | -2 | NA |    |    |    |    |    |    |    |
| GPX8          | ENSG00000164294.13 |    |    |    |    | NA | NA | NA | NA | NA | NA | NA | NA | NA |
| NA            | NA                 | NA | NA | NA | NA | -2 | NA |    |    |    |    |    |    |    |
| ESM1          | ENSG00000164283.12 |    |    |    |    | NA | NA | NA | NA | NA | NA | NA | NA | NA |
| NA            | NA                 | NA | NA | NA | NA | -2 | NA |    |    |    |    |    |    |    |
| ERGIC1        | ENSG00000113719.15 |    |    |    |    | NA | NA | NA | NA | NA | NA | NA | NA | NA |
| NA            | NA                 | NA | NA | NA | NA | -2 | NA |    |    |    |    |    |    |    |
| LINC02059     | ENSG00000250544.1  |    |    |    |    | NA | NA | NA | NA | NA | NA | NA | NA | NA |

|               |                    |    |    |    |    |    |    |    |    |    |    |    |    |    |
|---------------|--------------------|----|----|----|----|----|----|----|----|----|----|----|----|----|
| NA            | NA                 | NA | NA | NA | -2 | NA | NA | NA | NA | NA | NA | NA | NA | NA |
| LINC02057     | ENSG00000249279.5  | NA | NA | NA | NA | NA | NA | NA | NA | NA | NA | NA | NA | NA |
| NA            | NA                 | NA | NA | NA | -2 | NA | NA | NA | NA | NA | NA | NA | NA | NA |
| LRRTM2        | ENSG00000146006.7  | NA | NA | NA | NA | NA | NA | NA | NA | NA | NA | NA | NA | NA |
| NA            | NA                 | NA | NA | NA | -2 | NA | NA | NA | NA | NA | NA | NA | NA | NA |
| TCERG1        | ENSG00000113649.11 | NA | NA | NA | NA | NA | NA | NA | NA | NA | NA | NA | NA | NA |
| NA            | NA                 | NA | NA | NA | -2 | NA | NA | NA | NA | NA | NA | NA | NA | NA |
| CTC-235G5.3   | ENSG00000248127.1  | NA | NA | NA | NA | NA | NA | NA | NA | NA | NA | NA | NA | NA |
| NA            | NA                 | NA | NA | NA | NA | -2 | NA | NA | NA | NA | NA | NA | NA | NA |
| CTD-3007L5.1  | ENSG00000248490.1  | NA | NA | NA | NA | NA | NA | NA | NA | NA | NA | NA | NA | NA |
| NA            | NA                 | NA | NA | NA | NA | -2 | NA | NA | NA | NA | NA | NA | NA | NA |
| TRPC7         | ENSG00000069018.17 | NA | NA | NA | NA | NA | NA | NA | NA | NA | NA | NA | NA | NA |
| NA            | NA                 | NA | NA | NA | -2 | NA | NA | NA | NA | NA | NA | NA | NA | NA |
| C5orf24       | ENSG00000181904.8  | NA | NA | NA | NA | NA | NA | NA | NA | NA | NA | NA | NA | NA |
| NA            | NA                 | NA | NA | NA | NA | -2 | NA | NA | NA | NA | NA | NA | NA | NA |
| ITGA1         | ENSG00000213949.8  | NA | NA | NA | NA | NA | NA | NA | NA | NA | NA | NA | NA | NA |
| NA            | NA                 | NA | NA | NA | -2 | NA | NA | NA | NA | NA | NA | NA | NA | NA |
| RNF14         | ENSG00000013561.17 | NA | NA | NA | NA | NA | NA | NA | NA | NA | NA | NA | NA | NA |
| NA            | NA                 | NA | NA | NA | -2 | NA | NA | NA | NA | NA | NA | NA | NA | NA |
| HMGCR         | ENSG00000113161.15 | NA | NA | NA | NA | NA | NA | NA | NA | NA | NA | NA | NA | NA |
| NA            | NA                 | NA | NA | NA | -2 | NA | NA | NA | NA | NA | NA | NA | NA | NA |
| SLCO6A1       | ENSG00000205359.9  | NA | NA | NA | NA | NA | NA | NA | NA | NA | NA | NA | NA | NA |
| NA            | NA                 | NA | NA | NA | NA | -2 | NA | NA | NA | NA | NA | NA | NA | NA |
| RP11-213H15.1 | ENSG00000234292.3  | NA | NA | NA | NA | NA | NA | NA | NA | NA | NA | NA | NA | NA |
| NA            | NA                 | NA | NA | NA | NA | -2 | NA | NA | NA | NA | NA | NA | NA | NA |
| IL4           | ENSG00000113520.10 | NA | NA | NA | NA | NA | NA | NA | NA | NA | NA | NA | NA | NA |
| NA            | NA                 | NA | NA | NA | -2 | NA | NA | NA | NA | NA | NA | NA | NA | NA |
| LINC01021     | ENSG00000250337.5  | NA | NA | NA | NA | NA | NA | NA | NA | NA | NA | NA | NA | NA |
| NA            | NA                 | NA | NA | NA | NA | -2 | NA | NA | NA | NA | NA | NA | NA | NA |
| HSPB3         | ENSG00000169271.2  | NA | NA | NA | NA | NA | NA | NA | NA | NA | NA | NA | NA | NA |
| NA            | NA                 | NA | NA | NA | -2 | NA | NA | NA | NA | NA | NA | NA | NA | NA |
| LINC01932     | ENSG00000253315.1  | NA | NA | NA | NA | NA | NA | NA | NA | NA | NA | NA | NA | NA |
| NA            | NA                 | NA | NA | NA | NA | -2 | NA | NA | NA | NA | NA | NA | NA | NA |
| CTD-2161F6.2  | ENSG00000248311.1  | NA | NA | NA | NA | NA | NA | NA | NA | NA | NA | NA | NA | NA |
| NA            | NA                 | NA | NA | NA | NA | -2 | NA | NA | NA | NA | NA | NA | NA | NA |
| LINC02212     | ENSG00000249396.1  | NA | NA | NA | NA | NA | NA | NA | NA | NA | NA | NA | NA | NA |
| NA            | NA                 | NA | NA | NA | NA | -2 | NA | NA | NA | NA | NA | NA | NA | NA |
| CTD-2116N20.1 | ENSG00000250081.1  | NA | NA | NA | NA | NA | NA | NA | NA | NA | NA | NA | NA | NA |
| NA            | NA                 | NA | NA | NA | NA | -2 | NA | NA | NA | NA | NA | NA | NA | NA |
| CTD-2089N3.3  | ENSG00000248918.2  | NA | NA | NA | NA | NA | NA | NA | NA | NA | NA | NA | NA | NA |
| NA            | NA                 | NA | NA | NA | NA | -2 | NA | NA | NA | NA | NA | NA | NA | NA |
| OSMR          | ENSG00000145623.12 | NA | NA | NA | NA | NA | NA | NA | NA | NA | NA | NA | NA | NA |
| NA            | NA                 | NA | NA | NA | -2 | NA | NA | NA | NA | NA | NA | NA | NA | NA |
| RP11-259O2.2  | ENSG00000248597.1  | NA | NA | NA | NA | NA | NA | NA | NA | NA | NA | NA | NA | NA |
| NA            | NA                 | NA | NA | NA | NA | -2 | NA | NA | NA | NA | NA | NA | NA | NA |
| ERBIN         | ENSG00000112851.14 | NA | NA | NA | NA | NA | NA | NA | NA | NA | NA | NA | NA | NA |
| NA            | NA                 | NA | NA | NA | -2 | NA | NA | NA | NA | NA | NA | NA | NA | NA |
| IQGAP2        | ENSG00000145703.15 | NA | NA | NA | NA | NA | NA | NA | NA | NA | NA | NA | NA | NA |
| NA            | NA                 | NA | NA | NA | NA | -2 | NA | NA | NA | NA | NA | NA | NA | NA |
| CXXC5         | ENSG00000171604.11 | NA | NA | NA | NA | NA | NA | NA | NA | NA | NA | NA | NA | NA |
| NA            | NA                 | NA | NA | NA | -2 | NA | NA | NA | NA | NA | NA | NA | NA | NA |
| PTGER4        | ENSG00000171522.5  | NA | NA | NA | NA | NA | NA | NA | NA | NA | NA | NA | NA | NA |
| NA            | NA                 | NA | NA | NA | NA | -2 | NA | NA | NA | NA | NA | NA | NA | NA |
| CTB-114C7.4   | ENSG00000250274.1  | NA | NA | NA | NA | NA | NA | NA | NA | NA | NA | NA | NA | NA |
| NA            | NA                 | NA | NA | NA | NA | -2 | NA | NA | NA | NA | NA | NA | NA | NA |
| ARHGAP26      | ENSG00000145819.15 | NA | NA | NA | NA | NA | NA | NA | NA | NA | NA | NA | NA | NA |
| NA            | NA                 | NA | NA | NA | NA | -2 | NA | NA | NA | NA | NA | NA | NA | NA |
| SH3RF2        | ENSG00000156463.17 | NA | NA | NA | NA | NA | NA | NA | NA | NA | NA | NA | NA | NA |
| NA            | NA                 | NA | NA | NA | NA | -2 | NA | NA | NA | NA | NA | NA | NA | NA |
| LINC02215     | ENSG00000249128.1  | NA | NA | NA | NA | NA | NA | NA | NA | NA | NA | NA | NA | NA |
| NA            | NA                 | NA | NA | NA | NA | -2 | NA | NA | NA | NA | NA | NA | NA | NA |
| SEMA5A        | ENSG00000112902.11 | NA | NA | NA | NA | NA | NA | NA | NA | NA | NA | NA | NA | NA |

|               |                    |    |    |    |    |    |    |    |    |    |    |    |    |    |
|---------------|--------------------|----|----|----|----|----|----|----|----|----|----|----|----|----|
| NA            | NA                 | NA | NA | NA | -2 | NA |    |    |    |    |    |    |    |    |
| CNOT6         | ENSG00000113300.11 | NA | NA | NA | NA | NA | NA | NA | NA | NA | NA | NA | NA | NA |
| NA            | NA                 | NA | NA | NA | -2 | NA |    |    |    |    |    |    |    |    |
| COX7C         | ENSG00000127184.12 | NA | NA | NA | NA | NA | NA | NA | NA | NA | NA | NA | NA | NA |
| NA            | NA                 | NA | NA | NA | -2 | NA |    |    |    |    |    |    |    |    |
| SAP30L        | ENSG00000164576.11 | NA | NA | NA | NA | NA | NA | NA | NA | NA | NA | NA | NA | NA |
| NA            | NA                 | NA | NA | NA | -2 | NA |    |    |    |    |    |    |    |    |
| CTD-2333K2.1  | ENSG00000248261.1  | NA | NA | NA | NA | NA | NA | NA | NA | NA | NA | NA | NA | NA |
| NA            | NA                 | NA | NA | NA | NA | -2 | NA |    |    |    |    |    |    |    |
| CTB-40H15.4   | ENSG00000272057.1  | NA | NA | NA | NA | NA | NA | NA | NA | NA | NA | NA | NA | NA |
| NA            | NA                 | NA | NA | NA | NA | -2 | NA |    |    |    |    |    |    |    |
| FAM53C        | ENSG00000120709.10 | NA | NA | NA | NA | NA | NA | NA | NA | NA | NA | NA | NA | NA |
| NA            | NA                 | NA | NA | NA | NA | -2 | NA |    |    |    |    |    |    |    |
| MRPS30        | ENSG00000112996.10 | NA | NA | NA | NA | NA | NA | NA | NA | NA | NA | NA | NA | NA |
| NA            | NA                 | NA | NA | NA | NA | -2 | NA |    |    |    |    |    |    |    |
| PCDHGB3       | ENSG00000262209.2  | NA | NA | NA | NA | NA | NA | NA | NA | NA | NA | NA | NA | NA |
| NA            | NA                 | NA | NA | NA | NA | -2 | NA |    |    |    |    |    |    |    |
| CTC-366B18.4  | ENSG00000272040.1  | NA | NA | NA | NA | NA | NA | NA | NA | NA | NA | NA | NA | NA |
| NA            | NA                 | NA | NA | NA | NA | -2 | NA |    |    |    |    |    |    |    |
| SOX30         | ENSG00000039600.10 | NA | NA | NA | NA | NA | NA | NA | NA | NA | NA | NA | NA | NA |
| NA            | NA                 | NA | NA | NA | NA | -2 | NA |    |    |    |    |    |    |    |
| IPO11         | ENSG00000086200.16 | NA | NA | NA | NA | NA | NA | NA | NA | NA | NA | NA | NA | NA |
| NA            | NA                 | NA | NA | NA | NA | -2 | NA |    |    |    |    |    |    |    |
| LINC01187     | ENSG00000249601.2  | NA | NA | NA | NA | NA | NA | NA | NA | NA | NA | NA | NA | NA |
| NA            | NA                 | NA | NA | NA | NA | -2 | NA |    |    |    |    |    |    |    |
| LINC00491     | ENSG00000250682.5  | NA | NA | NA | NA | NA | NA | NA | NA | NA | NA | NA | NA | NA |
| NA            | NA                 | NA | NA | NA | NA | -2 | NA |    |    |    |    |    |    |    |
| LINC01340     | ENSG00000250331.1  | NA | NA | NA | NA | NA | NA | NA | NA | NA | NA | NA | NA | NA |
| NA            | NA                 | NA | NA | NA | NA | -2 | NA |    |    |    |    |    |    |    |
| PDGFRB        | ENSG00000113721.13 | NA | NA | NA | NA | NA | NA | NA | NA | NA | NA | NA | NA | NA |
| NA            | NA                 | NA | NA | NA | NA | -2 | NA |    |    |    |    |    |    |    |
| PFDN1         | ENSG00000113068.9  | NA | NA | NA | NA | NA | NA | NA | NA | NA | NA | NA | NA | NA |
| NA            | NA                 | NA | NA | NA | NA | -2 | NA |    |    |    |    |    |    |    |
| C5orf66-AS2   | ENSG00000249647.2  | NA | NA | NA | NA | NA | NA | NA | NA | NA | NA | NA | NA | NA |
| NA            | NA                 | NA | NA | NA | NA | -2 | NA |    |    |    |    |    |    |    |
| LINC01485     | ENSG00000254211.5  | NA | NA | NA | NA | NA | NA | NA | NA | NA | NA | NA | NA | NA |
| NA            | NA                 | NA | NA | NA | NA | -2 | NA |    |    |    |    |    |    |    |
| CTD-2195M15.3 | ENSG00000271766.1  | NA | NA | NA | NA | NA | NA | NA | NA | NA | NA | NA | NA | NA |
| NA            | NA                 | NA | NA | NA | NA | -2 | NA |    |    |    |    |    |    |    |
| ACTBL2        | ENSG00000169067.3  | NA | NA | NA | NA | NA | NA | NA | NA | NA | NA | NA | NA | NA |
| NA            | NA                 | NA | NA | NA | NA | -2 | NA |    |    |    |    |    |    |    |
| HMGCS1        | ENSG00000112972.14 | NA | NA | NA | NA | NA | NA | NA | NA | NA | NA | NA | NA | NA |
| NA            | NA                 | NA | NA | NA | NA | -2 | NA |    |    |    |    |    |    |    |
| LINC02104     | ENSG00000271334.5  | NA | NA | NA | NA | NA | NA | NA | NA | NA | NA | NA | NA | NA |
| NA            | NA                 | NA | NA | NA | NA | -2 | NA |    |    |    |    |    |    |    |
| C5orf52       | ENSG00000187658.6  | NA | NA | NA | NA | NA | NA | NA | NA | NA | NA | NA | NA | NA |
| NA            | NA                 | NA | NA | NA | NA | -2 | NA |    |    |    |    |    |    |    |
| SUB1          | ENSG00000113387.11 | NA | NA | NA | NA | NA | NA | NA | NA | NA | NA | NA | NA | NA |
| NA            | NA                 | NA | NA | NA | NA | -2 | NA |    |    |    |    |    |    |    |
| CTC-551A13.1  | ENSG00000248428.1  | NA | NA | NA | NA | NA | NA | NA | NA | NA | NA | NA | NA | NA |
| NA            | NA                 | NA | NA | NA | NA | -2 | NA |    |    |    |    |    |    |    |
| CTD-2334D19.1 | ENSG00000248927.1  | NA | NA | NA | NA | NA | NA | NA | NA | NA | NA | NA | NA | NA |
| NA            | NA                 | NA | NA | NA | NA | -2 | NA |    |    |    |    |    |    |    |
| C7            | ENSG00000112936.18 | NA | NA | NA | NA | NA | NA | NA | NA | NA | NA | NA | NA | NA |
| NA            | NA                 | NA | NA | NA | NA | -2 | NA |    |    |    |    |    |    |    |
| ZNF879        | ENSG00000234284.6  | NA | NA | NA | NA | NA | NA | NA | NA | NA | NA | NA | NA | NA |
| NA            | NA                 | NA | NA | NA | NA | -2 | NA |    |    |    |    |    |    |    |
| IGIP          | ENSG00000182700.4  | NA | NA | NA | NA | NA | NA | NA | NA | NA | NA | NA | NA | NA |
| NA            | NA                 | NA | NA | NA | NA | -2 | NA |    |    |    |    |    |    |    |
| ICE1          | ENSG00000164151.11 | NA | NA | NA | NA | NA | NA | NA | NA | NA | NA | NA | NA | NA |
| NA            | NA                 | NA | NA | NA | NA | -2 | NA |    |    |    |    |    |    |    |
| PCDHGA7       | ENSG00000253537.2  | NA | NA | NA | NA | NA | NA | NA | NA | NA | NA | NA | NA | NA |

|               |                    |    |    |    |    |    |    |    |    |    |    |    |    |    |
|---------------|--------------------|----|----|----|----|----|----|----|----|----|----|----|----|----|
| NA            | NA                 | NA | NA | NA | -2 | NA |    |    |    |    |    |    |    |    |
| CATSPER3      | ENSG00000152705.7  |    |    |    |    | NA | NA | NA | NA | NA | NA | NA | NA | NA |
| NA            | NA                 | NA | NA | NA | -2 | NA |    |    |    |    |    |    |    |    |
| AFAP1L1       | ENSG00000157510.13 |    |    |    |    | NA | NA | NA | NA | NA | NA | NA | NA | NA |
| NA            | NA                 | NA | NA | NA | -2 | NA |    |    |    |    |    |    |    |    |
| LINC02100     | ENSG00000248693.1  |    |    |    |    | NA | NA | NA | NA | NA | NA | NA | NA | NA |
| NA            | NA                 | NA | NA | NA | -2 | NA |    |    |    |    |    |    |    |    |
| WWC1          | ENSG00000113645.14 |    |    |    |    | NA | NA | NA | NA | NA | NA | NA | NA | NA |
| NA            | NA                 | NA | NA | -2 | NA |    |    |    |    |    |    |    |    |    |
| RP11-83M16.5  | ENSG00000249736.1  |    |    |    |    | NA | NA | NA | NA | NA | NA | NA | NA | NA |
| NA            | NA                 | NA | NA | NA | -2 | NA |    |    |    |    |    |    |    |    |
| CXXC5-AS1     | ENSG00000250635.1  |    |    |    |    | NA | NA | NA | NA | NA | NA | NA | NA | NA |
| NA            | NA                 | NA | NA | NA | -2 | NA |    |    |    |    |    |    |    |    |
| RP11-141O11.1 | ENSG00000250066.1  |    |    |    |    | NA | NA | NA | NA | NA | NA | NA | NA | NA |
| NA            | NA                 | NA | NA | NA | -2 | NA |    |    |    |    |    |    |    |    |
| CTD-2139B15.2 | ENSG00000248223.1  |    |    |    |    | NA | NA | NA | NA | NA | NA | NA | NA | NA |
| NA            | NA                 | NA | NA | NA | -2 | NA |    |    |    |    |    |    |    |    |
| SLC22A4       | ENSG00000197208.5  |    |    |    |    | NA | NA | NA | NA | NA | NA | NA | NA | NA |
| NA            | NA                 | NA | NA | NA | -2 | NA |    |    |    |    |    |    |    |    |
| AC138517.6    | ENSG00000283288.1  |    |    |    |    | NA | NA | NA | NA | NA | NA | NA | NA | NA |
| NA            | NA                 | NA | NA | NA | -2 | NA |    |    |    |    |    |    |    |    |
| LRRC70        | ENSG00000186105.7  |    |    |    |    | NA | NA | NA | NA | NA | NA | NA | NA | NA |
| NA            | NA                 | NA | NA | NA | -2 | NA |    |    |    |    |    |    |    |    |
| NPR3          | ENSG00000113389.15 |    |    |    |    | NA | NA | NA | NA | NA | NA | NA | NA | NA |
| NA            | NA                 | NA | NA | -2 | NA |    |    |    |    |    |    |    |    |    |
| LINC02162     | ENSG00000249830.1  |    |    |    |    | NA | NA | NA | NA | NA | NA | NA | NA | NA |
| NA            | NA                 | NA | NA | NA | -2 | NA |    |    |    |    |    |    |    |    |
| TAS2R1        | ENSG00000169777.6  |    |    |    |    | NA | NA | NA | NA | NA | NA | NA | NA | NA |
| NA            | NA                 | NA | NA | NA | -2 | NA |    |    |    |    |    |    |    |    |
| RNF145        | ENSG00000145860.11 |    |    |    |    | NA | NA | NA | NA | NA | NA | NA | NA | NA |
| NA            | NA                 | NA | NA | NA | -2 | NA |    |    |    |    |    |    |    |    |
| LINC02064     | ENSG00000248391.5  |    |    |    |    | NA | NA | NA | NA | NA | NA | NA | NA | NA |
| NA            | NA                 | NA | NA | NA | -2 | NA |    |    |    |    |    |    |    |    |
| LINC02142     | ENSG00000223597.2  |    |    |    |    | NA | NA | NA | NA | NA | NA | NA | NA | NA |
| NA            | NA                 | NA | NA | NA | -2 | NA |    |    |    |    |    |    |    |    |
| 3-Mar         | ENSG00000173926.5  |    |    |    |    | NA | NA | NA | NA | NA | NA | NA | NA | NA |
| NA            | NA                 | NA | NA | -2 | NA |    |    |    |    |    |    |    |    |    |
| RP11-254I22.3 | ENSG00000249746.1  |    |    |    |    | NA | NA | NA | NA | NA | NA | NA | NA | NA |
| NA            | NA                 | NA | NA | NA | -2 | NA |    |    |    |    |    |    |    |    |
| LINC00992     | ENSG00000248663.6  |    |    |    |    | NA | NA | NA | NA | NA | NA | NA | NA | NA |
| NA            | NA                 | NA | NA | NA | -2 | NA |    |    |    |    |    |    |    |    |
| CTB-32H22.1   | ENSG00000253968.1  |    |    |    |    | NA | NA | NA | NA | NA | NA | NA | NA | NA |
| NA            | NA                 | NA | NA | NA | -2 | NA |    |    |    |    |    |    |    |    |
| ZNF354C       | ENSG00000177932.6  |    |    |    |    | NA | NA | NA | NA | NA | NA | NA | NA | NA |
| NA            | NA                 | NA | NA | NA | -2 | NA |    |    |    |    |    |    |    |    |
| CTD-2247C11.1 | ENSG00000250481.1  |    |    |    |    | NA | NA | NA | NA | NA | NA | NA | NA | NA |
| NA            | NA                 | NA | NA | NA | -2 | NA |    |    |    |    |    |    |    |    |
| CARMN         | ENSG00000249669.9  |    |    |    |    | NA | NA | NA | NA | NA | NA | NA | NA | NA |
| NA            | NA                 | NA | NA | -2 | NA |    |    |    |    |    |    |    |    |    |
| ADRB2         | ENSG00000169252.5  |    |    |    |    | NA | NA | NA | NA | NA | NA | NA | NA | NA |
| NA            | NA                 | NA | NA | -2 | NA |    |    |    |    |    |    |    |    |    |
| KIF20A        | ENSG00000112984.11 |    |    |    |    | NA | NA | NA | NA | NA | NA | NA | NA | NA |
| NA            | NA                 | NA | NA | NA | -2 | NA |    |    |    |    |    |    |    |    |
| PCBD2         | ENSG00000132570.14 |    |    |    |    | NA | NA | NA | NA | NA | NA | NA | NA | NA |
| NA            | NA                 | NA | NA | -2 | NA |    |    |    |    |    |    |    |    |    |
| PCDHB4        | ENSG00000081818.3  |    |    |    |    | NA | NA | NA | NA | NA | NA | NA | NA | NA |
| NA            | NA                 | NA | NA | NA | -2 | NA |    |    |    |    |    |    |    |    |
| CARTPT        | ENSG00000164326.4  |    |    |    |    | NA | NA | NA | NA | NA | NA | NA | NA | NA |
| NA            | NA                 | NA | NA | NA | -2 | NA |    |    |    |    |    |    |    |    |
| RP11-774D14.1 | ENSG00000251629.6  |    |    |    |    | NA | NA | NA | NA | NA | NA | NA | NA | NA |
| NA            | NA                 | NA | NA | NA | -2 | NA |    |    |    |    |    |    |    |    |
| AP3B1         | ENSG00000132842.13 |    |    |    |    | NA | NA | NA | NA | NA | NA | NA | NA | NA |

|               |                    |    |    |    |    |    |    |    |    |    |    |    |    |    |
|---------------|--------------------|----|----|----|----|----|----|----|----|----|----|----|----|----|
|               | NA                 | NA | NA | NA | -2 | NA |    |    |    |    |    |    |    |    |
| GLRX          | ENSG00000173221.13 | NA | NA | NA | NA | NA | NA | NA | NA | NA | NA | NA | NA | NA |
|               | NA                 | NA | NA | NA | -2 | NA |    |    |    |    |    |    |    |    |
| FABP6         | ENSG00000170231.15 | NA | NA | NA | NA | NA | NA | NA | NA | NA | NA | NA | NA | NA |
|               | NA                 | NA | NA | NA | -2 | NA |    |    |    |    |    |    |    |    |
| LHFPL2        | ENSG00000145685.13 | NA | NA | NA | NA | NA | NA | NA | NA | NA | NA | NA | NA | NA |
|               | NA                 | NA | NA | NA | NA | -2 | NA |    |    |    |    |    |    |    |
| BASP1         | ENSG00000176788.8  | NA | NA | NA | NA | NA | NA | NA | NA | NA | NA | NA | NA | NA |
|               | NA                 | NA | NA | NA | -2 | NA |    |    |    |    |    |    |    |    |
| ADAMTS6       | ENSG00000049192.14 | NA | NA | NA | NA | NA | NA | NA | NA | NA | NA | NA | NA | NA |
|               | NA                 | NA | NA | NA | NA | -2 | NA |    |    |    |    |    |    |    |
| CTD-2091N23.1 | ENSG00000251361.1  | NA | NA | NA | NA | NA | NA | NA | NA | NA | NA | NA | NA | NA |
|               | NA                 | NA | NA | NA | NA | NA | -2 | NA |    |    |    |    |    |    |
| RP11-348J24.1 | ENSG00000248864.1  | NA | NA | NA | NA | NA | NA | NA | NA | NA | NA | NA | NA | NA |
|               | NA                 | NA | NA | NA | NA | NA | -2 | NA |    |    |    |    |    |    |
| LVRN          | ENSG00000172901.19 | NA | NA | NA | NA | NA | NA | NA | NA | NA | NA | NA | NA | NA |
|               | NA                 | NA | NA | NA | -2 | NA |    |    |    |    |    |    |    |    |
| PTCD2         | ENSG00000049883.14 | NA | NA | NA | NA | NA | NA | NA | NA | NA | NA | NA | NA | NA |
|               | NA                 | NA | NA | NA | -2 | NA |    |    |    |    |    |    |    |    |
| SPINK13       | ENSG00000214510.9  | NA | NA | NA | NA | NA | NA | NA | NA | NA | NA | NA | NA | NA |
|               | NA                 | NA | NA | NA | NA | -2 | NA |    |    |    |    |    |    |    |
| FYB           | ENSG00000082074.15 | NA | NA | NA | NA | NA | NA | NA | NA | NA | NA | NA | NA | NA |
|               | NA                 | NA | NA | NA | -2 | NA |    |    |    |    |    |    |    |    |
| LIX1-AS1      | ENSG00000251513.2  | NA | NA | NA | NA | NA | NA | NA | NA | NA | NA | NA | NA | NA |
|               | NA                 | NA | NA | NA | NA | -2 | NA |    |    |    |    |    |    |    |
| DUSP1         | ENSG00000120129.5  | NA | NA | NA | NA | NA | NA | NA | NA | NA | NA | NA | NA | NA |
|               | NA                 | NA | NA | NA | -2 | NA |    |    |    |    |    |    |    |    |
| RP11-549K20.1 | ENSG00000251273.1  | NA | NA | NA | NA | NA | NA | NA | NA | NA | NA | NA | NA | NA |
|               | NA                 | NA | NA | NA | NA | NA | -2 | NA |    |    |    |    |    |    |
| LINC01333     | ENSG00000249343.1  | NA | NA | NA | NA | NA | NA | NA | NA | NA | NA | NA | NA | NA |
|               | NA                 | NA | NA | NA | NA | -2 | NA |    |    |    |    |    |    |    |
| TARS          | ENSG00000113407.13 | NA | NA | NA | NA | NA | NA | NA | NA | NA | NA | NA | NA | NA |
|               | NA                 | NA | NA | NA | -2 | NA |    |    |    |    |    |    |    |    |
| LINC02198     | ENSG00000249352.4  | NA | NA | NA | NA | NA | NA | NA | NA | NA | NA | NA | NA | NA |
|               | NA                 | NA | NA | NA | NA | -2 | NA |    |    |    |    |    |    |    |
| SLC36A2       | ENSG00000186335.8  | NA | NA | NA | NA | NA | NA | NA | NA | NA | NA | NA | NA | NA |
|               | NA                 | NA | NA | NA | NA | -2 | NA |    |    |    |    |    |    |    |
| PANK3         | ENSG00000120137.6  | NA | NA | NA | NA | NA | NA | NA | NA | NA | NA | NA | NA | NA |
|               | NA                 | NA | NA | NA | -2 | NA |    |    |    |    |    |    |    |    |
| BTF3          | ENSG00000145741.15 | NA | NA | NA | NA | NA | NA | NA | NA | NA | NA | NA | NA | NA |
|               | NA                 | NA | NA | NA | -2 | NA |    |    |    |    |    |    |    |    |
| FAM173B       | ENSG00000150756.13 | NA | NA | NA | NA | NA | NA | NA | NA | NA | NA | NA | NA | NA |
|               | NA                 | NA | NA | NA | NA | -2 | NA |    |    |    |    |    |    |    |
| CDH6          | ENSG00000113361.12 | NA | NA | NA | NA | NA | NA | NA | NA | NA | NA | NA | NA | NA |
|               | NA                 | NA | NA | NA | -2 | NA |    |    |    |    |    |    |    |    |
| LINC01959     | ENSG00000251045.1  | NA | NA | NA | NA | NA | NA | NA | NA | NA | NA | NA | NA | NA |
|               | NA                 | NA | NA | NA | NA | -2 | NA |    |    |    |    |    |    |    |
| AC008592.4    | ENSG00000251409.1  | NA | NA | NA | NA | NA | NA | NA | NA | NA | NA | NA | NA | NA |
|               | NA                 | NA | NA | NA | NA | -2 | NA |    |    |    |    |    |    |    |
| SEC24A        | ENSG00000113615.12 | NA | NA | NA | NA | NA | NA | NA | NA | NA | NA | NA | NA | NA |
|               | NA                 | NA | NA | NA | NA | -2 | NA |    |    |    |    |    |    |    |
| RPL26L1       | ENSG00000037241.7  | NA | NA | NA | NA | NA | NA | NA | NA | NA | NA | NA | NA | NA |
|               | NA                 | NA | NA | NA | NA | -2 | NA |    |    |    |    |    |    |    |
| CTD-2072I24.1 | ENSG00000251168.1  | NA | NA | NA | NA | NA | NA | NA | NA | NA | NA | NA | NA | NA |
|               | NA                 | NA | NA | NA | NA | NA | -2 | NA |    |    |    |    |    |    |
| PCDHGA11      | ENSG00000253873.5  | NA | NA | NA | NA | NA | NA | NA | NA | NA | NA | NA | NA | NA |
|               | NA                 | NA | NA | NA | NA | -2 | NA |    |    |    |    |    |    |    |
| PCDHAC1       | ENSG00000248383.4  | NA | NA | NA | NA | NA | NA | NA | NA | NA | NA | NA | NA | NA |
|               | NA                 | NA | NA | NA | NA | -2 | NA |    |    |    |    |    |    |    |
| TEX43         | ENSG00000196900.4  | NA | NA | NA | NA | NA | NA | NA | NA | NA | NA | NA | NA | NA |
|               | NA                 | NA | NA | NA | -2 | NA |    |    |    |    |    |    |    |    |
| CAPSL         | ENSG00000152611.11 | NA | NA | NA | NA | NA | NA | NA | NA | NA | NA | NA | NA | NA |

|               |                    |    |    |    |    |    |    |    |    |    |    |    |    |    |
|---------------|--------------------|----|----|----|----|----|----|----|----|----|----|----|----|----|
| NA            | NA                 | NA | NA | -2 | NA |    |    |    |    |    |    |    |    |    |
| FAM71B        | ENSG00000170613.4  |    |    |    | NA | NA | NA | NA | NA | NA | NA | NA | NA | NA |
| NA            | NA                 | NA | NA | NA | -2 | NA |    |    |    |    |    |    |    |    |
| RP11-524N5.1  | ENSG00000276778.1  |    |    |    | NA | NA | NA | NA | NA | NA | NA | NA | NA | NA |
| NA            | NA                 | NA | NA | NA | -2 | NA |    |    |    |    |    |    |    |    |
| LINC01366     | ENSG00000235172.7  |    |    |    | NA | NA | NA | NA | NA | NA | NA | NA | NA | NA |
| NA            | NA                 | NA | NA | NA | -2 | NA |    |    |    |    |    |    |    |    |
| BTNL9         | ENSG00000165810.16 |    |    |    | NA | NA | NA | NA | NA | NA | NA | NA | NA | NA |
| NA            | NA                 | NA | NA | -2 | NA |    |    |    |    |    |    |    |    |    |
| CTB-76P12.1   | ENSG00000283413.1  |    |    |    | NA | NA | NA | NA | NA | NA | NA | NA | NA | NA |
| NA            | NA                 | NA | NA | NA | -2 | NA |    |    |    |    |    |    |    |    |
| RP11-315A16.1 | ENSG00000260981.1  |    |    |    | NA | NA | NA | NA | NA | NA | NA | NA | NA | NA |
| NA            | NA                 | NA | NA | NA | -2 | NA |    |    |    |    |    |    |    |    |
| VDAC1         | ENSG00000213585.10 |    |    |    | NA | NA | NA | NA | NA | NA | NA | NA | NA | NA |
| NA            | NA                 | NA | NA | -2 | NA |    |    |    |    |    |    |    |    |    |
| CTD-2194L12.3 | ENSG00000250032.1  |    |    |    | NA | NA | NA | NA | NA | NA | NA | NA | NA | NA |
| NA            | NA                 | NA | NA | NA | -2 | NA |    |    |    |    |    |    |    |    |
| GEMIN5        | ENSG00000082516.8  |    |    |    | NA | NA | NA | NA | NA | NA | NA | NA | NA | NA |
| NA            | NA                 | NA | NA | NA | -2 | NA |    |    |    |    |    |    |    |    |
| TRIM23        | ENSG00000113595.14 |    |    |    | NA | NA | NA | NA | NA | NA | NA | NA | NA | NA |
| NA            | NA                 | NA | NA | NA | -2 | NA |    |    |    |    |    |    |    |    |
| LINC02106     | ENSG00000251573.2  |    |    |    | NA | NA | NA | NA | NA | NA | NA | NA | NA | NA |
| NA            | NA                 | NA | NA | NA | -2 | NA |    |    |    |    |    |    |    |    |
| NLN           | ENSG00000123213.22 |    |    |    | NA | NA | NA | NA | NA | NA | NA | NA | NA | NA |
| NA            | NA                 | NA | NA | -2 | NA |    |    |    |    |    |    |    |    |    |
| ELL2          | ENSG00000118985.15 |    |    |    | NA | NA | NA | NA | NA | NA | NA | NA | NA | NA |
| NA            | NA                 | NA | NA | -2 | NA |    |    |    |    |    |    |    |    |    |
| UQCRQ         | ENSG00000164405.10 |    |    |    | NA | NA | NA | NA | NA | NA | NA | NA | NA | NA |
| NA            | NA                 | NA | NA | -2 | NA |    |    |    |    |    |    |    |    |    |
| SLC35A4       | ENSG00000176087.14 |    |    |    | NA | NA | NA | NA | NA | NA | NA | NA | NA | NA |
| NA            | NA                 | NA | NA | NA | -2 | NA |    |    |    |    |    |    |    |    |
| CTD-2383I20.1 | ENSG00000249994.1  |    |    |    | NA | NA | NA | NA | NA | NA | NA | NA | NA | NA |
| NA            | NA                 | NA | NA | NA | -2 | NA |    |    |    |    |    |    |    |    |
| RP11-1252I4.2 | ENSG00000250101.1  |    |    |    | NA | NA | NA | NA | NA | NA | NA | NA | NA | NA |
| NA            | NA                 | NA | NA | NA | -2 | NA |    |    |    |    |    |    |    |    |
| GABRG2        | ENSG00000113327.15 |    |    |    | NA | NA | NA | NA | NA | NA | NA | NA | NA | NA |
| NA            | NA                 | NA | NA | NA | -2 | NA |    |    |    |    |    |    |    |    |
| MCC           | ENSG00000171444.17 |    |    |    | NA | NA | NA | NA | NA | NA | NA | NA | NA | NA |
| NA            | NA                 | NA | NA | -2 | NA |    |    |    |    |    |    |    |    |    |
| FBXW11        | ENSG00000072803.17 |    |    |    | NA | NA | NA | NA | NA | NA | NA | NA | NA | NA |
| NA            | NA                 | NA | NA | NA | -2 | NA |    |    |    |    |    |    |    |    |
| GZMA          | ENSG00000145649.7  |    |    |    | NA | NA | NA | NA | NA | NA | NA | NA | NA | NA |
| NA            | NA                 | NA | NA | -2 | NA |    |    |    |    |    |    |    |    |    |
| BRIX1         | ENSG00000113460.12 |    |    |    | NA | NA | NA | NA | NA | NA | NA | NA | NA | NA |
| NA            | NA                 | NA | NA | -2 | NA |    |    |    |    |    |    |    |    |    |
| PITX1         | ENSG00000069011.15 |    |    |    | NA | NA | NA | NA | NA | NA | NA | NA | NA | NA |
| NA            | NA                 | NA | NA | -2 | NA |    |    |    |    |    |    |    |    |    |
| LEAP2         | ENSG00000164406.7  |    |    |    | NA | NA | NA | NA | NA | NA | NA | NA | NA | NA |
| NA            | NA                 | NA | NA | -2 | NA |    |    |    |    |    |    |    |    |    |
| LINC01947     | ENSG00000254130.1  |    |    |    | NA | NA | NA | NA | NA | NA | NA | NA | NA | NA |
| NA            | NA                 | NA | NA | NA | -2 | NA |    |    |    |    |    |    |    |    |
| CDH18         | ENSG00000145526.11 |    |    |    | NA | NA | NA | NA | NA | NA | NA | NA | NA | NA |
| NA            | NA                 | NA | NA | -2 | NA |    |    |    |    |    |    |    |    |    |
| LINC02220     | ENSG00000248457.1  |    |    |    | NA | NA | NA | NA | NA | NA | NA | NA | NA | NA |
| NA            | NA                 | NA | NA | NA | -2 | NA |    |    |    |    |    |    |    |    |
| HCN1          | ENSG00000164588.6  |    |    |    | NA | NA | NA | NA | NA | NA | NA | NA | NA | NA |
| NA            | NA                 | NA | NA | -2 | NA |    |    |    |    |    |    |    |    |    |
| DBN1          | ENSG00000113758.13 |    |    |    | NA | NA | NA | NA | NA | NA | NA | NA | NA | NA |
| NA            | NA                 | NA | NA | -2 | NA |    |    |    |    |    |    |    |    |    |
| TIFAB         | ENSG00000255833.1  |    |    |    | NA | NA | NA | NA | NA | NA | NA | NA | NA | NA |
| NA            | NA                 | NA | NA | -2 | NA |    |    |    |    |    |    |    |    |    |
| LINC02143     | ENSG00000253236.1  |    |    |    | NA | NA | NA | NA | NA | NA | NA | NA | NA | NA |



|               |                    |    |    |    |    |    |    |    |    |    |    |    |    |    |
|---------------|--------------------|----|----|----|----|----|----|----|----|----|----|----|----|----|
| NA            | NA                 | NA | NA | NA | -2 | NA |    |    |    |    |    |    |    |    |
| FBXO4         | ENSG00000151876.12 | NA | NA | NA | NA | NA | NA | NA | NA | NA | NA | NA | NA | NA |
| NA            | NA                 | NA | NA | NA | -2 | NA |    |    |    |    |    |    |    |    |
| ARL10         | ENSG00000175414.6  | NA | NA | NA | NA | NA | NA | NA | NA | NA | NA | NA | NA | NA |
| NA            | NA                 | NA | NA | NA | -2 | NA |    |    |    |    |    |    |    |    |
| LINC02159     | ENSG00000253417.5  | NA | NA | NA | NA | NA | NA | NA | NA | NA | NA | NA | NA | NA |
| NA            | NA                 | NA | NA | NA | -2 | NA |    |    |    |    |    |    |    |    |
| BDP1          | ENSG00000145734.18 | NA | NA | NA | NA | NA | NA | NA | NA | NA | NA | NA | NA | NA |
| NA            | NA                 | NA | NA | NA | -2 | NA |    |    |    |    |    |    |    |    |
| LINC01950     | ENSG00000251027.1  | NA | NA | NA | NA | NA | NA | NA | NA | NA | NA | NA | NA | NA |
| NA            | NA                 | NA | NA | NA | -2 | NA |    |    |    |    |    |    |    |    |
| WDR70         | ENSG00000082068.8  | NA | NA | NA | NA | NA | NA | NA | NA | NA | NA | NA | NA | NA |
| NA            | NA                 | NA | NA | NA | -2 | NA |    |    |    |    |    |    |    |    |
| LMAN2         | ENSG00000169223.14 | NA | NA | NA | NA | NA | NA | NA | NA | NA | NA | NA | NA | NA |
| NA            | NA                 | NA | NA | NA | -2 | NA |    |    |    |    |    |    |    |    |
| MIR583HG      | ENSG00000250551.1  | NA | NA | NA | NA | NA | NA | NA | NA | NA | NA | NA | NA | NA |
| NA            | NA                 | NA | NA | NA | -2 | NA |    |    |    |    |    |    |    |    |
| CTD-2374C24.1 | ENSG00000253584.1  | NA | NA | NA | NA | NA | NA | NA | NA | NA | NA | NA | NA | NA |
| NA            | NA                 | NA | NA | NA | NA | -2 | NA |    |    |    |    |    |    |    |
| CHD1          | ENSG00000153922.10 | NA | NA | NA | NA | NA | NA | NA | NA | NA | NA | NA | NA | NA |
| NA            | NA                 | NA | NA | NA | -2 | NA |    |    |    |    |    |    |    |    |
| RP11-374A4.1  | ENSG00000249359.2  | NA | NA | NA | NA | NA | NA | NA | NA | NA | NA | NA | NA | NA |
| NA            | NA                 | NA | NA | NA | NA | -2 | NA |    |    |    |    |    |    |    |
| DHX29         | ENSG00000067248.9  | NA | NA | NA | NA | NA | NA | NA | NA | NA | NA | NA | NA | NA |
| NA            | NA                 | NA | NA | NA | -2 | NA |    |    |    |    |    |    |    |    |
| IL9           | ENSG00000145839.1  | NA | NA | NA | NA | NA | NA | NA | NA | NA | NA | NA | NA | NA |
| NA            | NA                 | NA | NA | NA | -2 | NA |    |    |    |    |    |    |    |    |
| C1QTNF2       | ENSG00000145861.7  | NA | NA | NA | NA | NA | NA | NA | NA | NA | NA | NA | NA | NA |
| NA            | NA                 | NA | NA | NA | NA | -2 | NA |    |    |    |    |    |    |    |
| LCP2          | ENSG00000043462.11 | NA | NA | NA | NA | NA | NA | NA | NA | NA | NA | NA | NA | NA |
| NA            | NA                 | NA | NA | NA | -2 | NA |    |    |    |    |    |    |    |    |
| NDUFS6        | ENSG00000145494.11 | NA | NA | NA | NA | NA | NA | NA | NA | NA | NA | NA | NA | NA |
| NA            | NA                 | NA | NA | NA | NA | -2 | NA |    |    |    |    |    |    |    |
| OR2V1         | ENSG00000185372.2  | NA | NA | NA | NA | NA | NA | NA | NA | NA | NA | NA | NA | NA |
| NA            | NA                 | NA | NA | NA | -2 | NA |    |    |    |    |    |    |    |    |
| RP11-35O7.1   | ENSG00000248736.1  | NA | NA | NA | NA | NA | NA | NA | NA | NA | NA | NA | NA | NA |
| NA            | NA                 | NA | NA | NA | NA | -2 | NA |    |    |    |    |    |    |    |
| RP11-661C8.2  | ENSG00000248949.1  | NA | NA | NA | NA | NA | NA | NA | NA | NA | NA | NA | NA | NA |
| NA            | NA                 | NA | NA | NA | NA | -2 | NA |    |    |    |    |    |    |    |
| RP11-307L14.1 | ENSG00000272370.1  | NA | NA | NA | NA | NA | NA | NA | NA | NA | NA | NA | NA | NA |
| NA            | NA                 | NA | NA | NA | NA | -2 | NA |    |    |    |    |    |    |    |
| PKD2L2        | ENSG00000078795.16 | NA | NA | NA | NA | NA | NA | NA | NA | NA | NA | NA | NA | NA |
| NA            | NA                 | NA | NA | NA | NA | -2 | NA |    |    |    |    |    |    |    |
| SREK1IP1      | ENSG00000153006.15 | NA | NA | NA | NA | NA | NA | NA | NA | NA | NA | NA | NA | NA |
| NA            | NA                 | NA | NA | NA | NA | -2 | NA |    |    |    |    |    |    |    |
| CTD-2035E11.4 | ENSG00000272382.1  | NA | NA | NA | NA | NA | NA | NA | NA | NA | NA | NA | NA | NA |
| NA            | NA                 | NA | NA | NA | NA | -2 | NA |    |    |    |    |    |    |    |
| CTD-2410N18.3 | ENSG00000270177.1  | NA | NA | NA | NA | NA | NA | NA | NA | NA | NA | NA | NA | NA |
| NA            | NA                 | NA | NA | NA | NA | -2 | NA |    |    |    |    |    |    |    |
| TMEM267       | ENSG00000151881.14 | NA | NA | NA | NA | NA | NA | NA | NA | NA | NA | NA | NA | NA |
| NA            | NA                 | NA | NA | NA | NA | -2 | NA |    |    |    |    |    |    |    |
| GOLPH3        | ENSG00000113384.13 | NA | NA | NA | NA | NA | NA | NA | NA | NA | NA | NA | NA | NA |
| NA            | NA                 | NA | NA | NA | NA | -2 | NA |    |    |    |    |    |    |    |
| HDAC3         | ENSG00000171720.9  | NA | NA | NA | NA | NA | NA | NA | NA | NA | NA | NA | NA | NA |
| NA            | NA                 | NA | NA | NA | NA | -2 | NA |    |    |    |    |    |    |    |
| NIPBL         | ENSG00000164190.17 | NA | NA | NA | NA | NA | NA | NA | NA | NA | NA | NA | NA | NA |
| NA            | NA                 | NA | NA | NA | NA | -2 | NA |    |    |    |    |    |    |    |
| CTC-338M12.9  | ENSG00000248103.1  | NA | NA | NA | NA | NA | NA | NA | NA | NA | NA | NA | NA | NA |
| NA            | NA                 | NA | NA | NA | NA | -2 | NA |    |    |    |    |    |    |    |
| LINC01336     | ENSG00000250889.2  | NA | NA | NA | NA | NA | NA | NA | NA | NA | NA | NA | NA | NA |
| NA            | NA                 | NA | NA | NA | NA | -2 | NA |    |    |    |    |    |    |    |
| PCSK1         | ENSG00000175426.10 | NA | NA | NA | NA | NA | NA | NA | NA | NA | NA | NA | NA | NA |

|               |                    |    |    |    |    |    |    |    |    |    |    |    |    |    |
|---------------|--------------------|----|----|----|----|----|----|----|----|----|----|----|----|----|
| NA            | NA                 | NA | NA | -2 | NA |    |    |    |    |    |    |    |    |    |
| CTD-2532K18.2 | ENSG00000251144.1  | NA | NA | NA | NA | NA | NA | NA | NA | NA | NA | NA | NA | NA |
| NA            | NA                 | NA | NA | NA | NA | -2 | NA |    |    |    |    |    |    |    |
| LINC02039     | ENSG00000248107.1  | NA | NA | NA | NA | NA | NA | NA | NA | NA | NA | NA | NA | NA |
| NA            | NA                 | NA | NA | NA | NA | -2 | NA |    |    |    |    |    |    |    |
| SLC30A5       | ENSG00000145740.18 | NA | NA | NA | NA | NA | NA | NA | NA | NA | NA | NA | NA | NA |
| NA            | NA                 | NA | NA | NA | NA | -2 | NA |    |    |    |    |    |    |    |
| COL4A3BP      | ENSG00000113163.15 | NA | NA | NA | NA | NA | NA | NA | NA | NA | NA | NA | NA | NA |
| NA            | NA                 | NA | NA | NA | NA | -2 | NA |    |    |    |    |    |    |    |
| FAM151B       | ENSG00000152380.9  | NA | NA | NA | NA | NA | NA | NA | NA | NA | NA | NA | NA | NA |
| NA            | NA                 | NA | NA | NA | NA | -2 | NA |    |    |    |    |    |    |    |
| UGT3A1        | ENSG00000145626.11 | NA | NA | NA | NA | NA | NA | NA | NA | NA | NA | NA | NA | NA |
| NA            | NA                 | NA | NA | NA | NA | -2 | NA |    |    |    |    |    |    |    |
| ACOT12        | ENSG00000172497.8  | NA | NA | NA | NA | NA | NA | NA | NA | NA | NA | NA | NA | NA |
| NA            | NA                 | NA | NA | NA | NA | -2 | NA |    |    |    |    |    |    |    |
| RP11-443C10.1 | ENSG00000253163.1  | NA | NA | NA | NA | NA | NA | NA | NA | NA | NA | NA | NA | NA |
| NA            | NA                 | NA | NA | NA | NA | -2 | NA |    |    |    |    |    |    |    |
| PWWP2A        | ENSG00000170234.12 | NA | NA | NA | NA | NA | NA | NA | NA | NA | NA | NA | NA | NA |
| NA            | NA                 | NA | NA | NA | NA | -2 | NA |    |    |    |    |    |    |    |
| FAM105A       | ENSG00000145569.5  | NA | NA | NA | NA | NA | NA | NA | NA | NA | NA | NA | NA | NA |
| NA            | NA                 | NA | NA | NA | NA | -2 | NA |    |    |    |    |    |    |    |
| RP11-508M8.1  | ENSG00000249365.1  | NA | NA | NA | NA | NA | NA | NA | NA | NA | NA | NA | NA | NA |
| NA            | NA                 | NA | NA | NA | NA | -2 | NA |    |    |    |    |    |    |    |
| CTB-33018.1   | ENSG00000253768.1  | NA | NA | NA | NA | NA | NA | NA | NA | NA | NA | NA | NA | NA |
| NA            | NA                 | NA | NA | NA | NA | -2 | NA |    |    |    |    |    |    |    |
| CCT5          | ENSG00000150753.11 | NA | NA | NA | NA | NA | NA | NA | NA | NA | NA | NA | NA | NA |
| NA            | NA                 | NA | NA | NA | NA | -2 | NA |    |    |    |    |    |    |    |
| TRIM52        | ENSG00000183718.5  | NA | NA | NA | NA | NA | NA | NA | NA | NA | NA | NA | NA | NA |
| NA            | NA                 | NA | NA | NA | NA | -2 | NA |    |    |    |    |    |    |    |
| PCDHGB7       | ENSG00000254122.2  | NA | NA | NA | NA | NA | NA | NA | NA | NA | NA | NA | NA | NA |
| NA            | NA                 | NA | NA | NA | NA | -2 | NA |    |    |    |    |    |    |    |
| CTC-535M15.2  | ENSG00000253693.1  | NA | NA | NA | NA | NA | NA | NA | NA | NA | NA | NA | NA | NA |
| NA            | NA                 | NA | NA | NA | NA | -2 | NA |    |    |    |    |    |    |    |
| CDH10         | ENSG00000040731.10 | NA | NA | NA | NA | NA | NA | NA | NA | NA | NA | NA | NA | NA |
| NA            | NA                 | NA | NA | NA | NA | -2 | NA |    |    |    |    |    |    |    |
| C5orf30       | ENSG00000181751.9  | NA | NA | NA | NA | NA | NA | NA | NA | NA | NA | NA | NA | NA |
| NA            | NA                 | NA | NA | NA | NA | -2 | NA |    |    |    |    |    |    |    |
| BRD8          | ENSG00000112983.17 | NA | NA | NA | NA | NA | NA | NA | NA | NA | NA | NA | NA | NA |
| NA            | NA                 | NA | NA | NA | NA | -2 | NA |    |    |    |    |    |    |    |
| FCHSD1        | ENSG00000197948.10 | NA | NA | NA | NA | NA | NA | NA | NA | NA | NA | NA | NA | NA |
| NA            | NA                 | NA | NA | NA | NA | -2 | NA |    |    |    |    |    |    |    |
| CTD-2066L21.2 | ENSG00000251281.1  | NA | NA | NA | NA | NA | NA | NA | NA | NA | NA | NA | NA | NA |
| NA            | NA                 | NA | NA | NA | NA | -2 | NA |    |    |    |    |    |    |    |
| RP11-1026M7.3 | ENSG00000248943.1  | NA | NA | NA | NA | NA | NA | NA | NA | NA | NA | NA | NA | NA |
| NA            | NA                 | NA | NA | NA | NA | -2 | NA |    |    |    |    |    |    |    |
| PRDM6         | ENSG00000061455.10 | NA | NA | NA | NA | NA | NA | NA | NA | NA | NA | NA | NA | NA |
| NA            | NA                 | NA | NA | NA | NA | -2 | NA |    |    |    |    |    |    |    |
| TAF7          | ENSG00000178913.7  | NA | NA | NA | NA | NA | NA | NA | NA | NA | NA | NA | NA | NA |
| NA            | NA                 | NA | NA | NA | NA | -2 | NA |    |    |    |    |    |    |    |
| SFXN1         | ENSG00000164466.12 | NA | NA | NA | NA | NA | NA | NA | NA | NA | NA | NA | NA | NA |
| NA            | NA                 | NA | NA | NA | NA | -2 | NA |    |    |    |    |    |    |    |
| SLC36A3       | ENSG00000186334.9  | NA | NA | NA | NA | NA | NA | NA | NA | NA | NA | NA | NA | NA |
| NA            | NA                 | NA | NA | NA | NA | -2 | NA |    |    |    |    |    |    |    |
| CTC-806A22.1  | ENSG00000250842.1  | NA | NA | NA | NA | NA | NA | NA | NA | NA | NA | NA | NA | NA |
| NA            | NA                 | NA | NA | NA | NA | -2 | NA |    |    |    |    |    |    |    |
| GFRA3         | ENSG00000146013.10 | NA | NA | NA | NA | NA | NA | NA | NA | NA | NA | NA | NA | NA |
| NA            | NA                 | NA | NA | NA | NA | -2 | NA |    |    |    |    |    |    |    |
| ISL1          | ENSG00000016082.14 | NA | NA | NA | NA | NA | NA | NA | NA | NA | NA | NA | NA | NA |
| NA            | NA                 | NA | NA | NA | NA | -2 | NA |    |    |    |    |    |    |    |
| CTD-2074D8.1  | ENSG00000250694.1  | NA | NA | NA | NA | NA | NA | NA | NA | NA | NA | NA | NA | NA |
| NA            | NA                 | NA | NA | NA | NA | -2 | NA |    |    |    |    |    |    |    |
| RP11-184E9.2  | ENSG00000260761.1  | NA | NA | NA | NA | NA | NA | NA | NA | NA | NA | NA | NA | NA |

|               |                    |    |    |    |    |    |    |  |  |  |  |  |  |  |
|---------------|--------------------|----|----|----|----|----|----|--|--|--|--|--|--|--|
| NA            | NA                 | NA | NA | NA | NA | -2 | NA |  |  |  |  |  |  |  |
| KIF3A         | ENSG00000131437.15 |    |    |    |    |    |    |  |  |  |  |  |  |  |
| NA            | NA                 | NA | NA | -2 | NA |    |    |  |  |  |  |  |  |  |
| PCDHB6        | ENSG00000113211.5  |    |    |    |    |    |    |  |  |  |  |  |  |  |
| NA            | NA                 | NA | NA | -2 | NA |    |    |  |  |  |  |  |  |  |
| POU5F2        | ENSG00000248483.6  |    |    |    |    |    |    |  |  |  |  |  |  |  |
| NA            | NA                 | NA | NA | -2 | NA |    |    |  |  |  |  |  |  |  |
| LINC01020     | ENSG00000215231.7  |    |    |    |    |    |    |  |  |  |  |  |  |  |
| NA            | NA                 | NA | NA | -2 | NA |    |    |  |  |  |  |  |  |  |
| FAM13B        | ENSG00000031003.10 |    |    |    |    |    |    |  |  |  |  |  |  |  |
| NA            | NA                 | NA | NA | -2 | NA |    |    |  |  |  |  |  |  |  |
| IRGM          | ENSG00000237693.4  |    |    |    |    |    |    |  |  |  |  |  |  |  |
| NA            | NA                 | NA | NA | -2 | NA |    |    |  |  |  |  |  |  |  |
| PRR7          | ENSG00000131188.11 |    |    |    |    |    |    |  |  |  |  |  |  |  |
| NA            | NA                 | NA | NA | -2 | NA |    |    |  |  |  |  |  |  |  |
| CCNH          | ENSG00000134480.13 |    |    |    |    |    |    |  |  |  |  |  |  |  |
| NA            | NA                 | NA | NA | -2 | NA |    |    |  |  |  |  |  |  |  |
| AC138035.2    | ENSG00000238035.8  |    |    |    |    |    |    |  |  |  |  |  |  |  |
| NA            | NA                 | NA | NA | -2 | NA |    |    |  |  |  |  |  |  |  |
| CTC-573N18.1  | ENSG00000250509.1  |    |    |    |    |    |    |  |  |  |  |  |  |  |
| NA            | NA                 | NA | NA | -2 | NA |    |    |  |  |  |  |  |  |  |
| NSD1          | ENSG00000165671.19 |    |    |    |    |    |    |  |  |  |  |  |  |  |
| NA            | NA                 | NA | NA | -2 | NA |    |    |  |  |  |  |  |  |  |
| ARRDC3-AS1    | ENSG00000281357.2  |    |    |    |    |    |    |  |  |  |  |  |  |  |
| NA            | NA                 | NA | NA | -2 | NA |    |    |  |  |  |  |  |  |  |
| POU4F3        | ENSG00000091010.4  |    |    |    |    |    |    |  |  |  |  |  |  |  |
| NA            | NA                 | NA | NA | -2 | NA |    |    |  |  |  |  |  |  |  |
| RP11-772C9.1  | ENSG00000249198.1  |    |    |    |    |    |    |  |  |  |  |  |  |  |
| NA            | NA                 | NA | NA | -2 | NA |    |    |  |  |  |  |  |  |  |
| STC2          | ENSG00000113739.10 |    |    |    |    |    |    |  |  |  |  |  |  |  |
| NA            | NA                 | NA | NA | -2 | NA |    |    |  |  |  |  |  |  |  |
| ZNF622        | ENSG00000173545.4  |    |    |    |    |    |    |  |  |  |  |  |  |  |
| NA            | NA                 | NA | NA | -2 | NA |    |    |  |  |  |  |  |  |  |
| MZB1          | ENSG00000170476.15 |    |    |    |    |    |    |  |  |  |  |  |  |  |
| NA            | NA                 | NA | NA | -2 | NA |    |    |  |  |  |  |  |  |  |
| PAIP2         | ENSG00000120727.12 |    |    |    |    |    |    |  |  |  |  |  |  |  |
| NA            | NA                 | NA | NA | -2 | NA |    |    |  |  |  |  |  |  |  |
| LINC02200     | ENSG00000250358.5  |    |    |    |    |    |    |  |  |  |  |  |  |  |
| NA            | NA                 | NA | NA | -2 | NA |    |    |  |  |  |  |  |  |  |
| RP11-417J1.1  | ENSG00000249782.1  |    |    |    |    |    |    |  |  |  |  |  |  |  |
| NA            | NA                 | NA | NA | -2 | NA |    |    |  |  |  |  |  |  |  |
| C5orf51       | ENSG00000205765.8  |    |    |    |    |    |    |  |  |  |  |  |  |  |
| NA            | NA                 | NA | NA | -2 | NA |    |    |  |  |  |  |  |  |  |
| RP11-114H21.2 | ENSG00000249803.5  |    |    |    |    |    |    |  |  |  |  |  |  |  |
| NA            | NA                 | NA | NA | -2 | NA |    |    |  |  |  |  |  |  |  |
| LINC01846     | ENSG00000248901.1  |    |    |    |    |    |    |  |  |  |  |  |  |  |
| NA            | NA                 | NA | NA | -2 | NA |    |    |  |  |  |  |  |  |  |
| PTTG1         | ENSG00000164611.12 |    |    |    |    |    |    |  |  |  |  |  |  |  |
| NA            | NA                 | NA | NA | -2 | NA |    |    |  |  |  |  |  |  |  |
| LINC02197     | ENSG00000250387.2  |    |    |    |    |    |    |  |  |  |  |  |  |  |
| NA            | NA                 | NA | NA | -2 | NA |    |    |  |  |  |  |  |  |  |
| MYOT          | ENSG00000120729.9  |    |    |    |    |    |    |  |  |  |  |  |  |  |
| NA            | NA                 | NA | NA | -2 | NA |    |    |  |  |  |  |  |  |  |
| OR2V2         | ENSG00000182613.1  |    |    |    |    |    |    |  |  |  |  |  |  |  |
| NA            | NA                 | NA | NA | -2 | NA |    |    |  |  |  |  |  |  |  |
| CTD-2296D1.3  | ENSG00000249638.1  |    |    |    |    |    |    |  |  |  |  |  |  |  |
| NA            | NA                 | NA | NA | -2 | NA |    |    |  |  |  |  |  |  |  |
| EIF4E1B       | ENSG00000175766.11 |    |    |    |    |    |    |  |  |  |  |  |  |  |
| NA            | NA                 | NA | NA | -2 | NA |    |    |  |  |  |  |  |  |  |
| C5orf15       | ENSG00000113583.7  |    |    |    |    |    |    |  |  |  |  |  |  |  |
| NA            | NA                 | NA | NA | -2 | NA |    |    |  |  |  |  |  |  |  |
| SPINK1        | ENSG00000164266.10 |    |    |    |    |    |    |  |  |  |  |  |  |  |

|               |                    |    |    |    |    |    |    |    |    |    |    |    |    |    |
|---------------|--------------------|----|----|----|----|----|----|----|----|----|----|----|----|----|
| NA            | NA                 | NA | NA | NA | -2 | NA |    |    |    |    |    |    |    |    |
| CTB-17P3.4    | ENSG00000254298.1  |    |    |    |    | NA | NA | NA | NA | NA | NA | NA | NA | NA |
| NA            | NA                 | NA | NA | NA | -2 | NA |    |    |    |    |    |    |    |    |
| MGAT1         | ENSG00000131446.16 |    |    |    |    | NA | NA | NA | NA | NA | NA | NA | NA | NA |
| NA            | NA                 | NA | NA | NA | -2 | NA |    |    |    |    |    |    |    |    |
| PCDHGA12      | ENSG00000253159.2  |    |    |    |    | NA | NA | NA | NA | NA | NA | NA | NA | NA |
| NA            | NA                 | NA | NA | NA | -2 | NA |    |    |    |    |    |    |    |    |
| RP11-231G3.1  | ENSG00000272308.1  |    |    |    |    | NA | NA | NA | NA | NA | NA | NA | NA | NA |
| NA            | NA                 | NA | NA | NA | -2 | NA |    |    |    |    |    |    |    |    |
| PDLIM7        | ENSG00000196923.13 |    |    |    |    | NA | NA | NA | NA | NA | NA | NA | NA | NA |
| NA            | NA                 | NA | NA | NA | -2 | NA |    |    |    |    |    |    |    |    |
| LMNB1         | ENSG00000113368.11 |    |    |    |    | NA | NA | NA | NA | NA | NA | NA | NA | NA |
| NA            | NA                 | NA | NA | NA | -2 | NA |    |    |    |    |    |    |    |    |
| RP11-404K5.4  | ENSG00000251250.1  |    |    |    |    | NA | NA | NA | NA | NA | NA | NA | NA | NA |
| NA            | NA                 | NA | NA | NA | -2 | NA |    |    |    |    |    |    |    |    |
| EFCAB9        | ENSG00000214360.4  |    |    |    |    | NA | NA | NA | NA | NA | NA | NA | NA | NA |
| NA            | NA                 | NA | NA | NA | -2 | NA |    |    |    |    |    |    |    |    |
| NR2F1         | ENSG00000175745.11 |    |    |    |    | NA | NA | NA | NA | NA | NA | NA | NA | NA |
| NA            | NA                 | NA | NA | NA | -2 | NA |    |    |    |    |    |    |    |    |
| LINC02121     | ENSG00000250529.1  |    |    |    |    | NA | NA | NA | NA | NA | NA | NA | NA | NA |
| NA            | NA                 | NA | NA | NA | -2 | NA |    |    |    |    |    |    |    |    |
| CTB-164N12.1  | ENSG00000253141.1  |    |    |    |    | NA | NA | NA | NA | NA | NA | NA | NA | NA |
| NA            | NA                 | NA | NA | NA | -2 | NA |    |    |    |    |    |    |    |    |
| IL6ST         | ENSG00000134352.19 |    |    |    |    | NA | NA | NA | NA | NA | NA | NA | NA | NA |
| NA            | NA                 | NA | NA | NA | -2 | NA |    |    |    |    |    |    |    |    |
| C9            | ENSG00000113600.10 |    |    |    |    | NA | NA | NA | NA | NA | NA | NA | NA | NA |
| NA            | NA                 | NA | NA | NA | -2 | NA |    |    |    |    |    |    |    |    |
| IL31RA        | ENSG00000164509.13 |    |    |    |    | NA | NA | NA | NA | NA | NA | NA | NA | NA |
| NA            | NA                 | NA | NA | NA | -2 | NA |    |    |    |    |    |    |    |    |
| SKP1          | ENSG00000113558.18 |    |    |    |    | NA | NA | NA | NA | NA | NA | NA | NA | NA |
| NA            | NA                 | NA | NA | NA | -2 | NA |    |    |    |    |    |    |    |    |
| CTD-2023N9.3  | ENSG00000249436.1  |    |    |    |    | NA | NA | NA | NA | NA | NA | NA | NA | NA |
| NA            | NA                 | NA | NA | NA | -2 | NA |    |    |    |    |    |    |    |    |
| LINC00461     | ENSG00000245526.10 |    |    |    |    | NA | NA | NA | NA | NA | NA | NA | NA | NA |
| NA            | NA                 | NA | NA | NA | -2 | NA |    |    |    |    |    |    |    |    |
| RP11-185E12.2 | ENSG00000272406.1  |    |    |    |    | NA | NA | NA | NA | NA | NA | NA | NA | NA |
| NA            | NA                 | NA | NA | NA | -2 | NA |    |    |    |    |    |    |    |    |
| LINC01338     | ENSG00000281327.1  |    |    |    |    | NA | NA | NA | NA | NA | NA | NA | NA | NA |
| NA            | NA                 | NA | NA | NA | -2 | NA |    |    |    |    |    |    |    |    |
| CTD-2035E11.5 | ENSG00000272144.1  |    |    |    |    | NA | NA | NA | NA | NA | NA | NA | NA | NA |
| NA            | NA                 | NA | NA | NA | -2 | NA |    |    |    |    |    |    |    |    |
| CTD-2247C11.2 | ENSG00000251506.1  |    |    |    |    | NA | NA | NA | NA | NA | NA | NA | NA | NA |
| NA            | NA                 | NA | NA | NA | -2 | NA |    |    |    |    |    |    |    |    |
| FAF2          | ENSG00000113194.12 |    |    |    |    | NA | NA | NA | NA | NA | NA | NA | NA | NA |
| NA            | NA                 | NA | NA | NA | -2 | NA |    |    |    |    |    |    |    |    |
| CDC25C        | ENSG00000158402.18 |    |    |    |    | NA | NA | NA | NA | NA | NA | NA | NA | NA |
| NA            | NA                 | NA | NA | NA | -2 | NA |    |    |    |    |    |    |    |    |
| LINC02113     | ENSG00000249515.1  |    |    |    |    | NA | NA | NA | NA | NA | NA | NA | NA | NA |
| NA            | NA                 | NA | NA | NA | -2 | NA |    |    |    |    |    |    |    |    |
| TENM2         | ENSG00000145934.16 |    |    |    |    | NA | NA | NA | NA | NA | NA | NA | NA | NA |
| NA            | NA                 | NA | NA | NA | -2 | NA |    |    |    |    |    |    |    |    |
| CTB-113I20.2  | ENSG00000271737.1  |    |    |    |    | NA | NA | NA | NA | NA | NA | NA | NA | NA |
| NA            | NA                 | NA | NA | NA | -2 | NA |    |    |    |    |    |    |    |    |
| TGFBI         | ENSG00000120708.16 |    |    |    |    | NA | NA | NA | NA | NA | NA | NA | NA | NA |
| NA            | NA                 | NA | NA | NA | -2 | NA |    |    |    |    |    |    |    |    |
| PRELID1       | ENSG00000169230.9  |    |    |    |    | NA | NA | NA | NA | NA | NA | NA | NA | NA |
| NA            | NA                 | NA | NA | NA | -2 | NA |    |    |    |    |    |    |    |    |
| GRXCR2        | ENSG00000204928.2  |    |    |    |    | NA | NA | NA | NA | NA | NA | NA | NA | NA |
| NA            | NA                 | NA | NA | NA | -2 | NA |    |    |    |    |    |    |    |    |
| PCDHGB4       | ENSG00000253953.2  |    |    |    |    | NA | NA | NA | NA | NA | NA | NA | NA | NA |
| NA            | NA                 | NA | NA | NA | -2 | NA |    |    |    |    |    |    |    |    |
| CRHBP         | ENSG00000145708.10 |    |    |    |    | NA | NA | NA | NA | NA | NA | NA | NA | NA |

|               |                    |                   |    |    |    |    |    |    |    |    |    |    |    |    |
|---------------|--------------------|-------------------|----|----|----|----|----|----|----|----|----|----|----|----|
| NA            | NA                 | NA                | NA | -2 | NA |    |    |    |    |    |    |    |    |    |
| CTC-537E7.2   |                    | ENSG00000248359.1 |    |    |    | NA | NA | NA | NA | NA | NA | NA | NA | NA |
| NA            | NA                 | NA                | NA | NA | NA | -2 | NA |    |    |    |    |    |    |    |
| GABRP         | ENSG00000094755.16 |                   | NA | NA | NA | NA | NA | NA | NA | NA | NA | NA | NA | NA |
| NA            | NA                 | NA                | NA | -2 | NA |    |    |    |    |    |    |    |    |    |
| KCNN2         | ENSG00000080709.14 |                   | NA | NA | NA | NA | NA | NA | NA | NA | NA | NA | NA | NA |
| NA            | NA                 | NA                | NA | -2 | NA |    |    |    |    |    |    |    |    |    |
| PCDHGB5       | ENSG00000276547.1  |                   | NA | NA | NA | NA | NA | NA | NA | NA | NA | NA | NA | NA |
| NA            | NA                 | NA                | NA | NA | -2 | NA |    |    |    |    |    |    |    |    |
| FNDC9         | ENSG00000172568.4  |                   | NA | NA | NA | NA | NA | NA | NA | NA | NA | NA | NA | NA |
| NA            | NA                 | NA                | NA | -2 | NA |    |    |    |    |    |    |    |    |    |
| RP11-259O2.3  | ENSG00000249731.1  |                   | NA | NA | NA | NA | NA | NA | NA | NA | NA | NA | NA | NA |
| NA            | NA                 | NA                | NA | NA | NA | -2 | NA |    |    |    |    |    |    |    |
| EFNA5         | ENSG00000184349.12 |                   | NA | NA | NA | NA | NA | NA | NA | NA | NA | NA | NA | NA |
| NA            | NA                 | NA                | NA | -2 | NA |    |    |    |    |    |    |    |    |    |
| KIAA1024L     | ENSG00000186367.6  |                   | NA | NA | NA | NA | NA | NA | NA | NA | NA | NA | NA | NA |
| NA            | NA                 | NA                | NA | NA | -2 | NA |    |    |    |    |    |    |    |    |
| MROH2B        | ENSG00000171495.16 |                   | NA | NA | NA | NA | NA | NA | NA | NA | NA | NA | NA | NA |
| NA            | NA                 | NA                | NA | NA | -2 | NA |    |    |    |    |    |    |    |    |
| SLIT3         | ENSG00000184347.14 |                   | NA | NA | NA | NA | NA | NA | NA | NA | NA | NA | NA | NA |
| NA            | NA                 | NA                | NA | -2 | NA |    |    |    |    |    |    |    |    |    |
| RP11-455B3.1  | ENSG00000248202.1  |                   | NA | NA | NA | NA | NA | NA | NA | NA | NA | NA | NA | NA |
| NA            | NA                 | NA                | NA | NA | NA | -2 | NA |    |    |    |    |    |    |    |
| SPRY4-IT1     | ENSG00000281881.1  |                   | NA | NA | NA | NA | NA | NA | NA | NA | NA | NA | NA | NA |
| NA            | NA                 | NA                | NA | NA | -2 | NA |    |    |    |    |    |    |    |    |
| MIR3142HG     | ENSG00000253522.5  |                   | NA | NA | NA | NA | NA | NA | NA | NA | NA | NA | NA | NA |
| NA            | NA                 | NA                | NA | NA | -2 | NA |    |    |    |    |    |    |    |    |
| NUP155        | ENSG00000113569.15 |                   | NA | NA | NA | NA | NA | NA | NA | NA | NA | NA | NA | NA |
| NA            | NA                 | NA                | NA | NA | -2 | NA |    |    |    |    |    |    |    |    |
| MRPL22        | ENSG00000082515.17 |                   | NA | NA | NA | NA | NA | NA | NA | NA | NA | NA | NA | NA |
| NA            | NA                 | NA                | NA | NA | -2 | NA |    |    |    |    |    |    |    |    |
| CPLX2         | ENSG00000145920.14 |                   | NA | NA | NA | NA | NA | NA | NA | NA | NA | NA | NA | NA |
| NA            | NA                 | NA                | NA | -2 | NA |    |    |    |    |    |    |    |    |    |
| ZNF354A       | ENSG00000169131.11 |                   | NA | NA | NA | NA | NA | NA | NA | NA | NA | NA | NA | NA |
| NA            | NA                 | NA                | NA | NA | -2 | NA |    |    |    |    |    |    |    |    |
| RAB24         | ENSG00000169228.13 |                   | NA | NA | NA | NA | NA | NA | NA | NA | NA | NA | NA | NA |
| NA            | NA                 | NA                | NA | -2 | NA |    |    |    |    |    |    |    |    |    |
| PCDHGC5       | ENSG00000240764.3  |                   | NA | NA | NA | NA | NA | NA | NA | NA | NA | NA | NA | NA |
| NA            | NA                 | NA                | NA | NA | -2 | NA |    |    |    |    |    |    |    |    |
| LINC01023     | ENSG00000272523.1  |                   | NA | NA | NA | NA | NA | NA | NA | NA | NA | NA | NA | NA |
| NA            | NA                 | NA                | NA | NA | -2 | NA |    |    |    |    |    |    |    |    |
| ZNF346        | ENSG00000113761.11 |                   | NA | NA | NA | NA | NA | NA | NA | NA | NA | NA | NA | NA |
| NA            | NA                 | NA                | NA | NA | -2 | NA |    |    |    |    |    |    |    |    |
| CDC20B        | ENSG00000164287.12 |                   | NA | NA | NA | NA | NA | NA | NA | NA | NA | NA | NA | NA |
| NA            | NA                 | NA                | NA | NA | -2 | NA |    |    |    |    |    |    |    |    |
| RP11-129I19.2 | ENSG00000259757.1  |                   | NA | NA | NA | NA | NA | NA | NA | NA | NA | NA | NA | NA |
| NA            | NA                 | NA                | NA | NA | NA | -2 | NA |    |    |    |    |    |    |    |
| CTB-33O18.2   | ENSG00000254164.1  |                   | NA | NA | NA | NA | NA | NA | NA | NA | NA | NA | NA | NA |
| NA            | NA                 | NA                | NA | NA | NA | -2 | NA |    |    |    |    |    |    |    |
| LINC02112     | ENSG00000249781.6  |                   | NA | NA | NA | NA | NA | NA | NA | NA | NA | NA | NA | NA |
| NA            | NA                 | NA                | NA | NA | -2 | NA |    |    |    |    |    |    |    |    |
| CTD-2033C11.1 | ENSG00000269961.1  |                   | NA | NA | NA | NA | NA | NA | NA | NA | NA | NA | NA | NA |
| NA            | NA                 | NA                | NA | NA | NA | -2 | NA |    |    |    |    |    |    |    |
| LINC01863     | ENSG00000253959.1  |                   | NA | NA | NA | NA | NA | NA | NA | NA | NA | NA | NA | NA |
| NA            | NA                 | NA                | NA | NA | -2 | NA |    |    |    |    |    |    |    |    |
| UBE2D2        | ENSG00000131508.15 |                   | NA | NA | NA | NA | NA | NA | NA | NA | NA | NA | NA | NA |
| NA            | NA                 | NA                | NA | NA | -2 | NA |    |    |    |    |    |    |    |    |
| LINC02101     | ENSG00000248132.2  |                   | NA | NA | NA | NA | NA | NA | NA | NA | NA | NA | NA | NA |
| NA            | NA                 | NA                | NA | NA | -2 | NA |    |    |    |    |    |    |    |    |
| KIF2A         | ENSG00000068796.16 |                   | NA | NA | NA | NA | NA | NA | NA | NA | NA | NA | NA | NA |
| NA            | NA                 | NA                | NA | -2 | NA |    |    |    |    |    |    |    |    |    |
| SCGB3A2       | ENSG00000164265.8  |                   | NA | NA | NA | NA | NA | NA | NA | NA | NA | NA | NA | NA |

|               |                    |    |    |    |    |    |    |    |    |    |    |    |    |    |
|---------------|--------------------|----|----|----|----|----|----|----|----|----|----|----|----|----|
| NA            | NA                 | NA | NA | NA | -2 | NA | NA | NA | NA | NA | NA | NA | NA | NA |
| AC005754.8    | ENSG00000272108.1  | NA | NA | NA | NA | NA | NA | NA | NA | NA | NA | NA | NA | NA |
| NA            | NA                 | NA | NA | NA | -2 | NA | NA | NA | NA | NA | NA | NA | NA | NA |
| SPINK5        | ENSG00000133710.15 | NA | NA | NA | NA | NA | NA | NA | NA | NA | NA | NA | NA | NA |
| NA            | NA                 | NA | NA | NA | -2 | NA | NA | NA | NA | NA | NA | NA | NA | NA |
| HMH1          | ENSG00000158497.3  | NA | NA | NA | NA | NA | NA | NA | NA | NA | NA | NA | NA | NA |
| NA            | NA                 | NA | NA | NA | -2 | NA | NA | NA | NA | NA | NA | NA | NA | NA |
| RP11-434D11.4 | ENSG00000251072.2  | NA | NA | NA | NA | NA | NA | NA | NA | NA | NA | NA | NA | NA |
| NA            | NA                 | NA | NA | NA | -2 | NA | NA | NA | NA | NA | NA | NA | NA | NA |
| LINC01019     | ENSG00000248118.1  | NA | NA | NA | NA | NA | NA | NA | NA | NA | NA | NA | NA | NA |
| NA            | NA                 | NA | NA | NA | -2 | NA | NA | NA | NA | NA | NA | NA | NA | NA |
| RACK1         | ENSG00000204628.11 | NA | NA | NA | NA | NA | NA | NA | NA | NA | NA | NA | NA | NA |
| NA            | NA                 | NA | NA | NA | -2 | NA | NA | NA | NA | NA | NA | NA | NA | NA |
| LINC01938     | ENSG00000254066.1  | NA | NA | NA | NA | NA | NA | NA | NA | NA | NA | NA | NA | NA |
| NA            | NA                 | NA | NA | NA | -2 | NA | NA | NA | NA | NA | NA | NA | NA | NA |
| DAB2          | ENSG00000153071.14 | NA | NA | NA | NA | NA | NA | NA | NA | NA | NA | NA | NA | NA |
| NA            | NA                 | NA | NA | NA | -2 | NA | NA | NA | NA | NA | NA | NA | NA | NA |
| SMIM3         | ENSG00000256235.1  | NA | NA | NA | NA | NA | NA | NA | NA | NA | NA | NA | NA | NA |
| NA            | NA                 | NA | NA | NA | -2 | NA | NA | NA | NA | NA | NA | NA | NA | NA |
| FOXI1         | ENSG00000168269.8  | NA | NA | NA | NA | NA | NA | NA | NA | NA | NA | NA | NA | NA |
| NA            | NA                 | NA | NA | NA | -2 | NA | NA | NA | NA | NA | NA | NA | NA | NA |
| LINC02103     | ENSG00000249785.1  | NA | NA | NA | NA | NA | NA | NA | NA | NA | NA | NA | NA | NA |
| NA            | NA                 | NA | NA | NA | -2 | NA | NA | NA | NA | NA | NA | NA | NA | NA |
| LINC02146     | ENSG00000249490.1  | NA | NA | NA | NA | NA | NA | NA | NA | NA | NA | NA | NA | NA |
| NA            | NA                 | NA | NA | NA | -2 | NA | NA | NA | NA | NA | NA | NA | NA | NA |
| SPINK6        | ENSG00000178172.6  | NA | NA | NA | NA | NA | NA | NA | NA | NA | NA | NA | NA | NA |
| NA            | NA                 | NA | NA | NA | -2 | NA | NA | NA | NA | NA | NA | NA | NA | NA |
| FOXD1         | ENSG00000251493.4  | NA | NA | NA | NA | NA | NA | NA | NA | NA | NA | NA | NA | NA |
| NA            | NA                 | NA | NA | NA | -2 | NA | NA | NA | NA | NA | NA | NA | NA | NA |
| HTR4          | ENSG00000164270.17 | NA | NA | NA | NA | NA | NA | NA | NA | NA | NA | NA | NA | NA |
| NA            | NA                 | NA | NA | NA | -2 | NA | NA | NA | NA | NA | NA | NA | NA | NA |
| IRX4          | ENSG00000113430.9  | NA | NA | NA | NA | NA | NA | NA | NA | NA | NA | NA | NA | NA |
| NA            | NA                 | NA | NA | NA | -2 | NA | NA | NA | NA | NA | NA | NA | NA | NA |
| RP11-83M16.6  | ENSG00000250421.5  | NA | NA | NA | NA | NA | NA | NA | NA | NA | NA | NA | NA | NA |
| NA            | NA                 | NA | NA | NA | NA | -2 | NA | NA | NA | NA | NA | NA | NA | NA |
| AC008940.1    | ENSG00000228650.2  | NA | NA | NA | NA | NA | NA | NA | NA | NA | NA | NA | NA | NA |
| NA            | NA                 | NA | NA | NA | -2 | NA | NA | NA | NA | NA | NA | NA | NA | NA |
| LINC01385     | ENSG00000251604.1  | NA | NA | NA | NA | NA | NA | NA | NA | NA | NA | NA | NA | NA |
| NA            | NA                 | NA | NA | NA | -2 | NA | NA | NA | NA | NA | NA | NA | NA | NA |
| CTD-2318H23.1 | ENSG00000251371.1  | NA | NA | NA | NA | NA | NA | NA | NA | NA | NA | NA | NA | NA |
| NA            | NA                 | NA | NA | NA | NA | -2 | NA | NA | NA | NA | NA | NA | NA | NA |
| HMMR          | ENSG00000072571.19 | NA | NA | NA | NA | NA | NA | NA | NA | NA | NA | NA | NA | NA |
| NA            | NA                 | NA | NA | NA | -2 | NA | NA | NA | NA | NA | NA | NA | NA | NA |
| CTC-305H11.1  | ENSG00000248145.1  | NA | NA | NA | NA | NA | NA | NA | NA | NA | NA | NA | NA | NA |
| NA            | NA                 | NA | NA | NA | NA | -2 | NA | NA | NA | NA | NA | NA | NA | NA |
| CCNB1         | ENSG00000134057.14 | NA | NA | NA | NA | NA | NA | NA | NA | NA | NA | NA | NA | NA |
| NA            | NA                 | NA | NA | NA | -2 | NA | NA | NA | NA | NA | NA | NA | NA | NA |
| FAM172A       | ENSG00000113391.18 | NA | NA | NA | NA | NA | NA | NA | NA | NA | NA | NA | NA | NA |
| NA            | NA                 | NA | NA | NA | -2 | NA | NA | NA | NA | NA | NA | NA | NA | NA |
| FAM159B       | ENSG00000145642.11 | NA | NA | NA | NA | NA | NA | NA | NA | NA | NA | NA | NA | NA |
| NA            | NA                 | NA | NA | NA | -2 | NA | NA | NA | NA | NA | NA | NA | NA | NA |
| ARHGAP18      | ENSG00000146376.10 | NA | NA | NA | NA | NA | NA | NA | NA | NA | NA | NA | NA | NA |
| NA            | NA                 | NA | NA | NA | -2 | NA | NA | NA | NA | NA | NA | NA | NA | NA |
| RP1-86C11.7   | ENSG00000272468.1  | NA | NA | NA | NA | NA | NA | NA | NA | NA | NA | NA | NA | NA |
| NA            | NA                 | NA | NA | NA | NA | -2 | NA | NA | NA | NA | NA | NA | NA | NA |
| FAM26D        | ENSG00000164451.13 | NA | NA | NA | NA | NA | NA | NA | NA | NA | NA | NA | NA | NA |
| NA            | NA                 | NA | NA | NA | -2 | NA | NA | NA | NA | NA | NA | NA | NA | NA |
| TEAD3         | ENSG00000007866.19 | NA | NA | NA | NA | NA | NA | NA | NA | NA | NA | NA | NA | NA |
| NA            | NA                 | NA | NA | NA | -2 | NA | NA | NA | NA | NA | NA | NA | NA | NA |
| GLP1R         | ENSG00000112164.5  | NA | NA | NA | NA | NA | NA | NA | NA | NA | NA | NA | NA | NA |
| NA            | NA                 | NA | NA | NA | -2 | NA | NA | NA | NA | NA | NA | NA | NA | NA |
| IP6K3         | ENSG00000161896.11 | NA | NA | NA | NA | NA | NA | NA | NA | NA | NA | NA | NA | NA |

|                   |                    |    |    |    |    |    |    |    |    |    |    |    |    |    |
|-------------------|--------------------|----|----|----|----|----|----|----|----|----|----|----|----|----|
| NA                | NA                 | NA | NA | -2 | NA |    |    |    |    |    |    |    |    |    |
| TSTD3             | ENSG00000228439.5  |    |    |    | NA | NA | NA | NA | NA | NA | NA | NA | NA | NA |
| NA                | NA                 | NA | NA | -2 | NA |    |    |    |    |    |    |    |    |    |
| PRICKLE4          | ENSG00000278224.5  |    |    |    | NA | NA | NA | NA | NA | NA | NA | NA | NA | NA |
| NA                | NA                 | NA | NA | -2 | NA |    |    |    |    |    |    |    |    |    |
| SLC22A16          | ENSG00000004809.13 |    |    |    | NA | NA | NA | NA | NA | NA | NA | NA | NA | NA |
| NA                | NA                 | NA | NA | -2 | NA |    |    |    |    |    |    |    |    |    |
| CRISP1            | ENSG00000124812.14 |    |    |    | NA | NA | NA | NA | NA | NA | NA | NA | NA | NA |
| NA                | NA                 | NA | NA | -2 | NA |    |    |    |    |    |    |    |    |    |
| PLN               | ENSG00000198523.5  |    |    |    | NA | NA | NA | NA | NA | NA | NA | NA | NA | NA |
| NA                | NA                 | NA | NA | -2 | NA |    |    |    |    |    |    |    |    |    |
| KIFC1             | ENSG00000237649.7  |    |    |    | NA | NA | NA | NA | NA | NA | NA | NA | NA | NA |
| NA                | NA                 | NA | NA | -2 | NA |    |    |    |    |    |    |    |    |    |
| EZR               | ENSG00000092820.17 |    |    |    | NA | NA | NA | NA | NA | NA | NA | NA | NA | NA |
| NA                | NA                 | NA | NA | -2 | NA |    |    |    |    |    |    |    |    |    |
| SPDEF             | ENSG00000124664.10 |    |    |    | NA | NA | NA | NA | NA | NA | NA | NA | NA | NA |
| NA                | NA                 | NA | NA | -2 | NA |    |    |    |    |    |    |    |    |    |
| TIAM2             | ENSG00000146426.17 |    |    |    | NA | NA | NA | NA | NA | NA | NA | NA | NA | NA |
| NA                | NA                 | NA | NA | -2 | NA |    |    |    |    |    |    |    |    |    |
| LTB               | ENSG00000227507.2  |    |    |    | NA | NA | NA | NA | NA | NA | NA | NA | NA | NA |
| NA                | NA                 | NA | NA | -2 | NA |    |    |    |    |    |    |    |    |    |
| RP1-27K12.2       | ENSG00000231683.6  |    |    |    | NA | NA | NA | NA | NA | NA | NA | NA | NA | NA |
| NA                | NA                 | NA | NA | -2 | NA |    |    |    |    |    |    |    |    |    |
| PACSN1            | ENSG00000124507.10 |    |    |    | NA | NA | NA | NA | NA | NA | NA | NA | NA | NA |
| NA                | NA                 | NA | NA | -2 | NA |    |    |    |    |    |    |    |    |    |
| LINC00266-3       | ENSG00000170590.9  |    |    |    | NA | NA | NA | NA | NA | NA | NA | NA | NA | NA |
| NA                | NA                 | NA | NA | -2 | NA |    |    |    |    |    |    |    |    |    |
| IGF2R             | ENSG00000197081.12 |    |    |    | NA | NA | NA | NA | NA | NA | NA | NA | NA | NA |
| NA                | NA                 | NA | NA | -2 | NA |    |    |    |    |    |    |    |    |    |
| GSTA3             | ENSG00000174156.14 |    |    |    | NA | NA | NA | NA | NA | NA | NA | NA | NA | NA |
| NA                | NA                 | NA | NA | -2 | NA |    |    |    |    |    |    |    |    |    |
| PGK2              | ENSG00000170950.5  |    |    |    | NA | NA | NA | NA | NA | NA | NA | NA | NA | NA |
| NA                | NA                 | NA | NA | -2 | NA |    |    |    |    |    |    |    |    |    |
| AIF1              | ENSG00000204472.12 |    |    |    | NA | NA | NA | NA | NA | NA | NA | NA | NA | NA |
| NA                | NA                 | NA | NA | -2 | NA |    |    |    |    |    |    |    |    |    |
| LRP11             | ENSG00000120256.9  |    |    |    | NA | NA | NA | NA | NA | NA | NA | NA | NA | NA |
| NA                | NA                 | NA | NA | -2 | NA |    |    |    |    |    |    |    |    |    |
| RP3-503A6.2       | ENSG00000236355.2  |    |    |    | NA | NA | NA | NA | NA | NA | NA | NA | NA | NA |
| NA                | NA                 | NA | NA | -2 | NA |    |    |    |    |    |    |    |    |    |
| RP11-379B8.1      | ENSG00000226453.1  |    |    |    | NA | NA | NA | NA | NA | NA | NA | NA | NA | NA |
| NA                | NA                 | NA | NA | -2 | NA |    |    |    |    |    |    |    |    |    |
| FAM217A           | ENSG00000145975.14 |    |    |    | NA | NA | NA | NA | NA | NA | NA | NA | NA | NA |
| NA                | NA                 | NA | NA | -2 | NA |    |    |    |    |    |    |    |    |    |
| DNAH8             | ENSG00000124721.17 |    |    |    | NA | NA | NA | NA | NA | NA | NA | NA | NA | NA |
| NA                | NA                 | NA | NA | -2 | NA |    |    |    |    |    |    |    |    |    |
| SRSF3             | ENSG00000112081.16 |    |    |    | NA | NA | NA | NA | NA | NA | NA | NA | NA | NA |
| NA                | NA                 | NA | NA | -2 | NA |    |    |    |    |    |    |    |    |    |
| XXbac-BCX196D17.5 | ENSG00000227206.1  |    |    |    | NA | NA | NA | NA | NA | NA | NA | NA | NA | NA |
| NA                | NA                 | NA | NA | -2 | NA |    |    |    |    |    |    |    |    |    |
| PHF10             | ENSG00000130024.14 |    |    |    | NA | NA | NA | NA | NA | NA | NA | NA | NA | NA |
| NA                | NA                 | NA | NA | -2 | NA |    |    |    |    |    |    |    |    |    |
| MPC1              | ENSG00000060762.18 |    |    |    | NA | NA | NA | NA | NA | NA | NA | NA | NA | NA |
| NA                | NA                 | NA | NA | -2 | NA |    |    |    |    |    |    |    |    |    |
| RP11-568A7.2      | ENSG00000228648.1  |    |    |    | NA | NA | NA | NA | NA | NA | NA | NA | NA | NA |
| NA                | NA                 | NA | NA | -2 | NA |    |    |    |    |    |    |    |    |    |
| RP11-125D12.2     | ENSG00000234777.1  |    |    |    | NA | NA | NA | NA | NA | NA | NA | NA | NA | NA |
| NA                | NA                 | NA | NA | -2 | NA |    |    |    |    |    |    |    |    |    |
| NCR3              | ENSG00000204475.9  |    |    |    | NA | NA | NA | NA | NA | NA | NA | NA | NA | NA |
| NA                | NA                 | NA | NA | -2 | NA |    |    |    |    |    |    |    |    |    |
| LINC01615         | ENSG00000223485.2  |    |    |    | NA | NA | NA | NA | NA | NA | NA | NA | NA | NA |
| NA                | NA                 | NA | NA | -2 | NA |    |    |    |    |    |    |    |    |    |
| MOG               | ENSG00000204655.11 |    |    |    | NA | NA | NA | NA | NA | NA | NA | NA | NA | NA |

|               |                    |    |    |    |    |    |    |    |    |    |    |    |    |    |
|---------------|--------------------|----|----|----|----|----|----|----|----|----|----|----|----|----|
| NA            | NA                 | NA | NA | -2 | NA |    |    |    |    |    |    |    |    |    |
| POLR1C        | ENSG00000171453.17 | NA | NA | NA | NA | NA | NA | NA | NA | NA | NA | NA | NA | NA |
| NA            | NA                 | NA | NA | NA | -2 | NA |    |    |    |    |    |    |    |    |
| MAK           | ENSG00000111837.11 | NA | NA | NA | NA | NA | NA | NA | NA | NA | NA | NA | NA | NA |
| NA            | NA                 | NA | NA | NA | -2 | NA |    |    |    |    |    |    |    |    |
| RP11-406O16.1 | ENSG00000226497.1  | NA | NA | NA | NA | NA | NA | NA | NA | NA | NA | NA | NA | NA |
| NA            | NA                 | NA | NA | NA | NA | -2 | NA |    |    |    |    |    |    |    |
| RP1-290I10.5  | ENSG00000231056.1  | NA | NA | NA | NA | NA | NA | NA | NA | NA | NA | NA | NA | NA |
| NA            | NA                 | NA | NA | NA | NA | -2 | NA |    |    |    |    |    |    |    |
| RP1-69D17.4   | ENSG00000226149.5  | NA | NA | NA | NA | NA | NA | NA | NA | NA | NA | NA | NA | NA |
| NA            | NA                 | NA | NA | NA | NA | -2 | NA |    |    |    |    |    |    |    |
| LY6G6E        | ENSG00000255552.7  | NA | NA | NA | NA | NA | NA | NA | NA | NA | NA | NA | NA | NA |
| NA            | NA                 | NA | NA | NA | NA | -2 | NA |    |    |    |    |    |    |    |
| RP11-235G24.1 | ENSG00000224371.5  | NA | NA | NA | NA | NA | NA | NA | NA | NA | NA | NA | NA | NA |
| NA            | NA                 | NA | NA | NA | NA | -2 | NA |    |    |    |    |    |    |    |
| ADGRB3        | ENSG00000135298.13 | NA | NA | NA | NA | NA | NA | NA | NA | NA | NA | NA | NA | NA |
| NA            | NA                 | NA | NA | NA | NA | -2 | NA |    |    |    |    |    |    |    |
| RP1-249H1.2   | ENSG00000231912.2  | NA | NA | NA | NA | NA | NA | NA | NA | NA | NA | NA | NA | NA |
| NA            | NA                 | NA | NA | NA | NA | -2 | NA |    |    |    |    |    |    |    |
| C6orf99       | ENSG00000203711.11 | NA | NA | NA | NA | NA | NA | NA | NA | NA | NA | NA | NA | NA |
| NA            | NA                 | NA | NA | NA | NA | -2 | NA |    |    |    |    |    |    |    |
| C6orf1        | ENSG00000186577.12 | NA | NA | NA | NA | NA | NA | NA | NA | NA | NA | NA | NA | NA |
| NA            | NA                 | NA | NA | NA | NA | -2 | NA |    |    |    |    |    |    |    |
| MOCS1         | ENSG00000124615.17 | NA | NA | NA | NA | NA | NA | NA | NA | NA | NA | NA | NA | NA |
| NA            | NA                 | NA | NA | NA | NA | -2 | NA |    |    |    |    |    |    |    |
| RP11-497D6.3  | ENSG00000227748.1  | NA | NA | NA | NA | NA | NA | NA | NA | NA | NA | NA | NA | NA |
| NA            | NA                 | NA | NA | NA | NA | -2 | NA |    |    |    |    |    |    |    |
| LCA5          | ENSG00000135338.13 | NA | NA | NA | NA | NA | NA | NA | NA | NA | NA | NA | NA | NA |
| NA            | NA                 | NA | NA | NA | NA | -2 | NA |    |    |    |    |    |    |    |
| TCP10         | ENSG00000203690.11 | NA | NA | NA | NA | NA | NA | NA | NA | NA | NA | NA | NA | NA |
| NA            | NA                 | NA | NA | NA | NA | -2 | NA |    |    |    |    |    |    |    |
| GCM1          | ENSG00000137270.10 | NA | NA | NA | NA | NA | NA | NA | NA | NA | NA | NA | NA | NA |
| NA            | NA                 | NA | NA | NA | NA | -2 | NA |    |    |    |    |    |    |    |
| SLC22A2       | ENSG00000112499.12 | NA | NA | NA | NA | NA | NA | NA | NA | NA | NA | NA | NA | NA |
| NA            | NA                 | NA | NA | NA | NA | -2 | NA |    |    |    |    |    |    |    |
| RP11-63E9.1   | ENSG00000259828.1  | NA | NA | NA | NA | NA | NA | NA | NA | NA | NA | NA | NA | NA |
| NA            | NA                 | NA | NA | NA | NA | -2 | NA |    |    |    |    |    |    |    |
| PDE10A        | ENSG00000112541.13 | NA | NA | NA | NA | NA | NA | NA | NA | NA | NA | NA | NA | NA |
| NA            | NA                 | NA | NA | NA | NA | -2 | NA |    |    |    |    |    |    |    |
| HTR1E         | ENSG00000168830.7  | NA | NA | NA | NA | NA | NA | NA | NA | NA | NA | NA | NA | NA |
| NA            | NA                 | NA | NA | NA | NA | -2 | NA |    |    |    |    |    |    |    |
| STK38         | ENSG00000112079.8  | NA | NA | NA | NA | NA | NA | NA | NA | NA | NA | NA | NA | NA |
| NA            | NA                 | NA | NA | NA | NA | -2 | NA |    |    |    |    |    |    |    |
| TMEM151B      | ENSG00000178233.17 | NA | NA | NA | NA | NA | NA | NA | NA | NA | NA | NA | NA | NA |
| NA            | NA                 | NA | NA | NA | NA | -2 | NA |    |    |    |    |    |    |    |
| RHAG          | ENSG00000112077.15 | NA | NA | NA | NA | NA | NA | NA | NA | NA | NA | NA | NA | NA |
| NA            | NA                 | NA | NA | NA | NA | -2 | NA |    |    |    |    |    |    |    |
| NUDT3         | ENSG00000272325.1  | NA | NA | NA | NA | NA | NA | NA | NA | NA | NA | NA | NA | NA |
| NA            | NA                 | NA | NA | NA | NA | -2 | NA |    |    |    |    |    |    |    |
| FGD2          | ENSG00000146192.14 | NA | NA | NA | NA | NA | NA | NA | NA | NA | NA | NA | NA | NA |
| NA            | NA                 | NA | NA | NA | NA | -2 | NA |    |    |    |    |    |    |    |
| PNISR         | ENSG00000132424.14 | NA | NA | NA | NA | NA | NA | NA | NA | NA | NA | NA | NA | NA |
| NA            | NA                 | NA | NA | NA | NA | -2 | NA |    |    |    |    |    |    |    |
| LINC01149     | ENSG00000230174.1  | NA | NA | NA | NA | NA | NA | NA | NA | NA | NA | NA | NA | NA |
| NA            | NA                 | NA | NA | NA | NA | -2 | NA |    |    |    |    |    |    |    |
| LINC01558     | ENSG00000146521.9  | NA | NA | NA | NA | NA | NA | NA | NA | NA | NA | NA | NA | NA |
| NA            | NA                 | NA | NA | NA | NA | -2 | NA |    |    |    |    |    |    |    |
| RP11-457M11.5 | ENSG00000261584.1  | NA | NA | NA | NA | NA | NA | NA | NA | NA | NA | NA | NA | NA |
| NA            | NA                 | NA | NA | NA | NA | -2 | NA |    |    |    |    |    |    |    |
| RP11-679B17.2 | ENSG00000271897.1  | NA | NA | NA | NA | NA | NA | NA | NA | NA | NA | NA | NA | NA |
| NA            | NA                 | NA | NA | NA | NA | -2 | NA |    |    |    |    |    |    |    |
| TMEM217       | ENSG00000172738.11 | NA | NA | NA | NA | NA | NA | NA | NA | NA | NA | NA | NA | NA |



|              |                    |    |    |    |    |    |    |    |    |    |    |    |    |    |
|--------------|--------------------|----|----|----|----|----|----|----|----|----|----|----|----|----|
| NA           | NA                 | NA | NA | NA | -2 | NA |    |    |    |    |    |    |    |    |
| ADTRP        | ENSG00000111863.12 |    |    |    |    | NA | NA | NA | NA | NA | NA | NA | NA | NA |
| NA           | NA                 | NA | NA | NA | -2 | NA |    |    |    |    |    |    |    |    |
| TRERF1       | ENSG00000124496.12 |    |    |    |    | NA | NA | NA | NA | NA | NA | NA | NA | NA |
| NA           | NA                 | NA | NA | NA | -2 | NA |    |    |    |    |    |    |    |    |
| RREB1        | ENSG00000124782.19 |    |    |    |    | NA | NA | NA | NA | NA | NA | NA | NA | NA |
| NA           | NA                 | NA | NA | NA | -2 | NA |    |    |    |    |    |    |    |    |
| RP11-417E7.2 | ENSG00000261039.2  |    |    |    |    | NA | NA | NA | NA | NA | NA | NA | NA | NA |
| NA           | NA                 | NA | NA | NA | -2 | NA |    |    |    |    |    |    |    |    |
| EYS          | ENSG00000188107.14 |    |    |    |    | NA | NA | NA | NA | NA | NA | NA | NA | NA |
| NA           | NA                 | NA | NA | NA | -2 | NA |    |    |    |    |    |    |    |    |
| TNFRSF21     | ENSG00000146072.6  |    |    |    |    | NA | NA | NA | NA | NA | NA | NA | NA | NA |
| NA           | NA                 | NA | NA | NA | -2 | NA |    |    |    |    |    |    |    |    |
| STX11        | ENSG00000135604.9  |    |    |    |    | NA | NA | NA | NA | NA | NA | NA | NA | NA |
| NA           | NA                 | NA | NA | NA | -2 | NA |    |    |    |    |    |    |    |    |
| LY6G6F       | ENSG00000204424.9  |    |    |    |    | NA | NA | NA | NA | NA | NA | NA | NA | NA |
| NA           | NA                 | NA | NA | NA | -2 | NA |    |    |    |    |    |    |    |    |
| RP1-230L10.1 | ENSG00000235538.1  |    |    |    |    | NA | NA | NA | NA | NA | NA | NA | NA | NA |
| NA           | NA                 | NA | NA | NA | -2 | NA |    |    |    |    |    |    |    |    |
| RP1-60019.1  | ENSG00000235142.7  |    |    |    |    | NA | NA | NA | NA | NA | NA | NA | NA | NA |
| NA           | NA                 | NA | NA | NA | -2 | NA |    |    |    |    |    |    |    |    |
| RP5-856G1.1  | ENSG00000270937.1  |    |    |    |    | NA | NA | NA | NA | NA | NA | NA | NA | NA |
| NA           | NA                 | NA | NA | NA | -2 | NA |    |    |    |    |    |    |    |    |
| PRR18        | ENSG00000176381.5  |    |    |    |    | NA | NA | NA | NA | NA | NA | NA | NA | NA |
| NA           | NA                 | NA | NA | NA | -2 | NA |    |    |    |    |    |    |    |    |
| FUCA2        | ENSG00000001036.13 |    |    |    |    | NA | NA | NA | NA | NA | NA | NA | NA | NA |
| NA           | NA                 | NA | NA | NA | -2 | NA |    |    |    |    |    |    |    |    |
| HSP90AB1     | ENSG00000096384.19 |    |    |    |    | NA | NA | NA | NA | NA | NA | NA | NA | NA |
| NA           | NA                 | NA | NA | NA | -2 | NA |    |    |    |    |    |    |    |    |
| BCLAF1       | ENSG00000029363.16 |    |    |    |    | NA | NA | NA | NA | NA | NA | NA | NA | NA |
| NA           | NA                 | NA | NA | NA | -2 | NA |    |    |    |    |    |    |    |    |
| RP1-80N2.2   | ENSG00000226281.2  |    |    |    |    | NA | NA | NA | NA | NA | NA | NA | NA | NA |
| NA           | NA                 | NA | NA | NA | -2 | NA |    |    |    |    |    |    |    |    |
| NOL7         | ENSG00000225921.6  |    |    |    |    | NA | NA | NA | NA | NA | NA | NA | NA | NA |
| NA           | NA                 | NA | NA | NA | -2 | NA |    |    |    |    |    |    |    |    |
| TRIM40       | ENSG00000204614.8  |    |    |    |    | NA | NA | NA | NA | NA | NA | NA | NA | NA |
| NA           | NA                 | NA | NA | NA | -2 | NA |    |    |    |    |    |    |    |    |
| HIST1H3A     | ENSG00000275714.1  |    |    |    |    | NA | NA | NA | NA | NA | NA | NA | NA | NA |
| NA           | NA                 | NA | NA | NA | -2 | NA |    |    |    |    |    |    |    |    |
| SYTL3        | ENSG00000164674.15 |    |    |    |    | NA | NA | NA | NA | NA | NA | NA | NA | NA |
| NA           | NA                 | NA | NA | NA | -2 | NA |    |    |    |    |    |    |    |    |
| UNC93A       | ENSG00000112494.9  |    |    |    |    | NA | NA | NA | NA | NA | NA | NA | NA | NA |
| NA           | NA                 | NA | NA | NA | -2 | NA |    |    |    |    |    |    |    |    |
| KCNK16       | ENSG00000095981.10 |    |    |    |    | NA | NA | NA | NA | NA | NA | NA | NA | NA |
| NA           | NA                 | NA | NA | NA | -2 | NA |    |    |    |    |    |    |    |    |
| LINC01394    | ENSG00000281809.1  |    |    |    |    | NA | NA | NA | NA | NA | NA | NA | NA | NA |
| NA           | NA                 | NA | NA | NA | -2 | NA |    |    |    |    |    |    |    |    |
| CPNE5        | ENSG00000124772.11 |    |    |    |    | NA | NA | NA | NA | NA | NA | NA | NA | NA |
| NA           | NA                 | NA | NA | NA | -2 | NA |    |    |    |    |    |    |    |    |
| RP1-40E16.2  | ENSG00000229282.1  |    |    |    |    | NA | NA | NA | NA | NA | NA | NA | NA | NA |
| NA           | NA                 | NA | NA | NA | -2 | NA |    |    |    |    |    |    |    |    |
| RP11-307P5.2 | ENSG00000226249.1  |    |    |    |    | NA | NA | NA | NA | NA | NA | NA | NA | NA |
| NA           | NA                 | NA | NA | NA | -2 | NA |    |    |    |    |    |    |    |    |
| MED23        | ENSG00000112282.17 |    |    |    |    | NA | NA | NA | NA | NA | NA | NA | NA | NA |
| NA           | NA                 | NA | NA | NA | -2 | NA |    |    |    |    |    |    |    |    |
| RP3-527G5.1  | ENSG00000231811.2  |    |    |    |    | NA | NA | NA | NA | NA | NA | NA | NA | NA |
| NA           | NA                 | NA | NA | NA | -2 | NA |    |    |    |    |    |    |    |    |
| RP1-28O17.1  | ENSG00000230472.5  |    |    |    |    | NA | NA | NA | NA | NA | NA | NA | NA | NA |
| NA           | NA                 | NA | NA | NA | -2 | NA |    |    |    |    |    |    |    |    |
| RAB32        | ENSG00000118508.4  |    |    |    |    | NA | NA | NA | NA | NA | NA | NA | NA | NA |
| NA           | NA                 | NA | NA | NA | -2 | NA |    |    |    |    |    |    |    |    |
| RP1-302G2.5  | ENSG00000262179.2  |    |    |    |    | NA | NA | NA | NA | NA | NA | NA | NA | NA |

|                  |                    |    |    |    |    |    |    |    |    |    |    |    |    |    |
|------------------|--------------------|----|----|----|----|----|----|----|----|----|----|----|----|----|
| NA               | NA                 | NA | NA | NA | NA | -2 | NA |    |    |    |    |    |    |    |
| CRISP2           | ENSG00000124490.13 | NA | NA | NA | NA | NA | NA | NA | NA | NA | NA | NA | NA | NA |
| NA               | NA                 | NA | NA | NA | NA | -2 | NA |    |    |    |    |    |    |    |
| ULBP3            | ENSG00000131019.10 | NA | NA | NA | NA | NA | NA | NA | NA | NA | NA | NA | NA | NA |
| NA               | NA                 | NA | NA | NA | NA | -2 | NA |    |    |    |    |    |    |    |
| RP11-127B16.1    | ENSG00000220908.2  | NA | NA | NA | NA | NA | NA | NA | NA | NA | NA | NA | NA | NA |
| NA               | NA                 | NA | NA | NA | NA | -2 | NA |    |    |    |    |    |    |    |
| SLC17A2          | ENSG00000112337.10 | NA | NA | NA | NA | NA | NA | NA | NA | NA | NA | NA | NA | NA |
| NA               | NA                 | NA | NA | NA | NA | -2 | NA |    |    |    |    |    |    |    |
| TBX18            | ENSG00000112837.16 | NA | NA | NA | NA | NA | NA | NA | NA | NA | NA | NA | NA | NA |
| NA               | NA                 | NA | NA | NA | NA | -2 | NA |    |    |    |    |    |    |    |
| XXbac-BPG13B8.10 | ENSG00000229274.1  | NA | NA | NA | NA | NA | NA | NA | NA | NA | NA | NA | NA | NA |
| NA               | NA                 | NA | NA | NA | NA | -2 | NA |    |    |    |    |    |    |    |
| HIST1H3J         | ENSG00000197153.4  | NA | NA | NA | NA | NA | NA | NA | NA | NA | NA | NA | NA | NA |
| NA               | NA                 | NA | NA | NA | NA | -2 | NA |    |    |    |    |    |    |    |
| TCF21            | ENSG00000118526.6  | NA | NA | NA | NA | NA | NA | NA | NA | NA | NA | NA | NA | NA |
| NA               | NA                 | NA | NA | NA | NA | -2 | NA |    |    |    |    |    |    |    |
| RP11-503C24.3    | ENSG00000228361.2  | NA | NA | NA | NA | NA | NA | NA | NA | NA | NA | NA | NA | NA |
| NA               | NA                 | NA | NA | NA | NA | -2 | NA |    |    |    |    |    |    |    |
| TRIM15           | ENSG00000204610.12 | NA | NA | NA | NA | NA | NA | NA | NA | NA | NA | NA | NA | NA |
| NA               | NA                 | NA | NA | NA | NA | -2 | NA |    |    |    |    |    |    |    |
| RANBP9           | ENSG00000010017.12 | NA | NA | NA | NA | NA | NA | NA | NA | NA | NA | NA | NA | NA |
| NA               | NA                 | NA | NA | NA | NA | -2 | NA |    |    |    |    |    |    |    |
| SRF              | ENSG00000112658.7  | NA | NA | NA | NA | NA | NA | NA | NA | NA | NA | NA | NA | NA |
| NA               | NA                 | NA | NA | NA | NA | -2 | NA |    |    |    |    |    |    |    |
| LINC00243        | ENSG00000214894.6  | NA | NA | NA | NA | NA | NA | NA | NA | NA | NA | NA | NA | NA |
| NA               | NA                 | NA | NA | NA | NA | -2 | NA |    |    |    |    |    |    |    |
| RP1-153P14.5     | ENSG00000227920.2  | NA | NA | NA | NA | NA | NA | NA | NA | NA | NA | NA | NA | NA |
| NA               | NA                 | NA | NA | NA | NA | -2 | NA |    |    |    |    |    |    |    |
| LINC01625        | ENSG00000238099.2  | NA | NA | NA | NA | NA | NA | NA | NA | NA | NA | NA | NA | NA |
| NA               | NA                 | NA | NA | NA | NA | -2 | NA |    |    |    |    |    |    |    |
| HIST1H2AH        | ENSG00000274997.1  | NA | NA | NA | NA | NA | NA | NA | NA | NA | NA | NA | NA | NA |
| NA               | NA                 | NA | NA | NA | NA | -2 | NA |    |    |    |    |    |    |    |
| RP3-495K2.3      | ENSG00000225879.1  | NA | NA | NA | NA | NA | NA | NA | NA | NA | NA | NA | NA | NA |
| NA               | NA                 | NA | NA | NA | NA | -2 | NA |    |    |    |    |    |    |    |
| HMGA1            | ENSG00000137309.19 | NA | NA | NA | NA | NA | NA | NA | NA | NA | NA | NA | NA | NA |
| NA               | NA                 | NA | NA | NA | NA | -2 | NA |    |    |    |    |    |    |    |
| DAXX             | ENSG00000204209.11 | NA | NA | NA | NA | NA | NA | NA | NA | NA | NA | NA | NA | NA |
| NA               | NA                 | NA | NA | NA | NA | -2 | NA |    |    |    |    |    |    |    |
| HIST1H4I         | ENSG00000276180.1  | NA | NA | NA | NA | NA | NA | NA | NA | NA | NA | NA | NA | NA |
| NA               | NA                 | NA | NA | NA | NA | -2 | NA |    |    |    |    |    |    |    |
| LINC01312        | ENSG00000223586.5  | NA | NA | NA | NA | NA | NA | NA | NA | NA | NA | NA | NA | NA |
| NA               | NA                 | NA | NA | NA | NA | -2 | NA |    |    |    |    |    |    |    |
| RP11-631F7.2     | ENSG00000230205.1  | NA | NA | NA | NA | NA | NA | NA | NA | NA | NA | NA | NA | NA |
| NA               | NA                 | NA | NA | NA | NA | -2 | NA |    |    |    |    |    |    |    |
| OR2A4            | ENSG00000180658.3  | NA | NA | NA | NA | NA | NA | NA | NA | NA | NA | NA | NA | NA |
| NA               | NA                 | NA | NA | NA | NA | -2 | NA |    |    |    |    |    |    |    |
| RP11-146I2.1     | ENSG00000234261.3  | NA | NA | NA | NA | NA | NA | NA | NA | NA | NA | NA | NA | NA |
| NA               | NA                 | NA | NA | NA | NA | -2 | NA |    |    |    |    |    |    |    |
| RP5-894D12.5     | ENSG00000271820.1  | NA | NA | NA | NA | NA | NA | NA | NA | NA | NA | NA | NA | NA |
| NA               | NA                 | NA | NA | NA | NA | -2 | NA |    |    |    |    |    |    |    |
| ZC2HC1B          | ENSG00000118491.9  | NA | NA | NA | NA | NA | NA | NA | NA | NA | NA | NA | NA | NA |
| NA               | NA                 | NA | NA | NA | NA | -2 | NA |    |    |    |    |    |    |    |
| FABP7            | ENSG00000164434.11 | NA | NA | NA | NA | NA | NA | NA | NA | NA | NA | NA | NA | NA |
| NA               | NA                 | NA | NA | NA | NA | -2 | NA |    |    |    |    |    |    |    |
| RP11-716O23.1    | ENSG00000233656.1  | NA | NA | NA | NA | NA | NA | NA | NA | NA | NA | NA | NA | NA |
| NA               | NA                 | NA | NA | NA | NA | -2 | NA |    |    |    |    |    |    |    |
| GTF3C6           | ENSG00000155115.6  | NA | NA | NA | NA | NA | NA | NA | NA | NA | NA | NA | NA | NA |
| NA               | NA                 | NA | NA | NA | NA | -2 | NA |    |    |    |    |    |    |    |
| RP1-81D8.3       | ENSG00000224477.5  | NA | NA | NA | NA | NA | NA | NA | NA | NA | NA | NA | NA | NA |
| NA               | NA                 | NA | NA | NA | NA | -2 | NA |    |    |    |    |    |    |    |
| RSPH9            | ENSG00000172426.15 | NA | NA | NA | NA | NA | NA | NA | NA | NA | NA | NA | NA | NA |

|                    |                    |    |    |    |    |    |    |    |    |    |    |    |    |    |
|--------------------|--------------------|----|----|----|----|----|----|----|----|----|----|----|----|----|
| NA                 | NA                 | NA | NA | -2 | NA |    |    |    |    |    |    |    |    |    |
| AFDN-AS1           | ENSG00000198221.8  |    |    |    | NA | NA | NA | NA | NA | NA | NA | NA | NA | NA |
| NA                 | NA                 | NA | NA | NA | -2 | NA |    |    |    |    |    |    |    |    |
| RP11-204E9.1       | ENSG00000231754.2  |    |    |    | NA | NA | NA | NA | NA | NA | NA | NA | NA | NA |
| NA                 | NA                 | NA | NA | NA | -2 | NA |    |    |    |    |    |    |    |    |
| RP11-753B14.1      | ENSG00000237494.1  |    |    |    | NA | NA | NA | NA | NA | NA | NA | NA | NA | NA |
| NA                 | NA                 | NA | NA | NA | -2 | NA |    |    |    |    |    |    |    |    |
| TREM1              | ENSG00000124731.12 |    |    |    | NA | NA | NA | NA | NA | NA | NA | NA | NA | NA |
| NA                 | NA                 | NA | NA | -2 | NA |    |    |    |    |    |    |    |    |    |
| XXbac-BPG170G13.32 | ENSG00000272236.1  |    |    |    | NA | NA | NA | NA | NA | NA | NA | NA | NA | NA |
| NA                 | NA                 | NA | NA | NA | NA | -2 | NA |    |    |    |    |    |    |    |
| RP1-38C16.2        | ENSG00000233534.1  |    |    |    | NA | NA | NA | NA | NA | NA | NA | NA | NA | NA |
| NA                 | NA                 | NA | NA | NA | -2 | NA |    |    |    |    |    |    |    |    |
| C6orf15            | ENSG00000204542.2  |    |    |    | NA | NA | NA | NA | NA | NA | NA | NA | NA | NA |
| NA                 | NA                 | NA | NA | NA | -2 | NA |    |    |    |    |    |    |    |    |
| TRIM31             | ENSG00000204616.10 |    |    |    | NA | NA | NA | NA | NA | NA | NA | NA | NA | NA |
| NA                 | NA                 | NA | NA | NA | -2 | NA |    |    |    |    |    |    |    |    |
| HIST1H1T           | ENSG00000187475.5  |    |    |    | NA | NA | NA | NA | NA | NA | NA | NA | NA | NA |
| NA                 | NA                 | NA | NA | NA | -2 | NA |    |    |    |    |    |    |    |    |
| RP3-448I9.2        | ENSG00000237346.1  |    |    |    | NA | NA | NA | NA | NA | NA | NA | NA | NA | NA |
| NA                 | NA                 | NA | NA | NA | -2 | NA |    |    |    |    |    |    |    |    |
| RP4-529N6.2        | ENSG00000260673.1  |    |    |    | NA | NA | NA | NA | NA | NA | NA | NA | NA | NA |
| NA                 | NA                 | NA | NA | NA | -2 | NA |    |    |    |    |    |    |    |    |
| FAM135A            | ENSG00000082269.16 |    |    |    | NA | NA | NA | NA | NA | NA | NA | NA | NA | NA |
| NA                 | NA                 | NA | NA | NA | -2 | NA |    |    |    |    |    |    |    |    |
| TBCC               | ENSG00000124659.6  |    |    |    | NA | NA | NA | NA | NA | NA | NA | NA | NA | NA |
| NA                 | NA                 | NA | NA | -2 | NA |    |    |    |    |    |    |    |    |    |
| HIST1H2BC          | ENSG00000180596.7  |    |    |    | NA | NA | NA | NA | NA | NA | NA | NA | NA | NA |
| NA                 | NA                 | NA | NA | NA | -2 | NA |    |    |    |    |    |    |    |    |
| TRIM39             | ENSG00000204599.14 |    |    |    | NA | NA | NA | NA | NA | NA | NA | NA | NA | NA |
| NA                 | NA                 | NA | NA | NA | -2 | NA |    |    |    |    |    |    |    |    |
| RP11-437J19.1      | ENSG00000223811.1  |    |    |    | NA | NA | NA | NA | NA | NA | NA | NA | NA | NA |
| NA                 | NA                 | NA | NA | NA | NA | -2 | NA |    |    |    |    |    |    |    |
| LINC00473          | ENSG00000223414.2  |    |    |    | NA | NA | NA | NA | NA | NA | NA | NA | NA | NA |
| NA                 | NA                 | NA | NA | NA | -2 | NA |    |    |    |    |    |    |    |    |
| PLG                | ENSG00000122194.18 |    |    |    | NA | NA | NA | NA | NA | NA | NA | NA | NA | NA |
| NA                 | NA                 | NA | NA | -2 | NA |    |    |    |    |    |    |    |    |    |
| NHEG1              | ENSG00000225391.5  |    |    |    | NA | NA | NA | NA | NA | NA | NA | NA | NA | NA |
| NA                 | NA                 | NA | NA | -2 | NA |    |    |    |    |    |    |    |    |    |
| MLN                | ENSG00000096395.10 |    |    |    | NA | NA | NA | NA | NA | NA | NA | NA | NA | NA |
| NA                 | NA                 | NA | NA | -2 | NA |    |    |    |    |    |    |    |    |    |
| GSTA2              | ENSG00000244067.2  |    |    |    | NA | NA | NA | NA | NA | NA | NA | NA | NA | NA |
| NA                 | NA                 | NA | NA | -2 | NA |    |    |    |    |    |    |    |    |    |
| UBD                | ENSG00000213886.3  |    |    |    | NA | NA | NA | NA | NA | NA | NA | NA | NA | NA |
| NA                 | NA                 | NA | NA | -2 | NA |    |    |    |    |    |    |    |    |    |
| RP1-140K8.1        | ENSG00000233068.2  |    |    |    | NA | NA | NA | NA | NA | NA | NA | NA | NA | NA |
| NA                 | NA                 | NA | NA | NA | NA | -2 | NA |    |    |    |    |    |    |    |
| T                  | ENSG00000164458.9  |    |    |    | NA | NA | NA | NA | NA | NA | NA | NA | NA | NA |
| NA                 | NA                 | NA | NA | -2 | NA |    |    |    |    |    |    |    |    |    |
| NUP153             | ENSG00000124789.11 |    |    |    | NA | NA | NA | NA | NA | NA | NA | NA | NA | NA |
| NA                 | NA                 | NA | NA | NA | -2 | NA |    |    |    |    |    |    |    |    |
| OR2J2              | ENSG00000204700.4  |    |    |    | NA | NA | NA | NA | NA | NA | NA | NA | NA | NA |
| NA                 | NA                 | NA | NA | -2 | NA |    |    |    |    |    |    |    |    |    |
| MBOAT1             | ENSG00000172197.10 |    |    |    | NA | NA | NA | NA | NA | NA | NA | NA | NA | NA |
| NA                 | NA                 | NA | NA | NA | -2 | NA |    |    |    |    |    |    |    |    |
| ADGRG6             | ENSG00000112414.14 |    |    |    | NA | NA | NA | NA | NA | NA | NA | NA | NA | NA |
| NA                 | NA                 | NA | NA | NA | -2 | NA |    |    |    |    |    |    |    |    |
| RP11-95M15.3       | ENSG00000283265.1  |    |    |    | NA | NA | NA | NA | NA | NA | NA | NA | NA | NA |
| NA                 | NA                 | NA | NA | NA | NA | -2 | NA |    |    |    |    |    |    |    |
| MRAP2              | ENSG00000135324.5  |    |    |    | NA | NA | NA | NA | NA | NA | NA | NA | NA | NA |
| NA                 | NA                 | NA | NA | -2 | NA |    |    |    |    |    |    |    |    |    |
| RP1-111B22.3       | ENSG00000271734.1  |    |    |    | NA | NA | NA | NA | NA | NA | NA | NA | NA | NA |

|                    |                    |    |    |    |    |    |    |    |    |    |    |    |    |    |
|--------------------|--------------------|----|----|----|----|----|----|----|----|----|----|----|----|----|
| NA                 | NA                 | NA | NA | NA | NA | -2 | NA |    |    |    |    |    |    |    |
| HIST1H2BH          | ENSG00000275713.2  |    |    |    |    | NA | NA | NA | NA | NA | NA | NA | NA | NA |
| NA                 | NA                 | NA | NA | NA | NA | -2 | NA |    |    |    |    |    |    |    |
| PPP2R5D            | ENSG00000112640.14 |    |    |    |    | NA | NA | NA | NA | NA | NA | NA | NA | NA |
| NA                 | NA                 | NA | NA | NA | NA | -2 | NA |    |    |    |    |    |    |    |
| RP11-306O13.1      | ENSG00000213121.2  |    |    |    |    | NA | NA | NA | NA | NA | NA | NA | NA | NA |
| NA                 | NA                 | NA | NA | NA | NA | -2 | NA |    |    |    |    |    |    |    |
| CNPY3              | ENSG00000137161.16 |    |    |    |    | NA | NA | NA | NA | NA | NA | NA | NA | NA |
| NA                 | NA                 | NA | NA | NA | NA | -2 | NA |    |    |    |    |    |    |    |
| MUC22              | ENSG00000261272.1  |    |    |    |    | NA | NA | NA | NA | NA | NA | NA | NA | NA |
| NA                 | NA                 | NA | NA | NA | NA | -2 | NA |    |    |    |    |    |    |    |
| RP11-284J1.1       | ENSG00000272485.1  |    |    |    |    | NA | NA | NA | NA | NA | NA | NA | NA | NA |
| NA                 | NA                 | NA | NA | NA | NA | -2 | NA |    |    |    |    |    |    |    |
| VNN3               | ENSG00000093134.14 |    |    |    |    | NA | NA | NA | NA | NA | NA | NA | NA | NA |
| NA                 | NA                 | NA | NA | NA | NA | -2 | NA |    |    |    |    |    |    |    |
| VWA7               | ENSG00000204396.10 |    |    |    |    | NA | NA | NA | NA | NA | NA | NA | NA | NA |
| NA                 | NA                 | NA | NA | NA | NA | -2 | NA |    |    |    |    |    |    |    |
| AIM1               | ENSG00000112297.14 |    |    |    |    | NA | NA | NA | NA | NA | NA | NA | NA | NA |
| NA                 | NA                 | NA | NA | NA | NA | -2 | NA |    |    |    |    |    |    |    |
| RP3-400B16.1       | ENSG00000234817.2  |    |    |    |    | NA | NA | NA | NA | NA | NA | NA | NA | NA |
| NA                 | NA                 | NA | NA | NA | NA | -2 | NA |    |    |    |    |    |    |    |
| LPA                | ENSG00000198670.11 |    |    |    |    | NA | NA | NA | NA | NA | NA | NA | NA | NA |
| NA                 | NA                 | NA | NA | NA | NA | -2 | NA |    |    |    |    |    |    |    |
| SIM1               | ENSG00000112246.9  |    |    |    |    | NA | NA | NA | NA | NA | NA | NA | NA | NA |
| NA                 | NA                 | NA | NA | NA | NA | -2 | NA |    |    |    |    |    |    |    |
| TAB2               | ENSG00000055208.18 |    |    |    |    | NA | NA | NA | NA | NA | NA | NA | NA | NA |
| NA                 | NA                 | NA | NA | NA | NA | -2 | NA |    |    |    |    |    |    |    |
| HIST1H2BG          | ENSG00000273802.2  |    |    |    |    | NA | NA | NA | NA | NA | NA | NA | NA | NA |
| NA                 | NA                 | NA | NA | NA | NA | -2 | NA |    |    |    |    |    |    |    |
| SCAF8              | ENSG00000213079.9  |    |    |    |    | NA | NA | NA | NA | NA | NA | NA | NA | NA |
| NA                 | NA                 | NA | NA | NA | NA | -2 | NA |    |    |    |    |    |    |    |
| C6orf10            | ENSG00000204296.11 |    |    |    |    | NA | NA | NA | NA | NA | NA | NA | NA | NA |
| NA                 | NA                 | NA | NA | NA | NA | -2 | NA |    |    |    |    |    |    |    |
| RP3-495K2.2        | ENSG00000229720.1  |    |    |    |    | NA | NA | NA | NA | NA | NA | NA | NA | NA |
| NA                 | NA                 | NA | NA | NA | NA | -2 | NA |    |    |    |    |    |    |    |
| PPARD              | ENSG00000112033.13 |    |    |    |    | NA | NA | NA | NA | NA | NA | NA | NA | NA |
| NA                 | NA                 | NA | NA | NA | NA | -2 | NA |    |    |    |    |    |    |    |
| XXbac-BPG248L24.13 | ENSG00000256166.1  |    |    |    |    | NA | NA | NA | NA | NA | NA | NA | NA | NA |
| NA                 | NA                 | NA | NA | NA | NA | NA | -2 | NA |    |    |    |    |    |    |
| PSMB8-AS1          | ENSG00000204261.8  |    |    |    |    | NA | NA | NA | NA | NA | NA | NA | NA | NA |
| NA                 | NA                 | NA | NA | NA | NA | -2 | NA |    |    |    |    |    |    |    |
| PNPLA1             | ENSG00000180316.12 |    |    |    |    | NA | NA | NA | NA | NA | NA | NA | NA | NA |
| NA                 | NA                 | NA | NA | NA | NA | -2 | NA |    |    |    |    |    |    |    |
| C6orf229           | ENSG00000260286.3  |    |    |    |    | NA | NA | NA | NA | NA | NA | NA | NA | NA |
| NA                 | NA                 | NA | NA | NA | NA | -2 | NA |    |    |    |    |    |    |    |
| TTBK1              | ENSG00000146216.11 |    |    |    |    | NA | NA | NA | NA | NA | NA | NA | NA | NA |
| NA                 | NA                 | NA | NA | NA | NA | -2 | NA |    |    |    |    |    |    |    |
| RP1-137D17.2       | ENSG00000272848.1  |    |    |    |    | NA | NA | NA | NA | NA | NA | NA | NA | NA |
| NA                 | NA                 | NA | NA | NA | NA | -2 | NA |    |    |    |    |    |    |    |
| AIG1               | ENSG00000146416.17 |    |    |    |    | NA | NA | NA | NA | NA | NA | NA | NA | NA |
| NA                 | NA                 | NA | NA | NA | NA | -2 | NA |    |    |    |    |    |    |    |
| RP11-527F13.1      | ENSG00000231842.1  |    |    |    |    | NA | NA | NA | NA | NA | NA | NA | NA | NA |
| NA                 | NA                 | NA | NA | NA | NA | -2 | NA |    |    |    |    |    |    |    |
| SASH1              | ENSG00000111961.17 |    |    |    |    | NA | NA | NA | NA | NA | NA | NA | NA | NA |
| NA                 | NA                 | NA | NA | NA | NA | -2 | NA |    |    |    |    |    |    |    |
| RP1-261G23.5       | ENSG00000236961.1  |    |    |    |    | NA | NA | NA | NA | NA | NA | NA | NA | NA |
| NA                 | NA                 | NA | NA | NA | NA | -2 | NA |    |    |    |    |    |    |    |
| TREML1             | ENSG00000161911.11 |    |    |    |    | NA | NA | NA | NA | NA | NA | NA | NA | NA |
| NA                 | NA                 | NA | NA | NA | NA | -2 | NA |    |    |    |    |    |    |    |
| C6orf136           | ENSG00000204564.11 |    |    |    |    | NA | NA | NA | NA | NA | NA | NA | NA | NA |
| NA                 | NA                 | NA | NA | NA | NA | -2 | NA |    |    |    |    |    |    |    |
| ERVFRD-1           | ENSG00000244476.2  |    |    |    |    | NA | NA | NA | NA | NA | NA | NA | NA | NA |

|                    |                    |                    |    |    |    |    |    |    |    |    |    |    |    |    |
|--------------------|--------------------|--------------------|----|----|----|----|----|----|----|----|----|----|----|----|
| NA                 | NA                 | NA                 | NA | NA | -2 | NA |    |    |    |    |    |    |    |    |
| RP1-90J20.2        |                    | ENSG00000228365.1  |    |    |    | NA | NA | NA | NA | NA | NA | NA | NA | NA |
| NA                 | NA                 | NA                 | NA | NA | NA | -2 | NA |    |    |    |    |    |    |    |
| RP3-332B22.1       |                    | ENSG00000236013.5  |    |    |    | NA | NA | NA | NA | NA | NA | NA | NA | NA |
| NA                 | NA                 | NA                 | NA | NA | NA | -2 | NA |    |    |    |    |    |    |    |
| BACH2              | ENSG00000112182.14 |                    |    |    |    | NA | NA | NA | NA | NA | NA | NA | NA | NA |
| NA                 | NA                 | NA                 | NA | NA | NA | -2 | NA |    |    |    |    |    |    |    |
| RP11-686D16.1      |                    | ENSG00000231662.1  |    |    |    | NA | NA | NA | NA | NA | NA | NA | NA | NA |
| NA                 | NA                 | NA                 | NA | NA | NA | -2 | NA |    |    |    |    |    |    |    |
| RP11-301G19.1      |                    | ENSG00000227706.3  |    |    |    | NA | NA | NA | NA | NA | NA | NA | NA | NA |
| NA                 | NA                 | NA                 | NA | NA | NA | -2 | NA |    |    |    |    |    |    |    |
| KCTD20             |                    | ENSG00000112078.13 |    |    |    | NA | NA | NA | NA | NA | NA | NA | NA | NA |
| NA                 | NA                 | NA                 | NA | NA | NA | -2 | NA |    |    |    |    |    |    |    |
| RP11-250B2.6       |                    | ENSG00000272129.1  |    |    |    | NA | NA | NA | NA | NA | NA | NA | NA | NA |
| NA                 | NA                 | NA                 | NA | NA | NA | -2 | NA |    |    |    |    |    |    |    |
| ENPP3              | ENSG00000154269.14 |                    |    |    |    | NA | NA | NA | NA | NA | NA | NA | NA | NA |
| NA                 | NA                 | NA                 | NA | NA | NA | -2 | NA |    |    |    |    |    |    |    |
| OR14J1             |                    | ENSG00000204695.3  |    |    |    | NA | NA | NA | NA | NA | NA | NA | NA | NA |
| NA                 | NA                 | NA                 | NA | NA | NA | -2 | NA |    |    |    |    |    |    |    |
| RAET1L             |                    | ENSG00000155918.7  |    |    |    | NA | NA | NA | NA | NA | NA | NA | NA | NA |
| NA                 | NA                 | NA                 | NA | NA | NA | -2 | NA |    |    |    |    |    |    |    |
| NEU1               | ENSG00000204386.10 |                    |    |    |    | NA | NA | NA | NA | NA | NA | NA | NA | NA |
| NA                 | NA                 | NA                 | NA | NA | NA | -2 | NA |    |    |    |    |    |    |    |
| B3GALT4            |                    | ENSG00000235863.3  |    |    |    | NA | NA | NA | NA | NA | NA | NA | NA | NA |
| NA                 | NA                 | NA                 | NA | NA | NA | -2 | NA |    |    |    |    |    |    |    |
| RP3-431P23.5       |                    | ENSG00000269155.2  |    |    |    | NA | NA | NA | NA | NA | NA | NA | NA | NA |
| NA                 | NA                 | NA                 | NA | NA | NA | -2 | NA |    |    |    |    |    |    |    |
| RP11-177G23.2      |                    | ENSG00000272137.1  |    |    |    | NA | NA | NA | NA | NA | NA | NA | NA | NA |
| NA                 | NA                 | NA                 | NA | NA | NA | -2 | NA |    |    |    |    |    |    |    |
| RP3-340B19.3       |                    | ENSG00000228559.1  |    |    |    | NA | NA | NA | NA | NA | NA | NA | NA | NA |
| NA                 | NA                 | NA                 | NA | NA | NA | -2 | NA |    |    |    |    |    |    |    |
| GABRR1             |                    | ENSG00000146276.11 |    |    |    | NA | NA | NA | NA | NA | NA | NA | NA | NA |
| NA                 | NA                 | NA                 | NA | NA | NA | -2 | NA |    |    |    |    |    |    |    |
| FAM65B             |                    | ENSG00000111913.17 |    |    |    | NA | NA | NA | NA | NA | NA | NA | NA | NA |
| NA                 | NA                 | NA                 | NA | NA | NA | -2 | NA |    |    |    |    |    |    |    |
| RNGTT              | ENSG00000111880.15 |                    |    |    |    | NA | NA | NA | NA | NA | NA | NA | NA | NA |
| NA                 | NA                 | NA                 | NA | NA | NA | -2 | NA |    |    |    |    |    |    |    |
| MTFR2              | ENSG00000146410.11 |                    |    |    |    | NA | NA | NA | NA | NA | NA | NA | NA | NA |
| NA                 | NA                 | NA                 | NA | NA | NA | -2 | NA |    |    |    |    |    |    |    |
| NFKBIL1            |                    | ENSG00000204498.10 |    |    |    | NA | NA | NA | NA | NA | NA | NA | NA | NA |
| NA                 | NA                 | NA                 | NA | NA | NA | -2 | NA |    |    |    |    |    |    |    |
| FAM83B             |                    | ENSG00000168143.8  |    |    |    | NA | NA | NA | NA | NA | NA | NA | NA | NA |
| NA                 | NA                 | NA                 | NA | NA | NA | -2 | NA |    |    |    |    |    |    |    |
| ZNF165             |                    | ENSG00000197279.3  |    |    |    | NA | NA | NA | NA | NA | NA | NA | NA | NA |
| NA                 | NA                 | NA                 | NA | NA | NA | -2 | NA |    |    |    |    |    |    |    |
| SMAP1              | ENSG00000112305.14 |                    |    |    |    | NA | NA | NA | NA | NA | NA | NA | NA | NA |
| NA                 | NA                 | NA                 | NA | NA | NA | -2 | NA |    |    |    |    |    |    |    |
| HIST1H2BO          |                    | ENSG00000274641.1  |    |    |    | NA | NA | NA | NA | NA | NA | NA | NA | NA |
| NA                 | NA                 | NA                 | NA | NA | NA | -2 | NA |    |    |    |    |    |    |    |
| AKAP12             |                    | ENSG00000131016.16 |    |    |    | NA | NA | NA | NA | NA | NA | NA | NA | NA |
| NA                 | NA                 | NA                 | NA | NA | NA | -2 | NA |    |    |    |    |    |    |    |
| SLC22A23           |                    | ENSG00000137266.14 |    |    |    | NA | NA | NA | NA | NA | NA | NA | NA | NA |
| NA                 | NA                 | NA                 | NA | NA | NA | -2 | NA |    |    |    |    |    |    |    |
| XXbac-BPG157A10.21 |                    | ENSG00000272217.1  |    |    |    | NA | NA | NA | NA | NA | NA | NA | NA | NA |
| NA                 | NA                 | NA                 | NA | NA | NA | NA | -2 | NA |    |    |    |    |    |    |
| USP49              | ENSG00000164663.14 |                    |    |    |    | NA | NA | NA | NA | NA | NA | NA | NA | NA |
| NA                 | NA                 | NA                 | NA | NA | NA | -2 | NA |    |    |    |    |    |    |    |
| UNC5CL             |                    | ENSG00000124602.9  |    |    |    | NA | NA | NA | NA | NA | NA | NA | NA | NA |
| NA                 | NA                 | NA                 | NA | NA | NA | -2 | NA |    |    |    |    |    |    |    |
| LY86               | ENSG00000112799.8  |                    |    |    |    | NA | NA | NA | NA | NA | NA | NA | NA | NA |
| NA                 | NA                 | NA                 | NA | NA | NA | -2 | NA |    |    |    |    |    |    |    |
| GFRAL              | ENSG00000187871.2  |                    |    |    |    | NA | NA | NA | NA | NA | NA | NA | NA | NA |

|               |                    |    |    |    |    |    |    |    |    |    |    |    |    |    |
|---------------|--------------------|----|----|----|----|----|----|----|----|----|----|----|----|----|
| NA            | NA                 | NA | NA | -2 | NA |    |    |    |    |    |    |    |    |    |
| GPRC6A        | ENSG00000173612.9  |    |    |    | NA | NA | NA | NA | NA | NA | NA | NA | NA | NA |
| NA            | NA                 | NA | NA | NA | -2 | NA |    |    |    |    |    |    |    |    |
| LINC01624     | ENSG00000227508.6  |    |    |    | NA | NA | NA | NA | NA | NA | NA | NA | NA | NA |
| NA            | NA                 | NA | NA | NA | -2 | NA |    |    |    |    |    |    |    |    |
| BMP5          | ENSG00000112175.7  |    |    |    | NA | NA | NA | NA | NA | NA | NA | NA | NA | NA |
| NA            | NA                 | NA | NA | NA | -2 | NA |    |    |    |    |    |    |    |    |
| RAB44         | ENSG00000255587.7  |    |    |    | NA | NA | NA | NA | NA | NA | NA | NA | NA | NA |
| NA            | NA                 | NA | NA | NA | -2 | NA |    |    |    |    |    |    |    |    |
| EGFL8         | ENSG00000241404.6  |    |    |    | NA | NA | NA | NA | NA | NA | NA | NA | NA | NA |
| NA            | NA                 | NA | NA | NA | -2 | NA |    |    |    |    |    |    |    |    |
| SLC17A3       | ENSG00000124564.17 |    |    |    | NA | NA | NA | NA | NA | NA | NA | NA | NA | NA |
| NA            | NA                 | NA | NA | NA | -2 | NA |    |    |    |    |    |    |    |    |
| RP11-459O1.2  | ENSG00000234426.1  |    |    |    | NA | NA | NA | NA | NA | NA | NA | NA | NA | NA |
| NA            | NA                 | NA | NA | NA | NA | -2 | NA |    |    |    |    |    |    |    |
| CDC5L         | ENSG00000096401.7  |    |    |    | NA | NA | NA | NA | NA | NA | NA | NA | NA | NA |
| NA            | NA                 | NA | NA | NA | -2 | NA |    |    |    |    |    |    |    |    |
| RP1-97J1.2    | ENSG00000227012.2  |    |    |    | NA | NA | NA | NA | NA | NA | NA | NA | NA | NA |
| NA            | NA                 | NA | NA | NA | -2 | NA |    |    |    |    |    |    |    |    |
| CENPW         | ENSG00000203760.8  |    |    |    | NA | NA | NA | NA | NA | NA | NA | NA | NA | NA |
| NA            | NA                 | NA | NA | NA | -2 | NA |    |    |    |    |    |    |    |    |
| MAS1L         | ENSG00000204687.4  |    |    |    | NA | NA | NA | NA | NA | NA | NA | NA | NA | NA |
| NA            | NA                 | NA | NA | NA | -2 | NA |    |    |    |    |    |    |    |    |
| ZBTB2         | ENSG00000181472.4  |    |    |    | NA | NA | NA | NA | NA | NA | NA | NA | NA | NA |
| NA            | NA                 | NA | NA | NA | -2 | NA |    |    |    |    |    |    |    |    |
| RP11-554D15.3 | ENSG00000272243.5  |    |    |    | NA | NA | NA | NA | NA | NA | NA | NA | NA | NA |
| NA            | NA                 | NA | NA | NA | NA | -2 | NA |    |    |    |    |    |    |    |
| ADGRF2        | ENSG00000164393.8  |    |    |    | NA | NA | NA | NA | NA | NA | NA | NA | NA | NA |
| NA            | NA                 | NA | NA | NA | -2 | NA |    |    |    |    |    |    |    |    |
| RP1-297M16.2  | ENSG00000231883.1  |    |    |    | NA | NA | NA | NA | NA | NA | NA | NA | NA | NA |
| NA            | NA                 | NA | NA | NA | NA | -2 | NA |    |    |    |    |    |    |    |
| NFKBIE        | ENSG00000146232.15 |    |    |    | NA | NA | NA | NA | NA | NA | NA | NA | NA | NA |
| NA            | NA                 | NA | NA | NA | -2 | NA |    |    |    |    |    |    |    |    |
| CCNC          | ENSG00000112237.12 |    |    |    | NA | NA | NA | NA | NA | NA | NA | NA | NA | NA |
| NA            | NA                 | NA | NA | NA | -2 | NA |    |    |    |    |    |    |    |    |
| HIST1H2BN     | ENSG00000233822.4  |    |    |    | NA | NA | NA | NA | NA | NA | NA | NA | NA | NA |
| NA            | NA                 | NA | NA | NA | -2 | NA |    |    |    |    |    |    |    |    |
| SOX4          | ENSG00000124766.6  |    |    |    | NA | NA | NA | NA | NA | NA | NA | NA | NA | NA |
| NA            | NA                 | NA | NA | NA | -2 | NA |    |    |    |    |    |    |    |    |
| SLC35B2       | ENSG00000157593.18 |    |    |    | NA | NA | NA | NA | NA | NA | NA | NA | NA | NA |
| NA            | NA                 | NA | NA | NA | -2 | NA |    |    |    |    |    |    |    |    |
| C6orf47       | ENSG00000204439.3  |    |    |    | NA | NA | NA | NA | NA | NA | NA | NA | NA | NA |
| NA            | NA                 | NA | NA | NA | -2 | NA |    |    |    |    |    |    |    |    |
| FKBP1C        | ENSG00000198225.5  |    |    |    | NA | NA | NA | NA | NA | NA | NA | NA | NA | NA |
| NA            | NA                 | NA | NA | NA | -2 | NA |    |    |    |    |    |    |    |    |
| C6orf52       | ENSG00000137434.11 |    |    |    | NA | NA | NA | NA | NA | NA | NA | NA | NA | NA |
| NA            | NA                 | NA | NA | NA | -2 | NA |    |    |    |    |    |    |    |    |
| RP3-329A5.8   | ENSG00000272374.1  |    |    |    | NA | NA | NA | NA | NA | NA | NA | NA | NA | NA |
| NA            | NA                 | NA | NA | NA | NA | -2 | NA |    |    |    |    |    |    |    |
| RP11-367G18.1 | ENSG00000230943.1  |    |    |    | NA | NA | NA | NA | NA | NA | NA | NA | NA | NA |
| NA            | NA                 | NA | NA | NA | NA | -2 | NA |    |    |    |    |    |    |    |
| FOXC1         | ENSG00000054598.6  |    |    |    | NA | NA | NA | NA | NA | NA | NA | NA | NA | NA |
| NA            | NA                 | NA | NA | NA | -2 | NA |    |    |    |    |    |    |    |    |
| TUBB2B        | ENSG00000137285.9  |    |    |    | NA | NA | NA | NA | NA | NA | NA | NA | NA | NA |
| NA            | NA                 | NA | NA | NA | -2 | NA |    |    |    |    |    |    |    |    |
| CLPS          | ENSG00000137392.9  |    |    |    | NA | NA | NA | NA | NA | NA | NA | NA | NA | NA |
| NA            | NA                 | NA | NA | NA | -2 | NA |    |    |    |    |    |    |    |    |
| RP3-470L22.1  | ENSG00000224532.2  |    |    |    | NA | NA | NA | NA | NA | NA | NA | NA | NA | NA |
| NA            | NA                 | NA | NA | NA | NA | -2 | NA |    |    |    |    |    |    |    |
| COL10A1       | ENSG00000123500.9  |    |    |    | NA | NA | NA | NA | NA | NA | NA | NA | NA | NA |
| NA            | NA                 | NA | NA | NA | -2 | NA |    |    |    |    |    |    |    |    |
| OOEP          | ENSG00000203907.9  |    |    |    | NA | NA | NA | NA | NA | NA | NA | NA | NA | NA |

|                  |                    |    |    |    |    |    |    |    |    |    |    |    |    |    |
|------------------|--------------------|----|----|----|----|----|----|----|----|----|----|----|----|----|
|                  | NA                 | NA | NA | NA | -2 | NA |    |    |    |    |    |    |    |    |
| LST1             | ENSG00000204482.10 |    |    |    |    | NA | NA | NA | NA | NA | NA | NA | NA | NA |
|                  | NA                 | NA | NA | NA | -2 | NA |    |    |    |    |    |    |    |    |
| PBX2             | ENSG00000204304.11 |    |    |    |    | NA | NA | NA | NA | NA | NA | NA | NA | NA |
|                  | NA                 | NA | NA | NA | -2 | NA |    |    |    |    |    |    |    |    |
| HSPA1A           | ENSG00000204389.9  |    |    |    |    | NA | NA | NA | NA | NA | NA | NA | NA | NA |
|                  | NA                 | NA | NA | NA | -2 | NA |    |    |    |    |    |    |    |    |
| SLC17A1          | ENSG00000124568.10 |    |    |    |    | NA | NA | NA | NA | NA | NA | NA | NA | NA |
|                  | NA                 | NA | NA | NA | -2 | NA |    |    |    |    |    |    |    |    |
| PRPF4B           | ENSG00000112739.16 |    |    |    |    | NA | NA | NA | NA | NA | NA | NA | NA | NA |
|                  | NA                 | NA | NA | NA | -2 | NA |    |    |    |    |    |    |    |    |
| RP11-557H15.3    | ENSG00000231971.5  |    |    |    |    | NA | NA | NA | NA | NA | NA | NA | NA | NA |
|                  | NA                 | NA | NA | NA | NA | -2 | NA |    |    |    |    |    |    |    |
| C6orf203         | ENSG00000130349.9  |    |    |    |    | NA | NA | NA | NA | NA | NA | NA | NA | NA |
|                  | NA                 | NA | NA | NA | -2 | NA |    |    |    |    |    |    |    |    |
| TRIM10           | ENSG00000204613.10 |    |    |    |    | NA | NA | NA | NA | NA | NA | NA | NA | NA |
|                  | NA                 | NA | NA | NA | -2 | NA |    |    |    |    |    |    |    |    |
| SAPCD1           | ENSG00000228727.8  |    |    |    |    | NA | NA | NA | NA | NA | NA | NA | NA | NA |
|                  | NA                 | NA | NA | NA | -2 | NA |    |    |    |    |    |    |    |    |
| TRAPPC3L         | ENSG00000173626.9  |    |    |    |    | NA | NA | NA | NA | NA | NA | NA | NA | NA |
|                  | NA                 | NA | NA | NA | -2 | NA |    |    |    |    |    |    |    |    |
| SYNJ2            | ENSG00000078269.14 |    |    |    |    | NA | NA | NA | NA | NA | NA | NA | NA | NA |
|                  | NA                 | NA | NA | NA | -2 | NA |    |    |    |    |    |    |    |    |
| RP11-173D14.3    | ENSG00000229495.1  |    |    |    |    | NA | NA | NA | NA | NA | NA | NA | NA | NA |
|                  | NA                 | NA | NA | NA | NA | -2 | NA |    |    |    |    |    |    |    |
| EEF1A1           | ENSG00000156508.17 |    |    |    |    | NA | NA | NA | NA | NA | NA | NA | NA | NA |
|                  | NA                 | NA | NA | NA | -2 | NA |    |    |    |    |    |    |    |    |
| RP1-153P14.8     | ENSG00000204110.6  |    |    |    |    | NA | NA | NA | NA | NA | NA | NA | NA | NA |
|                  | NA                 | NA | NA | NA | NA | -2 | NA |    |    |    |    |    |    |    |
| RP3-406P24.4     | ENSG00000272248.1  |    |    |    |    | NA | NA | NA | NA | NA | NA | NA | NA | NA |
|                  | NA                 | NA | NA | NA | NA | -2 | NA |    |    |    |    |    |    |    |
| XXbac-BPG55C20.7 | ENSG00000225096.1  |    |    |    |    | NA | NA | NA | NA | NA | NA | NA | NA | NA |
|                  | NA                 | NA | NA | NA | NA | -2 | NA |    |    |    |    |    |    |    |
| MAP3K4           | ENSG00000085511.19 |    |    |    |    | NA | NA | NA | NA | NA | NA | NA | NA | NA |
|                  | NA                 | NA | NA | NA | -2 | NA |    |    |    |    |    |    |    |    |
| HIST1H2BA        | ENSG00000146047.6  |    |    |    |    | NA | NA | NA | NA | NA | NA | NA | NA | NA |
|                  | NA                 | NA | NA | NA | -2 | NA |    |    |    |    |    |    |    |    |
| ARG1             | ENSG00000118520.14 |    |    |    |    | NA | NA | NA | NA | NA | NA | NA | NA | NA |
|                  | NA                 | NA | NA | NA | -2 | NA |    |    |    |    |    |    |    |    |
| LINC01108        | ENSG00000226673.2  |    |    |    |    | NA | NA | NA | NA | NA | NA | NA | NA | NA |
|                  | NA                 | NA | NA | NA | -2 | NA |    |    |    |    |    |    |    |    |
| VNN1             | ENSG00000112299.7  |    |    |    |    | NA | NA | NA | NA | NA | NA | NA | NA | NA |
|                  | NA                 | NA | NA | NA | -2 | NA |    |    |    |    |    |    |    |    |
| DPPA5            | ENSG00000203909.3  |    |    |    |    | NA | NA | NA | NA | NA | NA | NA | NA | NA |
|                  | NA                 | NA | NA | NA | -2 | NA |    |    |    |    |    |    |    |    |
| TMEM200A         | ENSG00000164484.11 |    |    |    |    | NA | NA | NA | NA | NA | NA | NA | NA | NA |
|                  | NA                 | NA | NA | NA | -2 | NA |    |    |    |    |    |    |    |    |
| SLC17A4          | ENSG00000146039.10 |    |    |    |    | NA | NA | NA | NA | NA | NA | NA | NA | NA |
|                  | NA                 | NA | NA | NA | -2 | NA |    |    |    |    |    |    |    |    |
| RP5-826L7.1      | ENSG00000228692.2  |    |    |    |    | NA | NA | NA | NA | NA | NA | NA | NA | NA |
|                  | NA                 | NA | NA | NA | NA | -2 | NA |    |    |    |    |    |    |    |
| RP1-124C6.1      | ENSG00000232316.1  |    |    |    |    | NA | NA | NA | NA | NA | NA | NA | NA | NA |
|                  | NA                 | NA | NA | NA | NA | -2 | NA |    |    |    |    |    |    |    |
| DPCR1            | ENSG00000168631.12 |    |    |    |    | NA | NA | NA | NA | NA | NA | NA | NA | NA |
|                  | NA                 | NA | NA | NA | -2 | NA |    |    |    |    |    |    |    |    |
| RP4-529N6.1      | ENSG00000205444.2  |    |    |    |    | NA | NA | NA | NA | NA | NA | NA | NA | NA |
|                  | NA                 | NA | NA | NA | NA | -2 | NA |    |    |    |    |    |    |    |
| ZNF76            | ENSG00000065029.14 |    |    |    |    | NA | NA | NA | NA | NA | NA | NA | NA | NA |
|                  | NA                 | NA | NA | NA | -2 | NA |    |    |    |    |    |    |    |    |
| HUS1B            | ENSG00000188996.4  |    |    |    |    | NA | NA | NA | NA | NA | NA | NA | NA | NA |
|                  | NA                 | NA | NA | NA | -2 | NA |    |    |    |    |    |    |    |    |
| KCNK17           | ENSG00000124780.13 |    |    |    |    | NA | NA | NA | NA | NA | NA | NA | NA | NA |

|               |                    |    |    |    |    |    |    |    |    |    |    |    |    |    |
|---------------|--------------------|----|----|----|----|----|----|----|----|----|----|----|----|----|
| NA            | NA                 | NA | NA | NA | -2 | NA | NA | NA | NA | NA | NA | NA | NA | NA |
| SLC35F1       | ENSG00000196376.10 | NA | NA | NA | NA | NA | NA | NA | NA | NA | NA | NA | NA | NA |
| NA            | NA                 | NA | NA | NA | -2 | NA | NA | NA | NA | NA | NA | NA | NA | NA |
| GRIK2         | ENSG00000164418.19 | NA | NA | NA | NA | NA | NA | NA | NA | NA | NA | NA | NA | NA |
| NA            | NA                 | NA | NA | NA | -2 | NA | NA | NA | NA | NA | NA | NA | NA | NA |
| RP1-242N11.1  | ENSG00000283408.1  | NA | NA | NA | NA | NA | NA | NA | NA | NA | NA | NA | NA | NA |
| NA            | NA                 | NA | NA | NA | NA | -2 | NA | NA | NA | NA | NA | NA | NA | NA |
| C6orf223      | ENSG00000181577.15 | NA | NA | NA | NA | NA | NA | NA | NA | NA | NA | NA | NA | NA |
| NA            | NA                 | NA | NA | NA | -2 | NA | NA | NA | NA | NA | NA | NA | NA | NA |
| GNL1          | ENSG00000204590.12 | NA | NA | NA | NA | NA | NA | NA | NA | NA | NA | NA | NA | NA |
| NA            | NA                 | NA | NA | NA | -2 | NA | NA | NA | NA | NA | NA | NA | NA | NA |
| CDSN          | ENSG00000204539.3  | NA | NA | NA | NA | NA | NA | NA | NA | NA | NA | NA | NA | NA |
| NA            | NA                 | NA | NA | NA | -2 | NA | NA | NA | NA | NA | NA | NA | NA | NA |
| KAAG1         | ENSG00000146049.1  | NA | NA | NA | NA | NA | NA | NA | NA | NA | NA | NA | NA | NA |
| NA            | NA                 | NA | NA | NA | -2 | NA | NA | NA | NA | NA | NA | NA | NA | NA |
| RP11-125D12.1 | ENSG00000231178.1  | NA | NA | NA | NA | NA | NA | NA | NA | NA | NA | NA | NA | NA |
| NA            | NA                 | NA | NA | NA | NA | -2 | NA | NA | NA | NA | NA | NA | NA | NA |
| RP11-235G24.3 | ENSG00000233342.1  | NA | NA | NA | NA | NA | NA | NA | NA | NA | NA | NA | NA | NA |
| NA            | NA                 | NA | NA | NA | NA | -2 | NA | NA | NA | NA | NA | NA | NA | NA |
| PHIP          | ENSG00000146247.13 | NA | NA | NA | NA | NA | NA | NA | NA | NA | NA | NA | NA | NA |
| NA            | NA                 | NA | NA | NA | -2 | NA | NA | NA | NA | NA | NA | NA | NA | NA |
| CLIC1         | ENSG00000213719.8  | NA | NA | NA | NA | NA | NA | NA | NA | NA | NA | NA | NA | NA |
| NA            | NA                 | NA | NA | NA | -2 | NA | NA | NA | NA | NA | NA | NA | NA | NA |
| A POM         | ENSG00000204444.10 | NA | NA | NA | NA | NA | NA | NA | NA | NA | NA | NA | NA | NA |
| NA            | NA                 | NA | NA | NA | -2 | NA | NA | NA | NA | NA | NA | NA | NA | NA |
| BMP6          | ENSG00000153162.8  | NA | NA | NA | NA | NA | NA | NA | NA | NA | NA | NA | NA | NA |
| NA            | NA                 | NA | NA | NA | -2 | NA | NA | NA | NA | NA | NA | NA | NA | NA |
| KIAA0408      | ENSG00000189367.14 | NA | NA | NA | NA | NA | NA | NA | NA | NA | NA | NA | NA | NA |
| NA            | NA                 | NA | NA | NA | -2 | NA | NA | NA | NA | NA | NA | NA | NA | NA |
| TAAR1         | ENSG00000146399.1  | NA | NA | NA | NA | NA | NA | NA | NA | NA | NA | NA | NA | NA |
| NA            | NA                 | NA | NA | NA | -2 | NA | NA | NA | NA | NA | NA | NA | NA | NA |
| RP11-457M11.7 | ENSG00000275846.1  | NA | NA | NA | NA | NA | NA | NA | NA | NA | NA | NA | NA | NA |
| NA            | NA                 | NA | NA | NA | NA | -2 | NA | NA | NA | NA | NA | NA | NA | NA |
| RP11-79N23.1  | ENSG00000227885.1  | NA | NA | NA | NA | NA | NA | NA | NA | NA | NA | NA | NA | NA |
| NA            | NA                 | NA | NA | NA | NA | -2 | NA | NA | NA | NA | NA | NA | NA | NA |
| FARS2         | ENSG00000145982.11 | NA | NA | NA | NA | NA | NA | NA | NA | NA | NA | NA | NA | NA |
| NA            | NA                 | NA | NA | NA | -2 | NA | NA | NA | NA | NA | NA | NA | NA | NA |
| MRPL2         | ENSG00000112651.11 | NA | NA | NA | NA | NA | NA | NA | NA | NA | NA | NA | NA | NA |
| NA            | NA                 | NA | NA | NA | -2 | NA | NA | NA | NA | NA | NA | NA | NA | NA |
| IYD           | ENSG00000009765.14 | NA | NA | NA | NA | NA | NA | NA | NA | NA | NA | NA | NA | NA |
| NA            | NA                 | NA | NA | NA | -2 | NA | NA | NA | NA | NA | NA | NA | NA | NA |
| SLC16A10      | ENSG00000112394.16 | NA | NA | NA | NA | NA | NA | NA | NA | NA | NA | NA | NA | NA |
| NA            | NA                 | NA | NA | NA | -2 | NA | NA | NA | NA | NA | NA | NA | NA | NA |
| EDN1          | ENSG00000078401.6  | NA | NA | NA | NA | NA | NA | NA | NA | NA | NA | NA | NA | NA |
| NA            | NA                 | NA | NA | NA | -2 | NA | NA | NA | NA | NA | NA | NA | NA | NA |
| RP1-265C24.8  | ENSG00000261839.1  | NA | NA | NA | NA | NA | NA | NA | NA | NA | NA | NA | NA | NA |
| NA            | NA                 | NA | NA | NA | NA | -2 | NA | NA | NA | NA | NA | NA | NA | NA |
| RP11-556O15.1 | ENSG00000203498.2  | NA | NA | NA | NA | NA | NA | NA | NA | NA | NA | NA | NA | NA |
| NA            | NA                 | NA | NA | NA | NA | -2 | NA | NA | NA | NA | NA | NA | NA | NA |
| TNXB          | ENSG00000168477.17 | NA | NA | NA | NA | NA | NA | NA | NA | NA | NA | NA | NA | NA |
| NA            | NA                 | NA | NA | NA | -2 | NA | NA | NA | NA | NA | NA | NA | NA | NA |
| IL17F         | ENSG00000112116.9  | NA | NA | NA | NA | NA | NA | NA | NA | NA | NA | NA | NA | NA |
| NA            | NA                 | NA | NA | NA | -2 | NA | NA | NA | NA | NA | NA | NA | NA | NA |
| MEA1          | ENSG00000124733.3  | NA | NA | NA | NA | NA | NA | NA | NA | NA | NA | NA | NA | NA |
| NA            | NA                 | NA | NA | NA | -2 | NA | NA | NA | NA | NA | NA | NA | NA | NA |
| RP11-10J5.1   | ENSG00000226004.1  | NA | NA | NA | NA | NA | NA | NA | NA | NA | NA | NA | NA | NA |
| NA            | NA                 | NA | NA | NA | NA | -2 | NA | NA | NA | NA | NA | NA | NA | NA |
| RP3-523C21.2  | ENSG00000236166.1  | NA | NA | NA | NA | NA | NA | NA | NA | NA | NA | NA | NA | NA |
| NA            | NA                 | NA | NA | NA | NA | -2 | NA | NA | NA | NA | NA | NA | NA | NA |
| RP11-344J7.4  | ENSG00000283215.1  | NA | NA | NA | NA | NA | NA | NA | NA | NA | NA | NA | NA | NA |
| NA            | NA                 | NA | NA | NA | NA | -2 | NA | NA | NA | NA | NA | NA | NA | NA |
| IL22RA2       | ENSG00000164485.14 | NA | NA | NA | NA | NA | NA | NA | NA | NA | NA | NA | NA | NA |



|               |                    |    |    |    |    |    |    |    |    |    |    |    |    |    |
|---------------|--------------------|----|----|----|----|----|----|----|----|----|----|----|----|----|
| NA            | NA                 | NA | NA | NA | -2 | NA |    |    |    |    |    |    |    |    |
| BRPF3         | ENSG00000096070.19 |    |    |    |    | NA | NA | NA | NA | NA | NA | NA | NA | NA |
| NA            | NA                 | NA | NA | NA | -2 | NA |    |    |    |    |    |    |    |    |
| ADGRF5        | ENSG00000069122.18 |    |    |    |    | NA | NA | NA | NA | NA | NA | NA | NA | NA |
| NA            | NA                 | NA | NA | NA | -2 | NA |    |    |    |    |    |    |    |    |
| RP11-456H18.2 | ENSG00000229896.2  |    |    |    |    | NA | NA | NA | NA | NA | NA | NA | NA | NA |
| NA            | NA                 | NA | NA | NA | NA | -2 | NA |    |    |    |    |    |    |    |
| RP5-1077H22.2 | ENSG00000276687.1  |    |    |    |    | NA | NA | NA | NA | NA | NA | NA | NA | NA |
| NA            | NA                 | NA | NA | NA | NA | -2 | NA |    |    |    |    |    |    |    |
| BEND3         | ENSG00000178409.13 |    |    |    |    | NA | NA | NA | NA | NA | NA | NA | NA | NA |
| NA            | NA                 | NA | NA | NA | -2 | NA |    |    |    |    |    |    |    |    |
| RP11-367G6.3  | ENSG00000272053.1  |    |    |    |    | NA | NA | NA | NA | NA | NA | NA | NA | NA |
| NA            | NA                 | NA | NA | NA | NA | -2 | NA |    |    |    |    |    |    |    |
| RP11-570K4.1  | ENSG00000237947.1  |    |    |    |    | NA | NA | NA | NA | NA | NA | NA | NA | NA |
| NA            | NA                 | NA | NA | NA | NA | -2 | NA |    |    |    |    |    |    |    |
| SLC44A4       | ENSG00000204385.10 |    |    |    |    | NA | NA | NA | NA | NA | NA | NA | NA | NA |
| NA            | NA                 | NA | NA | NA | NA | -2 | NA |    |    |    |    |    |    |    |
| TMEM170B      | ENSG00000205269.5  |    |    |    |    | NA | NA | NA | NA | NA | NA | NA | NA | NA |
| NA            | NA                 | NA | NA | NA | NA | -2 | NA |    |    |    |    |    |    |    |
| RP1-166H4.2   | ENSG00000261080.1  |    |    |    |    | NA | NA | NA | NA | NA | NA | NA | NA | NA |
| NA            | NA                 | NA | NA | NA | NA | -2 | NA |    |    |    |    |    |    |    |
| PHF3          | ENSG00000118482.11 |    |    |    |    | NA | NA | NA | NA | NA | NA | NA | NA | NA |
| NA            | NA                 | NA | NA | NA | -2 | NA |    |    |    |    |    |    |    |    |
| QKI           | ENSG00000112531.16 |    |    |    |    | NA | NA | NA | NA | NA | NA | NA | NA | NA |
| NA            | NA                 | NA | NA | NA | -2 | NA |    |    |    |    |    |    |    |    |
| RP5-899B16.1  | ENSG00000231426.5  |    |    |    |    | NA | NA | NA | NA | NA | NA | NA | NA | NA |
| NA            | NA                 | NA | NA | NA | NA | -2 | NA |    |    |    |    |    |    |    |
| RP1-140K8.5   | ENSG00000260604.2  |    |    |    |    | NA | NA | NA | NA | NA | NA | NA | NA | NA |
| NA            | NA                 | NA | NA | NA | NA | -2 | NA |    |    |    |    |    |    |    |
| RFPL4B        | ENSG00000251258.1  |    |    |    |    | NA | NA | NA | NA | NA | NA | NA | NA | NA |
| NA            | NA                 | NA | NA | NA | NA | -2 | NA |    |    |    |    |    |    |    |
| GJB7          | ENSG00000164411.11 |    |    |    |    | NA | NA | NA | NA | NA | NA | NA | NA | NA |
| NA            | NA                 | NA | NA | NA | -2 | NA |    |    |    |    |    |    |    |    |
| SEC63         | ENSG00000025796.13 |    |    |    |    | NA | NA | NA | NA | NA | NA | NA | NA | NA |
| NA            | NA                 | NA | NA | NA | -2 | NA |    |    |    |    |    |    |    |    |
| PKHD1         | ENSG00000170927.14 |    |    |    |    | NA | NA | NA | NA | NA | NA | NA | NA | NA |
| NA            | NA                 | NA | NA | NA | -2 | NA |    |    |    |    |    |    |    |    |
| SMLR1         | ENSG00000256162.2  |    |    |    |    | NA | NA | NA | NA | NA | NA | NA | NA | NA |
| NA            | NA                 | NA | NA | NA | -2 | NA |    |    |    |    |    |    |    |    |
| GSTA5         | ENSG00000182793.11 |    |    |    |    | NA | NA | NA | NA | NA | NA | NA | NA | NA |
| NA            | NA                 | NA | NA | NA | -2 | NA |    |    |    |    |    |    |    |    |
| RRP36         | ENSG00000124541.6  |    |    |    |    | NA | NA | NA | NA | NA | NA | NA | NA | NA |
| NA            | NA                 | NA | NA | NA | -2 | NA |    |    |    |    |    |    |    |    |
| CDC40         | ENSG00000168438.14 |    |    |    |    | NA | NA | NA | NA | NA | NA | NA | NA | NA |
| NA            | NA                 | NA | NA | NA | -2 | NA |    |    |    |    |    |    |    |    |
| RP11-475C16.2 | ENSG00000237312.1  |    |    |    |    | NA | NA | NA | NA | NA | NA | NA | NA | NA |
| NA            | NA                 | NA | NA | NA | NA | -2 | NA |    |    |    |    |    |    |    |
| SLC22A7       | ENSG00000137204.14 |    |    |    |    | NA | NA | NA | NA | NA | NA | NA | NA | NA |
| NA            | NA                 | NA | NA | NA | NA | -2 | NA |    |    |    |    |    |    |    |
| YIPF3         | ENSG00000137207.11 |    |    |    |    | NA | NA | NA | NA | NA | NA | NA | NA | NA |
| NA            | NA                 | NA | NA | NA | -2 | NA |    |    |    |    |    |    |    |    |
| PXDC1         | ENSG00000168994.13 |    |    |    |    | NA | NA | NA | NA | NA | NA | NA | NA | NA |
| NA            | NA                 | NA | NA | NA | -2 | NA |    |    |    |    |    |    |    |    |
| PCMT1         | ENSG00000120265.16 |    |    |    |    | NA | NA | NA | NA | NA | NA | NA | NA | NA |
| NA            | NA                 | NA | NA | NA | -2 | NA |    |    |    |    |    |    |    |    |
| FOXQ1         | ENSG00000164379.6  |    |    |    |    | NA | NA | NA | NA | NA | NA | NA | NA | NA |
| NA            | NA                 | NA | NA | NA | -2 | NA |    |    |    |    |    |    |    |    |
| PGC           | ENSG00000096088.16 |    |    |    |    | NA | NA | NA | NA | NA | NA | NA | NA | NA |
| NA            | NA                 | NA | NA | NA | -2 | NA |    |    |    |    |    |    |    |    |
| CTGF          | ENSG00000118523.5  |    |    |    |    | NA | NA | NA | NA | NA | NA | NA | NA | NA |
| NA            | NA                 | NA | NA | NA | -2 | NA |    |    |    |    |    |    |    |    |
| KLC4          | ENSG00000137171.14 |    |    |    |    | NA | NA | NA | NA | NA | NA | NA | NA | NA |

|                 |                    |    |    |    |    |    |    |    |    |    |    |    |    |    |
|-----------------|--------------------|----|----|----|----|----|----|----|----|----|----|----|----|----|
| NA              | NA                 | NA | NA | -2 | NA |    |    |    |    |    |    |    |    |    |
| NBAT1           | ENSG00000260455.1  |    |    | NA | NA | NA | NA | NA | NA | NA | NA | NA | NA | NA |
| NA              | NA                 | NA | NA | -2 | NA |    |    |    |    |    |    |    |    |    |
| SGK1            | ENSG00000118515.11 |    |    | NA | NA | NA | NA | NA | NA | NA | NA | NA | NA | NA |
| NA              | NA                 | NA | NA | -2 | NA |    |    |    |    |    |    |    |    |    |
| RP1-142L7.9     | ENSG00000270661.1  |    |    | NA | NA | NA | NA | NA | NA | NA | NA | NA | NA | NA |
| NA              | NA                 | NA | NA | NA | -2 | NA |    |    |    |    |    |    |    |    |
| XXbac-BPG27H4.8 | ENSG00000237923.1  |    |    | NA | NA | NA | NA | NA | NA | NA | NA | NA | NA | NA |
| NA              | NA                 | NA | NA | NA | -2 | NA |    |    |    |    |    |    |    |    |
| TREML2          | ENSG00000112195.8  |    |    | NA | NA | NA | NA | NA | NA | NA | NA | NA | NA | NA |
| NA              | NA                 | NA | NA | NA | -2 | NA |    |    |    |    |    |    |    |    |
| BTN1A1          | ENSG00000124557.12 |    |    | NA | NA | NA | NA | NA | NA | NA | NA | NA | NA | NA |
| NA              | NA                 | NA | NA | NA | -2 | NA |    |    |    |    |    |    |    |    |
| CITED2          | ENSG00000164442.9  |    |    | NA | NA | NA | NA | NA | NA | NA | NA | NA | NA | NA |
| NA              | NA                 | NA | NA | NA | -2 | NA |    |    |    |    |    |    |    |    |
| COL12A1         | ENSG00000111799.20 |    |    | NA | NA | NA | NA | NA | NA | NA | NA | NA | NA | NA |
| NA              | NA                 | NA | NA | NA | -2 | NA |    |    |    |    |    |    |    |    |
| ATAT1           | ENSG00000137343.17 |    |    | NA | NA | NA | NA | NA | NA | NA | NA | NA | NA | NA |
| NA              | NA                 | NA | NA | -2 | NA |    |    |    |    |    |    |    |    |    |
| MRPS18B         | ENSG00000204568.11 |    |    | NA | NA | NA | NA | NA | NA | NA | NA | NA | NA | NA |
| NA              | NA                 | NA | NA | NA | -2 | NA |    |    |    |    |    |    |    |    |
| HIST1H2BB       | ENSG00000276410.3  |    |    | NA | NA | NA | NA | NA | NA | NA | NA | NA | NA | NA |
| NA              | NA                 | NA | NA | NA | -2 | NA |    |    |    |    |    |    |    |    |
| HIST1H2BM       | ENSG00000273703.1  |    |    | NA | NA | NA | NA | NA | NA | NA | NA | NA | NA | NA |
| NA              | NA                 | NA | NA | NA | -2 | NA |    |    |    |    |    |    |    |    |
| HIST1H1E        | ENSG00000168298.6  |    |    | NA | NA | NA | NA | NA | NA | NA | NA | NA | NA | NA |
| NA              | NA                 | NA | NA | NA | -2 | NA |    |    |    |    |    |    |    |    |
| LINC01623       | ENSG00000225595.2  |    |    | NA | NA | NA | NA | NA | NA | NA | NA | NA | NA | NA |
| NA              | NA                 | NA | NA | NA | -2 | NA |    |    |    |    |    |    |    |    |
| RP11-439H9.1    | ENSG00000235743.1  |    |    | NA | NA | NA | NA | NA | NA | NA | NA | NA | NA | NA |
| NA              | NA                 | NA | NA | NA | NA | -2 | NA |    |    |    |    |    |    |    |
| SYNCRIP         | ENSG00000135316.17 |    |    | NA | NA | NA | NA | NA | NA | NA | NA | NA | NA | NA |
| NA              | NA                 | NA | NA | NA | -2 | NA |    |    |    |    |    |    |    |    |
| FOXCU1          | ENSG00000280916.1  |    |    | NA | NA | NA | NA | NA | NA | NA | NA | NA | NA | NA |
| NA              | NA                 | NA | NA | NA | -2 | NA |    |    |    |    |    |    |    |    |
| TAAR2           | ENSG00000146378.6  |    |    | NA | NA | NA | NA | NA | NA | NA | NA | NA | NA | NA |
| NA              | NA                 | NA | NA | -2 | NA |    |    |    |    |    |    |    |    |    |
| RP11-524C21.2   | ENSG00000261568.1  |    |    | NA | NA | NA | NA | NA | NA | NA | NA | NA | NA | NA |
| NA              | NA                 | NA | NA | NA | NA | -2 | NA |    |    |    |    |    |    |    |
| ZBTB12          | ENSG00000204366.3  |    |    | NA | NA | NA | NA | NA | NA | NA | NA | NA | NA | NA |
| NA              | NA                 | NA | NA | NA | -2 | NA |    |    |    |    |    |    |    |    |
| HIST1H1B        | ENSG00000184357.4  |    |    | NA | NA | NA | NA | NA | NA | NA | NA | NA | NA | NA |
| NA              | NA                 | NA | NA | NA | -2 | NA |    |    |    |    |    |    |    |    |
| IRF4            | ENSG00000137265.14 |    |    | NA | NA | NA | NA | NA | NA | NA | NA | NA | NA | NA |
| NA              | NA                 | NA | NA | -2 | NA |    |    |    |    |    |    |    |    |    |
| RP1-155D22.1    | ENSG00000230627.1  |    |    | NA | NA | NA | NA | NA | NA | NA | NA | NA | NA | NA |
| NA              | NA                 | NA | NA | NA | NA | -2 | NA |    |    |    |    |    |    |    |
| RP11-557H15.5   | ENSG00000229722.1  |    |    | NA | NA | NA | NA | NA | NA | NA | NA | NA | NA | NA |
| NA              | NA                 | NA | NA | NA | NA | -2 | NA |    |    |    |    |    |    |    |
| TSPO2           | ENSG00000112212.11 |    |    | NA | NA | NA | NA | NA | NA | NA | NA | NA | NA | NA |
| NA              | NA                 | NA | NA | -2 | NA |    |    |    |    |    |    |    |    |    |
| MAN1A1          | ENSG00000111885.6  |    |    | NA | NA | NA | NA | NA | NA | NA | NA | NA | NA | NA |
| NA              | NA                 | NA | NA | NA | -2 | NA |    |    |    |    |    |    |    |    |
| GMDS            | ENSG00000112699.10 |    |    | NA | NA | NA | NA | NA | NA | NA | NA | NA | NA | NA |
| NA              | NA                 | NA | NA | -2 | NA |    |    |    |    |    |    |    |    |    |
| RP1-136B1.1     | ENSG00000272465.1  |    |    | NA | NA | NA | NA | NA | NA | NA | NA | NA | NA | NA |
| NA              | NA                 | NA | NA | NA | NA | -2 | NA |    |    |    |    |    |    |    |
| CRISP3          | ENSG00000096006.11 |    |    | NA | NA | NA | NA | NA | NA | NA | NA | NA | NA | NA |
| NA              | NA                 | NA | NA | NA | -2 | NA |    |    |    |    |    |    |    |    |
| ADGRF1          | ENSG00000153292.15 |    |    | NA | NA | NA | NA | NA | NA | NA | NA | NA | NA | NA |
| NA              | NA                 | NA | NA | NA | -2 | NA |    |    |    |    |    |    |    |    |
| LINC01012       | ENSG00000281706.2  |    |    | NA | NA | NA | NA | NA | NA | NA | NA | NA | NA | NA |

|               |                    |    |    |    |    |    |    |    |    |    |    |    |    |    |
|---------------|--------------------|----|----|----|----|----|----|----|----|----|----|----|----|----|
| NA            | NA                 | NA | NA | NA | -2 | NA |    |    |    |    |    |    |    |    |
| HMGN4         | ENSG00000182952.4  |    |    | NA | NA | NA | NA | NA | NA | NA | NA | NA | NA | NA |
| NA            | NA                 | NA | NA | NA | -2 | NA |    |    |    |    |    |    |    |    |
| PRR3          | ENSG00000204576.11 |    |    | NA | NA | NA | NA | NA | NA | NA | NA | NA | NA | NA |
| NA            | NA                 | NA | NA | NA | -2 | NA |    |    |    |    |    |    |    |    |
| TXNDC5        | ENSG00000239264.8  |    |    | NA | NA | NA | NA | NA | NA | NA | NA | NA | NA | NA |
| NA            | NA                 | NA | NA | NA | -2 | NA |    |    |    |    |    |    |    |    |
| RP11-462G2.1  | ENSG00000237643.1  |    |    | NA | NA | NA | NA | NA | NA | NA | NA | NA | NA | NA |
| NA            | NA                 | NA | NA | NA | -2 | NA |    |    |    |    |    |    |    |    |
| LINC01016     | ENSG00000249346.6  |    |    | NA | NA | NA | NA | NA | NA | NA | NA | NA | NA | NA |
| NA            | NA                 | NA | NA | NA | -2 | NA |    |    |    |    |    |    |    |    |
| RP11-242F11.2 | ENSG00000234675.1  |    |    | NA | NA | NA | NA | NA | NA | NA | NA | NA | NA | NA |
| NA            | NA                 | NA | NA | NA | -2 | NA |    |    |    |    |    |    |    |    |
| HCRTR2        | ENSG00000137252.9  |    |    | NA | NA | NA | NA | NA | NA | NA | NA | NA | NA | NA |
| NA            | NA                 | NA | NA | NA | -2 | NA |    |    |    |    |    |    |    |    |
| BAG2          | ENSG00000112208.11 |    |    | NA | NA | NA | NA | NA | NA | NA | NA | NA | NA | NA |
| NA            | NA                 | NA | NA | NA | -2 | NA |    |    |    |    |    |    |    |    |
| HSPA1B        | ENSG00000204388.6  |    |    | NA | NA | NA | NA | NA | NA | NA | NA | NA | NA | NA |
| NA            | NA                 | NA | NA | NA | -2 | NA |    |    |    |    |    |    |    |    |
| FRMD1         | ENSG00000153303.16 |    |    | NA | NA | NA | NA | NA | NA | NA | NA | NA | NA | NA |
| NA            | NA                 | NA | NA | NA | -2 | NA |    |    |    |    |    |    |    |    |
| HMGN3         | ENSG00000118418.14 |    |    | NA | NA | NA | NA | NA | NA | NA | NA | NA | NA | NA |
| NA            | NA                 | NA | NA | NA | -2 | NA |    |    |    |    |    |    |    |    |
| LIN28B        | ENSG00000187772.7  |    |    | NA | NA | NA | NA | NA | NA | NA | NA | NA | NA | NA |
| NA            | NA                 | NA | NA | NA | -2 | NA |    |    |    |    |    |    |    |    |
| PRRC2A        | ENSG00000204469.12 |    |    | NA | NA | NA | NA | NA | NA | NA | NA | NA | NA | NA |
| NA            | NA                 | NA | NA | NA | -2 | NA |    |    |    |    |    |    |    |    |
| HIST1H3G      | ENSG00000273983.1  |    |    | NA | NA | NA | NA | NA | NA | NA | NA | NA | NA | NA |
| NA            | NA                 | NA | NA | NA | -2 | NA |    |    |    |    |    |    |    |    |
| WEE2          | ENSG00000214102.7  |    |    | NA | NA | NA | NA | NA | NA | NA | NA | NA | NA | NA |
| NA            | NA                 | NA | NA | NA | -2 | NA |    |    |    |    |    |    |    |    |
| LVCAT5        | ENSG00000225546.5  |    |    | NA | NA | NA | NA | NA | NA | NA | NA | NA | NA | NA |
| NA            | NA                 | NA | NA | NA | -2 | NA |    |    |    |    |    |    |    |    |
| MAFK          | ENSG00000198517.9  |    |    | NA | NA | NA | NA | NA | NA | NA | NA | NA | NA | NA |
| NA            | NA                 | NA | NA | NA | -2 | NA |    |    |    |    |    |    |    |    |
| GPR85         | ENSG00000164604.12 |    |    | NA | NA | NA | NA | NA | NA | NA | NA | NA | NA | NA |
| NA            | NA                 | NA | NA | NA | -2 | NA |    |    |    |    |    |    |    |    |
| CD36          | ENSG00000135218.17 |    |    | NA | NA | NA | NA | NA | NA | NA | NA | NA | NA | NA |
| NA            | NA                 | NA | NA | NA | -2 | NA |    |    |    |    |    |    |    |    |
| AKR1B1        | ENSG00000085662.13 |    |    | NA | NA | NA | NA | NA | NA | NA | NA | NA | NA | NA |
| NA            | NA                 | NA | NA | NA | -2 | NA |    |    |    |    |    |    |    |    |
| TRIL          | ENSG00000255690.2  |    |    | NA | NA | NA | NA | NA | NA | NA | NA | NA | NA | NA |
| NA            | NA                 | NA | NA | NA | -2 | NA |    |    |    |    |    |    |    |    |
| TAS2R3        | ENSG00000127362.2  |    |    | NA | NA | NA | NA | NA | NA | NA | NA | NA | NA | NA |
| NA            | NA                 | NA | NA | NA | -2 | NA |    |    |    |    |    |    |    |    |
| TMEM213       | ENSG00000214128.10 |    |    | NA | NA | NA | NA | NA | NA | NA | NA | NA | NA | NA |
| NA            | NA                 | NA | NA | NA | -2 | NA |    |    |    |    |    |    |    |    |
| AC007161.5    | ENSG00000234718.6  |    |    | NA | NA | NA | NA | NA | NA | NA | NA | NA | NA | NA |
| NA            | NA                 | NA | NA | NA | -2 | NA |    |    |    |    |    |    |    |    |
| TBX20         | ENSG00000164532.10 |    |    | NA | NA | NA | NA | NA | NA | NA | NA | NA | NA | NA |
| NA            | NA                 | NA | NA | NA | -2 | NA |    |    |    |    |    |    |    |    |
| RARRES2       | ENSG00000106538.9  |    |    | NA | NA | NA | NA | NA | NA | NA | NA | NA | NA | NA |
| NA            | NA                 | NA | NA | NA | -2 | NA |    |    |    |    |    |    |    |    |
| ZC3HC1        | ENSG00000091732.15 |    |    | NA | NA | NA | NA | NA | NA | NA | NA | NA | NA | NA |
| NA            | NA                 | NA | NA | NA | -2 | NA |    |    |    |    |    |    |    |    |
| DDC           | ENSG00000132437.17 |    |    | NA | NA | NA | NA | NA | NA | NA | NA | NA | NA | NA |
| NA            | NA                 | NA | NA | NA | -2 | NA |    |    |    |    |    |    |    |    |
| AC073316.2    | ENSG00000231892.1  |    |    | NA | NA | NA | NA | NA | NA | NA | NA | NA | NA | NA |
| NA            | NA                 | NA | NA | NA | -2 | NA |    |    |    |    |    |    |    |    |
| HRAT17        | ENSG00000234520.5  |    |    | NA | NA | NA | NA | NA | NA | NA | NA | NA | NA | NA |
| NA            | NA                 | NA | NA | NA | -2 | NA |    |    |    |    |    |    |    |    |
| LINC00996     | ENSG00000242258.1  |    |    | NA | NA | NA | NA | NA | NA | NA | NA | NA | NA | NA |

|               |                    |    |    |    |    |    |    |    |    |    |    |    |    |    |
|---------------|--------------------|----|----|----|----|----|----|----|----|----|----|----|----|----|
| NA            | NA                 | NA | NA | NA | -2 | NA |    |    |    |    |    |    |    |    |
| PEX1          | ENSG00000127980.15 | NA | NA | NA | NA | NA | NA | NA | NA | NA | NA | NA | NA | NA |
| NA            | NA                 | NA | NA | NA | -2 | NA |    |    |    |    |    |    |    |    |
| PDAP1         | ENSG00000106244.12 | NA | NA | NA | NA | NA | NA | NA | NA | NA | NA | NA | NA | NA |
| NA            | NA                 | NA | NA | NA | -2 | NA |    |    |    |    |    |    |    |    |
| VOPP1         | ENSG00000154978.12 | NA | NA | NA | NA | NA | NA | NA | NA | NA | NA | NA | NA | NA |
| NA            | NA                 | NA | NA | NA | -2 | NA |    |    |    |    |    |    |    |    |
| ADAP1         | ENSG00000105963.13 | NA | NA | NA | NA | NA | NA | NA | NA | NA | NA | NA | NA | NA |
| NA            | NA                 | NA | NA | NA | -2 | NA |    |    |    |    |    |    |    |    |
| AGR3          | ENSG00000173467.8  | NA | NA | NA | NA | NA | NA | NA | NA | NA | NA | NA | NA | NA |
| NA            | NA                 | NA | NA | NA | -2 | NA |    |    |    |    |    |    |    |    |
| LAMB1         | ENSG00000091136.13 | NA | NA | NA | NA | NA | NA | NA | NA | NA | NA | NA | NA | NA |
| NA            | NA                 | NA | NA | NA | -2 | NA |    |    |    |    |    |    |    |    |
| ZNF716        | ENSG00000182111.8  | NA | NA | NA | NA | NA | NA | NA | NA | NA | NA | NA | NA | NA |
| NA            | NA                 | NA | NA | NA | -2 | NA |    |    |    |    |    |    |    |    |
| AC226118.1    | ENSG00000249574.1  | NA | NA | NA | NA | NA | NA | NA | NA | NA | NA | NA | NA | NA |
| NA            | NA                 | NA | NA | NA | -2 | NA |    |    |    |    |    |    |    |    |
| SPDYE16       | ENSG00000185040.13 | NA | NA | NA | NA | NA | NA | NA | NA | NA | NA | NA | NA | NA |
| NA            | NA                 | NA | NA | NA | -2 | NA |    |    |    |    |    |    |    |    |
| MYL10         | ENSG00000106436.4  | NA | NA | NA | NA | NA | NA | NA | NA | NA | NA | NA | NA | NA |
| NA            | NA                 | NA | NA | NA | -2 | NA |    |    |    |    |    |    |    |    |
| IRF5          | ENSG00000128604.19 | NA | NA | NA | NA | NA | NA | NA | NA | NA | NA | NA | NA | NA |
| NA            | NA                 | NA | NA | NA | -2 | NA |    |    |    |    |    |    |    |    |
| LINC01450     | ENSG00000232458.1  | NA | NA | NA | NA | NA | NA | NA | NA | NA | NA | NA | NA | NA |
| NA            | NA                 | NA | NA | NA | -2 | NA |    |    |    |    |    |    |    |    |
| DUS4L         | ENSG00000105865.10 | NA | NA | NA | NA | NA | NA | NA | NA | NA | NA | NA | NA | NA |
| NA            | NA                 | NA | NA | NA | -2 | NA |    |    |    |    |    |    |    |    |
| FBXL13        | ENSG00000161040.16 | NA | NA | NA | NA | NA | NA | NA | NA | NA | NA | NA | NA | NA |
| NA            | NA                 | NA | NA | NA | -2 | NA |    |    |    |    |    |    |    |    |
| GHRHR         | ENSG00000106128.18 | NA | NA | NA | NA | NA | NA | NA | NA | NA | NA | NA | NA | NA |
| NA            | NA                 | NA | NA | NA | -2 | NA |    |    |    |    |    |    |    |    |
| AC006007.1    | ENSG00000230746.1  | NA | NA | NA | NA | NA | NA | NA | NA | NA | NA | NA | NA | NA |
| NA            | NA                 | NA | NA | NA | -2 | NA |    |    |    |    |    |    |    |    |
| DMTF1         | ENSG00000135164.18 | NA | NA | NA | NA | NA | NA | NA | NA | NA | NA | NA | NA | NA |
| NA            | NA                 | NA | NA | NA | -2 | NA |    |    |    |    |    |    |    |    |
| ABCA13        | ENSG00000179869.14 | NA | NA | NA | NA | NA | NA | NA | NA | NA | NA | NA | NA | NA |
| NA            | NA                 | NA | NA | NA | -2 | NA |    |    |    |    |    |    |    |    |
| HOXA10        | ENSG00000253293.4  | NA | NA | NA | NA | NA | NA | NA | NA | NA | NA | NA | NA | NA |
| NA            | NA                 | NA | NA | NA | -2 | NA |    |    |    |    |    |    |    |    |
| FAM185A       | ENSG00000222011.8  | NA | NA | NA | NA | NA | NA | NA | NA | NA | NA | NA | NA | NA |
| NA            | NA                 | NA | NA | NA | -2 | NA |    |    |    |    |    |    |    |    |
| DNAJB6        | ENSG00000105993.14 | NA | NA | NA | NA | NA | NA | NA | NA | NA | NA | NA | NA | NA |
| NA            | NA                 | NA | NA | NA | -2 | NA |    |    |    |    |    |    |    |    |
| AC099552.2    | ENSG00000225612.1  | NA | NA | NA | NA | NA | NA | NA | NA | NA | NA | NA | NA | NA |
| NA            | NA                 | NA | NA | NA | -2 | NA |    |    |    |    |    |    |    |    |
| LINC01287     | ENSG00000234722.3  | NA | NA | NA | NA | NA | NA | NA | NA | NA | NA | NA | NA | NA |
| NA            | NA                 | NA | NA | NA | -2 | NA |    |    |    |    |    |    |    |    |
| KPNA7         | ENSG00000185467.7  | NA | NA | NA | NA | NA | NA | NA | NA | NA | NA | NA | NA | NA |
| NA            | NA                 | NA | NA | NA | -2 | NA |    |    |    |    |    |    |    |    |
| RP5-1121A15.3 | ENSG00000230033.1  | NA | NA | NA | NA | NA | NA | NA | NA | NA | NA | NA | NA | NA |
| NA            | NA                 | NA | NA | NA | -2 | NA |    |    |    |    |    |    |    |    |
| RP11-47909.4  | ENSG00000272693.3  | NA | NA | NA | NA | NA | NA | NA | NA | NA | NA | NA | NA | NA |
| NA            | NA                 | NA | NA | NA | -2 | NA |    |    |    |    |    |    |    |    |
| C7orf43       | ENSG00000146826.16 | NA | NA | NA | NA | NA | NA | NA | NA | NA | NA | NA | NA | NA |
| NA            | NA                 | NA | NA | NA | -2 | NA |    |    |    |    |    |    |    |    |
| OR2A42        | ENSG00000212807.1  | NA | NA | NA | NA | NA | NA | NA | NA | NA | NA | NA | NA | NA |
| NA            | NA                 | NA | NA | NA | -2 | NA |    |    |    |    |    |    |    |    |
| MACC1         | ENSG00000183742.12 | NA | NA | NA | NA | NA | NA | NA | NA | NA | NA | NA | NA | NA |
| NA            | NA                 | NA | NA | NA | -2 | NA |    |    |    |    |    |    |    |    |
| 7-Sep         | ENSG00000122545.18 | NA | NA | NA | NA | NA | NA | NA | NA | NA | NA | NA | NA | NA |
| NA            | NA                 | NA | NA | NA | -2 | NA |    |    |    |    |    |    |    |    |
| TRIM24        | ENSG00000122779.17 | NA | NA | NA | NA | NA | NA | NA | NA | NA | NA | NA | NA | NA |

|               |                    |    |    |    |    |    |    |    |    |    |    |    |    |    |
|---------------|--------------------|----|----|----|----|----|----|----|----|----|----|----|----|----|
|               | NA                 | NA | NA | NA | NA | -2 | NA |    |    |    |    |    |    |    |
| NOS3          | ENSG00000164867.10 |    |    |    |    | NA | NA | NA | NA | NA | NA | NA | NA | NA |
|               | NA                 | NA | NA | NA | NA | -2 | NA |    |    |    |    |    |    |    |
| TMEM140       | ENSG00000146859.6  |    |    |    |    | NA | NA | NA | NA | NA | NA | NA | NA | NA |
|               | NA                 | NA | NA | NA | NA | -2 | NA |    |    |    |    |    |    |    |
| SLC13A1       | ENSG00000081800.8  |    |    |    |    | NA | NA | NA | NA | NA | NA | NA | NA | NA |
|               | NA                 | NA | NA | NA | NA | -2 | NA |    |    |    |    |    |    |    |
| CCL24         | ENSG00000106178.6  |    |    |    |    | NA | NA | NA | NA | NA | NA | NA | NA | NA |
|               | NA                 | NA | NA | NA | NA | -2 | NA |    |    |    |    |    |    |    |
| BUD31         | ENSG00000106245.10 |    |    |    |    | NA | NA | NA | NA | NA | NA | NA | NA | NA |
|               | NA                 | NA | NA | NA | NA | -2 | NA |    |    |    |    |    |    |    |
| CCDC71L       | ENSG00000253276.2  |    |    |    |    | NA | NA | NA | NA | NA | NA | NA | NA | NA |
|               | NA                 | NA | NA | NA | NA | -2 | NA |    |    |    |    |    |    |    |
| SRRM3         | ENSG00000177679.15 |    |    |    |    | NA | NA | NA | NA | NA | NA | NA | NA | NA |
|               | NA                 | NA | NA | NA | NA | -2 | NA |    |    |    |    |    |    |    |
| PLOD3         | ENSG00000106397.11 |    |    |    |    | NA | NA | NA | NA | NA | NA | NA | NA | NA |
|               | NA                 | NA | NA | NA | NA | -2 | NA |    |    |    |    |    |    |    |
| RP5-884M6.1   | ENSG00000228742.9  |    |    |    |    | NA | NA | NA | NA | NA | NA | NA | NA | NA |
|               | NA                 | NA | NA | NA | NA | -2 | NA |    |    |    |    |    |    |    |
| RP5-958B11.2  | ENSG00000283504.1  |    |    |    |    | NA | NA | NA | NA | NA | NA | NA | NA | NA |
|               | NA                 | NA | NA | NA | NA | -2 | NA |    |    |    |    |    |    |    |
| DLX6          | ENSG00000006377.10 |    |    |    |    | NA | NA | NA | NA | NA | NA | NA | NA | NA |
|               | NA                 | NA | NA | NA | NA | -2 | NA |    |    |    |    |    |    |    |
| HPVC1         | ENSG00000280920.1  |    |    |    |    | NA | NA | NA | NA | NA | NA | NA | NA | NA |
|               | NA                 | NA | NA | NA | NA | -2 | NA |    |    |    |    |    |    |    |
| RP11-286H14.4 | ENSG00000230626.4  |    |    |    |    | NA | NA | NA | NA | NA | NA | NA | NA | NA |
|               | NA                 | NA | NA | NA | NA | -2 | NA |    |    |    |    |    |    |    |
| OR9A4         | ENSG00000258083.1  |    |    |    |    | NA | NA | NA | NA | NA | NA | NA | NA | NA |
|               | NA                 | NA | NA | NA | NA | -2 | NA |    |    |    |    |    |    |    |
| CHRM2         | ENSG00000181072.11 |    |    |    |    | NA | NA | NA | NA | NA | NA | NA | NA | NA |
|               | NA                 | NA | NA | NA | NA | -2 | NA |    |    |    |    |    |    |    |
| AVL9          | ENSG00000105778.18 |    |    |    |    | NA | NA | NA | NA | NA | NA | NA | NA | NA |
|               | NA                 | NA | NA | NA | NA | -2 | NA |    |    |    |    |    |    |    |
| LHFPL3        | ENSG00000187416.11 |    |    |    |    | NA | NA | NA | NA | NA | NA | NA | NA | NA |
|               | NA                 | NA | NA | NA | NA | -2 | NA |    |    |    |    |    |    |    |
| GS1-18A18.2   | ENSG00000228735.1  |    |    |    |    | NA | NA | NA | NA | NA | NA | NA | NA | NA |
|               | NA                 | NA | NA | NA | NA | -2 | NA |    |    |    |    |    |    |    |
| RP11-728K20.2 | ENSG00000260555.1  |    |    |    |    | NA | NA | NA | NA | NA | NA | NA | NA | NA |
|               | NA                 | NA | NA | NA | NA | -2 | NA |    |    |    |    |    |    |    |
| RHEB          | ENSG00000106615.9  |    |    |    |    | NA | NA | NA | NA | NA | NA | NA | NA | NA |
|               | NA                 | NA | NA | NA | NA | -2 | NA |    |    |    |    |    |    |    |
| UBE3C         | ENSG00000009335.17 |    |    |    |    | NA | NA | NA | NA | NA | NA | NA | NA | NA |
|               | NA                 | NA | NA | NA | NA | -2 | NA |    |    |    |    |    |    |    |
| AC005019.3    | ENSG00000224330.1  |    |    |    |    | NA | NA | NA | NA | NA | NA | NA | NA | NA |
|               | NA                 | NA | NA | NA | NA | -2 | NA |    |    |    |    |    |    |    |
| PMPCB         | ENSG00000105819.13 |    |    |    |    | NA | NA | NA | NA | NA | NA | NA | NA | NA |
|               | NA                 | NA | NA | NA | NA | -2 | NA |    |    |    |    |    |    |    |
| RP11-264K23.1 | ENSG00000243574.1  |    |    |    |    | NA | NA | NA | NA | NA | NA | NA | NA | NA |
|               | NA                 | NA | NA | NA | NA | -2 | NA |    |    |    |    |    |    |    |
| HOXA3         | ENSG00000105997.22 |    |    |    |    | NA | NA | NA | NA | NA | NA | NA | NA | NA |
|               | NA                 | NA | NA | NA | NA | -2 | NA |    |    |    |    |    |    |    |
| AC083864.4    | ENSG00000205745.2  |    |    |    |    | NA | NA | NA | NA | NA | NA | NA | NA | NA |
|               | NA                 | NA | NA | NA | NA | -2 | NA |    |    |    |    |    |    |    |
| HOXA9         | ENSG00000078399.17 |    |    |    |    | NA | NA | NA | NA | NA | NA | NA | NA | NA |
|               | NA                 | NA | NA | NA | NA | -2 | NA |    |    |    |    |    |    |    |
| TMEM60        | ENSG00000135211.5  |    |    |    |    | NA | NA | NA | NA | NA | NA | NA | NA | NA |
|               | NA                 | NA | NA | NA | NA | -2 | NA |    |    |    |    |    |    |    |
| RP5-945F2.3   | ENSG00000226829.1  |    |    |    |    | NA | NA | NA | NA | NA | NA | NA | NA | NA |
|               | NA                 | NA | NA | NA | NA | -2 | NA |    |    |    |    |    |    |    |
| RP11-731K22.1 | ENSG00000261467.2  |    |    |    |    | NA | NA | NA | NA | NA | NA | NA | NA | NA |
|               | NA                 | NA | NA | NA | NA | -2 | NA |    |    |    |    |    |    |    |
| TRA2A         | ENSG00000164548.10 |    |    |    |    | NA | NA | NA | NA | NA | NA | NA | NA | NA |

|               |                    |    |    |    |    |    |    |    |    |    |    |    |    |    |
|---------------|--------------------|----|----|----|----|----|----|----|----|----|----|----|----|----|
| NA            | NA                 | NA | NA | -2 | NA |    |    |    |    |    |    |    |    |    |
| AC003088.1    | ENSG00000226965.1  |    |    |    | NA | NA | NA | NA | NA | NA | NA | NA | NA | NA |
| NA            | NA                 | NA | NA | NA | -2 | NA |    |    |    |    |    |    |    |    |
| PSMC2         | ENSG00000161057.11 |    |    |    | NA | NA | NA | NA | NA | NA | NA | NA | NA | NA |
| NA            | NA                 | NA | NA | -2 | NA |    |    |    |    |    |    |    |    |    |
| MNX1          | ENSG00000130675.14 |    |    |    | NA | NA | NA | NA | NA | NA | NA | NA | NA | NA |
| NA            | NA                 | NA | NA | -2 | NA |    |    |    |    |    |    |    |    |    |
| NFE2L3        | ENSG00000050344.8  |    |    |    | NA | NA | NA | NA | NA | NA | NA | NA | NA | NA |
| NA            | NA                 | NA | NA | NA | -2 | NA |    |    |    |    |    |    |    |    |
| TAS2R38       | ENSG00000257138.1  |    |    |    | NA | NA | NA | NA | NA | NA | NA | NA | NA | NA |
| NA            | NA                 | NA | NA | NA | -2 | NA |    |    |    |    |    |    |    |    |
| LINC01447     | ENSG00000236078.1  |    |    |    | NA | NA | NA | NA | NA | NA | NA | NA | NA | NA |
| NA            | NA                 | NA | NA | NA | -2 | NA |    |    |    |    |    |    |    |    |
| FOXK1         | ENSG00000164916.10 |    |    |    | NA | NA | NA | NA | NA | NA | NA | NA | NA | NA |
| NA            | NA                 | NA | NA | -2 | NA |    |    |    |    |    |    |    |    |    |
| SMURF1        | ENSG00000198742.9  |    |    |    | NA | NA | NA | NA | NA | NA | NA | NA | NA | NA |
| NA            | NA                 | NA | NA | NA | -2 | NA |    |    |    |    |    |    |    |    |
| PDK4          | ENSG00000004799.7  |    |    |    | NA | NA | NA | NA | NA | NA | NA | NA | NA | NA |
| NA            | NA                 | NA | NA | -2 | NA |    |    |    |    |    |    |    |    |    |
| CTAGE15       | ENSG00000271079.1  |    |    |    | NA | NA | NA | NA | NA | NA | NA | NA | NA | NA |
| NA            | NA                 | NA | NA | NA | -2 | NA |    |    |    |    |    |    |    |    |
| CYP3A4        | ENSG00000160868.14 |    |    |    | NA | NA | NA | NA | NA | NA | NA | NA | NA | NA |
| NA            | NA                 | NA | NA | NA | -2 | NA |    |    |    |    |    |    |    |    |
| OGDH          | ENSG00000105953.14 |    |    |    | NA | NA | NA | NA | NA | NA | NA | NA | NA | NA |
| NA            | NA                 | NA | NA | -2 | NA |    |    |    |    |    |    |    |    |    |
| GNAT3         | ENSG00000214415.3  |    |    |    | NA | NA | NA | NA | NA | NA | NA | NA | NA | NA |
| NA            | NA                 | NA | NA | -2 | NA |    |    |    |    |    |    |    |    |    |
| HILPDA        | ENSG00000135245.9  |    |    |    | NA | NA | NA | NA | NA | NA | NA | NA | NA | NA |
| NA            | NA                 | NA | NA | NA | -2 | NA |    |    |    |    |    |    |    |    |
| HRAT92        | ENSG00000223855.1  |    |    |    | NA | NA | NA | NA | NA | NA | NA | NA | NA | NA |
| NA            | NA                 | NA | NA | NA | -2 | NA |    |    |    |    |    |    |    |    |
| GIMAP8        | ENSG00000171115.3  |    |    |    | NA | NA | NA | NA | NA | NA | NA | NA | NA | NA |
| NA            | NA                 | NA | NA | NA | -2 | NA |    |    |    |    |    |    |    |    |
| KMT2C         | ENSG00000055609.17 |    |    |    | NA | NA | NA | NA | NA | NA | NA | NA | NA | NA |
| NA            | NA                 | NA | NA | -2 | NA |    |    |    |    |    |    |    |    |    |
| AC009508.1    | ENSG00000227930.1  |    |    |    | NA | NA | NA | NA | NA | NA | NA | NA | NA | NA |
| NA            | NA                 | NA | NA | NA | -2 | NA |    |    |    |    |    |    |    |    |
| AC009784.3    | ENSG00000232053.6  |    |    |    | NA | NA | NA | NA | NA | NA | NA | NA | NA | NA |
| NA            | NA                 | NA | NA | NA | -2 | NA |    |    |    |    |    |    |    |    |
| AIMP2         | ENSG00000106305.9  |    |    |    | NA | NA | NA | NA | NA | NA | NA | NA | NA | NA |
| NA            | NA                 | NA | NA | -2 | NA |    |    |    |    |    |    |    |    |    |
| HOXA7         | ENSG00000122592.7  |    |    |    | NA | NA | NA | NA | NA | NA | NA | NA | NA | NA |
| NA            | NA                 | NA | NA | -2 | NA |    |    |    |    |    |    |    |    |    |
| PRSS2         | ENSG00000275896.5  |    |    |    | NA | NA | NA | NA | NA | NA | NA | NA | NA | NA |
| NA            | NA                 | NA | NA | -2 | NA |    |    |    |    |    |    |    |    |    |
| CTAGE4        | ENSG00000225932.3  |    |    |    | NA | NA | NA | NA | NA | NA | NA | NA | NA | NA |
| NA            | NA                 | NA | NA | NA | -2 | NA |    |    |    |    |    |    |    |    |
| TAS2R60       | ENSG00000185899.1  |    |    |    | NA | NA | NA | NA | NA | NA | NA | NA | NA | NA |
| NA            | NA                 | NA | NA | NA | -2 | NA |    |    |    |    |    |    |    |    |
| GLCCI1        | ENSG00000106415.12 |    |    |    | NA | NA | NA | NA | NA | NA | NA | NA | NA | NA |
| NA            | NA                 | NA | NA | NA | -2 | NA |    |    |    |    |    |    |    |    |
| RP11-325F22.2 | ENSG00000237513.1  |    |    |    | NA | NA | NA | NA | NA | NA | NA | NA | NA | NA |
| NA            | NA                 | NA | NA | NA | NA | -2 | NA |    |    |    |    |    |    |    |
| AC073094.4    | ENSG00000233082.1  |    |    |    | NA | NA | NA | NA | NA | NA | NA | NA | NA | NA |
| NA            | NA                 | NA | NA | NA | -2 | NA |    |    |    |    |    |    |    |    |
| LMTK2         | ENSG00000164715.5  |    |    |    | NA | NA | NA | NA | NA | NA | NA | NA | NA | NA |
| NA            | NA                 | NA | NA | -2 | NA |    |    |    |    |    |    |    |    |    |
| NFE4          | ENSG00000230257.2  |    |    |    | NA | NA | NA | NA | NA | NA | NA | NA | NA | NA |
| NA            | NA                 | NA | NA | -2 | NA |    |    |    |    |    |    |    |    |    |
| LINC01393     | ENSG00000225535.6  |    |    |    | NA | NA | NA | NA | NA | NA | NA | NA | NA | NA |
| NA            | NA                 | NA | NA | NA | -2 | NA |    |    |    |    |    |    |    |    |
| HNRNPA2B1     | ENSG00000122566.20 |    |    |    | NA | NA | NA | NA | NA | NA | NA | NA | NA | NA |

|                    |                    |    |    |    |    |    |    |    |    |    |    |    |    |    |
|--------------------|--------------------|----|----|----|----|----|----|----|----|----|----|----|----|----|
| HOXA4              | NA                 | NA | NA | NA | NA | -2 | NA | NA | NA | NA | NA | NA | NA | NA |
| ENSG00000197576.13 | NA                 | NA | NA | NA | NA | -2 | NA | NA | NA | NA | NA | NA | NA | NA |
| CASP2              | NA                 | NA | NA | NA | NA | -2 | NA | NA | NA | NA | NA | NA | NA | NA |
| ENSG00000106144.19 | NA                 | NA | NA | NA | NA | -2 | NA | NA | NA | NA | NA | NA | NA | NA |
| CDK6               | NA                 | NA | NA | NA | NA | -2 | NA | NA | NA | NA | NA | NA | NA | NA |
| ENSG00000105810.9  | NA                 | NA | NA | NA | NA | -2 | NA | NA | NA | NA | NA | NA | NA | NA |
| PSMG3              | NA                 | NA | NA | NA | NA | -2 | NA | NA | NA | NA | NA | NA | NA | NA |
| ENSG00000157778.8  | NA                 | NA | NA | NA | NA | -2 | NA | NA | NA | NA | NA | NA | NA | NA |
| GSTK1              | NA                 | NA | NA | NA | NA | -2 | NA | NA | NA | NA | NA | NA | NA | NA |
| ENSG00000197448.13 | NA                 | NA | NA | NA | NA | -2 | NA | NA | NA | NA | NA | NA | NA | NA |
| SNX13              | NA                 | NA | NA | NA | NA | -2 | NA | NA | NA | NA | NA | NA | NA | NA |
| ENSG00000071189.21 | NA                 | NA | NA | NA | NA | -2 | NA | NA | NA | NA | NA | NA | NA | NA |
| CYCS               | NA                 | NA | NA | NA | NA | -2 | NA | NA | NA | NA | NA | NA | NA | NA |
| ENSG00000172115.8  | NA                 | NA | NA | NA | NA | -2 | NA | NA | NA | NA | NA | NA | NA | NA |
| KLF14              | NA                 | NA | NA | NA | NA | -2 | NA | NA | NA | NA | NA | NA | NA | NA |
| ENSG00000266265.2  | NA                 | NA | NA | NA | NA | -2 | NA | NA | NA | NA | NA | NA | NA | NA |
| RP11-1275H24.3     | ENSG00000273084.1  | NA | NA | NA | NA | NA | NA | NA | NA | NA | NA | NA | NA | NA |
| NA                 | NA                 | NA | NA | NA | NA | -2 | NA | NA | NA | NA | NA | NA | NA | NA |
| PIK3CG             | ENSG00000105851.10 | NA | NA | NA | NA | NA | NA | NA | NA | NA | NA | NA | NA | NA |
| NA                 | NA                 | NA | NA | NA | NA | -2 | NA | NA | NA | NA | NA | NA | NA | NA |
| ATXN7L1            | ENSG00000146776.14 | NA | NA | NA | NA | NA | NA | NA | NA | NA | NA | NA | NA | NA |
| NA                 | NA                 | NA | NA | NA | NA | -2 | NA | NA | NA | NA | NA | NA | NA | NA |
| RSPH10B2           | ENSG00000169402.15 | NA | NA | NA | NA | NA | NA | NA | NA | NA | NA | NA | NA | NA |
| NA                 | NA                 | NA | NA | NA | NA | -2 | NA | NA | NA | NA | NA | NA | NA | NA |
| TSPAN12            | ENSG00000106025.8  | NA | NA | NA | NA | NA | NA | NA | NA | NA | NA | NA | NA | NA |
| NA                 | NA                 | NA | NA | NA | NA | -2 | NA | NA | NA | NA | NA | NA | NA | NA |
| AC003092.1         | ENSG00000236453.5  | NA | NA | NA | NA | NA | NA | NA | NA | NA | NA | NA | NA | NA |
| NA                 | NA                 | NA | NA | NA | NA | -2 | NA | NA | NA | NA | NA | NA | NA | NA |
| BCL7B              | ENSG00000106635.7  | NA | NA | NA | NA | NA | NA | NA | NA | NA | NA | NA | NA | NA |
| NA                 | NA                 | NA | NA | NA | NA | -2 | NA | NA | NA | NA | NA | NA | NA | NA |
| MAD1L1             | ENSG00000002822.15 | NA | NA | NA | NA | NA | NA | NA | NA | NA | NA | NA | NA | NA |
| NA                 | NA                 | NA | NA | NA | NA | -2 | NA | NA | NA | NA | NA | NA | NA | NA |
| MUC17              | ENSG00000169876.13 | NA | NA | NA | NA | NA | NA | NA | NA | NA | NA | NA | NA | NA |
| NA                 | NA                 | NA | NA | NA | NA | -2 | NA | NA | NA | NA | NA | NA | NA | NA |
| NDUFA5             | ENSG00000128609.14 | NA | NA | NA | NA | NA | NA | NA | NA | NA | NA | NA | NA | NA |
| NA                 | NA                 | NA | NA | NA | NA | -2 | NA | NA | NA | NA | NA | NA | NA | NA |
| AC007349.5         | ENSG00000235728.1  | NA | NA | NA | NA | NA | NA | NA | NA | NA | NA | NA | NA | NA |
| NA                 | NA                 | NA | NA | NA | NA | -2 | NA | NA | NA | NA | NA | NA | NA | NA |
| LUC7L2             | ENSG00000146963.17 | NA | NA | NA | NA | NA | NA | NA | NA | NA | NA | NA | NA | NA |
| NA                 | NA                 | NA | NA | NA | NA | -2 | NA | NA | NA | NA | NA | NA | NA | NA |
| AC004895.4         | ENSG00000231704.5  | NA | NA | NA | NA | NA | NA | NA | NA | NA | NA | NA | NA | NA |
| NA                 | NA                 | NA | NA | NA | NA | -2 | NA | NA | NA | NA | NA | NA | NA | NA |
| ZNF394             | ENSG00000160908.14 | NA | NA | NA | NA | NA | NA | NA | NA | NA | NA | NA | NA | NA |
| NA                 | NA                 | NA | NA | NA | NA | -2 | NA | NA | NA | NA | NA | NA | NA | NA |
| MINDY4             | ENSG00000106125.14 | NA | NA | NA | NA | NA | NA | NA | NA | NA | NA | NA | NA | NA |
| NA                 | NA                 | NA | NA | NA | NA | -2 | NA | NA | NA | NA | NA | NA | NA | NA |
| AKR1B15            | ENSG00000227471.8  | NA | NA | NA | NA | NA | NA | NA | NA | NA | NA | NA | NA | NA |
| NA                 | NA                 | NA | NA | NA | NA | -2 | NA | NA | NA | NA | NA | NA | NA | NA |
| AC004869.2         | ENSG00000230680.2  | NA | NA | NA | NA | NA | NA | NA | NA | NA | NA | NA | NA | NA |
| NA                 | NA                 | NA | NA | NA | NA | -2 | NA | NA | NA | NA | NA | NA | NA | NA |
| RP11-115N4.1       | ENSG00000243144.6  | NA | NA | NA | NA | NA | NA | NA | NA | NA | NA | NA | NA | NA |
| NA                 | NA                 | NA | NA | NA | NA | -2 | NA | NA | NA | NA | NA | NA | NA | NA |
| NPC1L1             | ENSG00000015520.14 | NA | NA | NA | NA | NA | NA | NA | NA | NA | NA | NA | NA | NA |
| NA                 | NA                 | NA | NA | NA | NA | -2 | NA | NA | NA | NA | NA | NA | NA | NA |
| ABCF2              | ENSG00000033050.7  | NA | NA | NA | NA | NA | NA | NA | NA | NA | NA | NA | NA | NA |
| NA                 | NA                 | NA | NA | NA | NA | -2 | NA | NA | NA | NA | NA | NA | NA | NA |
| MUC3A              | ENSG00000169894.17 | NA | NA | NA | NA | NA | NA | NA | NA | NA | NA | NA | NA | NA |
| NA                 | NA                 | NA | NA | NA | NA | -2 | NA | NA | NA | NA | NA | NA | NA | NA |
| RP13-580B18.4      | ENSG00000279072.1  | NA | NA | NA | NA | NA | NA | NA | NA | NA | NA | NA | NA | NA |
| NA                 | NA                 | NA | NA | NA | NA | -2 | NA | NA | NA | NA | NA | NA | NA | NA |
| RP11-310H4.3       | ENSG00000231394.1  | NA | NA | NA | NA | NA | NA | NA | NA | NA | NA | NA | NA | NA |

|               |                    |    |    |    |    |    |    |    |    |    |    |    |    |    |    |    |    |
|---------------|--------------------|----|----|----|----|----|----|----|----|----|----|----|----|----|----|----|----|
|               | NA                 | NA | NA | NA | NA | NA | -2 | NA |    |    |    |    |    |    |    |    |    |
| LFNG          | ENSG00000106003.12 |    |    | NA | NA | NA | NA | NA | NA | NA | NA | NA | NA | NA | NA | NA | NA |
|               | NA                 | NA | NA | NA | -2 | NA |    |    |    |    |    |    |    |    |    |    |    |
| TNRC18        | ENSG00000182095.14 |    |    | NA | NA | NA | NA | NA | NA | NA | NA | NA | NA | NA | NA | NA | NA |
|               | NA                 | NA | NA | NA | -2 | NA |    |    |    |    |    |    |    |    |    |    |    |
| SPDYE2        | ENSG00000205238.9  |    |    | NA | NA | NA | NA | NA | NA | NA | NA | NA | NA | NA | NA | NA | NA |
|               | NA                 | NA | NA | NA | -2 | NA |    |    |    |    |    |    |    |    |    |    |    |
| OR2AE1        | ENSG00000244623.1  |    |    | NA | NA | NA | NA | NA | NA | NA | NA | NA | NA | NA | NA | NA | NA |
|               | NA                 | NA | NA | NA | -2 | NA |    |    |    |    |    |    |    |    |    |    |    |
| RP11-89N17.1  | ENSG00000173862.3  |    |    | NA | NA | NA | NA | NA | NA | NA | NA | NA | NA | NA | NA | NA | NA |
|               | NA                 | NA | NA | NA | -2 | NA |    |    |    |    |    |    |    |    |    |    |    |
| ZNF92         | ENSG00000146757.13 |    |    | NA | NA | NA | NA | NA | NA | NA | NA | NA | NA | NA | NA | NA | NA |
|               | NA                 | NA | NA | NA | -2 | NA |    |    |    |    |    |    |    |    |    |    |    |
| CTD-2227E11.1 | ENSG00000270933.1  |    |    | NA | NA | NA | NA | NA | NA | NA | NA | NA | NA | NA | NA | NA | NA |
|               | NA                 | NA | NA | NA | -2 | NA |    |    |    |    |    |    |    |    |    |    |    |
| RBM28         | ENSG00000106344.8  |    |    | NA | NA | NA | NA | NA | NA | NA | NA | NA | NA | NA | NA | NA | NA |
|               | NA                 | NA | NA | NA | -2 | NA |    |    |    |    |    |    |    |    |    |    |    |
| ARF5          | ENSG00000004059.10 |    |    | NA | NA | NA | NA | NA | NA | NA | NA | NA | NA | NA | NA | NA | NA |
|               | NA                 | NA | NA | NA | -2 | NA |    |    |    |    |    |    |    |    |    |    |    |
| KLHDC10       | ENSG00000128607.13 |    |    | NA | NA | NA | NA | NA | NA | NA | NA | NA | NA | NA | NA | NA | NA |
|               | NA                 | NA | NA | NA | -2 | NA |    |    |    |    |    |    |    |    |    |    |    |
| KCND2         | ENSG00000184408.9  |    |    | NA | NA | NA | NA | NA | NA | NA | NA | NA | NA | NA | NA | NA | NA |
|               | NA                 | NA | NA | NA | -2 | NA |    |    |    |    |    |    |    |    |    |    |    |
| LAMB4         | ENSG00000091128.12 |    |    | NA | NA | NA | NA | NA | NA | NA | NA | NA | NA | NA | NA | NA | NA |
|               | NA                 | NA | NA | NA | -2 | NA |    |    |    |    |    |    |    |    |    |    |    |
| AHR           | ENSG00000106546.12 |    |    | NA | NA | NA | NA | NA | NA | NA | NA | NA | NA | NA | NA | NA | NA |
|               | NA                 | NA | NA | NA | -2 | NA |    |    |    |    |    |    |    |    |    |    |    |
| NACAD         | ENSG00000136274.8  |    |    | NA | NA | NA | NA | NA | NA | NA | NA | NA | NA | NA | NA | NA | NA |
|               | NA                 | NA | NA | NA | -2 | NA |    |    |    |    |    |    |    |    |    |    |    |
| EPHA1         | ENSG00000146904.8  |    |    | NA | NA | NA | NA | NA | NA | NA | NA | NA | NA | NA | NA | NA | NA |
|               | NA                 | NA | NA | NA | -2 | NA |    |    |    |    |    |    |    |    |    |    |    |
| CPED1         | ENSG00000106034.17 |    |    | NA | NA | NA | NA | NA | NA | NA | NA | NA | NA | NA | NA | NA | NA |
|               | NA                 | NA | NA | NA | -2 | NA |    |    |    |    |    |    |    |    |    |    |    |
| DGKI          | ENSG00000157680.15 |    |    | NA | NA | NA | NA | NA | NA | NA | NA | NA | NA | NA | NA | NA | NA |
|               | NA                 | NA | NA | NA | -2 | NA |    |    |    |    |    |    |    |    |    |    |    |
| RP11-738B7.1  | ENSG00000242078.1  |    |    | NA | NA | NA | NA | NA | NA | NA | NA | NA | NA | NA | NA | NA | NA |
|               | NA                 | NA | NA | NA | -2 | NA |    |    |    |    |    |    |    |    |    |    |    |
| NDUFB2        | ENSG00000090266.12 |    |    | NA | NA | NA | NA | NA | NA | NA | NA | NA | NA | NA | NA | NA | NA |
|               | NA                 | NA | NA | NA | -2 | NA |    |    |    |    |    |    |    |    |    |    |    |
| MGAM2         | ENSG00000257743.8  |    |    | NA | NA | NA | NA | NA | NA | NA | NA | NA | NA | NA | NA | NA | NA |
|               | NA                 | NA | NA | NA | -2 | NA |    |    |    |    |    |    |    |    |    |    |    |
| POU6F2        | ENSG00000106536.19 |    |    | NA | NA | NA | NA | NA | NA | NA | NA | NA | NA | NA | NA | NA | NA |
|               | NA                 | NA | NA | NA | -2 | NA |    |    |    |    |    |    |    |    |    |    |    |
| AC006372.4    | ENSG00000234210.1  |    |    | NA | NA | NA | NA | NA | NA | NA | NA | NA | NA | NA | NA | NA | NA |
|               | NA                 | NA | NA | NA | -2 | NA |    |    |    |    |    |    |    |    |    |    |    |
| ING3          | ENSG00000071243.15 |    |    | NA | NA | NA | NA | NA | NA | NA | NA | NA | NA | NA | NA | NA | NA |
|               | NA                 | NA | NA | NA | -2 | NA |    |    |    |    |    |    |    |    |    |    |    |
| AC021218.2    | ENSG00000204876.4  |    |    | NA | NA | NA | NA | NA | NA | NA | NA | NA | NA | NA | NA | NA | NA |
|               | NA                 | NA | NA | NA | -2 | NA |    |    |    |    |    |    |    |    |    |    |    |
| CYP2W1        | ENSG00000073067.13 |    |    | NA | NA | NA | NA | NA | NA | NA | NA | NA | NA | NA | NA | NA | NA |
|               | NA                 | NA | NA | NA | -2 | NA |    |    |    |    |    |    |    |    |    |    |    |
| CTB-30L5.1    | ENSG00000267052.1  |    |    | NA | NA | NA | NA | NA | NA | NA | NA | NA | NA | NA | NA | NA | NA |
|               | NA                 | NA | NA | NA | -2 | NA |    |    |    |    |    |    |    |    |    |    |    |
| OR2A25        | ENSG00000221933.2  |    |    | NA | NA | NA | NA | NA | NA | NA | NA | NA | NA | NA | NA | NA | NA |
|               | NA                 | NA | NA | NA | -2 | NA |    |    |    |    |    |    |    |    |    |    |    |
| SERPINE1      | ENSG00000106366.8  |    |    | NA | NA | NA | NA | NA | NA | NA | NA | NA | NA | NA | NA | NA | NA |
|               | NA                 | NA | NA | NA | -2 | NA |    |    |    |    |    |    |    |    |    |    |    |
| RP11-458K10.2 | ENSG00000240973.1  |    |    | NA | NA | NA | NA | NA | NA | NA | NA | NA | NA | NA | NA | NA | NA |
|               | NA                 | NA | NA | NA | -2 | NA |    |    |    |    |    |    |    |    |    |    |    |
| RP11-760D2.1  | ENSG00000225488.1  |    |    | NA | NA | NA | NA | NA | NA | NA | NA | NA | NA | NA | NA | NA | NA |
|               | NA                 | NA | NA | NA | -2 | NA |    |    |    |    |    |    |    |    |    |    |    |
| GRIFIN        | ENSG00000275572.1  |    |    | NA | NA | NA | NA | NA | NA | NA | NA | NA | NA | NA | NA | NA | NA |



|              |                    |    |    |    |    |    |    |    |    |    |    |    |    |    |
|--------------|--------------------|----|----|----|----|----|----|----|----|----|----|----|----|----|
| NA           | NA                 | NA | NA | NA | -2 | NA |    |    |    |    |    |    |    |    |
| SPDYE2B      | ENSG00000173678.14 | NA | NA | NA | NA | NA | NA | NA | NA | NA | NA | NA | NA | NA |
| NA           | NA                 | NA | NA | NA | -2 | NA |    |    |    |    |    |    |    |    |
| PRSS58       | ENSG00000258223.6  | NA | NA | NA | NA | NA | NA | NA | NA | NA | NA | NA | NA | NA |
| NA           | NA                 | NA | NA | NA | -2 | NA |    |    |    |    |    |    |    |    |
| AC004951.6   | ENSG00000228434.1  | NA | NA | NA | NA | NA | NA | NA | NA | NA | NA | NA | NA | NA |
| NA           | NA                 | NA | NA | NA | -2 | NA |    |    |    |    |    |    |    |    |
| ASB15        | ENSG00000146809.12 | NA | NA | NA | NA | NA | NA | NA | NA | NA | NA | NA | NA | NA |
| NA           | NA                 | NA | NA | NA | -2 | NA |    |    |    |    |    |    |    |    |
| FOXP2        | ENSG00000128573.24 | NA | NA | NA | NA | NA | NA | NA | NA | NA | NA | NA | NA | NA |
| NA           | NA                 | NA | NA | NA | -2 | NA |    |    |    |    |    |    |    |    |
| HOXA1        | ENSG00000105991.7  | NA | NA | NA | NA | NA | NA | NA | NA | NA | NA | NA | NA | NA |
| NA           | NA                 | NA | NA | NA | -2 | NA |    |    |    |    |    |    |    |    |
| RP5-958B11.1 | ENSG00000283648.1  | NA | NA | NA | NA | NA | NA | NA | NA | NA | NA | NA | NA | NA |
| NA           | NA                 | NA | NA | NA | -2 | NA |    |    |    |    |    |    |    |    |
| TCAF2        | ENSG00000170379.19 | NA | NA | NA | NA | NA | NA | NA | NA | NA | NA | NA | NA | NA |
| NA           | NA                 | NA | NA | NA | -2 | NA |    |    |    |    |    |    |    |    |
| CPA2         | ENSG00000158516.11 | NA | NA | NA | NA | NA | NA | NA | NA | NA | NA | NA | NA | NA |
| NA           | NA                 | NA | NA | NA | -2 | NA |    |    |    |    |    |    |    |    |
| SPAM1        | ENSG00000106304.15 | NA | NA | NA | NA | NA | NA | NA | NA | NA | NA | NA | NA | NA |
| NA           | NA                 | NA | NA | NA | -2 | NA |    |    |    |    |    |    |    |    |
| UNCX         | ENSG00000164853.8  | NA | NA | NA | NA | NA | NA | NA | NA | NA | NA | NA | NA | NA |
| NA           | NA                 | NA | NA | NA | -2 | NA |    |    |    |    |    |    |    |    |
| SRPK2        | ENSG00000135250.16 | NA | NA | NA | NA | NA | NA | NA | NA | NA | NA | NA | NA | NA |
| NA           | NA                 | NA | NA | NA | -2 | NA |    |    |    |    |    |    |    |    |
| ERVW-1       | ENSG00000242950.6  | NA | NA | NA | NA | NA | NA | NA | NA | NA | NA | NA | NA | NA |
| NA           | NA                 | NA | NA | NA | -2 | NA |    |    |    |    |    |    |    |    |
| IGF2BP3      | ENSG00000136231.13 | NA | NA | NA | NA | NA | NA | NA | NA | NA | NA | NA | NA | NA |
| NA           | NA                 | NA | NA | NA | -2 | NA |    |    |    |    |    |    |    |    |
| AC018647.3   | ENSG00000227544.8  | NA | NA | NA | NA | NA | NA | NA | NA | NA | NA | NA | NA | NA |
| NA           | NA                 | NA | NA | NA | -2 | NA |    |    |    |    |    |    |    |    |
| GIMAP4       | ENSG00000133574.9  | NA | NA | NA | NA | NA | NA | NA | NA | NA | NA | NA | NA | NA |
| NA           | NA                 | NA | NA | NA | -2 | NA |    |    |    |    |    |    |    |    |
| HDAC9        | ENSG00000048052.21 | NA | NA | NA | NA | NA | NA | NA | NA | NA | NA | NA | NA | NA |
| NA           | NA                 | NA | NA | NA | -2 | NA |    |    |    |    |    |    |    |    |
| HOXA2        | ENSG00000105996.6  | NA | NA | NA | NA | NA | NA | NA | NA | NA | NA | NA | NA | NA |
| NA           | NA                 | NA | NA | NA | -2 | NA |    |    |    |    |    |    |    |    |
| ZNF800       | ENSG00000048405.9  | NA | NA | NA | NA | NA | NA | NA | NA | NA | NA | NA | NA | NA |
| NA           | NA                 | NA | NA | NA | -2 | NA |    |    |    |    |    |    |    |    |
| CARD11       | ENSG00000198286.9  | NA | NA | NA | NA | NA | NA | NA | NA | NA | NA | NA | NA | NA |
| NA           | NA                 | NA | NA | NA | -2 | NA |    |    |    |    |    |    |    |    |
| AC011294.3   | ENSG00000233539.5  | NA | NA | NA | NA | NA | NA | NA | NA | NA | NA | NA | NA | NA |
| NA           | NA                 | NA | NA | NA | -2 | NA |    |    |    |    |    |    |    |    |
| LAT2         | ENSG00000086730.16 | NA | NA | NA | NA | NA | NA | NA | NA | NA | NA | NA | NA | NA |
| NA           | NA                 | NA | NA | NA | -2 | NA |    |    |    |    |    |    |    |    |
| SNX8         | ENSG00000106266.10 | NA | NA | NA | NA | NA | NA | NA | NA | NA | NA | NA | NA | NA |
| NA           | NA                 | NA | NA | NA | -2 | NA |    |    |    |    |    |    |    |    |
| CYP3A43      | ENSG00000021461.16 | NA | NA | NA | NA | NA | NA | NA | NA | NA | NA | NA | NA | NA |
| NA           | NA                 | NA | NA | NA | -2 | NA |    |    |    |    |    |    |    |    |
| PAPOLB       | ENSG00000218823.1  | NA | NA | NA | NA | NA | NA | NA | NA | NA | NA | NA | NA | NA |
| NA           | NA                 | NA | NA | NA | -2 | NA |    |    |    |    |    |    |    |    |
| RP4-777O23.2 | ENSG00000264520.1  | NA | NA | NA | NA | NA | NA | NA | NA | NA | NA | NA | NA | NA |
| NA           | NA                 | NA | NA | NA | -2 | NA |    |    |    |    |    |    |    |    |
| FBXO24       | ENSG00000106336.12 | NA | NA | NA | NA | NA | NA | NA | NA | NA | NA | NA | NA | NA |
| NA           | NA                 | NA | NA | NA | -2 | NA |    |    |    |    |    |    |    |    |
| MRPS17       | ENSG00000239789.5  | NA | NA | NA | NA | NA | NA | NA | NA | NA | NA | NA | NA | NA |
| NA           | NA                 | NA | NA | NA | -2 | NA |    |    |    |    |    |    |    |    |
| SSBP1        | ENSG00000106028.10 | NA | NA | NA | NA | NA | NA | NA | NA | NA | NA | NA | NA | NA |
| NA           | NA                 | NA | NA | NA | -2 | NA |    |    |    |    |    |    |    |    |
| AC000124.1   | ENSG00000226770.1  | NA | NA | NA | NA | NA | NA | NA | NA | NA | NA | NA | NA | NA |
| NA           | NA                 | NA | NA | NA | -2 | NA |    |    |    |    |    |    |    |    |
| PHKG1        | ENSG00000164776.9  | NA | NA | NA | NA | NA | NA | NA | NA | NA | NA | NA | NA | NA |

|                |                    |    |    |    |    |    |    |    |    |    |    |    |    |    |
|----------------|--------------------|----|----|----|----|----|----|----|----|----|----|----|----|----|
| NA             | NA                 | NA | NA | -2 | NA |    |    |    |    |    |    |    |    |    |
| AC074389.7     | ENSG00000234977.1  |    |    |    | NA | NA | NA | NA | NA | NA | NA | NA | NA | NA |
| NA             | NA                 | NA | NA | NA | -2 | NA |    |    |    |    |    |    |    |    |
| LIMK1          | ENSG00000106683.14 |    |    |    | NA | NA | NA | NA | NA | NA | NA | NA | NA | NA |
| NA             | NA                 | NA | NA | NA | -2 | NA |    |    |    |    |    |    |    |    |
| TMEM178B       | ENSG00000261115.5  |    |    |    | NA | NA | NA | NA | NA | NA | NA | NA | NA | NA |
| NA             | NA                 | NA | NA | NA | -2 | NA |    |    |    |    |    |    |    |    |
| TAF6           | ENSG00000106290.14 |    |    |    | NA | NA | NA | NA | NA | NA | NA | NA | NA | NA |
| NA             | NA                 | NA | NA | NA | -2 | NA |    |    |    |    |    |    |    |    |
| TRIM56         | ENSG00000169871.12 |    |    |    | NA | NA | NA | NA | NA | NA | NA | NA | NA | NA |
| NA             | NA                 | NA | NA | NA | -2 | NA |    |    |    |    |    |    |    |    |
| SEPT7-AS1      | ENSG00000228878.7  |    |    |    | NA | NA | NA | NA | NA | NA | NA | NA | NA | NA |
| NA             | NA                 | NA | NA | NA | -2 | NA |    |    |    |    |    |    |    |    |
| SVOPL          | ENSG00000157703.15 |    |    |    | NA | NA | NA | NA | NA | NA | NA | NA | NA | NA |
| NA             | NA                 | NA | NA | NA | -2 | NA |    |    |    |    |    |    |    |    |
| TRBV11-2       | ENSG00000241657.1  |    |    |    | NA | NA | NA | NA | NA | NA | NA | NA | NA | NA |
| NA             | NA                 | NA | NA | NA | -2 | NA |    |    |    |    |    |    |    |    |
| LINC00998      | ENSG00000214194.8  |    |    |    | NA | NA | NA | NA | NA | NA | NA | NA | NA | NA |
| NA             | NA                 | NA | NA | NA | -2 | NA |    |    |    |    |    |    |    |    |
| ZNF735         | ENSG00000223614.5  |    |    |    | NA | NA | NA | NA | NA | NA | NA | NA | NA | NA |
| NA             | NA                 | NA | NA | NA | -2 | NA |    |    |    |    |    |    |    |    |
| PON3           | ENSG00000105852.10 |    |    |    | NA | NA | NA | NA | NA | NA | NA | NA | NA | NA |
| NA             | NA                 | NA | NA | NA | -2 | NA |    |    |    |    |    |    |    |    |
| RP4-742N3.1    | ENSG00000233417.1  |    |    |    | NA | NA | NA | NA | NA | NA | NA | NA | NA | NA |
| NA             | NA                 | NA | NA | NA | NA | -2 | NA |    |    |    |    |    |    |    |
| RP11-196D18.1  | ENSG00000227148.1  |    |    |    | NA | NA | NA | NA | NA | NA | NA | NA | NA | NA |
| NA             | NA                 | NA | NA | NA | NA | -2 | NA |    |    |    |    |    |    |    |
| TAX1BP1        | ENSG00000106052.13 |    |    |    | NA | NA | NA | NA | NA | NA | NA | NA | NA | NA |
| NA             | NA                 | NA | NA | NA | -2 | NA |    |    |    |    |    |    |    |    |
| HOXA11         | ENSG00000005073.5  |    |    |    | NA | NA | NA | NA | NA | NA | NA | NA | NA | NA |
| NA             | NA                 | NA | NA | NA | -2 | NA |    |    |    |    |    |    |    |    |
| TMEM139        | ENSG00000178826.10 |    |    |    | NA | NA | NA | NA | NA | NA | NA | NA | NA | NA |
| NA             | NA                 | NA | NA | NA | -2 | NA |    |    |    |    |    |    |    |    |
| ELMO1          | ENSG00000155849.15 |    |    |    | NA | NA | NA | NA | NA | NA | NA | NA | NA | NA |
| NA             | NA                 | NA | NA | NA | -2 | NA |    |    |    |    |    |    |    |    |
| KMT2E          | ENSG00000005483.20 |    |    |    | NA | NA | NA | NA | NA | NA | NA | NA | NA | NA |
| NA             | NA                 | NA | NA | NA | -2 | NA |    |    |    |    |    |    |    |    |
| TMEM130        | ENSG00000166448.14 |    |    |    | NA | NA | NA | NA | NA | NA | NA | NA | NA | NA |
| NA             | NA                 | NA | NA | NA | -2 | NA |    |    |    |    |    |    |    |    |
| AC005008.2     | ENSG00000237896.6  |    |    |    | NA | NA | NA | NA | NA | NA | NA | NA | NA | NA |
| NA             | NA                 | NA | NA | NA | -2 | NA |    |    |    |    |    |    |    |    |
| RP11-73B2.2    | ENSG00000230600.1  |    |    |    | NA | NA | NA | NA | NA | NA | NA | NA | NA | NA |
| NA             | NA                 | NA | NA | NA | NA | -2 | NA |    |    |    |    |    |    |    |
| INHBA          | ENSG00000122641.10 |    |    |    | NA | NA | NA | NA | NA | NA | NA | NA | NA | NA |
| NA             | NA                 | NA | NA | NA | -2 | NA |    |    |    |    |    |    |    |    |
| EFCAB10        | ENSG00000185055.10 |    |    |    | NA | NA | NA | NA | NA | NA | NA | NA | NA | NA |
| NA             | NA                 | NA | NA | NA | -2 | NA |    |    |    |    |    |    |    |    |
| RAB19          | ENSG00000146955.10 |    |    |    | NA | NA | NA | NA | NA | NA | NA | NA | NA | NA |
| NA             | NA                 | NA | NA | NA | -2 | NA |    |    |    |    |    |    |    |    |
| RP11-1275H24.1 | ENSG00000234432.4  |    |    |    | NA | NA | NA | NA | NA | NA | NA | NA | NA | NA |
| NA             | NA                 | NA | NA | NA | NA | -2 | NA |    |    |    |    |    |    |    |
| AC002383.2     | ENSG00000227863.2  |    |    |    | NA | NA | NA | NA | NA | NA | NA | NA | NA | NA |
| NA             | NA                 | NA | NA | NA | -2 | NA |    |    |    |    |    |    |    |    |
| C7orf71        | ENSG00000222004.7  |    |    |    | NA | NA | NA | NA | NA | NA | NA | NA | NA | NA |
| NA             | NA                 | NA | NA | NA | -2 | NA |    |    |    |    |    |    |    |    |
| AC093627.7     | ENSG00000232325.4  |    |    |    | NA | NA | NA | NA | NA | NA | NA | NA | NA | NA |
| NA             | NA                 | NA | NA | NA | -2 | NA |    |    |    |    |    |    |    |    |
| RP11-3B12.5    | ENSG00000224899.1  |    |    |    | NA | NA | NA | NA | NA | NA | NA | NA | NA | NA |
| NA             | NA                 | NA | NA | NA | NA | -2 | NA |    |    |    |    |    |    |    |
| HBP1           | ENSG00000105856.13 |    |    |    | NA | NA | NA | NA | NA | NA | NA | NA | NA | NA |
| NA             | NA                 | NA | NA | NA | -2 | NA |    |    |    |    |    |    |    |    |
| AOAH           | ENSG00000136250.11 |    |    |    | NA | NA | NA | NA | NA | NA | NA | NA | NA | NA |

|               |                    |    |    |    |    |    |    |    |    |    |    |    |    |    |
|---------------|--------------------|----|----|----|----|----|----|----|----|----|----|----|----|----|
| NA            | NA                 | NA | NA | -2 | NA |    |    |    |    |    |    |    |    |    |
| EPHB6         | ENSG00000106123.11 | NA | NA | NA | NA | NA | NA | NA | NA | NA | NA | NA | NA | NA |
| NA            | NA                 | NA | NA | -2 | NA |    |    |    |    |    |    |    |    |    |
| GNG11         | ENSG00000127920.5  | NA | NA | NA | NA | NA | NA | NA | NA | NA | NA | NA | NA | NA |
| NA            | NA                 | NA | NA | -2 | NA |    |    |    |    |    |    |    |    |    |
| AC073115.7    | ENSG00000229628.1  | NA | NA | NA | NA | NA | NA | NA | NA | NA | NA | NA | NA | NA |
| NA            | NA                 | NA | NA | NA | -2 | NA |    |    |    |    |    |    |    |    |
| TPST1         | ENSG00000169902.13 | NA | NA | NA | NA | NA | NA | NA | NA | NA | NA | NA | NA | NA |
| NA            | NA                 | NA | NA | -2 | NA |    |    |    |    |    |    |    |    |    |
| SYPL1         | ENSG00000008282.8  | NA | NA | NA | NA | NA | NA | NA | NA | NA | NA | NA | NA | NA |
| NA            | NA                 | NA | NA | -2 | NA |    |    |    |    |    |    |    |    |    |
| PPP1R3A       | ENSG00000154415.7  | NA | NA | NA | NA | NA | NA | NA | NA | NA | NA | NA | NA | NA |
| NA            | NA                 | NA | NA | NA | -2 | NA |    |    |    |    |    |    |    |    |
| HGF           | ENSG00000019991.15 | NA | NA | NA | NA | NA | NA | NA | NA | NA | NA | NA | NA | NA |
| NA            | NA                 | NA | NA | -2 | NA |    |    |    |    |    |    |    |    |    |
| EN2           | ENSG00000164778.4  | NA | NA | NA | NA | NA | NA | NA | NA | NA | NA | NA | NA | NA |
| NA            | NA                 | NA | NA | -2 | NA |    |    |    |    |    |    |    |    |    |
| SEM1          | ENSG00000127922.9  | NA | NA | NA | NA | NA | NA | NA | NA | NA | NA | NA | NA | NA |
| NA            | NA                 | NA | NA | -2 | NA |    |    |    |    |    |    |    |    |    |
| POP7          | ENSG00000172336.4  | NA | NA | NA | NA | NA | NA | NA | NA | NA | NA | NA | NA | NA |
| NA            | NA                 | NA | NA | -2 | NA |    |    |    |    |    |    |    |    |    |
| HOXA6         | ENSG00000106006.6  | NA | NA | NA | NA | NA | NA | NA | NA | NA | NA | NA | NA | NA |
| NA            | NA                 | NA | NA | -2 | NA |    |    |    |    |    |    |    |    |    |
| TTC26         | ENSG00000105948.13 | NA | NA | NA | NA | NA | NA | NA | NA | NA | NA | NA | NA | NA |
| NA            | NA                 | NA | NA | -2 | NA |    |    |    |    |    |    |    |    |    |
| VGF           | ENSG00000128564.6  | NA | NA | NA | NA | NA | NA | NA | NA | NA | NA | NA | NA | NA |
| NA            | NA                 | NA | NA | -2 | NA |    |    |    |    |    |    |    |    |    |
| RP11-760D2.5  | ENSG00000233288.1  | NA | NA | NA | NA | NA | NA | NA | NA | NA | NA | NA | NA | NA |
| NA            | NA                 | NA | NA | NA | NA | -2 | NA |    |    |    |    |    |    |    |
| AOC1          | ENSG00000002726.20 | NA | NA | NA | NA | NA | NA | NA | NA | NA | NA | NA | NA | NA |
| NA            | NA                 | NA | NA | -2 | NA |    |    |    |    |    |    |    |    |    |
| ELDR          | ENSG00000280890.1  | NA | NA | NA | NA | NA | NA | NA | NA | NA | NA | NA | NA | NA |
| NA            | NA                 | NA | NA | -2 | NA |    |    |    |    |    |    |    |    |    |
| NDUFA4        | ENSG00000189043.9  | NA | NA | NA | NA | NA | NA | NA | NA | NA | NA | NA | NA | NA |
| NA            | NA                 | NA | NA | NA | -2 | NA |    |    |    |    |    |    |    |    |
| NUP205        | ENSG00000155561.14 | NA | NA | NA | NA | NA | NA | NA | NA | NA | NA | NA | NA | NA |
| NA            | NA                 | NA | NA | NA | -2 | NA |    |    |    |    |    |    |    |    |
| KCCAT333      | ENSG00000236318.2  | NA | NA | NA | NA | NA | NA | NA | NA | NA | NA | NA | NA | NA |
| NA            | NA                 | NA | NA | NA | -2 | NA |    |    |    |    |    |    |    |    |
| C7orf66       | ENSG00000205174.4  | NA | NA | NA | NA | NA | NA | NA | NA | NA | NA | NA | NA | NA |
| NA            | NA                 | NA | NA | NA | -2 | NA |    |    |    |    |    |    |    |    |
| MOGAT3        | ENSG00000106384.10 | NA | NA | NA | NA | NA | NA | NA | NA | NA | NA | NA | NA | NA |
| NA            | NA                 | NA | NA | NA | -2 | NA |    |    |    |    |    |    |    |    |
| CCL26         | ENSG00000006606.8  | NA | NA | NA | NA | NA | NA | NA | NA | NA | NA | NA | NA | NA |
| NA            | NA                 | NA | NA | -2 | NA |    |    |    |    |    |    |    |    |    |
| MTURN         | ENSG00000180354.15 | NA | NA | NA | NA | NA | NA | NA | NA | NA | NA | NA | NA | NA |
| NA            | NA                 | NA | NA | -2 | NA |    |    |    |    |    |    |    |    |    |
| RP5-1142J19.1 | ENSG00000229660.1  | NA | NA | NA | NA | NA | NA | NA | NA | NA | NA | NA | NA | NA |
| NA            | NA                 | NA | NA | NA | NA | -2 | NA |    |    |    |    |    |    |    |
| CTAGE6        | ENSG00000271321.1  | NA | NA | NA | NA | NA | NA | NA | NA | NA | NA | NA | NA | NA |
| NA            | NA                 | NA | NA | NA | -2 | NA |    |    |    |    |    |    |    |    |
| RNF133        | ENSG00000188050.2  | NA | NA | NA | NA | NA | NA | NA | NA | NA | NA | NA | NA | NA |
| NA            | NA                 | NA | NA | NA | -2 | NA |    |    |    |    |    |    |    |    |
| RP5-899E9.1   | ENSG00000273341.1  | NA | NA | NA | NA | NA | NA | NA | NA | NA | NA | NA | NA | NA |
| NA            | NA                 | NA | NA | NA | NA | -2 | NA |    |    |    |    |    |    |    |
| HOXA5         | ENSG00000106004.4  | NA | NA | NA | NA | NA | NA | NA | NA | NA | NA | NA | NA | NA |
| NA            | NA                 | NA | NA | -2 | NA |    |    |    |    |    |    |    |    |    |
| RP11-340I6.3  | ENSG00000227305.1  | NA | NA | NA | NA | NA | NA | NA | NA | NA | NA | NA | NA | NA |
| NA            | NA                 | NA | NA | NA | NA | -2 | NA |    |    |    |    |    |    |    |
| GBX1          | ENSG00000164900.4  | NA | NA | NA | NA | NA | NA | NA | NA | NA | NA | NA | NA | NA |
| NA            | NA                 | NA | NA | -2 | NA |    |    |    |    |    |    |    |    |    |
| SNX10         | ENSG00000086300.15 | NA | NA | NA | NA | NA | NA | NA | NA | NA | NA | NA | NA | NA |

|               |                    |    |    |    |    |    |    |    |    |    |    |    |    |    |
|---------------|--------------------|----|----|----|----|----|----|----|----|----|----|----|----|----|
| NA            | NA                 | NA | NA | -2 | NA |    |    |    |    |    |    |    |    |    |
| PRPS1L1       | ENSG00000229937.6  |    |    |    | NA | NA | NA | NA | NA | NA | NA | NA | NA | NA |
| NA            | NA                 | NA | NA | NA | -2 | NA |    |    |    |    |    |    |    |    |
| DLX5          | ENSG00000105880.4  |    |    |    | NA | NA | NA | NA | NA | NA | NA | NA | NA | NA |
| NA            | NA                 | NA | NA | NA | -2 | NA |    |    |    |    |    |    |    |    |
| AC074389.5    | ENSG00000231476.1  |    |    |    | NA | NA | NA | NA | NA | NA | NA | NA | NA | NA |
| NA            | NA                 | NA | NA | NA | -2 | NA |    |    |    |    |    |    |    |    |
| FAM200A       | ENSG00000221909.2  |    |    |    | NA | NA | NA | NA | NA | NA | NA | NA | NA | NA |
| NA            | NA                 | NA | NA | NA | -2 | NA |    |    |    |    |    |    |    |    |
| FKBP6         | ENSG00000077800.11 |    |    |    | NA | NA | NA | NA | NA | NA | NA | NA | NA | NA |
| NA            | NA                 | NA | NA | NA | -2 | NA |    |    |    |    |    |    |    |    |
| AC024084.1    | ENSG00000230649.2  |    |    |    | NA | NA | NA | NA | NA | NA | NA | NA | NA | NA |
| NA            | NA                 | NA | NA | NA | -2 | NA |    |    |    |    |    |    |    |    |
| AASS          | ENSG00000008311.14 |    |    |    | NA | NA | NA | NA | NA | NA | NA | NA | NA | NA |
| NA            | NA                 | NA | NA | NA | -2 | NA |    |    |    |    |    |    |    |    |
| UBN2          | ENSG00000157741.14 |    |    |    | NA | NA | NA | NA | NA | NA | NA | NA | NA | NA |
| NA            | NA                 | NA | NA | NA | -2 | NA |    |    |    |    |    |    |    |    |
| AC005522.7    | ENSG00000225703.1  |    |    |    | NA | NA | NA | NA | NA | NA | NA | NA | NA | NA |
| NA            | NA                 | NA | NA | NA | -2 | NA |    |    |    |    |    |    |    |    |
| NPY           | ENSG00000122585.7  |    |    |    | NA | NA | NA | NA | NA | NA | NA | NA | NA | NA |
| NA            | NA                 | NA | NA | NA | -2 | NA |    |    |    |    |    |    |    |    |
| IQCA1L        | ENSG00000278685.4  |    |    |    | NA | NA | NA | NA | NA | NA | NA | NA | NA | NA |
| NA            | NA                 | NA | NA | NA | -2 | NA |    |    |    |    |    |    |    |    |
| RP5-942I16.1  | ENSG00000234215.2  |    |    |    | NA | NA | NA | NA | NA | NA | NA | NA | NA | NA |
| NA            | NA                 | NA | NA | NA | -2 | NA |    |    |    |    |    |    |    |    |
| ZNF3          | ENSG00000166526.16 |    |    |    | NA | NA | NA | NA | NA | NA | NA | NA | NA | NA |
| NA            | NA                 | NA | NA | NA | -2 | NA |    |    |    |    |    |    |    |    |
| RP11-760D2.11 | ENSG00000261275.1  |    |    |    | NA | NA | NA | NA | NA | NA | NA | NA | NA | NA |
| NA            | NA                 | NA | NA | NA | -2 | NA |    |    |    |    |    |    |    |    |
| TRPV5         | ENSG00000127412.6  |    |    |    | NA | NA | NA | NA | NA | NA | NA | NA | NA | NA |
| NA            | NA                 | NA | NA | NA | -2 | NA |    |    |    |    |    |    |    |    |
| SUN3          | ENSG00000164744.12 |    |    |    | NA | NA | NA | NA | NA | NA | NA | NA | NA | NA |
| NA            | NA                 | NA | NA | NA | -2 | NA |    |    |    |    |    |    |    |    |
| RP11-89N17.4  | ENSG00000236494.1  |    |    |    | NA | NA | NA | NA | NA | NA | NA | NA | NA | NA |
| NA            | NA                 | NA | NA | NA | -2 | NA |    |    |    |    |    |    |    |    |
| GIMAP6        | ENSG00000133561.15 |    |    |    | NA | NA | NA | NA | NA | NA | NA | NA | NA | NA |
| NA            | NA                 | NA | NA | NA | -2 | NA |    |    |    |    |    |    |    |    |
| MUC12         | ENSG00000205277.9  |    |    |    | NA | NA | NA | NA | NA | NA | NA | NA | NA | NA |
| NA            | NA                 | NA | NA | NA | -2 | NA |    |    |    |    |    |    |    |    |
| SLC29A4       | ENSG00000164638.10 |    |    |    | NA | NA | NA | NA | NA | NA | NA | NA | NA | NA |
| NA            | NA                 | NA | NA | NA | -2 | NA |    |    |    |    |    |    |    |    |
| LEP           | ENSG00000174697.4  |    |    |    | NA | NA | NA | NA | NA | NA | NA | NA | NA | NA |
| NA            | NA                 | NA | NA | NA | -2 | NA |    |    |    |    |    |    |    |    |
| CTAGE8        | ENSG00000244693.1  |    |    |    | NA | NA | NA | NA | NA | NA | NA | NA | NA | NA |
| NA            | NA                 | NA | NA | NA | -2 | NA |    |    |    |    |    |    |    |    |
| AC093627.11   | ENSG00000239715.1  |    |    |    | NA | NA | NA | NA | NA | NA | NA | NA | NA | NA |
| NA            | NA                 | NA | NA | NA | -2 | NA |    |    |    |    |    |    |    |    |
| AC006372.5    | ENSG00000223872.1  |    |    |    | NA | NA | NA | NA | NA | NA | NA | NA | NA | NA |
| NA            | NA                 | NA | NA | NA | -2 | NA |    |    |    |    |    |    |    |    |
| LINC01449     | ENSG00000224017.1  |    |    |    | NA | NA | NA | NA | NA | NA | NA | NA | NA | NA |
| NA            | NA                 | NA | NA | NA | -2 | NA |    |    |    |    |    |    |    |    |
| EZH2          | ENSG00000106462.10 |    |    |    | NA | NA | NA | NA | NA | NA | NA | NA | NA | NA |
| NA            | NA                 | NA | NA | NA | -2 | NA |    |    |    |    |    |    |    |    |
| MOSPD3        | ENSG00000106330.11 |    |    |    | NA | NA | NA | NA | NA | NA | NA | NA | NA | NA |
| NA            | NA                 | NA | NA | NA | -2 | NA |    |    |    |    |    |    |    |    |
| ARPC1A        | ENSG00000241685.9  |    |    |    | NA | NA | NA | NA | NA | NA | NA | NA | NA | NA |
| NA            | NA                 | NA | NA | NA | -2 | NA |    |    |    |    |    |    |    |    |
| HYAL4         | ENSG00000106302.9  |    |    |    | NA | NA | NA | NA | NA | NA | NA | NA | NA | NA |
| NA            | NA                 | NA | NA | NA | -2 | NA |    |    |    |    |    |    |    |    |
| ZNF862        | ENSG00000106479.10 |    |    |    | NA | NA | NA | NA | NA | NA | NA | NA | NA | NA |
| NA            | NA                 | NA | NA | NA | -2 | NA |    |    |    |    |    |    |    |    |
| AC007036.6    | ENSG00000227017.1  |    |    |    | NA | NA | NA | NA | NA | NA | NA | NA | NA | NA |

|              |                    |                    |    |    |    |    |    |    |    |    |    |    |    |    |
|--------------|--------------------|--------------------|----|----|----|----|----|----|----|----|----|----|----|----|
| NA           | NA                 | NA                 | NA | NA | -2 | NA |    |    |    |    |    |    |    |    |
| RP11-138A9.1 |                    | ENSG00000271204.1  |    |    |    | NA | NA | NA | NA | NA | NA | NA | NA | NA |
| NA           | NA                 | NA                 | NA | NA | NA | -2 | NA |    |    |    |    |    |    |    |
| MYO1G        | ENSG00000136286.14 |                    | NA | NA | NA | NA | NA | NA | NA | NA | NA | NA | NA | NA |
| NA           | NA                 | NA                 | NA | NA | -2 | NA |    |    |    |    |    |    |    |    |
| AKR1B10      |                    | ENSG00000198074.9  |    |    |    | NA | NA | NA | NA | NA | NA | NA | NA | NA |
| NA           | NA                 | NA                 | NA | NA | NA | -2 | NA |    |    |    |    |    |    |    |
| ELFN1        | ENSG00000225968.7  |                    | NA | NA | NA | NA | NA | NA | NA | NA | NA | NA | NA | NA |
| NA           | NA                 | NA                 | NA | NA | -2 | NA |    |    |    |    |    |    |    |    |
| GALNT11      |                    | ENSG00000178234.12 |    |    |    | NA | NA | NA | NA | NA | NA | NA | NA | NA |
| NA           | NA                 | NA                 | NA | NA | NA | -2 | NA |    |    |    |    |    |    |    |
| RP11-3P22.2  |                    | ENSG00000225718.1  |    |    |    | NA | NA | NA | NA | NA | NA | NA | NA | NA |
| NA           | NA                 | NA                 | NA | NA | NA | -2 | NA |    |    |    |    |    |    |    |
| AC003984.1   | ENSG00000235139.2  |                    | NA | NA | NA | NA | NA | NA | NA | NA | NA | NA | NA | NA |
| NA           | NA                 | NA                 | NA | NA | NA | -2 | NA |    |    |    |    |    |    |    |
| CACNA2D1     |                    | ENSG00000153956.15 |    |    |    | NA | NA | NA | NA | NA | NA | NA | NA | NA |
| NA           | NA                 | NA                 | NA | NA | NA | -2 | NA |    |    |    |    |    |    |    |
| ORAI2        | ENSG00000160991.15 |                    | NA | NA | NA | NA | NA | NA | NA | NA | NA | NA | NA | NA |
| NA           | NA                 | NA                 | NA | NA | -2 | NA |    |    |    |    |    |    |    |    |
| ELFN1-AS1    |                    | ENSG00000236081.1  |    |    |    | NA | NA | NA | NA | NA | NA | NA | NA | NA |
| NA           | NA                 | NA                 | NA | NA | NA | -2 | NA |    |    |    |    |    |    |    |
| CYP3A7       |                    | ENSG00000160870.12 |    |    |    | NA | NA | NA | NA | NA | NA | NA | NA | NA |
| NA           | NA                 | NA                 | NA | NA | NA | -2 | NA |    |    |    |    |    |    |    |
| PTPRZ1       |                    | ENSG00000106278.11 |    |    |    | NA | NA | NA | NA | NA | NA | NA | NA | NA |
| NA           | NA                 | NA                 | NA | NA | NA | -2 | NA |    |    |    |    |    |    |    |
| ATG9B        | ENSG00000181652.19 |                    | NA | NA | NA | NA | NA | NA | NA | NA | NA | NA | NA | NA |
| NA           | NA                 | NA                 | NA | NA | -2 | NA |    |    |    |    |    |    |    |    |
| MKLN1        | ENSG00000128585.17 |                    | NA | NA | NA | NA | NA | NA | NA | NA | NA | NA | NA | NA |
| NA           | NA                 | NA                 | NA | NA | -2 | NA |    |    |    |    |    |    |    |    |
| ZNF316       |                    | ENSG00000205903.6  |    |    |    | NA | NA | NA | NA | NA | NA | NA | NA | NA |
| NA           | NA                 | NA                 | NA | NA | NA | -2 | NA |    |    |    |    |    |    |    |
| CNOT4        | ENSG00000080802.18 |                    | NA | NA | NA | NA | NA | NA | NA | NA | NA | NA | NA | NA |
| NA           | NA                 | NA                 | NA | NA | -2 | NA |    |    |    |    |    |    |    |    |
| SFRP4        | ENSG00000106483.11 |                    | NA | NA | NA | NA | NA | NA | NA | NA | NA | NA | NA | NA |
| NA           | NA                 | NA                 | NA | NA | -2 | NA |    |    |    |    |    |    |    |    |
| SP8          | ENSG00000164651.16 |                    | NA | NA | NA | NA | NA | NA | NA | NA | NA | NA | NA | NA |
| NA           | NA                 | NA                 | NA | NA | -2 | NA |    |    |    |    |    |    |    |    |
| AC073115.6   | ENSG00000237471.1  |                    | NA | NA | NA | NA | NA | NA | NA | NA | NA | NA | NA | NA |
| NA           | NA                 | NA                 | NA | NA | NA | -2 | NA |    |    |    |    |    |    |    |
| AC017060.1   | ENSG00000236039.2  |                    | NA | NA | NA | NA | NA | NA | NA | NA | NA | NA | NA | NA |
| NA           | NA                 | NA                 | NA | NA | NA | -2 | NA |    |    |    |    |    |    |    |
| FIS1         | ENSG00000214253.8  |                    | NA | NA | NA | NA | NA | NA | NA | NA | NA | NA | NA | NA |
| NA           | NA                 | NA                 | NA | NA | -2 | NA |    |    |    |    |    |    |    |    |
| TWISTNB      |                    | ENSG00000105849.5  |    |    |    | NA | NA | NA | NA | NA | NA | NA | NA | NA |
| NA           | NA                 | NA                 | NA | NA | NA | -2 | NA |    |    |    |    |    |    |    |
| PODXL        | ENSG00000128567.16 |                    | NA | NA | NA | NA | NA | NA | NA | NA | NA | NA | NA | NA |
| NA           | NA                 | NA                 | NA | NA | -2 | NA |    |    |    |    |    |    |    |    |
| ABCB1        | ENSG00000085563.14 |                    | NA | NA | NA | NA | NA | NA | NA | NA | NA | NA | NA | NA |
| NA           | NA                 | NA                 | NA | NA | -2 | NA |    |    |    |    |    |    |    |    |
| SDHAF3       |                    | ENSG00000196636.7  |    |    |    | NA | NA | NA | NA | NA | NA | NA | NA | NA |
| NA           | NA                 | NA                 | NA | NA | NA | -2 | NA |    |    |    |    |    |    |    |
| FSCN3        | ENSG00000106328.9  |                    | NA | NA | NA | NA | NA | NA | NA | NA | NA | NA | NA | NA |
| NA           | NA                 | NA                 | NA | NA | -2 | NA |    |    |    |    |    |    |    |    |
| CHCHD3       |                    | ENSG00000106554.11 |    |    |    | NA | NA | NA | NA | NA | NA | NA | NA | NA |
| NA           | NA                 | NA                 | NA | NA | NA | -2 | NA |    |    |    |    |    |    |    |
| CLCN1        | ENSG00000188037.10 |                    | NA | NA | NA | NA | NA | NA | NA | NA | NA | NA | NA | NA |
| NA           | NA                 | NA                 | NA | NA | -2 | NA |    |    |    |    |    |    |    |    |
| ZNF789       |                    | ENSG00000198556.13 |    |    |    | NA | NA | NA | NA | NA | NA | NA | NA | NA |
| NA           | NA                 | NA                 | NA | NA | NA | -2 | NA |    |    |    |    |    |    |    |
| SEMA3D       |                    | ENSG00000153993.13 |    |    |    | NA | NA | NA | NA | NA | NA | NA | NA | NA |
| NA           | NA                 | NA                 | NA | NA | NA | -2 | NA |    |    |    |    |    |    |    |
| GTF2IRD1     |                    | ENSG00000006704.10 |    |    |    | NA | NA | NA | NA | NA | NA | NA | NA | NA |

|               |                    |    |    |    |    |    |    |    |    |    |    |    |    |    |
|---------------|--------------------|----|----|----|----|----|----|----|----|----|----|----|----|----|
| NA            | NA                 | NA | NA | NA | -2 | NA |    |    |    |    |    |    |    |    |
| NYAP1         | ENSG00000166924.8  |    |    | NA | NA | NA | NA | NA | NA | NA | NA | NA | NA | NA |
| NA            | NA                 | NA | NA | NA | -2 | NA |    |    |    |    |    |    |    |    |
| LMOD2         | ENSG00000170807.11 |    |    | NA | NA | NA | NA | NA | NA | NA | NA | NA | NA | NA |
| NA            | NA                 | NA | NA | NA | -2 | NA |    |    |    |    |    |    |    |    |
| AGR2          | ENSG00000106541.11 |    |    | NA | NA | NA | NA | NA | NA | NA | NA | NA | NA | NA |
| NA            | NA                 | NA | NA | NA | -2 | NA |    |    |    |    |    |    |    |    |
| ZPBP          | ENSG00000042813.7  |    |    | NA | NA | NA | NA | NA | NA | NA | NA | NA | NA | NA |
| NA            | NA                 | NA | NA | NA | -2 | NA |    |    |    |    |    |    |    |    |
| OR2A14        | ENSG00000221938.4  |    |    | NA | NA | NA | NA | NA | NA | NA | NA | NA | NA | NA |
| NA            | NA                 | NA | NA | NA | -2 | NA |    |    |    |    |    |    |    |    |
| GPR141        | ENSG00000187037.8  |    |    | NA | NA | NA | NA | NA | NA | NA | NA | NA | NA | NA |
| NA            | NA                 | NA | NA | NA | -2 | NA |    |    |    |    |    |    |    |    |
| ARPC1B        | ENSG00000130429.12 |    |    | NA | NA | NA | NA | NA | NA | NA | NA | NA | NA | NA |
| NA            | NA                 | NA | NA | NA | -2 | NA |    |    |    |    |    |    |    |    |
| ZYX           | ENSG00000159840.15 |    |    | NA | NA | NA | NA | NA | NA | NA | NA | NA | NA | NA |
| NA            | NA                 | NA | NA | NA | -2 | NA |    |    |    |    |    |    |    |    |
| KEL           | ENSG00000197993.7  |    |    | NA | NA | NA | NA | NA | NA | NA | NA | NA | NA | NA |
| NA            | NA                 | NA | NA | NA | -2 | NA |    |    |    |    |    |    |    |    |
| AC083864.3    | ENSG00000232930.1  |    |    | NA | NA | NA | NA | NA | NA | NA | NA | NA | NA | NA |
| NA            | NA                 | NA | NA | NA | -2 | NA |    |    |    |    |    |    |    |    |
| AKR1D1        | ENSG00000122787.14 |    |    | NA | NA | NA | NA | NA | NA | NA | NA | NA | NA | NA |
| NA            | NA                 | NA | NA | NA | -2 | NA |    |    |    |    |    |    |    |    |
| KLRG2         | ENSG00000188883.4  |    |    | NA | NA | NA | NA | NA | NA | NA | NA | NA | NA | NA |
| NA            | NA                 | NA | NA | NA | -2 | NA |    |    |    |    |    |    |    |    |
| FAM180A       | ENSG00000189320.8  |    |    | NA | NA | NA | NA | NA | NA | NA | NA | NA | NA | NA |
| NA            | NA                 | NA | NA | NA | -2 | NA |    |    |    |    |    |    |    |    |
| SOSTDC1       | ENSG00000171243.7  |    |    | NA | NA | NA | NA | NA | NA | NA | NA | NA | NA | NA |
| NA            | NA                 | NA | NA | NA | -2 | NA |    |    |    |    |    |    |    |    |
| ZSCAN25       | ENSG00000197037.10 |    |    | NA | NA | NA | NA | NA | NA | NA | NA | NA | NA | NA |
| NA            | NA                 | NA | NA | NA | -2 | NA |    |    |    |    |    |    |    |    |
| IL6           | ENSG00000136244.11 |    |    | NA | NA | NA | NA | NA | NA | NA | NA | NA | NA | NA |
| NA            | NA                 | NA | NA | NA | -2 | NA |    |    |    |    |    |    |    |    |
| UBE2H         | ENSG00000186591.11 |    |    | NA | NA | NA | NA | NA | NA | NA | NA | NA | NA | NA |
| NA            | NA                 | NA | NA | NA | -2 | NA |    |    |    |    |    |    |    |    |
| GARS          | ENSG00000106105.13 |    |    | NA | NA | NA | NA | NA | NA | NA | NA | NA | NA | NA |
| NA            | NA                 | NA | NA | NA | -2 | NA |    |    |    |    |    |    |    |    |
| POM121L12     | ENSG00000221900.5  |    |    | NA | NA | NA | NA | NA | NA | NA | NA | NA | NA | NA |
| NA            | NA                 | NA | NA | NA | -2 | NA |    |    |    |    |    |    |    |    |
| LRRC72        | ENSG00000205858.9  |    |    | NA | NA | NA | NA | NA | NA | NA | NA | NA | NA | NA |
| NA            | NA                 | NA | NA | NA | -2 | NA |    |    |    |    |    |    |    |    |
| MNX1-AS1      | ENSG00000243479.3  |    |    | NA | NA | NA | NA | NA | NA | NA | NA | NA | NA | NA |
| NA            | NA                 | NA | NA | NA | -2 | NA |    |    |    |    |    |    |    |    |
| OR2A1         | ENSG00000221970.1  |    |    | NA | NA | NA | NA | NA | NA | NA | NA | NA | NA | NA |
| NA            | NA                 | NA | NA | NA | -2 | NA |    |    |    |    |    |    |    |    |
| RP11-486P11.1 | ENSG00000267055.1  |    |    | NA | NA | NA | NA | NA | NA | NA | NA | NA | NA | NA |
| NA            | NA                 | NA | NA | NA | NA | -2 | NA |    |    |    |    |    |    |    |
| ZAN           | ENSG00000146839.18 |    |    | NA | NA | NA | NA | NA | NA | NA | NA | NA | NA | NA |
| NA            | NA                 | NA | NA | NA | -2 | NA |    |    |    |    |    |    |    |    |
| AC009531.2    | ENSG00000226063.1  |    |    | NA | NA | NA | NA | NA | NA | NA | NA | NA | NA | NA |
| NA            | NA                 | NA | NA | NA | -2 | NA |    |    |    |    |    |    |    |    |
| RFC2          | ENSG00000049541.10 |    |    | NA | NA | NA | NA | NA | NA | NA | NA | NA | NA | NA |
| NA            | NA                 | NA | NA | NA | -2 | NA |    |    |    |    |    |    |    |    |
| SQLE          | ENSG00000104549.11 |    |    | NA | NA | NA | NA | NA | NA | NA | NA | NA | NA | NA |
| NA            | NA                 | NA | NA | NA | -2 | NA |    |    |    |    |    |    |    |    |
| RP11-7F18.2   | ENSG00000271966.1  |    |    | NA | NA | NA | NA | NA | NA | NA | NA | NA | NA | NA |
| NA            | NA                 | NA | NA | NA | NA | -2 | NA |    |    |    |    |    |    |    |
| COLEC10       | ENSG00000184374.2  |    |    | NA | NA | NA | NA | NA | NA | NA | NA | NA | NA | NA |
| NA            | NA                 | NA | NA | NA | -2 | NA |    |    |    |    |    |    |    |    |
| RP11-470M17.2 | ENSG00000254143.1  |    |    | NA | NA | NA | NA | NA | NA | NA | NA | NA | NA | NA |
| NA            | NA                 | NA | NA | NA | NA | -2 | NA |    |    |    |    |    |    |    |
| BRF2          | ENSG00000104221.12 |    |    | NA | NA | NA | NA | NA | NA | NA | NA | NA | NA | NA |

|               |                    |    |    |    |    |    |    |    |    |    |    |    |    |    |
|---------------|--------------------|----|----|----|----|----|----|----|----|----|----|----|----|----|
| FABP9         | NA                 | NA | NA | NA | -2 | NA | NA | NA | NA | NA | NA | NA | NA | NA |
|               | ENSG00000205186.2  |    |    |    |    | NA | NA | NA | NA | NA | NA | NA | NA | NA |
|               | NA                 | NA | NA | NA | -2 | NA |    |    |    |    |    |    |    |    |
| PDP1          | ENSG00000164951.15 |    |    |    |    | NA | NA | NA | NA | NA | NA | NA | NA | NA |
|               | NA                 | NA | NA | NA | -2 | NA |    |    |    |    |    |    |    |    |
| HOOK3         | ENSG00000168172.8  |    |    |    |    | NA | NA | NA | NA | NA | NA | NA | NA | NA |
|               | NA                 | NA | NA | NA | -2 | NA |    |    |    |    |    |    |    |    |
| AC083843.2    | ENSG00000254028.1  |    |    |    |    | NA | NA | NA | NA | NA | NA | NA | NA | NA |
|               | NA                 | NA | NA | NA | -2 | NA |    |    |    |    |    |    |    |    |
| RP11-94H18.2  | ENSG00000254086.1  |    |    |    |    | NA | NA | NA | NA | NA | NA | NA | NA | NA |
|               | NA                 | NA | NA | NA | NA | -2 | NA |    |    |    |    |    |    |    |
| CPA6          | ENSG00000165078.12 |    |    |    |    | NA | NA | NA | NA | NA | NA | NA | NA | NA |
|               | NA                 | NA | NA | NA | -2 | NA |    |    |    |    |    |    |    |    |
| RP11-1101K5.1 | ENSG00000253434.5  |    |    |    |    | NA | NA | NA | NA | NA | NA | NA | NA | NA |
|               | NA                 | NA | NA | NA | NA | -2 | NA |    |    |    |    |    |    |    |
| ADAM7         | ENSG00000069206.15 |    |    |    |    | NA | NA | NA | NA | NA | NA | NA | NA | NA |
|               | NA                 | NA | NA | NA | -2 | NA |    |    |    |    |    |    |    |    |
| KB-1410C5.5   | ENSG00000271882.1  |    |    |    |    | NA | NA | NA | NA | NA | NA | NA | NA | NA |
|               | NA                 | NA | NA | NA | NA | -2 | NA |    |    |    |    |    |    |    |
| CTA-398F10.2  | ENSG00000254153.1  |    |    |    |    | NA | NA | NA | NA | NA | NA | NA | NA | NA |
|               | NA                 | NA | NA | NA | NA | -2 | NA |    |    |    |    |    |    |    |
| LINC00968     | ENSG00000246430.6  |    |    |    |    | NA | NA | NA | NA | NA | NA | NA | NA | NA |
|               | NA                 | NA | NA | NA | NA | -2 | NA |    |    |    |    |    |    |    |
| IDO2          | ENSG00000188676.13 |    |    |    |    | NA | NA | NA | NA | NA | NA | NA | NA | NA |
|               | NA                 | NA | NA | NA | -2 | NA |    |    |    |    |    |    |    |    |
| USP17L2       | ENSG00000223443.2  |    |    |    |    | NA | NA | NA | NA | NA | NA | NA | NA | NA |
|               | NA                 | NA | NA | NA | NA | -2 | NA |    |    |    |    |    |    |    |
| KB-1930G5.4   | ENSG00000254084.1  |    |    |    |    | NA | NA | NA | NA | NA | NA | NA | NA | NA |
|               | NA                 | NA | NA | NA | NA | -2 | NA |    |    |    |    |    |    |    |
| CYP7A1        | ENSG00000167910.3  |    |    |    |    | NA | NA | NA | NA | NA | NA | NA | NA | NA |
|               | NA                 | NA | NA | NA | NA | -2 | NA |    |    |    |    |    |    |    |
| RP11-785H20.1 | ENSG00000254018.1  |    |    |    |    | NA | NA | NA | NA | NA | NA | NA | NA | NA |
|               | NA                 | NA | NA | NA | NA | -2 | NA |    |    |    |    |    |    |    |
| PRKDC         | ENSG00000253729.7  |    |    |    |    | NA | NA | NA | NA | NA | NA | NA | NA | NA |
|               | NA                 | NA | NA | NA | -2 | NA |    |    |    |    |    |    |    |    |
| RP11-92K15.3  | ENSG00000272264.1  |    |    |    |    | NA | NA | NA | NA | NA | NA | NA | NA | NA |
|               | NA                 | NA | NA | NA | NA | -2 | NA |    |    |    |    |    |    |    |
| PAG1          | ENSG00000076641.4  |    |    |    |    | NA | NA | NA | NA | NA | NA | NA | NA | NA |
|               | NA                 | NA | NA | NA | -2 | NA |    |    |    |    |    |    |    |    |
| LZTS1-AS1     | ENSG00000253733.3  |    |    |    |    | NA | NA | NA | NA | NA | NA | NA | NA | NA |
|               | NA                 | NA | NA | NA | NA | -2 | NA |    |    |    |    |    |    |    |
| SLC7A13       | ENSG00000164893.8  |    |    |    |    | NA | NA | NA | NA | NA | NA | NA | NA | NA |
|               | NA                 | NA | NA | NA | NA | -2 | NA |    |    |    |    |    |    |    |
| RP11-115J16.3 | ENSG00000253735.1  |    |    |    |    | NA | NA | NA | NA | NA | NA | NA | NA | NA |
|               | NA                 | NA | NA | NA | NA | -2 | NA |    |    |    |    |    |    |    |
| RP11-546K22.1 | ENSG00000253844.1  |    |    |    |    | NA | NA | NA | NA | NA | NA | NA | NA | NA |
|               | NA                 | NA | NA | NA | NA | -2 | NA |    |    |    |    |    |    |    |
| KIF13B        | ENSG00000197892.12 |    |    |    |    | NA | NA | NA | NA | NA | NA | NA | NA | NA |
|               | NA                 | NA | NA | NA | NA | -2 | NA |    |    |    |    |    |    |    |
| DKK4          | ENSG00000104371.4  |    |    |    |    | NA | NA | NA | NA | NA | NA | NA | NA | NA |
|               | NA                 | NA | NA | NA | -2 | NA |    |    |    |    |    |    |    |    |
| ZBTB10        | ENSG00000205189.11 |    |    |    |    | NA | NA | NA | NA | NA | NA | NA | NA | NA |
|               | NA                 | NA | NA | NA | NA | -2 | NA |    |    |    |    |    |    |    |
| LYPD2         | ENSG00000197353.3  |    |    |    |    | NA | NA | NA | NA | NA | NA | NA | NA | NA |
|               | NA                 | NA | NA | NA | -2 | NA |    |    |    |    |    |    |    |    |
| CDH17         | ENSG00000079112.9  |    |    |    |    | NA | NA | NA | NA | NA | NA | NA | NA | NA |
|               | NA                 | NA | NA | NA | -2 | NA |    |    |    |    |    |    |    |    |
| RP11-6I2.3    | ENSG00000254288.1  |    |    |    |    | NA | NA | NA | NA | NA | NA | NA | NA | NA |
|               | NA                 | NA | NA | NA | NA | -2 | NA |    |    |    |    |    |    |    |
| RP1           | ENSG00000104237.7  |    |    |    |    | NA | NA | NA | NA | NA | NA | NA | NA | NA |
|               | NA                 | NA | NA | NA | -2 | NA |    |    |    |    |    |    |    |    |
| RP11-486M23.1 | ENSG00000253632.1  |    |    |    |    | NA | NA | NA | NA | NA | NA | NA | NA | NA |

|                |                    |    |    |    |    |    |    |    |    |    |    |    |    |    |
|----------------|--------------------|----|----|----|----|----|----|----|----|----|----|----|----|----|
| NA             | NA                 | NA | NA | NA | NA | -2 | NA |    |    |    |    |    |    |    |
| DNAJC5B        | ENSG00000147570.9  |    |    |    |    | NA | NA | NA | NA | NA | NA | NA | NA | NA |
| NA             | NA                 | NA | NA | NA | NA | -2 | NA |    |    |    |    |    |    |    |
| C8orf74        | ENSG00000171060.10 |    |    |    |    | NA | NA | NA | NA | NA | NA | NA | NA | NA |
| NA             | NA                 | NA | NA | NA | NA | -2 | NA |    |    |    |    |    |    |    |
| SHARPIN        | ENSG00000179526.16 |    |    |    |    | NA | NA | NA | NA | NA | NA | NA | NA | NA |
| NA             | NA                 | NA | NA | NA | NA | -2 | NA |    |    |    |    |    |    |    |
| CTD-3023L14.3  | ENSG00000253343.1  |    |    |    |    | NA | NA | NA | NA | NA | NA | NA | NA | NA |
| NA             | NA                 | NA | NA | NA | NA | -2 | NA |    |    |    |    |    |    |    |
| TCEA1          | ENSG00000187735.13 |    |    |    |    | NA | NA | NA | NA | NA | NA | NA | NA | NA |
| NA             | NA                 | NA | NA | NA | NA | -2 | NA |    |    |    |    |    |    |    |
| RP11-219J21.1  | ENSG00000253100.1  |    |    |    |    | NA | NA | NA | NA | NA | NA | NA | NA | NA |
| NA             | NA                 | NA | NA | NA | NA | -2 | NA |    |    |    |    |    |    |    |
| BHLHE22        | ENSG00000180828.2  |    |    |    |    | NA | NA | NA | NA | NA | NA | NA | NA | NA |
| NA             | NA                 | NA | NA | NA | NA | -2 | NA |    |    |    |    |    |    |    |
| RP11-31K23.2   | ENSG00000248762.2  |    |    |    |    | NA | NA | NA | NA | NA | NA | NA | NA | NA |
| NA             | NA                 | NA | NA | NA | NA | -2 | NA |    |    |    |    |    |    |    |
| RP11-1102P16.1 | ENSG00000253379.5  |    |    |    |    | NA | NA | NA | NA | NA | NA | NA | NA | NA |
| NA             | NA                 | NA | NA | NA | NA | -2 | NA |    |    |    |    |    |    |    |
| PCAT1          | ENSG00000253438.2  |    |    |    |    | NA | NA | NA | NA | NA | NA | NA | NA | NA |
| NA             | NA                 | NA | NA | NA | NA | -2 | NA |    |    |    |    |    |    |    |
| RP11-21C17.1   | ENSG00000253373.1  |    |    |    |    | NA | NA | NA | NA | NA | NA | NA | NA | NA |
| NA             | NA                 | NA | NA | NA | NA | -2 | NA |    |    |    |    |    |    |    |
| KCTD9          | ENSG00000104756.15 |    |    |    |    | NA | NA | NA | NA | NA | NA | NA | NA | NA |
| NA             | NA                 | NA | NA | NA | NA | -2 | NA |    |    |    |    |    |    |    |
| CTD-3023L14.2  | ENSG00000253130.1  |    |    |    |    | NA | NA | NA | NA | NA | NA | NA | NA | NA |
| NA             | NA                 | NA | NA | NA | NA | -2 | NA |    |    |    |    |    |    |    |
| ZNF705D        | ENSG00000215343.7  |    |    |    |    | NA | NA | NA | NA | NA | NA | NA | NA | NA |
| NA             | NA                 | NA | NA | NA | NA | -2 | NA |    |    |    |    |    |    |    |
| RP11-567J20.3  | ENSG00000253140.1  |    |    |    |    | NA | NA | NA | NA | NA | NA | NA | NA | NA |
| NA             | NA                 | NA | NA | NA | NA | -2 | NA |    |    |    |    |    |    |    |
| RP11-473J6.1   | ENSG00000253452.5  |    |    |    |    | NA | NA | NA | NA | NA | NA | NA | NA | NA |
| NA             | NA                 | NA | NA | NA | NA | -2 | NA |    |    |    |    |    |    |    |
| RP11-350F16.1  | ENSG00000253745.1  |    |    |    |    | NA | NA | NA | NA | NA | NA | NA | NA | NA |
| NA             | NA                 | NA | NA | NA | NA | -2 | NA |    |    |    |    |    |    |    |
| ESCO2          | ENSG00000171320.14 |    |    |    |    | NA | NA | NA | NA | NA | NA | NA | NA | NA |
| NA             | NA                 | NA | NA | NA | NA | -2 | NA |    |    |    |    |    |    |    |
| ZC2HC1A        | ENSG00000104427.11 |    |    |    |    | NA | NA | NA | NA | NA | NA | NA | NA | NA |
| NA             | NA                 | NA | NA | NA | NA | -2 | NA |    |    |    |    |    |    |    |
| RP11-700E23.2  | ENSG00000253682.1  |    |    |    |    | NA | NA | NA | NA | NA | NA | NA | NA | NA |
| NA             | NA                 | NA | NA | NA | NA | -2 | NA |    |    |    |    |    |    |    |
| C8orf49        | ENSG00000255394.4  |    |    |    |    | NA | NA | NA | NA | NA | NA | NA | NA | NA |
| NA             | NA                 | NA | NA | NA | NA | -2 | NA |    |    |    |    |    |    |    |
| CALB1          | ENSG00000104327.7  |    |    |    |    | NA | NA | NA | NA | NA | NA | NA | NA | NA |
| NA             | NA                 | NA | NA | NA | NA | -2 | NA |    |    |    |    |    |    |    |
| RP11-513O17.3  | ENSG00000253614.1  |    |    |    |    | NA | NA | NA | NA | NA | NA | NA | NA | NA |
| NA             | NA                 | NA | NA | NA | NA | -2 | NA |    |    |    |    |    |    |    |
| ZNF703         | ENSG00000183779.6  |    |    |    |    | NA | NA | NA | NA | NA | NA | NA | NA | NA |
| NA             | NA                 | NA | NA | NA | NA | -2 | NA |    |    |    |    |    |    |    |
| FLJ42969       | ENSG00000248599.1  |    |    |    |    | NA | NA | NA | NA | NA | NA | NA | NA | NA |
| NA             | NA                 | NA | NA | NA | NA | -2 | NA |    |    |    |    |    |    |    |
| SDC2           | ENSG00000169439.11 |    |    |    |    | NA | NA | NA | NA | NA | NA | NA | NA | NA |
| NA             | NA                 | NA | NA | NA | NA | -2 | NA |    |    |    |    |    |    |    |
| RP11-567J20.2  | ENSG00000253688.2  |    |    |    |    | NA | NA | NA | NA | NA | NA | NA | NA | NA |
| NA             | NA                 | NA | NA | NA | NA | -2 | NA |    |    |    |    |    |    |    |
| LINC00536      | ENSG00000249917.2  |    |    |    |    | NA | NA | NA | NA | NA | NA | NA | NA | NA |
| NA             | NA                 | NA | NA | NA | NA | -2 | NA |    |    |    |    |    |    |    |
| RP11-10A14.5   | ENSG00000248538.6  |    |    |    |    | NA | NA | NA | NA | NA | NA | NA | NA | NA |
| NA             | NA                 | NA | NA | NA | NA | -2 | NA |    |    |    |    |    |    |    |
| NDUFB9         | ENSG00000147684.7  |    |    |    |    | NA | NA | NA | NA | NA | NA | NA | NA | NA |
| NA             | NA                 | NA | NA | NA | NA | -2 | NA |    |    |    |    |    |    |    |
| RP11-150O12.3  | ENSG00000254290.1  |    |    |    |    | NA | NA | NA | NA | NA | NA | NA | NA | NA |



|                |    |                    |    |    |    |    |    |    |    |    |    |    |    |    |    |    |    |
|----------------|----|--------------------|----|----|----|----|----|----|----|----|----|----|----|----|----|----|----|
|                | NA | NA                 | NA | NA | NA | NA | -2 | NA |    |    |    |    |    |    |    |    |    |
| RP11-697B24.1  |    | ENSG00000253470.1  |    |    |    |    | NA | NA | NA | NA | NA | NA | NA | NA | NA | NA | NA |
|                | NA | NA                 | NA | NA | NA | NA | -2 | NA |    |    |    |    |    |    |    |    |    |
| GML            |    | ENSG00000104499.6  |    |    |    |    | NA | NA | NA | NA | NA | NA | NA | NA | NA | NA | NA |
|                | NA | NA                 | NA | NA | NA | NA | -2 | NA |    |    |    |    |    |    |    |    |    |
| POLB           |    | ENSG00000070501.11 |    |    |    |    | NA | NA | NA | NA | NA | NA | NA | NA | NA | NA | NA |
|                | NA | NA                 | NA | NA | NA | NA | -2 | NA |    |    |    |    |    |    |    |    |    |
| LINC01602      |    | ENSG00000205293.3  |    |    |    |    | NA | NA | NA | NA | NA | NA | NA | NA | NA | NA | NA |
|                | NA | NA                 | NA | NA | NA | NA | -2 | NA |    |    |    |    |    |    |    |    |    |
| RAD54B         |    | ENSG00000197275.13 |    |    |    |    | NA | NA | NA | NA | NA | NA | NA | NA | NA | NA | NA |
|                | NA | NA                 | NA | NA | NA | NA | -2 | NA |    |    |    |    |    |    |    |    |    |
| SAMD12-AS1     |    | ENSG00000281641.2  |    |    |    |    | NA | NA | NA | NA | NA | NA | NA | NA | NA | NA | NA |
|                | NA | NA                 | NA | NA | NA | NA | -2 | NA |    |    |    |    |    |    |    |    |    |
| PSKH2          |    | ENSG00000147613.7  |    |    |    |    | NA | NA | NA | NA | NA | NA | NA | NA | NA | NA | NA |
|                | NA | NA                 | NA | NA | NA | NA | -2 | NA |    |    |    |    |    |    |    |    |    |
| RP11-124B13.1  |    | ENSG00000253880.1  |    |    |    |    | NA | NA | NA | NA | NA | NA | NA | NA | NA | NA | NA |
|                | NA | NA                 | NA | NA | NA | NA | -2 | NA |    |    |    |    |    |    |    |    |    |
| RP11-10H3.1    |    | ENSG00000253474.1  |    |    |    |    | NA | NA | NA | NA | NA | NA | NA | NA | NA | NA | NA |
|                | NA | NA                 | NA | NA | NA | NA | -2 | NA |    |    |    |    |    |    |    |    |    |
| HR             |    | ENSG00000168453.14 |    |    |    |    | NA | NA | NA | NA | NA | NA | NA | NA | NA | NA | NA |
|                | NA | NA                 | NA | NA | NA | NA | -2 | NA |    |    |    |    |    |    |    |    |    |
| GEM            |    | ENSG00000164949.7  |    |    |    |    | NA | NA | NA | NA | NA | NA | NA | NA | NA | NA | NA |
|                | NA | NA                 | NA | NA | NA | NA | -2 | NA |    |    |    |    |    |    |    |    |    |
| GRINA          |    | ENSG00000178719.16 |    |    |    |    | NA | NA | NA | NA | NA | NA | NA | NA | NA | NA | NA |
|                | NA | NA                 | NA | NA | NA | NA | -2 | NA |    |    |    |    |    |    |    |    |    |
| NPBWR1         |    | ENSG00000183729.3  |    |    |    |    | NA | NA | NA | NA | NA | NA | NA | NA | NA | NA | NA |
|                | NA | NA                 | NA | NA | NA | NA | -2 | NA |    |    |    |    |    |    |    |    |    |
| RP11-1144P22.1 |    | ENSG00000254277.1  |    |    |    |    | NA | NA | NA | NA | NA | NA | NA | NA | NA | NA | NA |
|                | NA | NA                 | NA | NA | NA | NA | -2 | NA |    |    |    |    |    |    |    |    |    |
| FAM66E         |    | ENSG00000225725.4  |    |    |    |    | NA | NA | NA | NA | NA | NA | NA | NA | NA | NA | NA |
|                | NA | NA                 | NA | NA | NA | NA | -2 | NA |    |    |    |    |    |    |    |    |    |
| ADAM2          |    | ENSG00000104755.14 |    |    |    |    | NA | NA | NA | NA | NA | NA | NA | NA | NA | NA | NA |
|                | NA | NA                 | NA | NA | NA | NA | -2 | NA |    |    |    |    |    |    |    |    |    |
| RP11-865I6.2   |    | ENSG00000254337.1  |    |    |    |    | NA | NA | NA | NA | NA | NA | NA | NA | NA | NA | NA |
|                | NA | NA                 | NA | NA | NA | NA | -2 | NA |    |    |    |    |    |    |    |    |    |
| RP11-10A14.4   |    | ENSG00000253426.5  |    |    |    |    | NA | NA | NA | NA | NA | NA | NA | NA | NA | NA | NA |
|                | NA | NA                 | NA | NA | NA | NA | -2 | NA |    |    |    |    |    |    |    |    |    |
| CTD-2342N23.3  |    | ENSG00000272456.1  |    |    |    |    | NA | NA | NA | NA | NA | NA | NA | NA | NA | NA | NA |
|                | NA | NA                 | NA | NA | NA | NA | -2 | NA |    |    |    |    |    |    |    |    |    |
| LINC01592      |    | ENSG00000253658.5  |    |    |    |    | NA | NA | NA | NA | NA | NA | NA | NA | NA | NA | NA |
|                | NA | NA                 | NA | NA | NA | NA | -2 | NA |    |    |    |    |    |    |    |    |    |
| KB-1184D12.1   |    | ENSG00000253585.1  |    |    |    |    | NA | NA | NA | NA | NA | NA | NA | NA | NA | NA | NA |
|                | NA | NA                 | NA | NA | NA | NA | -2 | NA |    |    |    |    |    |    |    |    |    |
| RP11-379I19.1  |    | ENSG00000253260.1  |    |    |    |    | NA | NA | NA | NA | NA | NA | NA | NA | NA | NA | NA |
|                | NA | NA                 | NA | NA | NA | NA | -2 | NA |    |    |    |    |    |    |    |    |    |
| C8orf88        |    | ENSG00000253250.2  |    |    |    |    | NA | NA | NA | NA | NA | NA | NA | NA | NA | NA | NA |
|                | NA | NA                 | NA | NA | NA | NA | -2 | NA |    |    |    |    |    |    |    |    |    |
| STAR           |    | ENSG00000147465.11 |    |    |    |    | NA | NA | NA | NA | NA | NA | NA | NA | NA | NA | NA |
|                | NA | NA                 | NA | NA | NA | NA | -2 | NA |    |    |    |    |    |    |    |    |    |
| FABP4          |    | ENSG00000170323.8  |    |    |    |    | NA | NA | NA | NA | NA | NA | NA | NA | NA | NA | NA |
|                | NA | NA                 | NA | NA | NA | NA | -2 | NA |    |    |    |    |    |    |    |    |    |
| CDCA2          |    | ENSG00000184661.13 |    |    |    |    | NA | NA | NA | NA | NA | NA | NA | NA | NA | NA | NA |
|                | NA | NA                 | NA | NA | NA | NA | -2 | NA |    |    |    |    |    |    |    |    |    |
| SMILR          |    | ENSG00000255364.1  |    |    |    |    | NA | NA | NA | NA | NA | NA | NA | NA | NA | NA | NA |
|                | NA | NA                 | NA | NA | NA | NA | -2 | NA |    |    |    |    |    |    |    |    |    |
| KB-1460A1.5    |    | ENSG00000261087.1  |    |    |    |    | NA | NA | NA | NA | NA | NA | NA | NA | NA | NA | NA |
|                | NA | NA                 | NA | NA | NA | NA | -2 | NA |    |    |    |    |    |    |    |    |    |
| RP11-618M23.2  |    | ENSG00000254201.1  |    |    |    |    | NA | NA | NA | NA | NA | NA | NA | NA | NA | NA | NA |
|                | NA | NA                 | NA | NA | NA | NA | -2 | NA |    |    |    |    |    |    |    |    |    |
| CNBD1          |    | ENSG00000176571.11 |    |    |    |    | NA | NA | NA | NA | NA | NA | NA | NA | NA | NA | NA |
|                | NA | NA                 | NA | NA | NA | NA | -2 | NA |    |    |    |    |    |    |    |    |    |
| RP11-941H19.3  |    | ENSG00000253238.1  |    |    |    |    | NA | NA | NA | NA | NA | NA | NA | NA | NA | NA | NA |

|                |                    |    |    |    |    |    |    |    |    |    |    |    |    |    |
|----------------|--------------------|----|----|----|----|----|----|----|----|----|----|----|----|----|
| NA             | NA                 | NA | NA | NA | NA | -2 | NA |    |    |    |    |    |    |    |
| RP11-1081M5.1  | ENSG00000253369.1  |    |    |    |    | NA | NA | NA | NA | NA | NA | NA | NA | NA |
| NA             | NA                 | NA | NA | NA | NA | -2 | NA |    |    |    |    |    |    |    |
| RP11-24P4.1    | ENSG00000254334.1  |    |    |    |    | NA | NA | NA | NA | NA | NA | NA | NA | NA |
| NA             | NA                 | NA | NA | NA | NA | -2 | NA |    |    |    |    |    |    |    |
| CASC19         | ENSG00000254166.1  |    |    |    |    | NA | NA | NA | NA | NA | NA | NA | NA | NA |
| NA             | NA                 | NA | NA | NA | NA | -2 | NA |    |    |    |    |    |    |    |
| FAM83A         | ENSG00000147689.16 |    |    |    |    | NA | NA | NA | NA | NA | NA | NA | NA | NA |
| NA             | NA                 | NA | NA | NA | NA | -2 | NA |    |    |    |    |    |    |    |
| AZIN1          | ENSG00000155096.13 |    |    |    |    | NA | NA | NA | NA | NA | NA | NA | NA | NA |
| NA             | NA                 | NA | NA | NA | NA | -2 | NA |    |    |    |    |    |    |    |
| RP11-79H23.3   | ENSG00000261618.1  |    |    |    |    | NA | NA | NA | NA | NA | NA | NA | NA | NA |
| NA             | NA                 | NA | NA | NA | NA | -2 | NA |    |    |    |    |    |    |    |
| RB1CC1         | ENSG00000023287.12 |    |    |    |    | NA | NA | NA | NA | NA | NA | NA | NA | NA |
| NA             | NA                 | NA | NA | NA | NA | -2 | NA |    |    |    |    |    |    |    |
| NSD3           | ENSG00000147548.16 |    |    |    |    | NA | NA | NA | NA | NA | NA | NA | NA | NA |
| NA             | NA                 | NA | NA | NA | NA | -2 | NA |    |    |    |    |    |    |    |
| CA2            | ENSG00000104267.9  |    |    |    |    | NA | NA | NA | NA | NA | NA | NA | NA | NA |
| NA             | NA                 | NA | NA | NA | NA | -2 | NA |    |    |    |    |    |    |    |
| RP11-115J16.1  | ENSG00000254235.5  |    |    |    |    | NA | NA | NA | NA | NA | NA | NA | NA | NA |
| NA             | NA                 | NA | NA | NA | NA | -2 | NA |    |    |    |    |    |    |    |
| RP11-388K12.1  | ENSG00000253960.1  |    |    |    |    | NA | NA | NA | NA | NA | NA | NA | NA | NA |
| NA             | NA                 | NA | NA | NA | NA | -2 | NA |    |    |    |    |    |    |    |
| AC084082.3     | ENSG00000253190.3  |    |    |    |    | NA | NA | NA | NA | NA | NA | NA | NA | NA |
| NA             | NA                 | NA | NA | NA | NA | -2 | NA |    |    |    |    |    |    |    |
| TRIQK          | ENSG00000205133.11 |    |    |    |    | NA | NA | NA | NA | NA | NA | NA | NA | NA |
| NA             | NA                 | NA | NA | NA | NA | -2 | NA |    |    |    |    |    |    |    |
| LINC02153      | ENSG00000253199.1  |    |    |    |    | NA | NA | NA | NA | NA | NA | NA | NA | NA |
| NA             | NA                 | NA | NA | NA | NA | -2 | NA |    |    |    |    |    |    |    |
| POLR3D         | ENSG00000168495.12 |    |    |    |    | NA | NA | NA | NA | NA | NA | NA | NA | NA |
| NA             | NA                 | NA | NA | NA | NA | -2 | NA |    |    |    |    |    |    |    |
| KB-1568E2.1    | ENSG00000253656.1  |    |    |    |    | NA | NA | NA | NA | NA | NA | NA | NA | NA |
| NA             | NA                 | NA | NA | NA | NA | -2 | NA |    |    |    |    |    |    |    |
| NRBP2          | ENSG00000185189.17 |    |    |    |    | NA | NA | NA | NA | NA | NA | NA | NA | NA |
| NA             | NA                 | NA | NA | NA | NA | -2 | NA |    |    |    |    |    |    |    |
| RP11-1080G15.1 | ENSG00000253557.5  |    |    |    |    | NA | NA | NA | NA | NA | NA | NA | NA | NA |
| NA             | NA                 | NA | NA | NA | NA | -2 | NA |    |    |    |    |    |    |    |
| CSPP1          | ENSG00000104218.14 |    |    |    |    | NA | NA | NA | NA | NA | NA | NA | NA | NA |
| NA             | NA                 | NA | NA | NA | NA | -2 | NA |    |    |    |    |    |    |    |
| RP11-486M23.2  | ENSG00000253182.1  |    |    |    |    | NA | NA | NA | NA | NA | NA | NA | NA | NA |
| NA             | NA                 | NA | NA | NA | NA | -2 | NA |    |    |    |    |    |    |    |
| RP11-973F15.2  | ENSG00000263443.1  |    |    |    |    | NA | NA | NA | NA | NA | NA | NA | NA | NA |
| NA             | NA                 | NA | NA | NA | NA | -2 | NA |    |    |    |    |    |    |    |
| RP11-756K15.2  | ENSG00000253871.1  |    |    |    |    | NA | NA | NA | NA | NA | NA | NA | NA | NA |
| NA             | NA                 | NA | NA | NA | NA | -2 | NA |    |    |    |    |    |    |    |
| IDO1           | ENSG00000131203.12 |    |    |    |    | NA | NA | NA | NA | NA | NA | NA | NA | NA |
| NA             | NA                 | NA | NA | NA | NA | -2 | NA |    |    |    |    |    |    |    |
| ADAMDEC1       | ENSG00000134028.14 |    |    |    |    | NA | NA | NA | NA | NA | NA | NA | NA | NA |
| NA             | NA                 | NA | NA | NA | NA | -2 | NA |    |    |    |    |    |    |    |
| RP11-379I19.3  | ENSG00000253879.1  |    |    |    |    | NA | NA | NA | NA | NA | NA | NA | NA | NA |
| NA             | NA                 | NA | NA | NA | NA | -2 | NA |    |    |    |    |    |    |    |
| RP11-3G20.1    | ENSG00000254209.1  |    |    |    |    | NA | NA | NA | NA | NA | NA | NA | NA | NA |
| NA             | NA                 | NA | NA | NA | NA | -2 | NA |    |    |    |    |    |    |    |
| RP11-1149M10.2 | ENSG00000253214.1  |    |    |    |    | NA | NA | NA | NA | NA | NA | NA | NA | NA |
| NA             | NA                 | NA | NA | NA | NA | -2 | NA |    |    |    |    |    |    |    |
| RP11-246K15.1  | ENSG00000253821.1  |    |    |    |    | NA | NA | NA | NA | NA | NA | NA | NA | NA |
| NA             | NA                 | NA | NA | NA | NA | -2 | NA |    |    |    |    |    |    |    |
| RP11-38H17.1   | ENSG00000254366.6  |    |    |    |    | NA | NA | NA | NA | NA | NA | NA | NA | NA |
| NA             | NA                 | NA | NA | NA | NA | -2 | NA |    |    |    |    |    |    |    |
| RP11-37N22.1   | ENSG00000214803.3  |    |    |    |    | NA | NA | NA | NA | NA | NA | NA | NA | NA |
| NA             | NA                 | NA | NA | NA | NA | -2 | NA |    |    |    |    |    |    |    |
| AF067845.2     | ENSG00000282160.1  |    |    |    |    | NA | NA | NA | NA | NA | NA | NA | NA | NA |

|               |                    |    |    |    |    |    |    |    |    |    |    |    |    |
|---------------|--------------------|----|----|----|----|----|----|----|----|----|----|----|----|
| NA            | NA                 | NA | NA | NA | -2 | NA | NA | NA | NA | NA | NA | NA | NA |
| KLHL38        | ENSG00000175946.8  | NA | NA | NA | NA | NA | NA | NA | NA | NA | NA | NA | NA |
| NA            | NA                 | NA | NA | NA | -2 | NA | NA | NA | NA | NA | NA | NA | NA |
| ZNF16         | ENSG00000170631.14 | NA | NA | NA | NA | NA | NA | NA | NA | NA | NA | NA | NA |
| NA            | NA                 | NA | NA | NA | -2 | NA | NA | NA | NA | NA | NA | NA | NA |
| ELOC          | ENSG00000154582.16 | NA | NA | NA | NA | NA | NA | NA | NA | NA | NA | NA | NA |
| NA            | NA                 | NA | NA | NA | -2 | NA | NA | NA | NA | NA | NA | NA | NA |
| CCDC166       | ENSG00000255181.3  | NA | NA | NA | NA | NA | NA | NA | NA | NA | NA | NA | NA |
| NA            | NA                 | NA | NA | NA | -2 | NA | NA | NA | NA | NA | NA | NA | NA |
| CTC-756D1.3   | ENSG00000253986.1  | NA | NA | NA | NA | NA | NA | NA | NA | NA | NA | NA | NA |
| NA            | NA                 | NA | NA | NA | NA | -2 | NA | NA | NA | NA | NA | NA | NA |
| NUDCD1        | ENSG00000120526.10 | NA | NA | NA | NA | NA | NA | NA | NA | NA | NA | NA | NA |
| NA            | NA                 | NA | NA | NA | -2 | NA | NA | NA | NA | NA | NA | NA | NA |
| RP11-91P17.1  | ENSG00000254001.5  | NA | NA | NA | NA | NA | NA | NA | NA | NA | NA | NA | NA |
| NA            | NA                 | NA | NA | NA | NA | -2 | NA | NA | NA | NA | NA | NA | NA |
| TG            | ENSG00000042832.11 | NA | NA | NA | NA | NA | NA | NA | NA | NA | NA | NA | NA |
| NA            | NA                 | NA | NA | NA | -2 | NA | NA | NA | NA | NA | NA | NA | NA |
| RP11-480O10.1 | ENSG00000254753.1  | NA | NA | NA | NA | NA | NA | NA | NA | NA | NA | NA | NA |
| NA            | NA                 | NA | NA | NA | NA | -2 | NA | NA | NA | NA | NA | NA | NA |
| TERF1         | ENSG00000147601.13 | NA | NA | NA | NA | NA | NA | NA | NA | NA | NA | NA | NA |
| NA            | NA                 | NA | NA | NA | -2 | NA | NA | NA | NA | NA | NA | NA | NA |
| POMK          | ENSG00000185900.9  | NA | NA | NA | NA | NA | NA | NA | NA | NA | NA | NA | NA |
| NA            | NA                 | NA | NA | NA | -2 | NA | NA | NA | NA | NA | NA | NA | NA |
| RP11-17A4.3   | ENSG00000253139.1  | NA | NA | NA | NA | NA | NA | NA | NA | NA | NA | NA | NA |
| NA            | NA                 | NA | NA | NA | NA | -2 | NA | NA | NA | NA | NA | NA | NA |
| KLF10         | ENSG00000155090.14 | NA | NA | NA | NA | NA | NA | NA | NA | NA | NA | NA | NA |
| NA            | NA                 | NA | NA | NA | -2 | NA | NA | NA | NA | NA | NA | NA | NA |
| PKHD1L1       | ENSG00000205038.11 | NA | NA | NA | NA | NA | NA | NA | NA | NA | NA | NA | NA |
| NA            | NA                 | NA | NA | NA | NA | -2 | NA | NA | NA | NA | NA | NA | NA |
| RP3-388N13.3  | ENSG00000254057.1  | NA | NA | NA | NA | NA | NA | NA | NA | NA | NA | NA | NA |
| NA            | NA                 | NA | NA | NA | NA | -2 | NA | NA | NA | NA | NA | NA | NA |
| RP11-11N9.4   | ENSG00000247134.6  | NA | NA | NA | NA | NA | NA | NA | NA | NA | NA | NA | NA |
| NA            | NA                 | NA | NA | NA | NA | -2 | NA | NA | NA | NA | NA | NA | NA |
| LINC00534     | ENSG00000253394.5  | NA | NA | NA | NA | NA | NA | NA | NA | NA | NA | NA | NA |
| NA            | NA                 | NA | NA | NA | NA | -2 | NA | NA | NA | NA | NA | NA | NA |
| RP11-3N13.2   | ENSG00000254043.1  | NA | NA | NA | NA | NA | NA | NA | NA | NA | NA | NA | NA |
| NA            | NA                 | NA | NA | NA | NA | -2 | NA | NA | NA | NA | NA | NA | NA |
| ADCK5         | ENSG00000173137.11 | NA | NA | NA | NA | NA | NA | NA | NA | NA | NA | NA | NA |
| NA            | NA                 | NA | NA | NA | -2 | NA | NA | NA | NA | NA | NA | NA | NA |
| RP11-252C15.1 | ENSG00000254813.5  | NA | NA | NA | NA | NA | NA | NA | NA | NA | NA | NA | NA |
| NA            | NA                 | NA | NA | NA | NA | -2 | NA | NA | NA | NA | NA | NA | NA |
| PBK           | ENSG00000168078.9  | NA | NA | NA | NA | NA | NA | NA | NA | NA | NA | NA | NA |
| NA            | NA                 | NA | NA | NA | -2 | NA | NA | NA | NA | NA | NA | NA | NA |
| ATP6V0D2      | ENSG00000147614.3  | NA | NA | NA | NA | NA | NA | NA | NA | NA | NA | NA | NA |
| NA            | NA                 | NA | NA | NA | NA | -2 | NA | NA | NA | NA | NA | NA | NA |
| CLDN23        | ENSG00000253958.1  | NA | NA | NA | NA | NA | NA | NA | NA | NA | NA | NA | NA |
| NA            | NA                 | NA | NA | NA | NA | -2 | NA | NA | NA | NA | NA | NA | NA |
| RP11-299D14.2 | ENSG00000254178.1  | NA | NA | NA | NA | NA | NA | NA | NA | NA | NA | NA | NA |
| NA            | NA                 | NA | NA | NA | NA | -2 | NA | NA | NA | NA | NA | NA | NA |
| CH17-31A6.1   | ENSG00000282686.1  | NA | NA | NA | NA | NA | NA | NA | NA | NA | NA | NA | NA |
| NA            | NA                 | NA | NA | NA | NA | -2 | NA | NA | NA | NA | NA | NA | NA |
| XKR5          | ENSG00000275591.4  | NA | NA | NA | NA | NA | NA | NA | NA | NA | NA | NA | NA |
| NA            | NA                 | NA | NA | NA | -2 | NA | NA | NA | NA | NA | NA | NA | NA |
| POU5F1B       | ENSG00000212993.4  | NA | NA | NA | NA | NA | NA | NA | NA | NA | NA | NA | NA |
| NA            | NA                 | NA | NA | NA | NA | -2 | NA | NA | NA | NA | NA | NA | NA |
| SCX           | ENSG00000260428.2  | NA | NA | NA | NA | NA | NA | NA | NA | NA | NA | NA | NA |
| NA            | NA                 | NA | NA | NA | -2 | NA | NA | NA | NA | NA | NA | NA | NA |
| WISP1         | ENSG00000104415.13 | NA | NA | NA | NA | NA | NA | NA | NA | NA | NA | NA | NA |
| NA            | NA                 | NA | NA | NA | -2 | NA | NA | NA | NA | NA | NA | NA | NA |
| NUGGC         | ENSG00000189233.11 | NA | NA | NA | NA | NA | NA | NA | NA | NA | NA | NA | NA |
| NA            | NA                 | NA | NA | NA | -2 | NA | NA | NA | NA | NA | NA | NA | NA |
| RBM12B        | ENSG00000183808.11 | NA | NA | NA | NA | NA | NA | NA | NA | NA | NA | NA | NA |

|               |                    |                    |    |    |    |    |    |    |    |    |    |    |    |    |
|---------------|--------------------|--------------------|----|----|----|----|----|----|----|----|----|----|----|----|
| TRPA1         | NA                 | NA                 | NA | NA | NA | -2 | NA | NA | NA | NA | NA | NA | NA | NA |
|               | ENSG00000104321.10 |                    |    |    |    |    | NA | NA | NA | NA | NA | NA | NA | NA |
|               | NA                 | NA                 | NA | NA | NA | -2 | NA |    |    |    |    |    |    |    |
| RP11-10A14.9  |                    | ENSG00000279949.1  |    |    |    |    | NA | NA | NA | NA | NA | NA | NA | NA |
|               | NA                 | NA                 | NA | NA | NA | NA | -2 | NA |    |    |    |    |    |    |
| LSM1          | ENSG00000175324.9  |                    |    |    |    |    | NA | NA | NA | NA | NA | NA | NA | NA |
|               | NA                 | NA                 | NA | NA | NA | -2 | NA |    |    |    |    |    |    |    |
| PINX1         | ENSG00000254093.8  |                    |    |    |    |    | NA | NA | NA | NA | NA | NA | NA | NA |
|               | NA                 | NA                 | NA | NA | NA | -2 | NA |    |    |    |    |    |    |    |
| TOX           | ENSG00000198846.5  |                    |    |    |    |    | NA | NA | NA | NA | NA | NA | NA | NA |
|               | NA                 | NA                 | NA | NA | NA | -2 | NA |    |    |    |    |    |    |    |
| PLAT          | ENSG00000104368.17 |                    |    |    |    |    | NA | NA | NA | NA | NA | NA | NA | NA |
|               | NA                 | NA                 | NA | NA | NA | -2 | NA |    |    |    |    |    |    |    |
| LY6L          | ENSG00000261667.1  |                    |    |    |    |    | NA | NA | NA | NA | NA | NA | NA | NA |
|               | NA                 | NA                 | NA | NA | NA | -2 | NA |    |    |    |    |    |    |    |
| RP11-99H20.1  |                    | ENSG00000254123.1  |    |    |    |    | NA | NA | NA | NA | NA | NA | NA | NA |
|               | NA                 | NA                 | NA | NA | NA | NA | -2 | NA |    |    |    |    |    |    |
| RP11-48B3.4   |                    | ENSG00000260317.1  |    |    |    |    | NA | NA | NA | NA | NA | NA | NA | NA |
|               | NA                 | NA                 | NA | NA | NA | NA | -2 | NA |    |    |    |    |    |    |
| GOT1L1        |                    | ENSG00000169154.5  |    |    |    |    | NA | NA | NA | NA | NA | NA | NA | NA |
|               | NA                 | NA                 | NA | NA | NA | -2 | NA |    |    |    |    |    |    |    |
| HAS2          | ENSG00000170961.6  |                    |    |    |    |    | NA | NA | NA | NA | NA | NA | NA | NA |
|               | NA                 | NA                 | NA | NA | NA | -2 | NA |    |    |    |    |    |    |    |
| C8orf76       |                    | ENSG00000189376.11 |    |    |    |    | NA | NA | NA | NA | NA | NA | NA | NA |
|               | NA                 | NA                 | NA | NA | NA | -2 | NA |    |    |    |    |    |    |    |
| FAM91A1       |                    | ENSG00000176853.15 |    |    |    |    | NA | NA | NA | NA | NA | NA | NA | NA |
|               | NA                 | NA                 | NA | NA | NA | -2 | NA |    |    |    |    |    |    |    |
| AF067845.3    |                    | ENSG00000281961.1  |    |    |    |    | NA | NA | NA | NA | NA | NA | NA | NA |
|               | NA                 | NA                 | NA | NA | NA | -2 | NA |    |    |    |    |    |    |    |
| FAM160B2      |                    | ENSG00000158863.21 |    |    |    |    | NA | NA | NA | NA | NA | NA | NA | NA |
|               | NA                 | NA                 | NA | NA | NA | -2 | NA |    |    |    |    |    |    |    |
| CEBPD         | ENSG00000221869.4  |                    |    |    |    |    | NA | NA | NA | NA | NA | NA | NA | NA |
|               | NA                 | NA                 | NA | NA | NA | -2 | NA |    |    |    |    |    |    |    |
| RP11-410L14.2 |                    | ENSG00000253948.1  |    |    |    |    | NA | NA | NA | NA | NA | NA | NA | NA |
|               | NA                 | NA                 | NA | NA | NA | NA | -2 | NA |    |    |    |    |    |    |
| ANGPT2        |                    | ENSG00000091879.13 |    |    |    |    | NA | NA | NA | NA | NA | NA | NA | NA |
|               | NA                 | NA                 | NA | NA | NA | -2 | NA |    |    |    |    |    |    |    |
| KAT6A         | ENSG00000083168.9  |                    |    |    |    |    | NA | NA | NA | NA | NA | NA | NA | NA |
|               | NA                 | NA                 | NA | NA | NA | -2 | NA |    |    |    |    |    |    |    |
| GATA4         | ENSG00000136574.17 |                    |    |    |    |    | NA | NA | NA | NA | NA | NA | NA | NA |
|               | NA                 | NA                 | NA | NA | NA | -2 | NA |    |    |    |    |    |    |    |
| NCOA2         | ENSG00000140396.12 |                    |    |    |    |    | NA | NA | NA | NA | NA | NA | NA | NA |
|               | NA                 | NA                 | NA | NA | NA | -2 | NA |    |    |    |    |    |    |    |
| GS1-24F4.2    |                    | ENSG00000245857.2  |    |    |    |    | NA | NA | NA | NA | NA | NA | NA | NA |
|               | NA                 | NA                 | NA | NA | NA | -2 | NA |    |    |    |    |    |    |    |
| LINC00681     |                    | ENSG00000255494.1  |    |    |    |    | NA | NA | NA | NA | NA | NA | NA | NA |
|               | NA                 | NA                 | NA | NA | NA | -2 | NA |    |    |    |    |    |    |    |
| LINC01289     |                    | ENSG00000253734.1  |    |    |    |    | NA | NA | NA | NA | NA | NA | NA | NA |
|               | NA                 | NA                 | NA | NA | NA | -2 | NA |    |    |    |    |    |    |    |
| KIAA1429      |                    | ENSG00000164944.11 |    |    |    |    | NA | NA | NA | NA | NA | NA | NA | NA |
|               | NA                 | NA                 | NA | NA | NA | -2 | NA |    |    |    |    |    |    |    |
| AC026904.1    |                    | ENSG00000233858.4  |    |    |    |    | NA | NA | NA | NA | NA | NA | NA | NA |
|               | NA                 | NA                 | NA | NA | NA | -2 | NA |    |    |    |    |    |    |    |
| NCRNA00250    |                    | ENSG00000253433.1  |    |    |    |    | NA | NA | NA | NA | NA | NA | NA | NA |
|               | NA                 | NA                 | NA | NA | NA | -2 | NA |    |    |    |    |    |    |    |
| RP11-527N22.2 |                    | ENSG00000253746.1  |    |    |    |    | NA | NA | NA | NA | NA | NA | NA | NA |
|               | NA                 | NA                 | NA | NA | NA | NA | -2 | NA |    |    |    |    |    |    |
| SLC25A37      |                    | ENSG00000147454.13 |    |    |    |    | NA | NA | NA | NA | NA | NA | NA | NA |
|               | NA                 | NA                 | NA | NA | NA | -2 | NA |    |    |    |    |    |    |    |
| OPLAH         | ENSG00000178814.16 |                    |    |    |    |    | NA | NA | NA | NA | NA | NA | NA | NA |
|               | NA                 | NA                 | NA | NA | NA | -2 | NA |    |    |    |    |    |    |    |
| TMEM74        |                    | ENSG00000164841.4  |    |    |    |    | NA | NA | NA | NA | NA | NA | NA | NA |

|               |    |                    |    |    |    |    |    |    |    |    |    |    |    |    |
|---------------|----|--------------------|----|----|----|----|----|----|----|----|----|----|----|----|
| NA            | NA | NA                 | NA | NA | -2 | NA |    |    |    |    |    |    |    |    |
| CTD-2588J1.1  |    | ENSG00000253561.1  |    |    |    | NA | NA | NA | NA | NA | NA | NA | NA | NA |
| NA            | NA | NA                 | NA | NA | NA | -2 | NA |    |    |    |    |    |    |    |
| DEFB4A        |    | ENSG00000171711.2  |    |    |    | NA | NA | NA | NA | NA | NA | NA | NA | NA |
| NA            | NA | NA                 | NA | NA | NA | -2 | NA |    |    |    |    |    |    |    |
| GDF6          |    | ENSG00000156466.9  |    |    |    | NA | NA | NA | NA | NA | NA | NA | NA | NA |
| NA            | NA | NA                 | NA | NA | NA | -2 | NA |    |    |    |    |    |    |    |
| ASH2L         |    | ENSG00000129691.15 |    |    |    | NA | NA | NA | NA | NA | NA | NA | NA | NA |
| NA            | NA | NA                 | NA | NA | NA | -2 | NA |    |    |    |    |    |    |    |
| LINC02155     |    | ENSG00000254120.1  |    |    |    | NA | NA | NA | NA | NA | NA | NA | NA | NA |
| NA            | NA | NA                 | NA | NA | NA | -2 | NA |    |    |    |    |    |    |    |
| RP11-100L22.1 |    | ENSG00000253177.1  |    |    |    | NA | NA | NA | NA | NA | NA | NA | NA | NA |
| NA            | NA | NA                 | NA | NA | NA | -2 | NA |    |    |    |    |    |    |    |
| VCPIP1        |    | ENSG00000175073.7  |    |    |    | NA | NA | NA | NA | NA | NA | NA | NA | NA |
| NA            | NA | NA                 | NA | NA | NA | -2 | NA |    |    |    |    |    |    |    |
| PTP4A3        |    | ENSG00000184489.11 |    |    |    | NA | NA | NA | NA | NA | NA | NA | NA | NA |
| NA            | NA | NA                 | NA | NA | NA | -2 | NA |    |    |    |    |    |    |    |
| CTD-2309H9.3  |    | ENSG00000253165.1  |    |    |    | NA | NA | NA | NA | NA | NA | NA | NA | NA |
| NA            | NA | NA                 | NA | NA | NA | -2 | NA |    |    |    |    |    |    |    |
| KB-173C10.2   |    | ENSG00000253824.1  |    |    |    | NA | NA | NA | NA | NA | NA | NA | NA | NA |
| NA            | NA | NA                 | NA | NA | NA | -2 | NA |    |    |    |    |    |    |    |
| RP11-369E15.4 |    | ENSG00000253147.5  |    |    |    | NA | NA | NA | NA | NA | NA | NA | NA | NA |
| NA            | NA | NA                 | NA | NA | NA | -2 | NA |    |    |    |    |    |    |    |
| KB-1507C5.3   |    | ENSG00000253263.1  |    |    |    | NA | NA | NA | NA | NA | NA | NA | NA | NA |
| NA            | NA | NA                 | NA | NA | NA | -2 | NA |    |    |    |    |    |    |    |
| KB-1448A5.1   |    | ENSG00000253105.5  |    |    |    | NA | NA | NA | NA | NA | NA | NA | NA | NA |
| NA            | NA | NA                 | NA | NA | NA | -2 | NA |    |    |    |    |    |    |    |
| RGS20         |    | ENSG00000147509.13 |    |    |    | NA | NA | NA | NA | NA | NA | NA | NA | NA |
| NA            | NA | NA                 | NA | NA | NA | -2 | NA |    |    |    |    |    |    |    |
| FAM84B        |    | ENSG00000168672.3  |    |    |    | NA | NA | NA | NA | NA | NA | NA | NA | NA |
| NA            | NA | NA                 | NA | NA | NA | -2 | NA |    |    |    |    |    |    |    |
| RP11-114O8.1  |    | ENSG00000253489.1  |    |    |    | NA | NA | NA | NA | NA | NA | NA | NA | NA |
| NA            | NA | NA                 | NA | NA | NA | -2 | NA |    |    |    |    |    |    |    |
| BOP1          |    | ENSG00000261236.7  |    |    |    | NA | NA | NA | NA | NA | NA | NA | NA | NA |
| NA            | NA | NA                 | NA | NA | NA | -2 | NA |    |    |    |    |    |    |    |
| CTA-392C11.2  |    | ENSG00000253354.1  |    |    |    | NA | NA | NA | NA | NA | NA | NA | NA | NA |
| NA            | NA | NA                 | NA | NA | NA | -2 | NA |    |    |    |    |    |    |    |
| RP11-705O24.1 |    | ENSG00000254119.5  |    |    |    | NA | NA | NA | NA | NA | NA | NA | NA | NA |
| NA            | NA | NA                 | NA | NA | NA | -2 | NA |    |    |    |    |    |    |    |
| HSF1          |    | ENSG00000185122.10 |    |    |    | NA | NA | NA | NA | NA | NA | NA | NA | NA |
| NA            | NA | NA                 | NA | NA | NA | -2 | NA |    |    |    |    |    |    |    |
| NECAB1        |    | ENSG00000123119.11 |    |    |    | NA | NA | NA | NA | NA | NA | NA | NA | NA |
| NA            | NA | NA                 | NA | NA | NA | -2 | NA |    |    |    |    |    |    |    |
| DGAT1         |    | ENSG00000185000.11 |    |    |    | NA | NA | NA | NA | NA | NA | NA | NA | NA |
| NA            | NA | NA                 | NA | NA | NA | -2 | NA |    |    |    |    |    |    |    |
| ADAM18        |    | ENSG00000168619.15 |    |    |    | NA | NA | NA | NA | NA | NA | NA | NA | NA |
| NA            | NA | NA                 | NA | NA | NA | -2 | NA |    |    |    |    |    |    |    |
| RP11-566H8.1  |    | ENSG00000253275.1  |    |    |    | NA | NA | NA | NA | NA | NA | NA | NA | NA |
| NA            | NA | NA                 | NA | NA | NA | -2 | NA |    |    |    |    |    |    |    |
| RP11-359E19.2 |    | ENSG00000253665.1  |    |    |    | NA | NA | NA | NA | NA | NA | NA | NA | NA |
| NA            | NA | NA                 | NA | NA | NA | -2 | NA |    |    |    |    |    |    |    |
| CCNE2         |    | ENSG00000175305.17 |    |    |    | NA | NA | NA | NA | NA | NA | NA | NA | NA |
| NA            | NA | NA                 | NA | NA | NA | -2 | NA |    |    |    |    |    |    |    |
| STMN2         |    | ENSG00000104435.13 |    |    |    | NA | NA | NA | NA | NA | NA | NA | NA | NA |
| NA            | NA | NA                 | NA | NA | NA | -2 | NA |    |    |    |    |    |    |    |
| POLR2K        |    | ENSG00000147669.10 |    |    |    | NA | NA | NA | NA | NA | NA | NA | NA | NA |
| NA            | NA | NA                 | NA | NA | NA | -2 | NA |    |    |    |    |    |    |    |
| RP11-1D12.2   |    | ENSG00000254006.5  |    |    |    | NA | NA | NA | NA | NA | NA | NA | NA | NA |
| NA            | NA | NA                 | NA | NA | NA | -2 | NA |    |    |    |    |    |    |    |
| RNF122        |    | ENSG00000133874.1  |    |    |    | NA | NA | NA | NA | NA | NA | NA | NA | NA |
| NA            | NA | NA                 | NA | NA | NA | -2 | NA |    |    |    |    |    |    |    |
| RPL7          |    | ENSG00000147604.13 |    |    |    | NA | NA | NA | NA | NA | NA | NA | NA | NA |

|               |                    |    |    |    |    |    |    |    |    |    |    |    |    |    |
|---------------|--------------------|----|----|----|----|----|----|----|----|----|----|----|----|----|
| CASC9         | NA                 | NA | NA | NA | -2 | NA | NA | NA | NA | NA | NA | NA | NA | NA |
|               | ENSG00000249395.2  |    |    |    |    | NA | NA | NA | NA | NA | NA | NA | NA | NA |
|               | NA                 | NA | NA | NA | -2 | NA |    |    |    |    |    |    |    |    |
| SOX17         | NA                 | NA | NA | NA | NA | NA | NA | NA | NA | NA | NA | NA | NA | NA |
|               | ENSG00000164736.5  |    |    |    |    | NA | NA | NA | NA | NA | NA | NA | NA | NA |
|               | NA                 | NA | NA | NA | -2 | NA |    |    |    |    |    |    |    |    |
| UBE2V2        | NA                 | NA | NA | NA | NA | NA | NA | NA | NA | NA | NA | NA | NA | NA |
|               | ENSG00000169139.11 |    |    |    |    | NA | NA | NA | NA | NA | NA | NA | NA | NA |
|               | NA                 | NA | NA | NA | -2 | NA |    |    |    |    |    |    |    |    |
| ZNF706        | NA                 | NA | NA | NA | NA | NA | NA | NA | NA | NA | NA | NA | NA | NA |
|               | ENSG00000120963.11 |    |    |    |    | NA | NA | NA | NA | NA | NA | NA | NA | NA |
|               | NA                 | NA | NA | NA | -2 | NA |    |    |    |    |    |    |    |    |
| RP11-350F16.2 | NA                 | NA | NA | NA | NA | NA | NA | NA | NA | NA | NA | NA | NA | NA |
|               | ENSG00000253782.1  |    |    |    |    | NA | NA | NA | NA | NA | NA | NA | NA | NA |
|               | NA                 | NA | NA | NA | NA | -2 | NA |    |    |    |    |    |    |    |
| RP11-142A23.1 | NA                 | NA | NA | NA | NA | NA | NA | NA | NA | NA | NA | NA | NA | NA |
|               | ENSG00000253317.1  |    |    |    |    | NA | NA | NA | NA | NA | NA | NA | NA | NA |
|               | NA                 | NA | NA | NA | NA | -2 | NA |    |    |    |    |    |    |    |
| RP11-579E24.2 | NA                 | NA | NA | NA | NA | NA | NA | NA | NA | NA | NA | NA | NA | NA |
|               | ENSG00000253762.1  |    |    |    |    | NA | NA | NA | NA | NA | NA | NA | NA | NA |
|               | NA                 | NA | NA | NA | NA | -2 | NA |    |    |    |    |    |    |    |
| NKAIN3        | NA                 | NA | NA | NA | NA | NA | NA | NA | NA | NA | NA | NA | NA | NA |
|               | ENSG00000185942.11 |    |    |    |    | NA | NA | NA | NA | NA | NA | NA | NA | NA |
|               | NA                 | NA | NA | NA | NA | -2 | NA |    |    |    |    |    |    |    |
| RP11-369E15.1 | NA                 | NA | NA | NA | NA | NA | NA | NA | NA | NA | NA | NA | NA | NA |
|               | ENSG00000254260.1  |    |    |    |    | NA | NA | NA | NA | NA | NA | NA | NA | NA |
|               | NA                 | NA | NA | NA | NA | -2 | NA |    |    |    |    |    |    |    |
| RP11-11C20.3  | NA                 | NA | NA | NA | NA | NA | NA | NA | NA | NA | NA | NA | NA | NA |
|               | ENSG00000272076.1  |    |    |    |    | NA | NA | NA | NA | NA | NA | NA | NA | NA |
|               | NA                 | NA | NA | NA | NA | -2 | NA |    |    |    |    |    |    |    |
| LRRC6         | NA                 | NA | NA | NA | NA | NA | NA | NA | NA | NA | NA | NA | NA | NA |
|               | ENSG00000129295.8  |    |    |    |    | NA | NA | NA | NA | NA | NA | NA | NA | NA |
|               | NA                 | NA | NA | NA | -2 | NA |    |    |    |    |    |    |    |    |
| DCTN6         | NA                 | NA | NA | NA | NA | NA | NA | NA | NA | NA | NA | NA | NA | NA |
|               | ENSG00000104671.7  |    |    |    |    | NA | NA | NA | NA | NA | NA | NA | NA | NA |
|               | NA                 | NA | NA | NA | -2 | NA |    |    |    |    |    |    |    |    |
| ADGRA2        | NA                 | NA | NA | NA | NA | NA | NA | NA | NA | NA | NA | NA | NA | NA |
|               | ENSG00000020181.17 |    |    |    |    | NA | NA | NA | NA | NA | NA | NA | NA | NA |
|               | NA                 | NA | NA | NA | NA | -2 | NA |    |    |    |    |    |    |    |
| CASC21        | NA                 | NA | NA | NA | NA | NA | NA | NA | NA | NA | NA | NA | NA | NA |
|               | ENSG00000253929.1  |    |    |    |    | NA | NA | NA | NA | NA | NA | NA | NA | NA |
|               | NA                 | NA | NA | NA | NA | -2 | NA |    |    |    |    |    |    |    |
| RP11-120I21.2 | NA                 | NA | NA | NA | NA | NA | NA | NA | NA | NA | NA | NA | NA | NA |
|               | ENSG00000254202.1  |    |    |    |    | NA | NA | NA | NA | NA | NA | NA | NA | NA |
|               | NA                 | NA | NA | NA | NA | -2 | NA |    |    |    |    |    |    |    |
| PKIA-AS1      | NA                 | NA | NA | NA | NA | NA | NA | NA | NA | NA | NA | NA | NA | NA |
|               | ENSG00000254266.5  |    |    |    |    | NA | NA | NA | NA | NA | NA | NA | NA | NA |
|               | NA                 | NA | NA | NA | NA | -2 | NA |    |    |    |    |    |    |    |
| RP11-115J16.2 | NA                 | NA | NA | NA | NA | NA | NA | NA | NA | NA | NA | NA | NA | NA |
|               | ENSG00000254237.5  |    |    |    |    | NA | NA | NA | NA | NA | NA | NA | NA | NA |
|               | NA                 | NA | NA | NA | NA | -2 | NA |    |    |    |    |    |    |    |
| RP11-1081M5.2 | NA                 | NA | NA | NA | NA | NA | NA | NA | NA | NA | NA | NA | NA | NA |
|               | ENSG00000260484.1  |    |    |    |    | NA | NA | NA | NA | NA | NA | NA | NA | NA |
|               | NA                 | NA | NA | NA | NA | -2 | NA |    |    |    |    |    |    |    |
| MYC           | NA                 | NA | NA | NA | NA | NA | NA | NA | NA | NA | NA | NA | NA | NA |
|               | ENSG00000136997.16 |    |    |    |    | NA | NA | NA | NA | NA | NA | NA | NA | NA |
|               | NA                 | NA | NA | NA | -2 | NA |    |    |    |    |    |    |    |    |
| AC022182.3    | NA                 | NA | NA | NA | NA | NA | NA | NA | NA | NA | NA | NA | NA | NA |
|               | ENSG00000254802.1  |    |    |    |    | NA | NA | NA | NA | NA | NA | NA | NA | NA |
|               | NA                 | NA | NA | NA | NA | -2 | NA |    |    |    |    |    |    |    |
| LINC01603     | NA                 | NA | NA | NA | NA | NA | NA | NA | NA | NA | NA | NA | NA | NA |
|               | ENSG00000253479.5  |    |    |    |    | NA | NA | NA | NA | NA | NA | NA | NA | NA |
|               | NA                 | NA | NA | NA | NA | -2 | NA |    |    |    |    |    |    |    |
| RP11-468H14.2 | NA                 | NA | NA | NA | NA | NA | NA | NA | NA | NA | NA | NA | NA | NA |
|               | ENSG00000249258.2  |    |    |    |    | NA | NA | NA | NA | NA | NA | NA | NA | NA |
|               | NA                 | NA | NA | NA | NA | -2 | NA |    |    |    |    |    |    |    |
| RP11-58O3.2   | NA                 | NA | NA | NA | NA | NA | NA | NA | NA | NA | NA | NA | NA | NA |
|               | ENSG00000254262.1  |    |    |    |    | NA | NA | NA | NA | NA | NA | NA | NA | NA |
|               | NA                 | NA | NA | NA | NA | -2 | NA |    |    |    |    |    |    |    |
| RP11-369K17.1 | NA                 | NA | NA | NA | NA | NA | NA | NA | NA | NA | NA | NA | NA | NA |
|               | ENSG00000253619.1  |    |    |    |    | NA | NA | NA | NA | NA | NA | NA | NA | NA |
|               | NA                 | NA | NA | NA | NA | -2 | NA |    |    |    |    |    |    |    |
| RP11-96B2.1   | NA                 | NA | NA | NA | NA | NA | NA | NA | NA | NA | NA | NA | NA | NA |
|               | ENSG00000255325.2  |    |    |    |    | NA | NA | NA | NA | NA | NA | NA | NA | NA |
|               | NA                 | NA | NA | NA | NA | -2 | NA |    |    |    |    |    |    |    |
| CA8           | NA                 | NA | NA | NA | NA | NA | NA | NA | NA | NA | NA | NA | NA | NA |
|               | ENSG00000178538.9  |    |    |    |    | NA | NA | NA | NA | NA | NA | NA | NA | NA |
|               | NA                 | NA | NA | NA | -2 | NA |    |    |    |    |    |    |    |    |
| MRPL15        | NA                 | NA | NA | NA | NA | NA | NA | NA | NA | NA | NA | NA | NA | NA |
|               | ENSG00000137547.8  |    |    |    |    | NA | NA | NA | NA | NA | NA | NA | NA | NA |
|               | NA                 | NA | NA | NA | NA | -2 | NA |    |    |    |    |    |    |    |
| KB-1991G8.1   | NA                 | NA | NA | NA | NA | NA | NA | NA | NA | NA | NA | NA | NA | NA |
|               | ENSG00000253217.1  |    |    |    |    | NA | NA | NA | NA | NA | NA | NA | NA | NA |
|               | NA                 | NA | NA | NA | NA | -2 | NA |    |    |    |    |    |    |    |
| RP1L1         | NA                 | NA | NA | NA | NA | NA | NA | NA | NA | NA | NA | NA | NA | NA |
|               | ENSG00000183638.5  |    |    |    |    | NA | NA | NA | NA | NA | NA | NA | NA | NA |
|               | NA                 | NA | NA | NA | -2 | NA |    |    |    |    |    |    |    |    |
| DOK2          | NA                 | NA | NA | NA | NA | NA | NA | NA | NA | NA | NA | NA | NA | NA |
|               | ENSG00000147443.12 |    |    |    |    | NA | NA | NA | NA | NA | NA | NA | NA | NA |
|               | NA                 | NA | NA | NA | -2 | NA |    |    |    |    |    |    |    |    |
| RP11-10A14.7  | NA                 | NA | NA | NA | NA | NA | NA | NA | NA | NA | NA | NA | NA | NA |
|               | ENSG00000253887.1  |    |    |    |    | NA | NA | NA | NA | NA | NA | NA | NA | NA |

|               |                    |    |    |    |    |    |    |    |    |    |    |    |    |    |
|---------------|--------------------|----|----|----|----|----|----|----|----|----|----|----|----|----|
| NA            | NA                 | NA | NA | NA | NA | -2 | NA |    |    |    |    |    |    |    |
| C8orf89       | ENSG00000274443.4  |    |    |    |    | NA | NA | NA | NA | NA | NA | NA | NA | NA |
| NA            | NA                 | NA | NA | NA | NA | -2 | NA |    |    |    |    |    |    |    |
| MIR2052HG     | ENSG00000254349.5  |    |    |    |    | NA | NA | NA | NA | NA | NA | NA | NA | NA |
| NA            | NA                 | NA | NA | NA | NA | -2 | NA |    |    |    |    |    |    |    |
| RP11-148O21.6 | ENSG00000269954.1  |    |    |    |    | NA | NA | NA | NA | NA | NA | NA | NA | NA |
| NA            | NA                 | NA | NA | NA | NA | -2 | NA |    |    |    |    |    |    |    |
| SGK3          | ENSG00000104205.12 |    |    |    |    | NA | NA | NA | NA | NA | NA | NA | NA | NA |
| NA            | NA                 | NA | NA | NA | NA | -2 | NA |    |    |    |    |    |    |    |
| OXR1          | ENSG00000164830.18 |    |    |    |    | NA | NA | NA | NA | NA | NA | NA | NA | NA |
| NA            | NA                 | NA | NA | NA | NA | -2 | NA |    |    |    |    |    |    |    |
| SLC30A8       | ENSG00000164756.12 |    |    |    |    | NA | NA | NA | NA | NA | NA | NA | NA | NA |
| NA            | NA                 | NA | NA | NA | NA | -2 | NA |    |    |    |    |    |    |    |
| CTD-3046C4.1  | ENSG00000253205.5  |    |    |    |    | NA | NA | NA | NA | NA | NA | NA | NA | NA |
| NA            | NA                 | NA | NA | NA | NA | -2 | NA |    |    |    |    |    |    |    |
| CTD-3212A4.2  | ENSG00000282692.1  |    |    |    |    | NA | NA | NA | NA | NA | NA | NA | NA | NA |
| NA            | NA                 | NA | NA | NA | NA | -2 | NA |    |    |    |    |    |    |    |
| DUSP26        | ENSG00000133878.8  |    |    |    |    | NA | NA | NA | NA | NA | NA | NA | NA | NA |
| NA            | NA                 | NA | NA | NA | NA | -2 | NA |    |    |    |    |    |    |    |
| RP11-369E15.2 | ENSG00000254026.1  |    |    |    |    | NA | NA | NA | NA | NA | NA | NA | NA | NA |
| NA            | NA                 | NA | NA | NA | NA | -2 | NA |    |    |    |    |    |    |    |
| RP11-398H6.1  | ENSG00000254258.1  |    |    |    |    | NA | NA | NA | NA | NA | NA | NA | NA | NA |
| NA            | NA                 | NA | NA | NA | NA | -2 | NA |    |    |    |    |    |    |    |
| ARHGAP39      | ENSG00000147799.11 |    |    |    |    | NA | NA | NA | NA | NA | NA | NA | NA | NA |
| NA            | NA                 | NA | NA | NA | NA | -2 | NA |    |    |    |    |    |    |    |
| MYBL1         | ENSG00000185697.16 |    |    |    |    | NA | NA | NA | NA | NA | NA | NA | NA | NA |
| NA            | NA                 | NA | NA | NA | NA | -2 | NA |    |    |    |    |    |    |    |
| RP11-434I12.4 | ENSG00000253235.1  |    |    |    |    | NA | NA | NA | NA | NA | NA | NA | NA | NA |
| NA            | NA                 | NA | NA | NA | NA | -2 | NA |    |    |    |    |    |    |    |
| RP11-281N10.1 | ENSG00000253287.1  |    |    |    |    | NA | NA | NA | NA | NA | NA | NA | NA | NA |
| NA            | NA                 | NA | NA | NA | NA | -2 | NA |    |    |    |    |    |    |    |
| LINC00208     | ENSG00000170983.3  |    |    |    |    | NA | NA | NA | NA | NA | NA | NA | NA | NA |
| NA            | NA                 | NA | NA | NA | NA | -2 | NA |    |    |    |    |    |    |    |
| HTRA4         | ENSG00000169495.4  |    |    |    |    | NA | NA | NA | NA | NA | NA | NA | NA | NA |
| NA            | NA                 | NA | NA | NA | NA | -2 | NA |    |    |    |    |    |    |    |
| UQCRB         | ENSG00000156467.9  |    |    |    |    | NA | NA | NA | NA | NA | NA | NA | NA | NA |
| NA            | NA                 | NA | NA | NA | NA | -2 | NA |    |    |    |    |    |    |    |
| RP11-211C9.1  | ENSG00000254367.5  |    |    |    |    | NA | NA | NA | NA | NA | NA | NA | NA | NA |
| NA            | NA                 | NA | NA | NA | NA | -2 | NA |    |    |    |    |    |    |    |
| RP11-158A14.1 | ENSG00000253189.1  |    |    |    |    | NA | NA | NA | NA | NA | NA | NA | NA | NA |
| NA            | NA                 | NA | NA | NA | NA | -2 | NA |    |    |    |    |    |    |    |
| DLGAP2        | ENSG00000198010.12 |    |    |    |    | NA | NA | NA | NA | NA | NA | NA | NA | NA |
| NA            | NA                 | NA | NA | NA | NA | -2 | NA |    |    |    |    |    |    |    |
| CTD-2168K21.1 | ENSG00000253832.1  |    |    |    |    | NA | NA | NA | NA | NA | NA | NA | NA | NA |
| NA            | NA                 | NA | NA | NA | NA | -2 | NA |    |    |    |    |    |    |    |
| KB-1410C5.2   | ENSG00000253679.1  |    |    |    |    | NA | NA | NA | NA | NA | NA | NA | NA | NA |
| NA            | NA                 | NA | NA | NA | NA | -2 | NA |    |    |    |    |    |    |    |
| COL22A1       | ENSG00000169436.16 |    |    |    |    | NA | NA | NA | NA | NA | NA | NA | NA | NA |
| NA            | NA                 | NA | NA | NA | NA | -2 | NA |    |    |    |    |    |    |    |
| HHLA1         | ENSG00000132297.11 |    |    |    |    | NA | NA | NA | NA | NA | NA | NA | NA | NA |
| NA            | NA                 | NA | NA | NA | NA | -2 | NA |    |    |    |    |    |    |    |
| RP11-1082L8.3 | ENSG00000255491.2  |    |    |    |    | NA | NA | NA | NA | NA | NA | NA | NA | NA |
| NA            | NA                 | NA | NA | NA | NA | -2 | NA |    |    |    |    |    |    |    |
| AB015752.3    | ENSG00000254180.1  |    |    |    |    | NA | NA | NA | NA | NA | NA | NA | NA | NA |
| NA            | NA                 | NA | NA | NA | NA | -2 | NA |    |    |    |    |    |    |    |
| NKX2-6        | ENSG00000180053.7  |    |    |    |    | NA | NA | NA | NA | NA | NA | NA | NA | NA |
| NA            | NA                 | NA | NA | NA | NA | -2 | NA |    |    |    |    |    |    |    |
| CTC-756D1.2   | ENSG00000253390.1  |    |    |    |    | NA | NA | NA | NA | NA | NA | NA | NA | NA |
| NA            | NA                 | NA | NA | NA | NA | -2 | NA |    |    |    |    |    |    |    |
| RP11-495O10.1 | ENSG00000254321.1  |    |    |    |    | NA | NA | NA | NA | NA | NA | NA | NA | NA |
| NA            | NA                 | NA | NA | NA | NA | -2 | NA |    |    |    |    |    |    |    |
| ENPP2         | ENSG00000136960.12 |    |    |    |    | NA | NA | NA | NA | NA | NA | NA | NA | NA |

|                |                    |    |    |    |    |    |    |    |    |    |    |    |    |    |
|----------------|--------------------|----|----|----|----|----|----|----|----|----|----|----|----|----|
| NA             | NA                 | NA | NA | -2 | NA |    |    |    |    |    |    |    |    |    |
| SLURP1         | ENSG00000126233.1  |    |    |    | NA | NA | NA | NA | NA | NA | NA | NA | NA | NA |
| NA             | NA                 | NA | NA | NA | -2 | NA |    |    |    |    |    |    |    |    |
| TTPA           | ENSG00000137561.4  |    |    |    | NA | NA | NA | NA | NA | NA | NA | NA | NA | NA |
| NA             | NA                 | NA | NA | NA | -2 | NA |    |    |    |    |    |    |    |    |
| PPP2CB         | ENSG00000104695.12 |    |    |    | NA | NA | NA | NA | NA | NA | NA | NA | NA | NA |
| NA             | NA                 | NA | NA | NA | -2 | NA |    |    |    |    |    |    |    |    |
| RP11-245A18.1  | ENSG00000254000.1  |    |    |    | NA | NA | NA | NA | NA | NA | NA | NA | NA | NA |
| NA             | NA                 | NA | NA | NA | -2 | NA |    |    |    |    |    |    |    |    |
| ZNF250         | ENSG00000196150.13 |    |    |    | NA | NA | NA | NA | NA | NA | NA | NA | NA | NA |
| NA             | NA                 | NA | NA | NA | -2 | NA |    |    |    |    |    |    |    |    |
| TATDN1         | ENSG00000147687.18 |    |    |    | NA | NA | NA | NA | NA | NA | NA | NA | NA | NA |
| NA             | NA                 | NA | NA | NA | -2 | NA |    |    |    |    |    |    |    |    |
| SPATC1         | ENSG00000186583.11 |    |    |    | NA | NA | NA | NA | NA | NA | NA | NA | NA | NA |
| NA             | NA                 | NA | NA | NA | -2 | NA |    |    |    |    |    |    |    |    |
| GRHL2          | ENSG00000083307.10 |    |    |    | NA | NA | NA | NA | NA | NA | NA | NA | NA | NA |
| NA             | NA                 | NA | NA | NA | -2 | NA |    |    |    |    |    |    |    |    |
| PXDNL          | ENSG00000147485.12 |    |    |    | NA | NA | NA | NA | NA | NA | NA | NA | NA | NA |
| NA             | NA                 | NA | NA | NA | -2 | NA |    |    |    |    |    |    |    |    |
| RP11-705O24.3  | ENSG00000253834.1  |    |    |    | NA | NA | NA | NA | NA | NA | NA | NA | NA | NA |
| NA             | NA                 | NA | NA | NA | -2 | NA |    |    |    |    |    |    |    |    |
| ST18           | ENSG00000147488.11 |    |    |    | NA | NA | NA | NA | NA | NA | NA | NA | NA | NA |
| NA             | NA                 | NA | NA | NA | -2 | NA |    |    |    |    |    |    |    |    |
| SNAI2          | ENSG00000019549.9  |    |    |    | NA | NA | NA | NA | NA | NA | NA | NA | NA | NA |
| NA             | NA                 | NA | NA | NA | -2 | NA |    |    |    |    |    |    |    |    |
| KCNK9          | ENSG00000169427.6  |    |    |    | NA | NA | NA | NA | NA | NA | NA | NA | NA | NA |
| NA             | NA                 | NA | NA | NA | -2 | NA |    |    |    |    |    |    |    |    |
| TMEM70         | ENSG00000175606.10 |    |    |    | NA | NA | NA | NA | NA | NA | NA | NA | NA | NA |
| NA             | NA                 | NA | NA | NA | -2 | NA |    |    |    |    |    |    |    |    |
| MRPS28         | ENSG00000147586.9  |    |    |    | NA | NA | NA | NA | NA | NA | NA | NA | NA | NA |
| NA             | NA                 | NA | NA | NA | -2 | NA |    |    |    |    |    |    |    |    |
| SULF1          | ENSG00000137573.13 |    |    |    | NA | NA | NA | NA | NA | NA | NA | NA | NA | NA |
| NA             | NA                 | NA | NA | NA | -2 | NA |    |    |    |    |    |    |    |    |
| RAB11FIP1      | ENSG00000156675.15 |    |    |    | NA | NA | NA | NA | NA | NA | NA | NA | NA | NA |
| NA             | NA                 | NA | NA | NA | -2 | NA |    |    |    |    |    |    |    |    |
| RP11-1057B8.2  | ENSG00000251218.1  |    |    |    | NA | NA | NA | NA | NA | NA | NA | NA | NA | NA |
| NA             | NA                 | NA | NA | NA | -2 | NA |    |    |    |    |    |    |    |    |
| FER1L6         | ENSG00000214814.7  |    |    |    | NA | NA | NA | NA | NA | NA | NA | NA | NA | NA |
| NA             | NA                 | NA | NA | NA | -2 | NA |    |    |    |    |    |    |    |    |
| RP11-1105O14.1 | ENSG00000253270.1  |    |    |    | NA | NA | NA | NA | NA | NA | NA | NA | NA | NA |
| NA             | NA                 | NA | NA | NA | -2 | NA |    |    |    |    |    |    |    |    |
| RP11-1082L8.2  | ENSG00000255313.1  |    |    |    | NA | NA | NA | NA | NA | NA | NA | NA | NA | NA |
| NA             | NA                 | NA | NA | NA | -2 | NA |    |    |    |    |    |    |    |    |
| RRS1-AS1       | ENSG00000246145.1  |    |    |    | NA | NA | NA | NA | NA | NA | NA | NA | NA | NA |
| NA             | NA                 | NA | NA | NA | -2 | NA |    |    |    |    |    |    |    |    |
| TNFRSF10A      | ENSG00000104689.9  |    |    |    | NA | NA | NA | NA | NA | NA | NA | NA | NA | NA |
| NA             | NA                 | NA | NA | NA | -2 | NA |    |    |    |    |    |    |    |    |
| CCDC26         | ENSG00000229140.8  |    |    |    | NA | NA | NA | NA | NA | NA | NA | NA | NA | NA |
| NA             | NA                 | NA | NA | NA | -2 | NA |    |    |    |    |    |    |    |    |
| MBOAT4         | ENSG00000177669.3  |    |    |    | NA | NA | NA | NA | NA | NA | NA | NA | NA | NA |
| NA             | NA                 | NA | NA | NA | -2 | NA |    |    |    |    |    |    |    |    |
| BAG4           | ENSG00000156735.10 |    |    |    | NA | NA | NA | NA | NA | NA | NA | NA | NA | NA |
| NA             | NA                 | NA | NA | NA | -2 | NA |    |    |    |    |    |    |    |    |
| ATP6V1H        | ENSG00000047249.17 |    |    |    | NA | NA | NA | NA | NA | NA | NA | NA | NA | NA |
| NA             | NA                 | NA | NA | NA | -2 | NA |    |    |    |    |    |    |    |    |
| ADGRB1         | ENSG00000181790.10 |    |    |    | NA | NA | NA | NA | NA | NA | NA | NA | NA | NA |
| NA             | NA                 | NA | NA | NA | -2 | NA |    |    |    |    |    |    |    |    |
| INTS9          | ENSG00000104299.14 |    |    |    | NA | NA | NA | NA | NA | NA | NA | NA | NA | NA |
| NA             | NA                 | NA | NA | NA | -2 | NA |    |    |    |    |    |    |    |    |
| RP11-213G6.2   | ENSG00000254002.1  |    |    |    | NA | NA | NA | NA | NA | NA | NA | NA | NA | NA |
| NA             | NA                 | NA | NA | NA | -2 | NA |    |    |    |    |    |    |    |    |
| MAPK15         | ENSG00000181085.14 |    |    |    | NA | NA | NA | NA | NA | NA | NA | NA | NA | NA |



|               |                    |    |    |    |    |    |    |    |    |    |    |    |    |
|---------------|--------------------|----|----|----|----|----|----|----|----|----|----|----|----|
| NA            | NA                 | NA | NA | NA | -2 | NA |    |    |    |    |    |    |    |
| RP11-419C23.1 | ENSG00000254038.1  |    |    |    |    | NA | NA | NA | NA | NA | NA | NA | NA |
| NA            | NA                 | NA | NA | NA | NA | -2 | NA |    |    |    |    |    |    |
| FBXO43        | ENSG00000156509.13 |    |    |    |    | NA | NA | NA | NA | NA | NA | NA | NA |
| NA            | NA                 | NA | NA | NA | NA | -2 | NA |    |    |    |    |    |    |
| CTD-2281E23.1 | ENSG00000275427.1  |    |    |    |    | NA | NA | NA | NA | NA | NA | NA | NA |
| NA            | NA                 | NA | NA | NA | NA | -2 | NA |    |    |    |    |    |    |
| RP11-383J24.1 | ENSG00000253227.1  |    |    |    |    | NA | NA | NA | NA | NA | NA | NA | NA |
| NA            | NA                 | NA | NA | NA | NA | -2 | NA |    |    |    |    |    |    |
| LY96          | ENSG00000154589.6  |    |    |    |    | NA | NA | NA | NA | NA | NA | NA | NA |
| NA            | NA                 | NA | NA | NA | NA | -2 | NA |    |    |    |    |    |    |
| MRPL13        | ENSG00000172172.7  |    |    |    |    | NA | NA | NA | NA | NA | NA | NA | NA |
| NA            | NA                 | NA | NA | NA | NA | -2 | NA |    |    |    |    |    |    |
| TMEM67        | ENSG00000164953.15 |    |    |    |    | NA | NA | NA | NA | NA | NA | NA | NA |
| NA            | NA                 | NA | NA | NA | NA | -2 | NA |    |    |    |    |    |    |
| ERLIN2        | ENSG00000147475.14 |    |    |    |    | NA | NA | NA | NA | NA | NA | NA | NA |
| NA            | NA                 | NA | NA | NA | NA | -2 | NA |    |    |    |    |    |    |
| TMEM71        | ENSG00000165071.14 |    |    |    |    | NA | NA | NA | NA | NA | NA | NA | NA |
| NA            | NA                 | NA | NA | NA | NA | -2 | NA |    |    |    |    |    |    |
| DAB2IP        | ENSG00000136848.16 |    |    |    |    | NA | NA | NA | NA | NA | NA | NA | NA |
| NA            | NA                 | NA | NA | NA | NA | -2 | NA |    |    |    |    |    |    |
| SUSD3         | ENSG00000157303.10 |    |    |    |    | NA | NA | NA | NA | NA | NA | NA | NA |
| NA            | NA                 | NA | NA | NA | NA | -2 | NA |    |    |    |    |    |    |
| ORM2          | ENSG00000228278.3  |    |    |    |    | NA | NA | NA | NA | NA | NA | NA | NA |
| NA            | NA                 | NA | NA | NA | NA | -2 | NA |    |    |    |    |    |    |
| PLAA          | ENSG00000137055.14 |    |    |    |    | NA | NA | NA | NA | NA | NA | NA | NA |
| NA            | NA                 | NA | NA | NA | NA | -2 | NA |    |    |    |    |    |    |
| SLC24A2       | ENSG00000155886.11 |    |    |    |    | NA | NA | NA | NA | NA | NA | NA | NA |
| NA            | NA                 | NA | NA | NA | NA | -2 | NA |    |    |    |    |    |    |
| RP11-262H14.3 | ENSG00000234665.8  |    |    |    |    | NA | NA | NA | NA | NA | NA | NA | NA |
| NA            | NA                 | NA | NA | NA | NA | -2 | NA |    |    |    |    |    |    |
| CAAP1         | ENSG00000120159.11 |    |    |    |    | NA | NA | NA | NA | NA | NA | NA | NA |
| NA            | NA                 | NA | NA | NA | NA | -2 | NA |    |    |    |    |    |    |
| LINC01492     | ENSG00000225564.6  |    |    |    |    | NA | NA | NA | NA | NA | NA | NA | NA |
| NA            | NA                 | NA | NA | NA | NA | -2 | NA |    |    |    |    |    |    |
| RP11-160N1.9  | ENSG00000231248.2  |    |    |    |    | NA | NA | NA | NA | NA | NA | NA | NA |
| NA            | NA                 | NA | NA | NA | NA | -2 | NA |    |    |    |    |    |    |
| EGFL7         | ENSG00000172889.15 |    |    |    |    | NA | NA | NA | NA | NA | NA | NA | NA |
| NA            | NA                 | NA | NA | NA | NA | -2 | NA |    |    |    |    |    |    |
| SAXO1         | ENSG00000155875.13 |    |    |    |    | NA | NA | NA | NA | NA | NA | NA | NA |
| NA            | NA                 | NA | NA | NA | NA | -2 | NA |    |    |    |    |    |    |
| LINC01474     | ENSG00000236849.5  |    |    |    |    | NA | NA | NA | NA | NA | NA | NA | NA |
| NA            | NA                 | NA | NA | NA | NA | -2 | NA |    |    |    |    |    |    |
| RP11-308N19.3 | ENSG00000237062.1  |    |    |    |    | NA | NA | NA | NA | NA | NA | NA | NA |
| NA            | NA                 | NA | NA | NA | NA | -2 | NA |    |    |    |    |    |    |
| SPINK4        | ENSG00000122711.8  |    |    |    |    | NA | NA | NA | NA | NA | NA | NA | NA |
| NA            | NA                 | NA | NA | NA | NA | -2 | NA |    |    |    |    |    |    |
| PTGDS         | ENSG00000107317.12 |    |    |    |    | NA | NA | NA | NA | NA | NA | NA | NA |
| NA            | NA                 | NA | NA | NA | NA | -2 | NA |    |    |    |    |    |    |
| MAPKAP1       | ENSG00000119487.16 |    |    |    |    | NA | NA | NA | NA | NA | NA | NA | NA |
| NA            | NA                 | NA | NA | NA | NA | -2 | NA |    |    |    |    |    |    |
| ASB6          | ENSG00000148331.11 |    |    |    |    | NA | NA | NA | NA | NA | NA | NA | NA |
| NA            | NA                 | NA | NA | NA | NA | -2 | NA |    |    |    |    |    |    |
| PTGS1         | ENSG00000095303.14 |    |    |    |    | NA | NA | NA | NA | NA | NA | NA | NA |
| NA            | NA                 | NA | NA | NA | NA | -2 | NA |    |    |    |    |    |    |
| CDKN2A        | ENSG00000147889.17 |    |    |    |    | NA | NA | NA | NA | NA | NA | NA | NA |
| NA            | NA                 | NA | NA | NA | NA | -2 | NA |    |    |    |    |    |    |
| TTF1          | ENSG00000125482.12 |    |    |    |    | NA | NA | NA | NA | NA | NA | NA | NA |
| NA            | NA                 | NA | NA | NA | NA | -2 | NA |    |    |    |    |    |    |
| RP11-344B5.4  | ENSG00000235007.2  |    |    |    |    | NA | NA | NA | NA | NA | NA | NA | NA |
| NA            | NA                 | NA | NA | NA | NA | -2 | NA |    |    |    |    |    |    |
| EDF1          | ENSG00000107223.12 |    |    |    |    | NA | NA | NA | NA | NA | NA | NA | NA |

|               |                    |    |    |    |    |    |    |    |    |    |    |    |    |    |
|---------------|--------------------|----|----|----|----|----|----|----|----|----|----|----|----|----|
|               | NA                 | NA | NA | NA | -2 | NA |    |    |    |    |    |    |    |    |
| CEL           | ENSG00000170835.14 |    |    |    |    | NA | NA | NA | NA | NA | NA | NA | NA | NA |
|               | NA                 | NA | NA | NA | -2 | NA |    |    |    |    |    |    |    |    |
| FAM214B       | ENSG00000005238.19 |    |    |    |    | NA | NA | NA | NA | NA | NA | NA | NA | NA |
|               | NA                 | NA | NA | NA | -2 | NA |    |    |    |    |    |    |    |    |
| RP11-167N5.5  | ENSG00000267834.1  |    |    |    |    | NA | NA | NA | NA | NA | NA | NA | NA | NA |
|               | NA                 | NA | NA | NA | NA | -2 | NA |    |    |    |    |    |    |    |
| FAM122A       | ENSG00000187866.8  |    |    |    |    | NA | NA | NA | NA | NA | NA | NA | NA | NA |
|               | NA                 | NA | NA | NA | -2 | NA |    |    |    |    |    |    |    |    |
| FOCAD-AS1     | ENSG00000227071.1  |    |    |    |    | NA | NA | NA | NA | NA | NA | NA | NA | NA |
|               | NA                 | NA | NA | NA | NA | -2 | NA |    |    |    |    |    |    |    |
| PRDM12        | ENSG00000130711.3  |    |    |    |    | NA | NA | NA | NA | NA | NA | NA | NA | NA |
|               | NA                 | NA | NA | NA | NA | -2 | NA |    |    |    |    |    |    |    |
| MELK          | ENSG00000165304.7  |    |    |    |    | NA | NA | NA | NA | NA | NA | NA | NA | NA |
|               | NA                 | NA | NA | NA | -2 | NA |    |    |    |    |    |    |    |    |
| RP11-88G17.6  | ENSG00000196979.1  |    |    |    |    | NA | NA | NA | NA | NA | NA | NA | NA | NA |
|               | NA                 | NA | NA | NA | NA | -2 | NA |    |    |    |    |    |    |    |
| RP11-217B7.3  | ENSG00000230013.1  |    |    |    |    | NA | NA | NA | NA | NA | NA | NA | NA | NA |
|               | NA                 | NA | NA | NA | NA | -2 | NA |    |    |    |    |    |    |    |
| KIAA1958      | ENSG00000165185.14 |    |    |    |    | NA | NA | NA | NA | NA | NA | NA | NA | NA |
|               | NA                 | NA | NA | NA | NA | -2 | NA |    |    |    |    |    |    |    |
| C9orf135-AS1  | ENSG00000225626.2  |    |    |    |    | NA | NA | NA | NA | NA | NA | NA | NA | NA |
|               | NA                 | NA | NA | NA | NA | -2 | NA |    |    |    |    |    |    |    |
| PDCL          | ENSG00000136940.13 |    |    |    |    | NA | NA | NA | NA | NA | NA | NA | NA | NA |
|               | NA                 | NA | NA | NA | -2 | NA |    |    |    |    |    |    |    |    |
| FNBP1         | ENSG00000187239.16 |    |    |    |    | NA | NA | NA | NA | NA | NA | NA | NA | NA |
|               | NA                 | NA | NA | NA | -2 | NA |    |    |    |    |    |    |    |    |
| FAM205A       | ENSG00000205108.5  |    |    |    |    | NA | NA | NA | NA | NA | NA | NA | NA | NA |
|               | NA                 | NA | NA | NA | NA | -2 | NA |    |    |    |    |    |    |    |
| PLPPR1        | ENSG00000148123.14 |    |    |    |    | NA | NA | NA | NA | NA | NA | NA | NA | NA |
|               | NA                 | NA | NA | NA | NA | -2 | NA |    |    |    |    |    |    |    |
| AK1           | ENSG00000106992.17 |    |    |    |    | NA | NA | NA | NA | NA | NA | NA | NA | NA |
|               | NA                 | NA | NA | NA | -2 | NA |    |    |    |    |    |    |    |    |
| RP11-168K11.3 | ENSG00000233817.1  |    |    |    |    | NA | NA | NA | NA | NA | NA | NA | NA | NA |
|               | NA                 | NA | NA | NA | NA | -2 | NA |    |    |    |    |    |    |    |
| LINC01509     | ENSG00000226825.1  |    |    |    |    | NA | NA | NA | NA | NA | NA | NA | NA | NA |
|               | NA                 | NA | NA | NA | NA | -2 | NA |    |    |    |    |    |    |    |
| GFI1B         | ENSG00000165702.13 |    |    |    |    | NA | NA | NA | NA | NA | NA | NA | NA | NA |
|               | NA                 | NA | NA | NA | -2 | NA |    |    |    |    |    |    |    |    |
| RP11-202G18.1 | ENSG00000227531.1  |    |    |    |    | NA | NA | NA | NA | NA | NA | NA | NA | NA |
|               | NA                 | NA | NA | NA | NA | -2 | NA |    |    |    |    |    |    |    |
| RP11-98L5.5   | ENSG00000236543.2  |    |    |    |    | NA | NA | NA | NA | NA | NA | NA | NA | NA |
|               | NA                 | NA | NA | NA | NA | -2 | NA |    |    |    |    |    |    |    |
| CDKN2B        | ENSG00000147883.10 |    |    |    |    | NA | NA | NA | NA | NA | NA | NA | NA | NA |
|               | NA                 | NA | NA | NA | NA | -2 | NA |    |    |    |    |    |    |    |
| NR5A1         | ENSG00000136931.9  |    |    |    |    | NA | NA | NA | NA | NA | NA | NA | NA | NA |
|               | NA                 | NA | NA | NA | -2 | NA |    |    |    |    |    |    |    |    |
| ANKRD20A2     | ENSG00000183148.6  |    |    |    |    | NA | NA | NA | NA | NA | NA | NA | NA | NA |
|               | NA                 | NA | NA | NA | NA | -2 | NA |    |    |    |    |    |    |    |
| OBP2B         | ENSG00000171102.14 |    |    |    |    | NA | NA | NA | NA | NA | NA | NA | NA | NA |
|               | NA                 | NA | NA | NA | -2 | NA |    |    |    |    |    |    |    |    |
| RP11-157L3.12 | ENSG00000275239.4  |    |    |    |    | NA | NA | NA | NA | NA | NA | NA | NA | NA |
|               | NA                 | NA | NA | NA | NA | -2 | NA |    |    |    |    |    |    |    |
| OR1J1         | ENSG00000136834.3  |    |    |    |    | NA | NA | NA | NA | NA | NA | NA | NA | NA |
|               | NA                 | NA | NA | NA | -2 | NA |    |    |    |    |    |    |    |    |
| GBA2          | ENSG00000070610.14 |    |    |    |    | NA | NA | NA | NA | NA | NA | NA | NA | NA |
|               | NA                 | NA | NA | NA | -2 | NA |    |    |    |    |    |    |    |    |
| ENTPD2        | ENSG00000054179.11 |    |    |    |    | NA | NA | NA | NA | NA | NA | NA | NA | NA |
|               | NA                 | NA | NA | NA | NA | -2 | NA |    |    |    |    |    |    |    |
| VCP           | ENSG00000165280.15 |    |    |    |    | NA | NA | NA | NA | NA | NA | NA | NA | NA |
|               | NA                 | NA | NA | NA | -2 | NA |    |    |    |    |    |    |    |    |
| STXBP1        | ENSG00000136854.19 |    |    |    |    | NA | NA | NA | NA | NA | NA | NA | NA | NA |

|               |                    |    |    |    |    |    |    |    |    |    |    |    |    |    |
|---------------|--------------------|----|----|----|----|----|----|----|----|----|----|----|----|----|
| NA            | NA                 | NA | NA | NA | -2 | NA | NA | NA | NA | NA | NA | NA | NA | NA |
| SLC27A4       | ENSG00000167114.12 | NA | NA | NA | NA | NA | NA | NA | NA | NA | NA | NA | NA | NA |
| NA            | NA                 | NA | NA | NA | -2 | NA | NA | NA | NA | NA | NA | NA | NA | NA |
| RP11-498P14.4 | ENSG00000235494.1  | NA | NA | NA | NA | NA | NA | NA | NA | NA | NA | NA | NA | NA |
| NA            | NA                 | NA | NA | NA | NA | -2 | NA | NA | NA | NA | NA | NA | NA | NA |
| RPL7A         | ENSG00000148303.16 | NA | NA | NA | NA | NA | NA | NA | NA | NA | NA | NA | NA | NA |
| NA            | NA                 | NA | NA | NA | -2 | NA | NA | NA | NA | NA | NA | NA | NA | NA |
| RP11-350E12.6 | ENSG00000283205.1  | NA | NA | NA | NA | NA | NA | NA | NA | NA | NA | NA | NA | NA |
| NA            | NA                 | NA | NA | NA | NA | -2 | NA | NA | NA | NA | NA | NA | NA | NA |
| OMD           | ENSG00000127083.7  | NA | NA | NA | NA | NA | NA | NA | NA | NA | NA | NA | NA | NA |
| NA            | NA                 | NA | NA | NA | -2 | NA | NA | NA | NA | NA | NA | NA | NA | NA |
| RP11-370F5.4  | ENSG00000203364.2  | NA | NA | NA | NA | NA | NA | NA | NA | NA | NA | NA | NA | NA |
| NA            | NA                 | NA | NA | NA | NA | -2 | NA | NA | NA | NA | NA | NA | NA | NA |
| NFIL3         | ENSG00000165030.3  | NA | NA | NA | NA | NA | NA | NA | NA | NA | NA | NA | NA | NA |
| NA            | NA                 | NA | NA | NA | -2 | NA | NA | NA | NA | NA | NA | NA | NA | NA |
| C9orf50       | ENSG00000179058.6  | NA | NA | NA | NA | NA | NA | NA | NA | NA | NA | NA | NA | NA |
| NA            | NA                 | NA | NA | NA | NA | -2 | NA | NA | NA | NA | NA | NA | NA | NA |
| RLN1          | ENSG00000107018.7  | NA | NA | NA | NA | NA | NA | NA | NA | NA | NA | NA | NA | NA |
| NA            | NA                 | NA | NA | NA | -2 | NA | NA | NA | NA | NA | NA | NA | NA | NA |
| COQ4          | ENSG00000167113.10 | NA | NA | NA | NA | NA | NA | NA | NA | NA | NA | NA | NA | NA |
| NA            | NA                 | NA | NA | NA | -2 | NA | NA | NA | NA | NA | NA | NA | NA | NA |
| UBQLN1        | ENSG00000135018.13 | NA | NA | NA | NA | NA | NA | NA | NA | NA | NA | NA | NA | NA |
| NA            | NA                 | NA | NA | NA | NA | -2 | NA | NA | NA | NA | NA | NA | NA | NA |
| C9orf84       | ENSG00000165181.16 | NA | NA | NA | NA | NA | NA | NA | NA | NA | NA | NA | NA | NA |
| NA            | NA                 | NA | NA | NA | NA | -2 | NA | NA | NA | NA | NA | NA | NA | NA |
| MIGA2         | ENSG00000148343.18 | NA | NA | NA | NA | NA | NA | NA | NA | NA | NA | NA | NA | NA |
| NA            | NA                 | NA | NA | NA | -2 | NA | NA | NA | NA | NA | NA | NA | NA | NA |
| PSAT1         | ENSG00000135069.13 | NA | NA | NA | NA | NA | NA | NA | NA | NA | NA | NA | NA | NA |
| NA            | NA                 | NA | NA | NA | -2 | NA | NA | NA | NA | NA | NA | NA | NA | NA |
| STRBP         | ENSG00000165209.18 | NA | NA | NA | NA | NA | NA | NA | NA | NA | NA | NA | NA | NA |
| NA            | NA                 | NA | NA | NA | -2 | NA | NA | NA | NA | NA | NA | NA | NA | NA |
| HEMGN         | ENSG00000136929.12 | NA | NA | NA | NA | NA | NA | NA | NA | NA | NA | NA | NA | NA |
| NA            | NA                 | NA | NA | NA | -2 | NA | NA | NA | NA | NA | NA | NA | NA | NA |
| DAPK1         | ENSG00000196730.12 | NA | NA | NA | NA | NA | NA | NA | NA | NA | NA | NA | NA | NA |
| NA            | NA                 | NA | NA | NA | -2 | NA | NA | NA | NA | NA | NA | NA | NA | NA |
| CRB2          | ENSG00000148204.11 | NA | NA | NA | NA | NA | NA | NA | NA | NA | NA | NA | NA | NA |
| NA            | NA                 | NA | NA | NA | -2 | NA | NA | NA | NA | NA | NA | NA | NA | NA |
| NFX1          | ENSG00000086102.18 | NA | NA | NA | NA | NA | NA | NA | NA | NA | NA | NA | NA | NA |
| NA            | NA                 | NA | NA | NA | -2 | NA | NA | NA | NA | NA | NA | NA | NA | NA |
| NTRK2         | ENSG00000148053.15 | NA | NA | NA | NA | NA | NA | NA | NA | NA | NA | NA | NA | NA |
| NA            | NA                 | NA | NA | NA | -2 | NA | NA | NA | NA | NA | NA | NA | NA | NA |
| INSL6         | ENSG00000120210.6  | NA | NA | NA | NA | NA | NA | NA | NA | NA | NA | NA | NA | NA |
| NA            | NA                 | NA | NA | NA | -2 | NA | NA | NA | NA | NA | NA | NA | NA | NA |
| SPAAR         | ENSG00000235387.2  | NA | NA | NA | NA | NA | NA | NA | NA | NA | NA | NA | NA | NA |
| NA            | NA                 | NA | NA | NA | -2 | NA | NA | NA | NA | NA | NA | NA | NA | NA |
| SSNA1         | ENSG00000176101.11 | NA | NA | NA | NA | NA | NA | NA | NA | NA | NA | NA | NA | NA |
| NA            | NA                 | NA | NA | NA | -2 | NA | NA | NA | NA | NA | NA | NA | NA | NA |
| BARX1         | ENSG00000131668.13 | NA | NA | NA | NA | NA | NA | NA | NA | NA | NA | NA | NA | NA |
| NA            | NA                 | NA | NA | NA | -2 | NA | NA | NA | NA | NA | NA | NA | NA | NA |
| RGS3          | ENSG00000138835.22 | NA | NA | NA | NA | NA | NA | NA | NA | NA | NA | NA | NA | NA |
| NA            | NA                 | NA | NA | NA | -2 | NA | NA | NA | NA | NA | NA | NA | NA | NA |
| ATP6V1G1      | ENSG00000136888.6  | NA | NA | NA | NA | NA | NA | NA | NA | NA | NA | NA | NA | NA |
| NA            | NA                 | NA | NA | NA | NA | -2 | NA | NA | NA | NA | NA | NA | NA | NA |
| LINC01506     | ENSG00000234506.5  | NA | NA | NA | NA | NA | NA | NA | NA | NA | NA | NA | NA | NA |
| NA            | NA                 | NA | NA | NA | -2 | NA | NA | NA | NA | NA | NA | NA | NA | NA |
| RP11-284G10.1 | ENSG00000228714.2  | NA | NA | NA | NA | NA | NA | NA | NA | NA | NA | NA | NA | NA |
| NA            | NA                 | NA | NA | NA | NA | -2 | NA | NA | NA | NA | NA | NA | NA | NA |
| WDR34         | ENSG00000119333.11 | NA | NA | NA | NA | NA | NA | NA | NA | NA | NA | NA | NA | NA |
| NA            | NA                 | NA | NA | NA | -2 | NA | NA | NA | NA | NA | NA | NA | NA | NA |
| LMX1B         | ENSG00000136944.17 | NA | NA | NA | NA | NA | NA | NA | NA | NA | NA | NA | NA | NA |
| NA            | NA                 | NA | NA | NA | -2 | NA | NA | NA | NA | NA | NA | NA | NA | NA |
| GOLGA2        | ENSG00000167110.17 | NA | NA | NA | NA | NA | NA | NA | NA | NA | NA | NA | NA | NA |

|               |                    |    |    |    |    |    |    |    |    |    |    |    |    |    |
|---------------|--------------------|----|----|----|----|----|----|----|----|----|----|----|----|----|
| NA            | NA                 | NA | NA | NA | -2 | NA |    |    |    |    |    |    |    |    |
| C9orf131      | ENSG00000174038.12 | NA | NA | NA | NA | NA | NA | NA | NA | NA | NA | NA | NA | NA |
| NA            | NA                 | NA | NA | NA | -2 | NA |    |    |    |    |    |    |    |    |
| OR1L8         | ENSG00000171496.3  | NA | NA | NA | NA | NA | NA | NA | NA | NA | NA | NA | NA | NA |
| NA            | NA                 | NA | NA | NA | -2 | NA |    |    |    |    |    |    |    |    |
| RAB14         | ENSG00000119396.10 | NA | NA | NA | NA | NA | NA | NA | NA | NA | NA | NA | NA | NA |
| NA            | NA                 | NA | NA | NA | -2 | NA |    |    |    |    |    |    |    |    |
| RP11-403N16.2 | ENSG00000232494.1  | NA | NA | NA | NA | NA | NA | NA | NA | NA | NA | NA | NA | NA |
| NA            | NA                 | NA | NA | NA | NA | -2 | NA |    |    |    |    |    |    |    |
| IDNK          | ENSG00000148057.15 | NA | NA | NA | NA | NA | NA | NA | NA | NA | NA | NA | NA | NA |
| NA            | NA                 | NA | NA | NA | -2 | NA |    |    |    |    |    |    |    |    |
| NACC2         | ENSG00000148411.7  | NA | NA | NA | NA | NA | NA | NA | NA | NA | NA | NA | NA | NA |
| NA            | NA                 | NA | NA | NA | -2 | NA |    |    |    |    |    |    |    |    |
| RP11-344B5.2  | ENSG00000224307.1  | NA | NA | NA | NA | NA | NA | NA | NA | NA | NA | NA | NA | NA |
| NA            | NA                 | NA | NA | NA | NA | -2 | NA |    |    |    |    |    |    |    |
| DMRT3         | ENSG00000064218.4  | NA | NA | NA | NA | NA | NA | NA | NA | NA | NA | NA | NA | NA |
| NA            | NA                 | NA | NA | NA | -2 | NA |    |    |    |    |    |    |    |    |
| MEGF9         | ENSG00000106780.8  | NA | NA | NA | NA | NA | NA | NA | NA | NA | NA | NA | NA | NA |
| NA            | NA                 | NA | NA | NA | -2 | NA |    |    |    |    |    |    |    |    |
| LHX3          | ENSG00000107187.15 | NA | NA | NA | NA | NA | NA | NA | NA | NA | NA | NA | NA | NA |
| NA            | NA                 | NA | NA | NA | -2 | NA |    |    |    |    |    |    |    |    |
| RPL35         | ENSG00000136942.14 | NA | NA | NA | NA | NA | NA | NA | NA | NA | NA | NA | NA | NA |
| NA            | NA                 | NA | NA | NA | -2 | NA |    |    |    |    |    |    |    |    |
| RP11-367F23.2 | ENSG00000260454.1  | NA | NA | NA | NA | NA | NA | NA | NA | NA | NA | NA | NA | NA |
| NA            | NA                 | NA | NA | NA | NA | -2 | NA |    |    |    |    |    |    |    |
| LHX6          | ENSG00000106852.15 | NA | NA | NA | NA | NA | NA | NA | NA | NA | NA | NA | NA | NA |
| NA            | NA                 | NA | NA | NA | -2 | NA |    |    |    |    |    |    |    |    |
| ASPN          | ENSG00000106819.11 | NA | NA | NA | NA | NA | NA | NA | NA | NA | NA | NA | NA | NA |
| NA            | NA                 | NA | NA | NA | -2 | NA |    |    |    |    |    |    |    |    |
| C9orf47       | ENSG00000186354.10 | NA | NA | NA | NA | NA | NA | NA | NA | NA | NA | NA | NA | NA |
| NA            | NA                 | NA | NA | NA | -2 | NA |    |    |    |    |    |    |    |    |
| C9orf163      | ENSG00000196366.3  | NA | NA | NA | NA | NA | NA | NA | NA | NA | NA | NA | NA | NA |
| NA            | NA                 | NA | NA | NA | -2 | NA |    |    |    |    |    |    |    |    |
| ANKS6         | ENSG00000165138.17 | NA | NA | NA | NA | NA | NA | NA | NA | NA | NA | NA | NA | NA |
| NA            | NA                 | NA | NA | NA | -2 | NA |    |    |    |    |    |    |    |    |
| NDUFB6        | ENSG00000165264.10 | NA | NA | NA | NA | NA | NA | NA | NA | NA | NA | NA | NA | NA |
| NA            | NA                 | NA | NA | NA | -2 | NA |    |    |    |    |    |    |    |    |
| SPACA9        | ENSG00000165698.15 | NA | NA | NA | NA | NA | NA | NA | NA | NA | NA | NA | NA | NA |
| NA            | NA                 | NA | NA | NA | -2 | NA |    |    |    |    |    |    |    |    |
| PPP1R26       | ENSG00000196422.10 | NA | NA | NA | NA | NA | NA | NA | NA | NA | NA | NA | NA | NA |
| NA            | NA                 | NA | NA | NA | -2 | NA |    |    |    |    |    |    |    |    |
| OR13C5        | ENSG00000277556.1  | NA | NA | NA | NA | NA | NA | NA | NA | NA | NA | NA | NA | NA |
| NA            | NA                 | NA | NA | NA | -2 | NA |    |    |    |    |    |    |    |    |
| UNQ6494       | ENSG00000237372.2  | NA | NA | NA | NA | NA | NA | NA | NA | NA | NA | NA | NA | NA |
| NA            | NA                 | NA | NA | NA | -2 | NA |    |    |    |    |    |    |    |    |
| SEC61B        | ENSG00000106803.9  | NA | NA | NA | NA | NA | NA | NA | NA | NA | NA | NA | NA | NA |
| NA            | NA                 | NA | NA | NA | -2 | NA |    |    |    |    |    |    |    |    |
| OR1J2         | ENSG00000197233.7  | NA | NA | NA | NA | NA | NA | NA | NA | NA | NA | NA | NA | NA |
| NA            | NA                 | NA | NA | NA | -2 | NA |    |    |    |    |    |    |    |    |
| RP11-180I4.2  | ENSG00000228142.2  | NA | NA | NA | NA | NA | NA | NA | NA | NA | NA | NA | NA | NA |
| NA            | NA                 | NA | NA | NA | NA | -2 | NA |    |    |    |    |    |    |    |
| BANCR         | ENSG00000278910.3  | NA | NA | NA | NA | NA | NA | NA | NA | NA | NA | NA | NA | NA |
| NA            | NA                 | NA | NA | NA | -2 | NA |    |    |    |    |    |    |    |    |
| TLE1          | ENSG00000196781.14 | NA | NA | NA | NA | NA | NA | NA | NA | NA | NA | NA | NA | NA |
| NA            | NA                 | NA | NA | NA | -2 | NA |    |    |    |    |    |    |    |    |
| ZFAND5        | ENSG00000107372.12 | NA | NA | NA | NA | NA | NA | NA | NA | NA | NA | NA | NA | NA |
| NA            | NA                 | NA | NA | NA | -2 | NA |    |    |    |    |    |    |    |    |
| RP11-436F21.1 | ENSG00000226566.2  | NA | NA | NA | NA | NA | NA | NA | NA | NA | NA | NA | NA | NA |
| NA            | NA                 | NA | NA | NA | NA | -2 | NA |    |    |    |    |    |    |    |
| PTGES         | ENSG00000148344.10 | NA | NA | NA | NA | NA | NA | NA | NA | NA | NA | NA | NA | NA |
| NA            | NA                 | NA | NA | NA | -2 | NA |    |    |    |    |    |    |    |    |
| GLT6D1        | ENSG00000204007.6  | NA | NA | NA | NA | NA | NA | NA | NA | NA | NA | NA | NA | NA |

|                  |                    |    |    |    |    |    |    |    |    |    |    |    |    |    |
|------------------|--------------------|----|----|----|----|----|----|----|----|----|----|----|----|----|
|                  | NA                 | NA | NA | NA | NA | -2 | NA |    |    |    |    |    |    |    |
| TLN1             | ENSG00000137076.20 |    |    |    |    | NA | NA | NA | NA | NA | NA | NA | NA | NA |
|                  | NA                 | NA | NA | NA | NA | -2 | NA |    |    |    |    |    |    |    |
| PHPT1            | ENSG00000054148.17 |    |    |    |    | NA | NA | NA | NA | NA | NA | NA | NA | NA |
|                  | NA                 | NA | NA | NA | NA | -2 | NA |    |    |    |    |    |    |    |
| OR1J4            | ENSG00000239590.1  |    |    |    |    | NA | NA | NA | NA | NA | NA | NA | NA | NA |
|                  | NA                 | NA | NA | NA | NA | -2 | NA |    |    |    |    |    |    |    |
| RP11-321L2.2     | ENSG00000237414.2  |    |    |    |    | NA | NA | NA | NA | NA | NA | NA | NA | NA |
|                  | NA                 | NA | NA | NA | NA | -2 | NA |    |    |    |    |    |    |    |
| ABCA2            | ENSG00000107331.16 |    |    |    |    | NA | NA | NA | NA | NA | NA | NA | NA | NA |
|                  | NA                 | NA | NA | NA | NA | -2 | NA |    |    |    |    |    |    |    |
| LINC01230        | ENSG00000281769.1  |    |    |    |    | NA | NA | NA | NA | NA | NA | NA | NA | NA |
|                  | NA                 | NA | NA | NA | NA | -2 | NA |    |    |    |    |    |    |    |
| GALNT12          | ENSG00000119514.6  |    |    |    |    | NA | NA | NA | NA | NA | NA | NA | NA | NA |
|                  | NA                 | NA | NA | NA | NA | -2 | NA |    |    |    |    |    |    |    |
| LL09NC01-139C3.1 | ENSG00000273473.1  |    |    |    |    | NA | NA | NA | NA | NA | NA | NA | NA | NA |
|                  | NA                 | NA | NA | NA | NA | -2 | NA |    |    |    |    |    |    |    |
| CLIC3            | ENSG00000169583.12 |    |    |    |    | NA | NA | NA | NA | NA | NA | NA | NA | NA |
|                  | NA                 | NA | NA | NA | NA | -2 | NA |    |    |    |    |    |    |    |
| CCL19            | ENSG00000172724.11 |    |    |    |    | NA | NA | NA | NA | NA | NA | NA | NA | NA |
|                  | NA                 | NA | NA | NA | NA | -2 | NA |    |    |    |    |    |    |    |
| BARX1-AS1        | ENSG00000235601.1  |    |    |    |    | NA | NA | NA | NA | NA | NA | NA | NA | NA |
|                  | NA                 | NA | NA | NA | NA | -2 | NA |    |    |    |    |    |    |    |
| 1-Dec            | ENSG00000173077.14 |    |    |    |    | NA | NA | NA | NA | NA | NA | NA | NA | NA |
|                  | NA                 | NA | NA | NA | NA | -2 | NA |    |    |    |    |    |    |    |
| FBP2             | ENSG00000130957.4  |    |    |    |    | NA | NA | NA | NA | NA | NA | NA | NA | NA |
|                  | NA                 | NA | NA | NA | NA | -2 | NA |    |    |    |    |    |    |    |
| RP11-546O6.4     | ENSG00000260677.1  |    |    |    |    | NA | NA | NA | NA | NA | NA | NA | NA | NA |
|                  | NA                 | NA | NA | NA | NA | -2 | NA |    |    |    |    |    |    |    |
| NIPSNAP3B        | ENSG00000165028.11 |    |    |    |    | NA | NA | NA | NA | NA | NA | NA | NA | NA |
|                  | NA                 | NA | NA | NA | NA | -2 | NA |    |    |    |    |    |    |    |
| RP11-349E4.1     | ENSG00000225050.1  |    |    |    |    | NA | NA | NA | NA | NA | NA | NA | NA | NA |
|                  | NA                 | NA | NA | NA | NA | -2 | NA |    |    |    |    |    |    |    |
| XXyac-YM21GA2.4  | ENSG00000234460.1  |    |    |    |    | NA | NA | NA | NA | NA | NA | NA | NA | NA |
|                  | NA                 | NA | NA | NA | NA | -2 | NA |    |    |    |    |    |    |    |
| RLN2             | ENSG00000107014.8  |    |    |    |    | NA | NA | NA | NA | NA | NA | NA | NA | NA |
|                  | NA                 | NA | NA | NA | NA | -2 | NA |    |    |    |    |    |    |    |
| OR13D1           | ENSG00000179055.6  |    |    |    |    | NA | NA | NA | NA | NA | NA | NA | NA | NA |
|                  | NA                 | NA | NA | NA | NA | -2 | NA |    |    |    |    |    |    |    |
| CDK9             | ENSG00000136807.13 |    |    |    |    | NA | NA | NA | NA | NA | NA | NA | NA | NA |
|                  | NA                 | NA | NA | NA | NA | -2 | NA |    |    |    |    |    |    |    |
| RP11-305L7.1     | ENSG00000230537.1  |    |    |    |    | NA | NA | NA | NA | NA | NA | NA | NA | NA |
|                  | NA                 | NA | NA | NA | NA | -2 | NA |    |    |    |    |    |    |    |
| TPRN             | ENSG00000176058.11 |    |    |    |    | NA | NA | NA | NA | NA | NA | NA | NA | NA |
|                  | NA                 | NA | NA | NA | NA | -2 | NA |    |    |    |    |    |    |    |
| SLC31A2          | ENSG00000136867.10 |    |    |    |    | NA | NA | NA | NA | NA | NA | NA | NA | NA |
|                  | NA                 | NA | NA | NA | NA | -2 | NA |    |    |    |    |    |    |    |
| NUTM2F           | ENSG00000130950.13 |    |    |    |    | NA | NA | NA | NA | NA | NA | NA | NA | NA |
|                  | NA                 | NA | NA | NA | NA | -2 | NA |    |    |    |    |    |    |    |
| RP11-18B16.2     | ENSG00000227482.1  |    |    |    |    | NA | NA | NA | NA | NA | NA | NA | NA | NA |
|                  | NA                 | NA | NA | NA | NA | -2 | NA |    |    |    |    |    |    |    |
| TOR4A            | ENSG00000198113.2  |    |    |    |    | NA | NA | NA | NA | NA | NA | NA | NA | NA |
|                  | NA                 | NA | NA | NA | NA | -2 | NA |    |    |    |    |    |    |    |
| TOPORS-AS1       | ENSG00000235453.8  |    |    |    |    | NA | NA | NA | NA | NA | NA | NA | NA | NA |
|                  | NA                 | NA | NA | NA | NA | -2 | NA |    |    |    |    |    |    |    |
| TRIM32           | ENSG00000119401.10 |    |    |    |    | NA | NA | NA | NA | NA | NA | NA | NA | NA |
|                  | NA                 | NA | NA | NA | NA | -2 | NA |    |    |    |    |    |    |    |
| ACTL7B           | ENSG00000148156.7  |    |    |    |    | NA | NA | NA | NA | NA | NA | NA | NA | NA |
|                  | NA                 | NA | NA | NA | NA | -2 | NA |    |    |    |    |    |    |    |
| TRAF2            | ENSG00000127191.17 |    |    |    |    | NA | NA | NA | NA | NA | NA | NA | NA | NA |
|                  | NA                 | NA | NA | NA | NA | -2 | NA |    |    |    |    |    |    |    |
| CREB3            | ENSG00000107175.11 |    |    |    |    | NA | NA | NA | NA | NA | NA | NA | NA | NA |

|               |                    |    |    |    |    |    |    |    |    |    |    |    |    |    |
|---------------|--------------------|----|----|----|----|----|----|----|----|----|----|----|----|----|
| NA            | NA                 | NA | NA | -2 | NA |    |    |    |    |    |    |    |    |    |
| TXNDC8        | ENSG00000204193.10 |    |    |    | NA | NA | NA | NA | NA | NA | NA | NA | NA | NA |
| NA            | NA                 | NA | NA | NA | -2 | NA |    |    |    |    |    |    |    |    |
| ZBTB26        | ENSG00000171448.8  |    |    |    | NA | NA | NA | NA | NA | NA | NA | NA | NA | NA |
| NA            | NA                 | NA | NA | NA | -2 | NA |    |    |    |    |    |    |    |    |
| LINC01235     | ENSG00000270547.5  |    |    |    | NA | NA | NA | NA | NA | NA | NA | NA | NA | NA |
| NA            | NA                 | NA | NA | NA | -2 | NA |    |    |    |    |    |    |    |    |
| PPP3R2        | ENSG00000188386.6  |    |    |    | NA | NA | NA | NA | NA | NA | NA | NA | NA | NA |
| NA            | NA                 | NA | NA | NA | -2 | NA |    |    |    |    |    |    |    |    |
| NR4A3         | ENSG00000119508.17 |    |    |    | NA | NA | NA | NA | NA | NA | NA | NA | NA | NA |
| NA            | NA                 | NA | NA | -2 | NA |    |    |    |    |    |    |    |    |    |
| TNFSF8        | ENSG00000106952.7  |    |    |    | NA | NA | NA | NA | NA | NA | NA | NA | NA | NA |
| NA            | NA                 | NA | NA | NA | -2 | NA |    |    |    |    |    |    |    |    |
| LINC01507     | ENSG00000230945.1  |    |    |    | NA | NA | NA | NA | NA | NA | NA | NA | NA | NA |
| NA            | NA                 | NA | NA | NA | -2 | NA |    |    |    |    |    |    |    |    |
| NDOR1         | ENSG00000188566.13 |    |    |    | NA | NA | NA | NA | NA | NA | NA | NA | NA | NA |
| NA            | NA                 | NA | NA | -2 | NA |    |    |    |    |    |    |    |    |    |
| FAM205C       | ENSG00000187791.12 |    |    |    | NA | NA | NA | NA | NA | NA | NA | NA | NA | NA |
| NA            | NA                 | NA | NA | NA | -2 | NA |    |    |    |    |    |    |    |    |
| RP11-359J6.1  | ENSG00000235819.1  |    |    |    | NA | NA | NA | NA | NA | NA | NA | NA | NA | NA |
| NA            | NA                 | NA | NA | NA | NA | -2 | NA |    |    |    |    |    |    |    |
| FSD1L         | ENSG00000106701.11 |    |    |    | NA | NA | NA | NA | NA | NA | NA | NA | NA | NA |
| NA            | NA                 | NA | NA | -2 | NA |    |    |    |    |    |    |    |    |    |
| RP11-2B6.2    | ENSG00000269929.1  |    |    |    | NA | NA | NA | NA | NA | NA | NA | NA | NA | NA |
| NA            | NA                 | NA | NA | NA | -2 | NA |    |    |    |    |    |    |    |    |
| NEK6          | ENSG00000119408.16 |    |    |    | NA | NA | NA | NA | NA | NA | NA | NA | NA | NA |
| NA            | NA                 | NA | NA | -2 | NA |    |    |    |    |    |    |    |    |    |
| SPATA31D4     | ENSG00000189357.8  |    |    |    | NA | NA | NA | NA | NA | NA | NA | NA | NA | NA |
| NA            | NA                 | NA | NA | NA | -2 | NA |    |    |    |    |    |    |    |    |
| OR1Q1         | ENSG00000165202.3  |    |    |    | NA | NA | NA | NA | NA | NA | NA | NA | NA | NA |
| NA            | NA                 | NA | NA | -2 | NA |    |    |    |    |    |    |    |    |    |
| DNAJB5-AS1    | ENSG00000281491.1  |    |    |    | NA | NA | NA | NA | NA | NA | NA | NA | NA | NA |
| NA            | NA                 | NA | NA | NA | -2 | NA |    |    |    |    |    |    |    |    |
| S1PR3         | ENSG00000213694.3  |    |    |    | NA | NA | NA | NA | NA | NA | NA | NA | NA | NA |
| NA            | NA                 | NA | NA | -2 | NA |    |    |    |    |    |    |    |    |    |
| RP11-370B11.3 | ENSG00000224549.1  |    |    |    | NA | NA | NA | NA | NA | NA | NA | NA | NA | NA |
| NA            | NA                 | NA | NA | NA | NA | -2 | NA |    |    |    |    |    |    |    |
| KIAA1161      | ENSG00000164976.8  |    |    |    | NA | NA | NA | NA | NA | NA | NA | NA | NA | NA |
| NA            | NA                 | NA | NA | NA | -2 | NA |    |    |    |    |    |    |    |    |
| EXOSC2        | ENSG00000130713.15 |    |    |    | NA | NA | NA | NA | NA | NA | NA | NA | NA | NA |
| NA            | NA                 | NA | NA | NA | -2 | NA |    |    |    |    |    |    |    |    |
| GABBR2        | ENSG00000136928.6  |    |    |    | NA | NA | NA | NA | NA | NA | NA | NA | NA | NA |
| NA            | NA                 | NA | NA | NA | -2 | NA |    |    |    |    |    |    |    |    |
| ANAPC2        | ENSG00000176248.8  |    |    |    | NA | NA | NA | NA | NA | NA | NA | NA | NA | NA |
| NA            | NA                 | NA | NA | NA | -2 | NA |    |    |    |    |    |    |    |    |
| RP11-77E14.2  | ENSG00000273056.1  |    |    |    | NA | NA | NA | NA | NA | NA | NA | NA | NA | NA |
| NA            | NA                 | NA | NA | NA | NA | -2 | NA |    |    |    |    |    |    |    |
| RFX3          | ENSG00000080298.15 |    |    |    | NA | NA | NA | NA | NA | NA | NA | NA | NA | NA |
| NA            | NA                 | NA | NA | -2 | NA |    |    |    |    |    |    |    |    |    |
| CLTA          | ENSG00000122705.16 |    |    |    | NA | NA | NA | NA | NA | NA | NA | NA | NA | NA |
| NA            | NA                 | NA | NA | -2 | NA |    |    |    |    |    |    |    |    |    |
| TNC           | ENSG00000041982.15 |    |    |    | NA | NA | NA | NA | NA | NA | NA | NA | NA | NA |
| NA            | NA                 | NA | NA | -2 | NA |    |    |    |    |    |    |    |    |    |
| SURF2         | ENSG00000148291.9  |    |    |    | NA | NA | NA | NA | NA | NA | NA | NA | NA | NA |
| NA            | NA                 | NA | NA | -2 | NA |    |    |    |    |    |    |    |    |    |
| ASS1          | ENSG00000130707.17 |    |    |    | NA | NA | NA | NA | NA | NA | NA | NA | NA | NA |
| NA            | NA                 | NA | NA | -2 | NA |    |    |    |    |    |    |    |    |    |
| TMEM38B       | ENSG00000095209.11 |    |    |    | NA | NA | NA | NA | NA | NA | NA | NA | NA | NA |
| NA            | NA                 | NA | NA | NA | -2 | NA |    |    |    |    |    |    |    |    |
| ZER1          | ENSG00000160445.10 |    |    |    | NA | NA | NA | NA | NA | NA | NA | NA | NA | NA |
| NA            | NA                 | NA | NA | -2 | NA |    |    |    |    |    |    |    |    |    |
| RP11-220I1.5  | ENSG00000260100.1  |    |    |    | NA | NA | NA | NA | NA | NA | NA | NA | NA | NA |

|               |                    |    |    |    |    |    |    |    |    |    |    |    |    |    |
|---------------|--------------------|----|----|----|----|----|----|----|----|----|----|----|----|----|
| NA            | NA                 | NA | NA | NA | NA | -2 | NA |    |    |    |    |    |    |    |
| PRKACG        | ENSG00000165059.7  |    |    |    |    | NA | NA | NA | NA | NA | NA | NA | NA | NA |
| NA            | NA                 | NA | NA | NA | NA | -2 | NA |    |    |    |    |    |    |    |
| RP11-27I1.4   | ENSG00000214654.7  |    |    |    |    | NA | NA | NA | NA | NA | NA | NA | NA | NA |
| NA            | NA                 | NA | NA | NA | NA | -2 | NA |    |    |    |    |    |    |    |
| PTCSC2        | ENSG00000236130.1  |    |    |    |    | NA | NA | NA | NA | NA | NA | NA | NA | NA |
| NA            | NA                 | NA | NA | NA | NA | -2 | NA |    |    |    |    |    |    |    |
| PCSK5         | ENSG00000099139.13 |    |    |    |    | NA | NA | NA | NA | NA | NA | NA | NA | NA |
| NA            | NA                 | NA | NA | NA | NA | -2 | NA |    |    |    |    |    |    |    |
| RRAGA         | ENSG00000155876.5  |    |    |    |    | NA | NA | NA | NA | NA | NA | NA | NA | NA |
| NA            | NA                 | NA | NA | NA | NA | -2 | NA |    |    |    |    |    |    |    |
| RC3H2         | ENSG00000056586.15 |    |    |    |    | NA | NA | NA | NA | NA | NA | NA | NA | NA |
| NA            | NA                 | NA | NA | NA | NA | -2 | NA |    |    |    |    |    |    |    |
| RP11-384P7.5  | ENSG00000227301.1  |    |    |    |    | NA | NA | NA | NA | NA | NA | NA | NA | NA |
| NA            | NA                 | NA | NA | NA | NA | -2 | NA |    |    |    |    |    |    |    |
| TDRD7         | ENSG00000196116.7  |    |    |    |    | NA | NA | NA | NA | NA | NA | NA | NA | NA |
| NA            | NA                 | NA | NA | NA | NA | -2 | NA |    |    |    |    |    |    |    |
| ZBTB5         | ENSG00000168795.4  |    |    |    |    | NA | NA | NA | NA | NA | NA | NA | NA | NA |
| NA            | NA                 | NA | NA | NA | NA | -2 | NA |    |    |    |    |    |    |    |
| SIT1          | ENSG00000137078.8  |    |    |    |    | NA | NA | NA | NA | NA | NA | NA | NA | NA |
| NA            | NA                 | NA | NA | NA | NA | -2 | NA |    |    |    |    |    |    |    |
| KIF27         | ENSG00000165115.14 |    |    |    |    | NA | NA | NA | NA | NA | NA | NA | NA | NA |
| NA            | NA                 | NA | NA | NA | NA | -2 | NA |    |    |    |    |    |    |    |
| ZBTB6         | ENSG00000186130.4  |    |    |    |    | NA | NA | NA | NA | NA | NA | NA | NA | NA |
| NA            | NA                 | NA | NA | NA | NA | -2 | NA |    |    |    |    |    |    |    |
| MUSK          | ENSG00000030304.13 |    |    |    |    | NA | NA | NA | NA | NA | NA | NA | NA | NA |
| NA            | NA                 | NA | NA | NA | NA | -2 | NA |    |    |    |    |    |    |    |
| RP11-74C3.1   | ENSG00000224935.1  |    |    |    |    | NA | NA | NA | NA | NA | NA | NA | NA | NA |
| NA            | NA                 | NA | NA | NA | NA | -2 | NA |    |    |    |    |    |    |    |
| SMARCA2       | ENSG00000080503.22 |    |    |    |    | NA | NA | NA | NA | NA | NA | NA | NA | NA |
| NA            | NA                 | NA | NA | NA | NA | -2 | NA |    |    |    |    |    |    |    |
| RP11-9M16.2   | ENSG00000235119.1  |    |    |    |    | NA | NA | NA | NA | NA | NA | NA | NA | NA |
| NA            | NA                 | NA | NA | NA | NA | -2 | NA |    |    |    |    |    |    |    |
| RP11-40A7.2   | ENSG00000283526.1  |    |    |    |    | NA | NA | NA | NA | NA | NA | NA | NA | NA |
| NA            | NA                 | NA | NA | NA | NA | -2 | NA |    |    |    |    |    |    |    |
| LCN2          | ENSG00000148346.11 |    |    |    |    | NA | NA | NA | NA | NA | NA | NA | NA | NA |
| NA            | NA                 | NA | NA | NA | NA | -2 | NA |    |    |    |    |    |    |    |
| C8G           | ENSG00000176919.11 |    |    |    |    | NA | NA | NA | NA | NA | NA | NA | NA | NA |
| NA            | NA                 | NA | NA | NA | NA | -2 | NA |    |    |    |    |    |    |    |
| INIP          | ENSG00000148153.13 |    |    |    |    | NA | NA | NA | NA | NA | NA | NA | NA | NA |
| NA            | NA                 | NA | NA | NA | NA | -2 | NA |    |    |    |    |    |    |    |
| AKAP2         | ENSG00000241978.9  |    |    |    |    | NA | NA | NA | NA | NA | NA | NA | NA | NA |
| NA            | NA                 | NA | NA | NA | NA | -2 | NA |    |    |    |    |    |    |    |
| SLC44A1       | ENSG00000070214.15 |    |    |    |    | NA | NA | NA | NA | NA | NA | NA | NA | NA |
| NA            | NA                 | NA | NA | NA | NA | -2 | NA |    |    |    |    |    |    |    |
| RP11-274B18.4 | ENSG00000226337.3  |    |    |    |    | NA | NA | NA | NA | NA | NA | NA | NA | NA |
| NA            | NA                 | NA | NA | NA | NA | -2 | NA |    |    |    |    |    |    |    |
| PTPDC1        | ENSG00000158079.14 |    |    |    |    | NA | NA | NA | NA | NA | NA | NA | NA | NA |
| NA            | NA                 | NA | NA | NA | NA | -2 | NA |    |    |    |    |    |    |    |
| RP11-402G3.3  | ENSG00000230601.6  |    |    |    |    | NA | NA | NA | NA | NA | NA | NA | NA | NA |
| NA            | NA                 | NA | NA | NA | NA | -2 | NA |    |    |    |    |    |    |    |
| C9orf66       | ENSG00000183784.6  |    |    |    |    | NA | NA | NA | NA | NA | NA | NA | NA | NA |
| NA            | NA                 | NA | NA | NA | NA | -2 | NA |    |    |    |    |    |    |    |
| RP11-205K6.1  | ENSG00000233721.1  |    |    |    |    | NA | NA | NA | NA | NA | NA | NA | NA | NA |
| NA            | NA                 | NA | NA | NA | NA | -2 | NA |    |    |    |    |    |    |    |
| TPD52L3       | ENSG00000170777.10 |    |    |    |    | NA | NA | NA | NA | NA | NA | NA | NA | NA |
| NA            | NA                 | NA | NA | NA | NA | -2 | NA |    |    |    |    |    |    |    |
| UBE2R2        | ENSG00000107341.4  |    |    |    |    | NA | NA | NA | NA | NA | NA | NA | NA | NA |
| NA            | NA                 | NA | NA | NA | NA | -2 | NA |    |    |    |    |    |    |    |
| IFNA6         | ENSG00000120235.4  |    |    |    |    | NA | NA | NA | NA | NA | NA | NA | NA | NA |
| NA            | NA                 | NA | NA | NA | NA | -2 | NA |    |    |    |    |    |    |    |
| FAM219A       | ENSG00000164970.14 |    |    |    |    | NA | NA | NA | NA | NA | NA | NA | NA | NA |

|               |                    |    |    |    |    |    |    |    |    |    |    |    |    |    |
|---------------|--------------------|----|----|----|----|----|----|----|----|----|----|----|----|----|
| NA            | NA                 | NA | NA | NA | -2 | NA | NA | NA | NA | NA | NA | NA | NA | NA |
| C9orf92       | ENSG00000205549.8  | NA | NA | NA | NA | NA | NA | NA | NA | NA | NA | NA | NA | NA |
| NA            | NA                 | NA | NA | NA | -2 | NA | NA | NA | NA | NA | NA | NA | NA | NA |
| PTGES2-AS1    | ENSG00000232850.3  | NA | NA | NA | NA | NA | NA | NA | NA | NA | NA | NA | NA | NA |
| NA            | NA                 | NA | NA | NA | -2 | NA | NA | NA | NA | NA | NA | NA | NA | NA |
| NOTCH1        | ENSG00000148400.9  | NA | NA | NA | NA | NA | NA | NA | NA | NA | NA | NA | NA | NA |
| NA            | NA                 | NA | NA | NA | -2 | NA | NA | NA | NA | NA | NA | NA | NA | NA |
| ACER2         | ENSG00000177076.5  | NA | NA | NA | NA | NA | NA | NA | NA | NA | NA | NA | NA | NA |
| NA            | NA                 | NA | NA | NA | -2 | NA | NA | NA | NA | NA | NA | NA | NA | NA |
| ZFP37         | ENSG00000136866.13 | NA | NA | NA | NA | NA | NA | NA | NA | NA | NA | NA | NA | NA |
| NA            | NA                 | NA | NA | NA | -2 | NA | NA | NA | NA | NA | NA | NA | NA | NA |
| PLPP6         | ENSG00000205808.5  | NA | NA | NA | NA | NA | NA | NA | NA | NA | NA | NA | NA | NA |
| NA            | NA                 | NA | NA | NA | -2 | NA | NA | NA | NA | NA | NA | NA | NA | NA |
| PGM5P3-AS1    | ENSG00000277631.4  | NA | NA | NA | NA | NA | NA | NA | NA | NA | NA | NA | NA | NA |
| NA            | NA                 | NA | NA | NA | -2 | NA | NA | NA | NA | NA | NA | NA | NA | NA |
| RP11-575I8.1  | ENSG00000260390.1  | NA | NA | NA | NA | NA | NA | NA | NA | NA | NA | NA | NA | NA |
| NA            | NA                 | NA | NA | NA | NA | -2 | NA | NA | NA | NA | NA | NA | NA | NA |
| RP11-495L19.1 | ENSG00000283982.1  | NA | NA | NA | NA | NA | NA | NA | NA | NA | NA | NA | NA | NA |
| NA            | NA                 | NA | NA | NA | NA | -2 | NA | NA | NA | NA | NA | NA | NA | NA |
| LINC01505     | ENSG00000234323.6  | NA | NA | NA | NA | NA | NA | NA | NA | NA | NA | NA | NA | NA |
| NA            | NA                 | NA | NA | NA | -2 | NA | NA | NA | NA | NA | NA | NA | NA | NA |
| DCAF12        | ENSG00000198876.12 | NA | NA | NA | NA | NA | NA | NA | NA | NA | NA | NA | NA | NA |
| NA            | NA                 | NA | NA | NA | -2 | NA | NA | NA | NA | NA | NA | NA | NA | NA |
| HNRNPK        | ENSG00000165119.20 | NA | NA | NA | NA | NA | NA | NA | NA | NA | NA | NA | NA | NA |
| NA            | NA                 | NA | NA | NA | -2 | NA | NA | NA | NA | NA | NA | NA | NA | NA |
| DOLPP1        | ENSG00000167130.17 | NA | NA | NA | NA | NA | NA | NA | NA | NA | NA | NA | NA | NA |
| NA            | NA                 | NA | NA | NA | -2 | NA | NA | NA | NA | NA | NA | NA | NA | NA |
| CCDC183       | ENSG00000213213.13 | NA | NA | NA | NA | NA | NA | NA | NA | NA | NA | NA | NA | NA |
| NA            | NA                 | NA | NA | NA | -2 | NA | NA | NA | NA | NA | NA | NA | NA | NA |
| SPOUT1        | ENSG00000198917.12 | NA | NA | NA | NA | NA | NA | NA | NA | NA | NA | NA | NA | NA |
| NA            | NA                 | NA | NA | NA | -2 | NA | NA | NA | NA | NA | NA | NA | NA | NA |
| TNFSF15       | ENSG00000181634.7  | NA | NA | NA | NA | NA | NA | NA | NA | NA | NA | NA | NA | NA |
| NA            | NA                 | NA | NA | NA | -2 | NA | NA | NA | NA | NA | NA | NA | NA | NA |
| DMRT1         | ENSG00000137090.11 | NA | NA | NA | NA | NA | NA | NA | NA | NA | NA | NA | NA | NA |
| NA            | NA                 | NA | NA | NA | -2 | NA | NA | NA | NA | NA | NA | NA | NA | NA |
| RP11-445L6.3  | ENSG00000234692.1  | NA | NA | NA | NA | NA | NA | NA | NA | NA | NA | NA | NA | NA |
| NA            | NA                 | NA | NA | NA | NA | -2 | NA | NA | NA | NA | NA | NA | NA | NA |
| B4GALT1       | ENSG00000086062.12 | NA | NA | NA | NA | NA | NA | NA | NA | NA | NA | NA | NA | NA |
| NA            | NA                 | NA | NA | NA | -2 | NA | NA | NA | NA | NA | NA | NA | NA | NA |
| RP11-435O5.7  | ENSG00000271384.1  | NA | NA | NA | NA | NA | NA | NA | NA | NA | NA | NA | NA | NA |
| NA            | NA                 | NA | NA | NA | NA | -2 | NA | NA | NA | NA | NA | NA | NA | NA |
| ACTL7A        | ENSG00000187003.6  | NA | NA | NA | NA | NA | NA | NA | NA | NA | NA | NA | NA | NA |
| NA            | NA                 | NA | NA | NA | -2 | NA | NA | NA | NA | NA | NA | NA | NA | NA |
| TRUB2         | ENSG00000167112.9  | NA | NA | NA | NA | NA | NA | NA | NA | NA | NA | NA | NA | NA |
| NA            | NA                 | NA | NA | NA | -2 | NA | NA | NA | NA | NA | NA | NA | NA | NA |
| PAX5          | ENSG00000196092.12 | NA | NA | NA | NA | NA | NA | NA | NA | NA | NA | NA | NA | NA |
| NA            | NA                 | NA | NA | NA | -2 | NA | NA | NA | NA | NA | NA | NA | NA | NA |
| PAEP          | ENSG00000122133.16 | NA | NA | NA | NA | NA | NA | NA | NA | NA | NA | NA | NA | NA |
| NA            | NA                 | NA | NA | NA | -2 | NA | NA | NA | NA | NA | NA | NA | NA | NA |
| RP11-132E11.2 | ENSG00000237153.2  | NA | NA | NA | NA | NA | NA | NA | NA | NA | NA | NA | NA | NA |
| NA            | NA                 | NA | NA | NA | NA | -2 | NA | NA | NA | NA | NA | NA | NA | NA |
| RP11-2B6.3    | ENSG00000269946.1  | NA | NA | NA | NA | NA | NA | NA | NA | NA | NA | NA | NA | NA |
| NA            | NA                 | NA | NA | NA | -2 | NA | NA | NA | NA | NA | NA | NA | NA | NA |
| TMEM261       | ENSG00000137038.7  | NA | NA | NA | NA | NA | NA | NA | NA | NA | NA | NA | NA | NA |
| NA            | NA                 | NA | NA | NA | -2 | NA | NA | NA | NA | NA | NA | NA | NA | NA |
| RABEPK        | ENSG00000136933.16 | NA | NA | NA | NA | NA | NA | NA | NA | NA | NA | NA | NA | NA |
| NA            | NA                 | NA | NA | NA | -2 | NA | NA | NA | NA | NA | NA | NA | NA | NA |
| DENND1A       | ENSG00000119522.16 | NA | NA | NA | NA | NA | NA | NA | NA | NA | NA | NA | NA | NA |
| NA            | NA                 | NA | NA | NA | -2 | NA | NA | NA | NA | NA | NA | NA | NA | NA |
| RP11-23D5.1   | ENSG00000230365.1  | NA | NA | NA | NA | NA | NA | NA | NA | NA | NA | NA | NA | NA |
| NA            | NA                 | NA | NA | NA | NA | -2 | NA | NA | NA | NA | NA | NA | NA | NA |
| SET           | ENSG00000119335.16 | NA | NA | NA | NA | NA | NA | NA | NA | NA | NA | NA | NA | NA |



|               |                    |    |    |    |    |    |    |    |    |    |    |    |    |    |
|---------------|--------------------|----|----|----|----|----|----|----|----|----|----|----|----|----|
| NA            | NA                 | NA | NA | -2 | NA |    |    |    |    |    |    |    |    |    |
| C9orf172      | ENSG00000232434.2  |    |    |    | NA | NA | NA | NA | NA | NA | NA | NA | NA | NA |
| NA            | NA                 | NA | NA | NA | -2 | NA |    |    |    |    |    |    |    |    |
| ALDH1A1       | ENSG00000165092.12 |    |    |    | NA | NA | NA | NA | NA | NA | NA | NA | NA | NA |
| NA            | NA                 | NA | NA | NA | -2 | NA |    |    |    |    |    |    |    |    |
| FAM225A       | ENSG00000231528.2  |    |    |    | NA | NA | NA | NA | NA | NA | NA | NA | NA | NA |
| NA            | NA                 | NA | NA | NA | -2 | NA |    |    |    |    |    |    |    |    |
| PAPPA         | ENSG00000182752.9  |    |    |    | NA | NA | NA | NA | NA | NA | NA | NA | NA | NA |
| NA            | NA                 | NA | NA | NA | -2 | NA |    |    |    |    |    |    |    |    |
| PTCH1         | ENSG00000185920.15 |    |    |    | NA | NA | NA | NA | NA | NA | NA | NA | NA | NA |
| NA            | NA                 | NA | NA | NA | -2 | NA |    |    |    |    |    |    |    |    |
| RP11-470F18.1 | ENSG00000236376.1  |    |    |    | NA | NA | NA | NA | NA | NA | NA | NA | NA | NA |
| NA            | NA                 | NA | NA | NA | -2 | NA |    |    |    |    |    |    |    |    |
| STOM          | ENSG00000148175.12 |    |    |    | NA | NA | NA | NA | NA | NA | NA | NA | NA | NA |
| NA            | NA                 | NA | NA | NA | -2 | NA |    |    |    |    |    |    |    |    |
| C9orf106      | ENSG00000179082.3  |    |    |    | NA | NA | NA | NA | NA | NA | NA | NA | NA | NA |
| NA            | NA                 | NA | NA | NA | -2 | NA |    |    |    |    |    |    |    |    |
| RP5-1050E16.2 | ENSG00000226206.1  |    |    |    | NA | NA | NA | NA | NA | NA | NA | NA | NA | NA |
| NA            | NA                 | NA | NA | NA | -2 | NA |    |    |    |    |    |    |    |    |
| HINT2         | ENSG00000137133.10 |    |    |    | NA | NA | NA | NA | NA | NA | NA | NA | NA | NA |
| NA            | NA                 | NA | NA | NA | -2 | NA |    |    |    |    |    |    |    |    |
| LINC01502     | ENSG00000237339.5  |    |    |    | NA | NA | NA | NA | NA | NA | NA | NA | NA | NA |
| NA            | NA                 | NA | NA | NA | -2 | NA |    |    |    |    |    |    |    |    |
| FBXW2         | ENSG00000119402.16 |    |    |    | NA | NA | NA | NA | NA | NA | NA | NA | NA | NA |
| NA            | NA                 | NA | NA | NA | -2 | NA |    |    |    |    |    |    |    |    |
| MIR4290HG     | ENSG00000227555.1  |    |    |    | NA | NA | NA | NA | NA | NA | NA | NA | NA | NA |
| NA            | NA                 | NA | NA | NA | -2 | NA |    |    |    |    |    |    |    |    |
| RNF20         | ENSG00000155827.11 |    |    |    | NA | NA | NA | NA | NA | NA | NA | NA | NA | NA |
| NA            | NA                 | NA | NA | NA | -2 | NA |    |    |    |    |    |    |    |    |
| RP11-527D15.1 | ENSG00000230920.1  |    |    |    | NA | NA | NA | NA | NA | NA | NA | NA | NA | NA |
| NA            | NA                 | NA | NA | NA | -2 | NA |    |    |    |    |    |    |    |    |
| TUSC1         | ENSG00000198680.4  |    |    |    | NA | NA | NA | NA | NA | NA | NA | NA | NA | NA |
| NA            | NA                 | NA | NA | NA | -2 | NA |    |    |    |    |    |    |    |    |
| TMEFF1        | ENSG00000241697.4  |    |    |    | NA | NA | NA | NA | NA | NA | NA | NA | NA | NA |
| NA            | NA                 | NA | NA | NA | -2 | NA |    |    |    |    |    |    |    |    |
| RP11-360A18.1 | ENSG00000225960.1  |    |    |    | NA | NA | NA | NA | NA | NA | NA | NA | NA | NA |
| NA            | NA                 | NA | NA | NA | -2 | NA |    |    |    |    |    |    |    |    |
| RP11-154D17.1 | ENSG00000233926.1  |    |    |    | NA | NA | NA | NA | NA | NA | NA | NA | NA | NA |
| NA            | NA                 | NA | NA | NA | -2 | NA |    |    |    |    |    |    |    |    |
| NTMT1         | ENSG00000148335.14 |    |    |    | NA | NA | NA | NA | NA | NA | NA | NA | NA | NA |
| NA            | NA                 | NA | NA | NA | -2 | NA |    |    |    |    |    |    |    |    |
| CYLC2         | ENSG00000155833.14 |    |    |    | NA | NA | NA | NA | NA | NA | NA | NA | NA | NA |
| NA            | NA                 | NA | NA | NA | -2 | NA |    |    |    |    |    |    |    |    |
| RP11-390F4.10 | ENSG00000229611.1  |    |    |    | NA | NA | NA | NA | NA | NA | NA | NA | NA | NA |
| NA            | NA                 | NA | NA | NA | -2 | NA |    |    |    |    |    |    |    |    |
| FAM120A       | ENSG00000048828.16 |    |    |    | NA | NA | NA | NA | NA | NA | NA | NA | NA | NA |
| NA            | NA                 | NA | NA | NA | -2 | NA |    |    |    |    |    |    |    |    |
| AUH           | ENSG00000148090.11 |    |    |    | NA | NA | NA | NA | NA | NA | NA | NA | NA | NA |
| NA            | NA                 | NA | NA | NA | -2 | NA |    |    |    |    |    |    |    |    |
| RP13-60M5.2   | ENSG00000228189.4  |    |    |    | NA | NA | NA | NA | NA | NA | NA | NA | NA | NA |
| NA            | NA                 | NA | NA | NA | -2 | NA |    |    |    |    |    |    |    |    |
| RP11-440G5.2  | ENSG00000233081.1  |    |    |    | NA | NA | NA | NA | NA | NA | NA | NA | NA | NA |
| NA            | NA                 | NA | NA | NA | -2 | NA |    |    |    |    |    |    |    |    |
| TBATA         | ENSG00000166220.12 |    |    |    | NA | NA | NA | NA | NA | NA | NA | NA | NA | NA |
| NA            | NA                 | NA | NA | NA | -2 | NA |    |    |    |    |    |    |    |    |
| GATA3         | ENSG00000107485.15 |    |    |    | NA | NA | NA | NA | NA | NA | NA | NA | NA | NA |
| NA            | NA                 | NA | NA | NA | -2 | NA |    |    |    |    |    |    |    |    |
| PLAU          | ENSG00000122861.15 |    |    |    | NA | NA | NA | NA | NA | NA | NA | NA | NA | NA |
| NA            | NA                 | NA | NA | NA | -2 | NA |    |    |    |    |    |    |    |    |
| LRRC18        | ENSG00000165383.11 |    |    |    | NA | NA | NA | NA | NA | NA | NA | NA | NA | NA |
| NA            | NA                 | NA | NA | NA | -2 | NA |    |    |    |    |    |    |    |    |
| BAMBI         | ENSG00000095739.10 |    |    |    | NA | NA | NA | NA | NA | NA | NA | NA | NA | NA |

|               |                    |    |    |    |    |    |    |    |    |    |    |    |    |    |
|---------------|--------------------|----|----|----|----|----|----|----|----|----|----|----|----|----|
| NA            | NA                 | NA | NA | -2 | NA |    |    |    |    |    |    |    |    |    |
| PLEKHS1       | ENSG00000148735.14 | NA | NA | NA | NA | NA | NA | NA | NA | NA | NA | NA | NA | NA |
| NA            | NA                 | NA | NA | NA | -2 | NA |    |    |    |    |    |    |    |    |
| DUSP5         | ENSG00000138166.5  | NA | NA | NA | NA | NA | NA | NA | NA | NA | NA | NA | NA | NA |
| NA            | NA                 | NA | NA | NA | -2 | NA |    |    |    |    |    |    |    |    |
| LINC00703     | ENSG00000224382.1  | NA | NA | NA | NA | NA | NA | NA | NA | NA | NA | NA | NA | NA |
| NA            | NA                 | NA | NA | NA | -2 | NA |    |    |    |    |    |    |    |    |
| LINC00708     | ENSG00000232170.5  | NA | NA | NA | NA | NA | NA | NA | NA | NA | NA | NA | NA | NA |
| NA            | NA                 | NA | NA | NA | -2 | NA |    |    |    |    |    |    |    |    |
| RP11-563J2.2  | ENSG00000215244.2  | NA | NA | NA | NA | NA | NA | NA | NA | NA | NA | NA | NA | NA |
| NA            | NA                 | NA | NA | NA | NA | -2 | NA |    |    |    |    |    |    |    |
| CFAP58        | ENSG00000120051.14 | NA | NA | NA | NA | NA | NA | NA | NA | NA | NA | NA | NA | NA |
| NA            | NA                 | NA | NA | NA | -2 | NA |    |    |    |    |    |    |    |    |
| FOXI2         | ENSG00000186766.7  | NA | NA | NA | NA | NA | NA | NA | NA | NA | NA | NA | NA | NA |
| NA            | NA                 | NA | NA | NA | -2 | NA |    |    |    |    |    |    |    |    |
| RP11-445P17.8 | ENSG00000224034.1  | NA | NA | NA | NA | NA | NA | NA | NA | NA | NA | NA | NA | NA |
| NA            | NA                 | NA | NA | NA | NA | -2 | NA |    |    |    |    |    |    |    |
| LIPM          | ENSG00000173239.13 | NA | NA | NA | NA | NA | NA | NA | NA | NA | NA | NA | NA | NA |
| NA            | NA                 | NA | NA | NA | -2 | NA |    |    |    |    |    |    |    |    |
| LINC01375     | ENSG00000226159.1  | NA | NA | NA | NA | NA | NA | NA | NA | NA | NA | NA | NA | NA |
| NA            | NA                 | NA | NA | NA | -2 | NA |    |    |    |    |    |    |    |    |
| LGI1          | ENSG00000108231.12 | NA | NA | NA | NA | NA | NA | NA | NA | NA | NA | NA | NA | NA |
| NA            | NA                 | NA | NA | NA | -2 | NA |    |    |    |    |    |    |    |    |
| LINC00705     | ENSG00000225269.2  | NA | NA | NA | NA | NA | NA | NA | NA | NA | NA | NA | NA | NA |
| NA            | NA                 | NA | NA | NA | -2 | NA |    |    |    |    |    |    |    |    |
| RP11-393J16.4 | ENSG00000226447.1  | NA | NA | NA | NA | NA | NA | NA | NA | NA | NA | NA | NA | NA |
| NA            | NA                 | NA | NA | NA | NA | -2 | NA |    |    |    |    |    |    |    |
| LINC01264     | ENSG00000229630.1  | NA | NA | NA | NA | NA | NA | NA | NA | NA | NA | NA | NA | NA |
| NA            | NA                 | NA | NA | NA | -2 | NA |    |    |    |    |    |    |    |    |
| ATE1          | ENSG00000107669.17 | NA | NA | NA | NA | NA | NA | NA | NA | NA | NA | NA | NA | NA |
| NA            | NA                 | NA | NA | NA | -2 | NA |    |    |    |    |    |    |    |    |
| COL17A1       | ENSG00000065618.18 | NA | NA | NA | NA | NA | NA | NA | NA | NA | NA | NA | NA | NA |
| NA            | NA                 | NA | NA | NA | -2 | NA |    |    |    |    |    |    |    |    |
| EIF4EBP2      | ENSG00000148730.6  | NA | NA | NA | NA | NA | NA | NA | NA | NA | NA | NA | NA | NA |
| NA            | NA                 | NA | NA | NA | -2 | NA |    |    |    |    |    |    |    |    |
| ZNF22         | ENSG00000165512.4  | NA | NA | NA | NA | NA | NA | NA | NA | NA | NA | NA | NA | NA |
| NA            | NA                 | NA | NA | NA | -2 | NA |    |    |    |    |    |    |    |    |
| HABP2         | ENSG00000148702.14 | NA | NA | NA | NA | NA | NA | NA | NA | NA | NA | NA | NA | NA |
| NA            | NA                 | NA | NA | NA | -2 | NA |    |    |    |    |    |    |    |    |
| STAMBPL1      | ENSG00000138134.11 | NA | NA | NA | NA | NA | NA | NA | NA | NA | NA | NA | NA | NA |
| NA            | NA                 | NA | NA | NA | -2 | NA |    |    |    |    |    |    |    |    |
| CDNF          | ENSG00000185267.9  | NA | NA | NA | NA | NA | NA | NA | NA | NA | NA | NA | NA | NA |
| NA            | NA                 | NA | NA | NA | -2 | NA |    |    |    |    |    |    |    |    |
| PIK3AP1       | ENSG00000155629.14 | NA | NA | NA | NA | NA | NA | NA | NA | NA | NA | NA | NA | NA |
| NA            | NA                 | NA | NA | NA | -2 | NA |    |    |    |    |    |    |    |    |
| MBL2          | ENSG00000165471.6  | NA | NA | NA | NA | NA | NA | NA | NA | NA | NA | NA | NA | NA |
| NA            | NA                 | NA | NA | NA | -2 | NA |    |    |    |    |    |    |    |    |
| KIF11         | ENSG00000138160.5  | NA | NA | NA | NA | NA | NA | NA | NA | NA | NA | NA | NA | NA |
| NA            | NA                 | NA | NA | NA | -2 | NA |    |    |    |    |    |    |    |    |
| HERC4         | ENSG00000148634.15 | NA | NA | NA | NA | NA | NA | NA | NA | NA | NA | NA | NA | NA |
| NA            | NA                 | NA | NA | NA | -2 | NA |    |    |    |    |    |    |    |    |
| OTUD1         | ENSG00000165312.6  | NA | NA | NA | NA | NA | NA | NA | NA | NA | NA | NA | NA | NA |
| NA            | NA                 | NA | NA | NA | -2 | NA |    |    |    |    |    |    |    |    |
| MRC1          | ENSG00000260314.2  | NA | NA | NA | NA | NA | NA | NA | NA | NA | NA | NA | NA | NA |
| NA            | NA                 | NA | NA | NA | -2 | NA |    |    |    |    |    |    |    |    |
| SRGN          | ENSG00000122862.4  | NA | NA | NA | NA | NA | NA | NA | NA | NA | NA | NA | NA | NA |
| NA            | NA                 | NA | NA | NA | -2 | NA |    |    |    |    |    |    |    |    |
| RP11-15K3.1   | ENSG00000236373.1  | NA | NA | NA | NA | NA | NA | NA | NA | NA | NA | NA | NA | NA |
| NA            | NA                 | NA | NA | NA | NA | -2 | NA |    |    |    |    |    |    |    |
| EBLN1         | ENSG00000223601.2  | NA | NA | NA | NA | NA | NA | NA | NA | NA | NA | NA | NA | NA |
| NA            | NA                 | NA | NA | NA | -2 | NA |    |    |    |    |    |    |    |    |
| DPCD          | ENSG00000166171.12 | NA | NA | NA | NA | NA | NA | NA | NA | NA | NA | NA | NA | NA |

|                    |                    |    |    |    |    |    |    |    |    |    |    |    |    |    |
|--------------------|--------------------|----|----|----|----|----|----|----|----|----|----|----|----|----|
|                    | NA                 | NA | NA | NA | -2 | NA |    |    |    |    |    |    |    |    |
| GDF2               | ENSG00000263761.2  |    |    |    |    | NA | NA | NA | NA | NA | NA | NA | NA | NA |
|                    | NA                 | NA | NA | NA | -2 | NA |    |    |    |    |    |    |    |    |
| RP11-109A6.3       | ENSG00000227374.1  |    |    |    |    | NA | NA | NA | NA | NA | NA | NA | NA | NA |
|                    | NA                 | NA | NA | NA | NA | -2 | NA |    |    |    |    |    |    |    |
| RP11-192P3.4       | ENSG00000272381.1  |    |    |    |    | NA | NA | NA | NA | NA | NA | NA | NA | NA |
|                    | NA                 | NA | NA | NA | NA | -2 | NA |    |    |    |    |    |    |    |
| NEUROG3            | ENSG00000122859.4  |    |    |    |    | NA | NA | NA | NA | NA | NA | NA | NA | NA |
|                    | NA                 | NA | NA | NA | NA | -2 | NA |    |    |    |    |    |    |    |
| RP11-433J20.1      | ENSG00000236990.1  |    |    |    |    | NA | NA | NA | NA | NA | NA | NA | NA | NA |
|                    | NA                 | NA | NA | NA | NA | -2 | NA |    |    |    |    |    |    |    |
| ABC11-4932300016.1 | ENSG00000283095.1  |    |    |    |    | NA | NA | NA | NA | NA | NA | NA | NA | NA |
|                    | NA                 | NA | NA | NA | NA | NA | -2 | NA |    |    |    |    |    |    |
| RP11-20J15.3       | ENSG00000229116.2  |    |    |    |    | NA | NA | NA | NA | NA | NA | NA | NA | NA |
|                    | NA                 | NA | NA | NA | NA | -2 | NA |    |    |    |    |    |    |    |
| PNLIP              | ENSG00000175535.6  |    |    |    |    | NA | NA | NA | NA | NA | NA | NA | NA | NA |
|                    | NA                 | NA | NA | NA | -2 | NA |    |    |    |    |    |    |    |    |
| ANKRD1             | ENSG00000148677.6  |    |    |    |    | NA | NA | NA | NA | NA | NA | NA | NA | NA |
|                    | NA                 | NA | NA | NA | NA | -2 | NA |    |    |    |    |    |    |    |
| LINP1              | ENSG00000223784.1  |    |    |    |    | NA | NA | NA | NA | NA | NA | NA | NA | NA |
|                    | NA                 | NA | NA | NA | -2 | NA |    |    |    |    |    |    |    |    |
| C10orf90           | ENSG00000154493.17 |    |    |    |    | NA | NA | NA | NA | NA | NA | NA | NA | NA |
|                    | NA                 | NA | NA | NA | NA | -2 | NA |    |    |    |    |    |    |    |
| WASHC2A            | ENSG00000099290.15 |    |    |    |    | NA | NA | NA | NA | NA | NA | NA | NA | NA |
|                    | NA                 | NA | NA | NA | NA | -2 | NA |    |    |    |    |    |    |    |
| SFTPA1             | ENSG00000122852.14 |    |    |    |    | NA | NA | NA | NA | NA | NA | NA | NA | NA |
|                    | NA                 | NA | NA | NA | NA | -2 | NA |    |    |    |    |    |    |    |
| A1CF               | ENSG00000148584.14 |    |    |    |    | NA | NA | NA | NA | NA | NA | NA | NA | NA |
|                    | NA                 | NA | NA | NA | -2 | NA |    |    |    |    |    |    |    |    |
| LRRTM3             | ENSG00000198739.10 |    |    |    |    | NA | NA | NA | NA | NA | NA | NA | NA | NA |
|                    | NA                 | NA | NA | NA | NA | -2 | NA |    |    |    |    |    |    |    |
| RP11-131N11.4      | ENSG00000254271.1  |    |    |    |    | NA | NA | NA | NA | NA | NA | NA | NA | NA |
|                    | NA                 | NA | NA | NA | NA | NA | -2 | NA |    |    |    |    |    |    |
| MLLT10             | ENSG00000078403.16 |    |    |    |    | NA | NA | NA | NA | NA | NA | NA | NA | NA |
|                    | NA                 | NA | NA | NA | NA | -2 | NA |    |    |    |    |    |    |    |
| CCNJ               | ENSG00000107443.15 |    |    |    |    | NA | NA | NA | NA | NA | NA | NA | NA | NA |
|                    | NA                 | NA | NA | NA | -2 | NA |    |    |    |    |    |    |    |    |
| RP11-598C10.1      | ENSG00000228048.1  |    |    |    |    | NA | NA | NA | NA | NA | NA | NA | NA | NA |
|                    | NA                 | NA | NA | NA | NA | NA | -2 | NA |    |    |    |    |    |    |
| SMC3               | ENSG00000108055.9  |    |    |    |    | NA | NA | NA | NA | NA | NA | NA | NA | NA |
|                    | NA                 | NA | NA | NA | -2 | NA |    |    |    |    |    |    |    |    |
| RP11-475D12.2      | ENSG00000224504.2  |    |    |    |    | NA | NA | NA | NA | NA | NA | NA | NA | NA |
|                    | NA                 | NA | NA | NA | NA | NA | -2 | NA |    |    |    |    |    |    |
| WDFY4              | ENSG00000128815.19 |    |    |    |    | NA | NA | NA | NA | NA | NA | NA | NA | NA |
|                    | NA                 | NA | NA | NA | -2 | NA |    |    |    |    |    |    |    |    |
| RP11-129J12.1      | ENSG00000228778.2  |    |    |    |    | NA | NA | NA | NA | NA | NA | NA | NA | NA |
|                    | NA                 | NA | NA | NA | NA | NA | -2 | NA |    |    |    |    |    |    |
| MMRN2              | ENSG00000173269.13 |    |    |    |    | NA | NA | NA | NA | NA | NA | NA | NA | NA |
|                    | NA                 | NA | NA | NA | -2 | NA |    |    |    |    |    |    |    |    |
| LYZL2              | ENSG00000151033.8  |    |    |    |    | NA | NA | NA | NA | NA | NA | NA | NA | NA |
|                    | NA                 | NA | NA | NA | -2 | NA |    |    |    |    |    |    |    |    |
| CDC123             | ENSG00000151465.13 |    |    |    |    | NA | NA | NA | NA | NA | NA | NA | NA | NA |
|                    | NA                 | NA | NA | NA | NA | -2 | NA |    |    |    |    |    |    |    |
| DDIT4              | ENSG00000168209.4  |    |    |    |    | NA | NA | NA | NA | NA | NA | NA | NA | NA |
|                    | NA                 | NA | NA | NA | -2 | NA |    |    |    |    |    |    |    |    |
| C10orf35           | ENSG00000171224.8  |    |    |    |    | NA | NA | NA | NA | NA | NA | NA | NA | NA |
|                    | NA                 | NA | NA | NA | NA | -2 | NA |    |    |    |    |    |    |    |
| RP11-168P8.5       | ENSG00000236769.1  |    |    |    |    | NA | NA | NA | NA | NA | NA | NA | NA | NA |
|                    | NA                 | NA | NA | NA | NA | NA | -2 | NA |    |    |    |    |    |    |
| ANTXR1             | ENSG00000274209.4  |    |    |    |    | NA | NA | NA | NA | NA | NA | NA | NA | NA |
|                    | NA                 | NA | NA | NA | NA | -2 | NA |    |    |    |    |    |    |    |
| DHX32              | ENSG00000089876.11 |    |    |    |    | NA | NA | NA | NA | NA | NA | NA | NA | NA |

|               |                    |    |    |    |    |    |    |    |    |    |    |    |    |    |
|---------------|--------------------|----|----|----|----|----|----|----|----|----|----|----|----|----|
|               | NA                 | NA | NA | NA | -2 | NA |    |    |    |    |    |    |    |    |
| CDK1          | ENSG00000170312.15 |    |    |    |    | NA | NA | NA | NA | NA | NA | NA | NA | NA |
|               | NA                 | NA | NA | NA | -2 | NA |    |    |    |    |    |    |    |    |
| KLLN          | ENSG00000227268.3  |    |    |    |    | NA | NA | NA | NA | NA | NA | NA | NA | NA |
|               | NA                 | NA | NA | NA | -2 | NA |    |    |    |    |    |    |    |    |
| RP11-135D11.2 | ENSG00000235140.1  |    |    |    |    | NA | NA | NA | NA | NA | NA | NA | NA | NA |
|               | NA                 | NA | NA | NA | NA | -2 | NA |    |    |    |    |    |    |    |
| GPR158        | ENSG00000151025.9  |    |    |    |    | NA | NA | NA | NA | NA | NA | NA | NA | NA |
|               | NA                 | NA | NA | NA | NA | -2 | NA |    |    |    |    |    |    |    |
| KIAA1462      | ENSG00000165757.8  |    |    |    |    | NA | NA | NA | NA | NA | NA | NA | NA | NA |
|               | NA                 | NA | NA | NA | NA | -2 | NA |    |    |    |    |    |    |    |
| PCAT5         | ENSG00000280719.1  |    |    |    |    | NA | NA | NA | NA | NA | NA | NA | NA | NA |
|               | NA                 | NA | NA | NA | -2 | NA |    |    |    |    |    |    |    |    |
| AFAP1L2       | ENSG00000169129.14 |    |    |    |    | NA | NA | NA | NA | NA | NA | NA | NA | NA |
|               | NA                 | NA | NA | NA | NA | -2 | NA |    |    |    |    |    |    |    |
| ELOVL3        | ENSG00000119915.4  |    |    |    |    | NA | NA | NA | NA | NA | NA | NA | NA | NA |
|               | NA                 | NA | NA | NA | NA | -2 | NA |    |    |    |    |    |    |    |
| RP11-153K11.3 | ENSG00000233590.1  |    |    |    |    | NA | NA | NA | NA | NA | NA | NA | NA | NA |
|               | NA                 | NA | NA | NA | NA | -2 | NA |    |    |    |    |    |    |    |
| DNAJB12       | ENSG00000148719.14 |    |    |    |    | NA | NA | NA | NA | NA | NA | NA | NA | NA |
|               | NA                 | NA | NA | NA | NA | -2 | NA |    |    |    |    |    |    |    |
| PSD           | ENSG00000059915.16 |    |    |    |    | NA | NA | NA | NA | NA | NA | NA | NA | NA |
|               | NA                 | NA | NA | NA | -2 | NA |    |    |    |    |    |    |    |    |
| PITX3         | ENSG00000107859.9  |    |    |    |    | NA | NA | NA | NA | NA | NA | NA | NA | NA |
|               | NA                 | NA | NA | NA | -2 | NA |    |    |    |    |    |    |    |    |
| BMI1          | ENSG00000168283.13 |    |    |    |    | NA | NA | NA | NA | NA | NA | NA | NA | NA |
|               | NA                 | NA | NA | NA | -2 | NA |    |    |    |    |    |    |    |    |
| DDX21         | ENSG00000165732.12 |    |    |    |    | NA | NA | NA | NA | NA | NA | NA | NA | NA |
|               | NA                 | NA | NA | NA | -2 | NA |    |    |    |    |    |    |    |    |
| C10orf91      | ENSG00000180066.9  |    |    |    |    | NA | NA | NA | NA | NA | NA | NA | NA | NA |
|               | NA                 | NA | NA | NA | NA | -2 | NA |    |    |    |    |    |    |    |
| MEIG1         | ENSG00000197889.9  |    |    |    |    | NA | NA | NA | NA | NA | NA | NA | NA | NA |
|               | NA                 | NA | NA | NA | -2 | NA |    |    |    |    |    |    |    |    |
| LINC00200     | ENSG00000229205.2  |    |    |    |    | NA | NA | NA | NA | NA | NA | NA | NA | NA |
|               | NA                 | NA | NA | NA | NA | -2 | NA |    |    |    |    |    |    |    |
| RAB18         | ENSG00000099246.16 |    |    |    |    | NA | NA | NA | NA | NA | NA | NA | NA | NA |
|               | NA                 | NA | NA | NA | -2 | NA |    |    |    |    |    |    |    |    |
| BAG3          | ENSG00000151929.9  |    |    |    |    | NA | NA | NA | NA | NA | NA | NA | NA | NA |
|               | NA                 | NA | NA | NA | -2 | NA |    |    |    |    |    |    |    |    |
| PSTK          | ENSG00000179988.13 |    |    |    |    | NA | NA | NA | NA | NA | NA | NA | NA | NA |
|               | NA                 | NA | NA | NA | -2 | NA |    |    |    |    |    |    |    |    |
| LINC01514     | ENSG00000237579.2  |    |    |    |    | NA | NA | NA | NA | NA | NA | NA | NA | NA |
|               | NA                 | NA | NA | NA | NA | -2 | NA |    |    |    |    |    |    |    |
| CAMK1D        | ENSG00000183049.12 |    |    |    |    | NA | NA | NA | NA | NA | NA | NA | NA | NA |
|               | NA                 | NA | NA | NA | NA | -2 | NA |    |    |    |    |    |    |    |
| RP11-351M16.3 | ENSG00000237128.1  |    |    |    |    | NA | NA | NA | NA | NA | NA | NA | NA | NA |
|               | NA                 | NA | NA | NA | NA | -2 | NA |    |    |    |    |    |    |    |
| MRPS16        | ENSG00000182180.13 |    |    |    |    | NA | NA | NA | NA | NA | NA | NA | NA | NA |
|               | NA                 | NA | NA | NA | NA | -2 | NA |    |    |    |    |    |    |    |
| RP11-38L15.8  | ENSG00000272430.1  |    |    |    |    | NA | NA | NA | NA | NA | NA | NA | NA | NA |
|               | NA                 | NA | NA | NA | NA | -2 | NA |    |    |    |    |    |    |    |
| OLAH          | ENSG00000152463.14 |    |    |    |    | NA | NA | NA | NA | NA | NA | NA | NA | NA |
|               | NA                 | NA | NA | NA | -2 | NA |    |    |    |    |    |    |    |    |
| LIPK          | ENSG00000204021.3  |    |    |    |    | NA | NA | NA | NA | NA | NA | NA | NA | NA |
|               | NA                 | NA | NA | NA | -2 | NA |    |    |    |    |    |    |    |    |
| PTF1A         | ENSG00000168267.6  |    |    |    |    | NA | NA | NA | NA | NA | NA | NA | NA | NA |
|               | NA                 | NA | NA | NA | -2 | NA |    |    |    |    |    |    |    |    |
| RP11-319F12.2 | ENSG00000227121.1  |    |    |    |    | NA | NA | NA | NA | NA | NA | NA | NA | NA |
|               | NA                 | NA | NA | NA | NA | -2 | NA |    |    |    |    |    |    |    |
| ZDHHC16       | ENSG00000171307.18 |    |    |    |    | NA | NA | NA | NA | NA | NA | NA | NA | NA |
|               | NA                 | NA | NA | NA | NA | -2 | NA |    |    |    |    |    |    |    |
| GOT1          | ENSG00000120053.10 |    |    |    |    | NA | NA | NA | NA | NA | NA | NA | NA | NA |

|               |                    |    |    |    |    |    |    |    |    |    |    |    |    |    |
|---------------|--------------------|----|----|----|----|----|----|----|----|----|----|----|----|----|
| NA            | NA                 | NA | NA | -2 | NA |    |    |    |    |    |    |    |    |    |
| EIF5AL1       | ENSG00000253626.3  |    |    |    | NA | NA | NA | NA | NA | NA | NA | NA | NA | NA |
| NA            | NA                 | NA | NA | NA | -2 | NA |    |    |    |    |    |    |    |    |
| RP11-748L13.6 | ENSG00000260151.1  |    |    |    | NA | NA | NA | NA | NA | NA | NA | NA | NA | NA |
| NA            | NA                 | NA | NA | NA | -2 | NA |    |    |    |    |    |    |    |    |
| RP11-138I18.2 | ENSG00000271046.1  |    |    |    | NA | NA | NA | NA | NA | NA | NA | NA | NA | NA |
| NA            | NA                 | NA | NA | NA | -2 | NA |    |    |    |    |    |    |    |    |
| RP11-534L6.2  | ENSG00000236800.1  |    |    |    | NA | NA | NA | NA | NA | NA | NA | NA | NA | NA |
| NA            | NA                 | NA | NA | NA | -2 | NA |    |    |    |    |    |    |    |    |
| MINPP1        | ENSG00000107789.15 |    |    |    | NA | NA | NA | NA | NA | NA | NA | NA | NA | NA |
| NA            | NA                 | NA | NA | NA | -2 | NA |    |    |    |    |    |    |    |    |
| IDI2          | ENSG00000148377.5  |    |    |    | NA | NA | NA | NA | NA | NA | NA | NA | NA | NA |
| NA            | NA                 | NA | NA | NA | -2 | NA |    |    |    |    |    |    |    |    |
| RP11-351M16.4 | ENSG00000282996.1  |    |    |    | NA | NA | NA | NA | NA | NA | NA | NA | NA | NA |
| NA            | NA                 | NA | NA | NA | -2 | NA |    |    |    |    |    |    |    |    |
| GRK5          | ENSG00000198873.11 |    |    |    | NA | NA | NA | NA | NA | NA | NA | NA | NA | NA |
| NA            | NA                 | NA | NA | NA | -2 | NA |    |    |    |    |    |    |    |    |
| RP11-478H13.1 | ENSG00000236716.1  |    |    |    | NA | NA | NA | NA | NA | NA | NA | NA | NA | NA |
| NA            | NA                 | NA | NA | NA | -2 | NA |    |    |    |    |    |    |    |    |
| SUV39H2       | ENSG00000152455.15 |    |    |    | NA | NA | NA | NA | NA | NA | NA | NA | NA | NA |
| NA            | NA                 | NA | NA | NA | -2 | NA |    |    |    |    |    |    |    |    |
| NDUFB8        | ENSG00000166136.15 |    |    |    | NA | NA | NA | NA | NA | NA | NA | NA | NA | NA |
| NA            | NA                 | NA | NA | NA | -2 | NA |    |    |    |    |    |    |    |    |
| C10orf53      | ENSG00000178645.12 |    |    |    | NA | NA | NA | NA | NA | NA | NA | NA | NA | NA |
| NA            | NA                 | NA | NA | NA | -2 | NA |    |    |    |    |    |    |    |    |
| LINC01374     | ENSG00000280560.1  |    |    |    | NA | NA | NA | NA | NA | NA | NA | NA | NA | NA |
| NA            | NA                 | NA | NA | NA | -2 | NA |    |    |    |    |    |    |    |    |
| RP11-139J15.5 | ENSG00000234244.1  |    |    |    | NA | NA | NA | NA | NA | NA | NA | NA | NA | NA |
| NA            | NA                 | NA | NA | NA | -2 | NA |    |    |    |    |    |    |    |    |
| SMNDC1        | ENSG00000119953.12 |    |    |    | NA | NA | NA | NA | NA | NA | NA | NA | NA | NA |
| NA            | NA                 | NA | NA | NA | -2 | NA |    |    |    |    |    |    |    |    |
| LINC01475     | ENSG00000257582.5  |    |    |    | NA | NA | NA | NA | NA | NA | NA | NA | NA | NA |
| NA            | NA                 | NA | NA | NA | -2 | NA |    |    |    |    |    |    |    |    |
| FAM175B       | ENSG00000165660.7  |    |    |    | NA | NA | NA | NA | NA | NA | NA | NA | NA | NA |
| NA            | NA                 | NA | NA | NA | -2 | NA |    |    |    |    |    |    |    |    |
| SEC24C        | ENSG00000176986.15 |    |    |    | NA | NA | NA | NA | NA | NA | NA | NA | NA | NA |
| NA            | NA                 | NA | NA | NA | -2 | NA |    |    |    |    |    |    |    |    |
| PLA2G12B      | ENSG00000138308.5  |    |    |    | NA | NA | NA | NA | NA | NA | NA | NA | NA | NA |
| NA            | NA                 | NA | NA | NA | -2 | NA |    |    |    |    |    |    |    |    |
| RP11-124O11.1 | ENSG00000234944.1  |    |    |    | NA | NA | NA | NA | NA | NA | NA | NA | NA | NA |
| NA            | NA                 | NA | NA | NA | -2 | NA |    |    |    |    |    |    |    |    |
| RP11-310E22.5 | ENSG00000231829.2  |    |    |    | NA | NA | NA | NA | NA | NA | NA | NA | NA | NA |
| NA            | NA                 | NA | NA | NA | -2 | NA |    |    |    |    |    |    |    |    |
| PDSS1         | ENSG00000148459.15 |    |    |    | NA | NA | NA | NA | NA | NA | NA | NA | NA | NA |
| NA            | NA                 | NA | NA | NA | -2 | NA |    |    |    |    |    |    |    |    |
| RP11-461K13.1 | ENSG00000226140.5  |    |    |    | NA | NA | NA | NA | NA | NA | NA | NA | NA | NA |
| NA            | NA                 | NA | NA | NA | -2 | NA |    |    |    |    |    |    |    |    |
| RP5-1031D4.2  | ENSG00000232591.1  |    |    |    | NA | NA | NA | NA | NA | NA | NA | NA | NA | NA |
| NA            | NA                 | NA | NA | NA | -2 | NA |    |    |    |    |    |    |    |    |
| LINC00702     | ENSG00000233117.2  |    |    |    | NA | NA | NA | NA | NA | NA | NA | NA | NA | NA |
| NA            | NA                 | NA | NA | NA | -2 | NA |    |    |    |    |    |    |    |    |
| PRR26         | ENSG00000180525.11 |    |    |    | NA | NA | NA | NA | NA | NA | NA | NA | NA | NA |
| NA            | NA                 | NA | NA | NA | -2 | NA |    |    |    |    |    |    |    |    |
| RP11-432J24.2 | ENSG00000231705.1  |    |    |    | NA | NA | NA | NA | NA | NA | NA | NA | NA | NA |
| NA            | NA                 | NA | NA | NA | -2 | NA |    |    |    |    |    |    |    |    |
| SIRT1         | ENSG00000096717.11 |    |    |    | NA | NA | NA | NA | NA | NA | NA | NA | NA | NA |
| NA            | NA                 | NA | NA | NA | -2 | NA |    |    |    |    |    |    |    |    |
| HNRNPF        | ENSG00000169813.16 |    |    |    | NA | NA | NA | NA | NA | NA | NA | NA | NA | NA |
| NA            | NA                 | NA | NA | NA | -2 | NA |    |    |    |    |    |    |    |    |
| RP11-85G18.6  | ENSG00000262412.1  |    |    |    | NA | NA | NA | NA | NA | NA | NA | NA | NA | NA |
| NA            | NA                 | NA | NA | NA | -2 | NA |    |    |    |    |    |    |    |    |
| PCGF6         | ENSG00000156374.14 |    |    |    | NA | NA | NA | NA | NA | NA | NA | NA | NA | NA |

|               |                    |    |    |    |    |    |    |    |    |    |    |    |    |    |
|---------------|--------------------|----|----|----|----|----|----|----|----|----|----|----|----|----|
| NA            | NA                 | NA | NA | -2 | NA |    |    |    |    |    |    |    |    |    |
| AP3M1         | ENSG00000185009.12 | NA | NA | NA | NA | NA | NA | NA | NA | NA | NA | NA | NA | NA |
| NA            | NA                 | NA | NA | -2 | NA |    |    |    |    |    |    |    |    |    |
| HNRNP3        | ENSG00000096746.17 | NA | NA | NA | NA | NA | NA | NA | NA | NA | NA | NA | NA | NA |
| NA            | NA                 | NA | NA | NA | -2 | NA |    |    |    |    |    |    |    |    |
| GDF10         | ENSG00000266524.2  | NA | NA | NA | NA | NA | NA | NA | NA | NA | NA | NA | NA | NA |
| NA            | NA                 | NA | NA | -2 | NA |    |    |    |    |    |    |    |    |    |
| CYP2C9        | ENSG00000138109.9  | NA | NA | NA | NA | NA | NA | NA | NA | NA | NA | NA | NA | NA |
| NA            | NA                 | NA | NA | NA | -2 | NA |    |    |    |    |    |    |    |    |
| RP11-179K3.2  | ENSG00000224714.2  | NA | NA | NA | NA | NA | NA | NA | NA | NA | NA | NA | NA | NA |
| NA            | NA                 | NA | NA | NA | NA | -2 | NA |    |    |    |    |    |    |    |
| C10orf95      | ENSG00000120055.7  | NA | NA | NA | NA | NA | NA | NA | NA | NA | NA | NA | NA | NA |
| NA            | NA                 | NA | NA | NA | -2 | NA |    |    |    |    |    |    |    |    |
| UBTD1         | ENSG00000165886.4  | NA | NA | NA | NA | NA | NA | NA | NA | NA | NA | NA | NA | NA |
| NA            | NA                 | NA | NA | -2 | NA |    |    |    |    |    |    |    |    |    |
| FAM25G        | ENSG00000189090.7  | NA | NA | NA | NA | NA | NA | NA | NA | NA | NA | NA | NA | NA |
| NA            | NA                 | NA | NA | NA | -2 | NA |    |    |    |    |    |    |    |    |
| VWA2          | ENSG00000165816.12 | NA | NA | NA | NA | NA | NA | NA | NA | NA | NA | NA | NA | NA |
| NA            | NA                 | NA | NA | -2 | NA |    |    |    |    |    |    |    |    |    |
| RP11-264E18.1 | ENSG00000234640.1  | NA | NA | NA | NA | NA | NA | NA | NA | NA | NA | NA | NA | NA |
| NA            | NA                 | NA | NA | NA | NA | -2 | NA |    |    |    |    |    |    |    |
| MSMB          | ENSG00000263639.5  | NA | NA | NA | NA | NA | NA | NA | NA | NA | NA | NA | NA | NA |
| NA            | NA                 | NA | NA | -2 | NA |    |    |    |    |    |    |    |    |    |
| LINC00840     | ENSG00000226808.1  | NA | NA | NA | NA | NA | NA | NA | NA | NA | NA | NA | NA | NA |
| NA            | NA                 | NA | NA | NA | -2 | NA |    |    |    |    |    |    |    |    |
| VTI1A         | ENSG00000151532.13 | NA | NA | NA | NA | NA | NA | NA | NA | NA | NA | NA | NA | NA |
| NA            | NA                 | NA | NA | -2 | NA |    |    |    |    |    |    |    |    |    |
| RP11-344L13.2 | ENSG00000233945.1  | NA | NA | NA | NA | NA | NA | NA | NA | NA | NA | NA | NA | NA |
| NA            | NA                 | NA | NA | NA | NA | -2 | NA |    |    |    |    |    |    |    |
| KLF6          | ENSG00000067082.14 | NA | NA | NA | NA | NA | NA | NA | NA | NA | NA | NA | NA | NA |
| NA            | NA                 | NA | NA | -2 | NA |    |    |    |    |    |    |    |    |    |
| NHLRC2        | ENSG00000196865.4  | NA | NA | NA | NA | NA | NA | NA | NA | NA | NA | NA | NA | NA |
| NA            | NA                 | NA | NA | NA | -2 | NA |    |    |    |    |    |    |    |    |
| CH17-360D5.2  | ENSG00000276850.4  | NA | NA | NA | NA | NA | NA | NA | NA | NA | NA | NA | NA | NA |
| NA            | NA                 | NA | NA | NA | NA | -2 | NA |    |    |    |    |    |    |    |
| GATA3-AS1     | ENSG00000197308.9  | NA | NA | NA | NA | NA | NA | NA | NA | NA | NA | NA | NA | NA |
| NA            | NA                 | NA | NA | NA | -2 | NA |    |    |    |    |    |    |    |    |
| MYPN          | ENSG00000138347.15 | NA | NA | NA | NA | NA | NA | NA | NA | NA | NA | NA | NA | NA |
| NA            | NA                 | NA | NA | -2 | NA |    |    |    |    |    |    |    |    |    |
| ANXA7         | ENSG00000138279.15 | NA | NA | NA | NA | NA | NA | NA | NA | NA | NA | NA | NA | NA |
| NA            | NA                 | NA | NA | -2 | NA |    |    |    |    |    |    |    |    |    |
| ZNF487        | ENSG00000243660.9  | NA | NA | NA | NA | NA | NA | NA | NA | NA | NA | NA | NA | NA |
| NA            | NA                 | NA | NA | NA | -2 | NA |    |    |    |    |    |    |    |    |
| LRIT1         | ENSG00000148602.5  | NA | NA | NA | NA | NA | NA | NA | NA | NA | NA | NA | NA | NA |
| NA            | NA                 | NA | NA | -2 | NA |    |    |    |    |    |    |    |    |    |
| LINC00841     | ENSG00000233395.1  | NA | NA | NA | NA | NA | NA | NA | NA | NA | NA | NA | NA | NA |
| NA            | NA                 | NA | NA | NA | -2 | NA |    |    |    |    |    |    |    |    |
| JMJD1C        | ENSG00000171988.18 | NA | NA | NA | NA | NA | NA | NA | NA | NA | NA | NA | NA | NA |
| NA            | NA                 | NA | NA | NA | -2 | NA |    |    |    |    |    |    |    |    |
| USMG5         | ENSG00000173915.14 | NA | NA | NA | NA | NA | NA | NA | NA | NA | NA | NA | NA | NA |
| NA            | NA                 | NA | NA | -2 | NA |    |    |    |    |    |    |    |    |    |
| RP11-445N18.5 | ENSG00000227683.1  | NA | NA | NA | NA | NA | NA | NA | NA | NA | NA | NA | NA | NA |
| NA            | NA                 | NA | NA | NA | NA | -2 | NA |    |    |    |    |    |    |    |
| SLC16A12      | ENSG00000152779.13 | NA | NA | NA | NA | NA | NA | NA | NA | NA | NA | NA | NA | NA |
| NA            | NA                 | NA | NA | NA | -2 | NA |    |    |    |    |    |    |    |    |
| UPF2          | ENSG00000151461.19 | NA | NA | NA | NA | NA | NA | NA | NA | NA | NA | NA | NA | NA |
| NA            | NA                 | NA | NA | -2 | NA |    |    |    |    |    |    |    |    |    |
| C10orf126     | ENSG00000204365.5  | NA | NA | NA | NA | NA | NA | NA | NA | NA | NA | NA | NA | NA |
| NA            | NA                 | NA | NA | NA | -2 | NA |    |    |    |    |    |    |    |    |
| MYOZ1         | ENSG00000177791.11 | NA | NA | NA | NA | NA | NA | NA | NA | NA | NA | NA | NA | NA |
| NA            | NA                 | NA | NA | -2 | NA |    |    |    |    |    |    |    |    |    |
| RP11-120C12.3 | ENSG00000234756.1  | NA | NA | NA | NA | NA | NA | NA | NA | NA | NA | NA | NA | NA |

|               |                    |    |    |    |    |    |    |    |    |    |    |    |    |    |
|---------------|--------------------|----|----|----|----|----|----|----|----|----|----|----|----|----|
| NA            | NA                 | NA | NA | NA | NA | -2 | NA |    |    |    |    |    |    |    |
| WAPL          | ENSG00000062650.17 | NA | NA | NA | NA | NA | NA | NA | NA | NA | NA | NA | NA | NA |
| NA            | NA                 | NA | NA | NA | NA | -2 | NA |    |    |    |    |    |    |    |
| LINC00843     | ENSG00000178440.5  | NA | NA | NA | NA | NA | NA | NA | NA | NA | NA | NA | NA | NA |
| NA            | NA                 | NA | NA | NA | NA | -2 | NA |    |    |    |    |    |    |    |
| RP11-179B15.5 | ENSG00000228527.1  | NA | NA | NA | NA | NA | NA | NA | NA | NA | NA | NA | NA | NA |
| NA            | NA                 | NA | NA | NA | NA | -2 | NA |    |    |    |    |    |    |    |
| ANXA8         | ENSG00000265190.6  | NA | NA | NA | NA | NA | NA | NA | NA | NA | NA | NA | NA | NA |
| NA            | NA                 | NA | NA | NA | NA | -2 | NA |    |    |    |    |    |    |    |
| CYP2C19       | ENSG00000165841.9  | NA | NA | NA | NA | NA | NA | NA | NA | NA | NA | NA | NA | NA |
| NA            | NA                 | NA | NA | NA | NA | -2 | NA |    |    |    |    |    |    |    |
| MKI67         | ENSG00000148773.13 | NA | NA | NA | NA | NA | NA | NA | NA | NA | NA | NA | NA | NA |
| NA            | NA                 | NA | NA | NA | NA | -2 | NA |    |    |    |    |    |    |    |
| P4HA1         | ENSG00000122884.12 | NA | NA | NA | NA | NA | NA | NA | NA | NA | NA | NA | NA | NA |
| NA            | NA                 | NA | NA | NA | NA | -2 | NA |    |    |    |    |    |    |    |
| RP11-56I23.1  | ENSG00000229466.1  | NA | NA | NA | NA | NA | NA | NA | NA | NA | NA | NA | NA | NA |
| NA            | NA                 | NA | NA | NA | NA | -2 | NA |    |    |    |    |    |    |    |
| TDRD1         | ENSG00000095627.9  | NA | NA | NA | NA | NA | NA | NA | NA | NA | NA | NA | NA | NA |
| NA            | NA                 | NA | NA | NA | NA | -2 | NA |    |    |    |    |    |    |    |
| RP11-464C19.3 | ENSG00000226005.3  | NA | NA | NA | NA | NA | NA | NA | NA | NA | NA | NA | NA | NA |
| NA            | NA                 | NA | NA | NA | NA | -2 | NA |    |    |    |    |    |    |    |
| RP11-398C13.6 | ENSG00000272853.1  | NA | NA | NA | NA | NA | NA | NA | NA | NA | NA | NA | NA | NA |
| NA            | NA                 | NA | NA | NA | NA | -2 | NA |    |    |    |    |    |    |    |
| DUPD1         | ENSG00000188716.5  | NA | NA | NA | NA | NA | NA | NA | NA | NA | NA | NA | NA | NA |
| NA            | NA                 | NA | NA | NA | NA | -2 | NA |    |    |    |    |    |    |    |
| PLXDC2        | ENSG00000120594.16 | NA | NA | NA | NA | NA | NA | NA | NA | NA | NA | NA | NA | NA |
| NA            | NA                 | NA | NA | NA | NA | -2 | NA |    |    |    |    |    |    |    |
| NFKB2         | ENSG00000077150.18 | NA | NA | NA | NA | NA | NA | NA | NA | NA | NA | NA | NA | NA |
| NA            | NA                 | NA | NA | NA | NA | -2 | NA |    |    |    |    |    |    |    |
| CPXM2         | ENSG00000121898.12 | NA | NA | NA | NA | NA | NA | NA | NA | NA | NA | NA | NA | NA |
| NA            | NA                 | NA | NA | NA | NA | -2 | NA |    |    |    |    |    |    |    |
| PCDH15        | ENSG00000150275.17 | NA | NA | NA | NA | NA | NA | NA | NA | NA | NA | NA | NA | NA |
| NA            | NA                 | NA | NA | NA | NA | -2 | NA |    |    |    |    |    |    |    |
| ANKRD22       | ENSG00000152766.5  | NA | NA | NA | NA | NA | NA | NA | NA | NA | NA | NA | NA | NA |
| NA            | NA                 | NA | NA | NA | NA | -2 | NA |    |    |    |    |    |    |    |
| LDB1          | ENSG00000198728.10 | NA | NA | NA | NA | NA | NA | NA | NA | NA | NA | NA | NA | NA |
| NA            | NA                 | NA | NA | NA | NA | -2 | NA |    |    |    |    |    |    |    |
| RP11-433J20.2 | ENSG00000227101.1  | NA | NA | NA | NA | NA | NA | NA | NA | NA | NA | NA | NA | NA |
| NA            | NA                 | NA | NA | NA | NA | -2 | NA |    |    |    |    |    |    |    |
| LIPF          | ENSG00000182333.14 | NA | NA | NA | NA | NA | NA | NA | NA | NA | NA | NA | NA | NA |
| NA            | NA                 | NA | NA | NA | NA | -2 | NA |    |    |    |    |    |    |    |
| RP13-463N16.6 | ENSG00000242147.1  | NA | NA | NA | NA | NA | NA | NA | NA | NA | NA | NA | NA | NA |
| NA            | NA                 | NA | NA | NA | NA | -2 | NA |    |    |    |    |    |    |    |
| TLX1          | ENSG00000107807.12 | NA | NA | NA | NA | NA | NA | NA | NA | NA | NA | NA | NA | NA |
| NA            | NA                 | NA | NA | NA | NA | -2 | NA |    |    |    |    |    |    |    |
| CEP55         | ENSG00000138180.15 | NA | NA | NA | NA | NA | NA | NA | NA | NA | NA | NA | NA | NA |
| NA            | NA                 | NA | NA | NA | NA | -2 | NA |    |    |    |    |    |    |    |
| NCOA4         | ENSG00000266412.5  | NA | NA | NA | NA | NA | NA | NA | NA | NA | NA | NA | NA | NA |
| NA            | NA                 | NA | NA | NA | NA | -2 | NA |    |    |    |    |    |    |    |
| ARMC3         | ENSG00000165309.13 | NA | NA | NA | NA | NA | NA | NA | NA | NA | NA | NA | NA | NA |
| NA            | NA                 | NA | NA | NA | NA | -2 | NA |    |    |    |    |    |    |    |
| SLC25A28      | ENSG00000155287.10 | NA | NA | NA | NA | NA | NA | NA | NA | NA | NA | NA | NA | NA |
| NA            | NA                 | NA | NA | NA | NA | -2 | NA |    |    |    |    |    |    |    |
| RP11-157J13.1 | ENSG00000283096.1  | NA | NA | NA | NA | NA | NA | NA | NA | NA | NA | NA | NA | NA |
| NA            | NA                 | NA | NA | NA | NA | -2 | NA |    |    |    |    |    |    |    |
| CC2D2B        | ENSG00000188649.12 | NA | NA | NA | NA | NA | NA | NA | NA | NA | NA | NA | NA | NA |
| NA            | NA                 | NA | NA | NA | NA | -2 | NA |    |    |    |    |    |    |    |
| AKR1C4        | ENSG00000198610.10 | NA | NA | NA | NA | NA | NA | NA | NA | NA | NA | NA | NA | NA |
| NA            | NA                 | NA | NA | NA | NA | -2 | NA |    |    |    |    |    |    |    |
| ADIRF         | ENSG00000148671.13 | NA | NA | NA | NA | NA | NA | NA | NA | NA | NA | NA | NA | NA |
| NA            | NA                 | NA | NA | NA | NA | -2 | NA |    |    |    |    |    |    |    |
| FAM24B        | ENSG00000213185.6  | NA | NA | NA | NA | NA | NA | NA | NA | NA | NA | NA | NA | NA |

|               |                    |    |    |    |    |    |    |    |    |    |    |    |    |    |
|---------------|--------------------|----|----|----|----|----|----|----|----|----|----|----|----|----|
| NA            | NA                 | NA | NA | NA | -2 | NA |    |    |    |    |    |    |    |    |
| C10orf99      | ENSG00000188373.4  |    |    |    | NA | NA | NA | NA | NA | NA | NA | NA | NA | NA |
| NA            | NA                 | NA | NA | NA | -2 | NA |    |    |    |    |    |    |    |    |
| MIR3663HG     | ENSG00000234474.2  |    |    |    | NA | NA | NA | NA | NA | NA | NA | NA | NA | NA |
| NA            | NA                 | NA | NA | NA | -2 | NA |    |    |    |    |    |    |    |    |
| RP11-80H5.6   | ENSG00000225836.1  |    |    |    | NA | NA | NA | NA | NA | NA | NA | NA | NA | NA |
| NA            | NA                 | NA | NA | NA | -2 | NA |    |    |    |    |    |    |    |    |
| LINC01153     | ENSG00000227143.1  |    |    |    | NA | NA | NA | NA | NA | NA | NA | NA | NA | NA |
| NA            | NA                 | NA | NA | NA | -2 | NA |    |    |    |    |    |    |    |    |
| PDLIM1        | ENSG00000107438.8  |    |    |    | NA | NA | NA | NA | NA | NA | NA | NA | NA | NA |
| NA            | NA                 | NA | NA | NA | -2 | NA |    |    |    |    |    |    |    |    |
| RAB11FIP2     | ENSG00000107560.10 |    |    |    | NA | NA | NA | NA | NA | NA | NA | NA | NA | NA |
| NA            | NA                 | NA | NA | NA | -2 | NA |    |    |    |    |    |    |    |    |
| CCNY          | ENSG00000108100.17 |    |    |    | NA | NA | NA | NA | NA | NA | NA | NA | NA | NA |
| NA            | NA                 | NA | NA | NA | -2 | NA |    |    |    |    |    |    |    |    |
| KCNIP2        | ENSG00000120049.18 |    |    |    | NA | NA | NA | NA | NA | NA | NA | NA | NA | NA |
| NA            | NA                 | NA | NA | NA | -2 | NA |    |    |    |    |    |    |    |    |
| RP11-318E3.9  | ENSG00000272764.1  |    |    |    | NA | NA | NA | NA | NA | NA | NA | NA | NA | NA |
| NA            | NA                 | NA | NA | NA | -2 | NA |    |    |    |    |    |    |    |    |
| ARMC4         | ENSG00000169126.15 |    |    |    | NA | NA | NA | NA | NA | NA | NA | NA | NA | NA |
| NA            | NA                 | NA | NA | NA | -2 | NA |    |    |    |    |    |    |    |    |
| FBXL15        | ENSG00000107872.12 |    |    |    | NA | NA | NA | NA | NA | NA | NA | NA | NA | NA |
| NA            | NA                 | NA | NA | NA | -2 | NA |    |    |    |    |    |    |    |    |
| RP11-4C20.3   | ENSG00000232259.1  |    |    |    | NA | NA | NA | NA | NA | NA | NA | NA | NA | NA |
| NA            | NA                 | NA | NA | NA | -2 | NA |    |    |    |    |    |    |    |    |
| HPS6          | ENSG00000166189.7  |    |    |    | NA | NA | NA | NA | NA | NA | NA | NA | NA | NA |
| NA            | NA                 | NA | NA | NA | -2 | NA |    |    |    |    |    |    |    |    |
| RP11-309N24.1 | ENSG00000227313.1  |    |    |    | NA | NA | NA | NA | NA | NA | NA | NA | NA | NA |
| NA            | NA                 | NA | NA | NA | -2 | NA |    |    |    |    |    |    |    |    |
| HECTD2        | ENSG00000165338.16 |    |    |    | NA | NA | NA | NA | NA | NA | NA | NA | NA | NA |
| NA            | NA                 | NA | NA | NA | -2 | NA |    |    |    |    |    |    |    |    |
| MCM10         | ENSG00000065328.16 |    |    |    | NA | NA | NA | NA | NA | NA | NA | NA | NA | NA |
| NA            | NA                 | NA | NA | NA | -2 | NA |    |    |    |    |    |    |    |    |
| SH3PXD2A      | ENSG00000107957.16 |    |    |    | NA | NA | NA | NA | NA | NA | NA | NA | NA | NA |
| NA            | NA                 | NA | NA | NA | -2 | NA |    |    |    |    |    |    |    |    |
| PTCHD3        | ENSG00000182077.10 |    |    |    | NA | NA | NA | NA | NA | NA | NA | NA | NA | NA |
| NA            | NA                 | NA | NA | NA | -2 | NA |    |    |    |    |    |    |    |    |
| RP11-432J24.5 | ENSG00000226900.1  |    |    |    | NA | NA | NA | NA | NA | NA | NA | NA | NA | NA |
| NA            | NA                 | NA | NA | NA | -2 | NA |    |    |    |    |    |    |    |    |
| IFIT2         | ENSG00000119922.9  |    |    |    | NA | NA | NA | NA | NA | NA | NA | NA | NA | NA |
| NA            | NA                 | NA | NA | NA | -2 | NA |    |    |    |    |    |    |    |    |
| C10orf71      | ENSG00000177354.11 |    |    |    | NA | NA | NA | NA | NA | NA | NA | NA | NA | NA |
| NA            | NA                 | NA | NA | NA | -2 | NA |    |    |    |    |    |    |    |    |
| ACTA2         | ENSG00000107796.13 |    |    |    | NA | NA | NA | NA | NA | NA | NA | NA | NA | NA |
| NA            | NA                 | NA | NA | NA | -2 | NA |    |    |    |    |    |    |    |    |
| CALML3        | ENSG00000178363.4  |    |    |    | NA | NA | NA | NA | NA | NA | NA | NA | NA | NA |
| NA            | NA                 | NA | NA | NA | -2 | NA |    |    |    |    |    |    |    |    |
| PRF1          | ENSG00000180644.7  |    |    |    | NA | NA | NA | NA | NA | NA | NA | NA | NA | NA |
| NA            | NA                 | NA | NA | NA | -2 | NA |    |    |    |    |    |    |    |    |
| COMMD3        | ENSG00000148444.15 |    |    |    | NA | NA | NA | NA | NA | NA | NA | NA | NA | NA |
| NA            | NA                 | NA | NA | NA | -2 | NA |    |    |    |    |    |    |    |    |
| ENO4          | ENSG00000188316.13 |    |    |    | NA | NA | NA | NA | NA | NA | NA | NA | NA | NA |
| NA            | NA                 | NA | NA | NA | -2 | NA |    |    |    |    |    |    |    |    |
| UCN3          | ENSG00000178473.6  |    |    |    | NA | NA | NA | NA | NA | NA | NA | NA | NA | NA |
| NA            | NA                 | NA | NA | NA | -2 | NA |    |    |    |    |    |    |    |    |
| CHCHD1        | ENSG00000172586.7  |    |    |    | NA | NA | NA | NA | NA | NA | NA | NA | NA | NA |
| NA            | NA                 | NA | NA | NA | -2 | NA |    |    |    |    |    |    |    |    |
| ANKRD30A      | ENSG00000148513.17 |    |    |    | NA | NA | NA | NA | NA | NA | NA | NA | NA | NA |
| NA            | NA                 | NA | NA | NA | -2 | NA |    |    |    |    |    |    |    |    |
| RP11-446F3.2  | ENSG00000234170.5  |    |    |    | NA | NA | NA | NA | NA | NA | NA | NA | NA | NA |
| NA            | NA                 | NA | NA | NA | -2 | NA |    |    |    |    |    |    |    |    |
| RP11-383C6.2  | ENSG00000236799.1  |    |    |    | NA | NA | NA | NA | NA | NA | NA | NA | NA | NA |



|               |                    |    |    |    |    |    |    |    |    |    |    |    |    |    |
|---------------|--------------------|----|----|----|----|----|----|----|----|----|----|----|----|----|
| NA            | NA                 | NA | NA | NA | NA | -2 | NA |    |    |    |    |    |    |    |
| RP11-402L1.11 | ENSG00000228426.1  |    |    |    |    | NA | NA | NA | NA | NA | NA | NA | NA | NA |
| NA            | NA                 | NA | NA | NA | NA | -2 | NA |    |    |    |    |    |    |    |
| C10orf113     | ENSG00000204683.10 |    |    |    |    | NA | NA | NA | NA | NA | NA | NA | NA | NA |
| NA            | NA                 | NA | NA | NA | NA | -2 | NA |    |    |    |    |    |    |    |
| LINC00867     | ENSG00000232139.5  |    |    |    |    | NA | NA | NA | NA | NA | NA | NA | NA | NA |
| NA            | NA                 | NA | NA | NA | NA | -2 | NA |    |    |    |    |    |    |    |
| RP11-38L15.2  | ENSG00000229227.8  |    |    |    |    | NA | NA | NA | NA | NA | NA | NA | NA | NA |
| NA            | NA                 | NA | NA | NA | NA | -2 | NA |    |    |    |    |    |    |    |
| SCD           | ENSG00000099194.5  |    |    |    |    | NA | NA | NA | NA | NA | NA | NA | NA | NA |
| NA            | NA                 | NA | NA | NA | NA | -2 | NA |    |    |    |    |    |    |    |
| ECHS1         | ENSG00000127884.4  |    |    |    |    | NA | NA | NA | NA | NA | NA | NA | NA | NA |
| NA            | NA                 | NA | NA | NA | NA | -2 | NA |    |    |    |    |    |    |    |
| FAM25A        | ENSG00000188100.8  |    |    |    |    | NA | NA | NA | NA | NA | NA | NA | NA | NA |
| NA            | NA                 | NA | NA | NA | NA | -2 | NA |    |    |    |    |    |    |    |
| PTEN          | ENSG00000171862.10 |    |    |    |    | NA | NA | NA | NA | NA | NA | NA | NA | NA |
| NA            | NA                 | NA | NA | NA | NA | -2 | NA |    |    |    |    |    |    |    |
| VENTX         | ENSG00000151650.7  |    |    |    |    | NA | NA | NA | NA | NA | NA | NA | NA | NA |
| NA            | NA                 | NA | NA | NA | NA | -2 | NA |    |    |    |    |    |    |    |
| TAF5          | ENSG00000148835.10 |    |    |    |    | NA | NA | NA | NA | NA | NA | NA | NA | NA |
| NA            | NA                 | NA | NA | NA | NA | -2 | NA |    |    |    |    |    |    |    |
| CH17-360D5.3  | ENSG00000273760.1  |    |    |    |    | NA | NA | NA | NA | NA | NA | NA | NA | NA |
| NA            | NA                 | NA | NA | NA | NA | -2 | NA |    |    |    |    |    |    |    |
| DHTKD1        | ENSG00000181192.11 |    |    |    |    | NA | NA | NA | NA | NA | NA | NA | NA | NA |
| NA            | NA                 | NA | NA | NA | NA | -2 | NA |    |    |    |    |    |    |    |
| LINC00700     | ENSG00000234962.5  |    |    |    |    | NA | NA | NA | NA | NA | NA | NA | NA | NA |
| NA            | NA                 | NA | NA | NA | NA | -2 | NA |    |    |    |    |    |    |    |
| LYZL1         | ENSG00000120563.8  |    |    |    |    | NA | NA | NA | NA | NA | NA | NA | NA | NA |
| NA            | NA                 | NA | NA | NA | NA | -2 | NA |    |    |    |    |    |    |    |
| FAM213A       | ENSG00000122378.13 |    |    |    |    | NA | NA | NA | NA | NA | NA | NA | NA | NA |
| NA            | NA                 | NA | NA | NA | NA | -2 | NA |    |    |    |    |    |    |    |
| RP11-236B18.2 | ENSG00000225519.1  |    |    |    |    | NA | NA | NA | NA | NA | NA | NA | NA | NA |
| NA            | NA                 | NA | NA | NA | NA | -2 | NA |    |    |    |    |    |    |    |
| IFIT1B        | ENSG00000204010.3  |    |    |    |    | NA | NA | NA | NA | NA | NA | NA | NA | NA |
| NA            | NA                 | NA | NA | NA | NA | -2 | NA |    |    |    |    |    |    |    |
| RP11-442O18.1 | ENSG00000232985.1  |    |    |    |    | NA | NA | NA | NA | NA | NA | NA | NA | NA |
| NA            | NA                 | NA | NA | NA | NA | -2 | NA |    |    |    |    |    |    |    |
| RP11-252C24.3 | ENSG00000282906.1  |    |    |    |    | NA | NA | NA | NA | NA | NA | NA | NA | NA |
| NA            | NA                 | NA | NA | NA | NA | -2 | NA |    |    |    |    |    |    |    |
| SORCS3        | ENSG00000156395.12 |    |    |    |    | NA | NA | NA | NA | NA | NA | NA | NA | NA |
| NA            | NA                 | NA | NA | NA | NA | -2 | NA |    |    |    |    |    |    |    |
| PNLIPRP1      | ENSG00000187021.14 |    |    |    |    | NA | NA | NA | NA | NA | NA | NA | NA | NA |
| NA            | NA                 | NA | NA | NA | NA | -2 | NA |    |    |    |    |    |    |    |
| RP11-253D19.1 | ENSG00000228800.1  |    |    |    |    | NA | NA | NA | NA | NA | NA | NA | NA | NA |
| NA            | NA                 | NA | NA | NA | NA | -2 | NA |    |    |    |    |    |    |    |
| EPC1          | ENSG00000120616.15 |    |    |    |    | NA | NA | NA | NA | NA | NA | NA | NA | NA |
| NA            | NA                 | NA | NA | NA | NA | -2 | NA |    |    |    |    |    |    |    |
| GOLGA7B       | ENSG00000155265.10 |    |    |    |    | NA | NA | NA | NA | NA | NA | NA | NA | NA |
| NA            | NA                 | NA | NA | NA | NA | -2 | NA |    |    |    |    |    |    |    |
| UCMA          | ENSG00000165623.9  |    |    |    |    | NA | NA | NA | NA | NA | NA | NA | NA | NA |
| NA            | NA                 | NA | NA | NA | NA | -2 | NA |    |    |    |    |    |    |    |
| C10orf88      | ENSG00000119965.12 |    |    |    |    | NA | NA | NA | NA | NA | NA | NA | NA | NA |
| NA            | NA                 | NA | NA | NA | NA | -2 | NA |    |    |    |    |    |    |    |
| RP11-464F9.22 | ENSG00000272791.1  |    |    |    |    | NA | NA | NA | NA | NA | NA | NA | NA | NA |
| NA            | NA                 | NA | NA | NA | NA | -2 | NA |    |    |    |    |    |    |    |
| LINC01163     | ENSG00000280953.2  |    |    |    |    | NA | NA | NA | NA | NA | NA | NA | NA | NA |
| NA            | NA                 | NA | NA | NA | NA | -2 | NA |    |    |    |    |    |    |    |
| RP11-462L8.1  | ENSG00000229656.6  |    |    |    |    | NA | NA | NA | NA | NA | NA | NA | NA | NA |
| NA            | NA                 | NA | NA | NA | NA | -2 | NA |    |    |    |    |    |    |    |
| SYNPO2L       | ENSG00000166317.11 |    |    |    |    | NA | NA | NA | NA | NA | NA | NA | NA | NA |
| NA            | NA                 | NA | NA | NA | NA | -2 | NA |    |    |    |    |    |    |    |
| C10orf55      | ENSG00000222047.8  |    |    |    |    | NA | NA | NA | NA | NA | NA | NA | NA | NA |

|               |                    |    |    |    |    |    |    |    |    |    |    |    |    |
|---------------|--------------------|----|----|----|----|----|----|----|----|----|----|----|----|
| NA            | NA                 | NA | NA | NA | -2 | NA | NA | NA | NA | NA | NA | NA | NA |
| MAP3K8        | ENSG00000107968.9  | NA | NA | NA | NA | NA | NA | NA | NA | NA | NA | NA | NA |
| NA            | NA                 | NA | NA | NA | -2 | NA | NA | NA | NA | NA | NA | NA | NA |
| LINC01519     | ENSG00000237267.1  | NA | NA | NA | NA | NA | NA | NA | NA | NA | NA | NA | NA |
| NA            | NA                 | NA | NA | NA | -2 | NA | NA | NA | NA | NA | NA | NA | NA |
| ACSM6         | ENSG00000173124.14 | NA | NA | NA | NA | NA | NA | NA | NA | NA | NA | NA | NA |
| NA            | NA                 | NA | NA | NA | -2 | NA | NA | NA | NA | NA | NA | NA | NA |
| GTPBP4        | ENSG00000107937.18 | NA | NA | NA | NA | NA | NA | NA | NA | NA | NA | NA | NA |
| NA            | NA                 | NA | NA | NA | -2 | NA | NA | NA | NA | NA | NA | NA | NA |
| FAM25C        | ENSG00000276430.2  | NA | NA | NA | NA | NA | NA | NA | NA | NA | NA | NA | NA |
| NA            | NA                 | NA | NA | NA | -2 | NA | NA | NA | NA | NA | NA | NA | NA |
| CPN1          | ENSG00000120054.11 | NA | NA | NA | NA | NA | NA | NA | NA | NA | NA | NA | NA |
| NA            | NA                 | NA | NA | NA | -2 | NA | NA | NA | NA | NA | NA | NA | NA |
| RP11-336A10.5 | ENSG00000231483.1  | NA | NA | NA | NA | NA | NA | NA | NA | NA | NA | NA | NA |
| NA            | NA                 | NA | NA | NA | NA | -2 | NA | NA | NA | NA | NA | NA | NA |
| RP11-598C10.2 | ENSG00000223800.1  | NA | NA | NA | NA | NA | NA | NA | NA | NA | NA | NA | NA |
| NA            | NA                 | NA | NA | NA | NA | -2 | NA | NA | NA | NA | NA | NA | NA |
| LINC00704     | ENSG00000231298.6  | NA | NA | NA | NA | NA | NA | NA | NA | NA | NA | NA | NA |
| NA            | NA                 | NA | NA | NA | -2 | NA | NA | NA | NA | NA | NA | NA | NA |
| CALY          | ENSG00000130643.8  | NA | NA | NA | NA | NA | NA | NA | NA | NA | NA | NA | NA |
| NA            | NA                 | NA | NA | NA | -2 | NA | NA | NA | NA | NA | NA | NA | NA |
| PNLIPRP3      | ENSG00000203837.4  | NA | NA | NA | NA | NA | NA | NA | NA | NA | NA | NA | NA |
| NA            | NA                 | NA | NA | NA | -2 | NA | NA | NA | NA | NA | NA | NA | NA |
| RP11-526P5.2  | ENSG00000235281.1  | NA | NA | NA | NA | NA | NA | NA | NA | NA | NA | NA | NA |
| NA            | NA                 | NA | NA | NA | NA | -2 | NA | NA | NA | NA | NA | NA | NA |
| RGS10         | ENSG00000148908.14 | NA | NA | NA | NA | NA | NA | NA | NA | NA | NA | NA | NA |
| NA            | NA                 | NA | NA | NA | -2 | NA | NA | NA | NA | NA | NA | NA | NA |
| LINC00993     | ENSG00000235687.8  | NA | NA | NA | NA | NA | NA | NA | NA | NA | NA | NA | NA |
| NA            | NA                 | NA | NA | NA | -2 | NA | NA | NA | NA | NA | NA | NA | NA |
| IDE           | ENSG00000119912.15 | NA | NA | NA | NA | NA | NA | NA | NA | NA | NA | NA | NA |
| NA            | NA                 | NA | NA | NA | -2 | NA | NA | NA | NA | NA | NA | NA | NA |
| IDI1          | ENSG00000067064.10 | NA | NA | NA | NA | NA | NA | NA | NA | NA | NA | NA | NA |
| NA            | NA                 | NA | NA | NA | -2 | NA | NA | NA | NA | NA | NA | NA | NA |
| RP11-297A16.4 | ENSG00000283000.1  | NA | NA | NA | NA | NA | NA | NA | NA | NA | NA | NA | NA |
| NA            | NA                 | NA | NA | NA | NA | -2 | NA | NA | NA | NA | NA | NA | NA |
| RP11-95I16.6  | ENSG00000278484.1  | NA | NA | NA | NA | NA | NA | NA | NA | NA | NA | NA | NA |
| NA            | NA                 | NA | NA | NA | NA | -2 | NA | NA | NA | NA | NA | NA | NA |
| VPS26A        | ENSG00000122958.14 | NA | NA | NA | NA | NA | NA | NA | NA | NA | NA | NA | NA |
| NA            | NA                 | NA | NA | NA | -2 | NA | NA | NA | NA | NA | NA | NA | NA |
| RP11-298H24.1 | ENSG00000229775.6  | NA | NA | NA | NA | NA | NA | NA | NA | NA | NA | NA | NA |
| NA            | NA                 | NA | NA | NA | NA | -2 | NA | NA | NA | NA | NA | NA | NA |
| TM9SF3        | ENSG00000077147.14 | NA | NA | NA | NA | NA | NA | NA | NA | NA | NA | NA | NA |
| NA            | NA                 | NA | NA | NA | -2 | NA | NA | NA | NA | NA | NA | NA | NA |
| RP11-90J7.3   | ENSG00000282863.1  | NA | NA | NA | NA | NA | NA | NA | NA | NA | NA | NA | NA |
| NA            | NA                 | NA | NA | NA | NA | -2 | NA | NA | NA | NA | NA | NA | NA |
| XPNPEP1       | ENSG00000108039.17 | NA | NA | NA | NA | NA | NA | NA | NA | NA | NA | NA | NA |
| NA            | NA                 | NA | NA | NA | -2 | NA | NA | NA | NA | NA | NA | NA | NA |
| FBXW4         | ENSG00000107829.13 | NA | NA | NA | NA | NA | NA | NA | NA | NA | NA | NA | NA |
| NA            | NA                 | NA | NA | NA | -2 | NA | NA | NA | NA | NA | NA | NA | NA |
| LINC01553     | ENSG00000235931.2  | NA | NA | NA | NA | NA | NA | NA | NA | NA | NA | NA | NA |
| NA            | NA                 | NA | NA | NA | -2 | NA | NA | NA | NA | NA | NA | NA | NA |
| ZSWIM8        | ENSG00000214655.10 | NA | NA | NA | NA | NA | NA | NA | NA | NA | NA | NA | NA |
| NA            | NA                 | NA | NA | NA | -2 | NA | NA | NA | NA | NA | NA | NA | NA |
| RASGEF1A      | ENSG00000198915.11 | NA | NA | NA | NA | NA | NA | NA | NA | NA | NA | NA | NA |
| NA            | NA                 | NA | NA | NA | -2 | NA | NA | NA | NA | NA | NA | NA | NA |
| MCMBP         | ENSG00000197771.12 | NA | NA | NA | NA | NA | NA | NA | NA | NA | NA | NA | NA |
| NA            | NA                 | NA | NA | NA | -2 | NA | NA | NA | NA | NA | NA | NA | NA |
| LINC01468     | ENSG00000231131.6  | NA | NA | NA | NA | NA | NA | NA | NA | NA | NA | NA | NA |
| NA            | NA                 | NA | NA | NA | -2 | NA | NA | NA | NA | NA | NA | NA | NA |
| RP11-336A10.4 | ENSG00000228951.1  | NA | NA | NA | NA | NA | NA | NA | NA | NA | NA | NA | NA |
| NA            | NA                 | NA | NA | NA | NA | -2 | NA | NA | NA | NA | NA | NA | NA |
| POLR3A        | ENSG00000148606.12 | NA | NA | NA | NA | NA | NA | NA | NA | NA | NA | NA | NA |

|                |                    |    |    |    |    |    |    |    |    |    |    |    |    |    |
|----------------|--------------------|----|----|----|----|----|----|----|----|----|----|----|----|----|
| NA             | NA                 | NA | NA | NA | -2 | NA |    |    |    |    |    |    |    |    |
| UBE2D1         | ENSG00000072401.14 |    |    |    |    | NA | NA | NA | NA | NA | NA | NA | NA | NA |
| NA             | NA                 | NA | NA | NA | -2 | NA |    |    |    |    |    |    |    |    |
| RP11-20F24.2   | ENSG00000234918.1  |    |    |    |    | NA | NA | NA | NA | NA | NA | NA | NA | NA |
| NA             | NA                 | NA | NA | NA | -2 | NA |    |    |    |    |    |    |    |    |
| RP11-399K21.13 | ENSG00000273248.1  |    |    |    |    | NA | NA | NA | NA | NA | NA | NA | NA | NA |
| NA             | NA                 | NA | NA | NA | -2 | NA |    |    |    |    |    |    |    |    |
| RP11-514F8.2   | ENSG00000231082.1  |    |    |    |    | NA | NA | NA | NA | NA | NA | NA | NA | NA |
| NA             | NA                 | NA | NA | NA | -2 | NA |    |    |    |    |    |    |    |    |
| LIPN           | ENSG00000204020.5  |    |    |    |    | NA | NA | NA | NA | NA | NA | NA | NA | NA |
| NA             | NA                 | NA | NA | NA | -2 | NA |    |    |    |    |    |    |    |    |
| RP11-57C13.6   | ENSG00000225913.2  |    |    |    |    | NA | NA | NA | NA | NA | NA | NA | NA | NA |
| NA             | NA                 | NA | NA | NA | -2 | NA |    |    |    |    |    |    |    |    |
| LINC00619      | ENSG00000204187.5  |    |    |    |    | NA | NA | NA | NA | NA | NA | NA | NA | NA |
| NA             | NA                 | NA | NA | NA | -2 | NA |    |    |    |    |    |    |    |    |
| ARHGAP21       | ENSG00000107863.17 |    |    |    |    | NA | NA | NA | NA | NA | NA | NA | NA | NA |
| NA             | NA                 | NA | NA | NA | -2 | NA |    |    |    |    |    |    |    |    |
| FAM24A         | ENSG00000203795.2  |    |    |    |    | NA | NA | NA | NA | NA | NA | NA | NA | NA |
| NA             | NA                 | NA | NA | NA | -2 | NA |    |    |    |    |    |    |    |    |
| SH2D4B         | ENSG00000178217.13 |    |    |    |    | NA | NA | NA | NA | NA | NA | NA | NA | NA |
| NA             | NA                 | NA | NA | NA | -2 | NA |    |    |    |    |    |    |    |    |
| EXOSC1         | ENSG00000171311.12 |    |    |    |    | NA | NA | NA | NA | NA | NA | NA | NA | NA |
| NA             | NA                 | NA | NA | NA | -2 | NA |    |    |    |    |    |    |    |    |
| E2F8           | ENSG00000129173.12 |    |    |    |    | NA | NA | NA | NA | NA | NA | NA | NA | NA |
| NA             | NA                 | NA | NA | NA | -2 | NA |    |    |    |    |    |    |    |    |
| PATL1          | ENSG00000166889.13 |    |    |    |    | NA | NA | NA | NA | NA | NA | NA | NA | NA |
| NA             | NA                 | NA | NA | NA | -2 | NA |    |    |    |    |    |    |    |    |
| LINC01001      | ENSG00000230724.9  |    |    |    |    | NA | NA | NA | NA | NA | NA | NA | NA | NA |
| NA             | NA                 | NA | NA | NA | -2 | NA |    |    |    |    |    |    |    |    |
| C11orf84       | ENSG00000168005.8  |    |    |    |    | NA | NA | NA | NA | NA | NA | NA | NA | NA |
| NA             | NA                 | NA | NA | NA | -2 | NA |    |    |    |    |    |    |    |    |
| NNMT           | ENSG00000166741.7  |    |    |    |    | NA | NA | NA | NA | NA | NA | NA | NA | NA |
| NA             | NA                 | NA | NA | NA | -2 | NA |    |    |    |    |    |    |    |    |
| C11orf16       | ENSG00000176029.13 |    |    |    |    | NA | NA | NA | NA | NA | NA | NA | NA | NA |
| NA             | NA                 | NA | NA | NA | -2 | NA |    |    |    |    |    |    |    |    |
| CD3E           | ENSG00000198851.9  |    |    |    |    | NA | NA | NA | NA | NA | NA | NA | NA | NA |
| NA             | NA                 | NA | NA | NA | -2 | NA |    |    |    |    |    |    |    |    |
| TAF10          | ENSG00000166337.9  |    |    |    |    | NA | NA | NA | NA | NA | NA | NA | NA | NA |
| NA             | NA                 | NA | NA | NA | -2 | NA |    |    |    |    |    |    |    |    |
| RPS13          | ENSG00000110700.6  |    |    |    |    | NA | NA | NA | NA | NA | NA | NA | NA | NA |
| NA             | NA                 | NA | NA | NA | -2 | NA |    |    |    |    |    |    |    |    |
| HIKESHI        | ENSG00000149196.15 |    |    |    |    | NA | NA | NA | NA | NA | NA | NA | NA | NA |
| NA             | NA                 | NA | NA | NA | -2 | NA |    |    |    |    |    |    |    |    |
| MMP26          | ENSG00000167346.7  |    |    |    |    | NA | NA | NA | NA | NA | NA | NA | NA | NA |
| NA             | NA                 | NA | NA | NA | -2 | NA |    |    |    |    |    |    |    |    |
| CARD17         | ENSG00000255221.3  |    |    |    |    | NA | NA | NA | NA | NA | NA | NA | NA | NA |
| NA             | NA                 | NA | NA | NA | -2 | NA |    |    |    |    |    |    |    |    |
| MS4A3          | ENSG00000149516.13 |    |    |    |    | NA | NA | NA | NA | NA | NA | NA | NA | NA |
| NA             | NA                 | NA | NA | NA | -2 | NA |    |    |    |    |    |    |    |    |
| FAT3           | ENSG00000165323.15 |    |    |    |    | NA | NA | NA | NA | NA | NA | NA | NA | NA |
| NA             | NA                 | NA | NA | NA | -2 | NA |    |    |    |    |    |    |    |    |
| RP11-168K9.1   | ENSG00000255546.1  |    |    |    |    | NA | NA | NA | NA | NA | NA | NA | NA | NA |
| NA             | NA                 | NA | NA | NA | -2 | NA |    |    |    |    |    |    |    |    |
| SESN3          | ENSG00000149212.11 |    |    |    |    | NA | NA | NA | NA | NA | NA | NA | NA | NA |
| NA             | NA                 | NA | NA | NA | -2 | NA |    |    |    |    |    |    |    |    |
| MOGAT2         | ENSG00000166391.14 |    |    |    |    | NA | NA | NA | NA | NA | NA | NA | NA | NA |
| NA             | NA                 | NA | NA | NA | -2 | NA |    |    |    |    |    |    |    |    |
| APOC3          | ENSG00000110245.11 |    |    |    |    | NA | NA | NA | NA | NA | NA | NA | NA | NA |
| NA             | NA                 | NA | NA | NA | -2 | NA |    |    |    |    |    |    |    |    |
| C11orf44       | ENSG00000175728.4  |    |    |    |    | NA | NA | NA | NA | NA | NA | NA | NA | NA |
| NA             | NA                 | NA | NA | NA | -2 | NA |    |    |    |    |    |    |    |    |
| CCDC83         | ENSG00000150676.12 |    |    |    |    | NA | NA | NA | NA | NA | NA | NA | NA | NA |

|               |                    |    |    |    |    |    |    |    |    |    |    |    |    |    |
|---------------|--------------------|----|----|----|----|----|----|----|----|----|----|----|----|----|
| NA            | NA                 | NA | NA | NA | -2 | NA |    |    |    |    |    |    |    |    |
| OR9G4         | ENSG00000172457.5  |    |    | NA | NA | NA | NA | NA | NA | NA | NA | NA | NA | NA |
| NA            | NA                 | NA | NA | NA | -2 | NA |    |    |    |    |    |    |    |    |
| AP003774.4    | ENSG00000181908.5  |    |    | NA | NA | NA | NA | NA | NA | NA | NA | NA | NA | NA |
| NA            | NA                 | NA | NA | NA | -2 | NA |    |    |    |    |    |    |    |    |
| GLYATL1       | ENSG00000166840.13 |    |    | NA | NA | NA | NA | NA | NA | NA | NA | NA | NA | NA |
| NA            | NA                 | NA | NA | NA | -2 | NA |    |    |    |    |    |    |    |    |
| DENND5A       | ENSG00000184014.7  |    |    | NA | NA | NA | NA | NA | NA | NA | NA | NA | NA | NA |
| NA            | NA                 | NA | NA | NA | -2 | NA |    |    |    |    |    |    |    |    |
| SORL1         | ENSG00000137642.12 |    |    | NA | NA | NA | NA | NA | NA | NA | NA | NA | NA | NA |
| NA            | NA                 | NA | NA | NA | -2 | NA |    |    |    |    |    |    |    |    |
| CLMP          | ENSG00000166250.11 |    |    | NA | NA | NA | NA | NA | NA | NA | NA | NA | NA | NA |
| NA            | NA                 | NA | NA | NA | -2 | NA |    |    |    |    |    |    |    |    |
| TEAD1         | ENSG00000187079.16 |    |    | NA | NA | NA | NA | NA | NA | NA | NA | NA | NA | NA |
| NA            | NA                 | NA | NA | NA | -2 | NA |    |    |    |    |    |    |    |    |
| OR8G1         | ENSG00000197849.5  |    |    | NA | NA | NA | NA | NA | NA | NA | NA | NA | NA | NA |
| NA            | NA                 | NA | NA | NA | -2 | NA |    |    |    |    |    |    |    |    |
| LGR4          | ENSG00000205213.13 |    |    | NA | NA | NA | NA | NA | NA | NA | NA | NA | NA | NA |
| NA            | NA                 | NA | NA | NA | -2 | NA |    |    |    |    |    |    |    |    |
| JRKL-AS1      | ENSG00000255679.1  |    |    | NA | NA | NA | NA | NA | NA | NA | NA | NA | NA | NA |
| NA            | NA                 | NA | NA | NA | -2 | NA |    |    |    |    |    |    |    |    |
| PHF21A        | ENSG00000135365.15 |    |    | NA | NA | NA | NA | NA | NA | NA | NA | NA | NA | NA |
| NA            | NA                 | NA | NA | NA | -2 | NA |    |    |    |    |    |    |    |    |
| OR51B6        | ENSG00000176239.7  |    |    | NA | NA | NA | NA | NA | NA | NA | NA | NA | NA | NA |
| NA            | NA                 | NA | NA | NA | -2 | NA |    |    |    |    |    |    |    |    |
| PPP2R5B       | ENSG00000068971.13 |    |    | NA | NA | NA | NA | NA | NA | NA | NA | NA | NA | NA |
| NA            | NA                 | NA | NA | NA | -2 | NA |    |    |    |    |    |    |    |    |
| CTD-2523D13.1 | ENSG00000255247.1  |    |    | NA | NA | NA | NA | NA | NA | NA | NA | NA | NA | NA |
| NA            | NA                 | NA | NA | NA | NA | -2 | NA |    |    |    |    |    |    |    |
| ZBTB44        | ENSG00000196323.12 |    |    | NA | NA | NA | NA | NA | NA | NA | NA | NA | NA | NA |
| NA            | NA                 | NA | NA | NA | -2 | NA |    |    |    |    |    |    |    |    |
| FJX1          | ENSG00000179431.6  |    |    | NA | NA | NA | NA | NA | NA | NA | NA | NA | NA | NA |
| NA            | NA                 | NA | NA | NA | -2 | NA |    |    |    |    |    |    |    |    |
| DGKZ          | ENSG00000149091.15 |    |    | NA | NA | NA | NA | NA | NA | NA | NA | NA | NA | NA |
| NA            | NA                 | NA | NA | NA | -2 | NA |    |    |    |    |    |    |    |    |
| MYRF          | ENSG00000124920.13 |    |    | NA | NA | NA | NA | NA | NA | NA | NA | NA | NA | NA |
| NA            | NA                 | NA | NA | NA | -2 | NA |    |    |    |    |    |    |    |    |
| NTM-AS1       | ENSG00000224795.1  |    |    | NA | NA | NA | NA | NA | NA | NA | NA | NA | NA | NA |
| NA            | NA                 | NA | NA | NA | -2 | NA |    |    |    |    |    |    |    |    |
| RP11-119D9.1  | ENSG00000251637.6  |    |    | NA | NA | NA | NA | NA | NA | NA | NA | NA | NA | NA |
| NA            | NA                 | NA | NA | NA | NA | -2 | NA |    |    |    |    |    |    |    |
| OR8A1         | ENSG00000196119.6  |    |    | NA | NA | NA | NA | NA | NA | NA | NA | NA | NA | NA |
| NA            | NA                 | NA | NA | NA | -2 | NA |    |    |    |    |    |    |    |    |
| NLRX1         | ENSG00000160703.15 |    |    | NA | NA | NA | NA | NA | NA | NA | NA | NA | NA | NA |
| NA            | NA                 | NA | NA | NA | -2 | NA |    |    |    |    |    |    |    |    |
| OR52N4        | ENSG00000181074.3  |    |    | NA | NA | NA | NA | NA | NA | NA | NA | NA | NA | NA |
| NA            | NA                 | NA | NA | NA | -2 | NA |    |    |    |    |    |    |    |    |
| ZBTB3         | ENSG00000185670.7  |    |    | NA | NA | NA | NA | NA | NA | NA | NA | NA | NA | NA |
| NA            | NA                 | NA | NA | NA | -2 | NA |    |    |    |    |    |    |    |    |
| MS4A6E        | ENSG00000166926.8  |    |    | NA | NA | NA | NA | NA | NA | NA | NA | NA | NA | NA |
| NA            | NA                 | NA | NA | NA | -2 | NA |    |    |    |    |    |    |    |    |
| RP11-326C3.14 | ENSG00000270105.1  |    |    | NA | NA | NA | NA | NA | NA | NA | NA | NA | NA | NA |
| NA            | NA                 | NA | NA | NA | NA | -2 | NA |    |    |    |    |    |    |    |
| PELI3         | ENSG00000174516.14 |    |    | NA | NA | NA | NA | NA | NA | NA | NA | NA | NA | NA |
| NA            | NA                 | NA | NA | NA | -2 | NA |    |    |    |    |    |    |    |    |
| MS4A12        | ENSG00000071203.9  |    |    | NA | NA | NA | NA | NA | NA | NA | NA | NA | NA | NA |
| NA            | NA                 | NA | NA | NA | -2 | NA |    |    |    |    |    |    |    |    |
| B3GNT6        | ENSG00000198488.10 |    |    | NA | NA | NA | NA | NA | NA | NA | NA | NA | NA | NA |
| NA            | NA                 | NA | NA | NA | -2 | NA |    |    |    |    |    |    |    |    |
| RP11-817J15.3 | ENSG00000281655.1  |    |    | NA | NA | NA | NA | NA | NA | NA | NA | NA | NA | NA |
| NA            | NA                 | NA | NA | NA | NA | -2 | NA |    |    |    |    |    |    |    |
| RBM14         | ENSG00000239306.4  |    |    | NA | NA | NA | NA | NA | NA | NA | NA | NA | NA | NA |

|               |                    |    |    |    |    |    |    |    |    |    |    |    |    |    |
|---------------|--------------------|----|----|----|----|----|----|----|----|----|----|----|----|----|
| NA            | NA                 | NA | NA | -2 | NA |    |    |    |    |    |    |    |    |    |
| OR2AT4        | ENSG00000171561.3  |    |    |    | NA | NA | NA | NA | NA | NA | NA | NA | NA | NA |
| NA            | NA                 | NA | NA | NA | -2 | NA |    |    |    |    |    |    |    |    |
| FAM111B       | ENSG00000189057.10 |    |    |    | NA | NA | NA | NA | NA | NA | NA | NA | NA | NA |
| NA            | NA                 | NA | NA | NA | -2 | NA |    |    |    |    |    |    |    |    |
| MMP12         | ENSG00000262406.2  |    |    |    | NA | NA | NA | NA | NA | NA | NA | NA | NA | NA |
| NA            | NA                 | NA | NA | NA | -2 | NA |    |    |    |    |    |    |    |    |
| RP11-430L3.1  | ENSG00000254819.1  |    |    |    | NA | NA | NA | NA | NA | NA | NA | NA | NA | NA |
| NA            | NA                 | NA | NA | NA | -2 | NA |    |    |    |    |    |    |    |    |
| RP11-867G2.6  | ENSG00000255666.5  |    |    |    | NA | NA | NA | NA | NA | NA | NA | NA | NA | NA |
| NA            | NA                 | NA | NA | NA | -2 | NA |    |    |    |    |    |    |    |    |
| RP11-347H15.4 | ENSG00000254518.1  |    |    |    | NA | NA | NA | NA | NA | NA | NA | NA | NA | NA |
| NA            | NA                 | NA | NA | NA | -2 | NA |    |    |    |    |    |    |    |    |
| RP11-460B17.3 | ENSG00000254530.1  |    |    |    | NA | NA | NA | NA | NA | NA | NA | NA | NA | NA |
| NA            | NA                 | NA | NA | NA | -2 | NA |    |    |    |    |    |    |    |    |
| SAA1          | ENSG00000173432.10 |    |    |    | NA | NA | NA | NA | NA | NA | NA | NA | NA | NA |
| NA            | NA                 | NA | NA | NA | -2 | NA |    |    |    |    |    |    |    |    |
| NUP98         | ENSG00000110713.15 |    |    |    | NA | NA | NA | NA | NA | NA | NA | NA | NA | NA |
| NA            | NA                 | NA | NA | NA | -2 | NA |    |    |    |    |    |    |    |    |
| PRCP          | ENSG00000137509.10 |    |    |    | NA | NA | NA | NA | NA | NA | NA | NA | NA | NA |
| NA            | NA                 | NA | NA | NA | -2 | NA |    |    |    |    |    |    |    |    |
| PCSK7         | ENSG00000160613.12 |    |    |    | NA | NA | NA | NA | NA | NA | NA | NA | NA | NA |
| NA            | NA                 | NA | NA | NA | -2 | NA |    |    |    |    |    |    |    |    |
| TMEM126A      | ENSG00000171202.6  |    |    |    | NA | NA | NA | NA | NA | NA | NA | NA | NA | NA |
| NA            | NA                 | NA | NA | NA | -2 | NA |    |    |    |    |    |    |    |    |
| C11orf71      | ENSG00000180425.11 |    |    |    | NA | NA | NA | NA | NA | NA | NA | NA | NA | NA |
| NA            | NA                 | NA | NA | NA | -2 | NA |    |    |    |    |    |    |    |    |
| RP13-631K18.2 | ENSG00000254486.1  |    |    |    | NA | NA | NA | NA | NA | NA | NA | NA | NA | NA |
| NA            | NA                 | NA | NA | NA | NA | -2 | NA |    |    |    |    |    |    |    |
| SLC6A5        | ENSG00000165970.11 |    |    |    | NA | NA | NA | NA | NA | NA | NA | NA | NA | NA |
| NA            | NA                 | NA | NA | NA | -2 | NA |    |    |    |    |    |    |    |    |
| FKBP2         | ENSG00000173486.12 |    |    |    | NA | NA | NA | NA | NA | NA | NA | NA | NA | NA |
| NA            | NA                 | NA | NA | NA | -2 | NA |    |    |    |    |    |    |    |    |
| SIK3          | ENSG00000160584.15 |    |    |    | NA | NA | NA | NA | NA | NA | NA | NA | NA | NA |
| NA            | NA                 | NA | NA | NA | -2 | NA |    |    |    |    |    |    |    |    |
| SLCO2B1       | ENSG00000137491.14 |    |    |    | NA | NA | NA | NA | NA | NA | NA | NA | NA | NA |
| NA            | NA                 | NA | NA | NA | -2 | NA |    |    |    |    |    |    |    |    |
| THAP12        | ENSG00000137492.7  |    |    |    | NA | NA | NA | NA | NA | NA | NA | NA | NA | NA |
| NA            | NA                 | NA | NA | NA | -2 | NA |    |    |    |    |    |    |    |    |
| LINC02098     | ENSG00000272575.5  |    |    |    | NA | NA | NA | NA | NA | NA | NA | NA | NA | NA |
| NA            | NA                 | NA | NA | NA | -2 | NA |    |    |    |    |    |    |    |    |
| SHANK2        | ENSG00000162105.17 |    |    |    | NA | NA | NA | NA | NA | NA | NA | NA | NA | NA |
| NA            | NA                 | NA | NA | NA | -2 | NA |    |    |    |    |    |    |    |    |
| ARL2          | ENSG00000213465.7  |    |    |    | NA | NA | NA | NA | NA | NA | NA | NA | NA | NA |
| NA            | NA                 | NA | NA | NA | -2 | NA |    |    |    |    |    |    |    |    |
| TUT1          | ENSG00000149016.15 |    |    |    | NA | NA | NA | NA | NA | NA | NA | NA | NA | NA |
| NA            | NA                 | NA | NA | NA | -2 | NA |    |    |    |    |    |    |    |    |
| CTD-2507G9.1  | ENSG00000255243.1  |    |    |    | NA | NA | NA | NA | NA | NA | NA | NA | NA | NA |
| NA            | NA                 | NA | NA | NA | NA | -2 | NA |    |    |    |    |    |    |    |
| CEND1         | ENSG00000184524.5  |    |    |    | NA | NA | NA | NA | NA | NA | NA | NA | NA | NA |
| NA            | NA                 | NA | NA | NA | -2 | NA |    |    |    |    |    |    |    |    |
| FAU           | ENSG00000149806.10 |    |    |    | NA | NA | NA | NA | NA | NA | NA | NA | NA | NA |
| NA            | NA                 | NA | NA | NA | -2 | NA |    |    |    |    |    |    |    |    |
| RP11-672A2.6  | ENSG00000255479.1  |    |    |    | NA | NA | NA | NA | NA | NA | NA | NA | NA | NA |
| NA            | NA                 | NA | NA | NA | NA | -2 | NA |    |    |    |    |    |    |    |
| RP11-63D14.1  | ENSG00000255477.1  |    |    |    | NA | NA | NA | NA | NA | NA | NA | NA | NA | NA |
| NA            | NA                 | NA | NA | NA | NA | -2 | NA |    |    |    |    |    |    |    |
| AP006285.7    | ENSG00000231487.1  |    |    |    | NA | NA | NA | NA | NA | NA | NA | NA | NA | NA |
| NA            | NA                 | NA | NA | NA | -2 | NA |    |    |    |    |    |    |    |    |
| PTGDR2        | ENSG00000183134.4  |    |    |    | NA | NA | NA | NA | NA | NA | NA | NA | NA | NA |
| NA            | NA                 | NA | NA | NA | -2 | NA |    |    |    |    |    |    |    |    |
| ORAOV1        | ENSG00000149716.12 |    |    |    | NA | NA | NA | NA | NA | NA | NA | NA | NA | NA |

|               |                    |    |    |    |    |    |    |    |    |    |    |    |    |    |
|---------------|--------------------|----|----|----|----|----|----|----|----|----|----|----|----|----|
| FGF4          | NA                 | NA | NA | NA | NA | -2 | NA | NA | NA | NA | NA | NA | NA | NA |
|               | ENSG00000075388.3  |    |    |    |    | NA | NA | NA | NA | NA | NA | NA | NA | NA |
|               | NA                 | NA | NA | NA | NA | -2 | NA |    |    |    |    |    |    |    |
| SPATA19       | NA                 | NA | NA | NA | NA | NA | NA | NA | NA | NA | NA | NA | NA | NA |
|               | ENSG00000166118.7  |    |    |    |    | NA | NA | NA | NA | NA | NA | NA | NA | NA |
|               | NA                 | NA | NA | NA | NA | -2 | NA |    |    |    |    |    |    |    |
| RP11-50B3.2   | NA                 | NA | NA | NA | NA | NA | NA | NA | NA | NA | NA | NA | NA | NA |
|               | ENSG00000254833.1  |    |    |    |    | NA | NA | NA | NA | NA | NA | NA | NA | NA |
|               | NA                 | NA | NA | NA | NA | -2 | NA |    |    |    |    |    |    |    |
| AP006285.6    | NA                 | NA | NA | NA | NA | NA | NA | NA | NA | NA | NA | NA | NA | NA |
|               | ENSG00000227306.1  |    |    |    |    | NA | NA | NA | NA | NA | NA | NA | NA | NA |
|               | NA                 | NA | NA | NA | NA | -2 | NA |    |    |    |    |    |    |    |
| TMEM86A       | NA                 | NA | NA | NA | NA | NA | NA | NA | NA | NA | NA | NA | NA | NA |
|               | ENSG00000151117.8  |    |    |    |    | NA | NA | NA | NA | NA | NA | NA | NA | NA |
|               | NA                 | NA | NA | NA | NA | -2 | NA |    |    |    |    |    |    |    |
| RNF121        | NA                 | NA | NA | NA | NA | NA | NA | NA | NA | NA | NA | NA | NA | NA |
|               | ENSG00000137522.17 |    |    |    |    | NA | NA | NA | NA | NA | NA | NA | NA | NA |
|               | NA                 | NA | NA | NA | NA | -2 | NA |    |    |    |    |    |    |    |
| SLC22A12      | NA                 | NA | NA | NA | NA | NA | NA | NA | NA | NA | NA | NA | NA | NA |
|               | ENSG00000197891.11 |    |    |    |    | NA | NA | NA | NA | NA | NA | NA | NA | NA |
|               | NA                 | NA | NA | NA | NA | -2 | NA |    |    |    |    |    |    |    |
| TCN1          | NA                 | NA | NA | NA | NA | NA | NA | NA | NA | NA | NA | NA | NA | NA |
|               | ENSG00000134827.7  |    |    |    |    | NA | NA | NA | NA | NA | NA | NA | NA | NA |
|               | NA                 | NA | NA | NA | NA | -2 | NA |    |    |    |    |    |    |    |
| KCNQ1         | NA                 | NA | NA | NA | NA | NA | NA | NA | NA | NA | NA | NA | NA | NA |
|               | ENSG00000053918.15 |    |    |    |    | NA | NA | NA | NA | NA | NA | NA | NA | NA |
|               | NA                 | NA | NA | NA | NA | -2 | NA |    |    |    |    |    |    |    |
| RP11-290F24.6 | NA                 | NA | NA | NA | NA | NA | NA | NA | NA | NA | NA | NA | NA | NA |
|               | ENSG00000267940.1  |    |    |    |    | NA | NA | NA | NA | NA | NA | NA | NA | NA |
|               | NA                 | NA | NA | NA | NA | -2 | NA |    |    |    |    |    |    |    |
| RP11-375D13.4 | NA                 | NA | NA | NA | NA | NA | NA | NA | NA | NA | NA | NA | NA | NA |
|               | ENSG00000255279.1  |    |    |    |    | NA | NA | NA | NA | NA | NA | NA | NA | NA |
|               | NA                 | NA | NA | NA | NA | -2 | NA |    |    |    |    |    |    |    |
| MMP7          | NA                 | NA | NA | NA | NA | NA | NA | NA | NA | NA | NA | NA | NA | NA |
|               | ENSG00000137673.8  |    |    |    |    | NA | NA | NA | NA | NA | NA | NA | NA | NA |
|               | NA                 | NA | NA | NA | NA | -2 | NA |    |    |    |    |    |    |    |
| DLAT          | NA                 | NA | NA | NA | NA | NA | NA | NA | NA | NA | NA | NA | NA | NA |
|               | ENSG00000150768.15 |    |    |    |    | NA | NA | NA | NA | NA | NA | NA | NA | NA |
|               | NA                 | NA | NA | NA | NA | -2 | NA |    |    |    |    |    |    |    |
| FAR1          | NA                 | NA | NA | NA | NA | NA | NA | NA | NA | NA | NA | NA | NA | NA |
|               | ENSG00000197601.12 |    |    |    |    | NA | NA | NA | NA | NA | NA | NA | NA | NA |
|               | NA                 | NA | NA | NA | NA | -2 | NA |    |    |    |    |    |    |    |
| SCGB1C1       | NA                 | NA | NA | NA | NA | NA | NA | NA | NA | NA | NA | NA | NA | NA |
|               | ENSG00000188076.2  |    |    |    |    | NA | NA | NA | NA | NA | NA | NA | NA | NA |
|               | NA                 | NA | NA | NA | NA | -2 | NA |    |    |    |    |    |    |    |
| CCDC87        | NA                 | NA | NA | NA | NA | NA | NA | NA | NA | NA | NA | NA | NA | NA |
|               | ENSG00000182791.4  |    |    |    |    | NA | NA | NA | NA | NA | NA | NA | NA | NA |
|               | NA                 | NA | NA | NA | NA | -2 | NA |    |    |    |    |    |    |    |
| LUZP2         | NA                 | NA | NA | NA | NA | NA | NA | NA | NA | NA | NA | NA | NA | NA |
|               | ENSG00000187398.11 |    |    |    |    | NA | NA | NA | NA | NA | NA | NA | NA | NA |
|               | NA                 | NA | NA | NA | NA | -2 | NA |    |    |    |    |    |    |    |
| OR52N1        | NA                 | NA | NA | NA | NA | NA | NA | NA | NA | NA | NA | NA | NA | NA |
|               | ENSG00000181001.1  |    |    |    |    | NA | NA | NA | NA | NA | NA | NA | NA | NA |
|               | NA                 | NA | NA | NA | NA | -2 | NA |    |    |    |    |    |    |    |
| CADM1         | NA                 | NA | NA | NA | NA | NA | NA | NA | NA | NA | NA | NA | NA | NA |
|               | ENSG00000182985.17 |    |    |    |    | NA | NA | NA | NA | NA | NA | NA | NA | NA |
|               | NA                 | NA | NA | NA | NA | -2 | NA |    |    |    |    |    |    |    |
| RP11-379J13.2 | NA                 | NA | NA | NA | NA | NA | NA | NA | NA | NA | NA | NA | NA | NA |
|               | ENSG00000255502.5  |    |    |    |    | NA | NA | NA | NA | NA | NA | NA | NA | NA |
|               | NA                 | NA | NA | NA | NA | -2 | NA |    |    |    |    |    |    |    |
| ACTN3         | NA                 | NA | NA | NA | NA | NA | NA | NA | NA | NA | NA | NA | NA | NA |
|               | ENSG00000248746.5  |    |    |    |    | NA | NA | NA | NA | NA | NA | NA | NA | NA |
|               | NA                 | NA | NA | NA | NA | -2 | NA |    |    |    |    |    |    |    |
| HBD           | NA                 | NA | NA | NA | NA | NA | NA | NA | NA | NA | NA | NA | NA | NA |
|               | ENSG00000223609.7  |    |    |    |    | NA | NA | NA | NA | NA | NA | NA | NA | NA |
|               | NA                 | NA | NA | NA | NA | -2 | NA |    |    |    |    |    |    |    |
| C11orf53      | NA                 | NA | NA | NA | NA | NA | NA | NA | NA | NA | NA | NA | NA | NA |
|               | ENSG00000150750.7  |    |    |    |    | NA | NA | NA | NA | NA | NA | NA | NA | NA |
|               | NA                 | NA | NA | NA | NA | -2 | NA |    |    |    |    |    |    |    |
| POU2F3        | NA                 | NA | NA | NA | NA | NA | NA | NA | NA | NA | NA | NA | NA | NA |
|               | ENSG00000137709.9  |    |    |    |    | NA | NA | NA | NA | NA | NA | NA | NA | NA |
|               | NA                 | NA | NA | NA | NA | -2 | NA |    |    |    |    |    |    |    |
| MRPL17        | NA                 | NA | NA | NA | NA | NA | NA | NA | NA | NA | NA | NA | NA | NA |
|               | ENSG00000158042.8  |    |    |    |    | NA | NA | NA | NA | NA | NA | NA | NA | NA |
|               | NA                 | NA | NA | NA | NA | -2 | NA |    |    |    |    |    |    |    |
| RAB6A         | NA                 | NA | NA | NA | NA | NA | NA | NA | NA | NA | NA | NA | NA | NA |
|               | ENSG00000175582.19 |    |    |    |    | NA | NA | NA | NA | NA | NA | NA | NA | NA |
|               | NA                 | NA | NA | NA | NA | -2 | NA |    |    |    |    |    |    |    |
| NUDT22        | NA                 | NA | NA | NA | NA | NA | NA | NA | NA | NA | NA | NA | NA | NA |
|               | ENSG00000149761.8  |    |    |    |    | NA | NA | NA | NA | NA | NA | NA | NA | NA |
|               | NA                 | NA | NA | NA | NA | -2 | NA |    |    |    |    |    |    |    |
| AP001257.1    | NA                 | NA | NA | NA | NA | NA | NA | NA | NA | NA | NA | NA | NA | NA |
|               | ENSG00000254952.1  |    |    |    |    | NA | NA | NA | NA | NA | NA | NA | NA | NA |
|               | NA                 | NA | NA | NA | NA | -2 | NA |    |    |    |    |    |    |    |
| DKFZP434K028  | NA                 | NA | NA | NA | NA | NA | NA | NA | NA | NA | NA | NA | NA | NA |
|               | ENSG00000124915.10 |    |    |    |    | NA | NA | NA | NA | NA | NA | NA | NA | NA |
|               | NA                 | NA | NA | NA | NA | -2 | NA |    |    |    |    |    |    |    |
| DYNC2H1       | NA                 | NA | NA | NA | NA | NA | NA | NA | NA | NA | NA | NA | NA | NA |
|               | ENSG00000187240.13 |    |    |    |    | NA | NA | NA | NA | NA | NA | NA | NA | NA |
|               | NA                 | NA | NA | NA | NA | -2 | NA |    |    |    |    |    |    |    |
| INS           | NA                 | NA | NA | NA | NA | NA | NA | NA | NA | NA | NA | NA | NA | NA |
|               | ENSG00000254647.6  |    |    |    |    | NA | NA | NA | NA | NA | NA | NA | NA | NA |

|               |                    |    |    |    |    |    |    |    |    |    |    |    |    |    |
|---------------|--------------------|----|----|----|----|----|----|----|----|----|----|----|----|----|
| NA            | NA                 | NA | NA | -2 | NA |    |    |    |    |    |    |    |    |    |
| CREB3L1       | ENSG00000157613.10 | NA | NA | NA | NA | NA | NA | NA | NA | NA | NA | NA | NA | NA |
| NA            | NA                 | NA | NA | NA | -2 | NA |    |    |    |    |    |    |    |    |
| LIPT2         | ENSG00000175536.6  | NA | NA | NA | NA | NA | NA | NA | NA | NA | NA | NA | NA | NA |
| NA            | NA                 | NA | NA | NA | -2 | NA |    |    |    |    |    |    |    |    |
| RP11-111M22.5 | ENSG00000271757.1  | NA | NA | NA | NA | NA | NA | NA | NA | NA | NA | NA | NA | NA |
| NA            | NA                 | NA | NA | NA | NA | -2 | NA |    |    |    |    |    |    |    |
| TMPRSS4       | ENSG00000137648.17 | NA | NA | NA | NA | NA | NA | NA | NA | NA | NA | NA | NA | NA |
| NA            | NA                 | NA | NA | NA | NA | -2 | NA |    |    |    |    |    |    |    |
| LINC00167     | ENSG00000233220.3  | NA | NA | NA | NA | NA | NA | NA | NA | NA | NA | NA | NA | NA |
| NA            | NA                 | NA | NA | NA | NA | -2 | NA |    |    |    |    |    |    |    |
| RP11-98J9.1   | ENSG00000255411.1  | NA | NA | NA | NA | NA | NA | NA | NA | NA | NA | NA | NA | NA |
| NA            | NA                 | NA | NA | NA | NA | NA | -2 | NA |    |    |    |    |    |    |
| NXF1          | ENSG00000162231.13 | NA | NA | NA | NA | NA | NA | NA | NA | NA | NA | NA | NA | NA |
| NA            | NA                 | NA | NA | NA | NA | -2 | NA |    |    |    |    |    |    |    |
| FTH1          | ENSG00000167996.15 | NA | NA | NA | NA | NA | NA | NA | NA | NA | NA | NA | NA | NA |
| NA            | NA                 | NA | NA | NA | NA | -2 | NA |    |    |    |    |    |    |    |
| CRYAB         | ENSG00000109846.7  | NA | NA | NA | NA | NA | NA | NA | NA | NA | NA | NA | NA | NA |
| NA            | NA                 | NA | NA | NA | NA | -2 | NA |    |    |    |    |    |    |    |
| SRPRA         | ENSG00000182934.11 | NA | NA | NA | NA | NA | NA | NA | NA | NA | NA | NA | NA | NA |
| NA            | NA                 | NA | NA | NA | NA | -2 | NA |    |    |    |    |    |    |    |
| CCDC73        | ENSG00000186714.12 | NA | NA | NA | NA | NA | NA | NA | NA | NA | NA | NA | NA | NA |
| NA            | NA                 | NA | NA | NA | NA | NA | -2 | NA |    |    |    |    |    |    |
| KBTBD4        | ENSG00000123444.13 | NA | NA | NA | NA | NA | NA | NA | NA | NA | NA | NA | NA | NA |
| NA            | NA                 | NA | NA | NA | NA | NA | -2 | NA |    |    |    |    |    |    |
| YIF1A         | ENSG00000174851.15 | NA | NA | NA | NA | NA | NA | NA | NA | NA | NA | NA | NA | NA |
| NA            | NA                 | NA | NA | NA | NA | NA | -2 | NA |    |    |    |    |    |    |
| OR5P2         | ENSG00000183303.2  | NA | NA | NA | NA | NA | NA | NA | NA | NA | NA | NA | NA | NA |
| NA            | NA                 | NA | NA | NA | NA | NA | -2 | NA |    |    |    |    |    |    |
| CARNS1        | ENSG00000172508.10 | NA | NA | NA | NA | NA | NA | NA | NA | NA | NA | NA | NA | NA |
| NA            | NA                 | NA | NA | NA | NA | NA | -2 | NA |    |    |    |    |    |    |
| AP000770.1    | ENSG00000237937.5  | NA | NA | NA | NA | NA | NA | NA | NA | NA | NA | NA | NA | NA |
| NA            | NA                 | NA | NA | NA | NA | NA | -2 | NA |    |    |    |    |    |    |
| CHRNA10       | ENSG00000129749.3  | NA | NA | NA | NA | NA | NA | NA | NA | NA | NA | NA | NA | NA |
| NA            | NA                 | NA | NA | NA | NA | NA | -2 | NA |    |    |    |    |    |    |
| VEGFB         | ENSG00000173511.9  | NA | NA | NA | NA | NA | NA | NA | NA | NA | NA | NA | NA | NA |
| NA            | NA                 | NA | NA | NA | NA | NA | -2 | NA |    |    |    |    |    |    |
| OR51A7        | ENSG00000176895.8  | NA | NA | NA | NA | NA | NA | NA | NA | NA | NA | NA | NA | NA |
| NA            | NA                 | NA | NA | NA | NA | NA | -2 | NA |    |    |    |    |    |    |
| KMT2A         | ENSG00000118058.20 | NA | NA | NA | NA | NA | NA | NA | NA | NA | NA | NA | NA | NA |
| NA            | NA                 | NA | NA | NA | NA | NA | -2 | NA |    |    |    |    |    |    |
| ARRB1         | ENSG00000137486.16 | NA | NA | NA | NA | NA | NA | NA | NA | NA | NA | NA | NA | NA |
| NA            | NA                 | NA | NA | NA | NA | NA | -2 | NA |    |    |    |    |    |    |
| BATF2         | ENSG00000168062.9  | NA | NA | NA | NA | NA | NA | NA | NA | NA | NA | NA | NA | NA |
| NA            | NA                 | NA | NA | NA | NA | NA | -2 | NA |    |    |    |    |    |    |
| ELP4          | ENSG00000109911.18 | NA | NA | NA | NA | NA | NA | NA | NA | NA | NA | NA | NA | NA |
| NA            | NA                 | NA | NA | NA | NA | NA | -2 | NA |    |    |    |    |    |    |
| PIK3C2A       | ENSG00000011405.13 | NA | NA | NA | NA | NA | NA | NA | NA | NA | NA | NA | NA | NA |
| NA            | NA                 | NA | NA | NA | NA | NA | -2 | NA |    |    |    |    |    |    |
| MMP20         | ENSG00000137674.3  | NA | NA | NA | NA | NA | NA | NA | NA | NA | NA | NA | NA | NA |
| NA            | NA                 | NA | NA | NA | NA | NA | -2 | NA |    |    |    |    |    |    |
| RP13-631K18.5 | ENSG00000255400.1  | NA | NA | NA | NA | NA | NA | NA | NA | NA | NA | NA | NA | NA |
| NA            | NA                 | NA | NA | NA | NA | NA | -2 | NA |    |    |    |    |    |    |
| RP11-626H12.3 | ENSG00000248844.6  | NA | NA | NA | NA | NA | NA | NA | NA | NA | NA | NA | NA | NA |
| NA            | NA                 | NA | NA | NA | NA | NA | -2 | NA |    |    |    |    |    |    |
| AP005273.1    | ENSG00000232500.1  | NA | NA | NA | NA | NA | NA | NA | NA | NA | NA | NA | NA | NA |
| NA            | NA                 | NA | NA | NA | NA | NA | -2 | NA |    |    |    |    |    |    |
| ELF5          | ENSG00000135374.9  | NA | NA | NA | NA | NA | NA | NA | NA | NA | NA | NA | NA | NA |
| NA            | NA                 | NA | NA | NA | NA | NA | -2 | NA |    |    |    |    |    |    |
| OTUB1         | ENSG00000167770.11 | NA | NA | NA | NA | NA | NA | NA | NA | NA | NA | NA | NA | NA |
| NA            | NA                 | NA | NA | NA | NA | NA | -2 | NA |    |    |    |    |    |    |
| TRAF6         | ENSG00000175104.14 | NA | NA | NA | NA | NA | NA | NA | NA | NA | NA | NA | NA | NA |

|               |                    |    |    |    |    |    |    |    |    |    |    |    |    |    |
|---------------|--------------------|----|----|----|----|----|----|----|----|----|----|----|----|----|
| NA            | NA                 | NA | NA | -2 | NA |    |    |    |    |    |    |    |    |    |
| INTS5         | ENSG00000185085.2  |    |    |    | NA | NA | NA | NA | NA | NA | NA | NA | NA | NA |
| NA            | NA                 | NA | NA | -2 | NA |    |    |    |    |    |    |    |    |    |
| TRIM49C       | ENSG00000204449.3  |    |    |    | NA | NA | NA | NA | NA | NA | NA | NA | NA | NA |
| NA            | NA                 | NA | NA | -2 | NA |    |    |    |    |    |    |    |    |    |
| PLEKHA7       | ENSG00000166689.15 |    |    |    | NA | NA | NA | NA | NA | NA | NA | NA | NA | NA |
| NA            | NA                 | NA | NA | -2 | NA |    |    |    |    |    |    |    |    |    |
| OR8B2         | ENSG00000204293.2  |    |    |    | NA | NA | NA | NA | NA | NA | NA | NA | NA | NA |
| NA            | NA                 | NA | NA | -2 | NA |    |    |    |    |    |    |    |    |    |
| RP11-540A21.2 | ENSG00000245522.2  |    |    |    | NA | NA | NA | NA | NA | NA | NA | NA | NA | NA |
| NA            | NA                 | NA | NA | -2 | NA |    |    |    |    |    |    |    |    |    |
| AP005135.2    | ENSG00000255512.1  |    |    |    | NA | NA | NA | NA | NA | NA | NA | NA | NA | NA |
| NA            | NA                 | NA | NA | -2 | NA |    |    |    |    |    |    |    |    |    |
| DGAT2         | ENSG00000062282.14 |    |    |    | NA | NA | NA | NA | NA | NA | NA | NA | NA | NA |
| NA            | NA                 | NA | NA | -2 | NA |    |    |    |    |    |    |    |    |    |
| MMP27         | ENSG00000137675.4  |    |    |    | NA | NA | NA | NA | NA | NA | NA | NA | NA | NA |
| NA            | NA                 | NA | NA | -2 | NA |    |    |    |    |    |    |    |    |    |
| ART1          | ENSG00000129744.2  |    |    |    | NA | NA | NA | NA | NA | NA | NA | NA | NA | NA |
| NA            | NA                 | NA | NA | -2 | NA |    |    |    |    |    |    |    |    |    |
| OR9Q2         | ENSG00000186513.2  |    |    |    | NA | NA | NA | NA | NA | NA | NA | NA | NA | NA |
| NA            | NA                 | NA | NA | -2 | NA |    |    |    |    |    |    |    |    |    |
| RP11-716H6.1  | ENSG00000255015.1  |    |    |    | NA | NA | NA | NA | NA | NA | NA | NA | NA | NA |
| NA            | NA                 | NA | NA | -2 | NA |    |    |    |    |    |    |    |    |    |
| TMEM225       | ENSG00000204300.6  |    |    |    | NA | NA | NA | NA | NA | NA | NA | NA | NA | NA |
| NA            | NA                 | NA | NA | -2 | NA |    |    |    |    |    |    |    |    |    |
| MMP8          | ENSG00000118113.11 |    |    |    | NA | NA | NA | NA | NA | NA | NA | NA | NA | NA |
| NA            | NA                 | NA | NA | -2 | NA |    |    |    |    |    |    |    |    |    |
| CCDC85B       | ENSG00000175602.3  |    |    |    | NA | NA | NA | NA | NA | NA | NA | NA | NA | NA |
| NA            | NA                 | NA | NA | -2 | NA |    |    |    |    |    |    |    |    |    |
| UPK2          | ENSG00000110375.2  |    |    |    | NA | NA | NA | NA | NA | NA | NA | NA | NA | NA |
| NA            | NA                 | NA | NA | -2 | NA |    |    |    |    |    |    |    |    |    |
| NXPE1         | ENSG00000095110.7  |    |    |    | NA | NA | NA | NA | NA | NA | NA | NA | NA | NA |
| NA            | NA                 | NA | NA | -2 | NA |    |    |    |    |    |    |    |    |    |
| MAP6          | ENSG00000171533.11 |    |    |    | NA | NA | NA | NA | NA | NA | NA | NA | NA | NA |
| NA            | NA                 | NA | NA | -2 | NA |    |    |    |    |    |    |    |    |    |
| OR10Q1        | ENSG00000180475.4  |    |    |    | NA | NA | NA | NA | NA | NA | NA | NA | NA | NA |
| NA            | NA                 | NA | NA | -2 | NA |    |    |    |    |    |    |    |    |    |
| TBRG1         | ENSG00000154144.12 |    |    |    | NA | NA | NA | NA | NA | NA | NA | NA | NA | NA |
| NA            | NA                 | NA | NA | -2 | NA |    |    |    |    |    |    |    |    |    |
| ZNF408        | ENSG00000175213.2  |    |    |    | NA | NA | NA | NA | NA | NA | NA | NA | NA | NA |
| NA            | NA                 | NA | NA | -2 | NA |    |    |    |    |    |    |    |    |    |
| OVCH2         | ENSG00000183378.11 |    |    |    | NA | NA | NA | NA | NA | NA | NA | NA | NA | NA |
| NA            | NA                 | NA | NA | -2 | NA |    |    |    |    |    |    |    |    |    |
| GPR152        | ENSG00000175514.2  |    |    |    | NA | NA | NA | NA | NA | NA | NA | NA | NA | NA |
| NA            | NA                 | NA | NA | -2 | NA |    |    |    |    |    |    |    |    |    |
| RAB30         | ENSG00000137502.9  |    |    |    | NA | NA | NA | NA | NA | NA | NA | NA | NA | NA |
| NA            | NA                 | NA | NA | -2 | NA |    |    |    |    |    |    |    |    |    |
| RP11-831A10.1 | ENSG00000255216.1  |    |    |    | NA | NA | NA | NA | NA | NA | NA | NA | NA | NA |
| NA            | NA                 | NA | NA | -2 | NA |    |    |    |    |    |    |    |    |    |
| CASP4         | ENSG00000196954.13 |    |    |    | NA | NA | NA | NA | NA | NA | NA | NA | NA | NA |
| NA            | NA                 | NA | NA | -2 | NA |    |    |    |    |    |    |    |    |    |
| ARNTL         | ENSG00000133794.17 |    |    |    | NA | NA | NA | NA | NA | NA | NA | NA | NA | NA |
| NA            | NA                 | NA | NA | -2 | NA |    |    |    |    |    |    |    |    |    |
| MTA2          | ENSG00000149480.6  |    |    |    | NA | NA | NA | NA | NA | NA | NA | NA | NA | NA |
| NA            | NA                 | NA | NA | -2 | NA |    |    |    |    |    |    |    |    |    |
| RP13-631K18.3 | ENSG00000254991.1  |    |    |    | NA | NA | NA | NA | NA | NA | NA | NA | NA | NA |
| NA            | NA                 | NA | NA | -2 | NA |    |    |    |    |    |    |    |    |    |
| CNTN5         | ENSG00000149972.10 |    |    |    | NA | NA | NA | NA | NA | NA | NA | NA | NA | NA |
| NA            | NA                 | NA | NA | -2 | NA |    |    |    |    |    |    |    |    |    |
| SERPINH1      | ENSG00000149257.13 |    |    |    | NA | NA | NA | NA | NA | NA | NA | NA | NA | NA |
| NA            | NA                 | NA | NA | -2 | NA |    |    |    |    |    |    |    |    |    |
| RP11-65M17.3  | ENSG00000254968.6  |    |    |    | NA | NA | NA | NA | NA | NA | NA | NA | NA | NA |



|               |                    |    |    |    |    |    |    |    |    |    |    |    |    |    |
|---------------|--------------------|----|----|----|----|----|----|----|----|----|----|----|----|----|
| NA            | NA                 | NA | NA | NA | NA | -2 | NA |    |    |    |    |    |    |    |
| CD3G          | ENSG00000160654.9  |    |    | NA | NA | NA | NA | NA | NA | NA | NA | NA | NA | NA |
| NA            | NA                 | NA | NA | -2 | NA |    |    |    |    |    |    |    |    |    |
| SAC3D1        | ENSG00000168061.14 |    |    | NA | NA | NA | NA | NA | NA | NA | NA | NA | NA | NA |
| NA            | NA                 | NA | NA | NA | -2 | NA |    |    |    |    |    |    |    |    |
| ZBTB16        | ENSG00000109906.13 |    |    | NA | NA | NA | NA | NA | NA | NA | NA | NA | NA | NA |
| NA            | NA                 | NA | NA | NA | -2 | NA |    |    |    |    |    |    |    |    |
| FAM76B        | ENSG00000077458.12 |    |    | NA | NA | NA | NA | NA | NA | NA | NA | NA | NA | NA |
| NA            | NA                 | NA | NA | NA | -2 | NA |    |    |    |    |    |    |    |    |
| SPTY2D1       | ENSG00000179119.14 |    |    | NA | NA | NA | NA | NA | NA | NA | NA | NA | NA | NA |
| NA            | NA                 | NA | NA | NA | -2 | NA |    |    |    |    |    |    |    |    |
| LINC01493     | ENSG00000254562.5  |    |    | NA | NA | NA | NA | NA | NA | NA | NA | NA | NA | NA |
| NA            | NA                 | NA | NA | NA | -2 | NA |    |    |    |    |    |    |    |    |
| ZDHHC5        | ENSG00000156599.10 |    |    | NA | NA | NA | NA | NA | NA | NA | NA | NA | NA | NA |
| NA            | NA                 | NA | NA | NA | -2 | NA |    |    |    |    |    |    |    |    |
| CKAP5         | ENSG00000175216.14 |    |    | NA | NA | NA | NA | NA | NA | NA | NA | NA | NA | NA |
| NA            | NA                 | NA | NA | -2 | NA |    |    |    |    |    |    |    |    |    |
| CTD-2210P24.2 | ENSG00000255426.1  |    |    | NA | NA | NA | NA | NA | NA | NA | NA | NA | NA | NA |
| NA            | NA                 | NA | NA | NA | -2 | NA |    |    |    |    |    |    |    |    |
| VPS26B        | ENSG00000151502.10 |    |    | NA | NA | NA | NA | NA | NA | NA | NA | NA | NA | NA |
| NA            | NA                 | NA | NA | NA | -2 | NA |    |    |    |    |    |    |    |    |
| ZC3H12C       | ENSG00000149289.10 |    |    | NA | NA | NA | NA | NA | NA | NA | NA | NA | NA | NA |
| NA            | NA                 | NA | NA | NA | -2 | NA |    |    |    |    |    |    |    |    |
| MAML2         | ENSG00000184384.13 |    |    | NA | NA | NA | NA | NA | NA | NA | NA | NA | NA | NA |
| NA            | NA                 | NA | NA | -2 | NA |    |    |    |    |    |    |    |    |    |
| CREBZF        | ENSG00000137504.13 |    |    | NA | NA | NA | NA | NA | NA | NA | NA | NA | NA | NA |
| NA            | NA                 | NA | NA | NA | -2 | NA |    |    |    |    |    |    |    |    |
| IL18          | ENSG00000150782.11 |    |    | NA | NA | NA | NA | NA | NA | NA | NA | NA | NA | NA |
| NA            | NA                 | NA | NA | -2 | NA |    |    |    |    |    |    |    |    |    |
| MS4A15        | ENSG00000166961.14 |    |    | NA | NA | NA | NA | NA | NA | NA | NA | NA | NA | NA |
| NA            | NA                 | NA | NA | NA | -2 | NA |    |    |    |    |    |    |    |    |
| AP004550.1    | ENSG00000254573.1  |    |    | NA | NA | NA | NA | NA | NA | NA | NA | NA | NA | NA |
| NA            | NA                 | NA | NA | NA | -2 | NA |    |    |    |    |    |    |    |    |
| RP11-113D6.6  | ENSG00000255470.1  |    |    | NA | NA | NA | NA | NA | NA | NA | NA | NA | NA | NA |
| NA            | NA                 | NA | NA | NA | -2 | NA |    |    |    |    |    |    |    |    |
| SCGB2A2       | ENSG00000110484.6  |    |    | NA | NA | NA | NA | NA | NA | NA | NA | NA | NA | NA |
| NA            | NA                 | NA | NA | NA | -2 | NA |    |    |    |    |    |    |    |    |
| USP28         | ENSG00000048028.11 |    |    | NA | NA | NA | NA | NA | NA | NA | NA | NA | NA | NA |
| NA            | NA                 | NA | NA | -2 | NA |    |    |    |    |    |    |    |    |    |
| UBTF1L1       | ENSG00000255009.4  |    |    | NA | NA | NA | NA | NA | NA | NA | NA | NA | NA | NA |
| NA            | NA                 | NA | NA | NA | -2 | NA |    |    |    |    |    |    |    |    |
| RBMXL2        | ENSG00000170748.6  |    |    | NA | NA | NA | NA | NA | NA | NA | NA | NA | NA | NA |
| NA            | NA                 | NA | NA | NA | -2 | NA |    |    |    |    |    |    |    |    |
| RP11-124G5.3  | ENSG00000255388.5  |    |    | NA | NA | NA | NA | NA | NA | NA | NA | NA | NA | NA |
| NA            | NA                 | NA | NA | NA | -2 | NA |    |    |    |    |    |    |    |    |
| ADAMTS15      | ENSG00000166106.3  |    |    | NA | NA | NA | NA | NA | NA | NA | NA | NA | NA | NA |
| NA            | NA                 | NA | NA | NA | -2 | NA |    |    |    |    |    |    |    |    |
| ARFGAP2       | ENSG00000149182.14 |    |    | NA | NA | NA | NA | NA | NA | NA | NA | NA | NA | NA |
| NA            | NA                 | NA | NA | NA | -2 | NA |    |    |    |    |    |    |    |    |
| THYN1         | ENSG00000151500.14 |    |    | NA | NA | NA | NA | NA | NA | NA | NA | NA | NA | NA |
| NA            | NA                 | NA | NA | -2 | NA |    |    |    |    |    |    |    |    |    |
| ANAPC15       | ENSG00000110200.8  |    |    | NA | NA | NA | NA | NA | NA | NA | NA | NA | NA | NA |
| NA            | NA                 | NA | NA | NA | -2 | NA |    |    |    |    |    |    |    |    |
| MPZL2         | ENSG00000149573.8  |    |    | NA | NA | NA | NA | NA | NA | NA | NA | NA | NA | NA |
| NA            | NA                 | NA | NA | -2 | NA |    |    |    |    |    |    |    |    |    |
| NCAM1         | ENSG00000149294.16 |    |    | NA | NA | NA | NA | NA | NA | NA | NA | NA | NA | NA |
| NA            | NA                 | NA | NA | -2 | NA |    |    |    |    |    |    |    |    |    |
| RP11-531H8.2  | ENSG00000254789.2  |    |    | NA | NA | NA | NA | NA | NA | NA | NA | NA | NA | NA |
| NA            | NA                 | NA | NA | NA | -2 | NA |    |    |    |    |    |    |    |    |
| MMP1          | ENSG00000196611.4  |    |    | NA | NA | NA | NA | NA | NA | NA | NA | NA | NA | NA |
| NA            | NA                 | NA | NA | -2 | NA |    |    |    |    |    |    |    |    |    |
| TAF6L         | ENSG00000162227.7  |    |    | NA | NA | NA | NA | NA | NA | NA | NA | NA | NA | NA |

|                |                    |    |    |    |    |    |    |    |    |    |    |    |    |    |
|----------------|--------------------|----|----|----|----|----|----|----|----|----|----|----|----|----|
| NA             | NA                 | NA | NA | -2 | NA |    |    |    |    |    |    |    |    |    |
| RP11-304C12.5  | ENSG00000282556.1  | NA | NA | NA | NA | NA | NA | NA | NA | NA | NA | NA | NA | NA |
| NA             | NA                 | NA | NA | NA | NA | -2 | NA |    |    |    |    |    |    |    |
| SRSF8          | ENSG00000263465.4  | NA | NA | NA | NA | NA | NA | NA | NA | NA | NA | NA | NA | NA |
| NA             | NA                 | NA | NA | NA | NA | -2 | NA |    |    |    |    |    |    |    |
| RP11-277K23.1  | ENSG00000255175.5  | NA | NA | NA | NA | NA | NA | NA | NA | NA | NA | NA | NA | NA |
| NA             | NA                 | NA | NA | NA | NA | -2 | NA |    |    |    |    |    |    |    |
| CFL1           | ENSG00000172757.12 | NA | NA | NA | NA | NA | NA | NA | NA | NA | NA | NA | NA | NA |
| NA             | NA                 | NA | NA | NA | NA | -2 | NA |    |    |    |    |    |    |    |
| CSNK2A3        | ENSG00000254598.2  | NA | NA | NA | NA | NA | NA | NA | NA | NA | NA | NA | NA | NA |
| NA             | NA                 | NA | NA | NA | NA | -2 | NA |    |    |    |    |    |    |    |
| RP11-613D13.8  | ENSG00000244953.1  | NA | NA | NA | NA | NA | NA | NA | NA | NA | NA | NA | NA | NA |
| NA             | NA                 | NA | NA | NA | NA | -2 | NA |    |    |    |    |    |    |    |
| AP001462.6     | ENSG00000269038.1  | NA | NA | NA | NA | NA | NA | NA | NA | NA | NA | NA | NA | NA |
| NA             | NA                 | NA | NA | NA | NA | -2 | NA |    |    |    |    |    |    |    |
| KRTAP5-3       | ENSG00000196224.7  | NA | NA | NA | NA | NA | NA | NA | NA | NA | NA | NA | NA | NA |
| NA             | NA                 | NA | NA | NA | NA | -2 | NA |    |    |    |    |    |    |    |
| DNHD1          | ENSG00000179532.12 | NA | NA | NA | NA | NA | NA | NA | NA | NA | NA | NA | NA | NA |
| NA             | NA                 | NA | NA | NA | NA | -2 | NA |    |    |    |    |    |    |    |
| PRRG4          | ENSG00000135378.3  | NA | NA | NA | NA | NA | NA | NA | NA | NA | NA | NA | NA | NA |
| NA             | NA                 | NA | NA | NA | NA | -2 | NA |    |    |    |    |    |    |    |
| AASDHPPT       | ENSG00000149313.10 | NA | NA | NA | NA | NA | NA | NA | NA | NA | NA | NA | NA | NA |
| NA             | NA                 | NA | NA | NA | NA | -2 | NA |    |    |    |    |    |    |    |
| RP11-632K5.3   | ENSG00000246211.2  | NA | NA | NA | NA | NA | NA | NA | NA | NA | NA | NA | NA | NA |
| NA             | NA                 | NA | NA | NA | NA | -2 | NA |    |    |    |    |    |    |    |
| ZNHIT2         | ENSG00000174276.6  | NA | NA | NA | NA | NA | NA | NA | NA | NA | NA | NA | NA | NA |
| NA             | NA                 | NA | NA | NA | NA | -2 | NA |    |    |    |    |    |    |    |
| SPDYC          | ENSG00000204710.2  | NA | NA | NA | NA | NA | NA | NA | NA | NA | NA | NA | NA | NA |
| NA             | NA                 | NA | NA | NA | NA | -2 | NA |    |    |    |    |    |    |    |
| AP000439.5     | ENSG00000261347.1  | NA | NA | NA | NA | NA | NA | NA | NA | NA | NA | NA | NA | NA |
| NA             | NA                 | NA | NA | NA | NA | -2 | NA |    |    |    |    |    |    |    |
| TEX12          | ENSG00000150783.9  | NA | NA | NA | NA | NA | NA | NA | NA | NA | NA | NA | NA | NA |
| NA             | NA                 | NA | NA | NA | NA | -2 | NA |    |    |    |    |    |    |    |
| PRMT3          | ENSG00000185238.12 | NA | NA | NA | NA | NA | NA | NA | NA | NA | NA | NA | NA | NA |
| NA             | NA                 | NA | NA | NA | NA | -2 | NA |    |    |    |    |    |    |    |
| C11orf86       | ENSG00000173237.4  | NA | NA | NA | NA | NA | NA | NA | NA | NA | NA | NA | NA | NA |
| NA             | NA                 | NA | NA | NA | NA | -2 | NA |    |    |    |    |    |    |    |
| C11orf98       | ENSG00000278615.4  | NA | NA | NA | NA | NA | NA | NA | NA | NA | NA | NA | NA | NA |
| NA             | NA                 | NA | NA | NA | NA | -2 | NA |    |    |    |    |    |    |    |
| CHKA           | ENSG00000110721.11 | NA | NA | NA | NA | NA | NA | NA | NA | NA | NA | NA | NA | NA |
| NA             | NA                 | NA | NA | NA | NA | -2 | NA |    |    |    |    |    |    |    |
| ARHGAP42       | ENSG00000165895.17 | NA | NA | NA | NA | NA | NA | NA | NA | NA | NA | NA | NA | NA |
| NA             | NA                 | NA | NA | NA | NA | -2 | NA |    |    |    |    |    |    |    |
| RP11-49K4.2    | ENSG00000256684.1  | NA | NA | NA | NA | NA | NA | NA | NA | NA | NA | NA | NA | NA |
| NA             | NA                 | NA | NA | NA | NA | -2 | NA |    |    |    |    |    |    |    |
| RP11-1036E20.9 | ENSG00000214797.3  | NA | NA | NA | NA | NA | NA | NA | NA | NA | NA | NA | NA | NA |
| NA             | NA                 | NA | NA | NA | NA | -2 | NA |    |    |    |    |    |    |    |
| RP11-677I18.4  | ENSG00000254580.1  | NA | NA | NA | NA | NA | NA | NA | NA | NA | NA | NA | NA | NA |
| NA             | NA                 | NA | NA | NA | NA | -2 | NA |    |    |    |    |    |    |    |
| RBM7           | ENSG00000076053.10 | NA | NA | NA | NA | NA | NA | NA | NA | NA | NA | NA | NA | NA |
| NA             | NA                 | NA | NA | NA | NA | -2 | NA |    |    |    |    |    |    |    |
| STX5           | ENSG00000162236.11 | NA | NA | NA | NA | NA | NA | NA | NA | NA | NA | NA | NA | NA |
| NA             | NA                 | NA | NA | NA | NA | -2 | NA |    |    |    |    |    |    |    |
| MS4A4E         | ENSG00000214787.9  | NA | NA | NA | NA | NA | NA | NA | NA | NA | NA | NA | NA | NA |
| NA             | NA                 | NA | NA | NA | NA | -2 | NA |    |    |    |    |    |    |    |
| LINC01395      | ENSG00000281097.1  | NA | NA | NA | NA | NA | NA | NA | NA | NA | NA | NA | NA | NA |
| NA             | NA                 | NA | NA | NA | NA | -2 | NA |    |    |    |    |    |    |    |
| SLC22A10       | ENSG00000184999.11 | NA | NA | NA | NA | NA | NA | NA | NA | NA | NA | NA | NA | NA |
| NA             | NA                 | NA | NA | NA | NA | -2 | NA |    |    |    |    |    |    |    |
| BDNF           | ENSG00000176697.18 | NA | NA | NA | NA | NA | NA | NA | NA | NA | NA | NA | NA | NA |
| NA             | NA                 | NA | NA | NA | NA | -2 | NA |    |    |    |    |    |    |    |
| INPPL1         | ENSG00000165458.13 | NA | NA | NA | NA | NA | NA | NA | NA | NA | NA | NA | NA | NA |

|               |                    |    |    |    |    |    |    |    |    |    |    |    |    |    |
|---------------|--------------------|----|----|----|----|----|----|----|----|----|----|----|----|----|
| NA            | NA                 | NA | NA | NA | -2 | NA |    |    |    |    |    |    |    |    |
| PDE3B         | ENSG00000152270.8  |    |    | NA | NA | NA | NA | NA | NA | NA | NA | NA | NA | NA |
| NA            | NA                 | NA | NA | NA | -2 | NA |    |    |    |    |    |    |    |    |
| SCGB2A1       | ENSG00000124939.5  |    |    | NA | NA | NA | NA | NA | NA | NA | NA | NA | NA | NA |
| NA            | NA                 | NA | NA | NA | -2 | NA |    |    |    |    |    |    |    |    |
| AP000654.4    | ENSG00000269895.1  |    |    | NA | NA | NA | NA | NA | NA | NA | NA | NA | NA | NA |
| NA            | NA                 | NA | NA | NA | -2 | NA |    |    |    |    |    |    |    |    |
| CTD-2572N17.1 | ENSG00000255109.5  |    |    | NA | NA | NA | NA | NA | NA | NA | NA | NA | NA | NA |
| NA            | NA                 | NA | NA | NA | -2 | NA |    |    |    |    |    |    |    |    |
| PDGFD         | ENSG00000170962.12 |    |    | NA | NA | NA | NA | NA | NA | NA | NA | NA | NA | NA |
| NA            | NA                 | NA | NA | NA | -2 | NA |    |    |    |    |    |    |    |    |
| ZW10          | ENSG00000086827.8  |    |    | NA | NA | NA | NA | NA | NA | NA | NA | NA | NA | NA |
| NA            | NA                 | NA | NA | NA | -2 | NA |    |    |    |    |    |    |    |    |
| OR8B12        | ENSG00000170953.2  |    |    | NA | NA | NA | NA | NA | NA | NA | NA | NA | NA | NA |
| NA            | NA                 | NA | NA | NA | -2 | NA |    |    |    |    |    |    |    |    |
| MICALCL       | ENSG00000133808.4  |    |    | NA | NA | NA | NA | NA | NA | NA | NA | NA | NA | NA |
| NA            | NA                 | NA | NA | NA | -2 | NA |    |    |    |    |    |    |    |    |
| HNRNPUL2      | ENSG00000214753.2  |    |    | NA | NA | NA | NA | NA | NA | NA | NA | NA | NA | NA |
| NA            | NA                 | NA | NA | NA | -2 | NA |    |    |    |    |    |    |    |    |
| RP11-237N19.3 | ENSG00000281386.1  |    |    | NA | NA | NA | NA | NA | NA | NA | NA | NA | NA | NA |
| NA            | NA                 | NA | NA | NA | -2 | NA |    |    |    |    |    |    |    |    |
| PRG2          | ENSG00000186652.9  |    |    | NA | NA | NA | NA | NA | NA | NA | NA | NA | NA | NA |
| NA            | NA                 | NA | NA | NA | -2 | NA |    |    |    |    |    |    |    |    |
| TMEM151A      | ENSG00000179292.4  |    |    | NA | NA | NA | NA | NA | NA | NA | NA | NA | NA | NA |
| NA            | NA                 | NA | NA | NA | -2 | NA |    |    |    |    |    |    |    |    |
| CSRP3         | ENSG00000129170.8  |    |    | NA | NA | NA | NA | NA | NA | NA | NA | NA | NA | NA |
| NA            | NA                 | NA | NA | NA | -2 | NA |    |    |    |    |    |    |    |    |
| CYB561A3      | ENSG00000162144.9  |    |    | NA | NA | NA | NA | NA | NA | NA | NA | NA | NA | NA |
| NA            | NA                 | NA | NA | NA | -2 | NA |    |    |    |    |    |    |    |    |
| KRTAP5-1      | ENSG00000205869.2  |    |    | NA | NA | NA | NA | NA | NA | NA | NA | NA | NA | NA |
| NA            | NA                 | NA | NA | NA | -2 | NA |    |    |    |    |    |    |    |    |
| OR8G5         | ENSG00000255298.2  |    |    | NA | NA | NA | NA | NA | NA | NA | NA | NA | NA | NA |
| NA            | NA                 | NA | NA | NA | -2 | NA |    |    |    |    |    |    |    |    |
| MS4A2         | ENSG00000149534.8  |    |    | NA | NA | NA | NA | NA | NA | NA | NA | NA | NA | NA |
| NA            | NA                 | NA | NA | NA | -2 | NA |    |    |    |    |    |    |    |    |
| PGA5          | ENSG00000256713.7  |    |    | NA | NA | NA | NA | NA | NA | NA | NA | NA | NA | NA |
| NA            | NA                 | NA | NA | NA | -2 | NA |    |    |    |    |    |    |    |    |
| NPAS4         | ENSG00000174576.9  |    |    | NA | NA | NA | NA | NA | NA | NA | NA | NA | NA | NA |
| NA            | NA                 | NA | NA | NA | -2 | NA |    |    |    |    |    |    |    |    |
| DSCAML1       | ENSG00000177103.13 |    |    | NA | NA | NA | NA | NA | NA | NA | NA | NA | NA | NA |
| NA            | NA                 | NA | NA | NA | -2 | NA |    |    |    |    |    |    |    |    |
| IZUMO1R       | ENSG00000183560.9  |    |    | NA | NA | NA | NA | NA | NA | NA | NA | NA | NA | NA |
| NA            | NA                 | NA | NA | NA | -2 | NA |    |    |    |    |    |    |    |    |
| OR8D1         | ENSG00000196341.2  |    |    | NA | NA | NA | NA | NA | NA | NA | NA | NA | NA | NA |
| NA            | NA                 | NA | NA | NA | -2 | NA |    |    |    |    |    |    |    |    |
| KMT5B         | ENSG00000110066.14 |    |    | NA | NA | NA | NA | NA | NA | NA | NA | NA | NA | NA |
| NA            | NA                 | NA | NA | NA | -2 | NA |    |    |    |    |    |    |    |    |
| TMEM138       | ENSG00000149483.11 |    |    | NA | NA | NA | NA | NA | NA | NA | NA | NA | NA | NA |
| NA            | NA                 | NA | NA | NA | -2 | NA |    |    |    |    |    |    |    |    |
| BUD13         | ENSG00000137656.11 |    |    | NA | NA | NA | NA | NA | NA | NA | NA | NA | NA | NA |
| NA            | NA                 | NA | NA | NA | -2 | NA |    |    |    |    |    |    |    |    |
| RP11-643C9.2  | ENSG00000260679.1  |    |    | NA | NA | NA | NA | NA | NA | NA | NA | NA | NA | NA |
| NA            | NA                 | NA | NA | NA | -2 | NA |    |    |    |    |    |    |    |    |
| RP11-347E10.1 | ENSG00000254416.5  |    |    | NA | NA | NA | NA | NA | NA | NA | NA | NA | NA | NA |
| NA            | NA                 | NA | NA | NA | -2 | NA |    |    |    |    |    |    |    |    |
| TRIM49        | ENSG00000168930.13 |    |    | NA | NA | NA | NA | NA | NA | NA | NA | NA | NA | NA |
| NA            | NA                 | NA | NA | NA | -2 | NA |    |    |    |    |    |    |    |    |
| FAM89B        | ENSG00000176973.7  |    |    | NA | NA | NA | NA | NA | NA | NA | NA | NA | NA | NA |
| NA            | NA                 | NA | NA | NA | -2 | NA |    |    |    |    |    |    |    |    |
| RP11-23F23.2  | ENSG00000254480.1  |    |    | NA | NA | NA | NA | NA | NA | NA | NA | NA | NA | NA |
| NA            | NA                 | NA | NA | NA | -2 | NA |    |    |    |    |    |    |    |    |
| RP11-89C3.4   | ENSG00000271584.2  |    |    | NA | NA | NA | NA | NA | NA | NA | NA | NA | NA | NA |

|                |                    |    |    |    |    |    |    |    |    |    |    |    |    |    |    |
|----------------|--------------------|----|----|----|----|----|----|----|----|----|----|----|----|----|----|
| RTN3           | NA                 | NA | NA | NA | NA | NA | -2 | NA | NA | NA | NA | NA | NA | NA | NA |
|                | ENSG00000133318.13 |    |    |    | NA | NA | NA | NA | NA | NA | NA | NA | NA | NA | NA |
|                | NA                 | NA | NA | NA | -2 | NA |    |    |    |    |    |    |    |    |    |
| CTR9           | ENSG00000198730.7  |    |    |    | NA | NA | NA | NA | NA | NA | NA | NA | NA | NA | NA |
|                | NA                 | NA | NA | NA | -2 | NA |    |    |    |    |    |    |    |    |    |
| WT1            | ENSG00000184937.13 |    |    |    | NA | NA | NA | NA | NA | NA | NA | NA | NA | NA | NA |
|                | NA                 | NA | NA | NA | -2 | NA |    |    |    |    |    |    |    |    |    |
| SERPING1       | ENSG00000149131.15 |    |    |    | NA | NA | NA | NA | NA | NA | NA | NA | NA | NA | NA |
|                | NA                 | NA | NA | NA | -2 | NA |    |    |    |    |    |    |    |    |    |
| SDHD           | ENSG00000204370.9  |    |    |    | NA | NA | NA | NA | NA | NA | NA | NA | NA | NA | NA |
|                | NA                 | NA | NA | NA | -2 | NA |    |    |    |    |    |    |    |    |    |
| CD3D           | ENSG00000167286.9  |    |    |    | NA | NA | NA | NA | NA | NA | NA | NA | NA | NA | NA |
|                | NA                 | NA | NA | NA | -2 | NA |    |    |    |    |    |    |    |    |    |
| MS4A10         | ENSG00000172689.1  |    |    |    | NA | NA | NA | NA | NA | NA | NA | NA | NA | NA | NA |
|                | NA                 | NA | NA | NA | -2 | NA |    |    |    |    |    |    |    |    |    |
| MYOD1          | ENSG00000129152.3  |    |    |    | NA | NA | NA | NA | NA | NA | NA | NA | NA | NA | NA |
|                | NA                 | NA | NA | NA | -2 | NA |    |    |    |    |    |    |    |    |    |
| ASCL2          | ENSG00000183734.4  |    |    |    | NA | NA | NA | NA | NA | NA | NA | NA | NA | NA | NA |
|                | NA                 | NA | NA | NA | -2 | NA |    |    |    |    |    |    |    |    |    |
| OR56A1         | ENSG00000180934.5  |    |    |    | NA | NA | NA | NA | NA | NA | NA | NA | NA | NA | NA |
|                | NA                 | NA | NA | NA | -2 | NA |    |    |    |    |    |    |    |    |    |
| HBB            | ENSG00000244734.3  |    |    |    | NA | NA | NA | NA | NA | NA | NA | NA | NA | NA | NA |
|                | NA                 | NA | NA | NA | -2 | NA |    |    |    |    |    |    |    |    |    |
| P2RY6          | ENSG00000171631.14 |    |    |    | NA | NA | NA | NA | NA | NA | NA | NA | NA | NA | NA |
|                | NA                 | NA | NA | NA | -2 | NA |    |    |    |    |    |    |    |    |    |
| RP11-179A16.2  | ENSG00000255246.1  |    |    |    | NA | NA | NA | NA | NA | NA | NA | NA | NA | NA | NA |
|                | NA                 | NA | NA | NA | -2 | NA |    |    |    |    |    |    |    |    |    |
| PITPNM1        | ENSG00000110697.12 |    |    |    | NA | NA | NA | NA | NA | NA | NA | NA | NA | NA | NA |
|                | NA                 | NA | NA | NA | -2 | NA |    |    |    |    |    |    |    |    |    |
| TSG101         | ENSG00000074319.12 |    |    |    | NA | NA | NA | NA | NA | NA | NA | NA | NA | NA | NA |
|                | NA                 | NA | NA | NA | -2 | NA |    |    |    |    |    |    |    |    |    |
| INS-IGF2       | ENSG00000129965.13 |    |    |    | NA | NA | NA | NA | NA | NA | NA | NA | NA | NA | NA |
|                | NA                 | NA | NA | NA | -2 | NA |    |    |    |    |    |    |    |    |    |
| AHNAK          | ENSG00000124942.13 |    |    |    | NA | NA | NA | NA | NA | NA | NA | NA | NA | NA | NA |
|                | NA                 | NA | NA | NA | -2 | NA |    |    |    |    |    |    |    |    |    |
| RP11-727F15.14 | ENSG00000283268.1  |    |    |    | NA | NA | NA | NA | NA | NA | NA | NA | NA | NA | NA |
|                | NA                 | NA | NA | NA | -2 | NA |    |    |    |    |    |    |    |    |    |
| KDM4E          | ENSG00000235268.2  |    |    |    | NA | NA | NA | NA | NA | NA | NA | NA | NA | NA | NA |
|                | NA                 | NA | NA | NA | -2 | NA |    |    |    |    |    |    |    |    |    |
| RP11-672A2.4   | ENSG00000254810.1  |    |    |    | NA | NA | NA | NA | NA | NA | NA | NA | NA | NA | NA |
|                | NA                 | NA | NA | NA | -2 | NA |    |    |    |    |    |    |    |    |    |
| DDI1           | ENSG00000170967.4  |    |    |    | NA | NA | NA | NA | NA | NA | NA | NA | NA | NA | NA |
|                | NA                 | NA | NA | NA | -2 | NA |    |    |    |    |    |    |    |    |    |
| RCN1           | ENSG00000049449.8  |    |    |    | NA | NA | NA | NA | NA | NA | NA | NA | NA | NA | NA |
|                | NA                 | NA | NA | NA | -2 | NA |    |    |    |    |    |    |    |    |    |
| RP11-469N6.2   | ENSG00000255344.1  |    |    |    | NA | NA | NA | NA | NA | NA | NA | NA | NA | NA | NA |
|                | NA                 | NA | NA | NA | -2 | NA |    |    |    |    |    |    |    |    |    |
| UBXN1          | ENSG00000162191.13 |    |    |    | NA | NA | NA | NA | NA | NA | NA | NA | NA | NA | NA |
|                | NA                 | NA | NA | NA | -2 | NA |    |    |    |    |    |    |    |    |    |
| MRGPRX3        | ENSG00000179826.6  |    |    |    | NA | NA | NA | NA | NA | NA | NA | NA | NA | NA | NA |
|                | NA                 | NA | NA | NA | -2 | NA |    |    |    |    |    |    |    |    |    |
| MMP13          | ENSG00000137745.11 |    |    |    | NA | NA | NA | NA | NA | NA | NA | NA | NA | NA | NA |
|                | NA                 | NA | NA | NA | -2 | NA |    |    |    |    |    |    |    |    |    |
| ARFIP2         | ENSG00000132254.12 |    |    |    | NA | NA | NA | NA | NA | NA | NA | NA | NA | NA | NA |
|                | NA                 | NA | NA | NA | -2 | NA |    |    |    |    |    |    |    |    |    |
| PGAP2          | ENSG00000148985.19 |    |    |    | NA | NA | NA | NA | NA | NA | NA | NA | NA | NA | NA |
|                | NA                 | NA | NA | NA | -2 | NA |    |    |    |    |    |    |    |    |    |
| LAMTOR1        | ENSG00000149357.9  |    |    |    | NA | NA | NA | NA | NA | NA | NA | NA | NA | NA | NA |
|                | NA                 | NA | NA | NA | -2 | NA |    |    |    |    |    |    |    |    |    |
| CHRM1          | ENSG00000168539.3  |    |    |    | NA | NA | NA | NA | NA | NA | NA | NA | NA | NA | NA |
|                | NA                 | NA | NA | NA | -2 | NA |    |    |    |    |    |    |    |    |    |
| VPS37C         | ENSG00000167987.10 |    |    |    | NA | NA | NA | NA | NA | NA | NA | NA | NA | NA | NA |

|               |    |                    |    |    |    |    |    |    |    |    |    |    |    |    |
|---------------|----|--------------------|----|----|----|----|----|----|----|----|----|----|----|----|
| NA            | NA | NA                 | NA | NA | -2 | NA |    |    |    |    |    |    |    |    |
| CTD-2005H7.2  |    | ENSG00000255250.1  |    |    |    | NA | NA | NA | NA | NA | NA | NA | NA | NA |
| NA            | NA | NA                 | NA | NA | NA | -2 | NA |    |    |    |    |    |    |    |
| SLC22A11      |    | ENSG00000168065.15 |    |    |    | NA | NA | NA | NA | NA | NA | NA | NA | NA |
| NA            | NA | NA                 | NA | NA | NA | -2 | NA |    |    |    |    |    |    |    |
| RP11-646J21.3 |    | ENSG00000255169.1  |    |    |    | NA | NA | NA | NA | NA | NA | NA | NA | NA |
| NA            | NA | NA                 | NA | NA | NA | -2 | NA |    |    |    |    |    |    |    |
| NRXN2         |    | ENSG00000110076.18 |    |    |    | NA | NA | NA | NA | NA | NA | NA | NA | NA |
| NA            | NA | NA                 | NA | NA | NA | -2 | NA |    |    |    |    |    |    |    |
| ZNF214        |    | ENSG00000149050.9  |    |    |    | NA | NA | NA | NA | NA | NA | NA | NA | NA |
| NA            | NA | NA                 | NA | NA | NA | -2 | NA |    |    |    |    |    |    |    |
| ROBO4         |    | ENSG00000154133.14 |    |    |    | NA | NA | NA | NA | NA | NA | NA | NA | NA |
| NA            | NA | NA                 | NA | NA | NA | -2 | NA |    |    |    |    |    |    |    |
| CCND1         |    | ENSG00000110092.3  |    |    |    | NA | NA | NA | NA | NA | NA | NA | NA | NA |
| NA            | NA | NA                 | NA | NA | NA | -2 | NA |    |    |    |    |    |    |    |
| RP11-646J21.4 |    | ENSG00000254619.1  |    |    |    | NA | NA | NA | NA | NA | NA | NA | NA | NA |
| NA            | NA | NA                 | NA | NA | NA | -2 | NA |    |    |    |    |    |    |    |
| TRIM48        |    | ENSG00000150244.11 |    |    |    | NA | NA | NA | NA | NA | NA | NA | NA | NA |
| NA            | NA | NA                 | NA | NA | NA | -2 | NA |    |    |    |    |    |    |    |
| ANGPTL5       |    | ENSG00000187151.7  |    |    |    | NA | NA | NA | NA | NA | NA | NA | NA | NA |
| NA            | NA | NA                 | NA | NA | NA | -2 | NA |    |    |    |    |    |    |    |
| MRGPRX2       |    | ENSG00000183695.2  |    |    |    | NA | NA | NA | NA | NA | NA | NA | NA | NA |
| NA            | NA | NA                 | NA | NA | NA | -2 | NA |    |    |    |    |    |    |    |
| CDC42EP2      |    | ENSG00000149798.4  |    |    |    | NA | NA | NA | NA | NA | NA | NA | NA | NA |
| NA            | NA | NA                 | NA | NA | NA | -2 | NA |    |    |    |    |    |    |    |
| SLC36A4       |    | ENSG00000180773.14 |    |    |    | NA | NA | NA | NA | NA | NA | NA | NA | NA |
| NA            | NA | NA                 | NA | NA | NA | -2 | NA |    |    |    |    |    |    |    |
| EIF3M         |    | ENSG00000149100.12 |    |    |    | NA | NA | NA | NA | NA | NA | NA | NA | NA |
| NA            | NA | NA                 | NA | NA | NA | -2 | NA |    |    |    |    |    |    |    |
| RP11-563P16.1 |    | ENSG00000254987.1  |    |    |    | NA | NA | NA | NA | NA | NA | NA | NA | NA |
| NA            | NA | NA                 | NA | NA | NA | -2 | NA |    |    |    |    |    |    |    |
| OMP           |    | ENSG00000254550.1  |    |    |    | NA | NA | NA | NA | NA | NA | NA | NA | NA |
| NA            | NA | NA                 | NA | NA | NA | -2 | NA |    |    |    |    |    |    |    |
| GLYATL1P3     |    | ENSG00000255151.2  |    |    |    | NA | NA | NA | NA | NA | NA | NA | NA | NA |
| NA            | NA | NA                 | NA | NA | NA | -2 | NA |    |    |    |    |    |    |    |
| KAT5          |    | ENSG00000172977.12 |    |    |    | NA | NA | NA | NA | NA | NA | NA | NA | NA |
| NA            | NA | NA                 | NA | NA | NA | -2 | NA |    |    |    |    |    |    |    |
| GIF           |    | ENSG00000134812.7  |    |    |    | NA | NA | NA | NA | NA | NA | NA | NA | NA |
| NA            | NA | NA                 | NA | NA | NA | -2 | NA |    |    |    |    |    |    |    |
| CTC-1337H24.4 |    | ENSG00000275484.1  |    |    |    | NA | NA | NA | NA | NA | NA | NA | NA | NA |
| NA            | NA | NA                 | NA | NA | NA | -2 | NA |    |    |    |    |    |    |    |
| SPI1          |    | ENSG00000066336.11 |    |    |    | NA | NA | NA | NA | NA | NA | NA | NA | NA |
| NA            | NA | NA                 | NA | NA | NA | -2 | NA |    |    |    |    |    |    |    |
| DPAGT1        |    | ENSG00000172269.18 |    |    |    | NA | NA | NA | NA | NA | NA | NA | NA | NA |
| NA            | NA | NA                 | NA | NA | NA | -2 | NA |    |    |    |    |    |    |    |
| PSMA1         |    | ENSG00000129084.17 |    |    |    | NA | NA | NA | NA | NA | NA | NA | NA | NA |
| NA            | NA | NA                 | NA | NA | NA | -2 | NA |    |    |    |    |    |    |    |
| RP5-903G2.2   |    | ENSG00000254610.2  |    |    |    | NA | NA | NA | NA | NA | NA | NA | NA | NA |
| NA            | NA | NA                 | NA | NA | NA | -2 | NA |    |    |    |    |    |    |    |
| MTNR1B        |    | ENSG00000134640.2  |    |    |    | NA | NA | NA | NA | NA | NA | NA | NA | NA |
| NA            | NA | NA                 | NA | NA | NA | -2 | NA |    |    |    |    |    |    |    |
| RP11-702B10.2 |    | ENSG00000273415.1  |    |    |    | NA | NA | NA | NA | NA | NA | NA | NA | NA |
| NA            | NA | NA                 | NA | NA | NA | -2 | NA |    |    |    |    |    |    |    |
| AP000439.3    |    | ENSG00000255774.1  |    |    |    | NA | NA | NA | NA | NA | NA | NA | NA | NA |
| NA            | NA | NA                 | NA | NA | NA | -2 | NA |    |    |    |    |    |    |    |
| RBM4          |    | ENSG00000173933.19 |    |    |    | NA | NA | NA | NA | NA | NA | NA | NA | NA |
| NA            | NA | NA                 | NA | NA | NA | -2 | NA |    |    |    |    |    |    |    |
| SAA2          |    | ENSG00000134339.8  |    |    |    | NA | NA | NA | NA | NA | NA | NA | NA | NA |
| NA            | NA | NA                 | NA | NA | NA | -2 | NA |    |    |    |    |    |    |    |
| RP11-626H12.1 |    | ENSG00000255191.1  |    |    |    | NA | NA | NA | NA | NA | NA | NA | NA | NA |
| NA            | NA | NA                 | NA | NA | NA | -2 | NA |    |    |    |    |    |    |    |
| ATP5L         |    | ENSG00000167283.7  |    |    |    | NA | NA | NA | NA | NA | NA | NA | NA | NA |

|               |                    |    |    |    |    |    |    |    |    |    |    |    |    |    |
|---------------|--------------------|----|----|----|----|----|----|----|----|----|----|----|----|----|
| NA            | NA                 | NA | NA | -2 | NA |    |    |    |    |    |    |    |    |    |
| TMEM109       | ENSG00000110108.9  |    |    |    | NA | NA | NA | NA | NA | NA | NA | NA | NA | NA |
| NA            | NA                 | NA | NA | NA | -2 | NA |    |    |    |    |    |    |    |    |
| RP11-794G24.1 | ENSG00000256443.1  |    |    |    | NA | NA | NA | NA | NA | NA | NA | NA | NA | NA |
| NA            | NA                 | NA | NA | NA | NA | -2 | NA |    |    |    |    |    |    |    |
| OR5AK2        | ENSG00000181273.2  |    |    |    | NA | NA | NA | NA | NA | NA | NA | NA | NA | NA |
| NA            | NA                 | NA | NA | NA | NA | -2 | NA |    |    |    |    |    |    |    |
| RP11-713P17.4 | ENSG00000254648.1  |    |    |    | NA | NA | NA | NA | NA | NA | NA | NA | NA | NA |
| NA            | NA                 | NA | NA | NA | NA | -2 | NA |    |    |    |    |    |    |    |
| CTD-2210P24.6 | ENSG00000255447.1  |    |    |    | NA | NA | NA | NA | NA | NA | NA | NA | NA | NA |
| NA            | NA                 | NA | NA | NA | NA | -2 | NA |    |    |    |    |    |    |    |
| LINC01499     | ENSG00000255171.5  |    |    |    | NA | NA | NA | NA | NA | NA | NA | NA | NA | NA |
| NA            | NA                 | NA | NA | NA | NA | -2 | NA |    |    |    |    |    |    |    |
| AP000442.4    | ENSG00000255008.2  |    |    |    | NA | NA | NA | NA | NA | NA | NA | NA | NA | NA |
| NA            | NA                 | NA | NA | NA | NA | -2 | NA |    |    |    |    |    |    |    |
| AC068858.1    | ENSG00000254654.1  |    |    |    | NA | NA | NA | NA | NA | NA | NA | NA | NA | NA |
| NA            | NA                 | NA | NA | NA | NA | -2 | NA |    |    |    |    |    |    |    |
| RP11-211G23.2 | ENSG00000260877.2  |    |    |    | NA | NA | NA | NA | NA | NA | NA | NA | NA | NA |
| NA            | NA                 | NA | NA | NA | NA | -2 | NA |    |    |    |    |    |    |    |
| IL10RA        | ENSG00000110324.10 |    |    |    | NA | NA | NA | NA | NA | NA | NA | NA | NA | NA |
| NA            | NA                 | NA | NA | NA | NA | -2 | NA |    |    |    |    |    |    |    |
| RP11-448P19.1 | ENSG00000255258.2  |    |    |    | NA | NA | NA | NA | NA | NA | NA | NA | NA | NA |
| NA            | NA                 | NA | NA | NA | NA | -2 | NA |    |    |    |    |    |    |    |
| SPTY2D1-AS1   | ENSG00000247595.4  |    |    |    | NA | NA | NA | NA | NA | NA | NA | NA | NA | NA |
| NA            | NA                 | NA | NA | NA | NA | -2 | NA |    |    |    |    |    |    |    |
| FNBP4         | ENSG00000109920.12 |    |    |    | NA | NA | NA | NA | NA | NA | NA | NA | NA | NA |
| NA            | NA                 | NA | NA | NA | NA | -2 | NA |    |    |    |    |    |    |    |
| RP11-222N13.1 | ENSG00000254661.2  |    |    |    | NA | NA | NA | NA | NA | NA | NA | NA | NA | NA |
| NA            | NA                 | NA | NA | NA | NA | -2 | NA |    |    |    |    |    |    |    |
| AP002856.5    | ENSG00000231698.2  |    |    |    | NA | NA | NA | NA | NA | NA | NA | NA | NA | NA |
| NA            | NA                 | NA | NA | NA | NA | -2 | NA |    |    |    |    |    |    |    |
| ARCN1         | ENSG00000095139.13 |    |    |    | NA | NA | NA | NA | NA | NA | NA | NA | NA | NA |
| NA            | NA                 | NA | NA | NA | NA | -2 | NA |    |    |    |    |    |    |    |
| RP11-201M22.1 | ENSG00000255332.7  |    |    |    | NA | NA | NA | NA | NA | NA | NA | NA | NA | NA |
| NA            | NA                 | NA | NA | NA | NA | -2 | NA |    |    |    |    |    |    |    |
| TMX2          | ENSG00000213593.9  |    |    |    | NA | NA | NA | NA | NA | NA | NA | NA | NA | NA |
| NA            | NA                 | NA | NA | NA | NA | -2 | NA |    |    |    |    |    |    |    |
| ACRV1         | ENSG00000134940.13 |    |    |    | NA | NA | NA | NA | NA | NA | NA | NA | NA | NA |
| NA            | NA                 | NA | NA | NA | NA | -2 | NA |    |    |    |    |    |    |    |
| RP11-555G19.1 | ENSG00000255327.1  |    |    |    | NA | NA | NA | NA | NA | NA | NA | NA | NA | NA |
| NA            | NA                 | NA | NA | NA | NA | -2 | NA |    |    |    |    |    |    |    |
| PTPN5         | ENSG00000110786.17 |    |    |    | NA | NA | NA | NA | NA | NA | NA | NA | NA | NA |
| NA            | NA                 | NA | NA | NA | NA | -2 | NA |    |    |    |    |    |    |    |
| ALDH3B2       | ENSG00000132746.14 |    |    |    | NA | NA | NA | NA | NA | NA | NA | NA | NA | NA |
| NA            | NA                 | NA | NA | NA | NA | -2 | NA |    |    |    |    |    |    |    |
| SLC25A22      | ENSG00000177542.10 |    |    |    | NA | NA | NA | NA | NA | NA | NA | NA | NA | NA |
| NA            | NA                 | NA | NA | NA | NA | -2 | NA |    |    |    |    |    |    |    |
| RP11-676F20.5 | ENSG00000282940.1  |    |    |    | NA | NA | NA | NA | NA | NA | NA | NA | NA | NA |
| NA            | NA                 | NA | NA | NA | NA | -2 | NA |    |    |    |    |    |    |    |
| LRP5          | ENSG00000162337.11 |    |    |    | NA | NA | NA | NA | NA | NA | NA | NA | NA | NA |
| NA            | NA                 | NA | NA | NA | NA | -2 | NA |    |    |    |    |    |    |    |
| SC5D          | ENSG00000109929.9  |    |    |    | NA | NA | NA | NA | NA | NA | NA | NA | NA | NA |
| NA            | NA                 | NA | NA | NA | NA | -2 | NA |    |    |    |    |    |    |    |
| CNIH2         | ENSG00000174871.10 |    |    |    | NA | NA | NA | NA | NA | NA | NA | NA | NA | NA |
| NA            | NA                 | NA | NA | NA | NA | -2 | NA |    |    |    |    |    |    |    |
| PGA3          | ENSG00000229859.9  |    |    |    | NA | NA | NA | NA | NA | NA | NA | NA | NA | NA |
| NA            | NA                 | NA | NA | NA | NA | -2 | NA |    |    |    |    |    |    |    |
| BIRC3         | ENSG00000023445.13 |    |    |    | NA | NA | NA | NA | NA | NA | NA | NA | NA | NA |
| NA            | NA                 | NA | NA | NA | NA | -2 | NA |    |    |    |    |    |    |    |
| CEP295        | ENSG00000166004.14 |    |    |    | NA | NA | NA | NA | NA | NA | NA | NA | NA | NA |
| NA            | NA                 | NA | NA | NA | NA | -2 | NA |    |    |    |    |    |    |    |
| GDPD5         | ENSG00000158555.14 |    |    |    | NA | NA | NA | NA | NA | NA | NA | NA | NA | NA |

|               |                    |    |    |    |    |    |    |    |    |    |    |    |    |    |
|---------------|--------------------|----|----|----|----|----|----|----|----|----|----|----|----|----|
|               | NA                 | NA | NA | NA | -2 | NA |    |    |    |    |    |    |    |    |
| GNG3          | ENSG00000162188.5  |    |    |    |    | NA | NA | NA | NA | NA | NA | NA | NA | NA |
|               | NA                 | NA | NA | NA | -2 | NA |    |    |    |    |    |    |    |    |
| HTR3B         | ENSG00000149305.6  |    |    |    |    | NA | NA | NA | NA | NA | NA | NA | NA | NA |
|               | NA                 | NA | NA | NA | -2 | NA |    |    |    |    |    |    |    |    |
| C11orf65      | ENSG00000166323.12 |    |    |    |    | NA | NA | NA | NA | NA | NA | NA | NA | NA |
|               | NA                 | NA | NA | NA | -2 | NA |    |    |    |    |    |    |    |    |
| FERMT3        | ENSG00000149781.12 |    |    |    |    | NA | NA | NA | NA | NA | NA | NA | NA | NA |
|               | NA                 | NA | NA | NA | -2 | NA |    |    |    |    |    |    |    |    |
| ADM           | ENSG00000148926.9  |    |    |    |    | NA | NA | NA | NA | NA | NA | NA | NA | NA |
|               | NA                 | NA | NA | NA | -2 | NA |    |    |    |    |    |    |    |    |
| CTD-2005H7.1  | ENSG00000254731.1  |    |    |    |    | NA | NA | NA | NA | NA | NA | NA | NA | NA |
|               | NA                 | NA | NA | NA | NA | -2 | NA |    |    |    |    |    |    |    |
| HYOU1         | ENSG00000149428.18 |    |    |    |    | NA | NA | NA | NA | NA | NA | NA | NA | NA |
|               | NA                 | NA | NA | NA | -2 | NA |    |    |    |    |    |    |    |    |
| MPEG1         | ENSG00000197629.5  |    |    |    |    | NA | NA | NA | NA | NA | NA | NA | NA | NA |
|               | NA                 | NA | NA | NA | -2 | NA |    |    |    |    |    |    |    |    |
| UBE2L6        | ENSG00000156587.15 |    |    |    |    | NA | NA | NA | NA | NA | NA | NA | NA | NA |
|               | NA                 | NA | NA | NA | NA | -2 | NA |    |    |    |    |    |    |    |
| GLYAT         | ENSG00000149124.10 |    |    |    |    | NA | NA | NA | NA | NA | NA | NA | NA | NA |
|               | NA                 | NA | NA | NA | -2 | NA |    |    |    |    |    |    |    |    |
| RP11-179A10.1 | ENSG00000254401.1  |    |    |    |    | NA | NA | NA | NA | NA | NA | NA | NA | NA |
|               | NA                 | NA | NA | NA | NA | -2 | NA |    |    |    |    |    |    |    |
| MS4A4A        | ENSG00000110079.16 |    |    |    |    | NA | NA | NA | NA | NA | NA | NA | NA | NA |
|               | NA                 | NA | NA | NA | NA | -2 | NA |    |    |    |    |    |    |    |
| RP11-358H18.3 | ENSG00000254586.1  |    |    |    |    | NA | NA | NA | NA | NA | NA | NA | NA | NA |
|               | NA                 | NA | NA | NA | NA | -2 | NA |    |    |    |    |    |    |    |
| BIRC2         | ENSG00000110330.8  |    |    |    |    | NA | NA | NA | NA | NA | NA | NA | NA | NA |
|               | NA                 | NA | NA | NA | -2 | NA |    |    |    |    |    |    |    |    |
| RP11-396O20.1 | ENSG00000254695.1  |    |    |    |    | NA | NA | NA | NA | NA | NA | NA | NA | NA |
|               | NA                 | NA | NA | NA | NA | -2 | NA |    |    |    |    |    |    |    |
| PIH1D2        | ENSG00000150773.10 |    |    |    |    | NA | NA | NA | NA | NA | NA | NA | NA | NA |
|               | NA                 | NA | NA | NA | NA | -2 | NA |    |    |    |    |    |    |    |
| RP11-413N10.3 | ENSG00000283415.1  |    |    |    |    | NA | NA | NA | NA | NA | NA | NA | NA | NA |
|               | NA                 | NA | NA | NA | NA | -2 | NA |    |    |    |    |    |    |    |
| CTD-2007L18.5 | ENSG00000260808.1  |    |    |    |    | NA | NA | NA | NA | NA | NA | NA | NA | NA |
|               | NA                 | NA | NA | NA | NA | -2 | NA |    |    |    |    |    |    |    |
| WEE1          | ENSG00000166483.10 |    |    |    |    | NA | NA | NA | NA | NA | NA | NA | NA | NA |
|               | NA                 | NA | NA | NA | -2 | NA |    |    |    |    |    |    |    |    |
| FOLR1         | ENSG00000110195.12 |    |    |    |    | NA | NA | NA | NA | NA | NA | NA | NA | NA |
|               | NA                 | NA | NA | NA | -2 | NA |    |    |    |    |    |    |    |    |
| IFITM5        | ENSG00000206013.2  |    |    |    |    | NA | NA | NA | NA | NA | NA | NA | NA | NA |
|               | NA                 | NA | NA | NA | NA | -2 | NA |    |    |    |    |    |    |    |
| OR2AG2        | ENSG00000188124.2  |    |    |    |    | NA | NA | NA | NA | NA | NA | NA | NA | NA |
|               | NA                 | NA | NA | NA | NA | -2 | NA |    |    |    |    |    |    |    |
| EHBP1L1       | ENSG00000173442.12 |    |    |    |    | NA | NA | NA | NA | NA | NA | NA | NA | NA |
|               | NA                 | NA | NA | NA | NA | -2 | NA |    |    |    |    |    |    |    |
| P2RX3         | ENSG00000109991.8  |    |    |    |    | NA | NA | NA | NA | NA | NA | NA | NA | NA |
|               | NA                 | NA | NA | NA | -2 | NA |    |    |    |    |    |    |    |    |
| RP11-98J9.3   | ENSG00000254930.1  |    |    |    |    | NA | NA | NA | NA | NA | NA | NA | NA | NA |
|               | NA                 | NA | NA | NA | NA | -2 | NA |    |    |    |    |    |    |    |
| NLRP10        | ENSG00000182261.3  |    |    |    |    | NA | NA | NA | NA | NA | NA | NA | NA | NA |
|               | NA                 | NA | NA | NA | NA | -2 | NA |    |    |    |    |    |    |    |
| CTD-2003C8.2  | ENSG00000250041.2  |    |    |    |    | NA | NA | NA | NA | NA | NA | NA | NA | NA |
|               | NA                 | NA | NA | NA | NA | -2 | NA |    |    |    |    |    |    |    |
| BSCL2         | ENSG00000168000.14 |    |    |    |    | NA | NA | NA | NA | NA | NA | NA | NA | NA |
|               | NA                 | NA | NA | NA | -2 | NA |    |    |    |    |    |    |    |    |
| SCYL1         | ENSG00000142186.16 |    |    |    |    | NA | NA | NA | NA | NA | NA | NA | NA | NA |
|               | NA                 | NA | NA | NA | -2 | NA |    |    |    |    |    |    |    |    |
| SDHAF2        | ENSG00000167985.6  |    |    |    |    | NA | NA | NA | NA | NA | NA | NA | NA | NA |
|               | NA                 | NA | NA | NA | NA | -2 | NA |    |    |    |    |    |    |    |
| MS4A5         | ENSG00000166930.6  |    |    |    |    | NA | NA | NA | NA | NA | NA | NA | NA | NA |

|               |                    |    |    |    |    |    |    |    |    |    |    |    |    |    |
|---------------|--------------------|----|----|----|----|----|----|----|----|----|----|----|----|----|
|               | NA                 | NA | NA | NA | -2 | NA |    |    |    |    |    |    |    |    |
| FOLR3         | ENSG00000110203.8  |    |    |    |    | NA | NA | NA | NA | NA | NA | NA | NA | NA |
|               | NA                 | NA | NA | NA | -2 | NA |    |    |    |    |    |    |    |    |
| REXO2         | ENSG00000076043.9  |    |    |    |    | NA | NA | NA | NA | NA | NA | NA | NA | NA |
|               | NA                 | NA | NA | NA | -2 | NA |    |    |    |    |    |    |    |    |
| VWCE          | ENSG00000167992.12 |    |    |    |    | NA | NA | NA | NA | NA | NA | NA | NA | NA |
|               | NA                 | NA | NA | NA | -2 | NA |    |    |    |    |    |    |    |    |
| HIPK3         | ENSG00000110422.11 |    |    |    |    | NA | NA | NA | NA | NA | NA | NA | NA | NA |
|               | NA                 | NA | NA | NA | -2 | NA |    |    |    |    |    |    |    |    |
| OR6T1         | ENSG00000181499.2  |    |    |    |    | NA | NA | NA | NA | NA | NA | NA | NA | NA |
|               | NA                 | NA | NA | NA | -2 | NA |    |    |    |    |    |    |    |    |
| SLC22A25      | ENSG00000196600.12 |    |    |    |    | NA | NA | NA | NA | NA | NA | NA | NA | NA |
|               | NA                 | NA | NA | NA | -2 | NA |    |    |    |    |    |    |    |    |
| C11orf88      | ENSG00000183644.13 |    |    |    |    | NA | NA | NA | NA | NA | NA | NA | NA | NA |
|               | NA                 | NA | NA | NA | -2 | NA |    |    |    |    |    |    |    |    |
| ARHGEF17      | ENSG00000110237.3  |    |    |    |    | NA | NA | NA | NA | NA | NA | NA | NA | NA |
|               | NA                 | NA | NA | NA | -2 | NA |    |    |    |    |    |    |    |    |
| MS4A1         | ENSG00000156738.17 |    |    |    |    | NA | NA | NA | NA | NA | NA | NA | NA | NA |
|               | NA                 | NA | NA | NA | -2 | NA |    |    |    |    |    |    |    |    |
| ODF3          | ENSG00000177947.13 |    |    |    |    | NA | NA | NA | NA | NA | NA | NA | NA | NA |
|               | NA                 | NA | NA | NA | -2 | NA |    |    |    |    |    |    |    |    |
| RP5-1027O15.1 | ENSG00000255117.5  |    |    |    |    | NA | NA | NA | NA | NA | NA | NA | NA | NA |
|               | NA                 | NA | NA | NA | -2 | NA |    |    |    |    |    |    |    |    |
| RP11-699F16.2 | ENSG00000255187.1  |    |    |    |    | NA | NA | NA | NA | NA | NA | NA | NA | NA |
|               | NA                 | NA | NA | NA | -2 | NA |    |    |    |    |    |    |    |    |
| MS4A6A        | ENSG00000110077.14 |    |    |    |    | NA | NA | NA | NA | NA | NA | NA | NA | NA |
|               | NA                 | NA | NA | NA | -2 | NA |    |    |    |    |    |    |    |    |
| ATG2A         | ENSG00000110046.12 |    |    |    |    | NA | NA | NA | NA | NA | NA | NA | NA | NA |
|               | NA                 | NA | NA | NA | -2 | NA |    |    |    |    |    |    |    |    |
| KIF18A        | ENSG00000121621.6  |    |    |    |    | NA | NA | NA | NA | NA | NA | NA | NA | NA |
|               | NA                 | NA | NA | NA | -2 | NA |    |    |    |    |    |    |    |    |
| RP11-676F20.4 | ENSG00000282916.1  |    |    |    |    | NA | NA | NA | NA | NA | NA | NA | NA | NA |
|               | NA                 | NA | NA | NA | -2 | NA |    |    |    |    |    |    |    |    |
| ANO1          | ENSG00000131620.17 |    |    |    |    | NA | NA | NA | NA | NA | NA | NA | NA | NA |
|               | NA                 | NA | NA | NA | -2 | NA |    |    |    |    |    |    |    |    |
| MACROD1       | ENSG00000133315.10 |    |    |    |    | NA | NA | NA | NA | NA | NA | NA | NA | NA |
|               | NA                 | NA | NA | NA | -2 | NA |    |    |    |    |    |    |    |    |
| PATE4         | ENSG00000237353.6  |    |    |    |    | NA | NA | NA | NA | NA | NA | NA | NA | NA |
|               | NA                 | NA | NA | NA | -2 | NA |    |    |    |    |    |    |    |    |
| FADS2         | ENSG00000134824.13 |    |    |    |    | NA | NA | NA | NA | NA | NA | NA | NA | NA |
|               | NA                 | NA | NA | NA | -2 | NA |    |    |    |    |    |    |    |    |
| LINC01495     | ENSG00000255323.5  |    |    |    |    | NA | NA | NA | NA | NA | NA | NA | NA | NA |
|               | NA                 | NA | NA | NA | -2 | NA |    |    |    |    |    |    |    |    |
| MRPL16        | ENSG00000166902.4  |    |    |    |    | NA | NA | NA | NA | NA | NA | NA | NA | NA |
|               | NA                 | NA | NA | NA | -2 | NA |    |    |    |    |    |    |    |    |
| MARK2         | ENSG00000072518.20 |    |    |    |    | NA | NA | NA | NA | NA | NA | NA | NA | NA |
|               | NA                 | NA | NA | NA | -2 | NA |    |    |    |    |    |    |    |    |
| JAML          | ENSG00000160593.18 |    |    |    |    | NA | NA | NA | NA | NA | NA | NA | NA | NA |
|               | NA                 | NA | NA | NA | -2 | NA |    |    |    |    |    |    |    |    |
| RP11-655C2.3  | ENSG00000255299.5  |    |    |    |    | NA | NA | NA | NA | NA | NA | NA | NA | NA |
|               | NA                 | NA | NA | NA | -2 | NA |    |    |    |    |    |    |    |    |
| FUT4          | ENSG00000196371.3  |    |    |    |    | NA | NA | NA | NA | NA | NA | NA | NA | NA |
|               | NA                 | NA | NA | NA | -2 | NA |    |    |    |    |    |    |    |    |
| MTRNR2L8      | ENSG00000255823.4  |    |    |    |    | NA | NA | NA | NA | NA | NA | NA | NA | NA |
|               | NA                 | NA | NA | NA | -2 | NA |    |    |    |    |    |    |    |    |
| IGF2          | ENSG00000167244.18 |    |    |    |    | NA | NA | NA | NA | NA | NA | NA | NA | NA |
|               | NA                 | NA | NA | NA | -2 | NA |    |    |    |    |    |    |    |    |
| RPL27A        | ENSG00000166441.12 |    |    |    |    | NA | NA | NA | NA | NA | NA | NA | NA | NA |
|               | NA                 | NA | NA | NA | -2 | NA |    |    |    |    |    |    |    |    |
| RP11-264E20.1 | ENSG00000255465.3  |    |    |    |    | NA | NA | NA | NA | NA | NA | NA | NA | NA |
|               | NA                 | NA | NA | NA | -2 | NA |    |    |    |    |    |    |    |    |
| CCDC34        | ENSG00000109881.16 |    |    |    |    | NA | NA | NA | NA | NA | NA | NA | NA | NA |



|               |                    |    |    |    |    |    |    |    |    |    |    |    |    |
|---------------|--------------------|----|----|----|----|----|----|----|----|----|----|----|----|
| NA            | NA                 | NA | NA | NA | -2 | NA | NA | NA | NA | NA | NA | NA | NA |
| MALAT1        | ENSG00000251562.7  | NA | NA | NA | NA | NA | NA | NA | NA | NA | NA | NA | NA |
| NA            | NA                 | NA | NA | NA | -2 | NA | NA | NA | NA | NA | NA | NA | NA |
| C11orf72      | ENSG00000184224.3  | NA | NA | NA | NA | NA | NA | NA | NA | NA | NA | NA | NA |
| NA            | NA                 | NA | NA | NA | -2 | NA | NA | NA | NA | NA | NA | NA | NA |
| UQCC3         | ENSG00000204922.4  | NA | NA | NA | NA | NA | NA | NA | NA | NA | NA | NA | NA |
| NA            | NA                 | NA | NA | NA | -2 | NA | NA | NA | NA | NA | NA | NA | NA |
| ETS1          | ENSG00000134954.14 | NA | NA | NA | NA | NA | NA | NA | NA | NA | NA | NA | NA |
| NA            | NA                 | NA | NA | NA | -2 | NA | NA | NA | NA | NA | NA | NA | NA |
| OR52N2        | ENSG00000180988.2  | NA | NA | NA | NA | NA | NA | NA | NA | NA | NA | NA | NA |
| NA            | NA                 | NA | NA | NA | -2 | NA | NA | NA | NA | NA | NA | NA | NA |
| AIP           | ENSG00000110711.9  | NA | NA | NA | NA | NA | NA | NA | NA | NA | NA | NA | NA |
| NA            | NA                 | NA | NA | NA | -2 | NA | NA | NA | NA | NA | NA | NA | NA |
| SBF2          | ENSG00000133812.15 | NA | NA | NA | NA | NA | NA | NA | NA | NA | NA | NA | NA |
| NA            | NA                 | NA | NA | NA | -2 | NA | NA | NA | NA | NA | NA | NA | NA |
| LGALS12       | ENSG00000133317.14 | NA | NA | NA | NA | NA | NA | NA | NA | NA | NA | NA | NA |
| NA            | NA                 | NA | NA | NA | -2 | NA | NA | NA | NA | NA | NA | NA | NA |
| SELENOH       | ENSG00000211450.9  | NA | NA | NA | NA | NA | NA | NA | NA | NA | NA | NA | NA |
| NA            | NA                 | NA | NA | NA | -2 | NA | NA | NA | NA | NA | NA | NA | NA |
| RP11-405K6.1  | ENSG00000254456.5  | NA | NA | NA | NA | NA | NA | NA | NA | NA | NA | NA | NA |
| NA            | NA                 | NA | NA | NA | NA | -2 | NA | NA | NA | NA | NA | NA | NA |
| RP11-98J9.2   | ENSG00000254927.1  | NA | NA | NA | NA | NA | NA | NA | NA | NA | NA | NA | NA |
| NA            | NA                 | NA | NA | NA | NA | -2 | NA | NA | NA | NA | NA | NA | NA |
| FOSL1         | ENSG00000175592.8  | NA | NA | NA | NA | NA | NA | NA | NA | NA | NA | NA | NA |
| NA            | NA                 | NA | NA | NA | -2 | NA | NA | NA | NA | NA | NA | NA | NA |
| CTC-1337H24.3 | ENSG00000274251.1  | NA | NA | NA | NA | NA | NA | NA | NA | NA | NA | NA | NA |
| NA            | NA                 | NA | NA | NA | NA | -2 | NA | NA | NA | NA | NA | NA | NA |
| GPR137        | ENSG00000173264.14 | NA | NA | NA | NA | NA | NA | NA | NA | NA | NA | NA | NA |
| NA            | NA                 | NA | NA | NA | NA | -2 | NA | NA | NA | NA | NA | NA | NA |
| RASSF10       | ENSG00000189431.7  | NA | NA | NA | NA | NA | NA | NA | NA | NA | NA | NA | NA |
| NA            | NA                 | NA | NA | NA | NA | -2 | NA | NA | NA | NA | NA | NA | NA |
| RELA          | ENSG00000173039.18 | NA | NA | NA | NA | NA | NA | NA | NA | NA | NA | NA | NA |
| NA            | NA                 | NA | NA | NA | -2 | NA | NA | NA | NA | NA | NA | NA | NA |
| VWA5A         | ENSG00000110002.15 | NA | NA | NA | NA | NA | NA | NA | NA | NA | NA | NA | NA |
| NA            | NA                 | NA | NA | NA | -2 | NA | NA | NA | NA | NA | NA | NA | NA |
| HSPA8         | ENSG00000109971.13 | NA | NA | NA | NA | NA | NA | NA | NA | NA | NA | NA | NA |
| NA            | NA                 | NA | NA | NA | -2 | NA | NA | NA | NA | NA | NA | NA | NA |
| MAPK8IP1      | ENSG00000121653.11 | NA | NA | NA | NA | NA | NA | NA | NA | NA | NA | NA | NA |
| NA            | NA                 | NA | NA | NA | NA | -2 | NA | NA | NA | NA | NA | NA | NA |
| RP11-428C19.5 | ENSG00000255160.5  | NA | NA | NA | NA | NA | NA | NA | NA | NA | NA | NA | NA |
| NA            | NA                 | NA | NA | NA | NA | NA | -2 | NA | NA | NA | NA | NA | NA |
| APOA4         | ENSG00000110244.6  | NA | NA | NA | NA | NA | NA | NA | NA | NA | NA | NA | NA |
| NA            | NA                 | NA | NA | NA | -2 | NA | NA | NA | NA | NA | NA | NA | NA |
| METTL12       | ENSG00000214756.7  | NA | NA | NA | NA | NA | NA | NA | NA | NA | NA | NA | NA |
| NA            | NA                 | NA | NA | NA | NA | -2 | NA | NA | NA | NA | NA | NA | NA |
| NUMA1         | ENSG00000137497.17 | NA | NA | NA | NA | NA | NA | NA | NA | NA | NA | NA | NA |
| NA            | NA                 | NA | NA | NA | -2 | NA | NA | NA | NA | NA | NA | NA | NA |
| CPT1A         | ENSG00000110090.12 | NA | NA | NA | NA | NA | NA | NA | NA | NA | NA | NA | NA |
| NA            | NA                 | NA | NA | NA | -2 | NA | NA | NA | NA | NA | NA | NA | NA |
| FAM99A        | ENSG00000205866.3  | NA | NA | NA | NA | NA | NA | NA | NA | NA | NA | NA | NA |
| NA            | NA                 | NA | NA | NA | NA | -2 | NA | NA | NA | NA | NA | NA | NA |
| RP11-89C3.3   | ENSG00000271390.1  | NA | NA | NA | NA | NA | NA | NA | NA | NA | NA | NA | NA |
| NA            | NA                 | NA | NA | NA | NA | -2 | NA | NA | NA | NA | NA | NA | NA |
| OR52N5        | ENSG00000181009.4  | NA | NA | NA | NA | NA | NA | NA | NA | NA | NA | NA | NA |
| NA            | NA                 | NA | NA | NA | NA | -2 | NA | NA | NA | NA | NA | NA | NA |
| EIF4G2        | ENSG00000110321.16 | NA | NA | NA | NA | NA | NA | NA | NA | NA | NA | NA | NA |
| NA            | NA                 | NA | NA | NA | NA | -2 | NA | NA | NA | NA | NA | NA | NA |
| TRIM22        | ENSG00000132274.15 | NA | NA | NA | NA | NA | NA | NA | NA | NA | NA | NA | NA |
| NA            | NA                 | NA | NA | NA | NA | -2 | NA | NA | NA | NA | NA | NA | NA |
| UEVLD         | ENSG00000151116.16 | NA | NA | NA | NA | NA | NA | NA | NA | NA | NA | NA | NA |
| NA            | NA                 | NA | NA | NA | NA | -2 | NA | NA | NA | NA | NA | NA | NA |
| RP11-338H14.1 | ENSG00000250390.2  | NA | NA | NA | NA | NA | NA | NA | NA | NA | NA | NA | NA |

|                |                    |    |    |    |    |    |    |    |    |    |    |    |    |    |
|----------------|--------------------|----|----|----|----|----|----|----|----|----|----|----|----|----|
| NA             | NA                 | NA | NA | NA | NA | -2 | NA |    |    |    |    |    |    |    |
| CAPRIN1        | ENSG00000135387.20 | NA | NA | NA | NA | NA | NA | NA | NA | NA | NA | NA | NA | NA |
| NA             | NA                 | NA | NA | NA | NA | -2 | NA |    |    |    |    |    |    |    |
| CABP2          | ENSG00000167791.12 | NA | NA | NA | NA | NA | NA | NA | NA | NA | NA | NA | NA | NA |
| NA             | NA                 | NA | NA | NA | NA | -2 | NA |    |    |    |    |    |    |    |
| TMEM123        | ENSG00000152558.14 | NA | NA | NA | NA | NA | NA | NA | NA | NA | NA | NA | NA | NA |
| NA             | NA                 | NA | NA | NA | NA | -2 | NA |    |    |    |    |    |    |    |
| ILK            | ENSG00000166333.13 | NA | NA | NA | NA | NA | NA | NA | NA | NA | NA | NA | NA | NA |
| NA             | NA                 | NA | NA | NA | NA | -2 | NA |    |    |    |    |    |    |    |
| CLCF1          | ENSG00000175505.10 | NA | NA | NA | NA | NA | NA | NA | NA | NA | NA | NA | NA | NA |
| NA             | NA                 | NA | NA | NA | NA | -2 | NA |    |    |    |    |    |    |    |
| ZFPL1          | ENSG00000162300.11 | NA | NA | NA | NA | NA | NA | NA | NA | NA | NA | NA | NA | NA |
| NA             | NA                 | NA | NA | NA | NA | -2 | NA |    |    |    |    |    |    |    |
| NXPE2          | ENSG00000204361.8  | NA | NA | NA | NA | NA | NA | NA | NA | NA | NA | NA | NA | NA |
| NA             | NA                 | NA | NA | NA | NA | -2 | NA |    |    |    |    |    |    |    |
| RP11-554A11.7  | ENSG00000260895.1  | NA | NA | NA | NA | NA | NA | NA | NA | NA | NA | NA | NA | NA |
| NA             | NA                 | NA | NA | NA | NA | -2 | NA |    |    |    |    |    |    |    |
| RP11-702F3.4   | ENSG00000255269.2  | NA | NA | NA | NA | NA | NA | NA | NA | NA | NA | NA | NA | NA |
| NA             | NA                 | NA | NA | NA | NA | -2 | NA |    |    |    |    |    |    |    |
| OR6A2          | ENSG00000184933.4  | NA | NA | NA | NA | NA | NA | NA | NA | NA | NA | NA | NA | NA |
| NA             | NA                 | NA | NA | NA | NA | -2 | NA |    |    |    |    |    |    |    |
| RP11-20L19.1   | ENSG00000257787.1  | NA | NA | NA | NA | NA | NA | NA | NA | NA | NA | NA | NA | NA |
| NA             | NA                 | NA | NA | NA | NA | -2 | NA |    |    |    |    |    |    |    |
| LINC00939      | ENSG00000249267.6  | NA | NA | NA | NA | NA | NA | NA | NA | NA | NA | NA | NA | NA |
| NA             | NA                 | NA | NA | NA | NA | -2 | NA |    |    |    |    |    |    |    |
| NDUFA4L2       | ENSG00000185633.10 | NA | NA | NA | NA | NA | NA | NA | NA | NA | NA | NA | NA | NA |
| NA             | NA                 | NA | NA | NA | NA | -2 | NA |    |    |    |    |    |    |    |
| LDHB           | ENSG00000111716.12 | NA | NA | NA | NA | NA | NA | NA | NA | NA | NA | NA | NA | NA |
| NA             | NA                 | NA | NA | NA | NA | -2 | NA |    |    |    |    |    |    |    |
| VDR            | ENSG00000111424.10 | NA | NA | NA | NA | NA | NA | NA | NA | NA | NA | NA | NA | NA |
| NA             | NA                 | NA | NA | NA | NA | -2 | NA |    |    |    |    |    |    |    |
| RP13-941N14.1  | ENSG00000256742.1  | NA | NA | NA | NA | NA | NA | NA | NA | NA | NA | NA | NA | NA |
| NA             | NA                 | NA | NA | NA | NA | -2 | NA |    |    |    |    |    |    |    |
| RASAL1         | ENSG00000111344.11 | NA | NA | NA | NA | NA | NA | NA | NA | NA | NA | NA | NA | NA |
| NA             | NA                 | NA | NA | NA | NA | -2 | NA |    |    |    |    |    |    |    |
| THAP2          | ENSG00000173451.6  | NA | NA | NA | NA | NA | NA | NA | NA | NA | NA | NA | NA | NA |
| NA             | NA                 | NA | NA | NA | NA | -2 | NA |    |    |    |    |    |    |    |
| HIST4H4        | ENSG00000197837.3  | NA | NA | NA | NA | NA | NA | NA | NA | NA | NA | NA | NA | NA |
| NA             | NA                 | NA | NA | NA | NA | -2 | NA |    |    |    |    |    |    |    |
| MPHOSPH9       | ENSG00000051825.14 | NA | NA | NA | NA | NA | NA | NA | NA | NA | NA | NA | NA | NA |
| NA             | NA                 | NA | NA | NA | NA | -2 | NA |    |    |    |    |    |    |    |
| PTPRO          | ENSG00000151490.13 | NA | NA | NA | NA | NA | NA | NA | NA | NA | NA | NA | NA | NA |
| NA             | NA                 | NA | NA | NA | NA | -2 | NA |    |    |    |    |    |    |    |
| ANKRD52        | ENSG00000139645.9  | NA | NA | NA | NA | NA | NA | NA | NA | NA | NA | NA | NA | NA |
| NA             | NA                 | NA | NA | NA | NA | -2 | NA |    |    |    |    |    |    |    |
| RP11-711D18.2  | ENSG00000258435.1  | NA | NA | NA | NA | NA | NA | NA | NA | NA | NA | NA | NA | NA |
| NA             | NA                 | NA | NA | NA | NA | -2 | NA |    |    |    |    |    |    |    |
| ANHX           | ENSG00000227059.6  | NA | NA | NA | NA | NA | NA | NA | NA | NA | NA | NA | NA | NA |
| NA             | NA                 | NA | NA | NA | NA | -2 | NA |    |    |    |    |    |    |    |
| RP11-776A13.3  | ENSG00000257756.5  | NA | NA | NA | NA | NA | NA | NA | NA | NA | NA | NA | NA | NA |
| NA             | NA                 | NA | NA | NA | NA | -2 | NA |    |    |    |    |    |    |    |
| RP11-15J22.8   | ENSG00000275265.1  | NA | NA | NA | NA | NA | NA | NA | NA | NA | NA | NA | NA | NA |
| NA             | NA                 | NA | NA | NA | NA | -2 | NA |    |    |    |    |    |    |    |
| RP11-637A17.2  | ENSG00000247363.2  | NA | NA | NA | NA | NA | NA | NA | NA | NA | NA | NA | NA | NA |
| NA             | NA                 | NA | NA | NA | NA | -2 | NA |    |    |    |    |    |    |    |
| LINC00934      | ENSG00000281196.1  | NA | NA | NA | NA | NA | NA | NA | NA | NA | NA | NA | NA | NA |
| NA             | NA                 | NA | NA | NA | NA | -2 | NA |    |    |    |    |    |    |    |
| RP11-277P12.10 | ENSG00000256288.1  | NA | NA | NA | NA | NA | NA | NA | NA | NA | NA | NA | NA | NA |
| NA             | NA                 | NA | NA | NA | NA | -2 | NA |    |    |    |    |    |    |    |
| RP11-295G12.1  | ENSG00000257750.1  | NA | NA | NA | NA | NA | NA | NA | NA | NA | NA | NA | NA | NA |
| NA             | NA                 | NA | NA | NA | NA | -2 | NA |    |    |    |    |    |    |    |
| ORMDL2         | ENSG00000123353.9  | NA | NA | NA | NA | NA | NA | NA | NA | NA | NA | NA | NA | NA |

|               |                    |    |    |    |    |    |    |    |    |    |    |    |    |    |
|---------------|--------------------|----|----|----|----|----|----|----|----|----|----|----|----|----|
| NA            | NA                 | NA | NA | NA | -2 | NA |    |    |    |    |    |    |    |    |
| RP11-357K6.2  | ENSG00000255814.1  | NA | NA | NA | NA | NA | NA | NA | NA | NA | NA | NA | NA | NA |
| NA            | NA                 | NA | NA | NA | NA | -2 | NA |    |    |    |    |    |    |    |
| PLBD2         | ENSG00000151176.7  | NA | NA | NA | NA | NA | NA | NA | NA | NA | NA | NA | NA | NA |
| NA            | NA                 | NA | NA | NA | NA | -2 | NA |    |    |    |    |    |    |    |
| TBK1          | ENSG00000183735.9  | NA | NA | NA | NA | NA | NA | NA | NA | NA | NA | NA | NA | NA |
| NA            | NA                 | NA | NA | NA | NA | -2 | NA |    |    |    |    |    |    |    |
| IFFO1         | ENSG00000010295.19 | NA | NA | NA | NA | NA | NA | NA | NA | NA | NA | NA | NA | NA |
| NA            | NA                 | NA | NA | NA | NA | -2 | NA |    |    |    |    |    |    |    |
| NR1H4         | ENSG00000012504.13 | NA | NA | NA | NA | NA | NA | NA | NA | NA | NA | NA | NA | NA |
| NA            | NA                 | NA | NA | NA | NA | -2 | NA |    |    |    |    |    |    |    |
| TPCN1         | ENSG00000186815.12 | NA | NA | NA | NA | NA | NA | NA | NA | NA | NA | NA | NA | NA |
| NA            | NA                 | NA | NA | NA | NA | -2 | NA |    |    |    |    |    |    |    |
| LINC01489     | ENSG00000255727.1  | NA | NA | NA | NA | NA | NA | NA | NA | NA | NA | NA | NA | NA |
| NA            | NA                 | NA | NA | NA | NA | -2 | NA |    |    |    |    |    |    |    |
| RILPL2        | ENSG00000150977.10 | NA | NA | NA | NA | NA | NA | NA | NA | NA | NA | NA | NA | NA |
| NA            | NA                 | NA | NA | NA | NA | -2 | NA |    |    |    |    |    |    |    |
| ZNF385A       | ENSG00000161642.17 | NA | NA | NA | NA | NA | NA | NA | NA | NA | NA | NA | NA | NA |
| NA            | NA                 | NA | NA | NA | NA | -2 | NA |    |    |    |    |    |    |    |
| OASL          | ENSG00000135114.12 | NA | NA | NA | NA | NA | NA | NA | NA | NA | NA | NA | NA | NA |
| NA            | NA                 | NA | NA | NA | NA | -2 | NA |    |    |    |    |    |    |    |
| FKBP4         | ENSG00000004478.7  | NA | NA | NA | NA | NA | NA | NA | NA | NA | NA | NA | NA | NA |
| NA            | NA                 | NA | NA | NA | NA | -2 | NA |    |    |    |    |    |    |    |
| RP11-552I14.1 | ENSG00000257860.5  | NA | NA | NA | NA | NA | NA | NA | NA | NA | NA | NA | NA | NA |
| NA            | NA                 | NA | NA | NA | NA | -2 | NA |    |    |    |    |    |    |    |
| TMEM119       | ENSG00000183160.8  | NA | NA | NA | NA | NA | NA | NA | NA | NA | NA | NA | NA | NA |
| NA            | NA                 | NA | NA | NA | NA | -2 | NA |    |    |    |    |    |    |    |
| C12orf77      | ENSG00000226397.8  | NA | NA | NA | NA | NA | NA | NA | NA | NA | NA | NA | NA | NA |
| NA            | NA                 | NA | NA | NA | NA | -2 | NA |    |    |    |    |    |    |    |
| SH2B3         | ENSG00000111252.10 | NA | NA | NA | NA | NA | NA | NA | NA | NA | NA | NA | NA | NA |
| NA            | NA                 | NA | NA | NA | NA | -2 | NA |    |    |    |    |    |    |    |
| OAS3          | ENSG00000111331.12 | NA | NA | NA | NA | NA | NA | NA | NA | NA | NA | NA | NA | NA |
| NA            | NA                 | NA | NA | NA | NA | -2 | NA |    |    |    |    |    |    |    |
| BAZ2A         | ENSG00000076108.11 | NA | NA | NA | NA | NA | NA | NA | NA | NA | NA | NA | NA | NA |
| NA            | NA                 | NA | NA | NA | NA | -2 | NA |    |    |    |    |    |    |    |
| RP11-417L19.4 | ENSG00000255992.1  | NA | NA | NA | NA | NA | NA | NA | NA | NA | NA | NA | NA | NA |
| NA            | NA                 | NA | NA | NA | NA | -2 | NA |    |    |    |    |    |    |    |
| CCDC63        | ENSG00000173093.12 | NA | NA | NA | NA | NA | NA | NA | NA | NA | NA | NA | NA | NA |
| NA            | NA                 | NA | NA | NA | NA | -2 | NA |    |    |    |    |    |    |    |
| RP11-625L16.1 | ENSG00000255745.1  | NA | NA | NA | NA | NA | NA | NA | NA | NA | NA | NA | NA | NA |
| NA            | NA                 | NA | NA | NA | NA | -2 | NA |    |    |    |    |    |    |    |
| RP11-116D17.5 | ENSG00000276972.1  | NA | NA | NA | NA | NA | NA | NA | NA | NA | NA | NA | NA | NA |
| NA            | NA                 | NA | NA | NA | NA | -2 | NA |    |    |    |    |    |    |    |
| TMEM132C      | ENSG00000181234.9  | NA | NA | NA | NA | NA | NA | NA | NA | NA | NA | NA | NA | NA |
| NA            | NA                 | NA | NA | NA | NA | -2 | NA |    |    |    |    |    |    |    |
| ZNF705A       | ENSG00000196946.10 | NA | NA | NA | NA | NA | NA | NA | NA | NA | NA | NA | NA | NA |
| NA            | NA                 | NA | NA | NA | NA | -2 | NA |    |    |    |    |    |    |    |
| RP11-162N7.1  | ENSG00000258254.1  | NA | NA | NA | NA | NA | NA | NA | NA | NA | NA | NA | NA | NA |
| NA            | NA                 | NA | NA | NA | NA | -2 | NA |    |    |    |    |    |    |    |
| NEDD1         | ENSG00000139350.11 | NA | NA | NA | NA | NA | NA | NA | NA | NA | NA | NA | NA | NA |
| NA            | NA                 | NA | NA | NA | NA | -2 | NA |    |    |    |    |    |    |    |
| RP11-362K2.2  | ENSG00000258231.5  | NA | NA | NA | NA | NA | NA | NA | NA | NA | NA | NA | NA | NA |
| NA            | NA                 | NA | NA | NA | NA | -2 | NA |    |    |    |    |    |    |    |
| FGF23         | ENSG00000118972.1  | NA | NA | NA | NA | NA | NA | NA | NA | NA | NA | NA | NA | NA |
| NA            | NA                 | NA | NA | NA | NA | -2 | NA |    |    |    |    |    |    |    |
| AC091814.3    | ENSG00000231560.1  | NA | NA | NA | NA | NA | NA | NA | NA | NA | NA | NA | NA | NA |
| NA            | NA                 | NA | NA | NA | NA | -2 | NA |    |    |    |    |    |    |    |
| DBX2          | ENSG00000185610.6  | NA | NA | NA | NA | NA | NA | NA | NA | NA | NA | NA | NA | NA |
| NA            | NA                 | NA | NA | NA | NA | -2 | NA |    |    |    |    |    |    |    |
| RP11-526P6.1  | ENSG00000256022.5  | NA | NA | NA | NA | NA | NA | NA | NA | NA | NA | NA | NA | NA |
| NA            | NA                 | NA | NA | NA | NA | -2 | NA |    |    |    |    |    |    |    |
| HOXC8         | ENSG00000037965.5  | NA | NA | NA | NA | NA | NA | NA | NA | NA | NA | NA | NA | NA |

|               |                    |    |    |    |    |    |    |    |    |    |    |    |    |
|---------------|--------------------|----|----|----|----|----|----|----|----|----|----|----|----|
| NA            | NA                 | NA | NA | -2 | NA |    |    |    |    |    |    |    |    |
| NECAP1        | ENSG00000089818.17 | NA | NA | NA | NA | NA | NA | NA | NA | NA | NA | NA | NA |
| NA            | NA                 | NA | NA | NA | -2 | NA |    |    |    |    |    |    |    |
| CTC-465D4.1   | ENSG00000256499.1  | NA | NA | NA | NA | NA | NA | NA | NA | NA | NA | NA | NA |
| NA            | NA                 | NA | NA | NA | NA | -2 | NA |    |    |    |    |    |    |
| UHRF1BP1L     | ENSG00000111647.12 | NA | NA | NA | NA | NA | NA | NA | NA | NA | NA | NA | NA |
| NA            | NA                 | NA | NA | NA | NA | -2 | NA |    |    |    |    |    |    |
| FIGNL2        | ENSG00000261308.2  | NA | NA | NA | NA | NA | NA | NA | NA | NA | NA | NA | NA |
| NA            | NA                 | NA | NA | NA | NA | -2 | NA |    |    |    |    |    |    |
| IRAK3         | ENSG00000090376.10 | NA | NA | NA | NA | NA | NA | NA | NA | NA | NA | NA | NA |
| NA            | NA                 | NA | NA | NA | NA | -2 | NA |    |    |    |    |    |    |
| C12orf42      | ENSG00000179088.14 | NA | NA | NA | NA | NA | NA | NA | NA | NA | NA | NA | NA |
| NA            | NA                 | NA | NA | NA | NA | -2 | NA |    |    |    |    |    |    |
| GOLGA3        | ENSG00000090615.14 | NA | NA | NA | NA | NA | NA | NA | NA | NA | NA | NA | NA |
| NA            | NA                 | NA | NA | NA | NA | -2 | NA |    |    |    |    |    |    |
| CTD-2021H9.1  | ENSG00000257265.1  | NA | NA | NA | NA | NA | NA | NA | NA | NA | NA | NA | NA |
| NA            | NA                 | NA | NA | NA | NA | -2 | NA |    |    |    |    |    |    |
| EIF2S3L       | ENSG00000180574.3  | NA | NA | NA | NA | NA | NA | NA | NA | NA | NA | NA | NA |
| NA            | NA                 | NA | NA | NA | NA | -2 | NA |    |    |    |    |    |    |
| RP11-417O18.2 | ENSG00000276487.1  | NA | NA | NA | NA | NA | NA | NA | NA | NA | NA | NA | NA |
| NA            | NA                 | NA | NA | NA | NA | -2 | NA |    |    |    |    |    |    |
| AMHR2         | ENSG00000135409.10 | NA | NA | NA | NA | NA | NA | NA | NA | NA | NA | NA | NA |
| NA            | NA                 | NA | NA | NA | NA | -2 | NA |    |    |    |    |    |    |
| HNRNPA1       | ENSG00000135486.17 | NA | NA | NA | NA | NA | NA | NA | NA | NA | NA | NA | NA |
| NA            | NA                 | NA | NA | NA | NA | -2 | NA |    |    |    |    |    |    |
| ABCD2         | ENSG00000173208.3  | NA | NA | NA | NA | NA | NA | NA | NA | NA | NA | NA | NA |
| NA            | NA                 | NA | NA | NA | NA | -2 | NA |    |    |    |    |    |    |
| UBC           | ENSG00000150991.14 | NA | NA | NA | NA | NA | NA | NA | NA | NA | NA | NA | NA |
| NA            | NA                 | NA | NA | NA | NA | -2 | NA |    |    |    |    |    |    |
| TXNRD1        | ENSG00000198431.15 | NA | NA | NA | NA | NA | NA | NA | NA | NA | NA | NA | NA |
| NA            | NA                 | NA | NA | NA | NA | -2 | NA |    |    |    |    |    |    |
| PPM1H         | ENSG00000111110.11 | NA | NA | NA | NA | NA | NA | NA | NA | NA | NA | NA | NA |
| NA            | NA                 | NA | NA | NA | NA | -2 | NA |    |    |    |    |    |    |
| UTP20         | ENSG00000120800.4  | NA | NA | NA | NA | NA | NA | NA | NA | NA | NA | NA | NA |
| NA            | NA                 | NA | NA | NA | NA | -2 | NA |    |    |    |    |    |    |
| METTL1        | ENSG00000037897.16 | NA | NA | NA | NA | NA | NA | NA | NA | NA | NA | NA | NA |
| NA            | NA                 | NA | NA | NA | NA | -2 | NA |    |    |    |    |    |    |
| KRT6A         | ENSG00000205420.10 | NA | NA | NA | NA | NA | NA | NA | NA | NA | NA | NA | NA |
| NA            | NA                 | NA | NA | NA | NA | -2 | NA |    |    |    |    |    |    |
| FICD          | ENSG00000198855.6  | NA | NA | NA | NA | NA | NA | NA | NA | NA | NA | NA | NA |
| NA            | NA                 | NA | NA | NA | NA | -2 | NA |    |    |    |    |    |    |
| GPR182        | ENSG00000166856.2  | NA | NA | NA | NA | NA | NA | NA | NA | NA | NA | NA | NA |
| NA            | NA                 | NA | NA | NA | NA | -2 | NA |    |    |    |    |    |    |
| CLSTN3        | ENSG00000139182.13 | NA | NA | NA | NA | NA | NA | NA | NA | NA | NA | NA | NA |
| NA            | NA                 | NA | NA | NA | NA | -2 | NA |    |    |    |    |    |    |
| RP11-983C2.3  | ENSG00000256286.1  | NA | NA | NA | NA | NA | NA | NA | NA | NA | NA | NA | NA |
| NA            | NA                 | NA | NA | NA | NA | -2 | NA |    |    |    |    |    |    |
| KRT3          | ENSG00000186442.7  | NA | NA | NA | NA | NA | NA | NA | NA | NA | NA | NA | NA |
| NA            | NA                 | NA | NA | NA | NA | -2 | NA |    |    |    |    |    |    |
| SLC38A4       | ENSG00000139209.15 | NA | NA | NA | NA | NA | NA | NA | NA | NA | NA | NA | NA |
| NA            | NA                 | NA | NA | NA | NA | -2 | NA |    |    |    |    |    |    |
| RP11-631N16.4 | ENSG00000275180.1  | NA | NA | NA | NA | NA | NA | NA | NA | NA | NA | NA | NA |
| NA            | NA                 | NA | NA | NA | NA | -2 | NA |    |    |    |    |    |    |
| CRY1          | ENSG00000008405.11 | NA | NA | NA | NA | NA | NA | NA | NA | NA | NA | NA | NA |
| NA            | NA                 | NA | NA | NA | NA | -2 | NA |    |    |    |    |    |    |
| C12orf45      | ENSG00000151131.10 | NA | NA | NA | NA | NA | NA | NA | NA | NA | NA | NA | NA |
| NA            | NA                 | NA | NA | NA | NA | -2 | NA |    |    |    |    |    |    |
| RP11-274M17.3 | ENSG00000257183.1  | NA | NA | NA | NA | NA | NA | NA | NA | NA | NA | NA | NA |
| NA            | NA                 | NA | NA | NA | NA | -2 | NA |    |    |    |    |    |    |
| RP11-21K12.3  | ENSG00000274695.1  | NA | NA | NA | NA | NA | NA | NA | NA | NA | NA | NA | NA |
| NA            | NA                 | NA | NA | NA | NA | -2 | NA |    |    |    |    |    |    |
| C12orf49      | ENSG00000111412.5  | NA | NA | NA | NA | NA | NA | NA | NA | NA | NA | NA | NA |

|               |                    |    |    |    |    |    |    |    |    |    |    |    |    |    |
|---------------|--------------------|----|----|----|----|----|----|----|----|----|----|----|----|----|
| NA            | NA                 | NA | NA | NA | -2 | NA |    |    |    |    |    |    |    |    |
| PTPRR         | ENSG00000153233.12 |    |    |    |    | NA | NA | NA | NA | NA | NA | NA | NA | NA |
| NA            | NA                 | NA | NA | NA | -2 | NA |    |    |    |    |    |    |    |    |
| RASSF8        | ENSG00000123094.15 |    |    |    |    | NA | NA | NA | NA | NA | NA | NA | NA | NA |
| NA            | NA                 | NA | NA | NA | -2 | NA |    |    |    |    |    |    |    |    |
| CLEC1B        | ENSG00000165682.14 |    |    |    |    | NA | NA | NA | NA | NA | NA | NA | NA | NA |
| NA            | NA                 | NA | NA | NA | -2 | NA |    |    |    |    |    |    |    |    |
| KRT85         | ENSG00000135443.8  |    |    |    |    | NA | NA | NA | NA | NA | NA | NA | NA | NA |
| NA            | NA                 | NA | NA | NA | -2 | NA |    |    |    |    |    |    |    |    |
| HRK           | ENSG00000135116.9  |    |    |    |    | NA | NA | NA | NA | NA | NA | NA | NA | NA |
| NA            | NA                 | NA | NA | NA | -2 | NA |    |    |    |    |    |    |    |    |
| RP11-686F15.2 | ENSG00000260030.1  |    |    |    |    | NA | NA | NA | NA | NA | NA | NA | NA | NA |
| NA            | NA                 | NA | NA | NA | NA | -2 | NA |    |    |    |    |    |    |    |
| RP11-116D17.4 | ENSG00000276308.1  |    |    |    |    | NA | NA | NA | NA | NA | NA | NA | NA | NA |
| NA            | NA                 | NA | NA | NA | NA | -2 | NA |    |    |    |    |    |    |    |
| TMPRSS12      | ENSG00000186452.10 |    |    |    |    | NA | NA | NA | NA | NA | NA | NA | NA | NA |
| NA            | NA                 | NA | NA | NA | -2 | NA |    |    |    |    |    |    |    |    |
| RP1-7G5.6     | ENSG00000249094.2  |    |    |    |    | NA | NA | NA | NA | NA | NA | NA | NA | NA |
| NA            | NA                 | NA | NA | NA | -2 | NA |    |    |    |    |    |    |    |    |
| ATG101        | ENSG00000123395.14 |    |    |    |    | NA | NA | NA | NA | NA | NA | NA | NA | NA |
| NA            | NA                 | NA | NA | NA | -2 | NA |    |    |    |    |    |    |    |    |
| RP11-71J4.2   | ENSG00000256273.1  |    |    |    |    | NA | NA | NA | NA | NA | NA | NA | NA | NA |
| NA            | NA                 | NA | NA | NA | NA | -2 | NA |    |    |    |    |    |    |    |
| RP11-89H19.2  | ENSG00000278385.1  |    |    |    |    | NA | NA | NA | NA | NA | NA | NA | NA | NA |
| NA            | NA                 | NA | NA | NA | NA | -2 | NA |    |    |    |    |    |    |    |
| OSBPL8        | ENSG00000091039.16 |    |    |    |    | NA | NA | NA | NA | NA | NA | NA | NA | NA |
| NA            | NA                 | NA | NA | NA | -2 | NA |    |    |    |    |    |    |    |    |
| RP11-43N5.1   | ENSG00000255970.1  |    |    |    |    | NA | NA | NA | NA | NA | NA | NA | NA | NA |
| NA            | NA                 | NA | NA | NA | NA | -2 | NA |    |    |    |    |    |    |    |
| PRPF40B       | ENSG00000110844.13 |    |    |    |    | NA | NA | NA | NA | NA | NA | NA | NA | NA |
| NA            | NA                 | NA | NA | NA | -2 | NA |    |    |    |    |    |    |    |    |
| LUM           | ENSG00000139329.4  |    |    |    |    | NA | NA | NA | NA | NA | NA | NA | NA | NA |
| NA            | NA                 | NA | NA | NA | -2 | NA |    |    |    |    |    |    |    |    |
| HOXC9         | ENSG00000180806.4  |    |    |    |    | NA | NA | NA | NA | NA | NA | NA | NA | NA |
| NA            | NA                 | NA | NA | NA | -2 | NA |    |    |    |    |    |    |    |    |
| RP3-473L9.4   | ENSG00000257595.2  |    |    |    |    | NA | NA | NA | NA | NA | NA | NA | NA | NA |
| NA            | NA                 | NA | NA | NA | NA | -2 | NA |    |    |    |    |    |    |    |
| SPRYD3        | ENSG00000167778.8  |    |    |    |    | NA | NA | NA | NA | NA | NA | NA | NA | NA |
| NA            | NA                 | NA | NA | NA | -2 | NA |    |    |    |    |    |    |    |    |
| CTD-2021H9.3  | ENSG00000258053.1  |    |    |    |    | NA | NA | NA | NA | NA | NA | NA | NA | NA |
| NA            | NA                 | NA | NA | NA | NA | -2 | NA |    |    |    |    |    |    |    |
| KRT8          | ENSG00000170421.12 |    |    |    |    | NA | NA | NA | NA | NA | NA | NA | NA | NA |
| NA            | NA                 | NA | NA | NA | -2 | NA |    |    |    |    |    |    |    |    |
| LGR5          | ENSG00000139292.12 |    |    |    |    | NA | NA | NA | NA | NA | NA | NA | NA | NA |
| NA            | NA                 | NA | NA | NA | -2 | NA |    |    |    |    |    |    |    |    |
| RP11-76C10.2  | ENSG00000256810.1  |    |    |    |    | NA | NA | NA | NA | NA | NA | NA | NA | NA |
| NA            | NA                 | NA | NA | NA | NA | -2 | NA |    |    |    |    |    |    |    |
| CLIP1-AS1     | ENSG00000257097.1  |    |    |    |    | NA | NA | NA | NA | NA | NA | NA | NA | NA |
| NA            | NA                 | NA | NA | NA | -2 | NA |    |    |    |    |    |    |    |    |
| TESC-AS1      | ENSG00000258285.1  |    |    |    |    | NA | NA | NA | NA | NA | NA | NA | NA | NA |
| NA            | NA                 | NA | NA | NA | -2 | NA |    |    |    |    |    |    |    |    |
| FOXN4         | ENSG00000139445.17 |    |    |    |    | NA | NA | NA | NA | NA | NA | NA | NA | NA |
| NA            | NA                 | NA | NA | NA | -2 | NA |    |    |    |    |    |    |    |    |
| KRT79         | ENSG00000185640.5  |    |    |    |    | NA | NA | NA | NA | NA | NA | NA | NA | NA |
| NA            | NA                 | NA | NA | NA | -2 | NA |    |    |    |    |    |    |    |    |
| RP11-197N18.7 | ENSG00000251497.2  |    |    |    |    | NA | NA | NA | NA | NA | NA | NA | NA | NA |
| NA            | NA                 | NA | NA | NA | NA | -2 | NA |    |    |    |    |    |    |    |
| TCTN1         | ENSG00000204852.15 |    |    |    |    | NA | NA | NA | NA | NA | NA | NA | NA | NA |
| NA            | NA                 | NA | NA | NA | -2 | NA |    |    |    |    |    |    |    |    |
| ZFC3H1        | ENSG00000133858.15 |    |    |    |    | NA | NA | NA | NA | NA | NA | NA | NA | NA |
| NA            | NA                 | NA | NA | NA | -2 | NA |    |    |    |    |    |    |    |    |
| NAP1L1        | ENSG00000187109.13 |    |    |    |    | NA | NA | NA | NA | NA | NA | NA | NA | NA |

|                |                    |    |    |    |    |    |    |    |    |    |    |    |    |
|----------------|--------------------|----|----|----|----|----|----|----|----|----|----|----|----|
| NA             | NA                 | NA | NA | NA | -2 | NA | NA | NA | NA | NA | NA | NA | NA |
| ZC3H10         | ENSG00000135482.6  | NA | NA | NA | NA | NA | NA | NA | NA | NA | NA | NA | NA |
| NA             | NA                 | NA | NA | NA | -2 | NA | NA | NA | NA | NA | NA | NA | NA |
| ART4           | ENSG00000111339.10 | NA | NA | NA | NA | NA | NA | NA | NA | NA | NA | NA | NA |
| NA             | NA                 | NA | NA | NA | -2 | NA | NA | NA | NA | NA | NA | NA | NA |
| RP11-609L23.1  | ENSG00000257510.1  | NA | NA | NA | NA | NA | NA | NA | NA | NA | NA | NA | NA |
| NA             | NA                 | NA | NA | NA | NA | -2 | NA | NA | NA | NA | NA | NA | NA |
| NCKAP1L        | ENSG00000123338.12 | NA | NA | NA | NA | NA | NA | NA | NA | NA | NA | NA | NA |
| NA             | NA                 | NA | NA | NA | -2 | NA | NA | NA | NA | NA | NA | NA | NA |
| NFE2           | ENSG00000123405.13 | NA | NA | NA | NA | NA | NA | NA | NA | NA | NA | NA | NA |
| NA             | NA                 | NA | NA | NA | -2 | NA | NA | NA | NA | NA | NA | NA | NA |
| CDK17          | ENSG00000059758.7  | NA | NA | NA | NA | NA | NA | NA | NA | NA | NA | NA | NA |
| NA             | NA                 | NA | NA | NA | -2 | NA | NA | NA | NA | NA | NA | NA | NA |
| TIMELESS       | ENSG00000111602.11 | NA | NA | NA | NA | NA | NA | NA | NA | NA | NA | NA | NA |
| NA             | NA                 | NA | NA | NA | -2 | NA | NA | NA | NA | NA | NA | NA | NA |
| ORAI1          | ENSG00000276045.2  | NA | NA | NA | NA | NA | NA | NA | NA | NA | NA | NA | NA |
| NA             | NA                 | NA | NA | NA | -2 | NA | NA | NA | NA | NA | NA | NA | NA |
| RP11-449P1.1   | ENSG00000256923.1  | NA | NA | NA | NA | NA | NA | NA | NA | NA | NA | NA | NA |
| NA             | NA                 | NA | NA | NA | NA | -2 | NA | NA | NA | NA | NA | NA | NA |
| RP11-834C11.11 | ENSG00000260470.1  | NA | NA | NA | NA | NA | NA | NA | NA | NA | NA | NA | NA |
| NA             | NA                 | NA | NA | NA | NA | -2 | NA | NA | NA | NA | NA | NA | NA |
| RP11-834C11.6  | ENSG00000249388.1  | NA | NA | NA | NA | NA | NA | NA | NA | NA | NA | NA | NA |
| NA             | NA                 | NA | NA | NA | NA | -2 | NA | NA | NA | NA | NA | NA | NA |
| LINC01405      | ENSG00000185847.7  | NA | NA | NA | NA | NA | NA | NA | NA | NA | NA | NA | NA |
| NA             | NA                 | NA | NA | NA | -2 | NA | NA | NA | NA | NA | NA | NA | NA |
| B3GNT4         | ENSG00000176383.8  | NA | NA | NA | NA | NA | NA | NA | NA | NA | NA | NA | NA |
| NA             | NA                 | NA | NA | NA | -2 | NA | NA | NA | NA | NA | NA | NA | NA |
| PLBD1          | ENSG00000121316.10 | NA | NA | NA | NA | NA | NA | NA | NA | NA | NA | NA | NA |
| NA             | NA                 | NA | NA | NA | -2 | NA | NA | NA | NA | NA | NA | NA | NA |
| RP11-834C11.15 | ENSG00000283073.1  | NA | NA | NA | NA | NA | NA | NA | NA | NA | NA | NA | NA |
| NA             | NA                 | NA | NA | NA | NA | -2 | NA | NA | NA | NA | NA | NA | NA |
| PLEKHG7        | ENSG00000187510.8  | NA | NA | NA | NA | NA | NA | NA | NA | NA | NA | NA | NA |
| NA             | NA                 | NA | NA | NA | -2 | NA | NA | NA | NA | NA | NA | NA | NA |
| DCTN2          | ENSG00000175203.15 | NA | NA | NA | NA | NA | NA | NA | NA | NA | NA | NA | NA |
| NA             | NA                 | NA | NA | NA | -2 | NA | NA | NA | NA | NA | NA | NA | NA |
| PZP            | ENSG00000126838.9  | NA | NA | NA | NA | NA | NA | NA | NA | NA | NA | NA | NA |
| NA             | NA                 | NA | NA | NA | -2 | NA | NA | NA | NA | NA | NA | NA | NA |
| ETV6           | ENSG00000139083.10 | NA | NA | NA | NA | NA | NA | NA | NA | NA | NA | NA | NA |
| NA             | NA                 | NA | NA | NA | -2 | NA | NA | NA | NA | NA | NA | NA | NA |
| RP11-669N7.3   | ENSG00000256699.1  | NA | NA | NA | NA | NA | NA | NA | NA | NA | NA | NA | NA |
| NA             | NA                 | NA | NA | NA | NA | -2 | NA | NA | NA | NA | NA | NA | NA |
| CLEC4C         | ENSG00000198178.10 | NA | NA | NA | NA | NA | NA | NA | NA | NA | NA | NA | NA |
| NA             | NA                 | NA | NA | NA | -2 | NA | NA | NA | NA | NA | NA | NA | NA |
| TROAP          | ENSG00000135451.12 | NA | NA | NA | NA | NA | NA | NA | NA | NA | NA | NA | NA |
| NA             | NA                 | NA | NA | NA | -2 | NA | NA | NA | NA | NA | NA | NA | NA |
| RP11-654D12.3  | ENSG00000257725.1  | NA | NA | NA | NA | NA | NA | NA | NA | NA | NA | NA | NA |
| NA             | NA                 | NA | NA | NA | NA | -2 | NA | NA | NA | NA | NA | NA | NA |
| RP11-221N13.3  | ENSG00000256268.1  | NA | NA | NA | NA | NA | NA | NA | NA | NA | NA | NA | NA |
| NA             | NA                 | NA | NA | NA | NA | -2 | NA | NA | NA | NA | NA | NA | NA |
| RP1-288H2.2    | ENSG00000257989.1  | NA | NA | NA | NA | NA | NA | NA | NA | NA | NA | NA | NA |
| NA             | NA                 | NA | NA | NA | NA | -2 | NA | NA | NA | NA | NA | NA | NA |
| RP11-324E6.6   | ENSG00000256249.1  | NA | NA | NA | NA | NA | NA | NA | NA | NA | NA | NA | NA |
| NA             | NA                 | NA | NA | NA | NA | -2 | NA | NA | NA | NA | NA | NA | NA |
| GALNT4         | ENSG00000257594.3  | NA | NA | NA | NA | NA | NA | NA | NA | NA | NA | NA | NA |
| NA             | NA                 | NA | NA | NA | -2 | NA | NA | NA | NA | NA | NA | NA | NA |
| RP11-1022B3.1  | ENSG00000258117.2  | NA | NA | NA | NA | NA | NA | NA | NA | NA | NA | NA | NA |
| NA             | NA                 | NA | NA | NA | NA | -2 | NA | NA | NA | NA | NA | NA | NA |
| MGP            | ENSG00000111341.9  | NA | NA | NA | NA | NA | NA | NA | NA | NA | NA | NA | NA |
| NA             | NA                 | NA | NA | NA | -2 | NA | NA | NA | NA | NA | NA | NA | NA |
| SELPLG         | ENSG00000110876.9  | NA | NA | NA | NA | NA | NA | NA | NA | NA | NA | NA | NA |
| NA             | NA                 | NA | NA | NA | -2 | NA | NA | NA | NA | NA | NA | NA | NA |
| RP11-900F13.2  | ENSG00000278011.1  | NA | NA | NA | NA | NA | NA | NA | NA | NA | NA | NA | NA |

|               |                    |    |    |    |    |    |    |    |    |    |    |    |    |    |
|---------------|--------------------|----|----|----|----|----|----|----|----|----|----|----|----|----|
| NA            | NA                 | NA | NA | NA | NA | -2 | NA |    |    |    |    |    |    |    |
| RP11-497G19.2 | ENSG00000257654.1  |    |    |    |    | NA | NA | NA | NA | NA | NA | NA | NA | NA |
| NA            | NA                 | NA | NA | NA | NA | -2 | NA |    |    |    |    |    |    |    |
| FOXJ2         | ENSG0000065970.8   |    |    |    |    | NA | NA | NA | NA | NA | NA | NA | NA | NA |
| NA            | NA                 | NA | NA | NA | NA | -2 | NA |    |    |    |    |    |    |    |
| PTGES3        | ENSG00000110958.15 |    |    |    |    | NA | NA | NA | NA | NA | NA | NA | NA | NA |
| NA            | NA                 | NA | NA | NA | NA | -2 | NA |    |    |    |    |    |    |    |
| RP11-214K3.24 | ENSG00000275389.1  |    |    |    |    | NA | NA | NA | NA | NA | NA | NA | NA | NA |
| NA            | NA                 | NA | NA | NA | NA | -2 | NA |    |    |    |    |    |    |    |
| PIWIL1        | ENSG00000125207.7  |    |    |    |    | NA | NA | NA | NA | NA | NA | NA | NA | NA |
| NA            | NA                 | NA | NA | NA | NA | -2 | NA |    |    |    |    |    |    |    |
| RP11-707G18.1 | ENSG00000278743.1  |    |    |    |    | NA | NA | NA | NA | NA | NA | NA | NA | NA |
| NA            | NA                 | NA | NA | NA | NA | -2 | NA |    |    |    |    |    |    |    |
| LRRC10        | ENSG00000198812.4  |    |    |    |    | NA | NA | NA | NA | NA | NA | NA | NA | NA |
| NA            | NA                 | NA | NA | NA | NA | -2 | NA |    |    |    |    |    |    |    |
| LALBA         | ENSG00000167531.6  |    |    |    |    | NA | NA | NA | NA | NA | NA | NA | NA | NA |
| NA            | NA                 | NA | NA | NA | NA | -2 | NA |    |    |    |    |    |    |    |
| AICDA         | ENSG00000111732.10 |    |    |    |    | NA | NA | NA | NA | NA | NA | NA | NA | NA |
| NA            | NA                 | NA | NA | NA | NA | -2 | NA |    |    |    |    |    |    |    |
| MYL6          | ENSG00000092841.18 |    |    |    |    | NA | NA | NA | NA | NA | NA | NA | NA | NA |
| NA            | NA                 | NA | NA | NA | NA | -2 | NA |    |    |    |    |    |    |    |
| EPS8          | ENSG00000151491.12 |    |    |    |    | NA | NA | NA | NA | NA | NA | NA | NA | NA |
| NA            | NA                 | NA | NA | NA | NA | -2 | NA |    |    |    |    |    |    |    |
| FAM109A       | ENSG00000198324.13 |    |    |    |    | NA | NA | NA | NA | NA | NA | NA | NA | NA |
| NA            | NA                 | NA | NA | NA | NA | -2 | NA |    |    |    |    |    |    |    |
| OR10P1        | ENSG00000175398.2  |    |    |    |    | NA | NA | NA | NA | NA | NA | NA | NA | NA |
| NA            | NA                 | NA | NA | NA | NA | -2 | NA |    |    |    |    |    |    |    |
| KRT4          | ENSG00000170477.12 |    |    |    |    | NA | NA | NA | NA | NA | NA | NA | NA | NA |
| NA            | NA                 | NA | NA | NA | NA | -2 | NA |    |    |    |    |    |    |    |
| RP11-495K9.7  | ENSG00000256424.1  |    |    |    |    | NA | NA | NA | NA | NA | NA | NA | NA | NA |
| NA            | NA                 | NA | NA | NA | NA | -2 | NA |    |    |    |    |    |    |    |
| RP11-572C21.1 | ENSG00000251536.2  |    |    |    |    | NA | NA | NA | NA | NA | NA | NA | NA | NA |
| NA            | NA                 | NA | NA | NA | NA | -2 | NA |    |    |    |    |    |    |    |
| KRT6B         | ENSG00000185479.5  |    |    |    |    | NA | NA | NA | NA | NA | NA | NA | NA | NA |
| NA            | NA                 | NA | NA | NA | NA | -2 | NA |    |    |    |    |    |    |    |
| RP13-653N12.1 | ENSG00000256551.1  |    |    |    |    | NA | NA | NA | NA | NA | NA | NA | NA | NA |
| NA            | NA                 | NA | NA | NA | NA | -2 | NA |    |    |    |    |    |    |    |
| STAC3         | ENSG00000185482.7  |    |    |    |    | NA | NA | NA | NA | NA | NA | NA | NA | NA |
| NA            | NA                 | NA | NA | NA | NA | -2 | NA |    |    |    |    |    |    |    |
| CLEC2A        | ENSG00000188393.8  |    |    |    |    | NA | NA | NA | NA | NA | NA | NA | NA | NA |
| NA            | NA                 | NA | NA | NA | NA | -2 | NA |    |    |    |    |    |    |    |
| ATF7          | ENSG00000170653.18 |    |    |    |    | NA | NA | NA | NA | NA | NA | NA | NA | NA |
| NA            | NA                 | NA | NA | NA | NA | -2 | NA |    |    |    |    |    |    |    |
| DNAJC22       | ENSG00000178401.14 |    |    |    |    | NA | NA | NA | NA | NA | NA | NA | NA | NA |
| NA            | NA                 | NA | NA | NA | NA | -2 | NA |    |    |    |    |    |    |    |
| ATXN2         | ENSG00000204842.14 |    |    |    |    | NA | NA | NA | NA | NA | NA | NA | NA | NA |
| NA            | NA                 | NA | NA | NA | NA | -2 | NA |    |    |    |    |    |    |    |
| KIF5A         | ENSG00000155980.11 |    |    |    |    | NA | NA | NA | NA | NA | NA | NA | NA | NA |
| NA            | NA                 | NA | NA | NA | NA | -2 | NA |    |    |    |    |    |    |    |
| LINC01598     | ENSG00000250432.5  |    |    |    |    | NA | NA | NA | NA | NA | NA | NA | NA | NA |
| NA            | NA                 | NA | NA | NA | NA | -2 | NA |    |    |    |    |    |    |    |
| RP11-554E23.2 | ENSG00000258308.5  |    |    |    |    | NA | NA | NA | NA | NA | NA | NA | NA | NA |
| NA            | NA                 | NA | NA | NA | NA | -2 | NA |    |    |    |    |    |    |    |
| RP11-230G5.2  | ENSG00000250748.6  |    |    |    |    | NA | NA | NA | NA | NA | NA | NA | NA | NA |
| NA            | NA                 | NA | NA | NA | NA | -2 | NA |    |    |    |    |    |    |    |
| RP11-923I11.4 | ENSG00000260473.2  |    |    |    |    | NA | NA | NA | NA | NA | NA | NA | NA | NA |
| NA            | NA                 | NA | NA | NA | NA | -2 | NA |    |    |    |    |    |    |    |
| DUSP6         | ENSG00000139318.7  |    |    |    |    | NA | NA | NA | NA | NA | NA | NA | NA | NA |
| NA            | NA                 | NA | NA | NA | NA | -2 | NA |    |    |    |    |    |    |    |
| RP11-503G7.2  | ENSG00000256875.2  |    |    |    |    | NA | NA | NA | NA | NA | NA | NA | NA | NA |
| NA            | NA                 | NA | NA | NA | NA | -2 | NA |    |    |    |    |    |    |    |
| RP11-117L5.4  | ENSG00000256064.1  |    |    |    |    | NA | NA | NA | NA | NA | NA | NA | NA | NA |

|               |                    |    |    |    |    |    |    |    |    |    |    |    |    |    |
|---------------|--------------------|----|----|----|----|----|----|----|----|----|----|----|----|----|
| NA            | NA                 | NA | NA | NA | NA | -2 | NA |    |    |    |    |    |    |    |
| METTL25       | ENSG00000127720.7  |    |    |    |    | NA | NA | NA | NA | NA | NA | NA | NA | NA |
| NA            | NA                 | NA | NA | NA | NA | -2 | NA |    |    |    |    |    |    |    |
| RP11-620J15.2 | ENSG00000245651.2  |    |    |    |    | NA | NA | NA | NA | NA | NA | NA | NA | NA |
| NA            | NA                 | NA | NA | NA | NA | -2 | NA |    |    |    |    |    |    |    |
| PTPRB         | ENSG00000127329.15 |    |    |    |    | NA | NA | NA | NA | NA | NA | NA | NA | NA |
| NA            | NA                 | NA | NA | NA | NA | -2 | NA |    |    |    |    |    |    |    |
| RP11-606D9.1  | ENSG00000256389.1  |    |    |    |    | NA | NA | NA | NA | NA | NA | NA | NA | NA |
| NA            | NA                 | NA | NA | NA | NA | -2 | NA |    |    |    |    |    |    |    |
| TMEM233       | ENSG00000224982.3  |    |    |    |    | NA | NA | NA | NA | NA | NA | NA | NA | NA |
| NA            | NA                 | NA | NA | NA | NA | -2 | NA |    |    |    |    |    |    |    |
| CAPZA3        | ENSG00000177938.4  |    |    |    |    | NA | NA | NA | NA | NA | NA | NA | NA | NA |
| NA            | NA                 | NA | NA | NA | NA | -2 | NA |    |    |    |    |    |    |    |
| OTOGL         | ENSG00000165899.10 |    |    |    |    | NA | NA | NA | NA | NA | NA | NA | NA | NA |
| NA            | NA                 | NA | NA | NA | NA | -2 | NA |    |    |    |    |    |    |    |
| NELL2         | ENSG00000184613.10 |    |    |    |    | NA | NA | NA | NA | NA | NA | NA | NA | NA |
| NA            | NA                 | NA | NA | NA | NA | -2 | NA |    |    |    |    |    |    |    |
| RP5-916L7.2   | ENSG00000256276.1  |    |    |    |    | NA | NA | NA | NA | NA | NA | NA | NA | NA |
| NA            | NA                 | NA | NA | NA | NA | -2 | NA |    |    |    |    |    |    |    |
| GLS2          | ENSG00000135423.12 |    |    |    |    | NA | NA | NA | NA | NA | NA | NA | NA | NA |
| NA            | NA                 | NA | NA | NA | NA | -2 | NA |    |    |    |    |    |    |    |
| TAC3          | ENSG00000166863.11 |    |    |    |    | NA | NA | NA | NA | NA | NA | NA | NA | NA |
| NA            | NA                 | NA | NA | NA | NA | -2 | NA |    |    |    |    |    |    |    |
| RAN           | ENSG00000132341.11 |    |    |    |    | NA | NA | NA | NA | NA | NA | NA | NA | NA |
| NA            | NA                 | NA | NA | NA | NA | -2 | NA |    |    |    |    |    |    |    |
| C12orf10      | ENSG00000139637.13 |    |    |    |    | NA | NA | NA | NA | NA | NA | NA | NA | NA |
| NA            | NA                 | NA | NA | NA | NA | -2 | NA |    |    |    |    |    |    |    |
| RP11-630C16.2 | ENSG00000257239.1  |    |    |    |    | NA | NA | NA | NA | NA | NA | NA | NA | NA |
| NA            | NA                 | NA | NA | NA | NA | -2 | NA |    |    |    |    |    |    |    |
| PRB3          | ENSG00000197870.12 |    |    |    |    | NA | NA | NA | NA | NA | NA | NA | NA | NA |
| NA            | NA                 | NA | NA | NA | NA | -2 | NA |    |    |    |    |    |    |    |
| RP11-70F11.8  | ENSG00000257771.5  |    |    |    |    | NA | NA | NA | NA | NA | NA | NA | NA | NA |
| NA            | NA                 | NA | NA | NA | NA | -2 | NA |    |    |    |    |    |    |    |
| ZNF10         | ENSG00000256223.5  |    |    |    |    | NA | NA | NA | NA | NA | NA | NA | NA | NA |
| NA            | NA                 | NA | NA | NA | NA | -2 | NA |    |    |    |    |    |    |    |
| CLEC4D        | ENSG00000166527.7  |    |    |    |    | NA | NA | NA | NA | NA | NA | NA | NA | NA |
| NA            | NA                 | NA | NA | NA | NA | -2 | NA |    |    |    |    |    |    |    |
| TAS2R30       | ENSG00000256188.3  |    |    |    |    | NA | NA | NA | NA | NA | NA | NA | NA | NA |
| NA            | NA                 | NA | NA | NA | NA | -2 | NA |    |    |    |    |    |    |    |
| RP11-50I19.2  | ENSG00000276136.1  |    |    |    |    | NA | NA | NA | NA | NA | NA | NA | NA | NA |
| NA            | NA                 | NA | NA | NA | NA | -2 | NA |    |    |    |    |    |    |    |
| PYM1          | ENSG00000170473.16 |    |    |    |    | NA | NA | NA | NA | NA | NA | NA | NA | NA |
| NA            | NA                 | NA | NA | NA | NA | -2 | NA |    |    |    |    |    |    |    |
| ARPC3         | ENSG00000111229.15 |    |    |    |    | NA | NA | NA | NA | NA | NA | NA | NA | NA |
| NA            | NA                 | NA | NA | NA | NA | -2 | NA |    |    |    |    |    |    |    |
| C12orf57      | ENSG00000111678.10 |    |    |    |    | NA | NA | NA | NA | NA | NA | NA | NA | NA |
| NA            | NA                 | NA | NA | NA | NA | -2 | NA |    |    |    |    |    |    |    |
| HCAR2         | ENSG00000182782.7  |    |    |    |    | NA | NA | NA | NA | NA | NA | NA | NA | NA |
| NA            | NA                 | NA | NA | NA | NA | -2 | NA |    |    |    |    |    |    |    |
| RP11-272B17.2 | ENSG00000257230.1  |    |    |    |    | NA | NA | NA | NA | NA | NA | NA | NA | NA |
| NA            | NA                 | NA | NA | NA | NA | -2 | NA |    |    |    |    |    |    |    |
| INHBC         | ENSG00000175189.3  |    |    |    |    | NA | NA | NA | NA | NA | NA | NA | NA | NA |
| NA            | NA                 | NA | NA | NA | NA | -2 | NA |    |    |    |    |    |    |    |
| RP11-116D17.2 | ENSG00000257519.1  |    |    |    |    | NA | NA | NA | NA | NA | NA | NA | NA | NA |
| NA            | NA                 | NA | NA | NA | NA | -2 | NA |    |    |    |    |    |    |    |
| ITGB7         | ENSG00000139626.15 |    |    |    |    | NA | NA | NA | NA | NA | NA | NA | NA | NA |
| NA            | NA                 | NA | NA | NA | NA | -2 | NA |    |    |    |    |    |    |    |
| VPS37B        | ENSG00000139722.6  |    |    |    |    | NA | NA | NA | NA | NA | NA | NA | NA | NA |
| NA            | NA                 | NA | NA | NA | NA | -2 | NA |    |    |    |    |    |    |    |
| RP11-497G19.7 | ENSG00000275898.1  |    |    |    |    | NA | NA | NA | NA | NA | NA | NA | NA | NA |
| NA            | NA                 | NA | NA | NA | NA | -2 | NA |    |    |    |    |    |    |    |
| RP11-81H14.1  | ENSG00000273824.1  |    |    |    |    | NA | NA | NA | NA | NA | NA | NA | NA | NA |



|               |                    |    |    |    |    |    |    |    |    |    |    |    |    |    |    |    |    |
|---------------|--------------------|----|----|----|----|----|----|----|----|----|----|----|----|----|----|----|----|
|               | NA                 | NA | NA | NA | NA | NA | -2 | NA |    |    |    |    |    |    |    |    |    |
| SYT1          | ENSG00000067715.13 |    |    | NA | NA | NA | NA | NA | NA | NA | NA | NA | NA | NA | NA | NA | NA |
|               | NA                 | NA | NA | NA | -2 | NA |    |    |    |    |    |    |    |    |    |    |    |
| HNF1A         | ENSG00000135100.17 |    |    | NA | NA | NA | NA | NA | NA | NA | NA | NA | NA | NA | NA | NA | NA |
|               | NA                 | NA | NA | NA | -2 | NA |    |    |    |    |    |    |    |    |    |    |    |
| H2AFJ         | ENSG00000246705.4  |    |    | NA | NA | NA | NA | NA | NA | NA | NA | NA | NA | NA | NA | NA | NA |
|               | NA                 | NA | NA | NA | -2 | NA |    |    |    |    |    |    |    |    |    |    |    |
| RP11-493L12.7 | ENSG00000276454.1  |    |    | NA | NA | NA | NA | NA | NA | NA | NA | NA | NA | NA | NA | NA | NA |
|               | NA                 | NA | NA | NA | NA | -2 | NA |    |    |    |    |    |    |    |    |    |    |
| RP11-620J15.3 | ENSG00000257698.1  |    |    | NA | NA | NA | NA | NA | NA | NA | NA | NA | NA | NA | NA | NA | NA |
|               | NA                 | NA | NA | NA | NA | -2 | NA |    |    |    |    |    |    |    |    |    |    |
| RP11-474D1.2  | ENSG00000256906.1  |    |    | NA | NA | NA | NA | NA | NA | NA | NA | NA | NA | NA | NA | NA | NA |
|               | NA                 | NA | NA | NA | NA | -2 | NA |    |    |    |    |    |    |    |    |    |    |
| ZNF891        | ENSG00000214029.4  |    |    | NA | NA | NA | NA | NA | NA | NA | NA | NA | NA | NA | NA | NA | NA |
|               | NA                 | NA | NA | NA | NA | -2 | NA |    |    |    |    |    |    |    |    |    |    |
| KRT76         | ENSG00000185069.2  |    |    | NA | NA | NA | NA | NA | NA | NA | NA | NA | NA | NA | NA | NA | NA |
|               | NA                 | NA | NA | NA | -2 | NA |    |    |    |    |    |    |    |    |    |    |    |
| CCDC38        | ENSG00000165972.12 |    |    | NA | NA | NA | NA | NA | NA | NA | NA | NA | NA | NA | NA | NA | NA |
|               | NA                 | NA | NA | NA | NA | -2 | NA |    |    |    |    |    |    |    |    |    |    |
| RP4-601P9.2   | ENSG00000257817.1  |    |    | NA | NA | NA | NA | NA | NA | NA | NA | NA | NA | NA | NA | NA | NA |
|               | NA                 | NA | NA | NA | NA | -2 | NA |    |    |    |    |    |    |    |    |    |    |
| IRAK4         | ENSG00000198001.13 |    |    | NA | NA | NA | NA | NA | NA | NA | NA | NA | NA | NA | NA | NA | NA |
|               | NA                 | NA | NA | NA | -2 | NA |    |    |    |    |    |    |    |    |    |    |    |
| CUX2          | ENSG00000111249.13 |    |    | NA | NA | NA | NA | NA | NA | NA | NA | NA | NA | NA | NA | NA | NA |
|               | NA                 | NA | NA | NA | -2 | NA |    |    |    |    |    |    |    |    |    |    |    |
| PIK3C2G       | ENSG00000139144.9  |    |    | NA | NA | NA | NA | NA | NA | NA | NA | NA | NA | NA | NA | NA | NA |
|               | NA                 | NA | NA | NA | NA | -2 | NA |    |    |    |    |    |    |    |    |    |    |
| DDN           | ENSG00000181418.7  |    |    | NA | NA | NA | NA | NA | NA | NA | NA | NA | NA | NA | NA | NA | NA |
|               | NA                 | NA | NA | NA | -2 | NA |    |    |    |    |    |    |    |    |    |    |    |
| CTD-2021H9.2  | ENSG00000257454.1  |    |    | NA | NA | NA | NA | NA | NA | NA | NA | NA | NA | NA | NA | NA | NA |
|               | NA                 | NA | NA | NA | NA | -2 | NA |    |    |    |    |    |    |    |    |    |    |
| BTG1          | ENSG00000133639.4  |    |    | NA | NA | NA | NA | NA | NA | NA | NA | NA | NA | NA | NA | NA | NA |
|               | NA                 | NA | NA | NA | -2 | NA |    |    |    |    |    |    |    |    |    |    |    |
| GSG1          | ENSG00000111305.18 |    |    | NA | NA | NA | NA | NA | NA | NA | NA | NA | NA | NA | NA | NA | NA |
|               | NA                 | NA | NA | NA | -2 | NA |    |    |    |    |    |    |    |    |    |    |    |
| RP11-328J6.1  | ENSG00000257703.5  |    |    | NA | NA | NA | NA | NA | NA | NA | NA | NA | NA | NA | NA | NA | NA |
|               | NA                 | NA | NA | NA | NA | -2 | NA |    |    |    |    |    |    |    |    |    |    |
| RP11-511B23.3 | ENSG00000258171.1  |    |    | NA | NA | NA | NA | NA | NA | NA | NA | NA | NA | NA | NA | NA | NA |
|               | NA                 | NA | NA | NA | NA | -2 | NA |    |    |    |    |    |    |    |    |    |    |
| RP1-116K23.1  | ENSG00000256763.1  |    |    | NA | NA | NA | NA | NA | NA | NA | NA | NA | NA | NA | NA | NA | NA |
|               | NA                 | NA | NA | NA | NA | -2 | NA |    |    |    |    |    |    |    |    |    |    |
| SOCS2         | ENSG00000120833.13 |    |    | NA | NA | NA | NA | NA | NA | NA | NA | NA | NA | NA | NA | NA | NA |
|               | NA                 | NA | NA | NA | -2 | NA |    |    |    |    |    |    |    |    |    |    |    |
| ING4          | ENSG00000111653.19 |    |    | NA | NA | NA | NA | NA | NA | NA | NA | NA | NA | NA | NA | NA | NA |
|               | NA                 | NA | NA | NA | -2 | NA |    |    |    |    |    |    |    |    |    |    |    |
| CCNT1         | ENSG00000129315.10 |    |    | NA | NA | NA | NA | NA | NA | NA | NA | NA | NA | NA | NA | NA | NA |
|               | NA                 | NA | NA | NA | -2 | NA |    |    |    |    |    |    |    |    |    |    |    |
| ASCL1         | ENSG00000139352.3  |    |    | NA | NA | NA | NA | NA | NA | NA | NA | NA | NA | NA | NA | NA | NA |
|               | NA                 | NA | NA | NA | -2 | NA |    |    |    |    |    |    |    |    |    |    |    |
| RP1-97G4.1    | ENSG00000257835.1  |    |    | NA | NA | NA | NA | NA | NA | NA | NA | NA | NA | NA | NA | NA | NA |
|               | NA                 | NA | NA | NA | NA | -2 | NA |    |    |    |    |    |    |    |    |    |    |
| DDX23         | ENSG00000174243.9  |    |    | NA | NA | NA | NA | NA | NA | NA | NA | NA | NA | NA | NA | NA | NA |
|               | NA                 | NA | NA | NA | -2 | NA |    |    |    |    |    |    |    |    |    |    |    |
| RP11-662M24.1 | ENSG00000256343.7  |    |    | NA | NA | NA | NA | NA | NA | NA | NA | NA | NA | NA | NA | NA | NA |
|               | NA                 | NA | NA | NA | NA | -2 | NA |    |    |    |    |    |    |    |    |    |    |
| RP11-428G5.5  | ENSG00000255760.1  |    |    | NA | NA | NA | NA | NA | NA | NA | NA | NA | NA | NA | NA | NA | NA |
|               | NA                 | NA | NA | NA | NA | -2 | NA |    |    |    |    |    |    |    |    |    |    |
| RP11-662M24.2 | ENSG00000256725.1  |    |    | NA | NA | NA | NA | NA | NA | NA | NA | NA | NA | NA | NA | NA | NA |
|               | NA                 | NA | NA | NA | NA | -2 | NA |    |    |    |    |    |    |    |    |    |    |
| HOXC11        | ENSG00000123388.4  |    |    | NA | NA | NA | NA | NA | NA | NA | NA | NA | NA | NA | NA | NA | NA |
|               | NA                 | NA | NA | NA | NA | -2 | NA |    |    |    |    |    |    |    |    |    |    |
| ESYT1         | ENSG00000139641.12 |    |    | NA | NA | NA | NA | NA | NA | NA | NA | NA | NA | NA | NA | NA | NA |

|               |                    |    |    |    |    |    |    |    |    |    |    |    |    |    |
|---------------|--------------------|----|----|----|----|----|----|----|----|----|----|----|----|----|
|               | NA                 | NA | NA | NA | -2 | NA |    |    |    |    |    |    |    |    |
| GPR84         | ENSG00000139572.3  |    |    |    |    | NA | NA | NA | NA | NA | NA | NA | NA | NA |
|               | NA                 | NA | NA | NA | -2 | NA |    |    |    |    |    |    |    |    |
| KERA          | ENSG00000139330.5  |    |    |    |    | NA | NA | NA | NA | NA | NA | NA | NA | NA |
|               | NA                 | NA | NA | NA | -2 | NA |    |    |    |    |    |    |    |    |
| RP11-405A12.2 | ENSG00000255910.1  |    |    |    |    | NA | NA | NA | NA | NA | NA | NA | NA | NA |
|               | NA                 | NA | NA | NA | NA | -2 | NA |    |    |    |    |    |    |    |
| C12orf80      | ENSG00000257137.6  |    |    |    |    | NA | NA | NA | NA | NA | NA | NA | NA | NA |
|               | NA                 | NA | NA | NA | NA | -2 | NA |    |    |    |    |    |    |    |
| MSI1          | ENSG00000135097.6  |    |    |    |    | NA | NA | NA | NA | NA | NA | NA | NA | NA |
|               | NA                 | NA | NA | NA | -2 | NA |    |    |    |    |    |    |    |    |
| PHB2          | ENSG00000215021.8  |    |    |    |    | NA | NA | NA | NA | NA | NA | NA | NA | NA |
|               | NA                 | NA | NA | NA | -2 | NA |    |    |    |    |    |    |    |    |
| DNAJC14       | ENSG00000135392.15 |    |    |    |    | NA | NA | NA | NA | NA | NA | NA | NA | NA |
|               | NA                 | NA | NA | NA | NA | -2 | NA |    |    |    |    |    |    |    |
| RP11-87C12.6  | ENSG00000278084.1  |    |    |    |    | NA | NA | NA | NA | NA | NA | NA | NA | NA |
|               | NA                 | NA | NA | NA | NA | -2 | NA |    |    |    |    |    |    |    |
| AGAP2         | ENSG00000135439.11 |    |    |    |    | NA | NA | NA | NA | NA | NA | NA | NA | NA |
|               | NA                 | NA | NA | NA | -2 | NA |    |    |    |    |    |    |    |    |
| ACSM4         | ENSG00000215009.5  |    |    |    |    | NA | NA | NA | NA | NA | NA | NA | NA | NA |
|               | NA                 | NA | NA | NA | -2 | NA |    |    |    |    |    |    |    |    |
| TAOK3         | ENSG00000135090.13 |    |    |    |    | NA | NA | NA | NA | NA | NA | NA | NA | NA |
|               | NA                 | NA | NA | NA | -2 | NA |    |    |    |    |    |    |    |    |
| RP11-239A17.1 | ENSG00000283240.1  |    |    |    |    | NA | NA | NA | NA | NA | NA | NA | NA | NA |
|               | NA                 | NA | NA | NA | NA | -2 | NA |    |    |    |    |    |    |    |
| RNFT2         | ENSG00000135119.14 |    |    |    |    | NA | NA | NA | NA | NA | NA | NA | NA | NA |
|               | NA                 | NA | NA | NA | -2 | NA |    |    |    |    |    |    |    |    |
| RP13-977J11.8 | ENSG00000256312.1  |    |    |    |    | NA | NA | NA | NA | NA | NA | NA | NA | NA |
|               | NA                 | NA | NA | NA | NA | -2 | NA |    |    |    |    |    |    |    |
| RP11-114H23.2 | ENSG00000258088.1  |    |    |    |    | NA | NA | NA | NA | NA | NA | NA | NA | NA |
|               | NA                 | NA | NA | NA | NA | -2 | NA |    |    |    |    |    |    |    |
| AC012531.25   | ENSG00000260597.1  |    |    |    |    | NA | NA | NA | NA | NA | NA | NA | NA | NA |
|               | NA                 | NA | NA | NA | NA | -2 | NA |    |    |    |    |    |    |    |
| RP11-218M22.2 | ENSG00000256672.1  |    |    |    |    | NA | NA | NA | NA | NA | NA | NA | NA | NA |
|               | NA                 | NA | NA | NA | NA | -2 | NA |    |    |    |    |    |    |    |
| CCND2         | ENSG00000118971.7  |    |    |    |    | NA | NA | NA | NA | NA | NA | NA | NA | NA |
|               | NA                 | NA | NA | NA | -2 | NA |    |    |    |    |    |    |    |    |
| ANO6          | ENSG00000177119.15 |    |    |    |    | NA | NA | NA | NA | NA | NA | NA | NA | NA |
|               | NA                 | NA | NA | NA | -2 | NA |    |    |    |    |    |    |    |    |
| RP13-895J2.6  | ENSG00000277011.1  |    |    |    |    | NA | NA | NA | NA | NA | NA | NA | NA | NA |
|               | NA                 | NA | NA | NA | NA | -2 | NA |    |    |    |    |    |    |    |
| KRT71         | ENSG00000139648.6  |    |    |    |    | NA | NA | NA | NA | NA | NA | NA | NA | NA |
|               | NA                 | NA | NA | NA | -2 | NA |    |    |    |    |    |    |    |    |
| ERP29         | ENSG00000089248.6  |    |    |    |    | NA | NA | NA | NA | NA | NA | NA | NA | NA |
|               | NA                 | NA | NA | NA | -2 | NA |    |    |    |    |    |    |    |    |
| RP11-370I10.2 | ENSG00000258234.1  |    |    |    |    | NA | NA | NA | NA | NA | NA | NA | NA | NA |
|               | NA                 | NA | NA | NA | NA | -2 | NA |    |    |    |    |    |    |    |
| RP13-507P19.2 | ENSG00000230294.4  |    |    |    |    | NA | NA | NA | NA | NA | NA | NA | NA | NA |
|               | NA                 | NA | NA | NA | NA | -2 | NA |    |    |    |    |    |    |    |
| MED13L        | ENSG00000123066.7  |    |    |    |    | NA | NA | NA | NA | NA | NA | NA | NA | NA |
|               | NA                 | NA | NA | NA | NA | -2 | NA |    |    |    |    |    |    |    |
| GDF3          | ENSG00000184344.3  |    |    |    |    | NA | NA | NA | NA | NA | NA | NA | NA | NA |
|               | NA                 | NA | NA | NA | -2 | NA |    |    |    |    |    |    |    |    |
| NABP2         | ENSG00000139579.12 |    |    |    |    | NA | NA | NA | NA | NA | NA | NA | NA | NA |
|               | NA                 | NA | NA | NA | -2 | NA |    |    |    |    |    |    |    |    |
| RP11-850F7.7  | ENSG00000257634.1  |    |    |    |    | NA | NA | NA | NA | NA | NA | NA | NA | NA |
|               | NA                 | NA | NA | NA | NA | -2 | NA |    |    |    |    |    |    |    |
| RP11-476M19.2 | ENSG00000257048.1  |    |    |    |    | NA | NA | NA | NA | NA | NA | NA | NA | NA |
|               | NA                 | NA | NA | NA | NA | -2 | NA |    |    |    |    |    |    |    |
| RP11-386I8.6  | ENSG00000246394.7  |    |    |    |    | NA | NA | NA | NA | NA | NA | NA | NA | NA |
|               | NA                 | NA | NA | NA | NA | -2 | NA |    |    |    |    |    |    |    |
| ASCL4         | ENSG00000187855.5  |    |    |    |    | NA | NA | NA | NA | NA | NA | NA | NA | NA |

|               |                    |    |    |    |    |    |    |    |    |    |    |    |    |    |
|---------------|--------------------|----|----|----|----|----|----|----|----|----|----|----|----|----|
| NA            | NA                 | NA | NA | -2 | NA |    |    |    |    |    |    |    |    |    |
| SLCO1B1       | ENSG00000134538.2  |    |    |    | NA | NA | NA | NA | NA | NA | NA | NA | NA | NA |
| NA            | NA                 | NA | NA | NA | -2 | NA |    |    |    |    |    |    |    |    |
| HMG2          | ENSG00000149948.13 |    |    |    | NA | NA | NA | NA | NA | NA | NA | NA | NA | NA |
| NA            | NA                 | NA | NA | -2 | NA |    |    |    |    |    |    |    |    |    |
| RP11-153K16.1 | ENSG00000256321.5  |    |    |    | NA | NA | NA | NA | NA | NA | NA | NA | NA | NA |
| NA            | NA                 | NA | NA | NA | -2 | NA |    |    |    |    |    |    |    |    |
| U47924.32     | ENSG00000275703.1  |    |    |    | NA | NA | NA | NA | NA | NA | NA | NA | NA | NA |
| NA            | NA                 | NA | NA | -2 | NA |    |    |    |    |    |    |    |    |    |
| RP11-711C17.2 | ENSG00000258332.1  |    |    |    | NA | NA | NA | NA | NA | NA | NA | NA | NA | NA |
| NA            | NA                 | NA | NA | NA | -2 | NA |    |    |    |    |    |    |    |    |
| REP15         | ENSG00000174236.3  |    |    |    | NA | NA | NA | NA | NA | NA | NA | NA | NA | NA |
| NA            | NA                 | NA | NA | -2 | NA |    |    |    |    |    |    |    |    |    |
| RP1-46F2.3    | ENSG00000258240.5  |    |    |    | NA | NA | NA | NA | NA | NA | NA | NA | NA | NA |
| NA            | NA                 | NA | NA | NA | -2 | NA |    |    |    |    |    |    |    |    |
| RP11-788H18.1 | ENSG00000257729.1  |    |    |    | NA | NA | NA | NA | NA | NA | NA | NA | NA | NA |
| NA            | NA                 | NA | NA | NA | -2 | NA |    |    |    |    |    |    |    |    |
| IFT81         | ENSG00000122970.15 |    |    |    | NA | NA | NA | NA | NA | NA | NA | NA | NA | NA |
| NA            | NA                 | NA | NA | -2 | NA |    |    |    |    |    |    |    |    |    |
| RP13-507P19.1 | ENSG00000256484.1  |    |    |    | NA | NA | NA | NA | NA | NA | NA | NA | NA | NA |
| NA            | NA                 | NA | NA | NA | -2 | NA |    |    |    |    |    |    |    |    |
| LINC01479     | ENSG00000255772.5  |    |    |    | NA | NA | NA | NA | NA | NA | NA | NA | NA | NA |
| NA            | NA                 | NA | NA | NA | -2 | NA |    |    |    |    |    |    |    |    |
| RP11-503G7.1  | ENSG00000256783.1  |    |    |    | NA | NA | NA | NA | NA | NA | NA | NA | NA | NA |
| NA            | NA                 | NA | NA | NA | -2 | NA |    |    |    |    |    |    |    |    |
| RP11-139B1.1  | ENSG00000257476.1  |    |    |    | NA | NA | NA | NA | NA | NA | NA | NA | NA | NA |
| NA            | NA                 | NA | NA | NA | -2 | NA |    |    |    |    |    |    |    |    |
| USP5          | ENSG00000111667.13 |    |    |    | NA | NA | NA | NA | NA | NA | NA | NA | NA | NA |
| NA            | NA                 | NA | NA | -2 | NA |    |    |    |    |    |    |    |    |    |
| TAS2R13       | ENSG00000212128.2  |    |    |    | NA | NA | NA | NA | NA | NA | NA | NA | NA | NA |
| NA            | NA                 | NA | NA | NA | -2 | NA |    |    |    |    |    |    |    |    |
| CD163         | ENSG00000177575.12 |    |    |    | NA | NA | NA | NA | NA | NA | NA | NA | NA | NA |
| NA            | NA                 | NA | NA | -2 | NA |    |    |    |    |    |    |    |    |    |
| RP11-18C24.8  | ENSG00000278344.1  |    |    |    | NA | NA | NA | NA | NA | NA | NA | NA | NA | NA |
| NA            | NA                 | NA | NA | NA | -2 | NA |    |    |    |    |    |    |    |    |
| ACVR1B        | ENSG00000135503.12 |    |    |    | NA | NA | NA | NA | NA | NA | NA | NA | NA | NA |
| NA            | NA                 | NA | NA | NA | -2 | NA |    |    |    |    |    |    |    |    |
| SRRM4         | ENSG00000139767.8  |    |    |    | NA | NA | NA | NA | NA | NA | NA | NA | NA | NA |
| NA            | NA                 | NA | NA | -2 | NA |    |    |    |    |    |    |    |    |    |
| RP11-561P12.5 | ENSG00000255801.1  |    |    |    | NA | NA | NA | NA | NA | NA | NA | NA | NA | NA |
| NA            | NA                 | NA | NA | NA | -2 | NA |    |    |    |    |    |    |    |    |
| LRMP          | ENSG00000118308.15 |    |    |    | NA | NA | NA | NA | NA | NA | NA | NA | NA | NA |
| NA            | NA                 | NA | NA | -2 | NA |    |    |    |    |    |    |    |    |    |
| CALCOCO1      | ENSG00000012822.15 |    |    |    | NA | NA | NA | NA | NA | NA | NA | NA | NA | NA |
| NA            | NA                 | NA | NA | NA | -2 | NA |    |    |    |    |    |    |    |    |
| FAM186B       | ENSG00000135436.8  |    |    |    | NA | NA | NA | NA | NA | NA | NA | NA | NA | NA |
| NA            | NA                 | NA | NA | NA | -2 | NA |    |    |    |    |    |    |    |    |
| RHNO1         | ENSG00000171792.10 |    |    |    | NA | NA | NA | NA | NA | NA | NA | NA | NA | NA |
| NA            | NA                 | NA | NA | -2 | NA |    |    |    |    |    |    |    |    |    |
| ACRBP         | ENSG00000111644.7  |    |    |    | NA | NA | NA | NA | NA | NA | NA | NA | NA | NA |
| NA            | NA                 | NA | NA | -2 | NA |    |    |    |    |    |    |    |    |    |
| RP11-612B6.1  | ENSG00000255858.1  |    |    |    | NA | NA | NA | NA | NA | NA | NA | NA | NA | NA |
| NA            | NA                 | NA | NA | NA | -2 | NA |    |    |    |    |    |    |    |    |
| BCL2L14       | ENSG00000121380.12 |    |    |    | NA | NA | NA | NA | NA | NA | NA | NA | NA | NA |
| NA            | NA                 | NA | NA | NA | -2 | NA |    |    |    |    |    |    |    |    |
| SLCO1B7       | ENSG00000205754.10 |    |    |    | NA | NA | NA | NA | NA | NA | NA | NA | NA | NA |
| NA            | NA                 | NA | NA | NA | -2 | NA |    |    |    |    |    |    |    |    |
| PLEKHA5       | ENSG00000052126.14 |    |    |    | NA | NA | NA | NA | NA | NA | NA | NA | NA | NA |
| NA            | NA                 | NA | NA | NA | -2 | NA |    |    |    |    |    |    |    |    |
| TDG           | ENSG00000139372.14 |    |    |    | NA | NA | NA | NA | NA | NA | NA | NA | NA | NA |
| NA            | NA                 | NA | NA | -2 | NA |    |    |    |    |    |    |    |    |    |
| KLRF1         | ENSG00000150045.11 |    |    |    | NA | NA | NA | NA | NA | NA | NA | NA | NA | NA |

|               |                    |    |    |    |    |    |    |    |    |    |    |    |    |    |
|---------------|--------------------|----|----|----|----|----|----|----|----|----|----|----|----|----|
| NA            | NA                 | NA | NA | -2 | NA |    |    |    |    |    |    |    |    |    |
| RERGL         | ENSG00000111404.6  |    |    |    | NA | NA | NA | NA | NA | NA | NA | NA | NA | NA |
| NA            | NA                 | NA | NA | -2 | NA |    |    |    |    |    |    |    |    |    |
| FBXL14        | ENSG00000171823.6  |    |    |    | NA | NA | NA | NA | NA | NA | NA | NA | NA | NA |
| NA            | NA                 | NA | NA | -2 | NA |    |    |    |    |    |    |    |    |    |
| RP11-408B11.2 | ENSG00000258815.1  |    |    |    | NA | NA | NA | NA | NA | NA | NA | NA | NA | NA |
| NA            | NA                 | NA | NA | -2 | NA |    |    |    |    |    |    |    |    |    |
| RP11-575F12.1 | ENSG00000249345.6  |    |    |    | NA | NA | NA | NA | NA | NA | NA | NA | NA | NA |
| NA            | NA                 | NA | NA | -2 | NA |    |    |    |    |    |    |    |    |    |
| YARS2         | ENSG00000139131.12 |    |    |    | NA | NA | NA | NA | NA | NA | NA | NA | NA | NA |
| NA            | NA                 | NA | NA | -2 | NA |    |    |    |    |    |    |    |    |    |
| LRIG3         | ENSG00000139263.11 |    |    |    | NA | NA | NA | NA | NA | NA | NA | NA | NA | NA |
| NA            | NA                 | NA | NA | -2 | NA |    |    |    |    |    |    |    |    |    |
| RP1-228P16.8  | ENSG00000276814.1  |    |    |    | NA | NA | NA | NA | NA | NA | NA | NA | NA | NA |
| NA            | NA                 | NA | NA | -2 | NA |    |    |    |    |    |    |    |    |    |
| RASSF3        | ENSG00000153179.12 |    |    |    | NA | NA | NA | NA | NA | NA | NA | NA | NA | NA |
| NA            | NA                 | NA | NA | -2 | NA |    |    |    |    |    |    |    |    |    |
| KRT6C         | ENSG00000170465.9  |    |    |    | NA | NA | NA | NA | NA | NA | NA | NA | NA | NA |
| NA            | NA                 | NA | NA | -2 | NA |    |    |    |    |    |    |    |    |    |
| OAS2          | ENSG00000111335.12 |    |    |    | NA | NA | NA | NA | NA | NA | NA | NA | NA | NA |
| NA            | NA                 | NA | NA | -2 | NA |    |    |    |    |    |    |    |    |    |
| ARL6IP4       | ENSG00000182196.13 |    |    |    | NA | NA | NA | NA | NA | NA | NA | NA | NA | NA |
| NA            | NA                 | NA | NA | -2 | NA |    |    |    |    |    |    |    |    |    |
| ANP32D        | ENSG00000139223.2  |    |    |    | NA | NA | NA | NA | NA | NA | NA | NA | NA | NA |
| NA            | NA                 | NA | NA | -2 | NA |    |    |    |    |    |    |    |    |    |
| SLC41A2       | ENSG00000136052.9  |    |    |    | NA | NA | NA | NA | NA | NA | NA | NA | NA | NA |
| NA            | NA                 | NA | NA | -2 | NA |    |    |    |    |    |    |    |    |    |
| USP15         | ENSG00000135655.15 |    |    |    | NA | NA | NA | NA | NA | NA | NA | NA | NA | NA |
| NA            | NA                 | NA | NA | -2 | NA |    |    |    |    |    |    |    |    |    |
| RP11-497G19.1 | ENSG00000257883.1  |    |    |    | NA | NA | NA | NA | NA | NA | NA | NA | NA | NA |
| NA            | NA                 | NA | NA | -2 | NA |    |    |    |    |    |    |    |    |    |
| NOP2          | ENSG00000111641.11 |    |    |    | NA | NA | NA | NA | NA | NA | NA | NA | NA | NA |
| NA            | NA                 | NA | NA | -2 | NA |    |    |    |    |    |    |    |    |    |
| RP11-90C1.1   | ENSG00000257879.1  |    |    |    | NA | NA | NA | NA | NA | NA | NA | NA | NA | NA |
| NA            | NA                 | NA | NA | -2 | NA |    |    |    |    |    |    |    |    |    |
| RP3-446N13.1  | ENSG00000256342.1  |    |    |    | NA | NA | NA | NA | NA | NA | NA | NA | NA | NA |
| NA            | NA                 | NA | NA | -2 | NA |    |    |    |    |    |    |    |    |    |
| SFSWAP        | ENSG00000061936.9  |    |    |    | NA | NA | NA | NA | NA | NA | NA | NA | NA | NA |
| NA            | NA                 | NA | NA | -2 | NA |    |    |    |    |    |    |    |    |    |
| FOXM1         | ENSG00000111206.12 |    |    |    | NA | NA | NA | NA | NA | NA | NA | NA | NA | NA |
| NA            | NA                 | NA | NA | -2 | NA |    |    |    |    |    |    |    |    |    |
| RBP5          | ENSG00000139194.7  |    |    |    | NA | NA | NA | NA | NA | NA | NA | NA | NA | NA |
| NA            | NA                 | NA | NA | -2 | NA |    |    |    |    |    |    |    |    |    |
| RP11-352M15.2 | ENSG00000273015.2  |    |    |    | NA | NA | NA | NA | NA | NA | NA | NA | NA | NA |
| NA            | NA                 | NA | NA | -2 | NA |    |    |    |    |    |    |    |    |    |
| AVIL          | ENSG00000135407.10 |    |    |    | NA | NA | NA | NA | NA | NA | NA | NA | NA | NA |
| NA            | NA                 | NA | NA | -2 | NA |    |    |    |    |    |    |    |    |    |
| DIABLO        | ENSG00000184047.16 |    |    |    | NA | NA | NA | NA | NA | NA | NA | NA | NA | NA |
| NA            | NA                 | NA | NA | -2 | NA |    |    |    |    |    |    |    |    |    |
| RP1-228P16.3  | ENSG00000258203.5  |    |    |    | NA | NA | NA | NA | NA | NA | NA | NA | NA | NA |
| NA            | NA                 | NA | NA | -2 | NA |    |    |    |    |    |    |    |    |    |
| RP11-493L12.5 | ENSG00000257924.1  |    |    |    | NA | NA | NA | NA | NA | NA | NA | NA | NA | NA |
| NA            | NA                 | NA | NA | -2 | NA |    |    |    |    |    |    |    |    |    |
| WNK1          | ENSG00000060237.16 |    |    |    | NA | NA | NA | NA | NA | NA | NA | NA | NA | NA |
| NA            | NA                 | NA | NA | -2 | NA |    |    |    |    |    |    |    |    |    |
| NR2C1         | ENSG00000120798.16 |    |    |    | NA | NA | NA | NA | NA | NA | NA | NA | NA | NA |
| NA            | NA                 | NA | NA | -2 | NA |    |    |    |    |    |    |    |    |    |
| HCFC2         | ENSG00000111727.11 |    |    |    | NA | NA | NA | NA | NA | NA | NA | NA | NA | NA |
| NA            | NA                 | NA | NA | -2 | NA |    |    |    |    |    |    |    |    |    |
| SCAF11        | ENSG00000139218.17 |    |    |    | NA | NA | NA | NA | NA | NA | NA | NA | NA | NA |
| NA            | NA                 | NA | NA | -2 | NA |    |    |    |    |    |    |    |    |    |
| LINC00477     | ENSG00000197503.4  |    |    |    | NA | NA | NA | NA | NA | NA | NA | NA | NA | NA |

|                |                    |    |    |    |    |    |    |    |    |    |    |    |    |    |
|----------------|--------------------|----|----|----|----|----|----|----|----|----|----|----|----|----|
| NA             | NA                 | NA | NA | NA | -2 | NA |    |    |    |    |    |    |    |    |
| RP11-291B21.2  | ENSG00000256039.1  |    |    |    |    | NA | NA | NA | NA | NA | NA | NA | NA | NA |
| NA             | NA                 | NA | NA | NA | NA | -2 | NA |    |    |    |    |    |    |    |
| RP11-498M15.1  | ENSG00000257515.1  |    |    |    |    | NA | NA | NA | NA | NA | NA | NA | NA | NA |
| NA             | NA                 | NA | NA | NA | NA | -2 | NA |    |    |    |    |    |    |    |
| RP11-118A3.1   | ENSG00000258331.1  |    |    |    |    | NA | NA | NA | NA | NA | NA | NA | NA | NA |
| NA             | NA                 | NA | NA | NA | NA | -2 | NA |    |    |    |    |    |    |    |
| LRRIQ1         | ENSG00000133640.18 |    |    |    |    | NA | NA | NA | NA | NA | NA | NA | NA | NA |
| NA             | NA                 | NA | NA | NA | NA | -2 | NA |    |    |    |    |    |    |    |
| RP11-1038A11.1 | ENSG00000255983.1  |    |    |    |    | NA | NA | NA | NA | NA | NA | NA | NA | NA |
| NA             | NA                 | NA | NA | NA | NA | -2 | NA |    |    |    |    |    |    |    |
| PA2G4          | ENSG00000170515.13 |    |    |    |    | NA | NA | NA | NA | NA | NA | NA | NA | NA |
| NA             | NA                 | NA | NA | NA | NA | -2 | NA |    |    |    |    |    |    |    |
| RP11-321F8.4   | ENSG00000257543.1  |    |    |    |    | NA | NA | NA | NA | NA | NA | NA | NA | NA |
| NA             | NA                 | NA | NA | NA | NA | -2 | NA |    |    |    |    |    |    |    |
| LINC00944      | ENSG00000256128.5  |    |    |    |    | NA | NA | NA | NA | NA | NA | NA | NA | NA |
| NA             | NA                 | NA | NA | NA | NA | -2 | NA |    |    |    |    |    |    |    |
| SLC39A5        | ENSG00000139540.11 |    |    |    |    | NA | NA | NA | NA | NA | NA | NA | NA | NA |
| NA             | NA                 | NA | NA | NA | NA | -2 | NA |    |    |    |    |    |    |    |
| RP1-228P16.5   | ENSG00000257955.1  |    |    |    |    | NA | NA | NA | NA | NA | NA | NA | NA | NA |
| NA             | NA                 | NA | NA | NA | NA | -2 | NA |    |    |    |    |    |    |    |
| AQP6           | ENSG00000086159.12 |    |    |    |    | NA | NA | NA | NA | NA | NA | NA | NA | NA |
| NA             | NA                 | NA | NA | NA | NA | -2 | NA |    |    |    |    |    |    |    |
| STAB2          | ENSG00000136011.14 |    |    |    |    | NA | NA | NA | NA | NA | NA | NA | NA | NA |
| NA             | NA                 | NA | NA | NA | NA | -2 | NA |    |    |    |    |    |    |    |
| RP11-664H17.1  | ENSG00000256287.1  |    |    |    |    | NA | NA | NA | NA | NA | NA | NA | NA | NA |
| NA             | NA                 | NA | NA | NA | NA | -2 | NA |    |    |    |    |    |    |    |
| RNF34          | ENSG00000170633.16 |    |    |    |    | NA | NA | NA | NA | NA | NA | NA | NA | NA |
| NA             | NA                 | NA | NA | NA | NA | -2 | NA |    |    |    |    |    |    |    |
| HOXC10         | ENSG00000180818.4  |    |    |    |    | NA | NA | NA | NA | NA | NA | NA | NA | NA |
| NA             | NA                 | NA | NA | NA | NA | -2 | NA |    |    |    |    |    |    |    |
| RP11-476D10.1  | ENSG00000260943.1  |    |    |    |    | NA | NA | NA | NA | NA | NA | NA | NA | NA |
| NA             | NA                 | NA | NA | NA | NA | -2 | NA |    |    |    |    |    |    |    |
| FZD10          | ENSG00000111432.4  |    |    |    |    | NA | NA | NA | NA | NA | NA | NA | NA | NA |
| NA             | NA                 | NA | NA | NA | NA | -2 | NA |    |    |    |    |    |    |    |
| FAM71C         | ENSG00000180219.1  |    |    |    |    | NA | NA | NA | NA | NA | NA | NA | NA | NA |
| NA             | NA                 | NA | NA | NA | NA | -2 | NA |    |    |    |    |    |    |    |
| SLC38A1        | ENSG00000111371.15 |    |    |    |    | NA | NA | NA | NA | NA | NA | NA | NA | NA |
| NA             | NA                 | NA | NA | NA | NA | -2 | NA |    |    |    |    |    |    |    |
| CLLU10S        | ENSG00000205057.4  |    |    |    |    | NA | NA | NA | NA | NA | NA | NA | NA | NA |
| NA             | NA                 | NA | NA | NA | NA | -2 | NA |    |    |    |    |    |    |    |
| OVCH1          | ENSG00000187950.8  |    |    |    |    | NA | NA | NA | NA | NA | NA | NA | NA | NA |
| NA             | NA                 | NA | NA | NA | NA | -2 | NA |    |    |    |    |    |    |    |
| RP11-75L1.1    | ENSG00000256582.1  |    |    |    |    | NA | NA | NA | NA | NA | NA | NA | NA | NA |
| NA             | NA                 | NA | NA | NA | NA | -2 | NA |    |    |    |    |    |    |    |
| RP11-114G22.1  | ENSG00000256995.6  |    |    |    |    | NA | NA | NA | NA | NA | NA | NA | NA | NA |
| NA             | NA                 | NA | NA | NA | NA | -2 | NA |    |    |    |    |    |    |    |
| PRB4           | ENSG00000230657.6  |    |    |    |    | NA | NA | NA | NA | NA | NA | NA | NA | NA |
| NA             | NA                 | NA | NA | NA | NA | -2 | NA |    |    |    |    |    |    |    |
| RP11-1028N23.3 | ENSG00000258108.1  |    |    |    |    | NA | NA | NA | NA | NA | NA | NA | NA | NA |
| NA             | NA                 | NA | NA | NA | NA | -2 | NA |    |    |    |    |    |    |    |
| HOXC5          | ENSG00000172789.3  |    |    |    |    | NA | NA | NA | NA | NA | NA | NA | NA | NA |
| NA             | NA                 | NA | NA | NA | NA | -2 | NA |    |    |    |    |    |    |    |
| KRT75          | ENSG00000170454.5  |    |    |    |    | NA | NA | NA | NA | NA | NA | NA | NA | NA |
| NA             | NA                 | NA | NA | NA | NA | -2 | NA |    |    |    |    |    |    |    |
| U47924.27      | ENSG00000257084.1  |    |    |    |    | NA | NA | NA | NA | NA | NA | NA | NA | NA |
| NA             | NA                 | NA | NA | NA | NA | -2 | NA |    |    |    |    |    |    |    |
| H3F3C          | ENSG00000188375.4  |    |    |    |    | NA | NA | NA | NA | NA | NA | NA | NA | NA |
| NA             | NA                 | NA | NA | NA | NA | -2 | NA |    |    |    |    |    |    |    |
| RP11-778H2.1   | ENSG00000256120.1  |    |    |    |    | NA | NA | NA | NA | NA | NA | NA | NA | NA |
| NA             | NA                 | NA | NA | NA | NA | -2 | NA |    |    |    |    |    |    |    |
| ALX1           | ENSG00000180318.3  |    |    |    |    | NA | NA | NA | NA | NA | NA | NA | NA | NA |

|               |                    |    |    |    |    |    |    |    |    |    |    |    |    |    |
|---------------|--------------------|----|----|----|----|----|----|----|----|----|----|----|----|----|
| NA            | NA                 | NA | NA | -2 | NA |    |    |    |    |    |    |    |    |    |
| HOXC12        | ENSG00000123407.3  |    |    |    | NA | NA | NA | NA | NA | NA | NA | NA | NA | NA |
| NA            | NA                 | NA | NA | NA | -2 | NA |    |    |    |    |    |    |    |    |
| C12orf56      | ENSG00000185306.12 |    |    |    | NA | NA | NA | NA | NA | NA | NA | NA | NA | NA |
| NA            | NA                 | NA | NA | NA | -2 | NA |    |    |    |    |    |    |    |    |
| RP11-473M14.3 | ENSG00000256172.1  |    |    |    | NA | NA | NA | NA | NA | NA | NA | NA | NA | NA |
| NA            | NA                 | NA | NA | NA | -2 | NA |    |    |    |    |    |    |    |    |
| COQ10A        | ENSG00000135469.13 |    |    |    | NA | NA | NA | NA | NA | NA | NA | NA | NA | NA |
| NA            | NA                 | NA | NA | NA | -2 | NA |    |    |    |    |    |    |    |    |
| CCDC60        | ENSG00000183273.6  |    |    |    | NA | NA | NA | NA | NA | NA | NA | NA | NA | NA |
| NA            | NA                 | NA | NA | NA | -2 | NA |    |    |    |    |    |    |    |    |
| RP11-1100L3.8 | ENSG00000259884.1  |    |    |    | NA | NA | NA | NA | NA | NA | NA | NA | NA | NA |
| NA            | NA                 | NA | NA | NA | -2 | NA |    |    |    |    |    |    |    |    |
| LINC01257     | ENSG00000204603.6  |    |    |    | NA | NA | NA | NA | NA | NA | NA | NA | NA | NA |
| NA            | NA                 | NA | NA | NA | -2 | NA |    |    |    |    |    |    |    |    |
| RP11-871F6.3  | ENSG00000256994.1  |    |    |    | NA | NA | NA | NA | NA | NA | NA | NA | NA | NA |
| NA            | NA                 | NA | NA | NA | -2 | NA |    |    |    |    |    |    |    |    |
| LINC01490     | ENSG00000257741.5  |    |    |    | NA | NA | NA | NA | NA | NA | NA | NA | NA | NA |
| NA            | NA                 | NA | NA | NA | -2 | NA |    |    |    |    |    |    |    |    |
| KRT73         | ENSG00000186049.8  |    |    |    | NA | NA | NA | NA | NA | NA | NA | NA | NA | NA |
| NA            | NA                 | NA | NA | -2 | NA |    |    |    |    |    |    |    |    |    |
| RP11-248E9.6  | ENSG00000257940.1  |    |    |    | NA | NA | NA | NA | NA | NA | NA | NA | NA | NA |
| NA            | NA                 | NA | NA | NA | -2 | NA |    |    |    |    |    |    |    |    |
| CEP83         | ENSG00000173588.14 |    |    |    | NA | NA | NA | NA | NA | NA | NA | NA | NA | NA |
| NA            | NA                 | NA | NA | -2 | NA |    |    |    |    |    |    |    |    |    |
| RP11-121E16.1 | ENSG00000258100.1  |    |    |    | NA | NA | NA | NA | NA | NA | NA | NA | NA | NA |
| NA            | NA                 | NA | NA | NA | -2 | NA |    |    |    |    |    |    |    |    |
| RP11-1143G9.5 | ENSG00000274979.1  |    |    |    | NA | NA | NA | NA | NA | NA | NA | NA | NA | NA |
| NA            | NA                 | NA | NA | NA | -2 | NA |    |    |    |    |    |    |    |    |
| BTBD11        | ENSG00000151136.14 |    |    |    | NA | NA | NA | NA | NA | NA | NA | NA | NA | NA |
| NA            | NA                 | NA | NA | NA | -2 | NA |    |    |    |    |    |    |    |    |
| PCBP2         | ENSG00000197111.15 |    |    |    | NA | NA | NA | NA | NA | NA | NA | NA | NA | NA |
| NA            | NA                 | NA | NA | -2 | NA |    |    |    |    |    |    |    |    |    |
| CLEC9A        | ENSG00000197992.6  |    |    |    | NA | NA | NA | NA | NA | NA | NA | NA | NA | NA |
| NA            | NA                 | NA | NA | NA | -2 | NA |    |    |    |    |    |    |    |    |
| PLCZ1         | ENSG00000139151.14 |    |    |    | NA | NA | NA | NA | NA | NA | NA | NA | NA | NA |
| NA            | NA                 | NA | NA | -2 | NA |    |    |    |    |    |    |    |    |    |
| RP11-210L7.3  | ENSG00000283052.1  |    |    |    | NA | NA | NA | NA | NA | NA | NA | NA | NA | NA |
| NA            | NA                 | NA | NA | NA | -2 | NA |    |    |    |    |    |    |    |    |
| ARID2         | ENSG00000189079.15 |    |    |    | NA | NA | NA | NA | NA | NA | NA | NA | NA | NA |
| NA            | NA                 | NA | NA | -2 | NA |    |    |    |    |    |    |    |    |    |
| RP11-134N1.2  | ENSG00000256084.1  |    |    |    | NA | NA | NA | NA | NA | NA | NA | NA | NA | NA |
| NA            | NA                 | NA | NA | NA | -2 | NA |    |    |    |    |    |    |    |    |
| NUP37         | ENSG00000075188.8  |    |    |    | NA | NA | NA | NA | NA | NA | NA | NA | NA | NA |
| NA            | NA                 | NA | NA | -2 | NA |    |    |    |    |    |    |    |    |    |
| RPLP0         | ENSG00000089157.15 |    |    |    | NA | NA | NA | NA | NA | NA | NA | NA | NA | NA |
| NA            | NA                 | NA | NA | -2 | NA |    |    |    |    |    |    |    |    |    |
| SSH1          | ENSG00000084112.14 |    |    |    | NA | NA | NA | NA | NA | NA | NA | NA | NA | NA |
| NA            | NA                 | NA | NA | -2 | NA |    |    |    |    |    |    |    |    |    |
| RP13-714J12.1 | ENSG00000274373.1  |    |    |    | NA | NA | NA | NA | NA | NA | NA | NA | NA | NA |
| NA            | NA                 | NA | NA | NA | -2 | NA |    |    |    |    |    |    |    |    |
| RP11-25I15.3  | ENSG00000257114.2  |    |    |    | NA | NA | NA | NA | NA | NA | NA | NA | NA | NA |
| NA            | NA                 | NA | NA | NA | -2 | NA |    |    |    |    |    |    |    |    |
| NR4A1         | ENSG00000123358.19 |    |    |    | NA | NA | NA | NA | NA | NA | NA | NA | NA | NA |
| NA            | NA                 | NA | NA | -2 | NA |    |    |    |    |    |    |    |    |    |
| BIN2          | ENSG00000110934.10 |    |    |    | NA | NA | NA | NA | NA | NA | NA | NA | NA | NA |
| NA            | NA                 | NA | NA | -2 | NA |    |    |    |    |    |    |    |    |    |
| AQP2          | ENSG00000167580.7  |    |    |    | NA | NA | NA | NA | NA | NA | NA | NA | NA | NA |
| NA            | NA                 | NA | NA | -2 | NA |    |    |    |    |    |    |    |    |    |
| RP11-77I22.2  | ENSG00000246331.2  |    |    |    | NA | NA | NA | NA | NA | NA | NA | NA | NA | NA |
| NA            | NA                 | NA | NA | NA | -2 | NA |    |    |    |    |    |    |    |    |
| MAP1LC3B2     | ENSG00000258102.3  |    |    |    | NA | NA | NA | NA | NA | NA | NA | NA | NA | NA |

|                |                    |    |    |    |    |    |    |    |    |    |    |    |    |    |
|----------------|--------------------|----|----|----|----|----|----|----|----|----|----|----|----|----|
| NA             | NA                 | NA | NA | NA | -2 | NA |    |    |    |    |    |    |    |    |
| RP11-1109F11.3 | ENSG00000271327.1  |    |    |    |    | NA | NA | NA | NA | NA | NA | NA | NA | NA |
| NA             | NA                 | NA | NA | NA | NA | -2 | NA |    |    |    |    |    |    |    |
| RP11-181C3.1   | ENSG00000245017.2  |    |    |    |    | NA | NA | NA | NA | NA | NA | NA | NA | NA |
| NA             | NA                 | NA | NA | NA | NA | -2 | NA |    |    |    |    |    |    |    |
| PXN            | ENSG00000089159.16 |    |    |    |    | NA | NA | NA | NA | NA | NA | NA | NA | NA |
| NA             | NA                 | NA | NA | NA | NA | -2 | NA |    |    |    |    |    |    |    |
| RP11-897M7.1   | ENSG00000256209.1  |    |    |    |    | NA | NA | NA | NA | NA | NA | NA | NA | NA |
| NA             | NA                 | NA | NA | NA | NA | -2 | NA |    |    |    |    |    |    |    |
| TRPV4          | ENSG00000111199.10 |    |    |    |    | NA | NA | NA | NA | NA | NA | NA | NA | NA |
| NA             | NA                 | NA | NA | NA | NA | -2 | NA |    |    |    |    |    |    |    |
| GABARAPL1      | ENSG00000139112.10 |    |    |    |    | NA | NA | NA | NA | NA | NA | NA | NA | NA |
| NA             | NA                 | NA | NA | NA | NA | -2 | NA |    |    |    |    |    |    |    |
| SMARCC2        | ENSG00000139613.11 |    |    |    |    | NA | NA | NA | NA | NA | NA | NA | NA | NA |
| NA             | NA                 | NA | NA | NA | NA | -2 | NA |    |    |    |    |    |    |    |
| MUCL1          | ENSG00000172551.10 |    |    |    |    | NA | NA | NA | NA | NA | NA | NA | NA | NA |
| NA             | NA                 | NA | NA | NA | NA | -2 | NA |    |    |    |    |    |    |    |
| PPTC7          | ENSG00000196850.5  |    |    |    |    | NA | NA | NA | NA | NA | NA | NA | NA | NA |
| NA             | NA                 | NA | NA | NA | NA | -2 | NA |    |    |    |    |    |    |    |
| RP11-955H22.3  | ENSG00000256362.1  |    |    |    |    | NA | NA | NA | NA | NA | NA | NA | NA | NA |
| NA             | NA                 | NA | NA | NA | NA | -2 | NA |    |    |    |    |    |    |    |
| CCT2           | ENSG00000166226.12 |    |    |    |    | NA | NA | NA | NA | NA | NA | NA | NA | NA |
| NA             | NA                 | NA | NA | NA | NA | -2 | NA |    |    |    |    |    |    |    |
| RACGAP1        | ENSG00000161800.12 |    |    |    |    | NA | NA | NA | NA | NA | NA | NA | NA | NA |
| NA             | NA                 | NA | NA | NA | NA | -2 | NA |    |    |    |    |    |    |    |
| CD69           | ENSG00000110848.8  |    |    |    |    | NA | NA | NA | NA | NA | NA | NA | NA | NA |
| NA             | NA                 | NA | NA | NA | NA | -2 | NA |    |    |    |    |    |    |    |
| CEP83-AS1      | ENSG00000278916.1  |    |    |    |    | NA | NA | NA | NA | NA | NA | NA | NA | NA |
| NA             | NA                 | NA | NA | NA | NA | -2 | NA |    |    |    |    |    |    |    |
| MIP            | ENSG00000135517.6  |    |    |    |    | NA | NA | NA | NA | NA | NA | NA | NA | NA |
| NA             | NA                 | NA | NA | NA | NA | -2 | NA |    |    |    |    |    |    |    |
| MAP3K12        | ENSG00000139625.12 |    |    |    |    | NA | NA | NA | NA | NA | NA | NA | NA | NA |
| NA             | NA                 | NA | NA | NA | NA | -2 | NA |    |    |    |    |    |    |    |
| RP11-114H23.1  | ENSG00000258077.2  |    |    |    |    | NA | NA | NA | NA | NA | NA | NA | NA | NA |
| NA             | NA                 | NA | NA | NA | NA | -2 | NA |    |    |    |    |    |    |    |
| KDM2B          | ENSG00000089094.18 |    |    |    |    | NA | NA | NA | NA | NA | NA | NA | NA | NA |
| NA             | NA                 | NA | NA | NA | NA | -2 | NA |    |    |    |    |    |    |    |
| SDSL           | ENSG00000139410.14 |    |    |    |    | NA | NA | NA | NA | NA | NA | NA | NA | NA |
| NA             | NA                 | NA | NA | NA | NA | -2 | NA |    |    |    |    |    |    |    |
| KRT78          | ENSG00000170423.12 |    |    |    |    | NA | NA | NA | NA | NA | NA | NA | NA | NA |
| NA             | NA                 | NA | NA | NA | NA | -2 | NA |    |    |    |    |    |    |    |
| DDX47          | ENSG00000213782.7  |    |    |    |    | NA | NA | NA | NA | NA | NA | NA | NA | NA |
| NA             | NA                 | NA | NA | NA | NA | -2 | NA |    |    |    |    |    |    |    |
| HIGD1C         | ENSG00000214511.3  |    |    |    |    | NA | NA | NA | NA | NA | NA | NA | NA | NA |
| NA             | NA                 | NA | NA | NA | NA | -2 | NA |    |    |    |    |    |    |    |
| KRT77          | ENSG00000189182.9  |    |    |    |    | NA | NA | NA | NA | NA | NA | NA | NA | NA |
| NA             | NA                 | NA | NA | NA | NA | -2 | NA |    |    |    |    |    |    |    |
| LINC01486      | ENSG00000256560.1  |    |    |    |    | NA | NA | NA | NA | NA | NA | NA | NA | NA |
| NA             | NA                 | NA | NA | NA | NA | -2 | NA |    |    |    |    |    |    |    |
| RP11-123O10.4  | ENSG00000256248.1  |    |    |    |    | NA | NA | NA | NA | NA | NA | NA | NA | NA |
| NA             | NA                 | NA | NA | NA | NA | -2 | NA |    |    |    |    |    |    |    |
| PMEL           | ENSG00000185664.14 |    |    |    |    | NA | NA | NA | NA | NA | NA | NA | NA | NA |
| NA             | NA                 | NA | NA | NA | NA | -2 | NA |    |    |    |    |    |    |    |
| CDK2           | ENSG00000123374.10 |    |    |    |    | NA | NA | NA | NA | NA | NA | NA | NA | NA |
| NA             | NA                 | NA | NA | NA | NA | -2 | NA |    |    |    |    |    |    |    |
| CKAP4          | ENSG00000136026.13 |    |    |    |    | NA | NA | NA | NA | NA | NA | NA | NA | NA |
| NA             | NA                 | NA | NA | NA | NA | -2 | NA |    |    |    |    |    |    |    |
| RP5-944M2.2    | ENSG00000256927.1  |    |    |    |    | NA | NA | NA | NA | NA | NA | NA | NA | NA |
| NA             | NA                 | NA | NA | NA | NA | -2 | NA |    |    |    |    |    |    |    |
| KLRF2          | ENSG00000256797.1  |    |    |    |    | NA | NA | NA | NA | NA | NA | NA | NA | NA |
| NA             | NA                 | NA | NA | NA | NA | -2 | NA |    |    |    |    |    |    |    |
| RIC8B          | ENSG00000111785.19 |    |    |    |    | NA | NA | NA | NA | NA | NA | NA | NA | NA |

|               |                    |    |    |    |    |    |    |    |    |    |    |    |    |    |
|---------------|--------------------|----|----|----|----|----|----|----|----|----|----|----|----|----|
| NA            | NA                 | NA | NA | -2 | NA |    |    |    |    |    |    |    |    |    |
| NUDT4         | ENSG00000173598.13 |    |    |    | NA | NA | NA | NA | NA | NA | NA | NA | NA | NA |
| NA            | NA                 | NA | NA | -2 | NA |    |    |    |    |    |    |    |    |    |
| RP11-474P2.4  | ENSG00000257496.1  |    |    |    | NA | NA | NA | NA | NA | NA | NA | NA | NA | NA |
| NA            | NA                 | NA | NA | NA | -2 | NA |    |    |    |    |    |    |    |    |
| C12orf4       | ENSG00000047621.11 |    |    |    | NA | NA | NA | NA | NA | NA | NA | NA | NA | NA |
| NA            | NA                 | NA | NA | NA | -2 | NA |    |    |    |    |    |    |    |    |
| RP11-626I20.3 | ENSG00000257762.5  |    |    |    | NA | NA | NA | NA | NA | NA | NA | NA | NA | NA |
| NA            | NA                 | NA | NA | NA | -2 | NA |    |    |    |    |    |    |    |    |
| TRAFD1        | ENSG00000135148.11 |    |    |    | NA | NA | NA | NA | NA | NA | NA | NA | NA | NA |
| NA            | NA                 | NA | NA | NA | -2 | NA |    |    |    |    |    |    |    |    |
| RP11-81H14.2  | ENSG00000251301.6  |    |    |    | NA | NA | NA | NA | NA | NA | NA | NA | NA | NA |
| NA            | NA                 | NA | NA | NA | -2 | NA |    |    |    |    |    |    |    |    |
| RP11-768F21.1 | ENSG00000248636.6  |    |    |    | NA | NA | NA | NA | NA | NA | NA | NA | NA | NA |
| NA            | NA                 | NA | NA | NA | -2 | NA |    |    |    |    |    |    |    |    |
| LOH12CR2      | ENSG00000205791.3  |    |    |    | NA | NA | NA | NA | NA | NA | NA | NA | NA | NA |
| NA            | NA                 | NA | NA | NA | -2 | NA |    |    |    |    |    |    |    |    |
| RP11-76C10.5  | ENSG00000256151.1  |    |    |    | NA | NA | NA | NA | NA | NA | NA | NA | NA | NA |
| NA            | NA                 | NA | NA | NA | -2 | NA |    |    |    |    |    |    |    |    |
| SPATS2        | ENSG00000123352.17 |    |    |    | NA | NA | NA | NA | NA | NA | NA | NA | NA | NA |
| NA            | NA                 | NA | NA | NA | -2 | NA |    |    |    |    |    |    |    |    |
| TUBA1A        | ENSG00000167552.13 |    |    |    | NA | NA | NA | NA | NA | NA | NA | NA | NA | NA |
| NA            | NA                 | NA | NA | NA | -2 | NA |    |    |    |    |    |    |    |    |
| RAB35         | ENSG00000111737.11 |    |    |    | NA | NA | NA | NA | NA | NA | NA | NA | NA | NA |
| NA            | NA                 | NA | NA | -2 | NA |    |    |    |    |    |    |    |    |    |
| SLCO1B3       | ENSG00000111700.12 |    |    |    | NA | NA | NA | NA | NA | NA | NA | NA | NA | NA |
| NA            | NA                 | NA | NA | NA | -2 | NA |    |    |    |    |    |    |    |    |
| LPAR5         | ENSG00000184574.9  |    |    |    | NA | NA | NA | NA | NA | NA | NA | NA | NA | NA |
| NA            | NA                 | NA | NA | -2 | NA |    |    |    |    |    |    |    |    |    |
| KLHL42        | ENSG00000087448.9  |    |    |    | NA | NA | NA | NA | NA | NA | NA | NA | NA | NA |
| NA            | NA                 | NA | NA | NA | -2 | NA |    |    |    |    |    |    |    |    |
| HOXC6         | ENSG00000197757.7  |    |    |    | NA | NA | NA | NA | NA | NA | NA | NA | NA | NA |
| NA            | NA                 | NA | NA | -2 | NA |    |    |    |    |    |    |    |    |    |
| GUCY2C        | ENSG00000070019.4  |    |    |    | NA | NA | NA | NA | NA | NA | NA | NA | NA | NA |
| NA            | NA                 | NA | NA | NA | -2 | NA |    |    |    |    |    |    |    |    |
| DYRK2         | ENSG00000127334.10 |    |    |    | NA | NA | NA | NA | NA | NA | NA | NA | NA | NA |
| NA            | NA                 | NA | NA | -2 | NA |    |    |    |    |    |    |    |    |    |
| GPRC5A        | ENSG00000013588.7  |    |    |    | NA | NA | NA | NA | NA | NA | NA | NA | NA | NA |
| NA            | NA                 | NA | NA | NA | -2 | NA |    |    |    |    |    |    |    |    |
| RP11-753N8.1  | ENSG00000258183.5  |    |    |    | NA | NA | NA | NA | NA | NA | NA | NA | NA | NA |
| NA            | NA                 | NA | NA | NA | -2 | NA |    |    |    |    |    |    |    |    |
| LINC00592     | ENSG00000258279.3  |    |    |    | NA | NA | NA | NA | NA | NA | NA | NA | NA | NA |
| NA            | NA                 | NA | NA | NA | -2 | NA |    |    |    |    |    |    |    |    |
| RP4-601P9.1   | ENSG00000257517.1  |    |    |    | NA | NA | NA | NA | NA | NA | NA | NA | NA | NA |
| NA            | NA                 | NA | NA | NA | -2 | NA |    |    |    |    |    |    |    |    |
| GAPDH         | ENSG00000111640.14 |    |    |    | NA | NA | NA | NA | NA | NA | NA | NA | NA | NA |
| NA            | NA                 | NA | NA | -2 | NA |    |    |    |    |    |    |    |    |    |
| RAB5B         | ENSG00000111540.15 |    |    |    | NA | NA | NA | NA | NA | NA | NA | NA | NA | NA |
| NA            | NA                 | NA | NA | -2 | NA |    |    |    |    |    |    |    |    |    |
| RP11-542B15.1 | ENSG00000203585.3  |    |    |    | NA | NA | NA | NA | NA | NA | NA | NA | NA | NA |
| NA            | NA                 | NA | NA | NA | -2 | NA |    |    |    |    |    |    |    |    |
| CRADD         | ENSG00000169372.12 |    |    |    | NA | NA | NA | NA | NA | NA | NA | NA | NA | NA |
| NA            | NA                 | NA | NA | -2 | NA |    |    |    |    |    |    |    |    |    |
| C12orf29      | ENSG00000133641.17 |    |    |    | NA | NA | NA | NA | NA | NA | NA | NA | NA | NA |
| NA            | NA                 | NA | NA | NA | -2 | NA |    |    |    |    |    |    |    |    |
| MAPKAPK5-AS1  | ENSG00000234608.7  |    |    |    | NA | NA | NA | NA | NA | NA | NA | NA | NA | NA |
| NA            | NA                 | NA | NA | NA | -2 | NA |    |    |    |    |    |    |    |    |
| COPS7A        | ENSG00000111652.9  |    |    |    | NA | NA | NA | NA | NA | NA | NA | NA | NA | NA |
| NA            | NA                 | NA | NA | NA | -2 | NA |    |    |    |    |    |    |    |    |
| CLEC6A        | ENSG00000205846.3  |    |    |    | NA | NA | NA | NA | NA | NA | NA | NA | NA | NA |
| NA            | NA                 | NA | NA | NA | -2 | NA |    |    |    |    |    |    |    |    |
| SPRYD4        | ENSG00000176422.13 |    |    |    | NA | NA | NA | NA | NA | NA | NA | NA | NA | NA |



|                |                    |    |    |    |    |    |    |    |    |    |    |    |    |    |
|----------------|--------------------|----|----|----|----|----|----|----|----|----|----|----|----|----|
| NA             | NA                 | NA | NA | NA | -2 | NA | NA | NA | NA | NA | NA | NA | NA | NA |
| LARP4          | ENSG00000161813.21 | NA | NA | NA | NA | NA | NA | NA | NA | NA | NA | NA | NA | NA |
| NA             | NA                 | NA | NA | NA | -2 | NA | NA | NA | NA | NA | NA | NA | NA | NA |
| RP11-497G19.3  | ENSG00000258249.1  | NA | NA | NA | NA | NA | NA | NA | NA | NA | NA | NA | NA | NA |
| NA             | NA                 | NA | NA | NA | NA | -2 | NA | NA | NA | NA | NA | NA | NA | NA |
| ELK3           | ENSG00000111145.7  | NA | NA | NA | NA | NA | NA | NA | NA | NA | NA | NA | NA | NA |
| NA             | NA                 | NA | NA | NA | NA | -2 | NA | NA | NA | NA | NA | NA | NA | NA |
| C1S            | ENSG00000182326.14 | NA | NA | NA | NA | NA | NA | NA | NA | NA | NA | NA | NA | NA |
| NA             | NA                 | NA | NA | NA | NA | -2 | NA | NA | NA | NA | NA | NA | NA | NA |
| RP11-624J6.2   | ENSG00000283536.1  | NA | NA | NA | NA | NA | NA | NA | NA | NA | NA | NA | NA | NA |
| NA             | NA                 | NA | NA | NA | NA | NA | -2 | NA | NA | NA | NA | NA | NA | NA |
| OR10AD1        | ENSG00000172640.3  | NA | NA | NA | NA | NA | NA | NA | NA | NA | NA | NA | NA | NA |
| NA             | NA                 | NA | NA | NA | NA | NA | -2 | NA | NA | NA | NA | NA | NA | NA |
| OAS1           | ENSG00000089127.12 | NA | NA | NA | NA | NA | NA | NA | NA | NA | NA | NA | NA | NA |
| NA             | NA                 | NA | NA | NA | NA | NA | -2 | NA | NA | NA | NA | NA | NA | NA |
| RP11-320N7.2   | ENSG00000256969.1  | NA | NA | NA | NA | NA | NA | NA | NA | NA | NA | NA | NA | NA |
| NA             | NA                 | NA | NA | NA | NA | NA | -2 | NA | NA | NA | NA | NA | NA | NA |
| RP11-983C2.2   | ENSG00000249873.6  | NA | NA | NA | NA | NA | NA | NA | NA | NA | NA | NA | NA | NA |
| NA             | NA                 | NA | NA | NA | NA | NA | -2 | NA | NA | NA | NA | NA | NA | NA |
| AC079630.2     | ENSG00000223914.1  | NA | NA | NA | NA | NA | NA | NA | NA | NA | NA | NA | NA | NA |
| NA             | NA                 | NA | NA | NA | NA | NA | -2 | NA | NA | NA | NA | NA | NA | NA |
| RP11-407A16.3  | ENSG00000256732.1  | NA | NA | NA | NA | NA | NA | NA | NA | NA | NA | NA | NA | NA |
| NA             | NA                 | NA | NA | NA | NA | NA | -2 | NA | NA | NA | NA | NA | NA | NA |
| HAL            | ENSG00000084110.10 | NA | NA | NA | NA | NA | NA | NA | NA | NA | NA | NA | NA | NA |
| NA             | NA                 | NA | NA | NA | NA | NA | -2 | NA | NA | NA | NA | NA | NA | NA |
| ADIPOR2        | ENSG00000006831.9  | NA | NA | NA | NA | NA | NA | NA | NA | NA | NA | NA | NA | NA |
| NA             | NA                 | NA | NA | NA | NA | NA | -2 | NA | NA | NA | NA | NA | NA | NA |
| USP30          | ENSG00000135093.12 | NA | NA | NA | NA | NA | NA | NA | NA | NA | NA | NA | NA | NA |
| NA             | NA                 | NA | NA | NA | NA | NA | -2 | NA | NA | NA | NA | NA | NA | NA |
| 9-Mar          | ENSG00000139266.5  | NA | NA | NA | NA | NA | NA | NA | NA | NA | NA | NA | NA | NA |
| NA             | NA                 | NA | NA | NA | NA | NA | -2 | NA | NA | NA | NA | NA | NA | NA |
| LINC01559      | ENSG00000180861.9  | NA | NA | NA | NA | NA | NA | NA | NA | NA | NA | NA | NA | NA |
| NA             | NA                 | NA | NA | NA | NA | NA | -2 | NA | NA | NA | NA | NA | NA | NA |
| BRI3BP         | ENSG00000184992.10 | NA | NA | NA | NA | NA | NA | NA | NA | NA | NA | NA | NA | NA |
| NA             | NA                 | NA | NA | NA | NA | NA | -2 | NA | NA | NA | NA | NA | NA | NA |
| PDE3A          | ENSG00000172572.6  | NA | NA | NA | NA | NA | NA | NA | NA | NA | NA | NA | NA | NA |
| NA             | NA                 | NA | NA | NA | NA | NA | -2 | NA | NA | NA | NA | NA | NA | NA |
| ACTR6          | ENSG00000075089.9  | NA | NA | NA | NA | NA | NA | NA | NA | NA | NA | NA | NA | NA |
| NA             | NA                 | NA | NA | NA | NA | NA | -2 | NA | NA | NA | NA | NA | NA | NA |
| RP11-1038A11.3 | ENSG00000256417.1  | NA | NA | NA | NA | NA | NA | NA | NA | NA | NA | NA | NA | NA |
| NA             | NA                 | NA | NA | NA | NA | NA | -2 | NA | NA | NA | NA | NA | NA | NA |
| CYP27B1        | ENSG00000111012.9  | NA | NA | NA | NA | NA | NA | NA | NA | NA | NA | NA | NA | NA |
| NA             | NA                 | NA | NA | NA | NA | NA | -2 | NA | NA | NA | NA | NA | NA | NA |
| DERA           | ENSG00000023697.12 | NA | NA | NA | NA | NA | NA | NA | NA | NA | NA | NA | NA | NA |
| NA             | NA                 | NA | NA | NA | NA | NA | -2 | NA | NA | NA | NA | NA | NA | NA |
| A2M            | ENSG00000175899.14 | NA | NA | NA | NA | NA | NA | NA | NA | NA | NA | NA | NA | NA |
| NA             | NA                 | NA | NA | NA | NA | NA | -2 | NA | NA | NA | NA | NA | NA | NA |
| CLLU1          | ENSG00000257127.6  | NA | NA | NA | NA | NA | NA | NA | NA | NA | NA | NA | NA | NA |
| NA             | NA                 | NA | NA | NA | NA | NA | -2 | NA | NA | NA | NA | NA | NA | NA |
| RP11-359M6.1   | ENSG00000257474.5  | NA | NA | NA | NA | NA | NA | NA | NA | NA | NA | NA | NA | NA |
| NA             | NA                 | NA | NA | NA | NA | NA | -2 | NA | NA | NA | NA | NA | NA | NA |
| APOBEC1        | ENSG00000111701.6  | NA | NA | NA | NA | NA | NA | NA | NA | NA | NA | NA | NA | NA |
| NA             | NA                 | NA | NA | NA | NA | NA | -2 | NA | NA | NA | NA | NA | NA | NA |
| HCAR3          | ENSG00000255398.2  | NA | NA | NA | NA | NA | NA | NA | NA | NA | NA | NA | NA | NA |
| NA             | NA                 | NA | NA | NA | NA | NA | -2 | NA | NA | NA | NA | NA | NA | NA |
| RP11-221N13.4  | ENSG00000256915.1  | NA | NA | NA | NA | NA | NA | NA | NA | NA | NA | NA | NA | NA |
| NA             | NA                 | NA | NA | NA | NA | NA | -2 | NA | NA | NA | NA | NA | NA | NA |
| C3AR1          | ENSG00000171860.4  | NA | NA | NA | NA | NA | NA | NA | NA | NA | NA | NA | NA | NA |
| NA             | NA                 | NA | NA | NA | NA | NA | -2 | NA | NA | NA | NA | NA | NA | NA |
| DHH            | ENSG00000139549.2  | NA | NA | NA | NA | NA | NA | NA | NA | NA | NA | NA | NA | NA |
| NA             | NA                 | NA | NA | NA | NA | NA | -2 | NA | NA | NA | NA | NA | NA | NA |
| LINC00433      | ENSG00000229443.1  | NA | NA | NA | NA | NA | NA | NA | NA | NA | NA | NA | NA | NA |

|               |                    |    |    |    |    |    |    |    |    |    |    |    |    |    |
|---------------|--------------------|----|----|----|----|----|----|----|----|----|----|----|----|----|
| IL17D         | ENSG00000172458.4  | NA | NA | NA | NA | NA | NA | NA | NA | NA | NA | NA | NA | NA |
| RP11-78J21.4  | ENSG00000244471.5  | NA | NA | NA | NA | NA | NA | NA | NA | NA | NA | NA | NA | NA |
| CLN5          | ENSG00000102805.14 | NA | NA | NA | NA | NA | NA | NA | NA | NA | NA | NA | NA | NA |
| ZMYM2         | ENSG00000121741.16 | NA | NA | NA | NA | NA | NA | NA | NA | NA | NA | NA | NA | NA |
| ALOX5AP       | ENSG00000132965.9  | NA | NA | NA | NA | NA | NA | NA | NA | NA | NA | NA | NA | NA |
| GTF2F2        | ENSG00000188342.11 | NA | NA | NA | NA | NA | NA | NA | NA | NA | NA | NA | NA | NA |
| ING1          | ENSG00000153487.12 | NA | NA | NA | NA | NA | NA | NA | NA | NA | NA | NA | NA | NA |
| LINC00351     | ENSG00000226317.2  | NA | NA | NA | NA | NA | NA | NA | NA | NA | NA | NA | NA | NA |
| LINC00460     | ENSG00000233532.5  | NA | NA | NA | NA | NA | NA | NA | NA | NA | NA | NA | NA | NA |
| LINC00364     | ENSG00000230040.1  | NA | NA | NA | NA | NA | NA | NA | NA | NA | NA | NA | NA | NA |
| RP11-54H7.4   | ENSG00000275216.1  | NA | NA | NA | NA | NA | NA | NA | NA | NA | NA | NA | NA | NA |
| LINC00444     | ENSG00000234689.1  | NA | NA | NA | NA | NA | NA | NA | NA | NA | NA | NA | NA | NA |
| LINC00376     | ENSG00000227564.2  | NA | NA | NA | NA | NA | NA | NA | NA | NA | NA | NA | NA | NA |
| SMIM2         | ENSG00000139656.6  | NA | NA | NA | NA | NA | NA | NA | NA | NA | NA | NA | NA | NA |
| MPHOSPH8      | ENSG00000196199.13 | NA | NA | NA | NA | NA | NA | NA | NA | NA | NA | NA | NA | NA |
| LINC01040     | ENSG00000226037.1  | NA | NA | NA | NA | NA | NA | NA | NA | NA | NA | NA | NA | NA |
| DIS3          | ENSG00000083520.14 | NA | NA | NA | NA | NA | NA | NA | NA | NA | NA | NA | NA | NA |
| MLNR          | ENSG00000102539.5  | NA | NA | NA | NA | NA | NA | NA | NA | NA | NA | NA | NA | NA |
| KBTBD6        | ENSG00000165572.7  | NA | NA | NA | NA | NA | NA | NA | NA | NA | NA | NA | NA | NA |
| RP11-120E13.1 | ENSG00000226134.1  | NA | NA | NA | NA | NA | NA | NA | NA | NA | NA | NA | NA | NA |
| ITM2B         | ENSG00000136156.12 | NA | NA | NA | NA | NA | NA | NA | NA | NA | NA | NA | NA | NA |
| LINC01074     | ENSG00000227611.1  | NA | NA | NA | NA | NA | NA | NA | NA | NA | NA | NA | NA | NA |
| ACOD1         | ENSG00000102794.9  | NA | NA | NA | NA | NA | NA | NA | NA | NA | NA | NA | NA | NA |
| SCEL          | ENSG00000136155.16 | NA | NA | NA | NA | NA | NA | NA | NA | NA | NA | NA | NA | NA |
| SACS-AS1      | ENSG00000229558.2  | NA | NA | NA | NA | NA | NA | NA | NA | NA | NA | NA | NA | NA |
| IPO5          | ENSG00000065150.18 | NA | NA | NA | NA | NA | NA | NA | NA | NA | NA | NA | NA | NA |
| LINC00370     | ENSG00000223617.1  | NA | NA | NA | NA | NA | NA | NA | NA | NA | NA | NA | NA | NA |
| SERTM1        | ENSG00000180440.3  | NA | NA | NA | NA | NA | NA | NA | NA | NA | NA | NA | NA | NA |
| RP11-65D24.2  | ENSG00000204398.5  | NA | NA | NA | NA | NA | NA | NA | NA | NA | NA | NA | NA | NA |
| LINC00559     | ENSG00000261446.2  | NA | NA | NA | NA | NA | NA | NA | NA | NA | NA | NA | NA | NA |
| ARL11         | ENSG00000152213.3  | NA | NA | NA | NA | NA | NA | NA | NA | NA | NA | NA | NA | NA |

|               |                    |    |    |    |    |    |    |    |    |    |    |    |    |    |
|---------------|--------------------|----|----|----|----|----|----|----|----|----|----|----|----|----|
| FAM216B       | NA                 | NA | NA | NA | -2 | NA | NA | NA | NA | NA | NA | NA | NA | NA |
|               | ENSG00000179813.6  |    |    |    |    | NA | NA | NA | NA | NA | NA | NA | NA | NA |
| RP11-40E6.2   | NA                 | NA | NA | NA | NA | -2 | NA | NA | NA | NA | NA | NA | NA | NA |
|               | ENSG00000275248.1  |    |    |    |    | NA | NA | NA | NA | NA | NA | NA | NA | NA |
| USP12         | NA                 | NA | NA | NA | NA | -2 | NA | NA | NA | NA | NA | NA | NA | NA |
|               | ENSG00000152484.13 |    |    |    |    | NA | NA | NA | NA | NA | NA | NA | NA | NA |
| LINC01070     | NA                 | NA | NA | NA | NA | -2 | NA | NA | NA | NA | NA | NA | NA | NA |
|               | ENSG00000260102.1  |    |    |    |    | NA | NA | NA | NA | NA | NA | NA | NA | NA |
| AMER2         | NA                 | NA | NA | NA | NA | -2 | NA | NA | NA | NA | NA | NA | NA | NA |
|               | ENSG00000165566.12 |    |    |    |    | NA | NA | NA | NA | NA | NA | NA | NA | NA |
| LINC00560     | NA                 | NA | NA | NA | NA | -2 | NA | NA | NA | NA | NA | NA | NA | NA |
|               | ENSG00000261666.1  |    |    |    |    | NA | NA | NA | NA | NA | NA | NA | NA | NA |
| ATP4B         | NA                 | NA | NA | NA | NA | -2 | NA | NA | NA | NA | NA | NA | NA | NA |
|               | ENSG00000186009.4  |    |    |    |    | NA | NA | NA | NA | NA | NA | NA | NA | NA |
| LINC01049     | NA                 | NA | NA | NA | NA | -2 | NA | NA | NA | NA | NA | NA | NA | NA |
|               | ENSG00000234384.1  |    |    |    |    | NA | NA | NA | NA | NA | NA | NA | NA | NA |
| RP11-189B4.7  | NA                 | NA | NA | NA | NA | -2 | NA | NA | NA | NA | NA | NA | NA | NA |
|               | ENSG00000277228.1  |    |    |    |    | NA | NA | NA | NA | NA | NA | NA | NA | NA |
| LINC00398     | NA                 | NA | NA | NA | NA | -2 | NA | NA | NA | NA | NA | NA | NA | NA |
|               | ENSG00000237879.1  |    |    |    |    | NA | NA | NA | NA | NA | NA | NA | NA | NA |
| GAS6-AS2      | NA                 | NA | NA | NA | NA | -2 | NA | NA | NA | NA | NA | NA | NA | NA |
|               | ENSG00000272695.1  |    |    |    |    | NA | NA | NA | NA | NA | NA | NA | NA | NA |
| F10           | NA                 | NA | NA | NA | NA | -2 | NA | NA | NA | NA | NA | NA | NA | NA |
|               | ENSG00000126218.11 |    |    |    |    | NA | NA | NA | NA | NA | NA | NA | NA | NA |
| LINC01043     | NA                 | NA | NA | NA | NA | -2 | NA | NA | NA | NA | NA | NA | NA | NA |
|               | ENSG00000260343.1  |    |    |    |    | NA | NA | NA | NA | NA | NA | NA | NA | NA |
| RP11-168P13.1 | NA                 | NA | NA | NA | NA | -2 | NA | NA | NA | NA | NA | NA | NA | NA |
|               | ENSG00000270522.1  |    |    |    |    | NA | NA | NA | NA | NA | NA | NA | NA | NA |
| NHLRC3        | NA                 | NA | NA | NA | NA | -2 | NA | NA | NA | NA | NA | NA | NA | NA |
|               | ENSG00000188811.13 |    |    |    |    | NA | NA | NA | NA | NA | NA | NA | NA | NA |
| RNF219        | NA                 | NA | NA | NA | NA | -2 | NA | NA | NA | NA | NA | NA | NA | NA |
|               | ENSG00000152193.7  |    |    |    |    | NA | NA | NA | NA | NA | NA | NA | NA | NA |
| PCDH9         | NA                 | NA | NA | NA | NA | -2 | NA | NA | NA | NA | NA | NA | NA | NA |
|               | ENSG00000184226.14 |    |    |    |    | NA | NA | NA | NA | NA | NA | NA | NA | NA |
| LINC00564     | NA                 | NA | NA | NA | NA | -2 | NA | NA | NA | NA | NA | NA | NA | NA |
|               | ENSG00000260094.1  |    |    |    |    | NA | NA | NA | NA | NA | NA | NA | NA | NA |
| LINC00397     | NA                 | NA | NA | NA | NA | -2 | NA | NA | NA | NA | NA | NA | NA | NA |
|               | ENSG00000223404.3  |    |    |    |    | NA | NA | NA | NA | NA | NA | NA | NA | NA |
| RGCC          | NA                 | NA | NA | NA | NA | -2 | NA | NA | NA | NA | NA | NA | NA | NA |
|               | ENSG00000102760.12 |    |    |    |    | NA | NA | NA | NA | NA | NA | NA | NA | NA |
| RP11-65D24.1  | NA                 | NA | NA | NA | NA | -2 | NA | NA | NA | NA | NA | NA | NA | NA |
|               | ENSG00000215881.3  |    |    |    |    | NA | NA | NA | NA | NA | NA | NA | NA | NA |
| RP11-29B2.6   | NA                 | NA | NA | NA | NA | -2 | NA | NA | NA | NA | NA | NA | NA | NA |
|               | ENSG00000276957.1  |    |    |    |    | NA | NA | NA | NA | NA | NA | NA | NA | NA |
| LINC00332     | NA                 | NA | NA | NA | NA | -2 | NA | NA | NA | NA | NA | NA | NA | NA |
|               | ENSG00000230710.1  |    |    |    |    | NA | NA | NA | NA | NA | NA | NA | NA | NA |
| LINC00462     | NA                 | NA | NA | NA | NA | -2 | NA | NA | NA | NA | NA | NA | NA | NA |
|               | ENSG00000233610.1  |    |    |    |    | NA | NA | NA | NA | NA | NA | NA | NA | NA |
| EDNRB         | NA                 | NA | NA | NA | NA | -2 | NA | NA | NA | NA | NA | NA | NA | NA |
|               | ENSG00000136160.14 |    |    |    |    | NA | NA | NA | NA | NA | NA | NA | NA | NA |
| LINC01069     | NA                 | NA | NA | NA | NA | -2 | NA | NA | NA | NA | NA | NA | NA | NA |
|               | ENSG00000236133.1  |    |    |    |    | NA | NA | NA | NA | NA | NA | NA | NA | NA |
| RP11-153I24.5 | NA                 | NA | NA | NA | NA | -2 | NA | NA | NA | NA | NA | NA | NA | NA |
|               | ENSG00000283384.1  |    |    |    |    | NA | NA | NA | NA | NA | NA | NA | NA | NA |
| LINC01075     | NA                 | NA | NA | NA | NA | -2 | NA | NA | NA | NA | NA | NA | NA | NA |
|               | ENSG00000230142.2  |    |    |    |    | NA | NA | NA | NA | NA | NA | NA | NA | NA |
| LINC01047     | NA                 | NA | NA | NA | NA | -2 | NA | NA | NA | NA | NA | NA | NA | NA |
|               | ENSG00000232225.6  |    |    |    |    | NA | NA | NA | NA | NA | NA | NA | NA | NA |
| TSC22D1       | NA                 | NA | NA | NA | NA | -2 | NA | NA | NA | NA | NA | NA | NA | NA |
|               | ENSG00000102804.14 |    |    |    |    | NA | NA | NA | NA | NA | NA | NA | NA | NA |
| LINC00365     | NA                 | NA | NA | NA | NA | -2 | NA | NA | NA | NA | NA | NA | NA | NA |
|               | ENSG00000224511.1  |    |    |    |    | NA | NA | NA | NA | NA | NA | NA | NA | NA |

|               |                    |    |    |    |    |    |    |    |    |    |    |    |    |    |
|---------------|--------------------|----|----|----|----|----|----|----|----|----|----|----|----|----|
| NA            | NA                 | NA | NA | NA | -2 | NA |    |    |    |    |    |    |    |    |
| TPP2          | ENSG00000134900.11 | NA | NA | NA | NA | NA | NA | NA | NA | NA | NA | NA | NA | NA |
| NA            | NA                 | NA | NA | NA | -2 | NA |    |    |    |    |    |    |    |    |
| USPL1         | ENSG00000132952.11 | NA | NA | NA | NA | NA | NA | NA | NA | NA | NA | NA | NA | NA |
| NA            | NA                 | NA | NA | NA | -2 | NA |    |    |    |    |    |    |    |    |
| RNF113B       | ENSG00000139797.7  | NA | NA | NA | NA | NA | NA | NA | NA | NA | NA | NA | NA | NA |
| NA            | NA                 | NA | NA | NA | -2 | NA |    |    |    |    |    |    |    |    |
| LINC00453     | ENSG00000274766.1  | NA | NA | NA | NA | NA | NA | NA | NA | NA | NA | NA | NA | NA |
| NA            | NA                 | NA | NA | NA | -2 | NA |    |    |    |    |    |    |    |    |
| UBL3          | ENSG00000122042.9  | NA | NA | NA | NA | NA | NA | NA | NA | NA | NA | NA | NA | NA |
| NA            | NA                 | NA | NA | NA | -2 | NA |    |    |    |    |    |    |    |    |
| RP11-385E5.5  | ENSG00000229791.1  | NA | NA | NA | NA | NA | NA | NA | NA | NA | NA | NA | NA | NA |
| NA            | NA                 | NA | NA | NA | NA | -2 | NA |    |    |    |    |    |    |    |
| ENOX1         | ENSG00000120658.13 | NA | NA | NA | NA | NA | NA | NA | NA | NA | NA | NA | NA | NA |
| NA            | NA                 | NA | NA | NA | -2 | NA |    |    |    |    |    |    |    |    |
| RP11-408E5.5  | ENSG00000232243.1  | NA | NA | NA | NA | NA | NA | NA | NA | NA | NA | NA | NA | NA |
| NA            | NA                 | NA | NA | NA | NA | -2 | NA |    |    |    |    |    |    |    |
| SPG20         | ENSG00000133104.12 | NA | NA | NA | NA | NA | NA | NA | NA | NA | NA | NA | NA | NA |
| NA            | NA                 | NA | NA | NA | -2 | NA |    |    |    |    |    |    |    |    |
| LINC00378     | ENSG00000225249.5  | NA | NA | NA | NA | NA | NA | NA | NA | NA | NA | NA | NA | NA |
| NA            | NA                 | NA | NA | NA | -2 | NA |    |    |    |    |    |    |    |    |
| SPRY2         | ENSG00000136158.11 | NA | NA | NA | NA | NA | NA | NA | NA | NA | NA | NA | NA | NA |
| NA            | NA                 | NA | NA | NA | -2 | NA |    |    |    |    |    |    |    |    |
| RP11-93G5.1   | ENSG00000274317.1  | NA | NA | NA | NA | NA | NA | NA | NA | NA | NA | NA | NA | NA |
| NA            | NA                 | NA | NA | NA | NA | -2 | NA |    |    |    |    |    |    |    |
| RP11-214F16.8 | ENSG00000280710.2  | NA | NA | NA | NA | NA | NA | NA | NA | NA | NA | NA | NA | NA |
| NA            | NA                 | NA | NA | NA | NA | -2 | NA |    |    |    |    |    |    |    |
| FGF9          | ENSG00000102678.6  | NA | NA | NA | NA | NA | NA | NA | NA | NA | NA | NA | NA | NA |
| NA            | NA                 | NA | NA | NA | -2 | NA |    |    |    |    |    |    |    |    |
| LINC01309     | ENSG00000234551.1  | NA | NA | NA | NA | NA | NA | NA | NA | NA | NA | NA | NA | NA |
| NA            | NA                 | NA | NA | NA | -2 | NA |    |    |    |    |    |    |    |    |
| SERPINE3      | ENSG00000253309.6  | NA | NA | NA | NA | NA | NA | NA | NA | NA | NA | NA | NA | NA |
| NA            | NA                 | NA | NA | NA | -2 | NA |    |    |    |    |    |    |    |    |
| LINC00392     | ENSG00000228295.1  | NA | NA | NA | NA | NA | NA | NA | NA | NA | NA | NA | NA | NA |
| NA            | NA                 | NA | NA | NA | -2 | NA |    |    |    |    |    |    |    |    |
| SLC15A1       | ENSG00000088386.16 | NA | NA | NA | NA | NA | NA | NA | NA | NA | NA | NA | NA | NA |
| NA            | NA                 | NA | NA | NA | -2 | NA |    |    |    |    |    |    |    |    |
| LINC00400     | ENSG00000229928.1  | NA | NA | NA | NA | NA | NA | NA | NA | NA | NA | NA | NA | NA |
| NA            | NA                 | NA | NA | NA | -2 | NA |    |    |    |    |    |    |    |    |
| LINC00402     | ENSG00000235532.1  | NA | NA | NA | NA | NA | NA | NA | NA | NA | NA | NA | NA | NA |
| NA            | NA                 | NA | NA | NA | -2 | NA |    |    |    |    |    |    |    |    |
| PCID2         | ENSG00000126226.21 | NA | NA | NA | NA | NA | NA | NA | NA | NA | NA | NA | NA | NA |
| NA            | NA                 | NA | NA | NA | -2 | NA |    |    |    |    |    |    |    |    |
| SPERT         | ENSG00000174015.9  | NA | NA | NA | NA | NA | NA | NA | NA | NA | NA | NA | NA | NA |
| NA            | NA                 | NA | NA | NA | -2 | NA |    |    |    |    |    |    |    |    |
| RP11-37L2.1   | ENSG00000234535.1  | NA | NA | NA | NA | NA | NA | NA | NA | NA | NA | NA | NA | NA |
| NA            | NA                 | NA | NA | NA | NA | -2 | NA |    |    |    |    |    |    |    |
| LINC01058     | ENSG00000225039.1  | NA | NA | NA | NA | NA | NA | NA | NA | NA | NA | NA | NA | NA |
| NA            | NA                 | NA | NA | NA | -2 | NA |    |    |    |    |    |    |    |    |
| LINC00459     | ENSG00000229307.1  | NA | NA | NA | NA | NA | NA | NA | NA | NA | NA | NA | NA | NA |
| NA            | NA                 | NA | NA | NA | -2 | NA |    |    |    |    |    |    |    |    |
| LINC00347     | ENSG00000236678.7  | NA | NA | NA | NA | NA | NA | NA | NA | NA | NA | NA | NA | NA |
| NA            | NA                 | NA | NA | NA | -2 | NA |    |    |    |    |    |    |    |    |
| BRCA2         | ENSG00000139618.14 | NA | NA | NA | NA | NA | NA | NA | NA | NA | NA | NA | NA | NA |
| NA            | NA                 | NA | NA | NA | -2 | NA |    |    |    |    |    |    |    |    |
| RP11-87C7.3   | ENSG00000273552.1  | NA | NA | NA | NA | NA | NA | NA | NA | NA | NA | NA | NA | NA |
| NA            | NA                 | NA | NA | NA | NA | -2 | NA |    |    |    |    |    |    |    |
| MBNL2         | ENSG00000139793.18 | NA | NA | NA | NA | NA | NA | NA | NA | NA | NA | NA | NA | NA |
| NA            | NA                 | NA | NA | NA | -2 | NA |    |    |    |    |    |    |    |    |
| COL4A1        | ENSG00000187498.14 | NA | NA | NA | NA | NA | NA | NA | NA | NA | NA | NA | NA | NA |
| NA            | NA                 | NA | NA | NA | -2 | NA |    |    |    |    |    |    |    |    |
| RP11-269C23.5 | ENSG00000277831.1  | NA | NA | NA | NA | NA | NA | NA | NA | NA | NA | NA | NA | NA |

|               |                    |    |    |    |    |    |    |    |    |    |    |    |    |    |
|---------------|--------------------|----|----|----|----|----|----|----|----|----|----|----|----|----|
| NA            | NA                 | NA | NA | NA | NA | -2 | NA |    |    |    |    |    |    |    |
| MAB21L1       | ENSG00000180660.7  | NA | NA | NA | NA | NA | NA | NA | NA | NA | NA | NA | NA | NA |
| NA            | NA                 | NA | NA | NA | NA | -2 | NA |    |    |    |    |    |    |    |
| LINC00563     | ENSG00000261097.1  | NA | NA | NA | NA | NA | NA | NA | NA | NA | NA | NA | NA | NA |
| NA            | NA                 | NA | NA | NA | NA | -2 | NA |    |    |    |    |    |    |    |
| RP11-141M1.3  | ENSG00000230490.2  | NA | NA | NA | NA | NA | NA | NA | NA | NA | NA | NA | NA | NA |
| NA            | NA                 | NA | NA | NA | NA | -2 | NA |    |    |    |    |    |    |    |
| FLT1          | ENSG00000102755.11 | NA | NA | NA | NA | NA | NA | NA | NA | NA | NA | NA | NA | NA |
| NA            | NA                 | NA | NA | NA | NA | -2 | NA |    |    |    |    |    |    |    |
| RP11-380B4.3  | ENSG00000277151.1  | NA | NA | NA | NA | NA | NA | NA | NA | NA | NA | NA | NA | NA |
| NA            | NA                 | NA | NA | NA | NA | -2 | NA |    |    |    |    |    |    |    |
| NUFIP1        | ENSG00000083635.7  | NA | NA | NA | NA | NA | NA | NA | NA | NA | NA | NA | NA | NA |
| NA            | NA                 | NA | NA | NA | NA | -2 | NA |    |    |    |    |    |    |    |
| TUBA3C        | ENSG00000198033.11 | NA | NA | NA | NA | NA | NA | NA | NA | NA | NA | NA | NA | NA |
| NA            | NA                 | NA | NA | NA | NA | -2 | NA |    |    |    |    |    |    |    |
| LINC00415     | ENSG00000231983.1  | NA | NA | NA | NA | NA | NA | NA | NA | NA | NA | NA | NA | NA |
| NA            | NA                 | NA | NA | NA | NA | -2 | NA |    |    |    |    |    |    |    |
| POU4F1        | ENSG00000152192.7  | NA | NA | NA | NA | NA | NA | NA | NA | NA | NA | NA | NA | NA |
| NA            | NA                 | NA | NA | NA | NA | -2 | NA |    |    |    |    |    |    |    |
| LINC00566     | ENSG00000261498.1  | NA | NA | NA | NA | NA | NA | NA | NA | NA | NA | NA | NA | NA |
| NA            | NA                 | NA | NA | NA | NA | -2 | NA |    |    |    |    |    |    |    |
| RP11-442J17.3 | ENSG00000231358.2  | NA | NA | NA | NA | NA | NA | NA | NA | NA | NA | NA | NA | NA |
| NA            | NA                 | NA | NA | NA | NA | -2 | NA |    |    |    |    |    |    |    |
| RFXAP         | ENSG00000133111.3  | NA | NA | NA | NA | NA | NA | NA | NA | NA | NA | NA | NA | NA |
| NA            | NA                 | NA | NA | NA | NA | -2 | NA |    |    |    |    |    |    |    |
| LINC00454     | ENSG00000226921.6  | NA | NA | NA | NA | NA | NA | NA | NA | NA | NA | NA | NA | NA |
| NA            | NA                 | NA | NA | NA | NA | -2 | NA |    |    |    |    |    |    |    |
| RXFP2         | ENSG00000133105.7  | NA | NA | NA | NA | NA | NA | NA | NA | NA | NA | NA | NA | NA |
| NA            | NA                 | NA | NA | NA | NA | -2 | NA |    |    |    |    |    |    |    |
| LINC00382     | ENSG00000229175.1  | NA | NA | NA | NA | NA | NA | NA | NA | NA | NA | NA | NA | NA |
| NA            | NA                 | NA | NA | NA | NA | -2 | NA |    |    |    |    |    |    |    |
| TUSC8         | ENSG00000237361.2  | NA | NA | NA | NA | NA | NA | NA | NA | NA | NA | NA | NA | NA |
| NA            | NA                 | NA | NA | NA | NA | -2 | NA |    |    |    |    |    |    |    |
| CDK8          | ENSG00000132964.11 | NA | NA | NA | NA | NA | NA | NA | NA | NA | NA | NA | NA | NA |
| NA            | NA                 | NA | NA | NA | NA | -2 | NA |    |    |    |    |    |    |    |
| SLC7A1        | ENSG00000139514.12 | NA | NA | NA | NA | NA | NA | NA | NA | NA | NA | NA | NA | NA |
| NA            | NA                 | NA | NA | NA | NA | -2 | NA |    |    |    |    |    |    |    |
| ZIC5          | ENSG00000139800.8  | NA | NA | NA | NA | NA | NA | NA | NA | NA | NA | NA | NA | NA |
| NA            | NA                 | NA | NA | NA | NA | -2 | NA |    |    |    |    |    |    |    |
| SPACA7        | ENSG00000153498.11 | NA | NA | NA | NA | NA | NA | NA | NA | NA | NA | NA | NA | NA |
| NA            | NA                 | NA | NA | NA | NA | -2 | NA |    |    |    |    |    |    |    |
| RP11-346C4.3  | ENSG00000274718.1  | NA | NA | NA | NA | NA | NA | NA | NA | NA | NA | NA | NA | NA |
| NA            | NA                 | NA | NA | NA | NA | -2 | NA |    |    |    |    |    |    |    |
| WBP4          | ENSG00000120688.8  | NA | NA | NA | NA | NA | NA | NA | NA | NA | NA | NA | NA | NA |
| NA            | NA                 | NA | NA | NA | NA | -2 | NA |    |    |    |    |    |    |    |
| LINC00330     | ENSG00000235097.1  | NA | NA | NA | NA | NA | NA | NA | NA | NA | NA | NA | NA | NA |
| NA            | NA                 | NA | NA | NA | NA | -2 | NA |    |    |    |    |    |    |    |
| ZIC2          | ENSG00000043355.11 | NA | NA | NA | NA | NA | NA | NA | NA | NA | NA | NA | NA | NA |
| NA            | NA                 | NA | NA | NA | NA | -2 | NA |    |    |    |    |    |    |    |
| STOML3        | ENSG00000133115.11 | NA | NA | NA | NA | NA | NA | NA | NA | NA | NA | NA | NA | NA |
| NA            | NA                 | NA | NA | NA | NA | -2 | NA |    |    |    |    |    |    |    |
| LINC00561     | ENSG00000261206.1  | NA | NA | NA | NA | NA | NA | NA | NA | NA | NA | NA | NA | NA |
| NA            | NA                 | NA | NA | NA | NA | -2 | NA |    |    |    |    |    |    |    |
| RP11-394A14.4 | ENSG00000272299.1  | NA | NA | NA | NA | NA | NA | NA | NA | NA | NA | NA | NA | NA |
| NA            | NA                 | NA | NA | NA | NA | -2 | NA |    |    |    |    |    |    |    |
| NUP58         | ENSG00000139496.15 | NA | NA | NA | NA | NA | NA | NA | NA | NA | NA | NA | NA | NA |
| NA            | NA                 | NA | NA | NA | NA | -2 | NA |    |    |    |    |    |    |    |
| FAM155A       | ENSG00000204442.3  | NA | NA | NA | NA | NA | NA | NA | NA | NA | NA | NA | NA | NA |
| NA            | NA                 | NA | NA | NA | NA | -2 | NA |    |    |    |    |    |    |    |
| UFM1          | ENSG00000120686.11 | NA | NA | NA | NA | NA | NA | NA | NA | NA | NA | NA | NA | NA |
| NA            | NA                 | NA | NA | NA | NA | -2 | NA |    |    |    |    |    |    |    |
| MIR4500HG     | ENSG00000228824.6  | NA | NA | NA | NA | NA | NA | NA | NA | NA | NA | NA | NA | NA |

|               |                    |    |    |    |    |    |    |    |    |    |    |    |    |
|---------------|--------------------|----|----|----|----|----|----|----|----|----|----|----|----|
| NA            | NA                 | NA | NA | NA | -2 | NA |    |    |    |    |    |    |    |
| COL4A2        | ENSG00000134871.17 |    |    |    |    | NA | NA | NA | NA | NA | NA | NA | NA |
| NA            | NA                 | NA | NA | NA | -2 | NA |    |    |    |    |    |    |    |
| RP11-527N12.2 | ENSG00000273550.1  |    |    |    |    | NA | NA | NA | NA | NA | NA | NA | NA |
| NA            | NA                 | NA | NA | NA | NA | -2 | NA |    |    |    |    |    |    |
| LINC00411     | ENSG00000229599.1  |    |    |    |    | NA | NA | NA | NA | NA | NA | NA | NA |
| NA            | NA                 | NA | NA | NA | -2 | NA |    |    |    |    |    |    |    |
| HTR2A         | ENSG00000102468.10 |    |    |    |    | NA | NA | NA | NA | NA | NA | NA | NA |
| NA            | NA                 | NA | NA | NA | -2 | NA |    |    |    |    |    |    |    |
| LPAR6         | ENSG00000139679.15 |    |    |    |    | NA | NA | NA | NA | NA | NA | NA | NA |
| NA            | NA                 | NA | NA | NA | -2 | NA |    |    |    |    |    |    |    |
| LINC00545     | ENSG00000236094.1  |    |    |    |    | NA | NA | NA | NA | NA | NA | NA | NA |
| NA            | NA                 | NA | NA | NA | -2 | NA |    |    |    |    |    |    |    |
| RP11-307O13.1 | ENSG00000261728.1  |    |    |    |    | NA | NA | NA | NA | NA | NA | NA | NA |
| NA            | NA                 | NA | NA | NA | NA | -2 | NA |    |    |    |    |    |    |
| KCTD12        | ENSG00000178695.5  |    |    |    |    | NA | NA | NA | NA | NA | NA | NA | NA |
| NA            | NA                 | NA | NA | NA | -2 | NA |    |    |    |    |    |    |    |
| LINC00448     | ENSG00000228669.1  |    |    |    |    | NA | NA | NA | NA | NA | NA | NA | NA |
| NA            | NA                 | NA | NA | NA | -2 | NA |    |    |    |    |    |    |    |
| LINC01050     | ENSG00000271216.1  |    |    |    |    | NA | NA | NA | NA | NA | NA | NA | NA |
| NA            | NA                 | NA | NA | NA | -2 | NA |    |    |    |    |    |    |    |
| PCOTH         | ENSG00000205861.11 |    |    |    |    | NA | NA | NA | NA | NA | NA | NA | NA |
| NA            | NA                 | NA | NA | NA | -2 | NA |    |    |    |    |    |    |    |
| LINC00550     | ENSG00000281778.1  |    |    |    |    | NA | NA | NA | NA | NA | NA | NA | NA |
| NA            | NA                 | NA | NA | NA | -2 | NA |    |    |    |    |    |    |    |
| LINC00441     | ENSG00000231473.2  |    |    |    |    | NA | NA | NA | NA | NA | NA | NA | NA |
| NA            | NA                 | NA | NA | NA | -2 | NA |    |    |    |    |    |    |    |
| PHF11         | ENSG00000136147.17 |    |    |    |    | NA | NA | NA | NA | NA | NA | NA | NA |
| NA            | NA                 | NA | NA | NA | -2 | NA |    |    |    |    |    |    |    |
| STARD13       | ENSG00000133121.20 |    |    |    |    | NA | NA | NA | NA | NA | NA | NA | NA |
| NA            | NA                 | NA | NA | NA | -2 | NA |    |    |    |    |    |    |    |
| UBE2L5P       | ENSG00000236444.4  |    |    |    |    | NA | NA | NA | NA | NA | NA | NA | NA |
| NA            | NA                 | NA | NA | NA | -2 | NA |    |    |    |    |    |    |    |
| FBXL3         | ENSG00000005812.10 |    |    |    |    | NA | NA | NA | NA | NA | NA | NA | NA |
| NA            | NA                 | NA | NA | NA | -2 | NA |    |    |    |    |    |    |    |
| ATP5EP2       | ENSG00000180389.6  |    |    |    |    | NA | NA | NA | NA | NA | NA | NA | NA |
| NA            | NA                 | NA | NA | NA | -2 | NA |    |    |    |    |    |    |    |
| MZT1          | ENSG00000204899.5  |    |    |    |    | NA | NA | NA | NA | NA | NA | NA | NA |
| NA            | NA                 | NA | NA | NA | -2 | NA |    |    |    |    |    |    |    |
| PDX1          | ENSG00000139515.5  |    |    |    |    | NA | NA | NA | NA | NA | NA | NA | NA |
| NA            | NA                 | NA | NA | NA | -2 | NA |    |    |    |    |    |    |    |
| GPR183        | ENSG00000169508.6  |    |    |    |    | NA | NA | NA | NA | NA | NA | NA | NA |
| NA            | NA                 | NA | NA | NA | -2 | NA |    |    |    |    |    |    |    |
| TNFSF13B      | ENSG00000102524.11 |    |    |    |    | NA | NA | NA | NA | NA | NA | NA | NA |
| NA            | NA                 | NA | NA | NA | -2 | NA |    |    |    |    |    |    |    |
| UTP14C        | ENSG00000253797.2  |    |    |    |    | NA | NA | NA | NA | NA | NA | NA | NA |
| NA            | NA                 | NA | NA | NA | -2 | NA |    |    |    |    |    |    |    |
| LINC00445     | ENSG00000236036.1  |    |    |    |    | NA | NA | NA | NA | NA | NA | NA | NA |
| NA            | NA                 | NA | NA | NA | -2 | NA |    |    |    |    |    |    |    |
| LINC00359     | ENSG00000243300.2  |    |    |    |    | NA | NA | NA | NA | NA | NA | NA | NA |
| NA            | NA                 | NA | NA | NA | -2 | NA |    |    |    |    |    |    |    |
| RP11-394A14.2 | ENSG00000219926.10 |    |    |    |    | NA | NA | NA | NA | NA | NA | NA | NA |
| NA            | NA                 | NA | NA | NA | NA | -2 | NA |    |    |    |    |    |    |
| KDELC1        | ENSG00000134901.12 |    |    |    |    | NA | NA | NA | NA | NA | NA | NA | NA |
| NA            | NA                 | NA | NA | NA | -2 | NA |    |    |    |    |    |    |    |
| KPNA3         | ENSG00000102753.9  |    |    |    |    | NA | NA | NA | NA | NA | NA | NA | NA |
| NA            | NA                 | NA | NA | NA | -2 | NA |    |    |    |    |    |    |    |
| N4BP2L1       | ENSG00000139597.17 |    |    |    |    | NA | NA | NA | NA | NA | NA | NA | NA |
| NA            | NA                 | NA | NA | NA | -2 | NA |    |    |    |    |    |    |    |
| TFDP1         | ENSG00000198176.12 |    |    |    |    | NA | NA | NA | NA | NA | NA | NA | NA |
| NA            | NA                 | NA | NA | NA | -2 | NA |    |    |    |    |    |    |    |
| GJA3          | ENSG00000121743.3  |    |    |    |    | NA | NA | NA | NA | NA | NA | NA | NA |

|               |                    |    |    |    |    |    |    |    |    |    |    |    |    |    |
|---------------|--------------------|----|----|----|----|----|----|----|----|----|----|----|----|----|
|               | NA                 | NA | NA | NA | -2 | NA |    |    |    |    |    |    |    |    |
| LRCH1         | ENSG00000136141.14 |    |    |    |    | NA | NA | NA | NA | NA | NA | NA | NA | NA |
|               | NA                 | NA | NA | NA | -2 | NA |    |    |    |    |    |    |    |    |
| RAB20         | ENSG00000139832.4  |    |    |    |    | NA | NA | NA | NA | NA | NA | NA | NA | NA |
|               | NA                 | NA | NA | NA | -2 | NA |    |    |    |    |    |    |    |    |
| LINC00358     | ENSG00000229578.2  |    |    |    |    | NA | NA | NA | NA | NA | NA | NA | NA | NA |
|               | NA                 | NA | NA | NA | -2 | NA |    |    |    |    |    |    |    |    |
| CHAMP1        | ENSG00000198824.5  |    |    |    |    | NA | NA | NA | NA | NA | NA | NA | NA | NA |
|               | NA                 | NA | NA | NA | -2 | NA |    |    |    |    |    |    |    |    |
| RP11-442J21.2 | ENSG00000276527.1  |    |    |    |    | NA | NA | NA | NA | NA | NA | NA | NA | NA |
|               | NA                 | NA | NA | NA | NA | -2 | NA |    |    |    |    |    |    |    |
| CYSLTR2       | ENSG00000152207.7  |    |    |    |    | NA | NA | NA | NA | NA | NA | NA | NA | NA |
|               | NA                 | NA | NA | NA | NA | -2 | NA |    |    |    |    |    |    |    |
| RNF17         | ENSG00000132972.18 |    |    |    |    | NA | NA | NA | NA | NA | NA | NA | NA | NA |
|               | NA                 | NA | NA | NA | -2 | NA |    |    |    |    |    |    |    |    |
| LINC00371     | ENSG00000226792.7  |    |    |    |    | NA | NA | NA | NA | NA | NA | NA | NA | NA |
|               | NA                 | NA | NA | NA | NA | -2 | NA |    |    |    |    |    |    |    |
| NBEA          | ENSG00000172915.18 |    |    |    |    | NA | NA | NA | NA | NA | NA | NA | NA | NA |
|               | NA                 | NA | NA | NA | -2 | NA |    |    |    |    |    |    |    |    |
| LCP1          | ENSG00000136167.13 |    |    |    |    | NA | NA | NA | NA | NA | NA | NA | NA | NA |
|               | NA                 | NA | NA | NA | -2 | NA |    |    |    |    |    |    |    |    |
| HSPH1         | ENSG00000120694.19 |    |    |    |    | NA | NA | NA | NA | NA | NA | NA | NA | NA |
|               | NA                 | NA | NA | NA | -2 | NA |    |    |    |    |    |    |    |    |
| C14orf105     | ENSG00000100557.9  |    |    |    |    | NA | NA | NA | NA | NA | NA | NA | NA | NA |
|               | NA                 | NA | NA | NA | NA | -2 | NA |    |    |    |    |    |    |    |
| FNTB          | ENSG00000257365.7  |    |    |    |    | NA | NA | NA | NA | NA | NA | NA | NA | NA |
|               | NA                 | NA | NA | NA | -2 | NA |    |    |    |    |    |    |    |    |
| MEG3          | ENSG00000214548.14 |    |    |    |    | NA | NA | NA | NA | NA | NA | NA | NA | NA |
|               | NA                 | NA | NA | NA | -2 | NA |    |    |    |    |    |    |    |    |
| IFI27         | ENSG00000165949.12 |    |    |    |    | NA | NA | NA | NA | NA | NA | NA | NA | NA |
|               | NA                 | NA | NA | NA | -2 | NA |    |    |    |    |    |    |    |    |
| FRMD6         | ENSG00000139926.15 |    |    |    |    | NA | NA | NA | NA | NA | NA | NA | NA | NA |
|               | NA                 | NA | NA | NA | -2 | NA |    |    |    |    |    |    |    |    |
| PRIMA1        | ENSG00000175785.12 |    |    |    |    | NA | NA | NA | NA | NA | NA | NA | NA | NA |
|               | NA                 | NA | NA | NA | NA | -2 | NA |    |    |    |    |    |    |    |
| RP11-982M15.7 | ENSG00000258736.1  |    |    |    |    | NA | NA | NA | NA | NA | NA | NA | NA | NA |
|               | NA                 | NA | NA | NA | NA | -2 | NA |    |    |    |    |    |    |    |
| RP11-219E7.3  | ENSG00000259130.1  |    |    |    |    | NA | NA | NA | NA | NA | NA | NA | NA | NA |
|               | NA                 | NA | NA | NA | NA | -2 | NA |    |    |    |    |    |    |    |
| RP11-129M6.1  | ENSG00000251363.2  |    |    |    |    | NA | NA | NA | NA | NA | NA | NA | NA | NA |
|               | NA                 | NA | NA | NA | NA | -2 | NA |    |    |    |    |    |    |    |
| CTD-2298J14.2 | ENSG00000258636.1  |    |    |    |    | NA | NA | NA | NA | NA | NA | NA | NA | NA |
|               | NA                 | NA | NA | NA | NA | -2 | NA |    |    |    |    |    |    |    |
| RP11-84C10.2  | ENSG00000136315.4  |    |    |    |    | NA | NA | NA | NA | NA | NA | NA | NA | NA |
|               | NA                 | NA | NA | NA | NA | -2 | NA |    |    |    |    |    |    |    |
| LINC00644     | ENSG00000259142.1  |    |    |    |    | NA | NA | NA | NA | NA | NA | NA | NA | NA |
|               | NA                 | NA | NA | NA | NA | -2 | NA |    |    |    |    |    |    |    |
| CCNK          | ENSG00000090061.17 |    |    |    |    | NA | NA | NA | NA | NA | NA | NA | NA | NA |
|               | NA                 | NA | NA | NA | -2 | NA |    |    |    |    |    |    |    |    |
| LINC00677     | ENSG00000259717.1  |    |    |    |    | NA | NA | NA | NA | NA | NA | NA | NA | NA |
|               | NA                 | NA | NA | NA | NA | -2 | NA |    |    |    |    |    |    |    |
| OR4Q3         | ENSG00000182652.1  |    |    |    |    | NA | NA | NA | NA | NA | NA | NA | NA | NA |
|               | NA                 | NA | NA | NA | -2 | NA |    |    |    |    |    |    |    |    |
| RP11-944C7.1  | ENSG00000258792.4  |    |    |    |    | NA | NA | NA | NA | NA | NA | NA | NA | NA |
|               | NA                 | NA | NA | NA | NA | -2 | NA |    |    |    |    |    |    |    |
| TMEM30B       | ENSG00000182107.6  |    |    |    |    | NA | NA | NA | NA | NA | NA | NA | NA | NA |
|               | NA                 | NA | NA | NA | NA | -2 | NA |    |    |    |    |    |    |    |
| RP11-725G5.2  | ENSG00000258630.1  |    |    |    |    | NA | NA | NA | NA | NA | NA | NA | NA | NA |
|               | NA                 | NA | NA | NA | NA | -2 | NA |    |    |    |    |    |    |    |
| ADAM20        | ENSG00000134007.3  |    |    |    |    | NA | NA | NA | NA | NA | NA | NA | NA | NA |
|               | NA                 | NA | NA | NA | NA | -2 | NA |    |    |    |    |    |    |    |
| PPP1R3E       | ENSG00000235194.8  |    |    |    |    | NA | NA | NA | NA | NA | NA | NA | NA | NA |

|               |                    |    |    |    |    |    |    |    |    |    |    |    |    |    |
|---------------|--------------------|----|----|----|----|----|----|----|----|----|----|----|----|----|
| NA            | NA                 | NA | NA | NA | -2 | NA |    |    |    |    |    |    |    |    |
| RP11-293M10.1 | ENSG00000258740.1  |    |    |    |    | NA | NA | NA | NA | NA | NA | NA | NA | NA |
| NA            | NA                 | NA | NA | NA | NA | -2 | NA |    |    |    |    |    |    |    |
| RNASE11       | ENSG00000173464.14 |    |    |    |    | NA | NA | NA | NA | NA | NA | NA | NA | NA |
| NA            | NA                 | NA | NA | NA | NA | -2 | NA |    |    |    |    |    |    |    |
| CTD-2506J14.1 | ENSG00000246084.2  |    |    |    |    | NA | NA | NA | NA | NA | NA | NA | NA | NA |
| NA            | NA                 | NA | NA | NA | NA | -2 | NA |    |    |    |    |    |    |    |
| LINC00238     | ENSG00000196553.14 |    |    |    |    | NA | NA | NA | NA | NA | NA | NA | NA | NA |
| NA            | NA                 | NA | NA | NA | NA | -2 | NA |    |    |    |    |    |    |    |
| NOP9          | ENSG00000196943.12 |    |    |    |    | NA | NA | NA | NA | NA | NA | NA | NA | NA |
| NA            | NA                 | NA | NA | NA | NA | -2 | NA |    |    |    |    |    |    |    |
| ZFP36L1       | ENSG00000185650.9  |    |    |    |    | NA | NA | NA | NA | NA | NA | NA | NA | NA |
| NA            | NA                 | NA | NA | NA | NA | -2 | NA |    |    |    |    |    |    |    |
| AL928768.3    | ENSG00000253701.2  |    |    |    |    | NA | NA | NA | NA | NA | NA | NA | NA | NA |
| NA            | NA                 | NA | NA | NA | NA | -2 | NA |    |    |    |    |    |    |    |
| FITM1         | ENSG00000139914.6  |    |    |    |    | NA | NA | NA | NA | NA | NA | NA | NA | NA |
| NA            | NA                 | NA | NA | NA | NA | -2 | NA |    |    |    |    |    |    |    |
| RP11-111A21.1 | ENSG00000258526.5  |    |    |    |    | NA | NA | NA | NA | NA | NA | NA | NA | NA |
| NA            | NA                 | NA | NA | NA | NA | -2 | NA |    |    |    |    |    |    |    |
| RNASE7        | ENSG00000165799.4  |    |    |    |    | NA | NA | NA | NA | NA | NA | NA | NA | NA |
| NA            | NA                 | NA | NA | NA | NA | -2 | NA |    |    |    |    |    |    |    |
| TMEM55B       | ENSG00000165782.10 |    |    |    |    | NA | NA | NA | NA | NA | NA | NA | NA | NA |
| NA            | NA                 | NA | NA | NA | NA | -2 | NA |    |    |    |    |    |    |    |
| DCAF5         | ENSG00000139990.17 |    |    |    |    | NA | NA | NA | NA | NA | NA | NA | NA | NA |
| NA            | NA                 | NA | NA | NA | NA | -2 | NA |    |    |    |    |    |    |    |
| MIS18BP1      | ENSG00000129534.13 |    |    |    |    | NA | NA | NA | NA | NA | NA | NA | NA | NA |
| NA            | NA                 | NA | NA | NA | NA | -2 | NA |    |    |    |    |    |    |    |
| RP11-116N8.4  | ENSG00000257826.1  |    |    |    |    | NA | NA | NA | NA | NA | NA | NA | NA | NA |
| NA            | NA                 | NA | NA | NA | NA | -2 | NA |    |    |    |    |    |    |    |
| IRF2BPL       | ENSG00000119669.4  |    |    |    |    | NA | NA | NA | NA | NA | NA | NA | NA | NA |
| NA            | NA                 | NA | NA | NA | NA | -2 | NA |    |    |    |    |    |    |    |
| RP11-1078H9.6 | ENSG00000259789.1  |    |    |    |    | NA | NA | NA | NA | NA | NA | NA | NA | NA |
| NA            | NA                 | NA | NA | NA | NA | -2 | NA |    |    |    |    |    |    |    |
| RNASE10       | ENSG00000182545.6  |    |    |    |    | NA | NA | NA | NA | NA | NA | NA | NA | NA |
| NA            | NA                 | NA | NA | NA | NA | -2 | NA |    |    |    |    |    |    |    |
| AKAP5         | ENSG00000179841.8  |    |    |    |    | NA | NA | NA | NA | NA | NA | NA | NA | NA |
| NA            | NA                 | NA | NA | NA | NA | -2 | NA |    |    |    |    |    |    |    |
| RP11-61O1.1   | ENSG00000259097.1  |    |    |    |    | NA | NA | NA | NA | NA | NA | NA | NA | NA |
| NA            | NA                 | NA | NA | NA | NA | -2 | NA |    |    |    |    |    |    |    |
| RP11-452D21.2 | ENSG00000258600.1  |    |    |    |    | NA | NA | NA | NA | NA | NA | NA | NA | NA |
| NA            | NA                 | NA | NA | NA | NA | -2 | NA |    |    |    |    |    |    |    |
| RP11-99L13.1  | ENSG00000258487.1  |    |    |    |    | NA | NA | NA | NA | NA | NA | NA | NA | NA |
| NA            | NA                 | NA | NA | NA | NA | -2 | NA |    |    |    |    |    |    |    |
| NKX2-8        | ENSG00000136327.6  |    |    |    |    | NA | NA | NA | NA | NA | NA | NA | NA | NA |
| NA            | NA                 | NA | NA | NA | NA | -2 | NA |    |    |    |    |    |    |    |
| RP11-930O11.1 | ENSG00000259719.5  |    |    |    |    | NA | NA | NA | NA | NA | NA | NA | NA | NA |
| NA            | NA                 | NA | NA | NA | NA | -2 | NA |    |    |    |    |    |    |    |
| RP11-566J3.2  | ENSG00000258717.1  |    |    |    |    | NA | NA | NA | NA | NA | NA | NA | NA | NA |
| NA            | NA                 | NA | NA | NA | NA | -2 | NA |    |    |    |    |    |    |    |
| MTA1          | ENSG00000182979.17 |    |    |    |    | NA | NA | NA | NA | NA | NA | NA | NA | NA |
| NA            | NA                 | NA | NA | NA | NA | -2 | NA |    |    |    |    |    |    |    |
| RP11-89K22.1  | ENSG00000258098.1  |    |    |    |    | NA | NA | NA | NA | NA | NA | NA | NA | NA |
| NA            | NA                 | NA | NA | NA | NA | -2 | NA |    |    |    |    |    |    |    |
| C14orf39      | ENSG00000179008.8  |    |    |    |    | NA | NA | NA | NA | NA | NA | NA | NA | NA |
| NA            | NA                 | NA | NA | NA | NA | -2 | NA |    |    |    |    |    |    |    |
| FOXN3         | ENSG00000053254.15 |    |    |    |    | NA | NA | NA | NA | NA | NA | NA | NA | NA |
| NA            | NA                 | NA | NA | NA | NA | -2 | NA |    |    |    |    |    |    |    |
| HSP90AA1      | ENSG00000080824.18 |    |    |    |    | NA | NA | NA | NA | NA | NA | NA | NA | NA |
| NA            | NA                 | NA | NA | NA | NA | -2 | NA |    |    |    |    |    |    |    |
| RABGTA        | ENSG00000100949.14 |    |    |    |    | NA | NA | NA | NA | NA | NA | NA | NA | NA |
| NA            | NA                 | NA | NA | NA | NA | -2 | NA |    |    |    |    |    |    |    |
| NFATC4        | ENSG00000100968.13 |    |    |    |    | NA | NA | NA | NA | NA | NA | NA | NA | NA |



|               |                    |    |    |    |    |    |    |    |    |    |    |    |    |    |
|---------------|--------------------|----|----|----|----|----|----|----|----|----|----|----|----|----|
| NA            | NA                 | NA | NA | NA | -2 | NA |    |    |    |    |    |    |    |    |
| MAPK1IP1L     | ENSG00000168175.14 | NA | NA | NA | NA | NA | NA | NA | NA | NA | NA | NA | NA | NA |
| NA            | NA                 | NA | NA | NA | -2 | NA |    |    |    |    |    |    |    |    |
| SGPP1         | ENSG00000126821.7  | NA | NA | NA | NA | NA | NA | NA | NA | NA | NA | NA | NA | NA |
| NA            | NA                 | NA | NA | NA | -2 | NA |    |    |    |    |    |    |    |    |
| RP11-259K15.2 | ENSG00000258844.1  | NA | NA | NA | NA | NA | NA | NA | NA | NA | NA | NA | NA | NA |
| NA            | NA                 | NA | NA | NA | NA | -2 | NA |    |    |    |    |    |    |    |
| RP11-151G14.2 | ENSG00000283627.1  | NA | NA | NA | NA | NA | NA | NA | NA | NA | NA | NA | NA | NA |
| NA            | NA                 | NA | NA | NA | NA | -2 | NA |    |    |    |    |    |    |    |
| SFTA3         | ENSG00000229415.9  | NA | NA | NA | NA | NA | NA | NA | NA | NA | NA | NA | NA | NA |
| NA            | NA                 | NA | NA | NA | -2 | NA |    |    |    |    |    |    |    |    |
| RP11-753D20.4 | ENSG00000259998.1  | NA | NA | NA | NA | NA | NA | NA | NA | NA | NA | NA | NA | NA |
| NA            | NA                 | NA | NA | NA | NA | -2 | NA |    |    |    |    |    |    |    |
| RNASE3        | ENSG00000169397.3  | NA | NA | NA | NA | NA | NA | NA | NA | NA | NA | NA | NA | NA |
| NA            | NA                 | NA | NA | NA | NA | -2 | NA |    |    |    |    |    |    |    |
| PTCSC3        | ENSG00000259104.2  | NA | NA | NA | NA | NA | NA | NA | NA | NA | NA | NA | NA | NA |
| NA            | NA                 | NA | NA | NA | NA | -2 | NA |    |    |    |    |    |    |    |
| RP11-260G13.1 | ENSG00000258107.1  | NA | NA | NA | NA | NA | NA | NA | NA | NA | NA | NA | NA | NA |
| NA            | NA                 | NA | NA | NA | NA | -2 | NA |    |    |    |    |    |    |    |
| SERPINA3      | ENSG00000196136.17 | NA | NA | NA | NA | NA | NA | NA | NA | NA | NA | NA | NA | NA |
| NA            | NA                 | NA | NA | NA | NA | -2 | NA |    |    |    |    |    |    |    |
| NOVA1         | ENSG00000139910.19 | NA | NA | NA | NA | NA | NA | NA | NA | NA | NA | NA | NA | NA |
| NA            | NA                 | NA | NA | NA | -2 | NA |    |    |    |    |    |    |    |    |
| TRMT5         | ENSG00000126814.6  | NA | NA | NA | NA | NA | NA | NA | NA | NA | NA | NA | NA | NA |
| NA            | NA                 | NA | NA | NA | -2 | NA |    |    |    |    |    |    |    |    |
| RP11-356O9.1  | ENSG00000258414.1  | NA | NA | NA | NA | NA | NA | NA | NA | NA | NA | NA | NA | NA |
| NA            | NA                 | NA | NA | NA | NA | -2 | NA |    |    |    |    |    |    |    |
| LINC01148     | ENSG00000258804.1  | NA | NA | NA | NA | NA | NA | NA | NA | NA | NA | NA | NA | NA |
| NA            | NA                 | NA | NA | NA | NA | -2 | NA |    |    |    |    |    |    |    |
| TINF2         | ENSG00000092330.15 | NA | NA | NA | NA | NA | NA | NA | NA | NA | NA | NA | NA | NA |
| NA            | NA                 | NA | NA | NA | -2 | NA |    |    |    |    |    |    |    |    |
| RNASE6        | ENSG00000169413.2  | NA | NA | NA | NA | NA | NA | NA | NA | NA | NA | NA | NA | NA |
| NA            | NA                 | NA | NA | NA | NA | -2 | NA |    |    |    |    |    |    |    |
| ZFYVE21       | ENSG00000100711.13 | NA | NA | NA | NA | NA | NA | NA | NA | NA | NA | NA | NA | NA |
| NA            | NA                 | NA | NA | NA | NA | -2 | NA |    |    |    |    |    |    |    |
| TIMM9         | ENSG00000100575.13 | NA | NA | NA | NA | NA | NA | NA | NA | NA | NA | NA | NA | NA |
| NA            | NA                 | NA | NA | NA | -2 | NA |    |    |    |    |    |    |    |    |
| GZMB          | ENSG00000100453.12 | NA | NA | NA | NA | NA | NA | NA | NA | NA | NA | NA | NA | NA |
| NA            | NA                 | NA | NA | NA | -2 | NA |    |    |    |    |    |    |    |    |
| RP11-526N18.1 | ENSG00000258416.1  | NA | NA | NA | NA | NA | NA | NA | NA | NA | NA | NA | NA | NA |
| NA            | NA                 | NA | NA | NA | NA | -2 | NA |    |    |    |    |    |    |    |
| NPAS3         | ENSG00000151322.18 | NA | NA | NA | NA | NA | NA | NA | NA | NA | NA | NA | NA | NA |
| NA            | NA                 | NA | NA | NA | -2 | NA |    |    |    |    |    |    |    |    |
| FSCB          | ENSG00000189139.5  | NA | NA | NA | NA | NA | NA | NA | NA | NA | NA | NA | NA | NA |
| NA            | NA                 | NA | NA | NA | -2 | NA |    |    |    |    |    |    |    |    |
| RP11-187E13.1 | ENSG00000258474.1  | NA | NA | NA | NA | NA | NA | NA | NA | NA | NA | NA | NA | NA |
| NA            | NA                 | NA | NA | NA | NA | -2 | NA |    |    |    |    |    |    |    |
| SUPT16H       | ENSG00000092201.9  | NA | NA | NA | NA | NA | NA | NA | NA | NA | NA | NA | NA | NA |
| NA            | NA                 | NA | NA | NA | NA | -2 | NA |    |    |    |    |    |    |    |
| KCNK13        | ENSG00000152315.4  | NA | NA | NA | NA | NA | NA | NA | NA | NA | NA | NA | NA | NA |
| NA            | NA                 | NA | NA | NA | NA | -2 | NA |    |    |    |    |    |    |    |
| C14orf80      | ENSG00000185347.17 | NA | NA | NA | NA | NA | NA | NA | NA | NA | NA | NA | NA | NA |
| NA            | NA                 | NA | NA | NA | NA | -2 | NA |    |    |    |    |    |    |    |
| RAD51B        | ENSG00000182185.18 | NA | NA | NA | NA | NA | NA | NA | NA | NA | NA | NA | NA | NA |
| NA            | NA                 | NA | NA | NA | NA | -2 | NA |    |    |    |    |    |    |    |
| OR6S1         | ENSG00000181803.3  | NA | NA | NA | NA | NA | NA | NA | NA | NA | NA | NA | NA | NA |
| NA            | NA                 | NA | NA | NA | -2 | NA |    |    |    |    |    |    |    |    |
| KLHDC2        | ENSG00000165516.10 | NA | NA | NA | NA | NA | NA | NA | NA | NA | NA | NA | NA | NA |
| NA            | NA                 | NA | NA | NA | NA | -2 | NA |    |    |    |    |    |    |    |
| TOMM20L       | ENSG00000196860.7  | NA | NA | NA | NA | NA | NA | NA | NA | NA | NA | NA | NA | NA |
| NA            | NA                 | NA | NA | NA | NA | -2 | NA |    |    |    |    |    |    |    |
| RP11-718G2.5  | ENSG00000259033.1  | NA | NA | NA | NA | NA | NA | NA | NA | NA | NA | NA | NA | NA |

|                |                    |    |    |    |    |    |    |    |    |    |    |    |    |    |    |
|----------------|--------------------|----|----|----|----|----|----|----|----|----|----|----|----|----|----|
| NAA30          | NA                 | NA | NA | NA | NA | NA | -2 | NA | NA | NA | NA | NA | NA | NA | NA |
|                | ENSG00000139977.13 |    |    |    | NA | NA | NA | NA | NA | NA | NA | NA | NA | NA | NA |
|                | NA                 | NA | NA | NA | -2 | NA |    |    |    |    |    |    |    |    |    |
| EXOC5          | ENSG00000070367.15 |    |    |    | NA | NA | NA | NA | NA | NA | NA | NA | NA | NA | NA |
|                | NA                 | NA | NA | NA | -2 | NA |    |    |    |    |    |    |    |    |    |
| PLEK2          | ENSG00000100558.8  |    |    |    | NA | NA | NA | NA | NA | NA | NA | NA | NA | NA | NA |
|                | NA                 | NA | NA | NA | -2 | NA |    |    |    |    |    |    |    |    |    |
| LINC00523      | ENSG00000196273.7  |    |    |    | NA | NA | NA | NA | NA | NA | NA | NA | NA | NA | NA |
|                | NA                 | NA | NA | NA | NA | -2 | NA |    |    |    |    |    |    |    |    |
| HIF1A          | ENSG00000100644.16 |    |    |    | NA | NA | NA | NA | NA | NA | NA | NA | NA | NA | NA |
|                | NA                 | NA | NA | NA | -2 | NA |    |    |    |    |    |    |    |    |    |
| ABHD4          | ENSG00000100439.10 |    |    |    | NA | NA | NA | NA | NA | NA | NA | NA | NA | NA | NA |
|                | NA                 | NA | NA | NA | -2 | NA |    |    |    |    |    |    |    |    |    |
| LINC01297      | ENSG00000274827.4  |    |    |    | NA | NA | NA | NA | NA | NA | NA | NA | NA | NA | NA |
|                | NA                 | NA | NA | NA | NA | -2 | NA |    |    |    |    |    |    |    |    |
| TMED10         | ENSG00000170348.8  |    |    |    | NA | NA | NA | NA | NA | NA | NA | NA | NA | NA | NA |
|                | NA                 | NA | NA | NA | NA | -2 | NA |    |    |    |    |    |    |    |    |
| GOLGA5         | ENSG00000066455.12 |    |    |    | NA | NA | NA | NA | NA | NA | NA | NA | NA | NA | NA |
|                | NA                 | NA | NA | NA | NA | -2 | NA |    |    |    |    |    |    |    |    |
| PRKD1          | ENSG00000184304.14 |    |    |    | NA | NA | NA | NA | NA | NA | NA | NA | NA | NA | NA |
|                | NA                 | NA | NA | NA | -2 | NA |    |    |    |    |    |    |    |    |    |
| DIO2           | ENSG00000211448.11 |    |    |    | NA | NA | NA | NA | NA | NA | NA | NA | NA | NA | NA |
|                | NA                 | NA | NA | NA | -2 | NA |    |    |    |    |    |    |    |    |    |
| DLGAP5         | ENSG00000126787.12 |    |    |    | NA | NA | NA | NA | NA | NA | NA | NA | NA | NA | NA |
|                | NA                 | NA | NA | NA | NA | -2 | NA |    |    |    |    |    |    |    |    |
| RP11-1070N10.5 | ENSG00000258927.1  |    |    |    | NA | NA | NA | NA | NA | NA | NA | NA | NA | NA | NA |
|                | NA                 | NA | NA | NA | NA | -2 | NA |    |    |    |    |    |    |    |    |
| BRMS1L         | ENSG00000100916.13 |    |    |    | NA | NA | NA | NA | NA | NA | NA | NA | NA | NA | NA |
|                | NA                 | NA | NA | NA | NA | -2 | NA |    |    |    |    |    |    |    |    |
| SOCS4          | ENSG00000180008.8  |    |    |    | NA | NA | NA | NA | NA | NA | NA | NA | NA | NA | NA |
|                | NA                 | NA | NA | NA | -2 | NA |    |    |    |    |    |    |    |    |    |
| YY1            | ENSG00000100811.12 |    |    |    | NA | NA | NA | NA | NA | NA | NA | NA | NA | NA | NA |
|                | NA                 | NA | NA | NA | -2 | NA |    |    |    |    |    |    |    |    |    |
| AL132796.1     | ENSG00000237342.1  |    |    |    | NA | NA | NA | NA | NA | NA | NA | NA | NA | NA | NA |
|                | NA                 | NA | NA | NA | NA | -2 | NA |    |    |    |    |    |    |    |    |
| LINC00520      | ENSG00000258791.7  |    |    |    | NA | NA | NA | NA | NA | NA | NA | NA | NA | NA | NA |
|                | NA                 | NA | NA | NA | NA | -2 | NA |    |    |    |    |    |    |    |    |
| LINC01629      | ENSG00000258602.1  |    |    |    | NA | NA | NA | NA | NA | NA | NA | NA | NA | NA | NA |
|                | NA                 | NA | NA | NA | NA | -2 | NA |    |    |    |    |    |    |    |    |
| CTD-2007A10.1  | ENSG00000258770.1  |    |    |    | NA | NA | NA | NA | NA | NA | NA | NA | NA | NA | NA |
|                | NA                 | NA | NA | NA | NA | -2 | NA |    |    |    |    |    |    |    |    |
| RP11-736N17.10 | ENSG00000278071.1  |    |    |    | NA | NA | NA | NA | NA | NA | NA | NA | NA | NA | NA |
|                | NA                 | NA | NA | NA | NA | -2 | NA |    |    |    |    |    |    |    |    |
| PGF            | ENSG00000119630.13 |    |    |    | NA | NA | NA | NA | NA | NA | NA | NA | NA | NA | NA |
|                | NA                 | NA | NA | NA | -2 | NA |    |    |    |    |    |    |    |    |    |
| RP11-696D21.2  | ENSG00000258943.1  |    |    |    | NA | NA | NA | NA | NA | NA | NA | NA | NA | NA | NA |
|                | NA                 | NA | NA | NA | NA | -2 | NA |    |    |    |    |    |    |    |    |
| RP11-543C4.3   | ENSG00000258672.1  |    |    |    | NA | NA | NA | NA | NA | NA | NA | NA | NA | NA | NA |
|                | NA                 | NA | NA | NA | NA | -2 | NA |    |    |    |    |    |    |    |    |
| GON7           | ENSG00000170270.4  |    |    |    | NA | NA | NA | NA | NA | NA | NA | NA | NA | NA | NA |
|                | NA                 | NA | NA | NA | -2 | NA |    |    |    |    |    |    |    |    |    |
| RNASE13        | ENSG00000206150.3  |    |    |    | NA | NA | NA | NA | NA | NA | NA | NA | NA | NA | NA |
|                | NA                 | NA | NA | NA | NA | -2 | NA |    |    |    |    |    |    |    |    |
| ZFYVE1         | ENSG00000165861.13 |    |    |    | NA | NA | NA | NA | NA | NA | NA | NA | NA | NA | NA |
|                | NA                 | NA | NA | NA | NA | -2 | NA |    |    |    |    |    |    |    |    |
| LGMN           | ENSG00000100600.14 |    |    |    | NA | NA | NA | NA | NA | NA | NA | NA | NA | NA | NA |
|                | NA                 | NA | NA | NA | -2 | NA |    |    |    |    |    |    |    |    |    |
| SERPINA10      | ENSG00000140093.9  |    |    |    | NA | NA | NA | NA | NA | NA | NA | NA | NA | NA | NA |
|                | NA                 | NA | NA | NA | NA | -2 | NA |    |    |    |    |    |    |    |    |
| C14orf119      | ENSG00000179933.5  |    |    |    | NA | NA | NA | NA | NA | NA | NA | NA | NA | NA | NA |
|                | NA                 | NA | NA | NA | NA | -2 | NA |    |    |    |    |    |    |    |    |
| MED6           | ENSG00000133997.11 |    |    |    | NA | NA | NA | NA | NA | NA | NA | NA | NA | NA | NA |

|               |                    |    |    |    |    |    |    |    |    |    |    |    |    |    |
|---------------|--------------------|----|----|----|----|----|----|----|----|----|----|----|----|----|
| NA            | NA                 | NA | NA | -2 | NA |    |    |    |    |    |    |    |    |    |
| ZNF219        | ENSG00000165804.15 | NA | NA | NA | NA | NA | NA | NA | NA | NA | NA | NA | NA | NA |
| NA            | NA                 | NA | NA | NA | -2 | NA |    |    |    |    |    |    |    |    |
| SERPINA11     | ENSG00000186910.3  | NA | NA | NA | NA | NA | NA | NA | NA | NA | NA | NA | NA | NA |
| NA            | NA                 | NA | NA | NA | -2 | NA |    |    |    |    |    |    |    |    |
| RP11-8L8.2    | ENSG00000259004.1  | NA | NA | NA | NA | NA | NA | NA | NA | NA | NA | NA | NA | NA |
| NA            | NA                 | NA | NA | NA | -2 | NA |    |    |    |    |    |    |    |    |
| RP11-260M19.2 | ENSG00000258913.1  | NA | NA | NA | NA | NA | NA | NA | NA | NA | NA | NA | NA | NA |
| NA            | NA                 | NA | NA | NA | -2 | NA |    |    |    |    |    |    |    |    |
| IL25          | ENSG00000166090.8  | NA | NA | NA | NA | NA | NA | NA | NA | NA | NA | NA | NA | NA |
| NA            | NA                 | NA | NA | NA | -2 | NA |    |    |    |    |    |    |    |    |
| LINC00605     | ENSG00000251533.2  | NA | NA | NA | NA | NA | NA | NA | NA | NA | NA | NA | NA | NA |
| NA            | NA                 | NA | NA | NA | -2 | NA |    |    |    |    |    |    |    |    |
| ARF6          | ENSG00000165527.6  | NA | NA | NA | NA | NA | NA | NA | NA | NA | NA | NA | NA | NA |
| NA            | NA                 | NA | NA | NA | -2 | NA |    |    |    |    |    |    |    |    |
| LRRC74A       | ENSG00000100565.15 | NA | NA | NA | NA | NA | NA | NA | NA | NA | NA | NA | NA | NA |
| NA            | NA                 | NA | NA | NA | -2 | NA |    |    |    |    |    |    |    |    |
| FOXG1         | ENSG00000176165.10 | NA | NA | NA | NA | NA | NA | NA | NA | NA | NA | NA | NA | NA |
| NA            | NA                 | NA | NA | NA | -2 | NA |    |    |    |    |    |    |    |    |
| RP11-108M12.3 | ENSG00000258592.1  | NA | NA | NA | NA | NA | NA | NA | NA | NA | NA | NA | NA | NA |
| NA            | NA                 | NA | NA | NA | NA | -2 | NA |    |    |    |    |    |    |    |
| PPP1R36       | ENSG00000165807.7  | NA | NA | NA | NA | NA | NA | NA | NA | NA | NA | NA | NA | NA |
| NA            | NA                 | NA | NA | NA | -2 | NA |    |    |    |    |    |    |    |    |
| AL161668.5    | ENSG00000258604.1  | NA | NA | NA | NA | NA | NA | NA | NA | NA | NA | NA | NA | NA |
| NA            | NA                 | NA | NA | NA | -2 | NA |    |    |    |    |    |    |    |    |
| CPNE6         | ENSG00000100884.9  | NA | NA | NA | NA | NA | NA | NA | NA | NA | NA | NA | NA | NA |
| NA            | NA                 | NA | NA | NA | -2 | NA |    |    |    |    |    |    |    |    |
| CLEC14A       | ENSG00000176435.6  | NA | NA | NA | NA | NA | NA | NA | NA | NA | NA | NA | NA | NA |
| NA            | NA                 | NA | NA | NA | -2 | NA |    |    |    |    |    |    |    |    |
| RP6-114E22.1  | ENSG00000266869.1  | NA | NA | NA | NA | NA | NA | NA | NA | NA | NA | NA | NA | NA |
| NA            | NA                 | NA | NA | NA | NA | -2 | NA |    |    |    |    |    |    |    |
| RP6-65G23.5   | ENSG00000275630.1  | NA | NA | NA | NA | NA | NA | NA | NA | NA | NA | NA | NA | NA |
| NA            | NA                 | NA | NA | NA | NA | -2 | NA |    |    |    |    |    |    |    |
| RP6-91H8.3    | ENSG00000269927.1  | NA | NA | NA | NA | NA | NA | NA | NA | NA | NA | NA | NA | NA |
| NA            | NA                 | NA | NA | NA | NA | -2 | NA |    |    |    |    |    |    |    |
| RP11-753D20.1 | ENSG00000258975.1  | NA | NA | NA | NA | NA | NA | NA | NA | NA | NA | NA | NA | NA |
| NA            | NA                 | NA | NA | NA | NA | -2 | NA |    |    |    |    |    |    |    |
| CGRRF1        | ENSG00000100532.11 | NA | NA | NA | NA | NA | NA | NA | NA | NA | NA | NA | NA | NA |
| NA            | NA                 | NA | NA | NA | NA | -2 | NA |    |    |    |    |    |    |    |
| LINC01467     | ENSG00000258977.1  | NA | NA | NA | NA | NA | NA | NA | NA | NA | NA | NA | NA | NA |
| NA            | NA                 | NA | NA | NA | NA | -2 | NA |    |    |    |    |    |    |    |
| SNW1          | ENSG00000100603.13 | NA | NA | NA | NA | NA | NA | NA | NA | NA | NA | NA | NA | NA |
| NA            | NA                 | NA | NA | NA | NA | -2 | NA |    |    |    |    |    |    |    |
| RP11-991C1.1  | ENSG00000258933.1  | NA | NA | NA | NA | NA | NA | NA | NA | NA | NA | NA | NA | NA |
| NA            | NA                 | NA | NA | NA | NA | -2 | NA |    |    |    |    |    |    |    |
| FAM181A       | ENSG00000140067.6  | NA | NA | NA | NA | NA | NA | NA | NA | NA | NA | NA | NA | NA |
| NA            | NA                 | NA | NA | NA | NA | -2 | NA |    |    |    |    |    |    |    |
| FAM30A        | ENSG00000226777.7  | NA | NA | NA | NA | NA | NA | NA | NA | NA | NA | NA | NA | NA |
| NA            | NA                 | NA | NA | NA | NA | -2 | NA |    |    |    |    |    |    |    |
| RP11-226P1.2  | ENSG00000258718.1  | NA | NA | NA | NA | NA | NA | NA | NA | NA | NA | NA | NA | NA |
| NA            | NA                 | NA | NA | NA | NA | -2 | NA |    |    |    |    |    |    |    |
| C14orf28      | ENSG00000179476.7  | NA | NA | NA | NA | NA | NA | NA | NA | NA | NA | NA | NA | NA |
| NA            | NA                 | NA | NA | NA | NA | -2 | NA |    |    |    |    |    |    |    |
| RP11-468E2.5  | ENSG00000259321.1  | NA | NA | NA | NA | NA | NA | NA | NA | NA | NA | NA | NA | NA |
| NA            | NA                 | NA | NA | NA | NA | -2 | NA |    |    |    |    |    |    |    |
| EIF5          | ENSG00000100664.10 | NA | NA | NA | NA | NA | NA | NA | NA | NA | NA | NA | NA | NA |
| NA            | NA                 | NA | NA | NA | NA | -2 | NA |    |    |    |    |    |    |    |
| RP3-514A23.2  | ENSG00000258871.1  | NA | NA | NA | NA | NA | NA | NA | NA | NA | NA | NA | NA | NA |
| NA            | NA                 | NA | NA | NA | NA | -2 | NA |    |    |    |    |    |    |    |
| MBIP          | ENSG00000151332.18 | NA | NA | NA | NA | NA | NA | NA | NA | NA | NA | NA | NA | NA |
| NA            | NA                 | NA | NA | NA | NA | -2 | NA |    |    |    |    |    |    |    |
| PNN           | ENSG00000100941.8  | NA | NA | NA | NA | NA | NA | NA | NA | NA | NA | NA | NA | NA |

|               |                    |    |    |    |    |    |    |    |    |    |    |    |    |    |
|---------------|--------------------|----|----|----|----|----|----|----|----|----|----|----|----|----|
| NA            | NA                 | NA | NA | -2 | NA |    |    |    |    |    |    |    |    |    |
| PTGER2        | ENSG00000125384.6  |    |    |    | NA | NA | NA | NA | NA | NA | NA | NA | NA | NA |
| NA            | NA                 | NA | NA | NA | -2 | NA |    |    |    |    |    |    |    |    |
| TM9SF1        | ENSG00000100926.14 |    |    |    | NA | NA | NA | NA | NA | NA | NA | NA | NA | NA |
| NA            | NA                 | NA | NA | NA | -2 | NA |    |    |    |    |    |    |    |    |
| SRP54         | ENSG00000100883.11 |    |    |    | NA | NA | NA | NA | NA | NA | NA | NA | NA | NA |
| NA            | NA                 | NA | NA | NA | -2 | NA |    |    |    |    |    |    |    |    |
| ZBTB42        | ENSG00000179627.9  |    |    |    | NA | NA | NA | NA | NA | NA | NA | NA | NA | NA |
| NA            | NA                 | NA | NA | NA | -2 | NA |    |    |    |    |    |    |    |    |
| FRMD6-AS2     | ENSG00000258537.5  |    |    |    | NA | NA | NA | NA | NA | NA | NA | NA | NA | NA |
| NA            | NA                 | NA | NA | NA | -2 | NA |    |    |    |    |    |    |    |    |
| RP11-314P15.2 | ENSG00000257986.1  |    |    |    | NA | NA | NA | NA | NA | NA | NA | NA | NA | NA |
| NA            | NA                 | NA | NA | NA | NA | -2 | NA |    |    |    |    |    |    |    |
| METTL3        | ENSG00000165819.11 |    |    |    | NA | NA | NA | NA | NA | NA | NA | NA | NA | NA |
| NA            | NA                 | NA | NA | NA | -2 | NA |    |    |    |    |    |    |    |    |
| CATSPERB      | ENSG00000133962.7  |    |    |    | NA | NA | NA | NA | NA | NA | NA | NA | NA | NA |
| NA            | NA                 | NA | NA | NA | -2 | NA |    |    |    |    |    |    |    |    |
| IRF9          | ENSG00000213928.8  |    |    |    | NA | NA | NA | NA | NA | NA | NA | NA | NA | NA |
| NA            | NA                 | NA | NA | NA | -2 | NA |    |    |    |    |    |    |    |    |
| WDR89         | ENSG00000140006.11 |    |    |    | NA | NA | NA | NA | NA | NA | NA | NA | NA | NA |
| NA            | NA                 | NA | NA | NA | -2 | NA |    |    |    |    |    |    |    |    |
| FLJ22447      | ENSG00000232774.7  |    |    |    | NA | NA | NA | NA | NA | NA | NA | NA | NA | NA |
| NA            | NA                 | NA | NA | NA | -2 | NA |    |    |    |    |    |    |    |    |
| TCL1A         | ENSG00000100721.10 |    |    |    | NA | NA | NA | NA | NA | NA | NA | NA | NA | NA |
| NA            | NA                 | NA | NA | NA | -2 | NA |    |    |    |    |    |    |    |    |
| MDP1          | ENSG00000213920.8  |    |    |    | NA | NA | NA | NA | NA | NA | NA | NA | NA | NA |
| NA            | NA                 | NA | NA | NA | -2 | NA |    |    |    |    |    |    |    |    |
| SLC10A1       | ENSG00000100652.4  |    |    |    | NA | NA | NA | NA | NA | NA | NA | NA | NA | NA |
| NA            | NA                 | NA | NA | NA | -2 | NA |    |    |    |    |    |    |    |    |
| CDC42BPB      | ENSG00000198752.10 |    |    |    | NA | NA | NA | NA | NA | NA | NA | NA | NA | NA |
| NA            | NA                 | NA | NA | NA | -2 | NA |    |    |    |    |    |    |    |    |
| RP11-454K7.3  | ENSG00000260046.1  |    |    |    | NA | NA | NA | NA | NA | NA | NA | NA | NA | NA |
| NA            | NA                 | NA | NA | NA | NA | -2 | NA |    |    |    |    |    |    |    |
| SLC25A47      | ENSG00000140107.10 |    |    |    | NA | NA | NA | NA | NA | NA | NA | NA | NA | NA |
| NA            | NA                 | NA | NA | NA | -2 | NA |    |    |    |    |    |    |    |    |
| RP11-26L16.1  | ENSG00000258994.1  |    |    |    | NA | NA | NA | NA | NA | NA | NA | NA | NA | NA |
| NA            | NA                 | NA | NA | NA | NA | -2 | NA |    |    |    |    |    |    |    |
| DICER1        | ENSG00000100697.14 |    |    |    | NA | NA | NA | NA | NA | NA | NA | NA | NA | NA |
| NA            | NA                 | NA | NA | NA | -2 | NA |    |    |    |    |    |    |    |    |
| PSMC6         | ENSG00000100519.11 |    |    |    | NA | NA | NA | NA | NA | NA | NA | NA | NA | NA |
| NA            | NA                 | NA | NA | NA | -2 | NA |    |    |    |    |    |    |    |    |
| GZMH          | ENSG00000100450.12 |    |    |    | NA | NA | NA | NA | NA | NA | NA | NA | NA | NA |
| NA            | NA                 | NA | NA | NA | -2 | NA |    |    |    |    |    |    |    |    |
| TEX22         | ENSG00000226174.6  |    |    |    | NA | NA | NA | NA | NA | NA | NA | NA | NA | NA |
| NA            | NA                 | NA | NA | NA | -2 | NA |    |    |    |    |    |    |    |    |
| TSSK4         | ENSG00000139908.14 |    |    |    | NA | NA | NA | NA | NA | NA | NA | NA | NA | NA |
| NA            | NA                 | NA | NA | NA | -2 | NA |    |    |    |    |    |    |    |    |
| SEL1L         | ENSG00000071537.13 |    |    |    | NA | NA | NA | NA | NA | NA | NA | NA | NA | NA |
| NA            | NA                 | NA | NA | NA | -2 | NA |    |    |    |    |    |    |    |    |
| CTD-2251F13.1 | ENSG00000248975.2  |    |    |    | NA | NA | NA | NA | NA | NA | NA | NA | NA | NA |
| NA            | NA                 | NA | NA | NA | NA | -2 | NA |    |    |    |    |    |    |    |
| MYH7          | ENSG00000092054.12 |    |    |    | NA | NA | NA | NA | NA | NA | NA | NA | NA | NA |
| NA            | NA                 | NA | NA | NA | -2 | NA |    |    |    |    |    |    |    |    |
| NFKBIA        | ENSG00000100906.10 |    |    |    | NA | NA | NA | NA | NA | NA | NA | NA | NA | NA |
| NA            | NA                 | NA | NA | NA | -2 | NA |    |    |    |    |    |    |    |    |
| RP11-11K13.1  | ENSG00000258683.1  |    |    |    | NA | NA | NA | NA | NA | NA | NA | NA | NA | NA |
| NA            | NA                 | NA | NA | NA | NA | -2 | NA |    |    |    |    |    |    |    |
| DIO3          | ENSG00000197406.7  |    |    |    | NA | NA | NA | NA | NA | NA | NA | NA | NA | NA |
| NA            | NA                 | NA | NA | NA | -2 | NA |    |    |    |    |    |    |    |    |
| PSMB11        | ENSG00000222028.3  |    |    |    | NA | NA | NA | NA | NA | NA | NA | NA | NA | NA |
| NA            | NA                 | NA | NA | NA | -2 | NA |    |    |    |    |    |    |    |    |
| RNF212B       | ENSG00000215277.8  |    |    |    | NA | NA | NA | NA | NA | NA | NA | NA | NA | NA |

|               |                    |    |    |    |    |    |    |    |    |    |    |    |    |
|---------------|--------------------|----|----|----|----|----|----|----|----|----|----|----|----|
| NA            | NA                 | NA | NA | NA | -2 | NA | NA | NA | NA | NA | NA | NA | NA |
| SERPINA6      | ENSG00000170099.5  | NA | NA | NA | -2 | NA | NA | NA | NA | NA | NA | NA | NA |
| NA            | NA                 | NA | NA | NA | -2 | NA | NA | NA | NA | NA | NA | NA | NA |
| SIX6          | ENSG00000184302.6  | NA | NA | NA | -2 | NA | NA | NA | NA | NA | NA | NA | NA |
| NA            | NA                 | NA | NA | NA | -2 | NA | NA | NA | NA | NA | NA | NA | NA |
| CTD-2555C10.3 | ENSG00000259230.1  | NA | NA | NA | -2 | NA | NA | NA | NA | NA | NA | NA | NA |
| NA            | NA                 | NA | NA | NA | -2 | NA | NA | NA | NA | NA | NA | NA | NA |
| RP11-384J4.2  | ENSG00000258081.3  | NA | NA | NA | -2 | NA | NA | NA | NA | NA | NA | NA | NA |
| NA            | NA                 | NA | NA | NA | -2 | NA | NA | NA | NA | NA | NA | NA | NA |
| RP11-488C13.5 | ENSG00000258301.3  | NA | NA | NA | -2 | NA | NA | NA | NA | NA | NA | NA | NA |
| NA            | NA                 | NA | NA | NA | -2 | NA | NA | NA | NA | NA | NA | NA | NA |
| SLC25A21      | ENSG00000183032.11 | NA | NA | NA | -2 | NA | NA | NA | NA | NA | NA | NA | NA |
| NA            | NA                 | NA | NA | NA | -2 | NA | NA | NA | NA | NA | NA | NA | NA |
| MRPL52        | ENSG00000172590.18 | NA | NA | NA | -2 | NA | NA | NA | NA | NA | NA | NA | NA |
| NA            | NA                 | NA | NA | NA | -2 | NA | NA | NA | NA | NA | NA | NA | NA |
| HIF1A-AS1     | ENSG00000258777.1  | NA | NA | NA | -2 | NA | NA | NA | NA | NA | NA | NA | NA |
| NA            | NA                 | NA | NA | NA | -2 | NA | NA | NA | NA | NA | NA | NA | NA |
| RP11-731F5.2  | ENSG00000253364.2  | NA | NA | NA | -2 | NA | NA | NA | NA | NA | NA | NA | NA |
| NA            | NA                 | NA | NA | NA | -2 | NA | NA | NA | NA | NA | NA | NA | NA |
| SERPINA12     | ENSG00000165953.9  | NA | NA | NA | -2 | NA | NA | NA | NA | NA | NA | NA | NA |
| NA            | NA                 | NA | NA | NA | -2 | NA | NA | NA | NA | NA | NA | NA | NA |
| EIF2S1        | ENSG00000134001.12 | NA | NA | NA | -2 | NA | NA | NA | NA | NA | NA | NA | NA |
| NA            | NA                 | NA | NA | NA | -2 | NA | NA | NA | NA | NA | NA | NA | NA |
| LINC00521     | ENSG00000175699.14 | NA | NA | NA | -2 | NA | NA | NA | NA | NA | NA | NA | NA |
| NA            | NA                 | NA | NA | NA | -2 | NA | NA | NA | NA | NA | NA | NA | NA |
| RTN1          | ENSG00000139970.16 | NA | NA | NA | -2 | NA | NA | NA | NA | NA | NA | NA | NA |
| NA            | NA                 | NA | NA | NA | -2 | NA | NA | NA | NA | NA | NA | NA | NA |
| CTD-2540L5.6  | ENSG00000245466.1  | NA | NA | NA | -2 | NA | NA | NA | NA | NA | NA | NA | NA |
| NA            | NA                 | NA | NA | NA | -2 | NA | NA | NA | NA | NA | NA | NA | NA |
| RP11-96D24.1  | ENSG00000259072.1  | NA | NA | NA | -2 | NA | NA | NA | NA | NA | NA | NA | NA |
| NA            | NA                 | NA | NA | NA | -2 | NA | NA | NA | NA | NA | NA | NA | NA |
| CALM1         | ENSG00000198668.10 | NA | NA | NA | -2 | NA | NA | NA | NA | NA | NA | NA | NA |
| NA            | NA                 | NA | NA | NA | -2 | NA | NA | NA | NA | NA | NA | NA | NA |
| MYH6          | ENSG00000197616.11 | NA | NA | NA | -2 | NA | NA | NA | NA | NA | NA | NA | NA |
| NA            | NA                 | NA | NA | NA | -2 | NA | NA | NA | NA | NA | NA | NA | NA |
| ADAM21        | ENSG00000139985.6  | NA | NA | NA | -2 | NA | NA | NA | NA | NA | NA | NA | NA |
| NA            | NA                 | NA | NA | NA | -2 | NA | NA | NA | NA | NA | NA | NA | NA |
| RP11-7F17.5   | ENSG00000246548.3  | NA | NA | NA | -2 | NA | NA | NA | NA | NA | NA | NA | NA |
| NA            | NA                 | NA | NA | NA | -2 | NA | NA | NA | NA | NA | NA | NA | NA |
| RP11-313C4.1  | ENSG00000259149.1  | NA | NA | NA | -2 | NA | NA | NA | NA | NA | NA | NA | NA |
| NA            | NA                 | NA | NA | NA | -2 | NA | NA | NA | NA | NA | NA | NA | NA |
| RP11-187O7.3  | ENSG00000259124.1  | NA | NA | NA | -2 | NA | NA | NA | NA | NA | NA | NA | NA |
| NA            | NA                 | NA | NA | NA | -2 | NA | NA | NA | NA | NA | NA | NA | NA |
| KIAA0586      | ENSG00000100578.14 | NA | NA | NA | -2 | NA | NA | NA | NA | NA | NA | NA | NA |
| NA            | NA                 | NA | NA | NA | -2 | NA | NA | NA | NA | NA | NA | NA | NA |
| FBXO33        | ENSG00000165355.7  | NA | NA | NA | -2 | NA | NA | NA | NA | NA | NA | NA | NA |
| NA            | NA                 | NA | NA | NA | -2 | NA | NA | NA | NA | NA | NA | NA | NA |
| NDRG2         | ENSG00000165795.23 | NA | NA | NA | -2 | NA | NA | NA | NA | NA | NA | NA | NA |
| NA            | NA                 | NA | NA | NA | -2 | NA | NA | NA | NA | NA | NA | NA | NA |
| FKBP3         | ENSG00000100442.10 | NA | NA | NA | -2 | NA | NA | NA | NA | NA | NA | NA | NA |
| NA            | NA                 | NA | NA | NA | -2 | NA | NA | NA | NA | NA | NA | NA | NA |
| LINC00639     | ENSG00000259070.5  | NA | NA | NA | -2 | NA | NA | NA | NA | NA | NA | NA | NA |
| NA            | NA                 | NA | NA | NA | -2 | NA | NA | NA | NA | NA | NA | NA | NA |
| HSPA2         | ENSG00000126803.9  | NA | NA | NA | -2 | NA | NA | NA | NA | NA | NA | NA | NA |
| NA            | NA                 | NA | NA | NA | -2 | NA | NA | NA | NA | NA | NA | NA | NA |
| GSC           | ENSG00000133937.4  | NA | NA | NA | -2 | NA | NA | NA | NA | NA | NA | NA | NA |
| NA            | NA                 | NA | NA | NA | -2 | NA | NA | NA | NA | NA | NA | NA | NA |
| PAX9          | ENSG00000198807.12 | NA | NA | NA | -2 | NA | NA | NA | NA | NA | NA | NA | NA |
| NA            | NA                 | NA | NA | NA | -2 | NA | NA | NA | NA | NA | NA | NA | NA |
| LINC00911     | ENSG00000259107.1  | NA | NA | NA | -2 | NA | NA | NA | NA | NA | NA | NA | NA |
| NA            | NA                 | NA | NA | NA | -2 | NA | NA | NA | NA | NA | NA | NA | NA |
| JAG2          | ENSG00000184916.8  | NA | NA | NA | -2 | NA | NA | NA | NA | NA | NA | NA | NA |

|               |                    |                   |    |    |    |    |    |    |    |    |    |    |    |
|---------------|--------------------|-------------------|----|----|----|----|----|----|----|----|----|----|----|
| NA            | NA                 | NA                | NA | -2 | NA |    |    |    |    |    |    |    |    |
| AE000662.93   |                    | ENSG00000259054.1 |    |    |    | NA | NA | NA | NA | NA | NA | NA | NA |
| NA            | NA                 | NA                | NA | NA | NA | -2 | NA |    |    |    |    |    |    |
| RP11-966I7.3  |                    | ENSG00000257748.1 |    |    |    | NA | NA | NA | NA | NA | NA | NA | NA |
| NA            | NA                 | NA                | NA | NA | NA | -2 | NA |    |    |    |    |    |    |
| HOMEZ         | ENSG00000215271.7  |                   | NA | NA | NA | NA | NA | NA | NA | NA | NA | NA | NA |
| NA            | NA                 | NA                | NA | -2 | NA |    |    |    |    |    |    |    |    |
| PRMT5         | ENSG00000100462.15 |                   | NA | NA | NA | NA | NA | NA | NA | NA | NA | NA | NA |
| NA            | NA                 | NA                | NA | -2 | NA |    |    |    |    |    |    |    |    |
| DYNC1H1       | ENSG00000197102.10 |                   | NA | NA | NA | NA | NA | NA | NA | NA | NA | NA | NA |
| NA            | NA                 | NA                | NA | NA | NA | -2 | NA |    |    |    |    |    |    |
| PABPN1        | ENSG00000100836.10 |                   | NA | NA | NA | NA | NA | NA | NA | NA | NA | NA | NA |
| NA            | NA                 | NA                | NA | NA | NA | -2 | NA |    |    |    |    |    |    |
| VRTN          | ENSG00000133980.4  |                   | NA | NA | NA | NA | NA | NA | NA | NA | NA | NA | NA |
| NA            | NA                 | NA                | NA | -2 | NA |    |    |    |    |    |    |    |    |
| CTD-2302E22.6 |                    | ENSG00000274015.1 |    |    |    | NA | NA | NA | NA | NA | NA | NA | NA |
| NA            | NA                 | NA                | NA | NA | NA | -2 | NA |    |    |    |    |    |    |
| SERPINA5      | ENSG00000188488.13 |                   | NA | NA | NA | NA | NA | NA | NA | NA | NA | NA | NA |
| NA            | NA                 | NA                | NA | NA | NA | -2 | NA |    |    |    |    |    |    |
| CTD-2568P8.1  |                    | ENSG00000258556.1 |    |    |    | NA | NA | NA | NA | NA | NA | NA | NA |
| NA            | NA                 | NA                | NA | NA | NA | -2 | NA |    |    |    |    |    |    |
| RP11-99L13.2  |                    | ENSG00000259126.1 |    |    |    | NA | NA | NA | NA | NA | NA | NA | NA |
| NA            | NA                 | NA                | NA | NA | NA | -2 | NA |    |    |    |    |    |    |
| RP11-219E7.4  |                    | ENSG00000258918.1 |    |    |    | NA | NA | NA | NA | NA | NA | NA | NA |
| NA            | NA                 | NA                | NA | NA | NA | -2 | NA |    |    |    |    |    |    |
| RP11-596C23.2 |                    | ENSG00000278002.1 |    |    |    | NA | NA | NA | NA | NA | NA | NA | NA |
| NA            | NA                 | NA                | NA | NA | NA | -2 | NA |    |    |    |    |    |    |
| AL163953.2    | ENSG00000225680.1  |                   | NA | NA | NA | NA | NA | NA | NA | NA | NA | NA | NA |
| NA            | NA                 | NA                | NA | NA | NA | -2 | NA |    |    |    |    |    |    |
| PROX2         | ENSG00000119608.12 |                   | NA | NA | NA | NA | NA | NA | NA | NA | NA | NA | NA |
| NA            | NA                 | NA                | NA | -2 | NA |    |    |    |    |    |    |    |    |
| CTD-2384A14.1 |                    | ENSG00000258038.5 |    |    |    | NA | NA | NA | NA | NA | NA | NA | NA |
| NA            | NA                 | NA                | NA | NA | NA | -2 | NA |    |    |    |    |    |    |
| RBM25         | ENSG00000119707.13 |                   | NA | NA | NA | NA | NA | NA | NA | NA | NA | NA | NA |
| NA            | NA                 | NA                | NA | -2 | NA |    |    |    |    |    |    |    |    |
| SPTSSA        | ENSG00000165389.6  |                   | NA | NA | NA | NA | NA | NA | NA | NA | NA | NA | NA |
| NA            | NA                 | NA                | NA | NA | NA | -2 | NA |    |    |    |    |    |    |
| TCL1B         | ENSG00000213231.12 |                   | NA | NA | NA | NA | NA | NA | NA | NA | NA | NA | NA |
| NA            | NA                 | NA                | NA | -2 | NA |    |    |    |    |    |    |    |    |
| DCAF11        | ENSG00000100897.17 |                   | NA | NA | NA | NA | NA | NA | NA | NA | NA | NA | NA |
| NA            | NA                 | NA                | NA | NA | NA | -2 | NA |    |    |    |    |    |    |
| FLRT2         | ENSG00000185070.10 |                   | NA | NA | NA | NA | NA | NA | NA | NA | NA | NA | NA |
| NA            | NA                 | NA                | NA | -2 | NA |    |    |    |    |    |    |    |    |
| YLPM1         | ENSG00000119596.17 |                   | NA | NA | NA | NA | NA | NA | NA | NA | NA | NA | NA |
| NA            | NA                 | NA                | NA | -2 | NA |    |    |    |    |    |    |    |    |
| AE000662.92   |                    | ENSG00000259003.1 |    |    |    | NA | NA | NA | NA | NA | NA | NA | NA |
| NA            | NA                 | NA                | NA | NA | NA | -2 | NA |    |    |    |    |    |    |
| SNHG23        | ENSG00000225746.9  |                   | NA | NA | NA | NA | NA | NA | NA | NA | NA | NA | NA |
| NA            | NA                 | NA                | NA | NA | NA | -2 | NA |    |    |    |    |    |    |
| OXA1L         | ENSG00000155463.12 |                   | NA | NA | NA | NA | NA | NA | NA | NA | NA | NA | NA |
| NA            | NA                 | NA                | NA | -2 | NA |    |    |    |    |    |    |    |    |
| RP1-292L20.3  |                    | ENSG00000274818.1 |    |    |    | NA | NA | NA | NA | NA | NA | NA | NA |
| NA            | NA                 | NA                | NA | NA | NA | -2 | NA |    |    |    |    |    |    |
| RP6-91H8.2    | ENSG00000259907.1  |                   | NA | NA | NA | NA | NA | NA | NA | NA | NA | NA | NA |
| NA            | NA                 | NA                | NA | NA | NA | -2 | NA |    |    |    |    |    |    |
| PRPF39        | ENSG00000185246.17 |                   | NA | NA | NA | NA | NA | NA | NA | NA | NA | NA | NA |
| NA            | NA                 | NA                | NA | NA | NA | -2 | NA |    |    |    |    |    |    |
| PAPOLA        | ENSG00000090060.17 |                   | NA | NA | NA | NA | NA | NA | NA | NA | NA | NA | NA |
| NA            | NA                 | NA                | NA | NA | NA | -2 | NA |    |    |    |    |    |    |
| RP11-146E13.4 |                    | ENSG00000277128.1 |    |    |    | NA | NA | NA | NA | NA | NA | NA | NA |
| NA            | NA                 | NA                | NA | NA | NA | -2 | NA |    |    |    |    |    |    |
| LINC00239     | ENSG00000258512.1  |                   | NA | NA | NA | NA | NA | NA | NA | NA | NA | NA | NA |

|                |                    |    |    |    |    |    |    |    |    |    |    |    |    |    |
|----------------|--------------------|----|----|----|----|----|----|----|----|----|----|----|----|----|
| NA             | NA                 | NA | NA | NA | -2 | NA |    |    |    |    |    |    |    |    |
| RP11-1079H9.1  | ENSG00000258912.1  |    |    |    |    | NA | NA | NA | NA | NA | NA | NA | NA | NA |
| NA             | NA                 | NA | NA | NA | NA | -2 | NA |    |    |    |    |    |    |    |
| CTD-3035D6.2   | ENSG00000258884.1  |    |    |    |    | NA | NA | NA | NA | NA | NA | NA | NA | NA |
| NA             | NA                 | NA | NA | NA | NA | -2 | NA |    |    |    |    |    |    |    |
| PRKCH          | ENSG0000027075.14  |    |    |    |    | NA | NA | NA | NA | NA | NA | NA | NA | NA |
| NA             | NA                 | NA | NA | NA | NA | -2 | NA |    |    |    |    |    |    |    |
| VIPAS39        | ENSG00000151445.15 |    |    |    |    | NA | NA | NA | NA | NA | NA | NA | NA | NA |
| NA             | NA                 | NA | NA | NA | NA | -2 | NA |    |    |    |    |    |    |    |
| OR4K1          | ENSG00000155249.4  |    |    |    |    | NA | NA | NA | NA | NA | NA | NA | NA | NA |
| NA             | NA                 | NA | NA | NA | NA | -2 | NA |    |    |    |    |    |    |    |
| AP5M1          | ENSG00000053770.11 |    |    |    |    | NA | NA | NA | NA | NA | NA | NA | NA | NA |
| NA             | NA                 | NA | NA | NA | NA | -2 | NA |    |    |    |    |    |    |    |
| C14orf1        | ENSG00000133935.6  |    |    |    |    | NA | NA | NA | NA | NA | NA | NA | NA | NA |
| NA             | NA                 | NA | NA | NA | NA | -2 | NA |    |    |    |    |    |    |    |
| FOXA1          | ENSG00000129514.5  |    |    |    |    | NA | NA | NA | NA | NA | NA | NA | NA | NA |
| NA             | NA                 | NA | NA | NA | NA | -2 | NA |    |    |    |    |    |    |    |
| RP11-353P15.1  | ENSG00000258532.1  |    |    |    |    | NA | NA | NA | NA | NA | NA | NA | NA | NA |
| NA             | NA                 | NA | NA | NA | NA | -2 | NA |    |    |    |    |    |    |    |
| CTSG           | ENSG00000100448.3  |    |    |    |    | NA | NA | NA | NA | NA | NA | NA | NA | NA |
| NA             | NA                 | NA | NA | NA | NA | -2 | NA |    |    |    |    |    |    |    |
| ATL1           | ENSG00000198513.11 |    |    |    |    | NA | NA | NA | NA | NA | NA | NA | NA | NA |
| NA             | NA                 | NA | NA | NA | NA | -2 | NA |    |    |    |    |    |    |    |
| RP11-1070N10.7 | ENSG00000270038.1  |    |    |    |    | NA | NA | NA | NA | NA | NA | NA | NA | NA |
| NA             | NA                 | NA | NA | NA | NA | -2 | NA |    |    |    |    |    |    |    |
| NUBPL          | ENSG00000151413.16 |    |    |    |    | NA | NA | NA | NA | NA | NA | NA | NA | NA |
| NA             | NA                 | NA | NA | NA | NA | -2 | NA |    |    |    |    |    |    |    |
| NGDN           | ENSG00000129460.15 |    |    |    |    | NA | NA | NA | NA | NA | NA | NA | NA | NA |
| NA             | NA                 | NA | NA | NA | NA | -2 | NA |    |    |    |    |    |    |    |
| RP11-982M15.8  | ENSG00000260792.1  |    |    |    |    | NA | NA | NA | NA | NA | NA | NA | NA | NA |
| NA             | NA                 | NA | NA | NA | NA | -2 | NA |    |    |    |    |    |    |    |
| RP11-325D8.1   | ENSG00000259028.1  |    |    |    |    | NA | NA | NA | NA | NA | NA | NA | NA | NA |
| NA             | NA                 | NA | NA | NA | NA | -2 | NA |    |    |    |    |    |    |    |
| MIA2           | ENSG00000150526.12 |    |    |    |    | NA | NA | NA | NA | NA | NA | NA | NA | NA |
| NA             | NA                 | NA | NA | NA | NA | -2 | NA |    |    |    |    |    |    |    |
| SALRNA1        | ENSG00000258952.2  |    |    |    |    | NA | NA | NA | NA | NA | NA | NA | NA | NA |
| NA             | NA                 | NA | NA | NA | NA | -2 | NA |    |    |    |    |    |    |    |
| SEC23A         | ENSG00000100934.14 |    |    |    |    | NA | NA | NA | NA | NA | NA | NA | NA | NA |
| NA             | NA                 | NA | NA | NA | NA | -2 | NA |    |    |    |    |    |    |    |
| PPP4R3A        | ENSG00000100796.17 |    |    |    |    | NA | NA | NA | NA | NA | NA | NA | NA | NA |
| NA             | NA                 | NA | NA | NA | NA | -2 | NA |    |    |    |    |    |    |    |
| TPPP2          | ENSG00000179636.14 |    |    |    |    | NA | NA | NA | NA | NA | NA | NA | NA | NA |
| NA             | NA                 | NA | NA | NA | NA | -2 | NA |    |    |    |    |    |    |    |
| TRIM9          | ENSG00000100505.13 |    |    |    |    | NA | NA | NA | NA | NA | NA | NA | NA | NA |
| NA             | NA                 | NA | NA | NA | NA | -2 | NA |    |    |    |    |    |    |    |
| CTD-2207P18.2  | ENSG00000258976.1  |    |    |    |    | NA | NA | NA | NA | NA | NA | NA | NA | NA |
| NA             | NA                 | NA | NA | NA | NA | -2 | NA |    |    |    |    |    |    |    |
| ARHGAP5        | ENSG00000100852.12 |    |    |    |    | NA | NA | NA | NA | NA | NA | NA | NA | NA |
| NA             | NA                 | NA | NA | NA | NA | -2 | NA |    |    |    |    |    |    |    |
| JPH4           | ENSG00000092051.16 |    |    |    |    | NA | NA | NA | NA | NA | NA | NA | NA | NA |
| NA             | NA                 | NA | NA | NA | NA | -2 | NA |    |    |    |    |    |    |    |
| RP11-624J12.1  | ENSG00000258803.1  |    |    |    |    | NA | NA | NA | NA | NA | NA | NA | NA | NA |
| NA             | NA                 | NA | NA | NA | NA | -2 | NA |    |    |    |    |    |    |    |
| EXOC3L4        | ENSG00000205436.7  |    |    |    |    | NA | NA | NA | NA | NA | NA | NA | NA | NA |
| NA             | NA                 | NA | NA | NA | NA | -2 | NA |    |    |    |    |    |    |    |
| CMA1           | ENSG00000092009.10 |    |    |    |    | NA | NA | NA | NA | NA | NA | NA | NA | NA |
| NA             | NA                 | NA | NA | NA | NA | -2 | NA |    |    |    |    |    |    |    |
| GMPR2          | ENSG00000100938.17 |    |    |    |    | NA | NA | NA | NA | NA | NA | NA | NA | NA |
| NA             | NA                 | NA | NA | NA | NA | -2 | NA |    |    |    |    |    |    |    |
| TTC8           | ENSG00000165533.18 |    |    |    |    | NA | NA | NA | NA | NA | NA | NA | NA | NA |
| NA             | NA                 | NA | NA | NA | NA | -2 | NA |    |    |    |    |    |    |    |
| BTBD7          | ENSG00000011114.14 |    |    |    |    | NA | NA | NA | NA | NA | NA | NA | NA | NA |

|               |                    |    |    |    |    |    |    |    |    |    |    |    |    |    |
|---------------|--------------------|----|----|----|----|----|----|----|----|----|----|----|----|----|
| NA            | NA                 | NA | NA | -2 | NA |    |    |    |    |    |    |    |    |    |
| TMEM253       | ENSG00000232070.8  |    |    |    | NA | NA | NA | NA | NA | NA | NA | NA | NA | NA |
| NA            | NA                 | NA | NA | NA | -2 | NA |    |    |    |    |    |    |    |    |
| MMP14         | ENSG00000157227.12 |    |    |    | NA | NA | NA | NA | NA | NA | NA | NA | NA | NA |
| NA            | NA                 | NA | NA | NA | -2 | NA |    |    |    |    |    |    |    |    |
| RP11-255G12.2 | ENSG00000258942.1  |    |    |    | NA | NA | NA | NA | NA | NA | NA | NA | NA | NA |
| NA            | NA                 | NA | NA | NA | NA | -2 | NA |    |    |    |    |    |    |    |
| SLC7A7        | ENSG00000155465.18 |    |    |    | NA | NA | NA | NA | NA | NA | NA | NA | NA | NA |
| NA            | NA                 | NA | NA | NA | -2 | NA |    |    |    |    |    |    |    |    |
| CTD-2134A5.4  | ENSG00000258534.1  |    |    |    | NA | NA | NA | NA | NA | NA | NA | NA | NA | NA |
| NA            | NA                 | NA | NA | NA | NA | -2 | NA |    |    |    |    |    |    |    |
| CTD-2128A3.2  | ENSG00000258902.1  |    |    |    | NA | NA | NA | NA | NA | NA | NA | NA | NA | NA |
| NA            | NA                 | NA | NA | NA | NA | -2 | NA |    |    |    |    |    |    |    |
| EDDM3A        | ENSG00000181562.4  |    |    |    | NA | NA | NA | NA | NA | NA | NA | NA | NA | NA |
| NA            | NA                 | NA | NA | NA | -2 | NA |    |    |    |    |    |    |    |    |
| CDCA4         | ENSG00000170779.10 |    |    |    | NA | NA | NA | NA | NA | NA | NA | NA | NA | NA |
| NA            | NA                 | NA | NA | NA | -2 | NA |    |    |    |    |    |    |    |    |
| RP11-356O9.2  | ENSG00000259087.5  |    |    |    | NA | NA | NA | NA | NA | NA | NA | NA | NA | NA |
| NA            | NA                 | NA | NA | NA | NA | -2 | NA |    |    |    |    |    |    |    |
| CTD-2509G16.5 | ENSG00000258760.1  |    |    |    | NA | NA | NA | NA | NA | NA | NA | NA | NA | NA |
| NA            | NA                 | NA | NA | NA | NA | -2 | NA |    |    |    |    |    |    |    |
| LINC01146     | ENSG00000258867.5  |    |    |    | NA | NA | NA | NA | NA | NA | NA | NA | NA | NA |
| NA            | NA                 | NA | NA | NA | -2 | NA |    |    |    |    |    |    |    |    |
| LRP10         | ENSG00000197324.8  |    |    |    | NA | NA | NA | NA | NA | NA | NA | NA | NA | NA |
| NA            | NA                 | NA | NA | NA | -2 | NA |    |    |    |    |    |    |    |    |
| POTEM         | ENSG00000222036.7  |    |    |    | NA | NA | NA | NA | NA | NA | NA | NA | NA | NA |
| NA            | NA                 | NA | NA | NA | -2 | NA |    |    |    |    |    |    |    |    |
| PSME1         | ENSG00000092010.14 |    |    |    | NA | NA | NA | NA | NA | NA | NA | NA | NA | NA |
| NA            | NA                 | NA | NA | NA | -2 | NA |    |    |    |    |    |    |    |    |
| SERPINA4      | ENSG00000100665.11 |    |    |    | NA | NA | NA | NA | NA | NA | NA | NA | NA | NA |
| NA            | NA                 | NA | NA | NA | -2 | NA |    |    |    |    |    |    |    |    |
| SERPINA9      | ENSG00000170054.14 |    |    |    | NA | NA | NA | NA | NA | NA | NA | NA | NA | NA |
| NA            | NA                 | NA | NA | NA | -2 | NA |    |    |    |    |    |    |    |    |
| RP11-862G15.1 | ENSG00000258742.5  |    |    |    | NA | NA | NA | NA | NA | NA | NA | NA | NA | NA |
| NA            | NA                 | NA | NA | NA | NA | -2 | NA |    |    |    |    |    |    |    |
| COX8C         | ENSG00000187581.2  |    |    |    | NA | NA | NA | NA | NA | NA | NA | NA | NA | NA |
| NA            | NA                 | NA | NA | NA | -2 | NA |    |    |    |    |    |    |    |    |
| REC8          | ENSG00000100918.12 |    |    |    | NA | NA | NA | NA | NA | NA | NA | NA | NA | NA |
| NA            | NA                 | NA | NA | NA | -2 | NA |    |    |    |    |    |    |    |    |
| POTEG         | ENSG00000187537.13 |    |    |    | NA | NA | NA | NA | NA | NA | NA | NA | NA | NA |
| NA            | NA                 | NA | NA | NA | -2 | NA |    |    |    |    |    |    |    |    |
| OR5AU1        | ENSG00000169327.4  |    |    |    | NA | NA | NA | NA | NA | NA | NA | NA | NA | NA |
| NA            | NA                 | NA | NA | NA | NA | -2 | NA |    |    |    |    |    |    |    |
| RD3L          | ENSG00000227729.3  |    |    |    | NA | NA | NA | NA | NA | NA | NA | NA | NA | NA |
| NA            | NA                 | NA | NA | NA | -2 | NA |    |    |    |    |    |    |    |    |
| METTLL17      | ENSG00000165792.17 |    |    |    | NA | NA | NA | NA | NA | NA | NA | NA | NA | NA |
| NA            | NA                 | NA | NA | NA | -2 | NA |    |    |    |    |    |    |    |    |
| RP11-1000B6.5 | ENSG00000244952.2  |    |    |    | NA | NA | NA | NA | NA | NA | NA | NA | NA | NA |
| NA            | NA                 | NA | NA | NA | NA | -2 | NA |    |    |    |    |    |    |    |
| RP11-932O9.10 | ENSG00000269974.1  |    |    |    | NA | NA | NA | NA | NA | NA | NA | NA | NA | NA |
| NA            | NA                 | NA | NA | NA | NA | -2 | NA |    |    |    |    |    |    |    |
| RP11-403B2.7  | ENSG00000260409.1  |    |    |    | NA | NA | NA | NA | NA | NA | NA | NA | NA | NA |
| NA            | NA                 | NA | NA | NA | NA | -2 | NA |    |    |    |    |    |    |    |
| KIF23         | ENSG00000137807.13 |    |    |    | NA | NA | NA | NA | NA | NA | NA | NA | NA | NA |
| NA            | NA                 | NA | NA | NA | -2 | NA |    |    |    |    |    |    |    |    |
| RP11-8P11.4   | ENSG00000276807.1  |    |    |    | NA | NA | NA | NA | NA | NA | NA | NA | NA | NA |
| NA            | NA                 | NA | NA | NA | NA | -2 | NA |    |    |    |    |    |    |    |
| EDC3          | ENSG00000179151.11 |    |    |    | NA | NA | NA | NA | NA | NA | NA | NA | NA | NA |
| NA            | NA                 | NA | NA | NA | -2 | NA |    |    |    |    |    |    |    |    |
| C15orf48      | ENSG00000166920.12 |    |    |    | NA | NA | NA | NA | NA | NA | NA | NA | NA | NA |
| NA            | NA                 | NA | NA | NA | -2 | NA |    |    |    |    |    |    |    |    |
| CHP1          | ENSG00000187446.11 |    |    |    | NA | NA | NA | NA | NA | NA | NA | NA | NA | NA |



|                |                    |    |    |    |    |    |    |    |    |    |    |    |    |    |
|----------------|--------------------|----|----|----|----|----|----|----|----|----|----|----|----|----|
| NA             | NA                 | NA | NA | -2 | NA |    |    |    |    |    |    |    |    |    |
| RP11-327J17.8  | ENSG00000278146.1  | NA | NA | NA | NA | NA | NA | NA | NA | NA | NA | NA | NA | NA |
| NA             | NA                 | NA | NA | NA | NA | -2 | NA |    |    |    |    |    |    |    |
| LTK            | ENSG00000062524.15 | NA | NA | NA | NA | NA | NA | NA | NA | NA | NA | NA | NA | NA |
| NA             | NA                 | NA | NA | -2 | NA |    |    |    |    |    |    |    |    |    |
| RP11-475A13.1  | ENSG00000259737.6  | NA | NA | NA | NA | NA | NA | NA | NA | NA | NA | NA | NA | NA |
| NA             | NA                 | NA | NA | NA | NA | -2 | NA |    |    |    |    |    |    |    |
| RP11-759A24.3  | ENSG00000275443.1  | NA | NA | NA | NA | NA | NA | NA | NA | NA | NA | NA | NA | NA |
| NA             | NA                 | NA | NA | NA | NA | -2 | NA |    |    |    |    |    |    |    |
| CTD-2034I4.2   | ENSG00000259594.5  | NA | NA | NA | NA | NA | NA | NA | NA | NA | NA | NA | NA | NA |
| NA             | NA                 | NA | NA | NA | NA | -2 | NA |    |    |    |    |    |    |    |
| WDR72          | ENSG00000166415.14 | NA | NA | NA | NA | NA | NA | NA | NA | NA | NA | NA | NA | NA |
| NA             | NA                 | NA | NA | -2 | NA |    |    |    |    |    |    |    |    |    |
| TMEM62         | ENSG00000137842.6  | NA | NA | NA | NA | NA | NA | NA | NA | NA | NA | NA | NA | NA |
| NA             | NA                 | NA | NA | NA | NA | -2 | NA |    |    |    |    |    |    |    |
| RP11-323I15.5  | ENSG00000259336.1  | NA | NA | NA | NA | NA | NA | NA | NA | NA | NA | NA | NA | NA |
| NA             | NA                 | NA | NA | NA | NA | -2 | NA |    |    |    |    |    |    |    |
| CTXN2          | ENSG00000233932.4  | NA | NA | NA | NA | NA | NA | NA | NA | NA | NA | NA | NA | NA |
| NA             | NA                 | NA | NA | -2 | NA |    |    |    |    |    |    |    |    |    |
| SNURF          | ENSG00000273173.5  | NA | NA | NA | NA | NA | NA | NA | NA | NA | NA | NA | NA | NA |
| NA             | NA                 | NA | NA | -2 | NA |    |    |    |    |    |    |    |    |    |
| RP11-1069G10.2 | ENSG00000259727.1  | NA | NA | NA | NA | NA | NA | NA | NA | NA | NA | NA | NA | NA |
| NA             | NA                 | NA | NA | NA | NA | -2 | NA |    |    |    |    |    |    |    |
| RP11-227D13.1  | ENSG00000259705.1  | NA | NA | NA | NA | NA | NA | NA | NA | NA | NA | NA | NA | NA |
| NA             | NA                 | NA | NA | NA | NA | -2 | NA |    |    |    |    |    |    |    |
| LINC01581      | ENSG00000259724.1  | NA | NA | NA | NA | NA | NA | NA | NA | NA | NA | NA | NA | NA |
| NA             | NA                 | NA | NA | NA | NA | -2 | NA |    |    |    |    |    |    |    |
| RP11-209K10.2  | ENSG00000259203.1  | NA | NA | NA | NA | NA | NA | NA | NA | NA | NA | NA | NA | NA |
| NA             | NA                 | NA | NA | NA | NA | -2 | NA |    |    |    |    |    |    |    |
| PCAT29         | ENSG00000259641.5  | NA | NA | NA | NA | NA | NA | NA | NA | NA | NA | NA | NA | NA |
| NA             | NA                 | NA | NA | NA | NA | -2 | NA |    |    |    |    |    |    |    |
| RP11-34F13.2   | ENSG00000245719.1  | NA | NA | NA | NA | NA | NA | NA | NA | NA | NA | NA | NA | NA |
| NA             | NA                 | NA | NA | NA | NA | -2 | NA |    |    |    |    |    |    |    |
| ISLR2          | ENSG00000167178.15 | NA | NA | NA | NA | NA | NA | NA | NA | NA | NA | NA | NA | NA |
| NA             | NA                 | NA | NA | -2 | NA |    |    |    |    |    |    |    |    |    |
| LRRK1          | ENSG00000154237.12 | NA | NA | NA | NA | NA | NA | NA | NA | NA | NA | NA | NA | NA |
| NA             | NA                 | NA | NA | -2 | NA |    |    |    |    |    |    |    |    |    |
| AC009878.2     | ENSG00000235160.1  | NA | NA | NA | NA | NA | NA | NA | NA | NA | NA | NA | NA | NA |
| NA             | NA                 | NA | NA | NA | NA | -2 | NA |    |    |    |    |    |    |    |
| LINC01582      | ENSG00000259611.1  | NA | NA | NA | NA | NA | NA | NA | NA | NA | NA | NA | NA | NA |
| NA             | NA                 | NA | NA | NA | NA | -2 | NA |    |    |    |    |    |    |    |
| PWRN4          | ENSG00000260232.1  | NA | NA | NA | NA | NA | NA | NA | NA | NA | NA | NA | NA | NA |
| NA             | NA                 | NA | NA | -2 | NA |    |    |    |    |    |    |    |    |    |
| RP11-1007O24.3 | ENSG00000261423.1  | NA | NA | NA | NA | NA | NA | NA | NA | NA | NA | NA | NA | NA |
| NA             | NA                 | NA | NA | NA | NA | -2 | NA |    |    |    |    |    |    |    |
| CPLX3          | ENSG00000213578.5  | NA | NA | NA | NA | NA | NA | NA | NA | NA | NA | NA | NA | NA |
| NA             | NA                 | NA | NA | -2 | NA |    |    |    |    |    |    |    |    |    |
| RP11-128A17.2  | ENSG00000274444.1  | NA | NA | NA | NA | NA | NA | NA | NA | NA | NA | NA | NA | NA |
| NA             | NA                 | NA | NA | NA | NA | -2 | NA |    |    |    |    |    |    |    |
| RP11-143J24.1  | ENSG00000259647.1  | NA | NA | NA | NA | NA | NA | NA | NA | NA | NA | NA | NA | NA |
| NA             | NA                 | NA | NA | NA | NA | -2 | NA |    |    |    |    |    |    |    |
| WDR76          | ENSG00000092470.11 | NA | NA | NA | NA | NA | NA | NA | NA | NA | NA | NA | NA | NA |
| NA             | NA                 | NA | NA | -2 | NA |    |    |    |    |    |    |    |    |    |
| EID1           | ENSG00000255302.4  | NA | NA | NA | NA | NA | NA | NA | NA | NA | NA | NA | NA | NA |
| NA             | NA                 | NA | NA | -2 | NA |    |    |    |    |    |    |    |    |    |
| RP11-162I7.1   | ENSG00000259284.1  | NA | NA | NA | NA | NA | NA | NA | NA | NA | NA | NA | NA | NA |
| NA             | NA                 | NA | NA | NA | NA | -2 | NA |    |    |    |    |    |    |    |
| RP11-461F11.3  | ENSG00000259582.3  | NA | NA | NA | NA | NA | NA | NA | NA | NA | NA | NA | NA | NA |
| NA             | NA                 | NA | NA | NA | NA | -2 | NA |    |    |    |    |    |    |    |
| LINC00929      | ENSG00000259150.5  | NA | NA | NA | NA | NA | NA | NA | NA | NA | NA | NA | NA | NA |
| NA             | NA                 | NA | NA | NA | NA | -2 | NA |    |    |    |    |    |    |    |
| RP11-295H24.4  | ENSG00000275580.1  | NA | NA | NA | NA | NA | NA | NA | NA | NA | NA | NA | NA | NA |

|               |                    |    |    |    |    |    |    |    |    |    |    |    |    |    |
|---------------|--------------------|----|----|----|----|----|----|----|----|----|----|----|----|----|
| NA            | NA                 | NA | NA | NA | NA | -2 | NA |    |    |    |    |    |    |    |
| GOLGA6C       | ENSG00000167195.7  |    |    |    |    | NA | NA | NA | NA | NA | NA | NA | NA | NA |
| NA            | NA                 | NA | NA | NA | NA | -2 | NA |    |    |    |    |    |    |    |
| MFAP1         | ENSG00000140259.6  |    |    |    |    | NA | NA | NA | NA | NA | NA | NA | NA | NA |
| NA            | NA                 | NA | NA | NA | NA | -2 | NA |    |    |    |    |    |    |    |
| FEM1B         | ENSG00000169018.5  |    |    |    |    | NA | NA | NA | NA | NA | NA | NA | NA | NA |
| NA            | NA                 | NA | NA | NA | NA | -2 | NA |    |    |    |    |    |    |    |
| RP11-343B18.2 | ENSG00000259676.1  |    |    |    |    | NA | NA | NA | NA | NA | NA | NA | NA | NA |
| NA            | NA                 | NA | NA | NA | NA | -2 | NA |    |    |    |    |    |    |    |
| RP11-255M2.3  | ENSG00000277654.4  |    |    |    |    | NA | NA | NA | NA | NA | NA | NA | NA | NA |
| NA            | NA                 | NA | NA | NA | NA | -2 | NA |    |    |    |    |    |    |    |
| AC007950.2    | ENSG00000276651.1  |    |    |    |    | NA | NA | NA | NA | NA | NA | NA | NA | NA |
| NA            | NA                 | NA | NA | NA | NA | -2 | NA |    |    |    |    |    |    |    |
| MYO9A         | ENSG00000066933.15 |    |    |    |    | NA | NA | NA | NA | NA | NA | NA | NA | NA |
| NA            | NA                 | NA | NA | NA | NA | -2 | NA |    |    |    |    |    |    |    |
| NR2F2         | ENSG00000185551.14 |    |    |    |    | NA | NA | NA | NA | NA | NA | NA | NA | NA |
| NA            | NA                 | NA | NA | NA | NA | -2 | NA |    |    |    |    |    |    |    |
| C2CD4B        | ENSG00000205502.3  |    |    |    |    | NA | NA | NA | NA | NA | NA | NA | NA | NA |
| NA            | NA                 | NA | NA | NA | NA | -2 | NA |    |    |    |    |    |    |    |
| ACAN          | ENSG00000157766.15 |    |    |    |    | NA | NA | NA | NA | NA | NA | NA | NA | NA |
| NA            | NA                 | NA | NA | NA | NA | -2 | NA |    |    |    |    |    |    |    |
| WDR61         | ENSG00000140395.8  |    |    |    |    | NA | NA | NA | NA | NA | NA | NA | NA | NA |
| NA            | NA                 | NA | NA | NA | NA | -2 | NA |    |    |    |    |    |    |    |
| PWRN2         | ENSG00000260551.1  |    |    |    |    | NA | NA | NA | NA | NA | NA | NA | NA | NA |
| NA            | NA                 | NA | NA | NA | NA | -2 | NA |    |    |    |    |    |    |    |
| RP11-522B15.3 | ENSG00000259275.2  |    |    |    |    | NA | NA | NA | NA | NA | NA | NA | NA | NA |
| NA            | NA                 | NA | NA | NA | NA | -2 | NA |    |    |    |    |    |    |    |
| PML           | ENSG00000140464.19 |    |    |    |    | NA | NA | NA | NA | NA | NA | NA | NA | NA |
| NA            | NA                 | NA | NA | NA | NA | -2 | NA |    |    |    |    |    |    |    |
| RP11-11H9.2   | ENSG00000280724.1  |    |    |    |    | NA | NA | NA | NA | NA | NA | NA | NA | NA |
| NA            | NA                 | NA | NA | NA | NA | -2 | NA |    |    |    |    |    |    |    |
| LEO1          | ENSG00000166477.12 |    |    |    |    | NA | NA | NA | NA | NA | NA | NA | NA | NA |
| NA            | NA                 | NA | NA | NA | NA | -2 | NA |    |    |    |    |    |    |    |
| LINC01580     | ENSG00000258785.5  |    |    |    |    | NA | NA | NA | NA | NA | NA | NA | NA | NA |
| NA            | NA                 | NA | NA | NA | NA | -2 | NA |    |    |    |    |    |    |    |
| RP11-14C10.5  | ENSG00000273585.1  |    |    |    |    | NA | NA | NA | NA | NA | NA | NA | NA | NA |
| NA            | NA                 | NA | NA | NA | NA | -2 | NA |    |    |    |    |    |    |    |
| MEIS2         | ENSG00000134138.19 |    |    |    |    | NA | NA | NA | NA | NA | NA | NA | NA | NA |
| NA            | NA                 | NA | NA | NA | NA | -2 | NA |    |    |    |    |    |    |    |
| CSPG4         | ENSG00000173546.7  |    |    |    |    | NA | NA | NA | NA | NA | NA | NA | NA | NA |
| NA            | NA                 | NA | NA | NA | NA | -2 | NA |    |    |    |    |    |    |    |
| TMC3          | ENSG00000188869.12 |    |    |    |    | NA | NA | NA | NA | NA | NA | NA | NA | NA |
| NA            | NA                 | NA | NA | NA | NA | -2 | NA |    |    |    |    |    |    |    |
| AC026150.8    | ENSG00000260693.1  |    |    |    |    | NA | NA | NA | NA | NA | NA | NA | NA | NA |
| NA            | NA                 | NA | NA | NA | NA | -2 | NA |    |    |    |    |    |    |    |
| GOLGA8M       | ENSG00000261480.1  |    |    |    |    | NA | NA | NA | NA | NA | NA | NA | NA | NA |
| NA            | NA                 | NA | NA | NA | NA | -2 | NA |    |    |    |    |    |    |    |
| RP11-14C10.6  | ENSG00000277210.3  |    |    |    |    | NA | NA | NA | NA | NA | NA | NA | NA | NA |
| NA            | NA                 | NA | NA | NA | NA | -2 | NA |    |    |    |    |    |    |    |
| CTD-2184D3.3  | ENSG00000259178.1  |    |    |    |    | NA | NA | NA | NA | NA | NA | NA | NA | NA |
| NA            | NA                 | NA | NA | NA | NA | -2 | NA |    |    |    |    |    |    |    |
| CTDSP12       | ENSG00000137770.13 |    |    |    |    | NA | NA | NA | NA | NA | NA | NA | NA | NA |
| NA            | NA                 | NA | NA | NA | NA | -2 | NA |    |    |    |    |    |    |    |
| SNX33         | ENSG00000173548.8  |    |    |    |    | NA | NA | NA | NA | NA | NA | NA | NA | NA |
| NA            | NA                 | NA | NA | NA | NA | -2 | NA |    |    |    |    |    |    |    |
| LDHAL6B       | ENSG00000171989.5  |    |    |    |    | NA | NA | NA | NA | NA | NA | NA | NA | NA |
| NA            | NA                 | NA | NA | NA | NA | -2 | NA |    |    |    |    |    |    |    |
| RP11-763K15.1 | ENSG00000259170.1  |    |    |    |    | NA | NA | NA | NA | NA | NA | NA | NA | NA |
| NA            | NA                 | NA | NA | NA | NA | -2 | NA |    |    |    |    |    |    |    |
| LINC02207     | ENSG00000258476.5  |    |    |    |    | NA | NA | NA | NA | NA | NA | NA | NA | NA |
| NA            | NA                 | NA | NA | NA | NA | -2 | NA |    |    |    |    |    |    |    |
| SLTM          | ENSG00000137776.16 |    |    |    |    | NA | NA | NA | NA | NA | NA | NA | NA | NA |

|                |                    |    |    |    |    |    |    |    |    |    |    |    |    |    |
|----------------|--------------------|----|----|----|----|----|----|----|----|----|----|----|----|----|
| NA             | NA                 | NA | NA | -2 | NA |    |    |    |    |    |    |    |    |    |
| GOLGA8J        | ENSG00000179938.12 | NA | NA | NA | NA | NA | NA | NA | NA | NA | NA | NA | NA | NA |
| NA             | NA                 | NA | NA | NA | -2 | NA |    |    |    |    |    |    |    |    |
| RP11-164C12.2  | ENSG00000258909.1  | NA | NA | NA | NA | NA | NA | NA | NA | NA | NA | NA | NA | NA |
| NA             | NA                 | NA | NA | NA | NA | -2 | NA |    |    |    |    |    |    |    |
| RP11-720L8.1   | ENSG00000259434.1  | NA | NA | NA | NA | NA | NA | NA | NA | NA | NA | NA | NA | NA |
| NA             | NA                 | NA | NA | NA | NA | -2 | NA |    |    |    |    |    |    |    |
| CTD-2240J17.1  | ENSG00000259372.2  | NA | NA | NA | NA | NA | NA | NA | NA | NA | NA | NA | NA | NA |
| NA             | NA                 | NA | NA | NA | NA | -2 | NA |    |    |    |    |    |    |    |
| GOLGA8F        | ENSG00000153684.14 | NA | NA | NA | NA | NA | NA | NA | NA | NA | NA | NA | NA | NA |
| NA             | NA                 | NA | NA | NA | NA | -2 | NA |    |    |    |    |    |    |    |
| RP11-209E8.1   | ENSG00000259237.1  | NA | NA | NA | NA | NA | NA | NA | NA | NA | NA | NA | NA | NA |
| NA             | NA                 | NA | NA | NA | NA | -2 | NA |    |    |    |    |    |    |    |
| PAQR5          | ENSG00000137819.13 | NA | NA | NA | NA | NA | NA | NA | NA | NA | NA | NA | NA | NA |
| NA             | NA                 | NA | NA | NA | NA | -2 | NA |    |    |    |    |    |    |    |
| DKFZP434L187   | ENSG00000225930.3  | NA | NA | NA | NA | NA | NA | NA | NA | NA | NA | NA | NA | NA |
| NA             | NA                 | NA | NA | NA | NA | -2 | NA |    |    |    |    |    |    |    |
| CRAT37         | ENSG00000258551.5  | NA | NA | NA | NA | NA | NA | NA | NA | NA | NA | NA | NA | NA |
| NA             | NA                 | NA | NA | NA | NA | -2 | NA |    |    |    |    |    |    |    |
| CHD2           | ENSG00000173575.20 | NA | NA | NA | NA | NA | NA | NA | NA | NA | NA | NA | NA | NA |
| NA             | NA                 | NA | NA | NA | NA | -2 | NA |    |    |    |    |    |    |    |
| MEX3B          | ENSG00000183496.5  | NA | NA | NA | NA | NA | NA | NA | NA | NA | NA | NA | NA | NA |
| NA             | NA                 | NA | NA | NA | NA | -2 | NA |    |    |    |    |    |    |    |
| RP11-1008C21.1 | ENSG00000259225.6  | NA | NA | NA | NA | NA | NA | NA | NA | NA | NA | NA | NA | NA |
| NA             | NA                 | NA | NA | NA | NA | -2 | NA |    |    |    |    |    |    |    |
| RP11-398J10.2  | ENSG00000258489.3  | NA | NA | NA | NA | NA | NA | NA | NA | NA | NA | NA | NA | NA |
| NA             | NA                 | NA | NA | NA | NA | -2 | NA |    |    |    |    |    |    |    |
| DUT            | ENSG00000128951.13 | NA | NA | NA | NA | NA | NA | NA | NA | NA | NA | NA | NA | NA |
| NA             | NA                 | NA | NA | NA | NA | -2 | NA |    |    |    |    |    |    |    |
| LINC02204      | ENSG00000280639.1  | NA | NA | NA | NA | NA | NA | NA | NA | NA | NA | NA | NA | NA |
| NA             | NA                 | NA | NA | NA | NA | -2 | NA |    |    |    |    |    |    |    |
| USP3           | ENSG00000140455.16 | NA | NA | NA | NA | NA | NA | NA | NA | NA | NA | NA | NA | NA |
| NA             | NA                 | NA | NA | NA | NA | -2 | NA |    |    |    |    |    |    |    |
| RP11-307C19.2  | ENSG00000259420.5  | NA | NA | NA | NA | NA | NA | NA | NA | NA | NA | NA | NA | NA |
| NA             | NA                 | NA | NA | NA | NA | -2 | NA |    |    |    |    |    |    |    |
| RP11-323F24.3  | ENSG00000276524.1  | NA | NA | NA | NA | NA | NA | NA | NA | NA | NA | NA | NA | NA |
| NA             | NA                 | NA | NA | NA | NA | -2 | NA |    |    |    |    |    |    |    |
| ISLR           | ENSG00000129009.12 | NA | NA | NA | NA | NA | NA | NA | NA | NA | NA | NA | NA | NA |
| NA             | NA                 | NA | NA | NA | NA | -2 | NA |    |    |    |    |    |    |    |
| RP11-236L14.2  | ENSG00000273771.1  | NA | NA | NA | NA | NA | NA | NA | NA | NA | NA | NA | NA | NA |
| NA             | NA                 | NA | NA | NA | NA | -2 | NA |    |    |    |    |    |    |    |
| RP11-259A24.1  | ENSG00000259530.1  | NA | NA | NA | NA | NA | NA | NA | NA | NA | NA | NA | NA | NA |
| NA             | NA                 | NA | NA | NA | NA | -2 | NA |    |    |    |    |    |    |    |
| DPH6           | ENSG00000134146.11 | NA | NA | NA | NA | NA | NA | NA | NA | NA | NA | NA | NA | NA |
| NA             | NA                 | NA | NA | NA | NA | -2 | NA |    |    |    |    |    |    |    |
| RP11-114H24.7  | ENSG00000261244.1  | NA | NA | NA | NA | NA | NA | NA | NA | NA | NA | NA | NA | NA |
| NA             | NA                 | NA | NA | NA | NA | -2 | NA |    |    |    |    |    |    |    |
| RP11-522B15.7  | ENSG00000259534.1  | NA | NA | NA | NA | NA | NA | NA | NA | NA | NA | NA | NA | NA |
| NA             | NA                 | NA | NA | NA | NA | -2 | NA |    |    |    |    |    |    |    |
| BLOC1S6        | ENSG00000104164.10 | NA | NA | NA | NA | NA | NA | NA | NA | NA | NA | NA | NA | NA |
| NA             | NA                 | NA | NA | NA | NA | -2 | NA |    |    |    |    |    |    |    |
| LINC00052      | ENSG00000259527.2  | NA | NA | NA | NA | NA | NA | NA | NA | NA | NA | NA | NA | NA |
| NA             | NA                 | NA | NA | NA | NA | -2 | NA |    |    |    |    |    |    |    |
| ZNF280D        | ENSG00000137871.19 | NA | NA | NA | NA | NA | NA | NA | NA | NA | NA | NA | NA | NA |
| NA             | NA                 | NA | NA | NA | NA | -2 | NA |    |    |    |    |    |    |    |
| RP11-107D24.2  | ENSG00000261598.1  | NA | NA | NA | NA | NA | NA | NA | NA | NA | NA | NA | NA | NA |
| NA             | NA                 | NA | NA | NA | NA | -2 | NA |    |    |    |    |    |    |    |
| RP11-509A17.3  | ENSG00000258654.1  | NA | NA | NA | NA | NA | NA | NA | NA | NA | NA | NA | NA | NA |
| NA             | NA                 | NA | NA | NA | NA | -2 | NA |    |    |    |    |    |    |    |
| RP11-627D16.1  | ENSG00000259255.1  | NA | NA | NA | NA | NA | NA | NA | NA | NA | NA | NA | NA | NA |
| NA             | NA                 | NA | NA | NA | NA | -2 | NA |    |    |    |    |    |    |    |
| RP11-382A20.3  | ENSG00000166503.8  | NA | NA | NA | NA | NA | NA | NA | NA | NA | NA | NA | NA | NA |

|               |                    |    |    |    |    |    |    |    |    |    |    |    |    |    |
|---------------|--------------------|----|----|----|----|----|----|----|----|----|----|----|----|----|
| NA            | NA                 | NA | NA | NA | NA | -2 | NA |    |    |    |    |    |    |    |
| HDDC3         | ENSG00000184508.10 | NA | NA | NA | NA | NA | NA | NA | NA | NA | NA | NA | NA | NA |
| NA            | NA                 | NA | NA | NA | NA | -2 | NA |    |    |    |    |    |    |    |
| SLC30A4       | ENSG00000104154.6  | NA | NA | NA | NA | NA | NA | NA | NA | NA | NA | NA | NA | NA |
| NA            | NA                 | NA | NA | NA | NA | -2 | NA |    |    |    |    |    |    |    |
| CTD-2306A12.1 | ENSG00000273972.1  | NA | NA | NA | NA | NA | NA | NA | NA | NA | NA | NA | NA | NA |
| NA            | NA                 | NA | NA | NA | NA | -2 | NA |    |    |    |    |    |    |    |
| MEF2A         | ENSG00000068305.17 | NA | NA | NA | NA | NA | NA | NA | NA | NA | NA | NA | NA | NA |
| NA            | NA                 | NA | NA | NA | NA | -2 | NA |    |    |    |    |    |    |    |
| AAGAB         | ENSG00000103591.12 | NA | NA | NA | NA | NA | NA | NA | NA | NA | NA | NA | NA | NA |
| NA            | NA                 | NA | NA | NA | NA | -2 | NA |    |    |    |    |    |    |    |
| CTD-2544M6.1  | ENSG00000259199.1  | NA | NA | NA | NA | NA | NA | NA | NA | NA | NA | NA | NA | NA |
| NA            | NA                 | NA | NA | NA | NA | -2 | NA |    |    |    |    |    |    |    |
| LINC02157     | ENSG00000259763.1  | NA | NA | NA | NA | NA | NA | NA | NA | NA | NA | NA | NA | NA |
| NA            | NA                 | NA | NA | NA | NA | -2 | NA |    |    |    |    |    |    |    |
| SPATA8        | ENSG00000185594.4  | NA | NA | NA | NA | NA | NA | NA | NA | NA | NA | NA | NA | NA |
| NA            | NA                 | NA | NA | NA | NA | -2 | NA |    |    |    |    |    |    |    |
| RP11-255M2.2  | ENSG00000258773.1  | NA | NA | NA | NA | NA | NA | NA | NA | NA | NA | NA | NA | NA |
| NA            | NA                 | NA | NA | NA | NA | -2 | NA |    |    |    |    |    |    |    |
| LINC01491     | ENSG00000259572.5  | NA | NA | NA | NA | NA | NA | NA | NA | NA | NA | NA | NA | NA |
| NA            | NA                 | NA | NA | NA | NA | -2 | NA |    |    |    |    |    |    |    |
| MYEF2         | ENSG00000104177.17 | NA | NA | NA | NA | NA | NA | NA | NA | NA | NA | NA | NA | NA |
| NA            | NA                 | NA | NA | NA | NA | -2 | NA |    |    |    |    |    |    |    |
| CTD-2240J17.2 | ENSG00000278029.1  | NA | NA | NA | NA | NA | NA | NA | NA | NA | NA | NA | NA | NA |
| NA            | NA                 | NA | NA | NA | NA | -2 | NA |    |    |    |    |    |    |    |
| RPL4          | ENSG00000174444.14 | NA | NA | NA | NA | NA | NA | NA | NA | NA | NA | NA | NA | NA |
| NA            | NA                 | NA | NA | NA | NA | -2 | NA |    |    |    |    |    |    |    |
| SLC24A1       | ENSG00000074621.13 | NA | NA | NA | NA | NA | NA | NA | NA | NA | NA | NA | NA | NA |
| NA            | NA                 | NA | NA | NA | NA | -2 | NA |    |    |    |    |    |    |    |
| FGF7          | ENSG00000140285.9  | NA | NA | NA | NA | NA | NA | NA | NA | NA | NA | NA | NA | NA |
| NA            | NA                 | NA | NA | NA | NA | -2 | NA |    |    |    |    |    |    |    |
| ZNF592        | ENSG00000166716.9  | NA | NA | NA | NA | NA | NA | NA | NA | NA | NA | NA | NA | NA |
| NA            | NA                 | NA | NA | NA | NA | -2 | NA |    |    |    |    |    |    |    |
| SNX22         | ENSG00000157734.13 | NA | NA | NA | NA | NA | NA | NA | NA | NA | NA | NA | NA | NA |
| NA            | NA                 | NA | NA | NA | NA | -2 | NA |    |    |    |    |    |    |    |
| NIPAZ         | ENSG00000140157.14 | NA | NA | NA | NA | NA | NA | NA | NA | NA | NA | NA | NA | NA |
| NA            | NA                 | NA | NA | NA | NA | -2 | NA |    |    |    |    |    |    |    |
| RP11-276M12.1 | ENSG00000259445.1  | NA | NA | NA | NA | NA | NA | NA | NA | NA | NA | NA | NA | NA |
| NA            | NA                 | NA | NA | NA | NA | -2 | NA |    |    |    |    |    |    |    |
| CTD-2311M21.4 | ENSG00000274937.1  | NA | NA | NA | NA | NA | NA | NA | NA | NA | NA | NA | NA | NA |
| NA            | NA                 | NA | NA | NA | NA | -2 | NA |    |    |    |    |    |    |    |
| LCTL          | ENSG00000188501.11 | NA | NA | NA | NA | NA | NA | NA | NA | NA | NA | NA | NA | NA |
| NA            | NA                 | NA | NA | NA | NA | -2 | NA |    |    |    |    |    |    |    |
| CTD-2515H24.2 | ENSG00000276772.1  | NA | NA | NA | NA | NA | NA | NA | NA | NA | NA | NA | NA | NA |
| NA            | NA                 | NA | NA | NA | NA | -2 | NA |    |    |    |    |    |    |    |
| RP11-294C11.3 | ENSG00000279408.2  | NA | NA | NA | NA | NA | NA | NA | NA | NA | NA | NA | NA | NA |
| NA            | NA                 | NA | NA | NA | NA | -2 | NA |    |    |    |    |    |    |    |
| ISG20         | ENSG00000172183.14 | NA | NA | NA | NA | NA | NA | NA | NA | NA | NA | NA | NA | NA |
| NA            | NA                 | NA | NA | NA | NA | -2 | NA |    |    |    |    |    |    |    |
| RP11-685G9.4  | ENSG00000270036.1  | NA | NA | NA | NA | NA | NA | NA | NA | NA | NA | NA | NA | NA |
| NA            | NA                 | NA | NA | NA | NA | -2 | NA |    |    |    |    |    |    |    |
| RP11-499F3.1  | ENSG00000259610.1  | NA | NA | NA | NA | NA | NA | NA | NA | NA | NA | NA | NA | NA |
| NA            | NA                 | NA | NA | NA | NA | -2 | NA |    |    |    |    |    |    |    |
| LINC00923     | ENSG00000251209.7  | NA | NA | NA | NA | NA | NA | NA | NA | NA | NA | NA | NA | NA |
| NA            | NA                 | NA | NA | NA | NA | -2 | NA |    |    |    |    |    |    |    |
| BAHD1         | ENSG00000140320.11 | NA | NA | NA | NA | NA | NA | NA | NA | NA | NA | NA | NA | NA |
| NA            | NA                 | NA | NA | NA | NA | -2 | NA |    |    |    |    |    |    |    |
| ITPKA         | ENSG00000137825.10 | NA | NA | NA | NA | NA | NA | NA | NA | NA | NA | NA | NA | NA |
| NA            | NA                 | NA | NA | NA | NA | -2 | NA |    |    |    |    |    |    |    |
| LINC00593     | ENSG00000259703.5  | NA | NA | NA | NA | NA | NA | NA | NA | NA | NA | NA | NA | NA |
| NA            | NA                 | NA | NA | NA | NA | -2 | NA |    |    |    |    |    |    |    |
| BNC1          | ENSG00000169594.13 | NA | NA | NA | NA | NA | NA | NA | NA | NA | NA | NA | NA | NA |

|                |                    |    |    |    |    |    |    |    |    |    |    |    |    |    |
|----------------|--------------------|----|----|----|----|----|----|----|----|----|----|----|----|----|
| NA             | NA                 | NA | NA | -2 | NA |    |    |    |    |    |    |    |    |    |
| ACTC1          | ENSG00000159251.6  |    |    |    | NA | NA | NA | NA | NA | NA | NA | NA | NA | NA |
| NA             | NA                 | NA | NA | -2 | NA |    |    |    |    |    |    |    |    |    |
| SPESP1         | ENSG00000258484.3  |    |    |    | NA | NA | NA | NA | NA | NA | NA | NA | NA | NA |
| NA             | NA                 | NA | NA | NA | -2 | NA |    |    |    |    |    |    |    |    |
| LINC00927      | ENSG00000259361.5  |    |    |    | NA | NA | NA | NA | NA | NA | NA | NA | NA | NA |
| NA             | NA                 | NA | NA | NA | -2 | NA |    |    |    |    |    |    |    |    |
| TP53BP1        | ENSG00000067369.13 |    |    |    | NA | NA | NA | NA | NA | NA | NA | NA | NA | NA |
| NA             | NA                 | NA | NA | NA | -2 | NA |    |    |    |    |    |    |    |    |
| CYP1A2         | ENSG00000140505.6  |    |    |    | NA | NA | NA | NA | NA | NA | NA | NA | NA | NA |
| NA             | NA                 | NA | NA | NA | -2 | NA |    |    |    |    |    |    |    |    |
| UBR1           | ENSG00000159459.11 |    |    |    | NA | NA | NA | NA | NA | NA | NA | NA | NA | NA |
| NA             | NA                 | NA | NA | -2 | NA |    |    |    |    |    |    |    |    |    |
| KNL1           | ENSG00000137812.19 |    |    |    | NA | NA | NA | NA | NA | NA | NA | NA | NA | NA |
| NA             | NA                 | NA | NA | -2 | NA |    |    |    |    |    |    |    |    |    |
| RP11-1006G14.2 | ENSG00000259783.5  |    |    |    | NA | NA | NA | NA | NA | NA | NA | NA | NA | NA |
| NA             | NA                 | NA | NA | NA | NA | -2 | NA |    |    |    |    |    |    |    |
| SALRNA2        | ENSG00000280515.1  |    |    |    | NA | NA | NA | NA | NA | NA | NA | NA | NA | NA |
| NA             | NA                 | NA | NA | NA | -2 | NA |    |    |    |    |    |    |    |    |
| ARHGAP11B      | ENSG00000187951.10 |    |    |    | NA | NA | NA | NA | NA | NA | NA | NA | NA | NA |
| NA             | NA                 | NA | NA | NA | -2 | NA |    |    |    |    |    |    |    |    |
| RP11-327J17.2  | ENSG00000259359.1  |    |    |    | NA | NA | NA | NA | NA | NA | NA | NA | NA | NA |
| NA             | NA                 | NA | NA | NA | NA | -2 | NA |    |    |    |    |    |    |    |
| CYP19A1        | ENSG00000137869.14 |    |    |    | NA | NA | NA | NA | NA | NA | NA | NA | NA | NA |
| NA             | NA                 | NA | NA | NA | -2 | NA |    |    |    |    |    |    |    |    |
| RP11-275I4.2   | ENSG00000259747.1  |    |    |    | NA | NA | NA | NA | NA | NA | NA | NA | NA | NA |
| NA             | NA                 | NA | NA | NA | NA | -2 | NA |    |    |    |    |    |    |    |
| PRC1           | ENSG00000198901.13 |    |    |    | NA | NA | NA | NA | NA | NA | NA | NA | NA | NA |
| NA             | NA                 | NA | NA | -2 | NA |    |    |    |    |    |    |    |    |    |
| RP11-753A21.2  | ENSG00000259870.1  |    |    |    | NA | NA | NA | NA | NA | NA | NA | NA | NA | NA |
| NA             | NA                 | NA | NA | NA | NA | -2 | NA |    |    |    |    |    |    |    |
| RP11-66B24.1   | ENSG00000259604.5  |    |    |    | NA | NA | NA | NA | NA | NA | NA | NA | NA | NA |
| NA             | NA                 | NA | NA | NA | NA | -2 | NA |    |    |    |    |    |    |    |
| NUTM1          | ENSG00000184507.15 |    |    |    | NA | NA | NA | NA | NA | NA | NA | NA | NA | NA |
| NA             | NA                 | NA | NA | -2 | NA |    |    |    |    |    |    |    |    |    |
| AC007950.1     | ENSG00000259268.1  |    |    |    | NA | NA | NA | NA | NA | NA | NA | NA | NA | NA |
| NA             | NA                 | NA | NA | NA | NA | -2 | NA |    |    |    |    |    |    |    |
| MGA            | ENSG00000174197.16 |    |    |    | NA | NA | NA | NA | NA | NA | NA | NA | NA | NA |
| NA             | NA                 | NA | NA | -2 | NA |    |    |    |    |    |    |    |    |    |
| SIN3A          | ENSG00000169375.15 |    |    |    | NA | NA | NA | NA | NA | NA | NA | NA | NA | NA |
| NA             | NA                 | NA | NA | -2 | NA |    |    |    |    |    |    |    |    |    |
| UBE3A          | ENSG00000114062.18 |    |    |    | NA | NA | NA | NA | NA | NA | NA | NA | NA | NA |
| NA             | NA                 | NA | NA | -2 | NA |    |    |    |    |    |    |    |    |    |
| PLEKH02        | ENSG00000241839.9  |    |    |    | NA | NA | NA | NA | NA | NA | NA | NA | NA | NA |
| NA             | NA                 | NA | NA | NA | NA | -2 | NA |    |    |    |    |    |    |    |
| IDH2           | ENSG00000182054.9  |    |    |    | NA | NA | NA | NA | NA | NA | NA | NA | NA | NA |
| NA             | NA                 | NA | NA | -2 | NA |    |    |    |    |    |    |    |    |    |
| RP11-266O8.1   | ENSG00000257060.6  |    |    |    | NA | NA | NA | NA | NA | NA | NA | NA | NA | NA |
| NA             | NA                 | NA | NA | NA | NA | -2 | NA |    |    |    |    |    |    |    |
| MIR9-3HG       | ENSG00000255571.8  |    |    |    | NA | NA | NA | NA | NA | NA | NA | NA | NA | NA |
| NA             | NA                 | NA | NA | NA | -2 | NA |    |    |    |    |    |    |    |    |
| KATNB1         | ENSG00000134152.10 |    |    |    | NA | NA | NA | NA | NA | NA | NA | NA | NA | NA |
| NA             | NA                 | NA | NA | NA | -2 | NA |    |    |    |    |    |    |    |    |
| NTRK3-AS1      | ENSG00000260305.1  |    |    |    | NA | NA | NA | NA | NA | NA | NA | NA | NA | NA |
| NA             | NA                 | NA | NA | NA | -2 | NA |    |    |    |    |    |    |    |    |
| DRAIC          | ENSG00000245750.7  |    |    |    | NA | NA | NA | NA | NA | NA | NA | NA | NA | NA |
| NA             | NA                 | NA | NA | -2 | NA |    |    |    |    |    |    |    |    |    |
| RP11-507B12.1  | ENSG00000259675.1  |    |    |    | NA | NA | NA | NA | NA | NA | NA | NA | NA | NA |
| NA             | NA                 | NA | NA | NA | NA | -2 | NA |    |    |    |    |    |    |    |
| SH3GL3         | ENSG00000140600.16 |    |    |    | NA | NA | NA | NA | NA | NA | NA | NA | NA | NA |
| NA             | NA                 | NA | NA | NA | -2 | NA |    |    |    |    |    |    |    |    |
| ANPEP          | ENSG00000166825.13 |    |    |    | NA | NA | NA | NA | NA | NA | NA | NA | NA | NA |

|               |                    |    |    |    |    |    |    |    |    |    |    |    |    |    |
|---------------|--------------------|----|----|----|----|----|----|----|----|----|----|----|----|----|
|               | NA                 | NA | NA | NA | -2 | NA |    |    |    |    |    |    |    |    |
| AQP9          | ENSG00000103569.9  |    |    |    |    | NA | NA | NA | NA | NA | NA | NA | NA | NA |
|               | NA                 | NA | NA | NA | -2 | NA |    |    |    |    |    |    |    |    |
| FBN1          | ENSG00000166147.13 |    |    |    |    | NA | NA | NA | NA | NA | NA | NA | NA | NA |
|               | NA                 | NA | NA | NA | -2 | NA |    |    |    |    |    |    |    |    |
| RP11-108K3.1  | ENSG00000259240.1  |    |    |    |    | NA | NA | NA | NA | NA | NA | NA | NA | NA |
|               | NA                 | NA | NA | NA | NA | -2 | NA |    |    |    |    |    |    |    |
| TGM5          | ENSG00000104055.15 |    |    |    |    | NA | NA | NA | NA | NA | NA | NA | NA | NA |
|               | NA                 | NA | NA | NA | -2 | NA |    |    |    |    |    |    |    |    |
| CASC4         | ENSG00000166734.18 |    |    |    |    | NA | NA | NA | NA | NA | NA | NA | NA | NA |
|               | NA                 | NA | NA | NA | -2 | NA |    |    |    |    |    |    |    |    |
| GCHFR         | ENSG00000137880.5  |    |    |    |    | NA | NA | NA | NA | NA | NA | NA | NA | NA |
|               | NA                 | NA | NA | NA | -2 | NA |    |    |    |    |    |    |    |    |
| IREB2         | ENSG00000136381.12 |    |    |    |    | NA | NA | NA | NA | NA | NA | NA | NA | NA |
|               | NA                 | NA | NA | NA | -2 | NA |    |    |    |    |    |    |    |    |
| RP11-255M2.1  | ENSG00000258433.1  |    |    |    |    | NA | NA | NA | NA | NA | NA | NA | NA | NA |
|               | NA                 | NA | NA | NA | NA | -2 | NA |    |    |    |    |    |    |    |
| RP11-624L4.1  | ENSG00000259345.5  |    |    |    |    | NA | NA | NA | NA | NA | NA | NA | NA | NA |
|               | NA                 | NA | NA | NA | NA | -2 | NA |    |    |    |    |    |    |    |
| RP11-299H22.1 | ENSG00000259697.1  |    |    |    |    | NA | NA | NA | NA | NA | NA | NA | NA | NA |
|               | NA                 | NA | NA | NA | NA | -2 | NA |    |    |    |    |    |    |    |
| HACD3         | ENSG00000074696.12 |    |    |    |    | NA | NA | NA | NA | NA | NA | NA | NA | NA |
|               | NA                 | NA | NA | NA | -2 | NA |    |    |    |    |    |    |    |    |
| GOLGA6L2      | ENSG00000174450.11 |    |    |    |    | NA | NA | NA | NA | NA | NA | NA | NA | NA |
|               | NA                 | NA | NA | NA | NA | -2 | NA |    |    |    |    |    |    |    |
| RP11-605F22.2 | ENSG00000259235.1  |    |    |    |    | NA | NA | NA | NA | NA | NA | NA | NA | NA |
|               | NA                 | NA | NA | NA | NA | -2 | NA |    |    |    |    |    |    |    |
| RORA          | ENSG00000069667.15 |    |    |    |    | NA | NA | NA | NA | NA | NA | NA | NA | NA |
|               | NA                 | NA | NA | NA | -2 | NA |    |    |    |    |    |    |    |    |
| FSD2          | ENSG00000186628.12 |    |    |    |    | NA | NA | NA | NA | NA | NA | NA | NA | NA |
|               | NA                 | NA | NA | NA | -2 | NA |    |    |    |    |    |    |    |    |
| RP11-76E17.4  | ENSG00000258831.1  |    |    |    |    | NA | NA | NA | NA | NA | NA | NA | NA | NA |
|               | NA                 | NA | NA | NA | NA | -2 | NA |    |    |    |    |    |    |    |
| C15orf54      | ENSG00000175746.6  |    |    |    |    | NA | NA | NA | NA | NA | NA | NA | NA | NA |
|               | NA                 | NA | NA | NA | NA | -2 | NA |    |    |    |    |    |    |    |
| DUOXA2        | ENSG00000140274.13 |    |    |    |    | NA | NA | NA | NA | NA | NA | NA | NA | NA |
|               | NA                 | NA | NA | NA | NA | -2 | NA |    |    |    |    |    |    |    |
| RP11-350A1.2  | ENSG00000260959.1  |    |    |    |    | NA | NA | NA | NA | NA | NA | NA | NA | NA |
|               | NA                 | NA | NA | NA | NA | -2 | NA |    |    |    |    |    |    |    |
| SLC12A1       | ENSG00000074803.17 |    |    |    |    | NA | NA | NA | NA | NA | NA | NA | NA | NA |
|               | NA                 | NA | NA | NA | NA | -2 | NA |    |    |    |    |    |    |    |
| RP11-20G13.1  | ENSG00000259341.1  |    |    |    |    | NA | NA | NA | NA | NA | NA | NA | NA | NA |
|               | NA                 | NA | NA | NA | NA | -2 | NA |    |    |    |    |    |    |    |
| CYFIP1        | ENSG00000273749.4  |    |    |    |    | NA | NA | NA | NA | NA | NA | NA | NA | NA |
|               | NA                 | NA | NA | NA | NA | -2 | NA |    |    |    |    |    |    |    |
| MNS1          | ENSG00000138587.5  |    |    |    |    | NA | NA | NA | NA | NA | NA | NA | NA | NA |
|               | NA                 | NA | NA | NA | -2 | NA |    |    |    |    |    |    |    |    |
| BLM           | ENSG00000197299.10 |    |    |    |    | NA | NA | NA | NA | NA | NA | NA | NA | NA |
|               | NA                 | NA | NA | NA | -2 | NA |    |    |    |    |    |    |    |    |
| RP11-32B5.7   | ENSG00000247765.2  |    |    |    |    | NA | NA | NA | NA | NA | NA | NA | NA | NA |
|               | NA                 | NA | NA | NA | NA | -2 | NA |    |    |    |    |    |    |    |
| TYRO3         | ENSG00000092445.11 |    |    |    |    | NA | NA | NA | NA | NA | NA | NA | NA | NA |
|               | NA                 | NA | NA | NA | -2 | NA |    |    |    |    |    |    |    |    |
| C15orf59      | ENSG00000205363.5  |    |    |    |    | NA | NA | NA | NA | NA | NA | NA | NA | NA |
|               | NA                 | NA | NA | NA | NA | -2 | NA |    |    |    |    |    |    |    |
| TBC1D21       | ENSG00000167139.8  |    |    |    |    | NA | NA | NA | NA | NA | NA | NA | NA | NA |
|               | NA                 | NA | NA | NA | NA | -2 | NA |    |    |    |    |    |    |    |
| FAM103A1      | ENSG00000169612.3  |    |    |    |    | NA | NA | NA | NA | NA | NA | NA | NA | NA |
|               | NA                 | NA | NA | NA | NA | -2 | NA |    |    |    |    |    |    |    |
| LINC01583     | ENSG00000259518.1  |    |    |    |    | NA | NA | NA | NA | NA | NA | NA | NA | NA |
|               | NA                 | NA | NA | NA | NA | -2 | NA |    |    |    |    |    |    |    |
| LINC01413     | ENSG00000260172.1  |    |    |    |    | NA | NA | NA | NA | NA | NA | NA | NA | NA |

|               |                    |    |    |    |    |    |    |    |    |    |    |    |    |    |
|---------------|--------------------|----|----|----|----|----|----|----|----|----|----|----|----|----|
| NA            | NA                 | NA | NA | NA | -2 | NA |    |    |    |    |    |    |    |    |
| RP11-24M17.6  | ENSG00000261043.5  |    |    |    |    | NA | NA | NA | NA | NA | NA | NA | NA | NA |
| NA            | NA                 | NA | NA | NA | NA | -2 | NA |    |    |    |    |    |    |    |
| RP11-424I19.2 | ENSG00000259182.5  |    |    |    |    | NA | NA | NA | NA | NA | NA | NA | NA | NA |
| NA            | NA                 | NA | NA | NA | NA | -2 | NA |    |    |    |    |    |    |    |
| PARP6         | ENSG00000137817.16 |    |    |    |    | NA | NA | NA | NA | NA | NA | NA | NA | NA |
| NA            | NA                 | NA | NA | NA | NA | -2 | NA |    |    |    |    |    |    |    |
| RP11-809H16.5 | ENSG00000259222.2  |    |    |    |    | NA | NA | NA | NA | NA | NA | NA | NA | NA |
| NA            | NA                 | NA | NA | NA | NA | -2 | NA |    |    |    |    |    |    |    |
| APBA2         | ENSG00000034053.14 |    |    |    |    | NA | NA | NA | NA | NA | NA | NA | NA | NA |
| NA            | NA                 | NA | NA | NA | NA | -2 | NA |    |    |    |    |    |    |    |
| SLCO3A1       | ENSG00000176463.13 |    |    |    |    | NA | NA | NA | NA | NA | NA | NA | NA | NA |
| NA            | NA                 | NA | NA | NA | NA | -2 | NA |    |    |    |    |    |    |    |
| CCDC33        | ENSG00000140481.14 |    |    |    |    | NA | NA | NA | NA | NA | NA | NA | NA | NA |
| NA            | NA                 | NA | NA | NA | NA | -2 | NA |    |    |    |    |    |    |    |
| TTBK2         | ENSG00000128881.16 |    |    |    |    | NA | NA | NA | NA | NA | NA | NA | NA | NA |
| NA            | NA                 | NA | NA | NA | NA | -2 | NA |    |    |    |    |    |    |    |
| PATL2         | ENSG00000229474.6  |    |    |    |    | NA | NA | NA | NA | NA | NA | NA | NA | NA |
| NA            | NA                 | NA | NA | NA | NA | -2 | NA |    |    |    |    |    |    |    |
| INO80         | ENSG00000128908.15 |    |    |    |    | NA | NA | NA | NA | NA | NA | NA | NA | NA |
| NA            | NA                 | NA | NA | NA | NA | -2 | NA |    |    |    |    |    |    |    |
| SQRDL         | ENSG00000137767.13 |    |    |    |    | NA | NA | NA | NA | NA | NA | NA | NA | NA |
| NA            | NA                 | NA | NA | NA | NA | -2 | NA |    |    |    |    |    |    |    |
| GOLGA8Q       | ENSG00000178115.11 |    |    |    |    | NA | NA | NA | NA | NA | NA | NA | NA | NA |
| NA            | NA                 | NA | NA | NA | NA | -2 | NA |    |    |    |    |    |    |    |
| NTRK3         | ENSG00000140538.16 |    |    |    |    | NA | NA | NA | NA | NA | NA | NA | NA | NA |
| NA            | NA                 | NA | NA | NA | NA | -2 | NA |    |    |    |    |    |    |    |
| RP11-463I20.2 | ENSG00000259587.2  |    |    |    |    | NA | NA | NA | NA | NA | NA | NA | NA | NA |
| NA            | NA                 | NA | NA | NA | NA | -2 | NA |    |    |    |    |    |    |    |
| TM6SF1        | ENSG00000136404.15 |    |    |    |    | NA | NA | NA | NA | NA | NA | NA | NA | NA |
| NA            | NA                 | NA | NA | NA | NA | -2 | NA |    |    |    |    |    |    |    |
| HIGD2B        | ENSG00000175202.3  |    |    |    |    | NA | NA | NA | NA | NA | NA | NA | NA | NA |
| NA            | NA                 | NA | NA | NA | NA | -2 | NA |    |    |    |    |    |    |    |
| RP11-499F3.2  | ENSG00000259692.5  |    |    |    |    | NA | NA | NA | NA | NA | NA | NA | NA | NA |
| NA            | NA                 | NA | NA | NA | NA | -2 | NA |    |    |    |    |    |    |    |
| PARP16        | ENSG00000138617.14 |    |    |    |    | NA | NA | NA | NA | NA | NA | NA | NA | NA |
| NA            | NA                 | NA | NA | NA | NA | -2 | NA |    |    |    |    |    |    |    |
| DET1          | ENSG00000140543.14 |    |    |    |    | NA | NA | NA | NA | NA | NA | NA | NA | NA |
| NA            | NA                 | NA | NA | NA | NA | -2 | NA |    |    |    |    |    |    |    |
| AC140725.4    | ENSG00000259553.5  |    |    |    |    | NA | NA | NA | NA | NA | NA | NA | NA | NA |
| NA            | NA                 | NA | NA | NA | NA | -2 | NA |    |    |    |    |    |    |    |
| LPCAT4        | ENSG00000176454.13 |    |    |    |    | NA | NA | NA | NA | NA | NA | NA | NA | NA |
| NA            | NA                 | NA | NA | NA | NA | -2 | NA |    |    |    |    |    |    |    |
| AC124997.1    | ENSG00000235731.1  |    |    |    |    | NA | NA | NA | NA | NA | NA | NA | NA | NA |
| NA            | NA                 | NA | NA | NA | NA | -2 | NA |    |    |    |    |    |    |    |
| CTD-2536I1.3  | ENSG00000273923.1  |    |    |    |    | NA | NA | NA | NA | NA | NA | NA | NA | NA |
| NA            | NA                 | NA | NA | NA | NA | -2 | NA |    |    |    |    |    |    |    |
| RP11-2C7.1    | ENSG00000259011.1  |    |    |    |    | NA | NA | NA | NA | NA | NA | NA | NA | NA |
| NA            | NA                 | NA | NA | NA | NA | -2 | NA |    |    |    |    |    |    |    |
| RP11-294C11.1 | ENSG00000182974.3  |    |    |    |    | NA | NA | NA | NA | NA | NA | NA | NA | NA |
| NA            | NA                 | NA | NA | NA | NA | -2 | NA |    |    |    |    |    |    |    |
| ZSCAN2        | ENSG00000176371.13 |    |    |    |    | NA | NA | NA | NA | NA | NA | NA | NA | NA |
| NA            | NA                 | NA | NA | NA | NA | -2 | NA |    |    |    |    |    |    |    |
| EMC4          | ENSG00000128463.12 |    |    |    |    | NA | NA | NA | NA | NA | NA | NA | NA | NA |
| NA            | NA                 | NA | NA | NA | NA | -2 | NA |    |    |    |    |    |    |    |
| RP11-299H22.6 | ENSG00000261296.1  |    |    |    |    | NA | NA | NA | NA | NA | NA | NA | NA | NA |
| NA            | NA                 | NA | NA | NA | NA | -2 | NA |    |    |    |    |    |    |    |
| LINC01852     | ENSG00000236914.3  |    |    |    |    | NA | NA | NA | NA | NA | NA | NA | NA | NA |
| NA            | NA                 | NA | NA | NA | NA | -2 | NA |    |    |    |    |    |    |    |
| USP50         | ENSG00000170236.14 |    |    |    |    | NA | NA | NA | NA | NA | NA | NA | NA | NA |
| NA            | NA                 | NA | NA | NA | NA | -2 | NA |    |    |    |    |    |    |    |
| RP11-265N7.1  | ENSG00000259450.1  |    |    |    |    | NA | NA | NA | NA | NA | NA | NA | NA | NA |

|               |                    |    |    |    |    |    |    |    |    |    |    |    |    |    |
|---------------|--------------------|----|----|----|----|----|----|----|----|----|----|----|----|----|
| NA            | NA                 | NA | NA | NA | NA | -2 | NA |    |    |    |    |    |    |    |
| ASB7          | ENSG00000183475.12 |    |    | NA | NA | NA | NA | NA | NA | NA | NA | NA | NA | NA |
| NA            | NA                 | NA | NA | -2 | NA |    |    |    |    |    |    |    |    |    |
| RP11-326N17.2 | ENSG00000274281.1  |    |    | NA | NA | NA | NA | NA | NA | NA | NA | NA | NA | NA |
| NA            | NA                 | NA | NA | NA | NA | -2 | NA |    |    |    |    |    |    |    |
| RP11-183E24.2 | ENSG00000259320.1  |    |    | NA | NA | NA | NA | NA | NA | NA | NA | NA | NA | NA |
| NA            | NA                 | NA | NA | NA | NA | -2 | NA |    |    |    |    |    |    |    |
| RP11-580I1.1  | ENSG00000260780.1  |    |    | NA | NA | NA | NA | NA | NA | NA | NA | NA | NA | NA |
| NA            | NA                 | NA | NA | NA | NA | -2 | NA |    |    |    |    |    |    |    |
| C15orf32      | ENSG00000183643.4  |    |    | NA | NA | NA | NA | NA | NA | NA | NA | NA | NA | NA |
| NA            | NA                 | NA | NA | NA | NA | -2 | NA |    |    |    |    |    |    |    |
| GOLGA6L7P     | ENSG00000261649.6  |    |    | NA | NA | NA | NA | NA | NA | NA | NA | NA | NA | NA |
| NA            | NA                 | NA | NA | NA | NA | -2 | NA |    |    |    |    |    |    |    |
| CTD-2008A1.3  | ENSG00000276121.1  |    |    | NA | NA | NA | NA | NA | NA | NA | NA | NA | NA | NA |
| NA            | NA                 | NA | NA | NA | NA | -2 | NA |    |    |    |    |    |    |    |
| PHGR1         | ENSG00000233041.8  |    |    | NA | NA | NA | NA | NA | NA | NA | NA | NA | NA | NA |
| NA            | NA                 | NA | NA | -2 | NA |    |    |    |    |    |    |    |    |    |
| SPG11         | ENSG00000104133.14 |    |    | NA | NA | NA | NA | NA | NA | NA | NA | NA | NA | NA |
| NA            | NA                 | NA | NA | -2 | NA |    |    |    |    |    |    |    |    |    |
| RP11-610I1.1  | ENSG00000275016.4  |    |    | NA | NA | NA | NA | NA | NA | NA | NA | NA | NA | NA |
| NA            | NA                 | NA | NA | NA | NA | -2 | NA |    |    |    |    |    |    |    |
| TMEM87A       | ENSG00000103978.15 |    |    | NA | NA | NA | NA | NA | NA | NA | NA | NA | NA | NA |
| NA            | NA                 | NA | NA | NA | NA | -2 | NA |    |    |    |    |    |    |    |
| TGM7          | ENSG00000159495.7  |    |    | NA | NA | NA | NA | NA | NA | NA | NA | NA | NA | NA |
| NA            | NA                 | NA | NA | -2 | NA |    |    |    |    |    |    |    |    |    |
| RP11-108K3.2  | ENSG00000259306.2  |    |    | NA | NA | NA | NA | NA | NA | NA | NA | NA | NA | NA |
| NA            | NA                 | NA | NA | NA | NA | -2 | NA |    |    |    |    |    |    |    |
| RP11-182J1.13 | ENSG00000259774.1  |    |    | NA | NA | NA | NA | NA | NA | NA | NA | NA | NA | NA |
| NA            | NA                 | NA | NA | NA | NA | -2 | NA |    |    |    |    |    |    |    |
| LINC01169     | ENSG00000259471.1  |    |    | NA | NA | NA | NA | NA | NA | NA | NA | NA | NA | NA |
| NA            | NA                 | NA | NA | NA | NA | -2 | NA |    |    |    |    |    |    |    |
| FBXL22        | ENSG00000197361.7  |    |    | NA | NA | NA | NA | NA | NA | NA | NA | NA | NA | NA |
| NA            | NA                 | NA | NA | NA | NA | -2 | NA |    |    |    |    |    |    |    |
| SLC12A6       | ENSG00000140199.11 |    |    | NA | NA | NA | NA | NA | NA | NA | NA | NA | NA | NA |
| NA            | NA                 | NA | NA | NA | NA | -2 | NA |    |    |    |    |    |    |    |
| RP11-326N17.1 | ENSG00000259731.2  |    |    | NA | NA | NA | NA | NA | NA | NA | NA | NA | NA | NA |
| NA            | NA                 | NA | NA | NA | NA | -2 | NA |    |    |    |    |    |    |    |
| RP11-133K1.6  | ENSG00000259198.1  |    |    | NA | NA | NA | NA | NA | NA | NA | NA | NA | NA | NA |
| NA            | NA                 | NA | NA | NA | NA | -2 | NA |    |    |    |    |    |    |    |
| CHRNA4        | ENSG00000117971.11 |    |    | NA | NA | NA | NA | NA | NA | NA | NA | NA | NA | NA |
| NA            | NA                 | NA | NA | NA | NA | -2 | NA |    |    |    |    |    |    |    |
| GABRA5        | ENSG00000186297.11 |    |    | NA | NA | NA | NA | NA | NA | NA | NA | NA | NA | NA |
| NA            | NA                 | NA | NA | NA | NA | -2 | NA |    |    |    |    |    |    |    |
| RP11-38G5.4   | ENSG00000261229.6  |    |    | NA | NA | NA | NA | NA | NA | NA | NA | NA | NA | NA |
| NA            | NA                 | NA | NA | NA | NA | -2 | NA |    |    |    |    |    |    |    |
| CLPX          | ENSG00000166855.9  |    |    | NA | NA | NA | NA | NA | NA | NA | NA | NA | NA | NA |
| NA            | NA                 | NA | NA | -2 | NA |    |    |    |    |    |    |    |    |    |
| NDUFAB1       | ENSG00000004779.9  |    |    | NA | NA | NA | NA | NA | NA | NA | NA | NA | NA | NA |
| NA            | NA                 | NA | NA | NA | NA | -2 | NA |    |    |    |    |    |    |    |
| CTD-2012K14.6 | ENSG00000261386.2  |    |    | NA | NA | NA | NA | NA | NA | NA | NA | NA | NA | NA |
| NA            | NA                 | NA | NA | NA | NA | -2 | NA |    |    |    |    |    |    |    |
| TSR3          | ENSG00000007520.3  |    |    | NA | NA | NA | NA | NA | NA | NA | NA | NA | NA | NA |
| NA            | NA                 | NA | NA | -2 | NA |    |    |    |    |    |    |    |    |    |
| CALB2         | ENSG00000172137.18 |    |    | NA | NA | NA | NA | NA | NA | NA | NA | NA | NA | NA |
| NA            | NA                 | NA | NA | -2 | NA |    |    |    |    |    |    |    |    |    |
| ZNF319        | ENSG00000166188.2  |    |    | NA | NA | NA | NA | NA | NA | NA | NA | NA | NA | NA |
| NA            | NA                 | NA | NA | NA | NA | -2 | NA |    |    |    |    |    |    |    |
| NOL3          | ENSG00000140939.14 |    |    | NA | NA | NA | NA | NA | NA | NA | NA | NA | NA | NA |
| NA            | NA                 | NA | NA | -2 | NA |    |    |    |    |    |    |    |    |    |
| CORO1A        | ENSG00000102879.15 |    |    | NA | NA | NA | NA | NA | NA | NA | NA | NA | NA | NA |
| NA            | NA                 | NA | NA | NA | NA | -2 | NA |    |    |    |    |    |    |    |
| DNAJA2        | ENSG00000069345.11 |    |    | NA | NA | NA | NA | NA | NA | NA | NA | NA | NA | NA |



|               |                    |    |    |    |    |    |    |    |    |    |    |    |    |    |
|---------------|--------------------|----|----|----|----|----|----|----|----|----|----|----|----|----|
| NA            | NA                 | NA | NA | NA | -2 | NA |    |    |    |    |    |    |    |    |
| RP11-434E6.4  | ENSG00000277559.1  |    |    |    |    | NA | NA | NA | NA | NA | NA | NA | NA | NA |
| NA            | NA                 | NA | NA | NA | NA | -2 | NA |    |    |    |    |    |    |    |
| TMEM170A      | ENSG00000166822.12 |    |    |    |    | NA | NA | NA | NA | NA | NA | NA | NA | NA |
| NA            | NA                 | NA | NA | NA | NA | -2 | NA |    |    |    |    |    |    |    |
| ZCCHC14       | ENSG00000140948.11 |    |    |    |    | NA | NA | NA | NA | NA | NA | NA | NA | NA |
| NA            | NA                 | NA | NA | NA | NA | -2 | NA |    |    |    |    |    |    |    |
| U91319.1      | ENSG00000262801.5  |    |    |    |    | NA | NA | NA | NA | NA | NA | NA | NA | NA |
| NA            | NA                 | NA | NA | NA | NA | -2 | NA |    |    |    |    |    |    |    |
| CHST6         | ENSG00000183196.8  |    |    |    |    | NA | NA | NA | NA | NA | NA | NA | NA | NA |
| NA            | NA                 | NA | NA | NA | NA | -2 | NA |    |    |    |    |    |    |    |
| CTD-260009.1  | ENSG00000187185.4  |    |    |    |    | NA | NA | NA | NA | NA | NA | NA | NA | NA |
| NA            | NA                 | NA | NA | NA | NA | -2 | NA |    |    |    |    |    |    |    |
| RP11-58A18.1  | ENSG00000261161.1  |    |    |    |    | NA | NA | NA | NA | NA | NA | NA | NA | NA |
| NA            | NA                 | NA | NA | NA | NA | -2 | NA |    |    |    |    |    |    |    |
| NUTF2         | ENSG00000102898.11 |    |    |    |    | NA | NA | NA | NA | NA | NA | NA | NA | NA |
| NA            | NA                 | NA | NA | NA | NA | -2 | NA |    |    |    |    |    |    |    |
| MTRNR2L4      | ENSG00000232196.3  |    |    |    |    | NA | NA | NA | NA | NA | NA | NA | NA | NA |
| NA            | NA                 | NA | NA | NA | NA | -2 | NA |    |    |    |    |    |    |    |
| LINC02180     | ENSG00000261749.2  |    |    |    |    | NA | NA | NA | NA | NA | NA | NA | NA | NA |
| NA            | NA                 | NA | NA | NA | NA | -2 | NA |    |    |    |    |    |    |    |
| RP11-150D5.2  | ENSG00000260983.1  |    |    |    |    | NA | NA | NA | NA | NA | NA | NA | NA | NA |
| NA            | NA                 | NA | NA | NA | NA | -2 | NA |    |    |    |    |    |    |    |
| C16orf86      | ENSG00000159761.14 |    |    |    |    | NA | NA | NA | NA | NA | NA | NA | NA | NA |
| NA            | NA                 | NA | NA | NA | NA | -2 | NA |    |    |    |    |    |    |    |
| RP4-536B24.3  | ENSG00000260177.1  |    |    |    |    | NA | NA | NA | NA | NA | NA | NA | NA | NA |
| NA            | NA                 | NA | NA | NA | NA | -2 | NA |    |    |    |    |    |    |    |
| LINC02190     | ENSG00000261475.2  |    |    |    |    | NA | NA | NA | NA | NA | NA | NA | NA | NA |
| NA            | NA                 | NA | NA | NA | NA | -2 | NA |    |    |    |    |    |    |    |
| IRX3          | ENSG00000177508.11 |    |    |    |    | NA | NA | NA | NA | NA | NA | NA | NA | NA |
| NA            | NA                 | NA | NA | NA | NA | -2 | NA |    |    |    |    |    |    |    |
| FBXL16        | ENSG00000127585.11 |    |    |    |    | NA | NA | NA | NA | NA | NA | NA | NA | NA |
| NA            | NA                 | NA | NA | NA | NA | -2 | NA |    |    |    |    |    |    |    |
| IL27          | ENSG00000197272.2  |    |    |    |    | NA | NA | NA | NA | NA | NA | NA | NA | NA |
| NA            | NA                 | NA | NA | NA | NA | -2 | NA |    |    |    |    |    |    |    |
| PARN          | ENSG00000140694.16 |    |    |    |    | NA | NA | NA | NA | NA | NA | NA | NA | NA |
| NA            | NA                 | NA | NA | NA | NA | -2 | NA |    |    |    |    |    |    |    |
| SRRM2         | ENSG00000167978.16 |    |    |    |    | NA | NA | NA | NA | NA | NA | NA | NA | NA |
| NA            | NA                 | NA | NA | NA | NA | -2 | NA |    |    |    |    |    |    |    |
| STUB1         | ENSG00000103266.10 |    |    |    |    | NA | NA | NA | NA | NA | NA | NA | NA | NA |
| NA            | NA                 | NA | NA | NA | NA | -2 | NA |    |    |    |    |    |    |    |
| KATNB1        | ENSG00000140854.12 |    |    |    |    | NA | NA | NA | NA | NA | NA | NA | NA | NA |
| NA            | NA                 | NA | NA | NA | NA | -2 | NA |    |    |    |    |    |    |    |
| CTD-3032H12.2 | ENSG00000259711.1  |    |    |    |    | NA | NA | NA | NA | NA | NA | NA | NA | NA |
| NA            | NA                 | NA | NA | NA | NA | -2 | NA |    |    |    |    |    |    |    |
| RP11-418I22.2 | ENSG00000260071.1  |    |    |    |    | NA | NA | NA | NA | NA | NA | NA | NA | NA |
| NA            | NA                 | NA | NA | NA | NA | -2 | NA |    |    |    |    |    |    |    |
| PHKG2         | ENSG00000156873.15 |    |    |    |    | NA | NA | NA | NA | NA | NA | NA | NA | NA |
| NA            | NA                 | NA | NA | NA | NA | -2 | NA |    |    |    |    |    |    |    |
| BFAR          | ENSG00000103429.10 |    |    |    |    | NA | NA | NA | NA | NA | NA | NA | NA | NA |
| NA            | NA                 | NA | NA | NA | NA | -2 | NA |    |    |    |    |    |    |    |
| RP11-65J21.4  | ENSG00000263257.1  |    |    |    |    | NA | NA | NA | NA | NA | NA | NA | NA | NA |
| NA            | NA                 | NA | NA | NA | NA | -2 | NA |    |    |    |    |    |    |    |
| FAM234A       | ENSG00000167930.15 |    |    |    |    | NA | NA | NA | NA | NA | NA | NA | NA | NA |
| NA            | NA                 | NA | NA | NA | NA | -2 | NA |    |    |    |    |    |    |    |
| AC140912.1    | ENSG00000261227.2  |    |    |    |    | NA | NA | NA | NA | NA | NA | NA | NA | NA |
| NA            | NA                 | NA | NA | NA | NA | -2 | NA |    |    |    |    |    |    |    |
| RP11-513N24.1 | ENSG00000260695.1  |    |    |    |    | NA | NA | NA | NA | NA | NA | NA | NA | NA |
| NA            | NA                 | NA | NA | NA | NA | -2 | NA |    |    |    |    |    |    |    |
| DUXB          | ENSG00000282757.3  |    |    |    |    | NA | NA | NA | NA | NA | NA | NA | NA | NA |
| NA            | NA                 | NA | NA | NA | NA | -2 | NA |    |    |    |    |    |    |    |
| ZNF267        | ENSG00000185947.14 |    |    |    |    | NA | NA | NA | NA | NA | NA | NA | NA | NA |

|               |                    |    |    |    |    |    |    |    |    |    |    |    |    |    |
|---------------|--------------------|----|----|----|----|----|----|----|----|----|----|----|----|----|
| NA            | NA                 | NA | NA | NA | -2 | NA |    |    |    |    |    |    |    |    |
| CMTM4         | ENSG00000183723.12 |    |    |    |    | NA | NA | NA | NA | NA | NA | NA | NA | NA |
| NA            | NA                 | NA | NA | NA | -2 | NA |    |    |    |    |    |    |    |    |
| ZNF821        | ENSG00000102984.14 |    |    |    |    | NA | NA | NA | NA | NA | NA | NA | NA | NA |
| NA            | NA                 | NA | NA | NA | -2 | NA |    |    |    |    |    |    |    |    |
| RP11-346C20.4 | ENSG00000272250.1  |    |    |    |    | NA | NA | NA | NA | NA | NA | NA | NA | NA |
| NA            | NA                 | NA | NA | NA | -2 | NA |    |    |    |    |    |    |    |    |
| RP11-252A24.3 | ENSG00000261079.1  |    |    |    |    | NA | NA | NA | NA | NA | NA | NA | NA | NA |
| NA            | NA                 | NA | NA | NA | -2 | NA |    |    |    |    |    |    |    |    |
| CMIP          | ENSG00000153815.16 |    |    |    |    | NA | NA | NA | NA | NA | NA | NA | NA | NA |
| NA            | NA                 | NA | NA | NA | -2 | NA |    |    |    |    |    |    |    |    |
| CIAPIN1       | ENSG00000005194.14 |    |    |    |    | NA | NA | NA | NA | NA | NA | NA | NA | NA |
| NA            | NA                 | NA | NA | NA | -2 | NA |    |    |    |    |    |    |    |    |
| ORC6          | ENSG00000091651.8  |    |    |    |    | NA | NA | NA | NA | NA | NA | NA | NA | NA |
| NA            | NA                 | NA | NA | NA | -2 | NA |    |    |    |    |    |    |    |    |
| HBA2          | ENSG00000188536.12 |    |    |    |    | NA | NA | NA | NA | NA | NA | NA | NA | NA |
| NA            | NA                 | NA | NA | NA | -2 | NA |    |    |    |    |    |    |    |    |
| DNASE1L2      | ENSG00000167968.12 |    |    |    |    | NA | NA | NA | NA | NA | NA | NA | NA | NA |
| NA            | NA                 | NA | NA | NA | -2 | NA |    |    |    |    |    |    |    |    |
| RP11-899L11.1 | ENSG00000261095.1  |    |    |    |    | NA | NA | NA | NA | NA | NA | NA | NA | NA |
| NA            | NA                 | NA | NA | NA | -2 | NA |    |    |    |    |    |    |    |    |
| ATP6V0C       | ENSG00000185883.11 |    |    |    |    | NA | NA | NA | NA | NA | NA | NA | NA | NA |
| NA            | NA                 | NA | NA | NA | -2 | NA |    |    |    |    |    |    |    |    |
| MIR3180-1     | ENSG00000258354.1  |    |    |    |    | NA | NA | NA | NA | NA | NA | NA | NA | NA |
| NA            | NA                 | NA | NA | NA | -2 | NA |    |    |    |    |    |    |    |    |
| C16orf58      | ENSG00000140688.16 |    |    |    |    | NA | NA | NA | NA | NA | NA | NA | NA | NA |
| NA            | NA                 | NA | NA | NA | -2 | NA |    |    |    |    |    |    |    |    |
| USP10         | ENSG00000103194.15 |    |    |    |    | NA | NA | NA | NA | NA | NA | NA | NA | NA |
| NA            | NA                 | NA | NA | NA | -2 | NA |    |    |    |    |    |    |    |    |
| CTB-193M12.5  | ENSG00000280206.1  |    |    |    |    | NA | NA | NA | NA | NA | NA | NA | NA | NA |
| NA            | NA                 | NA | NA | NA | -2 | NA |    |    |    |    |    |    |    |    |
| ITPRIPL2      | ENSG00000205730.6  |    |    |    |    | NA | NA | NA | NA | NA | NA | NA | NA | NA |
| NA            | NA                 | NA | NA | NA | -2 | NA |    |    |    |    |    |    |    |    |
| RP11-26L20.4  | ENSG00000263207.2  |    |    |    |    | NA | NA | NA | NA | NA | NA | NA | NA | NA |
| NA            | NA                 | NA | NA | NA | -2 | NA |    |    |    |    |    |    |    |    |
| SLC9A5        | ENSG00000135740.16 |    |    |    |    | NA | NA | NA | NA | NA | NA | NA | NA | NA |
| NA            | NA                 | NA | NA | NA | -2 | NA |    |    |    |    |    |    |    |    |
| RP11-505K9.4  | ENSG00000260300.5  |    |    |    |    | NA | NA | NA | NA | NA | NA | NA | NA | NA |
| NA            | NA                 | NA | NA | NA | -2 | NA |    |    |    |    |    |    |    |    |
| CTRB1         | ENSG00000168925.10 |    |    |    |    | NA | NA | NA | NA | NA | NA | NA | NA | NA |
| NA            | NA                 | NA | NA | NA | -2 | NA |    |    |    |    |    |    |    |    |
| MT1H          | ENSG00000205358.3  |    |    |    |    | NA | NA | NA | NA | NA | NA | NA | NA | NA |
| NA            | NA                 | NA | NA | NA | -2 | NA |    |    |    |    |    |    |    |    |
| CNEP1R1       | ENSG00000205423.11 |    |    |    |    | NA | NA | NA | NA | NA | NA | NA | NA | NA |
| NA            | NA                 | NA | NA | NA | -2 | NA |    |    |    |    |    |    |    |    |
| IRX5          | ENSG00000176842.14 |    |    |    |    | NA | NA | NA | NA | NA | NA | NA | NA | NA |
| NA            | NA                 | NA | NA | NA | -2 | NA |    |    |    |    |    |    |    |    |
| METTL9        | ENSG00000197006.13 |    |    |    |    | NA | NA | NA | NA | NA | NA | NA | NA | NA |
| NA            | NA                 | NA | NA | NA | -2 | NA |    |    |    |    |    |    |    |    |
| HS3ST6        | ENSG00000162040.6  |    |    |    |    | NA | NA | NA | NA | NA | NA | NA | NA | NA |
| NA            | NA                 | NA | NA | NA | -2 | NA |    |    |    |    |    |    |    |    |
| ACSM2A        | ENSG00000183747.11 |    |    |    |    | NA | NA | NA | NA | NA | NA | NA | NA | NA |
| NA            | NA                 | NA | NA | NA | -2 | NA |    |    |    |    |    |    |    |    |
| RP11-346C20.3 | ENSG00000271009.2  |    |    |    |    | NA | NA | NA | NA | NA | NA | NA | NA | NA |
| NA            | NA                 | NA | NA | NA | -2 | NA |    |    |    |    |    |    |    |    |
| ABCC1         | ENSG00000103222.18 |    |    |    |    | NA | NA | NA | NA | NA | NA | NA | NA | NA |
| NA            | NA                 | NA | NA | NA | -2 | NA |    |    |    |    |    |    |    |    |
| LA16c-380H5.3 | ENSG00000270168.2  |    |    |    |    | NA | NA | NA | NA | NA | NA | NA | NA | NA |
| NA            | NA                 | NA | NA | NA | -2 | NA |    |    |    |    |    |    |    |    |
| SPATA2L       | ENSG00000158792.15 |    |    |    |    | NA | NA | NA | NA | NA | NA | NA | NA | NA |
| NA            | NA                 | NA | NA | NA | -2 | NA |    |    |    |    |    |    |    |    |
| RP11-626G11.6 | ENSG00000278389.1  |    |    |    |    | NA | NA | NA | NA | NA | NA | NA | NA | NA |

|               |                    |    |    |    |    |    |    |    |    |    |    |    |    |    |
|---------------|--------------------|----|----|----|----|----|----|----|----|----|----|----|----|----|
| NA            | NA                 | NA | NA | NA | NA | -2 | NA |    |    |    |    |    |    |    |
| RP11-2L4.1    | ENSG00000261176.1  |    |    |    |    | NA | NA | NA | NA | NA | NA | NA | NA | NA |
| NA            | NA                 | NA | NA | NA | NA | -2 | NA |    |    |    |    |    |    |    |
| CBFB          | ENSG0000067955.13  |    |    |    |    | NA | NA | NA | NA | NA | NA | NA | NA | NA |
| NA            | NA                 | NA | NA | NA | NA | -2 | NA |    |    |    |    |    |    |    |
| RSL1D1        | ENSG00000171490.12 |    |    |    |    | NA | NA | NA | NA | NA | NA | NA | NA | NA |
| NA            | NA                 | NA | NA | NA | NA | -2 | NA |    |    |    |    |    |    |    |
| RP11-616M22.7 | ENSG00000260710.1  |    |    |    |    | NA | NA | NA | NA | NA | NA | NA | NA | NA |
| NA            | NA                 | NA | NA | NA | NA | -2 | NA |    |    |    |    |    |    |    |
| CASC16        | ENSG00000249231.7  |    |    |    |    | NA | NA | NA | NA | NA | NA | NA | NA | NA |
| NA            | NA                 | NA | NA | NA | NA | -2 | NA |    |    |    |    |    |    |    |
| RP11-356C4.5  | ENSG00000261172.1  |    |    |    |    | NA | NA | NA | NA | NA | NA | NA | NA | NA |
| NA            | NA                 | NA | NA | NA | NA | -2 | NA |    |    |    |    |    |    |    |
| PDILT         | ENSG00000169340.9  |    |    |    |    | NA | NA | NA | NA | NA | NA | NA | NA | NA |
| NA            | NA                 | NA | NA | NA | NA | -2 | NA |    |    |    |    |    |    |    |
| LINC02169     | ENSG00000259517.2  |    |    |    |    | NA | NA | NA | NA | NA | NA | NA | NA | NA |
| NA            | NA                 | NA | NA | NA | NA | -2 | NA |    |    |    |    |    |    |    |
| DNAH3         | ENSG00000158486.13 |    |    |    |    | NA | NA | NA | NA | NA | NA | NA | NA | NA |
| NA            | NA                 | NA | NA | NA | NA | -2 | NA |    |    |    |    |    |    |    |
| C16orf72      | ENSG00000182831.11 |    |    |    |    | NA | NA | NA | NA | NA | NA | NA | NA | NA |
| NA            | NA                 | NA | NA | NA | NA | -2 | NA |    |    |    |    |    |    |    |
| RP11-58A18.2  | ENSG00000274478.1  |    |    |    |    | NA | NA | NA | NA | NA | NA | NA | NA | NA |
| NA            | NA                 | NA | NA | NA | NA | -2 | NA |    |    |    |    |    |    |    |
| ZNF598        | ENSG00000167962.13 |    |    |    |    | NA | NA | NA | NA | NA | NA | NA | NA | NA |
| NA            | NA                 | NA | NA | NA | NA | -2 | NA |    |    |    |    |    |    |    |
| TNFRSF12A     | ENSG00000006327.13 |    |    |    |    | NA | NA | NA | NA | NA | NA | NA | NA | NA |
| NA            | NA                 | NA | NA | NA | NA | -2 | NA |    |    |    |    |    |    |    |
| CCL17         | ENSG00000102970.10 |    |    |    |    | NA | NA | NA | NA | NA | NA | NA | NA | NA |
| NA            | NA                 | NA | NA | NA | NA | -2 | NA |    |    |    |    |    |    |    |
| RP11-44F14.2  | ENSG00000261804.1  |    |    |    |    | NA | NA | NA | NA | NA | NA | NA | NA | NA |
| NA            | NA                 | NA | NA | NA | NA | -2 | NA |    |    |    |    |    |    |    |
| FUK           | ENSG00000157353.16 |    |    |    |    | NA | NA | NA | NA | NA | NA | NA | NA | NA |
| NA            | NA                 | NA | NA | NA | NA | -2 | NA |    |    |    |    |    |    |    |
| BEAN1         | ENSG00000166546.13 |    |    |    |    | NA | NA | NA | NA | NA | NA | NA | NA | NA |
| NA            | NA                 | NA | NA | NA | NA | -2 | NA |    |    |    |    |    |    |    |
| HYDIN         | ENSG00000157423.17 |    |    |    |    | NA | NA | NA | NA | NA | NA | NA | NA | NA |
| NA            | NA                 | NA | NA | NA | NA | -2 | NA |    |    |    |    |    |    |    |
| PRM1          | ENSG00000175646.3  |    |    |    |    | NA | NA | NA | NA | NA | NA | NA | NA | NA |
| NA            | NA                 | NA | NA | NA | NA | -2 | NA |    |    |    |    |    |    |    |
| GLG1          | ENSG00000090863.11 |    |    |    |    | NA | NA | NA | NA | NA | NA | NA | NA | NA |
| NA            | NA                 | NA | NA | NA | NA | -2 | NA |    |    |    |    |    |    |    |
| VAC14         | ENSG00000103043.14 |    |    |    |    | NA | NA | NA | NA | NA | NA | NA | NA | NA |
| NA            | NA                 | NA | NA | NA | NA | -2 | NA |    |    |    |    |    |    |    |
| RP11-142G1.1  | ENSG00000260478.1  |    |    |    |    | NA | NA | NA | NA | NA | NA | NA | NA | NA |
| NA            | NA                 | NA | NA | NA | NA | -2 | NA |    |    |    |    |    |    |    |
| LINC01572     | ENSG00000261008.6  |    |    |    |    | NA | NA | NA | NA | NA | NA | NA | NA | NA |
| NA            | NA                 | NA | NA | NA | NA | -2 | NA |    |    |    |    |    |    |    |
| TERB1         | ENSG00000249961.9  |    |    |    |    | NA | NA | NA | NA | NA | NA | NA | NA | NA |
| NA            | NA                 | NA | NA | NA | NA | -2 | NA |    |    |    |    |    |    |    |
| RP11-514D23.3 | ENSG00000270058.1  |    |    |    |    | NA | NA | NA | NA | NA | NA | NA | NA | NA |
| NA            | NA                 | NA | NA | NA | NA | -2 | NA |    |    |    |    |    |    |    |
| PRSS41        | ENSG00000215148.8  |    |    |    |    | NA | NA | NA | NA | NA | NA | NA | NA | NA |
| NA            | NA                 | NA | NA | NA | NA | -2 | NA |    |    |    |    |    |    |    |
| XPO6          | ENSG00000169180.11 |    |    |    |    | NA | NA | NA | NA | NA | NA | NA | NA | NA |
| NA            | NA                 | NA | NA | NA | NA | -2 | NA |    |    |    |    |    |    |    |
| DDX28         | ENSG00000182810.6  |    |    |    |    | NA | NA | NA | NA | NA | NA | NA | NA | NA |
| NA            | NA                 | NA | NA | NA | NA | -2 | NA |    |    |    |    |    |    |    |
| PRR25         | ENSG00000167945.1  |    |    |    |    | NA | NA | NA | NA | NA | NA | NA | NA | NA |
| NA            | NA                 | NA | NA | NA | NA | -2 | NA |    |    |    |    |    |    |    |
| USB1          | ENSG00000103005.11 |    |    |    |    | NA | NA | NA | NA | NA | NA | NA | NA | NA |
| NA            | NA                 | NA | NA | NA | NA | -2 | NA |    |    |    |    |    |    |    |
| ZG16          | ENSG00000174992.7  |    |    |    |    | NA | NA | NA | NA | NA | NA | NA | NA | NA |

|               |                    |    |    |    |    |    |    |    |    |    |    |    |    |    |
|---------------|--------------------|----|----|----|----|----|----|----|----|----|----|----|----|----|
| NA            | NA                 | NA | NA | -2 | NA |    |    |    |    |    |    |    |    |    |
| C16orf47      | ENSG00000197445.2  |    |    |    | NA | NA | NA | NA | NA | NA | NA | NA | NA | NA |
| NA            | NA                 | NA | NA | NA | -2 | NA |    |    |    |    |    |    |    |    |
| RP11-46D6.1   | ENSG00000261512.2  |    |    |    | NA | NA | NA | NA | NA | NA | NA | NA | NA | NA |
| NA            | NA                 | NA | NA | NA | NA | -2 | NA |    |    |    |    |    |    |    |
| RP11-488I20.8 | ENSG00000260958.2  |    |    |    | NA | NA | NA | NA | NA | NA | NA | NA | NA | NA |
| NA            | NA                 | NA | NA | NA | NA | -2 | NA |    |    |    |    |    |    |    |
| PYCARD        | ENSG00000103490.13 |    |    |    | NA | NA | NA | NA | NA | NA | NA | NA | NA | NA |
| NA            | NA                 | NA | NA | NA | NA | -2 | NA |    |    |    |    |    |    |    |
| LINC02195     | ENSG00000236481.1  |    |    |    | NA | NA | NA | NA | NA | NA | NA | NA | NA | NA |
| NA            | NA                 | NA | NA | NA | NA | -2 | NA |    |    |    |    |    |    |    |
| NOMO1         | ENSG00000103512.14 |    |    |    | NA | NA | NA | NA | NA | NA | NA | NA | NA | NA |
| NA            | NA                 | NA | NA | NA | NA | -2 | NA |    |    |    |    |    |    |    |
| RP11-189E14.3 | ENSG00000263110.1  |    |    |    | NA | NA | NA | NA | NA | NA | NA | NA | NA | NA |
| NA            | NA                 | NA | NA | NA | NA | -2 | NA |    |    |    |    |    |    |    |
| ZSCAN32       | ENSG00000140987.19 |    |    |    | NA | NA | NA | NA | NA | NA | NA | NA | NA | NA |
| NA            | NA                 | NA | NA | NA | NA | -2 | NA |    |    |    |    |    |    |    |
| KIAA0430      | ENSG00000166783.21 |    |    |    | NA | NA | NA | NA | NA | NA | NA | NA | NA | NA |
| NA            | NA                 | NA | NA | NA | NA | -2 | NA |    |    |    |    |    |    |    |
| OGFOD1        | ENSG00000087263.16 |    |    |    | NA | NA | NA | NA | NA | NA | NA | NA | NA | NA |
| NA            | NA                 | NA | NA | NA | NA | -2 | NA |    |    |    |    |    |    |    |
| RP11-437L7.1  | ENSG00000260850.1  |    |    |    | NA | NA | NA | NA | NA | NA | NA | NA | NA | NA |
| NA            | NA                 | NA | NA | NA | NA | -2 | NA |    |    |    |    |    |    |    |
| HSF4          | ENSG00000102878.16 |    |    |    | NA | NA | NA | NA | NA | NA | NA | NA | NA | NA |
| NA            | NA                 | NA | NA | NA | NA | -2 | NA |    |    |    |    |    |    |    |
| LINC01566     | ENSG00000259841.6  |    |    |    | NA | NA | NA | NA | NA | NA | NA | NA | NA | NA |
| NA            | NA                 | NA | NA | NA | NA | -2 | NA |    |    |    |    |    |    |    |
| HBA1          | ENSG00000206172.8  |    |    |    | NA | NA | NA | NA | NA | NA | NA | NA | NA | NA |
| NA            | NA                 | NA | NA | NA | NA | -2 | NA |    |    |    |    |    |    |    |
| ITFG1         | ENSG00000129636.12 |    |    |    | NA | NA | NA | NA | NA | NA | NA | NA | NA | NA |
| NA            | NA                 | NA | NA | NA | NA | -2 | NA |    |    |    |    |    |    |    |
| FA2H          | ENSG00000103089.8  |    |    |    | NA | NA | NA | NA | NA | NA | NA | NA | NA | NA |
| NA            | NA                 | NA | NA | NA | NA | -2 | NA |    |    |    |    |    |    |    |
| ANKRD11       | ENSG00000167522.14 |    |    |    | NA | NA | NA | NA | NA | NA | NA | NA | NA | NA |
| NA            | NA                 | NA | NA | NA | NA | -2 | NA |    |    |    |    |    |    |    |
| MT1B          | ENSG00000169688.10 |    |    |    | NA | NA | NA | NA | NA | NA | NA | NA | NA | NA |
| NA            | NA                 | NA | NA | NA | NA | -2 | NA |    |    |    |    |    |    |    |
| RP11-457D20.2 | ENSG00000278499.2  |    |    |    | NA | NA | NA | NA | NA | NA | NA | NA | NA | NA |
| NA            | NA                 | NA | NA | NA | NA | -2 | NA |    |    |    |    |    |    |    |
| RP11-805I24.3 | ENSG00000268505.1  |    |    |    | NA | NA | NA | NA | NA | NA | NA | NA | NA | NA |
| NA            | NA                 | NA | NA | NA | NA | -2 | NA |    |    |    |    |    |    |    |
| ERN2          | ENSG00000134398.14 |    |    |    | NA | NA | NA | NA | NA | NA | NA | NA | NA | NA |
| NA            | NA                 | NA | NA | NA | NA | -2 | NA |    |    |    |    |    |    |    |
| MIR193BHG     | ENSG00000262454.2  |    |    |    | NA | NA | NA | NA | NA | NA | NA | NA | NA | NA |
| NA            | NA                 | NA | NA | NA | NA | -2 | NA |    |    |    |    |    |    |    |
| MMP25         | ENSG00000008516.16 |    |    |    | NA | NA | NA | NA | NA | NA | NA | NA | NA | NA |
| NA            | NA                 | NA | NA | NA | NA | -2 | NA |    |    |    |    |    |    |    |
| NTHL1         | ENSG00000065057.7  |    |    |    | NA | NA | NA | NA | NA | NA | NA | NA | NA | NA |
| NA            | NA                 | NA | NA | NA | NA | -2 | NA |    |    |    |    |    |    |    |
| MYLPF         | ENSG00000180209.11 |    |    |    | NA | NA | NA | NA | NA | NA | NA | NA | NA | NA |
| NA            | NA                 | NA | NA | NA | NA | -2 | NA |    |    |    |    |    |    |    |
| CTD-2520I13.1 | ENSG00000261260.1  |    |    |    | NA | NA | NA | NA | NA | NA | NA | NA | NA | NA |
| NA            | NA                 | NA | NA | NA | NA | -2 | NA |    |    |    |    |    |    |    |
| AC009120.5    | ENSG00000260884.1  |    |    |    | NA | NA | NA | NA | NA | NA | NA | NA | NA | NA |
| NA            | NA                 | NA | NA | NA | NA | -2 | NA |    |    |    |    |    |    |    |
| OR2C1         | ENSG00000168158.3  |    |    |    | NA | NA | NA | NA | NA | NA | NA | NA | NA | NA |
| NA            | NA                 | NA | NA | NA | NA | -2 | NA |    |    |    |    |    |    |    |
| RP11-490B18.5 | ENSG00000276408.1  |    |    |    | NA | NA | NA | NA | NA | NA | NA | NA | NA | NA |
| NA            | NA                 | NA | NA | NA | NA | -2 | NA |    |    |    |    |    |    |    |
| LINC02191     | ENSG00000261636.1  |    |    |    | NA | NA | NA | NA | NA | NA | NA | NA | NA | NA |
| NA            | NA                 | NA | NA | NA | NA | -2 | NA |    |    |    |    |    |    |    |
| PRM2          | ENSG00000122304.10 |    |    |    | NA | NA | NA | NA | NA | NA | NA | NA | NA | NA |

|               |                    |    |    |    |    |    |    |    |    |    |    |    |    |    |
|---------------|--------------------|----|----|----|----|----|----|----|----|----|----|----|----|----|
|               | NA                 | NA | NA | NA | -2 | NA |    |    |    |    |    |    |    |    |
| AHSP          | ENSG00000169877.9  |    |    |    |    | NA | NA | NA | NA | NA | NA | NA | NA | NA |
|               | NA                 | NA | NA | NA | -2 | NA |    |    |    |    |    |    |    |    |
| ACD           | ENSG00000102977.13 |    |    |    |    | NA | NA | NA | NA | NA | NA | NA | NA | NA |
|               | NA                 | NA | NA | NA | -2 | NA |    |    |    |    |    |    |    |    |
| CTC-527H23.3  | ENSG00000260052.1  |    |    |    |    | NA | NA | NA | NA | NA | NA | NA | NA | NA |
|               | NA                 | NA | NA | NA | NA | -2 | NA |    |    |    |    |    |    |    |
| ACSM2B        | ENSG00000066813.14 |    |    |    |    | NA | NA | NA | NA | NA | NA | NA | NA | NA |
|               | NA                 | NA | NA | NA | NA | -2 | NA |    |    |    |    |    |    |    |
| ATP6V0D1      | ENSG00000159720.11 |    |    |    |    | NA | NA | NA | NA | NA | NA | NA | NA | NA |
|               | NA                 | NA | NA | NA | NA | -2 | NA |    |    |    |    |    |    |    |
| CCL22         | ENSG00000102962.4  |    |    |    |    | NA | NA | NA | NA | NA | NA | NA | NA | NA |
|               | NA                 | NA | NA | NA | -2 | NA |    |    |    |    |    |    |    |    |
| DRC7          | ENSG00000159625.14 |    |    |    |    | NA | NA | NA | NA | NA | NA | NA | NA | NA |
|               | NA                 | NA | NA | NA | -2 | NA |    |    |    |    |    |    |    |    |
| PKD1L3        | ENSG00000277481.1  |    |    |    |    | NA | NA | NA | NA | NA | NA | NA | NA | NA |
|               | NA                 | NA | NA | NA | NA | -2 | NA |    |    |    |    |    |    |    |
| DNAJA3        | ENSG00000103423.13 |    |    |    |    | NA | NA | NA | NA | NA | NA | NA | NA | NA |
|               | NA                 | NA | NA | NA | NA | -2 | NA |    |    |    |    |    |    |    |
| ZDHHC7        | ENSG00000153786.12 |    |    |    |    | NA | NA | NA | NA | NA | NA | NA | NA | NA |
|               | NA                 | NA | NA | NA | NA | -2 | NA |    |    |    |    |    |    |    |
| TPSG1         | ENSG00000116176.6  |    |    |    |    | NA | NA | NA | NA | NA | NA | NA | NA | NA |
|               | NA                 | NA | NA | NA | -2 | NA |    |    |    |    |    |    |    |    |
| SYNGR3        | ENSG00000127561.14 |    |    |    |    | NA | NA | NA | NA | NA | NA | NA | NA | NA |
|               | NA                 | NA | NA | NA | NA | -2 | NA |    |    |    |    |    |    |    |
| RP11-418I22.3 | ENSG00000283003.1  |    |    |    |    | NA | NA | NA | NA | NA | NA | NA | NA | NA |
|               | NA                 | NA | NA | NA | NA | -2 | NA |    |    |    |    |    |    |    |
| PALB2         | ENSG00000083093.9  |    |    |    |    | NA | NA | NA | NA | NA | NA | NA | NA | NA |
|               | NA                 | NA | NA | NA | -2 | NA |    |    |    |    |    |    |    |    |
| UMOD          | ENSG00000169344.15 |    |    |    |    | NA | NA | NA | NA | NA | NA | NA | NA | NA |
|               | NA                 | NA | NA | NA | -2 | NA |    |    |    |    |    |    |    |    |
| CES2          | ENSG00000172831.11 |    |    |    |    | NA | NA | NA | NA | NA | NA | NA | NA | NA |
|               | NA                 | NA | NA | NA | -2 | NA |    |    |    |    |    |    |    |    |
| N4BP1         | ENSG00000102921.7  |    |    |    |    | NA | NA | NA | NA | NA | NA | NA | NA | NA |
|               | NA                 | NA | NA | NA | -2 | NA |    |    |    |    |    |    |    |    |
| E4F1          | ENSG00000167967.15 |    |    |    |    | NA | NA | NA | NA | NA | NA | NA | NA | NA |
|               | NA                 | NA | NA | NA | -2 | NA |    |    |    |    |    |    |    |    |
| RP11-439I14.2 | ENSG00000259859.1  |    |    |    |    | NA | NA | NA | NA | NA | NA | NA | NA | NA |
|               | NA                 | NA | NA | NA | NA | -2 | NA |    |    |    |    |    |    |    |
| RP11-134D3.2  | ENSG00000261363.2  |    |    |    |    | NA | NA | NA | NA | NA | NA | NA | NA | NA |
|               | NA                 | NA | NA | NA | NA | -2 | NA |    |    |    |    |    |    |    |
| ITGAL         | ENSG00000005844.17 |    |    |    |    | NA | NA | NA | NA | NA | NA | NA | NA | NA |
|               | NA                 | NA | NA | NA | -2 | NA |    |    |    |    |    |    |    |    |
| LINC01568     | ENSG00000258779.6  |    |    |    |    | NA | NA | NA | NA | NA | NA | NA | NA | NA |
|               | NA                 | NA | NA | NA | NA | -2 | NA |    |    |    |    |    |    |    |
| RP11-158I3.3  | ENSG00000269826.1  |    |    |    |    | NA | NA | NA | NA | NA | NA | NA | NA | NA |
|               | NA                 | NA | NA | NA | NA | -2 | NA |    |    |    |    |    |    |    |
| FOXC2         | ENSG00000176692.5  |    |    |    |    | NA | NA | NA | NA | NA | NA | NA | NA | NA |
|               | NA                 | NA | NA | NA | -2 | NA |    |    |    |    |    |    |    |    |
| ZFH3          | ENSG00000140836.14 |    |    |    |    | NA | NA | NA | NA | NA | NA | NA | NA | NA |
|               | NA                 | NA | NA | NA | -2 | NA |    |    |    |    |    |    |    |    |
| KIFC3         | ENSG00000140859.15 |    |    |    |    | NA | NA | NA | NA | NA | NA | NA | NA | NA |
|               | NA                 | NA | NA | NA | -2 | NA |    |    |    |    |    |    |    |    |
| RP11-626G11.4 | ENSG00000260430.1  |    |    |    |    | NA | NA | NA | NA | NA | NA | NA | NA | NA |
|               | NA                 | NA | NA | NA | NA | -2 | NA |    |    |    |    |    |    |    |
| EXOC3L1       | ENSG00000179044.15 |    |    |    |    | NA | NA | NA | NA | NA | NA | NA | NA | NA |
|               | NA                 | NA | NA | NA | NA | -2 | NA |    |    |    |    |    |    |    |
| CD19          | ENSG00000177455.12 |    |    |    |    | NA | NA | NA | NA | NA | NA | NA | NA | NA |
|               | NA                 | NA | NA | NA | -2 | NA |    |    |    |    |    |    |    |    |
| RP11-212I21.4 | ENSG00000261997.1  |    |    |    |    | NA | NA | NA | NA | NA | NA | NA | NA | NA |
|               | NA                 | NA | NA | NA | NA | -2 | NA |    |    |    |    |    |    |    |
| MTSS1L        | ENSG00000132613.14 |    |    |    |    | NA | NA | NA | NA | NA | NA | NA | NA | NA |

|                |                    |    |    |    |    |    |    |    |    |    |    |    |    |    |
|----------------|--------------------|----|----|----|----|----|----|----|----|----|----|----|----|----|
| NA             | NA                 | NA | NA | NA | -2 | NA |    |    |    |    |    |    |    |    |
| UBALD1         | ENSG00000153443.12 | NA | NA | NA | NA | NA | NA | NA | NA | NA | NA | NA | NA | NA |
| NA             | NA                 | NA | NA | NA | -2 | NA |    |    |    |    |    |    |    |    |
| PRSS53         | ENSG00000151006.7  | NA | NA | NA | NA | NA | NA | NA | NA | NA | NA | NA | NA | NA |
| NA             | NA                 | NA | NA | NA | -2 | NA |    |    |    |    |    |    |    |    |
| ECI1           | ENSG00000167969.12 | NA | NA | NA | NA | NA | NA | NA | NA | NA | NA | NA | NA | NA |
| NA             | NA                 | NA | NA | NA | -2 | NA |    |    |    |    |    |    |    |    |
| TOX3           | ENSG00000103460.16 | NA | NA | NA | NA | NA | NA | NA | NA | NA | NA | NA | NA | NA |
| NA             | NA                 | NA | NA | NA | -2 | NA |    |    |    |    |    |    |    |    |
| RP11-1212A22.4 | ENSG00000233024.7  | NA | NA | NA | NA | NA | NA | NA | NA | NA | NA | NA | NA | NA |
| NA             | NA                 | NA | NA | NA | -2 | NA |    |    |    |    |    |    |    |    |
| MKL2           | ENSG00000186260.16 | NA | NA | NA | NA | NA | NA | NA | NA | NA | NA | NA | NA | NA |
| NA             | NA                 | NA | NA | NA | -2 | NA |    |    |    |    |    |    |    |    |
| LINC02189      | ENSG00000260026.1  | NA | NA | NA | NA | NA | NA | NA | NA | NA | NA | NA | NA | NA |
| NA             | NA                 | NA | NA | NA | -2 | NA |    |    |    |    |    |    |    |    |
| GABARAPL2      | ENSG00000034713.7  | NA | NA | NA | NA | NA | NA | NA | NA | NA | NA | NA | NA | NA |
| NA             | NA                 | NA | NA | NA | -2 | NA |    |    |    |    |    |    |    |    |
| GP2            | ENSG00000169347.16 | NA | NA | NA | NA | NA | NA | NA | NA | NA | NA | NA | NA | NA |
| NA             | NA                 | NA | NA | NA | -2 | NA |    |    |    |    |    |    |    |    |
| LINC02181      | ENSG00000232190.2  | NA | NA | NA | NA | NA | NA | NA | NA | NA | NA | NA | NA | NA |
| NA             | NA                 | NA | NA | NA | -2 | NA |    |    |    |    |    |    |    |    |
| RP11-143N13.2  | ENSG00000260201.2  | NA | NA | NA | NA | NA | NA | NA | NA | NA | NA | NA | NA | NA |
| NA             | NA                 | NA | NA | NA | NA | -2 | NA |    |    |    |    |    |    |    |
| KIAA0556       | ENSG00000047578.12 | NA | NA | NA | NA | NA | NA | NA | NA | NA | NA | NA | NA | NA |
| NA             | NA                 | NA | NA | NA | -2 | NA |    |    |    |    |    |    |    |    |
| CTD-2034I21.1  | ENSG00000260042.1  | NA | NA | NA | NA | NA | NA | NA | NA | NA | NA | NA | NA | NA |
| NA             | NA                 | NA | NA | NA | NA | -2 | NA |    |    |    |    |    |    |    |
| PLL2           | ENSG00000102934.9  | NA | NA | NA | NA | NA | NA | NA | NA | NA | NA | NA | NA | NA |
| NA             | NA                 | NA | NA | NA | -2 | NA |    |    |    |    |    |    |    |    |
| METTL26        | ENSG00000130731.15 | NA | NA | NA | NA | NA | NA | NA | NA | NA | NA | NA | NA | NA |
| NA             | NA                 | NA | NA | NA | -2 | NA |    |    |    |    |    |    |    |    |
| LINC00922      | ENSG00000261742.5  | NA | NA | NA | NA | NA | NA | NA | NA | NA | NA | NA | NA | NA |
| NA             | NA                 | NA | NA | NA | -2 | NA |    |    |    |    |    |    |    |    |
| ADGRG5         | ENSG00000159618.15 | NA | NA | NA | NA | NA | NA | NA | NA | NA | NA | NA | NA | NA |
| NA             | NA                 | NA | NA | NA | -2 | NA |    |    |    |    |    |    |    |    |
| MRPS34         | ENSG00000074071.14 | NA | NA | NA | NA | NA | NA | NA | NA | NA | NA | NA | NA | NA |
| NA             | NA                 | NA | NA | NA | -2 | NA |    |    |    |    |    |    |    |    |
| PDF            | ENSG00000258429.1  | NA | NA | NA | NA | NA | NA | NA | NA | NA | NA | NA | NA | NA |
| NA             | NA                 | NA | NA | NA | -2 | NA |    |    |    |    |    |    |    |    |
| RP11-960L18.1  | ENSG00000261218.5  | NA | NA | NA | NA | NA | NA | NA | NA | NA | NA | NA | NA | NA |
| NA             | NA                 | NA | NA | NA | NA | -2 | NA |    |    |    |    |    |    |    |
| RP11-586K12.10 | ENSG00000260311.1  | NA | NA | NA | NA | NA | NA | NA | NA | NA | NA | NA | NA | NA |
| NA             | NA                 | NA | NA | NA | NA | -2 | NA |    |    |    |    |    |    |    |
| TUBB3          | ENSG00000258947.6  | NA | NA | NA | NA | NA | NA | NA | NA | NA | NA | NA | NA | NA |
| NA             | NA                 | NA | NA | NA | -2 | NA |    |    |    |    |    |    |    |    |
| RP11-21B23.3   | ENSG00000260573.2  | NA | NA | NA | NA | NA | NA | NA | NA | NA | NA | NA | NA | NA |
| NA             | NA                 | NA | NA | NA | NA | -2 | NA |    |    |    |    |    |    |    |
| RP11-426C22.8  | ENSG00000277999.1  | NA | NA | NA | NA | NA | NA | NA | NA | NA | NA | NA | NA | NA |
| NA             | NA                 | NA | NA | NA | NA | -2 | NA |    |    |    |    |    |    |    |
| RP11-305A4.3   | ENSG00000261751.1  | NA | NA | NA | NA | NA | NA | NA | NA | NA | NA | NA | NA | NA |
| NA             | NA                 | NA | NA | NA | NA | -2 | NA |    |    |    |    |    |    |    |
| RP11-56L13.1   | ENSG00000260402.1  | NA | NA | NA | NA | NA | NA | NA | NA | NA | NA | NA | NA | NA |
| NA             | NA                 | NA | NA | NA | NA | -2 | NA |    |    |    |    |    |    |    |
| CDH16          | ENSG00000166589.12 | NA | NA | NA | NA | NA | NA | NA | NA | NA | NA | NA | NA | NA |
| NA             | NA                 | NA | NA | NA | -2 | NA |    |    |    |    |    |    |    |    |
| ST3GAL2        | ENSG00000157350.12 | NA | NA | NA | NA | NA | NA | NA | NA | NA | NA | NA | NA | NA |
| NA             | NA                 | NA | NA | NA | -2 | NA |    |    |    |    |    |    |    |    |
| FAM57B         | ENSG00000149926.13 | NA | NA | NA | NA | NA | NA | NA | NA | NA | NA | NA | NA | NA |
| NA             | NA                 | NA | NA | NA | -2 | NA |    |    |    |    |    |    |    |    |
| LINC02152      | ENSG00000261319.1  | NA | NA | NA | NA | NA | NA | NA | NA | NA | NA | NA | NA | NA |
| NA             | NA                 | NA | NA | NA | -2 | NA |    |    |    |    |    |    |    |    |
| PDPK1          | ENSG00000140992.18 | NA | NA | NA | NA | NA | NA | NA | NA | NA | NA | NA | NA | NA |

|               |                    |    |    |    |    |    |    |    |    |    |    |    |    |    |
|---------------|--------------------|----|----|----|----|----|----|----|----|----|----|----|----|----|
| NA            | NA                 | NA | NA | -2 | NA |    |    |    |    |    |    |    |    |    |
| LINC02165     | ENSG00000261014.1  |    |    |    | NA | NA | NA | NA | NA | NA | NA | NA | NA | NA |
| NA            | NA                 | NA | NA | NA | -2 | NA |    |    |    |    |    |    |    |    |
| RP11-70D24.3  | ENSG00000277214.1  |    |    |    | NA | NA | NA | NA | NA | NA | NA | NA | NA | NA |
| NA            | NA                 | NA | NA | NA | NA | -2 | NA |    |    |    |    |    |    |    |
| FAM173A       | ENSG00000103254.9  |    |    |    | NA | NA | NA | NA | NA | NA | NA | NA | NA | NA |
| NA            | NA                 | NA | NA | NA | NA | -2 | NA |    |    |    |    |    |    |    |
| CTA-276F8.1   | ENSG00000276564.1  |    |    |    | NA | NA | NA | NA | NA | NA | NA | NA | NA | NA |
| NA            | NA                 | NA | NA | NA | NA | -2 | NA |    |    |    |    |    |    |    |
| LCAT          | ENSG00000213398.7  |    |    |    | NA | NA | NA | NA | NA | NA | NA | NA | NA | NA |
| NA            | NA                 | NA | NA | NA | NA | -2 | NA |    |    |    |    |    |    |    |
| RP11-80F22.15 | ENSG00000260857.2  |    |    |    | NA | NA | NA | NA | NA | NA | NA | NA | NA | NA |
| NA            | NA                 | NA | NA | NA | NA | -2 | NA |    |    |    |    |    |    |    |
| RP11-356C4.3  | ENSG00000260507.1  |    |    |    | NA | NA | NA | NA | NA | NA | NA | NA | NA | NA |
| NA            | NA                 | NA | NA | NA | NA | -2 | NA |    |    |    |    |    |    |    |
| SYT17         | ENSG00000103528.16 |    |    |    | NA | NA | NA | NA | NA | NA | NA | NA | NA | NA |
| NA            | NA                 | NA | NA | NA | NA | -2 | NA |    |    |    |    |    |    |    |
| PRR35         | ENSG00000161992.5  |    |    |    | NA | NA | NA | NA | NA | NA | NA | NA | NA | NA |
| NA            | NA                 | NA | NA | NA | NA | -2 | NA |    |    |    |    |    |    |    |
| ADGRG1        | ENSG00000205336.11 |    |    |    | NA | NA | NA | NA | NA | NA | NA | NA | NA | NA |
| NA            | NA                 | NA | NA | NA | NA | -2 | NA |    |    |    |    |    |    |    |
| RP11-368L12.1 | ENSG00000260658.5  |    |    |    | NA | NA | NA | NA | NA | NA | NA | NA | NA | NA |
| NA            | NA                 | NA | NA | NA | NA | -2 | NA |    |    |    |    |    |    |    |
| CLN3          | ENSG00000188603.18 |    |    |    | NA | NA | NA | NA | NA | NA | NA | NA | NA | NA |
| NA            | NA                 | NA | NA | NA | NA | -2 | NA |    |    |    |    |    |    |    |
| TMEM219       | ENSG00000149932.16 |    |    |    | NA | NA | NA | NA | NA | NA | NA | NA | NA | NA |
| NA            | NA                 | NA | NA | NA | NA | -2 | NA |    |    |    |    |    |    |    |
| RP11-989E6.3  | ENSG00000214614.2  |    |    |    | NA | NA | NA | NA | NA | NA | NA | NA | NA | NA |
| NA            | NA                 | NA | NA | NA | NA | -2 | NA |    |    |    |    |    |    |    |
| NPIPB15       | ENSG00000196436.8  |    |    |    | NA | NA | NA | NA | NA | NA | NA | NA | NA | NA |
| NA            | NA                 | NA | NA | NA | NA | -2 | NA |    |    |    |    |    |    |    |
| DDX19B        | ENSG00000157349.16 |    |    |    | NA | NA | NA | NA | NA | NA | NA | NA | NA | NA |
| NA            | NA                 | NA | NA | NA | NA | -2 | NA |    |    |    |    |    |    |    |
| TMEM265       | ENSG00000281991.1  |    |    |    | NA | NA | NA | NA | NA | NA | NA | NA | NA | NA |
| NA            | NA                 | NA | NA | NA | NA | -2 | NA |    |    |    |    |    |    |    |
| BCKDK         | ENSG00000103507.13 |    |    |    | NA | NA | NA | NA | NA | NA | NA | NA | NA | NA |
| NA            | NA                 | NA | NA | NA | NA | -2 | NA |    |    |    |    |    |    |    |
| C16orf91      | ENSG00000174109.4  |    |    |    | NA | NA | NA | NA | NA | NA | NA | NA | NA | NA |
| NA            | NA                 | NA | NA | NA | NA | -2 | NA |    |    |    |    |    |    |    |
| LINC01081     | ENSG00000268754.1  |    |    |    | NA | NA | NA | NA | NA | NA | NA | NA | NA | NA |
| NA            | NA                 | NA | NA | NA | NA | -2 | NA |    |    |    |    |    |    |    |
| RBBP6         | ENSG00000122257.18 |    |    |    | NA | NA | NA | NA | NA | NA | NA | NA | NA | NA |
| NA            | NA                 | NA | NA | NA | NA | -2 | NA |    |    |    |    |    |    |    |
| RP11-80F22.4  | ENSG00000261445.1  |    |    |    | NA | NA | NA | NA | NA | NA | NA | NA | NA | NA |
| NA            | NA                 | NA | NA | NA | NA | -2 | NA |    |    |    |    |    |    |    |
| MVP           | ENSG00000013364.18 |    |    |    | NA | NA | NA | NA | NA | NA | NA | NA | NA | NA |
| NA            | NA                 | NA | NA | NA | NA | -2 | NA |    |    |    |    |    |    |    |
| RP11-44F14.8  | ENSG00000262714.1  |    |    |    | NA | NA | NA | NA | NA | NA | NA | NA | NA | NA |
| NA            | NA                 | NA | NA | NA | NA | -2 | NA |    |    |    |    |    |    |    |
| FENDRR        | ENSG00000268388.5  |    |    |    | NA | NA | NA | NA | NA | NA | NA | NA | NA | NA |
| NA            | NA                 | NA | NA | NA | NA | -2 | NA |    |    |    |    |    |    |    |
| FBRS          | ENSG00000156860.15 |    |    |    | NA | NA | NA | NA | NA | NA | NA | NA | NA | NA |
| NA            | NA                 | NA | NA | NA | NA | -2 | NA |    |    |    |    |    |    |    |
| DDX19A        | ENSG00000168872.16 |    |    |    | NA | NA | NA | NA | NA | NA | NA | NA | NA | NA |
| NA            | NA                 | NA | NA | NA | NA | -2 | NA |    |    |    |    |    |    |    |
| UBFD1         | ENSG00000103353.15 |    |    |    | NA | NA | NA | NA | NA | NA | NA | NA | NA | NA |
| NA            | NA                 | NA | NA | NA | NA | -2 | NA |    |    |    |    |    |    |    |
| C16orf52      | ENSG00000185716.11 |    |    |    | NA | NA | NA | NA | NA | NA | NA | NA | NA | NA |
| NA            | NA                 | NA | NA | NA | NA | -2 | NA |    |    |    |    |    |    |    |
| RP11-715J22.4 | ENSG00000260874.5  |    |    |    | NA | NA | NA | NA | NA | NA | NA | NA | NA | NA |
| NA            | NA                 | NA | NA | NA | NA | -2 | NA |    |    |    |    |    |    |    |
| MT4           | ENSG00000102891.3  |    |    |    | NA | NA | NA | NA | NA | NA | NA | NA | NA | NA |

|               |                    |    |    |    |    |    |    |    |    |    |    |    |    |    |
|---------------|--------------------|----|----|----|----|----|----|----|----|----|----|----|----|----|
| NA            | NA                 | NA | NA | -2 | NA |    |    |    |    |    |    |    |    |    |
| SLC6A2        | ENSG00000103546.18 | NA | NA | NA | NA | NA | NA | NA | NA | NA | NA | NA | NA | NA |
| NA            | NA                 | NA | NA | NA | -2 | NA |    |    |    |    |    |    |    |    |
| CASC22        | ENSG00000260887.2  | NA | NA | NA | NA | NA | NA | NA | NA | NA | NA | NA | NA | NA |
| NA            | NA                 | NA | NA | NA | -2 | NA |    |    |    |    |    |    |    |    |
| HSD17B2       | ENSG00000086696.10 | NA | NA | NA | NA | NA | NA | NA | NA | NA | NA | NA | NA | NA |
| NA            | NA                 | NA | NA | NA | -2 | NA |    |    |    |    |    |    |    |    |
| JPH3          | ENSG00000154118.12 | NA | NA | NA | NA | NA | NA | NA | NA | NA | NA | NA | NA | NA |
| NA            | NA                 | NA | NA | NA | -2 | NA |    |    |    |    |    |    |    |    |
| USP7          | ENSG00000187555.14 | NA | NA | NA | NA | NA | NA | NA | NA | NA | NA | NA | NA | NA |
| NA            | NA                 | NA | NA | NA | -2 | NA |    |    |    |    |    |    |    |    |
| CTD-2547G23.4 | ENSG00000274925.1  | NA | NA | NA | NA | NA | NA | NA | NA | NA | NA | NA | NA | NA |
| NA            | NA                 | NA | NA | NA | -2 | NA |    |    |    |    |    |    |    |    |
| NFAT5         | ENSG00000102908.20 | NA | NA | NA | NA | NA | NA | NA | NA | NA | NA | NA | NA | NA |
| NA            | NA                 | NA | NA | NA | -2 | NA |    |    |    |    |    |    |    |    |
| TVP23A        | ENSG00000166676.14 | NA | NA | NA | NA | NA | NA | NA | NA | NA | NA | NA | NA | NA |
| NA            | NA                 | NA | NA | NA | -2 | NA |    |    |    |    |    |    |    |    |
| NPIPB11       | ENSG00000254206.5  | NA | NA | NA | NA | NA | NA | NA | NA | NA | NA | NA | NA | NA |
| NA            | NA                 | NA | NA | NA | -2 | NA |    |    |    |    |    |    |    |    |
| PRR14         | ENSG00000156858.11 | NA | NA | NA | NA | NA | NA | NA | NA | NA | NA | NA | NA | NA |
| NA            | NA                 | NA | NA | NA | -2 | NA |    |    |    |    |    |    |    |    |
| C16orf82      | ENSG00000234186.2  | NA | NA | NA | NA | NA | NA | NA | NA | NA | NA | NA | NA | NA |
| NA            | NA                 | NA | NA | NA | -2 | NA |    |    |    |    |    |    |    |    |
| SPN           | ENSG00000197471.11 | NA | NA | NA | NA | NA | NA | NA | NA | NA | NA | NA | NA | NA |
| NA            | NA                 | NA | NA | NA | -2 | NA |    |    |    |    |    |    |    |    |
| CHD9          | ENSG00000177200.16 | NA | NA | NA | NA | NA | NA | NA | NA | NA | NA | NA | NA | NA |
| NA            | NA                 | NA | NA | NA | -2 | NA |    |    |    |    |    |    |    |    |
| FHOD1         | ENSG00000135723.13 | NA | NA | NA | NA | NA | NA | NA | NA | NA | NA | NA | NA | NA |
| NA            | NA                 | NA | NA | NA | -2 | NA |    |    |    |    |    |    |    |    |
| RABEP2        | ENSG00000177548.12 | NA | NA | NA | NA | NA | NA | NA | NA | NA | NA | NA | NA | NA |
| NA            | NA                 | NA | NA | NA | -2 | NA |    |    |    |    |    |    |    |    |
| RP11-467J12.4 | ENSG00000277639.2  | NA | NA | NA | NA | NA | NA | NA | NA | NA | NA | NA | NA | NA |
| NA            | NA                 | NA | NA | NA | NA | -2 | NA |    |    |    |    |    |    |    |
| CDYL2         | ENSG00000166446.14 | NA | NA | NA | NA | NA | NA | NA | NA | NA | NA | NA | NA | NA |
| NA            | NA                 | NA | NA | NA | -2 | NA |    |    |    |    |    |    |    |    |
| TBL3          | ENSG00000183751.14 | NA | NA | NA | NA | NA | NA | NA | NA | NA | NA | NA | NA | NA |
| NA            | NA                 | NA | NA | NA | -2 | NA |    |    |    |    |    |    |    |    |
| CLEC16A       | ENSG00000038532.14 | NA | NA | NA | NA | NA | NA | NA | NA | NA | NA | NA | NA | NA |
| NA            | NA                 | NA | NA | NA | -2 | NA |    |    |    |    |    |    |    |    |
| LINC02188     | ENSG00000261175.5  | NA | NA | NA | NA | NA | NA | NA | NA | NA | NA | NA | NA | NA |
| NA            | NA                 | NA | NA | NA | -2 | NA |    |    |    |    |    |    |    |    |
| ZNF785        | ENSG00000197162.9  | NA | NA | NA | NA | NA | NA | NA | NA | NA | NA | NA | NA | NA |
| NA            | NA                 | NA | NA | NA | -2 | NA |    |    |    |    |    |    |    |    |
| AC009120.4    | ENSG00000261404.5  | NA | NA | NA | NA | NA | NA | NA | NA | NA | NA | NA | NA | NA |
| NA            | NA                 | NA | NA | NA | -2 | NA |    |    |    |    |    |    |    |    |
| RP11-297L17.2 | ENSG00000260963.1  | NA | NA | NA | NA | NA | NA | NA | NA | NA | NA | NA | NA | NA |
| NA            | NA                 | NA | NA | NA | NA | -2 | NA |    |    |    |    |    |    |    |
| LINC00917     | ENSG00000168367.9  | NA | NA | NA | NA | NA | NA | NA | NA | NA | NA | NA | NA | NA |
| NA            | NA                 | NA | NA | NA | -2 | NA |    |    |    |    |    |    |    |    |
| RP11-805I24.1 | ENSG00000261177.1  | NA | NA | NA | NA | NA | NA | NA | NA | NA | NA | NA | NA | NA |
| NA            | NA                 | NA | NA | NA | NA | -2 | NA |    |    |    |    |    |    |    |
| PRDM7         | ENSG00000126856.13 | NA | NA | NA | NA | NA | NA | NA | NA | NA | NA | NA | NA | NA |
| NA            | NA                 | NA | NA | NA | -2 | NA |    |    |    |    |    |    |    |    |
| BANP          | ENSG00000172530.20 | NA | NA | NA | NA | NA | NA | NA | NA | NA | NA | NA | NA | NA |
| NA            | NA                 | NA | NA | NA | -2 | NA |    |    |    |    |    |    |    |    |
| ZNF688        | ENSG00000229809.8  | NA | NA | NA | NA | NA | NA | NA | NA | NA | NA | NA | NA | NA |
| NA            | NA                 | NA | NA | NA | -2 | NA |    |    |    |    |    |    |    |    |
| LINC2194      | ENSG00000260264.1  | NA | NA | NA | NA | NA | NA | NA | NA | NA | NA | NA | NA | NA |
| NA            | NA                 | NA | NA | NA | -2 | NA |    |    |    |    |    |    |    |    |
| ITGAX         | ENSG00000140678.16 | NA | NA | NA | NA | NA | NA | NA | NA | NA | NA | NA | NA | NA |
| NA            | NA                 | NA | NA | NA | -2 | NA |    |    |    |    |    |    |    |    |
| LINC01290     | ENSG00000260468.1  | NA | NA | NA | NA | NA | NA | NA | NA | NA | NA | NA | NA | NA |



|                |                    |                    |    |    |    |    |    |    |    |    |    |    |    |    |
|----------------|--------------------|--------------------|----|----|----|----|----|----|----|----|----|----|----|----|
| NA             | NA                 | NA                 | NA | NA | -2 | NA |    |    |    |    |    |    |    |    |
| RP11-345J4.3   |                    | ENSG00000258150.5  |    |    |    | NA | NA | NA | NA | NA | NA | NA | NA | NA |
| NA             | NA                 | NA                 | NA | NA | NA | -2 | NA |    |    |    |    |    |    |    |
| RP11-410D17.2  |                    | ENSG00000245768.6  |    |    |    | NA | NA | NA | NA | NA | NA | NA | NA | NA |
| NA             | NA                 | NA                 | NA | NA | NA | -2 | NA |    |    |    |    |    |    |    |
| ADGRG3         |                    | ENSG00000182885.16 |    |    |    | NA | NA | NA | NA | NA | NA | NA | NA | NA |
| NA             | NA                 | NA                 | NA | NA | NA | -2 | NA |    |    |    |    |    |    |    |
| ZNF423         |                    | ENSG00000102935.11 |    |    |    | NA | NA | NA | NA | NA | NA | NA | NA | NA |
| NA             | NA                 | NA                 | NA | NA | NA | -2 | NA |    |    |    |    |    |    |    |
| CYB5B          | ENSG00000103018.16 |                    |    |    |    | NA | NA | NA | NA | NA | NA | NA | NA | NA |
| NA             | NA                 | NA                 | NA | NA | -2 | NA |    |    |    |    |    |    |    |    |
| CACNG3         |                    | ENSG00000006116.3  |    |    |    | NA | NA | NA | NA | NA | NA | NA | NA | NA |
| NA             | NA                 | NA                 | NA | NA | NA | -2 | NA |    |    |    |    |    |    |    |
| RP4-536B24.4   |                    | ENSG00000260498.5  |    |    |    | NA | NA | NA | NA | NA | NA | NA | NA | NA |
| NA             | NA                 | NA                 | NA | NA | NA | -2 | NA |    |    |    |    |    |    |    |
| BCO1           | ENSG00000135697.9  |                    |    |    |    | NA | NA | NA | NA | NA | NA | NA | NA | NA |
| NA             | NA                 | NA                 | NA | NA | -2 | NA |    |    |    |    |    |    |    |    |
| LINC01229      |                    | ENSG00000260876.5  |    |    |    | NA | NA | NA | NA | NA | NA | NA | NA | NA |
| NA             | NA                 | NA                 | NA | NA | NA | -2 | NA |    |    |    |    |    |    |    |
| SALL1          | ENSG00000103449.11 |                    |    |    |    | NA | NA | NA | NA | NA | NA | NA | NA | NA |
| NA             | NA                 | NA                 | NA | NA | -2 | NA |    |    |    |    |    |    |    |    |
| LA16c-385E7.1  |                    | ENSG00000260646.1  |    |    |    | NA | NA | NA | NA | NA | NA | NA | NA | NA |
| NA             | NA                 | NA                 | NA | NA | NA | -2 | NA |    |    |    |    |    |    |    |
| CYLD           | ENSG00000083799.17 |                    |    |    |    | NA | NA | NA | NA | NA | NA | NA | NA | NA |
| NA             | NA                 | NA                 | NA | NA | -2 | NA |    |    |    |    |    |    |    |    |
| SOX8           | ENSG00000005513.9  |                    |    |    |    | NA | NA | NA | NA | NA | NA | NA | NA | NA |
| NA             | NA                 | NA                 | NA | NA | -2 | NA |    |    |    |    |    |    |    |    |
| THAP11         |                    | ENSG00000168286.2  |    |    |    | NA | NA | NA | NA | NA | NA | NA | NA | NA |
| NA             | NA                 | NA                 | NA | NA | NA | -2 | NA |    |    |    |    |    |    |    |
| CTA-363E6.2    |                    | ENSG00000259925.1  |    |    |    | NA | NA | NA | NA | NA | NA | NA | NA | NA |
| NA             | NA                 | NA                 | NA | NA | NA | -2 | NA |    |    |    |    |    |    |    |
| MT3            | ENSG00000087250.8  |                    |    |    |    | NA | NA | NA | NA | NA | NA | NA | NA | NA |
| NA             | NA                 | NA                 | NA | NA | -2 | NA |    |    |    |    |    |    |    |    |
| RP11-616M22.11 |                    | ENSG00000273551.1  |    |    |    | NA | NA | NA | NA | NA | NA | NA | NA | NA |
| NA             | NA                 | NA                 | NA | NA | NA | -2 | NA |    |    |    |    |    |    |    |
| RP11-77H9.8    |                    | ENSG00000260979.1  |    |    |    | NA | NA | NA | NA | NA | NA | NA | NA | NA |
| NA             | NA                 | NA                 | NA | NA | NA | -2 | NA |    |    |    |    |    |    |    |
| RP11-355E10.1  |                    | ENSG00000260041.5  |    |    |    | NA | NA | NA | NA | NA | NA | NA | NA | NA |
| NA             | NA                 | NA                 | NA | NA | NA | -2 | NA |    |    |    |    |    |    |    |
| FAM157C        |                    | ENSG00000260528.4  |    |    |    | NA | NA | NA | NA | NA | NA | NA | NA | NA |
| NA             | NA                 | NA                 | NA | NA | NA | -2 | NA |    |    |    |    |    |    |    |
| LCMT1          | ENSG00000205629.11 |                    |    |    |    | NA | NA | NA | NA | NA | NA | NA | NA | NA |
| NA             | NA                 | NA                 | NA | NA | -2 | NA |    |    |    |    |    |    |    |    |
| C16orf87       |                    | ENSG00000155330.9  |    |    |    | NA | NA | NA | NA | NA | NA | NA | NA | NA |
| NA             | NA                 | NA                 | NA | NA | NA | -2 | NA |    |    |    |    |    |    |    |
| ABCC11         |                    | ENSG00000121270.15 |    |    |    | NA | NA | NA | NA | NA | NA | NA | NA | NA |
| NA             | NA                 | NA                 | NA | NA | NA | -2 | NA |    |    |    |    |    |    |    |
| NPW            | ENSG00000183971.6  |                    |    |    |    | NA | NA | NA | NA | NA | NA | NA | NA | NA |
| NA             | NA                 | NA                 | NA | NA | -2 | NA |    |    |    |    |    |    |    |    |
| GSE1           | ENSG00000131149.18 |                    |    |    |    | NA | NA | NA | NA | NA | NA | NA | NA | NA |
| NA             | NA                 | NA                 | NA | NA | -2 | NA |    |    |    |    |    |    |    |    |
| RP11-542M13.2  |                    | ENSG00000269667.1  |    |    |    | NA | NA | NA | NA | NA | NA | NA | NA | NA |
| NA             | NA                 | NA                 | NA | NA | NA | -2 | NA |    |    |    |    |    |    |    |
| DOC2A          | ENSG00000149927.17 |                    |    |    |    | NA | NA | NA | NA | NA | NA | NA | NA | NA |
| NA             | NA                 | NA                 | NA | NA | -2 | NA |    |    |    |    |    |    |    |    |
| RP11-53L24.1   |                    | ENSG00000259817.2  |    |    |    | NA | NA | NA | NA | NA | NA | NA | NA | NA |
| NA             | NA                 | NA                 | NA | NA | NA | -2 | NA |    |    |    |    |    |    |    |
| LINC02164      |                    | ENSG00000261811.1  |    |    |    | NA | NA | NA | NA | NA | NA | NA | NA | NA |
| NA             | NA                 | NA                 | NA | NA | NA | -2 | NA |    |    |    |    |    |    |    |
| NPIP5          |                    | ENSG00000243716.10 |    |    |    | NA | NA | NA | NA | NA | NA | NA | NA | NA |
| NA             | NA                 | NA                 | NA | NA | NA | -2 | NA |    |    |    |    |    |    |    |
| TEPP           | ENSG00000159648.11 |                    |    |    |    | NA | NA | NA | NA | NA | NA | NA | NA | NA |

|               |                    |                    |    |    |    |    |    |    |    |    |    |    |    |    |
|---------------|--------------------|--------------------|----|----|----|----|----|----|----|----|----|----|----|----|
| NA            | NA                 | NA                 | NA | -2 | NA |    |    |    |    |    |    |    |    |    |
| RP11-95P2.3   |                    | ENSG00000263105.1  |    |    |    | NA | NA | NA | NA | NA | NA | NA | NA | NA |
| NA            | NA                 | NA                 | NA | NA | NA | -2 | NA |    |    |    |    |    |    |    |
| TIGD7         | ENSG00000140993.10 |                    | NA | NA | NA | NA | NA | NA | NA | NA | NA | NA | NA | NA |
| NA            | NA                 | NA                 | NA | -2 | NA |    |    |    |    |    |    |    |    |    |
| METR          | ENSG00000103260.8  |                    | NA | NA | NA | NA | NA | NA | NA | NA | NA | NA | NA | NA |
| NA            | NA                 | NA                 | NA | -2 | NA |    |    |    |    |    |    |    |    |    |
| IL4R          | ENSG00000077238.13 |                    | NA | NA | NA | NA | NA | NA | NA | NA | NA | NA | NA | NA |
| NA            | NA                 | NA                 | NA | -2 | NA |    |    |    |    |    |    |    |    |    |
| RP11-467L24.1 |                    | ENSG00000259846.1  |    |    |    | NA | NA | NA | NA | NA | NA | NA | NA | NA |
| NA            | NA                 | NA                 | NA | NA | NA | -2 | NA |    |    |    |    |    |    |    |
| DCTPP1        |                    | ENSG00000179958.8  |    |    |    | NA | NA | NA | NA | NA | NA | NA | NA | NA |
| NA            | NA                 | NA                 | NA | NA | -2 | NA |    |    |    |    |    |    |    |    |
| RP11-63M22.1  |                    | ENSG00000260558.1  |    |    |    | NA | NA | NA | NA | NA | NA | NA | NA | NA |
| NA            | NA                 | NA                 | NA | NA | NA | -2 | NA |    |    |    |    |    |    |    |
| TMEM208       |                    | ENSG00000168701.18 |    |    |    | NA | NA | NA | NA | NA | NA | NA | NA | NA |
| NA            | NA                 | NA                 | NA | NA | -2 | NA |    |    |    |    |    |    |    |    |
| DYNLRB2       |                    | ENSG00000168589.14 |    |    |    | NA | NA | NA | NA | NA | NA | NA | NA | NA |
| NA            | NA                 | NA                 | NA | NA | -2 | NA |    |    |    |    |    |    |    |    |
| MMP15         | ENSG00000102996.4  |                    | NA | NA | NA | NA | NA | NA | NA | NA | NA | NA | NA | NA |
| NA            | NA                 | NA                 | NA | -2 | NA |    |    |    |    |    |    |    |    |    |
| LINC01082     |                    | ENSG00000269186.1  |    |    |    | NA | NA | NA | NA | NA | NA | NA | NA | NA |
| NA            | NA                 | NA                 | NA | NA | -2 | NA |    |    |    |    |    |    |    |    |
| PLA2G10       |                    | ENSG00000069764.9  |    |    |    | NA | NA | NA | NA | NA | NA | NA | NA | NA |
| NA            | NA                 | NA                 | NA | NA | -2 | NA |    |    |    |    |    |    |    |    |
| PRKCB         | ENSG00000166501.12 |                    | NA | NA | NA | NA | NA | NA | NA | NA | NA | NA | NA | NA |
| NA            | NA                 | NA                 | NA | -2 | NA |    |    |    |    |    |    |    |    |    |
| RP11-212I21.5 |                    | ENSG00000274508.1  |    |    |    | NA | NA | NA | NA | NA | NA | NA | NA | NA |
| NA            | NA                 | NA                 | NA | NA | NA | -2 | NA |    |    |    |    |    |    |    |
| FOXF1         | ENSG00000103241.6  |                    | NA | NA | NA | NA | NA | NA | NA | NA | NA | NA | NA | NA |
| NA            | NA                 | NA                 | NA | -2 | NA |    |    |    |    |    |    |    |    |    |
| PSMB10        |                    | ENSG00000205220.11 |    |    |    | NA | NA | NA | NA | NA | NA | NA | NA | NA |
| NA            | NA                 | NA                 | NA | NA | -2 | NA |    |    |    |    |    |    |    |    |
| DPEP3         | ENSG00000141096.4  |                    | NA | NA | NA | NA | NA | NA | NA | NA | NA | NA | NA | NA |
| NA            | NA                 | NA                 | NA | -2 | NA |    |    |    |    |    |    |    |    |    |
| CAPNS2        |                    | ENSG00000256812.1  |    |    |    | NA | NA | NA | NA | NA | NA | NA | NA | NA |
| NA            | NA                 | NA                 | NA | NA | -2 | NA |    |    |    |    |    |    |    |    |
| DHX38         | ENSG00000140829.11 |                    | NA | NA | NA | NA | NA | NA | NA | NA | NA | NA | NA | NA |
| NA            | NA                 | NA                 | NA | -2 | NA |    |    |    |    |    |    |    |    |    |
| AGRP          | ENSG00000159723.4  |                    | NA | NA | NA | NA | NA | NA | NA | NA | NA | NA | NA | NA |
| NA            | NA                 | NA                 | NA | -2 | NA |    |    |    |    |    |    |    |    |    |
| SCNN1B        |                    | ENSG00000168447.10 |    |    |    | NA | NA | NA | NA | NA | NA | NA | NA | NA |
| NA            | NA                 | NA                 | NA | NA | -2 | NA |    |    |    |    |    |    |    |    |
| ZNF629        |                    | ENSG00000102870.5  |    |    |    | NA | NA | NA | NA | NA | NA | NA | NA | NA |
| NA            | NA                 | NA                 | NA | NA | -2 | NA |    |    |    |    |    |    |    |    |
| KCTD19        |                    | ENSG00000168676.10 |    |    |    | NA | NA | NA | NA | NA | NA | NA | NA | NA |
| NA            | NA                 | NA                 | NA | NA | -2 | NA |    |    |    |    |    |    |    |    |
| RP11-297L17.4 |                    | ENSG00000261261.2  |    |    |    | NA | NA | NA | NA | NA | NA | NA | NA | NA |
| NA            | NA                 | NA                 | NA | NA | NA | -2 | NA |    |    |    |    |    |    |    |
| CHST4         | ENSG00000140835.9  |                    | NA | NA | NA | NA | NA | NA | NA | NA | NA | NA | NA | NA |
| NA            | NA                 | NA                 | NA | -2 | NA |    |    |    |    |    |    |    |    |    |
| LINC02126     |                    | ENSG00000259847.1  |    |    |    | NA | NA | NA | NA | NA | NA | NA | NA | NA |
| NA            | NA                 | NA                 | NA | NA | -2 | NA |    |    |    |    |    |    |    |    |
| CTB-31N19.5   |                    | ENSG00000273956.1  |    |    |    | NA | NA | NA | NA | NA | NA | NA | NA | NA |
| NA            | NA                 | NA                 | NA | NA | NA | -2 | NA |    |    |    |    |    |    |    |
| TNRC6A        |                    | ENSG00000090905.18 |    |    |    | NA | NA | NA | NA | NA | NA | NA | NA | NA |
| NA            | NA                 | NA                 | NA | NA | -2 | NA |    |    |    |    |    |    |    |    |
| LINC02140     |                    | ENSG00000261803.1  |    |    |    | NA | NA | NA | NA | NA | NA | NA | NA | NA |
| NA            | NA                 | NA                 | NA | NA | -2 | NA |    |    |    |    |    |    |    |    |
| CDH13         | ENSG00000140945.16 |                    | NA | NA | NA | NA | NA | NA | NA | NA | NA | NA | NA | NA |
| NA            | NA                 | NA                 | NA | -2 | NA |    |    |    |    |    |    |    |    |    |
| CTD-2358C21.5 |                    | ENSG00000276867.1  |    |    |    | NA | NA | NA | NA | NA | NA | NA | NA | NA |

|              |                    |    |    |    |    |    |    |    |    |    |    |    |    |    |
|--------------|--------------------|----|----|----|----|----|----|----|----|----|----|----|----|----|
| NA           | NA                 | NA | NA | NA | NA | -2 | NA |    |    |    |    |    |    |    |
| PSKH1        | ENSG00000159792.9  |    |    | NA | NA | NA | NA | NA | NA | NA | NA | NA | NA | NA |
| NA           | NA                 | NA | NA | -2 | NA |    |    |    |    |    |    |    |    |    |
| NPIPA3       | ENSG00000224712.12 |    |    | NA | NA | NA | NA | NA | NA | NA | NA | NA | NA | NA |
| NA           | NA                 | NA | NA | NA | -2 | NA |    |    |    |    |    |    |    |    |
| ZDHHC1       | ENSG00000159714.10 |    |    | NA | NA | NA | NA | NA | NA | NA | NA | NA | NA | NA |
| NA           | NA                 | NA | NA | NA | -2 | NA |    |    |    |    |    |    |    |    |
| SLC12A3      | ENSG00000070915.9  |    |    | NA | NA | NA | NA | NA | NA | NA | NA | NA | NA | NA |
| NA           | NA                 | NA | NA | NA | -2 | NA |    |    |    |    |    |    |    |    |
| ZSCAN10      | ENSG00000130182.7  |    |    | NA | NA | NA | NA | NA | NA | NA | NA | NA | NA | NA |
| NA           | NA                 | NA | NA | NA | -2 | NA |    |    |    |    |    |    |    |    |
| BAIAP2-AS1   | ENSG00000226137.5  |    |    | NA | NA | NA | NA | NA | NA | NA | NA | NA | NA | NA |
| NA           | NA                 | NA | NA | NA | -2 | NA |    |    |    |    |    |    |    |    |
| TBC1D3H      | ENSG00000274226.5  |    |    | NA | NA | NA | NA | NA | NA | NA | NA | NA | NA | NA |
| NA           | NA                 | NA | NA | NA | -2 | NA |    |    |    |    |    |    |    |    |
| C17orf112    | ENSG00000227011.3  |    |    | NA | NA | NA | NA | NA | NA | NA | NA | NA | NA | NA |
| NA           | NA                 | NA | NA | NA | -2 | NA |    |    |    |    |    |    |    |    |
| TOB1         | ENSG00000141232.4  |    |    | NA | NA | NA | NA | NA | NA | NA | NA | NA | NA | NA |
| NA           | NA                 | NA | NA | -2 | NA |    |    |    |    |    |    |    |    |    |
| KLHL11       | ENSG00000178502.5  |    |    | NA | NA | NA | NA | NA | NA | NA | NA | NA | NA | NA |
| NA           | NA                 | NA | NA | NA | -2 | NA |    |    |    |    |    |    |    |    |
| TBX4         | ENSG00000121075.9  |    |    | NA | NA | NA | NA | NA | NA | NA | NA | NA | NA | NA |
| NA           | NA                 | NA | NA | -2 | NA |    |    |    |    |    |    |    |    |    |
| RP11-138I1.3 | ENSG00000266651.1  |    |    | NA | NA | NA | NA | NA | NA | NA | NA | NA | NA | NA |
| NA           | NA                 | NA | NA | NA | -2 | NA |    |    |    |    |    |    |    |    |
| LGALS3BP     | ENSG00000108679.12 |    |    | NA | NA | NA | NA | NA | NA | NA | NA | NA | NA | NA |
| NA           | NA                 | NA | NA | NA | -2 | NA |    |    |    |    |    |    |    |    |
| MIF4GD       | ENSG00000125457.13 |    |    | NA | NA | NA | NA | NA | NA | NA | NA | NA | NA | NA |
| NA           | NA                 | NA | NA | NA | -2 | NA |    |    |    |    |    |    |    |    |
| KRTAP4-6     | ENSG00000198090.3  |    |    | NA | NA | NA | NA | NA | NA | NA | NA | NA | NA | NA |
| NA           | NA                 | NA | NA | NA | -2 | NA |    |    |    |    |    |    |    |    |
| TP53I13      | ENSG00000167543.15 |    |    | NA | NA | NA | NA | NA | NA | NA | NA | NA | NA | NA |
| NA           | NA                 | NA | NA | NA | -2 | NA |    |    |    |    |    |    |    |    |
| ACLY         | ENSG00000131473.16 |    |    | NA | NA | NA | NA | NA | NA | NA | NA | NA | NA | NA |
| NA           | NA                 | NA | NA | -2 | NA |    |    |    |    |    |    |    |    |    |
| GAS7         | ENSG00000007237.18 |    |    | NA | NA | NA | NA | NA | NA | NA | NA | NA | NA | NA |
| NA           | NA                 | NA | NA | -2 | NA |    |    |    |    |    |    |    |    |    |
| HEXIM2       | ENSG00000168517.10 |    |    | NA | NA | NA | NA | NA | NA | NA | NA | NA | NA | NA |
| NA           | NA                 | NA | NA | NA | -2 | NA |    |    |    |    |    |    |    |    |
| ZNF750       | ENSG00000141579.6  |    |    | NA | NA | NA | NA | NA | NA | NA | NA | NA | NA | NA |
| NA           | NA                 | NA | NA | NA | -2 | NA |    |    |    |    |    |    |    |    |
| ALOXE3       | ENSG00000179148.9  |    |    | NA | NA | NA | NA | NA | NA | NA | NA | NA | NA | NA |
| NA           | NA                 | NA | NA | NA | -2 | NA |    |    |    |    |    |    |    |    |
| ERAL1        | ENSG00000132591.11 |    |    | NA | NA | NA | NA | NA | NA | NA | NA | NA | NA | NA |
| NA           | NA                 | NA | NA | -2 | NA |    |    |    |    |    |    |    |    |    |
| ARMC7        | ENSG00000125449.6  |    |    | NA | NA | NA | NA | NA | NA | NA | NA | NA | NA | NA |
| NA           | NA                 | NA | NA | -2 | NA |    |    |    |    |    |    |    |    |    |
| TNS4         | ENSG00000131746.12 |    |    | NA | NA | NA | NA | NA | NA | NA | NA | NA | NA | NA |
| NA           | NA                 | NA | NA | -2 | NA |    |    |    |    |    |    |    |    |    |
| RPL23A       | ENSG00000198242.13 |    |    | NA | NA | NA | NA | NA | NA | NA | NA | NA | NA | NA |
| NA           | NA                 | NA | NA | NA | -2 | NA |    |    |    |    |    |    |    |    |
| CNTD1        | ENSG00000176563.9  |    |    | NA | NA | NA | NA | NA | NA | NA | NA | NA | NA | NA |
| NA           | NA                 | NA | NA | -2 | NA |    |    |    |    |    |    |    |    |    |
| IFT20        | ENSG00000109083.13 |    |    | NA | NA | NA | NA | NA | NA | NA | NA | NA | NA | NA |
| NA           | NA                 | NA | NA | -2 | NA |    |    |    |    |    |    |    |    |    |
| CCL5         | ENSG00000271503.5  |    |    | NA | NA | NA | NA | NA | NA | NA | NA | NA | NA | NA |
| NA           | NA                 | NA | NA | -2 | NA |    |    |    |    |    |    |    |    |    |
| LINC01483    | ENSG00000227517.6  |    |    | NA | NA | NA | NA | NA | NA | NA | NA | NA | NA | NA |
| NA           | NA                 | NA | NA | NA | -2 | NA |    |    |    |    |    |    |    |    |
| LINC02097    | ENSG00000226101.1  |    |    | NA | NA | NA | NA | NA | NA | NA | NA | NA | NA | NA |
| NA           | NA                 | NA | NA | NA | -2 | NA |    |    |    |    |    |    |    |    |
| MBTD1        | ENSG00000011258.15 |    |    | NA | NA | NA | NA | NA | NA | NA | NA | NA | NA | NA |

|                |    |                    |    |    |    |    |    |    |    |    |    |    |    |    |
|----------------|----|--------------------|----|----|----|----|----|----|----|----|----|----|----|----|
| NA             | NA | NA                 | NA | -2 | NA |    |    |    |    |    |    |    |    |    |
| CTC-296K1.4    |    | ENSG00000267405.1  |    |    |    | NA | NA | NA | NA | NA | NA | NA | NA | NA |
| NA             | NA | NA                 | NA | NA | NA | -2 | NA |    |    |    |    |    |    |    |
| RP11-334C17.6  |    | ENSG00000275479.1  |    |    |    | NA | NA | NA | NA | NA | NA | NA | NA | NA |
| NA             | NA | NA                 | NA | NA | NA | -2 | NA |    |    |    |    |    |    |    |
| SLC46A1        |    | ENSG00000076351.12 |    |    |    | NA | NA | NA | NA | NA | NA | NA | NA | NA |
| NA             | NA | NA                 | NA | NA | NA | -2 | NA |    |    |    |    |    |    |    |
| PPM1E          |    | ENSG00000175175.5  |    |    |    | NA | NA | NA | NA | NA | NA | NA | NA | NA |
| NA             | NA | NA                 | NA | -2 | NA |    |    |    |    |    |    |    |    |    |
| H3F3B          |    | ENSG00000132475.10 |    |    |    | NA | NA | NA | NA | NA | NA | NA | NA | NA |
| NA             | NA | NA                 | NA | -2 | NA |    |    |    |    |    |    |    |    |    |
| RP11-159D12.11 |    | ENSG00000278642.1  |    |    |    | NA | NA | NA | NA | NA | NA | NA | NA | NA |
| NA             | NA | NA                 | NA | NA | NA | -2 | NA |    |    |    |    |    |    |    |
| DLX3           |    | ENSG00000064195.7  |    |    |    | NA | NA | NA | NA | NA | NA | NA | NA | NA |
| NA             | NA | NA                 | NA | -2 | NA |    |    |    |    |    |    |    |    |    |
| CTC-297N7.1    |    | ENSG00000261433.1  |    |    |    | NA | NA | NA | NA | NA | NA | NA | NA | NA |
| NA             | NA | NA                 | NA | NA | NA | -2 | NA |    |    |    |    |    |    |    |
| MIR2117HG      |    | ENSG00000267151.5  |    |    |    | NA | NA | NA | NA | NA | NA | NA | NA | NA |
| NA             | NA | NA                 | NA | NA | NA | -2 | NA |    |    |    |    |    |    |    |
| KRTAP2-3       |    | ENSG00000212724.3  |    |    |    | NA | NA | NA | NA | NA | NA | NA | NA | NA |
| NA             | NA | NA                 | NA | NA | NA | -2 | NA |    |    |    |    |    |    |    |
| C17orf49       |    | ENSG00000258315.5  |    |    |    | NA | NA | NA | NA | NA | NA | NA | NA | NA |
| NA             | NA | NA                 | NA | NA | NA | -2 | NA |    |    |    |    |    |    |    |
| CCL4           |    | ENSG00000275302.1  |    |    |    | NA | NA | NA | NA | NA | NA | NA | NA | NA |
| NA             | NA | NA                 | NA | -2 | NA |    |    |    |    |    |    |    |    |    |
| AC087491.2     |    | ENSG00000214546.3  |    |    |    | NA | NA | NA | NA | NA | NA | NA | NA | NA |
| NA             | NA | NA                 | NA | NA | NA | -2 | NA |    |    |    |    |    |    |    |
| GID4           |    | ENSG00000141034.9  |    |    |    | NA | NA | NA | NA | NA | NA | NA | NA | NA |
| NA             | NA | NA                 | NA | -2 | NA |    |    |    |    |    |    |    |    |    |
| CLTC           |    | ENSG00000141367.11 |    |    |    | NA | NA | NA | NA | NA | NA | NA | NA | NA |
| NA             | NA | NA                 | NA | -2 | NA |    |    |    |    |    |    |    |    |    |
| SLC5A10        |    | ENSG00000154025.15 |    |    |    | NA | NA | NA | NA | NA | NA | NA | NA | NA |
| NA             | NA | NA                 | NA | NA | NA | -2 | NA |    |    |    |    |    |    |    |
| RP11-227G15.8  |    | ENSG00000266385.1  |    |    |    | NA | NA | NA | NA | NA | NA | NA | NA | NA |
| NA             | NA | NA                 | NA | NA | NA | -2 | NA |    |    |    |    |    |    |    |
| RP1-193H18.3   |    | ENSG00000267653.1  |    |    |    | NA | NA | NA | NA | NA | NA | NA | NA | NA |
| NA             | NA | NA                 | NA | NA | NA | -2 | NA |    |    |    |    |    |    |    |
| KRTAP4-9       |    | ENSG00000212722.7  |    |    |    | NA | NA | NA | NA | NA | NA | NA | NA | NA |
| NA             | NA | NA                 | NA | NA | NA | -2 | NA |    |    |    |    |    |    |    |
| LINC00482      |    | ENSG00000185168.5  |    |    |    | NA | NA | NA | NA | NA | NA | NA | NA | NA |
| NA             | NA | NA                 | NA | NA | NA | -2 | NA |    |    |    |    |    |    |    |
| CTC-281F24.5   |    | ENSG00000282936.1  |    |    |    | NA | NA | NA | NA | NA | NA | NA | NA | NA |
| NA             | NA | NA                 | NA | NA | NA | -2 | NA |    |    |    |    |    |    |    |
| CCL8           |    | ENSG00000108700.4  |    |    |    | NA | NA | NA | NA | NA | NA | NA | NA | NA |
| NA             | NA | NA                 | NA | -2 | NA |    |    |    |    |    |    |    |    |    |
| VMP1           |    | ENSG00000062716.12 |    |    |    | NA | NA | NA | NA | NA | NA | NA | NA | NA |
| NA             | NA | NA                 | NA | -2 | NA |    |    |    |    |    |    |    |    |    |
| FKBP10         |    | ENSG00000141756.18 |    |    |    | NA | NA | NA | NA | NA | NA | NA | NA | NA |
| NA             | NA | NA                 | NA | NA | NA | -2 | NA |    |    |    |    |    |    |    |
| MYH13          |    | ENSG00000006788.13 |    |    |    | NA | NA | NA | NA | NA | NA | NA | NA | NA |
| NA             | NA | NA                 | NA | -2 | NA |    |    |    |    |    |    |    |    |    |
| WDR81          |    | ENSG00000167716.18 |    |    |    | NA | NA | NA | NA | NA | NA | NA | NA | NA |
| NA             | NA | NA                 | NA | -2 | NA |    |    |    |    |    |    |    |    |    |
| WNK4           |    | ENSG00000126562.16 |    |    |    | NA | NA | NA | NA | NA | NA | NA | NA | NA |
| NA             | NA | NA                 | NA | -2 | NA |    |    |    |    |    |    |    |    |    |
| RP11-434D2.3   |    | ENSG00000267075.1  |    |    |    | NA | NA | NA | NA | NA | NA | NA | NA | NA |
| NA             | NA | NA                 | NA | NA | NA | -2 | NA |    |    |    |    |    |    |    |
| UNC45B         |    | ENSG00000141161.11 |    |    |    | NA | NA | NA | NA | NA | NA | NA | NA | NA |
| NA             | NA | NA                 | NA | NA | NA | -2 | NA |    |    |    |    |    |    |    |
| HOXB7          |    | ENSG00000260027.4  |    |    |    | NA | NA | NA | NA | NA | NA | NA | NA | NA |
| NA             | NA | NA                 | NA | -2 | NA |    |    |    |    |    |    |    |    |    |
| KCTD11         |    | ENSG00000213859.4  |    |    |    | NA | NA | NA | NA | NA | NA | NA | NA | NA |

|               |                    |    |    |    |    |    |    |    |    |    |    |    |    |    |
|---------------|--------------------|----|----|----|----|----|----|----|----|----|----|----|----|----|
|               | NA                 | NA | NA | NA | NA | -2 | NA |    |    |    |    |    |    |    |
| CSF3          | ENSG00000108342.12 | NA | NA | NA | NA | NA | NA | NA | NA | NA | NA | NA | NA | NA |
|               | NA                 | NA | NA | NA | NA | -2 | NA |    |    |    |    |    |    |    |
| KRT38         | ENSG00000171360.3  | NA | NA | NA | NA | NA | NA | NA | NA | NA | NA | NA | NA | NA |
|               | NA                 | NA | NA | NA | NA | -2 | NA |    |    |    |    |    |    |    |
| HOXB5         | ENSG00000120075.5  | NA | NA | NA | NA | NA | NA | NA | NA | NA | NA | NA | NA | NA |
|               | NA                 | NA | NA | NA | NA | -2 | NA |    |    |    |    |    |    |    |
| KRT12         | ENSG00000187242.4  | NA | NA | NA | NA | NA | NA | NA | NA | NA | NA | NA | NA | NA |
|               | NA                 | NA | NA | NA | NA | -2 | NA |    |    |    |    |    |    |    |
| DNAJC7        | ENSG00000168259.14 | NA | NA | NA | NA | NA | NA | NA | NA | NA | NA | NA | NA | NA |
|               | NA                 | NA | NA | NA | NA | -2 | NA |    |    |    |    |    |    |    |
| ARHGAP23      | ENSG00000275832.4  | NA | NA | NA | NA | NA | NA | NA | NA | NA | NA | NA | NA | NA |
|               | NA                 | NA | NA | NA | NA | -2 | NA |    |    |    |    |    |    |    |
| TEX19         | ENSG00000182459.4  | NA | NA | NA | NA | NA | NA | NA | NA | NA | NA | NA | NA | NA |
|               | NA                 | NA | NA | NA | NA | -2 | NA |    |    |    |    |    |    |    |
| CACNB1        | ENSG00000067191.15 | NA | NA | NA | NA | NA | NA | NA | NA | NA | NA | NA | NA | NA |
|               | NA                 | NA | NA | NA | NA | -2 | NA |    |    |    |    |    |    |    |
| KRT33A        | ENSG00000006059.3  | NA | NA | NA | NA | NA | NA | NA | NA | NA | NA | NA | NA | NA |
|               | NA                 | NA | NA | NA | NA | -2 | NA |    |    |    |    |    |    |    |
| RASL10B       | ENSG00000270885.1  | NA | NA | NA | NA | NA | NA | NA | NA | NA | NA | NA | NA | NA |
|               | NA                 | NA | NA | NA | NA | -2 | NA |    |    |    |    |    |    |    |
| CTD-3194G12.2 | ENSG00000275613.1  | NA | NA | NA | NA | NA | NA | NA | NA | NA | NA | NA | NA | NA |
|               | NA                 | NA | NA | NA | NA | -2 | NA |    |    |    |    |    |    |    |
| PPP1R27       | ENSG00000182676.4  | NA | NA | NA | NA | NA | NA | NA | NA | NA | NA | NA | NA | NA |
|               | NA                 | NA | NA | NA | NA | -2 | NA |    |    |    |    |    |    |    |
| SLC16A5       | ENSG00000170190.15 | NA | NA | NA | NA | NA | NA | NA | NA | NA | NA | NA | NA | NA |
|               | NA                 | NA | NA | NA | NA | -2 | NA |    |    |    |    |    |    |    |
| LINC01975     | ENSG00000263312.1  | NA | NA | NA | NA | NA | NA | NA | NA | NA | NA | NA | NA | NA |
|               | NA                 | NA | NA | NA | NA | -2 | NA |    |    |    |    |    |    |    |
| KRT32         | ENSG00000108759.3  | NA | NA | NA | NA | NA | NA | NA | NA | NA | NA | NA | NA | NA |
|               | NA                 | NA | NA | NA | NA | -2 | NA |    |    |    |    |    |    |    |
| FBXL20        | ENSG00000108306.11 | NA | NA | NA | NA | NA | NA | NA | NA | NA | NA | NA | NA | NA |
|               | NA                 | NA | NA | NA | NA | -2 | NA |    |    |    |    |    |    |    |
| C17orf51      | ENSG00000212719.10 | NA | NA | NA | NA | NA | NA | NA | NA | NA | NA | NA | NA | NA |
|               | NA                 | NA | NA | NA | NA | -2 | NA |    |    |    |    |    |    |    |
| SEBOX         | ENSG00000274529.5  | NA | NA | NA | NA | NA | NA | NA | NA | NA | NA | NA | NA | NA |
|               | NA                 | NA | NA | NA | NA | -2 | NA |    |    |    |    |    |    |    |
| CCL1          | ENSG00000108702.3  | NA | NA | NA | NA | NA | NA | NA | NA | NA | NA | NA | NA | NA |
|               | NA                 | NA | NA | NA | NA | -2 | NA |    |    |    |    |    |    |    |
| LINC01989     | ENSG00000261156.6  | NA | NA | NA | NA | NA | NA | NA | NA | NA | NA | NA | NA | NA |
|               | NA                 | NA | NA | NA | NA | -2 | NA |    |    |    |    |    |    |    |
| RP11-160E2.6  | ENSG00000262202.4  | NA | NA | NA | NA | NA | NA | NA | NA | NA | NA | NA | NA | NA |
|               | NA                 | NA | NA | NA | NA | -2 | NA |    |    |    |    |    |    |    |
| NR1D1         | ENSG00000126368.5  | NA | NA | NA | NA | NA | NA | NA | NA | NA | NA | NA | NA | NA |
|               | NA                 | NA | NA | NA | NA | -2 | NA |    |    |    |    |    |    |    |
| GGT6          | ENSG00000167741.10 | NA | NA | NA | NA | NA | NA | NA | NA | NA | NA | NA | NA | NA |
|               | NA                 | NA | NA | NA | NA | -2 | NA |    |    |    |    |    |    |    |
| KIF1C         | ENSG00000129250.11 | NA | NA | NA | NA | NA | NA | NA | NA | NA | NA | NA | NA | NA |
|               | NA                 | NA | NA | NA | NA | -2 | NA |    |    |    |    |    |    |    |
| RP11-293E1.2  | ENSG00000265547.1  | NA | NA | NA | NA | NA | NA | NA | NA | NA | NA | NA | NA | NA |
|               | NA                 | NA | NA | NA | NA | -2 | NA |    |    |    |    |    |    |    |
| AIPL1         | ENSG00000129221.15 | NA | NA | NA | NA | NA | NA | NA | NA | NA | NA | NA | NA | NA |
|               | NA                 | NA | NA | NA | NA | -2 | NA |    |    |    |    |    |    |    |
| CCL11         | ENSG00000172156.3  | NA | NA | NA | NA | NA | NA | NA | NA | NA | NA | NA | NA | NA |
|               | NA                 | NA | NA | NA | NA | -2 | NA |    |    |    |    |    |    |    |
| PTRF          | ENSG00000177469.12 | NA | NA | NA | NA | NA | NA | NA | NA | NA | NA | NA | NA | NA |
|               | NA                 | NA | NA | NA | NA | -2 | NA |    |    |    |    |    |    |    |
| AURKB         | ENSG00000178999.12 | NA | NA | NA | NA | NA | NA | NA | NA | NA | NA | NA | NA | NA |
|               | NA                 | NA | NA | NA | NA | -2 | NA |    |    |    |    |    |    |    |
| DUSP3         | ENSG00000108861.8  | NA | NA | NA | NA | NA | NA | NA | NA | NA | NA | NA | NA | NA |
|               | NA                 | NA | NA | NA | NA | -2 | NA |    |    |    |    |    |    |    |
| CLEC10A       | ENSG00000132514.13 | NA | NA | NA | NA | NA | NA | NA | NA | NA | NA | NA | NA | NA |

|               |                    |    |    |    |    |    |    |    |    |    |    |    |    |    |
|---------------|--------------------|----|----|----|----|----|----|----|----|----|----|----|----|----|
|               | NA                 | NA | NA | NA | NA | -2 | NA |    |    |    |    |    |    |    |
| GSG2          | ENSG00000177602.5  |    |    |    | NA | NA | NA | NA | NA | NA | NA | NA | NA | NA |
|               | NA                 | NA | NA | NA | -2 | NA |    |    |    |    |    |    |    |    |
| VMO1          | ENSG00000182853.11 |    |    |    | NA | NA | NA | NA | NA | NA | NA | NA | NA | NA |
|               | NA                 | NA | NA | NA | -2 | NA |    |    |    |    |    |    |    |    |
| FNDC8         | ENSG00000073598.5  |    |    |    | NA | NA | NA | NA | NA | NA | NA | NA | NA | NA |
|               | NA                 | NA | NA | NA | -2 | NA |    |    |    |    |    |    |    |    |
| KCNJ2         | ENSG00000123700.4  |    |    |    | NA | NA | NA | NA | NA | NA | NA | NA | NA | NA |
|               | NA                 | NA | NA | NA | -2 | NA |    |    |    |    |    |    |    |    |
| ATP5H         | ENSG00000167863.11 |    |    |    | NA | NA | NA | NA | NA | NA | NA | NA | NA | NA |
|               | NA                 | NA | NA | NA | -2 | NA |    |    |    |    |    |    |    |    |
| CCL23         | ENSG00000274736.4  |    |    |    | NA | NA | NA | NA | NA | NA | NA | NA | NA | NA |
|               | NA                 | NA | NA | NA | -2 | NA |    |    |    |    |    |    |    |    |
| FASN          | ENSG00000169710.8  |    |    |    | NA | NA | NA | NA | NA | NA | NA | NA | NA | NA |
|               | NA                 | NA | NA | NA | -2 | NA |    |    |    |    |    |    |    |    |
| RP11-13K12.1  | ENSG00000267506.5  |    |    |    | NA | NA | NA | NA | NA | NA | NA | NA | NA | NA |
|               | NA                 | NA | NA | NA | NA | -2 | NA |    |    |    |    |    |    |    |
| AC084809.3    | ENSG00000236377.1  |    |    |    | NA | NA | NA | NA | NA | NA | NA | NA | NA | NA |
|               | NA                 | NA | NA | NA | -2 | NA |    |    |    |    |    |    |    |    |
| KRTAP3-2      | ENSG00000212900.2  |    |    |    | NA | NA | NA | NA | NA | NA | NA | NA | NA | NA |
|               | NA                 | NA | NA | NA | -2 | NA |    |    |    |    |    |    |    |    |
| NLGN2         | ENSG00000169992.9  |    |    |    | NA | NA | NA | NA | NA | NA | NA | NA | NA | NA |
|               | NA                 | NA | NA | NA | -2 | NA |    |    |    |    |    |    |    |    |
| TAF15         | ENSG00000270647.5  |    |    |    | NA | NA | NA | NA | NA | NA | NA | NA | NA | NA |
|               | NA                 | NA | NA | NA | -2 | NA |    |    |    |    |    |    |    |    |
| TUSC5         | ENSG00000184811.3  |    |    |    | NA | NA | NA | NA | NA | NA | NA | NA | NA | NA |
|               | NA                 | NA | NA | NA | -2 | NA |    |    |    |    |    |    |    |    |
| SREBF1        | ENSG00000072310.16 |    |    |    | NA | NA | NA | NA | NA | NA | NA | NA | NA | NA |
|               | NA                 | NA | NA | NA | -2 | NA |    |    |    |    |    |    |    |    |
| PRKAR1A       | ENSG00000108946.14 |    |    |    | NA | NA | NA | NA | NA | NA | NA | NA | NA | NA |
|               | NA                 | NA | NA | NA | -2 | NA |    |    |    |    |    |    |    |    |
| SLC4A1        | ENSG00000004939.13 |    |    |    | NA | NA | NA | NA | NA | NA | NA | NA | NA | NA |
|               | NA                 | NA | NA | NA | -2 | NA |    |    |    |    |    |    |    |    |
| HSF5          | ENSG00000176160.10 |    |    |    | NA | NA | NA | NA | NA | NA | NA | NA | NA | NA |
|               | NA                 | NA | NA | NA | -2 | NA |    |    |    |    |    |    |    |    |
| FN3K          | ENSG00000167363.13 |    |    |    | NA | NA | NA | NA | NA | NA | NA | NA | NA | NA |
|               | NA                 | NA | NA | NA | -2 | NA |    |    |    |    |    |    |    |    |
| IKZF3         | ENSG00000161405.16 |    |    |    | NA | NA | NA | NA | NA | NA | NA | NA | NA | NA |
|               | NA                 | NA | NA | NA | -2 | NA |    |    |    |    |    |    |    |    |
| STAT5B        | ENSG00000173757.9  |    |    |    | NA | NA | NA | NA | NA | NA | NA | NA | NA | NA |
|               | NA                 | NA | NA | NA | -2 | NA |    |    |    |    |    |    |    |    |
| RNF157        | ENSG00000141576.14 |    |    |    | NA | NA | NA | NA | NA | NA | NA | NA | NA | NA |
|               | NA                 | NA | NA | NA | -2 | NA |    |    |    |    |    |    |    |    |
| ODF4          | ENSG00000184650.10 |    |    |    | NA | NA | NA | NA | NA | NA | NA | NA | NA | NA |
|               | NA                 | NA | NA | NA | -2 | NA |    |    |    |    |    |    |    |    |
| TBC1D3K       | ENSG00000273513.1  |    |    |    | NA | NA | NA | NA | NA | NA | NA | NA | NA | NA |
|               | NA                 | NA | NA | NA | -2 | NA |    |    |    |    |    |    |    |    |
| RP11-806H10.4 | ENSG00000266970.1  |    |    |    | NA | NA | NA | NA | NA | NA | NA | NA | NA | NA |
|               | NA                 | NA | NA | NA | NA | -2 | NA |    |    |    |    |    |    |    |
| CTD-2319I12.5 | ENSG00000267095.1  |    |    |    | NA | NA | NA | NA | NA | NA | NA | NA | NA | NA |
|               | NA                 | NA | NA | NA | NA | -2 | NA |    |    |    |    |    |    |    |
| MED1          | ENSG00000125686.11 |    |    |    | NA | NA | NA | NA | NA | NA | NA | NA | NA | NA |
|               | NA                 | NA | NA | NA | -2 | NA |    |    |    |    |    |    |    |    |
| NAT9          | ENSG00000109065.11 |    |    |    | NA | NA | NA | NA | NA | NA | NA | NA | NA | NA |
|               | NA                 | NA | NA | NA | -2 | NA |    |    |    |    |    |    |    |    |
| AC091199.1    | ENSG00000275173.1  |    |    |    | NA | NA | NA | NA | NA | NA | NA | NA | NA | NA |
|               | NA                 | NA | NA | NA | -2 | NA |    |    |    |    |    |    |    |    |
| HOXB1         | ENSG00000120094.6  |    |    |    | NA | NA | NA | NA | NA | NA | NA | NA | NA | NA |
|               | NA                 | NA | NA | NA | -2 | NA |    |    |    |    |    |    |    |    |
| SUPT6H        | ENSG00000109111.14 |    |    |    | NA | NA | NA | NA | NA | NA | NA | NA | NA | NA |
|               | NA                 | NA | NA | NA | -2 | NA |    |    |    |    |    |    |    |    |
| MPRIP         | ENSG00000133030.20 |    |    |    | NA | NA | NA | NA | NA | NA | NA | NA | NA | NA |

|               |                    |    |    |    |    |    |    |    |    |    |    |    |    |    |
|---------------|--------------------|----|----|----|----|----|----|----|----|----|----|----|----|----|
|               | NA                 | NA | NA | NA | -2 | NA |    |    |    |    |    |    |    |    |
| RAB34         | ENSG00000109113.18 |    |    |    |    | NA | NA | NA | NA | NA | NA | NA | NA | NA |
|               | NA                 | NA | NA | NA | -2 | NA |    |    |    |    |    |    |    |    |
| PSMB6         | ENSG00000142507.9  |    |    |    |    | NA | NA | NA | NA | NA | NA | NA | NA | NA |
|               | NA                 | NA | NA | NA | -2 | NA |    |    |    |    |    |    |    |    |
| KCTD2         | ENSG00000180901.10 |    |    |    |    | NA | NA | NA | NA | NA | NA | NA | NA | NA |
|               | NA                 | NA | NA | NA | -2 | NA |    |    |    |    |    |    |    |    |
| ZNF652        | ENSG00000198740.8  |    |    |    |    | NA | NA | NA | NA | NA | NA | NA | NA | NA |
|               | NA                 | NA | NA | NA | -2 | NA |    |    |    |    |    |    |    |    |
| POLG2         | ENSG00000256525.6  |    |    |    |    | NA | NA | NA | NA | NA | NA | NA | NA | NA |
|               | NA                 | NA | NA | NA | -2 | NA |    |    |    |    |    |    |    |    |
| FOXN1         | ENSG00000109101.7  |    |    |    |    | NA | NA | NA | NA | NA | NA | NA | NA | NA |
|               | NA                 | NA | NA | NA | -2 | NA |    |    |    |    |    |    |    |    |
| AKAP10        | ENSG00000108599.14 |    |    |    |    | NA | NA | NA | NA | NA | NA | NA | NA | NA |
|               | NA                 | NA | NA | NA | -2 | NA |    |    |    |    |    |    |    |    |
| RP11-848P1.3  | ENSG00000265743.1  |    |    |    |    | NA | NA | NA | NA | NA | NA | NA | NA | NA |
|               | NA                 | NA | NA | NA | -2 | NA |    |    |    |    |    |    |    |    |
| SOCS3         | ENSG00000184557.4  |    |    |    |    | NA | NA | NA | NA | NA | NA | NA | NA | NA |
|               | NA                 | NA | NA | NA | -2 | NA |    |    |    |    |    |    |    |    |
| TMEM105       | ENSG00000185332.6  |    |    |    |    | NA | NA | NA | NA | NA | NA | NA | NA | NA |
|               | NA                 | NA | NA | NA | -2 | NA |    |    |    |    |    |    |    |    |
| RP11-218M11.1 | ENSG00000259928.1  |    |    |    |    | NA | NA | NA | NA | NA | NA | NA | NA | NA |
|               | NA                 | NA | NA | NA | -2 | NA |    |    |    |    |    |    |    |    |
| ETV4          | ENSG00000175832.12 |    |    |    |    | NA | NA | NA | NA | NA | NA | NA | NA | NA |
|               | NA                 | NA | NA | NA | -2 | NA |    |    |    |    |    |    |    |    |
| SPACA3        | ENSG00000141316.12 |    |    |    |    | NA | NA | NA | NA | NA | NA | NA | NA | NA |
|               | NA                 | NA | NA | NA | -2 | NA |    |    |    |    |    |    |    |    |
| SLC25A11      | ENSG00000108528.13 |    |    |    |    | NA | NA | NA | NA | NA | NA | NA | NA | NA |
|               | NA                 | NA | NA | NA | -2 | NA |    |    |    |    |    |    |    |    |
| LINC01180     | ENSG00000266979.1  |    |    |    |    | NA | NA | NA | NA | NA | NA | NA | NA | NA |
|               | NA                 | NA | NA | NA | -2 | NA |    |    |    |    |    |    |    |    |
| RP11-6N17.2   | ENSG00000266821.1  |    |    |    |    | NA | NA | NA | NA | NA | NA | NA | NA | NA |
|               | NA                 | NA | NA | NA | -2 | NA |    |    |    |    |    |    |    |    |
| GIT1          | ENSG00000108262.15 |    |    |    |    | NA | NA | NA | NA | NA | NA | NA | NA | NA |
|               | NA                 | NA | NA | NA | -2 | NA |    |    |    |    |    |    |    |    |
| MAP2K3        | ENSG00000034152.18 |    |    |    |    | NA | NA | NA | NA | NA | NA | NA | NA | NA |
|               | NA                 | NA | NA | NA | -2 | NA |    |    |    |    |    |    |    |    |
| KRTAP1-5      | ENSG00000221852.4  |    |    |    |    | NA | NA | NA | NA | NA | NA | NA | NA | NA |
|               | NA                 | NA | NA | NA | -2 | NA |    |    |    |    |    |    |    |    |
| OTOP3         | ENSG00000182938.4  |    |    |    |    | NA | NA | NA | NA | NA | NA | NA | NA | NA |
|               | NA                 | NA | NA | NA | -2 | NA |    |    |    |    |    |    |    |    |
| SPATA32       | ENSG00000184361.12 |    |    |    |    | NA | NA | NA | NA | NA | NA | NA | NA | NA |
|               | NA                 | NA | NA | NA | -2 | NA |    |    |    |    |    |    |    |    |
| CUEDC1        | ENSG00000180891.12 |    |    |    |    | NA | NA | NA | NA | NA | NA | NA | NA | NA |
|               | NA                 | NA | NA | NA | -2 | NA |    |    |    |    |    |    |    |    |
| PHOSPHO1      | ENSG00000173868.11 |    |    |    |    | NA | NA | NA | NA | NA | NA | NA | NA | NA |
|               | NA                 | NA | NA | NA | -2 | NA |    |    |    |    |    |    |    |    |
| PRR11         | ENSG00000068489.12 |    |    |    |    | NA | NA | NA | NA | NA | NA | NA | NA | NA |
|               | NA                 | NA | NA | NA | -2 | NA |    |    |    |    |    |    |    |    |
| IFI35         | ENSG00000068079.7  |    |    |    |    | NA | NA | NA | NA | NA | NA | NA | NA | NA |
|               | NA                 | NA | NA | NA | -2 | NA |    |    |    |    |    |    |    |    |
| KRT35         | ENSG00000197079.8  |    |    |    |    | NA | NA | NA | NA | NA | NA | NA | NA | NA |
|               | NA                 | NA | NA | NA | -2 | NA |    |    |    |    |    |    |    |    |
| B4GALNT2      | ENSG00000167080.8  |    |    |    |    | NA | NA | NA | NA | NA | NA | NA | NA | NA |
|               | NA                 | NA | NA | NA | -2 | NA |    |    |    |    |    |    |    |    |
| HOXB9         | ENSG00000170689.9  |    |    |    |    | NA | NA | NA | NA | NA | NA | NA | NA | NA |
|               | NA                 | NA | NA | NA | -2 | NA |    |    |    |    |    |    |    |    |
| LINC00670     | ENSG00000179136.6  |    |    |    |    | NA | NA | NA | NA | NA | NA | NA | NA | NA |
|               | NA                 | NA | NA | NA | -2 | NA |    |    |    |    |    |    |    |    |
| PFN1          | ENSG00000108518.7  |    |    |    |    | NA | NA | NA | NA | NA | NA | NA | NA | NA |
|               | NA                 | NA | NA | NA | -2 | NA |    |    |    |    |    |    |    |    |
| NTN1          | ENSG00000065320.8  |    |    |    |    | NA | NA | NA | NA | NA | NA | NA | NA | NA |

|                |                    |    |    |    |    |    |    |    |    |    |    |    |    |    |
|----------------|--------------------|----|----|----|----|----|----|----|----|----|----|----|----|----|
| NA             | NA                 | NA | NA | -2 | NA |    |    |    |    |    |    |    |    |    |
| PSME3          | ENSG00000131467.10 | NA | NA | NA | NA | NA | NA | NA | NA | NA | NA | NA | NA | NA |
| NA             | NA                 | NA | NA | -2 | NA |    |    |    |    |    |    |    |    |    |
| FAM117A        | ENSG00000121104.7  | NA | NA | NA | NA | NA | NA | NA | NA | NA | NA | NA | NA | NA |
| NA             | NA                 | NA | NA | NA | -2 | NA |    |    |    |    |    |    |    |    |
| CLUH           | ENSG00000132361.16 | NA | NA | NA | NA | NA | NA | NA | NA | NA | NA | NA | NA | NA |
| NA             | NA                 | NA | NA | -2 | NA |    |    |    |    |    |    |    |    |    |
| MYL4           | ENSG00000198336.9  | NA | NA | NA | NA | NA | NA | NA | NA | NA | NA | NA | NA | NA |
| NA             | NA                 | NA | NA | -2 | NA |    |    |    |    |    |    |    |    |    |
| ANKRD13B       | ENSG00000198720.12 | NA | NA | NA | NA | NA | NA | NA | NA | NA | NA | NA | NA | NA |
| NA             | NA                 | NA | NA | NA | -2 | NA |    |    |    |    |    |    |    |    |
| RP11-285E9.6   | ENSG00000263718.2  | NA | NA | NA | NA | NA | NA | NA | NA | NA | NA | NA | NA | NA |
| NA             | NA                 | NA | NA | NA | NA | -2 | NA |    |    |    |    |    |    |    |
| CBX8           | ENSG00000141570.10 | NA | NA | NA | NA | NA | NA | NA | NA | NA | NA | NA | NA | NA |
| NA             | NA                 | NA | NA | -2 | NA |    |    |    |    |    |    |    |    |    |
| LINC02089      | ENSG00000226364.1  | NA | NA | NA | NA | NA | NA | NA | NA | NA | NA | NA | NA | NA |
| NA             | NA                 | NA | NA | NA | -2 | NA |    |    |    |    |    |    |    |    |
| RAI1           | ENSG00000108557.18 | NA | NA | NA | NA | NA | NA | NA | NA | NA | NA | NA | NA | NA |
| NA             | NA                 | NA | NA | -2 | NA |    |    |    |    |    |    |    |    |    |
| PAFAH1B1       | ENSG00000007168.12 | NA | NA | NA | NA | NA | NA | NA | NA | NA | NA | NA | NA | NA |
| NA             | NA                 | NA | NA | NA | -2 | NA |    |    |    |    |    |    |    |    |
| SMURF2         | ENSG00000108854.15 | NA | NA | NA | NA | NA | NA | NA | NA | NA | NA | NA | NA | NA |
| NA             | NA                 | NA | NA | NA | -2 | NA |    |    |    |    |    |    |    |    |
| PRAC2          | ENSG00000229637.3  | NA | NA | NA | NA | NA | NA | NA | NA | NA | NA | NA | NA | NA |
| NA             | NA                 | NA | NA | -2 | NA |    |    |    |    |    |    |    |    |    |
| POLR2A         | ENSG00000181222.15 | NA | NA | NA | NA | NA | NA | NA | NA | NA | NA | NA | NA | NA |
| NA             | NA                 | NA | NA | NA | -2 | NA |    |    |    |    |    |    |    |    |
| LINC02087      | ENSG00000237057.2  | NA | NA | NA | NA | NA | NA | NA | NA | NA | NA | NA | NA | NA |
| NA             | NA                 | NA | NA | NA | -2 | NA |    |    |    |    |    |    |    |    |
| RP11-798G7.5   | ENSG00000131484.4  | NA | NA | NA | NA | NA | NA | NA | NA | NA | NA | NA | NA | NA |
| NA             | NA                 | NA | NA | NA | NA | -2 | NA |    |    |    |    |    |    |    |
| CTD-3193K9.11  | ENSG00000273650.1  | NA | NA | NA | NA | NA | NA | NA | NA | NA | NA | NA | NA | NA |
| NA             | NA                 | NA | NA | NA | NA | -2 | NA |    |    |    |    |    |    |    |
| HOXB13         | ENSG00000159184.7  | NA | NA | NA | NA | NA | NA | NA | NA | NA | NA | NA | NA | NA |
| NA             | NA                 | NA | NA | NA | -2 | NA |    |    |    |    |    |    |    |    |
| RP11-849F2.4   | ENSG00000266279.1  | NA | NA | NA | NA | NA | NA | NA | NA | NA | NA | NA | NA | NA |
| NA             | NA                 | NA | NA | NA | NA | -2 | NA |    |    |    |    |    |    |    |
| FO XK2         | ENSG00000141568.20 | NA | NA | NA | NA | NA | NA | NA | NA | NA | NA | NA | NA | NA |
| NA             | NA                 | NA | NA | -2 | NA |    |    |    |    |    |    |    |    |    |
| G6PC           | ENSG00000131482.9  | NA | NA | NA | NA | NA | NA | NA | NA | NA | NA | NA | NA | NA |
| NA             | NA                 | NA | NA | -2 | NA |    |    |    |    |    |    |    |    |    |
| RP11-159D12.10 | ENSG00000266290.1  | NA | NA | NA | NA | NA | NA | NA | NA | NA | NA | NA | NA | NA |
| NA             | NA                 | NA | NA | NA | NA | -2 | NA |    |    |    |    |    |    |    |
| 4-Sep          | ENSG00000108387.14 | NA | NA | NA | NA | NA | NA | NA | NA | NA | NA | NA | NA | NA |
| NA             | NA                 | NA | NA | -2 | NA |    |    |    |    |    |    |    |    |    |
| NUFIP2         | ENSG00000108256.8  | NA | NA | NA | NA | NA | NA | NA | NA | NA | NA | NA | NA | NA |
| NA             | NA                 | NA | NA | NA | -2 | NA |    |    |    |    |    |    |    |    |
| RP11-849N15.4  | ENSG00000266667.1  | NA | NA | NA | NA | NA | NA | NA | NA | NA | NA | NA | NA | NA |
| NA             | NA                 | NA | NA | NA | NA | -2 | NA |    |    |    |    |    |    |    |
| COA3           | ENSG00000183978.7  | NA | NA | NA | NA | NA | NA | NA | NA | NA | NA | NA | NA | NA |
| NA             | NA                 | NA | NA | -2 | NA |    |    |    |    |    |    |    |    |    |
| RP11-85B7.5    | ENSG00000273816.1  | NA | NA | NA | NA | NA | NA | NA | NA | NA | NA | NA | NA | NA |
| NA             | NA                 | NA | NA | NA | NA | -2 | NA |    |    |    |    |    |    |    |
| TRIM25         | ENSG00000121060.16 | NA | NA | NA | NA | NA | NA | NA | NA | NA | NA | NA | NA | NA |
| NA             | NA                 | NA | NA | NA | -2 | NA |    |    |    |    |    |    |    |    |
| HOXB6          | ENSG00000108511.9  | NA | NA | NA | NA | NA | NA | NA | NA | NA | NA | NA | NA | NA |
| NA             | NA                 | NA | NA | -2 | NA |    |    |    |    |    |    |    |    |    |
| RARA           | ENSG00000131759.17 | NA | NA | NA | NA | NA | NA | NA | NA | NA | NA | NA | NA | NA |
| NA             | NA                 | NA | NA | -2 | NA |    |    |    |    |    |    |    |    |    |
| ANKFN1         | ENSG00000153930.11 | NA | NA | NA | NA | NA | NA | NA | NA | NA | NA | NA | NA | NA |
| NA             | NA                 | NA | NA | NA | -2 | NA |    |    |    |    |    |    |    |    |
| TMEM94         | ENSG00000177728.16 | NA | NA | NA | NA | NA | NA | NA | NA | NA | NA | NA | NA | NA |



|                |                    |    |    |    |    |    |    |    |    |    |    |    |    |
|----------------|--------------------|----|----|----|----|----|----|----|----|----|----|----|----|
| NA             | NA                 | NA | NA | NA | -2 | NA | NA | NA | NA | NA | NA | NA | NA |
| SECTM1         | ENSG00000141574.7  | NA | NA | NA | NA | NA | NA | NA | NA | NA | NA | NA | NA |
| NA             | NA                 | NA | NA | NA | -2 | NA | NA | NA | NA | NA | NA | NA | NA |
| TAOK1          | ENSG00000160551.11 | NA | NA | NA | NA | NA | NA | NA | NA | NA | NA | NA | NA |
| NA             | NA                 | NA | NA | NA | -2 | NA | NA | NA | NA | NA | NA | NA | NA |
| KAT7           | ENSG00000136504.11 | NA | NA | NA | NA | NA | NA | NA | NA | NA | NA | NA | NA |
| NA             | NA                 | NA | NA | NA | -2 | NA | NA | NA | NA | NA | NA | NA | NA |
| SRSF2          | ENSG00000161547.16 | NA | NA | NA | NA | NA | NA | NA | NA | NA | NA | NA | NA |
| NA             | NA                 | NA | NA | NA | -2 | NA | NA | NA | NA | NA | NA | NA | NA |
| RP11-680C21.1  | ENSG00000264727.1  | NA | NA | NA | NA | NA | NA | NA | NA | NA | NA | NA | NA |
| NA             | NA                 | NA | NA | NA | NA | -2 | NA | NA | NA | NA | NA | NA | NA |
| CSNK1D         | ENSG00000141551.14 | NA | NA | NA | NA | NA | NA | NA | NA | NA | NA | NA | NA |
| NA             | NA                 | NA | NA | NA | NA | -2 | NA | NA | NA | NA | NA | NA | NA |
| UNK            | ENSG00000132478.9  | NA | NA | NA | NA | NA | NA | NA | NA | NA | NA | NA | NA |
| NA             | NA                 | NA | NA | NA | NA | -2 | NA | NA | NA | NA | NA | NA | NA |
| RP11-131K5.2   | ENSG00000265494.1  | NA | NA | NA | NA | NA | NA | NA | NA | NA | NA | NA | NA |
| NA             | NA                 | NA | NA | NA | NA | -2 | NA | NA | NA | NA | NA | NA | NA |
| PIGW           | ENSG00000277161.1  | NA | NA | NA | NA | NA | NA | NA | NA | NA | NA | NA | NA |
| NA             | NA                 | NA | NA | NA | NA | -2 | NA | NA | NA | NA | NA | NA | NA |
| KCNJ18         | ENSG00000260458.3  | NA | NA | NA | NA | NA | NA | NA | NA | NA | NA | NA | NA |
| NA             | NA                 | NA | NA | NA | NA | -2 | NA | NA | NA | NA | NA | NA | NA |
| APPBP2         | ENSG00000062725.9  | NA | NA | NA | NA | NA | NA | NA | NA | NA | NA | NA | NA |
| NA             | NA                 | NA | NA | NA | NA | -2 | NA | NA | NA | NA | NA | NA | NA |
| COPZ2          | ENSG00000005243.9  | NA | NA | NA | NA | NA | NA | NA | NA | NA | NA | NA | NA |
| NA             | NA                 | NA | NA | NA | NA | -2 | NA | NA | NA | NA | NA | NA | NA |
| CTD-2309O5.3   | ENSG00000261848.5  | NA | NA | NA | NA | NA | NA | NA | NA | NA | NA | NA | NA |
| NA             | NA                 | NA | NA | NA | NA | -2 | NA | NA | NA | NA | NA | NA | NA |
| C17orf74       | ENSG00000184560.7  | NA | NA | NA | NA | NA | NA | NA | NA | NA | NA | NA | NA |
| NA             | NA                 | NA | NA | NA | NA | -2 | NA | NA | NA | NA | NA | NA | NA |
| GCGR           | ENSG00000215644.9  | NA | NA | NA | NA | NA | NA | NA | NA | NA | NA | NA | NA |
| NA             | NA                 | NA | NA | NA | NA | -2 | NA | NA | NA | NA | NA | NA | NA |
| SLFN14         | ENSG00000236320.3  | NA | NA | NA | NA | NA | NA | NA | NA | NA | NA | NA | NA |
| NA             | NA                 | NA | NA | NA | NA | -2 | NA | NA | NA | NA | NA | NA | NA |
| RP11-104H15.12 | ENSG00000283439.1  | NA | NA | NA | NA | NA | NA | NA | NA | NA | NA | NA | NA |
| NA             | NA                 | NA | NA | NA | NA | -2 | NA | NA | NA | NA | NA | NA | NA |
| RP11-385D13.3  | ENSG00000266538.1  | NA | NA | NA | NA | NA | NA | NA | NA | NA | NA | NA | NA |
| NA             | NA                 | NA | NA | NA | NA | -2 | NA | NA | NA | NA | NA | NA | NA |
| CCDC43         | ENSG00000180329.13 | NA | NA | NA | NA | NA | NA | NA | NA | NA | NA | NA | NA |
| NA             | NA                 | NA | NA | NA | NA | -2 | NA | NA | NA | NA | NA | NA | NA |
| CDRT8          | ENSG00000265163.1  | NA | NA | NA | NA | NA | NA | NA | NA | NA | NA | NA | NA |
| NA             | NA                 | NA | NA | NA | NA | -2 | NA | NA | NA | NA | NA | NA | NA |
| CDC6           | ENSG00000094804.9  | NA | NA | NA | NA | NA | NA | NA | NA | NA | NA | NA | NA |
| NA             | NA                 | NA | NA | NA | NA | -2 | NA | NA | NA | NA | NA | NA | NA |
| ST6GALNAC1     | ENSG00000070526.14 | NA | NA | NA | NA | NA | NA | NA | NA | NA | NA | NA | NA |
| NA             | NA                 | NA | NA | NA | NA | -2 | NA | NA | NA | NA | NA | NA | NA |
| GP1BA          | ENSG00000185245.7  | NA | NA | NA | NA | NA | NA | NA | NA | NA | NA | NA | NA |
| NA             | NA                 | NA | NA | NA | NA | -2 | NA | NA | NA | NA | NA | NA | NA |
| CCR10          | ENSG00000184451.5  | NA | NA | NA | NA | NA | NA | NA | NA | NA | NA | NA | NA |
| NA             | NA                 | NA | NA | NA | NA | -2 | NA | NA | NA | NA | NA | NA | NA |
| AC061992.2     | ENSG00000267737.1  | NA | NA | NA | NA | NA | NA | NA | NA | NA | NA | NA | NA |
| NA             | NA                 | NA | NA | NA | NA | -2 | NA | NA | NA | NA | NA | NA | NA |
| EIF4A1         | ENSG00000161960.14 | NA | NA | NA | NA | NA | NA | NA | NA | NA | NA | NA | NA |
| NA             | NA                 | NA | NA | NA | NA | -2 | NA | NA | NA | NA | NA | NA | NA |
| RP11-104J23.2  | ENSG00000278690.1  | NA | NA | NA | NA | NA | NA | NA | NA | NA | NA | NA | NA |
| NA             | NA                 | NA | NA | NA | NA | -2 | NA | NA | NA | NA | NA | NA | NA |
| NCBP3          | ENSG00000074356.16 | NA | NA | NA | NA | NA | NA | NA | NA | NA | NA | NA | NA |
| NA             | NA                 | NA | NA | NA | NA | -2 | NA | NA | NA | NA | NA | NA | NA |
| PPP1R9B        | ENSG00000108819.10 | NA | NA | NA | NA | NA | NA | NA | NA | NA | NA | NA | NA |
| NA             | NA                 | NA | NA | NA | NA | -2 | NA | NA | NA | NA | NA | NA | NA |
| KRT10          | ENSG00000186395.7  | NA | NA | NA | NA | NA | NA | NA | NA | NA | NA | NA | NA |
| NA             | NA                 | NA | NA | NA | NA | -2 | NA | NA | NA | NA | NA | NA | NA |
| SRCIN1         | ENSG00000277363.4  | NA | NA | NA | NA | NA | NA | NA | NA | NA | NA | NA | NA |

|               |                    |    |    |    |    |    |    |    |    |    |    |    |    |    |
|---------------|--------------------|----|----|----|----|----|----|----|----|----|----|----|----|----|
| NA            | NA                 | NA | NA | NA | -2 | NA |    |    |    |    |    |    |    |    |
| OR1E1         | ENSG00000180016.2  |    |    | NA | NA | NA | NA | NA | NA | NA | NA | NA | NA | NA |
| NA            | NA                 | NA | NA | NA | -2 | NA |    |    |    |    |    |    |    |    |
| KRTAP4-5      | ENSG00000198271.4  |    |    | NA | NA | NA | NA | NA | NA | NA | NA | NA | NA | NA |
| NA            | NA                 | NA | NA | NA | -2 | NA |    |    |    |    |    |    |    |    |
| RP11-218M11.3 | ENSG00000263860.1  |    |    | NA | NA | NA | NA | NA | NA | NA | NA | NA | NA | NA |
| NA            | NA                 | NA | NA | NA | -2 | NA |    |    |    |    |    |    |    |    |
| RP11-215E13.2 | ENSG00000264990.1  |    |    | NA | NA | NA | NA | NA | NA | NA | NA | NA | NA | NA |
| NA            | NA                 | NA | NA | NA | -2 | NA |    |    |    |    |    |    |    |    |
| ACTG1         | ENSG00000184009.9  |    |    | NA | NA | NA | NA | NA | NA | NA | NA | NA | NA | NA |
| NA            | NA                 | NA | NA | NA | -2 | NA |    |    |    |    |    |    |    |    |
| EIF1          | ENSG00000173812.10 |    |    | NA | NA | NA | NA | NA | NA | NA | NA | NA | NA | NA |
| NA            | NA                 | NA | NA | NA | -2 | NA |    |    |    |    |    |    |    |    |
| EPOP          | ENSG00000273604.1  |    |    | NA | NA | NA | NA | NA | NA | NA | NA | NA | NA | NA |
| NA            | NA                 | NA | NA | NA | -2 | NA |    |    |    |    |    |    |    |    |
| CTC-296K1.3   | ENSG00000267505.1  |    |    | NA | NA | NA | NA | NA | NA | NA | NA | NA | NA | NA |
| NA            | NA                 | NA | NA | NA | -2 | NA |    |    |    |    |    |    |    |    |
| GFAP          | ENSG00000131095.12 |    |    | NA | NA | NA | NA | NA | NA | NA | NA | NA | NA | NA |
| NA            | NA                 | NA | NA | NA | -2 | NA |    |    |    |    |    |    |    |    |
| PIPOX         | ENSG00000179761.11 |    |    | NA | NA | NA | NA | NA | NA | NA | NA | NA | NA | NA |
| NA            | NA                 | NA | NA | NA | -2 | NA |    |    |    |    |    |    |    |    |
| MFAP4         | ENSG00000166482.11 |    |    | NA | NA | NA | NA | NA | NA | NA | NA | NA | NA | NA |
| NA            | NA                 | NA | NA | NA | -2 | NA |    |    |    |    |    |    |    |    |
| FLOT2         | ENSG00000132589.15 |    |    | NA | NA | NA | NA | NA | NA | NA | NA | NA | NA | NA |
| NA            | NA                 | NA | NA | NA | -2 | NA |    |    |    |    |    |    |    |    |
| ARHGDI1       | ENSG00000141522.11 |    |    | NA | NA | NA | NA | NA | NA | NA | NA | NA | NA | NA |
| NA            | NA                 | NA | NA | NA | -2 | NA |    |    |    |    |    |    |    |    |
| METTL23       | ENSG00000181038.13 |    |    | NA | NA | NA | NA | NA | NA | NA | NA | NA | NA | NA |
| NA            | NA                 | NA | NA | NA | -2 | NA |    |    |    |    |    |    |    |    |
| AC005703.3    | ENSG00000230971.1  |    |    | NA | NA | NA | NA | NA | NA | NA | NA | NA | NA | NA |
| NA            | NA                 | NA | NA | NA | -2 | NA |    |    |    |    |    |    |    |    |
| CCL16         | ENSG00000275152.4  |    |    | NA | NA | NA | NA | NA | NA | NA | NA | NA | NA | NA |
| NA            | NA                 | NA | NA | NA | -2 | NA |    |    |    |    |    |    |    |    |
| SMCR8         | ENSG00000176994.10 |    |    | NA | NA | NA | NA | NA | NA | NA | NA | NA | NA | NA |
| NA            | NA                 | NA | NA | NA | -2 | NA |    |    |    |    |    |    |    |    |
| RPS6KB1       | ENSG00000108443.13 |    |    | NA | NA | NA | NA | NA | NA | NA | NA | NA | NA | NA |
| NA            | NA                 | NA | NA | NA | -2 | NA |    |    |    |    |    |    |    |    |
| NLK           | ENSG00000087095.12 |    |    | NA | NA | NA | NA | NA | NA | NA | NA | NA | NA | NA |
| NA            | NA                 | NA | NA | NA | -2 | NA |    |    |    |    |    |    |    |    |
| RP11-87G24.6  | ENSG00000267521.1  |    |    | NA | NA | NA | NA | NA | NA | NA | NA | NA | NA | NA |
| NA            | NA                 | NA | NA | NA | -2 | NA |    |    |    |    |    |    |    |    |
| RP11-700H6.2  | ENSG00000251665.1  |    |    | NA | NA | NA | NA | NA | NA | NA | NA | NA | NA | NA |
| NA            | NA                 | NA | NA | NA | -2 | NA |    |    |    |    |    |    |    |    |
| RNF135        | ENSG00000181481.13 |    |    | NA | NA | NA | NA | NA | NA | NA | NA | NA | NA | NA |
| NA            | NA                 | NA | NA | NA | -2 | NA |    |    |    |    |    |    |    |    |
| LGALS9C       | ENSG00000171916.16 |    |    | NA | NA | NA | NA | NA | NA | NA | NA | NA | NA | NA |
| NA            | NA                 | NA | NA | NA | -2 | NA |    |    |    |    |    |    |    |    |
| KRT36         | ENSG00000126337.13 |    |    | NA | NA | NA | NA | NA | NA | NA | NA | NA | NA | NA |
| NA            | NA                 | NA | NA | NA | -2 | NA |    |    |    |    |    |    |    |    |
| LINC01482     | ENSG00000267659.5  |    |    | NA | NA | NA | NA | NA | NA | NA | NA | NA | NA | NA |
| NA            | NA                 | NA | NA | NA | -2 | NA |    |    |    |    |    |    |    |    |
| RP11-293E1.1  | ENSG00000265964.1  |    |    | NA | NA | NA | NA | NA | NA | NA | NA | NA | NA | NA |
| NA            | NA                 | NA | NA | NA | -2 | NA |    |    |    |    |    |    |    |    |
| MLLT6         | ENSG00000275023.4  |    |    | NA | NA | NA | NA | NA | NA | NA | NA | NA | NA | NA |
| NA            | NA                 | NA | NA | NA | -2 | NA |    |    |    |    |    |    |    |    |
| CD300LD       | ENSG00000204345.1  |    |    | NA | NA | NA | NA | NA | NA | NA | NA | NA | NA | NA |
| NA            | NA                 | NA | NA | NA | -2 | NA |    |    |    |    |    |    |    |    |
| RP11-728E14.3 | ENSG00000265043.1  |    |    | NA | NA | NA | NA | NA | NA | NA | NA | NA | NA | NA |
| NA            | NA                 | NA | NA | NA | -2 | NA |    |    |    |    |    |    |    |    |
| CTD-2008P7.8  | ENSG00000266830.1  |    |    | NA | NA | NA | NA | NA | NA | NA | NA | NA | NA | NA |
| NA            | NA                 | NA | NA | NA | -2 | NA |    |    |    |    |    |    |    |    |
| OR3A1         | ENSG00000180090.4  |    |    | NA | NA | NA | NA | NA | NA | NA | NA | NA | NA | NA |

|               |                    |    |    |    |    |    |    |    |    |    |    |    |    |    |
|---------------|--------------------|----|----|----|----|----|----|----|----|----|----|----|----|----|
| NA            | NA                 | NA | NA | -2 | NA |    |    |    |    |    |    |    |    |    |
| ALYREF        | ENSG00000183684.7  |    |    |    | NA | NA | NA | NA | NA | NA | NA | NA | NA | NA |
| NA            | NA                 | NA | NA | NA | -2 | NA |    |    |    |    |    |    |    |    |
| RP11-744K17.1 | ENSG00000261020.1  |    |    |    | NA | NA | NA | NA | NA | NA | NA | NA | NA | NA |
| NA            | NA                 | NA | NA | NA | -2 | NA |    |    |    |    |    |    |    |    |
| RP11-599B13.3 | ENSG00000263427.1  |    |    |    | NA | NA | NA | NA | NA | NA | NA | NA | NA | NA |
| NA            | NA                 | NA | NA | NA | -2 | NA |    |    |    |    |    |    |    |    |
| SLC16A13      | ENSG00000174327.6  |    |    |    | NA | NA | NA | NA | NA | NA | NA | NA | NA | NA |
| NA            | NA                 | NA | NA | NA | -2 | NA |    |    |    |    |    |    |    |    |
| HOXB4         | ENSG00000182742.5  |    |    |    | NA | NA | NA | NA | NA | NA | NA | NA | NA | NA |
| NA            | NA                 | NA | NA | NA | -2 | NA |    |    |    |    |    |    |    |    |
| KLHL10        | ENSG00000161594.6  |    |    |    | NA | NA | NA | NA | NA | NA | NA | NA | NA | NA |
| NA            | NA                 | NA | NA | NA | -2 | NA |    |    |    |    |    |    |    |    |
| HEATR9        | ENSG00000270379.5  |    |    |    | NA | NA | NA | NA | NA | NA | NA | NA | NA | NA |
| NA            | NA                 | NA | NA | NA | -2 | NA |    |    |    |    |    |    |    |    |
| AC011193.1    | ENSG00000225582.1  |    |    |    | NA | NA | NA | NA | NA | NA | NA | NA | NA | NA |
| NA            | NA                 | NA | NA | NA | -2 | NA |    |    |    |    |    |    |    |    |
| MMP28         | ENSG00000271447.5  |    |    |    | NA | NA | NA | NA | NA | NA | NA | NA | NA | NA |
| NA            | NA                 | NA | NA | NA | -2 | NA |    |    |    |    |    |    |    |    |
| AARSD1        | ENSG00000266967.6  |    |    |    | NA | NA | NA | NA | NA | NA | NA | NA | NA | NA |
| NA            | NA                 | NA | NA | NA | -2 | NA |    |    |    |    |    |    |    |    |
| FADS6         | ENSG00000172782.11 |    |    |    | NA | NA | NA | NA | NA | NA | NA | NA | NA | NA |
| NA            | NA                 | NA | NA | NA | -2 | NA |    |    |    |    |    |    |    |    |
| TBC1D3E       | ENSG00000278599.5  |    |    |    | NA | NA | NA | NA | NA | NA | NA | NA | NA | NA |
| NA            | NA                 | NA | NA | NA | -2 | NA |    |    |    |    |    |    |    |    |
| AC005304.1    | ENSG00000233852.1  |    |    |    | NA | NA | NA | NA | NA | NA | NA | NA | NA | NA |
| NA            | NA                 | NA | NA | NA | -2 | NA |    |    |    |    |    |    |    |    |
| LINC00511     | ENSG00000227036.6  |    |    |    | NA | NA | NA | NA | NA | NA | NA | NA | NA | NA |
| NA            | NA                 | NA | NA | NA | -2 | NA |    |    |    |    |    |    |    |    |
| LINC01974     | ENSG00000262031.1  |    |    |    | NA | NA | NA | NA | NA | NA | NA | NA | NA | NA |
| NA            | NA                 | NA | NA | NA | -2 | NA |    |    |    |    |    |    |    |    |
| CTD-2008P7.9  | ENSG00000267259.1  |    |    |    | NA | NA | NA | NA | NA | NA | NA | NA | NA | NA |
| NA            | NA                 | NA | NA | NA | NA | -2 | NA |    |    |    |    |    |    |    |
| ARL5C         | ENSG00000141748.12 |    |    |    | NA | NA | NA | NA | NA | NA | NA | NA | NA | NA |
| NA            | NA                 | NA | NA | NA | -2 | NA |    |    |    |    |    |    |    |    |
| EVPLL         | ENSG00000214860.4  |    |    |    | NA | NA | NA | NA | NA | NA | NA | NA | NA | NA |
| NA            | NA                 | NA | NA | NA | -2 | NA |    |    |    |    |    |    |    |    |
| BRCA1         | ENSG00000012048.20 |    |    |    | NA | NA | NA | NA | NA | NA | NA | NA | NA | NA |
| NA            | NA                 | NA | NA | NA | -2 | NA |    |    |    |    |    |    |    |    |
| MIEN1         | ENSG00000141741.11 |    |    |    | NA | NA | NA | NA | NA | NA | NA | NA | NA | NA |
| NA            | NA                 | NA | NA | NA | -2 | NA |    |    |    |    |    |    |    |    |
| GH2           | ENSG00000136487.17 |    |    |    | NA | NA | NA | NA | NA | NA | NA | NA | NA | NA |
| NA            | NA                 | NA | NA | NA | -2 | NA |    |    |    |    |    |    |    |    |
| RP11-219A15.2 | ENSG00000264729.1  |    |    |    | NA | NA | NA | NA | NA | NA | NA | NA | NA | NA |
| NA            | NA                 | NA | NA | NA | NA | -2 | NA |    |    |    |    |    |    |    |
| CNP           | ENSG00000173786.16 |    |    |    | NA | NA | NA | NA | NA | NA | NA | NA | NA | NA |
| NA            | NA                 | NA | NA | NA | -2 | NA |    |    |    |    |    |    |    |    |
| ACADVL        | ENSG00000072778.19 |    |    |    | NA | NA | NA | NA | NA | NA | NA | NA | NA | NA |
| NA            | NA                 | NA | NA | NA | -2 | NA |    |    |    |    |    |    |    |    |
| GALR2         | ENSG00000182687.3  |    |    |    | NA | NA | NA | NA | NA | NA | NA | NA | NA | NA |
| NA            | NA                 | NA | NA | NA | -2 | NA |    |    |    |    |    |    |    |    |
| LGALS9B       | ENSG00000170298.15 |    |    |    | NA | NA | NA | NA | NA | NA | NA | NA | NA | NA |
| NA            | NA                 | NA | NA | NA | -2 | NA |    |    |    |    |    |    |    |    |
| HSPB9         | ENSG00000260325.1  |    |    |    | NA | NA | NA | NA | NA | NA | NA | NA | NA | NA |
| NA            | NA                 | NA | NA | NA | -2 | NA |    |    |    |    |    |    |    |    |
| METTL2A       | ENSG00000087995.15 |    |    |    | NA | NA | NA | NA | NA | NA | NA | NA | NA | NA |
| NA            | NA                 | NA | NA | NA | -2 | NA |    |    |    |    |    |    |    |    |
| PIK3R5        | ENSG00000141506.13 |    |    |    | NA | NA | NA | NA | NA | NA | NA | NA | NA | NA |
| NA            | NA                 | NA | NA | NA | -2 | NA |    |    |    |    |    |    |    |    |
| CTD-2319I12.2 | ENSG00000267416.1  |    |    |    | NA | NA | NA | NA | NA | NA | NA | NA | NA | NA |
| NA            | NA                 | NA | NA | NA | NA | -2 | NA |    |    |    |    |    |    |    |
| KRTAP4-1      | ENSG00000198443.6  |    |    |    | NA | NA | NA | NA | NA | NA | NA | NA | NA | NA |

|               |                    |    |    |    |    |    |    |    |    |    |    |    |    |    |
|---------------|--------------------|----|----|----|----|----|----|----|----|----|----|----|----|----|
| NA            | NA                 | NA | NA | NA | -2 | NA |    |    |    |    |    |    |    |    |
| COG1          | ENSG00000166685.11 |    |    | NA | NA | NA | NA | NA | NA | NA | NA | NA | NA | NA |
| NA            | NA                 | NA | NA | NA | -2 | NA |    |    |    |    |    |    |    |    |
| RP11-118B18.2 | ENSG00000267250.1  |    |    | NA | NA | NA | NA | NA | NA | NA | NA | NA | NA | NA |
| NA            | NA                 | NA | NA | NA | NA | -2 | NA |    |    |    |    |    |    |    |
| FAM104A       | ENSG00000133193.12 |    |    | NA | NA | NA | NA | NA | NA | NA | NA | NA | NA | NA |
| NA            | NA                 | NA | NA | NA | NA | -2 | NA |    |    |    |    |    |    |    |
| TMEM107       | ENSG00000179029.14 |    |    | NA | NA | NA | NA | NA | NA | NA | NA | NA | NA | NA |
| NA            | NA                 | NA | NA | NA | NA | -2 | NA |    |    |    |    |    |    |    |
| EXOC7         | ENSG00000182473.21 |    |    | NA | NA | NA | NA | NA | NA | NA | NA | NA | NA | NA |
| NA            | NA                 | NA | NA | NA | NA | -2 | NA |    |    |    |    |    |    |    |
| LINC01987     | ENSG00000267790.1  |    |    | NA | NA | NA | NA | NA | NA | NA | NA | NA | NA | NA |
| NA            | NA                 | NA | NA | NA | NA | -2 | NA |    |    |    |    |    |    |    |
| ANAPC11       | ENSG00000141552.17 |    |    | NA | NA | NA | NA | NA | NA | NA | NA | NA | NA | NA |
| NA            | NA                 | NA | NA | NA | NA | -2 | NA |    |    |    |    |    |    |    |
| KRT27         | ENSG00000171446.6  |    |    | NA | NA | NA | NA | NA | NA | NA | NA | NA | NA | NA |
| NA            | NA                 | NA | NA | NA | NA | -2 | NA |    |    |    |    |    |    |    |
| CYB5D1        | ENSG00000182224.11 |    |    | NA | NA | NA | NA | NA | NA | NA | NA | NA | NA | NA |
| NA            | NA                 | NA | NA | NA | NA | -2 | NA |    |    |    |    |    |    |    |
| ARHGEF15      | ENSG00000198844.10 |    |    | NA | NA | NA | NA | NA | NA | NA | NA | NA | NA | NA |
| NA            | NA                 | NA | NA | NA | NA | -2 | NA |    |    |    |    |    |    |    |
| UNC13D        | ENSG00000092929.11 |    |    | NA | NA | NA | NA | NA | NA | NA | NA | NA | NA | NA |
| NA            | NA                 | NA | NA | NA | NA | -2 | NA |    |    |    |    |    |    |    |
| HS3ST3A1      | ENSG00000153976.2  |    |    | NA | NA | NA | NA | NA | NA | NA | NA | NA | NA | NA |
| NA            | NA                 | NA | NA | NA | NA | -2 | NA |    |    |    |    |    |    |    |
| RP11-433M22.2 | ENSG00000264451.1  |    |    | NA | NA | NA | NA | NA | NA | NA | NA | NA | NA | NA |
| NA            | NA                 | NA | NA | NA | NA | -2 | NA |    |    |    |    |    |    |    |
| APOH          | ENSG00000091583.10 |    |    | NA | NA | NA | NA | NA | NA | NA | NA | NA | NA | NA |
| NA            | NA                 | NA | NA | NA | NA | -2 | NA |    |    |    |    |    |    |    |
| NDEL1         | ENSG00000166579.15 |    |    | NA | NA | NA | NA | NA | NA | NA | NA | NA | NA | NA |
| NA            | NA                 | NA | NA | NA | NA | -2 | NA |    |    |    |    |    |    |    |
| GRAP          | ENSG00000154016.13 |    |    | NA | NA | NA | NA | NA | NA | NA | NA | NA | NA | NA |
| NA            | NA                 | NA | NA | NA | NA | -2 | NA |    |    |    |    |    |    |    |
| LINC00324     | ENSG00000178977.3  |    |    | NA | NA | NA | NA | NA | NA | NA | NA | NA | NA | NA |
| NA            | NA                 | NA | NA | NA | NA | -2 | NA |    |    |    |    |    |    |    |
| SPNS2         | ENSG00000183018.8  |    |    | NA | NA | NA | NA | NA | NA | NA | NA | NA | NA | NA |
| NA            | NA                 | NA | NA | NA | NA | -2 | NA |    |    |    |    |    |    |    |
| CCDC42        | ENSG00000161973.10 |    |    | NA | NA | NA | NA | NA | NA | NA | NA | NA | NA | NA |
| NA            | NA                 | NA | NA | NA | NA | -2 | NA |    |    |    |    |    |    |    |
| RP11-388C12.5 | ENSG00000263321.1  |    |    | NA | NA | NA | NA | NA | NA | NA | NA | NA | NA | NA |
| NA            | NA                 | NA | NA | NA | NA | -2 | NA |    |    |    |    |    |    |    |
| FBXO39        | ENSG00000177294.6  |    |    | NA | NA | NA | NA | NA | NA | NA | NA | NA | NA | NA |
| NA            | NA                 | NA | NA | NA | NA | -2 | NA |    |    |    |    |    |    |    |
| CCR7          | ENSG00000126353.3  |    |    | NA | NA | NA | NA | NA | NA | NA | NA | NA | NA | NA |
| NA            | NA                 | NA | NA | NA | NA | -2 | NA |    |    |    |    |    |    |    |
| RPL38         | ENSG00000172809.12 |    |    | NA | NA | NA | NA | NA | NA | NA | NA | NA | NA | NA |
| NA            | NA                 | NA | NA | NA | NA | -2 | NA |    |    |    |    |    |    |    |
| UBE2O         | ENSG00000175931.12 |    |    | NA | NA | NA | NA | NA | NA | NA | NA | NA | NA | NA |
| NA            | NA                 | NA | NA | NA | NA | -2 | NA |    |    |    |    |    |    |    |
| GLOD4         | ENSG00000167699.13 |    |    | NA | NA | NA | NA | NA | NA | NA | NA | NA | NA | NA |
| NA            | NA                 | NA | NA | NA | NA | -2 | NA |    |    |    |    |    |    |    |
| LINC00868     | ENSG00000267535.1  |    |    | NA | NA | NA | NA | NA | NA | NA | NA | NA | NA | NA |
| NA            | NA                 | NA | NA | NA | NA | -2 | NA |    |    |    |    |    |    |    |
| ENPP7         | ENSG00000182156.9  |    |    | NA | NA | NA | NA | NA | NA | NA | NA | NA | NA | NA |
| NA            | NA                 | NA | NA | NA | NA | -2 | NA |    |    |    |    |    |    |    |
| KRTAP9-4      | ENSG00000241595.2  |    |    | NA | NA | NA | NA | NA | NA | NA | NA | NA | NA | NA |
| NA            | NA                 | NA | NA | NA | NA | -2 | NA |    |    |    |    |    |    |    |
| TM4SF5        | ENSG00000142484.6  |    |    | NA | NA | NA | NA | NA | NA | NA | NA | NA | NA | NA |
| NA            | NA                 | NA | NA | NA | NA | -2 | NA |    |    |    |    |    |    |    |
| CTB-41I6.1    | ENSG00000266389.1  |    |    | NA | NA | NA | NA | NA | NA | NA | NA | NA | NA | NA |
| NA            | NA                 | NA | NA | NA | NA | -2 | NA |    |    |    |    |    |    |    |
| TOP2A         | ENSG00000131747.14 |    |    | NA | NA | NA | NA | NA | NA | NA | NA | NA | NA | NA |

|               |                    |    |    |    |    |    |    |    |    |    |    |    |    |    |
|---------------|--------------------|----|----|----|----|----|----|----|----|----|----|----|----|----|
| NA            | NA                 | NA | NA | -2 | NA |    |    |    |    |    |    |    |    |    |
| UBE2G1        | ENSG00000132388.12 | NA | NA | NA | NA | NA | NA | NA | NA | NA | NA | NA | NA | NA |
| NA            | NA                 | NA | NA | NA | -2 | NA |    |    |    |    |    |    |    |    |
| AC139099.4    | ENSG00000262898.1  | NA | NA | NA | NA | NA | NA | NA | NA | NA | NA | NA | NA | NA |
| NA            | NA                 | NA | NA | NA | -2 | NA |    |    |    |    |    |    |    |    |
| KRT222        | ENSG00000213424.8  | NA | NA | NA | NA | NA | NA | NA | NA | NA | NA | NA | NA | NA |
| NA            | NA                 | NA | NA | NA | -2 | NA |    |    |    |    |    |    |    |    |
| CCL13         | ENSG00000181374.7  | NA | NA | NA | NA | NA | NA | NA | NA | NA | NA | NA | NA | NA |
| NA            | NA                 | NA | NA | NA | -2 | NA |    |    |    |    |    |    |    |    |
| LINC02086     | ENSG00000244649.4  | NA | NA | NA | NA | NA | NA | NA | NA | NA | NA | NA | NA | NA |
| NA            | NA                 | NA | NA | NA | -2 | NA |    |    |    |    |    |    |    |    |
| SLC25A19      | ENSG00000125454.11 | NA | NA | NA | NA | NA | NA | NA | NA | NA | NA | NA | NA | NA |
| NA            | NA                 | NA | NA | NA | -2 | NA |    |    |    |    |    |    |    |    |
| CTD-3010D24.3 | ENSG00000263893.2  | NA | NA | NA | NA | NA | NA | NA | NA | NA | NA | NA | NA | NA |
| NA            | NA                 | NA | NA | NA | -2 | NA |    |    |    |    |    |    |    |    |
| KRT20         | ENSG00000171431.3  | NA | NA | NA | NA | NA | NA | NA | NA | NA | NA | NA | NA | NA |
| NA            | NA                 | NA | NA | NA | -2 | NA |    |    |    |    |    |    |    |    |
| NLE1          | ENSG00000073536.17 | NA | NA | NA | NA | NA | NA | NA | NA | NA | NA | NA | NA | NA |
| NA            | NA                 | NA | NA | NA | -2 | NA |    |    |    |    |    |    |    |    |
| ICAM2         | ENSG00000108622.10 | NA | NA | NA | NA | NA | NA | NA | NA | NA | NA | NA | NA | NA |
| NA            | NA                 | NA | NA | NA | -2 | NA |    |    |    |    |    |    |    |    |
| KRTAP1-1      | ENSG00000188581.8  | NA | NA | NA | NA | NA | NA | NA | NA | NA | NA | NA | NA | NA |
| NA            | NA                 | NA | NA | NA | -2 | NA |    |    |    |    |    |    |    |    |
| SLC16A11      | ENSG00000174326.11 | NA | NA | NA | NA | NA | NA | NA | NA | NA | NA | NA | NA | NA |
| NA            | NA                 | NA | NA | NA | -2 | NA |    |    |    |    |    |    |    |    |
| FAM64A        | ENSG00000129195.15 | NA | NA | NA | NA | NA | NA | NA | NA | NA | NA | NA | NA | NA |
| NA            | NA                 | NA | NA | NA | -2 | NA |    |    |    |    |    |    |    |    |
| RP11-686D22.5 | ENSG00000267711.1  | NA | NA | NA | NA | NA | NA | NA | NA | NA | NA | NA | NA | NA |
| NA            | NA                 | NA | NA | NA | NA | -2 | NA |    |    |    |    |    |    |    |
| LINC02095     | ENSG00000228639.6  | NA | NA | NA | NA | NA | NA | NA | NA | NA | NA | NA | NA | NA |
| NA            | NA                 | NA | NA | NA | -2 | NA |    |    |    |    |    |    |    |    |
| SLC13A2       | ENSG00000007216.14 | NA | NA | NA | NA | NA | NA | NA | NA | NA | NA | NA | NA | NA |
| NA            | NA                 | NA | NA | NA | -2 | NA |    |    |    |    |    |    |    |    |
| KRT37         | ENSG00000108417.3  | NA | NA | NA | NA | NA | NA | NA | NA | NA | NA | NA | NA | NA |
| NA            | NA                 | NA | NA | NA | -2 | NA |    |    |    |    |    |    |    |    |
| RP11-686D22.4 | ENSG00000267547.1  | NA | NA | NA | NA | NA | NA | NA | NA | NA | NA | NA | NA | NA |
| NA            | NA                 | NA | NA | NA | NA | -2 | NA |    |    |    |    |    |    |    |
| TRIM37        | ENSG00000108395.13 | NA | NA | NA | NA | NA | NA | NA | NA | NA | NA | NA | NA | NA |
| NA            | NA                 | NA | NA | NA | -2 | NA |    |    |    |    |    |    |    |    |
| SMARCE1       | ENSG00000073584.18 | NA | NA | NA | NA | NA | NA | NA | NA | NA | NA | NA | NA | NA |
| NA            | NA                 | NA | NA | NA | -2 | NA |    |    |    |    |    |    |    |    |
| RP11-277J6.3  | ENSG00000265935.1  | NA | NA | NA | NA | NA | NA | NA | NA | NA | NA | NA | NA | NA |
| NA            | NA                 | NA | NA | NA | NA | -2 | NA |    |    |    |    |    |    |    |
| SRSF1         | ENSG00000136450.12 | NA | NA | NA | NA | NA | NA | NA | NA | NA | NA | NA | NA | NA |
| NA            | NA                 | NA | NA | NA | -2 | NA |    |    |    |    |    |    |    |    |
| KRTAP9-6      | ENSG00000212659.1  | NA | NA | NA | NA | NA | NA | NA | NA | NA | NA | NA | NA | NA |
| NA            | NA                 | NA | NA | NA | -2 | NA |    |    |    |    |    |    |    |    |
| LINC02074     | ENSG00000266357.5  | NA | NA | NA | NA | NA | NA | NA | NA | NA | NA | NA | NA | NA |
| NA            | NA                 | NA | NA | NA | -2 | NA |    |    |    |    |    |    |    |    |
| STAT3         | ENSG00000168610.14 | NA | NA | NA | NA | NA | NA | NA | NA | NA | NA | NA | NA | NA |
| NA            | NA                 | NA | NA | NA | -2 | NA |    |    |    |    |    |    |    |    |
| LRRC3C        | ENSG00000204913.5  | NA | NA | NA | NA | NA | NA | NA | NA | NA | NA | NA | NA | NA |
| NA            | NA                 | NA | NA | NA | -2 | NA |    |    |    |    |    |    |    |    |
| GPS2          | ENSG00000132522.15 | NA | NA | NA | NA | NA | NA | NA | NA | NA | NA | NA | NA | NA |
| NA            | NA                 | NA | NA | NA | -2 | NA |    |    |    |    |    |    |    |    |
| RP11-60A24.3  | ENSG00000265542.5  | NA | NA | NA | NA | NA | NA | NA | NA | NA | NA | NA | NA | NA |
| NA            | NA                 | NA | NA | NA | NA | -2 | NA |    |    |    |    |    |    |    |
| CHMP6         | ENSG00000176108.9  | NA | NA | NA | NA | NA | NA | NA | NA | NA | NA | NA | NA | NA |
| NA            | NA                 | NA | NA | NA | -2 | NA |    |    |    |    |    |    |    |    |
| MSI2          | ENSG00000153944.10 | NA | NA | NA | NA | NA | NA | NA | NA | NA | NA | NA | NA | NA |
| NA            | NA                 | NA | NA | NA | -2 | NA |    |    |    |    |    |    |    |    |
| PITPNA        | ENSG00000174238.14 | NA | NA | NA | NA | NA | NA | NA | NA | NA | NA | NA | NA | NA |

|               |                    |    |    |    |    |    |    |    |    |    |    |    |    |    |
|---------------|--------------------|----|----|----|----|----|----|----|----|----|----|----|----|----|
| NA            | NA                 | NA | NA | NA | -2 | NA |    |    |    |    |    |    |    |    |
| DERL2         | ENSG00000072849.10 | NA | NA | NA | NA | NA | NA | NA | NA | NA | NA | NA | NA | NA |
| NA            | NA                 | NA | NA | NA | -2 | NA |    |    |    |    |    |    |    |    |
| C17orf99      | ENSG00000187997.11 | NA | NA | NA | NA | NA | NA | NA | NA | NA | NA | NA | NA | NA |
| NA            | NA                 | NA | NA | NA | -2 | NA |    |    |    |    |    |    |    |    |
| RP11-488L1.1  | ENSG00000273098.1  | NA | NA | NA | NA | NA | NA | NA | NA | NA | NA | NA | NA | NA |
| NA            | NA                 | NA | NA | NA | NA | -2 | NA |    |    |    |    |    |    |    |
| WRAP53        | ENSG00000141499.16 | NA | NA | NA | NA | NA | NA | NA | NA | NA | NA | NA | NA | NA |
| NA            | NA                 | NA | NA | NA | -2 | NA |    |    |    |    |    |    |    |    |
| RP11-285M22.3 | ENSG00000264262.1  | NA | NA | NA | NA | NA | NA | NA | NA | NA | NA | NA | NA | NA |
| NA            | NA                 | NA | NA | NA | NA | -2 | NA |    |    |    |    |    |    |    |
| TBC1D3I       | ENSG00000274933.5  | NA | NA | NA | NA | NA | NA | NA | NA | NA | NA | NA | NA | NA |
| NA            | NA                 | NA | NA | NA | NA | -2 | NA |    |    |    |    |    |    |    |
| USH1G         | ENSG00000182040.8  | NA | NA | NA | NA | NA | NA | NA | NA | NA | NA | NA | NA | NA |
| NA            | NA                 | NA | NA | NA | -2 | NA |    |    |    |    |    |    |    |    |
| CDR2L         | ENSG00000109089.7  | NA | NA | NA | NA | NA | NA | NA | NA | NA | NA | NA | NA | NA |
| NA            | NA                 | NA | NA | NA | -2 | NA |    |    |    |    |    |    |    |    |
| PIK3R6        | ENSG00000276231.4  | NA | NA | NA | NA | NA | NA | NA | NA | NA | NA | NA | NA | NA |
| NA            | NA                 | NA | NA | NA | NA | -2 | NA |    |    |    |    |    |    |    |
| C17orf75      | ENSG00000108666.9  | NA | NA | NA | NA | NA | NA | NA | NA | NA | NA | NA | NA | NA |
| NA            | NA                 | NA | NA | NA | NA | -2 | NA |    |    |    |    |    |    |    |
| RUNDC3A       | ENSG00000108309.13 | NA | NA | NA | NA | NA | NA | NA | NA | NA | NA | NA | NA | NA |
| NA            | NA                 | NA | NA | NA | NA | -2 | NA |    |    |    |    |    |    |    |
| AC144831.3    | ENSG00000274370.1  | NA | NA | NA | NA | NA | NA | NA | NA | NA | NA | NA | NA | NA |
| NA            | NA                 | NA | NA | NA | NA | -2 | NA |    |    |    |    |    |    |    |
| CDK12         | ENSG00000167258.13 | NA | NA | NA | NA | NA | NA | NA | NA | NA | NA | NA | NA | NA |
| NA            | NA                 | NA | NA | NA | NA | -2 | NA |    |    |    |    |    |    |    |
| EVI2A         | ENSG00000126860.11 | NA | NA | NA | NA | NA | NA | NA | NA | NA | NA | NA | NA | NA |
| NA            | NA                 | NA | NA | NA | NA | -2 | NA |    |    |    |    |    |    |    |
| GAS2L2        | ENSG00000270765.5  | NA | NA | NA | NA | NA | NA | NA | NA | NA | NA | NA | NA | NA |
| NA            | NA                 | NA | NA | NA | NA | -2 | NA |    |    |    |    |    |    |    |
| MEOX1         | ENSG00000005102.12 | NA | NA | NA | NA | NA | NA | NA | NA | NA | NA | NA | NA | NA |
| NA            | NA                 | NA | NA | NA | NA | -2 | NA |    |    |    |    |    |    |    |
| CDC27         | ENSG00000004897.11 | NA | NA | NA | NA | NA | NA | NA | NA | NA | NA | NA | NA | NA |
| NA            | NA                 | NA | NA | NA | NA | -2 | NA |    |    |    |    |    |    |    |
| GRAPL         | ENSG00000189152.10 | NA | NA | NA | NA | NA | NA | NA | NA | NA | NA | NA | NA | NA |
| NA            | NA                 | NA | NA | NA | NA | -2 | NA |    |    |    |    |    |    |    |
| HIGD1B        | ENSG00000131097.6  | NA | NA | NA | NA | NA | NA | NA | NA | NA | NA | NA | NA | NA |
| NA            | NA                 | NA | NA | NA | NA | -2 | NA |    |    |    |    |    |    |    |
| PMP22         | ENSG00000109099.13 | NA | NA | NA | NA | NA | NA | NA | NA | NA | NA | NA | NA | NA |
| NA            | NA                 | NA | NA | NA | NA | -2 | NA |    |    |    |    |    |    |    |
| TAC4          | ENSG00000176358.15 | NA | NA | NA | NA | NA | NA | NA | NA | NA | NA | NA | NA | NA |
| NA            | NA                 | NA | NA | NA | NA | -2 | NA |    |    |    |    |    |    |    |
| LINC01563     | ENSG00000236819.1  | NA | NA | NA | NA | NA | NA | NA | NA | NA | NA | NA | NA | NA |
| NA            | NA                 | NA | NA | NA | NA | -2 | NA |    |    |    |    |    |    |    |
| TLCD1         | ENSG00000160606.10 | NA | NA | NA | NA | NA | NA | NA | NA | NA | NA | NA | NA | NA |
| NA            | NA                 | NA | NA | NA | NA | -2 | NA |    |    |    |    |    |    |    |
| RP11-663N22.1 | ENSG00000265246.1  | NA | NA | NA | NA | NA | NA | NA | NA | NA | NA | NA | NA | NA |
| NA            | NA                 | NA | NA | NA | NA | NA | -2 | NA |    |    |    |    |    |    |
| TRIM16        | ENSG00000221926.11 | NA | NA | NA | NA | NA | NA | NA | NA | NA | NA | NA | NA | NA |
| NA            | NA                 | NA | NA | NA | NA | -2 | NA |    |    |    |    |    |    |    |
| PLSCR3        | ENSG00000187838.16 | NA | NA | NA | NA | NA | NA | NA | NA | NA | NA | NA | NA | NA |
| NA            | NA                 | NA | NA | NA | NA | -2 | NA |    |    |    |    |    |    |    |
| DHRS7C        | ENSG00000184544.11 | NA | NA | NA | NA | NA | NA | NA | NA | NA | NA | NA | NA | NA |
| NA            | NA                 | NA | NA | NA | NA | -2 | NA |    |    |    |    |    |    |    |
| CLDN7         | ENSG00000181885.18 | NA | NA | NA | NA | NA | NA | NA | NA | NA | NA | NA | NA | NA |
| NA            | NA                 | NA | NA | NA | NA | -2 | NA |    |    |    |    |    |    |    |
| FZD2          | ENSG00000180340.6  | NA | NA | NA | NA | NA | NA | NA | NA | NA | NA | NA | NA | NA |
| NA            | NA                 | NA | NA | NA | NA | -2 | NA |    |    |    |    |    |    |    |
| IGF2BP1       | ENSG00000159217.9  | NA | NA | NA | NA | NA | NA | NA | NA | NA | NA | NA | NA | NA |
| NA            | NA                 | NA | NA | NA | NA | -2 | NA |    |    |    |    |    |    |    |
| CACNG4        | ENSG00000075461.5  | NA | NA | NA | NA | NA | NA | NA | NA | NA | NA | NA | NA | NA |

|                |                    |    |    |    |    |    |    |    |    |    |    |    |    |    |
|----------------|--------------------|----|----|----|----|----|----|----|----|----|----|----|----|----|
| NA             | NA                 | NA | NA | NA | -2 | NA | NA | NA | NA | NA | NA | NA | NA | NA |
| MRPS23         | ENSG00000181610.12 | NA | NA | NA | NA | NA | NA | NA | NA | NA | NA | NA | NA | NA |
| NA             | NA                 | NA | NA | NA | -2 | NA | NA | NA | NA | NA | NA | NA | NA | NA |
| KIF2B          | ENSG00000141200.7  | NA | NA | NA | NA | NA | NA | NA | NA | NA | NA | NA | NA | NA |
| NA             | NA                 | NA | NA | NA | -2 | NA | NA | NA | NA | NA | NA | NA | NA | NA |
| KRT14          | ENSG00000186847.5  | NA | NA | NA | NA | NA | NA | NA | NA | NA | NA | NA | NA | NA |
| NA             | NA                 | NA | NA | NA | -2 | NA | NA | NA | NA | NA | NA | NA | NA | NA |
| RP11-304F15.6  | ENSG00000254039.1  | NA | NA | NA | NA | NA | NA | NA | NA | NA | NA | NA | NA | NA |
| NA             | NA                 | NA | NA | NA | NA | -2 | NA | NA | NA | NA | NA | NA | NA | NA |
| TMEM101        | ENSG00000091947.9  | NA | NA | NA | NA | NA | NA | NA | NA | NA | NA | NA | NA | NA |
| NA             | NA                 | NA | NA | NA | -2 | NA | NA | NA | NA | NA | NA | NA | NA | NA |
| MED9           | ENSG00000141026.5  | NA | NA | NA | NA | NA | NA | NA | NA | NA | NA | NA | NA | NA |
| NA             | NA                 | NA | NA | NA | -2 | NA | NA | NA | NA | NA | NA | NA | NA | NA |
| SMG8           | ENSG00000167447.12 | NA | NA | NA | NA | NA | NA | NA | NA | NA | NA | NA | NA | NA |
| NA             | NA                 | NA | NA | NA | -2 | NA | NA | NA | NA | NA | NA | NA | NA | NA |
| KRTAP9-7       | ENSG00000180386.7  | NA | NA | NA | NA | NA | NA | NA | NA | NA | NA | NA | NA | NA |
| NA             | NA                 | NA | NA | NA | -2 | NA | NA | NA | NA | NA | NA | NA | NA | NA |
| LINC00974      | ENSG00000226629.1  | NA | NA | NA | NA | NA | NA | NA | NA | NA | NA | NA | NA | NA |
| NA             | NA                 | NA | NA | NA | -2 | NA | NA | NA | NA | NA | NA | NA | NA | NA |
| MED13          | ENSG00000108510.9  | NA | NA | NA | NA | NA | NA | NA | NA | NA | NA | NA | NA | NA |
| NA             | NA                 | NA | NA | NA | -2 | NA | NA | NA | NA | NA | NA | NA | NA | NA |
| KIAA0100       | ENSG00000007202.14 | NA | NA | NA | NA | NA | NA | NA | NA | NA | NA | NA | NA | NA |
| NA             | NA                 | NA | NA | NA | -2 | NA | NA | NA | NA | NA | NA | NA | NA | NA |
| MYOCD          | ENSG00000141052.17 | NA | NA | NA | NA | NA | NA | NA | NA | NA | NA | NA | NA | NA |
| NA             | NA                 | NA | NA | NA | -2 | NA | NA | NA | NA | NA | NA | NA | NA | NA |
| RASD1          | ENSG00000108551.4  | NA | NA | NA | NA | NA | NA | NA | NA | NA | NA | NA | NA | NA |
| NA             | NA                 | NA | NA | NA | -2 | NA | NA | NA | NA | NA | NA | NA | NA | NA |
| MPO            | ENSG00000005381.7  | NA | NA | NA | NA | NA | NA | NA | NA | NA | NA | NA | NA | NA |
| NA             | NA                 | NA | NA | NA | -2 | NA | NA | NA | NA | NA | NA | NA | NA | NA |
| RP1-41C23.4    | ENSG00000278546.1  | NA | NA | NA | NA | NA | NA | NA | NA | NA | NA | NA | NA | NA |
| NA             | NA                 | NA | NA | NA | NA | -2 | NA | NA | NA | NA | NA | NA | NA | NA |
| FAAP100        | ENSG00000185504.16 | NA | NA | NA | NA | NA | NA | NA | NA | NA | NA | NA | NA | NA |
| NA             | NA                 | NA | NA | NA | -2 | NA | NA | NA | NA | NA | NA | NA | NA | NA |
| DLX4           | ENSG00000108813.10 | NA | NA | NA | NA | NA | NA | NA | NA | NA | NA | NA | NA | NA |
| NA             | NA                 | NA | NA | NA | -2 | NA | NA | NA | NA | NA | NA | NA | NA | NA |
| RUNDC1         | ENSG00000198863.7  | NA | NA | NA | NA | NA | NA | NA | NA | NA | NA | NA | NA | NA |
| NA             | NA                 | NA | NA | NA | -2 | NA | NA | NA | NA | NA | NA | NA | NA | NA |
| GPATCH8        | ENSG00000186566.12 | NA | NA | NA | NA | NA | NA | NA | NA | NA | NA | NA | NA | NA |
| NA             | NA                 | NA | NA | NA | -2 | NA | NA | NA | NA | NA | NA | NA | NA | NA |
| TEKT1          | ENSG00000167858.12 | NA | NA | NA | NA | NA | NA | NA | NA | NA | NA | NA | NA | NA |
| NA             | NA                 | NA | NA | NA | -2 | NA | NA | NA | NA | NA | NA | NA | NA | NA |
| KIF19          | ENSG00000196169.14 | NA | NA | NA | NA | NA | NA | NA | NA | NA | NA | NA | NA | NA |
| NA             | NA                 | NA | NA | NA | -2 | NA | NA | NA | NA | NA | NA | NA | NA | NA |
| RP11-849F2.9   | ENSG00000269947.1  | NA | NA | NA | NA | NA | NA | NA | NA | NA | NA | NA | NA | NA |
| NA             | NA                 | NA | NA | NA | NA | -2 | NA | NA | NA | NA | NA | NA | NA | NA |
| FAM83G         | ENSG00000188522.14 | NA | NA | NA | NA | NA | NA | NA | NA | NA | NA | NA | NA | NA |
| NA             | NA                 | NA | NA | NA | -2 | NA | NA | NA | NA | NA | NA | NA | NA | NA |
| RP11-227G15.10 | ENSG00000274341.1  | NA | NA | NA | NA | NA | NA | NA | NA | NA | NA | NA | NA | NA |
| NA             | NA                 | NA | NA | NA | NA | -2 | NA | NA | NA | NA | NA | NA | NA | NA |
| CCL15          | ENSG00000275718.1  | NA | NA | NA | NA | NA | NA | NA | NA | NA | NA | NA | NA | NA |
| NA             | NA                 | NA | NA | NA | -2 | NA | NA | NA | NA | NA | NA | NA | NA | NA |
| MAFG           | ENSG00000197063.10 | NA | NA | NA | NA | NA | NA | NA | NA | NA | NA | NA | NA | NA |
| NA             | NA                 | NA | NA | NA | -2 | NA | NA | NA | NA | NA | NA | NA | NA | NA |
| RBFOX3         | ENSG00000167281.18 | NA | NA | NA | NA | NA | NA | NA | NA | NA | NA | NA | NA | NA |
| NA             | NA                 | NA | NA | NA | -2 | NA | NA | NA | NA | NA | NA | NA | NA | NA |
| RNF222         | ENSG00000189051.5  | NA | NA | NA | NA | NA | NA | NA | NA | NA | NA | NA | NA | NA |
| NA             | NA                 | NA | NA | NA | -2 | NA | NA | NA | NA | NA | NA | NA | NA | NA |
| ZBPB2          | ENSG00000186075.12 | NA | NA | NA | NA | NA | NA | NA | NA | NA | NA | NA | NA | NA |
| NA             | NA                 | NA | NA | NA | -2 | NA | NA | NA | NA | NA | NA | NA | NA | NA |
| NACA2          | ENSG00000253506.2  | NA | NA | NA | NA | NA | NA | NA | NA | NA | NA | NA | NA | NA |
| NA             | NA                 | NA | NA | NA | -2 | NA | NA | NA | NA | NA | NA | NA | NA | NA |
| RP11-387H17.6  | ENSG00000265799.1  | NA | NA | NA | NA | NA | NA | NA | NA | NA | NA | NA | NA | NA |

|                |                    |    |    |    |    |    |    |    |    |    |    |    |    |    |
|----------------|--------------------|----|----|----|----|----|----|----|----|----|----|----|----|----|
| NA             | NA                 | NA | NA | NA | NA | -2 | NA |    |    |    |    |    |    |    |
| SPAG5          | ENSG00000076382.16 |    |    | NA | NA | NA | NA | NA | NA | NA | NA | NA | NA | NA |
| NA             | NA                 | NA | NA | NA | NA | -2 | NA |    |    |    |    |    |    |    |
| LINC01996      | ENSG00000261863.1  |    |    | NA | NA | NA | NA | NA | NA | NA | NA | NA | NA | NA |
| NA             | NA                 | NA | NA | NA | NA | -2 | NA |    |    |    |    |    |    |    |
| PCYT2          | ENSG00000185813.10 |    |    | NA | NA | NA | NA | NA | NA | NA | NA | NA | NA | NA |
| NA             | NA                 | NA | NA | NA | NA | -2 | NA |    |    |    |    |    |    |    |
| CTD-2008P7.10  | ENSG00000267644.1  |    |    | NA | NA | NA | NA | NA | NA | NA | NA | NA | NA | NA |
| NA             | NA                 | NA | NA | NA | NA | -2 | NA |    |    |    |    |    |    |    |
| CTD-2200P10.1  | ENSG00000266826.2  |    |    | NA | NA | NA | NA | NA | NA | NA | NA | NA | NA | NA |
| NA             | NA                 | NA | NA | NA | NA | -2 | NA |    |    |    |    |    |    |    |
| ASGR1          | ENSG00000141505.11 |    |    | NA | NA | NA | NA | NA | NA | NA | NA | NA | NA | NA |
| NA             | NA                 | NA | NA | NA | NA | -2 | NA |    |    |    |    |    |    |    |
| DVL2           | ENSG00000004975.11 |    |    | NA | NA | NA | NA | NA | NA | NA | NA | NA | NA | NA |
| NA             | NA                 | NA | NA | NA | NA | -2 | NA |    |    |    |    |    |    |    |
| LINC01970      | ENSG00000265692.1  |    |    | NA | NA | NA | NA | NA | NA | NA | NA | NA | NA | NA |
| NA             | NA                 | NA | NA | NA | NA | -2 | NA |    |    |    |    |    |    |    |
| HOXB8          | ENSG00000120068.6  |    |    | NA | NA | NA | NA | NA | NA | NA | NA | NA | NA | NA |
| NA             | NA                 | NA | NA | NA | NA | -2 | NA |    |    |    |    |    |    |    |
| CTB-41I6.2     | ENSG00000265975.1  |    |    | NA | NA | NA | NA | NA | NA | NA | NA | NA | NA | NA |
| NA             | NA                 | NA | NA | NA | NA | -2 | NA |    |    |    |    |    |    |    |
| RP11-304F15.4  | ENSG00000248954.1  |    |    | NA | NA | NA | NA | NA | NA | NA | NA | NA | NA | NA |
| NA             | NA                 | NA | NA | NA | NA | -2 | NA |    |    |    |    |    |    |    |
| RP11-515E23.1  | ENSG00000261873.2  |    |    | NA | NA | NA | NA | NA | NA | NA | NA | NA | NA | NA |
| NA             | NA                 | NA | NA | NA | NA | -2 | NA |    |    |    |    |    |    |    |
| SGK494         | ENSG00000167524.14 |    |    | NA | NA | NA | NA | NA | NA | NA | NA | NA | NA | NA |
| NA             | NA                 | NA | NA | NA | NA | -2 | NA |    |    |    |    |    |    |    |
| TIMP2          | ENSG00000035862.12 |    |    | NA | NA | NA | NA | NA | NA | NA | NA | NA | NA | NA |
| NA             | NA                 | NA | NA | NA | NA | -2 | NA |    |    |    |    |    |    |    |
| RP5-837J1.4    | ENSG00000267457.1  |    |    | NA | NA | NA | NA | NA | NA | NA | NA | NA | NA | NA |
| NA             | NA                 | NA | NA | NA | NA | -2 | NA |    |    |    |    |    |    |    |
| FOXJ1          | ENSG00000129654.7  |    |    | NA | NA | NA | NA | NA | NA | NA | NA | NA | NA | NA |
| NA             | NA                 | NA | NA | NA | NA | -2 | NA |    |    |    |    |    |    |    |
| AC005324.7     | ENSG00000233193.1  |    |    | NA | NA | NA | NA | NA | NA | NA | NA | NA | NA | NA |
| NA             | NA                 | NA | NA | NA | NA | -2 | NA |    |    |    |    |    |    |    |
| C17orf58       | ENSG00000186665.9  |    |    | NA | NA | NA | NA | NA | NA | NA | NA | NA | NA | NA |
| NA             | NA                 | NA | NA | NA | NA | -2 | NA |    |    |    |    |    |    |    |
| C17orf98       | ENSG00000275489.1  |    |    | NA | NA | NA | NA | NA | NA | NA | NA | NA | NA | NA |
| NA             | NA                 | NA | NA | NA | NA | -2 | NA |    |    |    |    |    |    |    |
| C17orf47       | ENSG00000181013.3  |    |    | NA | NA | NA | NA | NA | NA | NA | NA | NA | NA | NA |
| NA             | NA                 | NA | NA | NA | NA | -2 | NA |    |    |    |    |    |    |    |
| NXPH3          | ENSG00000182575.7  |    |    | NA | NA | NA | NA | NA | NA | NA | NA | NA | NA | NA |
| NA             | NA                 | NA | NA | NA | NA | -2 | NA |    |    |    |    |    |    |    |
| ZNF830         | ENSG00000198783.5  |    |    | NA | NA | NA | NA | NA | NA | NA | NA | NA | NA | NA |
| NA             | NA                 | NA | NA | NA | NA | -2 | NA |    |    |    |    |    |    |    |
| ALDH3A1        | ENSG00000108602.17 |    |    | NA | NA | NA | NA | NA | NA | NA | NA | NA | NA | NA |
| NA             | NA                 | NA | NA | NA | NA | -2 | NA |    |    |    |    |    |    |    |
| CA10           | ENSG00000154975.13 |    |    | NA | NA | NA | NA | NA | NA | NA | NA | NA | NA | NA |
| NA             | NA                 | NA | NA | NA | NA | -2 | NA |    |    |    |    |    |    |    |
| DSC2           | ENSG00000134755.14 |    |    | NA | NA | NA | NA | NA | NA | NA | NA | NA | NA | NA |
| NA             | NA                 | NA | NA | NA | NA | -2 | NA |    |    |    |    |    |    |    |
| RP11-527H14.1  | ENSG00000263821.1  |    |    | NA | NA | NA | NA | NA | NA | NA | NA | NA | NA | NA |
| NA             | NA                 | NA | NA | NA | NA | -2 | NA |    |    |    |    |    |    |    |
| ELOA2          | ENSG00000206181.5  |    |    | NA | NA | NA | NA | NA | NA | NA | NA | NA | NA | NA |
| NA             | NA                 | NA | NA | NA | NA | -2 | NA |    |    |    |    |    |    |    |
| TMX3           | ENSG00000166479.9  |    |    | NA | NA | NA | NA | NA | NA | NA | NA | NA | NA | NA |
| NA             | NA                 | NA | NA | NA | NA | -2 | NA |    |    |    |    |    |    |    |
| RP11-879F14.3  | ENSG00000267316.5  |    |    | NA | NA | NA | NA | NA | NA | NA | NA | NA | NA | NA |
| NA             | NA                 | NA | NA | NA | NA | -2 | NA |    |    |    |    |    |    |    |
| RP11-1151B14.3 | ENSG00000267391.4  |    |    | NA | NA | NA | NA | NA | NA | NA | NA | NA | NA | NA |
| NA             | NA                 | NA | NA | NA | NA | -2 | NA |    |    |    |    |    |    |    |
| HRH4           | ENSG00000134489.6  |    |    | NA | NA | NA | NA | NA | NA | NA | NA | NA | NA | NA |



|               |                    |    |    |    |    |    |    |    |    |    |    |    |    |    |
|---------------|--------------------|----|----|----|----|----|----|----|----|----|----|----|----|----|
| NA            | NA                 | NA | NA | -2 | NA |    |    |    |    |    |    |    |    |    |
| RP11-612A1.1  | ENSG00000263611.1  | NA | NA | NA | NA | NA | NA | NA | NA | NA | NA | NA | NA | NA |
| NA            | NA                 | NA | NA | NA | NA | -2 | NA |    |    |    |    |    |    |    |
| SERPINB7      | ENSG00000166396.12 | NA | NA | NA | NA | NA | NA | NA | NA | NA | NA | NA | NA | NA |
| NA            | NA                 | NA | NA | NA | NA | -2 | NA |    |    |    |    |    |    |    |
| TXNDC2        | ENSG00000168454.11 | NA | NA | NA | NA | NA | NA | NA | NA | NA | NA | NA | NA | NA |
| NA            | NA                 | NA | NA | NA | NA | -2 | NA |    |    |    |    |    |    |    |
| RP11-64C12.6  | ENSG00000267247.1  | NA | NA | NA | NA | NA | NA | NA | NA | NA | NA | NA | NA | NA |
| NA            | NA                 | NA | NA | NA | NA | -2 | NA |    |    |    |    |    |    |    |
| SLC25A52      | ENSG00000141437.8  | NA | NA | NA | NA | NA | NA | NA | NA | NA | NA | NA | NA | NA |
| NA            | NA                 | NA | NA | NA | NA | -2 | NA |    |    |    |    |    |    |    |
| RP11-244M2.1  | ENSG00000267374.1  | NA | NA | NA | NA | NA | NA | NA | NA | NA | NA | NA | NA | NA |
| NA            | NA                 | NA | NA | NA | NA | -2 | NA |    |    |    |    |    |    |    |
| ESCO1         | ENSG00000141446.10 | NA | NA | NA | NA | NA | NA | NA | NA | NA | NA | NA | NA | NA |
| NA            | NA                 | NA | NA | NA | NA | -2 | NA |    |    |    |    |    |    |    |
| RP11-161I6.2  | ENSG00000263745.6  | NA | NA | NA | NA | NA | NA | NA | NA | NA | NA | NA | NA | NA |
| NA            | NA                 | NA | NA | NA | NA | -2 | NA |    |    |    |    |    |    |    |
| THOC1         | ENSG00000079134.11 | NA | NA | NA | NA | NA | NA | NA | NA | NA | NA | NA | NA | NA |
| NA            | NA                 | NA | NA | NA | NA | -2 | NA |    |    |    |    |    |    |    |
| RP11-1030E3.1 | ENSG00000267695.1  | NA | NA | NA | NA | NA | NA | NA | NA | NA | NA | NA | NA | NA |
| NA            | NA                 | NA | NA | NA | NA | -2 | NA |    |    |    |    |    |    |    |
| AC007948.1    | ENSG00000263863.1  | NA | NA | NA | NA | NA | NA | NA | NA | NA | NA | NA | NA | NA |
| NA            | NA                 | NA | NA | NA | NA | -2 | NA |    |    |    |    |    |    |    |
| RNF152        | ENSG00000176641.10 | NA | NA | NA | NA | NA | NA | NA | NA | NA | NA | NA | NA | NA |
| NA            | NA                 | NA | NA | NA | NA | -2 | NA |    |    |    |    |    |    |    |
| RP11-739N10.1 | ENSG00000264151.5  | NA | NA | NA | NA | NA | NA | NA | NA | NA | NA | NA | NA | NA |
| NA            | NA                 | NA | NA | NA | NA | -2 | NA |    |    |    |    |    |    |    |
| CEP76         | ENSG00000101624.10 | NA | NA | NA | NA | NA | NA | NA | NA | NA | NA | NA | NA | NA |
| NA            | NA                 | NA | NA | NA | NA | -2 | NA |    |    |    |    |    |    |    |
| SERPINB10     | ENSG00000242550.5  | NA | NA | NA | NA | NA | NA | NA | NA | NA | NA | NA | NA | NA |
| NA            | NA                 | NA | NA | NA | NA | -2 | NA |    |    |    |    |    |    |    |
| SIGLEC15      | ENSG00000197046.11 | NA | NA | NA | NA | NA | NA | NA | NA | NA | NA | NA | NA | NA |
| NA            | NA                 | NA | NA | NA | NA | -2 | NA |    |    |    |    |    |    |    |
| LINC01927     | ENSG00000266312.1  | NA | NA | NA | NA | NA | NA | NA | NA | NA | NA | NA | NA | NA |
| NA            | NA                 | NA | NA | NA | NA | -2 | NA |    |    |    |    |    |    |    |
| NDUFV2        | ENSG00000178127.12 | NA | NA | NA | NA | NA | NA | NA | NA | NA | NA | NA | NA | NA |
| NA            | NA                 | NA | NA | NA | NA | -2 | NA |    |    |    |    |    |    |    |
| SERPINB11     | ENSG00000206072.12 | NA | NA | NA | NA | NA | NA | NA | NA | NA | NA | NA | NA | NA |
| NA            | NA                 | NA | NA | NA | NA | -2 | NA |    |    |    |    |    |    |    |
| RP11-535A5.1  | ENSG00000273348.1  | NA | NA | NA | NA | NA | NA | NA | NA | NA | NA | NA | NA | NA |
| NA            | NA                 | NA | NA | NA | NA | -2 | NA |    |    |    |    |    |    |    |
| ZNF521        | ENSG00000198795.10 | NA | NA | NA | NA | NA | NA | NA | NA | NA | NA | NA | NA | NA |
| NA            | NA                 | NA | NA | NA | NA | -2 | NA |    |    |    |    |    |    |    |
| SERPINB5      | ENSG00000206075.13 | NA | NA | NA | NA | NA | NA | NA | NA | NA | NA | NA | NA | NA |
| NA            | NA                 | NA | NA | NA | NA | -2 | NA |    |    |    |    |    |    |    |
| LINC00470     | ENSG00000132204.13 | NA | NA | NA | NA | NA | NA | NA | NA | NA | NA | NA | NA | NA |
| NA            | NA                 | NA | NA | NA | NA | -2 | NA |    |    |    |    |    |    |    |
| NOL4          | ENSG00000101746.15 | NA | NA | NA | NA | NA | NA | NA | NA | NA | NA | NA | NA | NA |
| NA            | NA                 | NA | NA | NA | NA | -2 | NA |    |    |    |    |    |    |    |
| SERPINB12     | ENSG00000166634.6  | NA | NA | NA | NA | NA | NA | NA | NA | NA | NA | NA | NA | NA |
| NA            | NA                 | NA | NA | NA | NA | -2 | NA |    |    |    |    |    |    |    |
| IER3IP1       | ENSG00000134049.5  | NA | NA | NA | NA | NA | NA | NA | NA | NA | NA | NA | NA | NA |
| NA            | NA                 | NA | NA | NA | NA | -2 | NA |    |    |    |    |    |    |    |
| AC100848.1    | ENSG00000236392.2  | NA | NA | NA | NA | NA | NA | NA | NA | NA | NA | NA | NA | NA |
| NA            | NA                 | NA | NA | NA | NA | -2 | NA |    |    |    |    |    |    |    |
| ANKRD62       | ENSG00000181626.11 | NA | NA | NA | NA | NA | NA | NA | NA | NA | NA | NA | NA | NA |
| NA            | NA                 | NA | NA | NA | NA | -2 | NA |    |    |    |    |    |    |    |
| MC2R          | ENSG00000185231.4  | NA | NA | NA | NA | NA | NA | NA | NA | NA | NA | NA | NA | NA |
| NA            | NA                 | NA | NA | NA | NA | -2 | NA |    |    |    |    |    |    |    |
| RP11-456K23.1 | ENSG00000267414.1  | NA | NA | NA | NA | NA | NA | NA | NA | NA | NA | NA | NA | NA |
| NA            | NA                 | NA | NA | NA | NA | -2 | NA |    |    |    |    |    |    |    |
| LINC01916     | ENSG00000264232.1  | NA | NA | NA | NA | NA | NA | NA | NA | NA | NA | NA | NA | NA |

|               |    |                    |    |    |    |    |    |    |    |    |    |    |    |
|---------------|----|--------------------|----|----|----|----|----|----|----|----|----|----|----|
| NA            | NA | NA                 | NA | NA | -2 | NA |    |    |    |    |    |    |    |
| CTD-2526M8.2  |    | ENSG00000267726.1  |    |    |    | NA | NA | NA | NA | NA | NA | NA | NA |
| NA            | NA | NA                 | NA | NA | NA | -2 | NA |    |    |    |    |    |    |
| RNF138        |    | ENSG00000134758.13 |    |    |    | NA | NA | NA | NA | NA | NA | NA | NA |
| NA            | NA | NA                 | NA | NA | NA | -2 | NA |    |    |    |    |    |    |
| C18orf65      |    | ENSG00000275763.3  |    |    |    | NA | NA | NA | NA | NA | NA | NA | NA |
| NA            | NA | NA                 | NA | NA | NA | -2 | NA |    |    |    |    |    |    |
| RP11-866E20.3 |    | ENSG00000267462.1  |    |    |    | NA | NA | NA | NA | NA | NA | NA | NA |
| NA            | NA | NA                 | NA | NA | NA | -2 | NA |    |    |    |    |    |    |
| RP11-154H12.3 |    | ENSG00000267780.2  |    |    |    | NA | NA | NA | NA | NA | NA | NA | NA |
| NA            | NA | NA                 | NA | NA | NA | -2 | NA |    |    |    |    |    |    |
| RP11-552O4.1  |    | ENSG00000263382.1  |    |    |    | NA | NA | NA | NA | NA | NA | NA | NA |
| NA            | NA | NA                 | NA | NA | NA | -2 | NA |    |    |    |    |    |    |
| LINC01254     |    | ENSG00000260913.1  |    |    |    | NA | NA | NA | NA | NA | NA | NA | NA |
| NA            | NA | NA                 | NA | NA | NA | -2 | NA |    |    |    |    |    |    |
| GAPLINC       |    | ENSG00000266835.5  |    |    |    | NA | NA | NA | NA | NA | NA | NA | NA |
| NA            | NA | NA                 | NA | NA | NA | -2 | NA |    |    |    |    |    |    |
| RP11-883A18.3 |    | ENSG00000265728.1  |    |    |    | NA | NA | NA | NA | NA | NA | NA | NA |
| NA            | NA | NA                 | NA | NA | NA | -2 | NA |    |    |    |    |    |    |
| RP11-95O2.1   |    | ENSG00000267651.1  |    |    |    | NA | NA | NA | NA | NA | NA | NA | NA |
| NA            | NA | NA                 | NA | NA | NA | -2 | NA |    |    |    |    |    |    |
| LINC00907     |    | ENSG00000267586.6  |    |    |    | NA | NA | NA | NA | NA | NA | NA | NA |
| NA            | NA | NA                 | NA | NA | NA | -2 | NA |    |    |    |    |    |    |
| RAX           |    | ENSG00000134438.9  |    |    |    | NA | NA | NA | NA | NA | NA | NA | NA |
| NA            | NA | NA                 | NA | NA | NA | -2 | NA |    |    |    |    |    |    |
| LINC01882     |    | ENSG00000267654.1  |    |    |    | NA | NA | NA | NA | NA | NA | NA | NA |
| NA            | NA | NA                 | NA | NA | NA | -2 | NA |    |    |    |    |    |    |
| DYM           |    | ENSG00000141627.13 |    |    |    | NA | NA | NA | NA | NA | NA | NA | NA |
| NA            | NA | NA                 | NA | NA | NA | -2 | NA |    |    |    |    |    |    |
| RP11-128P17.3 |    | ENSG00000267564.1  |    |    |    | NA | NA | NA | NA | NA | NA | NA | NA |
| NA            | NA | NA                 | NA | NA | NA | -2 | NA |    |    |    |    |    |    |
| RP11-888D10.3 |    | ENSG00000264964.1  |    |    |    | NA | NA | NA | NA | NA | NA | NA | NA |
| NA            | NA | NA                 | NA | NA | NA | -2 | NA |    |    |    |    |    |    |
| RP11-567M16.2 |    | ENSG00000267409.1  |    |    |    | NA | NA | NA | NA | NA | NA | NA | NA |
| NA            | NA | NA                 | NA | NA | NA | -2 | NA |    |    |    |    |    |    |
| RP11-1096D5.2 |    | ENSG00000267038.1  |    |    |    | NA | NA | NA | NA | NA | NA | NA | NA |
| NA            | NA | NA                 | NA | NA | NA | -2 | NA |    |    |    |    |    |    |
| RP11-26N15.2  |    | ENSG00000264790.1  |    |    |    | NA | NA | NA | NA | NA | NA | NA | NA |
| NA            | NA | NA                 | NA | NA | NA | -2 | NA |    |    |    |    |    |    |
| ME2           |    | ENSG00000082212.12 |    |    |    | NA | NA | NA | NA | NA | NA | NA | NA |
| NA            | NA | NA                 | NA | NA | NA | -2 | NA |    |    |    |    |    |    |
| RP11-108P20.2 |    | ENSG00000267501.1  |    |    |    | NA | NA | NA | NA | NA | NA | NA | NA |
| NA            | NA | NA                 | NA | NA | NA | -2 | NA |    |    |    |    |    |    |
| LINC01925     |    | ENSG00000264265.1  |    |    |    | NA | NA | NA | NA | NA | NA | NA | NA |
| NA            | NA | NA                 | NA | NA | NA | -2 | NA |    |    |    |    |    |    |
| LINC01894     |    | ENSG00000264345.1  |    |    |    | NA | NA | NA | NA | NA | NA | NA | NA |
| NA            | NA | NA                 | NA | NA | NA | -2 | NA |    |    |    |    |    |    |
| CCDC178       |    | ENSG00000166960.16 |    |    |    | NA | NA | NA | NA | NA | NA | NA | NA |
| NA            | NA | NA                 | NA | NA | NA | -2 | NA |    |    |    |    |    |    |
| LINC01928     |    | ENSG00000267425.1  |    |    |    | NA | NA | NA | NA | NA | NA | NA | NA |
| NA            | NA | NA                 | NA | NA | NA | -2 | NA |    |    |    |    |    |    |
| SOCS6         |    | ENSG00000170677.5  |    |    |    | NA | NA | NA | NA | NA | NA | NA | NA |
| NA            | NA | NA                 | NA | NA | NA | -2 | NA |    |    |    |    |    |    |
| RP11-705O1.8  |    | ENSG00000263884.1  |    |    |    | NA | NA | NA | NA | NA | NA | NA | NA |
| NA            | NA | NA                 | NA | NA | NA | -2 | NA |    |    |    |    |    |    |
| ROCK1         |    | ENSG00000067900.7  |    |    |    | NA | NA | NA | NA | NA | NA | NA | NA |
| NA            | NA | NA                 | NA | NA | NA | -2 | NA |    |    |    |    |    |    |
| LINC01929     |    | ENSG00000267013.5  |    |    |    | NA | NA | NA | NA | NA | NA | NA | NA |
| NA            | NA | NA                 | NA | NA | NA | -2 | NA |    |    |    |    |    |    |
| CELF4         |    | ENSG00000101489.19 |    |    |    | NA | NA | NA | NA | NA | NA | NA | NA |
| NA            | NA | NA                 | NA | NA | NA | -2 | NA |    |    |    |    |    |    |
| RP11-905K4.1  |    | ENSG00000267627.5  |    |    |    | NA | NA | NA | NA | NA | NA | NA | NA |

|               |                    |    |    |    |    |    |    |    |    |    |    |    |    |    |
|---------------|--------------------|----|----|----|----|----|----|----|----|----|----|----|----|----|
| NA            | NA                 | NA | NA | NA | NA | -2 | NA |    |    |    |    |    |    |    |
| SERPINB3      | ENSG00000057149.15 | NA | NA | NA | NA | NA | NA | NA | NA | NA | NA | NA | NA | NA |
| NA            | NA                 | NA | NA | NA | NA | -2 | NA |    |    |    |    |    |    |    |
| DSG3          | ENSG00000134757.4  | NA | NA | NA | NA | NA | NA | NA | NA | NA | NA | NA | NA | NA |
| NA            | NA                 | NA | NA | NA | NA | -2 | NA |    |    |    |    |    |    |    |
| LINC01917     | ENSG00000260433.1  | NA | NA | NA | NA | NA | NA | NA | NA | NA | NA | NA | NA | NA |
| NA            | NA                 | NA | NA | NA | NA | -2 | NA |    |    |    |    |    |    |    |
| VPS4B         | ENSG00000119541.9  | NA | NA | NA | NA | NA | NA | NA | NA | NA | NA | NA | NA | NA |
| NA            | NA                 | NA | NA | NA | NA | -2 | NA |    |    |    |    |    |    |    |
| RP11-396N11.1 | ENSG00000267401.1  | NA | NA | NA | NA | NA | NA | NA | NA | NA | NA | NA | NA | NA |
| NA            | NA                 | NA | NA | NA | NA | -2 | NA |    |    |    |    |    |    |    |
| LINC01906     | ENSG00000265786.1  | NA | NA | NA | NA | NA | NA | NA | NA | NA | NA | NA | NA | NA |
| NA            | NA                 | NA | NA | NA | NA | -2 | NA |    |    |    |    |    |    |    |
| RP11-677O4.2  | ENSG00000260759.1  | NA | NA | NA | NA | NA | NA | NA | NA | NA | NA | NA | NA | NA |
| NA            | NA                 | NA | NA | NA | NA | -2 | NA |    |    |    |    |    |    |    |
| SEH1L         | ENSG00000085415.15 | NA | NA | NA | NA | NA | NA | NA | NA | NA | NA | NA | NA | NA |
| NA            | NA                 | NA | NA | NA | NA | -2 | NA |    |    |    |    |    |    |    |
| PIEZO2        | ENSG00000154864.11 | NA | NA | NA | NA | NA | NA | NA | NA | NA | NA | NA | NA | NA |
| NA            | NA                 | NA | NA | NA | NA | -2 | NA |    |    |    |    |    |    |    |
| LINC01630     | ENSG00000227115.7  | NA | NA | NA | NA | NA | NA | NA | NA | NA | NA | NA | NA | NA |
| NA            | NA                 | NA | NA | NA | NA | -2 | NA |    |    |    |    |    |    |    |
| RP11-157P23.2 | ENSG00000261307.1  | NA | NA | NA | NA | NA | NA | NA | NA | NA | NA | NA | NA | NA |
| NA            | NA                 | NA | NA | NA | NA | -2 | NA |    |    |    |    |    |    |    |
| GREB1L        | ENSG00000141449.14 | NA | NA | NA | NA | NA | NA | NA | NA | NA | NA | NA | NA | NA |
| NA            | NA                 | NA | NA | NA | NA | -2 | NA |    |    |    |    |    |    |    |
| TCF4          | ENSG00000196628.15 | NA | NA | NA | NA | NA | NA | NA | NA | NA | NA | NA | NA | NA |
| NA            | NA                 | NA | NA | NA | NA | -2 | NA |    |    |    |    |    |    |    |
| OSBPL1A       | ENSG00000141447.17 | NA | NA | NA | NA | NA | NA | NA | NA | NA | NA | NA | NA | NA |
| NA            | NA                 | NA | NA | NA | NA | -2 | NA |    |    |    |    |    |    |    |
| LINC00668     | ENSG00000265933.5  | NA | NA | NA | NA | NA | NA | NA | NA | NA | NA | NA | NA | NA |
| NA            | NA                 | NA | NA | NA | NA | -2 | NA |    |    |    |    |    |    |    |
| LINC01415     | ENSG00000267325.1  | NA | NA | NA | NA | NA | NA | NA | NA | NA | NA | NA | NA | NA |
| NA            | NA                 | NA | NA | NA | NA | -2 | NA |    |    |    |    |    |    |    |
| RP11-243E13.2 | ENSG00000266102.1  | NA | NA | NA | NA | NA | NA | NA | NA | NA | NA | NA | NA | NA |
| NA            | NA                 | NA | NA | NA | NA | -2 | NA |    |    |    |    |    |    |    |
| LINC01541     | ENSG00000260676.5  | NA | NA | NA | NA | NA | NA | NA | NA | NA | NA | NA | NA | NA |
| NA            | NA                 | NA | NA | NA | NA | -2 | NA |    |    |    |    |    |    |    |
| MC5R          | ENSG00000176136.6  | NA | NA | NA | NA | NA | NA | NA | NA | NA | NA | NA | NA | NA |
| NA            | NA                 | NA | NA | NA | NA | -2 | NA |    |    |    |    |    |    |    |
| C18orf32      | ENSG00000177576.11 | NA | NA | NA | NA | NA | NA | NA | NA | NA | NA | NA | NA | NA |
| NA            | NA                 | NA | NA | NA | NA | -2 | NA |    |    |    |    |    |    |    |
| C18orf21      | ENSG00000141428.16 | NA | NA | NA | NA | NA | NA | NA | NA | NA | NA | NA | NA | NA |
| NA            | NA                 | NA | NA | NA | NA | -2 | NA |    |    |    |    |    |    |    |
| RP11-669I1.1  | ENSG00000260569.2  | NA | NA | NA | NA | NA | NA | NA | NA | NA | NA | NA | NA | NA |
| NA            | NA                 | NA | NA | NA | NA | -2 | NA |    |    |    |    |    |    |    |
| GATA6-AS1     | ENSG00000266010.1  | NA | NA | NA | NA | NA | NA | NA | NA | NA | NA | NA | NA | NA |
| NA            | NA                 | NA | NA | NA | NA | -2 | NA |    |    |    |    |    |    |    |
| RP11-813F20.2 | ENSG00000267674.1  | NA | NA | NA | NA | NA | NA | NA | NA | NA | NA | NA | NA | NA |
| NA            | NA                 | NA | NA | NA | NA | -2 | NA |    |    |    |    |    |    |    |
| LINC01255     | ENSG00000267252.5  | NA | NA | NA | NA | NA | NA | NA | NA | NA | NA | NA | NA | NA |
| NA            | NA                 | NA | NA | NA | NA | -2 | NA |    |    |    |    |    |    |    |
| RP11-126O1.6  | ENSG00000275418.1  | NA | NA | NA | NA | NA | NA | NA | NA | NA | NA | NA | NA | NA |
| NA            | NA                 | NA | NA | NA | NA | -2 | NA |    |    |    |    |    |    |    |
| RP11-138E9.2  | ENSG00000264876.1  | NA | NA | NA | NA | NA | NA | NA | NA | NA | NA | NA | NA | NA |
| NA            | NA                 | NA | NA | NA | NA | -2 | NA |    |    |    |    |    |    |    |
| RPL17         | ENSG00000265681.7  | NA | NA | NA | NA | NA | NA | NA | NA | NA | NA | NA | NA | NA |
| NA            | NA                 | NA | NA | NA | NA | -2 | NA |    |    |    |    |    |    |    |
| MEX3C         | ENSG00000176624.10 | NA | NA | NA | NA | NA | NA | NA | NA | NA | NA | NA | NA | NA |
| NA            | NA                 | NA | NA | NA | NA | -2 | NA |    |    |    |    |    |    |    |
| RP11-61L19.2  | ENSG00000273335.1  | NA | NA | NA | NA | NA | NA | NA | NA | NA | NA | NA | NA | NA |
| NA            | NA                 | NA | NA | NA | NA | -2 | NA |    |    |    |    |    |    |    |
| LINC01898     | ENSG00000261194.1  | NA | NA | NA | NA | NA | NA | NA | NA | NA | NA | NA | NA | NA |

|               |                    |    |    |    |    |    |    |    |    |    |    |    |    |    |
|---------------|--------------------|----|----|----|----|----|----|----|----|----|----|----|----|----|
| NA            | NA                 | NA | NA | NA | -2 | NA |    |    |    |    |    |    |    |    |
| DYNAP         | ENSG00000178690.2  |    |    | NA | NA | NA | NA | NA | NA | NA | NA | NA | NA | NA |
| NA            | NA                 | NA | NA | NA | -2 | NA |    |    |    |    |    |    |    |    |
| CNDP1         | ENSG00000150656.14 |    |    | NA | NA | NA | NA | NA | NA | NA | NA | NA | NA | NA |
| NA            | NA                 | NA | NA | NA | -2 | NA |    |    |    |    |    |    |    |    |
| GATA6         | ENSG00000141448.8  |    |    | NA | NA | NA | NA | NA | NA | NA | NA | NA | NA | NA |
| NA            | NA                 | NA | NA | NA | -2 | NA |    |    |    |    |    |    |    |    |
| RP11-64C12.4  | ENSG00000267643.1  |    |    | NA | NA | NA | NA | NA | NA | NA | NA | NA | NA | NA |
| NA            | NA                 | NA | NA | NA | NA | -2 | NA |    |    |    |    |    |    |    |
| SERPINB4      | ENSG00000206073.10 |    |    | NA | NA | NA | NA | NA | NA | NA | NA | NA | NA | NA |
| NA            | NA                 | NA | NA | NA | -2 | NA |    |    |    |    |    |    |    |    |
| L3MBTL4-AS1   | ENSG00000264707.1  |    |    | NA | NA | NA | NA | NA | NA | NA | NA | NA | NA | NA |
| NA            | NA                 | NA | NA | NA | NA | -2 | NA |    |    |    |    |    |    |    |
| LINC01912     | ENSG00000264699.1  |    |    | NA | NA | NA | NA | NA | NA | NA | NA | NA | NA | NA |
| NA            | NA                 | NA | NA | NA | -2 | NA |    |    |    |    |    |    |    |    |
| DSC3          | ENSG00000134762.16 |    |    | NA | NA | NA | NA | NA | NA | NA | NA | NA | NA | NA |
| NA            | NA                 | NA | NA | NA | -2 | NA |    |    |    |    |    |    |    |    |
| ALPK2         | ENSG00000198796.6  |    |    | NA | NA | NA | NA | NA | NA | NA | NA | NA | NA | NA |
| NA            | NA                 | NA | NA | NA | -2 | NA |    |    |    |    |    |    |    |    |
| POTEC         | ENSG00000183206.17 |    |    | NA | NA | NA | NA | NA | NA | NA | NA | NA | NA | NA |
| NA            | NA                 | NA | NA | NA | -2 | NA |    |    |    |    |    |    |    |    |
| LINC01539     | ENSG00000267712.5  |    |    | NA | NA | NA | NA | NA | NA | NA | NA | NA | NA | NA |
| NA            | NA                 | NA | NA | NA | -2 | NA |    |    |    |    |    |    |    |    |
| RP11-110H1.8  | ENSG00000264464.1  |    |    | NA | NA | NA | NA | NA | NA | NA | NA | NA | NA | NA |
| NA            | NA                 | NA | NA | NA | NA | -2 | NA |    |    |    |    |    |    |    |
| ADNP2         | ENSG00000101544.8  |    |    | NA | NA | NA | NA | NA | NA | NA | NA | NA | NA | NA |
| NA            | NA                 | NA | NA | NA | -2 | NA |    |    |    |    |    |    |    |    |
| RP11-723G8.1  | ENSG00000260457.2  |    |    | NA | NA | NA | NA | NA | NA | NA | NA | NA | NA | NA |
| NA            | NA                 | NA | NA | NA | NA | -2 | NA |    |    |    |    |    |    |    |
| SERPINB2      | ENSG00000197632.8  |    |    | NA | NA | NA | NA | NA | NA | NA | NA | NA | NA | NA |
| NA            | NA                 | NA | NA | NA | -2 | NA |    |    |    |    |    |    |    |    |
| LINC00908     | ENSG00000263812.5  |    |    | NA | NA | NA | NA | NA | NA | NA | NA | NA | NA | NA |
| NA            | NA                 | NA | NA | NA | -2 | NA |    |    |    |    |    |    |    |    |
| RP11-476K15.1 | ENSG00000266602.1  |    |    | NA | NA | NA | NA | NA | NA | NA | NA | NA | NA | NA |
| NA            | NA                 | NA | NA | NA | NA | -2 | NA |    |    |    |    |    |    |    |
| RP11-674P19.2 | ENSG00000264705.1  |    |    | NA | NA | NA | NA | NA | NA | NA | NA | NA | NA | NA |
| NA            | NA                 | NA | NA | NA | NA | -2 | NA |    |    |    |    |    |    |    |
| MBP           | ENSG00000197971.14 |    |    | NA | NA | NA | NA | NA | NA | NA | NA | NA | NA | NA |
| NA            | NA                 | NA | NA | NA | -2 | NA |    |    |    |    |    |    |    |    |
| CDH19         | ENSG00000071991.8  |    |    | NA | NA | NA | NA | NA | NA | NA | NA | NA | NA | NA |
| NA            | NA                 | NA | NA | NA | -2 | NA |    |    |    |    |    |    |    |    |
| RP11-322E11.2 | ENSG00000275512.1  |    |    | NA | NA | NA | NA | NA | NA | NA | NA | NA | NA | NA |
| NA            | NA                 | NA | NA | NA | NA | -2 | NA |    |    |    |    |    |    |    |
| MBD1          | ENSG00000141644.17 |    |    | NA | NA | NA | NA | NA | NA | NA | NA | NA | NA | NA |
| NA            | NA                 | NA | NA | NA | -2 | NA |    |    |    |    |    |    |    |    |
| RNF165        | ENSG00000141622.13 |    |    | NA | NA | NA | NA | NA | NA | NA | NA | NA | NA | NA |
| NA            | NA                 | NA | NA | NA | -2 | NA |    |    |    |    |    |    |    |    |
| TTR           | ENSG00000118271.9  |    |    | NA | NA | NA | NA | NA | NA | NA | NA | NA | NA | NA |
| NA            | NA                 | NA | NA | NA | -2 | NA |    |    |    |    |    |    |    |    |
| RP11-685A21.1 | ENSG00000267215.1  |    |    | NA | NA | NA | NA | NA | NA | NA | NA | NA | NA | NA |
| NA            | NA                 | NA | NA | NA | NA | -2 | NA |    |    |    |    |    |    |    |
| RP11-474N24.6 | ENSG00000272799.1  |    |    | NA | NA | NA | NA | NA | NA | NA | NA | NA | NA | NA |
| NA            | NA                 | NA | NA | NA | NA | -2 | NA |    |    |    |    |    |    |    |
| LINC01899     | ENSG00000265352.1  |    |    | NA | NA | NA | NA | NA | NA | NA | NA | NA | NA | NA |
| NA            | NA                 | NA | NA | NA | -2 | NA |    |    |    |    |    |    |    |    |
| RP11-99A1.2   | ENSG00000267311.1  |    |    | NA | NA | NA | NA | NA | NA | NA | NA | NA | NA | NA |
| NA            | NA                 | NA | NA | NA | NA | -2 | NA |    |    |    |    |    |    |    |
| CTD-2008L17.2 | ENSG00000206129.3  |    |    | NA | NA | NA | NA | NA | NA | NA | NA | NA | NA | NA |
| NA            | NA                 | NA | NA | NA | NA | -2 | NA |    |    |    |    |    |    |    |
| RP11-456O19.3 | ENSG00000267732.1  |    |    | NA | NA | NA | NA | NA | NA | NA | NA | NA | NA | NA |
| NA            | NA                 | NA | NA | NA | NA | -2 | NA |    |    |    |    |    |    |    |
| RP11-178F10.2 | ENSG00000264695.1  |    |    | NA | NA | NA | NA | NA | NA | NA | NA | NA | NA | NA |

|               |                    |    |    |    |    |    |    |    |    |    |    |    |    |    |
|---------------|--------------------|----|----|----|----|----|----|----|----|----|----|----|----|----|
| NA            | NA                 | NA | NA | NA | NA | -2 | NA |    |    |    |    |    |    |    |
| RP11-2N1.3    | ENSG00000273664.1  |    |    |    |    | NA | NA | NA | NA | NA | NA | NA | NA | NA |
| NA            | NA                 | NA | NA | NA | NA | -2 | NA |    |    |    |    |    |    |    |
| AQP4          | ENSG00000171885.13 |    |    |    |    | NA | NA | NA | NA | NA | NA | NA | NA | NA |
| NA            | NA                 | NA | NA | NA | NA | -2 | NA |    |    |    |    |    |    |    |
| CTD-2526M8.3  | ENSG00000267789.1  |    |    |    |    | NA | NA | NA | NA | NA | NA | NA | NA | NA |
| NA            | NA                 | NA | NA | NA | NA | -2 | NA |    |    |    |    |    |    |    |
| GTSCR1        | ENSG00000263417.4  |    |    |    |    | NA | NA | NA | NA | NA | NA | NA | NA | NA |
| NA            | NA                 | NA | NA | NA | NA | -2 | NA |    |    |    |    |    |    |    |
| RAB31         | ENSG00000168461.12 |    |    |    |    | NA | NA | NA | NA | NA | NA | NA | NA | NA |
| NA            | NA                 | NA | NA | NA | NA | -2 | NA |    |    |    |    |    |    |    |
| RP11-94B19.6  | ENSG00000266743.1  |    |    |    |    | NA | NA | NA | NA | NA | NA | NA | NA | NA |
| NA            | NA                 | NA | NA | NA | NA | -2 | NA |    |    |    |    |    |    |    |
| RP11-322E11.5 | ENSG00000267583.5  |    |    |    |    | NA | NA | NA | NA | NA | NA | NA | NA | NA |
| NA            | NA                 | NA | NA | NA | NA | -2 | NA |    |    |    |    |    |    |    |
| NETO1         | ENSG00000166342.18 |    |    |    |    | NA | NA | NA | NA | NA | NA | NA | NA | NA |
| NA            | NA                 | NA | NA | NA | NA | -2 | NA |    |    |    |    |    |    |    |
| C18orf63      | ENSG00000206043.6  |    |    |    |    | NA | NA | NA | NA | NA | NA | NA | NA | NA |
| NA            | NA                 | NA | NA | NA | NA | -2 | NA |    |    |    |    |    |    |    |
| RP11-879F14.2 | ENSG00000267279.1  |    |    |    |    | NA | NA | NA | NA | NA | NA | NA | NA | NA |
| NA            | NA                 | NA | NA | NA | NA | -2 | NA |    |    |    |    |    |    |    |
| LINC01887     | ENSG00000266604.1  |    |    |    |    | NA | NA | NA | NA | NA | NA | NA | NA | NA |
| NA            | NA                 | NA | NA | NA | NA | -2 | NA |    |    |    |    |    |    |    |
| LINC01900     | ENSG00000265758.1  |    |    |    |    | NA | NA | NA | NA | NA | NA | NA | NA | NA |
| NA            | NA                 | NA | NA | NA | NA | -2 | NA |    |    |    |    |    |    |    |
| VAPA          | ENSG00000101558.13 |    |    |    |    | NA | NA | NA | NA | NA | NA | NA | NA | NA |
| NA            | NA                 | NA | NA | NA | NA | -2 | NA |    |    |    |    |    |    |    |
| ZNF397        | ENSG00000186812.12 |    |    |    |    | NA | NA | NA | NA | NA | NA | NA | NA | NA |
| NA            | NA                 | NA | NA | NA | NA | -2 | NA |    |    |    |    |    |    |    |
| LINC-ROR      | ENSG00000258609.2  |    |    |    |    | NA | NA | NA | NA | NA | NA | NA | NA | NA |
| NA            | NA                 | NA | NA | NA | NA | -2 | NA |    |    |    |    |    |    |    |
| SERPINB13     | ENSG00000197641.11 |    |    |    |    | NA | NA | NA | NA | NA | NA | NA | NA | NA |
| NA            | NA                 | NA | NA | NA | NA | -2 | NA |    |    |    |    |    |    |    |
| SMIM21        | ENSG00000206026.7  |    |    |    |    | NA | NA | NA | NA | NA | NA | NA | NA | NA |
| NA            | NA                 | NA | NA | NA | NA | -2 | NA |    |    |    |    |    |    |    |
| RP11-650P15.1 | ENSG00000266521.1  |    |    |    |    | NA | NA | NA | NA | NA | NA | NA | NA | NA |
| NA            | NA                 | NA | NA | NA | NA | -2 | NA |    |    |    |    |    |    |    |
| RP11-672L10.6 | ENSG00000273355.1  |    |    |    |    | NA | NA | NA | NA | NA | NA | NA | NA | NA |
| NA            | NA                 | NA | NA | NA | NA | -2 | NA |    |    |    |    |    |    |    |
| SLC35G4       | ENSG00000236396.8  |    |    |    |    | NA | NA | NA | NA | NA | NA | NA | NA | NA |
| NA            | NA                 | NA | NA | NA | NA | -2 | NA |    |    |    |    |    |    |    |
| LRRC30        | ENSG00000206422.2  |    |    |    |    | NA | NA | NA | NA | NA | NA | NA | NA | NA |
| NA            | NA                 | NA | NA | NA | NA | -2 | NA |    |    |    |    |    |    |    |
| MEP1B         | ENSG00000141434.11 |    |    |    |    | NA | NA | NA | NA | NA | NA | NA | NA | NA |
| NA            | NA                 | NA | NA | NA | NA | -2 | NA |    |    |    |    |    |    |    |
| RP11-64C12.8  | ENSG00000267069.1  |    |    |    |    | NA | NA | NA | NA | NA | NA | NA | NA | NA |
| NA            | NA                 | NA | NA | NA | NA | -2 | NA |    |    |    |    |    |    |    |
| MBD2          | ENSG00000134046.11 |    |    |    |    | NA | NA | NA | NA | NA | NA | NA | NA | NA |
| NA            | NA                 | NA | NA | NA | NA | -2 | NA |    |    |    |    |    |    |    |
| RP11-321M21.1 | ENSG00000266774.1  |    |    |    |    | NA | NA | NA | NA | NA | NA | NA | NA | NA |
| NA            | NA                 | NA | NA | NA | NA | -2 | NA |    |    |    |    |    |    |    |
| MYO5B         | ENSG00000167306.19 |    |    |    |    | NA | NA | NA | NA | NA | NA | NA | NA | NA |
| NA            | NA                 | NA | NA | NA | NA | -2 | NA |    |    |    |    |    |    |    |
| LMAN1         | ENSG00000074695.5  |    |    |    |    | NA | NA | NA | NA | NA | NA | NA | NA | NA |
| NA            | NA                 | NA | NA | NA | NA | -2 | NA |    |    |    |    |    |    |    |
| RP11-419J16.1 | ENSG00000265554.1  |    |    |    |    | NA | NA | NA | NA | NA | NA | NA | NA | NA |
| NA            | NA                 | NA | NA | NA | NA | -2 | NA |    |    |    |    |    |    |    |
| MYL12B        | ENSG00000118680.12 |    |    |    |    | NA | NA | NA | NA | NA | NA | NA | NA | NA |
| NA            | NA                 | NA | NA | NA | NA | -2 | NA |    |    |    |    |    |    |    |
| LOXHD1        | ENSG00000167210.16 |    |    |    |    | NA | NA | NA | NA | NA | NA | NA | NA | NA |
| NA            | NA                 | NA | NA | NA | NA | -2 | NA |    |    |    |    |    |    |    |
| ZNF441        | ENSG00000197044.10 |    |    |    |    | NA | NA | NA | NA | NA | NA | NA | NA | NA |

|                |                    |    |    |    |    |    |    |    |    |    |    |    |    |
|----------------|--------------------|----|----|----|----|----|----|----|----|----|----|----|----|
| NA             | NA                 | NA | NA | NA | -2 | NA | NA | NA | NA | NA | NA | NA | NA |
| NLRP11         | ENSG00000179873.14 | NA | NA | NA | NA | NA | NA | NA | NA | NA | NA | NA | NA |
| NA             | NA                 | NA | NA | NA | -2 | NA | NA | NA | NA | NA | NA | NA | NA |
| KIR2DL3        | ENSG00000243772.7  | NA | NA | NA | NA | NA | NA | NA | NA | NA | NA | NA | NA |
| NA             | NA                 | NA | NA | NA | -2 | NA | NA | NA | NA | NA | NA | NA | NA |
| RNASEH2A       | ENSG00000104889.5  | NA | NA | NA | NA | NA | NA | NA | NA | NA | NA | NA | NA |
| NA             | NA                 | NA | NA | NA | -2 | NA | NA | NA | NA | NA | NA | NA | NA |
| KLK1           | ENSG00000167748.10 | NA | NA | NA | NA | NA | NA | NA | NA | NA | NA | NA | NA |
| NA             | NA                 | NA | NA | NA | -2 | NA | NA | NA | NA | NA | NA | NA | NA |
| IRF2BP1        | ENSG00000170604.4  | NA | NA | NA | NA | NA | NA | NA | NA | NA | NA | NA | NA |
| NA             | NA                 | NA | NA | NA | -2 | NA | NA | NA | NA | NA | NA | NA | NA |
| CALM3          | ENSG00000160014.16 | NA | NA | NA | NA | NA | NA | NA | NA | NA | NA | NA | NA |
| NA             | NA                 | NA | NA | NA | -2 | NA | NA | NA | NA | NA | NA | NA | NA |
| KEAP1          | ENSG00000079999.13 | NA | NA | NA | NA | NA | NA | NA | NA | NA | NA | NA | NA |
| NA             | NA                 | NA | NA | NA | -2 | NA | NA | NA | NA | NA | NA | NA | NA |
| SIGLEC8        | ENSG00000105366.15 | NA | NA | NA | NA | NA | NA | NA | NA | NA | NA | NA | NA |
| NA             | NA                 | NA | NA | NA | -2 | NA | NA | NA | NA | NA | NA | NA | NA |
| TMED1          | ENSG00000099203.6  | NA | NA | NA | NA | NA | NA | NA | NA | NA | NA | NA | NA |
| NA             | NA                 | NA | NA | NA | -2 | NA | NA | NA | NA | NA | NA | NA | NA |
| FOXA3          | ENSG00000170608.2  | NA | NA | NA | NA | NA | NA | NA | NA | NA | NA | NA | NA |
| NA             | NA                 | NA | NA | NA | -2 | NA | NA | NA | NA | NA | NA | NA | NA |
| RAD23A         | ENSG00000179262.9  | NA | NA | NA | NA | NA | NA | NA | NA | NA | NA | NA | NA |
| NA             | NA                 | NA | NA | NA | -2 | NA | NA | NA | NA | NA | NA | NA | NA |
| TUBB4A         | ENSG00000104833.11 | NA | NA | NA | NA | NA | NA | NA | NA | NA | NA | NA | NA |
| NA             | NA                 | NA | NA | NA | -2 | NA | NA | NA | NA | NA | NA | NA | NA |
| ZNF791         | ENSG00000173875.13 | NA | NA | NA | NA | NA | NA | NA | NA | NA | NA | NA | NA |
| NA             | NA                 | NA | NA | NA | -2 | NA | NA | NA | NA | NA | NA | NA | NA |
| PPP1R14A       | ENSG00000167641.10 | NA | NA | NA | NA | NA | NA | NA | NA | NA | NA | NA | NA |
| NA             | NA                 | NA | NA | NA | -2 | NA | NA | NA | NA | NA | NA | NA | NA |
| CTC-525D6.5    | ENSG00000267574.1  | NA | NA | NA | NA | NA | NA | NA | NA | NA | NA | NA | NA |
| NA             | NA                 | NA | NA | NA | NA | -2 | NA | NA | NA | NA | NA | NA | NA |
| CTD-2050I18.1  | ENSG00000267407.1  | NA | NA | NA | NA | NA | NA | NA | NA | NA | NA | NA | NA |
| NA             | NA                 | NA | NA | NA | NA | -2 | NA | NA | NA | NA | NA | NA | NA |
| CTD-3113P16.11 | ENSG00000282393.1  | NA | NA | NA | NA | NA | NA | NA | NA | NA | NA | NA | NA |
| NA             | NA                 | NA | NA | NA | NA | -2 | NA | NA | NA | NA | NA | NA | NA |
| KISS1R         | ENSG00000116014.9  | NA | NA | NA | NA | NA | NA | NA | NA | NA | NA | NA | NA |
| NA             | NA                 | NA | NA | NA | -2 | NA | NA | NA | NA | NA | NA | NA | NA |
| LILRA5         | ENSG00000187116.13 | NA | NA | NA | NA | NA | NA | NA | NA | NA | NA | NA | NA |
| NA             | NA                 | NA | NA | NA | -2 | NA | NA | NA | NA | NA | NA | NA | NA |
| MAST1          | ENSG00000105613.9  | NA | NA | NA | NA | NA | NA | NA | NA | NA | NA | NA | NA |
| NA             | NA                 | NA | NA | NA | -2 | NA | NA | NA | NA | NA | NA | NA | NA |
| EPOR           | ENSG00000187266.13 | NA | NA | NA | NA | NA | NA | NA | NA | NA | NA | NA | NA |
| NA             | NA                 | NA | NA | NA | -2 | NA | NA | NA | NA | NA | NA | NA | NA |
| PAFAH1B3       | ENSG00000079462.7  | NA | NA | NA | NA | NA | NA | NA | NA | NA | NA | NA | NA |
| NA             | NA                 | NA | NA | NA | -2 | NA | NA | NA | NA | NA | NA | NA | NA |
| UBL5           | ENSG00000198258.10 | NA | NA | NA | NA | NA | NA | NA | NA | NA | NA | NA | NA |
| NA             | NA                 | NA | NA | NA | -2 | NA | NA | NA | NA | NA | NA | NA | NA |
| RFPL4A         | ENSG00000223638.3  | NA | NA | NA | NA | NA | NA | NA | NA | NA | NA | NA | NA |
| NA             | NA                 | NA | NA | NA | -2 | NA | NA | NA | NA | NA | NA | NA | NA |
| CYP2S1         | ENSG00000167600.13 | NA | NA | NA | NA | NA | NA | NA | NA | NA | NA | NA | NA |
| NA             | NA                 | NA | NA | NA | -2 | NA | NA | NA | NA | NA | NA | NA | NA |
| IGFL2-AS1      | ENSG00000268621.5  | NA | NA | NA | NA | NA | NA | NA | NA | NA | NA | NA | NA |
| NA             | NA                 | NA | NA | NA | -2 | NA | NA | NA | NA | NA | NA | NA | NA |
| CTD-2291D10.3  | ENSG00000269543.5  | NA | NA | NA | NA | NA | NA | NA | NA | NA | NA | NA | NA |
| NA             | NA                 | NA | NA | NA | NA | -2 | NA | NA | NA | NA | NA | NA | NA |
| RAB3A          | ENSG00000105649.9  | NA | NA | NA | NA | NA | NA | NA | NA | NA | NA | NA | NA |
| NA             | NA                 | NA | NA | NA | -2 | NA | NA | NA | NA | NA | NA | NA | NA |
| CLEC17A        | ENSG00000187912.11 | NA | NA | NA | NA | NA | NA | NA | NA | NA | NA | NA | NA |
| NA             | NA                 | NA | NA | NA | -2 | NA | NA | NA | NA | NA | NA | NA | NA |
| ALKBH6         | ENSG00000239382.10 | NA | NA | NA | NA | NA | NA | NA | NA | NA | NA | NA | NA |
| NA             | NA                 | NA | NA | NA | -2 | NA | NA | NA | NA | NA | NA | NA | NA |
| TIMM29         | ENSG00000142444.6  | NA | NA | NA | NA | NA | NA | NA | NA | NA | NA | NA | NA |

|                |                    |    |    |    |    |    |    |    |    |    |    |    |    |    |
|----------------|--------------------|----|----|----|----|----|----|----|----|----|----|----|----|----|
| PIAS4          | NA                 | NA | NA | NA | NA | -2 | NA | NA | NA | NA | NA | NA | NA | NA |
|                | ENSG00000105229.6  |    |    |    | NA | NA | NA | NA | NA | NA | NA | NA | NA | NA |
|                | NA                 | NA | NA | NA | -2 | NA |    |    |    |    |    |    |    |    |
| SYCN           | ENSG00000179751.6  |    |    |    | NA | NA | NA | NA | NA | NA | NA | NA | NA | NA |
|                | NA                 | NA | NA | NA | -2 | NA |    |    |    |    |    |    |    |    |
| ZNF653         | ENSG00000161914.9  |    |    |    | NA | NA | NA | NA | NA | NA | NA | NA | NA | NA |
|                | NA                 | NA | NA | NA | -2 | NA |    |    |    |    |    |    |    |    |
| CTD-2527I21.15 | ENSG00000179066.7  |    |    |    | NA | NA | NA | NA | NA | NA | NA | NA | NA | NA |
|                | NA                 | NA | NA | NA | NA | -2 | NA |    |    |    |    |    |    |    |
| IGSF23         | ENSG00000216588.8  |    |    |    | NA | NA | NA | NA | NA | NA | NA | NA | NA | NA |
|                | NA                 | NA | NA | NA | -2 | NA |    |    |    |    |    |    |    |    |
| AC010641.1     | ENSG00000267443.2  |    |    |    | NA | NA | NA | NA | NA | NA | NA | NA | NA | NA |
|                | NA                 | NA | NA | NA | -2 | NA |    |    |    |    |    |    |    |    |
| GGN            | ENSG00000179168.14 |    |    |    | NA | NA | NA | NA | NA | NA | NA | NA | NA | NA |
|                | NA                 | NA | NA | NA | -2 | NA |    |    |    |    |    |    |    |    |
| LDLR           | ENSG00000130164.13 |    |    |    | NA | NA | NA | NA | NA | NA | NA | NA | NA | NA |
|                | NA                 | NA | NA | NA | -2 | NA |    |    |    |    |    |    |    |    |
| ZNF865         | ENSG00000261221.3  |    |    |    | NA | NA | NA | NA | NA | NA | NA | NA | NA | NA |
|                | NA                 | NA | NA | NA | -2 | NA |    |    |    |    |    |    |    |    |
| CLEC11A        | ENSG00000105472.12 |    |    |    | NA | NA | NA | NA | NA | NA | NA | NA | NA | NA |
|                | NA                 | NA | NA | NA | -2 | NA |    |    |    |    |    |    |    |    |
| TOMM40         | ENSG00000130204.12 |    |    |    | NA | NA | NA | NA | NA | NA | NA | NA | NA | NA |
|                | NA                 | NA | NA | NA | -2 | NA |    |    |    |    |    |    |    |    |
| ARMC6          | ENSG00000105676.13 |    |    |    | NA | NA | NA | NA | NA | NA | NA | NA | NA | NA |
|                | NA                 | NA | NA | NA | -2 | NA |    |    |    |    |    |    |    |    |
| S1PR5          | ENSG00000180739.13 |    |    |    | NA | NA | NA | NA | NA | NA | NA | NA | NA | NA |
|                | NA                 | NA | NA | NA | -2 | NA |    |    |    |    |    |    |    |    |
| HNRNPL         | ENSG00000104824.16 |    |    |    | NA | NA | NA | NA | NA | NA | NA | NA | NA | NA |
|                | NA                 | NA | NA | NA | -2 | NA |    |    |    |    |    |    |    |    |
| NR2F6          | ENSG00000160113.5  |    |    |    | NA | NA | NA | NA | NA | NA | NA | NA | NA | NA |
|                | NA                 | NA | NA | NA | -2 | NA |    |    |    |    |    |    |    |    |
| ZNF541         | ENSG00000118156.12 |    |    |    | NA | NA | NA | NA | NA | NA | NA | NA | NA | NA |
|                | NA                 | NA | NA | NA | -2 | NA |    |    |    |    |    |    |    |    |
| LILRA2         | ENSG00000239998.5  |    |    |    | NA | NA | NA | NA | NA | NA | NA | NA | NA | NA |
|                | NA                 | NA | NA | NA | -2 | NA |    |    |    |    |    |    |    |    |
| MKNK2          | ENSG00000099875.14 |    |    |    | NA | NA | NA | NA | NA | NA | NA | NA | NA | NA |
|                | NA                 | NA | NA | NA | -2 | NA |    |    |    |    |    |    |    |    |
| AC006129.2     | ENSG00000268027.5  |    |    |    | NA | NA | NA | NA | NA | NA | NA | NA | NA | NA |
|                | NA                 | NA | NA | NA | -2 | NA |    |    |    |    |    |    |    |    |
| SERTAD3        | ENSG00000167565.12 |    |    |    | NA | NA | NA | NA | NA | NA | NA | NA | NA | NA |
|                | NA                 | NA | NA | NA | -2 | NA |    |    |    |    |    |    |    |    |
| BST2           | ENSG00000130303.12 |    |    |    | NA | NA | NA | NA | NA | NA | NA | NA | NA | NA |
|                | NA                 | NA | NA | NA | -2 | NA |    |    |    |    |    |    |    |    |
| KLK13          | ENSG00000167759.12 |    |    |    | NA | NA | NA | NA | NA | NA | NA | NA | NA | NA |
|                | NA                 | NA | NA | NA | -2 | NA |    |    |    |    |    |    |    |    |
| NLRP8          | ENSG00000179709.8  |    |    |    | NA | NA | NA | NA | NA | NA | NA | NA | NA | NA |
|                | NA                 | NA | NA | NA | -2 | NA |    |    |    |    |    |    |    |    |
| MUC16          | ENSG00000181143.15 |    |    |    | NA | NA | NA | NA | NA | NA | NA | NA | NA | NA |
|                | NA                 | NA | NA | NA | -2 | NA |    |    |    |    |    |    |    |    |
| BCL3           | ENSG00000069399.14 |    |    |    | NA | NA | NA | NA | NA | NA | NA | NA | NA | NA |
|                | NA                 | NA | NA | NA | -2 | NA |    |    |    |    |    |    |    |    |
| RSPH6A         | ENSG00000104941.7  |    |    |    | NA | NA | NA | NA | NA | NA | NA | NA | NA | NA |
|                | NA                 | NA | NA | NA | -2 | NA |    |    |    |    |    |    |    |    |
| CEACAM7        | ENSG00000007306.14 |    |    |    | NA | NA | NA | NA | NA | NA | NA | NA | NA | NA |
|                | NA                 | NA | NA | NA | -2 | NA |    |    |    |    |    |    |    |    |
| SARS2          | ENSG00000104835.14 |    |    |    | NA | NA | NA | NA | NA | NA | NA | NA | NA | NA |
|                | NA                 | NA | NA | NA | -2 | NA |    |    |    |    |    |    |    |    |
| FOSB           | ENSG00000125740.13 |    |    |    | NA | NA | NA | NA | NA | NA | NA | NA | NA | NA |
|                | NA                 | NA | NA | NA | -2 | NA |    |    |    |    |    |    |    |    |
| PRTN3          | ENSG00000196415.9  |    |    |    | NA | NA | NA | NA | NA | NA | NA | NA | NA | NA |
|                | NA                 | NA | NA | NA | -2 | NA |    |    |    |    |    |    |    |    |
| MARK4          | ENSG00000007047.14 |    |    |    | NA | NA | NA | NA | NA | NA | NA | NA | NA | NA |

|               |                    |    |    |    |    |    |    |    |    |    |    |    |    |    |
|---------------|--------------------|----|----|----|----|----|----|----|----|----|----|----|----|----|
| NA            | NA                 | NA | NA | -2 | NA |    |    |    |    |    |    |    |    |    |
| ADAMTSL5      | ENSG00000185761.10 |    |    |    | NA | NA | NA | NA | NA | NA | NA | NA | NA | NA |
| NA            | NA                 | NA | NA | NA | -2 | NA |    |    |    |    |    |    |    |    |
| DCAF15        | ENSG00000132017.10 |    |    |    | NA | NA | NA | NA | NA | NA | NA | NA | NA | NA |
| NA            | NA                 | NA | NA | NA | -2 | NA |    |    |    |    |    |    |    |    |
| GSK3A         | ENSG00000105723.11 |    |    |    | NA | NA | NA | NA | NA | NA | NA | NA | NA | NA |
| NA            | NA                 | NA | NA | NA | -2 | NA |    |    |    |    |    |    |    |    |
| PTGER1        | ENSG00000160951.3  |    |    |    | NA | NA | NA | NA | NA | NA | NA | NA | NA | NA |
| NA            | NA                 | NA | NA | NA | -2 | NA |    |    |    |    |    |    |    |    |
| IFNL1         | ENSG00000182393.2  |    |    |    | NA | NA | NA | NA | NA | NA | NA | NA | NA | NA |
| NA            | NA                 | NA | NA | NA | -2 | NA |    |    |    |    |    |    |    |    |
| FTL           | ENSG00000087086.14 |    |    |    | NA | NA | NA | NA | NA | NA | NA | NA | NA | NA |
| NA            | NA                 | NA | NA | NA | -2 | NA |    |    |    |    |    |    |    |    |
| ANO8          | ENSG00000074855.10 |    |    |    | NA | NA | NA | NA | NA | NA | NA | NA | NA | NA |
| NA            | NA                 | NA | NA | NA | -2 | NA |    |    |    |    |    |    |    |    |
| CTC-246B18.10 | ENSG00000269246.1  |    |    |    | NA | NA | NA | NA | NA | NA | NA | NA | NA | NA |
| NA            | NA                 | NA | NA | NA | -2 | NA |    |    |    |    |    |    |    |    |
| DNAJB1        | ENSG00000132002.7  |    |    |    | NA | NA | NA | NA | NA | NA | NA | NA | NA | NA |
| NA            | NA                 | NA | NA | NA | -2 | NA |    |    |    |    |    |    |    |    |
| KLK8          | ENSG00000129455.15 |    |    |    | NA | NA | NA | NA | NA | NA | NA | NA | NA | NA |
| NA            | NA                 | NA | NA | NA | -2 | NA |    |    |    |    |    |    |    |    |
| ICAM3         | ENSG00000076662.9  |    |    |    | NA | NA | NA | NA | NA | NA | NA | NA | NA | NA |
| NA            | NA                 | NA | NA | NA | -2 | NA |    |    |    |    |    |    |    |    |
| AC007795.1    | ENSG00000267617.1  |    |    |    | NA | NA | NA | NA | NA | NA | NA | NA | NA | NA |
| NA            | NA                 | NA | NA | NA | -2 | NA |    |    |    |    |    |    |    |    |
| TMEM238       | ENSG00000233493.3  |    |    |    | NA | NA | NA | NA | NA | NA | NA | NA | NA | NA |
| NA            | NA                 | NA | NA | NA | -2 | NA |    |    |    |    |    |    |    |    |
| CRB3          | ENSG00000130545.15 |    |    |    | NA | NA | NA | NA | NA | NA | NA | NA | NA | NA |
| NA            | NA                 | NA | NA | NA | -2 | NA |    |    |    |    |    |    |    |    |
| AC079466.1    | ENSG00000266976.1  |    |    |    | NA | NA | NA | NA | NA | NA | NA | NA | NA | NA |
| NA            | NA                 | NA | NA | NA | -2 | NA |    |    |    |    |    |    |    |    |
| PIK3R2        | ENSG00000105647.16 |    |    |    | NA | NA | NA | NA | NA | NA | NA | NA | NA | NA |
| NA            | NA                 | NA | NA | NA | -2 | NA |    |    |    |    |    |    |    |    |
| NR2C2AP       | ENSG00000184162.14 |    |    |    | NA | NA | NA | NA | NA | NA | NA | NA | NA | NA |
| NA            | NA                 | NA | NA | NA | -2 | NA |    |    |    |    |    |    |    |    |
| FUT5          | ENSG00000130383.7  |    |    |    | NA | NA | NA | NA | NA | NA | NA | NA | NA | NA |
| NA            | NA                 | NA | NA | NA | -2 | NA |    |    |    |    |    |    |    |    |
| GRIN2D        | ENSG00000105464.3  |    |    |    | NA | NA | NA | NA | NA | NA | NA | NA | NA | NA |
| NA            | NA                 | NA | NA | NA | -2 | NA |    |    |    |    |    |    |    |    |
| SLC39A3       | ENSG00000141873.10 |    |    |    | NA | NA | NA | NA | NA | NA | NA | NA | NA | NA |
| NA            | NA                 | NA | NA | NA | -2 | NA |    |    |    |    |    |    |    |    |
| IL11          | ENSG00000095752.6  |    |    |    | NA | NA | NA | NA | NA | NA | NA | NA | NA | NA |
| NA            | NA                 | NA | NA | NA | -2 | NA |    |    |    |    |    |    |    |    |
| AC011524.1    | ENSG00000267528.1  |    |    |    | NA | NA | NA | NA | NA | NA | NA | NA | NA | NA |
| NA            | NA                 | NA | NA | NA | -2 | NA |    |    |    |    |    |    |    |    |
| TMEM150B      | ENSG00000180061.9  |    |    |    | NA | NA | NA | NA | NA | NA | NA | NA | NA | NA |
| NA            | NA                 | NA | NA | NA | -2 | NA |    |    |    |    |    |    |    |    |
| LILRA1        | ENSG00000104974.11 |    |    |    | NA | NA | NA | NA | NA | NA | NA | NA | NA | NA |
| NA            | NA                 | NA | NA | NA | -2 | NA |    |    |    |    |    |    |    |    |
| GRIK5         | ENSG00000105737.9  |    |    |    | NA | NA | NA | NA | NA | NA | NA | NA | NA | NA |
| NA            | NA                 | NA | NA | NA | -2 | NA |    |    |    |    |    |    |    |    |
| ARHGEF18      | ENSG00000104880.17 |    |    |    | NA | NA | NA | NA | NA | NA | NA | NA | NA | NA |
| NA            | NA                 | NA | NA | NA | -2 | NA |    |    |    |    |    |    |    |    |
| AC003973.5    | ENSG00000269199.1  |    |    |    | NA | NA | NA | NA | NA | NA | NA | NA | NA | NA |
| NA            | NA                 | NA | NA | NA | -2 | NA |    |    |    |    |    |    |    |    |
| CTD-2291D10.4 | ENSG00000267886.1  |    |    |    | NA | NA | NA | NA | NA | NA | NA | NA | NA | NA |
| NA            | NA                 | NA | NA | NA | -2 | NA |    |    |    |    |    |    |    |    |
| CTD-3131K8.2  | ENSG00000269439.5  |    |    |    | NA | NA | NA | NA | NA | NA | NA | NA | NA | NA |
| NA            | NA                 | NA | NA | NA | -2 | NA |    |    |    |    |    |    |    |    |
| RDH8          | ENSG00000080511.3  |    |    |    | NA | NA | NA | NA | NA | NA | NA | NA | NA | NA |
| NA            | NA                 | NA | NA | NA | -2 | NA |    |    |    |    |    |    |    |    |
| S1PR4         | ENSG00000125910.5  |    |    |    | NA | NA | NA | NA | NA | NA | NA | NA | NA | NA |



|               |                    |    |    |    |    |    |    |    |    |    |    |    |    |    |
|---------------|--------------------|----|----|----|----|----|----|----|----|----|----|----|----|----|
| NA            | NA                 | NA | NA | -2 | NA |    |    |    |    |    |    |    |    |    |
| RAB3D         | ENSG00000105514.7  |    |    | NA | NA | NA | NA | NA | NA | NA | NA | NA | NA | NA |
| NA            | NA                 | NA | NA | -2 | NA |    |    |    |    |    |    |    |    |    |
| JUNB          | ENSG00000171223.5  |    |    | NA | NA | NA | NA | NA | NA | NA | NA | NA | NA | NA |
| NA            | NA                 | NA | NA | -2 | NA |    |    |    |    |    |    |    |    |    |
| TSPAN16       | ENSG00000130167.13 |    |    | NA | NA | NA | NA | NA | NA | NA | NA | NA | NA | NA |
| NA            | NA                 | NA | NA | -2 | NA |    |    |    |    |    |    |    |    |    |
| CC2D1A        | ENSG00000132024.17 |    |    | NA | NA | NA | NA | NA | NA | NA | NA | NA | NA | NA |
| NA            | NA                 | NA | NA | -2 | NA |    |    |    |    |    |    |    |    |    |
| B3GNT3        | ENSG00000179913.10 |    |    | NA | NA | NA | NA | NA | NA | NA | NA | NA | NA | NA |
| NA            | NA                 | NA | NA | -2 | NA |    |    |    |    |    |    |    |    |    |
| ZNF599        | ENSG00000153896.17 |    |    | NA | NA | NA | NA | NA | NA | NA | NA | NA | NA | NA |
| NA            | NA                 | NA | NA | -2 | NA |    |    |    |    |    |    |    |    |    |
| MAP2K7        | ENSG00000076984.17 |    |    | NA | NA | NA | NA | NA | NA | NA | NA | NA | NA | NA |
| NA            | NA                 | NA | NA | -2 | NA |    |    |    |    |    |    |    |    |    |
| LINC01841     | ENSG00000266913.1  |    |    | NA | NA | NA | NA | NA | NA | NA | NA | NA | NA | NA |
| NA            | NA                 | NA | NA | -2 | NA |    |    |    |    |    |    |    |    |    |
| LRG1          | ENSG00000171236.9  |    |    | NA | NA | NA | NA | NA | NA | NA | NA | NA | NA | NA |
| NA            | NA                 | NA | NA | -2 | NA |    |    |    |    |    |    |    |    |    |
| KIR2DL4       | ENSG00000189013.14 |    |    | NA | NA | NA | NA | NA | NA | NA | NA | NA | NA | NA |
| NA            | NA                 | NA | NA | -2 | NA |    |    |    |    |    |    |    |    |    |
| CTD-2626G11.2 | ENSG00000268416.1  |    |    | NA | NA | NA | NA | NA | NA | NA | NA | NA | NA | NA |
| NA            | NA                 | NA | NA | -2 | NA |    |    |    |    |    |    |    |    |    |
| OR7D4         | ENSG00000174667.3  |    |    | NA | NA | NA | NA | NA | NA | NA | NA | NA | NA | NA |
| NA            | NA                 | NA | NA | -2 | NA |    |    |    |    |    |    |    |    |    |
| CNOT3         | ENSG00000088038.17 |    |    | NA | NA | NA | NA | NA | NA | NA | NA | NA | NA | NA |
| NA            | NA                 | NA | NA | -2 | NA |    |    |    |    |    |    |    |    |    |
| ARHGAP35      | ENSG00000160007.18 |    |    | NA | NA | NA | NA | NA | NA | NA | NA | NA | NA | NA |
| NA            | NA                 | NA | NA | -2 | NA |    |    |    |    |    |    |    |    |    |
| CTC-543D15.3  | ENSG00000267273.1  |    |    | NA | NA | NA | NA | NA | NA | NA | NA | NA | NA | NA |
| NA            | NA                 | NA | NA | -2 | NA |    |    |    |    |    |    |    |    |    |
| CCDC151       | ENSG00000198003.11 |    |    | NA | NA | NA | NA | NA | NA | NA | NA | NA | NA | NA |
| NA            | NA                 | NA | NA | -2 | NA |    |    |    |    |    |    |    |    |    |
| ANGPTL8       | ENSG00000130173.13 |    |    | NA | NA | NA | NA | NA | NA | NA | NA | NA | NA | NA |
| NA            | NA                 | NA | NA | -2 | NA |    |    |    |    |    |    |    |    |    |
| ZNF724        | ENSG00000196081.9  |    |    | NA | NA | NA | NA | NA | NA | NA | NA | NA | NA | NA |
| NA            | NA                 | NA | NA | -2 | NA |    |    |    |    |    |    |    |    |    |
| KIRREL2       | ENSG00000126259.19 |    |    | NA | NA | NA | NA | NA | NA | NA | NA | NA | NA | NA |
| NA            | NA                 | NA | NA | -2 | NA |    |    |    |    |    |    |    |    |    |
| CDC37         | ENSG00000105401.8  |    |    | NA | NA | NA | NA | NA | NA | NA | NA | NA | NA | NA |
| NA            | NA                 | NA | NA | -2 | NA |    |    |    |    |    |    |    |    |    |
| PDCD2L        | ENSG00000126249.7  |    |    | NA | NA | NA | NA | NA | NA | NA | NA | NA | NA | NA |
| NA            | NA                 | NA | NA | -2 | NA |    |    |    |    |    |    |    |    |    |
| NLRP7         | ENSG00000167634.12 |    |    | NA | NA | NA | NA | NA | NA | NA | NA | NA | NA | NA |
| NA            | NA                 | NA | NA | -2 | NA |    |    |    |    |    |    |    |    |    |
| ZNF383        | ENSG00000188283.11 |    |    | NA | NA | NA | NA | NA | NA | NA | NA | NA | NA | NA |
| NA            | NA                 | NA | NA | -2 | NA |    |    |    |    |    |    |    |    |    |
| CTC-523E23.1  | ENSG00000261754.2  |    |    | NA | NA | NA | NA | NA | NA | NA | NA | NA | NA | NA |
| NA            | NA                 | NA | NA | -2 | NA |    |    |    |    |    |    |    |    |    |
| DUXA          | ENSG00000258873.2  |    |    | NA | NA | NA | NA | NA | NA | NA | NA | NA | NA | NA |
| NA            | NA                 | NA | NA | -2 | NA |    |    |    |    |    |    |    |    |    |
| CADM4         | ENSG00000105767.2  |    |    | NA | NA | NA | NA | NA | NA | NA | NA | NA | NA | NA |
| NA            | NA                 | NA | NA | -2 | NA |    |    |    |    |    |    |    |    |    |
| CD70          | ENSG00000125726.10 |    |    | NA | NA | NA | NA | NA | NA | NA | NA | NA | NA | NA |
| NA            | NA                 | NA | NA | -2 | NA |    |    |    |    |    |    |    |    |    |
| CLDND2        | ENSG00000160318.6  |    |    | NA | NA | NA | NA | NA | NA | NA | NA | NA | NA | NA |
| NA            | NA                 | NA | NA | -2 | NA |    |    |    |    |    |    |    |    |    |
| TNNT1         | ENSG00000105048.16 |    |    | NA | NA | NA | NA | NA | NA | NA | NA | NA | NA | NA |
| NA            | NA                 | NA | NA | -2 | NA |    |    |    |    |    |    |    |    |    |
| ZNF844        | ENSG00000223547.9  |    |    | NA | NA | NA | NA | NA | NA | NA | NA | NA | NA | NA |
| NA            | NA                 | NA | NA | -2 | NA |    |    |    |    |    |    |    |    |    |
| AC006272.2    | ENSG00000268316.1  |    |    | NA | NA | NA | NA | NA | NA | NA | NA | NA | NA | NA |

|               |                    |    |    |    |    |    |    |    |    |    |    |    |    |    |
|---------------|--------------------|----|----|----|----|----|----|----|----|----|----|----|----|----|
| NA            | NA                 | NA | NA | NA | -2 | NA |    |    |    |    |    |    |    |    |
| AC020956.3    | ENSG00000278239.1  |    |    |    |    | NA | NA | NA | NA | NA | NA | NA | NA | NA |
| NA            | NA                 | NA | NA | NA | -2 | NA |    |    |    |    |    |    |    |    |
| GALP          | ENSG00000197487.8  |    |    |    |    | NA | NA | NA | NA | NA | NA | NA | NA | NA |
| NA            | NA                 | NA | NA | NA | -2 | NA |    |    |    |    |    |    |    |    |
| KIR3DL1       | ENSG00000167633.18 |    |    |    |    | NA | NA | NA | NA | NA | NA | NA | NA | NA |
| NA            | NA                 | NA | NA | NA | -2 | NA |    |    |    |    |    |    |    |    |
| GYS1          | ENSG00000104812.14 |    |    |    |    | NA | NA | NA | NA | NA | NA | NA | NA | NA |
| NA            | NA                 | NA | NA | NA | -2 | NA |    |    |    |    |    |    |    |    |
| CXCL17        | ENSG00000189377.8  |    |    |    |    | NA | NA | NA | NA | NA | NA | NA | NA | NA |
| NA            | NA                 | NA | NA | NA | -2 | NA |    |    |    |    |    |    |    |    |
| LAIR1         | ENSG00000167613.15 |    |    |    |    | NA | NA | NA | NA | NA | NA | NA | NA | NA |
| NA            | NA                 | NA | NA | NA | -2 | NA |    |    |    |    |    |    |    |    |
| SLC44A2       | ENSG00000129353.14 |    |    |    |    | NA | NA | NA | NA | NA | NA | NA | NA | NA |
| NA            | NA                 | NA | NA | NA | -2 | NA |    |    |    |    |    |    |    |    |
| NLRP9         | ENSG00000185792.9  |    |    |    |    | NA | NA | NA | NA | NA | NA | NA | NA | NA |
| NA            | NA                 | NA | NA | NA | -2 | NA |    |    |    |    |    |    |    |    |
| DAZAP1        | ENSG00000071626.16 |    |    |    |    | NA | NA | NA | NA | NA | NA | NA | NA | NA |
| NA            | NA                 | NA | NA | NA | -2 | NA |    |    |    |    |    |    |    |    |
| RPL13A        | ENSG00000142541.16 |    |    |    |    | NA | NA | NA | NA | NA | NA | NA | NA | NA |
| NA            | NA                 | NA | NA | NA | -2 | NA |    |    |    |    |    |    |    |    |
| ABHD17A       | ENSG00000129968.15 |    |    |    |    | NA | NA | NA | NA | NA | NA | NA | NA | NA |
| NA            | NA                 | NA | NA | NA | -2 | NA |    |    |    |    |    |    |    |    |
| C19orf43      | ENSG00000123144.10 |    |    |    |    | NA | NA | NA | NA | NA | NA | NA | NA | NA |
| NA            | NA                 | NA | NA | NA | -2 | NA |    |    |    |    |    |    |    |    |
| YIPF2         | ENSG00000130733.10 |    |    |    |    | NA | NA | NA | NA | NA | NA | NA | NA | NA |
| NA            | NA                 | NA | NA | NA | -2 | NA |    |    |    |    |    |    |    |    |
| CTC-523E23.11 | ENSG00000271109.1  |    |    |    |    | NA | NA | NA | NA | NA | NA | NA | NA | NA |
| NA            | NA                 | NA | NA | NA | NA | -2 | NA |    |    |    |    |    |    |    |
| AKT2          | ENSG00000105221.16 |    |    |    |    | NA | NA | NA | NA | NA | NA | NA | NA | NA |
| NA            | NA                 | NA | NA | NA | -2 | NA |    |    |    |    |    |    |    |    |
| OSCAR         | ENSG00000170909.13 |    |    |    |    | NA | NA | NA | NA | NA | NA | NA | NA | NA |
| NA            | NA                 | NA | NA | NA | -2 | NA |    |    |    |    |    |    |    |    |
| ONECUT3       | ENSG00000205922.4  |    |    |    |    | NA | NA | NA | NA | NA | NA | NA | NA | NA |
| NA            | NA                 | NA | NA | NA | -2 | NA |    |    |    |    |    |    |    |    |
| TMEM38A       | ENSG00000072954.6  |    |    |    |    | NA | NA | NA | NA | NA | NA | NA | NA | NA |
| NA            | NA                 | NA | NA | NA | -2 | NA |    |    |    |    |    |    |    |    |
| LINC01764     | ENSG00000267308.1  |    |    |    |    | NA | NA | NA | NA | NA | NA | NA | NA | NA |
| NA            | NA                 | NA | NA | NA | -2 | NA |    |    |    |    |    |    |    |    |
| AC005307.4    | ENSG00000267243.6  |    |    |    |    | NA | NA | NA | NA | NA | NA | NA | NA | NA |
| NA            | NA                 | NA | NA | NA | -2 | NA |    |    |    |    |    |    |    |    |
| CGB8          | ENSG00000213030.5  |    |    |    |    | NA | NA | NA | NA | NA | NA | NA | NA | NA |
| NA            | NA                 | NA | NA | NA | -2 | NA |    |    |    |    |    |    |    |    |
| LINC01872     | ENSG00000268318.5  |    |    |    |    | NA | NA | NA | NA | NA | NA | NA | NA | NA |
| NA            | NA                 | NA | NA | NA | -2 | NA |    |    |    |    |    |    |    |    |
| ZNF563        | ENSG00000188868.13 |    |    |    |    | NA | NA | NA | NA | NA | NA | NA | NA | NA |
| NA            | NA                 | NA | NA | NA | -2 | NA |    |    |    |    |    |    |    |    |
| ZNF729        | ENSG00000196350.8  |    |    |    |    | NA | NA | NA | NA | NA | NA | NA | NA | NA |
| NA            | NA                 | NA | NA | NA | -2 | NA |    |    |    |    |    |    |    |    |
| PLIN4         | ENSG00000167676.4  |    |    |    |    | NA | NA | NA | NA | NA | NA | NA | NA | NA |
| NA            | NA                 | NA | NA | NA | -2 | NA |    |    |    |    |    |    |    |    |
| CATSPERD      | ENSG00000174898.15 |    |    |    |    | NA | NA | NA | NA | NA | NA | NA | NA | NA |
| NA            | NA                 | NA | NA | NA | -2 | NA |    |    |    |    |    |    |    |    |
| PCP2          | ENSG00000174788.9  |    |    |    |    | NA | NA | NA | NA | NA | NA | NA | NA | NA |
| NA            | NA                 | NA | NA | NA | -2 | NA |    |    |    |    |    |    |    |    |
| AC008753.4    | ENSG00000269564.1  |    |    |    |    | NA | NA | NA | NA | NA | NA | NA | NA | NA |
| NA            | NA                 | NA | NA | NA | -2 | NA |    |    |    |    |    |    |    |    |
| ZBTB7A        | ENSG00000178951.8  |    |    |    |    | NA | NA | NA | NA | NA | NA | NA | NA | NA |
| NA            | NA                 | NA | NA | NA | -2 | NA |    |    |    |    |    |    |    |    |
| RPL18A        | ENSG00000105640.12 |    |    |    |    | NA | NA | NA | NA | NA | NA | NA | NA | NA |
| NA            | NA                 | NA | NA | NA | -2 | NA |    |    |    |    |    |    |    |    |
| LRRC8E        | ENSG00000171017.10 |    |    |    |    | NA | NA | NA | NA | NA | NA | NA | NA | NA |

|               |                    |    |    |    |    |    |    |    |    |    |    |    |    |    |
|---------------|--------------------|----|----|----|----|----|----|----|----|----|----|----|----|----|
|               | NA                 | NA | NA | NA | NA | -2 | NA |    |    |    |    |    |    |    |
| PALM          | ENSG00000099864.17 | NA | NA | NA | NA | NA | NA | NA | NA | NA | NA | NA | NA | NA |
|               | NA                 | NA | NA | NA | NA | -2 | NA |    |    |    |    |    |    |    |
| LINC01766     | ENSG00000224910.1  | NA | NA | NA | NA | NA | NA | NA | NA | NA | NA | NA | NA | NA |
|               | NA                 | NA | NA | NA | NA | -2 | NA |    |    |    |    |    |    |    |
| PET100        | ENSG00000229833.9  | NA | NA | NA | NA | NA | NA | NA | NA | NA | NA | NA | NA | NA |
|               | NA                 | NA | NA | NA | NA | -2 | NA |    |    |    |    |    |    |    |
| ACER1         | ENSG00000167769.4  | NA | NA | NA | NA | NA | NA | NA | NA | NA | NA | NA | NA | NA |
|               | NA                 | NA | NA | NA | NA | -2 | NA |    |    |    |    |    |    |    |
| AC006273.4    | ENSG00000272473.1  | NA | NA | NA | NA | NA | NA | NA | NA | NA | NA | NA | NA | NA |
|               | NA                 | NA | NA | NA | NA | -2 | NA |    |    |    |    |    |    |    |
| LSM4          | ENSG00000130520.10 | NA | NA | NA | NA | NA | NA | NA | NA | NA | NA | NA | NA | NA |
|               | NA                 | NA | NA | NA | NA | -2 | NA |    |    |    |    |    |    |    |
| CIC           | ENSG00000079432.7  | NA | NA | NA | NA | NA | NA | NA | NA | NA | NA | NA | NA | NA |
|               | NA                 | NA | NA | NA | NA | -2 | NA |    |    |    |    |    |    |    |
| CEACAM6       | ENSG00000086548.8  | NA | NA | NA | NA | NA | NA | NA | NA | NA | NA | NA | NA | NA |
|               | NA                 | NA | NA | NA | NA | -2 | NA |    |    |    |    |    |    |    |
| SYCE2         | ENSG00000161860.7  | NA | NA | NA | NA | NA | NA | NA | NA | NA | NA | NA | NA | NA |
|               | NA                 | NA | NA | NA | NA | -2 | NA |    |    |    |    |    |    |    |
| CEACAM3       | ENSG00000170956.16 | NA | NA | NA | NA | NA | NA | NA | NA | NA | NA | NA | NA | NA |
|               | NA                 | NA | NA | NA | NA | -2 | NA |    |    |    |    |    |    |    |
| STXBP2        | ENSG00000076944.15 | NA | NA | NA | NA | NA | NA | NA | NA | NA | NA | NA | NA | NA |
|               | NA                 | NA | NA | NA | NA | -2 | NA |    |    |    |    |    |    |    |
| CTD-2331H12.7 | ENSG00000269646.1  | NA | NA | NA | NA | NA | NA | NA | NA | NA | NA | NA | NA | NA |
|               | NA                 | NA | NA | NA | NA | -2 | NA |    |    |    |    |    |    |    |
| EHD2          | ENSG00000024422.11 | NA | NA | NA | NA | NA | NA | NA | NA | NA | NA | NA | NA | NA |
|               | NA                 | NA | NA | NA | NA | -2 | NA |    |    |    |    |    |    |    |
| PSPN          | ENSG00000125650.4  | NA | NA | NA | NA | NA | NA | NA | NA | NA | NA | NA | NA | NA |
|               | NA                 | NA | NA | NA | NA | -2 | NA |    |    |    |    |    |    |    |
| ZNF776        | ENSG00000152443.12 | NA | NA | NA | NA | NA | NA | NA | NA | NA | NA | NA | NA | NA |
|               | NA                 | NA | NA | NA | NA | -2 | NA |    |    |    |    |    |    |    |
| KLK12         | ENSG00000186474.15 | NA | NA | NA | NA | NA | NA | NA | NA | NA | NA | NA | NA | NA |
|               | NA                 | NA | NA | NA | NA | -2 | NA |    |    |    |    |    |    |    |
| SERTAD1       | ENSG00000197019.4  | NA | NA | NA | NA | NA | NA | NA | NA | NA | NA | NA | NA | NA |
|               | NA                 | NA | NA | NA | NA | -2 | NA |    |    |    |    |    |    |    |
| COLGALT1      | ENSG00000130309.10 | NA | NA | NA | NA | NA | NA | NA | NA | NA | NA | NA | NA | NA |
|               | NA                 | NA | NA | NA | NA | -2 | NA |    |    |    |    |    |    |    |
| CBARP         | ENSG00000099625.12 | NA | NA | NA | NA | NA | NA | NA | NA | NA | NA | NA | NA | NA |
|               | NA                 | NA | NA | NA | NA | -2 | NA |    |    |    |    |    |    |    |
| ADAT3         | ENSG00000213638.5  | NA | NA | NA | NA | NA | NA | NA | NA | NA | NA | NA | NA | NA |
|               | NA                 | NA | NA | NA | NA | -2 | NA |    |    |    |    |    |    |    |
| NPAS1         | ENSG00000130751.9  | NA | NA | NA | NA | NA | NA | NA | NA | NA | NA | NA | NA | NA |
|               | NA                 | NA | NA | NA | NA | -2 | NA |    |    |    |    |    |    |    |
| VSTM1         | ENSG00000189068.9  | NA | NA | NA | NA | NA | NA | NA | NA | NA | NA | NA | NA | NA |
|               | NA                 | NA | NA | NA | NA | -2 | NA |    |    |    |    |    |    |    |
| EPHX3         | ENSG00000105131.7  | NA | NA | NA | NA | NA | NA | NA | NA | NA | NA | NA | NA | NA |
|               | NA                 | NA | NA | NA | NA | -2 | NA |    |    |    |    |    |    |    |
| TNFAIP8L1     | ENSG00000185361.8  | NA | NA | NA | NA | NA | NA | NA | NA | NA | NA | NA | NA | NA |
|               | NA                 | NA | NA | NA | NA | -2 | NA |    |    |    |    |    |    |    |
| CYP2F1        | ENSG00000197446.8  | NA | NA | NA | NA | NA | NA | NA | NA | NA | NA | NA | NA | NA |
|               | NA                 | NA | NA | NA | NA | -2 | NA |    |    |    |    |    |    |    |
| CYP2B6        | ENSG00000197408.8  | NA | NA | NA | NA | NA | NA | NA | NA | NA | NA | NA | NA | NA |
|               | NA                 | NA | NA | NA | NA | -2 | NA |    |    |    |    |    |    |    |
| AC008992.1    | ENSG00000267636.1  | NA | NA | NA | NA | NA | NA | NA | NA | NA | NA | NA | NA | NA |
|               | NA                 | NA | NA | NA | NA | -2 | NA |    |    |    |    |    |    |    |
| ZNF587        | ENSG00000198466.11 | NA | NA | NA | NA | NA | NA | NA | NA | NA | NA | NA | NA | NA |
|               | NA                 | NA | NA | NA | NA | -2 | NA |    |    |    |    |    |    |    |
| TGFBR3L       | ENSG00000260001.6  | NA | NA | NA | NA | NA | NA | NA | NA | NA | NA | NA | NA | NA |
|               | NA                 | NA | NA | NA | NA | -2 | NA |    |    |    |    |    |    |    |
| KHSRP         | ENSG00000088247.17 | NA | NA | NA | NA | NA | NA | NA | NA | NA | NA | NA | NA | NA |
|               | NA                 | NA | NA | NA | NA | -2 | NA |    |    |    |    |    |    |    |
| CIRBP         | ENSG00000099622.13 | NA | NA | NA | NA | NA | NA | NA | NA | NA | NA | NA | NA | NA |

|               |                    |    |    |    |    |    |    |    |    |    |    |    |    |    |
|---------------|--------------------|----|----|----|----|----|----|----|----|----|----|----|----|----|
| NA            | NA                 | NA | NA | -2 | NA |    |    |    |    |    |    |    |    |    |
| LINC01531     | ENSG00000205786.8  |    |    |    | NA | NA | NA | NA | NA | NA | NA | NA | NA | NA |
| NA            | NA                 | NA | NA | NA | -2 | NA |    |    |    |    |    |    |    |    |
| CYP4F8        | ENSG00000186526.12 |    |    |    | NA | NA | NA | NA | NA | NA | NA | NA | NA | NA |
| NA            | NA                 | NA | NA | NA | -2 | NA |    |    |    |    |    |    |    |    |
| AF038458.5    | ENSG00000267388.1  |    |    |    | NA | NA | NA | NA | NA | NA | NA | NA | NA | NA |
| NA            | NA                 | NA | NA | NA | -2 | NA |    |    |    |    |    |    |    |    |
| SLC1A5        | ENSG00000105281.12 |    |    |    | NA | NA | NA | NA | NA | NA | NA | NA | NA | NA |
| NA            | NA                 | NA | NA | NA | -2 | NA |    |    |    |    |    |    |    |    |
| ADGRL1        | ENSG00000072071.16 |    |    |    | NA | NA | NA | NA | NA | NA | NA | NA | NA | NA |
| NA            | NA                 | NA | NA | NA | -2 | NA |    |    |    |    |    |    |    |    |
| CEACAM8       | ENSG00000124469.11 |    |    |    | NA | NA | NA | NA | NA | NA | NA | NA | NA | NA |
| NA            | NA                 | NA | NA | NA | -2 | NA |    |    |    |    |    |    |    |    |
| FPR3          | ENSG00000187474.4  |    |    |    | NA | NA | NA | NA | NA | NA | NA | NA | NA | NA |
| NA            | NA                 | NA | NA | NA | -2 | NA |    |    |    |    |    |    |    |    |
| ZNF134        | ENSG00000213762.11 |    |    |    | NA | NA | NA | NA | NA | NA | NA | NA | NA | NA |
| NA            | NA                 | NA | NA | NA | -2 | NA |    |    |    |    |    |    |    |    |
| PSG5          | ENSG00000204941.13 |    |    |    | NA | NA | NA | NA | NA | NA | NA | NA | NA | NA |
| NA            | NA                 | NA | NA | NA | -2 | NA |    |    |    |    |    |    |    |    |
| KRTDAP        | ENSG00000188508.10 |    |    |    | NA | NA | NA | NA | NA | NA | NA | NA | NA | NA |
| NA            | NA                 | NA | NA | NA | -2 | NA |    |    |    |    |    |    |    |    |
| PRKACA        | ENSG00000072062.13 |    |    |    | NA | NA | NA | NA | NA | NA | NA | NA | NA | NA |
| NA            | NA                 | NA | NA | NA | -2 | NA |    |    |    |    |    |    |    |    |
| SHANK1        | ENSG00000161681.15 |    |    |    | NA | NA | NA | NA | NA | NA | NA | NA | NA | NA |
| NA            | NA                 | NA | NA | NA | -2 | NA |    |    |    |    |    |    |    |    |
| AC006116.20   | ENSG00000267710.6  |    |    |    | NA | NA | NA | NA | NA | NA | NA | NA | NA | NA |
| NA            | NA                 | NA | NA | NA | NA | -2 | NA |    |    |    |    |    |    |    |
| APOC1         | ENSG00000130208.9  |    |    |    | NA | NA | NA | NA | NA | NA | NA | NA | NA | NA |
| NA            | NA                 | NA | NA | NA | -2 | NA |    |    |    |    |    |    |    |    |
| ZNF878        | ENSG00000257446.3  |    |    |    | NA | NA | NA | NA | NA | NA | NA | NA | NA | NA |
| NA            | NA                 | NA | NA | NA | -2 | NA |    |    |    |    |    |    |    |    |
| CTB-70G10.1   | ENSG00000266928.1  |    |    |    | NA | NA | NA | NA | NA | NA | NA | NA | NA | NA |
| NA            | NA                 | NA | NA | NA | NA | -2 | NA |    |    |    |    |    |    |    |
| BCL2L12       | ENSG00000126453.9  |    |    |    | NA | NA | NA | NA | NA | NA | NA | NA | NA | NA |
| NA            | NA                 | NA | NA | NA | -2 | NA |    |    |    |    |    |    |    |    |
| ZNF671        | ENSG00000083814.13 |    |    |    | NA | NA | NA | NA | NA | NA | NA | NA | NA | NA |
| NA            | NA                 | NA | NA | NA | -2 | NA |    |    |    |    |    |    |    |    |
| RAVER1        | ENSG00000161847.13 |    |    |    | NA | NA | NA | NA | NA | NA | NA | NA | NA | NA |
| NA            | NA                 | NA | NA | NA | -2 | NA |    |    |    |    |    |    |    |    |
| CTD-2332E11.2 | ENSG00000268560.1  |    |    |    | NA | NA | NA | NA | NA | NA | NA | NA | NA | NA |
| NA            | NA                 | NA | NA | NA | NA | -2 | NA |    |    |    |    |    |    |    |
| CRX           | ENSG00000105392.15 |    |    |    | NA | NA | NA | NA | NA | NA | NA | NA | NA | NA |
| NA            | NA                 | NA | NA | NA | -2 | NA |    |    |    |    |    |    |    |    |
| ETFB          | ENSG00000105379.9  |    |    |    | NA | NA | NA | NA | NA | NA | NA | NA | NA | NA |
| NA            | NA                 | NA | NA | NA | -2 | NA |    |    |    |    |    |    |    |    |
| CYP4F22       | ENSG00000171954.12 |    |    |    | NA | NA | NA | NA | NA | NA | NA | NA | NA | NA |
| NA            | NA                 | NA | NA | NA | -2 | NA |    |    |    |    |    |    |    |    |
| ZNF14         | ENSG00000105708.8  |    |    |    | NA | NA | NA | NA | NA | NA | NA | NA | NA | NA |
| NA            | NA                 | NA | NA | NA | -2 | NA |    |    |    |    |    |    |    |    |
| NTF4          | ENSG00000225950.8  |    |    |    | NA | NA | NA | NA | NA | NA | NA | NA | NA | NA |
| NA            | NA                 | NA | NA | NA | -2 | NA |    |    |    |    |    |    |    |    |
| PSG4          | ENSG00000243137.7  |    |    |    | NA | NA | NA | NA | NA | NA | NA | NA | NA | NA |
| NA            | NA                 | NA | NA | NA | -2 | NA |    |    |    |    |    |    |    |    |
| CTD-2329C7.2  | ENSG00000266985.1  |    |    |    | NA | NA | NA | NA | NA | NA | NA | NA | NA | NA |
| NA            | NA                 | NA | NA | NA | NA | -2 | NA |    |    |    |    |    |    |    |
| SLC7A10       | ENSG00000130876.11 |    |    |    | NA | NA | NA | NA | NA | NA | NA | NA | NA | NA |
| NA            | NA                 | NA | NA | NA | -2 | NA |    |    |    |    |    |    |    |    |
| ZNF430        | ENSG00000118620.12 |    |    |    | NA | NA | NA | NA | NA | NA | NA | NA | NA | NA |
| NA            | NA                 | NA | NA | NA | -2 | NA |    |    |    |    |    |    |    |    |
| CIB3          | ENSG00000141977.9  |    |    |    | NA | NA | NA | NA | NA | NA | NA | NA | NA | NA |
| NA            | NA                 | NA | NA | NA | -2 | NA |    |    |    |    |    |    |    |    |
| HSPBP1        | ENSG00000133265.10 |    |    |    | NA | NA | NA | NA | NA | NA | NA | NA | NA | NA |

|            |                    |    |    |    |    |    |    |    |    |    |    |    |    |    |
|------------|--------------------|----|----|----|----|----|----|----|----|----|----|----|----|----|
| NA         | NA                 | NA | NA | NA | -2 | NA |    |    |    |    |    |    |    |    |
| LINC01859  | ENSG00000261558.1  |    |    |    |    | NA | NA | NA | NA | NA | NA | NA | NA | NA |
| NA         | NA                 | NA | NA | NA | -2 | NA |    |    |    |    |    |    |    |    |
| ELAVL3     | ENSG00000196361.9  |    |    |    |    | NA | NA | NA | NA | NA | NA | NA | NA | NA |
| NA         | NA                 | NA | NA | NA | -2 | NA |    |    |    |    |    |    |    |    |
| LMNB2      | ENSG00000176619.12 |    |    |    |    | NA | NA | NA | NA | NA | NA | NA | NA | NA |
| NA         | NA                 | NA | NA | NA | -2 | NA |    |    |    |    |    |    |    |    |
| ATP1A3     | ENSG00000105409.16 |    |    |    |    | NA | NA | NA | NA | NA | NA | NA | NA | NA |
| NA         | NA                 | NA | NA | NA | -2 | NA |    |    |    |    |    |    |    |    |
| STX10      | ENSG00000104915.14 |    |    |    |    | NA | NA | NA | NA | NA | NA | NA | NA | NA |
| NA         | NA                 | NA | NA | NA | -2 | NA |    |    |    |    |    |    |    |    |
| CAMSAP3    | ENSG00000076826.9  |    |    |    |    | NA | NA | NA | NA | NA | NA | NA | NA | NA |
| NA         | NA                 | NA | NA | NA | -2 | NA |    |    |    |    |    |    |    |    |
| ZNF444     | ENSG00000167685.14 |    |    |    |    | NA | NA | NA | NA | NA | NA | NA | NA | NA |
| NA         | NA                 | NA | NA | NA | -2 | NA |    |    |    |    |    |    |    |    |
| IGFL3      | ENSG00000188624.2  |    |    |    |    | NA | NA | NA | NA | NA | NA | NA | NA | NA |
| NA         | NA                 | NA | NA | NA | -2 | NA |    |    |    |    |    |    |    |    |
| CTXN1      | ENSG00000178531.5  |    |    |    |    | NA | NA | NA | NA | NA | NA | NA | NA | NA |
| NA         | NA                 | NA | NA | NA | -2 | NA |    |    |    |    |    |    |    |    |
| KLK15      | ENSG00000174562.13 |    |    |    |    | NA | NA | NA | NA | NA | NA | NA | NA | NA |
| NA         | NA                 | NA | NA | NA | -2 | NA |    |    |    |    |    |    |    |    |
| ZNF773     | ENSG00000152439.12 |    |    |    |    | NA | NA | NA | NA | NA | NA | NA | NA | NA |
| NA         | NA                 | NA | NA | NA | -2 | NA |    |    |    |    |    |    |    |    |
| CGB3       | ENSG00000104827.12 |    |    |    |    | NA | NA | NA | NA | NA | NA | NA | NA | NA |
| NA         | NA                 | NA | NA | NA | -2 | NA |    |    |    |    |    |    |    |    |
| C19orf25   | ENSG00000119559.15 |    |    |    |    | NA | NA | NA | NA | NA | NA | NA | NA | NA |
| NA         | NA                 | NA | NA | NA | -2 | NA |    |    |    |    |    |    |    |    |
| FSTL3      | ENSG00000070404.9  |    |    |    |    | NA | NA | NA | NA | NA | NA | NA | NA | NA |
| NA         | NA                 | NA | NA | NA | -2 | NA |    |    |    |    |    |    |    |    |
| VAV1       | ENSG00000141968.7  |    |    |    |    | NA | NA | NA | NA | NA | NA | NA | NA | NA |
| NA         | NA                 | NA | NA | NA | -2 | NA |    |    |    |    |    |    |    |    |
| GPR42      | ENSG00000126251.6  |    |    |    |    | NA | NA | NA | NA | NA | NA | NA | NA | NA |
| NA         | NA                 | NA | NA | NA | -2 | NA |    |    |    |    |    |    |    |    |
| JUND       | ENSG00000130522.5  |    |    |    |    | NA | NA | NA | NA | NA | NA | NA | NA | NA |
| NA         | NA                 | NA | NA | NA | -2 | NA |    |    |    |    |    |    |    |    |
| KLK3       | ENSG00000142515.14 |    |    |    |    | NA | NA | NA | NA | NA | NA | NA | NA | NA |
| NA         | NA                 | NA | NA | NA | -2 | NA |    |    |    |    |    |    |    |    |
| FXYD3      | ENSG00000089356.18 |    |    |    |    | NA | NA | NA | NA | NA | NA | NA | NA | NA |
| NA         | NA                 | NA | NA | NA | -2 | NA |    |    |    |    |    |    |    |    |
| CNN1       | ENSG00000130176.7  |    |    |    |    | NA | NA | NA | NA | NA | NA | NA | NA | NA |
| NA         | NA                 | NA | NA | NA | -2 | NA |    |    |    |    |    |    |    |    |
| NAPA       | ENSG00000105402.7  |    |    |    |    | NA | NA | NA | NA | NA | NA | NA | NA | NA |
| NA         | NA                 | NA | NA | NA | -2 | NA |    |    |    |    |    |    |    |    |
| MIA        | ENSG00000261857.6  |    |    |    |    | NA | NA | NA | NA | NA | NA | NA | NA | NA |
| NA         | NA                 | NA | NA | NA | -2 | NA |    |    |    |    |    |    |    |    |
| ZNF526     | ENSG00000167625.10 |    |    |    |    | NA | NA | NA | NA | NA | NA | NA | NA | NA |
| NA         | NA                 | NA | NA | NA | -2 | NA |    |    |    |    |    |    |    |    |
| WIZ        | ENSG00000011451.17 |    |    |    |    | NA | NA | NA | NA | NA | NA | NA | NA | NA |
| NA         | NA                 | NA | NA | NA | -2 | NA |    |    |    |    |    |    |    |    |
| ZNF799     | ENSG00000196466.10 |    |    |    |    | NA | NA | NA | NA | NA | NA | NA | NA | NA |
| NA         | NA                 | NA | NA | NA | -2 | NA |    |    |    |    |    |    |    |    |
| NAPSA      | ENSG00000131400.7  |    |    |    |    | NA | NA | NA | NA | NA | NA | NA | NA | NA |
| NA         | NA                 | NA | NA | NA | -2 | NA |    |    |    |    |    |    |    |    |
| KIR3DL2    | ENSG00000240403.5  |    |    |    |    | NA | NA | NA | NA | NA | NA | NA | NA | NA |
| NA         | NA                 | NA | NA | NA | -2 | NA |    |    |    |    |    |    |    |    |
| AC011516.1 | ENSG00000269796.1  |    |    |    |    | NA | NA | NA | NA | NA | NA | NA | NA | NA |
| NA         | NA                 | NA | NA | NA | -2 | NA |    |    |    |    |    |    |    |    |
| GMIP       | ENSG00000089639.10 |    |    |    |    | NA | NA | NA | NA | NA | NA | NA | NA | NA |
| NA         | NA                 | NA | NA | NA | -2 | NA |    |    |    |    |    |    |    |    |
| CEACAM16   | ENSG00000213892.11 |    |    |    |    | NA | NA | NA | NA | NA | NA | NA | NA | NA |
| NA         | NA                 | NA | NA | NA | -2 | NA |    |    |    |    |    |    |    |    |
| PLVAP      | ENSG00000130300.8  |    |    |    |    | NA | NA | NA | NA | NA | NA | NA | NA | NA |

|               |                    |    |    |    |    |    |    |    |    |    |    |    |    |    |
|---------------|--------------------|----|----|----|----|----|----|----|----|----|----|----|----|----|
| NA            | NA                 | NA | NA | -2 | NA |    |    |    |    |    |    |    |    |    |
| PRAM1         | ENSG00000133246.11 | NA | NA | NA | NA | NA | NA | NA | NA | NA | NA | NA | NA | NA |
| NA            | NA                 | NA | NA | -2 | NA |    |    |    |    |    |    |    |    |    |
| PPP1R15A      | ENSG00000087074.7  | NA | NA | NA | NA | NA | NA | NA | NA | NA | NA | NA | NA | NA |
| NA            | NA                 | NA | NA | NA | -2 | NA |    |    |    |    |    |    |    |    |
| ZNF540        | ENSG00000171817.16 | NA | NA | NA | NA | NA | NA | NA | NA | NA | NA | NA | NA | NA |
| NA            | NA                 | NA | NA | NA | -2 | NA |    |    |    |    |    |    |    |    |
| HRC           | ENSG00000130528.11 | NA | NA | NA | NA | NA | NA | NA | NA | NA | NA | NA | NA | NA |
| NA            | NA                 | NA | NA | NA | -2 | NA |    |    |    |    |    |    |    |    |
| URI1          | ENSG00000105176.17 | NA | NA | NA | NA | NA | NA | NA | NA | NA | NA | NA | NA | NA |
| NA            | NA                 | NA | NA | NA | -2 | NA |    |    |    |    |    |    |    |    |
| FCAR          | ENSG00000186431.18 | NA | NA | NA | NA | NA | NA | NA | NA | NA | NA | NA | NA | NA |
| NA            | NA                 | NA | NA | NA | -2 | NA |    |    |    |    |    |    |    |    |
| PSG9          | ENSG00000183668.17 | NA | NA | NA | NA | NA | NA | NA | NA | NA | NA | NA | NA | NA |
| NA            | NA                 | NA | NA | NA | -2 | NA |    |    |    |    |    |    |    |    |
| ZNF562        | ENSG00000171466.9  | NA | NA | NA | NA | NA | NA | NA | NA | NA | NA | NA | NA | NA |
| NA            | NA                 | NA | NA | NA | -2 | NA |    |    |    |    |    |    |    |    |
| CD22          | ENSG00000012124.16 | NA | NA | NA | NA | NA | NA | NA | NA | NA | NA | NA | NA | NA |
| NA            | NA                 | NA | NA | NA | -2 | NA |    |    |    |    |    |    |    |    |
| KLK9          | ENSG00000213022.5  | NA | NA | NA | NA | NA | NA | NA | NA | NA | NA | NA | NA | NA |
| NA            | NA                 | NA | NA | NA | -2 | NA |    |    |    |    |    |    |    |    |
| CTD-2537I9.19 | ENSG00000283567.1  | NA | NA | NA | NA | NA | NA | NA | NA | NA | NA | NA | NA | NA |
| NA            | NA                 | NA | NA | NA | NA | -2 | NA |    |    |    |    |    |    |    |
| LRFN3         | ENSG00000126243.8  | NA | NA | NA | NA | NA | NA | NA | NA | NA | NA | NA | NA | NA |
| NA            | NA                 | NA | NA | NA | -2 | NA |    |    |    |    |    |    |    |    |
| ZNF560        | ENSG00000198028.3  | NA | NA | NA | NA | NA | NA | NA | NA | NA | NA | NA | NA | NA |
| NA            | NA                 | NA | NA | NA | -2 | NA |    |    |    |    |    |    |    |    |
| CTC-301O7.4   | ENSG00000197813.5  | NA | NA | NA | NA | NA | NA | NA | NA | NA | NA | NA | NA | NA |
| NA            | NA                 | NA | NA | NA | NA | -2 | NA |    |    |    |    |    |    |    |
| QTRT1         | ENSG00000213339.8  | NA | NA | NA | NA | NA | NA | NA | NA | NA | NA | NA | NA | NA |
| NA            | NA                 | NA | NA | NA | -2 | NA |    |    |    |    |    |    |    |    |
| SSBP4         | ENSG00000130511.15 | NA | NA | NA | NA | NA | NA | NA | NA | NA | NA | NA | NA | NA |
| NA            | NA                 | NA | NA | NA | -2 | NA |    |    |    |    |    |    |    |    |
| AC005616.2    | ENSG00000267423.1  | NA | NA | NA | NA | NA | NA | NA | NA | NA | NA | NA | NA | NA |
| NA            | NA                 | NA | NA | NA | -2 | NA |    |    |    |    |    |    |    |    |
| LINC01595     | ENSG00000259108.2  | NA | NA | NA | NA | NA | NA | NA | NA | NA | NA | NA | NA | NA |
| NA            | NA                 | NA | NA | NA | -2 | NA |    |    |    |    |    |    |    |    |
| AC002511.3    | ENSG00000232680.2  | NA | NA | NA | NA | NA | NA | NA | NA | NA | NA | NA | NA | NA |
| NA            | NA                 | NA | NA | NA | -2 | NA |    |    |    |    |    |    |    |    |
| AC006129.1    | ENSG00000268355.1  | NA | NA | NA | NA | NA | NA | NA | NA | NA | NA | NA | NA | NA |
| NA            | NA                 | NA | NA | NA | -2 | NA |    |    |    |    |    |    |    |    |
| ZNF583        | ENSG00000198440.9  | NA | NA | NA | NA | NA | NA | NA | NA | NA | NA | NA | NA | NA |
| NA            | NA                 | NA | NA | NA | -2 | NA |    |    |    |    |    |    |    |    |
| ZNF350        | ENSG00000256683.6  | NA | NA | NA | NA | NA | NA | NA | NA | NA | NA | NA | NA | NA |
| NA            | NA                 | NA | NA | NA | -2 | NA |    |    |    |    |    |    |    |    |
| TBXA2R        | ENSG00000006638.11 | NA | NA | NA | NA | NA | NA | NA | NA | NA | NA | NA | NA | NA |
| NA            | NA                 | NA | NA | NA | -2 | NA |    |    |    |    |    |    |    |    |
| RASAL3        | ENSG00000105122.12 | NA | NA | NA | NA | NA | NA | NA | NA | NA | NA | NA | NA | NA |
| NA            | NA                 | NA | NA | NA | -2 | NA |    |    |    |    |    |    |    |    |
| PRRG2         | ENSG00000126460.10 | NA | NA | NA | NA | NA | NA | NA | NA | NA | NA | NA | NA | NA |
| NA            | NA                 | NA | NA | NA | -2 | NA |    |    |    |    |    |    |    |    |
| CTC-523E23.5  | ENSG00000269086.2  | NA | NA | NA | NA | NA | NA | NA | NA | NA | NA | NA | NA | NA |
| NA            | NA                 | NA | NA | NA | NA | -2 | NA |    |    |    |    |    |    |    |
| CTB-50L17.16  | ENSG00000267011.5  | NA | NA | NA | NA | NA | NA | NA | NA | NA | NA | NA | NA | NA |
| NA            | NA                 | NA | NA | NA | NA | -2 | NA |    |    |    |    |    |    |    |
| ZNF805        | ENSG00000204524.6  | NA | NA | NA | NA | NA | NA | NA | NA | NA | NA | NA | NA | NA |
| NA            | NA                 | NA | NA | NA | -2 | NA |    |    |    |    |    |    |    |    |
| KIR2DL1       | ENSG00000125498.19 | NA | NA | NA | NA | NA | NA | NA | NA | NA | NA | NA | NA | NA |
| NA            | NA                 | NA | NA | NA | -2 | NA |    |    |    |    |    |    |    |    |
| TPRX1         | ENSG00000178928.8  | NA | NA | NA | NA | NA | NA | NA | NA | NA | NA | NA | NA | NA |
| NA            | NA                 | NA | NA | NA | -2 | NA |    |    |    |    |    |    |    |    |
| TMEM205       | ENSG00000105518.13 | NA | NA | NA | NA | NA | NA | NA | NA | NA | NA | NA | NA | NA |

|               |                    |    |    |    |    |    |    |    |    |    |    |    |    |    |
|---------------|--------------------|----|----|----|----|----|----|----|----|----|----|----|----|----|
| NA            | NA                 | NA | NA | NA | -2 | NA |    |    |    |    |    |    |    |    |
| DNM2          | ENSG00000079805.16 |    |    | NA | NA | NA | NA | NA | NA | NA | NA | NA | NA | NA |
| NA            | NA                 | NA | NA | NA | -2 | NA |    |    |    |    |    |    |    |    |
| AC002511.2    | ENSG00000233214.1  |    |    | NA | NA | NA | NA | NA | NA | NA | NA | NA | NA | NA |
| NA            | NA                 | NA | NA | NA | -2 | NA |    |    |    |    |    |    |    |    |
| TMEM190       | ENSG00000160472.4  |    |    | NA | NA | NA | NA | NA | NA | NA | NA | NA | NA | NA |
| NA            | NA                 | NA | NA | NA | -2 | NA |    |    |    |    |    |    |    |    |
| CTC-448F2.4   | ENSG00000267006.1  |    |    | NA | NA | NA | NA | NA | NA | NA | NA | NA | NA | NA |
| NA            | NA                 | NA | NA | NA | -2 | NA |    |    |    |    |    |    |    |    |
| ZNF536        | ENSG00000198597.8  |    |    | NA | NA | NA | NA | NA | NA | NA | NA | NA | NA | NA |
| NA            | NA                 | NA | NA | NA | -2 | NA |    |    |    |    |    |    |    |    |
| WDR830S       | ENSG00000105583.9  |    |    | NA | NA | NA | NA | NA | NA | NA | NA | NA | NA | NA |
| NA            | NA                 | NA | NA | NA | -2 | NA |    |    |    |    |    |    |    |    |
| UHRF1         | ENSG00000276043.4  |    |    | NA | NA | NA | NA | NA | NA | NA | NA | NA | NA | NA |
| NA            | NA                 | NA | NA | NA | -2 | NA |    |    |    |    |    |    |    |    |
| IGFL1         | ENSG00000188293.5  |    |    | NA | NA | NA | NA | NA | NA | NA | NA | NA | NA | NA |
| NA            | NA                 | NA | NA | NA | -2 | NA |    |    |    |    |    |    |    |    |
| RPS15         | ENSG00000115268.9  |    |    | NA | NA | NA | NA | NA | NA | NA | NA | NA | NA | NA |
| NA            | NA                 | NA | NA | NA | -2 | NA |    |    |    |    |    |    |    |    |
| ZNF222        | ENSG00000159885.13 |    |    | NA | NA | NA | NA | NA | NA | NA | NA | NA | NA | NA |
| NA            | NA                 | NA | NA | NA | -2 | NA |    |    |    |    |    |    |    |    |
| CEACAM18      | ENSG00000213822.6  |    |    | NA | NA | NA | NA | NA | NA | NA | NA | NA | NA | NA |
| NA            | NA                 | NA | NA | NA | -2 | NA |    |    |    |    |    |    |    |    |
| PRKCG         | ENSG00000126583.10 |    |    | NA | NA | NA | NA | NA | NA | NA | NA | NA | NA | NA |
| NA            | NA                 | NA | NA | NA | -2 | NA |    |    |    |    |    |    |    |    |
| RELB          | ENSG00000104856.13 |    |    | NA | NA | NA | NA | NA | NA | NA | NA | NA | NA | NA |
| NA            | NA                 | NA | NA | NA | -2 | NA |    |    |    |    |    |    |    |    |
| LSR           | ENSG00000105699.16 |    |    | NA | NA | NA | NA | NA | NA | NA | NA | NA | NA | NA |
| NA            | NA                 | NA | NA | NA | -2 | NA |    |    |    |    |    |    |    |    |
| LLNLR-263F3.1 | ENSG00000284430.1  |    |    | NA | NA | NA | NA | NA | NA | NA | NA | NA | NA | NA |
| NA            | NA                 | NA | NA | NA | -2 | NA |    |    |    |    |    |    |    |    |
| HSD11B1L      | ENSG00000167733.13 |    |    | NA | NA | NA | NA | NA | NA | NA | NA | NA | NA | NA |
| NA            | NA                 | NA | NA | NA | -2 | NA |    |    |    |    |    |    |    |    |
| KLK2          | ENSG00000167751.12 |    |    | NA | NA | NA | NA | NA | NA | NA | NA | NA | NA | NA |
| NA            | NA                 | NA | NA | NA | -2 | NA |    |    |    |    |    |    |    |    |
| AC005523.3    | ENSG00000268536.1  |    |    | NA | NA | NA | NA | NA | NA | NA | NA | NA | NA | NA |
| NA            | NA                 | NA | NA | NA | -2 | NA |    |    |    |    |    |    |    |    |
| LGALS7B       | ENSG00000178934.4  |    |    | NA | NA | NA | NA | NA | NA | NA | NA | NA | NA | NA |
| NA            | NA                 | NA | NA | NA | -2 | NA |    |    |    |    |    |    |    |    |
| SGTA          | ENSG00000104969.9  |    |    | NA | NA | NA | NA | NA | NA | NA | NA | NA | NA | NA |
| NA            | NA                 | NA | NA | NA | -2 | NA |    |    |    |    |    |    |    |    |
| ADGRE1        | ENSG00000174837.14 |    |    | NA | NA | NA | NA | NA | NA | NA | NA | NA | NA | NA |
| NA            | NA                 | NA | NA | NA | -2 | NA |    |    |    |    |    |    |    |    |
| CEACAM5       | ENSG00000105388.15 |    |    | NA | NA | NA | NA | NA | NA | NA | NA | NA | NA | NA |
| NA            | NA                 | NA | NA | NA | -2 | NA |    |    |    |    |    |    |    |    |
| PEG3          | ENSG00000198300.12 |    |    | NA | NA | NA | NA | NA | NA | NA | NA | NA | NA | NA |
| NA            | NA                 | NA | NA | NA | -2 | NA |    |    |    |    |    |    |    |    |
| SIGLEC6       | ENSG00000105492.15 |    |    | NA | NA | NA | NA | NA | NA | NA | NA | NA | NA | NA |
| NA            | NA                 | NA | NA | NA | -2 | NA |    |    |    |    |    |    |    |    |
| CGB7          | ENSG00000196337.11 |    |    | NA | NA | NA | NA | NA | NA | NA | NA | NA | NA | NA |
| NA            | NA                 | NA | NA | NA | -2 | NA |    |    |    |    |    |    |    |    |
| RFPL4AL1      | ENSG00000229292.1  |    |    | NA | NA | NA | NA | NA | NA | NA | NA | NA | NA | NA |
| NA            | NA                 | NA | NA | NA | -2 | NA |    |    |    |    |    |    |    |    |
| KCNA7         | ENSG00000104848.1  |    |    | NA | NA | NA | NA | NA | NA | NA | NA | NA | NA | NA |
| NA            | NA                 | NA | NA | NA | -2 | NA |    |    |    |    |    |    |    |    |
| CTC-339O9.1   | ENSG00000269842.5  |    |    | NA | NA | NA | NA | NA | NA | NA | NA | NA | NA | NA |
| NA            | NA                 | NA | NA | NA | -2 | NA |    |    |    |    |    |    |    |    |
| OR10H1        | ENSG00000186723.3  |    |    | NA | NA | NA | NA | NA | NA | NA | NA | NA | NA | NA |
| NA            | NA                 | NA | NA | NA | -2 | NA |    |    |    |    |    |    |    |    |
| ZNF614        | ENSG00000142556.18 |    |    | NA | NA | NA | NA | NA | NA | NA | NA | NA | NA | NA |
| NA            | NA                 | NA | NA | NA | -2 | NA |    |    |    |    |    |    |    |    |
| SIGLECL1      | ENSG00000179213.13 |    |    | NA | NA | NA | NA | NA | NA | NA | NA | NA | NA | NA |

|                |                    |    |    |    |    |    |    |    |    |    |    |    |    |    |
|----------------|--------------------|----|----|----|----|----|----|----|----|----|----|----|----|----|
| NA             | NA                 | NA | NA | NA | -2 | NA |    |    |    |    |    |    |    |    |
| PSG2           | ENSG00000242221.8  |    |    |    |    | NA | NA | NA | NA | NA | NA | NA | NA | NA |
| NA             | NA                 | NA | NA | NA | -2 | NA |    |    |    |    |    |    |    |    |
| CTB-3204.2     | ENSG00000267498.1  |    |    |    |    | NA | NA | NA | NA | NA | NA | NA | NA | NA |
| NA             | NA                 | NA | NA | NA | -2 | NA |    |    |    |    |    |    |    |    |
| LGALS4         | ENSG00000171747.8  |    |    |    |    | NA | NA | NA | NA | NA | NA | NA | NA | NA |
| NA             | NA                 | NA | NA | NA | -2 | NA |    |    |    |    |    |    |    |    |
| ZNF576         | ENSG00000124444.15 |    |    |    |    | NA | NA | NA | NA | NA | NA | NA | NA | NA |
| NA             | NA                 | NA | NA | NA | -2 | NA |    |    |    |    |    |    |    |    |
| NCR1           | ENSG00000189430.12 |    |    |    |    | NA | NA | NA | NA | NA | NA | NA | NA | NA |
| NA             | NA                 | NA | NA | NA | -2 | NA |    |    |    |    |    |    |    |    |
| ZNF433         | ENSG00000197647.11 |    |    |    |    | NA | NA | NA | NA | NA | NA | NA | NA | NA |
| NA             | NA                 | NA | NA | NA | -2 | NA |    |    |    |    |    |    |    |    |
| ADGRE3         | ENSG00000131355.14 |    |    |    |    | NA | NA | NA | NA | NA | NA | NA | NA | NA |
| NA             | NA                 | NA | NA | NA | -2 | NA |    |    |    |    |    |    |    |    |
| TCF3           | ENSG00000071564.14 |    |    |    |    | NA | NA | NA | NA | NA | NA | NA | NA | NA |
| NA             | NA                 | NA | NA | NA | -2 | NA |    |    |    |    |    |    |    |    |
| CTC-241F20.4   | ENSG00000268186.1  |    |    |    |    | NA | NA | NA | NA | NA | NA | NA | NA | NA |
| NA             | NA                 | NA | NA | NA | NA | -2 | NA |    |    |    |    |    |    |    |
| CTC-490E21.10  | ENSG00000269843.1  |    |    |    |    | NA | NA | NA | NA | NA | NA | NA | NA | NA |
| NA             | NA                 | NA | NA | NA | NA | -2 | NA |    |    |    |    |    |    |    |
| CTD-2568A17.1  | ENSG00000261341.6  |    |    |    |    | NA | NA | NA | NA | NA | NA | NA | NA | NA |
| NA             | NA                 | NA | NA | NA | NA | -2 | NA |    |    |    |    |    |    |    |
| ARRDC5         | ENSG00000205784.2  |    |    |    |    | NA | NA | NA | NA | NA | NA | NA | NA | NA |
| NA             | NA                 | NA | NA | NA | -2 | NA |    |    |    |    |    |    |    |    |
| PLEKHA4        | ENSG00000105559.11 |    |    |    |    | NA | NA | NA | NA | NA | NA | NA | NA | NA |
| NA             | NA                 | NA | NA | NA | -2 | NA |    |    |    |    |    |    |    |    |
| DHPS           | ENSG00000095059.15 |    |    |    |    | NA | NA | NA | NA | NA | NA | NA | NA | NA |
| NA             | NA                 | NA | NA | NA | -2 | NA |    |    |    |    |    |    |    |    |
| LINGO3         | ENSG00000220008.3  |    |    |    |    | NA | NA | NA | NA | NA | NA | NA | NA | NA |
| NA             | NA                 | NA | NA | NA | -2 | NA |    |    |    |    |    |    |    |    |
| NOVA2          | ENSG00000104967.6  |    |    |    |    | NA | NA | NA | NA | NA | NA | NA | NA | NA |
| NA             | NA                 | NA | NA | NA | -2 | NA |    |    |    |    |    |    |    |    |
| RANBP3         | ENSG00000031823.14 |    |    |    |    | NA | NA | NA | NA | NA | NA | NA | NA | NA |
| NA             | NA                 | NA | NA | NA | -2 | NA |    |    |    |    |    |    |    |    |
| WDR83          | ENSG00000123154.11 |    |    |    |    | NA | NA | NA | NA | NA | NA | NA | NA | NA |
| NA             | NA                 | NA | NA | NA | -2 | NA |    |    |    |    |    |    |    |    |
| BHMG1          | ENSG00000237452.2  |    |    |    |    | NA | NA | NA | NA | NA | NA | NA | NA | NA |
| NA             | NA                 | NA | NA | NA | -2 | NA |    |    |    |    |    |    |    |    |
| CTD-2587H24.10 | ENSG00000267649.1  |    |    |    |    | NA | NA | NA | NA | NA | NA | NA | NA | NA |
| NA             | NA                 | NA | NA | NA | NA | -2 | NA |    |    |    |    |    |    |    |
| LMTK3          | ENSG00000142235.8  |    |    |    |    | NA | NA | NA | NA | NA | NA | NA | NA | NA |
| NA             | NA                 | NA | NA | NA | -2 | NA |    |    |    |    |    |    |    |    |
| ZNF382         | ENSG00000161298.17 |    |    |    |    | NA | NA | NA | NA | NA | NA | NA | NA | NA |
| NA             | NA                 | NA | NA | NA | -2 | NA |    |    |    |    |    |    |    |    |
| EID2B          | ENSG00000176401.5  |    |    |    |    | NA | NA | NA | NA | NA | NA | NA | NA | NA |
| NA             | NA                 | NA | NA | NA | -2 | NA |    |    |    |    |    |    |    |    |
| ZNF416         | ENSG00000083817.8  |    |    |    |    | NA | NA | NA | NA | NA | NA | NA | NA | NA |
| NA             | NA                 | NA | NA | NA | -2 | NA |    |    |    |    |    |    |    |    |
| IL4I1          | ENSG00000104951.15 |    |    |    |    | NA | NA | NA | NA | NA | NA | NA | NA | NA |
| NA             | NA                 | NA | NA | NA | -2 | NA |    |    |    |    |    |    |    |    |
| CEACAM20       | ENSG00000273777.4  |    |    |    |    | NA | NA | NA | NA | NA | NA | NA | NA | NA |
| NA             | NA                 | NA | NA | NA | -2 | NA |    |    |    |    |    |    |    |    |
| ATCAY          | ENSG00000167654.17 |    |    |    |    | NA | NA | NA | NA | NA | NA | NA | NA | NA |
| NA             | NA                 | NA | NA | NA | -2 | NA |    |    |    |    |    |    |    |    |
| CTC-273B12.10  | ENSG00000269814.1  |    |    |    |    | NA | NA | NA | NA | NA | NA | NA | NA | NA |
| NA             | NA                 | NA | NA | NA | NA | -2 | NA |    |    |    |    |    |    |    |
| EFNA2          | ENSG00000099617.3  |    |    |    |    | NA | NA | NA | NA | NA | NA | NA | NA | NA |
| NA             | NA                 | NA | NA | NA | -2 | NA |    |    |    |    |    |    |    |    |
| DMRTC2         | ENSG00000142025.15 |    |    |    |    | NA | NA | NA | NA | NA | NA | NA | NA | NA |
| NA             | NA                 | NA | NA | NA | -2 | NA |    |    |    |    |    |    |    |    |
| CCDC105        | ENSG00000160994.3  |    |    |    |    | NA | NA | NA | NA | NA | NA | NA | NA | NA |



|              |                    |    |    |    |    |    |    |    |    |    |    |    |    |    |
|--------------|--------------------|----|----|----|----|----|----|----|----|----|----|----|----|----|
| NA           | NA                 | NA | NA | NA | -2 | NA |    |    |    |    |    |    |    |    |
| FFAR2        | ENSG00000126262.4  |    |    | NA | NA | NA | NA | NA | NA | NA | NA | NA | NA | NA |
| NA           | NA                 | NA | NA | NA | -2 | NA |    |    |    |    |    |    |    |    |
| LINC01801    | ENSG00000267767.2  |    |    | NA | NA | NA | NA | NA | NA | NA | NA | NA | NA | NA |
| NA           | NA                 | NA | NA | NA | -2 | NA |    |    |    |    |    |    |    |    |
| JSRP1        | ENSG00000167476.10 |    |    | NA | NA | NA | NA | NA | NA | NA | NA | NA | NA | NA |
| NA           | NA                 | NA | NA | NA | -2 | NA |    |    |    |    |    |    |    |    |
| GDF15        | ENSG00000130513.6  |    |    | NA | NA | NA | NA | NA | NA | NA | NA | NA | NA | NA |
| NA           | NA                 | NA | NA | NA | -2 | NA |    |    |    |    |    |    |    |    |
| CTC-459F4.5  | ENSG00000266977.1  |    |    | NA | NA | NA | NA | NA | NA | NA | NA | NA | NA | NA |
| NA           | NA                 | NA | NA | NA | -2 | NA |    |    |    |    |    |    |    |    |
| SLC25A42     | ENSG00000181035.13 |    |    | NA | NA | NA | NA | NA | NA | NA | NA | NA | NA | NA |
| NA           | NA                 | NA | NA | NA | -2 | NA |    |    |    |    |    |    |    |    |
| EIF3K        | ENSG00000178982.9  |    |    | NA | NA | NA | NA | NA | NA | NA | NA | NA | NA | NA |
| NA           | NA                 | NA | NA | NA | -2 | NA |    |    |    |    |    |    |    |    |
| TNFSF9       | ENSG00000125657.4  |    |    | NA | NA | NA | NA | NA | NA | NA | NA | NA | NA | NA |
| NA           | NA                 | NA | NA | NA | -2 | NA |    |    |    |    |    |    |    |    |
| NLRP13       | ENSG00000173572.11 |    |    | NA | NA | NA | NA | NA | NA | NA | NA | NA | NA | NA |
| NA           | NA                 | NA | NA | NA | -2 | NA |    |    |    |    |    |    |    |    |
| ZNF837       | ENSG00000152475.6  |    |    | NA | NA | NA | NA | NA | NA | NA | NA | NA | NA | NA |
| NA           | NA                 | NA | NA | NA | -2 | NA |    |    |    |    |    |    |    |    |
| KLF1         | ENSG00000105610.4  |    |    | NA | NA | NA | NA | NA | NA | NA | NA | NA | NA | NA |
| NA           | NA                 | NA | NA | NA | -2 | NA |    |    |    |    |    |    |    |    |
| ZNF224       | ENSG00000267680.5  |    |    | NA | NA | NA | NA | NA | NA | NA | NA | NA | NA | NA |
| NA           | NA                 | NA | NA | NA | -2 | NA |    |    |    |    |    |    |    |    |
| SAFB         | ENSG00000160633.12 |    |    | NA | NA | NA | NA | NA | NA | NA | NA | NA | NA | NA |
| NA           | NA                 | NA | NA | NA | -2 | NA |    |    |    |    |    |    |    |    |
| HSPB6        | ENSG00000004776.12 |    |    | NA | NA | NA | NA | NA | NA | NA | NA | NA | NA | NA |
| NA           | NA                 | NA | NA | NA | -2 | NA |    |    |    |    |    |    |    |    |
| CTC-513N18.6 | ENSG00000269043.1  |    |    | NA | NA | NA | NA | NA | NA | NA | NA | NA | NA | NA |
| NA           | NA                 | NA | NA | NA | -2 | NA |    |    |    |    |    |    |    |    |
| MRPL4        | ENSG00000105364.13 |    |    | NA | NA | NA | NA | NA | NA | NA | NA | NA | NA | NA |
| NA           | NA                 | NA | NA | NA | -2 | NA |    |    |    |    |    |    |    |    |
| SPIB         | ENSG00000269404.6  |    |    | NA | NA | NA | NA | NA | NA | NA | NA | NA | NA | NA |
| NA           | NA                 | NA | NA | NA | -2 | NA |    |    |    |    |    |    |    |    |
| ZNF274       | ENSG00000171606.17 |    |    | NA | NA | NA | NA | NA | NA | NA | NA | NA | NA | NA |
| NA           | NA                 | NA | NA | NA | -2 | NA |    |    |    |    |    |    |    |    |
| RBM42        | ENSG00000126254.11 |    |    | NA | NA | NA | NA | NA | NA | NA | NA | NA | NA | NA |
| NA           | NA                 | NA | NA | NA | -2 | NA |    |    |    |    |    |    |    |    |
| DMWD         | ENSG00000185800.11 |    |    | NA | NA | NA | NA | NA | NA | NA | NA | NA | NA | NA |
| NA           | NA                 | NA | NA | NA | -2 | NA |    |    |    |    |    |    |    |    |
| PPP5D1       | ENSG00000230510.6  |    |    | NA | NA | NA | NA | NA | NA | NA | NA | NA | NA | NA |
| NA           | NA                 | NA | NA | NA | -2 | NA |    |    |    |    |    |    |    |    |
| CYP2A13      | ENSG00000197838.4  |    |    | NA | NA | NA | NA | NA | NA | NA | NA | NA | NA | NA |
| NA           | NA                 | NA | NA | NA | -2 | NA |    |    |    |    |    |    |    |    |
| TSSK6        | ENSG00000178093.13 |    |    | NA | NA | NA | NA | NA | NA | NA | NA | NA | NA | NA |
| NA           | NA                 | NA | NA | NA | -2 | NA |    |    |    |    |    |    |    |    |
| TMEM145      | ENSG00000167619.11 |    |    | NA | NA | NA | NA | NA | NA | NA | NA | NA | NA | NA |
| NA           | NA                 | NA | NA | NA | -2 | NA |    |    |    |    |    |    |    |    |
| NMRK2        | ENSG00000077009.13 |    |    | NA | NA | NA | NA | NA | NA | NA | NA | NA | NA | NA |
| NA           | NA                 | NA | NA | NA | -2 | NA |    |    |    |    |    |    |    |    |
| GADD45GIP1   | ENSG00000179271.2  |    |    | NA | NA | NA | NA | NA | NA | NA | NA | NA | NA | NA |
| NA           | NA                 | NA | NA | NA | -2 | NA |    |    |    |    |    |    |    |    |
| PSG7         | ENSG00000221878.12 |    |    | NA | NA | NA | NA | NA | NA | NA | NA | NA | NA | NA |
| NA           | NA                 | NA | NA | NA | -2 | NA |    |    |    |    |    |    |    |    |
| ATG4D        | ENSG00000130734.9  |    |    | NA | NA | NA | NA | NA | NA | NA | NA | NA | NA | NA |
| NA           | NA                 | NA | NA | NA | -2 | NA |    |    |    |    |    |    |    |    |
| ZNF780B      | ENSG00000128000.15 |    |    | NA | NA | NA | NA | NA | NA | NA | NA | NA | NA | NA |
| NA           | NA                 | NA | NA | NA | -2 | NA |    |    |    |    |    |    |    |    |
| LINC01855    | ENSG00000267517.1  |    |    | NA | NA | NA | NA | NA | NA | NA | NA | NA | NA | NA |
| NA           | NA                 | NA | NA | NA | -2 | NA |    |    |    |    |    |    |    |    |
| NDUFA13      | ENSG00000186010.18 |    |    | NA | NA | NA | NA | NA | NA | NA | NA | NA | NA | NA |

|              |                    |    |    |    |    |    |    |    |    |    |    |    |    |    |
|--------------|--------------------|----|----|----|----|----|----|----|----|----|----|----|----|----|
| NA           | NA                 | NA | NA | NA | -2 | NA |    |    |    |    |    |    |    |    |
| PRSS57       | ENSG00000185198.11 | NA | NA | NA | NA | NA | NA | NA | NA | NA | NA | NA | NA | NA |
| NA           | NA                 | NA | NA | NA | -2 | NA |    |    |    |    |    |    |    |    |
| ZNF699       | ENSG00000196110.7  | NA | NA | NA | NA | NA | NA | NA | NA | NA | NA | NA | NA | NA |
| NA           | NA                 | NA | NA | NA | -2 | NA |    |    |    |    |    |    |    |    |
| SHKBP1       | ENSG00000160410.14 | NA | NA | NA | NA | NA | NA | NA | NA | NA | NA | NA | NA | NA |
| NA           | NA                 | NA | NA | NA | -2 | NA |    |    |    |    |    |    |    |    |
| PTPRS        | ENSG00000105426.16 | NA | NA | NA | NA | NA | NA | NA | NA | NA | NA | NA | NA | NA |
| NA           | NA                 | NA | NA | NA | -2 | NA |    |    |    |    |    |    |    |    |
| NDUFB7       | ENSG00000099795.6  | NA | NA | NA | NA | NA | NA | NA | NA | NA | NA | NA | NA | NA |
| NA           | NA                 | NA | NA | NA | -2 | NA |    |    |    |    |    |    |    |    |
| SBSN         | ENSG00000189001.10 | NA | NA | NA | NA | NA | NA | NA | NA | NA | NA | NA | NA | NA |
| NA           | NA                 | NA | NA | NA | -2 | NA |    |    |    |    |    |    |    |    |
| LINC01533    | ENSG00000267779.5  | NA | NA | NA | NA | NA | NA | NA | NA | NA | NA | NA | NA | NA |
| NA           | NA                 | NA | NA | NA | -2 | NA |    |    |    |    |    |    |    |    |
| ZSCAN4       | ENSG00000180532.10 | NA | NA | NA | NA | NA | NA | NA | NA | NA | NA | NA | NA | NA |
| NA           | NA                 | NA | NA | NA | -2 | NA |    |    |    |    |    |    |    |    |
| SULT2A1      | ENSG00000105398.3  | NA | NA | NA | NA | NA | NA | NA | NA | NA | NA | NA | NA | NA |
| NA           | NA                 | NA | NA | NA | -2 | NA |    |    |    |    |    |    |    |    |
| AC002115.9   | ENSG00000267626.1  | NA | NA | NA | NA | NA | NA | NA | NA | NA | NA | NA | NA | NA |
| NA           | NA                 | NA | NA | NA | -2 | NA |    |    |    |    |    |    |    |    |
| SH2D3A       | ENSG00000125731.12 | NA | NA | NA | NA | NA | NA | NA | NA | NA | NA | NA | NA | NA |
| NA           | NA                 | NA | NA | NA | -2 | NA |    |    |    |    |    |    |    |    |
| HAMP         | ENSG00000105697.7  | NA | NA | NA | NA | NA | NA | NA | NA | NA | NA | NA | NA | NA |
| NA           | NA                 | NA | NA | NA | -2 | NA |    |    |    |    |    |    |    |    |
| ZNF121       | ENSG00000197961.11 | NA | NA | NA | NA | NA | NA | NA | NA | NA | NA | NA | NA | NA |
| NA           | NA                 | NA | NA | NA | -2 | NA |    |    |    |    |    |    |    |    |
| RGS9BP       | ENSG00000186326.3  | NA | NA | NA | NA | NA | NA | NA | NA | NA | NA | NA | NA | NA |
| NA           | NA                 | NA | NA | NA | -2 | NA |    |    |    |    |    |    |    |    |
| CTD-3252C9.4 | ENSG00000267519.5  | NA | NA | NA | NA | NA | NA | NA | NA | NA | NA | NA | NA | NA |
| NA           | NA                 | NA | NA | NA | NA | -2 | NA |    |    |    |    |    |    |    |
| F2RL3        | ENSG00000127533.3  | NA | NA | NA | NA | NA | NA | NA | NA | NA | NA | NA | NA | NA |
| NA           | NA                 | NA | NA | NA | -2 | NA |    |    |    |    |    |    |    |    |
| CEACAM1      | ENSG00000079385.21 | NA | NA | NA | NA | NA | NA | NA | NA | NA | NA | NA | NA | NA |
| NA           | NA                 | NA | NA | NA | -2 | NA |    |    |    |    |    |    |    |    |
| FUT1         | ENSG00000174951.10 | NA | NA | NA | NA | NA | NA | NA | NA | NA | NA | NA | NA | NA |
| NA           | NA                 | NA | NA | NA | -2 | NA |    |    |    |    |    |    |    |    |
| TTC9B        | ENSG00000174521.7  | NA | NA | NA | NA | NA | NA | NA | NA | NA | NA | NA | NA | NA |
| NA           | NA                 | NA | NA | NA | -2 | NA |    |    |    |    |    |    |    |    |
| C19orf45     | ENSG00000198723.10 | NA | NA | NA | NA | NA | NA | NA | NA | NA | NA | NA | NA | NA |
| NA           | NA                 | NA | NA | NA | -2 | NA |    |    |    |    |    |    |    |    |
| FUT6         | ENSG00000156413.13 | NA | NA | NA | NA | NA | NA | NA | NA | NA | NA | NA | NA | NA |
| NA           | NA                 | NA | NA | NA | -2 | NA |    |    |    |    |    |    |    |    |
| ZNF836       | ENSG00000196267.12 | NA | NA | NA | NA | NA | NA | NA | NA | NA | NA | NA | NA | NA |
| NA           | NA                 | NA | NA | NA | -2 | NA |    |    |    |    |    |    |    |    |
| PGLYRP2      | ENSG00000161031.12 | NA | NA | NA | NA | NA | NA | NA | NA | NA | NA | NA | NA | NA |
| NA           | NA                 | NA | NA | NA | -2 | NA |    |    |    |    |    |    |    |    |
| HSH2D        | ENSG00000196684.12 | NA | NA | NA | NA | NA | NA | NA | NA | NA | NA | NA | NA | NA |
| NA           | NA                 | NA | NA | NA | -2 | NA |    |    |    |    |    |    |    |    |
| CTC-499B15.8 | ENSG00000267089.1  | NA | NA | NA | NA | NA | NA | NA | NA | NA | NA | NA | NA | NA |
| NA           | NA                 | NA | NA | NA | NA | -2 | NA |    |    |    |    |    |    |    |
| GADD45B      | ENSG00000099860.8  | NA | NA | NA | NA | NA | NA | NA | NA | NA | NA | NA | NA | NA |
| NA           | NA                 | NA | NA | NA | -2 | NA |    |    |    |    |    |    |    |    |
| ASNA1        | ENSG00000198356.11 | NA | NA | NA | NA | NA | NA | NA | NA | NA | NA | NA | NA | NA |
| NA           | NA                 | NA | NA | NA | -2 | NA |    |    |    |    |    |    |    |    |
| SNAPC2       | ENSG00000104976.11 | NA | NA | NA | NA | NA | NA | NA | NA | NA | NA | NA | NA | NA |
| NA           | NA                 | NA | NA | NA | -2 | NA |    |    |    |    |    |    |    |    |
| DOCK6        | ENSG00000130158.13 | NA | NA | NA | NA | NA | NA | NA | NA | NA | NA | NA | NA | NA |
| NA           | NA                 | NA | NA | NA | -2 | NA |    |    |    |    |    |    |    |    |
| TSKS         | ENSG00000126467.10 | NA | NA | NA | NA | NA | NA | NA | NA | NA | NA | NA | NA | NA |
| NA           | NA                 | NA | NA | NA | -2 | NA |    |    |    |    |    |    |    |    |
| MEGF8        | ENSG00000105429.12 | NA | NA | NA | NA | NA | NA | NA | NA | NA | NA | NA | NA | NA |

|               |                    |    |    |    |    |    |    |    |    |    |    |    |    |    |
|---------------|--------------------|----|----|----|----|----|----|----|----|----|----|----|----|----|
| ISOC2         | NA                 | NA | NA | NA | -2 | NA | NA | NA | NA | NA | NA | NA | NA | NA |
|               | ENSG00000063241.7  |    |    |    |    | NA | NA | NA | NA | NA | NA | NA | NA | NA |
|               | NA                 | NA | NA | NA | -2 | NA |    |    |    |    |    |    |    |    |
| PSG8          | ENSG00000124467.18 |    |    |    |    | NA | NA | NA | NA | NA | NA | NA | NA | NA |
|               | NA                 | NA | NA | NA | -2 | NA |    |    |    |    |    |    |    |    |
| AC006262.4    | ENSG00000269729.1  |    |    |    |    | NA | NA | NA | NA | NA | NA | NA | NA | NA |
|               | NA                 | NA | NA | NA | NA | -2 | NA |    |    |    |    |    |    |    |
| IFNL2         | ENSG00000183709.7  |    |    |    |    | NA | NA | NA | NA | NA | NA | NA | NA | NA |
|               | NA                 | NA | NA | NA | -2 | NA |    |    |    |    |    |    |    |    |
| CEBPG         | ENSG00000153879.8  |    |    |    |    | NA | NA | NA | NA | NA | NA | NA | NA | NA |
|               | NA                 | NA | NA | NA | -2 | NA |    |    |    |    |    |    |    |    |
| CTC-523E23.14 | ENSG00000270544.1  |    |    |    |    | NA | NA | NA | NA | NA | NA | NA | NA | NA |
|               | NA                 | NA | NA | NA | NA | -2 | NA |    |    |    |    |    |    |    |
| CTC-490G23.2  | ENSG00000231412.2  |    |    |    |    | NA | NA | NA | NA | NA | NA | NA | NA | NA |
|               | NA                 | NA | NA | NA | NA | -2 | NA |    |    |    |    |    |    |    |
| ZFP82         | ENSG00000181007.8  |    |    |    |    | NA | NA | NA | NA | NA | NA | NA | NA | NA |
|               | NA                 | NA | NA | NA | -2 | NA |    |    |    |    |    |    |    |    |
| MIDN          | ENSG00000167470.12 |    |    |    |    | NA | NA | NA | NA | NA | NA | NA | NA | NA |
|               | NA                 | NA | NA | NA | -2 | NA |    |    |    |    |    |    |    |    |
| NOSIP         | ENSG00000142546.13 |    |    |    |    | NA | NA | NA | NA | NA | NA | NA | NA | NA |
|               | NA                 | NA | NA | NA | -2 | NA |    |    |    |    |    |    |    |    |
| ZSWIM4        | ENSG00000132003.9  |    |    |    |    | NA | NA | NA | NA | NA | NA | NA | NA | NA |
|               | NA                 | NA | NA | NA | NA | -2 | NA |    |    |    |    |    |    |    |
| FCER2         | ENSG00000104921.14 |    |    |    |    | NA | NA | NA | NA | NA | NA | NA | NA | NA |
|               | NA                 | NA | NA | NA | -2 | NA |    |    |    |    |    |    |    |    |
| HKR1          | ENSG00000181666.17 |    |    |    |    | NA | NA | NA | NA | NA | NA | NA | NA | NA |
|               | NA                 | NA | NA | NA | -2 | NA |    |    |    |    |    |    |    |    |
| KCNC3         | ENSG00000131398.13 |    |    |    |    | NA | NA | NA | NA | NA | NA | NA | NA | NA |
|               | NA                 | NA | NA | NA | -2 | NA |    |    |    |    |    |    |    |    |
| USP29         | ENSG00000131864.10 |    |    |    |    | NA | NA | NA | NA | NA | NA | NA | NA | NA |
|               | NA                 | NA | NA | NA | -2 | NA |    |    |    |    |    |    |    |    |
| BIRC8         | ENSG00000163098.4  |    |    |    |    | NA | NA | NA | NA | NA | NA | NA | NA | NA |
|               | NA                 | NA | NA | NA | -2 | NA |    |    |    |    |    |    |    |    |
| EMC10         | ENSG00000161671.16 |    |    |    |    | NA | NA | NA | NA | NA | NA | NA | NA | NA |
|               | NA                 | NA | NA | NA | -2 | NA |    |    |    |    |    |    |    |    |
| ZNF71         | ENSG00000197951.8  |    |    |    |    | NA | NA | NA | NA | NA | NA | NA | NA | NA |
|               | NA                 | NA | NA | NA | -2 | NA |    |    |    |    |    |    |    |    |
| LYPD4         | ENSG00000273111.5  |    |    |    |    | NA | NA | NA | NA | NA | NA | NA | NA | NA |
|               | NA                 | NA | NA | NA | -2 | NA |    |    |    |    |    |    |    |    |
| MAG           | ENSG00000105695.14 |    |    |    |    | NA | NA | NA | NA | NA | NA | NA | NA | NA |
|               | NA                 | NA | NA | NA | -2 | NA |    |    |    |    |    |    |    |    |
| HNRNPM        | ENSG00000099783.11 |    |    |    |    | NA | NA | NA | NA | NA | NA | NA | NA | NA |
|               | NA                 | NA | NA | NA | NA | -2 | NA |    |    |    |    |    |    |    |
| LINC01837     | ENSG00000267489.3  |    |    |    |    | NA | NA | NA | NA | NA | NA | NA | NA | NA |
|               | NA                 | NA | NA | NA | NA | -2 | NA |    |    |    |    |    |    |    |
| LYL1          | ENSG00000104903.4  |    |    |    |    | NA | NA | NA | NA | NA | NA | NA | NA | NA |
|               | NA                 | NA | NA | NA | -2 | NA |    |    |    |    |    |    |    |    |
| ZNF606        | ENSG00000166704.11 |    |    |    |    | NA | NA | NA | NA | NA | NA | NA | NA | NA |
|               | NA                 | NA | NA | NA | NA | -2 | NA |    |    |    |    |    |    |    |
| ERF           | ENSG00000105722.9  |    |    |    |    | NA | NA | NA | NA | NA | NA | NA | NA | NA |
|               | NA                 | NA | NA | NA | -2 | NA |    |    |    |    |    |    |    |    |
| JOSD2         | ENSG00000161677.11 |    |    |    |    | NA | NA | NA | NA | NA | NA | NA | NA | NA |
|               | NA                 | NA | NA | NA | -2 | NA |    |    |    |    |    |    |    |    |
| CTD-3064H18.2 | ENSG00000267115.1  |    |    |    |    | NA | NA | NA | NA | NA | NA | NA | NA | NA |
|               | NA                 | NA | NA | NA | NA | -2 | NA |    |    |    |    |    |    |    |
| DPRX          | ENSG00000204595.1  |    |    |    |    | NA | NA | NA | NA | NA | NA | NA | NA | NA |
|               | NA                 | NA | NA | NA | -2 | NA |    |    |    |    |    |    |    |    |
| CTB-31020.2   | ENSG00000261526.2  |    |    |    |    | NA | NA | NA | NA | NA | NA | NA | NA | NA |
|               | NA                 | NA | NA | NA | NA | -2 | NA |    |    |    |    |    |    |    |
| VASP          | ENSG00000125753.13 |    |    |    |    | NA | NA | NA | NA | NA | NA | NA | NA | NA |
|               | NA                 | NA | NA | NA | -2 | NA |    |    |    |    |    |    |    |    |
| RAX2          | ENSG00000173976.15 |    |    |    |    | NA | NA | NA | NA | NA | NA | NA | NA | NA |

|                |                    |    |    |    |    |    |    |    |    |    |    |    |    |    |
|----------------|--------------------|----|----|----|----|----|----|----|----|----|----|----|----|----|
| NA             | NA                 | NA | NA | -2 | NA |    |    |    |    |    |    |    |    |    |
| CABP5          | ENSG00000105507.2  |    |    |    | NA | NA | NA | NA | NA | NA | NA | NA | NA | NA |
| NA             | NA                 | NA | NA | -2 | NA |    |    |    |    |    |    |    |    |    |
| PLIN5          | ENSG00000214456.8  |    |    |    | NA | NA | NA | NA | NA | NA | NA | NA | NA | NA |
| NA             | NA                 | NA | NA | -2 | NA |    |    |    |    |    |    |    |    |    |
| FBXW9          | ENSG00000132004.12 |    |    |    | NA | NA | NA | NA | NA | NA | NA | NA | NA | NA |
| NA             | NA                 | NA | NA | -2 | NA |    |    |    |    |    |    |    |    |    |
| EXOC3L2        | ENSG00000283632.2  |    |    |    | NA | NA | NA | NA | NA | NA | NA | NA | NA | NA |
| NA             | NA                 | NA | NA | NA | -2 | NA |    |    |    |    |    |    |    |    |
| SH3GL1         | ENSG00000141985.9  |    |    |    | NA | NA | NA | NA | NA | NA | NA | NA | NA | NA |
| NA             | NA                 | NA | NA | NA | -2 | NA |    |    |    |    |    |    |    |    |
| CGB5           | ENSG00000189052.6  |    |    |    | NA | NA | NA | NA | NA | NA | NA | NA | NA | NA |
| NA             | NA                 | NA | NA | -2 | NA |    |    |    |    |    |    |    |    |    |
| LINC01838      | ENSG00000269037.1  |    |    |    | NA | NA | NA | NA | NA | NA | NA | NA | NA | NA |
| NA             | NA                 | NA | NA | NA | -2 | NA |    |    |    |    |    |    |    |    |
| MATK           | ENSG00000007264.14 |    |    |    | NA | NA | NA | NA | NA | NA | NA | NA | NA | NA |
| NA             | NA                 | NA | NA | -2 | NA |    |    |    |    |    |    |    |    |    |
| DNMT1          | ENSG00000130816.14 |    |    |    | NA | NA | NA | NA | NA | NA | NA | NA | NA | NA |
| NA             | NA                 | NA | NA | -2 | NA |    |    |    |    |    |    |    |    |    |
| TGFB1          | ENSG00000105329.9  |    |    |    | NA | NA | NA | NA | NA | NA | NA | NA | NA | NA |
| NA             | NA                 | NA | NA | -2 | NA |    |    |    |    |    |    |    |    |    |
| PSG1           | ENSG00000231924.9  |    |    |    | NA | NA | NA | NA | NA | NA | NA | NA | NA | NA |
| NA             | NA                 | NA | NA | -2 | NA |    |    |    |    |    |    |    |    |    |
| ZIM3           | ENSG00000141946.1  |    |    |    | NA | NA | NA | NA | NA | NA | NA | NA | NA | NA |
| NA             | NA                 | NA | NA | -2 | NA |    |    |    |    |    |    |    |    |    |
| SPACA4         | ENSG00000177202.2  |    |    |    | NA | NA | NA | NA | NA | NA | NA | NA | NA | NA |
| NA             | NA                 | NA | NA | NA | -2 | NA |    |    |    |    |    |    |    |    |
| C19orf73       | ENSG00000221916.3  |    |    |    | NA | NA | NA | NA | NA | NA | NA | NA | NA | NA |
| NA             | NA                 | NA | NA | NA | -2 | NA |    |    |    |    |    |    |    |    |
| MEX3D          | ENSG00000181588.16 |    |    |    | NA | NA | NA | NA | NA | NA | NA | NA | NA | NA |
| NA             | NA                 | NA | NA | -2 | NA |    |    |    |    |    |    |    |    |    |
| ARRDC2         | ENSG00000105643.9  |    |    |    | NA | NA | NA | NA | NA | NA | NA | NA | NA | NA |
| NA             | NA                 | NA | NA | NA | -2 | NA |    |    |    |    |    |    |    |    |
| CTB-60B18.10   | ENSG00000268655.2  |    |    |    | NA | NA | NA | NA | NA | NA | NA | NA | NA | NA |
| NA             | NA                 | NA | NA | NA | NA | -2 | NA |    |    |    |    |    |    |    |
| CTD-2619J13.13 | ENSG00000268307.1  |    |    |    | NA | NA | NA | NA | NA | NA | NA | NA | NA | NA |
| NA             | NA                 | NA | NA | NA | NA | -2 | NA |    |    |    |    |    |    |    |
| AKT1S1         | ENSG00000204673.10 |    |    |    | NA | NA | NA | NA | NA | NA | NA | NA | NA | NA |
| NA             | NA                 | NA | NA | NA | -2 | NA |    |    |    |    |    |    |    |    |
| ETV2           | ENSG00000105672.14 |    |    |    | NA | NA | NA | NA | NA | NA | NA | NA | NA | NA |
| NA             | NA                 | NA | NA | -2 | NA |    |    |    |    |    |    |    |    |    |
| FAM187B        | ENSG00000177558.3  |    |    |    | NA | NA | NA | NA | NA | NA | NA | NA | NA | NA |
| NA             | NA                 | NA | NA | NA | -2 | NA |    |    |    |    |    |    |    |    |
| CTB-50L17.10   | ENSG00000167674.14 |    |    |    | NA | NA | NA | NA | NA | NA | NA | NA | NA | NA |
| NA             | NA                 | NA | NA | NA | NA | -2 | NA |    |    |    |    |    |    |    |
| ZNF527         | ENSG00000189164.14 |    |    |    | NA | NA | NA | NA | NA | NA | NA | NA | NA | NA |
| NA             | NA                 | NA | NA | NA | -2 | NA |    |    |    |    |    |    |    |    |
| C19orf38       | ENSG00000214212.8  |    |    |    | NA | NA | NA | NA | NA | NA | NA | NA | NA | NA |
| NA             | NA                 | NA | NA | NA | -2 | NA |    |    |    |    |    |    |    |    |
| USHBP1         | ENSG00000130307.11 |    |    |    | NA | NA | NA | NA | NA | NA | NA | NA | NA | NA |
| NA             | NA                 | NA | NA | NA | -2 | NA |    |    |    |    |    |    |    |    |
| RP11-157B13.7  | ENSG00000267872.1  |    |    |    | NA | NA | NA | NA | NA | NA | NA | NA | NA | NA |
| NA             | NA                 | NA | NA | NA | NA | -2 | NA |    |    |    |    |    |    |    |
| ICAM1          | ENSG00000090339.8  |    |    |    | NA | NA | NA | NA | NA | NA | NA | NA | NA | NA |
| NA             | NA                 | NA | NA | -2 | NA |    |    |    |    |    |    |    |    |    |
| LRP3           | ENSG00000130881.13 |    |    |    | NA | NA | NA | NA | NA | NA | NA | NA | NA | NA |
| NA             | NA                 | NA | NA | -2 | NA |    |    |    |    |    |    |    |    |    |
| KLK11          | ENSG00000167757.13 |    |    |    | NA | NA | NA | NA | NA | NA | NA | NA | NA | NA |
| NA             | NA                 | NA | NA | -2 | NA |    |    |    |    |    |    |    |    |    |
| SYDE1          | ENSG00000105137.12 |    |    |    | NA | NA | NA | NA | NA | NA | NA | NA | NA | NA |
| NA             | NA                 | NA | NA | -2 | NA |    |    |    |    |    |    |    |    |    |
| PPP6R1         | ENSG00000105063.18 |    |    |    | NA | NA | NA | NA | NA | NA | NA | NA | NA | NA |

|               |    |                    |    |    |    |    |    |    |    |    |    |    |    |    |
|---------------|----|--------------------|----|----|----|----|----|----|----|----|----|----|----|----|
| NA            | NA | NA                 | NA | NA | -2 | NA |    |    |    |    |    |    |    |    |
| RP4-806M20.4  |    | ENSG00000268649.5  |    |    |    | NA | NA | NA | NA | NA | NA | NA | NA | NA |
| NA            | NA | NA                 | NA | NA | NA | -2 | NA |    |    |    |    |    |    |    |
| GNAS          |    | ENSG00000087460.24 |    | NA | NA | NA | NA | NA | NA | NA | NA | NA | NA | NA |
| NA            | NA | NA                 | NA | NA | -2 | NA |    |    |    |    |    |    |    |    |
| ANKRD60       |    | ENSG00000124227.5  |    |    |    | NA | NA | NA | NA | NA | NA | NA | NA | NA |
| NA            | NA | NA                 | NA | NA | NA | -2 | NA |    |    |    |    |    |    |    |
| CST4          |    | ENSG00000101441.4  |    | NA | NA | NA | NA | NA | NA | NA | NA | NA | NA | NA |
| NA            | NA | NA                 | NA | NA | -2 | NA |    |    |    |    |    |    |    |    |
| MATN4         |    | ENSG00000124159.15 |    | NA | NA | NA | NA | NA | NA | NA | NA | NA | NA | NA |
| NA            | NA | NA                 | NA | NA | -2 | NA |    |    |    |    |    |    |    |    |
| DYNLRB1       |    | ENSG00000125971.16 |    |    |    | NA | NA | NA | NA | NA | NA | NA | NA | NA |
| NA            | NA | NA                 | NA | NA | NA | -2 | NA |    |    |    |    |    |    |    |
| RP5-1116H23.4 |    | ENSG00000278816.1  |    |    |    | NA | NA | NA | NA | NA | NA | NA | NA | NA |
| NA            | NA | NA                 | NA | NA | NA | -2 | NA |    |    |    |    |    |    |    |
| CSNK2A1       |    | ENSG00000101266.17 |    | NA | NA | NA | NA | NA | NA | NA | NA | NA | NA | NA |
| NA            | NA | NA                 | NA | NA | NA | -2 | NA |    |    |    |    |    |    |    |
| SIRPD         |    | ENSG00000125900.12 |    | NA | NA | NA | NA | NA | NA | NA | NA | NA | NA | NA |
| NA            | NA | NA                 | NA | NA | -2 | NA |    |    |    |    |    |    |    |    |
| RP11-164D18.2 |    | ENSG00000227282.1  |    |    |    | NA | NA | NA | NA | NA | NA | NA | NA | NA |
| NA            | NA | NA                 | NA | NA | NA | -2 | NA |    |    |    |    |    |    |    |
| POFUT1        |    | ENSG00000101346.13 |    |    |    | NA | NA | NA | NA | NA | NA | NA | NA | NA |
| NA            | NA | NA                 | NA | NA | NA | -2 | NA |    |    |    |    |    |    |    |
| RP11-321P16.1 |    | ENSG00000276923.1  |    |    |    | NA | NA | NA | NA | NA | NA | NA | NA | NA |
| NA            | NA | NA                 | NA | NA | NA | -2 | NA |    |    |    |    |    |    |    |
| TOP1          |    | ENSG00000198900.5  |    | NA | NA | NA | NA | NA | NA | NA | NA | NA | NA | NA |
| NA            | NA | NA                 | NA | NA | -2 | NA |    |    |    |    |    |    |    |    |
| RP5-851M4.1   |    | ENSG00000277901.1  |    |    |    | NA | NA | NA | NA | NA | NA | NA | NA | NA |
| NA            | NA | NA                 | NA | NA | NA | -2 | NA |    |    |    |    |    |    |    |
| LINC01722     |    | ENSG00000233048.1  |    | NA | NA | NA | NA | NA | NA | NA | NA | NA | NA | NA |
| NA            | NA | NA                 | NA | NA | NA | -2 | NA |    |    |    |    |    |    |    |
| RP5-906C1.1   |    | ENSG00000278231.1  |    |    |    | NA | NA | NA | NA | NA | NA | NA | NA | NA |
| NA            | NA | NA                 | NA | NA | NA | -2 | NA |    |    |    |    |    |    |    |
| TGM2          |    | ENSG00000198959.11 |    | NA | NA | NA | NA | NA | NA | NA | NA | NA | NA | NA |
| NA            | NA | NA                 | NA | NA | -2 | NA |    |    |    |    |    |    |    |    |
| EFCAB8        |    | ENSG00000215529.12 |    | NA | NA | NA | NA | NA | NA | NA | NA | NA | NA | NA |
| NA            | NA | NA                 | NA | NA | NA | -2 | NA |    |    |    |    |    |    |    |
| LINC00494     |    | ENSG00000235621.8  |    | NA | NA | NA | NA | NA | NA | NA | NA | NA | NA | NA |
| NA            | NA | NA                 | NA | NA | NA | -2 | NA |    |    |    |    |    |    |    |
| OVOL2         |    | ENSG00000125850.10 |    | NA | NA | NA | NA | NA | NA | NA | NA | NA | NA | NA |
| NA            | NA | NA                 | NA | NA | -2 | NA |    |    |    |    |    |    |    |    |
| FAM209A       |    | ENSG00000124103.8  |    | NA | NA | NA | NA | NA | NA | NA | NA | NA | NA | NA |
| NA            | NA | NA                 | NA | NA | NA | -2 | NA |    |    |    |    |    |    |    |
| RP11-101E14.3 |    | ENSG00000233415.1  |    |    |    | NA | NA | NA | NA | NA | NA | NA | NA | NA |
| NA            | NA | NA                 | NA | NA | NA | -2 | NA |    |    |    |    |    |    |    |
| RP5-1125A11.4 |    | ENSG00000228386.2  |    |    |    | NA | NA | NA | NA | NA | NA | NA | NA | NA |
| NA            | NA | NA                 | NA | NA | NA | -2 | NA |    |    |    |    |    |    |    |
| SEMG1         |    | ENSG00000124233.11 |    | NA | NA | NA | NA | NA | NA | NA | NA | NA | NA | NA |
| NA            | NA | NA                 | NA | NA | -2 | NA |    |    |    |    |    |    |    |    |
| GATA5         |    | ENSG00000130700.6  |    | NA | NA | NA | NA | NA | NA | NA | NA | NA | NA | NA |
| NA            | NA | NA                 | NA | NA | -2 | NA |    |    |    |    |    |    |    |    |
| GHRH          |    | ENSG00000118702.9  |    | NA | NA | NA | NA | NA | NA | NA | NA | NA | NA | NA |
| NA            | NA | NA                 | NA | NA | -2 | NA |    |    |    |    |    |    |    |    |
| TFAP2C        |    | ENSG00000087510.6  |    | NA | NA | NA | NA | NA | NA | NA | NA | NA | NA | NA |
| NA            | NA | NA                 | NA | NA | NA | -2 | NA |    |    |    |    |    |    |    |
| RP4-715N11.2  |    | ENSG00000232294.5  |    |    |    | NA | NA | NA | NA | NA | NA | NA | NA | NA |
| NA            | NA | NA                 | NA | NA | NA | -2 | NA |    |    |    |    |    |    |    |
| ZSWIM3        |    | ENSG00000132801.6  |    | NA | NA | NA | NA | NA | NA | NA | NA | NA | NA | NA |
| NA            | NA | NA                 | NA | NA | NA | -2 | NA |    |    |    |    |    |    |    |
| UBE2V1        |    | ENSG00000244687.11 |    | NA | NA | NA | NA | NA | NA | NA | NA | NA | NA | NA |
| NA            | NA | NA                 | NA | NA | NA | -2 | NA |    |    |    |    |    |    |    |
| LINC01754     |    | ENSG00000224565.1  |    | NA | NA | NA | NA | NA | NA | NA | NA | NA | NA | NA |

|               |                    |    |    |    |    |    |    |    |    |    |    |    |    |
|---------------|--------------------|----|----|----|----|----|----|----|----|----|----|----|----|
| NA            | NA                 | NA | NA | NA | -2 | NA |    |    |    |    |    |    |    |
| BPIFA1        | ENSG00000198183.11 | NA | NA | NA | NA | NA | NA | NA | NA | NA | NA | NA | NA |
| NA            | NA                 | NA | NA | NA | -2 | NA |    |    |    |    |    |    |    |
| DBNDD2        | ENSG00000244274.7  | NA | NA | NA | NA | NA | NA | NA | NA | NA | NA | NA | NA |
| NA            | NA                 | NA | NA | NA | -2 | NA |    |    |    |    |    |    |    |
| RP5-963E22.4  | ENSG00000231977.1  | NA | NA | NA | NA | NA | NA | NA | NA | NA | NA | NA | NA |
| NA            | NA                 | NA | NA | NA | -2 | NA |    |    |    |    |    |    |    |
| RP5-1185K9.1  | ENSG00000238034.1  | NA | NA | NA | NA | NA | NA | NA | NA | NA | NA | NA | NA |
| NA            | NA                 | NA | NA | NA | -2 | NA |    |    |    |    |    |    |    |
| COL9A3        | ENSG00000092758.15 | NA | NA | NA | NA | NA | NA | NA | NA | NA | NA | NA | NA |
| NA            | NA                 | NA | NA | NA | -2 | NA |    |    |    |    |    |    |    |
| RP11-416N4.1  | ENSG00000232448.1  | NA | NA | NA | NA | NA | NA | NA | NA | NA | NA | NA | NA |
| NA            | NA                 | NA | NA | NA | -2 | NA |    |    |    |    |    |    |    |
| ATRN          | ENSG00000088812.17 | NA | NA | NA | NA | NA | NA | NA | NA | NA | NA | NA | NA |
| NA            | NA                 | NA | NA | NA | -2 | NA |    |    |    |    |    |    |    |
| LINC00687     | ENSG00000228422.3  | NA | NA | NA | NA | NA | NA | NA | NA | NA | NA | NA | NA |
| NA            | NA                 | NA | NA | NA | -2 | NA |    |    |    |    |    |    |    |
| XKR7          | ENSG00000260903.2  | NA | NA | NA | NA | NA | NA | NA | NA | NA | NA | NA | NA |
| NA            | NA                 | NA | NA | NA | -2 | NA |    |    |    |    |    |    |    |
| FITM2         | ENSG00000197296.5  | NA | NA | NA | NA | NA | NA | NA | NA | NA | NA | NA | NA |
| NA            | NA                 | NA | NA | NA | -2 | NA |    |    |    |    |    |    |    |
| PCK1          | ENSG00000124253.10 | NA | NA | NA | NA | NA | NA | NA | NA | NA | NA | NA | NA |
| NA            | NA                 | NA | NA | NA | -2 | NA |    |    |    |    |    |    |    |
| SYCP2         | ENSG00000196074.12 | NA | NA | NA | NA | NA | NA | NA | NA | NA | NA | NA | NA |
| NA            | NA                 | NA | NA | NA | -2 | NA |    |    |    |    |    |    |    |
| RP5-839B4.8   | ENSG00000243961.2  | NA | NA | NA | NA | NA | NA | NA | NA | NA | NA | NA | NA |
| NA            | NA                 | NA | NA | NA | -2 | NA |    |    |    |    |    |    |    |
| SOX12         | ENSG00000177732.8  | NA | NA | NA | NA | NA | NA | NA | NA | NA | NA | NA | NA |
| NA            | NA                 | NA | NA | NA | -2 | NA |    |    |    |    |    |    |    |
| FERMT1        | ENSG00000101311.15 | NA | NA | NA | NA | NA | NA | NA | NA | NA | NA | NA | NA |
| NA            | NA                 | NA | NA | NA | -2 | NA |    |    |    |    |    |    |    |
| CSTL1         | ENSG00000125823.12 | NA | NA | NA | NA | NA | NA | NA | NA | NA | NA | NA | NA |
| NA            | NA                 | NA | NA | NA | -2 | NA |    |    |    |    |    |    |    |
| WFDC8         | ENSG00000158901.11 | NA | NA | NA | NA | NA | NA | NA | NA | NA | NA | NA | NA |
| NA            | NA                 | NA | NA | NA | -2 | NA |    |    |    |    |    |    |    |
| TMEM239       | ENSG00000198326.9  | NA | NA | NA | NA | NA | NA | NA | NA | NA | NA | NA | NA |
| NA            | NA                 | NA | NA | NA | -2 | NA |    |    |    |    |    |    |    |
| RP11-560A15.4 | ENSG00000231078.1  | NA | NA | NA | NA | NA | NA | NA | NA | NA | NA | NA | NA |
| NA            | NA                 | NA | NA | NA | -2 | NA |    |    |    |    |    |    |    |
| TRMT6         | ENSG00000089195.14 | NA | NA | NA | NA | NA | NA | NA | NA | NA | NA | NA | NA |
| NA            | NA                 | NA | NA | NA | -2 | NA |    |    |    |    |    |    |    |
| LINC01723     | ENSG00000234265.1  | NA | NA | NA | NA | NA | NA | NA | NA | NA | NA | NA | NA |
| NA            | NA                 | NA | NA | NA | -2 | NA |    |    |    |    |    |    |    |
| RPS21         | ENSG00000171858.17 | NA | NA | NA | NA | NA | NA | NA | NA | NA | NA | NA | NA |
| NA            | NA                 | NA | NA | NA | -2 | NA |    |    |    |    |    |    |    |
| LINC01370     | ENSG00000237767.1  | NA | NA | NA | NA | NA | NA | NA | NA | NA | NA | NA | NA |
| NA            | NA                 | NA | NA | NA | -2 | NA |    |    |    |    |    |    |    |
| PTPRT         | ENSG00000196090.12 | NA | NA | NA | NA | NA | NA | NA | NA | NA | NA | NA | NA |
| NA            | NA                 | NA | NA | NA | -2 | NA |    |    |    |    |    |    |    |
| PET117        | ENSG00000232838.3  | NA | NA | NA | NA | NA | NA | NA | NA | NA | NA | NA | NA |
| NA            | NA                 | NA | NA | NA | -2 | NA |    |    |    |    |    |    |    |
| MYBL2         | ENSG00000101057.15 | NA | NA | NA | NA | NA | NA | NA | NA | NA | NA | NA | NA |
| NA            | NA                 | NA | NA | NA | -2 | NA |    |    |    |    |    |    |    |
| RP1-28H20.3   | ENSG00000271784.1  | NA | NA | NA | NA | NA | NA | NA | NA | NA | NA | NA | NA |
| NA            | NA                 | NA | NA | NA | -2 | NA |    |    |    |    |    |    |    |
| MYL9          | ENSG00000101335.9  | NA | NA | NA | NA | NA | NA | NA | NA | NA | NA | NA | NA |
| NA            | NA                 | NA | NA | NA | -2 | NA |    |    |    |    |    |    |    |
| MAFB          | ENSG00000204103.3  | NA | NA | NA | NA | NA | NA | NA | NA | NA | NA | NA | NA |
| NA            | NA                 | NA | NA | NA | -2 | NA |    |    |    |    |    |    |    |
| SNAP25        | ENSG00000132639.12 | NA | NA | NA | NA | NA | NA | NA | NA | NA | NA | NA | NA |
| NA            | NA                 | NA | NA | NA | -2 | NA |    |    |    |    |    |    |    |
| EPB41L1       | ENSG00000088367.21 | NA | NA | NA | NA | NA | NA | NA | NA | NA | NA | NA | NA |

|               |                    |    |    |    |    |    |    |    |    |    |    |    |    |    |
|---------------|--------------------|----|----|----|----|----|----|----|----|----|----|----|----|----|
|               | NA                 | NA | NA | NA | NA | -2 | NA |    |    |    |    |    |    |    |
| ASIP          | ENSG00000101440.9  |    |    |    |    | NA | NA | NA | NA | NA | NA | NA | NA | NA |
|               | NA                 | NA | NA | NA | NA | -2 | NA |    |    |    |    |    |    |    |
| TPX2          | ENSG00000088325.15 |    |    |    |    | NA | NA | NA | NA | NA | NA | NA | NA | NA |
|               | NA                 | NA | NA | NA | NA | -2 | NA |    |    |    |    |    |    |    |
| RP5-897D18.1  | ENSG00000231604.2  |    |    |    |    | NA | NA | NA | NA | NA | NA | NA | NA | NA |
|               | NA                 | NA | NA | NA | NA | -2 | NA |    |    |    |    |    |    |    |
| RP4-737E23.7  | ENSG00000275179.1  |    |    |    |    | NA | NA | NA | NA | NA | NA | NA | NA | NA |
|               | NA                 | NA | NA | NA | NA | -2 | NA |    |    |    |    |    |    |    |
| RIMS4         | ENSG00000101098.12 |    |    |    |    | NA | NA | NA | NA | NA | NA | NA | NA | NA |
|               | NA                 | NA | NA | NA | NA | -2 | NA |    |    |    |    |    |    |    |
| ZSWIM1        | ENSG00000168612.4  |    |    |    |    | NA | NA | NA | NA | NA | NA | NA | NA | NA |
|               | NA                 | NA | NA | NA | NA | -2 | NA |    |    |    |    |    |    |    |
| ZBP1          | ENSG00000124256.14 |    |    |    |    | NA | NA | NA | NA | NA | NA | NA | NA | NA |
|               | NA                 | NA | NA | NA | NA | -2 | NA |    |    |    |    |    |    |    |
| LINC01524     | ENSG00000234948.1  |    |    |    |    | NA | NA | NA | NA | NA | NA | NA | NA | NA |
|               | NA                 | NA | NA | NA | NA | -2 | NA |    |    |    |    |    |    |    |
| ROMO1         | ENSG00000125995.15 |    |    |    |    | NA | NA | NA | NA | NA | NA | NA | NA | NA |
|               | NA                 | NA | NA | NA | NA | -2 | NA |    |    |    |    |    |    |    |
| CDH26         | ENSG00000124215.16 |    |    |    |    | NA | NA | NA | NA | NA | NA | NA | NA | NA |
|               | NA                 | NA | NA | NA | NA | -2 | NA |    |    |    |    |    |    |    |
| TGIF2         | ENSG00000118707.9  |    |    |    |    | NA | NA | NA | NA | NA | NA | NA | NA | NA |
|               | NA                 | NA | NA | NA | NA | -2 | NA |    |    |    |    |    |    |    |
| PCED1A        | ENSG00000132635.16 |    |    |    |    | NA | NA | NA | NA | NA | NA | NA | NA | NA |
|               | NA                 | NA | NA | NA | NA | -2 | NA |    |    |    |    |    |    |    |
| RP5-827E24.1  | ENSG00000277270.1  |    |    |    |    | NA | NA | NA | NA | NA | NA | NA | NA | NA |
|               | NA                 | NA | NA | NA | NA | -2 | NA |    |    |    |    |    |    |    |
| RP5-905G11.3  | ENSG00000233625.1  |    |    |    |    | NA | NA | NA | NA | NA | NA | NA | NA | NA |
|               | NA                 | NA | NA | NA | NA | -2 | NA |    |    |    |    |    |    |    |
| WFDC12        | ENSG00000168703.5  |    |    |    |    | NA | NA | NA | NA | NA | NA | NA | NA | NA |
|               | NA                 | NA | NA | NA | NA | -2 | NA |    |    |    |    |    |    |    |
| PRNT          | ENSG00000180259.9  |    |    |    |    | NA | NA | NA | NA | NA | NA | NA | NA | NA |
|               | NA                 | NA | NA | NA | NA | -2 | NA |    |    |    |    |    |    |    |
| LINC01384     | ENSG00000237396.1  |    |    |    |    | NA | NA | NA | NA | NA | NA | NA | NA | NA |
|               | NA                 | NA | NA | NA | NA | -2 | NA |    |    |    |    |    |    |    |
| HM13          | ENSG00000101294.16 |    |    |    |    | NA | NA | NA | NA | NA | NA | NA | NA | NA |
|               | NA                 | NA | NA | NA | NA | -2 | NA |    |    |    |    |    |    |    |
| BANF2         | ENSG00000125888.14 |    |    |    |    | NA | NA | NA | NA | NA | NA | NA | NA | NA |
|               | NA                 | NA | NA | NA | NA | -2 | NA |    |    |    |    |    |    |    |
| BLCAP         | ENSG00000166619.12 |    |    |    |    | NA | NA | NA | NA | NA | NA | NA | NA | NA |
|               | NA                 | NA | NA | NA | NA | -2 | NA |    |    |    |    |    |    |    |
| TRERNA1       | ENSG00000231265.1  |    |    |    |    | NA | NA | NA | NA | NA | NA | NA | NA | NA |
|               | NA                 | NA | NA | NA | NA | -2 | NA |    |    |    |    |    |    |    |
| PIGT          | ENSG00000124155.17 |    |    |    |    | NA | NA | NA | NA | NA | NA | NA | NA | NA |
|               | NA                 | NA | NA | NA | NA | -2 | NA |    |    |    |    |    |    |    |
| CEBPB         | ENSG00000172216.5  |    |    |    |    | NA | NA | NA | NA | NA | NA | NA | NA | NA |
|               | NA                 | NA | NA | NA | NA | -2 | NA |    |    |    |    |    |    |    |
| RP4-568C11.4  | ENSG00000274173.1  |    |    |    |    | NA | NA | NA | NA | NA | NA | NA | NA | NA |
|               | NA                 | NA | NA | NA | NA | -2 | NA |    |    |    |    |    |    |    |
| RP13-379L11.1 | ENSG00000225708.6  |    |    |    |    | NA | NA | NA | NA | NA | NA | NA | NA | NA |
|               | NA                 | NA | NA | NA | NA | -2 | NA |    |    |    |    |    |    |    |
| LINC00176     | ENSG00000196421.8  |    |    |    |    | NA | NA | NA | NA | NA | NA | NA | NA | NA |
|               | NA                 | NA | NA | NA | NA | -2 | NA |    |    |    |    |    |    |    |
| RP11-347D21.2 | ENSG00000228503.1  |    |    |    |    | NA | NA | NA | NA | NA | NA | NA | NA | NA |
|               | NA                 | NA | NA | NA | NA | -2 | NA |    |    |    |    |    |    |    |
| LINC00261     | ENSG00000259974.2  |    |    |    |    | NA | NA | NA | NA | NA | NA | NA | NA | NA |
|               | NA                 | NA | NA | NA | NA | -2 | NA |    |    |    |    |    |    |    |
| RP5-1069C8.3  | ENSG00000269931.1  |    |    |    |    | NA | NA | NA | NA | NA | NA | NA | NA | NA |
|               | NA                 | NA | NA | NA | NA | -2 | NA |    |    |    |    |    |    |    |
| RP5-1116H23.3 | ENSG00000277425.1  |    |    |    |    | NA | NA | NA | NA | NA | NA | NA | NA | NA |
|               | NA                 | NA | NA | NA | NA | -2 | NA |    |    |    |    |    |    |    |
| RP4-734C18.1  | ENSG00000230990.1  |    |    |    |    | NA | NA | NA | NA | NA | NA | NA | NA | NA |

|               |                    |    |    |    |    |    |    |    |    |    |    |    |    |    |
|---------------|--------------------|----|----|----|----|----|----|----|----|----|----|----|----|----|
| NA            | NA                 | NA | NA | NA | NA | -2 | NA |    |    |    |    |    |    |    |
| SNRPB         | ENSG00000125835.18 | NA | NA | NA | NA | NA | NA | NA | NA | NA | NA | NA | NA | NA |
| NA            | NA                 | NA | NA | -2 | NA |    |    |    |    |    |    |    |    |    |
| KIZ           | ENSG00000088970.15 | NA | NA | NA | NA | NA | NA | NA | NA | NA | NA | NA | NA | NA |
| NA            | NA                 | NA | NA | -2 | NA |    |    |    |    |    |    |    |    |    |
| RP5-1068H6.6  | ENSG000000278595.1 | NA | NA | NA | NA | NA | NA | NA | NA | NA | NA | NA | NA | NA |
| NA            | NA                 | NA | NA | NA | NA | -2 | NA |    |    |    |    |    |    |    |
| UBE2C         | ENSG00000175063.16 | NA | NA | NA | NA | NA | NA | NA | NA | NA | NA | NA | NA | NA |
| NA            | NA                 | NA | NA | -2 | NA |    |    |    |    |    |    |    |    |    |
| DOK5          | ENSG00000101134.11 | NA | NA | NA | NA | NA | NA | NA | NA | NA | NA | NA | NA | NA |
| NA            | NA                 | NA | NA | -2 | NA |    |    |    |    |    |    |    |    |    |
| SPINT3        | ENSG00000101446.7  | NA | NA | NA | NA | NA | NA | NA | NA | NA | NA | NA | NA | NA |
| NA            | NA                 | NA | NA | NA | NA | -2 | NA |    |    |    |    |    |    |    |
| LINC00656     | ENSG00000233746.1  | NA | NA | NA | NA | NA | NA | NA | NA | NA | NA | NA | NA | NA |
| NA            | NA                 | NA | NA | NA | NA | -2 | NA |    |    |    |    |    |    |    |
| TSHZ2         | ENSG00000182463.15 | NA | NA | NA | NA | NA | NA | NA | NA | NA | NA | NA | NA | NA |
| NA            | NA                 | NA | NA | -2 | NA |    |    |    |    |    |    |    |    |    |
| TCF15         | ENSG00000125878.6  | NA | NA | NA | NA | NA | NA | NA | NA | NA | NA | NA | NA | NA |
| NA            | NA                 | NA | NA | -2 | NA |    |    |    |    |    |    |    |    |    |
| C20orf187     | ENSG00000125899.7  | NA | NA | NA | NA | NA | NA | NA | NA | NA | NA | NA | NA | NA |
| NA            | NA                 | NA | NA | NA | NA | -2 | NA |    |    |    |    |    |    |    |
| ADNP          | ENSG00000101126.15 | NA | NA | NA | NA | NA | NA | NA | NA | NA | NA | NA | NA | NA |
| NA            | NA                 | NA | NA | -2 | NA |    |    |    |    |    |    |    |    |    |
| REM1          | ENSG00000088320.3  | NA | NA | NA | NA | NA | NA | NA | NA | NA | NA | NA | NA | NA |
| NA            | NA                 | NA | NA | -2 | NA |    |    |    |    |    |    |    |    |    |
| SOGA1         | ENSG00000149639.14 | NA | NA | NA | NA | NA | NA | NA | NA | NA | NA | NA | NA | NA |
| NA            | NA                 | NA | NA | -2 | NA |    |    |    |    |    |    |    |    |    |
| TGM3          | ENSG00000125780.11 | NA | NA | NA | NA | NA | NA | NA | NA | NA | NA | NA | NA | NA |
| NA            | NA                 | NA | NA | -2 | NA |    |    |    |    |    |    |    |    |    |
| NOL4L         | ENSG00000197183.14 | NA | NA | NA | NA | NA | NA | NA | NA | NA | NA | NA | NA | NA |
| NA            | NA                 | NA | NA | -2 | NA |    |    |    |    |    |    |    |    |    |
| FAM217B       | ENSG00000196227.10 | NA | NA | NA | NA | NA | NA | NA | NA | NA | NA | NA | NA | NA |
| NA            | NA                 | NA | NA | NA | NA | -2 | NA |    |    |    |    |    |    |    |
| GCNT7         | ENSG00000124091.9  | NA | NA | NA | NA | NA | NA | NA | NA | NA | NA | NA | NA | NA |
| NA            | NA                 | NA | NA | -2 | NA |    |    |    |    |    |    |    |    |    |
| SMOX          | ENSG00000088826.17 | NA | NA | NA | NA | NA | NA | NA | NA | NA | NA | NA | NA | NA |
| NA            | NA                 | NA | NA | -2 | NA |    |    |    |    |    |    |    |    |    |
| SAMHD1        | ENSG00000101347.8  | NA | NA | NA | NA | NA | NA | NA | NA | NA | NA | NA | NA | NA |
| NA            | NA                 | NA | NA | NA | NA | -2 | NA |    |    |    |    |    |    |    |
| STK4          | ENSG00000101109.11 | NA | NA | NA | NA | NA | NA | NA | NA | NA | NA | NA | NA | NA |
| NA            | NA                 | NA | NA | -2 | NA |    |    |    |    |    |    |    |    |    |
| RP4-616B8.5   | ENSG000000274825.1 | NA | NA | NA | NA | NA | NA | NA | NA | NA | NA | NA | NA | NA |
| NA            | NA                 | NA | NA | NA | NA | -2 | NA |    |    |    |    |    |    |    |
| FAM65C        | ENSG00000042062.11 | NA | NA | NA | NA | NA | NA | NA | NA | NA | NA | NA | NA | NA |
| NA            | NA                 | NA | NA | NA | NA | -2 | NA |    |    |    |    |    |    |    |
| FAM83C        | ENSG00000125998.7  | NA | NA | NA | NA | NA | NA | NA | NA | NA | NA | NA | NA | NA |
| NA            | NA                 | NA | NA | NA | NA | -2 | NA |    |    |    |    |    |    |    |
| WISP2         | ENSG00000064205.10 | NA | NA | NA | NA | NA | NA | NA | NA | NA | NA | NA | NA | NA |
| NA            | NA                 | NA | NA | -2 | NA |    |    |    |    |    |    |    |    |    |
| RP5-963E22.5  | ENSG000000260416.1 | NA | NA | NA | NA | NA | NA | NA | NA | NA | NA | NA | NA | NA |
| NA            | NA                 | NA | NA | NA | NA | -2 | NA |    |    |    |    |    |    |    |
| RP5-963E22.6  | ENSG000000273821.1 | NA | NA | NA | NA | NA | NA | NA | NA | NA | NA | NA | NA | NA |
| NA            | NA                 | NA | NA | NA | NA | -2 | NA |    |    |    |    |    |    |    |
| RP1-278O22.2  | ENSG000000234900.1 | NA | NA | NA | NA | NA | NA | NA | NA | NA | NA | NA | NA | NA |
| NA            | NA                 | NA | NA | NA | NA | -2 | NA |    |    |    |    |    |    |    |
| RP5-1004I9.1  | ENSG000000204684.3 | NA | NA | NA | NA | NA | NA | NA | NA | NA | NA | NA | NA | NA |
| NA            | NA                 | NA | NA | NA | NA | -2 | NA |    |    |    |    |    |    |    |
| RP13-379O24.3 | ENSG000000272050.1 | NA | NA | NA | NA | NA | NA | NA | NA | NA | NA | NA | NA | NA |
| NA            | NA                 | NA | NA | NA | NA | -2 | NA |    |    |    |    |    |    |    |
| C20orf141     | ENSG000000258713.2 | NA | NA | NA | NA | NA | NA | NA | NA | NA | NA | NA | NA | NA |
| NA            | NA                 | NA | NA | NA | NA | -2 | NA |    |    |    |    |    |    |    |
| ARFGAP1       | ENSG00000101199.12 | NA | NA | NA | NA | NA | NA | NA | NA | NA | NA | NA | NA | NA |



|               |                    |                   |    |    |    |    |    |    |    |    |    |    |    |    |
|---------------|--------------------|-------------------|----|----|----|----|----|----|----|----|----|----|----|----|
| NA            | NA                 | NA                | NA | NA | -2 | NA |    |    |    |    |    |    |    |    |
| RP5-1022P6.7  |                    | ENSG00000266908.1 |    |    |    | NA | NA | NA | NA | NA | NA | NA | NA | NA |
| NA            | NA                 | NA                | NA | NA | NA | -2 | NA |    |    |    |    |    |    |    |
| CST1          | ENSG00000170373.8  |                   | NA | NA | NA | NA | NA | NA | NA | NA | NA | NA | NA | NA |
| NA            | NA                 | NA                | NA | NA | -2 | NA |    |    |    |    |    |    |    |    |
| LINC01752     | ENSG00000224961.1  |                   |    |    |    | NA | NA | NA | NA | NA | NA | NA | NA | NA |
| NA            | NA                 | NA                | NA | NA | -2 | NA |    |    |    |    |    |    |    |    |
| SNRPB2        | ENSG00000125870.10 |                   |    |    |    | NA | NA | NA | NA | NA | NA | NA | NA | NA |
| NA            | NA                 | NA                | NA | NA | -2 | NA |    |    |    |    |    |    |    |    |
| BPIFB1        | ENSG00000125999.10 |                   |    |    |    | NA | NA | NA | NA | NA | NA | NA | NA | NA |
| NA            | NA                 | NA                | NA | NA | -2 | NA |    |    |    |    |    |    |    |    |
| RP13-379L11.2 | ENSG00000203971.1  |                   |    |    |    | NA | NA | NA | NA | NA | NA | NA | NA | NA |
| NA            | NA                 | NA                | NA | NA | NA | -2 | NA |    |    |    |    |    |    |    |
| WI2-87327B8.2 | ENSG00000273812.1  |                   |    |    |    | NA | NA | NA | NA | NA | NA | NA | NA | NA |
| NA            | NA                 | NA                | NA | NA | NA | -2 | NA |    |    |    |    |    |    |    |
| RP11-19D2.1   | ENSG00000238102.1  |                   |    |    |    | NA | NA | NA | NA | NA | NA | NA | NA | NA |
| NA            | NA                 | NA                | NA | NA | NA | -2 | NA |    |    |    |    |    |    |    |
| CST5          | ENSG00000170367.4  |                   | NA | NA | NA | NA | NA | NA | NA | NA | NA | NA | NA | NA |
| NA            | NA                 | NA                | NA | NA | -2 | NA |    |    |    |    |    |    |    |    |
| LINC01427     | ENSG00000225321.2  |                   |    |    |    | NA | NA | NA | NA | NA | NA | NA | NA | NA |
| NA            | NA                 | NA                | NA | NA | -2 | NA |    |    |    |    |    |    |    |    |
| LINC00028     | ENSG00000233354.1  |                   |    |    |    | NA | NA | NA | NA | NA | NA | NA | NA | NA |
| NA            | NA                 | NA                | NA | NA | -2 | NA |    |    |    |    |    |    |    |    |
| OSBPL2        | ENSG00000130703.15 |                   |    |    |    | NA | NA | NA | NA | NA | NA | NA | NA | NA |
| NA            | NA                 | NA                | NA | NA | -2 | NA |    |    |    |    |    |    |    |    |
| RP11-103J8.2  | ENSG00000270777.1  |                   |    |    |    | NA | NA | NA | NA | NA | NA | NA | NA | NA |
| NA            | NA                 | NA                | NA | NA | NA | -2 | NA |    |    |    |    |    |    |    |
| LINC01733     | ENSG00000226203.1  |                   |    |    |    | NA | NA | NA | NA | NA | NA | NA | NA | NA |
| NA            | NA                 | NA                | NA | NA | -2 | NA |    |    |    |    |    |    |    |    |
| CBLN4         | ENSG00000054803.3  |                   | NA | NA | NA | NA | NA | NA | NA | NA | NA | NA | NA | NA |
| NA            | NA                 | NA                | NA | NA | -2 | NA |    |    |    |    |    |    |    |    |
| APCDD1L       | ENSG00000198768.10 |                   |    |    |    | NA | NA | NA | NA | NA | NA | NA | NA | NA |
| NA            | NA                 | NA                | NA | NA | -2 | NA |    |    |    |    |    |    |    |    |
| NOP56         | ENSG00000101361.16 |                   | NA | NA | NA | NA | NA | NA | NA | NA | NA | NA | NA | NA |
| NA            | NA                 | NA                | NA | NA | -2 | NA |    |    |    |    |    |    |    |    |
| BCL2L1        | ENSG00000171552.12 |                   |    |    |    | NA | NA | NA | NA | NA | NA | NA | NA | NA |
| NA            | NA                 | NA                | NA | NA | -2 | NA |    |    |    |    |    |    |    |    |
| ZMYND8        | ENSG00000101040.19 |                   |    |    |    | NA | NA | NA | NA | NA | NA | NA | NA | NA |
| NA            | NA                 | NA                | NA | NA | -2 | NA |    |    |    |    |    |    |    |    |
| DEFB124       | ENSG00000180383.3  |                   |    |    |    | NA | NA | NA | NA | NA | NA | NA | NA | NA |
| NA            | NA                 | NA                | NA | NA | -2 | NA |    |    |    |    |    |    |    |    |
| CST9L         | ENSG00000101435.4  |                   | NA | NA | NA | NA | NA | NA | NA | NA | NA | NA | NA | NA |
| NA            | NA                 | NA                | NA | NA | -2 | NA |    |    |    |    |    |    |    |    |
| PAX1          | ENSG00000125813.13 |                   | NA | NA | NA | NA | NA | NA | NA | NA | NA | NA | NA | NA |
| NA            | NA                 | NA                | NA | NA | -2 | NA |    |    |    |    |    |    |    |    |
| DEFB118       | ENSG00000131068.3  |                   |    |    |    | NA | NA | NA | NA | NA | NA | NA | NA | NA |
| NA            | NA                 | NA                | NA | NA | -2 | NA |    |    |    |    |    |    |    |    |
| RP4-585I14.3  | ENSG00000278153.1  |                   |    |    |    | NA | NA | NA | NA | NA | NA | NA | NA | NA |
| NA            | NA                 | NA                | NA | NA | NA | -2 | NA |    |    |    |    |    |    |    |
| EIF2S2        | ENSG00000125977.6  |                   |    |    |    | NA | NA | NA | NA | NA | NA | NA | NA | NA |
| NA            | NA                 | NA                | NA | NA | -2 | NA |    |    |    |    |    |    |    |    |
| RP4-640H8.2   | ENSG00000204117.1  |                   |    |    |    | NA | NA | NA | NA | NA | NA | NA | NA | NA |
| NA            | NA                 | NA                | NA | NA | NA | -2 | NA |    |    |    |    |    |    |    |
| CST2          | ENSG00000170369.3  |                   | NA | NA | NA | NA | NA | NA | NA | NA | NA | NA | NA | NA |
| NA            | NA                 | NA                | NA | NA | -2 | NA |    |    |    |    |    |    |    |    |
| RP4-564F22.6  | ENSG00000275285.1  |                   |    |    |    | NA | NA | NA | NA | NA | NA | NA | NA | NA |
| NA            | NA                 | NA                | NA | NA | NA | -2 | NA |    |    |    |    |    |    |    |
| WFDC6         | ENSG00000243543.8  |                   | NA | NA | NA | NA | NA | NA | NA | NA | NA | NA | NA | NA |
| NA            | NA                 | NA                | NA | NA | -2 | NA |    |    |    |    |    |    |    |    |
| TASP1         | ENSG00000089123.15 |                   | NA | NA | NA | NA | NA | NA | NA | NA | NA | NA | NA | NA |
| NA            | NA                 | NA                | NA | NA | -2 | NA |    |    |    |    |    |    |    |    |
| BPIFA2        | ENSG00000131050.10 |                   |    |    |    | NA | NA | NA | NA | NA | NA | NA | NA | NA |

|               |                    |    |    |    |    |    |    |    |    |    |    |    |    |    |
|---------------|--------------------|----|----|----|----|----|----|----|----|----|----|----|----|----|
| NA            | NA                 | NA | NA | NA | -2 | NA | NA | NA | NA | NA | NA | NA | NA | NA |
| RAD21L1       | ENSG00000244588.5  | NA | NA | NA | NA | NA | NA | NA | NA | NA | NA | NA | NA | NA |
| NA            | NA                 | NA | NA | NA | -2 | NA | NA | NA | NA | NA | NA | NA | NA | NA |
| ZHX3          | ENSG00000174306.21 | NA | NA | NA | NA | NA | NA | NA | NA | NA | NA | NA | NA | NA |
| NA            | NA                 | NA | NA | NA | -2 | NA | NA | NA | NA | NA | NA | NA | NA | NA |
| CASC20        | ENSG00000229876.1  | NA | NA | NA | NA | NA | NA | NA | NA | NA | NA | NA | NA | NA |
| NA            | NA                 | NA | NA | NA | -2 | NA | NA | NA | NA | NA | NA | NA | NA | NA |
| ARHGAP40      | ENSG00000124143.10 | NA | NA | NA | NA | NA | NA | NA | NA | NA | NA | NA | NA | NA |
| NA            | NA                 | NA | NA | NA | -2 | NA | NA | NA | NA | NA | NA | NA | NA | NA |
| FOXA2         | ENSG00000125798.14 | NA | NA | NA | NA | NA | NA | NA | NA | NA | NA | NA | NA | NA |
| NA            | NA                 | NA | NA | NA | -2 | NA | NA | NA | NA | NA | NA | NA | NA | NA |
| FNDC11        | ENSG00000125531.6  | NA | NA | NA | NA | NA | NA | NA | NA | NA | NA | NA | NA | NA |
| NA            | NA                 | NA | NA | NA | -2 | NA | NA | NA | NA | NA | NA | NA | NA | NA |
| DDX27         | ENSG00000124228.14 | NA | NA | NA | NA | NA | NA | NA | NA | NA | NA | NA | NA | NA |
| NA            | NA                 | NA | NA | NA | -2 | NA | NA | NA | NA | NA | NA | NA | NA | NA |
| TP53INP2      | ENSG00000078804.12 | NA | NA | NA | NA | NA | NA | NA | NA | NA | NA | NA | NA | NA |
| NA            | NA                 | NA | NA | NA | -2 | NA | NA | NA | NA | NA | NA | NA | NA | NA |
| CNBD2         | ENSG00000149646.12 | NA | NA | NA | NA | NA | NA | NA | NA | NA | NA | NA | NA | NA |
| NA            | NA                 | NA | NA | NA | -2 | NA | NA | NA | NA | NA | NA | NA | NA | NA |
| RP5-967N21.11 | ENSG00000275632.1  | NA | NA | NA | NA | NA | NA | NA | NA | NA | NA | NA | NA | NA |
| NA            | NA                 | NA | NA | NA | NA | -2 | NA | NA | NA | NA | NA | NA | NA | NA |
| CENPB         | ENSG00000125817.7  | NA | NA | NA | NA | NA | NA | NA | NA | NA | NA | NA | NA | NA |
| NA            | NA                 | NA | NA | NA | -2 | NA | NA | NA | NA | NA | NA | NA | NA | NA |
| PCSK2         | ENSG00000125851.9  | NA | NA | NA | NA | NA | NA | NA | NA | NA | NA | NA | NA | NA |
| NA            | NA                 | NA | NA | NA | -2 | NA | NA | NA | NA | NA | NA | NA | NA | NA |
| LINC01727     | ENSG00000279082.3  | NA | NA | NA | NA | NA | NA | NA | NA | NA | NA | NA | NA | NA |
| NA            | NA                 | NA | NA | NA | -2 | NA | NA | NA | NA | NA | NA | NA | NA | NA |
| RPN2          | ENSG00000118705.16 | NA | NA | NA | NA | NA | NA | NA | NA | NA | NA | NA | NA | NA |
| NA            | NA                 | NA | NA | NA | -2 | NA | NA | NA | NA | NA | NA | NA | NA | NA |
| LINC01523     | ENSG00000229522.1  | NA | NA | NA | NA | NA | NA | NA | NA | NA | NA | NA | NA | NA |
| NA            | NA                 | NA | NA | NA | -2 | NA | NA | NA | NA | NA | NA | NA | NA | NA |
| PCIF1         | ENSG00000100982.11 | NA | NA | NA | NA | NA | NA | NA | NA | NA | NA | NA | NA | NA |
| NA            | NA                 | NA | NA | NA | -2 | NA | NA | NA | NA | NA | NA | NA | NA | NA |
| POLR3F        | ENSG00000132664.11 | NA | NA | NA | NA | NA | NA | NA | NA | NA | NA | NA | NA | NA |
| NA            | NA                 | NA | NA | NA | -2 | NA | NA | NA | NA | NA | NA | NA | NA | NA |
| RP5-1022J11.2 | ENSG00000232465.1  | NA | NA | NA | NA | NA | NA | NA | NA | NA | NA | NA | NA | NA |
| NA            | NA                 | NA | NA | NA | NA | -2 | NA | NA | NA | NA | NA | NA | NA | NA |
| RP11-323C15.2 | ENSG00000236028.1  | NA | NA | NA | NA | NA | NA | NA | NA | NA | NA | NA | NA | NA |
| NA            | NA                 | NA | NA | NA | NA | -2 | NA | NA | NA | NA | NA | NA | NA | NA |
| RP5-991B18.2  | ENSG00000281460.1  | NA | NA | NA | NA | NA | NA | NA | NA | NA | NA | NA | NA | NA |
| NA            | NA                 | NA | NA | NA | NA | -2 | NA | NA | NA | NA | NA | NA | NA | NA |
| NKX2-4        | ENSG00000125816.4  | NA | NA | NA | NA | NA | NA | NA | NA | NA | NA | NA | NA | NA |
| NA            | NA                 | NA | NA | NA | -2 | NA | NA | NA | NA | NA | NA | NA | NA | NA |
| LINC01711     | ENSG00000268941.2  | NA | NA | NA | NA | NA | NA | NA | NA | NA | NA | NA | NA | NA |
| NA            | NA                 | NA | NA | NA | -2 | NA | NA | NA | NA | NA | NA | NA | NA | NA |
| RP3-333B15.6  | ENSG00000276638.1  | NA | NA | NA | NA | NA | NA | NA | NA | NA | NA | NA | NA | NA |
| NA            | NA                 | NA | NA | NA | NA | -2 | NA | NA | NA | NA | NA | NA | NA | NA |
| RP4-777L9.3   | ENSG00000275728.1  | NA | NA | NA | NA | NA | NA | NA | NA | NA | NA | NA | NA | NA |
| NA            | NA                 | NA | NA | NA | NA | -2 | NA | NA | NA | NA | NA | NA | NA | NA |
| EPPIN         | ENSG00000101448.13 | NA | NA | NA | NA | NA | NA | NA | NA | NA | NA | NA | NA | NA |
| NA            | NA                 | NA | NA | NA | -2 | NA | NA | NA | NA | NA | NA | NA | NA | NA |
| SLC35C2       | ENSG00000080189.14 | NA | NA | NA | NA | NA | NA | NA | NA | NA | NA | NA | NA | NA |
| NA            | NA                 | NA | NA | NA | -2 | NA | NA | NA | NA | NA | NA | NA | NA | NA |
| RP13-379O24.2 | ENSG00000260542.1  | NA | NA | NA | NA | NA | NA | NA | NA | NA | NA | NA | NA | NA |
| NA            | NA                 | NA | NA | NA | NA | -2 | NA | NA | NA | NA | NA | NA | NA | NA |
| ID1           | ENSG00000125968.8  | NA | NA | NA | NA | NA | NA | NA | NA | NA | NA | NA | NA | NA |
| NA            | NA                 | NA | NA | NA | -2 | NA | NA | NA | NA | NA | NA | NA | NA | NA |
| PTPRA         | ENSG00000132670.20 | NA | NA | NA | NA | NA | NA | NA | NA | NA | NA | NA | NA | NA |
| NA            | NA                 | NA | NA | NA | -2 | NA | NA | NA | NA | NA | NA | NA | NA | NA |
| CST9          | ENSG00000173335.4  | NA | NA | NA | NA | NA | NA | NA | NA | NA | NA | NA | NA | NA |
| NA            | NA                 | NA | NA | NA | -2 | NA | NA | NA | NA | NA | NA | NA | NA | NA |
| DEFB121       | ENSG00000204548.3  | NA | NA | NA | NA | NA | NA | NA | NA | NA | NA | NA | NA | NA |

|               |                    |    |    |    |    |    |    |    |    |    |    |    |    |    |
|---------------|--------------------|----|----|----|----|----|----|----|----|----|----|----|----|----|
| NA            | NA                 | NA | NA | NA | -2 | NA | NA | NA | NA | NA | NA | NA | NA | NA |
| AC006076.1    | ENSG00000225563.1  | NA | NA | NA | NA | NA | NA | NA | NA | NA | NA | NA | NA | NA |
| NA            | NA                 | NA | NA | NA | -2 | NA | NA | NA | NA | NA | NA | NA | NA | NA |
| SEMG2         | ENSG00000124157.6  | NA | NA | NA | NA | NA | NA | NA | NA | NA | NA | NA | NA | NA |
| NA            | NA                 | NA | NA | NA | -2 | NA | NA | NA | NA | NA | NA | NA | NA | NA |
| LBP           | ENSG00000129988.5  | NA | NA | NA | NA | NA | NA | NA | NA | NA | NA | NA | NA | NA |
| NA            | NA                 | NA | NA | NA | -2 | NA | NA | NA | NA | NA | NA | NA | NA | NA |
| RP11-307010.1 | ENSG00000236387.1  | NA | NA | NA | NA | NA | NA | NA | NA | NA | NA | NA | NA | NA |
| NA            | NA                 | NA | NA | NA | -2 | NA | NA | NA | NA | NA | NA | NA | NA | NA |
| DEFB123       | ENSG00000180424.6  | NA | NA | NA | NA | NA | NA | NA | NA | NA | NA | NA | NA | NA |
| NA            | NA                 | NA | NA | NA | -2 | NA | NA | NA | NA | NA | NA | NA | NA | NA |
| PI3           | ENSG00000124102.4  | NA | NA | NA | NA | NA | NA | NA | NA | NA | NA | NA | NA | NA |
| NA            | NA                 | NA | NA | NA | -2 | NA | NA | NA | NA | NA | NA | NA | NA | NA |
| WFDC10B       | ENSG00000182931.9  | NA | NA | NA | NA | NA | NA | NA | NA | NA | NA | NA | NA | NA |
| NA            | NA                 | NA | NA | NA | -2 | NA | NA | NA | NA | NA | NA | NA | NA | NA |
| SLC2A10       | ENSG00000197496.5  | NA | NA | NA | NA | NA | NA | NA | NA | NA | NA | NA | NA | NA |
| NA            | NA                 | NA | NA | NA | -2 | NA | NA | NA | NA | NA | NA | NA | NA | NA |
| TNNC2         | ENSG00000101470.9  | NA | NA | NA | NA | NA | NA | NA | NA | NA | NA | NA | NA | NA |
| NA            | NA                 | NA | NA | NA | -2 | NA | NA | NA | NA | NA | NA | NA | NA | NA |
| NAA20         | ENSG00000173418.11 | NA | NA | NA | NA | NA | NA | NA | NA | NA | NA | NA | NA | NA |
| NA            | NA                 | NA | NA | NA | -2 | NA | NA | NA | NA | NA | NA | NA | NA | NA |
| RP4-583K8.1   | ENSG00000225785.1  | NA | NA | NA | NA | NA | NA | NA | NA | NA | NA | NA | NA | NA |
| NA            | NA                 | NA | NA | NA | -2 | NA | NA | NA | NA | NA | NA | NA | NA | NA |
| SCAND1        | ENSG00000171222.10 | NA | NA | NA | NA | NA | NA | NA | NA | NA | NA | NA | NA | NA |
| NA            | NA                 | NA | NA | NA | -2 | NA | NA | NA | NA | NA | NA | NA | NA | NA |
| FLRT3         | ENSG00000125848.9  | NA | NA | NA | NA | NA | NA | NA | NA | NA | NA | NA | NA | NA |
| NA            | NA                 | NA | NA | NA | -2 | NA | NA | NA | NA | NA | NA | NA | NA | NA |
| GGTLC1        | ENSG00000149435.12 | NA | NA | NA | NA | NA | NA | NA | NA | NA | NA | NA | NA | NA |
| NA            | NA                 | NA | NA | NA | -2 | NA | NA | NA | NA | NA | NA | NA | NA | NA |
| LINC01729     | ENSG00000225640.1  | NA | NA | NA | NA | NA | NA | NA | NA | NA | NA | NA | NA | NA |
| NA            | NA                 | NA | NA | NA | -2 | NA | NA | NA | NA | NA | NA | NA | NA | NA |
| KCNS1         | ENSG00000124134.8  | NA | NA | NA | NA | NA | NA | NA | NA | NA | NA | NA | NA | NA |
| NA            | NA                 | NA | NA | NA | -2 | NA | NA | NA | NA | NA | NA | NA | NA | NA |
| WI2-87327B8.1 | ENSG00000264490.3  | NA | NA | NA | NA | NA | NA | NA | NA | NA | NA | NA | NA | NA |
| NA            | NA                 | NA | NA | NA | -2 | NA | NA | NA | NA | NA | NA | NA | NA | NA |
| BPIFB4        | ENSG00000186191.7  | NA | NA | NA | NA | NA | NA | NA | NA | NA | NA | NA | NA | NA |
| NA            | NA                 | NA | NA | NA | -2 | NA | NA | NA | NA | NA | NA | NA | NA | NA |
| RP11-410N8.4  | ENSG00000204393.7  | NA | NA | NA | NA | NA | NA | NA | NA | NA | NA | NA | NA | NA |
| NA            | NA                 | NA | NA | NA | -2 | NA | NA | NA | NA | NA | NA | NA | NA | NA |
| WFDC5         | ENSG00000175121.11 | NA | NA | NA | NA | NA | NA | NA | NA | NA | NA | NA | NA | NA |
| NA            | NA                 | NA | NA | NA | -2 | NA | NA | NA | NA | NA | NA | NA | NA | NA |
| MOCS3         | ENSG00000124217.4  | NA | NA | NA | NA | NA | NA | NA | NA | NA | NA | NA | NA | NA |
| NA            | NA                 | NA | NA | NA | -2 | NA | NA | NA | NA | NA | NA | NA | NA | NA |
| CST8          | ENSG00000125815.8  | NA | NA | NA | NA | NA | NA | NA | NA | NA | NA | NA | NA | NA |
| NA            | NA                 | NA | NA | NA | -2 | NA | NA | NA | NA | NA | NA | NA | NA | NA |
| LINC01673     | ENSG00000234052.1  | NA | NA | NA | NA | NA | NA | NA | NA | NA | NA | NA | NA | NA |
| NA            | NA                 | NA | NA | NA | -2 | NA | NA | NA | NA | NA | NA | NA | NA | NA |
| COL6A2        | ENSG00000142173.14 | NA | NA | NA | NA | NA | NA | NA | NA | NA | NA | NA | NA | NA |
| NA            | NA                 | NA | NA | NA | -2 | NA | NA | NA | NA | NA | NA | NA | NA | NA |
| LINC01423     | ENSG00000231231.5  | NA | NA | NA | NA | NA | NA | NA | NA | NA | NA | NA | NA | NA |
| NA            | NA                 | NA | NA | NA | -2 | NA | NA | NA | NA | NA | NA | NA | NA | NA |
| PKNOX1        | ENSG00000160199.14 | NA | NA | NA | NA | NA | NA | NA | NA | NA | NA | NA | NA | NA |
| NA            | NA                 | NA | NA | NA | -2 | NA | NA | NA | NA | NA | NA | NA | NA | NA |
| AP000569.9    | ENSG00000273102.1  | NA | NA | NA | NA | NA | NA | NA | NA | NA | NA | NA | NA | NA |
| NA            | NA                 | NA | NA | NA | -2 | NA | NA | NA | NA | NA | NA | NA | NA | NA |
| KB-68A7.2     | ENSG00000277352.1  | NA | NA | NA | NA | NA | NA | NA | NA | NA | NA | NA | NA | NA |
| NA            | NA                 | NA | NA | NA | -2 | NA | NA | NA | NA | NA | NA | NA | NA | NA |
| ADAMTS1       | ENSG00000154734.14 | NA | NA | NA | NA | NA | NA | NA | NA | NA | NA | NA | NA | NA |
| NA            | NA                 | NA | NA | NA | -2 | NA | NA | NA | NA | NA | NA | NA | NA | NA |
| CHAF1B        | ENSG00000159259.7  | NA | NA | NA | NA | NA | NA | NA | NA | NA | NA | NA | NA | NA |
| NA            | NA                 | NA | NA | NA | -2 | NA | NA | NA | NA | NA | NA | NA | NA | NA |
| LINC00479     | ENSG00000236384.7  | NA | NA | NA | NA | NA | NA | NA | NA | NA | NA | NA | NA | NA |

|              |                    |    |    |    |    |    |    |    |    |    |    |    |    |    |
|--------------|--------------------|----|----|----|----|----|----|----|----|----|----|----|----|----|
| NA           | NA                 | NA | NA | NA | -2 | NA |    |    |    |    |    |    |    |    |
| UBASH3A      | ENSG00000160185.14 | NA | NA | NA | NA | NA | NA | NA | NA | NA | NA | NA | NA | NA |
| NA           | NA                 | NA | NA | NA | -2 | NA |    |    |    |    |    |    |    |    |
| AP006748.1   | ENSG00000223400.1  | NA | NA | NA | NA | NA | NA | NA | NA | NA | NA | NA | NA | NA |
| NA           | NA                 | NA | NA | NA | -2 | NA |    |    |    |    |    |    |    |    |
| KCNE1        | ENSG00000180509.11 | NA | NA | NA | NA | NA | NA | NA | NA | NA | NA | NA | NA | NA |
| NA           | NA                 | NA | NA | NA | -2 | NA |    |    |    |    |    |    |    |    |
| ERG          | ENSG00000157554.18 | NA | NA | NA | NA | NA | NA | NA | NA | NA | NA | NA | NA | NA |
| NA           | NA                 | NA | NA | NA | -2 | NA |    |    |    |    |    |    |    |    |
| AP001172.2   | ENSG00000270071.1  | NA | NA | NA | NA | NA | NA | NA | NA | NA | NA | NA | NA | NA |
| NA           | NA                 | NA | NA | NA | -2 | NA |    |    |    |    |    |    |    |    |
| AP000431.2   | ENSG00000229289.1  | NA | NA | NA | NA | NA | NA | NA | NA | NA | NA | NA | NA | NA |
| NA           | NA                 | NA | NA | NA | -2 | NA |    |    |    |    |    |    |    |    |
| LINC01692    | ENSG00000226983.2  | NA | NA | NA | NA | NA | NA | NA | NA | NA | NA | NA | NA | NA |
| NA           | NA                 | NA | NA | NA | -2 | NA |    |    |    |    |    |    |    |    |
| AF096876.1   | ENSG00000259981.1  | NA | NA | NA | NA | NA | NA | NA | NA | NA | NA | NA | NA | NA |
| NA           | NA                 | NA | NA | NA | -2 | NA |    |    |    |    |    |    |    |    |
| ZBTB21       | ENSG00000173276.13 | NA | NA | NA | NA | NA | NA | NA | NA | NA | NA | NA | NA | NA |
| NA           | NA                 | NA | NA | NA | -2 | NA |    |    |    |    |    |    |    |    |
| TMPRSS2      | ENSG00000184012.11 | NA | NA | NA | NA | NA | NA | NA | NA | NA | NA | NA | NA | NA |
| NA           | NA                 | NA | NA | NA | -2 | NA |    |    |    |    |    |    |    |    |
| U2AF1        | ENSG00000160201.11 | NA | NA | NA | NA | NA | NA | NA | NA | NA | NA | NA | NA | NA |
| NA           | NA                 | NA | NA | NA | -2 | NA |    |    |    |    |    |    |    |    |
| CYYR1        | ENSG00000166265.11 | NA | NA | NA | NA | NA | NA | NA | NA | NA | NA | NA | NA | NA |
| NA           | NA                 | NA | NA | NA | -2 | NA |    |    |    |    |    |    |    |    |
| GRIK1        | ENSG00000171189.17 | NA | NA | NA | NA | NA | NA | NA | NA | NA | NA | NA | NA | NA |
| NA           | NA                 | NA | NA | NA | -2 | NA |    |    |    |    |    |    |    |    |
| SYNJ1        | ENSG00000159082.17 | NA | NA | NA | NA | NA | NA | NA | NA | NA | NA | NA | NA | NA |
| NA           | NA                 | NA | NA | NA | -2 | NA |    |    |    |    |    |    |    |    |
| KCNJ15       | ENSG00000157551.17 | NA | NA | NA | NA | NA | NA | NA | NA | NA | NA | NA | NA | NA |
| NA           | NA                 | NA | NA | NA | -2 | NA |    |    |    |    |    |    |    |    |
| LINC00313    | ENSG00000185186.8  | NA | NA | NA | NA | NA | NA | NA | NA | NA | NA | NA | NA | NA |
| NA           | NA                 | NA | NA | NA | -2 | NA |    |    |    |    |    |    |    |    |
| SON          | ENSG00000159140.19 | NA | NA | NA | NA | NA | NA | NA | NA | NA | NA | NA | NA | NA |
| NA           | NA                 | NA | NA | NA | -2 | NA |    |    |    |    |    |    |    |    |
| AP000432.2   | ENSG00000226956.1  | NA | NA | NA | NA | NA | NA | NA | NA | NA | NA | NA | NA | NA |
| NA           | NA                 | NA | NA | NA | -2 | NA |    |    |    |    |    |    |    |    |
| C21orf91-OT1 | ENSG00000240770.5  | NA | NA | NA | NA | NA | NA | NA | NA | NA | NA | NA | NA | NA |
| NA           | NA                 | NA | NA | NA | NA | -2 | NA |    |    |    |    |    |    |    |
| RIPPLY3      | ENSG00000183145.8  | NA | NA | NA | NA | NA | NA | NA | NA | NA | NA | NA | NA | NA |
| NA           | NA                 | NA | NA | NA | -2 | NA |    |    |    |    |    |    |    |    |
| LINC01684    | ENSG00000237484.5  | NA | NA | NA | NA | NA | NA | NA | NA | NA | NA | NA | NA | NA |
| NA           | NA                 | NA | NA | NA | -2 | NA |    |    |    |    |    |    |    |    |
| GABPA        | ENSG00000154727.10 | NA | NA | NA | NA | NA | NA | NA | NA | NA | NA | NA | NA | NA |
| NA           | NA                 | NA | NA | NA | -2 | NA |    |    |    |    |    |    |    |    |
| BACH1-AS1    | ENSG00000232118.2  | NA | NA | NA | NA | NA | NA | NA | NA | NA | NA | NA | NA | NA |
| NA           | NA                 | NA | NA | NA | -2 | NA |    |    |    |    |    |    |    |    |
| AJ006998.2   | ENSG00000229425.2  | NA | NA | NA | NA | NA | NA | NA | NA | NA | NA | NA | NA | NA |
| NA           | NA                 | NA | NA | NA | -2 | NA |    |    |    |    |    |    |    |    |
| AP000233.4   | ENSG00000222042.1  | NA | NA | NA | NA | NA | NA | NA | NA | NA | NA | NA | NA | NA |
| NA           | NA                 | NA | NA | NA | -2 | NA |    |    |    |    |    |    |    |    |
| POTED        | ENSG00000166351.10 | NA | NA | NA | NA | NA | NA | NA | NA | NA | NA | NA | NA | NA |
| NA           | NA                 | NA | NA | NA | -2 | NA |    |    |    |    |    |    |    |    |
| USP25        | ENSG00000155313.15 | NA | NA | NA | NA | NA | NA | NA | NA | NA | NA | NA | NA | NA |
| NA           | NA                 | NA | NA | NA | -2 | NA |    |    |    |    |    |    |    |    |
| D21S2088E    | ENSG00000228592.1  | NA | NA | NA | NA | NA | NA | NA | NA | NA | NA | NA | NA | NA |
| NA           | NA                 | NA | NA | NA | -2 | NA |    |    |    |    |    |    |    |    |
| LINC01548    | ENSG00000229086.4  | NA | NA | NA | NA | NA | NA | NA | NA | NA | NA | NA | NA | NA |
| NA           | NA                 | NA | NA | NA | -2 | NA |    |    |    |    |    |    |    |    |
| AP001605.4   | ENSG00000236332.1  | NA | NA | NA | NA | NA | NA | NA | NA | NA | NA | NA | NA | NA |
| NA           | NA                 | NA | NA | NA | -2 | NA |    |    |    |    |    |    |    |    |
| DSCR3        | ENSG00000157538.13 | NA | NA | NA | NA | NA | NA | NA | NA | NA | NA | NA | NA | NA |

|             |                    |    |    |    |    |    |    |    |    |    |    |    |    |    |
|-------------|--------------------|----|----|----|----|----|----|----|----|----|----|----|----|----|
| NA          | NA                 | NA | NA | -2 | NA |    |    |    |    |    |    |    |    |    |
| AP000696.2  | ENSG00000231324.1  |    |    |    | NA | NA | NA | NA | NA | NA | NA | NA | NA | NA |
| NA          | NA                 | NA | NA | NA | -2 | NA |    |    |    |    |    |    |    |    |
| KRTAP13-2   | ENSG00000182816.8  |    |    |    | NA | NA | NA | NA | NA | NA | NA | NA | NA | NA |
| NA          | NA                 | NA | NA | NA | -2 | NA |    |    |    |    |    |    |    |    |
| SAMSN1      | ENSG00000155307.17 |    |    |    | NA | NA | NA | NA | NA | NA | NA | NA | NA | NA |
| NA          | NA                 | NA | NA | NA | -2 | NA |    |    |    |    |    |    |    |    |
| AP000221.1  | ENSG00000229962.1  |    |    |    | NA | NA | NA | NA | NA | NA | NA | NA | NA | NA |
| NA          | NA                 | NA | NA | NA | -2 | NA |    |    |    |    |    |    |    |    |
| LINC01695   | ENSG00000236532.5  |    |    |    | NA | NA | NA | NA | NA | NA | NA | NA | NA | NA |
| NA          | NA                 | NA | NA | NA | -2 | NA |    |    |    |    |    |    |    |    |
| LINC00319   | ENSG00000188660.3  |    |    |    | NA | NA | NA | NA | NA | NA | NA | NA | NA | NA |
| NA          | NA                 | NA | NA | NA | -2 | NA |    |    |    |    |    |    |    |    |
| TFF2        | ENSG00000160181.8  |    |    |    | NA | NA | NA | NA | NA | NA | NA | NA | NA | NA |
| NA          | NA                 | NA | NA | NA | -2 | NA |    |    |    |    |    |    |    |    |
| SCAF4       | ENSG00000156304.14 |    |    |    | NA | NA | NA | NA | NA | NA | NA | NA | NA | NA |
| NA          | NA                 | NA | NA | NA | -2 | NA |    |    |    |    |    |    |    |    |
| CLDN8       | ENSG00000156284.5  |    |    |    | NA | NA | NA | NA | NA | NA | NA | NA | NA | NA |
| NA          | NA                 | NA | NA | NA | -2 | NA |    |    |    |    |    |    |    |    |
| ETS2        | ENSG00000157557.11 |    |    |    | NA | NA | NA | NA | NA | NA | NA | NA | NA | NA |
| NA          | NA                 | NA | NA | NA | -2 | NA |    |    |    |    |    |    |    |    |
| MRAP        | ENSG00000170262.12 |    |    |    | NA | NA | NA | NA | NA | NA | NA | NA | NA | NA |
| NA          | NA                 | NA | NA | NA | -2 | NA |    |    |    |    |    |    |    |    |
| LINC00114   | ENSG00000223806.7  |    |    |    | NA | NA | NA | NA | NA | NA | NA | NA | NA | NA |
| NA          | NA                 | NA | NA | NA | -2 | NA |    |    |    |    |    |    |    |    |
| TFF3        | ENSG00000160180.15 |    |    |    | NA | NA | NA | NA | NA | NA | NA | NA | NA | NA |
| NA          | NA                 | NA | NA | NA | -2 | NA |    |    |    |    |    |    |    |    |
| AP001042.1  | ENSG00000229986.1  |    |    |    | NA | NA | NA | NA | NA | NA | NA | NA | NA | NA |
| NA          | NA                 | NA | NA | NA | -2 | NA |    |    |    |    |    |    |    |    |
| TFF1        | ENSG00000160182.2  |    |    |    | NA | NA | NA | NA | NA | NA | NA | NA | NA | NA |
| NA          | NA                 | NA | NA | NA | -2 | NA |    |    |    |    |    |    |    |    |
| AP001476.2  | ENSG00000224413.1  |    |    |    | NA | NA | NA | NA | NA | NA | NA | NA | NA | NA |
| NA          | NA                 | NA | NA | NA | -2 | NA |    |    |    |    |    |    |    |    |
| LINC00316   | ENSG00000237664.1  |    |    |    | NA | NA | NA | NA | NA | NA | NA | NA | NA | NA |
| NA          | NA                 | NA | NA | NA | -2 | NA |    |    |    |    |    |    |    |    |
| EVA1C       | ENSG00000166979.12 |    |    |    | NA | NA | NA | NA | NA | NA | NA | NA | NA | NA |
| NA          | NA                 | NA | NA | NA | -2 | NA |    |    |    |    |    |    |    |    |
| MIR99AHG    | ENSG00000215386.11 |    |    |    | NA | NA | NA | NA | NA | NA | NA | NA | NA | NA |
| NA          | NA                 | NA | NA | NA | -2 | NA |    |    |    |    |    |    |    |    |
| AF165138.7  | ENSG00000243440.6  |    |    |    | NA | NA | NA | NA | NA | NA | NA | NA | NA | NA |
| NA          | NA                 | NA | NA | NA | -2 | NA |    |    |    |    |    |    |    |    |
| KRTAP13-4   | ENSG00000186971.3  |    |    |    | NA | NA | NA | NA | NA | NA | NA | NA | NA | NA |
| NA          | NA                 | NA | NA | NA | -2 | NA |    |    |    |    |    |    |    |    |
| HUNK        | ENSG00000142149.8  |    |    |    | NA | NA | NA | NA | NA | NA | NA | NA | NA | NA |
| NA          | NA                 | NA | NA | NA | -2 | NA |    |    |    |    |    |    |    |    |
| LTN1        | ENSG00000198862.13 |    |    |    | NA | NA | NA | NA | NA | NA | NA | NA | NA | NA |
| NA          | NA                 | NA | NA | NA | -2 | NA |    |    |    |    |    |    |    |    |
| CLDN14      | ENSG00000159261.10 |    |    |    | NA | NA | NA | NA | NA | NA | NA | NA | NA | NA |
| NA          | NA                 | NA | NA | NA | -2 | NA |    |    |    |    |    |    |    |    |
| AP000289.6  | ENSG00000226527.1  |    |    |    | NA | NA | NA | NA | NA | NA | NA | NA | NA | NA |
| NA          | NA                 | NA | NA | NA | -2 | NA |    |    |    |    |    |    |    |    |
| AP001046.6  | ENSG00000225637.1  |    |    |    | NA | NA | NA | NA | NA | NA | NA | NA | NA | NA |
| NA          | NA                 | NA | NA | NA | -2 | NA |    |    |    |    |    |    |    |    |
| SIK1        | ENSG00000142178.7  |    |    |    | NA | NA | NA | NA | NA | NA | NA | NA | NA | NA |
| NA          | NA                 | NA | NA | NA | -2 | NA |    |    |    |    |    |    |    |    |
| KCNE2       | ENSG00000159197.3  |    |    |    | NA | NA | NA | NA | NA | NA | NA | NA | NA | NA |
| NA          | NA                 | NA | NA | NA | -2 | NA |    |    |    |    |    |    |    |    |
| AP001604.3  | ENSG00000231236.2  |    |    |    | NA | NA | NA | NA | NA | NA | NA | NA | NA | NA |
| NA          | NA                 | NA | NA | NA | -2 | NA |    |    |    |    |    |    |    |    |
| KRTAP10-6   | ENSG00000188155.11 |    |    |    | NA | NA | NA | NA | NA | NA | NA | NA | NA | NA |
| NA          | NA                 | NA | NA | NA | -2 | NA |    |    |    |    |    |    |    |    |
| AF064858.10 | ENSG00000237609.1  |    |    |    | NA | NA | NA | NA | NA | NA | NA | NA | NA | NA |

|                 |                    |    |    |    |    |    |    |    |    |    |    |    |    |    |
|-----------------|--------------------|----|----|----|----|----|----|----|----|----|----|----|----|----|
| NA              | NA                 | NA | NA | NA | NA | -2 | NA |    |    |    |    |    |    |    |
| BACH1-IT2       | ENSG00000228817.4  |    |    |    |    | NA | NA | NA | NA | NA | NA | NA | NA | NA |
| NA              | NA                 | NA | NA | NA | NA | -2 | NA |    |    |    |    |    |    |    |
| RP5-1023B21.1   | ENSG00000267857.2  |    |    |    |    | NA | NA | NA | NA | NA | NA | NA | NA | NA |
| NA              | NA                 | NA | NA | NA | NA | -2 | NA |    |    |    |    |    |    |    |
| DSCR8           | ENSG00000198054.11 |    |    |    |    | NA | NA | NA | NA | NA | NA | NA | NA | NA |
| NA              | NA                 | NA | NA | NA | NA | -2 | NA |    |    |    |    |    |    |    |
| RIPK4           | ENSG00000183421.11 |    |    |    |    | NA | NA | NA | NA | NA | NA | NA | NA | NA |
| NA              | NA                 | NA | NA | NA | NA | -2 | NA |    |    |    |    |    |    |    |
| DNMT3L          | ENSG00000142182.8  |    |    |    |    | NA | NA | NA | NA | NA | NA | NA | NA | NA |
| NA              | NA                 | NA | NA | NA | NA | -2 | NA |    |    |    |    |    |    |    |
| KRTAP8-1        | ENSG00000183640.5  |    |    |    |    | NA | NA | NA | NA | NA | NA | NA | NA | NA |
| NA              | NA                 | NA | NA | NA | NA | -2 | NA |    |    |    |    |    |    |    |
| MORC3           | ENSG00000159256.12 |    |    |    |    | NA | NA | NA | NA | NA | NA | NA | NA | NA |
| NA              | NA                 | NA | NA | NA | NA | -2 | NA |    |    |    |    |    |    |    |
| BTG3            | ENSG00000154640.14 |    |    |    |    | NA | NA | NA | NA | NA | NA | NA | NA | NA |
| NA              | NA                 | NA | NA | NA | NA | -2 | NA |    |    |    |    |    |    |    |
| SLC5A3          | ENSG00000198743.6  |    |    |    |    | NA | NA | NA | NA | NA | NA | NA | NA | NA |
| NA              | NA                 | NA | NA | NA | NA | -2 | NA |    |    |    |    |    |    |    |
| TMPRSS15        | ENSG00000154646.8  |    |    |    |    | NA | NA | NA | NA | NA | NA | NA | NA | NA |
| NA              | NA                 | NA | NA | NA | NA | -2 | NA |    |    |    |    |    |    |    |
| B3GALT5         | ENSG00000183778.17 |    |    |    |    | NA | NA | NA | NA | NA | NA | NA | NA | NA |
| NA              | NA                 | NA | NA | NA | NA | -2 | NA |    |    |    |    |    |    |    |
| AP000473.6      | ENSG00000237735.2  |    |    |    |    | NA | NA | NA | NA | NA | NA | NA | NA | NA |
| NA              | NA                 | NA | NA | NA | NA | -2 | NA |    |    |    |    |    |    |    |
| MX2             | ENSG00000183486.12 |    |    |    |    | NA | NA | NA | NA | NA | NA | NA | NA | NA |
| NA              | NA                 | NA | NA | NA | NA | -2 | NA |    |    |    |    |    |    |    |
| DSCR9           | ENSG00000230366.9  |    |    |    |    | NA | NA | NA | NA | NA | NA | NA | NA | NA |
| NA              | NA                 | NA | NA | NA | NA | -2 | NA |    |    |    |    |    |    |    |
| RUNX1           | ENSG00000159216.18 |    |    |    |    | NA | NA | NA | NA | NA | NA | NA | NA | NA |
| NA              | NA                 | NA | NA | NA | NA | -2 | NA |    |    |    |    |    |    |    |
| PITPNB          | ENSG00000180957.17 |    |    |    |    | NA | NA | NA | NA | NA | NA | NA | NA | NA |
| NA              | NA                 | NA | NA | NA | NA | -2 | NA |    |    |    |    |    |    |    |
| GGTLC2          | ENSG00000100121.12 |    |    |    |    | NA | NA | NA | NA | NA | NA | NA | NA | NA |
| NA              | NA                 | NA | NA | NA | NA | -2 | NA |    |    |    |    |    |    |    |
| LL22NC03-27C5.1 | ENSG00000278890.1  |    |    |    |    | NA | NA | NA | NA | NA | NA | NA | NA | NA |
| NA              | NA                 | NA | NA | NA | NA | -2 | NA |    |    |    |    |    |    |    |
| Z83851.4        | ENSG00000233903.2  |    |    |    |    | NA | NA | NA | NA | NA | NA | NA | NA | NA |
| NA              | NA                 | NA | NA | NA | NA | -2 | NA |    |    |    |    |    |    |    |
| LA16c-2F2.8     | ENSG00000230471.1  |    |    |    |    | NA | NA | NA | NA | NA | NA | NA | NA | NA |
| NA              | NA                 | NA | NA | NA | NA | -2 | NA |    |    |    |    |    |    |    |
| INPP5J          | ENSG00000185133.13 |    |    |    |    | NA | NA | NA | NA | NA | NA | NA | NA | NA |
| NA              | NA                 | NA | NA | NA | NA | -2 | NA |    |    |    |    |    |    |    |
| RBX1            | ENSG00000100387.8  |    |    |    |    | NA | NA | NA | NA | NA | NA | NA | NA | NA |
| NA              | NA                 | NA | NA | NA | NA | -2 | NA |    |    |    |    |    |    |    |
| MLC1            | ENSG00000100427.15 |    |    |    |    | NA | NA | NA | NA | NA | NA | NA | NA | NA |
| NA              | NA                 | NA | NA | NA | NA | -2 | NA |    |    |    |    |    |    |    |
| TNRC6B          | ENSG00000100354.20 |    |    |    |    | NA | NA | NA | NA | NA | NA | NA | NA | NA |
| NA              | NA                 | NA | NA | NA | NA | -2 | NA |    |    |    |    |    |    |    |
| HSCB            | ENSG00000100209.9  |    |    |    |    | NA | NA | NA | NA | NA | NA | NA | NA | NA |
| NA              | NA                 | NA | NA | NA | NA | -2 | NA |    |    |    |    |    |    |    |
| EMID1           | ENSG00000186998.15 |    |    |    |    | NA | NA | NA | NA | NA | NA | NA | NA | NA |
| NA              | NA                 | NA | NA | NA | NA | -2 | NA |    |    |    |    |    |    |    |
| AIFM3           | ENSG00000183773.15 |    |    |    |    | NA | NA | NA | NA | NA | NA | NA | NA | NA |
| NA              | NA                 | NA | NA | NA | NA | -2 | NA |    |    |    |    |    |    |    |
| CDC42EP1        | ENSG00000128283.6  |    |    |    |    | NA | NA | NA | NA | NA | NA | NA | NA | NA |
| NA              | NA                 | NA | NA | NA | NA | -2 | NA |    |    |    |    |    |    |    |
| CLDN5           | ENSG00000184113.9  |    |    |    |    | NA | NA | NA | NA | NA | NA | NA | NA | NA |
| NA              | NA                 | NA | NA | NA | NA | -2 | NA |    |    |    |    |    |    |    |
| GTSE1           | ENSG00000075218.18 |    |    |    |    | NA | NA | NA | NA | NA | NA | NA | NA | NA |
| NA              | NA                 | NA | NA | NA | NA | -2 | NA |    |    |    |    |    |    |    |
| CTA-384D8.34    | ENSG00000273272.1  |    |    |    |    | NA | NA | NA | NA | NA | NA | NA | NA | NA |

|                   |                    |    |    |    |    |    |    |    |    |    |    |    |    |    |
|-------------------|--------------------|----|----|----|----|----|----|----|----|----|----|----|----|----|
| NA                | NA                 | NA | NA | NA | NA | -2 | NA |    |    |    |    |    |    |    |
| SHISA8            | ENSG00000234965.2  |    |    |    |    | NA | NA | NA | NA | NA | NA | NA | NA | NA |
| NA                | NA                 | NA | NA | NA | NA | -2 | NA |    |    |    |    |    |    |    |
| TCF20             | ENSG00000100207.18 |    |    |    |    | NA | NA | NA | NA | NA | NA | NA | NA | NA |
| NA                | NA                 | NA | NA | NA | NA | -2 | NA |    |    |    |    |    |    |    |
| LINC00898         | ENSG00000205634.6  |    |    |    |    | NA | NA | NA | NA | NA | NA | NA | NA | NA |
| NA                | NA                 | NA | NA | NA | NA | -2 | NA |    |    |    |    |    |    |    |
| XKR3              | ENSG00000172967.7  |    |    |    |    | NA | NA | NA | NA | NA | NA | NA | NA | NA |
| NA                | NA                 | NA | NA | NA | NA | -2 | NA |    |    |    |    |    |    |    |
| CDC45             | ENSG00000093009.9  |    |    |    |    | NA | NA | NA | NA | NA | NA | NA | NA | NA |
| NA                | NA                 | NA | NA | NA | NA | -2 | NA |    |    |    |    |    |    |    |
| ENTHD1            | ENSG00000176177.9  |    |    |    |    | NA | NA | NA | NA | NA | NA | NA | NA | NA |
| NA                | NA                 | NA | NA | NA | NA | -2 | NA |    |    |    |    |    |    |    |
| PRR14L            | ENSG00000183530.13 |    |    |    |    | NA | NA | NA | NA | NA | NA | NA | NA | NA |
| NA                | NA                 | NA | NA | NA | NA | -2 | NA |    |    |    |    |    |    |    |
| CTA-929C8.6       | ENSG00000226741.1  |    |    |    |    | NA | NA | NA | NA | NA | NA | NA | NA | NA |
| NA                | NA                 | NA | NA | NA | NA | -2 | NA |    |    |    |    |    |    |    |
| CTA-722E9.1       | ENSG00000280224.1  |    |    |    |    | NA | NA | NA | NA | NA | NA | NA | NA | NA |
| NA                | NA                 | NA | NA | NA | NA | -2 | NA |    |    |    |    |    |    |    |
| KCNJ4             | ENSG00000168135.4  |    |    |    |    | NA | NA | NA | NA | NA | NA | NA | NA | NA |
| NA                | NA                 | NA | NA | NA | NA | -2 | NA |    |    |    |    |    |    |    |
| TEX33             | ENSG00000185264.11 |    |    |    |    | NA | NA | NA | NA | NA | NA | NA | NA | NA |
| NA                | NA                 | NA | NA | NA | NA | -2 | NA |    |    |    |    |    |    |    |
| SLC5A1            | ENSG00000100170.9  |    |    |    |    | NA | NA | NA | NA | NA | NA | NA | NA | NA |
| NA                | NA                 | NA | NA | NA | NA | -2 | NA |    |    |    |    |    |    |    |
| GSTTP1            | ENSG00000276950.5  |    |    |    |    | NA | NA | NA | NA | NA | NA | NA | NA | NA |
| NA                | NA                 | NA | NA | NA | NA | -2 | NA |    |    |    |    |    |    |    |
| RP1-29C18.10      | ENSG00000212939.2  |    |    |    |    | NA | NA | NA | NA | NA | NA | NA | NA | NA |
| NA                | NA                 | NA | NA | NA | NA | -2 | NA |    |    |    |    |    |    |    |
| ZNF70             | ENSG00000187792.4  |    |    |    |    | NA | NA | NA | NA | NA | NA | NA | NA | NA |
| NA                | NA                 | NA | NA | NA | NA | -2 | NA |    |    |    |    |    |    |    |
| PMM1              | ENSG00000100417.11 |    |    |    |    | NA | NA | NA | NA | NA | NA | NA | NA | NA |
| NA                | NA                 | NA | NA | NA | NA | -2 | NA |    |    |    |    |    |    |    |
| CHCHD10           | ENSG00000250479.8  |    |    |    |    | NA | NA | NA | NA | NA | NA | NA | NA | NA |
| NA                | NA                 | NA | NA | NA | NA | -2 | NA |    |    |    |    |    |    |    |
| RP6-109B7.4       | ENSG00000235159.1  |    |    |    |    | NA | NA | NA | NA | NA | NA | NA | NA | NA |
| NA                | NA                 | NA | NA | NA | NA | -2 | NA |    |    |    |    |    |    |    |
| RFPL1             | ENSG00000128250.5  |    |    |    |    | NA | NA | NA | NA | NA | NA | NA | NA | NA |
| NA                | NA                 | NA | NA | NA | NA | -2 | NA |    |    |    |    |    |    |    |
| GSC2              | ENSG00000063515.2  |    |    |    |    | NA | NA | NA | NA | NA | NA | NA | NA | NA |
| NA                | NA                 | NA | NA | NA | NA | -2 | NA |    |    |    |    |    |    |    |
| RP11-191L9.4      | ENSG00000224271.5  |    |    |    |    | NA | NA | NA | NA | NA | NA | NA | NA | NA |
| NA                | NA                 | NA | NA | NA | NA | -2 | NA |    |    |    |    |    |    |    |
| AP000345.4        | ENSG00000225413.2  |    |    |    |    | NA | NA | NA | NA | NA | NA | NA | NA | NA |
| NA                | NA                 | NA | NA | NA | NA | -2 | NA |    |    |    |    |    |    |    |
| SRRD              | ENSG00000100104.13 |    |    |    |    | NA | NA | NA | NA | NA | NA | NA | NA | NA |
| NA                | NA                 | NA | NA | NA | NA | -2 | NA |    |    |    |    |    |    |    |
| LINC01643         | ENSG00000236052.1  |    |    |    |    | NA | NA | NA | NA | NA | NA | NA | NA | NA |
| NA                | NA                 | NA | NA | NA | NA | -2 | NA |    |    |    |    |    |    |    |
| NCF4              | ENSG00000100365.14 |    |    |    |    | NA | NA | NA | NA | NA | NA | NA | NA | NA |
| NA                | NA                 | NA | NA | NA | NA | -2 | NA |    |    |    |    |    |    |    |
| KB-1440D3.14      | ENSG00000273342.1  |    |    |    |    | NA | NA | NA | NA | NA | NA | NA | NA | NA |
| NA                | NA                 | NA | NA | NA | NA | -2 | NA |    |    |    |    |    |    |    |
| MCM5              | ENSG00000100297.15 |    |    |    |    | NA | NA | NA | NA | NA | NA | NA | NA | NA |
| NA                | NA                 | NA | NA | NA | NA | -2 | NA |    |    |    |    |    |    |    |
| PES1              | ENSG00000100029.17 |    |    |    |    | NA | NA | NA | NA | NA | NA | NA | NA | NA |
| NA                | NA                 | NA | NA | NA | NA | -2 | NA |    |    |    |    |    |    |    |
| GTPBP1            | ENSG00000100226.15 |    |    |    |    | NA | NA | NA | NA | NA | NA | NA | NA | NA |
| NA                | NA                 | NA | NA | NA | NA | -2 | NA |    |    |    |    |    |    |    |
| AC007326.10       | ENSG00000280418.1  |    |    |    |    | NA | NA | NA | NA | NA | NA | NA | NA | NA |
| NA                | NA                 | NA | NA | NA | NA | -2 | NA |    |    |    |    |    |    |    |
| LL22NC03-102D1.18 | ENSG00000223999.1  |    |    |    |    | NA | NA | NA | NA | NA | NA | NA | NA | NA |

|                |                    |    |    |    |    |    |    |    |    |    |    |    |    |    |
|----------------|--------------------|----|----|----|----|----|----|----|----|----|----|----|----|----|
| NA             | NA                 | NA | NA | NA | NA | NA | -2 | NA |    |    |    |    |    |    |
| TBC1D10A       | ENSG00000099992.15 | NA | NA | NA | NA | NA | NA | NA | NA | NA | NA | NA | NA | NA |
| NA             | NA                 | NA | NA | NA | -2 | NA |    |    |    |    |    |    |    |    |
| RP1-41P2.7     | ENSG00000228587.1  | NA | NA | NA | NA | NA | NA | NA | NA | NA | NA | NA | NA | NA |
| NA             | NA                 | NA | NA | NA | -2 | NA |    |    |    |    |    |    |    |    |
| ISX            | ENSG00000175329.12 | NA | NA | NA | NA | NA | NA | NA | NA | NA | NA | NA | NA | NA |
| NA             | NA                 | NA | NA | NA | -2 | NA |    |    |    |    |    |    |    |    |
| CTA-280A3.2    | ENSG00000279712.1  | NA | NA | NA | NA | NA | NA | NA | NA | NA | NA | NA | NA | NA |
| NA             | NA                 | NA | NA | NA | -2 | NA |    |    |    |    |    |    |    |    |
| UQCR10         | ENSG00000184076.13 | NA | NA | NA | NA | NA | NA | NA | NA | NA | NA | NA | NA | NA |
| NA             | NA                 | NA | NA | NA | -2 | NA |    |    |    |    |    |    |    |    |
| SMC1B          | ENSG00000077935.16 | NA | NA | NA | NA | NA | NA | NA | NA | NA | NA | NA | NA | NA |
| NA             | NA                 | NA | NA | NA | -2 | NA |    |    |    |    |    |    |    |    |
| THAP7          | ENSG00000184436.11 | NA | NA | NA | NA | NA | NA | NA | NA | NA | NA | NA | NA | NA |
| NA             | NA                 | NA | NA | NA | -2 | NA |    |    |    |    |    |    |    |    |
| POTEH          | ENSG00000198062.14 | NA | NA | NA | NA | NA | NA | NA | NA | NA | NA | NA | NA | NA |
| NA             | NA                 | NA | NA | NA | -2 | NA |    |    |    |    |    |    |    |    |
| APOL5          | ENSG00000128313.2  | NA | NA | NA | NA | NA | NA | NA | NA | NA | NA | NA | NA | NA |
| NA             | NA                 | NA | NA | NA | -2 | NA |    |    |    |    |    |    |    |    |
| SHANK3         | ENSG00000251322.7  | NA | NA | NA | NA | NA | NA | NA | NA | NA | NA | NA | NA | NA |
| NA             | NA                 | NA | NA | NA | -2 | NA |    |    |    |    |    |    |    |    |
| RP3-370M22.8   | ENSG00000225528.3  | NA | NA | NA | NA | NA | NA | NA | NA | NA | NA | NA | NA | NA |
| NA             | NA                 | NA | NA | NA | -2 | NA |    |    |    |    |    |    |    |    |
| RP6-109B7.2    | ENSG00000231010.1  | NA | NA | NA | NA | NA | NA | NA | NA | NA | NA | NA | NA | NA |
| NA             | NA                 | NA | NA | NA | -2 | NA |    |    |    |    |    |    |    |    |
| CHEK2          | ENSG00000183765.20 | NA | NA | NA | NA | NA | NA | NA | NA | NA | NA | NA | NA | NA |
| NA             | NA                 | NA | NA | NA | -2 | NA |    |    |    |    |    |    |    |    |
| LINC01644      | ENSG00000218357.3  | NA | NA | NA | NA | NA | NA | NA | NA | NA | NA | NA | NA | NA |
| NA             | NA                 | NA | NA | NA | -2 | NA |    |    |    |    |    |    |    |    |
| CELSR1         | ENSG00000075275.16 | NA | NA | NA | NA | NA | NA | NA | NA | NA | NA | NA | NA | NA |
| NA             | NA                 | NA | NA | NA | -2 | NA |    |    |    |    |    |    |    |    |
| CITF22-49E9.3  | ENSG00000278869.1  | NA | NA | NA | NA | NA | NA | NA | NA | NA | NA | NA | NA | NA |
| NA             | NA                 | NA | NA | NA | -2 | NA |    |    |    |    |    |    |    |    |
| SBF1           | ENSG00000100241.20 | NA | NA | NA | NA | NA | NA | NA | NA | NA | NA | NA | NA | NA |
| NA             | NA                 | NA | NA | NA | -2 | NA |    |    |    |    |    |    |    |    |
| ATXN10         | ENSG00000130638.16 | NA | NA | NA | NA | NA | NA | NA | NA | NA | NA | NA | NA | NA |
| NA             | NA                 | NA | NA | NA | -2 | NA |    |    |    |    |    |    |    |    |
| MYO18B         | ENSG00000133454.15 | NA | NA | NA | NA | NA | NA | NA | NA | NA | NA | NA | NA | NA |
| NA             | NA                 | NA | NA | NA | -2 | NA |    |    |    |    |    |    |    |    |
| ASPHD2         | ENSG00000128203.6  | NA | NA | NA | NA | NA | NA | NA | NA | NA | NA | NA | NA | NA |
| NA             | NA                 | NA | NA | NA | -2 | NA |    |    |    |    |    |    |    |    |
| SNU13          | ENSG00000100138.13 | NA | NA | NA | NA | NA | NA | NA | NA | NA | NA | NA | NA | NA |
| NA             | NA                 | NA | NA | NA | -2 | NA |    |    |    |    |    |    |    |    |
| LRRC75B        | ENSG00000178026.12 | NA | NA | NA | NA | NA | NA | NA | NA | NA | NA | NA | NA | NA |
| NA             | NA                 | NA | NA | NA | -2 | NA |    |    |    |    |    |    |    |    |
| C22orf46       | ENSG00000184208.10 | NA | NA | NA | NA | NA | NA | NA | NA | NA | NA | NA | NA | NA |
| NA             | NA                 | NA | NA | NA | -2 | NA |    |    |    |    |    |    |    |    |
| CITF22-1A6.3   | ENSG00000273192.1  | NA | NA | NA | NA | NA | NA | NA | NA | NA | NA | NA | NA | NA |
| NA             | NA                 | NA | NA | NA | -2 | NA |    |    |    |    |    |    |    |    |
| XXbac-B33L19.4 | ENSG00000235578.1  | NA | NA | NA | NA | NA | NA | NA | NA | NA | NA | NA | NA | NA |
| NA             | NA                 | NA | NA | NA | -2 | NA |    |    |    |    |    |    |    |    |
| DNAL4          | ENSG00000100246.12 | NA | NA | NA | NA | NA | NA | NA | NA | NA | NA | NA | NA | NA |
| NA             | NA                 | NA | NA | NA | -2 | NA |    |    |    |    |    |    |    |    |
| TMEM191C       | ENSG00000206140.10 | NA | NA | NA | NA | NA | NA | NA | NA | NA | NA | NA | NA | NA |
| NA             | NA                 | NA | NA | NA | -2 | NA |    |    |    |    |    |    |    |    |
| COMT           | ENSG00000093010.13 | NA | NA | NA | NA | NA | NA | NA | NA | NA | NA | NA | NA | NA |
| NA             | NA                 | NA | NA | NA | -2 | NA |    |    |    |    |    |    |    |    |
| CTA-221G9.7    | ENSG00000236641.1  | NA | NA | NA | NA | NA | NA | NA | NA | NA | NA | NA | NA | NA |
| NA             | NA                 | NA | NA | NA | -2 | NA |    |    |    |    |    |    |    |    |
| ANKRD54        | ENSG00000100124.14 | NA | NA | NA | NA | NA | NA | NA | NA | NA | NA | NA | NA | NA |
| NA             | NA                 | NA | NA | NA | -2 | NA |    |    |    |    |    |    |    |    |
| AP1B1          | ENSG00000100280.16 | NA | NA | NA | NA | NA | NA | NA | NA | NA | NA | NA | NA | NA |



|               |                    |    |    |    |    |    |    |    |    |    |    |    |    |    |
|---------------|--------------------|----|----|----|----|----|----|----|----|----|----|----|----|----|
| NA            | NA                 | NA | NA | -2 | NA |    |    |    |    |    |    |    |    |    |
| RP5-1119A7.14 | ENSG00000228719.1  | NA | NA | NA | NA | NA | NA | NA | NA | NA | NA | NA | NA | NA |
| NA            | NA                 | NA | NA | NA | NA | -2 | NA |    |    |    |    |    |    |    |
| C22orf42      | ENSG00000205856.3  | NA | NA | NA | NA | NA | NA | NA | NA | NA | NA | NA | NA | NA |
| NA            | NA                 | NA | NA | NA | NA | -2 | NA |    |    |    |    |    |    |    |
| PCAT14        | ENSG00000280623.1  | NA | NA | NA | NA | NA | NA | NA | NA | NA | NA | NA | NA | NA |
| NA            | NA                 | NA | NA | NA | NA | -2 | NA |    |    |    |    |    |    |    |
| RP5-983L19.2  | ENSG00000226954.1  | NA | NA | NA | NA | NA | NA | NA | NA | NA | NA | NA | NA | NA |
| NA            | NA                 | NA | NA | NA | NA | -2 | NA |    |    |    |    |    |    |    |
| CTA-126B4.7   | ENSG00000230107.1  | NA | NA | NA | NA | NA | NA | NA | NA | NA | NA | NA | NA | NA |
| NA            | NA                 | NA | NA | NA | NA | -2 | NA |    |    |    |    |    |    |    |
| SDF2L1        | ENSG00000128228.4  | NA | NA | NA | NA | NA | NA | NA | NA | NA | NA | NA | NA | NA |
| NA            | NA                 | NA | NA | NA | NA | -2 | NA |    |    |    |    |    |    |    |
| VPREB1        | ENSG00000169575.4  | NA | NA | NA | NA | NA | NA | NA | NA | NA | NA | NA | NA | NA |
| NA            | NA                 | NA | NA | NA | NA | -2 | NA |    |    |    |    |    |    |    |
| TMEM191B      | ENSG00000278558.4  | NA | NA | NA | NA | NA | NA | NA | NA | NA | NA | NA | NA | NA |
| NA            | NA                 | NA | NA | NA | NA | -2 | NA |    |    |    |    |    |    |    |
| NCAPH2        | ENSG00000025770.18 | NA | NA | NA | NA | NA | NA | NA | NA | NA | NA | NA | NA | NA |
| NA            | NA                 | NA | NA | NA | NA | -2 | NA |    |    |    |    |    |    |    |
| CBX7          | ENSG00000100307.12 | NA | NA | NA | NA | NA | NA | NA | NA | NA | NA | NA | NA | NA |
| NA            | NA                 | NA | NA | NA | NA | -2 | NA |    |    |    |    |    |    |    |
| MAPK11        | ENSG00000185386.14 | NA | NA | NA | NA | NA | NA | NA | NA | NA | NA | NA | NA | NA |
| NA            | NA                 | NA | NA | NA | NA | -2 | NA |    |    |    |    |    |    |    |
| MIOX          | ENSG00000100253.12 | NA | NA | NA | NA | NA | NA | NA | NA | NA | NA | NA | NA | NA |
| NA            | NA                 | NA | NA | NA | NA | -2 | NA |    |    |    |    |    |    |    |
| CARD10        | ENSG00000100065.14 | NA | NA | NA | NA | NA | NA | NA | NA | NA | NA | NA | NA | NA |
| NA            | NA                 | NA | NA | NA | NA | -2 | NA |    |    |    |    |    |    |    |
| TTL8          | ENSG00000138892.11 | NA | NA | NA | NA | NA | NA | NA | NA | NA | NA | NA | NA | NA |
| NA            | NA                 | NA | NA | NA | NA | -2 | NA |    |    |    |    |    |    |    |
| FAM83F        | ENSG00000133477.16 | NA | NA | NA | NA | NA | NA | NA | NA | NA | NA | NA | NA | NA |
| NA            | NA                 | NA | NA | NA | NA | -2 | NA |    |    |    |    |    |    |    |
| APOL2         | ENSG00000128335.13 | NA | NA | NA | NA | NA | NA | NA | NA | NA | NA | NA | NA | NA |
| NA            | NA                 | NA | NA | NA | NA | -2 | NA |    |    |    |    |    |    |    |
| LINC01399     | ENSG00000233080.2  | NA | NA | NA | NA | NA | NA | NA | NA | NA | NA | NA | NA | NA |
| NA            | NA                 | NA | NA | NA | NA | -2 | NA |    |    |    |    |    |    |    |
| OGFRP1        | ENSG00000182057.4  | NA | NA | NA | NA | NA | NA | NA | NA | NA | NA | NA | NA | NA |
| NA            | NA                 | NA | NA | NA | NA | -2 | NA |    |    |    |    |    |    |    |
| CTA-373H7.7   | ENSG00000206028.1  | NA | NA | NA | NA | NA | NA | NA | NA | NA | NA | NA | NA | NA |
| NA            | NA                 | NA | NA | NA | NA | -2 | NA |    |    |    |    |    |    |    |
| RP1-29C18.9   | ENSG00000213279.2  | NA | NA | NA | NA | NA | NA | NA | NA | NA | NA | NA | NA | NA |
| NA            | NA                 | NA | NA | NA | NA | -2 | NA |    |    |    |    |    |    |    |
| C22orf15      | ENSG00000169314.14 | NA | NA | NA | NA | NA | NA | NA | NA | NA | NA | NA | NA | NA |
| NA            | NA                 | NA | NA | NA | NA | -2 | NA |    |    |    |    |    |    |    |
| RIMBP3C       | ENSG00000183246.6  | NA | NA | NA | NA | NA | NA | NA | NA | NA | NA | NA | NA | NA |
| NA            | NA                 | NA | NA | NA | NA | -2 | NA |    |    |    |    |    |    |    |
| PATZ1         | ENSG00000100105.17 | NA | NA | NA | NA | NA | NA | NA | NA | NA | NA | NA | NA | NA |
| NA            | NA                 | NA | NA | NA | NA | -2 | NA |    |    |    |    |    |    |    |
| ZNF280A       | ENSG00000169548.3  | NA | NA | NA | NA | NA | NA | NA | NA | NA | NA | NA | NA | NA |
| NA            | NA                 | NA | NA | NA | NA | -2 | NA |    |    |    |    |    |    |    |
| OSM           | ENSG00000099985.3  | NA | NA | NA | NA | NA | NA | NA | NA | NA | NA | NA | NA | NA |
| NA            | NA                 | NA | NA | NA | NA | -2 | NA |    |    |    |    |    |    |    |
| EWSR1         | ENSG00000182944.17 | NA | NA | NA | NA | NA | NA | NA | NA | NA | NA | NA | NA | NA |
| NA            | NA                 | NA | NA | NA | NA | -2 | NA |    |    |    |    |    |    |    |
| LINC01634     | ENSG00000235295.1  | NA | NA | NA | NA | NA | NA | NA | NA | NA | NA | NA | NA | NA |
| NA            | NA                 | NA | NA | NA | NA | -2 | NA |    |    |    |    |    |    |    |
| RP1-127L4.7   | ENSG00000239674.2  | NA | NA | NA | NA | NA | NA | NA | NA | NA | NA | NA | NA | NA |
| NA            | NA                 | NA | NA | NA | NA | -2 | NA |    |    |    |    |    |    |    |
| UBE2L3        | ENSG00000185651.14 | NA | NA | NA | NA | NA | NA | NA | NA | NA | NA | NA | NA | NA |
| NA            | NA                 | NA | NA | NA | NA | -2 | NA |    |    |    |    |    |    |    |
| PLA2G3        | ENSG00000100078.3  | NA | NA | NA | NA | NA | NA | NA | NA | NA | NA | NA | NA | NA |
| NA            | NA                 | NA | NA | NA | NA | -2 | NA |    |    |    |    |    |    |    |
| PNPLA3        | ENSG00000100344.10 | NA | NA | NA | NA | NA | NA | NA | NA | NA | NA | NA | NA | NA |

|                  |                    |    |    |    |    |    |    |    |    |    |    |    |    |    |
|------------------|--------------------|----|----|----|----|----|----|----|----|----|----|----|----|----|
| NA               | NA                 | NA | NA | NA | -2 | NA |    |    |    |    |    |    |    |    |
| LL22NC03-2H8.4   | ENSG00000234630.1  |    |    |    |    | NA | NA | NA | NA | NA | NA | NA | NA | NA |
| NA               | NA                 | NA | NA | NA | NA | -2 | NA |    |    |    |    |    |    |    |
| CITF22-49D8.1    | ENSG00000224715.1  |    |    |    |    | NA | NA | NA | NA | NA | NA | NA | NA | NA |
| NA               | NA                 | NA | NA | NA | NA | -2 | NA |    |    |    |    |    |    |    |
| CTA-929C8.7      | ENSG00000223726.1  |    |    |    |    | NA | NA | NA | NA | NA | NA | NA | NA | NA |
| NA               | NA                 | NA | NA | NA | NA | -2 | NA |    |    |    |    |    |    |    |
| XXbac-B444P24.14 | ENSG00000273139.1  |    |    |    |    | NA | NA | NA | NA | NA | NA | NA | NA | NA |
| NA               | NA                 | NA | NA | NA | NA | -2 | NA |    |    |    |    |    |    |    |
| SEC14L3          | ENSG00000100012.11 |    |    |    |    | NA | NA | NA | NA | NA | NA | NA | NA | NA |
| NA               | NA                 | NA | NA | NA | NA | -2 | NA |    |    |    |    |    |    |    |
| SMTN             | ENSG00000183963.18 |    |    |    |    | NA | NA | NA | NA | NA | NA | NA | NA | NA |
| NA               | NA                 | NA | NA | NA | NA | -2 | NA |    |    |    |    |    |    |    |
| PHF5A            | ENSG00000100410.7  |    |    |    |    | NA | NA | NA | NA | NA | NA | NA | NA | NA |
| NA               | NA                 | NA | NA | NA | NA | -2 | NA |    |    |    |    |    |    |    |
| LINC01637        | ENSG00000237476.1  |    |    |    |    | NA | NA | NA | NA | NA | NA | NA | NA | NA |
| NA               | NA                 | NA | NA | NA | NA | -2 | NA |    |    |    |    |    |    |    |
| CTA-992D9.8      | ENSG00000280025.1  |    |    |    |    | NA | NA | NA | NA | NA | NA | NA | NA | NA |
| NA               | NA                 | NA | NA | NA | NA | -2 | NA |    |    |    |    |    |    |    |
| TEF              | ENSG00000167074.14 |    |    |    |    | NA | NA | NA | NA | NA | NA | NA | NA | NA |
| NA               | NA                 | NA | NA | NA | NA | -2 | NA |    |    |    |    |    |    |    |
| CTA-989H11.1     | ENSG00000273366.1  |    |    |    |    | NA | NA | NA | NA | NA | NA | NA | NA | NA |
| NA               | NA                 | NA | NA | NA | NA | -2 | NA |    |    |    |    |    |    |    |
| NEFH             | ENSG00000100285.9  |    |    |    |    | NA | NA | NA | NA | NA | NA | NA | NA | NA |
| NA               | NA                 | NA | NA | NA | NA | -2 | NA |    |    |    |    |    |    |    |
| CTA-796E4.3      | ENSG00000236464.1  |    |    |    |    | NA | NA | NA | NA | NA | NA | NA | NA | NA |
| NA               | NA                 | NA | NA | NA | NA | -2 | NA |    |    |    |    |    |    |    |
| ELFN2            | ENSG00000166897.14 |    |    |    |    | NA | NA | NA | NA | NA | NA | NA | NA | NA |
| NA               | NA                 | NA | NA | NA | NA | -2 | NA |    |    |    |    |    |    |    |
| CSF2RB           | ENSG00000100368.13 |    |    |    |    | NA | NA | NA | NA | NA | NA | NA | NA | NA |
| NA               | NA                 | NA | NA | NA | NA | -2 | NA |    |    |    |    |    |    |    |
| RPS19BP1         | ENSG00000187051.8  |    |    |    |    | NA | NA | NA | NA | NA | NA | NA | NA | NA |
| NA               | NA                 | NA | NA | NA | NA | -2 | NA |    |    |    |    |    |    |    |
| TIMP3            | ENSG00000100234.11 |    |    |    |    | NA | NA | NA | NA | NA | NA | NA | NA | NA |
| NA               | NA                 | NA | NA | NA | NA | -2 | NA |    |    |    |    |    |    |    |
| APOBEC3A         | ENSG00000128383.12 |    |    |    |    | NA | NA | NA | NA | NA | NA | NA | NA | NA |
| NA               | NA                 | NA | NA | NA | NA | -2 | NA |    |    |    |    |    |    |    |
| SPECC1L          | ENSG00000100014.19 |    |    |    |    | NA | NA | NA | NA | NA | NA | NA | NA | NA |
| NA               | NA                 | NA | NA | NA | NA | -2 | NA |    |    |    |    |    |    |    |
| RPL3             | ENSG00000100316.15 |    |    |    |    | NA | NA | NA | NA | NA | NA | NA | NA | NA |
| NA               | NA                 | NA | NA | NA | NA | -2 | NA |    |    |    |    |    |    |    |
| XRCC6            | ENSG00000196419.12 |    |    |    |    | NA | NA | NA | NA | NA | NA | NA | NA | NA |
| NA               | NA                 | NA | NA | NA | NA | -2 | NA |    |    |    |    |    |    |    |
| BPIFC            | ENSG00000184459.8  |    |    |    |    | NA | NA | NA | NA | NA | NA | NA | NA | NA |
| NA               | NA                 | NA | NA | NA | NA | -2 | NA |    |    |    |    |    |    |    |
| FAM19A5          | ENSG00000219438.8  |    |    |    |    | NA | NA | NA | NA | NA | NA | NA | NA | NA |
| NA               | NA                 | NA | NA | NA | NA | -2 | NA |    |    |    |    |    |    |    |
| APOL6            | ENSG00000221963.5  |    |    |    |    | NA | NA | NA | NA | NA | NA | NA | NA | NA |
| NA               | NA                 | NA | NA | NA | NA | -2 | NA |    |    |    |    |    |    |    |
| USP18            | ENSG00000184979.9  |    |    |    |    | NA | NA | NA | NA | NA | NA | NA | NA | NA |
| NA               | NA                 | NA | NA | NA | NA | -2 | NA |    |    |    |    |    |    |    |
| RP1-213J1P_B.1   | ENSG00000227838.1  |    |    |    |    | NA | NA | NA | NA | NA | NA | NA | NA | NA |
| NA               | NA                 | NA | NA | NA | NA | -2 | NA |    |    |    |    |    |    |    |
| XXbac-B135H6.18  | ENSG00000272829.1  |    |    |    |    | NA | NA | NA | NA | NA | NA | NA | NA | NA |
| NA               | NA                 | NA | NA | NA | NA | -2 | NA |    |    |    |    |    |    |    |
| SNRPD3           | ENSG00000100028.11 |    |    |    |    | NA | NA | NA | NA | NA | NA | NA | NA | NA |
| NA               | NA                 | NA | NA | NA | NA | -2 | NA |    |    |    |    |    |    |    |
| DUSP18           | ENSG00000167065.13 |    |    |    |    | NA | NA | NA | NA | NA | NA | NA | NA | NA |
| NA               | NA                 | NA | NA | NA | NA | -2 | NA |    |    |    |    |    |    |    |
| LINC01638        | ENSG00000233521.5  |    |    |    |    | NA | NA | NA | NA | NA | NA | NA | NA | NA |
| NA               | NA                 | NA | NA | NA | NA | -2 | NA |    |    |    |    |    |    |    |
| TOB2             | ENSG00000183864.4  |    |    |    |    | NA | NA | NA | NA | NA | NA | NA | NA | NA |

|        |                    |    |    |    |    |    |    |    |    |    |    |    |    |    |
|--------|--------------------|----|----|----|----|----|----|----|----|----|----|----|----|----|
| NA     | NA                 | NA | NA | -2 | NA |    |    |    |    |    |    |    |    |    |
| PIWIL3 | ENSG00000184571.13 |    |    |    | NA | NA | NA | NA | NA | NA | NA | NA | NA | NA |
| NA     | NA                 | NA | NA | NA | -2 | NA |    |    |    |    |    |    |    |    |
